# Supplementary material
Source: PubMed Central journal article supplement (PMC7058976)
Supplement: NIHMS1549047-supplement-Supplemental_Material.pdf [file NIHMS1549047-supplement-Supplemental_Material.pdf]

1  
2  
3 Epigenetic Modifications in T Cells: The Role of DNA Methylation in Salt-Sensitive  
4 Hypertension

5  
6 **ONLINE SUPPLEMENT**

7  
8 John Henry Dasinger<sup>1,3</sup>, Ammar J. Alsheikh<sup>1</sup>, Justine M. Abais-Battad<sup>1,3</sup>, Xiaoqing Pan<sup>1</sup>, Daniel  
9 J. Fehrenbach<sup>1,3</sup>, Hayley Lund<sup>1</sup>, Michelle L Roberts<sup>1</sup>, Allen W. Cowley Jr<sup>1</sup>, Srividya Kidambi<sup>2</sup>,  
10 Theodore A. Kotchen<sup>2</sup>, Pengyuan Liu<sup>1</sup>, Mingyu Liang<sup>1</sup>, David L. Mattson<sup>1,3</sup>

11  
12 <sup>1</sup>Department of Physiology, <sup>2</sup>Department of Medicine, Medical College of Wisconsin, <sup>3</sup>Current  
13 address: Department of Physiology, Augusta University

14  
15  
16  
17  
18  
19  
20  
21  
22  
23  
24  
25  
26  
27  
28  
29 Corresponding Author: John Henry Dasinger, Ph.D.  
30 1120 15<sup>th</sup> Street, CA3099  
31 Augusta, GA 30912  
32 Phone: 706-721-0831  
33 Fax: 706-721-7299  
34 E-mail: [jdasinger@augusta.edu](mailto:jdasinger@augusta.edu)  
35  
36

37 *Methylation and Gene Expression Profile in T cells of the Dahl SS rat.*

38 *T cell isolation from SS/MCW and SS/CRL rats.* At the end of the 10-week study, T cells were  
39 collected from both the blood and kidneys of male SS/MCW and SS/CRL rats fed the high salt  
40 diet as well as in the low salt control groups in the morning between 8 and 10 am. The isolated T  
41 cells were collected with the intention of RNA isolation for RNA-seq and DNA isolation for  
42 reduced representation bisulfite sequencing (RRBS) from T cells within the same animals and  
43 tissue source [1]. This would allow analysis of both gene expression and DNA methylation profile  
44 within the same animals of each experimental group previously mentioned (n=4 pools/group, 3  
45 rats/pool). One limitation of this study is the examination of methylome profile in T cells was only  
46 performed in male rats. We have previously demonstrated that Dahl SS females do develop salt-  
47 induced hypertension and renal damage that is significantly blunted relative to age-matched males  
48 [2]. While there are varying reports in the human literature about sex differences in genome-wide  
49 methylome status [3, 4], future studies will focus on whether female Dahl SS rats exhibit similar  
50 methylation patterns as the males in response to a high salt diet.

51  
52 *DNA methylation profiling.* Reduced representation bisulfite sequencing (RRBS) was performed  
53 to quantify methylation levels at single-base resolution. A total of 40 libraries were generated  
54 according to the previously described protocols [5] with modifications to allow multiplexing [6,  
55 7]. The libraries underwent cluster generation using TruSeq PE Cluster Kit v4-cBot-HS and 100  
56 cycles of paired-end sequencing using TruSeq SBS Kit v4-HS (Illumina). 13 or 14 libraries were  
57 multiplexed in one lane and sequenced on an Illumina HiSeq 2500 sequencer.

58 The raw sequences from HiSeq 2500 were first processed and trimmed [8]. The trimmed short  
59 reads were mapped to the rat reference genome (rn5) downloaded from the UCSC Genome  
60 Browser (<http://hgdownload.cse.ucsc.edu/goldenPath/rn5/database/>) using Bismark (v0.16.1) [9].  
61 Bisulfite conversion rates were estimated from the number of unconverted cytosines at Klenow  
62 filled-in 3'MspI sites of sequencing reads that were short enough to read through these sites.

63 For each CpG site, the methylation rate (5mC) was calculated as the percentage of unconverted  
64 cytosines in each library. Next, we used metilene software [10] to identify all methylation regions  
65 across the genome and subsequently identify differentially methylated regions (DMRs) between  
66 two groups of rats. A DMR was required to contain at least five CpG sites, and exhibit a 5mC  
67 difference of greater than 5% between two tested groups [5]. Methylation regions were divided  
68 based on genomic location as transcription start site (TSS) regions (defined to include 1,000 bp  
69 upstream and downstream of a known gene TSS), intragenic (if located within the gene body), or  
70 intergenic (if located between genes) [5].

71 *Pathway analysis.* Pathway analysis of genes with differential methylation and expression was  
72 performed using Ingenuity Pathway Analysis (IPA; Qiagen Bioinformatics). In IPA, the 'Core  
73 Expression Analysis' module was used, which provided outputs including canonical pathways, as  
74 well as upstream regulators.

75 *Retrospective analysis of RNA-seq Data.* A previously generated RNA-seq data set [1] was utilized  
76 to assess relationships between methylation and expression in the T cells isolated from SS/MCW  
77 and SS/CRL rats. Differentially expressed genes, in kidney vs blood T cells of the same group of  
78 animals, were identified as having a false discovery rate <0.05. Additionally, in the RRBS dataset  
79 comparing blood and kidney T cells, genes which had at least one DMR in the TSS were identified.

80 For genes that had more than one DMR in the TSS, the region with the greatest methylation  
81 difference was considered. Overlapping genes that had a DMR in the TSS and were differentially  
82 expressed were plotted as delta methylation versus log<sub>2</sub>(ratio) of expression in FPKM. The number  
83 of genes that exhibited a negative relationship between methylation and expression were compared  
84 to the number of genes that exhibited positive relationship. A flow diagram of the workflow taken  
85 to perform the combined analysis is shown in **Supplemental Figure 2**.

86 *Decitabine Study-Functional Inhibition of Methylation in Dahl SS rats.*

87 *Blood Pressure and Renal Disease Phenotyping.* Under a deep anesthesia via isoflurane, 7-week  
88 old male SS/MCW rats were instrumented with carotid catheter radio telemeters (DSI Sciences  
89 International, St. Paul, MN) for continuous measurement of mean arterial pressure (MAP) as  
90 previously described [11, 12]. Animals were treated with analgesics (0.3mg/kg Buprenorphine SR)  
91 and antibiotics (25mg/kg Cefazolin) after implementation of radio telemeters. Upon recovery,  
92 MAP was continuously measured for 7 days as the low salt period (0.4% NaCl). Before switching  
93 animals to a high salt diet (HS, 4.0% NaCl), animals were divided into two experimental groups:  
94 one receiving a DNA methyltransferase inhibitor (decitabine) at 5mg/kg at high salt days 0, 3, 5  
95 and 7 and one group receiving vehicle (saline) at the same time points via intraperitoneal injections.  
96 MAP was continuously measured through the 2-week HS challenge. Similarly, low salt controls  
97 (LS-vehicle and LS-decitabine, n=5-7/ group) were subjected to the same experimental protocol  
98 except these groups were maintained on a low salt diet throughout the study. The injections were  
99 administered before 10 am on each specified day, and the intraperitoneal injection of vehicle or  
100 decitabine led to no discernable acute change in blood pressure. In addition to the MAP  
101 phenotype, overnight urine collections were performed just prior to the HS challenge for the  
102 baseline measurements of renal damage, as well as at HS days 7 and 14. Low salt controls were  
103 placed in metabolic cages at the same time points as the experimental groups switched to a high  
104 salt diet. Urine albumin excretion was quantified with a fluorescent assay that utilized Albumin  
105 Blue 580 dye (Molecular Probes) and a fluorescent plate reader (FL600, Bio-Tek). Urine protein  
106 excretion was quantified utilizing Weichselbaum's biuret reagent and an autoanalyzer (Alfa,  
107 Wasserman).

108 *Histological Analysis, Kidney Immune Cell Isolation and Flow Cytometry.* All procedures were  
109 performed as previously described [11]. Briefly, animals were deeply anesthetized under  
110 isoflurane and the aorta was catheterized for blood collection and flushing kidneys with  
111 heparinized dPBS. Then kidneys were excised with the right kidney collected for histological  
112 analysis and the left kidney collected for flow cytometric analysis of infiltrating immune cells. The  
113 right kidneys were fixed in 10% paraformaldehyde, paraffin embedded, cut in 4- $\mu$ m sections,  
114 mounted, and stained with Masson's Trichrome stain. Slides were then scanned using Nikon  
115 CoolScan, and the outer medullary protein cast area percentage was calculated by color inclusion  
116 utilizing MetaMorph software. Glomerular injury was assessed by assigning >40 glomeruli/kidney  
117 scores on a scale of 1 to 4 based on glomerulosclerosis and mesangial expansion [13]. The left  
118 kidneys were minced and incubated in RPMI 1640 media containing L-glutamine, HEPES,  
119 collagenase type IV, and DNase. Infiltrating renal immune cells were isolated by Percoll density  
120 gradient centrifugation and washed then counted on a hemocytometer. Mononuclear cells were  
121 incubated with extracellular markers anti-CD45 (BioLegend, #202214, Clone OX-1) for  
122 leukocytes, anti-CD3 (eBioscience, #46-0030-82, Clone G4.18), anti-CD4 (BioLegend, #201518,  
123 Clone W3/25), and anti-CD8 (BioLegend, #201703, Clone OX-8) for T-cells, anti-CD45R (BD  
124 Bioscience, #554881, Clone HIS24) for B-cells, anti-CD11b/c (eBioscience, #50-0110-82, Clone

125 OX-42) for monocytes/macrophages. All cells were analyzed by flow cytometry (LSRII, Becton  
126 Dickinson) with FACSDIVA software (Becton Dickinson) and FlowJo software (Tree Star).

127 *Confirmation of Efficacy of Decitabine in T-Cells.* To confirm the demethylating properties of  
128 decitabine, T-cells were isolated from the blood utilizing rat Pan T-Cell Microbeads and MACS  
129 Columns for magnetic cell isolation (Miltenyi Biotech). DNA was extracted from the T-cells via  
130 PureLink Genomic DNA Mini Kit (Invitrogen) to measure the percentage of methylation utilizing  
131 a colorimetric assay per the manufacturer's instructions (EpiGentek).

132 *Statistical Analysis.* Differential expression of genes and DMRs were identified using false  
133 discovery rate <0.05 by the Benjamini-Hochberg method. For all other statistical tests, a p-value  
134 <0.05 was considered significant. A chi-squared test was used to assess association between DNA  
135 methylation and gene expression as well as to test differences in proportions in methylation  
136 regions. Fischer's exact test was used to test the overlap between methylation and expression gene  
137 lists. A two-sample student's T test was used to test difference between two groups. Two-way  
138 repeated measures ANOVA with a Holm-Sidak post-hoc test was used for blood pressure and  
139 urinary albumin and protein data. Phenotype data in Figures 5 and 6 are expressed as the mean  $\pm$   
140 the standard error of the mean.

- 141  
142
- 143 1. Abais-Battad Justine, M., et al., *Dietary Effects on Dahl Salt-Sensitive Hypertension, Renal*  
144 *Damage, and the T Lymphocyte Transcriptome.* Hypertension, 2019. **74**(4): p. 854-863.
  - 145 2. Mattson, D.L., et al., *Chromosome substitution reveals the genetic basis of Dahl salt-*  
146 *sensitive hypertension and renal disease.* American journal of physiology. Renal  
147 physiology, 2008. **295**(3): p. F837-F842.
  - 148 3. Watanabe, M., et al., *Within-pair differences of DNA methylation levels between*  
149 *monozygotic twins are different between male and female pairs.* BMC medical genomics,  
150 2016. **9**(1): p. 55-55.
  - 151 4. Mamrut, S., et al., *Integrative analysis of methylome and transcriptome in human blood*  
152 *identifies extensive sex- and immune cell-specific differentially methylated regions.*  
153 *Epigenetics*, 2015. **10**(10): p. 943-957.
  - 154 5. Gu, H., et al., *Genome-scale DNA methylation mapping of clinical samples at single-*  
155 *nucleotide resolution.* Nature Methods, 2010. **7**: p. 133.
  - 156 6. Liu, P., et al., *Role of DNA De Novo (De)Methylation in the Kidney in Salt-Induced*  
157 *Hypertension.* Hypertension, 2018. **72**(5): p. 1160-1171.
  - 158 7. Liu, Y., et al., *Base-Resolution Maps of 5-Methylcytosine and 5-Hydroxymethylcytosine in*  
159 *Dahl S Rats.* Hypertension, 2014. **63**(4): p. 827-838.
  - 160 8. Li, Y., et al., *Stability of global methylation profiles of whole blood and extracted DNA*  
161 *under different storage durations and conditions.* 2018. **10**(6): p. 797-811.
  - 162 9. Krueger, F. and S.R. Andrews, *Bismark: a flexible aligner and methylation caller for*  
163 *Bisulfite-Seq applications.* Bioinformatics, 2011. **27**(11): p. 1571-1572.
  - 164 10. Jühling, F., et al., *metilene: fast and sensitive calling of differentially methylated regions*  
165 *from bisulfite sequencing data.* Genome research, 2016. **26**(2): p. 256-262.
  - 166 11. Abais-Battad, J.M., et al., *Rag1-null Dahl SS rats reveal that adaptive immune mechanisms*  
167 *exacerbate high protein-induced hypertension and renal injury.* 2018. **315**(1): p. R28-R35.
  - 168 12. Abais-Battad Justine, M., *Dietary Effects on Dahl Salt-Sensitive Hypertension, Renal*  
169 *Damage, and the T Lymphocyte Transcriptome.* Hypertension, 2019.

- 170 13. Fehrenbach, D.J., et al., *Salt-sensitive increase in macrophages in the kidneys of Dahl SS*  
171 *rats*. *Am J Physiol Renal Physiol*, 2019. **317**(2): p. F361-F374.

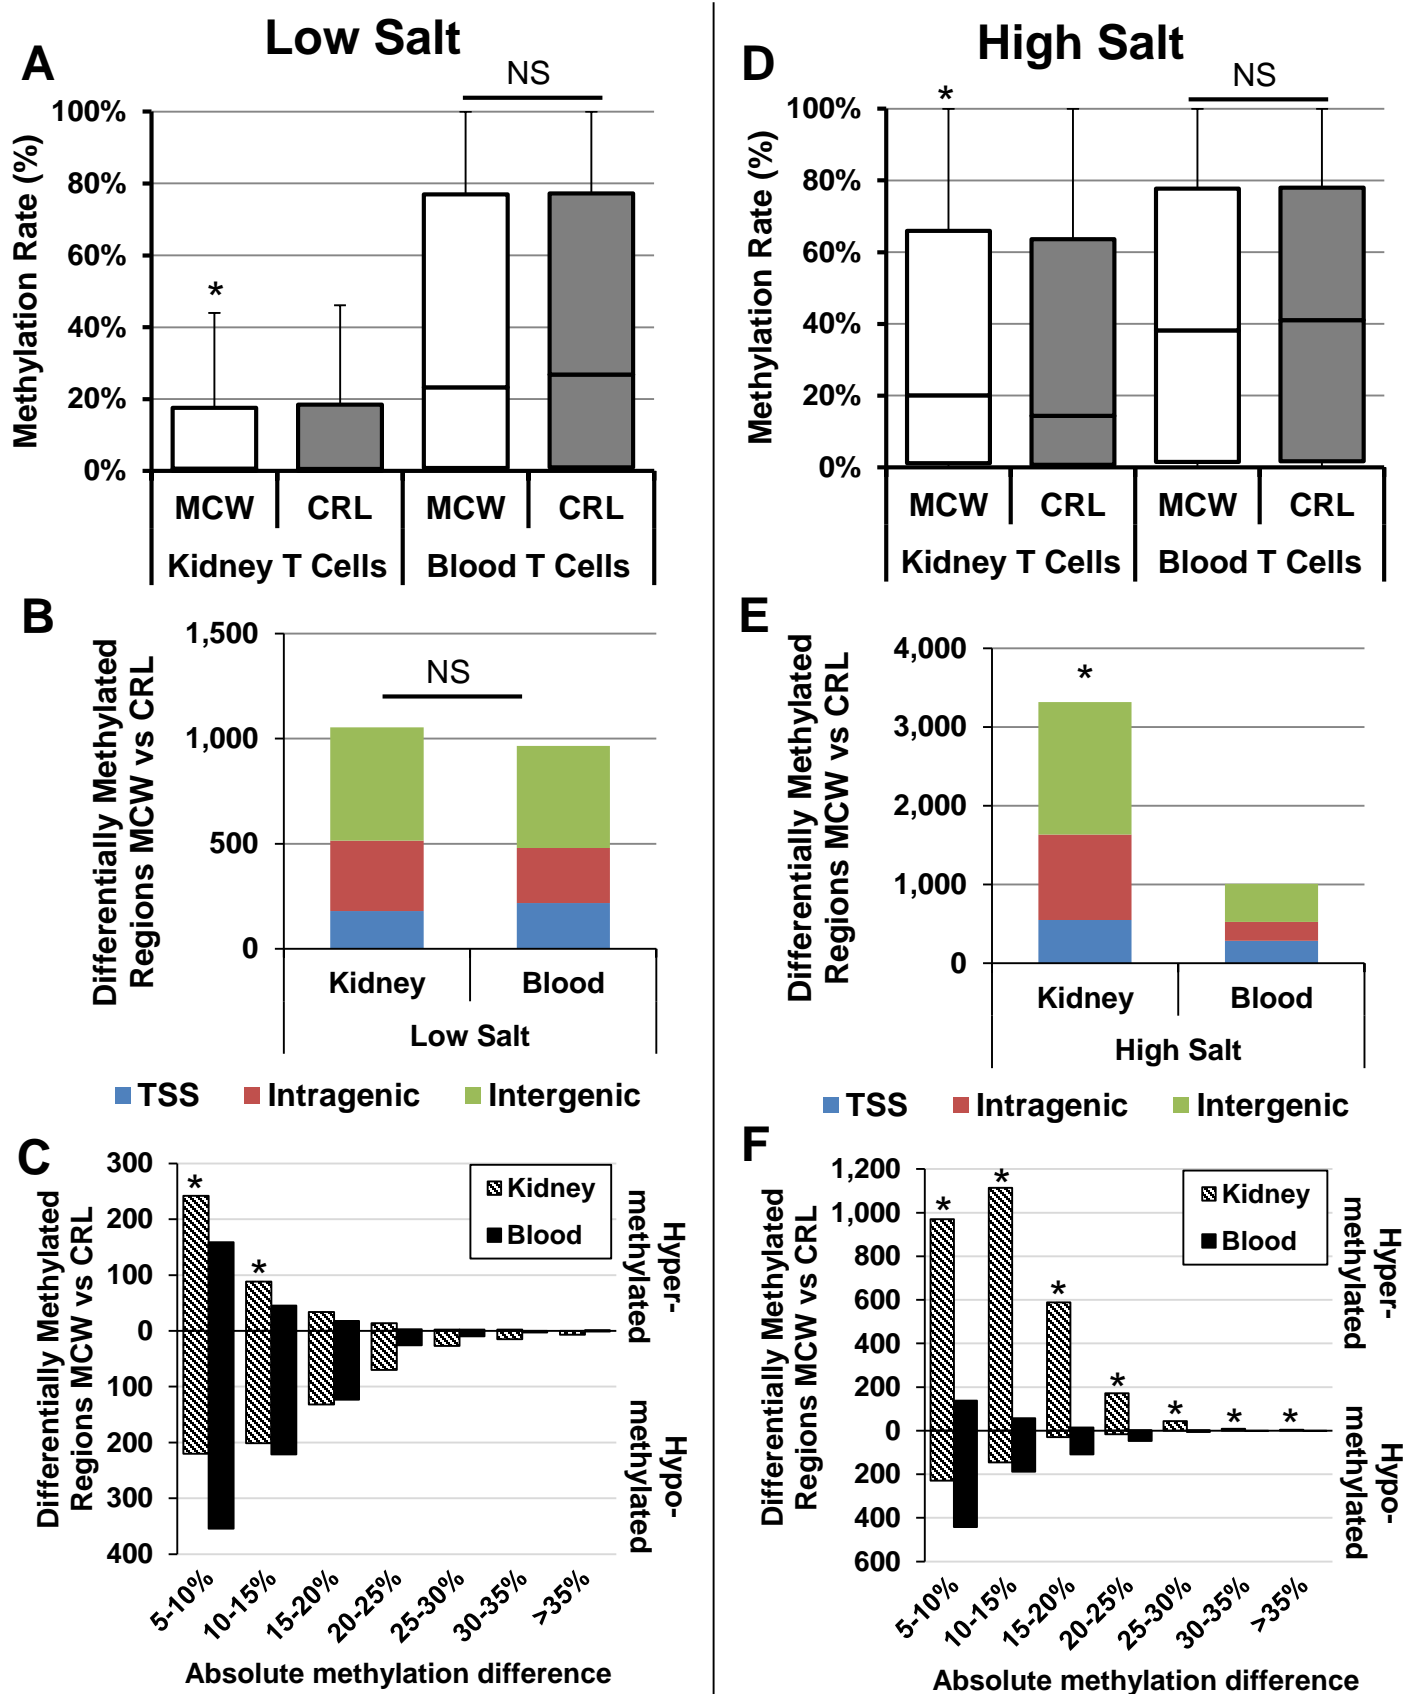

**Figure S1. SS/MCW Kidney T-cells have higher methylation rates than SS/CRL on HS.** Summary of the methylated differences between SS/MCW and SS/CRL T cells both on (A-C) low salt diet and on (D-F) high salt diet. Panels A, C show the overall methylation rate of all the identified methylation regions. Panels B, E show the number of DMRs separated by genomic location. Panels C, F show the number of DMRs that were either hypermethylated or hypomethylated and their absolute methylation difference.  $*=p<0.05$

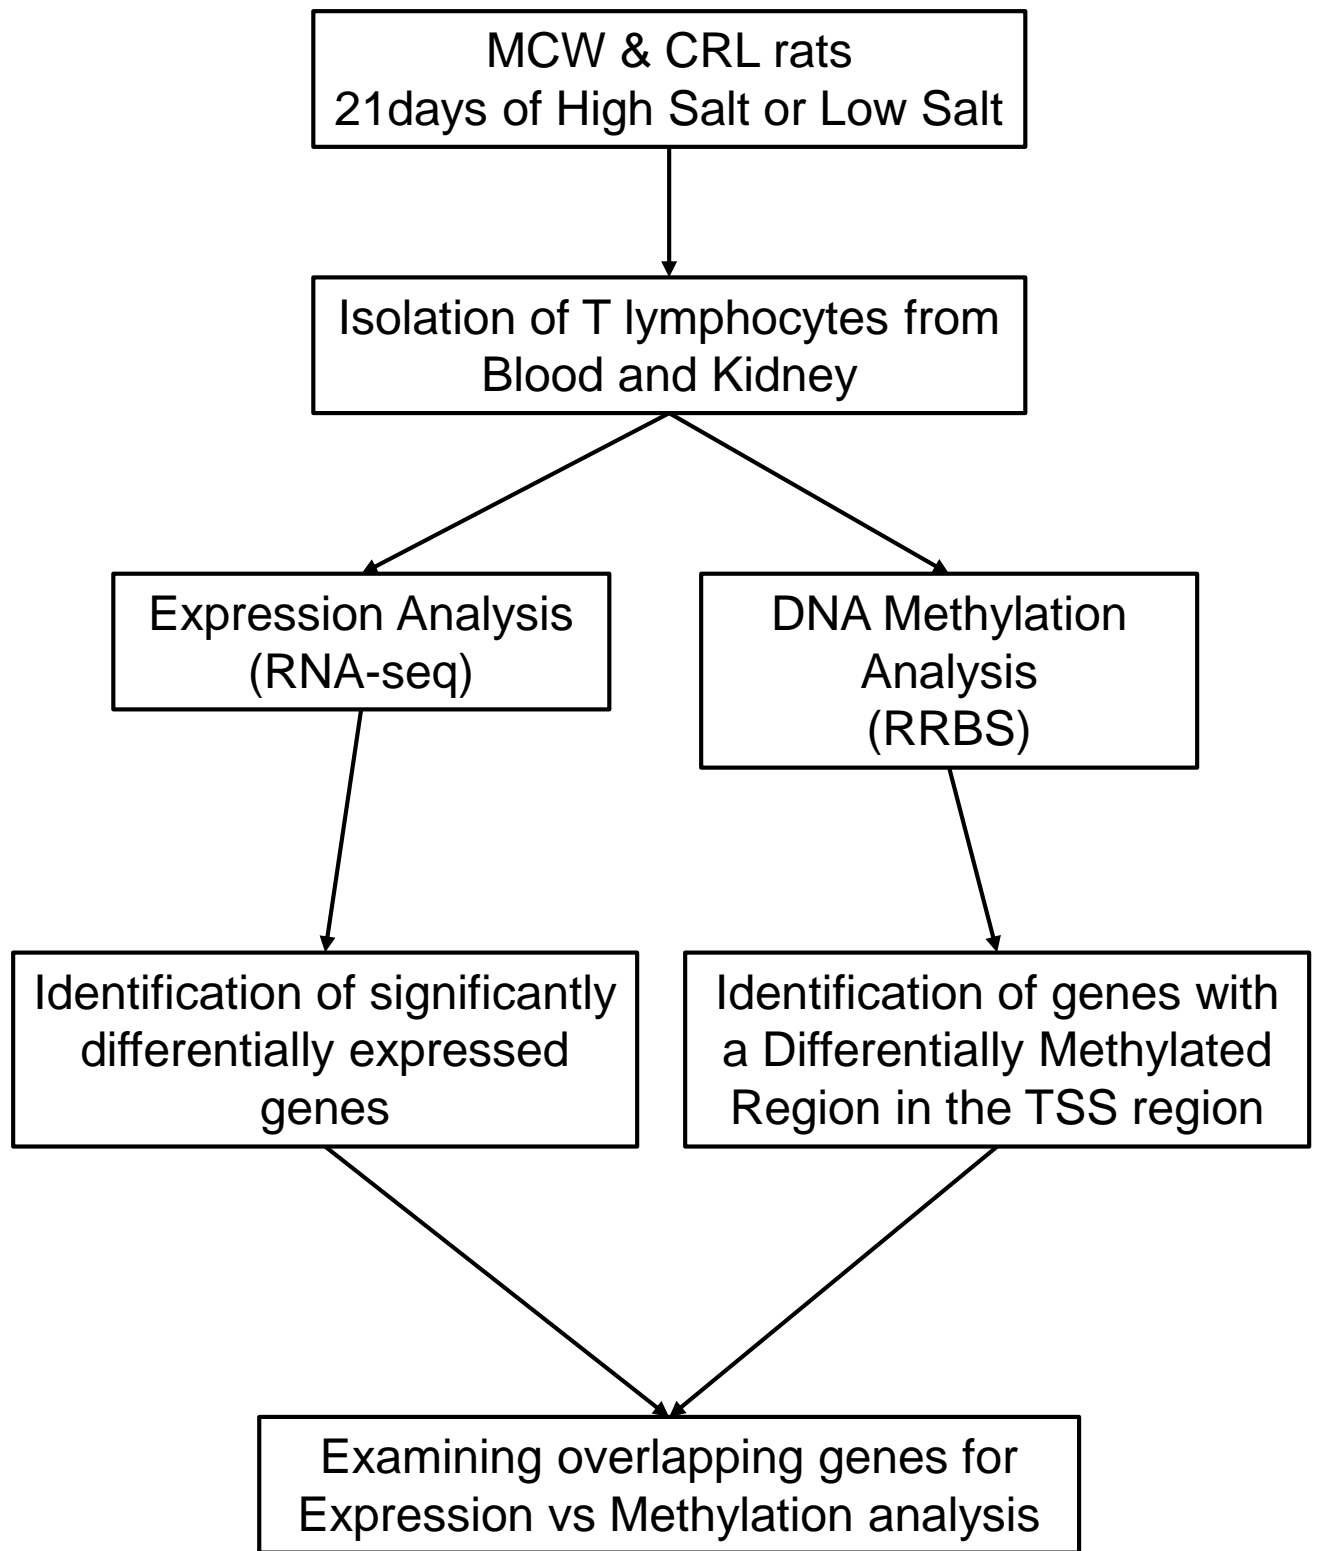

**Figure S2. Schematic of the approach taken to identify the relationship between gene expression and methylation profile.**

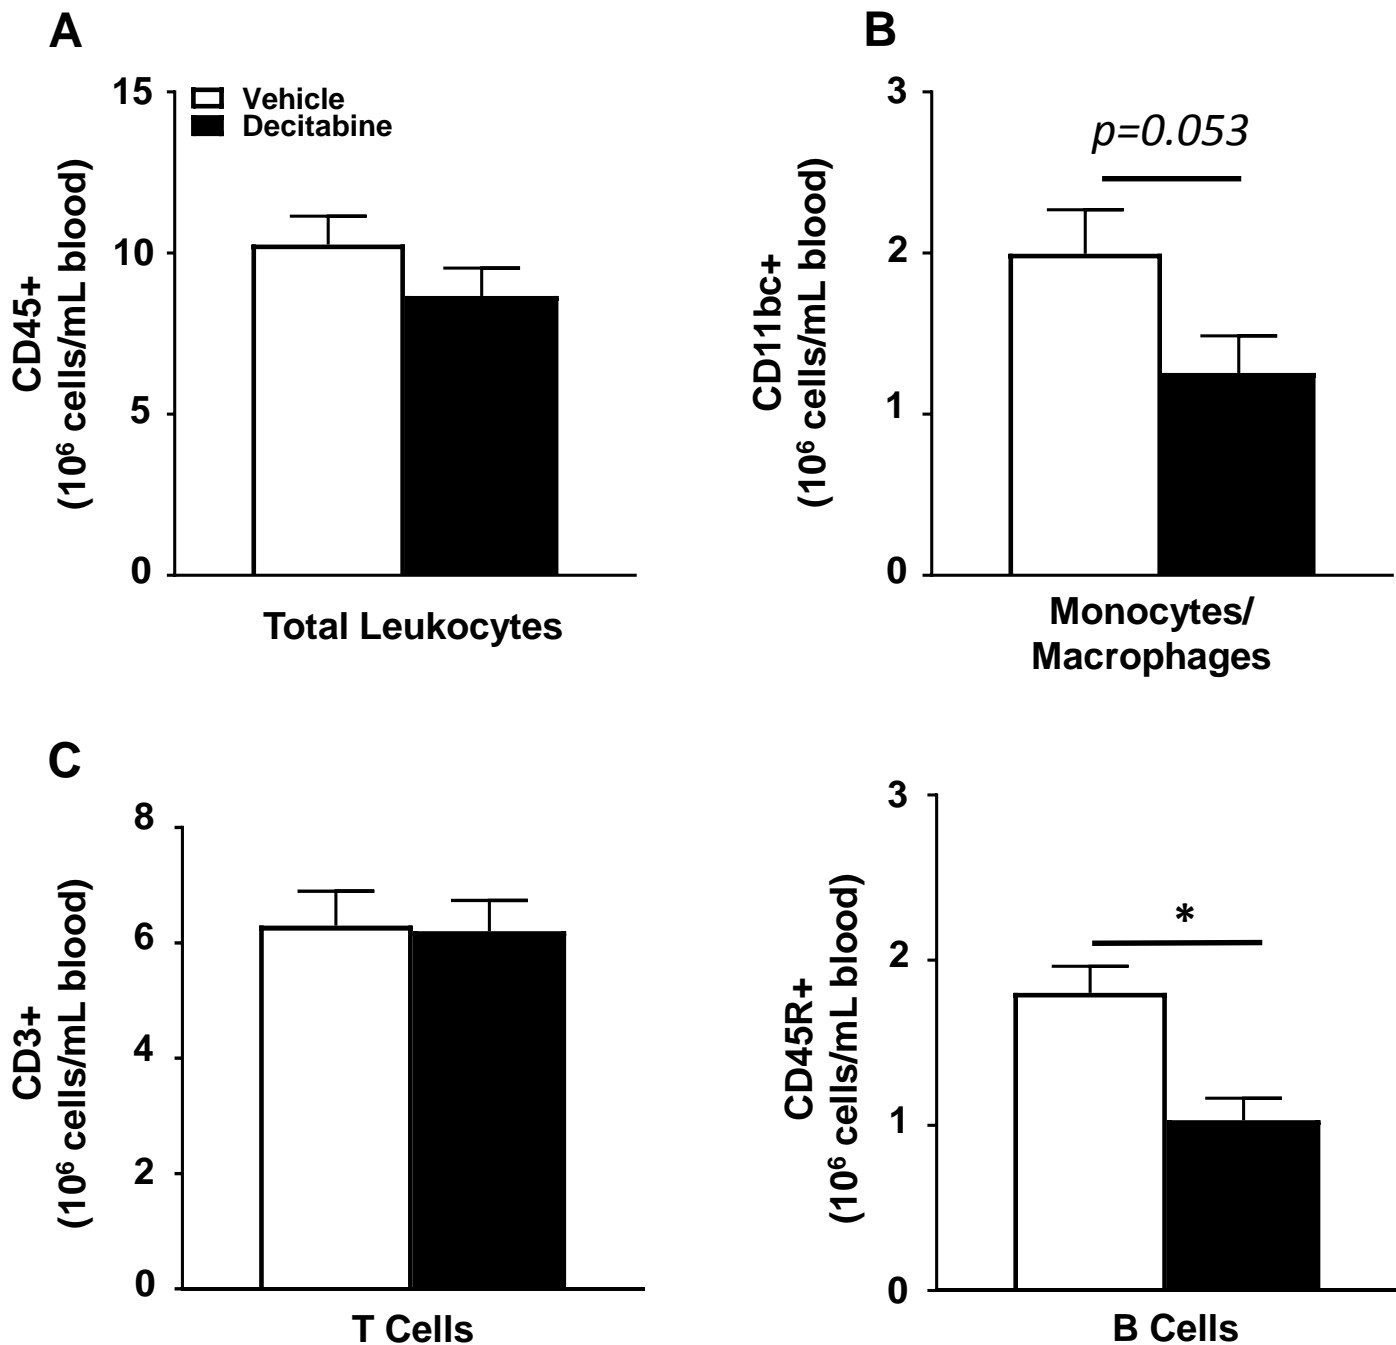

**Figure S3. Circulating immune cell profile following decitabine administration in Dahl SS rats.** (A) Total leukocytes circulating in the blood (CD45+). (B) Circulating monocytes and macrophages in the blood (CD11bc+). (C) Circulating T cells in the blood (CD3+ T cells) (D) Circulating B cells in the blood (CD45R+ B cells).



Figure2A Kidney MCW

| chr | start    | stop     | q-value  | methy.diff | CpGs | pMWU     | p2DKS    | MCWLS    | MCWHS    | pMWU.fdr    | cgi.type   | transcript             | gene      |
|-----|----------|----------|----------|------------|------|----------|----------|----------|----------|-------------|------------|------------------------|-----------|
| 1   | 767170   | 767274   | 1        | -0.14635   | 12   | 1.30E-07 | 5.30E-06 | 0.18729  | 0.33364  | 2.11E-06    | Intergenic | NA                     | NA        |
| 1   | 3244007  | 3244073  | 1        | -0.145121  | 9    | 7.40E-06 | 0.0019   | 0.3239   | 0.46902  | 6.09E-05    | Intergenic | NA                     | NA        |
| 1   | 3639083  | 3639207  | 1        | -0.214359  | 7    | 9.20E-08 | 3.80E-06 | 0.35552  | 0.56988  | 1.63E-06    | Intragenic | NM_001107469           | Zc3h12d   |
| 1   | 3666869  | 3666899  | 1        | -0.089891  | 5    | 0.0087   | 0.0092   | 0.14709  | 0.23698  | 0.020391633 | Intragenic | NM_001107469           | Zc3h12d   |
| 1   | 3667124  | 3667332  | 3.30E-05 | -0.144489  | 17   | 1.40E-13 | 1.00E-10 | 0.099408 | 0.2439   | 1.41E-11    | Intragenic | NM_001107469           | Zc3h12d   |
| 1   | 4480958  | 4480978  | 1        | -0.056191  | 5    | 0.00019  | 0.0032   | 0.87952  | 0.93572  | 0.000879857 | Intergenic | NA                     | NA        |
| 1   | 6228429  | 6228539  | 1        | -0.097444  | 5    | 0.019    | 0.038    | 0.33481  | 0.43225  | 0.038322088 | Intergenic | NA                     | NA        |
| 1   | 6816650  | 6816704  | 1        | -0.059907  | 9    | 6.40E-08 | 4.40E-05 | 0.03624  | 0.096148 | 1.19E-06    | TSS        | NM_001114330:NM_017011 | Grm1:Grm1 |
| 1   | 7075548  | 7075621  | 1        | -0.094592  | 5    | 0.017    | 0.024    | 0.61427  | 0.70887  | 0.034796287 | Intergenic | NA                     | NA        |
| 1   | 7438777  | 7438939  | 1        | -0.122557  | 7    | 0.0046   | 0.0043   | 0.47482  | 0.59738  | 0.012157071 | Intergenic | NA                     | NA        |
| 1   | 7772969  | 7773274  | 1        | 0.113252   | 5    | 0.011    | 0.025    | 0.81382  | 0.70056  | 0.02463877  | Intergenic | NA                     | NA        |
| 1   | 8830123  | 8830272  | 1        | -0.117654  | 7    | 8.40E-05 | 0.00049  | 0.1321   | 0.24975  | 0.000451848 | Intergenic | NA                     | NA        |
| 1   | 8830716  | 8830980  | 2.10E-07 | -0.247256  | 20   | 4.40E-14 | 6.50E-13 | 0.080113 | 0.32737  | 6.64E-12    | Intergenic | NA                     | NA        |
| 1   | 8857008  | 8857175  | 3.60E-09 | -0.112716  | 21   | 9.00E-09 | 1.10E-14 | 0.16258  | 0.2753   | 2.28E-07    | TSS        | NM_012760              | Plagl1    |
| 1   | 8857179  | 8857233  | 0.0058   | -0.321421  | 5    | 6.30E-08 | 1.80E-08 | 0.21963  | 0.54105  | 1.18E-06    | TSS        | NM_012760              | Plagl1    |
| 1   | 8857273  | 8857320  | 1        | -0.145797  | 5    | 0.0012   | 0.0018   | 0.18529  | 0.33109  | 0.004013471 | TSS        | NM_012760              | Plagl1    |
| 1   | 9066361  | 9066523  | 1        | -0.122986  | 7    | 0.0051   | 0.0067   | 0.47418  | 0.59717  | 0.013208341 | Intragenic | NM_214458              | Phactr2   |
| 1   | 9083987  | 9084180  | 1        | -0.080621  | 5    | 0.00014  | 0.00014  | 0.010337 | 0.090957 | 0.000684451 | Intragenic | NM_214458              | Phactr2   |
| 1   | 9374234  | 9374338  | 1        | -0.091481  | 5    | 0.019    | 0.038    | 0.59836  | 0.68984  | 0.038322088 | Intergenic | NA                     | NA        |
| 1   | 9452065  | 9452138  | 1        | -0.212149  | 5    | 0.0013   | 0.039    | 0.54695  | 0.7591   | 0.004277683 | Intragenic | NM_001134425           | Aig1      |
| 1   | 9541092  | 9541270  | 1        | -0.15658   | 8    | 0.00043  | 0.0026   | 0.21343  | 0.37001  | 0.001736911 | Intragenic | NM_001134425           | Aig1      |
| 1   | 9775402  | 9775473  | 1        | -0.135699  | 5    | 0.008    | 0.038    | 0.62294  | 0.75864  | 0.019059477 | Intragenic | NM_024137              | Hivep2    |
| 1   | 9905814  | 9905958  | 1        | -0.174112  | 6    | 8.90E-05 | 0.00096  | 0.10981  | 0.28392  | 0.000471983 | Intragenic | NM_024137              | Hivep2    |
| 1   | 10081520 | 10081650 | 1        | -0.089962  | 5    | 0.0038   | 0.025    | 0.58398  | 0.67395  | 0.010352437 | Intergenic | NA                     | NA        |
| 1   | 10084363 | 10084410 | 1        | -0.283779  | 5    | 5.50E-06 | 7.10E-05 | 0.12843  | 0.41221  | 4.78E-05    | Intergenic | NA                     | NA        |
| 1   | 11575343 | 11575454 | 1        | -0.070494  | 5    | 0.0063   | 0.025    | 0.83465  | 0.90515  | 0.015629046 | Intergenic | NA                     | NA        |
| 1   | 12878953 | 12879035 | 1        | -0.162498  | 5    | 0.021    | 0.038    | 0.43774  | 0.60023  | 0.041207871 | Intergenic | NA                     | NA        |
| 1   | 13498318 | 13498339 | 1        | 0.075464   | 5    | 0.012    | 0.088    | 0.22795  | 0.15249  | 0.026435197 | TSS        | NR_046238              | Rn5-8s    |
| 1   | 13498489 | 13498505 | 1        | -0.265782  | 5    | 0.0011   | 0.00097  | 0.19086  | 0.45664  | 0.003737263 | TSS        | NR_046238              | Rn5-8s    |
| 1   | 13500695 | 13500723 | 1        | 0.118756   | 5    | 2.80E-05 | 0.00097  | 0.2396   | 0.12084  | 0.000182174 | TSS        | NR_046238              | Rn5-8s    |
| 1   | 13502046 | 13502068 | 1        | -0.051451  | 5    | 0.0087   | 0.088    | 0.16206  | 0.21351  | 0.020391633 | TSS        | NR_046238              | Rn5-8s    |
| 1   | 13503361 | 13503592 | 0.43     | -0.0594    | 34   | 2.10E-09 | 1.30E-06 | 0.099522 | 0.13316  | 6.26E-08    | Intragenic | NM_001025002           | LOC310926 |
| 1   | 13503593 | 13503615 | 1        | -0.056171  | 5    | 0.00019  | 0.00014  | 0.1031   | 0.15927  | 0.000879857 | Intragenic | NM_001025002           | LOC310926 |
| 1   | 13503834 | 13503846 | 1        | 0.069168   | 5    | 0.0074   | 0.088    | 0.2414   | 0.17224  | 0.017853001 | Intragenic | NM_001025002           | LOC310926 |
| 1   | 13504792 | 13505140 | 1        | 0.090981   | 55   | 0.0035   | 0.087    | 0.10539  | 0.1127   | 0.009686665 | Intragenic | NM_001025002           | LOC310926 |

| chr | start    | stop     | q-value | methy.diff | CpGs | pMWU     | p2DKS    | MCWLS    | MCWHS    | pMWU.fdr    | cgi.type   | transcript                    | gene      |
|-----|----------|----------|---------|------------|------|----------|----------|----------|----------|-------------|------------|-------------------------------|-----------|
| 1   | 13506442 | 13506522 | 1       | -0.066236  | 5    | 0.0017   | 0.025    | 0.069404 | 0.13564  | 0.005339493 | TSS        | NM_001025002                  | LOC310926 |
| 1   | 13506525 | 13506563 | 1       | -0.053968  | 5    | 0.00044  | 0.015    | 0.053812 | 0.10778  | 0.001760146 | TSS        | NM_001025002                  | LOC310926 |
| 1   | 13506569 | 13506607 | 1       | -0.063679  | 5    | 0.00065  | 0.0018   | 0.049561 | 0.11324  | 0.002426546 | TSS        | NM_001025002                  | LOC310926 |
| 1   | 13507619 | 13507760 | 0.0022  | -0.12238   | 13   | 1.30E-08 | 6.70E-09 | 0.10069  | 0.22307  | 3.10E-07    | TSS        | NM_001025002                  | LOC310926 |
| 1   | 13508203 | 13508226 | 1       | -0.067068  | 5    | 0.0017   | 0.038    | 0.062833 | 0.1299   | 0.005339493 | TSS        | NM_001025002                  | LOC310926 |
| 1   | 13508240 | 13508270 | 1       | -0.050457  | 5    | 0.0014   | 0.015    | 0.060002 | 0.11046  | 0.004540837 | TSS        | NM_001025002                  | LOC310926 |
| 1   | 13510443 | 13510550 | 1       | -0.101442  | 7    | 1.30E-05 | 0.00029  | 0.074704 | 0.17615  | 9.66E-05    | Intergenic | NA                            | NA        |
| 1   | 13550441 | 13550606 | 1       | -0.09593   | 9    | 8.60E-07 | 2.90E-05 | 0.089411 | 0.18534  | 1.04E-05    | Intergenic | NA                            | NA        |
| 1   | 13553609 | 13553656 | 1       | -0.067058  | 5    | 0.0012   | 7.00E-05 | 0.091151 | 0.15821  | 0.004013471 | Intergenic | NA                            | NA        |
| 1   | 13554549 | 13556936 | 1       | -0.051342  | 318  | 8.60E-07 | 0.00036  | 0.1199   | 0.14247  | 1.04E-05    | Intergenic | NA                            | NA        |
| 1   | 13557363 | 13557558 | 1       | -0.054206  | 21   | 0.00088  | 0.0012   | 0.098338 | 0.14284  | 0.003092094 | TSS        | NR_046238                     | Rn5-8s    |
| 1   | 13558858 | 13558888 | 1       | 0.11868    | 5    | 5.60E-05 | 0.00052  | 0.25169  | 0.13301  | 0.000320912 | TSS        | NR_046238                     | Rn5-8s    |
| 1   | 13561167 | 13561188 | 1       | 0.089547   | 5    | 0.0035   | 0.088    | 0.24302  | 0.15347  | 0.009686665 | TSS        | NR_046238                     | Rn5-8s    |
| 1   | 13562762 | 13563006 | 1       | 0.113744   | 34   | 0.0039   | 0.059    | 0.12719  | 0.094013 | 0.010605635 | Intergenic | NA                            | NA        |
| 1   | 13563364 | 13563381 | 1       | -0.088436  | 5    | 0.023    | 0.058    | 0.20929  | 0.29772  | 0.04441443  | Intergenic | NA                            | NA        |
| 1   | 14560556 | 14560682 | 1       | -0.129856  | 8    | 0.025    | 0.16     | 0.36572  | 0.49558  | 0.047453009 | Intergenic | NA                            | NA        |
| 1   | 14663587 | 14663679 | 1       | -0.127401  | 5    | 0.00036  | 0.0031   | 0.4247   | 0.5521   | 0.001486639 | Intergenic | NA                            | NA        |
| 1   | 14663794 | 14663967 | 1       | -0.093893  | 5    | 0.00088  | 0.009    | 0.70526  | 0.79916  | 0.003092094 | Intergenic | NA                            | NA        |
| 1   | 14934859 | 14935061 | 1       | -0.151441  | 8    | 1.10E-05 | 5.40E-05 | 0.52205  | 0.67349  | 8.53E-05    | Intergenic | NA                            | NA        |
| 1   | 15280155 | 15280209 | 1       | -0.1065    | 5    | 0.016    | 0.057    | 0.28705  | 0.39355  | 0.033288089 | Intergenic | NA                            | NA        |
| 1   | 15326877 | 15326959 | 1       | -0.194565  | 5    | 0.0022   | 0.0055   | 0.31982  | 0.51438  | 0.006578104 | Intergenic | NA                            | NA        |
| 1   | 15383780 | 15383891 | 1       | -0.241138  | 5    | 0.00036  | 0.0054   | 0.36056  | 0.60169  | 0.001486639 | Intergenic | NA                            | NA        |
| 1   | 15383911 | 15384062 | 0.45    | -0.200772  | 8    | 2.70E-09 | 1.40E-06 | 0.19721  | 0.39798  | 7.80E-08    | Intergenic | NA                            | NA        |
| 1   | 15635408 | 15635825 | 1       | -0.248423  | 10   | 0.00053  | 0.011    | 0.30401  | 0.55243  | 0.002069204 | Intergenic | NA                            | NA        |
| 1   | 16125979 | 16126112 | 1       | -0.120722  | 6    | 0.0013   | 0.026    | 0.54719  | 0.66791  | 0.004277683 | Intergenic | NA                            | NA        |
| 1   | 16323616 | 16323817 | 1       | -0.089686  | 5    | 0.025    | 0.038    | 0.074528 | 0.16421  | 0.047453009 | Intergenic | NA                            | NA        |
| 1   | 16383995 | 16384026 | 1       | -0.177046  | 6    | 0.0065   | 0.026    | 0.50441  | 0.68145  | 0.016085358 | Intergenic | NA                            | NA        |
| 1   | 16965273 | 16965313 | 0.015   | -0.298847  | 5    | 1.30E-07 | 4.50E-08 | 0.079381 | 0.37823  | 2.11E-06    | Intragenic | NM_001277694                  | Map3k5    |
| 1   | 17146640 | 17146696 | 1       | -0.202734  | 5    | 1.30E-05 | 6.90E-05 | 0.23461  | 0.43734  | 9.66E-05    | Intragenic | NM_001277694                  | Map3k5    |
| 1   | 17223525 | 17223666 | 1       | -0.167536  | 5    | 2.20E-06 | 3.50E-05 | 0.025758 | 0.19329  | 2.27E-05    | Intragenic | NM_001106270                  | Map7      |
| 1   | 17228239 | 17228337 | 1       | -0.144432  | 5    | 0.014    | 0.13     | 0.27126  | 0.4157   | 0.029850603 | Intragenic | NM_001106270                  | Map7      |
| 1   | 17240671 | 17240730 | 1       | -0.103889  | 5    | 0.00014  | 0.00098  | 0.082304 | 0.18619  | 0.000684451 | Intragenic | NM_001106270                  | Map7      |
| 1   | 17240735 | 17240851 | 1       | -0.068324  | 5    | 0.02     | 0.18     | 0.087238 | 0.15556  | 0.039778219 | Intragenic | NM_001106270                  | Map7      |
| 1   | 17262219 | 17262322 | 1       | -0.145872  | 8    | 0.0064   | 0.012    | 0.65746  | 0.80333  | 0.015860755 | Intragenic | NM_001106270:N<br>M_001198638 | Map7:Map7 |
| 1   | 17278177 | 17278239 | 1       | -0.268031  | 6    | 8.40E-06 | 2.50E-05 | 0.10426  | 0.37229  | 6.80E-05    | Intragenic | NM_001106270:N<br>M_001198638 | Map7:Map7 |
| 1   | 17280945 | 17281146 | 1       | -0.170177  | 7    | 6.40E-05 | 0.0013   | 0.18524  | 0.35542  | 0.000358884 | Intragenic | NM_001106270:N<br>M_001198638 | Map7:Map7 |

| chr | start    | stop     | q-value | methy.diff | CpGs | pMWU     | p2DKS    | MCWLS    | MCWHS   | pMWU.fdr    | cgi.type   | transcript                          | gene           |
|-----|----------|----------|---------|------------|------|----------|----------|----------|---------|-------------|------------|-------------------------------------|----------------|
| 1   | 17582799 | 17582851 | 1       | -0.124893  | 5    | 0.011    | 0.039    | 0.15242  | 0.27731 | 0.02463877  | Intragenic | NM_080894                           | Pde7b          |
| 1   | 18070095 | 18070169 | 1       | -0.20256   | 5    | 0.011    | 0.0089   | 0.23963  | 0.44219 | 0.02463877  | Intragenic | NM_001191088                        | Aldh8a1        |
| 1   | 18191906 | 18192005 | 1       | -0.116465  | 5    | 0.0027   | 0.024    | 0.75813  | 0.8746  | 0.007840962 | Intergenic | NA                                  | NA             |
| 1   | 19441594 | 19441779 | 1       | -0.322385  | 5    | 1.30E-05 | 7.10E-05 | 0.10289  | 0.42527 | 9.66E-05    | Intragenic | NM_001029902                        | Ptprk          |
| 1   | 20901081 | 20901174 | 1       | -0.103992  | 6    | 0.013    | 0.16     | 0.2999   | 0.40389 | 0.028097302 | Intergenic | NA                                  | NA             |
| 1   | 21277446 | 21277557 | 1       | -0.141251  | 5    | 0.02     | 0.024    | 0.48829  | 0.62954 | 0.039778219 | Intergenic | NA                                  | NA             |
| 1   | 21658953 | 21659049 | 1       | -0.157616  | 5    | 0.0011   | 0.0089   | 0.55645  | 0.71407 | 0.003737263 | Intergenic | NA                                  | NA             |
| 1   | 21673781 | 21673938 | 1       | -0.110979  | 5    | 0.0019   | 0.024    | 0.091637 | 0.20262 | 0.005855937 | Intergenic | NA                                  | NA             |
| 1   | 21731010 | 21731135 | 1       | -0.133032  | 5    | 5.60E-05 | 0.00095  | 0.57878  | 0.71181 | 0.000320912 | Intergenic | NA                                  | NA             |
| 1   | 22345856 | 22346008 | 0.015   | -0.2138    | 9    | 3.10E-10 | 4.60E-08 | 0.58091  | 0.79471 | 1.21E-08    | Intragenic | NM_001195606                        | Smlr1          |
| 1   | 22351848 | 22351911 | 1       | -0.116789  | 7    | 0.001    | 0.0033   | 0.20315  | 0.31993 | 0.003452169 | Intragenic | NM_001195606                        | Smlr1          |
| 1   | 22352353 | 22352505 | 0.015   | -0.210915  | 9    | 3.80E-10 | 4.60E-08 | 0.58338  | 0.7943  | 1.44E-08    | Intragenic | NM_001195606                        | Smlr1          |
| 1   | 22452305 | 22452413 | 1       | -0.262628  | 5    | 1.20E-05 | 6.80E-05 | 0.085962 | 0.34859 | 9.15E-05    | Intergenic | NA                                  | NA             |
| 1   | 23333380 | 23333534 | 1       | -0.078827  | 5    | 0.023    | 0.088    | 0.08379  | 0.16262 | 0.04441443  | TSS        | NM_022266                           | Ctgf           |
| 1   | 24156790 | 24156824 | 1       | -0.148068  | 5    | 7.40E-07 | 3.30E-05 | 0.76684  | 0.91491 | 9.26E-06    | Intergenic | NA                                  | NA             |
| 1   | 25542346 | 25542443 | 1       | -0.081213  | 5    | 3.10E-05 | 0.00098  | 0.046307 | 0.12752 | 0.000197418 | Intergenic | NA                                  | NA             |
| 1   | 25653669 | 25653689 | 1       | -0.286027  | 5    | 9.80E-05 | 0.00053  | 0.21436  | 0.50038 | 0.000512474 | Intragenic | NM_019232:NM_001193568:NM_001193569 | Sgk1:Sgk1:Sgk1 |
| 1   | 25674987 | 25675164 | 0.067   | -0.203419  | 11   | 2.20E-09 | 2.10E-07 | 0.16312  | 0.36654 | 6.51E-08    | Intergenic | NA                                  | NA             |
| 1   | 25725842 | 25726069 | 0.0018  | -0.146064  | 11   | 1.30E-11 | 5.60E-09 | 0.030027 | 0.17609 | 7.23E-10    | Intergenic | NA                                  | NA             |
| 1   | 25796809 | 25796872 | 1       | -0.116789  | 7    | 0.001    | 0.0033   | 0.20315  | 0.31993 | 0.003452169 | Intergenic | NA                                  | NA             |
| 1   | 25906068 | 25906129 | 1       | -0.238146  | 5    | 1.20E-05 | 0.00028  | 0.1655   | 0.40365 | 9.15E-05    | Intergenic | NA                                  | NA             |
| 1   | 26488686 | 26488795 | 1       | -0.133672  | 5    | 0.0058   | 0.058    | 0.42936  | 0.56303 | 0.014624129 | Intergenic | NA                                  | NA             |
| 1   | 26519931 | 26520040 | 1       | -0.133672  | 5    | 0.0058   | 0.058    | 0.42936  | 0.56303 | 0.014624129 | Intergenic | NA                                  | NA             |
| 1   | 26768536 | 26768661 | 1       | -0.103677  | 9    | 0.015    | 0.012    | 0.55216  | 0.65584 | 0.031584896 | Intergenic | NA                                  | NA             |
| 1   | 27413007 | 27413103 | 1       | -0.145407  | 5    | 0.00044  | 0.0031   | 0.61167  | 0.75708 | 0.001760146 | Intergenic | NA                                  | NA             |
| 1   | 32872113 | 32872135 | 0.088   | -0.339479  | 5    | 1.50E-07 | 2.70E-07 | 0.345    | 0.68448 | 2.38E-06    | Intergenic | NA                                  | NA             |
| 1   | 33161884 | 33161922 | 1       | -0.191746  | 5    | 0.00097  | 0.0088   | 0.41487  | 0.60661 | 0.003366009 | Intragenic | NM_012654                           | Slc9a3         |
| 1   | 33512372 | 33512447 | 1       | -0.251661  | 5    | 2.20E-05 | 0.00027  | 0.18712  | 0.43878 | 0.000149617 | Intragenic | NM_001013144                        | Slc12a7        |
| 1   | 34189748 | 34189999 | 1       | -0.149937  | 14   | 2.70E-05 | 0.0014   | 0.24383  | 0.39377 | 0.000178372 | Intergenic | NA                                  | NA             |
| 1   | 34598338 | 34598430 | 1       | -0.184395  | 5    | 0.00048  | 0.0093   | 0.13619  | 0.32058 | 0.001881331 | Intergenic | NA                                  | NA             |
| 1   | 35323384 | 35323527 | 1       | -0.067383  | 7    | 0.0014   | 0.0078   | 0.059057 | 0.12644 | 0.004540837 | Intragenic | NM_001107331                        | Irx1           |
| 1   | 35324703 | 35324915 | 1       | -0.069308  | 12   | 6.30E-05 | 0.0025   | 0.083367 | 0.15268 | 0.000354102 | Intragenic | NM_001107331                        | Irx1           |
| 1   | 35513011 | 35513262 | 1       | -0.15468   | 7    | 0.001    | 0.018    | 0.32405  | 0.47873 | 0.003452169 | Intergenic | NA                                  | NA             |
| 1   | 39250445 | 39250568 | 1       | -0.15504   | 5    | 0.00021  | 0.00095  | 0.50399  | 0.65903 | 0.000951214 | Intergenic | NA                                  | NA             |
| 1   | 41999580 | 41999707 | 1       | -0.212158  | 5    | 0.0014   | 0.015    | 0.46866  | 0.68082 | 0.004540837 | Intragenic | NM_001108462                        | Mthfd1l        |
| 1   | 42161533 | 42161693 | 1       | -0.119153  | 7    | 9.20E-08 | 3.00E-05 | 0.11853  | 0.23768 | 1.63E-06    | TSS        | NM_057103                           | Akap12         |
| 1   | 42667054 | 42667104 | 1       | -0.097089  | 5    | 0.0019   | 0.025    | 0.10381  | 0.2009  | 0.005855937 | TSS        | NM_012689                           | Esrr1          |

| chr | start    | stop     | q-value  | methyI.diff | CpGs | pMWU     | p2DKS    | MCWLS    | MCWHS    | pMWU.fdr    | cgi.type   | transcript                          | gene              |
|-----|----------|----------|----------|-------------|------|----------|----------|----------|----------|-------------|------------|-------------------------------------|-------------------|
| 1   | 42670542 | 42670793 | 1        | -0.081628   | 8    | 0.0078   | 0.12     | 0.11054  | 0.19217  | 0.018765285 | Intragenic | NM_012689                           | Esr1              |
| 1   | 43150943 | 43151019 | 1        | -0.23016    | 5    | 0.00023  | 0.0055   | 0.27875  | 0.50891  | 0.00102405  | Intergenic | NA                                  | NA                |
| 1   | 43214532 | 43214890 | 1        | -0.126371   | 13   | 5.20E-06 | 0.0022   | 0.59625  | 0.72262  | 4.61E-05    | Intergenic | NA                                  | NA                |
| 1   | 43490326 | 43490903 | 1        | -0.111046   | 10   | 0.0002   | 0.0028   | 0.61465  | 0.72569  | 0.00092049  | Intergenic | NA                                  | NA                |
| 1   | 45053897 | 45053991 | 1        | -0.136688   | 5    | 0.0045   | 0.059    | 0.19614  | 0.33283  | 0.011905878 | Intergenic | NA                                  | NA                |
| 1   | 45159752 | 45159977 | 1        | -0.181859   | 5    | 0.00017  | 0.0018   | 0.05878  | 0.24064  | 0.000806192 | Intragenic | NM_001012061                        | Cnksr3            |
| 1   | 46179682 | 46179878 | 1        | -0.130599   | 7    | 0.0072   | 0.078    | 0.21194  | 0.34254  | 0.017539509 | Intergenic | NA                                  | NA                |
| 1   | 47528590 | 47528855 | 1        | -0.107049   | 8    | 0.00026  | 0.025    | 0.072066 | 0.17912  | 0.001130807 | Intergenic | NA                                  | NA                |
| 1   | 47606603 | 47606663 | 1        | -0.053315   | 5    | 0.021    | 0.059    | 0.89184  | 0.94516  | 0.041207871 | Intergenic | NA                                  | NA                |
| 1   | 48004868 | 48004944 | 1        | -0.259914   | 5    | 0.00014  | 0.0092   | 0.27155  | 0.53147  | 0.000684451 | Intergenic | NA                                  | NA                |
| 1   | 48155592 | 48155834 | 1        | -0.182628   | 5    | 0.00036  | 0.0018   | 0.12593  | 0.30856  | 0.001486639 | Intragenic | NM_032071:NM_001113371:NM_001113372 | Synj2:Synj2:Synj2 |
| 1   | 48217567 | 48217697 | 1        | -0.229613   | 5    | 1.00E-05 | 7.60E-06 | 0.18651  | 0.41612  | 7.82E-05    | Intragenic | NM_032071:NM_001113371:NM_001113372 | Synj2:Synj2:Synj2 |
| 1   | 48534287 | 48534586 | 1        | -0.175148   | 15   | 1.10E-06 | 0.00057  | 0.29754  | 0.47269  | 1.27E-05    | TSS        | NM_001127560                        | Syt13             |
| 1   | 48840313 | 48840429 | 1        | -0.122823   | 5    | 0.0058   | 0.038    | 0.22582  | 0.34864  | 0.014624129 | Intergenic | NA                                  | NA                |
| 1   | 48880760 | 48880856 | 1        | -0.127725   | 5    | 0.00048  | 0.0053   | 0.63746  | 0.76518  | 0.001881331 | Intergenic | NA                                  | NA                |
| 1   | 48951992 | 48952085 | 1        | -0.191506   | 5    | 1.30E-05 | 0.00028  | 0.34916  | 0.54067  | 9.66E-05    | Intragenic | NM_001038615                        | Fndc1             |
| 1   | 50655421 | 50655535 | 1        | -0.098041   | 8    | 0.00072  | 0.013    | 0.16234  | 0.26039  | 0.002634665 | Intragenic | NM_020093                           | Park2             |
| 1   | 50756153 | 50756353 | 0.033    | -0.218701   | 11   | 6.60E-10 | 1.00E-07 | 0.20563  | 0.42433  | 2.31E-08    | Intragenic | NM_020093                           | Park2             |
| 1   | 51077830 | 51077890 | 1        | -0.323916   | 5    | 2.20E-05 | 1.60E-05 | 0.14131  | 0.46523  | 0.000149617 | Intragenic | NM_001107456                        | Map3k4            |
| 1   | 51547489 | 51547803 | 2.70E-10 | -0.123851   | 25   | 6.50E-14 | 8.30E-16 | 0.073723 | 0.19757  | 7.58E-12    | Intragenic | NM_012756                           | Igf2r             |
| 1   | 51576787 | 51577357 | 4.30E-20 | -0.136557   | 74   | 4.00E-14 | 1.30E-25 | 0.1406   | 0.27715  | 6.64E-12    | TSS        | NM_012756                           | Igf2r             |
| 1   | 51754816 | 51754840 | 1        | -0.19296    | 5    | 5.60E-05 | 0.00051  | 0.31858  | 0.51153  | 0.000320912 | Intergenic | NA                                  | NA                |
| 1   | 52028102 | 52028397 | 1        | -0.056768   | 8    | 0.00019  | 0.001    | 0.074578 | 0.13135  | 0.000879857 | Intergenic | NA                                  | NA                |
| 1   | 53762155 | 53762204 | 1        | -0.231483   | 5    | 6.30E-06 | 0.00052  | 0.27235  | 0.50383  | 5.33E-05    | Intragenic | NM_022236                           | Pde10a            |
| 1   | 54944691 | 54944899 | 1        | -0.144576   | 8    | 0.00025  | 0.0024   | 0.60426  | 0.74884  | 0.001103692 | Intergenic | NA                                  | NA                |
| 1   | 55087402 | 55087629 | 1        | -0.160235   | 7    | 0.00014  | 9.10E-05 | 0.11227  | 0.2725   | 0.000684451 | Intergenic | NA                                  | NA                |
| 1   | 55165530 | 55165679 | 1        | -0.184074   | 8    | 2.80E-05 | 0.0036   | 0.15016  | 0.33424  | 0.000182174 | Intergenic | NA                                  | NA                |
| 1   | 55637644 | 55637685 | 1        | -0.183008   | 5    | 0.0013   | 0.00097  | 0.4521   | 0.63511  | 0.004277683 | Intergenic | NA                                  | NA                |
| 1   | 55637762 | 55637802 | 1        | -0.111366   | 5    | 0.0049   | 0.037    | 0.39586  | 0.50723  | 0.012753585 | Intergenic | NA                                  | NA                |
| 1   | 55638780 | 55638842 | 1        | -0.208292   | 7    | 4.50E-05 | 0.00048  | 0.37087  | 0.57916  | 0.000268503 | Intergenic | NA                                  | NA                |
| 1   | 55638919 | 55638959 | 1        | -0.111366   | 5    | 0.0049   | 0.037    | 0.39586  | 0.50723  | 0.012753585 | Intergenic | NA                                  | NA                |
| 1   | 55662609 | 55662686 | 1        | -0.152328   | 8    | 1.30E-06 | 0.00015  | 0.20736  | 0.35969  | 1.46E-05    | Intergenic | NA                                  | NA                |
| 1   | 55663352 | 55663499 | 1        | -0.195673   | 7    | 5.60E-06 | 0.00049  | 0.2536   | 0.44928  | 4.84E-05    | Intergenic | NA                                  | NA                |
| 1   | 57362554 | 57362588 | 1        | -0.06274    | 5    | 3.50E-05 | 3.40E-05 | 0.029208 | 0.091948 | 0.000218038 | TSS        | NM_001107464                        | Dact2             |
| 1   | 57362767 | 57362803 | 1        | 0.061555    | 5    | 0.0014   | 0.0032   | 0.097764 | 0.036208 | 0.004540837 | TSS        | NM_001107464                        | Dact2             |

| chr | start    | stop     | q-value  | methy.diff | CpGs | pMWU     | p2DKS    | MCWLS    | MCWHS      | pMWU.fdr    | cgi.type   | transcript                                           | gene                                       |
|-----|----------|----------|----------|------------|------|----------|----------|----------|------------|-------------|------------|------------------------------------------------------|--------------------------------------------|
| 1   | 57363815 | 57363938 | 1        | -0.178979  | 7    | 9.60E-07 | 2.90E-05 | 0.079559 | 0.25854    | 1.15E-05    | TSS        | NM_001107464                                         | Dact2                                      |
| 1   | 57434196 | 57434248 | 1        | -0.050029  | 5    | 0.00026  | 0.00098  | 0.0252   | 0.075228   | 0.001130807 | TSS        | NM_001106215                                         | Smoc2                                      |
| 1   | 58133603 | 58133770 | 1        | -0.069458  | 11   | 5.80E-05 | 0.00019  | 0.0123   | 0.081759   | 0.000331425 | TSS        | NM_001103356                                         | LOC100125364                               |
| 1   | 58227338 | 58227414 | 1        | -0.206462  | 5    | 0.00029  | 0.0092   | 0.11393  | 0.3204     | 0.001239307 | Intergenic | NA                                                   | NA                                         |
| 1   | 58725548 | 58725741 | 1        | -0.11862   | 5    | 0.0019   | 0.024    | 0.026736 | 0.14536    | 0.005855937 | Intergenic | NA                                                   | NA                                         |
| 1   | 58745610 | 58745711 | 1        | -0.112255  | 8    | 4.50E-05 | 0.0026   | 0.15432  | 0.26658    | 0.000268503 | Intergenic | NA                                                   | NA                                         |
| 1   | 60402119 | 60402200 | 1        | -0.126217  | 5    | 0.0058   | 0.038    | 0.6126   | 0.73882    | 0.014624129 | Intergenic | NA                                                   | NA                                         |
| 1   | 60623856 | 60624147 | 1        | -0.131288  | 17   | 6.80E-05 | 0.00054  | 0.28296  | 0.41425    | 0.000379896 | TSS        | NR_031857:NR_031805:NR_037379:NR_031868:NM_001135720 | Mir99b:Mirlet7e:Mir3596c:Mir125a:LOC688452 |
| 1   | 61419247 | 61419358 | 1        | -0.273419  | 5    | 2.50E-06 | 6.60E-05 | 0.53632  | 0.80974    | 2.52E-05    | Intergenic | NA                                                   | NA                                         |
| 1   | 61419385 | 61419494 | 0.24     | -0.25837   | 12   | 1.50E-09 | 7.30E-07 | 0.18617  | 0.44454    | 4.72E-08    | Intergenic | NA                                                   | NA                                         |
| 1   | 63031587 | 63031615 | 1        | -0.095729  | 5    | 0.014    | 0.015    | 0.74161  | 0.83734    | 0.029850603 | Intragenic | NM_001134978:NM_001313940                            | Mboat7:Mboat7l1                            |
| 1   | 63099914 | 63099942 | 1        | -0.095729  | 5    | 0.014    | 0.015    | 0.74161  | 0.83734    | 0.029850603 | Intragenic | NM_001134978:NM_001313940                            | Mboat7:Mboat7l1                            |
| 1   | 63155799 | 63155860 | 1        | -0.109269  | 8    | 6.70E-05 | 0.0026   | 0.28619  | 0.39546    | 0.000375356 | TSS        | NM_001106219:NM_138870                               | Prpf31:Tfpt                                |
| 1   | 63313712 | 63313758 | 1        | 0.051421   | 5    | 0.0053   | 0.015    | 0.052227 | 0.00080665 | 0.013591571 | TSS        | NM_080694                                            | Cacng6                                     |
| 1   | 63547610 | 63547666 | 3.40E-05 | -0.321731  | 7    | 1.10E-09 | 1.00E-10 | 0.30673  | 0.62846    | 3.60E-08    | Intergenic | NA                                                   | NA                                         |
| 1   | 63548184 | 63548519 | 1        | -0.086252  | 18   | 0.01     | 0.038    | 0.58055  | 0.66681    | 0.02275947  | Intergenic | NA                                                   | NA                                         |
| 1   | 64322328 | 64322382 | 1        | -0.080641  | 5    | 0.00014  | 6.80E-05 | 0.7303   | 0.81094    | 0.000684451 | Intergenic | NA                                                   | NA                                         |
| 1   | 64322403 | 64322448 | 1        | -0.127862  | 5    | 0.0063   | 0.13     | 0.41843  | 0.54629    | 0.015629046 | Intergenic | NA                                                   | NA                                         |
| 1   | 64322510 | 64322559 | 1        | -0.217655  | 5    | 1.90E-06 | 0.00014  | 0.1258   | 0.34346    | 2.01E-05    | Intergenic | NA                                                   | NA                                         |
| 1   | 64391697 | 64391735 | 1        | -0.064315  | 5    | 0.017    | 0.0091   | 0.77035  | 0.83467    | 0.034796287 | Intergenic | NA                                                   | NA                                         |
| 1   | 64504012 | 64504066 | 1        | -0.081245  | 5    | 0.00012  | 3.30E-05 | 0.72937  | 0.81061    | 0.000603617 | Intragenic | NM_001099488                                         | Vom2r12                                    |
| 1   | 64504087 | 64504132 | 1        | -0.130779  | 5    | 0.0049   | 0.13     | 0.41392  | 0.5447     | 0.012753585 | Intragenic | NM_001099488                                         | Vom2r12                                    |
| 1   | 64504194 | 64504243 | 1        | -0.219064  | 5    | 2.50E-06 | 7.00E-05 | 0.1249   | 0.34396    | 2.52E-05    | Intragenic | NM_001099488                                         | Vom2r12                                    |
| 1   | 65590568 | 65590724 | 0.11     | -0.303547  | 10   | 2.00E-09 | 3.40E-07 | 0.17456  | 0.47811    | 6.02E-08    | Intergenic | NA                                                   | NA                                         |
| 1   | 66343156 | 66343207 | 1        | -0.067596  | 5    | 0.013    | 0.088    | 0.080826 | 0.14842    | 0.028097302 | Intragenic | NM_001108470                                         | Mzf1                                       |
| 1   | 66343239 | 66343331 | 1        | -0.074205  | 7    | 0.012    | 0.027    | 0.16577  | 0.23998    | 0.026435197 | Intragenic | NM_001108470                                         | Mzf1                                       |
| 1   | 66584194 | 66584322 | 0.065    | -0.272057  | 11   | 6.00E-11 | 2.00E-07 | 0.23852  | 0.51058    | 2.79E-09    | Intergenic | NA                                                   | NA                                         |
| 1   | 68161497 | 68161540 | 1        | -0.127187  | 6    | 0.0065   | 0.011    | 0.81608  | 0.94327    | 0.016085358 | Intragenic | NM_147135                                            | Sbk1                                       |
| 1   | 70537351 | 70537407 | 0.00019  | -0.3252    | 7    | 2.80E-10 | 5.70E-10 | 0.30326  | 0.62846    | 1.12E-08    | Intergenic | NA                                                   | NA                                         |
| 1   | 70537925 | 70537994 | 1        | -0.119336  | 5    | 0.017    | 0.0054   | 0.57498  | 0.69432    | 0.034796287 | Intergenic | NA                                                   | NA                                         |
| 1   | 70538108 | 70538185 | 1        | -0.170679  | 5    | 0.0058   | 0.039    | 0.53075  | 0.70143    | 0.014624129 | Intergenic | NA                                                   | NA                                         |
| 1   | 70784511 | 70784642 | 1        | 0.15783    | 5    | 0.0041   | 0.085    | 0.85987  | 0.70204    | 0.01100507  | Intragenic | NM_001106220                                         | Nlrp4a                                     |

| chr | start    | stop     | q-value  | methy.diff | CpGs | pMWU     | p2DKS    | MCWLS    | MCWHS   | pMWU.fdr    | cgi.type   | transcript                                                   | gene                        |
|-----|----------|----------|----------|------------|------|----------|----------|----------|---------|-------------|------------|--------------------------------------------------------------|-----------------------------|
| 1   | 70794431 | 70794568 | 1        | -0.106514  | 5    | 0.008    | 0.015    | 0.62465  | 0.73116 | 0.019059477 | Intragenic | NM_001106220                                                 | Nlrp4a                      |
| 1   | 70870550 | 70870595 | 1        | 0.205634   | 5    | 0.023    | 0.18     | 0.6542   | 0.44857 | 0.04441443  | Intergenic | NA                                                           | NA                          |
| 1   | 70927517 | 70927630 | 5.70E-05 | -0.151246  | 12   | 1.80E-12 | 1.80E-10 | 0.067478 | 0.21872 | 1.31E-10    | Intragenic | NM_001099472                                                 | Vom2r28                     |
| 1   | 71603603 | 71603642 | 1        | -0.164647  | 5    | 0.0016   | 0.0054   | 0.27076  | 0.4354  | 0.005100053 | TSS        | NM_001304816                                                 | Peg3                        |
| 1   | 71777846 | 71777905 | 1        | -0.165298  | 5    | 1.90E-05 | 7.10E-05 | 0.1784   | 0.3437  | 0.000131674 | Intergenic | NA                                                           | NA                          |
| 1   | 71996222 | 71996350 | 1        | -0.081885  | 7    | 0.0092   | 0.11     | 0.75295  | 0.83484 | 0.021504843 | Intergenic | NA                                                           | NA                          |
| 1   | 72776330 | 72776815 | 2.80E-05 | -0.206189  | 37   | 4.20E-14 | 8.50E-11 | 0.32178  | 0.52797 | 6.64E-12    | Intragenic | NM_001169143                                                 | Zfp444                      |
| 1   | 72804225 | 72804371 | 1        | -0.239709  | 5    | 1.50E-06 | 0.00014  | 0.15907  | 0.39878 | 1.65E-05    | Intergenic | NA                                                           | NA                          |
| 1   | 72812473 | 72812619 | 1        | -0.231709  | 5    | 9.80E-07 | 7.00E-05 | 0.16707  | 0.39878 | 1.16E-05    | Intergenic | NA                                                           | NA                          |
| 1   | 72838940 | 72839104 | 1        | -0.154812  | 5    | 0.008    | 0.0093   | 0.34226  | 0.49707 | 0.019059477 | Intragenic | NM_001108904                                                 | Zfp787                      |
| 1   | 73806559 | 73806616 | 1        | -0.134682  | 5    | 0.012    | 0.18     | 0.40231  | 0.53699 | 0.026435197 | Intragenic | NM_001099467                                                 | Vom2r30                     |
| 1   | 74825805 | 74826052 | 1        | -0.10838   | 7    | 0.024    | 0.039    | 0.23871  | 0.34709 | 0.046241462 | Intragenic | NM_001037790                                                 | Leng8                       |
| 1   | 74830133 | 74830497 | 1        | -0.136323  | 11   | 1.70E-06 | 0.00064  | 0.11658  | 0.2529  | 1.83E-05    | TSS        | NM_001108469                                                 | Cdc42ep5                    |
| 1   | 75622655 | 75622701 | 1        | -0.064075  | 5    | 1.70E-05 | 7.00E-05 | 0.038006 | 0.10208 | 0.000120524 | Intragenic | NM_001108467                                                 | Eps81l                      |
| 1   | 75659642 | 75659748 | 1        | -0.175869  | 5    | 0.025    | 0.086    | 0.39651  | 0.57238 | 0.047453009 | Intragenic | NM_001277260:N<br>M_001277261:N<br>M_001277262:N<br>M_134388 | Tnnt1:Tnnt1:T<br>nnt1:Tnnt1 |
| 1   | 75825449 | 75825537 | 1        | -0.12959   | 5    | 0.02     | 0.058    | 0.22108  | 0.35067 | 0.039778219 | Intragenic | NM_001127337                                                 | Brsk1                       |
| 1   | 75897911 | 75898026 | 1        | -0.053363  | 7    | 0.0092   | 0.027    | 0.069223 | 0.12259 | 0.021504843 | TSS        | NM_133519                                                    | Il11                        |
| 1   | 75990970 | 75990997 | 1        | -0.150163  | 5    | 8.80E-05 | 0.0031   | 0.20989  | 0.36005 | 0.000466886 | TSS        | NM_001145175                                                 | Shisa7                      |
| 1   | 76054920 | 76054988 | 1        | -0.073454  | 5    | 0.023    | 0.024    | 0.76005  | 0.83351 | 0.04441443  | Intergenic | NA                                                           | NA                          |
| 1   | 76076755 | 76077090 | 1        | -0.176155  | 5    | 0.008    | 0.038    | 0.23718  | 0.41333 | 0.019059477 | Intragenic | NM_001134545                                                 | Ssc5d                       |
| 1   | 76117839 | 76117974 | 1        | -0.059665  | 10   | 0.015    | 0.091    | 0.15808  | 0.21774 | 0.031584896 | Intergenic | NA                                                           | NA                          |
| 1   | 76227711 | 76227986 | 0.0042   | -0.241537  | 12   | 4.10E-11 | 1.30E-08 | 0.10323  | 0.34477 | 1.99E-09    | TSS        | NM_057136                                                    | Epn1                        |
| 1   | 76231767 | 76231941 | 1        | -0.158592  | 5    | 1.70E-05 | 1.60E-05 | 0.031945 | 0.19054 | 0.000120524 | Intragenic | NM_057136                                                    | Epn1                        |
| 1   | 76788774 | 76788946 | 1        | -0.143917  | 5    | 0.0087   | 0.024    | 0.40998  | 0.5539  | 0.020391633 | Intergenic | NA                                                           | NA                          |
| 1   | 76797796 | 76797968 | 1        | -0.143917  | 5    | 0.0087   | 0.024    | 0.40998  | 0.5539  | 0.020391633 | Intergenic | NA                                                           | NA                          |
| 1   | 79123763 | 79123786 | 1        | -0.183929  | 5    | 0.0019   | 0.00049  | 0.54479  | 0.72872 | 0.005855937 | Intragenic | NM_001024897                                                 | Ehd2                        |
| 1   | 79320200 | 79320370 | 0.012    | -0.09683   | 16   | 1.20E-11 | 3.70E-08 | 0.056607 | 0.15344 | 6.71E-10    | Intragenic | NM_078619                                                    | Slc8a2                      |
| 1   | 79450686 | 79450744 | 1        | -0.162173  | 5    | 6.30E-06 | 7.10E-05 | 0.062677 | 0.22485 | 5.33E-05    | Intergenic | NA                                                           | NA                          |
| 1   | 79684393 | 79684439 | 1        | -0.158304  | 5    | 0.0012   | 0.025    | 0.49263  | 0.65093 | 0.004013471 | Intragenic | NM_001107479                                                 | Npas1                       |
| 1   | 79793247 | 79793275 | 0.015    | -0.348263  | 5    | 6.30E-08 | 4.60E-08 | 0.084972 | 0.43323 | 1.18E-06    | Intragenic | NM_001271132                                                 | Arhgap35                    |
| 1   | 79933325 | 79933505 | 1        | -0.111725  | 5    | 0.0068   | 0.015    | 0.27963  | 0.39136 | 0.016642688 | Intergenic | NA                                                           | NA                          |
| 1   | 79933633 | 79933711 | 1        | -0.075942  | 5    | 0.0058   | 0.038    | 0.071479 | 0.14742 | 0.014624129 | Intergenic | NA                                                           | NA                          |
| 1   | 79983143 | 79983259 | 1        | -0.163688  | 5    | 0.023    | 0.18     | 0.43939  | 0.60308 | 0.04441443  | Intragenic | NM_001025678                                                 | Fkrp                        |
| 1   | 80024572 | 80024672 | 1        | -0.251005  | 5    | 2.90E-06 | 7.10E-05 | 0.27019  | 0.5212  | 2.84E-05    | Intragenic | NM_001013895                                                 | Prkd2                       |
| 1   | 80171696 | 80171803 | 1        | -0.254513  | 5    | 9.80E-07 | 7.00E-05 | 0.27097  | 0.52548 | 1.16E-05    | Intergenic | NA                                                           | NA                          |
| 1   | 80404516 | 80404589 | 1        | -0.07003   | 5    | 0.0041   | 0.059    | 0.75888  | 0.82891 | 0.01100507  | Intergenic | NA                                                           | NA                          |

| chr | start    | stop     | q-value  | methy.diff | CpGs | pMWU     | p2DKS    | MCWLS    | MCWHS   | pMWU.fdr    | cgi.type   | transcript                                                   | gene                        |
|-----|----------|----------|----------|------------|------|----------|----------|----------|---------|-------------|------------|--------------------------------------------------------------|-----------------------------|
| 1   | 81172858 | 81172983 | 0.88     | -0.129949  | 11   | 2.30E-09 | 2.70E-06 | 0.068328 | 0.19828 | 6.77E-08    | TSS        | NM_001107483                                                 | Irf2bp1                     |
| 1   | 81265649 | 81265812 | 1        | -0.204857  | 5    | 0.0014   | 0.0093   | 0.36417  | 0.56903 | 0.004540837 | Intergenic | NA                                                           | NA                          |
| 1   | 81362275 | 81362383 | 1        | -0.207502  | 5    | 0.0008   | 0.0093   | 0.26543  | 0.47293 | 0.002866309 | Intragenic | NM_138921                                                    | Eml2                        |
| 1   | 81435718 | 81435957 | 1        | -0.123941  | 13   | 0.0019   | 0.033    | 0.545    | 0.66894 | 0.005855937 | Intergenic | NA                                                           | NA                          |
| 1   | 81505583 | 81505669 | 1        | -0.088434  | 5    | 0.0027   | 0.015    | 0.06845  | 0.15688 | 0.007840962 | Intergenic | NA                                                           | NA                          |
| 1   | 81519412 | 81519521 | 1        | -0.113947  | 5    | 0.00012  | 0.00098  | 0.23983  | 0.35378 | 0.000603617 | Intergenic | NA                                                           | NA                          |
| 1   | 81585935 | 81586109 | 1        | -0.176588  | 5    | 0.00088  | 0.0031   | 0.15691  | 0.3335  | 0.003092094 | TSS        | NM_012530                                                    | Ckm                         |
| 1   | 81596359 | 81596477 | 1        | -0.064757  | 13   | 4.10E-05 | 0.0035   | 0.15886  | 0.22361 | 0.000249467 | Intragenic | NM_012530                                                    | Ckm                         |
| 1   | 81640452 | 81640543 | 1        | -0.136131  | 5    | 0.00026  | 0.0055   | 0.18741  | 0.32354 | 0.001130807 | Intergenic | NA                                                           | NA                          |
| 1   | 81644716 | 81644922 | 1        | -0.096259  | 14   | 1.00E-08 | 7.20E-05 | 0.11328  | 0.20953 | 2.49E-07    | Intergenic | NA                                                           | NA                          |
| 1   | 81663276 | 81663394 | 6.80E-09 | -0.122277  | 13   | 4.40E-14 | 2.10E-14 | 0.048587 | 0.17086 | 6.64E-12    | Intergenic | NA                                                           | NA                          |
| 1   | 81681801 | 81681850 | 1        | -0.103628  | 10   | 4.60E-08 | 1.40E-05 | 0.16874  | 0.27237 | 9.56E-07    | TSS        | NM_001109410                                                 | Trappc6a                    |
| 1   | 81682109 | 81682134 | 1        | -0.090835  | 5    | 0.0024   | 0.015    | 0.10875  | 0.19958 | 0.00705499  | TSS        | NM_001109410                                                 | Trappc6a                    |
| 1   | 81694130 | 81694174 | 1        | -0.073156  | 5    | 0.00088  | 0.025    | 0.036592 | 0.10975 | 0.003092094 | Intergenic | NA                                                           | NA                          |
| 1   | 81762076 | 81762153 | 1        | -0.191598  | 13   | 5.60E-11 | 6.70E-06 | 0.26725  | 0.45885 | 2.63E-09    | Intragenic | NM_001024294                                                 | Clasrp                      |
| 1   | 81762155 | 81762471 | 1        | -0.11525   | 40   | 4.90E-08 | 4.00E-05 | 0.3422   | 0.43719 | 1.01E-06    | Intragenic | NM_001024294                                                 | Clasrp                      |
| 1   | 81999191 | 81999266 | 1        | -0.205239  | 5    | 1.30E-05 | 0.00053  | 0.51236  | 0.7176  | 9.66E-05    | Intragenic | NM_001109422                                                 | Bcl3                        |
| 1   | 82045399 | 82045455 | 1        | -0.129975  | 5    | 0.013    | 0.038    | 0.204    | 0.33397 | 0.028097302 | Intragenic | NM_001169579                                                 | Ceacam16                    |
| 1   | 82456911 | 82457224 | 1        | -0.116694  | 22   | 3.70E-05 | 0.0012   | 0.40217  | 0.51886 | 0.000229545 | TSS        | NM_001106233                                                 | Tescl                       |
| 1   | 82500449 | 82500886 | 8.90E-07 | -0.131716  | 33   | 4.20E-14 | 2.70E-12 | 0.1342   | 0.26592 | 6.64E-12    | Intragenic | NM_001270701:N<br>M_001270702:N<br>M_001270703:N<br>M_023021 | Kcnn4:Kcnn4:<br>Kcnn4:Kcnn4 |
| 1   | 82555034 | 82555149 | 1        | -0.098545  | 8    | 0.0082   | 0.07     | 0.7183   | 0.81685 | 0.019516617 | Intragenic | NM_001014016                                                 | Irgc                        |
| 1   | 82667480 | 82667590 | 1        | -0.07652   | 5    | 0.017    | 0.039    | 0.86269  | 0.93921 | 0.034796287 | Intragenic | NM_001107488                                                 | Pinlyp                      |
| 1   | 82707938 | 82708002 | 1        | -0.118497  | 5    | 0.0049   | 0.0088   | 0.72937  | 0.84786 | 0.012753585 | TSS        | NM_001107489                                                 | Zfp575                      |
| 1   | 82717502 | 82717558 | 1        | -0.130988  | 5    | 0.00017  | 0.0055   | 0.22179  | 0.35278 | 0.000806192 | TSS        | NM_001106234                                                 | Ethe1                       |
| 1   | 82768193 | 82768397 | 1        | -0.091577  | 8    | 0.026    | 0.066    | 0.097564 | 0.18914 | 0.049234478 | Intergenic | NA                                                           | NA                          |
| 1   | 83128465 | 83129058 | 1        | -0.093873  | 18   | 0.02     | 0.1      | 0.35231  | 0.44618 | 0.039778219 | Intragenic | NM_012506                                                    | Atp1a3                      |
| 1   | 83234421 | 83234450 | 1        | -0.278756  | 5    | 1.10E-06 | 3.40E-06 | 0.26752  | 0.54628 | 1.27E-05    | Intragenic | NM_001271204                                                 | Pou2f2                      |
| 1   | 83265520 | 83265631 | 1        | -0.125683  | 13   | 8.50E-08 | 6.60E-05 | 0.23049  | 0.35617 | 1.53E-06    | Intergenic | NA                                                           | NA                          |
| 1   | 83449737 | 83449800 | 1        | -0.059344  | 5    | 0.0024   | 0.038    | 0.052365 | 0.11171 | 0.00705499  | TSS        | NM_053628                                                    | Megf8                       |
| 1   | 83559148 | 83559389 | 0.0021   | -0.266495  | 5    | 6.30E-08 | 6.50E-09 | 0.025347 | 0.29184 | 1.18E-06    | Intergenic | NA                                                           | NA                          |
| 1   | 83560675 | 83560791 | 0.52     | -0.169559  | 8    | 5.30E-06 | 1.60E-06 | 0.47363  | 0.64318 | 4.70E-05    | Intergenic | NA                                                           | NA                          |
| 1   | 83573416 | 83573539 | 1        | -0.200358  | 5    | 0.00014  | 0.0017   | 0.37883  | 0.57919 | 0.000684451 | Intergenic | NA                                                           | NA                          |
| 1   | 83611706 | 83611753 | 0.49     | -0.182009  | 5    | 4.20E-07 | 1.50E-06 | 0.063787 | 0.2458  | 5.76E-06    | Intergenic | NA                                                           | NA                          |
| 1   | 83654755 | 83654976 | 1        | -0.136866  | 11   | 0.0017   | 0.015    | 0.28193  | 0.4188  | 0.005339493 | Intergenic | NA                                                           | NA                          |
| 1   | 83758482 | 83758782 | 1        | -0.093385  | 5    | 0.0035   | 0.015    | 0.12749  | 0.22087 | 0.009686665 | Intergenic | NA                                                           | NA                          |
| 1   | 84808752 | 84808825 | 1        | -0.13356   | 5    | 0.00097  | 0.00093  | 0.5592   | 0.69276 | 0.003366009 | Intragenic | NM_017156                                                    | Cyp2b12                     |

| chr | start    | stop     | q-value  | methy.diff | CpGs | pMWU     | p2DKS    | MCWLS     | MCWHS    | pMWU.fdr    | cgi.type   | transcript             | gene        |
|-----|----------|----------|----------|------------|------|----------|----------|-----------|----------|-------------|------------|------------------------|-------------|
| 1   | 85176274 | 85176483 | 1        | -0.054666  | 6    | 0.00017  | 0.0016   | 0.04403   | 0.098696 | 0.000806192 | TSS        | NM_134369              | Cyp2t1      |
| 1   | 85302303 | 85302349 | 1        | -0.188249  | 5    | 8.80E-05 | 0.0018   | 0.15595   | 0.3442   | 0.000466886 | Intergenic | NA                     | NA          |
| 1   | 85349714 | 85350040 | 1        | -0.19767   | 19   | 3.60E-08 | 1.20E-05 | 0.24739   | 0.44506  | 7.75E-07    | Intragenic | NM_001170336           | Ltbp4       |
| 1   | 85703638 | 85703836 | 1        | -0.087483  | 5    | 0.025    | 0.038    | 0.18473   | 0.27222  | 0.047453009 | TSS        | NM_001191621           | Map3k10     |
| 1   | 86025578 | 86025625 | 1        | -0.090125  | 5    | 0.017    | 0.025    | 0.18858   | 0.2787   | 0.034796287 | Intragenic | NM_030862              | Marcks1     |
| 1   | 86430982 | 86431152 | 1        | -0.104902  | 12   | 0.011    | 0.11     | 0.40929   | 0.51419  | 0.02463877  | Intragenic | NM_001134506           | Nccrp1      |
| 1   | 87210692 | 87210722 | 1        | 0.083027   | 5    | 0.025    | 0.015    | 0.84568   | 0.76265  | 0.047453009 | Intergenic | NA                     | NA          |
| 1   | 87387773 | 87387803 | 1        | 0.074163   | 5    | 0.0035   | 0.039    | 0.89298   | 0.81882  | 0.009686665 | Intergenic | NA                     | NA          |
| 1   | 88163054 | 88163119 | 1        | -0.168131  | 5    | 0.0017   | 0.024    | 0.13917   | 0.3073   | 0.005339493 | Intragenic | NM_001106241           | Rinl        |
| 1   | 88371041 | 88371148 | 1        | -0.11522   | 12   | 8.80E-08 | 1.30E-05 | 0.12474   | 0.23996  | 1.57E-06    | Intragenic | NM_198734:NM_001014810 | Yif1b:Yif1b |
| 1   | 88371840 | 88371919 | 1        | -0.472084  | 5    | 4.20E-07 | 7.50E-06 | 0.15299   | 0.62507  | 5.76E-06    | Intergenic | NA                     | NA          |
| 1   | 88371923 | 88372108 | 1        | -0.08114   | 5    | 0.0024   | 0.024    | 0.040485  | 0.12162  | 0.00705499  | Intergenic | NA                     | NA          |
| 1   | 88372114 | 88372235 | 0.49     | -0.16006   | 5    | 1.80E-07 | 1.50E-06 | 0.037022  | 0.19708  | 2.78E-06    | Intergenic | NA                     | NA          |
| 1   | 88409410 | 88409782 | 1        | -0.108913  | 14   | 0.01     | 0.12     | 0.35029   | 0.4592   | 0.02275947  | TSS        | NM_130403              | Ppp1r14a    |
| 1   | 88462797 | 88463128 | 1        | -0.141364  | 7    | 0.025    | 0.077    | 0.33698   | 0.47834  | 0.047453009 | Intragenic | NM_001013066           | Sipa1l3     |
| 1   | 88604035 | 88604109 | 1        | -0.188893  | 5    | 0.02     | 0.0055   | 0.43077   | 0.61966  | 0.039778219 | Intergenic | NA                     | NA          |
| 1   | 88628944 | 88629016 | 1        | -0.264951  | 5    | 1.90E-06 | 3.40E-05 | 0.29847   | 0.56342  | 2.01E-05    | Intergenic | NA                     | NA          |
| 1   | 88743744 | 88743967 | 9.70E-13 | -0.192182  | 21   | 4.60E-14 | 3.00E-18 | 0.14287   | 0.33505  | 6.64E-12    | Intergenic | NA                     | NA          |
| 1   | 88743996 | 88744055 | 1        | -0.134884  | 5    | 1.30E-06 | 7.30E-06 | 0.23794   | 0.37282  | 1.46E-05    | Intergenic | NA                     | NA          |
| 1   | 88850638 | 88850861 | 9.70E-13 | -0.192182  | 21   | 4.60E-14 | 3.00E-18 | 0.14287   | 0.33505  | 6.64E-12    | Intergenic | NA                     | NA          |
| 1   | 88850890 | 88850949 | 1        | -0.134884  | 5    | 1.30E-06 | 7.30E-06 | 0.23794   | 0.37282  | 1.46E-05    | Intergenic | NA                     | NA          |
| 1   | 88985966 | 88986207 | 1        | -0.103802  | 14   | 1.00E-07 | 3.20E-05 | 0.11223   | 0.21603  | 1.72E-06    | Intergenic | NA                     | NA          |
| 1   | 88986208 | 88986272 | 1        | -0.190033  | 5    | 0.00054  | 0.0053   | 0.22082   | 0.41085  | 0.002077867 | Intergenic | NA                     | NA          |
| 1   | 89114633 | 89114714 | 1        | -0.150654  | 5    | 0.008    | 0.058    | 0.19672   | 0.34738  | 0.019059477 | TSS        | NM_001106243           | Map4k1      |
| 1   | 89189005 | 89189074 | 1        | -0.269985  | 5    | 4.30E-06 | 0.00014  | 0.26429   | 0.53427  | 3.93E-05    | Intergenic | NA                     | NA          |
| 1   | 89196133 | 89196203 | 1        | -0.096988  | 5    | 1.90E-05 | 7.10E-05 | 0.11618   | 0.21317  | 0.000131674 | Intergenic | NA                     | NA          |
| 1   | 89196207 | 89196334 | 1        | -0.0662    | 8    | 0.0064   | 0.049    | 0.093394  | 0.15959  | 0.015860755 | Intergenic | NA                     | NA          |
| 1   | 89196492 | 89196557 | 0.48     | -0.087438  | 5    | 4.30E-06 | 1.50E-06 | 0.0096154 | 0.097054 | 3.93E-05    | Intergenic | NA                     | NA          |
| 1   | 89196572 | 89196673 | 6.70E-05 | -0.141147  | 9    | 3.40E-12 | 2.10E-10 | 0.034043  | 0.17519  | 2.28E-10    | Intergenic | NA                     | NA          |
| 1   | 89204344 | 89204473 | 1        | -0.084514  | 10   | 0.011    | 0.016    | 0.62622   | 0.71073  | 0.02463877  | Intergenic | NA                     | NA          |
| 1   | 89253109 | 89253224 | 1        | -0.104345  | 5    | 0.011    | 0.0055   | 0.70771   | 0.81205  | 0.02463877  | TSS        | NM_130824              | Rasgrp4     |
| 1   | 89385545 | 89385786 | 1        | -0.103802  | 14   | 1.00E-07 | 3.20E-05 | 0.11223   | 0.21603  | 1.72E-06    | Intergenic | NA                     | NA          |
| 1   | 89385787 | 89385851 | 1        | -0.190033  | 5    | 0.00054  | 0.0053   | 0.22082   | 0.41085  | 0.002077867 | Intergenic | NA                     | NA          |
| 1   | 89761204 | 89761223 | 1        | -0.122389  | 5    | 0.0022   | 0.039    | 0.55012   | 0.67251  | 0.006578104 | Intragenic | NM_144749              | Zfp382      |
| 1   | 89761406 | 89761434 | 1        | -0.120505  | 5    | 0.025    | 0.015    | 0.57644   | 0.69694  | 0.047453009 | Intragenic | NM_144749              | Zfp382      |
| 1   | 89927830 | 89928041 | 1        | -0.07987   | 15   | 4.40E-06 | 0.0069   | 0.1178    | 0.19767  | 4.01E-05    | TSS        | NM_001009283           | Syne4       |
| 1   | 89954537 | 89954677 | 1        | -0.050387  | 6    | 0.023    | 0.04     | 0.123     | 0.17339  | 0.04441443  | Intergenic | NA                     | NA          |
| 1   | 90084404 | 90084503 | 1        | -0.077665  | 8    | 0.00011  | 0.0026   | 0.072857  | 0.15052  | 0.000565143 | Intragenic | NM_022628              | Nphs1       |



| chr | start    | stop     | q-value  | methy.diff | CpGs | pMWU     | p2DKS    | MCWLS    | MCWHS    | pMWU.fdr    | cgi.type   | transcript                                     | gene                      |
|-----|----------|----------|----------|------------|------|----------|----------|----------|----------|-------------|------------|------------------------------------------------|---------------------------|
| 1   | 90154409 | 90154566 | 1        | -0.160874  | 5    | 0.0038   | 0.039    | 0.281    | 0.44187  | 0.010352437 | Intragenic | NM_001127579                                   | Proser3                   |
| 1   | 90173473 | 90173559 | 1        | -0.175552  | 6    | 0.0094   | 0.084    | 0.30562  | 0.48117  | 0.021723038 | TSS        | NM_001008764:N<br>M_001008775:N<br>M_001134610 | Psenen:U2af1<br>l4:Igflr1 |
| 1   | 90198073 | 90198155 | 1        | -0.073037  | 8    | 0.00075  | 0.0025   | 0.081355 | 0.15439  | 0.002737773 | TSS        | NR_037357:NM_0<br>01109517                     | Mir3569:Zbtb<br>32        |
| 1   | 90283180 | 90283253 | 1        | -0.178276  | 5    | 0.0063   | 0.015    | 0.33355  | 0.51182  | 0.015629046 | Intergenic | NA                                             | NA                        |
| 1   | 90425256 | 90425346 | 1        | -0.183521  | 5    | 0.00048  | 0.0092   | 0.41943  | 0.60295  | 0.001881331 | TSS        | NM_001005877                                   | Ffar2                     |
| 1   | 90503559 | 90503661 | 1        | -0.20029   | 7    | 2.70E-05 | 0.0014   | 0.40297  | 0.60326  | 0.000178372 | Intragenic | NM_017190                                      | Mag                       |
| 1   | 90642429 | 90642516 | 1        | -0.218031  | 5    | 4.40E-05 | 0.00027  | 0.34961  | 0.56764  | 0.000263321 | TSS        | NM_031648                                      | Fxyd1                     |
| 1   | 90703738 | 90704078 | 1        | -0.11232   | 14   | 8.10E-06 | 8.80E-06 | 0.032931 | 0.14525  | 6.58E-05    | TSS        | NM_017112                                      | Hpn                       |
| 1   | 90704604 | 90704698 | 1        | -0.154122  | 5    | 0.00029  | 0.0091   | 0.099726 | 0.25385  | 0.001239307 | TSS        | NM_017112                                      | Hpn                       |
| 1   | 91231327 | 91231445 | 1        | -0.207773  | 5    | 7.80E-05 | 0.0018   | 0.14887  | 0.35664  | 0.000422981 | Intragenic | NM_207592                                      | Gpi                       |
| 1   | 91553375 | 91553473 | 1        | -0.136672  | 5    | 0.019    | 0.015    | 0.28593  | 0.4226   | 0.038322088 | Intergenic | NA                                             | NA                        |
| 1   | 91599465 | 91599628 | 1        | -0.168402  | 8    | 0.00015  | 0.0038   | 0.19557  | 0.36397  | 0.000724207 | Intergenic | NA                                             | NA                        |
| 1   | 91674431 | 91674531 | 1        | -0.09748   | 8    | 0.0085   | 0.036    | 0.19559  | 0.29307  | 0.020154795 | Intergenic | NA                                             | NA                        |
| 1   | 91675693 | 91675804 | 1        | -0.056323  | 5    | 0.00021  | 0.00053  | 0.013168 | 0.069491 | 0.000951214 | Intergenic | NA                                             | NA                        |
| 1   | 91760132 | 91760469 | 1        | -0.12901   | 16   | 6.80E-06 | 0.00022  | 0.2413   | 0.37031  | 5.73E-05    | Intragenic | NM_001107504                                   | Chst8                     |
| 1   | 92094530 | 92094741 | 1        | -0.083009  | 15   | 1.80E-06 | 0.0029   | 0.11617  | 0.19917  | 1.93E-05    | TSS        | NM_001009283                                   | Syne4                     |
| 1   | 92385427 | 92385586 | 1        | -0.06865   | 6    | 0.0054   | 0.027    | 0.79387  | 0.86252  | 0.013836205 | Intragenic | NM_001009641                                   | Pepd                      |
| 1   | 92503947 | 92504109 | 1        | -0.122605  | 5    | 0.013    | 0.038    | 0.46031  | 0.58292  | 0.028097302 | Intergenic | NA                                             | NA                        |
| 1   | 92764585 | 92764617 | 1        | -0.167879  | 5    | 0.00097  | 0.0018   | 0.37911  | 0.54698  | 0.003366009 | Intragenic | NM_001107505                                   | Rhpn2                     |
| 1   | 92973270 | 92973317 | 1        | -0.278398  | 5    | 1.90E-06 | 7.60E-06 | 0.067039 | 0.34544  | 2.01E-05    | Intergenic | NA                                             | NA                        |
| 1   | 93609709 | 93609863 | 0.0011   | -0.26009   | 8    | 8.30E-12 | 3.40E-09 | 0.1362   | 0.39629  | 4.87E-10    | Intergenic | NA                                             | NA                        |
| 1   | 93876859 | 93876977 | 1        | -0.115078  | 5    | 0.0019   | 0.059    | 0.13646  | 0.25154  | 0.005855937 | Intragenic | NM_001107506                                   | Tshz3                     |
| 1   | 93880160 | 93880202 | 1        | -0.170232  | 5    | 0.016    | 0.13     | 0.32494  | 0.49518  | 0.033288089 | Intragenic | NM_001107506                                   | Tshz3                     |
| 1   | 94663583 | 94663721 | 1        | -0.106785  | 5    | 0.00039  | 0.025    | 0.064457 | 0.17124  | 0.001587612 | Intergenic | NA                                             | NA                        |
| 1   | 94779068 | 94779454 | 1        | -0.125492  | 10   | 0.00051  | 0.006    | 0.18457  | 0.31007  | 0.00199501  | Intergenic | NA                                             | NA                        |
| 1   | 94818497 | 94818638 | 1        | -0.11194   | 7    | 5.20E-06 | 0.00016  | 0.093453 | 0.20539  | 4.61E-05    | Intergenic | NA                                             | NA                        |
| 1   | 95301198 | 95301319 | 1        | -0.119857  | 7    | 0.0062   | 0.077    | 0.15947  | 0.27933  | 0.015570617 | Intergenic | NA                                             | NA                        |
| 1   | 95636473 | 95636549 | 1        | -0.144738  | 5    | 0.0013   | 0.0018   | 0.61269  | 0.75743  | 0.004277683 | Intergenic | NA                                             | NA                        |
| 1   | 95650226 | 95650333 | 1        | -0.10819   | 7    | 0.016    | 0.11     | 0.2607   | 0.36889  | 0.033288089 | Intergenic | NA                                             | NA                        |
| 1   | 99553286 | 99553393 | 1        | -0.128872  | 5    | 0.00097  | 0.039    | 0.084369 | 0.21324  | 0.003366009 | Intragenic | NM_001004220                                   | Etfb                      |
| 1   | 99675947 | 99676382 | 1        | -0.224466  | 10   | 1.20E-05 | 0.002    | 0.2394   | 0.46386  | 9.15E-05    | Intergenic | NA                                             | NA                        |
| 1   | 99720686 | 99720724 | 4.20E-05 | -0.1702    | 8    | 7.40E-11 | 1.30E-10 | 0.029394 | 0.19959  | 3.38E-09    | Intergenic | NA                                             | NA                        |
| 1   | 99771951 | 99772007 | 1        | -0.081061  | 5    | 0.00059  | 0.015    | 0.11514  | 0.1962   | 0.002242971 | Intergenic | NA                                             | NA                        |
| 1   | 99772013 | 99772040 | 0.49     | -0.055966  | 5    | 6.30E-06 | 1.50E-06 | 0.037461 | 0.093427 | 5.33E-05    | Intergenic | NA                                             | NA                        |
| 1   | 99772043 | 99772157 | 5.10E-05 | -0.11574   | 10   | 2.40E-13 | 1.60E-10 | 0.044906 | 0.16065  | 2.22E-11    | Intergenic | NA                                             | NA                        |
| 1   | 99774628 | 99774684 | 1        | -0.081061  | 5    | 0.00059  | 0.015    | 0.11514  | 0.1962   | 0.002242971 | Intergenic | NA                                             | NA                        |

| chr | start     | stop      | q-value  | methy.diff | CpGs | pMWU     | p2DKS    | MCWLS    | MCWHS    | pMWU.fdr    | cgi.type   | transcript   | gene     |
|-----|-----------|-----------|----------|------------|------|----------|----------|----------|----------|-------------|------------|--------------|----------|
| 1   | 99774690  | 99774717  | 0.49     | -0.055966  | 5    | 6.30E-06 | 1.50E-06 | 0.037461 | 0.093427 | 5.33E-05    | Intergenic | NA           | NA       |
| 1   | 99774720  | 99774834  | 5.10E-05 | -0.11574   | 10   | 2.40E-13 | 1.60E-10 | 0.044906 | 0.16065  | 2.22E-11    | Intergenic | NA           | NA       |
| 1   | 100701452 | 100701489 | 1        | -0.309317  | 5    | 0.00011  | 6.80E-05 | 0.33473  | 0.64404  | 0.000565143 | Intergenic | NA           | NA       |
| 1   | 100709818 | 100709946 | 1        | -0.062558  | 5    | 0.013    | 0.038    | 0.7952   | 0.85776  | 0.028097302 | Intergenic | NA           | NA       |
| 1   | 100783834 | 100783931 | 1        | -0.13892   | 7    | 0.0032   | 0.053    | 0.47763  | 0.61655  | 0.008990975 | Intragenic | NM_001106252 | Klk11    |
| 1   | 101567859 | 101568049 | 1        | -0.093829  | 6    | 0.0078   | 0.085    | 0.11621  | 0.21004  | 0.018765285 | TSS        | NM_001004221 | Emc10    |
| 1   | 101646283 | 101646416 | 1        | -0.123466  | 5    | 0.0016   | 0.0018   | 0.14473  | 0.26819  | 0.005100053 | Intragenic | NM_031670    | Napsa    |
| 1   | 102236775 | 102236949 | 1        | -0.085576  | 10   | 0.024    | 0.19     | 0.26336  | 0.34893  | 0.046241462 | Intragenic | NM_053859    | Slc17a7  |
| 1   | 102296868 | 102296921 | 1        | -0.149961  | 5    | 5.50E-06 | 3.40E-05 | 0.042346 | 0.19231  | 4.78E-05    | Intragenic | NM_017124    | Cd37     |
| 1   | 102297306 | 102297429 | 1        | -0.131517  | 9    | 0.00018  | 0.012    | 0.25682  | 0.38834  | 0.000849258 | Intragenic | NM_017124    | Cd37     |
| 1   | 102302243 | 102302393 | 1        | -0.213975  | 10   | 1.60E-06 | 0.00036  | 0.38536  | 0.59933  | 1.75E-05    | TSS        | NM_017124    | Cd37     |
| 1   | 102403007 | 102403209 | 1        | -0.098655  | 9    | 0.00093  | 0.022    | 0.16544  | 0.2641   | 0.003255406 | Intragenic | NM_001270985 | Ppfia3   |
| 1   | 102524940 | 102525030 | 1        | -0.216055  | 5    | 0.0016   | 0.015    | 0.23475  | 0.45081  | 0.005100053 | Intragenic | NM_001109615 | Gys1     |
| 1   | 102528718 | 102528884 | 1        | -0.206167  | 13   | 5.30E-08 | 2.80E-05 | 0.36719  | 0.57336  | 1.08E-06    | TSS        | NM_022500    | Ftl1     |
| 1   | 102604845 | 102605083 | 1        | -0.091188  | 16   | 0.00027  | 0.00054  | 0.075264 | 0.16645  | 0.001172178 | Intragenic | NM_199101    | Plekha4  |
| 1   | 102607287 | 102607438 | 1        | -0.152958  | 5    | 0.00072  | 0.00053  | 0.25075  | 0.40371  | 0.002634665 | Intragenic | NM_199101    | Plekha4  |
| 1   | 102618863 | 102618952 | 1        | -0.141337  | 5    | 0.0022   | 0.0031   | 0.13094  | 0.27227  | 0.006578104 | TSS        | NM_001191111 | Hsd17b14 |
| 1   | 102665272 | 102665475 | 1        | -0.237667  | 8    | 1.10E-05 | 9.10E-05 | 0.19454  | 0.43221  | 8.53E-05    | Intergenic | NA           | NA       |
| 1   | 102693576 | 102693601 | 1        | -0.102302  | 5    | 0.012    | 0.18     | 0.17642  | 0.27872  | 0.026435197 | Intragenic | NM_001106261 | Rasip1   |
| 1   | 102693741 | 102693866 | 4.50E-06 | -0.219524  | 12   | 4.50E-14 | 1.40E-11 | 0.16631  | 0.38583  | 6.64E-12    | Intragenic | NM_001106261 | Rasip1   |
| 1   | 102700200 | 102700243 | 1        | -0.15294   | 5    | 1.50E-05 | 0.00052  | 0.092463 | 0.2454   | 0.000109113 | Intragenic | NM_001106261 | Rasip1   |
| 1   | 102852109 | 102852248 | 1        | -0.05209   | 8    | 0.01     | 0.049    | 0.092998 | 0.14509  | 0.02275947  | TSS        | NM_001039665 | Sult2b1  |
| 1   | 102862551 | 102862860 | 1        | 0.059232   | 12   | 0.023    | 0.03     | 0.79422  | 0.73499  | 0.04441443  | Intergenic | NA           | NA       |
| 1   | 102880876 | 102880997 | 1        | -0.191175  | 5    | 0.0008   | 0.0032   | 0.24531  | 0.43649  | 0.002866309 | TSS        | NM_053911    | Cyth2    |
| 1   | 102887619 | 102887898 | 0.085    | -0.124335  | 24   | 4.50E-11 | 2.60E-07 | 0.12519  | 0.24953  | 2.15E-09    | TSS        | NM_170718    | Kcnj14   |
| 1   | 103236337 | 103236484 | 1        | -0.239189  | 7    | 2.00E-05 | 0.00016  | 0.17817  | 0.41736  | 0.000138285 | Intragenic | NM_013039    | Abcc8    |
| 1   | 103244787 | 103245438 | 1        | -0.110641  | 17   | 0.011    | 0.081    | 0.42467  | 0.53531  | 0.02463877  | Intragenic | NM_013039    | Abcc8    |
| 1   | 103300494 | 103300602 | 1        | -0.089333  | 5    | 0.012    | 0.13     | 0.14503  | 0.23436  | 0.026435197 | Intragenic | NM_212521    | Ush1c    |
| 1   | 103339502 | 103339555 | 1        | -0.058219  | 5    | 0.00088  | 0.015    | 0.056655 | 0.11487  | 0.003092094 | TSS        | NM_212521    | Ush1c    |
| 1   | 103634292 | 103634400 | 1        | -0.073587  | 5    | 0.021    | 0.038    | 0.14639  | 0.21998  | 0.041207871 | Intergenic | NA           | NA       |
| 1   | 103839496 | 103839591 | 0.49     | -0.251565  | 5    | 1.50E-07 | 1.50E-06 | 0.55409  | 0.80565  | 2.38E-06    | Intergenic | NA           | NA       |
| 1   | 104183782 | 104184060 | 1        | -0.111     | 10   | 0.001    | 0.047    | 0.11797  | 0.22897  | 0.003452169 | Intergenic | NA           | NA       |
| 1   | 105268972 | 105269251 | 1        | -0.126407  | 8    | 0.0048   | 0.036    | 0.17564  | 0.30205  | 0.012663359 | Intergenic | NA           | NA       |
| 1   | 105592027 | 105592092 | 1        | -0.180188  | 5    | 0.0024   | 0.038    | 0.23324  | 0.41343  | 0.00705499  | Intergenic | NA           | NA       |
| 1   | 105939631 | 105939746 | 1        | -0.232709  | 5    | 0.0011   | 0.0054   | 0.27454  | 0.50725  | 0.003737263 | Intragenic | NM_138529    | Nav2     |
| 1   | 114367168 | 114367293 | 1        | -0.112259  | 8    | 0.00065  | 0.0086   | 0.68271  | 0.79497  | 0.002426546 | Intergenic | NA           | NA       |
| 1   | 115180689 | 115180726 | 0.14     | -0.26134   | 9    | 3.00E-08 | 4.40E-07 | 0.44297  | 0.70431  | 6.59E-07    | Intergenic | NA           | NA       |
| 1   | 116238880 | 116238984 | 1        | -0.114351  | 10   | 1.70E-06 | 3.10E-06 | 0.12753  | 0.24188  | 1.83E-05    | TSS        | NR_130147    | Tug1     |
| 1   | 116533685 | 116533789 | 1        | -0.116351  | 5    | 1.00E-05 | 0.00028  | 0.1581   | 0.27445  | 7.82E-05    | Intergenic | NA           | NA       |

| chr | start     | stop      | q-value | methy.diff | CpGs | pMWU     | p2DKS    | MCWLS    | MCWHS   | pMWU.fdr    | cgi.type   | transcript   | gene   |
|-----|-----------|-----------|---------|------------|------|----------|----------|----------|---------|-------------|------------|--------------|--------|
| 1   | 118210297 | 118210471 | 1       | -0.117233  | 8    | 0.00019  | 0.00025  | 0.52891  | 0.64614 | 0.000879857 | Intergenic | NA           | NA     |
| 1   | 118326936 | 118327110 | 1       | -0.117926  | 8    | 0.0002   | 0.00025  | 0.52824  | 0.64616 | 0.00092049  | Intergenic | NA           | NA     |
| 1   | 122600675 | 122600849 | 1       | -0.10665   | 8    | 0.00065  | 0.0011   | 0.53742  | 0.64407 | 0.002426546 | Intergenic | NA           | NA     |
| 1   | 123904881 | 123905017 | 1       | -0.138622  | 5    | 0.01     | 0.038    | 0.50476  | 0.64338 | 0.02275947  | Intergenic | NA           | NA     |
| 1   | 124119086 | 124119160 | 1       | -0.056874  | 5    | 0.0087   | 0.058    | 0.070301 | 0.12718 | 0.020391633 | TSS        | NM_001008558 | Ndn    |
| 1   | 124153169 | 124153212 | 1       | -0.104223  | 5    | 3.50E-05 | 0.00028  | 0.032782 | 0.137   | 0.000218038 | Intergenic | NA           | NA     |
| 1   | 124153237 | 124153471 | 1       | -0.212971  | 17   | 1.70E-06 | 0.00028  | 0.13273  | 0.2367  | 1.83E-05    | Intergenic | NA           | NA     |
| 1   | 124185028 | 124185130 | 1       | -0.091798  | 15   | 2.00E-07 | 0.00021  | 0.20846  | 0.30026 | 3.06E-06    | Intergenic | NA           | NA     |
| 1   | 124201260 | 124201329 | 1       | -0.133067  | 5    | 0.011    | 0.015    | 0.29452  | 0.42759 | 0.02463877  | Intergenic | NA           | NA     |
| 1   | 124201811 | 124201870 | 1       | -0.058707  | 9    | 0.0099   | 0.14     | 0.089191 | 0.1479  | 0.02275947  | Intergenic | NA           | NA     |
| 1   | 124237061 | 124237405 | 0.00052 | -0.057604  | 27   | 5.00E-14 | 1.60E-09 | 0.073687 | 0.13129 | 6.72E-12    | TSS        | NM_001170562 | Peg12  |
| 1   | 125316089 | 125316133 | 1       | -0.077151  | 5    | 0.021    | 0.014    | 0.68009  | 0.75724 | 0.041207871 | Intergenic | NA           | NA     |
| 1   | 125915157 | 125915306 | 1       | -0.1942    | 5    | 0.00032  | 0.0018   | 0.12523  | 0.31943 | 0.001346443 | TSS        | NM_001109147 | Klf13  |
| 1   | 126610914 | 126611028 | 1       | -0.152669  | 5    | 2.20E-05 | 3.40E-05 | 0.050124 | 0.20279 | 0.000149617 | Intragenic | NM_031780    | Apba2  |
| 1   | 126611134 | 126611236 | 1       | -0.163821  | 5    | 1.70E-05 | 0.00098  | 0.26823  | 0.43205 | 0.000120524 | Intragenic | NM_031780    | Apba2  |
| 1   | 126946853 | 126947024 | 1       | -0.152799  | 5    | 0.0012   | 0.024    | 0.16531  | 0.31811 | 0.004013471 | Intergenic | NA           | NA     |
| 1   | 127101949 | 127102105 | 1       | -0.115752  | 5    | 0.0049   | 0.015    | 0.76057  | 0.87632 | 0.012753585 | Intergenic | NA           | NA     |
| 1   | 127249949 | 127250088 | 1       | -0.289628  | 5    | 0.00039  | 0.00013  | 0.081572 | 0.3712  | 0.001587612 | Intragenic | NM_001106266 | Tjp1   |
| 1   | 127651466 | 127651571 | 1       | -0.171559  | 5    | 1.50E-05 | 0.00096  | 0.70257  | 0.87413 | 0.000109113 | Intragenic | NM_001014020 | Tarsl2 |
| 1   | 128022711 | 128022974 | 0.25    | -0.188994  | 13   | 3.90E-09 | 7.80E-07 | 0.19506  | 0.38405 | 1.06E-07    | Intragenic | NM_012999    | Pcsk6  |
| 1   | 128203688 | 128203820 | 1       | -0.138728  | 5    | 7.80E-05 | 0.0032   | 0.087457 | 0.22618 | 0.000422981 | Intergenic | NA           | NA     |
| 1   | 128241491 | 128241627 | 1       | -0.194427  | 8    | 0.00039  | 0.0016   | 0.39269  | 0.58712 | 0.001587612 | Intergenic | NA           | NA     |
| 1   | 130001554 | 130001623 | 1       | -0.118586  | 5    | 0.0022   | 0.015    | 0.23687  | 0.35545 | 0.006578104 | Intragenic | NM_052807    | Igf1r  |
| 1   | 130066122 | 130066217 | 1       | -0.127702  | 5    | 0.0022   | 0.015    | 0.1212   | 0.2489  | 0.006578104 | Intragenic | NM_052807    | Igf1r  |
| 1   | 130304967 | 130305029 | 1       | -0.095509  | 5    | 0.014    | 0.13     | 0.14328  | 0.23879 | 0.029850603 | Intergenic | NA           | NA     |
| 1   | 130346668 | 130346812 | 1       | -0.103154  | 5    | 0.016    | 0.014    | 0.60762  | 0.71077 | 0.033288089 | Intergenic | NA           | NA     |
| 1   | 130436770 | 130436951 | 1       | -0.133368  | 6    | 0.013    | 0.084    | 0.47803  | 0.6114  | 0.028097302 | Intergenic | NA           | NA     |
| 1   | 132459886 | 132460047 | 1       | -0.112365  | 8    | 0.015    | 0.12     | 0.3445   | 0.45687 | 0.031584896 | Intergenic | NA           | NA     |
| 1   | 132491076 | 132491124 | 1       | -0.095796  | 5    | 0.00065  | 0.015    | 0.071935 | 0.16773 | 0.002426546 | Intragenic | NM_080778    | Nr2f2  |
| 1   | 133557854 | 133557993 | 1       | -0.164441  | 7    | 0.0087   | 0.076    | 0.29169  | 0.45613 | 0.020391633 | Intergenic | NA           | NA     |
| 1   | 133587670 | 133587748 | 1       | -0.145315  | 5    | 0.0068   | 0.088    | 0.27872  | 0.42404 | 0.016642688 | Intergenic | NA           | NA     |
| 1   | 134622852 | 134623109 | 1       | -0.179361  | 15   | 2.30E-08 | 1.10E-05 | 0.43495  | 0.61431 | 5.20E-07    | Intergenic | NA           | NA     |
| 1   | 135370758 | 135370802 | 1       | -0.082337  | 5    | 0.021    | 0.087    | 0.50866  | 0.591   | 0.041207871 | Intergenic | NA           | NA     |
| 1   | 135500562 | 135500659 | 1       | -0.209751  | 6    | 3.20E-06 | 0.00017  | 0.073928 | 0.28368 | 3.11E-05    | Intergenic | NA           | NA     |
| 1   | 136137095 | 136137400 | 1       | -0.142846  | 9    | 1.90E-06 | 0.00051  | 0.11621  | 0.25905 | 2.01E-05    | Intergenic | NA           | NA     |
| 1   | 136293894 | 136294051 | 1       | -0.112589  | 8    | 0.0025   | 0.037    | 0.41916  | 0.53175 | 0.007343559 | Intergenic | NA           | NA     |
| 1   | 138435931 | 138436080 | 1       | -0.183204  | 8    | 9.90E-05 | 0.0014   | 0.15615  | 0.33936 | 0.000516804 | Intergenic | NA           | NA     |
| 1   | 142015049 | 142015211 | 1       | 0.134479   | 8    | 0.012    | 0.083    | 0.41536  | 0.28088 | 0.026435197 | Intragenic | NM_001106275 | Abhd2  |
| 1   | 142201361 | 142201399 | 1       | -0.068647  | 5    | 5.00E-05 | 0.00052  | 0.06228  | 0.13093 | 0.000291675 | Intergenic | NA           | NA     |

| chr | start     | stop      | q-value  | methyI.diff | CpGs | pMWU     | p2DKS    | MCWLS     | MCWHS   | pMWU.fdr    | cgi.type   | transcript   | gene   |
|-----|-----------|-----------|----------|-------------|------|----------|----------|-----------|---------|-------------|------------|--------------|--------|
| 1   | 142243776 | 142243854 | 1        | -0.105076   | 5    | 0.00065  | 0.00098  | 0.11552   | 0.2206  | 0.002426546 | Intergenic | NA           | NA     |
| 1   | 142253623 | 142253727 | 1        | -0.08902    | 5    | 0.017    | 0.038    | 0.30299   | 0.39201 | 0.034796287 | Intergenic | NA           | NA     |
| 1   | 142407424 | 142407472 | 1        | -0.131503   | 5    | 0.00032  | 0.0055   | 0.16181   | 0.29331 | 0.001346443 | Intergenic | NA           | NA     |
| 1   | 142407519 | 142407555 | 1        | -0.142618   | 5    | 1.70E-06 | 0.00027  | 0.053596  | 0.19621 | 1.83E-05    | Intergenic | NA           | NA     |
| 1   | 142522652 | 142522932 | 1        | -0.163633   | 10   | 5.50E-05 | 0.00054  | 0.21337   | 0.377   | 0.000319601 | Intragenic | NM_031012    | Anpep  |
| 1   | 142631358 | 142631529 | 1        | -0.261879   | 5    | 0.00014  | 3.40E-05 | 0.067721  | 0.3296  | 0.000684451 | TSS        | NM_001107530 | Arpin  |
| 1   | 142721623 | 142721709 | 1        | -0.127713   | 5    | 0.00065  | 0.015    | 0.059958  | 0.18767 | 0.002426546 | Intergenic | NA           | NA     |
| 1   | 142721738 | 142721880 | 1        | -0.078781   | 5    | 0.002    | 0.015    | 0.062193  | 0.14097 | 0.006079939 | Intergenic | NA           | NA     |
| 1   | 142821913 | 142822006 | 1        | -0.130696   | 5    | 0.0041   | 0.0091   | 0.37806   | 0.50876 | 0.01100507  | Intragenic | NM_001134563 | Zfp710 |
| 1   | 142899798 | 142899953 | 0.0021   | -0.317384   | 5    | 6.30E-08 | 6.60E-09 | 0.0050002 | 0.32238 | 1.18E-06    | Intergenic | NA           | NA     |
| 1   | 143645832 | 143645885 | 1        | -0.078436   | 5    | 0.0022   | 0.0092   | 0.82794   | 0.90637 | 0.006578104 | Intergenic | NA           | NA     |
| 1   | 143834001 | 143834204 | 1        | -0.169912   | 7    | 1.30E-05 | 0.00048  | 0.14676   | 0.31667 | 9.66E-05    | Intragenic | NM_001191895 | Alpk3  |
| 1   | 144111876 | 144111965 | 0.00024  | -0.326988   | 8    | 1.90E-11 | 7.40E-10 | 0.3283    | 0.65529 | 9.88E-10    | TSS        | NM_017152    | Rps17  |
| 1   | 144766108 | 144766296 | 1        | -0.051586   | 6    | 0.014    | 0.027    | 0.10216   | 0.15375 | 0.029850603 | Intergenic | NA           | NA     |
| 1   | 144897533 | 144897586 | 1        | -0.129922   | 5    | 0.0053   | 0.015    | 0.70741   | 0.83733 | 0.013591571 | Intergenic | NA           | NA     |
| 1   | 145762529 | 145762917 | 2.40E-05 | -0.11279    | 29   | 5.50E-13 | 7.50E-11 | 0.15006   | 0.26285 | 4.47E-11    | Intragenic | NM_001191626 | Mex3b  |
| 1   | 146075932 | 146076066 | 1        | -0.144238   | 5    | 0.0016   | 0.00098  | 0.19917   | 0.3434  | 0.005100053 | Intergenic | NA           | NA     |
| 1   | 146289727 | 146289861 | 1        | -0.144238   | 5    | 0.0016   | 0.00098  | 0.19917   | 0.3434  | 0.005100053 | Intergenic | NA           | NA     |
| 1   | 147958844 | 147958959 | 1        | -0.165425   | 5    | 0.011    | 0.0054   | 0.62228   | 0.78771 | 0.02463877  | Intragenic | NM_023091    | Gabre  |
| 1   | 148853321 | 148853432 | 1        | -0.094135   | 7    | 0.0062   | 0.036    | 0.51777   | 0.61191 | 0.015570617 | Intergenic | NA           | NA     |
| 1   | 151842791 | 151842843 | 0.0009   | -0.413766   | 7    | 1.50E-10 | 2.80E-09 | 0.2987    | 0.71247 | 6.44E-09    | Intergenic | NA           | NA     |
| 1   | 151966535 | 151966696 | 1        | -0.083918   | 13   | 0.0065   | 0.018    | 0.16852   | 0.22065 | 0.016085358 | Intergenic | NA           | NA     |
| 1   | 151966704 | 151966905 | 0.94     | -0.133633   | 18   | 1.50E-09 | 2.90E-06 | 0.12368   | 0.25731 | 4.72E-08    | Intergenic | NA           | NA     |
| 1   | 151967407 | 151967450 | 1        | -0.1743     | 5    | 3.70E-06 | 7.10E-05 | 0.065441  | 0.23974 | 3.46E-05    | Intergenic | NA           | NA     |
| 1   | 151967466 | 151967506 | 1        | -0.135977   | 5    | 3.30E-06 | 7.10E-05 | 0.063679  | 0.19966 | 3.16E-05    | Intergenic | NA           | NA     |
| 1   | 151967524 | 151967544 | 1        | -0.2037     | 5    | 2.80E-05 | 0.0018   | 0.247     | 0.4507  | 0.000182174 | Intergenic | NA           | NA     |
| 1   | 151967568 | 151967847 | 0.0035   | -0.07893    | 30   | 1.40E-13 | 1.10E-08 | 0.12359   | 0.21661 | 1.41E-11    | Intergenic | NA           | NA     |
| 1   | 151967870 | 151968013 | 2.80E-08 | -0.235017   | 14   | 4.40E-14 | 8.60E-14 | 0.13508   | 0.3701  | 6.64E-12    | Intergenic | NA           | NA     |
| 1   | 151968016 | 151968314 | 0.28     | -0.155122   | 26   | 5.00E-06 | 8.60E-07 | 0.15737   | 0.28668 | 4.46E-05    | Intergenic | NA           | NA     |
| 1   | 151968357 | 151968431 | 1        | -0.086278   | 13   | 5.80E-05 | 0.0027   | 0.096224  | 0.17581 | 0.000331425 | Intergenic | NA           | NA     |
| 1   | 151968481 | 151968518 | 1        | -0.117851   | 5    | 4.80E-06 | 7.00E-05 | 0.059255  | 0.17711 | 4.29E-05    | Intergenic | NA           | NA     |
| 1   | 151968523 | 151968736 | 0.0015   | -0.123456   | 15   | 1.90E-12 | 4.70E-09 | 0.065607  | 0.15435 | 1.36E-10    | Intergenic | NA           | NA     |
| 1   | 151968747 | 151968773 | 0.49     | -0.119059   | 5    | 9.80E-07 | 1.50E-06 | 0.050013  | 0.16907 | 1.16E-05    | Intergenic | NA           | NA     |
| 1   | 151970280 | 151970398 | 0.0039   | -0.079937   | 17   | 4.30E-10 | 1.20E-08 | 0.26588   | 0.34582 | 1.60E-08    | Intergenic | NA           | NA     |
| 1   | 151970402 | 151970429 | 0.015    | -0.270734   | 5    | 1.30E-07 | 4.60E-08 | 0.12358   | 0.39431 | 2.11E-06    | Intergenic | NA           | NA     |
| 1   | 151970975 | 151971053 | 1        | -0.166438   | 7    | 4.10E-06 | 1.60E-05 | 0.14066   | 0.30709 | 3.78E-05    | Intergenic | NA           | NA     |
| 1   | 151971957 | 151972046 | 1        | -0.092793   | 5    | 0.02     | 0.0093   | 0.30539   | 0.39819 | 0.039778219 | Intergenic | NA           | NA     |
| 1   | 151972076 | 151972166 | 1        | -0.106922   | 5    | 0.0049   | 0.059    | 0.21691   | 0.32383 | 0.012753585 | Intergenic | NA           | NA     |
| 1   | 151972178 | 151972416 | 0.031    | -0.185855   | 20   | 5.20E-14 | 9.60E-08 | 0.21765   | 0.40351 | 6.72E-12    | Intergenic | NA           | NA     |

| chr | start     | stop      | q-value | methy.diff | CpGs | pMWU     | p2DKS    | MCWLS    | MCWHS    | pMWU.fdr    | cgi.type   | transcript                                  | gene                  |
|-----|-----------|-----------|---------|------------|------|----------|----------|----------|----------|-------------|------------|---------------------------------------------|-----------------------|
| 1   | 151975034 | 151975075 | 1       | -0.170058  | 5    | 0.00065  | 0.0093   | 0.61485  | 0.78491  | 0.002426546 | Intergenic | NA                                          | NA                    |
| 1   | 151976029 | 151976286 | 0.035   | -0.279901  | 10   | 4.70E-11 | 1.10E-07 | 0.13352  | 0.41342  | 2.23E-09    | Intergenic | NA                                          | NA                    |
| 1   | 151976385 | 151976467 | 1       | -0.119411  | 5    | 0.00097  | 0.0054   | 0.26207  | 0.38148  | 0.003366009 | Intergenic | NA                                          | NA                    |
| 1   | 153407272 | 153407320 | 1       | -0.063298  | 5    | 0.0041   | 0.0054   | 0.054092 | 0.11739  | 0.01100507  | Intergenic | NA                                          | NA                    |
| 1   | 156474749 | 156475107 | 1       | -0.076172  | 12   | 0.0083   | 0.0013   | 0.68546  | 0.76163  | 0.019719474 | Intergenic | NA                                          | NA                    |
| 1   | 156906737 | 156907069 | 1       | -0.050588  | 11   | 0.015    | 0.036    | 0.68834  | 0.73892  | 0.031584896 | Intergenic | NA                                          | NA                    |
| 1   | 160206744 | 160206823 | 1       | -0.206293  | 5    | 0.00036  | 1.40E-05 | 0.55221  | 0.7585   | 0.001486639 | Intragenic | NM_001108491                                | Me3                   |
| 1   | 160364845 | 160364978 | 1       | -0.181861  | 5    | 5.60E-05 | 0.00014  | 0.26132  | 0.44318  | 0.000320912 | Intergenic | NA                                          | NA                    |
| 1   | 160436337 | 160436392 | 1       | -0.144613  | 5    | 1.90E-05 | 0.00014  | 0.35332  | 0.49793  | 0.000131674 | Intergenic | NA                                          | NA                    |
| 1   | 160871053 | 160871172 | 1       | -0.079923  | 5    | 0.00032  | 0.00098  | 0.060152 | 0.14008  | 0.001346443 | TSS        | NM_001134833                                | Ccdc89                |
| 1   | 160920115 | 160920178 | 1       | -0.052776  | 5    | 0.017    | 0.088    | 0.035245 | 0.088021 | 0.034796287 | Intergenic | NA                                          | NA                    |
| 1   | 161406717 | 161406876 | 1       | -0.07894   | 7    | 0.00065  | 0.0034   | 0.093508 | 0.17245  | 0.002426546 | TSS        | NM_022282                                   | Dlg2                  |
| 1   | 161569819 | 161569882 | 1       | -0.052776  | 5    | 0.017    | 0.088    | 0.035245 | 0.088021 | 0.034796287 | Intragenic | NM_022282                                   | Dlg2                  |
| 1   | 162572734 | 162572853 | 1       | -0.076948  | 5    | 0.00026  | 0.00053  | 0.056931 | 0.13388  | 0.001130807 | TSS        | NM_001134833                                | Ccdc89                |
| 1   | 163320060 | 163320211 | 1       | -0.140507  | 5    | 5.50E-06 | 1.60E-05 | 0.080481 | 0.22099  | 4.78E-05    | Intragenic | NM_022282                                   | Dlg2                  |
| 1   | 165672791 | 165672975 | 1       | -0.053042  | 7    | 0.01     | 0.018    | 0.79495  | 0.84799  | 0.02275947  | Intergenic | NA                                          | NA                    |
| 1   | 167737027 | 167737141 | 1       | -0.199137  | 8    | 6.30E-05 | 0.0024   | 0.21321  | 0.41235  | 0.000354102 | Intragenic | NM_001191628                                | Tenm4                 |
| 1   | 167986023 | 167986089 | 1       | -0.201797  | 5    | 0.0041   | 0.037    | 0.34361  | 0.54541  | 0.01100507  | Intragenic | NM_001191628                                | Tenm4                 |
| 1   | 169645685 | 169645798 | 1       | -0.123777  | 5    | 0.0017   | 0.038    | 0.17036  | 0.29413  | 0.005339493 | Intergenic | NA                                          | NA                    |
| 1   | 169646679 | 169646809 | 1       | -0.189269  | 5    | 9.80E-05 | 0.00028  | 0.085298 | 0.27457  | 0.000512474 | Intergenic | NA                                          | NA                    |
| 1   | 170049002 | 170049186 | 1       | -0.152929  | 13   | 8.00E-07 | 0.00065  | 0.19874  | 0.35167  | 9.90E-06    | Intergenic | NA                                          | NA                    |
| 1   | 170510548 | 170510648 | 1       | -0.095646  | 5    | 0.0019   | 0.037    | 0.080128 | 0.17577  | 0.005855937 | TSS        | NM_017173                                   | Serpinh1              |
| 1   | 170630875 | 170630915 | 1       | -0.171677  | 5    | 4.40E-05 | 0.00098  | 0.25835  | 0.43002  | 0.000263321 | Intergenic | NA                                          | NA                    |
| 1   | 172115984 | 172116377 | 1       | -0.08908   | 7    | 0.013    | 0.052    | 0.2218   | 0.31088  | 0.028097302 | Intergenic | NA                                          | NA                    |
| 1   | 172161316 | 172161353 | 1       | -0.166054  | 5    | 0.0008   | 0.00052  | 0.2756   | 0.44165  | 0.002866309 | Intergenic | NA                                          | NA                    |
| 1   | 172163218 | 172163281 | 1       | -0.089323  | 5    | 3.70E-06 | 3.40E-05 | 0.038494 | 0.12782  | 3.46E-05    | Intergenic | NA                                          | NA                    |
| 1   | 172398114 | 172398149 | 1       | 0.116934   | 5    | 0.012    | 0.059    | 0.90102  | 0.78409  | 0.026435197 | Intragenic | NM_001107539                                | Fchsd2                |
| 1   | 172623352 | 172623510 | 1       | -0.079311  | 9    | 0.00086  | 0.0041   | 0.090895 | 0.17021  | 0.003063925 | TSS        | NM_001013069                                | Stard10               |
| 1   | 172674930 | 172674975 | 1       | -0.115356  | 5    | 0.021    | 0.015    | 0.64339  | 0.75874  | 0.041207871 | Intergenic | NA                                          | NA                    |
| 1   | 172770158 | 172770211 | 1       | -0.082704  | 5    | 0.017    | 0.088    | 0.215    | 0.29771  | 0.034796287 | Intragenic | NM_001143847:N<br>M_001270604:N<br>M_031079 | Pde2a:Pde2a:<br>Pde2a |
| 1   | 174885005 | 174885167 | 1       | -0.148245  | 8    | 0.00051  | 0.018    | 0.40632  | 0.55457  | 0.00199501  | Intergenic | NA                                          | NA                    |
| 1   | 174923682 | 174923717 | 1       | -0.066848  | 5    | 0.0024   | 0.039    | 0.11305  | 0.17989  | 0.00705499  | Intergenic | NA                                          | NA                    |
| 1   | 175331303 | 175331566 | 1       | -0.159577  | 11   | 0.018    | 0.0078   | 0.70613  | 0.8657   | 0.036742993 | Intergenic | NA                                          | NA                    |
| 1   | 175549861 | 175550016 | 1       | -0.193315  | 8    | 0.00018  | 0.00062  | 0.20613  | 0.39944  | 0.000849258 | TSS        | NM_001170461                                | Trim6                 |
| 1   | 176523003 | 176523177 | 1       | -0.105944  | 8    | 0.00075  | 0.0011   | 0.54525  | 0.6512   | 0.002737773 | Intergenic | NA                                          | NA                    |
| 1   | 177323858 | 177323944 | 1       | -0.120894  | 5    | 0.00072  | 0.0054   | 0.30466  | 0.42555  | 0.002634665 | TSS        | NM_134449                                   | Prkcdpb               |
| 1   | 177610022 | 177610176 | 1       | -0.117369  | 19   | 5.90E-05 | 0.0024   | 0.45845  | 0.57582  | 0.000336659 | Intragenic | NM_001107544                                | Dchs1                 |

| chr | start     | stop      | q-value  | methy1.diff | CpGs | pMWU     | p2DKS    | MCWLS    | MCWHS    | pMWU.fdr    | cgi.type   | transcript                       | gene              |
|-----|-----------|-----------|----------|-------------|------|----------|----------|----------|----------|-------------|------------|----------------------------------|-------------------|
| 1   | 177981907 | 177982076 | 1        | -0.121042   | 5    | 0.019    | 0.039    | 0.54278  | 0.66382  | 0.038322088 | Intergenic | NA                               | NA                |
| 1   | 178423162 | 178423629 | 1        | -0.069728   | 20   | 0.0059   | 0.061    | 0.10681  | 0.15353  | 0.014851341 | Intergenic | NA                               | NA                |
| 1   | 178423633 | 178423665 | 1        | -0.142013   | 5    | 0.00036  | 0.024    | 0.1473   | 0.28931  | 0.001486639 | Intergenic | NA                               | NA                |
| 1   | 178423843 | 178423927 | 1        | -0.067707   | 17   | 0.0017   | 0.018    | 0.12585  | 0.19997  | 0.005339493 | Intergenic | NA                               | NA                |
| 1   | 178423943 | 178423962 | 1        | -0.076461   | 5    | 3.90E-05 | 0.00014  | 0.064241 | 0.1407   | 0.000237659 | Intergenic | NA                               | NA                |
| 1   | 178424021 | 178424063 | 1        | -0.11392    | 6    | 8.20E-05 | 0.00053  | 0.06895  | 0.18287  | 0.000442277 | Intergenic | NA                               | NA                |
| 1   | 179974867 | 179974944 | 1        | -0.117086   | 5    | 0.00097  | 0.0093   | 0.085284 | 0.20237  | 0.003366009 | Intergenic | NA                               | NA                |
| 1   | 180275515 | 180275714 | 0.14     | -0.100488   | 17   | 4.10E-08 | 4.20E-07 | 0.12446  | 0.22495  | 8.61E-07    | Intergenic | NA                               | NA                |
| 1   | 180822851 | 180822983 | 1        | -0.24166    | 6    | 3.90E-06 | 4.40E-05 | 0.22205  | 0.46371  | 3.62E-05    | Intergenic | NA                               | NA                |
| 1   | 181825761 | 181825885 | 0.014    | -0.076584   | 9    | 1.10E-10 | 4.50E-08 | 0.029867 | 0.10645  | 4.91E-09    | Intergenic | NA                               | NA                |
| 1   | 182020173 | 182020642 | 1        | -0.194136   | 8    | 0.00062  | 0.0039   | 0.2477   | 0.44183  | 0.002348106 | Intragenic | NM_001134970                     | Sbf2              |
| 1   | 182609233 | 182609294 | 1        | -0.07711    | 5    | 0.0022   | 0.0032   | 0.85665  | 0.93376  | 0.006578104 | Intragenic | NM_031544                        | Ampd3             |
| 1   | 182853070 | 182853137 | 1        | -0.187465   | 5    | 0.01     | 0.12     | 0.47926  | 0.66673  | 0.02275947  | Intragenic | NM_001100661                     | Ctr9              |
| 1   | 182856914 | 182857081 | 1        | -0.199498   | 5    | 6.30E-06 | 1.60E-05 | 0.073464 | 0.27296  | 5.33E-05    | Intergenic | NA                               | NA                |
| 1   | 183961279 | 183961373 | 1        | -0.066108   | 5    | 0.02     | 0.088    | 0.055609 | 0.12172  | 0.039778219 | TSS        | NM_138519                        | Dkk3              |
| 1   | 184027942 | 184028039 | 1        | 0.06194     | 5    | 0.0063   | 0.015    | 0.11461  | 0.052673 | 0.015629046 | Intergenic | NA                               | NA                |
| 1   | 190848544 | 190848717 | 1        | -0.105212   | 7    | 0.0016   | 0.027    | 0.59765  | 0.70286  | 0.005100053 | Intergenic | NA                               | NA                |
| 1   | 192518589 | 192518665 | 1        | -0.192385   | 5    | 3.10E-05 | 0.00014  | 0.10762  | 0.30001  | 0.000197418 | Intergenic | NA                               | NA                |
| 1   | 192601040 | 192601179 | 1        | -0.140286   | 5    | 0.015    | 0.088    | 0.19102  | 0.3313   | 0.031584896 | Intergenic | NA                               | NA                |
| 1   | 195088829 | 195088896 | 1        | -0.150658   | 9    | 0.00025  | 0.016    | 0.3249   | 0.47556  | 0.001103692 | TSS        | NM_001127303                     | Itpripl2          |
| 1   | 195204576 | 195204638 | 1        | -0.130928   | 8    | 0.0028   | 0.0039   | 0.29876  | 0.42968  | 0.008113721 | Intergenic | NA                               | NA                |
| 1   | 195251559 | 195251711 | 1        | -0.068103   | 7    | 0.022    | 0.11     | 0.74888  | 0.81698  | 0.043064669 | Intragenic | NM_001012216                     | Tmc5              |
| 1   | 196425895 | 196425939 | 1        | 0.074958    | 7    | 0.0012   | 0.0032   | 0.92322  | 0.84826  | 0.004013471 | Intragenic | NM_001009688                     | Thumpd1           |
| 1   | 196600057 | 196600143 | 2.50E-06 | -0.155036   | 11   | 1.70E-13 | 7.90E-12 | 0.069864 | 0.2249   | 1.65E-11    | TSS        | NM_001276487:NM_001024886        | Lymr1:Dcun1d3     |
| 1   | 198312047 | 198312152 | 1        | -0.142757   | 5    | 0.00048  | 0.038    | 0.54732  | 0.69008  | 0.001881331 | Intragenic | NM_181370                        | Hs3st2            |
| 1   | 199087672 | 199087706 | 0.4      | -0.18667    | 7    | 1.90E-08 | 1.20E-06 | 0.05696  | 0.24363  | 4.37E-07    | TSS        | NM_001034911                     | Ubfd1             |
| 1   | 199477286 | 199477477 | 1        | -0.115144   | 13   | 6.40E-06 | 0.0036   | 0.24056  | 0.35571  | 5.40E-05    | Intragenic | NM_012713:NM_001172305           | Prkcb:Prkcb       |
| 1   | 199651598 | 199651734 | 1        | -0.086611   | 5    | 0.0013   | 0.015    | 0.1066   | 0.19321  | 0.004277683 | Intergenic | NA                               | NA                |
| 1   | 200051690 | 200051854 | 1        | -0.088849   | 7    | 0.0024   | 0.027    | 0.088074 | 0.17692  | 0.00705499  | Intergenic | NA                               | NA                |
| 1   | 202144944 | 202145007 | 1        | -0.173115   | 5    | 0.00054  | 0.00028  | 0.20971  | 0.38283  | 0.002077867 | TSS        | NM_031117:NM_001270712:NM_130738 | Snrpn:Snurf:Snurf |
| 1   | 204358823 | 204358924 | 1        | -0.15711    | 7    | 0.0037   | 0.027    | 0.52364  | 0.68075  | 0.010204935 | Intergenic | NA                               | NA                |
| 1   | 204451210 | 204451267 | 1        | -0.222932   | 5    | 0.00054  | 0.0055   | 0.4076   | 0.63054  | 0.002077867 | Intergenic | NA                               | NA                |
| 1   | 204661257 | 204661450 | 0.25     | -0.162421   | 17   | 1.10E-08 | 7.80E-07 | 0.24758  | 0.41001  | 2.70E-07    | Intergenic | NA                               | NA                |
| 1   | 204877236 | 204877280 | 0.49     | -0.085383   | 5    | 7.40E-07 | 1.50E-06 | 0.027668 | 0.11305  | 9.26E-06    | Intergenic | NA                               | NA                |
| 1   | 205194338 | 205194506 | 1        | -0.063455   | 11   | 8.50E-05 | 0.005    | 0.059915 | 0.12337  | 0.000457022 | TSS        | NM_001108920                     | Tbx6              |

| chr | start     | stop      | q-value | methyL.diff | CpGs | pMWU     | p2DKS    | MCWLS    | MCWHS   | pMWU.fdr    | cgi.type   | transcript                | gene        |
|-----|-----------|-----------|---------|-------------|------|----------|----------|----------|---------|-------------|------------|---------------------------|-------------|
| 1   | 205210699 | 205210856 | 1       | -0.105318   | 7    | 0.0076   | 0.018    | 0.24498  | 0.35029 | 0.018313455 | TSS        | NM_012495                 | Aldoa       |
| 1   | 205404087 | 205404137 | 1       | -0.175027   | 5    | 0.0035   | 0.015    | 0.36993  | 0.54496 | 0.009686665 | Intragenic | NM_022715                 | Mvp         |
| 1   | 205652692 | 205652827 | 0.00073 | -0.225837   | 7    | 2.00E-09 | 2.30E-09 | 0.13443  | 0.36027 | 6.02E-08    | Intragenic | NM_001012460              | 1-Sep       |
| 1   | 205893971 | 205894258 | 1       | -0.148742   | 11   | 4.10E-06 | 0.00091  | 0.23599  | 0.38473 | 3.78E-05    | Intragenic | NM_173330                 | Zfp689      |
| 1   | 206396406 | 206396451 | 0.015   | -0.229822   | 5    | 6.30E-08 | 4.60E-08 | 0.038457 | 0.26828 | 1.18E-06    | Intragenic | NM_138836                 | Prss8       |
| 1   | 206405972 | 206406080 | 1       | -0.18722    | 5    | 0.011    | 0.059    | 0.14378  | 0.331   | 0.02463877  | Intragenic | NM_001011560              | Prss36      |
| 1   | 206416378 | 206416436 | 1       | -0.148038   | 5    | 0.0014   | 0.024    | 0.54536  | 0.6934  | 0.004540837 | TSS        | NM_001011560              | Prss36      |
| 1   | 206568101 | 206568157 | 1       | -0.149832   | 5    | 0.00059  | 0.0054   | 0.12745  | 0.27729 | 0.002242971 | Intragenic | NM_012711                 | ltgam       |
| 1   | 206813810 | 206813924 | 1       | 0.120024    | 5    | 0.0094   | 0.13     | 0.49531  | 0.37528 | 0.021723038 | Intergenic | NA                        | NA          |
| 1   | 207008148 | 207008239 | 1       | -0.290358   | 5    | 3.70E-06 | 3.40E-05 | 0.15352  | 0.44388 | 3.46E-05    | Intragenic | NM_001011936              | Bag3        |
| 1   | 208264435 | 208264703 | 1       | -0.126306   | 5    | 0.0022   | 0.0053   | 0.12007  | 0.24638 | 0.006578104 | Intragenic | NM_001004415:NM_001004418 | Tacc2:Tacc2 |
| 1   | 208559488 | 208559691 | 1       | -0.160888   | 6    | 4.10E-05 | 0.00094  | 0.072731 | 0.23362 | 0.000249467 | Intragenic | NM_031721                 | Htra1       |
| 1   | 209703724 | 209703918 | 1       | -0.157194   | 5    | 0.0032   | 0.015    | 0.13402  | 0.29121 | 0.008990975 | Intergenic | NA                        | NA          |
| 1   | 210116471 | 210116593 | 1       | -0.244497   | 5    | 5.60E-05 | 0.00051  | 0.16949  | 0.41399 | 0.000320912 | Intergenic | NA                        | NA          |
| 1   | 210598569 | 210598728 | 1       | -0.129385   | 5    | 0.0094   | 0.059    | 0.09799  | 0.22737 | 0.021723038 | Intergenic | NA                        | NA          |
| 1   | 210767196 | 210767255 | 1       | -0.179104   | 5    | 0.00048  | 0.00094  | 0.25102  | 0.43012 | 0.001881331 | Intergenic | NA                        | NA          |
| 1   | 211110743 | 211110784 | 1       | -0.158287   | 5    | 0.0068   | 0.088    | 0.27776  | 0.43604 | 0.016642688 | Intragenic | NM_001106306              | Cpxm2       |
| 1   | 211277065 | 211277176 | 1       | -0.258026   | 5    | 5.50E-06 | 3.40E-05 | 0.23584  | 0.49386 | 4.78E-05    | Intergenic | NA                        | NA          |
| 1   | 211806498 | 211806622 | 0.037   | -0.182777   | 5    | 8.50E-08 | 1.10E-07 | 0.085516 | 0.26829 | 1.53E-06    | Intergenic | NA                        | NA          |
| 1   | 212065044 | 212065122 | 1       | -0.145251   | 5    | 0.00072  | 0.0092   | 0.21726  | 0.36251 | 0.002634665 | Intergenic | NA                        | NA          |
| 1   | 212496048 | 212496253 | 1       | -0.085875   | 10   | 0.014    | 0.039    | 0.31392  | 0.3998  | 0.029850603 | Intergenic | NA                        | NA          |
| 1   | 213665222 | 213665371 | 1       | -0.156393   | 5    | 0.0013   | 0.0092   | 0.14248  | 0.29887 | 0.004277683 | Intergenic | NA                        | NA          |
| 1   | 213683560 | 213683635 | 1       | 0.190757    | 7    | 0.012    | 0.11     | 0.79154  | 0.60078 | 0.026435197 | Intergenic | NA                        | NA          |
| 1   | 213936470 | 213936576 | 1       | -0.124498   | 5    | 0.01     | 0.087    | 0.50153  | 0.62603 | 0.02275947  | Intragenic | NM_001143858              | Dock1       |
| 1   | 214575037 | 214575191 | 1       | -0.132007   | 7    | 0.00016  | 0.0035   | 0.10167  | 0.23367 | 0.000769396 | Intergenic | NA                        | NA          |
| 1   | 214661036 | 214661266 | 1       | -0.053962   | 6    | 0.021    | 0.22     | 0.06186  | 0.11582 | 0.041207871 | Intergenic | NA                        | NA          |
| 1   | 214727648 | 214727987 | 1       | -0.131136   | 7    | 0.0076   | 0.038    | 0.29287  | 0.42401 | 0.018313455 | Intergenic | NA                        | NA          |
| 1   | 214772899 | 214773238 | 1       | -0.148897   | 7    | 0.003    | 0.038    | 0.27511  | 0.42401 | 0.008555055 | Intergenic | NA                        | NA          |
| 1   | 215593911 | 215594014 | 1       | -0.183056   | 5    | 2.40E-05 | 3.40E-05 | 0.10255  | 0.2856  | 0.000160049 | Intergenic | NA                        | NA          |
| 1   | 215681648 | 215681847 | 1       | -0.109285   | 8    | 0.014    | 0.16     | 0.47007  | 0.57936 | 0.029850603 | Intergenic | NA                        | NA          |
| 1   | 215741918 | 215742238 | 1       | -0.109804   | 10   | 0.00031  | 6.50E-05 | 0.19246  | 0.30226 | 0.001320549 | Intergenic | NA                        | NA          |
| 1   | 216850343 | 216850443 | 1       | -0.133602   | 5    | 0.0049   | 0.0054   | 0.64476  | 0.77836 | 0.012753585 | Intergenic | NA                        | NA          |
| 1   | 216850455 | 216850541 | 1       | -0.23779    | 5    | 0.0019   | 0.0053   | 0.50621  | 0.744   | 0.005855937 | Intergenic | NA                        | NA          |
| 1   | 217158194 | 217158565 | 1       | -0.141573   | 10   | 0.0017   | 0.00018  | 0.2817   | 0.42328 | 0.005339493 | Intergenic | NA                        | NA          |
| 1   | 218381829 | 218381919 | 1       | -0.122794   | 5    | 0.023    | 0.13     | 0.49109  | 0.61388 | 0.04441443  | Intragenic | NM_001108922              | Stk32c      |
| 1   | 218504825 | 218505129 | 1       | -0.089173   | 13   | 0.0043   | 0.083    | 0.16291  | 0.25208 | 0.011513614 | TSS        | NM_001108507              | Pwpp2b      |
| 1   | 219453211 | 219453314 | 1       | -0.056069   | 7    | 0.013    | 0.14     | 0.077233 | 0.1333  | 0.028097302 | Intragenic | NM_138915:NM_001190399    | Caly:Caly   |

| chr | start     | stop      | q-value  | methy.diff | CpGs | pMWU     | p2DKS    | MCWLS    | MCWHS    | pMWU.fdr    | cgi.type   | transcript                | gene         |
|-----|-----------|-----------|----------|------------|------|----------|----------|----------|----------|-------------|------------|---------------------------|--------------|
| 1   | 219538006 | 219538073 | 1        | -0.089071  | 5    | 0.0012   | 0.024    | 0.060304 | 0.14938  | 0.004013471 | TSS        | NM_001031845              | Sprn         |
| 1   | 220634571 | 220634723 | 1        | -0.11098   | 7    | 0.017    | 0.077    | 0.51197  | 0.62295  | 0.034796287 | Intergenic | NA                        | NA           |
| 1   | 220653177 | 220653723 | 1        | -0.107092  | 15   | 0.0021   | 0.0083   | 0.55346  | 0.66055  | 0.006364615 | Intergenic | NA                        | NA           |
| 1   | 220738720 | 220738874 | 1        | -0.222927  | 5    | 0.00029  | 0.0055   | 0.23127  | 0.4542   | 0.001239307 | Intergenic | NA                        | NA           |
| 1   | 220807705 | 220807970 | 0.00049  | -0.162919  | 14   | 5.10E-14 | 1.50E-09 | 0.058538 | 0.22146  | 6.72E-12    | TSS        | NM_001106315              | Pkp3         |
| 1   | 220826674 | 220826825 | 1        | -0.060742  | 7    | 0.015    | 0.0083   | 0.11452  | 0.17526  | 0.031584896 | TSS        | NM_001024887              | Sigirr       |
| 1   | 220886478 | 220886650 | 1        | -0.199512  | 5    | 0.012    | 0.015    | 0.26139  | 0.4609   | 0.026435197 | Intergenic | NA                        | NA           |
| 1   | 220924563 | 220925297 | 1.00E-07 | -0.141251  | 40   | 4.70E-14 | 3.20E-13 | 0.14342  | 0.28467  | 6.64E-12    | TSS        | NM_022523                 | Cd151        |
| 1   | 221245364 | 221245741 | 1.10E-07 | -0.113519  | 19   | 4.50E-14 | 3.30E-13 | 0.040775 | 0.15429  | 6.64E-12    | Intergenic | NA                        | NA           |
| 1   | 221323267 | 221323439 | 1        | -0.199512  | 5    | 0.012    | 0.015    | 0.26139  | 0.4609   | 0.026435197 | Intergenic | NA                        | NA           |
| 1   | 221361352 | 221362086 | 1.00E-07 | -0.141251  | 40   | 4.70E-14 | 3.20E-13 | 0.14342  | 0.28467  | 6.64E-12    | TSS        | NM_022523                 | Cd151        |
| 1   | 222193946 | 222194010 | 1        | -0.106158  | 5    | 0.025    | 0.0055   | 0.082885 | 0.18904  | 0.047453009 | TSS        | NM_021868                 | Cttn         |
| 1   | 222290531 | 222290616 | 1        | -0.091445  | 5    | 0.0013   | 0.015    | 0.75931  | 0.85075  | 0.004277683 | Intergenic | NA                        | NA           |
| 1   | 222591967 | 222592444 | 1        | -0.149872  | 9    | 0.018    | 0.1      | 0.29682  | 0.44669  | 0.036742993 | Intergenic | NA                        | NA           |
| 1   | 222729394 | 222729570 | 1        | -0.131728  | 5    | 0.015    | 0.039    | 0.21061  | 0.34234  | 0.031584896 | TSS        | NM_001190162:NM_031511    | Igf2:Igf2    |
| 1   | 223166385 | 223166809 | 1        | -0.088159  | 10   | 0.0084   | 0.29     | 0.16501  | 0.25317  | 0.019933412 | Intragenic | NM_032073                 | Kcnq1        |
| 1   | 223360305 | 223360358 | 1        | -0.116001  | 5    | 0.0068   | 0.038    | 0.30528  | 0.42129  | 0.016642688 | Intragenic | NM_032073                 | Kcnq1        |
| 1   | 223360447 | 223360512 | 1        | -0.203758  | 5    | 7.80E-05 | 0.00098  | 0.31253  | 0.51629  | 0.000422981 | Intragenic | NM_032073                 | Kcnq1        |
| 1   | 223443388 | 223443477 | 1        | -0.219033  | 7    | 0.00038  | 0.0054   | 0.22888  | 0.44791  | 0.001566539 | Intragenic | NM_032073                 | Kcnq1        |
| 1   | 224494341 | 224494405 | 1        | -0.106158  | 5    | 0.025    | 0.0055   | 0.082885 | 0.18904  | 0.047453009 | TSS        | NM_021868                 | Cttn         |
| 1   | 225716882 | 225716964 | 1        | -0.222167  | 5    | 6.20E-05 | 0.00052  | 0.17439  | 0.39655  | 0.000349462 | Intragenic | NM_001106321              | Lrp5         |
| 1   | 226719531 | 226719599 | 1        | -0.064722  | 5    | 0.0032   | 0.015    | 0.039805 | 0.10453  | 0.008990975 | TSS        | NM_001109508              | Lrfn4        |
| 1   | 227254759 | 227254814 | 1        | -0.081459  | 5    | 5.60E-05 | 7.00E-05 | 0.016557 | 0.098017 | 0.000320912 | TSS        | NM_001106324:NM_001009605 | B4gat1:Brms1 |
| 1   | 227266882 | 227266930 | 1        | -0.088664  | 5    | 0.00014  | 0.00096  | 0.078785 | 0.16745  | 0.000684451 | TSS        | NM_139038                 | Rin1         |
| 1   | 227284787 | 227284899 | 1        | -0.164884  | 7    | 0.00026  | 0.012    | 0.22625  | 0.39114  | 0.001130807 | TSS        | NM_001106325              | Cd248        |
| 1   | 227293495 | 227293607 | 1        | -0.164884  | 7    | 0.00026  | 0.012    | 0.22625  | 0.39114  | 0.001130807 | TSS        | NM_001106325              | Cd248        |
| 1   | 227347923 | 227347978 | 1        | -0.081459  | 5    | 5.60E-05 | 7.00E-05 | 0.016557 | 0.098017 | 0.000320912 | TSS        | NM_001106324:NM_001009605 | B4gat1:Brms1 |
| 1   | 227360046 | 227360094 | 1        | -0.088664  | 5    | 0.00014  | 0.00096  | 0.078785 | 0.16745  | 0.000684451 | TSS        | NM_139038                 | Rin1         |
| 1   | 227377976 | 227378088 | 1        | -0.164884  | 7    | 0.00026  | 0.012    | 0.22625  | 0.39114  | 0.001130807 | TSS        | NM_001106325              | Cd248        |
| 1   | 227606950 | 227607131 | 1.20E-14 | -0.142674  | 33   | 3.80E-14 | 3.80E-20 | 0.12231  | 0.26499  | 6.64E-12    | Intragenic | NM_001024290              | Gal3st3      |
| 1   | 227812267 | 227812347 | 1        | -0.118124  | 5    | 0.0011   | 0.038    | 0.16706  | 0.28519  | 0.003737263 | Intergenic | NA                        | NA           |
| 1   | 227862052 | 227862126 | 1        | -0.177735  | 5    | 5.50E-06 | 0.00028  | 0.057448 | 0.23518  | 4.78E-05    | Intragenic | NM_001107572              | Ovo1         |
| 1   | 227944748 | 227944818 | 1        | -0.232345  | 5    | 5.60E-07 | 7.60E-06 | 0.085324 | 0.31767  | 7.29E-06    | Intragenic | NM_001004089              | Sipa1        |
| 1   | 227945367 | 227945598 | 1        | -0.139222  | 13   | 0.00057  | 0.0046   | 0.2893   | 0.42852  | 0.002190499 | Intragenic | NM_001004089              | Sipa1        |
| 1   | 227950945 | 227951112 | 1        | -0.146353  | 12   | 5.60E-05 | 0.00094  | 0.07876  | 0.22511  | 0.000320912 | TSS        | NM_001004089              | Sipa1        |
| 1   | 228135657 | 228135741 | 1        | -0.065278  | 5    | 0.00026  | 0.0031   | 0.040255 | 0.10553  | 0.001130807 | Intergenic | NA                        | NA           |



| chr | start     | stop      | q-value  | methyI.diff | CpGs | pMWU     | p2DKS    | MCWLS    | MCWHS   | pMWU.fdr    | cgi.type   | transcript   | gene       |
|-----|-----------|-----------|----------|-------------|------|----------|----------|----------|---------|-------------|------------|--------------|------------|
| 1   | 228541451 | 228541520 | 1        | -0.224076   | 5    | 7.10E-06 | 0.00014  | 0.07633  | 0.30041 | 5.86E-05    | TSS        | NM_181379    | Ppp2r5b    |
| 1   | 228587745 | 228587814 | 1        | -0.224076   | 5    | 7.10E-06 | 0.00014  | 0.07633  | 0.30041 | 5.86E-05    | TSS        | NM_181379    | Ppp2r5b    |
| 1   | 228697937 | 228697993 | 1        | -0.14648    | 5    | 0.00021  | 6.90E-05 | 0.0965   | 0.24298 | 0.000951214 | TSS        | NM_001106329 | Map4k2     |
| 1   | 228774619 | 228774796 | 1        | -0.19704    | 9    | 1.10E-06 | 0.00033  | 0.18113  | 0.37817 | 1.27E-05    | Intragenic | NM_001082977 | Rasgrp2    |
| 1   | 228808119 | 228808261 | 1        | -0.128454   | 5    | 0.0087   | 0.015    | 0.10796  | 0.23641 | 0.020391633 | Intragenic | NM_053846    | Nrxn2      |
| 1   | 228898931 | 228899295 | 1        | -0.083628   | 5    | 0.016    | 0.088    | 0.11742  | 0.20105 | 0.033288089 | Intragenic | NM_053846    | Nrxn2      |
| 1   | 229070808 | 229070888 | 1        | -0.170263   | 5    | 0.00048  | 0.0092   | 0.35435  | 0.52461 | 0.001881331 | Intergenic | NA           | NA         |
| 1   | 229096717 | 229096824 | 1        | -0.14707    | 5    | 0.014    | 0.088    | 0.24453  | 0.3916  | 0.029850603 | Intergenic | NA           | NA         |
| 1   | 229103855 | 229103938 | 1        | -0.272065   | 5    | 4.80E-06 | 3.20E-05 | 0.42408  | 0.69615 | 4.29E-05    | Intergenic | NA           | NA         |
| 1   | 229220690 | 229220726 | 1        | -0.11447    | 8    | 5.70E-06 | 2.70E-05 | 0.14944  | 0.26391 | 4.91E-05    | TSS        | NM_172045    | Ppp1r14b   |
| 1   | 229354342 | 229354489 | 1        | -0.144491   | 5    | 4.80E-06 | 7.10E-05 | 0.11773  | 0.26222 | 4.29E-05    | Intragenic | NM_139337    | Macrodl    |
| 1   | 229365101 | 229365235 | 0.0019   | -0.208457   | 9    | 2.80E-11 | 6.00E-09 | 0.054965 | 0.26342 | 1.41E-09    | Intragenic | NM_139337    | Macrodl    |
| 1   | 229376906 | 229377097 | 1        | -0.164057   | 5    | 8.50E-07 | 7.60E-06 | 0.029309 | 0.19337 | 1.03E-05    | Intragenic | NM_139337    | Macrodl    |
| 1   | 229377113 | 229377150 | 1        | -0.259467   | 5    | 5.60E-07 | 7.50E-06 | 0.141    | 0.40047 | 7.29E-06    | Intragenic | NM_139337    | Macrodl    |
| 1   | 229379178 | 229379303 | 1        | -0.121445   | 5    | 0.012    | 0.038    | 0.25681  | 0.37826 | 0.026435197 | Intragenic | NM_139337    | Macrodl    |
| 1   | 229429300 | 229429378 | 1        | -0.205623   | 5    | 0.0058   | 0.039    | 0.23662  | 0.44224 | 0.014624129 | Intragenic | NM_139337    | Macrodl    |
| 1   | 229440373 | 229440400 | 1        | -0.143285   | 5    | 1.20E-05 | 0.00027  | 0.14619  | 0.28947 | 9.15E-05    | Intragenic | NM_139337    | Macrodl    |
| 1   | 229509271 | 229509322 | 1        | -0.061324   | 5    | 0.0041   | 0.015    | 0.12612  | 0.18744 | 0.01100507  | Intergenic | NA           | NA         |
| 1   | 229660102 | 229660204 | 1        | -0.25076    | 7    | 9.00E-06 | 0.00042  | 0.18224  | 0.433   | 7.26E-05    | TSS        | NM_001109161 | RGD1560108 |
| 1   | 229660766 | 229660900 | 0.017    | -0.216811   | 15   | 1.90E-09 | 5.20E-08 | 0.64474  | 0.86156 | 5.77E-08    | TSS        | NM_001109161 | RGD1560108 |
| 1   | 229660911 | 229660950 | 1        | -0.159998   | 5    | 0.00014  | 0.00028  | 0.44025  | 0.60025 | 0.000684451 | TSS        | NM_001109161 | RGD1560108 |
| 1   | 229661013 | 229661091 | 1        | -0.30287    | 5    | 7.80E-05 | 0.00014  | 0.29378  | 0.59665 | 0.000422981 | TSS        | NM_001109161 | RGD1560108 |
| 1   | 229661462 | 229661995 | 6.60E-18 | -0.228054   | 53   | 4.70E-14 | 2.00E-23 | 0.20472  | 0.43277 | 6.64E-12    | TSS        | NM_001109161 | RGD1560108 |
| 1   | 229662037 | 229662078 | 1        | -0.141893   | 5    | 6.20E-05 | 0.00052  | 0.17498  | 0.31687 | 0.000349462 | Intragenic | NM_001109161 | RGD1560108 |
| 1   | 229662081 | 229662121 | 1        | -0.129772   | 5    | 0.00054  | 0.0031   | 0.13151  | 0.26128 | 0.002077867 | Intragenic | NM_001109161 | RGD1560108 |
| 1   | 230609391 | 230609485 | 0.53     | -0.080001   | 9    | 2.70E-09 | 1.60E-06 | 0.060684 | 0.14068 | 7.80E-08    | Intergenic | NA           | NA         |
| 1   | 231399998 | 231400305 | 0.11     | -0.146861   | 19   | 2.70E-09 | 3.30E-07 | 0.15727  | 0.30413 | 7.80E-08    | Intragenic | NM_134380    | Ust5r      |
| 1   | 231737052 | 231737181 | 1        | -0.268332   | 7    | 1.70E-08 | 4.70E-06 | 0.078728 | 0.34706 | 4.01E-07    | TSS        | NM_031332    | Slc22a8    |
| 1   | 231763023 | 231763468 | 0.37     | -0.293747   | 7    | 3.20E-07 | 1.20E-06 | 0.14033  | 0.43408 | 4.57E-06    | TSS        | NM_017224    | Slc22a6    |
| 1   | 231821336 | 231821572 | 1        | -0.135408   | 7    | 0.012    | 0.1      | 0.29383  | 0.42924 | 0.026435197 | TSS        | NM_080773    | Chrm1      |
| 1   | 232099640 | 232099785 | 1        | -0.137791   | 8    | 0.0028   | 0.0084   | 0.21927  | 0.35706 | 0.008113721 | TSS        | NM_001004223 | Eef1g      |
| 1   | 232277545 | 232277692 | 1        | -0.102266   | 5    | 0.01     | 0.038    | 0.63003  | 0.73229 | 0.02275947  | Intergenic | NA           | NA         |
| 1   | 232973326 | 232973449 | 1        | -0.252566   | 5    | 2.20E-05 | 3.40E-05 | 0.088937 | 0.3415  | 0.000149617 | Intragenic | NM_031344    | Fads2      |
| 1   | 233190023 | 233190122 | 1        | -0.07126    | 10   | 0.013    | 0.012    | 0.21359  | 0.28485 | 0.028097302 | Intragenic | NM_053445    | Fads1      |
| 1   | 233226882 | 233227050 | 1        | -0.14777    | 5    | 0.012    | 0.087    | 0.27552  | 0.42329 | 0.026435197 | Intragenic | NM_001170487 | Myrf       |
| 1   | 233245111 | 233245178 | 1        | -0.107022   | 5    | 0.0029   | 0.015    | 0.11693  | 0.22395 | 0.008293503 | Intragenic | NM_001005886 | Dagla      |
| 1   | 233354700 | 233354814 | 1        | -0.063616   | 7    | 0.00078  | 0.0082   | 0.030855 | 0.09447 | 0.002840382 | Intergenic | NA           | NA         |
| 1   | 233633259 | 233633746 | 1        | -0.065366   | 14   | 3.00E-05 | 0.00044  | 0.037512 | 0.10288 | 0.000194345 | TSS        | NM_001271311 | Vwce       |
| 1   | 234164911 | 234164944 | 1        | -0.135267   | 5    | 0.0013   | 0.0093   | 0.60965  | 0.74492 | 0.004277683 | Intergenic | NA           | NA         |

| chr | start     | stop      | q-value | methy.diff | CpGs | pMWU     | p2DKS    | MCWLS    | MCWHS   | pMWU.fdr    | cgi.type   | transcript             | gene        |
|-----|-----------|-----------|---------|------------|------|----------|----------|----------|---------|-------------|------------|------------------------|-------------|
| 1   | 235447177 | 235447293 | 1       | -0.075034  | 10   | 0.025    | 0.092    | 0.4511   | 0.52614 | 0.047453009 | Intergenic | NA                     | NA          |
| 1   | 237004851 | 237005126 | 0.015   | -0.204784  | 17   | 1.20E-09 | 4.60E-08 | 0.26432  | 0.4691  | 3.88E-08    | Intergenic | NA                     | NA          |
| 1   | 237116899 | 237117067 | 1       | -0.116937  | 5    | 0.012    | 0.015    | 0.46319  | 0.58013 | 0.026435197 | Intergenic | NA                     | NA          |
| 1   | 237299276 | 237299566 | 1       | -0.113553  | 5    | 0.0074   | 0.13     | 0.61166  | 0.72521 | 0.017853001 | Intergenic | NA                     | NA          |
| 1   | 239516215 | 239516297 | 1       | -0.070808  | 5    | 0.00011  | 0.00098  | 0.091476 | 0.16228 | 0.000565143 | Intergenic | NA                     | NA          |
| 1   | 239900147 | 239900299 | 1       | -0.071465  | 7    | 0.0044   | 0.038    | 0.68103  | 0.75249 | 0.011763026 | Intergenic | NA                     | NA          |
| 1   | 240284163 | 240284210 | 1       | -0.260364  | 5    | 1.50E-05 | 0.00053  | 0.17725  | 0.43762 | 0.000109113 | Intergenic | NA                     | NA          |
| 1   | 240297373 | 240297420 | 1       | -0.260364  | 5    | 1.50E-05 | 0.00053  | 0.17725  | 0.43762 | 0.000109113 | Intergenic | NA                     | NA          |
| 1   | 241564149 | 241564441 | 1       | -0.162442  | 10   | 1.20E-08 | 8.20E-06 | 0.068149 | 0.23059 | 2.88E-07    | Intergenic | NA                     | NA          |
| 1   | 241849384 | 241849401 | 1       | -0.122689  | 5    | 0.0045   | 0.00014  | 0.22837  | 0.35106 | 0.011905878 | TSS        | NM_001024292:NM_148892 | Nmrk1:Ostf1 |
| 1   | 242121918 | 242122165 | 1       | -0.150276  | 5    | 8.80E-05 | 0.00052  | 0.075262 | 0.22554 | 0.000466886 | Intergenic | NA                     | NA          |
| 1   | 244197592 | 244197739 | 1       | -0.148373  | 5    | 0.0024   | 0.039    | 0.1817   | 0.33007 | 0.00705499  | Intergenic | NA                     | NA          |
| 1   | 246155740 | 246155974 | 1       | -0.119749  | 10   | 0.0019   | 0.0037   | 0.54251  | 0.66226 | 0.005855937 | Intergenic | NA                     | NA          |
| 1   | 247973974 | 247974023 | 1       | -0.177957  | 5    | 1.70E-06 | 0.00014  | 0.047383 | 0.22534 | 1.83E-05    | Intragenic | NM_001191562           | Trpm3       |
| 1   | 248216719 | 248216909 | 1       | -0.156066  | 7    | 7.80E-05 | 0.00029  | 0.14207  | 0.29813 | 0.000422981 | Intragenic | NM_057211              | Klf9        |
| 1   | 249091791 | 249091874 | 1       | -0.124324  | 5    | 0.015    | 0.086    | 0.29086  | 0.41518 | 0.031584896 | Intergenic | NA                     | NA          |
| 1   | 249528288 | 249528487 | 1       | -0.127031  | 5    | 0.00088  | 0.0031   | 0.21561  | 0.34264 | 0.003092094 | Intragenic | NM_001012743           | Pip5k1b     |
| 1   | 250421604 | 250421706 | 1       | -0.167741  | 5    | 3.10E-05 | 0.00014  | 0.044011 | 0.21175 | 0.000197418 | Intergenic | NA                     | NA          |
| 1   | 250631940 | 250632116 | 1       | -0.067544  | 9    | 1.80E-06 | 0.0019   | 0.039458 | 0.107   | 1.93E-05    | Intragenic | NM_001037197           | Kank1       |
| 1   | 250926864 | 250927043 | 1       | -0.115617  | 7    | 0.0048   | 0.038    | 0.16553  | 0.28115 | 0.012663359 | Intragenic | NM_001107597           | Dmrt2       |
| 1   | 251951415 | 251951536 | 1       | -0.185671  | 5    | 0.019    | 0.057    | 0.36295  | 0.54862 | 0.038322088 | Intragenic | NM_001004446           | Smarca2     |
| 1   | 253844989 | 253845065 | 1       | -0.178421  | 5    | 0.0017   | 0.0055   | 0.30555  | 0.48397 | 0.005339493 | Intergenic | NA                     | NA          |
| 1   | 254033683 | 254033799 | 1       | -0.111101  | 5    | 0.0074   | 0.059    | 0.14324  | 0.25434 | 0.017853001 | Intergenic | NA                     | NA          |
| 1   | 254112384 | 254112548 | 1       | -0.104951  | 5    | 0.002    | 0.0055   | 0.052484 | 0.15743 | 0.006079939 | Intergenic | NA                     | NA          |
| 1   | 254113660 | 254113824 | 1       | -0.104951  | 5    | 0.002    | 0.0055   | 0.052484 | 0.15743 | 0.006079939 | Intergenic | NA                     | NA          |
| 1   | 254213575 | 254213625 | 1       | -0.200417  | 5    | 3.90E-05 | 0.00053  | 0.55512  | 0.75554 | 0.000237659 | Intragenic | NM_013032              | Slc1a1      |
| 1   | 254432683 | 254432724 | 1       | -0.103656  | 5    | 0.00054  | 0.00053  | 0.059914 | 0.16357 | 0.002077867 | Intergenic | NA                     | NA          |
| 1   | 256836797 | 256836920 | 1       | -0.192174  | 5    | 0.0068   | 0.015    | 0.49868  | 0.69086 | 0.016642688 | Intragenic | NM_001105731           | Prkg1       |
| 1   | 256960945 | 256961090 | 1       | -0.082739  | 5    | 0.023    | 0.086    | 0.71016  | 0.7929  | 0.04441443  | Intragenic | NM_001105731           | Prkg1       |
| 1   | 259018037 | 259018181 | 0.084   | -0.186561  | 7    | 5.80E-07 | 2.60E-07 | 0.10007  | 0.28663 | 7.50E-06    | Intergenic | NA                     | NA          |
| 1   | 259772765 | 259772840 | 1       | -0.212656  | 5    | 2.50E-06 | 1.50E-05 | 0.17244  | 0.3851  | 2.52E-05    | TSS        | NM_031004              | Acta2       |
| 1   | 260158254 | 260158287 | 1       | -0.144917  | 5    | 0.015    | 0.015    | 0.57498  | 0.7199  | 0.031584896 | Intergenic | NA                     | NA          |
| 1   | 260516695 | 260516752 | 1       | -0.065001  | 5    | 0.01     | 0.0055   | 0.90173  | 0.96673 | 0.02275947  | Intergenic | NA                     | NA          |
| 1   | 260516783 | 260516826 | 0.074   | -0.177806  | 8    | 3.80E-09 | 2.30E-07 | 0.054109 | 0.23191 | 1.03E-07    | Intergenic | NA                     | NA          |
| 1   | 260656991 | 260657159 | 1       | -0.142467  | 8    | 0.00019  | 0.0017   | 0.62749  | 0.76996 | 0.000879857 | Intergenic | NA                     | NA          |
| 1   | 262006219 | 262006317 | 1       | -0.151269  | 5    | 0.017    | 0.058    | 0.25482  | 0.40609 | 0.034796287 | Intergenic | NA                     | NA          |
| 1   | 262081834 | 262081981 | 1       | -0.102502  | 5    | 0.0049   | 0.024    | 0.64033  | 0.74283 | 0.012753585 | Intergenic | NA                     | NA          |
| 1   | 263174026 | 263174162 | 1       | -0.220889  | 5    | 0.015    | 0.088    | 0.2134   | 0.43429 | 0.031584896 | Intergenic | NA                     | NA          |

| chr | start     | stop      | q-value | methy.diff | CpGs | pMWU     | p2DKS    | MCWLS    | MCWHS    | pMWU.fdr    | cgi.type   | transcript   | gene     |
|-----|-----------|-----------|---------|------------|------|----------|----------|----------|----------|-------------|------------|--------------|----------|
| 1   | 263436938 | 263437057 | 1       | -0.138858  | 5    | 0.0058   | 0.015    | 0.65184  | 0.7907   | 0.014624129 | Intragenic | NM_013159    | Ide      |
| 1   | 263585854 | 263585884 | 1       | -0.139668  | 5    | 1.30E-05 | 0.00098  | 0.16402  | 0.30369  | 9.66E-05    | TSS        | NM_024385    | Hhex     |
| 1   | 263741725 | 263741796 | 1       | -0.214472  | 5    | 0.0011   | 0.0017   | 0.25735  | 0.47182  | 0.003737263 | Intragenic | NM_019277    | Exoc6    |
| 1   | 263976099 | 263976214 | 1       | -0.19253   | 5    | 0.0035   | 0.015    | 0.23801  | 0.43054  | 0.009686665 | Intergenic | NA           | NA       |
| 1   | 263987314 | 263987557 | 1       | -0.077347  | 5    | 0.0008   | 0.015    | 0.038999 | 0.11635  | 0.002866309 | Intergenic | NA           | NA       |
| 1   | 264303066 | 264303158 | 1       | 0.07704    | 5    | 0.0053   | 0.0055   | 0.84506  | 0.76802  | 0.013591571 | TSS        | NM_001108522 | Pde6c    |
| 1   | 266474985 | 266475753 | 1       | -0.118873  | 16   | 4.60E-07 | 0.0015   | 0.14811  | 0.26698  | 6.27E-06    | Intergenic | NA           | NA       |
| 1   | 266521420 | 266521482 | 0.2     | -0.224886  | 7    | 3.00E-09 | 6.10E-07 | 0.21748  | 0.44236  | 8.36E-08    | Intragenic | NM_001108524 | Aldh18a1 |
| 1   | 266936600 | 266936689 | 1       | -0.23928   | 5    | 1.30E-05 | 3.40E-05 | 0.065531 | 0.30481  | 9.66E-05    | Intergenic | NA           | NA       |
| 1   | 267053083 | 267053851 | 1       | -0.118873  | 16   | 4.60E-07 | 0.0015   | 0.14811  | 0.26698  | 6.27E-06    | Intergenic | NA           | NA       |
| 1   | 267101324 | 267101386 | 0.2     | -0.224886  | 7    | 3.00E-09 | 6.10E-07 | 0.21748  | 0.44236  | 8.36E-08    | Intragenic | NM_001108524 | Aldh18a1 |
| 1   | 267357755 | 267357940 | 1       | -0.089167  | 7    | 0.0032   | 0.0054   | 0.63313  | 0.7223   | 0.008990975 | Intergenic | NA           | NA       |
| 1   | 267524139 | 267524324 | 1       | -0.090204  | 7    | 0.0026   | 0.0083   | 0.63274  | 0.72295  | 0.007616821 | Intergenic | NA           | NA       |
| 1   | 267818716 | 267818853 | 1       | -0.086814  | 5    | 0.0087   | 0.039    | 0.088014 | 0.17483  | 0.020391633 | Intragenic | NM_001191898 | Tll2     |
| 1   | 268146586 | 268147095 | 0.56    | -0.13702   | 11   | 7.70E-08 | 1.70E-06 | 0.083035 | 0.22005  | 1.41E-06    | Intergenic | NA           | NA       |
| 1   | 268317738 | 268317794 | 1       | -0.207676  | 5    | 3.10E-05 | 0.00098  | 0.10317  | 0.31085  | 0.000197418 | Intragenic | NM_022953    | Slit1    |
| 1   | 268350984 | 268351084 | 1       | -0.168867  | 5    | 0.00054  | 0.015    | 0.51633  | 0.68519  | 0.002077867 | Intragenic | NM_022953    | Slit1    |
| 1   | 268357668 | 268358070 | 0.48    | -0.134467  | 5    | 3.90E-05 | 1.50E-06 | 1.50E-07 | 0.13447  | 0.000237659 | Intragenic | NM_022953    | Slit1    |
| 1   | 268842765 | 268842845 | 1       | -0.112874  | 9    | 0.00013  | 0.0011   | 0.14591  | 0.25878  | 0.000648758 | TSS        | NM_001107590 | Marveld1 |
| 1   | 269038651 | 269038798 | 1       | -0.175877  | 7    | 1.30E-05 | 2.50E-05 | 0.24058  | 0.41645  | 9.66E-05    | Intragenic | NM_134401    | Crtac1   |
| 1   | 269116628 | 269116687 | 1       | -0.066247  | 5    | 0.0035   | 0.015    | 0.066779 | 0.13303  | 0.009686665 | Intragenic | NM_134401    | Crtac1   |
| 1   | 269424487 | 269424619 | 1       | -0.136329  | 5    | 0.0041   | 0.015    | 0.058481 | 0.19481  | 0.01100507  | Intragenic | NM_001004261 | Pyroxd2  |
| 1   | 269424648 | 269424750 | 1       | -0.245332  | 5    | 2.80E-05 | 3.50E-05 | 0.071429 | 0.31676  | 0.000182174 | Intragenic | NM_001004261 | Pyroxd2  |
| 1   | 269427715 | 269427881 | 1       | -0.102219  | 8    | 0.018    | 0.026    | 0.22414  | 0.32636  | 0.036742993 | Intragenic | NM_001004261 | Pyroxd2  |
| 1   | 269441758 | 269441922 | 1       | -0.126061  | 6    | 1.60E-05 | 0.00017  | 0.080314 | 0.20637  | 0.000115757 | Intragenic | NM_040669    | Hps1     |
| 1   | 269443679 | 269443774 | 1       | -0.167719  | 5    | 0.00059  | 0.015    | 0.21614  | 0.38386  | 0.002242971 | Intragenic | NM_040669    | Hps1     |
| 1   | 269448830 | 269448930 | 1       | 0.163602   | 5    | 0.0014   | 0.025    | 0.66687  | 0.50326  | 0.004540837 | Intragenic | NM_040669    | Hps1     |
| 1   | 269788201 | 269788390 | 1       | -0.104472  | 8    | 0.0028   | 0.037    | 0.625    | 0.72947  | 0.008113721 | Intragenic | NM_001135762 | Hpse2    |
| 1   | 269986196 | 269986385 | 1       | -0.104215  | 8    | 0.0029   | 0.037    | 0.62526  | 0.72947  | 0.008293503 | Intragenic | NM_001135762 | Hpse2    |
| 1   | 270667630 | 270667745 | 1       | -0.106964  | 5    | 0.0032   | 0.024    | 0.1251   | 0.23206  | 0.008990975 | Intragenic | NM_001107593 | Cnm1     |
| 1   | 270694439 | 270694636 | 1       | -0.206597  | 9    | 2.60E-06 | 0.00018  | 0.23349  | 0.44009  | 2.60E-05    | Intragenic | NM_012571    | Got1     |
| 1   | 270733912 | 270734062 | 0.48    | -0.156945  | 11   | 3.00E-08 | 1.50E-06 | 0.24068  | 0.39763  | 6.59E-07    | Intergenic | NA           | NA       |
| 1   | 271110288 | 271110414 | 0.38    | -0.069827  | 7    | 2.70E-05 | 1.20E-06 | 1.43E-07 | 0.069828 | 0.000178372 | Intergenic | NA           | NA       |
| 1   | 271111148 | 271111449 | 0.0097  | -0.212124  | 8    | 7.80E-10 | 3.00E-08 | 0.071319 | 0.28344  | 2.68E-08    | Intergenic | NA           | NA       |
| 1   | 271561618 | 271561684 | 1       | -0.249986  | 5    | 0.00044  | 0.015    | 0.26529  | 0.51528  | 0.001760146 | Intergenic | NA           | NA       |
| 1   | 271828602 | 271828711 | 1       | -0.083477  | 5    | 9.80E-05 | 0.00098  | 0.05552  | 0.139    | 0.000512474 | Intergenic | NA           | NA       |
| 1   | 271864399 | 271864509 | 1       | -0.096158  | 11   | 1.20E-05 | 0.0012   | 0.13584  | 0.232    | 9.15E-05    | Intergenic | NA           | NA       |
| 1   | 272025140 | 272025186 | 1       | -0.108993  | 8    | 2.00E-05 | 0.0014   | 0.18352  | 0.29251  | 0.000138285 | Intragenic | NM_001106361 | Pax2     |
| 1   | 272260163 | 272260209 | 1       | 0.087161   | 5    | 0.021    | 0.087    | 0.22213  | 0.13497  | 0.041207871 | Intergenic | NA           | NA       |

| chr | start     | stop      | q-value  | methy1.diff | CpGs | pMWU     | p2DKS    | MCWLS    | MCWHS   | pMWU.fdr    | cgi.type   | transcript   | gene     |
|-----|-----------|-----------|----------|-------------|------|----------|----------|----------|---------|-------------|------------|--------------|----------|
| 1   | 272261987 | 272262212 | 1        | -0.116364   | 13   | 0.0012   | 0.035    | 0.24274  | 0.3591  | 0.004013471 | Intergenic | NA           | NA       |
| 1   | 272468854 | 272468919 | 1        | -0.126188   | 5    | 0.0068   | 0.038    | 0.67968  | 0.80586 | 0.016642688 | Intergenic | NA           | NA       |
| 1   | 272470125 | 272470190 | 1        | -0.179246   | 6    | 0.00011  | 0.0045   | 0.61468  | 0.79393 | 0.000565143 | Intergenic | NA           | NA       |
| 1   | 272877648 | 272877683 | 1        | 0.114643    | 5    | 0.01     | 0.024    | 0.91103  | 0.79639 | 0.02275947  | Intergenic | NA           | NA       |
| 1   | 273636100 | 273636248 | 1        | -0.422417   | 5    | 3.70E-07 | 3.40E-06 | 0.19817  | 0.62059 | 5.21E-06    | Intragenic | NM_001024899 | Sufu     |
| 1   | 273806939 | 273807029 | 1        | -0.156927   | 5    | 0.0038   | 0.025    | 0.30344  | 0.46036 | 0.010352437 | Intragenic | NM_001127484 | Wbp1l    |
| 1   | 273899545 | 273899626 | 1        | -0.227931   | 5    | 0.0019   | 0.009    | 0.53989  | 0.76782 | 0.005855937 | Intergenic | NA           | NA       |
| 1   | 273962688 | 273962752 | 1        | -0.27288    | 5    | 4.20E-07 | 1.60E-05 | 0.094718 | 0.3676  | 5.76E-06    | TSS        | NM_001011942 | Cnm2     |
| 1   | 274349033 | 274349179 | 1        | -0.180729   | 10   | 0.00048  | 0.022    | 0.34342  | 0.52415 | 0.001881331 | TSS        | NM_001109168 | Calhm1   |
| 1   | 274463343 | 274463405 | 0.76     | -0.180705   | 7    | 1.60E-06 | 2.30E-06 | 0.48888  | 0.66958 | 1.75E-05    | Intergenic | NA           | NA       |
| 1   | 274523637 | 274523805 | 4.20E-05 | -0.124481   | 13   | 1.20E-13 | 1.30E-10 | 0.037506 | 0.16199 | 1.24E-11    | Intragenic | NM_001107606 | Sh3pxd2a |
| 1   | 274523820 | 274523852 | 1        | -0.1076     | 5    | 0.0029   | 0.0032   | 0.10413  | 0.21173 | 0.008293503 | Intragenic | NM_001107606 | Sh3pxd2a |
| 1   | 274523867 | 274523985 | 1        | -0.08152    | 5    | 0.011    | 0.0053   | 0.10259  | 0.18411 | 0.02463877  | Intragenic | NM_001107606 | Sh3pxd2a |
| 1   | 274548948 | 274549029 | 0.098    | -0.120921   | 7    | 3.30E-09 | 3.00E-07 | 0.11789  | 0.23882 | 9.10E-08    | Intragenic | NM_001107606 | Sh3pxd2a |
| 1   | 275687658 | 275687810 | 1        | 0.130905    | 7    | 0.013    | 0.11     | 0.59199  | 0.46109 | 0.028097302 | Intragenic | NM_001106367 | Sorcs3   |
| 1   | 276365541 | 276365710 | 1        | -0.158022   | 8    | 5.00E-06 | 0.00096  | 0.23649  | 0.39451 | 4.46E-05    | Intergenic | NA           | NA       |
| 1   | 280560003 | 280560150 | 1        | -0.12243    | 7    | 0.002    | 0.051    | 0.62233  | 0.74476 | 0.006079939 | Intergenic | NA           | NA       |
| 1   | 280653608 | 280653711 | 1        | -0.136536   | 5    | 7.00E-05 | 0.00014  | 0.15542  | 0.29196 | 0.000386221 | Intergenic | NA           | NA       |
| 1   | 280736315 | 280736418 | 1        | -0.136536   | 5    | 7.00E-05 | 0.00014  | 0.15542  | 0.29196 | 0.000386221 | Intergenic | NA           | NA       |
| 1   | 280749129 | 280749290 | 1        | -0.162985   | 5    | 0.0087   | 0.059    | 0.57478  | 0.73777 | 0.020391633 | Intergenic | NA           | NA       |
| 1   | 281107948 | 281108153 | 1        | -0.121356   | 7    | 0.0044   | 0.077    | 0.18749  | 0.30884 | 0.011763026 | Intergenic | NA           | NA       |
| 1   | 281165610 | 281165784 | 1        | -0.290953   | 5    | 2.50E-06 | 3.40E-05 | 0.11572  | 0.40667 | 2.52E-05    | Intragenic | NM_131913    | Xpnpep1  |
| 1   | 281165804 | 281165925 | 1        | -0.204578   | 5    | 5.00E-05 | 0.00098  | 0.13573  | 0.34031 | 0.000291675 | Intragenic | NM_131913    | Xpnpep1  |
| 1   | 281166244 | 281166355 | 1        | -0.233951   | 5    | 3.50E-05 | 3.40E-05 | 0.02391  | 0.25786 | 0.000218038 | Intragenic | NM_131913    | Xpnpep1  |
| 1   | 281495067 | 281495125 | 1        | -0.203779   | 5    | 3.70E-06 | 7.10E-05 | 0.063312 | 0.26709 | 3.46E-05    | Intragenic | NM_013160    | Mxi1     |
| 1   | 281501788 | 281501864 | 1        | -0.121768   | 5    | 0.00017  | 0.0018   | 0.12995  | 0.25172 | 0.000806192 | Intragenic | NM_013160    | Mxi1     |
| 1   | 281588558 | 281588698 | 1        | -0.339621   | 7    | 2.10E-07 | 4.50E-06 | 0.12744  | 0.46706 | 3.19E-06    | Intergenic | NA           | NA       |
| 1   | 281670327 | 281670371 | 1        | -0.149992   | 5    | 0.00097  | 0.025    | 0.18197  | 0.33196 | 0.003366009 | Intragenic | NM_133578    | Dusp5    |
| 1   | 281670412 | 281670560 | 1        | -0.218163   | 5    | 0.00054  | 0.0092   | 0.22811  | 0.44628 | 0.002077867 | Intragenic | NM_133578    | Dusp5    |
| 1   | 281670574 | 281670647 | 1        | -0.105079   | 5    | 0.014    | 0.13     | 0.65462  | 0.7597  | 0.029850603 | Intragenic | NM_133578    | Dusp5    |
| 1   | 281932156 | 281932224 | 1        | -0.179119   | 8    | 1.70E-05 | 0.00067  | 0.43172  | 0.61084 | 0.000120524 | Intragenic | NM_001107611 | Rbm20    |
| 1   | 281979038 | 281979108 | 1        | -0.173794   | 5    | 0.013    | 0.087    | 0.3719   | 0.5457  | 0.028097302 | Intragenic | NM_001107611 | Rbm20    |
| 1   | 283408786 | 283408845 | 0.037    | -0.399554   | 5    | 5.60E-07 | 1.10E-07 | 0.26303  | 0.66258 | 7.29E-06    | Intergenic | NA           | NA       |
| 1   | 283409486 | 283409516 | 1        | -0.072599   | 5    | 0.00072  | 0.0093   | 0.034937 | 0.10754 | 0.002634665 | Intergenic | NA           | NA       |
| 1   | 283972409 | 283972475 | 1        | -0.184605   | 7    | 1.30E-07 | 4.60E-06 | 0.096386 | 0.28099 | 2.11E-06    | Intergenic | NA           | NA       |
| 1   | 284730270 | 284730421 | 1        | -0.304361   | 5    | 0.00023  | 0.0017   | 0.23661  | 0.54097 | 0.00102405  | Intragenic | NM_001106201 | Dclre1a  |
| 1   | 284843306 | 284843399 | 1        | -0.12104    | 5    | 0.0008   | 0.00028  | 0.1185   | 0.23954 | 0.002866309 | Intergenic | NA           | NA       |
| 1   | 285333188 | 285333356 | 1        | -0.18706    | 7    | 0.00099  | 0.039    | 0.31704  | 0.5041  | 0.003433429 | Intergenic | NA           | NA       |
| 1   | 285451011 | 285451177 | 1        | -0.098895   | 7    | 0.0087   | 0.00028  | 0.14948  | 0.24838 | 0.020391633 | Intergenic | NA           | NA       |

| chr | start     | stop      | q-value  | methy.diff | CpGs | pMWU     | p2DKS    | MCWLS    | MCWHS    | pMWU.fdr    | cgi.type   | transcript                | gene       |
|-----|-----------|-----------|----------|------------|------|----------|----------|----------|----------|-------------|------------|---------------------------|------------|
| 1   | 285540002 | 285540079 | 1        | -0.128538  | 5    | 0.016    | 0.015    | 0.30539  | 0.43393  | 0.033288089 | Intergenic | NA                        | NA         |
| 1   | 286394064 | 286394153 | 1        | -0.310633  | 5    | 9.80E-05 | 0.0005   | 0.40701  | 0.71764  | 0.000512474 | Intergenic | NA                        | NA         |
| 1   | 286802970 | 286803124 | 1        | -0.28737   | 7    | 2.40E-07 | 1.60E-05 | 0.14743  | 0.4348   | 3.57E-06    | Intragenic | NM_012959                 | Gfra1      |
| 1   | 286922535 | 286922689 | 1        | -0.282022  | 7    | 3.50E-07 | 1.50E-05 | 0.15278  | 0.4348   | 4.97E-06    | Intragenic | NM_012959                 | Gfra1      |
| 1   | 287378787 | 287378897 | 1        | -0.070402  | 5    | 0.0035   | 0.015    | 0.067688 | 0.13809  | 0.009686665 | TSS        | NM_001107445              | Hspa12a    |
| 1   | 288240753 | 288240870 | 1        | -0.150003  | 5    | 0.019    | 0.0093   | 0.35291  | 0.50292  | 0.038322088 | Intergenic | NA                        | NA         |
| 1   | 289893047 | 289893077 | 1        | -0.094335  | 5    | 0.0068   | 0.088    | 0.76521  | 0.85955  | 0.016642688 | Intergenic | NA                        | NA         |
| 1   | 289946843 | 289946944 | 1        | -0.109646  | 5    | 0.00023  | 0.0031   | 0.62055  | 0.73019  | 0.00102405  | Intergenic | NA                        | NA         |
| 1   | 289947042 | 289947201 | 1        | -0.076624  | 5    | 0.0008   | 0.0031   | 0.8048   | 0.88142  | 0.002866309 | Intergenic | NA                        | NA         |
| 10  | 1866469   | 1866882   | 1        | -0.107553  | 17   | 9.00E-06 | 0.00028  | 0.54555  | 0.6531   | 7.26E-05    | Intergenic | NA                        | NA         |
| 10  | 4451917   | 4451981   | 1        | -0.120583  | 5    | 3.30E-06 | 1.60E-05 | 0.027269 | 0.14785  | 3.16E-05    | Intergenic | NA                        | NA         |
| 10  | 4844133   | 4844319   | 1        | -0.136996  | 8    | 0.0015   | 0.0025   | 0.21741  | 0.3544   | 0.004849475 | Intragenic | NM_012573                 | Grin2a     |
| 10  | 5499591   | 5499677   | 1        | -0.248355  | 5    | 0.00032  | 0.0092   | 0.30974  | 0.5581   | 0.001346443 | Intergenic | NA                        | NA         |
| 10  | 5850599   | 5850651   | 1        | -0.168234  | 5    | 0.013    | 0.024    | 0.48845  | 0.65669  | 0.028097302 | Intragenic | NM_152790                 | Carhsp1    |
| 10  | 5916479   | 5916597   | 1        | -0.115357  | 5    | 0.0063   | 0.037    | 0.67661  | 0.79196  | 0.015629046 | Intragenic | NM_031003                 | Abat       |
| 10  | 6094189   | 6094268   | 1        | -0.1198    | 7    | 0.021    | 0.034    | 0.3544   | 0.4742   | 0.041207871 | Intragenic | NM_001134638              | Tmem114    |
| 10  | 6715286   | 6715537   | 1        | -0.217864  | 7    | 1.50E-06 | 0.0013   | 0.17379  | 0.39165  | 1.65E-05    | Intergenic | NA                        | NA         |
| 10  | 8240230   | 8240302   | 1        | -0.083769  | 5    | 0.0013   | 0.0055   | 0.092028 | 0.1758   | 0.004277683 | Intergenic | NA                        | NA         |
| 10  | 9439483   | 9439779   | 1        | -0.104574  | 14   | 0.0087   | 0.14     | 0.51947  | 0.62404  | 0.020391633 | Intragenic | NM_001106976              | Ppl        |
| 10  | 9529593   | 9529796   | 1        | -0.156211  | 5    | 4.40E-05 | 0.00053  | 0.065476 | 0.22169  | 0.000263321 | TSS        | NM_001024864              | Rogdi      |
| 10  | 9530136   | 9530472   | 1        | -0.153835  | 6    | 0.013    | 0.038    | 0.21471  | 0.36854  | 0.028097302 | TSS        | NM_001024864              | Rogdi      |
| 10  | 9685272   | 9685429   | 1        | 0.236766   | 5    | 0.00019  | 0.00053  | 0.63904  | 0.40227  | 0.000879857 | Intergenic | NA                        | NA         |
| 10  | 9887123   | 9887773   | 0.00022  | -0.157425  | 23   | 4.40E-14 | 6.80E-10 | 0.086135 | 0.24356  | 6.64E-12    | Intragenic | NM_001191639:NM_001109382 | Coro7:Vasn |
| 10  | 9888331   | 9888386   | 1        | -0.221993  | 5    | 1.70E-06 | 0.00053  | 0.42177  | 0.64376  | 1.83E-05    | Intragenic | NM_001191639:NM_001109382 | Coro7:Vasn |
| 10  | 9896784   | 9896833   | 1        | -0.115074  | 5    | 0.00019  | 0.0055   | 0.13573  | 0.2508   | 0.000879857 | TSS        | NM_001109382              | Vasn       |
| 10  | 9938418   | 9938786   | 1        | -0.145895  | 5    | 1.50E-06 | 3.40E-05 | 0.01577  | 0.16167  | 1.65E-05    | TSS        | NM_001106978              | Glis2      |
| 10  | 9941177   | 9941270   | 1        | -0.082099  | 5    | 0.0063   | 0.038    | 0.058182 | 0.14028  | 0.015629046 | TSS        | NM_001106978              | Glis2      |
| 10  | 10199217  | 10199317  | 1        | -0.161844  | 5    | 0.019    | 0.088    | 0.43663  | 0.59848  | 0.038322088 | Intergenic | NA                        | NA         |
| 10  | 10522474  | 10522550  | 1        | -0.157172  | 5    | 0.0094   | 0.015    | 0.40358  | 0.56076  | 0.021723038 | Intergenic | NA                        | NA         |
| 10  | 10883528  | 10883699  | 1        | -0.098158  | 8    | 0.00059  | 0.019    | 0.66394  | 0.7621   | 0.002242971 | Intergenic | NA                        | NA         |
| 10  | 12675612  | 12675662  | 1        | -0.074394  | 5    | 0.013    | 0.015    | 0.090743 | 0.16514  | 0.028097302 | Intergenic | NA                        | NA         |
| 10  | 12698657  | 12699023  | 1        | -0.050211  | 5    | 0.0019   | 0.015    | 0.034565 | 0.084776 | 0.005855937 | Intergenic | NA                        | NA         |
| 10  | 12730454  | 12730631  | 1        | -0.113846  | 15   | 0.0018   | 0.006    | 0.71183  | 0.82568  | 0.005640313 | Intragenic | NM_001105765              | Zfp13      |
| 10  | 12788179  | 12788323  | 1        | -0.110223  | 5    | 3.50E-05 | 0.0031   | 0.35838  | 0.4686   | 0.000218038 | Intergenic | NA                        | NA         |
| 10  | 12939115  | 12939169  | 1        | -0.137069  | 6    | 3.40E-05 | 0.00028  | 0.050086 | 0.18716  | 0.000214477 | Intergenic | NA                        | NA         |
| 10  | 12939386  | 12939425  | 1        | -0.123638  | 5    | 8.80E-05 | 0.00052  | 0.032877 | 0.15651  | 0.000466886 | Intergenic | NA                        | NA         |
| 10  | 12981356  | 12981481  | 5.50E-05 | -0.237599  | 9    | 2.30E-12 | 1.70E-10 | 0.031854 | 0.26945  | 1.61E-10    | Intragenic | NM_001277154              | Srrm2      |

| chr | start    | stop     | q-value | methy.diff | CpGs | pMWU     | p2DKS    | MCWLS     | MCWHS    | pMWU.fdr    | cgi.type   | transcript                                      | gene                    |
|-----|----------|----------|---------|------------|------|----------|----------|-----------|----------|-------------|------------|-------------------------------------------------|-------------------------|
| 10  | 13006811 | 13006869 | 1       | -0.175913  | 7    | 0.0013   | 0.0083   | 0.69587   | 0.87179  | 0.004277683 | TSS        | NM_001135087                                    | Prss41                  |
| 10  | 13172517 | 13172625 | 1       | -0.153501  | 5    | 0.0035   | 0.039    | 0.15539   | 0.30889  | 0.009686665 | Intergenic | NA                                              | NA                      |
| 10  | 13773975 | 13774126 | 1       | -0.168636  | 9    | 3.20E-05 | 0.0018   | 0.20413   | 0.37276  | 0.00020314  | Intragenic | NM_001257352                                    | Pkd1                    |
| 10  | 13878340 | 13878402 | 0.00011 | -0.259611  | 6    | 2.90E-09 | 3.50E-10 | 0.038322  | 0.29793  | 8.18E-08    | TSS        | NM_013222:NM_001106986                          | Gfer:Noxo1              |
| 10  | 14048388 | 14048444 | 1       | -0.296102  | 6    | 2.30E-07 | 1.30E-05 | 0.10674   | 0.40285  | 3.45E-06    | Intergenic | NA                                              | NA                      |
| 10  | 14055418 | 14055681 | 1       | -0.192335  | 5    | 2.90E-06 | 7.00E-05 | 0.066724  | 0.25906  | 2.84E-05    | TSS        | NM_053329                                       | Igfals                  |
| 10  | 14059123 | 14059243 | 0.035   | -0.34262   | 5    | 7.30E-08 | 1.10E-07 | 0.17988   | 0.5225   | 1.35E-06    | Intragenic | NM_053329                                       | Igfals                  |
| 10  | 14289954 | 14290033 | 1       | -0.050785  | 5    | 0.014    | 0.13     | 0.88074   | 0.93152  | 0.029850603 | Intergenic | NA                                              | NA                      |
| 10  | 14405554 | 14405771 | 1       | -0.240304  | 15   | 6.40E-08 | 1.00E-05 | 0.3725    | 0.6128   | 1.19E-06    | Intergenic | NA                                              | NA                      |
| 10  | 14422233 | 14422422 | 1       | -0.146256  | 6    | 0.0012   | 0.0044   | 0.53242   | 0.67868  | 0.004013471 | TSS        | NR_037321                                       | Mir3547                 |
| 10  | 14629138 | 14629341 | 1       | -0.076165  | 10   | 0.0014   | 0.004    | 0.13946   | 0.21562  | 0.004540837 | Intergenic | NA                                              | NA                      |
| 10  | 14645139 | 14645222 | 1       | -0.123489  | 5    | 1.90E-05 | 0.0017   | 0.084762  | 0.20825  | 0.000131674 | TSS        | NM_001013965                                    | Tekt4                   |
| 10  | 15045572 | 15045619 | 1       | -0.17528   | 5    | 3.50E-05 | 7.00E-05 | 0.078519  | 0.2538   | 0.000218038 | Intragenic | NM_001109475                                    | Fam195a                 |
| 10  | 15244714 | 15244909 | 0.58    | -0.054002  | 15   | 3.20E-10 | 1.80E-06 | 0.034363  | 0.088364 | 1.24E-08    | Intergenic | NA                                              | NA                      |
| 10  | 15469831 | 15469938 | 1       | -0.187217  | 7    | 3.50E-07 | 2.90E-05 | 0.22154   | 0.40875  | 4.97E-06    | Intergenic | NA                                              | NA                      |
| 10  | 15481316 | 15481423 | 1       | -0.201141  | 7    | 1.00E-07 | 1.60E-05 | 0.20631   | 0.40745  | 1.72E-06    | Intergenic | NA                                              | NA                      |
| 10  | 15495244 | 15495487 | 1       | -0.128262  | 12   | 1.80E-06 | 0.0002   | 0.17877   | 0.30703  | 1.93E-05    | Intergenic | NA                                              | NA                      |
| 10  | 15638001 | 15638061 | 1       | -0.102405  | 5    | 2.80E-05 | 0.0018   | 0.08837   | 0.19077  | 0.000182174 | Intergenic | NA                                              | NA                      |
| 10  | 15643363 | 15643387 | 1       | -0.053093  | 5    | 0.0038   | 0.015    | 0.87087   | 0.92396  | 0.010352437 | Intergenic | NA                                              | NA                      |
| 10  | 15646862 | 15646946 | 1       | -0.170978  | 5    | 0.0008   | 0.009    | 0.18442   | 0.3554   | 0.002866309 | Intergenic | NA                                              | NA                      |
| 10  | 16121686 | 16121778 | 1       | -0.117759  | 5    | 0.011    | 0.088    | 0.6406    | 0.75836  | 0.02463877  | Intergenic | NA                                              | NA                      |
| 10  | 16933197 | 16933312 | 1       | -0.115949  | 5    | 0.0045   | 0.024    | 0.16339   | 0.27934  | 0.011905878 | Intergenic | NA                                              | NA                      |
| 10  | 16948192 | 16948279 | 1       | -0.152284  | 6    | 2.40E-05 | 0.00029  | 0.25486   | 0.40715  | 0.000160049 | Intragenic | NM_001142652                                    | Neurl1b                 |
| 10  | 16963750 | 16963987 | 1       | -0.151859  | 5    | 0.00026  | 0.0032   | 0.069957  | 0.22182  | 0.001130807 | Intragenic | NM_001142652                                    | Neurl1b                 |
| 10  | 17660732 | 17661068 | 1       | -0.063775  | 9    | 0.00041  | 0.018    | 0.064534  | 0.12831  | 0.001662832 | Intergenic | NA                                              | NA                      |
| 10  | 17873805 | 17873883 | 1       | -0.081347  | 5    | 8.10E-06 | 0.00014  | 0.033721  | 0.11507  | 6.58E-05    | Intergenic | NA                                              | NA                      |
| 10  | 18014422 | 18014549 | 1       | -0.06535   | 7    | 4.50E-05 | 0.00016  | 0.0071429 | 0.072493 | 0.000268503 | Intergenic | NA                                              | NA                      |
| 10  | 18578375 | 18578505 | 1       | -0.140041  | 5    | 0.016    | 0.086    | 0.18213   | 0.32217  | 0.033288089 | Intragenic | NM_001261389:NM_022929:NM_01261387:NM_001261388 | Kcnp1:Kcnp1:Kcnp1:Kcnp1 |
| 10  | 19091654 | 19091734 | 1       | -0.160876  | 5    | 0.0011   | 0.0018   | 0.37938   | 0.54026  | 0.003737263 | Intergenic | NA                                              | NA                      |
| 10  | 19466642 | 19466769 | 1       | -0.185533  | 5    | 0.008    | 0.038    | 0.22519   | 0.41072  | 0.019059477 | Intergenic | NA                                              | NA                      |
| 10  | 19521060 | 19521144 | 1       | -0.223048  | 5    | 0.0024   | 0.0053   | 0.47026   | 0.6933   | 0.00705499  | Intragenic | NM_001034138                                    | Spdl1                   |
| 10  | 20282475 | 20282597 | 1       | -0.191848  | 5    | 0.0063   | 0.038    | 0.37648   | 0.56832  | 0.015629046 | Intragenic | NM_031321                                       | Slit3                   |
| 10  | 20622943 | 20623086 | 1       | -0.131082  | 5    | 0.00048  | 0.00098  | 0.12363   | 0.25472  | 0.001881331 | Intergenic | NA                                              | NA                      |
| 10  | 20679186 | 20679339 | 0.18    | -0.18656   | 9    | 1.00E-07 | 5.50E-07 | 0.13436   | 0.32092  | 1.72E-06    | Intergenic | NA                                              | NA                      |
| 10  | 20680415 | 20680505 | 1       | -0.08038   | 5    | 0.0038   | 0.025    | 0.03917   | 0.11955  | 0.010352437 | Intergenic | NA                                              | NA                      |

| chr | start    | stop     | q-value  | methyL.diff | CpGs | pMWU     | p2DKS    | MCWLS    | MCWHS   | pMWU.fdr    | cgi.type   | transcript   | gene    |
|-----|----------|----------|----------|-------------|------|----------|----------|----------|---------|-------------|------------|--------------|---------|
| 10  | 20773954 | 20774032 | 1        | -0.146506   | 5    | 0.0049   | 0.025    | 0.26868  | 0.41519 | 0.012753585 | Intragenic | NM_020088    | Tenm2   |
| 10  | 20903059 | 20903165 | 1        | -0.215259   | 5    | 0.00036  | 0.0092   | 0.28757  | 0.50283 | 0.001486639 | Intragenic | NM_020088    | Tenm2   |
| 10  | 21743022 | 21743047 | 1        | -0.098661   | 5    | 0.0094   | 0.088    | 0.16523  | 0.26389 | 0.021723038 | Intergenic | NA           | NA      |
| 10  | 21996297 | 21996367 | 1        | -0.114432   | 5    | 0.0049   | 0.025    | 0.72799  | 0.84242 | 0.012753585 | Intergenic | NA           | NA      |
| 10  | 23889073 | 23889123 | 1        | -0.128222   | 5    | 0.0024   | 0.0055   | 0.24769  | 0.37591 | 0.00705499  | Intragenic | NM_053820    | Ebf1    |
| 10  | 28908955 | 28909003 | 1        | -0.082866   | 5    | 0.01     | 0.059    | 0.10573  | 0.18859 | 0.02275947  | TSS        | NM_001191918 | C1qtnf2 |
| 10  | 28953399 | 28953511 | 1        | -0.15074    | 7    | 0.0015   | 0.0054   | 0.21428  | 0.36502 | 0.004849475 | Intergenic | NA           | NA      |
| 10  | 30983965 | 30984039 | 1        | -0.278848   | 6    | 0.00014  | 0.00027  | 0.43739  | 0.71624 | 0.000684451 | Intragenic | NM_001160228 | Adam19  |
| 10  | 31693047 | 31693097 | 6.00E-08 | -0.24479    | 10   | 7.00E-14 | 1.80E-13 | 0.024764 | 0.26955 | 8.01E-12    | Intergenic | NA           | NA      |
| 10  | 34201666 | 34201696 | 1        | -0.126656   | 5    | 1.50E-06 | 7.60E-06 | 0.052628 | 0.17928 | 1.65E-05    | Intergenic | NA           | NA      |
| 10  | 34784766 | 34784984 | 1        | -0.128268   | 7    | 0.0072   | 0.018    | 0.25131  | 0.37958 | 0.017539509 | Intergenic | NA           | NA      |
| 10  | 34874909 | 34874949 | 1        | -0.153028   | 5    | 0.0017   | 0.015    | 0.16496  | 0.31799 | 0.005339493 | Intragenic | NM_053652    | Flt4    |
| 10  | 35051843 | 35051981 | 1        | -0.081883   | 9    | 0.0032   | 0.0084   | 0.085194 | 0.16708 | 0.008990975 | TSS        | NM_001002819 | Gfpt2   |
| 10  | 35495349 | 35495507 | 1        | -0.13121    | 10   | 0.0084   | 0.029    | 0.31     | 0.44121 | 0.019933412 | Intragenic | NM_001127533 | Mgat4b  |
| 10  | 35627328 | 35627524 | 1        | -0.204649   | 5    | 0.00036  | 0.00013  | 0.16059  | 0.36524 | 0.001486639 | Intergenic | NA           | NA      |
| 10  | 35730926 | 35731019 | 1        | -0.163461   | 6    | 0.02     | 0.12     | 0.274    | 0.43746 | 0.039778219 | Intergenic | NA           | NA      |
| 10  | 36878009 | 36878227 | 1        | -0.128268   | 7    | 0.0072   | 0.018    | 0.25131  | 0.37958 | 0.017539509 | Intergenic | NA           | NA      |
| 10  | 37466833 | 37466922 | 1        | -0.27348    | 7    | 2.90E-05 | 0.0013   | 0.36908  | 0.64256 | 0.000187968 | Intergenic | NA           | NA      |
| 10  | 37926671 | 37926869 | 1        | 0.100757    | 5    | 0.02     | 0.13     | 0.551    | 0.45025 | 0.039778219 | Intragenic | NM_001107000 | Fstl4   |
| 10  | 38605536 | 38605584 | 1        | -0.054561   | 5    | 0.002    | 0.024    | 0.1171   | 0.17166 | 0.006079939 | Intergenic | NA           | NA      |
| 10  | 38750634 | 38750774 | 1        | -0.109537   | 5    | 0.012    | 0.015    | 0.15471  | 0.26424 | 0.026435197 | TSS        | NM_201270    | Ii4     |
| 10  | 38961555 | 38961689 | 1        | -0.080656   | 5    | 0.019    | 0.13     | 0.064708 | 0.14536 | 0.038322088 | Intergenic | NA           | NA      |
| 10  | 39222289 | 39222554 | 1        | -0.13344    | 5    | 0.0011   | 0.039    | 0.14276  | 0.2762  | 0.003737263 | Intragenic | NM_001108275 | P4ha2   |
| 10  | 39980598 | 39980630 | 1        | -0.209263   | 5    | 3.10E-05 | 0.00051  | 0.21186  | 0.42112 | 0.000197418 | TSS        | NM_001109607 | Hint1   |
| 10  | 40009281 | 40009399 | 0.0022   | -0.35676    | 5    | 6.30E-08 | 6.80E-09 | 0.14378  | 0.50054 | 1.18E-06    | Intergenic | NA           | NA      |
| 10  | 40095086 | 40095189 | 1        | -0.29657    | 5    | 2.40E-05 | 6.90E-05 | 0.25942  | 0.55599 | 0.000160049 | Intragenic | NM_024156    | Anxa6   |
| 10  | 40095195 | 40095226 | 9.80E-06 | -0.305434   | 8    | 7.50E-12 | 3.00E-11 | 0.47413  | 0.77957 | 4.48E-10    | Intragenic | NM_024156    | Anxa6   |
| 10  | 40096504 | 40096572 | 1        | -0.149938   | 5    | 0.01     | 0.0055   | 0.61516  | 0.7651  | 0.02275947  | Intragenic | NM_024156    | Anxa6   |
| 10  | 42888180 | 42888297 | 1        | -0.167335   | 5    | 0.021    | 0.024    | 0.42177  | 0.58911 | 0.041207871 | Intragenic | NM_130742    | Galnt10 |
| 10  | 42944701 | 42944903 | 1        | -0.15715    | 6    | 0.00084  | 0.0069   | 0.064567 | 0.22172 | 0.002993559 | Intragenic | NM_130742    | Galnt10 |
| 10  | 43050172 | 43050187 | 1        | -0.068302   | 5    | 0.0087   | 0.13     | 0.1108   | 0.17911 | 0.020391633 | Intragenic | NM_021592    | Hand1   |
| 10  | 43052277 | 43052332 | 1        | -0.071611   | 5    | 0.01     | 0.038    | 0.097576 | 0.16919 | 0.02275947  | TSS        | NM_021592    | Hand1   |
| 10  | 43089957 | 43090046 | 1        | -0.074184   | 7    | 0.013    | 0.027    | 0.7084   | 0.78258 | 0.028097302 | Intergenic | NA           | NA      |
| 10  | 43107577 | 43107670 | 1        | -0.178534   | 5    | 0.01     | 0.0087   | 0.44468  | 0.62321 | 0.02275947  | Intergenic | NA           | NA      |
| 10  | 43152187 | 43152355 | 1        | -0.155734   | 8    | 0.00025  | 0.0088   | 0.2815   | 0.43723 | 0.001103692 | Intergenic | NA           | NA      |
| 10  | 43194356 | 43194486 | 1        | -0.114945   | 5    | 0.002    | 0.0055   | 0.12487  | 0.23981 | 0.006079939 | Intergenic | NA           | NA      |
| 10  | 44984905 | 44984990 | 1        | -0.081018   | 5    | 0.0087   | 0.038    | 0.75293  | 0.83395 | 0.020391633 | Intragenic | NM_001107004 | Zfp39   |
| 10  | 45070733 | 45070766 | 1        | -0.114095   | 5    | 1.30E-06 | 3.40E-05 | 0.017485 | 0.13158 | 1.46E-05    | Intragenic | NM_022798    | Trim17  |
| 10  | 45094514 | 45094581 | 1        | -0.056187   | 12   | 8.10E-05 | 0.0038   | 0.061772 | 0.11796 | 0.000437473 | Intergenic | NA           | NA      |

| chr | start    | stop     | q-value  | methy.diff | CpGs | pMWU     | p2DKS    | MCWLS     | MCWHS    | pMWU.fdr    | cgi.type   | transcript   | gene     |
|-----|----------|----------|----------|------------|------|----------|----------|-----------|----------|-------------|------------|--------------|----------|
| 10  | 45236707 | 45236744 | 1        | -0.05777   | 5    | 3.90E-05 | 0.00098  | 0.02896   | 0.08673  | 0.000237659 | Intergenic | NA           | NA       |
| 10  | 45284324 | 45284363 | 1        | -0.052693  | 5    | 0.013    | 0.059    | 0.074794  | 0.12749  | 0.028097302 | Intragenic | NM_001100784 | Gjc2     |
| 10  | 45284381 | 45284527 | 0.062    | -0.11914   | 19   | 9.30E-11 | 1.90E-07 | 0.15356   | 0.2727   | 4.22E-09    | Intragenic | NM_001100784 | Gjc2     |
| 10  | 45391208 | 45391386 | 1        | -0.126915  | 5    | 0.012    | 0.0055   | 0.065649  | 0.19256  | 0.026435197 | Intragenic | NM_001107005 | Wnt3a    |
| 10  | 45492204 | 45492278 | 1        | -0.08945   | 5    | 0.0058   | 0.015    | 0.14763   | 0.23708  | 0.014624129 | Intergenic | NA           | NA       |
| 10  | 46047793 | 46047924 | 1        | -0.229299  | 6    | 7.50E-07 | 2.30E-05 | 0.15208   | 0.38138  | 9.35E-06    | Intergenic | NA           | NA       |
| 10  | 46428103 | 46428283 | 1        | -0.136924  | 5    | 0.0045   | 0.0054   | 0.17249   | 0.30942  | 0.011905878 | Intragenic | NM_001108277 | Tom1l2   |
| 10  | 46721724 | 46721859 | 1        | -0.178154  | 5    | 0.00023  | 0.0031   | 0.093381  | 0.27153  | 0.00102405  | Intragenic | NM_001304613 | Llg1     |
| 10  | 47427925 | 47428052 | 1        | -0.242112  | 5    | 0.00015  | 0.00014  | 0.16462   | 0.40673  | 0.000724207 | Intragenic | NM_001014118 | Slc47a1  |
| 10  | 47754636 | 47754813 | 1        | -0.095401  | 17   | 1.00E-07 | 1.70E-05 | 0.12918   | 0.22458  | 1.72E-06    | Intragenic | NM_001107007 | Slc5a10  |
| 10  | 48107757 | 48108038 | 0.021    | -0.184702  | 13   | 3.50E-11 | 6.50E-08 | 0.098993  | 0.28369  | 1.72E-09    | Intragenic | NM_001039017 | Specc1   |
| 10  | 48653958 | 48654056 | 1        | -0.123711  | 5    | 0.0013   | 0.00098  | 0.28513   | 0.40884  | 0.004277683 | Intergenic | NA           | NA       |
| 10  | 48664755 | 48664940 | 1        | -0.166993  | 6    | 4.90E-05 | 0.0027   | 0.13622   | 0.30321  | 0.000290925 | TSS        | NM_138895    | Ubb      |
| 10  | 48776588 | 48776663 | 1        | -0.205233  | 6    | 0.00028  | 0.0024   | 0.55487   | 0.76011  | 0.001214715 | Intergenic | NA           | NA       |
| 10  | 50138594 | 50139037 | 4.90E-05 | -0.112889  | 31   | 4.50E-14 | 1.50E-10 | 0.15359   | 0.26648  | 6.64E-12    | Intragenic | NM_001191646 | Hs3st3b1 |
| 10  | 50167207 | 50167298 | 1        | -0.128576  | 5    | 0.0032   | 0.0055   | 0.12805   | 0.25662  | 0.008990975 | Intragenic | NM_001191646 | Hs3st3b1 |
| 10  | 50778934 | 50779357 | 0.0012   | -0.109354  | 29   | 7.10E-14 | 3.80E-09 | 0.15945   | 0.2688   | 8.05E-12    | Intragenic | NM_001172067 | Hs3st3a1 |
| 10  | 51213073 | 51213181 | 1        | -0.207949  | 8    | 0.00053  | 0.0039   | 0.39726   | 0.60521  | 0.002069204 | Intergenic | NA           | NA       |
| 10  | 52074738 | 52074807 | 1        | -0.240124  | 5    | 7.00E-05 | 0.0017   | 0.40616   | 0.64629  | 0.000386221 | Intergenic | NA           | NA       |
| 10  | 53395462 | 53395615 | 1        | -0.111163  | 8    | 0.00016  | 0.0052   | 0.14535   | 0.25652  | 0.000769396 | Intragenic | NM_012604    | Myh3     |
| 10  | 54277906 | 54278148 | 1        | -0.158347  | 7    | 0.00058  | 0.0082   | 0.35558   | 0.51393  | 0.002226081 | Intragenic | NM_031656    | Stx8     |
| 10  | 54361765 | 54361816 | 0.0023   | -0.32991   | 7    | 2.80E-10 | 7.10E-09 | 0.11738   | 0.44729  | 1.12E-08    | Intragenic | NM_031656    | Stx8     |
| 10  | 54439195 | 54439369 | 1        | -0.208687  | 5    | 0.0008   | 0.00094  | 0.1636    | 0.37229  | 0.002866309 | Intragenic | NM_031656    | Stx8     |
| 10  | 54724832 | 54724980 | 1        | -0.054565  | 8    | 4.20E-05 | 0.00059  | 0.047126  | 0.10169  | 0.00025452  | Intergenic | NA           | NA       |
| 10  | 55142969 | 55143044 | 1        | -0.245103  | 5    | 7.10E-06 | 7.10E-05 | 0.48656   | 0.73166  | 5.86E-05    | Intragenic | NM_031520    | Myh10    |
| 10  | 55285673 | 55285806 | 1        | -0.112535  | 7    | 0.0012   | 0.013    | 0.11792   | 0.23045  | 0.004013471 | TSS        | NM_001105789 | Arhgef15 |
| 10  | 55742263 | 55742314 | 1        | -0.160075  | 5    | 0.0019   | 0.015    | 0.27924   | 0.43931  | 0.005855937 | TSS        | NM_001128155 | Tmem88   |
| 10  | 55743858 | 55743931 | 1        | -0.100228  | 8    | 0.0042   | 0.018    | 0.14952   | 0.24975  | 0.011250869 | TSS        | NM_001128155 | Tmem88   |
| 10  | 55750155 | 55750284 | 1        | -0.188033  | 8    | 0.0062   | 0.066    | 0.39945   | 0.58749  | 0.015570617 | TSS        | NM_001108829 | Kdm6b    |
| 10  | 56005788 | 56005932 | 1        | -0.19588   | 5    | 0.00017  | 0.0055   | 0.19106   | 0.38694  | 0.000806192 | TSS        | NM_001108830 | Sox15    |
| 10  | 56045274 | 56045367 | 1        | -0.072156  | 5    | 4.40E-05 | 7.00E-05 | 0.0071429 | 0.079299 | 0.000263321 | TSS        | NM_001001513 | Tnfsf12  |
| 10  | 56200258 | 56200302 | 1        | -0.229032  | 7    | 6.60E-06 | 4.80E-05 | 0.42507   | 0.65411  | 5.57E-05    | TSS        | NM_001012139 | Plscr3   |
| 10  | 56292248 | 56292418 | 1        | -0.084494  | 8    | 0.0033   | 0.035    | 0.13184   | 0.21633  | 0.009256793 | TSS        | NM_001305212 | Ybx2     |
| 10  | 56362353 | 56362653 | 1        | -0.214372  | 5    | 0.0019   | 0.00053  | 0.37108   | 0.58545  | 0.005855937 | Intragenic | NM_001172056 | Dvl2     |
| 10  | 56381075 | 56381277 | 1        | -0.129768  | 12   | 5.60E-05 | 0.0053   | 0.10347   | 0.23324  | 0.000320912 | Intragenic | NM_019621    | Dlg4     |
| 10  | 56411441 | 56411559 | 1        | -0.086007  | 5    | 0.025    | 0.015    | 0.42488   | 0.51089  | 0.047453009 | Intergenic | NA           | NA       |
| 10  | 56569193 | 56569242 | 1        | -0.055834  | 5    | 0.0024   | 0.0055   | 0.003125  | 0.058959 | 0.00705499  | TSS        | NM_001105797 | Slc16a11 |
| 10  | 56570099 | 56570291 | 1        | -0.14486   | 9    | 9.10E-06 | 0.00012  | 0.049413  | 0.19427  | 7.32E-05    | Intragenic | NM_001105797 | Slc16a11 |
| 10  | 56828022 | 56828286 | 0.6      | -0.16985   | 17   | 6.40E-10 | 1.90E-06 | 0.18668   | 0.35653  | 2.26E-08    | Intragenic | NM_001105800 | Zmynd15  |



| chr | start    | stop     | q-value  | methy.diff | CpGs | pMWU     | p2DKS    | MCWLS    | MCWHS   | pMWU.fdr    | cgi.type   | transcript   | gene      |
|-----|----------|----------|----------|------------|------|----------|----------|----------|---------|-------------|------------|--------------|-----------|
| 10  | 56985033 | 56985069 | 1        | -0.076999  | 5    | 4.40E-05 | 7.10E-05 | 0.048291 | 0.12529 | 0.000263321 | TSS        | NM_001145538 | LOC687707 |
| 10  | 58191752 | 58191852 | 1        | -0.140729  | 5    | 0.0094   | 0.059    | 0.23297  | 0.3737  | 0.021723038 | Intergenic | NA           | NA        |
| 10  | 58360969 | 58361183 | 1        | -0.141277  | 6    | 0.0078   | 0.026    | 0.4184   | 0.55967 | 0.018765285 | Intergenic | NA           | NA        |
| 10  | 58573992 | 58574084 | 1        | -0.092941  | 5    | 0.00039  | 0.0018   | 0.036531 | 0.12947 | 0.001587612 | TSS        | NM_170668    | Slc13a5   |
| 10  | 58889989 | 58890022 | 1        | 0.055305   | 5    | 1.90E-05 | 0.00098  | 0.98612  | 0.93082 | 0.000131674 | Intergenic | NA           | NA        |
| 10  | 61402943 | 61403024 | 1        | -0.196124  | 5    | 1.80E-07 | 3.40E-06 | 0.075799 | 0.27192 | 2.78E-06    | Intergenic | NA           | NA        |
| 10  | 61723035 | 61723052 | 1        | -0.062451  | 5    | 0.0022   | 0.0093   | 0.095593 | 0.15804 | 0.006578104 | Intragenic | NM_001107021 | Hic1      |
| 10  | 61723346 | 61723596 | 1        | -0.078136  | 26   | 0.001    | 0.016    | 0.15372  | 0.2146  | 0.003452169 | TSS        | NM_001107021 | Hic1      |
| 10  | 61770721 | 61770827 | 1        | -0.138642  | 5    | 0.00039  | 0.0054   | 0.10328  | 0.24193 | 0.001587612 | Intragenic | NM_181377    | Rtn4r1    |
| 10  | 61978684 | 61978759 | 1        | -0.169583  | 5    | 0.0019   | 0.0092   | 0.32355  | 0.49313 | 0.005855937 | Intergenic | NA           | NA        |
| 10  | 61987065 | 61987177 | 1        | -0.205     | 5    | 1.50E-05 | 0.00098  | 0.21185  | 0.41685 | 0.000109113 | TSS        | NM_001011892 | Serpinf2  |
| 10  | 62192720 | 62193041 | 1        | -0.051868  | 18   | 2.50E-05 | 0.0097   | 0.056538 | 0.10841 | 0.000166164 | Intergenic | NA           | NA        |
| 10  | 62193058 | 62193308 | 1        | -0.078136  | 26   | 0.001    | 0.016    | 0.15372  | 0.2146  | 0.003452169 | Intergenic | NA           | NA        |
| 10  | 62388165 | 62388328 | 0.054    | -0.163947  | 16   | 1.50E-09 | 1.70E-07 | 0.30196  | 0.4659  | 4.72E-08    | Intergenic | NA           | NA        |
| 10  | 63250329 | 63250390 | 1        | -0.086092  | 5    | 0.011    | 0.025    | 0.11976  | 0.20585 | 0.02463877  | Intergenic | NA           | NA        |
| 10  | 63428500 | 63428929 | 1        | -0.151715  | 16   | 8.70E-08 | 7.10E-06 | 0.16493  | 0.31665 | 1.57E-06    | Intragenic | NM_001105814 | Abr       |
| 10  | 63568405 | 63568528 | 1        | -0.205003  | 12   | 3.10E-07 | 0.0002   | 0.26532  | 0.47032 | 4.47E-06    | Intragenic | NM_001108285 | Nxn       |
| 10  | 63810583 | 63810813 | 9.80E-07 | -0.083478  | 27   | 4.70E-14 | 3.00E-12 | 0.093373 | 0.17685 | 6.64E-12    | TSS        | NM_001007611 | Fam101b   |
| 10  | 63889955 | 63890138 | 1        | -0.160468  | 10   | 0.00087  | 0.0049   | 0.34015  | 0.50062 | 0.003092094 | Intergenic | NA           | NA        |
| 10  | 64496475 | 64496711 | 1        | -0.202939  | 8    | 3.90E-07 | 0.00014  | 0.15201  | 0.35495 | 5.46E-06    | Intergenic | NA           | NA        |
| 10  | 64646593 | 64646736 | 1        | -0.247083  | 5    | 0.0063   | 0.0018   | 0.34679  | 0.59387 | 0.015629046 | Intragenic | NM_001107023 | Rab11fip4 |
| 10  | 65078009 | 65078064 | 1        | -0.295299  | 5    | 0.00044  | 0.0054   | 0.3161   | 0.61139 | 0.001760146 | Intergenic | NA           | NA        |
| 10  | 65078100 | 65078456 | 1        | -0.123095  | 5    | 4.40E-05 | 0.00027  | 0.056133 | 0.17923 | 0.000263321 | Intergenic | NA           | NA        |
| 10  | 65296312 | 65296561 | 1        | -0.137409  | 5    | 0.015    | 0.18     | 0.21356  | 0.35097 | 0.031584896 | Intragenic | NM_001108284 | Ksr1      |
| 10  | 65319966 | 65320215 | 1        | -0.127953  | 5    | 0.023    | 0.18     | 0.22302  | 0.35097 | 0.04441443  | Intergenic | NA           | NA        |
| 10  | 65962005 | 65962242 | 1        | -0.106918  | 5    | 0.013    | 0.025    | 0.32628  | 0.43319 | 0.028097302 | Intragenic | NM_031746    | Slc13a2   |
| 10  | 65974878 | 65975119 | 1        | -0.248131  | 7    | 2.00E-06 | 0.00029  | 0.15751  | 0.40564 | 2.10E-05    | Intragenic | NM_031746    | Slc13a2   |
| 10  | 65978755 | 65978988 | 1        | -0.132226  | 11   | 0.0039   | 0.061    | 0.33119  | 0.46342 | 0.010605635 | Intragenic | NM_031746    | Slc13a2   |
| 10  | 66207332 | 66207549 | 1        | -0.209241  | 5    | 5.00E-05 | 0.00053  | 0.099999 | 0.30924 | 0.000291675 | Intragenic | NM_001105804 | Nek8      |
| 10  | 66213968 | 66214048 | 1        | -0.121377  | 5    | 0.025    | 0.088    | 0.19653  | 0.3179  | 0.047453009 | Intragenic | NM_001107017 | Traf4     |
| 10  | 66479859 | 66479923 | 1        | -0.078492  | 5    | 0.0041   | 0.0055   | 0.8239   | 0.90239 | 0.01100507  | Intergenic | NA           | NA        |
| 10  | 66547792 | 66547948 | 1        | -0.133021  | 5    | 7.00E-05 | 0.0032   | 0.10701  | 0.24003 | 0.000386221 | Intragenic | NM_001172137 | Myo18a    |
| 10  | 66555516 | 66555724 | 1        | -0.166067  | 6    | 3.10E-05 | 9.10E-05 | 0.081927 | 0.24799 | 0.000197418 | Intragenic | NM_001172137 | Myo18a    |
| 10  | 66560005 | 66560555 | 1        | -0.1695    | 13   | 7.10E-08 | 2.60E-05 | 0.15349  | 0.32299 | 1.32E-06    | Intragenic | NM_001172137 | Myo18a    |
| 10  | 66609571 | 66609780 | 1        | -0.243101  | 7    | 7.00E-08 | 3.00E-05 | 0.12396  | 0.36706 | 1.30E-06    | Intragenic | NM_001172137 | Myo18a    |
| 10  | 66754391 | 66754493 | 1        | -0.084325  | 6    | 2.30E-06 | 8.80E-05 | 0.02403  | 0.10836 | 2.36E-05    | Intragenic | NM_001105754 | Sez6      |
| 10  | 67321661 | 67321732 | 1        | -0.235058  | 5    | 5.60E-05 | 0.00028  | 0.253    | 0.48806 | 0.000320912 | Intragenic | NM_001012010 | Rnf135    |
| 10  | 67327963 | 67328065 | 1        | -0.151624  | 5    | 0.0049   | 0.003    | 0.22502  | 0.37665 | 0.012753585 | Intragenic | NM_001012010 | Rnf135    |

| chr | start    | stop     | q-value | methy.diff | CpGs | pMWU     | p2DKS    | MCWLS    | MCWHS    | pMWU.fdr    | cgi.type   | transcript                             | gene                 |
|-----|----------|----------|---------|------------|------|----------|----------|----------|----------|-------------|------------|----------------------------------------|----------------------|
| 10  | 67956885 | 67957115 | 1       | -0.207471  | 7    | 0.00012  | 0.0013   | 0.12509  | 0.33256  | 0.000603617 | Intragenic | NM_001034014:NM_012892                 | Asic2:Asic2          |
| 10  | 68996513 | 68996623 | 1       | -0.153334  | 5    | 0.00015  | 0.0018   | 0.20248  | 0.35582  | 0.000724207 | Intergenic | NA                                     | NA                   |
| 10  | 70084086 | 70084124 | 1       | -0.065066  | 5    | 0.017    | 0.0091   | 0.76941  | 0.83448  | 0.034796287 | Intergenic | NA                                     | NA                   |
| 10  | 70091372 | 70091473 | 1       | -0.097057  | 5    | 0.008    | 0.039    | 0.5233   | 0.62036  | 0.019059477 | Intergenic | NA                                     | NA                   |
| 10  | 70278750 | 70278826 | 1       | -0.072952  | 5    | 0.012    | 0.0055   | 0.11769  | 0.19064  | 0.026435197 | TSS        | NM_001105823                           | Gas2l2               |
| 10  | 70279915 | 70280031 | 1       | -0.22426   | 5    | 9.80E-05 | 0.0032   | 0.30837  | 0.53263  | 0.000512474 | TSS        | NM_001105823                           | Gas2l2               |
| 10  | 70727736 | 70727883 | 1       | -0.139867  | 5    | 0.00011  | 3.30E-05 | 0.042706 | 0.18257  | 0.000565143 | Intergenic | NA                                     | NA                   |
| 10  | 70777350 | 70777466 | 1       | -0.056296  | 7    | 0.00043  | 0.00047  | 0.024749 | 0.081045 | 0.001736911 | TSS        | NM_001308148:NM_001308149:NM_013103    | Hnf1b:Hnf1b:Hnf1b    |
| 10  | 71106945 | 71107021 | 1       | -0.072952  | 5    | 0.012    | 0.0055   | 0.11769  | 0.19064  | 0.026435197 | TSS        | NM_001105823                           | Gas2l2               |
| 10  | 71108110 | 71108226 | 1       | -0.22426   | 5    | 9.80E-05 | 0.0032   | 0.30837  | 0.53263  | 0.000512474 | TSS        | NM_001105823                           | Gas2l2               |
| 10  | 71297023 | 71297076 | 0.00024 | -0.131154  | 9    | 1.40E-12 | 7.50E-10 | 0.04166  | 0.17281  | 1.04E-10    | TSS        | NM_001270836:NM_001270835:NM_001079893 | Dusp14:Dusp14:Dusp14 |
| 10  | 71756459 | 71756600 | 1       | -0.062452  | 7    | 0.0014   | 0.013    | 0.03531  | 0.097762 | 0.004540837 | TSS        | NM_145880                              | Lhx1                 |
| 10  | 71995542 | 71995740 | 1       | -0.177235  | 5    | 0.0014   | 0.0093   | 0.40442  | 0.58165  | 0.004540837 | Intergenic | NA                                     | NA                   |
| 10  | 72189957 | 72190006 | 1       | -0.324559  | 6    | 2.10E-06 | 0.00028  | 0.3808   | 0.70536  | 2.20E-05    | Intergenic | NA                                     | NA                   |
| 10  | 73152209 | 73152256 | 1       | -0.156584  | 5    | 0.0063   | 0.038    | 0.3333   | 0.48989  | 0.015629046 | Intragenic | NM_001173430                           | Bcas3                |
| 10  | 73180555 | 73180652 | 1       | -0.061046  | 8    | 7.90E-05 | 0.00088  | 0.068778 | 0.12982  | 0.000427247 | Intergenic | NA                                     | NA                   |
| 10  | 73188333 | 73188401 | 1       | -0.060625  | 5    | 0.016    | 0.088    | 0.10269  | 0.16331  | 0.033288089 | Intragenic | NM_001107033                           | Tbx2                 |
| 10  | 73235109 | 73235158 | 1       | -0.124854  | 5    | 0.025    | 0.25     | 0.42023  | 0.54508  | 0.047453009 | TSS        | NM_001107034                           | Tbx4                 |
| 10  | 73239264 | 73239277 | 1       | 0.065712   | 5    | 0.0008   | 0.0055   | 0.13212  | 0.066412 | 0.002866309 | Intragenic | NM_001107034                           | Tbx4                 |
| 10  | 74171218 | 74171355 | 1       | -0.089358  | 5    | 0.01     | 0.015    | 0.052223 | 0.14158  | 0.02275947  | Intergenic | NA                                     | NA                   |
| 10  | 74589222 | 74589278 | 1       | -0.141006  | 5    | 0.0016   | 0.0017   | 0.4131   | 0.55411  | 0.005100053 | Intergenic | NA                                     | NA                   |
| 10  | 75029690 | 75030671 | 0.15    | -0.157629  | 27   | 4.00E-09 | 4.50E-07 | 0.25522  | 0.41284  | 1.08E-07    | Intergenic | NA                                     | NA                   |
| 10  | 75828170 | 75828360 | 1       | -0.211737  | 5    | 0.011    | 0.038    | 0.33991  | 0.55164  | 0.02463877  | Intragenic | NM_001108286                           | Ypel2                |
| 10  | 75929984 | 75930166 | 1       | -0.132907  | 10   | 0.00025  | 0.02     | 0.36496  | 0.49787  | 0.001103692 | Intergenic | NA                                     | NA                   |
| 10  | 77402097 | 77402325 | 1       | -0.123303  | 5    | 0.0045   | 0.025    | 0.22586  | 0.34916  | 0.011905878 | Intragenic | NM_001017479                           | Tmem100              |
| 10  | 77720017 | 77720068 | 1       | -0.18131   | 5    | 7.80E-05 | 0.00014  | 0.097275 | 0.27859  | 0.000422981 | Intergenic | NA                                     | NA                   |
| 10  | 80990220 | 80990359 | 1       | -0.157911  | 5    | 0.0058   | 0.015    | 0.1339   | 0.29181  | 0.014624129 | Intergenic | NA                                     | NA                   |
| 10  | 81584803 | 81584898 | 1       | -0.058913  | 5    | 0.00012  | 0.00098  | 0.029807 | 0.08872  | 0.000603617 | Intragenic | NM_001108290                           | Spag9                |
| 10  | 81669654 | 81669767 | 1       | -0.17351   | 7    | 1.00E-05 | 0.00075  | 0.16352  | 0.33703  | 7.82E-05    | Intergenic | NA                                     | NA                   |
| 10  | 81672705 | 81672895 | 1       | -0.133226  | 8    | 4.10E-06 | 9.80E-06 | 0.06818  | 0.20141  | 3.78E-05    | Intergenic | NA                                     | NA                   |
| 10  | 81692868 | 81693297 | 1       | -0.157776  | 6    | 8.40E-06 | 0.00091  | 0.052734 | 0.21051  | 6.80E-05    | Intergenic | NA                                     | NA                   |
| 10  | 81775751 | 81775855 | 1       | -0.050178  | 5    | 0.013    | 0.039    | 0.07967  | 0.12985  | 0.028097302 | Intergenic | NA                                     | NA                   |
| 10  | 82111869 | 82112217 | 1       | -0.101354  | 12   | 0.0085   | 0.11     | 0.25992  | 0.36128  | 0.020154795 | TSS        | NM_019164                              | Chad                 |
| 10  | 82237760 | 82237859 | 1       | -0.130539  | 5    | 0.00039  | 0.015    | 0.47557  | 0.60611  | 0.001587612 | Intergenic | NA                                     | NA                   |

| chr | start    | stop     | q-value  | methy.diff | CpGs | pMWU     | p2DKS    | MCWLS    | MCWHS    | pMWU.fdr    | cgi.type   | transcript             | gene          |
|-----|----------|----------|----------|------------|------|----------|----------|----------|----------|-------------|------------|------------------------|---------------|
| 10  | 82241432 | 82241547 | 1        | -0.117551  | 7    | 0.00083  | 0.0074   | 0.4162   | 0.53375  | 0.002961434 | Intergenic | NA                     | NA            |
| 10  | 82549998 | 82550068 | 1        | -0.186147  | 5    | 8.80E-05 | 0.00014  | 0.21424  | 0.40039  | 0.000466886 | Intergenic | NA                     | NA            |
| 10  | 82661577 | 82661767 | 0.39     | -0.258785  | 7    | 1.70E-07 | 1.20E-06 | 0.10447  | 0.36325  | 2.66E-06    | Intragenic | NM_030872              | Pdk2          |
| 10  | 83162750 | 83162816 | 1        | -0.101118  | 6    | 0.005    | 0.018    | 0.15162  | 0.25274  | 0.012977322 | Intergenic | NA                     | NA            |
| 10  | 83361689 | 83361730 | 1        | -0.192921  | 5    | 0.0017   | 0.015    | 0.34125  | 0.53417  | 0.005339493 | TSS        | NM_001080207           | Zfp652        |
| 10  | 83446429 | 83446614 | 2.20E-10 | -0.149269  | 17   | 4.20E-14 | 6.90E-16 | 0.061058 | 0.21033  | 6.64E-12    | Intragenic | NM_001105833           | Phospho1      |
| 10  | 83482295 | 83482352 | 1        | -0.202672  | 5    | 0.0029   | 0.0031   | 0.5224   | 0.72508  | 0.008293503 | Intergenic | NA                     | NA            |
| 10  | 83612913 | 83612974 | 1        | -0.091902  | 5    | 0.021    | 0.088    | 0.16398  | 0.25589  | 0.041207871 | Intragenic | NM_175594              | Igf2bp1       |
| 10  | 83734529 | 83734626 | 1        | -0.113696  | 5    | 0.0029   | 0.059    | 0.16524  | 0.27894  | 0.008293503 | Intergenic | NA                     | NA            |
| 10  | 83915474 | 83915767 | 1        | -0.08925   | 17   | 0.0034   | 0.068    | 0.28867  | 0.37792  | 0.009519525 | TSS        | NR_032269              | Mir196c       |
| 10  | 83955941 | 83956026 | 1        | -0.060577  | 5    | 0.017    | 0.13     | 0.073035 | 0.13361  | 0.034796287 | TSS        | NM_001191925           | Hoxb5         |
| 10  | 83956342 | 83956412 | 0.11     | -0.179226  | 10   | 1.10E-09 | 3.30E-07 | 0.18368  | 0.3629   | 3.60E-08    | TSS        | NM_001191925:NR_132637 | Hoxb5:Hoxb5os |
| 10  | 83962043 | 83962182 | 1        | -0.091307  | 9    | 0.00097  | 0.018    | 0.1212   | 0.21251  | 0.003366009 | Intergenic | NA                     | NA            |
| 10  | 83971577 | 83971793 | 3.50E-06 | -0.052917  | 20   | 4.50E-14 | 1.10E-11 | 0.014299 | 0.067216 | 6.64E-12    | TSS        | NM_001100787           | Hoxb4         |
| 10  | 83978347 | 83978434 | 1        | -0.176528  | 5    | 0.0041   | 0.015    | 0.34816  | 0.52469  | 0.01100507  | Intergenic | NA                     | NA            |
| 10  | 83984785 | 83984858 | 1        | -0.133224  | 5    | 0.002    | 0.015    | 0.23638  | 0.36961  | 0.006079939 | Intergenic | NA                     | NA            |
| 10  | 83996121 | 83996283 | 0.01     | -0.231109  | 7    | 2.30E-08 | 3.20E-08 | 0.168    | 0.3991   | 5.20E-07    | TSS        | NM_001107042           | Hoxb3         |
| 10  | 84006238 | 84006485 | 0.001    | -0.121415  | 18   | 1.20E-13 | 3.10E-09 | 0.051882 | 0.1733   | 1.24E-11    | Intergenic | NA                     | NA            |
| 10  | 84018051 | 84018167 | 1        | -0.194792  | 9    | 3.80E-05 | 0.0018   | 0.46823  | 0.66302  | 0.000235506 | Intergenic | NA                     | NA            |
| 10  | 84067490 | 84067600 | 1        | -0.156511  | 5    | 0.0045   | 0.088    | 0.28722  | 0.44373  | 0.011905878 | Intergenic | NA                     | NA            |
| 10  | 84067640 | 84067758 | 1        | -0.258108  | 5    | 2.40E-05 | 3.40E-05 | 0.19024  | 0.44834  | 0.000160049 | Intergenic | NA                     | NA            |
| 10  | 84082229 | 84082289 | 1        | -0.170417  | 5    | 0.0032   | 0.015    | 0.23515  | 0.40556  | 0.008990975 | Intergenic | NA                     | NA            |
| 10  | 84092400 | 84092683 | 1        | -0.161463  | 5    | 0.0008   | 0.00097  | 0.11466  | 0.27612  | 0.002866309 | Intergenic | NA                     | NA            |
| 10  | 84158822 | 84158949 | 1        | -0.200363  | 5    | 0.00023  | 0.00053  | 0.15707  | 0.35743  | 0.00102405  | Intragenic | NM_173311              | Skap1         |
| 10  | 84255495 | 84255592 | 1        | -0.060444  | 9    | 0.0024   | 0.0084   | 0.89035  | 0.95079  | 0.00705499  | Intragenic | NM_173311              | Skap1         |
| 10  | 84276941 | 84277021 | 1        | -0.051718  | 5    | 0.021    | 0.18     | 0.05249  | 0.10421  | 0.041207871 | Intragenic | NM_173311              | Skap1         |
| 10  | 84280285 | 84280366 | 1        | -0.198581  | 5    | 6.20E-05 | 0.00052  | 0.43282  | 0.6314   | 0.000349462 | Intragenic | NM_173311              | Skap1         |
| 10  | 84298872 | 84298977 | 1        | -0.172558  | 5    | 0.021    | 0.088    | 0.39966  | 0.57222  | 0.041207871 | Intragenic | NM_173311              | Skap1         |
| 10  | 84489469 | 84489710 | 1        | -0.099386  | 7    | 0.011    | 0.038    | 0.17418  | 0.27356  | 0.02463877  | Intergenic | NA                     | NA            |
| 10  | 84657732 | 84657935 | 0.27     | -0.194926  | 8    | 8.40E-09 | 8.30E-07 | 0.084471 | 0.2794   | 2.15E-07    | Intergenic | NA                     | NA            |
| 10  | 84731751 | 84731790 | 1        | -0.199938  | 5    | 0.00054  | 0.0032   | 0.2868   | 0.48673  | 0.002077867 | Intergenic | NA                     | NA            |
| 10  | 84863672 | 84864097 | 8.90E-26 | -0.143177  | 42   | 4.50E-14 | 2.70E-31 | 0.042522 | 0.1857   | 6.64E-12    | Intragenic | NM_172021              | Tbkbp1        |
| 10  | 85064196 | 85064341 | 1        | -0.108955  | 7    | 0.0017   | 0.0079   | 0.13087  | 0.23982  | 0.005339493 | Intergenic | NA                     | NA            |
| 10  | 85194399 | 85194536 | 1        | -0.184049  | 8    | 0.0011   | 0.0059   | 0.42973  | 0.61378  | 0.003737263 | Intergenic | NA                     | NA            |
| 10  | 85232503 | 85232534 | 1        | -0.209275  | 5    | 8.80E-05 | 0.0092   | 0.14136  | 0.35063  | 0.000466886 | Intergenic | NA                     | NA            |
| 10  | 85232553 | 85232598 | 1        | -0.266261  | 5    | 1.30E-06 | 3.40E-06 | 0.15146  | 0.41773  | 1.46E-05    | Intergenic | NA                     | NA            |
| 10  | 85232617 | 85232878 | 4.60E-05 | -0.115835  | 36   | 4.50E-14 | 1.40E-10 | 0.14207  | 0.25791  | 6.64E-12    | Intergenic | NA                     | NA            |
| 10  | 85254713 | 85254837 | 1        | -0.179226  | 7    | 4.50E-05 | 0.0021   | 0.28753  | 0.46675  | 0.000268503 | Intragenic | NM_019378              | Srcin1        |

| chr | start    | stop     | q-value | methy.diff | CpGs | pMWU     | p2DKS    | MCWLS    | MCWHS    | pMWU.fdr    | cgi.type   | transcript                       | gene             |
|-----|----------|----------|---------|------------|------|----------|----------|----------|----------|-------------|------------|----------------------------------|------------------|
| 10  | 85266212 | 85266287 | 1       | -0.107336  | 11   | 4.60E-06 | 0.0013   | 0.29214  | 0.39948  | 4.18E-05    | Intragenic | NM_019378                        | Srcin1           |
| 10  | 85267220 | 85267299 | 1       | -0.154496  | 5    | 0.015    | 0.088    | 0.37961  | 0.53411  | 0.031584896 | Intragenic | NM_019378                        | Srcin1           |
| 10  | 85275448 | 85275597 | 0.49    | -0.20107   | 6    | 4.90E-07 | 1.50E-06 | 0.07344  | 0.27451  | 6.54E-06    | Intragenic | NM_019378                        | Srcin1           |
| 10  | 85343930 | 85344319 | 1       | -0.103177  | 14   | 0.00013  | 0.01     | 0.12548  | 0.22865  | 0.000648758 | Intergenic | NA                               | NA               |
| 10  | 85361386 | 85361424 | 1       | -0.15859   | 5    | 1.50E-05 | 0.00014  | 0.11075  | 0.26934  | 0.000109113 | TSS        | NM_001109627                     | LOC691153        |
| 10  | 85361437 | 85361722 | 1       | -0.064131  | 25   | 4.10E-10 | 4.80E-06 | 0.049649 | 0.11378  | 1.53E-08    | TSS        | NM_001109627                     | LOC691153        |
| 10  | 85361742 | 85361767 | 1       | -0.054212  | 5    | 0.0008   | 0.0018   | 0.047099 | 0.10131  | 0.002866309 | TSS        | NM_001109627                     | LOC691153        |
| 10  | 85426914 | 85427016 | 1       | -0.270439  | 5    | 7.00E-05 | 0.0018   | 0.27355  | 0.54399  | 0.000386221 | Intergenic | NA                               | NA               |
| 10  | 85468276 | 85468555 | 1       | -0.217557  | 5    | 0.0038   | 0.0051   | 0.43601  | 0.65356  | 0.010352437 | Intragenic | NM_053550                        | Pip4k2b          |
| 10  | 85548751 | 85548862 | 1       | -0.223812  | 5    | 0.01     | 0.0017   | 0.25201  | 0.47582  | 0.02275947  | Intragenic | NM_032613                        | Laspl            |
| 10  | 85708072 | 85708151 | 1       | -0.083107  | 5    | 5.00E-05 | 0.00098  | 0.081572 | 0.16468  | 0.000291675 | Intragenic | NM_001107046                     | Plxdc1           |
| 10  | 85886180 | 85886338 | 1       | -0.168253  | 5    | 0.0068   | 0.024    | 0.19731  | 0.36557  | 0.016642688 | Intragenic | NM_022272                        | Fbxl20           |
| 10  | 86106885 | 86107153 | 1       | -0.179685  | 5    | 0.0045   | 0.024    | 0.25314  | 0.43283  | 0.011905878 | Intragenic | NM_138521                        | Ppp1r1b          |
| 10  | 86199341 | 86199494 | 1       | -0.259143  | 5    | 0.00029  | 0.0053   | 0.31144  | 0.57059  | 0.001239307 | Intragenic | NM_053403                        | Grb7             |
| 10  | 86361394 | 86361470 | 1       | -0.078441  | 5    | 0.0049   | 0.015    | 0.13982  | 0.21826  | 0.012753585 | Intergenic | NA                               | NA               |
| 10  | 86361947 | 86362015 | 1       | -0.050696  | 5    | 0.00072  | 0.0054   | 0.049251 | 0.099947 | 0.002634665 | Intergenic | NA                               | NA               |
| 10  | 86480184 | 86480255 | 1       | -0.269337  | 5    | 1.10E-06 | 7.60E-06 | 0.14355  | 0.41289  | 1.27E-05    | Intragenic | NM_031134:NM_145775:NM_001113422 | Thra:Nr1d1:Nr1d1 |
| 10  | 86572761 | 86573160 | 1       | -0.072865  | 5    | 0.0017   | 0.015    | 0.057196 | 0.13006  | 0.005339493 | Intergenic | NA                               | NA               |
| 10  | 86626512 | 86626586 | 1       | -0.162035  | 5    | 0.00023  | 0.0055   | 0.17418  | 0.33621  | 0.00102405  | Intragenic | NM_001108298                     | Cdc6             |
| 10  | 86632299 | 86632535 | 1       | -0.164198  | 7    | 0.0059   | 0.039    | 0.17687  | 0.34107  | 0.014851341 | Intergenic | NA                               | NA               |
| 10  | 86641780 | 86641958 | 1       | -0.06683   | 14   | 0.00017  | 0.0071   | 0.034907 | 0.08279  | 0.000806192 | Intergenic | NA                               | NA               |
| 10  | 86641978 | 86642010 | 1       | -0.083848  | 5    | 0.00014  | 0.00053  | 0.016954 | 0.1008   | 0.000684451 | Intergenic | NA                               | NA               |
| 10  | 86678406 | 86679796 | 0.024   | -0.152798  | 32   | 1.90E-11 | 7.40E-08 | 0.1752   | 0.328    | 9.88E-10    | Intragenic | NM_031528                        | Rara             |
| 10  | 87064349 | 87064432 | 1       | -0.200787  | 7    | 8.40E-05 | 0.00082  | 0.2642   | 0.46499  | 0.000451848 | Intergenic | NA                               | NA               |
| 10  | 88056699 | 88056781 | 1       | -0.215759  | 5    | 0.0038   | 0.0018   | 0.44735  | 0.66311  | 0.010352437 | Intragenic | NM_024133:NM_177982              | Hap1:Hap1        |
| 10  | 88077417 | 88077512 | 1       | -0.185634  | 6    | 0.0065   | 0.027    | 0.4939   | 0.67954  | 0.016085358 | Intragenic | NM_031047                        | Jup              |
| 10  | 88093818 | 88094423 | 1       | -0.184612  | 11   | 0.00018  | 0.0013   | 0.23805  | 0.42266  | 0.000849258 | Intragenic | NM_031047                        | Jup              |
| 10  | 88096537 | 88096669 | 1       | -0.159269  | 5    | 0.02     | 0.038    | 0.14406  | 0.30333  | 0.039778219 | Intragenic | NM_031047                        | Jup              |
| 10  | 88336100 | 88336290 | 1       | -0.171413  | 7    | 0.0017   | 0.0035   | 0.31206  | 0.48347  | 0.005339493 | Intergenic | NA                               | NA               |
| 10  | 88371949 | 88372005 | 1       | -0.073765  | 5    | 0.0016   | 0.025    | 0.086507 | 0.16027  | 0.005100053 | Intergenic | NA                               | NA               |
| 10  | 88372056 | 88372093 | 1       | 0.149203   | 5    | 6.20E-05 | 0.00014  | 0.2542   | 0.105    | 0.000349462 | Intergenic | NA                               | NA               |
| 10  | 88527425 | 88527561 | 1       | -0.241521  | 5    | 0.0063   | 0.015    | 0.18698  | 0.4285   | 0.015629046 | Intergenic | NA                               | NA               |
| 10  | 88660343 | 88660412 | 1       | -0.163827  | 5    | 0.00065  | 0.015    | 0.12274  | 0.28657  | 0.002426546 | Intragenic | NM_001105841                     | Ptrf             |
| 10  | 88730071 | 88730163 | 1       | -0.381996  | 5    | 5.60E-07 | 7.50E-06 | 0.23935  | 0.62135  | 7.29E-06    | Intragenic | NM_031604                        | Atp6v0a1         |
| 10  | 88786397 | 88786710 | 1       | -0.175645  | 15   | 2.30E-09 | 4.70E-06 | 0.15187  | 0.32752  | 6.77E-08    | TSS        | NM_012851                        | Hsd17b1          |
| 10  | 88876276 | 88876341 | 1       | -0.121595  | 5    | 0.015    | 0.024    | 0.56671  | 0.6883   | 0.031584896 | Intragenic | NM_001037202                     | Plekhh3          |

| chr | start    | stop     | q-value  | methy.diff | CpGs | pMWU     | p2DKS    | MCWLS     | MCWHS    | pMWU.fdr    | cgi.type   | transcript                | gene             |
|-----|----------|----------|----------|------------|------|----------|----------|-----------|----------|-------------|------------|---------------------------|------------------|
| 10  | 88876360 | 88876381 | 1        | -0.191231  | 5    | 0.00054  | 0.0092   | 0.37687   | 0.5681   | 0.002077867 | Intragenic | NM_001037202              | Plekhh3          |
| 10  | 88876418 | 88876486 | 0.019    | -0.278146  | 10   | 5.30E-11 | 5.90E-08 | 0.23105   | 0.50919  | 2.50E-09    | Intragenic | NM_001037202              | Plekhh3          |
| 10  | 88886723 | 88886941 | 1        | -0.169037  | 6    | 0.00072  | 0.0045   | 0.25587   | 0.4249   | 0.002634665 | TSS        | NM_001108836:NM_032061    | Ccr10:Cntnap1    |
| 10  | 89376757 | 89376973 | 0.0022   | -0.131508  | 13   | 4.30E-11 | 6.90E-09 | 0.086388  | 0.2179   | 2.08E-09    | TSS        | NM_001107052              | Arl4d            |
| 10  | 89378775 | 89378891 | 1        | -0.144396  | 5    | 1.90E-05 | 0.00053  | 0.096543  | 0.24094  | 0.000131674 | Intergenic | NA                        | NA               |
| 10  | 89645692 | 89645811 | 1        | -0.052447  | 5    | 0.019    | 0.038    | 0.03645   | 0.088897 | 0.038322088 | Intergenic | NA                        | NA               |
| 10  | 89708792 | 89708823 | 1        | -0.172766  | 5    | 0.0008   | 0.00053  | 0.09342   | 0.26619  | 0.002866309 | TSS        | NM_001173376:NM_001134601 | Dusp3:RGD1565533 |
| 10  | 89875509 | 89875640 | 1        | -0.163365  | 5    | 0.00048  | 0.0093   | 0.11341   | 0.27677  | 0.001881331 | Intragenic | NM_001107053              | Nags             |
| 10  | 90136784 | 90136845 | 1        | -0.086801  | 5    | 3.70E-06 | 1.60E-05 | 0.058878  | 0.14568  | 3.46E-05    | Intragenic | NM_198758                 | Rundc3a          |
| 10  | 90172641 | 90172664 | 1        | -0.051866  | 5    | 0.0019   | 0.0055   | 0.0019231 | 0.053789 | 0.005855937 | Intergenic | NA                        | NA               |
| 10  | 90172680 | 90172701 | 1        | -0.059904  | 5    | 0.0014   | 0.0055   | 0.0038647 | 0.063769 | 0.004540837 | Intergenic | NA                        | NA               |
| 10  | 90172711 | 90172993 | 1        | -0.116481  | 5    | 0.0035   | 0.015    | 0.035314  | 0.15179  | 0.009686665 | Intergenic | NA                        | NA               |
| 10  | 90172997 | 90173020 | 0.0053   | -0.228786  | 5    | 6.30E-08 | 1.70E-08 | 0.084574  | 0.31336  | 1.18E-06    | Intergenic | NA                        | NA               |
| 10  | 90173025 | 90173047 | 0.0057   | -0.189637  | 5    | 6.30E-08 | 1.80E-08 | 0.045546  | 0.23518  | 1.18E-06    | Intergenic | NA                        | NA               |
| 10  | 90173062 | 90173266 | 0.049    | -0.19847   | 21   | 9.90E-09 | 1.50E-07 | 0.073276  | 0.2186   | 2.48E-07    | Intergenic | NA                        | NA               |
| 10  | 90173281 | 90173430 | 3.60E-14 | -0.159484  | 16   | 4.20E-14 | 1.10E-19 | 0.032223  | 0.19171  | 6.64E-12    | Intergenic | NA                        | NA               |
| 10  | 90173460 | 90173481 | 1        | -0.159096  | 5    | 0.0013   | 0.0091   | 0.21088   | 0.36998  | 0.004277683 | Intergenic | NA                        | NA               |
| 10  | 90173508 | 90173541 | 1        | -0.232846  | 5    | 2.50E-06 | 0.00028  | 0.15446   | 0.3873   | 2.52E-05    | Intergenic | NA                        | NA               |
| 10  | 90173547 | 90173580 | 1        | -0.182025  | 5    | 0.00017  | 0.003    | 0.25663   | 0.43865  | 0.000806192 | Intergenic | NA                        | NA               |
| 10  | 90178327 | 90178451 | 1        | -0.060532  | 7    | 0.02     | 0.075    | 0.73976   | 0.80029  | 0.039778219 | Intergenic | NA                        | NA               |
| 10  | 90179768 | 90179893 | 1        | -0.127043  | 6    | 0.0083   | 0.026    | 0.18116   | 0.3082   | 0.019719474 | Intergenic | NA                        | NA               |
| 10  | 90213587 | 90213681 | 1        | -0.130584  | 8    | 0.0001   | 0.00037  | 0.43194   | 0.56252  | 0.000521119 | Intergenic | NA                        | NA               |
| 10  | 90344637 | 90344824 | 0.99     | -0.077108  | 15   | 6.70E-10 | 3.10E-06 | 0.058733  | 0.13584  | 2.33E-08    | TSS        | NM_172035                 | Fzd2             |
| 10  | 90344914 | 90344960 | 1        | -0.064596  | 5    | 0.0053   | 0.015    | 0.081466  | 0.14606  | 0.013591571 | TSS        | NM_172035                 | Fzd2             |
| 10  | 90368446 | 90368582 | 1        | -0.132597  | 5    | 0.025    | 0.18     | 0.237     | 0.3696   | 0.047453009 | Intergenic | NA                        | NA               |
| 10  | 90491082 | 90491119 | 1        | -0.199972  | 5    | 1.90E-05 | 3.40E-05 | 0.28724   | 0.48722  | 0.000131674 | Intergenic | NA                        | NA               |
| 10  | 90531751 | 90531931 | 1        | -0.142564  | 10   | 3.70E-05 | 0.00079  | 0.18023   | 0.32279  | 0.000229545 | Intragenic | NM_001108300              | Adam11           |
| 10  | 90559805 | 90559935 | 1        | -0.130386  | 5    | 0.0013   | 0.0092   | 0.7213    | 0.85168  | 0.004277683 | Intergenic | NA                        | NA               |
| 10  | 90560562 | 90560629 | 1        | -0.185133  | 5    | 0.011    | 0.18     | 0.3775    | 0.56263  | 0.02463877  | Intergenic | NA                        | NA               |
| 10  | 90587824 | 90587916 | 0.48     | -0.360881  | 5    | 8.50E-07 | 1.50E-06 | 0.26047   | 0.62135  | 1.03E-05    | Intragenic | NM_001085381              | Gjc1             |
| 10  | 90865372 | 90865520 | 1        | -0.119991  | 5    | 0.013    | 0.039    | 0.29828   | 0.41827  | 0.028097302 | Intergenic | NA                        | NA               |
| 10  | 90946764 | 90946819 | 1        | -0.165491  | 5    | 0.017    | 0.038    | 0.36162   | 0.52711  | 0.034796287 | Intragenic | NM_001105845              | Plcd3            |
| 10  | 90947294 | 90947411 | 1        | -0.110444  | 13   | 4.10E-05 | 0.008    | 0.15714   | 0.26758  | 0.000249467 | Intragenic | NM_001105845              | Plcd3            |
| 10  | 90960935 | 90961188 | 1        | -0.272032  | 8    | 1.20E-05 | 8.00E-05 | 0.21747   | 0.4895   | 9.15E-05    | TSS        | NM_001012013              | Acbd4            |
| 10  | 90961770 | 90962040 | 1        | -0.238994  | 6    | 3.50E-06 | 4.70E-05 | 0.15493   | 0.39392  | 3.33E-05    | Intragenic | NM_001012013              | Acbd4            |
| 10  | 90968860 | 90968943 | 1        | -0.195757  | 5    | 0.0041   | 3.40E-05 | 0.2232    | 0.41896  | 0.01100507  | Intergenic | NA                        | NA               |
| 10  | 91011048 | 91011107 | 1        | -0.067098  | 5    | 0.021    | 0.039    | 0.24734   | 0.31444  | 0.041207871 | Intergenic | NA                        | NA               |

| chr | start     | stop      | q-value  | methy.diff | CpGs | pMWU     | p2DKS    | MCWLS    | MCWHS   | pMWU.fdr    | cgi.type   | transcript   | gene     |
|-----|-----------|-----------|----------|------------|------|----------|----------|----------|---------|-------------|------------|--------------|----------|
| 10  | 91073015  | 91073388  | 1        | -0.057875  | 17   | 0.00067  | 0.016    | 0.072713 | 0.13059 | 0.00249888  | TSS        | NM_001005531 | Spata32  |
| 10  | 91096900  | 91096969  | 0.036    | -0.131366  | 5    | 7.30E-08 | 1.10E-07 | 0.032512 | 0.16388 | 1.35E-06    | Intragenic | NM_001108301 | Map3k14  |
| 10  | 91193752  | 91193993  | 7.80E-05 | -0.181194  | 19   | 4.50E-14 | 2.40E-10 | 0.14876  | 0.32995 | 6.64E-12    | Intragenic | NM_198759    | Arhgap27 |
| 10  | 91208315  | 91208534  | 1        | -0.204777  | 5    | 0.00015  | 0.00098  | 0.16866  | 0.37344 | 0.000724207 | Intragenic | NM_198759    | Arhgap27 |
| 10  | 91215338  | 91215427  | 1        | -0.146423  | 5    | 0.0094   | 0.088    | 0.3039   | 0.45033 | 0.021723038 | TSS        | NM_198759    | Arhgap27 |
| 10  | 91824049  | 91824156  | 1        | -0.21898   | 5    | 0.0053   | 0.087    | 0.39583  | 0.61481 | 0.013591571 | Intergenic | NA           | NA       |
| 10  | 92088827  | 92088985  | 1        | -0.18351   | 5    | 0.00048  | 0.0092   | 0.21459  | 0.3981  | 0.001881331 | Intragenic | NM_017212    | Mapt     |
| 10  | 93277794  | 93277947  | 1        | -0.159997  | 7    | 0.00043  | 0.0052   | 0.1986   | 0.3586  | 0.001736911 | TSS        | NM_001024687 | Mrc2     |
| 10  | 93303963  | 93304057  | 1        | -0.107381  | 5    | 0.02     | 0.088    | 0.69668  | 0.80407 | 0.039778219 | Intragenic | NM_001024687 | Mrc2     |
| 10  | 93342654  | 93343023  | 1        | -0.15422   | 7    | 5.60E-05 | 0.0013   | 0.097443 | 0.25166 | 0.000320912 | Intergenic | NA           | NA       |
| 10  | 93926296  | 93926429  | 1        | -0.170403  | 6    | 5.70E-06 | 0.00055  | 0.076095 | 0.2465  | 4.91E-05    | Intragenic | NM_012544    | Ace      |
| 10  | 94305503  | 94305897  | 1        | -0.102691  | 8    | 0.0036   | 0.012    | 0.11916  | 0.22185 | 0.009945103 | TSS        | NM_013178    | Scn4a    |
| 10  | 94508199  | 94508304  | 0.2      | -0.256546  | 7    | 6.40E-08 | 6.20E-07 | 0.11002  | 0.36657 | 1.19E-06    | Intergenic | NA           | NA       |
| 10  | 94606364  | 94606463  | 1        | -0.215947  | 5    | 0.0013   | 0.0092   | 0.3093   | 0.52524 | 0.004277683 | Intragenic | NM_031591    | Pecam1   |
| 10  | 95254855  | 95254988  | 0.00096  | -0.132743  | 7    | 3.00E-09 | 3.00E-09 | 0.015145 | 0.14789 | 8.36E-08    | Intergenic | NA           | NA       |
| 10  | 95275571  | 95275716  | 1        | -0.193159  | 11   | 0.00015  | 0.0019   | 0.41725  | 0.61041 | 0.000724207 | Intergenic | NA           | NA       |
| 10  | 95341497  | 95341640  | 0.4      | -0.313583  | 7    | 1.20E-08 | 1.20E-06 | 0.15346  | 0.46704 | 2.88E-07    | Intergenic | NA           | NA       |
| 10  | 95393314  | 95393392  | 1        | -0.197557  | 5    | 0.00072  | 0.0031   | 0.11685  | 0.31441 | 0.002634665 | Intergenic | NA           | NA       |
| 10  | 95718706  | 95718908  | 0.17     | -0.164922  | 11   | 5.30E-10 | 5.40E-07 | 0.10975  | 0.27467 | 1.92E-08    | Intragenic | NM_080692    | Cacng4   |
| 10  | 95732545  | 95732608  | 1        | -0.083795  | 5    | 0.0022   | 0.0032   | 0.82535  | 0.90915 | 0.006578104 | Intragenic | NM_080692    | Cacng4   |
| 10  | 96904074  | 96904169  | 1        | -0.189621  | 5    | 0.0014   | 0.024    | 0.2498   | 0.43942 | 0.004540837 | Intergenic | NA           | NA       |
| 10  | 96973070  | 96973140  | 1        | -0.096077  | 5    | 0.0019   | 0.039    | 0.083738 | 0.17981 | 0.005855937 | Intergenic | NA           | NA       |
| 10  | 97206386  | 97206441  | 0.49     | -0.189814  | 5    | 4.20E-07 | 1.50E-06 | 0.076383 | 0.2662  | 5.76E-06    | Intergenic | NA           | NA       |
| 10  | 97355645  | 97355808  | 1        | -0.183589  | 5    | 9.20E-06 | 3.40E-05 | 0.12546  | 0.30905 | 7.32E-05    | Intergenic | NA           | NA       |
| 10  | 97627526  | 97627624  | 1        | -0.160581  | 5    | 1.30E-05 | 0.00097  | 0.20074  | 0.36132 | 9.66E-05    | Intergenic | NA           | NA       |
| 10  | 97870044  | 97870152  | 1        | -0.156165  | 5    | 0.00072  | 0.015    | 0.26451  | 0.42068 | 0.002634665 | Intergenic | NA           | NA       |
| 10  | 98257758  | 98257914  | 1        | -0.12851   | 11   | 3.90E-06 | 7.60E-05 | 0.70896  | 0.83747 | 3.62E-05    | Intergenic | NA           | NA       |
| 10  | 98969691  | 98969887  | 1        | -0.110502  | 6    | 0.0023   | 0.011    | 0.17836  | 0.28886 | 0.00686004  | Intergenic | NA           | NA       |
| 10  | 99013569  | 99013639  | 1        | -0.282407  | 5    | 9.80E-07 | 7.40E-06 | 0.17476  | 0.45716 | 1.16E-05    | Intergenic | NA           | NA       |
| 10  | 99911584  | 99911730  | 1        | -0.118     | 7    | 0.0069   | 0.038    | 0.34309  | 0.46109 | 0.01685311  | Intergenic | NA           | NA       |
| 10  | 100716214 | 100716514 | 1        | -0.078099  | 14   | 0.004    | 0.094    | 0.69184  | 0.76993 | 0.010872653 | Intergenic | NA           | NA       |
| 10  | 100761641 | 100761798 | 1        | -0.120544  | 5    | 0.0022   | 0.058    | 0.21191  | 0.33245 | 0.006578104 | Intergenic | NA           | NA       |
| 10  | 101061806 | 101061895 | 1        | -0.115105  | 5    | 0.00072  | 0.015    | 0.13415  | 0.24926 | 0.002634665 | Intergenic | NA           | NA       |
| 10  | 101175391 | 101175650 | 1        | -0.127458  | 8    | 7.80E-06 | 0.00041  | 0.0727   | 0.20016 | 6.39E-05    | Intergenic | NA           | NA       |
| 10  | 101179034 | 101179079 | 1        | -0.128206  | 5    | 0.012    | 0.038    | 0.31309  | 0.44129 | 0.026435197 | Intergenic | NA           | NA       |
| 10  | 101230451 | 101230597 | 1        | -0.152766  | 8    | 0.0001   | 0.00098  | 0.24187  | 0.39464 | 0.000521119 | Intergenic | NA           | NA       |
| 10  | 101656455 | 101656599 | 1        | -0.102682  | 7    | 0.019    | 0.11     | 0.30581  | 0.4085  | 0.038322088 | Intragenic | NM_001013042 | Slc39a11 |
| 10  | 101977101 | 101977301 | 1        | -0.151049  | 15   | 1.30E-05 | 0.0014   | 0.31877  | 0.46982 | 9.66E-05    | Intergenic | NA           | NA       |
| 10  | 102139148 | 102139289 | 1        | -0.158401  | 8    | 0.0041   | 0.094    | 0.3713   | 0.5297  | 0.01100507  | Intergenic | NA           | NA       |

| chr | start     | stop      | q-value | methy.diff | CpGs | pMWU     | p2DKS    | MCWLS    | MCWHS    | pMWU.fdr    | cgi.type   | transcript                    | gene              |
|-----|-----------|-----------|---------|------------|------|----------|----------|----------|----------|-------------|------------|-------------------------------|-------------------|
| 10  | 102373275 | 102373545 | 1       | -0.145663  | 9    | 0.00015  | 0.016    | 0.17952  | 0.32518  | 0.000724207 | Intergenic | NA                            | NA                |
| 10  | 102384103 | 102384301 | 1       | -0.149164  | 5    | 0.01     | 0.058    | 0.247    | 0.39617  | 0.02275947  | Intergenic | NA                            | NA                |
| 10  | 102504352 | 102504792 | 1       | -0.128871  | 18   | 6.70E-07 | 9.40E-05 | 0.23939  | 0.36826  | 8.53E-06    | Intergenic | NA                            | NA                |
| 10  | 102831315 | 102831387 | 1       | -0.203733  | 5    | 6.50E-07 | 3.40E-06 | 0.15203  | 0.35576  | 8.28E-06    | Intergenic | NA                            | NA                |
| 10  | 102851048 | 102851135 | 1       | -0.118631  | 5    | 0.008    | 0.015    | 0.11214  | 0.23077  | 0.019059477 | Intergenic | NA                            | NA                |
| 10  | 102866904 | 102866936 | 1       | -0.060052  | 5    | 0.0024   | 0.0093   | 0.010718 | 0.070771 | 0.00705499  | Intergenic | NA                            | NA                |
| 10  | 103037894 | 103038034 | 1       | -0.209527  | 7    | 0.0017   | 0.0079   | 0.50152  | 0.71104  | 0.005339493 | Intergenic | NA                            | NA                |
| 10  | 103064710 | 103065144 | 1       | -0.155692  | 9    | 5.70E-07 | 0.0008   | 0.10883  | 0.26452  | 7.41E-06    | Intragenic | NM_001191591                  | Gprc5c            |
| 10  | 103068192 | 103068277 | 1       | -0.122542  | 5    | 0.0053   | 0.088    | 0.18719  | 0.30973  | 0.013591571 | Intragenic | NM_001191591                  | Gprc5c            |
| 10  | 103594909 | 103595044 | 1       | -0.273575  | 5    | 1.00E-05 | 7.00E-05 | 0.087668 | 0.36124  | 7.82E-05    | TSS        | NM_001009369                  | Mrpl38            |
| 10  | 103675184 | 103675329 | 1       | -0.128739  | 5    | 0.023    | 0.038    | 0.31873  | 0.44747  | 0.04441443  | Intergenic | NA                            | NA                |
| 10  | 103851939 | 103852068 | 1       | -0.139563  | 7    | 0.0059   | 0.012    | 0.38249  | 0.52205  | 0.014851341 | Intergenic | NA                            | NA                |
| 10  | 103887334 | 103887480 | 1       | -0.180656  | 7    | 4.10E-06 | 0.00017  | 0.58484  | 0.76549  | 3.78E-05    | Intragenic | NM_001127549                  | Llg12             |
| 10  | 103931466 | 103931900 | 1       | -0.161604  | 7    | 0.0051   | 0.008    | 0.4461   | 0.6077   | 0.013208341 | Intragenic | NM_001107065                  | Caskin2           |
| 10  | 103965730 | 103966123 | 1       | -0.139402  | 12   | 6.80E-10 | 3.90E-06 | 0.04073  | 0.18013  | 2.36E-08    | Intergenic | NA                            | NA                |
| 10  | 103975441 | 103975600 | 0.018   | -0.224203  | 8    | 3.60E-10 | 5.40E-08 | 0.060359 | 0.28456  | 1.37E-08    | Intergenic | NA                            | NA                |
| 10  | 104209250 | 104209419 | 1       | -0.196556  | 8    | 2.50E-05 | 0.00067  | 0.15682  | 0.35338  | 0.000166164 | Intragenic | NM_001005876                  | Hn1               |
| 10  | 104332537 | 104332763 | 0.98    | -0.33054   | 10   | 6.40E-08 | 3.00E-06 | 0.31919  | 0.64973  | 1.19E-06    | Intergenic | NA                            | NA                |
| 10  | 104417695 | 104417843 | 1       | -0.094018  | 7    | 0.0021   | 0.012    | 0.17526  | 0.26928  | 0.006364615 | Intragenic | NM_001105851                  | Otop2             |
| 10  | 104421199 | 104421278 | 1       | -0.054478  | 5    | 0.0022   | 0.039    | 0.067916 | 0.12239  | 0.006578104 | TSS        | NM_001105851:N<br>M_001105850 | Otop2:Ush1g       |
| 10  | 104514511 | 104514748 | 1       | -0.111853  | 7    | 0.0039   | 0.038    | 0.13825  | 0.25011  | 0.010605635 | Intragenic | NM_001191655                  | Tmem104           |
| 10  | 104526715 | 104526773 | 1       | -0.158553  | 5    | 0.00088  | 0.0055   | 0.1048   | 0.26336  | 0.003092094 | Intragenic | NM_001191655                  | Tmem104           |
| 10  | 104591143 | 104591311 | 1       | -0.05967   | 5    | 0.016    | 0.058    | 0.061978 | 0.12165  | 0.033288089 | TSS        | NM_021594                     | Slc9a3r1          |
| 10  | 104771460 | 104771507 | 1       | -0.180698  | 5    | 0.0017   | 0.015    | 0.38073  | 0.56143  | 0.005339493 | Intragenic | NM_001107066                  | Evpl              |
| 10  | 104781152 | 104781221 | 1       | -0.21539   | 5    | 0.00026  | 0.00052  | 0.36196  | 0.57735  | 0.001130807 | Intragenic | NM_001107066                  | Evpl              |
| 10  | 104784657 | 104784679 | 0.037   | -0.177428  | 5    | 1.10E-07 | 1.10E-07 | 0.056421 | 0.23385  | 1.86E-06    | TSS        | NM_001107066                  | Evpl              |
| 10  | 104948227 | 104948355 | 1       | -0.172683  | 7    | 6.10E-06 | 5.50E-05 | 0.13419  | 0.30688  | 5.24E-05    | TSS        | NM_053832                     | Foxj1             |
| 10  | 105149345 | 105149575 | 1       | -0.072484  | 14   | 0.00079  | 0.0077   | 0.23066  | 0.30314  | 0.002866309 | Intergenic | NA                            | NA                |
| 10  | 105240422 | 105240452 | 1       | -0.147813  | 5    | 0.025    | 0.13     | 0.55595  | 0.70376  | 0.047453009 | Intragenic | NM_001107067:N<br>M_001270834 | Rhbdf2:Rhbdf<br>2 |
| 10  | 105279563 | 105279685 | 1       | -0.161169  | 5    | 0.00039  | 0.0092   | 0.077595 | 0.23876  | 0.001587612 | Intergenic | NA                            | NA                |
| 10  | 105433651 | 105433942 | 1       | -0.065852  | 13   | 0.0099   | 0.015    | 0.2271   | 0.29296  | 0.02275947  | Intergenic | NA                            | NA                |
| 10  | 105479546 | 105479611 | 1       | -0.180813  | 5    | 8.50E-07 | 1.60E-05 | 0.052258 | 0.23307  | 1.03E-05    | Intergenic | NA                            | NA                |
| 10  | 105556768 | 105556907 | 1       | -0.172419  | 7    | 0.00083  | 0.0083   | 0.40646  | 0.57888  | 0.002961434 | Intragenic | NM_001107068                  | Mgat5b            |
| 10  | 105640612 | 105640808 | 1       | -0.197091  | 5    | 0.0024   | 0.015    | 0.16392  | 0.36101  | 0.00705499  | Intergenic | NA                            | NA                |
| 10  | 105732316 | 105732424 | 1       | -0.216915  | 5    | 0.00012  | 0.0055   | 0.12622  | 0.34313  | 0.000603617 | Intragenic | NM_001108309                  | Sec14l1           |
| 10  | 105733023 | 105733246 | 1       | -0.147606  | 9    | 0.0021   | 0.011    | 0.33204  | 0.47965  | 0.006364615 | Intragenic | NM_001108309                  | Sec14l1           |
| 10  | 105787922 | 105787976 | 1       | -0.134595  | 5    | 0.012    | 0.038    | 0.57913  | 0.71373  | 0.026435197 | Intergenic | NA                            | NA                |

| chr | start     | stop      | q-value  | methy.diff | CpGs | pMWU     | p2DKS    | MCWLS    | MCWHS    | pMWU.fdr    | cgi.type   | transcript                | gene         |
|-----|-----------|-----------|----------|------------|------|----------|----------|----------|----------|-------------|------------|---------------------------|--------------|
| 10  | 105800069 | 105800191 | 1        | -0.057124  | 5    | 0.0016   | 0.0054   | 0.033828 | 0.090952 | 0.005100053 | Intergenic | NA                        | NA           |
| 10  | 105841811 | 105841872 | 1        | -0.172588  | 5    | 5.50E-06 | 0.00028  | 0.077862 | 0.25045  | 4.78E-05    | TSS        | NM_176856                 | 9-Sep        |
| 10  | 105842765 | 105842845 | 1        | -0.161364  | 5    | 0.012    | 0.088    | 0.32387  | 0.48523  | 0.026435197 | TSS        | NM_176856                 | 9-Sep        |
| 10  | 105856736 | 105856974 | 1        | -0.202386  | 8    | 4.10E-07 | 9.10E-05 | 0.1385   | 0.34089  | 5.71E-06    | Intragenic | NM_176856                 | 9-Sep        |
| 10  | 105859016 | 105859096 | 1        | -0.161364  | 5    | 0.012    | 0.088    | 0.32387  | 0.48523  | 0.026435197 | Intragenic | NM_176856                 | 9-Sep        |
| 10  | 105935072 | 105935267 | 1        | -0.192008  | 5    | 2.90E-06 | 3.40E-06 | 0.042654 | 0.23466  | 2.84E-05    | Intragenic | NM_176856:NM_031837       | Sept9:Sept9  |
| 10  | 105955141 | 105955456 | 1        | -0.083367  | 14   | 0.0028   | 0.021    | 0.14044  | 0.22381  | 0.008113721 | TSS        | NM_001113497              | 9-Sep        |
| 10  | 105997981 | 105998068 | 1        | -0.176482  | 5    | 0.013    | 0.038    | 0.46147  | 0.63795  | 0.028097302 | Intergenic | NA                        | NA           |
| 10  | 106216177 | 106216263 | 1        | -0.152135  | 5    | 0.0027   | 0.038    | 0.39232  | 0.54445  | 0.007840962 | Intergenic | NA                        | NA           |
| 10  | 106518579 | 106518635 | 1        | -0.14585   | 7    | 0.00048  | 0.0082   | 0.1438   | 0.28965  | 0.001881331 | Intergenic | NA                        | NA           |
| 10  | 106576627 | 106576772 | 1        | -0.093477  | 6    | 0.012    | 0.04     | 0.090597 | 0.18407  | 0.026435197 | Intergenic | NA                        | NA           |
| 10  | 106695295 | 106695610 | 1        | -0.117008  | 17   | 6.40E-06 | 0.00069  | 0.23565  | 0.35266  | 5.40E-05    | Intergenic | NA                        | NA           |
| 10  | 106716660 | 106716734 | 1        | -0.257723  | 5    | 1.70E-06 | 7.50E-06 | 0.1174   | 0.37512  | 1.83E-05    | Intergenic | NA                        | NA           |
| 10  | 106721310 | 106721444 | 1        | -0.147573  | 9    | 0.015    | 0.04     | 0.39272  | 0.54029  | 0.031584896 | Intergenic | NA                        | NA           |
| 10  | 107055764 | 107055934 | 1        | -0.214693  | 9    | 1.50E-06 | 0.0002   | 0.21542  | 0.43012  | 1.65E-05    | Intragenic | NM_139096                 | Lgals3bp     |
| 10  | 107174174 | 107174282 | 1        | -0.149533  | 8    | 5.70E-06 | 0.0016   | 0.16622  | 0.31575  | 4.91E-05    | TSS        | NM_001134498              | Rbfox3       |
| 10  | 107185629 | 107186204 | 1        | -0.093303  | 17   | 5.20E-05 | 0.00071  | 0.13018  | 0.22349  | 0.000303048 | Intergenic | NA                        | NA           |
| 10  | 107239657 | 107239771 | 1        | -0.134871  | 5    | 0.021    | 0.086    | 0.25095  | 0.38582  | 0.041207871 | Intergenic | NA                        | NA           |
| 10  | 107361309 | 107361741 | 1        | -0.084441  | 5    | 0.0027   | 0.0054   | 0.042339 | 0.12678  | 0.007840962 | Intergenic | NA                        | NA           |
| 10  | 107421160 | 107421517 | 1        | -0.134331  | 15   | 7.80E-06 | 0.00012  | 0.15809  | 0.29242  | 6.39E-05    | Intergenic | NA                        | NA           |
| 10  | 107513407 | 107513500 | 1        | -0.188192  | 5    | 3.30E-06 | 7.60E-06 | 0.12156  | 0.30975  | 3.16E-05    | Intergenic | NA                        | NA           |
| 10  | 107713028 | 107713170 | 0.53     | -0.184763  | 8    | 3.70E-08 | 1.60E-06 | 0.097995 | 0.28276  | 7.87E-07    | Intragenic | NM_001134688:NM_001012466 | Ccdc40:Enpp7 |
| 10  | 107801729 | 107801810 | 1        | -0.087235  | 5    | 6.30E-06 | 0.00028  | 0.028336 | 0.11557  | 5.33E-05    | Intragenic | NM_001134688              | Ccdc40       |
| 10  | 107881020 | 107881101 | 1        | -0.117455  | 5    | 0.0022   | 0.038    | 0.3051   | 0.42255  | 0.006578104 | Intragenic | NM_001134688              | Ccdc40       |
| 10  | 107901246 | 107901355 | 1        | -0.142822  | 5    | 0.00029  | 0.0018   | 0.40126  | 0.54408  | 0.001239307 | Intragenic | NM_001134688              | Ccdc40       |
| 10  | 107922525 | 107922616 | 1        | -0.160153  | 5    | 0.0063   | 0.0054   | 0.21721  | 0.37736  | 0.015629046 | Intragenic | NM_001134688              | Ccdc40       |
| 10  | 107935646 | 107935703 | 1        | -0.274645  | 6    | 9.20E-07 | 6.30E-06 | 0.12633  | 0.40098  | 1.11E-05    | Intragenic | NM_001134688              | Ccdc40       |
| 10  | 108788640 | 108788856 | 1        | -0.174877  | 11   | 9.40E-05 | 0.0027   | 0.53297  | 0.70785  | 0.000496745 | Intragenic | NM_001168703              | Aatk         |
| 10  | 108790822 | 108791431 | 1.60E-07 | -0.159066  | 25   | 4.10E-14 | 5.00E-13 | 0.06796  | 0.22703  | 6.64E-12    | TSS        | NR_037349                 | Mir3065      |
| 10  | 108965356 | 108965435 | 1        | -0.067918  | 5    | 0.013    | 0.088    | 0.075003 | 0.14292  | 0.028097302 | Intergenic | NA                        | NA           |
| 10  | 108966746 | 108966848 | 0.002    | -0.145935  | 11   | 1.40E-12 | 6.20E-09 | 0.14601  | 0.29195  | 1.04E-10    | Intergenic | NA                        | NA           |
| 10  | 108989457 | 108989555 | 1        | -0.134905  | 5    | 0.012    | 0.015    | 0.5252   | 0.66011  | 0.026435197 | Intergenic | NA                        | NA           |
| 10  | 109021012 | 109021066 | 1        | -0.057741  | 5    | 0.012    | 0.025    | 0.023557 | 0.081298 | 0.026435197 | Intergenic | NA                        | NA           |
| 10  | 109037352 | 109037420 | 1        | -0.088779  | 5    | 0.00021  | 0.015    | 0.040336 | 0.12912  | 0.000951214 | Intergenic | NA                        | NA           |
| 10  | 109065945 | 109066035 | 1        | -0.125956  | 12   | 0.00012  | 0.00039  | 0.6331   | 0.75905  | 0.000603617 | Intergenic | NA                        | NA           |
| 10  | 109072711 | 109072900 | 1        | -0.172124  | 6    | 0.00017  | 0.0027   | 0.098985 | 0.27111  | 0.000806192 | Intergenic | NA                        | NA           |
| 10  | 109379279 | 109379448 | 1        | -0.091697  | 21   | 1.60E-06 | 0.00011  | 0.20096  | 0.29266  | 1.75E-05    | TSS        | NM_153293                 | Npb          |



| chr | start     | stop      | q-value  | methy.diff | CpGs | pMWU     | p2DKS    | MCWLS    | MCWHS    | pMWU.fdr    | cgi.type   | transcript   | gene     |
|-----|-----------|-----------|----------|------------|------|----------|----------|----------|----------|-------------|------------|--------------|----------|
| 10  | 109419601 | 109419677 | 1        | -0.118567  | 5    | 0.0029   | 0.015    | 0.64408  | 0.76265  | 0.008293503 | TSS        | NM_001128185 | Myadml2  |
| 10  | 109500274 | 109500441 | 1        | -0.205077  | 7    | 6.10E-06 | 0.0013   | 0.077006 | 0.28208  | 5.24E-05    | TSS        | NM_134387    | Dcxr     |
| 10  | 109965888 | 109966574 | 9.20E-05 | -0.163747  | 23   | 4.60E-14 | 2.80E-10 | 0.075311 | 0.23906  | 6.64E-12    | Intragenic | NM_001013976 | Ogfod3   |
| 10  | 110218078 | 110218263 | 1        | -0.158698  | 7    | 0.00069  | 0.0052   | 0.16783  | 0.32653  | 0.002570282 | TSS        | NM_001109051 | Fn3k     |
| 10  | 110810057 | 110810155 | 4.90E-07 | -0.429631  | 9    | 4.50E-13 | 1.50E-12 | 0.16954  | 0.59917  | 3.73E-11    | Intergenic | NA           | NA       |
| 10  | 111446173 | 111446271 | 4.90E-07 | -0.429631  | 9    | 4.50E-13 | 1.50E-12 | 0.16954  | 0.59917  | 3.73E-11    | Intragenic | NM_001099458 | Vom2r4   |
| 10  | 111452847 | 111452945 | 4.90E-07 | -0.429631  | 9    | 4.50E-13 | 1.50E-12 | 0.16954  | 0.59917  | 3.73E-11    | Intragenic | NM_001099458 | Vom2r4   |
| 10  | 111716358 | 111716456 | 4.90E-07 | -0.429631  | 9    | 4.50E-13 | 1.50E-12 | 0.16954  | 0.59917  | 3.73E-11    | Intragenic | NM_001099458 | Vom2r4   |
| 11  | 51572     | 51705     | 1        | -0.202484  | 7    | 5.20E-06 | 0.0013   | 0.3794   | 0.58188  | 4.61E-05    | Intergenic | NA           | NA       |
| 11  | 1737023   | 1737511   | 1        | -0.17232   | 9    | 0.00026  | 0.0012   | 0.59673  | 0.76905  | 0.001130807 | Intergenic | NA           | NA       |
| 11  | 1799411   | 1799458   | 1        | -0.265574  | 5    | 1.70E-05 | 0.00053  | 0.11483  | 0.38041  | 0.000120524 | TSS        | NM_001005552 | MGC95208 |
| 11  | 1911958   | 1911980   | 1        | -0.104635  | 5    | 0.0022   | 0.0052   | 0.81325  | 0.91789  | 0.006578104 | Intergenic | NA           | NA       |
| 11  | 2145179   | 2145336   | 0.039    | -0.102786  | 15   | 6.20E-13 | 1.20E-07 | 0.15633  | 0.25912  | 5.00E-11    | Intergenic | NA           | NA       |
| 11  | 2266999   | 2267072   | 1        | -0.065309  | 5    | 0.0068   | 0.039    | 0.77678  | 0.84209  | 0.016642688 | Intergenic | NA           | NA       |
| 11  | 10098367  | 10098432  | 1        | -0.062931  | 5    | 0.019    | 0.038    | 0.72143  | 0.78436  | 0.038322088 | Intergenic | NA           | NA       |
| 11  | 10294166  | 10294326  | 1        | -0.092174  | 7    | 0.00048  | 9.10E-05 | 0.61789  | 0.71006  | 0.001881331 | Intergenic | NA           | NA       |
| 11  | 12198238  | 12198353  | 1        | -0.132728  | 6    | 0.005    | 0.00031  | 0.16721  | 0.29994  | 0.012977322 | Intergenic | NA           | NA       |
| 11  | 14409103  | 14409203  | 0.19     | -0.30907   | 10   | 1.40E-11 | 5.80E-07 | 0.16766  | 0.47673  | 7.61E-10    | Intergenic | NA           | NA       |
| 11  | 15253864  | 15253886  | 1        | -0.063628  | 5    | 3.10E-05 | 0.00028  | 0.061529 | 0.12516  | 0.000197418 | TSS        | NM_032106    | Robo2    |
| 11  | 15254029  | 15254066  | 1        | -0.055263  | 5    | 0.00088  | 0.015    | 0.067773 | 0.12304  | 0.003092094 | TSS        | NM_032106    | Robo2    |
| 11  | 17916539  | 17916642  | 1        | -0.139423  | 5    | 0.023    | 0.023    | 0.45371  | 0.59313  | 0.04441443  | Intragenic | NM_130821    | Samsn1   |
| 11  | 20402813  | 20402838  | 1        | -0.161578  | 5    | 0.00072  | 0.0054   | 0.67131  | 0.83289  | 0.002634665 | Intergenic | NA           | NA       |
| 11  | 24208886  | 24208995  | 1        | -0.164296  | 5    | 0.00026  | 0.0017   | 0.16777  | 0.33207  | 0.001130807 | Intragenic | NM_203409    | Ncam2    |
| 11  | 24567448  | 24567555  | 1        | -0.179108  | 9    | 4.10E-08 | 5.70E-06 | 0.11672  | 0.29583  | 8.61E-07    | Intergenic | NA           | NA       |
| 11  | 24567562  | 24567721  | 1        | -0.080463  | 9    | 0.0021   | 0.0026   | 0.13324  | 0.2137   | 0.006364615 | Intergenic | NA           | NA       |
| 11  | 24625216  | 24625379  | 1        | -0.063041  | 7    | 0.0076   | 0.11     | 0.80508  | 0.86812  | 0.018313455 | Intergenic | NA           | NA       |
| 11  | 26552103  | 26552167  | 1        | -0.298486  | 5    | 0.0038   | 0.0055   | 0.55902  | 0.85751  | 0.010352437 | Intergenic | NA           | NA       |
| 11  | 26910541  | 26910712  | 1        | -0.081693  | 8    | 0.0082   | 0.16     | 0.49057  | 0.57226  | 0.019516617 | Intergenic | NA           | NA       |
| 11  | 27405408  | 27405430  | 0.09     | -0.475075  | 5    | 6.30E-08 | 2.80E-07 | 0.35394  | 0.82901  | 1.18E-06    | Intergenic | NA           | NA       |
| 11  | 27536162  | 27536195  | 0.085    | -0.255971  | 7    | 1.20E-07 | 2.60E-07 | 0.58565  | 0.84162  | 2.01E-06    | Intergenic | NA           | NA       |
| 11  | 28276366  | 28276869  | 0.49     | -0.123545  | 6    | 9.30E-08 | 1.50E-06 | 0.08466  | 0.2082   | 1.64E-06    | Intergenic | NA           | NA       |
| 11  | 28970275  | 28970375  | 1        | -0.17604   | 5    | 0.014    | 0.015    | 0.41407  | 0.59011  | 0.029850603 | Intragenic | NM_024400    | Adamts1  |
| 11  | 32147179  | 32147234  | 1        | -0.10527   | 5    | 0.023    | 0.086    | 0.64484  | 0.7501   | 0.04441443  | TSS        | NM_001037774 | Cldn8    |
| 11  | 33583741  | 33584169  | 1        | -0.161752  | 12   | 2.90E-06 | 0.00062  | 0.1249   | 0.28666  | 2.84E-05    | Intragenic | NM_001100558 | Tiam1    |
| 11  | 33690541  | 33690705  | 1        | -0.051018  | 7    | 4.80E-05 | 0.019    | 0.036915 | 0.087933 | 0.000285411 | Intergenic | NA           | NA       |
| 11  | 33723140  | 33723277  | 1        | -0.153217  | 7    | 0.0022   | 0.0081   | 0.44836  | 0.60157  | 0.006578104 | Intergenic | NA           | NA       |
| 11  | 33836520  | 33836668  | 1        | -0.056579  | 7    | 0.0026   | 0.0083   | 0.89453  | 0.95111  | 0.007616821 | Intergenic | NA           | NA       |
| 11  | 34303143  | 34303255  | 1        | -0.141742  | 5    | 0.0041   | 0.088    | 0.23012  | 0.37186  | 0.01100507  | Intergenic | NA           | NA       |
| 11  | 34306434  | 34306475  | 1        | -0.186549  | 5    | 0.00032  | 0.00014  | 0.27913  | 0.46568  | 0.001346443 | Intergenic | NA           | NA       |

| chr | start    | stop     | q-value  | methy.diff | CpGs | pMWU     | p2DKS    | MCWLS    | MCWHS    | pMWU.fdr    | cgi.type   | transcript   | gene       |
|-----|----------|----------|----------|------------|------|----------|----------|----------|----------|-------------|------------|--------------|------------|
| 11  | 34519899 | 34519948 | 1        | -0.155546  | 5    | 0.00072  | 0.00052  | 0.22742  | 0.38297  | 0.002634665 | Intragenic | NM_001135834 | Mrap       |
| 11  | 34848350 | 34848555 | 1        | -0.090086  | 11   | 0.00021  | 0.0018   | 0.16743  | 0.25752  | 0.000951214 | TSS        | NM_001109052 | RGD1562726 |
| 11  | 34929531 | 34929594 | 1        | -0.172985  | 5    | 0.0024   | 0.0088   | 0.21899  | 0.39198  | 0.00705499  | Intergenic | NA           | NA         |
| 11  | 35031267 | 35031417 | 1        | -0.060008  | 5    | 0.00088  | 0.0018   | 0.026561 | 0.086569 | 0.003092094 | Intergenic | NA           | NA         |
| 11  | 35091154 | 35091214 | 1        | -0.111871  | 5    | 0.00029  | 0.0055   | 0.19262  | 0.30449  | 0.001239307 | Intergenic | NA           | NA         |
| 11  | 35664409 | 35664522 | 1        | -0.11799   | 8    | 9.30E-05 | 0.0038   | 0.11558  | 0.23357  | 0.000491677 | Intragenic | NM_001136096 | Its1n1     |
| 11  | 35746705 | 35746738 | 1        | -0.195472  | 5    | 0.0087   | 0.00098  | 0.60675  | 0.80222  | 0.020391633 | Intergenic | NA           | NA         |
| 11  | 35892464 | 35892552 | 1        | -0.197989  | 5    | 0.013    | 0.058    | 0.49116  | 0.68914  | 0.028097302 | Intergenic | NA           | NA         |
| 11  | 35923327 | 35923459 | 1        | -0.201784  | 8    | 2.40E-06 | 3.10E-05 | 0.38821  | 0.58999  | 2.45E-05    | Intergenic | NA           | NA         |
| 11  | 36044205 | 36044491 | 1        | -0.172337  | 9    | 0.00019  | 0.024    | 0.21609  | 0.38843  | 0.000879857 | TSS        | NM_133603    | Kcne2      |
| 11  | 36371712 | 36372047 | 1.00E-22 | -0.200747  | 33   | 4.30E-14 | 3.20E-28 | 0.068482 | 0.26923  | 6.64E-12    | Intragenic | NM_017325    | Runx1      |
| 11  | 36459711 | 36459829 | 1        | -0.099778  | 10   | 4.30E-05 | 0.0013   | 0.076598 | 0.17638  | 0.000260449 | TSS        | NM_017325    | Runx1      |
| 11  | 36464548 | 36464651 | 1        | -0.16678   | 7    | 1.20E-06 | 9.70E-05 | 0.11105  | 0.27783  | 1.37E-05    | Intergenic | NA           | NA         |
| 11  | 37738381 | 37738509 | 1        | -0.173034  | 5    | 0.02     | 0.038    | 0.32914  | 0.50218  | 0.039778219 | Intergenic | NA           | NA         |
| 11  | 37843340 | 37843542 | 1        | -0.112857  | 11   | 0.0042   | 0.026    | 0.27421  | 0.38706  | 0.011250869 | Intergenic | NA           | NA         |
| 11  | 38023900 | 38023992 | 1        | -0.215957  | 7    | 0.00031  | 0.0013   | 0.27878  | 0.49473  | 0.001320549 | Intergenic | NA           | NA         |
| 11  | 38593907 | 38593975 | 1        | -0.121987  | 5    | 0.002    | 0.0055   | 0.074363 | 0.19635  | 0.006079939 | Intergenic | NA           | NA         |
| 11  | 38697344 | 38697573 | 1        | -0.125432  | 7    | 0.00058  | 0.00079  | 0.10309  | 0.22852  | 0.002226081 | Intragenic | NM_013192    | Kcnj6      |
| 11  | 39048803 | 39048963 | 1        | -0.174983  | 7    | 3.90E-05 | 0.0021   | 0.15138  | 0.32637  | 0.000237659 | Intergenic | NA           | NA         |
| 11  | 40044065 | 40044102 | 1        | -0.062068  | 5    | 0.014    | 0.13     | 0.12783  | 0.1899   | 0.029850603 | Intragenic | NM_001017484 | Lca5l      |
| 11  | 41772740 | 41772852 | 1        | -0.219102  | 5    | 3.70E-06 | 0.00052  | 0.085472 | 0.30457  | 3.46E-05    | Intragenic | NM_001107103 | Ripk4      |
| 11  | 42614484 | 42614568 | 1        | -0.117987  | 5    | 0.0053   | 0.015    | 0.64478  | 0.76276  | 0.013591571 | Intergenic | NA           | NA         |
| 11  | 42616311 | 42616395 | 1        | -0.118138  | 5    | 0.0053   | 0.015    | 0.64478  | 0.76291  | 0.013591571 | Intergenic | NA           | NA         |
| 11  | 42973251 | 42973287 | 1        | -0.236327  | 5    | 5.60E-07 | 7.30E-06 | 0.13977  | 0.3761   | 7.29E-06    | Intergenic | NA           | NA         |
| 11  | 48227855 | 48227910 | 1        | -0.248625  | 5    | 2.80E-05 | 6.90E-05 | 0.11125  | 0.35988  | 0.000182174 | TSS        | NM_001013866 | Cmss1      |
| 11  | 48917293 | 48917351 | 1        | -0.131932  | 5    | 0.0035   | 0.0016   | 0.59249  | 0.72442  | 0.009686665 | Intergenic | NA           | NA         |
| 11  | 54411667 | 54411798 | 1        | -0.149233  | 5    | 0.012    | 0.025    | 0.54356  | 0.69279  | 0.026435197 | Intergenic | NA           | NA         |
| 11  | 55507622 | 55507661 | 1        | -0.063286  | 5    | 0.0058   | 0.024    | 0.81206  | 0.87534  | 0.014624129 | Intergenic | NA           | NA         |
| 11  | 55669296 | 55669359 | 1        | -0.07585   | 5    | 0.017    | 0.015    | 0.25498  | 0.33083  | 0.034796287 | Intergenic | NA           | NA         |
| 11  | 55871694 | 55871785 | 1        | -0.215094  | 5    | 6.50E-07 | 3.40E-05 | 0.16114  | 0.37624  | 8.28E-06    | Intergenic | NA           | NA         |
| 11  | 56065293 | 56065384 | 1        | -0.215094  | 5    | 6.50E-07 | 3.40E-05 | 0.16114  | 0.37624  | 8.28E-06    | Intergenic | NA           | NA         |
| 11  | 56155119 | 56155196 | 1        | -0.092836  | 5    | 0.011    | 0.038    | 0.15782  | 0.25066  | 0.02463877  | Intergenic | NA           | NA         |
| 11  | 58027094 | 58027163 | 1        | -0.129078  | 5    | 2.20E-06 | 7.00E-05 | 0.703    | 0.83208  | 2.27E-05    | Intragenic | NM_001172090 | Morc1      |
| 11  | 59348697 | 59348825 | 1        | -0.106719  | 5    | 0.0041   | 0.058    | 0.59962  | 0.70634  | 0.01100507  | Intergenic | NA           | NA         |
| 11  | 59348933 | 59349107 | 1        | -0.161358  | 8    | 1.70E-05 | 3.00E-05 | 0.54107  | 0.70243  | 0.000120524 | Intergenic | NA           | NA         |
| 11  | 62354711 | 62354884 | 1        | -0.181814  | 7    | 1.60E-06 | 5.30E-05 | 0.3687   | 0.55051  | 1.75E-05    | Intergenic | NA           | NA         |
| 11  | 65275472 | 65275566 | 1        | -0.18581   | 5    | 0.02     | 0.088    | 0.32362  | 0.50943  | 0.039778219 | Intergenic | NA           | NA         |
| 11  | 65407863 | 65408036 | 1        | -0.170882  | 7    | 3.80E-06 | 0.00028  | 0.38338  | 0.55426  | 3.54E-05    | Intergenic | NA           | NA         |
| 11  | 66740855 | 66741017 | 1        | -0.174627  | 5    | 0.0063   | 0.088    | 0.48718  | 0.6618   | 0.015629046 | Intragenic | NM_153295    | Gpr156     |

| chr | start    | stop     | q-value  | methy.diff | CpGs | pMWU     | p2DKS    | MCWLS    | MCWHS   | pMWU.fdr    | cgi.type   | transcript   | gene    |
|-----|----------|----------|----------|------------|------|----------|----------|----------|---------|-------------|------------|--------------|---------|
| 11  | 67106487 | 67106564 | 1        | -0.059746  | 5    | 0.015    | 0.015    | 0.095564 | 0.15531 | 0.031584896 | Intergenic | NA           | NA      |
| 11  | 68309947 | 68310016 | 1        | 0.325612   | 5    | 0.00026  | 0.015    | 0.78935  | 0.46374 | 0.001130807 | Intergenic | NA           | NA      |
| 11  | 68310070 | 68310186 | 1        | 0.11526    | 5    | 0.0022   | 0.039    | 0.88735  | 0.77209 | 0.006578104 | Intergenic | NA           | NA      |
| 11  | 68906496 | 68906610 | 1        | -0.163834  | 5    | 0.008    | 0.039    | 0.23042  | 0.39425 | 0.019059477 | Intragenic | NM_024369    | Fstl1   |
| 11  | 69052471 | 69052508 | 1        | -0.274757  | 5    | 1.30E-05 | 0.00051  | 0.18519  | 0.45994 | 9.66E-05    | TSS        | NM_001037338 | Ndufb4  |
| 11  | 69805542 | 69805641 | 1        | -0.123988  | 5    | 2.80E-05 | 0.00014  | 0.073206 | 0.19719 | 0.000182174 | Intergenic | NA           | NA      |
| 11  | 70152132 | 70152208 | 1        | -0.231469  | 6    | 8.40E-06 | 0.00094  | 0.10699  | 0.33846 | 6.80E-05    | Intergenic | NA           | NA      |
| 11  | 71039324 | 71039404 | 1        | -0.179002  | 5    | 0.00023  | 0.0018   | 0.13338  | 0.31238 | 0.00102405  | Intergenic | NA           | NA      |
| 11  | 71290043 | 71290175 | 1        | -0.126892  | 5    | 0.0068   | 0.038    | 0.20287  | 0.32976 | 0.016642688 | Intragenic | NM_001012017 | Dirc2   |
| 11  | 71396222 | 71396264 | 1        | -0.092266  | 5    | 0.0094   | 0.088    | 0.1544   | 0.24666 | 0.021723038 | Intragenic | NM_001107091 | Sema5b  |
| 11  | 71396428 | 71396474 | 1        | -0.082047  | 5    | 5.50E-06 | 3.40E-05 | 0.091362 | 0.17341 | 4.78E-05    | Intragenic | NM_001107091 | Sema5b  |
| 11  | 71396504 | 71396660 | 0.26     | -0.10632   | 8    | 1.20E-08 | 8.00E-07 | 0.02239  | 0.12871 | 2.88E-07    | Intragenic | NM_001107091 | Sema5b  |
| 11  | 71401365 | 71401530 | 1        | -0.086139  | 8    | 0.013    | 0.16     | 0.33407  | 0.42021 | 0.028097302 | Intragenic | NM_001107091 | Sema5b  |
| 11  | 71479184 | 71479410 | 1        | -0.117178  | 8    | 0.011    | 0.025    | 0.50817  | 0.62534 | 0.02463877  | Intragenic | NM_001107091 | Sema5b  |
| 11  | 71553457 | 71553565 | 1        | -0.084688  | 8    | 0.025    | 0.13     | 0.32197  | 0.40665 | 0.047453009 | Intergenic | NA           | NA      |
| 11  | 71598470 | 71598550 | 1        | -0.179002  | 5    | 0.00023  | 0.0018   | 0.13338  | 0.31238 | 0.00102405  | Intragenic | NM_001014125 | Pdia5   |
| 11  | 72880448 | 72880569 | 0.038    | -0.280338  | 12   | 7.00E-13 | 1.20E-07 | 0.14038  | 0.42072 | 5.53E-11    | Intragenic | NM_032062    | Kalrn   |
| 11  | 73019991 | 73020083 | 1        | -0.210823  | 5    | 1.90E-05 | 6.80E-05 | 0.10873  | 0.31956 | 0.000131674 | Intragenic | NM_032062    | Kalrn   |
| 11  | 73034114 | 73034259 | 1        | -0.101483  | 7    | 0.013    | 0.013    | 0.63133  | 0.73281 | 0.028097302 | Intragenic | NM_032062    | Kalrn   |
| 11  | 73155794 | 73155926 | 1        | -0.187268  | 7    | 9.60E-05 | 0.00015  | 0.10889  | 0.29616 | 0.000507091 | Intragenic | NM_147139    | Itgb5   |
| 11  | 73256332 | 73256403 | 1        | -0.084211  | 5    | 0.0087   | 0.059    | 0.081351 | 0.16556 | 0.020391633 | Intragenic | NM_147139    | Itgb5   |
| 11  | 73261963 | 73262101 | 1        | -0.131047  | 8    | 5.00E-05 | 0.0024   | 0.053688 | 0.18473 | 0.000291675 | TSS        | NM_147139    | Itgb5   |
| 11  | 73369710 | 73369907 | 4.50E-10 | -0.154623  | 24   | 4.20E-14 | 1.40E-15 | 0.11042  | 0.26505 | 6.64E-12    | Intergenic | NA           | NA      |
| 11  | 74089900 | 74090224 | 1        | -0.200306  | 9    | 5.40E-07 | 1.50E-05 | 0.11285  | 0.31316 | 7.17E-06    | Intragenic | NM_001014230 | lqcg    |
| 11  | 74343075 | 74343453 | 1        | -0.140595  | 10   | 2.30E-06 | 0.00039  | 0.10301  | 0.24361 | 2.36E-05    | Intergenic | NA           | NA      |
| 11  | 74469062 | 74469221 | 1        | -0.169247  | 6    | 0.025    | 0.08     | 0.24884  | 0.41809 | 0.047453009 | TSS        | NM_001008336 | Tnk2    |
| 11  | 74606319 | 74606357 | 1        | -0.155397  | 5    | 0.0016   | 0.024    | 0.17859  | 0.33398 | 0.005100053 | TSS        | NM_001039259 | Zdhhc19 |
| 11  | 74972550 | 74972620 | 1        | -0.211036  | 5    | 0.00036  | 0.0093   | 0.43166  | 0.6427  | 0.001486639 | Intragenic | NM_001024995 | Nrros   |
| 11  | 75110824 | 75110881 | 1        | -0.135273  | 7    | 1.00E-06 | 1.60E-05 | 0.062279 | 0.19755 | 1.18E-05    | Intergenic | NA           | NA      |
| 11  | 75468246 | 75468356 | 1        | -0.11496   | 8    | 0.00016  | 0.0051   | 0.76787  | 0.88283 | 0.000769396 | Intergenic | NA           | NA      |
| 11  | 75607735 | 75607882 | 1        | -0.11352   | 8    | 1.70E-05 | 0.00065  | 0.090755 | 0.20428 | 0.000120524 | Intergenic | NA           | NA      |
| 11  | 75676583 | 75676652 | 1        | -0.121677  | 5    | 0.02     | 0.038    | 0.56358  | 0.68525 | 0.039778219 | Intragenic | NM_053995    | Bdh1    |
| 11  | 75957207 | 75957264 | 1        | -0.135273  | 7    | 1.00E-06 | 1.60E-05 | 0.062279 | 0.19755 | 1.18E-05    | Intragenic | NM_138823    | Ppp1r2  |
| 11  | 76289237 | 76289439 | 1        | -0.206883  | 5    | 1.50E-05 | 7.00E-05 | 0.086204 | 0.29309 | 0.000109113 | Intergenic | NA           | NA      |
| 11  | 76690219 | 76690504 | 1        | -0.123934  | 5    | 0.00014  | 0.00098  | 0.017612 | 0.14155 | 0.000684451 | Intergenic | NA           | NA      |
| 11  | 76712683 | 76712789 | 1        | 0.108674   | 5    | 0.0094   | 0.059    | 0.86258  | 0.75391 | 0.021723038 | Intergenic | NA           | NA      |
| 11  | 76860341 | 76860785 | 1        | -0.083275  | 10   | 0.018    | 0.085    | 0.072752 | 0.15603 | 0.036742993 | Intergenic | NA           | NA      |
| 11  | 77142762 | 77142821 | 1        | -0.221241  | 5    | 8.80E-05 | 0.0055   | 0.13468  | 0.35592 | 0.000466886 | Intergenic | NA           | NA      |
| 11  | 77158979 | 77159008 | 1        | -0.394108  | 5    | 1.50E-05 | 0.00028  | 0.38308  | 0.77719 | 0.000109113 | Intergenic | NA           | NA      |

| chr | start    | stop     | q-value | methy.diff | CpGs | pMWU     | p2DKS    | MCWLS    | MCWHS   | pMWU.fdr    | cgi.type   | transcript                    | gene                |
|-----|----------|----------|---------|------------|------|----------|----------|----------|---------|-------------|------------|-------------------------------|---------------------|
| 11  | 77159032 | 77159086 | 1       | -0.102782  | 5    | 0.0016   | 0.0054   | 0.66664  | 0.76942 | 0.005100053 | Intergenic | NA                            | NA                  |
| 11  | 77522015 | 77522071 | 1       | -0.113574  | 5    | 0.019    | 0.18     | 0.25291  | 0.36649 | 0.038322088 | Intergenic | NA                            | NA                  |
| 11  | 78477595 | 78477671 | 1       | -0.126017  | 5    | 0.0045   | 0.088    | 0.18129  | 0.3073  | 0.011905878 | TSS        | NM_001109056                  | Mb21d2              |
| 11  | 79893352 | 79893396 | 1       | -0.151588  | 5    | 1.00E-05 | 0.00014  | 0.20254  | 0.35412 | 7.82E-05    | Intergenic | NA                            | NA                  |
| 11  | 80461260 | 80461503 | 1       | -0.13575   | 9    | 0.0033   | 0.012    | 0.30086  | 0.43661 | 0.009256793 | Intragenic | NM_001107084                  | Bcl6                |
| 11  | 80655961 | 80656134 | 1       | -0.156801  | 7    | 0.00024  | 0.00042  | 0.13307  | 0.28987 | 0.001064629 | Intergenic | NA                            | NA                  |
| 11  | 81423765 | 81423926 | 1       | -0.122352  | 5    | 8.80E-05 | 0.0054   | 0.63613  | 0.75848 | 0.000466886 | Intragenic | NM_001013864                  | Lpp                 |
| 11  | 81744476 | 81744659 | 1       | -0.14618   | 7    | 0.00048  | 0.002    | 0.55348  | 0.69966 | 0.001881331 | Intergenic | NA                            | NA                  |
| 11  | 85086017 | 85086091 | 1       | -0.221407  | 5    | 0.00088  | 0.0052   | 0.3284   | 0.5498  | 0.003092094 | Intragenic | NM_013126                     | Dgkg                |
| 11  | 85210800 | 85211010 | 0.57    | -0.248218  | 9    | 2.20E-07 | 1.80E-06 | 0.14639  | 0.39461 | 3.32E-06    | Intragenic | NM_013126                     | Dgkg                |
| 11  | 85335025 | 85335139 | 1       | -0.174045  | 5    | 0.00059  | 0.015    | 0.24595  | 0.42    | 0.002242971 | Intragenic | NM_001107082                  | Etv5                |
| 11  | 85614899 | 85615001 | 1       | -0.191152  | 8    | 2.50E-07 | 9.90E-06 | 0.15235  | 0.3435  | 3.70E-06    | Intragenic | NM_001270598:N<br>M_001270599 | Igf2bp2:Igf2b<br>p2 |
| 11  | 85670179 | 85670281 | 1       | -0.191152  | 8    | 2.50E-07 | 9.90E-06 | 0.15235  | 0.3435  | 3.70E-06    | Intragenic | NM_001270598:N<br>M_001270599 | Igf2bp2:Igf2b<br>p2 |
| 11  | 85803578 | 85803645 | 1       | -0.171196  | 5    | 0.00023  | 0.0092   | 0.17123  | 0.34243 | 0.00102405  | Intragenic | NM_001044279                  | Liph                |
| 11  | 85926214 | 85926343 | 1       | -0.125825  | 6    | 0.013    | 0.16     | 0.17663  | 0.30246 | 0.028097302 | TSS        | NM_031133                     | Thpo                |
| 11  | 86182935 | 86183015 | 1       | -0.215294  | 5    | 0.0029   | 0.038    | 0.42344  | 0.63874 | 0.008293503 | Intergenic | NA                            | NA                  |
| 11  | 86327203 | 86327372 | 1       | -0.13307   | 7    | 0.0056   | 0.0082   | 0.42822  | 0.56129 | 0.014333376 | Intergenic | NA                            | NA                  |
| 11  | 86422228 | 86422335 | 1       | -0.125796  | 5    | 0.025    | 0.088    | 0.53068  | 0.65648 | 0.047453009 | Intergenic | NA                            | NA                  |
| 11  | 86679473 | 86679932 | 1       | -0.11259   | 6    | 0.0011   | 0.0003   | 0.077507 | 0.1901  | 0.003737263 | Intergenic | NA                            | NA                  |
| 11  | 86940270 | 86940399 | 1       | -0.125825  | 6    | 0.013    | 0.16     | 0.17663  | 0.30246 | 0.028097302 | TSS        | NM_057134:NM_<br>031133       | Chrd:Thpo           |
| 11  | 87049252 | 87049268 | 1       | -0.07013   | 5    | 0.00036  | 0.015    | 0.061965 | 0.13209 | 0.001486639 | TSS        | NM_021678                     | Camk2n2             |
| 11  | 87060409 | 87060500 | 1       | -0.127409  | 5    | 0.012    | 0.13     | 0.70089  | 0.8283  | 0.026435197 | TSS        | NM_001142363:N<br>R_024535    | Alg3:Alg3           |
| 11  | 88369105 | 88369265 | 1       | -0.088509  | 7    | 0.00048  | 9.20E-05 | 0.62159  | 0.7101  | 0.001881331 | Intergenic | NA                            | NA                  |
| 11  | 89619149 | 89619216 | 1       | -0.125105  | 5    | 0.00019  | 0.0055   | 0.19781  | 0.32291 | 0.000879857 | TSS        | NM_053930                     | Gp1bb               |
| 11  | 89656173 | 89656254 | 1       | -0.06741   | 5    | 0.012    | 0.0091   | 0.11292  | 0.18033 | 0.026435197 | Intragenic | NM_001108322                  | Tbx1                |
| 11  | 89661027 | 89661152 | 1       | -0.151196  | 7    | 6.40E-05 | 0.0012   | 0.33075  | 0.48195 | 0.000358884 | Intergenic | NA                            | NA                  |
| 11  | 89830219 | 89830442 | 1       | -0.164852  | 6    | 0.00046  | 0.0044   | 0.092688 | 0.25754 | 0.001836485 | Intragenic | NM_001131013                  | Arvcf               |
| 11  | 89884330 | 89884408 | 0.037   | -0.266511  | 5    | 8.50E-08 | 1.10E-07 | 0.13069  | 0.3972  | 1.53E-06    | Intragenic | NM_001131013                  | Arvcf               |
| 11  | 90039528 | 90039626 | 1       | -0.132071  | 5    | 0.00088  | 0.015    | 0.33518  | 0.46725 | 0.003092094 | Intergenic | NA                            | NA                  |
| 11  | 90082772 | 90082962 | 1       | -0.142263  | 10   | 0.012    | 0.19     | 0.36271  | 0.50498 | 0.026435197 | Intergenic | NA                            | NA                  |
| 11  | 90249458 | 90249544 | 1       | 0.05029    | 5    | 0.0012   | 0.00052  | 0.98283  | 0.93254 | 0.004013471 | TSS        | NM_001134788                  | Vpreb2              |
| 11  | 90775370 | 90775542 | 1       | -0.080818  | 7    | 0.025    | 0.14     | 0.11754  | 0.19836 | 0.047453009 | TSS        | NM_001105864                  | Scarf2              |
| 11  | 90784761 | 90784778 | 1       | -0.082259  | 5    | 0.0049   | 0.015    | 0.17175  | 0.25401 | 0.012753585 | Intragenic | NM_001105864                  | Scarf2              |
| 11  | 91046044 | 91046139 | 0.38    | -0.353624  | 7    | 1.30E-07 | 1.20E-06 | 0.18472  | 0.53834 | 2.11E-06    | Intragenic | NM_001105862                  | Hic2                |
| 12  | 328316   | 328459   | 0.066   | -0.1981    | 11   | 1.80E-09 | 2.00E-07 | 0.10901  | 0.30711 | 5.50E-08    | Intergenic | NA                            | NA                  |

| chr | start    | stop     | q-value  | methy1.diff | CpGs | pMWU     | p2DKS    | MCWLS    | MCWHS    | pMWU.fdr    | cgi.type   | transcript   | gene     |
|-----|----------|----------|----------|-------------|------|----------|----------|----------|----------|-------------|------------|--------------|----------|
| 12  | 328463   | 328515   | 1        | -0.260821   | 5    | 0.00059  | 0.00098  | 0.18135  | 0.44217  | 0.002242971 | Intergenic | NA           | NA       |
| 12  | 328532   | 328623   | 1        | -0.122255   | 5    | 0.00036  | 0.00053  | 0.4109   | 0.53315  | 0.001486639 | Intergenic | NA           | NA       |
| 12  | 346029   | 346308   | 0.27     | -0.160883   | 19   | 1.10E-09 | 8.40E-07 | 0.20697  | 0.36786  | 3.60E-08    | Intergenic | NA           | NA       |
| 12  | 356009   | 356343   | 0.0018   | -0.259793   | 11   | 4.10E-10 | 5.60E-09 | 0.13831  | 0.3981   | 1.53E-08    | Intergenic | NA           | NA       |
| 12  | 434209   | 434244   | 1        | -0.144598   | 5    | 7.10E-06 | 3.30E-05 | 0.22673  | 0.37133  | 5.86E-05    | Intergenic | NA           | NA       |
| 12  | 4100332  | 4100375  | 1        | -0.157026   | 5    | 0.00029  | 0.00053  | 0.073883 | 0.23091  | 0.001239307 | Intragenic | NM_001107115 | Arhgef18 |
| 12  | 4253673  | 4253722  | 1        | -0.251919   | 5    | 0.00019  | 0.00098  | 0.43183  | 0.68375  | 0.000879857 | Intergenic | NA           | NA       |
| 12  | 4362809  | 4362903  | 1        | -0.132054   | 5    | 0.02     | 0.088    | 0.3424   | 0.47445  | 0.039778219 | TSS        | NM_144741    | Retn     |
| 12  | 4678165  | 4678273  | 0.036    | -0.211813   | 5    | 1.80E-07 | 1.10E-07 | 0.06697  | 0.27878  | 2.78E-06    | Intragenic | NM_017267    | Timm44   |
| 12  | 4721036  | 4721137  | 1        | -0.110508   | 5    | 0.00026  | 0.0031   | 0.064947 | 0.17545  | 0.001130807 | TSS        | NM_001034139 | Lrrc8e   |
| 12  | 4721287  | 4721339  | 1        | -0.054628   | 5    | 0.0008   | 0.0093   | 0.056966 | 0.11159  | 0.002866309 | TSS        | NM_001034139 | Lrrc8e   |
| 12  | 4737871  | 4737916  | 1        | -0.291596   | 5    | 0.0019   | 0.0055   | 0.2022   | 0.4938   | 0.005855937 | Intergenic | NA           | NA       |
| 12  | 4742707  | 4742771  | 1        | -0.210382   | 5    | 0.0012   | 0.0089   | 0.49219  | 0.70257  | 0.004013471 | Intergenic | NA           | NA       |
| 12  | 6055942  | 6055969  | 1        | -0.073148   | 7    | 3.40E-05 | 0.00017  | 0.10275  | 0.1759   | 0.000214477 | Intergenic | NA           | NA       |
| 12  | 7721458  | 7721488  | 1        | -0.087696   | 5    | 0.0058   | 0.024    | 0.70963  | 0.79733  | 0.014624129 | Intragenic | NM_001170398 | Fry      |
| 12  | 7889428  | 7889709  | 6.00E-07 | -0.233803   | 18   | 4.70E-14 | 1.90E-12 | 0.13948  | 0.37328  | 6.64E-12    | Intragenic | NM_001170398 | Fry      |
| 12  | 7924936  | 7925031  | 1        | -0.102012   | 5    | 0.02     | 0.18     | 0.30269  | 0.4047   | 0.039778219 | TSS        | NM_001170398 | Fry      |
| 12  | 8290410  | 8290710  | 1        | -0.106114   | 9    | 0.0039   | 0.045    | 0.26465  | 0.37077  | 0.010605635 | Intergenic | NA           | NA       |
| 12  | 8826759  | 8827060  | 1        | -0.122475   | 10   | 0.0051   | 0.021    | 0.39739  | 0.51986  | 0.013208341 | Intergenic | NA           | NA       |
| 12  | 8834797  | 8835098  | 1        | -0.142908   | 10   | 0.0021   | 0.011    | 0.37695  | 0.51986  | 0.006364615 | Intergenic | NA           | NA       |
| 12  | 8874348  | 8874444  | 1        | -0.068081   | 5    | 0.013    | 0.18     | 0.086412 | 0.15449  | 0.028097302 | Intergenic | NA           | NA       |
| 12  | 8951005  | 8951102  | 1        | -0.064184   | 7    | 0.013    | 0.027    | 0.81955  | 0.88373  | 0.028097302 | Intragenic | NM_017260    | Alox5ap  |
| 12  | 9098189  | 9098273  | 1        | -0.1663     | 5    | 0.00072  | 0.024    | 0.1107   | 0.277    | 0.002634665 | Intergenic | NA           | NA       |
| 12  | 9204166  | 9204190  | 1        | -0.06644    | 5    | 0.023    | 0.087    | 0.83722  | 0.90366  | 0.04441443  | Intergenic | NA           | NA       |
| 12  | 9248869  | 9248992  | 1        | -0.366815   | 8    | 1.20E-05 | 5.30E-05 | 0.33073  | 0.69755  | 9.15E-05    | Intergenic | NA           | NA       |
| 12  | 9407932  | 9407984  | 1        | -0.188864   | 5    | 0.00012  | 0.00027  | 0.6624   | 0.85127  | 0.000603617 | Intergenic | NA           | NA       |
| 12  | 9414935  | 9414976  | 1        | -0.248739   | 5    | 7.10E-06 | 7.20E-06 | 0.31218  | 0.56092  | 5.86E-05    | Intergenic | NA           | NA       |
| 12  | 9486684  | 9486776  | 1        | -0.435293   | 5    | 0.00021  | 7.10E-05 | 0.29772  | 0.73301  | 0.000951214 | Intergenic | NA           | NA       |
| 12  | 9684326  | 9684378  | 1        | -0.210649   | 5    | 7.80E-05 | 0.00027  | 0.64062  | 0.85127  | 0.000422981 | Intergenic | NA           | NA       |
| 12  | 9691329  | 9691370  | 1        | -0.248739   | 5    | 7.10E-06 | 7.20E-06 | 0.31218  | 0.56092  | 5.86E-05    | Intergenic | NA           | NA       |
| 12  | 9787258  | 9787353  | 1        | -0.315714   | 5    | 1.80E-07 | 3.30E-06 | 0.20781  | 0.52352  | 2.78E-06    | Intergenic | NA           | NA       |
| 12  | 10189812 | 10189910 | 1        | -0.303529   | 5    | 1.30E-05 | 0.00027  | 0.19832  | 0.50185  | 9.66E-05    | Intragenic | NM_013111    | Slc7a1   |
| 12  | 10198435 | 10198625 | 1        | -0.078545   | 5    | 1.90E-06 | 7.50E-06 | 0.005    | 0.083545 | 2.01E-05    | Intragenic | NM_001100989 | Mtus2    |
| 12  | 10258295 | 10258349 | 1        | -0.100112   | 5    | 0.011    | 0.13     | 0.33766  | 0.43777  | 0.02463877  | Intergenic | NA           | NA       |
| 12  | 10294249 | 10294292 | 1        | -0.122936   | 5    | 0.0058   | 0.088    | 0.40181  | 0.52475  | 0.014624129 | Intergenic | NA           | NA       |
| 12  | 10307983 | 10308084 | 1        | -0.155667   | 5    | 0.008    | 0.038    | 0.18928  | 0.34494  | 0.019059477 | Intergenic | NA           | NA       |
| 12  | 10342364 | 10342490 | 1        | -0.185467   | 5    | 0.0016   | 0.015    | 0.18008  | 0.36554  | 0.005100053 | Intergenic | NA           | NA       |
| 12  | 10525203 | 10525371 | 1        | -0.101015   | 5    | 0.021    | 0.13     | 0.36     | 0.46102  | 0.041207871 | Intergenic | NA           | NA       |
| 12  | 10565485 | 10565530 | 1        | -0.129008   | 5    | 0.016    | 0.18     | 0.62     | 0.749    | 0.033288089 | Intergenic | NA           | NA       |

| chr | start    | stop     | q-value | methy.diff | CpGs | pMWU     | p2DKS    | MCWLS    | MCWHS   | pMWU.fdr    | cgi.type   | transcript             | gene      |
|-----|----------|----------|---------|------------|------|----------|----------|----------|---------|-------------|------------|------------------------|-----------|
| 12  | 10914244 | 10914515 | 1       | -0.083893  | 13   | 0.0051   | 0.09     | 0.29745  | 0.38134 | 0.013208341 | Intergenic | NA                     | NA        |
| 12  | 10940626 | 10940730 | 0.037   | -0.244408  | 5    | 6.30E-08 | 1.10E-07 | 0.11086  | 0.35526 | 1.18E-06    | Intergenic | NA                     | NA        |
| 12  | 11000603 | 11000733 | 1       | -0.127343  | 5    | 0.02     | 0.058    | 0.48179  | 0.60913 | 0.039778219 | Intergenic | NA                     | NA        |
| 12  | 11015687 | 11015916 | 1       | -0.130133  | 7    | 0.002    | 0.027    | 0.14276  | 0.2729  | 0.006079939 | Intergenic | NA                     | NA        |
| 12  | 11028766 | 11028995 | 1       | -0.129887  | 7    | 0.002    | 0.027    | 0.14301  | 0.2729  | 0.006079939 | Intergenic | NA                     | NA        |
| 12  | 11057005 | 11057069 | 1       | -0.085363  | 7    | 0.0069   | 0.078    | 0.35684  | 0.4422  | 0.01685311  | Intergenic | NA                     | NA        |
| 12  | 11174548 | 11174652 | 0.037   | -0.237722  | 5    | 6.30E-08 | 1.10E-07 | 0.11743  | 0.35516 | 1.18E-06    | Intragenic | NM_001309381:NM_019306 | Flt1:Flt1 |
| 12  | 11754587 | 11754629 | 1       | -0.094574  | 5    | 0.00054  | 0.024    | 0.091492 | 0.18607 | 0.002077867 | Intergenic | NA                     | NA        |
| 12  | 11754635 | 11754687 | 1       | -0.144706  | 5    | 1.10E-06 | 1.60E-05 | 0.1657   | 0.31041 | 1.27E-05    | Intergenic | NA                     | NA        |
| 12  | 11970272 | 11970430 | 1       | -0.22773   | 5    | 0.00065  | 0.0054   | 0.24384  | 0.47157 | 0.002426546 | Intragenic | NM_001113570           | Gtf3a     |
| 12  | 12292221 | 12292300 | 1       | -0.061853  | 5    | 0.0094   | 0.015    | 0.19426  | 0.25611 | 0.021723038 | Intergenic | NA                     | NA        |
| 12  | 12449594 | 12449731 | 1       | -0.19701   | 5    | 0.013    | 0.088    | 0.35254  | 0.54955 | 0.028097302 | Intergenic | NA                     | NA        |
| 12  | 12909608 | 12909717 | 1       | -0.123399  | 5    | 0.00097  | 0.0092   | 0.28153  | 0.40493 | 0.003366009 | Intragenic | NM_153312              | Cyp3a2    |
| 12  | 13244285 | 13244351 | 1       | -0.091551  | 5    | 0.0011   | 0.015    | 0.11458  | 0.20613 | 0.003737263 | TSS        | NM_001107119           | Zkscan5   |
| 12  | 13388087 | 13388118 | 1       | -0.081103  | 5    | 0.0058   | 0.059    | 0.14237  | 0.22347 | 0.014624129 | Intragenic | NM_153312              | Cyp3a2    |
| 12  | 14149627 | 14149769 | 1       | -0.105886  | 5    | 0.0016   | 0.015    | 0.060413 | 0.1663  | 0.005100053 | Intergenic | NA                     | NA        |
| 12  | 14160852 | 14160935 | 1       | -0.188647  | 5    | 2.40E-05 | 0.00028  | 0.10743  | 0.29607 | 0.000160049 | Intergenic | NA                     | NA        |
| 12  | 14246663 | 14246733 | 1       | -0.099614  | 9    | 6.30E-06 | 4.80E-05 | 0.14126  | 0.24087 | 5.33E-05    | Intergenic | NA                     | NA        |
| 12  | 14405125 | 14405300 | 1       | -0.105353  | 7    | 9.00E-05 | 0.00016  | 0.050325 | 0.15568 | 0.000476445 | Intergenic | NA                     | NA        |
| 12  | 15160540 | 15160601 | 0.089   | -0.218938  | 5    | 2.80E-07 | 2.80E-07 | 0.020411 | 0.23935 | 4.09E-06    | Intragenic | NM_001107120           | Daglb     |
| 12  | 15265480 | 15265617 | 1       | -0.091784  | 5    | 0.0022   | 0.088    | 0.080528 | 0.17231 | 0.006578104 | Intragenic | NM_001105910           | Grid2ip   |
| 12  | 15368574 | 15369119 | 0.054   | -0.088408  | 30   | 6.20E-14 | 1.70E-07 | 0.11904  | 0.20745 | 7.45E-12    | Intergenic | NA                     | NA        |
| 12  | 15403268 | 15404113 | 1       | -0.09879   | 56   | 0.0039   | 0.011    | 0.32052  | 0.38946 | 0.010605635 | Intragenic | NM_001107121           | Zfp316    |
| 12  | 15404473 | 15404492 | 1       | -0.08538   | 5    | 0.00032  | 0.0032   | 0.065696 | 0.15108 | 0.001346443 | Intragenic | NM_001107121           | Zfp316    |
| 12  | 15404714 | 15404978 | 1       | -0.107599  | 29   | 2.90E-11 | 4.10E-06 | 0.15815  | 0.26575 | 1.44E-09    | Intragenic | NM_001107121           | Zfp316    |
| 12  | 15530145 | 15530240 | 1       | -0.177869  | 7    | 0.0053   | 0.018    | 0.4715   | 0.64937 | 0.013591571 | Intergenic | NA                     | NA        |
| 12  | 15758826 | 15758885 | 1       | -0.190774  | 5    | 7.80E-05 | 0.0031   | 0.11825  | 0.30902 | 0.000422981 | Intergenic | NA                     | NA        |
| 12  | 15893454 | 15893604 | 1       | -0.302529  | 5    | 5.50E-06 | 0.00014  | 0.067965 | 0.37049 | 4.78E-05    | Intragenic | NM_001107123           | Tnrc18    |
| 12  | 15898117 | 15898166 | 1       | -0.195151  | 5    | 0.0038   | 0.038    | 0.39811  | 0.59326 | 0.010352437 | Intragenic | NM_001107123           | Tnrc18    |
| 12  | 16118085 | 16118186 | 1       | -0.206799  | 5    | 1.20E-05 | 0.00014  | 0.12841  | 0.33521 | 9.15E-05    | Intergenic | NA                     | NA        |
| 12  | 16140332 | 16140374 | 1       | -0.079505  | 5    | 0.0027   | 0.058    | 0.11775  | 0.19725 | 0.007840962 | TSS        | NM_001012020           | Papolb    |
| 12  | 16140555 | 16140601 | 1       | -0.097876  | 5    | 0.023    | 0.024    | 0.25361  | 0.35148 | 0.04441443  | TSS        | NM_001012020           | Papolb    |
| 12  | 16352783 | 16352870 | 1       | -0.079337  | 5    | 0.00097  | 0.0018   | 0.076179 | 0.15552 | 0.003366009 | Intergenic | NA                     | NA        |
| 12  | 16728912 | 16728945 | 1       | -0.158653  | 5    | 0.017    | 0.0086   | 0.50607  | 0.66473 | 0.034796287 | Intergenic | NA                     | NA        |
| 12  | 17072401 | 17072522 | 1       | 0.17708    | 5    | 0.0041   | 0.0053   | 0.38784  | 0.21076 | 0.01100507  | Intergenic | NA                     | NA        |
| 12  | 17178395 | 17178456 | 1       | -0.121077  | 5    | 0.02     | 0.088    | 0.60074  | 0.72182 | 0.039778219 | Intergenic | NA                     | NA        |
| 12  | 17324011 | 17324215 | 1       | -0.161113  | 5    | 3.50E-05 | 0.00028  | 0.044099 | 0.20521 | 0.000218038 | Intergenic | NA                     | NA        |
| 12  | 17326755 | 17326830 | 1       | -0.145174  | 5    | 0.00021  | 0.0032   | 0.37297  | 0.51814 | 0.000951214 | Intergenic | NA                     | NA        |

| chr | start    | stop     | q-value | methyI.diff | CpGs | pMWU     | p2DKS    | MCWLS    | MCWHS   | pMWU.fdr    | cgi.type   | transcript   | gene      |
|-----|----------|----------|---------|-------------|------|----------|----------|----------|---------|-------------|------------|--------------|-----------|
| 12  | 17824819 | 17824863 | 1       | -0.13694    | 5    | 1.30E-05 | 0.00014  | 0.23156  | 0.3685  | 9.66E-05    | Intergenic | NA           | NA        |
| 12  | 18112694 | 18112848 | 1       | -0.174696   | 5    | 1.90E-05 | 0.00053  | 0.26894  | 0.44363 | 0.000131674 | Intergenic | NA           | NA        |
| 12  | 18742308 | 18742435 | 1       | -0.225231   | 9    | 2.20E-06 | 0.0019   | 0.24642  | 0.47165 | 2.27E-05    | Intragenic | NM_001105913 | Elfn1     |
| 12  | 18742707 | 18742757 | 1       | -0.148756   | 5    | 0.019    | 0.18     | 0.28887  | 0.43763 | 0.038322088 | Intragenic | NM_001105913 | Elfn1     |
| 12  | 19054921 | 19055283 | 1       | -0.084717   | 5    | 0.00039  | 0.0092   | 0.06682  | 0.15154 | 0.001587612 | Intergenic | NA           | NA        |
| 12  | 19125012 | 19125111 | 1       | -0.10554    | 5    | 0.021    | 0.057    | 0.20689  | 0.31243 | 0.041207871 | Intergenic | NA           | NA        |
| 12  | 19139513 | 19139613 | 1       | -0.080259   | 9    | 0.00079  | 0.0004   | 0.76417  | 0.84443 | 0.002866309 | Intergenic | NA           | NA        |
| 12  | 19146172 | 19146322 | 1       | -0.07101    | 5    | 0.023    | 0.038    | 0.14757  | 0.21858 | 0.04441443  | Intergenic | NA           | NA        |
| 12  | 19162722 | 19162806 | 1       | -0.091853   | 5    | 0.0032   | 0.024    | 0.16574  | 0.25759 | 0.008990975 | Intergenic | NA           | NA        |
| 12  | 19164838 | 19164890 | 1       | -0.053596   | 9    | 0.0014   | 0.0059   | 0.10558  | 0.15917 | 0.004540837 | Intergenic | NA           | NA        |
| 12  | 19201377 | 19201450 | 1       | -0.066818   | 5    | 0.00019  | 0.0055   | 0.043611 | 0.11043 | 0.000879857 | Intragenic | NM_001047923 | LOC498152 |
| 12  | 19347102 | 19347198 | 0.2     | -0.110026   | 7    | 9.70E-09 | 6.20E-07 | 0.050547 | 0.16057 | 2.44E-07    | TSS        | NM_001109062 | Gpr146    |
| 12  | 19354449 | 19354631 | 1       | -0.134153   | 5    | 0.0035   | 0.0092   | 0.16179  | 0.29595 | 0.009686665 | TSS        | NR_031784    | Mir339    |
| 12  | 19370005 | 19370194 | 1       | -0.169283   | 10   | 2.80E-06 | 0.002    | 0.22578  | 0.39507 | 2.79E-05    | Intergenic | NA           | NA        |
| 12  | 19995400 | 19995486 | 1       | -0.252452   | 5    | 0.00017  | 0.0092   | 0.30677  | 0.55922 | 0.000806192 | Intergenic | NA           | NA        |
| 12  | 20620873 | 20621330 | 1       | -0.104877   | 7    | 0.014    | 0.077    | 0.30242  | 0.40729 | 0.029850603 | Intergenic | NA           | NA        |
| 12  | 21451730 | 21451820 | 1       | -0.232374   | 5    | 0.00054  | 0.0054   | 0.19386  | 0.42624 | 0.002077867 | Intergenic | NA           | NA        |
| 12  | 21651533 | 21651960 | 1       | -0.114487   | 26   | 1.40E-08 | 5.30E-06 | 0.18214  | 0.29662 | 3.31E-07    | Intragenic | NM_138511    | Gpc2      |
| 12  | 23774923 | 23775040 | 1       | -0.182075   | 5    | 0.0068   | 0.13     | 0.36156  | 0.54363 | 0.016642688 | Intragenic | NM_001044284 | Tsc22d4   |
| 12  | 24031695 | 24031812 | 1       | -0.182075   | 5    | 0.0068   | 0.13     | 0.36156  | 0.54363 | 0.016642688 | Intragenic | NM_001044284 | Tsc22d4   |
| 12  | 24160534 | 24160620 | 0.023   | -0.261745   | 7    | 6.60E-09 | 7.00E-08 | 0.5504   | 0.81214 | 1.72E-07    | TSS        | NM_001107130 | Fbxo24    |
| 12  | 24206153 | 24206192 | 1       | -0.076045   | 5    | 0.02     | 0.18     | 0.10707  | 0.18311 | 0.039778219 | Intragenic | NM_001105916 | Tfr2      |
| 12  | 24206281 | 24206474 | 1       | -0.122941   | 5    | 0.0022   | 0.0032   | 0.20735  | 0.33029 | 0.006578104 | Intragenic | NM_001105916 | Tfr2      |
| 12  | 24206530 | 24206589 | 1       | -0.090208   | 5    | 0.0087   | 0.088    | 0.72169  | 0.8119  | 0.020391633 | Intragenic | NM_001105916 | Tfr2      |
| 12  | 24291882 | 24291963 | 1       | -0.090604   | 5    | 0.00097  | 0.00051  | 0.046261 | 0.13686 | 0.003366009 | TSS        | NM_017001    | Epo       |
| 12  | 24466115 | 24466410 | 1       | -0.091064   | 5    | 1.30E-05 | 3.40E-05 | 0.018986 | 0.11005 | 9.66E-05    | TSS        | NM_001127570 | Trip6     |
| 12  | 24466537 | 24466949 | 1       | -0.208746   | 5    | 5.60E-07 | 7.50E-06 | 0.080603 | 0.28935 | 7.29E-06    | TSS        | NM_001127570 | Trip6     |
| 12  | 24996406 | 24996567 | 1       | -0.130346   | 5    | 0.0035   | 0.038    | 0.31372  | 0.44406 | 0.009686665 | Intergenic | NA           | NA        |
| 12  | 25071916 | 25072036 | 1       | -0.092978   | 5    | 0.011    | 0.015    | 0.11739  | 0.21037 | 0.02463877  | Intergenic | NA           | NA        |
| 12  | 25315187 | 25315277 | 1       | -0.050962   | 10   | 0.0017   | 0.00016  | 0.11599  | 0.16695 | 0.005339493 | Intergenic | NA           | NA        |
| 12  | 25570891 | 25570940 | 1       | -0.148498   | 5    | 0.02     | 0.088    | 0.47481  | 0.6233  | 0.039778219 | Intragenic | NM_001105920 | Alkbh4    |
| 12  | 25994986 | 25995078 | 1       | -0.191399   | 5    | 0.00015  | 0.00014  | 0.24     | 0.4314  | 0.000724207 | Intragenic | NM_001010945 | Tmem120a  |
| 12  | 26652352 | 26652697 | 0.002   | -0.169166   | 9    | 4.80E-11 | 6.20E-09 | 0.023784 | 0.19295 | 2.27E-09    | TSS        | NM_001128193 | Vps37d    |
| 12  | 26745213 | 26745270 | 0.0058  | -0.193802   | 5    | 6.30E-08 | 1.80E-08 | 0.043775 | 0.23758 | 1.18E-06    | Intergenic | NA           | NA        |
| 12  | 26762037 | 26762131 | 0.77    | -0.166445   | 7    | 1.20E-07 | 2.40E-06 | 0.095763 | 0.26221 | 2.01E-06    | TSS        | NM_001012022 | Cldn4     |
| 12  | 26864249 | 26864354 | 1       | -0.18328    | 9    | 0.00019  | 0.0014   | 0.29344  | 0.47672 | 0.000879857 | Intergenic | NA           | NA        |
| 12  | 26918116 | 26918213 | 1       | -0.129725   | 9    | 0.0033   | 0.024    | 0.24026  | 0.36998 | 0.009256793 | Intergenic | NA           | NA        |
| 12  | 26969572 | 26969731 | 1       | -0.053818   | 10   | 0.0029   | 0.054    | 0.11574  | 0.16956 | 0.008293503 | Intergenic | NA           | NA        |
| 12  | 27153317 | 27153551 | 1       | -0.125925   | 7    | 0.00026  | 0.0021   | 0.084188 | 0.21011 | 0.001130807 | Intergenic | NA           | NA        |

| chr | start    | stop     | q-value  | methy.diff | CpGs | pMWU     | p2DKS    | MCWLS    | MCWHS    | pMWU.fdr    | cgi.type   | transcript   | gene    |
|-----|----------|----------|----------|------------|------|----------|----------|----------|----------|-------------|------------|--------------|---------|
| 12  | 27203834 | 27203902 | 1        | -0.130045  | 5    | 0.0068   | 0.088    | 0.44386  | 0.5739   | 0.016642688 | Intragenic | NM_021997    | Clip2   |
| 12  | 27512968 | 27513169 | 1.10E-08 | -0.085966  | 19   | 4.30E-14 | 3.50E-14 | 0.018259 | 0.10423  | 6.64E-12    | Intragenic | NM_053734    | Ncf1    |
| 12  | 30704331 | 30704435 | 1        | -0.152563  | 5    | 0.0013   | 0.024    | 0.28244  | 0.435    | 0.004277683 | Intragenic | NM_001025112 | Wbscr17 |
| 12  | 30927459 | 30927596 | 6.30E-08 | -0.110658  | 13   | 4.60E-14 | 2.00E-13 | 0.019595 | 0.13025  | 6.64E-12    | Intragenic | NM_001025112 | Wbscr17 |
| 12  | 31237189 | 31237273 | 1        | -0.211535  | 5    | 6.20E-05 | 0.00094  | 0.2685   | 0.48004  | 0.000349462 | Intergenic | NA           | NA      |
| 12  | 31597385 | 31597449 | 1        | -0.109795  | 5    | 0.017    | 0.037    | 0.18134  | 0.29113  | 0.034796287 | Intragenic | NM_001077201 | Caln1   |
| 12  | 31644179 | 31644341 | 1        | -0.110515  | 6    | 0.017    | 0.026    | 0.17074  | 0.28125  | 0.034796287 | Intragenic | NM_001077201 | Caln1   |
| 12  | 31645379 | 31645437 | 1        | -0.052968  | 5    | 0.0087   | 0.038    | 0.064495 | 0.11746  | 0.020391633 | Intragenic | NM_001077201 | Caln1   |
| 12  | 31864471 | 31864574 | 1        | -0.135764  | 5    | 0.014    | 0.039    | 0.42033  | 0.55609  | 0.029850603 | Intragenic | NM_001008289 | Sbds    |
| 12  | 32048459 | 32048693 | 1        | -0.186746  | 7    | 5.80E-07 | 0.00049  | 0.079527 | 0.26627  | 7.50E-06    | Intergenic | NA           | NA      |
| 12  | 32104235 | 32104296 | 1        | -0.239564  | 5    | 0.0024   | 0.025    | 0.34732  | 0.58689  | 0.00705499  | Intragenic | NM_021577    | Asl     |
| 12  | 32375533 | 32375680 | 1        | -0.109056  | 7    | 0.00093  | 0.00082  | 0.63816  | 0.74722  | 0.003255406 | Intergenic | NA           | NA      |
| 12  | 32463339 | 32463376 | 1        | -0.17544   | 5    | 7.10E-06 | 3.30E-05 | 0.15806  | 0.3335   | 5.86E-05    | Intragenic | NM_001009679 | Psph    |
| 12  | 32471021 | 32471151 | 1        | -0.143488  | 5    | 0.0019   | 0.0093   | 0.25265  | 0.39614  | 0.005855937 | Intragenic | NM_001017486 | Gbas    |
| 12  | 32476242 | 32476289 | 0.0021   | -0.455712  | 5    | 6.30E-08 | 6.60E-09 | 0.20374  | 0.65945  | 1.18E-06    | Intragenic | NM_001017486 | Gbas    |
| 12  | 33026738 | 33026847 | 1        | -0.17293   | 5    | 7.80E-05 | 0.00052  | 0.12541  | 0.29834  | 0.000422981 | Intergenic | NA           | NA      |
| 12  | 33164795 | 33164929 | 1        | -0.128297  | 8    | 0.00011  | 0.00015  | 0.13072  | 0.25902  | 0.000565143 | Intergenic | NA           | NA      |
| 12  | 33217135 | 33217249 | 1        | -0.192062  | 5    | 0.011    | 0.057    | 0.28023  | 0.47229  | 0.02463877  | Intergenic | NA           | NA      |
| 12  | 33505141 | 33505370 | 1        | -0.137433  | 9    | 0.013    | 0.046    | 0.43579  | 0.57322  | 0.028097302 | Intragenic | NM_001100488 | Rimbp2  |
| 12  | 33577447 | 33577527 | 1        | -0.130295  | 5    | 6.30E-06 | 1.60E-05 | 0.22632  | 0.35661  | 5.33E-05    | Intergenic | NA           | NA      |
| 12  | 33587149 | 33587249 | 5.90E-07 | -0.245128  | 12   | 5.10E-14 | 1.80E-12 | 0.27401  | 0.51914  | 6.72E-12    | Intergenic | NA           | NA      |
| 12  | 33814415 | 33814527 | 1        | -0.249035  | 5    | 2.50E-06 | 7.10E-05 | 0.053048 | 0.30208  | 2.52E-05    | Intergenic | NA           | NA      |
| 12  | 34842768 | 34842942 | 1        | -0.235821  | 7    | 1.20E-05 | 0.0013   | 0.33689  | 0.57271  | 9.15E-05    | Intergenic | NA           | NA      |
| 12  | 34880198 | 34880294 | 1        | -0.139648  | 5    | 0.002    | 0.00014  | 0.12813  | 0.26778  | 0.006079939 | Intergenic | NA           | NA      |
| 12  | 35328974 | 35329050 | 1        | -0.120662  | 5    | 0.025    | 0.039    | 0.57311  | 0.69377  | 0.047453009 | Intergenic | NA           | NA      |
| 12  | 35353826 | 35353914 | 1        | -0.1066    | 5    | 0.0029   | 0.059    | 0.10722  | 0.21382  | 0.008293503 | Intergenic | NA           | NA      |
| 12  | 35673181 | 35673384 | 1        | -0.070676  | 8    | 0.0042   | 0.07     | 0.13983  | 0.21051  | 0.011250869 | Intergenic | NA           | NA      |
| 12  | 35721344 | 35721487 | 1        | -0.120979  | 9    | 0.0034   | 0.02     | 0.28401  | 0.40499  | 0.009519525 | Intergenic | NA           | NA      |
| 12  | 37443579 | 37443809 | 1        | -0.076778  | 10   | 0.023    | 0.15     | 0.69705  | 0.77382  | 0.04441443  | Intergenic | NA           | NA      |
| 12  | 38430158 | 38430279 | 1        | -0.281889  | 6    | 3.90E-07 | 2.40E-05 | 0.14077  | 0.42266  | 5.46E-06    | Intergenic | NA           | NA      |
| 12  | 38530559 | 38530903 | 3.80E-11 | -0.175433  | 17   | 4.10E-14 | 1.20E-16 | 0.030527 | 0.20596  | 6.64E-12    | Intergenic | NA           | NA      |
| 12  | 38666528 | 38666588 | 1        | -0.054322  | 5    | 0.008    | 0.015    | 0.099193 | 0.15352  | 0.019059477 | Intergenic | NA           | NA      |
| 12  | 38751813 | 38751898 | 1        | -0.087414  | 5    | 0.00036  | 0.00095  | 0.058537 | 0.14595  | 0.001486639 | Intragenic | NM_001108334 | Ncor2   |
| 12  | 38785822 | 38786093 | 8.50E-12 | -0.081835  | 16   | 4.10E-14 | 2.60E-17 | 0.004891 | 0.086726 | 6.64E-12    | Intragenic | NM_001108334 | Ncor2   |
| 12  | 38820212 | 38820276 | 1        | -0.124863  | 5    | 0.00017  | 0.00028  | 0.1238   | 0.24866  | 0.000806192 | Intragenic | NM_001108334 | Ncor2   |
| 12  | 38844231 | 38844320 | 1        | -0.099098  | 5    | 0.0012   | 0.039    | 0.093652 | 0.19275  | 0.004013471 | Intragenic | NM_001108334 | Ncor2   |
| 12  | 38867583 | 38867644 | 1        | -0.083101  | 5    | 0.0022   | 0.038    | 0.02697  | 0.11007  | 0.006578104 | Intragenic | NM_001108334 | Ncor2   |
| 12  | 38867991 | 38868108 | 1        | -0.153811  | 5    | 0.0041   | 0.025    | 0.26361  | 0.41742  | 0.01100507  | Intragenic | NM_001108334 | Ncor2   |
| 12  | 38883983 | 38884049 | 1        | -0.128012  | 5    | 0.013    | 0.038    | 0.43019  | 0.5582   | 0.028097302 | Intragenic | NM_001108334 | Ncor2   |



| chr | start    | stop     | q-value  | methy.diff | CpGs | pMWU     | p2DKS    | MCWLS     | MCWHS    | pMWU.fdr    | cgi.type   | transcript             | gene         |
|-----|----------|----------|----------|------------|------|----------|----------|-----------|----------|-------------|------------|------------------------|--------------|
| 12  | 38885049 | 38885523 | 1        | -0.153744  | 7    | 7.70E-06 | 0.00047  | 0.094036  | 0.24778  | 6.32E-05    | Intragenic | NM_001108334           | Ncor2        |
| 12  | 38924065 | 38924168 | 1        | -0.133484  | 5    | 0.00017  | 0.00053  | 0.096897  | 0.23038  | 0.000806192 | TSS        | NM_001109547           | Fam101a      |
| 12  | 39013985 | 39014079 | 1        | -0.105572  | 5    | 7.80E-05 | 0.003    | 0.10709   | 0.21266  | 0.000422981 | Intergenic | NA                     | NA           |
| 12  | 39142690 | 39142819 | 1        | -0.136499  | 8    | 0.00012  | 0.012    | 0.22218   | 0.35868  | 0.000603617 | Intergenic | NA                     | NA           |
| 12  | 39146549 | 39146871 | 1        | -0.187775  | 5    | 0.0094   | 0.038    | 0.69678   | 0.88456  | 0.021723038 | Intergenic | NA                     | NA           |
| 12  | 39196588 | 39196824 | 1        | -0.184751  | 12   | 4.40E-07 | 0.00021  | 0.19623   | 0.38098  | 6.02E-06    | Intergenic | NA                     | NA           |
| 12  | 39429537 | 39429596 | 1        | -0.18379   | 5    | 0.0045   | 0.0055   | 0.29405   | 0.47784  | 0.011905878 | Intergenic | NA                     | NA           |
| 12  | 39656725 | 39656892 | 1        | -0.190851  | 5    | 0.008    | 0.038    | 0.23498   | 0.42583  | 0.019059477 | Intergenic | NA                     | NA           |
| 12  | 39872998 | 39873424 | 1        | -0.132885  | 10   | 0.0081   | 0.04     | 0.35796   | 0.49085  | 0.019293895 | Intragenic | NM_001105928           | Vps37b       |
| 12  | 39894314 | 39894469 | 1        | -0.143579  | 5    | 0.013    | 0.024    | 0.13142   | 0.275    | 0.028097302 | Intragenic | NM_001105928           | Vps37b       |
| 12  | 40015971 | 40016014 | 1        | -0.2018    | 5    | 1.90E-05 | 0.00014  | 0.12756   | 0.32936  | 0.000131674 | TSS        | NM_001145334           | Gpr81        |
| 12  | 40565890 | 40566303 | 0.00022  | -0.190446  | 13   | 7.50E-13 | 6.70E-10 | 0.058638  | 0.24908  | 5.89E-11    | Intergenic | NA                     | NA           |
| 12  | 40655470 | 40655543 | 1        | -0.170841  | 5    | 0.0012   | 0.025    | 0.19551   | 0.36635  | 0.004013471 | Intergenic | NA                     | NA           |
| 12  | 40703254 | 40703327 | 1        | -0.216811  | 5    | 0.0022   | 0.0053   | 0.49857   | 0.71538  | 0.006578104 | Intergenic | NA                     | NA           |
| 12  | 40775199 | 40775491 | 3.30E-05 | -0.109302  | 17   | 5.20E-14 | 1.00E-10 | 0.019837  | 0.12914  | 6.72E-12    | Intergenic | NA                     | NA           |
| 12  | 40793957 | 40794188 | 1        | -0.169988  | 8    | 0.00012  | 0.0026   | 0.27936   | 0.44935  | 0.000603617 | Intragenic | NM_001271309           | Tmem120b     |
| 12  | 40805856 | 40805962 | 1        | -0.245877  | 5    | 1.70E-06 | 0.00014  | 0.096699  | 0.34258  | 1.83E-05    | Intragenic | NM_001271309           | Tmem120b     |
| 12  | 41006537 | 41006615 | 1        | -0.162258  | 5    | 0.017    | 0.18     | 0.34057   | 0.50283  | 0.034796287 | Intragenic | NM_001100679           | Kdm2b        |
| 12  | 41035306 | 41035514 | 1        | -0.145765  | 18   | 0.00018  | 0.0012   | 0.40115   | 0.54692  | 0.000849258 | Intragenic | NM_001100679:NM_031338 | Kdm2b:Camkk2 |
| 12  | 41183821 | 41184198 | 1        | -0.128745  | 8    | 0.013    | 0.068    | 0.20699   | 0.33574  | 0.028097302 | Intragenic | NM_031338              | Camkk2       |
| 12  | 41284403 | 41284500 | 1        | -0.056893  | 5    | 0.0008   | 0.0092   | 0.056574  | 0.11347  | 0.002866309 | TSS        | NM_019256              | P2rx7        |
| 12  | 41284505 | 41284671 | 1        | -0.117969  | 10   | 6.80E-05 | 0.0019   | 0.25054   | 0.36851  | 0.000379896 | TSS        | NM_019256              | P2rx7        |
| 12  | 41412825 | 41412935 | 1        | -0.152674  | 5    | 1.70E-05 | 0.00027  | 0.057538  | 0.21021  | 0.000120524 | Intergenic | NA                     | NA           |
| 12  | 41620759 | 41620915 | 0.6      | -0.215926  | 9    | 3.90E-09 | 1.80E-06 | 0.14464   | 0.36056  | 1.06E-07    | Intragenic | NM_001107141           | Pptc7        |
| 12  | 41620919 | 41620990 | 1        | -0.137167  | 5    | 0.0094   | 0.038    | 0.1746    | 0.31177  | 0.021723038 | Intragenic | NM_001107141           | Pptc7        |
| 12  | 41621836 | 41622044 | 1        | -0.130311  | 10   | 0.00066  | 0.012    | 0.524     | 0.65431  | 0.002462347 | Intragenic | NM_001107141           | Pptc7        |
| 12  | 41777275 | 41777417 | 1        | -0.12192   | 7    | 0.0004   | 0.019    | 0.12156   | 0.24348  | 0.00162337  | Intergenic | NA                     | NA           |
| 12  | 41793456 | 41794061 | 1        | -0.095487  | 14   | 0.0028   | 0.004    | 0.18162   | 0.2771   | 0.008113721 | Intragenic | NM_001025665           | Ccdc63       |
| 12  | 41894659 | 41894749 | 1        | -0.053396  | 7    | 0.015    | 0.038    | 0.088356  | 0.14175  | 0.031584896 | TSS        | NM_001271380           | Cux2         |
| 12  | 42059786 | 42060135 | 1        | -0.097082  | 6    | 0.0013   | 0.0026   | 0.13384   | 0.23092  | 0.004277683 | Intragenic | NM_001271380           | Cux2         |
| 12  | 42072848 | 42072962 | 1        | -0.172689  | 5    | 0.00097  | 0.0018   | 0.53026   | 0.70295  | 0.003366009 | Intragenic | NM_001271380           | Cux2         |
| 12  | 42112971 | 42113187 | 1        | 0.064921   | 8    | 8.30E-05 | 0.00025  | 0.12915   | 0.064232 | 0.00044747  | Intergenic | NA                     | NA           |
| 12  | 42122758 | 42122813 | 1        | -0.188656  | 5    | 1.50E-06 | 7.50E-06 | 0.076412  | 0.26507  | 1.65E-05    | Intergenic | NA                     | NA           |
| 12  | 42123237 | 42123289 | 1        | -0.14909   | 5    | 0.0011   | 0.0055   | 0.084137  | 0.23323  | 0.003737263 | Intergenic | NA                     | NA           |
| 12  | 42253999 | 42254212 | 1        | -0.115603  | 7    | 0.0051   | 0.0034   | 0.10687   | 0.22247  | 0.013208341 | Intragenic | NM_001271194           | Brap         |
| 12  | 42298228 | 42298336 | 1        | -0.224683  | 5    | 0.0063   | 0.038    | 0.34095   | 0.56563  | 0.015629046 | Intragenic | NM_001134537           | Acad10       |
| 12  | 42517538 | 42517660 | 3.20E-05 | -0.216332  | 7    | 1.80E-10 | 9.90E-11 | 0.0020216 | 0.21835  | 7.51E-09    | Intragenic | NM_001047900           | Naa25        |
| 12  | 42547079 | 42547102 | 1        | -0.162871  | 5    | 3.10E-05 | 0.0018   | 0.11773   | 0.2806   | 0.000197418 | TSS        | NM_001047900           | Naa25        |

| chr | start    | stop     | q-value  | methyL.diff | CpGs | pMWU     | p2DKS    | MCWLS    | MCWHS    | pMWU.fdr    | cgi.type   | transcript                    | gene        |
|-----|----------|----------|----------|-------------|------|----------|----------|----------|----------|-------------|------------|-------------------------------|-------------|
| 12  | 43217223 | 43217518 | 1        | -0.052792   | 10   | 0.0041   | 0.015    | 0.052542 | 0.10533  | 0.01100507  | Intragenic | NM_001009715                  | Oas2        |
| 12  | 43254949 | 43255411 | 1        | -0.122729   | 11   | 0.0082   | 0.047    | 0.47266  | 0.59539  | 0.019516617 | Intergenic | NA                            | NA          |
| 12  | 43259171 | 43259206 | 1        | -0.084166   | 5    | 0.0045   | 0.059    | 0.16644  | 0.2506   | 0.011905878 | Intergenic | NA                            | NA          |
| 12  | 43273757 | 43273900 | 1        | -0.157876   | 5    | 8.10E-06 | 0.00014  | 0.10333  | 0.26121  | 6.58E-05    | Intergenic | NA                            | NA          |
| 12  | 43279577 | 43279673 | 1        | -0.185586   | 5    | 0.0049   | 0.024    | 0.32633  | 0.51192  | 0.012753585 | Intragenic | NM_001108335                  | Rasal1      |
| 12  | 43288289 | 43288688 | 1        | -0.133221   | 9    | 0.0017   | 0.0082   | 0.24582  | 0.37904  | 0.005339493 | Intragenic | NM_001108335                  | Rasal1      |
| 12  | 43344236 | 43344309 | 1        | -0.085657   | 7    | 0.011    | 0.019    | 0.27145  | 0.35711  | 0.02463877  | TSS        | NM_001191548:N<br>M_001044226 | Ddx54:Rita1 |
| 12  | 43375603 | 43375925 | 1        | -0.124775   | 9    | 0.00021  | 0.0027   | 0.088001 | 0.21278  | 0.000951214 | Intragenic | NM_139332                     | Tpcn1       |
| 12  | 43393324 | 43393435 | 1        | -0.156689   | 5    | 1.70E-06 | 7.60E-06 | 0.035693 | 0.19238  | 1.83E-05    | Intragenic | NM_139332                     | Tpcn1       |
| 12  | 43416460 | 43416638 | 1        | -0.193429   | 8    | 0.00091  | 0.026    | 0.45229  | 0.64572  | 0.003192838 | Intragenic | NM_139332                     | Tpcn1       |
| 12  | 43482724 | 43482882 | 1        | -0.094511   | 5    | 0.0041   | 0.038    | 0.084296 | 0.17881  | 0.01100507  | Intergenic | NA                            | NA          |
| 12  | 43505814 | 43505980 | 1        | -0.111709   | 9    | 1.90E-08 | 3.20E-06 | 0.054185 | 0.16589  | 4.37E-07    | Intergenic | NA                            | NA          |
| 12  | 43677174 | 43677213 | 1        | -0.068494   | 5    | 0.019    | 0.18     | 0.065521 | 0.13401  | 0.038322088 | Intergenic | NA                            | NA          |
| 12  | 43706452 | 43706622 | 1        | -0.107647   | 5    | 0.0087   | 0.038    | 0.09909  | 0.20674  | 0.020391633 | Intergenic | NA                            | NA          |
| 12  | 43971454 | 43971674 | 1        | -0.111921   | 5    | 0.012    | 0.088    | 0.29726  | 0.40918  | 0.026435197 | Intragenic | NM_001009964                  | Tbx5        |
| 12  | 44400750 | 44400817 | 1        | -0.060909   | 5    | 0.0035   | 0.0055   | 0.087574 | 0.14848  | 0.009686665 | Intergenic | NA                            | NA          |
| 12  | 44622688 | 44622780 | 1        | -0.17316    | 5    | 0.0032   | 0.025    | 0.32713  | 0.50029  | 0.008990975 | Intergenic | NA                            | NA          |
| 12  | 44735916 | 44736273 | 1        | -0.125632   | 5    | 0.0038   | 0.0088   | 0.18698  | 0.31261  | 0.010352437 | Intergenic | NA                            | NA          |
| 12  | 44736334 | 44736437 | 1        | -0.095723   | 5    | 0.017    | 0.18     | 0.14906  | 0.24478  | 0.034796287 | Intergenic | NA                            | NA          |
| 12  | 44749368 | 44749423 | 1        | -0.200069   | 5    | 1.90E-06 | 0.00014  | 0.11963  | 0.3197   | 2.01E-05    | Intergenic | NA                            | NA          |
| 12  | 44874523 | 44874794 | 1        | -0.059177   | 15   | 8.80E-05 | 0.015    | 0.098205 | 0.15738  | 0.000466886 | Intergenic | NA                            | NA          |
| 12  | 45051414 | 45051558 | 1        | -0.190385   | 5    | 0.011    | 0.13     | 0.29273  | 0.48312  | 0.02463877  | Intergenic | NA                            | NA          |
| 12  | 45250219 | 45250322 | 1        | -0.178819   | 5    | 0.008    | 0.039    | 0.31955  | 0.49837  | 0.019059477 | Intergenic | NA                            | NA          |
| 12  | 45543162 | 45543266 | 1        | -0.131692   | 5    | 0.0041   | 0.059    | 0.18572  | 0.31742  | 0.01100507  | Intergenic | NA                            | NA          |
| 12  | 45543303 | 45543511 | 1        | -0.051133   | 7    | 0.00031  | 0.00077  | 0.024868 | 0.076002 | 0.001320549 | Intergenic | NA                            | NA          |
| 12  | 45647816 | 45647999 | 1        | -0.173146   | 7    | 0.0046   | 0.072    | 0.31331  | 0.48646  | 0.012157071 | Intergenic | NA                            | NA          |
| 12  | 45696078 | 45696191 | 1        | -0.054135   | 8    | 0.0042   | 0.0088   | 0.75346  | 0.80759  | 0.011250869 | Intergenic | NA                            | NA          |
| 12  | 46008318 | 46008624 | 1        | -0.130175   | 12   | 1.30E-05 | 0.0014   | 0.139    | 0.26918  | 9.66E-05    | Intergenic | NA                            | NA          |
| 12  | 46246321 | 46246510 | 1        | -0.138076   | 6    | 0.01     | 0.084    | 0.40559  | 0.54367  | 0.02275947  | Intergenic | NA                            | NA          |
| 12  | 46300665 | 46300783 | 1        | -0.056039   | 5    | 0.00012  | 0.00053  | 0.027263 | 0.083302 | 0.000603617 | Intergenic | NA                            | NA          |
| 12  | 46583663 | 46583770 | 1        | -0.189758   | 8    | 0.00037  | 0.018    | 0.35521  | 0.54497  | 0.001526885 | Intergenic | NA                            | NA          |
| 12  | 46601443 | 46601599 | 1        | -0.178977   | 7    | 1.90E-06 | 2.70E-05 | 0.14176  | 0.32073  | 2.01E-05    | Intergenic | NA                            | NA          |
| 12  | 46640478 | 46640580 | 1        | -0.105613   | 5    | 0.017    | 0.13     | 0.14666  | 0.25227  | 0.034796287 | Intergenic | NA                            | NA          |
| 12  | 46829511 | 46829582 | 1        | -0.073274   | 5    | 5.00E-05 | 0.00098  | 0.063369 | 0.13664  | 0.000291675 | Intergenic | NA                            | NA          |
| 12  | 46890964 | 46891149 | 1        | -0.129633   | 8    | 0.018    | 0.019    | 0.28345  | 0.41309  | 0.036742993 | Intragenic | NM_001024254                  | Taok3       |
| 12  | 47002216 | 47002320 | 1        | -0.160429   | 5    | 0.0022   | 0.0091   | 0.21412  | 0.37455  | 0.006578104 | TSS        | NM_001024254                  | Taok3       |
| 12  | 47123851 | 47124111 | 9.00E-05 | -0.183418   | 17   | 4.40E-14 | 2.80E-10 | 0.083075 | 0.26649  | 6.64E-12    | Intergenic | NA                            | NA          |
| 12  | 47631486 | 47631581 | 1        | -0.23762    | 7    | 5.80E-08 | 8.80E-06 | 0.24059  | 0.47821  | 1.17E-06    | Intergenic | NA                            | NA          |

| chr | start    | stop     | q-value | methy1.diff | CpGs | pMWU     | p2DKS    | MCWLS    | MCWHS    | pMWU.fdr    | cgi.type   | transcript                                  | gene                  |
|-----|----------|----------|---------|-------------|------|----------|----------|----------|----------|-------------|------------|---------------------------------------------|-----------------------|
| 12  | 47684788 | 47684847 | 1       | -0.083958   | 5    | 0.0011   | 0.0032   | 0.042617 | 0.12657  | 0.003737263 | Intergenic | NA                                          | NA                    |
| 12  | 47694927 | 47694975 | 1       | 0.094791    | 5    | 0.00012  | 0.0018   | 0.21939  | 0.12459  | 0.000603617 | Intergenic | NA                                          | NA                    |
| 12  | 48018042 | 48018084 | 1       | -0.23593    | 5    | 0.00039  | 0.0093   | 0.24368  | 0.47961  | 0.001587612 | Intergenic | NA                                          | NA                    |
| 12  | 48046786 | 48047151 | 1       | 0.232588    | 5    | 0.0012   | 0.015    | 0.36405  | 0.13146  | 0.004013471 | Intergenic | NA                                          | NA                    |
| 12  | 48122711 | 48122819 | 1       | -0.079774   | 5    | 3.90E-05 | 7.00E-05 | 0.015495 | 0.095269 | 0.000237659 | Intragenic | NM_031976                                   | Prkab1                |
| 12  | 48233261 | 48233491 | 1       | -0.083851   | 13   | 0.0086   | 0.071    | 0.20707  | 0.29092  | 0.020387887 | Intragenic | NM_001029911                                | Cit                   |
| 12  | 48538234 | 48538301 | 1       | -0.276082   | 5    | 0.00012  | 0.0055   | 0.25498  | 0.53107  | 0.000603617 | Intragenic | NM_001168664                                | Gcn1l1                |
| 12  | 48667523 | 48667577 | 1       | -0.154002   | 5    | 0.00017  | 0.0032   | 0.15576  | 0.30977  | 0.000806192 | TSS        | NM_001107147                                | Sirt4                 |
| 12  | 48669948 | 48670120 | 1       | -0.139849   | 15   | 0.0001   | 0.012    | 0.39865  | 0.5385   | 0.000521119 | Intragenic | NM_001107147                                | Sirt4                 |
| 12  | 48679283 | 48679344 | 1       | -0.152321   | 5    | 0.0029   | 0.015    | 0.26705  | 0.41937  | 0.008293503 | Intragenic | NM_031585                                   | Pla2g1b               |
| 12  | 48679428 | 48679471 | 1       | -0.125289   | 5    | 0.019    | 0.039    | 0.54364  | 0.66892  | 0.038322088 | Intragenic | NM_031585                                   | Pla2g1b               |
| 12  | 48711300 | 48711342 | 1       | -0.055122   | 5    | 0.0074   | 0.0032   | 0.12291  | 0.17803  | 0.017853001 | Intragenic | NM_148890                                   | Msi1                  |
| 12  | 48770945 | 48771083 | 1       | -0.116938   | 5    | 0.00023  | 0.00096  | 0.076628 | 0.19357  | 0.00102405  | Intergenic | NA                                          | NA                    |
| 12  | 48867540 | 48867598 | 1       | -0.156304   | 5    | 9.20E-06 | 0.00028  | 0.05685  | 0.21315  | 7.32E-05    | TSS        | NM_053319                                   | Dynll1                |
| 12  | 48969794 | 48969973 | 1       | -0.239354   | 9    | 7.00E-06 | 0.0028   | 0.26671  | 0.50606  | 5.86E-05    | Intergenic | NA                                          | NA                    |
| 12  | 49004459 | 49004662 | 1       | -0.151757   | 9    | 0.00011  | 0.00021  | 0.49567  | 0.64742  | 0.000565143 | Intragenic | NM_001033676:N<br>M_001033675:N<br>M_133529 | Cabp1:Cabp1:<br>Cabp1 |
| 12  | 49046402 | 49046694 | 1       | -0.148916   | 8    | 0.00072  | 0.0083   | 0.17318  | 0.32209  | 0.002634665 | Intragenic | NM_001105934                                | Unc119b               |
| 12  | 49056386 | 49056483 | 1       | -0.233772   | 5    | 1.70E-06 | 7.60E-06 | 0.085625 | 0.3194   | 1.83E-05    | Intragenic | NM_022512                                   | Acads                 |
| 12  | 49178788 | 49178905 | 1       | -0.19614    | 5    | 0.00023  | 0.0018   | 0.14994  | 0.34608  | 0.00102405  | Intergenic | NA                                          | NA                    |
| 12  | 49178959 | 49179126 | 1       | -0.11254    | 5    | 0.02     | 0.18     | 0.1715   | 0.28404  | 0.039778219 | Intergenic | NA                                          | NA                    |
| 12  | 49186721 | 49186971 | 1       | -0.159794   | 12   | 0.00053  | 0.017    | 0.38676  | 0.54655  | 0.002069204 | Intergenic | NA                                          | NA                    |
| 12  | 49202060 | 49202525 | 0.14    | -0.145193   | 13   | 1.50E-09 | 4.30E-07 | 0.060359 | 0.20555  | 4.72E-08    | TSS        | NM_012669                                   | Hnf1a                 |
| 12  | 49227624 | 49227898 | 1       | -0.187456   | 8    | 0.00015  | 0.013    | 0.1785   | 0.36596  | 0.000724207 | Intragenic | NM_001009630                                | RGD1311899            |
| 12  | 49238260 | 49238318 | 1       | -0.124684   | 5    | 0.0017   | 0.0055   | 0.22357  | 0.34826  | 0.005339493 | Intragenic | NM_001009681                                | Oasl                  |
| 12  | 49255207 | 49255327 | 1       | -0.132571   | 5    | 0.016    | 0.087    | 0.2093   | 0.34187  | 0.033288089 | Intergenic | NA                                          | NA                    |
| 12  | 49294875 | 49295033 | 1       | -0.099214   | 8    | 0.026    | 0.091    | 0.41898  | 0.51819  | 0.049234478 | Intergenic | NA                                          | NA                    |
| 12  | 49379467 | 49379771 | 1       | -0.158876   | 7    | 4.80E-05 | 0.0013   | 0.2107   | 0.36958  | 0.000285411 | Intragenic | NM_001012148                                | Ankrd13a              |
| 12  | 49444885 | 49444979 | 1       | -0.276035   | 5    | 3.50E-05 | 3.40E-05 | 0.33031  | 0.60635  | 0.000218038 | TSS        | NM_001191666                                | Tchp                  |
| 12  | 49497231 | 49497372 | 1       | -0.161169   | 5    | 0.021    | 0.087    | 0.48965  | 0.65081  | 0.041207871 | Intragenic | NM_023970                                   | Trpv4                 |
| 12  | 49574903 | 49575067 | 1       | -0.170506   | 7    | 0.00018  | 0.0054   | 0.33053  | 0.50103  | 0.000849258 | Intragenic | NM_001109067                                | Fam222a               |
| 12  | 49591929 | 49592189 | 1       | -0.148889   | 9    | 4.10E-06 | 1.70E-05 | 0.1421   | 0.29099  | 3.78E-05    | Intergenic | NA                                          | NA                    |
| 12  | 49597267 | 49597604 | 1       | -0.271178   | 5    | 2.90E-06 | 3.40E-05 | 0.13595  | 0.40713  | 2.84E-05    | Intergenic | NA                                          | NA                    |
| 12  | 49724788 | 49724852 | 1       | -0.154119   | 5    | 1.30E-05 | 0.00014  | 0.12083  | 0.27495  | 9.66E-05    | Intergenic | NA                                          | NA                    |
| 12  | 49938821 | 49938963 | 1       | -0.200013   | 5    | 1.70E-05 | 3.40E-05 | 0.12605  | 0.32606  | 0.000120524 | Intragenic | NM_053922                                   | Acacb                 |
| 12  | 50029294 | 50029415 | 0.74    | -0.231512   | 7    | 2.50E-08 | 2.30E-06 | 0.23549  | 0.46701  | 5.59E-07    | Intragenic | NM_001013124                                | Ung                   |
| 12  | 50131987 | 50132285 | 0.91    | -0.192189   | 14   | 2.20E-09 | 2.80E-06 | 0.18603  | 0.37822  | 6.51E-08    | Intragenic | NM_134404                                   | Svop                  |
| 12  | 50133129 | 50133231 | 1       | -0.219124   | 5    | 3.50E-05 | 0.0018   | 0.14403  | 0.36315  | 0.000218038 | Intergenic | NA                                          | NA                    |

| chr | start    | stop     | q-value  | methy.diff | CpGs | pMWU     | p2DKS    | MCWLS    | MCWHS   | pMWU.fdr    | cgi.type   | transcript   | gene    |
|-----|----------|----------|----------|------------|------|----------|----------|----------|---------|-------------|------------|--------------|---------|
| 12  | 50133312 | 50133422 | 1        | -0.128914  | 5    | 0.012    | 0.088    | 0.29507  | 0.42399 | 0.026435197 | Intergenic | NA           | NA      |
| 12  | 50156553 | 50156662 | 0.6      | -0.209738  | 9    | 2.60E-07 | 1.80E-06 | 0.13839  | 0.34813 | 3.84E-06    | TSS        | NM_053626    | Dao     |
| 12  | 50262633 | 50262761 | 1        | -0.102301  | 5    | 0.0074   | 0.059    | 0.11219  | 0.21449 | 0.017853001 | Intergenic | NA           | NA      |
| 12  | 50385709 | 50386088 | 1        | -0.084351  | 5    | 0.0074   | 0.0055   | 0.13941  | 0.22376 | 0.017853001 | Intragenic | NM_001107155 | Tmem119 |
| 12  | 50618778 | 50618818 | 1        | 0.146516   | 5    | 0.0035   | 0.0032   | 0.36527  | 0.21875 | 0.009686665 | Intragenic | NM_001271178 | Wscd2   |
| 12  | 50628475 | 50628552 | 1        | -0.172396  | 5    | 0.00072  | 0.0017   | 0.24539  | 0.41778 | 0.002634665 | Intragenic | NM_001271178 | Wscd2   |
| 12  | 50820359 | 50820441 | 1        | -0.141823  | 5    | 0.0058   | 0.015    | 0.12738  | 0.2692  | 0.014624129 | Intergenic | NA           | NA      |
| 12  | 50840588 | 50840751 | 1        | -0.178568  | 9    | 0.00018  | 0.004    | 0.30717  | 0.48574 | 0.000849258 | Intergenic | NA           | NA      |
| 12  | 50853679 | 50853823 | 1        | -0.131691  | 6    | 0.02     | 0.059    | 0.22769  | 0.35938 | 0.039778219 | Intergenic | NA           | NA      |
| 12  | 51091288 | 51091469 | 1        | -0.141012  | 8    | 0.019    | 0.13     | 0.36494  | 0.50595 | 0.038322088 | Intergenic | NA           | NA      |
| 12  | 51110625 | 51110725 | 1        | -0.135547  | 7    | 0.00013  | 1.60E-05 | 0.18044  | 0.31599 | 0.000648758 | Intragenic | NM_001105937 | Sgsm1   |
| 12  | 51122897 | 51123044 | 1        | -0.162211  | 5    | 0.0029   | 0.0055   | 0.20735  | 0.36956 | 0.008293503 | Intragenic | NM_001105937 | Sgsm1   |
| 12  | 51329710 | 51329820 | 1        | -0.179058  | 5    | 0.021    | 0.0052   | 0.43633  | 0.61539 | 0.041207871 | Intergenic | NA           | NA      |
| 12  | 51548915 | 51549193 | 1        | -0.150348  | 6    | 0.02     | 0.081    | 0.38998  | 0.54032 | 0.039778219 | Intergenic | NA           | NA      |
| 12  | 51553877 | 51554016 | 1        | -0.156605  | 5    | 0.023    | 0.038    | 0.29583  | 0.45244 | 0.04441443  | Intergenic | NA           | NA      |
| 12  | 51621424 | 51621538 | 1        | -0.141596  | 5    | 0.025    | 0.059    | 0.54229  | 0.68389 | 0.047453009 | Intergenic | NA           | NA      |
| 12  | 51798460 | 51798589 | 1        | -0.250164  | 5    | 1.90E-06 | 1.60E-05 | 0.3501   | 0.60026 | 2.01E-05    | Intergenic | NA           | NA      |
| 12  | 51903418 | 51903473 | 1        | -0.175296  | 5    | 0.0008   | 0.003    | 0.24029  | 0.41558 | 0.002866309 | Intragenic | NM_001134538 | Sez6l   |
| 12  | 52040201 | 52040294 | 1        | -0.137471  | 5    | 0.00032  | 0.00052  | 0.26814  | 0.40561 | 0.001346443 | Intergenic | NA           | NA      |
| 12  | 52135037 | 52135105 | 0.015    | -0.339793  | 5    | 1.10E-07 | 4.50E-08 | 0.059235 | 0.39903 | 1.86E-06    | Intragenic | NM_001008508 | Tpst2   |
| 12  | 52156978 | 52157056 | 1        | -0.185065  | 7    | 0.0018   | 0.013    | 0.31683  | 0.5019  | 0.005640313 | Intragenic | NM_012936    | Crybb1  |
| 12  | 52308813 | 52308946 | 1        | -0.171893  | 5    | 5.00E-05 | 0.00097  | 0.10847  | 0.28037 | 0.000291675 | Intergenic | NA           | NA      |
| 12  | 52330882 | 52330959 | 1        | -0.114179  | 5    | 0.025    | 0.13     | 0.35388  | 0.46806 | 0.047453009 | Intergenic | NA           | NA      |
| 12  | 52330967 | 52331025 | 1        | -0.161502  | 5    | 1.50E-05 | 0.00052  | 0.37468  | 0.53618 | 0.000109113 | Intergenic | NA           | NA      |
| 12  | 52351056 | 52351452 | 1        | -0.132748  | 8    | 0.0023   | 0.05     | 0.25822  | 0.39097 | 0.00686004  | Intergenic | NA           | NA      |
| 12  | 52633327 | 52633664 | 1        | -0.108679  | 10   | 0.00066  | 0.022    | 0.18624  | 0.29492 | 0.002462347 | Intergenic | NA           | NA      |
| 12  | 52846747 | 52846918 | 1        | -0.07229   | 7    | 0.0002   | 0.0013   | 0.02197  | 0.09426 | 0.00092049  | Intergenic | NA           | NA      |
| 12  | 52866217 | 52866428 | 1        | -0.157406  | 11   | 1.20E-07 | 5.00E-05 | 0.1148   | 0.27221 | 2.01E-06    | Intergenic | NA           | NA      |
| 12  | 52883013 | 52883164 | 1        | -0.222895  | 7    | 0.00014  | 0.0013   | 0.37145  | 0.59434 | 0.000684451 | Intergenic | NA           | NA      |
| 12  | 52884394 | 52884451 | 1        | -0.161696  | 5    | 2.40E-05 | 6.80E-05 | 0.090548 | 0.25224 | 0.000160049 | Intergenic | NA           | NA      |
| 12  | 52910129 | 52910722 | 1        | -0.143304  | 16   | 0.00012  | 0.013    | 0.21239  | 0.35569 | 0.000603617 | Intergenic | NA           | NA      |
| 12  | 52989090 | 52989301 | 1        | -0.170239  | 11   | 1.60E-05 | 0.004    | 0.33916  | 0.5094  | 0.000115757 | Intragenic | NM_001191928 | Mn1     |
| 12  | 52989668 | 52989702 | 1        | -0.05996   | 5    | 0.02     | 0.087    | 0.076474 | 0.13643 | 0.039778219 | Intragenic | NM_001191928 | Mn1     |
| 12  | 52989791 | 52990021 | 1        | -0.123129  | 18   | 0.00021  | 0.021    | 0.13384  | 0.24675 | 0.000951214 | TSS        | NM_001191928 | Mn1     |
| 12  | 52990034 | 52990111 | 1        | -0.109259  | 5    | 0.0035   | 0.024    | 0.105    | 0.21426 | 0.009686665 | TSS        | NM_001191928 | Mn1     |
| 12  | 52990143 | 52991118 | 1.80E-08 | -0.186059  | 42   | 4.60E-14 | 5.60E-14 | 0.18606  | 0.37212 | 6.64E-12    | TSS        | NM_001191928 | Mn1     |
| 12  | 52991273 | 52991317 | 1        | -0.075099  | 5    | 0.00019  | 0.0055   | 0.085821 | 0.16092 | 0.000879857 | TSS        | NM_001191928 | Mn1     |
| 12  | 53803721 | 53803809 | 0.00096  | -0.444436  | 9    | 1.20E-11 | 3.00E-09 | 0.23679  | 0.68122 | 6.71E-10    | Intergenic | NA           | NA      |
| 12  | 53957694 | 53957826 | 1        | -0.270534  | 5    | 1.50E-05 | 0.00098  | 0.13614  | 0.40668 | 0.000109113 | Intergenic | NA           | NA      |

| chr | start    | stop     | q-value  | methy.diff | CpGs | pMWU     | p2DKS    | MCWLS    | MCWHS    | pMWU.fdr    | cgi.type   | transcript   | gene     |
|-----|----------|----------|----------|------------|------|----------|----------|----------|----------|-------------|------------|--------------|----------|
| 12  | 54112107 | 54112425 | 1        | -0.116984  | 27   | 1.50E-05 | 0.0004   | 0.34253  | 0.45952  | 0.000109113 | Intergenic | NA           | NA       |
| 12  | 54426375 | 54426588 | 1        | -0.231105  | 5    | 0.0049   | 0.015    | 0.22571  | 0.45682  | 0.012753585 | Intergenic | NA           | NA       |
| 13  | 1726633  | 1726766  | 1        | -0.165104  | 7    | 6.00E-05 | 0.0051   | 0.42954  | 0.59465  | 0.000341554 | Intergenic | NA           | NA       |
| 13  | 2003043  | 2003123  | 1        | -0.132675  | 5    | 0.017    | 0.038    | 0.51415  | 0.64682  | 0.034796287 | Intergenic | NA           | NA       |
| 13  | 2608048  | 2608142  | 1        | -0.139209  | 7    | 1.90E-05 | 9.70E-05 | 0.68587  | 0.82508  | 0.000131674 | Intergenic | NA           | NA       |
| 13  | 2608647  | 2608716  | 1        | -0.152589  | 7    | 0.00083  | 0.0078   | 0.53855  | 0.69114  | 0.002961434 | Intergenic | NA           | NA       |
| 13  | 4804095  | 4804227  | 1        | -0.156692  | 9    | 4.30E-06 | 7.60E-05 | 0.25308  | 0.40977  | 3.93E-05    | Intergenic | NA           | NA       |
| 13  | 5338334  | 5338575  | 3.00E-07 | -0.224071  | 14   | 5.90E-12 | 9.10E-13 | 0.17176  | 0.39584  | 3.75E-10    | Intergenic | NA           | NA       |
| 13  | 16435043 | 16435213 | 1        | -0.189607  | 8    | 0.0085   | 0.063    | 0.43085  | 0.62046  | 0.020154795 | Intergenic | NA           | NA       |
| 13  | 18559654 | 18559842 | 1        | -0.054996  | 11   | 0.0057   | 0.16     | 0.14992  | 0.20492  | 0.014573809 | Intergenic | NA           | NA       |
| 13  | 20917764 | 20917865 | 1        | -0.216093  | 5    | 6.30E-06 | 3.40E-05 | 0.31184  | 0.52793  | 5.33E-05    | Intergenic | NA           | NA       |
| 13  | 20952050 | 20952268 | 1        | -0.127283  | 11   | 0.0044   | 0.035    | 0.54473  | 0.67201  | 0.011763026 | Intergenic | NA           | NA       |
| 13  | 21741386 | 21741404 | 1        | -0.24208   | 5    | 1.30E-05 | 0.00014  | 0.42882  | 0.6709   | 9.66E-05    | Intergenic | NA           | NA       |
| 13  | 22841754 | 22841862 | 1        | -0.145003  | 5    | 0.015    | 0.0055   | 0.32708  | 0.47209  | 0.031584896 | Intergenic | NA           | NA       |
| 13  | 26433173 | 26433371 | 1        | -0.099234  | 5    | 0.014    | 0.039    | 0.14222  | 0.24145  | 0.029850603 | Intergenic | NA           | NA       |
| 13  | 26433425 | 26433504 | 1        | -0.213195  | 5    | 0.02     | 0.058    | 0.48181  | 0.69501  | 0.039778219 | Intergenic | NA           | NA       |
| 13  | 27712168 | 27712280 | 0.89     | -0.371237  | 8    | 4.60E-08 | 2.80E-06 | 0.33401  | 0.70525  | 9.56E-07    | Intragenic | NM_001047873 | Cntnap5b |
| 13  | 27714552 | 27714664 | 0.89     | -0.371237  | 8    | 4.60E-08 | 2.80E-06 | 0.33401  | 0.70525  | 9.56E-07    | Intragenic | NM_001047873 | Cntnap5b |
| 13  | 30023489 | 30023549 | 1        | -0.153105  | 5    | 0.00054  | 0.0054   | 0.66407  | 0.81718  | 0.002077867 | Intragenic | NM_001012748 | Cdh20    |
| 13  | 30085117 | 30085240 | 0.35     | -0.249841  | 11   | 1.60E-07 | 1.10E-06 | 0.21217  | 0.46201  | 2.51E-06    | Intragenic | NM_001012748 | Cdh20    |
| 13  | 31289697 | 31289779 | 1        | -0.168307  | 5    | 0.0041   | 0.037    | 0.25531  | 0.42362  | 0.01100507  | Intergenic | NA           | NA       |
| 13  | 31329082 | 31329452 | 1        | -0.123471  | 7    | 7.10E-06 | 0.00047  | 0.093318 | 0.21679  | 5.86E-05    | TSS        | NM_021657    | Phlpp1   |
| 13  | 31641694 | 31641761 | 1        | -0.452267  | 5    | 4.30E-06 | 7.00E-05 | 0.22327  | 0.67553  | 3.93E-05    | Intergenic | NA           | NA       |
| 13  | 31842781 | 31843160 | 1        | -0.097881  | 7    | 2.40E-05 | 0.0013   | 0.072998 | 0.17088  | 0.000160049 | Intragenic | NM_016993    | Bcl2     |
| 13  | 31961791 | 31961862 | 1        | -0.118225  | 5    | 1.00E-05 | 0.00014  | 0.090243 | 0.20847  | 7.82E-05    | TSS        | NM_001108342 | Kdsr     |
| 13  | 32171076 | 32171143 | 1        | -0.452267  | 5    | 4.30E-06 | 7.00E-05 | 0.22327  | 0.67553  | 3.93E-05    | Intergenic | NA           | NA       |
| 13  | 33061482 | 33061631 | 1        | -0.198154  | 7    | 3.60E-05 | 0.00029  | 0.18118  | 0.37933  | 0.000223919 | Intergenic | NA           | NA       |
| 13  | 34435281 | 34435352 | 1        | -0.150108  | 5    | 0.00054  | 0.0031   | 0.58829  | 0.73839  | 0.002077867 | Intergenic | NA           | NA       |
| 13  | 34895883 | 34896075 | 1        | -0.131388  | 7    | 0.016    | 0.018    | 0.54072  | 0.67211  | 0.033288089 | Intergenic | NA           | NA       |
| 13  | 36219148 | 36219197 | 1        | -0.052584  | 7    | 3.80E-07 | 1.60E-05 | 0.017213 | 0.069797 | 5.34E-06    | Intergenic | NA           | NA       |
| 13  | 36657428 | 36657564 | 1        | -0.050606  | 5    | 0.017    | 0.059    | 0.85744  | 0.90805  | 0.034796287 | Intergenic | NA           | NA       |
| 13  | 37176084 | 37176143 | 1        | -0.107666  | 5    | 0.0074   | 0.024    | 0.70525  | 0.81291  | 0.017853001 | Intergenic | NA           | NA       |
| 13  | 37438144 | 37438204 | 1        | -0.059851  | 5    | 0.0038   | 0.024    | 0.87861  | 0.93846  | 0.010352437 | Intergenic | NA           | NA       |
| 13  | 39428083 | 39428222 | 1        | -0.159476  | 6    | 0.0069   | 0.084    | 0.35326  | 0.51273  | 0.01685311  | Intergenic | NA           | NA       |
| 13  | 39882208 | 39882320 | 1        | -0.111994  | 5    | 0.002    | 0.058    | 0.1096   | 0.2216   | 0.006079939 | Intergenic | NA           | NA       |
| 13  | 40091729 | 40091808 | 1        | -0.200139  | 5    | 8.10E-06 | 0.00014  | 0.12669  | 0.32683  | 6.58E-05    | Intergenic | NA           | NA       |
| 13  | 40114727 | 40114843 | 1        | -0.193252  | 5    | 0.00054  | 0.00051  | 0.14459  | 0.33784  | 0.002077867 | Intergenic | NA           | NA       |
| 13  | 40234963 | 40235113 | 1        | -0.143172  | 7    | 0.0087   | 0.027    | 0.37742  | 0.5206   | 0.020391633 | Intergenic | NA           | NA       |
| 13  | 40486821 | 40486914 | 1        | -0.18375   | 5    | 0.00097  | 0.0055   | 0.24999  | 0.43374  | 0.003366009 | Intergenic | NA           | NA       |

| chr | start    | stop     | q-value  | methy.diff | CpGs | pMWU     | p2DKS    | MCWLS    | MCWHS   | pMWU.fdr    | cgi.type   | transcript   | gene     |
|-----|----------|----------|----------|------------|------|----------|----------|----------|---------|-------------|------------|--------------|----------|
| 13  | 40634988 | 40635106 | 1        | -0.12222   | 5    | 0.017    | 0.18     | 0.24965  | 0.37187 | 0.034796287 | Intragenic | NM_053821    | Ralb     |
| 13  | 40783331 | 40783421 | 1.80E-06 | -0.240212  | 8    | 1.20E-11 | 5.60E-12 | 0.041202 | 0.28141 | 6.71E-10    | Intragenic | NM_001012023 | Epb4.1l5 |
| 13  | 41258811 | 41259218 | 1        | -0.177267  | 8    | 1.70E-05 | 0.00015  | 0.18127  | 0.35854 | 0.000120524 | Intragenic | NM_031853    | Dbi      |
| 13  | 42155061 | 42155168 | 1        | -0.153995  | 5    | 0.0024   | 0.015    | 0.50591  | 0.65991 | 0.00705499  | Intergenic | NA           | NA       |
| 13  | 46237142 | 46237278 | 1        | -0.061642  | 7    | 0.0016   | 0.0077   | 0.71442  | 0.77607 | 0.005100053 | Intergenic | NA           | NA       |
| 13  | 47896351 | 47896524 | 1        | -0.112593  | 5    | 0.013    | 0.024    | 0.38413  | 0.49672 | 0.028097302 | Intergenic | NA           | NA       |
| 13  | 48653254 | 48653410 | 1        | -0.11282   | 5    | 2.90E-06 | 7.00E-05 | 0.037807 | 0.15063 | 2.84E-05    | Intergenic | NA           | NA       |
| 13  | 49025099 | 49025255 | 1        | -0.111507  | 5    | 4.30E-06 | 0.00028  | 0.038145 | 0.14965 | 3.93E-05    | Intragenic | NM_023095    | Mgat5    |
| 13  | 49749258 | 49749411 | 1        | -0.209017  | 5    | 0.0074   | 0.059    | 0.41662  | 0.62564 | 0.017853001 | Intergenic | NA           | NA       |
| 13  | 50523287 | 50523385 | 1        | -0.161863  | 7    | 0.00016  | 0.0012   | 0.4287   | 0.59056 | 0.000769396 | Intergenic | NA           | NA       |
| 13  | 52033469 | 52033517 | 1        | -0.234259  | 5    | 1.90E-05 | 0.00052  | 0.51701  | 0.75126 | 0.000131674 | Intergenic | NA           | NA       |
| 13  | 52702723 | 52702977 | 1        | -0.069725  | 10   | 9.20E-06 | 0.00023  | 0.077981 | 0.14771 | 7.32E-05    | Intragenic | NM_001014843 | Fcmr     |
| 13  | 53127946 | 53128087 | 1        | -0.334355  | 5    | 0.00015  | 0.00014  | 0.30653  | 0.64088 | 0.000724207 | Intragenic | NM_001108854 | lkbke    |
| 13  | 53404212 | 53404267 | 1        | -0.183863  | 5    | 0.00026  | 0.0092   | 0.5943   | 0.77816 | 0.001130807 | Intergenic | NA           | NA       |
| 13  | 53976030 | 53976168 | 1        | -0.146721  | 5    | 0.00048  | 0.00052  | 0.096414 | 0.24314 | 0.001881331 | Intergenic | NA           | NA       |
| 13  | 54167550 | 54167714 | 0.088    | -0.342275  | 5    | 2.80E-07 | 2.70E-07 | 0.058937 | 0.40121 | 4.09E-06    | Intragenic | NM_001007617 | Nuak2    |
| 13  | 54175730 | 54176023 | 1        | -0.124557  | 13   | 7.00E-06 | 0.0034   | 0.14638  | 0.27094 | 5.86E-05    | Intragenic | NM_001007617 | Nuak2    |
| 13  | 54365264 | 54365335 | 1        | -0.14679   | 5    | 0.0013   | 0.015    | 0.36945  | 0.51624 | 0.004277683 | Intragenic | NM_012884    | Cntn2    |
| 13  | 54373368 | 54373841 | 1        | -0.078229  | 10   | 0.011    | 0.026    | 0.18876  | 0.26699 | 0.02463877  | Intragenic | NM_012884    | Cntn2    |
| 13  | 54389571 | 54389602 | 1        | -0.062777  | 5    | 0.002    | 0.039    | 0.043583 | 0.10636 | 0.006079939 | TSS        | NM_012884    | Cntn2    |
| 13  | 55016386 | 55016476 | 1        | -0.222013  | 5    | 8.80E-05 | 7.00E-05 | 0.18017  | 0.40218 | 0.000466886 | Intergenic | NA           | NA       |
| 13  | 55037412 | 55037650 | 1        | -0.181773  | 7    | 0.012    | 0.078    | 0.27281  | 0.45458 | 0.026435197 | Intergenic | NA           | NA       |
| 13  | 55047658 | 55047926 | 1        | -0.116789  | 5    | 0.025    | 0.18     | 0.16932  | 0.28611 | 0.047453009 | Intergenic | NA           | NA       |
| 13  | 55285954 | 55285991 | 1        | -0.105614  | 5    | 0.0074   | 0.0054   | 0.716    | 0.82162 | 0.017853001 | Intragenic | NM_001047902 | Zc3h11a  |
| 13  | 55493342 | 55493413 | 1        | -0.096104  | 5    | 0.0012   | 0.0055   | 0.029211 | 0.12531 | 0.004013471 | Intragenic | NM_001105952 | Sox13    |
| 13  | 55582334 | 55582900 | 1        | -0.097998  | 13   | 2.70E-05 | 0.001    | 0.14983  | 0.24783 | 0.000178372 | Intragenic | NM_181692    | Kiss1    |
| 13  | 55623037 | 55623165 | 1        | -0.237601  | 5    | 1.70E-05 | 6.60E-05 | 0.031699 | 0.2693  | 0.000120524 | Intergenic | NA           | NA       |
| 13  | 55665162 | 55665236 | 1        | -0.181304  | 8    | 0.0019   | 0.0038   | 0.57201  | 0.75331 | 0.005855937 | Intergenic | NA           | NA       |
| 13  | 55713949 | 55714196 | 1        | -0.205442  | 9    | 2.70E-05 | 0.0014   | 0.19812  | 0.40357 | 0.000178372 | Intergenic | NA           | NA       |
| 13  | 55855781 | 55856196 | 1        | -0.167058  | 11   | 7.90E-05 | 0.0048   | 0.18917  | 0.35623 | 0.000427247 | Intergenic | NA           | NA       |
| 13  | 55937252 | 55937306 | 1        | -0.230644  | 5    | 0.00039  | 0.0055   | 0.51894  | 0.74958 | 0.001587612 | Intragenic | NM_080698    | Fmod     |
| 13  | 55989365 | 55989764 | 1        | -0.070318  | 5    | 0.0058   | 0.059    | 0.051113 | 0.12143 | 0.014624129 | Intergenic | NA           | NA       |
| 13  | 56064279 | 56064389 | 1        | -0.291342  | 5    | 7.10E-06 | 7.40E-06 | 0.16211  | 0.45346 | 5.86E-05    | Intergenic | NA           | NA       |
| 13  | 56192673 | 56193110 | 1        | -0.116718  | 5    | 0.0094   | 0.015    | 0.098841 | 0.21556 | 0.021723038 | Intragenic | NM_080409    | Ppfia4   |
| 13  | 56206831 | 56206971 | 1        | -0.184515  | 5    | 0.0024   | 0.015    | 0.037673 | 0.22219 | 0.00705499  | Intragenic | NM_080409    | Ppfia4   |
| 13  | 56816483 | 56816716 | 1        | -0.190102  | 6    | 0.0023   | 0.011    | 0.32039  | 0.51049 | 0.00686004  | Intragenic | NM_001107178 | Ppp1r12b |
| 13  | 56866910 | 56867115 | 1        | -0.228272  | 5    | 0.016    | 0.087    | 0.36026  | 0.58853 | 0.033288089 | Intergenic | NA           | NA       |
| 13  | 56886054 | 56886193 | 1        | -0.182509  | 5    | 0.015    | 0.088    | 0.32299  | 0.5055  | 0.031584896 | Intergenic | NA           | NA       |
| 13  | 57093403 | 57093694 | 1        | -0.224477  | 5    | 0.013    | 0.037    | 0.19132  | 0.4158  | 0.028097302 | Intergenic | NA           | NA       |

| chr | start    | stop     | q-value | methy.diff | CpGs | pMWU     | p2DKS    | MCWLS    | MCWHS   | pMWU.fdr    | cgi.type   | transcript                    | gene       |
|-----|----------|----------|---------|------------|------|----------|----------|----------|---------|-------------|------------|-------------------------------|------------|
| 13  | 57386716 | 57387192 | 1       | -0.148934  | 7    | 0.014    | 0.11     | 0.22821  | 0.37714 | 0.029850603 | Intergenic | NA                            | NA         |
| 13  | 57408991 | 57409060 | 1       | -0.123139  | 5    | 0.021    | 0.085    | 0.17849  | 0.30163 | 0.041207871 | Intergenic | NA                            | NA         |
| 13  | 57461381 | 57461909 | 1       | -0.126737  | 13   | 0.0012   | 0.016    | 0.24433  | 0.37106 | 0.004013471 | Intergenic | NA                            | NA         |
| 13  | 57943375 | 57943590 | 1       | -0.103254  | 8    | 3.40E-06 | 0.00066  | 0.045073 | 0.14833 | 3.25E-05    | TSS        | NM_053873                     | Cacna1s    |
| 13  | 58061763 | 58061855 | 1       | -0.117745  | 7    | 0.024    | 0.14     | 0.53228  | 0.65002 | 0.046241462 | Intragenic | NM_001105990                  | Kif21b     |
| 13  | 58156793 | 58156856 | 1       | -0.116736  | 5    | 0.00088  | 0.0092   | 0.18216  | 0.2989  | 0.003092094 | Intragenic | NM_001134502                  | RGD1311892 |
| 13  | 58188997 | 58189091 | 1       | -0.091342  | 5    | 0.0087   | 0.059    | 0.080655 | 0.172   | 0.020391633 | Intergenic | NA                            | NA         |
| 13  | 58511472 | 58511574 | 1       | -0.112604  | 5    | 0.01     | 0.0055   | 0.25926  | 0.37186 | 0.02275947  | Intergenic | NA                            | NA         |
| 13  | 58617998 | 58618071 | 1       | -0.134043  | 5    | 9.80E-07 | 7.40E-06 | 0.046645 | 0.18069 | 1.16E-05    | Intergenic | NA                            | NA         |
| 13  | 58958771 | 58959108 | 1       | -0.132515  | 9    | 0.0021   | 0.012    | 0.19179  | 0.3243  | 0.006364615 | Intergenic | NA                            | NA         |
| 13  | 59016964 | 59017074 | 1       | -0.245127  | 5    | 2.80E-05 | 0.00013  | 0.15795  | 0.40308 | 0.000182174 | Intergenic | NA                            | NA         |
| 13  | 59205400 | 59205455 | 1       | -0.142822  | 5    | 0.02     | 0.13     | 0.53831  | 0.68113 | 0.039778219 | Intergenic | NA                            | NA         |
| 13  | 59205572 | 59205661 | 1       | -0.090959  | 5    | 2.40E-05 | 0.00014  | 0.058573 | 0.14953 | 0.000160049 | Intergenic | NA                            | NA         |
| 13  | 59205682 | 59205767 | 0.12    | -0.117754  | 8    | 1.40E-09 | 3.60E-07 | 0.062362 | 0.18012 | 4.46E-08    | Intergenic | NA                            | NA         |
| 13  | 61423635 | 61423698 | 1       | -0.208399  | 5    | 1.90E-05 | 0.0031   | 0.10334  | 0.31174 | 0.000131674 | Intragenic | NM_001107182                  | Crb1       |
| 13  | 63445160 | 63445444 | 1       | -0.113789  | 5    | 0.011    | 0.024    | 0.36527  | 0.47906 | 0.02463877  | Intergenic | NA                            | NA         |
| 13  | 70077462 | 70077536 | 1       | -0.428124  | 7    | 1.90E-08 | 8.80E-06 | 0.16606  | 0.59418 | 4.37E-07    | Intergenic | NA                            | NA         |
| 13  | 73405660 | 73405848 | 1       | -0.163851  | 7    | 1.80E-05 | 0.0013   | 0.049205 | 0.21306 | 0.000127015 | Intergenic | NA                            | NA         |
| 13  | 74008342 | 74008459 | 0.0023  | -0.221663  | 7    | 4.80E-10 | 7.00E-09 | 0.15615  | 0.37781 | 1.75E-08    | Intragenic | NM_022242                     | Fam129a    |
| 13  | 74201250 | 74201314 | 0.49    | -0.180932  | 5    | 4.90E-07 | 1.50E-06 | 0.16888  | 0.34981 | 6.54E-06    | Intergenic | NA                            | NA         |
| 13  | 74206498 | 74206773 | 1       | -0.103905  | 9    | 0.024    | 0.27     | 0.17863  | 0.28254 | 0.046241462 | Intergenic | NA                            | NA         |
| 13  | 74655331 | 74655423 | 1       | -0.137959  | 5    | 0.0094   | 0.015    | 0.20293  | 0.34089 | 0.021723038 | Intergenic | NA                            | NA         |
| 13  | 74737835 | 74738162 | 1       | -0.206005  | 5    | 0.0087   | 0.039    | 0.35341  | 0.55941 | 0.020391633 | Intragenic | NM_001105958                  | Tsen15     |
| 13  | 74757969 | 74758095 | 1       | -0.090922  | 5    | 0.016    | 0.038    | 0.69287  | 0.78379 | 0.033288089 | Intergenic | NA                            | NA         |
| 13  | 74913573 | 74913644 | 1       | -0.170304  | 5    | 5.00E-05 | 0.0032   | 0.13728  | 0.30759 | 0.000291675 | Intragenic | NM_001105957                  | Rgl1       |
| 13  | 74917661 | 74917946 | 1       | -0.105971  | 9    | 0.026    | 0.081    | 0.21074  | 0.31671 | 0.049234478 | Intragenic | NM_001105957                  | Rgl1       |
| 13  | 75007643 | 75007745 | 1       | -0.278627  | 5    | 2.50E-06 | 7.60E-06 | 0.15948  | 0.4381  | 2.52E-05    | Intragenic | NM_001105957                  | Rgl1       |
| 13  | 75146188 | 75146210 | 0.015   | -0.164297  | 5    | 6.30E-08 | 4.60E-08 | 0.039189 | 0.20349 | 1.18E-06    | TSS        | NM_001105957:N<br>M_001025717 | Rgl1:Arpc5 |
| 13  | 75179124 | 75179186 | 1       | -0.243742  | 5    | 7.00E-05 | 0.00014  | 0.27156  | 0.5153  | 0.000386221 | Intergenic | NA                            | NA         |
| 13  | 75370545 | 75370643 | 1       | -0.19854   | 5    | 0.021    | 0.039    | 0.21752  | 0.41606 | 0.041207871 | Intragenic | NM_001048042                  | Nmnat2     |
| 13  | 75580060 | 75580422 | 1       | -0.066367  | 13   | 0.013    | 0.14     | 0.19605  | 0.26242 | 0.028097302 | Intragenic | NM_001100640                  | Lamc2      |
| 13  | 75582366 | 75582436 | 1       | -0.214025  | 5    | 8.10E-06 | 1.60E-05 | 0.15563  | 0.36966 | 6.58E-05    | Intragenic | NM_001100640                  | Lamc2      |
| 13  | 75595826 | 75596320 | 1       | -0.09803   | 13   | 0.00047  | 0.0059   | 0.19022  | 0.28825 | 0.001875163 | Intergenic | NA                            | NA         |
| 13  | 75657954 | 75658161 | 0.0035  | -0.300208  | 12   | 8.10E-13 | 1.10E-08 | 0.24872  | 0.54893 | 6.28E-11    | Intragenic | NM_053966                     | Lamc1      |
| 13  | 75818025 | 75818081 | 1       | -0.147338  | 5    | 0.00054  | 0.0054   | 0.16188  | 0.30922 | 0.002077867 | TSS        | NM_001105961                  | Shcbp1l    |
| 13  | 76038903 | 76038980 | 1       | -0.051163  | 9    | 0.011    | 0.025    | 0.70828  | 0.75945 | 0.02463877  | Intergenic | NA                            | NA         |
| 13  | 76039818 | 76039924 | 1       | -0.056128  | 5    | 0.021    | 0.18     | 0.072092 | 0.12822 | 0.041207871 | Intergenic | NA                            | NA         |
| 13  | 76086944 | 76087025 | 1       | -0.216183  | 6    | 2.00E-05 | 6.10E-06 | 0.097774 | 0.31396 | 0.000138285 | Intragenic | NM_019344                     | Rgs8       |

| chr | start    | stop     | q-value  | methy.diff | CpGs | pMWU     | p2DKS    | MCWLS    | MCWHS    | pMWU.fdr    | cgi.type   | transcript             | gene           |
|-----|----------|----------|----------|------------|------|----------|----------|----------|----------|-------------|------------|------------------------|----------------|
| 13  | 76299663 | 76299726 | 1        | -0.155545  | 5    | 0.013    | 0.088    | 0.29167  | 0.44721  | 0.028097302 | Intragenic | NM_017073              | Glul           |
| 13  | 76381607 | 76381748 | 1        | -0.10146   | 5    | 0.0087   | 0.038    | 0.21607  | 0.31753  | 0.020391633 | Intergenic | NA                     | NA             |
| 13  | 77306322 | 77306394 | 1        | -0.070411  | 7    | 0.0013   | 0.012    | 0.13204  | 0.20245  | 0.004277683 | TSS        | NM_019294              | Cacna1e        |
| 13  | 77815077 | 77815145 | 1        | -0.214818  | 5    | 2.20E-06 | 7.10E-05 | 0.10345  | 0.31827  | 2.27E-05    | Intergenic | NA                     | NA             |
| 13  | 79618699 | 79618804 | 1        | -0.244481  | 5    | 0.0008   | 0.015    | 0.23402  | 0.4785   | 0.002866309 | Intergenic | NA                     | NA             |
| 13  | 83866728 | 83866859 | 1        | -0.294257  | 5    | 0.0019   | 0.0053   | 0.22966  | 0.52392  | 0.005855937 | Intergenic | NA                     | NA             |
| 13  | 83868936 | 83869059 | 1        | -0.109711  | 10   | 6.70E-06 | 0.00051  | 0.1139   | 0.22361  | 5.65E-05    | Intergenic | NA                     | NA             |
| 13  | 83878376 | 83878421 | 1        | -0.21425   | 5    | 0.0019   | 0.015    | 0.37087  | 0.58512  | 0.005855937 | Intergenic | NA                     | NA             |
| 13  | 85044893 | 85045098 | 1        | -0.161382  | 5    | 0.0019   | 0.0054   | 0.56547  | 0.72685  | 0.005855937 | Intragenic | NM_138538              | Dnm3           |
| 13  | 85507423 | 85507479 | 0.037    | -0.322593  | 5    | 1.30E-07 | 1.10E-07 | 0.10623  | 0.42882  | 2.11E-06    | TSS        | NR_111961              | Prrc2c         |
| 13  | 85632527 | 85632639 | 1        | -0.137731  | 5    | 0.01     | 0.0091   | 0.18382  | 0.32155  | 0.02275947  | Intragenic | NM_012792              | Fmo1           |
| 13  | 87565320 | 87565384 | 1        | -0.314136  | 5    | 9.80E-05 | 0.0018   | 0.56465  | 0.87879  | 0.000512474 | Intragenic | NM_138532              | Nme7           |
| 13  | 88822996 | 88823053 | 1        | -0.131204  | 5    | 0.0058   | 0.014    | 0.27953  | 0.41073  | 0.014624129 | Intergenic | NA                     | NA             |
| 13  | 88892023 | 88892085 | 1        | -0.160664  | 5    | 0.0041   | 0.015    | 0.58675  | 0.74742  | 0.01100507  | Intragenic | NM_001205304:NM_170789 | Cd247: Cd247   |
| 13  | 91666308 | 91666441 | 1        | 0.081613   | 7    | 0.0072   | 0.013    | 0.83359  | 0.75198  | 0.017539509 | Intergenic | NA                     | NA             |
| 13  | 93116728 | 93116990 | 1        | -0.095498  | 5    | 0.015    | 0.0032   | 0.64064  | 0.73614  | 0.031584896 | Intragenic | NM_001191930           | Uap1           |
| 13  | 93162306 | 93162350 | 1        | 0.186775   | 5    | 0.0038   | 0.015    | 0.41095  | 0.22417  | 0.010352437 | TSS        | NM_017293              | Uhmk1          |
| 13  | 93162496 | 93162578 | 6.40E-08 | -0.129535  | 15   | 4.60E-14 | 2.00E-13 | 0.067956 | 0.19749  | 6.64E-12    | TSS        | NM_017293              | Uhmk1          |
| 13  | 93162579 | 93162614 | 1        | -0.257046  | 5    | 3.90E-05 | 0.00028  | 0.27027  | 0.52731  | 0.000237659 | TSS        | NM_017293              | Uhmk1          |
| 13  | 93294172 | 93294338 | 1        | -0.307725  | 7    | 2.50E-05 | 0.00029  | 0.15338  | 0.4611   | 0.000166164 | Intragenic | NM_138922              | Nos1ap         |
| 13  | 93865919 | 93865957 | 1        | -0.176136  | 5    | 1.90E-05 | 0.00051  | 0.4242   | 0.60034  | 0.000131674 | Intergenic | NA                     | NA             |
| 13  | 94073825 | 94073966 | 1        | -0.085661  | 5    | 0.0058   | 0.038    | 0.34613  | 0.43179  | 0.014624129 | Intergenic | NA                     | NA             |
| 13  | 94075078 | 94075177 | 1        | -0.086329  | 5    | 0.00072  | 0.00098  | 0.16661  | 0.25294  | 0.002634665 | Intergenic | NA                     | NA             |
| 13  | 94156270 | 94156293 | 1        | -0.122396  | 5    | 0.0038   | 0.015    | 0.11124  | 0.23364  | 0.010352437 | Intragenic | NM_001314068:NM_017027 | Mpz: Mpz       |
| 13  | 94156512 | 94156581 | 1        | -0.177526  | 5    | 0.0038   | 0.059    | 0.18808  | 0.36561  | 0.010352437 | Intragenic | NM_001314068:NM_017027 | Mpz: Mpz       |
| 13  | 94250308 | 94250547 | 1        | -0.12182   | 12   | 2.10E-05 | 0.0019   | 0.15459  | 0.27641  | 0.000144949 | TSS        | NM_023959              | Adamts4        |
| 13  | 94402636 | 94402738 | 1        | -0.199747  | 5    | 0.00023  | 0.0032   | 0.25167  | 0.45142  | 0.00102405  | TSS        | NM_001109077           | Arhgap30       |
| 13  | 94501254 | 94501307 | 5.00E-05 | -0.20732   | 8    | 1.00E-11 | 1.50E-10 | 0.23065  | 0.43797  | 5.72E-10    | Intergenic | NA                     | NA             |
| 13  | 95134698 | 95134853 | 1        | -0.253069  | 5    | 0.00012  | 0.0018   | 0.15961  | 0.41268  | 0.000603617 | Intragenic | NM_001271030:NM_022848 | Atp1a4: Atp1a4 |
| 13  | 95228814 | 95229131 | 1        | -0.067433  | 12   | 0.0047   | 0.062    | 0.1627   | 0.23014  | 0.012418624 | Intragenic | NM_053834              | Kcnj9          |
| 13  | 95457337 | 95457441 | 1        | -0.073927  | 5    | 0.0041   | 0.0017   | 0.013055 | 0.086982 | 0.01100507  | Intergenic | NA                     | NA             |
| 13  | 95496447 | 95496515 | 1        | -0.240776  | 5    | 0.0038   | 0.015    | 0.32734  | 0.56811  | 0.010352437 | TSS        | NM_001105973           | Slamf8         |
| 13  | 96901275 | 96901420 | 1        | -0.124419  | 5    | 0.023    | 0.13     | 0.69871  | 0.82313  | 0.04441443  | Intergenic | NA                     | NA             |
| 13  | 98892360 | 98892521 | 1        | -0.171855  | 8    | 1.60E-05 | 0.0017   | 0.099441 | 0.2713   | 0.000115757 | Intergenic | NA                     | NA             |
| 13  | 99495325 | 99495479 | 1        | -0.256585  | 5    | 9.80E-07 | 7.30E-06 | 0.068795 | 0.32538  | 1.16E-05    | Intragenic | NM_177929              | Sdccag8        |



| chr | start     | stop      | q-value | methy.diff | CpGs | pMWU     | p2DKS    | MCWLS    | MCWHS   | pMWU.fdr    | cgi.type   | transcript   | gene       |
|-----|-----------|-----------|---------|------------|------|----------|----------|----------|---------|-------------|------------|--------------|------------|
| 13  | 100006368 | 100006460 | 1       | -0.117528  | 5    | 0.02     | 0.0051   | 0.63103  | 0.74856 | 0.039778219 | Intergenic | NA           | NA         |
| 13  | 100175828 | 100175895 | 0.087   | -0.237143  | 5    | 3.20E-07 | 2.70E-07 | 0.073906 | 0.31105 | 4.57E-06    | Intergenic | NA           | NA         |
| 13  | 100422028 | 100422180 | 1       | -0.216083  | 5    | 4.80E-06 | 0.00014  | 0.059602 | 0.27568 | 4.29E-05    | Intergenic | NA           | NA         |
| 13  | 100438255 | 100438329 | 1       | -0.268153  | 5    | 1.70E-06 | 3.40E-05 | 0.15555  | 0.42371 | 1.83E-05    | Intergenic | NA           | NA         |
| 13  | 100886487 | 100886573 | 1       | -0.256888  | 5    | 0.00072  | 0.015    | 0.30263  | 0.55952 | 0.002634665 | Intragenic | NM_001025669 | Brox       |
| 13  | 101371438 | 101371557 | 1       | -0.173533  | 5    | 0.014    | 0.0092   | 0.2829   | 0.45643 | 0.029850603 | Intergenic | NA           | NA         |
| 13  | 101632860 | 101633000 | 0.11    | -0.267669  | 6    | 2.90E-08 | 3.30E-07 | 0.067989 | 0.33566 | 6.39E-07    | Intergenic | NA           | NA         |
| 13  | 101819497 | 101819576 | 1       | 0.055851   | 5    | 0.0011   | 0.00052  | 0.96149  | 0.90564 | 0.003737263 | Intragenic | NM_001109079 | Kif26b     |
| 13  | 101990979 | 101991281 | 1       | -0.169735  | 7    | 2.70E-07 | 8.40E-06 | 0.12127  | 0.291   | 3.98E-06    | Intragenic | NM_001109079 | Kif26b     |
| 13  | 102039900 | 102040210 | 1       | -0.149562  | 5    | 0.0038   | 0.015    | 0.14749  | 0.29705 | 0.010352437 | Intragenic | NM_001109079 | Kif26b     |
| 13  | 102555091 | 102555266 | 1       | -0.077179  | 7    | 0.015    | 0.039    | 0.29002  | 0.3672  | 0.031584896 | Intragenic | NM_001025762 | Smyd3      |
| 13  | 102679361 | 102679485 | 1       | -0.110098  | 5    | 0.0032   | 0.015    | 0.74899  | 0.85909 | 0.008990975 | Intragenic | NM_001025762 | Smyd3      |
| 13  | 102883682 | 102883806 | 1       | -0.110098  | 5    | 0.0032   | 0.015    | 0.74899  | 0.85909 | 0.008990975 | Intergenic | NA           | NA         |
| 13  | 103223657 | 103223762 | 1       | -0.158063  | 5    | 0.012    | 0.025    | 0.48583  | 0.64389 | 0.026435197 | Intergenic | NA           | NA         |
| 13  | 103697034 | 103697138 | 1       | 0.078619   | 7    | 0.015    | 0.038    | 0.28561  | 0.20699 | 0.031584896 | Intragenic | NM_019312    | Itpkb      |
| 13  | 103707732 | 103707982 | 1       | -0.135792  | 15   | 0.0011   | 0.00044  | 0.55368  | 0.68947 | 0.003737263 | Intragenic | NM_019312    | Itpkb      |
| 13  | 103849505 | 103850051 | 1       | -0.105548  | 5    | 0.0032   | 0.024    | 0.15346  | 0.25901 | 0.008990975 | Intergenic | NA           | NA         |
| 13  | 104040148 | 104040506 | 1       | -0.125979  | 5    | 0.00012  | 0.0055   | 0.057343 | 0.18332 | 0.000603617 | Intergenic | NA           | NA         |
| 13  | 104708163 | 104708369 | 1       | -0.168421  | 5    | 0.0094   | 0.038    | 0.26007  | 0.42849 | 0.021723038 | Intragenic | NM_001166578 | Cnih3      |
| 13  | 104763583 | 104763760 | 1       | -0.154084  | 7    | 0.0062   | 0.053    | 0.26299  | 0.41707 | 0.015570617 | Intergenic | NA           | NA         |
| 13  | 104790186 | 104790250 | 1       | -0.267091  | 5    | 0.0024   | 0.037    | 0.3974   | 0.66449 | 0.00705499  | Intergenic | NA           | NA         |
| 13  | 104844285 | 104844366 | 1       | -0.106679  | 5    | 0.016    | 0.038    | 0.23667  | 0.34335 | 0.033288089 | Intergenic | NA           | NA         |
| 13  | 105465749 | 105465965 | 1       | -0.12486   | 8    | 0.00037  | 0.036    | 0.14864  | 0.2735  | 0.001526885 | Intergenic | NA           | NA         |
| 13  | 105621611 | 105621680 | 1       | -0.152579  | 7    | 0.0012   | 0.0051   | 0.53748  | 0.69006 | 0.004013471 | Intergenic | NA           | NA         |
| 13  | 106126674 | 106126870 | 1       | -0.073233  | 5    | 0.019    | 0.18     | 0.0845   | 0.15773 | 0.038322088 | Intragenic | NM_001105982 | Susd4      |
| 13  | 106238592 | 106238640 | 1       | -0.160462  | 5    | 0.014    | 0.088    | 0.35098  | 0.51144 | 0.029850603 | Intergenic | NA           | NA         |
| 13  | 106558904 | 106558968 | 1       | -0.240321  | 5    | 0.0074   | 0.085    | 0.42417  | 0.66449 | 0.017853001 | Intergenic | NA           | NA         |
| 13  | 106561022 | 106561086 | 1       | -0.27735   | 5    | 0.002    | 0.014    | 0.38714  | 0.66449 | 0.006079939 | Intergenic | NA           | NA         |
| 13  | 106776008 | 106776042 | 1       | -0.175216  | 5    | 0.0045   | 0.087    | 0.33939  | 0.51461 | 0.011905878 | Intergenic | NA           | NA         |
| 13  | 107465364 | 107465438 | 1       | -0.238629  | 5    | 3.50E-05 | 3.40E-05 | 0.1004   | 0.33902 | 0.000218038 | TSS        | NM_001100857 | RGD1310587 |
| 13  | 107663787 | 107663837 | 1       | -0.348796  | 5    | 1.30E-05 | 0.00027  | 0.34233  | 0.69112 | 9.66E-05    | Intergenic | NA           | NA         |
| 13  | 107814306 | 107814371 | 1       | -0.157079  | 8    | 0.012    | 0.00066  | 0.29784  | 0.45492 | 0.026435197 | Intergenic | NA           | NA         |
| 13  | 108934833 | 108934883 | 1       | -0.088184  | 5    | 0.002    | 0.0055   | 0.1668   | 0.25498 | 0.006079939 | Intragenic | NM_001105734 | Dusp10     |
| 13  | 109539923 | 109540006 | 1       | -0.168887  | 5    | 1.70E-05 | 0.00052  | 0.080056 | 0.24894 | 0.000120524 | Intergenic | NA           | NA         |
| 13  | 109731018 | 109731072 | 1       | -0.238135  | 5    | 0.019    | 0.0017   | 0.47351  | 0.71164 | 0.038322088 | Intragenic | NM_031131    | Tgfb2      |
| 13  | 109871681 | 109871773 | 1       | -0.127151  | 7    | 0.00048  | 0.0022   | 0.40325  | 0.53041 | 0.001881331 | Intergenic | NA           | NA         |
| 13  | 109987241 | 109987317 | 1       | -0.08147   | 5    | 0.013    | 0.059    | 0.11635  | 0.19782 | 0.028097302 | Intergenic | NA           | NA         |
| 13  | 110058496 | 110058563 | 1       | -0.110369  | 9    | 0.00052  | 0.012    | 0.6488   | 0.75917 | 0.002033466 | TSS        | NM_001108858 | Ddx3y      |
| 13  | 110712112 | 110712133 | 1       | -0.055044  | 5    | 0.008    | 0.087    | 0.049327 | 0.10437 | 0.019059477 | Intergenic | NA           | NA         |

| chr | start     | stop      | q-value  | methy.diff | CpGs | pMWU     | p2DKS    | MCWLS     | MCWHS    | pMWU.fdr    | cgi.type   | transcript   | gene    |
|-----|-----------|-----------|----------|------------|------|----------|----------|-----------|----------|-------------|------------|--------------|---------|
| 13  | 110769064 | 110769276 | 1        | -0.117365  | 8    | 9.90E-05 | 0.00041  | 0.17538   | 0.29275  | 0.000516804 | TSS        | NM_203336    | Esrrg   |
| 13  | 110940714 | 110940869 | 1        | -0.276872  | 5    | 5.60E-05 | 0.00053  | 0.10353   | 0.3804   | 0.000320912 | Intragenic | NM_203336    | Esrrg   |
| 13  | 110964113 | 110964231 | 1        | -0.244836  | 7    | 4.90E-07 | 3.90E-06 | 0.13091   | 0.37574  | 6.54E-06    | Intragenic | NM_203336    | Esrrg   |
| 13  | 111773242 | 111773661 | 1        | 0.061556   | 8    | 0.02     | 0.16     | 0.5469    | 0.48534  | 0.039778219 | Intragenic | NM_001302219 | Ush2a   |
| 13  | 111990673 | 111990735 | 1        | 0.194533   | 5    | 0.0087   | 0.088    | 0.80114   | 0.6066   | 0.020391633 | Intragenic | NM_001302219 | Ush2a   |
| 13  | 112164178 | 112164365 | 1        | -0.20015   | 13   | 2.50E-09 | 1.30E-05 | 0.12095   | 0.3211   | 7.29E-08    | Intergenic | NA           | NA      |
| 13  | 112822519 | 112822566 | 1        | -0.29183   | 5    | 5.00E-05 | 0.0017   | 0.33929   | 0.63112  | 0.000291675 | Intergenic | NA           | NA      |
| 13  | 113036934 | 113037005 | 1        | -0.163698  | 7    | 0.00033  | 0.0035   | 0.40105   | 0.56475  | 0.001385608 | Intragenic | NM_001107201 | Prox1   |
| 13  | 113259703 | 113259806 | 1        | -0.231479  | 5    | 3.10E-05 | 0.00014  | 0.10828   | 0.33976  | 0.000197418 | TSS        | NM_206851    | Smyd2   |
| 13  | 113413602 | 113413728 | 1        | -0.145795  | 5    | 0.014    | 0.015    | 0.20729   | 0.35309  | 0.029850603 | Intragenic | NM_001107200 | Ptpn14  |
| 13  | 113438790 | 113438946 | 1        | -0.251195  | 5    | 0.00059  | 0.024    | 0.35391   | 0.60511  | 0.002242971 | Intragenic | NM_001107200 | Ptpn14  |
| 13  | 113731616 | 113731801 | 1        | -0.155461  | 5    | 0.00011  | 0.0018   | 0.14376   | 0.29922  | 0.000565143 | Intergenic | NA           | NA      |
| 13  | 113807537 | 113807581 | 1        | -0.248501  | 5    | 0.00023  | 0.0018   | 0.35605   | 0.60455  | 0.00102405  | Intergenic | NA           | NA      |
| 13  | 113963029 | 113963162 | 1        | -0.139918  | 5    | 0.0011   | 0.0054   | 0.094161  | 0.23408  | 0.003737263 | Intragenic | NM_001105984 | Rps6kc1 |
| 13  | 115042100 | 115042358 | 1        | -0.184257  | 5    | 0.0041   | 0.015    | 0.19428   | 0.37854  | 0.01100507  | Intergenic | NA           | NA      |
| 13  | 115071854 | 115071886 | 1        | -0.238759  | 5    | 2.20E-06 | 3.40E-05 | 0.18321   | 0.42197  | 2.27E-05    | TSS        | NM_053691    | Nek2    |
| 13  | 115263997 | 115264348 | 1        | -0.189933  | 5    | 0.0058   | 0.086    | 0.3238    | 0.51374  | 0.014624129 | Intergenic | NA           | NA      |
| 13  | 115306385 | 115306405 | 1        | -0.141638  | 5    | 0.00036  | 0.0032   | 0.25514   | 0.39678  | 0.001486639 | Intergenic | NA           | NA      |
| 13  | 116117305 | 116117387 | 1        | -0.126097  | 5    | 0.002    | 0.015    | 0.20818   | 0.33428  | 0.006079939 | Intergenic | NA           | NA      |
| 14  | 129723    | 129821    | 9.30E-08 | -0.42997   | 9    | 3.40E-13 | 2.90E-13 | 0.1643    | 0.59427  | 3.00E-11    | Intergenic | NA           | NA      |
| 14  | 1140169   | 1140368   | 0.0041   | -0.191849  | 6    | 4.70E-09 | 1.30E-08 | 0.048777  | 0.24063  | 1.26E-07    | Intergenic | NA           | NA      |
| 14  | 1140417   | 1140432   | 1        | -0.235463  | 5    | 0.00017  | 0.00027  | 0.30032   | 0.53578  | 0.000806192 | Intergenic | NA           | NA      |
| 14  | 1468957   | 1469165   | 3.60E-13 | -0.139654  | 16   | 4.40E-14 | 1.10E-18 | 0.067587  | 0.20724  | 6.64E-12    | Intragenic | NM_001037660 | Csf2ra  |
| 14  | 1685652   | 1685725   | 1        | -0.109711  | 5    | 0.0032   | 0.00095  | 0.60622   | 0.71593  | 0.008990975 | Intergenic | NA           | NA      |
| 14  | 1686257   | 1686417   | 1        | -0.111971  | 7    | 0.00021  | 5.10E-05 | 0.59777   | 0.70974  | 0.000951214 | Intergenic | NA           | NA      |
| 14  | 2048008   | 2048120   | 1        | -0.24766   | 5    | 0.00019  | 0.00027  | 0.051673  | 0.29933  | 0.000879857 | TSS        | NM_022287    | Slc26a1 |
| 14  | 2532091   | 2532164   | 1        | -0.077448  | 5    | 0.023    | 0.13     | 0.74177   | 0.81922  | 0.04441443  | Intergenic | NA           | NA      |
| 14  | 3064578   | 3064637   | 1.30E-07 | -0.16133   | 10   | 1.60E-13 | 4.00E-13 | 0.023851  | 0.18518  | 1.56E-11    | Intragenic | NM_012566    | Gfi1    |
| 14  | 3064651   | 3064966   | 0.21     | -0.096174  | 37   | 0.00028  | 6.50E-07 | 0.013325  | 0.098133 | 0.001214715 | Intragenic | NM_012566    | Gfi1    |
| 14  | 3064993   | 3065025   | 1        | -0.149797  | 5    | 0.0014   | 0.0018   | 0.0097223 | 0.15952  | 0.004540837 | Intragenic | NM_012566    | Gfi1    |
| 14  | 3065032   | 3065105   | 1        | -0.140613  | 5    | 0.0012   | 3.40E-05 | 0.0029018 | 0.14352  | 0.004013471 | Intragenic | NM_012566    | Gfi1    |
| 14  | 3097113   | 3097218   | 0.00042  | -0.238952  | 7    | 3.10E-10 | 1.30E-09 | 0.096491  | 0.33544  | 1.21E-08    | Intergenic | NA           | NA      |
| 14  | 3508897   | 3508931   | 1        | -0.202459  | 5    | 0.0035   | 0.039    | 0.5517    | 0.75416  | 0.009686665 | TSS        | NM_017256    | Tgfbr3  |
| 14  | 3997350   | 3997413   | 1        | -0.164774  | 7    | 0.00023  | 0.0012   | 0.6025    | 0.76728  | 0.00102405  | Intergenic | NA           | NA      |
| 14  | 4103065   | 4103150   | 1        | -0.106234  | 5    | 0.0049   | 0.0091   | 0.65414   | 0.76037  | 0.012753585 | Intergenic | NA           | NA      |
| 14  | 4258013   | 4258141   | 1        | -0.12052   | 5    | 0.015    | 0.059    | 0.10491   | 0.22543  | 0.031584896 | Intergenic | NA           | NA      |
| 14  | 4297358   | 4297387   | 1        | -0.290404  | 5    | 1.50E-06 | 7.00E-05 | 0.27303   | 0.56343  | 1.65E-05    | Intergenic | NA           | NA      |
| 14  | 4298241   | 4298661   | 1        | -0.126944  | 11   | 0.013    | 0.12     | 0.40706   | 0.534    | 0.028097302 | Intergenic | NA           | NA      |
| 14  | 4655963   | 4656101   | 1        | -0.229012  | 5    | 0.0049   | 0.015    | 0.238     | 0.46701  | 0.012753585 | Intergenic | NA           | NA      |

| chr | start    | stop     | q-value | methy.diff | CpGs | pMWU     | p2DKS    | MCWLS    | MCWHS   | pMWU.fdr    | cgi.type   | transcript                                  | gene                     |
|-----|----------|----------|---------|------------|------|----------|----------|----------|---------|-------------|------------|---------------------------------------------|--------------------------|
| 14  | 4814067  | 4814116  | 1       | -0.138483  | 5    | 0.015    | 0.13     | 0.31271  | 0.45119 | 0.031584896 | Intergenic | NA                                          | NA                       |
| 14  | 5042401  | 5042477  | 1       | -0.13673   | 5    | 1.10E-06 | 7.60E-06 | 0.03409  | 0.17082 | 1.27E-05    | Intergenic | NA                                          | NA                       |
| 14  | 5147299  | 5147427  | 1       | -0.192634  | 5    | 8.80E-05 | 1.60E-05 | 0.092556 | 0.28519 | 0.000466886 | Intergenic | NA                                          | NA                       |
| 14  | 5193606  | 5193834  | 1       | -0.154028  | 7    | 1.80E-05 | 0.00017  | 0.15151  | 0.30554 | 0.000127015 | Intergenic | NA                                          | NA                       |
| 14  | 5554391  | 5554513  | 1       | -0.226212  | 6    | 0.003    | 0.00054  | 0.19573  | 0.42194 | 0.008555055 | Intergenic | NA                                          | NA                       |
| 14  | 5626110  | 5626232  | 1       | -0.226212  | 6    | 0.003    | 0.00054  | 0.19573  | 0.42194 | 0.008555055 | Intragenic | NM_001037205:N<br>M_001014133               | Abcg3l4:Abcg<br>3l2      |
| 14  | 5739138  | 5739260  | 1       | -0.217713  | 6    | 0.005    | 0.00095  | 0.20772  | 0.42544 | 0.012977322 | Intragenic | NM_001037205:N<br>M_001014133               | Abcg3l4:Abcg<br>3l2      |
| 14  | 6802227  | 6802309  | 1       | -0.22886   | 5    | 0.0013   | 0.0017   | 0.10147  | 0.33033 | 0.004277683 | TSS        | NM_012587                                   | Ibsp                     |
| 14  | 6985038  | 6985147  | 1       | -0.101995  | 5    | 0.00088  | 0.0054   | 0.049985 | 0.15198 | 0.003092094 | TSS        | NM_012946                                   | Sparcl1                  |
| 14  | 7099149  | 7099277  | 1       | -0.145206  | 5    | 0.00059  | 0.0031   | 0.19036  | 0.33556 | 0.002242971 | Intergenic | NA                                          | NA                       |
| 14  | 7232739  | 7232940  | 1       | -0.162883  | 5    | 0.008    | 0.015    | 0.14275  | 0.30564 | 0.019059477 | Intragenic | NM_001107206                                | Aff1                     |
| 14  | 7258325  | 7258462  | 1       | -0.160397  | 5    | 0.0074   | 0.015    | 0.1839   | 0.3443  | 0.017853001 | Intragenic | NM_001107206                                | Aff1                     |
| 14  | 7281879  | 7281903  | 0.0022  | -0.310192  | 5    | 6.30E-08 | 6.70E-09 | 0.033456 | 0.34365 | 1.18E-06    | Intragenic | NM_001107206                                | Aff1                     |
| 14  | 7288196  | 7288326  | 1       | -0.160996  | 5    | 0.00011  | 7.40E-06 | 0.071291 | 0.23229 | 0.000565143 | Intragenic | NM_001107206                                | Aff1                     |
| 14  | 7738447  | 7738568  | 1       | -0.189725  | 5    | 0.01     | 0.0054   | 0.25587  | 0.44559 | 0.02275947  | Intragenic | NM_001100789                                | Ptpn13                   |
| 14  | 7787927  | 7787982  | 1       | -0.268062  | 5    | 0.00021  | 0.0017   | 0.32552  | 0.59358 | 0.000951214 | Intragenic | NM_001100789                                | Ptpn13                   |
| 14  | 7831675  | 7831756  | 1       | -0.13645   | 5    | 0.0013   | 0.015    | 0.59595  | 0.7324  | 0.004277683 | Intragenic | NM_001100789                                | Ptpn13                   |
| 14  | 8190177  | 8190311  | 1       | -0.168394  | 5    | 0.0014   | 0.00096  | 0.12123  | 0.28962 | 0.004540837 | Intragenic | NM_001270556:N<br>M_001318190:N<br>M_012806 | Mapk10:Map<br>k10:Mapk10 |
| 14  | 8291842  | 8291945  | 1       | -0.12058   | 5    | 0.0012   | 0.015    | 0.82484  | 0.94542 | 0.004013471 | Intragenic | NM_001270556:N<br>M_001318190:N<br>M_012806 | Mapk10:Map<br>k10:Mapk10 |
| 14  | 8392167  | 8392366  | 1       | -0.233644  | 10   | 7.70E-06 | 0.00072  | 0.23194  | 0.46558 | 6.32E-05    | Intragenic | NM_001012032                                | Arhgap24                 |
| 14  | 8834209  | 8834522  | 0.1     | -0.158577  | 17   | 2.50E-09 | 3.20E-07 | 0.27972  | 0.4383  | 7.29E-08    | Intergenic | NA                                          | NA                       |
| 14  | 9010221  | 9010241  | 1       | -0.186696  | 5    | 0.0049   | 0.0051   | 0.075637 | 0.26233 | 0.012753585 | Intergenic | NA                                          | NA                       |
| 14  | 9052418  | 9052589  | 1       | -0.224606  | 8    | 1.10E-05 | 5.30E-05 | 0.13387  | 0.35848 | 8.53E-05    | Intergenic | NA                                          | NA                       |
| 14  | 9119426  | 9119532  | 1       | -0.222081  | 5    | 9.80E-05 | 0.00027  | 0.13259  | 0.35467 | 0.000512474 | Intergenic | NA                                          | NA                       |
| 14  | 9339021  | 9339111  | 1       | -0.157209  | 5    | 0.00019  | 0.00051  | 0.32039  | 0.4776  | 0.000879857 | Intragenic | NM_001170551                                | Wdfy3                    |
| 14  | 9350011  | 9350093  | 1       | -0.322056  | 6    | 6.90E-05 | 0.0027   | 0.40434  | 0.7264  | 0.000385124 | Intergenic | NA                                          | NA                       |
| 14  | 9837844  | 9837955  | 1       | -0.17227   | 7    | 0.00018  | 0.002    | 0.40675  | 0.57902 | 0.000849258 | Intergenic | NA                                          | NA                       |
| 14  | 10466621 | 10466668 | 1       | -0.238417  | 5    | 5.60E-07 | 7.40E-06 | 0.46793  | 0.70635 | 7.29E-06    | Intergenic | NA                                          | NA                       |
| 14  | 10571384 | 10571451 | 1       | -0.08586   | 11   | 3.80E-08 | 0.00019  | 0.14124  | 0.2271  | 8.07E-07    | Intergenic | NA                                          | NA                       |
| 14  | 10838916 | 10839056 | 1       | -0.210972  | 9    | 1.10E-07 | 3.30E-06 | 0.26878  | 0.47975 | 1.86E-06    | Intragenic | NM_033021                                   | Sec31a                   |
| 14  | 10926047 | 10926150 | 1       | -0.169976  | 5    | 0.00012  | 0.0055   | 0.10219  | 0.27217 | 0.000603617 | Intergenic | NA                                          | NA                       |
| 14  | 10926240 | 10926295 | 1       | -0.155414  | 5    | 0.0008   | 0.00095  | 0.39845  | 0.55387 | 0.002866309 | Intergenic | NA                                          | NA                       |
| 14  | 10937362 | 10937541 | 1       | -0.155584  | 5    | 0.0027   | 0.088    | 0.30269  | 0.45827 | 0.007840962 | Intergenic | NA                                          | NA                       |

| chr | start    | stop     | q-value | methy.diff | CpGs | pMWU     | p2DKS    | MCWLS    | MCWHS    | pMWU.fdr    | cgi.type   | transcript   | gene     |
|-----|----------|----------|---------|------------|------|----------|----------|----------|----------|-------------|------------|--------------|----------|
| 14  | 11071324 | 11071464 | 1       | -0.219565  | 5    | 0.00015  | 0.0018   | 0.30949  | 0.52905  | 0.000724207 | Intragenic | NM_001108354 | Tmem150c |
| 14  | 11108420 | 11108604 | 1       | -0.171546  | 10   | 0.00022  | 0.004    | 0.59727  | 0.76882  | 0.000994261 | Intragenic | NM_001108354 | Tmem150c |
| 14  | 11249270 | 11249315 | 1       | -0.129262  | 5    | 0.011    | 0.015    | 0.43111  | 0.56037  | 0.02463877  | Intergenic | NA           | NA       |
| 14  | 11768064 | 11768172 | 1       | -0.260462  | 5    | 0.00054  | 0.0017   | 0.10232  | 0.36278  | 0.002077867 | Intergenic | NA           | NA       |
| 14  | 13218915 | 13219008 | 1       | -0.055296  | 9    | 0.00011  | 0.0041   | 0.069085 | 0.12438  | 0.000565143 | Intergenic | NA           | NA       |
| 14  | 14335153 | 14335363 | 1       | -0.198753  | 7    | 0.00012  | 0.0035   | 0.21615  | 0.41491  | 0.000603617 | Intragenic | NM_012823    | Anxa3    |
| 14  | 14938147 | 14938251 | 1       | -0.169221  | 5    | 0.017    | 0.015    | 0.27585  | 0.44507  | 0.034796287 | Intragenic | NM_001105997 | Mrpl1    |
| 14  | 15376658 | 15376771 | 1       | -0.148713  | 5    | 0.00021  | 7.00E-05 | 0.1047   | 0.25341  | 0.000951214 | Intergenic | NA           | NA       |
| 14  | 15629871 | 15629908 | 1       | -0.282006  | 5    | 3.10E-05 | 0.00028  | 0.36748  | 0.64948  | 0.000197418 | Intergenic | NA           | NA       |
| 14  | 15634315 | 15634352 | 1       | -0.282006  | 5    | 3.10E-05 | 0.00028  | 0.36748  | 0.64948  | 0.000197418 | Intergenic | NA           | NA       |
| 14  | 16342757 | 16342964 | 1       | -0.205482  | 5    | 0.0058   | 0.088    | 0.22723  | 0.43271  | 0.014624129 | Intragenic | NM_001107208 | 11-Sep   |
| 14  | 16418530 | 16418753 | 1       | -0.101459  | 8    | 0.0023   | 0.0084   | 0.085875 | 0.18733  | 0.00686004  | Intergenic | NA           | NA       |
| 14  | 16419075 | 16419733 | 1       | -0.22607   | 12   | 1.90E-08 | 5.60E-05 | 0.20008  | 0.42615  | 4.37E-07    | Intergenic | NA           | NA       |
| 14  | 16592996 | 16593103 | 1       | -0.303309  | 5    | 2.40E-05 | 0.00014  | 0.38945  | 0.69276  | 0.000160049 | Intragenic | NM_001100889 | Shroom3  |
| 14  | 16788553 | 16788647 | 1       | -0.156123  | 5    | 0.011    | 0.039    | 0.25146  | 0.40758  | 0.02463877  | Intragenic | NM_001100889 | Shroom3  |
| 14  | 17086619 | 17086717 | 1       | -0.197552  | 5    | 0.00011  | 0.0055   | 0.15088  | 0.34844  | 0.000565143 | Intragenic | NM_001012034 | Art3     |
| 14  | 17618692 | 17618834 | 1       | -0.204622  | 7    | 4.10E-07 | 3.00E-05 | 0.48506  | 0.68968  | 5.71E-06    | Intergenic | NA           | NA       |
| 14  | 17665752 | 17665896 | 1       | -0.103694  | 5    | 0.0094   | 0.088    | 0.20671  | 0.3104   | 0.021723038 | Intergenic | NA           | NA       |
| 14  | 17684940 | 17685048 | 1       | -0.137687  | 5    | 0.0014   | 0.0054   | 0.35584  | 0.49352  | 0.004540837 | Intergenic | NA           | NA       |
| 14  | 18758867 | 18759022 | 1       | -0.124096  | 7    | 0.019    | 0.078    | 0.19291  | 0.317    | 0.038322088 | TSS        | NM_001007729 | Pf4      |
| 14  | 18965526 | 18965672 | 1       | -0.17381   | 8    | 0.00016  | 0.0016   | 0.28941  | 0.46322  | 0.000769396 | Intergenic | NA           | NA       |
| 14  | 20563314 | 20563342 | 1       | -0.285407  | 5    | 2.20E-05 | 0.00098  | 0.28716  | 0.57256  | 0.000149617 | Intragenic | NM_053424    | Slc4a4   |
| 14  | 20753500 | 20753612 | 1       | -0.128717  | 5    | 0.0014   | 0.00025  | 0.6534   | 0.78211  | 0.004540837 | Intergenic | NA           | NA       |
| 14  | 22151619 | 22151729 | 1       | -0.164446  | 5    | 0.014    | 0.015    | 0.42924  | 0.59369  | 0.029850603 | Intragenic | NM_022228    | Ugt2a1   |
| 14  | 28444164 | 28444350 | 1       | -0.182776  | 8    | 0.0011   | 0.013    | 0.30867  | 0.49145  | 0.003737263 | Intragenic | NM_130822    | Adgrl3   |
| 14  | 32347544 | 32347575 | 1       | -0.225443  | 5    | 7.00E-05 | 3.40E-05 | 0.21919  | 0.44463  | 0.000386221 | Intergenic | NA           | NA       |
| 14  | 32446961 | 32447102 | 1       | -0.147424  | 5    | 0.008    | 0.015    | 0.19389  | 0.34131  | 0.019059477 | Intergenic | NA           | NA       |
| 14  | 32845484 | 32845518 | 1       | -0.177345  | 5    | 1.70E-06 | 3.40E-05 | 0.053831 | 0.23118  | 1.83E-05    | Intragenic | NM_001013048 | Igfbp7   |
| 14  | 32993252 | 32993426 | 1       | -0.069723  | 9    | 0.025    | 0.0087   | 0.6813   | 0.75103  | 0.047453009 | Intergenic | NA           | NA       |
| 14  | 33221320 | 33221356 | 1       | -0.13603   | 5    | 0.00011  | 0.00097  | 0.25782  | 0.39385  | 0.000565143 | TSS        | NM_001017498 | Thegl    |
| 14  | 33453229 | 33453326 | 1       | -0.141327  | 10   | 5.50E-05 | 0.0013   | 0.23851  | 0.37984  | 0.000319601 | Intergenic | NA           | NA       |
| 14  | 33463282 | 33463369 | 1       | -0.131324  | 5    | 0.00014  | 0.00053  | 0.14145  | 0.27278  | 0.000684451 | Intergenic | NA           | NA       |
| 14  | 35536476 | 35536527 | 1       | -0.097675  | 5    | 0.0094   | 0.025    | 0.13345  | 0.23112  | 0.021723038 | Intragenic | NM_001105736 | Chic2    |
| 14  | 35897240 | 35897366 | 1       | -0.103127  | 5    | 0.0049   | 0.0054   | 0.13206  | 0.23519  | 0.012753585 | Intragenic | NM_001108358 | Lnx1     |
| 14  | 36487085 | 36487224 | 1       | -0.097907  | 7    | 0.014    | 0.039    | 0.25511  | 0.35302  | 0.029850603 | Intergenic | NA           | NA       |
| 14  | 37251151 | 37251321 | 1       | -0.061118  | 5    | 0.00054  | 0.0055   | 0.031457 | 0.092575 | 0.002077867 | TSS        | NM_001271181 | Ociad2   |
| 14  | 37528951 | 37529055 | 1       | -0.195536  | 6    | 0.003    | 0.027    | 0.57956  | 0.7751   | 0.008555055 | Intergenic | NA           | NA       |
| 14  | 38174785 | 38174843 | 1       | -0.201139  | 5    | 0.0013   | 0.015    | 0.20489  | 0.40603  | 0.004277683 | Intragenic | NM_182473    | Corin    |
| 14  | 42085781 | 42085937 | 1       | -0.213185  | 5    | 0.0017   | 0.0053   | 0.18053  | 0.39372  | 0.005339493 | Intergenic | NA           | NA       |

| chr | start    | stop     | q-value | methyL.diff | CpGs | pMWU     | p2DKS    | MCWLS    | MCWHS    | pMWU.fdr    | cgi.type   | transcript             | gene            |
|-----|----------|----------|---------|-------------|------|----------|----------|----------|----------|-------------|------------|------------------------|-----------------|
| 14  | 42131809 | 42131945 | 1       | -0.153121   | 5    | 0.021    | 0.13     | 0.18173  | 0.33485  | 0.041207871 | Intergenic | NA                     | NA              |
| 14  | 42389192 | 42389228 | 1       | -0.075541   | 5    | 0.0045   | 0.039    | 0.16171  | 0.23725  | 0.011905878 | Intergenic | NA                     | NA              |
| 14  | 43666127 | 43666339 | 1       | -0.087835   | 6    | 0.021    | 0.16     | 0.097467 | 0.1853   | 0.041207871 | Intergenic | NA                     | NA              |
| 14  | 44333524 | 44333686 | 1       | -0.147721   | 5    | 0.017    | 0.18     | 0.26845  | 0.41617  | 0.034796287 | Intragenic | NM_001012037           | Lias            |
| 14  | 44428014 | 44428093 | 1       | -0.190579   | 5    | 5.60E-07 | 1.60E-05 | 0.20669  | 0.39726  | 7.29E-06    | Intergenic | NA                     | NA              |
| 14  | 44746325 | 44746531 | 1       | -0.155213   | 8    | 0.0023   | 0.037    | 0.35434  | 0.50955  | 0.00686004  | Intergenic | NA                     | NA              |
| 14  | 44977811 | 44978205 | 1       | -0.182017   | 11   | 2.60E-07 | 1.20E-05 | 0.09882  | 0.28084  | 3.84E-06    | Intergenic | NA                     | NA              |
| 14  | 45604202 | 45604227 | 1       | -0.077315   | 5    | 0.025    | 0.088    | 0.22395  | 0.30126  | 0.047453009 | Intergenic | NA                     | NA              |
| 14  | 46694292 | 46694322 | 0.39    | 0.080996    | 7    | 2.50E-08 | 1.20E-06 | 0.22005  | 0.13905  | 5.59E-07    | Intergenic | NA                     | NA              |
| 14  | 46694381 | 46694411 | 1       | 0.134974    | 5    | 0.0029   | 0.038    | 0.2926   | 0.15762  | 0.008293503 | Intergenic | NA                     | NA              |
| 14  | 46699319 | 46699340 | 1       | 0.083009    | 5    | 0.00097  | 0.0054   | 0.23352  | 0.15051  | 0.003366009 | Intergenic | NA                     | NA              |
| 14  | 46699348 | 46699367 | 1       | 0.118396    | 5    | 0.00029  | 0.0018   | 0.21327  | 0.094872 | 0.001239307 | Intergenic | NA                     | NA              |
| 14  | 46699995 | 46700025 | 1       | 0.079713    | 7    | 2.80E-08 | 4.60E-06 | 0.21878  | 0.13907  | 6.20E-07    | Intergenic | NA                     | NA              |
| 14  | 46700084 | 46700114 | 1       | 0.134922    | 5    | 0.0029   | 0.038    | 0.29254  | 0.15762  | 0.008293503 | Intergenic | NA                     | NA              |
| 14  | 46701498 | 46701519 | 1       | 0.201884    | 5    | 0.0032   | 0.0093   | 0.4496   | 0.24771  | 0.008990975 | Intergenic | NA                     | NA              |
| 14  | 46702370 | 46703011 | 1       | -0.051048   | 32   | 8.50E-09 | 2.80E-05 | 0.11014  | 0.15716  | 2.17E-07    | Intergenic | NA                     | NA              |
| 14  | 46742259 | 46742435 | 1       | -0.091587   | 10   | 7.20E-07 | 6.40E-05 | 0.085933 | 0.17752  | 9.10E-06    | Intergenic | NA                     | NA              |
| 14  | 46743685 | 46743742 | 1       | -0.139321   | 5    | 0.01     | 0.059    | 0.3366   | 0.47592  | 0.02275947  | Intergenic | NA                     | NA              |
| 14  | 46743754 | 46743870 | 1       | -0.230002   | 5    | 4.40E-05 | 0.00053  | 0.23447  | 0.46447  | 0.000263321 | Intergenic | NA                     | NA              |
| 14  | 46757421 | 46757463 | 1       | -0.125263   | 5    | 0.013    | 0.059    | 0.16646  | 0.29172  | 0.028097302 | Intergenic | NA                     | NA              |
| 14  | 46765654 | 46765702 | 1       | 0.109099    | 10   | 1.60E-07 | 3.80E-05 | 0.22664  | 0.11754  | 2.51E-06    | Intergenic | NA                     | NA              |
| 14  | 46767554 | 46767575 | 1       | 0.202171    | 5    | 0.0032   | 0.0093   | 0.44988  | 0.24771  | 0.008990975 | Intergenic | NA                     | NA              |
| 14  | 46767596 | 46767644 | 1       | 0.101275    | 5    | 0.01     | 0.015    | 0.24523  | 0.14396  | 0.02275947  | Intergenic | NA                     | NA              |
| 14  | 46808715 | 46808880 | 1       | -0.096125   | 9    | 8.10E-07 | 2.90E-05 | 0.089244 | 0.18537  | 1.00E-05    | Intergenic | NA                     | NA              |
| 14  | 46809808 | 46809973 | 1       | -0.092706   | 9    | 1.60E-06 | 4.80E-05 | 0.09305  | 0.18576  | 1.75E-05    | Intergenic | NA                     | NA              |
| 14  | 46813262 | 46813382 | 0.35    | -0.059538   | 10   | 1.60E-05 | 1.10E-06 | 0.095765 | 0.1553   | 0.000115757 | TSS        | NM_001025002           | LOC310926       |
| 14  | 46815534 | 46815606 | 1       | -0.055086   | 5    | 0.0019   | 0.0018   | 0.086475 | 0.14156  | 0.005855937 | TSS        | NM_001025002           | LOC310926       |
| 14  | 46816428 | 46819480 | 1       | -0.050178   | 345  | 9.30E-07 | 0.00036  | 0.11389  | 0.13681  | 1.12E-05    | TSS        | NM_001025002:NR_046239 | LOC310926:Rn45s |
| 14  | 46821920 | 46822115 | 1       | -0.054206   | 21   | 0.00088  | 0.0012   | 0.098338 | 0.14284  | 0.003092094 | TSS        | NR_046239:NR_046238    | Rn45s:Rn5-8s    |
| 14  | 46823416 | 46823446 | 1       | 0.11868     | 5    | 5.60E-05 | 0.00052  | 0.25169  | 0.13301  | 0.000320912 | TSS        | NR_046238              | Rn5-8s          |
| 14  | 46825564 | 46825579 | 1       | -0.277318   | 5    | 0.0012   | 0.00053  | 0.20284  | 0.48016  | 0.004013471 | TSS        | NR_046238:NR_046246    | Rn5-8s:Rn28s    |
| 14  | 46825726 | 46825747 | 1       | 0.077042    | 5    | 0.012    | 0.088    | 0.22914  | 0.15209  | 0.026435197 | TSS        | NR_046238:NR_046246    | Rn5-8s:Rn28s    |
| 14  | 46826890 | 46826929 | 1       | 0.142654    | 5    | 4.40E-05 | 0.00014  | 0.18478  | 0.042122 | 0.000263321 | TSS        | NR_046246              | Rn28s           |
| 14  | 46827270 | 46827293 | 1       | 0.073412    | 5    | 0.00039  | 0.0031   | 0.19313  | 0.11972  | 0.001587612 | TSS        | NR_046246              | Rn28s           |
| 14  | 46827680 | 46827701 | 1       | 0.099042    | 5    | 0.00065  | 0.0055   | 0.22343  | 0.12439  | 0.002426546 | TSS        | NR_046246              | Rn28s           |

| chr | start    | stop     | q-value  | methy.diff | CpGs | pMWU     | p2DKS    | MCWLS    | MCWHS    | pMWU.fdr    | cgi.type   | transcript             | gene            |
|-----|----------|----------|----------|------------|------|----------|----------|----------|----------|-------------|------------|------------------------|-----------------|
| 14  | 46829231 | 46829252 | 1        | 0.074826   | 5    | 0.0035   | 0.015    | 0.22164  | 0.14682  | 0.009686665 | TSS        | NR_046246:NM_147136    | Rn28s:LOC257642 |
| 14  | 46829260 | 46830083 | 1        | 0.129581   | 77   | 9.80E-05 | 0.00098  | 0.13553  | 0.14145  | 0.000512474 | TSS        | NR_046246:NM_147136    | Rn28s:LOC257642 |
| 14  | 46830090 | 46830111 | 1        | 0.074414   | 5    | 0.0035   | 0.0091   | 0.22264  | 0.14822  | 0.009686665 | TSS        | NM_147136              | LOC257642       |
| 14  | 46830119 | 46830138 | 1        | 0.11992    | 5    | 0.00015  | 0.00098  | 0.19468  | 0.074757 | 0.000724207 | TSS        | NM_147136              | LOC257642       |
| 14  | 46832139 | 46832162 | 1        | 0.087311   | 5    | 0.00015  | 0.0054   | 0.21237  | 0.12506  | 0.000724207 | Intragenic | NM_001025002:NR_046239 | LOC310926:Rn45s |
| 14  | 46832806 | 46832836 | 0.39     | 0.081002   | 7    | 2.50E-08 | 1.20E-06 | 0.22005  | 0.13904  | 5.59E-07    | Intragenic | NM_001025002:NR_046239 | LOC310926:Rn45s |
| 14  | 46832895 | 46832925 | 1        | 0.135654   | 5    | 0.0032   | 0.038    | 0.29258  | 0.15693  | 0.008990975 | Intragenic | NM_001025002:NR_046239 | LOC310926:Rn45s |
| 14  | 46834164 | 46834273 | 1        | 0.081332   | 15   | 0.021    | 0.096    | 0.32569  | 0.24435  | 0.041207871 | Intragenic | NM_001025002:NR_046239 | LOC310926:Rn45s |
| 14  | 46834309 | 46834775 | 1        | 0.164571   | 64   | 0.00013  | 0.00067  | 0.15208  | 0.1597   | 0.000648758 | Intragenic | NM_001025002:NR_046239 | LOC310926:Rn45s |
| 14  | 46854406 | 46854596 | 1        | -0.184153  | 11   | 8.50E-07 | 1.90E-05 | 0.29767  | 0.48183  | 1.03E-05    | Intragenic | NM_001025002           | LOC310926       |
| 14  | 46856097 | 46856821 | 0.037    | -0.056363  | 70   | 1.90E-08 | 1.10E-07 | 0.093633 | 0.11632  | 4.37E-07    | Intragenic | NM_001025002           | LOC310926       |
| 14  | 46857342 | 46857358 | 1        | 0.102119   | 5    | 0.00088  | 0.038    | 0.22836  | 0.12625  | 0.003092094 | Intragenic | NM_001025002           | LOC310926       |
| 14  | 46857408 | 46857431 | 1        | -0.115987  | 5    | 0.0032   | 0.00098  | 0.20802  | 0.32401  | 0.008990975 | Intragenic | NM_001025002           | LOC310926       |
| 14  | 46858536 | 46858558 | 1        | -0.051583  | 5    | 0.00029  | 0.00014  | 0.10988  | 0.16146  | 0.001239307 | Intragenic | NM_001025002           | LOC310926       |
| 14  | 46858712 | 46858770 | 1        | -0.073708  | 14   | 0.00013  | 0.00031  | 0.08757  | 0.15406  | 0.000648758 | Intragenic | NM_001025002           | LOC310926       |
| 14  | 46860651 | 46860846 | 1        | -0.054211  | 21   | 0.00088  | 0.0012   | 0.098338 | 0.14284  | 0.003092094 | TSS        | NR_046238              | Rn5-8s          |
| 14  | 46861704 | 46861810 | 1        | -0.064993  | 17   | 0.0083   | 0.11     | 0.16909  | 0.2118   | 0.019719474 | TSS        | NR_046238              | Rn5-8s          |
| 14  | 47395018 | 47395132 | 0.15     | -0.235274  | 8    | 1.80E-09 | 4.50E-07 | 0.2877   | 0.52297  | 5.50E-08    | Intergenic | NA                     | NA              |
| 14  | 47849953 | 47850240 | 1.30E-06 | -0.083504  | 33   | 4.60E-14 | 4.00E-12 | 0.036875 | 0.12038  | 6.64E-12    | Intergenic | NA                     | NA              |
| 14  | 47850245 | 47850267 | 1        | -0.184508  | 5    | 7.00E-05 | 0.0018   | 0.047609 | 0.23212  | 0.000386221 | Intergenic | NA                     | NA              |
| 14  | 48003072 | 48003111 | 0.0022   | -0.317854  | 7    | 4.80E-10 | 6.90E-09 | 0.38861  | 0.70646  | 1.75E-08    | Intergenic | NA                     | NA              |
| 14  | 48476703 | 48476742 | 0.0022   | -0.317854  | 7    | 4.80E-10 | 6.90E-09 | 0.38861  | 0.70646  | 1.75E-08    | Intergenic | NA                     | NA              |
| 14  | 50906174 | 50906223 | 1        | 0.080498   | 5    | 0.011    | 0.0087   | 0.93502  | 0.85453  | 0.02463877  | Intergenic | NA                     | NA              |
| 14  | 53952992 | 53953096 | 1        | 0.155838   | 5    | 0.015    | 0.25     | 0.91211  | 0.75627  | 0.031584896 | Intergenic | NA                     | NA              |
| 14  | 55064142 | 55064287 | 1        | -0.084071  | 8    | 0.00053  | 0.0055   | 0.7011   | 0.78517  | 0.002069204 | Intragenic | NM_001004087           | Pcdh7           |
| 14  | 55832835 | 55832869 | 0.015    | -0.45585   | 5    | 1.30E-07 | 4.50E-08 | 0.38189  | 0.83774  | 2.11E-06    | Intergenic | NA                     | NA              |
| 14  | 60102125 | 60102479 | 1        | -0.152165  | 5    | 0.019    | 0.086    | 0.52339  | 0.67556  | 0.038322088 | Intergenic | NA                     | NA              |
| 14  | 60102482 | 60102513 | 9.80E-06 | -0.305868  | 8    | 7.50E-12 | 3.00E-11 | 0.47408  | 0.77995  | 4.48E-10    | Intergenic | NA                     | NA              |
| 14  | 64580182 | 64580286 | 1        | -0.133695  | 5    | 0.0022   | 0.015    | 0.17223  | 0.30593  | 0.006578104 | Intergenic | NA                     | NA              |
| 14  | 64799743 | 64800067 | 1        | -0.200354  | 5    | 0.00054  | 0.00052  | 0.14189  | 0.34224  | 0.002077867 | Intergenic | NA                     | NA              |
| 14  | 70371492 | 70371915 | 1        | -0.119112  | 9    | 0.00012  | 0.012    | 0.15515  | 0.27427  | 0.000603617 | Intergenic | NA                     | NA              |
| 14  | 75701826 | 75701924 | 1        | -0.102119  | 5    | 0.019    | 0.038    | 0.47103  | 0.57315  | 0.038322088 | Intergenic | NA                     | NA              |

| chr | start    | stop     | q-value  | methy.diff | CpGs | pMWU     | p2DKS    | MCWLS    | MCWHS    | pMWU.fdr    | cgi.type   | transcript                                  | gene        |
|-----|----------|----------|----------|------------|------|----------|----------|----------|----------|-------------|------------|---------------------------------------------|-------------|
| 14  | 76817999 | 76818074 | 1        | -0.186262  | 5    | 1.50E-05 | 0.00053  | 0.062573 | 0.24883  | 0.000109113 | Intergenic | NA                                          | NA          |
| 14  | 77644208 | 77644380 | 1        | -0.092438  | 5    | 0.0074   | 0.088    | 0.16442  | 0.25686  | 0.017853001 | Intergenic | NA                                          | NA          |
| 14  | 78313680 | 78313966 | 1        | -0.149985  | 8    | 0.017    | 0.032    | 0.32901  | 0.479    | 0.034796287 | Intergenic | NA                                          | NA          |
| 14  | 78421377 | 78421516 | 1        | -0.133549  | 6    | 0.01     | 0.0071   | 0.21082  | 0.34437  | 0.02275947  | Intragenic | NM_001033894                                | Jakmip1     |
| 14  | 79242405 | 79242645 | 1        | -0.117829  | 10   | 5.50E-05 | 0.012    | 0.12345  | 0.24128  | 0.000319601 | Intragenic | NM_001107225                                | Sorcs2      |
| 14  | 79326681 | 79326815 | 1        | -0.173027  | 5    | 0.00017  | 0.00097  | 0.1212   | 0.29423  | 0.000806192 | Intragenic | NM_001107225                                | Sorcs2      |
| 14  | 80141735 | 80141888 | 1        | -0.178559  | 5    | 2.40E-05 | 0.00053  | 0.10433  | 0.28288  | 0.000160049 | Intergenic | NA                                          | NA          |
| 14  | 80385778 | 80385809 | 9.80E-06 | -0.307394  | 8    | 6.90E-12 | 3.00E-11 | 0.47168  | 0.77907  | 4.25E-10    | Intergenic | NA                                          | NA          |
| 14  | 80495198 | 80495370 | 1        | -0.159351  | 10   | 1.20E-06 | 0.0009   | 0.17997  | 0.33933  | 1.37E-05    | Intragenic | NM_001100655                                | Nacad       |
| 14  | 80498320 | 80499226 | 1        | -0.108879  | 18   | 0.00047  | 0.016    | 0.2145   | 0.32338  | 0.001875163 | Intragenic | NM_001100655                                | Nacad       |
| 14  | 81634834 | 81634931 | 1        | -0.144215  | 5    | 0.0049   | 0.038    | 0.63764  | 0.78185  | 0.012753585 | Intragenic | NM_001130062                                | Dok7        |
| 14  | 81658639 | 81658721 | 1        | -0.124701  | 5    | 0.013    | 0.015    | 0.64366  | 0.76836  | 0.028097302 | Intragenic | NM_053320                                   | Hgfac       |
| 14  | 81898529 | 81898712 | 1        | -0.108298  | 6    | 0.012    | 0.0066   | 0.19695  | 0.30525  | 0.026435197 | Intragenic | NM_024357                                   | Htt         |
| 14  | 82968713 | 82968931 | 1        | -0.239386  | 11   | 1.70E-08 | 1.30E-05 | 0.19909  | 0.43847  | 4.01E-07    | Intragenic | NM_053429                                   | Fgfr3       |
| 14  | 83222124 | 83222186 | 1        | -0.108243  | 5    | 0.019    | 0.0055   | 0.42342  | 0.53166  | 0.038322088 | Intergenic | NA                                          | NA          |
| 14  | 84319052 | 84319176 | 1        | -0.199553  | 5    | 0.0019   | 0.0055   | 0.38848  | 0.58803  | 0.005855937 | Intragenic | NM_024135                                   | Limk2       |
| 14  | 84452533 | 84452795 | 1        | -0.230644  | 12   | 1.10E-08 | 6.60E-06 | 0.27575  | 0.5064   | 2.70E-07    | Intragenic | NM_001013049                                | Smtn        |
| 14  | 84572823 | 84572873 | 1        | -0.131287  | 5    | 0.00017  | 0.0018   | 0.10077  | 0.23206  | 0.000806192 | TSS        | NR_130147                                   | Tug1        |
| 14  | 84848164 | 84848337 | 1        | -0.261477  | 5    | 0.00012  | 0.0053   | 0.25312  | 0.51459  | 0.000603617 | Intragenic | NM_153316                                   | Slc35e4     |
| 14  | 84915301 | 84915331 | 1        | -0.052245  | 7    | 2.20E-05 | 1.30E-05 | 0.032516 | 0.084761 | 0.000149617 | TSS        | NM_001109447                                | Gal3st1     |
| 14  | 84928451 | 84928497 | 1        | -0.157985  | 5    | 0.0019   | 0.025    | 0.188    | 0.34599  | 0.005855937 | Intragenic | NM_001109447                                | Gal3st1     |
| 14  | 84928521 | 84928584 | 1        | -0.113297  | 5    | 0.011    | 0.038    | 0.22079  | 0.33408  | 0.02463877  | Intragenic | NM_001109447                                | Gal3st1     |
| 14  | 84928833 | 84928899 | 1        | -0.071546  | 5    | 7.00E-05 | 0.00098  | 0.075454 | 0.147    | 0.000386221 | Intragenic | NM_001109447                                | Gal3st1     |
| 14  | 84928949 | 84928980 | 0.49     | -0.108797  | 5    | 6.50E-07 | 1.50E-06 | 0.0676   | 0.1764   | 8.28E-06    | Intragenic | NM_001109447                                | Gal3st1     |
| 14  | 85206054 | 85206169 | 1        | -0.173764  | 5    | 1.50E-05 | 0.00014  | 0.11623  | 0.29     | 0.000109113 | Intergenic | NA                                          | NA          |
| 14  | 85362532 | 85362618 | 1        | -0.116046  | 5    | 3.10E-05 | 0.00051  | 0.075586 | 0.19163  | 0.000197418 | Intergenic | NA                                          | NA          |
| 14  | 85374205 | 85374295 | 1        | -0.144356  | 5    | 0.00059  | 0.0018   | 0.14081  | 0.28517  | 0.002242971 | Intergenic | NA                                          | NA          |
| 14  | 85844478 | 85844576 | 1        | -0.185727  | 5    | 0.01     | 0.0054   | 0.20717  | 0.3929   | 0.02275947  | Intragenic | NM_001012153                                | Thoc5       |
| 14  | 85992060 | 85992148 | 1        | 0.079018   | 9    | 0.00073  | 0.00033  | 0.19063  | 0.11161  | 0.002670444 | Intragenic | NM_001108365                                | Gas2l1      |
| 14  | 86072562 | 86072708 | 1.10E-05 | -0.222026  | 9    | 1.00E-11 | 3.30E-11 | 0.12031  | 0.34233  | 5.72E-10    | TSS        | NM_001109467                                | Emid1       |
| 14  | 86183028 | 86183246 | 1        | -0.110941  | 12   | 0.005    | 0.023    | 0.26565  | 0.37659  | 0.012977322 | Intergenic | NA                                          | NA          |
| 14  | 86391902 | 86392131 | 1        | -0.216515  | 7    | 2.70E-05 | 5.40E-05 | 0.39019  | 0.6067   | 0.000178372 | Intergenic | NA                                          | NA          |
| 14  | 86843741 | 86843828 | 1        | -0.14299   | 5    | 0.021    | 0.13     | 0.34978  | 0.49277  | 0.041207871 | Intragenic | NM_001270849:N<br>M_012565:NM_0<br>01270850 | Gck:Gck:Gck |
| 14  | 87434299 | 87434522 | 1        | -0.262355  | 8    | 6.80E-07 | 5.30E-05 | 0.13227  | 0.39462  | 8.62E-06    | Intragenic | NM_001002025:N<br>M_001017461               | Npc1l1:Ogdh |
| 14  | 87492969 | 87493032 | 1        | -0.099753  | 5    | 0.02     | 0.059    | 0.10037  | 0.20012  | 0.039778219 | Intragenic | NM_001002025                                | Npc1l1      |
| 14  | 87939205 | 87939287 | 1        | -0.07294   | 5    | 0.0008   | 0.009    | 0.78762  | 0.86056  | 0.002866309 | Intergenic | NA                                          | NA          |

| chr | start     | stop      | q-value  | methy.diff | CpGs | pMWU     | p2DKS    | MCWLS    | MCWHS   | pMWU.fdr    | cgi.type   | transcript   | gene   |
|-----|-----------|-----------|----------|------------|------|----------|----------|----------|---------|-------------|------------|--------------|--------|
| 14  | 88581672  | 88581786  | 1        | -0.119044  | 5    | 0.008    | 0.015    | 0.2764   | 0.39544 | 0.019059477 | Intragenic | NM_001170459 | Tns3   |
| 14  | 88704570  | 88705117  | 0.11     | -0.134763  | 11   | 1.20E-09 | 3.50E-07 | 0.068042 | 0.20281 | 3.88E-08    | Intergenic | NA           | NA     |
| 14  | 88844652  | 88844804  | 1        | -0.12286   | 5    | 0.0049   | 0.058    | 0.21057  | 0.33343 | 0.012753585 | Intergenic | NA           | NA     |
| 14  | 89089172  | 89089224  | 1        | -0.134592  | 5    | 0.025    | 0.0031   | 0.2638   | 0.39839 | 0.047453009 | Intergenic | NA           | NA     |
| 14  | 89519099  | 89519181  | 1        | -0.072296  | 5    | 0.00088  | 0.0091   | 0.78774  | 0.86004 | 0.003092094 | Intragenic | NM_001106020 | Abca13 |
| 14  | 89744240  | 89744341  | 1        | -0.068046  | 5    | 0.0045   | 0.015    | 0.59901  | 0.66705 | 0.011905878 | Intergenic | NA           | NA     |
| 14  | 91332342  | 91332502  | 1        | -0.092174  | 7    | 0.00048  | 9.10E-05 | 0.61789  | 0.71006 | 0.001881331 | Intragenic | NM_001025139 | Zpbp   |
| 14  | 91609566  | 91609673  | 1        | -0.216113  | 5    | 0.0053   | 0.015    | 0.33877  | 0.55488 | 0.013591571 | Intragenic | NM_001107237 | lkzf1  |
| 14  | 91913715  | 91913746  | 1        | -0.169982  | 5    | 0.0029   | 0.0091   | 0.17509  | 0.34507 | 0.008293503 | TSS        | NM_001109093 | Grb10  |
| 14  | 91913750  | 91913777  | 0.09     | -0.21585   | 5    | 9.90E-08 | 2.80E-07 | 0.081323 | 0.29717 | 1.72E-06    | TSS        | NM_001109093 | Grb10  |
| 14  | 91913782  | 91913807  | 0.21     | -0.211926  | 5    | 1.10E-07 | 6.50E-07 | 0.084251 | 0.29618 | 1.86E-06    | TSS        | NM_001109093 | Grb10  |
| 14  | 91913809  | 91913901  | 1        | -0.228597  | 5    | 5.60E-07 | 7.50E-06 | 0.072732 | 0.30133 | 7.29E-06    | TSS        | NM_001109093 | Grb10  |
| 14  | 91913909  | 91914153  | 1.90E-10 | -0.14974   | 30   | 4.60E-14 | 6.00E-16 | 0.21668  | 0.36642 | 6.64E-12    | TSS        | NM_001109093 | Grb10  |
| 14  | 91914243  | 91914283  | 1        | -0.245659  | 5    | 0.0068   | 0.015    | 0.27239  | 0.51804 | 0.016642688 | TSS        | NM_001109093 | Grb10  |
| 14  | 91914414  | 91914437  | 1        | -0.153123  | 5    | 9.80E-07 | 3.50E-05 | 0.32371  | 0.47684 | 1.16E-05    | TSS        | NM_001109093 | Grb10  |
| 14  | 91914909  | 91914983  | 0.076    | -0.251669  | 8    | 4.30E-10 | 2.40E-07 | 0.24487  | 0.49654 | 1.60E-08    | TSS        | NM_001109093 | Grb10  |
| 14  | 92490531  | 92490712  | 1        | -0.10168   | 5    | 0.016    | 0.025    | 0.74888  | 0.85056 | 0.033288089 | Intergenic | NA           | NA     |
| 14  | 92716972  | 92717142  | 1        | -0.11399   | 5    | 0.00039  | 0.0005   | 0.69729  | 0.81128 | 0.001587612 | Intergenic | NA           | NA     |
| 14  | 101692024 | 101692118 | 1        | -0.054882  | 5    | 0.025    | 0.18     | 0.81171  | 0.86659 | 0.047453009 | Intergenic | NA           | NA     |
| 14  | 102047479 | 102047533 | 0.00022  | -0.187223  | 12   | 6.50E-14 | 6.70E-10 | 0.24906  | 0.43628 | 7.58E-12    | TSS        | NM_001109094 | Etaa1  |
| 14  | 102047536 | 102047573 | 1        | -0.066023  | 5    | 0.021    | 0.18     | 0.23263  | 0.29866 | 0.041207871 | TSS        | NM_001109094 | Etaa1  |
| 14  | 102052756 | 102052810 | 0.00022  | -0.187533  | 12   | 6.50E-14 | 6.70E-10 | 0.24875  | 0.43628 | 7.58E-12    | Intergenic | NA           | NA     |
| 14  | 102052813 | 102052850 | 1        | -0.066023  | 5    | 0.021    | 0.18     | 0.23263  | 0.29866 | 0.041207871 | Intergenic | NA           | NA     |
| 14  | 103053467 | 103053514 | 1        | -0.157057  | 5    | 9.80E-05 | 0.0054   | 0.46655  | 0.62361 | 0.000512474 | Intragenic | NM_001134702 | Meis1  |
| 14  | 103053718 | 103053780 | 1        | -0.140947  | 5    | 0.0087   | 0.024    | 0.30773  | 0.44868 | 0.020391633 | Intragenic | NM_001134702 | Meis1  |
| 14  | 103054470 | 103054568 | 1        | -0.086188  | 7    | 0.022    | 0.1      | 0.28244  | 0.36863 | 0.043064669 | Intragenic | NM_001134702 | Meis1  |
| 14  | 103184660 | 103184780 | 1        | -0.176714  | 5    | 0.0029   | 0.0054   | 0.20539  | 0.3821  | 0.008293503 | Intergenic | NA           | NA     |
| 14  | 103784960 | 103785040 | 1        | -0.159805  | 6    | 0.0042   | 0.00095  | 0.77132  | 0.93113 | 0.011250869 | Intergenic | NA           | NA     |
| 14  | 103811474 | 103811692 | 1        | -0.162744  | 5    | 0.00059  | 0.0055   | 0.10205  | 0.26479 | 0.002242971 | Intergenic | NA           | NA     |
| 14  | 103915256 | 103915358 | 1        | -0.273451  | 5    | 0.00065  | 0.0052   | 0.29317  | 0.56662 | 0.002426546 | Intergenic | NA           | NA     |
| 14  | 103943525 | 103943696 | 1        | -0.090793  | 11   | 4.60E-08 | 3.10E-05 | 0.055644 | 0.14644 | 9.56E-07    | Intragenic | NM_001047094 | Spred2 |
| 14  | 104297488 | 104297601 | 1        | -0.220149  | 5    | 0.0024   | 0.015    | 0.40801  | 0.62816 | 0.00705499  | Intergenic | NA           | NA     |
| 14  | 104458659 | 104458803 | 1        | -0.092422  | 6    | 2.60E-06 | 2.50E-05 | 0.013695 | 0.10612 | 2.60E-05    | Intergenic | NA           | NA     |
| 14  | 104782545 | 104782767 | 0.0047   | -0.226129  | 7    | 1.90E-08 | 1.50E-08 | 0.045678 | 0.27181 | 4.37E-07    | TSS        | NM_001134730 | Lgalsl |
| 14  | 105598314 | 105598390 | 1        | -0.120547  | 5    | 0.0058   | 0.088    | 0.11448  | 0.23502 | 0.014624129 | Intergenic | NA           | NA     |
| 14  | 106042497 | 106042768 | 1        | -0.132316  | 13   | 0.00021  | 0.0035   | 0.13815  | 0.27047 | 0.000951214 | Intergenic | NA           | NA     |
| 14  | 106837867 | 106838019 | 1        | -0.174351  | 7    | 0.00074  | 0.0049   | 0.71303  | 0.88738 | 0.002702912 | Intergenic | NA           | NA     |
| 14  | 107624690 | 107624775 | 1        | -0.264962  | 5    | 2.50E-06 | 0.00014  | 0.11873  | 0.38369 | 2.52E-05    | Intergenic | NA           | NA     |
| 14  | 107760811 | 107760902 | 1        | -0.206237  | 5    | 0.00032  | 0.0031   | 0.12025  | 0.32649 | 0.001346443 | Intragenic | NM_001115022 | Commd1 |



| chr | start     | stop      | q-value  | methy.diff | CpGs | pMWU     | p2DKS    | MCWLS    | MCWHS   | pMWU.fdr    | cgi.type   | transcript             | gene      |
|-----|-----------|-----------|----------|------------|------|----------|----------|----------|---------|-------------|------------|------------------------|-----------|
| 14  | 107824236 | 107824479 | 1        | 0.087305   | 14   | 0.00093  | 9.70E-05 | 0.41873  | 0.33142 | 0.003255406 | TSS        | NM_001017504           | Zrsr1     |
| 14  | 107827112 | 107827233 | 0.0011   | -0.299813  | 8    | 2.10E-11 | 3.30E-09 | 0.15913  | 0.45894 | 1.07E-09    | TSS        | NM_001017504           | Zrsr1     |
| 14  | 107977587 | 107977761 | 0.13     | -0.222941  | 14   | 2.70E-11 | 4.10E-07 | 0.23858  | 0.46152 | 1.36E-09    | Intergenic | NA                     | NA        |
| 14  | 108145412 | 108145629 | 1        | -0.158057  | 12   | 3.20E-06 | 5.90E-05 | 0.13945  | 0.2975  | 3.11E-05    | Intergenic | NA                     | NA        |
| 14  | 108333191 | 108333685 | 1        | -0.236367  | 9    | 1.00E-06 | 0.00012  | 0.11854  | 0.35491 | 1.18E-05    | Intergenic | NA                     | NA        |
| 14  | 108759784 | 108759975 | 1        | -0.096683  | 5    | 0.0014   | 0.0031   | 0.083325 | 0.18001 | 0.004540837 | Intergenic | NA                     | NA        |
| 14  | 108867196 | 108867248 | 1        | -0.186862  | 5    | 0.0024   | 0.024    | 0.2652   | 0.45207 | 0.00705499  | Intergenic | NA                     | NA        |
| 14  | 109798465 | 109798535 | 1        | -0.213412  | 5    | 2.80E-05 | 3.40E-05 | 0.24539  | 0.4588  | 0.000182174 | Intergenic | NA                     | NA        |
| 14  | 109918089 | 109918262 | 1        | -0.088433  | 7    | 0.0083   | 0.055    | 0.66345  | 0.75188 | 0.019719474 | Intergenic | NA                     | NA        |
| 14  | 111213225 | 111213359 | 1        | -0.116244  | 6    | 0.026    | 0.16     | 0.5948   | 0.71105 | 0.049234478 | Intergenic | NA                     | NA        |
| 14  | 111521500 | 111521563 | 1        | -0.103898  | 5    | 0.0013   | 0.0055   | 0.70868  | 0.81258 | 0.004277683 | Intergenic | NA                     | NA        |
| 14  | 113712694 | 113712869 | 1        | -0.112737  | 9    | 0.0027   | 0.023    | 0.65468  | 0.76742 | 0.007840962 | Intergenic | NA                     | NA        |
| 14  | 114362563 | 114362661 | 1        | -0.062866  | 5    | 0.0074   | 0.058    | 0.045099 | 0.10796 | 0.017853001 | Intergenic | NA                     | NA        |
| 14  | 114818850 | 114818966 | 1        | -0.090235  | 5    | 1.70E-05 | 7.00E-05 | 0.046145 | 0.13638 | 0.000120524 | Intergenic | NA                     | NA        |
| 15  | 52722     | 52939     | 1        | -0.196038  | 17   | 2.00E-09 | 9.80E-06 | 0.27836  | 0.4744  | 6.02E-08    | Intergenic | NA                     | NA        |
| 15  | 188118    | 188233    | 1        | -0.159511  | 7    | 0.00065  | 0.018    | 0.2389   | 0.39841 | 0.002426546 | Intergenic | NA                     | NA        |
| 15  | 2351095   | 2351185   | 1        | -0.117404  | 5    | 0.0058   | 0.038    | 0.14353  | 0.26093 | 0.014624129 | Intergenic | NA                     | NA        |
| 15  | 2353532   | 2353677   | 1        | -0.212149  | 5    | 0.00097  | 0.0032   | 0.10235  | 0.3145  | 0.003366009 | Intergenic | NA                     | NA        |
| 15  | 2354363   | 2354556   | 1        | -0.167541  | 8    | 3.10E-07 | 8.90E-05 | 0.11202  | 0.27956 | 4.47E-06    | Intergenic | NA                     | NA        |
| 15  | 2359126   | 2359205   | 1        | -0.105275  | 5    | 1.00E-05 | 3.40E-05 | 0.093886 | 0.19916 | 7.82E-05    | Intragenic | NM_001107250           | Zfp503    |
| 15  | 2359294   | 2359700   | 1.20E-05 | -0.179593  | 26   | 4.10E-14 | 3.60E-11 | 0.11204  | 0.29163 | 6.64E-12    | Intragenic | NM_001107250           | Zfp503    |
| 15  | 2361533   | 2362488   | 0.014    | -0.112306  | 30   | 6.20E-12 | 4.20E-08 | 0.10452  | 0.21683 | 3.92E-10    | Intergenic | NA                     | NA        |
| 15  | 2362508   | 2362611   | 1        | -0.231704  | 5    | 1.30E-05 | 6.90E-05 | 0.093549 | 0.32525 | 9.66E-05    | Intergenic | NA                     | NA        |
| 15  | 2380828   | 2380876   | 1        | -0.096109  | 5    | 0.013    | 0.015    | 0.26071  | 0.35682 | 0.028097302 | Intergenic | NA                     | NA        |
| 15  | 2501966   | 2502034   | 1        | -0.131835  | 5    | 0.00039  | 0.00014  | 0.62464  | 0.75648 | 0.001587612 | Intergenic | NA                     | NA        |
| 15  | 2594344   | 2594415   | 1        | -0.139817  | 5    | 0.00014  | 0.00028  | 0.61636  | 0.75618 | 0.000684451 | Intergenic | NA                     | NA        |
| 15  | 2776572   | 2776940   | 1        | -0.053913  | 8    | 0.012    | 0.083    | 0.10322  | 0.15713 | 0.026435197 | Intragenic | NM_001108368           | Dupd1     |
| 15  | 2851161   | 2851474   | 1        | -0.179447  | 9    | 0.0019   | 0.012    | 0.35309  | 0.53254 | 0.005855937 | Intergenic | NA                     | NA        |
| 15  | 2962714   | 2962930   | 1        | -0.081165  | 5    | 0.025    | 0.18     | 0.12689  | 0.20806 | 0.047453009 | Intergenic | NA                     | NA        |
| 15  | 3655338   | 3655587   | 1        | -0.111218  | 15   | 0.00014  | 0.00013  | 0.56386  | 0.67508 | 0.000684451 | Intergenic | NA                     | NA        |
| 15  | 3657750   | 3657796   | 1        | -0.058477  | 6    | 0.0088   | 0.018    | 0.14503  | 0.20351 | 0.020605924 | Intergenic | NA                     | NA        |
| 15  | 3719640   | 3719858   | 1        | -0.111354  | 7    | 0.017    | 0.024    | 0.54487  | 0.65622 | 0.034796287 | Intragenic | NM_133605              | Camk2g    |
| 15  | 3723984   | 3724045   | 1        | -0.155532  | 5    | 8.80E-05 | 0.0032   | 0.11854  | 0.27407 | 0.000466886 | Intragenic | NM_133605              | Camk2g    |
| 15  | 8610206   | 8610324   | 1        | -0.188018  | 6    | 1.20E-05 | 0.00017  | 0.24579  | 0.43381 | 9.15E-05    | Intergenic | NA                     | NA        |
| 15  | 8653510   | 8653678   | 1        | -0.116286  | 5    | 0.014    | 0.088    | 0.20408  | 0.32037 | 0.029850603 | TSS        | NM_001039516           | Kcnk5     |
| 15  | 8668422   | 8668537   | 1        | -0.243967  | 5    | 5.50E-06 | 0.00014  | 0.15635  | 0.40031 | 4.78E-05    | Intragenic | NM_001039516           | Kcnk5     |
| 15  | 8688545   | 8688658   | 1        | -0.275779  | 5    | 9.20E-06 | 0.0005   | 0.26105  | 0.53683 | 7.32E-05    | Intragenic | NM_001039516           | Kcnk5     |
| 15  | 8902498   | 8902564   | 1        | -0.095315  | 5    | 0.0058   | 0.039    | 0.40359  | 0.49891 | 0.014624129 | Intragenic | NM_031754:NM_001257349 | Gng2:Gng2 |

| chr | start    | stop     | q-value | methy.diff | CpGs | pMWU     | p2DKS    | MCWLS    | MCWHS   | pMWU.fdr    | cgi.type   | transcript             | gene      |
|-----|----------|----------|---------|------------|------|----------|----------|----------|---------|-------------|------------|------------------------|-----------|
| 15  | 8936500  | 8936630  | 1       | -0.146263  | 5    | 0.0063   | 0.087    | 0.20436  | 0.35063 | 0.015629046 | Intragenic | NM_031754:NM_001257349 | Gng2:Gng2 |
| 15  | 9215319  | 9215475  | 1       | -0.100521  | 31   | 6.00E-08 | 5.40E-06 | 0.32191  | 0.42243 | 1.18E-06    | Intergenic | NA                     | NA        |
| 15  | 9329952  | 9330109  | 0.17    | -0.118322  | 15   | 1.40E-08 | 5.30E-07 | 0.37438  | 0.4927  | 3.31E-07    | Intergenic | NA                     | NA        |
| 15  | 9393053  | 9393281  | 0.49    | -0.233555  | 14   | 1.90E-10 | 1.50E-06 | 0.32617  | 0.55972 | 7.85E-09    | Intragenic | NM_134459              | Cd99l2    |
| 15  | 9795504  | 9795732  | 0.02    | -0.224825  | 17   | 1.40E-10 | 6.10E-08 | 0.37427  | 0.59909 | 6.05E-09    | Intragenic | NM_134459              | Cd99l2    |
| 15  | 11915472 | 11915554 | 1       | -0.195842  | 5    | 8.80E-05 | 0.00027  | 0.1401   | 0.33595 | 0.000466886 | Intragenic | NM_001108371           | Ube2e2    |
| 15  | 12015645 | 12015704 | 1       | -0.189826  | 5    | 3.10E-05 | 7.00E-05 | 0.088564 | 0.27839 | 0.000197418 | Intergenic | NA                     | NA        |
| 15  | 12168755 | 12168857 | 1       | -0.154734  | 5    | 0.025    | 0.18     | 0.24425  | 0.39899 | 0.047453009 | Intergenic | NA                     | NA        |
| 15  | 12637099 | 12637422 | 1       | -0.09567   | 12   | 0.023    | 0.05     | 0.58476  | 0.68043 | 0.04441443  | Intergenic | NA                     | NA        |
| 15  | 12672900 | 12672993 | 1       | -0.152718  | 5    | 0.017    | 0.039    | 0.24525  | 0.39797 | 0.034796287 | Intergenic | NA                     | NA        |
| 15  | 12807865 | 12807999 | 1       | -0.212606  | 5    | 0.0041   | 0.0054   | 0.3015   | 0.51411 | 0.01100507  | Intragenic | NM_147210              | Nr1d2     |
| 15  | 13481016 | 13481113 | 1       | 0.10067    | 5    | 0.0063   | 0.0031   | 0.54251  | 0.44185 | 0.015629046 | Intergenic | NA                     | NA        |
| 15  | 13487352 | 13487464 | 1       | -0.166722  | 7    | 0.0026   | 0.027    | 0.40024  | 0.56696 | 0.007616821 | Intergenic | NA                     | NA        |
| 15  | 14136267 | 14136392 | 1       | -0.20136   | 5    | 3.10E-05 | 3.40E-05 | 0.14293  | 0.34429 | 0.000197418 | Intergenic | NA                     | NA        |
| 15  | 14188616 | 14188748 | 1       | -0.222412  | 9    | 9.60E-07 | 4.10E-05 | 0.24573  | 0.46814 | 1.15E-05    | Intragenic | NM_031529              | Rarb      |
| 15  | 17056954 | 17057012 | 1       | -0.151659  | 7    | 0.0015   | 0.027    | 0.20618  | 0.35784 | 0.004849475 | Intragenic | NM_134356              | Ptprg     |
| 15  | 17296581 | 17296653 | 1       | -0.19583   | 5    | 8.80E-05 | 7.10E-05 | 0.2777   | 0.47353 | 0.000466886 | Intragenic | NM_134356              | Ptprg     |
| 15  | 21734316 | 21734517 | 1       | -0.148373  | 6    | 0.025    | 0.081    | 0.55586  | 0.70423 | 0.047453009 | Intragenic | NM_001014137           | LOC361016 |
| 15  | 22393179 | 22393380 | 1       | -0.127764  | 6    | 0.0036   | 0.017    | 0.053569 | 0.18133 | 0.009945103 | Intergenic | NA                     | NA        |
| 15  | 22818060 | 22818246 | 0.14    | -0.23107   | 8    | 5.60E-09 | 4.40E-07 | 0.06013  | 0.2912  | 1.47E-07    | Intragenic | NM_001107288           | Flnb      |
| 15  | 23314910 | 23315027 | 1       | -0.162252  | 7    | 0.02     | 0.14     | 0.41058  | 0.57283 | 0.039778219 | Intragenic | NM_031088              | Ptger2    |
| 15  | 23394604 | 23394656 | 1       | -0.115943  | 7    | 0.0013   | 4.70E-06 | 0.30322  | 0.41917 | 0.004277683 | Intergenic | NA                     | NA        |
| 15  | 23568782 | 23568833 | 1       | -0.061324  | 5    | 0.0041   | 0.015    | 0.12612  | 0.18744 | 0.01100507  | TSS        | NM_001013994           | Rcor2     |
| 15  | 23752349 | 23752407 | 1       | -0.253032  | 5    | 0.00014  | 0.0054   | 0.2007   | 0.45373 | 0.000684451 | Intergenic | NA                     | NA        |
| 15  | 23758065 | 23758124 | 1       | -0.110498  | 5    | 0.0022   | 0.0018   | 0.12001  | 0.23051 | 0.006578104 | Intergenic | NA                     | NA        |
| 15  | 24362707 | 24362814 | 1       | -0.24345   | 5    | 0.0011   | 0.015    | 0.26303  | 0.50648 | 0.003737263 | Intergenic | NA                     | NA        |
| 15  | 24933687 | 24933878 | 1       | -0.107845  | 10   | 0.02     | 0.092    | 0.40016  | 0.50801 | 0.039778219 | Intergenic | NA                     | NA        |
| 15  | 25684383 | 25684444 | 1       | -0.100649  | 5    | 0.0012   | 0.0031   | 0.81363  | 0.91428 | 0.004013471 | Intergenic | NA                     | NA        |
| 15  | 25885141 | 25885235 | 1       | -0.23632   | 7    | 9.20E-08 | 5.20E-05 | 0.32568  | 0.562   | 1.63E-06    | Intergenic | NA                     | NA        |
| 15  | 27582743 | 27583176 | 1       | -0.136855  | 9    | 0.015    | 0.062    | 0.34621  | 0.48306 | 0.031584896 | Intragenic | NM_053899              | Cgrrf1    |
| 15  | 27941600 | 27941705 | 1       | -0.216622  | 5    | 0.00088  | 0.00098  | 0.14965  | 0.36627 | 0.003092094 | Intergenic | NA                     | NA        |
| 15  | 28019036 | 28019126 | 1       | -0.080108  | 10   | 8.80E-10 | 3.10E-06 | 0.070286 | 0.15039 | 2.98E-08    | TSS        | NM_001108373           | Mapk1ip1l |
| 15  | 28136541 | 28136646 | 1       | -0.076509  | 8    | 0.022    | 0.037    | 0.35195  | 0.42846 | 0.043064669 | Intragenic | NM_001135802           | Dlgap5    |
| 15  | 28186746 | 28186810 | 1       | -0.144745  | 5    | 1.30E-05 | 0.00014  | 0.15088  | 0.29562 | 9.66E-05    | Intergenic | NA                     | NA        |
| 15  | 28233278 | 28233382 | 1       | -0.15102   | 7    | 0.0029   | 0.027    | 0.12953  | 0.28055 | 0.008293503 | Intragenic | NM_001107257           | Fbxo34    |
| 15  | 28363998 | 28364105 | 1       | -0.155612  | 5    | 0.0041   | 0.015    | 0.42191  | 0.57752 | 0.01100507  | Intergenic | NA                     | NA        |
| 15  | 28907532 | 28907851 | 1       | -0.086807  | 7    | 0.00062  | 0.0013   | 0.099582 | 0.18639 | 0.002348106 | Intragenic | NM_001107259           | Peli2     |
| 15  | 29399028 | 29399100 | 1       | -0.235987  | 7    | 1.60E-05 | 0.00083  | 0.31241  | 0.5484  | 0.000115757 | Intergenic | NA                     | NA        |

| chr | start    | stop     | q-value | methy.diff | CpGs | pMWU     | p2DKS    | MCWLS    | MCWHS    | pMWU.fdr    | cgi.type   | transcript             | gene        |
|-----|----------|----------|---------|------------|------|----------|----------|----------|----------|-------------|------------|------------------------|-------------|
| 15  | 31662637 | 31662721 | 1       | -0.22432   | 5    | 0.00065  | 0.015    | 0.3324   | 0.55672  | 0.002426546 | Intergenic | NA                     | NA          |
| 15  | 31976387 | 31976476 | 1       | -0.200684  | 5    | 0.00026  | 0.0052   | 0.1864   | 0.38708  | 0.001130807 | Intergenic | NA                     | NA          |
| 15  | 32034166 | 32034307 | 1       | -0.201145  | 5    | 0.0038   | 0.0092   | 0.20275  | 0.40389  | 0.010352437 | TSS        | NM_001012232           | Rnase17     |
| 15  | 32046888 | 32047029 | 1       | -0.202187  | 5    | 0.0035   | 0.0054   | 0.20251  | 0.40469  | 0.009686665 | TSS        | NM_138902              | Ear11       |
| 15  | 32053198 | 32053339 | 1       | -0.202187  | 5    | 0.0035   | 0.0054   | 0.20251  | 0.40469  | 0.009686665 | TSS        | NM_138902              | Ear11       |
| 15  | 32194103 | 32194544 | 1       | -0.107802  | 14   | 9.00E-05 | 0.0012   | 0.1246   | 0.2324   | 0.000476445 | Intragenic | NM_001271313           | Arhgef40    |
| 15  | 32216462 | 32216500 | 1       | -0.168064  | 5    | 0.00044  | 0.0017   | 0.28104  | 0.44911  | 0.001760146 | TSS        | NM_001007681           | Zfp219      |
| 15  | 32287430 | 32287502 | 1       | -0.281182  | 5    | 0.00019  | 0.0093   | 0.33257  | 0.61375  | 0.000879857 | Intergenic | NA                     | NA          |
| 15  | 34359901 | 34360039 | 0.053   | -0.270349  | 9    | 3.00E-11 | 1.70E-07 | 0.2459   | 0.51624  | 1.48E-09    | Intergenic | NA                     | NA          |
| 15  | 34831488 | 34831647 | 1       | -0.120761  | 6    | 0.00016  | 0.0067   | 0.66438  | 0.78514  | 0.000769396 | Intergenic | NA                     | NA          |
| 15  | 36639434 | 36639501 | 1       | -0.203149  | 5    | 0.0008   | 0.0092   | 0.56417  | 0.76732  | 0.002866309 | Intergenic | NA                     | NA          |
| 15  | 36662239 | 36662365 | 1       | 0.082833   | 5    | 0.0068   | 0.024    | 0.6364   | 0.55357  | 0.016642688 | Intergenic | NA                     | NA          |
| 15  | 36867530 | 36867770 | 1       | -0.139017  | 5    | 0.0087   | 0.038    | 0.19789  | 0.33691  | 0.020391633 | Intergenic | NA                     | NA          |
| 15  | 36867777 | 36867827 | 1       | -0.091857  | 5    | 0.017    | 0.038    | 0.84981  | 0.94167  | 0.034796287 | Intergenic | NA                     | NA          |
| 15  | 36892492 | 36892597 | 1       | -0.173284  | 5    | 0.00065  | 0.0031   | 0.09235  | 0.26563  | 0.002426546 | Intragenic | NM_001168583           | Oxa1l       |
| 15  | 36905932 | 36906077 | 1       | -0.198978  | 5    | 1.70E-05 | 0.00014  | 0.23098  | 0.42996  | 0.000120524 | Intragenic | NM_031341              | Slc7a7      |
| 15  | 36912420 | 36912517 | 1       | -0.209123  | 5    | 0.00021  | 0.0032   | 0.1293   | 0.33842  | 0.000951214 | Intragenic | NM_031341              | Slc7a7      |
| 15  | 36938147 | 36938372 | 1       | -0.056705  | 7    | 0.0048   | 0.078    | 0.05597  | 0.11268  | 0.012663359 | TSS        | NM_031341              | Slc7a7      |
| 15  | 37163419 | 37163641 | 1       | -0.155539  | 12   | 0.00062  | 0.01     | 0.53408  | 0.68962  | 0.002348106 | Intergenic | NA                     | NA          |
| 15  | 37241269 | 37241303 | 1       | -0.164241  | 7    | 0.002    | 0.037    | 0.48231  | 0.64655  | 0.006079939 | TSS        | NM_017095              | Cebpe       |
| 15  | 37462366 | 37462410 | 1       | -0.155915  | 5    | 0.016    | 0.18     | 0.26811  | 0.42403  | 0.033288089 | TSS        | NM_177421              | Slc22a17    |
| 15  | 37515613 | 37515695 | 1       | -0.143318  | 5    | 0.0013   | 0.0093   | 0.15855  | 0.30187  | 0.004277683 | TSS        | NM_017239              | Myh6        |
| 15  | 37657621 | 37657839 | 1       | -0.172184  | 5    | 0.0058   | 0.038    | 0.349    | 0.52118  | 0.014624129 | Intragenic | NM_001003711           | Jph4        |
| 15  | 37660511 | 37660599 | 1       | 0.050748   | 11   | 0.00029  | 9.80E-05 | 0.89753  | 0.84678  | 0.001239307 | TSS        | NM_001003711           | Jph4        |
| 15  | 37987012 | 37987088 | 1       | -0.109206  | 5    | 0.008    | 0.059    | 0.58818  | 0.69739  | 0.019059477 | Intergenic | NA                     | NA          |
| 15  | 38030804 | 38030876 | 1       | -0.104726  | 5    | 0.0058   | 0.025    | 0.16094  | 0.26567  | 0.014624129 | Intergenic | NA                     | NA          |
| 15  | 38078046 | 38078203 | 1       | -0.156344  | 6    | 0.00033  | 0.0027   | 0.1648   | 0.32114  | 0.001385608 | TSS        | NM_001191113           | Cpne6       |
| 15  | 38161617 | 38161677 | 1       | -0.050848  | 5    | 0.0027   | 0.0093   | 0.035918 | 0.086766 | 0.007840962 | TSS        | NM_017257:NM_001108868 | Psme2:Rnf31 |
| 15  | 38352746 | 38352899 | 1       | -0.150527  | 8    | 1.70E-05 | 0.00041  | 0.68844  | 0.83897  | 0.000120524 | Intragenic | NM_019285              | Adcy4       |
| 15  | 39936289 | 39936417 | 1       | -0.180739  | 5    | 0.00065  | 0.0093   | 0.18385  | 0.36459  | 0.002426546 | Intergenic | NA                     | NA          |
| 15  | 41349232 | 41349301 | 1       | -0.0798    | 8    | 1.30E-05 | 4.30E-06 | 0.76083  | 0.84063  | 9.66E-05    | Intergenic | NA                     | NA          |
| 15  | 41520471 | 41520599 | 1       | -0.180739  | 5    | 0.00065  | 0.0093   | 0.18385  | 0.36459  | 0.002426546 | Intergenic | NA                     | NA          |
| 15  | 41652416 | 41652451 | 1       | -0.117023  | 9    | 1.20E-05 | 0.0041   | 0.77333  | 0.89035  | 9.15E-05    | Intergenic | NA                     | NA          |
| 15  | 41652470 | 41652553 | 1       | -0.109105  | 5    | 0.0063   | 0.015    | 0.38701  | 0.49612  | 0.015629046 | Intergenic | NA                     | NA          |
| 15  | 42582279 | 42582644 | 1       | -0.156328  | 7    | 0.0032   | 0.011    | 0.16591  | 0.32224  | 0.008990975 | Intergenic | NA                     | NA          |
| 15  | 43931670 | 43931785 | 1       | -0.199109  | 5    | 2.40E-05 | 0.00053  | 0.31041  | 0.50952  | 0.000160049 | Intergenic | NA                     | NA          |
| 15  | 44379951 | 44380316 | 1       | -0.152981  | 7    | 0.0034   | 0.011    | 0.1657   | 0.31868  | 0.009519525 | Intragenic | NM_001107268           | Mtmr6       |
| 15  | 44700416 | 44700562 | 1       | -0.099672  | 5    | 0.0029   | 0.025    | 0.079833 | 0.17951  | 0.008293503 | Intergenic | NA                     | NA          |

| chr | start    | stop     | q-value | methy.diff | CpGs | pMWU     | p2DKS    | MCWLS     | MCWHS    | pMWU.fdr    | cgi.type   | transcript   | gene    |
|-----|----------|----------|---------|------------|------|----------|----------|-----------|----------|-------------|------------|--------------|---------|
| 15  | 44859429 | 44859644 | 1       | -0.106936  | 5    | 0.016    | 0.015    | 0.23725   | 0.34419  | 0.033288089 | Intragenic | NM_001191686 | Spata13 |
| 15  | 45495648 | 45495740 | 0.034   | -0.055517  | 10   | 2.40E-10 | 1.00E-07 | 0.018207  | 0.073724 | 9.71E-09    | TSS        | NM_001108381 | Ebpl    |
| 15  | 45495812 | 45495875 | 1       | -0.121814  | 5    | 4.80E-06 | 0.00014  | 0.063974  | 0.18579  | 4.29E-05    | TSS        | NM_001108381 | Ebpl    |
| 15  | 45822675 | 45822767 | 0.15    | -0.099421  | 8    | 3.20E-08 | 4.60E-07 | 0.036864  | 0.13628  | 6.98E-07    | Intergenic | NA           | NA      |
| 15  | 46737217 | 46737258 | 1       | -0.063129  | 5    | 0.00039  | 0.0018   | 0.0083646 | 0.071493 | 0.001587612 | TSS        | NM_017029    | Nefm    |
| 15  | 46756992 | 46757110 | 1       | -0.261708  | 12   | 1.90E-06 | 0.00013  | 0.26188   | 0.52359  | 2.01E-05    | Intergenic | NA           | NA      |
| 15  | 47566481 | 47566559 | 1       | -0.204406  | 5    | 1.70E-05 | 0.00051  | 0.13732   | 0.34172  | 0.000120524 | Intragenic | NM_001108383 | Ebf2    |
| 15  | 49665106 | 49665367 | 0.0063  | -0.189372  | 12   | 1.60E-10 | 2.00E-08 | 0.080216  | 0.26959  | 6.77E-09    | Intragenic | NM_001271488 | Ints6   |
| 15  | 50040866 | 50040958 | 1       | -0.300634  | 5    | 5.60E-05 | 0.0031   | 0.13016   | 0.43079  | 0.000320912 | Intergenic | NA           | NA      |
| 15  | 50146897 | 50147037 | 1       | -0.079678  | 7    | 3.30E-06 | 9.40E-05 | 0.07099   | 0.15067  | 3.16E-05    | TSS        | NM_001107270 | Neil2   |
| 15  | 50147097 | 50147134 | 1       | -0.066672  | 5    | 0.025    | 0.18     | 0.15792   | 0.2246   | 0.047453009 | TSS        | NM_001107270 | Neil2   |
| 15  | 50147622 | 50147973 | 1       | -0.301389  | 5    | 0.00059  | 0.0055   | 0.20166   | 0.50305  | 0.002242971 | TSS        | NM_001107270 | Neil2   |
| 15  | 51051957 | 51052063 | 1       | -0.071413  | 5    | 0.025    | 0.088    | 0.10638   | 0.17779  | 0.047453009 | TSS        | NM_001106045 | Sox7    |
| 15  | 51546774 | 51546910 | 0.076   | -0.278509  | 7    | 1.30E-07 | 2.30E-07 | 0.14424   | 0.42275  | 2.11E-06    | Intragenic | NM_053307    | Msra    |
| 15  | 52550869 | 52551007 | 1       | -0.078727  | 5    | 0.00059  | 0.0055   | 0.068489  | 0.14722  | 0.002242971 | Intragenic | NM_013007    | Pnoc    |
| 15  | 54941417 | 54941591 | 1       | -0.159991  | 5    | 1.20E-05 | 7.10E-05 | 0.069639  | 0.22963  | 9.15E-05    | Intergenic | NA           | NA      |
| 15  | 55143018 | 55143106 | 1       | -0.190662  | 8    | 0.00027  | 0.00063  | 0.42382   | 0.61448  | 0.001172178 | Intergenic | NA           | NA      |
| 15  | 55392832 | 55392949 | 1       | -0.161409  | 5    | 0.017    | 0.088    | 0.29257   | 0.45398  | 0.034796287 | Intergenic | NA           | NA      |
| 15  | 55484842 | 55484950 | 0.017   | -0.099163  | 12   | 6.60E-11 | 5.20E-08 | 0.062379  | 0.16154  | 3.06E-09    | Intragenic | NM_017086    | Egr3    |
| 15  | 55485047 | 55485091 | 1       | -0.051372  | 5    | 0.0024   | 0.039    | 0.16908   | 0.22045  | 0.00705499  | Intragenic | NM_017086    | Egr3    |
| 15  | 60726897 | 60726997 | 1       | -0.358266  | 7    | 5.30E-08 | 7.60E-06 | 0.46293   | 0.8212   | 1.08E-06    | Intergenic | NA           | NA      |
| 15  | 61577082 | 61577318 | 1       | -0.225389  | 7    | 1.00E-06 | 1.50E-05 | 0.10089   | 0.32628  | 1.18E-05    | Intergenic | NA           | NA      |
| 15  | 61598803 | 61598866 | 0.23    | -0.214887  | 8    | 2.60E-06 | 7.20E-07 | 0.17033   | 0.38522  | 2.60E-05    | TSS        | NM_053867    | Tpt1    |
| 15  | 61936359 | 61936437 | 1       | -0.123995  | 5    | 0.0024   | 0.0055   | 0.1233    | 0.2473   | 0.00705499  | Intergenic | NA           | NA      |
| 15  | 62021004 | 62021363 | 1       | -0.171188  | 8    | 1.50E-06 | 0.00042  | 0.13892   | 0.31011  | 1.65E-05    | Intergenic | NA           | NA      |
| 15  | 62524555 | 62524722 | 1       | -0.23717   | 5    | 0.014    | 0.058    | 0.30487   | 0.54204  | 0.029850603 | Intergenic | NA           | NA      |
| 15  | 63407086 | 63407290 | 1       | 0.102665   | 11   | 0.012    | 0.056    | 0.66837   | 0.56571  | 0.026435197 | Intergenic | NA           | NA      |
| 15  | 63763663 | 63763754 | 1       | -0.233426  | 5    | 2.50E-06 | 0.00014  | 0.31753   | 0.55095  | 2.52E-05    | TSS        | NM_001044257 | Epsti1  |
| 15  | 64520807 | 64520876 | 1       | -0.137078  | 5    | 0.02     | 0.038    | 0.59604   | 0.73312  | 0.039778219 | Intergenic | NA           | NA      |
| 15  | 64633301 | 64633479 | 1       | -0.140139  | 8    | 7.80E-07 | 8.50E-05 | 0.085084  | 0.22522  | 9.69E-06    | Intergenic | NA           | NA      |
| 15  | 67829734 | 67829823 | 0.00024 | -0.326164  | 8    | 1.90E-11 | 7.40E-10 | 0.3283    | 0.65446  | 9.88E-10    | Intergenic | NA           | NA      |
| 15  | 68258948 | 68259093 | 1       | -0.232192  | 5    | 0.0019   | 0.0053   | 0.28354   | 0.51573  | 0.005855937 | Intergenic | NA           | NA      |
| 15  | 73137503 | 73137631 | 1       | -0.183059  | 5    | 4.80E-06 | 0.00014  | 0.043294  | 0.22635  | 4.29E-05    | Intergenic | NA           | NA      |
| 15  | 78470817 | 78470891 | 1       | -0.361248  | 5    | 1.30E-06 | 3.40E-05 | 0.33908   | 0.70033  | 1.46E-05    | Intergenic | NA           | NA      |
| 15  | 78973338 | 78973411 | 1       | -0.114902  | 5    | 0.0029   | 0.038    | 0.76436   | 0.87926  | 0.008293503 | Intergenic | NA           | NA      |
| 15  | 79042097 | 79042225 | 1       | -0.15144   | 5    | 3.50E-05 | 0.00028  | 0.5964    | 0.74784  | 0.000218038 | Intergenic | NA           | NA      |
| 15  | 79489887 | 79489969 | 1       | -0.115876  | 7    | 0.0046   | 0.026    | 0.60134   | 0.71721  | 0.012157071 | Intergenic | NA           | NA      |
| 15  | 81877830 | 81877871 | 1       | 0.095699   | 5    | 0.0035   | 0.00096  | 0.97778   | 0.88208  | 0.009686665 | Intergenic | NA           | NA      |
| 15  | 81903813 | 81903871 | 1       | 0.096425   | 5    | 0.0027   | 0.0055   | 0.97761   | 0.88119  | 0.007840962 | Intergenic | NA           | NA      |

| chr | start     | stop      | q-value | methy.diff | CpGs | pMWU     | p2DKS    | MCWLS    | MCWHS    | pMWU.fdr    | cgi.type   | transcript   | gene   |
|-----|-----------|-----------|---------|------------|------|----------|----------|----------|----------|-------------|------------|--------------|--------|
| 15  | 84665453  | 84665488  | 1       | -0.062093  | 5    | 0.0074   | 0.009    | 0.10541  | 0.1675   | 0.017853001 | Intergenic | NA           | NA     |
| 15  | 86027564  | 86027635  | 1       | -0.142074  | 5    | 0.015    | 0.13     | 0.26735  | 0.40943  | 0.031584896 | Intergenic | NA           | NA     |
| 15  | 86356630  | 86356730  | 1       | -0.234077  | 5    | 2.20E-06 | 1.60E-05 | 0.10153  | 0.33561  | 2.27E-05    | Intergenic | NA           | NA     |
| 15  | 86448098  | 86448195  | 1       | -0.174983  | 7    | 0.015    | 0.0013   | 0.52344  | 0.69842  | 0.031584896 | Intergenic | NA           | NA     |
| 15  | 86744422  | 86744524  | 1       | -0.16093   | 5    | 0.0045   | 0.0054   | 0.27528  | 0.43621  | 0.011905878 | Intergenic | NA           | NA     |
| 15  | 87230143  | 87230198  | 1       | -0.117235  | 5    | 0.0017   | 0.0018   | 0.73788  | 0.85512  | 0.005339493 | Intragenic | NM_053394    | KIF5   |
| 15  | 90887736  | 90887804  | 1       | -0.205628  | 5    | 0.0035   | 0.038    | 0.21751  | 0.42313  | 0.009686665 | Intergenic | NA           | NA     |
| 15  | 91142735  | 91142823  | 1       | -0.200126  | 5    | 0.0013   | 0.0031   | 0.29057  | 0.4907   | 0.004277683 | Intergenic | NA           | NA     |
| 15  | 91212798  | 91212907  | 1       | -0.063574  | 5    | 0.01     | 0.059    | 0.63333  | 0.6969   | 0.02275947  | Intragenic | NM_001108388 | Scel   |
| 15  | 91236992  | 91237108  | 1       | -0.221464  | 5    | 0.0074   | 0.009    | 0.18177  | 0.40324  | 0.017853001 | Intragenic | NM_001108388 | Scel   |
| 15  | 92471644  | 92471750  | 1       | -0.164231  | 5    | 0.00054  | 0.0054   | 0.32607  | 0.4903   | 0.002077867 | Intergenic | NA           | NA     |
| 15  | 92969754  | 92969814  | 1       | -0.053822  | 7    | 0.016    | 0.19     | 0.76266  | 0.81648  | 0.033288089 | Intergenic | NA           | NA     |
| 15  | 93664095  | 93664217  | 1       | -0.165104  | 5    | 0.00023  | 0.00052  | 0.38523  | 0.55033  | 0.00102405  | TSS        | NM_001012046 | Spry2  |
| 15  | 100705554 | 100705681 | 1       | 0.055375   | 5    | 0.012    | 0.015    | 0.92143  | 0.86605  | 0.026435197 | Intergenic | NA           | NA     |
| 15  | 102563889 | 102563950 | 1       | -0.208819  | 5    | 0.00026  | 0.0055   | 0.6378   | 0.84662  | 0.001130807 | Intergenic | NA           | NA     |
| 15  | 106013966 | 106014058 | 1       | -0.199179  | 5    | 0.0045   | 0.024    | 0.37055  | 0.56973  | 0.011905878 | Intergenic | NA           | NA     |
| 15  | 106933810 | 106933937 | 1       | -0.149366  | 5    | 0.00059  | 0.0018   | 0.12239  | 0.27175  | 0.002242971 | Intergenic | NA           | NA     |
| 15  | 106969874 | 106970043 | 1       | -0.113375  | 6    | 0.0088   | 0.084    | 0.15986  | 0.27323  | 0.020605924 | Intergenic | NA           | NA     |
| 15  | 107214699 | 107214821 | 1       | -0.152258  | 8    | 0.019    | 0.21     | 0.54013  | 0.69239  | 0.038322088 | Intragenic | NM_133411    | Abcc4  |
| 15  | 107337201 | 107337379 | 1       | -0.13106   | 7    | 0.024    | 0.11     | 0.37444  | 0.5055   | 0.046241462 | Intragenic | NM_133411    | Abcc4  |
| 15  | 107351070 | 107351153 | 1       | -0.176841  | 6    | 0.00072  | 0.011    | 0.21819  | 0.39503  | 0.002634665 | Intragenic | NM_133411    | Abcc4  |
| 15  | 107428778 | 107428879 | 1       | -0.212495  | 9    | 3.70E-06 | 5.80E-06 | 0.17345  | 0.38594  | 3.46E-05    | Intergenic | NA           | NA     |
| 15  | 107458139 | 107458224 | 1       | -0.1839    | 5    | 9.20E-06 | 0.00014  | 0.71604  | 0.89994  | 7.32E-05    | Intragenic | NM_001106058 | Cldn10 |
| 15  | 107565127 | 107565250 | 1       | -0.06234   | 7    | 8.40E-05 | 0.0051   | 0.028756 | 0.091095 | 0.000451848 | Intergenic | NA           | NA     |
| 15  | 107591517 | 107591605 | 1       | -0.193199  | 5    | 8.50E-07 | 3.40E-06 | 0.055101 | 0.2483   | 1.03E-05    | Intergenic | NA           | NA     |
| 15  | 107591607 | 107591872 | 1       | -0.076022  | 26   | 3.20E-05 | 0.0019   | 0.018098 | 0.053484 | 0.00020314  | Intergenic | NA           | NA     |
| 15  | 107871678 | 107871777 | 1       | -0.053613  | 5    | 0.01     | 0.039    | 0.028996 | 0.082609 | 0.02275947  | TSS        | NM_001271404 | Hs6st3 |
| 15  | 108194885 | 108194973 | 1       | -0.144606  | 5    | 0.00019  | 0.0031   | 0.12821  | 0.27282  | 0.000879857 | Intragenic | NM_001271404 | Hs6st3 |
| 15  | 108423344 | 108423445 | 1       | -0.117062  | 5    | 0.0012   | 0.024    | 0.68644  | 0.8035   | 0.004013471 | Intragenic | NM_001271404 | Hs6st3 |
| 15  | 109080837 | 109080913 | 0.088   | -0.225527  | 5    | 1.30E-07 | 2.70E-07 | 0.075055 | 0.30058  | 2.11E-06    | Intragenic | NM_001111064 | Mbnl2  |
| 15  | 109127907 | 109128153 | 1       | -0.192291  | 7    | 0.00083  | 0.0034   | 0.21321  | 0.4055   | 0.002961434 | Intragenic | NM_001111064 | Mbnl2  |
| 15  | 109726442 | 109726726 | 1       | -0.050554  | 11   | 1.00E-05 | 0.0014   | 0.046467 | 0.097021 | 7.82E-05    | Intergenic | NA           | NA     |
| 15  | 109902300 | 109902447 | 1       | -0.18028   | 7    | 7.70E-06 | 3.70E-06 | 0.12158  | 0.30186  | 6.32E-05    | Intragenic | NM_001107287 | Farp1  |
| 15  | 109951178 | 109951243 | 1       | -0.121191  | 5    | 0.025    | 0.0032   | 0.3781   | 0.49929  | 0.047453009 | Intragenic | NM_001107287 | Farp1  |
| 15  | 110168792 | 110168885 | 1       | -0.183522  | 5    | 0.013    | 0.13     | 0.32261  | 0.50613  | 0.028097302 | Intergenic | NA           | NA     |
| 15  | 111619219 | 111619360 | 1       | -0.115433  | 7    | 1.20E-06 | 0.00082  | 0.059018 | 0.17445  | 1.37E-05    | Intergenic | NA           | NA     |
| 15  | 111851441 | 111851536 | 1       | -0.222037  | 5    | 4.40E-05 | 0.00052  | 0.20033  | 0.42237  | 0.000263321 | Intergenic | NA           | NA     |
| 15  | 112027213 | 112027301 | 1       | -0.145881  | 5    | 0.0045   | 0.0055   | 0.2511   | 0.39698  | 0.011905878 | Intragenic | NM_001100685 | Clybl  |
| 15  | 113454828 | 113454951 | 1       | -0.059346  | 8    | 0.00091  | 0.0087   | 0.069001 | 0.12835  | 0.003192838 | TSS        | NM_153630    | Nalcn  |

| chr | start     | stop      | q-value  | methy.diff | CpGs | pMWU     | p2DKS    | MCWLS    | MCWHS   | pMWU.fdr    | cgi.type   | transcript             | gene        |
|-----|-----------|-----------|----------|------------|------|----------|----------|----------|---------|-------------|------------|------------------------|-------------|
| 15  | 113816017 | 113816335 | 1        | -0.110978  | 10   | 0.00036  | 0.00015  | 0.53467  | 0.64565 | 0.001486639 | Intragenic | NM_022223              | Fgf14       |
| 16  | 280529    | 280810    | 0.00085  | -0.275593  | 18   | 9.60E-14 | 2.60E-09 | 0.22898  | 0.50457 | 1.04E-11    | Intergenic | NA                     | NA          |
| 16  | 1871950   | 1871996   | 1        | 0.071854   | 5    | 0.00026  | 0.0054   | 0.14167  | 0.06982 | 0.001130807 | Intragenic | NM_001108393           | Zmiz1       |
| 16  | 1926869   | 1926962   | 1        | -0.132772  | 5    | 0.013    | 0.088    | 0.55097  | 0.68374 | 0.028097302 | Intragenic | NM_001108393           | Zmiz1       |
| 16  | 2601050   | 2601196   | 1        | -0.096243  | 10   | 0.013    | 0.092    | 0.39244  | 0.48868 | 0.028097302 | Intergenic | NA                     | NA          |
| 16  | 2716886   | 2716982   | 1        | -0.095144  | 5    | 0.0045   | 0.038    | 0.087815 | 0.18296 | 0.011905878 | Intergenic | NA                     | NA          |
| 16  | 3133970   | 3134155   | 1        | -0.26693   | 5    | 0.00011  | 0.00097  | 0.31067  | 0.5776  | 0.000565143 | Intergenic | NA                     | NA          |
| 16  | 3208793   | 3208908   | 1        | -0.129146  | 7    | 0.017    | 0.056    | 0.49398  | 0.62313 | 0.034796287 | Intergenic | NA                     | NA          |
| 16  | 4417898   | 4418085   | 1        | -0.102692  | 10   | 0.0065   | 0.15     | 0.30829  | 0.41098 | 0.016085358 | Intragenic | NM_022631              | Wnt5a       |
| 16  | 5630801   | 5631041   | 1        | -0.14485   | 8    | 0.00029  | 0.0017   | 0.15917  | 0.30402 | 0.001239307 | Intragenic | NM_175595              | Cacna2d3    |
| 16  | 6455258   | 6455311   | 1        | -0.157671  | 5    | 6.20E-05 | 0.00053  | 0.15777  | 0.31544 | 0.000349462 | Intergenic | NA                     | NA          |
| 16  | 6519809   | 6519941   | 1        | -0.287573  | 5    | 3.70E-06 | 3.50E-05 | 0.090294 | 0.37787 | 3.46E-05    | Intergenic | NA                     | NA          |
| 16  | 6529880   | 6530029   | 1        | -0.293926  | 5    | 7.00E-05 | 0.0031   | 0.19571  | 0.48964 | 0.000386221 | Intergenic | NA                     | NA          |
| 16  | 6625379   | 6625587   | 1        | -0.195301  | 5    | 0.00029  | 0.0091   | 0.1619   | 0.3572  | 0.001239307 | Intergenic | NA                     | NA          |
| 16  | 6626947   | 6627178   | 1        | -0.223085  | 5    | 0.0024   | 0.0031   | 0.21777  | 0.44086 | 0.00705499  | Intergenic | NA                     | NA          |
| 16  | 7140242   | 7140360   | 0.0094   | -0.155454  | 6    | 2.60E-08 | 2.90E-08 | 0.030224 | 0.18568 | 5.80E-07    | TSS        | NM_001009271           | Nt5dc2      |
| 16  | 7185015   | 7185174   | 0.36     | -0.2879    | 7    | 2.10E-08 | 1.10E-06 | 0.099813 | 0.38771 | 4.80E-07    | Intergenic | NA                     | NA          |
| 16  | 7237309   | 7237599   | 0.038    | -0.194254  | 12   | 1.70E-09 | 1.20E-07 | 0.12871  | 0.32297 | 5.28E-08    | Intragenic | NM_001100882           | Sema3g      |
| 16  | 7433132   | 7433256   | 1        | -0.243152  | 5    | 0.0017   | 0.015    | 0.22262  | 0.46577 | 0.005339493 | Intragenic | NM_054011              | Sh3bp5      |
| 16  | 7433310   | 7433439   | 1        | -0.163958  | 5    | 0.0058   | 0.18     | 0.42731  | 0.59127 | 0.014624129 | Intragenic | NM_054011              | Sh3bp5      |
| 16  | 8266912   | 8266958   | 5.90E-06 | -0.20656   | 7    | 1.30E-10 | 1.80E-11 | 0.027788 | 0.23435 | 5.70E-09    | TSS        | NM_019352:NM_031339    | Timm23:Parg |
| 16  | 8330182   | 8330307   | 1        | -0.193858  | 6    | 0.00024  | 0.00055  | 0.17727  | 0.37113 | 0.001064629 | Intragenic | NM_031339              | Parg        |
| 16  | 8495198   | 8495496   | 1        | -0.117441  | 9    | 0.018    | 0.041    | 0.25921  | 0.37665 | 0.036742993 | Intragenic | NM_001170593           | Chat        |
| 16  | 9017461   | 9017553   | 0.0057   | -0.242398  | 5    | 6.30E-08 | 1.80E-08 | 0.030075 | 0.27247 | 1.18E-06    | Intragenic | NM_001170593           | Chat        |
| 16  | 9273459   | 9273655   | 1        | -0.179893  | 5    | 0.025    | 0.037    | 0.47817  | 0.65807 | 0.047453009 | Intragenic | NM_001170593:NM_138860 | Chat:Opn4   |
| 16  | 9345646   | 9345749   | 1        | -0.148293  | 5    | 0.021    | 0.088    | 0.47624  | 0.62453 | 0.041207871 | Intragenic | NM_001170593           | Chat        |
| 16  | 9597431   | 9597488   | 1        | -0.147814  | 5    | 0.0008   | 0.0031   | 0.45002  | 0.59784 | 0.002866309 | Intragenic | NM_001170593:NM_024378 | Chat:Grid1  |
| 16  | 10132983  | 10133106  | 1        | -0.124998  | 5    | 0.0014   | 0.015    | 0.28749  | 0.41248 | 0.004540837 | Intragenic | NM_001170593:NM_024378 | Chat:Grid1  |
| 16  | 10872197  | 10872619  | 1        | -0.102753  | 6    | 0.013    | 0.084    | 0.24786  | 0.35061 | 0.028097302 | Intergenic | NA                     | NA          |
| 16  | 11156471  | 11156671  | 1        | -0.158606  | 10   | 6.80E-05 | 0.0059   | 0.1261   | 0.28471 | 0.000379896 | Intergenic | NA                     | NA          |
| 16  | 11525536  | 11525614  | 1        | -0.131261  | 8    | 0.00016  | 0.0037   | 0.36558  | 0.49684 | 0.000769396 | Intragenic | NM_001107297           | Arhgap22    |
| 16  | 12278071  | 12278194  | 1        | -0.127773  | 5    | 0.0011   | 0.0031   | 0.28431  | 0.41208 | 0.003737263 | Intergenic | NA                     | NA          |
| 16  | 14892202  | 14892244  | 1        | 0.058858   | 5    | 0.0049   | 0.0016   | 0.88148  | 0.82262 | 0.012753585 | Intergenic | NA                     | NA          |
| 16  | 15068505  | 15068763  | 1        | -0.103834  | 5    | 0.0058   | 0.0091   | 0.70742  | 0.81125 | 0.014624129 | Intergenic | NA                     | NA          |
| 16  | 17565803  | 17565843  | 1        | -0.069543  | 5    | 0.0024   | 0.0055   | 0.093143 | 0.16269 | 0.00705499  | Intragenic | NM_001170349           | Sh2d4b      |

| chr | start    | stop     | q-value  | methy.diff | CpGs | pMWU     | p2DKS    | MCWLS    | MCWHS    | pMWU.fdr    | cgi.type   | transcript                | gene          |
|-----|----------|----------|----------|------------|------|----------|----------|----------|----------|-------------|------------|---------------------------|---------------|
| 16  | 18259947 | 18259997 | 1        | -0.226643  | 7    | 4.80E-08 | 8.80E-06 | 0.09111  | 0.31775  | 9.95E-07    | Intergenic | NA                        | NA            |
| 16  | 18589398 | 18589472 | 1        | -0.422355  | 7    | 2.10E-08 | 8.80E-06 | 0.16431  | 0.58666  | 4.80E-07    | Intergenic | NA                        | NA            |
| 16  | 19084042 | 19084247 | 1        | -0.150622  | 13   | 0.00017  | 0.02     | 0.29816  | 0.44878  | 0.000806192 | TSS        | NM_001007684              | Klf2          |
| 16  | 19429973 | 19430089 | 1        | -0.194603  | 11   | 3.20E-05 | 2.70E-05 | 0.33698  | 0.53158  | 0.00020314  | Intergenic | NA                        | NA            |
| 16  | 19636180 | 19636440 | 1        | -0.117358  | 9    | 2.80E-06 | 0.00052  | 0.095419 | 0.21278  | 2.79E-05    | TSS        | NM_139113                 | Nr2f6         |
| 16  | 19636615 | 19636920 | 1        | -0.064184  | 5    | 0.013    | 0.18     | 0.073812 | 0.138    | 0.028097302 | TSS        | NM_139113                 | Nr2f6         |
| 16  | 19653697 | 19653753 | 1        | -0.087446  | 5    | 0.025    | 0.015    | 0.44673  | 0.53418  | 0.047453009 | TSS        | NM_001033687:NM_001006964 | Ushbp1:Babam1 |
| 16  | 19727561 | 19727697 | 1        | -0.244638  | 8    | 1.80E-07 | 3.10E-05 | 0.20677  | 0.4514   | 2.78E-06    | Intragenic | NM_001107301              | Abhd8         |
| 16  | 19727740 | 19727775 | 1        | -0.06569   | 5    | 0.016    | 0.088    | 0.032254 | 0.097943 | 0.033288089 | Intragenic | NM_001107301              | Abhd8         |
| 16  | 19766838 | 19767017 | 1        | -0.1734    | 11   | 1.20E-07 | 0.00027  | 0.19425  | 0.36765  | 2.01E-06    | Intergenic | NA                        | NA            |
| 16  | 19775664 | 19776178 | 0.00064  | -0.100502  | 30   | 4.50E-14 | 2.00E-09 | 0.043037 | 0.14354  | 6.64E-12    | Intragenic | NM_020086                 | Plvap         |
| 16  | 19780180 | 19780227 | 1        | -0.102045  | 5    | 0.00015  | 0.0052   | 0.15516  | 0.2572   | 0.000724207 | TSS        | NM_020086                 | Plvap         |
| 16  | 19814423 | 19814630 | 1        | -0.198503  | 7    | 8.40E-05 | 0.0012   | 0.24019  | 0.4387   | 0.000451848 | Intergenic | NA                        | NA            |
| 16  | 19892841 | 19892918 | 1        | -0.091101  | 5    | 0.0063   | 0.039    | 0.070975 | 0.16208  | 0.015629046 | Intragenic | NM_001100908              | Fam129c       |
| 16  | 19951679 | 19951752 | 1        | -0.162154  | 5    | 0.013    | 0.059    | 0.3661   | 0.52825  | 0.028097302 | Intragenic | NM_022861                 | Unc13a        |
| 16  | 19972785 | 19973194 | 0.0024   | -0.196681  | 21   | 4.50E-14 | 7.50E-09 | 0.11667  | 0.31335  | 6.64E-12    | Intragenic | NM_012855                 | Jak3          |
| 16  | 19976803 | 19977243 | 1        | -0.164436  | 12   | 3.50E-05 | 0.00045  | 0.26807  | 0.43251  | 0.000218038 | Intragenic | NM_012855                 | Jak3          |
| 16  | 19977814 | 19978109 | 0.043    | -0.137286  | 21   | 1.70E-10 | 1.30E-07 | 0.36865  | 0.50593  | 7.17E-09    | Intragenic | NM_012855                 | Jak3          |
| 16  | 19978153 | 19978209 | 1        | -0.214235  | 5    | 0.0032   | 0.058    | 0.3123   | 0.52653  | 0.008990975 | Intragenic | NM_012855                 | Jak3          |
| 16  | 19978220 | 19978283 | 1        | -0.343515  | 5    | 5.50E-06 | 0.00014  | 0.24314  | 0.58666  | 4.78E-05    | Intragenic | NM_012855                 | Jak3          |
| 16  | 19978288 | 19978336 | 1        | -0.187562  | 6    | 0.01     | 0.011    | 0.18932  | 0.37689  | 0.02275947  | Intragenic | NM_012855                 | Jak3          |
| 16  | 19978665 | 19978774 | 1        | -0.187217  | 5    | 2.20E-06 | 7.60E-06 | 0.068435 | 0.25565  | 2.27E-05    | Intragenic | NM_012855                 | Jak3          |
| 16  | 19996408 | 19996781 | 1.70E-09 | -0.180157  | 23   | 4.60E-14 | 5.10E-15 | 0.078015 | 0.25817  | 6.64E-12    | Intragenic | NM_001106069              | Fcho1         |
| 16  | 20192816 | 20192867 | 1        | -0.078947  | 5    | 0.021    | 0.088    | 0.060755 | 0.1397   | 0.041207871 | TSS        | NM_019313                 | Kcnn1         |
| 16  | 20215027 | 20215163 | 1        | -0.149917  | 7    | 0.00065  | 0.0021   | 0.21409  | 0.36401  | 0.002426546 | Intergenic | NA                        | NA            |
| 16  | 20223763 | 20223922 | 1        | -0.179438  | 6    | 0.0057   | 0.027    | 0.28595  | 0.46539  | 0.014573809 | Intergenic | NA                        | NA            |
| 16  | 20234380 | 20234417 | 1        | -0.147507  | 5    | 0.00032  | 0.0092   | 0.44366  | 0.59116  | 0.001346443 | Intragenic | NM_001170604              | Il12rb1       |
| 16  | 20234422 | 20234523 | 1        | -0.092251  | 5    | 0.023    | 0.058    | 0.3564   | 0.44865  | 0.04441443  | Intragenic | NM_001170604              | Il12rb1       |
| 16  | 20253641 | 20253689 | 1        | -0.143712  | 5    | 0.00032  | 0.0053   | 0.22305  | 0.36676  | 0.001346443 | Intergenic | NA                        | NA            |
| 16  | 20411325 | 20411364 | 1        | -0.078106  | 5    | 0.0024   | 0.038    | 0.079922 | 0.15803  | 0.00705499  | TSS        | NM_019216                 | Gdf15         |
| 16  | 20411426 | 20411784 | 1        | -0.125589  | 5    | 8.80E-05 | 0.0055   | 0.10111  | 0.2267   | 0.000466886 | TSS        | NM_019216                 | Gdf15         |
| 16  | 20414920 | 20415267 | 1        | -0.137896  | 13   | 0.0012   | 0.035    | 0.3269   | 0.46479  | 0.004013471 | Intergenic | NA                        | NA            |
| 16  | 20443722 | 20443937 | 2.20E-08 | -0.308904  | 15   | 4.20E-14 | 6.80E-14 | 0.077181 | 0.38608  | 6.64E-12    | Intragenic | NM_001014236              | Ssbp4         |
| 16  | 20443974 | 20444021 | 0.015    | -0.193247  | 5    | 6.30E-08 | 4.50E-08 | 0.10765  | 0.30089  | 1.18E-06    | Intragenic | NM_001014236              | Ssbp4         |
| 16  | 20444030 | 20444063 | 1        | -0.1274    | 5    | 0.0074   | 0.015    | 0.16394  | 0.29134  | 0.017853001 | Intragenic | NM_001014236              | Ssbp4         |
| 16  | 20444393 | 20444686 | 4.80E-08 | -0.186049  | 40   | 4.50E-14 | 1.50E-13 | 0.12024  | 0.30629  | 6.64E-12    | Intragenic | NM_001014236              | Ssbp4         |
| 16  | 20444689 | 20444814 | 1        | -0.060337  | 13   | 0.011    | 0.0047   | 0.41298  | 0.47332  | 0.02463877  | Intragenic | NM_001014236              | Ssbp4         |
| 16  | 20446321 | 20446486 | 1        | -0.127025  | 9    | 2.40E-05 | 0.00081  | 0.72743  | 0.85445  | 0.000160049 | TSS        | NM_001013880              | lsyna1        |

| chr | start    | stop     | q-value | methy.diff | CpGs | pMWU     | p2DKS    | MCWLS    | MCWHS    | pMWU.fdr    | cgi.type   | transcript                    | gene       |
|-----|----------|----------|---------|------------|------|----------|----------|----------|----------|-------------|------------|-------------------------------|------------|
| 16  | 20528721 | 20528771 | 1       | -0.117462  | 5    | 0.012    | 0.087    | 0.29852  | 0.41599  | 0.026435197 | TSS        | NM_001107305                  | RGD1566239 |
| 16  | 20699450 | 20699525 | 1       | -0.053858  | 5    | 0.0022   | 0.0091   | 0.054645 | 0.1085   | 0.006578104 | Intragenic | NM_001044230:N<br>M_001044240 | Cers1:Gdf1 |
| 16  | 20746922 | 20747228 | 1       | -0.097696  | 16   | 0.0044   | 0.031    | 0.33454  | 0.43224  | 0.011763026 | Intergenic | NA                            | NA         |
| 16  | 20949166 | 20949220 | 1       | -0.20646   | 6    | 3.90E-06 | 0.00017  | 0.074234 | 0.28069  | 3.62E-05    | TSS        | NM_001127654                  | Tm6sf2     |
| 16  | 21015046 | 21015100 | 1       | -0.20646   | 6    | 3.90E-06 | 0.00017  | 0.074234 | 0.28069  | 3.62E-05    | TSS        | NM_001127654                  | Tm6sf2     |
| 16  | 21210917 | 21210937 | 1       | -0.075496  | 5    | 0.025    | 0.25     | 0.17303  | 0.24852  | 0.047453009 | Intragenic | NM_001107307                  | Cilp2      |
| 16  | 21217003 | 21217243 | 1       | -0.149144  | 12   | 2.10E-05 | 0.0016   | 0.20292  | 0.35207  | 0.000144949 | Intergenic | NA                            | NA         |
| 16  | 21473548 | 21473606 | 1       | -0.130335  | 6    | 0.0015   | 0.011    | 0.19712  | 0.32746  | 0.004849475 | Intergenic | NA                            | NA         |
| 16  | 23358675 | 23358843 | 1       | -0.05513   | 6    | 0.00072  | 0.0044   | 0.042876 | 0.098006 | 0.002634665 | Intergenic | NA                            | NA         |
| 16  | 24992808 | 24992915 | 1       | 0.149265   | 5    | 0.016    | 0.0018   | 0.31343  | 0.16417  | 0.033288089 | Intragenic | NM_001135838                  | 1-Mar      |
| 16  | 30997522 | 30997597 | 0.49    | -0.201468  | 5    | 4.90E-07 | 1.50E-06 | 0.074482 | 0.27595  | 6.54E-06    | Intergenic | NA                            | NA         |
| 16  | 31748274 | 31748392 | 1       | -0.061791  | 15   | 0.013    | 0.063    | 0.26174  | 0.32353  | 0.028097302 | Intergenic | NA                            | NA         |
| 16  | 31948498 | 31948564 | 1       | -0.156136  | 5    | 0.014    | 0.088    | 0.24212  | 0.39825  | 0.029850603 | Intragenic | NM_198764                     | Sh3rf1     |
| 16  | 32002302 | 32002475 | 1       | -0.17181   | 6    | 4.90E-07 | 6.40E-06 | 0.032269 | 0.20408  | 6.54E-06    | Intragenic | NM_198764                     | Sh3rf1     |
| 16  | 32011845 | 32012009 | 1       | -0.14931   | 5    | 0.0012   | 0.0032   | 0.1911   | 0.34041  | 0.004013471 | Intragenic | NM_198764                     | Sh3rf1     |
| 16  | 32026233 | 32026308 | 0.49    | -0.201468  | 5    | 4.90E-07 | 1.50E-06 | 0.074482 | 0.27595  | 6.54E-06    | Intragenic | NM_198764                     | Sh3rf1     |
| 16  | 32060430 | 32060550 | 1       | -0.165117  | 5    | 0.00036  | 0.0018   | 0.052633 | 0.21775  | 0.001486639 | TSS        | NM_198764                     | Sh3rf1     |
| 16  | 32489738 | 32489876 | 1       | -0.137839  | 5    | 0.00097  | 0.024    | 0.029427 | 0.16727  | 0.003366009 | Intergenic | NA                            | NA         |
| 16  | 35553917 | 35553994 | 1       | -0.164659  | 5    | 0.015    | 0.059    | 0.56534  | 0.73     | 0.031584896 | Intragenic | NM_001135756                  | Galnt16    |
| 16  | 35903175 | 35903327 | 0.47    | -0.215212  | 6    | 1.60E-07 | 1.40E-06 | 0.010965 | 0.22618  | 2.51E-06    | Intergenic | NA                            | NA         |
| 16  | 36671310 | 36671369 | 1       | -0.099     | 5    | 0.0035   | 0.038    | 0.13024  | 0.22924  | 0.009686665 | Intergenic | NA                            | NA         |
| 16  | 45852270 | 45852354 | 1       | -0.150988  | 7    | 0.0004   | 0.0082   | 0.32092  | 0.47191  | 0.00162337  | Intergenic | NA                            | NA         |
| 16  | 46654510 | 46654698 | 0.002   | -0.192768  | 21   | 5.70E-12 | 6.20E-09 | 0.35846  | 0.55122  | 3.66E-10    | Intragenic | NM_001169133                  | Tenm3      |
| 16  | 46661830 | 46662026 | 1       | -0.194567  | 7    | 1.80E-05 | 0.0013   | 0.19296  | 0.38752  | 0.000127015 | Intergenic | NA                            | NA         |
| 16  | 46732401 | 46732608 | 1       | -0.129643  | 12   | 5.40E-10 | 3.90E-06 | 0.077408 | 0.20705  | 1.93E-08    | Intergenic | NA                            | NA         |
| 16  | 46771797 | 46771881 | 1       | -0.150988  | 7    | 0.0004   | 0.0082   | 0.32092  | 0.47191  | 0.00162337  | Intergenic | NA                            | NA         |
| 16  | 47280665 | 47280744 | 1       | 0.161589   | 5    | 0.0038   | 0.0088   | 0.58365  | 0.42206  | 0.010352437 | Intergenic | NA                            | NA         |
| 16  | 47647888 | 47648156 | 1       | -0.073249  | 5    | 0.0074   | 0.0092   | 0.093615 | 0.16686  | 0.017853001 | Intergenic | NA                            | NA         |
| 16  | 47773239 | 47773530 | 1       | -0.120604  | 9    | 0.0033   | 0.11     | 0.20522  | 0.32582  | 0.009256793 | Intergenic | NA                            | NA         |
| 16  | 47837556 | 47837576 | 1       | 0.067551   | 5    | 0.0074   | 0.015    | 0.17984  | 0.11229  | 0.017853001 | TSS        | NM_001134863                  | Stox2      |
| 16  | 48050217 | 48050388 | 1       | -0.105712  | 8    | 0.00026  | 0.012    | 0.67107  | 0.77678  | 0.001130807 | Intragenic | NM_001107311                  | Enpp6      |
| 16  | 49773375 | 49773441 | 1       | -0.168508  | 5    | 0.0058   | 0.0031   | 0.27993  | 0.44844  | 0.014624129 | Intergenic | NA                            | NA         |
| 16  | 49867781 | 49867811 | 1       | -0.068344  | 5    | 0.00065  | 0.015    | 0.84532  | 0.91367  | 0.002426546 | Intergenic | NA                            | NA         |
| 16  | 50154801 | 50154992 | 1       | -0.198086  | 5    | 0.0022   | 0.0055   | 0.098812 | 0.2969   | 0.006578104 | Intragenic | NM_031819                     | Fat1       |
| 16  | 51741920 | 51742001 | 1       | -0.222146  | 6    | 1.40E-06 | 6.40E-06 | 0.07281  | 0.29496  | 1.57E-05    | Intergenic | NA                            | NA         |
| 16  | 53671185 | 53671293 | 1       | -0.139618  | 5    | 0.002    | 0.015    | 0.098564 | 0.23818  | 0.006079939 | TSS        | NM_001290133                  | Frg1       |
| 16  | 54011002 | 54011063 | 1       | -0.152263  | 5    | 0.0019   | 0.039    | 0.10589  | 0.25815  | 0.005855937 | Intergenic | NA                            | NA         |
| 16  | 59553315 | 59553410 | 1       | -0.172014  | 5    | 0.0022   | 0.059    | 0.25848  | 0.4305   | 0.006578104 | Intergenic | NA                            | NA         |



| chr | start    | stop     | q-value  | methy.diff | CpGs | pMWU     | p2DKS    | MCWLS    | MCWHS    | pMWU.fdr    | cgi.type   | transcript   | gene    |
|-----|----------|----------|----------|------------|------|----------|----------|----------|----------|-------------|------------|--------------|---------|
| 16  | 59882037 | 59882192 | 1        | -0.06805   | 7    | 0.0029   | 0.056    | 0.080196 | 0.14825  | 0.008293503 | TSS        | NM_001107316 | Mfhas1  |
| 16  | 60099226 | 60099291 | 1        | -0.134528  | 5    | 0.012    | 0.059    | 0.50159  | 0.63612  | 0.026435197 | Intragenic | NM_138912    | Ppp1r3b |
| 16  | 60155811 | 60155844 | 1        | -0.107195  | 5    | 0.00029  | 0.0018   | 0.12881  | 0.236    | 0.001239307 | Intergenic | NA           | NA      |
| 16  | 60662303 | 60662376 | 1        | -0.340444  | 5    | 8.10E-06 | 0.00027  | 0.46383  | 0.80428  | 6.58E-05    | Intragenic | NM_001106084 | Tnks    |
| 16  | 60752719 | 60752774 | 1        | -0.124243  | 5    | 0.011    | 0.13     | 0.32059  | 0.44484  | 0.02463877  | Intragenic | NM_022199    | Dusp4   |
| 16  | 60938289 | 60938588 | 1        | -0.093533  | 5    | 0.0053   | 0.088    | 0.16175  | 0.25529  | 0.013591571 | Intergenic | NA           | NA      |
| 16  | 61448844 | 61448955 | 1        | -0.124806  | 5    | 0.00088  | 0.015    | 0.14122  | 0.26603  | 0.003092094 | Intragenic | NM_001107317 | Mboat4  |
| 16  | 61472053 | 61472160 | 0.0022   | -0.284087  | 5    | 6.30E-08 | 6.80E-09 | 0.076954 | 0.36104  | 1.18E-06    | Intragenic | NM_001106085 | Dctn6   |
| 16  | 61644468 | 61644814 | 1        | -0.12013   | 9    | 0.0005   | 0.034    | 0.14777  | 0.2679   | 0.001958442 | Intragenic | NM_001271244 | Rbpms   |
| 16  | 61725874 | 61725995 | 1        | -0.200864  | 5    | 0.00072  | 0.0055   | 0.35488  | 0.55575  | 0.002634665 | Intragenic | NM_001271244 | Rbpms   |
| 16  | 61732025 | 61732208 | 1        | -0.126158  | 5    | 5.00E-05 | 0.00052  | 0.092775 | 0.21893  | 0.000291675 | Intragenic | NM_001271244 | Rbpms   |
| 16  | 61737590 | 61737756 | 1        | -0.176286  | 5    | 0.00011  | 0.0055   | 0.10978  | 0.28606  | 0.000565143 | Intragenic | NM_001271244 | Rbpms   |
| 16  | 61750056 | 61750141 | 0.49     | -0.417061  | 5    | 1.30E-07 | 1.50E-06 | 0.124    | 0.54106  | 2.11E-06    | Intragenic | NM_001271244 | Rbpms   |
| 16  | 62147490 | 62147573 | 1        | -0.087487  | 5    | 0.0058   | 0.024    | 0.054585 | 0.14207  | 0.014624129 | TSS        | NM_001191554 | Purg    |
| 16  | 64446336 | 64446580 | 1        | -0.091527  | 10   | 6.00E-05 | 0.00086  | 0.13274  | 0.22427  | 0.000341554 | Intergenic | NA           | NA      |
| 16  | 64963005 | 64963170 | 1        | -0.102933  | 5    | 0.025    | 0.015    | 0.51003  | 0.61296  | 0.047453009 | Intergenic | NA           | NA      |
| 16  | 65302240 | 65302332 | 1        | -0.116153  | 5    | 0.00032  | 0.0032   | 0.50985  | 0.626    | 0.001346443 | Intergenic | NA           | NA      |
| 16  | 65914978 | 65915008 | 1        | -0.296249  | 5    | 1.90E-05 | 6.70E-05 | 0.51568  | 0.81193  | 0.000131674 | Intergenic | NA           | NA      |
| 16  | 66680706 | 66680813 | 5.30E-05 | -0.063671  | 18   | 1.10E-11 | 1.60E-10 | 0.017495 | 0.081165 | 6.24E-10    | TSS        | NM_001107319 | Unc5d   |
| 16  | 68769918 | 68770192 | 1        | -0.132858  | 13   | 3.40E-05 | 0.00055  | 0.3103   | 0.44316  | 0.000214477 | Intergenic | NA           | NA      |
| 16  | 68912497 | 68912905 | 1        | -0.154428  | 22   | 1.80E-05 | 0.0016   | 0.19757  | 0.29972  | 0.000127015 | Intragenic | NM_001109425 | Zfp703  |
| 16  | 68912934 | 68912997 | 1        | -0.094475  | 5    | 9.80E-05 | 0.00014  | 0.073278 | 0.16775  | 0.000512474 | Intragenic | NM_001109425 | Zfp703  |
| 16  | 68913090 | 68913118 | 1        | -0.072541  | 5    | 0.00039  | 0.015    | 0.1545   | 0.22704  | 0.001587612 | Intragenic | NM_001109425 | Zfp703  |
| 16  | 68913186 | 68913269 | 1        | -0.168731  | 8    | 2.20E-05 | 0.00015  | 0.27869  | 0.44742  | 0.000149617 | Intragenic | NM_001109425 | Zfp703  |
| 16  | 68913356 | 68913435 | 1        | -0.054019  | 5    | 0.0053   | 0.038    | 0.05489  | 0.10891  | 0.013591571 | TSS        | NM_001109425 | Zfp703  |
| 16  | 69339929 | 69340136 | 1        | -0.169877  | 7    | 0.0011   | 0.0053   | 0.24106  | 0.41094  | 0.003737263 | Intergenic | NA           | NA      |
| 16  | 70209733 | 70209908 | 1        | -0.232427  | 8    | 7.90E-05 | 0.001    | 0.27792  | 0.51035  | 0.000427247 | Intergenic | NA           | NA      |
| 16  | 71071313 | 71071651 | 1        | -0.128364  | 10   | 6.80E-05 | 0.00038  | 0.13197  | 0.26034  | 0.000379896 | Intergenic | NA           | NA      |
| 16  | 71086256 | 71086594 | 1        | -0.138842  | 10   | 1.70E-05 | 0.00016  | 0.1215   | 0.26034  | 0.000120524 | Intergenic | NA           | NA      |
| 16  | 71242864 | 71242991 | 1        | -0.144899  | 5    | 0.0022   | 0.0018   | 0.11827  | 0.26317  | 0.006578104 | Intergenic | NA           | NA      |
| 16  | 71333666 | 71333775 | 0.076    | -0.26097   | 8    | 3.40E-06 | 2.30E-07 | 0.1448   | 0.40577  | 3.25E-05    | Intragenic | NM_001004107 | Tacc1   |
| 16  | 71409696 | 71409751 | 1        | -0.113463  | 5    | 0.0038   | 0.0091   | 0.091854 | 0.20532  | 0.010352437 | Intergenic | NA           | NA      |
| 16  | 71946684 | 71946762 | 1        | -0.086285  | 5    | 0.0094   | 0.087    | 0.76155  | 0.84783  | 0.021723038 | Intergenic | NA           | NA      |
| 16  | 73294694 | 73294897 | 1        | -0.084723  | 16   | 0.007    | 0.12     | 0.62691  | 0.71163  | 0.01709041  | Intergenic | NA           | NA      |
| 16  | 73406847 | 73406999 | 1        | -0.116492  | 7    | 0.0092   | 0.0053   | 0.51271  | 0.62921  | 0.021504843 | Intragenic | NM_001107322 | Ank1    |
| 16  | 74318345 | 74318442 | 1        | -0.143919  | 5    | 3.70E-06 | 3.40E-05 | 0.04132  | 0.18524  | 3.46E-05    | Intragenic | NM_001108878 | Thsd1   |
| 16  | 74318469 | 74318617 | 0.0022   | -0.293493  | 7    | 5.90E-10 | 6.90E-09 | 0.029653 | 0.32315  | 2.09E-08    | Intragenic | NM_001108878 | Thsd1   |
| 16  | 74318643 | 74318812 | 1        | -0.105774  | 11   | 0.0029   | 0.0027   | 0.21865  | 0.32443  | 0.008293503 | Intragenic | NM_001108878 | Thsd1   |
| 16  | 74319224 | 74319329 | 1        | -0.142248  | 5    | 1.90E-05 | 0.00053  | 0.15779  | 0.30004  | 0.000131674 | Intragenic | NM_001108878 | Thsd1   |

| chr | start    | stop     | q-value | methyl.diff | CpGs | pMWU     | p2DKS    | MCWLS    | MCWHS   | pMWU.fdr    | cgi.type   | transcript                    | gene        |
|-----|----------|----------|---------|-------------|------|----------|----------|----------|---------|-------------|------------|-------------------------------|-------------|
| 16  | 74422644 | 74423216 | 1       | 0.231756    | 18   | 5.10E-07 | 0.00036  | 0.57377  | 0.34202 | 6.80E-06    | Intergenic | NA                            | NA          |
| 16  | 75376007 | 75376219 | 1       | -0.182186   | 8    | 5.00E-08 | 9.10E-06 | 0.13917  | 0.32136 | 1.03E-06    | Intergenic | NA                            | NA          |
| 16  | 75383490 | 75383551 | 1       | -0.100984   | 5    | 0.016    | 0.038    | 0.10074  | 0.20172 | 0.033288089 | Intergenic | NA                            | NA          |
| 16  | 75512547 | 75512609 | 1       | -0.096716   | 5    | 0.0038   | 0.0018   | 0.72405  | 0.82077 | 0.010352437 | Intergenic | NA                            | NA          |
| 16  | 75521234 | 75521291 | 1       | -0.147159   | 5    | 0.0068   | 0.038    | 0.26951  | 0.41667 | 0.016642688 | Intergenic | NA                            | NA          |
| 16  | 77819565 | 77819630 | 1       | -0.178395   | 5    | 0.0032   | 0.0091   | 0.4863   | 0.66469 | 0.008990975 | Intragenic | NM_001037327                  | Csmd1       |
| 16  | 78024361 | 78024409 | 1       | 0.075399    | 5    | 0.0058   | 0.015    | 0.8882   | 0.8128  | 0.014624129 | Intragenic | NM_001037327                  | Csmd1       |
| 16  | 79275104 | 79275194 | 1       | -0.116908   | 5    | 0.0049   | 0.025    | 0.10606  | 0.22297 | 0.012753585 | Intragenic | NM_001107326                  | Kbtbd11     |
| 16  | 79275319 | 79275386 | 1       | -0.094479   | 5    | 0.00072  | 0.015    | 0.060469 | 0.15495 | 0.002634665 | Intragenic | NM_001107326                  | Kbtbd11     |
| 16  | 79937066 | 79937219 | 1       | -0.125935   | 7    | 0.00024  | 0.0053   | 0.14757  | 0.2735  | 0.001064629 | Intragenic | NM_053901                     | Dlgap2      |
| 16  | 80002560 | 80002707 | 1       | -0.132422   | 8    | 0.0048   | 0.019    | 0.45686  | 0.58928 | 0.012663359 | Intragenic | NM_053901                     | Dlgap2      |
| 16  | 80287279 | 80287425 | 1       | -0.204571   | 5    | 0.023    | 0.088    | 0.40307  | 0.60764 | 0.04441443  | Intergenic | NA                            | NA          |
| 16  | 80309542 | 80309807 | 1       | -0.06998    | 8    | 0.018    | 0.13     | 0.31342  | 0.3834  | 0.036742993 | Intragenic | NM_001100791                  | Tdrp        |
| 16  | 80322809 | 80323010 | 1       | -0.164849   | 8    | 0.0031   | 0.0078   | 0.53531  | 0.70016 | 0.008829746 | Intergenic | NA                            | NA          |
| 16  | 80458603 | 80458749 | 1       | -0.204571   | 5    | 0.023    | 0.088    | 0.40307  | 0.60764 | 0.04441443  | Intergenic | NA                            | NA          |
| 16  | 80731146 | 80731279 | 1       | -0.090593   | 9    | 0.00031  | 0.012    | 0.071937 | 0.16253 | 0.001320549 | TSS        | NM_057100                     | Gas6        |
| 16  | 80914688 | 80914811 | 1       | -0.274038   | 7    | 1.30E-07 | 4.30E-06 | 0.061471 | 0.33551 | 2.11E-06    | Intragenic | NM_031574                     | Rasa3       |
| 16  | 81105039 | 81105082 | 1       | -0.093949   | 5    | 0.017    | 0.18     | 0.71551  | 0.80946 | 0.034796287 | TSS        | NM_001013054                  | Adprh1      |
| 16  | 81108342 | 81108521 | 1       | -0.170897   | 5    | 0.0017   | 0.038    | 0.23586  | 0.40676 | 0.005339493 | Intragenic | NM_001013054                  | Adprh1      |
| 16  | 81156821 | 81156964 | 1       | -0.225704   | 5    | 0.012    | 0.015    | 0.45373  | 0.67943 | 0.026435197 | Intragenic | NM_001170477:N<br>M_001031813 | Grtp1:Grtp1 |
| 16  | 81283025 | 81283298 | 1       | -0.128139   | 9    | 0.0022   | 0.046    | 0.22969  | 0.35783 | 0.006578104 | TSS        | NM_001309433                  | Proz        |
| 16  | 81419653 | 81419841 | 1       | -0.182001   | 8    | 3.10E-07 | 5.00E-06 | 0.50207  | 0.68407 | 4.47E-06    | Intragenic | NM_053951                     | Mcf2l       |
| 16  | 81788824 | 81789082 | 1       | -0.115209   | 12   | 0.00019  | 0.013    | 0.26555  | 0.38076 | 0.000879857 | Intergenic | NA                            | NA          |
| 16  | 82032766 | 82032889 | 0.048   | -0.18137    | 7    | 6.60E-09 | 1.50E-07 | 0.068385 | 0.24976 | 1.72E-07    | Intergenic | NA                            | NA          |
| 16  | 82100248 | 82100600 | 1       | -0.10844    | 7    | 0.0079   | 0.078    | 0.21817  | 0.32661 | 0.018998259 | Intergenic | NA                            | NA          |
| 16  | 82129775 | 82130034 | 1       | -0.073453   | 10   | 0.00061  | 0.016    | 0.10702  | 0.18048 | 0.002317537 | Intergenic | NA                            | NA          |
| 16  | 82169962 | 82170539 | 1       | -0.129135   | 11   | 7.10E-05 | 0.00012  | 0.21379  | 0.34293 | 0.000391021 | Intergenic | NA                            | NA          |
| 16  | 82177364 | 82177682 | 1       | -0.116291   | 9    | 0.0084   | 0.046    | 0.38537  | 0.50166 | 0.019933412 | Intergenic | NA                            | NA          |
| 16  | 82340498 | 82340737 | 1       | -0.082261   | 10   | 3.50E-05 | 0.012    | 0.085942 | 0.1682  | 0.000218038 | Intergenic | NA                            | NA          |
| 16  | 82420709 | 82420806 | 1       | -0.067694   | 5    | 0.02     | 0.024    | 0.080665 | 0.14836 | 0.039778219 | Intergenic | NA                            | NA          |
| 16  | 82728184 | 82728308 | 1       | -0.234944   | 5    | 0.0013   | 0.0032   | 0.19529  | 0.43023 | 0.004277683 | Intergenic | NA                            | NA          |
| 16  | 82828843 | 82828913 | 1       | -0.216468   | 6    | 4.70E-06 | 9.10E-05 | 0.11014  | 0.32661 | 4.26E-05    | Intragenic | NM_001109535                  | Rab20       |
| 16  | 83081484 | 83081606 | 1       | -0.268221   | 5    | 1.90E-05 | 0.00028  | 0.13436  | 0.40258 | 0.000131674 | Intragenic | NM_001135009                  | Col4a1      |
| 16  | 83123217 | 83123337 | 1       | -0.237789   | 6    | 4.90E-05 | 0.0003   | 0.13289  | 0.37067 | 0.000290925 | Intergenic | NA                            | NA          |
| 16  | 83242877 | 83243304 | 1       | -0.06768    | 5    | 0.017    | 0.13     | 0.072115 | 0.13979 | 0.034796287 | Intergenic | NA                            | NA          |
| 16  | 83368446 | 83368506 | 1       | -0.170089   | 5    | 0.0032   | 0.0031   | 0.33887  | 0.50896 | 0.008990975 | Intergenic | NA                            | NA          |
| 16  | 83953781 | 83954027 | 1       | -0.172491   | 10   | 2.80E-08 | 6.40E-05 | 0.10919  | 0.28168 | 6.20E-07    | Intergenic | NA                            | NA          |
| 16  | 84544439 | 84544649 | 1       | -0.159839   | 6    | 0.016    | 0.058    | 0.37422  | 0.53406 | 0.033288089 | Intergenic | NA                            | NA          |

| chr | start    | stop     | q-value | methy.diff | CpGs | pMWU     | p2DKS    | MCWLS    | MCWHS   | pMWU.fdr    | cgi.type   | transcript   | gene   |
|-----|----------|----------|---------|------------|------|----------|----------|----------|---------|-------------|------------|--------------|--------|
| 16  | 85576325 | 85576372 | 1       | -0.161675  | 5    | 0.00065  | 0.015    | 0.2201   | 0.38178 | 0.002426546 | Intergenic | NA           | NA     |
| 16  | 85845894 | 85846030 | 1       | -0.14493   | 5    | 0.01     | 0.038    | 0.45941  | 0.60434 | 0.02275947  | Intergenic | NA           | NA     |
| 16  | 86278738 | 86278919 | 1       | -0.169827  | 9    | 2.20E-05 | 0.0011   | 0.14903  | 0.31886 | 0.000149617 | Intergenic | NA           | NA     |
| 16  | 89945699 | 89945768 | 1       | -0.121366  | 5    | 0.0032   | 0.038    | 0.73579  | 0.85716 | 0.008990975 | Intergenic | NA           | NA     |
| 16  | 90047763 | 90047819 | 1       | -0.090106  | 5    | 0.0022   | 0.0031   | 0.21197  | 0.30208 | 0.006578104 | Intergenic | NA           | NA     |
| 17  | 384846   | 384919   | 1       | -0.103396  | 5    | 0.0019   | 0.024    | 0.060041 | 0.16344 | 0.005855937 | TSS        | NM_053716    | Fbp2   |
| 17  | 411688   | 411844   | 1       | -0.158636  | 5    | 0.0038   | 0.015    | 0.18233  | 0.34097 | 0.010352437 | TSS        | NM_012558    | Fbp1   |
| 17  | 1058916  | 1058981  | 1       | -0.206247  | 6    | 3.20E-06 | 0.00031  | 0.14595  | 0.3522  | 3.11E-05    | Intragenic | NM_053566    | Ptch1  |
| 17  | 1437260  | 1437642  | 1       | -0.088876  | 5    | 0.025    | 0.039    | 0.13072  | 0.2196  | 0.047453009 | Intergenic | NA           | NA     |
| 17  | 1437651  | 1437737  | 1       | -0.243151  | 5    | 5.50E-06 | 0.00028  | 0.17889  | 0.42205 | 4.78E-05    | Intergenic | NA           | NA     |
| 17  | 1840879  | 1840950  | 1       | -0.114518  | 5    | 6.20E-05 | 0.00014  | 0.11836  | 0.23288 | 0.000349462 | Intergenic | NA           | NA     |
| 17  | 2209180  | 2209238  | 1       | -0.155716  | 5    | 0.0053   | 0.0052   | 0.24127  | 0.39699 | 0.013591571 | Intergenic | NA           | NA     |
| 17  | 5089589  | 5089695  | 1       | -0.16549   | 5    | 0.0049   | 0.038    | 0.23677  | 0.40226 | 0.012753585 | Intergenic | NA           | NA     |
| 17  | 5089698  | 5089788  | 1       | -0.230759  | 8    | 3.40E-08 | 7.10E-06 | 0.39064  | 0.6214  | 7.35E-07    | Intergenic | NA           | NA     |
| 17  | 5202643  | 5202674  | 1       | -0.250851  | 5    | 2.40E-05 | 0.00053  | 0.23162  | 0.48247 | 0.000160049 | Intergenic | NA           | NA     |
| 17  | 5202677  | 5202832  | 1       | -0.189746  | 10   | 2.90E-09 | 9.00E-06 | 0.09015  | 0.2799  | 8.18E-08    | Intergenic | NA           | NA     |
| 17  | 5210732  | 5210814  | 1       | -0.260063  | 5    | 0.00026  | 0.0093   | 0.33708  | 0.59714 | 0.001130807 | Intergenic | NA           | NA     |
| 17  | 5263997  | 5264028  | 1       | -0.250851  | 5    | 2.40E-05 | 0.00053  | 0.23162  | 0.48247 | 0.000160049 | Intergenic | NA           | NA     |
| 17  | 5264031  | 5264186  | 1       | -0.189746  | 10   | 2.90E-09 | 9.00E-06 | 0.09015  | 0.2799  | 8.18E-08    | Intergenic | NA           | NA     |
| 17  | 5272086  | 5272168  | 1       | -0.260063  | 5    | 0.00026  | 0.0093   | 0.33708  | 0.59714 | 0.001130807 | Intergenic | NA           | NA     |
| 17  | 5340441  | 5340472  | 1       | -0.250851  | 5    | 2.40E-05 | 0.00053  | 0.23162  | 0.48247 | 0.000160049 | Intergenic | NA           | NA     |
| 17  | 5340475  | 5340630  | 1       | -0.189746  | 10   | 2.90E-09 | 9.00E-06 | 0.09015  | 0.2799  | 8.18E-08    | Intergenic | NA           | NA     |
| 17  | 5348530  | 5348612  | 1       | -0.260063  | 5    | 0.00026  | 0.0093   | 0.33708  | 0.59714 | 0.001130807 | Intergenic | NA           | NA     |
| 17  | 5365570  | 5365601  | 1       | -0.250851  | 5    | 2.40E-05 | 0.00053  | 0.23162  | 0.48247 | 0.000160049 | Intergenic | NA           | NA     |
| 17  | 5365604  | 5365759  | 1       | -0.189746  | 10   | 2.90E-09 | 9.00E-06 | 0.09015  | 0.2799  | 8.18E-08    | Intergenic | NA           | NA     |
| 17  | 5373656  | 5373738  | 1       | -0.260063  | 5    | 0.00026  | 0.0093   | 0.33708  | 0.59714 | 0.001130807 | Intergenic | NA           | NA     |
| 17  | 6614126  | 6614237  | 1       | -0.200263  | 5    | 6.30E-06 | 0.00053  | 0.092205 | 0.29247 | 5.33E-05    | Intragenic | NM_001107335 | Dapk1  |
| 17  | 6684759  | 6684844  | 1       | -0.203972  | 5    | 0.011    | 0.088    | 0.40148  | 0.60546 | 0.02463877  | TSS        | NM_001107335 | Dapk1  |
| 17  | 6770790  | 6771000  | 0.012   | -0.161972  | 9    | 5.90E-10 | 3.80E-08 | 0.052024 | 0.214   | 2.09E-08    | Intergenic | NA           | NA     |
| 17  | 6927744  | 6927880  | 1       | -0.140191  | 9    | 0.0029   | 0.017    | 0.25388  | 0.39408 | 0.008293503 | Intergenic | NA           | NA     |
| 17  | 7170000  | 7170129  | 1       | -0.123849  | 6    | 0.0069   | 0.027    | 0.16434  | 0.28819 | 0.01685311  | Intergenic | NA           | NA     |
| 17  | 7285736  | 7286034  | 1       | -0.172212  | 5    | 0.014    | 0.0092   | 0.47099  | 0.6432  | 0.029850603 | Intergenic | NA           | NA     |
| 17  | 7841299  | 7841324  | 1       | -0.127414  | 5    | 0.0045   | 0.0053   | 0.67556  | 0.80298 | 0.011905878 | Intergenic | NA           | NA     |
| 17  | 7955132  | 7955248  | 1       | 0.065459   | 7    | 0.0087   | 0.056    | 0.86172  | 0.79626 | 0.020391633 | Intergenic | NA           | NA     |
| 17  | 8061930  | 8062052  | 1       | -0.117698  | 7    | 0.003    | 0.018    | 0.4376   | 0.5553  | 0.008555055 | Intergenic | NA           | NA     |
| 17  | 8247434  | 8247600  | 1       | -0.15039   | 5    | 0.0053   | 0.0017   | 0.2978   | 0.44819 | 0.013591571 | Intragenic | NM_012731    | Ntrk2  |
| 17  | 8311624  | 8311703  | 1       | -0.155078  | 5    | 0.0032   | 0.015    | 0.42112  | 0.57619 | 0.008990975 | Intragenic | NM_012731    | Ntrk2  |
| 17  | 8654829  | 8654894  | 1       | -0.149963  | 5    | 0.00059  | 0.0054   | 0.37869  | 0.52866 | 0.002242971 | Intergenic | NA           | NA     |
| 17  | 9076165  | 9076422  | 1       | -0.174121  | 5    | 0.01     | 0.038    | 0.1767   | 0.35083 | 0.02275947  | Intragenic | NM_053747    | Ubqln1 |

| chr | start    | stop     | q-value | methy.diff | CpGs | pMWU     | p2DKS    | MCWLS    | MCWHS    | pMWU.fdr    | cgi.type   | transcript                    | gene              |
|-----|----------|----------|---------|------------|------|----------|----------|----------|----------|-------------|------------|-------------------------------|-------------------|
| 17  | 9098373  | 9098407  | 1       | -0.25271   | 5    | 2.40E-05 | 0.0018   | 0.20408  | 0.45679  | 0.000160049 | Intergenic | NA                            | NA                |
| 17  | 9368297  | 9368468  | 1       | -0.174845  | 6    | 0.00012  | 8.80E-05 | 0.14375  | 0.31859  | 0.000603617 | Intergenic | NA                            | NA                |
| 17  | 9454495  | 9454669  | 1       | -0.272821  | 5    | 0.00072  | 0.0018   | 0.17142  | 0.44424  | 0.002634665 | Intergenic | NA                            | NA                |
| 17  | 9496136  | 9496194  | 1       | -0.125533  | 6    | 0.013    | 0.056    | 0.189    | 0.31454  | 0.028097302 | Intergenic | NA                            | NA                |
| 17  | 9507028  | 9507115  | 1       | -0.133411  | 5    | 0.0063   | 0.025    | 0.26648  | 0.39989  | 0.015629046 | Intergenic | NA                            | NA                |
| 17  | 10016098 | 10016348 | 1       | -0.185745  | 12   | 9.60E-09 | 6.10E-06 | 0.25213  | 0.43788  | 2.42E-07    | Intergenic | NA                            | NA                |
| 17  | 10168910 | 10168993 | 1       | -0.148322  | 5    | 0.0087   | 0.0093   | 0.29559  | 0.44391  | 0.020391633 | Intergenic | NA                            | NA                |
| 17  | 10176001 | 10176107 | 1       | -0.10735   | 5    | 0.00021  | 0.0018   | 0.25834  | 0.36569  | 0.000951214 | Intergenic | NA                            | NA                |
| 17  | 10357113 | 10357223 | 1       | -0.072533  | 5    | 0.017    | 0.087    | 0.088325 | 0.16086  | 0.034796287 | Intragenic | NM_001191691                  | Trpc7             |
| 17  | 10606671 | 10606860 | 1       | -0.084682  | 10   | 0.014    | 0.03     | 0.67276  | 0.75744  | 0.029850603 | TSS        | NM_053802                     | Tgfb1             |
| 17  | 10617890 | 10617967 | 1       | -0.09286   | 7    | 6.40E-05 | 0.0054   | 0.10192  | 0.19478  | 0.000358884 | Intergenic | NA                            | NA                |
| 17  | 10641605 | 10641662 | 1       | -0.174764  | 5    | 0.00072  | 0.0091   | 0.58207  | 0.75683  | 0.002634665 | Intergenic | NA                            | NA                |
| 17  | 10652449 | 10652577 | 1       | -0.179792  | 9    | 2.20E-05 | 0.0041   | 0.20474  | 0.38453  | 0.000149617 | Intergenic | NA                            | NA                |
| 17  | 10680429 | 10680458 | 0.0058  | -0.314005  | 5    | 6.30E-08 | 1.80E-08 | 0.10581  | 0.41982  | 1.18E-06    | Intergenic | NA                            | NA                |
| 17  | 10717564 | 10717653 | 1       | -0.203399  | 5    | 1.70E-05 | 3.40E-05 | 0.09841  | 0.30181  | 0.000120524 | Intergenic | NA                            | NA                |
| 17  | 10781340 | 10781623 | 1       | -0.051716  | 9    | 0.0027   | 0.034    | 0.069012 | 0.12073  | 0.007840962 | Intergenic | NA                            | NA                |
| 17  | 10786318 | 10786496 | 1       | -0.173487  | 5    | 0.00039  | 0.0018   | 0.099067 | 0.27255  | 0.001587612 | Intergenic | NA                            | NA                |
| 17  | 10854334 | 10854475 | 0.038   | -0.135959  | 12   | 1.10E-09 | 1.20E-07 | 0.093488 | 0.22945  | 3.60E-08    | Intergenic | NA                            | NA                |
| 17  | 11095756 | 11095985 | 1       | -0.144527  | 7    | 0.00062  | 0.0083   | 0.14147  | 0.286    | 0.002348106 | Intergenic | NA                            | NA                |
| 17  | 11251242 | 11251589 | 0.67    | -0.133637  | 19   | 1.40E-11 | 2.10E-06 | 0.14849  | 0.28213  | 7.61E-10    | Intragenic | NM_001024998                  | Txndc15           |
| 17  | 11367486 | 11367540 | 1       | -0.066208  | 7    | 0.023    | 0.19     | 0.14358  | 0.20979  | 0.04441443  | Intragenic | NM_001024998                  | Txndc15           |
| 17  | 11469431 | 11469538 | 1       | -0.237196  | 5    | 0.002    | 0.0031   | 0.27906  | 0.51625  | 0.006079939 | Intragenic | NM_001024998:N<br>M_017182    | Txndc15:H2af<br>y |
| 17  | 11519546 | 11519617 | 1       | -0.101053  | 5    | 0.014    | 0.18     | 0.18131  | 0.28236  | 0.029850603 | Intragenic | NM_001024998                  | Txndc15           |
| 17  | 11727062 | 11727123 | 1       | -0.179188  | 5    | 0.0074   | 0.024    | 0.29577  | 0.47496  | 0.017853001 | Intragenic | NM_001170408                  | Fam193b           |
| 17  | 11752519 | 11752649 | 1       | -0.150172  | 10   | 1.70E-05 | 0.0025   | 0.12042  | 0.27059  | 0.000120524 | Intragenic | NM_001107336                  | Dok3              |
| 17  | 11868622 | 11868786 | 1       | -0.125157  | 6    | 0.00042  | 0.0027   | 0.1229   | 0.24806  | 0.001700519 | Intragenic | NM_013030                     | Slc34a1           |
| 17  | 11945981 | 11946090 | 1       | -0.091226  | 7    | 0.00018  | 0.0014   | 0.14778  | 0.23901  | 0.000849258 | TSS        | NM_001015023:N<br>M_001009636 | Rab24:Prelid1     |
| 17  | 12064496 | 12064714 | 1       | -0.063223  | 22   | 0.0039   | 0.027    | 0.15614  | 0.19244  | 0.010605635 | TSS        | NM_001107337                  | Nsd1              |
| 17  | 12096288 | 12096314 | 1       | -0.079958  | 5    | 4.80E-06 | 0.00014  | 0.037588 | 0.11755  | 4.29E-05    | Intergenic | NA                            | NA                |
| 17  | 12100391 | 12100475 | 1       | -0.229409  | 5    | 1.30E-05 | 7.10E-05 | 0.15744  | 0.38685  | 9.66E-05    | Intragenic | NM_001109904                  | Fgfr4             |
| 17  | 12107500 | 12107560 | 1       | -0.209768  | 5    | 0.0094   | 0.039    | 0.54201  | 0.75178  | 0.021723038 | Intragenic | NM_001109904                  | Fgfr4             |
| 17  | 12262481 | 12263021 | 1       | -0.141715  | 13   | 0.0028   | 0.0073   | 0.29923  | 0.44094  | 0.008113721 | Intragenic | NM_022206                     | Unc5a             |
| 17  | 12304093 | 12304198 | 1       | -0.099859  | 5    | 0.023    | 0.015    | 0.2317   | 0.33155  | 0.04441443  | Intragenic | NM_022206                     | Unc5a             |
| 17  | 12323284 | 12323389 | 1       | -0.104254  | 5    | 0.02     | 0.015    | 0.2273   | 0.33155  | 0.039778219 | Intergenic | NA                            | NA                |
| 17  | 12359563 | 12359594 | 1       | 0.051198   | 5    | 0.0032   | 0.038    | 0.96866  | 0.91746  | 0.008990975 | Intergenic | NA                            | NA                |
| 17  | 12437196 | 12437286 | 1       | -0.064206  | 6    | 0.00097  | 0.018    | 0.04759  | 0.1118   | 0.003366009 | Intergenic | NA                            | NA                |
| 17  | 12455193 | 12455279 | 1       | -0.052741  | 5    | 0.0014   | 0.015    | 0.034201 | 0.086942 | 0.004540837 | Intergenic | NA                            | NA                |

| chr | start    | stop     | q-value | methy.diff | CpGs | pMWU     | p2DKS    | MCWLS    | MCWHS    | pMWU.fdr    | cgi.type   | transcript   | gene    |
|-----|----------|----------|---------|------------|------|----------|----------|----------|----------|-------------|------------|--------------|---------|
| 17  | 12830873 | 12831005 | 1       | -0.197841  | 5    | 3.10E-05 | 0.00026  | 0.062848 | 0.26069  | 0.000197418 | Intergenic | NA           | NA      |
| 17  | 13503540 | 13503598 | 1       | -0.19774   | 5    | 0.0022   | 0.039    | 0.21872  | 0.41646  | 0.006578104 | Intergenic | NA           | NA      |
| 17  | 13504023 | 13504067 | 1       | -0.187906  | 5    | 1.30E-06 | 3.40E-05 | 0.13557  | 0.32348  | 1.46E-05    | Intergenic | NA           | NA      |
| 17  | 13834289 | 13834402 | 1       | -0.122342  | 5    | 0.0058   | 0.087    | 0.72461  | 0.84695  | 0.014624129 | Intergenic | NA           | NA      |
| 17  | 14015542 | 14015597 | 1       | -0.279684  | 5    | 1.70E-05 | 0.00028  | 0.16716  | 0.44684  | 0.000120524 | Intergenic | NA           | NA      |
| 17  | 14052005 | 14052071 | 1       | -0.088159  | 5    | 0.02     | 0.038    | 0.16484  | 0.25299  | 0.039778219 | TSS        | NM_001107339 | Ror2    |
| 17  | 14106525 | 14106614 | 1       | -0.17677   | 5    | 0.0049   | 0.024    | 0.50053  | 0.6773   | 0.012753585 | Intragenic | NM_001107339 | Ror2    |
| 17  | 14153052 | 14153119 | 1       | -0.172367  | 5    | 0.02     | 0.038    | 0.49179  | 0.66415  | 0.039778219 | Intragenic | NM_001107339 | Ror2    |
| 17  | 14678178 | 14678282 | 1       | -0.156962  | 5    | 0.025    | 0.024    | 0.23683  | 0.39379  | 0.047453009 | Intergenic | NA           | NA      |
| 17  | 14758932 | 14759073 | 1       | -0.162143  | 9    | 0.00089  | 0.00032  | 0.40025  | 0.56239  | 0.003126317 | TSS        | NM_012758    | Syk     |
| 17  | 15580429 | 15580683 | 1       | -0.070301  | 6    | 0.017    | 0.04     | 0.11122  | 0.18153  | 0.034796287 | Intergenic | NA           | NA      |
| 17  | 15737298 | 15737514 | 1       | -0.054938  | 10   | 0.0019   | 0.03     | 0.092297 | 0.14724  | 0.005855937 | Intergenic | NA           | NA      |
| 17  | 16129407 | 16129902 | 1       | -0.146148  | 18   | 0.00056  | 0.006    | 0.40307  | 0.54922  | 0.002153446 | Intergenic | NA           | NA      |
| 17  | 17141494 | 17141578 | 1       | -0.232992  | 5    | 0.00048  | 0.0018   | 0.20926  | 0.44225  | 0.001881331 | Intragenic | NM_001082409 | Fbxw17  |
| 17  | 17151334 | 17151605 | 1       | -0.05177   | 9    | 0.002    | 0.06     | 0.035095 | 0.086865 | 0.006079939 | TSS        | NM_001082409 | Fbxw17  |
| 17  | 17818957 | 17819045 | 1       | -0.057552  | 8    | 0.0059   | 0.036    | 0.080618 | 0.13817  | 0.014851341 | Intragenic | NM_001108409 | Fgd3    |
| 17  | 18011761 | 18011992 | 1       | -0.209444  | 5    | 0.0017   | 0.0054   | 0.22401  | 0.43345  | 0.005339493 | Intragenic | NM_001191556 | Wnk2    |
| 17  | 18278084 | 18278302 | 1       | -0.141433  | 8    | 0.024    | 0.026    | 0.47548  | 0.61691  | 0.046241462 | Intergenic | NA           | NA      |
| 17  | 18367029 | 18367123 | 1       | -0.223481  | 7    | 2.20E-06 | 8.70E-05 | 0.396    | 0.61948  | 2.27E-05    | Intergenic | NA           | NA      |
| 17  | 18459593 | 18459732 | 1       | -0.102285  | 5    | 0.019    | 0.13     | 0.1929   | 0.29519  | 0.038322088 | Intergenic | NA           | NA      |
| 17  | 19877277 | 19877389 | 1       | -0.099056  | 9    | 5.80E-05 | 0.0027   | 0.091931 | 0.19099  | 0.000331425 | TSS        | NM_199236    | Nhlrc1  |
| 17  | 19900913 | 19901241 | 1       | -0.199581  | 12   | 2.00E-07 | 0.00019  | 0.19009  | 0.38967  | 3.06E-06    | Intragenic | NM_001079531 | Tpmt    |
| 17  | 19913139 | 19913274 | 1       | -0.380409  | 5    | 0.00012  | 0.00026  | 0.14509  | 0.5255   | 0.000603617 | Intragenic | NM_001107343 | Kdm1b   |
| 17  | 19927414 | 19927591 | 1       | 0.229177   | 5    | 1.00E-05 | 0.00014  | 0.76753  | 0.53836  | 7.82E-05    | Intragenic | NM_001107343 | Kdm1b   |
| 17  | 20554784 | 20554840 | 1       | -0.08586   | 5    | 0.0087   | 0.13     | 0.76214  | 0.848    | 0.020391633 | Intergenic | NA           | NA      |
| 17  | 20697335 | 20697412 | 1       | -0.286033  | 5    | 4.80E-06 | 0.00096  | 0.18602  | 0.47206  | 4.29E-05    | Intergenic | NA           | NA      |
| 17  | 21335461 | 21335648 | 0.00089 | -0.254167  | 9    | 1.60E-11 | 2.80E-09 | 0.086006 | 0.34017  | 8.51E-10    | Intragenic | NM_012726    | Atxn1   |
| 17  | 21611791 | 21611841 | 1       | -0.180316  | 5    | 0.023    | 0.087    | 0.48257  | 0.66289  | 0.04441443  | Intergenic | NA           | NA      |
| 17  | 21611875 | 21611963 | 1       | -0.159275  | 5    | 0.0074   | 0.0017   | 0.58378  | 0.74305  | 0.017853001 | Intergenic | NA           | NA      |
| 17  | 21639333 | 21639399 | 1       | -0.193484  | 5    | 0.0027   | 0.0051   | 0.53502  | 0.7285   | 0.007840962 | Intergenic | NA           | NA      |
| 17  | 21987845 | 21987917 | 1       | -0.188686  | 5    | 0.002    | 0.0053   | 0.50403  | 0.69271  | 0.006079939 | Intergenic | NA           | NA      |
| 17  | 22350893 | 22350969 | 1       | -0.120414  | 5    | 0.023    | 0.039    | 0.57393  | 0.69434  | 0.04441443  | Intergenic | NA           | NA      |
| 17  | 22964637 | 22964703 | 1       | -0.15606   | 5    | 0.025    | 0.088    | 0.42377  | 0.57983  | 0.047453009 | Intergenic | NA           | NA      |
| 17  | 23961211 | 23961836 | 1       | -0.059277  | 19   | 0.011    | 0.098    | 0.74319  | 0.80247  | 0.02463877  | Intergenic | NA           | NA      |
| 17  | 25243349 | 25243397 | 1       | -0.092355  | 5    | 8.80E-05 | 0.0093   | 0.038159 | 0.13051  | 0.000466886 | Intragenic | NM_214457    | Phactr1 |
| 17  | 26090540 | 26090674 | 1       | -0.187575  | 5    | 0.0008   | 6.90E-05 | 0.086593 | 0.27417  | 0.002866309 | Intergenic | NA           | NA      |
| 17  | 26097353 | 26097439 | 1       | -0.083414  | 5    | 0.00036  | 0.0093   | 0.06605  | 0.14946  | 0.001486639 | Intergenic | NA           | NA      |
| 17  | 26156165 | 26156332 | 1       | -0.101484  | 5    | 0.0058   | 0.024    | 0.038894 | 0.14038  | 0.014624129 | Intergenic | NA           | NA      |
| 17  | 26393588 | 26393624 | 1       | -0.225613  | 5    | 0.00054  | 0.0054   | 0.31053  | 0.53614  | 0.002077867 | Intergenic | NA           | NA      |

| chr | start    | stop     | q-value | methy.diff | CpGs | pMWU     | p2DKS    | MCWLS    | MCWHS    | pMWU.fdr    | cgi.type   | transcript   | gene     |
|-----|----------|----------|---------|------------|------|----------|----------|----------|----------|-------------|------------|--------------|----------|
| 17  | 26573696 | 26573816 | 1       | -0.131434  | 7    | 0.026    | 0.039    | 0.4825   | 0.61393  | 0.049234478 | Intergenic | NA           | NA       |
| 17  | 26589489 | 26589600 | 1       | -0.055216  | 5    | 0.013    | 0.015    | 0.041196 | 0.096412 | 0.028097302 | Intergenic | NA           | NA       |
| 17  | 26590121 | 26590257 | 1       | -0.170835  | 5    | 0.0068   | 0.038    | 0.13485  | 0.30568  | 0.016642688 | Intergenic | NA           | NA       |
| 17  | 26597416 | 26597678 | 1       | -0.066336  | 7    | 0.00038  | 0.0013   | 0.025831 | 0.092167 | 0.001566539 | TSS        | NM_001107345 | Tfap2a   |
| 17  | 26873054 | 26873375 | 1       | -0.178296  | 7    | 4.50E-06 | 9.10E-05 | 0.1645   | 0.34279  | 4.09E-05    | Intergenic | NA           | NA       |
| 17  | 27020360 | 27020439 | 1       | -0.162578  | 5    | 0.0094   | 0.024    | 0.24227  | 0.40485  | 0.021723038 | Intergenic | NA           | NA       |
| 17  | 28585018 | 28585151 | 1       | -0.196803  | 5    | 0.0013   | 0.0018   | 0.31541  | 0.51222  | 0.004277683 | Intergenic | NA           | NA       |
| 17  | 29237370 | 29237455 | 1       | -0.122735  | 5    | 0.0063   | 0.059    | 0.41789  | 0.54063  | 0.015629046 | Intergenic | NA           | NA       |
| 17  | 29444476 | 29444647 | 1       | -0.22619   | 9    | 8.80E-08 | 9.80E-06 | 0.18797  | 0.41416  | 1.57E-06    | Intergenic | NA           | NA       |
| 17  | 29464010 | 29464262 | 1       | -0.157139  | 9    | 0.00022  | 0.0028   | 0.3353   | 0.49244  | 0.000994261 | Intragenic | NM_001107348 | Rreb1    |
| 17  | 29676387 | 29676533 | 1       | -0.15533   | 5    | 0.00011  | 0.00098  | 0.089652 | 0.24498  | 0.000565143 | Intergenic | NA           | NA       |
| 17  | 30813703 | 30813780 | 1       | 0.184282   | 5    | 0.0068   | 0.015    | 0.7774   | 0.59312  | 0.016642688 | Intergenic | NA           | NA       |
| 17  | 30897105 | 30897238 | 1       | -0.138035  | 5    | 0.013    | 0.024    | 0.21179  | 0.34982  | 0.028097302 | Intergenic | NA           | NA       |
| 17  | 31706354 | 31706481 | 1       | -0.114343  | 8    | 0.02     | 0.2      | 0.2672   | 0.38155  | 0.039778219 | Intragenic | NM_001014145 | Cdyl     |
| 17  | 32569189 | 32569844 | 1       | -0.070859  | 17   | 2.50E-06 | 5.30E-05 | 0.067779 | 0.13864  | 2.52E-05    | TSS        | NM_001271083 | Fam217a  |
| 17  | 32764802 | 32764986 | 0.054   | -0.209526  | 15   | 1.10E-08 | 1.70E-07 | 0.39617  | 0.6057   | 2.70E-07    | Intragenic | NM_001107349 | Fam50b   |
| 17  | 33160913 | 33161035 | 1       | -0.140405  | 5    | 0.025    | 0.25     | 0.43008  | 0.57049  | 0.047453009 | Intragenic | NM_022624    | Slc22a23 |
| 17  | 34065007 | 34065034 | 1       | -0.128283  | 5    | 1.70E-06 | 3.40E-05 | 0.1093   | 0.23758  | 1.83E-05    | Intergenic | NA           | NA       |
| 17  | 35823265 | 35823410 | 1       | -0.119535  | 5    | 0.019    | 0.037    | 0.6786   | 0.79814  | 0.038322088 | Intragenic | NM_001039606 | Gmcs     |
| 17  | 37071228 | 37071320 | 1       | -0.056155  | 5    | 0.019    | 0.015    | 0.78233  | 0.83848  | 0.038322088 | Intergenic | NA           | NA       |
| 17  | 37400162 | 37400262 | 1       | -0.108864  | 5    | 0.00026  | 0.0018   | 0.80802  | 0.91689  | 0.001130807 | Intragenic | NM_001109120 | Mboat1   |
| 17  | 39005142 | 39005325 | 1       | -0.086694  | 8    | 0.0048   | 0.017    | 0.60448  | 0.69118  | 0.012663359 | Intergenic | NA           | NA       |
| 17  | 39225105 | 39225154 | 1       | -0.184861  | 5    | 1.00E-05 | 0.00098  | 0.36749  | 0.55235  | 7.82E-05    | Intergenic | NA           | NA       |
| 17  | 39327134 | 39327177 | 1       | -0.099812  | 11   | 0.00011  | 0.00063  | 0.36785  | 0.46766  | 0.000565143 | Intergenic | NA           | NA       |
| 17  | 39327229 | 39327406 | 1       | -0.076661  | 21   | 0.01     | 0.11     | 0.17135  | 0.21583  | 0.02275947  | Intergenic | NA           | NA       |
| 17  | 39548126 | 39548175 | 1       | -0.184861  | 5    | 1.00E-05 | 0.00098  | 0.36749  | 0.55235  | 7.82E-05    | Intergenic | NA           | NA       |
| 17  | 39579644 | 39579739 | 1       | -0.15229   | 5    | 0.025    | 0.25     | 0.29297  | 0.44526  | 0.047453009 | Intergenic | NA           | NA       |
| 17  | 43092049 | 43092200 | 1       | -0.091596  | 7    | 0.0024   | 0.019    | 0.62418  | 0.71578  | 0.00705499  | Intergenic | NA           | NA       |
| 17  | 44192765 | 44192818 | 1       | -0.122162  | 5    | 0.00039  | 0.015    | 0.41825  | 0.54041  | 0.001587612 | Intragenic | NM_001014009 | Fam65b   |
| 17  | 44286310 | 44286335 | 1       | -0.051603  | 5    | 0.019    | 0.038    | 0.042942 | 0.094545 | 0.038322088 | Intragenic | NM_001014009 | Fam65b   |
| 17  | 44415123 | 44415243 | 1       | -0.073098  | 6    | 0.018    | 0.16     | 0.12143  | 0.19453  | 0.036742993 | Intergenic | NA           | NA       |
| 17  | 44917197 | 44917395 | 1       | -0.074208  | 9    | 0.00013  | 0.0017   | 0.031886 | 0.10609  | 0.000648758 | TSS        | NM_001191692 | Lrrc16a  |
| 17  | 45815533 | 45815568 | 1       | -0.112554  | 5    | 0.00039  | 0.00098  | 0.31602  | 0.42858  | 0.001587612 | Intergenic | NA           | NA       |
| 17  | 45929402 | 45929506 | 1       | -0.163802  | 5    | 0.0041   | 0.0055   | 0.29767  | 0.46148  | 0.01100507  | Intergenic | NA           | NA       |
| 17  | 46461940 | 46461978 | 1       | -0.112847  | 5    | 0.0024   | 0.015    | 0.28042  | 0.39326  | 0.00705499  | Intragenic | NM_022217    | Amph     |
| 17  | 47572238 | 47572277 | 1       | -0.192853  | 5    | 0.016    | 0.038    | 0.42737  | 0.62022  | 0.033288089 | Intergenic | NA           | NA       |
| 17  | 47591343 | 47591830 | 1       | -0.083571  | 8    | 0.016    | 0.07     | 0.7295   | 0.81307  | 0.033288089 | Intergenic | NA           | NA       |
| 17  | 48688261 | 48688309 | 1       | 0.081747   | 5    | 0.025    | 0.088    | 0.85568  | 0.77393  | 0.047453009 | Intragenic | NM_001014146 | Sugct    |
| 17  | 51155986 | 51156068 | 1       | -0.28293   | 5    | 0.0017   | 0.00052  | 0.31558  | 0.59851  | 0.005339493 | Intragenic | NM_001106117 | Hecw1    |

| chr | start    | stop     | q-value | methyI.diff | CpGs | pMWU     | p2DKS    | MCWLS    | MCWHS   | pMWU.fdr    | cgi.type   | transcript             | gene      |
|-----|----------|----------|---------|-------------|------|----------|----------|----------|---------|-------------|------------|------------------------|-----------|
| 17  | 51216145 | 51216292 | 1       | 0.086653    | 5    | 0.014    | 0.038    | 0.73591  | 0.64925 | 0.029850603 | Intragenic | NM_001106117           | Hecw1     |
| 17  | 52560101 | 52560307 | 1       | -0.149226   | 8    | 9.90E-05 | 0.0026   | 0.17531  | 0.32453 | 0.000516804 | Intergenic | NA                     | NA        |
| 17  | 54399225 | 54399353 | 1       | -0.150289   | 5    | 0.00012  | 0.0018   | 0.11412  | 0.26441 | 0.000603617 | Intergenic | NA                     | NA        |
| 17  | 55315505 | 55315602 | 1       | -0.110753   | 7    | 0.0056   | 0.0076   | 0.72738  | 0.83813 | 0.014333376 | Intergenic | NA                     | NA        |
| 17  | 55351046 | 55351161 | 0.088   | -0.202228   | 5    | 2.10E-07 | 2.70E-07 | 0.048941 | 0.25117 | 3.19E-06    | Intragenic | NM_001309462           | Epc1      |
| 17  | 55775345 | 55775383 | 1       | -0.11291    | 5    | 0.0024   | 0.015    | 0.28042  | 0.39333 | 0.00705499  | Intergenic | NA                     | NA        |
| 17  | 56692507 | 56692534 | 1       | -0.210767   | 5    | 0.0011   | 0.00053  | 0.31337  | 0.52414 | 0.003737263 | Intragenic | NM_001108415           | Elmo1     |
| 17  | 57149906 | 57149954 | 1       | -0.064935   | 5    | 0.015    | 0.038    | 0.68693  | 0.75187 | 0.031584896 | Intergenic | NA                     | NA        |
| 17  | 57150133 | 57150427 | 1       | -0.081742   | 5    | 0.0019   | 0.0055   | 0.7542   | 0.83594 | 0.005855937 | Intergenic | NA                     | NA        |
| 17  | 58366341 | 58366455 | 1       | -0.053957   | 5    | 0.0045   | 0.0031   | 0.071366 | 0.12532 | 0.011905878 | Intergenic | NA                     | NA        |
| 17  | 58434485 | 58434550 | 1       | -0.081633   | 5    | 0.0029   | 0.0092   | 0.80087  | 0.8825  | 0.008293503 | Intergenic | NA                     | NA        |
| 17  | 58720152 | 58720230 | 1       | -0.092766   | 8    | 1.10E-05 | 0.001    | 0.07878  | 0.17155 | 8.53E-05    | Intergenic | NA                     | NA        |
| 17  | 58810270 | 58810359 | 1       | -0.077128   | 5    | 0.0016   | 0.0092   | 0.10421  | 0.18134 | 0.005100053 | Intergenic | NA                     | NA        |
| 17  | 59052971 | 59053073 | 0.00077 | -0.306495   | 14   | 5.70E-14 | 2.40E-09 | 0.23239  | 0.53888 | 7.06E-12    | Intergenic | NA                     | NA        |
| 17  | 62747168 | 62747396 | 1       | -0.139787   | 16   | 4.10E-07 | 0.00011  | 0.49858  | 0.63837 | 5.71E-06    | Intergenic | NA                     | NA        |
| 17  | 62747879 | 62748083 | 1       | -0.188529   | 7    | 2.20E-05 | 0.0005   | 0.57299  | 0.76152 | 0.000149617 | Intergenic | NA                     | NA        |
| 17  | 62948381 | 62948544 | 1       | -0.322264   | 5    | 1.10E-06 | 3.50E-05 | 0.070819 | 0.39308 | 1.27E-05    | Intergenic | NA                     | NA        |
| 17  | 65113291 | 65113399 | 1       | -0.089711   | 5    | 0.0049   | 0.025    | 0.11756  | 0.20727 | 0.012753585 | Intergenic | NA                     | NA        |
| 17  | 65401285 | 65401403 | 0.012   | -0.147396   | 13   | 7.00E-11 | 3.70E-08 | 0.18639  | 0.33379 | 3.22E-09    | Intragenic | NM_001107360           | Dip2c     |
| 17  | 67464551 | 67464656 | 1       | -0.109495   | 5    | 0.0029   | 0.059    | 0.46237  | 0.57186 | 0.008293503 | Intragenic | NM_001191043:NM_032078 | Ryr2:Ryr2 |
| 17  | 67464697 | 67464780 | 1       | -0.153356   | 5    | 0.0032   | 0.024    | 0.22569  | 0.37905 | 0.008990975 | Intragenic | NM_001191043:NM_032078 | Ryr2:Ryr2 |
| 17  | 67935356 | 67935489 | 1       | 0.392466    | 6    | 2.20E-05 | 0.00092  | 0.76501  | 0.37255 | 0.000149617 | Intergenic | NA                     | NA        |
| 17  | 68942346 | 68942580 | 0.1     | -0.064204   | 27   | 4.60E-12 | 3.20E-07 | 0.088559 | 0.15276 | 2.99E-10    | Intergenic | NA                     | NA        |
| 17  | 71918503 | 71918654 | 1       | -0.225497   | 7    | 3.90E-05 | 5.30E-05 | 0.16115  | 0.38665 | 0.000237659 | Intragenic | NM_001108420           | Asb13     |
| 17  | 72090881 | 72091043 | 1       | -0.312017   | 8    | 3.10E-07 | 1.00E-05 | 0.22015  | 0.53216 | 4.47E-06    | Intragenic | NM_001033698           | Ankrd16   |
| 17  | 72682879 | 72682993 | 1       | -0.146048   | 5    | 0.023    | 0.088    | 0.40443  | 0.55048 | 0.04441443  | Intragenic | NM_001276721           | Prkcq     |
| 17  | 73543776 | 73543925 | 1       | -0.253225   | 9    | 2.80E-06 | 4.40E-05 | 0.17154  | 0.42476 | 2.79E-05    | Intragenic | NM_001107364           | Sfmbt2    |
| 17  | 73672565 | 73672605 | 1       | -0.155752   | 5    | 0.002    | 0.0018   | 0.70246  | 0.85821 | 0.006079939 | Intergenic | NA                     | NA        |
| 17  | 74111971 | 74112096 | 1       | -0.113401   | 5    | 0.0016   | 0.00052  | 0.20321  | 0.31661 | 0.005100053 | Intergenic | NA                     | NA        |
| 17  | 74112201 | 74112237 | 1       | -0.073877   | 5    | 0.0094   | 0.088    | 0.073013 | 0.14689 | 0.021723038 | Intergenic | NA                     | NA        |
| 17  | 74112292 | 74112332 | 1       | -0.319805   | 7    | 2.90E-07 | 9.50E-05 | 0.15865  | 0.47845 | 4.23E-06    | Intergenic | NA                     | NA        |
| 17  | 74112341 | 74112463 | 1       | -0.057132   | 7    | 0.0072   | 0.11     | 0.1199   | 0.17703 | 0.017539509 | Intergenic | NA                     | NA        |
| 17  | 74118727 | 74118780 | 1       | -0.05037    | 5    | 0.00044  | 0.0018   | 0.06818  | 0.11855 | 0.001760146 | Intragenic | NM_133293              | Gata3     |
| 17  | 74118934 | 74119035 | 1       | -0.096095   | 5    | 0.0019   | 0.0032   | 0.055822 | 0.15192 | 0.005855937 | Intragenic | NM_133293              | Gata3     |
| 17  | 76687420 | 76687574 | 1       | -0.125702   | 5    | 0.014    | 0.037    | 0.4273   | 0.553   | 0.029850603 | Intergenic | NA                     | NA        |
| 17  | 77777638 | 77777771 | 1       | -0.188428   | 18   | 3.10E-08 | 2.60E-05 | 0.48989  | 0.67832 | 6.79E-07    | Intergenic | NA                     | NA        |
| 17  | 77777786 | 77777813 | 1       | -0.097561   | 5    | 0.0014   | 0.015    | 0.54604  | 0.6436  | 0.004540837 | Intergenic | NA                     | NA        |

| chr | start    | stop     | q-value  | methy.diff | CpGs | pMWU     | p2DKS    | MCWLS    | MCWHS    | pMWU.fdr    | cgi.type   | transcript   | gene    |
|-----|----------|----------|----------|------------|------|----------|----------|----------|----------|-------------|------------|--------------|---------|
| 17  | 77950948 | 77951094 | 1        | -0.295366  | 5    | 0.00017  | 0.00052  | 0.19819  | 0.49356  | 0.000806192 | Intragenic | NM_001025720 | Dhtkd1  |
| 17  | 78735201 | 78735375 | 1        | -0.120673  | 8    | 0.00022  | 0.00025  | 0.5336   | 0.65428  | 0.000994261 | Intergenic | NA           | NA      |
| 17  | 78838429 | 78838587 | 1        | -0.100513  | 5    | 0.014    | 0.088    | 0.17765  | 0.27816  | 0.029850603 | Intergenic | NA           | NA      |
| 17  | 79146383 | 79146574 | 1        | -0.125721  | 8    | 0.0013   | 0.0056   | 0.25011  | 0.37583  | 0.004277683 | Intragenic | NM_001191834 | Bend7   |
| 17  | 79284890 | 79285082 | 9.70E-12 | -0.349834  | 17   | 4.40E-14 | 3.00E-17 | 0.12967  | 0.4795   | 6.64E-12    | Intragenic | NM_138523    | Prpf18  |
| 17  | 79320387 | 79320588 | 1        | -0.141187  | 7    | 0.0083   | 0.035    | 0.59364  | 0.73483  | 0.019719474 | Intragenic | NM_001191821 | Frmd4a  |
| 17  | 79347095 | 79347147 | 1        | -0.211694  | 5    | 0.008    | 0.038    | 0.26607  | 0.47776  | 0.019059477 | Intragenic | NM_001191821 | Frmd4a  |
| 17  | 79731164 | 79731287 | 1        | -0.057282  | 5    | 0.00036  | 0.0018   | 0.027105 | 0.084387 | 0.001486639 | Intergenic | NA           | NA      |
| 17  | 79889540 | 79889643 | 1        | -0.09255   | 5    | 0.0032   | 0.059    | 0.082864 | 0.17541  | 0.008990975 | Intergenic | NA           | NA      |
| 17  | 79910175 | 79910271 | 1        | -0.233171  | 5    | 8.10E-06 | 6.80E-05 | 0.14447  | 0.37764  | 6.58E-05    | Intergenic | NA           | NA      |
| 17  | 80144899 | 80145318 | 1        | -0.089113  | 6    | 0.0013   | 0.018    | 0.084778 | 0.17389  | 0.004277683 | Intragenic | NM_001025034 | Fam107b |
| 17  | 80733392 | 80733450 | 0.49     | -0.291364  | 5    | 1.10E-06 | 1.50E-06 | 0.073377 | 0.36474  | 1.27E-05    | Intergenic | NA           | NA      |
| 17  | 80892209 | 80892288 | 1        | 0.05465    | 5    | 0.014    | 0.059    | 0.8805   | 0.82585  | 0.029850603 | Intergenic | NA           | NA      |
| 17  | 81303994 | 81304089 | 1        | -0.218927  | 5    | 0.00048  | 0.0053   | 0.23258  | 0.45151  | 0.001881331 | TSS        | NM_001173972 | Itga8   |
| 17  | 82103122 | 82103224 | 1        | -0.232569  | 5    | 0.0013   | 0.025    | 0.3959   | 0.62847  | 0.004277683 | Intragenic | NM_001109404 | Rsu1    |
| 17  | 82414255 | 82414448 | 1        | -0.154186  | 7    | 0.017    | 0.039    | 0.15315  | 0.30734  | 0.034796287 | Intragenic | NM_053332    | Cubn    |
| 17  | 82425386 | 82425656 | 0.33     | -0.244492  | 9    | 1.80E-09 | 1.00E-06 | 0.099885 | 0.34438  | 5.50E-08    | TSS        | NM_053332    | Cubn    |
| 17  | 82505785 | 82505834 | 1        | -0.137122  | 5    | 0.002    | 0.039    | 0.13024  | 0.26736  | 0.006079939 | Intragenic | NM_031140    | Vim     |
| 17  | 84966387 | 84966475 | 1        | -0.08162   | 5    | 0.0041   | 0.015    | 0.11783  | 0.19945  | 0.01100507  | Intragenic | NM_001108422 | Plxdc2  |
| 17  | 86550355 | 86550407 | 1        | -0.155115  | 5    | 0.0041   | 0.038    | 0.2948   | 0.44992  | 0.01100507  | Intergenic | NA           | NA      |
| 17  | 86552282 | 86552367 | 0.0022   | -0.11562   | 7    | 1.20E-09 | 6.80E-09 | 0.00639  | 0.12201  | 3.88E-08    | Intergenic | NA           | NA      |
| 17  | 87411612 | 87411699 | 1        | -0.168421  | 5    | 0.017    | 0.038    | 0.20026  | 0.36868  | 0.034796287 | Intragenic | NM_053926    | Pip4k2a |
| 17  | 87525172 | 87525280 | 1        | -0.113488  | 6    | 0.00012  | 0.0045   | 0.060949 | 0.17444  | 0.000603617 | Intergenic | NA           | NA      |
| 17  | 87779880 | 87780009 | 1        | -0.113931  | 8    | 3.20E-06 | 0.00041  | 0.088735 | 0.20267  | 3.11E-05    | TSS        | NM_001031660 | Msrp2   |
| 17  | 87782801 | 87782950 | 1        | -0.126369  | 5    | 0.014    | 0.18     | 0.15851  | 0.28488  | 0.029850603 | TSS        | NM_001031660 | Msrp2   |
| 17  | 87876478 | 87876747 | 0.14     | -0.154412  | 14   | 3.20E-10 | 4.30E-07 | 0.113    | 0.26741  | 1.24E-08    | Intergenic | NA           | NA      |
| 17  | 88118919 | 88118992 | 1        | -0.056937  | 7    | 0.0051   | 0.056    | 0.067591 | 0.12453  | 0.013208341 | Intergenic | NA           | NA      |
| 17  | 88150222 | 88150414 | 2.60E-07 | -0.333715  | 11   | 1.60E-13 | 7.90E-13 | 0.016079 | 0.34979  | 1.56E-11    | Intergenic | NA           | NA      |
| 17  | 88907694 | 88907774 | 0.089    | -0.175795  | 5    | 1.10E-07 | 2.80E-07 | 0.11355  | 0.28935  | 1.86E-06    | Intergenic | NA           | NA      |
| 17  | 88964451 | 88964591 | 1        | -0.192366  | 5    | 0.0058   | 0.015    | 0.15166  | 0.34403  | 0.014624129 | Intergenic | NA           | NA      |
| 17  | 89256934 | 89256992 | 1        | -0.315466  | 5    | 4.90E-07 | 1.60E-05 | 0.3175   | 0.63296  | 6.54E-06    | Intergenic | NA           | NA      |
| 17  | 89377220 | 89377311 | 0.098    | -0.209622  | 7    | 5.30E-07 | 3.00E-07 | 0.14378  | 0.3534   | 7.05E-06    | Intergenic | NA           | NA      |
| 17  | 89672670 | 89672982 | 0.23     | -0.177299  | 6    | 3.50E-07 | 7.00E-07 | 0.011421 | 0.18872  | 4.97E-06    | Intragenic | NM_001106127 | Prtfdc1 |
| 17  | 89835240 | 89835298 | 1        | -0.106388  | 5    | 0.0019   | 0.015    | 0.10034  | 0.20672  | 0.005855937 | Intergenic | NA           | NA      |
| 17  | 90526935 | 90526983 | 1        | -0.156125  | 5    | 0.00032  | 0.00028  | 0.18476  | 0.34089  | 0.001346443 | Intergenic | NA           | NA      |
| 18  | 361607   | 361742   | 1        | -0.227524  | 5    | 0.0068   | 0.015    | 0.20555  | 0.43307  | 0.016642688 | Intragenic | NM_001191725 | Mtmt1   |
| 18  | 447188   | 447271   | 1        | -0.115603  | 5    | 0.00048  | 0.00014  | 0.090759 | 0.20636  | 0.001881331 | TSS        | NM_001135757 | Fundc2  |
| 18  | 1370575  | 1370764  | 1        | -0.126979  | 9    | 0.009    | 0.082    | 0.53891  | 0.66589  | 0.02106603  | Intragenic | NM_031098    | Rock1   |
| 18  | 1586306  | 1586367  | 1        | -0.252745  | 7    | 7.70E-06 | 4.60E-06 | 0.099377 | 0.35212  | 6.32E-05    | Intergenic | NA           | NA      |



| chr | start    | stop     | q-value | methy.diff | CpGs | pMWU     | p2DKS    | MCWLS     | MCWHS     | pMWU.fdr    | cgi.type   | transcript   | gene     |
|-----|----------|----------|---------|------------|------|----------|----------|-----------|-----------|-------------|------------|--------------|----------|
| 18  | 2441206  | 2441300  | 1       | -0.111709  | 8    | 0.00023  | 0.0084   | 0.21929   | 0.331     | 0.00102405  | Intragenic | NM_019185    | Gata6    |
| 18  | 5603242  | 5603313  | 1       | -0.20983   | 5    | 1.70E-05 | 0.00013  | 0.2061    | 0.41593   | 0.000120524 | Intergenic | NA           | NA       |
| 18  | 11588958 | 11589044 | 1       | -0.134961  | 7    | 6.80E-05 | 0.0014   | 0.41752   | 0.55248   | 0.000379896 | TSS        | NM_001107402 | Dsc3     |
| 18  | 13020773 | 13020882 | 1       | -0.112254  | 5    | 0.017    | 0.038    | 0.25022   | 0.36247   | 0.034796287 | Intergenic | NA           | NA       |
| 18  | 14287733 | 14288032 | 1       | -0.081177  | 7    | 0.0059   | 0.018    | 0.067525  | 0.1487    | 0.014851341 | Intergenic | NA           | NA       |
| 18  | 14909491 | 14909591 | 1       | -0.083015  | 5    | 0.012    | 0.015    | 0.085495  | 0.16851   | 0.026435197 | Intragenic | NM_001101000 | Mapre2   |
| 18  | 15339102 | 15339305 | 1       | -0.149446  | 5    | 0.01     | 0.086    | 0.20236   | 0.35181   | 0.02275947  | Intragenic | NM_001101000 | Mapre2   |
| 18  | 15385985 | 15386126 | 1       | -0.262071  | 5    | 0.00032  | 3.40E-05 | 0.052691  | 0.31476   | 0.001346443 | Intragenic | NM_001101000 | Mapre2   |
| 18  | 15695993 | 15696040 | 1       | -0.21941   | 5    | 0.0038   | 0.024    | 0.37394   | 0.59335   | 0.010352437 | Intergenic | NA           | NA       |
| 18  | 16847254 | 16847577 | 1       | -0.075894  | 6    | 0.0026   | 0.04     | 0.13768   | 0.21358   | 0.007616821 | Intragenic | NM_001271332 | Fhod3    |
| 18  | 17443198 | 17443243 | 1       | -0.192967  | 5    | 0.00072  | 0.0055   | 0.62428   | 0.81725   | 0.002634665 | Intragenic | NM_001107400 | Celf4    |
| 18  | 17490346 | 17490401 | 1       | -0.199419  | 5    | 8.80E-05 | 0.00014  | 0.39358   | 0.593     | 0.000466886 | Intragenic | NM_001107400 | Celf4    |
| 18  | 17755165 | 17755178 | 1       | -0.071689  | 5    | 0.0024   | 0.015    | 0.045573  | 0.11726   | 0.00705499  | Intragenic | NM_001107400 | Celf4    |
| 18  | 22803051 | 22803151 | 1       | -0.128186  | 5    | 0.00029  | 0.0054   | 0.11009   | 0.23828   | 0.001239307 | Intergenic | NA           | NA       |
| 18  | 24467617 | 24467814 | 0.39    | -0.333691  | 7    | 6.60E-09 | 1.20E-06 | 0.15156   | 0.48525   | 1.72E-07    | Intragenic | NM_001191941 | Myo7b    |
| 18  | 24483049 | 24483128 | 1       | -0.196844  | 5    | 0.0063   | 0.015    | 0.30249   | 0.49934   | 0.015629046 | Intragenic | NM_001191941 | Myo7b    |
| 18  | 24496689 | 24496738 | 1       | -0.371289  | 7    | 4.00E-08 | 3.90E-06 | 0.18495   | 0.55624   | 8.43E-07    | Intragenic | NM_001191941 | Myo7b    |
| 18  | 24645101 | 24645381 | 1       | -0.147255  | 7    | 7.80E-05 | 0.00048  | 0.12067   | 0.26793   | 0.000422981 | TSS        | NM_012803    | Proc     |
| 18  | 24660327 | 24660899 | 0.43    | -0.159549  | 15   | 7.50E-09 | 1.30E-06 | 0.093449  | 0.253     | 1.94E-07    | Intergenic | NA           | NA       |
| 18  | 26343779 | 26344010 | 1       | -0.135261  | 7    | 0.0087   | 0.0012   | 0.28929   | 0.42455   | 0.020391633 | Intragenic | NM_001107397 | Epb41l4a |
| 18  | 26484819 | 26485105 | 0.92    | -0.145979  | 8    | 2.20E-07 | 2.90E-06 | 0.032209  | 0.17819   | 3.32E-06    | Intergenic | NA           | NA       |
| 18  | 26539881 | 26540073 | 0.023   | -0.213028  | 7    | 8.00E-10 | 7.10E-08 | 0.080358  | 0.29339   | 2.72E-08    | Intergenic | NA           | NA       |
| 18  | 26577670 | 26577721 | 1       | -0.188696  | 5    | 8.80E-05 | 0.0018   | 0.2479    | 0.43659   | 0.000466886 | Intergenic | NA           | NA       |
| 18  | 27370327 | 27370483 | 1       | -0.127503  | 8    | 1.90E-07 | 3.10E-05 | 0.06653   | 0.19403   | 2.92E-06    | TSS        | NM_012551    | Egr1     |
| 18  | 27777930 | 27777998 | 1       | -0.208629  | 6    | 0.011    | 0.027    | 0.56199   | 0.77062   | 0.02463877  | Intragenic | NM_199376    | Sil1     |
| 18  | 28324314 | 28324528 | 1       | -0.087532  | 9    | 2.50E-05 | 0.0012   | 0.064928  | 0.15246   | 0.000166164 | Intergenic | NA           | NA       |
| 18  | 28349488 | 28349557 | 1       | -0.151516  | 5    | 5.00E-05 | 0.0018   | 0.15894   | 0.31046   | 0.000291675 | Intergenic | NA           | NA       |
| 18  | 28353179 | 28353261 | 1       | -0.223834  | 5    | 7.10E-06 | 7.50E-06 | 0.12506   | 0.34889   | 5.86E-05    | Intergenic | NA           | NA       |
| 18  | 28365858 | 28365989 | 0.18    | -0.29089   | 9    | 1.80E-09 | 5.70E-07 | 0.1982    | 0.48909   | 5.50E-08    | TSS        | NM_001007628 | Cxhc5    |
| 18  | 28385705 | 28385788 | 1       | -0.127544  | 9    | 1.60E-06 | 0.00011  | 0.10834   | 0.23588   | 1.75E-05    | Intergenic | NA           | NA       |
| 18  | 28430555 | 28430611 | 0.037   | -0.313682  | 5    | 1.50E-07 | 1.10E-07 | 0.0076923 | 0.32137   | 2.38E-06    | Intergenic | NA           | NA       |
| 18  | 28442955 | 28443067 | 1       | -0.076026  | 5    | 0.00029  | 0.0055   | 0.020758  | 0.096784  | 0.001239307 | Intergenic | NA           | NA       |
| 18  | 28443086 | 28443101 | 0.015   | -0.133274  | 5    | 2.10E-07 | 4.50E-08 | 0.069798  | 0.20307   | 3.19E-06    | Intergenic | NA           | NA       |
| 18  | 28468673 | 28468740 | 1       | -0.160061  | 5    | 0.00097  | 0.0032   | 0.12124   | 0.2813    | 0.003366009 | Intergenic | NA           | NA       |
| 18  | 28849895 | 28850041 | 1       | 0.071613   | 5    | 7.10E-06 | 0.088    | 0.074317  | 0.0027043 | 5.86E-05    | Intergenic | NA           | NA       |
| 18  | 28853415 | 28854114 | 1       | -0.056425  | 23   | 0.00012  | 0.021    | 0.10565   | 0.16207   | 0.000603617 | Intergenic | NA           | NA       |
| 18  | 29195990 | 29196096 | 1       | -0.138075  | 5    | 0.0045   | 0.015    | 0.23378   | 0.37185   | 0.011905878 | TSS        | NM_001202552 | Eif4ebp3 |
| 18  | 29248771 | 29249065 | 1       | -0.154828  | 17   | 1.90E-06 | 0.00036  | 0.31126   | 0.46609   | 2.01E-05    | Intergenic | NA           | NA       |
| 18  | 29701919 | 29701983 | 1       | -0.139521  | 6    | 3.40E-05 | 0.0027   | 0.14722   | 0.28675   | 0.000214477 | TSS        | NM_199508    | Pcdha9   |

| chr | start    | stop     | q-value | methy.diff | CpGs | pMWU     | p2DKS    | MCWLS    | MCWHS   | pMWU.fdr    | cgi.type   | transcript                                                                                        | gene                                                        |
|-----|----------|----------|---------|------------|------|----------|----------|----------|---------|-------------|------------|---------------------------------------------------------------------------------------------------|-------------------------------------------------------------|
| 18  | 30502835 | 30503086 | 1       | -0.06651   | 18   | 0.00053  | 0.015    | 0.21767  | 0.28418 | 0.002069204 | TSS        | NM_001037140                                                                                      | Pcdhga1                                                     |
| 18  | 30509544 | 30509595 | 1       | -0.086133  | 5    | 0.021    | 0.015    | 0.38479  | 0.47092 | 0.041207871 | TSS        | NM_001037139                                                                                      | Pcdhga2                                                     |
| 18  | 30514572 | 30514611 | 1       | -0.192764  | 5    | 3.30E-06 | 6.90E-05 | 0.22461  | 0.41737 | 3.16E-05    | TSS        | NM_001037154                                                                                      | Pcdhga3                                                     |
| 18  | 30514630 | 30515129 | 1       | -0.088307  | 22   | 0.00015  | 0.012    | 0.24134  | 0.31725 | 0.000724207 | TSS        | NM_001037154                                                                                      | Pcdhga3                                                     |
| 18  | 30563892 | 30563967 | 1       | -0.059928  | 5    | 0.01     | 0.038    | 0.17956  | 0.23949 | 0.02275947  | Intragenic | NM_001037140:N<br>M_001037139:N<br>M_001037154:N<br>M_001037137:N<br>M_001014773                  | Pcdhga1:Pcdh<br>ga2:Pcdhga3:<br>Pcdhga5:Pcdh<br>ga7         |
| 18  | 30574284 | 30574359 | 1       | -0.060359  | 5    | 0.0094   | 0.038    | 0.17777  | 0.23813 | 0.021723038 | Intragenic | NM_001037140:N<br>M_001037139:N<br>M_001037154:N<br>M_001037137:N<br>M_001014773:N<br>M_001037156 | Pcdhga1:Pcdh<br>ga2:Pcdhga3:<br>Pcdhga5:Pcdh<br>ga7:Pcdhga8 |
| 18  | 30599493 | 30599567 | 1       | -0.122535  | 6    | 0.0024   | 0.026    | 0.19961  | 0.32214 | 0.00705499  | TSS        | NM_001037153                                                                                      | Pcdhga11                                                    |
| 18  | 30608168 | 30608310 | 1       | -0.141243  | 11   | 6.40E-05 | 0.0041   | 0.26084  | 0.40208 | 0.000358884 | TSS        | NM_001037337                                                                                      | Pcdhga12                                                    |
| 18  | 32118053 | 32118185 | 1       | -0.203678  | 5    | 0.0011   | 0.0053   | 0.20634  | 0.41001 | 0.003737263 | Intragenic | NM_012576                                                                                         | Nr3c1                                                       |
| 18  | 32271989 | 32272033 | 1       | -0.119619  | 5    | 9.20E-06 | 0.00014  | 0.073851 | 0.19347 | 7.32E-05    | TSS        | NM_001106150                                                                                      | Spry4                                                       |
| 18  | 32289775 | 32289811 | 1       | -0.139791  | 5    | 0.017    | 0.058    | 0.50455  | 0.64434 | 0.034796287 | Intragenic | NM_012576                                                                                         | Nr3c1                                                       |
| 18  | 33026766 | 33026949 | 1       | -0.077167  | 9    | 0.0028   | 0.0084   | 0.74465  | 0.82182 | 0.008113721 | Intergenic | NA                                                                                                | NA                                                          |
| 18  | 34970498 | 34970584 | 1       | -0.095069  | 5    | 0.016    | 0.18     | 0.72597  | 0.82104 | 0.033288089 | Intergenic | NA                                                                                                | NA                                                          |
| 18  | 36434897 | 36435084 | 1       | -0.113798  | 10   | 0.0091   | 0.068    | 0.17901  | 0.29281 | 0.021291803 | Intergenic | NA                                                                                                | NA                                                          |
| 18  | 39195107 | 39195151 | 1       | -0.268749  | 5    | 0.0049   | 0.015    | 0.39872  | 0.66747 | 0.012753585 | Intergenic | NA                                                                                                | NA                                                          |
| 18  | 39600062 | 39600144 | 1       | -0.076274  | 7    | 0.0002   | 0.00076  | 0.75082  | 0.82709 | 0.00092049  | Intergenic | NA                                                                                                | NA                                                          |
| 18  | 39650596 | 39650659 | 1       | -0.052275  | 5    | 0.0094   | 0.038    | 0.82748  | 0.87976 | 0.021723038 | Intergenic | NA                                                                                                | NA                                                          |
| 18  | 41028947 | 41029150 | 1       | -0.195761  | 5    | 0.025    | 0.13     | 0.32704  | 0.52281 | 0.047453009 | Intergenic | NA                                                                                                | NA                                                          |
| 18  | 44094841 | 44094898 | 1       | -0.342949  | 5    | 3.30E-06 | 3.50E-05 | 0.15951  | 0.50246 | 3.16E-05    | Intragenic | NM_024392                                                                                         | Hsd17b4                                                     |
| 18  | 45566168 | 45566365 | 1       | -0.119383  | 5    | 0.0058   | 0.087    | 0.11524  | 0.23463 | 0.014624129 | Intergenic | NA                                                                                                | NA                                                          |
| 18  | 47192430 | 47192684 | 1       | -0.067749  | 15   | 0.02     | 0.06     | 0.71051  | 0.77826 | 0.039778219 | Intergenic | NA                                                                                                | NA                                                          |
| 18  | 48695398 | 48695600 | 1       | -0.212267  | 8    | 5.00E-08 | 1.70E-05 | 0.1039   | 0.31617 | 1.03E-06    | Intergenic | NA                                                                                                | NA                                                          |
| 18  | 49122974 | 49123023 | 1       | -0.105212  | 5    | 0.019    | 0.039    | 0.26134  | 0.36655 | 0.038322088 | Intragenic | NM_001107378                                                                                      | Zfp608                                                      |
| 18  | 49215968 | 49216036 | 0.00028 | -0.161705  | 6    | 2.90E-09 | 8.60E-10 | 0.018281 | 0.17999 | 8.18E-08    | Intergenic | NA                                                                                                | NA                                                          |
| 18  | 50311890 | 50312321 | 1       | -0.123986  | 19   | 4.70E-06 | 0.0003   | 0.59895  | 0.72294 | 4.26E-05    | Intergenic | NA                                                                                                | NA                                                          |
| 18  | 52466265 | 52466356 | 1       | -0.236532  | 5    | 8.80E-05 | 0.0092   | 0.15956  | 0.39609 | 0.000466886 | Intragenic | NM_031826                                                                                         | Fbn2                                                        |
| 18  | 55104568 | 55104611 | 0.2     | -0.428222  | 7    | 3.70E-08 | 6.20E-07 | 0.20862  | 0.63684 | 7.87E-07    | Intragenic | NM_021695                                                                                         | Synpo                                                       |
| 18  | 55206565 | 55206657 | 1       | -0.213427  | 5    | 0.00072  | 0.039    | 0.37754  | 0.59097 | 0.002634665 | Intragenic | NM_024361                                                                                         | Ndst1                                                       |
| 18  | 55424731 | 55424782 | 1       | -0.099701  | 5    | 4.40E-05 | 0.00053  | 0.064074 | 0.16378 | 0.000263321 | Intergenic | NA                                                                                                | NA                                                          |

| chr | start    | stop     | q-value | methy.diff | CpGs | pMWU     | p2DKS    | MCWLS    | MCWHS    | pMWU.fdr    | cgi.type   | transcript          | gene                |
|-----|----------|----------|---------|------------|------|----------|----------|----------|----------|-------------|------------|---------------------|---------------------|
| 18  | 55957303 | 55957360 | 1       | -0.091156  | 5    | 0.0045   | 0.037    | 0.095463 | 0.18662  | 0.011905878 | TSS        | NR_032139:NM_176075 | Mir378:Pparg<br>c1b |
| 18  | 56441513 | 56441650 | 1       | -0.162235  | 6    | 0.005    | 0.059    | 0.22621  | 0.38845  | 0.012977322 | Intragenic | NM_001191698        | Ablim3              |
| 18  | 56517961 | 56518194 | 1       | -0.121193  | 7    | 9.00E-05 | 0.008    | 0.082834 | 0.20403  | 0.000476445 | Intergenic | NA                  | NA                  |
| 18  | 56520429 | 56520510 | 1       | -0.085414  | 5    | 0.002    | 0.025    | 0.062391 | 0.14781  | 0.006079939 | Intergenic | NA                  | NA                  |
| 18  | 57302470 | 57302541 | 1       | -0.113402  | 5    | 0.00048  | 0.015    | 0.19513  | 0.30853  | 0.001881331 | Intragenic | NM_001109539        | Spink13             |
| 18  | 57512014 | 57512175 | 1       | -0.178572  | 5    | 0.021    | 0.059    | 0.20896  | 0.38753  | 0.041207871 | Intergenic | NA                  | NA                  |
| 18  | 59061829 | 59061925 | 1       | -0.138412  | 5    | 2.80E-05 | 0.00014  | 0.12476  | 0.26317  | 0.000182174 | Intergenic | NA                  | NA                  |
| 18  | 59550186 | 59550269 | 1       | -0.217803  | 5    | 0.008    | 0.059    | 0.34653  | 0.56434  | 0.019059477 | Intergenic | NA                  | NA                  |
| 18  | 59639090 | 59639188 | 1       | -0.226584  | 5    | 3.90E-05 | 0.00053  | 0.136    | 0.36258  | 0.000237659 | Intragenic | NM_001008300        | Nedd4l              |
| 18  | 59773463 | 59773542 | 1       | -0.303117  | 5    | 5.50E-06 | 3.40E-05 | 0.07368  | 0.3768   | 4.78E-05    | Intragenic | NM_001008300        | Nedd4l              |
| 18  | 59842594 | 59842816 | 1       | -0.170581  | 7    | 0.0014   | 0.0077   | 0.28207  | 0.45265  | 0.004540837 | Intragenic | NM_001008300        | Nedd4l              |
| 18  | 60109118 | 60109187 | 1       | -0.148513  | 5    | 0.0053   | 0.088    | 0.55027  | 0.69879  | 0.013591571 | Intergenic | NA                  | NA                  |
| 18  | 60141726 | 60141906 | 1       | -0.165685  | 5    | 0.0022   | 0.038    | 0.19935  | 0.36503  | 0.006578104 | Intergenic | NA                  | NA                  |
| 18  | 60177740 | 60177826 | 1       | -0.341755  | 6    | 7.70E-06 | 0.00017  | 0.3185   | 0.66026  | 6.32E-05    | Intergenic | NA                  | NA                  |
| 18  | 61366844 | 61367090 | 1       | -0.098958  | 14   | 7.00E-06 | 0.0015   | 0.1607   | 0.25965  | 5.86E-05    | TSS        | NM_001008385        | Pmaip1              |
| 18  | 61373334 | 61373386 | 1       | -0.125931  | 5    | 0.02     | 0.037    | 0.31779  | 0.44372  | 0.039778219 | Intergenic | NA                  | NA                  |
| 18  | 61423506 | 61423837 | 1       | -0.073022  | 9    | 0.019    | 0.0018   | 0.19754  | 0.27057  | 0.038322088 | Intergenic | NA                  | NA                  |
| 18  | 61571336 | 61571442 | 1       | -0.150188  | 5    | 0.0058   | 0.038    | 0.2677   | 0.41789  | 0.014624129 | Intergenic | NA                  | NA                  |
| 18  | 61970531 | 61970600 | 1       | -0.148513  | 5    | 0.0053   | 0.088    | 0.55027  | 0.69879  | 0.013591571 | Intergenic | NA                  | NA                  |
| 18  | 62003862 | 62004042 | 1       | -0.160781  | 5    | 0.0029   | 0.024    | 0.20425  | 0.36503  | 0.008293503 | Intragenic | NM_001191836        | Gnal                |
| 18  | 63112315 | 63112549 | 1       | -0.128187  | 7    | 0.00012  | 0.0013   | 0.12534  | 0.25353  | 0.000603617 | Intragenic | NM_001271365        | Ldlrad4             |
| 18  | 63811986 | 63812086 | 1       | -0.254354  | 5    | 0.00026  | 0.0093   | 0.24471  | 0.49906  | 0.001130807 | Intergenic | NA                  | NA                  |
| 18  | 64473502 | 64473559 | 1       | -0.1772    | 5    | 0.00014  | 0.00051  | 0.26056  | 0.43776  | 0.000684451 | Intragenic | NM_053369           | Tcf4                |
| 18  | 65071531 | 65071616 | 1       | -0.095787  | 5    | 0.0019   | 0.015    | 0.80658  | 0.90237  | 0.005855937 | Intergenic | NA                  | NA                  |
| 18  | 65124922 | 65125050 | 1       | -0.103265  | 5    | 0.00021  | 0.00051  | 0.76349  | 0.86675  | 0.000951214 | Intergenic | NA                  | NA                  |
| 18  | 68774693 | 68774772 | 1       | -0.182275  | 5    | 0.016    | 0.085    | 0.46735  | 0.64963  | 0.033288089 | Intragenic | NM_019275           | Smad4               |
| 18  | 69087202 | 69087263 | 0.37    | -0.386055  | 7    | 3.30E-08 | 1.10E-06 | 0.21368  | 0.59973  | 7.16E-07    | TSS        | NM_019319           | Mapk4               |
| 18  | 69466466 | 69466595 | 1       | -0.092924  | 5    | 0.015    | 0.039    | 0.53346  | 0.62639  | 0.031584896 | Intergenic | NA                  | NA                  |
| 18  | 69570064 | 69570364 | 1       | -0.068216  | 7    | 3.60E-05 | 0.00049  | 0.024829 | 0.093045 | 0.000223919 | TSS        | NM_017083           | Myo5b               |
| 18  | 69625967 | 69626025 | 1       | -0.129886  | 5    | 0.0016   | 0.025    | 0.14327  | 0.27315  | 0.005100053 | Intragenic | NM_017083           | Myo5b               |
| 18  | 70436737 | 70436762 | 1       | -0.424351  | 5    | 1.00E-05 | 7.60E-06 | 0.42699  | 0.85134  | 7.82E-05    | Intragenic | NM_001106133        | Dym                 |
| 18  | 70460817 | 70460892 | 1       | -0.162964  | 5    | 0.0087   | 0.037    | 0.40254  | 0.56551  | 0.020391633 | Intergenic | NA                  | NA                  |
| 18  | 70539275 | 70539423 | 1       | -0.163311  | 5    | 5.60E-05 | 3.40E-05 | 0.1357   | 0.29901  | 0.000320912 | Intragenic | NM_030858           | Smad7               |
| 18  | 70602867 | 70602984 | 0.48    | -0.361252  | 5    | 3.70E-07 | 1.50E-06 | 0.13659  | 0.49785  | 5.21E-06    | Intragenic | NM_001108891        | Ctif                |
| 18  | 70692447 | 70692500 | 1       | -0.163794  | 5    | 1.50E-05 | 0.00053  | 0.10329  | 0.26708  | 0.000109113 | Intragenic | NM_001108891        | Ctif                |
| 18  | 70814968 | 70815021 | 1       | -0.163794  | 5    | 1.50E-05 | 0.00053  | 0.10329  | 0.26708  | 0.000109113 | Intragenic | NM_001108891        | Ctif                |
| 18  | 71553373 | 71553504 | 1       | -0.247569  | 5    | 0.0019   | 0.0018   | 0.16497  | 0.41253  | 0.005855937 | Intragenic | NM_001127375        | Zbtb7c              |
| 18  | 71587941 | 71587970 | 1       | -0.166211  | 5    | 4.40E-05 | 0.0017   | 0.52089  | 0.6871   | 0.000263321 | Intragenic | NM_001127375        | Zbtb7c              |

| chr | start    | stop     | q-value | methy.diff | CpGs | pMWU     | p2DKS    | MCWLS    | MCWHS   | pMWU.fdr    | cgi.type   | transcript                 | gene          |
|-----|----------|----------|---------|------------|------|----------|----------|----------|---------|-------------|------------|----------------------------|---------------|
| 18  | 71896699 | 71896790 | 1       | -0.150063  | 5    | 0.021    | 0.13     | 0.46698  | 0.61704 | 0.041207871 | Intergenic | NA                         | NA            |
| 18  | 71924353 | 71924456 | 1       | -0.064524  | 5    | 0.01     | 0.039    | 0.065975 | 0.1305  | 0.02275947  | Intergenic | NA                         | NA            |
| 18  | 72023387 | 72023492 | 1       | -0.140621  | 5    | 0.0022   | 0.00027  | 0.1378   | 0.27842 | 0.006578104 | Intragenic | NM_001013189               | Pq1c1         |
| 18  | 72525919 | 72526092 | 1       | -0.096497  | 9    | 0.0028   | 0.032    | 0.15572  | 0.25222 | 0.008113721 | Intergenic | NA                         | NA            |
| 18  | 72838321 | 72838364 | 1       | -0.125694  | 6    | 0.02     | 0.12     | 0.065184 | 0.19088 | 0.039778219 | Intergenic | NA                         | NA            |
| 18  | 73242737 | 73242832 | 1       | -0.076321  | 5    | 0.016    | 0.087    | 0.027216 | 0.10354 | 0.033288089 | TSS        | NM_213628                  | St8sia5       |
| 18  | 73672517 | 73672833 | 1       | -0.056956  | 10   | 0.023    | 0.038    | 0.14808  | 0.20504 | 0.04441443  | Intergenic | NA                         | NA            |
| 18  | 73821266 | 73821341 | 1       | -0.177739  | 5    | 0.0045   | 0.0031   | 0.3154   | 0.49314 | 0.011905878 | Intragenic | NM_138864                  | Haus1         |
| 18  | 73867904 | 73867979 | 1       | -0.177739  | 5    | 0.0045   | 0.0031   | 0.3154   | 0.49314 | 0.011905878 | Intragenic | NM_001271281:N<br>M_138864 | Pstpip2:Haus1 |
| 18  | 74181453 | 74181618 | 1       | -0.137202  | 5    | 0.0094   | 0.024    | 0.24267  | 0.37987 | 0.021723038 | Intergenic | NA                         | NA            |
| 18  | 74774126 | 74774241 | 1       | -0.406621  | 5    | 1.50E-06 | 7.40E-06 | 0.2402   | 0.64682 | 1.65E-05    | Intergenic | NA                         | NA            |
| 18  | 76681847 | 76682026 | 1       | -0.13977   | 7    | 0.026    | 0.053    | 0.54885  | 0.68862 | 0.049234478 | TSS        | NM_001108892               | Sall3         |
| 18  | 77384328 | 77384453 | 1       | -0.09906   | 5    | 0.0045   | 0.015    | 0.18852  | 0.28758 | 0.011905878 | Intergenic | NA                         | NA            |
| 18  | 77436233 | 77436372 | 1       | -0.153622  | 6    | 0.0083   | 0.018    | 0.25194  | 0.40556 | 0.019719474 | Intergenic | NA                         | NA            |
| 18  | 78317219 | 78317271 | 1       | -0.062339  | 5    | 0.0038   | 0.0092   | 0.03422  | 0.09656 | 0.010352437 | TSS        | NM_012958                  | Galr1         |
| 18  | 78725074 | 78725138 | 1       | -0.069249  | 5    | 0.012    | 0.059    | 0.077142 | 0.14639 | 0.026435197 | Intergenic | NA                         | NA            |
| 18  | 78805338 | 78805399 | 1       | -0.196173  | 5    | 0.0045   | 0.038    | 0.41685  | 0.61302 | 0.011905878 | Intergenic | NA                         | NA            |
| 18  | 78850905 | 78851069 | 1       | -0.162522  | 5    | 0.0014   | 0.039    | 0.25613  | 0.41865 | 0.004540837 | Intergenic | NA                         | NA            |
| 18  | 78983884 | 78984270 | 1       | -0.155807  | 6    | 0.0057   | 0.081    | 0.14165  | 0.29746 | 0.014573809 | Intergenic | NA                         | NA            |
| 18  | 79170929 | 79171037 | 1       | -0.183349  | 9    | 6.40E-07 | 4.90E-06 | 0.28777  | 0.47112 | 8.24E-06    | Intergenic | NA                         | NA            |
| 18  | 79171548 | 79171587 | 1       | -0.075842  | 5    | 0.00065  | 0.0032   | 0.83982  | 0.91566 | 0.002426546 | Intergenic | NA                         | NA            |
| 18  | 79211257 | 79211372 | 1       | -0.175836  | 5    | 0.00012  | 0.0055   | 0.10512  | 0.28095 | 0.000603617 | Intergenic | NA                         | NA            |
| 18  | 79791144 | 79791276 | 1       | -0.060042  | 5    | 0.014    | 0.025    | 0.037779 | 0.09782 | 0.029850603 | Intergenic | NA                         | NA            |
| 18  | 80570553 | 80570754 | 1       | -0.155471  | 13   | 5.90E-05 | 0.0066   | 0.30493  | 0.4604  | 0.000336659 | Intragenic | NM_001010920               | Cndp2         |
| 18  | 80625585 | 80625636 | 1       | -0.227772  | 5    | 0.00039  | 0.00014  | 0.18885  | 0.41663 | 0.001587612 | Intergenic | NA                         | NA            |
| 18  | 80728162 | 80728440 | 1       | -0.115044  | 15   | 0.0038   | 0.014    | 0.42006  | 0.5351  | 0.010352437 | Intergenic | NA                         | NA            |
| 18  | 86245912 | 86246032 | 1       | -0.134589  | 5    | 0.015    | 0.13     | 0.55554  | 0.69013 | 0.031584896 | Intergenic | NA                         | NA            |
| 19  | 4924947  | 4925029  | 1       | -0.069974  | 5    | 0.00054  | 0.0031   | 0.79357  | 0.86355 | 0.002077867 | Intergenic | NA                         | NA            |
| 19  | 5092351  | 5092563  | 1       | -0.250441  | 10   | 5.40E-10 | 5.40E-06 | 0.31604  | 0.56648 | 1.93E-08    | Intergenic | NA                         | NA            |
| 19  | 5580389  | 5580448  | 1       | -0.051977  | 5    | 0.00088  | 0.0091   | 0.88849  | 0.94047 | 0.003092094 | Intergenic | NA                         | NA            |
| 19  | 5824926  | 5825091  | 1       | -0.095948  | 9    | 8.60E-07 | 2.90E-05 | 0.089411 | 0.18536 | 1.04E-05    | Intergenic | NA                         | NA            |
| 19  | 5825746  | 5825821  | 1       | 0.070868   | 5    | 0.019    | 0.13     | 0.18756  | 0.11669 | 0.038322088 | Intergenic | NA                         | NA            |
| 19  | 5826614  | 5826995  | 1       | -0.053365  | 27   | 0.0035   | 0.048    | 0.14717  | 0.21283 | 0.009686665 | Intergenic | NA                         | NA            |
| 19  | 5827115  | 5827201  | 1       | -0.182754  | 5    | 0.0087   | 0.015    | 0.24185  | 0.42461 | 0.020391633 | Intergenic | NA                         | NA            |
| 19  | 7031171  | 7031345  | 1       | -0.075987  | 9    | 0.0062   | 0.0018   | 0.66615  | 0.74214 | 0.015570617 | Intergenic | NA                         | NA            |
| 19  | 9007893  | 9007917  | 1       | -0.144652  | 5    | 0.0041   | 0.0053   | 0.71768  | 0.86234 | 0.01100507  | Intergenic | NA                         | NA            |
| 19  | 9375644  | 9375782  | 1       | -0.063168  | 5    | 0.0017   | 0.00097  | 0.046808 | 0.10998 | 0.005339493 | Intergenic | NA                         | NA            |
| 19  | 9417902  | 9417926  | 1       | -0.147318  | 5    | 0.0027   | 0.0053   | 0.71502  | 0.86234 | 0.007840962 | Intergenic | NA                         | NA            |

| chr | start    | stop     | q-value  | methy.diff | CpGs | pMWU     | p2DKS    | MCWLS    | MCWHS   | pMWU.fdr    | cgi.type   | transcript   | gene     |
|-----|----------|----------|----------|------------|------|----------|----------|----------|---------|-------------|------------|--------------|----------|
| 19  | 9479244  | 9479322  | 1        | -0.208173  | 5    | 5.50E-06 | 3.40E-05 | 0.13369  | 0.34187 | 4.78E-05    | Intergenic | NA           | NA       |
| 19  | 9625466  | 9625553  | 1        | -0.207159  | 5    | 0.00021  | 0.0018   | 0.11135  | 0.31851 | 0.000951214 | Intergenic | NA           | NA       |
| 19  | 10105233 | 10105431 | 1        | -0.146838  | 7    | 0.018    | 0.026    | 0.50447  | 0.65131 | 0.036742993 | Intragenic | NM_001170478 | Zfp319   |
| 19  | 10115124 | 10115245 | 1        | -0.197473  | 5    | 0.015    | 0.086    | 0.49342  | 0.69089 | 0.031584896 | Intragenic | NM_201655    | Tepp     |
| 19  | 10180081 | 10180345 | 1        | -0.121506  | 12   | 0.00049  | 0.0072   | 0.20587  | 0.32738 | 0.001919899 | Intragenic | NM_031809    | Cngb1    |
| 19  | 10289953 | 10290350 | 0.57     | -0.0961    | 18   | 1.90E-09 | 1.80E-06 | 0.054082 | 0.17181 | 5.77E-08    | Intergenic | NA           | NA       |
| 19  | 10290368 | 10290530 | 2.60E-05 | -0.233075  | 9    | 1.60E-12 | 8.00E-11 | 0.1253   | 0.35838 | 1.17E-10    | Intergenic | NA           | NA       |
| 19  | 10422705 | 10422825 | 1        | -0.136569  | 5    | 0.02     | 0.0091   | 0.15279  | 0.28936 | 0.039778219 | Intragenic | NM_152242    | Adgrg1   |
| 19  | 10478139 | 10478261 | 0.02     | -0.377238  | 8    | 4.30E-08 | 6.10E-08 | 0.18779  | 0.56503 | 9.02E-07    | Intergenic | NA           | NA       |
| 19  | 10520044 | 10520170 | 1        | -0.13941   | 12   | 3.00E-06 | 9.20E-05 | 0.21192  | 0.35133 | 2.93E-05    | Intragenic | NM_001108437 | Ccdc102a |
| 19  | 10520494 | 10520512 | 1        | -0.213427  | 5    | 5.60E-05 | 0.00014  | 0.16114  | 0.37457 | 0.000320912 | Intragenic | NM_001108437 | Ccdc102a |
| 19  | 10636895 | 10636968 | 1        | -0.138645  | 5    | 3.30E-06 | 0.00014  | 0.055379 | 0.19402 | 3.16E-05    | Intergenic | NA           | NA       |
| 19  | 10648672 | 10648981 | 1        | -0.174387  | 7    | 3.30E-08 | 1.50E-05 | 0.068602 | 0.24299 | 7.16E-07    | TSS        | NM_134455    | Cx3cl1   |
| 19  | 11277222 | 11277337 | 1        | -0.125982  | 5    | 0.0029   | 0.038    | 0.10805  | 0.23403 | 0.008293503 | TSS        | NM_138826    | Mt1      |
| 19  | 11278051 | 11278190 | 1        | -0.154697  | 8    | 5.00E-05 | 1.80E-05 | 0.10304  | 0.25773 | 0.000291675 | TSS        | NM_138826    | Mt1      |
| 19  | 11534315 | 11534540 | 1        | -0.133716  | 9    | 0.011    | 0.062    | 0.46347  | 0.59719 | 0.02463877  | Intragenic | NM_017327    | Gnao1    |
| 19  | 23867491 | 23867589 | 1        | -0.223551  | 5    | 0.0041   | 0.015    | 0.36468  | 0.58823 | 0.01100507  | Intragenic | NM_001108439 | Large    |
| 19  | 26918567 | 26918787 | 1        | -0.137222  | 6    | 0.0088   | 0.059    | 0.17922  | 0.31645 | 0.020605924 | TSS        | NM_001107413 | Irx3     |
| 19  | 27398990 | 27399089 | 1        | -0.130238  | 5    | 0.023    | 0.088    | 0.32158  | 0.45182 | 0.04441443  | Intergenic | NA           | NA       |
| 19  | 27416976 | 27417063 | 1        | -0.123114  | 5    | 0.0038   | 0.0055   | 0.2071   | 0.33022 | 0.010352437 | Intergenic | NA           | NA       |
| 19  | 27493316 | 27493770 | 0.13     | -0.059347  | 34   | 5.80E-11 | 4.00E-07 | 0.053564 | 0.11291 | 2.71E-09    | TSS        | NM_001030044 | Irx5     |
| 19  | 27494126 | 27494340 | 1        | -0.061284  | 19   | 0.021    | 0.057    | 0.072753 | 0.11537 | 0.041207871 | Intragenic | NM_001030044 | Irx5     |
| 19  | 27494346 | 27494383 | 1        | -0.081611  | 5    | 0.00072  | 0.0032   | 0.13671  | 0.21832 | 0.002634665 | Intragenic | NM_001030044 | Irx5     |
| 19  | 27573958 | 27574213 | 1        | -0.159857  | 10   | 0.00051  | 0.0041   | 0.19587  | 0.35573 | 0.00199501  | Intergenic | NA           | NA       |
| 19  | 27880924 | 27881128 | 1        | -0.215019  | 7    | 1.10E-05 | 0.0013   | 0.21948  | 0.43449 | 8.53E-05    | Intragenic | NM_001039713 | Fto      |
| 19  | 28162487 | 28162637 | 1        | -0.194496  | 7    | 3.80E-06 | 9.70E-05 | 0.1116   | 0.30609 | 3.54E-05    | Intragenic | NM_001039713 | Fto      |
| 19  | 30188105 | 30188262 | 1        | -0.21719   | 9    | 6.10E-08 | 1.50E-05 | 0.15153  | 0.36872 | 1.18E-06    | Intergenic | NA           | NA       |
| 19  | 30207097 | 30207255 | 1        | -0.132003  | 9    | 0.0054   | 0.062    | 0.34449  | 0.47649 | 0.013836205 | Intergenic | NA           | NA       |
| 19  | 30358857 | 30359058 | 1        | -0.123524  | 8    | 0.022    | 0.051    | 0.61663  | 0.74016 | 0.043064669 | TSS        | NM_001017380 | Cyld     |
| 19  | 30397994 | 30398376 | 0.0001   | -0.231543  | 18   | 2.70E-12 | 3.20E-10 | 0.17597  | 0.40751 | 1.85E-10    | Intragenic | NM_001106172 | Nod2     |
| 19  | 30435824 | 30435860 | 1        | -0.097845  | 5    | 0.00054  | 0.0032   | 0.058533 | 0.15638 | 0.002077867 | Intragenic | NM_001024999 | Snx20    |
| 19  | 30953361 | 30953415 | 1        | -0.092676  | 5    | 0.02     | 0.086    | 0.6343   | 0.72697 | 0.039778219 | Intergenic | NA           | NA       |
| 19  | 31191133 | 31191259 | 1        | -0.153658  | 9    | 0.00019  | 0.004    | 0.35389  | 0.50754 | 0.000879857 | Intragenic | NM_053583    | Zfp423   |
| 19  | 31556515 | 31556640 | 1        | -0.074092  | 8    | 0.00025  | 0.0059   | 0.081738 | 0.15583 | 0.001103692 | Intergenic | NA           | NA       |
| 19  | 31722316 | 31722452 | 1        | -0.164605  | 5    | 0.019    | 0.038    | 0.44326  | 0.60786 | 0.038322088 | Intergenic | NA           | NA       |
| 19  | 32370436 | 32370746 | 1        | -0.064259  | 13   | 0.0041   | 0.11     | 0.12399  | 0.18824 | 0.01100507  | Intergenic | NA           | NA       |
| 19  | 33946052 | 33946235 | 1        | -0.12264   | 8    | 0.0033   | 0.017    | 0.18689  | 0.30953 | 0.009256793 | Intergenic | NA           | NA       |
| 19  | 34025957 | 34026092 | 1        | -0.220673  | 5    | 0.01     | 0.088    | 0.34088  | 0.56155 | 0.02275947  | Intergenic | NA           | NA       |
| 19  | 34389890 | 34389999 | 1        | -0.261381  | 5    | 0.00011  | 0.00096  | 0.19636  | 0.45774 | 0.000565143 | Intragenic | NM_001107415 | Sall1    |

| chr | start    | stop     | q-value | methy.diff | CpGs | pMWU     | p2DKS    | MCWLS    | MCWHS    | pMWU.fdr    | cgi.type   | transcript                    | gene                 |
|-----|----------|----------|---------|------------|------|----------|----------|----------|----------|-------------|------------|-------------------------------|----------------------|
| 19  | 34391158 | 34391403 | 1       | -0.1747    | 7    | 0.0046   | 0.018    | 0.3798   | 0.5545   | 0.012157071 | Intragenic | NM_001107415                  | Sall1                |
| 19  | 34396720 | 34396975 | 1       | -0.059595  | 5    | 0.01     | 0.059    | 0.064083 | 0.12368  | 0.02275947  | Intergenic | NA                            | NA                   |
| 19  | 35314707 | 35314921 | 1       | -0.166054  | 9    | 2.50E-05 | 0.0041   | 0.13187  | 0.29792  | 0.000166164 | Intragenic | NM_001134539                  | Tbc1d9               |
| 19  | 35474902 | 35474948 | 1       | -0.072759  | 5    | 0.00036  | 0.0092   | 0.042872 | 0.11563  | 0.001486639 | TSS        | NM_001025666                  | Mgat4d               |
| 19  | 35686109 | 35686346 | 1       | -0.101156  | 10   | 0.0025   | 0.03     | 0.26998  | 0.37114  | 0.007343559 | Intragenic | NM_138549                     | Tecr                 |
| 19  | 35982892 | 35982921 | 0.78    | -0.096217  | 7    | 1.00E-07 | 2.40E-06 | 0.014593 | 0.11081  | 1.72E-06    | Intergenic | NA                            | NA                   |
| 19  | 36013447 | 36013777 | 1       | -0.166071  | 8    | 1.40E-05 | 0.00041  | 0.11021  | 0.27628  | 0.000103723 | Intergenic | NA                            | NA                   |
| 19  | 36100881 | 36100995 | 1       | -0.1578    | 8    | 0.00087  | 0.0016   | 0.54756  | 0.70536  | 0.003092094 | Intergenic | NA                            | NA                   |
| 19  | 36120028 | 36120529 | 0.017   | -0.09524   | 25   | 1.10E-11 | 5.40E-08 | 0.088118 | 0.18336  | 6.24E-10    | Intergenic | NA                            | NA                   |
| 19  | 36124839 | 36124922 | 1       | -0.112361  | 10   | 9.70E-07 | 2.30E-05 | 0.15477  | 0.26713  | 1.16E-05    | Intergenic | NA                            | NA                   |
| 19  | 36141087 | 36141562 | 1       | -0.10149   | 16   | 0.013    | 0.14     | 0.26977  | 0.37126  | 0.028097302 | TSS        | NM_001105943:N<br>M_170667    | Il27ra:Rln3          |
| 19  | 36176125 | 36176325 | 1       | -0.116345  | 5    | 0.0068   | 0.088    | 0.16943  | 0.28577  | 0.016642688 | Intragenic | NM_001105944                  | Rfx1                 |
| 19  | 36176332 | 36176466 | 0.73    | -0.191198  | 10   | 2.10E-08 | 2.30E-06 | 0.23789  | 0.42909  | 4.80E-07    | Intragenic | NM_001105944                  | Rfx1                 |
| 19  | 36222126 | 36222451 | 1       | -0.215319  | 22   | 3.80E-12 | 3.10E-06 | 0.2667   | 0.48202  | 2.48E-10    | Intergenic | NA                            | NA                   |
| 19  | 36559951 | 36560005 | 1       | 0.138012   | 5    | 0.00097  | 0.0053   | 0.8913   | 0.75328  | 0.003366009 | Intragenic | NM_012918                     | Cacna1a              |
| 19  | 36795713 | 36795857 | 0.14    | -0.064732  | 14   | 2.10E-11 | 4.20E-07 | 0.025763 | 0.090495 | 1.07E-09    | Intergenic | NA                            | NA                   |
| 19  | 36796003 | 36796040 | 1       | -0.051866  | 5    | 0.0017   | 0.025    | 0.04353  | 0.095396 | 0.005339493 | Intergenic | NA                            | NA                   |
| 19  | 36797151 | 36797234 | 1       | -0.149065  | 5    | 0.0068   | 0.025    | 0.22486  | 0.37392  | 0.016642688 | Intergenic | NA                            | NA                   |
| 19  | 36862077 | 36862432 | 1       | -0.239996  | 16   | 1.40E-09 | 4.50E-06 | 0.2704   | 0.5104   | 4.46E-08    | Intragenic | NM_030866                     | Nfix                 |
| 19  | 36869663 | 36869922 | 1       | -0.261695  | 5    | 0.00015  | 0.0018   | 0.20241  | 0.4641   | 0.000724207 | Intragenic | NM_030866                     | Nfix                 |
| 19  | 36874887 | 36874911 | 1       | -0.066995  | 5    | 0.012    | 0.059    | 0.1233   | 0.19029  | 0.026435197 | Intragenic | NM_030866                     | Nfix                 |
| 19  | 36875410 | 36875459 | 1       | -0.227713  | 5    | 4.30E-06 | 0.00013  | 0.1607   | 0.38842  | 3.93E-05    | Intragenic | NM_030866                     | Nfix                 |
| 19  | 36876562 | 36876658 | 1       | -0.099988  | 7    | 0.0012   | 0.018    | 0.27919  | 0.37918  | 0.004013471 | Intragenic | NM_030866                     | Nfix                 |
| 19  | 36958915 | 36959000 | 1       | -0.099344  | 11   | 2.80E-05 | 0.0033   | 0.15859  | 0.25793  | 0.000182174 | TSS        | NM_001191557                  | Syce2                |
| 19  | 37001944 | 37002401 | 0.0055  | -0.136948  | 22   | 3.90E-13 | 1.70E-08 | 0.076466 | 0.21341  | 3.35E-11    | Intragenic | NM_181089                     | MAST1                |
| 19  | 37013731 | 37013786 | 1       | -0.215557  | 5    | 2.20E-05 | 0.00014  | 0.2132   | 0.42875  | 0.000149617 | Intragenic | NM_181089                     | MAST1                |
| 19  | 37072048 | 37072101 | 0.086   | -0.063768  | 5    | 2.40E-07 | 2.70E-07 | 0.013357 | 0.077125 | 3.57E-06    | TSS        | NM_021836                     | Junb                 |
| 19  | 37087051 | 37087112 | 1       | -0.286645  | 7    | 5.80E-07 | 9.50E-05 | 0.24918  | 0.53582  | 7.50E-06    | Intragenic | NM_001100562                  | Hook2                |
| 19  | 37098914 | 37098947 | 1       | -0.166193  | 5    | 0.0074   | 0.038    | 0.51723  | 0.68343  | 0.017853001 | Intragenic | NM_001108895                  | Best2                |
| 19  | 37118459 | 37118658 | 0.22    | -0.212695  | 16   | 1.40E-11 | 6.80E-07 | 0.23632  | 0.44902  | 7.61E-10    | TSS        | NM_001100505:N<br>M_001105946 | Asna1:RGD15<br>64093 |
| 19  | 37182524 | 37182580 | 1       | -0.183623  | 5    | 0.0014   | 0.039    | 0.18736  | 0.37098  | 0.004540837 | Intragenic | NM_199404                     | Man2b1               |
| 19  | 38661572 | 38661680 | 1       | -0.145003  | 5    | 0.015    | 0.0055   | 0.32708  | 0.47209  | 0.031584896 | Intergenic | NA                            | NA                   |
| 19  | 39033302 | 39033410 | 1       | -0.145003  | 5    | 0.015    | 0.0055   | 0.32708  | 0.47209  | 0.031584896 | Intergenic | NA                            | NA                   |
| 19  | 41909624 | 41909841 | 1       | -0.16144   | 7    | 1.20E-05 | 4.40E-06 | 0.057468 | 0.21891  | 9.15E-05    | Intragenic | NM_001191699                  | Frem3                |
| 19  | 42370736 | 42370939 | 1       | -0.155444  | 6    | 0.018    | 0.026    | 0.28123  | 0.43668  | 0.036742993 | Intergenic | NA                            | NA                   |
| 19  | 43094802 | 43095070 | 0.49    | -0.219008  | 12   | 3.60E-10 | 1.50E-06 | 0.13318  | 0.35219  | 1.37E-08    | Intragenic | NM_013130                     | Smad1                |
| 19  | 43095636 | 43095758 | 1       | -0.1226    | 8    | 0.0072   | 0.051    | 0.16386  | 0.28646  | 0.017539509 | Intragenic | NM_013130                     | Smad1                |

| chr | start    | stop     | q-value  | methy.diff | CpGs | pMWU     | p2DKS    | MCWLS    | MCWHS   | pMWU.fdr    | cgi.type   | transcript   | gene     |
|-----|----------|----------|----------|------------|------|----------|----------|----------|---------|-------------|------------|--------------|----------|
| 19  | 43367877 | 43367939 | 1        | -0.329936  | 5    | 1.20E-05 | 0.00014  | 0.14951  | 0.47945 | 9.15E-05    | Intergenic | NA           | NA       |
| 19  | 43750009 | 43750084 | 1        | -0.12641   | 5    | 0.012    | 0.058    | 0.6115   | 0.73791 | 0.026435197 | Intergenic | NA           | NA       |
| 19  | 44384810 | 44385038 | 1        | -0.185191  | 6    | 0.02     | 0.01     | 0.19527  | 0.38046 | 0.039778219 | Intergenic | NA           | NA       |
| 19  | 44895367 | 44895397 | 1        | -0.245219  | 5    | 0.0022   | 0.015    | 0.42587  | 0.67109 | 0.006578104 | Intergenic | NA           | NA       |
| 19  | 45099142 | 45099337 | 1        | -0.180916  | 6    | 0.00014  | 0.0045   | 0.22813  | 0.40905 | 0.000684451 | Intragenic | NM_001109501 | Arhgap10 |
| 19  | 48081828 | 48081860 | 1        | -0.085854  | 5    | 0.019    | 0.088    | 0.13731  | 0.22317 | 0.038322088 | TSS        | NM_001100480 | Tradd    |
| 19  | 48081890 | 48082022 | 1        | -0.05522   | 5    | 0.01     | 0.039    | 0.065048 | 0.12027 | 0.02275947  | TSS        | NM_001100480 | Tradd    |
| 19  | 48090706 | 48091602 | 1        | -0.121002  | 17   | 3.40E-06 | 0.00072  | 0.14784  | 0.26885 | 3.25E-05    | TSS        | NM_001106177 | Hsf4     |
| 19  | 48100845 | 48100904 | 1        | -0.135248  | 5    | 0.00011  | 0.0018   | 0.21459  | 0.34983 | 0.000565143 | TSS        | NM_053516    | Nol3     |
| 19  | 48527893 | 48528220 | 3.10E-20 | -0.17053   | 37   | 4.20E-14 | 9.70E-26 | 0.035918 | 0.20645 | 6.64E-12    | Intergenic | NA           | NA       |
| 19  | 48777575 | 48777624 | 1        | -0.138433  | 5    | 0.00029  | 7.10E-05 | 0.068597 | 0.20703 | 0.001239307 | TSS        | NM_001025637 | Psmb10   |
| 19  | 48806869 | 48807053 | 1        | -0.0868    | 5    | 0.021    | 0.015    | 0.071565 | 0.15837 | 0.041207871 | TSS        | NM_019229    | Slc12a4  |
| 19  | 49205557 | 49205636 | 1        | 0.053224   | 5    | 0.021    | 0.024    | 0.8849   | 0.83167 | 0.041207871 | Intergenic | NA           | NA       |
| 19  | 49539439 | 49539635 | 1        | -0.150812  | 5    | 7.80E-05 | 0.00014  | 0.068341 | 0.21915 | 0.000422981 | TSS        | NM_053938    | Cdh3     |
| 19  | 49928069 | 49928491 | 1        | -0.061138  | 16   | 0.0037   | 0.046    | 0.11375  | 0.17489 | 0.010204935 | TSS        | NM_172319    | Has3     |
| 19  | 49982440 | 49982554 | 1        | -0.2253    | 5    | 0.0027   | 0.0018   | 0.14306  | 0.36836 | 0.007840962 | Intergenic | NA           | NA       |
| 19  | 50021190 | 50021288 | 0.014    | -0.316156  | 5    | 1.30E-07 | 4.40E-08 | 0.048283 | 0.36444 | 2.11E-06    | Intragenic | NM_001168674 | Sntb2    |
| 19  | 50828874 | 50828967 | 1        | -0.083812  | 5    | 0.023    | 0.038    | 0.84557  | 0.92939 | 0.04441443  | Intergenic | NA           | NA       |
| 19  | 51297224 | 51297337 | 1        | -0.081922  | 5    | 0.021    | 0.18     | 0.1067   | 0.18862 | 0.041207871 | Intergenic | NA           | NA       |
| 19  | 51418689 | 51418873 | 1        | -0.154399  | 12   | 3.40E-05 | 0.0017   | 0.30352  | 0.45792 | 0.000214477 | Intergenic | NA           | NA       |
| 19  | 51965811 | 51966024 | 1        | -0.097536  | 14   | 0.013    | 0.058    | 0.30937  | 0.40691 | 0.028097302 | Intergenic | NA           | NA       |
| 19  | 52339431 | 52339588 | 1        | -0.136286  | 5    | 0.014    | 0.0032   | 0.16984  | 0.30612 | 0.029850603 | Intergenic | NA           | NA       |
| 19  | 52416251 | 52416319 | 1        | -0.06252   | 5    | 0.015    | 0.087    | 0.83455  | 0.89707 | 0.031584896 | Intergenic | NA           | NA       |
| 19  | 52495045 | 52495098 | 1        | -0.143949  | 7    | 4.80E-05 | 0.0013   | 0.2803   | 0.42425 | 0.000285411 | Intergenic | NA           | NA       |
| 19  | 52840221 | 52840298 | 1        | -0.248226  | 5    | 3.10E-05 | 0.00027  | 0.201    | 0.44923 | 0.000197418 | Intergenic | NA           | NA       |
| 19  | 52856817 | 52857041 | 1        | -0.16938   | 9    | 0.0084   | 0.079    | 0.43247  | 0.60185 | 0.019933412 | Intergenic | NA           | NA       |
| 19  | 53074739 | 53074901 | 0.4      | -0.167411  | 7    | 6.30E-07 | 1.20E-06 | 0.11012  | 0.27753 | 8.14E-06    | Intergenic | NA           | NA       |
| 19  | 53595721 | 53595823 | 1        | -0.152222  | 5    | 0.0053   | 0.039    | 0.19755  | 0.34978 | 0.013591571 | Intergenic | NA           | NA       |
| 19  | 53720270 | 53720469 | 1        | -0.16624   | 6    | 0.00013  | 8.70E-05 | 0.15488  | 0.32112 | 0.000648758 | Intergenic | NA           | NA       |
| 19  | 53748455 | 53748560 | 1        | -0.121184  | 5    | 0.0016   | 0.0018   | 0.14771  | 0.26889 | 0.005100053 | Intergenic | NA           | NA       |
| 19  | 54742858 | 54743344 | 0.064    | -0.211414  | 19   | 2.90E-13 | 2.00E-07 | 0.1349   | 0.34632 | 2.66E-11    | Intragenic | NM_012931    | Bcar1    |
| 19  | 55684870 | 55684943 | 1        | -0.094113  | 5    | 0.013    | 0.0018   | 0.23663  | 0.33074 | 0.028097302 | Intragenic | NM_001107432 | Cntnap4  |
| 19  | 57646345 | 57646445 | 1        | -0.189439  | 5    | 3.70E-06 | 7.40E-06 | 0.070888 | 0.26033 | 3.46E-05    | Intragenic | NM_001106188 | Wwox     |
| 19  | 57747285 | 57747379 | 1        | -0.201427  | 7    | 0.0029   | 0.024    | 0.5413   | 0.74273 | 0.008293503 | Intragenic | NM_001106188 | Wwox     |
| 19  | 58415155 | 58415227 | 0.35     | -0.216722  | 10   | 5.40E-10 | 1.10E-06 | 0.14536  | 0.36208 | 1.93E-08    | Intergenic | NA           | NA       |
| 19  | 59446006 | 59446084 | 1        | -0.07099   | 5    | 0.016    | 0.015    | 0.1125   | 0.18349 | 0.033288089 | Intergenic | NA           | NA       |
| 19  | 59576743 | 59576809 | 1        | -0.130529  | 5    | 0.0094   | 0.088    | 0.33586  | 0.46639 | 0.021723038 | Intergenic | NA           | NA       |
| 19  | 59722868 | 59723276 | 0.012    | -0.143147  | 12   | 1.20E-08 | 3.70E-08 | 0.055048 | 0.19819 | 2.88E-07    | Intergenic | NA           | NA       |
| 19  | 59903279 | 59903393 | 1        | -0.315032  | 5    | 0.00044  | 3.40E-05 | 0.55104  | 0.86607 | 0.001760146 | Intragenic | NM_001106189 | Cdyl2    |

| chr | start    | stop     | q-value | methy.diff | CpGs | pMWU     | p2DKS    | MCWLS    | MCWHS   | pMWU.fdr    | cgi.type   | transcript   | gene     |
|-----|----------|----------|---------|------------|------|----------|----------|----------|---------|-------------|------------|--------------|----------|
| 19  | 59924260 | 59924413 | 1       | -0.150476  | 9    | 0.0024   | 0.0085   | 0.45915  | 0.60963 | 0.00705499  | Intragenic | NM_001106189 | Cdyl2    |
| 19  | 60146974 | 60147037 | 1       | -0.330438  | 5    | 2.90E-06 | 1.60E-05 | 0.24442  | 0.57486 | 2.84E-05    | Intergenic | NA           | NA       |
| 19  | 60150354 | 60150417 | 1       | -0.330438  | 5    | 2.90E-06 | 1.60E-05 | 0.24442  | 0.57486 | 2.84E-05    | Intergenic | NA           | NA       |
| 19  | 60273858 | 60273949 | 0.0056  | -0.085664  | 16   | 6.00E-14 | 1.70E-08 | 0.14814  | 0.23381 | 7.28E-12    | TSS        | NM_001191786 | Atmin    |
| 19  | 60406122 | 60406194 | 1       | -0.337874  | 5    | 1.10E-06 | 3.40E-05 | 0.33788  | 0.67576 | 1.27E-05    | Intergenic | NA           | NA       |
| 19  | 60531784 | 60531845 | 1       | -0.201721  | 5    | 0.00029  | 0.0018   | 0.39205  | 0.59377 | 0.001239307 | Intergenic | NA           | NA       |
| 19  | 60582939 | 60583145 | 1       | -0.170315  | 12   | 3.80E-07 | 5.90E-05 | 0.15962  | 0.32993 | 5.34E-06    | Intragenic | NM_001163273 | Cmip     |
| 19  | 60586916 | 60587002 | 1       | -0.137817  | 5    | 7.80E-05 | 0.00053  | 0.05644  | 0.19426 | 0.000422981 | Intragenic | NM_001163273 | Cmip     |
| 19  | 60631214 | 60631292 | 1       | -0.196341  | 5    | 9.80E-05 | 0.0032   | 0.14231  | 0.33866 | 0.000512474 | Intragenic | NM_001163273 | Cmip     |
| 19  | 60636657 | 60636789 | 1       | -0.131597  | 5    | 0.0014   | 0.0055   | 0.14674  | 0.27834 | 0.004540837 | Intragenic | NM_001163273 | Cmip     |
| 19  | 60662476 | 60662723 | 1       | -0.075105  | 12   | 1.20E-07 | 4.00E-06 | 0.046044 | 0.12115 | 2.01E-06    | Intragenic | NM_001163273 | Cmip     |
| 19  | 60668814 | 60668940 | 1       | -0.216463  | 5    | 0.00023  | 0.025    | 0.16176  | 0.37822 | 0.00102405  | Intragenic | NM_001163273 | Cmip     |
| 19  | 60679028 | 60679191 | 1       | -0.203021  | 6    | 4.90E-07 | 1.20E-05 | 0.052741 | 0.25576 | 6.54E-06    | Intragenic | NM_001163273 | Cmip     |
| 19  | 60687684 | 60687871 | 1       | -0.155097  | 5    | 0.0032   | 0.025    | 0.20177  | 0.35687 | 0.008990975 | Intragenic | NM_001163273 | Cmip     |
| 19  | 60710644 | 60710695 | 1       | -0.178787  | 5    | 0.0027   | 0.039    | 0.27914  | 0.45793 | 0.007840962 | Intragenic | NM_001163273 | Cmip     |
| 19  | 60754356 | 60754612 | 1       | -0.137388  | 6    | 0.00021  | 0.00031  | 0.12677  | 0.26416 | 0.000951214 | Intragenic | NM_001163273 | Cmip     |
| 19  | 61008120 | 61008259 | 1       | -0.158722  | 9    | 2.00E-06 | 0.00077  | 0.19107  | 0.3498  | 2.10E-05    | TSS        | NM_001271269 | Sdr42e1  |
| 19  | 61623347 | 61623434 | 1       | -0.121262  | 5    | 0.0068   | 0.088    | 0.20849  | 0.32975 | 0.016642688 | TSS        | NM_138889    | Cdh13    |
| 19  | 61641727 | 61641979 | 1       | -0.133559  | 5    | 0.016    | 0.0092   | 0.075744 | 0.2093  | 0.033288089 | Intragenic | NM_138889    | Cdh13    |
| 19  | 62227808 | 62228041 | 0.55    | -0.164702  | 14   | 5.30E-10 | 1.70E-06 | 0.10449  | 0.26919 | 1.92E-08    | Intragenic | NM_138889    | Cdh13    |
| 19  | 62487535 | 62487643 | 1       | -0.225298  | 9    | 1.40E-08 | 7.90E-05 | 0.23442  | 0.45972 | 3.31E-07    | Intragenic | NM_138889    | Cdh13    |
| 19  | 62848763 | 62848890 | 1       | -0.1495    | 9    | 0.0052   | 0.11     | 0.42224  | 0.57174 | 0.013458626 | Intragenic | NM_133415    | Necab2   |
| 19  | 63072478 | 63072510 | 1       | -0.151725  | 5    | 0.016    | 0.085    | 0.45749  | 0.60921 | 0.033288089 | Intragenic | NM_133581    | Wfdc1    |
| 19  | 63210841 | 63210884 | 1       | -0.243517  | 5    | 7.00E-05 | 0.00097  | 0.19402  | 0.43754 | 0.000386221 | Intragenic | NM_001108452 | Cotl1    |
| 19  | 63231664 | 63231842 | 1       | -0.113606  | 8    | 0.024    | 0.21     | 0.27226  | 0.38587 | 0.046241462 | Intragenic | NM_001108452 | Cotl1    |
| 19  | 63240063 | 63240240 | 1       | -0.21013   | 5    | 9.20E-06 | 7.60E-06 | 0.059429 | 0.26956 | 7.32E-05    | Intragenic | NM_001108452 | Cotl1    |
| 19  | 63288800 | 63289001 | 1       | -0.07023   | 5    | 0.0022   | 0.058    | 0.04103  | 0.11126 | 0.006578104 | Intergenic | NA           | NA       |
| 19  | 63452080 | 63452354 | 1       | -0.123533  | 9    | 0.022    | 0.11     | 0.36305  | 0.48658 | 0.043064669 | Intragenic | NM_138518    | Crispld2 |
| 19  | 63559432 | 63559597 | 1       | -0.095613  | 7    | 0.00074  | 0.0051   | 0.13071  | 0.22632 | 0.002702912 | Intergenic | NA           | NA       |
| 19  | 63631164 | 63631383 | 1       | -0.15064   | 7    | 0.00078  | 0.0075   | 0.29202  | 0.44266 | 0.002840382 | Intergenic | NA           | NA       |
| 19  | 63899090 | 63899230 | 1       | -0.124477  | 5    | 0.0016   | 0.0031   | 0.15256  | 0.27704 | 0.005100053 | Intergenic | NA           | NA       |
| 19  | 63956380 | 63956673 | 1       | -0.119161  | 12   | 0.0022   | 0.0097   | 0.32409  | 0.44325 | 0.006578104 | Intergenic | NA           | NA       |
| 19  | 63964455 | 63964663 | 1       | -0.213045  | 5    | 5.50E-06 | 0.00028  | 0.13836  | 0.35141 | 4.78E-05    | Intergenic | NA           | NA       |
| 19  | 63995392 | 63995715 | 1       | -0.066004  | 6    | 0.022    | 0.018    | 0.1767   | 0.24271 | 0.043064669 | Intergenic | NA           | NA       |
| 19  | 63999147 | 63999184 | 1       | -0.088341  | 5    | 0.0094   | 0.039    | 0.35582  | 0.44416 | 0.021723038 | Intergenic | NA           | NA       |
| 19  | 64013885 | 64014042 | 0.18    | -0.193165  | 10   | 6.50E-10 | 5.70E-07 | 0.14678  | 0.33995 | 2.28E-08    | Intergenic | NA           | NA       |
| 19  | 64087034 | 64087294 | 1       | -0.147619  | 11   | 1.00E-06 | 0.00029  | 0.10704  | 0.25466 | 1.18E-05    | Intergenic | NA           | NA       |
| 19  | 64089356 | 64089430 | 1       | -0.120375  | 8    | 0.0044   | 0.068    | 0.13449  | 0.25486 | 0.011763026 | Intergenic | NA           | NA       |
| 19  | 64091922 | 64092080 | 1       | -0.074304  | 7    | 0.0037   | 0.1      | 0.11854  | 0.19285 | 0.010204935 | Intergenic | NA           | NA       |



| chr | start    | stop     | q-value  | methy.diff | CpGs | pMWU     | p2DKS    | MCWLS    | MCWHS   | pMWU.fdr    | cgi.type   | transcript   | gene   |
|-----|----------|----------|----------|------------|------|----------|----------|----------|---------|-------------|------------|--------------|--------|
| 19  | 64150158 | 64150312 | 1        | -0.165702  | 8    | 1.60E-05 | 9.10E-05 | 0.18404  | 0.34974 | 0.000115757 | Intergenic | NA           | NA     |
| 19  | 64226716 | 64226825 | 1        | -0.192035  | 8    | 6.30E-05 | 0.00067  | 0.32424  | 0.51628 | 0.000354102 | Intragenic | NM_001044259 | Fbxo31 |
| 19  | 64244073 | 64244262 | 1        | -0.165235  | 5    | 0.00012  | 0.0017   | 0.044078 | 0.20931 | 0.000603617 | Intragenic | NM_001044259 | Fbxo31 |
| 19  | 64244504 | 64244550 | 1        | -0.31872   | 5    | 3.90E-05 | 7.10E-05 | 0.24708  | 0.56579 | 0.000237659 | Intragenic | NM_001044259 | Fbxo31 |
| 19  | 64351500 | 64351689 | 1        | -0.165235  | 5    | 0.00012  | 0.0017   | 0.044078 | 0.20931 | 0.000603617 | Intragenic | NM_001044259 | Fbxo31 |
| 19  | 64351931 | 64351977 | 1        | -0.31872   | 5    | 3.90E-05 | 7.10E-05 | 0.24708  | 0.56579 | 0.000237659 | Intragenic | NM_001044259 | Fbxo31 |
| 19  | 64567528 | 64567593 | 1        | -0.132686  | 5    | 0.00012  | 0.0018   | 0.11759  | 0.25028 | 0.000603617 | Intergenic | NA           | NA     |
| 19  | 64621530 | 64622070 | 1        | -0.13664   | 15   | 7.90E-07 | 0.00078  | 0.10362  | 0.24026 | 9.79E-06    | Intergenic | NA           | NA     |
| 19  | 64646841 | 64647552 | 1        | -0.132544  | 19   | 0.00024  | 0.0051   | 0.29288  | 0.42543 | 0.001064629 | Intergenic | NA           | NA     |
| 19  | 64664421 | 64664571 | 1        | -0.202014  | 7    | 0.0023   | 0.04     | 0.37736  | 0.57937 | 0.00686004  | Intergenic | NA           | NA     |
| 19  | 64681285 | 64681360 | 1        | -0.223187  | 5    | 0.00044  | 0.015    | 0.26111  | 0.4843  | 0.001760146 | Intergenic | NA           | NA     |
| 19  | 64690835 | 64691234 | 1        | -0.193114  | 15   | 7.60E-07 | 0.00014  | 0.30064  | 0.49376 | 9.46E-06    | Intergenic | NA           | NA     |
| 19  | 64695686 | 64695865 | 1        | -0.111002  | 5    | 0.0087   | 0.039    | 0.15288  | 0.26388 | 0.020391633 | Intergenic | NA           | NA     |
| 19  | 64715467 | 64715735 | 1        | -0.146846  | 8    | 0.00019  | 0.0035   | 0.096986 | 0.24383 | 0.000879857 | Intergenic | NA           | NA     |
| 19  | 64726890 | 64727080 | 1        | -0.105855  | 8    | 0.021    | 0.069    | 0.24859  | 0.35445 | 0.041207871 | Intergenic | NA           | NA     |
| 19  | 64768362 | 64768494 | 1        | -0.281195  | 6    | 1.30E-06 | 2.50E-05 | 0.078301 | 0.3595  | 1.46E-05    | Intergenic | NA           | NA     |
| 19  | 64793879 | 64794216 | 1        | -0.122809  | 9    | 2.80E-06 | 0.0003   | 0.045878 | 0.16869 | 2.79E-05    | Intergenic | NA           | NA     |
| 19  | 64799839 | 64800078 | 1        | -0.141247  | 7    | 4.80E-08 | 8.60E-06 | 0.050652 | 0.1919  | 9.95E-07    | Intergenic | NA           | NA     |
| 19  | 64803689 | 64803740 | 1        | -0.164068  | 5    | 0.0008   | 0.0055   | 0.11514  | 0.27921 | 0.002866309 | Intergenic | NA           | NA     |
| 19  | 64855474 | 64855700 | 1        | -0.20095   | 5    | 0.00036  | 0.0032   | 0.26323  | 0.46418 | 0.001486639 | Intergenic | NA           | NA     |
| 19  | 64859697 | 64859921 | 1        | -0.117155  | 8    | 2.30E-06 | 0.00015  | 0.064895 | 0.18205 | 2.36E-05    | Intergenic | NA           | NA     |
| 19  | 64870454 | 64870630 | 1        | -0.137447  | 7    | 0.0051   | 0.14     | 0.35467  | 0.49212 | 0.013208341 | Intergenic | NA           | NA     |
| 19  | 65037353 | 65037381 | 1        | -0.142082  | 5    | 6.20E-05 | 0.0018   | 0.52938  | 0.67147 | 0.000349462 | TSS        | NM_001008722 | Irf8   |
| 19  | 65051052 | 65051093 | 1        | -0.204354  | 5    | 0.0027   | 0.0092   | 0.29404  | 0.49839 | 0.007840962 | Intragenic | NM_001008722 | Irf8   |
| 19  | 65158586 | 65158923 | 1        | -0.122809  | 9    | 2.80E-06 | 0.0003   | 0.045878 | 0.16869 | 2.79E-05    | Intergenic | NA           | NA     |
| 19  | 65578105 | 65578155 | 1        | -0.237794  | 5    | 1.30E-05 | 6.80E-05 | 0.14819  | 0.38598 | 9.66E-05    | Intergenic | NA           | NA     |
| 19  | 65646434 | 65646536 | 1        | -0.109955  | 5    | 0.017    | 0.037    | 0.21482  | 0.32477 | 0.034796287 | Intergenic | NA           | NA     |
| 19  | 65697030 | 65697105 | 1        | -0.139743  | 5    | 0.0027   | 0.025    | 0.1479   | 0.28765 | 0.007840962 | Intergenic | NA           | NA     |
| 19  | 65755393 | 65755651 | 1        | -0.163232  | 9    | 0.00019  | 0.0012   | 0.4923   | 0.65553 | 0.000879857 | Intergenic | NA           | NA     |
| 19  | 65796647 | 65796685 | 1        | -0.091752  | 5    | 0.00048  | 0.0092   | 0.77294  | 0.86469 | 0.001881331 | Intergenic | NA           | NA     |
| 19  | 65805309 | 65805534 | 1        | -0.117512  | 7    | 0.023    | 0.011    | 0.69638  | 0.81389 | 0.04441443  | Intergenic | NA           | NA     |
| 19  | 65812417 | 65812548 | 1        | -0.090603  | 8    | 0.0023   | 0.008    | 0.1171   | 0.2077  | 0.00686004  | Intergenic | NA           | NA     |
| 19  | 65864368 | 65864456 | 1        | -0.190474  | 5    | 0.0035   | 0.023    | 0.26621  | 0.45668 | 0.009686665 | Intragenic | NM_001242627 | Zfpm1  |
| 19  | 65864504 | 65864552 | 1        | -0.219044  | 5    | 6.50E-07 | 3.40E-06 | 0.061578 | 0.28062 | 8.28E-06    | Intragenic | NM_001242627 | Zfpm1  |
| 19  | 65864862 | 65864901 | 1        | -0.12636   | 5    | 3.10E-05 | 0.00053  | 0.1886   | 0.31496 | 0.000197418 | Intragenic | NM_001242627 | Zfpm1  |
| 19  | 65864947 | 65865079 | 1        | -0.087699  | 17   | 9.30E-05 | 0.0012   | 0.11109  | 0.18985 | 0.000491677 | Intragenic | NM_001242627 | Zfpm1  |
| 19  | 65865110 | 65865183 | 2.70E-05 | -0.124336  | 14   | 1.30E-12 | 8.30E-11 | 0.13558  | 0.25992 | 9.76E-11    | Intragenic | NM_001242627 | Zfpm1  |
| 19  | 65865320 | 65865352 | 0.037    | -0.23863   | 5    | 7.30E-08 | 1.10E-07 | 0.12148  | 0.36011 | 1.35E-06    | Intragenic | NM_001242627 | Zfpm1  |
| 19  | 65865773 | 65865861 | 1        | -0.095099  | 5    | 0.0087   | 0.038    | 0.41049  | 0.50559 | 0.020391633 | Intragenic | NM_001242627 | Zfpm1  |

| chr | start    | stop     | q-value  | methyI.diff | CpGs | pMWU     | p2DKS    | MCWLS    | MCWHS     | pMWU.fdr    | cgi.type   | transcript   | gene       |
|-----|----------|----------|----------|-------------|------|----------|----------|----------|-----------|-------------|------------|--------------|------------|
| 19  | 65868926 | 65869096 | 1        | -0.181855   | 5    | 0.008    | 0.058    | 0.35538  | 0.53723   | 0.019059477 | Intergenic | NA           | NA         |
| 19  | 66075299 | 66075320 | 1        | 0.065259    | 5    | 0.0038   | 0.0093   | 0.070668 | 0.0054094 | 0.010352437 | TSS        | NM_001077200 | Piezo1     |
| 19  | 66229152 | 66229197 | 1        | -0.203653   | 5    | 4.40E-05 | 0.0032   | 0.21662  | 0.42028   | 0.000263321 | Intergenic | NA           | NA         |
| 19  | 66623281 | 66623312 | 9.80E-06 | -0.317067   | 8    | 6.90E-12 | 3.00E-11 | 0.46251  | 0.77958   | 4.25E-10    | TSS        | NM_031101    | Rpl13      |
| 19  | 66693841 | 66694001 | 1        | -0.13865    | 5    | 0.017    | 0.088    | 0.30707  | 0.44572   | 0.034796287 | Intragenic | NM_053591    | Dpep1      |
| 19  | 66772655 | 66772807 | 1        | -0.170209   | 5    | 0.00029  | 0.0031   | 0.13219  | 0.3024    | 0.001239307 | Intragenic | NM_001108455 | Fanca      |
| 19  | 67111594 | 67111752 | 1        | -0.128193   | 5    | 0.0087   | 0.0093   | 0.17357  | 0.30176   | 0.020391633 | Intergenic | NA           | NA         |
| 19  | 67187644 | 67189459 | 0.23     | 0.150908    | 24   | 1.70E-07 | 7.30E-07 | 0.32581  | 0.1749    | 2.66E-06    | Intergenic | NA           | NA         |
| 19  | 67245089 | 67245287 | 1        | -0.146112   | 7    | 0.003    | 0.005    | 0.1556   | 0.30171   | 0.008555055 | Intergenic | NA           | NA         |
| 19  | 67258712 | 67258870 | 1        | -0.128193   | 5    | 0.0087   | 0.0093   | 0.17357  | 0.30176   | 0.020391633 | Intergenic | NA           | NA         |
| 19  | 67616991 | 67617216 | 1        | -0.220437   | 7    | 7.30E-05 | 0.008    | 0.18605  | 0.40648   | 0.000401851 | Intergenic | NA           | NA         |
| 19  | 67669168 | 67669260 | 1        | -0.170787   | 7    | 7.80E-05 | 0.0083   | 0.17899  | 0.34978   | 0.000422981 | Intergenic | NA           | NA         |
| 19  | 67703335 | 67703674 | 1        | -0.199141   | 11   | 7.50E-07 | 7.90E-05 | 0.21233  | 0.41147   | 9.35E-06    | Intergenic | NA           | NA         |
| 19  | 67777778 | 67778149 | 1        | -0.130284   | 13   | 0.017    | 0.09     | 0.43449  | 0.56478   | 0.034796287 | Intragenic | NM_001106196 | Galnt2     |
| 19  | 67783300 | 67783483 | 1        | -0.179526   | 11   | 5.60E-05 | 0.00078  | 0.56739  | 0.74692   | 0.000320912 | Intragenic | NM_001106196 | Galnt2     |
| 19  | 67795164 | 67795355 | 0.0055   | -0.271954   | 10   | 1.60E-11 | 1.70E-08 | 0.056223 | 0.32818   | 8.51E-10    | Intragenic | NM_001106196 | Galnt2     |
| 19  | 68115391 | 68115502 | 1        | -0.132902   | 5    | 0.011    | 0.015    | 0.46258  | 0.59549   | 0.02463877  | Intragenic | NM_001109134 | RGD1559896 |
| 19  | 68115557 | 68115721 | 1        | -0.195602   | 5    | 5.60E-05 | 6.90E-06 | 0.076121 | 0.27172   | 0.000320912 | Intragenic | NM_001109134 | RGD1559896 |
| 19  | 68167440 | 68167506 | 1        | -0.217015   | 5    | 0.00065  | 0.0055   | 0.23072  | 0.44774   | 0.002426546 | Intragenic | NM_001136162 | Ttc13      |
| 19  | 68220120 | 68220334 | 1        | -0.189601   | 9    | 4.80E-06 | 0.00013  | 0.201    | 0.3906    | 4.29E-05    | TSS        | NM_001011711 | Fam89a     |
| 19  | 68293819 | 68294037 | 1        | -0.165712   | 6    | 0.011    | 0.018    | 0.24054  | 0.40625   | 0.02463877  | Intragenic | NM_001135715 | Trim67     |
| 19  | 68309544 | 68309707 | 1        | -0.149709   | 5    | 0.023    | 0.058    | 0.39909  | 0.5488    | 0.04441443  | Intergenic | NA           | NA         |
| 19  | 68325829 | 68325914 | 1        | -0.134523   | 6    | 0.005    | 0.018    | 0.29322  | 0.42774   | 0.012977322 | TSS        | NM_001034919 | RGD1562218 |
| 19  | 68392139 | 68392211 | 1        | -0.316654   | 5    | 8.50E-07 | 7.50E-06 | 0.14639  | 0.46304   | 1.03E-05    | Intergenic | NA           | NA         |
| 19  | 68570629 | 68570771 | 2.30E-06 | -0.362363   | 9    | 5.30E-13 | 7.00E-12 | 0.070428 | 0.43279   | 4.36E-11    | Intragenic | NM_175596    | Disc1      |
| 19  | 68573894 | 68573957 | 1        | -0.238535   | 5    | 0.00026  | 0.0092   | 0.32784  | 0.56637   | 0.001130807 | Intragenic | NM_175596    | Disc1      |
| 19  | 68613259 | 68613400 | 1        | -0.238161   | 5    | 3.90E-05 | 0.00028  | 0.25812  | 0.49628   | 0.000237659 | Intragenic | NM_175596    | Disc1      |
| 19  | 68617980 | 68618036 | 1        | -0.274966   | 5    | 2.80E-05 | 0.00051  | 0.26216  | 0.53713   | 0.000182174 | Intragenic | NM_175596    | Disc1      |
| 19  | 68763415 | 68763495 | 1        | -0.154787   | 5    | 0.00011  | 0.00028  | 0.70958  | 0.86437   | 0.000565143 | Intragenic | NM_175596    | Disc1      |
| 19  | 68917680 | 68917934 | 1        | -0.136732   | 10   | 0.0094   | 0.19     | 0.42593  | 0.56267   | 0.021723038 | Intergenic | NA           | NA         |
| 19  | 69112331 | 69112465 | 1        | -0.121121   | 7    | 5.60E-05 | 0.0083   | 0.1624   | 0.28352   | 0.000320912 | Intergenic | NA           | NA         |
| 19  | 69203740 | 69203776 | 1        | -0.065264   | 5    | 0.02     | 0.13     | 0.16733  | 0.2326    | 0.039778219 | TSS        | NM_001277391 | Map10      |
| 19  | 69248100 | 69248469 | 1        | -0.11049    | 10   | 0.0002   | 0.0082   | 0.13321  | 0.2437    | 0.00092049  | Intergenic | NA           | NA         |
| 19  | 69314461 | 69314573 | 1        | -0.068507   | 7    | 0.013    | 0.078    | 0.083691 | 0.1522    | 0.028097302 | Intergenic | NA           | NA         |
| 19  | 69364405 | 69364574 | 1        | -0.128943   | 6    | 0.005    | 0.0027   | 0.15786  | 0.28681   | 0.012977322 | Intergenic | NA           | NA         |
| 19  | 69380931 | 69381040 | 1        | -0.175039   | 5    | 9.80E-05 | 0.00014  | 0.06656  | 0.2416    | 0.000512474 | Intergenic | NA           | NA         |
| 19  | 69447214 | 69447293 | 1        | -0.235766   | 5    | 4.90E-07 | 7.60E-06 | 0.048947 | 0.28471   | 6.54E-06    | Intergenic | NA           | NA         |
| 19  | 69460373 | 69460531 | 1        | -0.134991   | 5    | 0.021    | 0.015    | 0.45172  | 0.58671   | 0.041207871 | Intergenic | NA           | NA         |
| 19  | 69730686 | 69730730 | 1        | -0.169829   | 5    | 5.60E-05 | 0.0018   | 0.10178  | 0.27161   | 0.000320912 | Intergenic | NA           | NA         |

| chr | start    | stop     | q-value | methyL.diff | CpGs | pMWU     | p2DKS    | MCWLS    | MCWHS    | pMWU.fdr    | cgi.type   | transcript                                  | gene           |
|-----|----------|----------|---------|-------------|------|----------|----------|----------|----------|-------------|------------|---------------------------------------------|----------------|
| 19  | 70107801 | 70107907 | 1       | -0.165915   | 5    | 0.025    | 0.13     | 0.33068  | 0.49659  | 0.047453009 | Intergenic | NA                                          | NA             |
| 19  | 70326551 | 70326930 | 0.014   | -0.151004   | 16   | 1.10E-13 | 4.30E-08 | 0.061472 | 0.21248  | 1.18E-11    | Intergenic | NA                                          | NA             |
| 19  | 70367123 | 70367175 | 1       | -0.181765   | 5    | 0.0041   | 0.025    | 0.33485  | 0.51661  | 0.01100507  | Intergenic | NA                                          | NA             |
| 19  | 70434655 | 70434779 | 0.098   | -0.3109     | 7    | 6.60E-09 | 3.00E-07 | 0.14546  | 0.45636  | 1.72E-07    | Intergenic | NA                                          | NA             |
| 19  | 70434957 | 70435194 | 1       | -0.104733   | 5    | 0.0012   | 0.015    | 0.065106 | 0.16984  | 0.004013471 | Intergenic | NA                                          | NA             |
| 19  | 70742410 | 70742559 | 1       | -0.123292   | 8    | 0.00027  | 0.0058   | 0.14262  | 0.26591  | 0.001172178 | Intragenic | NM_031235                                   | Pard3          |
| 19  | 71067091 | 71067954 | 0.00014 | -0.226035   | 18   | 1.40E-13 | 4.40E-10 | 0.1048   | 0.33083  | 1.41E-11    | Intragenic | NM_031235                                   | Pard3          |
| 19  | 71405252 | 71405353 | 1       | -0.257335   | 5    | 0.00029  | 3.30E-05 | 0.14152  | 0.39885  | 0.001239307 | Intergenic | NA                                          | NA             |
| 19  | 71984311 | 71984413 | 1       | -0.139852   | 6    | 1.10E-06 | 3.20E-06 | 0.069733 | 0.20959  | 1.27E-05    | TSS        | NM_145098                                   | Nrp1           |
| 19  | 72758812 | 72758923 | 1       | -0.069073   | 5    | 0.00023  | 0.00096  | 0.79994  | 0.86901  | 0.00102405  | Intragenic | NM_001011561                                | Ccdc7          |
| 2   | 118255   | 118327   | 0.0002  | -0.159384   | 12   | 1.50E-13 | 6.30E-10 | 0.067246 | 0.22663  | 1.50E-11    | Intergenic | NA                                          | NA             |
| 2   | 118334   | 118383   | 1       | -0.085448   | 5    | 0.0019   | 0.015    | 0.035059 | 0.12051  | 0.005855937 | Intergenic | NA                                          | NA             |
| 2   | 118400   | 118461   | 1       | -0.145623   | 8    | 0.00022  | 0.0014   | 0.10706  | 0.25268  | 0.000994261 | Intergenic | NA                                          | NA             |
| 2   | 118487   | 118568   | 1       | -0.153734   | 5    | 0.00044  | 0.0055   | 0.1349   | 0.28864  | 0.001760146 | Intergenic | NA                                          | NA             |
| 2   | 400990   | 401030   | 1       | -0.173394   | 7    | 8.30E-06 | 0.00049  | 0.25137  | 0.42476  | 6.73E-05    | Intergenic | NA                                          | NA             |
| 2   | 402382   | 402719   | 1       | -0.078008   | 17   | 0.00093  | 0.0051   | 0.18024  | 0.24319  | 0.003255406 | Intergenic | NA                                          | NA             |
| 2   | 402991   | 403034   | 1       | -0.126395   | 5    | 0.0022   | 0.024    | 0.15471  | 0.2811   | 0.006578104 | Intergenic | NA                                          | NA             |
| 2   | 536792   | 537010   | 1       | -0.078733   | 5    | 0.00012  | 6.20E-05 | 0.049924 | 0.12866  | 0.000603617 | Intergenic | NA                                          | NA             |
| 2   | 537661   | 537751   | 1       | -0.062188   | 5    | 0.00048  | 0.0032   | 0.019982 | 0.08217  | 0.001881331 | Intergenic | NA                                          | NA             |
| 2   | 537757   | 537828   | 1       | -0.051805   | 5    | 7.80E-05 | 0.00014  | 0.005306 | 0.057111 | 0.000422981 | Intergenic | NA                                          | NA             |
| 2   | 889921   | 889986   | 1       | -0.079175   | 5    | 0.014    | 0.0031   | 0.19657  | 0.27574  | 0.029850603 | Intergenic | NA                                          | NA             |
| 2   | 913570   | 913626   | 1       | -0.132644   | 5    | 0.025    | 0.059    | 0.38897  | 0.52161  | 0.047453009 | Intergenic | NA                                          | NA             |
| 2   | 1406971  | 1407327  | 1       | -0.087818   | 11   | 0.004    | 0.0079   | 0.6499   | 0.73772  | 0.010872653 | Intragenic | NM_030836                                   | Erap1          |
| 2   | 1492816  | 1493112  | 1       | -0.147376   | 13   | 2.80E-05 | 0.0036   | 0.60474  | 0.75211  | 0.000182174 | Intragenic | NM_001033715:N<br>M_001033716:N<br>M_053295 | Cast:Cast:Cast |
| 2   | 1499656  | 1499749  | 1       | -0.087737   | 7    | 0.0018   | 0.012    | 0.66501  | 0.75274  | 0.005640313 | Intragenic | NM_001033715:N<br>M_001033716:N<br>M_053295 | Cast:Cast:Cast |
| 2   | 2226458  | 2226568  | 1       | -0.111377   | 5    | 0.02     | 0.088    | 0.45302  | 0.56439  | 0.039778219 | Intergenic | NA                                          | NA             |
| 2   | 5559564  | 5559688  | 1       | -0.124533   | 12   | 0.0031   | 0.024    | 0.28405  | 0.40858  | 0.008829746 | Intragenic | NM_031130                                   | Nr2f1          |
| 2   | 5574689  | 5574846  | 0.088   | 0.110393    | 17   | 3.40E-05 | 2.70E-07 | 0.57694  | 0.46654  | 0.000214477 | Intergenic | NA                                          | NA             |
| 2   | 13196925 | 13197086 | 1       | -0.050085   | 7    | 0.0083   | 0.11     | 0.78068  | 0.83077  | 0.019719474 | Intergenic | NA                                          | NA             |
| 2   | 14205625 | 14205699 | 1       | -0.216477   | 7    | 0.00013  | 0.012    | 0.58553  | 0.80201  | 0.000648758 | Intergenic | NA                                          | NA             |
| 2   | 16017284 | 16017456 | 1       | -0.176674   | 8    | 0.00021  | 0.026    | 0.33266  | 0.50933  | 0.000951214 | Intergenic | NA                                          | NA             |
| 2   | 16069429 | 16069768 | 1       | -0.188935   | 5    | 0.013    | 0.015    | 0.38367  | 0.57261  | 0.028097302 | Intergenic | NA                                          | NA             |
| 2   | 16562784 | 16562905 | 1       | -0.078618   | 5    | 0.015    | 0.18     | 0.71789  | 0.7965   | 0.031584896 | Intergenic | NA                                          | NA             |

| chr | start    | stop     | q-value | methy.diff | CpGs | pMWU     | p2DKS    | MCWLS    | MCWHS    | pMWU.fdr    | cgi.type   | transcript                                                   | gene                    |
|-----|----------|----------|---------|------------|------|----------|----------|----------|----------|-------------|------------|--------------------------------------------------------------|-------------------------|
| 2   | 18426907 | 18427029 | 1       | -0.214249  | 5    | 0.0008   | 0.00052  | 0.056943 | 0.27119  | 0.002866309 | Intragenic | NM_001170558:N<br>M_001170559:N<br>M_001170560:N<br>M_053663 | Vcan:Vcan:Vc<br>an:Vcan |
| 2   | 41577882 | 41578000 | 1       | -0.212352  | 5    | 0.012    | 0.18     | 0.32488  | 0.53723  | 0.026435197 | Intragenic | NM_017133                                                    | Thbs4                   |
| 2   | 41803645 | 41804097 | 1       | -0.118592  | 16   | 0.00044  | 0.00058  | 0.23718  | 0.35577  | 0.001760146 | Intergenic | NA                                                           | NA                      |
| 2   | 42437222 | 42437547 | 1       | -0.171499  | 15   | 5.50E-06 | 0.0052   | 0.28957  | 0.46107  | 4.78E-05    | TSS        | NM_030850                                                    | Bhmt                    |
| 2   | 42468329 | 42468477 | 1       | -0.239375  | 5    | 7.80E-05 | 0.00014  | 0.12566  | 0.36503  | 0.000422981 | TSS        | NM_001014256:N<br>M_139102                                   | Bhmt2:Dmgd<br>h         |
| 2   | 42469157 | 42469311 | 1       | -0.185936  | 5    | 0.00032  | 0.0031   | 0.12984  | 0.31578  | 0.001346443 | TSS        | NM_001014256:N<br>M_139102                                   | Bhmt2:Dmgd<br>h         |
| 2   | 42469359 | 42469748 | 1       | -0.092698  | 17   | 2.10E-05 | 4.80E-05 | 0.17748  | 0.27018  | 0.000144949 | TSS        | NM_001014256:N<br>M_139102                                   | Bhmt2:Dmgd<br>h         |
| 2   | 43090074 | 43090344 | 1       | -0.286488  | 5    | 3.70E-06 | 7.50E-06 | 0.2324   | 0.51889  | 3.46E-05    | Intragenic | NM_001100636                                                 | Scamp1                  |
| 2   | 43404663 | 43404735 | 1       | 0.058917   | 5    | 0.0049   | 0.015    | 0.11026  | 0.051345 | 0.012753585 | Intergenic | NA                                                           | NA                      |
| 2   | 43408255 | 43408282 | 1       | -0.185895  | 5    | 0.012    | 0.085    | 0.37888  | 0.56478  | 0.026435197 | Intergenic | NA                                                           | NA                      |
| 2   | 43440431 | 43440502 | 1       | -0.13596   | 5    | 0.00019  | 0.0031   | 0.14172  | 0.27768  | 0.000879857 | Intergenic | NA                                                           | NA                      |
| 2   | 43871288 | 43871520 | 0.57    | -0.129401  | 11   | 1.40E-09 | 1.80E-06 | 0.070303 | 0.1997   | 4.46E-08    | Intragenic | NM_001108541                                                 | Wdr41                   |
| 2   | 44282063 | 44282201 | 1       | -0.165692  | 5    | 0.0094   | 0.038    | 0.26199  | 0.42768  | 0.021723038 | Intergenic | NA                                                           | NA                      |
| 2   | 44809668 | 44809899 | 1       | -0.152563  | 11   | 0.001    | 0.027    | 0.46972  | 0.62229  | 0.003452169 | Intergenic | NA                                                           | NA                      |
| 2   | 44887996 | 44888094 | 1       | -0.172449  | 5    | 0.0016   | 0.039    | 0.16504  | 0.33748  | 0.005100053 | Intergenic | NA                                                           | NA                      |
| 2   | 45019175 | 45019279 | 1       | -0.264835  | 5    | 3.70E-06 | 0.00028  | 0.10565  | 0.37048  | 3.46E-05    | Intragenic | NM_001108542                                                 | Arhgef28                |
| 2   | 46319669 | 46319817 | 1       | -0.139194  | 5    | 0.017    | 0.024    | 0.37874  | 0.51793  | 0.034796287 | Intergenic | NA                                                           | NA                      |
| 2   | 46330425 | 46330573 | 1       | -0.139194  | 5    | 0.017    | 0.024    | 0.37874  | 0.51793  | 0.034796287 | Intergenic | NA                                                           | NA                      |
| 2   | 47398347 | 47398579 | 1       | -0.121349  | 7    | 0.013    | 0.075    | 0.26224  | 0.38359  | 0.028097302 | Intergenic | NA                                                           | NA                      |
| 2   | 47472532 | 47472585 | 0.16    | -0.07342   | 9    | 1.20E-07 | 4.80E-07 | 0.051704 | 0.12512  | 2.01E-06    | TSS        | NM_001107647                                                 | Utp15                   |
| 2   | 47473018 | 47473080 | 0.011   | -0.068483  | 11   | 4.40E-09 | 3.40E-08 | 0.046203 | 0.11469  | 1.18E-07    | TSS        | NM_001107647                                                 | Utp15                   |
| 2   | 47635523 | 47635580 | 1       | -0.103227  | 5    | 2.40E-05 | 0.00013  | 0.17255  | 0.27578  | 0.000160049 | Intergenic | NA                                                           | NA                      |
| 2   | 47737585 | 47737695 | 1       | -0.059025  | 5    | 0.0063   | 0.0092   | 0.046445 | 0.10547  | 0.015629046 | Intergenic | NA                                                           | NA                      |
| 2   | 47900489 | 47900635 | 1       | -0.230605  | 7    | 6.10E-06 | 0.00029  | 0.11466  | 0.34527  | 5.24E-05    | TSS        | NM_001013903                                                 | Tmem171                 |
| 2   | 48096787 | 48096901 | 1       | -0.132139  | 5    | 0.00044  | 0.0054   | 0.1367   | 0.26884  | 0.001760146 | TSS        | NM_130747                                                    | Acot12                  |
| 2   | 49000866 | 49000984 | 1       | -0.130353  | 6    | 0.015    | 0.017    | 0.60534  | 0.73569  | 0.031584896 | Intergenic | NA                                                           | NA                      |
| 2   | 51619497 | 51619576 | 0.0022  | -0.33658   | 5    | 6.30E-08 | 6.70E-09 | 0.032601 | 0.36918  | 1.18E-06    | Intergenic | NA                                                           | NA                      |
| 2   | 52032928 | 52033007 | 0.0022  | -0.33658   | 5    | 6.30E-08 | 6.70E-09 | 0.032601 | 0.36918  | 1.18E-06    | Intergenic | NA                                                           | NA                      |
| 2   | 52404468 | 52404753 | 1       | -0.120722  | 8    | 0.00062  | 0.0088   | 0.12896  | 0.24968  | 0.002348106 | Intergenic | NA                                                           | NA                      |
| 2   | 52727624 | 52727861 | 1       | -0.195566  | 5    | 0.00015  | 0.0018   | 0.16606  | 0.36162  | 0.000724207 | Intergenic | NA                                                           | NA                      |
| 2   | 53159416 | 53159505 | 1       | -0.206026  | 5    | 2.80E-05 | 0.0031   | 0.17327  | 0.3793   | 0.000182174 | Intergenic | NA                                                           | NA                      |
| 2   | 53166068 | 53166141 | 1       | -0.163454  | 5    | 0.021    | 0.13     | 0.34964  | 0.51309  | 0.041207871 | Intergenic | NA                                                           | NA                      |
| 2   | 53166507 | 53166666 | 1       | -0.091052  | 5    | 4.30E-06 | 1        | 0        | 0.091052 | 3.93E-05    | Intergenic | NA                                                           | NA                      |

| chr | start    | stop     | q-value | methy.diff | CpGs | pMWU     | p2DKS    | MCWLS    | MCWHS   | pMWU.fdr    | cgi.type   | transcript                                                   | gene                        |
|-----|----------|----------|---------|------------|------|----------|----------|----------|---------|-------------|------------|--------------------------------------------------------------|-----------------------------|
| 2   | 53314953 | 53315048 | 1       | -0.101232  | 5    | 0.00048  | 0.0018   | 0.084475 | 0.18571 | 0.001881331 | TSS        | NM_053970:NM_181629                                          | Nln:Sgtb                    |
| 2   | 53846438 | 53846575 | 0.38    | -0.256173  | 7    | 3.70E-08 | 1.20E-06 | 0.12107  | 0.37724 | 7.87E-07    | Intragenic | NM_001013199                                                 | Cwc27                       |
| 2   | 54048968 | 54049033 | 1       | -0.105502  | 7    | 0.00062  | 5.40E-05 | 0.13145  | 0.23695 | 0.002348106 | TSS        | NM_001013199                                                 | Cwc27                       |
| 2   | 54181579 | 54181633 | 1       | -0.214826  | 5    | 0.0063   | 0.0017   | 0.50449  | 0.71931 | 0.015629046 | Intergenic | NA                                                           | NA                          |
| 2   | 54184162 | 54184249 | 1       | -0.217677  | 5    | 5.60E-05 | 0.00014  | 0.27401  | 0.49169 | 0.000320912 | Intergenic | NA                                                           | NA                          |
| 2   | 55222278 | 55222364 | 1       | -0.097656  | 5    | 0.015    | 0.18     | 0.72271  | 0.82037 | 0.031584896 | Intergenic | NA                                                           | NA                          |
| 2   | 55621517 | 55621787 | 0.0022  | -0.172805  | 15   | 1.60E-10 | 6.80E-09 | 0.17973  | 0.35253 | 6.77E-09    | Intergenic | NA                                                           | NA                          |
| 2   | 56999803 | 56999872 | 1       | -0.263413  | 5    | 0.00048  | 0.0053   | 0.18975  | 0.45316 | 0.001881331 | Intergenic | NA                                                           | NA                          |
| 2   | 58329891 | 58329980 | 1       | -0.278516  | 5    | 0.00036  | 0.0055   | 0.22547  | 0.50398 | 0.001486639 | Intergenic | NA                                                           | NA                          |
| 2   | 58342120 | 58342315 | 1       | -0.167365  | 7    | 1.40E-07 | 9.70E-05 | 0.076951 | 0.24432 | 2.25E-06    | Intergenic | NA                                                           | NA                          |
| 2   | 58351533 | 58351728 | 1       | -0.167365  | 7    | 1.40E-07 | 9.70E-05 | 0.076951 | 0.24432 | 2.25E-06    | Intergenic | NA                                                           | NA                          |
| 2   | 59724956 | 59724995 | 1       | -0.063494  | 5    | 0.00072  | 0.015    | 0.058763 | 0.12226 | 0.002634665 | TSS        | NM_001113328                                                 | Pde4d                       |
| 2   | 60169342 | 60169430 | 0.49    | -0.170669  | 6    | 9.30E-08 | 1.50E-06 | 0.073062 | 0.24373 | 1.64E-06    | Intragenic | NM_001113329:N<br>M_001113328:N<br>M_001113332:N<br>M_017032 | Pde4d:Pde4d:<br>Pde4d:Pde4d |
| 2   | 60793790 | 60793862 | 1       | -0.234197  | 5    | 0.00026  | 0.0089   | 0.22983  | 0.46402 | 0.001130807 | Intragenic | NM_133536                                                    | Rab3c                       |
| 2   | 62515840 | 62515899 | 1       | -0.282976  | 5    | 7.40E-07 | 3.40E-06 | 0.11746  | 0.40043 | 9.26E-06    | Intergenic | NA                                                           | NA                          |
| 2   | 62600399 | 62600605 | 1       | -0.189381  | 5    | 0.014    | 0.038    | 0.32294  | 0.51232 | 0.029850603 | Intergenic | NA                                                           | NA                          |
| 2   | 62720530 | 62720673 | 1       | -0.060343  | 5    | 0.023    | 0.038    | 0.096803 | 0.15715 | 0.04441443  | Intergenic | NA                                                           | NA                          |
| 2   | 62729826 | 62729969 | 1       | -0.059966  | 5    | 0.023    | 0.038    | 0.096652 | 0.15662 | 0.04441443  | Intergenic | NA                                                           | NA                          |
| 2   | 63357033 | 63357456 | 1       | -0.125923  | 7    | 1.10E-06 | 0.00017  | 0.13018  | 0.2561  | 1.27E-05    | Intragenic | NM_001008725                                                 | Il6st                       |
| 2   | 64137419 | 64137675 | 1       | -0.120084  | 11   | 0.0067   | 0.045    | 0.3486   | 0.46868 | 0.016573466 | TSS        | NM_022604                                                    | Esm1                        |
| 2   | 64765476 | 64765643 | 1       | -0.206003  | 10   | 5.10E-06 | 7.30E-06 | 0.11948  | 0.32548 | 4.54E-05    | Intergenic | NA                                                           | NA                          |
| 2   | 65325351 | 65325447 | 1       | -0.247191  | 5    | 0.00015  | 0.00051  | 0.2619   | 0.50909 | 0.000724207 | Intergenic | NA                                                           | NA                          |
| 2   | 67733072 | 67733210 | 1       | -0.05922   | 7    | 0.00045  | 0.0032   | 0.82086  | 0.88008 | 0.001798952 | Intergenic | NA                                                           | NA                          |
| 2   | 68182576 | 68182787 | 1       | -0.090174  | 7    | 0.022    | 0.077    | 0.62973  | 0.7199  | 0.043064669 | Intergenic | NA                                                           | NA                          |
| 2   | 68347453 | 68347471 | 0.0021  | -0.406972  | 5    | 6.30E-08 | 6.60E-09 | 0.36389  | 0.77086 | 1.18E-06    | Intergenic | NA                                                           | NA                          |
| 2   | 72829150 | 72829286 | 1       | -0.129007  | 5    | 0.0053   | 0.038    | 0.57716  | 0.70617 | 0.013591571 | Intergenic | NA                                                           | NA                          |
| 2   | 74003989 | 74004109 | 1       | -0.11955   | 5    | 0.0094   | 0.038    | 0.22906  | 0.34861 | 0.021723038 | Intergenic | NA                                                           | NA                          |
| 2   | 74605860 | 74606012 | 1       | -0.147216  | 7    | 0.00021  | 0.019    | 0.46625  | 0.61347 | 0.000951214 | Intergenic | NA                                                           | NA                          |
| 2   | 75055951 | 75056033 | 1       | -0.059357  | 5    | 0.023    | 0.038    | 0.78992  | 0.84927 | 0.04441443  | Intergenic | NA                                                           | NA                          |
| 2   | 75462420 | 75462598 | 1       | -0.126236  | 7    | 0.00043  | 0.0083   | 0.18647  | 0.31271 | 0.001736911 | Intergenic | NA                                                           | NA                          |
| 2   | 75551156 | 75551252 | 1       | -0.156382  | 5    | 6.20E-05 | 0.00098  | 0.10974  | 0.26612 | 0.000349462 | Intragenic | NM_057146                                                    | C9                          |
| 2   | 76165634 | 76165816 | 1       | -0.163952  | 5    | 1.00E-05 | 0.00027  | 0.05913  | 0.22308 | 7.82E-05    | Intergenic | NA                                                           | NA                          |
| 2   | 76260999 | 76261232 | 1       | -0.194055  | 11   | 4.40E-06 | 0.004    | 0.22814  | 0.42219 | 4.01E-05    | Intragenic | NM_001108938                                                 | Egflam                      |
| 2   | 76278208 | 76278317 | 1       | -0.189695  | 5    | 0.0027   | 0.0092   | 0.22108  | 0.41077 | 0.007840962 | Intragenic | NM_001108938                                                 | Egflam                      |
| 2   | 77013999 | 77014149 | 1       | -0.250326  | 7    | 2.70E-07 | 5.50E-05 | 0.23855  | 0.48887 | 3.98E-06    | Intragenic | NM_001013909                                                 | Wdr70                       |

| chr | start     | stop      | q-value | methyl.diff | CpGs | pMWU     | p2DKS    | MCWLS    | MCWHS   | pMWU.fdr    | cgi.type   | transcript                | gene        |
|-----|-----------|-----------|---------|-------------|------|----------|----------|----------|---------|-------------|------------|---------------------------|-------------|
| 2   | 77622159  | 77622219  | 1       | -0.159022   | 5    | 0.0013   | 0.00097  | 0.048729 | 0.20775 | 0.004277683 | TSS        | NM_001106416:NM_001109177 | Skp2:Lmbrd2 |
| 2   | 78835716  | 78835754  | 1       | -0.26727    | 7    | 8.80E-07 | 3.00E-05 | 0.35315  | 0.62042 | 1.06E-05    | Intergenic | NA                        | NA          |
| 2   | 81673745  | 81673805  | 1       | -0.053935   | 5    | 0.017    | 0.025    | 0.89383  | 0.94777 | 0.034796287 | Intergenic | NA                        | NA          |
| 2   | 82096191  | 82096250  | 1       | -0.150408   | 5    | 0.00032  | 0.00098  | 0.17284  | 0.32325 | 0.001346443 | Intergenic | NA                        | NA          |
| 2   | 82131741  | 82131794  | 0.49    | -0.191652   | 5    | 4.20E-07 | 1.50E-06 | 0.48956  | 0.68121 | 5.76E-06    | Intergenic | NA                        | NA          |
| 2   | 82166122  | 82166238  | 1       | -0.2469     | 5    | 1.20E-05 | 0.00052  | 0.13134  | 0.37824 | 9.15E-05    | Intergenic | NA                        | NA          |
| 2   | 82229618  | 82229752  | 1       | -0.216954   | 5    | 0.00044  | 0.0093   | 0.27705  | 0.49401 | 0.001760146 | Intragenic | NM_022940                 | Pdzd2       |
| 2   | 82276429  | 82276612  | 1       | -0.17068    | 5    | 0.002    | 0.0018   | 0.15793  | 0.32861 | 0.006079939 | Intragenic | NM_022940                 | Pdzd2       |
| 2   | 82276917  | 82277011  | 1       | -0.12698    | 5    | 3.70E-06 | 3.40E-05 | 0.038448 | 0.16543 | 3.46E-05    | Intragenic | NM_022940                 | Pdzd2       |
| 2   | 83707542  | 83707630  | 1       | -0.140327   | 5    | 0.0063   | 0.088    | 0.56627  | 0.7066  | 0.015629046 | Intragenic | NM_001107653              | Slc45a2     |
| 2   | 83729634  | 83729770  | 1       | -0.162723   | 5    | 0.0038   | 0.059    | 0.17478  | 0.33751 | 0.010352437 | Intragenic | NM_012816                 | Amacr       |
| 2   | 84092426  | 84092503  | 1       | -0.201558   | 5    | 0.0016   | 0.015    | 0.22076  | 0.42231 | 0.005100053 | Intragenic | NM_001011947              | Rai14       |
| 2   | 87957433  | 87957594  | 1       | -0.094842   | 5    | 0.023    | 0.13     | 0.6439   | 0.73874 | 0.04441443  | Intergenic | NA                        | NA          |
| 2   | 89483955  | 89484120  | 1       | -0.066191   | 5    | 0.013    | 0.038    | 0.7407   | 0.8069  | 0.028097302 | Intergenic | NA                        | NA          |
| 2   | 89898767  | 89898980  | 1       | -0.081819   | 5    | 0.0094   | 0.0018   | 0.64374  | 0.72556 | 0.021723038 | Intergenic | NA                        | NA          |
| 2   | 92542145  | 92542435  | 1       | -0.108583   | 5    | 0.0045   | 0.0054   | 0.72998  | 0.83856 | 0.011905878 | Intergenic | NA                        | NA          |
| 2   | 95125878  | 95125960  | 1       | -0.100166   | 7    | 0.0076   | 0.026    | 0.59651  | 0.69668 | 0.018313455 | Intergenic | NA                        | NA          |
| 2   | 97745991  | 97746058  | 1       | -0.190561   | 5    | 0.00048  | 0.009    | 0.21212  | 0.40268 | 0.001881331 | Intragenic | NM_001107657              | Myo10       |
| 2   | 97785750  | 97785998  | 1       | -0.143188   | 13   | 8.50E-06 | 2.40E-05 | 0.17825  | 0.32143 | 6.88E-05    | Intragenic | NM_001107657              | Myo10       |
| 2   | 97886490  | 97886633  | 0.00014 | -0.216376   | 13   | 9.90E-13 | 4.30E-10 | 0.12676  | 0.34314 | 7.63E-11    | Intragenic | NM_001034912              | Fam134b     |
| 2   | 97930270  | 97930364  | 0.09    | -0.18637    | 5    | 2.40E-07 | 2.80E-07 | 0.050646 | 0.23702 | 3.57E-06    | Intragenic | NM_001034912              | Fam134b     |
| 2   | 97978646  | 97978748  | 1       | -0.125727   | 12   | 3.60E-08 | 2.50E-05 | 0.11709  | 0.24282 | 7.75E-07    | TSS        | NM_001009652              | Zfp622      |
| 2   | 99380885  | 99380967  | 1       | -0.091154   | 5    | 0.0019   | 0.0053   | 0.74101  | 0.83217 | 0.005855937 | Intergenic | NA                        | NA          |
| 2   | 100169296 | 100169346 | 1       | -0.095709   | 5    | 0.0094   | 0.039    | 0.72723  | 0.82294 | 0.021723038 | Intergenic | NA                        | NA          |
| 2   | 100366547 | 100366661 | 1       | -0.269197   | 5    | 2.90E-06 | 3.20E-05 | 0.12919  | 0.39838 | 2.84E-05    | Intergenic | NA                        | NA          |
| 2   | 100955805 | 100955858 | 1       | -0.154879   | 5    | 5.00E-05 | 0.00096  | 0.57832  | 0.7332  | 0.000291675 | Intergenic | NA                        | NA          |
| 2   | 101230856 | 101230900 | 1       | -0.124358   | 5    | 0.008    | 0.0092   | 0.10086  | 0.22522 | 0.019059477 | Intergenic | NA                        | NA          |
| 2   | 102276403 | 102276513 | 1       | -0.114209   | 5    | 0.0014   | 0.0092   | 0.595    | 0.70921 | 0.004540837 | Intergenic | NA                        | NA          |
| 2   | 104034856 | 104034964 | 1       | -0.113256   | 5    | 0.023    | 0.038    | 0.57461  | 0.68787 | 0.04441443  | Intragenic | NM_001191565              | Ankrd33b    |
| 2   | 104034973 | 104035077 | 1       | -0.187043   | 5    | 0.00017  | 0.0031   | 0.1124   | 0.29944 | 0.000806192 | Intragenic | NM_001191565              | Ankrd33b    |
| 2   | 108504099 | 108504156 | 1       | -0.226931   | 5    | 0.00072  | 0.0054   | 0.577    | 0.80393 | 0.002634665 | Intergenic | NA                        | NA          |
| 2   | 108505193 | 108505265 | 1       | -0.171264   | 5    | 0.0032   | 0.025    | 0.68877  | 0.86003 | 0.008990975 | Intergenic | NA                        | NA          |
| 2   | 108508404 | 108508497 | 1       | -0.327868   | 9    | 1.90E-06 | 1.00E-05 | 0.33431  | 0.66217 | 2.01E-05    | Intergenic | NA                        | NA          |
| 2   | 108639740 | 108639812 | 1       | -0.149578   | 5    | 0.013    | 0.088    | 0.71045  | 0.86003 | 0.028097302 | Intergenic | NA                        | NA          |
| 2   | 108750391 | 108750463 | 1       | -0.209047   | 5    | 2.80E-05 | 3.30E-05 | 0.62906  | 0.83811 | 0.000182174 | Intergenic | NA                        | NA          |
| 2   | 112918025 | 112918121 | 1       | -0.162192   | 7    | 9.00E-06 | 2.30E-05 | 0.1478   | 0.30999 | 7.26E-05    | Intergenic | NA                        | NA          |
| 2   | 113851243 | 113851386 | 1       | -0.115107   | 5    | 0.011    | 0.059    | 0.45774  | 0.57284 | 0.02463877  | Intergenic | NA                        | NA          |
| 2   | 114286419 | 114286484 | 1       | -0.293186   | 5    | 1.30E-05 | 7.40E-06 | 0.27703  | 0.57021 | 9.66E-05    | Intergenic | NA                        | NA          |

| chr | start     | stop      | q-value  | methy.diff | CpGs | pMWU     | p2DKS    | MCWLS     | MCWHS    | pMWU.fdr    | cgi.type   | transcript   | gene   |
|-----|-----------|-----------|----------|------------|------|----------|----------|-----------|----------|-------------|------------|--------------|--------|
| 2   | 114751948 | 114752107 | 1        | -0.229664  | 5    | 0.00097  | 0.0052   | 0.2081    | 0.43777  | 0.003366009 | TSS        | NM_001106421 | Tpd52  |
| 2   | 115451568 | 115452136 | 1        | -0.059441  | 17   | 0.011    | 0.016    | 0.65481   | 0.71425  | 0.02463877  | Intergenic | NA           | NA     |
| 2   | 116640934 | 116641117 | 1        | -0.102251  | 6    | 0.015    | 0.027    | 0.25493   | 0.35718  | 0.031584896 | Intergenic | NA           | NA     |
| 2   | 117434676 | 117434712 | 1        | -0.136613  | 5    | 0.00019  | 0.0032   | 0.35532   | 0.49193  | 0.000879857 | Intergenic | NA           | NA     |
| 2   | 124367044 | 124367136 | 1        | -0.184183  | 5    | 0.0027   | 0.0091   | 0.32066   | 0.50485  | 0.007840962 | Intergenic | NA           | NA     |
| 2   | 127768920 | 127769083 | 1        | -0.099537  | 5    | 0.0063   | 0.059    | 0.57769   | 0.67723  | 0.015629046 | Intergenic | NA           | NA     |
| 2   | 128670863 | 128670924 | 1        | -0.105648  | 5    | 0.011    | 0.0087   | 0.62003   | 0.72567  | 0.02463877  | Intergenic | NA           | NA     |
| 2   | 130811206 | 130811312 | 1        | -0.052258  | 5    | 0.023    | 0.086    | 0.75488   | 0.80714  | 0.04441443  | Intragenic | NM_053868    | Nlgn1  |
| 2   | 132560547 | 132560814 | 1        | -0.073585  | 11   | 0.024    | 0.045    | 0.68665   | 0.76024  | 0.046241462 | Intergenic | NA           | NA     |
| 2   | 132699995 | 132700162 | 1        | -0.134283  | 11   | 0.00084  | 0.004    | 0.18001   | 0.31429  | 0.002993559 | Intergenic | NA           | NA     |
| 2   | 132785268 | 132785285 | 1        | -0.122946  | 5    | 0.00019  | 0.00098  | 0.04387   | 0.16682  | 0.000879857 | TSS        | NM_032075    | Ghsr   |
| 2   | 133059714 | 133059805 | 1        | -0.061151  | 8    | 0.011    | 0.022    | 0.83087   | 0.89202  | 0.02463877  | TSS        | NM_001191704 | Fndc3b |
| 2   | 133105462 | 133105516 | 1        | -0.136268  | 5    | 2.40E-05 | 7.10E-05 | 0.09758   | 0.23385  | 0.000160049 | Intergenic | NA           | NA     |
| 2   | 135025981 | 135026066 | 1        | -0.080572  | 5    | 0.0024   | 0.038    | 0.065448  | 0.14602  | 0.00705499  | Intergenic | NA           | NA     |
| 2   | 135034361 | 135034446 | 1        | -0.074715  | 5    | 0.0029   | 0.038    | 0.065122  | 0.13984  | 0.008293503 | TSS        | NM_001100697 | Eif5a2 |
| 2   | 135610369 | 135610511 | 1        | -0.076389  | 5    | 0.0022   | 0.0054   | 0.050043  | 0.12643  | 0.006578104 | Intergenic | NA           | NA     |
| 2   | 137147718 | 137147845 | 0.18     | -0.237857  | 9    | 1.10E-10 | 5.70E-07 | 0.22093   | 0.45879  | 4.91E-09    | Intragenic | NM_001106423 | Mecom  |
| 2   | 137269379 | 137269498 | 1        | -0.160107  | 5    | 0.0094   | 0.024    | 0.37512   | 0.53523  | 0.021723038 | Intragenic | NM_001106423 | Mecom  |
| 2   | 138131104 | 138131195 | 1        | -0.212909  | 5    | 0.0008   | 0.0054   | 0.14978   | 0.36268  | 0.002866309 | Intergenic | NA           | NA     |
| 2   | 138448106 | 138448225 | 1        | -0.223443  | 7    | 0.00024  | 0.00026  | 0.19356   | 0.417    | 0.001064629 | Intergenic | NA           | NA     |
| 2   | 139186296 | 139186342 | 1        | 0.051237   | 5    | 0.0032   | 0.0091   | 0.067157  | 0.01592  | 0.008990975 | TSS        | NM_173152    | Pex5l  |
| 2   | 139911732 | 139911821 | 1        | -0.208675  | 10   | 0.00014  | 0.0019   | 0.54539   | 0.75406  | 0.000684451 | Intergenic | NA           | NA     |
| 2   | 140814552 | 140814662 | 1        | -0.057831  | 5    | 0.019    | 0.0018   | 0.08831   | 0.14614  | 0.038322088 | Intergenic | NA           | NA     |
| 2   | 140920050 | 140920090 | 1        | -0.152355  | 5    | 0.019    | 0.088    | 0.38164   | 0.534    | 0.038322088 | Intergenic | NA           | NA     |
| 2   | 141849133 | 141849192 | 1        | -0.063864  | 5    | 0.016    | 0.088    | 0.69898   | 0.76285  | 0.033288089 | Intergenic | NA           | NA     |
| 2   | 142477439 | 142477591 | 1        | -0.250434  | 7    | 7.50E-07 | 2.80E-05 | 0.25771   | 0.50815  | 9.35E-06    | Intergenic | NA           | NA     |
| 2   | 142477646 | 142477793 | 1        | -0.102508  | 5    | 0.0049   | 0.0053   | 0.71507   | 0.81758  | 0.012753585 | Intergenic | NA           | NA     |
| 2   | 142510101 | 142510211 | 1        | -0.06682   | 6    | 0.0021   | 0.018    | 0.057522  | 0.12434  | 0.006364615 | Intragenic | NM_001047885 | Arse   |
| 2   | 143263431 | 143263476 | 1        | 0.229635   | 5    | 0.0063   | 0.015    | 0.78918   | 0.55955  | 0.015629046 | Intergenic | NA           | NA     |
| 2   | 143263498 | 143263609 | 1        | -0.093131  | 5    | 0.00059  | 0.0032   | 0.80716   | 0.90029  | 0.002242971 | Intergenic | NA           | NA     |
| 2   | 144564274 | 144564394 | 1        | -0.130413  | 6    | 1.40E-05 | 0.0027   | 0.076807  | 0.20722  | 0.000103723 | Intergenic | NA           | NA     |
| 2   | 144684452 | 144684631 | 1        | -0.163782  | 8    | 5.60E-05 | 0.0025   | 0.18978   | 0.35356  | 0.000320912 | Intergenic | NA           | NA     |
| 2   | 145134748 | 145134817 | 1        | -0.165149  | 7    | 0.00083  | 0.00082  | 0.49623   | 0.66138  | 0.002961434 | Intergenic | NA           | NA     |
| 2   | 148414902 | 148416511 | 1        | -0.112123  | 62   | 3.70E-09 | 5.40E-06 | 0.060785  | 0.14207  | 1.01E-07    | Intergenic | NA           | NA     |
| 2   | 148416548 | 148416673 | 4.10E-06 | -0.092072  | 12   | 2.90E-11 | 1.30E-11 | 0.0046769 | 0.096749 | 1.44E-09    | Intergenic | NA           | NA     |
| 2   | 148416905 | 148417688 | 1        | -0.058188  | 29   | 1.80E-07 | 7.00E-06 | 0.033863  | 0.092897 | 2.78E-06    | Intergenic | NA           | NA     |
| 2   | 148424643 | 148424766 | 1        | -0.0582    | 5    | 0.012    | 0.13     | 0.026416  | 0.084615 | 0.026435197 | Intergenic | NA           | NA     |
| 2   | 149556780 | 149556932 | 1        | 0.146732   | 7    | 0.026    | 0.035    | 0.47277   | 0.32604  | 0.049234478 | Intergenic | NA           | NA     |
| 2   | 154252202 | 154252246 | 1        | -0.093766  | 5    | 0.00072  | 0.0054   | 0.82682   | 0.92059  | 0.002634665 | Intergenic | NA           | NA     |

| chr | start     | stop      | q-value  | methy.diff | CpGs | pMWU     | p2DKS    | MCWLS    | MCWHS   | pMWU.fdr    | cgi.type   | transcript   | gene      |
|-----|-----------|-----------|----------|------------|------|----------|----------|----------|---------|-------------|------------|--------------|-----------|
| 2   | 154252603 | 154252766 | 1        | -0.09528   | 6    | 5.30E-05 | 0.00091  | 0.74748  | 0.84276 | 0.000308427 | Intergenic | NA           | NA        |
| 2   | 157839555 | 157839637 | 1        | -0.07998   | 7    | 0.0029   | 0.026    | 0.69403  | 0.77401 | 0.008293503 | Intergenic | NA           | NA        |
| 2   | 158010660 | 158010734 | 1        | -0.202648  | 5    | 0.008    | 0.005    | 0.56585  | 0.76849 | 0.019059477 | Intergenic | NA           | NA        |
| 2   | 158846863 | 158846948 | 1        | -0.140466  | 5    | 0.0068   | 0.0089   | 0.22081  | 0.36127 | 0.016642688 | Intergenic | NA           | NA        |
| 2   | 159775758 | 159775828 | 1        | -0.159286  | 5    | 0.0019   | 0.0032   | 0.49957  | 0.65886 | 0.005855937 | Intragenic | NM_138526    | Noct      |
| 2   | 160077713 | 160077773 | 1        | -0.121311  | 5    | 0.00015  | 0.0017   | 0.061572 | 0.18288 | 0.000724207 | Intragenic | NM_001109558 | Setd7     |
| 2   | 160226784 | 160226984 | 1        | -0.081395  | 9    | 0.002    | 0.011    | 0.10907  | 0.19047 | 0.006079939 | Intragenic | NM_001107675 | Maml3     |
| 2   | 160527368 | 160527430 | 5.10E-05 | -0.118359  | 10   | 4.40E-13 | 1.60E-10 | 0.037721 | 0.15608 | 3.73E-11    | Intragenic | NM_001107675 | Maml3     |
| 2   | 160601344 | 160601539 | 1        | -0.121818  | 5    | 1.20E-05 | 0.00014  | 0.054748 | 0.17657 | 9.15E-05    | Intragenic | NM_001107675 | Maml3     |
| 2   | 160609553 | 160609753 | 1        | -0.082677  | 9    | 0.002    | 0.011    | 0.10907  | 0.19175 | 0.006079939 | Intragenic | NM_001107675 | Maml3     |
| 2   | 161060793 | 161060938 | 1        | -0.148016  | 6    | 0.013    | 0.026    | 0.33585  | 0.48386 | 0.028097302 | Intergenic | NA           | NA        |
| 2   | 161253737 | 161253796 | 1        | -0.304308  | 5    | 3.70E-06 | 7.00E-05 | 0.2665   | 0.5708  | 3.46E-05    | Intergenic | NA           | NA        |
| 2   | 161703733 | 161704100 | 1        | 0.167774   | 9    | 0.015    | 0.082    | 0.58255  | 0.41477 | 0.031584896 | Intergenic | NA           | NA        |
| 2   | 162385789 | 162385924 | 1        | -0.168454  | 9    | 0.0002   | 0.017    | 0.25716  | 0.42562 | 0.00092049  | Intragenic | NM_001107676 | Proser1   |
| 2   | 164222233 | 164222391 | 1        | -0.255028  | 5    | 3.30E-06 | 0.00014  | 0.079613 | 0.33464 | 3.16E-05    | Intergenic | NA           | NA        |
| 2   | 164236191 | 164236307 | 1        | -0.172937  | 6    | 1.10E-05 | 2.40E-05 | 0.036681 | 0.20962 | 8.53E-05    | Intergenic | NA           | NA        |
| 2   | 165814308 | 165814390 | 1        | -0.087444  | 6    | 0.025    | 0.12     | 0.6534   | 0.74084 | 0.047453009 | Intergenic | NA           | NA        |
| 2   | 166273752 | 166273875 | 1        | -0.094929  | 5    | 0.016    | 0.037    | 0.50563  | 0.60056 | 0.033288089 | Intergenic | NA           | NA        |
| 2   | 166799995 | 166800071 | 1        | -0.253275  | 5    | 4.80E-06 | 6.90E-05 | 0.30189  | 0.55517 | 4.29E-05    | TSS        | NM_001106434 | Tm4sf1    |
| 2   | 166888507 | 166888675 | 1        | -0.08812   | 5    | 0.025    | 0.18     | 0.22688  | 0.315   | 0.047453009 | Intergenic | NA           | NA        |
| 2   | 167797365 | 167797486 | 0.065    | -0.150259  | 12   | 3.40E-06 | 2.00E-07 | 0.12177  | 0.27203 | 3.25E-05    | Intergenic | NA           | NA        |
| 2   | 168375087 | 168375189 | 1        | -0.11442   | 5    | 0.023    | 0.088    | 0.14101  | 0.25543 | 0.04441443  | Intergenic | NA           | NA        |
| 2   | 168982746 | 168982811 | 1        | -0.187036  | 5    | 6.50E-07 | 7.50E-06 | 0.079508 | 0.26654 | 8.28E-06    | Intragenic | NM_198768    | Igsf10    |
| 2   | 169202370 | 169202551 | 1        | 0.140677   | 7    | 0.02     | 0.19     | 0.71094  | 0.57026 | 0.039778219 | Intergenic | NA           | NA        |
| 2   | 171882803 | 171882976 | 1        | -0.105651  | 6    | 0.017    | 0.039    | 0.59304  | 0.69869 | 0.034796287 | Intergenic | NA           | NA        |
| 2   | 172019396 | 172019497 | 1        | -0.192036  | 5    | 0.0074   | 0.025    | 0.6163   | 0.80834 | 0.017853001 | Intergenic | NA           | NA        |
| 2   | 175600030 | 175600086 | 1        | -0.132644  | 5    | 0.025    | 0.059    | 0.38897  | 0.52161 | 0.047453009 | Intergenic | NA           | NA        |
| 2   | 175603168 | 175603214 | 1        | -0.093292  | 5    | 0.0094   | 0.13     | 0.64077  | 0.73406 | 0.021723038 | Intergenic | NA           | NA        |
| 2   | 176165256 | 176165343 | 1        | -0.075938  | 5    | 0.0027   | 0.015    | 0.031028 | 0.10697 | 0.007840962 | Intragenic | NM_001127530 | LOC302022 |
| 2   | 176275520 | 176275553 | 1        | -0.275108  | 7    | 7.70E-08 | 9.00E-05 | 0.48552  | 0.76063 | 1.41E-06    | Intergenic | NA           | NA        |
| 2   | 177021475 | 177021587 | 1        | -0.065821  | 7    | 0.00065  | 0.0054   | 0.042756 | 0.10858 | 0.002426546 | Intergenic | NA           | NA        |
| 2   | 177509855 | 177510050 | 1        | -0.060885  | 8    | 1.50E-05 | 0.001    | 0.040822 | 0.10171 | 0.000109113 | Intragenic | NM_001014171 | Veph1     |
| 2   | 177792501 | 177792653 | 1        | -0.071596  | 7    | 0.026    | 0.11     | 0.8187   | 0.89029 | 0.049234478 | Intergenic | NA           | NA        |
| 2   | 177898465 | 177898648 | 1        | -0.118048  | 9    | 0.006    | 0.0057   | 0.51116  | 0.62921 | 0.015096734 | Intergenic | NA           | NA        |
| 2   | 180905637 | 180905683 | 1        | -0.130917  | 5    | 0.014    | 0.024    | 0.70001  | 0.83093 | 0.029850603 | Intergenic | NA           | NA        |
| 2   | 180905701 | 180905728 | 1        | -0.146336  | 5    | 8.50E-07 | 3.40E-06 | 0.48936  | 0.6357  | 1.03E-05    | Intergenic | NA           | NA        |
| 2   | 180905919 | 180905957 | 1        | -0.204099  | 5    | 0.00036  | 0.0018   | 0.43231  | 0.63641 | 0.001486639 | Intergenic | NA           | NA        |
| 2   | 180905969 | 180906042 | 1        | -0.20715   | 5    | 0.00026  | 0.0017   | 0.38061  | 0.58776 | 0.001130807 | Intergenic | NA           | NA        |
| 2   | 180911256 | 180911293 | 1        | -0.204938  | 5    | 9.80E-05 | 0.003    | 0.27479  | 0.47972 | 0.000512474 | Intergenic | NA           | NA        |



| chr | start     | stop      | q-value  | methy.diff | CpGs | pMWU     | p2DKS    | MCWLS     | MCWHS    | pMWU.fdr    | cgi.type   | transcript                    | gene               |
|-----|-----------|-----------|----------|------------|------|----------|----------|-----------|----------|-------------|------------|-------------------------------|--------------------|
| 2   | 180916171 | 180916643 | 3.80E-06 | -0.197409  | 32   | 4.70E-14 | 1.20E-11 | 0.18194   | 0.37935  | 6.64E-12    | Intergenic | NA                            | NA                 |
| 2   | 180917002 | 180917546 | 1        | -0.17931   | 10   | 2.10E-06 | 4.90E-06 | 0.11109   | 0.2904   | 2.20E-05    | Intergenic | NA                            | NA                 |
| 2   | 180995548 | 180996002 | 1        | -0.113825  | 18   | 7.90E-07 | 3.70E-05 | 0.1618    | 0.27562  | 9.79E-06    | Intergenic | NA                            | NA                 |
| 2   | 181019777 | 181019859 | 1        | 0.136258   | 5    | 0.014    | 0.038    | 0.74829   | 0.61203  | 0.029850603 | Intergenic | NA                            | NA                 |
| 2   | 181027820 | 181027955 | 1        | -0.260647  | 11   | 4.30E-07 | 2.30E-05 | 0.2349    | 0.49554  | 5.89E-06    | Intergenic | NA                            | NA                 |
| 2   | 184383409 | 184383536 | 1        | -0.056859  | 7    | 0.015    | 0.078    | 0.86009   | 0.91694  | 0.031584896 | Intergenic | NA                            | NA                 |
| 2   | 184590293 | 184590378 | 1        | -0.10104   | 5    | 0.0058   | 0.015    | 0.66089   | 0.76193  | 0.014624129 | Intergenic | NA                            | NA                 |
| 2   | 184714037 | 184714122 | 1        | -0.106234  | 5    | 0.0049   | 0.0091   | 0.65414   | 0.76037  | 0.012753585 | Intergenic | NA                            | NA                 |
| 2   | 185523432 | 185523648 | 1        | -0.296541  | 7    | 1.50E-06 | 0.00027  | 0.19556   | 0.4921   | 1.65E-05    | Intragenic | NM_001107681                  | Ppm1l              |
| 2   | 185524059 | 185524111 | 1        | -0.203342  | 5    | 0.00072  | 0.059    | 0.11692   | 0.32027  | 0.002634665 | Intragenic | NM_001107681                  | Ppm1l              |
| 2   | 186367838 | 186367950 | 1        | -0.066518  | 5    | 0.023    | 0.039    | 0.10271   | 0.16922  | 0.04441443  | Intergenic | NA                            | NA                 |
| 2   | 191122387 | 191122570 | 1        | -0.073734  | 9    | 0.022    | 0.06     | 0.61886   | 0.69259  | 0.043064669 | Intergenic | NA                            | NA                 |
| 2   | 193160788 | 193160985 | 1        | -0.2722    | 7    | 2.60E-06 | 0.00044  | 0.26474   | 0.53694  | 2.60E-05    | Intergenic | NA                            | NA                 |
| 2   | 193166285 | 193166359 | 1        | -0.419013  | 7    | 2.80E-08 | 1.60E-05 | 0.15376   | 0.57277  | 6.20E-07    | Intergenic | NA                            | NA                 |
| 2   | 196590979 | 196591136 | 1        | -0.240612  | 5    | 1.90E-05 | 0.00028  | 0.24459   | 0.4852   | 0.000131674 | Intergenic | NA                            | NA                 |
| 2   | 197176090 | 197176243 | 0.022    | -0.219688  | 16   | 2.00E-11 | 6.80E-08 | 0.48623   | 0.70592  | 1.04E-09    | Intragenic | NM_001107684                  | Rapgef2            |
| 2   | 197439698 | 197439855 | 1        | -0.219046  | 5    | 6.20E-05 | 0.00014  | 0.26615   | 0.4852   | 0.000349462 | Intergenic | NA                            | NA                 |
| 2   | 199122718 | 199122791 | 1        | 0.065656   | 6    | 0.014    | 0.027    | 0.93704   | 0.87138  | 0.029850603 | Intergenic | NA                            | NA                 |
| 2   | 200152762 | 200152907 | 1        | -0.059875  | 8    | 0.00091  | 0.025    | 0.72709   | 0.78697  | 0.003192838 | Intergenic | NA                            | NA                 |
| 2   | 201288381 | 201288418 | 1        | -0.075983  | 7    | 0.003    | 0.019    | 0.073947  | 0.14993  | 0.008555055 | TSS        | NM_001135717                  | Rbm46              |
| 2   | 201319582 | 201319696 | 1        | -0.061864  | 5    | 0.023    | 0.058    | 0.10085   | 0.16271  | 0.04441443  | TSS        | NM_022280                     | Lrat               |
| 2   | 203661460 | 203661638 | 0.0072   | -0.201712  | 9    | 1.80E-10 | 2.20E-08 | 0.071168  | 0.27288  | 7.51E-09    | Intergenic | NA                            | NA                 |
| 2   | 206033702 | 206033725 | 1        | -0.162664  | 5    | 0.00065  | 0.015    | 0.40125   | 0.56391  | 0.002426546 | Intergenic | NA                            | NA                 |
| 2   | 206316679 | 206316796 | 1        | -0.201267  | 5    | 0.0016   | 0.039    | 0.40947   | 0.61074  | 0.005100053 | Intergenic | NA                            | NA                 |
| 2   | 206518648 | 206518748 | 1        | -0.092174  | 5    | 0.015    | 0.088    | 0.10611   | 0.19829  | 0.031584896 | TSS        | NM_001107701                  | Lrrc71             |
| 2   | 206526267 | 206526316 | 1        | -0.089332  | 5    | 0.0016   | 0.024    | 0.094153  | 0.18349  | 0.005100053 | Intragenic | NM_001134959                  | Pear1              |
| 2   | 206534469 | 206534796 | 1        | -0.215571  | 6    | 0.00026  | 0.0016   | 0.12415   | 0.33972  | 0.001130807 | Intragenic | NM_001134959                  | Pear1              |
| 2   | 206705346 | 206705380 | 0.00019  | -0.167567  | 7    | 2.50E-10 | 5.90E-10 | 0.014147  | 0.18171  | 1.00E-08    | TSS        | NM_001007741:N<br>M_001014173 | Isg20l2:Rrnad<br>1 |
| 2   | 206725738 | 206726166 | 1        | -0.085572  | 10   | 0.026    | 0.42     | 0.15978   | 0.24535  | 0.049234478 | TSS        | NM_017244                     | Crabp2             |
| 2   | 206913485 | 206913553 | 1        | -0.123996  | 5    | 0.00065  | 0.0031   | 0.08373   | 0.20773  | 0.002426546 | TSS        | NM_030860                     | Mef2d              |
| 2   | 207107891 | 207107989 | 0.49     | -0.259125  | 5    | 1.80E-07 | 1.50E-06 | 0.025781  | 0.28491  | 2.78E-06    | TSS        | NM_001033896                  | Tmem79             |
| 2   | 207140663 | 207140721 | 1        | -0.11834   | 5    | 0.00072  | 0.0031   | 0.10276   | 0.2211   | 0.002634665 | TSS        | NM_001191077                  | Paqr6              |
| 2   | 207142342 | 207142416 | 1        | -0.248976  | 5    | 1.50E-05 | 1.60E-05 | 0.077998  | 0.32697  | 0.000109113 | TSS        | NM_001191077                  | Paqr6              |
| 2   | 207210862 | 207210935 | 1        | -0.218215  | 5    | 0.0087   | 0.059    | 0.40599   | 0.62421  | 0.020391633 | Intragenic | NM_001012078                  | Sema4a             |
| 2   | 207256663 | 207256686 | 1        | -0.111453  | 7    | 9.00E-06 | 0.00049  | 0.068362  | 0.17981  | 7.26E-05    | Intragenic | NM_001002016                  | Lmna               |
| 2   | 207368825 | 207368940 | 1        | -0.206028  | 5    | 4.30E-06 | 7.60E-06 | 0.0089137 | 0.21494  | 3.93E-05    | Intergenic | NA                            | NA                 |
| 2   | 207390859 | 207391261 | 1        | -0.176301  | 6    | 0.019    | 0.011    | 0.26685   | 0.44316  | 0.038322088 | Intergenic | NA                            | NA                 |
| 2   | 207811816 | 207811909 | 1        | -0.051959  | 5    | 0.0035   | 0.038    | 0.045474  | 0.097433 | 0.009686665 | Intergenic | NA                            | NA                 |

| chr | start     | stop      | q-value  | methy.diff | CpGs | pMWU     | p2DKS    | MCWLS    | MCWHS    | pMWU.fdr    | cgi.type   | transcript                    | gene                 |
|-----|-----------|-----------|----------|------------|------|----------|----------|----------|----------|-------------|------------|-------------------------------|----------------------|
| 2   | 207866093 | 207866130 | 1        | -0.219981  | 5    | 3.10E-05 | 0.00052  | 0.20798  | 0.42796  | 0.000197418 | TSS        | NM_012624                     | Pklr                 |
| 2   | 207870829 | 207870938 | 1        | -0.21424   | 9    | 2.30E-08 | 9.90E-06 | 0.14567  | 0.35991  | 5.20E-07    | Intragenic | NM_012624                     | Pklr                 |
| 2   | 207912251 | 207912466 | 1        | -0.083658  | 8    | 0.0096   | 0.017    | 0.10219  | 0.18585  | 0.022155406 | TSS        | NM_001107690                  | Fam189b              |
| 2   | 207967408 | 207967521 | 1        | -0.080526  | 7    | 1.00E-05 | 0.00028  | 0.062518 | 0.14304  | 7.82E-05    | Intragenic | NM_001107691                  | Trim46               |
| 2   | 208009371 | 208009443 | 1        | -0.142475  | 5    | 0.00015  | 6.90E-05 | 0.063185 | 0.20566  | 0.000724207 | TSS        | NM_053599                     | Efna1                |
| 2   | 208064914 | 208064975 | 1        | -0.11525   | 5    | 0.0029   | 0.015    | 0.13755  | 0.2528   | 0.008293503 | Intergenic | NA                            | NA                   |
| 2   | 208081376 | 208081681 | 0.63     | -0.092462  | 15   | 9.70E-08 | 2.00E-06 | 0.098031 | 0.19049  | 1.71E-06    | TSS        | NM_020308                     | Adam15               |
| 2   | 208188911 | 208189038 | 1        | -0.163602  | 6    | 0.011    | 0.085    | 0.32385  | 0.48745  | 0.02463877  | Intragenic | NM_001100976                  | Pbxip1               |
| 2   | 208258333 | 208258612 | 1        | -0.052527  | 13   | 1.90E-05 | 0.00063  | 0.051039 | 0.10357  | 0.000131674 | Intergenic | NA                            | NA                   |
| 2   | 208411535 | 208411680 | 1        | -0.153331  | 5    | 0.0087   | 0.039    | 0.14439  | 0.29772  | 0.020391633 | Intragenic | NM_019315                     | Kcnn3                |
| 2   | 208703476 | 208703557 | 1        | -0.128373  | 5    | 0.016    | 0.088    | 0.34599  | 0.47437  | 0.033288089 | Intergenic | NA                            | NA                   |
| 2   | 209185493 | 209185599 | 1        | -0.147029  | 7    | 0.017    | 0.14     | 0.40797  | 0.555    | 0.034796287 | Intergenic | NA                            | NA                   |
| 2   | 209335561 | 209335734 | 1        | -0.053987  | 8    | 4.50E-05 | 0.00015  | 0.019134 | 0.073121 | 0.000268503 | TSS        | NM_001007636:N<br>M_001191607 | S100a1:S100a<br>13   |
| 2   | 210338294 | 210338403 | 4.20E-06 | -0.337766  | 8    | 6.90E-12 | 1.30E-11 | 0.26599  | 0.60376  | 4.25E-10    | Intergenic | NA                            | NA                   |
| 2   | 210338918 | 210339053 | 1        | -0.190536  | 9    | 0.00013  | 0.0036   | 0.48928  | 0.67982  | 0.000648758 | Intergenic | NA                            | NA                   |
| 2   | 211292706 | 211292855 | 1        | -0.098416  | 5    | 0.021    | 0.34     | 0.74944  | 0.84786  | 0.041207871 | Intergenic | NA                            | NA                   |
| 2   | 211326655 | 211326777 | 1        | -0.206744  | 5    | 0.00015  | 0.0017   | 0.16718  | 0.37393  | 0.000724207 | Intergenic | NA                            | NA                   |
| 2   | 214982952 | 214983041 | 1        | -0.107655  | 6    | 0.018    | 0.056    | 0.26091  | 0.36856  | 0.036742993 | Intragenic | NM_001100985                  | RGD1563667           |
| 2   | 215205276 | 215205406 | 1        | -0.326085  | 5    | 3.70E-06 | 3.50E-05 | 0.11964  | 0.44573  | 3.46E-05    | Intragenic | NM_001109190                  | Celf3                |
| 2   | 215396978 | 215397039 | 1        | -0.191646  | 5    | 0.0013   | 0.025    | 0.1664   | 0.35805  | 0.004277683 | Intergenic | NA                            | NA                   |
| 2   | 215716715 | 215716770 | 1        | -0.120179  | 5    | 0.0058   | 0.025    | 0.62838  | 0.74856  | 0.014624129 | Intergenic | NA                            | NA                   |
| 2   | 215804820 | 215804926 | 1        | -0.31157   | 5    | 5.50E-06 | 3.40E-05 | 0.14325  | 0.45482  | 4.78E-05    | Intragenic | NM_001024302:N<br>M_001014039 | Lysmd1:Tnfai<br>p8l2 |
| 2   | 215839201 | 215839215 | 1        | -0.222574  | 5    | 0.0012   | 0.015    | 0.33901  | 0.56159  | 0.004013471 | Intragenic | NM_001024302:N<br>M_017308    | Lysmd1:Sema<br>6c    |
| 2   | 215839605 | 215839834 | 6.30E-06 | -0.086599  | 31   | 5.10E-14 | 1.90E-11 | 0.12748  | 0.21408  | 6.72E-12    | Intragenic | NM_001024302:N<br>M_017308    | Lysmd1:Sema<br>6c    |
| 2   | 216067873 | 216067920 | 1        | -0.275201  | 5    | 3.90E-05 | 0.00014  | 0.098338 | 0.37354  | 0.000237659 | Intergenic | NA                            | NA                   |
| 2   | 216700164 | 216700334 | 1        | -0.06625   | 14   | 1.10E-07 | 0.00065  | 0.10965  | 0.1759   | 1.86E-06    | Intergenic | NA                            | NA                   |
| 2   | 216701109 | 216701152 | 1        | -0.176932  | 7    | 1.10E-05 | 0.00049  | 0.2525   | 0.42944  | 8.53E-05    | Intergenic | NA                            | NA                   |
| 2   | 217304847 | 217304931 | 1        | -0.123743  | 7    | 0.00018  | 0.0022   | 0.070778 | 0.19452  | 0.000849258 | TSS        | NM_001034012                  | Adamtsl4             |
| 2   | 217464080 | 217464212 | 1        | -0.082521  | 6    | 0.0024   | 0.011    | 0.057634 | 0.14016  | 0.00705499  | TSS        | NM_001108559                  | Prpf3                |
| 2   | 217514815 | 217515005 | 1        | -0.20516   | 7    | 0.0002   | 0.0044   | 0.35275  | 0.55791  | 0.00092049  | Intergenic | NA                            | NA                   |
| 2   | 217605806 | 217605952 | 1        | -0.131563  | 6    | 0.01     | 0.025    | 0.37989  | 0.51146  | 0.02275947  | Intragenic | NM_001025119                  | Plekho1              |
| 2   | 217613967 | 217614017 | 1        | -0.208291  | 5    | 0.00044  | 0.0032   | 0.25818  | 0.46647  | 0.001760146 | Intragenic | NM_172072                     | Vps45                |
| 2   | 217919818 | 217920050 | 1        | -0.118114  | 16   | 8.50E-07 | 0.0003   | 0.18445  | 0.30256  | 1.03E-05    | Intragenic | NM_001100836                  | Fcgr1a               |
| 2   | 218030631 | 218030717 | 1        | -0.140786  | 5    | 6.30E-06 | 0.00014  | 0.20941  | 0.35019  | 5.33E-05    | Intergenic | NA                            | NA                   |
| 2   | 218052875 | 218052975 | 1        | -0.201716  | 5    | 0.0074   | 0.059    | 0.33312  | 0.53484  | 0.017853001 | Intergenic | NA                            | NA                   |

| chr | start     | stop      | q-value | methy.diff | CpGs | pMWU     | p2DKS    | MCWLS    | MCWHS   | pMWU.fdr    | cgi.type   | transcript   | gene    |
|-----|-----------|-----------|---------|------------|------|----------|----------|----------|---------|-------------|------------|--------------|---------|
| 2   | 218074638 | 218074772 | 1       | -0.087936  | 7    | 0.017    | 0.039    | 0.72931  | 0.81725 | 0.034796287 | Intergenic | NA           | NA      |
| 2   | 218086824 | 218086934 | 1       | -0.172157  | 7    | 3.90E-05 | 8.40E-05 | 0.08647  | 0.25863 | 0.000237659 | Intergenic | NA           | NA      |
| 2   | 218145486 | 218145578 | 1       | -0.216506  | 5    | 3.30E-06 | 3.40E-05 | 0.55259  | 0.7691  | 3.16E-05    | Intragenic | NM_001012080 | Hfe2    |
| 2   | 218265808 | 218265834 | 1       | -0.22753   | 5    | 4.40E-05 | 0.00014  | 0.23759  | 0.46512 | 0.000263321 | Intragenic | NM_001107699 | Itga10  |
| 2   | 218331201 | 218331346 | 1       | -0.215679  | 5    | 0.00065  | 0.0018   | 0.077112 | 0.29279 | 0.002426546 | Intragenic | NM_001012081 | Polr3c  |
| 2   | 218475617 | 218475693 | 1       | -0.13152   | 5    | 0.025    | 0.038    | 0.55647  | 0.68799 | 0.047453009 | Intragenic | NM_031712    | Pdzk1   |
| 2   | 218681795 | 218681935 | 1       | -0.091621  | 6    | 0.001    | 0.04     | 0.1302   | 0.22182 | 0.003452169 | TSS        | NM_001011995 | Tuba1c  |
| 2   | 219156454 | 219156530 | 1       | -0.145542  | 5    | 0.011    | 0.088    | 0.23565  | 0.38119 | 0.02463877  | Intergenic | NA           | NA      |
| 2   | 222136523 | 222136609 | 1       | -0.110237  | 5    | 0.0068   | 0.088    | 0.48739  | 0.59763 | 0.016642688 | Intergenic | NA           | NA      |
| 2   | 222268605 | 222268678 | 1       | -0.182196  | 5    | 0.012    | 0.088    | 0.2625   | 0.44469 | 0.026435197 | Intergenic | NA           | NA      |
| 2   | 223507127 | 223507272 | 1       | -0.164648  | 5    | 2.80E-07 | 3.40E-06 | 0.018182 | 0.18283 | 4.09E-06    | Intergenic | NA           | NA      |
| 2   | 223937526 | 223937559 | 0.49    | -0.176125  | 5    | 1.50E-07 | 1.50E-06 | 0.23665  | 0.41277 | 2.38E-06    | Intergenic | NA           | NA      |
| 2   | 224138786 | 224138832 | 1       | -0.093148  | 5    | 0.01     | 0.13     | 0.64225  | 0.7354  | 0.02275947  | Intergenic | NA           | NA      |
| 2   | 224139188 | 224139330 | 1       | -0.169778  | 7    | 0.00054  | 0.0054   | 0.42009  | 0.58986 | 0.002077867 | Intergenic | NA           | NA      |
| 2   | 225320647 | 225320707 | 1       | -0.070929  | 5    | 0.00019  | 0.0031   | 0.035579 | 0.10651 | 0.000879857 | Intergenic | NA           | NA      |
| 2   | 225456302 | 225456672 | 1       | -0.070983  | 7    | 0.0056   | 0.0052   | 0.14352  | 0.2145  | 0.014333376 | Intergenic | NA           | NA      |
| 2   | 226060910 | 226061083 | 1       | -0.074109  | 8    | 0.013    | 0.094    | 0.70211  | 0.77622 | 0.028097302 | Intragenic | NM_139084    | Magi3   |
| 2   | 226205976 | 226206199 | 1       | -0.095593  | 8    | 0.021    | 0.0039   | 0.26582  | 0.36141 | 0.041207871 | Intergenic | NA           | NA      |
| 2   | 226680655 | 226680945 | 1       | -0.22886   | 6    | 2.20E-05 | 0.00054  | 0.13821  | 0.36707 | 0.000149617 | TSS        | NM_001005540 | Ppm1j   |
| 2   | 226691866 | 226692077 | 0.48    | -0.132082  | 5    | 8.50E-07 | 1.50E-06 | 0.023398 | 0.15548 | 1.03E-05    | TSS        | NM_001106461 | Rhoc    |
| 2   | 226808066 | 226808223 | 1       | -0.145913  | 10   | 7.10E-05 | 0.00035  | 0.49342  | 0.63933 | 0.000391021 | Intragenic | NM_001007639 | St7l    |
| 2   | 228044555 | 228044600 | 1       | -0.123861  | 5    | 0.0058   | 0.015    | 0.1525   | 0.27636 | 0.014624129 | Intergenic | NA           | NA      |
| 2   | 228189261 | 228189406 | 1       | -0.220109  | 8    | 7.80E-07 | 7.60E-05 | 0.37447  | 0.59458 | 9.69E-06    | Intragenic | NM_207586    | Chia    |
| 2   | 229555705 | 229555951 | 1       | -0.196346  | 13   | 2.90E-09 | 1.60E-05 | 0.16998  | 0.36633 | 8.18E-08    | Intergenic | NA           | NA      |
| 2   | 229830591 | 229830700 | 1       | -0.087856  | 5    | 0.015    | 0.0055   | 0.11978  | 0.20764 | 0.031584896 | Intergenic | NA           | NA      |
| 2   | 230106635 | 230106861 | 1       | -0.122072  | 8    | 1.70E-05 | 3.00E-05 | 0.12222  | 0.24429 | 0.000120524 | Intergenic | NA           | NA      |
| 2   | 230331901 | 230332020 | 1       | -0.257219  | 6    | 7.50E-05 | 0.0027   | 0.1983   | 0.45552 | 0.000412106 | Intragenic | NM_001101681 | Ampd2   |
| 2   | 230654931 | 230655023 | 1       | -0.160364  | 5    | 0.02     | 0.086    | 0.39456  | 0.55493 | 0.039778219 | Intragenic | NM_001191110 | Celsr2  |
| 2   | 230731106 | 230731225 | 1       | -0.190718  | 5    | 0.0053   | 0.024    | 0.28077  | 0.47149 | 0.013591571 | Intergenic | NA           | NA      |
| 2   | 230731255 | 230731336 | 1       | -0.324956  | 5    | 4.80E-06 | 3.30E-05 | 0.30008  | 0.62504 | 4.29E-05    | Intergenic | NA           | NA      |
| 2   | 231155491 | 231155543 | 1       | -0.089748  | 5    | 0.021    | 0.18     | 0.14286  | 0.23261 | 0.041207871 | TSS        | NR_106680    | Mir6314 |
| 2   | 231282409 | 231282669 | 1       | -0.163338  | 9    | 0.0084   | 0.028    | 0.36759  | 0.53093 | 0.019933412 | Intragenic | NM_001163568 | Fam102b |
| 2   | 233856534 | 233856693 | 1       | -0.08656   | 5    | 0.0038   | 0.0017   | 0.761    | 0.84756 | 0.010352437 | Intergenic | NA           | NA      |
| 2   | 237968562 | 237968620 | 1       | 0.054653   | 5    | 0.0053   | 0.015    | 0.95787  | 0.90321 | 0.013591571 | Intragenic | NM_001107720 | Plppr5  |
| 2   | 239133661 | 239133735 | 1       | -0.184994  | 5    | 0.00021  | 0.0031   | 0.40293  | 0.58793 | 0.000951214 | Intragenic | NM_001012083 | Snx7    |
| 2   | 240252810 | 240252968 | 1       | -0.115084  | 5    | 0.0035   | 0.0017   | 0.57314  | 0.68823 | 0.009686665 | Intragenic | NM_031027    | Dpyd    |
| 2   | 242917611 | 242917724 | 1       | -0.180941  | 5    | 9.20E-06 | 0.00014  | 0.085615 | 0.26656 | 7.32E-05    | Intragenic | NM_001014176 | Alg14   |
| 2   | 243107177 | 243107384 | 1       | -0.147199  | 5    | 0.0074   | 0.024    | 0.085905 | 0.2331  | 0.017853001 | Intragenic | NM_001013914 | Slc44a3 |
| 2   | 243671749 | 243671860 | 1       | -0.282947  | 5    | 3.10E-05 | 0.0032   | 0.4345   | 0.71744 | 0.000197418 | Intergenic | NA           | NA      |

| chr | start     | stop      | q-value | methy.diff | CpGs | pMWU     | p2DKS    | MCWLS     | MCWHS    | pMWU.fdr    | cgi.type   | transcript             | gene        |
|-----|-----------|-----------|---------|------------|------|----------|----------|-----------|----------|-------------|------------|------------------------|-------------|
| 2   | 243848920 | 243849258 | 1       | -0.205436  | 8    | 6.30E-08 | 5.40E-06 | 0.09783   | 0.30327  | 1.18E-06    | Intergenic | NA                     | NA          |
| 2   | 246019972 | 246020038 | 1       | -0.184014  | 5    | 0.00044  | 0.0054   | 0.29026   | 0.47428  | 0.001760146 | Intragenic | NM_001107722           | Bcar3       |
| 2   | 246142495 | 246142582 | 0.11    | -0.271625  | 6    | 3.90E-07 | 3.30E-07 | 0.13622   | 0.40784  | 5.46E-06    | TSS        | NM_001039609           | Fnbp1l      |
| 2   | 246270849 | 246271001 | 1       | -0.116498  | 7    | 0.00033  | 0.0053   | 0.58675   | 0.70325  | 0.001385608 | Intragenic | NM_133584              | Pde5a       |
| 2   | 246780433 | 246780682 | 1       | -0.198619  | 5    | 0.0032   | 0.015    | 0.13524   | 0.33386  | 0.008990975 | Intergenic | NA                     | NA          |
| 2   | 247409242 | 247409365 | 1       | -0.097337  | 5    | 0.0094   | 0.088    | 0.266     | 0.36334  | 0.021723038 | Intergenic | NA                     | NA          |
| 2   | 248525542 | 248526008 | 1       | -0.093851  | 9    | 0.0024   | 0.0057   | 0.089735  | 0.18359  | 0.00705499  | Intergenic | NA                     | NA          |
| 2   | 248526051 | 248526123 | 1       | -0.129607  | 5    | 0.00054  | 0.0018   | 0.18382   | 0.31343  | 0.002077867 | Intergenic | NA                     | NA          |
| 2   | 248739721 | 248739944 | 1       | -0.105806  | 7    | 0.013    | 0.14     | 0.20884   | 0.31464  | 0.028097302 | Intragenic | NM_001191849           | Ndst4       |
| 2   | 249526811 | 249526963 | 1       | -0.163345  | 7    | 4.20E-05 | 0.0022   | 0.45046   | 0.61381  | 0.00025452  | Intragenic | NM_001047887           | Arsj        |
| 2   | 249533414 | 249533566 | 1       | -0.163287  | 7    | 4.20E-05 | 0.0022   | 0.45046   | 0.61375  | 0.00025452  | Intragenic | NM_001047887           | Arsj        |
| 2   | 250779615 | 250779802 | 1       | -0.191547  | 6    | 0.00014  | 0.0027   | 0.14586   | 0.33741  | 0.000684451 | Intergenic | NA                     | NA          |
| 2   | 251313382 | 251313494 | 1       | -0.067031  | 5    | 0.0053   | 0.039    | 0.14241   | 0.20944  | 0.013591571 | Intergenic | NA                     | NA          |
| 2   | 251367099 | 251367191 | 1       | -0.071164  | 11   | 2.30E-05 | 0.0057   | 0.08058   | 0.15174  | 0.000156153 | Intergenic | NA                     | NA          |
| 2   | 251395531 | 251395781 | 1       | -0.146879  | 9    | 5.80E-05 | 0.0017   | 0.10026   | 0.24714  | 0.000331425 | Intergenic | NA                     | NA          |
| 2   | 251899648 | 251899722 | 1       | -0.177185  | 5    | 2.20E-05 | 0.0018   | 0.087564  | 0.26475  | 0.000149617 | Intergenic | NA                     | NA          |
| 2   | 252943360 | 252943387 | 1       | -0.058365  | 5    | 0.0024   | 0.0018   | 0.0026863 | 0.061051 | 0.00705499  | TSS        | NM_001042505           | Pitx2       |
| 2   | 252946794 | 252946937 | 1       | -0.051504  | 5    | 0.025    | 0.015    | 0.082236  | 0.13374  | 0.047453009 | Intragenic | NM_019334:NM_001042505 | Pitx2:Pitx2 |
| 2   | 254245761 | 254245789 | 1       | -0.171898  | 5    | 4.30E-06 | 0.00028  | 0.17789   | 0.34979  | 3.93E-05    | Intergenic | NA                     | NA          |
| 2   | 254579592 | 254579669 | 1       | -0.194978  | 5    | 0.0049   | 0.015    | 0.25522   | 0.4502   | 0.012753585 | Intergenic | NA                     | NA          |
| 2   | 254619667 | 254619730 | 1       | -0.198232  | 5    | 3.30E-06 | 1.60E-05 | 0.028896  | 0.22713  | 3.16E-05    | Intergenic | NA                     | NA          |
| 2   | 254698540 | 254698667 | 1       | -0.105127  | 5    | 0.021    | 0.025    | 0.59847   | 0.7036   | 0.041207871 | Intergenic | NA                     | NA          |
| 2   | 254773483 | 254773617 | 1       | -0.121678  | 5    | 0.00072  | 0.0018   | 0.073762  | 0.19544  | 0.002634665 | Intergenic | NA                     | NA          |
| 2   | 254803941 | 254804070 | 1       | -0.066329  | 10   | 6.30E-05 | 0.00039  | 0.083565  | 0.14989  | 0.000354102 | Intragenic | NM_130429              | Lef1        |
| 2   | 254850271 | 254850327 | 1       | -0.261343  | 5    | 2.80E-07 | 3.30E-06 | 0.5195    | 0.78085  | 4.09E-06    | Intragenic | NM_130429              | Lef1        |
| 2   | 254935450 | 254935637 | 1       | -0.200606  | 7    | 2.20E-05 | 0.00077  | 0.12383   | 0.32444  | 0.000149617 | Intragenic | NM_057186              | Hadh        |
| 2   | 256542857 | 256542940 | 1       | -0.238255  | 7    | 1.20E-05 | 5.30E-05 | 0.42017   | 0.65843  | 9.15E-05    | Intergenic | NA                     | NA          |
| 2   | 257199703 | 257199832 | 1       | -0.106841  | 5    | 0.0087   | 0.0093   | 0.60468   | 0.71152  | 0.020391633 | Intergenic | NA                     | NA          |
| 2   | 258026448 | 258026599 | 1       | -0.13162   | 6    | 0.0023   | 0.059    | 0.17814   | 0.30976  | 0.00686004  | Intergenic | NA                     | NA          |
| 2   | 258066312 | 258066427 | 1       | -0.209369  | 5    | 0.00023  | 0.0018   | 0.18276   | 0.39212  | 0.00102405  | Intergenic | NA                     | NA          |
| 2   | 258900775 | 258900944 | 1       | -0.157872  | 8    | 0.0002   | 0.00041  | 0.48305   | 0.64092  | 0.00092049  | Intergenic | NA                     | NA          |
| 2   | 259203697 | 259203815 | 1       | -0.216558  | 5    | 1.50E-05 | 0.00027  | 0.18905   | 0.40561  | 0.000109113 | Intragenic | NM_001031655           | Manba       |
| 2   | 259203907 | 259204117 | 1       | -0.182033  | 5    | 0.00023  | 0.00098  | 0.14974   | 0.33177  | 0.00102405  | Intragenic | NM_001031655           | Manba       |
| 2   | 259209935 | 259210053 | 1       | -0.216558  | 5    | 1.50E-05 | 0.00027  | 0.18905   | 0.40561  | 0.000109113 | Intragenic | NM_001031655           | Manba       |
| 2   | 259210145 | 259210355 | 1       | -0.181616  | 5    | 0.00023  | 0.00098  | 0.14974   | 0.33136  | 0.00102405  | Intragenic | NM_001031655           | Manba       |
| 2   | 259408898 | 259409062 | 1       | -0.187919  | 11   | 6.90E-07 | 0.00027  | 0.23562   | 0.42354  | 8.73E-06    | Intragenic | NM_001276711           | Nfkb1       |
| 2   | 259511597 | 259511760 | 1       | -0.183463  | 5    | 0.0058   | 0.015    | 0.15622   | 0.33968  | 0.014624129 | Intergenic | NA                     | NA          |
| 2   | 261771375 | 261771491 | 1       | -0.188633  | 5    | 0.0027   | 0.0092   | 0.33883   | 0.52746  | 0.007840962 | TSS        | NM_001108568           | Dapp1       |

| chr | start     | stop      | q-value | methy.diff | CpGs | pMWU     | p2DKS    | MCWLS    | MCWHS    | pMWU.fdr    | cgi.type   | transcript             | gene        |
|-----|-----------|-----------|---------|------------|------|----------|----------|----------|----------|-------------|------------|------------------------|-------------|
| 2   | 261880569 | 261880687 | 1       | -0.096791  | 8    | 0.017    | 0.063    | 0.60906  | 0.70586  | 0.034796287 | Intergenic | NA                     | NA          |
| 2   | 262342899 | 262342959 | 1       | -0.153896  | 5    | 0.0068   | 0.039    | 0.29887  | 0.45277  | 0.016642688 | Intergenic | NA                     | NA          |
| 2   | 262603936 | 262604024 | 1       | -0.120992  | 5    | 0.02     | 0.059    | 0.32234  | 0.44333  | 0.039778219 | Intragenic | NM_001004090           | Tspan5      |
| 2   | 262614587 | 262615009 | 0.48    | -0.302489  | 8    | 1.80E-09 | 1.50E-06 | 0.13122  | 0.43371  | 5.50E-08    | Intragenic | NM_001004090           | Tspan5      |
| 2   | 262627675 | 262627799 | 1       | -0.111675  | 5    | 0.0063   | 0.0087   | 0.55013  | 0.66181  | 0.015629046 | Intragenic | NM_001004090           | Tspan5      |
| 2   | 264942059 | 264942213 | 1       | -0.118494  | 5    | 0.00039  | 0.00096  | 0.052274 | 0.17077  | 0.001587612 | Intergenic | NA                     | NA          |
| 2   | 266305258 | 266305281 | 1       | -0.065884  | 5    | 0.0068   | 0.0031   | 0.89311  | 0.95899  | 0.016642688 | Intergenic | NA                     | NA          |
| 2   | 267335716 | 267335793 | 1       | -0.128942  | 5    | 0.00029  | 0.0053   | 0.62141  | 0.75035  | 0.001239307 | Intragenic | NM_001105755           | Pkn2        |
| 2   | 268868903 | 268869172 | 1       | -0.165918  | 6    | 3.40E-05 | 0.0016   | 0.15989  | 0.3258   | 0.000214477 | Intergenic | NA                     | NA          |
| 2   | 268931574 | 268931953 | 1       | -0.121933  | 13   | 0.00034  | 0.00014  | 0.31168  | 0.43361  | 0.001424609 | Intergenic | NA                     | NA          |
| 2   | 269496131 | 269496261 | 1       | -0.282147  | 8    | 4.00E-08 | 9.90E-06 | 0.16717  | 0.44932  | 8.43E-07    | Intragenic | NM_001107450           | Clca5       |
| 2   | 270181407 | 270181458 | 1       | -0.241943  | 5    | 5.00E-05 | 0.0018   | 0.2108   | 0.45274  | 0.000291675 | Intragenic | NM_022297              | Ddah1       |
| 2   | 270379342 | 270379418 | 1       | -0.194313  | 5    | 0.00019  | 0.00094  | 0.44011  | 0.63442  | 0.000879857 | Intergenic | NA                     | NA          |
| 2   | 270577956 | 270578066 | 1       | -0.104128  | 5    | 0.0027   | 0.038    | 0.18629  | 0.29042  | 0.007840962 | Intragenic | NM_001039005           | Mcoln2      |
| 2   | 270886960 | 270886988 | 0.0058  | -0.151107  | 5    | 6.30E-08 | 1.80E-08 | 0.023748 | 0.17486  | 1.18E-06    | TSS        | NM_001014177:NM_024377 | Spata1:Gng5 |
| 2   | 272545573 | 272545707 | 1       | -0.176918  | 7    | 0.00043  | 0.019    | 0.29866  | 0.47558  | 0.001736911 | Intergenic | NA                     | NA          |
| 2   | 272956339 | 272956465 | 1       | -0.20263   | 5    | 0.02     | 0.038    | 0.38076  | 0.58339  | 0.039778219 | Intergenic | NA                     | NA          |
| 2   | 275989726 | 275989763 | 1       | -0.183625  | 5    | 0.0038   | 0.059    | 0.22524  | 0.40886  | 0.010352437 | Intragenic | NM_001037210           | Gipc2       |
| 2   | 276215129 | 276215257 | 1       | -0.274853  | 10   | 1.20E-06 | 0.00025  | 0.4531   | 0.72795  | 1.37E-05    | Intergenic | NA                     | NA          |
| 2   | 276239384 | 276239472 | 1       | -0.186664  | 5    | 0.00017  | 0.0017   | 0.16682  | 0.35348  | 0.000806192 | Intergenic | NA                     | NA          |
| 2   | 276807543 | 276807606 | 1       | -0.137842  | 5    | 0.023    | 0.087    | 0.49606  | 0.6339   | 0.04441443  | Intragenic | NM_001271361           | St6galnac5  |
| 2   | 277698806 | 277698868 | 1       | -0.272715  | 5    | 7.00E-05 | 3.30E-05 | 0.30666  | 0.57938  | 0.000386221 | Intragenic | NM_001271361           | St6galnac5  |
| 2   | 277908675 | 277908766 | 1       | -0.275667  | 5    | 0.00017  | 0.00053  | 0.2002   | 0.47587  | 0.000806192 | Intergenic | NA                     | NA          |
| 2   | 277978153 | 277978226 | 1       | -0.133197  | 5    | 0.016    | 0.13     | 0.62749  | 0.76069  | 0.033288089 | Intergenic | NA                     | NA          |
| 2   | 278125713 | 278125823 | 1       | -0.292039  | 5    | 3.50E-05 | 0.00027  | 0.36921  | 0.66125  | 0.000218038 | Intragenic | NM_019123              | St6galnac3  |
| 2   | 278512723 | 278513071 | 1       | -0.152308  | 5    | 0.0035   | 0.059    | 0.12423  | 0.27654  | 0.009686665 | Intragenic | NM_019123              | St6galnac3  |
| 2   | 278615999 | 278616071 | 0.035   | -0.177716  | 8    | 2.10E-09 | 1.10E-07 | 0.058546 | 0.23626  | 6.26E-08    | Intergenic | NA                     | NA          |
| 2   | 278822106 | 278822226 | 1       | -0.363184  | 5    | 5.00E-05 | 0.00051  | 0.40574  | 0.76893  | 0.000291675 | Intergenic | NA                     | NA          |
| 2   | 278963365 | 278963549 | 1       | -0.136739  | 11   | 1.10E-05 | 0.00027  | 0.62453  | 0.76127  | 8.53E-05    | Intergenic | NA                     | NA          |
| 2   | 279644547 | 279644728 | 1       | -0.127369  | 6    | 0.021    | 0.056    | 0.20494  | 0.33231  | 0.041207871 | Intergenic | NA                     | NA          |
| 2   | 281241227 | 281241275 | 1       | -0.072502  | 5    | 0.0045   | 0.015    | 0.76765  | 0.84015  | 0.011905878 | Intergenic | NA                     | NA          |
| 2   | 282303026 | 282303254 | 1       | -0.076653  | 7    | 0.013    | 0.053    | 0.66268  | 0.73934  | 0.028097302 | Intragenic | NM_021682              | Negr1       |
| 2   | 282585287 | 282585458 | 1       | -0.077367  | 8    | 0.013    | 0.093    | 0.48569  | 0.56305  | 0.028097302 | Intergenic | NA                     | NA          |
| 2   | 282697669 | 282697921 | 1       | -0.080983  | 5    | 0.0032   | 0.025    | 0.042328 | 0.12331  | 0.008990975 | Intragenic | NM_012704              | Ptger3      |
| 2   | 284035038 | 284035051 | 1       | -0.052987  | 5    | 0.0013   | 0.0031   | 0.013104 | 0.066092 | 0.004277683 | Intergenic | NA                     | NA          |
| 2   | 284731836 | 284731858 | 1       | -0.224069  | 5    | 0.00014  | 0.00053  | 0.46948  | 0.69355  | 0.000684451 | Intergenic | NA                     | NA          |
| 20  | 55847     | 56020     | 1       | -0.057576  | 8    | 0.0033   | 0.018    | 0.11059  | 0.16817  | 0.009256793 | Intergenic | NA                     | NA          |
| 20  | 3940220   | 3940281   | 1       | -0.094698  | 5    | 0.0019   | 0.0018   | 0.12014  | 0.21483  | 0.005855937 | Intergenic | NA                     | NA          |

| chr | start   | stop    | q-value  | methy.diff | CpGs | pMWU     | p2DKS    | MCWLS    | MCWHS    | pMWU.fdr    | cgi.type   | transcript                          | gene             |
|-----|---------|---------|----------|------------|------|----------|----------|----------|----------|-------------|------------|-------------------------------------|------------------|
| 20  | 4020453 | 4020505 | 1        | -0.177748  | 5    | 0.0045   | 0.024    | 0.27524  | 0.45299  | 0.011905878 | Intragenic | NM_031028                           | Gabbr1           |
| 20  | 4020526 | 4020568 | 1        | -0.184753  | 5    | 0.0012   | 0.0054   | 0.27125  | 0.456    | 0.004013471 | Intragenic | NM_031028                           | Gabbr1           |
| 20  | 4020826 | 4020976 | 2.80E-05 | -0.159161  | 14   | 2.40E-13 | 8.60E-11 | 0.058044 | 0.2172   | 2.22E-11    | Intragenic | NM_031028                           | Gabbr1           |
| 20  | 4021442 | 4021597 | 7.00E-14 | -0.106755  | 19   | 4.60E-14 | 2.20E-19 | 0.011827 | 0.11858  | 6.64E-12    | Intragenic | NM_031028                           | Gabbr1           |
| 20  | 4670155 | 4670482 | 1        | -0.071686  | 11   | 0.019    | 0.12     | 0.43383  | 0.50551  | 0.038322088 | Intergenic | NA                                  | NA               |
| 20  | 5211850 | 5212015 | 1        | -0.058947  | 11   | 0.014    | 0.24     | 0.11343  | 0.17238  | 0.029850603 | Intergenic | NA                                  | NA               |
| 20  | 5217735 | 5217900 | 1        | -0.058947  | 11   | 0.014    | 0.24     | 0.11343  | 0.17238  | 0.029850603 | TSS        | NM_001002821                        | RT1-T18          |
| 20  | 5363825 | 5363869 | 1        | -0.171311  | 5    | 0.00012  | 0.0055   | 0.23299  | 0.4043   | 0.000603617 | Intergenic | NA                                  | NA               |
| 20  | 5548450 | 5548535 | 1        | -0.137589  | 5    | 9.20E-06 | 3.40E-05 | 0.051453 | 0.18904  | 7.32E-05    | Intergenic | NA                                  | NA               |
| 20  | 5644147 | 5644304 | 1        | -0.181941  | 5    | 0.0016   | 0.015    | 0.18045  | 0.36239  | 0.005100053 | Intergenic | NA                                  | NA               |
| 20  | 5646507 | 5646901 | 1        | -0.13265   | 12   | 4.50E-06 | 0.0028   | 0.092659 | 0.22531  | 4.09E-05    | Intergenic | NA                                  | NA               |
| 20  | 5651626 | 5652159 | 1        | -0.112354  | 8    | 6.80E-07 | 5.20E-05 | 0.049466 | 0.16182  | 8.62E-06    | TSS        | NM_001166022:NM_013137              | Ddr1:Ddr1        |
| 20  | 5771398 | 5771509 | 1        | -0.147805  | 5    | 0.014    | 0.038    | 0.42112  | 0.56893  | 0.029850603 | Intergenic | NA                                  | NA               |
| 20  | 5793369 | 5793565 | 1        | -0.139304  | 9    | 0.0026   | 0.0018   | 0.66119  | 0.8005   | 0.007616821 | Intergenic | NA                                  | NA               |
| 20  | 5851682 | 5851749 | 1        | -0.240587  | 5    | 7.00E-05 | 0.00014  | 0.20114  | 0.44173  | 0.000386221 | Intergenic | NA                                  | NA               |
| 20  | 5908734 | 5908751 | 1        | -0.131929  | 5    | 4.80E-06 | 7.60E-06 | 0.12635  | 0.25828  | 4.29E-05    | TSS        | NM_212528                           | Col11a2          |
| 20  | 5944268 | 5944565 | 1        | -0.142802  | 5    | 0.021    | 0.25     | 0.24901  | 0.39181  | 0.041207871 | Intergenic | NA                                  | NA               |
| 20  | 6103880 | 6104018 | 1        | -0.17698   | 5    | 0.02     | 0.18     | 0.35079  | 0.52777  | 0.039778219 | Intragenic | NM_001008846                        | RT1-DOb          |
| 20  | 6125167 | 6125491 | 1        | -0.055432  | 5    | 0.0038   | 0.088    | 0.039031 | 0.094463 | 0.010352437 | TSS        | NM_001004084:NM_001101017           | RT1-Bb:LOC688090 |
| 20  | 6125523 | 6125579 | 1        | -0.219276  | 5    | 2.80E-05 | 0.0018   | 0.17057  | 0.38985  | 0.000182174 | Intragenic | NM_001004084:NM_001101017           | RT1-Bb:LOC688090 |
| 20  | 6257959 | 6258102 | 1        | -0.084328  | 5    | 6.20E-05 | 0.00096  | 0.018036 | 0.10236  | 0.000349462 | Intergenic | NA                                  | NA               |
| 20  | 6458020 | 6458389 | 1        | -0.14045   | 7    | 8.40E-05 | 9.00E-05 | 0.11965  | 0.2601   | 0.000451848 | TSS        | NM_001004070:NM_001165880           | Egfl8:Egfl8      |
| 20  | 6474536 | 6474603 | 1        | -0.111137  | 12   | 7.80E-08 | 5.40E-05 | 0.11216  | 0.2233   | 1.42E-06    | Intragenic | NM_031504:NM_001013197:NM_001032285 | C4a:Stk19:Prrt1  |
| 20  | 6486138 | 6486239 | 1        | -0.119757  | 5    | 0.0022   | 0.039    | 0.14698  | 0.26673  | 0.006578104 | Intragenic | NM_031504:NM_001013197              | C4a:Stk19        |
| 20  | 6490466 | 6490676 | 1        | -0.158802  | 6    | 0.0016   | 0.0072   | 0.070172 | 0.22897  | 0.005100053 | TSS        | NM_001002818                        | Fkbp1            |
| 20  | 6517425 | 6517692 | 1        | -0.098477  | 28   | 7.90E-07 | 0.00031  | 0.16463  | 0.2631   | 9.79E-06    | Intragenic | NM_031504:NM_001013197              | C4a:Stk19        |
| 20  | 6517834 | 6517867 | 1        | 0.083966   | 5    | 0.013    | 0.088    | 0.2284   | 0.14443  | 0.028097302 | Intragenic | NM_031504:NM_001013197              | C4a:Stk19        |

| chr | start   | stop    | q-value | methy.diff | CpGs | pMWU     | p2DKS    | MCWLS    | MCWHS   | pMWU.fdr    | cgi.type   | transcript                | gene              |
|-----|---------|---------|---------|------------|------|----------|----------|----------|---------|-------------|------------|---------------------------|-------------------|
| 20  | 6524815 | 6525288 | 1       | -0.073082  | 18   | 8.00E-05 | 0.0034   | 0.20275  | 0.27583 | 0.000432266 | Intragenic | NM_031504:NM_001013197    | C4a:Stk19         |
| 20  | 6527853 | 6527934 | 1       | -0.206563  | 5    | 0.00021  | 7.00E-05 | 0.27458  | 0.48115 | 0.000951214 | Intragenic | NM_031504:NM_001013197    | C4a:Stk19         |
| 20  | 6530012 | 6530068 | 1       | 0.115762   | 7    | 0.00029  | 0.00046  | 0.8261   | 0.71034 | 0.001239307 | Intragenic | NM_031504:NM_001013197    | C4a:Stk19         |
| 20  | 6562771 | 6562843 | 1       | -0.061844  | 10   | 0.0077   | 0.0076   | 0.12127  | 0.18312 | 0.018546983 | TSS        | NR_024118                 | Tnxa-ps1          |
| 20  | 6564300 | 6564464 | 1       | -0.158137  | 7    | 0.0037   | 0.012    | 0.37245  | 0.53058 | 0.010204935 | TSS        | NR_024118                 | Tnxa-ps1          |
| 20  | 6613808 | 6613857 | 1       | 0.166632   | 5    | 0.021    | 0.18     | 0.80566  | 0.63903 | 0.041207871 | Intragenic | NM_001165901:NM_212548    | Nelfe:Nelfe       |
| 20  | 6622933 | 6623063 | 1       | -0.183124  | 5    | 0.0016   | 0.024    | 0.26199  | 0.44511 | 0.005100053 | TSS        | NM_212466                 | Cfb               |
| 20  | 6635481 | 6635543 | 1       | -0.242137  | 5    | 0.0012   | 0.0055   | 0.31817  | 0.5603  | 0.004013471 | Intragenic | NM_172222                 | C2                |
| 20  | 6694115 | 6694347 | 1       | -0.216542  | 13   | 6.70E-09 | 1.30E-05 | 0.29913  | 0.51567 | 1.74E-07    | Intragenic | NM_031522                 | Neu1              |
| 20  | 6706274 | 6706325 | 1       | -0.235883  | 5    | 0.00019  | 0.0018   | 0.25631  | 0.4922  | 0.000879857 | Intergenic | NA                        | NA                |
| 20  | 6707183 | 6707258 | 1       | -0.170001  | 5    | 0.0011   | 0.0031   | 0.22668  | 0.39668 | 0.003737263 | Intergenic | NA                        | NA                |
| 20  | 6920828 | 6920896 | 1       | -0.162314  | 5    | 0.002    | 0.0018   | 0.33586  | 0.49818 | 0.006079939 | Intragenic | NM_001008837:NM_001033985 | RT1-CE14:RT1-CE14 |
| 20  | 7079104 | 7079146 | 1       | -0.161563  | 5    | 3.90E-05 | 3.40E-05 | 0.075968 | 0.23753 | 0.000237659 | Intragenic | NM_053292                 | Vars              |
| 20  | 7096472 | 7096607 | 1       | -0.261435  | 11   | 7.50E-07 | 0.00091  | 0.46056  | 0.722   | 9.35E-06    | Intragenic | NM_212536                 | Msh5              |
| 20  | 7124249 | 7124383 | 1       | -0.134538  | 7    | 0.00078  | 0.0052   | 0.16266  | 0.2972  | 0.002840382 | TSS        | NM_212532:NM_001165936    | Ddah2:Ddah2       |
| 20  | 7167095 | 7167273 | 1       | -0.176282  | 5    | 0.013    | 0.038    | 0.2455   | 0.42178 | 0.028097302 | Intragenic | NM_212531                 | Abhd16a           |
| 20  | 7522288 | 7522512 | 1       | -0.28117   | 5    | 2.90E-06 | 3.40E-05 | 0.20125  | 0.48242 | 2.84E-05    | Intragenic | NM_212547                 | Rgl2              |
| 20  | 7535655 | 7535673 | 1       | -0.070902  | 5    | 0.0094   | 0.087    | 0.13657  | 0.20748 | 0.021723038 | TSS        | NM_033098                 | Tapbp             |
| 20  | 7535710 | 7535961 | 0.54    | -0.204716  | 14   | 4.80E-09 | 1.70E-06 | 0.19721  | 0.40193 | 1.28E-07    | TSS        | NM_033098                 | Tapbp             |
| 20  | 7606309 | 7606364 | 1       | -0.242196  | 5    | 2.40E-05 | 0.00053  | 0.31665  | 0.55884 | 0.000160049 | TSS        | NM_001113409              | Syngap1           |
| 20  | 7694338 | 7694502 | 1       | -0.153242  | 7    | 0.00033  | 0.0034   | 0.1738   | 0.32704 | 0.001385608 | Intergenic | NA                        | NA                |
| 20  | 7722860 | 7722956 | 1       | -0.127032  | 5    | 0.00012  | 0.0018   | 0.72101  | 0.84805 | 0.000603617 | Intragenic | NM_013138                 | Itpr3             |
| 20  | 7741566 | 7741670 | 1       | -0.172828  | 5    | 0.00039  | 0.0018   | 0.61993  | 0.79276 | 0.001587612 | Intragenic | NM_013138                 | Itpr3             |
| 20  | 7743931 | 7744193 | 0.0023  | -0.152706  | 15   | 1.10E-12 | 7.10E-09 | 0.10603  | 0.25874 | 8.37E-11    | Intragenic | NM_013138                 | Itpr3             |
| 20  | 7756140 | 7756214 | 1       | -0.202648  | 5    | 0.0016   | 0.015    | 0.22806  | 0.43071 | 0.005100053 | Intragenic | NM_013138                 | Itpr3             |
| 20  | 7756931 | 7757102 | 1       | -0.24069   | 5    | 0.00048  | 0.0054   | 0.27318  | 0.51387 | 0.001881331 | Intragenic | NM_013138                 | Itpr3             |
| 20  | 7842110 | 7842284 | 1       | -0.161211  | 7    | 2.90E-05 | 0.00048  | 0.2154   | 0.37661 | 0.000187968 | TSS        | NM_013139                 | Clps              |
| 20  | 7991805 | 7991907 | 1       | -0.190785  | 5    | 2.20E-05 | 0.00028  | 0.074679 | 0.26546 | 0.000149617 | Intragenic | NM_031020                 | Mapk14            |
| 20  | 8354648 | 8354706 | 1       | -0.128796  | 5    | 5.00E-05 | 0.0032   | 0.088239 | 0.21704 | 0.000291675 | TSS        | NM_001191841              | Pnpla1            |
| 20  | 8600783 | 8600856 | 1       | -0.174391  | 5    | 0.017    | 0.18     | 0.46518  | 0.63957 | 0.034796287 | Intragenic | NM_080782                 | Cdkn1a            |
| 20  | 8678729 | 8678811 | 1       | -0.202874  | 5    | 0.0022   | 0.0055   | 0.40912  | 0.612   | 0.006578104 | Intragenic | NM_001107616              | Cpne5             |
| 20  | 8757050 | 8757192 | 1       | -0.244322  | 8    | 1.00E-06 | 3.00E-05 | 0.21454  | 0.45886 | 1.18E-05    | Intergenic | NA                        | NA                |

| chr | start    | stop     | q-value  | methy.diff | CpGs | pMWU     | p2DKS    | MCWLS     | MCWHS    | pMWU.fdr    | cgi.type   | transcript             | gene       |
|-----|----------|----------|----------|------------|------|----------|----------|-----------|----------|-------------|------------|------------------------|------------|
| 20  | 8867765  | 8867969  | 1        | -0.091291  | 11   | 0.0013   | 0.0057   | 0.2148    | 0.30609  | 0.004277683 | Intragenic | NM_001034188           | Ppil1      |
| 20  | 8922421  | 8922521  | 1        | -0.147478  | 5    | 0.0068   | 0.015    | 0.40989   | 0.55737  | 0.016642688 | Intragenic | NM_001034188           | Ppil1      |
| 20  | 8995534  | 8995656  | 0.089    | -0.260811  | 11   | 8.10E-10 | 2.80E-07 | 0.23956   | 0.50037  | 2.75E-08    | Intragenic | NM_001034188:NM_022666 | Ppil1:Grm4 |
| 20  | 8999104  | 8999162  | 1        | -0.131496  | 5    | 0.0016   | 0.0054   | 0.31248   | 0.44398  | 0.005100053 | Intragenic | NM_001034188:NM_022666 | Ppil1:Grm4 |
| 20  | 8999452  | 8999518  | 1        | -0.220953  | 5    | 0.00048  | 0.024    | 0.25227   | 0.47322  | 0.001881331 | Intragenic | NM_001034188:NM_022666 | Ppil1:Grm4 |
| 20  | 8999584  | 8999638  | 1        | -0.083937  | 5    | 0.017    | 0.015    | 0.58364   | 0.66758  | 0.034796287 | Intragenic | NM_001034188:NM_022666 | Ppil1:Grm4 |
| 20  | 9003498  | 9003577  | 1        | -0.16304   | 5    | 0.0013   | 0.0055   | 0.15077   | 0.31381  | 0.004277683 | Intragenic | NM_001034188:NM_022666 | Ppil1:Grm4 |
| 20  | 9003635  | 9003751  | 1        | -0.090608  | 5    | 0.0041   | 0.024    | 0.078503  | 0.16911  | 0.01100507  | Intragenic | NM_001034188:NM_022666 | Ppil1:Grm4 |
| 20  | 9085292  | 9085391  | 1        | -0.158126  | 5    | 3.50E-05 | 0.00097  | 0.1164    | 0.27452  | 0.000218038 | Intragenic | NM_001034188           | Ppil1      |
| 20  | 9101549  | 9101627  | 1        | -0.143209  | 8    | 0.0034   | 0.0077   | 0.60157   | 0.74478  | 0.009519525 | Intragenic | NM_001034188           | Ppil1      |
| 20  | 9166603  | 9166693  | 0.29     | -0.155497  | 7    | 6.40E-08 | 8.80E-07 | 0.094004  | 0.2495   | 1.19E-06    | Intragenic | NM_001170481           | Pi16       |
| 20  | 9264676  | 9264831  | 0.0014   | -0.179948  | 14   | 6.50E-13 | 4.50E-09 | 0.12077   | 0.30072  | 5.17E-11    | Intergenic | NA                     | NA         |
| 20  | 9457588  | 9457640  | 1        | -0.140276  | 5    | 0.00011  | 0.00053  | 0.10873   | 0.249    | 0.000565143 | Intragenic | NM_017294              | Pacsin1    |
| 20  | 9657901  | 9658177  | 0.18     | -0.173665  | 9    | 5.10E-09 | 5.60E-07 | 0.078584  | 0.25225  | 1.35E-07    | Intergenic | NA                     | NA         |
| 20  | 9664244  | 9664469  | 1        | -0.251607  | 11   | 1.00E-07 | 5.20E-06 | 0.27401   | 0.52562  | 1.72E-06    | Intergenic | NA                     | NA         |
| 20  | 9732527  | 9732617  | 1        | -0.132781  | 5    | 0.01     | 0.088    | 0.15709   | 0.28987  | 0.02275947  | Intragenic | NM_001107613           | Anks1a     |
| 20  | 9744574  | 9744646  | 1        | -0.090995  | 5    | 3.70E-06 | 7.60E-06 | 0.0061566 | 0.097152 | 3.46E-05    | Intragenic | NM_001107613           | Anks1a     |
| 20  | 9764790  | 9765030  | 1        | -0.204319  | 7    | 0.002    | 0.036    | 0.21498   | 0.4193   | 0.006079939 | Intragenic | NM_001107613           | Anks1a     |
| 20  | 9803843  | 9803962  | 1        | -0.177293  | 7    | 3.50E-06 | 5.50E-05 | 0.15884   | 0.33613  | 3.33E-05    | Intragenic | NM_001107613           | Anks1a     |
| 20  | 9853298  | 9853494  | 1        | -0.216894  | 6    | 0.00036  | 0.017    | 0.45368   | 0.67058  | 0.001486639 | Intragenic | NM_001007695           | Tcp11      |
| 20  | 9917417  | 9917461  | 1        | -0.111502  | 5    | 0.0008   | 0.0054   | 0.77561   | 0.88711  | 0.002866309 | Intergenic | NA                     | NA         |
| 20  | 9918634  | 9918804  | 1        | -0.145935  | 5    | 7.10E-06 | 0.00014  | 0.032284  | 0.17822  | 5.86E-05    | Intergenic | NA                     | NA         |
| 20  | 9928600  | 9928716  | 1        | -0.202657  | 5    | 0.0014   | 0.00048  | 0.41116   | 0.61381  | 0.004540837 | Intergenic | NA                     | NA         |
| 20  | 10003902 | 10004220 | 6.00E-14 | -0.163189  | 31   | 4.70E-14 | 1.90E-19 | 0.05196   | 0.21515  | 6.64E-12    | Intragenic | NM_001191717           | Def6       |
| 20  | 10006209 | 10006803 | 9.60E-09 | -0.157999  | 33   | 4.70E-14 | 3.00E-14 | 0.098803  | 0.2568   | 6.64E-12    | Intragenic | NM_001191717           | Def6       |
| 20  | 10011940 | 10012102 | 1        | -0.211744  | 6    | 4.90E-05 | 0.00031  | 0.26449   | 0.47623  | 0.000290925 | Intergenic | NA                     | NA         |
| 20  | 10096829 | 10097318 | 1        | -0.100986  | 11   | 0.0015   | 0.0057   | 0.25059   | 0.35157  | 0.004849475 | TSS        | NM_001191718           | Fance      |
| 20  | 10155407 | 10155523 | 1        | -0.145444  | 5    | 0.0041   | 0.024    | 0.14013   | 0.28558  | 0.01100507  | Intergenic | NA                     | NA         |
| 20  | 10374390 | 10374479 | 1        | -0.09437   | 5    | 0.0045   | 0.0018   | 0.18365   | 0.27802  | 0.011905878 | Intergenic | NA                     | NA         |
| 20  | 10723427 | 10723511 | 1        | -0.12028   | 5    | 0.0063   | 0.038    | 0.52526   | 0.64554  | 0.015629046 | Intragenic | NM_001107618           | Mdga1      |
| 20  | 10810413 | 10810519 | 1        | -0.128466  | 5    | 0.021    | 0.088    | 0.22855   | 0.35702  | 0.041207871 | Intergenic | NA                     | NA         |
| 20  | 10852389 | 10852520 | 1        | -0.101962  | 7    | 0.002    | 0.019    | 0.17429   | 0.27625  | 0.006079939 | Intergenic | NA                     | NA         |
| 20  | 11387298 | 11387387 | 1        | -0.06934   | 5    | 0.017    | 0.0032   | 0.85474   | 0.92408  | 0.034796287 | Intragenic | NM_001013073           | Btbd9      |



| chr | start    | stop     | q-value | methy.diff | CpGs | pMWU     | p2DKS    | MCWLS    | MCWHS    | pMWU.fdr    | cgi.type   | transcript                                                   | gene                                |
|-----|----------|----------|---------|------------|------|----------|----------|----------|----------|-------------|------------|--------------------------------------------------------------|-------------------------------------|
| 20  | 11421279 | 11421544 | 1       | -0.105203  | 10   | 0.015    | 0.04     | 0.3139   | 0.4191   | 0.031584896 | Intragenic | NM_001013073                                                 | Btbd9                               |
| 20  | 11539341 | 11539422 | 1       | -0.161107  | 5    | 0.014    | 0.087    | 0.43109  | 0.59219  | 0.029850603 | Intergenic | NA                                                           | NA                                  |
| 20  | 12046565 | 12046651 | 1       | -0.185017  | 5    | 0.0019   | 0.0031   | 0.5172   | 0.70221  | 0.005855937 | Intergenic | NA                                                           | NA                                  |
| 20  | 12127592 | 12127730 | 1       | -0.05643   | 6    | 0.019    | 0.018    | 0.13718  | 0.19361  | 0.038322088 | TSS        | NM_001107620                                                 | Ubash3a                             |
| 20  | 12284346 | 12284425 | 1       | -0.247766  | 5    | 1.10E-06 | 3.40E-05 | 0.22294  | 0.47071  | 1.27E-05    | Intergenic | NA                                                           | NA                                  |
| 20  | 12568808 | 12569140 | 0.36    | -0.12571   | 17   | 8.10E-11 | 1.10E-06 | 0.14525  | 0.27096  | 3.69E-09    | Intragenic | NM_012522                                                    | Cbs                                 |
| 20  | 12675395 | 12675676 | 0.31    | -0.196909  | 9    | 1.50E-10 | 9.50E-07 | 0.078751 | 0.27566  | 6.44E-09    | Intergenic | NA                                                           | NA                                  |
| 20  | 12825528 | 12825610 | 1       | -0.116211  | 5    | 0.00054  | 0.003    | 0.13639  | 0.2526   | 0.002077867 | Intergenic | NA                                                           | NA                                  |
| 20  | 12923150 | 12923260 | 1       | -0.173922  | 5    | 1.70E-05 | 0.00052  | 0.71702  | 0.89095  | 0.000120524 | Intergenic | NA                                                           | NA                                  |
| 20  | 12942803 | 12942933 | 1       | -0.110007  | 5    | 0.0008   | 0.0031   | 0.028192 | 0.1382   | 0.002866309 | Intragenic | NM_001127683                                                 | Hsf2bp                              |
| 20  | 12962298 | 12962415 | 1       | -0.220447  | 5    | 5.00E-05 | 6.70E-05 | 0.13685  | 0.3573   | 0.000291675 | Intragenic | NM_001127683                                                 | Hsf2bp                              |
| 20  | 13011391 | 13011717 | 1       | -0.135748  | 9    | 0.00012  | 0.00016  | 0.25314  | 0.38889  | 0.000603617 | Intragenic | NM_001127683                                                 | Hsf2bp                              |
| 20  | 13136491 | 13136937 | 1       | -0.155521  | 9    | 0.00022  | 0.0084   | 0.19037  | 0.34589  | 0.000994261 | Intergenic | NA                                                           | NA                                  |
| 20  | 13225296 | 13225357 | 1       | -0.066474  | 5    | 0.0041   | 0.059    | 0.12574  | 0.19222  | 0.01100507  | Intergenic | NA                                                           | NA                                  |
| 20  | 13229092 | 13229294 | 1       | -0.096826  | 8    | 5.80E-08 | 5.00E-06 | 0.03334  | 0.13017  | 1.17E-06    | Intergenic | NA                                                           | NA                                  |
| 20  | 13285118 | 13285212 | 1       | -0.17086   | 5    | 0.0029   | 0.038    | 0.34138  | 0.51224  | 0.008293503 | TSS        | NM_001106378                                                 | Agpat3                              |
| 20  | 13300031 | 13300126 | 1       | -0.24712   | 5    | 9.20E-06 | 0.00014  | 0.21515  | 0.46227  | 7.32E-05    | Intragenic | NM_001106378                                                 | Agpat3                              |
| 20  | 13556416 | 13556965 | 1       | -0.09508   | 9    | 0.018    | 0.11     | 0.1177   | 0.21278  | 0.036742993 | Intergenic | NA                                                           | NA                                  |
| 20  | 13565389 | 13565501 | 1       | -0.157907  | 5    | 0.0058   | 0.037    | 0.27453  | 0.43243  | 0.014624129 | TSS        | NM_013190                                                    | Pfkl                                |
| 20  | 13639030 | 13639119 | 1       | -0.101736  | 5    | 6.20E-05 | 0.0018   | 0.050542 | 0.15228  | 0.000349462 | Intragenic | NM_001011559                                                 | Trpm2                               |
| 20  | 13909352 | 13909500 | 1       | -0.092     | 5    | 0.0049   | 0.00053  | 0.091507 | 0.18351  | 0.012753585 | Intergenic | NA                                                           | NA                                  |
| 20  | 13922918 | 13923433 | 1       | -0.220961  | 14   | 1.00E-07 | 0.00015  | 0.23779  | 0.45875  | 1.72E-06    | Intragenic | NM_001013238                                                 | Pttg1ip                             |
| 20  | 14121245 | 14121417 | 1       | -0.138057  | 5    | 2.80E-05 | 6.80E-05 | 0.059833 | 0.19789  | 0.000182174 | Intergenic | NA                                                           | NA                                  |
| 20  | 14211462 | 14211738 | 1       | -0.057108  | 15   | 2.20E-05 | 0.0053   | 0.087464 | 0.14457  | 0.000149617 | Intragenic | NM_001111055:N<br>M_001111056:N<br>M_001111057:N<br>M_012894 | Adarb1:Adarb<br>1:Adarb1:Ada<br>rb1 |
| 20  | 14303821 | 14303989 | 1       | -0.186471  | 5    | 0.0074   | 0.037    | 0.24941  | 0.43588  | 0.017853001 | Intergenic | NA                                                           | NA                                  |
| 20  | 14436396 | 14436543 | 1       | -0.317055  | 5    | 1.70E-05 | 0.0018   | 0.2982   | 0.61526  | 0.000120524 | Intragenic | NM_053489                                                    | Col18a1                             |
| 20  | 14526198 | 14526477 | 1       | -0.058751  | 5    | 0.0094   | 0.18     | 0.033715 | 0.092466 | 0.021723038 | Intergenic | NA                                                           | NA                                  |
| 20  | 14526526 | 14526629 | 1       | -0.128484  | 5    | 1.30E-05 | 0.00053  | 0.080267 | 0.20875  | 9.66E-05    | Intergenic | NA                                                           | NA                                  |
| 20  | 14542326 | 14542621 | 1       | -0.139101  | 12   | 2.50E-07 | 1.00E-05 | 0.12604  | 0.26514  | 3.70E-06    | Intergenic | NA                                                           | NA                                  |
| 20  | 15827463 | 15827688 | 1       | -0.102886  | 5    | 0.0008   | 0.015    | 0.073443 | 0.17633  | 0.002866309 | TSS        | NM_012980                                                    | Mmp11                               |
| 20  | 15892607 | 15892728 | 1       | -0.05802   | 5    | 0.0087   | 0.015    | 0.02095  | 0.07897  | 0.020391633 | Intergenic | NA                                                           | NA                                  |
| 20  | 15916243 | 15916302 | 0.0055  | -0.322641  | 5    | 6.30E-08 | 1.70E-08 | 0.10918  | 0.43182  | 1.18E-06    | Intragenic | NM_012796                                                    | Gstt2                               |
| 20  | 16152827 | 16153720 | 1       | -0.118592  | 14   | 0.00025  | 0.023    | 0.1137   | 0.23229  | 0.001103692 | TSS        | NM_001106381                                                 | Susd2                               |
| 20  | 16166634 | 16166703 | 1       | -0.18507   | 5    | 0.0038   | 0.0055   | 0.16441  | 0.34948  | 0.010352437 | Intergenic | NA                                                           | NA                                  |
| 20  | 16213919 | 16214040 | 1       | -0.387236  | 6    | 3.20E-07 | 6.50E-06 | 0.16275  | 0.54999  | 4.57E-06    | Intragenic | NM_053840                                                    | Ggt1                                |
| 20  | 16266142 | 16266192 | 1       | -0.142341  | 5    | 0.00097  | 0.00052  | 0.11167  | 0.25401  | 0.003366009 | Intergenic | NA                                                           | NA                                  |

| chr | start    | stop     | q-value | methy.diff | CpGs | pMWU     | p2DKS    | MCWLS     | MCWHS   | pMWU.fdr    | cgi.type   | transcript             | gene      |
|-----|----------|----------|---------|------------|------|----------|----------|-----------|---------|-------------|------------|------------------------|-----------|
| 20  | 16415744 | 16415803 | 1       | -0.147164  | 5    | 0.0024   | 0.059    | 0.32491   | 0.47207 | 0.00705499  | Intergenic | NA                     | NA        |
| 20  | 16639387 | 16639631 | 1       | -0.143191  | 5    | 0.008    | 0.18     | 0.12102   | 0.26421 | 0.019059477 | Intergenic | NA                     | NA        |
| 20  | 16691426 | 16691586 | 1       | -0.094352  | 10   | 0.00076  | 0.0027   | 0.23535   | 0.3297  | 0.002773435 | Intergenic | NA                     | NA        |
| 20  | 16802358 | 16802404 | 1       | -0.143137  | 5    | 0.0053   | 0.0018   | 0.20022   | 0.34336 | 0.013591571 | TSS        | NM_013189              | Gnaz      |
| 20  | 16813767 | 16814092 | 1       | -0.110151  | 8    | 0.00062  | 0.0059   | 0.16543   | 0.27558 | 0.002348106 | Intergenic | NA                     | NA        |
| 20  | 17012801 | 17012893 | 1       | -0.200534  | 5    | 0.00032  | 0.0055   | 0.31702   | 0.51756 | 0.001346443 | Intergenic | NA                     | NA        |
| 20  | 17604271 | 17604363 | 1       | -0.200534  | 5    | 0.00032  | 0.0055   | 0.31702   | 0.51756 | 0.001346443 | Intergenic | NA                     | NA        |
| 20  | 17658626 | 17658738 | 1       | -0.197163  | 5    | 0.0063   | 0.037    | 0.23772   | 0.43488 | 0.015629046 | Intergenic | NA                     | NA        |
| 20  | 20492263 | 20492703 | 1       | -0.195876  | 5    | 1.30E-06 | 3.40E-06 | 0.049744  | 0.24562 | 1.46E-05    | Intergenic | NA                     | NA        |
| 20  | 20547188 | 20547241 | 1       | -0.143949  | 7    | 4.80E-05 | 0.0013   | 0.2803    | 0.42425 | 0.000285411 | Intergenic | NA                     | NA        |
| 20  | 20647431 | 20647482 | 1       | -0.162163  | 5    | 0.011    | 0.0054   | 0.36646   | 0.52862 | 0.02463877  | Intragenic | NM_134417              | lpmk      |
| 20  | 20668135 | 20668324 | 1       | -0.11035   | 10   | 0.00078  | 0.0013   | 0.15693   | 0.26728 | 0.002840382 | Intragenic | NM_001106385           | Cisd1     |
| 20  | 20670859 | 20671054 | 1       | -0.213918  | 8    | 9.50E-07 | 0.0004   | 0.30977   | 0.52369 | 1.14E-05    | Intragenic | NM_001106385           | Cisd1     |
| 20  | 20702464 | 20702592 | 1       | -0.104928  | 7    | 0.0018   | 0.039    | 0.1513    | 0.25623 | 0.005640313 | Intergenic | NA                     | NA        |
| 20  | 20759306 | 20759416 | 1       | -0.192192  | 5    | 0.0019   | 0.038    | 0.25047   | 0.44267 | 0.005855937 | TSS        | NM_031326              | Tfam      |
| 20  | 20959986 | 20960167 | 1       | -0.153971  | 6    | 6.30E-05 | 0.00017  | 0.051025  | 0.205   | 0.000354102 | Intragenic | NM_001108531           | Bicc1     |
| 20  | 20989474 | 20989588 | 0.0056  | -0.272703  | 5    | 6.30E-08 | 1.70E-08 | 0.039352  | 0.31205 | 1.18E-06    | Intragenic | NM_001108531           | Bicc1     |
| 20  | 21015537 | 21015706 | 1       | -0.152678  | 5    | 0.00054  | 0.039    | 0.12906   | 0.28174 | 0.002077867 | Intragenic | NM_001108531           | Bicc1     |
| 20  | 21205926 | 21205986 | 1       | -0.260569  | 5    | 3.70E-06 | 0.00028  | 0.1261    | 0.38667 | 3.46E-05    | Intergenic | NA                     | NA        |
| 20  | 21206194 | 21206265 | 1       | -0.062323  | 5    | 0.0058   | 0.038    | 0.077278  | 0.1396  | 0.014624129 | Intergenic | NA                     | NA        |
| 20  | 21816997 | 21817278 | 1       | -0.195003  | 7    | 0.0029   | 0.013    | 0.25612   | 0.45112 | 0.008293503 | Intergenic | NA                     | NA        |
| 20  | 21869632 | 21869717 | 1       | -0.158083  | 5    | 0.014    | 0.087    | 0.48167   | 0.63975 | 0.029850603 | Intergenic | NA                     | NA        |
| 20  | 21932300 | 21932369 | 1       | -0.159914  | 5    | 0.02     | 0.18     | 0.46199   | 0.6219  | 0.039778219 | Intergenic | NA                     | NA        |
| 20  | 21934476 | 21934722 | 1       | -0.2298    | 5    | 0.00097  | 0.0031   | 0.11008   | 0.33988 | 0.003366009 | Intergenic | NA                     | NA        |
| 20  | 21934768 | 21934832 | 1       | -0.114611  | 5    | 0.0068   | 0.015    | 0.16198   | 0.27659 | 0.016642688 | Intergenic | NA                     | NA        |
| 20  | 22088300 | 22088494 | 1       | -0.162967  | 8    | 4.40E-06 | 0.001    | 0.12371   | 0.28668 | 4.01E-05    | TSS        | NM_031805              | Ank3      |
| 20  | 22165601 | 22165660 | 0.0002  | -0.29944   | 7    | 1.60E-10 | 6.10E-10 | 0.14919   | 0.44863 | 6.77E-09    | Intragenic | NM_031805              | Ank3      |
| 20  | 22180100 | 22180537 | 1       | -0.210584  | 11   | 4.10E-07 | 3.30E-05 | 0.16307   | 0.37366 | 5.71E-06    | Intragenic | NM_031805              | Ank3      |
| 20  | 22569588 | 22569664 | 1       | -0.301564  | 5    | 7.00E-05 | 0.0018   | 0.2977    | 0.59926 | 0.000386221 | Intragenic | NM_031805:NM_001033984 | Ank3:Ank3 |
| 20  | 22794523 | 22794596 | 1       | -0.117237  | 5    | 0.00065  | 0.0018   | 0.12096   | 0.2382  | 0.002426546 | Intragenic | NM_001107622           | Rhobtb1   |
| 20  | 22799162 | 22799242 | 1       | -0.11141   | 5    | 5.00E-05 | 0.00051  | 0.085146  | 0.19656 | 0.000291675 | Intragenic | NM_001107622           | Rhobtb1   |
| 20  | 23679467 | 23679769 | 1       | -0.144981  | 12   | 1.80E-08 | 0.00019  | 0.11531   | 0.26029 | 4.21E-07    | Intragenic | NM_001107624           | Arid5b    |
| 20  | 23827741 | 23828043 | 1       | -0.144981  | 12   | 1.80E-08 | 0.00019  | 0.11531   | 0.26029 | 4.21E-07    | Intragenic | NM_001107624           | Arid5b    |
| 20  | 23916760 | 23917010 | 1       | -0.206613  | 7    | 0.00024  | 0.0053   | 0.29999   | 0.5066  | 0.001064629 | Intragenic | NM_001107624           | Arid5b    |
| 20  | 24084700 | 24084787 | 1       | -0.187128  | 5    | 0.00014  | 0.0053   | 0.14109   | 0.32822 | 0.000684451 | Intragenic | NM_001107625           | Rtnk2     |
| 20  | 24560101 | 24560177 | 1       | -0.191518  | 5    | 0.019    | 0.036    | 0.4238    | 0.61532 | 0.038322088 | Intergenic | NA                     | NA        |
| 20  | 28063096 | 28063207 | 1       | -0.053282  | 7    | 0.00014  | 1.50E-05 | 0.0097885 | 0.06307 | 0.000684451 | Intragenic | NM_001106387           | Lrrtm3    |
| 20  | 30745016 | 30745206 | 1       | -0.075112  | 7    | 0.0059   | 0.037    | 0.56099   | 0.6361  | 0.014851341 | Intragenic | NM_172062              | P4ha1     |

| chr | start    | stop     | q-value | methy.diff | CpGs | pMWU     | p2DKS    | MCWLS    | MCWHS   | pMWU.fdr    | cgi.type   | transcript   | gene    |
|-----|----------|----------|---------|------------|------|----------|----------|----------|---------|-------------|------------|--------------|---------|
| 20  | 30836774 | 30837114 | 1       | -0.078897  | 5    | 0.0053   | 0.015    | 0.093071 | 0.17197 | 0.013591571 | Intergenic | NA           | NA      |
| 20  | 31322509 | 31322556 | 1       | -0.06924   | 5    | 0.0035   | 0.039    | 0.13462  | 0.20386 | 0.009686665 | Intergenic | NA           | NA      |
| 20  | 31387823 | 31387952 | 1       | -0.214264  | 5    | 6.50E-07 | 1.60E-05 | 0.075557 | 0.28982 | 8.28E-06    | Intragenic | NM_001007632 | Ascc1   |
| 20  | 31456036 | 31456100 | 1       | -0.120079  | 5    | 0.0016   | 0.038    | 0.12066  | 0.24073 | 0.005100053 | TSS        | NM_001108533 | Spock2  |
| 20  | 31458310 | 31458591 | 1       | -0.156358  | 8    | 0.005    | 0.07     | 0.23698  | 0.39333 | 0.012977322 | TSS        | NM_001108533 | Spock2  |
| 20  | 31478942 | 31478998 | 1       | -0.093665  | 5    | 0.00011  | 0.00099  | 0.86748  | 0.96115 | 0.000565143 | Intragenic | NM_001108533 | Spock2  |
| 20  | 31515307 | 31515458 | 0.019   | -0.201098  | 10   | 2.30E-10 | 5.90E-08 | 0.10483  | 0.30593 | 9.34E-09    | Intergenic | NA           | NA      |
| 20  | 31555025 | 31555177 | 1       | -0.159785  | 5    | 0.011    | 0.015    | 0.23315  | 0.39293 | 0.02463877  | Intergenic | NA           | NA      |
| 20  | 31672110 | 31672322 | 1       | -0.177691  | 8    | 0.0096   | 0.037    | 0.34387  | 0.52156 | 0.022155406 | Intragenic | NM_053644    | Cdh23   |
| 20  | 31792769 | 31792814 | 1       | -0.14811   | 5    | 3.90E-05 | 0.00028  | 0.1917   | 0.33981 | 0.000237659 | Intragenic | NM_053644    | Cdh23   |
| 20  | 31819409 | 31819454 | 1       | -0.14811   | 5    | 3.90E-05 | 0.00028  | 0.1917   | 0.33981 | 0.000237659 | Intragenic | NM_053644    | Cdh23   |
| 20  | 31945199 | 31945352 | 1       | -0.249897  | 8    | 1.30E-06 | 0.00041  | 0.17189  | 0.42179 | 1.46E-05    | Intragenic | NM_053644    | Cdh23   |
| 20  | 31961405 | 31961598 | 1       | -0.160196  | 5    | 0.021    | 0.058    | 0.18437  | 0.34457 | 0.041207871 | Intragenic | NM_053644    | Cdh23   |
| 20  | 32021218 | 32021333 | 1       | -0.223145  | 5    | 3.30E-06 | 1.60E-05 | 0.177    | 0.40015 | 3.16E-05    | Intragenic | NM_053644    | Cdh23   |
| 20  | 32122130 | 32122220 | 1       | -0.136556  | 7    | 5.80E-08 | 4.60E-06 | 0.030366 | 0.16692 | 1.17E-06    | Intragenic | NM_181639    | Slc29a3 |
| 20  | 32231372 | 32231602 | 1       | -0.119085  | 6    | 0.017    | 0.038    | 0.40624  | 0.52532 | 0.034796287 | Intergenic | NA           | NA      |
| 20  | 32823719 | 32823852 | 1       | -0.056272  | 7    | 0.0059   | 0.012    | 0.088668 | 0.14494 | 0.014851341 | TSS        | NM_001106394 | Nodal   |
| 20  | 32824135 | 32824443 | 1       | -0.087303  | 13   | 0.0053   | 0.015    | 0.078987 | 0.15107 | 0.013591571 | TSS        | NM_001106394 | Nodal   |
| 20  | 33111613 | 33111663 | 1       | -0.050661  | 5    | 0.0074   | 0.023    | 0.05524  | 0.1059  | 0.017853001 | TSS        | NM_001108932 | Tysnd1  |
| 20  | 33312121 | 33312235 | 1       | -0.073206  | 5    | 0.016    | 0.058    | 0.13979  | 0.21299 | 0.033288089 | Intragenic | NM_001109172 | Col13a1 |
| 20  | 33343502 | 33343651 | 1       | -0.128511  | 5    | 0.0013   | 0.015    | 0.088597 | 0.21711 | 0.004277683 | Intragenic | NM_001109172 | Col13a1 |
| 20  | 33382190 | 33382287 | 1       | -0.197617  | 6    | 0.003    | 0.0072   | 0.25221  | 0.44983 | 0.008555055 | Intragenic | NM_001109172 | Col13a1 |
| 20  | 33491513 | 33491607 | 1       | -0.24696   | 5    | 8.50E-07 | 7.40E-06 | 0.25437  | 0.50133 | 1.03E-05    | Intergenic | NA           | NA      |
| 20  | 34956717 | 34956786 | 0.023   | -0.172545  | 7    | 3.30E-09 | 7.00E-08 | 0.13098  | 0.30353 | 9.10E-08    | Intragenic | NM_012874    | Ros1    |
| 20  | 34962613 | 34962682 | 0.023   | -0.172545  | 7    | 3.30E-09 | 7.00E-08 | 0.13098  | 0.30353 | 9.10E-08    | Intragenic | NM_012874    | Ros1    |
| 20  | 36562814 | 36562893 | 1       | -0.158006  | 5    | 0.00097  | 0.015    | 0.20622  | 0.36422 | 0.003366009 | Intergenic | NA           | NA      |
| 20  | 37422066 | 37422239 | 1       | -0.14306   | 7    | 9.70E-06 | 0.00028  | 0.40634  | 0.5494  | 7.71E-05    | Intergenic | NA           | NA      |
| 20  | 38204991 | 38205102 | 1       | -0.371446  | 5    | 1.50E-07 | 7.60E-06 | 0.26849  | 0.63994 | 2.38E-06    | Intergenic | NA           | NA      |
| 20  | 39165150 | 39165208 | 1       | -0.112989  | 5    | 1.90E-05 | 3.40E-05 | 0.83786  | 0.95085 | 0.000131674 | Intergenic | NA           | NA      |
| 20  | 39332953 | 39332979 | 1       | -0.065436  | 5    | 0.00072  | 0.00052  | 0.040137 | 0.10557 | 0.002634665 | Intragenic | NM_001014032 | Msl3l2  |
| 20  | 39333035 | 39333173 | 1       | -0.131855  | 5    | 0.00021  | 0.0054   | 0.16912  | 0.30098 | 0.000951214 | Intragenic | NM_001014032 | Msl3l2  |
| 20  | 39710666 | 39711154 | 1       | -0.15207   | 5    | 0.0049   | 0.039    | 0.43019  | 0.58226 | 0.012753585 | Intergenic | NA           | NA      |
| 20  | 42501751 | 42501898 | 1       | -0.124646  | 5    | 0.011    | 0.18     | 0.39526  | 0.51991 | 0.02463877  | TSS        | NM_030832    | Fabp7   |
| 20  | 44639845 | 44640057 | 1       | -0.141408  | 9    | 2.90E-05 | 0.0012   | 0.33143  | 0.47283 | 0.000187968 | Intergenic | NA           | NA      |
| 20  | 45825159 | 45825210 | 1       | -0.270553  | 5    | 0.0038   | 0.0054   | 0.47293  | 0.74348 | 0.010352437 | Intragenic | NM_001309447 | Lama4   |
| 20  | 45926180 | 45926247 | 1       | -0.131872  | 6    | 0.00062  | 0.016    | 0.60542  | 0.7373  | 0.002348106 | Intragenic | NM_001309447 | Lama4   |
| 20  | 46166037 | 46166136 | 1       | -0.242568  | 5    | 0.0027   | 0.038    | 0.27595  | 0.51852 | 0.007840962 | Intragenic | NM_012755    | Fyn     |
| 20  | 46179840 | 46179924 | 1       | -0.133935  | 5    | 0.0045   | 0.038    | 0.23303  | 0.36697 | 0.011905878 | Intragenic | NM_012755    | Fyn     |
| 20  | 46214469 | 46214603 | 1       | -0.216297  | 5    | 1.30E-05 | 0.00014  | 0.16654  | 0.38284 | 9.66E-05    | Intragenic | NM_012755    | Fyn     |

| chr | start    | stop     | q-value  | methy.diff | CpGs | pMWU     | p2DKS    | MCWLS    | MCWHS   | pMWU.fdr    | cgi.type   | transcript   | gene    |
|-----|----------|----------|----------|------------|------|----------|----------|----------|---------|-------------|------------|--------------|---------|
| 20  | 46332084 | 46332174 | 1        | -0.193184  | 5    | 0.002    | 0.038    | 0.40025  | 0.59344 | 0.006079939 | Intragenic | NM_012755    | Fyn     |
| 20  | 46351812 | 46351987 | 1        | -0.11273   | 9    | 7.40E-06 | 0.00021  | 0.2134   | 0.32613 | 6.09E-05    | Intragenic | NM_012755    | Fyn     |
| 20  | 46756426 | 46756605 | 1        | -0.12067   | 9    | 0.0044   | 0.0095   | 0.60699  | 0.72766 | 0.011763026 | Intergenic | NA           | NA      |
| 20  | 47019115 | 47019194 | 1        | -0.250328  | 5    | 5.50E-06 | 3.40E-06 | 0.14033  | 0.39066 | 4.78E-05    | Intergenic | NA           | NA      |
| 20  | 47082288 | 47082540 | 3.40E-08 | -0.189821  | 15   | 4.10E-14 | 1.00E-13 | 0.049661 | 0.23948 | 6.64E-12    | Intergenic | NA           | NA      |
| 20  | 47088481 | 47088698 | 1        | -0.167037  | 9    | 0.00062  | 0.017    | 0.2626   | 0.42964 | 0.002348106 | Intergenic | NA           | NA      |
| 20  | 47541649 | 47541686 | 1        | -0.101583  | 5    | 2.20E-06 | 3.40E-05 | 0.057743 | 0.15933 | 2.27E-05    | Intergenic | NA           | NA      |
| 20  | 47778406 | 47778475 | 1        | -0.083964  | 5    | 8.50E-07 | 3.40E-06 | 0.032788 | 0.11675 | 1.03E-05    | Intergenic | NA           | NA      |
| 20  | 47815814 | 47815874 | 1        | -0.190151  | 5    | 0.0016   | 0.038    | 0.35694  | 0.54709 | 0.005100053 | Intergenic | NA           | NA      |
| 20  | 47829900 | 47830057 | 0.25     | -0.193622  | 8    | 3.10E-07 | 7.60E-07 | 0.063036 | 0.25666 | 4.47E-06    | Intergenic | NA           | NA      |
| 20  | 47866988 | 47867063 | 1        | -0.256963  | 5    | 1.90E-05 | 0.00028  | 0.14341  | 0.40038 | 0.000131674 | TSS        | NM_001098667 | Zbtb24  |
| 20  | 48114100 | 48114130 | 1        | -0.115282  | 5    | 0.00097  | 0.00097  | 0.1647   | 0.27999 | 0.003366009 | TSS        | NM_001106395 | Foxo3   |
| 20  | 48137177 | 48137301 | 1        | -0.16535   | 5    | 0.023    | 0.088    | 0.17987  | 0.34522 | 0.04441443  | Intragenic | NM_001106395 | Foxo3   |
| 20  | 48167022 | 48167094 | 1        | -0.069247  | 5    | 0.00036  | 0.0032   | 0.039042 | 0.10829 | 0.001486639 | Intragenic | NM_001106395 | Foxo3   |
| 20  | 48168451 | 48168541 | 0.0022   | -0.233021  | 5    | 6.30E-08 | 6.70E-09 | 0.0298   | 0.26282 | 1.18E-06    | Intragenic | NM_001106395 | Foxo3   |
| 20  | 48184092 | 48184223 | 1        | -0.147842  | 5    | 0.0029   | 0.0089   | 0.13125  | 0.27909 | 0.008293503 | Intragenic | NM_001106395 | Foxo3   |
| 20  | 48193487 | 48193638 | 1        | -0.183089  | 5    | 0.002    | 0.015    | 0.12439  | 0.30748 | 0.006079939 | Intragenic | NM_001106395 | Foxo3   |
| 20  | 48314304 | 48314335 | 1        | -0.077643  | 5    | 0.0058   | 0.015    | 0.64075  | 0.71839 | 0.014624129 | Intragenic | NM_001017448 | Cep57l1 |
| 20  | 48448707 | 48448868 | 1        | 0.086403   | 7    | 0.0018   | 0.0013   | 0.63047  | 0.54407 | 0.005640313 | Intergenic | NA           | NA      |
| 20  | 48471716 | 48471788 | 1        | -0.22258   | 5    | 0.00088  | 0.0091   | 0.28973  | 0.51231 | 0.003092094 | Intergenic | NA           | NA      |
| 20  | 48516690 | 48516831 | 1        | -0.087337  | 11   | 4.20E-05 | 0.002    | 0.097732 | 0.18507 | 0.00025452  | Intergenic | NA           | NA      |
| 20  | 48638824 | 48639034 | 1        | -0.182868  | 7    | 5.60E-06 | 1.50E-05 | 0.080418 | 0.26329 | 4.84E-05    | Intergenic | NA           | NA      |
| 20  | 48720406 | 48720505 | 0.21     | -0.319807  | 5    | 3.70E-07 | 6.30E-07 | 0.1059   | 0.42571 | 5.21E-06    | Intragenic | NM_001037656 | Lace1   |
| 20  | 48770480 | 48770592 | 1        | -0.148011  | 11   | 1.10E-08 | 1.20E-05 | 0.63981  | 0.78782 | 2.70E-07    | Intragenic | NM_001037656 | Lace1   |
| 20  | 49241640 | 49241792 | 1        | -0.160024  | 8    | 3.00E-06 | 0.00066  | 0.29692  | 0.45694 | 2.93E-05    | Intergenic | NA           | NA      |
| 20  | 49342344 | 49342505 | 1        | -0.142901  | 5    | 0.002    | 0.0031   | 0.14414  | 0.28704 | 0.006079939 | Intragenic | NM_001107638 | Scml4   |
| 20  | 49352500 | 49352642 | 1        | -0.137717  | 5    | 0.0041   | 0.015    | 0.15023  | 0.28795 | 0.01100507  | Intergenic | NA           | NA      |
| 20  | 49385227 | 49385395 | 1        | -0.156963  | 7    | 3.00E-06 | 5.50E-05 | 0.12676  | 0.28372 | 2.93E-05    | Intergenic | NA           | NA      |
| 20  | 49733505 | 49733744 | 1        | -0.147697  | 5    | 0.017    | 0.015    | 0.31455  | 0.46225 | 0.034796287 | Intragenic | NM_001014249 | Pdss2   |
| 20  | 49778409 | 49778509 | 1        | -0.151724  | 5    | 0.00048  | 0.0055   | 0.11422  | 0.26594 | 0.001881331 | Intragenic | NM_001014249 | Pdss2   |
| 20  | 49822090 | 49822177 | 1        | -0.118988  | 5    | 7.80E-05 | 0.00027  | 0.046039 | 0.16503 | 0.000422981 | Intragenic | NM_001014249 | Pdss2   |
| 20  | 49851183 | 49851260 | 1        | -0.129646  | 5    | 0.01     | 0.009    | 0.26641  | 0.39606 | 0.02275947  | Intragenic | NM_001014249 | Pdss2   |
| 20  | 49852410 | 49852615 | 0.012    | -0.163076  | 12   | 7.70E-12 | 3.80E-08 | 0.034632 | 0.19771 | 4.58E-10    | Intergenic | NA           | NA      |
| 20  | 49904652 | 49904744 | 1        | -0.071739  | 5    | 0.0063   | 0.038    | 0.14065  | 0.21239 | 0.015629046 | Intergenic | NA           | NA      |
| 20  | 49908654 | 49908727 | 1        | -0.209041  | 5    | 7.00E-05 | 0.00027  | 0.35403  | 0.56307 | 0.000386221 | Intergenic | NA           | NA      |
| 20  | 50290805 | 50291027 | 1        | -0.105683  | 9    | 0.00014  | 7.50E-05 | 0.13748  | 0.24317 | 0.000684451 | Intragenic | NM_001025038 | Mettl24 |
| 20  | 50451977 | 50452105 | 1        | -0.153525  | 5    | 8.80E-05 | 0.0053   | 0.078976 | 0.2325  | 0.000466886 | Intergenic | NA           | NA      |
| 20  | 50760853 | 50760976 | 1        | -0.062283  | 12   | 0.00011  | 0.024    | 0.080244 | 0.14253 | 0.000565143 | Intergenic | NA           | NA      |
| 20  | 50786731 | 50786880 | 1        | -0.066213  | 8    | 0.02     | 0.094    | 0.78786  | 0.85407 | 0.039778219 | Intergenic | NA           | NA      |

| chr | start    | stop     | q-value  | methy.diff | CpGs | pMWU     | p2DKS    | MCWLS     | MCWHS    | pMWU.fdr    | cgi.type   | transcript                | gene            |
|-----|----------|----------|----------|------------|------|----------|----------|-----------|----------|-------------|------------|---------------------------|-----------------|
| 20  | 51106143 | 51106359 | 1        | -0.174576  | 8    | 0.001    | 0.013    | 0.29966   | 0.47424  | 0.003452169 | Intragenic | NM_001107639              | Prdm1           |
| 20  | 51137861 | 51137877 | 1        | -0.184389  | 5    | 0.0068   | 0.025    | 0.51985   | 0.70423  | 0.016642688 | Intergenic | NA                        | NA              |
| 20  | 51628540 | 51628784 | 1        | -0.138718  | 11   | 1.20E-05 | 0.00064  | 0.087312  | 0.22603  | 9.15E-05    | Intergenic | NA                        | NA              |
| 20  | 51749951 | 51750016 | 1        | -0.131873  | 5    | 0.0029   | 0.0055   | 0.054296  | 0.18617  | 0.008293503 | Intergenic | NA                        | NA              |
| 20  | 51796282 | 51796386 | 1        | -0.148536  | 5    | 0.00014  | 0.0032   | 0.73415   | 0.88269  | 0.000684451 | Intragenic | NM_031324                 | Prep            |
| 20  | 53059471 | 53060134 | 0.38     | -0.315929  | 19   | 4.70E-11 | 1.20E-06 | 0.3002    | 0.61613  | 2.23E-09    | Intergenic | NA                        | NA              |
| 20  | 56129267 | 56129364 | 1        | -0.133853  | 7    | 4.50E-06 | 5.30E-05 | 0.093957  | 0.22781  | 4.09E-05    | Intergenic | NA                        | NA              |
| 20  | 56167741 | 56167833 | 1        | -0.106512  | 5    | 0.0022   | 0.039    | 0.63664   | 0.74315  | 0.006578104 | Intergenic | NA                        | NA              |
| 20  | 56732215 | 56732330 | 1        | -0.122787  | 5    | 0.0074   | 0.038    | 0.30591   | 0.4287   | 0.017853001 | Intergenic | NA                        | NA              |
| 20  | 57194876 | 57194930 | 1        | -0.05618   | 5    | 0.00059  | 0.0018   | 0.0097422 | 0.065922 | 0.002242971 | TSS        | NM_001107641              | Sim1            |
| 20  | 57779419 | 57779604 | 1        | -0.105073  | 9    | 0.0069   | 0.1      | 0.13725   | 0.24233  | 0.01685311  | Intragenic | NM_001100804              | Cd99            |
| 3   | 1707920  | 1708099  | 1        | -0.202483  | 5    | 0.0058   | 0.088    | 0.41498   | 0.61747  | 0.014624129 | Intergenic | NA                        | NA              |
| 3   | 1714577  | 1714756  | 1        | -0.19748   | 5    | 0.0094   | 0.13     | 0.41999   | 0.61747  | 0.021723038 | Intergenic | NA                        | NA              |
| 3   | 1826129  | 1826539  | 1        | -0.098117  | 33   | 0.0024   | 0.0052   | 0.38647   | 0.43255  | 0.00705499  | Intragenic | NM_147141:NM_001195199    | Cacna1b:Cacna1b |
| 3   | 1826569  | 1826596  | 1        | -0.146317  | 5    | 3.10E-05 | 7.00E-05 | 0.17558   | 0.3219   | 0.000197418 | Intragenic | NM_147141:NM_001195199    | Cacna1b:Cacna1b |
| 3   | 2367235  | 2367320  | 1        | -0.239386  | 5    | 0.00088  | 0.0055   | 0.38271   | 0.62209  | 0.003092094 | Intergenic | NA                        | NA              |
| 3   | 2414317  | 2414460  | 1        | -0.193854  | 12   | 5.90E-05 | 0.0027   | 0.37715   | 0.571    | 0.000336659 | TSS        | NM_001107817:NM_001025694 | Nelfb:Fam166a   |
| 3   | 2669866  | 2669909  | 1        | -0.158726  | 5    | 0.00059  | 0.00091  | 0.53738   | 0.6961   | 0.002242971 | TSS        | NM_013015                 | Ptgds           |
| 3   | 2765295  | 2765698  | 1        | -0.141022  | 6    | 0.025    | 0.027    | 0.35704   | 0.49806  | 0.047453009 | Intragenic | NM_001106557              | Edf1            |
| 3   | 2766679  | 2766728  | 1        | -0.35331   | 5    | 1.30E-06 | 3.40E-05 | 0.18385   | 0.53716  | 1.46E-05    | Intragenic | NM_001106557              | Edf1            |
| 3   | 2782308  | 2782318  | 1        | -0.153454  | 5    | 0.0029   | 0.00053  | 0.21896   | 0.37242  | 0.008293503 | Intergenic | NA                        | NA              |
| 3   | 2782364  | 2782404  | 1        | -0.079626  | 5    | 0.025    | 0.18     | 0.086785  | 0.16641  | 0.047453009 | Intergenic | NA                        | NA              |
| 3   | 9195290  | 9195364  | 3.40E-06 | -0.070955  | 16   | 4.70E-14 | 1.10E-11 | 0.059914  | 0.13087  | 6.64E-12    | TSS        | NM_001013135:NM_001003673 | Sdccag3:Pmpca   |
| 3   | 9195367  | 9195767  | 1        | -0.241387  | 34   | 1.60E-07 | 2.50E-05 | 0.017853  | 0.061359 | 2.51E-06    | TSS        | NM_001013135:NM_001003673 | Sdccag3:Pmpca   |
| 3   | 9268876  | 9268981  | 1        | -0.202346  | 5    | 0.00059  | 0.00098  | 0.2673    | 0.46964  | 0.002242971 | Intragenic | NM_001105721              | Notch1          |
| 3   | 9312203  | 9312397  | 1        | -0.123984  | 11   | 7.10E-05 | 0.0019   | 0.21808   | 0.34206  | 0.000391021 | TSS        | NM_001105721              | Notch1          |
| 3   | 9397386  | 9397453  | 1        | -0.116526  | 5    | 0.00039  | 0.0055   | 0.054866  | 0.17139  | 0.001587612 | Intragenic | NM_139104                 | Egfl7           |
| 3   | 9402761  | 9402812  | 1        | -0.089164  | 5    | 0.0063   | 0.039    | 0.83635   | 0.92552  | 0.015629046 | TSS        | NR_031871:NR_037353       | Mir126:Mir3567  |
| 3   | 9461364  | 9461626  | 1        | -0.136882  | 8    | 3.10E-07 | 5.40E-06 | 0.049293  | 0.18618  | 4.47E-06    | Intergenic | NA                        | NA              |
| 3   | 9467700  | 9467962  | 1        | -0.110319  | 7    | 1.20E-06 | 1.70E-05 | 0.047168  | 0.15749  | 1.37E-05    | Intergenic | NA                        | NA              |
| 3   | 9542819  | 9543047  | 1        | -0.127141  | 7    | 2.00E-06 | 0.00029  | 0.047932  | 0.17507  | 2.10E-05    | Intergenic | NA                        | NA              |
| 3   | 9549096  | 9549358  | 1        | -0.13709   | 8    | 3.10E-07 | 5.40E-06 | 0.049293  | 0.18638  | 4.47E-06    | Intergenic | NA                        | NA              |
| 3   | 10215450 | 10215489 | 4.20E-06 | -0.271812  | 8    | 6.30E-12 | 1.30E-11 | 0.027417  | 0.29923  | 3.94E-10    | Intergenic | NA                        | NA              |

| chr | start    | stop     | q-value  | methy.diff | CpGs | pMWU     | p2DKS    | MCWLS    | MCWHS   | pMWU.fdr    | cgi.type   | transcript          | gene             |
|-----|----------|----------|----------|------------|------|----------|----------|----------|---------|-------------|------------|---------------------|------------------|
| 3   | 10270700 | 10270759 | 1        | -0.10369   | 5    | 0.0063   | 0.039    | 0.23841  | 0.3421  | 0.015629046 | Intergenic | NA                  | NA               |
| 3   | 10273666 | 10273725 | 1        | -0.10369   | 5    | 0.0063   | 0.039    | 0.23841  | 0.3421  | 0.015629046 | Intergenic | NA                  | NA               |
| 3   | 10701427 | 10701537 | 1        | -0.116392  | 5    | 0.00088  | 0.0018   | 0.57475  | 0.69115 | 0.003092094 | Intergenic | NA                  | NA               |
| 3   | 10814087 | 10814126 | 4.20E-06 | -0.271812  | 8    | 6.30E-12 | 1.30E-11 | 0.027417 | 0.29923 | 3.94E-10    | TSS        | NM_001015014        | Surf6            |
| 3   | 10913148 | 10913289 | 1        | -0.138588  | 5    | 0.0035   | 0.0018   | 0.12333  | 0.26191 | 0.009686665 | Intergenic | NA                  | NA               |
| 3   | 10920988 | 10921166 | 1        | -0.176246  | 5    | 0.00097  | 0.0054   | 0.14592  | 0.32217 | 0.003366009 | Intragenic | NM_001106561        | Cacfd1           |
| 3   | 11020505 | 11020573 | 1        | -0.184415  | 5    | 3.90E-05 | 0.00028  | 0.26032  | 0.44474 | 0.000237659 | Intragenic | NM_001109458        | Fam163b          |
| 3   | 11264759 | 11265004 | 1        | -0.242951  | 9    | 3.00E-07 | 4.80E-05 | 0.26343  | 0.50638 | 4.38E-06    | Intragenic | NM_001106563        | Vav2             |
| 3   | 11335696 | 11335793 | 1        | -0.096607  | 8    | 0.0012   | 0.036    | 0.10762  | 0.20423 | 0.004013471 | TSS        | NM_001106563        | Vav2             |
| 3   | 11577626 | 11577745 | 1        | -0.204314  | 5    | 2.80E-05 | 0.00053  | 0.10715  | 0.31146 | 0.000182174 | Intragenic | NM_012805           | Rxra             |
| 3   | 11586171 | 11586262 | 1        | -0.144602  | 5    | 0.0019   | 0.0054   | 0.10956  | 0.25416 | 0.005855937 | Intragenic | NM_012805           | Rxra             |
| 3   | 11626553 | 11626824 | 1        | -0.136001  | 7    | 0.0018   | 0.017    | 0.17746  | 0.31346 | 0.005640313 | Intragenic | NM_012805           | Rxra             |
| 3   | 11645610 | 11645772 | 0.035    | -0.184798  | 10   | 1.70E-09 | 1.10E-07 | 0.040929 | 0.22573 | 5.28E-08    | Intragenic | NM_012805           | Rxra             |
| 3   | 11925178 | 11925346 | 1        | -0.167157  | 7    | 0.0015   | 0.012    | 0.2561   | 0.42326 | 0.004849475 | Intragenic | NM_134452           | Col5a1           |
| 3   | 11965911 | 11966109 | 1        | -0.147459  | 8    | 0.022    | 0.16     | 0.42221  | 0.56967 | 0.043064669 | Intergenic | NA                  | NA               |
| 3   | 11972776 | 11973154 | 1        | -0.16634   | 7    | 0.0012   | 0.0034   | 0.40274  | 0.56908 | 0.004013471 | Intergenic | NA                  | NA               |
| 3   | 12021615 | 12021779 | 1        | -0.177222  | 5    | 0.0029   | 0.024    | 0.29613  | 0.47335 | 0.008293503 | Intergenic | NA                  | NA               |
| 3   | 12218119 | 12218209 | 1        | -0.221847  | 5    | 1.00E-05 | 0.00051  | 0.27413  | 0.49598 | 7.82E-05    | Intergenic | NA                  | NA               |
| 3   | 12287718 | 12287841 | 1        | -0.088078  | 5    | 0.0045   | 0.025    | 0.0905   | 0.17858 | 0.011905878 | Intergenic | NA                  | NA               |
| 3   | 12541370 | 12541531 | 1        | -0.163848  | 7    | 0.0053   | 0.018    | 0.36046  | 0.52431 | 0.013591571 | Intragenic | NM_001107823        | Gfi1b            |
| 3   | 12847621 | 12847753 | 1        | -0.062303  | 5    | 0.014    | 0.038    | 0.059034 | 0.12134 | 0.029850603 | TSS        | NM_057109           | Barhl1           |
| 3   | 12873747 | 12873879 | 1        | -0.205946  | 5    | 0.00014  | 0.00014  | 0.030907 | 0.23685 | 0.000684451 | Intragenic | NM_001127563        | Cfap77           |
| 3   | 12952220 | 12952328 | 1        | -0.155828  | 5    | 5.00E-05 | 0.0018   | 0.10471  | 0.26054 | 0.000291675 | Intragenic | NM_001127563        | Cfap77           |
| 3   | 13091339 | 13091405 | 1        | -0.05786   | 9    | 1.50E-05 | 0.00052  | 0.046326 | 0.10419 | 0.000109113 | Intragenic | NM_001107825        | Ntng2            |
| 3   | 13146337 | 13146435 | 1        | -0.130985  | 5    | 0.0024   | 0.0092   | 0.17501  | 0.306   | 0.00705499  | TSS        | NM_001107825        | Ntng2            |
| 3   | 13146441 | 13146614 | 0.0066   | -0.075055  | 11   | 4.10E-11 | 2.00E-08 | 0.030003 | 0.10506 | 1.99E-09    | TSS        | NM_001107825        | Ntng2            |
| 3   | 13672029 | 13672186 | 1        | -0.182504  | 5    | 0.0016   | 0.037    | 0.49878  | 0.68129 | 0.005100053 | Intergenic | NA                  | NA               |
| 3   | 13750960 | 13751536 | 1        | -0.097243  | 28   | 0.0036   | 0.095    | 0.48809  | 0.58533 | 0.009945103 | TSS        | NR_037382:NR_031933 | Mir2964:Mir219-2 |
| 3   | 14046055 | 14046151 | 1        | -0.189132  | 5    | 0.00048  | 0.009    | 0.14519  | 0.33432 | 0.001881331 | Intergenic | NA                  | NA               |
| 3   | 14062888 | 14063251 | 1        | -0.183605  | 5    | 0.0058   | 0.024    | 0.16434  | 0.34794 | 0.014624129 | Intergenic | NA                  | NA               |
| 3   | 14120385 | 14120450 | 1        | -0.190858  | 5    | 0.002    | 0.0018   | 0.40902  | 0.59987 | 0.006079939 | TSS        | NM_001013164        | Ccbl1            |
| 3   | 14180531 | 14180625 | 1        | -0.246444  | 5    | 9.80E-07 | 1.60E-05 | 0.17229  | 0.41873 | 1.16E-05    | Intragenic | NM_001024782        | Lrrc8a           |
| 3   | 14188681 | 14188852 | 1        | -0.37484   | 5    | 4.90E-07 | 7.40E-06 | 0.14719  | 0.52203 | 6.54E-06    | Intragenic | NM_001013081        | Phyhd1           |
| 3   | 14188867 | 14188944 | 1        | -0.186607  | 5    | 0.013    | 0.087    | 0.34028  | 0.52689 | 0.028097302 | Intragenic | NM_001013081        | Phyhd1           |
| 3   | 14423502 | 14423832 | 1        | -0.143822  | 10   | 0.013    | 0.19     | 0.47466  | 0.61848 | 0.028097302 | Intergenic | NA                  | NA               |
| 3   | 14610990 | 14611160 | 1        | -0.105155  | 5    | 0.019    | 0.015    | 0.13916  | 0.24431 | 0.038322088 | Intragenic | NM_001108578        | Aif1l            |
| 3   | 14698298 | 14698355 | 1        | -0.176195  | 5    | 5.00E-05 | 0.0018   | 0.23111  | 0.40731 | 0.000291675 | Intergenic | NA                  | NA               |
| 3   | 14844121 | 14844154 | 0.49     | -0.186977  | 5    | 1.50E-07 | 1.50E-06 | 0.22579  | 0.41277 | 2.38E-06    | Intergenic | NA                  | NA               |

| chr | start    | stop     | q-value  | methyI.diff | CpGs | pMWU     | p2DKS    | MCWLS     | MCWHS    | pMWU.fdr    | cgi.type   | transcript   | gene       |
|-----|----------|----------|----------|-------------|------|----------|----------|-----------|----------|-------------|------------|--------------|------------|
| 3   | 14894782 | 14895017 | 1        | -0.186967   | 7    | 4.20E-05 | 0.0005   | 0.13187   | 0.31883  | 0.00025452  | Intergenic | NA           | NA         |
| 3   | 14911143 | 14911355 | 0.07     | -0.062144   | 20   | 7.30E-11 | 2.20E-07 | 0.04158   | 0.10372  | 3.35E-09    | Intergenic | NA           | NA         |
| 3   | 14946979 | 14947130 | 1        | -0.0606     | 7    | 0.021    | 0.19     | 0.074177  | 0.13478  | 0.041207871 | Intergenic | NA           | NA         |
| 3   | 14949594 | 14949802 | 1        | -0.221398   | 7    | 0.0004   | 0.0034   | 0.27523   | 0.49663  | 0.00162337  | Intergenic | NA           | NA         |
| 3   | 14990017 | 14990179 | 1        | -0.077617   | 9    | 0.0033   | 0.004    | 0.0771    | 0.15472  | 0.009256793 | Intragenic | NM_001100979 | RGD1311084 |
| 3   | 15032210 | 15032414 | 1        | -0.169906   | 7    | 6.10E-06 | 0.00079  | 0.068253  | 0.23816  | 5.24E-05    | Intergenic | NA           | NA         |
| 3   | 15188136 | 15188348 | 1        | -0.145417   | 5    | 0.00054  | 0.0054   | 0.099909  | 0.24533  | 0.002077867 | Intragenic | NM_001107827 | Usp20      |
| 3   | 15330494 | 15330551 | 1        | -0.176195   | 5    | 5.00E-05 | 0.0018   | 0.23111   | 0.40731  | 0.000291675 | Intergenic | NA           | NA         |
| 3   | 15745605 | 15745708 | 1        | -0.07073    | 5    | 0.00054  | 0.0017   | 0.068287  | 0.13902  | 0.002077867 | Intergenic | NA           | NA         |
| 3   | 15783828 | 15783962 | 0.0037   | -0.368579   | 8    | 5.50E-10 | 1.10E-08 | 0.13735   | 0.50593  | 1.96E-08    | Intergenic | NA           | NA         |
| 3   | 15836079 | 15836285 | 1        | -0.062011   | 10   | 0.025    | 0.092    | 0.22793   | 0.28995  | 0.047453009 | Intergenic | NA           | NA         |
| 3   | 15845983 | 15846119 | 1        | -0.109077   | 5    | 0.0022   | 0.038    | 0.1075    | 0.21658  | 0.006578104 | Intergenic | NA           | NA         |
| 3   | 15993628 | 15993740 | 1        | -0.181119   | 5    | 0.0058   | 0.058    | 0.30386   | 0.48498  | 0.014624129 | Intragenic | NM_001107828 | Gpr107     |
| 3   | 16266054 | 16266236 | 1        | -0.109852   | 8    | 0.021    | 0.11     | 0.34493   | 0.45479  | 0.041207871 | Intergenic | NA           | NA         |
| 3   | 16287663 | 16287771 | 1        | -0.155828   | 5    | 5.00E-05 | 0.0018   | 0.10471   | 0.26054  | 0.000291675 | Intergenic | NA           | NA         |
| 3   | 16454350 | 16454421 | 1        | -0.124959   | 5    | 0.025    | 0.088    | 0.30817   | 0.43313  | 0.047453009 | Intergenic | NA           | NA         |
| 3   | 16467584 | 16467691 | 1        | -0.309542   | 5    | 0.00036  | 0.0092   | 0.32249   | 0.63203  | 0.001486639 | TSS        | NM_001012349 | Plpp7      |
| 3   | 16508349 | 16508482 | 1        | 0.116803    | 5    | 0.00032  | 0.0091   | 0.77782   | 0.66102  | 0.001346443 | Intergenic | NA           | NA         |
| 3   | 16715422 | 16715516 | 1        | -0.13997    | 5    | 0.0027   | 0.058    | 0.27991   | 0.41988  | 0.007840962 | Intragenic | NM_080689    | Dnm1       |
| 3   | 16880747 | 16881154 | 1        | -0.138709   | 14   | 8.10E-08 | 6.40E-05 | 0.12071   | 0.25942  | 1.47E-06    | Intergenic | NA           | NA         |
| 3   | 17116258 | 17116707 | 2.70E-06 | -0.124679   | 39   | 4.40E-14 | 8.40E-12 | 0.10078   | 0.22546  | 6.64E-12    | Intragenic | NM_001108579 | Sh2d3c     |
| 3   | 17117172 | 17117223 | 1        | -0.09688    | 8    | 7.90E-05 | 0.00067  | 0.077086  | 0.17397  | 0.000427247 | Intragenic | NM_001108579 | Sh2d3c     |
| 3   | 17126697 | 17126865 | 0.0064   | -0.201891   | 9    | 4.40E-10 | 2.00E-08 | 0.14832   | 0.35021  | 1.63E-08    | Intragenic | NM_001108579 | Sh2d3c     |
| 3   | 17127238 | 17127285 | 1        | -0.18637    | 5    | 0.0012   | 0.025    | 0.19308   | 0.37945  | 0.004013471 | Intragenic | NM_001108579 | Sh2d3c     |
| 3   | 17257279 | 17257424 | 1        | -0.069493   | 5    | 0.013    | 0.038    | 0.10073   | 0.17023  | 0.028097302 | TSS        | NM_001109885 | Fam129b    |
| 3   | 17776978 | 17777269 | 1        | -0.131356   | 5    | 0.00023  | 0.00053  | 0.073769  | 0.20512  | 0.00102405  | Intergenic | NA           | NA         |
| 3   | 18017009 | 18017026 | 1        | -0.067539   | 5    | 2.80E-05 | 0.00014  | 0.0054487 | 0.072988 | 0.000182174 | TSS        | NM_053709    | Lmx1b      |
| 3   | 18021865 | 18021896 | 1        | -0.147516   | 5    | 0.0063   | 0.059    | 0.34614   | 0.49366  | 0.015629046 | Intergenic | NA           | NA         |
| 3   | 18030419 | 18030531 | 1        | -0.108846   | 5    | 0.0049   | 0.024    | 0.073771  | 0.18262  | 0.012753585 | Intergenic | NA           | NA         |
| 3   | 18306745 | 18307023 | 1        | -0.100298   | 8    | 0.023    | 0.2      | 0.18499   | 0.28529  | 0.04441443  | Intergenic | NA           | NA         |
| 3   | 19773004 | 19773108 | 1        | -0.052845   | 6    | 0.0054   | 0.016    | 0.1153    | 0.16814  | 0.013836205 | Intergenic | NA           | NA         |
| 3   | 19846418 | 19846546 | 1        | -0.268377   | 7    | 4.50E-07 | 4.30E-06 | 0.4114    | 0.67978  | 6.15E-06    | Intragenic | NM_001011965 | Stom       |
| 3   | 19902715 | 19902813 | 1        | -0.20221    | 5    | 0.0029   | 0.059    | 0.33791   | 0.54012  | 0.008293503 | Intragenic | NM_053464    | Srm        |
| 3   | 20201734 | 20201853 | 1        | -0.184815   | 5    | 0.017    | 0.0054   | 0.29044   | 0.47525  | 0.034796287 | TSS        | NM_138710    | Dab2ip     |
| 3   | 20224412 | 20224486 | 1        | -0.054112   | 5    | 0.01     | 0.038    | 0.071081  | 0.12519  | 0.02275947  | Intragenic | NM_138710    | Dab2ip     |
| 3   | 20603861 | 20604017 | 1        | -0.208912   | 5    | 0.00023  | 0.0018   | 0.15503   | 0.36394  | 0.00102405  | Intergenic | NA           | NA         |
| 3   | 20739880 | 20739923 | 1        | -0.052714   | 5    | 0.0027   | 0.025    | 0.025883  | 0.078597 | 0.007840962 | Intragenic | NM_001107837 | Lhx6       |
| 3   | 20745909 | 20746207 | 1        | -0.056949   | 7    | 0.017    | 0.056    | 0.1359    | 0.19285  | 0.034796287 | Intergenic | NA           | NA         |
| 3   | 21066616 | 21066678 | 1        | -0.091302   | 9    | 8.80E-08 | 9.70E-06 | 0.075263  | 0.16656  | 1.57E-06    | Intergenic | NA           | NA         |

| chr | start    | stop     | q-value | methy.diff | CpGs | pMWU     | p2DKS    | MCWLS    | MCWHS    | pMWU.fdr    | cgi.type   | transcript             | gene      |
|-----|----------|----------|---------|------------|------|----------|----------|----------|----------|-------------|------------|------------------------|-----------|
| 3   | 21067943 | 21068151 | 1       | -0.098462  | 13   | 5.30E-05 | 0.0013   | 0.72096  | 0.81942  | 0.000308427 | Intergenic | NA                     | NA        |
| 3   | 23346551 | 23346619 | 1       | -0.201371  | 6    | 7.50E-05 | 9.10E-05 | 0.053836 | 0.25521  | 0.000412106 | Intergenic | NA                     | NA        |
| 3   | 23782983 | 23783051 | 1       | -0.201371  | 6    | 7.50E-05 | 9.10E-05 | 0.053836 | 0.25521  | 0.000412106 | Intergenic | NA                     | NA        |
| 3   | 23788123 | 23788191 | 1       | -0.201371  | 6    | 7.50E-05 | 9.10E-05 | 0.053836 | 0.25521  | 0.000412106 | Intergenic | NA                     | NA        |
| 3   | 27273664 | 27273740 | 1       | -0.085314  | 5    | 0.023    | 0.059    | 0.16204  | 0.24736  | 0.04441443  | TSS        | NM_001135761           | Crb2      |
| 3   | 27273747 | 27273885 | 1       | -0.10354   | 5    | 0.0024   | 0.015    | 0.14365  | 0.24719  | 0.00705499  | TSS        | NM_001135761           | Crb2      |
| 3   | 27273984 | 27274023 | 1       | -0.068493  | 5    | 0.0053   | 0.015    | 0.1414   | 0.2099   | 0.013591571 | TSS        | NM_001135761           | Crb2      |
| 3   | 27274496 | 27274609 | 1       | -0.23128   | 5    | 2.40E-05 | 0.00053  | 0.16807  | 0.39935  | 0.000160049 | TSS        | NM_001135761           | Crb2      |
| 3   | 27291740 | 27291761 | 1       | 0.129628   | 5    | 0.015    | 0.024    | 0.41631  | 0.28668  | 0.031584896 | Intragenic | NM_001135761           | Crb2      |
| 3   | 27871528 | 27871647 | 1       | -0.05532   | 7    | 0.01     | 0.038    | 0.091164 | 0.14648  | 0.02275947  | TSS        | NM_001106571           | Lhx2      |
| 3   | 27872981 | 27873104 | 1       | 0.055827   | 10   | 0.00025  | 6.50E-05 | 0.075951 | 0.020124 | 0.001103692 | Intragenic | NM_001106571           | Lhx2      |
| 3   | 28063760 | 28063870 | 1       | -0.271448  | 5    | 7.10E-06 | 6.90E-05 | 0.32409  | 0.59554  | 5.86E-05    | Intragenic | NM_182953:NM_001277232 | Nek6:Nek6 |
| 3   | 28695956 | 28695986 | 1       | -0.168744  | 5    | 0.00019  | 0.00053  | 0.090836 | 0.25958  | 0.000879857 | Intergenic | NA                     | NA        |
| 3   | 29818751 | 29818840 | 0.00024 | -0.326164  | 8    | 1.90E-11 | 7.40E-10 | 0.3283   | 0.65446  | 9.88E-10    | Intergenic | NA                     | NA        |
| 3   | 29854390 | 29854500 | 1       | -0.138876  | 5    | 0.00039  | 0.0018   | 0.5528   | 0.69168  | 0.001587612 | Intergenic | NA                     | NA        |
| 3   | 29982632 | 29982916 | 1       | -0.14005   | 16   | 4.70E-05 | 0.006    | 0.21521  | 0.35526  | 0.000280297 | Intergenic | NA                     | NA        |
| 3   | 33760439 | 33760557 | 1       | -0.140994  | 6    | 0.026    | 0.084    | 0.4292   | 0.5702   | 0.049234478 | Intragenic | NM_053902              | Kynu      |
| 3   | 34308676 | 34308745 | 1       | -0.189699  | 5    | 0.0017   | 0.0092   | 0.5383   | 0.728    | 0.005339493 | Intragenic | NM_001013917           | Arhgap15  |
| 3   | 35077358 | 35077419 | 1       | -0.253743  | 5    | 9.20E-06 | 0.00052  | 0.090263 | 0.34401  | 7.32E-05    | Intragenic | NM_001033701           | Zeb2      |
| 3   | 35371768 | 35372203 | 1       | -0.145911  | 8    | 0.00025  | 0.017    | 0.15591  | 0.30182  | 0.001103692 | Intergenic | NA                     | NA        |
| 3   | 35595770 | 35595831 | 1       | -0.088939  | 5    | 0.0017   | 0.024    | 0.10958  | 0.19852  | 0.005339493 | Intergenic | NA                     | NA        |
| 3   | 35595900 | 35595947 | 1       | -0.093373  | 5    | 0.0017   | 0.015    | 0.16138  | 0.25475  | 0.005339493 | Intergenic | NA                     | NA        |
| 3   | 36501824 | 36501875 | 1       | -0.096205  | 5    | 0.012    | 0.086    | 0.72501  | 0.82122  | 0.026435197 | Intergenic | NA                     | NA        |
| 3   | 41518081 | 41518190 | 1       | -0.20305   | 7    | 3.80E-06 | 9.70E-05 | 0.21977  | 0.42282  | 3.54E-05    | Intergenic | NA                     | NA        |
| 3   | 43116282 | 43116364 | 1       | -0.086685  | 5    | 0.0013   | 0.024    | 0.70191  | 0.7886   | 0.004277683 | Intragenic | NM_001105733           | Cacnb4    |
| 3   | 48186431 | 48186518 | 1       | -0.154529  | 5    | 0.0032   | 0.059    | 0.36845  | 0.52298  | 0.008990975 | Intragenic | NM_019328              | Nr4a2     |
| 3   | 48187838 | 48187875 | 1       | -0.203152  | 5    | 1.70E-06 | 7.60E-06 | 0.13097  | 0.33412  | 1.83E-05    | TSS        | NM_019328              | Nr4a2     |
| 3   | 48188280 | 48188334 | 1       | -0.19078   | 5    | 0.0016   | 0.024    | 0.17673  | 0.36751  | 0.005100053 | TSS        | NM_019328              | Nr4a2     |
| 3   | 48482362 | 48482434 | 1       | -0.248789  | 5    | 2.90E-06 | 3.40E-05 | 0.1223   | 0.37109  | 2.84E-05    | Intergenic | NA                     | NA        |
| 3   | 49269284 | 49269334 | 1       | -0.118184  | 5    | 0.012    | 0.038    | 0.3755   | 0.49368  | 0.026435197 | Intergenic | NA                     | NA        |
| 3   | 49439912 | 49440036 | 1       | -0.117905  | 5    | 0.021    | 0.18     | 0.22419  | 0.34209  | 0.041207871 | Intragenic | NM_139090              | Acvr1c    |
| 3   | 50695980 | 50696119 | 1       | -0.212513  | 5    | 0.0049   | 0.039    | 0.18204  | 0.39455  | 0.012753585 | Intergenic | NA                     | NA        |
| 3   | 50968622 | 50968682 | 1       | -0.148948  | 5    | 5.50E-06 | 0.00014  | 0.13872  | 0.28767  | 4.78E-05    | Intragenic | NM_001002854           | Tanc1     |
| 3   | 51546890 | 51547096 | 1       | -0.100977  | 9    | 0.013    | 0.012    | 0.63211  | 0.73309  | 0.028097302 | Intergenic | NA                     | NA        |
| 3   | 52743921 | 52744039 | 0.58    | -0.093081  | 9    | 3.90E-08 | 1.80E-06 | 0.017639 | 0.11072  | 8.27E-07    | Intergenic | NA                     | NA        |
| 3   | 53509953 | 53510007 | 1       | -0.22256   | 5    | 0.0013   | 0.037    | 0.37365  | 0.59621  | 0.004277683 | Intergenic | NA                     | NA        |
| 3   | 53825079 | 53825245 | 1       | -0.109825  | 7    | 1.10E-05 | 0.0014   | 0.12382  | 0.23364  | 8.53E-05    | Intergenic | NA                     | NA        |
| 3   | 54191273 | 54191331 | 1       | -0.084745  | 5    | 0.00019  | 0.0018   | 0.055674 | 0.14042  | 0.000879857 | Intergenic | NA                     | NA        |



| chr | start    | stop     | q-value | methyL.diff | CpGs | pMWU     | p2DKS    | MCWLS    | MCWHS   | pMWU.fdr    | cgi.type   | transcript                         | gene                 |
|-----|----------|----------|---------|-------------|------|----------|----------|----------|---------|-------------|------------|------------------------------------|----------------------|
| 3   | 54191419 | 54191541 | 1       | -0.156502   | 5    | 0.014    | 0.037    | 0.39081  | 0.54731 | 0.029850603 | Intergenic | NA                                 | NA                   |
| 3   | 54360086 | 54360128 | 1       | -0.11319    | 5    | 0.016    | 0.088    | 0.16115  | 0.27434 | 0.033288089 | Intergenic | NA                                 | NA                   |
| 3   | 54662321 | 54662464 | 1       | -0.134626   | 5    | 0.0053   | 0.0093   | 0.077543 | 0.21217 | 0.013591571 | TSS        | NM_178092                          | Slc4a10              |
| 3   | 54997896 | 54998112 | 1       | -0.149493   | 8    | 3.40E-06 | 0.00041  | 0.1069   | 0.25639 | 3.25E-05    | Intragenic | NM_012789                          | Dpp4                 |
| 3   | 58611511 | 58611599 | 1       | -0.17053    | 5    | 2.40E-05 | 0.0018   | 0.14085  | 0.31138 | 0.000160049 | Intragenic | NM_001271225                       | Csrnp3               |
| 3   | 61009899 | 61010058 | 0.018   | -0.288598   | 10   | 7.90E-12 | 5.60E-08 | 0.20112  | 0.48971 | 4.68E-10    | Intragenic | NM_019362                          | Stk39                |
| 3   | 62306243 | 62306336 | 1       | -0.279752   | 5    | 0.0032   | 0.015    | 0.45784  | 0.73759 | 0.008990975 | Intragenic | NM_030827                          | Lrp2                 |
| 3   | 62475875 | 62475942 | 1       | -0.220948   | 5    | 1.70E-06 | 3.50E-05 | 0.13839  | 0.35933 | 1.83E-05    | Intergenic | NA                                 | NA                   |
| 3   | 62940784 | 62940892 | 1       | -0.311914   | 5    | 0.00021  | 0.0017   | 0.33373  | 0.64564 | 0.000951214 | Intergenic | NA                                 | NA                   |
| 3   | 63213536 | 63213633 | 1       | -0.124349   | 5    | 0.0068   | 0.039    | 0.18048  | 0.30483 | 0.016642688 | Intragenic | NM_001191901                       | Myo3b                |
| 3   | 63383371 | 63383443 | 1       | -0.120868   | 5    | 0.0041   | 0.00053  | 0.11006  | 0.23093 | 0.01100507  | Intergenic | NA                                 | NA                   |
| 3   | 63733829 | 63733918 | 1       | -0.349865   | 5    | 6.50E-07 | 1.50E-05 | 0.16236  | 0.51222 | 8.28E-06    | Intergenic | NA                                 | NA                   |
| 3   | 64656147 | 64656218 | 1       | -0.089931   | 5    | 0.021    | 0.088    | 0.10837  | 0.19831 | 0.041207871 | Intergenic | NA                                 | NA                   |
| 3   | 64711748 | 64711873 | 1       | -0.161065   | 9    | 0.001    | 0.0028   | 0.55792  | 0.71898 | 0.003452169 | Intergenic | NA                                 | NA                   |
| 3   | 64949645 | 64949796 | 1       | -0.075455   | 5    | 0.00054  | 0.0093   | 0.068004 | 0.14346 | 0.002077867 | Intragenic | NM_053725                          | Itga6                |
| 3   | 64959983 | 64960193 | 1       | -0.067344   | 9    | 0.0012   | 0.016    | 0.071512 | 0.13886 | 0.004013471 | Intragenic | NM_053725                          | Itga6                |
| 3   | 65897941 | 65898116 | 1       | -0.285943   | 8    | 1.10E-08 | 1.60E-05 | 0.1513   | 0.43724 | 2.70E-07    | Intergenic | NA                                 | NA                   |
| 3   | 66463447 | 66463602 | 1       | -0.074429   | 7    | 0.021    | 0.13     | 0.11228  | 0.18671 | 0.041207871 | Intergenic | NA                                 | NA                   |
| 3   | 66667282 | 66667348 | 1       | -0.214759   | 5    | 3.70E-06 | 0.00014  | 0.079007 | 0.29377 | 3.46E-05    | Intragenic | NM_057192                          | Wipf1                |
| 3   | 67698018 | 67698162 | 1       | -0.124753   | 5    | 0.023    | 0.18     | 0.12     | 0.24475 | 0.04441443  | Intergenic | NA                                 | NA                   |
| 3   | 68064056 | 68064519 | 1       | -0.125789   | 21   | 1.50E-07 | 0.0017   | 0.1951   | 0.32089 | 2.38E-06    | TSS        | NM_001191903                       | Hoxd12               |
| 3   | 68115842 | 68116062 | 1       | -0.109717   | 10   | 0.021    | 0.11     | 0.23349  | 0.3432  | 0.041207871 | Intragenic | NM_001105885                       | Hoxd4                |
| 3   | 68371204 | 68371308 | 1       | -0.107736   | 7    | 0.011    | 0.0082   | 0.31124  | 0.41898 | 0.02463877  | Intergenic | NA                                 | NA                   |
| 3   | 69080768 | 69080922 | 1       | -0.254079   | 5    | 0.0022   | 0.024    | 0.1683   | 0.42238 | 0.006578104 | Intergenic | NA                                 | NA                   |
| 3   | 69307923 | 69307995 | 1       | -0.089188   | 5    | 0.00023  | 0.0018   | 0.1477   | 0.23689 | 0.00102405  | TSS        | NM_001127607                       | Ttc30b               |
| 3   | 69349961 | 69350031 | 1       | -0.086091   | 5    | 0.0029   | 0.0017   | 0.31261  | 0.3987  | 0.008293503 | TSS        | NM_001029918                       | Ttc30a1              |
| 3   | 69371399 | 69371674 | 1       | -0.170267   | 5    | 0.0019   | 0.0017   | 0.15298  | 0.32325 | 0.005855937 | Intragenic | NM_001127481:NM_080893:NM_01127480 | Pde11a:Pde11a:Pde11a |
| 3   | 69726858 | 69726949 | 1       | -0.197601   | 5    | 0.00026  | 0.0055   | 0.47401  | 0.67161 | 0.001130807 | TSS        | NM_080893                          | Pde11a               |
| 3   | 69751834 | 69752078 | 1       | -0.13028    | 5    | 0.0013   | 0.015    | 0.079877 | 0.21016 | 0.004277683 | Intragenic | NM_001127480:NM_012840:NM_012903   | Pde11a:Cyct:Anp32a   |
| 3   | 69890310 | 69890398 | 1       | -0.163433   | 5    | 9.20E-06 | 0.00014  | 0.19189  | 0.35532 | 7.32E-05    | Intergenic | NA                                 | NA                   |
| 3   | 70052498 | 70052877 | 1       | -0.224515   | 5    | 0.0024   | 0.0053   | 0.15195  | 0.37647 | 0.00705499  | Intergenic | NA                                 | NA                   |
| 3   | 70596021 | 70596196 | 1       | -0.164063   | 6    | 0.00046  | 0.0072   | 0.1064   | 0.27046 | 0.001836485 | Intergenic | NA                                 | NA                   |
| 3   | 70757912 | 70758053 | 1       | -0.104289   | 5    | 0.025    | 0.13     | 0.09004  | 0.19433 | 0.047453009 | Intergenic | NA                                 | NA                   |
| 3   | 71427898 | 71428060 | 1       | -0.105279   | 7    | 0.0016   | 0.013    | 0.35854  | 0.46382 | 0.005100053 | Intergenic | NA                                 | NA                   |
| 3   | 72962279 | 72962416 | 1       | -0.143928   | 5    | 0.0032   | 0.0053   | 0.2462   | 0.39013 | 0.008990975 | Intergenic | NA                                 | NA                   |

| chr | start     | stop      | q-value  | methy.diff | CpGs | pMWU     | p2DKS    | MCWLS    | MCWHS   | pMWU.fdr    | cgi.type   | transcript          | gene            |
|-----|-----------|-----------|----------|------------|------|----------|----------|----------|---------|-------------|------------|---------------------|-----------------|
| 3   | 75118304  | 75118438  | 1        | -0.058823  | 5    | 0.02     | 0.015    | 0.72786  | 0.78668 | 0.039778219 | Intergenic | NA                  | NA              |
| 3   | 78305256  | 78305373  | 1        | 0.288272   | 5    | 0.0063   | 0.015    | 0.69407  | 0.4058  | 0.015629046 | Intragenic | NM_012717           | Calcr1          |
| 3   | 78592109  | 78592142  | 1        | -0.224276  | 5    | 0.00036  | 0.00053  | 0.21973  | 0.44401 | 0.001486639 | TSS        | NM_001114939        | RGD1563348      |
| 3   | 78661681  | 78661772  | 1        | -0.054696  | 5    | 0.0017   | 0.0093   | 0.051084 | 0.10578 | 0.005339493 | TSS        | NR_037388:NR_031876 | Mir3590:Mir130a |
| 3   | 78771350  | 78771413  | 1        | -0.118716  | 5    | 0.0087   | 0.025    | 0.042148 | 0.16086 | 0.020391633 | Intragenic | NM_001107742        | Slc43a1         |
| 3   | 79189114  | 79189267  | 1        | -0.075791  | 6    | 0.022    | 0.085    | 0.11786  | 0.19365 | 0.043064669 | Intergenic | NA                  | NA              |
| 3   | 81937439  | 81937642  | 1        | -0.136962  | 13   | 8.60E-07 | 0.00022  | 0.18363  | 0.3206  | 1.04E-05    | Intergenic | NA                  | NA              |
| 3   | 82359499  | 82359548  | 3.30E-05 | -0.165326  | 7    | 8.00E-10 | 1.00E-10 | 0.03837  | 0.2037  | 2.72E-08    | Intergenic | NA                  | NA              |
| 3   | 82602042  | 82602111  | 1        | -0.120726  | 5    | 0.0035   | 0.038    | 0.73556  | 0.85628 | 0.009686665 | Intergenic | NA                  | NA              |
| 3   | 82877812  | 82877850  | 1        | -0.069606  | 5    | 0.0012   | 0.015    | 0.83623  | 0.90584 | 0.004013471 | Intergenic | NA                  | NA              |
| 3   | 83694407  | 83694611  | 0.011    | -0.299885  | 13   | 1.60E-11 | 3.50E-08 | 0.25334  | 0.55322 | 8.51E-10    | Intergenic | NA                  | NA              |
| 3   | 84888667  | 84888762  | 0.49     | -0.251565  | 5    | 1.50E-07 | 1.50E-06 | 0.55409  | 0.80565 | 2.38E-06    | Intergenic | NA                  | NA              |
| 3   | 86426055  | 86426184  | 1        | -0.094574  | 14   | 0.00043  | 0.0031   | 0.22523  | 0.3198  | 0.001736911 | Intragenic | NM_001107745        | C1qtnf4         |
| 3   | 86781818  | 86781929  | 1        | -0.134234  | 5    | 0.0029   | 0.015    | 0.15552  | 0.28975 | 0.008293503 | TSS        | NM_001009966        | Pacsin3         |
| 3   | 87081438  | 87081538  | 1        | -0.130637  | 5    | 0.00029  | 0.0032   | 0.083496 | 0.21413 | 0.001239307 | Intragenic | NM_031322           | Lrp4            |
| 3   | 87541557  | 87542007  | 1        | -0.09629   | 17   | 0.00094  | 0.018    | 0.191    | 0.28729 | 0.003289453 | TSS        | NM_030859           | Mdk             |
| 3   | 88104459  | 88104840  | 1        | -0.072904  | 9    | 0.014    | 0.11     | 0.12077  | 0.19368 | 0.029850603 | Intergenic | NA                  | NA              |
| 3   | 88134614  | 88135046  | 1        | -0.167917  | 16   | 1.40E-07 | 0.0003   | 0.24288  | 0.4108  | 2.25E-06    | Intergenic | NA                  | NA              |
| 3   | 88317312  | 88317532  | 1        | -0.132508  | 6    | 0.0094   | 0.16     | 0.22963  | 0.36213 | 0.021723038 | Intergenic | NA                  | NA              |
| 3   | 88358619  | 88358738  | 1        | -0.178025  | 5    | 0.00029  | 0.009    | 0.37681  | 0.55483 | 0.001239307 | Intergenic | NA                  | NA              |
| 3   | 88416310  | 88416481  | 1        | -0.146401  | 7    | 1.20E-07 | 4.50E-06 | 0.05873  | 0.20513 | 2.01E-06    | Intergenic | NA                  | NA              |
| 3   | 88824222  | 88824415  | 1        | -0.068051  | 6    | 0.016    | 0.055    | 0.10893  | 0.17698 | 0.033288089 | Intragenic | NM_001107750        | Tspan18         |
| 3   | 88884306  | 88884452  | 1        | -0.2282    | 5    | 5.60E-07 | 3.40E-06 | 0.031354 | 0.25955 | 7.29E-06    | Intragenic | NM_001107750        | Tspan18         |
| 3   | 89177854  | 89177939  | 1        | -0.082045  | 5    | 0.0049   | 0.0093   | 0.09478  | 0.17682 | 0.012753585 | Intergenic | NA                  | NA              |
| 3   | 89672400  | 89672461  | 0.00024  | -0.18126   | 8    | 2.10E-11 | 7.50E-10 | 0.029589 | 0.21085 | 1.07E-09    | Intragenic | NM_032066           | Hsd17b12        |
| 3   | 89914188  | 89914447  | 1        | -0.090177  | 11   | 0.016    | 0.088    | 0.58954  | 0.65234 | 0.033288089 | Intragenic | NM_001107752        | Ttc17           |
| 3   | 89914481  | 89914609  | 1        | -0.190453  | 5    | 7.10E-06 | 0.00053  | 0.61823  | 0.80869 | 5.86E-05    | Intragenic | NM_001107752        | Ttc17           |
| 3   | 96143951  | 96144068  | 1        | -0.280365  | 5    | 0.00019  | 0.009    | 0.2882   | 0.56856 | 0.000879857 | Intergenic | NA                  | NA              |
| 3   | 96148890  | 96148964  | 1        | -0.291817  | 5    | 3.90E-05 | 0.0017   | 0.50781  | 0.79963 | 0.000237659 | Intergenic | NA                  | NA              |
| 3   | 98804490  | 98804584  | 1        | -0.141548  | 7    | 1.50E-05 | 5.50E-05 | 0.68473  | 0.82628 | 0.000109113 | Intragenic | NM_001013203        | Trim44          |
| 3   | 98805118  | 98805187  | 1        | -0.124024  | 5    | 0.016    | 0.0091   | 0.5676   | 0.69162 | 0.033288089 | Intragenic | NM_001013203        | Trim44          |
| 3   | 99599113  | 99599285  | 0.016    | -0.181336  | 8    | 2.00E-10 | 4.90E-08 | 0.079478 | 0.26081 | 8.20E-09    | Intergenic | NA                  | NA              |
| 3   | 100288856 | 100288962 | 1        | -0.24108   | 5    | 3.10E-05 | 3.40E-05 | 0.1198   | 0.36088 | 0.000197418 | Intragenic | NM_134403           | Abtb2           |
| 3   | 100477615 | 100477744 | 1        | -0.143407  | 5    | 0.0049   | 0.0053   | 0.16828  | 0.31168 | 0.012753585 | Intergenic | NA                  | NA              |
| 3   | 100515202 | 100515263 | 1        | -0.124157  | 5    | 0.0068   | 0.088    | 0.2987   | 0.42286 | 0.016642688 | Intergenic | NA                  | NA              |
| 3   | 101312268 | 101312401 | 1        | -0.186053  | 5    | 0.00023  | 0.0054   | 0.19699  | 0.38305 | 0.00102405  | TSS        | NM_001029916        | Depdc7          |
| 3   | 102014045 | 102014141 | 1        | -0.10631   | 5    | 0.0049   | 0.015    | 0.19624  | 0.30255 | 0.012753585 | Intragenic | NM_001144862        | LOC691083       |
| 3   | 102234054 | 102234123 | 1        | -0.079424  | 5    | 0.00088  | 0.0053   | 0.81095  | 0.89037 | 0.003092094 | Intergenic | NA                  | NA              |

| chr | start     | stop      | q-value | methy.diff | CpGs | pMWU     | p2DKS    | MCWLS    | MCWHS   | pMWU.fdr    | cgi.type   | transcript                    | gene              |
|-----|-----------|-----------|---------|------------|------|----------|----------|----------|---------|-------------|------------|-------------------------------|-------------------|
| 3   | 102255886 | 102256028 | 1       | -0.097244  | 7    | 0.0056   | 0.027    | 0.15928  | 0.25652 | 0.014333376 | Intergenic | NA                            | NA                |
| 3   | 102895478 | 102895572 | 1       | -0.059948  | 5    | 0.017    | 0.086    | 0.80665  | 0.86659 | 0.034796287 | Intergenic | NA                            | NA                |
| 3   | 103908388 | 103908630 | 1       | -0.11358   | 7    | 0.0017   | 0.039    | 0.10251  | 0.21609 | 0.005339493 | Intragenic | NM_001114621                  | Dcdc5             |
| 3   | 104567798 | 104567843 | 1       | -0.171868  | 5    | 0.0087   | 0.015    | 0.37034  | 0.5422  | 0.020391633 | Intergenic | NA                            | NA                |
| 3   | 105342091 | 105342284 | 1       | -0.086021  | 5    | 0.00072  | 0.059    | 0.7227   | 0.80872 | 0.002634665 | Intergenic | NA                            | NA                |
| 3   | 105342326 | 105342431 | 1       | -0.139138  | 5    | 0.0027   | 7.00E-05 | 0.52853  | 0.66767 | 0.007840962 | Intergenic | NA                            | NA                |
| 3   | 110343094 | 110343212 | 1       | -0.137725  | 5    | 1.10E-06 | 7.40E-06 | 0.17372  | 0.31144 | 1.27E-05    | TSS        | NM_001126100                  | Nop10             |
| 3   | 114321938 | 114322108 | 1       | -0.053789  | 7    | 0.0017   | 0.039    | 0.061392 | 0.11518 | 0.005339493 | Intragenic | NM_001107758                  | Meis2             |
| 3   | 114991533 | 114991638 | 1       | -0.281616  | 5    | 4.90E-07 | 7.40E-06 | 0.12754  | 0.40916 | 6.54E-06    | Intergenic | NA                            | NA                |
| 3   | 116831269 | 116831418 | 1       | -0.110368  | 9    | 2.40E-06 | 0.00012  | 0.056558 | 0.16693 | 2.45E-05    | Intergenic | NA                            | NA                |
| 3   | 116856949 | 116857033 | 0.2     | -0.190716  | 5    | 6.30E-06 | 6.30E-07 | 0.034173 | 0.22489 | 5.33E-05    | Intragenic | NM_139258                     | Bmf               |
| 3   | 117032406 | 117032473 | 1       | -0.248958  | 5    | 1.10E-06 | 7.60E-06 | 0.088089 | 0.33705 | 1.27E-05    | Intergenic | NA                            | NA                |
| 3   | 117032520 | 117032692 | 0.00046 | -0.088439  | 19   | 8.70E-14 | 1.40E-09 | 0.043266 | 0.13171 | 9.59E-12    | Intergenic | NA                            | NA                |
| 3   | 117041347 | 117041675 | 1       | -0.160056  | 15   | 2.30E-08 | 4.80E-05 | 0.26469  | 0.42475 | 5.20E-07    | Intragenic | NM_053478                     | Plcb2             |
| 3   | 117096887 | 117097045 | 1       | -0.245666  | 5    | 4.40E-05 | 0.00028  | 0.103    | 0.34866 | 0.000263321 | Intergenic | NA                            | NA                |
| 3   | 117097467 | 117097532 | 0.088   | -0.137798  | 5    | 2.90E-06 | 2.70E-07 | 0.027406 | 0.1652  | 2.84E-05    | Intergenic | NA                            | NA                |
| 3   | 117262250 | 117262352 | 1       | -0.12889   | 5    | 0.0058   | 0.0053   | 0.45352  | 0.58241 | 0.014624129 | Intergenic | NA                            | NA                |
| 3   | 117687926 | 117688037 | 1       | -0.108938  | 7    | 0.024    | 0.036    | 0.55189  | 0.66083 | 0.046241462 | Intragenic | NM_001107760                  | Dll4              |
| 3   | 118095662 | 118095774 | 1       | -0.142018  | 8    | 4.70E-06 | 0.0006   | 0.2046   | 0.34662 | 4.26E-05    | Intragenic | NM_031045                     | ltpka             |
| 3   | 118958423 | 118958532 | 1       | -0.166485  | 5    | 2.90E-06 | 0.00014  | 0.25535  | 0.42183 | 2.84E-05    | Intergenic | NA                            | NA                |
| 3   | 119590843 | 119590932 | 1       | -0.190656  | 5    | 0.0074   | 0.087    | 0.22973  | 0.42038 | 0.017853001 | Intergenic | NA                            | NA                |
| 3   | 120523218 | 120523255 | 0.0021  | -0.342024  | 5    | 6.30E-08 | 6.30E-09 | 0.11732  | 0.45934 | 1.18E-06    | Intragenic | NM_001077670                  | Eif3j             |
| 3   | 124514387 | 124514420 | 1       | -0.131208  | 5    | 0.012    | 0.059    | 0.20437  | 0.33557 | 0.026435197 | TSS        | NM_001191065                  | Shc4              |
| 3   | 125543804 | 125544054 | 1       | -0.052239  | 14   | 8.80E-05 | 0.0077   | 0.058402 | 0.11064 | 0.000466886 | TSS        | NM_031736                     | Slc27a2           |
| 3   | 126202796 | 126202832 | 1       | -0.234008  | 5    | 6.50E-07 | 7.30E-06 | 0.13949  | 0.3735  | 8.28E-06    | TSS        | NM_001008766:N<br>M_001100978 | Ciao1:Tmem1<br>27 |
| 3   | 126307904 | 126307972 | 1       | -0.051495  | 5    | 0.0049   | 0.024    | 0.048533 | 0.10003 | 0.012753585 | Intergenic | NA                            | NA                |
| 3   | 126402464 | 126402563 | 1       | -0.122721  | 5    | 0.025    | 0.087    | 0.26336  | 0.38608 | 0.047453009 | Intergenic | NA                            | NA                |
| 3   | 127227061 | 127227272 | 1       | -0.125983  | 12   | 0.0076   | 0.052    | 0.50066  | 0.62664 | 0.018313455 | TSS        | NM_138857                     | Prom2             |
| 3   | 127565631 | 127565763 | 1       | -0.090416  | 10   | 0.0084   | 0.041    | 0.23098  | 0.3214  | 0.019933412 | Intergenic | NA                            | NA                |
| 3   | 127670903 | 127670994 | 1       | 0.086399   | 5    | 0.00021  | 0.015    | 0.91042  | 0.82402 | 0.000951214 | Intergenic | NA                            | NA                |
| 3   | 128709925 | 128710030 | 1       | -0.158501  | 5    | 1.30E-05 | 0.00014  | 0.25373  | 0.41223 | 9.66E-05    | Intragenic | NM_022943                     | Mertk             |
| 3   | 129675475 | 129675661 | 1       | -0.085911  | 8    | 5.30E-05 | 0.00096  | 0.06381  | 0.14972 | 0.000308427 | Intragenic | NM_172022                     | Lzts3             |
| 3   | 129677796 | 129677907 | 0.00024 | -0.258648  | 9    | 3.90E-13 | 7.30E-10 | 0.013425 | 0.27207 | 3.35E-11    | TSS        | NM_172022                     | Lzts3             |
| 3   | 129677916 | 129677980 | 1       | -0.135702  | 5    | 9.80E-05 | 7.10E-05 | 0.073819 | 0.20952 | 0.000512474 | TSS        | NM_172022                     | Lzts3             |
| 3   | 130213170 | 130213481 | 1       | -0.082971  | 18   | 0.0087   | 0.054    | 0.084827 | 0.13392 | 0.020391633 | Intragenic | NM_001039024                  | Spef1             |
| 3   | 130273998 | 130274145 | 1       | -0.05734   | 5    | 0.0019   | 0.00053  | 0.044655 | 0.10199 | 0.005855937 | TSS        | NM_001005556                  | Mavs              |
| 3   | 130490309 | 130490558 | 1       | -0.085018  | 10   | 0.0043   | 0.015    | 0.59885  | 0.68387 | 0.011513614 | Intergenic | NA                            | NA                |
| 3   | 130635785 | 130636163 | 1       | -0.055875  | 22   | 0.00026  | 0.00067  | 0.1417   | 0.19758 | 0.001130807 | TSS        | NM_024483                     | Adra1d            |

| chr | start     | stop      | q-value  | methyI.diff | CpGs | pMWU     | p2DKS    | MCWLS    | MCWHS   | pMWU.fdr    | cgi.type   | transcript   | gene    |
|-----|-----------|-----------|----------|-------------|------|----------|----------|----------|---------|-------------|------------|--------------|---------|
| 3   | 130724556 | 130724725 | 1        | -0.179549   | 5    | 0.00044  | 0.00014  | 0.088623 | 0.26817 | 0.001760146 | Intergenic | NA           | NA      |
| 3   | 132774349 | 132774435 | 1        | -0.138835   | 5    | 0.0024   | 0.0091   | 0.17468  | 0.31352 | 0.00705499  | Intergenic | NA           | NA      |
| 3   | 135985168 | 135985248 | 1        | -0.239341   | 5    | 0.00023  | 0.00052  | 0.2184   | 0.45774 | 0.00102405  | TSS        | NM_001106516 | Ankef1  |
| 3   | 137825328 | 137825568 | 1        | -0.096861   | 7    | 0.00074  | 0.039    | 0.05634  | 0.1532  | 0.002702912 | TSS        | NM_001107782 | Btbd3   |
| 3   | 144794622 | 144794773 | 1        | -0.111598   | 6    | 0.014    | 0.027    | 0.32248  | 0.43408 | 0.029850603 | Intergenic | NA           | NA      |
| 3   | 146020443 | 146020601 | 1        | -0.148089   | 5    | 1.70E-05 | 0.00053  | 0.095562 | 0.24365 | 0.000120524 | Intragenic | NM_053505    | Slc24a3 |
| 3   | 146387767 | 146387862 | 0.0048   | -0.143012   | 7    | 8.90E-10 | 1.50E-08 | 0.054147 | 0.19716 | 3.00E-08    | Intragenic | NM_001107786 | Rin2    |
| 3   | 146483278 | 146483897 | 0.0057   | -0.082465   | 25   | 3.10E-13 | 1.80E-08 | 0.054464 | 0.13693 | 2.82E-11    | Intragenic | NM_001107786 | Rin2    |
| 3   | 146561738 | 146561776 | 0.4      | -0.209887   | 7    | 0.0013   | 1.20E-06 | 0.20544  | 0.41533 | 0.004277683 | TSS        | NM_053797    | Crnk11  |
| 3   | 146695917 | 146696059 | 1        | -0.151715   | 7    | 0.0072   | 0.026    | 0.2369   | 0.38862 | 0.017539509 | Intergenic | NA           | NA      |
| 3   | 147453377 | 147453449 | 1        | -0.137382   | 5    | 0.0041   | 0.024    | 0.30847  | 0.44585 | 0.01100507  | Intergenic | NA           | NA      |
| 3   | 147824173 | 147824318 | 1        | -0.100537   | 8    | 2.40E-06 | 0.00025  | 0.073422 | 0.17396 | 2.45E-05    | Intergenic | NA           | NA      |
| 3   | 147832728 | 147832836 | 1        | -0.121113   | 7    | 1.90E-06 | 0.00081  | 0.085653 | 0.20677 | 2.01E-05    | Intergenic | NA           | NA      |
| 3   | 153799182 | 153799256 | 1        | -0.099867   | 5    | 0.025    | 0.038    | 0.44754  | 0.54741 | 0.047453009 | Intragenic | NM_001106526 | Angpt4  |
| 3   | 153867611 | 153867697 | 1        | -0.229475   | 5    | 4.90E-07 | 7.40E-06 | 0.10046  | 0.32993 | 6.54E-06    | Intergenic | NA           | NA      |
| 3   | 153946293 | 153946441 | 0.056    | -0.138371   | 18   | 2.00E-10 | 1.70E-07 | 0.1356   | 0.27397 | 8.20E-09    | Intragenic | NM_001191905 | Scrt2   |
| 3   | 154199611 | 154199652 | 1        | -0.148637   | 5    | 0.0029   | 0.015    | 0.37139  | 0.52003 | 0.008293503 | TSS        | NM_001109561 | Nrsn2   |
| 3   | 154210930 | 154211116 | 1        | -0.170766   | 5    | 0.008    | 0.039    | 0.44195  | 0.61272 | 0.019059477 | Intergenic | NA           | NA      |
| 3   | 154226902 | 154227008 | 1        | -0.225535   | 5    | 1.90E-05 | 0.0018   | 0.20358  | 0.42912 | 0.000131674 | Intergenic | NA           | NA      |
| 3   | 154514139 | 154514230 | 1        | -0.128332   | 7    | 0.00012  | 0.0054   | 0.10407  | 0.2324  | 0.000603617 | TSS        | NM_001025753 | Rem1    |
| 3   | 154518418 | 154518543 | 1        | -0.167707   | 5    | 0.015    | 0.086    | 0.45646  | 0.62417 | 0.031584896 | Intragenic | NM_001025753 | Rem1    |
| 3   | 154572330 | 154572701 | 3.70E-05 | -0.212742   | 27   | 4.40E-14 | 1.20E-10 | 0.32127  | 0.53401 | 6.64E-12    | Intragenic | NM_001107789 | Hm13    |
| 3   | 154593155 | 154593262 | 0.087    | -0.163676   | 13   | 7.20E-09 | 2.70E-07 | 0.12505  | 0.28872 | 1.86E-07    | Intragenic | NM_001107789 | Hm13    |
| 3   | 154935192 | 154935270 | 1        | -0.114843   | 5    | 0.0058   | 0.038    | 0.69294  | 0.80778 | 0.014624129 | Intragenic | NM_001012092 | Xkr7    |
| 3   | 154949494 | 154949554 | 1        | -0.150579   | 5    | 0.00015  | 0.00053  | 0.14789  | 0.29847 | 0.000724207 | Intergenic | NA           | NA      |
| 3   | 155109156 | 155109284 | 1        | -0.212208   | 5    | 9.20E-06 | 0.00027  | 0.094115 | 0.30632 | 7.32E-05    | Intergenic | NA           | NA      |
| 3   | 156175830 | 156175909 | 1        | -0.159491   | 5    | 0.0053   | 0.088    | 0.17641  | 0.3359  | 0.013591571 | Intergenic | NA           | NA      |
| 3   | 156428278 | 156428411 | 1        | -0.070026   | 12   | 5.40E-06 | 0.00014  | 0.068706 | 0.13873 | 4.78E-05    | Intragenic | NM_001098724 | Necab3  |
| 3   | 156559360 | 156559442 | 0.0019   | -0.201645   | 13   | 7.00E-11 | 6.00E-09 | 0.092116 | 0.29376 | 3.22E-09    | Intergenic | NA           | NA      |
| 3   | 156665495 | 156665542 | 1        | -0.132539   | 5    | 3.90E-05 | 0.00052  | 0.58895  | 0.72149 | 0.000237659 | Intergenic | NA           | NA      |
| 3   | 157390629 | 157390682 | 1        | -0.152858   | 5    | 0.0011   | 0.003    | 0.61204  | 0.7649  | 0.003737263 | Intragenic | NM_130423    | Ggt7    |
| 3   | 157513467 | 157513621 | 1        | -0.059006   | 13   | 1.60E-05 | 0.0047   | 0.090911 | 0.14992 | 0.000115757 | Intragenic | NM_001107794 | Myh7b   |
| 3   | 157514133 | 157514395 | 1        | -0.077022   | 10   | 1.80E-06 | 0.00035  | 0.057697 | 0.13472 | 1.93E-05    | Intragenic | NM_001107794 | Myh7b   |
| 3   | 157647864 | 157648258 | 1        | -0.159516   | 7    | 0.017    | 0.077    | 0.34413  | 0.50365 | 0.034796287 | Intergenic | NA           | NA      |
| 3   | 158266053 | 158266123 | 1        | -0.158905   | 5    | 0.01     | 0.059    | 0.36211  | 0.52101 | 0.02275947  | Intragenic | NM_031577    | Ghrh    |
| 3   | 158787776 | 158787818 | 1        | -0.222511   | 5    | 0.002    | 0.0055   | 0.29856  | 0.52107 | 0.006079939 | TSS        | NM_001134983 | Tgif2   |
| 3   | 158839385 | 158839502 | 1        | -0.224581   | 5    | 7.40E-07 | 7.40E-06 | 0.11178  | 0.33637 | 9.26E-06    | Intergenic | NA           | NA      |
| 3   | 158993657 | 158993821 | 1        | -0.076217   | 5    | 0.0024   | 0.015    | 0.093352 | 0.16957 | 0.00705499  | Intergenic | NA           | NA      |
| 3   | 159169715 | 159169771 | 1        | -0.347928   | 5    | 6.30E-06 | 6.80E-05 | 0.39954  | 0.74747 | 5.33E-05    | Intergenic | NA           | NA      |

| chr | start     | stop      | q-value  | methy.diff | CpGs | pMWU     | p2DKS    | MCWLS    | MCWHS   | pMWU.fdr    | cgi.type   | transcript                                           | gene                      |
|-----|-----------|-----------|----------|------------|------|----------|----------|----------|---------|-------------|------------|------------------------------------------------------|---------------------------|
| 3   | 160843080 | 160843213 | 1        | -0.106822  | 5    | 0.0029   | 0.0032   | 0.10157  | 0.20839 | 0.008293503 | Intragenic | NM_001004079                                         | Bpi                       |
| 3   | 160981050 | 160981122 | 0.49     | -0.379364  | 6    | 8.30E-08 | 1.50E-06 | 0.099238 | 0.4786  | 1.51E-06    | Intragenic | NM_019386                                            | Tgm2                      |
| 3   | 161375186 | 161375290 | 1        | -0.100384  | 5    | 0.021    | 0.18     | 0.095768 | 0.19615 | 0.041207871 | Intragenic | NM_001024870                                         | Ctnnbl1                   |
| 3   | 161419638 | 161419873 | 1        | -0.141706  | 6    | 1.10E-05 | 4.80E-05 | 0.077152 | 0.21886 | 8.53E-05    | Intergenic | NA                                                   | NA                        |
| 3   | 161555314 | 161555514 | 0.012    | -0.156659  | 17   | 4.90E-09 | 3.60E-08 | 0.17688  | 0.33354 | 1.30E-07    | TSS        | NM_001270867:NM_053601:NM_181687:NR_073089           | Nnat:Nnat:Nnat:Nnat       |
| 3   | 161555690 | 161555738 | 1        | 0.081482   | 5    | 0.0014   | 0.0093   | 0.46745  | 0.38597 | 0.004540837 | TSS        | NM_001270867:NM_053601:NM_181687:NR_073089:NM_133582 | Nnat:Nnat:Nnat:Nnat:Blcap |
| 3   | 161555753 | 161555787 | 1        | 0.083205   | 5    | 0.025    | 0.038    | 0.48805  | 0.40484 | 0.047453009 | TSS        | NM_001270867:NM_053601:NM_181687:NR_073089:NM_133582 | Nnat:Nnat:Nnat:Nnat:Blcap |
| 3   | 161557617 | 161557726 | 0.37     | -0.246549  | 7    | 2.30E-08 | 1.10E-06 | 0.25614  | 0.50269 | 5.20E-07    | TSS        | NM_001270867:NM_053601:NM_181687:NR_073089:NM_133582 | Nnat:Nnat:Nnat:Nnat:Blcap |
| 3   | 162410184 | 162410376 | 1        | -0.126244  | 5    | 0.02     | 0.086    | 0.22231  | 0.34855 | 0.039778219 | Intergenic | NA                                                   | NA                        |
| 3   | 162446011 | 162446162 | 1        | -0.164859  | 5    | 0.023    | 0.024    | 0.22601  | 0.39087 | 0.04441443  | Intergenic | NA                                                   | NA                        |
| 3   | 162497420 | 162497560 | 1        | -0.113913  | 8    | 0.0096   | 0.07     | 0.53009  | 0.644   | 0.022155406 | Intergenic | NA                                                   | NA                        |
| 3   | 162546524 | 162546669 | 1        | -0.165928  | 6    | 0.0044   | 0.026    | 0.26572  | 0.43165 | 0.011763026 | Intergenic | NA                                                   | NA                        |
| 3   | 162794101 | 162794176 | 1        | -0.155493  | 5    | 0.00021  | 0.00096  | 0.16423  | 0.31973 | 0.000951214 | Intergenic | NA                                                   | NA                        |
| 3   | 163358085 | 163358224 | 1        | -0.093661  | 5    | 0.0041   | 0.015    | 0.076123 | 0.16978 | 0.01100507  | Intergenic | NA                                                   | NA                        |
| 3   | 163484711 | 163484834 | 1        | -0.115425  | 5    | 0.015    | 0.038    | 0.54432  | 0.65975 | 0.031584896 | Intergenic | NA                                                   | NA                        |
| 3   | 165478666 | 165478743 | 1        | -0.121103  | 5    | 0.015    | 0.088    | 0.23777  | 0.35887 | 0.031584896 | Intergenic | NA                                                   | NA                        |
| 3   | 165518193 | 165518827 | 8.70E-10 | -0.222488  | 27   | 4.30E-14 | 2.70E-15 | 0.17957  | 0.40205 | 6.64E-12    | Intergenic | NA                                                   | NA                        |
| 3   | 165557479 | 165557574 | 1        | -0.119402  | 5    | 0.00029  | 0.009    | 0.095162 | 0.21456 | 0.001239307 | TSS        | NM_134463                                            | Sgk2                      |
| 3   | 165557723 | 165557906 | 1        | -0.143566  | 5    | 2.80E-05 | 0.00014  | 0.07133  | 0.2149  | 0.000182174 | TSS        | NM_134463                                            | Sgk2                      |
| 3   | 165802955 | 165803009 | 1        | -0.144219  | 5    | 0.0063   | 0.0087   | 0.53958  | 0.6838  | 0.015629046 | Intragenic | NM_199392                                            | Tox2                      |
| 3   | 165946999 | 165947053 | 1        | 0.110002   | 5    | 0.0041   | 0.0093   | 0.75172  | 0.64172 | 0.01100507  | Intragenic | NM_001037974                                         | Jph2                      |
| 3   | 165947112 | 165947181 | 1        | 0.095128   | 9    | 0.0032   | 0.0061   | 0.84375  | 0.74862 | 0.008990975 | Intragenic | NM_001037974                                         | Jph2                      |
| 3   | 166120743 | 166120959 | 1        | -0.210045  | 5    | 0.00088  | 0.0091   | 0.14949  | 0.35953 | 0.003092094 | Intragenic | NM_001270931:NM_001270933                            | Hnf4a:Hnf4a               |
| 3   | 166128000 | 166128349 | 1        | -0.161269  | 8    | 0.00014  | 0.018    | 0.19225  | 0.35351 | 0.000684451 | TSS        | NM_022180                                            | Hnf4a                     |
| 3   | 166179029 | 166179258 | 1        | -0.084641  | 5    | 0.008    | 0.059    | 0.11675  | 0.20139 | 0.019059477 | Intergenic | NA                                                   | NA                        |
| 3   | 166743180 | 166743217 | 1        | -0.120373  | 5    | 0.0032   | 0.038    | 0.22142  | 0.34179 | 0.008990975 | Intragenic | NM_053954                                            | Kcns1                     |

| chr | start     | stop      | q-value | methy.diff | CpGs | pMWU     | p2DKS    | MCWLS    | MCWHS    | pMWU.fdr    | cgi.type   | transcript   | gene    |
|-----|-----------|-----------|---------|------------|------|----------|----------|----------|----------|-------------|------------|--------------|---------|
| 3   | 166743259 | 166743293 | 1       | -0.098605  | 5    | 0.00023  | 0.0052   | 0.1014   | 0.2      | 0.00102405  | Intragenic | NM_053954    | Kcns1   |
| 3   | 166748574 | 166748691 | 1       | -0.165369  | 7    | 0.0004   | 0.0054   | 0.48644  | 0.65181  | 0.00162337  | Intergenic | NA           | NA      |
| 3   | 167059661 | 167059720 | 1       | -0.061364  | 5    | 2.80E-05 | 0.0017   | 0.032601 | 0.093965 | 0.000182174 | Intragenic | NM_012649    | Sdc4    |
| 3   | 167290284 | 167290435 | 0.00011 | -0.382519  | 9    | 3.70E-12 | 3.50E-10 | 0.21678  | 0.5993   | 2.43E-10    | Intragenic | NM_001008868 | Wfdc9   |
| 3   | 167308752 | 167308849 | 1       | -0.116188  | 5    | 0.01     | 0.0088   | 0.15318  | 0.26937  | 0.02275947  | TSS        | NM_001253677 | Wfdc11  |
| 3   | 167599505 | 167599536 | 1       | -0.05892   | 5    | 0.0029   | 0.0091   | 0.12345  | 0.18237  | 0.008293503 | TSS        | NM_031055    | Mmp9    |
| 3   | 167604961 | 167605054 | 1       | -0.174109  | 5    | 0.008    | 0.088    | 0.35324  | 0.52735  | 0.019059477 | Intragenic | NM_031055    | Mmp9    |
| 3   | 167725294 | 167725493 | 1       | -0.080499  | 5    | 2.80E-05 | 0.00028  | 0.022882 | 0.10338  | 0.000182174 | Intergenic | NA           | NA      |
| 3   | 168111160 | 168111371 | 0.12    | -0.182433  | 13   | 2.90E-09 | 3.80E-07 | 0.13734  | 0.31977  | 8.18E-08    | Intragenic | NM_019161    | Cdh22   |
| 3   | 168287998 | 168288168 | 1       | -0.108883  | 7    | 0.00069  | 0.019    | 0.1661   | 0.27498  | 0.002570282 | Intragenic | NM_022866    | Slc13a3 |
| 3   | 168330257 | 168330354 | 1       | -0.22344   | 5    | 8.80E-05 | 0.00051  | 0.23749  | 0.46093  | 0.000466886 | TSS        | NM_022866    | Slc13a3 |
| 3   | 168420923 | 168421399 | 0.33    | -0.091886  | 16   | 1.10E-09 | 1.00E-06 | 0.087099 | 0.17899  | 3.60E-08    | Intergenic | NA           | NA      |
| 3   | 168471934 | 168472028 | 1       | -0.07612   | 7    | 9.00E-05 | 0.00078  | 0.074114 | 0.15023  | 0.000476445 | Intergenic | NA           | NA      |
| 3   | 168612221 | 168612401 | 1       | -0.074613  | 11   | 2.20E-06 | 0.00058  | 0.035313 | 0.10993  | 2.27E-05    | Intragenic | NM_130427    | Eya2    |
| 3   | 168613025 | 168613085 | 1       | -0.148409  | 5    | 0.0011   | 0.0018   | 0.1137   | 0.26211  | 0.003737263 | Intragenic | NM_130427    | Eya2    |
| 3   | 168676582 | 168676824 | 1       | -0.212722  | 7    | 0.00013  | 0.0078   | 0.19162  | 0.40434  | 0.000648758 | Intragenic | NM_001100838 | Zmynd8  |
| 3   | 168679008 | 168679091 | 1       | -0.186445  | 9    | 8.10E-07 | 0.0012   | 0.17372  | 0.36017  | 1.00E-05    | Intragenic | NM_001100838 | Zmynd8  |
| 3   | 168691380 | 168691430 | 1       | -0.215484  | 5    | 0.0063   | 0.014    | 0.35127  | 0.56675  | 0.015629046 | Intragenic | NM_001100838 | Zmynd8  |
| 3   | 168705183 | 168705245 | 1       | -0.193648  | 5    | 0.00039  | 0.015    | 0.3966   | 0.59025  | 0.001587612 | Intragenic | NM_001100838 | Zmynd8  |
| 3   | 168725766 | 168725956 | 1       | -0.225864  | 10   | 8.20E-09 | 2.30E-05 | 0.11379  | 0.33965  | 2.11E-07    | Intragenic | NM_001100838 | Zmynd8  |
| 3   | 168730639 | 168730725 | 1       | -0.084056  | 8    | 0.015    | 0.025    | 0.15074  | 0.23479  | 0.031584896 | Intragenic | NM_001100838 | Zmynd8  |
| 3   | 168970696 | 168970740 | 1       | -0.05135   | 5    | 0.0014   | 0.003    | 0.039243 | 0.090593 | 0.004540837 | Intragenic | NM_001034927 | Sulf2   |
| 3   | 168990801 | 168990885 | 1       | -0.079057  | 5    | 0.023    | 0.25     | 0.15981  | 0.23887  | 0.04441443  | Intragenic | NM_001034927 | Sulf2   |
| 3   | 169000573 | 169000693 | 1       | -0.113305  | 7    | 0.019    | 0.076    | 0.41515  | 0.52845  | 0.038322088 | Intragenic | NM_001034927 | Sulf2   |
| 3   | 169033187 | 169033296 | 1       | -0.141537  | 7    | 1.10E-06 | 5.50E-05 | 0.040917 | 0.18245  | 1.27E-05    | Intragenic | NM_001034927 | Sulf2   |
| 3   | 169294848 | 169295025 | 1       | -0.063315  | 11   | 2.60E-05 | 0.00086  | 0.066449 | 0.12976  | 0.00017262  | Intergenic | NA           | NA      |
| 3   | 169393934 | 169394019 | 1       | -0.257525  | 7    | 3.20E-05 | 0.0014   | 0.35402  | 0.61155  | 0.00020314  | Intergenic | NA           | NA      |
| 3   | 169451250 | 169451649 | 1       | -0.207931  | 5    | 0.00088  | 0.0054   | 0.22756  | 0.43549  | 0.003092094 | Intergenic | NA           | NA      |
| 3   | 169494402 | 169494664 | 1       | -0.190782  | 7    | 0.00048  | 0.0073   | 0.22537  | 0.41615  | 0.001881331 | Intragenic | NM_001135718 | Prex1   |
| 3   | 169586054 | 169586208 | 1       | -0.139466  | 5    | 0.01     | 0.059    | 0.2133   | 0.35277  | 0.02275947  | Intergenic | NA           | NA      |
| 3   | 169593178 | 169593238 | 1       | -0.290544  | 6    | 0.00017  | 0.00054  | 0.3594   | 0.64995  | 0.000806192 | Intergenic | NA           | NA      |
| 3   | 169653835 | 169653908 | 1       | -0.155992  | 5    | 0.0019   | 0.038    | 0.17601  | 0.332    | 0.005855937 | Intergenic | NA           | NA      |
| 3   | 169740075 | 169740221 | 1       | -0.120441  | 5    | 0.025    | 0.088    | 0.25817  | 0.37861  | 0.047453009 | Intragenic | NM_181083    | Arfgef2 |
| 3   | 170042754 | 170042931 | 1       | -0.170544  | 10   | 0.0037   | 0.053    | 0.38784  | 0.55839  | 0.010204935 | Intragenic | NM_013186    | Kcnb1   |
| 3   | 170426201 | 170426245 | 1       | -0.060898  | 5    | 0.02     | 0.088    | 0.13527  | 0.19616  | 0.039778219 | TSS        | NM_053805    | Snai1   |
| 3   | 170426487 | 170426706 | 1       | -0.101634  | 15   | 0.02     | 0.079    | 0.42782  | 0.52945  | 0.039778219 | TSS        | NM_053805    | Snai1   |
| 3   | 170431555 | 170431683 | 1       | -0.260922  | 5    | 1.20E-05 | 0.00052  | 0.44234  | 0.70326  | 9.15E-05    | Intergenic | NA           | NA      |
| 3   | 170484253 | 170484747 | 0.05    | -0.145103  | 32   | 5.70E-10 | 1.50E-07 | 0.22937  | 0.37447  | 2.03E-08    | Intergenic | NA           | NA      |

| chr | start     | stop      | q-value  | methy.diff | CpGs | pMWU     | p2DKS    | MCWLS    | MCWHS    | pMWU.fdr    | cgi.type   | transcript                                  | gene                |
|-----|-----------|-----------|----------|------------|------|----------|----------|----------|----------|-------------|------------|---------------------------------------------|---------------------|
| 3   | 170579586 | 170579743 | 1        | -0.073709  | 5    | 0.014    | 0.059    | 0.041097 | 0.11481  | 0.029850603 | TSS        | NM_001301715:N<br>M_001301720:N<br>M_024125 | Cebp: Cebp:<br>Cebp |
| 3   | 170658571 | 170658605 | 1        | -0.206499  | 5    | 6.30E-06 | 0.00014  | 0.2782   | 0.4847   | 5.33E-05    | Intergenic | NA                                          | NA                  |
| 3   | 170662646 | 170662722 | 1        | -0.187854  | 5    | 0.0087   | 0.025    | 0.19794  | 0.3858   | 0.020391633 | Intergenic | NA                                          | NA                  |
| 3   | 170668498 | 170668755 | 1        | -0.149244  | 9    | 1.90E-08 | 9.20E-06 | 0.083909 | 0.23315  | 4.37E-07    | Intergenic | NA                                          | NA                  |
| 3   | 170691115 | 170691200 | 1        | -0.142782  | 5    | 0.00048  | 0.0017   | 0.10609  | 0.24887  | 0.001881331 | Intergenic | NA                                          | NA                  |
| 3   | 170749535 | 170749734 | 1        | -0.196229  | 5    | 0.00032  | 0.0055   | 0.13613  | 0.33236  | 0.001346443 | Intergenic | NA                                          | NA                  |
| 3   | 170988416 | 170988487 | 1        | -0.250081  | 5    | 0.00044  | 0.0054   | 0.22503  | 0.47511  | 0.001760146 | Intragenic | NM_001108609                                | Pard6b              |
| 3   | 171126407 | 171126436 | 1        | -0.062217  | 5    | 0.016    | 0.088    | 0.16094  | 0.22315  | 0.033288089 | TSS        | NM_001106544:N<br>M_001107804               | Dpm1:Mocs3          |
| 3   | 171169023 | 171169176 | 1        | -0.160272  | 5    | 0.00039  | 0.0092   | 0.13485  | 0.29512  | 0.001587612 | Intragenic | NM_001106545                                | Kcng1               |
| 3   | 171251880 | 171251965 | 1        | -0.093001  | 5    | 0.0074   | 0.015    | 0.097045 | 0.19005  | 0.017853001 | Intergenic | NA                                          | NA                  |
| 3   | 171354650 | 171354716 | 1        | -0.090376  | 5    | 0.0053   | 0.015    | 0.6997   | 0.79008  | 0.013591571 | Intergenic | NA                                          | NA                  |
| 3   | 171376047 | 171376508 | 1        | -0.079334  | 10   | 0.0056   | 0.19     | 0.13018  | 0.20951  | 0.014333376 | Intergenic | NA                                          | NA                  |
| 3   | 171429048 | 171429139 | 1        | -0.057351  | 5    | 0.0013   | 0.0093   | 0.022578 | 0.079929 | 0.004277683 | Intragenic | NM_001107805                                | Nfatc2              |
| 3   | 171449688 | 171449871 | 1        | -0.107428  | 8    | 0.023    | 0.21     | 0.25289  | 0.36032  | 0.04441443  | Intragenic | NM_001107805                                | Nfatc2              |
| 3   | 171539835 | 171539949 | 0.096    | -0.076698  | 7    | 8.80E-09 | 3.00E-07 | 0.036097 | 0.1128   | 2.23E-07    | Intergenic | NA                                          | NA                  |
| 3   | 171594593 | 171594750 | 1        | -0.149132  | 7    | 0.00078  | 0.008    | 0.18893  | 0.33807  | 0.002840382 | Intergenic | NA                                          | NA                  |
| 3   | 171660028 | 171660044 | 1        | -0.111523  | 5    | 0.00026  | 0.0092   | 0.84941  | 0.96093  | 0.001130807 | Intergenic | NA                                          | NA                  |
| 3   | 171845815 | 171845880 | 0.048    | -0.101324  | 7    | 1.30E-09 | 1.50E-07 | 0.046814 | 0.14814  | 4.18E-08    | Intergenic | NA                                          | NA                  |
| 3   | 171938600 | 171938688 | 1        | -0.130109  | 5    | 0.0035   | 0.038    | 0.27153  | 0.40164  | 0.009686665 | Intergenic | NA                                          | NA                  |
| 3   | 172090276 | 172090345 | 1        | -0.250594  | 5    | 0.00012  | 0.00051  | 0.2195   | 0.4701   | 0.000603617 | Intergenic | NA                                          | NA                  |
| 3   | 172158487 | 172158595 | 1        | -0.144364  | 5    | 0.023    | 0.18     | 0.41467  | 0.55904  | 0.04441443  | Intergenic | NA                                          | NA                  |
| 3   | 172189698 | 172189796 | 1        | -0.121881  | 5    | 0.00012  | 0.0055   | 0.13148  | 0.25336  | 0.000603617 | Intergenic | NA                                          | NA                  |
| 3   | 172319543 | 172319663 | 1        | -0.143794  | 5    | 0.0049   | 0.039    | 0.75811  | 0.9019   | 0.012753585 | Intergenic | NA                                          | NA                  |
| 3   | 172410141 | 172410285 | 1        | -0.17003   | 7    | 0.0002   | 0.0032   | 0.19755  | 0.36758  | 0.00092049  | Intergenic | NA                                          | NA                  |
| 3   | 172454195 | 172454257 | 1        | -0.184065  | 5    | 3.10E-05 | 0.00014  | 0.43619  | 0.62026  | 0.000197418 | Intergenic | NA                                          | NA                  |
| 3   | 172482767 | 172482821 | 1        | -0.14817   | 5    | 0.025    | 0.13     | 0.53328  | 0.68145  | 0.047453009 | Intergenic | NA                                          | NA                  |
| 3   | 172656329 | 172656455 | 1        | -0.102471  | 7    | 0.0002   | 0.0051   | 0.1481   | 0.25057  | 0.00092049  | Intergenic | NA                                          | NA                  |
| 3   | 172712497 | 172712560 | 1        | -0.161514  | 5    | 0.012    | 0.18     | 0.33794  | 0.49946  | 0.026435197 | Intergenic | NA                                          | NA                  |
| 3   | 172804977 | 172805629 | 1.50E-07 | -0.201505  | 24   | 4.50E-14 | 4.70E-13 | 0.11494  | 0.31644  | 6.64E-12    | Intergenic | NA                                          | NA                  |
| 3   | 172969734 | 172969827 | 1        | -0.171538  | 8    | 3.50E-09 | 9.80E-06 | 0.0567   | 0.22824  | 9.56E-08    | Intergenic | NA                                          | NA                  |
| 3   | 173058185 | 173058247 | 1        | -0.110786  | 9    | 0.006    | 0.054    | 0.44284  | 0.55363  | 0.015096734 | Intergenic | NA                                          | NA                  |
| 3   | 173069402 | 173069537 | 1        | -0.201086  | 5    | 0.0011   | 0.0055   | 0.21304  | 0.41412  | 0.003737263 | Intergenic | NA                                          | NA                  |
| 3   | 173085585 | 173085682 | 1        | -0.262774  | 5    | 0.00014  | 0.00049  | 0.3736   | 0.63638  | 0.000684451 | Intergenic | NA                                          | NA                  |
| 3   | 173164733 | 173164791 | 1        | -0.215959  | 5    | 7.00E-05 | 0.00052  | 0.21162  | 0.42758  | 0.000386221 | Intergenic | NA                                          | NA                  |
| 3   | 174019344 | 174019645 | 1        | -0.17934   | 11   | 5.40E-09 | 1.60E-05 | 0.058252 | 0.23759  | 1.43E-07    | Intergenic | NA                                          | NA                  |
| 3   | 174026804 | 174026933 | 1        | 0.183019   | 5    | 0.00026  | 0.00051  | 0.88847  | 0.70545  | 0.001130807 | Intergenic | NA                                          | NA                  |

| chr | start     | stop      | q-value  | methyI.diff | CpGs | pMWU     | p2DKS    | MCWLS     | MCWHS    | pMWU.fdr    | cgi.type   | transcript                | gene      |
|-----|-----------|-----------|----------|-------------|------|----------|----------|-----------|----------|-------------|------------|---------------------------|-----------|
| 3   | 174028198 | 174028265 | 1        | -0.145426   | 5    | 0.019    | 0.038    | 0.35369   | 0.49912  | 0.038322088 | Intergenic | NA                        | NA        |
| 3   | 174028298 | 174028375 | 1        | -0.075816   | 5    | 0.0068   | 0.059    | 0.10001   | 0.17582  | 0.016642688 | Intergenic | NA                        | NA        |
| 3   | 174028519 | 174028568 | 1        | -0.156463   | 5    | 1.80E-07 | 3.40E-06 | 0.22606   | 0.38252  | 2.78E-06    | Intergenic | NA                        | NA        |
| 3   | 174176377 | 174176624 | 1        | -0.258153   | 12   | 1.00E-08 | 9.10E-06 | 0.23525   | 0.4934   | 2.49E-07    | Intergenic | NA                        | NA        |
| 3   | 174177071 | 174177472 | 1        | -0.110303   | 8    | 0.0088   | 0.068    | 0.28579   | 0.39609  | 0.020605924 | Intergenic | NA                        | NA        |
| 3   | 174188429 | 174188474 | 1        | -0.288449   | 5    | 6.20E-05 | 0.0018   | 0.44193   | 0.73038  | 0.000349462 | Intergenic | NA                        | NA        |
| 3   | 174193288 | 174193549 | 0.15     | -0.208784   | 8    | 5.60E-09 | 4.50E-07 | 0.050813  | 0.2596   | 1.47E-07    | Intergenic | NA                        | NA        |
| 3   | 174205107 | 174205225 | 1        | -0.199013   | 6    | 0.00033  | 0.00051  | 0.21252   | 0.41153  | 0.001385608 | Intragenic | NM_201635                 | Cyp24a1   |
| 3   | 174299513 | 174299583 | 1        | -0.191764   | 7    | 1.00E-06 | 9.60E-05 | 0.36145   | 0.55321  | 1.18E-05    | Intergenic | NA                        | NA        |
| 3   | 174311040 | 174311128 | 1        | -0.08803    | 5    | 0.011    | 0.059    | 0.094661  | 0.18269  | 0.02463877  | Intergenic | NA                        | NA        |
| 3   | 175724008 | 175724146 | 1        | -0.143777   | 5    | 0.0041   | 0.0018   | 0.2477    | 0.39147  | 0.01100507  | Intergenic | NA                        | NA        |
| 3   | 175960231 | 175960285 | 1        | -0.180012   | 5    | 4.40E-05 | 0.00014  | 0.11748   | 0.2975   | 0.000263321 | Intergenic | NA                        | NA        |
| 3   | 176098143 | 176098244 | 1        | -0.19075    | 5    | 0.0014   | 0.024    | 0.17607   | 0.36682  | 0.004540837 | Intergenic | NA                        | NA        |
| 3   | 176310102 | 176310187 | 1        | -0.076061   | 5    | 0.0017   | 0.015    | 0.76326   | 0.83933  | 0.005339493 | Intergenic | NA                        | NA        |
| 3   | 176362697 | 176362772 | 1        | -0.135089   | 5    | 0.0008   | 0.0093   | 0.15603   | 0.29112  | 0.002866309 | Intergenic | NA                        | NA        |
| 3   | 176374218 | 176374426 | 1        | -0.143333   | 5    | 0.00032  | 0.00028  | 0.10549   | 0.24882  | 0.001346443 | Intergenic | NA                        | NA        |
| 3   | 176432468 | 176432560 | 1        | -0.166656   | 7    | 1.20E-07 | 4.40E-06 | 0.075348  | 0.242    | 2.01E-06    | Intragenic | NM_001106547              | Fam210b   |
| 3   | 176622636 | 176622672 | 1        | -0.116481   | 5    | 0.00072  | 0.024    | 0.19349   | 0.30997  | 0.002634665 | Intergenic | NA                        | NA        |
| 3   | 176765753 | 176765836 | 1        | -0.126926   | 5    | 0.021    | 0.087    | 0.33627   | 0.4632   | 0.041207871 | Intergenic | NA                        | NA        |
| 3   | 176787424 | 176787539 | 1        | -0.137766   | 11   | 1.50E-06 | 1.30E-05 | 0.25564   | 0.3934   | 1.65E-05    | Intergenic | NA                        | NA        |
| 3   | 176918444 | 176918496 | 1        | -0.19137    | 5    | 0.0014   | 0.025    | 0.19364   | 0.38501  | 0.004540837 | Intergenic | NA                        | NA        |
| 3   | 176966709 | 176967241 | 2.70E-11 | -0.226916   | 16   | 4.60E-14 | 8.50E-17 | 0.082007  | 0.30892  | 6.64E-12    | Intragenic | NM_001191856              | Bmp7      |
| 3   | 177015947 | 177016001 | 1        | -0.196159   | 5    | 0.0008   | 0.0017   | 0.26526   | 0.46141  | 0.002866309 | Intragenic | NM_001191856              | Bmp7      |
| 3   | 177019395 | 177019420 | 1        | -0.071145   | 7    | 3.40E-05 | 1.60E-05 | 0.0068535 | 0.077999 | 0.000214477 | TSS        | NM_001191856              | Bmp7      |
| 3   | 177039292 | 177039630 | 1        | -0.176695   | 5    | 0.00065  | 0.0031   | 0.16005   | 0.33675  | 0.002426546 | Intergenic | NA                        | NA        |
| 3   | 177136965 | 177137083 | 1        | -0.310875   | 5    | 7.40E-07 | 1.60E-05 | 0.15118   | 0.46205  | 9.26E-06    | Intergenic | NA                        | NA        |
| 3   | 177153850 | 177153934 | 1        | -0.173628   | 5    | 0.00019  | 0.0018   | 0.11417   | 0.2878   | 0.000879857 | Intergenic | NA                        | NA        |
| 3   | 177280735 | 177280938 | 1        | -0.20971    | 7    | 3.90E-05 | 9.00E-05 | 0.18909   | 0.3988   | 0.000237659 | TSS        | NM_198780                 | Pck1      |
| 3   | 177305642 | 177305777 | 0.53     | -0.160604   | 8    | 2.10E-09 | 1.60E-06 | 0.075414  | 0.23602  | 6.26E-08    | Intergenic | NA                        | NA        |
| 3   | 177479124 | 177479229 | 1        | -0.119278   | 6    | 0.019    | 0.12     | 0.22615   | 0.34542  | 0.038322088 | Intergenic | NA                        | NA        |
| 3   | 177643945 | 177644075 | 1        | -0.22039    | 5    | 0.00048  | 0.0054   | 0.403     | 0.62339  | 0.001881331 | Intergenic | NA                        | NA        |
| 3   | 177726369 | 177726434 | 1        | -0.240161   | 9    | 1.10E-08 | 3.20E-06 | 0.34181   | 0.58197  | 2.70E-07    | Intergenic | NA                        | NA        |
| 3   | 178228120 | 178228157 | 1        | -0.253629   | 5    | 0.00072  | 0.0018   | 0.46937   | 0.723    | 0.002634665 | Intragenic | NM_001108610              | Stx16     |
| 3   | 178426112 | 178426145 | 0.0022   | -0.157785   | 5    | 6.30E-08 | 6.80E-09 | 0.0086623 | 0.16645  | 1.18E-06    | TSS        | NM_001159656:NM_001159653 | Gnas:Gnas |
| 3   | 178426511 | 178426768 | 5.20E-08 | -0.26693    | 22   | 4.20E-14 | 1.60E-13 | 0.12413   | 0.39106  | 6.64E-12    | TSS        | NM_001159656:NM_001159653 | Gnas:Gnas |
| 3   | 178427317 | 178427639 | 1        | -0.147599   | 6    | 0.00046  | 0.00094  | 0.19402   | 0.34162  | 0.001836485 | TSS        | NM_001159656:NM_001159653 | Gnas:Gnas |



| chr | start     | stop      | q-value  | methy.diff | CpGs | pMWU     | p2DKS    | MCWLS    | MCWHS   | pMWU.fdr    | cgi.type   | transcript                                       | gene                |
|-----|-----------|-----------|----------|------------|------|----------|----------|----------|---------|-------------|------------|--------------------------------------------------|---------------------|
| 3   | 178437584 | 178437678 | 0.00058  | -0.16847   | 11   | 1.90E-08 | 1.80E-09 | 0.2058   | 0.37427 | 4.37E-07    | TSS        | NM_001024823:NM_021845                           | Gnas:Gnas           |
| 3   | 178438668 | 178438737 | 1        | -0.223051  | 7    | 0.0013   | 5.00E-05 | 0.26726  | 0.49031 | 0.004277683 | TSS        | NM_001024823:NM_021845                           | Gnas:Gnas           |
| 3   | 178439695 | 178439772 | 1        | -0.210392  | 5    | 7.00E-05 | 0.00098  | 0.19933  | 0.40972 | 0.000386221 | TSS        | NM_001024823:NM_021845                           | Gnas:Gnas           |
| 3   | 178440435 | 178440501 | 0.015    | -0.30426   | 5    | 6.30E-08 | 4.60E-08 | 0.17666  | 0.48092 | 1.18E-06    | TSS        | NM_001024823:NM_021845                           | Gnas:Gnas           |
| 3   | 178440582 | 178440595 | 1        | -0.126169  | 5    | 0.0032   | 0.0032   | 0.10882  | 0.23499 | 0.008990975 | TSS        | NM_001024823:NM_021845                           | Gnas:Gnas           |
| 3   | 178440597 | 178440694 | 1        | -0.102968  | 13   | 0.02     | 0.0073   | 0.13413  | 0.2308  | 0.039778219 | TSS        | NM_001024823:NM_021845                           | Gnas:Gnas           |
| 3   | 178440717 | 178440759 | 1        | -0.175153  | 5    | 8.50E-07 | 3.50E-05 | 0.2567   | 0.43185 | 1.03E-05    | TSS        | NM_001024823:NM_021845                           | Gnas:Gnas           |
| 3   | 178440846 | 178441326 | 2.10E-09 | -0.231532  | 26   | 4.20E-14 | 6.50E-15 | 0.15266  | 0.38419 | 6.64E-12    | TSS        | NM_001024823:NM_021845                           | Gnas:Gnas           |
| 3   | 178441775 | 178441843 | 1        | -0.361173  | 5    | 0.0035   | 0.00014  | 0.30536  | 0.66653 | 0.009686665 | Intragenic | NM_001159656:NM_001159653:NM_001024823:NM_021845 | Gnas:Gnas:Gnas:Gnas |
| 3   | 178471493 | 178471627 | 0.0063   | -0.175404  | 15   | 3.90E-10 | 1.90E-08 | 0.20146  | 0.37687 | 1.47E-08    | TSS        | NM_019132                                        | Gnas                |
| 3   | 178472035 | 178472089 | 1        | -0.222746  | 5    | 2.40E-05 | 1.60E-05 | 0.19016  | 0.41291 | 0.000160049 | TSS        | NM_019132                                        | Gnas                |
| 3   | 178472134 | 178472164 | 0.0022   | -0.208792  | 5    | 6.30E-08 | 6.80E-09 | 0.084745 | 0.29354 | 1.18E-06    | TSS        | NM_019132                                        | Gnas                |
| 3   | 178472172 | 178472733 | 6.70E-05 | -0.112581  | 28   | 1.50E-11 | 2.10E-10 | 0.13585  | 0.24843 | 8.08E-10    | TSS        | NM_019132                                        | Gnas                |
| 3   | 178788574 | 178788607 | 1        | -0.188626  | 5    | 0.008    | 0.059    | 0.45082  | 0.63944 | 0.019059477 | Intragenic | NM_001171096                                     | Zfp831              |
| 3   | 179643201 | 179643272 | 1        | -0.200153  | 5    | 0.00012  | 0.0054   | 0.27668  | 0.47683 | 0.000603617 | Intergenic | NA                                               | NA                  |
| 3   | 179647691 | 179647847 | 1        | -0.198619  | 12   | 1.40E-07 | 6.00E-05 | 0.33698  | 0.5356  | 2.25E-06    | Intergenic | NA                                               | NA                  |
| 3   | 179864616 | 179864766 | 1        | -0.084986  | 9    | 0.024    | 0.024    | 0.16807  | 0.25306 | 0.046241462 | Intergenic | NA                                               | NA                  |
| 3   | 180670229 | 180670284 | 1        | -0.106484  | 5    | 0.0032   | 0.024    | 0.096314 | 0.2028  | 0.008990975 | Intergenic | NA                                               | NA                  |
| 3   | 181119096 | 181119192 | 1        | -0.127619  | 5    | 0.013    | 0.086    | 0.28551  | 0.41313 | 0.028097302 | Intergenic | NA                                               | NA                  |
| 3   | 181119231 | 181119258 | 1        | -0.24596   | 5    | 6.30E-06 | 7.00E-06 | 0.36805  | 0.61401 | 5.33E-05    | Intergenic | NA                                               | NA                  |
| 3   | 181142873 | 181142940 | 1        | -0.075555  | 7    | 0.00031  | 0.012    | 0.13045  | 0.20601 | 0.001320549 | Intergenic | NA                                               | NA                  |
| 3   | 181142961 | 181143025 | 1        | -0.162177  | 5    | 0.0038   | 0.015    | 0.30295  | 0.46512 | 0.010352437 | Intergenic | NA                                               | NA                  |
| 3   | 181394307 | 181394508 | 1        | -0.113472  | 11   | 0.0007   | 0.002    | 0.18449  | 0.29796 | 0.002606725 | Intergenic | NA                                               | NA                  |
| 3   | 181567894 | 181568018 | 1        | -0.275377  | 5    | 1.80E-07 | 7.60E-06 | 0.092648 | 0.36803 | 2.78E-06    | Intragenic | NM_031708                                        | Adrm1               |
| 3   | 181634723 | 181634833 | 1        | -0.142012  | 6    | 3.50E-07 | 6.40E-06 | 0.037655 | 0.17967 | 4.97E-06    | Intergenic | NA                                               | NA                  |
| 3   | 181799744 | 181799798 | 1        | -0.186034  | 5    | 0.023    | 0.037    | 0.53714  | 0.72317 | 0.04441443  | Intergenic | NA                                               | NA                  |
| 3   | 181902224 | 181902312 | 1        | -0.210134  | 7    | 0.00024  | 0.0022   | 0.26228  | 0.47241 | 0.001064629 | Intergenic | NA                                               | NA                  |
| 3   | 182214494 | 182214676 | 1        | -0.157181  | 8    | 1.30E-06 | 9.80E-06 | 0.16793  | 0.32511 | 1.46E-05    | Intergenic | NA                                               | NA                  |

| chr | start     | stop      | q-value  | methy.diff | CpGs | pMWU     | p2DKS    | MCWLS     | MCWHS    | pMWU.fdr    | cgi.type   | transcript   | gene    |
|-----|-----------|-----------|----------|------------|------|----------|----------|-----------|----------|-------------|------------|--------------|---------|
| 3   | 182515734 | 182516076 | 1        | -0.131303  | 11   | 0.00018  | 0.011    | 0.21657   | 0.34787  | 0.000849258 | Intergenic | NA           | NA      |
| 3   | 182743765 | 182743898 | 1        | -0.161395  | 7    | 0.0017   | 0.0054   | 0.29494   | 0.45634  | 0.005339493 | Intergenic | NA           | NA      |
| 3   | 182860841 | 182861026 | 0.00015  | -0.31247   | 11   | 8.50E-14 | 4.60E-10 | 0.07116   | 0.38363  | 9.46E-12    | Intergenic | NA           | NA      |
| 3   | 182978154 | 182978277 | 1        | -0.18636   | 5    | 0.0011   | 0.0093   | 0.23226   | 0.41862  | 0.003737263 | Intergenic | NA           | NA      |
| 3   | 183064424 | 183064506 | 1        | -0.211839  | 5    | 0.00044  | 0.0018   | 0.22355   | 0.43539  | 0.001760146 | Intergenic | NA           | NA      |
| 3   | 183102885 | 183102937 | 1        | -0.065447  | 5    | 0.0038   | 0.015    | 0.074869  | 0.14032  | 0.010352437 | Intragenic | NM_001191745 | Cdh26   |
| 3   | 183138012 | 183138206 | 1        | -0.074151  | 18   | 7.40E-08 | 9.60E-06 | 0.070563  | 0.14471  | 1.36E-06    | TSS        | NM_001109564 | Ppp1r3d |
| 3   | 183313087 | 183313153 | 1        | 0.059042   | 5    | 0.0008   | 0.0018   | 0.93735   | 0.8783   | 0.002866309 | Intergenic | NA           | NA      |
| 3   | 183696755 | 183696904 | 2.30E-09 | -0.332061  | 11   | 4.20E-14 | 7.10E-15 | 0.12517   | 0.45723  | 6.64E-12    | Intergenic | NA           | NA      |
| 4   | 192977    | 193110    | 1        | -0.070244  | 5    | 0.02     | 0.038    | 0.091784  | 0.16203  | 0.039778219 | TSS        | NM_013148    | Htr5a   |
| 4   | 337639    | 337716    | 1        | -0.111704  | 5    | 7.00E-05 | 7.10E-05 | 0.075455  | 0.18716  | 0.000386221 | TSS        | NM_022392    | Insig1  |
| 4   | 720380    | 720484    | 1        | -0.073064  | 5    | 0.017    | 0.0054   | 0.0085644 | 0.081628 | 0.034796287 | TSS        | NM_017221    | Shh     |
| 4   | 2043941   | 2044094   | 1        | -0.090873  | 7    | 0.00048  | 0.0013   | 0.81383   | 0.9047   | 0.001881331 | Intergenic | NA           | NA      |
| 4   | 2146222   | 2146403   | 1        | -0.115843  | 6    | 0.02     | 0.027    | 0.51646   | 0.63231  | 0.039778219 | Intragenic | NM_001012095 | Rnf32   |
| 4   | 2535291   | 2535347   | 0.0023   | -0.385667  | 7    | 3.50E-10 | 7.10E-09 | 0.22917   | 0.61484  | 1.34E-08    | Intergenic | NA           | NA      |
| 4   | 5587478   | 5587718   | 1        | -0.125718  | 5    | 0.023    | 0.039    | 0.46792   | 0.59364  | 0.04441443  | Intergenic | NA           | NA      |
| 4   | 6497479   | 6497786   | 1        | -0.078414  | 10   | 0.0091   | 0.18     | 0.22271   | 0.30113  | 0.021291803 | Intergenic | NA           | NA      |
| 4   | 6680047   | 6680117   | 1        | -0.174876  | 5    | 1.30E-05 | 0.0018   | 0.15574   | 0.33061  | 9.66E-05    | Intergenic | NA           | NA      |
| 4   | 7170832   | 7171211   | 1        | -0.092496  | 5    | 0.0038   | 0.015    | 0.09148   | 0.18398  | 0.010352437 | TSS        | NM_001109216 | Asb10   |
| 4   | 7211810   | 7211891   | 1        | -0.161156  | 5    | 0.00088  | 0.015    | 0.33195   | 0.49311  | 0.003092094 | Intragenic | NM_001271453 | Gbx1    |
| 4   | 7231126   | 7231347   | 1        | -0.153281  | 5    | 0.012    | 0.024    | 0.13092   | 0.2842   | 0.026435197 | Intragenic | NM_001108616 | Agap3   |
| 4   | 7234149   | 7234488   | 0.2      | -0.204178  | 16   | 1.20E-10 | 6.20E-07 | 0.11643   | 0.32061  | 5.34E-09    | Intragenic | NM_001108616 | Agap3   |
| 4   | 7234848   | 7234965   | 1        | -0.132081  | 5    | 0.0049   | 0.015    | 0.13893   | 0.27101  | 0.012753585 | Intragenic | NM_001108616 | Agap3   |
| 4   | 7236418   | 7236629   | 1        | -0.253353  | 8    | 0.00034  | 0.0055   | 0.38717   | 0.64053  | 0.001424609 | Intragenic | NM_001108616 | Agap3   |
| 4   | 7242691   | 7242722   | 1        | -0.064595  | 5    | 0.00044  | 0.00052  | 0.037139  | 0.10173  | 0.001760146 | Intergenic | NA           | NA      |
| 4   | 7242731   | 7242783   | 1        | -0.07098   | 5    | 0.00036  | 0.00098  | 0.148     | 0.21898  | 0.001486639 | Intergenic | NA           | NA      |
| 4   | 7386110   | 7386190   | 1        | -0.254322  | 5    | 0.0017   | 0.038    | 0.28222   | 0.53655  | 0.005339493 | Intragenic | NM_053949    | Kcnh2   |
| 4   | 9410984   | 9411049   | 1        | -0.244454  | 5    | 7.10E-06 | 7.00E-05 | 0.21053   | 0.45499  | 5.86E-05    | Intragenic | NM_080394    | Reln    |
| 4   | 10448891  | 10448957  | 0.00037  | -0.249804  | 7    | 2.40E-09 | 1.20E-09 | 0.54611   | 0.79592  | 7.03E-08    | Intragenic | NM_001107845 | Gsap    |
| 4   | 18040873  | 18040901  | 1        | -0.273703  | 5    | 9.20E-06 | 0.00027  | 0.37333   | 0.64703  | 7.32E-05    | Intergenic | NA           | NA      |
| 4   | 20037065  | 20037126  | 1        | -0.139344  | 5    | 4.90E-07 | 7.60E-06 | 0.07277   | 0.21211  | 6.54E-06    | Intergenic | NA           | NA      |
| 4   | 21982256  | 21982389  | 1        | -0.11926   | 5    | 0.011    | 0.038    | 0.175     | 0.29426  | 0.02463877  | Intergenic | NA           | NA      |
| 4   | 25301179  | 25301212  | 1        | -0.267241  | 7    | 1.00E-07 | 5.00E-05 | 0.49246   | 0.7597   | 1.72E-06    | Intergenic | NA           | NA      |
| 4   | 25627697  | 25627879  | 1        | -0.238961  | 7    | 2.20E-06 | 1.60E-05 | 0.1959    | 0.43486  | 2.27E-05    | Intergenic | NA           | NA      |
| 4   | 25892039  | 25892228  | 1        | -0.139241  | 7    | 0.025    | 0.11     | 0.36618   | 0.50542  | 0.047453009 | Intragenic | NM_001108617 | Cdk14   |
| 4   | 26406378  | 26406544  | 0.0058   | -0.190104  | 5    | 6.30E-08 | 1.80E-08 | 0.055835  | 0.24594  | 1.18E-06    | Intergenic | NA           | NA      |
| 4   | 27335068  | 27335172  | 1        | -0.195123  | 7    | 2.90E-05 | 0.00049  | 0.17495   | 0.37008  | 0.000187968 | Intergenic | NA           | NA      |
| 4   | 27672161  | 27672366  | 1        | -0.052854  | 8    | 0.0002   | 0.00022  | 0.017361  | 0.070215 | 0.00092049  | Intergenic | NA           | NA      |
| 4   | 27754383  | 27754520  | 1.70E-08 | -0.193894  | 9    | 3.40E-13 | 5.30E-14 | 0.011439  | 0.20533  | 3.00E-11    | Intragenic | NM_001191861 | Cdk6    |

| chr | start    | stop     | q-value  | methy.diff | CpGs | pMWU     | p2DKS    | MCWLS    | MCWHS    | pMWU.fdr    | cgi.type   | transcript   | gene    |
|-----|----------|----------|----------|------------|------|----------|----------|----------|----------|-------------|------------|--------------|---------|
| 4   | 27774984 | 27775095 | 1        | -0.27167   | 5    | 0.0038   | 0.0093   | 0.285    | 0.55667  | 0.010352437 | Intragenic | NM_001191861 | Cdk6    |
| 4   | 27840480 | 27840587 | 1        | -0.217208  | 5    | 0.0019   | 0.015    | 0.27374  | 0.49095  | 0.005855937 | Intragenic | NM_001191861 | Cdk6    |
| 4   | 28115442 | 28115515 | 1        | -0.183713  | 5    | 0.0014   | 0.015    | 0.54656  | 0.73027  | 0.004540837 | Intergenic | NA           | NA      |
| 4   | 28666254 | 28666387 | 1        | -0.119838  | 7    | 0.00074  | 0.037    | 0.56599  | 0.68583  | 0.002702912 | Intergenic | NA           | NA      |
| 4   | 29704099 | 29704221 | 5.50E-06 | -0.322964  | 9    | 2.30E-12 | 1.70E-11 | 0.17211  | 0.49508  | 1.61E-10    | Intergenic | NA           | NA      |
| 4   | 29882795 | 29882868 | 1        | -0.050266  | 5    | 0.0029   | 0.009    | 0.044799 | 0.095065 | 0.008293503 | Intergenic | NA           | NA      |
| 4   | 29973930 | 29974039 | 1        | -0.070611  | 5    | 0.016    | 0.086    | 0.58953  | 0.66014  | 0.033288089 | Intragenic | NM_053473    | Ppp1r9a |
| 4   | 29974173 | 29974267 | 1        | -0.19322   | 5    | 0.0058   | 0.0054   | 0.5135   | 0.70672  | 0.014624129 | Intragenic | NM_053473    | Ppp1r9a |
| 4   | 30363388 | 30363652 | 1        | -0.110248  | 7    | 0.00065  | 0.0033   | 0.11967  | 0.22992  | 0.002426546 | Intergenic | NA           | NA      |
| 4   | 31154321 | 31154359 | 1        | -0.064182  | 5    | 0.017    | 0.0091   | 0.77056  | 0.83474  | 0.034796287 | Intergenic | NA           | NA      |
| 4   | 31209367 | 31209405 | 1        | -0.064182  | 5    | 0.017    | 0.0091   | 0.77056  | 0.83474  | 0.034796287 | Intergenic | NA           | NA      |
| 4   | 31675208 | 31675336 | 0.46     | -0.295924  | 5    | 5.60E-07 | 1.40E-06 | 0.093389 | 0.38931  | 7.29E-06    | Intergenic | NA           | NA      |
| 4   | 32451811 | 32451939 | 1        | -0.059861  | 5    | 0.0058   | 0.0091   | 0.79679  | 0.85665  | 0.014624129 | Intergenic | NA           | NA      |
| 4   | 37993676 | 37993823 | 1        | 0.18596    | 5    | 0.0014   | 0.0055   | 0.76641  | 0.58045  | 0.004540837 | Intergenic | NA           | NA      |
| 4   | 38242198 | 38242364 | 1        | -0.121188  | 7    | 0.00023  | 0.0035   | 0.59926  | 0.72044  | 0.00102405  | Intergenic | NA           | NA      |
| 4   | 45678621 | 45678769 | 1        | -0.11783   | 5    | 0.019    | 0.18     | 0.34586  | 0.46369  | 0.038322088 | Intragenic | NM_001004102 | ST7     |
| 4   | 45749340 | 45749407 | 1        | -0.087095  | 5    | 0.0049   | 0.038    | 0.84599  | 0.93308  | 0.012753585 | Intragenic | NM_001004102 | ST7     |
| 4   | 45996129 | 45996189 | 1        | -0.063439  | 5    | 0.0049   | 0.0053   | 0.82943  | 0.89287  | 0.012753585 | Intragenic | NM_130750    | Asz1    |
| 4   | 47709846 | 47709928 | 1        | -0.129711  | 7    | 0.0021   | 0.0032   | 0.57606  | 0.70577  | 0.006364615 | Intergenic | NA           | NA      |
| 4   | 49331421 | 49331776 | 1        | -0.151757  | 9    | 0.012    | 0.044    | 0.41683  | 0.56859  | 0.026435197 | Intergenic | NA           | NA      |
| 4   | 49361347 | 49361416 | 1        | -0.155305  | 5    | 0.023    | 0.0018   | 0.42001  | 0.57531  | 0.04441443  | Intergenic | NA           | NA      |
| 4   | 53315096 | 53315197 | 1        | -0.111974  | 5    | 0.008    | 0.13     | 0.62685  | 0.73882  | 0.019059477 | Intergenic | NA           | NA      |
| 4   | 55436585 | 55436646 | 1        | -0.10371   | 6    | 3.10E-05 | 0.00028  | 0.1072   | 0.21091  | 0.000197418 | Intergenic | NA           | NA      |
| 4   | 55458159 | 55458231 | 1        | -0.17693   | 5    | 3.90E-05 | 6.80E-05 | 0.40991  | 0.58684  | 0.000237659 | Intergenic | NA           | NA      |
| 4   | 55458240 | 55458307 | 1        | -0.253407  | 5    | 3.90E-05 | 0.00098  | 0.17506  | 0.42847  | 0.000237659 | Intergenic | NA           | NA      |
| 4   | 55952010 | 55952204 | 1        | -0.122217  | 5    | 0.02     | 0.024    | 0.11571  | 0.23793  | 0.039778219 | Intergenic | NA           | NA      |
| 4   | 56481548 | 56481668 | 1        | -0.146938  | 5    | 0.013    | 0.059    | 0.44276  | 0.5897   | 0.028097302 | Intragenic | NM_001191862 | Flnc    |
| 4   | 56541908 | 56542046 | 1        | -0.159974  | 6    | 2.10E-06 | 4.60E-05 | 0.20397  | 0.36394  | 2.20E-05    | Intergenic | NA           | NA      |
| 4   | 56672957 | 56673062 | 1        | -0.165463  | 5    | 0.021    | 0.088    | 0.49267  | 0.65813  | 0.041207871 | Intergenic | NA           | NA      |
| 4   | 57049331 | 57049563 | 1        | -0.224128  | 6    | 0.0018   | 0.011    | 0.28273  | 0.50686  | 0.005640313 | Intergenic | NA           | NA      |
| 4   | 57264956 | 57265037 | 1        | -0.213348  | 5    | 0.00019  | 0.00098  | 0.13576  | 0.3491   | 0.000879857 | Intergenic | NA           | NA      |
| 4   | 57451507 | 57451643 | 1        | -0.227848  | 7    | 5.30E-07 | 1.60E-05 | 0.20377  | 0.43161  | 7.05E-06    | Intragenic | NM_001127293 | Zc3hc1  |
| 4   | 57811137 | 57811177 | 1        | -0.103944  | 5    | 0.00021  | 3.30E-05 | 0.30453  | 0.40848  | 0.000951214 | TSS        | NM_001009617 | Mest    |
| 4   | 58131995 | 58132127 | 1        | -0.191576  | 5    | 0.00015  | 0.0032   | 0.16128  | 0.35286  | 0.000724207 | Intergenic | NA           | NA      |
| 4   | 58333013 | 58333145 | 1        | -0.281499  | 5    | 3.20E-07 | 7.20E-06 | 0.11403  | 0.39553  | 4.57E-06    | Intergenic | NA           | NA      |
| 4   | 58378716 | 58378807 | 1        | -0.129651  | 5    | 0.0063   | 0.038    | 0.1833   | 0.31295  | 0.015629046 | Intergenic | NA           | NA      |
| 4   | 58419305 | 58419430 | 1        | -0.115046  | 5    | 0.00036  | 0.0031   | 0.087318 | 0.20236  | 0.001486639 | Intergenic | NA           | NA      |
| 4   | 61104024 | 61104074 | 0.036    | -0.246047  | 5    | 8.50E-08 | 1.10E-07 | 0.10604  | 0.35209  | 1.53E-06    | Intergenic | NA           | NA      |
| 4   | 61661441 | 61661657 | 1        | -0.22654   | 7    | 0.00018  | 0.008    | 0.2642   | 0.49074  | 0.000849258 | Intragenic | NM_199382    | Bpgm    |

| chr | start     | stop      | q-value  | methy.diff | CpGs | pMWU     | p2DKS    | MCWLS    | MCWHS     | pMWU.fdr    | cgi.type   | transcript   | gene      |
|-----|-----------|-----------|----------|------------|------|----------|----------|----------|-----------|-------------|------------|--------------|-----------|
| 4   | 61713022  | 61713181  | 1        | -0.220467  | 8    | 4.10E-06 | 5.20E-05 | 0.23836  | 0.45883   | 3.78E-05    | Intergenic | NA           | NA        |
| 4   | 62119041  | 62119090  | 1        | -0.074155  | 5    | 0.025    | 0.087    | 0.16224  | 0.23639   | 0.047453009 | Intragenic | NM_001009709 | Tmem140   |
| 4   | 62127930  | 62127991  | 1        | -0.090225  | 5    | 0.0024   | 0.024    | 0.098238 | 0.18846   | 0.00705499  | TSS        | NM_001024325 | LOC500077 |
| 4   | 62128060  | 62128107  | 1        | -0.093763  | 5    | 0.0024   | 0.015    | 0.15444  | 0.2482    | 0.00705499  | TSS        | NM_001024325 | LOC500077 |
| 4   | 62138615  | 62138729  | 1        | -0.189195  | 5    | 0.00029  | 0.0031   | 0.2394   | 0.42859   | 0.001239307 | Intragenic | NM_001127298 | Wdr91     |
| 4   | 62261737  | 62261797  | 1        | -0.131157  | 5    | 0.0063   | 0.087    | 0.2908   | 0.42195   | 0.015629046 | Intergenic | NA           | NA        |
| 4   | 62549032  | 62549197  | 1        | -0.158173  | 5    | 0.0014   | 0.024    | 0.1649   | 0.32307   | 0.004540837 | Intragenic | NM_001012621 | Slc13a4   |
| 4   | 62554343  | 62554573  | 1        | -0.104085  | 5    | 0.00065  | 0.0055   | 0.045943 | 0.15003   | 0.002426546 | Intragenic | NM_001012621 | Slc13a4   |
| 4   | 62641316  | 62641409  | 1        | -0.209505  | 5    | 6.50E-07 | 7.60E-06 | 0.12273  | 0.33223   | 8.28E-06    | Intergenic | NA           | NA        |
| 4   | 65587327  | 65587428  | 1        | -0.156795  | 5    | 0.00054  | 0.015    | 0.20375  | 0.36055   | 0.002077867 | Intragenic | NM_001106591 | Atp6v0a4  |
| 4   | 66148098  | 66148175  | 1        | -0.250831  | 5    | 0.00032  | 7.10E-05 | 0.23659  | 0.48742   | 0.001346443 | Intragenic | NM_001107853 | Luc7l2    |
| 4   | 66148248  | 66148272  | 1        | -0.137271  | 5    | 0.00023  | 0.00013  | 0.64579  | 0.78306   | 0.00102405  | Intragenic | NM_001107853 | Luc7l2    |
| 4   | 66842179  | 66842293  | 1        | 0.055382   | 5    | 3.50E-05 | 0.059    | 0.06316  | 0.0077775 | 0.000218038 | Intergenic | NA           | NA        |
| 4   | 66842645  | 66842746  | 1        | -0.146857  | 5    | 0.0035   | 0.088    | 0.15828  | 0.30513   | 0.009686665 | Intergenic | NA           | NA        |
| 4   | 66867473  | 66867567  | 9.80E-06 | -0.193164  | 14   | 1.40E-11 | 3.00E-11 | 0.088818 | 0.28198   | 7.61E-10    | TSS        | NM_001276456 | Chmp4bl1  |
| 4   | 67387481  | 67387592  | 1        | -0.238849  | 7    | 1.70E-06 | 0.00028  | 0.50975  | 0.7486    | 1.83E-05    | Intergenic | NA           | NA        |
| 4   | 67387659  | 67387706  | 1        | -0.10956   | 5    | 0.0022   | 0.0092   | 0.77706  | 0.88662   | 0.006578104 | Intergenic | NA           | NA        |
| 4   | 134344626 | 134344708 | 1        | -0.050722  | 5    | 0.0032   | 0.058    | 0.82991  | 0.88063   | 0.008990975 | Intergenic | NA           | NA        |
| 4   | 135188778 | 135188926 | 1        | -0.150799  | 5    | 0.0087   | 0.056    | 0.36392  | 0.51471   | 0.020391633 | Intergenic | NA           | NA        |
| 4   | 139172745 | 139172826 | 0.94     | -0.140851  | 6    | 2.60E-08 | 2.90E-06 | 0.039691 | 0.18054   | 5.80E-07    | Intergenic | NA           | NA        |
| 4   | 140295614 | 140295734 | 1        | 0.133844   | 5    | 0.023    | 0.13     | 0.74061  | 0.60676   | 0.04441443  | Intergenic | NA           | NA        |
| 4   | 141729297 | 141729355 | 1        | -0.166004  | 5    | 0.00048  | 0.0093   | 0.18618  | 0.35218   | 0.001881331 | Intergenic | NA           | NA        |
| 4   | 142941078 | 142941293 | 1        | -0.258544  | 8    | 1.40E-07 | 2.90E-05 | 0.099598 | 0.35814   | 2.25E-06    | Intergenic | NA           | NA        |
| 4   | 143062726 | 143063086 | 1.60E-06 | -0.089144  | 38   | 4.50E-14 | 4.80E-12 | 0.055473 | 0.14462   | 6.64E-12    | Intragenic | NM_001034849 | Gimap1    |
| 4   | 144517900 | 144518205 | 1        | -0.124628  | 8    | 0.0099   | 0.051    | 0.21885  | 0.34348   | 0.02275947  | TSS        | NM_001134982 | Mpp6      |
| 4   | 144795983 | 144796088 | 1        | -0.222755  | 5    | 0.00088  | 0.0092   | 0.27857  | 0.50133   | 0.003092094 | Intergenic | NA           | NA        |
| 4   | 145111132 | 145111255 | 1        | -0.195606  | 5    | 0.014    | 0.038    | 0.24072  | 0.43633   | 0.029850603 | Intergenic | NA           | NA        |
| 4   | 145360169 | 145360348 | 1        | -0.187825  | 5    | 0.023    | 0.057    | 0.42396  | 0.61179   | 0.04441443  | Intergenic | NA           | NA        |
| 4   | 145395333 | 145395490 | 1        | -0.099942  | 7    | 0.024    | 0.25     | 0.28707  | 0.38701   | 0.046241462 | Intergenic | NA           | NA        |
| 4   | 145451430 | 145451623 | 1        | -0.180754  | 10   | 9.20E-06 | 0.0008   | 0.24114  | 0.42189   | 7.32E-05    | Intergenic | NA           | NA        |
| 4   | 145579429 | 145579551 | 1        | -0.050891  | 6    | 0.016    | 0.084    | 0.068705 | 0.1196    | 0.033288089 | Intergenic | NA           | NA        |
| 4   | 145992907 | 145993078 | 1        | -0.211865  | 7    | 2.60E-06 | 5.40E-05 | 0.076394 | 0.28826   | 2.60E-05    | Intragenic | NM_001013085 | Snx10     |
| 4   | 146470504 | 146470646 | 1        | -0.128485  | 5    | 0.0032   | 0.0054   | 0.17671  | 0.30519   | 0.008990975 | Intergenic | NA           | NA        |
| 4   | 146799066 | 146799119 | 1        | -0.166086  | 5    | 0.00065  | 0.003    | 0.2953   | 0.46138   | 0.002426546 | TSS        | NM_012581    | Hoxa2     |
| 4   | 146804333 | 146804380 | 1        | -0.131185  | 5    | 0.0038   | 0.015    | 0.54169  | 0.67287   | 0.010352437 | Intergenic | NA           | NA        |
| 4   | 146804431 | 146804514 | 1        | -0.201925  | 9    | 2.00E-06 | 4.70E-05 | 0.34797  | 0.5499    | 2.10E-05    | Intergenic | NA           | NA        |
| 4   | 146806047 | 146806192 | 1        | -0.131553  | 10   | 0.00084  | 0.012    | 0.26734  | 0.3989    | 0.002993559 | Intergenic | NA           | NA        |
| 4   | 146813034 | 146813144 | 1        | -0.103587  | 9    | 6.40E-07 | 0.00033  | 0.051456 | 0.15504   | 8.24E-06    | Intergenic | NA           | NA        |
| 4   | 146825753 | 146825840 | 1        | -0.256374  | 5    | 1.10E-06 | 0.00014  | 0.3419   | 0.59828   | 1.27E-05    | Intergenic | NA           | NA        |

| chr | start     | stop      | q-value  | methyI.diff | CpGs | pMWU     | p2DKS    | MCWLS    | MCWHS    | pMWU.fdr    | cgi.type   | transcript   | gene       |
|-----|-----------|-----------|----------|-------------|------|----------|----------|----------|----------|-------------|------------|--------------|------------|
| 4   | 146825939 | 146825957 | 1        | -0.109109   | 5    | 0.0016   | 0.039    | 0.20643  | 0.31554  | 0.005100053 | Intergenic | NA           | NA         |
| 4   | 146826323 | 146826482 | 1        | -0.060176   | 9    | 0.00019  | 4.80E-05 | 0.037351 | 0.097527 | 0.000879857 | Intergenic | NA           | NA         |
| 4   | 146839034 | 146839750 | 8.50E-32 | -0.079555   | 68   | 4.60E-14 | 2.60E-37 | 0.026418 | 0.10597  | 6.64E-12    | Intragenic | NR_132648    | Hoxaas3    |
| 4   | 146843763 | 146844021 | 1        | -0.078375   | 14   | 0.00015  | 0.013    | 0.085013 | 0.16339  | 0.000724207 | TSS        | NM_001191087 | Hoxa6      |
| 4   | 146885235 | 146885390 | 1        | -0.128813   | 7    | 0.0069   | 0.027    | 0.23092  | 0.35973  | 0.01685311  | Intragenic | NR_132628    | RGD1564419 |
| 4   | 146889113 | 146889574 | 1        | -0.058356   | 24   | 0.0014   | 0.0042   | 0.11376  | 0.16638  | 0.004540837 | Intergenic | NA           | NA         |
| 4   | 146889593 | 146889783 | 1        | -0.078187   | 15   | 1.40E-06 | 0.00086  | 0.12036  | 0.19855  | 1.57E-05    | Intergenic | NA           | NA         |
| 4   | 146924829 | 146925545 | 8.50E-32 | -0.079555   | 68   | 4.60E-14 | 2.60E-37 | 0.026418 | 0.10597  | 6.64E-12    | Intragenic | NR_132648    | Hoxaas3    |
| 4   | 146929558 | 146929816 | 1        | -0.080857   | 14   | 0.00012  | 0.013    | 0.085013 | 0.16587  | 0.000603617 | TSS        | NM_001191087 | Hoxa6      |
| 4   | 146970759 | 146970914 | 1        | -0.128813   | 7    | 0.0069   | 0.027    | 0.23092  | 0.35973  | 0.01685311  | Intragenic | NR_132628    | RGD1564419 |
| 4   | 146974637 | 146975098 | 1        | -0.058356   | 24   | 0.0014   | 0.0042   | 0.11376  | 0.16638  | 0.004540837 | Intergenic | NA           | NA         |
| 4   | 146975117 | 146975307 | 1        | -0.078187   | 15   | 1.40E-06 | 0.00086  | 0.12036  | 0.19855  | 1.57E-05    | Intergenic | NA           | NA         |
| 4   | 146995011 | 146995153 | 1        | -0.170164   | 10   | 0.00016  | 0.022    | 0.33176  | 0.50193  | 0.000769396 | Intergenic | NA           | NA         |
| 4   | 146995822 | 146995888 | 1        | -0.176104   | 5    | 0.00014  | 0.0055   | 0.26339  | 0.4395   | 0.000684451 | Intergenic | NA           | NA         |
| 4   | 146995945 | 146996139 | 1        | -0.161231   | 5    | 5.00E-05 | 0.0055   | 0.097895 | 0.25913  | 0.000291675 | Intergenic | NA           | NA         |
| 4   | 146996143 | 146996202 | 1        | -0.323725   | 6    | 3.20E-07 | 1.30E-05 | 0.26366  | 0.58738  | 4.57E-06    | Intergenic | NA           | NA         |
| 4   | 147014558 | 147014610 | 1        | -0.067586   | 5    | 0.023    | 0.038    | 0.34724  | 0.41483  | 0.04441443  | Intergenic | NA           | NA         |
| 4   | 147119255 | 147119337 | 1        | -0.086633   | 5    | 2.20E-05 | 3.30E-05 | 0.80117  | 0.8878   | 0.000149617 | Intergenic | NA           | NA         |
| 4   | 148632341 | 148632511 | 1        | -0.064528   | 18   | 0.0026   | 0.053    | 0.10581  | 0.17034  | 0.007616821 | Intragenic | NM_001034010 | Tril       |
| 4   | 149141722 | 149141814 | 1        | -0.233475   | 5    | 0.00014  | 0.00052  | 0.2566   | 0.49008  | 0.000684451 | Intragenic | NM_001104527 | Prr15      |
| 4   | 149270897 | 149271011 | 1        | -0.14131    | 6    | 0.005    | 0.0041   | 0.54642  | 0.68773  | 0.012977322 | Intragenic | NM_147211    | Wipf3      |
| 4   | 149276430 | 149276507 | 1        | -0.161215   | 5    | 0.00036  | 0.00095  | 0.66359  | 0.82481  | 0.001486639 | Intragenic | NM_147211    | Wipf3      |
| 4   | 149531841 | 149531965 | 1        | -0.10545    | 5    | 0.02     | 0.025    | 0.24767  | 0.35312  | 0.039778219 | Intergenic | NA           | NA         |
| 4   | 149799326 | 149799646 | 1        | -0.180962   | 11   | 0.0021   | 0.046    | 0.53359  | 0.71455  | 0.006364615 | Intragenic | NM_001109236 | Nod1       |
| 4   | 150002722 | 150002874 | 1        | -0.149699   | 7    | 0.00078  | 0.039    | 0.44773  | 0.59743  | 0.002840382 | Intergenic | NA           | NA         |
| 4   | 150009248 | 150009400 | 1        | -0.147216   | 7    | 0.00021  | 0.019    | 0.46625  | 0.61347  | 0.000951214 | Intergenic | NA           | NA         |
| 4   | 150203794 | 150203857 | 1        | -0.229591   | 5    | 3.90E-05 | 0.00053  | 0.18752  | 0.41711  | 0.000237659 | TSS        | NM_012778    | Aqp1       |
| 4   | 150212498 | 150212627 | 1        | -0.285447   | 6    | 5.20E-08 | 6.50E-06 | 0.18662  | 0.47207  | 1.07E-06    | Intragenic | NM_012778    | Aqp1       |
| 4   | 150253969 | 150254142 | 1        | -0.149403   | 7    | 2.00E-06 | 5.50E-05 | 0.069123 | 0.21853  | 2.10E-05    | Intergenic | NA           | NA         |
| 4   | 151811020 | 151811230 | 1        | -0.077571   | 5    | 0.021    | 0.038    | 0.7899   | 0.86747  | 0.041207871 | Intergenic | NA           | NA         |
| 4   | 152520015 | 152520092 | 1        | -0.289959   | 5    | 0.0013   | 0.015    | 0.52255  | 0.81251  | 0.004277683 | Intergenic | NA           | NA         |
| 4   | 153971978 | 153972005 | 1        | -0.123001   | 5    | 2.20E-05 | 0.00014  | 0.41629  | 0.53929  | 0.000149617 | TSS        | NM_001044293 | Nap1l5     |
| 4   | 154492820 | 154492900 | 1        | -0.162579   | 7    | 0.00031  | 0.0021   | 0.37779  | 0.54037  | 0.001320549 | Intergenic | NA           | NA         |
| 4   | 157841707 | 157841790 | 1        | -0.119342   | 5    | 0.019    | 0.058    | 0.48559  | 0.60493  | 0.038322088 | Intergenic | NA           | NA         |
| 4   | 158200674 | 158200723 | 1        | -0.192667   | 5    | 7.80E-05 | 0.00014  | 0.18634  | 0.37901  | 0.000422981 | Intergenic | NA           | NA         |
| 4   | 159066823 | 159066928 | 1        | -0.142458   | 5    | 0.0029   | 7.00E-05 | 0.52771  | 0.67017  | 0.008293503 | Intragenic | NM_024379    | Grid2      |
| 4   | 159666442 | 159666525 | 1        | -0.119342   | 5    | 0.019    | 0.058    | 0.48559  | 0.60493  | 0.038322088 | Intragenic | NM_024379    | Grid2      |
| 4   | 162294486 | 162294534 | 1        | -0.078955   | 5    | 0.012    | 0.024    | 0.60642  | 0.68537  | 0.026435197 | Intergenic | NA           | NA         |
| 4   | 162404391 | 162404522 | 1        | 0.166466    | 5    | 0.0016   | 0.057    | 0.86634  | 0.69988  | 0.005100053 | Intergenic | NA           | NA         |

| chr | start     | stop      | q-value | methy.diff | CpGs | pMWU     | p2DKS    | MCWLS    | MCWHS   | pMWU.fdr    | cgi.type   | transcript | gene   |
|-----|-----------|-----------|---------|------------|------|----------|----------|----------|---------|-------------|------------|------------|--------|
| 4   | 162675440 | 162675649 | 0.038   | -0.205744  | 8    | 7.10E-10 | 1.20E-07 | 0.063376 | 0.26912 | 2.45E-08    | Intergenic | NA         | NA     |
| 4   | 164017797 | 164017884 | 1       | -0.318277  | 5    | 0.0027   | 0.0053   | 0.37732  | 0.6956  | 0.007840962 | TSS        | NM_031538  | Cd8a   |
| 4   | 165026142 | 165026252 | 0.21    | -0.234133  | 5    | 2.10E-07 | 6.60E-07 | 0.058158 | 0.29229 | 3.19E-06    | Intergenic | NA         | NA     |
| 4   | 165041114 | 165041195 | 1       | -0.111437  | 5    | 0.013    | 0.18     | 0.15258  | 0.26402 | 0.028097302 | Intergenic | NA         | NA     |
| 4   | 165645852 | 165645922 | 1       | -0.142663  | 7    | 0.017    | 0.017    | 0.057005 | 0.19967 | 0.034796287 | TSS        | NM_021261  | Tmsb10 |
| 4   | 165671589 | 165671640 | 1       | -0.17788   | 5    | 7.40E-07 | 7.50E-06 | 0.49594  | 0.67382 | 9.26E-06    | Intergenic | NA         | NA     |
| 4   | 167113428 | 167113497 | 1       | -0.133138  | 5    | 0.013    | 0.025    | 0.41305  | 0.54619 | 0.028097302 | Intergenic | NA         | NA     |
| 4   | 167130555 | 167130624 | 1       | -0.133138  | 5    | 0.013    | 0.025    | 0.41305  | 0.54619 | 0.028097302 | Intergenic | NA         | NA     |
| 4   | 168092147 | 168092216 | 1       | -0.131326  | 5    | 0.014    | 0.025    | 0.41433  | 0.54566 | 0.029850603 | Intergenic | NA         | NA     |
| 4   | 169699670 | 169699745 | 1       | -0.117838  | 8    | 0.019    | 0.12     | 0.58692  | 0.70476 | 0.038322088 | Intergenic | NA         | NA     |
| 4   | 176666964 | 176667161 | 1       | -0.066427  | 7    | 0.0096   | 0.017    | 0.75247  | 0.8189  | 0.022155406 | Intergenic | NA         | NA     |
| 4   | 177136787 | 177136876 | 1       | -0.272812  | 5    | 1.70E-06 | 3.30E-05 | 0.14461  | 0.41742 | 1.83E-05    | Intergenic | NA         | NA     |
| 4   | 177619432 | 177619562 | 1       | -0.143421  | 5    | 4.40E-05 | 0.0018   | 0.076886 | 0.22031 | 0.000263321 | Intergenic | NA         | NA     |
| 4   | 178203456 | 178203582 | 1       | -0.067593  | 5    | 0.011    | 0.039    | 0.079599 | 0.14719 | 0.02463877  | Intergenic | NA         | NA     |
| 4   | 178387203 | 178387311 | 1       | -0.113547  | 5    | 0.016    | 0.087    | 0.10145  | 0.215   | 0.033288089 | Intergenic | NA         | NA     |
| 4   | 178388754 | 178388868 | 1       | -0.165582  | 7    | 0.0011   | 0.017    | 0.32484  | 0.49042 | 0.003737263 | Intergenic | NA         | NA     |
| 4   | 178428271 | 178428431 | 1       | -0.144704  | 8    | 0.0012   | 0.0034   | 0.16696  | 0.31167 | 0.004013471 | Intragenic | NM_019272  | Sema4f |
| 4   | 179472175 | 179472256 | 1       | 0.133333   | 8    | 3.10E-07 | 5.10E-05 | 0.27734  | 0.144   | 4.47E-06    | Intragenic | NM_024130  | Dctn1  |
| 4   | 179478305 | 179478398 | 1       | -0.187906  | 5    | 0.016    | 0.087    | 0.52716  | 0.71507 | 0.033288089 | Intragenic | NM_024130  | Dctn1  |
| 4   | 179553651 | 179553694 | 1       | -0.319419  | 5    | 8.80E-05 | 0.00098  | 0.25112  | 0.57054 | 0.000466886 | Intragenic | NM_212512  | Slc4a5 |
| 4   | 179656527 | 179656654 | 1       | -0.206338  | 9    | 0.00014  | 0.0038   | 0.40954  | 0.61588 | 0.000684451 | Intergenic | NA         | NA     |
| 4   | 179749024 | 179749074 | 1       | -0.193043  | 5    | 0.00039  | 0.00053  | 0.099531 | 0.29257 | 0.001587612 | Intergenic | NA         | NA     |
| 4   | 180001098 | 180001147 | 1       | -0.091192  | 5    | 0.0032   | 0.0054   | 0.052822 | 0.14401 | 0.008990975 | Intragenic | NM_022637  | Vax2   |
| 4   | 180029752 | 180029923 | 0.18    | -0.142473  | 16   | 1.90E-10 | 5.50E-07 | 0.13519  | 0.27766 | 7.85E-09    | Intergenic | NA         | NA     |
| 4   | 180546597 | 180546764 | 1       | -0.113563  | 7    | 0.014    | 0.036    | 0.2049   | 0.31846 | 0.029850603 | Intergenic | NA         | NA     |
| 4   | 180704319 | 180704463 | 1       | -0.148171  | 5    | 0.0008   | 0.0018   | 0.057078 | 0.20525 | 0.002866309 | Intergenic | NA         | NA     |
| 4   | 181550329 | 181550403 | 1       | -0.061793  | 12   | 2.40E-05 | 0.0014   | 0.14018  | 0.20197 | 0.000160049 | Intergenic | NA         | NA     |
| 4   | 181731510 | 181731563 | 1       | -0.092827  | 5    | 0.00048  | 0.00099  | 0.025915 | 0.11874 | 0.001881331 | Intergenic | NA         | NA     |
| 4   | 182106440 | 182106534 | 1       | -0.244538  | 5    | 5.60E-07 | 3.40E-06 | 0.053378 | 0.29792 | 7.29E-06    | TSS        | NM_080884  | Nat8f5 |
| 4   | 182113548 | 182113700 | 1       | -0.143885  | 8    | 1.30E-05 | 0.0022   | 0.58697  | 0.73085 | 9.66E-05    | Intergenic | NA         | NA     |
| 4   | 182865297 | 182865450 | 1       | -0.098041  | 5    | 0.015    | 0.038    | 0.13779  | 0.23583 | 0.031584896 | Intergenic | NA         | NA     |
| 4   | 183759684 | 183759747 | 1       | -0.142525  | 5    | 0.011    | 0.037    | 0.6425   | 0.78503 | 0.02463877  | Intergenic | NA         | NA     |
| 4   | 184278036 | 184278345 | 1       | -0.078177  | 10   | 0.01     | 0.12     | 0.24757  | 0.32575 | 0.02275947  | Intergenic | NA         | NA     |
| 4   | 185367073 | 185367485 | 1       | -0.070617  | 13   | 2.70E-05 | 5.80E-05 | 0.062262 | 0.13288 | 0.000178372 | Intergenic | NA         | NA     |
| 4   | 185367525 | 185367572 | 1       | -0.125514  | 5    | 0.008    | 0.058    | 0.25779  | 0.38331 | 0.019059477 | Intergenic | NA         | NA     |
| 4   | 185373414 | 185373466 | 1       | -0.118857  | 5    | 2.80E-05 | 0.00097  | 0.11334  | 0.2322  | 0.000182174 | TSS        | NM_033442  | Gata2  |
| 4   | 185377587 | 185377858 | 1       | -0.132559  | 9    | 0.00011  | 0.0012   | 0.15741  | 0.28997 | 0.000565143 | Intragenic | NM_033442  | Gata2  |
| 4   | 185689718 | 185689780 | 1       | -0.102697  | 7    | 1.30E-05 | 0.00016  | 0.065099 | 0.1678  | 9.66E-05    | Intergenic | NA         | NA     |
| 4   | 186227697 | 186227934 | 1       | -0.072663  | 9    | 0.02     | 0.13     | 0.17609  | 0.24875 | 0.039778219 | Intergenic | NA         | NA     |

| chr | start     | stop      | q-value | methyL.diff | CpGs | pMWU     | p2DKS    | MCWLS    | MCWHS   | pMWU.fdr    | cgi.type   | transcript                                     | gene              |
|-----|-----------|-----------|---------|-------------|------|----------|----------|----------|---------|-------------|------------|------------------------------------------------|-------------------|
| 4   | 186766292 | 186766375 | 1       | -0.086021   | 15   | 0.00096  | 0.02     | 0.42403  | 0.51005 | 0.003358463 | Intragenic | NM_001191974                                   | Chst13            |
| 4   | 186766392 | 186766444 | 1       | -0.101459   | 8    | 0.026    | 0.12     | 0.38576  | 0.48722 | 0.049234478 | Intragenic | NM_001191974                                   | Chst13            |
| 4   | 186766460 | 186766505 | 1       | -0.079912   | 5    | 0.015    | 0.088    | 0.53054  | 0.61046 | 0.031584896 | Intragenic | NM_001191974                                   | Chst13            |
| 4   | 186910602 | 186910729 | 1       | -0.237666   | 5    | 0.00039  | 0.00053  | 0.19356  | 0.43123 | 0.001587612 | Intragenic | NM_053536                                      | Klf15             |
| 4   | 187165708 | 187165766 | 1       | -0.10877    | 5    | 0.008    | 0.024    | 0.099634 | 0.2084  | 0.019059477 | Intergenic | NA                                             | NA                |
| 4   | 187759332 | 187759476 | 0.095   | -0.199918   | 7    | 1.30E-08 | 2.90E-07 | 0.015783 | 0.2157  | 3.10E-07    | Intragenic | NM_001106610                                   | Hdac11            |
| 4   | 188095025 | 188095333 | 1       | -0.074042   | 5    | 0.021    | 0.088    | 0.078216 | 0.15226 | 0.041207871 | Intergenic | NA                                             | NA                |
| 4   | 188222584 | 188222648 | 1       | -0.1875     | 6    | 1.60E-06 | 0.00017  | 0.074572 | 0.26207 | 1.75E-05    | Intragenic | NM_017206                                      | Slc6a6            |
| 4   | 188243907 | 188244103 | 1       | -0.232447   | 5    | 0.00032  | 0.0018   | 0.11303  | 0.34548 | 0.001346443 | TSS        | NM_017206                                      | Slc6a6            |
| 4   | 188314248 | 188314358 | 1       | -0.154502   | 5    | 0.008    | 0.13     | 0.46985  | 0.62435 | 0.019059477 | Intergenic | NA                                             | NA                |
| 4   | 188589479 | 188589608 | 1       | -0.121624   | 5    | 0.015    | 0.086    | 0.47118  | 0.5928  | 0.031584896 | Intragenic | NM_001107877                                   | Adamts9           |
| 4   | 191675404 | 191675455 | 1       | -0.186244   | 5    | 0.0063   | 0.024    | 0.27938  | 0.46562 | 0.015629046 | TSS        | NM_001109250                                   | Kbtbd8            |
| 4   | 192313519 | 192313700 | 1       | -0.12866    | 12   | 0.00061  | 0.0037   | 0.37436  | 0.50302 | 0.002317537 | Intragenic | NM_001100750                                   | Suclg2            |
| 4   | 192748430 | 192748548 | 1       | -0.132566   | 5    | 0.01     | 0.015    | 0.30225  | 0.43481 | 0.02275947  | Intergenic | NA                                             | NA                |
| 4   | 193875724 | 193875785 | 1       | -0.073076   | 5    | 0.025    | 0.088    | 0.64426  | 0.71734 | 0.047453009 | Intragenic | NM_001134700                                   | Fam19a4           |
| 4   | 195003880 | 195004101 | 1       | -0.184573   | 5    | 0.0011   | 0.015    | 0.10645  | 0.29102 | 0.003737263 | Intergenic | NA                                             | NA                |
| 4   | 195570072 | 195570181 | 1       | -0.153874   | 7    | 0.0004   | 0.0034   | 0.18118  | 0.33506 | 0.00162337  | Intergenic | NA                                             | NA                |
| 4   | 195942124 | 195942599 | 1       | -0.118316   | 8    | 0.0042   | 0.07     | 0.21609  | 0.33441 | 0.011250869 | Intragenic | NM_001034131                                   | Foxp1             |
| 4   | 196250100 | 196250333 | 1       | -0.147222   | 7    | 0.0076   | 0.056    | 0.32243  | 0.46965 | 0.018313455 | Intergenic | NA                                             | NA                |
| 4   | 196528109 | 196528266 | 1       | -0.064201   | 7    | 0.00013  | 0.0082   | 0.086173 | 0.15037 | 0.000648758 | Intergenic | NA                                             | NA                |
| 4   | 196535974 | 196536131 | 1       | -0.064201   | 7    | 0.00013  | 0.0082   | 0.086173 | 0.15037 | 0.000648758 | Intergenic | NA                                             | NA                |
| 4   | 196787210 | 196787278 | 0.1     | -0.266134   | 6    | 2.90E-08 | 3.20E-07 | 0.12508  | 0.39122 | 6.39E-07    | Intergenic | NA                                             | NA                |
| 4   | 196787297 | 196787549 | 1       | -0.141001   | 16   | 0.011    | 0.038    | 0.34543  | 0.46403 | 0.02463877  | Intergenic | NA                                             | NA                |
| 4   | 197362066 | 197362180 | 1       | -0.208706   | 5    | 7.00E-05 | 0.00028  | 0.16312  | 0.37182 | 0.000386221 | Intergenic | NA                                             | NA                |
| 4   | 197362560 | 197362605 | 1       | -0.149979   | 5    | 0.00023  | 0.0032   | 0.29204  | 0.44202 | 0.00102405  | Intergenic | NA                                             | NA                |
| 4   | 197686466 | 197686554 | 1       | -0.200428   | 5    | 7.80E-05 | 0.0032   | 0.24654  | 0.44697 | 0.000422981 | Intergenic | NA                                             | NA                |
| 4   | 198131419 | 198131504 | 1       | -0.102976   | 5    | 0.0049   | 0.0091   | 0.65739  | 0.76037 | 0.012753585 | Intergenic | NA                                             | NA                |
| 4   | 204092111 | 204092270 | 1       | -0.088815   | 5    | 0.0016   | 0.009    | 0.77775  | 0.86656 | 0.005100053 | Intergenic | NA                                             | NA                |
| 4   | 204105902 | 204106340 | 1       | -0.105419   | 11   | 0.016    | 0.042    | 0.14706  | 0.25248 | 0.033288089 | Intergenic | NA                                             | NA                |
| 4   | 204177230 | 204177489 | 1       | -0.285295   | 5    | 0.0032   | 0.00095  | 0.53934  | 0.82464 | 0.008990975 | Intergenic | NA                                             | NA                |
| 4   | 204601145 | 204601291 | 1       | -0.245765   | 5    | 0.002    | 0.0018   | 0.20661  | 0.45237 | 0.006079939 | Intergenic | NA                                             | NA                |
| 4   | 204817345 | 204817481 | 1       | -0.194129   | 5    | 0.00072  | 0.0017   | 0.093908 | 0.28804 | 0.002634665 | Intragenic | NM_001007235:N<br>M_001270596:N<br>M_001270597 | Itpr1:Itpr1:Itpr1 |
| 4   | 207683062 | 207683169 | 1       | -0.11979    | 5    | 0.025    | 0.039    | 0.39884  | 0.51863 | 0.047453009 | TSS        | NM_019155                                      | Cav3              |
| 4   | 208415823 | 208415871 | 1       | -0.069304   | 5    | 0.015    | 0.088    | 0.25074  | 0.32004 | 0.031584896 | Intergenic | NA                                             | NA                |
| 4   | 208852029 | 208852189 | 0.00057 | -0.24292    | 12   | 6.30E-13 | 1.80E-09 | 0.11424  | 0.35716 | 5.05E-11    | TSS        | NM_001109251                                   | Fancd2os          |
| 4   | 208926203 | 208926304 | 1       | -0.143046   | 5    | 0.0053   | 0.025    | 0.22073  | 0.36377 | 0.013591571 | Intragenic | NM_001025422                                   | Irak2             |
| 4   | 209097942 | 209098017 | 1       | -0.184102   | 5    | 0.015    | 0.13     | 0.39884  | 0.58295 | 0.031584896 | Intragenic | NM_012508                                      | Atp2b2            |

| chr | start     | stop      | q-value | methy.diff | CpGs | pMWU     | p2DKS    | MCWLS    | MCWHS    | pMWU.fdr    | cgi.type   | transcript             | gene      |
|-----|-----------|-----------|---------|------------|------|----------|----------|----------|----------|-------------|------------|------------------------|-----------|
| 4   | 209834754 | 209834985 | 1       | -0.248659  | 5    | 9.80E-05 | 7.10E-05 | 0.40501  | 0.65366  | 0.000512474 | Intergenic | NA                     | NA        |
| 4   | 209846205 | 209846311 | 1       | -0.076399  | 8    | 0.013    | 0.0081   | 0.23741  | 0.3138   | 0.028097302 | Intergenic | NA                     | NA        |
| 4   | 210273659 | 210273807 | 1       | -0.146786  | 5    | 0.00032  | 0.0055   | 0.62316  | 0.76995  | 0.001346443 | Intergenic | NA                     | NA        |
| 4   | 210723614 | 210723885 | 1       | -0.187654  | 7    | 3.60E-05 | 0.0007   | 0.15454  | 0.3422   | 0.000223919 | Intragenic | NM_019159              | Syn2      |
| 4   | 214075968 | 214076050 | 1       | -0.060703  | 7    | 0.022    | 0.1      | 0.67896  | 0.73966  | 0.043064669 | Intergenic | NA                     | NA        |
| 4   | 214718271 | 214718351 | 1       | -0.188991  | 5    | 0.0016   | 0.0055   | 0.33405  | 0.52304  | 0.005100053 | Intragenic | NM_001024275           | Rassf4    |
| 4   | 214782072 | 214782190 | 1       | -0.246957  | 7    | 6.00E-05 | 0.0014   | 0.3662   | 0.61316  | 0.000341554 | TSS        | NM_001108643           | Tmem72    |
| 4   | 214823917 | 214824227 | 1       | -0.108194  | 8    | 0.011    | 0.05     | 0.31414  | 0.42233  | 0.02463877  | Intergenic | NA                     | NA        |
| 4   | 215423677 | 215423992 | 1       | -0.187301  | 11   | 4.80E-06 | 0.00095  | 0.22789  | 0.41519  | 4.29E-05    | Intergenic | NA                     | NA        |
| 4   | 216152308 | 216152379 | 1       | -0.11009   | 5    | 0.0045   | 0.059    | 0.70851  | 0.8186   | 0.011905878 | Intragenic | NM_012643:NM_001110099 | Ret:Ret   |
| 4   | 217288195 | 217288278 | 1       | -0.187117  | 5    | 7.80E-05 | 0.0018   | 0.3492   | 0.53632  | 0.000422981 | Intragenic | NM_001191751           | Cacna2d4  |
| 4   | 217414857 | 217414952 | 1       | -0.163802  | 7    | 0.00083  | 0.054    | 0.28948  | 0.45328  | 0.002961434 | Intragenic | NM_001100489           | Wnt5b     |
| 4   | 219073749 | 219073822 | 0.38    | -0.072895  | 7    | 1.60E-05 | 1.20E-06 | 0.015461 | 0.088357 | 0.000115757 | TSS        | NM_001271276           | Fbxl14    |
| 4   | 219085912 | 219086084 | 1       | -0.177608  | 5    | 0.0035   | 0.015    | 0.18234  | 0.35995  | 0.009686665 | Intergenic | NA                     | NA        |
| 4   | 220228703 | 220228990 | 1       | -0.184153  | 5    | 0.00036  | 0.003    | 0.10563  | 0.28979  | 0.001486639 | Intergenic | NA                     | NA        |
| 4   | 220540909 | 220541002 | 1       | -0.093552  | 7    | 3.90E-05 | 0.0034   | 0.043181 | 0.13673  | 0.000237659 | Intragenic | NM_022684              | Bid       |
| 4   | 220735200 | 220735323 | 1       | -0.230367  | 5    | 2.20E-06 | 0.00014  | 0.087945 | 0.31831  | 2.27E-05    | Intergenic | NA                     | NA        |
| 4   | 224287608 | 224287763 | 1       | -0.171783  | 10   | 8.70E-09 | 2.50E-05 | 0.16644  | 0.33822  | 2.21E-07    | Intragenic | NM_017228              | Atn1      |
| 4   | 224443444 | 224443468 | 1       | -0.055333  | 5    | 0.021    | 0.13     | 0.036357 | 0.09169  | 0.041207871 | Intragenic | NM_212513              | Lag3      |
| 4   | 224453228 | 224453356 | 1       | -0.162428  | 5    | 1.20E-05 | 0.00053  | 0.027255 | 0.18968  | 9.15E-05    | Intragenic | NM_031975              | Ptms      |
| 4   | 224589477 | 224589589 | 1       | -0.134497  | 5    | 0.012    | 0.024    | 0.23184  | 0.36634  | 0.026435197 | Intergenic | NA                     | NA        |
| 4   | 224613139 | 224613189 | 1       | -0.140668  | 5    | 1.70E-05 | 3.50E-05 | 0.039734 | 0.1804   | 0.000120524 | Intergenic | NA                     | NA        |
| 4   | 224695659 | 224695804 | 1       | -0.070035  | 5    | 0.00036  | 0.0055   | 0.046304 | 0.11634  | 0.001486639 | TSS        | NM_017008              | Gapdh     |
| 4   | 224845149 | 224845268 | 1       | -0.135116  | 5    | 1.00E-05 | 3.40E-05 | 0.059947 | 0.19506  | 7.82E-05    | TSS        | NM_001008315           | Ltbr      |
| 4   | 224845775 | 224846123 | 1       | -0.114128  | 5    | 0.00029  | 0.0018   | 0.091998 | 0.20613  | 0.001239307 | TSS        | NM_001008315           | Ltbr      |
| 4   | 224853854 | 224854152 | 1       | -0.097422  | 12   | 1.10E-05 | 0.0019   | 0.13082  | 0.22824  | 8.53E-05    | TSS        | NM_031548              | Scnn1a    |
| 4   | 225095128 | 225095218 | 1       | -0.114119  | 5    | 0.0074   | 0.00053  | 0.38762  | 0.50174  | 0.017853001 | Intergenic | NA                     | NA        |
| 4   | 225149651 | 225150169 | 1       | -0.127906  | 17   | 4.00E-06 | 4.50E-06 | 0.20023  | 0.32813  | 3.71E-05    | Intragenic | NM_053889              | Vwf       |
| 4   | 226076263 | 226076335 | 1       | -0.188582  | 5    | 7.10E-06 | 3.40E-05 | 0.17307  | 0.36165  | 5.86E-05    | TSS        | NM_012972              | Kcna5     |
| 4   | 226925819 | 226925943 | 1       | -0.11505   | 8    | 0.00025  | 0.013    | 0.11003  | 0.22508  | 0.001103692 | Intergenic | NA                     | NA        |
| 4   | 226957076 | 226957218 | 1       | -0.210704  | 7    | 5.80E-07 | 3.00E-05 | 0.12247  | 0.33317  | 7.50E-06    | Intragenic | NM_001191863           | Fkbp4     |
| 4   | 227107994 | 227108254 | 1       | -0.095673  | 10   | 0.0014   | 0.051    | 0.1666   | 0.26228  | 0.004540837 | Intergenic | NA                     | NA        |
| 4   | 227108810 | 227108924 | 1       | -0.118503  | 5    | 0.0068   | 0.038    | 0.21064  | 0.32914  | 0.016642688 | Intergenic | NA                     | NA        |
| 4   | 227274139 | 227274338 | 0.11    | -0.187013  | 17   | 1.40E-10 | 3.50E-07 | 0.2435   | 0.43051  | 6.05E-09    | TSS        | NM_001024337           | LOC500331 |
| 4   | 227302712 | 227302886 | 1       | -0.226796  | 10   | 8.00E-05 | 0.0079   | 0.38123  | 0.60803  | 0.000432266 | Intergenic | NA                     | NA        |
| 4   | 227350877 | 227351076 | 0.11    | -0.187013  | 17   | 1.40E-10 | 3.50E-07 | 0.2435   | 0.43051  | 6.05E-09    | TSS        | NM_001024337           | LOC500331 |
| 4   | 229189264 | 229189307 | 1       | -0.054259  | 5    | 0.0022   | 0.0092   | 0.10454  | 0.1588   | 0.006578104 | Intergenic | NA                     | NA        |
| 4   | 229189637 | 229189744 | 1       | -0.052918  | 5    | 0.0035   | 0.0018   | 0.01861  | 0.071529 | 0.009686665 | Intergenic | NA                     | NA        |



| chr | start     | stop      | q-value | methyI.diff | CpGs | pMWU     | p2DKS    | MCWLS    | MCWHS   | pMWU.fdr    | cgi.type   | transcript   | gene    |
|-----|-----------|-----------|---------|-------------|------|----------|----------|----------|---------|-------------|------------|--------------|---------|
| 4   | 229192551 | 229192613 | 1       | -0.056303   | 7    | 0.00031  | 0.0054   | 0.093323 | 0.14963 | 0.001320549 | Intergenic | NA           | NA      |
| 4   | 229212387 | 229212450 | 1       | -0.116789   | 7    | 0.001    | 0.0033   | 0.20315  | 0.31993 | 0.003452169 | Intergenic | NA           | NA      |
| 4   | 230651923 | 230652090 | 1       | -0.229039   | 9    | 2.90E-05 | 0.00049  | 0.39246  | 0.6215  | 0.000187968 | Intergenic | NA           | NA      |
| 4   | 231594370 | 231594623 | 0.58    | -0.181862   | 9    | 1.20E-08 | 1.80E-06 | 0.10533  | 0.2872  | 2.88E-07    | Intergenic | NA           | NA      |
| 4   | 231800330 | 231800504 | 0.037   | -0.344561   | 5    | 6.30E-08 | 1.10E-07 | 0.023327 | 0.36789 | 1.18E-06    | Intergenic | NA           | NA      |
| 4   | 231922922 | 231922959 | 1       | -0.146413   | 5    | 0.017    | 0.015    | 0.2078   | 0.35421 | 0.034796287 | Intragenic | NM_022267    | Ccnd2   |
| 4   | 232049412 | 232049847 | 0.86    | -0.136945   | 14   | 2.90E-10 | 2.70E-06 | 0.1008   | 0.23775 | 1.15E-08    | TSS        | NM_131908    | Fgf6    |
| 4   | 232415932 | 232416019 | 0.011   | -0.212994   | 7    | 8.00E-10 | 3.30E-08 | 0.039664 | 0.25266 | 2.72E-08    | Intergenic | NA           | NA      |
| 4   | 232416065 | 232416186 | 1       | -0.108191   | 5    | 0.0045   | 0.015    | 0.12684  | 0.23503 | 0.011905878 | Intergenic | NA           | NA      |
| 4   | 232637561 | 232637618 | 0.011   | -0.289466   | 7    | 1.60E-09 | 3.30E-08 | 0.17814  | 0.46761 | 5.01E-08    | Intergenic | NA           | NA      |
| 4   | 232998223 | 232998246 | 1       | -0.129882   | 5    | 0.00044  | 0.0055   | 0.15916  | 0.28904 | 0.001760146 | Intergenic | NA           | NA      |
| 4   | 233032621 | 233032820 | 1       | -0.175289   | 7    | 3.40E-05 | 0.00082  | 0.14901  | 0.32429 | 0.000214477 | Intergenic | NA           | NA      |
| 4   | 233085618 | 233085696 | 1       | -0.303351   | 7    | 1.20E-08 | 4.50E-06 | 0.1798   | 0.48315 | 2.88E-07    | Intergenic | NA           | NA      |
| 4   | 233167596 | 233167711 | 1       | -0.218128   | 5    | 0.00017  | 0.0055   | 0.45322  | 0.67135 | 0.000806192 | Intergenic | NA           | NA      |
| 4   | 234057642 | 234057734 | 0.086   | -0.233784   | 5    | 2.50E-06 | 2.70E-07 | 0.11341  | 0.3472  | 2.52E-05    | Intragenic | NM_012574    | Grin2b  |
| 4   | 234131302 | 234131415 | 1       | -0.086612   | 7    | 0.017    | 0.036    | 0.73238  | 0.819   | 0.034796287 | Intragenic | NM_012574    | Grin2b  |
| 4   | 234865543 | 234865692 | 1       | -0.155372   | 10   | 0.018    | 0.041    | 0.4837   | 0.63907 | 0.036742993 | Intragenic | NM_001013927 | Plbd1   |
| 4   | 235316612 | 235316750 | 1       | -0.146438   | 5    | 1.90E-05 | 3.40E-05 | 0.070897 | 0.21734 | 0.000131674 | Intergenic | NA           | NA      |
| 4   | 235368541 | 235368628 | 1       | -0.274334   | 5    | 6.20E-05 | 0.0031   | 0.27648  | 0.55082 | 0.000349462 | Intergenic | NA           | NA      |
| 4   | 235712926 | 235713088 | 1       | -0.164416   | 5    | 9.80E-05 | 0.0018   | 0.11614  | 0.28055 | 0.000512474 | Intragenic | NM_017336    | Ptpro   |
| 4   | 236722890 | 236723130 | 1       | -0.146072   | 5    | 0.0027   | 0.0018   | 0.15362  | 0.29969 | 0.007840962 | Intergenic | NA           | NA      |
| 4   | 237907704 | 237907814 | 1       | -0.137532   | 5    | 0.0049   | 0.025    | 0.18695  | 0.32448 | 0.012753585 | Intergenic | NA           | NA      |
| 4   | 238120347 | 238120504 | 1       | -0.104      | 8    | 0.00035  | 0.0078   | 0.64945  | 0.75345 | 0.001465488 | Intragenic | NM_053923    | Pik3c2g |
| 4   | 238209887 | 238209926 | 1       | 0.209009    | 5    | 0.016    | 0.13     | 0.84013  | 0.63112 | 0.033288089 | Intragenic | NM_053923    | Pik3c2g |
| 4   | 238478897 | 238479003 | 1       | -0.200551   | 5    | 0.011    | 0.13     | 0.35431  | 0.55486 | 0.02463877  | Intergenic | NA           | NA      |
| 4   | 238636005 | 238636233 | 1       | -0.155474   | 6    | 2.40E-05 | 0.00054  | 0.085778 | 0.24125 | 0.000160049 | Intergenic | NA           | NA      |
| 4   | 239014492 | 239014544 | 1       | -0.247991   | 5    | 0.00023  | 0.015    | 0.35775  | 0.60574 | 0.00102405  | Intergenic | NA           | NA      |
| 4   | 239783219 | 239783330 | 1       | -0.190542   | 5    | 0.00072  | 0.0018   | 0.13203  | 0.32258 | 0.002634665 | Intragenic | NM_017337    | Pde3a   |
| 4   | 240381052 | 240381204 | 1       | -0.080061   | 7    | 0.0083   | 0.055    | 0.55943  | 0.63949 | 0.019719474 | Intragenic | NM_017111    | Slco1a1 |
| 4   | 240512931 | 240513020 | 1       | -0.284559   | 5    | 2.80E-05 | 0.00028  | 0.21796  | 0.50252 | 0.000182174 | Intragenic | NM_030837    | Slc21a4 |
| 4   | 240513369 | 240513497 | 1       | -0.22902    | 5    | 0.0011   | 0.0018   | 0.27107  | 0.50009 | 0.003737263 | TSS        | NM_030837    | Slc21a4 |
| 4   | 240515284 | 240515342 | 1       | -0.113987   | 5    | 0.00021  | 0.0018   | 0.80902  | 0.92301 | 0.000951214 | TSS        | NM_030837    | Slc21a4 |
| 4   | 241351336 | 241351401 | 1       | -0.189252   | 8    | 2.60E-05 | 0.00061  | 0.24402  | 0.43328 | 0.00017262  | Intragenic | NM_012813    | St8sia1 |
| 4   | 241377210 | 241377360 | 1       | -0.144616   | 6    | 0.02     | 0.12     | 0.41383  | 0.55845 | 0.039778219 | Intragenic | NM_012813    | St8sia1 |
| 4   | 241593961 | 241594094 | 1       | -0.153927   | 5    | 2.90E-06 | 1.60E-05 | 0.11167  | 0.2656  | 2.84E-05    | Intergenic | NA           | NA      |
| 4   | 241704751 | 241704811 | 1       | -0.164382   | 5    | 0.015    | 0.18     | 0.26475  | 0.42914 | 0.031584896 | Intergenic | NA           | NA      |
| 4   | 242271432 | 242271502 | 1       | -0.180824   | 5    | 1.50E-05 | 1.60E-05 | 0.21498  | 0.3958  | 0.000109113 | Intragenic | NM_001271267 | Sox5    |
| 4   | 242469884 | 242469987 | 1       | -0.326377   | 5    | 5.50E-06 | 0.00014  | 0.10137  | 0.42775 | 4.78E-05    | Intragenic | NM_001271267 | Sox5    |
| 4   | 242477429 | 242477526 | 0.089   | -0.230232   | 5    | 3.20E-07 | 2.80E-07 | 0.31678  | 0.54702 | 4.57E-06    | Intragenic | NM_001271267 | Sox5    |

| chr | start     | stop      | q-value  | methy.diff | CpGs | pMWU     | p2DKS    | MCWLS    | MCWHS    | pMWU.fdr    | cgi.type   | transcript   | gene    |
|-----|-----------|-----------|----------|------------|------|----------|----------|----------|----------|-------------|------------|--------------|---------|
| 4   | 243246853 | 243247038 | 1        | -0.16319   | 5    | 0.0016   | 0.015    | 0.099275 | 0.26246  | 0.005100053 | Intergenic | NA           | NA      |
| 4   | 243491188 | 243491244 | 1        | -0.051028  | 5    | 0.019    | 0.015    | 0.077874 | 0.1289   | 0.038322088 | TSS        | NM_017253    | Bcat1   |
| 4   | 243566619 | 243566667 | 1        | -0.200334  | 5    | 0.00054  | 0.015    | 0.22854  | 0.42888  | 0.002077867 | Intergenic | NA           | NA      |
| 4   | 243584944 | 243585580 | 1        | -0.118332  | 15   | 0.00084  | 0.011    | 0.57472  | 0.69306  | 0.002993559 | Intergenic | NA           | NA      |
| 4   | 243805577 | 243805769 | 1        | -0.156027  | 10   | 2.60E-07 | 0.00024  | 0.13891  | 0.29494  | 3.84E-06    | Intergenic | NA           | NA      |
| 4   | 243938051 | 243938362 | 1        | -0.189202  | 9    | 0.00024  | 0.016    | 0.19898  | 0.38818  | 0.001064629 | Intergenic | NA           | NA      |
| 4   | 244171822 | 244172037 | 1        | -0.142803  | 5    | 0.025    | 0.18     | 0.21361  | 0.35642  | 0.047453009 | Intergenic | NA           | NA      |
| 4   | 244536498 | 244536625 | 1        | -0.1535    | 7    | 0.0041   | 0.038    | 0.37795  | 0.53145  | 0.01100507  | Intergenic | NA           | NA      |
| 4   | 245005937 | 245005960 | 1        | -0.074271  | 5    | 0.013    | 0.015    | 0.1578   | 0.23207  | 0.028097302 | Intergenic | NA           | NA      |
| 4   | 245420125 | 245420207 | 0.47     | -0.109726  | 5    | 3.30E-06 | 1.50E-06 | 0.018381 | 0.12811  | 3.16E-05    | Intergenic | NA           | NA      |
| 4   | 245483199 | 245483256 | 1        | -0.171621  | 5    | 0.0011   | 0.015    | 0.17902  | 0.35064  | 0.003737263 | Intragenic | NM_001107896 | Ppfibp1 |
| 4   | 246784336 | 246784409 | 1        | -0.18154   | 5    | 3.90E-05 | 0.00053  | 0.50362  | 0.68516  | 0.000237659 | Intergenic | NA           | NA      |
| 4   | 246785089 | 246785144 | 1        | -0.254788  | 5    | 0.00021  | 0.0055   | 0.56151  | 0.8163   | 0.000951214 | Intergenic | NA           | NA      |
| 4   | 246879804 | 246880025 | 1        | -0.195064  | 12   | 5.20E-06 | 9.30E-05 | 0.32506  | 0.52013  | 4.61E-05    | TSS        | NM_001109612 | Rps4y2  |
| 4   | 247771232 | 247771314 | 1        | -0.133764  | 7    | 0.00083  | 0.0012   | 0.58602  | 0.71979  | 0.002961434 | Intergenic | NA           | NA      |
| 5   | 242351    | 242783    | 1        | -0.112105  | 7    | 0.022    | 0.037    | 0.16228  | 0.27438  | 0.043064669 | Intergenic | NA           | NA      |
| 5   | 843350    | 843367    | 1        | -0.290237  | 5    | 2.50E-06 | 7.50E-06 | 0.3878   | 0.67804  | 2.52E-05    | Intergenic | NA           | NA      |
| 5   | 1059702   | 1059881   | 1        | -0.262842  | 5    | 0.0013   | 0.024    | 0.20673  | 0.46957  | 0.004277683 | Intergenic | NA           | NA      |
| 5   | 2073608   | 2073741   | 5.30E-16 | -0.125743  | 20   | 4.30E-14 | 1.60E-21 | 0.039013 | 0.16476  | 6.64E-12    | Intergenic | NA           | NA      |
| 5   | 2213966   | 2214044   | 1        | -0.291884  | 5    | 8.10E-06 | 0.00014  | 0.37451  | 0.66639  | 6.58E-05    | Intergenic | NA           | NA      |
| 5   | 2899748   | 2899959   | 1        | -0.089555  | 10   | 0.017    | 0.092    | 0.63052  | 0.72007  | 0.034796287 | Intergenic | NA           | NA      |
| 5   | 4526476   | 4526564   | 0.0017   | -0.372321  | 7    | 4.80E-10 | 5.30E-09 | 0.215    | 0.58732  | 1.75E-08    | Intergenic | NA           | NA      |
| 5   | 10576762  | 10576879  | 0.012    | -0.25013   | 11   | 1.90E-09 | 3.70E-08 | 0.18971  | 0.43984  | 5.77E-08    | Intergenic | NA           | NA      |
| 5   | 10581591  | 10581633  | 1        | -0.067613  | 5    | 0.023    | 0.13     | 0.13836  | 0.20598  | 0.04441443  | Intergenic | NA           | NA      |
| 5   | 10643807  | 10643960  | 1        | -0.09932   | 9    | 0.0052   | 0.012    | 0.3241   | 0.42342  | 0.013458626 | Intergenic | NA           | NA      |
| 5   | 10860314  | 10860487  | 1        | -0.077108  | 5    | 0.01     | 0.088    | 0.089814 | 0.16692  | 0.02275947  | Intragenic | NM_134378    | Sulf1   |
| 5   | 14228457  | 14228646  | 0.053    | -0.1768    | 9    | 1.80E-08 | 1.60E-07 | 0.092574 | 0.26937  | 4.21E-07    | TSS        | NM_001025423 | Adhfe1  |
| 5   | 15448071  | 15448323  | 1        | -0.085506  | 5    | 0.00059  | 0.00014  | 0.7669   | 0.8524   | 0.002242971 | Intergenic | NA           | NA      |
| 5   | 15967416  | 15967446  | 0.49     | -0.397442  | 5    | 2.40E-07 | 1.50E-06 | 0.20105  | 0.5985   | 3.57E-06    | Intergenic | NA           | NA      |
| 5   | 18947032  | 18947082  | 1        | -0.061857  | 5    | 0.025    | 0.038    | 0.87822  | 0.94007  | 0.047453009 | Intergenic | NA           | NA      |
| 5   | 20195021  | 20195422  | 1        | -0.208476  | 7    | 0.00014  | 0.0033   | 0.25716  | 0.46564  | 0.000684451 | Intergenic | NA           | NA      |
| 5   | 26231943  | 26232052  | 1        | -0.093696  | 5    | 0.0012   | 0.025    | 0.59454  | 0.68824  | 0.004013471 | Intergenic | NA           | NA      |
| 5   | 26256045  | 26256439  | 1        | -0.066988  | 15   | 0.019    | 0.041    | 0.59765  | 0.66464  | 0.038322088 | Intergenic | NA           | NA      |
| 5   | 26480586  | 26480612  | 1        | -0.21251   | 5    | 3.70E-07 | 7.60E-06 | 0.22494  | 0.43745  | 5.21E-06    | Intergenic | NA           | NA      |
| 5   | 26605158  | 26605237  | 1        | -0.179812  | 5    | 0.00019  | 0.00093  | 0.12089  | 0.3007   | 0.000879857 | Intergenic | NA           | NA      |
| 5   | 26741246  | 26741332  | 1        | -0.055589  | 5    | 0.00054  | 0.015    | 0.035289 | 0.090878 | 0.002077867 | Intergenic | NA           | NA      |
| 5   | 26741335  | 26741379  | 1        | -0.054185  | 5    | 0.0027   | 0.024    | 0.038325 | 0.09251  | 0.007840962 | Intergenic | NA           | NA      |
| 5   | 26742459  | 26742631  | 1        | -0.179861  | 5    | 0.0017   | 0.0017   | 0.096522 | 0.27638  | 0.005339493 | Intergenic | NA           | NA      |
| 5   | 26887521  | 26887657  | 1        | -0.13745   | 5    | 4.40E-05 | 0.0018   | 0.091191 | 0.22864  | 0.000263321 | Intergenic | NA           | NA      |

| chr | start    | stop     | q-value | methy.diff | CpGs | pMWU     | p2DKS    | MCWLS    | MCWHS    | pMWU.fdr    | cgi.type   | transcript   | gene   |
|-----|----------|----------|---------|------------|------|----------|----------|----------|----------|-------------|------------|--------------|--------|
| 5   | 26915101 | 26915242 | 1       | -0.091496  | 7    | 0.012    | 0.012    | 0.17025  | 0.26175  | 0.026435197 | Intergenic | NA           | NA     |
| 5   | 27036379 | 27036478 | 1       | -0.138014  | 5    | 0.0016   | 0.0032   | 0.19277  | 0.33078  | 0.005100053 | Intergenic | NA           | NA     |
| 5   | 27171031 | 27171219 | 1       | -0.156176  | 5    | 0.002    | 0.024    | 0.15675  | 0.31293  | 0.006079939 | Intragenic | NM_001108969 | Clvs1  |
| 5   | 28117816 | 28117892 | 1       | -0.259426  | 5    | 0.0008   | 0.0055   | 0.35778  | 0.61721  | 0.002866309 | Intergenic | NA           | NA     |
| 5   | 28905270 | 28905346 | 1       | -0.259426  | 5    | 0.0008   | 0.0055   | 0.35778  | 0.61721  | 0.002866309 | Intergenic | NA           | NA     |
| 5   | 28949792 | 28949924 | 1       | -0.062241  | 6    | 0.013    | 0.04     | 0.076147 | 0.13839  | 0.028097302 | Intergenic | NA           | NA     |
| 5   | 28952269 | 28952407 | 1       | -0.168226  | 5    | 6.30E-06 | 7.00E-05 | 0.10175  | 0.26997  | 5.33E-05    | Intergenic | NA           | NA     |
| 5   | 28966371 | 28966620 | 1       | -0.151615  | 6    | 0.00042  | 0.011    | 0.105    | 0.25662  | 0.001700519 | Intergenic | NA           | NA     |
| 5   | 29098775 | 29098854 | 1       | -0.183034  | 5    | 6.30E-06 | 0.00028  | 0.080114 | 0.26315  | 5.33E-05    | Intergenic | NA           | NA     |
| 5   | 30002703 | 30002766 | 1       | -0.116789  | 7    | 0.001    | 0.0033   | 0.20315  | 0.31993  | 0.003452169 | Intergenic | NA           | NA     |
| 5   | 32556935 | 32557428 | 1       | -0.132143  | 11   | 0.0002   | 0.013    | 0.29736  | 0.4295   | 0.00092049  | Intergenic | NA           | NA     |
| 5   | 33530170 | 33530222 | 1       | -0.061338  | 6    | 1.80E-05 | 0.00017  | 0.020682 | 0.08202  | 0.000127015 | Intergenic | NA           | NA     |
| 5   | 33530344 | 33530375 | 1       | -0.056502  | 5    | 0.02     | 0.038    | 0.044624 | 0.10113  | 0.039778219 | Intergenic | NA           | NA     |
| 5   | 35870199 | 35870278 | 1       | -0.14828   | 8    | 1.50E-05 | 0.00041  | 0.62737  | 0.77565  | 0.000109113 | Intergenic | NA           | NA     |
| 5   | 37825251 | 37825317 | 1       | -0.111814  | 5    | 0.019    | 0.13     | 0.15706  | 0.26887  | 0.038322088 | Intragenic | NM_001271238 | Cngb3  |
| 5   | 38074863 | 38074904 | 1       | 0.100731   | 5    | 0.002    | 0.0055   | 0.94156  | 0.84083  | 0.006079939 | Intragenic | NM_001271238 | Cngb3  |
| 5   | 39770296 | 39770668 | 1       | -0.345186  | 8    | 3.70E-08 | 4.40E-06 | 0.36438  | 0.70956  | 7.87E-07    | Intergenic | NA           | NA     |
| 5   | 42945450 | 42945588 | 1       | -0.083535  | 5    | 0.011    | 0.0054   | 0.12521  | 0.20875  | 0.02463877  | Intergenic | NA           | NA     |
| 5   | 47011891 | 47011964 | 1       | -0.067281  | 5    | 0.0058   | 0.039    | 0.12495  | 0.19223  | 0.014624129 | Intergenic | NA           | NA     |
| 5   | 47689177 | 47689250 | 1       | -0.067281  | 5    | 0.0058   | 0.039    | 0.12495  | 0.19223  | 0.014624129 | Intergenic | NA           | NA     |
| 5   | 48935326 | 48935512 | 1       | -0.121325  | 9    | 0.00057  | 0.016    | 0.54028  | 0.6616   | 0.002190499 | Intergenic | NA           | NA     |
| 5   | 50111467 | 50111496 | 1       | -0.235273  | 5    | 5.00E-05 | 0.0018   | 0.55898  | 0.79425  | 0.000291675 | Intergenic | NA           | NA     |
| 5   | 52007445 | 52007551 | 1       | -0.187037  | 5    | 0.0094   | 0.009    | 0.15515  | 0.34219  | 0.021723038 | Intergenic | NA           | NA     |
| 5   | 52257351 | 52257476 | 1       | -0.226575  | 5    | 0.017    | 0.18     | 0.37113  | 0.5977   | 0.034796287 | Intragenic | NM_001135754 | Bach2  |
| 5   | 52704744 | 52704870 | 1       | -0.145476  | 5    | 0.0022   | 0.015    | 0.35519  | 0.50066  | 0.006578104 | Intragenic | NM_001134969 | Ankrd6 |
| 5   | 52745709 | 52746070 | 1       | -0.128386  | 7    | 0.0004   | 0.013    | 0.19401  | 0.3224   | 0.00162337  | Intragenic | NM_001134969 | Ankrd6 |
| 5   | 53084210 | 53084305 | 1       | -0.165135  | 5    | 2.80E-05 | 0.00098  | 0.085134 | 0.25027  | 0.000182174 | Intragenic | NM_173322    | Pnrc1  |
| 5   | 55012256 | 55012379 | 0.00019 | -0.26389   | 7    | 1.30E-10 | 5.90E-10 | 0.026914 | 0.2908   | 5.70E-09    | Intragenic | NM_001108970 | Mob3b  |
| 5   | 55047013 | 55047207 | 0.089   | -0.193336  | 5    | 1.30E-07 | 2.80E-07 | 0.040372 | 0.23371  | 2.11E-06    | Intragenic | NM_001108970 | Mob3b  |
| 5   | 55714096 | 55714219 | 0.00019 | -0.26389   | 7    | 1.30E-10 | 5.90E-10 | 0.026914 | 0.2908   | 5.70E-09    | Intergenic | NA           | NA     |
| 5   | 55748856 | 55749050 | 0.089   | -0.193336  | 5    | 1.30E-07 | 2.80E-07 | 0.040372 | 0.23371  | 2.11E-06    | Intergenic | NA           | NA     |
| 5   | 56382431 | 56382541 | 1       | -0.122468  | 5    | 0.0032   | 0.038    | 0.71553  | 0.838    | 0.008990975 | Intergenic | NA           | NA     |
| 5   | 57189906 | 57190077 | 1       | -0.160563  | 5    | 0.0074   | 0.039    | 0.57723  | 0.73779  | 0.017853001 | Intergenic | NA           | NA     |
| 5   | 61163355 | 61163395 | 1       | -0.158448  | 5    | 0.0024   | 0.0054   | 0.61501  | 0.77346  | 0.00705499  | Intergenic | NA           | NA     |
| 5   | 61760156 | 61760207 | 1       | -0.119323  | 5    | 7.80E-05 | 0.00053  | 0.066123 | 0.18545  | 0.000422981 | Intergenic | NA           | NA     |
| 5   | 61760483 | 61760540 | 1       | -0.159691  | 5    | 9.20E-06 | 0.00014  | 0.13418  | 0.29387  | 7.32E-05    | Intergenic | NA           | NA     |
| 5   | 61921351 | 61921529 | 1       | -0.162286  | 8    | 2.80E-06 | 0.00025  | 0.10802  | 0.27031  | 2.79E-05    | Intergenic | NA           | NA     |
| 5   | 61941314 | 61942107 | 0.059   | -0.165124  | 25   | 2.10E-09 | 1.80E-07 | 0.53868  | 0.70381  | 6.26E-08    | Intergenic | NA           | NA     |
| 5   | 62687831 | 62688004 | 1       | -0.05433   | 8    | 0.0019   | 0.026    | 0.040038 | 0.094368 | 0.005855937 | TSS        | NM_001108660 | Ccl27  |

| chr | start    | stop     | q-value | methy.diff | CpGs | pMWU     | p2DKS    | MCWLS    | MCWHS   | pMWU.fdr    | cgi.type   | transcript                | gene        |
|-----|----------|----------|---------|------------|------|----------|----------|----------|---------|-------------|------------|---------------------------|-------------|
| 5   | 62904562 | 62904632 | 1       | -0.128843  | 5    | 0.0087   | 0.13     | 0.63798  | 0.76682 | 0.020391633 | Intergenic | NA                        | NA          |
| 5   | 62917634 | 62917847 | 1       | -0.100522  | 7    | 6.00E-05 | 0.0054   | 0.057247 | 0.15777 | 0.000341554 | TSS        | NM_001108004              | Dnajb5      |
| 5   | 63398748 | 63398989 | 1       | -0.13797   | 5    | 0.017    | 0.088    | 0.31483  | 0.4528  | 0.034796287 | Intergenic | NA                        | NA          |
| 5   | 63492422 | 63492462 | 1       | -0.160683  | 5    | 0.0024   | 0.0054   | 0.61809  | 0.77878 | 0.00705499  | Intergenic | NA                        | NA          |
| 5   | 63534632 | 63534728 | 1       | -0.060389  | 5    | 0.017    | 0.18     | 0.071917 | 0.13231 | 0.034796287 | TSS        | NM_001107956              | Car9        |
| 5   | 63661987 | 63662141 | 1       | -0.183818  | 5    | 0.017    | 0.18     | 0.51844  | 0.70225 | 0.034796287 | Intragenic | NM_053838                 | Npr2        |
| 5   | 64392746 | 64392788 | 0.0057  | -0.281809  | 5    | 6.30E-08 | 1.80E-08 | 0.28139  | 0.5632  | 1.18E-06    | Intergenic | NA                        | NA          |
| 5   | 64392827 | 64392894 | 1       | -0.185668  | 5    | 0.00054  | 0.00028  | 0.10976  | 0.29542 | 0.002077867 | Intergenic | NA                        | NA          |
| 5   | 64586780 | 64586864 | 1       | -0.238434  | 5    | 0.00011  | 0.00096  | 0.22716  | 0.46559 | 0.000565143 | Intragenic | NM_001109261              | Pax5        |
| 5   | 64610491 | 64610600 | 1       | -0.115105  | 5    | 0.0053   | 0.0052   | 0.17344  | 0.28855 | 0.013591571 | Intragenic | NM_001109261              | Pax5        |
| 5   | 65040927 | 65040993 | 0.48    | -0.29092   | 5    | 4.20E-07 | 1.50E-06 | 0.17895  | 0.46986 | 5.76E-06    | Intragenic | NM_001113754              | Grhpr       |
| 5   | 65468546 | 65468671 | 1       | -0.131334  | 5    | 0.0045   | 0.0052   | 0.22436  | 0.35569 | 0.011905878 | Intergenic | NA                        | NA          |
| 5   | 65506979 | 65507024 | 1       | -0.147652  | 5    | 1.30E-06 | 3.50E-05 | 0.096299 | 0.24395 | 1.46E-05    | Intergenic | NA                        | NA          |
| 5   | 65520133 | 65520380 | 1       | -0.15223   | 6    | 0.00062  | 0.0009   | 0.1633   | 0.31553 | 0.002348106 | Intergenic | NA                        | NA          |
| 5   | 65546802 | 65547022 | 1       | -0.146943  | 8    | 8.80E-05 | 0.0025   | 0.21582  | 0.36276 | 0.000466886 | Intergenic | NA                        | NA          |
| 5   | 66166466 | 66166581 | 1       | -0.161517  | 6    | 0.026    | 0.16     | 0.54183  | 0.70334 | 0.049234478 | Intragenic | NM_013044                 | Tmod1       |
| 5   | 66229395 | 66229427 | 1       | -0.143535  | 5    | 0.0074   | 0.057    | 0.31036  | 0.45389 | 0.017853001 | Intragenic | NM_001108663              | Tstd2       |
| 5   | 66297666 | 66297808 | 1       | -0.10745   | 7    | 0.021    | 0.054    | 0.23614  | 0.34359 | 0.041207871 | Intragenic | NM_001106656              | Xpa         |
| 5   | 66581393 | 66581563 | 1       | -0.157663  | 5    | 0.012    | 0.088    | 0.3199   | 0.47756 | 0.026435197 | Intergenic | NA                        | NA          |
| 5   | 66985618 | 66985870 | 1       | -0.159466  | 12   | 4.00E-06 | 8.00E-05 | 0.2146   | 0.37406 | 3.71E-05    | Intragenic | NM_031802                 | Gabbr2      |
| 5   | 67397845 | 67397997 | 0.035   | -0.270807  | 10   | 3.10E-10 | 1.10E-07 | 0.20718  | 0.47799 | 1.21E-08    | Intragenic | NM_001100535              | Col15a1     |
| 5   | 68305310 | 68305404 | 0.32    | -0.086106  | 9    | 1.30E-08 | 9.80E-07 | 0.050168 | 0.13627 | 3.10E-07    | Intragenic | NM_031628                 | Nr4a3       |
| 5   | 68989258 | 68989410 | 0.035   | -0.270807  | 10   | 3.10E-10 | 1.10E-07 | 0.20718  | 0.47799 | 1.21E-08    | Intergenic | NA                        | NA          |
| 5   | 72590143 | 72590231 | 1       | -0.144604  | 5    | 0.017    | 0.038    | 0.30764  | 0.45225 | 0.034796287 | Intergenic | NA                        | NA          |
| 5   | 73244484 | 73244686 | 1       | -0.077968  | 8    | 0.012    | 0.034    | 0.64811  | 0.72607 | 0.026435197 | Intergenic | NA                        | NA          |
| 5   | 73379705 | 73379880 | 1       | -0.061863  | 5    | 0.0029   | 0.024    | 0.05705  | 0.11891 | 0.008293503 | Intergenic | NA                        | NA          |
| 5   | 74926169 | 74926335 | 1       | -0.165347  | 6    | 0.0074   | 0.04     | 0.37212  | 0.53747 | 0.017853001 | Intergenic | NA                        | NA          |
| 5   | 74986335 | 74986367 | 1       | -0.242888  | 5    | 0.00044  | 0.00052  | 0.30337  | 0.54626 | 0.001760146 | Intergenic | NA                        | NA          |
| 5   | 75308117 | 75308299 | 1       | -0.106507  | 7    | 0.0062   | 0.0081   | 0.25866  | 0.36517 | 0.015570617 | Intergenic | NA                        | NA          |
| 5   | 75537173 | 75537347 | 1       | -0.136059  | 8    | 4.20E-05 | 2.90E-05 | 0.55156  | 0.68762 | 0.00025452  | Intergenic | NA                        | NA          |
| 5   | 76245483 | 76245663 | 1       | -0.124134  | 7    | 0.021    | 0.037    | 0.75454  | 0.87867 | 0.041207871 | Intergenic | NA                        | NA          |
| 5   | 77635126 | 77635446 | 1       | -0.103767  | 11   | 0.0021   | 0.0078   | 0.16195  | 0.26572 | 0.006364615 | Intergenic | NA                        | NA          |
| 5   | 79049278 | 79049371 | 1       | -0.15768   | 5    | 1.00E-05 | 0.00053  | 0.054461 | 0.21214 | 7.82E-05    | Intergenic | NA                        | NA          |
| 5   | 79078921 | 79078956 | 1       | -0.25118   | 5    | 1.30E-06 | 1.60E-05 | 0.27868  | 0.52986 | 1.46E-05    | Intergenic | NA                        | NA          |
| 5   | 79125335 | 79125429 | 1       | -0.222141  | 6    | 9.20E-07 | 9.10E-05 | 0.078208 | 0.30035 | 1.11E-05    | Intragenic | NM_001011974:NM_001309260 | Akap2:Akap2 |
| 5   | 79145878 | 79146029 | 0.022   | -0.137627  | 7    | 4.00E-08 | 6.70E-08 | 0.061227 | 0.19885 | 8.43E-07    | Intergenic | NA                        | NA          |
| 5   | 79159469 | 79159748 | 1       | -0.1151    | 5    | 7.00E-05 | 0.00028  | 0.068571 | 0.18367 | 0.000386221 | Intergenic | NA                        | NA          |
| 5   | 79371365 | 79371501 | 1       | -0.142607  | 7    | 0.002    | 0.0035   | 0.57515  | 0.71775 | 0.006079939 | Intergenic | NA                        | NA          |

| chr | start     | stop      | q-value  | methy.diff | CpGs | pMWU     | p2DKS    | MCWLS    | MCWHS    | pMWU.fdr    | cgi.type   | transcript   | gene    |
|-----|-----------|-----------|----------|------------|------|----------|----------|----------|----------|-------------|------------|--------------|---------|
| 5   | 79988758  | 79988811  | 1        | -0.162195  | 5    | 1.70E-05 | 7.40E-06 | 0.10866  | 0.27086  | 0.000120524 | Intergenic | NA           | NA      |
| 5   | 80351999  | 80352045  | 1        | -0.093198  | 5    | 0.0087   | 0.088    | 0.64086  | 0.73406  | 0.020391633 | Intergenic | NA           | NA      |
| 5   | 80653176  | 80653289  | 1        | -0.207083  | 5    | 0.00072  | 0.00052  | 0.46407  | 0.67115  | 0.002634665 | Intergenic | NA           | NA      |
| 5   | 80718228  | 80718371  | 1        | -0.071567  | 5    | 0.0035   | 0.0017   | 0.80166  | 0.87323  | 0.009686665 | Intergenic | NA           | NA      |
| 5   | 81199775  | 81199879  | 1        | -0.163455  | 5    | 0.0024   | 0.0054   | 0.10078  | 0.26424  | 0.00705499  | Intragenic | NM_001106651 | Snx30   |
| 5   | 82489173  | 82489267  | 1        | -0.238211  | 5    | 8.10E-06 | 3.50E-05 | 0.13017  | 0.36838  | 6.58E-05    | Intragenic | NM_012899    | Alad    |
| 5   | 82570620  | 82570809  | 0.0046   | -0.133269  | 8    | 4.10E-09 | 1.40E-08 | 0.02102  | 0.15429  | 1.10E-07    | Intergenic | NA           | NA      |
| 5   | 82686945  | 82686971  | 1        | -0.098975  | 5    | 0.014    | 0.015    | 0.3118   | 0.41077  | 0.029850603 | Intragenic | NM_019340    | Rgs3    |
| 5   | 83125485  | 83126280  | 3.50E-14 | -0.191722  | 30   | 4.50E-14 | 1.10E-19 | 0.096016 | 0.28774  | 6.64E-12    | TSS        | NM_001012102 | Kif12   |
| 5   | 83170814  | 83171072  | 1        | -0.052128  | 11   | 0.00019  | 0.0056   | 0.03379  | 0.085918 | 0.000879857 | TSS        | NM_198747    | Col27a1 |
| 5   | 83175912  | 83176139  | 0.039    | -0.266433  | 8    | 7.80E-10 | 1.20E-07 | 0.081966 | 0.3484   | 2.68E-08    | Intragenic | NM_198747    | Col27a1 |
| 5   | 83352384  | 83352466  | 1        | -0.258099  | 6    | 1.40E-06 | 0.00017  | 0.20147  | 0.45957  | 1.57E-05    | Intragenic | NM_181088    | Dfnb31  |
| 5   | 95165386  | 95165551  | 1        | -0.092748  | 9    | 1.60E-06 | 4.80E-05 | 0.093008 | 0.18576  | 1.75E-05    | Intergenic | NA           | NA      |
| 5   | 95168368  | 95168434  | 1        | -0.05106   | 5    | 0.0035   | 0.015    | 0.079163 | 0.13022  | 0.009686665 | Intergenic | NA           | NA      |
| 5   | 95168446  | 95168493  | 1        | -0.064274  | 5    | 0.00048  | 0.0018   | 0.080582 | 0.14486  | 0.001881331 | Intergenic | NA           | NA      |
| 5   | 95169613  | 95169629  | 1        | 0.102116   | 5    | 0.00088  | 0.038    | 0.22839  | 0.12627  | 0.003092094 | Intergenic | NA           | NA      |
| 5   | 95169679  | 95169702  | 1        | -0.116128  | 5    | 0.0032   | 0.00098  | 0.2079   | 0.32403  | 0.008990975 | Intergenic | NA           | NA      |
| 5   | 95170807  | 95170829  | 1        | -0.051564  | 5    | 0.00029  | 0.00014  | 0.10989  | 0.16146  | 0.001239307 | Intergenic | NA           | NA      |
| 5   | 95170983  | 95171041  | 1        | -0.073707  | 14   | 0.00013  | 0.00031  | 0.087572 | 0.15406  | 0.000648758 | Intergenic | NA           | NA      |
| 5   | 95172207  | 95172402  | 1        | -0.054209  | 21   | 0.00088  | 0.0012   | 0.098338 | 0.14284  | 0.003092094 | TSS        | NR_046238    | Rn5-8s  |
| 5   | 95173263  | 95173282  | 1        | -0.074221  | 5    | 0.019    | 0.059    | 0.11782  | 0.19204  | 0.038322088 | TSS        | NR_046238    | Rn5-8s  |
| 5   | 95173565  | 95173595  | 1        | 0.05982    | 5    | 0.002    | 0.024    | 0.18701  | 0.12719  | 0.006079939 | TSS        | NR_046238    | Rn5-8s  |
| 5   | 95173702  | 95173732  | 1        | 0.118706   | 5    | 5.60E-05 | 0.00052  | 0.2517   | 0.133    | 0.000320912 | TSS        | NR_046238    | Rn5-8s  |
| 5   | 95177867  | 95177882  | 1        | -0.277318  | 5    | 0.0012   | 0.00053  | 0.20284  | 0.48016  | 0.004013471 | TSS        | NR_046238    | Rn5-8s  |
| 5   | 95178029  | 95178050  | 1        | 0.076112   | 5    | 0.012    | 0.088    | 0.22827  | 0.15216  | 0.026435197 | TSS        | NR_046238    | Rn5-8s  |
| 5   | 95179969  | 95180171  | 1        | 0.114402   | 31   | 0.0039   | 0.059    | 0.13015  | 0.096684 | 0.010605635 | Intergenic | NA           | NA      |
| 5   | 96590682  | 96590806  | 1        | -0.097771  | 5    | 0.016    | 0.025    | 0.72751  | 0.82528  | 0.033288089 | Intergenic | NA           | NA      |
| 5   | 99699692  | 99699750  | 1        | -0.077404  | 5    | 0.0087   | 0.0031   | 0.79617  | 0.87357  | 0.020391633 | Intergenic | NA           | NA      |
| 5   | 102616593 | 102616675 | 1        | -0.14964   | 5    | 7.00E-05 | 0.00052  | 0.11138  | 0.26102  | 0.000386221 | Intergenic | NA           | NA      |
| 5   | 102622833 | 102623013 | 1        | -0.129942  | 5    | 0.00029  | 0.00053  | 0.063709 | 0.19365  | 0.001239307 | Intergenic | NA           | NA      |
| 5   | 102704384 | 102704440 | 0.0058   | -0.33913   | 5    | 6.30E-08 | 1.80E-08 | 0.10624  | 0.44537  | 1.18E-06    | Intergenic | NA           | NA      |
| 5   | 103760968 | 103761028 | 1        | -0.221915  | 5    | 3.10E-05 | 0.00053  | 0.21203  | 0.43394  | 0.000197418 | Intergenic | NA           | NA      |
| 5   | 104368871 | 104368987 | 1        | -0.130386  | 5    | 0.0019   | 0.059    | 0.2037   | 0.33409  | 0.005855937 | Intergenic | NA           | NA      |
| 5   | 105826227 | 105826379 | 1        | -0.058267  | 7    | 0.017    | 0.14     | 0.74166  | 0.79993  | 0.034796287 | Intergenic | NA           | NA      |
| 5   | 106981692 | 106981776 | 1        | 0.057909   | 5    | 0.00072  | 0.00095  | 0.95454  | 0.89663  | 0.002634665 | Intergenic | NA           | NA      |
| 5   | 108969033 | 108969053 | 1        | -0.168278  | 5    | 0.0068   | 0.0089   | 0.35379  | 0.52207  | 0.016642688 | Intergenic | NA           | NA      |
| 5   | 108969076 | 108969109 | 1        | -0.179846  | 5    | 2.90E-06 | 1.60E-05 | 0.12949  | 0.30933  | 2.84E-05    | Intergenic | NA           | NA      |
| 5   | 109033313 | 109033404 | 1        | -0.210038  | 5    | 7.10E-06 | 7.00E-05 | 0.077775 | 0.28781  | 5.86E-05    | Intergenic | NA           | NA      |
| 5   | 109470232 | 109470311 | 1        | -0.165549  | 8    | 0.0011   | 0.026    | 0.47721  | 0.64276  | 0.003737263 | Intragenic | NM_031743    | Slc24a2 |

| chr | start     | stop      | q-value  | methy.diff | CpGs | pMWU     | p2DKS    | MCWLS    | MCWHS    | pMWU.fdr    | cgi.type   | transcript   | gene   |
|-----|-----------|-----------|----------|------------|------|----------|----------|----------|----------|-------------|------------|--------------|--------|
| 5   | 109715365 | 109715620 | 1        | -0.12901   | 5    | 0.0022   | 0.015    | 0.14667  | 0.27568  | 0.006578104 | Intergenic | NA           | NA     |
| 5   | 110579080 | 110579139 | 1        | -0.120711  | 5    | 0.0038   | 0.038    | 0.69531  | 0.81602  | 0.010352437 | Intergenic | NA           | NA     |
| 5   | 111811292 | 111811353 | 1        | -0.078549  | 5    | 0.0068   | 0.038    | 0.1049   | 0.18345  | 0.016642688 | Intergenic | NA           | NA     |
| 5   | 112327533 | 112327592 | 1        | 0.050816   | 5    | 0.0094   | 0.038    | 0.91616  | 0.86534  | 0.021723038 | Intergenic | NA           | NA     |
| 5   | 114905927 | 114906079 | 1        | -0.079259  | 7    | 0.0087   | 0.055    | 0.56027  | 0.63953  | 0.020391633 | Intergenic | NA           | NA     |
| 5   | 117725300 | 117725449 | 1        | -0.185862  | 5    | 0.0016   | 0.038    | 0.17725  | 0.36311  | 0.005100053 | Intragenic | NM_001105737 | Tek    |
| 5   | 117983982 | 117984048 | 1        | -0.092819  | 5    | 0.0012   | 0.0005   | 0.16292  | 0.25574  | 0.004013471 | Intergenic | NA           | NA     |
| 5   | 120450953 | 120451062 | 1        | -0.21291   | 5    | 0.00012  | 0.0017   | 0.12389  | 0.3368   | 0.000603617 | Intragenic | NM_012988    | Nfia   |
| 5   | 120461834 | 120461960 | 1        | -0.298426  | 7    | 1.20E-05 | 3.00E-05 | 0.13158  | 0.43001  | 9.15E-05    | Intragenic | NM_012988    | Nfia   |
| 5   | 120731423 | 120731572 | 0.014    | -0.293909  | 5    | 2.40E-07 | 4.40E-08 | 0.059654 | 0.35356  | 3.57E-06    | Intergenic | NA           | NA     |
| 5   | 121471378 | 121471479 | 1        | 0.072108   | 5    | 0.017    | 0.0092   | 0.93684  | 0.86473  | 0.034796287 | Intergenic | NA           | NA     |
| 5   | 121698368 | 121698503 | 1        | -0.100169  | 7    | 0.0041   | 0.019    | 0.22789  | 0.32806  | 0.01100507  | Intergenic | NA           | NA     |
| 5   | 121967963 | 121968088 | 1        | -0.116503  | 5    | 6.20E-05 | 0.00098  | 0.043311 | 0.15981  | 0.000349462 | Intergenic | NA           | NA     |
| 5   | 122170898 | 122170964 | 1        | -0.313761  | 5    | 0.00032  | 0.00014  | 0.3285   | 0.64226  | 0.001346443 | Intergenic | NA           | NA     |
| 5   | 125548131 | 125548200 | 1        | -0.199556  | 6    | 2.80E-05 | 0.00016  | 0.60377  | 0.80332  | 0.000182174 | Intergenic | NA           | NA     |
| 5   | 126464815 | 126464880 | 1        | -0.092586  | 5    | 0.002    | 0.00097  | 0.81416  | 0.90674  | 0.006079939 | Intragenic | NM_001024786 | Wdr78  |
| 5   | 126796424 | 126796558 | 1        | -0.110344  | 9    | 0.0022   | 0.0041   | 0.60229  | 0.71263  | 0.006578104 | Intergenic | NA           | NA     |
| 5   | 126923890 | 126924072 | 0.046    | -0.053849  | 17   | 7.20E-12 | 1.40E-07 | 0.046114 | 0.099963 | 4.35E-10    | Intergenic | NA           | NA     |
| 5   | 126925770 | 126925850 | 1        | -0.060808  | 5    | 0.00048  | 0.0018   | 0.012243 | 0.073051 | 0.001881331 | Intergenic | NA           | NA     |
| 5   | 126926408 | 126926896 | 1        | -0.132085  | 21   | 2.20E-06 | 0.00032  | 0.25941  | 0.39149  | 2.27E-05    | Intergenic | NA           | NA     |
| 5   | 128437074 | 128437306 | 1        | -0.146427  | 7    | 0.00014  | 0.0083   | 0.092829 | 0.23926  | 0.000684451 | Intragenic | NM_023991    | Prkaa2 |
| 5   | 130010453 | 130010623 | 1        | -0.153127  | 5    | 0.002    | 0.00099  | 0.15447  | 0.3076   | 0.006079939 | TSS        | NM_001080148 | Dhcr24 |
| 5   | 130012630 | 130012679 | 1        | -0.06617   | 5    | 0.0014   | 0.015    | 0.053835 | 0.12001  | 0.004540837 | TSS        | NM_001080148 | Dhcr24 |
| 5   | 130012828 | 130012966 | 1        | -0.111147  | 5    | 0.00072  | 0.025    | 0.07566  | 0.18681  | 0.002634665 | TSS        | NM_001080148 | Dhcr24 |
| 5   | 130063054 | 130063163 | 1        | -0.110858  | 5    | 0.02     | 0.038    | 0.13195  | 0.24281  | 0.039778219 | Intragenic | NM_001109262 | Lexm   |
| 5   | 130071459 | 130071624 | 1        | -0.076948  | 7    | 0.0013   | 0.0082   | 0.10894  | 0.18589  | 0.004277683 | TSS        | NM_001106671 | Ttc22  |
| 5   | 130071888 | 130071947 | 1        | -0.150579  | 5    | 0.00044  | 0.015    | 0.1821   | 0.33268  | 0.001760146 | TSS        | NM_001106671 | Ttc22  |
| 5   | 130077189 | 130077504 | 1        | -0.177637  | 5    | 0.00029  | 0.00052  | 0.094773 | 0.27241  | 0.001239307 | Intragenic | NM_001106671 | Ttc22  |
| 5   | 130899519 | 130899775 | 0.0041   | -0.310083  | 8    | 7.80E-09 | 1.30E-08 | 0.04918  | 0.35926  | 2.01E-07    | Intergenic | NA           | NA     |
| 5   | 131284029 | 131284260 | 1        | -0.22787   | 11   | 3.50E-09 | 1.60E-05 | 0.16908  | 0.39695  | 9.56E-08    | Intergenic | NA           | NA     |
| 5   | 131284583 | 131284646 | 1        | -0.209111  | 5    | 1.90E-05 | 7.00E-05 | 0.1526   | 0.36171  | 0.000131674 | Intergenic | NA           | NA     |
| 5   | 131293639 | 131293698 | 1        | -0.178182  | 5    | 0.0027   | 0.039    | 0.23253  | 0.41071  | 0.007840962 | Intergenic | NA           | NA     |
| 5   | 131294515 | 131294620 | 2.50E-05 | -0.290226  | 14   | 2.10E-13 | 7.70E-11 | 0.18992  | 0.48015  | 1.99E-11    | Intergenic | NA           | NA     |
| 5   | 131468947 | 131469176 | 1        | -0.141236  | 8    | 0.01     | 0.093    | 0.38753  | 0.52877  | 0.02275947  | Intergenic | NA           | NA     |
| 5   | 131471398 | 131471483 | 1        | -0.168236  | 5    | 0.0049   | 0.038    | 0.4735   | 0.64174  | 0.012753585 | Intergenic | NA           | NA     |
| 5   | 131471488 | 131471567 | 1        | -0.242584  | 5    | 9.20E-06 | 6.90E-05 | 0.55239  | 0.79497  | 7.32E-05    | Intergenic | NA           | NA     |
| 5   | 131507764 | 131507824 | 1        | -0.179124  | 6    | 1.50E-05 | 2.50E-05 | 0.12349  | 0.30262  | 0.000109113 | Intragenic | NM_138508    | Scp2   |
| 5   | 133132784 | 133132829 | 1        | -0.203394  | 5    | 0.00029  | 0.00027  | 0.16811  | 0.3715   | 0.001239307 | Intergenic | NA           | NA     |
| 5   | 133178903 | 133179189 | 1        | -0.06878   | 10   | 1.00E-05 | 0.00016  | 0.032112 | 0.10089  | 7.82E-05    | Intergenic | NA           | NA     |

| chr | start     | stop      | q-value  | methy.diff | CpGs | pMWU     | p2DKS    | MCWLS    | MCWHS   | pMWU.fdr    | cgi.type   | transcript   | gene       |
|-----|-----------|-----------|----------|------------|------|----------|----------|----------|---------|-------------|------------|--------------|------------|
| 5   | 135192605 | 135192731 | 1        | -0.125627  | 5    | 0.0035   | 0.0055   | 0.63138  | 0.75701 | 0.009686665 | Intergenic | NA           | NA         |
| 5   | 135390430 | 135390663 | 1        | -0.100281  | 9    | 0.00042  | 0.0041   | 0.66074  | 0.76103 | 0.001700519 | Intergenic | NA           | NA         |
| 5   | 137138427 | 137138584 | 1        | -0.176945  | 5    | 0.00021  | 0.0032   | 0.1409   | 0.31785 | 0.000951214 | Intergenic | NA           | NA         |
| 5   | 137165540 | 137165713 | 1        | -0.093943  | 7    | 0.00013  | 5.40E-05 | 0.023772 | 0.11771 | 0.000648758 | Intergenic | NA           | NA         |
| 5   | 137258639 | 137258727 | 1        | -0.174742  | 5    | 4.40E-05 | 0.00014  | 0.14153  | 0.31627 | 0.000263321 | Intergenic | NA           | NA         |
| 5   | 137264677 | 137264770 | 1        | -0.05661   | 8    | 2.20E-05 | 8.50E-05 | 0.062362 | 0.11897 | 0.000149617 | Intergenic | NA           | NA         |
| 5   | 137356709 | 137356828 | 1        | -0.085339  | 8    | 0.00023  | 0.0016   | 0.096004 | 0.18134 | 0.00102405  | Intergenic | NA           | NA         |
| 5   | 138538961 | 138539107 | 1        | -0.113938  | 8    | 0.021    | 0.049    | 0.43908  | 0.55302 | 0.041207871 | Intergenic | NA           | NA         |
| 5   | 139788085 | 139788417 | 1        | -0.167075  | 5    | 0.013    | 0.015    | 0.31954  | 0.48661 | 0.028097302 | Intergenic | NA           | NA         |
| 5   | 139792669 | 139793173 | 1        | -0.197985  | 7    | 1.90E-05 | 0.00082  | 0.059149 | 0.25713 | 0.000131674 | Intragenic | NM_022187    | Plk3       |
| 5   | 139956037 | 139956453 | 3.40E-30 | -0.225294  | 42   | 4.20E-14 | 1.00E-35 | 0.05646  | 0.28175 | 6.64E-12    | Intergenic | NA           | NA         |
| 5   | 139964616 | 139964649 | 1        | -0.182685  | 5    | 0.0011   | 0.0087   | 0.25276  | 0.43545 | 0.003737263 | Intergenic | NA           | NA         |
| 5   | 139969541 | 139969704 | 0.0011   | -0.238481  | 8    | 3.00E-11 | 3.40E-09 | 0.04265  | 0.28113 | 1.48E-09    | Intergenic | NA           | NA         |
| 5   | 139970008 | 139970130 | 1        | -0.095163  | 7    | 0.0015   | 0.0054   | 0.038503 | 0.13367 | 0.004849475 | Intergenic | NA           | NA         |
| 5   | 139974357 | 139974519 | 1        | -0.152741  | 8    | 2.40E-06 | 0.0024   | 0.16753  | 0.32027 | 2.45E-05    | Intergenic | NA           | NA         |
| 5   | 140009518 | 140009726 | 1        | -0.324002  | 7    | 5.30E-08 | 8.80E-06 | 0.14654  | 0.47055 | 1.08E-06    | Intergenic | NA           | NA         |
| 5   | 140014267 | 140014402 | 1        | -0.110765  | 8    | 0.00025  | 0.026    | 0.15825  | 0.26901 | 0.001103692 | Intergenic | NA           | NA         |
| 5   | 140043824 | 140043979 | 1        | -0.088106  | 14   | 1.40E-08 | 1.50E-05 | 0.075791 | 0.1639  | 3.31E-07    | Intergenic | NA           | NA         |
| 5   | 140495889 | 140495968 | 1        | -0.103108  | 5    | 0.0019   | 0.015    | 0.11726  | 0.22037 | 0.005855937 | TSS        | NM_001134626 | Ccdc24     |
| 5   | 140562488 | 140562631 | 1        | -0.313067  | 5    | 3.70E-06 | 0.00014  | 0.42377  | 0.73683 | 3.46E-05    | Intragenic | NM_031697    | St3gal3    |
| 5   | 140633538 | 140633709 | 1        | -0.142532  | 6    | 0.00014  | 0.0016   | 0.2097   | 0.35224 | 0.000684451 | Intragenic | NM_031697    | St3gal3    |
| 5   | 140645075 | 140645308 | 1        | -0.13972   | 7    | 0.0041   | 0.026    | 0.43273  | 0.57245 | 0.01100507  | Intragenic | NM_031697    | St3gal3    |
| 5   | 140665958 | 140666088 | 1        | -0.369073  | 5    | 4.20E-07 | 7.50E-06 | 0.10952  | 0.47859 | 5.76E-06    | Intragenic | NM_031697    | St3gal3    |
| 5   | 140696863 | 140696933 | 1        | -0.205257  | 5    | 0.0014   | 0.015    | 0.239    | 0.44426 | 0.004540837 | Intragenic | NM_031697    | St3gal3    |
| 5   | 140886012 | 140886162 | 1        | -0.153883  | 7    | 1.10E-06 | 0.00017  | 0.15577  | 0.30966 | 1.27E-05    | Intragenic | NM_019249    | Ptprf      |
| 5   | 141050276 | 141050410 | 1        | -0.22327   | 8    | 4.80E-07 | 0.00015  | 0.24699  | 0.47026 | 6.54E-06    | Intragenic | NM_171993    | Cdc20      |
| 5   | 141061701 | 141061838 | 1        | -0.17787   | 5    | 1.70E-05 | 7.00E-05 | 0.10164  | 0.27951 | 0.000120524 | Intergenic | NA           | NA         |
| 5   | 141108496 | 141108590 | 1        | -0.144589  | 9    | 0.00036  | 0.00033  | 0.17616  | 0.32075 | 0.001486639 | Intragenic | NM_053545    | Tie1       |
| 5   | 141147270 | 141147331 | 1        | -0.39449   | 5    | 4.30E-06 | 0.00014  | 0.18468  | 0.57917 | 3.93E-05    | Intragenic | NM_001108674 | RGD1305347 |
| 5   | 141853017 | 141853244 | 1        | -0.152763  | 7    | 3.20E-05 | 0.0032   | 0.12051  | 0.27328 | 0.00020314  | Intergenic | NA           | NA         |
| 5   | 141925963 | 141926035 | 1        | -0.065528  | 5    | 0.02     | 0.039    | 0.088902 | 0.15443 | 0.039778219 | Intergenic | NA           | NA         |
| 5   | 141927024 | 141927049 | 1        | -0.053217  | 5    | 0.0017   | 0.025    | 0.081594 | 0.13481 | 0.005339493 | Intergenic | NA           | NA         |
| 5   | 141993497 | 141993624 | 0.02     | -0.074637  | 8    | 1.80E-08 | 6.10E-08 | 0.033502 | 0.10814 | 4.21E-07    | Intergenic | NA           | NA         |
| 5   | 142112098 | 142112191 | 1        | -0.118314  | 5    | 0.025    | 0.088    | 0.34592  | 0.46424 | 0.047453009 | TSS        | NM_001008514 | Cldn19     |
| 5   | 142919388 | 142919591 | 1        | -0.063075  | 8    | 0.026    | 0.094    | 0.12515  | 0.18822 | 0.049234478 | Intergenic | NA           | NA         |
| 5   | 143397959 | 143398038 | 1        | -0.139044  | 5    | 0.016    | 0.024    | 0.54103  | 0.68008 | 0.033288089 | Intergenic | NA           | NA         |
| 5   | 144210656 | 144210816 | 1        | -0.100314  | 8    | 0.0064   | 0.035    | 0.73387  | 0.83418 | 0.015860755 | Intergenic | NA           | NA         |
| 5   | 144276837 | 144276865 | 1        | -0.153862  | 5    | 0.0014   | 0.00052  | 0.13598  | 0.28984 | 0.004540837 | Intergenic | NA           | NA         |
| 5   | 144603430 | 144603535 | 1        | -0.143452  | 5    | 0.016    | 0.088    | 0.23922  | 0.38267 | 0.033288089 | TSS        | NM_001012221 | Oxct2a     |

| chr | start     | stop      | q-value | methy.diff | CpGs | pMWU     | p2DKS    | MCWLS    | MCWHS   | pMWU.fdr    | cgi.type   | transcript                          | gene                 |
|-----|-----------|-----------|---------|------------|------|----------|----------|----------|---------|-------------|------------|-------------------------------------|----------------------|
| 5   | 144640541 | 144640687 | 1       | -0.109678  | 5    | 0.016    | 0.025    | 0.41548  | 0.52516 | 0.033288089 | Intergenic | NA                                  | NA                   |
| 5   | 144768939 | 144768966 | 0.78    | -0.080499  | 7    | 1.20E-07 | 2.40E-06 | 0.067233 | 0.14773 | 2.01E-06    | TSS        | NM_001100538                        | Pabpc4               |
| 5   | 144780574 | 144780635 | 1       | -0.226276  | 5    | 2.50E-06 | 3.40E-05 | 0.062075 | 0.28835 | 2.52E-05    | Intragenic | NM_001100538                        | Pabpc4               |
| 5   | 144809195 | 144809300 | 1       | -0.135993  | 5    | 0.017    | 0.088    | 0.24488  | 0.38087 | 0.034796287 | TSS        | NM_001012221                        | Oxct2a               |
| 5   | 144853724 | 144853867 | 1       | -0.239882  | 5    | 0.0012   | 0.038    | 0.218    | 0.45788 | 0.004013471 | Intragenic | NM_001135758                        | Macf1                |
| 5   | 145195905 | 145195960 | 1       | -0.129884  | 5    | 4.80E-06 | 7.00E-05 | 0.089742 | 0.21963 | 4.29E-05    | TSS        | NM_001030052                        | Ndufs5               |
| 5   | 145650332 | 145650388 | 1       | -0.076187  | 9    | 0.0066   | 0.11     | 0.19751  | 0.2737  | 0.016329463 | Intergenic | NA                                  | NA                   |
| 5   | 145676820 | 145676998 | 1       | -0.140012  | 8    | 0.003    | 0.024    | 0.28033  | 0.42034 | 0.008555055 | Intergenic | NA                                  | NA                   |
| 5   | 145704215 | 145704395 | 1       | -0.120959  | 10   | 0.001    | 0.012    | 0.23653  | 0.35749 | 0.003452169 | Intergenic | NA                                  | NA                   |
| 5   | 146190267 | 146190484 | 1       | 0.07579    | 7    | 0.017    | 0.078    | 0.49597  | 0.42018 | 0.034796287 | Intergenic | NA                                  | NA                   |
| 5   | 146366903 | 146366948 | 1       | -0.146585  | 5    | 0.008    | 0.015    | 0.29767  | 0.44425 | 0.019059477 | Intergenic | NA                                  | NA                   |
| 5   | 146774957 | 146775042 | 1       | -0.193334  | 5    | 0.0011   | 0.0055   | 0.20979  | 0.40312 | 0.003737263 | Intragenic | NM_001107980                        | Rspo1                |
| 5   | 147007137 | 147007317 | 1       | -0.059765  | 7    | 0.0059   | 0.019    | 0.72824  | 0.78801 | 0.014851341 | Intergenic | NA                                  | NA                   |
| 5   | 147141248 | 147141343 | 1       | -0.103034  | 5    | 0.014    | 0.088    | 0.20161  | 0.30464 | 0.029850603 | Intergenic | NA                                  | NA                   |
| 5   | 147371904 | 147371930 | 1       | -0.123515  | 5    | 0.0008   | 0.0018   | 0.33247  | 0.45599 | 0.002866309 | Intragenic | NM_001112716:NM_181373              | Grik3:Grik3          |
| 5   | 147491069 | 147491557 | 1       | -0.070462  | 20   | 0.0016   | 0.02     | 0.14122  | 0.21168 | 0.005100053 | Intergenic | NA                                  | NA                   |
| 5   | 147737133 | 147737362 | 1       | -0.121839  | 12   | 0.023    | 0.16     | 0.5562   | 0.67804 | 0.04441443  | Intergenic | NA                                  | NA                   |
| 5   | 147752127 | 147752245 | 1       | -0.193587  | 5    | 3.70E-06 | 0.00014  | 0.086294 | 0.27988 | 3.46E-05    | Intergenic | NA                                  | NA                   |
| 5   | 147929781 | 147929914 | 0.19    | -0.204068  | 11   | 2.40E-08 | 5.90E-07 | 0.25153  | 0.4556  | 5.41E-07    | TSS        | NM_001108679                        | Eva1b                |
| 5   | 147948480 | 147948509 | 1       | -0.203348  | 5    | 0.00011  | 0.0017   | 0.32316  | 0.52651 | 0.000565143 | Intragenic | NM_001009693                        | Thrap3               |
| 5   | 147959875 | 147960157 | 1       | -0.319055  | 5    | 4.20E-07 | 1.60E-05 | 0.18404  | 0.5031  | 5.76E-06    | Intragenic | NM_001009693                        | Thrap3               |
| 5   | 148626451 | 148626528 | 1       | -0.1291    | 5    | 0.0017   | 0.015    | 0.39076  | 0.51986 | 0.005339493 | Intragenic | NM_001159655                        | LOC100294508         |
| 5   | 148829118 | 148829247 | 1       | -0.19234   | 5    | 0.00036  | 0.0055   | 0.17317  | 0.36551 | 0.001486639 | Intergenic | NA                                  | NA                   |
| 5   | 148841635 | 148841688 | 1       | -0.267495  | 7    | 0.00013  | 1.50E-05 | 0.59341  | 0.86091 | 0.000648758 | Intergenic | NA                                  | NA                   |
| 5   | 149047379 | 149047460 | 1       | -0.050093  | 5    | 0.0094   | 0.088    | 0.073789 | 0.12388 | 0.021723038 | Intragenic | NM_001276304:NM_001301876:NM_173138 | Dlgap3:Dlgap3:Dlgap3 |
| 5   | 149070799 | 149070892 | 1       | -0.126457  | 5    | 0.014    | 0.015    | 0.1601   | 0.28656 | 0.029850603 | Intragenic | NM_001276304:NM_001301876:NM_173138 | Dlgap3:Dlgap3:Dlgap3 |
| 5   | 149157126 | 149157377 | 1       | -0.161414  | 8    | 0.00091  | 0.0087   | 0.30455  | 0.46597 | 0.003192838 | Intergenic | NA                                  | NA                   |
| 5   | 149220834 | 149220958 | 1       | -0.146664  | 8    | 6.30E-08 | 1.70E-05 | 0.086551 | 0.23322 | 1.18E-06    | Intergenic | NA                                  | NA                   |
| 5   | 150693830 | 150693942 | 0.49    | -0.297093  | 5    | 7.40E-07 | 1.50E-06 | 0.13305  | 0.43014 | 9.26E-06    | Intragenic | NM_001191612                        | Zfp362               |
| 5   | 150706190 | 150706345 | 1       | -0.155526  | 5    | 0.002    | 0.0055   | 0.051472 | 0.207   | 0.006079939 | Intragenic | NM_001191612                        | Zfp362               |
| 5   | 150706431 | 150706479 | 1       | -0.059271  | 9    | 1.20E-06 | 1.70E-05 | 0.045542 | 0.10481 | 1.37E-05    | Intragenic | NM_001191612                        | Zfp362               |
| 5   | 150706503 | 150706534 | 1       | -0.212532  | 5    | 5.00E-05 | 0.00098  | 0.13433  | 0.34687 | 0.000291675 | Intragenic | NM_001191612                        | Zfp362               |
| 5   | 150777286 | 150777369 | 1       | -0.091112  | 5    | 0.012    | 0.088    | 0.21713  | 0.30824 | 0.026435197 | Intergenic | NA                                  | NA                   |



| chr | start     | stop      | q-value | methy.diff | CpGs | pMWU     | p2DKS    | MCWLS    | MCWHS    | pMWU.fdr    | cgi.type   | transcript                    | gene              |
|-----|-----------|-----------|---------|------------|------|----------|----------|----------|----------|-------------|------------|-------------------------------|-------------------|
| 5   | 150952057 | 150952325 | 0.23    | -0.126832  | 6    | 2.30E-08 | 7.20E-07 | 0.018194 | 0.14503  | 5.20E-07    | Intergenic | NA                            | NA                |
| 5   | 151147267 | 151147361 | 0.015   | -0.208847  | 5    | 9.90E-08 | 4.50E-08 | 0.081316 | 0.29016  | 1.72E-06    | TSS        | NM_001134629                  | RGD1561149        |
| 5   | 151215553 | 151215909 | 1       | -0.12176   | 18   | 0.00021  | 0.0016   | 0.36731  | 0.48907  | 0.000951214 | Intragenic | NM_001108683                  | Sync              |
| 5   | 151329218 | 151329274 | 1       | -0.074668  | 5    | 0.0019   | 0.015    | 0.061928 | 0.1366   | 0.005855937 | Intergenic | NA                            | NA                |
| 5   | 151349443 | 151349484 | 1       | -0.143283  | 5    | 0.019    | 0.039    | 0.39788  | 0.54117  | 0.038322088 | Intragenic | NM_001109265                  | Zbtb8b            |
| 5   | 151381452 | 151381676 | 1       | -0.11685   | 5    | 0.00097  | 0.0054   | 0.030506 | 0.14736  | 0.003366009 | TSS        | NM_001106636                  | Bsdcl             |
| 5   | 151413360 | 151413437 | 1       | -0.113081  | 5    | 0.00072  | 0.0055   | 0.13273  | 0.24581  | 0.002634665 | TSS        | NM_001007650:N<br>M_001109266 | Tssk3:Fam229<br>a |
| 5   | 151413527 | 151413718 | 0.56    | -0.149034  | 11   | 1.10E-09 | 1.70E-06 | 0.10827  | 0.2573   | 3.60E-08    | TSS        | NM_001007650:N<br>M_001109266 | Tssk3:Fam229<br>a |
| 5   | 151625166 | 151625262 | 1       | -0.184335  | 7    | 3.50E-06 | 3.00E-05 | 0.13076  | 0.31509  | 3.33E-05    | Intragenic | NM_001014192                  | Tmem39b           |
| 5   | 151747910 | 151748178 | 0.26    | -0.130237  | 13   | 2.60E-09 | 7.90E-07 | 0.11565  | 0.24589  | 7.57E-08    | Intergenic | NA                            | NA                |
| 5   | 151935292 | 151935360 | 1       | -0.139804  | 5    | 0.0019   | 0.015    | 0.1312   | 0.271    | 0.005855937 | Intragenic | NM_001107914                  | Adgrb2            |
| 5   | 151935392 | 151935432 | 1       | -0.093905  | 5    | 0.00048  | 0.0017   | 0.4875   | 0.58141  | 0.001881331 | Intragenic | NM_001107914                  | Adgrb2            |
| 5   | 152148008 | 152148159 | 1       | -0.126435  | 5    | 2.20E-06 | 3.40E-05 | 0.068491 | 0.19493  | 2.27E-05    | Intergenic | NA                            | NA                |
| 5   | 152148170 | 152148413 | 1       | -0.112345  | 7    | 0.0037   | 0.026    | 0.18578  | 0.29813  | 0.010204935 | Intergenic | NA                            | NA                |
| 5   | 152706285 | 152706494 | 1       | -0.158875  | 5    | 0.0063   | 0.00052  | 0.45066  | 0.60954  | 0.015629046 | Intergenic | NA                            | NA                |
| 5   | 153009746 | 153010065 | 1       | -0.086626  | 5    | 0.00088  | 0.0018   | 0.071478 | 0.1581   | 0.003092094 | Intergenic | NA                            | NA                |
| 5   | 153212130 | 153212207 | 1       | -0.090904  | 5    | 0.02     | 0.059    | 0.18243  | 0.27333  | 0.039778219 | Intergenic | NA                            | NA                |
| 5   | 153563511 | 153563577 | 1       | -0.145712  | 5    | 3.90E-05 | 0.0018   | 0.21956  | 0.36527  | 0.000237659 | Intergenic | NA                            | NA                |
| 5   | 153738748 | 153738819 | 1       | -0.298354  | 5    | 2.50E-06 | 3.40E-05 | 0.29001  | 0.58837  | 2.52E-05    | Intragenic | NM_001108685                  | Srsf4             |
| 5   | 153757227 | 153757589 | 1       | -0.057581  | 43   | 0.003    | 0.056    | 0.051416 | 0.067334 | 0.008555055 | Intergenic | NA                            | NA                |
| 5   | 153773516 | 153773656 | 1       | -0.165187  | 5    | 0.00065  | 0.0092   | 0.23075  | 0.39594  | 0.002426546 | Intergenic | NA                            | NA                |
| 5   | 153918590 | 153918802 | 1       | -0.095815  | 8    | 0.00012  | 0.0025   | 0.069383 | 0.1652   | 0.000603617 | Intergenic | NA                            | NA                |
| 5   | 154022582 | 154022702 | 1       | -0.192469  | 5    | 2.90E-06 | 3.40E-05 | 0.064812 | 0.25728  | 2.84E-05    | Intergenic | NA                            | NA                |
| 5   | 154253315 | 154253433 | 1       | -0.108729  | 5    | 0.0041   | 0.0093   | 0.13978  | 0.24851  | 0.01100507  | Intergenic | NA                            | NA                |
| 5   | 154275053 | 154275388 | 1       | -0.058171  | 17   | 0.0011   | 0.029    | 0.067265 | 0.12544  | 0.003737263 | Intergenic | NA                            | NA                |
| 5   | 154808122 | 154808257 | 1       | -0.169799  | 5    | 3.50E-05 | 0.00096  | 0.1035   | 0.2733   | 0.000218038 | Intergenic | NA                            | NA                |
| 5   | 154839967 | 154840118 | 1       | -0.065766  | 7    | 0.0011   | 0.0083   | 0.059477 | 0.12524  | 0.003737263 | TSS        | NM_024145                     | Fgr               |
| 5   | 154906389 | 154906605 | 1       | -0.06842   | 16   | 5.20E-07 | 5.30E-05 | 0.078837 | 0.14726  | 6.93E-06    | Intragenic | NM_001134956                  | Ahdc1             |
| 5   | 154909811 | 154909921 | 1       | -0.207777  | 7    | 7.10E-06 | 0.00016  | 0.10762  | 0.3154   | 5.86E-05    | Intragenic | NM_001134956                  | Ahdc1             |
| 5   | 154931009 | 154931547 | 1       | -0.173179  | 9    | 1.20E-09 | 9.60E-06 | 0.070998 | 0.24418  | 3.88E-08    | Intragenic | NM_001134956                  | Ahdc1             |
| 5   | 155079260 | 155079287 | 1       | -0.124195  | 5    | 1.10E-06 | 1.60E-05 | 0.086126 | 0.21032  | 1.27E-05    | TSS        | NM_001271259                  | Cd164l2           |
| 5   | 155108005 | 155108091 | 1       | -0.154997  | 7    | 2.90E-05 | 0.0013   | 0.16809  | 0.32309  | 0.000187968 | Intragenic | NM_001107909                  | Map3k6            |
| 5   | 155117592 | 155117702 | 0.0018  | -0.183914  | 15   | 7.70E-13 | 5.70E-09 | 0.13821  | 0.32213  | 6.01E-11    | Intragenic | NM_001025651                  | Syt1              |
| 5   | 155145961 | 155146056 | 1       | -0.163795  | 5    | 0.019    | 0.015    | 0.39521  | 0.559    | 0.038322088 | Intergenic | NA                            | NA                |
| 5   | 155360240 | 155360320 | 0.2     | -0.257297  | 7    | 8.80E-09 | 6.10E-07 | 0.37797  | 0.63527  | 2.23E-07    | Intragenic | NM_001107907                  | Fam46b            |
| 5   | 155430963 | 155431002 | 1       | -0.153801  | 7    | 2.10E-07 | 2.80E-05 | 0.057744 | 0.21154  | 3.19E-06    | TSS        | NM_001004268                  | Kdf1              |
| 5   | 155431037 | 155431061 | 1       | -0.076718  | 5    | 0.0058   | 0.087    | 0.076891 | 0.15361  | 0.014624129 | TSS        | NM_001004268                  | Kdf1              |

| chr | start     | stop      | q-value | methy.diff | CpGs | pMWU     | p2DKS    | MCWLS    | MCWHS   | pMWU.fdr    | cgi.type   | transcript                    | gene       |
|-----|-----------|-----------|---------|------------|------|----------|----------|----------|---------|-------------|------------|-------------------------------|------------|
| 5   | 155431192 | 155431214 | 1       | -0.072308  | 5    | 0.0094   | 0.13     | 0.12631  | 0.19862 | 0.021723038 | TSS        | NM_001004268                  | Kdf1       |
| 5   | 155439220 | 155439337 | 1       | -0.152921  | 9    | 0.0011   | 0.023    | 0.22416  | 0.37708 | 0.003737263 | Intragenic | NM_001004268                  | Kdf1       |
| 5   | 155514784 | 155514852 | 1       | -0.204943  | 5    | 0.0014   | 0.015    | 0.17609  | 0.38103 | 0.004540837 | Intergenic | NA                            | NA         |
| 5   | 155753290 | 155753328 | 1       | 0.109629   | 5    | 9.80E-07 | 7.50E-06 | 0.89425  | 0.78462 | 1.16E-05    | Intergenic | NA                            | NA         |
| 5   | 155942742 | 155942911 | 1       | -0.181654  | 6    | 0.00024  | 0.0041   | 0.13261  | 0.31427 | 0.001064629 | Intergenic | NA                            | NA         |
| 5   | 155976649 | 155976794 | 1       | -0.151346  | 8    | 7.80E-08 | 1.60E-05 | 0.038302 | 0.18965 | 1.42E-06    | Intergenic | NA                            | NA         |
| 5   | 155981200 | 155981440 | 1       | -0.129689  | 8    | 1.10E-05 | 0.0011   | 0.084579 | 0.21427 | 8.53E-05    | Intergenic | NA                            | NA         |
| 5   | 155988219 | 155988447 | 1       | -0.151729  | 11   | 0.0031   | 0.061    | 0.38367  | 0.5354  | 0.008829746 | Intergenic | NA                            | NA         |
| 5   | 156011964 | 156012002 | 1       | -0.193475  | 5    | 1.30E-05 | 0.00027  | 0.4158   | 0.60927 | 9.66E-05    | TSS        | NM_053983                     | Cd52       |
| 5   | 156105256 | 156105295 | 1       | -0.153801  | 7    | 2.10E-07 | 2.80E-05 | 0.057744 | 0.21154 | 3.19E-06    | TSS        | NM_001004268                  | Kdf1       |
| 5   | 156105330 | 156105354 | 1       | -0.076718  | 5    | 0.0058   | 0.087    | 0.076891 | 0.15361 | 0.014624129 | TSS        | NM_001004268                  | Kdf1       |
| 5   | 156105485 | 156105507 | 1       | -0.072308  | 5    | 0.0094   | 0.13     | 0.12631  | 0.19862 | 0.021723038 | TSS        | NM_001004268                  | Kdf1       |
| 5   | 156113511 | 156113628 | 1       | -0.152921  | 9    | 0.0011   | 0.023    | 0.22416  | 0.37708 | 0.003737263 | Intragenic | NM_001080151:N<br>M_001004268 | Cep85:Kdf1 |
| 5   | 156292559 | 156292819 | 1       | -0.225004  | 12   | 9.20E-08 | 0.0004   | 0.2473   | 0.4723  | 1.63E-06    | TSS        | NM_080903                     | Trim63     |
| 5   | 156407770 | 156407896 | 1       | -0.144802  | 5    | 0.0038   | 0.024    | 0.079207 | 0.22401 | 0.010352437 | Intragenic | NM_177932                     | Pafah2     |
| 5   | 156422358 | 156422692 | 1       | -0.154954  | 7    | 0.003    | 0.0019   | 0.17483  | 0.32979 | 0.008555055 | Intergenic | NA                            | NA         |
| 5   | 156503849 | 156503901 | 1       | -0.288607  | 5    | 5.60E-07 | 3.40E-06 | 0.11693  | 0.40553 | 7.29E-06    | TSS        | NM_001034081                  | Paqr7      |
| 5   | 156631936 | 156632020 | 1       | -0.081804  | 5    | 0.00065  | 0.00053  | 0.066102 | 0.14791 | 0.002426546 | Intragenic | NM_001108687                  | Man1c1     |
| 5   | 156653010 | 156653252 | 1       | -0.137066  | 6    | 0.0083   | 0.04     | 0.18421  | 0.32127 | 0.019719474 | Intragenic | NM_001108687                  | Man1c1     |
| 5   | 156660224 | 156660494 | 1       | -0.097398  | 13   | 2.30E-05 | 6.60E-05 | 0.17234  | 0.26974 | 0.000156153 | Intragenic | NM_001108687                  | Man1c1     |
| 5   | 156669967 | 156670043 | 1       | -0.176354  | 5    | 0.0045   | 0.038    | 0.29338  | 0.46973 | 0.011905878 | Intragenic | NM_001108687                  | Man1c1     |
| 5   | 157003293 | 157003397 | 1       | -0.190303  | 6    | 0.0057   | 0.027    | 0.44401  | 0.63432 | 0.014573809 | Intragenic | NM_022505                     | Rhd        |
| 5   | 157263707 | 157263817 | 1       | -0.052857  | 10   | 0.00068  | 0.028    | 0.059148 | 0.112   | 0.002535389 | Intergenic | NA                            | NA         |
| 5   | 157273730 | 157273968 | 1       | -0.076852  | 14   | 0.01     | 0.092    | 0.12719  | 0.20404 | 0.02275947  | TSS        | NM_130425                     | Runx3      |
| 5   | 157274714 | 157274780 | 1       | -0.100475  | 5    | 0.0058   | 0.015    | 0.066112 | 0.16659 | 0.014624129 | TSS        | NM_130425                     | Runx3      |
| 5   | 157278103 | 157278128 | 1       | -0.197573  | 5    | 3.70E-06 | 3.40E-05 | 0.1258   | 0.32338 | 3.46E-05    | Intragenic | NM_130425                     | Runx3      |
| 5   | 157278813 | 157278988 | 1       | -0.132536  | 5    | 0.0029   | 0.015    | 0.074401 | 0.20694 | 0.008293503 | Intragenic | NM_130425                     | Runx3      |
| 5   | 157291344 | 157291375 | 1       | -0.140004  | 5    | 0.0022   | 0.015    | 0.14123  | 0.28123 | 0.006578104 | Intragenic | NM_130425                     | Runx3      |
| 5   | 157300157 | 157300208 | 1       | -0.110623  | 5    | 0.0074   | 0.18     | 0.4097   | 0.52032 | 0.017853001 | Intragenic | NM_130425                     | Runx3      |
| 5   | 157300225 | 157300348 | 1       | -0.178856  | 9    | 2.30E-07 | 0.00033  | 0.3609   | 0.53976 | 3.45E-06    | Intragenic | NM_130425                     | Runx3      |
| 5   | 157433975 | 157434125 | 1       | -0.178946  | 5    | 3.10E-05 | 3.40E-05 | 0.062644 | 0.24159 | 0.000197418 | Intergenic | NA                            | NA         |
| 5   | 157511894 | 157511921 | 1       | -0.208798  | 5    | 0.00072  | 0.0053   | 0.45661  | 0.66541 | 0.002634665 | Intergenic | NA                            | NA         |
| 5   | 157542880 | 157542963 | 0.15    | -0.16953   | 8    | 9.80E-08 | 4.50E-07 | 0.17741  | 0.34694 | 1.72E-06    | Intragenic | NM_001012746                  | Rcan3      |
| 5   | 157609122 | 157609377 | 1       | -0.140523  | 5    | 0.0008   | 0.039    | 0.079778 | 0.2203  | 0.002866309 | TSS        | NR_106707                     | Mir6333    |
| 5   | 157941033 | 157941378 | 1       | -0.073386  | 12   | 0.0085   | 0.05     | 0.097437 | 0.17082 | 0.020154795 | Intergenic | NA                            | NA         |
| 5   | 158304030 | 158304115 | 1       | -0.1702    | 5    | 9.80E-05 | 0.00052  | 0.11691  | 0.28711 | 0.000512474 | Intergenic | NA                            | NA         |
| 5   | 158306616 | 158306725 | 1       | -0.185942  | 5    | 1.30E-06 | 3.40E-06 | 0.03002  | 0.21596 | 1.46E-05    | Intergenic | NA                            | NA         |
| 5   | 158385246 | 158385387 | 1       | -0.248941  | 7    | 3.20E-07 | 1.40E-05 | 0.10238  | 0.35133 | 4.57E-06    | Intragenic | NM_001015008                  | Tcea3      |

| chr | start     | stop      | q-value | methy.diff | CpGs | pMWU     | p2DKS    | MCWLS    | MCWHS   | pMWU.fdr    | cgi.type   | transcript   | gene       |
|-----|-----------|-----------|---------|------------|------|----------|----------|----------|---------|-------------|------------|--------------|------------|
| 5   | 158409459 | 158409538 | 1       | -0.204592  | 5    | 0.00054  | 0.015    | 0.1572   | 0.36179 | 0.002077867 | TSS        | NR_036617    | RGD1564482 |
| 5   | 158418926 | 158418968 | 1       | -0.056302  | 5    | 0.011    | 0.0032   | 0.91421  | 0.97052 | 0.02463877  | TSS        | NM_001106691 | Zfp46      |
| 5   | 158511556 | 158511786 | 1       | -0.187077  | 5    | 0.011    | 0.039    | 0.3549   | 0.54197 | 0.02463877  | Intergenic | NA           | NA         |
| 5   | 158572986 | 158573068 | 1       | -0.142879  | 5    | 2.40E-05 | 3.30E-05 | 0.41185  | 0.55473 | 0.000160049 | Intergenic | NA           | NA         |
| 5   | 158586060 | 158586274 | 1       | -0.106888  | 9    | 0.00093  | 0.0039   | 0.28369  | 0.39058 | 0.003255406 | Intergenic | NA           | NA         |
| 5   | 158966212 | 158966369 | 1       | -0.173705  | 7    | 0.0072   | 0.056    | 0.44753  | 0.62123 | 0.017539509 | Intergenic | NA           | NA         |
| 5   | 159075956 | 159076158 | 1       | -0.125431  | 5    | 0.025    | 0.088    | 0.34286  | 0.4683  | 0.047453009 | Intergenic | NA           | NA         |
| 5   | 159091572 | 159091644 | 1       | -0.192992  | 5    | 3.90E-05 | 0.00053  | 0.099751 | 0.29274 | 0.000237659 | Intergenic | NA           | NA         |
| 5   | 159265876 | 159266225 | 1       | -0.131486  | 13   | 0.015    | 0.09     | 0.5265   | 0.65799 | 0.031584896 | Intragenic | NR_036653    | Bc1        |
| 5   | 159607485 | 159607640 | 1       | -0.128419  | 7    | 0.00058  | 0.027    | 0.42895  | 0.55737 | 0.002226081 | Intergenic | NA           | NA         |
| 5   | 159824397 | 159824495 | 1       | -0.103103  | 9    | 0.00024  | 0.0026   | 0.24249  | 0.3456  | 0.001064629 | Intragenic | NM_001100713 | Rap1gap    |
| 5   | 159824543 | 159824704 | 1       | -0.085599  | 5    | 0.0019   | 0.0055   | 0.13513  | 0.22073 | 0.005855937 | Intragenic | NM_001100713 | Rap1gap    |
| 5   | 160325204 | 160325265 | 1       | -0.194242  | 5    | 1.10E-06 | 3.40E-05 | 0.73336  | 0.92761 | 1.27E-05    | Intergenic | NA           | NA         |
| 5   | 160374167 | 160374240 | 1       | -0.349611  | 5    | 3.50E-05 | 0.00053  | 0.21196  | 0.56157 | 0.000218038 | Intergenic | NA           | NA         |
| 5   | 160593688 | 160593789 | 1       | -0.104578  | 5    | 0.025    | 0.34     | 0.1683   | 0.27288 | 0.047453009 | Intergenic | NA           | NA         |
| 5   | 160600490 | 160600591 | 1       | -0.104578  | 5    | 0.025    | 0.34     | 0.1683   | 0.27288 | 0.047453009 | Intergenic | NA           | NA         |
| 5   | 160629700 | 160630229 | 1       | -0.211182  | 7    | 5.80E-07 | 0.00048  | 0.13474  | 0.34592 | 7.50E-06    | Intergenic | NA           | NA         |
| 5   | 160732212 | 160732465 | 1       | -0.094262  | 14   | 0.00016  | 0.0059   | 0.11178  | 0.20604 | 0.000769396 | Intergenic | NA           | NA         |
| 5   | 160927590 | 160927668 | 1       | -0.13358   | 5    | 0.013    | 0.0018   | 0.55744  | 0.69102 | 0.028097302 | Intergenic | NA           | NA         |
| 5   | 161157292 | 161157427 | 1       | -0.220656  | 7    | 4.20E-05 | 0.0022   | 0.26831  | 0.48897 | 0.00025452  | TSS        | NM_001109592 | Rnf186     |
| 5   | 161209651 | 161209704 | 0.088   | -0.375707  | 5    | 1.10E-07 | 2.70E-07 | 0.10847  | 0.48418 | 1.86E-06    | Intragenic | NM_001034949 | Tmco4      |
| 5   | 161685726 | 161685898 | 0.48    | -0.222736  | 5    | 8.50E-07 | 1.50E-06 | 0.048387 | 0.27112 | 1.03E-05    | Intragenic | NM_001039026 | Ubr4       |
| 5   | 161842870 | 161842907 | 1       | -0.270047  | 5    | 1.70E-05 | 0.00053  | 0.21251  | 0.48255 | 0.000120524 | Intragenic | NM_001134698 | Aldh4a1    |
| 5   | 161877681 | 161877761 | 1       | -0.165268  | 5    | 0.0012   | 0.015    | 0.15211  | 0.31738 | 0.004013471 | Intergenic | NA           | NA         |
| 5   | 161966018 | 161966306 | 1       | -0.175107  | 5    | 0.00036  | 0.0055   | 0.14348  | 0.31859 | 0.001486639 | Intragenic | NM_001191984 | Pax7       |
| 5   | 161974527 | 161974795 | 1       | -0.130996  | 5    | 0.0049   | 0.0092   | 0.11627  | 0.24726 | 0.012753585 | Intragenic | NM_001191984 | Pax7       |
| 5   | 162087570 | 162087685 | 1       | -0.106898  | 5    | 0.021    | 0.088    | 0.27674  | 0.38364 | 0.041207871 | Intergenic | NA           | NA         |
| 5   | 162162336 | 162162583 | 1       | -0.146755  | 9    | 2.20E-07 | 4.40E-05 | 0.078341 | 0.2251  | 3.32E-06    | Intergenic | NA           | NA         |
| 5   | 162165454 | 162165611 | 1       | -0.102734  | 6    | 0.0054   | 0.0072   | 0.10088  | 0.20361 | 0.013836205 | Intergenic | NA           | NA         |
| 5   | 162166181 | 162166388 | 1       | -0.123452  | 8    | 5.50E-07 | 9.10E-05 | 0.084454 | 0.20791 | 7.29E-06    | Intergenic | NA           | NA         |
| 5   | 162246139 | 162246208 | 1       | -0.093655  | 5    | 0.02     | 0.088    | 0.15998  | 0.25364 | 0.039778219 | Intragenic | NM_001271454 | Igsf21     |
| 5   | 162269033 | 162269183 | 1       | -0.108667  | 5    | 0.01     | 0.059    | 0.11426  | 0.22292 | 0.02275947  | Intragenic | NM_001271454 | Igsf21     |
| 5   | 162276592 | 162276657 | 1       | -0.098668  | 5    | 0.0022   | 0.024    | 0.22716  | 0.32583 | 0.006578104 | Intragenic | NM_001271454 | Igsf21     |
| 5   | 162291239 | 162291379 | 1       | -0.181682  | 5    | 0.00023  | 0.0031   | 0.26791  | 0.44959 | 0.00102405  | Intragenic | NM_001271454 | Igsf21     |
| 5   | 162393025 | 162393116 | 1       | -0.12813   | 5    | 0.014    | 0.13     | 0.29182  | 0.41995 | 0.029850603 | Intragenic | NM_001271454 | Igsf21     |
| 5   | 162404406 | 162404482 | 1       | -0.0876    | 5    | 0.0024   | 0.025    | 0.089559 | 0.17716 | 0.00705499  | Intragenic | NM_001271454 | Igsf21     |
| 5   | 162407519 | 162407621 | 1       | -0.151737  | 5    | 0.00036  | 0.00014  | 0.13537  | 0.2871  | 0.001486639 | Intragenic | NM_001271454 | Igsf21     |
| 5   | 162513830 | 162513916 | 1       | -0.184765  | 5    | 0.00019  | 0.00053  | 0.38947  | 0.57423 | 0.000879857 | Intergenic | NA           | NA         |
| 5   | 162517099 | 162517229 | 1       | -0.140491  | 7    | 0.0015   | 0.0035   | 0.58265  | 0.72314 | 0.004849475 | Intergenic | NA           | NA         |

| chr | start     | stop      | q-value | methy.diff | CpGs | pMWU     | p2DKS    | MCWLS    | MCWHS    | pMWU.fdr    | cgi.type   | transcript             | gene        |
|-----|-----------|-----------|---------|------------|------|----------|----------|----------|----------|-------------|------------|------------------------|-------------|
| 5   | 162597762 | 162597972 | 1       | -0.173293  | 9    | 6.40E-05 | 0.0002   | 0.39578  | 0.56908  | 0.000358884 | Intergenic | NA                     | NA          |
| 5   | 162709075 | 162709162 | 1       | -0.187439  | 5    | 1.90E-06 | 7.00E-05 | 0.097553 | 0.28499  | 2.01E-05    | Intergenic | NA                     | NA          |
| 5   | 162713205 | 162713379 | 1       | -0.103028  | 9    | 0.00079  | 0.024    | 0.22731  | 0.33033  | 0.002866309 | Intergenic | NA                     | NA          |
| 5   | 162742087 | 162742696 | 1       | -0.061984  | 10   | 0.0026   | 0.0058   | 0.19239  | 0.25437  | 0.007616821 | Intergenic | NA                     | NA          |
| 5   | 162804012 | 162804159 | 1       | -0.153319  | 5    | 0.00021  | 0.0053   | 0.093547 | 0.24687  | 0.000951214 | Intergenic | NA                     | NA          |
| 5   | 162845495 | 162845574 | 0.0022  | -0.2447    | 5    | 6.30E-08 | 6.80E-09 | 0.072241 | 0.31694  | 1.18E-06    | Intergenic | NA                     | NA          |
| 5   | 162845589 | 162845699 | 1       | -0.157438  | 5    | 1.00E-05 | 0.00014  | 0.076533 | 0.23397  | 7.82E-05    | Intergenic | NA                     | NA          |
| 5   | 162872691 | 162872810 | 1       | -0.161528  | 5    | 0.0074   | 0.037    | 0.2368   | 0.39833  | 0.017853001 | Intergenic | NA                     | NA          |
| 5   | 162942033 | 162942091 | 1       | -0.170489  | 5    | 0.014    | 0.088    | 0.34566  | 0.51615  | 0.029850603 | Intergenic | NA                     | NA          |
| 5   | 163056899 | 163056993 | 1       | -0.238443  | 5    | 8.80E-05 | 0.00052  | 0.31513  | 0.55357  | 0.000466886 | Intragenic | NM_019332              | Padi1       |
| 5   | 163100275 | 163100409 | 1       | 0.124256   | 5    | 0.017    | 0.038    | 0.57746  | 0.45321  | 0.034796287 | Intergenic | NA                     | NA          |
| 5   | 163175862 | 163175961 | 1       | -0.055472  | 5    | 0.025    | 0.024    | 0.069059 | 0.12453  | 0.047453009 | Intragenic | NM_017226              | Padi2       |
| 5   | 163359265 | 163359306 | 1       | -0.176671  | 5    | 0.0035   | 0.015    | 0.098687 | 0.27536  | 0.009686665 | Intragenic | NM_001114599:NR_102345 | Szrd1:Szrd1 |
| 5   | 163539730 | 163539907 | 0.023   | -0.21482   | 7    | 1.20E-08 | 7.00E-08 | 0.038123 | 0.25294  | 2.88E-07    | Intergenic | NA                     | NA          |
| 5   | 163564948 | 163564994 | 1       | -0.156076  | 5    | 0.0014   | 0.0018   | 0.22007  | 0.37615  | 0.004540837 | Intragenic | NM_001108977           | Epha2       |
| 5   | 163565095 | 163565374 | 0.016   | -0.358158  | 13   | 5.80E-12 | 4.90E-08 | 0.168    | 0.52616  | 3.71E-10    | Intragenic | NM_001108977           | Epha2       |
| 5   | 163565753 | 163565896 | 1       | -0.293295  | 5    | 3.70E-06 | 7.00E-05 | 0.13803  | 0.43132  | 3.46E-05    | Intragenic | NM_001108977           | Epha2       |
| 5   | 163573427 | 163573734 | 0.00044 | -0.311811  | 15   | 8.80E-14 | 1.40E-09 | 0.12137  | 0.43318  | 9.61E-12    | Intragenic | NM_001108977           | Epha2       |
| 5   | 163590458 | 163590883 | 1       | -0.193304  | 5    | 0.0074   | 0.0093   | 0.17499  | 0.36829  | 0.017853001 | Intergenic | NA                     | NA          |
| 5   | 163640245 | 163640399 | 1       | -0.052163  | 7    | 0.0017   | 0.056    | 0.057228 | 0.10939  | 0.005339493 | Intergenic | NA                     | NA          |
| 5   | 163646483 | 163646637 | 1       | -0.051862  | 7    | 0.0017   | 0.056    | 0.05753  | 0.10939  | 0.005339493 | Intergenic | NA                     | NA          |
| 5   | 163673046 | 163673118 | 1       | -0.14905   | 5    | 0.00021  | 0.0032   | 0.57761  | 0.72666  | 0.000951214 | Intragenic | NM_173103              | Clnkb       |
| 5   | 163693030 | 163693081 | 1       | -0.129663  | 5    | 0.0019   | 0.0055   | 0.070946 | 0.20061  | 0.005855937 | Intergenic | NA                     | NA          |
| 5   | 163827114 | 163827351 | 1       | -0.141054  | 7    | 0.002    | 0.012    | 0.18583  | 0.32689  | 0.006079939 | Intergenic | NA                     | NA          |
| 5   | 163888985 | 163889220 | 1       | -0.121211  | 8    | 2.60E-06 | 0.001    | 0.08284  | 0.20405  | 2.60E-05    | Intergenic | NA                     | NA          |
| 5   | 163893662 | 163894049 | 0.21    | -0.236319  | 14   | 1.50E-11 | 6.50E-07 | 0.19273  | 0.42905  | 8.08E-10    | TSS        | NM_001013936           | Slc25a34    |
| 5   | 163894119 | 163894518 | 1       | -0.112025  | 5    | 0.0027   | 0.015    | 0.10254  | 0.21456  | 0.007840962 | TSS        | NM_001013936           | Slc25a34    |
| 5   | 163922647 | 163922715 | 1       | -0.148115  | 5    | 0.00026  | 0.0032   | 0.58354  | 0.73165  | 0.001130807 | Intragenic | NM_001191767           | Plekhm2     |
| 5   | 164014046 | 164014323 | 1       | -0.149488  | 5    | 0.023    | 0.039    | 0.18415  | 0.33364  | 0.04441443  | Intergenic | NA                     | NA          |
| 5   | 164019333 | 164019390 | 1       | -0.124795  | 5    | 0.00015  | 0.0055   | 0.13751  | 0.2623   | 0.000724207 | TSS        | NM_001048185           | Agmat       |
| 5   | 164019456 | 164019524 | 1       | -0.091294  | 5    | 0.01     | 0.088    | 0.16725  | 0.25855  | 0.02275947  | TSS        | NM_001048185           | Agmat       |
| 5   | 164088086 | 164088349 | 1       | -0.084199  | 10   | 0.011    | 0.092    | 0.15202  | 0.23622  | 0.02463877  | Intragenic | NM_012553              | Cela2a      |
| 5   | 164161639 | 164161775 | 0.096   | -0.067933  | 7    | 9.20E-08 | 3.00E-07 | 0.02679  | 0.094723 | 1.63E-06    | Intergenic | NA                     | NA          |
| 5   | 164207379 | 164207473 | 1       | -0.120448  | 5    | 0.014    | 0.13     | 0.56012  | 0.68057  | 0.029850603 | Intergenic | NA                     | NA          |
| 5   | 164213644 | 164213680 | 1       | -0.302488  | 5    | 2.90E-06 | 3.30E-05 | 0.24661  | 0.5491   | 2.84E-05    | Intergenic | NA                     | NA          |
| 5   | 164294724 | 164294919 | 1       | -0.174722  | 7    | 3.40E-05 | 0.00049  | 0.085707 | 0.26043  | 0.000214477 | Intragenic | NM_001109273           | Tmem51      |
| 5   | 164327254 | 164327345 | 1       | -0.135259  | 5    | 0.00029  | 0.0093   | 0.13788  | 0.27314  | 0.001239307 | Intragenic | NM_001109273           | Tmem51      |
| 5   | 164364553 | 164364667 | 1       | -0.165291  | 7    | 0.0004   | 0.018    | 0.20636  | 0.37165  | 0.00162337  | Intergenic | NA                     | NA          |

| chr | start     | stop      | q-value  | methy.diff | CpGs | pMWU     | p2DKS    | MCWLS    | MCWHS   | pMWU.fdr    | cgi.type   | transcript   | gene     |
|-----|-----------|-----------|----------|------------|------|----------|----------|----------|---------|-------------|------------|--------------|----------|
| 5   | 164373088 | 164373169 | 1        | -0.11231   | 5    | 0.0063   | 0.0018   | 0.18969  | 0.302   | 0.015629046 | Intergenic | NA           | NA       |
| 5   | 164457238 | 164457338 | 1        | -0.212691  | 7    | 7.70E-08 | 8.80E-06 | 0.19705  | 0.40974 | 1.41E-06    | Intragenic | NM_001014070 | Kazn     |
| 5   | 164513684 | 164513879 | 1        | -0.124541  | 5    | 0.025    | 0.087    | 0.064089 | 0.18863 | 0.047453009 | Intragenic | NM_001014070 | Kazn     |
| 5   | 164542067 | 164542163 | 1        | -0.165875  | 5    | 0.00012  | 0.00098  | 0.26701  | 0.43288 | 0.000603617 | Intragenic | NM_001014070 | Kazn     |
| 5   | 164780772 | 164780968 | 1        | -0.175404  | 6    | 0.00036  | 0.018    | 0.18031  | 0.35571 | 0.001486639 | Intergenic | NA           | NA       |
| 5   | 164789556 | 164789588 | 1        | -0.145252  | 5    | 0.0053   | 0.015    | 0.53238  | 0.67763 | 0.013591571 | Intergenic | NA           | NA       |
| 5   | 165257222 | 165257341 | 1        | -0.121022  | 5    | 0.0063   | 0.087    | 0.22888  | 0.3499  | 0.015629046 | Intergenic | NA           | NA       |
| 5   | 165678291 | 165678376 | 1        | -0.076838  | 5    | 0.021    | 0.038    | 0.057417 | 0.13425 | 0.041207871 | TSS        | NM_019358    | Pdpm     |
| 5   | 166755987 | 166756098 | 1        | -0.256773  | 5    | 0.00065  | 0.0091   | 0.36524  | 0.62201 | 0.002426546 | Intragenic | NM_001108006 | Vps13d   |
| 5   | 167011736 | 167011851 | 1        | -0.097348  | 5    | 0.014    | 0.087    | 0.60944  | 0.70678 | 0.029850603 | Intergenic | NA           | NA       |
| 5   | 168152937 | 168153130 | 1        | -0.263443  | 5    | 0.0017   | 0.015    | 0.37805  | 0.6415  | 0.005339493 | Intergenic | NA           | NA       |
| 5   | 168385147 | 168385339 | 0.012    | -0.21322   | 12   | 3.40E-09 | 3.70E-08 | 0.14188  | 0.3551  | 9.33E-08    | Intragenic | NM_053827    | Plod1    |
| 5   | 168549043 | 168549090 | 1        | -0.266642  | 5    | 6.30E-06 | 7.10E-05 | 0.267    | 0.53364 | 5.33E-05    | Intragenic | NM_001007654 | Agtrap   |
| 5   | 168577218 | 168577380 | 0.094    | -0.187995  | 7    | 1.30E-08 | 2.90E-07 | 0.052318 | 0.24031 | 3.10E-07    | Intergenic | NA           | NA       |
| 5   | 168600350 | 168600489 | 1        | -0.08355   | 5    | 0.025    | 0.088    | 0.12788  | 0.21143 | 0.047453009 | Intergenic | NA           | NA       |
| 5   | 168614800 | 168614920 | 1        | -0.23611   | 5    | 0.00054  | 0.015    | 0.27916  | 0.51527 | 0.002077867 | Intragenic | NM_138917    | Fbxo6    |
| 5   | 168709630 | 168709830 | 1        | -0.162645  | 9    | 0.0024   | 0.044    | 0.38532  | 0.54796 | 0.00705499  | Intergenic | NA           | NA       |
| 5   | 168740700 | 168740722 | 1        | -0.187009  | 5    | 4.40E-05 | 0.00053  | 0.23212  | 0.41913 | 0.000263321 | Intergenic | NA           | NA       |
| 5   | 168754149 | 168754195 | 1        | 0.131167   | 5    | 0.012    | 0.058    | 0.40253  | 0.27136 | 0.026435197 | Intergenic | NA           | NA       |
| 5   | 168783044 | 168783193 | 1        | -0.224412  | 5    | 0.0094   | 0.0031   | 0.12732  | 0.35173 | 0.021723038 | Intergenic | NA           | NA       |
| 5   | 169064337 | 169064435 | 1        | -0.20221   | 5    | 0.0029   | 0.059    | 0.33791  | 0.54012 | 0.008293503 | Intragenic | NM_053464    | Srm      |
| 5   | 169193623 | 169193690 | 1        | -0.139771  | 5    | 0.00048  | 0.00027  | 0.091976 | 0.23175 | 0.001881331 | Intergenic | NA           | NA       |
| 5   | 169346656 | 169346934 | 1        | -0.102759  | 8    | 0.022    | 0.051    | 0.36937  | 0.47213 | 0.043064669 | Intergenic | NA           | NA       |
| 5   | 169410822 | 169411133 | 1        | -0.151287  | 9    | 0.024    | 0.046    | 0.48395  | 0.63524 | 0.046241462 | Intergenic | NA           | NA       |
| 5   | 169424577 | 169424605 | 1        | 0.132587   | 5    | 7.80E-05 | 0.0017   | 0.41699  | 0.2844  | 0.000422981 | Intergenic | NA           | NA       |
| 5   | 169424611 | 169424651 | 1        | 0.070738   | 5    | 0.0035   | 0.015    | 0.31157  | 0.24084 | 0.009686665 | Intergenic | NA           | NA       |
| 5   | 169424719 | 169424848 | 1        | -0.126675  | 5    | 0.02     | 0.25     | 0.24834  | 0.37501 | 0.039778219 | Intergenic | NA           | NA       |
| 5   | 169424869 | 169424959 | 1        | -0.087755  | 14   | 0.00041  | 0.00065  | 0.1262   | 0.20451 | 0.001662832 | Intergenic | NA           | NA       |
| 5   | 169425026 | 169425148 | 0.56     | -0.145878  | 10   | 3.50E-10 | 1.70E-06 | 0.14783  | 0.29371 | 1.34E-08    | Intergenic | NA           | NA       |
| 5   | 170164786 | 170165171 | 1        | -0.105407  | 5    | 3.10E-05 | 0.00098  | 0.043987 | 0.14939 | 0.000197418 | Intergenic | NA           | NA       |
| 5   | 170207362 | 170207495 | 1        | -0.151651  | 5    | 0.019    | 0.25     | 0.50769  | 0.65934 | 0.038322088 | Intragenic | NM_001007092 | Clstn1   |
| 5   | 170209789 | 170209899 | 1        | -0.299197  | 5    | 1.20E-05 | 0.00026  | 0.27243  | 0.57163 | 9.15E-05    | Intragenic | NM_001007092 | Clstn1   |
| 5   | 170275268 | 170276150 | 3.60E-12 | -0.13995   | 46   | 4.20E-14 | 1.10E-17 | 0.091111 | 0.23106 | 6.64E-12    | TSS        | NM_001108978 | Pik3cd   |
| 5   | 170285928 | 170286057 | 1        | -0.200729  | 5    | 0.0074   | 0.0018   | 0.19094  | 0.39167 | 0.017853001 | Intergenic | NA           | NA       |
| 5   | 170351870 | 170352003 | 1        | -0.090802  | 5    | 0.002    | 0.015    | 0.13464  | 0.22544 | 0.006079939 | Intragenic | NM_001127574 | Slc25a33 |
| 5   | 170496055 | 170496227 | 1        | -0.144026  | 9    | 0.0079   | 0.034    | 0.23832  | 0.38235 | 0.018998259 | Intergenic | NA           | NA       |
| 5   | 170512687 | 170512813 | 1        | -0.077288  | 8    | 0.0028   | 0.037    | 0.14581  | 0.2231  | 0.008113721 | Intergenic | NA           | NA       |
| 5   | 170575413 | 170575530 | 1        | -0.268973  | 5    | 3.70E-07 | 3.40E-06 | 0.10559  | 0.37457 | 5.21E-06    | Intergenic | NA           | NA       |
| 5   | 170580550 | 170580884 | 1        | -0.107701  | 5    | 0.00014  | 0.0092   | 0.045623 | 0.15332 | 0.000684451 | Intergenic | NA           | NA       |

| chr | start     | stop      | q-value | methy.diff | CpGs | pMWU     | p2DKS    | MCWLS     | MCWHS    | pMWU.fdr    | cgi.type   | transcript             | gene        |
|-----|-----------|-----------|---------|------------|------|----------|----------|-----------|----------|-------------|------------|------------------------|-------------|
| 5   | 170614385 | 170614585 | 1       | -0.146832  | 7    | 0.011    | 0.077    | 0.51908   | 0.66591  | 0.02463877  | Intergenic | NA                     | NA          |
| 5   | 170661255 | 170661515 | 0.99    | -0.232457  | 10   | 1.20E-08 | 3.10E-06 | 0.1054    | 0.33786  | 2.88E-07    | Intragenic | NM_001106698           | H6pd        |
| 5   | 170859747 | 170859916 | 1       | -0.192295  | 6    | 0.0057   | 0.011    | 0.37422   | 0.56651  | 0.014573809 | Intragenic | NM_001134841           | Car6        |
| 5   | 171154860 | 171154924 | 1       | -0.20524   | 7    | 4.20E-05 | 0.00025  | 0.46504   | 0.67028  | 0.00025452  | Intragenic | NM_053885              | Rere        |
| 5   | 171385954 | 171385991 | 1       | -0.208839  | 5    | 1.90E-05 | 0.00027  | 0.17772   | 0.38656  | 0.000131674 | Intergenic | NA                     | NA          |
| 5   | 171497070 | 171497180 | 1       | -0.220803  | 5    | 0.002    | 0.0055   | 0.39676   | 0.61756  | 0.006079939 | Intergenic | NA                     | NA          |
| 5   | 171545522 | 171546011 | 1       | -0.121546  | 7    | 0.00043  | 0.005    | 0.12844   | 0.24998  | 0.001736911 | Intergenic | NA                     | NA          |
| 5   | 171739398 | 171739634 | 1       | -0.18122   | 14   | 6.60E-09 | 3.80E-06 | 0.21864   | 0.39986  | 1.72E-07    | Intragenic | NM_001195559           | Camta1      |
| 5   | 171747968 | 171748188 | 1       | -0.137519  | 14   | 0.00039  | 0.01     | 0.5364    | 0.67392  | 0.001587612 | Intragenic | NM_001195559           | Camta1      |
| 5   | 171789689 | 171789792 | 1       | -0.136743  | 5    | 2.20E-05 | 0.00098  | 0.1586    | 0.29534  | 0.000149617 | Intragenic | NM_001195559           | Camta1      |
| 5   | 171808482 | 171808611 | 1       | -0.242268  | 5    | 0.00021  | 0.00013  | 0.077775  | 0.32004  | 0.000951214 | Intragenic | NM_001195559           | Camta1      |
| 5   | 171829670 | 171829726 | 1       | -0.165315  | 5    | 0.0017   | 0.0054   | 0.16232   | 0.32763  | 0.005339493 | Intragenic | NM_001195559           | Camta1      |
| 5   | 171839846 | 171839949 | 1       | -0.128768  | 5    | 0.0094   | 0.058    | 0.21731   | 0.34608  | 0.021723038 | Intragenic | NM_001195559           | Camta1      |
| 5   | 171856317 | 171856472 | 1       | -0.095624  | 5    | 0.0035   | 0.038    | 0.14271   | 0.23833  | 0.009686665 | Intragenic | NM_001195559           | Camta1      |
| 5   | 171856839 | 171856985 | 1       | -0.152225  | 5    | 0.00088  | 0.038    | 0.28986   | 0.44209  | 0.003092094 | Intragenic | NM_001195559           | Camta1      |
| 5   | 171939996 | 171940198 | 1       | -0.230996  | 9    | 8.20E-06 | 0.0011   | 0.2823    | 0.5133   | 6.66E-05    | Intragenic | NM_001195559           | Camta1      |
| 5   | 172018886 | 172018970 | 1       | -0.236175  | 7    | 1.40E-07 | 8.60E-05 | 0.19026   | 0.42643  | 2.25E-06    | Intragenic | NM_001195559           | Camta1      |
| 5   | 172079227 | 172079454 | 1       | -0.112973  | 7    | 0.0096   | 0.039    | 0.36031   | 0.47329  | 0.022155406 | Intragenic | NM_001195559           | Camta1      |
| 5   | 172162479 | 172162543 | 1       | -0.160804  | 5    | 0.00032  | 0.0031   | 0.24547   | 0.40628  | 0.001346443 | Intragenic | NM_001195559           | Camta1      |
| 5   | 172174521 | 172174817 | 1       | -0.111396  | 12   | 1.60E-07 | 0.00014  | 0.10163   | 0.21302  | 2.51E-06    | Intragenic | NM_001195559           | Camta1      |
| 5   | 172273696 | 172274194 | 1       | -0.15881   | 13   | 0.00038  | 0.0046   | 0.27675   | 0.43556  | 0.001566539 | Intragenic | NM_001195559           | Camta1      |
| 5   | 172319188 | 172319303 | 1       | -0.109976  | 5    | 0.0058   | 0.058    | 0.11335   | 0.22333  | 0.014624129 | Intragenic | NM_001195559           | Camta1      |
| 5   | 172369584 | 172369723 | 1       | -0.133606  | 12   | 1.30E-05 | 0.00043  | 0.25162   | 0.38522  | 9.66E-05    | Intragenic | NM_001195559           | Camta1      |
| 5   | 172442401 | 172442579 | 1       | -0.155816  | 5    | 0.0068   | 0.088    | 0.21816   | 0.37398  | 0.016642688 | Intragenic | NM_001195559           | Camta1      |
| 5   | 172600257 | 172600849 | 1       | -0.112781  | 14   | 0.00013  | 0.0011   | 0.27953   | 0.39231  | 0.000648758 | Intergenic | NA                     | NA          |
| 5   | 172609206 | 172609255 | 0.015   | -0.055864  | 5    | 2.40E-07 | 4.50E-08 | 0.0064646 | 0.062329 | 3.57E-06    | Intergenic | NA                     | NA          |
| 5   | 172827784 | 172827826 | 1       | -0.128705  | 7    | 0.0014   | 0.013    | 0.3228    | 0.4515   | 0.004540837 | Intragenic | NM_201272              | Plekhg5     |
| 5   | 172832191 | 172832296 | 1       | -0.168825  | 5    | 0.0032   | 0.024    | 0.21266   | 0.38148  | 0.008990975 | Intragenic | NM_201272              | Plekhg5     |
| 5   | 172838608 | 172838979 | 0.48    | -0.16634   | 11   | 9.50E-10 | 1.50E-06 | 0.10831   | 0.27465  | 3.19E-08    | Intragenic | NM_201272              | Plekhg5     |
| 5   | 172859601 | 172859662 | 1       | -0.170873  | 5    | 7.80E-05 | 0.00053  | 0.22282   | 0.39369  | 0.000422981 | Intragenic | NM_019622              | Espn        |
| 5   | 172998453 | 172998601 | 1       | -0.159593  | 8    | 0.00046  | 0.0039   | 0.24243   | 0.40202  | 0.001836485 | Intragenic | NM_013214:NM_001146061 | Acot7:Acot7 |
| 5   | 173017497 | 173017589 | 1       | -0.110161  | 5    | 0.0032   | 0.058    | 0.11534   | 0.2255   | 0.008990975 | Intergenic | NA                     | NA          |
| 5   | 173018116 | 173018168 | 1       | -0.058587  | 5    | 0.0087   | 0.025    | 0.050834  | 0.10942  | 0.020391633 | Intergenic | NA                     | NA          |
| 5   | 173052708 | 173053020 | 1       | -0.095401  | 15   | 0.0019   | 0.02     | 0.24564   | 0.34104  | 0.005855937 | Intergenic | NA                     | NA          |
| 5   | 173118626 | 173118661 | 1       | -0.149001  | 5    | 0.00048  | 0.0032   | 0.39431   | 0.54331  | 0.001881331 | Intragenic | NM_001271226           | Chd5        |
| 5   | 173153030 | 173153185 | 0.013   | -0.208121  | 9    | 2.30E-10 | 4.00E-08 | 0.14831   | 0.35643  | 9.34E-09    | Intragenic | NM_017304              | Kcnab2      |
| 5   | 173171471 | 173171621 | 0.00088 | -0.194177  | 7    | 3.00E-09 | 2.70E-09 | 0.11527   | 0.30945  | 8.36E-08    | Intragenic | NM_017304              | Kcnab2      |
| 5   | 173260978 | 173261145 | 1       | -0.156516  | 5    | 0.015    | 0.18     | 0.26179   | 0.4183   | 0.031584896 | Intragenic | NM_001037650           | Nphp4       |

| chr | start     | stop      | q-value | methy.diff | CpGs | pMWU     | p2DKS    | MCWLS    | MCWHS   | pMWU.fdr    | cgi.type   | transcript   | gene    |
|-----|-----------|-----------|---------|------------|------|----------|----------|----------|---------|-------------|------------|--------------|---------|
| 5   | 173527775 | 173527842 | 1       | -0.170655  | 5    | 0.00026  | 0.0032   | 0.19607  | 0.36672 | 0.001130807 | Intergenic | NA           | NA      |
| 5   | 173920944 | 173921081 | 1       | -0.138542  | 7    | 0.0072   | 0.053    | 0.39239  | 0.53093 | 0.017539509 | Intergenic | NA           | NA      |
| 5   | 173974948 | 173975092 | 0.01    | -0.150763  | 10   | 2.50E-12 | 3.10E-08 | 0.031363 | 0.18213 | 1.73E-10    | Intergenic | NA           | NA      |
| 5   | 174020593 | 174020679 | 1       | -0.111451  | 7    | 0.025    | 0.076    | 0.28157  | 0.39302 | 0.047453009 | Intergenic | NA           | NA      |
| 5   | 174189741 | 174190064 | 1       | -0.154274  | 8    | 0.00013  | 0.011    | 0.15579  | 0.31006 | 0.000648758 | Intragenic | NM_001101014 | Ajap1   |
| 5   | 174195665 | 174195736 | 1       | 0.20873    | 5    | 0.00044  | 0.0092   | 0.53452  | 0.32579 | 0.001760146 | TSS        | NM_001101014 | Ajap1   |
| 5   | 174203713 | 174203866 | 1       | -0.158319  | 5    | 0.01     | 0.015    | 0.33763  | 0.49595 | 0.02275947  | Intergenic | NA           | NA      |
| 5   | 174240138 | 174240402 | 1       | -0.127443  | 12   | 1.80E-05 | 0.00089  | 0.16246  | 0.28991 | 0.000127015 | Intergenic | NA           | NA      |
| 5   | 174350201 | 174350347 | 1       | -0.121503  | 8    | 0.0064   | 0.094    | 0.29593  | 0.41743 | 0.015860755 | Intergenic | NA           | NA      |
| 5   | 174387009 | 174387110 | 1       | -0.11548   | 5    | 0.008    | 0.015    | 0.43753  | 0.55301 | 0.019059477 | Intergenic | NA           | NA      |
| 5   | 174482434 | 174482564 | 1       | -0.092586  | 5    | 0.015    | 0.0088   | 0.20399  | 0.29657 | 0.031584896 | Intergenic | NA           | NA      |
| 5   | 174727726 | 174727845 | 1       | -0.132029  | 5    | 0.0008   | 0.015    | 0.12286  | 0.25489 | 0.002866309 | Intergenic | NA           | NA      |
| 5   | 175145033 | 175145151 | 1       | -0.139811  | 7    | 4.80E-05 | 0.00042  | 0.04913  | 0.18894 | 0.000285411 | Intergenic | NA           | NA      |
| 5   | 175150047 | 175150166 | 1       | -0.124445  | 5    | 0.0045   | 0.015    | 0.14446  | 0.26891 | 0.011905878 | Intergenic | NA           | NA      |
| 5   | 175153539 | 175153615 | 1       | -0.162615  | 5    | 0.014    | 0.039    | 0.24694  | 0.40955 | 0.029850603 | Intergenic | NA           | NA      |
| 5   | 175163683 | 175163746 | 1       | -0.202128  | 5    | 0.011    | 0.038    | 0.36045  | 0.56257 | 0.02463877  | Intergenic | NA           | NA      |
| 5   | 175236698 | 175236788 | 1       | -0.100301  | 7    | 3.00E-06 | 5.40E-05 | 0.049936 | 0.15024 | 2.93E-05    | Intergenic | NA           | NA      |
| 5   | 175254687 | 175254841 | 1       | -0.193992  | 5    | 0.0094   | 0.024    | 0.22597  | 0.41996 | 0.021723038 | Intergenic | NA           | NA      |
| 5   | 175342356 | 175342527 | 0.00046 | -0.265522  | 9    | 1.00E-10 | 1.40E-09 | 0.17356  | 0.43908 | 4.52E-09    | Intergenic | NA           | NA      |
| 5   | 175347979 | 175348007 | 1       | -0.177117  | 5    | 5.60E-05 | 0.00052  | 0.51214  | 0.68926 | 0.000320912 | Intergenic | NA           | NA      |
| 5   | 175395871 | 175396024 | 1       | -0.105517  | 12   | 0.00083  | 0.0027   | 0.50785  | 0.61337 | 0.002961434 | Intergenic | NA           | NA      |
| 5   | 175462992 | 175463080 | 1       | -0.174696  | 5    | 0.00019  | 0.0031   | 0.12018  | 0.29488 | 0.000879857 | Intergenic | NA           | NA      |
| 5   | 175566982 | 175567063 | 1       | -0.160435  | 5    | 0.014    | 0.088    | 0.4067   | 0.56714 | 0.029850603 | Intergenic | NA           | NA      |
| 5   | 175573013 | 175573110 | 1       | -0.348723  | 7    | 0.00021  | 5.20E-05 | 0.32871  | 0.67744 | 0.000951214 | Intergenic | NA           | NA      |
| 5   | 175579682 | 175579941 | 1       | -0.175724  | 5    | 0.0038   | 0.0054   | 0.49887  | 0.67459 | 0.010352437 | Intergenic | NA           | NA      |
| 5   | 175612138 | 175612564 | 1       | -0.228939  | 9    | 9.40E-08 | 1.70E-05 | 0.17125  | 0.40019 | 1.66E-06    | Intergenic | NA           | NA      |
| 5   | 175666257 | 175666478 | 1       | -0.232528  | 9    | 1.60E-06 | 0.00013  | 0.34383  | 0.57636 | 1.75E-05    | Intergenic | NA           | NA      |
| 5   | 175674340 | 175674649 | 1       | -0.108499  | 17   | 1.60E-06 | 8.20E-05 | 0.1409   | 0.2494  | 1.75E-05    | Intergenic | NA           | NA      |
| 5   | 175817761 | 175817970 | 1       | -0.055023  | 9    | 0.021    | 0.11     | 0.061896 | 0.11692 | 0.041207871 | Intergenic | NA           | NA      |
| 5   | 175917261 | 175917378 | 1       | -0.219569  | 5    | 0.0024   | 0.015    | 0.40441  | 0.62398 | 0.00705499  | Intergenic | NA           | NA      |
| 5   | 175927666 | 175927769 | 1       | -0.194475  | 5    | 0.0038   | 0.088    | 0.45513  | 0.64961 | 0.010352437 | TSS        | NM_001109405 | Pex10   |
| 5   | 176007014 | 176007141 | 1       | -0.063363  | 6    | 0.012    | 0.084    | 0.10922  | 0.17258 | 0.026435197 | Intergenic | NA           | NA      |
| 5   | 176080610 | 176080914 | 1       | -0.091179  | 5    | 0.0068   | 0.059    | 0.059785 | 0.15096 | 0.016642688 | Intergenic | NA           | NA      |
| 5   | 176209548 | 176209586 | 1       | -0.142464  | 5    | 0.02     | 0.015    | 0.46668  | 0.60914 | 0.039778219 | Intragenic | NM_022507    | Prkcz   |
| 5   | 176360722 | 176360867 | 1       | -0.09056   | 5    | 0.00039  | 0.0092   | 0.046613 | 0.13717 | 0.001587612 | Intergenic | NA           | NA      |
| 5   | 176556214 | 176556357 | 1       | -0.123181  | 7    | 0.014    | 0.055    | 0.45551  | 0.57869 | 0.029850603 | TSS        | NM_053606    | Mmp23   |
| 5   | 176693861 | 176693930 | 1       | -0.277615  | 5    | 1.50E-06 | 7.50E-06 | 0.0845   | 0.36211 | 1.65E-05    | Intragenic | NM_001013938 | Vwa1    |
| 5   | 176714055 | 176714256 | 1       | -0.146605  | 11   | 5.80E-08 | 5.20E-05 | 0.094231 | 0.24084 | 1.17E-06    | TSS        | NM_001109427 | Ankrd65 |
| 5   | 176866585 | 176866839 | 1       | -0.122796  | 14   | 0.00014  | 0.0017   | 0.24401  | 0.36681 | 0.000684451 | TSS        | NM_001108000 | Fam132a |

| chr | start     | stop      | q-value  | methy.diff | CpGs | pMWU     | p2DKS    | MCWLS    | MCWHS   | pMWU.fdr    | cgi.type   | transcript                                                                                                                                        | gene                                                         |
|-----|-----------|-----------|----------|------------|------|----------|----------|----------|---------|-------------|------------|---------------------------------------------------------------------------------------------------------------------------------------------------|--------------------------------------------------------------|
| 5   | 176868768 | 176868867 | 0.044    | -0.386894  | 7    | 1.60E-09 | 1.40E-07 | 0.11218  | 0.49908 | 5.01E-08    | Intragenic | NM_001108000                                                                                                                                      | Fam132a                                                      |
| 5   | 176934575 | 176934805 | 1        | -0.100261  | 6    | 0.0042   | 0.04     | 0.11776  | 0.21802 | 0.011250869 | TSS        | NM_001024349                                                                                                                                      | Tnfrsf18                                                     |
| 5   | 176967481 | 176967805 | 1        | -0.155567  | 5    | 0.021    | 0.18     | 0.18318  | 0.33875 | 0.041207871 | TSS        | NR_132445                                                                                                                                         | LOC106182250                                                 |
| 6   | 726983    | 727111    | 1        | -0.124679  | 5    | 0.015    | 0.039    | 0.11735  | 0.24203 | 0.031584896 | Intergenic | NA                                                                                                                                                | NA                                                           |
| 6   | 863442    | 863498    | 1        | -0.237692  | 5    | 3.50E-05 | 0.00013  | 0.33883  | 0.57652 | 0.000218038 | Intragenic | NM_001169103                                                                                                                                      | Crim1                                                        |
| 6   | 883569    | 883676    | 0.2      | -0.311406  | 7    | 1.20E-08 | 6.10E-07 | 0.19944  | 0.51085 | 2.88E-07    | Intragenic | NM_001169103                                                                                                                                      | Crim1                                                        |
| 6   | 1012828   | 1012987   | 1        | -0.081823  | 5    | 0.014    | 0.039    | 0.12904  | 0.21086 | 0.029850603 | Intergenic | NA                                                                                                                                                | NA                                                           |
| 6   | 1038511   | 1038594   | 1        | -0.228286  | 7    | 7.70E-06 | 0.00029  | 0.18879  | 0.41708 | 6.32E-05    | Intergenic | NA                                                                                                                                                | NA                                                           |
| 6   | 2430912   | 2431218   | 1        | -0.14835   | 11   | 0.00092  | 0.015    | 0.28071  | 0.42906 | 0.00322604  | Intergenic | NA                                                                                                                                                | NA                                                           |
| 6   | 2632302   | 2632416   | 1        | -0.109719  | 5    | 0.0074   | 0.0018   | 0.53441  | 0.64413 | 0.017853001 | Intergenic | NA                                                                                                                                                | NA                                                           |
| 6   | 2892357   | 2892454   | 0.77     | -0.270148  | 7    | 3.70E-08 | 2.40E-06 | 0.19071  | 0.46086 | 7.87E-07    | Intergenic | NA                                                                                                                                                | NA                                                           |
| 6   | 2923006   | 2923053   | 1        | -0.270455  | 5    | 4.20E-07 | 7.60E-06 | 0.04073  | 0.31118 | 5.76E-06    | Intragenic | NM_001191907                                                                                                                                      | Dhx57                                                        |
| 6   | 3021333   | 3021432   | 1        | -0.079796  | 5    | 0.008    | 0.00052  | 0.81335  | 0.89314 | 0.019059477 | Intergenic | NA                                                                                                                                                | NA                                                           |
| 6   | 3517752   | 3517840   | 1        | -0.230021  | 5    | 1.20E-05 | 0.00098  | 0.15189  | 0.38191 | 9.15E-05    | Intergenic | NA                                                                                                                                                | NA                                                           |
| 6   | 3600221   | 3600338   | 0.089    | -0.241934  | 5    | 9.90E-08 | 2.80E-07 | 0.061482 | 0.30342 | 1.72E-06    | Intergenic | NA                                                                                                                                                | NA                                                           |
| 6   | 3624568   | 3624779   | 1        | -0.059472  | 11   | 0.00092  | 0.01     | 0.052754 | 0.11223 | 0.00322604  | TSS        | NM_001004282                                                                                                                                      | Tmem178a                                                     |
| 6   | 3682631   | 3682852   | 1        | -0.204538  | 9    | 3.00E-06 | 0.0002   | 0.1387   | 0.34324 | 2.93E-05    | Intragenic | NM_001004282                                                                                                                                      | Tmem178a                                                     |
| 6   | 4006341   | 4006444   | 1        | -0.064743  | 7    | 0.0062   | 0.056    | 0.39356  | 0.4583  | 0.015570617 | Intergenic | NA                                                                                                                                                | NA                                                           |
| 6   | 4377702   | 4377899   | 1        | -0.165406  | 7    | 2.20E-06 | 5.50E-05 | 0.093424 | 0.25883 | 2.27E-05    | Intragenic | NM_001270772:N<br>M_001270773:N<br>M_001270774:N<br>M_001270775:N<br>M_001270776:N<br>M_001270777:N<br>M_001270778:N<br>M_001270779:N<br>M_019268 | Slc8a1:Slc8a1:<br>Slc8a1:Slc8a1:<br>Slc8a1:Slc8a1:<br>Slc8a1 |
| 6   | 4778585   | 4778635   | 1        | -0.110597  | 5    | 0.0016   | 0.0031   | 0.67588  | 0.78648 | 0.005100053 | Intergenic | NA                                                                                                                                                | NA                                                           |
| 6   | 6138299   | 6138351   | 0.48     | -0.363752  | 6    | 3.30E-08 | 1.50E-06 | 0.31254  | 0.67629 | 7.16E-07    | Intergenic | NA                                                                                                                                                | NA                                                           |
| 6   | 6255957   | 6256059   | 1        | -0.106998  | 5    | 0.00029  | 0.0054   | 0.099471 | 0.20647 | 0.001239307 | Intergenic | NA                                                                                                                                                | NA                                                           |
| 6   | 6286159   | 6286309   | 1        | -0.2617    | 5    | 0.0063   | 0.0092   | 0.24858  | 0.51028 | 0.015629046 | Intergenic | NA                                                                                                                                                | NA                                                           |
| 6   | 6305200   | 6305318   | 1        | -0.218249  | 5    | 0.00044  | 0.00098  | 0.062556 | 0.28081 | 0.001760146 | Intergenic | NA                                                                                                                                                | NA                                                           |
| 6   | 6419407   | 6419507   | 1        | -0.241349  | 7    | 3.90E-05 | 0.00045  | 0.31724  | 0.55859 | 0.000237659 | Intergenic | NA                                                                                                                                                | NA                                                           |
| 6   | 6421653   | 6421789   | 1        | -0.16058   | 5    | 0.0074   | 0.038    | 0.31983  | 0.48041 | 0.017853001 | Intergenic | NA                                                                                                                                                | NA                                                           |
| 6   | 6640975   | 6641127   | 5.50E-05 | -0.271206  | 9    | 3.70E-12 | 1.70E-10 | 0.28598  | 0.55719 | 2.43E-10    | Intergenic | NA                                                                                                                                                | NA                                                           |
| 6   | 7005923   | 7006034   | 1        | -0.137078  | 7    | 6.00E-05 | 0.00081  | 0.16224  | 0.29932 | 0.000341554 | TSS        | NM_020076                                                                                                                                         | Hao                                                          |
| 6   | 7007205   | 7007420   | 1        | -0.114145  | 7    | 2.20E-05 | 0.00049  | 0.066637 | 0.18078 | 0.000149617 | TSS        | NM_020076                                                                                                                                         | Hao                                                          |
| 6   | 7293196   | 7293324   | 1        | -0.072392  | 7    | 0.0046   | 0.017    | 0.097338 | 0.16973 | 0.012157071 | Intergenic | NA                                                                                                                                                | NA                                                           |



| chr | start    | stop     | q-value | methy.diff | CpGs | pMWU     | p2DKS    | MCWLS    | MCWHS    | pMWU.fdr    | cgi.type   | transcript                                  | gene                  |
|-----|----------|----------|---------|------------|------|----------|----------|----------|----------|-------------|------------|---------------------------------------------|-----------------------|
| 6   | 7322318  | 7322428  | 1       | -0.051383  | 5    | 0.012    | 0.038    | 0.030626 | 0.082008 | 0.026435197 | Intergenic | NA                                          | NA                    |
| 6   | 8173988  | 8174050  | 1       | -0.092195  | 5    | 0.002    | 0.038    | 0.070987 | 0.16318  | 0.006079939 | Intragenic | NM_001270620:N<br>M_001270619:N<br>M_033096 | Ppm1b:Ppm1<br>b:Ppm1b |
| 6   | 8217576  | 8217823  | 1       | -0.215913  | 8    | 1.00E-05 | 0.00067  | 0.1701   | 0.38602  | 7.82E-05    | TSS        | NM_017216                                   | Slc3a1                |
| 6   | 8223390  | 8223534  | 1       | -0.089016  | 5    | 0.016    | 0.0053   | 0.13843  | 0.22745  | 0.033288089 | Intragenic | NM_017216                                   | Slc3a1                |
| 6   | 8230872  | 8231084  | 1       | -0.194156  | 8    | 0.00035  | 0.0059   | 0.55225  | 0.7464   | 0.001465488 | Intragenic | NM_017216                                   | Slc3a1                |
| 6   | 8830078  | 8830182  | 1       | -0.082826  | 8    | 0.017    | 0.068    | 0.56037  | 0.6432   | 0.034796287 | Intergenic | NA                                          | NA                    |
| 6   | 8876547  | 8876685  | 1       | -0.054211  | 6    | 0.0042   | 0.059    | 0.079872 | 0.13408  | 0.011250869 | TSS        | NM_001191908                                | Six2                  |
| 6   | 8882117  | 8882202  | 1       | -0.10815   | 8    | 6.70E-05 | 0.0078   | 0.10126  | 0.20941  | 0.000375356 | Intergenic | NA                                          | NA                    |
| 6   | 8942275  | 8942547  | 1       | -0.13032   | 7    | 0.00012  | 0.00041  | 0.085473 | 0.21579  | 0.000603617 | Intergenic | NA                                          | NA                    |
| 6   | 9402356  | 9402443  | 1       | -0.06735   | 6    | 0.0034   | 0.058    | 0.068485 | 0.13584  | 0.009519525 | Intergenic | NA                                          | NA                    |
| 6   | 9404937  | 9405079  | 0.5     | -0.124217  | 12   | 1.20E-09 | 1.50E-06 | 0.035115 | 0.15933  | 3.88E-08    | TSS        | NM_017171                                   | Prkce                 |
| 6   | 9438115  | 9438247  | 0.015   | -0.216943  | 9    | 1.60E-10 | 4.60E-08 | 0.04966  | 0.2666   | 6.77E-09    | Intragenic | NM_017171                                   | Prkce                 |
| 6   | 9630487  | 9630611  | 1       | -0.187562  | 7    | 5.60E-06 | 0.00049  | 0.16343  | 0.35099  | 4.84E-05    | Intragenic | NM_017171                                   | Prkce                 |
| 6   | 9648038  | 9648163  | 1       | -0.245153  | 5    | 0.00012  | 0.0032   | 0.23971  | 0.48487  | 0.000603617 | Intragenic | NM_017171                                   | Prkce                 |
| 6   | 20693891 | 20693968 | 1       | -0.180428  | 5    | 0.00088  | 0.015    | 0.6169   | 0.79733  | 0.003092094 | Intragenic | NM_001109274                                | Socs5                 |
| 6   | 20745005 | 20745159 | 1       | -0.121536  | 7    | 0.022    | 0.077    | 0.47586  | 0.5974   | 0.043064669 | Intergenic | NA                                          | NA                    |
| 6   | 20957544 | 20957607 | 1       | -0.184631  | 5    | 0.0049   | 0.059    | 0.32616  | 0.51079  | 0.012753585 | Intragenic | NM_001100756                                | Ttc7a                 |
| 6   | 21051247 | 21051291 | 1       | -0.065259  | 8    | 0.0039   | 0.018    | 0.18229  | 0.24755  | 0.010605635 | TSS        | NM_001163562                                | LOC681766             |
| 6   | 21279158 | 21279228 | 1       | -0.175613  | 5    | 2.80E-05 | 0.00014  | 0.16095  | 0.33656  | 0.000182174 | TSS        | NM_138541                                   | Epcam                 |
| 6   | 21500952 | 21501071 | 1       | -0.116886  | 5    | 0.019    | 0.13     | 0.39848  | 0.51537  | 0.038322088 | Intergenic | NA                                          | NA                    |
| 6   | 22478336 | 22478410 | 1       | -0.131127  | 5    | 0.00059  | 0.00051  | 0.17123  | 0.30235  | 0.002242971 | Intragenic | NM_012978                                   | Lhcgr                 |
| 6   | 22516226 | 22516379 | 1       | -0.066912  | 7    | 0.011    | 0.056    | 0.091157 | 0.15807  | 0.02463877  | TSS        | NM_012978                                   | Lhcgr                 |
| 6   | 22740228 | 22740387 | 1       | -0.055464  | 5    | 0.0045   | 0.015    | 0.83289  | 0.88836  | 0.011905878 | Intergenic | NA                                          | NA                    |
| 6   | 24553808 | 24553877 | 1       | 0.086531   | 5    | 0.0074   | 0.015    | 0.75633  | 0.6698   | 0.017853001 | Intragenic | NM_021767                                   | Nrxn1                 |
| 6   | 24735934 | 24736003 | 1       | 0.087231   | 5    | 0.02     | 0.058    | 0.75703  | 0.6698   | 0.039778219 | Intragenic | NM_021767                                   | Nrxn1                 |
| 6   | 25209107 | 25209399 | 1       | -0.171007  | 17   | 2.00E-08 | 3.70E-05 | 0.40799  | 0.579    | 4.60E-07    | Intergenic | NA                                          | NA                    |
| 6   | 28251330 | 28251368 | 0.4     | -0.209257  | 7    | 0.0013   | 1.20E-06 | 0.20607  | 0.41533  | 0.004277683 | Intergenic | NA                                          | NA                    |
| 6   | 28719727 | 28720004 | 1       | -0.07648   | 8    | 0.025    | 0.07     | 0.17718  | 0.25366  | 0.047453009 | Intergenic | NA                                          | NA                    |
| 6   | 31441173 | 31441324 | 1       | -0.113542  | 10   | 0.0051   | 0.054    | 0.33166  | 0.4452   | 0.013208341 | Intragenic | NM_021587                                   | Ltbp1                 |
| 6   | 31584984 | 31585171 | 1       | -0.105686  | 8    | 0.0078   | 0.019    | 0.29988  | 0.40557  | 0.018765285 | Intergenic | NA                                          | NA                    |
| 6   | 31693629 | 31693775 | 0.33    | -0.206708  | 9    | 9.40E-08 | 1.00E-06 | 0.1536   | 0.36031  | 1.66E-06    | Intragenic | NM_001106706                                | Ttc27                 |
| 6   | 32815791 | 32815894 | 1       | -0.176138  | 5    | 0.0029   | 0.024    | 0.30948  | 0.48562  | 0.008293503 | Intragenic | NM_001169101                                | Alk                   |
| 6   | 33048081 | 33048178 | 1       | -0.106209  | 5    | 0.0017   | 0.0054   | 0.1304   | 0.23661  | 0.005339493 | Intragenic | NM_001169101                                | Alk                   |
| 6   | 34134954 | 34135167 | 1       | -0.10777   | 9    | 0.02     | 0.082    | 0.46038  | 0.56815  | 0.039778219 | Intergenic | NA                                          | NA                    |
| 6   | 34387473 | 34387551 | 1       | -0.196754  | 7    | 5.30E-08 | 1.60E-05 | 0.10707  | 0.30382  | 1.08E-06    | Intergenic | NA                                          | NA                    |
| 6   | 35988722 | 35988819 | 1       | -0.170606  | 5    | 0.019    | 0.038    | 0.29578  | 0.46639  | 0.038322088 | Intergenic | NA                                          | NA                    |
| 6   | 36016590 | 36016623 | 1       | -0.104948  | 5    | 0.01     | 0.039    | 0.21585  | 0.32079  | 0.02275947  | Intergenic | NA                                          | NA                    |

| chr | start    | stop     | q-value  | methy.diff | CpGs | pMWU     | p2DKS    | MCWLS    | MCWHS    | pMWU.fdr    | cgi.type   | transcript   | gene    |
|-----|----------|----------|----------|------------|------|----------|----------|----------|----------|-------------|------------|--------------|---------|
| 6   | 36305624 | 36305925 | 2.20E-12 | -0.17863   | 31   | 4.10E-14 | 6.70E-18 | 0.058581 | 0.23721  | 6.64E-12    | TSS        | NM_001109674 | Krtcap3 |
| 6   | 36357459 | 36357575 | 1        | -0.241462  | 5    | 1.20E-05 | 0.00052  | 0.10176  | 0.34322  | 9.15E-05    | TSS        | NM_001012110 | Zfp513  |
| 6   | 36623396 | 36623517 | 0.00038  | -0.202366  | 15   | 1.30E-12 | 1.20E-09 | 0.52397  | 0.72633  | 9.76E-11    | Intragenic | NM_139087    | Cgref1  |
| 6   | 36637207 | 36637295 | 1        | -0.164444  | 5    | 5.00E-05 | 0.00053  | 0.069024 | 0.23347  | 0.000291675 | TSS        | NM_031855    | Khk     |
| 6   | 36637354 | 36637454 | 0.046    | -0.18864   | 7    | 2.20E-09 | 1.40E-07 | 0.12985  | 0.31849  | 6.51E-08    | TSS        | NM_031855    | Khk     |
| 6   | 36899732 | 36899776 | 1        | -0.057579  | 5    | 0.015    | 0.18     | 0.84457  | 0.90215  | 0.031584896 | Intergenic | NA           | NA      |
| 6   | 36905756 | 36905819 | 1        | -0.116789  | 7    | 0.001    | 0.0033   | 0.20315  | 0.31993  | 0.003452169 | Intergenic | NA           | NA      |
| 6   | 36906374 | 36906418 | 1        | -0.06375   | 5    | 0.017    | 0.18     | 0.83601  | 0.89976  | 0.034796287 | Intergenic | NA           | NA      |
| 6   | 37049692 | 37049936 | 1        | -0.186033  | 5    | 0.0011   | 0.0055   | 0.062735 | 0.24877  | 0.003737263 | Intergenic | NA           | NA      |
| 6   | 37272167 | 37272323 | 1        | -0.080728  | 10   | 0.00017  | 0.0006   | 0.099602 | 0.18033  | 0.000806192 | TSS        | NM_001007009 | Drc1    |
| 6   | 37306141 | 37306186 | 1        | -0.342289  | 5    | 5.60E-07 | 7.60E-06 | 0.31196  | 0.65425  | 7.29E-06    | Intragenic | NM_001134754 | Seli    |
| 6   | 37726191 | 37726303 | 1        | -0.178933  | 5    | 0.00032  | 0.00097  | 0.059471 | 0.2384   | 0.001346443 | Intergenic | NA           | NA      |
| 6   | 37935900 | 37936296 | 1        | -0.120583  | 12   | 0.012    | 0.12     | 0.28031  | 0.40089  | 0.026435197 | Intragenic | NM_001012191 | Dtnb    |
| 6   | 38176332 | 38176371 | 1        | -0.087285  | 5    | 0.011    | 0.088    | 0.2527   | 0.33999  | 0.02463877  | Intergenic | NA           | NA      |
| 6   | 38176415 | 38176464 | 1        | -0.138572  | 5    | 0.0016   | 0.0018   | 0.2432   | 0.38178  | 0.005100053 | Intergenic | NA           | NA      |
| 6   | 38197221 | 38197328 | 1        | -0.053893  | 11   | 6.90E-06 | 7.10E-05 | 0.06847  | 0.12236  | 5.80E-05    | Intragenic | NM_139326    | Pomc    |
| 6   | 38416530 | 38416691 | 1        | -0.200919  | 7    | 0.00088  | 0.00049  | 0.38894  | 0.58986  | 0.003092094 | Intragenic | NM_130779    | Adcy3   |
| 6   | 38853349 | 38853689 | 1        | -0.056505  | 34   | 1.00E-08 | 6.30E-06 | 0.13471  | 0.19122  | 2.49E-07    | Intergenic | NA           | NA      |
| 6   | 38854179 | 38854200 | 1        | 0.203609   | 5    | 0.0032   | 0.0093   | 0.45236  | 0.24875  | 0.008990975 | Intergenic | NA           | NA      |
| 6   | 38855778 | 38855820 | 1        | 0.116548   | 9    | 9.60E-07 | 4.80E-05 | 0.26753  | 0.15098  | 1.15E-05    | Intergenic | NA           | NA      |
| 6   | 39045143 | 39045163 | 1        | -0.050458  | 5    | 7.80E-05 | 0.0031   | 0.044453 | 0.094911 | 0.000422981 | Intergenic | NA           | NA      |
| 6   | 39262405 | 39262419 | 1        | -0.061183  | 5    | 0.0068   | 0.039    | 0.15236  | 0.21354  | 0.016642688 | Intergenic | NA           | NA      |
| 6   | 39262422 | 39262434 | 1        | -0.051117  | 5    | 0.0008   | 0.015    | 0.10019  | 0.1513   | 0.002866309 | Intergenic | NA           | NA      |
| 6   | 39262766 | 39262787 | 1        | 0.201284   | 5    | 0.002    | 0.0092   | 0.45294  | 0.25165  | 0.006079939 | Intergenic | NA           | NA      |
| 6   | 39262826 | 39263392 | 1        | 0.096208   | 52   | 0.00025  | 0.02     | 0.30518  | 0.20053  | 0.001103692 | Intergenic | NA           | NA      |
| 6   | 39265002 | 39265050 | 1        | 0.102606   | 10   | 2.40E-06 | 0.00016  | 0.26204  | 0.15944  | 2.45E-05    | Intergenic | NA           | NA      |
| 6   | 39265528 | 39265548 | 1        | 0.068433   | 5    | 0.0032   | 0.0055   | 0.22334  | 0.15491  | 0.008990975 | Intergenic | NA           | NA      |
| 6   | 39270076 | 39270097 | 1        | 0.075464   | 5    | 0.012    | 0.088    | 0.22795  | 0.15249  | 0.026435197 | TSS        | NR_046238    | Rn5-8s  |
| 6   | 39270247 | 39270263 | 1        | -0.265782  | 5    | 0.0011   | 0.00097  | 0.19086  | 0.45664  | 0.003737263 | TSS        | NR_046238    | Rn5-8s  |
| 6   | 39272364 | 39272732 | 1        | 0.084951   | 37   | 0.00072  | 0.017    | 0.14517  | 0.11617  | 0.002634665 | TSS        | NR_046238    | Rn5-8s  |
| 6   | 39273823 | 39273845 | 1        | -0.051451  | 5    | 0.0087   | 0.088    | 0.16206  | 0.21351  | 0.020391633 | TSS        | NR_046238    | Rn5-8s  |
| 6   | 39274736 | 39274764 | 1        | 0.101235   | 5    | 5.60E-05 | 0.0018   | 0.22027  | 0.11903  | 0.000320912 | Intergenic | NA           | NA      |
| 6   | 40511499 | 40511568 | 1        | -0.23576   | 5    | 2.50E-06 | 7.60E-06 | 0.060213 | 0.29597  | 2.52E-05    | Intragenic | NM_001106713 | Klhl29  |
| 6   | 42857419 | 42857589 | 1        | -0.11425   | 6    | 0.0036   | 0.0066   | 0.39688  | 0.51113  | 0.009945103 | Intergenic | NA           | NA      |
| 6   | 42956281 | 42956413 | 1        | -0.186946  | 5    | 0.0008   | 0.015    | 0.24928  | 0.43623  | 0.002866309 | TSS        | NM_019287    | Apob    |
| 6   | 43293434 | 43293519 | 1        | -0.074308  | 5    | 0.016    | 0.18     | 0.10233  | 0.17664  | 0.033288089 | TSS        | NM_001170350 | Gdf7    |
| 6   | 43337141 | 43337229 | 1        | -0.198293  | 5    | 0.012    | 0.088    | 0.35251  | 0.5508   | 0.026435197 | Intergenic | NA           | NA      |
| 6   | 43354877 | 43354977 | 1        | -0.173643  | 5    | 0.0014   | 0.0031   | 0.40671  | 0.58035  | 0.004540837 | Intergenic | NA           | NA      |
| 6   | 43375494 | 43375893 | 1        | -0.113306  | 9    | 0.0035   | 0.11     | 0.2184   | 0.3317   | 0.009686665 | Intergenic | NA           | NA      |

| chr | start    | stop     | q-value  | methy.diff | CpGs | pMWU     | p2DKS    | MCWLS    | MCWHS   | pMWU.fdr    | cgi.type   | transcript                                              | gene                |
|-----|----------|----------|----------|------------|------|----------|----------|----------|---------|-------------|------------|---------------------------------------------------------|---------------------|
| 6   | 43416788 | 43417044 | 1        | -0.071701  | 10   | 0.00048  | 0.00059  | 0.097085 | 0.16879 | 0.001881331 | Intergenic | NA                                                      | NA                  |
| 6   | 43459638 | 43459761 | 1        | -0.295623  | 5    | 5.50E-06 | 1.60E-05 | 0.1312   | 0.42683 | 4.78E-05    | Intergenic | NA                                                      | NA                  |
| 6   | 43521959 | 43522025 | 1        | -0.183258  | 5    | 0.0017   | 0.025    | 0.20537  | 0.38862 | 0.005339493 | TSS        | NM_001106714                                            | Slc7a15             |
| 6   | 51108964 | 51109381 | 1        | -0.168669  | 13   | 2.10E-06 | 0.00015  | 0.27724  | 0.44591 | 2.20E-05    | Intergenic | NA                                                      | NA                  |
| 6   | 51317604 | 51317631 | 1        | -0.085309  | 5    | 0.011    | 0.18     | 0.12968  | 0.21498 | 0.02463877  | Intergenic | NA                                                      | NA                  |
| 6   | 51317722 | 51317843 | 1        | -0.189363  | 7    | 5.80E-08 | 8.60E-06 | 0.057434 | 0.2468  | 1.17E-06    | Intergenic | NA                                                      | NA                  |
| 6   | 51746856 | 51746967 | 1        | -0.115841  | 9    | 0.0069   | 0.056    | 0.4532   | 0.56905 | 0.01685311  | Intergenic | NA                                                      | NA                  |
| 6   | 52116648 | 52116848 | 1        | -0.147636  | 7    | 0.0017   | 0.026    | 0.14475  | 0.29239 | 0.005339493 | Intergenic | NA                                                      | NA                  |
| 6   | 52732730 | 52732904 | 1        | -0.100576  | 10   | 5.80E-05 | 0.00019  | 0.05323  | 0.15381 | 0.000331425 | Intragenic | NM_017356                                               | Hpcal1              |
| 6   | 52770090 | 52770167 | 1        | -0.105375  | 5    | 2.50E-06 | 3.40E-06 | 0.014646 | 0.12002 | 2.52E-05    | Intragenic | NM_017356                                               | Hpcal1              |
| 6   | 56513709 | 56513777 | 1        | -0.118486  | 5    | 0.0038   | 0.038    | 0.68497  | 0.80346 | 0.010352437 | TSS        | NM_001195807                                            | Dcdc2c              |
| 6   | 56513965 | 56514042 | 1        | -0.183031  | 5    | 3.50E-05 | 0.00052  | 0.59717  | 0.7802  | 0.000218038 | TSS        | NM_001195807                                            | Dcdc2c              |
| 6   | 58648969 | 58649112 | 1        | -0.065523  | 5    | 0.0008   | 0.0055   | 0.075338 | 0.14086 | 0.002866309 | TSS        | NM_001025051                                            | Fam110c             |
| 6   | 58842754 | 58842849 | 1        | -0.256193  | 5    | 6.20E-05 | 0.0018   | 0.24079  | 0.49698 | 0.000349462 | Intergenic | NA                                                      | NA                  |
| 6   | 59233840 | 59233911 | 1        | -0.178266  | 5    | 0.019    | 0.086    | 0.31895  | 0.49721 | 0.038322088 | Intergenic | NA                                                      | NA                  |
| 6   | 59472896 | 59472997 | 0.78     | -0.246732  | 7    | 9.70E-09 | 2.40E-06 | 0.065161 | 0.31189 | 2.44E-07    | Intergenic | NA                                                      | NA                  |
| 6   | 60256882 | 60257008 | 1        | -0.225596  | 5    | 0.02     | 0.088    | 0.25463  | 0.48022 | 0.039778219 | Intragenic | NM_001030030                                            | Cpsf3               |
| 6   | 60711629 | 60711816 | 1        | -0.128202  | 5    | 0.0094   | 0.059    | 0.24304  | 0.37124 | 0.021723038 | Intragenic | NM_001037354                                            | Klf11               |
| 6   | 62110996 | 62111129 | 1        | -0.052909  | 5    | 0.015    | 0.088    | 0.079139 | 0.13205 | 0.031584896 | Intergenic | NA                                                      | NA                  |
| 6   | 62570555 | 62570737 | 1        | -0.094575  | 5    | 0.0014   | 0.039    | 0.653    | 0.74758 | 0.004540837 | Intergenic | NA                                                      | NA                  |
| 6   | 62585217 | 62585288 | 1        | -0.063033  | 5    | 7.00E-05 | 0.00052  | 0.061663 | 0.1247  | 0.000386221 | Intergenic | NA                                                      | NA                  |
| 6   | 62854177 | 62854307 | 1        | -0.130471  | 5    | 0.0087   | 0.015    | 0.67011  | 0.80058 | 0.020391633 | Intergenic | NA                                                      | NA                  |
| 6   | 64604297 | 64604428 | 1        | -0.120401  | 5    | 0.0019   | 0.015    | 0.16248  | 0.28288 | 0.005855937 | Intragenic | NM_001308254:NM_001308255:NM_013149:NR_131775:NR_131776 | Ahr:Ahr:Ahr:Ahr:Ahr |
| 6   | 69010945 | 69011058 | 1        | -0.104824  | 5    | 0.019    | 0.058    | 0.61957  | 0.72439 | 0.038322088 | Intergenic | NA                                                      | NA                  |
| 6   | 69143620 | 69143755 | 1        | -0.164725  | 5    | 0.00059  | 0.0018   | 0.20764  | 0.37236 | 0.002242971 | Intergenic | NA                                                      | NA                  |
| 6   | 72383869 | 72383894 | 1.60E-08 | -0.504571  | 9    | 3.40E-13 | 5.00E-14 | 0.12016  | 0.62473 | 3.00E-11    | Intergenic | NA                                                      | NA                  |
| 6   | 72511618 | 72511677 | 1        | -0.085928  | 5    | 0.0058   | 0.0092   | 0.85315  | 0.93908 | 0.014624129 | Intergenic | NA                                                      | NA                  |
| 6   | 77675664 | 77675924 | 1        | 0.13048    | 5    | 0.0058   | 0.015    | 0.76139  | 0.63091 | 0.014624129 | Intergenic | NA                                                      | NA                  |
| 6   | 83165702 | 83165907 | 1        | -0.209904  | 6    | 6.30E-05 | 0.0016   | 0.1673   | 0.3772  | 0.000354102 | Intragenic | NM_022618                                               | Akap6               |
| 6   | 83540990 | 83541055 | 1        | -0.115888  | 5    | 0.0063   | 0.015    | 0.68279  | 0.79867 | 0.015629046 | Intragenic | NM_022618                                               | Akap6               |
| 6   | 84814411 | 84814525 | 1        | -0.31815   | 5    | 2.40E-05 | 0.00014  | 0.20813  | 0.52628 | 0.000160049 | Intergenic | NA                                                      | NA                  |
| 6   | 85165942 | 85166348 | 0.65     | -0.222074  | 13   | 3.40E-10 | 2.00E-06 | 0.20079  | 0.42286 | 1.31E-08    | Intergenic | NA                                                      | NA                  |
| 6   | 86053158 | 86053525 | 1        | -0.057348  | 5    | 0.017    | 0.18     | 0.78607  | 0.84342 | 0.034796287 | Intragenic | NM_020083                                               | Ralgapa1            |
| 6   | 86184996 | 86185034 | 1        | -0.188788  | 5    | 1.00E-05 | 0.00014  | 0.4226   | 0.61139 | 7.82E-05    | Intragenic | NM_020083                                               | Ralgapa1            |
| 6   | 87138729 | 87138769 | 1        | -0.051544  | 7    | 0.0062   | 0.11     | 0.070517 | 0.12206 | 0.015570617 | Intragenic | NM_001039539                                            | Pax9                |

| chr | start     | stop      | q-value  | methyI.diff | CpGs | pMWU     | p2DKS    | MCWLS    | MCWHS    | pMWU.fdr    | cgi.type   | transcript                          | gene              |
|-----|-----------|-----------|----------|-------------|------|----------|----------|----------|----------|-------------|------------|-------------------------------------|-------------------|
| 6   | 87559106  | 87559178  | 1        | -0.169139   | 6    | 5.20E-06 | 0.00017  | 0.12047  | 0.28961  | 4.61E-05    | Intragenic | NM_133614                           | Slc25a21          |
| 6   | 87586976  | 87587041  | 1        | -0.170554   | 5    | 0.0094   | 0.0016   | 0.30364  | 0.47419  | 0.021723038 | Intragenic | NM_133614                           | Slc25a21          |
| 6   | 87636279  | 87636485  | 1.80E-05 | -0.089101   | 20   | 4.80E-14 | 5.50E-11 | 0.059596 | 0.1487   | 6.71E-12    | TSS        | NM_133614                           | Slc25a21          |
| 6   | 88114317  | 88114427  | 1        | -0.054494   | 8    | 0.0036   | 0.019    | 0.04093  | 0.095424 | 0.009945103 | Intergenic | NA                                  | NA                |
| 6   | 88156843  | 88156901  | 1        | -0.216023   | 5    | 0.0017   | 0.039    | 0.17781  | 0.39383  | 0.005339493 | Intergenic | NA                                  | NA                |
| 6   | 89654595  | 89654650  | 1        | -0.08341    | 5    | 0.00059  | 0.0053   | 0.087613 | 0.17102  | 0.002242971 | Intergenic | NA                                  | NA                |
| 6   | 92426811  | 92426934  | 0.0015   | -0.104268   | 22   | 4.30E-14 | 4.60E-09 | 0.13252  | 0.23679  | 6.64E-12    | Intergenic | NA                                  | NA                |
| 6   | 92500488  | 92500611  | 0.0015   | -0.104268   | 22   | 4.30E-14 | 4.60E-09 | 0.13252  | 0.23679  | 6.64E-12    | Intergenic | NA                                  | NA                |
| 6   | 100018271 | 100018319 | 1        | 0.059081    | 5    | 0.0045   | 0.038    | 0.91948  | 0.8604   | 0.011905878 | Intergenic | NA                                  | NA                |
| 6   | 100915681 | 100915824 | 0.00025  | -0.217658   | 13   | 2.00E-12 | 7.70E-10 | 0.13017  | 0.34783  | 1.42E-10    | TSS        | NM_012876:NR_10377                  | Rps29:Rn7sl1      |
| 6   | 101036655 | 101037114 | 1        | -0.072618   | 14   | 0.025    | 0.2      | 0.65148  | 0.72409  | 0.047453009 | Intergenic | NA                                  | NA                |
| 6   | 101136721 | 101136838 | 0.022    | -0.233957   | 11   | 2.30E-12 | 6.70E-08 | 0.13482  | 0.36878  | 1.61E-10    | TSS        | NR_110377                           | Rn7sl1            |
| 6   | 101150415 | 101150459 | 1        | -0.13987    | 5    | 0.0045   | 0.015    | 0.056561 | 0.19643  | 0.011905878 | TSS        | NM_024152                           | Arf6              |
| 6   | 101320698 | 101320743 | 1        | -0.098175   | 5    | 0.013    | 0.087    | 0.21852  | 0.31669  | 0.028097302 | Intergenic | NA                                  | NA                |
| 6   | 101558175 | 101558203 | 0.49     | -0.2982     | 5    | 5.60E-07 | 1.50E-06 | 0.22509  | 0.52329  | 7.29E-06    | Intragenic | NM_001025121                        | Cdk11             |
| 6   | 102811437 | 102811498 | 1        | -0.266322   | 5    | 2.20E-06 | 6.90E-05 | 0.24915  | 0.51547  | 2.27E-05    | Intergenic | NA                                  | NA                |
| 6   | 103004651 | 103004831 | 1        | -0.097207   | 12   | 0.0034   | 0.037    | 0.13515  | 0.19778  | 0.009519525 | Intergenic | NA                                  | NA                |
| 6   | 103004832 | 103004866 | 1        | -0.050301   | 5    | 0.013    | 0.037    | 0.044519 | 0.09482  | 0.028097302 | Intergenic | NA                                  | NA                |
| 6   | 103151061 | 103151194 | 1        | -0.236436   | 5    | 3.30E-06 | 3.40E-05 | 0.12221  | 0.35865  | 3.16E-05    | Intergenic | NA                                  | NA                |
| 6   | 104208462 | 104208543 | 1        | -0.179902   | 5    | 0.0022   | 0.015    | 0.22125  | 0.40116  | 0.006578104 | Intergenic | NA                                  | NA                |
| 6   | 105362678 | 105362833 | 1        | -0.070325   | 8    | 0.00048  | 0.0086   | 0.086336 | 0.15666  | 0.001881331 | Intergenic | NA                                  | NA                |
| 6   | 105727862 | 105728089 | 1        | -0.180196   | 11   | 1.20E-06 | 7.20E-05 | 0.17296  | 0.35315  | 1.37E-05    | Intergenic | NA                                  | NA                |
| 6   | 105892760 | 105892856 | 1        | -0.111066   | 5    | 0.025    | 0.088    | 0.44786  | 0.55892  | 0.047453009 | Intergenic | NA                                  | NA                |
| 6   | 106198711 | 106198914 | 1        | -0.12704    | 8    | 3.10E-05 | 0.013    | 0.078078 | 0.20512  | 0.000197418 | Intergenic | NA                                  | NA                |
| 6   | 106307315 | 106307379 | 1        | -0.211468   | 5    | 0.00023  | 0.00053  | 0.5088   | 0.72027  | 0.00102405  | Intragenic | NM_001108033                        | Snapc1            |
| 6   | 108300407 | 108300472 | 1        | -0.090562   | 5    | 6.20E-05 | 0.00014  | 0.047843 | 0.1384   | 0.000349462 | Intergenic | NA                                  | NA                |
| 6   | 109047912 | 109048019 | 1        | -0.177927   | 5    | 5.60E-05 | 0.00014  | 0.22307  | 0.40099  | 0.000320912 | Intergenic | NA                                  | NA                |
| 6   | 109239482 | 109239620 | 1        | -0.106615   | 8    | 0.00072  | 0.018    | 0.15407  | 0.26068  | 0.002634665 | TSS        | NM_183403                           | Gpx2              |
| 6   | 110663387 | 110663495 | 1        | -0.145003   | 5    | 0.015    | 0.0055   | 0.32708  | 0.47209  | 0.031584896 | Intergenic | NA                                  | NA                |
| 6   | 111504045 | 111504134 | 1        | -0.146632   | 5    | 0.014    | 0.058    | 0.20762  | 0.35426  | 0.029850603 | Intergenic | NA                                  | NA                |
| 6   | 112780253 | 112780368 | 0.97     | -0.248358   | 8    | 2.00E-07 | 3.00E-06 | 0.2141   | 0.46246  | 3.06E-06    | Intragenic | NM_001195505:NM_001195506:NM_019257 | Srsf5:Srsf5:Srsf5 |
| 6   | 113414956 | 113415019 | 1        | -0.11651    | 7    | 0.0012   | 0.0052   | 0.20315  | 0.31966  | 0.004013471 | Intergenic | NA                                  | NA                |
| 6   | 113415391 | 113415517 | 1        | -0.167336   | 7    | 0.00013  | 1.50E-05 | 0.23664  | 0.40397  | 0.000648758 | Intergenic | NA                                  | NA                |
| 6   | 113667039 | 113667375 | 1        | -0.188205   | 9    | 0.00039  | 0.013    | 0.27454  | 0.46275  | 0.001587612 | Intergenic | NA                                  | NA                |
| 6   | 113819229 | 113819266 | 1        | -0.197682   | 5    | 0.00019  | 0.00014  | 0.27102  | 0.4687   | 0.000879857 | Intragenic | NM_001170347                        | Pcnx1             |
| 6   | 114506709 | 114506879 | 1        | -0.183087   | 8    | 0.013    | 0.032    | 0.43485  | 0.61794  | 0.028097302 | Intragenic | NM_019342                           | Rgs6              |

| chr | start     | stop      | q-value  | methy.diff | CpGs | pMWU     | p2DKS    | MCWLS    | MCWHS    | pMWU.fdr    | cgi.type   | transcript   | gene    |
|-----|-----------|-----------|----------|------------|------|----------|----------|----------|----------|-------------|------------|--------------|---------|
| 6   | 114717154 | 114717309 | 1        | -0.125119  | 10   | 0.021    | 0.00086  | 0.3828   | 0.50792  | 0.041207871 | Intragenic | NM_019342    | Rgs6    |
| 6   | 115905989 | 115906086 | 1        | -0.09546   | 7    | 0.0015   | 0.038    | 0.19864  | 0.2941   | 0.004849475 | Intergenic | NA           | NA      |
| 6   | 116035175 | 116035363 | 1        | -0.078365  | 7    | 0.013    | 0.0073   | 0.60744  | 0.6858   | 0.028097302 | Intergenic | NA           | NA      |
| 6   | 116056371 | 116056517 | 1        | -0.083248  | 15   | 0.00015  | 0.00015  | 0.19072  | 0.27397  | 0.000724207 | Intragenic | NM_031005    | Actn1   |
| 6   | 116491280 | 116491386 | 1        | -0.12236   | 8    | 0.0036   | 0.037    | 0.37391  | 0.49627  | 0.009945103 | Intragenic | NM_001108043 | Mlh3    |
| 6   | 116594855 | 116594909 | 1        | -0.133265  | 5    | 0.002    | 0.024    | 0.1859   | 0.31917  | 0.006079939 | Intergenic | NA           | NA      |
| 6   | 116626998 | 116627244 | 1        | -0.127288  | 5    | 0.017    | 0.059    | 0.53826  | 0.66555  | 0.034796287 | Intergenic | NA           | NA      |
| 6   | 116943139 | 116943245 | 1        | -0.131662  | 5    | 3.10E-05 | 3.30E-05 | 0.13467  | 0.26634  | 0.000197418 | Intergenic | NA           | NA      |
| 6   | 117093775 | 117093802 | 1        | -0.064696  | 5    | 0.0032   | 0.0018   | 0.77075  | 0.83545  | 0.008990975 | Intergenic | NA           | NA      |
| 6   | 117183342 | 117183400 | 1        | -0.207951  | 5    | 0.00059  | 0.015    | 0.31453  | 0.52248  | 0.002242971 | Intergenic | NA           | NA      |
| 6   | 117842019 | 117842128 | 1        | -0.197574  | 5    | 4.30E-06 | 0.00014  | 0.12215  | 0.31973  | 3.93E-05    | Intergenic | NA           | NA      |
| 6   | 118775202 | 118775371 | 0.94     | -0.157266  | 8    | 4.60E-08 | 2.90E-06 | 0.031672 | 0.18894  | 9.56E-07    | Intergenic | NA           | NA      |
| 6   | 118842365 | 118842479 | 1        | -0.190411  | 5    | 0.0049   | 0.0054   | 0.21582  | 0.40623  | 0.012753585 | Intergenic | NA           | NA      |
| 6   | 119243609 | 119243680 | 1        | -0.139575  | 5    | 0.021    | 0.13     | 0.25057  | 0.39014  | 0.041207871 | TSS        | NM_013174    | Tgfb3   |
| 6   | 119377889 | 119378112 | 1        | -0.059539  | 15   | 6.90E-06 | 0.0012   | 0.075993 | 0.13553  | 5.80E-05    | Intergenic | NA           | NA      |
| 6   | 119889497 | 119889580 | 1        | -0.209346  | 5    | 1.20E-05 | 7.00E-05 | 0.2096   | 0.41895  | 9.15E-05    | Intergenic | NA           | NA      |
| 6   | 120108512 | 120108628 | 1        | -0.069758  | 5    | 0.014    | 0.087    | 0.060555 | 0.13031  | 0.029850603 | Intergenic | NA           | NA      |
| 6   | 120117875 | 120118011 | 1        | -0.056563  | 7    | 0.013    | 0.11     | 0.050816 | 0.10738  | 0.028097302 | Intergenic | NA           | NA      |
| 6   | 120194304 | 120194495 | 2.10E-05 | -0.209786  | 11   | 9.80E-12 | 6.40E-11 | 0.060216 | 0.27     | 5.69E-10    | TSS        | NM_001012470 | Irf2bpl |
| 6   | 120194519 | 120194588 | 1        | -0.140508  | 5    | 8.50E-07 | 3.50E-05 | 0.051154 | 0.19166  | 1.03E-05    | TSS        | NM_001012470 | Irf2bpl |
| 6   | 120194643 | 120194679 | 1        | -0.071584  | 5    | 6.20E-05 | 0.00014  | 0.025284 | 0.096869 | 0.000349462 | TSS        | NM_001012470 | Irf2bpl |
| 6   | 120194680 | 120194739 | 1        | -0.053907  | 5    | 9.20E-06 | 0.00028  | 0.028287 | 0.082194 | 7.32E-05    | TSS        | NM_001012470 | Irf2bpl |
| 6   | 120194803 | 120195035 | 0.4      | -0.103324  | 13   | 2.50E-08 | 1.20E-06 | 0.033258 | 0.14439  | 5.59E-07    | TSS        | NM_001012470 | Irf2bpl |
| 6   | 120288266 | 120288333 | 1        | -0.299156  | 5    | 0.00065  | 0.015    | 0.35443  | 0.65358  | 0.002426546 | Intergenic | NA           | NA      |
| 6   | 120592133 | 120592275 | 0.018    | -0.338899  | 8    | 3.40E-08 | 5.60E-08 | 0.10733  | 0.44623  | 7.35E-07    | Intergenic | NA           | NA      |
| 6   | 122376100 | 122376231 | 1        | 0.193243   | 8    | 0.0064   | 0.07     | 0.77981  | 0.58656  | 0.015860755 | Intragenic | NM_053817    | Nrxn3   |
| 6   | 127947189 | 127947228 | 1        | -0.364471  | 5    | 5.50E-06 | 0.00014  | 0.14187  | 0.50634  | 4.78E-05    | Intergenic | NA           | NA      |
| 6   | 132338195 | 132338284 | 1        | -0.163114  | 5    | 0.012    | 0.015    | 0.26765  | 0.43076  | 0.026435197 | Intergenic | NA           | NA      |
| 6   | 132587430 | 132587603 | 1        | -0.143017  | 5    | 0.00026  | 0.00052  | 0.13154  | 0.27456  | 0.001130807 | Intragenic | NM_001108047 | Foxn3   |
| 6   | 132770762 | 132770955 | 1        | -0.197361  | 7    | 0.0035   | 0.0083   | 0.35969  | 0.55705  | 0.009686665 | Intragenic | NM_001108047 | Foxn3   |
| 6   | 133247833 | 133247943 | 1        | -0.112974  | 5    | 0.0058   | 0.0005   | 0.083804 | 0.19678  | 0.014624129 | Intragenic | NM_022293    | Kcnk13  |
| 6   | 133542080 | 133542223 | 1        | -0.198054  | 5    | 0.008    | 0.039    | 0.12981  | 0.32786  | 0.019059477 | Intragenic | NM_001108719 | Ttc7b   |
| 6   | 133725562 | 133725667 | 1        | -0.189528  | 8    | 3.90E-06 | 1.80E-05 | 0.16176  | 0.35129  | 3.62E-05    | Intergenic | NA           | NA      |
| 6   | 134213758 | 134213815 | 0.21     | -0.209577  | 5    | 9.90E-08 | 6.60E-07 | 0.092836 | 0.30241  | 1.72E-06    | Intergenic | NA           | NA      |
| 6   | 134954049 | 134954133 | 1        | -0.246807  | 5    | 0.0019   | 0.00014  | 0.30434  | 0.55115  | 0.005855937 | Intergenic | NA           | NA      |
| 6   | 135467638 | 135467703 | 1        | -0.267435  | 5    | 0.019    | 0.0092   | 0.37888  | 0.64632  | 0.038322088 | Intragenic | NM_001108052 | Rin3    |
| 6   | 135541796 | 135542048 | 1        | -0.142266  | 5    | 0.008    | 0.024    | 0.092495 | 0.23476  | 0.019059477 | Intergenic | NA           | NA      |
| 6   | 135692815 | 135693087 | 0.057    | -0.233357  | 10   | 9.40E-10 | 1.80E-07 | 0.090345 | 0.3237   | 3.16E-08    | Intragenic | NM_001191985 | Itpk1   |
| 6   | 135777712 | 135778029 | 1        | -0.16168   | 5    | 0.0063   | 0.038    | 0.19628  | 0.35796  | 0.015629046 | Intragenic | NM_001191985 | Itpk1   |

| chr | start     | stop      | q-value | methy.diff | CpGs | pMWU     | p2DKS    | MCWLS    | MCWHS   | pMWU.fdr    | cgi.type   | transcript                | gene          |
|-----|-----------|-----------|---------|------------|------|----------|----------|----------|---------|-------------|------------|---------------------------|---------------|
| 6   | 135827715 | 135827863 | 1       | -0.183571  | 5    | 0.0068   | 0.0017   | 0.086108 | 0.26968 | 0.016642688 | TSS        | NM_001013101              | Moap1         |
| 6   | 136408946 | 136409135 | 1       | -0.142171  | 8    | 0.005    | 0.051    | 0.3542   | 0.49637 | 0.012977322 | Intergenic | NA                        | NA            |
| 6   | 136469500 | 136469549 | 1       | -0.217624  | 5    | 3.30E-06 | 7.00E-05 | 0.13039  | 0.34801 | 3.16E-05    | TSS        | NM_001011984              | Asb2          |
| 6   | 137326043 | 137326133 | 1       | -0.198667  | 5    | 0.00015  | 0.00014  | 0.10227  | 0.30094 | 0.000724207 | TSS        | NM_001047975              | LOC690435     |
| 6   | 137606669 | 137606760 | 1       | -0.273821  | 8    | 0.0012   | 0.0055   | 0.48386  | 0.75768 | 0.004013471 | Intergenic | NA                        | NA            |
| 6   | 137725249 | 137725388 | 1       | -0.209707  | 5    | 0.00021  | 3.40E-05 | 0.038621 | 0.24833 | 0.000951214 | Intragenic | NM_001106755              | Clmn          |
| 6   | 137744871 | 137744934 | 1       | -0.184172  | 5    | 0.01     | 0.037    | 0.38632  | 0.57049 | 0.02275947  | Intragenic | NM_001106755              | Clmn          |
| 6   | 137797055 | 137797217 | 1       | -0.097271  | 5    | 0.0087   | 0.015    | 0.10453  | 0.2018  | 0.020391633 | Intergenic | NA                        | NA            |
| 6   | 137867127 | 137867384 | 1       | -0.159155  | 5    | 0.00072  | 0.00095  | 0.11581  | 0.27496 | 0.002634665 | Intragenic | NM_001106762              | Syne3         |
| 6   | 138032233 | 138032344 | 1       | -0.091619  | 7    | 0.017    | 0.038    | 0.74318  | 0.8348  | 0.034796287 | Intergenic | NA                        | NA            |
| 6   | 138177727 | 138177916 | 1       | -0.141055  | 8    | 0.0072   | 0.051    | 0.35387  | 0.49492 | 0.017539509 | Intergenic | NA                        | NA            |
| 6   | 138379504 | 138379646 | 1       | -0.185901  | 5    | 7.00E-05 | 7.00E-05 | 0.11667  | 0.30257 | 0.000386221 | Intergenic | NA                        | NA            |
| 6   | 138386092 | 138386153 | 1       | -0.277833  | 5    | 4.20E-07 | 3.40E-06 | 0.19431  | 0.47215 | 5.76E-06    | Intergenic | NA                        | NA            |
| 6   | 138672452 | 138672539 | 1       | -0.212487  | 5    | 0.0012   | 0.0031   | 0.38898  | 0.60147 | 0.004013471 | Intergenic | NA                        | NA            |
| 6   | 138762320 | 138762650 | 1       | -0.149041  | 9    | 0.00082  | 0.024    | 0.2203   | 0.36934 | 0.002936216 | Intragenic | NM_001108055              | Ak7           |
| 6   | 138884615 | 138884790 | 0.0043  | -0.141165  | 13   | 3.10E-12 | 1.30E-08 | 0.08216  | 0.22332 | 2.12E-10    | Intergenic | NA                        | NA            |
| 6   | 138905828 | 138905851 | 1       | -0.15005   | 5    | 0.012    | 0.025    | 0.47888  | 0.62893 | 0.026435197 | Intergenic | NA                        | NA            |
| 6   | 138940240 | 138940398 | 1       | -0.15102   | 7    | 0.01     | 0.11     | 0.2943   | 0.44532 | 0.02275947  | Intergenic | NA                        | NA            |
| 6   | 138953089 | 138953159 | 1       | -0.151578  | 5    | 0.00023  | 0.00053  | 0.22821  | 0.37979 | 0.00102405  | Intergenic | NA                        | NA            |
| 6   | 139106638 | 139106702 | 1       | -0.149043  | 5    | 0.016    | 0.039    | 0.301    | 0.45005 | 0.033288089 | Intergenic | NA                        | NA            |
| 6   | 139126772 | 139126876 | 1       | -0.170488  | 5    | 0.00088  | 0.015    | 0.22755  | 0.39804 | 0.003092094 | Intergenic | NA                        | NA            |
| 6   | 139210271 | 139210294 | 1       | -0.064658  | 10   | 6.40E-08 | 2.40E-05 | 0.067254 | 0.13191 | 1.19E-06    | Intergenic | NA                        | NA            |
| 6   | 139847417 | 139847577 | 1       | -0.099853  | 7    | 0.00065  | 0.00073  | 0.6229   | 0.72275 | 0.002426546 | Intergenic | NA                        | NA            |
| 6   | 139861347 | 139861524 | 1       | -0.161936  | 5    | 0.00072  | 0.0091   | 0.12832  | 0.29026 | 0.002634665 | Intergenic | NA                        | NA            |
| 6   | 140049589 | 140049709 | 1       | -0.086204  | 6    | 0.02     | 0.0043   | 0.47055  | 0.55675 | 0.039778219 | Intergenic | NA                        | NA            |
| 6   | 140872687 | 140872843 | 1       | -0.111045  | 7    | 0.021    | 0.072    | 0.35989  | 0.47093 | 0.041207871 | Intergenic | NA                        | NA            |
| 6   | 140897193 | 140897296 | 1       | -0.112545  | 5    | 0.0049   | 0.059    | 0.11761  | 0.23016 | 0.012753585 | Intergenic | NA                        | NA            |
| 6   | 141027484 | 141027746 | 1       | -0.123039  | 6    | 0.00021  | 0.0068   | 0.047432 | 0.17047 | 0.000951214 | Intragenic | NM_001277287:NM_001277288 | Bcl11b:Bcl11b |
| 6   | 141072522 | 141073115 | 1       | -0.067244  | 13   | 6.40E-07 | 0.00095  | 0.041762 | 0.10901 | 8.24E-06    | Intragenic | NM_001277287:NM_001277288 | Bcl11b:Bcl11b |
| 6   | 141073500 | 141073899 | 1       | -0.063279  | 19   | 1.70E-09 | 1.80E-05 | 0.04797  | 0.11125 | 5.28E-08    | Intragenic | NM_001277287:NM_001277288 | Bcl11b:Bcl11b |
| 6   | 141131680 | 141131854 | 1       | -0.156987  | 5    | 0.02     | 0.087    | 0.32795  | 0.48494 | 0.039778219 | Intergenic | NA                        | NA            |
| 6   | 141284071 | 141284126 | 1       | -0.132501  | 5    | 0.0045   | 0.015    | 0.37406  | 0.50656 | 0.011905878 | Intergenic | NA                        | NA            |
| 6   | 141286186 | 141286447 | 1       | -0.204393  | 5    | 0.0016   | 0.015    | 0.2094   | 0.4138  | 0.005100053 | Intergenic | NA                        | NA            |
| 6   | 141287557 | 141287629 | 1       | -0.239495  | 5    | 1.70E-05 | 0.00053  | 0.23326  | 0.47276 | 0.000120524 | Intergenic | NA                        | NA            |
| 6   | 141296507 | 141296637 | 1       | -0.159457  | 5    | 0.014    | 0.059    | 0.22288  | 0.38234 | 0.029850603 | Intergenic | NA                        | NA            |
| 6   | 141303223 | 141303323 | 1       | -0.145785  | 5    | 0.017    | 0.025    | 0.34125  | 0.48704 | 0.034796287 | Intergenic | NA                        | NA            |

| chr | start     | stop      | q-value  | methyI.diff | CpGs | pMWU     | p2DKS    | MCWLS    | MCWHS    | pMWU.fdr    | cgi.type   | transcript             | gene           |
|-----|-----------|-----------|----------|-------------|------|----------|----------|----------|----------|-------------|------------|------------------------|----------------|
| 6   | 141322771 | 141322968 | 1        | -0.238241   | 6    | 1.40E-05 | 2.50E-05 | 0.033766 | 0.27201  | 0.000103723 | Intergenic | NA                     | NA             |
| 6   | 141410148 | 141410188 | 1        | -0.089022   | 5    | 0.0024   | 0.059    | 0.11013  | 0.19915  | 0.00705499  | Intergenic | NA                     | NA             |
| 6   | 141410504 | 141410523 | 1        | -0.052982   | 5    | 0.0017   | 0.0055   | 0.025919 | 0.078901 | 0.005339493 | Intergenic | NA                     | NA             |
| 6   | 141434816 | 141434994 | 1        | -0.135296   | 5    | 0.025    | 0.088    | 0.27134  | 0.40663  | 0.047453009 | Intragenic | NM_001108723           | Cyp46a1        |
| 6   | 141453184 | 141453288 | 1        | -0.185255   | 5    | 0.0041   | 0.024    | 0.2544   | 0.43966  | 0.01100507  | Intergenic | NA                     | NA             |
| 6   | 141513591 | 141513741 | 1        | -0.152655   | 5    | 0.00017  | 0.00098  | 0.077523 | 0.23018  | 0.000806192 | Intergenic | NA                     | NA             |
| 6   | 141972522 | 141972548 | 0.21     | -0.227901   | 5    | 1.10E-07 | 6.60E-07 | 0.21229  | 0.4402   | 1.86E-06    | TSS        | NM_001013170           | Wars           |
| 6   | 142109216 | 142109232 | 1        | -0.093405   | 5    | 0.011    | 0.13     | 0.63819  | 0.7316   | 0.02463877  | Intragenic | NM_024163:NM_001111115 | Begain:Gain    |
| 6   | 142109365 | 142109431 | 1        | -0.133244   | 5    | 0.021    | 0.059    | 0.50499  | 0.63823  | 0.041207871 | Intragenic | NM_024163:NM_001111115 | Begain:Gain    |
| 6   | 142109860 | 142109914 | 1        | -0.065166   | 5    | 0.0017   | 0.025    | 0.86588  | 0.93105  | 0.005339493 | Intragenic | NM_024163:NM_001111115 | Begain:Gain    |
| 6   | 142121695 | 142121809 | 1        | -0.126172   | 8    | 0.0011   | 0.07     | 0.18961  | 0.31578  | 0.003737263 | Intragenic | NM_024163:NM_001111115 | Begain:Gain    |
| 6   | 142333578 | 142333692 | 1        | -0.162055   | 7    | 0.00083  | 0.038    | 0.29049  | 0.45255  | 0.002961434 | Intergenic | NA                     | NA             |
| 6   | 142484187 | 142484227 | 1        | 0.053206    | 5    | 0.013    | 0.13     | 0.94498  | 0.89177  | 0.028097302 | Intergenic | NA                     | NA             |
| 6   | 142748380 | 142748736 | 1.70E-07 | -0.216662   | 29   | 4.00E-14 | 5.20E-13 | 0.15159  | 0.36825  | 6.64E-12    | Intragenic | NM_053744              | Dlk1           |
| 6   | 142820360 | 142820761 | 1        | -0.21998    | 10   | 1.00E-06 | 0.00024  | 0.23351  | 0.45349  | 1.18E-05    | TSS        | NR_131064              | RGD1566401     |
| 6   | 142820794 | 142820972 | 1        | -0.124076   | 5    | 0.023    | 0.18     | 0.31767  | 0.44175  | 0.04441443  | TSS        | NR_131064              | RGD1566401     |
| 6   | 142896843 | 142896888 | 0.00031  | -0.186881   | 11   | 5.50E-12 | 9.50E-10 | 0.091893 | 0.27877  | 3.55E-10    | TSS        | NR_031785:NR_037363    | Mir341:Mir1188 |
| 6   | 142896965 | 142896999 | 1        | -0.070986   | 5    | 0.0029   | 0.015    | 0.19585  | 0.26684  | 0.008293503 | TSS        | NR_031785:NR_037363    | Mir341:Mir1188 |
| 6   | 143309222 | 143309376 | 1        | -0.12443    | 6    | 0.016    | 0.083    | 0.29746  | 0.42189  | 0.033288089 | Intergenic | NA                     | NA             |
| 6   | 143384284 | 143384382 | 1        | -0.078788   | 5    | 0.0053   | 0.0054   | 0.11261  | 0.1914   | 0.013591571 | Intergenic | NA                     | NA             |
| 6   | 143455711 | 143455825 | 1        | -0.162055   | 7    | 0.00083  | 0.038    | 0.29049  | 0.45255  | 0.002961434 | Intergenic | NA                     | NA             |
| 6   | 144050426 | 144050763 | 1        | 0.267612    | 7    | 0.00099  | 0.0083   | 0.68821  | 0.42059  | 0.003433429 | Intragenic | NM_001191112           | Ppp2r5c        |
| 6   | 144192259 | 144192331 | 1        | -0.097559   | 5    | 0.0087   | 0.024    | 0.20562  | 0.30317  | 0.020391633 | Intergenic | NA                     | NA             |
| 6   | 144278460 | 144278607 | 1        | -0.256072   | 6    | 6.30E-06 | 9.10E-05 | 0.31357  | 0.56964  | 5.33E-05    | Intergenic | NA                     | NA             |
| 6   | 144295255 | 144295395 | 1        | -0.174691   | 6    | 0.00016  | 0.0016   | 0.17698  | 0.35167  | 0.000769396 | Intragenic | NM_130749              | Mark3          |
| 6   | 144504872 | 144504935 | 1        | -0.166013   | 6    | 0.0078   | 0.027    | 0.50799  | 0.67401  | 0.018765285 | Intergenic | NA                     | NA             |
| 6   | 144521316 | 144521597 | 1        | -0.062648   | 26   | 5.10E-06 | 0.0002   | 0.11597  | 0.17861  | 4.54E-05    | Intragenic | NM_001137633           | Tnfaip2        |
| 6   | 144657549 | 144657648 | 0.35     | -0.191911   | 10   | 2.00E-05 | 1.10E-06 | 0.28927  | 0.48118  | 0.000138285 | Intragenic | NM_053620              | Cdc42bpb       |
| 6   | 144673014 | 144673141 | 1        | -0.18238    | 5    | 0.00017  | 0.00014  | 0.15547  | 0.33785  | 0.000806192 | Intergenic | NA                     | NA             |
| 6   | 144683187 | 144683465 | 0.31     | -0.085421   | 32   | 5.40E-10 | 9.50E-07 | 0.13849  | 0.22391  | 1.93E-08    | Intragenic | NM_001108061           | Amn            |
| 6   | 144683701 | 144683746 | 1        | -0.101749   | 5    | 9.80E-07 | 7.60E-06 | 0.028342 | 0.13009  | 1.16E-05    | Intragenic | NM_001108061           | Amn            |
| 6   | 144683808 | 144684510 | 1        | -0.061682   | 58   | 0.00065  | 0.00052  | 0.12766  | 0.15566  | 0.002426546 | Intragenic | NM_001108061           | Amn            |
| 6   | 144684514 | 144684534 | 1        | -0.123126   | 5    | 1.10E-06 | 7.60E-06 | 0.097561 | 0.22069  | 1.27E-05    | Intragenic | NM_001108061           | Amn            |

| chr | start     | stop      | q-value  | methy.diff | CpGs | pMWU     | p2DKS    | MCWLS    | MCWHS    | pMWU.fdr    | cgi.type   | transcript                                     | gene           |
|-----|-----------|-----------|----------|------------|------|----------|----------|----------|----------|-------------|------------|------------------------------------------------|----------------|
| 6   | 144841712 | 144841775 | 1        | -0.11764   | 7    | 0.0012   | 0.0033   | 0.20315  | 0.32078  | 0.004013471 | Intergenic | NA                                             | NA             |
| 6   | 145002299 | 145002424 | 1        | -0.25101   | 5    | 0.013    | 0.025    | 0.3986   | 0.64961  | 0.028097302 | Intragenic | NM_001012112                                   | Ankrd9         |
| 6   | 145356000 | 145356163 | 9.10E-08 | -0.296986  | 9    | 1.60E-12 | 2.80E-13 | 0.028884 | 0.32587  | 1.17E-10    | Intragenic | NM_001081973:N<br>M_001081974:N<br>M_001081972 | Klc1:Klc1:Klc1 |
| 6   | 145366043 | 145366155 | 1        | -0.170765  | 7    | 0.00054  | 0.00027  | 0.23184  | 0.4026   | 0.002077867 | Intragenic | NM_001081973:N<br>M_001081974:N<br>M_001081972 | Klc1:Klc1:Klc1 |
| 6   | 145480757 | 145480847 | 1        | -0.144743  | 5    | 0.008    | 0.059    | 0.18839  | 0.33313  | 0.019059477 | Intergenic | NA                                             | NA             |
| 6   | 145524525 | 145524642 | 1        | -0.14108   | 7    | 0.0001   | 0.00029  | 0.16611  | 0.30719  | 0.000521119 | Intergenic | NA                                             | NA             |
| 6   | 145756637 | 145756697 | 1        | -0.162903  | 5    | 6.30E-06 | 7.10E-05 | 0.22534  | 0.38825  | 5.33E-05    | Intragenic | NM_001170348                                   | Kif26a         |
| 6   | 145759328 | 145759460 | 0.0011   | -0.291675  | 8    | 2.30E-10 | 3.40E-09 | 0.23619  | 0.52787  | 9.34E-09    | Intragenic | NM_001170348                                   | Kif26a         |
| 6   | 145918203 | 145918363 | 1        | -0.177559  | 7    | 0.00069  | 0.013    | 0.19692  | 0.37448  | 0.002570282 | Intergenic | NA                                             | NA             |
| 6   | 146054193 | 146054570 | 1        | -0.120151  | 10   | 0.00022  | 0.0059   | 0.1545   | 0.27465  | 0.000994261 | Intergenic | NA                                             | NA             |
| 6   | 146342977 | 146343141 | 1        | -0.109713  | 7    | 0.011    | 0.077    | 0.45925  | 0.56897  | 0.02463877  | Intergenic | NA                                             | NA             |
| 6   | 146365155 | 146365255 | 1        | -0.203717  | 6    | 0.00026  | 0.0016   | 0.16724  | 0.37095  | 0.001130807 | Intergenic | NA                                             | NA             |
| 6   | 146720307 | 146720389 | 1        | -0.119867  | 5    | 0.0008   | 0.0031   | 0.72179  | 0.84166  | 0.002866309 | Intergenic | NA                                             | NA             |
| 6   | 146777093 | 146777229 | 1        | -0.242077  | 8    | 6.80E-07 | 3.00E-05 | 0.21556  | 0.45764  | 8.62E-06    | Intragenic | NM_001106761                                   | Brf1           |
| 6   | 150005850 | 150005878 | 1        | 0.077565   | 5    | 0.0094   | 0.038    | 0.2334   | 0.15584  | 0.021723038 | Intergenic | NA                                             | NA             |
| 6   | 152450905 | 152450947 | 1        | -0.108617  | 5    | 0.00059  | 0.015    | 0.76744  | 0.87606  | 0.002242971 | Intergenic | NA                                             | NA             |
| 6   | 152603239 | 152603281 | 1        | -0.092936  | 5    | 0.0016   | 0.0093   | 0.78312  | 0.87606  | 0.005100053 | Intergenic | NA                                             | NA             |
| 6   | 153259306 | 153259416 | 1        | -0.141323  | 5    | 0.0024   | 0.025    | 0.50055  | 0.64187  | 0.00705499  | Intergenic | NA                                             | NA             |
| 6   | 153361684 | 153361865 | 1        | -0.168744  | 5    | 0.0041   | 0.13     | 0.42465  | 0.5934   | 0.01100507  | Intragenic | NM_031600                                      | Ptprn2         |
| 7   | 18266     | 18307     | 1        | -0.125272  | 5    | 0.0016   | 0.0092   | 0.26145  | 0.38672  | 0.005100053 | Intergenic | NA                                             | NA             |
| 7   | 19024     | 19194     | 1        | -0.06625   | 14   | 1.10E-07 | 0.00065  | 0.10965  | 0.1759   | 1.86E-06    | Intergenic | NA                                             | NA             |
| 7   | 19970     | 20097     | 1        | -0.140916  | 10   | 0.0063   | 0.0041   | 0.48133  | 0.62225  | 0.015629046 | Intergenic | NA                                             | NA             |
| 7   | 720267    | 720306    | 1        | -0.144109  | 5    | 0.002    | 0.024    | 0.67952  | 0.82363  | 0.006079939 | Intergenic | NA                                             | NA             |
| 7   | 736946    | 737164    | 1        | -0.074521  | 5    | 0.0013   | 0.00013  | 0.12746  | 0.20198  | 0.004277683 | Intergenic | NA                                             | NA             |
| 7   | 855171    | 855235    | 1        | -0.091432  | 5    | 0.00019  | 0.00028  | 0.04944  | 0.14087  | 0.000879857 | Intergenic | NA                                             | NA             |
| 7   | 939713    | 939782    | 1        | -0.129592  | 5    | 0.012    | 0.024    | 0.5569   | 0.68649  | 0.026435197 | Intergenic | NA                                             | NA             |
| 7   | 1609945   | 1609983   | 1        | -0.062532  | 5    | 0.0012   | 0.038    | 0.1677   | 0.23023  | 0.004013471 | Intergenic | NA                                             | NA             |
| 7   | 1609987   | 1610020   | 1        | -0.092642  | 5    | 0.00065  | 0.0055   | 0.16033  | 0.25297  | 0.002426546 | Intergenic | NA                                             | NA             |
| 7   | 1610110   | 1610145   | 1        | -0.065987  | 5    | 0.0024   | 0.0018   | 0.047053 | 0.11304  | 0.00705499  | Intergenic | NA                                             | NA             |
| 7   | 1610800   | 1610851   | 1        | -0.073621  | 5    | 5.60E-07 | 1.60E-05 | 0.078464 | 0.15208  | 7.29E-06    | Intergenic | NA                                             | NA             |
| 7   | 1610885   | 1610924   | 1        | -0.088357  | 5    | 1.30E-06 | 3.50E-05 | 0.080223 | 0.16858  | 1.46E-05    | Intergenic | NA                                             | NA             |
| 7   | 1611802   | 1611913   | 1        | -0.086247  | 5    | 0.00039  | 0.0091   | 0.13034  | 0.21658  | 0.001587612 | Intergenic | NA                                             | NA             |
| 7   | 1659689   | 1660236   | 1        | -0.08748   | 5    | 0.021    | 0.038    | 0.034549 | 0.12203  | 0.041207871 | Intergenic | NA                                             | NA             |
| 7   | 1662247   | 1662290   | 1        | -0.057209  | 5    | 9.80E-05 | 0.0005   | 0.035508 | 0.092717 | 0.000512474 | Intergenic | NA                                             | NA             |
| 7   | 2877154   | 2877390   | 1        | -0.132721  | 10   | 2.70E-05 | 0.0011   | 0.1488   | 0.28152  | 0.000178372 | Intergenic | NA                                             | NA             |



| chr | start    | stop     | q-value | methy.diff | CpGs | pMWU     | p2DKS    | MCWLS     | MCWHS     | pMWU.fdr    | cgi.type   | transcript   | gene      |
|-----|----------|----------|---------|------------|------|----------|----------|-----------|-----------|-------------|------------|--------------|-----------|
| 7   | 2878349  | 2878405  | 1       | -0.12648   | 5    | 0.00036  | 0.0017   | 0.64899   | 0.77547   | 0.001486639 | Intergenic | NA           | NA        |
| 7   | 3047481  | 3047710  | 0.21    | 0.058947   | 20   | 4.00E-14 | 6.50E-07 | 0.067815  | 0.0088688 | 6.64E-12    | Intergenic | NA           | NA        |
| 7   | 3290961  | 3291094  | 1       | -0.168871  | 5    | 0.0019   | 0.037    | 0.11342   | 0.28229   | 0.005855937 | Intergenic | NA           | NA        |
| 7   | 4523943  | 4524003  | 1       | -0.068752  | 5    | 0.0014   | 0.0018   | 0.75501   | 0.82376   | 0.004540837 | Intergenic | NA           | NA        |
| 7   | 4687242  | 4687321  | 1       | -0.261508  | 5    | 0.019    | 0.037    | 0.23422   | 0.49573   | 0.038322088 | Intergenic | NA           | NA        |
| 7   | 6735903  | 6735950  | 1       | -0.121353  | 5    | 0.0008   | 0.0054   | 0.24838   | 0.36974   | 0.002866309 | Intergenic | NA           | NA        |
| 7   | 9421578  | 9421669  | 0.49    | -0.306542  | 5    | 2.40E-07 | 1.50E-06 | 0.27261   | 0.57915   | 3.57E-06    | Intergenic | NA           | NA        |
| 7   | 11158548 | 11158570 | 1       | -0.144542  | 5    | 0.011    | 0.039    | 0.34027   | 0.48481   | 0.02463877  | Intragenic | NM_001039013 | Tle2      |
| 7   | 11182240 | 11182353 | 1       | -0.225965  | 6    | 5.20E-06 | 8.80E-05 | 0.10434   | 0.33031   | 4.61E-05    | Intragenic | NM_019220    | Aes       |
| 7   | 11186148 | 11186268 | 1       | -0.127159  | 5    | 0.00032  | 0.0055   | 0.1022    | 0.22936   | 0.001346443 | TSS        | NM_019220    | Aes       |
| 7   | 11203592 | 11203666 | 1       | -0.190178  | 5    | 1.00E-05 | 3.30E-05 | 0.12066   | 0.31084   | 7.82E-05    | Intragenic | NM_031033    | Gna11     |
| 7   | 11222279 | 11222379 | 1       | -0.094247  | 7    | 0.0017   | 0.0022   | 0.34765   | 0.4419    | 0.005339493 | TSS        | NM_053542    | Gna15     |
| 7   | 11241801 | 11241811 | 1       | -0.093341  | 5    | 0.0008   | 0.0018   | 0.12069   | 0.21403   | 0.002866309 | Intragenic | NM_053542    | Gna15     |
| 7   | 11273160 | 11273209 | 1       | -0.054235  | 5    | 0.0032   | 0.024    | 0.055382  | 0.10962   | 0.008990975 | Intragenic | NM_001135603 | Celf5     |
| 7   | 11286682 | 11286748 | 1       | -0.147285  | 5    | 0.016    | 0.038    | 0.45838   | 0.60566   | 0.033288089 | Intragenic | NM_001135603 | Celf5     |
| 7   | 11293077 | 11293148 | 1       | -0.093169  | 5    | 0.0049   | 0.087    | 0.13448   | 0.22765   | 0.012753585 | Intergenic | NA           | NA        |
| 7   | 11325470 | 11325494 | 1       | -0.163584  | 5    | 0.00015  | 0.00026  | 0.29264   | 0.45623   | 0.000724207 | Intragenic | NM_031567    | Nfic      |
| 7   | 11331722 | 11331874 | 1       | -0.073387  | 8    | 0.00018  | 0.0016   | 0.028154  | 0.10154   | 0.000849258 | Intragenic | NM_031567    | Nfic      |
| 7   | 11333902 | 11333979 | 0.49    | -0.07884   | 5    | 2.10E-07 | 1.50E-06 | 0.0046402 | 0.08348   | 3.19E-06    | Intragenic | NM_031567    | Nfic      |
| 7   | 11348092 | 11348213 | 1       | -0.208329  | 7    | 5.60E-05 | 0.00017  | 0.22799   | 0.43632   | 0.000320912 | Intergenic | NA           | NA        |
| 7   | 11383826 | 11384007 | 0.0024  | -0.234895  | 15   | 5.00E-10 | 7.30E-09 | 0.18982   | 0.42471   | 1.82E-08    | TSS        | NM_001109605 | LOC690617 |
| 7   | 11392898 | 11393040 | 1       | -0.16366   | 7    | 0.00054  | 0.0083   | 0.42348   | 0.58714   | 0.002077867 | Intergenic | NA           | NA        |
| 7   | 11407100 | 11407154 | 0.67    | -0.238801  | 7    | 1.50E-06 | 2.10E-06 | 0.51615   | 0.75495   | 1.65E-05    | TSS        | NM_001108731 | Hmg20b    |
| 7   | 11414563 | 11414639 | 1       | -0.199269  | 5    | 0.00019  | 0.0032   | 0.20033   | 0.3996    | 0.000879857 | TSS        | NM_001109282 | Gipc3     |
| 7   | 11421546 | 11421773 | 1       | -0.105703  | 23   | 0.00012  | 0.0058   | 0.42872   | 0.55609   | 0.000603617 | Intragenic | NM_017054    | Tbxa2r    |
| 7   | 11421826 | 11421862 | 1       | -0.27642   | 5    | 8.80E-05 | 0.00053  | 0.15084   | 0.42726   | 0.000466886 | Intragenic | NM_017054    | Tbxa2r    |
| 7   | 11421979 | 11421998 | 1       | -0.151496  | 5    | 0.00015  | 0.00097  | 0.21117   | 0.36266   | 0.000724207 | Intragenic | NM_017054    | Tbxa2r    |
| 7   | 11422030 | 11422092 | 0.077   | -0.207581  | 8    | 2.90E-09 | 2.40E-07 | 0.088524  | 0.2961    | 8.18E-08    | Intragenic | NM_017054    | Tbxa2r    |
| 7   | 11463733 | 11463843 | 1       | -0.101449  | 5    | 0.0024   | 0.0055   | 0.099345  | 0.20079   | 0.00705499  | Intergenic | NA           | NA        |
| 7   | 11477394 | 11477462 | 1       | -0.164956  | 5    | 0.00029  | 0.00053  | 0.42762   | 0.59257   | 0.001239307 | Intragenic | NM_001108073 | Tjp3      |
| 7   | 11502205 | 11502310 | 1       | -0.091763  | 5    | 0.0027   | 0.059    | 0.060775  | 0.15254   | 0.007840962 | Intergenic | NA           | NA        |
| 7   | 11562342 | 11562381 | 1       | -0.350641  | 5    | 4.20E-07 | 1.60E-05 | 0.26175   | 0.61239   | 5.76E-06    | Intragenic | NM_022546    | Dapk3     |
| 7   | 11749085 | 11749227 | 1       | -0.065167  | 5    | 0.014    | 0.039    | 0.064498  | 0.12966   | 0.029850603 | TSS        | NM_024138    | Gng7      |
| 7   | 11765317 | 11765419 | 1       | -0.2366    | 5    | 7.10E-06 | 7.10E-05 | 0.083813  | 0.32041   | 5.86E-05    | Intragenic | NM_024138    | Gng7      |
| 7   | 11771399 | 11771510 | 1       | -0.134643  | 5    | 0.00044  | 0.00028  | 0.067457  | 0.2021    | 0.001760146 | Intragenic | NM_024138    | Gng7      |
| 7   | 11772387 | 11772565 | 1       | -0.086125  | 10   | 0.0014   | 0.008    | 0.20042   | 0.28655   | 0.004540837 | Intragenic | NM_024138    | Gng7      |
| 7   | 11813354 | 11813594 | 1       | -0.144503  | 6    | 0.00072  | 0.0016   | 0.095262  | 0.23976   | 0.002634665 | TSS        | NM_001008321 | Gadd45b   |
| 7   | 11858915 | 11858954 | 1       | -0.157942  | 5    | 8.80E-05 | 0.0055   | 0.26575   | 0.42369   | 0.000466886 | Intragenic | NM_001047100 | Tmprss9   |
| 7   | 11910795 | 11910966 | 1       | -0.111205  | 8    | 0.024    | 0.16     | 0.24656   | 0.35777   | 0.046241462 | Intragenic | NM_001109609 | Lingo3    |

| chr | start    | stop     | q-value  | methy.diff | CpGs | pMWU     | p2DKS    | MCWLS    | MCWHS   | pMWU.fdr    | cgi.type   | transcript                                  | gene              |
|-----|----------|----------|----------|------------|------|----------|----------|----------|---------|-------------|------------|---------------------------------------------|-------------------|
| 7   | 11913215 | 11913429 | 1        | -0.076234  | 15   | 0.0082   | 0.16     | 0.23467  | 0.3109  | 0.019516617 | Intragenic | NM_001109609                                | Lingo3            |
| 7   | 11913880 | 11913957 | 1        | -0.139505  | 11   | 1.10E-05 | 0.0014   | 0.41776  | 0.55727 | 8.53E-05    | Intragenic | NM_001109609                                | Lingo3            |
| 7   | 11920722 | 11920843 | 1        | -0.107765  | 5    | 0.00048  | 0.0055   | 0.096519 | 0.20428 | 0.001881331 | TSS        | NM_001297557:N<br>M_001301048:N<br>M_139081 | Oaz1:Oaz1:Oaz1    |
| 7   | 11940062 | 11940561 | 0.39     | -0.162165  | 27   | 6.90E-10 | 1.20E-06 | 0.19408  | 0.35624 | 2.39E-08    | Intragenic | NM_001109591                                | Jsrp1             |
| 7   | 12006804 | 12006976 | 0.016    | -0.181538  | 8    | 2.50E-10 | 4.90E-08 | 0.081834 | 0.26337 | 1.00E-08    | TSS        | NM_001100719                                | Ap3d1             |
| 7   | 12109047 | 12109084 | 1        | -0.316045  | 5    | 5.00E-05 | 0.00052  | 0.34166  | 0.65771 | 0.000291675 | Intergenic | NA                                          | NA                |
| 7   | 12115118 | 12115188 | 1        | -0.180934  | 5    | 0.0016   | 0.0092   | 0.17955  | 0.36048 | 0.005100053 | Intragenic | NM_001033870:N<br>M_023102                  | Csnk1g2:Csnk1g2   |
| 7   | 12163296 | 12163349 | 1        | -0.163901  | 5    | 0.008    | 0.025    | 0.50004  | 0.66394 | 0.019059477 | Intragenic | NM_001006983                                | Abhd17a           |
| 7   | 12163475 | 12163575 | 1        | -0.176879  | 12   | 5.70E-05 | 0.00031  | 0.51383  | 0.69071 | 0.000326487 | Intragenic | NM_001006983                                | Abhd17a           |
| 7   | 12163595 | 12163717 | 1        | -0.135857  | 5    | 0.0058   | 0.0055   | 0.28034  | 0.4162  | 0.014624129 | Intragenic | NM_001006983                                | Abhd17a           |
| 7   | 12286680 | 12286793 | 1        | -0.100155  | 5    | 0.0029   | 0.015    | 0.17652  | 0.27667 | 0.008293503 | Intergenic | NA                                          | NA                |
| 7   | 12405872 | 12405948 | 1        | -0.098983  | 6    | 0.0015   | 0.04     | 0.12644  | 0.22543 | 0.004849475 | Intergenic | NA                                          | NA                |
| 7   | 12434084 | 12434213 | 7.40E-07 | -0.404065  | 13   | 4.70E-14 | 2.30E-12 | 0.27425  | 0.67831 | 6.64E-12    | Intragenic | NM_001106769                                | Apc2              |
| 7   | 12443973 | 12444170 | 1        | -0.201402  | 5    | 0.00029  | 0.0092   | 0.13364  | 0.33505 | 0.001239307 | TSS        | NM_001106769                                | Apc2              |
| 7   | 12452004 | 12452071 | 1        | -0.134112  | 5    | 0.0019   | 0.0091   | 0.11905  | 0.25317 | 0.005855937 | TSS        | NM_017151                                   | Rps15             |
| 7   | 12458949 | 12459060 | 1        | -0.185162  | 5    | 1.90E-05 | 0.00014  | 0.076286 | 0.26145 | 0.000131674 | Intergenic | NA                                          | NA                |
| 7   | 12462883 | 12463224 | 0.56     | -0.205942  | 11   | 6.60E-10 | 1.70E-06 | 0.11697  | 0.32291 | 2.31E-08    | Intragenic | NM_001025742                                | Dazap1            |
| 7   | 12468379 | 12468530 | 1        | -0.151018  | 5    | 0.012    | 0.087    | 0.27157  | 0.42259 | 0.026435197 | Intragenic | NM_001025742                                | Dazap1            |
| 7   | 12474329 | 12474833 | 1        | -0.142133  | 5    | 0.0016   | 0.015    | 0.063791 | 0.20592 | 0.005100053 | Intragenic | NM_001025742                                | Dazap1            |
| 7   | 12570817 | 12570913 | 1        | -0.139099  | 5    | 9.80E-05 | 0.0055   | 0.14841  | 0.28751 | 0.000512474 | TSS        | NM_001109283                                | RGD1562114        |
| 7   | 12570926 | 12571138 | 1        | -0.056002  | 18   | 0.011    | 0.0005   | 0.19483  | 0.25083 | 0.02463877  | TSS        | NM_001109283                                | RGD1562114        |
| 7   | 12686509 | 12686579 | 1        | -0.234564  | 5    | 1.30E-05 | 3.40E-05 | 0.34503  | 0.57959 | 9.66E-05    | Intragenic | NM_001039849:N<br>M_017165                  | Gpx4:Gpx4         |
| 7   | 12741544 | 12741639 | 1        | -0.189187  | 5    | 2.40E-05 | 0.00052  | 0.089525 | 0.27871 | 0.000160049 | Intragenic | NM_001108067                                | Hmha1             |
| 7   | 12804243 | 12804519 | 1        | -0.06219   | 13   | 3.30E-06 | 9.10E-05 | 0.044463 | 0.10665 | 3.16E-05    | TSS        | NM_001077642                                | Cfd               |
| 7   | 12830791 | 12831046 | 1        | -0.135449  | 12   | 0.00027  | 0.0035   | 0.17236  | 0.30781 | 0.001172178 | Intragenic | NM_001108067:N<br>M_181634                  | Hmha1:Plppr3      |
| 7   | 12832289 | 12832455 | 1        | -0.140007  | 8    | 0.00019  | 0.0039   | 0.15403  | 0.29404 | 0.000879857 | Intragenic | NM_001108067:N<br>M_181634                  | Hmha1:Plppr3      |
| 7   | 12835745 | 12835943 | 1        | -0.146684  | 7    | 0.00051  | 0.0054   | 0.27014  | 0.41682 | 0.00199501  | Intragenic | NM_001108067:N<br>M_001271057:N<br>M_022516 | Hmha1:Ptbp1:Ptbp1 |
| 7   | 12866173 | 12866404 | 1        | -0.148503  | 5    | 0.0011   | 0.0054   | 0.072803 | 0.22131 | 0.003737263 | Intragenic | NM_001108067                                | Hmha1             |
| 7   | 12875999 | 12876155 | 0.004    | -0.243875  | 6    | 7.80E-09 | 1.20E-08 | 0.10697  | 0.35084 | 2.01E-07    | TSS        | NM_001109284                                | Misp              |
| 7   | 12881741 | 12881793 | 1        | -0.201302  | 5    | 4.80E-06 | 7.00E-05 | 0.28599  | 0.48729 | 4.29E-05    | Intragenic | NM_001108067:N<br>M_130829                  | Hmha1:Palms       |

| chr | start    | stop     | q-value  | methyI.diff | CpGs | pMWU     | p2DKS    | MCWLS    | MCWHS    | pMWU.fdr    | cgi.type   | transcript             | gene       |
|-----|----------|----------|----------|-------------|------|----------|----------|----------|----------|-------------|------------|------------------------|------------|
| 7   | 12953589 | 12953733 | 1        | -0.090161   | 7    | 0.0002   | 0.00017  | 0.10221  | 0.19237  | 0.00092049  | Intragenic | NM_130829              | Palm       |
| 7   | 12962277 | 12962785 | 1        | -0.129054   | 5    | 0.013    | 0.18     | 0.075347 | 0.2044   | 0.028097302 | TSS        | NM_130829              | Palm       |
| 7   | 12963104 | 12963189 | 1        | -0.107042   | 5    | 0.0068   | 0.18     | 0.090112 | 0.19715  | 0.016642688 | TSS        | NM_130829              | Palm       |
| 7   | 13008159 | 13008290 | 0.48     | -0.131931   | 6    | 2.80E-07 | 1.50E-06 | 0.03336  | 0.16529  | 4.09E-06    | Intergenic | NA                     | NA         |
| 7   | 13021808 | 13021860 | 1        | -0.221391   | 5    | 0.00023  | 0.0017   | 0.40093  | 0.62232  | 0.00102405  | Intergenic | NA                     | NA         |
| 7   | 13021865 | 13021879 | 1        | -0.318128   | 5    | 4.90E-07 | 1.60E-05 | 0.2854   | 0.60353  | 6.54E-06    | Intergenic | NA                     | NA         |
| 7   | 13021913 | 13021929 | 1        | -0.141744   | 5    | 0.0032   | 0.015    | 0.1645   | 0.30624  | 0.008990975 | Intergenic | NA                     | NA         |
| 7   | 13021930 | 13021966 | 1        | -0.191674   | 5    | 4.20E-07 | 1.60E-05 | 0.28513  | 0.47681  | 5.76E-06    | Intragenic | NM_053684              | Hcn2       |
| 7   | 13021982 | 13022089 | 1        | -0.099185   | 9    | 0.0026   | 0.046    | 0.21041  | 0.30959  | 0.007616821 | Intragenic | NM_053684              | Hcn2       |
| 7   | 13022092 | 13022275 | 4.30E-08 | -0.203814   | 28   | 4.20E-14 | 1.30E-13 | 0.16149  | 0.3653   | 6.64E-12    | Intragenic | NM_053684              | Hcn2       |
| 7   | 13032320 | 13032463 | 1        | -0.050032   | 13   | 0.016    | 0.0063   | 0.87184  | 0.92188  | 0.033288089 | Intragenic | NM_053684              | Hcn2       |
| 7   | 13047642 | 13047708 | 0.037    | -0.332242   | 5    | 1.10E-07 | 1.10E-07 | 0.16639  | 0.49863  | 1.86E-06    | Intragenic | NM_001109882:NM_012783 | Bsg:Bsg    |
| 7   | 13143918 | 13144813 | 0.0016   | -0.16585    | 32   | 5.70E-14 | 5.00E-09 | 0.20301  | 0.36886  | 7.06E-12    | TSS        | NM_001109285           | C2cd4c     |
| 7   | 13168306 | 13168428 | 1        | -0.197986   | 5    | 0.00044  | 0.0031   | 0.16638  | 0.36437  | 0.001760146 | Intergenic | NA                     | NA         |
| 7   | 13217498 | 13217601 | 1        | -0.288184   | 5    | 0.00044  | 0.0089   | 0.41497  | 0.70316  | 0.001760146 | Intragenic | NM_001108737           | Mier2      |
| 7   | 14132854 | 14132884 | 1        | -0.265067   | 5    | 5.60E-05 | 0.00026  | 0.51767  | 0.78274  | 0.000320912 | Intergenic | NA                     | NA         |
| 7   | 14344684 | 14344745 | 1        | -0.064954   | 5    | 0.015    | 0.088    | 0.072476 | 0.13743  | 0.031584896 | TSS        | NM_020087              | Notch3     |
| 7   | 14363466 | 14363958 | 1        | -0.088606   | 7    | 0.013    | 0.1      | 0.10513  | 0.19373  | 0.028097302 | Intergenic | NA                     | NA         |
| 7   | 14559960 | 14560161 | 7.90E-06 | -0.210422   | 12   | 5.20E-14 | 2.40E-11 | 0.065986 | 0.27641  | 6.72E-12    | Intragenic | NM_001134562           | Rasal3     |
| 7   | 14563730 | 14564672 | 1.30E-19 | -0.135735   | 50   | 3.70E-14 | 4.00E-25 | 0.10526  | 0.241    | 6.64E-12    | Intragenic | NM_001134562           | Rasal3     |
| 7   | 14824109 | 14824194 | 1        | -0.304761   | 9    | 1.60E-07 | 9.10E-06 | 0.27533  | 0.5801   | 2.51E-06    | Intragenic | NM_173124              | Cyp4f5     |
| 7   | 14923413 | 14923498 | 1        | -0.304761   | 9    | 1.60E-07 | 9.10E-06 | 0.27533  | 0.5801   | 2.51E-06    | Intragenic | NM_173124              | Cyp4f5     |
| 7   | 15550645 | 15550683 | 1        | -0.180774   | 5    | 1.90E-05 | 0.00051  | 0.42917  | 0.60994  | 0.000131674 | Intergenic | NA                     | NA         |
| 7   | 16760872 | 16761142 | 1        | -0.101975   | 5    | 0.025    | 0.088    | 0.59746  | 0.69943  | 0.047453009 | Intergenic | NA                     | NA         |
| 7   | 16772316 | 16772393 | 1        | -0.143307   | 5    | 0.0038   | 0.0017   | 0.29627  | 0.43958  | 0.010352437 | Intergenic | NA                     | NA         |
| 7   | 18676137 | 18676240 | 1        | -0.199986   | 5    | 2.40E-05 | 0.0032   | 0.14654  | 0.34653  | 0.000160049 | TSS        | NM_001009664           | Zfp414     |
| 7   | 20997916 | 20998099 | 1        | -0.113668   | 11   | 0.012    | 0.027    | 0.42174  | 0.53541  | 0.026435197 | Intergenic | NA                     | NA         |
| 7   | 21253457 | 21253479 | 1        | -0.054272   | 5    | 0.011    | 0.038    | 0.030446 | 0.084718 | 0.02463877  | Intergenic | NA                     | NA         |
| 7   | 21367469 | 21367678 | 1        | -0.09023    | 12   | 0.0038   | 0.11     | 0.2765   | 0.36673  | 0.010352437 | Intergenic | NA                     | NA         |
| 7   | 22168886 | 22169017 | 1        | -0.113797   | 5    | 0.0053   | 0.0093   | 0.58542  | 0.69922  | 0.013591571 | Intergenic | NA                     | NA         |
| 7   | 22616064 | 22616100 | 1        | -0.164107   | 5    | 0.0074   | 0.088    | 0.39394  | 0.55805  | 0.017853001 | Intergenic | NA                     | NA         |
| 7   | 22617053 | 22617099 | 0.046    | -0.051161   | 7    | 9.80E-10 | 1.40E-07 | 0.023467 | 0.074628 | 3.28E-08    | Intergenic | NA                     | NA         |
| 7   | 22617105 | 22617138 | 1        | -0.126001   | 5    | 7.10E-06 | 0.00014  | 0.079274 | 0.20528  | 5.86E-05    | Intergenic | NA                     | NA         |
| 7   | 22728302 | 22728366 | 1        | -0.091432   | 5    | 0.00019  | 0.00028  | 0.04944  | 0.14087  | 0.000879857 | Intergenic | NA                     | NA         |
| 7   | 23700593 | 23700653 | 1        | -0.194541   | 5    | 0.0041   | 0.038    | 0.38958  | 0.58412  | 0.01100507  | Intragenic | NM_017109:NM_012886    | Syn3:Timp3 |
| 7   | 23726346 | 23726572 | 1        | -0.146367   | 6    | 3.70E-05 | 0.0027   | 0.066152 | 0.21252  | 0.000229545 | Intragenic | NM_017109:NM_012886    | Syn3:Timp3 |

| chr | start    | stop     | q-value  | methy.diff | CpGs | pMWU     | p2DKS    | MCWLS    | MCWHS   | pMWU.fdr    | cgi.type   | transcript          | gene       |
|-----|----------|----------|----------|------------|------|----------|----------|----------|---------|-------------|------------|---------------------|------------|
| 7   | 23729277 | 23729487 | 1        | -0.240405  | 7    | 2.20E-07 | 9.40E-05 | 0.094878 | 0.33528 | 3.32E-06    | Intragenic | NM_017109:NM_012886 | Syn3:Timp3 |
| 7   | 25743623 | 25743833 | 1        | -0.193375  | 7    | 0.00019  | 0.0021   | 0.20532  | 0.3987  | 0.000879857 | Intergenic | NA                  | NA         |
| 7   | 26714147 | 26714327 | 1        | -0.108159  | 10   | 3.70E-05 | 0.0019   | 0.17679  | 0.28495 | 0.000229545 | Intragenic | NM_001108742        | Slc41a2    |
| 7   | 26778157 | 26778302 | 1        | -0.18389   | 5    | 0.0032   | 0.0054   | 0.24804  | 0.43193 | 0.008990975 | Intragenic | NM_001108079        | Chst11     |
| 7   | 26817349 | 26817407 | 1        | -0.169341  | 5    | 0.0068   | 0.059    | 0.30868  | 0.47802 | 0.016642688 | Intragenic | NM_001108079        | Chst11     |
| 7   | 26984190 | 26984326 | 1        | -0.238151  | 7    | 1.30E-07 | 1.60E-05 | 0.17954  | 0.4177  | 2.11E-06    | Intergenic | NA                  | NA         |
| 7   | 27024204 | 27024281 | 1        | -0.07827   | 5    | 0.012    | 0.087    | 0.83844  | 0.91671 | 0.026435197 | Intergenic | NA                  | NA         |
| 7   | 27134110 | 27134359 | 1        | -0.194182  | 9    | 0.0002   | 0.018    | 0.44877  | 0.64295 | 0.00092049  | Intergenic | NA                  | NA         |
| 7   | 27146758 | 27146795 | 1        | -0.169381  | 5    | 0.0019   | 0.0018   | 0.45819  | 0.62758 | 0.005855937 | Intergenic | NA                  | NA         |
| 7   | 27164216 | 27164263 | 1        | -0.200218  | 5    | 0.0053   | 0.015    | 0.50879  | 0.70901 | 0.013591571 | Intergenic | NA                  | NA         |
| 7   | 27484083 | 27484165 | 1        | -0.305581  | 5    | 5.00E-05 | 0.00014  | 0.38329  | 0.68887 | 0.000291675 | Intergenic | NA                  | NA         |
| 7   | 27997871 | 27997959 | 1        | -0.082632  | 7    | 0.023    | 0.056    | 0.58006  | 0.6627  | 0.04441443  | Intergenic | NA                  | NA         |
| 7   | 29872019 | 29872079 | 1        | -0.216075  | 5    | 0.00014  | 0.00098  | 0.5802   | 0.79627 | 0.000684451 | Intragenic | NM_001106778        | Ano4       |
| 7   | 30178629 | 30178745 | 1        | -0.245825  | 5    | 0.00072  | 0.0018   | 0.16945  | 0.41527 | 0.002634665 | Intragenic | NM_021745           | Nr1h4      |
| 7   | 30205932 | 30205973 | 1        | -0.111128  | 6    | 0.0032   | 0.018    | 0.092273 | 0.2034  | 0.008990975 | Intragenic | NM_021745           | Nr1h4      |
| 7   | 31359543 | 31359610 | 1        | -0.1022    | 7    | 0.0051   | 0.037    | 0.46016  | 0.56236 | 0.013208341 | Intragenic | NM_001271371        | Anks1b     |
| 7   | 31551264 | 31551359 | 1        | -0.104808  | 5    | 0.0074   | 0.025    | 0.66351  | 0.76832 | 0.017853001 | Intragenic | NM_001271371        | Anks1b     |
| 7   | 31963699 | 31963847 | 1        | -0.124796  | 9    | 2.90E-05 | 0.004    | 0.19909  | 0.32389 | 0.000187968 | Intergenic | NA                  | NA         |
| 7   | 34137032 | 34137127 | 1        | -0.091213  | 5    | 0.00065  | 0.015    | 0.031615 | 0.12283 | 0.002426546 | Intragenic | NM_001108082        | Cdk17      |
| 7   | 34197327 | 34197378 | 1        | -0.051145  | 5    | 0.0011   | 0.015    | 0.052068 | 0.10321 | 0.003737263 | Intergenic | NA                  | NA         |
| 7   | 34392009 | 34392313 | 1        | -0.131681  | 5    | 0.019    | 0.0055   | 0.30264  | 0.43432 | 0.038322088 | TSS        | NM_017159           | Hal        |
| 7   | 34465567 | 34465688 | 1        | -0.203174  | 5    | 7.80E-05 | 0.0018   | 0.087713 | 0.29089 | 0.000422981 | Intragenic | NM_001191781        | Amdhd1     |
| 7   | 34524672 | 34524773 | 1        | -0.078772  | 5    | 0.0087   | 0.0055   | 0.74393  | 0.8227  | 0.020391633 | Intergenic | NA                  | NA         |
| 7   | 34760898 | 34760997 | 1        | -0.16595   | 5    | 0.011    | 0.18     | 0.30206  | 0.46801 | 0.02463877  | Intergenic | NA                  | NA         |
| 7   | 34792506 | 34792550 | 1        | -0.082368  | 5    | 8.10E-06 | 7.10E-05 | 0.024757 | 0.10712 | 6.58E-05    | Intragenic | NM_001108083        | Usp44      |
| 7   | 34805715 | 34805836 | 1        | -0.130882  | 11   | 1.90E-06 | 0.0001   | 0.63108  | 0.76196 | 2.01E-05    | Intragenic | NM_001108083        | Usp44      |
| 7   | 35266744 | 35266819 | 0.97     | -0.228798  | 8    | 6.80E-07 | 3.00E-06 | 0.21079  | 0.43959 | 8.62E-06    | Intergenic | NA                  | NA         |
| 7   | 35584366 | 35584491 | 1        | -0.243106  | 5    | 0.00029  | 0.0018   | 0.1602   | 0.40331 | 0.001239307 | Intragenic | NM_001108084        | Tmcc3      |
| 7   | 36026191 | 36026335 | 2.60E-06 | -0.245602  | 10   | 1.20E-13 | 8.20E-12 | 0.031586 | 0.27719 | 1.24E-11    | Intergenic | NA                  | NA         |
| 7   | 36498797 | 36499079 | 1        | -0.148218  | 5    | 0.016    | 0.024    | 0.50781  | 0.65602 | 0.033288089 | Intergenic | NA                  | NA         |
| 7   | 36700269 | 36700361 | 0.036    | -0.206044  | 5    | 6.30E-08 | 1.10E-07 | 0.072064 | 0.27811 | 1.18E-06    | Intragenic | NM_053598           | Nudt4      |
| 7   | 36846734 | 36846830 | 1        | -0.080886  | 5    | 0.0017   | 0.00028  | 0.14191  | 0.2228  | 0.005339493 | Intergenic | NA                  | NA         |
| 7   | 36916939 | 36917105 | 1        | -0.148312  | 7    | 1.40E-05 | 0.0013   | 0.16359  | 0.3119  | 0.000103723 | Intergenic | NA                  | NA         |
| 7   | 38987675 | 38987785 | 1        | -0.17177   | 5    | 0.023    | 0.038    | 0.44152  | 0.61329 | 0.04441443  | TSS        | NM_001025052        | Ccer1      |
| 7   | 40170645 | 40171029 | 1        | -0.26776   | 5    | 0.0011   | 0.024    | 0.3537   | 0.62146 | 0.003737263 | Intergenic | NA                  | NA         |
| 7   | 41447809 | 41448122 | 1        | -0.102865  | 8    | 0.005    | 0.0036   | 0.51307  | 0.61594 | 0.012977322 | Intergenic | NA                  | NA         |
| 7   | 41463416 | 41463552 | 1        | -0.143359  | 5    | 0.025    | 0.0018   | 0.14852  | 0.29188 | 0.047453009 | Intergenic | NA                  | NA         |
| 7   | 41540342 | 41540393 | 1        | -0.120295  | 5    | 7.80E-05 | 0.00053  | 0.10695  | 0.22724 | 0.000422981 | Intergenic | NA                  | NA         |

| chr | start    | stop     | q-value  | methyl.diff | CpGs | pMWU     | p2DKS    | MCWLS    | MCWHS   | pMWU.fdr    | cgi.type   | transcript   | gene     |
|-----|----------|----------|----------|-------------|------|----------|----------|----------|---------|-------------|------------|--------------|----------|
| 7   | 43829646 | 43829741 | 1        | -0.089968   | 5    | 0.025    | 0.057    | 0.16858  | 0.25854 | 0.047453009 | TSS        | NM_001135814 | Mgat4c   |
| 7   | 46989483 | 46989656 | 1        | -0.079076   | 8    | 0.0088   | 0.094    | 0.69864  | 0.77771 | 0.020605924 | Intergenic | NA           | NA       |
| 7   | 50650431 | 50650465 | 1        | -0.084764   | 5    | 0.00017  | 0.015    | 0.050463 | 0.13523 | 0.000806192 | TSS        | NM_001033680 | Syt1     |
| 7   | 56115032 | 56115117 | 1        | -0.106234   | 5    | 0.0049   | 0.0091   | 0.65414  | 0.76037 | 0.012753585 | Intergenic | NA           | NA       |
| 7   | 56715215 | 56715508 | 1        | -0.189483   | 5    | 0.0045   | 0.059    | 0.62853  | 0.81802 | 0.011905878 | Intergenic | NA           | NA       |
| 7   | 56715845 | 56716194 | 5.20E-06 | -0.356044   | 21   | 4.20E-14 | 1.60E-11 | 0.46448  | 0.82052 | 6.64E-12    | Intergenic | NA           | NA       |
| 7   | 60302857 | 60302898 | 1        | -0.148622   | 5    | 0.012    | 0.038    | 0.26377  | 0.41239 | 0.026435197 | Intergenic | NA           | NA       |
| 7   | 60302952 | 60303080 | 0.13     | -0.268305   | 8    | 1.30E-09 | 4.10E-07 | 0.22582  | 0.49413 | 4.18E-08    | Intergenic | NA           | NA       |
| 7   | 61030414 | 61030594 | 1        | -0.151875   | 5    | 0.013    | 0.037    | 0.28136  | 0.43324 | 0.028097302 | Intergenic | NA           | NA       |
| 7   | 61133545 | 61133619 | 1        | -0.223749   | 5    | 0.00088  | 0.0091   | 0.41598  | 0.63973 | 0.003092094 | Intergenic | NA           | NA       |
| 7   | 61138274 | 61138359 | 0.21     | -0.155822   | 5    | 3.70E-07 | 6.60E-07 | 0.15202  | 0.30784 | 5.21E-06    | Intergenic | NA           | NA       |
| 7   | 61863870 | 61863920 | 1        | -0.11817    | 5    | 0.014    | 0.0055   | 0.11465  | 0.23282 | 0.029850603 | Intergenic | NA           | NA       |
| 7   | 62838898 | 62838988 | 1        | -0.201972   | 5    | 0.017    | 0.18     | 0.29338  | 0.49535 | 0.034796287 | Intergenic | NA           | NA       |
| 7   | 63252848 | 63252889 | 1        | -0.162924   | 5    | 0.00011  | 0.00049  | 0.18002  | 0.34295 | 0.000565143 | Intragenic | NM_001134780 | Parvb    |
| 7   | 63335831 | 63335951 | 1        | -0.124386   | 7    | 0.023    | 0.04     | 0.54056  | 0.66495 | 0.04441443  | Intergenic | NA           | NA       |
| 7   | 63373409 | 63373551 | 1        | -0.193628   | 5    | 1.70E-05 | 0.00014  | 0.10144  | 0.29507 | 0.000120524 | Intergenic | NA           | NA       |
| 7   | 63402416 | 63402559 | 1        | -0.068148   | 5    | 0.019    | 0.059    | 0.082878 | 0.15103 | 0.038322088 | Intergenic | NA           | NA       |
| 7   | 65030019 | 65030088 | 1        | -0.118735   | 5    | 0.0029   | 0.0055   | 0.49184  | 0.61058 | 0.008293503 | Intragenic | NM_032069    | Grip1    |
| 7   | 65262224 | 65262293 | 0.39     | -0.27422    | 7    | 1.10E-08 | 1.20E-06 | 0.42647  | 0.70069 | 2.70E-07    | Intergenic | NA           | NA       |
| 7   | 65643799 | 65644147 | 1        | -0.108068   | 15   | 0.0026   | 0.049    | 0.36484  | 0.47291 | 0.007616821 | Intergenic | NA           | NA       |
| 7   | 65667186 | 65667272 | 1        | -0.185364   | 5    | 0.00019  | 0.0055   | 0.28484  | 0.47021 | 0.000879857 | Intergenic | NA           | NA       |
| 7   | 66692458 | 66692550 | 1        | -0.135054   | 5    | 0.0017   | 0.0017   | 0.61566  | 0.75072 | 0.005339493 | Intergenic | NA           | NA       |
| 7   | 67073265 | 67073469 | 1        | -0.154119   | 9    | 0.0013   | 0.046    | 0.1793   | 0.33342 | 0.004277683 | Intragenic | NM_001271079 | Ppm1h    |
| 7   | 67075308 | 67075461 | 1        | -0.177605   | 7    | 0.0092   | 0.11     | 0.17972  | 0.35732 | 0.021504843 | Intragenic | NM_001271079 | Ppm1h    |
| 7   | 67093106 | 67093223 | 1        | -0.147202   | 5    | 0.0045   | 0.039    | 0.48592  | 0.63312 | 0.011905878 | Intragenic | NM_001271079 | Ppm1h    |
| 7   | 68690438 | 68690523 | 1        | -0.074104   | 10   | 0.0099   | 0.006    | 0.70504  | 0.77915 | 0.02275947  | Intragenic | NM_017302    | Slc16a7  |
| 7   | 69353823 | 69354044 | 1        | -0.11301    | 5    | 0.0045   | 0.058    | 0.072165 | 0.18517 | 0.011905878 | Intergenic | NA           | NA       |
| 7   | 70039862 | 70039945 | 1        | -0.16716    | 5    | 0.0012   | 0.0018   | 0.53637  | 0.70353 | 0.004013471 | Intergenic | NA           | NA       |
| 7   | 70065796 | 70065879 | 1        | -0.16716    | 5    | 0.0012   | 0.0018   | 0.53637  | 0.70353 | 0.004013471 | Intergenic | NA           | NA       |
| 7   | 70132076 | 70132211 | 1        | -0.182045   | 9    | 0.00011  | 0.00045  | 0.49637  | 0.67842 | 0.000565143 | Intergenic | NA           | NA       |
| 7   | 70542250 | 70542765 | 3.50E-11 | -0.155525   | 32   | 4.00E-14 | 1.10E-16 | 0.078308 | 0.23383 | 6.64E-12    | TSS        | NM_023026    | Agap2    |
| 7   | 70542917 | 70543542 | 4.70E-06 | -0.142529   | 38   | 4.00E-14 | 1.40E-11 | 0.11374  | 0.25005 | 6.64E-12    | TSS        | NM_023026    | Agap2    |
| 7   | 70544276 | 70544456 | 1        | -0.187796   | 11   | 1.10E-07 | 7.70E-06 | 0.12592  | 0.31372 | 1.86E-06    | TSS        | NM_023026    | Agap2    |
| 7   | 70544480 | 70544524 | 1        | -0.116764   | 5    | 0.014    | 0.0055   | 0.16727  | 0.28403 | 0.029850603 | TSS        | NM_023026    | Agap2    |
| 7   | 70544551 | 70544574 | 1        | -0.10293    | 5    | 0.00032  | 0.00014  | 0.16783  | 0.27076 | 0.001346443 | Intragenic | NM_023026    | Agap2    |
| 7   | 70553666 | 70553858 | 1.50E-10 | -0.166118   | 22   | 4.00E-14 | 4.60E-16 | 0.058792 | 0.22491 | 6.64E-12    | Intragenic | NM_023026    | Agap2    |
| 7   | 70634756 | 70634821 | 1        | -0.225254   | 5    | 4.80E-06 | 0.00014  | 0.16714  | 0.3924  | 4.29E-05    | Intragenic | NM_022860    | B4galnt1 |
| 7   | 70635506 | 70635904 | 2.50E-06 | -0.186724   | 27   | 4.60E-14 | 7.90E-12 | 0.136    | 0.32273 | 6.64E-12    | Intragenic | NM_022860    | B4galnt1 |

| chr | start     | stop      | q-value  | methy.diff | CpGs | pMWU     | p2DKS    | MCWLS    | MCWHS    | pMWU.fdr    | cgi.type   | transcript                | gene            |
|-----|-----------|-----------|----------|------------|------|----------|----------|----------|----------|-------------|------------|---------------------------|-----------------|
| 7   | 70791383  | 70791911  | 1        | -0.072008  | 30   | 7.30E-08 | 9.90E-05 | 0.094517 | 0.17778  | 1.35E-06    | Intragenic | NM_001080789:NM_001012198 | Arhgap9:Arhgap9 |
| 7   | 70799028  | 70799094  | 1        | -0.198337  | 6    | 0.016    | 0.04     | 0.44393  | 0.64227  | 0.033288089 | Intragenic | NM_001191910              | Gli1            |
| 7   | 70815949  | 70816137  | 1        | -0.074534  | 8    | 0.007    | 0.018    | 0.11739  | 0.19192  | 0.01709041  | TSS        | NM_031815                 | Inhbe           |
| 7   | 70897834  | 70897914  | 1        | -0.149567  | 5    | 0.012    | 0.015    | 0.3136   | 0.46317  | 0.026435197 | Intragenic | NM_001130557              | R3hdm2          |
| 7   | 71022685  | 71022750  | 1        | -0.307028  | 7    | 3.20E-05 | 0.0021   | 0.33599  | 0.64301  | 0.00020314  | Intragenic | NM_001130490              | Lrp1            |
| 7   | 71218587  | 71218791  | 1        | -0.178463  | 7    | 0.00074  | 0.0083   | 0.26559  | 0.44405  | 0.002702912 | Intragenic | NM_053302                 | Gpr182          |
| 7   | 71283158  | 71283214  | 8.00E-05 | -0.377052  | 7    | 3.90E-10 | 2.50E-10 | 0.25658  | 0.63363  | 1.47E-08    | Intergenic | NA                        | NA              |
| 7   | 71643782  | 71643925  | 2.30E-05 | -0.215509  | 13   | 3.60E-13 | 7.00E-11 | 0.124    | 0.33951  | 3.13E-11    | Intergenic | NA                        | NA              |
| 7   | 71786598  | 71786741  | 2.30E-05 | -0.215509  | 13   | 3.60E-13 | 7.00E-11 | 0.124    | 0.33951  | 3.13E-11    | Intragenic | NM_013082                 | Sdc2            |
| 7   | 73248262  | 73248318  | 0.0023   | -0.356864  | 7    | 4.80E-10 | 7.00E-09 | 0.2323   | 0.58916  | 1.75E-08    | Intergenic | NA                        | NA              |
| 7   | 73901696  | 73901857  | 1        | -0.121303  | 5    | 7.80E-05 | 0.0031   | 0.63807  | 0.75937  | 0.000422981 | Intragenic | NM_031735                 | Stk3            |
| 7   | 74055108  | 74055204  | 0.99     | -0.311811  | 9    | 4.40E-09 | 3.10E-06 | 0.16329  | 0.4751   | 1.18E-07    | TSS        | NM_031735                 | Stk3            |
| 7   | 74217498  | 74217624  | 1        | -0.117914  | 9    | 1.50E-06 | 0.0012   | 0.080192 | 0.19811  | 1.65E-05    | Intragenic | NM_001012118              | Osr2            |
| 7   | 74218433  | 74218561  | 1        | -0.075887  | 8    | 0.0036   | 0.026    | 0.082459 | 0.15835  | 0.009945103 | Intragenic | NM_001012118              | Osr2            |
| 7   | 74495643  | 74495740  | 0.07     | -0.081559  | 17   | 6.90E-14 | 2.20E-07 | 0.15275  | 0.23431  | 7.97E-12    | Intragenic | NM_001134886              | Vps13b          |
| 7   | 74788753  | 74788953  | 1        | -0.094975  | 9    | 0.0069   | 0.074    | 0.76902  | 0.86399  | 0.01685311  | Intragenic | NM_001134886              | Vps13b          |
| 7   | 75136652  | 75137044  | 1        | -0.128386  | 16   | 3.10E-09 | 1.40E-05 | 0.10064  | 0.22902  | 8.60E-08    | TSS        | NM_001282325              | Polr2k          |
| 7   | 75433993  | 75434075  | 1        | -0.178074  | 5    | 0.00032  | 0.0055   | 0.30334  | 0.48142  | 0.001346443 | Intragenic | NM_001013948              | Ankrd46         |
| 7   | 75922216  | 75922389  | 1        | -0.153426  | 5    | 0.0035   | 0.015    | 0.10365  | 0.25707  | 0.009686665 | Intergenic | NA                        | NA              |
| 7   | 76003522  | 76003579  | 1        | -0.11538   | 6    | 0.018    | 0.058    | 0.42906  | 0.54444  | 0.036742993 | Intergenic | NA                        | NA              |
| 7   | 76613061  | 76613210  | 1        | -0.104261  | 5    | 0.0063   | 0.088    | 0.13818  | 0.24245  | 0.015629046 | Intergenic | NA                        | NA              |
| 7   | 77336007  | 77336340  | 1        | -0.170843  | 8    | 0.005    | 0.068    | 0.4467   | 0.61754  | 0.012977322 | Intergenic | NA                        | NA              |
| 7   | 78666157  | 78666506  | 1        | -0.075386  | 14   | 0.0017   | 0.011    | 0.14691  | 0.2223   | 0.005339493 | Intergenic | NA                        | NA              |
| 7   | 78857221  | 78857316  | 1        | -0.196071  | 5    | 0.0045   | 0.038    | 0.27631  | 0.47238  | 0.011905878 | Intragenic | NM_031705                 | Dpys            |
| 7   | 86236742  | 86237065  | 1        | -0.101407  | 12   | 0.013    | 0.017    | 0.57902  | 0.68043  | 0.028097302 | Intergenic | NA                        | NA              |
| 7   | 86582143  | 86582187  | 1        | -0.062943  | 7    | 0.021    | 0.074    | 0.8535   | 0.91644  | 0.041207871 | Intergenic | NA                        | NA              |
| 7   | 91797397  | 91797489  | 1        | -0.157327  | 5    | 7.80E-05 | 0.0018   | 0.40944  | 0.56677  | 0.000422981 | Intragenic | NM_001044245              | Asap1           |
| 7   | 91798024  | 91798125  | 1        | -0.146394  | 5    | 0.00065  | 0.038    | 0.467    | 0.61339  | 0.002426546 | Intragenic | NM_001044245              | Asap1           |
| 7   | 100070676 | 100070978 | 1        | -0.167345  | 9    | 0.0023   | 0.0088   | 0.35848  | 0.52582  | 0.00686004  | Intergenic | NA                        | NA              |
| 7   | 100111476 | 100111559 | 1        | -0.164273  | 5    | 0.00088  | 0.024    | 0.50534  | 0.66961  | 0.003092094 | Intergenic | NA                        | NA              |
| 7   | 100113010 | 100113070 | 1        | -0.086733  | 5    | 1.10E-06 | 3.40E-05 | 0.010023 | 0.096756 | 1.27E-05    | Intergenic | NA                        | NA              |
| 7   | 100114021 | 100114155 | 0.73     | -0.307303  | 7    | 8.40E-08 | 2.30E-06 | 0.46288  | 0.77018  | 1.52E-06    | Intergenic | NA                        | NA              |
| 7   | 100114802 | 100114845 | 1        | -0.126609  | 5    | 0.00065  | 0.00099  | 0.68902  | 0.81563  | 0.002426546 | Intergenic | NA                        | NA              |
| 7   | 100114897 | 100115050 | 1        | -0.06319   | 16   | 8.20E-05 | 8.00E-05 | 0.44909  | 0.47316  | 0.000442277 | Intergenic | NA                        | NA              |
| 7   | 100524461 | 100524625 | 1        | -0.18846   | 5    | 0.008    | 0.015    | 0.33342  | 0.52188  | 0.019059477 | Intergenic | NA                        | NA              |
| 7   | 100544759 | 100544872 | 0.036    | -0.27237   | 5    | 6.30E-08 | 1.10E-07 | 0.044014 | 0.31638  | 1.18E-06    | Intergenic | NA                        | NA              |
| 7   | 100551787 | 100551993 | 1        | -0.104771  | 8    | 0.024    | 0.093    | 0.094362 | 0.19913  | 0.046241462 | Intergenic | NA                        | NA              |
| 7   | 100567426 | 100567640 | 1        | -0.105794  | 8    | 1.40E-06 | 8.90E-05 | 0.035547 | 0.14134  | 1.57E-05    | Intergenic | NA                        | NA              |

| chr | start     | stop      | q-value  | methy.diff | CpGs | pMWU     | p2DKS    | MCWLS     | MCWHS    | pMWU.fdr    | cgi.type   | transcript                | gene            |
|-----|-----------|-----------|----------|------------|------|----------|----------|-----------|----------|-------------|------------|---------------------------|-----------------|
| 7   | 103194310 | 103194445 | 1        | -0.182229  | 9    | 0.00011  | 0.00045  | 0.49613   | 0.67836  | 0.000565143 | Intergenic | NA                        | NA              |
| 7   | 105050500 | 105050633 | 1        | -0.109814  | 5    | 0.025    | 0.058    | 0.492     | 0.60182  | 0.047453009 | Intergenic | NA                        | NA              |
| 7   | 105755742 | 105756060 | 1        | -0.122307  | 11   | 0.00042  | 7.90E-05 | 0.51348   | 0.63579  | 0.001700519 | Intergenic | NA                        | NA              |
| 7   | 109966986 | 109967049 | 1        | -0.279622  | 5    | 0.00014  | 0.0018   | 0.35813   | 0.63776  | 0.000684451 | TSS        | NM_022249                 | Khdrbs3         |
| 7   | 112872496 | 112872593 | 1        | -0.061282  | 9    | 2.40E-05 | 0.00033  | 0.038028  | 0.099311 | 0.000160049 | Intergenic | NA                        | NA              |
| 7   | 114146497 | 114146595 | 1        | -0.187032  | 5    | 0.008    | 0.00052  | 0.17929   | 0.36632  | 0.019059477 | Intragenic | NM_001034156              | Trappc9         |
| 7   | 114146604 | 114146811 | 4.00E-08 | -0.095782  | 15   | 1.80E-13 | 1.20E-13 | 0.38399   | 0.47978  | 1.73E-11    | Intragenic | NM_001034156              | Trappc9         |
| 7   | 114790773 | 114790934 | 1        | -0.151803  | 5    | 0.0053   | 0.0055   | 0.14071   | 0.29251  | 0.013591571 | Intergenic | NA                        | NA              |
| 7   | 115140731 | 115140815 | 1        | -0.140227  | 5    | 0.0038   | 0.0091   | 0.19736   | 0.33759  | 0.010352437 | Intergenic | NA                        | NA              |
| 7   | 115301781 | 115302114 | 1        | -0.116968  | 5    | 0.0068   | 0.0053   | 0.27384   | 0.3908   | 0.016642688 | Intergenic | NA                        | NA              |
| 7   | 115317759 | 115317805 | 1        | -0.126823  | 5    | 4.40E-05 | 0.00098  | 0.13191   | 0.25873  | 0.000263321 | Intergenic | NA                        | NA              |
| 7   | 115733692 | 115733863 | 1        | -0.084239  | 15   | 0.0077   | 0.097    | 0.54661   | 0.63085  | 0.018546983 | Intragenic | NM_001170597              | Bai1            |
| 7   | 116389418 | 116389473 | 1        | -0.160209  | 5    | 0.00036  | 0.0092   | 0.62949   | 0.7897   | 0.001486639 | Intragenic | NM_001113792              | RGD1565410      |
| 7   | 116809491 | 116809643 | 1        | -0.067927  | 11   | 0.014    | 0.057    | 0.73841   | 0.80634  | 0.029850603 | Intergenic | NA                        | NA              |
| 7   | 116818104 | 116818356 | 1        | -0.054103  | 19   | 5.00E-05 | 0.0061   | 0.044962  | 0.099065 | 0.000291675 | TSS        | NM_207609                 | Naprt           |
| 7   | 117250915 | 117251263 | 1        | -0.129533  | 16   | 0.00011  | 0.0088   | 0.2409    | 0.37043  | 0.000565143 | TSS        | NM_022401:NM_001164302    | Plec:Plec       |
| 7   | 117277709 | 117277764 | 1        | -0.165111  | 5    | 0.0027   | 0.039    | 0.27533   | 0.44044  | 0.007840962 | Intergenic | NA                        | NA              |
| 7   | 117292781 | 117292847 | 1        | -0.241687  | 8    | 8.80E-06 | 0.00066  | 0.49345   | 0.73514  | 7.12E-05    | Intragenic | NM_153308                 | Grina           |
| 7   | 117308455 | 117308542 | 0.089    | -0.167776  | 5    | 1.30E-07 | 2.70E-07 | 0.059644  | 0.22742  | 2.11E-06    | Intergenic | NA                        | NA              |
| 7   | 117506753 | 117507057 | 0.097    | -0.090311  | 37   | 5.50E-13 | 3.00E-07 | 0.12111   | 0.21142  | 4.47E-11    | TSS        | NM_001130508              | Scx             |
| 7   | 117512967 | 117513121 | 1        | -0.171202  | 7    | 0.0087   | 0.055    | 0.30024   | 0.47144  | 0.020391633 | Intragenic | NM_001024250              | Bop1            |
| 7   | 117569053 | 117569088 | 1        | -0.12492   | 5    | 0.0024   | 0.0055   | 0.3189    | 0.44382  | 0.00705499  | Intergenic | NA                        | NA              |
| 7   | 117571504 | 117571531 | 1        | -0.052107  | 5    | 0.0022   | 0.025    | 0.019037  | 0.071145 | 0.006578104 | Intragenic | NM_001130570              | Scrt1           |
| 7   | 117717541 | 117717670 | 1        | -0.190773  | 11   | 3.00E-09 | 3.30E-05 | 0.12294   | 0.31372  | 8.36E-08    | Intragenic | NM_198752                 | Kifc2           |
| 7   | 117744764 | 117744809 | 1        | -0.210746  | 5    | 0.00088  | 0.0092   | 0.38789   | 0.59864  | 0.003092094 | Intragenic | NM_001130566              | Ppp1r16a        |
| 7   | 117770884 | 117770949 | 1        | -0.169386  | 5    | 0.0019   | 0.0055   | 0.29963   | 0.46901  | 0.005855937 | Intragenic | NM_001135896              | Lrrc24          |
| 7   | 117774941 | 117774967 | 1        | -0.05588   | 5    | 2.80E-05 | 7.00E-05 | 0.0091006 | 0.064981 | 0.000182174 | TSS        | NM_001135896:NM_001007751 | Lrrc24:MGC94207 |
| 7   | 117777529 | 117777711 | 1        | -0.10626   | 14   | 1.80E-05 | 0.0017   | 0.19497   | 0.30123  | 0.000127015 | TSS        | NM_001007751              | MGC94207        |
| 7   | 117948692 | 117948867 | 1        | -0.241559  | 5    | 2.40E-05 | 0.00052  | 0.11455   | 0.35611  | 0.000160049 | TSS        | NM_139108                 | Commd5          |
| 7   | 118424770 | 118424839 | 1        | -0.113757  | 5    | 5.00E-05 | 0.00053  | 0.027384  | 0.14114  | 0.000291675 | Intergenic | NA                        | NA              |
| 7   | 118496097 | 118496272 | 1        | -0.241559  | 5    | 2.40E-05 | 0.00052  | 0.11455   | 0.35611  | 0.000160049 | TSS        | NM_139108                 | Commd5          |
| 7   | 118676823 | 118676927 | 1        | -0.187666  | 6    | 0.0021   | 0.038    | 0.32034   | 0.50801  | 0.006364615 | Intergenic | NA                        | NA              |
| 7   | 119132615 | 119132709 | 1        | -0.21379   | 5    | 1.20E-05 | 3.40E-05 | 0.12119   | 0.33498  | 9.15E-05    | Intergenic | NA                        | NA              |
| 7   | 119179868 | 119180128 | 1        | -0.084918  | 18   | 2.40E-06 | 0.0012   | 0.086932  | 0.17185  | 2.45E-05    | TSS        | NM_001191787              | Foxred2         |
| 7   | 119222922 | 119222952 | 1        | -0.083839  | 5    | 0.00029  | 0.0018   | 0.066908  | 0.15075  | 0.001239307 | Intragenic | NM_053351                 | Cacng2          |
| 7   | 119613155 | 119613276 | 1        | -0.132058  | 5    | 0.0014   | 0.0092   | 0.22092   | 0.35298  | 0.004540837 | TSS        | NM_012808                 | Tst             |
| 7   | 119613350 | 119613463 | 1        | -0.08576   | 8    | 8.30E-07 | 5.10E-05 | 0.07015   | 0.15591  | 1.02E-05    | TSS        | NM_012808                 | Tst             |

| chr | start     | stop      | q-value | methy.diff | CpGs | pMWU     | p2DKS    | MCWLS    | MCWHS   | pMWU.fdr    | cgi.type   | transcript   | gene     |
|-----|-----------|-----------|---------|------------|------|----------|----------|----------|---------|-------------|------------|--------------|----------|
| 7   | 119617861 | 119617938 | 0.076   | -0.380999  | 8    | 1.80E-09 | 2.40E-07 | 0.1544   | 0.5354  | 5.50E-08    | TSS        | NM_138843    | Mpst     |
| 7   | 119892051 | 119892101 | 1       | -0.178193  | 5    | 0.016    | 0.088    | 0.25249  | 0.43068 | 0.033288089 | Intergenic | NA           | NA       |
| 7   | 119928281 | 119928428 | 1       | -0.172181  | 7    | 0.0012   | 0.0013   | 0.20037  | 0.37255 | 0.004013471 | Intergenic | NA           | NA       |
| 7   | 120015088 | 120015146 | 1       | -0.286504  | 5    | 3.30E-06 | 0.00014  | 0.20903  | 0.49553 | 3.16E-05    | Intragenic | NM_001130554 | Card10   |
| 7   | 120017693 | 120017811 | 1       | -0.140217  | 5    | 0.00088  | 0.015    | 0.21003  | 0.35024 | 0.003092094 | TSS        | NM_001130554 | Card10   |
| 7   | 120173006 | 120173123 | 1       | -0.154214  | 5    | 0.0032   | 0.0092   | 0.356    | 0.51021 | 0.008990975 | Intragenic | NM_001013220 | Triobp   |
| 7   | 120203779 | 120203936 | 1       | -0.134489  | 7    | 2.50E-05 | 0.00049  | 0.16731  | 0.3018  | 0.000166164 | Intragenic | NM_001013220 | Triobp   |
| 7   | 120497089 | 120497117 | 1       | -0.073563  | 5    | 0.0094   | 0.13     | 0.27413  | 0.3477  | 0.021723038 | Intragenic | NM_001271220 | Baiap2l2 |
| 7   | 120917027 | 120917083 | 1       | -0.105104  | 5    | 0.02     | 0.18     | 0.39444  | 0.49954 | 0.039778219 | Intragenic | NM_001199315 | Gtpbp1   |
| 7   | 121086399 | 121086557 | 1       | -0.14693   | 10   | 1.60E-07 | 1.50E-05 | 0.11973  | 0.26666 | 2.51E-06    | Intergenic | NA           | NA       |
| 7   | 121218282 | 121218375 | 1       | -0.10323   | 5    | 0.008    | 0.059    | 0.17853  | 0.28176 | 0.019059477 | Intragenic | NM_031524    | Pdgfb    |
| 7   | 121402971 | 121403128 | 1       | -0.190125  | 5    | 0.00059  | 0.015    | 0.13278  | 0.3229  | 0.002242971 | Intragenic | NM_019239    | Mgat3    |
| 7   | 121499161 | 121499291 | 1       | -0.071137  | 8    | 0.0015   | 0.036    | 0.088505 | 0.15964 | 0.004849475 | Intergenic | NA           | NA       |
| 7   | 121507445 | 121507525 | 0.49    | -0.252538  | 5    | 3.70E-07 | 1.50E-06 | 0.11508  | 0.36762 | 5.21E-06    | TSS        | NM_020084    | Cacna1i  |
| 7   | 121552749 | 121552950 | 0.65    | -0.142985  | 7    | 8.80E-07 | 2.00E-06 | 0.037519 | 0.1805  | 1.06E-05    | Intragenic | NM_020084    | Cacna1i  |
| 7   | 121579882 | 121579981 | 1       | -0.109719  | 5    | 0.00036  | 0.0055   | 0.093107 | 0.20283 | 0.001486639 | Intragenic | NM_020084    | Cacna1i  |
| 7   | 121580033 | 121580115 | 1       | -0.189653  | 5    | 1.50E-06 | 3.40E-06 | 0.17923  | 0.36889 | 1.65E-05    | Intragenic | NM_020084    | Cacna1i  |
| 7   | 121782371 | 121782415 | 1       | -0.197525  | 5    | 0.00017  | 0.00098  | 0.54774  | 0.74527 | 0.000806192 | TSS        | NM_001034944 | Grap2    |
| 7   | 122151974 | 122152006 | 1       | -0.225239  | 5    | 1.30E-05 | 7.10E-05 | 0.27658  | 0.50182 | 9.66E-05    | TSS        | NM_001008373 | Srek1ip1 |
| 7   | 122426843 | 122427181 | 1       | -0.204902  | 6    | 0.0078   | 0.027    | 0.10218  | 0.30709 | 0.018765285 | Intergenic | NA           | NA       |
| 7   | 122899702 | 122899829 | 1       | -0.135668  | 9    | 0.00034  | 0.0027   | 0.12983  | 0.2655  | 0.001424609 | Intergenic | NA           | NA       |
| 7   | 123130916 | 123131013 | 1       | -0.192312  | 5    | 0.0017   | 0.00053  | 0.46714  | 0.65945 | 0.005339493 | TSS        | NM_001127295 | Polr3h   |
| 7   | 123135258 | 123135321 | 1       | -0.175715  | 5    | 0.00044  | 0.0092   | 0.3717   | 0.54742 | 0.001760146 | Intergenic | NA           | NA       |
| 7   | 123424103 | 123424133 | 1       | -0.060239  | 5    | 0.019    | 0.13     | 0.10991  | 0.17015 | 0.038322088 | Intragenic | NM_001207022 | Shisa8   |
| 7   | 123424251 | 123424295 | 1       | -0.057778  | 6    | 0.0065   | 0.04     | 0.12056  | 0.17834 | 0.016085358 | Intragenic | NM_001207022 | Shisa8   |
| 7   | 123439787 | 123439869 | 1       | -0.108889  | 5    | 0.00072  | 0.0055   | 0.11745  | 0.22634 | 0.002634665 | Intergenic | NA           | NA       |
| 7   | 123516398 | 123516479 | 1       | -0.083263  | 8    | 8.80E-05 | 0.0034   | 0.13085  | 0.21411 | 0.000466886 | Intergenic | NA           | NA       |
| 7   | 123524208 | 123524468 | 1       | -0.068463  | 6    | 6.90E-05 | 0.0003   | 0.83713  | 0.90559 | 0.000385124 | Intergenic | NA           | NA       |
| 7   | 123753256 | 123753484 | 1       | -0.061293  | 13   | 0.00012  | 0.00077  | 0.069524 | 0.13082 | 0.000603617 | TSS        | NM_001130574 | Tcf20    |
| 7   | 123759219 | 123759325 | 0.0073  | -0.178378  | 12   | 2.80E-09 | 2.30E-08 | 0.21137  | 0.38975 | 8.07E-08    | Intergenic | NA           | NA       |
| 7   | 123822623 | 123822882 | 1       | -0.101246  | 7    | 0.012    | 0.027    | 0.23632  | 0.33756 | 0.026435197 | Intergenic | NA           | NA       |
| 7   | 123878199 | 123878264 | 0.46    | -0.269034  | 5    | 4.90E-07 | 1.40E-06 | 0.22446  | 0.49349 | 6.54E-06    | Intergenic | NA           | NA       |
| 7   | 124552308 | 124552378 | 1       | -0.131877  | 5    | 0.021    | 0.039    | 0.25138  | 0.38325 | 0.041207871 | Intragenic | NM_001134884 | Scube1   |
| 7   | 124656636 | 124656699 | 1       | -0.131137  | 5    | 5.50E-06 | 0.00014  | 0.021925 | 0.15306 | 4.78E-05    | Intergenic | NA           | NA       |
| 7   | 124670332 | 124670403 | 1       | -0.079802  | 5    | 0.0063   | 0.039    | 0.17567  | 0.25547 | 0.015629046 | TSS        | NM_001130569 | Mpped1   |
| 7   | 124838675 | 124838913 | 1       | -0.188009  | 10   | 3.70E-05 | 0.005    | 0.155    | 0.34301 | 0.000229545 | Intergenic | NA           | NA       |
| 7   | 124978557 | 124978702 | 1       | -0.149065  | 5    | 8.80E-05 | 0.00053  | 0.17627  | 0.32534 | 0.000466886 | Intragenic | NM_001130497 | Pnpla5   |
| 7   | 125306716 | 125306834 | 1       | -0.2513    | 5    | 4.20E-07 | 7.00E-05 | 0.041766 | 0.29307 | 5.76E-06    | Intergenic | NA           | NA       |
| 7   | 125466679 | 125467054 | 1       | -0.129446  | 11   | 4.60E-06 | 0.0017   | 0.081125 | 0.21057 | 4.18E-05    | Intragenic | NM_001004242 | Arhgap8  |



| chr | start     | stop      | q-value  | methy.diff | CpGs | pMWU     | p2DKS    | MCWLS    | MCWHS    | pMWU.fdr    | cgi.type   | transcript   | gene   |
|-----|-----------|-----------|----------|------------|------|----------|----------|----------|----------|-------------|------------|--------------|--------|
| 7   | 125746267 | 125746397 | 1        | -0.070501  | 5    | 0.0038   | 0.088    | 0.11834  | 0.18885  | 0.010352437 | Intragenic | NM_001013949 | Ribc2  |
| 7   | 125933638 | 125933701 | 1        | -0.139667  | 5    | 0.0094   | 0.038    | 0.51639  | 0.65605  | 0.021723038 | Intergenic | NA           | NA     |
| 7   | 126124753 | 126124899 | 1        | -0.122093  | 8    | 0.011    | 0.087    | 0.33845  | 0.46054  | 0.02463877  | Intergenic | NA           | NA     |
| 7   | 126137671 | 126137801 | 1        | -0.124027  | 6    | 4.30E-06 | 9.10E-05 | 0.092479 | 0.21651  | 3.93E-05    | Intragenic | NM_001009695 | Wnt7b  |
| 7   | 126174180 | 126174254 | 1        | -0.050024  | 8    | 9.90E-05 | 0.00066  | 0.047977 | 0.098001 | 0.000516804 | Intragenic | NM_001009695 | Wnt7b  |
| 7   | 126208342 | 126208533 | 0.59     | -0.071497  | 9    | 5.30E-08 | 1.80E-06 | 0.031273 | 0.10277  | 1.08E-06    | Intergenic | NA           | NA     |
| 7   | 126255601 | 126255848 | 2.90E-12 | -0.05015   | 31   | 4.60E-14 | 9.10E-18 | 0.013067 | 0.063217 | 6.64E-12    | Intergenic | NA           | NA     |
| 7   | 126257217 | 126257367 | 0.017    | -0.3455    | 8    | 3.00E-10 | 5.30E-08 | 0.20701  | 0.55251  | 1.19E-08    | Intergenic | NA           | NA     |
| 7   | 126273069 | 126273126 | 0.47     | -0.237759  | 5    | 2.50E-06 | 1.50E-06 | 0.086845 | 0.3246   | 2.52E-05    | Intergenic | NA           | NA     |
| 7   | 126277798 | 126277998 | 1        | -0.162329  | 10   | 0.00027  | 0.016    | 0.27668  | 0.43901  | 0.001172178 | Intergenic | NA           | NA     |
| 7   | 126338314 | 126338832 | 1        | -0.187202  | 5    | 0.013    | 0.038    | 0.06911  | 0.25631  | 0.028097302 | Intragenic | NM_013196    | Ppara  |
| 7   | 126567928 | 126567987 | 1        | -0.239173  | 5    | 0.00017  | 0.00027  | 0.29035  | 0.52952  | 0.000806192 | Intergenic | NA           | NA     |
| 7   | 126600397 | 126600490 | 1        | -0.197377  | 5    | 1.30E-05 | 0.00052  | 0.096761 | 0.29414  | 9.66E-05    | Intergenic | NA           | NA     |
| 7   | 126665955 | 126666227 | 1        | -0.183217  | 5    | 1.00E-05 | 7.40E-06 | 0.060032 | 0.24325  | 7.82E-05    | Intergenic | NA           | NA     |
| 7   | 126721888 | 126721967 | 1        | -0.204796  | 7    | 0.00088  | 0.019    | 0.32896  | 0.53376  | 0.003092094 | Intergenic | NA           | NA     |
| 7   | 126886682 | 126886786 | 1        | -0.216703  | 5    | 0.0008   | 0.0055   | 0.32994  | 0.54664  | 0.002866309 | Intergenic | NA           | NA     |
| 7   | 127209827 | 127209934 | 1        | -0.056134  | 5    | 0.0011   | 0.0055   | 0.097657 | 0.15379  | 0.003737263 | Intergenic | NA           | NA     |
| 7   | 127423919 | 127424037 | 1        | -0.311786  | 5    | 1.90E-06 | 7.00E-05 | 0.234    | 0.54578  | 2.01E-05    | Intergenic | NA           | NA     |
| 7   | 128530268 | 128530420 | 1        | -0.135887  | 7    | 1.50E-05 | 0.0013   | 0.086479 | 0.22237  | 0.000109113 | Intergenic | NA           | NA     |
| 7   | 128703791 | 128703954 | 1        | -0.059672  | 7    | 0.012    | 0.055    | 0.087373 | 0.14704  | 0.026435197 | Intergenic | NA           | NA     |
| 7   | 129172016 | 129172139 | 1        | -0.153658  | 7    | 0.0013   | 0.01     | 0.36877  | 0.52243  | 0.004277683 | Intergenic | NA           | NA     |
| 7   | 129532686 | 129532964 | 1        | -0.148663  | 5    | 0.023    | 0.18     | 0.21743  | 0.36609  | 0.04441443  | Intergenic | NA           | NA     |
| 7   | 129546532 | 129546643 | 0.4      | -0.185229  | 7    | 1.00E-07 | 1.20E-06 | 0.095324 | 0.28055  | 1.72E-06    | TSS        | NM_022602    | Pim3   |
| 7   | 129736445 | 129736509 | 1        | -0.175145  | 5    | 2.20E-05 | 6.90E-05 | 0.69918  | 0.87433  | 0.000149617 | Intragenic | NM_199409    | Panx2  |
| 7   | 129826940 | 129827405 | 1        | -0.161237  | 17   | 9.10E-05 | 0.0018   | 0.51093  | 0.67216  | 0.000481527 | Intragenic | NM_001108106 | Plxnb2 |
| 7   | 129982386 | 129982567 | 1        | -0.155259  | 5    | 0.002    | 0.00025  | 0.14599  | 0.30125  | 0.006079939 | TSS        | NM_201426    | Adm2   |
| 7   | 130088400 | 130088507 | 1        | -0.209296  | 6    | 0.011    | 0.059    | 0.33709  | 0.54639  | 0.02463877  | TSS        | NM_013200    | Cpt1b  |
| 7   | 130088823 | 130089146 | 1        | -0.216193  | 11   | 6.90E-07 | 4.30E-05 | 0.23368  | 0.44988  | 8.73E-06    | TSS        | NM_013200    | Cpt1b  |
| 7   | 130183174 | 130183230 | 1        | -0.094839  | 11   | 5.70E-06 | 4.90E-05 | 0.073344 | 0.16522  | 4.91E-05    | Intragenic | NM_021676    | Shank3 |
| 7   | 130183286 | 130183508 | 1        | -0.057342  | 17   | 0.00048  | 0.0055   | 0.076692 | 0.12821  | 0.001881331 | Intragenic | NM_021676    | Shank3 |
| 7   | 130183510 | 130183662 | 1.10E-13 | -0.135603  | 22   | 4.10E-14 | 3.50E-19 | 0.084314 | 0.21992  | 6.64E-12    | Intragenic | NM_021676    | Shank3 |
| 7   | 130183685 | 130183768 | 1        | -0.099515  | 5    | 0.00072  | 0.0093   | 0.14643  | 0.24594  | 0.002634665 | Intragenic | NM_021676    | Shank3 |
| 7   | 130191785 | 130191941 | 1        | -0.142497  | 11   | 3.40E-05 | 0.0055   | 0.11041  | 0.25291  | 0.000214477 | Intragenic | NM_021676    | Shank3 |
| 7   | 130205073 | 130205148 | 1        | -0.115994  | 5    | 0.0011   | 0.039    | 0.57618  | 0.69218  | 0.003737263 | Intragenic | NM_021676    | Shank3 |
| 7   | 130207462 | 130207639 | 1        | -0.178999  | 8    | 0.00056  | 0.018    | 0.35076  | 0.52976  | 0.002153446 | Intragenic | NM_021676    | Shank3 |
| 7   | 130217790 | 130217815 | 1        | -0.109872  | 5    | 0.008    | 0.025    | 0.22984  | 0.33971  | 0.019059477 | Intragenic | NM_021676    | Shank3 |
| 7   | 130218321 | 130218346 | 1        | -0.108513  | 5    | 0.01     | 0.025    | 0.22891  | 0.33743  | 0.02275947  | Intragenic | NM_021676    | Shank3 |
| 7   | 131868172 | 131868317 | 1        | -0.103052  | 5    | 0.0022   | 0.00052  | 0.041122 | 0.14417  | 0.006578104 | Intergenic | NA           | NA     |
| 7   | 132839451 | 132839559 | 1        | -0.126782  | 5    | 0.0058   | 0.015    | 0.2238   | 0.35059  | 0.014624129 | Intragenic | NM_001309489 | Muc19  |

| chr | start     | stop      | q-value | methy.diff | CpGs | pMWU     | p2DKS    | MCWLS    | MCWHS    | pMWU.fdr    | cgi.type   | transcript                | gene          |
|-----|-----------|-----------|---------|------------|------|----------|----------|----------|----------|-------------|------------|---------------------------|---------------|
| 7   | 134183755 | 134183968 | 0.004   | -0.148015  | 12   | 2.50E-12 | 1.20E-08 | 0.02923  | 0.17725  | 1.73E-10    | Intragenic | NM_001309489:NM_001134871 | Muc19:Yaf2    |
| 7   | 134612996 | 134613095 | 1       | -0.120141  | 5    | 0.012    | 0.038    | 0.30926  | 0.4294   | 0.026435197 | Intragenic | NM_001309489              | Muc19         |
| 7   | 135367296 | 135367393 | 1       | -0.155214  | 5    | 0.012    | 0.038    | 0.5384   | 0.69361  | 0.026435197 | Intragenic | NM_001309489              | Muc19         |
| 7   | 135477184 | 135477245 | 1       | -0.095398  | 6    | 0.025    | 0.078    | 0.65582  | 0.75121  | 0.047453009 | Intragenic | NM_001309489:NM_001106791 | Muc19:Irak4   |
| 7   | 135507000 | 135507018 | 1       | -0.158067  | 5    | 0.00048  | 7.00E-05 | 0.12899  | 0.28706  | 0.001881331 | TSS        | NM_001008521              | Twf1          |
| 7   | 135725967 | 135726075 | 1       | -0.126782  | 5    | 0.0058   | 0.015    | 0.2238   | 0.35059  | 0.014624129 | Intragenic | NM_001309489:NM_001271239 | Muc19:Tmem117 |
| 7   | 136249742 | 136249899 | 1       | 0.070506   | 5    | 0.013    | 0.13     | 0.478    | 0.40749  | 0.028097302 | Intragenic | NM_031070                 | Nell2         |
| 7   | 136621805 | 136621928 | 1       | -0.141509  | 5    | 0.0016   | 0.0053   | 0.14971  | 0.29122  | 0.005100053 | Intergenic | NA                        | NA            |
| 7   | 136796551 | 136796766 | 1       | -0.144056  | 5    | 0.013    | 0.057    | 0.11286  | 0.25691  | 0.028097302 | Intragenic | NM_001108108              | Ano6          |
| 7   | 136824363 | 136824594 | 1       | -0.101775  | 5    | 0.00032  | 0.0018   | 0.090426 | 0.1922   | 0.001346443 | Intragenic | NM_001108108              | Ano6          |
| 7   | 137276604 | 137276674 | 1       | -0.232828  | 5    | 0.0012   | 0.0089   | 0.45796  | 0.69079  | 0.004013471 | Intergenic | NA                        | NA            |
| 7   | 137488350 | 137488377 | 1       | -0.177892  | 5    | 4.80E-06 | 3.40E-05 | 0.016801 | 0.19469  | 4.29E-05    | TSS        | NM_001271170              | Scaf11        |
| 7   | 137488498 | 137488525 | 1       | -0.172187  | 5    | 5.50E-06 | 7.60E-06 | 0.016747 | 0.18893  | 4.78E-05    | TSS        | NM_001271170              | Scaf11        |
| 7   | 137608428 | 137608843 | 1       | -0.121284  | 5    | 0.0058   | 0.025    | 0.20929  | 0.33057  | 0.014624129 | Intragenic | NM_138832                 | Slc38a1       |
| 7   | 137665295 | 137665375 | 1       | -0.201454  | 5    | 0.0024   | 0.015    | 0.306    | 0.50745  | 0.00705499  | Intragenic | NM_138832                 | Slc38a1       |
| 7   | 137850796 | 137850907 | 1       | -0.169303  | 6    | 0.0032   | 0.018    | 0.26041  | 0.42971  | 0.008990975 | Intergenic | NA                        | NA            |
| 7   | 138090016 | 138090129 | 0.2     | -0.362534  | 7    | 2.40E-09 | 6.10E-07 | 0.38692  | 0.74946  | 7.03E-08    | Intragenic | NM_130748                 | Slc38a4       |
| 7   | 138370953 | 138371076 | 0.088   | -0.152962  | 5    | 1.80E-07 | 2.70E-07 | 0.03793  | 0.19089  | 2.78E-06    | Intragenic | NM_001039454              | Pced1b        |
| 7   | 138377482 | 138377657 | 1       | -0.129259  | 5    | 0.008    | 0.059    | 0.2282   | 0.35746  | 0.019059477 | Intragenic | NM_001039454              | Pced1b        |
| 7   | 138459748 | 138460269 | 1       | -0.149873  | 18   | 3.90E-05 | 0.00034  | 0.25903  | 0.40891  | 0.000237659 | Intragenic | NM_001039454              | Pced1b        |
| 7   | 139264637 | 139264702 | 1       | -0.151077  | 5    | 0.0068   | 0.037    | 0.34623  | 0.49731  | 0.016642688 | Intergenic | NA                        | NA            |
| 7   | 139345618 | 139345720 | 1       | -0.059383  | 5    | 0.013    | 0.18     | 0.050959 | 0.11034  | 0.028097302 | Intergenic | NA                        | NA            |
| 7   | 139420972 | 139421326 | 1       | -0.258106  | 9    | 1.40E-07 | 0.00012  | 0.18615  | 0.44426  | 2.25E-06    | Intergenic | NA                        | NA            |
| 7   | 139428804 | 139428844 | 1       | -0.115009  | 5    | 0.00054  | 0.0031   | 0.76064  | 0.87565  | 0.002077867 | Intragenic | NM_021690                 | Rapgef3       |
| 7   | 139445120 | 139445524 | 1       | -0.063839  | 17   | 0.0068   | 0.088    | 0.030033 | 0.054497 | 0.016642688 | TSS        | NM_021690                 | Rapgef3       |
| 7   | 139568024 | 139568213 | 1       | -0.180619  | 5    | 0.023    | 0.087    | 0.321    | 0.50162  | 0.04441443  | Intragenic | NM_017058                 | Vdr           |
| 7   | 139577744 | 139577830 | 1       | -0.058246  | 5    | 0.00014  | 0.0018   | 0.011869 | 0.070114 | 0.000684451 | Intragenic | NM_017058                 | Vdr           |
| 7   | 139764108 | 139764218 | 1       | -0.126254  | 13   | 0.0012   | 0.0019   | 0.544    | 0.67025  | 0.004013471 | Intergenic | NA                        | NA            |
| 7   | 140016909 | 140016974 | 1       | -0.124476  | 5    | 0.02     | 0.087    | 0.37174  | 0.49622  | 0.039778219 | TSS        | NM_001105746              | Pou6f1        |
| 7   | 140132638 | 140132728 | 0.48    | -0.335133  | 5    | 1.30E-07 | 1.50E-06 | 0.30648  | 0.64162  | 2.11E-06    | Intragenic | NM_001172063              | Galnt6        |
| 7   | 140132762 | 140132862 | 1       | -0.150162  | 5    | 0.0019   | 0.015    | 0.18106  | 0.33122  | 0.005855937 | Intragenic | NM_001172063              | Galnt6        |
| 7   | 140459407 | 140459524 | 1       | -0.136174  | 11   | 0.013    | 0.014    | 0.76192  | 0.89809  | 0.028097302 | Intragenic | NM_019266                 | Scn8a         |
| 7   | 140497208 | 140497289 | 1       | -0.145349  | 13   | 1.30E-05 | 0.00065  | 0.30064  | 0.44598  | 9.66E-05    | Intergenic | NA                        | NA            |
| 7   | 140497349 | 140497371 | 1       | -0.124401  | 5    | 0.00023  | 0.025    | 0.17723  | 0.30163  | 0.00102405  | Intergenic | NA                        | NA            |
| 7   | 140497378 | 140497406 | 1       | -0.114549  | 5    | 0.0068   | 0.039    | 0.26586  | 0.38041  | 0.016642688 | Intergenic | NA                        | NA            |
| 7   | 140497742 | 140498122 | 1       | -0.123341  | 5    | 0.013    | 0.038    | 0.20861  | 0.33196  | 0.028097302 | Intergenic | NA                        | NA            |

| chr | start     | stop      | q-value  | methy.diff | CpGs | pMWU     | p2DKS    | MCWLS    | MCWHS   | pMWU.fdr    | cgi.type   | transcript             | gene      |
|-----|-----------|-----------|----------|------------|------|----------|----------|----------|---------|-------------|------------|------------------------|-----------|
| 7   | 140521787 | 140521827 | 1        | -0.117237  | 5    | 0.0014   | 0.038    | 0.23147  | 0.34871 | 0.004540837 | Intergenic | NA                     | NA        |
| 7   | 140597491 | 140597763 | 1        | -0.171081  | 8    | 0.0037   | 0.023    | 0.48016  | 0.65124 | 0.010204935 | Intergenic | NA                     | NA        |
| 7   | 140621043 | 140621374 | 1        | -0.152806  | 5    | 0.0063   | 0.088    | 0.20386  | 0.35667 | 0.015629046 | Intragenic | NM_199230              | Acvr1b    |
| 7   | 140640871 | 140640965 | 1        | -0.11502   | 5    | 0.0029   | 0.015    | 0.13072  | 0.24574 | 0.008293503 | Intragenic | NM_199230              | Acvr1b    |
| 7   | 140741908 | 140742060 | 1        | -0.094917  | 5    | 0.023    | 0.088    | 0.21194  | 0.30686 | 0.04441443  | Intergenic | NA                     | NA        |
| 7   | 140790818 | 140790879 | 1        | -0.173575  | 6    | 0.0032   | 0.085    | 0.28538  | 0.45896 | 0.008990975 | Intergenic | NA                     | NA        |
| 7   | 140862324 | 140862344 | 1        | -0.14444   | 5    | 3.70E-06 | 0.00014  | 0.05494  | 0.19938 | 3.46E-05    | Intergenic | NA                     | NA        |
| 7   | 140862350 | 140862408 | 1        | -0.123978  | 5    | 0.0029   | 0.0018   | 0.07227  | 0.19625 | 0.008293503 | Intergenic | NA                     | NA        |
| 7   | 140886861 | 140887250 | 0.093    | -0.15438   | 29   | 1.10E-10 | 2.90E-07 | 0.21762  | 0.372   | 4.91E-09    | TSS        | NM_001101675           | Krt83     |
| 7   | 140913240 | 140913485 | 1        | -0.156058  | 17   | 0.00012  | 0.023    | 0.35395  | 0.51001 | 0.000603617 | TSS        | NM_001008814           | Krt81     |
| 7   | 140928584 | 140928847 | 1        | -0.066514  | 8    | 5.00E-05 | 0.0013   | 0.091546 | 0.15806 | 0.000291675 | Intragenic | NM_001008810           | Krt86     |
| 7   | 140941869 | 140942005 | 1        | -0.232939  | 12   | 3.80E-06 | 0.00014  | 0.42888  | 0.66182 | 3.54E-05    | TSS        | NM_001008813           | Kb23      |
| 7   | 141196869 | 141197054 | 1        | 0.132537   | 5    | 0.017    | 0.18     | 0.40022  | 0.26768 | 0.034796287 | Intragenic | NM_183333              | Krt5      |
| 7   | 141499840 | 141499949 | 0.4      | -0.196879  | 7    | 1.10E-08 | 1.20E-06 | 0.13158  | 0.32846 | 2.70E-07    | Intergenic | NA                     | NA        |
| 7   | 141507113 | 141507450 | 1        | -0.131759  | 16   | 0.0025   | 0.053    | 0.50296  | 0.63472 | 0.007343559 | Intergenic | NA                     | NA        |
| 7   | 141546338 | 141546391 | 1        | -0.069573  | 6    | 0.012    | 0.16     | 0.14424  | 0.21381 | 0.026435197 | TSS        | NM_013104              | Igfbp6    |
| 7   | 141590408 | 141590521 | 1        | -0.181353  | 5    | 0.014    | 0.0054   | 0.56015  | 0.7415  | 0.029850603 | TSS        | NM_001134454:NM_021750 | Csad:Csad |
| 7   | 141627608 | 141627652 | 1        | -0.123354  | 5    | 9.80E-07 | 3.40E-05 | 0.05404  | 0.17739 | 1.16E-05    | Intragenic | NM_013171              | Itgb7     |
| 7   | 141752381 | 141752415 | 1        | -0.052873  | 5    | 0.0029   | 0.025    | 0.06497  | 0.11784 | 0.008293503 | TSS        | NM_001106795           | Aaas      |
| 7   | 142352721 | 142352763 | 1        | -0.067271  | 6    | 0.0034   | 0.018    | 0.083353 | 0.15062 | 0.009519525 | Intergenic | NA                     | NA        |
| 7   | 142365923 | 142366031 | 1        | -0.07092   | 5    | 0.00017  | 0.00027  | 0.06475  | 0.13567 | 0.000806192 | Intergenic | NA                     | NA        |
| 7   | 142367829 | 142368309 | 1        | -0.057493  | 7    | 0.00045  | 0.0083   | 0.052367 | 0.10986 | 0.001798952 | TSS        | NM_001308636           | Hoxc10    |
| 7   | 142374619 | 142374762 | 1        | -0.051945  | 12   | 0.019    | 0.067    | 0.16874  | 0.22069 | 0.038322088 | TSS        | NR_031913              | Mir196a   |
| 7   | 142411135 | 142411191 | 1        | -0.092529  | 5    | 0.0058   | 0.0055   | 0.11884  | 0.21137 | 0.014624129 | Intergenic | NA                     | NA        |
| 7   | 142432364 | 142432437 | 1        | -0.211058  | 5    | 3.50E-05 | 0.00014  | 0.15988  | 0.37093 | 0.000218038 | Intergenic | NA                     | NA        |
| 7   | 142439601 | 142439626 | 0.087    | -0.222213  | 5    | 1.30E-07 | 2.70E-07 | 0.10858  | 0.33079 | 2.11E-06    | TSS        | NM_001109884           | Hoxc4     |
| 7   | 142591702 | 142591909 | 1        | -0.124757  | 10   | 1.30E-05 | 0.004    | 0.16192  | 0.28668 | 9.66E-05    | Intergenic | NA                     | NA        |
| 7   | 142707299 | 142707416 | 1        | -0.104093  | 8    | 0.019    | 0.094    | 0.36716  | 0.47125 | 0.038322088 | Intergenic | NA                     | NA        |
| 7   | 142898137 | 142898324 | 1        | -0.052465  | 7    | 0.018    | 0.075    | 0.054134 | 0.1066  | 0.036742993 | TSS        | NM_022710              | Pde1b     |
| 8   | 324220    | 324284    | 1        | -0.214359  | 5    | 0.0087   | 0.058    | 0.66938  | 0.88374 | 0.020391633 | Intergenic | NA                     | NA        |
| 8   | 2834135   | 2834204   | 1        | -0.100141  | 5    | 0.0013   | 0.015    | 0.08558  | 0.18572 | 0.004277683 | Intergenic | NA                     | NA        |
| 8   | 3290690   | 3290719   | 0.47     | -0.238535  | 5    | 1.50E-07 | 1.40E-06 | 0.54662  | 0.78516 | 2.38E-06    | Intergenic | NA                     | NA        |
| 8   | 4308765   | 4308953   | 0.0047   | -0.256571  | 15   | 1.10E-12 | 1.50E-08 | 0.16965  | 0.42622 | 8.37E-11    | Intergenic | NA                     | NA        |
| 8   | 4308985   | 4309370   | 1        | -0.245477  | 5    | 0.00021  | 0.003    | 0.49938  | 0.74485 | 0.000951214 | Intergenic | NA                     | NA        |
| 8   | 5788767   | 5788902   | 1        | -0.207013  | 7    | 0.0026   | 0.0033   | 0.52805  | 0.73506 | 0.007616821 | Intergenic | NA                     | NA        |
| 8   | 6738027   | 6738058   | 9.80E-06 | -0.307818  | 8    | 8.30E-12 | 3.00E-11 | 0.47219  | 0.78001 | 4.87E-10    | Intergenic | NA                     | NA        |
| 8   | 6738064   | 6738167   | 1        | -0.318775  | 5    | 2.20E-05 | 7.50E-06 | 0.21377  | 0.53255 | 0.000149617 | Intergenic | NA                     | NA        |
| 8   | 7377504   | 7377667   | 1        | -0.209889  | 5    | 1.90E-05 | 0.00028  | 0.10514  | 0.31503 | 0.000131674 | Intergenic | NA                     | NA        |

| chr | start    | stop     | q-value | methy.diff | CpGs | pMWU     | p2DKS    | MCWLS    | MCWHS    | pMWU.fdr    | cgi.type   | transcript   | gene     |
|-----|----------|----------|---------|------------|------|----------|----------|----------|----------|-------------|------------|--------------|----------|
| 8   | 8542398  | 8542512  | 1       | -0.171723  | 5    | 0.0013   | 0.0031   | 0.09457  | 0.26629  | 0.004277683 | Intergenic | NA           | NA       |
| 8   | 11130341 | 11130476 | 1       | -0.214585  | 7    | 0.0013   | 0.0034   | 0.52048  | 0.73506  | 0.004277683 | Intergenic | NA           | NA       |
| 8   | 11811263 | 11811450 | 1       | -0.080388  | 6    | 0.025    | 0.084    | 0.21447  | 0.29485  | 0.047453009 | Intergenic | NA           | NA       |
| 8   | 11893837 | 11893907 | 1       | -0.055526  | 6    | 0.023    | 0.04     | 0.13049  | 0.18601  | 0.04441443  | Intergenic | NA           | NA       |
| 8   | 12475243 | 12475401 | 1       | -0.148608  | 7    | 0.02     | 0.075    | 0.37533  | 0.52393  | 0.039778219 | Intergenic | NA           | NA       |
| 8   | 13072069 | 13072147 | 1       | -0.250127  | 5    | 6.20E-05 | 0.00098  | 0.20782  | 0.45795  | 0.000349462 | Intergenic | NA           | NA       |
| 8   | 13306482 | 13306639 | 1       | -0.10936   | 7    | 0.0027   | 0.037    | 0.18135  | 0.29071  | 0.007840962 | TSS        | NM_080411    | Gpr83    |
| 8   | 14072287 | 14072417 | 1       | -0.18281   | 8    | 1.70E-05 | 0.00061  | 0.28473  | 0.46754  | 0.000120524 | Intergenic | NA           | NA       |
| 8   | 14252422 | 14252479 | 1       | -0.167324  | 6    | 4.90E-07 | 6.30E-06 | 0.059934 | 0.22726  | 6.54E-06    | TSS        | NM_001014087 | Ccdc67   |
| 8   | 17006727 | 17006792 | 1       | -0.201515  | 5    | 0.00048  | 0.0053   | 0.43758  | 0.63909  | 0.001881331 | Intergenic | NA           | NA       |
| 8   | 17658231 | 17658362 | 1       | 0.055661   | 11   | 8.20E-05 | 0.004    | 0.92477  | 0.8691   | 0.000442277 | Intergenic | NA           | NA       |
| 8   | 21313345 | 21313385 | 1       | 0.08951    | 11   | 5.60E-06 | 0.00011  | 0.18787  | 0.098361 | 4.84E-05    | Intergenic | NA           | NA       |
| 8   | 21601389 | 21601577 | 1       | -0.166285  | 5    | 0.025    | 0.088    | 0.47612  | 0.64241  | 0.047453009 | Intergenic | NA           | NA       |
| 8   | 22047916 | 22048141 | 1       | -0.28621   | 5    | 0.00021  | 0.0017   | 0.31813  | 0.60434  | 0.000951214 | Intragenic | NM_017192    | S1pr2    |
| 8   | 22111625 | 22111653 | 1       | -0.10033   | 5    | 0.00088  | 0.0018   | 0.15257  | 0.2529   | 0.003092094 | Intragenic | NM_001172079 | Icam5    |
| 8   | 22112799 | 22112926 | 1       | -0.107195  | 15   | 1.70E-05 | 0.00061  | 0.18205  | 0.28924  | 0.000120524 | Intragenic | NM_001172079 | Icam5    |
| 8   | 22113758 | 22113846 | 1       | -0.080422  | 8    | 0.0003   | 0.026    | 0.078468 | 0.15889  | 0.001281585 | Intragenic | NM_001172079 | Icam5    |
| 8   | 22391059 | 22391080 | 1       | -0.109659  | 5    | 0.00088  | 0.0055   | 0.16577  | 0.27543  | 0.003092094 | TSS        | NM_001108996 | Ap1m2    |
| 8   | 22422780 | 22423559 | 1       | -0.07609   | 16   | 0.0094   | 0.16     | 0.21468  | 0.29077  | 0.021723038 | TSS        | NM_001134715 | Slc44a2  |
| 8   | 22869365 | 22869507 | 1       | -0.137595  | 8    | 0.026    | 0.25     | 0.31422  | 0.45181  | 0.049234478 | Intragenic | NM_001270413 | Kank2    |
| 8   | 22906274 | 22906353 | 1       | -0.226559  | 5    | 2.20E-06 | 6.90E-05 | 0.27188  | 0.49844  | 2.27E-05    | Intragenic | NM_001108997 | Dock6    |
| 8   | 23008957 | 23009011 | 1       | -0.054669  | 5    | 0.021    | 0.059    | 0.088798 | 0.14347  | 0.041207871 | Intragenic | NM_001005881 | Plppr2   |
| 8   | 23009075 | 23009124 | 1       | -0.177366  | 7    | 0.00054  | 0.0014   | 0.21381  | 0.39117  | 0.002077867 | Intragenic | NM_001005881 | Plppr2   |
| 8   | 23048575 | 23048639 | 1       | -0.186602  | 5    | 0.01     | 0.086    | 0.44811  | 0.63471  | 0.02275947  | Intragenic | NM_001106805 | Rgl3     |
| 8   | 23259562 | 23259727 | 1       | -0.203498  | 13   | 8.70E-09 | 4.70E-06 | 0.21343  | 0.41693  | 2.21E-07    | Intergenic | NA           | NA       |
| 8   | 23717611 | 23717672 | 1       | -0.166847  | 5    | 0.00072  | 0.015    | 0.24761  | 0.41445  | 0.002634665 | Intergenic | NA           | NA       |
| 8   | 23728909 | 23729195 | 1       | -0.13071   | 9    | 0.017    | 0.11     | 0.26929  | 0.4      | 0.034796287 | Intergenic | NA           | NA       |
| 8   | 24227061 | 24227122 | 1       | -0.166847  | 5    | 0.00072  | 0.015    | 0.24761  | 0.41445  | 0.002634665 | Intergenic | NA           | NA       |
| 8   | 24238359 | 24238645 | 1       | -0.13071   | 9    | 0.017    | 0.11     | 0.26929  | 0.4      | 0.034796287 | Intergenic | NA           | NA       |
| 8   | 24299315 | 24299444 | 1       | 0.052535   | 5    | 0.023    | 0.18     | 0.71937  | 0.66683  | 0.04441443  | Intergenic | NA           | NA       |
| 8   | 25109276 | 25109332 | 1       | -0.131571  | 5    | 0.014    | 0.015    | 0.58174  | 0.71331  | 0.029850603 | Intergenic | NA           | NA       |
| 8   | 25109363 | 25109576 | 1       | -0.218258  | 14   | 1.50E-06 | 4.10E-05 | 0.31112  | 0.52938  | 1.65E-05    | Intergenic | NA           | NA       |
| 8   | 27845714 | 27845985 | 1       | -0.188206  | 8    | 7.90E-05 | 0.00064  | 0.16785  | 0.35606  | 0.000427247 | Intragenic | NM_001192018 | Glb1l2   |
| 8   | 30686671 | 30686876 | 1       | -0.105588  | 6    | 0.025    | 0.11     | 0.20535  | 0.31094  | 0.047453009 | Intergenic | NA           | NA       |
| 8   | 30755788 | 30755883 | 1       | -0.132314  | 5    | 0.0011   | 0.0018   | 0.094667 | 0.22698  | 0.003737263 | Intergenic | NA           | NA       |
| 8   | 30939855 | 30940034 | 1       | -0.299231  | 5    | 0.0017   | 0.0054   | 0.12749  | 0.42672  | 0.005339493 | Intergenic | NA           | NA       |
| 8   | 32010722 | 32010783 | 1       | -0.187152  | 5    | 3.50E-05 | 0.0018   | 0.4316   | 0.61875  | 0.000218038 | Intragenic | NM_001106810 | Adamts15 |
| 8   | 32026159 | 32026190 | 1       | -0.056281  | 5    | 0.00054  | 0.0031   | 0.016207 | 0.072489 | 0.002077867 | TSS        | NM_001106810 | Adamts15 |
| 8   | 32215461 | 32215570 | 1       | -0.253699  | 5    | 0.00036  | 0.0031   | 0.29053  | 0.54423  | 0.001486639 | Intragenic | NM_001034942 | Zbtb44   |

| chr | start    | stop     | q-value | methy.diff | CpGs | pMWU     | p2DKS    | MCWLS    | MCWHS   | pMWU.fdr    | cgi.type   | transcript                 | gene                   |
|-----|----------|----------|---------|------------|------|----------|----------|----------|---------|-------------|------------|----------------------------|------------------------|
| 8   | 32267005 | 32267176 | 1       | -0.105511  | 5    | 0.02     | 0.0054   | 0.019165 | 0.12468 | 0.039778219 | Intragenic | NM_053635                  | St14                   |
| 8   | 32986648 | 32987275 | 1       | -0.051177  | 10   | 0.0089   | 0.021    | 0.07843  | 0.12961 | 0.020836022 | Intragenic | NM_017297                  | Kcnj5                  |
| 8   | 33431377 | 33431717 | 1       | -0.084617  | 9    | 0.0031   | 0.061    | 0.096614 | 0.18123 | 0.008829746 | Intragenic | NM_017297                  | Kcnj5                  |
| 8   | 33457234 | 33457308 | 1       | -0.152702  | 5    | 0.011    | 0.039    | 0.26988  | 0.42258 | 0.02463877  | Intragenic | NM_017297                  | Kcnj5                  |
| 8   | 33706788 | 33706856 | 1       | -0.14804   | 5    | 7.00E-05 | 0.00052  | 0.06926  | 0.2173  | 0.000386221 | Intergenic | NA                         | NA                     |
| 8   | 36182041 | 36182180 | 1       | -0.16618   | 7    | 0.0051   | 0.11     | 0.2822   | 0.44838 | 0.013208341 | Intragenic | NM_001048215               | Kirrel3                |
| 8   | 36194976 | 36195023 | 1       | -0.164647  | 5    | 0.0008   | 0.0052   | 0.43998  | 0.60463 | 0.002866309 | Intragenic | NM_001048215               | Kirrel3                |
| 8   | 36262494 | 36262542 | 1       | -0.096594  | 5    | 0.0063   | 0.0092   | 0.12051  | 0.21711 | 0.015629046 | Intragenic | NM_001048215               | Kirrel3                |
| 8   | 37208861 | 37208894 | 1       | -0.353071  | 5    | 5.60E-07 | 7.30E-06 | 0.48738  | 0.84045 | 7.29E-06    | Intergenic | NA                         | NA                     |
| 8   | 39093336 | 39093407 | 1       | -0.14171   | 5    | 0.00014  | 0.00098  | 0.19577  | 0.33748 | 0.000684451 | Intragenic | NM_181375                  | Robo4                  |
| 8   | 39613771 | 39613909 | 1       | -0.172393  | 5    | 0.0058   | 0.015    | 0.41265  | 0.58504 | 0.014624129 | Intergenic | NA                         | NA                     |
| 8   | 39886139 | 39886210 | 1       | -0.14073   | 5    | 0.00014  | 0.0018   | 0.19816  | 0.33889 | 0.000684451 | Intragenic | NM_001305215:N<br>M_181375 | LOC10091106<br>8:Robo4 |
| 8   | 40017460 | 40017501 | 1       | -0.107651  | 5    | 0.021    | 0.13     | 0.63522  | 0.74287 | 0.041207871 | Intragenic | NM_024140                  | Nrgn                   |
| 8   | 40123113 | 40123182 | 0.011   | -0.172275  | 7    | 1.50E-09 | 3.30E-08 | 0.13199  | 0.30426 | 4.72E-08    | TSS        | NM_001009344               | Tbrg1                  |
| 8   | 41393723 | 41393856 | 1       | -0.222029  | 7    | 7.70E-08 | 8.10E-06 | 0.43473  | 0.65676 | 1.41E-06    | Intergenic | NA                         | NA                     |
| 8   | 41621477 | 41621584 | 1       | -0.208989  | 5    | 4.40E-05 | 0.00014  | 0.54522  | 0.75421 | 0.000263321 | Intergenic | NA                         | NA                     |
| 8   | 41635588 | 41635653 | 1       | -0.233069  | 5    | 1.70E-05 | 0.00052  | 0.47166  | 0.70473 | 0.000120524 | Intergenic | NA                         | NA                     |
| 8   | 43894699 | 43894828 | 1       | -0.152636  | 5    | 0.0038   | 0.0091   | 0.16416  | 0.3168  | 0.010352437 | Intergenic | NA                         | NA                     |
| 8   | 44747944 | 44748001 | 1       | -0.204837  | 6    | 0.012    | 0.059    | 0.3473   | 0.55214 | 0.026435197 | Intragenic | NM_053519                  | Sorl1                  |
| 8   | 44986871 | 44986974 | 1       | -0.10318   | 7    | 5.60E-06 | 9.10E-05 | 0.13009  | 0.23327 | 4.84E-05    | Intergenic | NA                         | NA                     |
| 8   | 45083502 | 45083527 | 1       | -0.225147  | 5    | 4.80E-06 | 0.00014  | 0.53147  | 0.75662 | 4.29E-05    | Intragenic | NM_001106814               | Tecta                  |
| 8   | 45114120 | 45114200 | 1       | -0.106594  | 5    | 0.016    | 0.024    | 0.24827  | 0.35487 | 0.033288089 | Intragenic | NM_001106814               | Tecta                  |
| 8   | 45138082 | 45138176 | 1       | -0.20267   | 5    | 0.00029  | 0.015    | 0.23781  | 0.44048 | 0.001239307 | Intragenic | NM_001106814               | Tecta                  |
| 8   | 45648877 | 45648953 | 1       | -0.199152  | 5    | 0.00021  | 0.0018   | 0.13316  | 0.33231 | 0.000951214 | Intergenic | NA                         | NA                     |
| 8   | 45702909 | 45703009 | 1       | -0.154307  | 5    | 0.00015  | 0.0032   | 0.13372  | 0.28803 | 0.000724207 | Intergenic | NA                         | NA                     |
| 8   | 45988415 | 45988553 | 1       | -0.318668  | 5    | 1.50E-05 | 7.40E-06 | 0.087903 | 0.40657 | 0.000109113 | Intragenic | NM_001014090               | Oaf                    |
| 8   | 46103893 | 46103934 | 0.0058  | -0.254247  | 5    | 6.30E-08 | 1.80E-08 | 0.068909 | 0.32316 | 1.18E-06    | Intragenic | NM_173154                  | Clmp                   |
| 8   | 46122014 | 46122162 | 1       | -0.136936  | 5    | 0.013    | 0.13     | 0.14062  | 0.27756 | 0.028097302 | Intragenic | NM_173154                  | Clmp                   |
| 8   | 46312474 | 46312560 | 1       | -0.144709  | 6    | 1.00E-05 | 0.00095  | 0.07234  | 0.21705 | 7.82E-05    | Intragenic | NM_001106815               | Trim29                 |
| 8   | 46654698 | 46654954 | 1       | -0.095951  | 7    | 0.0096   | 0.077    | 0.15878  | 0.25474 | 0.022155406 | Intergenic | NA                         | NA                     |
| 8   | 46930744 | 46930808 | 1       | -0.147341  | 5    | 0.0049   | 0.059    | 0.24184  | 0.38918 | 0.012753585 | Intergenic | NA                         | NA                     |
| 8   | 47060636 | 47060689 | 1       | -0.132051  | 5    | 0.013    | 0.038    | 0.45864  | 0.59069 | 0.028097302 | TSS        | NM_001012123               | C1qtnf5                |
| 8   | 47060710 | 47060769 | 1       | -0.102505  | 5    | 0.00017  | 0.00052  | 0.71661  | 0.81912 | 0.000806192 | TSS        | NM_001012123               | C1qtnf5                |
| 8   | 47204515 | 47204600 | 1       | 0.103782   | 5    | 0.0011   | 0.0055   | 0.57882  | 0.47504 | 0.003737263 | Intragenic | NM_001025010               | Nlr1                   |
| 8   | 47260653 | 47260723 | 1       | -0.241397  | 5    | 0.00039  | 0.0032   | 0.19021  | 0.4316  | 0.001587612 | Intragenic | NM_001011996               | C2cd2l                 |
| 8   | 47543160 | 47543190 | 0.037   | -0.223773  | 5    | 1.30E-07 | 1.10E-07 | 0.062306 | 0.28608 | 2.11E-06    | TSS        | NM_001109292               | Ddx6                   |
| 8   | 47543234 | 47543350 | 1       | -0.135827  | 5    | 0.00059  | 0.00096  | 0.037223 | 0.17305 | 0.002242971 | TSS        | NM_001109292               | Ddx6                   |

| chr | start    | stop     | q-value | methy.diff | CpGs | pMWU     | p2DKS    | MCWLS    | MCWHS    | pMWU.fdr    | cgi.type   | transcript          | gene        |
|-----|----------|----------|---------|------------|------|----------|----------|----------|----------|-------------|------------|---------------------|-------------|
| 8   | 48337126 | 48337219 | 1       | -0.169856  | 5    | 0.01     | 0.058    | 0.38043  | 0.55029  | 0.02275947  | TSS        | NM_017349:NM_145717 | Fxyd2:Fxyd2 |
| 8   | 48438822 | 48439044 | 1       | -0.146352  | 7    | 2.70E-05 | 0.0013   | 0.12643  | 0.27278  | 0.000178372 | Intragenic | NM_001108141        | Dscaml1     |
| 8   | 48594339 | 48594381 | 1       | -0.205698  | 5    | 0.0074   | 0.0091   | 0.3107   | 0.5164   | 0.017853001 | Intragenic | NM_001108141        | Dscaml1     |
| 8   | 48601094 | 48601173 | 1       | -0.162273  | 7    | 0.00093  | 0.0052   | 0.37977  | 0.54204  | 0.003255406 | Intragenic | NM_001108141        | Dscaml1     |
| 8   | 50084296 | 50084419 | 1       | -0.134573  | 5    | 0.00054  | 0.0054   | 0.36082  | 0.4954   | 0.002077867 | Intergenic | NA                  | NA          |
| 8   | 50777676 | 50777839 | 1       | -0.165526  | 5    | 0.0041   | 0.024    | 0.11248  | 0.27801  | 0.01100507  | Intragenic | NM_001012201        | Cadm1       |
| 8   | 51312229 | 51312318 | 0.0022  | -0.257196  | 5    | 6.30E-08 | 6.70E-09 | 0.1442   | 0.40139  | 1.18E-06    | TSS        | NM_001025055        | Fam55b      |
| 8   | 51599023 | 51599138 | 1       | -0.148021  | 6    | 0.011    | 0.085    | 0.28376  | 0.43178  | 0.02463877  | Intragenic | NM_001013181        | Zbtb16      |
| 8   | 52168748 | 52168836 | 1       | -0.176322  | 5    | 0.0035   | 0.024    | 0.2632   | 0.43952  | 0.009686665 | Intergenic | NA                  | NA          |
| 8   | 53571967 | 53572036 | 1       | -0.082944  | 5    | 0.015    | 0.058    | 0.23037  | 0.31331  | 0.031584896 | Intragenic | NM_001127712        | Bco2        |
| 8   | 54278066 | 54278611 | 0.00066 | -0.092045  | 20   | 1.20E-13 | 2.00E-09 | 0.027487 | 0.11953  | 1.24E-11    | Intergenic | NA                  | NA          |
| 8   | 54290068 | 54290130 | 1       | -0.164488  | 5    | 5.50E-06 | 0.00028  | 0.13907  | 0.30356  | 4.78E-05    | Intergenic | NA                  | NA          |
| 8   | 54669600 | 54669648 | 1       | -0.148232  | 5    | 0.00023  | 0.0018   | 0.61163  | 0.75986  | 0.00102405  | Intergenic | NA                  | NA          |
| 8   | 54774702 | 54774783 | 1       | -0.243462  | 5    | 0.00017  | 0.0018   | 0.43025  | 0.67372  | 0.000806192 | Intragenic | NM_213629           | Arhgap20    |
| 8   | 55039861 | 55040004 | 1       | -0.18263   | 8    | 0.00048  | 0.0084   | 0.24526  | 0.42789  | 0.001881331 | Intragenic | NM_001105997        | Mrpl1       |
| 8   | 57122099 | 57122215 | 1       | -0.07034   | 5    | 0.00015  | 7.00E-05 | 0.018662 | 0.089002 | 0.000724207 | TSS        | NM_001191579        | Elmod1      |
| 8   | 57374641 | 57374733 | 1       | -0.178602  | 5    | 0.0045   | 0.0016   | 0.5513   | 0.7299   | 0.011905878 | Intergenic | NA                  | NA          |
| 8   | 57929375 | 57929549 | 1       | -0.260919  | 5    | 0.00019  | 0.0091   | 0.3001   | 0.56102  | 0.000879857 | Intragenic | NM_001105716        | Crabp1      |
| 8   | 58206162 | 58206262 | 1       | -0.154261  | 5    | 0.0068   | 0.039    | 0.27052  | 0.42478  | 0.016642688 | Intragenic | NM_052806           | Chrb4       |
| 8   | 58470187 | 58470264 | 1       | -0.121762  | 5    | 0.01     | 0.024    | 0.17241  | 0.29417  | 0.02275947  | Intergenic | NA                  | NA          |
| 8   | 58470272 | 58470306 | 1       | -0.14715   | 5    | 0.0011   | 0.0055   | 0.17369  | 0.32084  | 0.003737263 | Intergenic | NA                  | NA          |
| 8   | 58470430 | 58470514 | 1       | -0.217297  | 7    | 1.50E-05 | 1.60E-05 | 0.31151  | 0.52881  | 0.000109113 | Intergenic | NA                  | NA          |
| 8   | 58522694 | 58522761 | 1       | -0.152574  | 5    | 0.0027   | 0.0055   | 0.16239  | 0.31497  | 0.007840962 | Intragenic | NM_001109294        | Tmem266     |
| 8   | 59424012 | 59424132 | 1       | -0.132589  | 7    | 0.013    | 0.078    | 0.24958  | 0.38217  | 0.028097302 | Intergenic | NA                  | NA          |
| 8   | 59778387 | 59778485 | 1       | -0.186531  | 5    | 0.00054  | 0.0054   | 0.14408  | 0.33061  | 0.002077867 | Intergenic | NA                  | NA          |
| 8   | 59845977 | 59846021 | 1       | -0.224508  | 5    | 3.90E-05 | 0.00098  | 0.31696  | 0.54146  | 0.000237659 | Intragenic | NM_001100722        | Lingo1      |
| 8   | 60101181 | 60101227 | 1       | -0.06796   | 5    | 0.01     | 0.015    | 0.11962  | 0.18758  | 0.02275947  | TSS        | NM_031022           | Cspg4       |
| 8   | 60101241 | 60101573 | 1       | -0.096539  | 5    | 0.011    | 0.038    | 0.15546  | 0.252    | 0.02463877  | TSS        | NM_031022           | Cspg4       |
| 8   | 60164128 | 60164534 | 0.62    | -0.050082  | 18   | 3.10E-08 | 1.90E-06 | 0.02996  | 0.080042 | 6.79E-07    | TSS        | NM_001127488        | Snx33       |
| 8   | 61331106 | 61331199 | 1       | -0.181876  | 5    | 0.015    | 0.038    | 0.45116  | 0.63304  | 0.031584896 | Intragenic | NM_001191616        | Gramd1b     |
| 8   | 62649492 | 62649600 | 1       | -0.185876  | 5    | 0.012    | 0.088    | 0.30711  | 0.49298  | 0.026435197 | Intragenic | NM_001014091        | Ccdc33      |
| 8   | 62866980 | 62867019 | 1       | -0.101948  | 5    | 0.00088  | 0.0055   | 0.32252  | 0.42447  | 0.003092094 | TSS        | NM_001012125        | Loxl1       |
| 8   | 63013105 | 63013248 | 0.00014 | -0.217824  | 13   | 1.90E-12 | 4.30E-10 | 0.13019  | 0.34801  | 1.36E-10    | Intergenic | NA                  | NA          |
| 8   | 63184117 | 63184156 | 1       | -0.107441  | 7    | 0.0041   | 0.027    | 0.518    | 0.62544  | 0.01100507  | Intragenic | NM_019380           | Nptn        |
| 8   | 63404301 | 63404812 | 1       | -0.109774  | 18   | 0.0011   | 0.1      | 0.29879  | 0.40856  | 0.003737263 | Intragenic | NM_021658           | Hcn4        |
| 8   | 63914700 | 63914738 | 0.0035  | -0.385173  | 9    | 1.80E-10 | 1.10E-08 | 0.29905  | 0.68422  | 7.51E-09    | TSS        | NM_001106826        | Bbs4        |
| 8   | 63915029 | 63915131 | 1       | -0.280186  | 5    | 0.0041   | 0.0054   | 0.4024   | 0.68259  | 0.01100507  | TSS        | NM_001106826        | Bbs4        |
| 8   | 64088127 | 64088186 | 1       | -0.076377  | 5    | 0.0038   | 0.0055   | 0.061551 | 0.13793  | 0.010352437 | TSS        | NM_001004443        | Hexa        |

| chr | start     | stop      | q-value | methy.diff | CpGs | pMWU     | p2DKS    | MCWLS    | MCWHS   | pMWU.fdr    | cgi.type   | transcript   | gene     |
|-----|-----------|-----------|---------|------------|------|----------|----------|----------|---------|-------------|------------|--------------|----------|
| 8   | 64278978  | 64279010  | 1       | -0.148897  | 5    | 0.0016   | 0.015    | 0.16624  | 0.31514 | 0.005100053 | Intergenic | NA           | NA       |
| 8   | 66034624  | 66034773  | 1       | -0.107163  | 5    | 0.0094   | 0.088    | 0.059072 | 0.16623 | 0.021723038 | Intergenic | NA           | NA       |
| 8   | 67035949  | 67036193  | 1       | -0.13028   | 5    | 0.0013   | 0.015    | 0.079877 | 0.21016 | 0.004277683 | Intergenic | NA           | NA       |
| 8   | 67042477  | 67043226  | 1       | -0.076967  | 11   | 0.0004   | 0.0019   | 0.094558 | 0.17153 | 0.00162337  | Intergenic | NA           | NA       |
| 8   | 67710590  | 67710678  | 0.91    | -0.197059  | 8    | 1.00E-09 | 2.80E-06 | 0.15006  | 0.34712 | 3.33E-08    | Intergenic | NA           | NA       |
| 8   | 68395870  | 68395969  | 1       | -0.106153  | 5    | 0.017    | 0.13     | 0.17559  | 0.28175 | 0.034796287 | TSS        | NM_013095    | Smad3    |
| 8   | 68450974  | 68451093  | 1       | -0.250415  | 5    | 5.00E-05 | 0.00027  | 0.062857 | 0.31327 | 0.000291675 | Intergenic | NA           | NA       |
| 8   | 68579345  | 68579437  | 1       | -0.184847  | 8    | 1.40E-05 | 0.00095  | 0.16929  | 0.35414 | 0.000103723 | Intergenic | NA           | NA       |
| 8   | 68672758  | 68673106  | 1       | -0.090975  | 6    | 0.023    | 0.16     | 0.087324 | 0.1783  | 0.04441443  | Intragenic | NM_001109002 | Smad6    |
| 8   | 68724144  | 68724209  | 1       | -0.148251  | 5    | 0.017    | 0.056    | 0.3676   | 0.51585 | 0.034796287 | Intergenic | NA           | NA       |
| 8   | 68742278  | 68742535  | 1       | -0.06194   | 6    | 0.025    | 0.056    | 0.039158 | 0.1011  | 0.047453009 | Intergenic | NA           | NA       |
| 8   | 69569762  | 69570193  | 1       | -0.05458   | 13   | 0.00042  | 0.0013   | 0.047931 | 0.10251 | 0.001700519 | Intergenic | NA           | NA       |
| 8   | 69669455  | 69669560  | 1       | -0.107056  | 5    | 0.00097  | 0.0093   | 0.42914  | 0.5362  | 0.003366009 | Intergenic | NA           | NA       |
| 8   | 70405141  | 70405357  | 1       | -0.142355  | 7    | 1.00E-05 | 0.00016  | 0.091992 | 0.23435 | 7.82E-05    | TSS        | NM_001014093 | Parp16   |
| 8   | 70803203  | 70803354  | 1       | -0.189645  | 5    | 0.0008   | 0.00098  | 0.24615  | 0.4358  | 0.002866309 | Intergenic | NA           | NA       |
| 8   | 70817069  | 70817115  | 1       | -0.271043  | 5    | 3.50E-05 | 0.00027  | 0.1949   | 0.46595 | 0.000218038 | Intragenic | NM_001044253 | Pif1     |
| 8   | 70852452  | 70852557  | 1       | -0.086097  | 5    | 0.0068   | 0.024    | 0.079618 | 0.16571 | 0.016642688 | TSS        | NM_001173426 | Rbpms2   |
| 8   | 71490661  | 71490750  | 1       | -0.067929  | 5    | 0.00019  | 0.0032   | 0.041731 | 0.10966 | 0.000879857 | Intergenic | NA           | NA       |
| 8   | 73551682  | 73551904  | 1       | -0.200517  | 5    | 0.0008   | 0.00052  | 0.13602  | 0.33654 | 0.002866309 | Intragenic | NM_001037651 | Prtg     |
| 8   | 77397451  | 77397574  | 1       | -0.189693  | 5    | 0.00039  | 0.0053   | 0.12749  | 0.31718 | 0.001587612 | Intergenic | NA           | NA       |
| 8   | 77732904  | 77733066  | 1       | -0.103733  | 7    | 0.00033  | 0.013    | 0.19257  | 0.2963  | 0.001385608 | Intergenic | NA           | NA       |
| 8   | 79813934  | 79814065  | 1       | -0.1458    | 5    | 0.00048  | 0.00028  | 0.13194  | 0.27774 | 0.001881331 | Intergenic | NA           | NA       |
| 8   | 80068704  | 80068871  | 1       | -0.07372   | 7    | 0.013    | 0.14     | 0.14677  | 0.22049 | 0.028097302 | Intergenic | NA           | NA       |
| 8   | 80472067  | 80472138  | 1       | -0.075678  | 5    | 0.0087   | 0.038    | 0.093419 | 0.1691  | 0.020391633 | Intergenic | NA           | NA       |
| 8   | 83752342  | 83752576  | 1       | -0.172579  | 5    | 0.0053   | 0.025    | 0.095743 | 0.26832 | 0.013591571 | Intragenic | NM_001005549 | Tinag    |
| 8   | 84083549  | 84083784  | 1       | -0.169861  | 5    | 0.008    | 0.038    | 0.52656  | 0.69642 | 0.019059477 | Intergenic | NA           | NA       |
| 8   | 84382347  | 84382653  | 1       | -0.118015  | 8    | 0.0036   | 0.013    | 0.13654  | 0.25456 | 0.009945103 | Intragenic | NM_001014268 | Lrrc1    |
| 8   | 84617796  | 84617849  | 1       | -0.171995  | 5    | 0.00054  | 0.015    | 0.67954  | 0.85153 | 0.002077867 | Intergenic | NA           | NA       |
| 8   | 85107798  | 85107958  | 1       | -0.164168  | 10   | 1.30E-05 | 0.0001   | 0.20681  | 0.37098 | 9.66E-05    | Intergenic | NA           | NA       |
| 8   | 85303917  | 85304000  | 1       | -0.052689  | 14   | 1.10E-06 | 0.00043  | 0.052262 | 0.10495 | 1.27E-05    | Intergenic | NA           | NA       |
| 8   | 86726281  | 86726454  | 1       | -0.131262  | 6    | 0.016    | 0.059    | 0.12195  | 0.25321 | 0.033288089 | Intergenic | NA           | NA       |
| 8   | 87764868  | 87765059  | 1       | -0.141288  | 10   | 7.10E-05 | 0.00022  | 0.51834  | 0.65962 | 0.000391021 | Intergenic | NA           | NA       |
| 8   | 89874803  | 89874936  | 1       | -0.291206  | 5    | 6.20E-05 | 0.0055   | 0.15858  | 0.44978 | 0.000349462 | Intragenic | NM_001277283 | Irak1bp1 |
| 8   | 91933927  | 91934079  | 1       | -0.065951  | 7    | 0.026    | 0.14     | 0.72003  | 0.78598 | 0.049234478 | Intergenic | NA           | NA       |
| 8   | 93237031  | 93237157  | 1       | -0.165367  | 7    | 0.00058  | 0.012    | 0.37874  | 0.54411 | 0.002226081 | Intergenic | NA           | NA       |
| 8   | 94308315  | 94308348  | 1       | -0.223931  | 5    | 0.00029  | 0.00053  | 0.21911  | 0.44304 | 0.001239307 | TSS        | NM_001108774 | Mrap2    |
| 8   | 99823458  | 99823521  | 1       | -0.139422  | 5    | 0.0017   | 0.039    | 0.2546   | 0.39403 | 0.005339493 | Intergenic | NA           | NA       |
| 8   | 101865454 | 101865719 | 1       | -0.129704  | 11   | 0.0021   | 0.025    | 0.3901   | 0.51981 | 0.006364615 | Intragenic | NM_001271438 | Slc9a9   |
| 8   | 102828796 | 102828837 | 1       | -0.092864  | 5    | 0.00019  | 0.0018   | 0.055564 | 0.14843 | 0.000879857 | Intergenic | NA           | NA       |

| chr | start     | stop      | q-value  | methy.diff | CpGs | pMWU     | p2DKS    | MCWLS    | MCWHS    | pMWU.fdr    | cgi.type   | transcript   | gene    |
|-----|-----------|-----------|----------|------------|------|----------|----------|----------|----------|-------------|------------|--------------|---------|
| 8   | 103810221 | 103810426 | 1        | -0.117178  | 11   | 7.90E-05 | 0.02     | 0.18602  | 0.3032   | 0.000427247 | Intergenic | NA           | NA      |
| 8   | 104102828 | 104103037 | 1        | -0.274721  | 8    | 3.10E-07 | 5.50E-06 | 0.26703  | 0.54176  | 4.47E-06    | Intergenic | NA           | NA      |
| 8   | 104534484 | 104534573 | 0.00024  | -0.326164  | 8    | 1.90E-11 | 7.40E-10 | 0.3283   | 0.65446  | 9.88E-10    | Intergenic | NA           | NA      |
| 8   | 106881637 | 106881809 | 1        | -0.151372  | 19   | 5.00E-09 | 4.40E-06 | 0.22323  | 0.3746   | 1.33E-07    | Intergenic | NA           | NA      |
| 8   | 107231883 | 107231946 | 1        | -0.055327  | 5    | 0.0011   | 0.0032   | 0.052616 | 0.10794  | 0.003737263 | Intragenic | NM_001173354 | Armc8   |
| 8   | 107813089 | 107813235 | 1        | -0.156993  | 6    | 0.00036  | 0.0027   | 0.12246  | 0.27945  | 0.001486639 | Intergenic | NA           | NA      |
| 8   | 107822148 | 107822218 | 1        | -0.200958  | 5    | 3.20E-07 | 7.50E-06 | 0.21745  | 0.4184   | 4.57E-06    | Intergenic | NA           | NA      |
| 8   | 108295783 | 108295928 | 1        | -0.097362  | 5    | 0.00012  | 0.0018   | 0.027441 | 0.1248   | 0.000603617 | TSS        | NM_001012126 | Slc35g2 |
| 8   | 108450014 | 108450116 | 1        | -0.143015  | 5    | 0.0058   | 0.015    | 0.46903  | 0.61205  | 0.014624129 | Intragenic | NM_001108179 | Stag1   |
| 8   | 110238970 | 110239047 | 1        | -0.138157  | 5    | 0.012    | 0.039    | 0.25263  | 0.39079  | 0.026435197 | Intergenic | NA           | NA      |
| 8   | 110245247 | 110245522 | 1        | -0.272647  | 7    | 0.0002   | 4.80E-05 | 0.54804  | 0.82068  | 0.00092049  | Intergenic | NA           | NA      |
| 8   | 110607008 | 110607343 | 1        | -0.081396  | 15   | 0.0024   | 0.012    | 0.15143  | 0.23283  | 0.00705499  | Intragenic | NM_031717    | Amotl2  |
| 8   | 111425686 | 111425818 | 1        | -0.154375  | 6    | 0.0018   | 0.0071   | 0.15926  | 0.31364  | 0.005640313 | Intergenic | NA           | NA      |
| 8   | 112224749 | 112224804 | 1        | -0.154769  | 5    | 0.00032  | 0.0018   | 0.72596  | 0.88073  | 0.001346443 | Intragenic | NM_001134901 | Acpp    |
| 8   | 112761424 | 112761569 | 1        | -0.104002  | 7    | 0.0096   | 0.11     | 0.65996  | 0.76397  | 0.022155406 | Intragenic | NM_001109003 | Cpne4   |
| 8   | 114214071 | 114214279 | 0.48     | -0.324068  | 5    | 3.70E-06 | 1.50E-06 | 0.08268  | 0.40675  | 3.46E-05    | Intragenic | NM_001109449 | Glyctk  |
| 8   | 114215541 | 114215658 | 1        | -0.2083    | 5    | 4.40E-05 | 0.00014  | 0.32245  | 0.53075  | 0.000263321 | Intragenic | NM_001109449 | Glyctk  |
| 8   | 114215722 | 114215782 | 1        | -0.129629  | 5    | 0.00032  | 0.00053  | 0.33955  | 0.46918  | 0.001346443 | Intragenic | NM_001109449 | Glyctk  |
| 8   | 114216063 | 114216354 | 0.00078  | -0.28752   | 10   | 3.50E-12 | 2.40E-09 | 0.079657 | 0.36718  | 2.34E-10    | Intragenic | NM_001109449 | Glyctk  |
| 8   | 114259877 | 114259911 | 1        | -0.109126  | 5    | 0.025    | 0.13     | 0.13821  | 0.24733  | 0.047453009 | TSS        | NM_001135238 | Twf2    |
| 8   | 115663525 | 115663560 | 1        | -0.055641  | 5    | 0.00012  | 0.00014  | 0.039192 | 0.094834 | 0.000603617 | TSS        | NM_001037555 | Rassf1  |
| 8   | 115702365 | 115702467 | 1        | -0.102922  | 8    | 0.011    | 0.019    | 0.63062  | 0.73354  | 0.02463877  | Intragenic | NM_001047871 | lfrd2   |
| 8   | 115710582 | 115710650 | 1        | -0.136367  | 5    | 0.0049   | 0.015    | 0.34656  | 0.48293  | 0.012753585 | Intragenic | NM_001079942 | Sema3b  |
| 8   | 115716846 | 115716938 | 1        | -0.102086  | 5    | 0.00026  | 0.00053  | 0.02565  | 0.12774  | 0.001130807 | TSS        | NM_001079942 | Sema3b  |
| 8   | 115789068 | 115789193 | 1        | -0.15924   | 5    | 0.00023  | 0.0018   | 0.027921 | 0.18716  | 0.00102405  | Intragenic | NM_001108780 | Gnat1   |
| 8   | 115828571 | 115828669 | 1        | -0.139788  | 5    | 0.0014   | 0.038    | 0.19417  | 0.33395  | 0.004540837 | Intergenic | NA           | NA      |
| 8   | 115850500 | 115850595 | 1        | -0.129805  | 6    | 0.0012   | 0.0069   | 0.2156   | 0.34541  | 0.004013471 | Intergenic | NA           | NA      |
| 8   | 116040977 | 116041125 | 1        | -0.203039  | 12   | 1.30E-06 | 4.10E-06 | 0.27483  | 0.47787  | 1.46E-05    | TSS        | NM_001106855 | Mst1r   |
| 8   | 116553018 | 116553193 | 1        | -0.114711  | 8    | 0.00034  | 0.0017   | 0.65972  | 0.77443  | 0.001424609 | Intergenic | NA           | NA      |
| 8   | 116934558 | 116934776 | 1        | -0.157703  | 9    | 6.10E-05 | 0.00028  | 0.16791  | 0.32561  | 0.000347082 | Intragenic | NM_021660    | lp6k2   |
| 8   | 117001905 | 117001982 | 1        | 0.099679   | 5    | 0.025    | 0.015    | 0.69138  | 0.5917   | 0.047453009 | Intragenic | NM_001143817 | Slc26a6 |
| 8   | 117096091 | 117096290 | 1        | -0.203701  | 6    | 0.00039  | 0.0027   | 0.22189  | 0.42559  | 0.001587612 | Intragenic | NM_019333    | Pfkfb4  |
| 8   | 117561673 | 117561811 | 3.20E-05 | -0.197926  | 16   | 9.20E-12 | 1.00E-10 | 0.14167  | 0.33959  | 5.37E-10    | TSS        | NM_001106861 | Smarcc1 |
| 8   | 117884474 | 117884581 | 1        | -0.166857  | 5    | 0.0008   | 0.0092   | 0.168    | 0.33486  | 0.002866309 | Intragenic | NM_001108782 | Elp6    |
| 8   | 117968818 | 117968857 | 1        | -0.062433  | 5    | 0.017    | 0.015    | 0.68757  | 0.75     | 0.034796287 | Intragenic | NM_001100966 | Scap    |
| 8   | 117968885 | 117969302 | 1        | -0.125981  | 26   | 0.0038   | 0.056    | 0.52373  | 0.63259  | 0.010352437 | Intragenic | NM_001100966 | Scap    |
| 8   | 118234737 | 118234859 | 2.50E-06 | -0.108539  | 9    | 3.70E-12 | 7.80E-12 | 0.0248   | 0.13334  | 2.43E-10    | TSS        | NM_139259    | Nradd   |
| 8   | 118297712 | 118297852 | 1        | -0.157486  | 5    | 7.10E-06 | 0.00014  | 0.036715 | 0.1942   | 5.86E-05    | Intragenic | NM_001108783 | Ccdc12  |
| 8   | 118658289 | 118658356 | 1        | -0.261171  | 5    | 5.00E-05 | 0.00028  | 0.15741  | 0.41858  | 0.000291675 | Intergenic | NA           | NA      |



| chr | start     | stop      | q-value | methy.diff | CpGs | pMWU     | p2DKS    | MCWLS    | MCWHS    | pMWU.fdr    | cgi.type   | transcript                    | gene          |
|-----|-----------|-----------|---------|------------|------|----------|----------|----------|----------|-------------|------------|-------------------------------|---------------|
| 8   | 119334888 | 119334910 | 1       | -0.287293  | 5    | 2.90E-06 | 0.00053  | 0.59227  | 0.87956  | 2.84E-05    | Intergenic | NA                            | NA            |
| 8   | 119778476 | 119778682 | 1       | -0.089704  | 6    | 0.0034   | 0.0071   | 0.077215 | 0.16692  | 0.009519525 | Intragenic | NM_001135045                  | Arpp21        |
| 8   | 121126993 | 121127147 | 1       | -0.242676  | 5    | 5.60E-05 | 0.0018   | 0.16271  | 0.40538  | 0.000320912 | Intergenic | NA                            | NA            |
| 8   | 121212520 | 121212625 | 1       | -0.158704  | 5    | 0.00011  | 0.00098  | 0.24423  | 0.40294  | 0.000565143 | Intergenic | NA                            | NA            |
| 8   | 121766144 | 121766309 | 1       | -0.122046  | 8    | 0.00072  | 0.017    | 0.16361  | 0.28566  | 0.002634665 | Intragenic | NM_001108192                  | Glb1          |
| 8   | 121767136 | 121767200 | 0.015   | -0.230091  | 5    | 7.30E-08 | 4.50E-08 | 0.11533  | 0.34542  | 1.35E-06    | Intragenic | NM_001108192                  | Glb1          |
| 8   | 121907434 | 121907553 | 1       | -0.147295  | 5    | 0.021    | 0.039    | 0.22763  | 0.37492  | 0.041207871 | Intragenic | NM_001191801                  | Trim71        |
| 8   | 122474054 | 122474098 | 1       | -0.214394  | 5    | 0.013    | 0.015    | 0.3459   | 0.5603   | 0.028097302 | Intergenic | NA                            | NA            |
| 8   | 122759825 | 122760065 | 1       | -0.109721  | 12   | 0.00083  | 0.0013   | 0.75262  | 0.86234  | 0.002961434 | Intergenic | NA                            | NA            |
| 8   | 122936906 | 122936967 | 1       | -0.093815  | 5    | 0.01     | 0.088    | 0.70888  | 0.8027   | 0.02275947  | Intergenic | NA                            | NA            |
| 8   | 122956538 | 122956594 | 1       | -0.051249  | 5    | 0.023    | 0.059    | 0.92103  | 0.97228  | 0.04441443  | Intergenic | NA                            | NA            |
| 8   | 123592386 | 123592470 | 1       | -0.201855  | 5    | 0.00014  | 0.0054   | 0.16451  | 0.36636  | 0.000684451 | Intragenic | NM_031132                     | Tgfbr2        |
| 8   | 124621055 | 124621156 | 1       | -0.188289  | 5    | 0.00012  | 0.00052  | 0.17425  | 0.36254  | 0.000603617 | Intergenic | NA                            | NA            |
| 8   | 124692708 | 124692737 | 1       | -0.163323  | 5    | 9.80E-07 | 7.50E-06 | 0.083628 | 0.24695  | 1.16E-05    | Intergenic | NA                            | NA            |
| 8   | 125856040 | 125856119 | 1       | -0.110135  | 5    | 0.011    | 0.015    | 0.38583  | 0.49597  | 0.02463877  | Intergenic | NA                            | NA            |
| 8   | 125920073 | 125920189 | 1       | -0.149573  | 7    | 0.0026   | 0.027    | 0.25494  | 0.40451  | 0.007616821 | Intergenic | NA                            | NA            |
| 8   | 126105676 | 126105858 | 0.046   | -0.053849  | 17   | 7.20E-12 | 1.40E-07 | 0.046114 | 0.099963 | 4.35E-10    | Intergenic | NA                            | NA            |
| 8   | 126108194 | 126108682 | 1       | -0.132085  | 21   | 2.20E-06 | 0.00032  | 0.25941  | 0.39149  | 2.27E-05    | Intergenic | NA                            | NA            |
| 8   | 126112557 | 126112739 | 0.046   | -0.053849  | 17   | 7.20E-12 | 1.40E-07 | 0.046114 | 0.099963 | 4.35E-10    | Intergenic | NA                            | NA            |
| 8   | 126114437 | 126114517 | 1       | -0.080722  | 5    | 0.00048  | 0.0018   | 0.012243 | 0.092965 | 0.001881331 | Intergenic | NA                            | NA            |
| 8   | 126115075 | 126115306 | 1       | -0.131417  | 12   | 4.10E-07 | 9.00E-05 | 0.16838  | 0.29979  | 5.71E-06    | Intergenic | NA                            | NA            |
| 8   | 126119677 | 126119859 | 0.046   | -0.053849  | 17   | 7.20E-12 | 1.40E-07 | 0.046114 | 0.099963 | 4.35E-10    | Intergenic | NA                            | NA            |
| 8   | 126121557 | 126121637 | 1       | -0.060439  | 5    | 0.00088  | 0.0054   | 0.012243 | 0.072682 | 0.003092094 | Intergenic | NA                            | NA            |
| 8   | 126122195 | 126122683 | 1       | -0.132085  | 21   | 2.20E-06 | 0.00032  | 0.25941  | 0.39149  | 2.27E-05    | Intergenic | NA                            | NA            |
| 8   | 126358353 | 126358455 | 1       | -0.125487  | 5    | 0.0027   | 0.025    | 0.11763  | 0.24312  | 0.007840962 | Intragenic | NM_001106865                  | Ctdspl        |
| 8   | 126408922 | 126408981 | 1       | -0.250276  | 5    | 8.10E-06 | 0.00098  | 0.20008  | 0.45035  | 6.58E-05    | Intragenic | NM_001106865:N<br>M_001191080 | Ctdspl:Golga4 |
| 8   | 126498410 | 126498651 | 1       | -0.132863  | 8    | 0.017    | 0.094    | 0.39824  | 0.5311   | 0.034796287 | Intragenic | NM_001106865                  | Ctdspl        |
| 8   | 126546804 | 126547016 | 1       | -0.061804  | 7    | 0.0053   | 0.027    | 0.057735 | 0.11954  | 0.013591571 | Intragenic | NM_001106865                  | Ctdspl        |
| 8   | 126579723 | 126579900 | 1       | -0.231109  | 10   | 2.00E-07 | 8.60E-06 | 0.26751  | 0.49862  | 3.06E-06    | Intragenic | NM_001106865                  | Ctdspl        |
| 8   | 126588239 | 126588427 | 1       | -0.153712  | 5    | 0.0038   | 0.058    | 0.27644  | 0.43016  | 0.010352437 | Intragenic | NM_001106865                  | Ctdspl        |
| 8   | 126856436 | 126856691 | 1       | -0.111291  | 8    | 5.00E-05 | 0.0039   | 0.074024 | 0.18531  | 0.000291675 | Intragenic | NM_001106865                  | Ctdspl        |
| 8   | 126878571 | 126878688 | 1       | -0.18076   | 5    | 0.00044  | 0.0092   | 0.20181  | 0.38257  | 0.001760146 | Intragenic | NM_001106865                  | Ctdspl        |
| 8   | 126952331 | 126952415 | 1       | -0.104665  | 5    | 0.00059  | 0.0032   | 0.046434 | 0.1511   | 0.002242971 | Intergenic | NA                            | NA            |
| 8   | 127049535 | 127049594 | 1       | -0.257941  | 5    | 7.00E-05 | 0.00053  | 0.56789  | 0.82583  | 0.000386221 | Intergenic | NA                            | NA            |
| 8   | 127256629 | 127256959 | 1       | -0.177586  | 9    | 0.0002   | 0.018    | 0.27871  | 0.45629  | 0.00092049  | Intragenic | NM_001033704                  | Xylb          |
| 8   | 127309211 | 127309252 | 1       | -0.112179  | 5    | 0.0049   | 0.059    | 0.11741  | 0.22959  | 0.012753585 | Intragenic | NM_031554                     | Acvr2b        |
| 8   | 127480970 | 127481200 | 1       | -0.107815  | 9    | 0.016    | 0.055    | 0.23837  | 0.34619  | 0.033288089 | Intergenic | NA                            | NA            |
| 8   | 127526084 | 127526214 | 1       | -0.16935   | 8    | 0.0023   | 0.065    | 0.25757  | 0.42692  | 0.00686004  | Intragenic | NM_017247                     | Scn10a        |

| chr | start     | stop      | q-value  | methyI.diff | CpGs | pMWU     | p2DKS    | MCWLS     | MCWHS    | pMWU.fdr    | cgi.type   | transcript   | gene     |
|-----|-----------|-----------|----------|-------------|------|----------|----------|-----------|----------|-------------|------------|--------------|----------|
| 8   | 127834565 | 127834672 | 1        | -0.132339   | 9    | 3.10E-05 | 0.0018   | 0.24263   | 0.37497  | 0.000197418 | Intergenic | NA           | NA       |
| 8   | 127874526 | 127874660 | 1        | -0.171653   | 5    | 0.0041   | 0.0018   | 0.11181   | 0.28346  | 0.01100507  | Intergenic | NA           | NA       |
| 8   | 127925334 | 127925493 | 1        | -0.227645   | 5    | 0.0027   | 0.0054   | 0.23176   | 0.45941  | 0.007840962 | Intergenic | NA           | NA       |
| 8   | 128512728 | 128512817 | 1        | -0.338255   | 5    | 2.90E-06 | 6.70E-05 | 0.10971   | 0.44796  | 2.84E-05    | Intergenic | NA           | NA       |
| 8   | 128530846 | 128530972 | 1        | -0.224078   | 7    | 1.50E-05 | 0.00048  | 0.1983    | 0.42238  | 0.000109113 | Intergenic | NA           | NA       |
| 8   | 128570120 | 128570193 | 1        | -0.182118   | 5    | 8.80E-05 | 0.0018   | 0.20082   | 0.38294  | 0.000466886 | Intergenic | NA           | NA       |
| 8   | 128733480 | 128733573 | 1        | -0.110854   | 5    | 0.00014  | 0.0032   | 0.11595   | 0.2268   | 0.000684451 | Intergenic | NA           | NA       |
| 8   | 129134739 | 129134793 | 1        | -0.140909   | 5    | 0.0008   | 0.0018   | 0.63488   | 0.77579  | 0.002866309 | Intergenic | NA           | NA       |
| 8   | 129236841 | 129236978 | 1        | -0.158676   | 7    | 7.10E-06 | 0.0014   | 0.12182   | 0.2805   | 5.86E-05    | Intragenic | NM_001134565 | Trak1    |
| 8   | 129257692 | 129257966 | 1        | -0.136099   | 5    | 0.0049   | 0.015    | 0.11498   | 0.25108  | 0.012753585 | Intragenic | NM_001134565 | Trak1    |
| 8   | 129489608 | 129489769 | 1        | -0.086521   | 5    | 0.019    | 0.088    | 0.71354   | 0.80006  | 0.038322088 | Intragenic | NM_012685    | Vipr1    |
| 8   | 129577749 | 129577850 | 1        | -0.061699   | 8    | 1.10E-05 | 0.0025   | 0.03392   | 0.095619 | 8.53E-05    | Intergenic | NA           | NA       |
| 8   | 129608283 | 129608517 | 1        | -0.126505   | 9    | 0.011    | 0.078    | 0.18129   | 0.3078   | 0.02463877  | TSS        | NM_001106868 | Hhatl    |
| 8   | 130926932 | 130927123 | 1        | -0.11399    | 8    | 3.80E-05 | 0.00012  | 0.0042199 | 0.11821  | 0.000235506 | Intergenic | NA           | NA       |
| 8   | 131034187 | 131034237 | 1        | -0.211112   | 5    | 0.0063   | 0.088    | 0.38275   | 0.59387  | 0.015629046 | Intergenic | NA           | NA       |
| 8   | 132359608 | 132359645 | 1        | -0.291715   | 5    | 5.50E-06 | 7.30E-06 | 0.19696   | 0.48867  | 4.78E-05    | Intergenic | NA           | NA       |
| 9   | 840265    | 840440    | 1        | -0.11472    | 8    | 0.00034  | 0.0017   | 0.65973   | 0.77445  | 0.001424609 | Intergenic | NA           | NA       |
| 9   | 1047148   | 1047262   | 1        | -0.143541   | 5    | 0.0053   | 0.024    | 0.2583    | 0.40184  | 0.013591571 | Intergenic | NA           | NA       |
| 9   | 1461284   | 1461436   | 1        | -0.141255   | 7    | 1.60E-05 | 0.0021   | 0.39278   | 0.53404  | 0.000115757 | Intragenic | NM_001134762 | Tbc1d5   |
| 9   | 1972722   | 1972744   | 1        | -0.054314   | 5    | 0.008    | 0.038    | 0.029355  | 0.08367  | 0.019059477 | TSS        | NM_001106880 | Plcl2    |
| 9   | 3498658   | 3498733   | 1        | -0.085632   | 5    | 0.01     | 0.039    | 0.094057  | 0.17969  | 0.02275947  | Intragenic | NM_001013177 | Sult1c2a |
| 9   | 6513114   | 6513158   | 1        | -0.205367   | 5    | 7.10E-06 | 0.00026  | 0.44898   | 0.65434  | 5.86E-05    | Intergenic | NA           | NA       |
| 9   | 6513695   | 6513763   | 1        | -0.068981   | 5    | 0.0016   | 0.0092   | 0.061318  | 0.1303   | 0.005100053 | Intergenic | NA           | NA       |
| 9   | 6514006   | 6514044   | 1        | -0.140871   | 5    | 0.0053   | 0.015    | 0.27195   | 0.41282  | 0.013591571 | Intergenic | NA           | NA       |
| 9   | 6514049   | 6514111   | 1        | -0.122793   | 5    | 9.20E-06 | 0.00014  | 0.14986   | 0.27265  | 7.32E-05    | Intergenic | NA           | NA       |
| 9   | 6514654   | 6514772   | 1.80E-09 | -0.115011   | 17   | 4.50E-14 | 5.60E-15 | 0.044354  | 0.15937  | 6.64E-12    | Intergenic | NA           | NA       |
| 9   | 6515062   | 6515246   | 1        | 0.143399    | 11   | 0.021    | 0.024    | 0.64205   | 0.52572  | 0.041207871 | Intergenic | NA           | NA       |
| 9   | 6515259   | 6515352   | 1        | -0.093301   | 5    | 0.01     | 0.13     | 0.099881  | 0.19318  | 0.02275947  | Intergenic | NA           | NA       |
| 9   | 7412984   | 7413027   | 1        | -0.066007   | 5    | 4.90E-07 | 7.60E-06 | 0.043487  | 0.10949  | 6.54E-06    | Intergenic | NA           | NA       |
| 9   | 8668099   | 8668262   | 1        | -0.202442   | 7    | 0.0012   | 0.025    | 0.31647   | 0.51891  | 0.004013471 | Intragenic | NM_012759    | Vav1     |
| 9   | 8721660   | 8721888   | 0.0018   | -0.263515   | 9    | 3.40E-09 | 5.70E-09 | 0.029768  | 0.29328  | 9.33E-08    | Intragenic | NM_199399    | Gpr108   |
| 9   | 8951911   | 8952051   | 1        | -0.124677   | 5    | 0.015    | 0.024    | 0.15019   | 0.27487  | 0.031584896 | Intergenic | NA           | NA       |
| 9   | 8989178   | 8989298   | 1        | -0.083474   | 5    | 0.00054  | 0.0054   | 0.08728   | 0.17075  | 0.002077867 | TSS        | NM_001106873 | Slc25a23 |
| 9   | 9042429   | 9042555   | 0.00097  | -0.25637    | 7    | 3.10E-10 | 3.00E-09 | 0.1244    | 0.38077  | 1.21E-08    | Intragenic | NM_001007711 | Gtf2f1   |
| 9   | 9278415   | 9278494   | 1        | 0.056551    | 5    | 0.023    | 0.039    | 0.93064   | 0.87409  | 0.04441443  | Intragenic | NM_001106877 | Rfx2     |
| 9   | 9309948   | 9310134   | 1        | -0.11112    | 7    | 0.0092   | 0.072    | 0.1418    | 0.25292  | 0.021504843 | Intergenic | NA           | NA       |
| 9   | 9324500   | 9324670   | 1        | -0.151028   | 5    | 0.0008   | 0.015    | 0.11879   | 0.26982  | 0.002866309 | Intergenic | NA           | NA       |
| 9   | 9447379   | 9447437   | 1        | -0.229906   | 5    | 0.00017  | 0.0018   | 0.29455   | 0.52446  | 0.000806192 | Intragenic | NM_022394    | Safb     |
| 9   | 9450417   | 9450528   | 1        | -0.192164   | 6    | 0.0042   | 0.0068   | 0.42211   | 0.61428  | 0.011250869 | Intragenic | NM_022394    | Safb     |

| chr | start    | stop     | q-value  | methy.diff | CpGs | pMWU     | p2DKS    | MCWLS    | MCWHS    | pMWU.fdr    | cgi.type   | transcript   | gene   |
|-----|----------|----------|----------|------------|------|----------|----------|----------|----------|-------------|------------|--------------|--------|
| 9   | 9530280  | 9530298  | 1        | -0.11776   | 5    | 0.0063   | 0.024    | 0.18663  | 0.30439  | 0.015629046 | TSS        | NM_001024878 | Znrf4  |
| 9   | 9576582  | 9576666  | 1        | -0.186325  | 5    | 0.00048  | 0.0055   | 0.16568  | 0.352    | 0.001881331 | TSS        | NM_019140    | Ptprs  |
| 9   | 9584249  | 9584328  | 1        | -0.195596  | 7    | 5.60E-06 | 0.00029  | 0.20802  | 0.40361  | 4.84E-05    | Intragenic | NM_019140    | Ptprs  |
| 9   | 9626813  | 9626837  | 1        | -0.063321  | 5    | 4.40E-05 | 0.0018   | 0.037925 | 0.10125  | 0.000263321 | Intragenic | NM_019140    | Ptprs  |
| 9   | 9626843  | 9627233  | 1.00E-09 | -0.163757  | 25   | 4.40E-14 | 3.10E-15 | 0.10509  | 0.26885  | 6.64E-12    | Intragenic | NM_019140    | Ptprs  |
| 9   | 9885850  | 9886088  | 1        | -0.12758   | 10   | 0.0069   | 0.054    | 0.36641  | 0.49399  | 0.01685311  | Intergenic | NA           | NA     |
| 9   | 10081770 | 10082107 | 1        | -0.157043  | 12   | 3.50E-05 | 0.0053   | 0.26104  | 0.41809  | 0.000218038 | TSS        | NM_001108223 | Shd    |
| 9   | 10096907 | 10096933 | 1        | -0.05963   | 5    | 8.10E-06 | 7.00E-05 | 0.027878 | 0.087509 | 6.58E-05    | Intragenic | NM_001109421 | Ebi3   |
| 9   | 11276749 | 11276771 | 1        | -0.068639  | 5    | 0.016    | 0.0093   | 0.83801  | 0.90665  | 0.033288089 | Intergenic | NA           | NA     |
| 9   | 11337054 | 11337114 | 0.019    | -0.251552  | 10   | 2.70E-08 | 5.90E-08 | 0.07101  | 0.32256  | 6.01E-07    | Intergenic | NA           | NA     |
| 9   | 11340537 | 11340725 | 0.0026   | -0.090642  | 22   | 4.30E-11 | 8.00E-09 | 0.091425 | 0.18207  | 2.08E-09    | Intergenic | NA           | NA     |
| 9   | 11340877 | 11340903 | 1        | -0.054082  | 5    | 0.0019   | 0.024    | 0.07164  | 0.12572  | 0.005855937 | Intergenic | NA           | NA     |
| 9   | 11438363 | 11438393 | 1        | -0.296249  | 5    | 1.90E-05 | 6.70E-05 | 0.51568  | 0.81193  | 0.000131674 | Intergenic | NA           | NA     |
| 9   | 11640020 | 11640383 | 1        | -0.131182  | 7    | 0.0062   | 0.077    | 0.23226  | 0.36344  | 0.015570617 | Intergenic | NA           | NA     |
| 9   | 11866861 | 11866996 | 1        | -0.189457  | 7    | 0.00011  | 0.00029  | 0.11091  | 0.30037  | 0.000565143 | Intragenic | NM_001135011 | Rftn1  |
| 9   | 11976298 | 11976356 | 1        | -0.124614  | 5    | 0.017    | 0.058    | 0.52078  | 0.6454   | 0.034796287 | Intergenic | NA           | NA     |
| 9   | 12611040 | 12611088 | 1        | -0.188703  | 5    | 1.50E-05 | 0.00052  | 0.11553  | 0.30424  | 0.000109113 | Intergenic | NA           | NA     |
| 9   | 12856526 | 12856638 | 1        | -0.129461  | 5    | 0.0068   | 0.015    | 0.45474  | 0.5842   | 0.016642688 | Intergenic | NA           | NA     |
| 9   | 13008477 | 13008552 | 1        | -0.143207  | 5    | 0.014    | 0.088    | 0.20138  | 0.34459  | 0.029850603 | Intergenic | NA           | NA     |
| 9   | 13240584 | 13240720 | 1        | -0.174003  | 5    | 0.015    | 0.014    | 0.62591  | 0.79991  | 0.031584896 | Intergenic | NA           | NA     |
| 9   | 13343247 | 13344361 | 1        | -0.114746  | 15   | 0.002    | 0.0067   | 0.20416  | 0.3189   | 0.006079939 | Intergenic | NA           | NA     |
| 9   | 13426449 | 13426633 | 1        | -0.097955  | 9    | 3.40E-05 | 0.00033  | 0.06584  | 0.1638   | 0.000214477 | Intragenic | NM_001106882 | Unc5cl |
| 9   | 13448106 | 13448480 | 1        | -0.198226  | 5    | 0.0063   | 0.059    | 0.28887  | 0.48709  | 0.015629046 | Intergenic | NA           | NA     |
| 9   | 13883154 | 13883497 | 0.34     | -0.095843  | 30   | 3.40E-12 | 1.10E-06 | 0.1009   | 0.19674  | 2.28E-10    | Intergenic | NA           | NA     |
| 9   | 14135161 | 14135280 | 1        | -0.228174  | 5    | 2.20E-05 | 0.00027  | 0.20984  | 0.43801  | 0.000149617 | Intragenic | NM_001025707 | Tfeb   |
| 9   | 14218840 | 14218985 | 1        | -0.189985  | 5    | 3.10E-05 | 0.00014  | 0.18714  | 0.37713  | 0.000197418 | Intergenic | NA           | NA     |
| 9   | 14499388 | 14499454 | 1        | -0.128133  | 5    | 0.021    | 0.18     | 0.55131  | 0.67945  | 0.041207871 | Intergenic | NA           | NA     |
| 9   | 14612385 | 14612457 | 1        | -0.245743  | 5    | 0.00017  | 0.0018   | 0.2811   | 0.52684  | 0.000806192 | Intragenic | NM_001108199 | Trerf1 |
| 9   | 14662495 | 14662616 | 1        | -0.144878  | 5    | 0.0011   | 0.0055   | 0.17102  | 0.3159   | 0.003737263 | Intergenic | NA           | NA     |
| 9   | 14784693 | 14784758 | 1        | -0.217132  | 5    | 0.0094   | 0.015    | 0.31518  | 0.53231  | 0.021723038 | Intergenic | NA           | NA     |
| 9   | 15063851 | 15064194 | 0.34     | -0.095827  | 30   | 3.40E-12 | 1.10E-06 | 0.1009   | 0.19673  | 2.28E-10    | Intragenic | NM_013021    | Prph2  |
| 9   | 15545669 | 15545745 | 1        | -0.090308  | 7    | 0.015    | 0.0034   | 0.71146  | 0.80176  | 0.031584896 | Intergenic | NA           | NA     |
| 9   | 15550344 | 15550432 | 0.18     | -0.163992  | 7    | 9.20E-08 | 5.70E-07 | 0.021194 | 0.18519  | 1.63E-06    | Intragenic | NM_001034136 | Mrpl2  |
| 9   | 15569587 | 15569645 | 1        | 0.05793    | 8    | 0.003    | 0.037    | 0.090728 | 0.032798 | 0.008555055 | TSS        | NM_001106889 | Ptk7   |
| 9   | 15569827 | 15569859 | 1        | 0.051345   | 5    | 0.0063   | 0.038    | 0.16141  | 0.11006  | 0.015629046 | TSS        | NM_001106889 | Ptk7   |
| 9   | 15645841 | 15646002 | 1        | -0.074831  | 5    | 0.0012   | 0.0018   | 0.05098  | 0.12581  | 0.004013471 | Intragenic | NM_001109302 | Srf    |
| 9   | 15925160 | 15925249 | 1        | -0.095529  | 5    | 0.0049   | 0.015    | 0.43622  | 0.53175  | 0.012753585 | Intergenic | NA           | NA     |
| 9   | 16121123 | 16121269 | 1        | -0.075243  | 12   | 0.00029  | 0.0006   | 0.065926 | 0.14117  | 0.001239307 | TSS        | NM_001108205 | Rsph9  |
| 9   | 16376476 | 16376709 | 0.38     | -0.309701  | 7    | 1.60E-07 | 1.20E-06 | 0.12089  | 0.43059  | 2.51E-06    | Intergenic | NA           | NA     |

| chr | start    | stop     | q-value  | methy.diff | CpGs | pMWU     | p2DKS    | MCWLS    | MCWHS   | pMWU.fdr    | cgi.type   | transcript   | gene      |
|-----|----------|----------|----------|------------|------|----------|----------|----------|---------|-------------|------------|--------------|-----------|
| 9   | 16393464 | 16393553 | 1        | -0.120483  | 5    | 0.00015  | 0.00028  | 0.064656 | 0.18514 | 0.000724207 | Intergenic | NA           | NA        |
| 9   | 16406183 | 16406246 | 1        | -0.161823  | 5    | 0.011    | 0.037    | 0.52072  | 0.68254 | 0.02463877  | Intergenic | NA           | NA        |
| 9   | 16539192 | 16539251 | 1        | -0.166093  | 5    | 0.019    | 0.059    | 0.37747  | 0.54356 | 0.038322088 | Intergenic | NA           | NA        |
| 9   | 16733693 | 16734614 | 5.60E-12 | -0.137586  | 78   | 4.00E-14 | 1.70E-17 | 0.18098  | 0.31856 | 6.64E-12    | TSS        | NM_001191804 | Tmem151b  |
| 9   | 16986044 | 16986154 | 1        | -0.174175  | 5    | 0.0041   | 0.024    | 0.21813  | 0.3923  | 0.01100507  | Intergenic | NA           | NA        |
| 9   | 17059131 | 17059253 | 1        | -0.148557  | 6    | 0.011    | 0.026    | 0.47268  | 0.62124 | 0.02463877  | Intergenic | NA           | NA        |
| 9   | 17097249 | 17097547 | 1        | -0.195745  | 9    | 0.00018  | 0.0081   | 0.31051  | 0.50626 | 0.000849258 | Intergenic | NA           | NA        |
| 9   | 17764579 | 17764666 | 1        | -0.135954  | 5    | 0.00019  | 0.0032   | 0.51164  | 0.64759 | 0.000879857 | Intergenic | NA           | NA        |
| 9   | 18198980 | 18199091 | 1        | -0.179973  | 7    | 0.0011   | 0.012    | 0.51909  | 0.69906 | 0.003737263 | Intragenic | NM_053603    | Clic5     |
| 9   | 18210202 | 18210313 | 1        | -0.179973  | 7    | 0.0011   | 0.012    | 0.51909  | 0.69906 | 0.003737263 | Intragenic | NM_053603    | Clic5     |
| 9   | 19151462 | 19151552 | 1        | -0.186529  | 8    | 3.20E-08 | 9.60E-06 | 0.17674  | 0.36327 | 6.98E-07    | Intragenic | NM_017228    | Atn1      |
| 9   | 19284224 | 19284354 | 1        | -0.149112  | 5    | 0.00029  | 0.00053  | 0.11978  | 0.26889 | 0.001239307 | Intergenic | NA           | NA        |
| 9   | 19320720 | 19320848 | 1        | -0.137192  | 5    | 0.00012  | 0.0018   | 0.17796  | 0.31515 | 0.000603617 | Intergenic | NA           | NA        |
| 9   | 19376146 | 19376276 | 1        | -0.104858  | 5    | 0.0063   | 0.0018   | 0.14606  | 0.25092 | 0.015629046 | Intergenic | NA           | NA        |
| 9   | 19390674 | 19390739 | 1        | -0.123437  | 5    | 0.025    | 0.015    | 0.17845  | 0.30189 | 0.047453009 | Intergenic | NA           | NA        |
| 9   | 19446223 | 19446434 | 1        | -0.097645  | 7    | 5.20E-05 | 9.70E-05 | 0.10708  | 0.20473 | 0.000303048 | Intragenic | NM_001108207 | Tnfrsf21  |
| 9   | 26324709 | 26324886 | 1        | -0.085455  | 5    | 0.0094   | 0.024    | 0.73275  | 0.81821 | 0.021723038 | Intragenic | NM_001024361 | LOC501110 |
| 9   | 27247376 | 27247589 | 1        | -0.078824  | 5    | 0.021    | 0.088    | 0.72484  | 0.80366 | 0.041207871 | Intergenic | NA           | NA        |
| 9   | 28453917 | 28454097 | 1        | -0.149162  | 6    | 0.0065   | 0.04     | 0.18308  | 0.33224 | 0.016085358 | Intergenic | NA           | NA        |
| 9   | 29210531 | 29210654 | 1        | -0.100714  | 5    | 0.02     | 0.058    | 0.68369  | 0.7844  | 0.039778219 | Intergenic | NA           | NA        |
| 9   | 33173279 | 33173415 | 1        | -0.230981  | 5    | 2.90E-06 | 1.60E-05 | 0.37065  | 0.60163 | 2.84E-05    | Intergenic | NA           | NA        |
| 9   | 34010680 | 34010853 | 1        | -0.170968  | 7    | 2.40E-06 | 9.10E-05 | 0.35431  | 0.52528 | 2.45E-05    | Intergenic | NA           | NA        |
| 9   | 35916591 | 35916821 | 1        | -0.215938  | 5    | 0.00048  | 0.0018   | 0.22825  | 0.44419 | 0.001881331 | Intragenic | NM_001108791 | Phf3      |
| 9   | 36057442 | 36057490 | 1        | -0.11337   | 5    | 0.00032  | 0.0055   | 0.04942  | 0.16279 | 0.001346443 | Intergenic | NA           | NA        |
| 9   | 36059202 | 36059385 | 0.34     | -0.166072  | 7    | 1.90E-07 | 1.00E-06 | 0.18098  | 0.34705 | 2.92E-06    | Intergenic | NA           | NA        |
| 9   | 37646411 | 37646573 | 1        | -0.239874  | 7    | 0.0011   | 0.0012   | 0.25751  | 0.49739 | 0.003737263 | Intergenic | NA           | NA        |
| 9   | 37774100 | 37774599 | 0.0011   | -0.130046  | 18   | 1.30E-10 | 3.50E-09 | 0.11851  | 0.24856 | 5.70E-09    | Intergenic | NA           | NA        |
| 9   | 37782300 | 37782374 | 0.038    | -0.347911  | 8    | 3.60E-10 | 1.20E-07 | 0.32665  | 0.67456 | 1.37E-08    | Intergenic | NA           | NA        |
| 9   | 38638803 | 38638841 | 1        | -0.16534   | 5    | 0.00011  | 0.0018   | 0.10289  | 0.26824 | 0.000565143 | Intergenic | NA           | NA        |
| 9   | 38638847 | 38638910 | 0.019    | -0.223608  | 8    | 2.50E-11 | 6.00E-08 | 0.36603  | 0.58964 | 1.27E-09    | Intergenic | NA           | NA        |
| 9   | 38871106 | 38871208 | 1        | -0.214243  | 5    | 3.30E-06 | 0.00014  | 0.12495  | 0.33919 | 3.16E-05    | Intergenic | NA           | NA        |
| 9   | 40725421 | 40725532 | 1        | -0.137573  | 5    | 0.0013   | 0.0031   | 0.22108  | 0.35865 | 0.004277683 | Intergenic | NA           | NA        |
| 9   | 40735160 | 40735458 | 1        | -0.11282   | 11   | 0.021    | 0.29     | 0.41602  | 0.52884 | 0.041207871 | Intragenic | NM_001108209 | Prss40    |
| 9   | 40965451 | 40965527 | 0.0077   | -0.204409  | 10   | 1.40E-11 | 2.40E-08 | 0.16368  | 0.36809 | 7.61E-10    | Intergenic | NA           | NA        |
| 9   | 42243841 | 42244370 | 0.027    | -0.166207  | 19   | 8.00E-14 | 8.30E-08 | 0.1118   | 0.278   | 8.98E-12    | Intergenic | NA           | NA        |
| 9   | 42281333 | 42281546 | 1        | -0.205079  | 6    | 1.80E-05 | 0.0027   | 0.16679  | 0.37186 | 0.000127015 | Intragenic | NM_001108210 | Hs6st1    |
| 9   | 42316042 | 42316179 | 1        | -0.144184  | 7    | 0.00078  | 0.026    | 0.28285  | 0.42703 | 0.002840382 | Intergenic | NA           | NA        |
| 9   | 42338088 | 42338213 | 1        | -0.148131  | 5    | 0.0029   | 0.0055   | 0.12024  | 0.26837 | 0.008293503 | Intergenic | NA           | NA        |
| 9   | 42549977 | 42550109 | 1        | -0.179172  | 5    | 0.00029  | 0.0091   | 0.37533  | 0.5545  | 0.001239307 | Intergenic | NA           | NA        |

| chr | start    | stop     | q-value | methyL.diff | CpGs | pMWU     | p2DKS    | MCWLS    | MCWHS   | pMWU.fdr    | cgi.type   | transcript             | gene        |
|-----|----------|----------|---------|-------------|------|----------|----------|----------|---------|-------------|------------|------------------------|-------------|
| 9   | 42698898 | 42699059 | 1       | -0.130752   | 9    | 0.0013   | 0.0078   | 0.11985  | 0.2506  | 0.004277683 | Intergenic | NA                     | NA          |
| 9   | 42739141 | 42739211 | 1       | -0.16443    | 5    | 0.0016   | 0.0055   | 0.29842  | 0.46285 | 0.005100053 | Intragenic | NM_001271050           | Cnm4        |
| 9   | 42773266 | 42773376 | 1       | -0.321481   | 5    | 3.10E-05 | 0.00028  | 0.12946  | 0.45095 | 0.000197418 | TSS        | NM_001108211           | Ankrd23     |
| 9   | 42989838 | 42990193 | 1       | -0.064144   | 20   | 0.01     | 0.11     | 0.1801   | 0.24424 | 0.02275947  | Intragenic | NM_001012002           | Zap70       |
| 9   | 43000012 | 43000239 | 1       | -0.160805   | 8    | 0.0015   | 0.025    | 0.29241  | 0.45321 | 0.004849475 | Intragenic | NM_001012002           | Zap70       |
| 9   | 43200992 | 43201045 | 1       | -0.143949   | 7    | 4.80E-05 | 0.0013   | 0.2803   | 0.42425 | 0.000285411 | Intergenic | NA                     | NA          |
| 9   | 43895914 | 43896038 | 1       | -0.242908   | 5    | 7.10E-06 | 3.50E-05 | 0.08877  | 0.33168 | 5.86E-05    | Intergenic | NA                     | NA          |
| 9   | 44199431 | 44199720 | 1       | -0.093466   | 13   | 0.0024   | 0.054    | 0.21475  | 0.30821 | 0.00705499  | Intergenic | NA                     | NA          |
| 9   | 44276549 | 44276838 | 1       | -0.093466   | 13   | 0.0024   | 0.054    | 0.21475  | 0.30821 | 0.00705499  | Intergenic | NA                     | NA          |
| 9   | 44881895 | 44882085 | 1       | -0.103187   | 7    | 0.0053   | 0.0083   | 0.15152  | 0.25471 | 0.013591571 | Intragenic | NM_001191887           | Aff3        |
| 9   | 44882420 | 44882610 | 1       | -0.102778   | 7    | 0.0053   | 0.0083   | 0.15152  | 0.2543  | 0.013591571 | Intragenic | NM_001191887           | Aff3        |
| 9   | 44900223 | 44900276 | 1       | -0.160237   | 5    | 7.10E-06 | 3.40E-05 | 0.62337  | 0.78361 | 5.86E-05    | TSS        | NM_001191887           | Aff3        |
| 9   | 44985822 | 44985912 | 1       | -0.101586   | 5    | 0.0014   | 0.025    | 0.097499 | 0.19908 | 0.004540837 | Intergenic | NA                     | NA          |
| 9   | 45520467 | 45520654 | 1       | -0.174806   | 5    | 0.00065  | 0.024    | 0.11619  | 0.291   | 0.002426546 | Intergenic | NA                     | NA          |
| 9   | 46103259 | 46103498 | 1       | -0.136377   | 7    | 0.017    | 0.076    | 0.21953  | 0.3559  | 0.034796287 | Intergenic | NA                     | NA          |
| 9   | 46147790 | 46147958 | 1       | -0.135745   | 9    | 0.005    | 0.0082   | 0.45351  | 0.58925 | 0.012977322 | Intergenic | NA                     | NA          |
| 9   | 46224554 | 46224792 | 1       | -0.254595   | 9    | 8.80E-08 | 0.00013  | 0.16783  | 0.42243 | 1.57E-06    | Intergenic | NA                     | NA          |
| 9   | 46461284 | 46461391 | 1       | -0.1389     | 9    | 0.0052   | 0.034    | 0.61966  | 0.75856 | 0.013458626 | Intragenic | NM_001106904           | Map4k4      |
| 9   | 46466211 | 46466398 | 1       | -0.147989   | 7    | 6.80E-05 | 2.80E-05 | 0.20024  | 0.34823 | 0.000379896 | Intragenic | NM_001106904           | Map4k4      |
| 9   | 46527140 | 46527261 | 1       | -0.111302   | 5    | 0.012    | 0.025    | 0.18813  | 0.29943 | 0.026435197 | TSS        | NM_053953              | Il1r2       |
| 9   | 47341349 | 47341481 | 1       | -0.110414   | 5    | 0.02     | 0.058    | 0.11646  | 0.22687 | 0.039778219 | Intergenic | NA                     | NA          |
| 9   | 47573592 | 47573662 | 1       | -0.124764   | 5    | 0.00023  | 0.015    | 0.15126  | 0.27602 | 0.00102405  | Intergenic | NA                     | NA          |
| 9   | 49196113 | 49196191 | 1       | -0.163275   | 5    | 0.0035   | 0.015    | 0.25063  | 0.4139  | 0.009686665 | Intergenic | NA                     | NA          |
| 9   | 49592441 | 49592550 | 1       | -0.209803   | 5    | 0.00021  | 0.0055   | 0.26365  | 0.47345 | 0.000951214 | Intragenic | NM_031677              | Fhl2        |
| 9   | 50155621 | 50155732 | 1       | -0.090797   | 5    | 0.00048  | 0.024    | 0.04724  | 0.13804 | 0.001881331 | Intergenic | NA                     | NA          |
| 9   | 53179464 | 53179592 | 1       | -0.154357   | 7    | 0.0029   | 0.0034   | 0.53089  | 0.68525 | 0.008293503 | Intragenic | NM_001013112           | Hibch       |
| 9   | 54531389 | 54531446 | 1       | -0.103949   | 5    | 3.90E-05 | 0.0032   | 0.069934 | 0.17388 | 0.000237659 | Intergenic | NA                     | NA          |
| 9   | 56258684 | 56258725 | 1       | -0.25709    | 7    | 4.50E-05 | 1.50E-05 | 0.50505  | 0.76214 | 0.000268503 | Intergenic | NA                     | NA          |
| 9   | 60178901 | 60179007 | 1       | -0.251776   | 5    | 0.00059  | 0.0055   | 0.27399  | 0.52577 | 0.002242971 | Intragenic | NM_001108218           | Hecw2       |
| 9   | 60987133 | 60987306 | 1       | -0.090472   | 8    | 0.002    | 0.037    | 0.68802  | 0.77849 | 0.006079939 | Intragenic | NM_001191807           | Ankrd44     |
| 9   | 61783945 | 61783981 | 1       | -0.057485   | 5    | 0.0014   | 0.015    | 0.0607   | 0.11819 | 0.004540837 | TSS        | NM_001113370           | Boll        |
| 9   | 62238439 | 62238505 | 1       | -0.182977   | 7    | 5.60E-06 | 0.0013   | 0.34656  | 0.52954 | 4.84E-05    | Intergenic | NA                     | NA          |
| 9   | 62972370 | 62972429 | 1       | -0.225621   | 5    | 3.50E-05 | 0.00051  | 0.29573  | 0.52135 | 0.000218038 | Intergenic | NA                     | NA          |
| 9   | 63547119 | 63547254 | 1       | -0.097952   | 5    | 0.0074   | 0.024    | 0.13964  | 0.23759 | 0.017853001 | Intergenic | NA                     | NA          |
| 9   | 64377118 | 64377154 | 1       | -0.057485   | 5    | 0.0014   | 0.015    | 0.0607   | 0.11819 | 0.004540837 | TSS        | NM_001113370           | Boll        |
| 9   | 64610031 | 64610370 | 1       | 0.142543    | 11   | 0.00082  | 0.027    | 0.58762  | 0.44508 | 0.002936216 | Intragenic | NM_001014102           | Spats2l     |
| 9   | 65306813 | 65306969 | 0.048   | -0.272214   | 6    | 2.80E-07 | 1.50E-07 | 0.1743   | 0.44651 | 4.09E-06    | Intergenic | NA                     | NA          |
| 9   | 65344494 | 65344597 | 1       | -0.216156   | 5    | 3.30E-06 | 1.60E-05 | 0.18579  | 0.40194 | 3.16E-05    | Intragenic | NM_057138:NM_001033864 | Cflar:Cflar |

| chr | start    | stop     | q-value | methy.diff | CpGs | pMWU     | p2DKS    | MCWLS    | MCWHS   | pMWU.fdr    | cgi.type   | transcript             | gene         |
|-----|----------|----------|---------|------------|------|----------|----------|----------|---------|-------------|------------|------------------------|--------------|
| 9   | 65372241 | 65372307 | 1       | -0.162006  | 5    | 0.00088  | 0.015    | 0.13954  | 0.30154 | 0.003092094 | Intragenic | NM_001033864           | Cflar        |
| 9   | 65465296 | 65465528 | 1       | -0.170986  | 5    | 0.023    | 0.13     | 0.35349  | 0.52448 | 0.04441443  | Intragenic | NM_022277              | Casp8        |
| 9   | 65570281 | 65570368 | 0.027   | -0.139537  | 9    | 4.40E-11 | 8.30E-08 | 0.14329  | 0.28283 | 2.11E-09    | TSS        | NM_133560:NM_001109307 | Trak2:Stradb |
| 9   | 65845021 | 65845147 | 1       | -0.119051  | 5    | 0.0074   | 0.059    | 0.66741  | 0.78646 | 0.017853001 | Intergenic | NA                     | NA           |
| 9   | 65866652 | 65866821 | 1       | -0.065434  | 8    | 0.011    | 0.051    | 0.12608  | 0.19152 | 0.02463877  | Intergenic | NA                     | NA           |
| 9   | 69605967 | 69606055 | 1       | -0.13323   | 5    | 0.0041   | 0.025    | 0.50214  | 0.63537 | 0.01100507  | Intergenic | NA                     | NA           |
| 9   | 69675367 | 69675518 | 1       | -0.205065  | 5    | 0.00032  | 0.0032   | 0.18557  | 0.39063 | 0.001346443 | TSS        | NM_001191809           | Ino80d       |
| 9   | 69820577 | 69820838 | 1       | -0.113647  | 11   | 0.012    | 0.076    | 0.62699  | 0.74064 | 0.026435197 | Intergenic | NA                     | NA           |
| 9   | 69850529 | 69850793 | 0.38    | -0.166992  | 11   | 6.30E-06 | 1.20E-06 | 0.18977  | 0.35676 | 5.33E-05    | Intergenic | NA                     | NA           |
| 9   | 70719957 | 70720060 | 1       | -0.194747  | 5    | 0.011    | 0.0031   | 0.19382  | 0.38857 | 0.02463877  | Intergenic | NA                     | NA           |
| 9   | 71121710 | 71121795 | 1       | -0.291229  | 7    | 5.30E-08 | 7.80E-06 | 0.24968  | 0.54091 | 1.08E-06    | TSS        | NM_173838              | Fzd5         |
| 9   | 71121835 | 71121872 | 1       | -0.170422  | 5    | 0.0038   | 0.0053   | 0.35556  | 0.52598 | 0.010352437 | TSS        | NM_173838              | Fzd5         |
| 9   | 71121885 | 71121925 | 1       | -0.157473  | 5    | 0.00044  | 0.0032   | 0.28984  | 0.44731 | 0.001760146 | TSS        | NM_173838              | Fzd5         |
| 9   | 71250927 | 71250989 | 1       | -0.084888  | 8    | 0.013    | 0.12     | 0.41297  | 0.49786 | 0.028097302 | Intergenic | NA                     | NA           |
| 9   | 71383356 | 71383443 | 1       | -0.162165  | 5    | 0.0068   | 0.024    | 0.20106  | 0.36322 | 0.016642688 | Intergenic | NA                     | NA           |
| 9   | 79898773 | 79898850 | 1       | -0.236403  | 5    | 0.0035   | 0.0087   | 0.31582  | 0.55222 | 0.009686665 | Intragenic | NM_013122              | Igfbp2       |
| 9   | 80925433 | 80925509 | 1       | -0.061639  | 5    | 0.0063   | 0.038    | 0.062063 | 0.1237  | 0.015629046 | Intergenic | NA                     | NA           |
| 9   | 80951602 | 80951701 | 1       | -0.22355   | 5    | 0.00072  | 0.0031   | 0.13259  | 0.35614 | 0.002634665 | Intergenic | NA                     | NA           |
| 9   | 81073382 | 81073710 | 1       | -0.168616  | 5    | 5.00E-05 | 0.0018   | 0.030498 | 0.19911 | 0.000291675 | Intragenic | NM_001191810           | Tns1         |
| 9   | 81089668 | 81089879 | 1       | -0.188907  | 5    | 0.00048  | 0.00052  | 0.027149 | 0.21606 | 0.001881331 | Intragenic | NM_001191810           | Tns1         |
| 9   | 81238696 | 81238797 | 1       | -0.104865  | 5    | 0.008    | 0.039    | 0.56906  | 0.67393 | 0.019059477 | Intergenic | NA                     | NA           |
| 9   | 81328344 | 81328397 | 1       | -0.18092   | 5    | 0.0068   | 0.038    | 0.24397  | 0.42489 | 0.016642688 | Intragenic | NM_001106920           | Aamp         |
| 9   | 81807332 | 81807774 | 1       | -0.181009  | 5    | 3.10E-05 | 0.00027  | 0.13239  | 0.3134  | 0.000197418 | Intragenic | NM_001108226           | Wnt6         |
| 9   | 81807976 | 81808024 | 1       | -0.075183  | 5    | 0.0063   | 0.025    | 0.10995  | 0.18514 | 0.015629046 | Intragenic | NM_001108226           | Wnt6         |
| 9   | 81817991 | 81818064 | 1       | -0.143971  | 5    | 0.0074   | 0.037    | 0.17148  | 0.31545 | 0.017853001 | TSS        | NM_001108227           | Wnt10a       |
| 9   | 81829650 | 81829877 | 1       | -0.104837  | 7    | 0.02     | 0.053    | 0.14899  | 0.25382 | 0.039778219 | Intergenic | NA                     | NA           |
| 9   | 82141082 | 82141411 | 1       | -0.210937  | 5    | 0.0049   | 0.0017   | 0.37166  | 0.5826  | 0.012753585 | TSS        | NM_001025745           | Zfand2b      |
| 9   | 82189269 | 82189300 | 1       | -0.081927  | 5    | 0.023    | 0.13     | 0.28881  | 0.37074 | 0.04441443  | TSS        | NM_001007004           | Tuba4a       |
| 9   | 82340610 | 82340641 | 1       | -0.113303  | 5    | 0.0019   | 0.009    | 0.18302  | 0.29632 | 0.005855937 | TSS        | NM_001108802           | Speg         |
| 9   | 82405682 | 82405827 | 1       | -0.178682  | 5    | 0.023    | 0.25     | 0.40702  | 0.5857  | 0.04441443  | Intragenic | NM_001025056           | Gmppa        |
| 9   | 82958054 | 82958105 | 1       | -0.271305  | 5    | 4.40E-05 | 0.00098  | 0.28542  | 0.55672 | 0.000263321 | Intragenic | NM_001162411           | Epha4        |
| 9   | 83156796 | 83157403 | 1       | -0.112891  | 22   | 0.0038   | 0.0055   | 0.55994  | 0.61409 | 0.010352437 | Intergenic | NA                     | NA           |
| 9   | 83157423 | 83157476 | 1       | -0.133165  | 5    | 0.0035   | 0.0053   | 0.58163  | 0.7148  | 0.009686665 | Intergenic | NA                     | NA           |
| 9   | 84052003 | 84052085 | 1       | -0.283358  | 5    | 0.0013   | 0.00052  | 0.31293  | 0.59629 | 0.004277683 | Intragenic | NM_001191811           | Sgpp2        |
| 9   | 84387604 | 84387685 | 1       | -0.194825  | 5    | 0.012    | 0.056    | 0.35274  | 0.54757 | 0.026435197 | Intergenic | NA                     | NA           |
| 9   | 86027026 | 86027448 | 1       | -0.10903   | 14   | 0.00034  | 0.0043   | 0.57875  | 0.68778 | 0.001424609 | Intergenic | NA                     | NA           |
| 9   | 86239593 | 86239685 | 1       | -0.116041  | 5    | 0.0045   | 0.039    | 0.54957  | 0.66562 | 0.011905878 | Intergenic | NA                     | NA           |
| 9   | 86400584 | 86400629 | 1       | -0.203394  | 5    | 0.00029  | 0.00027  | 0.16811  | 0.3715  | 0.001239307 | Intergenic | NA                     | NA           |

| chr | start     | stop      | q-value  | methy.diff | CpGs | pMWU     | p2DKS    | MCWLS    | MCWHS   | pMWU.fdr    | cgi.type   | transcript          | gene              |
|-----|-----------|-----------|----------|------------|------|----------|----------|----------|---------|-------------|------------|---------------------|-------------------|
| 9   | 88152939  | 88153040  | 1        | -0.095785  | 5    | 7.40E-07 | 7.60E-06 | 0.010525 | 0.10631 | 9.26E-06    | Intragenic | NM_001135759        | Col4a3            |
| 9   | 89005083  | 89005264  | 1        | -0.111084  | 5    | 0.0074   | 0.086    | 0.60902  | 0.72011 | 0.017853001 | Intergenic | NA                  | NA                |
| 9   | 92031374  | 92031601  | 1        | -0.149692  | 6    | 0.00013  | 0.0045   | 0.13399  | 0.28369 | 0.000648758 | Intergenic | NA                  | NA                |
| 9   | 92759430  | 92759536  | 1        | -0.08543   | 5    | 0.011    | 0.015    | 0.17095  | 0.25638 | 0.02463877  | TSS        | NM_001108805        | Spata3            |
| 9   | 93056598  | 93056702  | 1        | -0.10259   | 5    | 0.016    | 0.088    | 0.15868  | 0.26127 | 0.033288089 | TSS        | NM_001012134        | B3gnt7            |
| 9   | 93250001  | 93250051  | 1        | -0.135461  | 5    | 3.90E-05 | 0.0018   | 0.095069 | 0.23053 | 0.000237659 | Intergenic | NA                  | NA                |
| 9   | 93273341  | 93273394  | 0.00011  | -0.265441  | 8    | 1.00E-11 | 3.40E-10 | 0.16742  | 0.43286 | 5.72E-10    | TSS        | NM_021740           | Ptma              |
| 9   | 94116050  | 94116168  | 1        | -0.081203  | 7    | 0.023    | 0.078    | 0.15423  | 0.23543 | 0.04441443  | Intragenic | NM_001109310        | Efhd1             |
| 9   | 94667362  | 94667431  | 1        | 0.101036   | 5    | 0.0008   | 0.015    | 0.73953  | 0.6385  | 0.002866309 | Intragenic | NM_013023           | Sag               |
| 9   | 95891102  | 95891173  | 1        | -0.20225   | 5    | 0.00014  | 0.0032   | 0.18162  | 0.38387 | 0.000684451 | Intergenic | NA                  | NA                |
| 9   | 95971863  | 95971934  | 1        | -0.20225   | 5    | 0.00014  | 0.0032   | 0.18162  | 0.38387 | 0.000684451 | Intragenic | NM_022693           | Sh3bp4            |
| 9   | 95977116  | 95977213  | 1        | -0.200616  | 5    | 0.019    | 0.024    | 0.1408   | 0.34142 | 0.038322088 | Intragenic | NM_022693           | Sh3bp4            |
| 9   | 96330082  | 96330142  | 0.0022   | -0.279151  | 5    | 6.30E-08 | 6.70E-09 | 0.037629 | 0.31678 | 1.18E-06    | Intergenic | NA                  | NA                |
| 9   | 96383106  | 96383228  | 1        | -0.162355  | 7    | 0.0048   | 0.017    | 0.52315  | 0.68551 | 0.012663359 | Intergenic | NA                  | NA                |
| 9   | 96536859  | 96537007  | 1        | -0.087863  | 5    | 0.017    | 0.015    | 0.66304  | 0.7509  | 0.034796287 | Intragenic | NM_001108230        | Agap1             |
| 9   | 96584064  | 96584170  | 1        | -0.130317  | 10   | 0.001    | 0.0041   | 0.51896  | 0.64928 | 0.003452169 | Intragenic | NM_001108230        | Agap1             |
| 9   | 96605654  | 96605879  | 0.34     | -0.189588  | 10   | 1.20E-08 | 1.00E-06 | 0.14598  | 0.33557 | 2.88E-07    | Intragenic | NM_001108230        | Agap1             |
| 9   | 96754637  | 96754751  | 1        | -0.050074  | 7    | 0.012    | 0.039    | 0.07664  | 0.12671 | 0.026435197 | TSS        | NM_053708           | Gbx2              |
| 9   | 96765649  | 96765783  | 1        | -0.139188  | 5    | 0.0058   | 0.088    | 0.10318  | 0.24236 | 0.014624129 | Intergenic | NA                  | NA                |
| 9   | 96786361  | 96786628  | 1        | -0.108807  | 7    | 0.015    | 0.037    | 0.24008  | 0.34888 | 0.031584896 | Intragenic | NM_001108231        | Asb18             |
| 9   | 96884824  | 96885224  | 1        | -0.146451  | 5    | 0.0022   | 0.0018   | 0.12717  | 0.27362 | 0.006578104 | Intergenic | NA                  | NA                |
| 9   | 97142844  | 97142912  | 1        | -0.152467  | 5    | 0.0068   | 0.039    | 0.31016  | 0.46263 | 0.016642688 | Intergenic | NA                  | NA                |
| 9   | 97500683  | 97500798  | 1        | -0.190637  | 5    | 0.00072  | 0.015    | 0.12507  | 0.3157  | 0.002634665 | Intergenic | NA                  | NA                |
| 9   | 97810288  | 97810635  | 1        | -0.144009  | 5    | 0.00039  | 0.0018   | 0.123    | 0.26701 | 0.001587612 | Intragenic | NM_001109363        | Rab17             |
| 9   | 97821133  | 97821305  | 1        | -0.067717  | 5    | 0.0094   | 0.024    | 0.070925 | 0.13864 | 0.021723038 | Intergenic | NA                  | NA                |
| 9   | 97821311  | 97821376  | 1        | -0.120473  | 7    | 0.00031  | 0.013    | 0.21884  | 0.33931 | 0.001320549 | Intergenic | NA                  | NA                |
| 9   | 97886089  | 97886180  | 1        | -0.185992  | 10   | 2.30E-07 | 0.00016  | 0.29679  | 0.48278 | 3.45E-06    | Intragenic | NM_001014269        | Lrrfip1           |
| 9   | 97961149  | 97961198  | 1        | 0.060278   | 5    | 0.0063   | 0.0018   | 0.96519  | 0.90491 | 0.015629046 | Intergenic | NA                  | NA                |
| 9   | 98126083  | 98126396  | 1        | -0.246076  | 9    | 2.50E-07 | 0.0002   | 0.14893  | 0.395   | 3.70E-06    | Intragenic | NM_001007755        | Scly              |
| 9   | 98134624  | 98134713  | 1        | -0.202923  | 5    | 0.01     | 0.038    | 0.33782  | 0.54074 | 0.02275947  | TSS        | NM_001191812        | Espnl             |
| 9   | 98136831  | 98136918  | 1        | -0.136667  | 5    | 0.023    | 0.13     | 0.25938  | 0.39605 | 0.04441443  | TSS        | NM_001191812        | Espnl             |
| 9   | 98184996  | 98185143  | 1        | -0.350494  | 7    | 3.50E-07 | 1.60E-05 | 0.3334   | 0.68389 | 4.97E-06    | Intergenic | NA                  | NA                |
| 9   | 98185210  | 98185292  | 1        | -0.194088  | 5    | 0.023    | 0.18     | 0.40812  | 0.60221 | 0.04441443  | Intergenic | NA                  | NA                |
| 9   | 98576276  | 98576409  | 1        | -0.223285  | 5    | 1.30E-05 | 0.00053  | 0.22409  | 0.44737 | 9.66E-05    | Intergenic | NA                  | NA                |
| 9   | 99316810  | 99316835  | 1.60E-08 | -0.5287    | 9    | 3.40E-13 | 5.10E-14 | 0.089763 | 0.61846 | 3.00E-11    | TSS        | NM_182671:NM_199495 | Ndufa10l1:Ndufa10 |
| 9   | 99862622  | 99862655  | 1        | -0.073311  | 6    | 3.50E-06 | 6.40E-06 | 0.027287 | 0.1006  | 3.33E-05    | Intragenic | NM_001009825        | Ppp1r7            |
| 9   | 100842323 | 100842489 | 1        | -0.166366  | 7    | 0.0017   | 0.018    | 0.40728  | 0.57364 | 0.005339493 | Intergenic | NA                  | NA                |
| 9   | 101335696 | 101335840 | 1        | 0.166887   | 9    | 0.0071   | 0.046    | 0.81353  | 0.64665 | 0.017331038 | Intergenic | NA                  | NA                |

| chr | start     | stop      | q-value  | methy.diff | CpGs | pMWU     | p2DKS    | MCWLS     | MCWHS    | pMWU.fdr    | cgi.type   | transcript             | gene          |
|-----|-----------|-----------|----------|------------|------|----------|----------|-----------|----------|-------------|------------|------------------------|---------------|
| 9   | 101894782 | 101894867 | 1        | 0.286931   | 5    | 9.80E-05 | 6.90E-05 | 0.51843   | 0.2315   | 0.000512474 | Intergenic | NA                     | NA            |
| 9   | 105124019 | 105124143 | 1        | -0.17173   | 5    | 0.0053   | 0.0054   | 0.16404   | 0.33577  | 0.013591571 | Intergenic | NA                     | NA            |
| 9   | 105975155 | 105975466 | 0.015    | -0.267843  | 18   | 2.40E-11 | 4.70E-08 | 0.4144    | 0.68224  | 1.22E-09    | Intergenic | NA                     | NA            |
| 9   | 106497624 | 106497724 | 1        | -0.21928   | 9    | 0.00017  | 1.50E-05 | 0.51902   | 0.7383   | 0.000806192 | Intergenic | NA                     | NA            |
| 9   | 109588527 | 109588567 | 1        | -0.09273   | 5    | 0.017    | 0.058    | 0.70901   | 0.80174  | 0.034796287 | Intergenic | NA                     | NA            |
| 9   | 109955704 | 109955758 | 1        | 0.057871   | 5    | 0.023    | 0.038    | 0.94427   | 0.8864   | 0.04441443  | Intergenic | NA                     | NA            |
| 9   | 109969871 | 109969945 | 1        | -0.202773  | 7    | 0.00026  | 0.018    | 0.34966   | 0.55243  | 0.001130807 | Intergenic | NA                     | NA            |
| 9   | 110546762 | 110546957 | 1        | -0.134369  | 5    | 0.0012   | 0.0054   | 0.19768   | 0.33205  | 0.004013471 | Intergenic | NA                     | NA            |
| 9   | 110932003 | 110932094 | 1        | -0.251003  | 5    | 2.20E-06 | 7.40E-06 | 0.31507   | 0.56607  | 2.27E-05    | Intergenic | NA                     | NA            |
| 9   | 111454152 | 111454189 | 1        | -0.134743  | 5    | 0.0049   | 0.015    | 0.16902   | 0.30376  | 0.012753585 | Intergenic | NA                     | NA            |
| 9   | 111689532 | 111689756 | 1        | -0.161964  | 8    | 1.30E-05 | 0.0017   | 0.09165   | 0.25361  | 9.66E-05    | Intergenic | NA                     | NA            |
| 9   | 112405141 | 112405369 | 1        | -0.145142  | 8    | 0.0041   | 0.017    | 0.23661   | 0.38175  | 0.01100507  | Intergenic | NA                     | NA            |
| 9   | 113036123 | 113036196 | 1        | -0.180712  | 5    | 0.013    | 0.18     | 0.45808   | 0.6388   | 0.028097302 | TSS        | NM_145094              | Rab31         |
| 9   | 114013576 | 114013689 | 1        | -0.281771  | 5    | 0.0013   | 0.038    | 0.3362    | 0.61797  | 0.004277683 | Intergenic | NA                     | NA            |
| 9   | 114264175 | 114264224 | 1        | -0.223426  | 5    | 0.00072  | 0.015    | 0.24262   | 0.46604  | 0.002634665 | Intergenic | NA                     | NA            |
| 9   | 114392755 | 114392932 | 1        | -0.180542  | 5    | 0.0049   | 0.024    | 0.26051   | 0.44105  | 0.012753585 | Intragenic | NM_001168632           | Ptprm         |
| 9   | 114450922 | 114451107 | 1        | -0.134235  | 6    | 0.016    | 0.056    | 0.45656   | 0.59079  | 0.033288089 | Intragenic | NM_001168632           | Ptprm         |
| 9   | 115249411 | 115249714 | 1        | -0.130832  | 13   | 2.20E-07 | 4.50E-05 | 0.14948   | 0.28031  | 3.32E-06    | Intergenic | NA                     | NA            |
| 9   | 115444002 | 115444190 | 1.20E-07 | -0.34293   | 10   | 2.00E-13 | 3.70E-13 | 0.026009  | 0.36894  | 1.91E-11    | Intragenic | NM_001108237           | Lama1         |
| 9   | 116334219 | 116334275 | 1        | -0.133547  | 5    | 0.00059  | 0.00028  | 0.17881   | 0.31236  | 0.002242971 | Intergenic | NA                     | NA            |
| 9   | 117000726 | 117000872 | 1        | -0.150012  | 5    | 0.0087   | 0.058    | 0.26276   | 0.41277  | 0.020391633 | Intergenic | NA                     | NA            |
| 9   | 118362726 | 118362876 | 1        | -0.211471  | 5    | 1.30E-06 | 7.40E-06 | 0.060759  | 0.27223  | 1.46E-05    | Intragenic | NM_022946:NM_001304287 | Dlgap1:Dlgap1 |
| 9   | 118591412 | 118591588 | 1        | -0.09561   | 8    | 0.016    | 0.037    | 0.38892   | 0.48453  | 0.033288089 | Intragenic | NM_022946:NM_001304287 | Dlgap1:Dlgap1 |
| 9   | 119664418 | 119664644 | 1        | -0.10159   | 9    | 0.0011   | 0.0026   | 0.63905   | 0.74064  | 0.003737263 | Intergenic | NA                     | NA            |
| X   | 5897392   | 5897523   | 0.48     | -0.215243  | 5    | 7.40E-07 | 1.50E-06 | 0.08943   | 0.30467  | 9.26E-06    | Intergenic | NA                     | NA            |
| X   | 7844053   | 7844103   | 1        | -0.228556  | 7    | 3.70E-08 | 4.70E-06 | 0.090467  | 0.31902  | 7.87E-07    | Intergenic | NA                     | NA            |
| X   | 10997180  | 10997275  | 1        | -0.054259  | 13   | 0.01     | 0.02     | 0.16071   | 0.21497  | 0.02275947  | Intragenic | NM_001100967           | Nyx           |
| X   | 11185761  | 11185824  | 1        | -0.09158   | 5    | 0.0094   | 0.024    | 0.7995    | 0.89108  | 0.021723038 | Intergenic | NA                     | NA            |
| X   | 11589318  | 11589475  | 1        | -0.0985    | 6    | 0.001    | 0.011    | 0.049054  | 0.14755  | 0.003452169 | Intergenic | NA                     | NA            |
| X   | 12453057  | 12453145  | 1        | -0.125369  | 5    | 0.0038   | 0.088    | 0.1389    | 0.26427  | 0.010352437 | Intragenic | NM_001191586           | Bcor          |
| X   | 12482189  | 12482308  | 1        | -0.203957  | 6    | 4.90E-07 | 6.20E-06 | 0.12189   | 0.32584  | 6.54E-06    | Intragenic | NM_001191586           | Bcor          |
| X   | 16104565  | 16104676  | 1        | -0.132675  | 5    | 0.02     | 0.015    | 0.61098   | 0.74365  | 0.039778219 | Intragenic | NM_019279              | Pcsk1n        |
| X   | 16107887  | 16107940  | 1        | -0.054964  | 8    | 0.00025  | 0.0038   | 0.02884   | 0.083804 | 0.001103692 | TSS        | NM_019279              | Pcsk1n        |
| X   | 16206372  | 16206483  | 1        | -0.140876  | 5    | 0.014    | 0.015    | 0.60278   | 0.74365  | 0.029850603 | Intragenic | NM_019279              | Pcsk1n        |
| X   | 16209694  | 16209747  | 1        | -0.054825  | 8    | 0.00025  | 0.0038   | 0.028978  | 0.083804 | 0.001103692 | TSS        | NM_019279              | Pcsk1n        |
| X   | 16726748  | 16726933  | 0.085    | -0.079643  | 9    | 1.40E-07 | 2.60E-07 | 0.0099942 | 0.089637 | 2.25E-06    | Intergenic | NA                     | NA            |
| X   | 20153410  | 20153494  | 1        | -0.243453  | 5    | 0.00014  | 0.0017   | 0.13081   | 0.37426  | 0.000684451 | Intergenic | NA                     | NA            |



| chr | start    | stop     | q-value | methy.diff | CpGs | pMWU     | p2DKS    | MCWLS    | MCWHS    | pMWU.fdr    | cgi.type   | transcript   | gene   |
|-----|----------|----------|---------|------------|------|----------|----------|----------|----------|-------------|------------|--------------|--------|
| X   | 21307976 | 21308023 | 1       | -0.277955  | 5    | 5.50E-06 | 7.10E-05 | 0.13082  | 0.40877  | 4.78E-05    | Intergenic | NA           | NA     |
| X   | 22418059 | 22418106 | 1       | -0.278294  | 5    | 5.50E-06 | 7.10E-05 | 0.13253  | 0.41082  | 4.78E-05    | Intergenic | NA           | NA     |
| X   | 22898999 | 22899081 | 1       | -0.26511   | 5    | 0.0019   | 0.0018   | 0.34491  | 0.61002  | 0.005855937 | Intergenic | NA           | NA     |
| X   | 25404507 | 25404637 | 1       | -0.092619  | 5    | 0.019    | 0.087    | 0.69003  | 0.78265  | 0.038322088 | Intergenic | NA           | NA     |
| X   | 28619745 | 28619800 | 1       | -0.056607  | 5    | 0.025    | 0.25     | 0.83031  | 0.88692  | 0.047453009 | Intergenic | NA           | NA     |
| X   | 29514564 | 29514619 | 1       | -0.057226  | 5    | 0.023    | 0.25     | 0.83031  | 0.88754  | 0.04441443  | Intergenic | NA           | NA     |
| X   | 32909340 | 32909417 | 1       | -0.143307  | 5    | 0.0038   | 0.0017   | 0.29627  | 0.43958  | 0.010352437 | Intergenic | NA           | NA     |
| X   | 35690981 | 35691204 | 1       | -0.087455  | 9    | 0.0013   | 0.018    | 0.66138  | 0.74884  | 0.004277683 | Intergenic | NA           | NA     |
| X   | 35816933 | 35817076 | 0.00014 | -0.217824  | 13   | 1.90E-12 | 4.30E-10 | 0.13019  | 0.34801  | 1.36E-10    | Intergenic | NA           | NA     |
| X   | 37911035 | 37911095 | 1       | -0.084108  | 5    | 0.0013   | 0.0032   | 0.040793 | 0.1249   | 0.004277683 | Intergenic | NA           | NA     |
| X   | 43884650 | 43884710 | 1       | -0.073084  | 5    | 0.0041   | 0.0092   | 0.80479  | 0.87787  | 0.01100507  | Intragenic | NM_001013960 | Acot9  |
| X   | 44166007 | 44166190 | 0.00052 | -0.156891  | 14   | 5.80E-14 | 1.60E-09 | 0.058994 | 0.21588  | 7.11E-12    | Intergenic | NA           | NA     |
| X   | 45785172 | 45785254 | 1       | -0.284589  | 5    | 0.00097  | 0.0018   | 0.31363  | 0.59822  | 0.003366009 | Intergenic | NA           | NA     |
| X   | 47771446 | 47771538 | 1       | -0.117624  | 5    | 0.014    | 0.13     | 0.60865  | 0.72628  | 0.029850603 | Intergenic | NA           | NA     |
| X   | 50546840 | 50546914 | 1       | -0.226369  | 7    | 7.80E-05 | 0.012    | 0.57595  | 0.80232  | 0.000422981 | Intergenic | NA           | NA     |
| X   | 58538761 | 58538908 | 1       | -0.112129  | 7    | 0.00083  | 0.0022   | 0.63788  | 0.75001  | 0.002961434 | Intergenic | NA           | NA     |
| X   | 58859892 | 58860002 | 1       | -0.115605  | 5    | 0.0045   | 0.038    | 0.47666  | 0.59227  | 0.011905878 | Intergenic | NA           | NA     |
| X   | 61781743 | 61781873 | 1       | -0.134512  | 5    | 1.50E-05 | 0.00014  | 0.36118  | 0.49569  | 0.000109113 | Intergenic | NA           | NA     |
| X   | 61898925 | 61899099 | 1       | -0.152927  | 5    | 0.0063   | 0.015    | 0.54605  | 0.69898  | 0.015629046 | Intergenic | NA           | NA     |
| X   | 62876135 | 62876300 | 1       | -0.057891  | 5    | 0.011    | 0.13     | 0.75902  | 0.81691  | 0.02463877  | Intergenic | NA           | NA     |
| X   | 64998621 | 64998735 | 1       | -0.071885  | 8    | 2.30E-05 | 9.00E-05 | 0.023818 | 0.095703 | 0.000156153 | Intergenic | NA           | NA     |
| X   | 67429219 | 67429349 | 1       | -0.061171  | 5    | 0.023    | 0.088    | 0.064559 | 0.12573  | 0.04441443  | Intergenic | NA           | NA     |
| X   | 69908088 | 69908273 | 1       | -0.146113  | 7    | 0.01     | 0.054    | 0.2279   | 0.37401  | 0.02275947  | Intergenic | NA           | NA     |
| X   | 69913963 | 69914403 | 1       | -0.126621  | 7    | 0.0018   | 0.0021   | 0.19078  | 0.3174   | 0.005640313 | Intergenic | NA           | NA     |
| X   | 70053124 | 70053159 | 1       | -0.097878  | 5    | 0.00026  | 0.0018   | 0.11218  | 0.21006  | 0.001130807 | Intergenic | NA           | NA     |
| X   | 70194758 | 70194942 | 1       | -0.057378  | 5    | 0.0094   | 0.038    | 0.046576 | 0.10395  | 0.021723038 | Intergenic | NA           | NA     |
| X   | 71468914 | 71469017 | 1       | -0.091576  | 5    | 0.0068   | 0.038    | 0.15115  | 0.24273  | 0.016642688 | TSS        | NM_031639    | Dlg3   |
| X   | 72131098 | 72131225 | 1       | -0.14232   | 10   | 1.30E-07 | 0.00016  | 0.14045  | 0.28277  | 2.11E-06    | Intragenic | NM_017251    | Gjb1   |
| X   | 73290364 | 73290399 | 1       | -0.127512  | 5    | 0.0022   | 0.0089   | 0.2724   | 0.39991  | 0.006578104 | Intragenic | NM_022626    | Phka1  |
| X   | 73290478 | 73290512 | 1       | -0.103338  | 5    | 0.0074   | 0.088    | 0.13324  | 0.23657  | 0.017853001 | Intragenic | NM_022626    | Phka1  |
| X   | 76693546 | 76693758 | 1       | -0.1056    | 11   | 0.022    | 0.057    | 0.61529  | 0.72089  | 0.043064669 | Intergenic | NA           | NA     |
| X   | 78582782 | 78582864 | 1       | -0.125742  | 5    | 0.00065  | 0.038    | 0.7074   | 0.83315  | 0.002426546 | Intragenic | NM_001106938 | Gpr174 |
| X   | 78624051 | 78624133 | 1       | -0.125899  | 5    | 0.00065  | 0.038    | 0.70731  | 0.83321  | 0.002426546 | Intergenic | NA           | NA     |
| X   | 78772140 | 78772198 | 1       | -0.112989  | 5    | 1.90E-05 | 3.40E-05 | 0.83786  | 0.95085  | 0.000131674 | Intergenic | NA           | NA     |
| X   | 81173163 | 81173322 | 1       | -0.103839  | 5    | 0.019    | 0.059    | 0.69036  | 0.7942   | 0.038322088 | Intergenic | NA           | NA     |
| X   | 81276849 | 81276895 | 1       | -0.093239  | 5    | 0.0094   | 0.13     | 0.64216  | 0.7354   | 0.021723038 | Intergenic | NA           | NA     |
| X   | 81277282 | 81277424 | 1       | -0.16683   | 7    | 0.00065  | 0.013    | 0.42279  | 0.58962  | 0.002426546 | Intergenic | NA           | NA     |
| X   | 81281988 | 81282058 | 1       | -0.155513  | 5    | 2.20E-05 | 7.00E-05 | 0.080074 | 0.23559  | 0.000149617 | Intergenic | NA           | NA     |
| X   | 82392491 | 82392553 | 0.033   | -0.062773  | 10   | 7.90E-08 | 1.00E-07 | 0.049796 | 0.11257  | 1.44E-06    | TSS        | NM_207595    | Ankra2 |

| chr | start     | stop      | q-value  | methy.diff | CpGs | pMWU     | p2DKS    | MCWLS    | MCWHS   | pMWU.fdr    | cgi.type   | transcript   | gene    |
|-----|-----------|-----------|----------|------------|------|----------|----------|----------|---------|-------------|------------|--------------|---------|
| X   | 83197486  | 83197663  | 1        | -0.117436  | 5    | 9.80E-05 | 0.0054   | 0.063471 | 0.18091 | 0.000512474 | Intergenic | NA           | NA      |
| X   | 88078478  | 88078652  | 1        | -0.136319  | 8    | 0.00039  | 9.10E-05 | 0.51928  | 0.65559 | 0.001587612 | Intergenic | NA           | NA      |
| X   | 93028059  | 93028141  | 1        | -0.095127  | 5    | 0.00032  | 0.015    | 0.76322  | 0.85834 | 0.001346443 | Intragenic | NM_001271228 | Pcdh11x |
| X   | 93376033  | 93376090  | 1        | -0.136472  | 5    | 0.023    | 0.18     | 0.46941  | 0.60588 | 0.04441443  | Intergenic | NA           | NA      |
| X   | 93654388  | 93654521  | 1        | -0.094009  | 5    | 0.023    | 0.18     | 0.59488  | 0.68889 | 0.04441443  | Intergenic | NA           | NA      |
| X   | 95245949  | 95246129  | 1        | -0.110358  | 8    | 0.0012   | 0.018    | 0.62629  | 0.73664 | 0.004013471 | Intergenic | NA           | NA      |
| X   | 96421260  | 96421298  | 1        | -0.157195  | 6    | 1.90E-06 | 9.20E-05 | 0.78311  | 0.9403  | 2.01E-05    | Intergenic | NA           | NA      |
| X   | 99310635  | 99310735  | 1        | 0.081411   | 5    | 0.012    | 0.059    | 0.77465  | 0.69324 | 0.026435197 | Intergenic | NA           | NA      |
| X   | 100813640 | 100813735 | 0.089    | -0.260173  | 5    | 1.30E-07 | 2.70E-07 | 0.5272   | 0.78737 | 2.11E-06    | Intergenic | NA           | NA      |
| X   | 103953696 | 103953809 | 1        | -0.124671  | 5    | 0.025    | 0.18     | 0.52662  | 0.65129 | 0.047453009 | Intergenic | NA           | NA      |
| X   | 106591071 | 106591137 | 1        | -0.179282  | 5    | 0.0032   | 0.0053   | 0.61546  | 0.79474 | 0.008990975 | Intergenic | NA           | NA      |
| X   | 112723255 | 112723412 | 1        | -0.158498  | 5    | 0.015    | 0.088    | 0.55161  | 0.71011 | 0.031584896 | Intergenic | NA           | NA      |
| X   | 112783983 | 112784142 | 1        | -0.125233  | 5    | 0.019    | 0.088    | 0.16624  | 0.29147 | 0.038322088 | Intergenic | NA           | NA      |
| X   | 113674011 | 113674103 | 1        | -0.108572  | 5    | 0.016    | 0.088    | 0.61958  | 0.72815 | 0.033288089 | Intergenic | NA           | NA      |
| X   | 113803840 | 113803912 | 1        | -0.062012  | 5    | 0.017    | 0.024    | 0.82508  | 0.88709 | 0.034796287 | Intergenic | NA           | NA      |
| X   | 114106827 | 114106960 | 1        | 0.127033   | 7    | 0.018    | 0.078    | 0.74767  | 0.62064 | 0.036742993 | Intragenic | NM_080898    | Trpc5   |
| X   | 114856540 | 114856681 | 1        | -0.165396  | 5    | 0.019    | 0.024    | 0.21066  | 0.37606 | 0.038322088 | Intragenic | NM_001013222 | Rnd1    |
| X   | 114955755 | 114955857 | 1        | -0.19302   | 5    | 0.0008   | 0.0055   | 0.1984   | 0.39142 | 0.002866309 | Intergenic | NA           | NA      |
| X   | 114960687 | 114960847 | 1        | -0.135499  | 5    | 0.0016   | 0.024    | 0.17202  | 0.30752 | 0.005100053 | Intragenic | NM_001108111 | Wnt10b  |
| X   | 115115526 | 115115605 | 1        | -0.208575  | 5    | 0.016    | 0.0018   | 0.293    | 0.50157 | 0.033288089 | Intergenic | NA           | NA      |
| X   | 115159568 | 115159869 | 1        | -0.244077  | 5    | 0.014    | 0.014    | 0.23565  | 0.47973 | 0.029850603 | Intergenic | NA           | NA      |
| X   | 115223331 | 115223471 | 1        | -0.089428  | 6    | 0.0012   | 0.04     | 0.1324   | 0.22182 | 0.004013471 | Intergenic | NA           | NA      |
| X   | 115231575 | 115232025 | 1        | -0.170152  | 13   | 5.90E-06 | 0.00063  | 0.25658  | 0.42673 | 5.08E-05    | Intergenic | NA           | NA      |
| X   | 115284028 | 115284064 | 1        | -0.054877  | 5    | 0.002    | 0.015    | 0.084228 | 0.1391  | 0.006079939 | Intergenic | NA           | NA      |
| X   | 115405721 | 115405851 | 1        | -0.184264  | 10   | 1.20E-06 | 0.00025  | 0.30008  | 0.48434 | 1.37E-05    | Intragenic | NM_017108    | Kcnh3   |
| X   | 115576138 | 115576597 | 1        | -0.188424  | 16   | 3.10E-09 | 3.10E-06 | 0.2122   | 0.40062 | 8.60E-08    | Intergenic | NA           | NA      |
| X   | 115875171 | 115875427 | 1        | -0.082718  | 7    | 6.60E-06 | 0.00016  | 0.050215 | 0.13293 | 5.57E-05    | TSS        | NM_022215    | Gpd1    |
| X   | 115879423 | 115879579 | 1        | -0.112016  | 12   | 3.70E-08 | 1.30E-05 | 0.063426 | 0.17544 | 7.87E-07    | Intragenic | NM_022215    | Gpd1    |
| X   | 115935252 | 115935595 | 1        | -0.06428   | 18   | 0.0011   | 0.038    | 0.15679  | 0.22107 | 0.003737263 | Intragenic | NM_001191615 | Lima1   |
| X   | 116849759 | 116849860 | 1        | -0.143526  | 5    | 0.00036  | 0.0093   | 0.43044  | 0.57397 | 0.001486639 | Intergenic | NA           | NA      |
| X   | 116947781 | 116948132 | 1        | -0.195706  | 5    | 5.00E-05 | 0.00014  | 0.099846 | 0.29555 | 0.000291675 | Intergenic | NA           | NA      |
| X   | 119281685 | 119281969 | 0.0067   | -0.217406  | 18   | 1.40E-10 | 2.10E-08 | 0.27545  | 0.49285 | 6.05E-09    | Intergenic | NA           | NA      |
| X   | 119304770 | 119304816 | 2.20E-09 | -0.108431  | 10   | 5.70E-14 | 6.90E-15 | 0.031627 | 0.14006 | 7.06E-12    | Intergenic | NA           | NA      |
| X   | 119304841 | 119304861 | 0.49     | -0.235326  | 5    | 1.80E-07 | 1.50E-06 | 0.079105 | 0.31443 | 2.78E-06    | Intergenic | NA           | NA      |
| X   | 119678038 | 119678084 | 2.20E-09 | -0.108431  | 10   | 5.70E-14 | 6.90E-15 | 0.031627 | 0.14006 | 7.06E-12    | Intergenic | NA           | NA      |
| X   | 119678109 | 119678129 | 0.49     | -0.235326  | 5    | 1.80E-07 | 1.50E-06 | 0.079105 | 0.31443 | 2.78E-06    | Intergenic | NA           | NA      |
| X   | 123967382 | 123967747 | 0.28     | -0.117096  | 12   | 9.90E-10 | 8.70E-07 | 0.1263   | 0.24339 | 3.30E-08    | Intergenic | NA           | NA      |
| X   | 124121763 | 124121889 | 0.008    | -0.125908  | 10   | 1.90E-10 | 2.50E-08 | 0.125    | 0.25091 | 7.85E-09    | Intergenic | NA           | NA      |
| X   | 124155727 | 124155853 | 0.00053  | -0.130095  | 11   | 1.60E-13 | 1.60E-09 | 0.092559 | 0.22265 | 1.56E-11    | Intergenic | NA           | NA      |

| chr | start     | stop      | q-value | methy.diff | CpGs | pMWU     | p2DKS    | MCWLS    | MCWHS    | pMWU.fdr    | cgi.type   | transcript   | gene   |
|-----|-----------|-----------|---------|------------|------|----------|----------|----------|----------|-------------|------------|--------------|--------|
| X   | 124228169 | 124228242 | 1       | -0.171465  | 5    | 0.00014  | 0.0055   | 0.51665  | 0.68812  | 0.000684451 | Intergenic | NA           | NA     |
| X   | 126932362 | 126932454 | 1       | -0.117359  | 5    | 0.0049   | 0.088    | 0.65132  | 0.76868  | 0.012753585 | Intergenic | NA           | NA     |
| X   | 131418871 | 131419011 | 0.0071  | -0.083603  | 14   | 2.90E-11 | 2.20E-08 | 0.012702 | 0.096305 | 1.44E-09    | TSS        | NM_001107941 | Dcaf12 |
| X   | 132371247 | 132371385 | 1       | -0.057721  | 7    | 0.00065  | 9.20E-05 | 0.75622  | 0.81395  | 0.002426546 | Intergenic | NA           | NA     |
| X   | 134618040 | 134618286 | 1       | -0.072822  | 15   | 0.0031   | 0.0049   | 0.15623  | 0.22906  | 0.008829746 | Intergenic | NA           | NA     |
| X   | 134618799 | 134618899 | 0.76    | -0.319565  | 7    | 4.90E-09 | 2.30E-06 | 0.222    | 0.54156  | 1.30E-07    | Intergenic | NA           | NA     |
| X   | 135365781 | 135365885 | 1       | -0.06736   | 7    | 0.015    | 0.077    | 0.106    | 0.17336  | 0.031584896 | Intergenic | NA           | NA     |
| X   | 135725910 | 135726079 | 1       | -0.13621   | 5    | 0.025    | 0.059    | 0.2188   | 0.35501  | 0.047453009 | Intergenic | NA           | NA     |
| X   | 138460776 | 138460944 | 1       | -0.205987  | 5    | 0.00014  | 0.00052  | 0.21911  | 0.4251   | 0.000684451 | Intragenic | NM_001106949 | Mbnl3  |
| X   | 139524113 | 139524168 | 1       | -0.134519  | 5    | 9.80E-05 | 0.003    | 0.30913  | 0.44365  | 0.000512474 | Intergenic | NA           | NA     |
| X   | 141293634 | 141293703 | 1       | -0.117757  | 7    | 0.0048   | 0.026    | 0.56185  | 0.6796   | 0.012663359 | Intergenic | NA           | NA     |
| X   | 141294369 | 141294438 | 1       | -0.223736  | 5    | 0.00017  | 0.0017   | 0.42197  | 0.64571  | 0.000806192 | Intergenic | NA           | NA     |
| X   | 142319646 | 142319774 | 1       | -0.122092  | 5    | 0.011    | 0.015    | 0.60325  | 0.72534  | 0.02463877  | Intergenic | NA           | NA     |
| X   | 145482308 | 145482356 | 1       | -0.065737  | 5    | 0.0049   | 0.088    | 0.74676  | 0.81249  | 0.012753585 | Intergenic | NA           | NA     |
| X   | 152520742 | 152521060 | 1       | -0.129249  | 9    | 0.00039  | 0.0056   | 0.12422  | 0.25346  | 0.001587612 | Intergenic | NA           | NA     |
| X   | 153015262 | 153015580 | 1       | -0.141185  | 9    | 0.00011  | 0.0017   | 0.11228  | 0.25346  | 0.000565143 | Intergenic | NA           | NA     |

### Figure2A Kidney CRL

| chr | start    | stop     | q-value  | methy.diff | CpGs | pMWU     | p2DKS    | MCWLS    | MCWHS   | pMWU.fdr    | cgi.type   | transcript   | gene      |
|-----|----------|----------|----------|------------|------|----------|----------|----------|---------|-------------|------------|--------------|-----------|
| 1   | 767170   | 767232   | 1        | -0.072269  | 5    | 0.00036  | 0.00098  | 0.072517 | 0.14479 | 0.003505013 | Intergenic | NA           | NA        |
| 1   | 767239   | 767263   | 0.03     | -0.159774  | 5    | 7.30E-08 | 1.10E-07 | 0.11222  | 0.272   | 4.94E-06    | Intergenic | NA           | NA        |
| 1   | 3666879  | 3667008  | 0.95     | -0.083537  | 5    | 5.60E-07 | 3.40E-06 | 0.054863 | 0.1384  | 2.40E-05    | Intragenic | NM_001107469 | Zc3h12d   |
| 1   | 8678079  | 8678164  | 1        | 0.071088   | 7    | 0.012    | 0.018    | 0.85837  | 0.78728 | 0.042700096 | Intragenic | NM_001025638 | Stx11     |
| 1   | 8830123  | 8830272  | 1        | -0.085384  | 7    | 0.00024  | 0.0083   | 0.077217 | 0.1626  | 0.002620118 | Intergenic | NA           | NA        |
| 1   | 8830759  | 8830980  | 0.45     | -0.114614  | 10   | 9.90E-10 | 1.60E-06 | 0.032684 | 0.1473  | 1.18E-07    | Intergenic | NA           | NA        |
| 1   | 8857041  | 8857075  | 1        | -0.109937  | 5    | 0.00017  | 0.00028  | 0.04731  | 0.15725 | 0.002036688 | TSS        | NM_012760    | Plagl1    |
| 1   | 8857081  | 8857118  | 1        | -0.106767  | 5    | 9.80E-05 | 0.00014  | 0.057921 | 0.16469 | 0.001307848 | TSS        | NM_012760    | Plagl1    |
| 1   | 8857155  | 8857175  | 1        | -0.092902  | 5    | 0.00026  | 0.0055   | 0.066476 | 0.15938 | 0.002784906 | TSS        | NM_012760    | Plagl1    |
| 1   | 8857179  | 8857264  | 8.30E-08 | -0.230453  | 9    | 1.20E-12 | 3.00E-13 | 0.19183  | 0.42228 | 3.41E-10    | TSS        | NM_012760    | Plagl1    |
| 1   | 9541103  | 9541270  | 1        | -0.091733  | 7    | 0.011    | 0.019    | 0.21619  | 0.30792 | 0.040408163 | Intragenic | NM_001134425 | Aig1      |
| 1   | 9669836  | 9669972  | 1        | 0.121373   | 5    | 0.0053   | 0.015    | 0.86827  | 0.7469  | 0.024662043 | Intergenic | NA           | NA        |
| 1   | 10084363 | 10084410 | 1        | -0.181612  | 5    | 2.20E-05 | 0.0018   | 0.084221 | 0.26583 | 0.000427263 | Intergenic | NA           | NA        |
| 1   | 13453079 | 13453184 | 1        | 0.077614   | 9    | 4.80E-05 | 4.20E-05 | 0.92989  | 0.85228 | 0.000788953 | Intergenic | NA           | NA        |
| 1   | 13498483 | 13498501 | 1        | -0.257848  | 5    | 9.80E-05 | 0.00098  | 0.18135  | 0.43919 | 0.001307848 | TSS        | NR_046238    | Rn5-8s    |
| 1   | 13498720 | 13498733 | 1        | -0.169177  | 5    | 0.0032   | 0.058    | 0.29274  | 0.46192 | 0.017454545 | TSS        | NR_046238    | Rn5-8s    |
| 1   | 13500695 | 13500723 | 1        | 0.143296   | 5    | 7.80E-05 | 0.00053  | 0.3584   | 0.21511 | 0.001113424 | TSS        | NR_046238    | Rn5-8s    |
| 1   | 13501725 | 13501743 | 1        | -0.072928  | 5    | 0.00023  | 0.00099  | 0.1721   | 0.24503 | 0.002525893 | TSS        | NR_046238    | Rn5-8s    |
| 1   | 13507030 | 13507288 | 5.10E-09 | -0.148016  | 31   | 4.20E-14 | 1.80E-14 | 0.21405  | 0.36207 | 3.20E-11    | TSS        | NM_001025002 | LOC310926 |

| chr | start    | stop     | q-value  | methy.diff | CpGs | pMWU     | p2DKS    | MCWLS    | MCWHS    | pMWU.fdr    | cgi.type   | transcript      | gene      |
|-----|----------|----------|----------|------------|------|----------|----------|----------|----------|-------------|------------|-----------------|-----------|
| 1   | 13507548 | 13507620 | 1        | -0.084193  | 5    | 3.50E-05 | 0.0005   | 0.084775 | 0.16897  | 0.000606338 | TSS        | NM_001025002    | LOC310926 |
| 1   | 13507676 | 13507726 | 1        | -0.182074  | 5    | 4.30E-06 | 0.00014  | 0.070187 | 0.25226  | 0.000114978 | TSS        | NM_001025002    | LOC310926 |
| 1   | 13507743 | 13507816 | 1        | -0.153067  | 5    | 0.0014   | 0.015    | 0.10915  | 0.26222  | 0.00960223  | TSS        | NM_001025002    | LOC310926 |
| 1   | 13551223 | 13551335 | 1        | -0.07389   | 7    | 1.90E-05 | 0.0013   | 0.083105 | 0.157    | 0.000376935 | Intergenic | NA              | NA        |
| 1   | 13553493 | 13553727 | 7.20E-05 | -0.102539  | 18   | 5.20E-14 | 2.60E-10 | 0.084576 | 0.18712  | 3.20E-11    | Intergenic | NA              | NA        |
| 1   | 13556494 | 13556936 | 1        | -0.050674  | 41   | 2.70E-05 | 0.0071   | 0.14887  | 0.17834  | 0.000503182 | Intergenic | NA              | NA        |
| 1   | 13558858 | 13558888 | 1        | 0.137829   | 5    | 0.00021  | 0.0018   | 0.37216  | 0.23433  | 0.002348182 | TSS        | NR_046238       | Rn5-8s    |
| 1   | 13558941 | 13558955 | 1        | -0.074378  | 5    | 0.0068   | 0.13     | 0.29999  | 0.37437  | 0.029075319 | TSS        | NR_046238       | Rn5-8s    |
| 1   | 13560781 | 13560794 | 1        | -0.169833  | 5    | 0.0038   | 0.058    | 0.29653  | 0.46636  | 0.019583799 | TSS        | NR_046238       | Rn5-8s    |
| 1   | 13560875 | 13560890 | 1        | -0.073911  | 5    | 0.0038   | 0.015    | 0.18126  | 0.25517  | 0.019583799 | TSS        | NR_046238       | Rn5-8s    |
| 1   | 13563364 | 13563381 | 1        | -0.070186  | 5    | 0.015    | 0.024    | 0.27239  | 0.34258  | 0.049419643 | Intergenic | NA              | NA        |
| 1   | 15100080 | 15100185 | 1        | 0.086156   | 9    | 7.00E-05 | 4.20E-05 | 0.93069  | 0.84453  | 0.001035271 | Intergenic | NA              | NA        |
| 1   | 15787084 | 15787159 | 1        | -0.055868  | 5    | 0.0053   | 0.059    | 0.038178 | 0.094046 | 0.024662043 | TSS        | NM_001106265    | Perp      |
| 1   | 16384002 | 16384026 | 1        | -0.376027  | 5    | 9.80E-07 | 7.60E-06 | 0.29213  | 0.66816  | 3.73E-05    | Intergenic | NA              | NA        |
| 1   | 16965268 | 16965313 | 1        | -0.129346  | 6    | 0.00019  | 0.00095  | 0.055083 | 0.18443  | 0.002222187 | Intragenic | NM_001277694    | Map3k5    |
| 1   | 17240671 | 17240855 | 1        | -0.059406  | 11   | 0.0035   | 0.02     | 0.053058 | 0.11246  | 0.018410549 | Intragenic | NM_001106270    | Map7      |
| 1   | 17278206 | 17278239 | 1        | -0.22463   | 5    | 1.00E-05 | 7.10E-05 | 0.071544 | 0.29617  | 0.000218343 | Intragenic | NM_001106270:NM | Map7:Map7 |
| 1   | 17280945 | 17281146 | 1        | -0.129813  | 7    | 1.20E-05 | 0.0022   | 0.097983 | 0.2278   | 0.000257442 | Intragenic | NM_001106270:NM | Map7:Map7 |
| 1   | 19095559 | 19095695 | 1        | -0.164269  | 8    | 5.70E-06 | 0.001    | 0.64098  | 0.80525  | 0.000146063 | Intragenic | NM_001029902    | Ptprk     |
| 1   | 19164627 | 19164763 | 1        | -0.131627  | 8    | 6.70E-05 | 0.0058   | 0.65919  | 0.79081  | 0.001013238 | Intragenic | NM_001029902    | Ptprk     |
| 1   | 19702042 | 19702201 | 1        | -0.098471  | 5    | 0.01     | 0.023    | 0.58169  | 0.68016  | 0.037614679 | Intergenic | NA              | NA        |
| 1   | 20901081 | 20901151 | 1        | -0.112843  | 5    | 0.008    | 0.0054   | 0.22056  | 0.33341  | 0.03243956  | Intergenic | NA              | NA        |
| 1   | 22345873 | 22345949 | 1        | -0.169786  | 5    | 0.00015  | 0.0055   | 0.55129  | 0.72107  | 0.001835821 | Intragenic | NM_001195606    | Smlr1     |
| 1   | 22352358 | 22352446 | 1        | -0.15375   | 7    | 0.00013  | 0.0022   | 0.55572  | 0.70947  | 0.001648454 | Intragenic | NM_001195606    | Smlr1     |
| 1   | 22452305 | 22452413 | 1        | -0.086531  | 5    | 0.011    | 0.038    | 0.071022 | 0.15755  | 0.040408163 | Intergenic | NA              | NA        |
| 1   | 25725947 | 25726069 | 0.34     | -0.122351  | 7    | 1.60E-06 | 1.20E-06 | 0.030447 | 0.1528   | 5.47E-05    | Intergenic | NA              | NA        |
| 1   | 25906068 | 25906129 | 1        | -0.090235  | 5    | 0.0049   | 0.088    | 0.22376  | 0.314    | 0.023345384 | Intergenic | NA              | NA        |
| 1   | 26488686 | 26488837 | 1        | -0.156395  | 7    | 0.0015   | 0.017    | 0.42626  | 0.58265  | 0.01019337  | Intergenic | NA              | NA        |
| 1   | 26519931 | 26520082 | 1        | -0.156395  | 7    | 0.0015   | 0.017    | 0.42626  | 0.58265  | 0.01019337  | Intergenic | NA              | NA        |
| 1   | 32872113 | 32872135 | 1        | -0.148007  | 5    | 0.002    | 0.039    | 0.37199  | 0.52     | 0.012269327 | Intergenic | NA              | NA        |
| 1   | 33161965 | 33161983 | 1        | -0.240603  | 5    | 0.00011  | 0.0018   | 0.15392  | 0.39453  | 0.001431746 | Intragenic | NM_012654       | Slc9a3    |
| 1   | 34061624 | 34061702 | 1        | -0.058284  | 7    | 0.0041   | 0.0081   | 0.030406 | 0.08869  | 0.020486121 | Intragenic | NM_001107330    | Irx4      |
| 1   | 39775996 | 39776066 | 1        | 0.151914   | 5    | 0.0063   | 0.088    | 0.83009  | 0.67817  | 0.027757612 | Intergenic | NA              | NA        |
| 1   | 42092181 | 42092299 | 1        | -0.143931  | 5    | 0.00011  | 0.00095  | 0.08124  | 0.22517  | 0.001431746 | Intergenic | NA              | NA        |
| 1   | 42393694 | 42393825 | 1        | 0.087815   | 5    | 0.0087   | 0.0088   | 0.93433  | 0.84652  | 0.034705946 | Intergenic | NA              | NA        |
| 1   | 43150943 | 43151019 | 1        | -0.165849  | 5    | 0.0008   | 0.0054   | 0.23608  | 0.40193  | 0.006267516 | Intergenic | NA              | NA        |
| 1   | 47606603 | 47606663 | 1        | 0.062151   | 5    | 0.011    | 0.025    | 0.95247  | 0.89032  | 0.040408163 | Intergenic | NA              | NA        |
| 1   | 48534479 | 48534551 | 1        | -0.21658   | 5    | 0.00097  | 0.015    | 0.32484  | 0.54142  | 0.007223613 | TSS        | NM_001127560    | Syt13     |
| 1   | 48888114 | 48888202 | 1        | -0.1872    | 5    | 0.011    | 0.015    | 0.36785  | 0.55505  | 0.040408163 | Intergenic | NA              | NA        |

| chr | start    | stop     | q-value  | methy.diff | CpGs | pMWU     | p2DKS    | MCWLS    | MCWHS    | pMWU.fdr    | cgi.type   | transcript      | gene        |
|-----|----------|----------|----------|------------|------|----------|----------|----------|----------|-------------|------------|-----------------|-------------|
| 1   | 48951992 | 48952085 | 1        | -0.190303  | 5    | 1.00E-05 | 1.60E-05 | 0.30031  | 0.49062  | 0.000218343 | Intragenic | NM_001038615    | Fndc1       |
| 1   | 49617744 | 49617826 | 1        | -0.095123  | 5    | 0.013    | 0.0055   | 0.14066  | 0.23579  | 0.04506341  | Intragenic | NM_001077677    | Pacrg       |
| 1   | 50655421 | 50655513 | 1        | -0.135039  | 5    | 8.80E-05 | 0.0032   | 0.12956  | 0.2646   | 0.00123     | Intragenic | NM_020093       | Park2       |
| 1   | 51576787 | 51577047 | 1        | -0.074535  | 36   | 0.00029  | 0.0038   | 0.21775  | 0.26806  | 0.002984937 | TSS        | NM_012756       | Igf2r       |
| 1   | 51577051 | 51577145 | 2.90E-05 | -0.191723  | 17   | 4.20E-14 | 1.00E-10 | 0.10225  | 0.29397  | 3.20E-11    | TSS        | NM_012756       | Igf2r       |
| 1   | 51577324 | 51577357 | 0.077    | -0.082634  | 5    | 1.50E-06 | 2.70E-07 | 0.011781 | 0.094415 | 5.17E-05    | TSS        | NM_012756       | Igf2r       |
| 1   | 52894408 | 52894596 | 1        | 0.051115   | 15   | 0.0087   | 0.022    | 0.87108  | 0.81996  | 0.034705946 | TSS        | NM_001106208    | Pabpc6      |
| 1   | 53762155 | 53762204 | 1        | -0.168051  | 5    | 0.00032  | 0.00053  | 0.25686  | 0.42491  | 0.003243956 | Intragenic | NM_022236       | Pde10a      |
| 1   | 55087438 | 55087622 | 1        | -0.108657  | 5    | 0.0074   | 0.039    | 0.12139  | 0.23005  | 0.030871679 | Intergenic | NA              | NA          |
| 1   | 62762496 | 62762607 | 1        | 0.102839   | 5    | 0.0027   | 0.0092   | 0.96126  | 0.85842  | 0.015434547 | Intergenic | NA              | NA          |
| 1   | 63155793 | 63155854 | 1        | 0.082696   | 8    | 0.0059   | 0.068    | 0.36588  | 0.28318  | 0.02655     | TSS        | NM_001106219:NM | Prpf31:Tfpt |
| 1   | 63547610 | 63547666 | 0.34     | -0.332774  | 7    | 4.40E-08 | 1.20E-06 | 0.18027  | 0.51304  | 3.31E-06    | Intergenic | NA              | NA          |
| 1   | 63548184 | 63548253 | 1        | -0.111923  | 5    | 0.0027   | 0.0031   | 0.57006  | 0.68199  | 0.015434547 | Intergenic | NA              | NA          |
| 1   | 65590568 | 65590710 | 1        | -0.155005  | 8    | 0.00039  | 0.013    | 0.23471  | 0.38971  | 0.003723415 | Intergenic | NA              | NA          |
| 1   | 66343179 | 66343285 | 1        | -0.126265  | 11   | 0.00044  | 0.00091  | 0.10373  | 0.23     | 0.0041      | Intragenic | NM_001108470    | Mzf1        |
| 1   | 68161386 | 68161540 | 1        | -0.216371  | 8    | 0.00012  | 5.60E-06 | 0.57866  | 0.79503  | 0.00153218  | Intragenic | NM_147135       | Sbk1        |
| 1   | 70537351 | 70537407 | 0.34     | -0.332774  | 7    | 4.40E-08 | 1.20E-06 | 0.18027  | 0.51304  | 3.31E-06    | Intergenic | NA              | NA          |
| 1   | 70537925 | 70537994 | 1        | -0.11268   | 5    | 0.0024   | 0.0031   | 0.56972  | 0.6824   | 0.014124402 | Intergenic | NA              | NA          |
| 1   | 70714745 | 70714898 | 1        | 0.057038   | 5    | 0.015    | 0.039    | 0.95654  | 0.8995   | 0.049419643 | Intergenic | NA              | NA          |
| 1   | 70927517 | 70927630 | 0.83     | -0.101733  | 12   | 6.80E-10 | 3.00E-06 | 0.072526 | 0.17426  | 8.63E-08    | Intragenic | NM_001099472    | Vom2r28     |
| 1   | 71778141 | 71778201 | 1        | 0.118173   | 5    | 0.0074   | 0.088    | 0.86721  | 0.74904  | 0.030871679 | Intergenic | NA              | NA          |
| 1   | 72727804 | 72727866 | 1        | 0.084284   | 5    | 0.0029   | 0.0055   | 0.94168  | 0.8574   | 0.016164653 | Intergenic | NA              | NA          |
| 1   | 72776396 | 72776605 | 0.008    | -0.250318  | 16   | 7.10E-13 | 2.80E-08 | 0.19139  | 0.44171  | 2.10E-10    | Intragenic | NM_001169143    | Zfp444      |
| 1   | 72776722 | 72776771 | 1        | -0.162221  | 5    | 0.0029   | 0.015    | 0.3743   | 0.53652  | 0.016164653 | Intragenic | NM_001169143    | Zfp444      |
| 1   | 74830283 | 74830497 | 1        | -0.078932  | 5    | 0.0074   | 0.025    | 0.069349 | 0.14828  | 0.030871679 | TSS        | NM_001108469    | Cdc42ep5    |
| 1   | 75622655 | 75622701 | 1        | -0.064693  | 5    | 0.0008   | 0.0018   | 0.037397 | 0.10209  | 0.006267516 | Intragenic | NM_001108467    | Eps8l1      |
| 1   | 75825536 | 75825616 | 1        | 0.142023   | 8    | 3.60E-06 | 9.70E-06 | 0.7089   | 0.56687  | 0.000101405 | Intragenic | NM_001127337    | Brsk1       |
| 1   | 75990837 | 75990868 | 1        | -0.158968  | 5    | 0.0013   | 0.0055   | 0.095481 | 0.25445  | 0.009111111 | TSS        | NM_001145175    | Shisa7      |
| 1   | 76227753 | 76227788 | 1        | -0.195913  | 5    | 7.80E-05 | 0.00014  | 0.05317  | 0.24908  | 0.001113424 | TSS        | NM_057136       | Epn1        |
| 1   | 76949937 | 76949967 | 1        | -0.057071  | 5    | 0.0041   | 0.015    | 0.081297 | 0.13837  | 0.020486121 | Intergenic | NA              | NA          |
| 1   | 79793247 | 79793275 | 1        | -0.096831  | 5    | 0.0017   | 0.00014  | 0.13027  | 0.2271   | 0.011044014 | Intragenic | NM_001271132    | Arhgap35    |
| 1   | 79933629 | 79933701 | 1        | -0.056867  | 5    | 0.0094   | 0.087    | 0.04932  | 0.10619  | 0.036473186 | Intergenic | NA              | NA          |
| 1   | 80024698 | 80024891 | 1        | -0.120934  | 9    | 0.0093   | 0.034    | 0.28474  | 0.40568  | 0.036473186 | Intragenic | NM_001013895    | Prkd2       |
| 1   | 80058387 | 80058486 | 1        | -0.089798  | 17   | 0.01     | 0.082    | 0.25325  | 0.30949  | 0.037614679 | Intragenic | NM_001191947    | Dact3       |
| 1   | 80171696 | 80171803 | 1        | -0.150987  | 5    | 0.00088  | 0.00098  | 0.2745   | 0.42549  | 0.006722981 | Intergenic | NA              | NA          |
| 1   | 81172865 | 81172983 | 1        | -0.084653  | 10   | 2.30E-07 | 0.0001   | 0.039676 | 0.12433  | 1.18E-05    | TSS        | NM_001107483    | Irf2bp1     |
| 1   | 81265649 | 81265812 | 1        | -0.278922  | 5    | 0.00072  | 0.00053  | 0.30924  | 0.58816  | 0.005769381 | Intergenic | NA              | NA          |
| 1   | 81596344 | 81596464 | 1        | 0.090472   | 13   | 0.0093   | 0.13     | 0.28674  | 0.19627  | 0.036473186 | Intragenic | NM_012530       | Ckm         |
| 1   | 81644708 | 81644779 | 1        | -0.051651  | 7    | 0.0059   | 0.11     | 0.069277 | 0.12093  | 0.02655     | Intergenic | NA              | NA          |

| chr | start     | stop      | q-value | methyl.diff | CpGs | pMWU     | p2DKS    | MCWLS    | MCWHS    | pMWU.fdr    | cgi.type   | transcript                | gene              |
|-----|-----------|-----------|---------|-------------|------|----------|----------|----------|----------|-------------|------------|---------------------------|-------------------|
| 1   | 81681762  | 81681850  | 1       | -0.113621   | 13   | 5.70E-09 | 6.00E-06 | 0.085409 | 0.19903  | 5.61E-07    | TSS        | NM_001109410              | Trappc6a          |
| 1   | 81698774  | 81698854  | 1       | -0.052048   | 5    | 0.00054  | 0.0092   | 0.044961 | 0.097009 | 0.004710638 | Intergenic | NA                        | NA                |
| 1   | 81762173  | 81762200  | 1       | 0.215338    | 5    | 0.0024   | 0.00053  | 0.53436  | 0.31902  | 0.014124402 | Intragenic | NM_001024294              | Clasrp            |
| 1   | 82436445  | 82436509  | 1       | -0.074715   | 5    | 5.00E-05 | 7.10E-05 | 0.032831 | 0.10755  | 0.000803922 | Intergenic | NA                        | NA                |
| 1   | 82500449  | 82500567  | 1       | -0.095159   | 7    | 2.90E-05 | 0.0013   | 0.068413 | 0.16357  | 0.000525848 | Intragenic | NM_001270701:NM_001270701 | Kcnn4:Kcnn4:Kcnn4 |
| 1   | 82732896  | 82733109  | 1       | -0.107246   | 5    | 0.00048  | 0.0054   | 0.022479 | 0.12972  | 0.004351843 | TSS        | NM_001191622              | Phldb3            |
| 1   | 85302188  | 85302349  | 1       | -0.100458   | 6    | 0.0034   | 0.011    | 0.11834  | 0.21879  | 0.018409391 | Intergenic | NA                        | NA                |
| 1   | 85349714  | 85349940  | 1       | -0.140717   | 12   | 0.00038  | 0.00021  | 0.2573   | 0.39802  | 0.00369     | Intragenic | NM_001170336              | Ltbp4             |
| 1   | 86025578  | 86025625  | 1       | -0.134399   | 5    | 0.00011  | 0.0055   | 0.16358  | 0.29798  | 0.001431746 | Intragenic | NM_030862                 | Marcks1           |
| 1   | 88371095  | 88371148  | 1       | -0.066906   | 7    | 6.10E-06 | 5.30E-05 | 0.094959 | 0.16186  | 0.000154171 | Intragenic | NM_198734:NM_001191622    | Yif1b:Yif1b       |
| 1   | 88371840  | 88371919  | 0.42    | -0.216596   | 5    | 2.80E-07 | 1.50E-06 | 0.06937  | 0.28597  | 1.37E-05    | Intergenic | NA                        | NA                |
| 1   | 88743782  | 88743867  | 0.0025  | -0.202555   | 10   | 1.30E-11 | 9.10E-09 | 0.098809 | 0.30136  | 2.74E-09    | Intergenic | NA                        | NA                |
| 1   | 88743874  | 88744112  | 1       | -0.109267   | 18   | 0.0041   | 0.056    | 0.25502  | 0.31803  | 0.020486121 | Intergenic | NA                        | NA                |
| 1   | 88850676  | 88850761  | 0.0025  | -0.202555   | 10   | 1.30E-11 | 9.10E-09 | 0.098809 | 0.30136  | 2.74E-09    | Intergenic | NA                        | NA                |
| 1   | 88850806  | 88850861  | 1       | -0.1034     | 5    | 0.014    | 0.039    | 0.21713  | 0.32053  | 0.04726441  | Intergenic | NA                        | NA                |
| 1   | 88985966  | 88986035  | 1       | -0.124516   | 5    | 0.0012   | 0.0091   | 0.13548  | 0.26     | 0.008573088 | Intergenic | NA                        | NA                |
| 1   | 89196159  | 89196604  | 0.091   | -0.09764    | 24   | 7.20E-12 | 3.30E-07 | 0.079343 | 0.17698  | 1.66E-09    | Intergenic | NA                        | NA                |
| 1   | 89385545  | 89385614  | 1       | -0.124516   | 5    | 0.0012   | 0.0091   | 0.13548  | 0.26     | 0.008573088 | Intergenic | NA                        | NA                |
| 1   | 89927830  | 89928041  | 0.00066 | -0.109606   | 15   | 5.30E-10 | 2.30E-09 | 0.040163 | 0.14977  | 7.24E-08    | TSS        | NM_001009283              | Syne4             |
| 1   | 90154409  | 90154566  | 1       | -0.136249   | 5    | 0.0058   | 0.015    | 0.22622  | 0.36247  | 0.026163814 | Intragenic | NM_001127579              | Proser3           |
| 1   | 90503590  | 90503661  | 1       | -0.171233   | 5    | 0.0049   | 0.015    | 0.38072  | 0.55196  | 0.023345384 | Intragenic | NM_017190                 | Mag               |
| 1   | 90524157  | 90524240  | 1       | -0.156124   | 5    | 0.00065  | 0.0054   | 0.23055  | 0.38667  | 0.005335929 | TSS        | NM_053469                 | Hamp              |
| 1   | 90704604  | 90704708  | 1       | -0.080052   | 6    | 0.005    | 0.082    | 0.081618 | 0.16167  | 0.023791103 | TSS        | NM_017112                 | Hpn               |
| 1   | 91231327  | 91231445  | 1       | -0.18534    | 5    | 0.00088  | 0.0053   | 0.13683  | 0.32217  | 0.006722981 | Intragenic | NM_207592                 | Gpi               |
| 1   | 91553375  | 91553473  | 1       | -0.192059   | 5    | 0.00017  | 0.0017   | 0.19392  | 0.38598  | 0.002036688 | Intergenic | NA                        | NA                |
| 1   | 91682090  | 91682148  | 1       | 0.214069    | 7    | 0.0014   | 0.013    | 0.61039  | 0.39632  | 0.00960223  | Intragenic | NM_001107504              | Chst8             |
| 1   | 91760132  | 91760469  | 1       | -0.11716    | 16   | 1.40E-06 | 0.00057  | 0.18167  | 0.29883  | 4.97E-05    | Intragenic | NM_001107504              | Chst8             |
| 1   | 92094530  | 92094741  | 0.00064 | -0.109009   | 15   | 5.90E-10 | 2.30E-09 | 0.041074 | 0.15008  | 7.78E-08    | TSS        | NM_001009283              | Syne4             |
| 1   | 99771929  | 99771952  | 1       | -0.068698   | 5    | 0.014    | 0.088    | 0.12203  | 0.19073  | 0.04726441  | Intergenic | NA                        | NA                |
| 1   | 99774606  | 99774629  | 1       | -0.068005   | 5    | 0.015    | 0.13     | 0.12272  | 0.19073  | 0.049419643 | Intergenic | NA                        | NA                |
| 1   | 100519714 | 100519836 | 1       | 0.130005    | 11   | 0.015    | 0.015    | 0.67767  | 0.54767  | 0.049419643 | Intergenic | NA                        | NA                |
| 1   | 100701452 | 100701489 | 1       | -0.165955   | 5    | 0.008    | 0.015    | 0.38975  | 0.5557   | 0.03243956  | Intergenic | NA                        | NA                |
| 1   | 101675255 | 101675300 | 1       | 0.10128     | 5    | 0.01     | 0.13     | 0.49702  | 0.39574  | 0.037614679 | Intragenic | NM_001100690              | Myh14             |
| 1   | 102524940 | 102525030 | 1       | -0.149518   | 5    | 0.008    | 0.039    | 0.16658  | 0.3161   | 0.03243956  | Intragenic | NM_001109615              | Gys1              |
| 1   | 102528718 | 102528837 | 1       | -0.116693   | 10   | 0.00076  | 0.0033   | 0.36882  | 0.48552  | 0.006057019 | TSS        | NM_022500                 | Ftl1              |
| 1   | 102618863 | 102618952 | 1       | -0.139301   | 5    | 0.0027   | 0.015    | 0.077239 | 0.21654  | 0.015434547 | TSS        | NM_001191111              | Hsd17b14          |
| 1   | 102700200 | 102700243 | 1       | -0.0968     | 5    | 7.00E-05 | 0.00028  | 0.034127 | 0.13093  | 0.001035271 | Intragenic | NM_001106261              | Rasip1            |
| 1   | 102866682 | 102866711 | 1       | -0.069847   | 5    | 0.0063   | 0.088    | 0.054477 | 0.12432  | 0.027757612 | Intergenic | NA                        | NA                |
| 1   | 102880876 | 102880997 | 1       | -0.198325   | 5    | 0.00036  | 0.00098  | 0.1659   | 0.36423  | 0.003505013 | TSS        | NM_053911                 | Cyth2             |

| chr | start     | stop      | q-value  | methy.diff | CpGs | pMWU     | p2DKS    | MCWLS     | MCWHS     | pMWU.fdr    | cgi.type   | transcript      | gene         |
|-----|-----------|-----------|----------|------------|------|----------|----------|-----------|-----------|-------------|------------|-----------------|--------------|
| 1   | 104183782 | 104184060 | 1        | -0.067752  | 10   | 0.00059  | 0.038    | 0.08096   | 0.14871   | 0.005010587 | Intergenic | NA              | NA           |
| 1   | 105767486 | 105767653 | 1        | -0.146493  | 8    | 0.00087  | 0.0086   | 0.18833   | 0.33482   | 0.006722981 | Intragenic | NM_138529       | Nav2         |
| 1   | 115711493 | 115711654 | 1        | 0.056809   | 7    | 0.013    | 0.012    | 0.93358   | 0.87677   | 0.04506341  | Intragenic | NM_001271493    | LOC100365773 |
| 1   | 116238885 | 116238984 | 0.14     | -0.101256  | 9    | 1.80E-07 | 4.90E-07 | 0.065382  | 0.16664   | 9.99E-06    | TSS        | NR_130147       | Tug1         |
| 1   | 116533685 | 116533789 | 1        | -0.122715  | 5    | 0.0074   | 0.015    | 0.1516    | 0.27432   | 0.030871679 | Intergenic | NA              | NA           |
| 1   | 118075353 | 118075415 | 1        | 0.084284   | 5    | 0.0029   | 0.0055   | 0.94168   | 0.8574    | 0.016164653 | Intergenic | NA              | NA           |
| 1   | 123905045 | 123905089 | 1        | 0.153162   | 5    | 0.011    | 0.015    | 0.79458   | 0.64142   | 0.040408163 | Intergenic | NA              | NA           |
| 1   | 124201260 | 124201329 | 1        | -0.250537  | 5    | 0.00097  | 0.0018   | 0.19206   | 0.4426    | 0.007223613 | Intergenic | NA              | NA           |
| 1   | 124201828 | 124201867 | 1        | -0.070676  | 7    | 0.00043  | 0.0033   | 0.068643  | 0.13932   | 0.004073684 | Intergenic | NA              | NA           |
| 1   | 124237833 | 124237891 | 1        | 0.06079    | 5    | 0.00044  | 0.00052  | 0.10539   | 0.044598  | 0.0041      | TSS        | NM_001170562    | Peg12        |
| 1   | 127249949 | 127250088 | 1        | -0.137612  | 5    | 0.0014   | 0.0005   | 0.11766   | 0.25528   | 0.00960223  | Intragenic | NM_001106266    | Tjp1         |
| 1   | 128203688 | 128203820 | 1        | -0.079865  | 5    | 0.0074   | 0.0092   | 0.070871  | 0.15074   | 0.030871679 | Intergenic | NA              | NA           |
| 1   | 130001587 | 130001661 | 1        | -0.064932  | 5    | 0.013    | 0.024    | 0.14646   | 0.21139   | 0.04506341  | Intragenic | NM_052807       | Igf1r        |
| 1   | 130066122 | 130066217 | 1        | -0.120501  | 5    | 0.00054  | 0.0018   | 0.081668  | 0.20217   | 0.004710638 | Intragenic | NM_052807       | Igf1r        |
| 1   | 132491076 | 132491124 | 1        | -0.087375  | 5    | 0.0013   | 0.0054   | 0.052656  | 0.14003   | 0.009111111 | Intragenic | NM_080778       | Nr2f2        |
| 1   | 137058773 | 137058869 | 1        | -0.104767  | 6    | 0.011    | 0.018    | 0.65125   | 0.75602   | 0.040408163 | Intragenic | NM_177481       | Slco3a1      |
| 1   | 141829371 | 141829462 | 1        | 0.051594   | 5    | 0.0013   | 0.58     | 0.054165  | 0.0025709 | 0.009111111 | TSS        | NM_001040186:NM | Mfge8:Mfge8  |
| 1   | 142407452 | 142407496 | 1        | -0.090032  | 8    | 0.0052   | 0.12     | 0.16191   | 0.25194   | 0.024631579 | Intergenic | NA              | NA           |
| 1   | 142522652 | 142522932 | 1        | -0.120987  | 10   | 0.0051   | 0.015    | 0.20644   | 0.32743   | 0.024220077 | Intragenic | NM_031012       | Anpep        |
| 1   | 143139310 | 143139403 | 1        | -0.128881  | 5    | 0.011    | 0.0092   | 0.3311    | 0.45998   | 0.040408163 | Intragenic | NM_019331       | Furin        |
| 1   | 143412868 | 143412913 | 1        | 0.071866   | 5    | 0.0016   | 0.0018   | 0.95133   | 0.87946   | 0.010628263 | Intergenic | NA              | NA           |
| 1   | 143834001 | 143834197 | 1        | -0.142272  | 6    | 0.003    | 0.058    | 0.13242   | 0.27469   | 0.01668425  | Intragenic | NM_001191895    | Alpk3        |
| 1   | 144111876 | 144111965 | 0.85     | -0.126993  | 8    | 1.70E-05 | 3.00E-06 | 0.33615   | 0.46314   | 0.000342787 | TSS        | NM_017152       | Rps17        |
| 1   | 145762533 | 145762607 | 1        | -0.137234  | 5    | 0.00088  | 0.0054   | 0.16138   | 0.29862   | 0.006722981 | Intragenic | NM_001191626    | Mex3b        |
| 1   | 151966549 | 151966905 | 0.73     | -0.051412  | 30   | 3.40E-06 | 2.60E-06 | 0.057164  | 0.10858   | 9.73E-05    | Intergenic | NA              | NA           |
| 1   | 151967401 | 151968328 | 1        | -0.087799  | 92   | 6.90E-06 | 7.90E-06 | 0.12752   | 0.20511   | 0.000166957 | Intergenic | NA              | NA           |
| 1   | 151970271 | 151970429 | 6.70E-06 | -0.157327  | 23   | 4.30E-14 | 2.40E-11 | 0.097649  | 0.25498   | 3.20E-11    | Intergenic | NA              | NA           |
| 1   | 151970993 | 151971042 | 1        | -0.097386  | 5    | 0.00088  | 0.0018   | 0.087886  | 0.18527   | 0.006722981 | Intergenic | NA              | NA           |
| 1   | 151971946 | 151971965 | 1        | -0.117958  | 5    | 0.008    | 0.088    | 0.19273   | 0.31068   | 0.03243956  | Intergenic | NA              | NA           |
| 1   | 151972199 | 151972263 | 1        | -0.244277  | 5    | 2.40E-05 | 7.10E-05 | 0.068351  | 0.31263   | 0.000455321 | Intergenic | NA              | NA           |
| 1   | 151975018 | 151975089 | 1        | -0.190456  | 7    | 0.00045  | 0.00048  | 0.2513    | 0.44176   | 0.00418262  | Intergenic | NA              | NA           |
| 1   | 153406766 | 153406794 | 1        | -0.057342  | 5    | 0.00072  | 0.0018   | 0.0011111 | 0.058453  | 0.005769381 | Intergenic | NA              | NA           |
| 1   | 160425078 | 160425187 | 1        | -0.120044  | 5    | 0.0087   | 0.025    | 0.56354   | 0.68359   | 0.034705946 | Intergenic | NA              | NA           |
| 1   | 160436337 | 160436392 | 1        | -0.101256  | 5    | 0.00036  | 0.0018   | 0.36994   | 0.4712    | 0.003505013 | Intergenic | NA              | NA           |
| 1   | 162695295 | 162695362 | 1        | -0.136502  | 5    | 0.0041   | 0.025    | 0.76643   | 0.90293   | 0.020486121 | Intragenic | NM_022282       | Dlg2         |
| 1   | 163320060 | 163320254 | 1        | -0.071888  | 6    | 0.0057   | 0.018    | 0.036008  | 0.1079    | 0.026163814 | Intragenic | NM_022282       | Dlg2         |
| 1   | 169351237 | 169351277 | 1        | -0.089042  | 5    | 0.0053   | 0.0053   | 0.096747  | 0.18579   | 0.024662043 | Intragenic | NM_001106211    | B3gnt6       |
| 1   | 170628081 | 170628186 | 1        | -0.075841  | 7    | 0.0096   | 0.019    | 0.09177   | 0.16761   | 0.037112624 | Intergenic | NA              | NA           |
| 1   | 172724774 | 172724927 | 1        | -0.110393  | 5    | 0.0074   | 0.0054   | 0.1158    | 0.2262    | 0.030871679 | TSS        | NM_001143847    | Pde2a        |

| chr | start     | stop      | q-value | methy.diff | CpGs | pMWU     | p2DKS    | MCWLS     | MCWHS     | pMWU.fdr    | cgi.type   | transcript                | gene          |
|-----|-----------|-----------|---------|------------|------|----------|----------|-----------|-----------|-------------|------------|---------------------------|---------------|
| 1   | 172770158 | 172770211 | 1       | -0.133189  | 5    | 0.0029   | 0.0055   | 0.17231   | 0.3055    | 0.016164653 | Intragenic | NM_001143847:NM_001143847 | Pde2a:Pde2a:P |
| 1   | 175549874 | 175550016 | 1       | -0.176363  | 7    | 0.0012   | 0.003    | 0.20636   | 0.38272   | 0.008573088 | TSS        | NM_001170461              | Trim6         |
| 1   | 178423820 | 178423927 | 1       | -0.092633  | 19   | 2.70E-07 | 7.00E-05 | 0.073473  | 0.16611   | 1.34E-05    | Intergenic | NA                        | NA            |
| 1   | 179081519 | 179081646 | 1       | -0.114232  | 7    | 0.00013  | 0.0052   | 0.79796   | 0.91219   | 0.001648454 | Intergenic | NA                        | NA            |
| 1   | 180561762 | 180561845 | 1       | 0.090215   | 5    | 0.015    | 0.024    | 0.83322   | 0.743     | 0.049419643 | Intergenic | NA                        | NA            |
| 1   | 180823004 | 180823165 | 1       | -0.055125  | 9    | 0.0014   | 0.0041   | 0.042424  | 0.097549  | 0.00960223  | Intergenic | NA                        | NA            |
| 1   | 181040304 | 181040363 | 1       | -0.077615  | 5    | 3.90E-05 | 0.00027  | 0.017129  | 0.094744  | 0.000661655 | Intergenic | NA                        | NA            |
| 1   | 182856914 | 182857081 | 1       | -0.100034  | 5    | 0.0027   | 0.015    | 0.068729  | 0.16876   | 0.015434547 | Intergenic | NA                        | NA            |
| 1   | 184998337 | 184998527 | 1       | -0.118689  | 5    | 0.0049   | 0.0093   | 0.066229  | 0.18492   | 0.023345384 | Intergenic | NA                        | NA            |
| 1   | 192518589 | 192518665 | 1       | -0.094902  | 5    | 0.012    | 0.0092   | 0.097674  | 0.19258   | 0.042700096 | Intergenic | NA                        | NA            |
| 1   | 192601030 | 192601179 | 1       | -0.184363  | 6    | 0.00084  | 0.0044   | 0.1426    | 0.32697   | 0.006539241 | Intergenic | NA                        | NA            |
| 1   | 196600057 | 196600143 | 0.8     | -0.103375  | 11   | 3.00E-10 | 2.80E-06 | 0.073048  | 0.17642   | 4.34E-08    | TSS        | NM_001276487:NM_001276487 | Lyrm1:Dcun1d3 |
| 1   | 204451210 | 204451267 | 1       | -0.296616  | 5    | 1.70E-06 | 7.50E-06 | 0.23954   | 0.53615   | 5.73E-05    | Intergenic | NA                        | NA            |
| 1   | 204661257 | 204661490 | 1       | -0.094742  | 18   | 0.00019  | 0.0021   | 0.23808   | 0.33282   | 0.002222187 | Intergenic | NA                        | NA            |
| 1   | 204877038 | 204877280 | 0.7     | -0.080312  | 15   | 1.80E-09 | 2.50E-06 | 0.033273  | 0.11359   | 2.08E-07    | Intergenic | NA                        | NA            |
| 1   | 205268056 | 205268149 | 1       | -0.286561  | 5    | 7.00E-05 | 0.00014  | 0.40174   | 0.6883    | 0.001035271 | Intragenic | NM_022937:NM_022937       | Doc2a:Ino80e  |
| 1   | 205429580 | 205429650 | 1       | -0.13234   | 5    | 0.014    | 0.015    | 0.36256   | 0.4949    | 0.04726441  | TSS        | NM_022715:NM_022715       | Mvp:Pagr1     |
| 1   | 205894083 | 205894258 | 1       | -0.147078  | 5    | 0.0058   | 0.0031   | 0.1587    | 0.30578   | 0.026163814 | Intragenic | NM_173330                 | Zfp689        |
| 1   | 206396406 | 206396451 | 0.013   | -0.119671  | 5    | 6.50E-07 | 4.50E-08 | 0.0019489 | 0.12162   | 2.73E-05    | Intragenic | NM_138836                 | Prss8         |
| 1   | 208264435 | 208264703 | 1       | -0.081695  | 5    | 0.0063   | 0.015    | 0.05439   | 0.13609   | 0.027757612 | Intragenic | NM_001004415:NM_001004415 | Tacc2:Tacc2   |
| 1   | 208559488 | 208559674 | 1       | -0.117355  | 5    | 0.0049   | 0.0055   | 0.067703  | 0.18506   | 0.023345384 | Intragenic | NM_031721                 | Htra1         |
| 1   | 209703724 | 209703918 | 1       | -0.084731  | 5    | 0.0063   | 0.015    | 0.10618   | 0.19091   | 0.027757612 | Intergenic | NA                        | NA            |
| 1   | 210598569 | 210598728 | 1       | -0.08932   | 5    | 0.015    | 0.039    | 0.060607  | 0.14993   | 0.049419643 | Intergenic | NA                        | NA            |
| 1   | 210975273 | 210975351 | 1       | 0.055822   | 7    | 0.00099  | 0.0014   | 0.099104  | 0.043282  | 0.007357704 | TSS        | NM_138841                 | Gpr26         |
| 1   | 210975440 | 210975489 | 1       | -0.05502   | 5    | 0.0058   | 0.038    | 0.055492  | 0.11051   | 0.026163814 | TSS        | NM_138841                 | Gpr26         |
| 1   | 215593911 | 215594014 | 1       | -0.070513  | 5    | 0.012    | 0.0018   | 0.076006  | 0.14652   | 0.042700096 | Intergenic | NA                        | NA            |
| 1   | 220655872 | 220655964 | 1       | -0.066235  | 7    | 0.00026  | 0.0022   | 0.0584    | 0.12463   | 0.002784906 | Intergenic | NA                        | NA            |
| 1   | 220807705 | 220807968 | 1       | -0.08705   | 9    | 2.30E-07 | 4.80E-06 | 0.016336  | 0.10339   | 1.18E-05    | TSS        | NM_001106315              | Pkp3          |
| 1   | 220924574 | 220924659 | 1       | -0.08379   | 5    | 0.00065  | 0.0032   | 0.10597   | 0.18976   | 0.005335929 | Intragenic | NM_001127541              | Cracr2b       |
| 1   | 220925077 | 220925206 | 1       | -0.107596  | 8    | 3.90E-06 | 0.00025  | 0.20826   | 0.31585   | 0.000108203 | TSS        | NM_022523                 | Cd151         |
| 1   | 221245364 | 221245467 | 1       | -0.116778  | 5    | 1.30E-05 | 0.00014  | 0.057339  | 0.17412   | 0.000273333 | Intergenic | NA                        | NA            |
| 1   | 221361363 | 221361448 | 1       | -0.082286  | 5    | 0.00097  | 0.0032   | 0.10747   | 0.18976   | 0.007223613 | Intragenic | NM_001127541              | Cracr2b       |
| 1   | 221361902 | 221361995 | 1       | -0.121509  | 5    | 5.60E-05 | 0.00014  | 0.19486   | 0.31637   | 0.000873742 | TSS        | NM_022523                 | Cd151         |
| 1   | 221944254 | 221944394 | 1       | -0.05472   | 14   | 0.0014   | 0.037    | 0.090529  | 0.14525   | 0.00960223  | Intragenic | NM_001108510              | Dusp8         |
| 1   | 222193964 | 222194057 | 1       | -0.081036  | 7    | 4.80E-06 | 9.10E-05 | 0.011575  | 0.092612  | 0.000126064 | TSS        | NM_021868                 | Cttn          |
| 1   | 222535075 | 222535103 | 1       | -0.118541  | 5    | 0.0053   | 0.0054   | 0.24079   | 0.35933   | 0.024662043 | Intragenic | NM_001025420              | Lsp1          |
| 1   | 222735960 | 222736001 | 1       | 0.115619   | 5    | 0.0035   | 0.0055   | 0.12147   | 0.0058459 | 0.018410549 | Intergenic | NA                        | NA            |
| 1   | 223360305 | 223360519 | 1       | -0.14615   | 11   | 6.90E-06 | 4.10E-06 | 0.31372   | 0.45987   | 0.000166957 | Intragenic | NM_032073                 | Kcnq1         |
| 1   | 224494359 | 224494452 | 1       | -0.084162  | 7    | 1.70E-06 | 5.10E-05 | 0.0084491 | 0.092612  | 5.73E-05    | TSS        | NM_021868                 | Cttn          |



| chr | start     | stop      | q-value | methy.diff | CpGs | pMWU     | p2DKS    | MCWLS    | MCWHS    | pMWU.fdr    | cgi.type   | transcript      | gene        |
|-----|-----------|-----------|---------|------------|------|----------|----------|----------|----------|-------------|------------|-----------------|-------------|
| 1   | 224702418 | 224702619 | 1       | -0.057024  | 11   | 0.0019   | 0.076    | 0.10066  | 0.15769  | 0.011943782 | Intragenic | NM_001107564    | Ano1        |
| 1   | 226719747 | 226719780 | 1       | 0.103076   | 7    | 0.011    | 0.055    | 0.55769  | 0.45461  | 0.040408163 | TSS        | NM_001109508    | Lrfn4       |
| 1   | 227293376 | 227293607 | 1       | -0.064794  | 13   | 0.0017   | 0.0035   | 0.11511  | 0.1799   | 0.011044014 | TSS        | NM_001106325    | Cd248       |
| 1   | 227377857 | 227378088 | 1       | -0.060794  | 13   | 0.0074   | 0.044    | 0.11964  | 0.18044  | 0.030871679 | TSS        | NM_001106325    | Cd248       |
| 1   | 227812253 | 227812391 | 1       | -0.101449  | 7    | 0.00054  | 0.0083   | 0.13469  | 0.23614  | 0.004710638 | Intergenic | NA              | NA          |
| 1   | 227862052 | 227862126 | 0.43    | -0.095579  | 5    | 6.50E-07 | 1.50E-06 | 0.010697 | 0.10628  | 2.73E-05    | Intragenic | NM_001107572    | Ovo1        |
| 1   | 227944748 | 227944818 | 1       | -0.059448  | 5    | 0.0027   | 0.0055   | 0.030618 | 0.090066 | 0.015434547 | Intragenic | NM_001004089    | Sipa1       |
| 1   | 228541451 | 228541520 | 1       | -0.119601  | 5    | 9.20E-06 | 7.60E-06 | 0.018657 | 0.13826  | 0.000206371 | TSS        | NM_181379       | Ppp2r5b     |
| 1   | 228587745 | 228587814 | 1       | -0.119601  | 5    | 9.20E-06 | 7.60E-06 | 0.018657 | 0.13826  | 0.000206371 | TSS        | NM_181379       | Ppp2r5b     |
| 1   | 228697916 | 228698248 | 1       | -0.080697  | 9    | 0.0099   | 0.0031   | 0.19504  | 0.27573  | 0.037614679 | TSS        | NM_001106329    | Map4k2      |
| 1   | 229103855 | 229103938 | 1       | -0.175811  | 5    | 0.012    | 0.087    | 0.51629  | 0.6921   | 0.042700096 | Intergenic | NA              | NA          |
| 1   | 229354342 | 229354489 | 1       | -0.123082  | 5    | 0.00054  | 0.0032   | 0.051563 | 0.17464  | 0.004710638 | Intragenic | NM_139337       | Macrodl     |
| 1   | 229365160 | 229365235 | 1       | -0.124569  | 7    | 0.00024  | 4.70E-06 | 0.043791 | 0.16836  | 0.002620118 | Intragenic | NM_139337       | Macrodl     |
| 1   | 229376906 | 229377097 | 1       | -0.061618  | 5    | 0.0011   | 0.0018   | 0.029242 | 0.09086  | 0.007982301 | Intragenic | NM_139337       | Macrodl     |
| 1   | 229440360 | 229440396 | 1       | -0.193572  | 5    | 3.70E-06 | 3.30E-05 | 0.10641  | 0.29998  | 0.000103825 | Intragenic | NM_139337       | Macrodl     |
| 1   | 229509267 | 229509305 | 1       | -0.081524  | 5    | 0.0013   | 0.015    | 0.10289  | 0.18441  | 0.009111111 | Intergenic | NA              | NA          |
| 1   | 229660000 | 229660204 | 1       | -0.141379  | 18   | 0.0024   | 0.01     | 0.40767  | 0.54905  | 0.014124402 | TSS        | NM_001109161    | RGD1560108  |
| 1   | 229660825 | 229660900 | 1       | -0.231369  | 8    | 4.50E-07 | 9.80E-06 | 0.59888  | 0.83025  | 1.98E-05    | TSS        | NM_001109161    | RGD1560108  |
| 1   | 229660994 | 229661059 | 1       | -0.169044  | 5    | 0.0063   | 0.037    | 0.2894   | 0.45844  | 0.027757612 | TSS        | NM_001109161    | RGD1560108  |
| 1   | 229661462 | 229661535 | 0.17    | -0.133572  | 14   | 3.30E-08 | 6.00E-07 | 0.11338  | 0.24696  | 2.68E-06    | TSS        | NM_001109161    | RGD1560108  |
| 1   | 229661536 | 229661569 | 1       | -0.138029  | 5    | 5.60E-05 | 0.0018   | 0.1206   | 0.25863  | 0.000873742 | TSS        | NM_001109161    | RGD1560108  |
| 1   | 229661684 | 229661933 | 1       | -0.1155    | 24   | 5.50E-06 | 0.00066  | 0.17694  | 0.30425  | 0.000141923 | TSS        | NM_001109161    | RGD1560108  |
| 1   | 229662037 | 229662078 | 1       | -0.137036  | 5    | 0.0035   | 0.0092   | 0.16771  | 0.30475  | 0.018410549 | Intragenic | NM_001109161    | RGD1560108  |
| 1   | 229662081 | 229662121 | 1       | -0.104152  | 5    | 0.011    | 0.058    | 0.1243   | 0.22845  | 0.040408163 | Intragenic | NM_001109161    | RGD1560108  |
| 1   | 229964220 | 229964350 | 1       | 0.103949   | 5    | 0.014    | 0.058    | 0.78416  | 0.68021  | 0.04726441  | Intragenic | NM_173302       | Slc22a24    |
| 1   | 231399998 | 231400305 | 1       | -0.055304  | 16   | 3.90E-07 | 9.40E-05 | 0.057709 | 0.11301  | 1.81E-05    | Intragenic | NM_134380       | Ust5r       |
| 1   | 231762983 | 231763590 | 1       | -0.123695  | 9    | 0.00011  | 0.0017   | 0.096251 | 0.21995  | 0.001431746 | TSS        | NM_017224       | Slc22a6     |
| 1   | 234164778 | 234164944 | 1       | -0.089913  | 8    | 0.0042   | 0.094    | 0.60744  | 0.69735  | 0.020943243 | Intergenic | NA              | NA          |
| 1   | 235447215 | 235447270 | 1       | -0.228634  | 7    | 3.20E-05 | 0.0054   | 0.37746  | 0.60609  | 0.000564976 | Intergenic | NA              | NA          |
| 1   | 237004923 | 237005126 | 1       | -0.119239  | 11   | 6.30E-06 | 0.00062  | 0.17898  | 0.29822  | 0.000156545 | Intergenic | NA              | NA          |
| 1   | 240284163 | 240284210 | 1       | -0.115059  | 5    | 0.0058   | 0.024    | 0.16226  | 0.27732  | 0.026163814 | Intergenic | NA              | NA          |
| 1   | 240297373 | 240297420 | 1       | -0.117512  | 5    | 0.0045   | 0.024    | 0.15981  | 0.27732  | 0.021964286 | Intergenic | NA              | NA          |
| 1   | 241849384 | 241849401 | 0.032   | -0.158421  | 5    | 2.10E-07 | 1.10E-07 | 0.11945  | 0.27787  | 1.11E-05    | TSS        | NM_001024292:NM | Nmrk1:Ostf1 |
| 1   | 244197592 | 244197739 | 1       | -0.160844  | 5    | 0.0008   | 0.0092   | 0.14194  | 0.30278  | 0.006267516 | Intergenic | NA              | NA          |
| 1   | 247973974 | 247974023 | 0.92    | -0.094792  | 5    | 3.30E-06 | 3.30E-06 | 0.027851 | 0.12264  | 9.48E-05    | Intragenic | NM_001191562    | Trpm3       |
| 1   | 248216719 | 248216909 | 1       | -0.089541  | 7    | 0.0062   | 0.0079   | 0.15082  | 0.24036  | 0.027757612 | Intragenic | NM_057211       | Klf9        |
| 1   | 252048616 | 252048658 | 1       | 0.052054   | 5    | 0.00023  | 0.00053  | 0.99825  | 0.94619  | 0.002525893 | Intergenic | NA              | NA          |
| 1   | 259018037 | 259018181 | 1       | -0.072595  | 7    | 0.00093  | 0.0013   | 0.079734 | 0.15233  | 0.007046612 | Intergenic | NA              | NA          |
| 1   | 259772765 | 259772840 | 1       | -0.171257  | 5    | 0.00015  | 0.0054   | 0.14043  | 0.31169  | 0.001835821 | TSS        | NM_031004       | Acta2       |

| chr | start     | stop      | q-value | methy.diff | CpGs | pMWU     | p2DKS    | MCWLS     | MCWHS    | pMWU.fdr    | cgi.type   | transcript   | gene     |
|-----|-----------|-----------|---------|------------|------|----------|----------|-----------|----------|-------------|------------|--------------|----------|
| 1   | 260158264 | 260158311 | 1       | -0.11512   | 5    | 0.0074   | 0.038    | 0.66983   | 0.78495  | 0.030871679 | Intergenic | NA           | NA       |
| 1   | 261676059 | 261676109 | 1       | 0.102451   | 5    | 0.011    | 0.038    | 0.83132   | 0.72887  | 0.040408163 | Intergenic | NA           | NA       |
| 1   | 262730193 | 262730313 | 1       | 0.17249    | 5    | 0.00039  | 0.0017   | 0.90237   | 0.72988  | 0.003723415 | Intergenic | NA           | NA       |
| 1   | 264303029 | 264303119 | 1       | -0.171701  | 5    | 0.0027   | 0.024    | 0.64131   | 0.81301  | 0.015434547 | TSS        | NM_001108522 | Pde6c    |
| 1   | 266474985 | 266475748 | 1       | -0.102675  | 15   | 2.40E-06 | 3.30E-05 | 0.12211   | 0.22478  | 7.47E-05    | Intergenic | NA           | NA       |
| 1   | 266936600 | 266936689 | 1       | -0.085399  | 5    | 0.00054  | 0.00053  | 0.019608  | 0.10501  | 0.004710638 | Intergenic | NA           | NA       |
| 1   | 267053083 | 267053846 | 1       | -0.095955  | 15   | 8.30E-06 | 0.00015  | 0.12707   | 0.22303  | 0.000194457 | Intergenic | NA           | NA       |
| 1   | 268146586 | 268147095 | 1       | -0.059369  | 11   | 0.0002   | 0.0056   | 0.060079  | 0.11945  | 0.002324409 | Intergenic | NA           | NA       |
| 1   | 269038651 | 269038798 | 1       | -0.129661  | 7    | 0.0065   | 0.012    | 0.24717   | 0.37684  | 0.028502674 | Intragenic | NM_134401    | Crtac1   |
| 1   | 269116628 | 269116687 | 1       | -0.056013  | 5    | 0.008    | 0.038    | 0.057431  | 0.11344  | 0.03243956  | Intragenic | NM_134401    | Crtac1   |
| 1   | 269427715 | 269427858 | 0.67    | -0.253224  | 7    | 2.60E-06 | 2.40E-06 | 0.13424   | 0.38746  | 7.93E-05    | Intragenic | NM_001004261 | Pyroxd2  |
| 1   | 269441758 | 269441922 | 1       | -0.064616  | 6    | 0.00078  | 0.018    | 0.045482  | 0.1101   | 0.006209709 | Intragenic | NM_040669    | Hps1     |
| 1   | 270497305 | 270497376 | 1       | -0.181911  | 5    | 0.00048  | 0.0018   | 0.13948   | 0.32139  | 0.004351843 | Intragenic | NM_001135762 | Hpse2    |
| 1   | 270498112 | 270498183 | 1       | -0.181911  | 5    | 0.00048  | 0.0018   | 0.13948   | 0.32139  | 0.004351843 | Intragenic | NM_001135762 | Hpse2    |
| 1   | 270694462 | 270694617 | 1       | -0.185229  | 7    | 9.60E-05 | 0.00045  | 0.20054   | 0.38576  | 0.001307848 | Intragenic | NM_012571    | Got1     |
| 1   | 270733967 | 270733999 | 1       | -0.149607  | 5    | 0.0017   | 0.0055   | 0.20547   | 0.35508  | 0.011044014 | Intergenic | NA           | NA       |
| 1   | 271041708 | 271041833 | 1       | 0.098231   | 9    | 0.002    | 0.0039   | 0.84401   | 0.74578  | 0.012269327 | Intragenic | NM_012833    | Abcc2    |
| 1   | 271111349 | 271111449 | 1       | -0.113095  | 5    | 0.00072  | 0.00014  | 0.032197  | 0.14529  | 0.005769381 | Intergenic | NA           | NA       |
| 1   | 271828602 | 271828711 | 1       | -0.059814  | 5    | 1.20E-05 | 3.50E-05 | 0.032866  | 0.09268  | 0.000257442 | Intergenic | NA           | NA       |
| 1   | 272025140 | 272025186 | 1       | 0.185908   | 8    | 1.00E-05 | 0.00035  | 0.46657   | 0.28066  | 0.000218343 | Intragenic | NM_001106361 | Pax2     |
| 1   | 272026093 | 272026162 | 1       | -0.091869  | 5    | 0.0038   | 0.088    | 0.094895  | 0.18676  | 0.019583799 | Intergenic | NA           | NA       |
| 1   | 272261987 | 272262212 | 1       | -0.105776  | 13   | 0.00076  | 0.02     | 0.1889    | 0.29468  | 0.006057019 | Intergenic | NA           | NA       |
| 1   | 273900478 | 273900536 | 1       | -0.098757  | 5    | 0.0094   | 0.088    | 0.75877   | 0.85753  | 0.036473186 | Intergenic | NA           | NA       |
| 1   | 273962720 | 273962788 | 1       | -0.12378   | 5    | 0.0019   | 0.0054   | 0.11062   | 0.2344   | 0.011943782 | TSS        | NM_001011942 | Cnm2     |
| 1   | 274523813 | 274523878 | 1       | -0.085128  | 9    | 2.00E-07 | 0.00046  | 0.044567  | 0.1297   | 1.09E-05    | Intragenic | NM_001107606 | Sh3pxd2a |
| 1   | 278389319 | 278389374 | 1       | 0.061259   | 5    | 0.014    | 0.0032   | 0.82007   | 0.75881  | 0.04726441  | Intergenic | NA           | NA       |
| 1   | 281495067 | 281495125 | 1       | -0.112267  | 5    | 0.0013   | 0.038    | 0.060902  | 0.17317  | 0.009111111 | Intragenic | NM_013160    | Mxi1     |
| 1   | 281772959 | 281773091 | 1       | -0.183783  | 5    | 0.00021  | 0.0018   | 0.074905  | 0.25869  | 0.002348182 | Intergenic | NA           | NA       |
| 1   | 281840375 | 281840605 | 1       | -0.093019  | 6    | 0.0065   | 0.018    | 0.13964   | 0.23266  | 0.028502674 | Intragenic | NM_001107611 | Rbm20    |
| 1   | 281979038 | 281979108 | 1       | -0.296381  | 5    | 0.00072  | 0.0018   | 0.27868   | 0.57506  | 0.005769381 | Intragenic | NM_001107611 | Rbm20    |
| 1   | 281985645 | 281985868 | 1       | -0.121902  | 5    | 3.30E-06 | 1.60E-05 | 0.013591  | 0.13549  | 9.48E-05    | Intragenic | NM_001107611 | Rbm20    |
| 1   | 282052510 | 282052681 | 1       | -0.098977  | 6    | 0.0016   | 0.017    | 0.63797   | 0.73694  | 0.010628263 | Intragenic | NM_022265    | Pdcd4    |
| 1   | 283408786 | 283408845 | 0.077   | -0.239223  | 5    | 8.50E-07 | 2.70E-07 | 0.13718   | 0.3764   | 3.35E-05    | Intergenic | NA           | NA       |
| 1   | 283409486 | 283409516 | 1       | -0.065315  | 5    | 1.30E-05 | 3.40E-05 | 0.011275  | 0.076589 | 0.000273333 | Intergenic | NA           | NA       |
| 1   | 283972419 | 283972463 | 1       | -0.125625  | 5    | 0.0027   | 0.00098  | 0.12108   | 0.2467   | 0.015434547 | Intergenic | NA           | NA       |
| 1   | 285206367 | 285206462 | 1       | -0.051213  | 5    | 0.0032   | 0.0093   | 0.073762  | 0.12498  | 0.017454545 | TSS        | NM_001305184 | Afap112  |
| 1   | 289602836 | 289602927 | 1       | -0.06831   | 5    | 0.00044  | 0.0018   | 0.011897  | 0.080207 | 0.0041      | TSS        | NM_030829    | Grk5     |
| 10  | 1866716   | 1866882   | 1       | -0.089177  | 8    | 0.0039   | 0.16     | 0.60826   | 0.69744  | 0.0199875   | Intergenic | NA           | NA       |
| 10  | 4451917   | 4451981   | 1       | -0.072989  | 5    | 2.20E-06 | 7.00E-05 | 0.0053038 | 0.078293 | 6.91E-05    | Intergenic | NA           | NA       |

| chr | start    | stop     | q-value | methy.diff | CpGs | pMWU     | p2DKS    | MCWLS     | MCWHS    | pMWU.fdr    | cgi.type   | transcript      | gene       |
|-----|----------|----------|---------|------------|------|----------|----------|-----------|----------|-------------|------------|-----------------|------------|
| 10  | 4527429  | 4527491  | 1       | -0.096528  | 5    | 0.0087   | 0.038    | 0.23657   | 0.3331   | 0.034705946 | Intragenic | NM_012573       | Grin2a     |
| 10  | 4844133  | 4844319  | 1       | -0.101958  | 8    | 0.0059   | 0.051    | 0.14775   | 0.24971  | 0.02655     | Intragenic | NM_012573       | Grin2a     |
| 10  | 5499591  | 5499677  | 1       | -0.173546  | 5    | 0.0019   | 0.0055   | 0.27444   | 0.44799  | 0.011943782 | Intergenic | NA              | NA         |
| 10  | 6715286  | 6715414  | 1       | -0.172285  | 5    | 7.80E-05 | 3.30E-05 | 0.23371   | 0.40599  | 0.001113424 | Intergenic | NA              | NA         |
| 10  | 9002882  | 9002992  | 1       | 0.080276   | 7    | 0.015    | 0.078    | 0.87978   | 0.7995   | 0.049419643 | Intergenic | NA              | NA         |
| 10  | 9887170  | 9887200  | 0.0019  | -0.220446  | 5    | 6.30E-08 | 6.80E-09 | 0.073521  | 0.29397  | 4.39E-06    | Intragenic | NM_001191639:NM | Coro7:Vasn |
| 10  | 9887533  | 9887594  | 1       | -0.09953   | 5    | 0.0058   | 0.015    | 0.069676  | 0.16921  | 0.026163814 | Intragenic | NM_001191639:NM | Coro7:Vasn |
| 10  | 9896759  | 9896833  | 1       | -0.071537  | 7    | 0.0037   | 0.0051   | 0.1106    | 0.18213  | 0.019379702 | TSS        | NM_001109382    | Vasn       |
| 10  | 10199217 | 10199317 | 1       | -0.182933  | 5    | 0.011    | 0.039    | 0.3853    | 0.56823  | 0.040408163 | Intergenic | NA              | NA         |
| 10  | 12730454 | 12730562 | 1       | -0.306061  | 8    | 0.00027  | 0.00025  | 0.3494    | 0.65546  | 0.002883647 | Intragenic | NM_001105765    | Zfp13      |
| 10  | 12981356 | 12981481 | 0.29    | -0.118575  | 9    | 2.10E-06 | 1.00E-06 | 0.027729  | 0.1463   | 6.80E-05    | Intragenic | NM_001277154    | Srrm2      |
| 10  | 13878340 | 13878402 | 0.43    | -0.067587  | 6    | 1.80E-07 | 1.50E-06 | 0.012242  | 0.079829 | 9.99E-06    | TSS        | NM_013222:NM_0  | Gfer:Noxo1 |
| 10  | 14048388 | 14048419 | 1       | -0.159533  | 5    | 0.00059  | 0.0018   | 0.078939  | 0.23847  | 0.005010587 | Intergenic | NA              | NA         |
| 10  | 14422181 | 14422246 | 1       | -0.112369  | 5    | 0.014    | 0.015    | 0.68146   | 0.79383  | 0.04726441  | TSS        | NR_037321       | Mir3547    |
| 10  | 15461902 | 15461978 | 1       | 0.050987   | 9    | 0.0066   | 0.032    | 0.92776   | 0.87678  | 0.02892399  | Intragenic | NM_001024269    | Luc7l      |
| 10  | 15469831 | 15469938 | 0.083   | -0.225922  | 7    | 3.00E-08 | 2.90E-07 | 0.14334   | 0.36926  | 2.49E-06    | Intergenic | NA              | NA         |
| 10  | 15481316 | 15481423 | 0.66    | -0.212367  | 7    | 2.20E-07 | 2.40E-06 | 0.1273    | 0.33967  | 1.14E-05    | Intergenic | NA              | NA         |
| 10  | 15495273 | 15495351 | 1       | -0.10922   | 5    | 0.0045   | 0.00014  | 0.13602   | 0.24524  | 0.021964286 | Intergenic | NA              | NA         |
| 10  | 17555433 | 17555477 | 1       | 0.301023   | 5    | 0.00097  | 0.024    | 0.41386   | 0.11284  | 0.007223613 | Intergenic | NA              | NA         |
| 10  | 17873771 | 17873886 | 1       | -0.057211  | 7    | 1.20E-05 | 9.70E-05 | 0.010698  | 0.067909 | 0.000257442 | Intergenic | NA              | NA         |
| 10  | 20163833 | 20163940 | 1       | 0.083804   | 5    | 0.0038   | 0.059    | 0.89584   | 0.81203  | 0.019583799 | Intragenic | NM_031321       | Slit3      |
| 10  | 20622876 | 20623142 | 1       | -0.088654  | 7    | 9.60E-05 | 0.0052   | 0.062397  | 0.15105  | 0.001307848 | Intergenic | NA              | NA         |
| 10  | 20679186 | 20679327 | 0.0035  | -0.213056  | 8    | 8.50E-10 | 1.20E-08 | 0.077157  | 0.29021  | 1.05E-07    | Intergenic | NA              | NA         |
| 10  | 20773870 | 20774032 | 1       | -0.1498    | 7    | 0.0083   | 0.075    | 0.24482   | 0.39462  | 0.033563836 | Intragenic | NM_020088       | Tenm2      |
| 10  | 20872927 | 20873014 | 1       | 0.083035   | 5    | 0.011    | 0.058    | 0.95604   | 0.873    | 0.040408163 | Intragenic | NM_020088       | Tenm2      |
| 10  | 21977594 | 21977681 | 1       | 0.08312    | 5    | 0.011    | 0.058    | 0.95604   | 0.87292  | 0.040408163 | Intergenic | NA              | NA         |
| 10  | 23889073 | 23889123 | 1       | -0.127764  | 5    | 0.0053   | 0.088    | 0.23411   | 0.36188  | 0.024662043 | Intragenic | NM_053820       | Ebf1       |
| 10  | 29234962 | 29235084 | 1       | -0.161715  | 7    | 0.00016  | 0.0021   | 0.046652  | 0.20837  | 0.001938916 | Intragenic | NM_016991       | Adra1b     |
| 10  | 30983965 | 30984039 | 1       | -0.2167    | 6    | 8.20E-05 | 4.00E-05 | 0.36533   | 0.58203  | 0.001163769 | Intragenic | NM_001160228    | Adam19     |
| 10  | 31693047 | 31693097 | 0.0086  | -0.119961  | 10   | 1.50E-08 | 3.10E-08 | 0.0015877 | 0.12155  | 1.35E-06    | Intergenic | NA              | NA         |
| 10  | 39222345 | 39222609 | 1       | -0.089519  | 5    | 0.0029   | 0.0032   | 0.083476  | 0.17299  | 0.016164653 | Intragenic | NM_001108275    | P4ha2      |
| 10  | 42944701 | 42944903 | 1       | -0.127915  | 6    | 0.0032   | 0.0043   | 0.053517  | 0.18143  | 0.017454545 | Intragenic | NM_130742       | Galnt10    |
| 10  | 43194258 | 43194486 | 1       | -0.078442  | 6    | 0.013    | 0.04     | 0.08747   | 0.16591  | 0.04506341  | Intergenic | NA              | NA         |
| 10  | 45013156 | 45013190 | 1       | -0.054196  | 5    | 0.0045   | 0.0091   | 0.026693  | 0.080889 | 0.021964286 | Intergenic | NA              | NA         |
| 10  | 45284348 | 45284479 | 1       | -0.052364  | 12   | 9.10E-05 | 0.0047   | 0.057571  | 0.10993  | 0.00126     | Intragenic | NM_001100784    | Gjc2       |
| 10  | 47193165 | 47193214 | 1       | -0.065577  | 5    | 0.0058   | 0.0093   | 0.87538   | 0.94095  | 0.026163814 | Intragenic | NM_001305991    | Tnfrsf13b  |
| 10  | 48653958 | 48654056 | 1       | -0.123682  | 5    | 0.0014   | 0.025    | 0.25121   | 0.37489  | 0.00960223  | Intergenic | NA              | NA         |
| 10  | 50138848 | 50138916 | 1       | -0.058329  | 7    | 0.0039   | 0.0053   | 0.15991   | 0.21824  | 0.0199875   | Intragenic | NM_001191646    | Hs3st3b1   |
| 10  | 50167207 | 50167298 | 1       | -0.108791  | 5    | 0.0068   | 0.00027  | 0.12441   | 0.2332   | 0.029075319 | Intragenic | NM_001191646    | Hs3st3b1   |

| chr | start    | stop     | q-value | methy.diff | CpGs | pMWU     | p2DKS    | MCWLS    | MCWHS    | pMWU.fdr    | cgi.type   | transcript   | gene    |
|-----|----------|----------|---------|------------|------|----------|----------|----------|----------|-------------|------------|--------------|---------|
| 10  | 53470082 | 53470228 | 1       | 0.072762   | 9    | 0.013    | 0.061    | 0.85858  | 0.78582  | 0.04506341  | Intragenic | NM_001135157 | Myh2    |
| 10  | 54277906 | 54278148 | 1       | -0.140268  | 7    | 0.011    | 0.077    | 0.26194  | 0.40221  | 0.040408163 | Intragenic | NM_031656    | Stx8    |
| 10  | 55440774 | 55440862 | 1       | -0.0654    | 9    | 0.0005   | 0.0037   | 0.057108 | 0.12251  | 0.004511002 | Intergenic | NA           | NA      |
| 10  | 55593302 | 55593901 | 1       | -0.070152  | 22   | 0.013    | 0.028    | 0.31862  | 0.38877  | 0.04506341  | TSS        | NM_024380    | Gucy2e  |
| 10  | 55750155 | 55750199 | 1       | -0.273665  | 5    | 0.0094   | 0.088    | 0.39372  | 0.66738  | 0.036473186 | TSS        | NM_001108829 | Kdm6b   |
| 10  | 55941728 | 55941798 | 1       | 0.068807   | 5    | 0.002    | 0.025    | 0.9508   | 0.88199  | 0.012269327 | Intragenic | NM_030989    | Tp53    |
| 10  | 56381079 | 56381189 | 1       | -0.083547  | 7    | 0.0029   | 0.025    | 0.085678 | 0.16923  | 0.016164653 | Intragenic | NM_019621    | Dlg4    |
| 10  | 59269742 | 59269810 | 1       | -0.095441  | 5    | 0.0035   | 0.038    | 0.059199 | 0.15464  | 0.018410549 | TSS        | NM_012914    | Atp2a3  |
| 10  | 61723037 | 61723101 | 1       | -0.05829   | 7    | 0.00043  | 0.0034   | 0.047804 | 0.10609  | 0.004073684 | Intragenic | NM_001107021 | Hic1    |
| 10  | 61978688 | 61978771 | 1       | -0.147239  | 5    | 0.008    | 0.009    | 0.16965  | 0.31688  | 0.03243956  | Intergenic | NA           | NA      |
| 10  | 62388173 | 62388328 | 0.0004  | -0.34276   | 15   | 4.50E-14 | 1.40E-09 | 0.23286  | 0.57562  | 3.20E-11    | Intergenic | NA           | NA      |
| 10  | 63428500 | 63428648 | 1       | -0.080679  | 5    | 0.00032  | 0.0032   | 0.06886  | 0.14954  | 0.003243956 | Intragenic | NM_001105814 | Abr     |
| 10  | 63428726 | 63428795 | 1       | -0.098623  | 5    | 0.0045   | 0.015    | 0.16185  | 0.26047  | 0.021964286 | Intragenic | NM_001105814 | Abr     |
| 10  | 64200382 | 64200576 | 1       | 0.216222   | 5    | 0.0017   | 0.015    | 0.63239  | 0.41617  | 0.011044014 | TSS        | NM_023092    | Myo1c   |
| 10  | 65974878 | 65975243 | 1       | -0.178279  | 9    | 0.00016  | 0.0011   | 0.0953   | 0.27358  | 0.001938916 | Intragenic | NM_031746    | Slc13a2 |
| 10  | 66207332 | 66207552 | 1       | -0.117555  | 6    | 0.0032   | 0.0072   | 0.11164  | 0.2292   | 0.017454545 | Intragenic | NM_001105804 | Nek8    |
| 10  | 66560005 | 66560555 | 1       | -0.144077  | 13   | 1.70E-06 | 0.00025  | 0.10654  | 0.25062  | 5.73E-05    | Intragenic | NM_001172137 | Myo18a  |
| 10  | 66609583 | 66609731 | 1       | -0.191594  | 5    | 7.80E-05 | 0.0018   | 0.057618 | 0.24921  | 0.001113424 | Intragenic | NM_001172137 | Myo18a  |
| 10  | 67321661 | 67321741 | 1       | -0.154084  | 5    | 0.01     | 0.13     | 0.2529   | 0.40698  | 0.037614679 | Intragenic | NM_001012010 | Rnf135  |
| 10  | 68996537 | 68996626 | 1       | -0.159527  | 5    | 0.00054  | 0.0053   | 0.12079  | 0.28032  | 0.004710638 | Intergenic | NA           | NA      |
| 10  | 70278750 | 70278826 | 1       | -0.089565  | 5    | 0.0063   | 0.059    | 0.11451  | 0.20407  | 0.027757612 | TSS        | NM_001105823 | Gas2l2  |
| 10  | 71106945 | 71107021 | 1       | -0.092848  | 5    | 0.0029   | 0.024    | 0.11122  | 0.20407  | 0.016164653 | TSS        | NM_001105823 | Gas2l2  |
| 10  | 73180792 | 73181108 | 1       | -0.050504  | 5    | 0.0035   | 0.038    | 0.042074 | 0.092578 | 0.018410549 | Intergenic | NA           | NA      |
| 10  | 75029740 | 75029772 | 1       | -0.200516  | 5    | 9.80E-05 | 0.0018   | 0.17514  | 0.37565  | 0.001307848 | Intergenic | NA           | NA      |
| 10  | 75029786 | 75030175 | 1       | -0.130068  | 7    | 3.30E-08 | 4.40E-06 | 0.081278 | 0.21135  | 2.68E-06    | Intergenic | NA           | NA      |
| 10  | 77720017 | 77720068 | 1       | -0.074985  | 5    | 0.0063   | 0.0093   | 0.075568 | 0.15055  | 0.027757612 | Intergenic | NA           | NA      |
| 10  | 81669641 | 81669767 | 1       | -0.13255   | 8    | 0.0033   | 0.018    | 0.13105  | 0.2636   | 0.017946942 | Intergenic | NA           | NA      |
| 10  | 82237760 | 82237936 | 1       | 0.317068   | 7    | 6.10E-06 | 8.80E-05 | 0.79373  | 0.47666  | 0.000154171 | Intergenic | NA           | NA      |
| 10  | 82661614 | 82661767 | 1       | -0.145448  | 5    | 0.00036  | 0.0018   | 0.088794 | 0.23424  | 0.003505013 | Intragenic | NM_030872    | Pdk2    |
| 10  | 83962043 | 83962088 | 1       | -0.069733  | 5    | 0.0041   | 0.0091   | 0.041981 | 0.11171  | 0.020486121 | Intergenic | NA           | NA      |
| 10  | 83984712 | 83984751 | 1       | 0.123149   | 5    | 0.014    | 0.025    | 0.54898  | 0.42583  | 0.04726441  | Intergenic | NA           | NA      |
| 10  | 83984767 | 83984867 | 1       | -0.160193  | 9    | 0.00064  | 0.017    | 0.28762  | 0.44781  | 0.005335929 | Intergenic | NA           | NA      |
| 10  | 83993526 | 83993588 | 0.88    | -0.051422  | 6    | 2.50E-07 | 3.10E-06 | 0.021137 | 0.072559 | 1.26E-05    | TSS        | NM_001107042 | Hoxb3   |
| 10  | 83996157 | 83996283 | 1       | -0.239225  | 5    | 1.90E-06 | 0.00014  | 0.054051 | 0.29328  | 6.26E-05    | TSS        | NM_001107042 | Hoxb3   |
| 10  | 84006238 | 84006360 | 1       | -0.067556  | 6    | 0.0026   | 0.04     | 0.06911  | 0.13667  | 0.015204437 | Intergenic | NA           | NA      |
| 10  | 84018126 | 84018193 | 1       | -0.177953  | 5    | 0.0068   | 0.024    | 0.3054   | 0.48336  | 0.029075319 | Intergenic | NA           | NA      |
| 10  | 84092400 | 84092694 | 1       | -0.06622   | 6    | 0.0074   | 0.12     | 0.06261  | 0.12883  | 0.030871679 | Intergenic | NA           | NA      |
| 10  | 84158822 | 84158949 | 1       | -0.178281  | 5    | 1.70E-05 | 0.00053  | 0.04562  | 0.2239   | 0.000342787 | Intragenic | NM_173311    | Skap1   |
| 10  | 84255488 | 84255541 | 1       | 0.063588   | 5    | 0.00088  | 0.00098  | 0.97919  | 0.9156   | 0.006722981 | Intragenic | NM_173311    | Skap1   |

| chr | start    | stop     | q-value | methy.diff | CpGs | pMWU     | p2DKS    | MCWLS     | MCWHS    | pMWU.fdr    | cgi.type   | transcript     | gene           |
|-----|----------|----------|---------|------------|------|----------|----------|-----------|----------|-------------|------------|----------------|----------------|
| 10  | 84657830 | 84657935 | 0.078   | -0.085195  | 5    | 1.10E-06 | 2.80E-07 | 0.058914  | 0.14411  | 4.02E-05    | Intergenic | NA             | NA             |
| 10  | 84863755 | 84863791 | 1       | -0.060535  | 5    | 0.00036  | 0.0093   | 0.028961  | 0.089496 | 0.003505013 | Intragenic | NM_172021      | Tbkbp1         |
| 10  | 84863897 | 84863955 | 0.042   | -0.09241   | 9    | 9.40E-08 | 1.50E-07 | 0.027846  | 0.12026  | 5.93E-06    | Intragenic | NM_172021      | Tbkbp1         |
| 10  | 85085143 | 85085223 | 1       | -0.089181  | 5    | 0.008    | 0.024    | 0.74025   | 0.82944  | 0.03243956  | Intergenic | NA             | NA             |
| 10  | 85232407 | 85232678 | 1       | -0.076367  | 31   | 3.00E-07 | 0.00061  | 0.16259   | 0.23896  | 1.45E-05    | Intergenic | NA             | NA             |
| 10  | 85232832 | 85232878 | 1       | -0.060541  | 5    | 0.0074   | 0.025    | 0.080207  | 0.14075  | 0.030871679 | Intergenic | NA             | NA             |
| 10  | 85266634 | 85266687 | 1       | -0.195792  | 8    | 0.00019  | 0.013    | 0.30935   | 0.50515  | 0.002222187 | Intragenic | NM_019378      | Srcin1         |
| 10  | 85275448 | 85275597 | 1       | -0.112451  | 6    | 0.00053  | 0.0016   | 0.032422  | 0.14487  | 0.004710638 | Intragenic | NM_019378      | Srcin1         |
| 10  | 85343967 | 85344316 | 1       | -0.097498  | 7    | 0.0022   | 0.039    | 0.069252  | 0.16675  | 0.01321074  | Intergenic | NA             | NA             |
| 10  | 85708075 | 85708193 | 1       | -0.075914  | 5    | 0.00072  | 0.015    | 0.052407  | 0.12832  | 0.005769381 | Intragenic | NM_001107046   | Plxdc1         |
| 10  | 86080608 | 86080648 | 1       | -0.051876  | 5    | 0.00059  | 0.0032   | 0.016637  | 0.068513 | 0.005010587 | TSS        | NM_019326      | Neurod2        |
| 10  | 86480184 | 86480255 | 1       | -0.162628  | 5    | 0.00036  | 0.0054   | 0.16136   | 0.32399  | 0.003505013 | Intragenic | NM_031134:NM_1 | Thra:Nr1d1:Nr1 |
| 10  | 86678936 | 86679118 | 1       | -0.164629  | 7    | 0.00033  | 0.0034   | 0.21195   | 0.37658  | 0.003313469 | Intragenic | NM_031528      | Rara           |
| 10  | 86679404 | 86679537 | 1       | -0.117995  | 5    | 0.0024   | 0.038    | 0.068768  | 0.18676  | 0.014124402 | Intragenic | NM_031528      | Rara           |
| 10  | 86679697 | 86679784 | 1       | -0.204261  | 5    | 1.70E-05 | 0.00096  | 0.06974   | 0.274    | 0.000342787 | Intragenic | NM_031528      | Rara           |
| 10  | 88096537 | 88096669 | 1       | -0.115266  | 5    | 0.015    | 0.0052   | 0.16018   | 0.27545  | 0.049419643 | Intragenic | NM_031047      | Jup            |
| 10  | 88730034 | 88730144 | 1       | -0.326821  | 5    | 0.00065  | 7.00E-05 | 0.20825   | 0.53507  | 0.005335929 | Intragenic | NM_031604      | Atp6v0a1       |
| 10  | 88786517 | 88786710 | 1       | -0.115295  | 8    | 6.00E-05 | 5.30E-05 | 0.19704   | 0.31234  | 0.0009225   | TSS        | NM_012851      | Hsd17b1        |
| 10  | 88876380 | 88876452 | 1       | -0.176111  | 5    | 0.0049   | 0.015    | 0.27037   | 0.44648  | 0.023345384 | Intragenic | NM_001037202   | Plekhh3        |
| 10  | 89323836 | 89323876 | 1       | 0.174205   | 5    | 0.012    | 0.038    | 0.75029   | 0.57609  | 0.042700096 | Intergenic | NA             | NA             |
| 10  | 89378775 | 89378931 | 1       | -0.068567  | 6    | 5.30E-05 | 0.00095  | 0.052896  | 0.12146  | 0.000841161 | Intergenic | NA             | NA             |
| 10  | 90172669 | 90172681 | 1       | -0.053733  | 5    | 0.0014   | 0.0055   | 0.0051843 | 0.058918 | 0.00960223  | Intergenic | NA             | NA             |
| 10  | 90213593 | 90213693 | 1       | -0.124407  | 9    | 0.01     | 0.082    | 0.40153   | 0.52594  | 0.037614679 | Intergenic | NA             | NA             |
| 10  | 90587787 | 90587897 | 1       | -0.32939   | 5    | 0.00065  | 7.00E-05 | 0.20568   | 0.53507  | 0.005335929 | Intragenic | NM_001085381   | Gjc1           |
| 10  | 90960935 | 90961265 | 1       | -0.131675  | 10   | 3.50E-06 | 0.00024  | 0.070182  | 0.20186  | 9.90E-05    | TSS        | NM_001012013   | Acbd4          |
| 10  | 91073088 | 91073140 | 1       | -0.101264  | 5    | 0.0022   | 0.059    | 0.050261  | 0.15153  | 0.01321074  | TSS        | NM_001005531   | Spata32        |
| 10  | 91096900 | 91096969 | 1       | -0.063756  | 5    | 1.50E-06 | 3.40E-05 | 0.022273  | 0.086029 | 5.17E-05    | Intragenic | NM_001108301   | Map3k14        |
| 10  | 91193735 | 91193993 | 0.25    | -0.157181  | 20   | 2.00E-10 | 8.70E-07 | 0.15027   | 0.30745  | 3.14E-08    | Intragenic | NM_198759      | Arhgap27       |
| 10  | 92088827 | 92088985 | 1       | -0.157237  | 5    | 0.0074   | 0.0092   | 0.19242   | 0.34966  | 0.030871679 | Intragenic | NM_017212      | Mapt           |
| 10  | 93342815 | 93343023 | 1       | -0.097209  | 5    | 0.0022   | 0.0092   | 0.087024  | 0.18423  | 0.01321074  | Intergenic | NA             | NA             |
| 10  | 93439915 | 93439945 | 1       | -0.050479  | 5    | 0.0014   | 0.00097  | 0.009031  | 0.05951  | 0.00960223  | TSS        | NM_001013973   | 10-Mar         |
| 10  | 94305503 | 94305897 | 1       | -0.100561  | 8    | 0.00091  | 0.0054   | 0.10294   | 0.2035   | 0.006916375 | TSS        | NM_013178      | Scn4a          |
| 10  | 95341497 | 95341640 | 1       | -0.163727  | 5    | 1.30E-05 | 3.30E-05 | 0.0975    | 0.26123  | 0.000273333 | Intergenic | NA             | NA             |
| 10  | 95393314 | 95393392 | 1       | -0.125972  | 5    | 0.015    | 0.025    | 0.067952  | 0.19392  | 0.049419643 | Intergenic | NA             | NA             |
| 10  | 95718631 | 95718775 | 1       | -0.103582  | 5    | 0.00029  | 6.80E-05 | 0.021312  | 0.12489  | 0.002984937 | Intragenic | NM_080692      | Cacng4         |
| 10  | 95730206 | 95730325 | 1       | -0.140851  | 8    | 0.013    | 0.12     | 0.2628    | 0.40365  | 0.04506341  | Intragenic | NM_080692      | Cacng4         |
| 10  | 96372761 | 96372862 | 1       | -0.208579  | 7    | 0.01     | 0.039    | 0.43715   | 0.64573  | 0.037614679 | Intragenic | NM_001009626   | Apoh           |
| 10  | 97189252 | 97189390 | 1       | -0.10114   | 5    | 0.01     | 0.059    | 0.10353   | 0.20467  | 0.037614679 | Intergenic | NA             | NA             |
| 10  | 97355594 | 97355841 | 1       | -0.084528  | 7    | 0.00015  | 0.0013   | 0.090341  | 0.17487  | 0.001835821 | Intergenic | NA             | NA             |

| chr | start     | stop      | q-value  | methy.diff | CpGs | pMWU     | p2DKS    | MCWLS    | MCWHS    | pMWU.fdr    | cgi.type   | transcript      | gene         |
|-----|-----------|-----------|----------|------------|------|----------|----------|----------|----------|-------------|------------|-----------------|--------------|
| 10  | 97436394  | 97436500  | 1        | -0.108676  | 7    | 0.0039   | 0.11     | 0.70703  | 0.8157   | 0.0199875   | TSS        | NM_001014121    | Amz2         |
| 10  | 97627022  | 97627101  | 1        | 0.066679   | 5    | 0.014    | 0.088    | 0.080556 | 0.013877 | 0.04726441  | Intergenic | NA              | NA           |
| 10  | 101061806 | 101061895 | 1        | -0.088156  | 5    | 0.0068   | 0.015    | 0.094221 | 0.18238  | 0.029075319 | Intergenic | NA              | NA           |
| 10  | 101230420 | 101230491 | 1        | -0.183562  | 5    | 0.00014  | 0.009    | 0.18302  | 0.36658  | 0.00174527  | Intergenic | NA              | NA           |
| 10  | 102373416 | 102373631 | 1        | -0.081462  | 5    | 0.012    | 0.024    | 0.065301 | 0.14676  | 0.042700096 | Intergenic | NA              | NA           |
| 10  | 102664339 | 102664374 | 1        | -0.102391  | 5    | 0.0058   | 0.015    | 0.74438  | 0.84677  | 0.026163814 | Intergenic | NA              | NA           |
| 10  | 103064710 | 103065032 | 1        | -0.111761  | 5    | 0.00044  | 0.0054   | 0.059541 | 0.1713   | 0.0041      | Intragenic | NM_001191591    | Gprc5c       |
| 10  | 103594909 | 103595044 | 1        | -0.18055   | 5    | 0.00029  | 0.0055   | 0.072748 | 0.2533   | 0.002984937 | TSS        | NM_001009369    | Mrpl38       |
| 10  | 104514511 | 104514748 | 1        | -0.07927   | 7    | 0.0096   | 0.076    | 0.10475  | 0.18402  | 0.037112624 | Intragenic | NM_001191655    | Tmem104      |
| 10  | 104784626 | 104784693 | 1        | -0.105568  | 7    | 1.30E-06 | 9.70E-05 | 0.019827 | 0.1254   | 4.66E-05    | TSS        | NM_001107066    | Evpl         |
| 10  | 105152849 | 105152935 | 1        | -0.070415  | 5    | 0.00072  | 0.0054   | 0.026273 | 0.096688 | 0.005769381 | Intergenic | NA              | NA           |
| 10  | 105152936 | 105152961 | 1        | -0.230064  | 5    | 4.80E-06 | 7.30E-06 | 0.092096 | 0.32216  | 0.000126064 | Intergenic | NA              | NA           |
| 10  | 105356062 | 105356148 | 1        | -0.096535  | 5    | 0.0038   | 0.0055   | 0.14518  | 0.24171  | 0.019583799 | Intergenic | NA              | NA           |
| 10  | 105413206 | 105413247 | 1        | -0.051556  | 11   | 0.00033  | 0.004    | 0.032492 | 0.084047 | 0.003313469 | Intergenic | NA              | NA           |
| 10  | 105433800 | 105433917 | 1        | -0.112824  | 8    | 0.00048  | 0.018    | 0.14025  | 0.25307  | 0.004351843 | Intergenic | NA              | NA           |
| 10  | 105732316 | 105732424 | 1        | -0.087014  | 5    | 0.0024   | 0.025    | 0.06336  | 0.15037  | 0.014124402 | Intragenic | NM_001108309    | Sec14l1      |
| 10  | 105841800 | 105841901 | 1        | -0.051498  | 7    | 0.003    | 0.0022   | 0.032604 | 0.084102 | 0.01668425  | TSS        | NM_176856       | 9-Sep        |
| 10  | 105856736 | 105856974 | 1        | -0.118715  | 7    | 0.0044   | 0.013    | 0.10586  | 0.22458  | 0.021881402 | Intragenic | NM_176856       | 9-Sep        |
| 10  | 106695320 | 106695610 | 1        | -0.14234   | 16   | 2.70E-05 | 0.0034   | 0.25081  | 0.39315  | 0.000503182 | Intergenic | NA              | NA           |
| 10  | 106721268 | 106721378 | 1        | -0.257693  | 5    | 0.0022   | 0.024    | 0.19003  | 0.44772  | 0.01321074  | Intergenic | NA              | NA           |
| 10  | 107174174 | 107174238 | 1        | -0.093594  | 5    | 0.01     | 0.059    | 0.11798  | 0.21157  | 0.037614679 | TSS        | NM_001134498    | Rbfox3       |
| 10  | 107513309 | 107513500 | 1        | -0.107183  | 7    | 0.0053   | 0.00082  | 0.056964 | 0.16415  | 0.024662043 | Intergenic | NA              | NA           |
| 10  | 107703087 | 107703166 | 1        | -0.105655  | 5    | 0.0087   | 0.024    | 0.18393  | 0.28958  | 0.034705946 | Intragenic | NM_001134688    | Ccdc40       |
| 10  | 107713028 | 107713151 | 1        | -0.110289  | 7    | 1.60E-05 | 0.00049  | 0.090922 | 0.20121  | 0.000329832 | Intragenic | NM_001134688:NM | Ccdc40:Enpp7 |
| 10  | 107922545 | 107922664 | 1        | -0.109299  | 5    | 1.30E-06 | 1.60E-05 | 0.025135 | 0.13443  | 4.66E-05    | Intragenic | NM_001134688    | Ccdc40       |
| 10  | 107935650 | 107935703 | 1        | -0.136729  | 5    | 7.80E-05 | 0.00014  | 0.10916  | 0.24589  | 0.001113424 | Intragenic | NM_001134688    | Ccdc40       |
| 10  | 108790850 | 108791363 | 0.55     | -0.077726  | 18   | 2.90E-09 | 1.90E-06 | 0.057441 | 0.13517  | 3.06E-07    | Intragenic | NM_001168703    | Aatk         |
| 10  | 108830306 | 108830392 | 1        | -0.220359  | 5    | 0.008    | 0.088    | 0.34426  | 0.56462  | 0.03243956  | Intergenic | NA              | NA           |
| 10  | 109072768 | 109072900 | 1        | -0.158658  | 5    | 7.00E-05 | 0.00026  | 0.041193 | 0.19985  | 0.001035271 | Intergenic | NA              | NA           |
| 10  | 109073215 | 109073247 | 1        | -0.209476  | 5    | 0.00015  | 0.00014  | 0.52012  | 0.7296   | 0.001835821 | Intergenic | NA              | NA           |
| 10  | 109379299 | 109379333 | 1        | -0.169085  | 5    | 0.00065  | 0.0018   | 0.18072  | 0.34981  | 0.005335929 | TSS        | NM_153293       | Npb          |
| 10  | 109379378 | 109379422 | 1        | -0.084707  | 5    | 0.0017   | 0.00094  | 0.11837  | 0.20308  | 0.011044014 | TSS        | NM_153293       | Npb          |
| 10  | 109500274 | 109500477 | 1        | -0.051525  | 8    | 0.0085   | 0.05     | 0.075303 | 0.12683  | 0.034353779 | TSS        | NM_134387       | Dcxr         |
| 10  | 109966209 | 109966574 | 0.017    | -0.12385   | 16   | 2.00E-11 | 6.00E-08 | 0.055327 | 0.17918  | 3.99E-09    | Intragenic | NM_001013976    | Ogfod3       |
| 10  | 110607362 | 110607421 | 1        | -0.05362   | 5    | 0.01     | 0.088    | 0.046893 | 0.10051  | 0.037614679 | Intergenic | NA              | NA           |
| 11  | 1737029   | 1737511   | 1        | -0.127903  | 8    | 0.0064   | 0.013    | 0.59849  | 0.72639  | 0.028147795 | Intergenic | NA              | NA           |
| 11  | 1799411   | 1799458   | 1        | -0.168616  | 5    | 0.00029  | 0.0093   | 0.074249 | 0.24287  | 0.002984937 | TSS        | NM_001005552    | MGC95208     |
| 11  | 2145212   | 2145336   | 2.40E-08 | -0.174506  | 14   | 4.00E-14 | 8.70E-14 | 0.15671  | 0.33122  | 3.20E-11    | Intergenic | NA              | NA           |
| 11  | 9964224   | 9964299   | 1        | 0.058719   | 5    | 0.014    | 0.038    | 0.91225  | 0.85353  | 0.04726441  | Intergenic | NA              | NA           |

| chr | start    | stop     | q-value  | methy.diff | CpGs | pMWU     | p2DKS    | MCWLS     | MCWHS    | pMWU.fdr    | cgi.type   | transcript   | gene   |
|-----|----------|----------|----------|------------|------|----------|----------|-----------|----------|-------------|------------|--------------|--------|
| 11  | 14409103 | 14409177 | 1        | -0.126483  | 7    | 0.0014   | 0.00029  | 0.14713   | 0.27361  | 0.00960223  | Intergenic | NA           | NA     |
| 11  | 24567520 | 24567551 | 1        | -0.051711  | 5    | 0.0094   | 0.038    | 0.056723  | 0.10843  | 0.036473186 | Intergenic | NA           | NA     |
| 11  | 26047327 | 26047397 | 1        | -0.115258  | 5    | 0.00072  | 0.0032   | 0.85045   | 0.96571  | 0.005769381 | Intergenic | NA           | NA     |
| 11  | 28276366 | 28276869 | 1        | -0.055001  | 5    | 0.0094   | 0.015    | 0.071217  | 0.12622  | 0.036473186 | Intergenic | NA           | NA     |
| 11  | 32147179 | 32147234 | 1        | -0.147914  | 5    | 0.0068   | 0.0053   | 0.56666   | 0.71457  | 0.029075319 | TSS        | NM_001037774 | Cldn8  |
| 11  | 33583741 | 33584169 | 1        | -0.084649  | 12   | 0.00014  | 0.0099   | 0.098057  | 0.18271  | 0.00174527  | Intragenic | NM_001100558 | Tiam1  |
| 11  | 34306434 | 34306475 | 1        | -0.185163  | 5    | 0.00072  | 0.0018   | 0.29297   | 0.47813  | 0.005769381 | Intergenic | NA           | NA     |
| 11  | 34881049 | 34881166 | 1        | -0.134027  | 5    | 0.0063   | 0.024    | 0.21886   | 0.35288  | 0.027757612 | Intergenic | NA           | NA     |
| 11  | 34929499 | 34929589 | 1        | -0.13169   | 7    | 0.0018   | 0.013    | 0.19464   | 0.32633  | 0.011652632 | Intergenic | NA           | NA     |
| 11  | 36063853 | 36063887 | 1        | -0.149166  | 5    | 0.00054  | 0.0017   | 0.47894   | 0.62811  | 0.004710638 | Intragenic | NM_001131000 | Smim11 |
| 11  | 36087975 | 36088062 | 1        | 0.144735   | 5    | 0.0041   | 0.038    | 0.81642   | 0.67169  | 0.020486121 | Intergenic | NA           | NA     |
| 11  | 36371712 | 36371968 | 0.025    | -0.062583  | 17   | 3.40E-08 | 9.00E-08 | 0.035483  | 0.098065 | 2.73E-06    | Intragenic | NM_017325    | Runx1  |
| 11  | 36464548 | 36464651 | 1        | -0.079602  | 7    | 0.012    | 0.039    | 0.13738   | 0.21698  | 0.042700096 | Intergenic | NA           | NA     |
| 11  | 36815732 | 36815841 | 1        | 0.122607   | 5    | 0.0094   | 0.038    | 0.70473   | 0.58213  | 0.036473186 | Intergenic | NA           | NA     |
| 11  | 37843439 | 37843524 | 1        | -0.116716  | 5    | 0.00012  | 0.0018   | 0.21703   | 0.33375  | 0.00153218  | Intergenic | NA           | NA     |
| 11  | 37912318 | 37912369 | 1        | -0.066143  | 5    | 0.00032  | 0.0032   | 0.066549  | 0.13269  | 0.003243956 | Intragenic | NM_001107108 | Sim2   |
| 11  | 38023900 | 38023992 | 1        | -0.172291  | 7    | 0.0079   | 0.077    | 0.25803   | 0.43033  | 0.03243956  | Intergenic | NA           | NA     |
| 11  | 38697344 | 38697468 | 1        | -0.063832  | 5    | 0.012    | 0.059    | 0.11677   | 0.1806   | 0.042700096 | Intragenic | NM_013192    | Kcnj6  |
| 11  | 39990926 | 39990988 | 1        | 0.115983   | 5    | 0.013    | 0.038    | 0.911     | 0.79502  | 0.04506341  | Intergenic | NA           | NA     |
| 11  | 40044065 | 40044149 | 1        | -0.057287  | 12   | 0.00035  | 0.0095   | 0.067105  | 0.12439  | 0.003490541 | Intragenic | NM_001017484 | Lca5l  |
| 11  | 47675300 | 47675358 | 3.00E-05 | -0.070171  | 7    | 2.80E-10 | 1.10E-10 | 0.0037184 | 0.07389  | 4.13E-08    | Intergenic | NA           | NA     |
| 11  | 48227855 | 48227910 | 1        | -0.123465  | 5    | 0.0019   | 0.0054   | 0.12858   | 0.25204  | 0.011943782 | TSS        | NM_001013866 | Cmss1  |
| 11  | 50974515 | 50974570 | 1        | 0.190819   | 5    | 0.0041   | 0.003    | 0.55603   | 0.36522  | 0.020486121 | Intergenic | NA           | NA     |
| 11  | 59348697 | 59348825 | 1        | -0.077569  | 5    | 0.013    | 0.024    | 0.59033   | 0.6679   | 0.04506341  | Intergenic | NA           | NA     |
| 11  | 62354732 | 62354862 | 1        | -0.063573  | 5    | 0.0032   | 0.0055   | 0.38086   | 0.44444  | 0.017454545 | Intergenic | NA           | NA     |
| 11  | 65407884 | 65408014 | 1        | -0.055819  | 5    | 0.0068   | 0.0092   | 0.39683   | 0.45265  | 0.029075319 | Intergenic | NA           | NA     |
| 11  | 67150336 | 67150419 | 1        | 0.050056   | 5    | 0.00072  | 0.0092   | 0.97163   | 0.92157  | 0.005769381 | Intergenic | NA           | NA     |
| 11  | 69052471 | 69052508 | 1        | -0.193788  | 5    | 0.0013   | 0.0091   | 0.19734   | 0.39113  | 0.009111111 | TSS        | NM_001037338 | Ndufb4 |
| 11  | 69805542 | 69805641 | 1        | -0.120189  | 5    | 0.0014   | 0.015    | 0.063073  | 0.18326  | 0.00960223  | Intergenic | NA           | NA     |
| 11  | 70152132 | 70152208 | 1        | -0.151286  | 6    | 0.00016  | 0.00031  | 0.10913   | 0.26042  | 0.001938916 | Intergenic | NA           | NA     |
| 11  | 70994652 | 70994704 | 1        | 0.209896   | 5    | 0.0029   | 0.0091   | 0.57752   | 0.36762  | 0.016164653 | Intergenic | NA           | NA     |
| 11  | 71039324 | 71039404 | 1        | -0.121327  | 5    | 1.00E-05 | 0.00014  | 0.049043  | 0.17037  | 0.000218343 | Intergenic | NA           | NA     |
| 11  | 71553515 | 71553567 | 1        | 0.209896   | 5    | 0.0029   | 0.0091   | 0.57752   | 0.36762  | 0.016164653 | Intergenic | NA           | NA     |
| 11  | 71598470 | 71598550 | 1        | -0.121327  | 5    | 1.00E-05 | 0.00014  | 0.049043  | 0.17037  | 0.000218343 | Intragenic | NM_001014125 | Pdia5  |
| 11  | 72880448 | 72880569 | 0.019    | -0.160673  | 12   | 2.10E-08 | 6.90E-08 | 0.085988  | 0.24666  | 1.82E-06    | Intragenic | NM_032062    | Kalrn  |
| 11  | 73369845 | 73369876 | 1        | -0.075495  | 5    | 0.0074   | 0.015    | 0.06373   | 0.13922  | 0.030871679 | Intergenic | NA           | NA     |
| 11  | 75110830 | 75110866 | 1        | -0.060226  | 5    | 0.011    | 0.0093   | 0.063225  | 0.12345  | 0.040408163 | Intergenic | NA           | NA     |
| 11  | 75676587 | 75676657 | 1        | -0.117378  | 5    | 0.0035   | 0.0018   | 0.73709   | 0.85447  | 0.018410549 | Intragenic | NM_053995    | Bdh1   |
| 11  | 75957213 | 75957249 | 1        | -0.060226  | 5    | 0.011    | 0.0093   | 0.063225  | 0.12345  | 0.040408163 | Intragenic | NM_138823    | Ppp1r2 |

| chr | start    | stop     | q-value | methy.diff | CpGs | pMWU     | p2DKS    | MCWLS    | MCWHS    | pMWU.fdr    | cgi.type   | transcript      | gene            |
|-----|----------|----------|---------|------------|------|----------|----------|----------|----------|-------------|------------|-----------------|-----------------|
| 11  | 77159085 | 77159109 | 1       | 0.091812   | 5    | 0.008    | 0.0055   | 0.78661  | 0.6948   | 0.03243956  | Intergenic | NA              | NA              |
| 11  | 77522015 | 77522071 | 1       | -0.12239   | 5    | 0.015    | 0.086    | 0.18033  | 0.30272  | 0.049419643 | Intergenic | NA              | NA              |
| 11  | 77692184 | 77692303 | 1       | -0.15347   | 6    | 0.0057   | 0.084    | 0.19201  | 0.34548  | 0.026163814 | Intergenic | NA              | NA              |
| 11  | 78477595 | 78477671 | 1       | -0.129853  | 5    | 0.0019   | 0.015    | 0.1568   | 0.28665  | 0.011943782 | TSS        | NM_001109056    | Mb21d2          |
| 11  | 79893352 | 79893396 | 1       | -0.140468  | 5    | 0.0019   | 0.015    | 0.21453  | 0.355    | 0.011943782 | Intergenic | NA              | NA              |
| 11  | 80846648 | 80846768 | 1       | -0.067436  | 5    | 0.002    | 0.00014  | 0.031573 | 0.09901  | 0.012269327 | Intergenic | NA              | NA              |
| 11  | 81727195 | 81727268 | 1       | -0.161739  | 6    | 0.0032   | 0.0016   | 0.32201  | 0.48375  | 0.017454545 | Intergenic | NA              | NA              |
| 11  | 84884865 | 84884994 | 1       | -0.116952  | 5    | 8.80E-05 | 0.0018   | 0.066253 | 0.1832   | 0.00123     | TSS        | NM_001109553    | Crygs           |
| 11  | 85335025 | 85335178 | 1       | -0.094765  | 6    | 0.0078   | 0.058    | 0.128    | 0.22277  | 0.032284913 | Intragenic | NM_001107082    | Etv5            |
| 11  | 85614939 | 85614989 | 1       | -0.160202  | 5    | 4.30E-06 | 7.60E-06 | 0.09696  | 0.25716  | 0.000114978 | Intragenic | NM_001270598:NM | Igf2bp2:Igf2bp2 |
| 11  | 85670219 | 85670269 | 1       | -0.160202  | 5    | 4.30E-06 | 7.60E-06 | 0.09696  | 0.25716  | 0.000114978 | Intragenic | NM_001270598:NM | Igf2bp2:Igf2bp2 |
| 11  | 85803578 | 85803645 | 1       | -0.08522   | 5    | 0.0027   | 0.024    | 0.16986  | 0.25508  | 0.015434547 | Intragenic | NM_001044279    | Liph            |
| 11  | 85944335 | 85944435 | 1       | 0.06425    | 5    | 0.01     | 0.015    | 0.89433  | 0.83008  | 0.037614679 | Intragenic | NM_001013978:NM | Map3k13:Clcn2   |
| 11  | 86958391 | 86958491 | 1       | 0.06402    | 5    | 0.012    | 0.015    | 0.89424  | 0.83022  | 0.042700096 | Intragenic | NM_017137       | Clcn2           |
| 11  | 88317321 | 88317495 | 1       | 0.050613   | 11   | 0.01     | 0.019    | 0.88183  | 0.83122  | 0.037614679 | Intergenic | NA              | NA              |
| 11  | 89617931 | 89618146 | 1       | -0.098853  | 9    | 0.011    | 0.034    | 0.22348  | 0.32234  | 0.040408163 | TSS        | NM_053931       | 5-Sep           |
| 11  | 89620885 | 89620935 | 1       | -0.061046  | 5    | 0.012    | 0.015    | 0.059228 | 0.12027  | 0.042700096 | TSS        | NM_053930       | Gp1bb           |
| 11  | 89621830 | 89621872 | 1       | 0.062925   | 5    | 0.0094   | 0.58     | 0.078133 | 0.015208 | 0.036473186 | TSS        | NM_053930       | Gp1bb           |
| 11  | 89654683 | 89654730 | 1       | -0.055938  | 5    | 0.008    | 0.038    | 0.048636 | 0.10457  | 0.03243956  | Intragenic | NM_001108322    | Tbx1            |
| 11  | 89830219 | 89830442 | 1       | -0.114446  | 6    | 0.0083   | 0.0073   | 0.036024 | 0.15047  | 0.033563836 | Intragenic | NM_001131013    | Arvcf           |
| 11  | 89838075 | 89838114 | 1       | 0.067915   | 5    | 0.008    | 0.015    | 0.893    | 0.82509  | 0.03243956  | Intragenic | NM_001131013    | Arvcf           |
| 11  | 89884330 | 89884408 | 1       | -0.15911   | 5    | 2.80E-05 | 0.00053  | 0.080216 | 0.23933  | 0.000511485 | Intragenic | NM_001131013    | Arvcf           |
| 11  | 90303345 | 90303384 | 1       | -0.069699  | 7    | 0.0076   | 0.078    | 0.070794 | 0.14049  | 0.031563309 | Intergenic | NA              | NA              |
| 11  | 90480132 | 90480341 | 1       | -0.077096  | 7    | 0.0035   | 0.017    | 0.082985 | 0.16008  | 0.018410549 | Intergenic | NA              | NA              |
| 11  | 90784757 | 90784776 | 1       | -0.116347  | 5    | 0.00072  | 0.0031   | 0.13174  | 0.24808  | 0.005769381 | Intragenic | NM_001105864    | Scarf2          |
| 11  | 91032035 | 91032063 | 1       | -0.08355   | 5    | 0.0032   | 0.024    | 0.06234  | 0.14589  | 0.017454545 | Intergenic | NA              | NA              |
| 11  | 91046044 | 91046139 | 1       | -0.176651  | 7    | 5.60E-06 | 0.00047  | 0.10922  | 0.28587  | 0.000144    | Intragenic | NM_001105862    | Hic2            |
| 12  | 327673   | 327818   | 1       | 0.0525     | 9    | 0.00046  | 0.0039   | 0.15911  | 0.10661  | 0.004270189 | Intergenic | NA              | NA              |
| 12  | 344693   | 344744   | 1       | 0.119219   | 7    | 0.0004   | 0.0054   | 0.18564  | 0.066426 | 0.003813953 | Intergenic | NA              | NA              |
| 12  | 346064   | 346150   | 1       | -0.080911  | 7    | 0.012    | 0.038    | 0.13972  | 0.22063  | 0.042700096 | Intergenic | NA              | NA              |
| 12  | 346218   | 346294   | 1       | -0.097642  | 5    | 0.0017   | 0.0031   | 0.34846  | 0.4461   | 0.011044014 | Intergenic | NA              | NA              |
| 12  | 356009   | 356084   | 1       | 0.235411   | 7    | 0.00074  | 0.027    | 0.638    | 0.40259  | 0.005916793 | Intergenic | NA              | NA              |
| 12  | 434439   | 434512   | 1       | -0.054862  | 5    | 0.00026  | 0.0055   | 0.051877 | 0.10674  | 0.002784906 | Intergenic | NA              | NA              |
| 12  | 922679   | 922723   | 1       | 0.068787   | 5    | 0.0068   | 0.038    | 0.95097  | 0.88218  | 0.029075319 | Intergenic | NA              | NA              |
| 12  | 4678165  | 4678276  | 1       | -0.075751  | 6    | 0.00026  | 0.00095  | 0.041866 | 0.11762  | 0.002784906 | Intragenic | NM_017267       | Timm44          |
| 12  | 6055942  | 6055973  | 1       | -0.063011  | 8    | 0.00029  | 0.018    | 0.093272 | 0.15628  | 0.002984937 | Intergenic | NA              | NA              |
| 12  | 7889467  | 7889629  | 1       | -0.216186  | 7    | 3.00E-06 | 5.30E-05 | 0.063861 | 0.28005  | 8.86E-05    | Intragenic | NM_001170398    | Fry             |
| 12  | 8950979  | 8951159  | 1       | -0.151787  | 15   | 9.20E-07 | 0.00011  | 0.65444  | 0.80623  | 3.57E-05    | Intragenic | NM_017260       | Alox5ap         |
| 12  | 9414930  | 9414970  | 1       | -0.105113  | 5    | 0.0074   | 0.059    | 0.39289  | 0.498    | 0.030871679 | Intergenic | NA              | NA              |



| chr | start    | stop     | q-value | methy.diff | CpGs | pMWU     | p2DKS    | MCWLS    | MCWHS    | pMWU.fdr    | cgi.type   | transcript      | gene      |
|-----|----------|----------|---------|------------|------|----------|----------|----------|----------|-------------|------------|-----------------|-----------|
| 12  | 9691324  | 9691364  | 1       | -0.107754  | 5    | 0.01     | 0.025    | 0.39024  | 0.498    | 0.037614679 | Intergenic | NA              | NA        |
| 12  | 10331523 | 10331657 | 1       | -0.102931  | 5    | 0.015    | 0.087    | 0.088919 | 0.19185  | 0.049419643 | Intergenic | NA              | NA        |
| 12  | 10342364 | 10342560 | 1       | -0.125641  | 6    | 0.0042   | 0.017    | 0.094706 | 0.22035  | 0.020943243 | Intergenic | NA              | NA        |
| 12  | 10387683 | 10387852 | 1       | 0.126014   | 5    | 0.0035   | 0.015    | 0.92182  | 0.7958   | 0.018410549 | Intergenic | NA              | NA        |
| 12  | 10914335 | 10914391 | 1       | -0.204615  | 5    | 0.00044  | 0.0032   | 0.17682  | 0.38144  | 0.0041      | Intergenic | NA              | NA        |
| 12  | 10940626 | 10940730 | 1       | -0.152798  | 5    | 0.00044  | 0.0093   | 0.1364   | 0.2892   | 0.0041      | Intergenic | NA              | NA        |
| 12  | 11056881 | 11057152 | 1       | -0.078466  | 13   | 0.00094  | 0.00093  | 0.22391  | 0.30238  | 0.007115077 | Intergenic | NA              | NA        |
| 12  | 11174548 | 11174652 | 1       | -0.135601  | 5    | 0.00048  | 0.0055   | 0.146    | 0.2816   | 0.004351843 | Intragenic | NM_001309381:NM | Flt1:Flt1 |
| 12  | 11754587 | 11754629 | 1       | -0.088276  | 5    | 0.00036  | 0.00014  | 0.064649 | 0.15293  | 0.003505013 | Intergenic | NA              | NA        |
| 12  | 11754635 | 11754827 | 1       | -0.097176  | 7    | 0.015    | 0.1      | 0.18406  | 0.28124  | 0.049419643 | Intergenic | NA              | NA        |
| 12  | 11970267 | 11970430 | 1       | -0.149104  | 6    | 0.0039   | 0.018    | 0.1594   | 0.3085   | 0.0199875   | Intragenic | NM_001113570    | Gtf3a     |
| 12  | 12069179 | 12069241 | 1       | 0.053312   | 5    | 0.0049   | 0.0088   | 0.92753  | 0.87422  | 0.023345384 | Intergenic | NA              | NA        |
| 12  | 13388056 | 13388088 | 1       | -0.063007  | 5    | 0.0068   | 0.038    | 0.040502 | 0.10351  | 0.029075319 | Intragenic | NM_153312       | Cyp3a2    |
| 12  | 14160852 | 14160935 | 1       | -0.082468  | 5    | 0.0074   | 0.039    | 0.082125 | 0.16459  | 0.030871679 | Intergenic | NA              | NA        |
| 12  | 14405169 | 14405295 | 1       | -0.084269  | 5    | 0.0035   | 0.015    | 0.037231 | 0.1215   | 0.018410549 | Intergenic | NA              | NA        |
| 12  | 15368574 | 15368610 | 1       | -0.152102  | 5    | 2.40E-05 | 0.00014  | 0.11575  | 0.26785  | 0.000455321 | Intergenic | NA              | NA        |
| 12  | 15403030 | 15403086 | 1       | -0.188196  | 5    | 0.012    | 0.058    | 0.32269  | 0.51089  | 0.042700096 | Intragenic | NM_001107121    | Zfp316    |
| 12  | 15403221 | 15403264 | 1       | 0.129753   | 5    | 0.008    | 0.024    | 0.72961  | 0.59986  | 0.03243956  | Intragenic | NM_001107121    | Zfp316    |
| 12  | 15403579 | 15403625 | 1       | -0.1659    | 5    | 0.0019   | 0.0054   | 0.3029   | 0.4688   | 0.011943782 | Intragenic | NM_001107121    | Zfp316    |
| 12  | 15404248 | 15404283 | 1       | 0.099057   | 5    | 0.00014  | 0.0018   | 0.16025  | 0.061189 | 0.00174527  | Intragenic | NM_001107121    | Zfp316    |
| 12  | 15404288 | 15404310 | 1       | -0.193533  | 5    | 0.0041   | 0.0054   | 0.13753  | 0.33106  | 0.020486121 | Intragenic | NM_001107121    | Zfp316    |
| 12  | 15404344 | 15404462 | 1       | -0.116058  | 25   | 0.0024   | 0.015    | 0.099958 | 0.1526   | 0.014124402 | Intragenic | NM_001107121    | Zfp316    |
| 12  | 15404487 | 15404625 | 1       | -0.198867  | 9    | 2.60E-07 | 5.50E-06 | 0.054973 | 0.25384  | 1.30E-05    | Intragenic | NM_001107121    | Zfp316    |
| 12  | 15404627 | 15404904 | 1       | -0.090291  | 24   | 0.00018  | 0.0066   | 0.18335  | 0.26745  | 0.002142581 | Intragenic | NM_001107121    | Zfp316    |
| 12  | 15893454 | 15893604 | 1       | -0.143002  | 5    | 0.0049   | 0.059    | 0.071119 | 0.21412  | 0.023345384 | Intragenic | NM_001107123    | Tnrc18    |
| 12  | 19054921 | 19055283 | 1       | -0.054648  | 5    | 0.0041   | 0.025    | 0.065498 | 0.12015  | 0.020486121 | Intergenic | NA              | NA        |
| 12  | 19125012 | 19125314 | 1       | -0.063878  | 19   | 0.013    | 0.026    | 0.29179  | 0.35567  | 0.04506341  | Intergenic | NA              | NA        |
| 12  | 19139513 | 19139566 | 1       | -0.266047  | 9    | 0.00019  | 0.00033  | 0.60073  | 0.86677  | 0.002222187 | Intergenic | NA              | NA        |
| 12  | 19146172 | 19146322 | 1       | -0.098847  | 5    | 0.0027   | 0.015    | 0.10418  | 0.20302  | 0.015434547 | Intergenic | NA              | NA        |
| 12  | 19162722 | 19163030 | 1       | -0.056638  | 17   | 0.0072   | 0.026    | 0.10509  | 0.16172  | 0.030714451 | Intergenic | NA              | NA        |
| 12  | 19347115 | 19347195 | 1       | -0.055164  | 5    | 0.00029  | 0.00053  | 0.020614 | 0.075778 | 0.002984937 | TSS        | NM_001109062    | Gpr146    |
| 12  | 19370005 | 19370194 | 1       | -0.106561  | 10   | 7.40E-05 | 0.006    | 0.14688  | 0.25344  | 0.00109006  | Intergenic | NA              | NA        |
| 12  | 19731309 | 19731385 | 1       | 0.252842   | 5    | 0.0011   | 0.0031   | 0.28792  | 0.035075 | 0.007982301 | Intragenic | NM_012801       | Pdgfa     |
| 12  | 19995400 | 19995486 | 1       | -0.173759  | 5    | 0.002    | 0.0032   | 0.27358  | 0.44733  | 0.012269327 | Intergenic | NA              | NA        |
| 12  | 21651667 | 21651960 | 1       | -0.06257   | 12   | 0.0016   | 0.013    | 0.10963  | 0.17221  | 0.010628263 | Intragenic | NM_138511       | Gpc2      |
| 12  | 23849553 | 23849616 | 1       | -0.063416  | 7    | 0.0029   | 0.027    | 0.05036  | 0.11378  | 0.016164653 | TSS        | NM_031700       | Cldn3     |
| 12  | 24224452 | 24224557 | 1       | -0.148689  | 5    | 0.008    | 0.024    | 0.35207  | 0.50076  | 0.03243956  | Intragenic | NM_001105917    | Actl6b    |
| 12  | 24465966 | 24466538 | 1       | -0.070735  | 14   | 1.90E-05 | 0.00063  | 0.046741 | 0.11748  | 0.000376935 | TSS        | NM_001127570    | Trip6     |
| 12  | 25315187 | 25315338 | 0.78    | -0.068105  | 11   | 2.60E-07 | 2.80E-06 | 0.056972 | 0.12508  | 1.30E-05    | Intergenic | NA              | NA        |

| chr | start    | stop     | q-value | methy.diff | CpGs | pMWU     | p2DKS    | MCWLS     | MCWHS    | pMWU.fdr    | cgi.type   | transcript   | gene     |
|-----|----------|----------|---------|------------|------|----------|----------|-----------|----------|-------------|------------|--------------|----------|
| 12  | 25605368 | 25605436 | 1       | 0.083964   | 5    | 0.0019   | 0.015    | 0.29904   | 0.21507  | 0.011943782 | Intergenic | NA           | NA       |
| 12  | 26355871 | 26355914 | 1       | -0.149239  | 5    | 0.00032  | 0.0018   | 0.66081   | 0.81005  | 0.003243956 | Intragenic | NM_181080    | Trim50   |
| 12  | 26745213 | 26745270 | 1       | -0.075195  | 5    | 0.0068   | 0.00014  | 0.031294  | 0.10649  | 0.029075319 | Intergenic | NA           | NA       |
| 12  | 26762004 | 26762131 | 1       | -0.092476  | 9    | 7.00E-06 | 5.70E-06 | 0.076076  | 0.16855  | 0.000168824 | TSS        | NM_001012022 | Cldn4    |
| 12  | 27512985 | 27513042 | 1       | -0.053644  | 5    | 0.00059  | 0.00052  | 0.01822   | 0.071864 | 0.005010587 | Intragenic | NM_053734    | Ncf1     |
| 12  | 31597331 | 31597479 | 1       | -0.093413  | 9    | 0.002    | 0.0084   | 0.096237  | 0.18965  | 0.012269327 | Intragenic | NM_001077201 | Caln1    |
| 12  | 31645214 | 31645509 | 1       | -0.050875  | 11   | 0.00066  | 0.0029   | 0.04562   | 0.096495 | 0.005412    | Intragenic | NM_001077201 | Caln1    |
| 12  | 33169823 | 33169920 | 1       | -0.173983  | 5    | 0.00021  | 0.0018   | 0.068896  | 0.24288  | 0.002348182 | Intergenic | NA           | NA       |
| 12  | 33512833 | 33512887 | 1       | 0.096063   | 5    | 0.0019   | 0.015    | 0.89847   | 0.8024   | 0.011943782 | Intragenic | NM_001100488 | Rimbp2   |
| 12  | 33552281 | 33552407 | 1       | -0.123035  | 5    | 0.013    | 0.088    | 0.14484   | 0.26788  | 0.04506341  | TSS        | NM_001108853 | Piwil1   |
| 12  | 33577434 | 33577550 | 1       | -0.067163  | 7    | 0.0012   | 0.0031   | 0.15205   | 0.21921  | 0.008573088 | Intergenic | NA           | NA       |
| 12  | 33814405 | 33814524 | 1       | -0.125853  | 5    | 0.00014  | 3.40E-05 | 0.025908  | 0.15176  | 0.00174527  | Intergenic | NA           | NA       |
| 12  | 34292318 | 34292368 | 1       | -0.104276  | 5    | 0.0029   | 0.0018   | 0.63658   | 0.74086  | 0.016164653 | Intragenic | NM_198727    | Tmem132d |
| 12  | 34880198 | 34880294 | 1       | -0.146107  | 5    | 0.00059  | 0.00028  | 0.086343  | 0.23245  | 0.005010587 | Intergenic | NA           | NA       |
| 12  | 38530559 | 38530832 | 1       | -0.056791  | 12   | 0.00067  | 2.40E-05 | 0.010396  | 0.051953 | 0.005487902 | Intergenic | NA           | NA       |
| 12  | 38530846 | 38530903 | 1       | -0.067603  | 5    | 1.00E-05 | 1.60E-05 | 0.019899  | 0.087501 | 0.000218343 | Intergenic | NA           | NA       |
| 12  | 38666528 | 38666588 | 1       | -0.072835  | 5    | 0.00019  | 0.0031   | 0.094403  | 0.16724  | 0.002222187 | Intergenic | NA           | NA       |
| 12  | 38844231 | 38844320 | 1       | -0.063129  | 5    | 0.0053   | 0.015    | 0.065351  | 0.12848  | 0.024662043 | Intragenic | NM_001108334 | Ncor2    |
| 12  | 39013939 | 39014053 | 1       | -0.055371  | 5    | 0.012    | 0.038    | 0.12204   | 0.17741  | 0.042700096 | Intergenic | NA           | NA       |
| 12  | 39142699 | 39142819 | 1       | -0.063358  | 7    | 0.0079   | 0.019    | 0.21367   | 0.27703  | 0.03243956  | Intergenic | NA           | NA       |
| 12  | 39429537 | 39429596 | 1       | -0.213761  | 5    | 0.0024   | 0.0055   | 0.19945   | 0.41321  | 0.014124402 | Intergenic | NA           | NA       |
| 12  | 40775199 | 40775462 | 1       | -0.05468   | 12   | 5.00E-06 | 0.00029  | 0.0083566 | 0.063037 | 0.000130851 | Intergenic | NA           | NA       |
| 12  | 40805856 | 40805962 | 1       | -0.10647   | 5    | 0.012    | 0.0032   | 0.09854   | 0.20501  | 0.042700096 | Intragenic | NM_001271309 | Tmem120b |
| 12  | 41412825 | 41412935 | 1       | -0.112957  | 5    | 0.0011   | 0.00098  | 0.033342  | 0.1463   | 0.007982301 | Intergenic | NA           | NA       |
| 12  | 41620759 | 41621045 | 1       | -0.096474  | 15   | 2.70E-05 | 0.007    | 0.15393   | 0.25041  | 0.000503182 | Intragenic | NM_001107141 | Pptc7    |
| 12  | 41793692 | 41794011 | 1       | -0.111086  | 9    | 0.00057  | 0.0061   | 0.13056   | 0.24164  | 0.004925761 | Intragenic | NM_001025665 | Ccdc63   |
| 12  | 42215413 | 42215541 | 1       | -0.271909  | 5    | 0.0053   | 0.025    | 0.39877   | 0.67068  | 0.024662043 | Intergenic | NA           | NA       |
| 12  | 42547079 | 42547102 | 1       | -0.148046  | 5    | 6.30E-06 | 0.00028  | 0.077358  | 0.2254   | 0.000156545 | TSS        | NM_001047900 | Naa25    |
| 12  | 43273757 | 43273900 | 1       | -0.119293  | 5    | 4.40E-05 | 0.0054   | 0.063719  | 0.18301  | 0.000729708 | Intergenic | NA           | NA       |
| 12  | 43288328 | 43288369 | 1       | -0.155913  | 5    | 0.0094   | 0.038    | 0.17293   | 0.32884  | 0.036473186 | Intragenic | NM_001108335 | Rasal1   |
| 12  | 43375603 | 43375925 | 1       | -0.098787  | 9    | 0.00021  | 0.0027   | 0.063025  | 0.16181  | 0.002348182 | Intragenic | NM_139332    | Tpcn1    |
| 12  | 43505814 | 43506008 | 1       | -0.056201  | 11   | 1.60E-05 | 0.00028  | 0.040797  | 0.096998 | 0.000329832 | Intergenic | NA           | NA       |
| 12  | 43949703 | 43949736 | 1       | -0.064715  | 5    | 0.0013   | 0.015    | 0.062143  | 0.12686  | 0.009111111 | TSS        | NM_001009964 | Tbx5     |
| 12  | 44874523 | 44874571 | 1       | -0.089568  | 5    | 0.0027   | 0.015    | 0.070859  | 0.16043  | 0.015434547 | Intergenic | NA           | NA       |
| 12  | 45606314 | 45606447 | 1       | -0.102206  | 11   | 0.0024   | 0.011    | 0.6643    | 0.7665   | 0.014124402 | Intergenic | NA           | NA       |
| 12  | 46008432 | 46008563 | 1       | -0.084125  | 8    | 0.0075   | 0.026    | 0.15683   | 0.24095  | 0.031235892 | Intergenic | NA           | NA       |
| 12  | 47123851 | 47124111 | 1       | -0.070289  | 17   | 2.20E-06 | 0.00015  | 0.055013  | 0.1253   | 6.91E-05    | Intergenic | NA           | NA       |
| 12  | 47195461 | 47195520 | 1       | 0.072415   | 5    | 8.80E-05 | 0.00053  | 0.97193   | 0.89951  | 0.00123     | Intergenic | NA           | NA       |
| 12  | 47694927 | 47694993 | 1       | 0.125192   | 5    | 0.0019   | 0.00053  | 0.24472   | 0.11953  | 0.011943782 | Intergenic | NA           | NA       |

| chr | start    | stop     | q-value  | methy.diff | CpGs | pMWU     | p2DKS    | MCWLS    | MCWHS    | pMWU.fdr    | cgi.type   | transcript   | gene   |
|-----|----------|----------|----------|------------|------|----------|----------|----------|----------|-------------|------------|--------------|--------|
| 12  | 47729497 | 47729544 | 1        | -0.10947   | 5    | 1.90E-05 | 0.00014  | 0.06036  | 0.16983  | 0.000376935 | Intragenic | NM_053612    | Hspb8  |
| 12  | 48667484 | 48667567 | 1        | -0.123451  | 5    | 0.00044  | 0.0017   | 0.11999  | 0.24344  | 0.0041      | TSS        | NM_001107147 | Sirt4  |
| 12  | 48768895 | 48768946 | 1        | -0.079869  | 5    | 0.012    | 0.039    | 0.10251  | 0.18238  | 0.042700096 | Intergenic | NA           | NA     |
| 12  | 49056359 | 49056492 | 1        | -0.098593  | 7    | 0.00048  | 3.00E-05 | 0.017857 | 0.11645  | 0.004351843 | Intragenic | NM_022512    | Acads  |
| 12  | 49178823 | 49178976 | 1        | -0.18183   | 7    | 1.90E-06 | 3.00E-05 | 0.1091   | 0.29093  | 6.26E-05    | Intergenic | NA           | NA     |
| 12  | 49238198 | 49238778 | 1        | -0.072364  | 16   | 0.002    | 0.01     | 0.14084  | 0.21321  | 0.012269327 | Intragenic | NM_001009681 | Oasl   |
| 12  | 49294940 | 49295006 | 1        | -0.188041  | 5    | 0.0022   | 0.0093   | 0.47775  | 0.66579  | 0.01321074  | Intergenic | NA           | NA     |
| 12  | 49497208 | 49497365 | 1        | -0.196343  | 5    | 0.011    | 0.0053   | 0.32891  | 0.52525  | 0.040408163 | Intragenic | NM_023970    | Trpv4  |
| 12  | 49591929 | 49592189 | 1        | -0.072394  | 9    | 0.0001   | 0.0008   | 0.17627  | 0.24866  | 0.001327338 | Intergenic | NA           | NA     |
| 12  | 49724327 | 49724852 | 1        | -0.061252  | 9    | 0.0045   | 0.032    | 0.046827 | 0.10808  | 0.021964286 | Intergenic | NA           | NA     |
| 12  | 49938689 | 49938759 | 1        | -0.272186  | 5    | 0.01     | 0.0054   | 0.4243   | 0.69648  | 0.037614679 | Intragenic | NM_053922    | Acacb  |
| 12  | 50029294 | 50029415 | 1        | -0.191045  | 7    | 0.0027   | 5.30E-05 | 0.2394   | 0.43045  | 0.015434547 | Intragenic | NM_001013124 | Ung    |
| 12  | 50133129 | 50133432 | 1        | -0.103781  | 12   | 0.00031  | 0.0027   | 0.15537  | 0.25915  | 0.003181919 | Intergenic | NA           | NA     |
| 12  | 50156584 | 50156651 | 1        | -0.159164  | 7    | 1.80E-05 | 0.0005   | 0.0903   | 0.24946  | 0.000361962 | TSS        | NM_053626    | Dao    |
| 12  | 50820359 | 50820441 | 1        | -0.100233  | 5    | 0.0058   | 0.0054   | 0.05792  | 0.15815  | 0.026163814 | Intergenic | NA           | NA     |
| 12  | 51112615 | 51112706 | 1        | -0.086417  | 5    | 0.0094   | 0.037    | 0.11346  | 0.19988  | 0.036473186 | Intragenic | NM_001105937 | Sgsm1  |
| 12  | 51125840 | 51125910 | 1        | -0.06888   | 5    | 0.012    | 0.038    | 0.025647 | 0.094528 | 0.042700096 | Intragenic | NM_001105937 | Sgsm1  |
| 12  | 51266703 | 51266840 | 1        | -0.281197  | 5    | 0.0041   | 0.0017   | 0.19125  | 0.47245  | 0.020486121 | Intergenic | NA           | NA     |
| 12  | 51457219 | 51457290 | 1        | 0.050172   | 5    | 0.014    | 0.039    | 0.93248  | 0.88231  | 0.04726441  | Intragenic | NM_012897    | Adrbk2 |
| 12  | 52879604 | 52879721 | 1        | -0.088415  | 5    | 0.013    | 0.088    | 0.13243  | 0.22084  | 0.04506341  | Intergenic | NA           | NA     |
| 12  | 52971300 | 52971350 | 1        | -0.132206  | 5    | 0.0038   | 0.039    | 0.6804   | 0.81261  | 0.019583799 | Intragenic | NM_001191928 | Mn1    |
| 12  | 52989683 | 52989983 | 1.50E-07 | -0.057674  | 22   | 4.10E-14 | 5.40E-13 | 0.031349 | 0.089024 | 3.20E-11    | Intragenic | NM_001191928 | Mn1    |
| 12  | 52990020 | 52990054 | 1        | -0.102391  | 5    | 0.00044  | 0.00053  | 0.067793 | 0.17018  | 0.0041      | TSS        | NM_001191928 | Mn1    |
| 12  | 52990121 | 52990174 | 1        | -0.282299  | 5    | 6.20E-05 | 0.00053  | 0.13682  | 0.41912  | 0.000939548 | TSS        | NM_001191928 | Mn1    |
| 12  | 52990206 | 52990248 | 1        | -0.241584  | 5    | 4.30E-06 | 0.00014  | 0.067628 | 0.30921  | 0.000114978 | TSS        | NM_001191928 | Mn1    |
| 12  | 52990506 | 52990548 | 1        | -0.120098  | 5    | 0.0012   | 0.0054   | 0.14597  | 0.26607  | 0.008573088 | TSS        | NM_001191928 | Mn1    |
| 12  | 52990599 | 52990630 | 1        | -0.098971  | 5    | 0.0027   | 0.039    | 0.086761 | 0.18573  | 0.015434547 | TSS        | NM_001191928 | Mn1    |
| 12  | 52990642 | 52990680 | 1        | -0.185864  | 5    | 2.20E-06 | 1.60E-05 | 0.18915  | 0.37502  | 6.91E-05    | TSS        | NM_001191928 | Mn1    |
| 12  | 52991060 | 52991118 | 1        | -0.165069  | 5    | 3.30E-06 | 1.60E-05 | 0.042074 | 0.20714  | 9.48E-05    | TSS        | NM_001191928 | Mn1    |
| 12  | 52991268 | 52991304 | 1        | -0.055363  | 5    | 0.00065  | 0.0032   | 0.060553 | 0.11592  | 0.005335929 | TSS        | NM_001191928 | Mn1    |
| 12  | 53266294 | 53266383 | 1        | -0.233008  | 5    | 0.0058   | 0.0055   | 0.45312  | 0.68613  | 0.026163814 | Intergenic | NA           | NA     |
| 12  | 53803721 | 53803809 | 1        | -0.2459    | 9    | 7.20E-07 | 7.90E-05 | 0.22267  | 0.46857  | 2.99E-05    | Intergenic | NA           | NA     |
| 12  | 53957694 | 53957826 | 1        | -0.107648  | 5    | 0.014    | 0.059    | 0.10991  | 0.21756  | 0.04726441  | Intergenic | NA           | NA     |
| 12  | 54112639 | 54112688 | 1        | -0.080048  | 7    | 2.80E-06 | 9.60E-05 | 0.033051 | 0.1131   | 8.50E-05    | Intergenic | NA           | NA     |
| 12  | 54426307 | 54426588 | 1        | -0.173557  | 10   | 0.01     | 0.0056   | 0.24381  | 0.41737  | 0.037614679 | Intergenic | NA           | NA     |
| 13  | 2142389  | 2142557  | 1        | -0.111659  | 5    | 0.0063   | 0.015    | 0.64527  | 0.75693  | 0.027757612 | Intergenic | NA           | NA     |
| 13  | 4804095  | 4804185  | 1        | -0.0982    | 5    | 0.0035   | 0.0055   | 0.16979  | 0.26799  | 0.018410549 | Intergenic | NA           | NA     |
| 13  | 5338341  | 5338483  | 1        | -0.066457  | 11   | 0.002    | 0.0063   | 0.29102  | 0.35748  | 0.012269327 | Intergenic | NA           | NA     |
| 13  | 26433425 | 26433504 | 1        | -0.159062  | 5    | 0.01     | 0.038    | 0.50908  | 0.66814  | 0.037614679 | Intergenic | NA           | NA     |

| chr | start    | stop     | q-value | methy.diff | CpGs | pMWU     | p2DKS    | MCWLS    | MCWHS    | pMWU.fdr    | cgi.type   | transcript      | gene       |
|-----|----------|----------|---------|------------|------|----------|----------|----------|----------|-------------|------------|-----------------|------------|
| 13  | 27712184 | 27712280 | 1       | -0.270301  | 7    | 0.00019  | 5.50E-05 | 0.31037  | 0.58068  | 0.002222187 | Intragenic | NM_001047873    | Cntnap5b   |
| 13  | 27714568 | 27714664 | 1       | -0.281765  | 7    | 0.00016  | 5.50E-05 | 0.29891  | 0.58068  | 0.001938916 | Intragenic | NM_001047873    | Cntnap5b   |
| 13  | 30023561 | 30023683 | 1       | 0.172939   | 5    | 0.012    | 0.088    | 0.81336  | 0.64042  | 0.042700096 | Intragenic | NM_001012748    | Cdh20      |
| 13  | 31842781 | 31842852 | 1       | -0.09366   | 5    | 0.00021  | 0.00098  | 0.027069 | 0.12073  | 0.002348182 | Intragenic | NM_016993       | Bcl2       |
| 13  | 36553394 | 36553433 | 1       | -0.091163  | 5    | 0.0017   | 0.0055   | 0.83212  | 0.92328  | 0.011044014 | Intergenic | NA              | NA         |
| 13  | 36754155 | 36754349 | 1       | 0.055987   | 12   | 0.014    | 0.022    | 0.86473  | 0.80874  | 0.04726441  | Intergenic | NA              | NA         |
| 13  | 40091729 | 40091808 | 1       | -0.170308  | 5    | 1.00E-05 | 0.00098  | 0.091775 | 0.26208  | 0.000218343 | Intergenic | NA              | NA         |
| 13  | 40486821 | 40486914 | 1       | -0.1219    | 5    | 0.0049   | 0.0093   | 0.2745   | 0.3964   | 0.023345384 | Intergenic | NA              | NA         |
| 13  | 40634988 | 40635106 | 1       | -0.13974   | 5    | 0.0053   | 0.039    | 0.13869  | 0.27843  | 0.024662043 | Intragenic | NM_053821       | Ralb       |
| 13  | 40783331 | 40783421 | 0.0002  | -0.111862  | 8    | 9.20E-10 | 7.30E-10 | 0.01464  | 0.1265   | 1.11E-07    | Intragenic | NM_001012023    | Epb4.1l5   |
| 13  | 41258811 | 41259193 | 1       | -0.086031  | 7    | 0.0023   | 0.013    | 0.15092  | 0.23695  | 0.013777597 | Intragenic | NM_031853       | Dbi        |
| 13  | 41289368 | 41289576 | 1       | -0.060447  | 5    | 0.015    | 0.039    | 0.072747 | 0.13319  | 0.049419643 | Intragenic | NM_001134500    | LOC288978  |
| 13  | 41634643 | 41634703 | 1       | -0.053591  | 5    | 0.0024   | 0.0054   | 0.035311 | 0.088902 | 0.014124402 | Intergenic | NA              | NA         |
| 13  | 50523287 | 50523416 | 1       | -0.111358  | 8    | 0.0052   | 0.017    | 0.46322  | 0.57458  | 0.024631579 | Intergenic | NA              | NA         |
| 13  | 55301441 | 55301494 | 1       | 0.13065    | 5    | 0.0063   | 0.0092   | 0.82382  | 0.69317  | 0.027757612 | Intragenic | NM_001047925    | LOC498231  |
| 13  | 55713949 | 55714201 | 1       | -0.093176  | 9    | 0.015    | 0.023    | 0.11741  | 0.21058  | 0.049419643 | Intergenic | NA              | NA         |
| 13  | 56206831 | 56206971 | 1       | -0.069575  | 5    | 0.0035   | 0.0032   | 0.005    | 0.074575 | 0.018410549 | Intragenic | NM_080409       | Ppfia4     |
| 13  | 56961752 | 56961855 | 1       | -0.254541  | 5    | 0.0063   | 0.059    | 0.2473   | 0.50184  | 0.027757612 | Intergenic | NA              | NA         |
| 13  | 58156793 | 58156856 | 1       | -0.143707  | 5    | 0.00021  | 0.0054   | 0.13082  | 0.27453  | 0.002348182 | Intragenic | NM_001134502    | RGD1311892 |
| 13  | 58531971 | 58532024 | 1       | 0.081725   | 5    | 0.01     | 0.039    | 0.79739  | 0.71566  | 0.037614679 | Intergenic | NA              | NA         |
| 13  | 59016964 | 59017074 | 1       | -0.124684  | 5    | 0.0041   | 0.024    | 0.16178  | 0.28646  | 0.020486121 | Intergenic | NA              | NA         |
| 13  | 59205682 | 59205767 | 1       | -0.073486  | 8    | 8.90E-07 | 2.90E-05 | 0.02282  | 0.096307 | 3.48E-05    | Intergenic | NA              | NA         |
| 13  | 70077462 | 70077536 | 1       | -0.172379  | 7    | 0.0017   | 0.013    | 0.19292  | 0.3653   | 0.011044014 | Intergenic | NA              | NA         |
| 13  | 71219744 | 71220219 | 1       | 0.060414   | 11   | 0.015    | 0.018    | 0.76903  | 0.70862  | 0.049419643 | Intergenic | NA              | NA         |
| 13  | 73516145 | 73516420 | 1       | -0.053742  | 5    | 0.013    | 0.059    | 0.016589 | 0.070331 | 0.04506341  | Intergenic | NA              | NA         |
| 13  | 74008294 | 74008482 | 1       | -0.100066  | 11   | 0.00016  | 0.00028  | 0.14128  | 0.24135  | 0.001938916 | Intragenic | NM_022242       | Fam129a    |
| 13  | 74201236 | 74201314 | 1       | -0.10603   | 6    | 0.0013   | 0.0045   | 0.1179   | 0.22393  | 0.009111111 | Intergenic | NA              | NA         |
| 13  | 74738207 | 74738281 | 1       | -0.15995   | 5    | 0.0035   | 0.0055   | 0.34526  | 0.50521  | 0.018410549 | Intragenic | NM_001105958    | Tsen15     |
| 13  | 75146188 | 75146210 | 1       | -0.052688  | 5    | 0.0074   | 0.00014  | 0.03316  | 0.085848 | 0.030871679 | TSS        | NM_001105957:NM | Rgl1:Arpc5 |
| 13  | 75179124 | 75179186 | 1       | -0.14695   | 5    | 0.0029   | 0.015    | 0.2658   | 0.41275  | 0.016164653 | Intergenic | NA              | NA         |
| 13  | 75595757 | 75596276 | 1       | -0.12107   | 14   | 0.00026  | 0.00073  | 0.1823   | 0.30337  | 0.002784906 | Intergenic | NA              | NA         |
| 13  | 75657980 | 75658161 | 1       | 0.225233   | 10   | 0.0033   | 0.054    | 0.52459  | 0.29936  | 0.017946942 | Intragenic | NM_053966       | Lamc1      |
| 13  | 76269608 | 76269725 | 1       | -0.075214  | 5    | 0.0094   | 0.058    | 0.80223  | 0.87745  | 0.036473186 | Intergenic | NA              | NA         |
| 13  | 77815035 | 77815194 | 1       | -0.059042  | 7    | 0.0001   | 0.00029  | 0.025797 | 0.084839 | 0.001327338 | Intergenic | NA              | NA         |
| 13  | 85507423 | 85507479 | 0.0019  | -0.208099  | 5    | 6.30E-08 | 6.80E-09 | 0.067848 | 0.27595  | 4.39E-06    | TSS        | NR_111961       | Prrc2c     |
| 13  | 87628146 | 87628203 | 1       | -0.120255  | 5    | 0.0087   | 0.18     | 0.16134  | 0.2816   | 0.034705946 | Intragenic | NM_013113       | Atp1b1     |
| 13  | 93162316 | 93162364 | 1       | 0.181992   | 5    | 0.0094   | 0.059    | 0.55379  | 0.3718   | 0.036473186 | TSS        | NM_017293       | Uhmk1      |
| 13  | 93162496 | 93162572 | 1       | -0.057946  | 14   | 1.60E-07 | 6.20E-06 | 0.066493 | 0.12444  | 9.23E-06    | TSS        | NM_017293       | Uhmk1      |
| 13  | 93162579 | 93162614 | 1       | -0.121962  | 5    | 0.0035   | 0.00014  | 0.31325  | 0.43521  | 0.018410549 | TSS        | NM_017293       | Uhmk1      |

| chr | start     | stop      | q-value  | methy.diff | CpGs | pMWU     | p2DKS    | MCWLS     | MCWHS    | pMWU.fdr    | cgi.type   | transcript      | gene           |
|-----|-----------|-----------|----------|------------|------|----------|----------|-----------|----------|-------------|------------|-----------------|----------------|
| 13  | 93865925  | 93865974  | 1        | -0.125796  | 5    | 0.01     | 0.015    | 0.39414   | 0.51993  | 0.037614679 | Intergenic | NA              | NA             |
| 13  | 94501247  | 94501307  | 0.16     | -0.171358  | 9    | 2.20E-06 | 5.60E-07 | 0.17464   | 0.346    | 6.91E-05    | Intergenic | NA              | NA             |
| 13  | 94962591  | 94962669  | 1        | -0.050867  | 12   | 0.00026  | 0.0038   | 0.060535  | 0.1114   | 0.002784906 | Intragenic | NM_001105970    | Nhlh1          |
| 13  | 96443337  | 96443397  | 1        | -0.068648  | 5    | 0.002    | 0.015    | 0.87141   | 0.94006  | 0.012269327 | Intergenic | NA              | NA             |
| 13  | 98770488  | 98770709  | 1        | 0.129408   | 7    | 0.0062   | 0.039    | 0.76044   | 0.63103  | 0.027757612 | Intragenic | NM_001191674    | Pld5           |
| 13  | 99495325  | 99495479  | 1        | -0.127856  | 5    | 1.90E-06 | 7.50E-06 | 0.02431   | 0.15217  | 6.26E-05    | Intragenic | NM_177929       | Sdccag8        |
| 13  | 100175828 | 100175895 | 1        | -0.0757    | 5    | 5.00E-05 | 0.00027  | 0.052371  | 0.12807  | 0.000803922 | Intergenic | NA              | NA             |
| 13  | 100422028 | 100422180 | 1        | -0.129048  | 5    | 0.012    | 0.0032   | 0.10574   | 0.23479  | 0.042700096 | Intergenic | NA              | NA             |
| 13  | 100438255 | 100438329 | 1        | -0.196892  | 5    | 0.00019  | 7.10E-05 | 0.10526   | 0.30216  | 0.002222187 | Intergenic | NA              | NA             |
| 13  | 101632860 | 101633000 | 1        | -0.099779  | 6    | 0.00057  | 9.20E-05 | 0.040967  | 0.14075  | 0.004925761 | Intergenic | NA              | NA             |
| 13  | 102679361 | 102679485 | 1        | 0.066286   | 5    | 0.01     | 0.025    | 0.86709   | 0.8008   | 0.037614679 | Intragenic | NM_001025762    | Smyd3          |
| 13  | 102883682 | 102883806 | 1        | 0.065671   | 5    | 0.011    | 0.0093   | 0.86647   | 0.8008   | 0.040408163 | Intergenic | NA              | NA             |
| 13  | 104040148 | 104040506 | 1        | -0.07142   | 5    | 0.01     | 0.059    | 0.046676  | 0.1181   | 0.037614679 | Intergenic | NA              | NA             |
| 13  | 107465364 | 107465438 | 1        | -0.122982  | 5    | 0.0058   | 0.0055   | 0.047077  | 0.17006  | 0.026163814 | TSS        | NM_001100857    | RGD1310587     |
| 13  | 109539923 | 109540006 | 1        | -0.076718  | 5    | 0.0049   | 0.0055   | 0.068006  | 0.14472  | 0.023345384 | Intergenic | NA              | NA             |
| 13  | 110058605 | 110058671 | 1        | 0.161038   | 5    | 0.0035   | 0.015    | 0.75397   | 0.59293  | 0.018410549 | TSS        | NM_001108858    | Ddx3y          |
| 13  | 110769064 | 110769276 | 1        | -0.127444  | 8    | 1.50E-05 | 0.00041  | 0.08304   | 0.21048  | 0.000310955 | TSS        | NM_203336       | Esrrg          |
| 13  | 110964113 | 110964231 | 1        | -0.131946  | 7    | 0.00093  | 0.0019   | 0.092877  | 0.22482  | 0.007046612 | Intragenic | NM_203336       | Esrrg          |
| 13  | 111388395 | 111388489 | 1        | -0.169938  | 5    | 0.0058   | 0.086    | 0.45334   | 0.62327  | 0.026163814 | Intergenic | NA              | NA             |
| 13  | 113000710 | 113000834 | 1        | -0.050716  | 5    | 0.0045   | 0.038    | 0.0054032 | 0.056119 | 0.021964286 | Intergenic | NA              | NA             |
| 13  | 113259703 | 113259806 | 1        | -0.113422  | 5    | 0.015    | 0.015    | 0.096567  | 0.20999  | 0.049419643 | TSS        | NM_206851       | Smyd2          |
| 13  | 115264074 | 115264411 | 1        | -0.153465  | 5    | 0.0068   | 0.038    | 0.19755   | 0.35102  | 0.029075319 | Intergenic | NA              | NA             |
| 13  | 115306385 | 115306437 | 1        | -0.094307  | 10   | 0.0031   | 0.021    | 0.2339    | 0.32821  | 0.01722741  | Intergenic | NA              | NA             |
| 14  | 1140402   | 1140435   | 1        | -0.12052   | 7    | 0.0017   | 0.055    | 0.31739   | 0.43791  | 0.011044014 | Intergenic | NA              | NA             |
| 14  | 2048008   | 2048120   | 1        | -0.084613  | 5    | 0.0035   | 0.015    | 0.041468  | 0.12608  | 0.018410549 | TSS        | NM_022287       | Slc26a1        |
| 14  | 3064578   | 3064652   | 7.30E-06 | -0.060565  | 12   | 1.90E-13 | 2.60E-11 | 0.0076997 | 0.068264 | 7.01E-11    | Intragenic | NM_012566       | Gfi1           |
| 14  | 3097113   | 3097218   | 0.67     | -0.13614   | 7    | 3.60E-05 | 2.40E-06 | 0.072753  | 0.20889  | 0.000622201 | Intergenic | NA              | NA             |
| 14  | 4345575   | 4345610   | 1        | -0.050643  | 5    | 0.0041   | 0.0055   | 0.022906  | 0.073549 | 0.020486121 | Intergenic | NA              | NA             |
| 14  | 5042401   | 5042477   | 1        | -0.06041   | 5    | 8.80E-05 | 0.00098  | 0.0081006 | 0.06851  | 0.00123     | Intergenic | NA              | NA             |
| 14  | 5087993   | 5088060   | 1        | -0.11512   | 5    | 0.0094   | 0.038    | 0.11257   | 0.22769  | 0.036473186 | Intragenic | NM_001008338    | Lrrc8d         |
| 14  | 5093427   | 5093509   | 1        | -0.105532  | 5    | 7.10E-06 | 6.90E-05 | 0.12996   | 0.23549  | 0.000169026 | TSS        | NM_001008338    | Lrrc8d         |
| 14  | 5193547   | 5193679   | 1        | -0.073614  | 5    | 0.01     | 0.015    | 0.13114   | 0.20475  | 0.037614679 | Intergenic | NA              | NA             |
| 14  | 5193729   | 5193840   | 1        | -0.173631  | 5    | 0.00088  | 0.0093   | 0.14917   | 0.32281  | 0.006722981 | Intergenic | NA              | NA             |
| 14  | 6155259   | 6155327   | 1        | -0.060832  | 5    | 0.0022   | 0.024    | 0.07084   | 0.13167  | 0.01321074  | Intragenic | NM_001037205:NM | Abcg3l4:Abcg3l |
| 14  | 6985038   | 6985147   | 1        | -0.070464  | 5    | 0.00088  | 0.0018   | 0.031831  | 0.1023   | 0.006722981 | TSS        | NM_012946       | Sparcl1        |
| 14  | 7281902   | 7282034   | 1        | -0.113937  | 5    | 0.0063   | 0.0091   | 0.14319   | 0.25712  | 0.027757612 | Intragenic | NM_001107206    | Aff1           |
| 14  | 7282662   | 7282738   | 1        | -0.160064  | 5    | 0.0074   | 0.038    | 0.23086   | 0.39092  | 0.030871679 | Intragenic | NM_001107206    | Aff1           |
| 14  | 8834219   | 8834512   | 1        | -0.097525  | 15   | 0.0019   | 0.096    | 0.2662    | 0.36373  | 0.011943782 | Intergenic | NA              | NA             |
| 14  | 9103754   | 9103815   | 1        | 0.052748   | 5    | 2.50E-06 | 0.83     | 0.053835  | 0.001087 | 7.69E-05    | Intergenic | NA              | NA             |

| chr | start    | stop     | q-value | methy.diff | CpGs | pMWU     | p2DKS    | MCWLS     | MCWHS   | pMWU.fdr    | cgi.type   | transcript      | gene         |
|-----|----------|----------|---------|------------|------|----------|----------|-----------|---------|-------------|------------|-----------------|--------------|
| 14  | 9339021  | 9339111  | 1       | -0.240889  | 5    | 0.00029  | 0.0031   | 0.28911   | 0.53    | 0.002984937 | Intragenic | NM_001170551    | Wdfy3        |
| 14  | 9365107  | 9365184  | 1       | 0.067611   | 5    | 0.0068   | 0.0092   | 0.95271   | 0.8851  | 0.029075319 | Intragenic | NM_031242       | Cds1         |
| 14  | 10466649 | 10466689 | 1       | -0.06508   | 5    | 0.015    | 0.039    | 0.73442   | 0.7995  | 0.049419643 | Intergenic | NA              | NA           |
| 14  | 10466727 | 10466813 | 1       | 0.203189   | 5    | 9.80E-05 | 3.20E-05 | 0.83764   | 0.63445 | 0.001307848 | Intergenic | NA              | NA           |
| 14  | 10838916 | 10839056 | 1       | -0.218939  | 9    | 1.60E-08 | 2.80E-05 | 0.15634   | 0.37528 | 1.42E-06    | Intragenic | NM_033021       | Sec31a       |
| 14  | 10926051 | 10926281 | 1       | -0.123521  | 10   | 0.013    | 0.0063   | 0.27464   | 0.39816 | 0.04506341  | Intergenic | NA              | NA           |
| 14  | 10973350 | 10973541 | 1       | -0.162523  | 11   | 0.00062  | 0.004    | 0.46833   | 0.63085 | 0.005241237 | Intergenic | NA              | NA           |
| 14  | 11108451 | 11108520 | 1       | 0.143721   | 5    | 0.00039  | 0.0031   | 0.89126   | 0.74754 | 0.003723415 | Intragenic | NM_001108354    | Tmem150c     |
| 14  | 14335256 | 14335325 | 1       | -0.167663  | 5    | 0.0035   | 0.0055   | 0.20057   | 0.36823 | 0.018410549 | Intragenic | NM_012823       | Anxa3        |
| 14  | 15629871 | 15629908 | 1       | -0.156415  | 5    | 0.0041   | 0.015    | 0.41145   | 0.56787 | 0.020486121 | Intergenic | NA              | NA           |
| 14  | 15634315 | 15634352 | 1       | -0.160788  | 5    | 0.0035   | 0.015    | 0.40708   | 0.56787 | 0.018410549 | Intergenic | NA              | NA           |
| 14  | 16802100 | 16802286 | 1       | -0.101066  | 5    | 0.00088  | 0.0032   | 0.07087   | 0.17194 | 0.006722981 | Intragenic | NM_001100889    | Shroom3      |
| 14  | 33126190 | 33126319 | 1       | -0.064253  | 5    | 0.012    | 0.025    | 0.07507   | 0.13932 | 0.042700096 | Intergenic | NA              | NA           |
| 14  | 35536476 | 35536575 | 1       | -0.090698  | 6    | 0.0047   | 0.0045   | 0.044337  | 0.13503 | 0.022879947 | Intragenic | NM_001105736    | Chic2        |
| 14  | 46694292 | 46694544 | 1       | 0.050978   | 44   | 0.012    | 0.11     | 0.18222   | 0.17125 | 0.042700096 | Intergenic | NA              | NA           |
| 14  | 46743414 | 46743686 | 1       | -0.082157  | 21   | 0.0095   | 0.041    | 0.23523   | 0.30323 | 0.036841829 | Intergenic | NA              | NA           |
| 14  | 46757205 | 46757275 | 1       | -0.108636  | 5    | 0.0008   | 0.0092   | 0.1433    | 0.25194 | 0.006267516 | Intergenic | NA              | NA           |
| 14  | 46767626 | 46767651 | 1       | -0.226788  | 5    | 0.0032   | 0.015    | 0.094854  | 0.32164 | 0.017454545 | Intergenic | NA              | NA           |
| 14  | 46810592 | 46810717 | 1       | -0.085639  | 9    | 0.00036  | 0.0036   | 0.17954   | 0.26518 | 0.003505013 | Intergenic | NA              | NA           |
| 14  | 46813148 | 46813382 | 0.00012 | -0.101877  | 18   | 5.20E-14 | 4.20E-10 | 0.084576  | 0.18645 | 3.20E-11    | TSS        | NM_001025002    | LOC310926    |
| 14  | 46815534 | 46815727 | 1       | -0.079987  | 17   | 9.80E-05 | 0.0052   | 0.1291    | 0.1679  | 0.001307848 | TSS        | NM_001025002    | LOC310926    |
| 14  | 46815776 | 46816103 | 1       | -0.054609  | 35   | 6.60E-06 | 0.00064  | 0.22155   | 0.28755 | 0.000161821 | TSS        | NM_001025002    | LOC310926    |
| 14  | 46816435 | 46817808 | 1       | -0.07756   | 204  | 6.90E-10 | 1.50E-05 | 0.181     | 0.20131 | 8.63E-08    | TSS        | NM_001025002    | LOC310926    |
| 14  | 46821075 | 46821169 | 1       | -0.061212  | 5    | 0.0013   | 0.039    | 0.14075   | 0.20196 | 0.009111111 | TSS        | NR_046239       | Rn45s        |
| 14  | 46823416 | 46823446 | 1       | 0.137829   | 5    | 0.00021  | 0.0018   | 0.37216   | 0.23433 | 0.002348182 | TSS        | NR_046238       | Rn5-8s       |
| 14  | 46825564 | 46825579 | 1       | -0.270928  | 5    | 9.80E-05 | 0.0018   | 0.1938    | 0.46473 | 0.001307848 | TSS        | NR_046238:NR_04 | Rn5-8s:Rn28s |
| 14  | 46856058 | 46856810 | 1       | -0.06154   | 71   | 2.50E-09 | 4.20E-06 | 0.14553   | 0.18002 | 2.67E-07    | Intragenic | NM_001025002    | LOC310926    |
| 14  | 46861824 | 46861845 | 1       | -0.069189  | 5    | 0.0058   | 0.0054   | 0.099045  | 0.16823 | 0.026163814 | TSS        | NR_046238       | Rn5-8s       |
| 14  | 46863999 | 46864012 | 1       | -0.170045  | 5    | 0.0038   | 0.058    | 0.29632   | 0.46636 | 0.019583799 | TSS        | NR_046238       | Rn5-8s       |
| 14  | 46864093 | 46864108 | 1       | -0.074894  | 5    | 0.0032   | 0.0091   | 0.1798    | 0.25469 | 0.017454545 | TSS        | NR_046238       | Rn5-8s       |
| 14  | 47850245 | 47850269 | 0.042   | -0.149738  | 6    | 6.90E-09 | 1.50E-07 | 0.0075338 | 0.15727 | 6.53E-07    | Intergenic | NA              | NA           |
| 14  | 48003072 | 48003111 | 1       | -0.177405  | 7    | 0.0001   | 0.0054   | 0.33642   | 0.51382 | 0.001327338 | Intergenic | NA              | NA           |
| 14  | 48476703 | 48476742 | 1       | -0.156864  | 7    | 0.00043  | 0.0022   | 0.35696   | 0.51382 | 0.004073684 | Intergenic | NA              | NA           |
| 14  | 49725297 | 49725394 | 1       | 0.074834   | 5    | 0.0068   | 0.024    | 0.94519   | 0.87035 | 0.029075319 | Intergenic | NA              | NA           |
| 14  | 49921040 | 49921113 | 1       | 0.092625   | 5    | 0.0014   | 0.0092   | 0.92401   | 0.83139 | 0.00960223  | Intergenic | NA              | NA           |
| 14  | 57118702 | 57118826 | 1       | 0.077074   | 7    | 0.0011   | 0.0082   | 0.93367   | 0.8566  | 0.007982301 | Intergenic | NA              | NA           |
| 14  | 64537611 | 64537671 | 1       | 0.066881   | 5    | 0.0017   | 0.0054   | 0.98714   | 0.92026 | 0.011044014 | Intragenic | NM_001106010    | Gba3         |
| 14  | 64799802 | 64800097 | 1       | -0.129356  | 5    | 0.014    | 0.058    | 0.16323   | 0.29258 | 0.04726441  | Intergenic | NA              | NA           |
| 14  | 76817999 | 76818074 | 1       | -0.102017  | 5    | 0.0029   | 0.015    | 0.039952  | 0.14197 | 0.016164653 | Intergenic | NA              | NA           |

| chr | start     | stop      | q-value  | methy.diff | CpGs | pMWU     | p2DKS    | MCWLS    | MCWHS    | pMWU.fdr    | cgi.type   | transcript   | gene    |
|-----|-----------|-----------|----------|------------|------|----------|----------|----------|----------|-------------|------------|--------------|---------|
| 14  | 79326681  | 79326815  | 1        | -0.153793  | 5    | 0.012    | 0.0054   | 0.078408 | 0.2322   | 0.042700096 | Intragenic | NM_001107225 | Sorcs2  |
| 14  | 80495253  | 80495313  | 1        | -0.113768  | 5    | 0.002    | 0.015    | 0.11429  | 0.22806  | 0.012269327 | Intragenic | NM_001100655 | Nacad   |
| 14  | 82968713  | 82968931  | 1        | -0.103721  | 11   | 0.0015   | 0.026    | 0.20152  | 0.30524  | 0.01019337  | Intragenic | NM_053429    | Fgfr3   |
| 14  | 84452533  | 84452795  | 1        | -0.140451  | 12   | 7.80E-05 | 0.0053   | 0.24278  | 0.38323  | 0.001113424 | Intragenic | NM_001013049 | Smtn    |
| 14  | 84572786  | 84572868  | 0.34     | -0.112876  | 7    | 7.00E-08 | 1.20E-06 | 0.053619 | 0.16649  | 4.78E-06    | TSS        | NR_130147    | Tug1    |
| 14  | 84928560  | 84928594  | 1        | -0.132889  | 5    | 0.014    | 0.18     | 0.18796  | 0.32085  | 0.04726441  | Intragenic | NM_001109447 | Gal3st1 |
| 14  | 84928949  | 84928980  | 1        | -0.117554  | 5    | 0.0016   | 0.0018   | 0.060825 | 0.17838  | 0.010628263 | Intragenic | NM_001109447 | Gal3st1 |
| 14  | 85139242  | 85139288  | 1        | -0.138613  | 5    | 0.0041   | 0.015    | 0.41296  | 0.55157  | 0.020486121 | Intergenic | NA           | NA      |
| 14  | 85844478  | 85844576  | 1        | -0.198094  | 5    | 0.0027   | 0.015    | 0.12776  | 0.32586  | 0.015434547 | Intragenic | NM_001012153 | Thoc5   |
| 14  | 85991967  | 85992006  | 1        | 0.183745   | 6    | 0.00057  | 0.0026   | 0.5562   | 0.37246  | 0.004925761 | Intragenic | NM_001108365 | Gas2l1  |
| 14  | 86072562  | 86072733  | 1        | -0.110801  | 10   | 3.70E-05 | 0.0013   | 0.13571  | 0.24651  | 0.000637991 | TSS        | NM_001109467 | Emid1   |
| 14  | 86183012  | 86183147  | 1        | -0.201828  | 5    | 0.00059  | 0.0054   | 0.15702  | 0.35885  | 0.005010587 | Intergenic | NA           | NA      |
| 14  | 87939222  | 87939451  | 1        | -0.09634   | 5    | 0.0013   | 0.015    | 0.74159  | 0.83793  | 0.009111111 | Intergenic | NA           | NA      |
| 14  | 88704570  | 88705117  | 1        | -0.051033  | 11   | 0.0009   | 0.015    | 0.050812 | 0.10185  | 0.006847423 | Intergenic | NA           | NA      |
| 14  | 89519099  | 89519181  | 1        | -0.090741  | 5    | 0.00014  | 0.0054   | 0.76959  | 0.86033  | 0.00174527  | Intragenic | NM_001106020 | Abca13  |
| 14  | 91913734  | 91913866  | 0.74     | -0.094803  | 14   | 1.40E-09 | 2.60E-06 | 0.089473 | 0.18428  | 1.64E-07    | TSS        | NM_001109093 | Grb10   |
| 14  | 91913872  | 91913915  | 1        | -0.127983  | 5    | 0.00015  | 0.0018   | 0.11106  | 0.23904  | 0.001835821 | TSS        | NM_001109093 | Grb10   |
| 14  | 91913926  | 91914126  | 5.40E-15 | -0.170278  | 25   | 4.50E-14 | 1.90E-20 | 0.20618  | 0.37646  | 3.20E-11    | TSS        | NM_001109093 | Grb10   |
| 14  | 91914414  | 91914437  | 1        | -0.169712  | 5    | 0.0094   | 0.00053  | 0.33019  | 0.4999   | 0.036473186 | TSS        | NM_001109093 | Grb10   |
| 14  | 91914909  | 91914960  | 1        | -0.154991  | 5    | 1.30E-05 | 1.50E-05 | 0.25283  | 0.40782  | 0.000273333 | TSS        | NM_001109093 | Grb10   |
| 14  | 94137289  | 94137387  | 1        | 0.050889   | 7    | 0.015    | 0.078    | 0.88052  | 0.82964  | 0.049419643 | Intergenic | NA           | NA      |
| 14  | 101496608 | 101496670 | 1        | -0.108509  | 5    | 0.008    | 0.0054   | 0.76961  | 0.87812  | 0.03243956  | Intergenic | NA           | NA      |
| 14  | 102047472 | 102047569 | 1        | 0.1203     | 17   | 0.014    | 0.018    | 0.44127  | 0.32097  | 0.04726441  | TSS        | NM_001109094 | Etaa1   |
| 14  | 102052749 | 102052846 | 1        | 0.118791   | 17   | 0.015    | 0.019    | 0.43833  | 0.31954  | 0.049419643 | Intergenic | NA           | NA      |
| 14  | 102917111 | 102917288 | 1        | -0.052648  | 7    | 0.0062   | 0.027    | 0.050002 | 0.10265  | 0.027757612 | Intergenic | NA           | NA      |
| 14  | 103184660 | 103184780 | 1        | -0.186867  | 5    | 0.0053   | 0.0018   | 0.14616  | 0.33302  | 0.024662043 | Intergenic | NA           | NA      |
| 14  | 103943581 | 103943696 | 1        | -0.123682  | 10   | 9.00E-05 | 1.50E-05 | 0.043799 | 0.16748  | 0.001248496 | Intragenic | NM_001047094 | Spred2  |
| 14  | 103967885 | 103967998 | 1        | -0.065369  | 5    | 0.0041   | 0.015    | 0.071038 | 0.13641  | 0.020486121 | Intragenic | NM_001047094 | Spred2  |
| 14  | 104782545 | 104782767 | 1        | -0.086206  | 7    | 8.30E-06 | 1.60E-05 | 0.016485 | 0.10269  | 0.000194457 | TSS        | NM_001134730 | Lgalsl  |
| 14  | 106042686 | 106042768 | 1        | -0.116477  | 5    | 0.00014  | 0.00053  | 0.098486 | 0.21496  | 0.00174527  | Intergenic | NA           | NA      |
| 14  | 107175748 | 107175836 | 1        | -0.127227  | 9    | 0.011    | 0.062    | 0.66603  | 0.79325  | 0.040408163 | Intragenic | NM_001305130 | Ehbp1   |
| 14  | 107824610 | 107824758 | 1        | 0.177572   | 12   | 8.40E-06 | 0.0013   | 0.53496  | 0.35739  | 0.000195558 | TSS        | NM_001017504 | Zrsr1   |
| 14  | 107825417 | 107825458 | 1        | 0.071811   | 5    | 0.014    | 0.038    | 0.3456   | 0.27378  | 0.04726441  | TSS        | NM_001017504 | Zrsr1   |
| 14  | 107827099 | 107827233 | 0.91     | -0.224723  | 9    | 1.60E-06 | 3.20E-06 | 0.070708 | 0.29543  | 5.47E-05    | TSS        | NM_001017504 | Zrsr1   |
| 14  | 108258064 | 108258173 | 1        | 0.097296   | 5    | 0.0035   | 0.024    | 0.91078  | 0.81348  | 0.018410549 | Intergenic | NA           | NA      |
| 14  | 108333191 | 108333338 | 1        | -0.105148  | 5    | 0.014    | 0.088    | 0.056391 | 0.16154  | 0.04726441  | Intergenic | NA           | NA      |
| 14  | 108457965 | 108458080 | 1        | 0.052441   | 8    | 0.0033   | 0.025    | 0.92518  | 0.87274  | 0.017946942 | Intergenic | NA           | NA      |
| 14  | 109798465 | 109798535 | 1        | -0.158495  | 5    | 0.0038   | 0.025    | 0.24197  | 0.40046  | 0.019583799 | Intergenic | NA           | NA      |
| 14  | 114362563 | 114362661 | 1        | -0.064772  | 5    | 0.00059  | 0.0031   | 0.023723 | 0.088495 | 0.005010587 | Intergenic | NA           | NA      |

| chr | start     | stop      | q-value  | methy.diff | CpGs | pMWU     | p2DKS    | MCWLS    | MCWHS    | pMWU.fdr    | cgi.type   | transcript      | gene         |
|-----|-----------|-----------|----------|------------|------|----------|----------|----------|----------|-------------|------------|-----------------|--------------|
| 14  | 114818809 | 114818966 | 1        | -0.062134  | 7    | 0.00062  | 0.0054   | 0.013547 | 0.075681 | 0.005241237 | Intergenic | NA              | NA           |
| 15  | 2350523   | 2350577   | 1        | 0.103913   | 5    | 0.0053   | 0.038    | 0.25317  | 0.14926  | 0.024662043 | Intergenic | NA              | NA           |
| 15  | 2354391   | 2354443   | 1        | -0.059638  | 5    | 0.0074   | 0.0053   | 0.12985  | 0.18948  | 0.030871679 | Intergenic | NA              | NA           |
| 15  | 2359105   | 2359189   | 1        | -0.05306   | 5    | 0.002    | 0.038    | 0.040804 | 0.093864 | 0.012269327 | Intragenic | NM_001107250    | Zfp503       |
| 15  | 2359204   | 2359235   | 1        | -0.05503   | 5    | 0.00065  | 0.0018   | 0.036215 | 0.091245 | 0.005335929 | Intragenic | NM_001107250    | Zfp503       |
| 15  | 2359375   | 2359483   | 1        | -0.077955  | 5    | 0.0032   | 0.024    | 0.060201 | 0.13816  | 0.017454545 | Intragenic | NM_001107250    | Zfp503       |
| 15  | 2359543   | 2359588   | 1        | -0.214183  | 6    | 8.30E-07 | 2.50E-05 | 0.20996  | 0.42414  | 3.35E-05    | Intragenic | NM_001107250    | Zfp503       |
| 15  | 2361538   | 2361603   | 1        | -0.067515  | 5    | 0.0058   | 0.059    | 0.086463 | 0.15398  | 0.026163814 | Intergenic | NA              | NA           |
| 15  | 2362487   | 2362575   | 1        | -0.204203  | 5    | 0.00097  | 7.00E-05 | 0.10453  | 0.30873  | 0.007223613 | Intergenic | NA              | NA           |
| 15  | 2501966   | 2502034   | 1        | 0.114162   | 5    | 0.0094   | 0.015    | 0.69247  | 0.57831  | 0.036473186 | Intergenic | NA              | NA           |
| 15  | 3440159   | 3440284   | 1        | 0.073818   | 5    | 0.0032   | 0.038    | 0.97715  | 0.90333  | 0.017454545 | Intragenic | NM_001107248    | Vcl          |
| 15  | 3655338   | 3655471   | 1        | 0.181025   | 9    | 0.0093   | 0.11     | 0.62437  | 0.44334  | 0.036473186 | Intergenic | NA              | NA           |
| 15  | 8668422   | 8668537   | 1        | -0.120332  | 5    | 0.002    | 0.0018   | 0.12118  | 0.24152  | 0.012269327 | Intragenic | NM_001039516    | Kcnk5        |
| 15  | 8676265   | 8676356   | 1        | -0.064161  | 5    | 0.0058   | 0.0032   | 0.031812 | 0.095973 | 0.026163814 | Intragenic | NM_001039516    | Kcnk5        |
| 15  | 9329952   | 9330076   | 1.30E-11 | -0.203333  | 14   | 4.50E-14 | 4.50E-17 | 0.44539  | 0.64872  | 3.20E-11    | Intergenic | NA              | NA           |
| 15  | 9393053   | 9393281   | 1        | -0.13095   | 18   | 0.00052  | 0.011    | 0.36737  | 0.49832  | 0.00468     | Intragenic | NM_134459       | Cd99l2       |
| 15  | 9795551   | 9795629   | 1        | -0.123545  | 5    | 0.014    | 0.015    | 0.39945  | 0.52299  | 0.04726441  | Intragenic | NM_134459       | Cd99l2       |
| 15  | 9795686   | 9795721   | 1        | -0.163473  | 5    | 0.0094   | 0.038    | 0.24043  | 0.4039   | 0.036473186 | Intragenic | NM_134459       | Cd99l2       |
| 15  | 11915472  | 11915554  | 1        | -0.167181  | 5    | 7.80E-05 | 0.00014  | 0.063002 | 0.23018  | 0.001113424 | Intragenic | NM_001108371    | Ube2e2       |
| 15  | 13272816  | 13272942  | 1        | -0.155058  | 5    | 0.0016   | 0.0093   | 0.13085  | 0.2859   | 0.010628263 | Intragenic | NM_001270854:NM | Thrb:Thrb    |
| 15  | 16740144  | 16740187  | 1        | 0.063299   | 5    | 0.0068   | 0.0053   | 0.9054   | 0.8421   | 0.029075319 | Intergenic | NA              | NA           |
| 15  | 16751458  | 16751501  | 1        | 0.076538   | 5    | 0.0053   | 0.0053   | 0.91864  | 0.8421   | 0.024662043 | Intergenic | NA              | NA           |
| 15  | 22817953  | 22818246  | 1        | -0.079037  | 12   | 0.0025   | 0.0013   | 0.053544 | 0.13258  | 0.01468949  | Intragenic | NM_001107288    | Flnb         |
| 15  | 23394604  | 23394656  | 1        | -0.094918  | 7    | 0.0018   | 0.0083   | 0.33788  | 0.43279  | 0.011652632 | Intergenic | NA              | NA           |
| 15  | 23568778  | 23568890  | 1        | -0.065369  | 8    | 0.0012   | 0.048    | 0.07732  | 0.14269  | 0.008573088 | TSS        | NM_001013994    | Rcor2        |
| 15  | 23789219  | 23789295  | 1        | -0.129689  | 5    | 0.00054  | 0.0054   | 0.46716  | 0.59685  | 0.004710638 | Intragenic | NM_001011915    | Fermt2       |
| 15  | 25885196  | 25885235  | 1        | -0.16535   | 5    | 0.0058   | 0.025    | 0.2786   | 0.44395  | 0.026163814 | Intergenic | NA              | NA           |
| 15  | 28233291  | 28233357  | 1        | -0.171375  | 5    | 0.00012  | 0.00052  | 0.084252 | 0.25563  | 0.00153218  | Intragenic | NM_001107257    | Fbxo34       |
| 15  | 29399028  | 29399100  | 1        | -0.162326  | 7    | 0.0062   | 0.04     | 0.2737   | 0.43602  | 0.027757612 | Intergenic | NA              | NA           |
| 15  | 32194278  | 32194471  | 1        | -0.069043  | 5    | 0.0053   | 0.0017   | 0.036929 | 0.10597  | 0.024662043 | Intragenic | NM_001271313    | Arhgef40     |
| 15  | 32211592  | 32211696  | 1        | -0.138777  | 7    | 3.40E-05 | 0.0005   | 0.10406  | 0.24284  | 0.000597429 | Intragenic | NM_001271313    | Arhgef40     |
| 15  | 39936289  | 39936417  | 1        | -0.175785  | 5    | 0.0087   | 0.0032   | 0.1473   | 0.32308  | 0.034705946 | Intergenic | NA              | NA           |
| 15  | 41349247  | 41349290  | 1        | 0.055925   | 5    | 0.00029  | 0.00053  | 0.96166  | 0.90573  | 0.002984937 | Intergenic | NA              | NA           |
| 15  | 41520471  | 41520599  | 1        | -0.179275  | 5    | 0.011    | 0.0032   | 0.14381  | 0.32308  | 0.040408163 | Intergenic | NA              | NA           |
| 15  | 42492627  | 42492693  | 1        | -0.054946  | 5    | 0.01     | 0.015    | 0.83842  | 0.89337  | 0.037614679 | Intragenic | NM_001024272:NM | Phf11:Phf11b |
| 15  | 42548109  | 42548175  | 1        | -0.055109  | 5    | 0.013    | 0.059    | 0.83826  | 0.89337  | 0.04506341  | Intergenic | NA              | NA           |
| 15  | 44478249  | 44478311  | 1        | -0.14536   | 5    | 0.01     | 0.038    | 0.61103  | 0.75639  | 0.037614679 | Intergenic | NA              | NA           |
| 15  | 45495739  | 45495858  | 1        | -0.090607  | 5    | 0.0019   | 0.0031   | 0.034678 | 0.12529  | 0.011943782 | TSS        | NM_001108381    | Ebpl         |
| 15  | 47566481  | 47566559  | 1        | -0.116793  | 5    | 0.015    | 0.087    | 0.15668  | 0.27347  | 0.049419643 | Intragenic | NM_001108383    | Ebf2         |



| chr | start     | stop      | q-value | methy.diff | CpGs | pMWU     | p2DKS    | MCWLS    | MCWHS    | pMWU.fdr    | cgi.type   | transcript      | gene       |
|-----|-----------|-----------|---------|------------|------|----------|----------|----------|----------|-------------|------------|-----------------|------------|
| 15  | 47694383  | 47694420  | 1       | -0.062661  | 5    | 0.0045   | 0.0018   | 0.053108 | 0.11577  | 0.021964286 | Intergenic | NA              | NA         |
| 15  | 50040866  | 50040958  | 1       | -0.223721  | 5    | 0.0014   | 0.0018   | 0.10443  | 0.32815  | 0.00960223  | Intergenic | NA              | NA         |
| 15  | 51121492  | 51121601  | 1       | 0.134225   | 5    | 0.013    | 0.015    | 0.65153  | 0.5173   | 0.04506341  | Intergenic | NA              | NA         |
| 15  | 51546765  | 51546886  | 1       | -0.147773  | 6    | 0.00084  | 0.0025   | 0.12121  | 0.26898  | 0.006539241 | Intragenic | NM_053307       | Msra       |
| 15  | 52550869  | 52551007  | 1       | -0.071921  | 5    | 0.0016   | 0.0055   | 0.047981 | 0.1199   | 0.010628263 | Intragenic | NM_013007       | Pnoc       |
| 15  | 55228442  | 55228598  | 1       | -0.072919  | 7    | 6.00E-05 | 0.00082  | 0.038601 | 0.11152  | 0.0009225   | Intergenic | NA              | NA         |
| 15  | 65356811  | 65356848  | 1       | -0.053831  | 5    | 0.013    | 0.13     | 0.084579 | 0.13841  | 0.04506341  | TSS        | NM_001302944    | Kbtbd7     |
| 15  | 65395530  | 65395567  | 1       | -0.053831  | 5    | 0.013    | 0.13     | 0.084579 | 0.13841  | 0.04506341  | TSS        | NM_001012045    | Kbtbd6     |
| 15  | 67829734  | 67829823  | 1       | -0.123827  | 8    | 2.10E-05 | 5.50E-06 | 0.33932  | 0.46314  | 0.00041328  | Intergenic | NA              | NA         |
| 15  | 78470809  | 78470886  | 1       | -0.294759  | 5    | 0.00036  | 0.0018   | 0.33277  | 0.62753  | 0.003505013 | Intergenic | NA              | NA         |
| 15  | 78714981  | 78715030  | 1       | 0.206867   | 5    | 0.0045   | 0.0054   | 0.59317  | 0.38631  | 0.021964286 | Intergenic | NA              | NA         |
| 15  | 86356630  | 86356730  | 1       | -0.066325  | 5    | 0.0074   | 0.038    | 0.11548  | 0.1818   | 0.030871679 | Intergenic | NA              | NA         |
| 15  | 93684103  | 93684320  | 1       | -0.095979  | 8    | 0.0067   | 0.019    | 0.17317  | 0.26915  | 0.029075319 | Intergenic | NA              | NA         |
| 15  | 107351070 | 107351143 | 0.97    | -0.227337  | 5    | 9.80E-07 | 3.40E-06 | 0.090712 | 0.31805  | 3.73E-05    | Intragenic | NM_133411       | Abcc4      |
| 15  | 107428805 | 107428870 | 1       | -0.169194  | 5    | 0.00015  | 0.00028  | 0.12636  | 0.29555  | 0.001835821 | Intergenic | NA              | NA         |
| 15  | 107518622 | 107518677 | 1       | 0.317784   | 5    | 0.0012   | 0.003    | 0.49461  | 0.17683  | 0.008573088 | Intragenic | NM_001106058    | Cldn10     |
| 15  | 109902335 | 109902374 | 1       | 0.24905    | 5    | 0.0049   | 0.0018   | 0.39787  | 0.14882  | 0.023345384 | Intragenic | NM_001107287    | Farp1      |
| 16  | 280668    | 280810    | 1       | -0.07547   | 9    | 0.015    | 0.032    | 0.21464  | 0.29011  | 0.049419643 | Intergenic | NA              | NA         |
| 16  | 2925991   | 2926232   | 1       | 0.056444   | 13   | 0.0097   | 0.14     | 0.11738  | 0.060936 | 0.037479581 | TSS        | NM_001106061    | Arhgef3    |
| 16  | 4417971   | 4418149   | 1       | -0.123589  | 7    | 0.0044   | 0.11     | 0.23317  | 0.35675  | 0.021881402 | Intragenic | NM_022631       | Wnt5a      |
| 16  | 5979312   | 5979344   | 1       | 0.052631   | 5    | 7.80E-05 | 0.83     | 0.052632 | 1.00E-07 | 0.001113424 | TSS        | NM_001309459    | Actr8      |
| 16  | 6455258   | 6455352   | 1       | -0.08127   | 6    | 0.00097  | 0.0072   | 0.10623  | 0.1875   | 0.007223613 | Intergenic | NA              | NA         |
| 16  | 6519809   | 6519941   | 1       | -0.12841   | 5    | 0.0035   | 0.039    | 0.12835  | 0.25676  | 0.018410549 | Intergenic | NA              | NA         |
| 16  | 6625379   | 6625587   | 1       | -0.100289  | 5    | 0.0014   | 0.0031   | 0.10718  | 0.20747  | 0.00960223  | Intergenic | NA              | NA         |
| 16  | 7237286   | 7237599   | 1       | -0.161175  | 5    | 7.80E-05 | 0.00027  | 0.057114 | 0.21829  | 0.001113424 | Intragenic | NM_001100882    | Sema3g     |
| 16  | 7476804   | 7476928   | 1       | -0.259873  | 5    | 0.0035   | 0.039    | 0.39175  | 0.65162  | 0.018410549 | Intergenic | NA              | NA         |
| 16  | 9597437   | 9597494   | 1       | 0.178321   | 5    | 0.013    | 0.0092   | 0.66539  | 0.48707  | 0.04506341  | Intragenic | NM_001170593:NM | Chat:Grid1 |
| 16  | 11395377  | 11395415  | 1       | -0.05569   | 5    | 0.0053   | 0.015    | 0.86474  | 0.92043  | 0.024662043 | Intergenic | NA              | NA         |
| 16  | 12278113  | 12278278  | 1       | -0.090911  | 8    | 0.0088   | 0.07     | 0.20428  | 0.29519  | 0.03504803  | Intergenic | NA              | NA         |
| 16  | 17565803  | 17565843  | 1       | -0.074331  | 5    | 0.00032  | 0.0055   | 0.075616 | 0.14995  | 0.003243956 | Intragenic | NM_001170349    | Sh2d4b     |
| 16  | 18259951  | 18259978  | 1       | -0.166358  | 5    | 9.20E-06 | 0.00014  | 0.097522 | 0.26388  | 0.000206371 | Intergenic | NA              | NA         |
| 16  | 18589390  | 18589472  | 1       | -0.167039  | 8    | 0.0015   | 0.026    | 0.16547  | 0.33251  | 0.01019337  | Intergenic | NA              | NA         |
| 16  | 19084156  | 19084205  | 1       | -0.130663  | 5    | 0.0019   | 0.0092   | 0.41477  | 0.54543  | 0.011943782 | TSS        | NM_001007684    | Klf2       |
| 16  | 19084944  | 19085111  | 1       | 0.136364   | 17   | 0.011    | 0.057    | 0.13262  | 0.078963 | 0.040408163 | TSS        | NM_001007684    | Klf2       |
| 16  | 19766838  | 19767017  | 1       | -0.089319  | 11   | 0.0048   | 0.078    | 0.20192  | 0.29124  | 0.023320606 | Intergenic | NA              | NA         |
| 16  | 19780168  | 19780211  | 1       | -0.055234  | 5    | 0.0024   | 0.015    | 0.054303 | 0.10954  | 0.014124402 | TSS        | NM_020086       | Plvap      |
| 16  | 19814423  | 19814630  | 1       | -0.162125  | 7    | 0.0026   | 0.0075   | 0.21619  | 0.37831  | 0.015204437 | Intergenic | NA              | NA         |
| 16  | 19972919  | 19973194  | 0.58    | -0.102046  | 15   | 2.30E-10 | 2.10E-06 | 0.062986 | 0.16503  | 3.54E-08    | Intragenic | NM_012855       | Jak3       |
| 16  | 19976903  | 19977152  | 1       | -0.141354  | 5    | 1.50E-05 | 0.00027  | 0.071532 | 0.21289  | 0.000310955 | Intragenic | NM_012855       | Jak3       |

| chr | start    | stop     | q-value | methy.diff | CpGs | pMWU     | p2DKS    | MCWLS     | MCWHS    | pMWU.fdr    | cgi.type   | transcript      | gene            |
|-----|----------|----------|---------|------------|------|----------|----------|-----------|----------|-------------|------------|-----------------|-----------------|
| 16  | 19977955 | 19978109 | 1       | -0.113246  | 15   | 9.20E-05 | 0.004    | 0.21835   | 0.3316   | 0.001271461 | Intragenic | NM_012855       | Jak3            |
| 16  | 19978656 | 19978779 | 1       | -0.084184  | 7    | 0.00018  | 0.0013   | 0.01711   | 0.10129  | 0.002142581 | Intragenic | NM_012855       | Jak3            |
| 16  | 19996653 | 19996717 | 1       | -0.073801  | 7    | 9.00E-05 | 0.0022   | 0.05299   | 0.12679  | 0.001248496 | Intragenic | NM_001106069    | Fcho1           |
| 16  | 20052636 | 20052716 | 1       | 0.107056   | 5    | 0.0013   | 0.0055   | 0.89166   | 0.78461  | 0.009111111 | Intergenic | NA              | NA              |
| 16  | 20071540 | 20071696 | 1       | 0.110305   | 9    | 0.013    | 0.11     | 0.78516   | 0.67486  | 0.04506341  | Intergenic | NA              | NA              |
| 16  | 20414920 | 20415017 | 1       | -0.148566  | 5    | 0.0063   | 0.0055   | 0.20721   | 0.35577  | 0.027757612 | Intergenic | NA              | NA              |
| 16  | 20443665 | 20444063 | 0.0005  | -0.095133  | 30   | 1.70E-12 | 1.80E-09 | 0.088141  | 0.18327  | 4.65E-10    | Intragenic | NM_001014236    | Ssbp4           |
| 16  | 20444425 | 20444447 | 1       | -0.144419  | 7    | 6.00E-05 | 1.60E-05 | 0.087379  | 0.2318   | 0.0009225   | Intragenic | NM_001014236    | Ssbp4           |
| 16  | 20444476 | 20444499 | 1       | -0.073146  | 5    | 0.0029   | 0.0055   | 0.073312  | 0.14646  | 0.016164653 | Intragenic | NM_001014236    | Ssbp4           |
| 16  | 20444501 | 20444522 | 1       | -0.054331  | 5    | 0.0019   | 0.00053  | 0.056699  | 0.11103  | 0.011943782 | Intragenic | NM_001014236    | Ssbp4           |
| 16  | 20444689 | 20444795 | 1       | -0.157033  | 12   | 0.0026   | 0.039    | 0.33412   | 0.45732  | 0.015204437 | Intragenic | NM_001014236    | Ssbp4           |
| 16  | 21473507 | 21473597 | 1       | -0.090088  | 8    | 0.0099   | 0.016    | 0.20538   | 0.29546  | 0.037614679 | Intergenic | NA              | NA              |
| 16  | 30997508 | 30997584 | 1       | -0.088664  | 5    | 0.0022   | 0.0031   | 0.063831  | 0.1525   | 0.01321074  | Intergenic | NA              | NA              |
| 16  | 32026219 | 32026295 | 1       | -0.091006  | 5    | 0.0017   | 0.0054   | 0.061489  | 0.1525   | 0.011044014 | Intragenic | NM_198764       | Sh3rf1          |
| 16  | 34146199 | 34146350 | 1       | 0.067998   | 8    | 0.011    | 0.12     | 0.82635   | 0.75835  | 0.040408163 | Intergenic | NA              | NA              |
| 16  | 46732401 | 46732608 | 1       | -0.096183  | 12   | 6.80E-09 | 3.80E-06 | 0.045153  | 0.14134  | 6.52E-07    | Intergenic | NA              | NA              |
| 16  | 48980578 | 48980693 | 1       | -0.153165  | 5    | 0.013    | 0.025    | 0.18366   | 0.33682  | 0.04506341  | TSS        | NM_053515       | Slc25a4         |
| 16  | 49867781 | 49867811 | 1       | -0.129754  | 5    | 0.0041   | 3.40E-05 | 0.72899   | 0.85875  | 0.020486121 | Intergenic | NA              | NA              |
| 16  | 51741920 | 51742001 | 0.87    | -0.164279  | 6    | 4.30E-06 | 3.10E-06 | 0.012417  | 0.1767   | 0.000114978 | Intergenic | NA              | NA              |
| 16  | 61004553 | 61004587 | 1       | 0.072174   | 5    | 0.011    | 0.0055   | 0.92936   | 0.85718  | 0.040408163 | Intergenic | NA              | NA              |
| 16  | 61448844 | 61448955 | 1       | -0.106246  | 5    | 0.0041   | 0.025    | 0.12479   | 0.23104  | 0.020486121 | Intragenic | NM_001107317    | Mboat4          |
| 16  | 61472053 | 61472160 | 0.43    | -0.15329   | 5    | 1.90E-06 | 1.50E-06 | 0.11422   | 0.26751  | 6.26E-05    | Intragenic | NM_001106085    | Dctn6           |
| 16  | 61644468 | 61644795 | 1       | -0.071491  | 7    | 0.012    | 0.1      | 0.11927   | 0.19076  | 0.042700096 | Intragenic | NM_001271244    | Rbpms           |
| 16  | 61732025 | 61732208 | 1       | -0.079705  | 5    | 0.0008   | 0.0032   | 0.05412   | 0.13383  | 0.006267516 | Intragenic | NM_001271244    | Rbpms           |
| 16  | 61737590 | 61737756 | 1       | -0.082095  | 5    | 0.00048  | 0.0018   | 0.055355  | 0.13745  | 0.004351843 | Intragenic | NM_001271244    | Rbpms           |
| 16  | 64992317 | 64992371 | 1       | -0.115345  | 5    | 0.00026  | 0.0055   | 0.5656    | 0.68095  | 0.002784906 | Intergenic | NA              | NA              |
| 16  | 65975532 | 65975633 | 1       | 0.08075    | 5    | 0.0027   | 0.0018   | 0.94156   | 0.86081  | 0.015434547 | Intergenic | NA              | NA              |
| 16  | 68752396 | 68752602 | 1       | 0.143745   | 8    | 0.015    | 0.023    | 0.68333   | 0.53959  | 0.049419643 | Intragenic | NM_001191555:NM | Rab11fip1:Rab11 |
| 16  | 68912989 | 68913040 | 1       | -0.206764  | 5    | 0.00014  | 0.00014  | 0.12736   | 0.33412  | 0.00174527  | Intragenic | NM_001109425    | Zfp703          |
| 16  | 68913092 | 68913121 | 1       | -0.155094  | 5    | 7.80E-05 | 0.0018   | 0.14997   | 0.30507  | 0.001113424 | Intragenic | NM_001109425    | Zfp703          |
| 16  | 71071366 | 71071435 | 1       | 0.270871   | 5    | 0.0094   | 0.0092   | 0.36168   | 0.090807 | 0.036473186 | Intergenic | NA              | NA              |
| 16  | 71333666 | 71333763 | 0.019   | -0.151516  | 7    | 4.40E-08 | 6.70E-08 | 0.020008  | 0.17152  | 3.31E-06    | Intragenic | NM_001004107    | Tacc1           |
| 16  | 71409696 | 71409751 | 1       | -0.135641  | 5    | 3.10E-05 | 0.00098  | 0.0087814 | 0.14442  | 0.000549952 | Intergenic | NA              | NA              |
| 16  | 71867752 | 71868058 | 1       | -0.142192  | 12   | 0.0067   | 0.14     | 0.47476   | 0.61695  | 0.029075319 | TSS        | NM_023973       | Ido1            |
| 16  | 74422855 | 74423096 | 1       | 0.181631   | 8    | 0.0002   | 0.0039   | 0.65297   | 0.47134  | 0.002324409 | Intergenic | NA              | NA              |
| 16  | 75376069 | 75376195 | 1       | -0.069171  | 5    | 0.0038   | 0.0092   | 0.08623   | 0.1554   | 0.019583799 | Intergenic | NA              | NA              |
| 16  | 77819419 | 77819616 | 1       | -0.193572  | 5    | 0.002    | 0.059    | 0.54185   | 0.73542  | 0.012269327 | Intragenic | NM_001037327    | Csmd1           |
| 16  | 78024361 | 78024409 | 1       | 0.065931   | 5    | 0.0053   | 0.058    | 0.93186   | 0.86593  | 0.024662043 | Intragenic | NM_001037327    | Csmd1           |
| 16  | 79275104 | 79275320 | 1       | -0.103837  | 13   | 3.90E-06 | 0.0001   | 0.067663  | 0.1715   | 0.000108203 | Intragenic | NM_001107326    | Kbtbd11         |

| chr | start    | stop     | q-value | methy.diff | CpGs | pMWU     | p2DKS    | MCWLS    | MCWHS    | pMWU.fdr    | cgi.type   | transcript   | gene    |
|-----|----------|----------|---------|------------|------|----------|----------|----------|----------|-------------|------------|--------------|---------|
| 16  | 80002551 | 80002722 | 1       | -0.141017  | 10   | 0.011    | 0.04     | 0.23654  | 0.37755  | 0.040408163 | Intragenic | NM_053901    | Dlgap2  |
| 16  | 80314936 | 80315096 | 1       | -0.279416  | 5    | 7.10E-06 | 7.50E-06 | 0.050068 | 0.32948  | 0.000169026 | Intragenic | NM_001100791 | Tdrp    |
| 16  | 80465772 | 80465932 | 1       | -0.265127  | 5    | 7.10E-06 | 7.50E-06 | 0.050068 | 0.31519  | 0.000169026 | Intergenic | NA           | NA      |
| 16  | 82032754 | 82032901 | 1       | -0.085313  | 9    | 3.50E-06 | 4.70E-05 | 0.019826 | 0.10514  | 9.90E-05    | Intergenic | NA           | NA      |
| 16  | 82129775 | 82129844 | 1       | -0.131167  | 5    | 0.0029   | 0.015    | 0.14862  | 0.27978  | 0.016164653 | Intergenic | NA           | NA      |
| 16  | 82169962 | 82170539 | 1       | -0.07128   | 9    | 0.0018   | 0.034    | 0.12017  | 0.19145  | 0.011652632 | Intergenic | NA           | NA      |
| 16  | 82626138 | 82626183 | 1       | 0.074226   | 7    | 0.0048   | 0.0054   | 0.92976  | 0.85553  | 0.023320606 | Intergenic | NA           | NA      |
| 16  | 82728184 | 82728308 | 1       | -0.144902  | 5    | 0.008    | 0.13     | 0.12833  | 0.27323  | 0.03243956  | Intergenic | NA           | NA      |
| 16  | 82787249 | 82787313 | 1       | 0.10749    | 5    | 0.002    | 0.00098  | 0.85305  | 0.74556  | 0.012269327 | Intragenic | NM_001177684 | Cars2   |
| 16  | 83081484 | 83081606 | 1       | -0.141199  | 5    | 0.0063   | 0.088    | 0.14223  | 0.28343  | 0.027757612 | Intragenic | NM_001135009 | Col4a1  |
| 16  | 83953781 | 83954027 | 1       | -0.074181  | 10   | 4.50E-05 | 0.0028   | 0.076114 | 0.15029  | 0.000744619 | Intergenic | NA           | NA      |
| 16  | 89853906 | 89854022 | 1       | 0.068326   | 5    | 0.0074   | 0.0093   | 0.87581  | 0.80748  | 0.030871679 | Intergenic | NA           | NA      |
| 17  | 411688   | 411933   | 1       | -0.101268  | 7    | 0.0083   | 0.075    | 0.093968 | 0.19524  | 0.033563836 | TSS        | NM_012558    | Fbp1    |
| 17  | 1058916  | 1058973  | 1       | -0.196766  | 5    | 1.10E-06 | 1.60E-05 | 0.062633 | 0.2594   | 4.02E-05    | Intragenic | NM_053566    | Ptch1   |
| 17  | 5089623  | 5089777  | 1       | -0.119468  | 10   | 0.00064  | 0.0052   | 0.32541  | 0.44488  | 0.005335929 | Intergenic | NA           | NA      |
| 17  | 5202643  | 5202832  | 1       | -0.07498   | 15   | 0.00011  | 0.0027   | 0.12671  | 0.20169  | 0.001431746 | Intergenic | NA           | NA      |
| 17  | 5264010  | 5264040  | 1       | -0.085274  | 5    | 0.0068   | 0.037    | 0.17578  | 0.26106  | 0.029075319 | Intergenic | NA           | NA      |
| 17  | 5264052  | 5264092  | 1       | -0.051766  | 5    | 0.00065  | 0.0054   | 0.067044 | 0.11881  | 0.005335929 | Intergenic | NA           | NA      |
| 17  | 5340441  | 5340630  | 1       | -0.076385  | 15   | 9.80E-05 | 0.0064   | 0.12531  | 0.20169  | 0.001307848 | Intergenic | NA           | NA      |
| 17  | 5365570  | 5365759  | 1       | -0.076358  | 15   | 8.60E-05 | 0.0048   | 0.12534  | 0.20169  | 0.001215862 | Intergenic | NA           | NA      |
| 17  | 6927744  | 6927880  | 1       | -0.144155  | 9    | 7.00E-05 | 0.00013  | 0.14509  | 0.28924  | 0.001035271 | Intergenic | NA           | NA      |
| 17  | 7210161  | 7210304  | 1       | -0.054944  | 8    | 0.005    | 0.026    | 0.032175 | 0.08712  | 0.023791103 | Intergenic | NA           | NA      |
| 17  | 7293300  | 7293405  | 1       | 0.112464   | 5    | 0.0074   | 0.0018   | 0.82256  | 0.7101   | 0.030871679 | Intergenic | NA           | NA      |
| 17  | 7955132  | 7955224  | 1       | 0.13973    | 5    | 0.0074   | 0.025    | 0.88515  | 0.74542  | 0.030871679 | Intergenic | NA           | NA      |
| 17  | 8061930  | 8062052  | 1       | -0.138933  | 7    | 0.013    | 0.055    | 0.29434  | 0.43327  | 0.04506341  | Intergenic | NA           | NA      |
| 17  | 9128032  | 9128117  | 1       | -0.08055   | 5    | 0.013    | 0.088    | 0.11458  | 0.19513  | 0.04506341  | Intergenic | NA           | NA      |
| 17  | 9168590  | 9168756  | 1       | 0.065547   | 13   | 0.011    | 0.0085   | 0.78999  | 0.72444  | 0.040408163 | Intergenic | NA           | NA      |
| 17  | 9507028  | 9507115  | 1       | -0.166969  | 5    | 0.00011  | 7.00E-05 | 0.17535  | 0.34232  | 0.001431746 | Intergenic | NA           | NA      |
| 17  | 9568327  | 9568473  | 1       | -0.146079  | 5    | 0.014    | 0.015    | 0.29288  | 0.43895  | 0.04726441  | Intergenic | NA           | NA      |
| 17  | 10176001 | 10176107 | 1       | -0.085197  | 5    | 0.0016   | 0.0032   | 0.25866  | 0.34386  | 0.010628263 | Intergenic | NA           | NA      |
| 17  | 10652455 | 10652577 | 1       | -0.14452   | 8    | 0.0016   | 0.0059   | 0.20073  | 0.34525  | 0.010628263 | Intergenic | NA           | NA      |
| 17  | 10680429 | 10680458 | 1       | -0.165462  | 5    | 0.0068   | 0.00014  | 0.12412  | 0.28958  | 0.029075319 | Intergenic | NA           | NA      |
| 17  | 10781417 | 10781607 | 1       | -0.087002  | 5    | 0.00021  | 0.0018   | 0.037024 | 0.12403  | 0.002348182 | Intergenic | NA           | NA      |
| 17  | 11049477 | 11049629 | 1       | -0.050773  | 10   | 0.0009   | 0.0029   | 0.024041 | 0.074814 | 0.006847423 | Intragenic | NM_053624    | Pitx1   |
| 17  | 11208268 | 11208315 | 1       | 0.07162    | 7    | 0.00033  | 0.00082  | 0.91907  | 0.84745  | 0.003313469 | Intragenic | NM_001024998 | Txndc15 |
| 17  | 11251261 | 11251519 | 1       | -0.076236  | 14   | 0.00057  | 0.038    | 0.14106  | 0.21729  | 0.004925761 | Intragenic | NM_001024998 | Txndc15 |
| 17  | 12100391 | 12100475 | 1       | -0.166706  | 5    | 2.80E-05 | 3.40E-05 | 0.12577  | 0.29248  | 0.000511485 | Intragenic | NM_001109904 | Fgfr4   |
| 17  | 12454879 | 12454966 | 1       | -0.062247  | 5    | 0.0014   | 0.0055   | 0.035275 | 0.097522 | 0.00960223  | Intergenic | NA           | NA      |
| 17  | 13831826 | 13831891 | 1       | -0.122272  | 5    | 0.011    | 0.038    | 0.71003  | 0.8323   | 0.040408163 | Intergenic | NA           | NA      |

| chr | start    | stop     | q-value  | methy.diff | CpGs | pMWU     | p2DKS    | MCWLS    | MCWHS    | pMWU.fdr    | cgi.type   | transcript      | gene      |
|-----|----------|----------|----------|------------|------|----------|----------|----------|----------|-------------|------------|-----------------|-----------|
| 17  | 14015542 | 14015597 | 1        | -0.121636  | 5    | 0.0058   | 0.015    | 0.14807  | 0.26971  | 0.026163814 | Intergenic | NA              | NA        |
| 17  | 18367029 | 18367123 | 1        | -0.167126  | 7    | 2.90E-05 | 7.20E-05 | 0.51827  | 0.68539  | 0.000525848 | Intergenic | NA              | NA        |
| 17  | 20067574 | 20067644 | 1        | -0.070617  | 5    | 0.0053   | 0.015    | 0.053823 | 0.12444  | 0.024662043 | Intragenic | NM_001108881    | Rnf144b   |
| 17  | 21335461 | 21335648 | 1        | -0.069436  | 9    | 1.30E-05 | 0.00013  | 0.10587  | 0.1753   | 0.000273333 | Intragenic | NM_012726       | Atxn1     |
| 17  | 22133987 | 22134122 | 1        | -0.144927  | 8    | 0.0017   | 0.0025   | 0.28194  | 0.42687  | 0.011044014 | Intragenic | NM_001037664    | Dtnbp1    |
| 17  | 26097353 | 26097439 | 1        | -0.094669  | 5    | 3.30E-06 | 0.00014  | 0.038683 | 0.13335  | 9.48E-05    | Intergenic | NA              | NA        |
| 17  | 26873280 | 26873375 | 1        | -0.113185  | 5    | 0.0013   | 0.024    | 0.090361 | 0.20355  | 0.009111111 | Intergenic | NA              | NA        |
| 17  | 27134919 | 27135307 | 1        | 0.140762   | 5    | 0.008    | 0.038    | 0.77241  | 0.63165  | 0.03243956  | Intergenic | NA              | NA        |
| 17  | 27730724 | 27730824 | 1        | -0.10222   | 5    | 0.0016   | 0.0031   | 0.20656  | 0.30878  | 0.010628263 | Intergenic | NA              | NA        |
| 17  | 29444476 | 29444647 | 1        | -0.113867  | 9    | 0.00062  | 0.0008   | 0.19631  | 0.31018  | 0.005241237 | Intergenic | NA              | NA        |
| 17  | 29676387 | 29676533 | 1        | -0.080692  | 5    | 0.0016   | 0.0093   | 0.055733 | 0.13642  | 0.010628263 | Intergenic | NA              | NA        |
| 17  | 31706354 | 31706407 | 1        | -0.132679  | 5    | 0.0045   | 0.0091   | 0.18     | 0.31267  | 0.021964286 | Intragenic | NM_001014145    | Cdyl      |
| 17  | 44192765 | 44192818 | 1        | -0.122799  | 5    | 0.0029   | 0.025    | 0.41429  | 0.53709  | 0.016164653 | Intragenic | NM_001014009    | Fam65b    |
| 17  | 44917197 | 44917395 | 1        | -0.067207  | 9    | 0.0022   | 0.00078  | 0.034619 | 0.10183  | 0.01321074  | TSS        | NM_001191692    | Lrrc16a   |
| 17  | 45918772 | 45918911 | 1        | -0.143245  | 12   | 3.10E-05 | 0.0073   | 0.15633  | 0.29957  | 0.000549952 | Intergenic | NA              | NA        |
| 17  | 46268112 | 46268242 | 1        | -0.15591   | 5    | 0.0087   | 0.087    | 0.47306  | 0.62897  | 0.034705946 | Intergenic | NA              | NA        |
| 17  | 51155986 | 51156068 | 1        | -0.112816  | 5    | 0.014    | 0.015    | 0.3924   | 0.50522  | 0.04726441  | Intragenic | NM_001106117    | Hecw1     |
| 17  | 55351046 | 55351161 | 1        | -0.17393   | 5    | 0.00014  | 0.00014  | 0.086401 | 0.26033  | 0.00174527  | Intragenic | NM_001309462    | Epc1      |
| 17  | 55492779 | 55492926 | 1        | -0.080294  | 5    | 0.0087   | 0.088    | 0.71711  | 0.79741  | 0.034705946 | Intergenic | NA              | NA        |
| 17  | 56692507 | 56692701 | 1        | -0.149735  | 9    | 0.0038   | 0.046    | 0.3728   | 0.52253  | 0.019583799 | Intragenic | NM_001108415    | Elmo1     |
| 17  | 58720164 | 58720218 | 1        | -0.067448  | 5    | 0.00097  | 0.0031   | 0.039141 | 0.10659  | 0.007223613 | Intergenic | NA              | NA        |
| 17  | 58810270 | 58810359 | 1        | -0.058859  | 5    | 0.0068   | 0.0018   | 0.0663   | 0.12516  | 0.029075319 | Intergenic | NA              | NA        |
| 17  | 59052971 | 59053073 | 3.50E-05 | -0.226002  | 14   | 7.80E-14 | 1.20E-10 | 0.16889  | 0.39489  | 3.20E-11    | Intergenic | NA              | NA        |
| 17  | 62747315 | 62747388 | 1        | -0.133789  | 7    | 3.00E-06 | 5.40E-05 | 0.44606  | 0.57985  | 8.86E-05    | Intergenic | NA              | NA        |
| 17  | 62747879 | 62747944 | 1        | -0.164094  | 5    | 0.0045   | 0.039    | 0.56374  | 0.72783  | 0.021964286 | Intergenic | NA              | NA        |
| 17  | 65113286 | 65113364 | 1        | -0.060982  | 5    | 0.0087   | 0.059    | 0.069806 | 0.13079  | 0.034705946 | Intergenic | NA              | NA        |
| 17  | 67464551 | 67464656 | 1        | -0.22517   | 5    | 0.00017  | 0.0031   | 0.28132  | 0.50649  | 0.002036688 | Intragenic | NM_001191043:NM | Ryr2;Ryr2 |
| 17  | 68942346 | 68942580 | 6.50E-05 | -0.081154  | 27   | 2.90E-13 | 2.30E-10 | 0.064936 | 0.14609  | 1.02E-10    | Intergenic | NA              | NA        |
| 17  | 70633793 | 70633979 | 1        | 0.052041   | 16   | 0.0077   | 0.01     | 0.80227  | 0.75023  | 0.03196063  | Intergenic | NA              | NA        |
| 17  | 71918503 | 71918654 | 1        | -0.21333   | 7    | 2.20E-07 | 4.60E-06 | 0.03297  | 0.2463   | 1.14E-05    | Intragenic | NM_001108420    | Asb13     |
| 17  | 73543776 | 73543868 | 1        | -0.082308  | 7    | 0.0018   | 0.0082   | 0.065839 | 0.14815  | 0.011652632 | Intragenic | NM_001107364    | Sfmbt2    |
| 17  | 74118892 | 74118981 | 1        | 0.059271   | 5    | 0.012    | 0.015    | 0.10566  | 0.046387 | 0.042700096 | Intragenic | NM_133293       | Gata3     |
| 17  | 77777643 | 77777691 | 1        | -0.215157  | 7    | 0.00083  | 0.0083   | 0.39163  | 0.60679  | 0.006481905 | Intergenic | NA              | NA        |
| 17  | 77777720 | 77777783 | 1        | -0.176348  | 5    | 0.0068   | 0.039    | 0.34713  | 0.52347  | 0.029075319 | Intergenic | NA              | NA        |
| 17  | 78783686 | 78783723 | 1        | 0.07009    | 5    | 0.0024   | 0.0031   | 0.1389   | 0.06881  | 0.014124402 | Intergenic | NA              | NA        |
| 17  | 79284727 | 79284980 | 1        | -0.137968  | 5    | 0.0035   | 0.015    | 0.18006  | 0.31803  | 0.018410549 | Intragenic | NM_138523       | Prpf18    |
| 17  | 79285012 | 79285082 | 0.00088  | -0.265327  | 7    | 4.80E-10 | 3.10E-09 | 0.045311 | 0.31064  | 6.68E-08    | Intragenic | NM_138523       | Prpf18    |
| 17  | 79910096 | 79910211 | 1        | -0.152258  | 8    | 0.0034   | 0.017    | 0.24086  | 0.39311  | 0.018409391 | Intergenic | NA              | NA        |
| 17  | 86550872 | 86551417 | 1        | -0.1054    | 12   | 0.0011   | 0.052    | 0.21935  | 0.32475  | 0.007982301 | Intergenic | NA              | NA        |

| chr | start    | stop     | q-value | methy.diff | CpGs | pMWU     | p2DKS    | MCWLS     | MCWHS     | pMWU.fdr    | cgi.type   | transcript                | gene          |
|-----|----------|----------|---------|------------|------|----------|----------|-----------|-----------|-------------|------------|---------------------------|---------------|
| 17  | 87550514 | 87550678 | 1       | -0.057131  | 7    | 0.013    | 0.039    | 0.091297  | 0.14843   | 0.04506341  | Intergenic | NA                        | NA            |
| 17  | 88907694 | 88907774 | 1       | -0.108559  | 5    | 2.40E-05 | 0.00014  | 0.10003   | 0.20859   | 0.000455321 | Intergenic | NA                        | NA            |
| 17  | 88964451 | 88964591 | 1       | -0.169185  | 5    | 0.00036  | 0.0055   | 0.03896   | 0.20815   | 0.003505013 | Intergenic | NA                        | NA            |
| 17  | 89256930 | 89257017 | 1       | -0.316431  | 7    | 1.90E-07 | 1.70E-05 | 0.1266    | 0.44303   | 1.05E-05    | Intergenic | NA                        | NA            |
| 17  | 89835240 | 89835298 | 1       | -0.093649  | 5    | 0.0094   | 0.024    | 0.11712   | 0.21077   | 0.036473186 | Intergenic | NA                        | NA            |
| 17  | 89903354 | 89903577 | 1       | -0.107824  | 5    | 0.011    | 0.024    | 0.087792  | 0.19562   | 0.040408163 | TSS        | NM_001170326              | Gpr158        |
| 17  | 91905483 | 91905545 | 1       | 0.07983    | 5    | 0.012    | 0.038    | 0.87118   | 0.79135   | 0.042700096 | Intergenic | NA                        | NA            |
| 18  | 447325   | 447386   | 0.00088 | -0.080359  | 7    | 2.50E-08 | 3.10E-09 | 0.0083333 | 0.088692  | 2.15E-06    | TSS        | NM_001135757              | Fundc2        |
| 18  | 2387962  | 2387999  | 1       | -0.057292  | 5    | 0.00021  | 0.00053  | 0.010025  | 0.067316  | 0.002348182 | Intergenic | NA                        | NA            |
| 18  | 2436864  | 2436901  | 1       | -0.057292  | 5    | 0.00021  | 0.00053  | 0.010025  | 0.067316  | 0.002348182 | TSS        | NM_019185                 | Gata6         |
| 18  | 3712840  | 3712916  | 1       | 0.066216   | 5    | 0.0053   | 0.024    | 0.15505   | 0.088835  | 0.024662043 | Intergenic | NA                        | NA            |
| 18  | 11589032 | 11589080 | 1       | -0.183705  | 5    | 0.00088  | 0.039    | 0.35423   | 0.53794   | 0.006722981 | TSS        | NM_001107402              | Dsc3          |
| 18  | 13154198 | 13154377 | 1       | 0.063622   | 5    | 0.0087   | 0.038    | 0.99191   | 0.92828   | 0.034705946 | Intergenic | NA                        | NA            |
| 18  | 15365131 | 15365208 | 1       | 0.076839   | 5    | 0.0041   | 0.0093   | 0.95506   | 0.87823   | 0.020486121 | Intragenic | NM_001101000              | Mapre2        |
| 18  | 17755168 | 17755190 | 1       | -0.152072  | 5    | 0.00011  | 0.0031   | 0.049727  | 0.2018    | 0.001431746 | Intragenic | NM_001107400              | Celf4         |
| 18  | 24467617 | 24467814 | 1       | -0.247774  | 7    | 1.20E-07 | 8.80E-06 | 0.12885   | 0.37662   | 7.14E-06    | Intragenic | NM_001191941              | Myo7b         |
| 18  | 24496699 | 24496726 | 1       | -0.291692  | 5    | 2.40E-05 | 3.50E-05 | 0.20992   | 0.50161   | 0.000455321 | Intragenic | NM_001191941              | Myo7b         |
| 18  | 24660559 | 24660860 | 1       | -0.094215  | 9    | 4.80E-05 | 0.0061   | 0.10723   | 0.20145   | 0.000788953 | Intergenic | NA                        | NA            |
| 18  | 26484819 | 26485021 | 1       | -0.053876  | 7    | 0.0017   | 0.0008   | 0.01327   | 0.067147  | 0.011044014 | Intergenic | NA                        | NA            |
| 18  | 28349465 | 28349581 | 1       | -0.076964  | 7    | 0.0011   | 0.0083   | 0.068023  | 0.14499   | 0.007982301 | Intergenic | NA                        | NA            |
| 18  | 28353179 | 28353276 | 1       | -0.094864  | 6    | 0.0069   | 0.12     | 0.11824   | 0.21311   | 0.029451706 | Intergenic | NA                        | NA            |
| 18  | 28385705 | 28385780 | 1       | -0.068704  | 7    | 0.0022   | 0.018    | 0.070853  | 0.13956   | 0.01321074  | Intergenic | NA                        | NA            |
| 18  | 29248806 | 29248913 | 1       | -0.171906  | 5    | 0.0045   | 0.0092   | 0.37144   | 0.54335   | 0.021964286 | Intergenic | NA                        | NA            |
| 18  | 29810733 | 29810757 | 1       | -0.056312  | 5    | 0.0027   | 0.0093   | 0.020485  | 0.076797  | 0.015434547 | TSS        | NM_199509                 | Pcdhac1       |
| 18  | 30502905 | 30502956 | 1       | 0.103259   | 5    | 0.012    | 0.13     | 0.27934   | 0.17608   | 0.042700096 | TSS        | NM_001037140              | Pcdhga1       |
| 18  | 30520355 | 30520473 | 1       | -0.154186  | 5    | 0.0019   | 0.059    | 0.17857   | 0.33276   | 0.011943782 | Intragenic | NM_001037140:NM_001037140 | Pcdhga1:Pcdhg |
| 18  | 30590320 | 30590356 | 1       | -0.104772  | 5    | 0.011    | 0.025    | 0.13292   | 0.23769   | 0.040408163 | TSS        | NM_001037135              | Pcdhga10      |
| 18  | 31318563 | 31318612 | 1       | -0.074492  | 5    | 0.00015  | 3.40E-05 | 0.0089921 | 0.083484  | 0.001835821 | Intergenic | NA                        | NA            |
| 18  | 32118048 | 32118281 | 1       | -0.138763  | 9    | 0.0058   | 0.052    | 0.22018   | 0.35894   | 0.026163814 | Intragenic | NM_012576                 | Nr3c1         |
| 18  | 32271989 | 32272033 | 1       | -0.059955  | 5    | 0.01     | 0.059    | 0.08518   | 0.14514   | 0.037614679 | TSS        | NM_001106150              | Spry4         |
| 18  | 32283405 | 32283566 | 1       | -0.179202  | 7    | 0.0076   | 0.038    | 0.34484   | 0.52405   | 0.031563309 | Intragenic | NM_012576:NM_012576       | Nr3c1:Spry4   |
| 18  | 44179353 | 44179527 | 1       | 0.050362   | 14   | 2.90E-05 | 2.80E-05 | 0.86147   | 0.81111   | 0.000525848 | Intergenic | NA                        | NA            |
| 18  | 45566168 | 45566365 | 1       | -0.123955  | 5    | 0.00088  | 0.0093   | 0.061904  | 0.18586   | 0.006722981 | Intergenic | NA                        | NA            |
| 18  | 46725082 | 46725151 | 1       | -0.060811  | 5    | 0.0053   | 0.088    | 0.04      | 0.10081   | 0.024662043 | Intragenic | NM_017061                 | Lox           |
| 18  | 46725666 | 46725701 | 1       | 0.058145   | 5    | 0.002    | 0.0092   | 0.090415  | 0.03227   | 0.012269327 | Intragenic | NM_017061                 | Lox           |
| 18  | 49215968 | 49216068 | 0.59    | -0.053939  | 7    | 2.00E-06 | 2.10E-06 | 0.019043  | 0.072982  | 6.50E-05    | Intergenic | NA                        | NA            |
| 18  | 50633585 | 50633671 | 1       | -0.100218  | 5    | 0.014    | 0.13     | 0.76081   | 0.86103   | 0.04726441  | Intergenic | NA                        | NA            |
| 18  | 51087851 | 51087994 | 1       | -0.115401  | 5    | 0.00012  | 6.70E-05 | 0.08127   | 0.19667   | 0.00153218  | Intragenic | NM_001007759              | 3-Mar         |
| 18  | 52488171 | 52488285 | 1       | 0.1103     | 5    | 9.80E-05 | 0.83     | 0.1151    | 0.0047986 | 0.001307848 | TSS        | NM_031826                 | Fbn2          |

| chr | start    | stop     | q-value | methyl.diff | CpGs | pMWU     | p2DKS    | MCWLS     | MCWHS    | pMWU.fdr    | cgi.type   | transcript      | gene          |
|-----|----------|----------|---------|-------------|------|----------|----------|-----------|----------|-------------|------------|-----------------|---------------|
| 18  | 56517961 | 56518093 | 1       | -0.056392   | 5    | 0.008    | 0.059    | 0.061578  | 0.11797  | 0.03243956  | Intergenic | NA              | NA            |
| 18  | 57512014 | 57512175 | 1       | -0.15485    | 5    | 0.012    | 0.088    | 0.093255  | 0.24811  | 0.042700096 | Intergenic | NA              | NA            |
| 18  | 59286847 | 59286946 | 1       | -0.129252   | 7    | 0.014    | 0.078    | 0.32662   | 0.45587  | 0.04726441  | Intragenic | NM_001106140    | Atp8b1        |
| 18  | 59362539 | 59362589 | 1       | -0.056944   | 5    | 0.0053   | 0.0018   | 0.0064689 | 0.063413 | 0.024662043 | Intergenic | NA              | NA            |
| 18  | 61366906 | 61366981 | 1       | -0.103663   | 5    | 0.0014   | 0.0092   | 0.17905   | 0.28271  | 0.00960223  | TSS        | NM_001008385    | Pmaip1        |
| 18  | 61571336 | 61571442 | 1       | -0.177265   | 5    | 0.0024   | 0.015    | 0.17928   | 0.35654  | 0.014124402 | Intergenic | NA              | NA            |
| 18  | 63112429 | 63112530 | 1       | 0.095693    | 5    | 0.013    | 0.0093   | 0.27178   | 0.17609  | 0.04506341  | Intragenic | NM_001271365    | Ldlrad4       |
| 18  | 63666874 | 63667032 | 1       | 0.114832    | 5    | 0.00097  | 0.0055   | 0.8174    | 0.70257  | 0.007223613 | Intergenic | NA              | NA            |
| 18  | 64473487 | 64473547 | 1       | -0.104864   | 5    | 0.015    | 0.088    | 0.29721   | 0.40207  | 0.049419643 | Intragenic | NM_053369       | Tcf4          |
| 18  | 69087207 | 69087252 | 1       | -0.217395   | 5    | 7.80E-05 | 0.00053  | 0.25542   | 0.47281  | 0.001113424 | TSS        | NM_019319       | Mapk4         |
| 18  | 69625967 | 69626025 | 1       | -0.064099   | 5    | 0.0063   | 0.059    | 0.10077   | 0.16487  | 0.027757612 | Intragenic | NM_017083       | Myo5b         |
| 18  | 70539394 | 70539487 | 1       | -0.077935   | 5    | 3.50E-05 | 0.00097  | 0.046422  | 0.12436  | 0.000606338 | Intragenic | NM_030858       | Smad7         |
| 18  | 70692447 | 70692500 | 1       | -0.072353   | 5    | 0.0049   | 0.039    | 0.076633  | 0.14899  | 0.023345384 | Intragenic | NM_001108891    | Ctif          |
| 18  | 70814968 | 70815021 | 1       | -0.06653    | 5    | 0.0074   | 0.059    | 0.082456  | 0.14899  | 0.030871679 | Intragenic | NM_001108891    | Ctif          |
| 18  | 72023415 | 72023532 | 1       | 0.109002    | 5    | 0.0022   | 0.0054   | 0.24602   | 0.13702  | 0.01321074  | Intragenic | NM_001013189    | Pqlc1         |
| 18  | 73891855 | 73891982 | 1       | -0.209878   | 5    | 0.00029  | 0.0018   | 0.20355   | 0.41342  | 0.002984937 | Intragenic | NM_001271281    | Pstpip2       |
| 18  | 74774233 | 74774339 | 1       | -0.224211   | 5    | 0.0087   | 0.0093   | 0.24906   | 0.47327  | 0.034705946 | Intergenic | NA              | NA            |
| 18  | 76681847 | 76681950 | 1       | -0.098348   | 7    | 0.015    | 0.038    | 0.64908   | 0.74743  | 0.049419643 | TSS        | NM_001108892    | Sall3         |
| 18  | 77225336 | 77225462 | 1       | 0.092035    | 5    | 0.0063   | 0.00048  | 0.73527   | 0.64323  | 0.027757612 | Intergenic | NA              | NA            |
| 18  | 78805338 | 78805399 | 1       | -0.166287   | 5    | 0.013    | 0.13     | 0.4269    | 0.59319  | 0.04506341  | Intergenic | NA              | NA            |
| 18  | 79170982 | 79171037 | 1       | -0.173049   | 5    | 0.00088  | 0.0017   | 0.1248    | 0.29785  | 0.006722981 | Intergenic | NA              | NA            |
| 18  | 79171557 | 79171599 | 1       | -0.262663   | 5    | 0.0074   | 0.13     | 0.59839   | 0.86106  | 0.030871679 | Intergenic | NA              | NA            |
| 18  | 80728195 | 80728305 | 1       | -0.163926   | 5    | 0.0045   | 0.13     | 0.20649   | 0.37042  | 0.021964286 | Intergenic | NA              | NA            |
| 19  | 4924947  | 4925029  | 1       | -0.082157   | 5    | 0.00023  | 0.0054   | 0.7799    | 0.86206  | 0.002525893 | Intergenic | NA              | NA            |
| 19  | 5092351  | 5092511  | 1       | -0.093343   | 7    | 0.0012   | 0.018    | 0.35606   | 0.4494   | 0.008573088 | Intergenic | NA              | NA            |
| 19  | 5826356  | 5826475  | 1       | -0.082543   | 8    | 0.00014  | 0.00061  | 0.14484   | 0.22738  | 0.00174527  | Intergenic | NA              | NA            |
| 19  | 10289953 | 10290270 | 1       | -0.051739   | 13   | 0.0074   | 0.015    | 0.02096   | 0.058323 | 0.030871679 | Intergenic | NA              | NA            |
| 19  | 10290378 | 10290483 | 0.34    | -0.163842   | 7    | 4.40E-08 | 1.20E-06 | 0.028908  | 0.19275  | 3.31E-06    | Intergenic | NA              | NA            |
| 19  | 10520500 | 10520541 | 1       | -0.229049   | 5    | 0.0017   | 0.0017   | 0.14188   | 0.37093  | 0.011044014 | Intragenic | NM_001108437    | Ccdc102a      |
| 19  | 10648672 | 10648981 | 1       | -0.097602   | 7    | 4.80E-05 | 0.00017  | 0.027162  | 0.12476  | 0.000788953 | TSS        | NM_134455       | Cx3cl1        |
| 19  | 11278081 | 11278190 | 1       | -0.109197   | 7    | 0.00026  | 0.0014   | 0.062178  | 0.17137  | 0.002784906 | TSS        | NM_138826       | Mt1           |
| 19  | 11425874 | 11425937 | 1       | -0.058399   | 5    | 7.80E-05 | 0.0055   | 0.051469  | 0.10987  | 0.001113424 | TSS        | NM_001107411:NM | Ogfod1:Nudt21 |
| 19  | 26918561 | 26918787 | 1       | -0.105967   | 7    | 0.0092   | 0.039    | 0.17588   | 0.28185  | 0.036473186 | TSS        | NM_001107413    | Irx3          |
| 19  | 26919218 | 26919257 | 1       | 0.069227    | 5    | 0.00048  | 0.0054   | 0.1005    | 0.031274 | 0.004351843 | TSS        | NM_001107413    | Irx3          |
| 19  | 27479036 | 27479146 | 1       | 0.121407    | 6    | 0.0078   | 0.084    | 0.92486   | 0.80346  | 0.032284913 | Intergenic | NA              | NA            |
| 19  | 27494121 | 27494157 | 1       | 0.081873    | 5    | 0.00059  | 0.003    | 0.15745   | 0.075578 | 0.005010587 | Intragenic | NM_001030044    | Irx5          |
| 19  | 30188105 | 30188262 | 1       | -0.117164   | 9    | 0.00015  | 0.012    | 0.13873   | 0.25589  | 0.001835821 | Intergenic | NA              | NA            |
| 19  | 30207097 | 30207255 | 1       | -0.118594   | 9    | 0.0056   | 0.062    | 0.29131   | 0.40991  | 0.025943503 | Intergenic | NA              | NA            |
| 19  | 30398064 | 30398199 | 1       | -0.149297   | 9    | 5.30E-05 | 0.0054   | 0.16792   | 0.31721  | 0.000841161 | Intragenic | NM_001106172    | Nod2          |

| chr | start    | stop     | q-value  | methy.diff | CpGs | pMWU     | p2DKS    | MCWLS     | MCWHS    | pMWU.fdr    | cgi.type   | transcript   | gene     |
|-----|----------|----------|----------|------------|------|----------|----------|-----------|----------|-------------|------------|--------------|----------|
| 19  | 30398216 | 30398376 | 1        | -0.06095   | 5    | 0.0016   | 0.0055   | 0.064153  | 0.1251   | 0.010628263 | Intragenic | NM_001106172 | Nod2     |
| 19  | 30436415 | 30436466 | 0.0019   | -0.17663   | 5    | 6.30E-08 | 6.80E-09 | 0.022514  | 0.19914  | 4.39E-06    | Intragenic | NM_001024999 | Snx20    |
| 19  | 33946052 | 33946235 | 1        | -0.088993  | 8    | 0.0075   | 0.05     | 0.092771  | 0.18176  | 0.031235892 | Intergenic | NA           | NA       |
| 19  | 34290129 | 34290229 | 1        | 0.142343   | 5    | 0.0087   | 0.015    | 0.88068   | 0.73833  | 0.034705946 | Intergenic | NA           | NA       |
| 19  | 36013447 | 36013614 | 1        | -0.080506  | 5    | 0.012    | 0.025    | 0.042809  | 0.12331  | 0.042700096 | Intergenic | NA           | NA       |
| 19  | 36100881 | 36100995 | 1        | -0.103495  | 8    | 0.015    | 0.036    | 0.5087    | 0.61219  | 0.049419643 | Intergenic | NA           | NA       |
| 19  | 36124887 | 36124932 | 1        | 0.12253    | 5    | 0.0058   | 0.088    | 0.37205   | 0.24952  | 0.026163814 | Intergenic | NA           | NA       |
| 19  | 36176197 | 36176466 | 1        | -0.147835  | 14   | 9.90E-07 | 0.0024   | 0.20082   | 0.34866  | 3.75E-05    | Intragenic | NM_001105944 | Rfx1     |
| 19  | 36793044 | 36793093 | 1        | -0.05672   | 5    | 0.0022   | 0.015    | 0.062746  | 0.11947  | 0.01321074  | Intragenic | NM_001007677 | Lyl1     |
| 19  | 36862211 | 36862286 | 1        | -0.141538  | 7    | 0.00014  | 0.0022   | 0.23387   | 0.37541  | 0.00174527  | Intragenic | NM_030866    | Nfix     |
| 19  | 36875398 | 36875448 | 1        | -0.107683  | 5    | 0.0058   | 0.025    | 0.14297   | 0.25065  | 0.026163814 | Intragenic | NM_030866    | Nfix     |
| 19  | 36958937 | 36959000 | 1        | -0.061062  | 8    | 0.0099   | 0.065    | 0.16411   | 0.22517  | 0.037614679 | TSS        | NM_001191557 | Syce2    |
| 19  | 37002223 | 37002401 | 1.50E-07 | -0.073086  | 16   | 7.30E-14 | 5.30E-13 | 0.021689  | 0.094775 | 3.20E-11    | Intragenic | NM_181089    | MAST1    |
| 19  | 37087051 | 37087152 | 1        | -0.118098  | 9    | 0.014    | 0.035    | 0.31294   | 0.43104  | 0.04726441  | Intragenic | NM_001100562 | Hook2    |
| 19  | 37182524 | 37182580 | 1        | -0.169871  | 5    | 0.0019   | 0.0055   | 0.12744   | 0.29731  | 0.011943782 | Intragenic | NM_199404    | Man2b1   |
| 19  | 41909664 | 41909841 | 1        | -0.157926  | 5    | 0.00032  | 0.00098  | 0.0093359 | 0.16726  | 0.003243956 | Intragenic | NM_001191699 | Frem3    |
| 19  | 44018418 | 44018459 | 1        | -0.157415  | 5    | 0.008    | 0.059    | 0.43864   | 0.59606  | 0.03243956  | Intergenic | NA           | NA       |
| 19  | 45099142 | 45099324 | 1        | -0.110185  | 5    | 0.0029   | 0.0092   | 0.16371   | 0.27389  | 0.016164653 | Intragenic | NM_001109501 | Arhgap10 |
| 19  | 48091123 | 48091197 | 1        | -0.186648  | 5    | 7.00E-05 | 0.0018   | 0.13228   | 0.31893  | 0.001035271 | TSS        | NM_001106177 | Hsf4     |
| 19  | 48528051 | 48528080 | 1        | -0.050667  | 5    | 0.0019   | 0.015    | 0.022487  | 0.073154 | 0.011943782 | Intergenic | NA           | NA       |
| 19  | 48777575 | 48777643 | 1        | -0.052448  | 6    | 0.00028  | 0.0027   | 0.02414   | 0.076588 | 0.002984937 | TSS        | NM_001025637 | Psmb10   |
| 19  | 51418755 | 51418786 | 1        | -0.163584  | 5    | 0.0019   | 0.015    | 0.36816   | 0.53174  | 0.011943782 | Intergenic | NA           | NA       |
| 19  | 52416226 | 52416328 | 1        | -0.12143   | 7    | 0.012    | 0.0082   | 0.69501   | 0.81644  | 0.042700096 | Intergenic | NA           | NA       |
| 19  | 53149913 | 53149970 | 1        | -0.054829  | 5    | 2.80E-05 | 3.40E-05 | 0.013397  | 0.068225 | 0.000511485 | Intergenic | NA           | NA       |
| 19  | 53595721 | 53595823 | 1        | -0.148339  | 5    | 0.0012   | 0.00098  | 0.13427   | 0.28261  | 0.008573088 | Intergenic | NA           | NA       |
| 19  | 53720270 | 53720469 | 1        | -0.174457  | 6    | 5.80E-05 | 0.0016   | 0.10072   | 0.27518  | 0.000901137 | Intergenic | NA           | NA       |
| 19  | 54146248 | 54146332 | 1        | -0.142158  | 5    | 0.0022   | 0.038    | 0.11781   | 0.25997  | 0.01321074  | Intergenic | NA           | NA       |
| 19  | 54742858 | 54743344 | 0.016    | -0.148476  | 19   | 2.30E-09 | 5.60E-08 | 0.080328  | 0.2288   | 2.53E-07    | Intragenic | NM_012931    | Bcar1    |
| 19  | 57646345 | 57646445 | 1        | -0.11389   | 5    | 0.0014   | 0.015    | 0.0616    | 0.17549  | 0.00960223  | Intragenic | NM_001106188 | Wwox     |
| 19  | 58303831 | 58303982 | 1        | -0.134685  | 5    | 0.00044  | 0.015    | 0.083483  | 0.21817  | 0.0041      | Intergenic | NA           | NA       |
| 19  | 58415166 | 58415227 | 1        | -0.11236   | 8    | 4.10E-06 | 1.00E-05 | 0.08597   | 0.19833  | 0.000112483 | Intergenic | NA           | NA       |
| 19  | 58805094 | 58805231 | 1        | -0.105621  | 5    | 0.0049   | 0.025    | 0.037307  | 0.14293  | 0.023345384 | Intergenic | NA           | NA       |
| 19  | 59924260 | 59924326 | 1        | -0.174401  | 5    | 0.0035   | 0.088    | 0.31766   | 0.49206  | 0.018410549 | Intragenic | NM_001106189 | Cdyl2    |
| 19  | 60146974 | 60147037 | 1        | -0.109413  | 5    | 0.008    | 0.00052  | 0.085789  | 0.1952   | 0.03243956  | Intergenic | NA           | NA       |
| 19  | 60150354 | 60150417 | 1        | -0.123012  | 5    | 0.008    | 0.00014  | 0.075458  | 0.19847  | 0.03243956  | Intergenic | NA           | NA       |
| 19  | 60582964 | 60583031 | 1        | -0.1478    | 5    | 0.013    | 0.0054   | 0.21493   | 0.36273  | 0.04506341  | Intragenic | NM_001163273 | Cmip     |
| 19  | 60583057 | 60583145 | 1        | -0.066103  | 5    | 0.014    | 0.00052  | 0.11363   | 0.17973  | 0.04726441  | Intragenic | NM_001163273 | Cmip     |
| 19  | 60628518 | 60628655 | 1        | -0.105621  | 5    | 0.0049   | 0.025    | 0.037307  | 0.14293  | 0.023345384 | Intragenic | NM_001163273 | Cmip     |
| 19  | 60631175 | 60631268 | 1        | -0.260374  | 5    | 2.20E-06 | 7.60E-06 | 0.084923  | 0.3453   | 6.91E-05    | Intragenic | NM_001163273 | Cmip     |

| chr | start    | stop     | q-value  | methy.diff | CpGs | pMWU     | p2DKS    | MCWLS    | MCWHS    | pMWU.fdr    | cgi.type   | transcript   | gene   |
|-----|----------|----------|----------|------------|------|----------|----------|----------|----------|-------------|------------|--------------|--------|
| 19  | 60679127 | 60679191 | 0.077    | -0.154786  | 5    | 4.20E-07 | 2.70E-07 | 0.017029 | 0.17181  | 1.93E-05    | Intragenic | NM_001163273 | Cmip   |
| 19  | 60754356 | 60754612 | 1        | -0.100652  | 6    | 7.50E-05 | 0.00055  | 0.04084  | 0.14149  | 0.00110259  | Intragenic | NM_001163273 | Cmip   |
| 19  | 62227820 | 62227921 | 1        | -0.122727  | 5    | 8.80E-05 | 3.40E-05 | 0.022397 | 0.14512  | 0.00123     | Intragenic | NM_138889    | Cdh13  |
| 19  | 63128048 | 63128113 | 1        | -0.098955  | 7    | 0.012    | 0.037    | 0.27935  | 0.37831  | 0.042700096 | Intragenic | NM_134462    | Atp2c2 |
| 19  | 63210841 | 63210884 | 1        | -0.134638  | 5    | 0.00017  | 0.00013  | 0.21527  | 0.34991  | 0.002036688 | Intragenic | NM_001108452 | Cotl1  |
| 19  | 63231502 | 63231671 | 1        | -0.142695  | 7    | 0.0029   | 0.04     | 0.29466  | 0.43736  | 0.016164653 | Intragenic | NM_001108452 | Cotl1  |
| 19  | 63288800 | 63289021 | 1        | -0.061201  | 5    | 0.0094   | 0.015    | 0.01907  | 0.080271 | 0.036473186 | Intergenic | NA           | NA     |
| 19  | 63529969 | 63530063 | 1        | 0.082446   | 5    | 0.0068   | 0.024    | 0.92208  | 0.83963  | 0.029075319 | Intergenic | NA           | NA     |
| 19  | 63631025 | 63631422 | 1        | -0.111087  | 11   | 0.014    | 0.0074   | 0.29606  | 0.40715  | 0.04726441  | Intergenic | NA           | NA     |
| 19  | 63964455 | 63964663 | 1        | -0.145676  | 5    | 0.00019  | 0.0032   | 0.08444  | 0.23012  | 0.002222187 | Intergenic | NA           | NA     |
| 19  | 64087086 | 64087209 | 1        | -0.074491  | 8    | 0.0037   | 0.0083   | 0.076918 | 0.15141  | 0.019379702 | Intergenic | NA           | NA     |
| 19  | 64089356 | 64089430 | 1        | -0.101582  | 8    | 0.0092   | 0.12     | 0.11274  | 0.21432  | 0.036473186 | Intergenic | NA           | NA     |
| 19  | 64091928 | 64092012 | 1        | -0.089828  | 5    | 0.0029   | 0.015    | 0.067969 | 0.1578   | 0.016164653 | Intergenic | NA           | NA     |
| 19  | 64226742 | 64226825 | 0.97     | -0.381     | 5    | 3.30E-06 | 3.40E-06 | 0.1089   | 0.4899   | 9.48E-05    | Intragenic | NM_001044259 | Fbxo31 |
| 19  | 64647104 | 64647552 | 1        | -0.158079  | 5    | 0.0058   | 0.015    | 0.15824  | 0.31632  | 0.026163814 | Intergenic | NA           | NA     |
| 19  | 64768362 | 64768494 | 1        | -0.135848  | 6    | 0.00016  | 0.0003   | 0.033808 | 0.16966  | 0.001938916 | Intergenic | NA           | NA     |
| 19  | 64803689 | 64803740 | 1        | -0.137563  | 5    | 0.0019   | 0.024    | 0.080309 | 0.21787  | 0.011943782 | Intergenic | NA           | NA     |
| 19  | 65018217 | 65018260 | 1        | 0.120387   | 5    | 0.012    | 0.0018   | 0.91185  | 0.79146  | 0.042700096 | Intergenic | NA           | NA     |
| 19  | 65578105 | 65578155 | 1        | -0.084425  | 5    | 0.0058   | 0.13     | 0.13725  | 0.22167  | 0.026163814 | Intergenic | NA           | NA     |
| 19  | 65796580 | 65796672 | 1        | 0.128165   | 5    | 0.0022   | 0.0053   | 0.87861  | 0.75045  | 0.01321074  | Intergenic | NA           | NA     |
| 19  | 65864474 | 65864514 | 1        | -0.163784  | 5    | 2.90E-06 | 0.00014  | 0.035532 | 0.19932  | 8.70E-05    | Intragenic | NM_001242627 | Zfpm1  |
| 19  | 65864515 | 65864624 | 1        | -0.067155  | 5    | 0.0038   | 0.024    | 0.043845 | 0.111    | 0.019583799 | Intragenic | NM_001242627 | Zfpm1  |
| 19  | 65864862 | 65864901 | 1        | -0.084942  | 5    | 0.008    | 0.039    | 0.15362  | 0.23856  | 0.03243956  | Intragenic | NM_001242627 | Zfpm1  |
| 19  | 65864954 | 65864988 | 1        | -0.060529  | 5    | 6.20E-05 | 7.60E-06 | 0.10487  | 0.1654   | 0.000939548 | Intragenic | NM_001242627 | Zfpm1  |
| 19  | 65865110 | 65865148 | 9.60E-07 | -0.123848  | 9    | 4.40E-12 | 3.40E-12 | 0.11723  | 0.24108  | 1.08E-09    | Intragenic | NM_001242627 | Zfpm1  |
| 19  | 65865342 | 65865362 | 1        | -0.091832  | 5    | 0.00015  | 0.00052  | 0.078706 | 0.17054  | 0.001835821 | Intragenic | NM_001242627 | Zfpm1  |
| 19  | 65865780 | 65865902 | 1        | -0.18031   | 8    | 3.10E-05 | 0.0026   | 0.23618  | 0.41649  | 0.000549952 | Intragenic | NM_001242627 | Zfpm1  |
| 19  | 66623081 | 66623160 | 1        | -0.068212  | 5    | 0.015    | 0.088    | 0.032722 | 0.10093  | 0.049419643 | TSS        | NM_031101    | Rpl13  |
| 19  | 67187644 | 67187986 | 1        | 0.119432   | 5    | 3.90E-05 | 0.00014  | 0.16119  | 0.041759 | 0.000661655 | Intergenic | NA           | NA     |
| 19  | 67188798 | 67189079 | 1        | 0.164404   | 5    | 0.00048  | 0.0093   | 0.36079  | 0.19639  | 0.004351843 | Intergenic | NA           | NA     |
| 19  | 68167440 | 68167506 | 1        | -0.156586  | 5    | 0.0045   | 0.059    | 0.21024  | 0.36683  | 0.021964286 | Intragenic | NM_001136162 | Ttc13  |
| 19  | 68220120 | 68220207 | 1        | -0.104608  | 5    | 0.0035   | 0.025    | 0.35456  | 0.45917  | 0.018410549 | TSS        | NM_001011711 | Fam89a |
| 19  | 68570682 | 68570771 | 1        | -0.100857  | 7    | 0.0026   | 0.039    | 0.05507  | 0.15593  | 0.015204437 | Intragenic | NM_175596    | Disc1  |
| 19  | 68573894 | 68573957 | 1        | -0.135325  | 5    | 0.011    | 0.015    | 0.4311   | 0.56643  | 0.040408163 | Intragenic | NM_175596    | Disc1  |
| 19  | 68613255 | 68613439 | 1        | -0.086432  | 7    | 0.015    | 0.11     | 0.20742  | 0.29385  | 0.049419643 | Intragenic | NM_175596    | Disc1  |
| 19  | 68768303 | 68768426 | 1        | -0.277177  | 5    | 0.00059  | 0.0092   | 0.15015  | 0.42732  | 0.005010587 | Intragenic | NM_175596    | Disc1  |
| 19  | 68917680 | 68917808 | 1        | -0.174127  | 8    | 0.0034   | 0.051    | 0.34458  | 0.5187   | 0.018409391 | Intergenic | NA           | NA     |
| 19  | 69203740 | 69203796 | 1        | -0.090144  | 7    | 0.00069  | 0.0078   | 0.13871  | 0.22885  | 0.00562053  | TSS        | NM_001277391 | Map10  |
| 19  | 70326646 | 70326930 | 1        | -0.054203  | 12   | 1.00E-07 | 9.20E-05 | 0.011885 | 0.066088 | 6.15E-06    | Intergenic | NA           | NA     |



| chr | start     | stop      | q-value  | methy.diff | CpGs | pMWU     | p2DKS    | MCWLS     | MCWHS     | pMWU.fdr    | cgi.type   | transcript      | gene           |
|-----|-----------|-----------|----------|------------|------|----------|----------|-----------|-----------|-------------|------------|-----------------|----------------|
| 19  | 70742410  | 70742559  | 1        | -0.083414  | 8    | 0.0092   | 0.036    | 0.14409   | 0.2275    | 0.036473186 | Intragenic | NM_031235       | Pard3          |
| 19  | 71067091  | 71067416  | 1        | -0.092409  | 8    | 0.00041  | 0.0026   | 0.085997  | 0.17841   | 0.003904258 | Intragenic | NM_031235       | Pard3          |
| 19  | 72758789  | 72759013  | 1        | 0.061544   | 9    | 0.013    | 0.03     | 0.81455   | 0.75301   | 0.04506341  | Intragenic | NM_001011561    | Ccdc7          |
| 19  | 72867755  | 72867875  | 1        | -0.052575  | 5    | 0.0022   | 0.00053  | 0.0058761 | 0.058451  | 0.01321074  | Intergenic | NA              | NA             |
| 2   | 537014    | 537074    | 1        | -0.112855  | 5    | 0.00088  | 0.0092   | 0.044182  | 0.15704   | 0.006722981 | Intergenic | NA              | NA             |
| 2   | 2681281   | 2681305   | 1        | 0.057392   | 5    | 0.008    | 0.18     | 0.059116  | 0.0017241 | 0.03243956  | TSS        | NM_001107645    | Rhobtb3        |
| 2   | 3097392   | 3097468   | 1        | -0.15669   | 5    | 0.0063   | 0.088    | 0.24359   | 0.40028   | 0.027757612 | Intergenic | NA              | NA             |
| 2   | 18426907  | 18427029  | 1        | -0.070749  | 5    | 0.013    | 0.015    | 0.066158  | 0.13691   | 0.04506341  | Intragenic | NM_001170558:NM | Vcan:Vcan:Vcan |
| 2   | 18725260  | 18725305  | 1        | 0.135354   | 5    | 0.011    | 0.039    | 0.84366   | 0.70831   | 0.040408163 | Intragenic | NM_001006999    | Xrcc4          |
| 2   | 41803614  | 41803717  | 1        | -0.138031  | 5    | 0.0068   | 0.037    | 0.15312   | 0.29115   | 0.029075319 | Intergenic | NA              | NA             |
| 2   | 41803948  | 41804122  | 1        | -0.101768  | 8    | 0.0036   | 0.023    | 0.11169   | 0.21346   | 0.018923077 | Intergenic | NA              | NA             |
| 2   | 42437222  | 42437547  | 1        | -0.119581  | 14   | 0.00055  | 0.0017   | 0.33614   | 0.45572   | 0.004792208 | TSS        | NM_030850       | Bhmt           |
| 2   | 42468329  | 42468477  | 1        | -0.19164   | 5    | 4.40E-05 | 0.00053  | 0.057993  | 0.24963   | 0.000729708 | TSS        | NM_001014256:NM | Bhmt2:Dmgdh    |
| 2   | 42469601  | 42469748  | 1        | -0.1131    | 10   | 0.00033  | 0.016    | 0.11328   | 0.22638   | 0.003313469 | TSS        | NM_001014256:NM | Bhmt2:Dmgdh    |
| 2   | 45019175  | 45019279  | 1        | -0.101478  | 5    | 0.015    | 0.015    | 0.12263   | 0.22411   | 0.049419643 | Intragenic | NM_001108542    | Arhgef28       |
| 2   | 47712819  | 47712857  | 1        | -0.081273  | 5    | 0.015    | 0.038    | 0.088536  | 0.16981   | 0.049419643 | Intergenic | NA              | NA             |
| 2   | 48096787  | 48096901  | 1        | -0.157495  | 5    | 3.10E-05 | 0.00053  | 0.083502  | 0.241     | 0.000549952 | TSS        | NM_130747       | Acot12         |
| 2   | 51619492  | 51619542  | 1        | -0.121949  | 5    | 0.0053   | 0.00052  | 0.059754  | 0.1817    | 0.024662043 | Intergenic | NA              | NA             |
| 2   | 52032923  | 52032973  | 1        | -0.122936  | 5    | 0.0049   | 0.00014  | 0.058768  | 0.1817    | 0.023345384 | Intergenic | NA              | NA             |
| 2   | 52729483  | 52729637  | 1        | 0.071844   | 7    | 0.00051  | 0.0013   | 0.94833   | 0.87648   | 0.004595604 | Intergenic | NA              | NA             |
| 2   | 53159416  | 53159505  | 1        | -0.193143  | 5    | 7.00E-05 | 0.00013  | 0.10427   | 0.29742   | 0.001035271 | Intergenic | NA              | NA             |
| 2   | 53744185  | 53744247  | 1        | -0.164249  | 5    | 9.20E-06 | 0.00014  | 0.58876   | 0.753     | 0.000206371 | Intergenic | NA              | NA             |
| 2   | 54048995  | 54049027  | 1        | -0.113593  | 5    | 1.50E-06 | 3.50E-05 | 0.15218   | 0.26577   | 5.17E-05    | TSS        | NM_001013199    | Cwc27          |
| 2   | 54184162  | 54184249  | 1        | -0.187666  | 5    | 0.0011   | 0.0018   | 0.19547   | 0.38314   | 0.007982301 | Intergenic | NA              | NA             |
| 2   | 54788802  | 54788884  | 1        | -0.131618  | 5    | 0.0074   | 0.039    | 0.69841   | 0.83003   | 0.030871679 | Intergenic | NA              | NA             |
| 2   | 55621517  | 55621787  | 4.70E-05 | -0.138661  | 15   | 7.10E-13 | 1.70E-10 | 0.091801  | 0.23046   | 2.10E-10    | Intergenic | NA              | NA             |
| 2   | 60475461  | 60475496  | 1        | 0.158166   | 5    | 0.0087   | 0.015    | 0.26748   | 0.10932   | 0.034705946 | Intragenic | NM_001113329:NM | Pde4d:Pde4d:P  |
| 2   | 62211536  | 62211758  | 1        | 0.062843   | 10   | 0.0081   | 0.15     | 0.84062   | 0.77778   | 0.032827018 | Intergenic | NA              | NA             |
| 2   | 62515840  | 62515899  | 1        | -0.125339  | 5    | 6.20E-05 | 0.00052  | 0.083383  | 0.20872   | 0.000939548 | Intergenic | NA              | NA             |
| 2   | 63357028  | 63357413  | 1        | -0.075451  | 7    | 0.0021   | 0.0022   | 0.097384  | 0.17283   | 0.012840099 | Intragenic | NM_001008725    | Il6st          |
| 2   | 71957155  | 71957323  | 1        | -0.163052  | 7    | 0.0039   | 0.0083   | 0.48839   | 0.65144   | 0.0199875   | Intergenic | NA              | NA             |
| 2   | 82131732  | 82131796  | 1        | -0.138721  | 7    | 0.00023  | 0.00014  | 0.54041   | 0.67913   | 0.002525893 | Intergenic | NA              | NA             |
| 2   | 82276917  | 82277011  | 1        | -0.055702  | 5    | 0.0019   | 0.0032   | 0.019425  | 0.075126  | 0.011943782 | Intragenic | NM_022940       | Pdzd2          |
| 2   | 83729634  | 83729770  | 1        | -0.210261  | 5    | 0.00044  | 0.0032   | 0.095568  | 0.30583   | 0.0041      | Intragenic | NM_012816       | Amacr          |
| 2   | 84092426  | 84092503  | 1        | -0.251703  | 5    | 6.30E-06 | 3.30E-05 | 0.12821   | 0.37991   | 0.000156545 | Intragenic | NM_001011947    | Rai14          |
| 2   | 84161525  | 84161623  | 1        | -0.073282  | 5    | 0.0074   | 0.038    | 0.12969   | 0.20297   | 0.030871679 | Intergenic | NA              | NA             |
| 2   | 97886494  | 97886611  | 0.058    | -0.119671  | 11   | 4.10E-07 | 2.10E-07 | 0.090168  | 0.20984   | 1.89E-05    | Intragenic | NM_001034912    | Fam134b        |
| 2   | 97978641  | 97978679  | 1        | -0.050284  | 5    | 6.20E-05 | 3.40E-05 | 0.0004951 | 0.050779  | 0.000939548 | TSS        | NM_001009652    | Zfp622         |
| 2   | 100366547 | 100366720 | 1        | -0.1986    | 6    | 3.50E-06 | 8.50E-05 | 0.083649  | 0.28225   | 9.90E-05    | Intergenic | NA              | NA             |

| chr | start     | stop      | q-value | methy.diff | CpGs | pMWU     | p2DKS    | MCWLS     | MCWHS    | pMWU.fdr    | cgi.type   | transcript   | gene     |
|-----|-----------|-----------|---------|------------|------|----------|----------|-----------|----------|-------------|------------|--------------|----------|
| 2   | 100955805 | 100955971 | 1       | -0.067664  | 7    | 0.013    | 0.14     | 0.59399   | 0.66165  | 0.04506341  | Intergenic | NA           | NA       |
| 2   | 104034999 | 104035101 | 1       | -0.082079  | 5    | 0.00029  | 0.00052  | 0.018053  | 0.10013  | 0.002984937 | Intragenic | NM_001191565 | Ankrd33b |
| 2   | 108504099 | 108504156 | 1       | -0.120402  | 5    | 0.01     | 0.059    | 0.68834   | 0.80874  | 0.037614679 | Intergenic | NA           | NA       |
| 2   | 111141578 | 111141622 | 1       | 0.065179   | 5    | 0.013    | 0.025    | 0.88401   | 0.81883  | 0.04506341  | Intergenic | NA           | NA       |
| 2   | 114395300 | 114395391 | 1       | 0.073962   | 5    | 0.01     | 0.038    | 0.088345  | 0.014384 | 0.037614679 | Intergenic | NA           | NA       |
| 2   | 138448138 | 138448225 | 1       | -0.181624  | 5    | 3.50E-05 | 0.00028  | 0.17568   | 0.3573   | 0.000606338 | Intergenic | NA           | NA       |
| 2   | 142849304 | 142849350 | 1       | -0.077822  | 5    | 0.015    | 0.13     | 0.086521  | 0.16434  | 0.049419643 | Intergenic | NA           | NA       |
| 2   | 143263431 | 143263476 | 1       | 0.201261   | 5    | 0.00026  | 0.0032   | 0.85692   | 0.65566  | 0.002784906 | Intergenic | NA           | NA       |
| 2   | 148401010 | 148401089 | 1       | 0.056805   | 7    | 0.00093  | 0.027    | 0.92639   | 0.86958  | 0.007046612 | Intergenic | NA           | NA       |
| 2   | 148415759 | 148415785 | 1       | -0.072245  | 5    | 9.20E-06 | 0.00053  | 0.038504  | 0.11075  | 0.000206371 | Intergenic | NA           | NA       |
| 2   | 148416172 | 148416211 | 1       | 0.07183    | 5    | 0.0008   | 0.015    | 0.083898  | 0.012068 | 0.006267516 | Intergenic | NA           | NA       |
| 2   | 160226784 | 160226984 | 1       | -0.102881  | 9    | 0.0012   | 0.017    | 0.04511   | 0.14799  | 0.008573088 | Intragenic | NM_001107675 | Maml3    |
| 2   | 160601320 | 160601660 | 1       | -0.070601  | 9    | 0.0025   | 0.004    | 0.0454    | 0.116    | 0.01468949  | Intragenic | NM_001107675 | Maml3    |
| 2   | 160609553 | 160609753 | 1       | -0.10291   | 9    | 0.0012   | 0.017    | 0.04508   | 0.14799  | 0.008573088 | Intragenic | NM_001107675 | Maml3    |
| 2   | 163517826 | 163517893 | 1       | 0.057693   | 5    | 0.0035   | 0.015    | 0.99622   | 0.93852  | 0.018410549 | Intergenic | NA           | NA       |
| 2   | 164585883 | 164586090 | 1       | -0.07836   | 10   | 0.00048  | 0.016    | 0.085788  | 0.16415  | 0.004351843 | TSS        | NM_001109497 | Mab2111  |
| 2   | 166799995 | 166800071 | 1       | -0.12135   | 5    | 0.0035   | 0.087    | 0.27295   | 0.3943   | 0.018410549 | TSS        | NM_001106434 | Tm4sf1   |
| 2   | 167797365 | 167797486 | 0.0011  | -0.128122  | 12   | 2.30E-11 | 4.00E-09 | 0.035193  | 0.16331  | 4.47E-09    | Intergenic | NA           | NA       |
| 2   | 168719081 | 168719254 | 1       | -0.084133  | 5    | 0.0068   | 0.058    | 0.75921   | 0.84334  | 0.029075319 | Intragenic | NM_001169130 | Med12l   |
| 2   | 168982746 | 168982811 | 1       | -0.084844  | 5    | 0.0014   | 0.015    | 0.079662  | 0.16451  | 0.00960223  | Intragenic | NM_198768    | Igsf10   |
| 2   | 171882803 | 171882981 | 1       | -0.089105  | 7    | 0.012    | 0.0035   | 0.52755   | 0.61665  | 0.042700096 | Intergenic | NA           | NA       |
| 2   | 176275511 | 176275553 | 1       | -0.107813  | 8    | 0.0096   | 0.0083   | 0.48647   | 0.59428  | 0.037112624 | Intergenic | NA           | NA       |
| 2   | 177458267 | 177458319 | 1       | 0.100746   | 5    | 0.0094   | 0.024    | 0.15464   | 0.053898 | 0.036473186 | TSS        | NM_001109536 | Ptx3     |
| 2   | 180905555 | 180906042 | 1       | -0.150956  | 27   | 8.50E-07 | 0.00021  | 0.40866   | 0.55962  | 3.35E-05    | Intergenic | NA           | NA       |
| 2   | 180916315 | 180916607 | 1       | -0.183362  | 14   | 9.20E-06 | 6.80E-06 | 0.23885   | 0.42221  | 0.000206371 | Intergenic | NA           | NA       |
| 2   | 180995718 | 180996002 | 1       | -0.055138  | 16   | 0.0041   | 0.052    | 0.13544   | 0.19058  | 0.020486121 | Intergenic | NA           | NA       |
| 2   | 182587461 | 182587616 | 1       | 0.067684   | 8    | 0.0078   | 0.037    | 0.86076   | 0.79307  | 0.032284913 | Intergenic | NA           | NA       |
| 2   | 193160833 | 193160865 | 1       | -0.14626   | 5    | 0.0045   | 0.0093   | 0.29634   | 0.44261  | 0.021964286 | Intergenic | NA           | NA       |
| 2   | 193166285 | 193166359 | 1       | -0.151644  | 7    | 0.0059   | 0.056    | 0.17244   | 0.32408  | 0.02655     | Intergenic | NA           | NA       |
| 2   | 197176174 | 197176243 | 1       | -0.12524   | 7    | 0.0051   | 0.039    | 0.41983   | 0.54507  | 0.024220077 | Intragenic | NM_001107684 | Rapgef2  |
| 2   | 199575242 | 199575393 | 1       | -0.217215  | 5    | 0.0029   | 0.0053   | 0.29259   | 0.50981  | 0.016164653 | Intergenic | NA           | NA       |
| 2   | 201288353 | 201288382 | 1       | -0.073477  | 5    | 0.0053   | 0.024    | 0.03712   | 0.1106   | 0.024662043 | TSS        | NM_001135717 | Rbm46    |
| 2   | 201319582 | 201319696 | 1       | -0.069976  | 5    | 0.0087   | 0.058    | 0.055957  | 0.12593  | 0.034705946 | TSS        | NM_022280    | Lrat     |
| 2   | 203661460 | 203661665 | 1       | -0.068317  | 10   | 0.00032  | 0.0036   | 0.040246  | 0.10856  | 0.003243956 | Intergenic | NA           | NA       |
| 2   | 205250775 | 205250983 | 1       | -0.138784  | 19   | 8.20E-05 | 0.0018   | 0.33514   | 0.47392  | 0.001163769 | TSS        | NM_001109391 | Mab2112  |
| 2   | 206518648 | 206518748 | 1       | -0.100815  | 5    | 0.0074   | 0.024    | 0.0695    | 0.17032  | 0.030871679 | TSS        | NM_001107701 | Lrrc71   |
| 2   | 206580851 | 206580951 | 1       | -0.054947  | 6    | 0.011    | 0.084    | 0.12903   | 0.18398  | 0.040408163 | Intragenic | NM_022212    | Insrr    |
| 2   | 207368825 | 207368940 | 1       | -0.065141  | 5    | 0.0041   | 0.00098  | 0.0073168 | 0.072457 | 0.020486121 | Intergenic | NA           | NA       |
| 2   | 207866093 | 207866130 | 1       | -0.186799  | 5    | 2.20E-05 | 7.00E-05 | 0.12288   | 0.30968  | 0.000427263 | TSS        | NM_012624    | Pklr     |

| chr | start     | stop      | q-value | methyL.diff | CpGs | pMWU     | p2DKS    | MCWLS    | MCWHS      | pMWU.fdr    | cgi.type   | transcript                | gene            |
|-----|-----------|-----------|---------|-------------|------|----------|----------|----------|------------|-------------|------------|---------------------------|-----------------|
| 2   | 207870839 | 207870919 | 1       | -0.141505   | 5    | 0.00029  | 0.0054   | 0.10077  | 0.24227    | 0.002984937 | Intragenic | NM_012624                 | Pklr            |
| 2   | 208081376 | 208081681 | 0.097   | -0.100404   | 15   | 8.70E-11 | 3.50E-07 | 0.089597 | 0.19       | 1.58E-08    | TSS        | NM_020308                 | Adam15          |
| 2   | 209285554 | 209285645 | 1       | -0.178518   | 5    | 0.014    | 0.038    | 0.53538  | 0.7139     | 0.04726441  | TSS        | NM_012613                 | Npr1            |
| 2   | 209285929 | 209285982 | 1       | -0.071681   | 6    | 0.0069   | 0.0045   | 0.098742 | 0.17042    | 0.029451706 | TSS        | NM_012613                 | Npr1            |
| 2   | 210079928 | 210080045 | 1       | 0.069951    | 6    | 0.0014   | 0.0045   | 0.9323   | 0.86235    | 0.00960223  | Intergenic | NA                        | NA              |
| 2   | 210338347 | 210338403 | 1       | -0.307099   | 7    | 1.20E-07 | 8.80E-06 | 0.20393  | 0.51103    | 7.14E-06    | Intergenic | NA                        | NA              |
| 2   | 211085588 | 211085694 | 1       | 0.10009     | 5    | 2.50E-06 | 0.58     | 0.10091  | 0.00081967 | 7.69E-05    | Intergenic | NA                        | NA              |
| 2   | 211269512 | 211269570 | 1       | 0.059602    | 5    | 0.00065  | 0.0031   | 0.94339  | 0.88379    | 0.005335929 | Intergenic | NA                        | NA              |
| 2   | 214053383 | 214053449 | 1       | 0.069105    | 7    | 0.00013  | 0.00047  | 0.97714  | 0.90804    | 0.001648454 | Intergenic | NA                        | NA              |
| 2   | 214890134 | 214890664 | 1       | -0.093476   | 8    | 0.00065  | 0.0016   | 0.035228 | 0.1287     | 0.005335929 | Intragenic | NM_001100985:NM_001100985 | RGD1563667:R    |
| 2   | 215716715 | 215716770 | 1       | -0.109878   | 5    | 0.00065  | 0.0018   | 0.60413  | 0.71401    | 0.005335929 | Intergenic | NA                        | NA              |
| 2   | 215804761 | 215804881 | 1       | -0.140244   | 5    | 0.0032   | 0.0031   | 0.13452  | 0.27476    | 0.017454545 | Intragenic | NM_001024302:NM_001024302 | Lysmd1:Tnfaipt8 |
| 2   | 215840245 | 215840312 | 1       | -0.08948    | 7    | 0.0027   | 0.0034   | 0.12076  | 0.21024    | 0.015434547 | Intragenic | NM_001024302:NM_001024302 | Lysmd1:Sema6    |
| 2   | 216079037 | 216079223 | 1       | -0.205583   | 5    | 0.00021  | 0.0055   | 0.42086  | 0.62645    | 0.002348182 | Intergenic | NA                        | NA              |
| 2   | 216983990 | 216984017 | 1       | -0.050378   | 5    | 0.002    | 0.0018   | 0.93791  | 0.98828    | 0.012269327 | Intergenic | NA                        | NA              |
| 2   | 217498902 | 217498989 | 1       | 0.103456    | 5    | 0.0053   | 0.0018   | 0.86677  | 0.76331    | 0.024662043 | Intragenic | NM_001014255              | Aph1a           |
| 2   | 217613910 | 217614017 | 1       | -0.134635   | 6    | 0.00033  | 0.0027   | 0.13435  | 0.26899    | 0.003313469 | Intragenic | NM_172072                 | Vps45           |
| 2   | 217919987 | 217920050 | 1       | -0.146159   | 7    | 5.20E-05 | 1.60E-05 | 0.16973  | 0.31589    | 0.000830649 | Intragenic | NM_001100836              | Fcgr1a          |
| 2   | 218052853 | 218052950 | 1       | -0.191485   | 5    | 0.0049   | 0.009    | 0.16714  | 0.35863    | 0.023345384 | Intergenic | NA                        | NA              |
| 2   | 220051914 | 220051948 | 1       | -0.059053   | 5    | 0.0022   | 0.0054   | 0.058648 | 0.1177     | 0.01321074  | Intragenic | NM_001271334              | Zfp697          |
| 2   | 221264389 | 221264544 | 1       | 0.068366    | 8    | 0.0096   | 0.051    | 0.85755  | 0.78918    | 0.037112624 | Intergenic | NA                        | NA              |
| 2   | 223139773 | 223139912 | 1       | -0.080766   | 5    | 0.014    | 0.0054   | 0.090495 | 0.17126    | 0.04726441  | Intragenic | NM_012830                 | Cd2             |
| 2   | 224139188 | 224139295 | 1       | -0.167578   | 5    | 0.0053   | 0.015    | 0.37771  | 0.54529    | 0.024662043 | Intergenic | NA                        | NA              |
| 2   | 226283730 | 226283834 | 1       | 0.090835    | 5    | 0.0063   | 0.038    | 0.949    | 0.85816    | 0.027757612 | Intergenic | NA                        | NA              |
| 2   | 229555705 | 229555951 | 1       | -0.116756   | 13   | 9.30E-06 | 0.0033   | 0.12186  | 0.23861    | 0.000207982 | Intergenic | NA                        | NA              |
| 2   | 229714413 | 229714465 | 1       | -0.10264    | 6    | 0.00049  | 0.0072   | 0.095021 | 0.19766    | 0.004431618 | TSS        | NM_001122776              | Kcnc4           |
| 2   | 237201323 | 237201431 | 1       | -0.235082   | 5    | 7.80E-05 | 0.0018   | 0.48368  | 0.71876    | 0.001113424 | Intergenic | NA                        | NA              |
| 2   | 243849086 | 243849168 | 1       | -0.081286   | 5    | 0.013    | 0.015    | 0.067822 | 0.14911    | 0.04506341  | Intergenic | NA                        | NA              |
| 2   | 246019960 | 246020011 | 1       | -0.181758   | 5    | 0.00011  | 7.00E-05 | 0.22071  | 0.40247    | 0.001431746 | Intragenic | NM_001107722              | Bcar3           |
| 2   | 246142495 | 246142582 | 0.43    | -0.101333   | 6    | 4.40E-07 | 1.50E-06 | 0.11854  | 0.21988    | 1.96E-05    | TSS        | NM_001039609              | Fnbp1l          |
| 2   | 248525681 | 248526123 | 1       | -0.068313   | 11   | 0.00035  | 0.014    | 0.093626 | 0.16194    | 0.003490541 | Intergenic | NA                        | NA              |
| 2   | 251366989 | 251367025 | 1       | -0.092717   | 5    | 3.10E-05 | 0.00014  | 0.046968 | 0.13969    | 0.000549952 | Intergenic | NA                        | NA              |
| 2   | 251367090 | 251367126 | 1       | -0.080135   | 5    | 0.0068   | 0.038    | 0.074495 | 0.15463    | 0.029075319 | Intergenic | NA                        | NA              |
| 2   | 251367176 | 251367202 | 1       | -0.077759   | 5    | 0.0038   | 0.059    | 0.070005 | 0.14776    | 0.019583799 | Intergenic | NA                        | NA              |
| 2   | 251899648 | 251899722 | 1       | -0.094187   | 5    | 4.40E-05 | 0.00014  | 0.049586 | 0.14377    | 0.000729708 | Intergenic | NA                        | NA              |
| 2   | 254693801 | 254693980 | 1       | -0.080493   | 8    | 0.011    | 0.0038   | 0.15549  | 0.23598    | 0.040408163 | Intergenic | NA                        | NA              |
| 2   | 254803946 | 254804000 | 1       | -0.063539   | 5    | 0.008    | 0.038    | 0.10942  | 0.17296    | 0.03243956  | Intragenic | NM_130429                 | Lef1            |
| 2   | 256542896 | 256542940 | 0.18    | -0.230289   | 5    | 2.40E-07 | 6.30E-07 | 0.415    | 0.64529    | 1.22E-05    | Intergenic | NA                        | NA              |
| 2   | 259203697 | 259203970 | 1       | -0.104037   | 8    | 0.0033   | 0.0058   | 0.084797 | 0.18883    | 0.017946942 | Intragenic | NM_001031655              | Manba           |

| chr | start     | stop      | q-value  | methy.diff | CpGs | pMWU     | p2DKS    | MCWLS    | MCWHS    | pMWU.fdr    | cgi.type   | transcript                | gene           |
|-----|-----------|-----------|----------|------------|------|----------|----------|----------|----------|-------------|------------|---------------------------|----------------|
| 2   | 259209921 | 259210208 | 1        | -0.090884  | 9    | 0.0056   | 0.0087   | 0.084059 | 0.17494  | 0.025943503 | Intragenic | NM_001031655              | Manba          |
| 2   | 259408910 | 259408983 | 0.083    | -0.315387  | 7    | 2.20E-09 | 3.00E-07 | 0.14109  | 0.45648  | 2.46E-07    | Intragenic | NM_001276711              | Nfkb1          |
| 2   | 262603936 | 262604024 | 1        | -0.253797  | 5    | 1.30E-06 | 7.60E-06 | 0.068292 | 0.32209  | 4.66E-05    | Intragenic | NM_001004090              | Tspan5         |
| 2   | 262614587 | 262615009 | 1        | -0.174081  | 8    | 4.10E-06 | 0.00055  | 0.056224 | 0.2303   | 0.000112483 | Intragenic | NM_001004090              | Tspan5         |
| 2   | 270181407 | 270181458 | 1        | -0.135033  | 5    | 0.008    | 0.039    | 0.17029  | 0.30532  | 0.03243956  | Intragenic | NM_022297                 | Ddah1          |
| 2   | 270379334 | 270379425 | 1        | -0.183939  | 7    | 0.0069   | 0.038    | 0.34597  | 0.52991  | 0.029451706 | Intergenic | NA                        | NA             |
| 2   | 277698806 | 277698868 | 1        | -0.185821  | 5    | 0.00097  | 0.0031   | 0.18299  | 0.36881  | 0.007223613 | Intragenic | NM_001271361              | St6galnac5     |
| 2   | 278125713 | 278125823 | 1        | -0.181181  | 5    | 0.00059  | 0.015    | 0.35346  | 0.53464  | 0.005010587 | Intragenic | NM_019123                 | St6galnac3     |
| 2   | 278512723 | 278513071 | 1        | -0.122907  | 5    | 0.0058   | 0.015    | 0.12558  | 0.24849  | 0.026163814 | Intragenic | NM_019123                 | St6galnac3     |
| 20  | 187888    | 188070    | 1        | -0.072599  | 10   | 0.01     | 0.022    | 0.29516  | 0.36775  | 0.037614679 | Intergenic | NA                        | NA             |
| 20  | 5363825   | 5363869   | 1        | -0.129312  | 5    | 0.0019   | 0.038    | 0.1749   | 0.30422  | 0.011943782 | Intergenic | NA                        | NA             |
| 20  | 6486138   | 6486239   | 1        | -0.092816  | 5    | 0.002    | 0.0032   | 0.10439  | 0.19721  | 0.012269327 | Intragenic | NM_031504:NM_031504       | C4a:Stk19      |
| 20  | 6562700   | 6562838   | 1        | -0.097022  | 12   | 0.00029  | 0.00041  | 0.1441   | 0.24112  | 0.002984937 | TSS        | NR_024118                 | Tnxa-ps1       |
| 20  | 6635481   | 6635543   | 1        | -0.207099  | 5    | 0.00054  | 0.0018   | 0.29143  | 0.49853  | 0.004710638 | Intragenic | NM_172222                 | C2             |
| 20  | 6694294   | 6694363   | 1        | -0.22728   | 5    | 0.00036  | 0.0018   | 0.17699  | 0.40427  | 0.003505013 | Intragenic | NM_031522                 | Neu1           |
| 20  | 6938183   | 6938245   | 1        | -0.100232  | 5    | 0.015    | 0.0055   | 0.64677  | 0.747    | 0.049419643 | TSS        | NM_012675                 | Tnf            |
| 20  | 6958775   | 6958801   | 1        | 0.181197   | 5    | 0.008    | 0.71     | 0.2      | 0.018803 | 0.03243956  | Intragenic | NM_001008837:NM_001008837 | RT1-CE14:RT1-C |
| 20  | 7079104   | 7079146   | 1        | -0.113102  | 5    | 0.00039  | 0.0093   | 0.020615 | 0.13372  | 0.003723415 | Intragenic | NM_053292                 | Vars           |
| 20  | 7096538   | 7096596   | 1        | -0.344706  | 5    | 2.40E-05 | 0.00053  | 0.35234  | 0.69705  | 0.000455321 | Intragenic | NM_212536                 | Msh5           |
| 20  | 7505386   | 7505651   | 1        | -0.071193  | 5    | 0.012    | 0.088    | 0.096536 | 0.16773  | 0.042700096 | TSS        | NM_133553                 | B3galt4        |
| 20  | 7535710   | 7535943   | 0.04     | -0.156577  | 13   | 3.70E-08 | 1.40E-07 | 0.10659  | 0.26317  | 2.94E-06    | TSS        | NM_033098                 | Tapbp          |
| 20  | 7744109   | 7744213   | 1        | -0.108994  | 9    | 0.00082  | 0.0019   | 0.1987   | 0.3077   | 0.006410593 | Intragenic | NM_013138                 | Itpr3          |
| 20  | 7842003   | 7842152   | 1        | -0.168949  | 5    | 0.00044  | 0.0054   | 0.17178  | 0.34072  | 0.0041      | TSS        | NM_013139                 | Clps           |
| 20  | 7991805   | 7991907   | 1        | -0.074722  | 5    | 0.0008   | 0.038    | 0.043503 | 0.11823  | 0.006267516 | Intragenic | NM_031020                 | Mapk14         |
| 20  | 8757105   | 8757192   | 1        | -0.185237  | 5    | 0.0045   | 0.0093   | 0.25784  | 0.44307  | 0.021964286 | Intergenic | NA                        | NA             |
| 20  | 8960736   | 8960916   | 1        | -0.195504  | 5    | 0.0058   | 0.015    | 0.44817  | 0.64367  | 0.026163814 | Intragenic | NM_001034188              | Ppil1          |
| 20  | 8999488   | 8999661   | 1        | -0.171429  | 17   | 8.80E-06 | 0.0003   | 0.42302  | 0.59445  | 0.000204226 | Intragenic | NM_001034188:NM_001034188 | Ppil1:Grm4     |
| 20  | 9166664   | 9166693   | 1        | -0.075865  | 5    | 0.0041   | 0.015    | 0.12364  | 0.1995   | 0.020486121 | Intragenic | NM_001170481              | Pi16           |
| 20  | 9264757   | 9264831   | 1        | -0.070065  | 7    | 0.0056   | 0.039    | 0.10292  | 0.17298  | 0.025943503 | Intergenic | NA                        | NA             |
| 20  | 9422408   | 9422469   | 0.025    | -0.20364   | 9    | 7.80E-08 | 8.80E-08 | 0.27025  | 0.47389  | 5.14E-06    | TSS        | NM_031109                 | Rps10          |
| 20  | 9657901   | 9658177   | 1        | -0.066324  | 9    | 4.50E-07 | 1.70E-05 | 0.069368 | 0.13569  | 1.98E-05    | Intergenic | NA                        | NA             |
| 20  | 9732527   | 9732628   | 1        | -0.126901  | 6    | 0.00084  | 0.0071   | 0.09191  | 0.21881  | 0.006539241 | Intragenic | NM_001107613              | Anks1a         |
| 20  | 9853298   | 9853494   | 1        | -0.157898  | 6    | 0.0074   | 0.0044   | 0.43352  | 0.59142  | 0.030871679 | Intragenic | NM_001007695              | Tcp11          |
| 20  | 10003902  | 10004220  | 2.90E-09 | -0.062341  | 31   | 4.30E-14 | 1.00E-14 | 0.018729 | 0.08107  | 3.20E-11    | Intragenic | NM_001191717              | Def6           |
| 20  | 10006252  | 10006623  | 1.60E-07 | -0.090377  | 23   | 6.40E-14 | 5.80E-13 | 0.024534 | 0.11491  | 3.20E-11    | Intragenic | NM_001191717              | Def6           |
| 20  | 10011940  | 10011992  | 1        | -0.209859  | 5    | 0.00039  | 0.015    | 0.14422  | 0.35408  | 0.003723415 | Intergenic | NA                        | NA             |
| 20  | 10096797  | 10097055  | 1        | -0.204608  | 5    | 0.00044  | 0.0092   | 0.17608  | 0.38069  | 0.0041      | TSS        | NM_001191718              | Fance          |
| 20  | 10428561  | 10428716  | 1        | -0.095738  | 6    | 0.014    | 0.085    | 0.13995  | 0.23569  | 0.04726441  | Intergenic | NA                        | NA             |
| 20  | 10615268  | 10615321  | 1        | -0.0637    | 5    | 0.011    | 0.087    | 0.051648 | 0.11535  | 0.040408163 | Intergenic | NA                        | NA             |

| chr | start    | stop     | q-value | methy.diff | CpGs | pMWU     | p2DKS    | MCWLS    | MCWHS    | pMWU.fdr    | cgi.type   | transcript   | gene     |
|-----|----------|----------|---------|------------|------|----------|----------|----------|----------|-------------|------------|--------------|----------|
| 20  | 10719354 | 10719383 | 1       | -0.050469  | 5    | 0.00021  | 0.0018   | 0.0276   | 0.07807  | 0.002348182 | Intragenic | NM_001107618 | Mdga1    |
| 20  | 10852231 | 10852333 | 1       | -0.110039  | 7    | 3.20E-05 | 0.00027  | 0.048126 | 0.15816  | 0.000564976 | Intergenic | NA           | NA       |
| 20  | 11817338 | 11817605 | 1       | 0.058799   | 15   | 0.011    | 0.077    | 0.88942  | 0.83062  | 0.040408163 | Intergenic | NA           | NA       |
| 20  | 12284346 | 12284425 | 1       | -0.129149  | 5    | 0.0032   | 0.038    | 0.15473  | 0.28388  | 0.017454545 | Intergenic | NA           | NA       |
| 20  | 12675395 | 12675684 | 1       | -0.076753  | 9    | 5.80E-05 | 0.0055   | 0.049367 | 0.12612  | 0.000901137 | Intergenic | NA           | NA       |
| 20  | 13299984 | 13300065 | 1       | -0.159484  | 5    | 0.0074   | 0.0091   | 0.13813  | 0.29762  | 0.030871679 | Intragenic | NM_001106378 | Agpat3   |
| 20  | 13639030 | 13639119 | 1       | -0.074773  | 5    | 0.00039  | 0.0093   | 0.029024 | 0.1038   | 0.003723415 | Intragenic | NM_001011559 | Trpm2    |
| 20  | 13922918 | 13923433 | 1       | -0.081391  | 14   | 0.013    | 0.06     | 0.32973  | 0.41112  | 0.04506341  | Intragenic | NM_001013238 | Pttg1ip  |
| 20  | 14121220 | 14121395 | 1       | -0.063272  | 5    | 0.0035   | 0.0093   | 0.033075 | 0.096347 | 0.018410549 | Intergenic | NA           | NA       |
| 20  | 14526198 | 14526629 | 1       | -0.055572  | 9    | 0.0007   | 0.0088   | 0.059685 | 0.11526  | 0.0056957   | Intergenic | NA           | NA       |
| 20  | 14940198 | 14940291 | 1       | 0.050902   | 7    | 0.00062  | 0.0081   | 0.97542  | 0.92452  | 0.005241237 | Intragenic | NM_001100741 | Col6a2   |
| 20  | 14951222 | 14951286 | 1       | 0.070819   | 5    | 0.014    | 0.0018   | 0.88633  | 0.81551  | 0.04726441  | Intragenic | NM_001100741 | Col6a2   |
| 20  | 15827463 | 15827688 | 1       | -0.110294  | 5    | 2.20E-05 | 0.00014  | 0.047987 | 0.15828  | 0.000427263 | TSS        | NM_012980    | Mmp11    |
| 20  | 15916243 | 15916302 | 1       | -0.12289   | 5    | 0.0024   | 0.0055   | 0.041964 | 0.16485  | 0.014124402 | Intragenic | NM_012796    | Gstt2    |
| 20  | 17067169 | 17067281 | 1       | -0.190378  | 5    | 0.0027   | 0.003    | 0.19229  | 0.38266  | 0.015434547 | Intergenic | NA           | NA       |
| 20  | 17658626 | 17658738 | 1       | -0.190565  | 5    | 0.0027   | 0.003    | 0.1921   | 0.38266  | 0.015434547 | Intergenic | NA           | NA       |
| 20  | 20989474 | 20989588 | 1       | -0.103694  | 5    | 0.00026  | 0.0018   | 0.036056 | 0.13975  | 0.002784906 | Intragenic | NM_001108531 | Bicc1    |
| 20  | 21015537 | 21015706 | 1       | -0.068697  | 5    | 0.00054  | 0.0018   | 0.076109 | 0.14481  | 0.004710638 | Intragenic | NM_001108531 | Bicc1    |
| 20  | 21205926 | 21206219 | 1       | -0.089212  | 9    | 0.00034  | 0.018    | 0.086381 | 0.17559  | 0.0034      | Intergenic | NA           | NA       |
| 20  | 21793274 | 21793390 | 1       | -0.164916  | 5    | 0.0045   | 0.0091   | 0.4443   | 0.60922  | 0.021964286 | Intergenic | NA           | NA       |
| 20  | 22088315 | 22088385 | 1       | -0.108568  | 5    | 0.01     | 0.13     | 0.13591  | 0.24448  | 0.037614679 | TSS        | NM_031805    | Ank3     |
| 20  | 22727322 | 22727444 | 1       | -0.062111  | 5    | 0.008    | 0.025    | 0.014887 | 0.076997 | 0.03243956  | Intergenic | NA           | NA       |
| 20  | 22794523 | 22794596 | 1       | -0.057061  | 5    | 0.0014   | 0.038    | 0.069029 | 0.12609  | 0.00960223  | Intragenic | NM_001107622 | Rhobtb1  |
| 20  | 24084700 | 24084787 | 1       | -0.144489  | 5    | 0.0011   | 0.0089   | 0.06316  | 0.20765  | 0.007982301 | Intragenic | NM_001107625 | Rtkn2    |
| 20  | 24724261 | 24724418 | 1       | -0.165235  | 8    | 0.012    | 0.069    | 0.28055  | 0.44578  | 0.042700096 | Intergenic | NA           | NA       |
| 20  | 30745016 | 30745261 | 1       | 0.078564   | 9    | 0.015    | 0.03     | 0.56972  | 0.49116  | 0.049419643 | Intragenic | NM_172062    | P4ha1    |
| 20  | 31515339 | 31515458 | 1       | -0.083883  | 9    | 0.00026  | 0.0086   | 0.12543  | 0.20931  | 0.002784906 | Intergenic | NA           | NA       |
| 20  | 32824322 | 32824455 | 1       | -0.093975  | 5    | 0.014    | 0.059    | 0.085082 | 0.17906  | 0.04726441  | TSS        | NM_001106394 | Nodal    |
| 20  | 34956717 | 34956786 | 1       | -0.10103   | 7    | 0.0002   | 3.00E-05 | 0.1334   | 0.23443  | 0.002324409 | Intragenic | NM_012874    | Ros1     |
| 20  | 34962613 | 34962682 | 1       | -0.095826  | 7    | 0.00021  | 5.40E-05 | 0.13861  | 0.23443  | 0.002348182 | Intragenic | NM_012874    | Ros1     |
| 20  | 37422087 | 37422217 | 1       | -0.072706  | 5    | 0.0008   | 0.00098  | 0.38634  | 0.45905  | 0.006267516 | Intergenic | NA           | NA       |
| 20  | 39332465 | 39332486 | 1       | -0.054775  | 5    | 0.0049   | 0.025    | 0.028289 | 0.083064 | 0.023345384 | Intragenic | NM_001014032 | Msl3l2   |
| 20  | 39332689 | 39333199 | 1       | 0.332938   | 25   | 1.10E-06 | 4.80E-06 | 0.31991  | 0.10049  | 4.02E-05    | Intragenic | NM_001014032 | Msl3l2   |
| 20  | 46002023 | 46002146 | 1       | -0.169879  | 7    | 0.01     | 0.013    | 0.3161   | 0.48598  | 0.037614679 | Intergenic | NA           | NA       |
| 20  | 46886734 | 46886784 | 1       | -0.089459  | 5    | 0.013    | 0.0093   | 0.65545  | 0.74491  | 0.04506341  | Intragenic | NM_138831    | Slc16a10 |
| 20  | 47082335 | 47082540 | 1       | -0.08306   | 14   | 1.90E-09 | 9.50E-06 | 0.029421 | 0.11248  | 2.16E-07    | Intergenic | NA           | NA       |
| 20  | 47866988 | 47867063 | 1       | -0.150418  | 5    | 0.015    | 0.0093   | 0.16993  | 0.32035  | 0.049419643 | TSS        | NM_001098667 | Zbtb24   |
| 20  | 48280991 | 48281092 | 1       | 0.07738    | 5    | 0.012    | 0.024    | 0.12756  | 0.050176 | 0.042700096 | Intergenic | NA           | NA       |
| 20  | 48720406 | 48720505 | 1       | -0.179399  | 5    | 0.00039  | 0.00096  | 0.097393 | 0.27679  | 0.003723415 | Intragenic | NM_001037656 | Lace1    |

| chr | start    | stop     | q-value  | methy.diff | CpGs | pMWU     | p2DKS    | MCWLS     | MCWHS    | pMWU.fdr    | cgi.type   | transcript      | gene          |
|-----|----------|----------|----------|------------|------|----------|----------|-----------|----------|-------------|------------|-----------------|---------------|
| 20  | 48770480 | 48770592 | 1        | -0.112137  | 11   | 0.0047   | 0.0057   | 0.55382   | 0.66596  | 0.022879947 | Intragenic | NM_001037656    | Lace1         |
| 20  | 49908654 | 49908727 | 1        | -0.270529  | 5    | 2.90E-06 | 3.40E-05 | 0.2015    | 0.47203  | 8.70E-05    | Intergenic | NA              | NA            |
| 20  | 50290805 | 50290910 | 1        | -0.078006  | 5    | 0.0011   | 0.00052  | 0.07707   | 0.15508  | 0.007982301 | Intragenic | NM_001025038    | Mettl24       |
| 20  | 50451977 | 50452105 | 1        | -0.099612  | 5    | 0.011    | 0.0053   | 0.085853  | 0.18546  | 0.040408163 | Intergenic | NA              | NA            |
| 20  | 53059478 | 53059958 | 1        | -0.176014  | 8    | 0.0028   | 0.0078   | 0.29708   | 0.47309  | 0.015993808 | Intergenic | NA              | NA            |
| 20  | 56129271 | 56129357 | 1        | -0.07034   | 5    | 0.0094   | 0.0055   | 0.069767  | 0.14011  | 0.036473186 | Intergenic | NA              | NA            |
| 20  | 57210041 | 57210133 | 1        | -0.064872  | 7    | 0.0087   | 0.027    | 0.07966   | 0.14453  | 0.034705946 | Intragenic | NM_001107641    | Sim1          |
| 3   | 1826433  | 1826604  | 1        | -0.102654  | 15   | 6.90E-06 | 0.0049   | 0.1621    | 0.26475  | 0.000166957 | Intragenic | NM_147141:NM_0  | Cacna1b:Cacna |
| 3   | 2643388  | 2643543  | 1        | 0.064127   | 9    | 0.0032   | 0.013    | 0.88265   | 0.81853  | 0.017454545 | Intragenic | NM_024396       | Abca2         |
| 3   | 2766679  | 2766728  | 1        | -0.193924  | 5    | 0.00059  | 0.0018   | 0.26644   | 0.46036  | 0.005010587 | Intragenic | NM_001106557    | Edf1          |
| 3   | 2782308  | 2782355  | 1        | -0.222189  | 5    | 0.0019   | 0.038    | 0.11651   | 0.3387   | 0.011943782 | Intergenic | NA              | NA            |
| 3   | 8904849  | 8904879  | 1        | -0.128876  | 5    | 3.10E-05 | 0.00053  | 0.076419  | 0.2053   | 0.000549952 | Intragenic | NM_001100533    | Nacc2         |
| 3   | 9195367  | 9195394  | 1        | -0.167197  | 5    | 4.80E-06 | 0.00014  | 0.096683  | 0.26388  | 0.000126064 | TSS        | NM_001013135:NM | Sdccag3:Pmpcc |
| 3   | 9312288  | 9312352  | 1        | 0.177976   | 5    | 0.014    | 0.015    | 0.49409   | 0.31611  | 0.04726441  | TSS        | NM_001105721    | Notch1        |
| 3   | 10215450 | 10215489 | 0.24     | -0.132835  | 8    | 3.40E-07 | 8.60E-07 | 0.0009766 | 0.13381  | 1.60E-05    | Intergenic | NA              | NA            |
| 3   | 10814087 | 10814126 | 0.24     | -0.132835  | 8    | 3.40E-07 | 8.60E-07 | 0.0009766 | 0.13381  | 1.60E-05    | TSS        | NM_001015014    | Surf6         |
| 3   | 10913148 | 10913289 | 1        | -0.125958  | 5    | 2.40E-05 | 0.00053  | 0.048503  | 0.17446  | 0.000455321 | Intergenic | NA              | NA            |
| 3   | 11264941 | 11265004 | 1        | -0.132888  | 5    | 0.0011   | 0.00028  | 0.29082   | 0.42371  | 0.007982301 | Intragenic | NM_001106563    | Vav2          |
| 3   | 11645610 | 11645772 | 9.00E-05 | -0.080541  | 10   | 1.20E-10 | 3.20E-10 | 0.0025287 | 0.083069 | 1.97E-08    | Intragenic | NM_012805       | Rxra          |
| 3   | 12021467 | 12021616 | 1        | -0.097624  | 9    | 0.0002   | 0.0028   | 0.19404   | 0.29167  | 0.002324409 | Intergenic | NA              | NA            |
| 3   | 12288583 | 12288628 | 1        | -0.08169   | 5    | 0.00021  | 0.0055   | 0.020198  | 0.10189  | 0.002348182 | Intergenic | NA              | NA            |
| 3   | 14180531 | 14180625 | 0.013    | -0.233023  | 5    | 9.90E-08 | 4.60E-08 | 0.12071   | 0.35373  | 6.15E-06    | Intragenic | NM_001024782    | Lrrc8a        |
| 3   | 14188681 | 14188852 | 1        | -0.14261   | 5    | 0.0029   | 0.0018   | 0.13202   | 0.27463  | 0.016164653 | Intragenic | NM_001013081    | Phyhd1        |
| 3   | 14434576 | 14434734 | 1        | -0.239874  | 8    | 0.0029   | 0.018    | 0.44248   | 0.68235  | 0.016164653 | Intergenic | NA              | NA            |
| 3   | 14930752 | 14930818 | 1        | -0.097394  | 5    | 0.00029  | 0.00096  | 0.077505  | 0.1749   | 0.002984937 | Intergenic | NA              | NA            |
| 3   | 15032210 | 15032414 | 1        | -0.073308  | 7    | 0.013    | 0.078    | 0.073949  | 0.14726  | 0.04506341  | Intergenic | NA              | NA            |
| 3   | 15140407 | 15140474 | 1        | -0.090054  | 5    | 0.01     | 0.088    | 0.069667  | 0.15972  | 0.037614679 | Intergenic | NA              | NA            |
| 3   | 15188136 | 15188348 | 1        | -0.137094  | 5    | 3.90E-05 | 0.00028  | 0.063822  | 0.20092  | 0.000661655 | Intragenic | NM_001107827    | Usp20         |
| 3   | 15949895 | 15950067 | 1        | -0.054465  | 8    | 0.0096   | 0.069    | 0.12817   | 0.18263  | 0.037112624 | Intragenic | NM_024366       | Ncs1          |
| 3   | 15993628 | 15993740 | 1        | -0.199906  | 5    | 0.00048  | 0.0054   | 0.14401   | 0.34392  | 0.004351843 | Intragenic | NM_001107828    | Gpr107        |
| 3   | 16580124 | 16580310 | 1        | -0.134644  | 8    | 0.011    | 0.0082   | 0.3016    | 0.43624  | 0.040408163 | Intergenic | NA              | NA            |
| 3   | 16881003 | 16881146 | 1        | -0.158094  | 7    | 2.50E-05 | 0.0022   | 0.14969   | 0.30778  | 0.000473077 | Intergenic | NA              | NA            |
| 3   | 17116448 | 17116538 | 7.20E-06 | -0.065481  | 10   | 3.20E-11 | 2.60E-11 | 0.015312  | 0.080793 | 6.06E-09    | Intragenic | NM_001108579    | Sh2d3c        |
| 3   | 17776978 | 17777269 | 1        | -0.057791  | 5    | 0.0029   | 0.038    | 0.033258  | 0.09105  | 0.016164653 | Intergenic | NA              | NA            |
| 3   | 19025294 | 19025381 | 1        | -0.181452  | 5    | 0.0022   | 0.039    | 0.19088   | 0.37233  | 0.01321074  | Intergenic | NA              | NA            |
| 3   | 19799908 | 19799999 | 1        | -0.063154  | 11   | 5.00E-05 | 0.00043  | 0.028764  | 0.091919 | 0.000803922 | TSS        | NM_001004080    | Gsn           |
| 3   | 20739206 | 20739368 | 1        | -0.052765  | 9    | 0.0019   | 0.034    | 0.031714  | 0.084479 | 0.011943782 | Intragenic | NM_001107837    | Lhx6          |
| 3   | 27273984 | 27274101 | 1        | -0.075862  | 9    | 8.90E-05 | 0.0088   | 0.078745  | 0.15461  | 0.001241626 | TSS        | NM_001135761    | Crb2          |
| 3   | 27274496 | 27274609 | 1        | -0.115053  | 5    | 0.0094   | 0.039    | 0.15644   | 0.27149  | 0.036473186 | TSS        | NM_001135761    | Crb2          |

| chr | start     | stop      | q-value | methy.diff | CpGs | pMWU     | p2DKS    | MCWLS    | MCWHS    | pMWU.fdr    | cgi.type   | transcript   | gene      |
|-----|-----------|-----------|---------|------------|------|----------|----------|----------|----------|-------------|------------|--------------|-----------|
| 3   | 27291248  | 27291281  | 1       | 0.071903   | 7    | 0.0034   | 0.0022   | 0.12846  | 0.056553 | 0.018409391 | Intragenic | NM_001135761 | Crb2      |
| 3   | 27291306  | 27291376  | 1       | 0.23451    | 11   | 0.015    | 0.13     | 0.29451  | 0.10446  | 0.049419643 | Intragenic | NM_001135761 | Crb2      |
| 3   | 27291678  | 27291719  | 1       | -0.102728  | 5    | 0.014    | 0.039    | 0.14735  | 0.25008  | 0.04726441  | Intragenic | NM_001135761 | Crb2      |
| 3   | 29818751  | 29818840  | 1       | -0.125122  | 8    | 2.10E-05 | 5.50E-06 | 0.33802  | 0.46314  | 0.00041328  | Intergenic | NA           | NA        |
| 3   | 30797524  | 30797595  | 1       | -0.140459  | 5    | 9.80E-05 | 0.00014  | 0.62902  | 0.76948  | 0.001307848 | Intragenic | NM_001107843 | Lrp1b     |
| 3   | 35595770  | 35595831  | 1       | -0.070283  | 5    | 0.0094   | 0.088    | 0.085851 | 0.15613  | 0.036473186 | Intergenic | NA           | NA        |
| 3   | 35595840  | 35595878  | 1       | -0.159422  | 5    | 0.0049   | 0.024    | 0.36759  | 0.52701  | 0.023345384 | Intergenic | NA           | NA        |
| 3   | 35595900  | 35595947  | 1       | -0.083847  | 5    | 0.011    | 0.088    | 0.14679  | 0.23064  | 0.040408163 | Intergenic | NA           | NA        |
| 3   | 41518081  | 41518190  | 0.02    | -0.272252  | 7    | 4.50E-09 | 7.00E-08 | 0.10409  | 0.37634  | 4.55E-07    | Intergenic | NA           | NA        |
| 3   | 48187990  | 48188175  | 1       | -0.07762   | 14   | 0.00024  | 0.029    | 0.16308  | 0.2407   | 0.002620118 | TSS        | NM_019328    | Nr4a2     |
| 3   | 48188265  | 48188313  | 1       | -0.201628  | 5    | 0.0035   | 0.025    | 0.12475  | 0.32637  | 0.018410549 | TSS        | NM_019328    | Nr4a2     |
| 3   | 48482362  | 48482434  | 1       | -0.156974  | 5    | 0.00072  | 0.0093   | 0.18794  | 0.34492  | 0.005769381 | Intergenic | NA           | NA        |
| 3   | 49439787  | 49439853  | 1       | 0.269481   | 5    | 0.0024   | 0.038    | 0.60736  | 0.33788  | 0.014124402 | Intragenic | NM_139090    | Acvr1c    |
| 3   | 54360080  | 54360122  | 1       | -0.091516  | 5    | 0.0074   | 0.015    | 0.11134  | 0.20285  | 0.030871679 | Intergenic | NA           | NA        |
| 3   | 61009948  | 61010058  | 1       | -0.271441  | 7    | 5.20E-06 | 0.00045  | 0.22833  | 0.49977  | 0.000135604 | Intragenic | NM_019362    | Stk39     |
| 3   | 62475875  | 62475942  | 1       | -0.147608  | 5    | 0.0035   | 0.00028  | 0.074381 | 0.22199  | 0.018410549 | Intergenic | NA           | NA        |
| 3   | 63483288  | 63483371  | 1       | -0.052067  | 7    | 0.00088  | 0.0013   | 0.026023 | 0.07809  | 0.006722981 | Intragenic | NM_017007    | Gad1      |
| 3   | 63733829  | 63733918  | 1       | -0.176942  | 5    | 0.0027   | 0.024    | 0.15742  | 0.33436  | 0.015434547 | Intergenic | NA           | NA        |
| 3   | 66667282  | 66667348  | 1       | -0.095507  | 5    | 0.00023  | 0.00098  | 0.035858 | 0.13137  | 0.002525893 | Intragenic | NM_057192    | Wipf1     |
| 3   | 68064244  | 68064303  | 1       | -0.209724  | 5    | 1.70E-05 | 0.00098  | 0.087891 | 0.29762  | 0.000342787 | TSS        | NM_001191903 | Hoxd12    |
| 3   | 68123510  | 68123623  | 1       | -0.107237  | 5    | 0.0049   | 0.015    | 0.14299  | 0.25023  | 0.023345384 | TSS        | NM_001271038 | Hoxd3     |
| 3   | 68134373  | 68134622  | 1       | -0.090457  | 11   | 0.0092   | 0.079    | 0.19158  | 0.28203  | 0.036473186 | Intragenic | NM_001271038 | Hoxd3     |
| 3   | 69890321  | 69890420  | 1       | -0.155619  | 5    | 6.30E-06 | 0.00014  | 0.056377 | 0.212    | 0.000156545 | Intergenic | NA           | NA        |
| 3   | 69973809  | 69973863  | 1       | 0.055772   | 5    | 0.0041   | 0.024    | 0.96118  | 0.90541  | 0.020486121 | Intragenic | NM_001107735 | Osbpl6    |
| 3   | 70596062  | 70596196  | 1       | -0.101598  | 5    | 0.0019   | 0.00053  | 0.060227 | 0.16182  | 0.011943782 | Intergenic | NA           | NA        |
| 3   | 78305137  | 78305743  | 1       | 0.052164   | 24   | 0.012    | 0.081    | 0.71453  | 0.66237  | 0.042700096 | Intragenic | NM_012717    | Calcr1    |
| 3   | 81937439  | 81937482  | 1       | -0.151149  | 5    | 7.00E-05 | 7.00E-05 | 0.18773  | 0.33888  | 0.001035271 | Intergenic | NA           | NA        |
| 3   | 82359499  | 82359548  | 1       | -0.147877  | 7    | 0.00069  | 0.0054   | 0.03563  | 0.18351  | 0.00562053  | Intergenic | NA           | NA        |
| 3   | 83694549  | 83694596  | 1       | -0.185006  | 5    | 0.0016   | 0.00096  | 0.2574   | 0.4424   | 0.010628263 | Intergenic | NA           | NA        |
| 3   | 86319755  | 86319899  | 1       | -0.071473  | 9    | 0.009    | 0.045    | 0.13337  | 0.20484  | 0.035786638 | Intergenic | NA           | NA        |
| 3   | 87081438  | 87081538  | 1       | -0.057113  | 5    | 0.00036  | 0.0032   | 0.030432 | 0.087545 | 0.003505013 | Intragenic | NM_031322    | Lrp4      |
| 3   | 88416310  | 88416481  | 1       | -0.082865  | 7    | 6.30E-07 | 9.60E-05 | 0.036322 | 0.11919  | 2.67E-05    | Intergenic | NA           | NA        |
| 3   | 98805118  | 98805187  | 1       | -0.119484  | 5    | 0.0029   | 0.0054   | 0.56317  | 0.68265  | 0.016164653 | Intragenic | NM_001013203 | Trim44    |
| 3   | 100288856 | 100288962 | 1       | -0.218572  | 5    | 4.80E-06 | 0.00028  | 0.050653 | 0.26923  | 0.000126064 | Intragenic | NM_134403    | Abtb2     |
| 3   | 101762299 | 101762340 | 1       | -0.09969   | 5    | 0.0094   | 0.059    | 0.15227  | 0.25196  | 0.036473186 | Intragenic | NM_031534    | Wt1       |
| 3   | 102014026 | 102014106 | 1       | -0.111397  | 5    | 0.012    | 0.0032   | 0.12281  | 0.23421  | 0.042700096 | Intragenic | NM_001144862 | LOC691083 |
| 3   | 103447715 | 103447870 | 1       | 0.067684   | 8    | 0.0078   | 0.037    | 0.86076  | 0.79307  | 0.032284913 | Intergenic | NA           | NA        |
| 3   | 114321919 | 114322191 | 1       | -0.061185  | 10   | 6.40E-06 | 0.00015  | 0.014545 | 0.075731 | 0.000157967 | Intragenic | NM_001107758 | Meis2     |
| 3   | 116831269 | 116831418 | 1       | -0.07682   | 9    | 6.60E-06 | 4.10E-06 | 0.021886 | 0.098706 | 0.000161821 | Intergenic | NA           | NA        |

| chr | start     | stop      | q-value  | methyI.diff | CpGs | pMWU     | p2DKS    | MCWLS    | MCWHS    | pMWU.fdr    | cgi.type   | transcript      | gene          |
|-----|-----------|-----------|----------|-------------|------|----------|----------|----------|----------|-------------|------------|-----------------|---------------|
| 3   | 117041537 | 117041583 | 1        | -0.11681    | 5    | 0.012    | 0.087    | 0.25555  | 0.37236  | 0.042700096 | Intragenic | NM_053478       | Plcb2         |
| 3   | 117515362 | 117515457 | 1        | -0.302129   | 5    | 0.0011   | 0.0017   | 0.2267   | 0.52883  | 0.007982301 | TSS        | NM_001014046    | Rmdn3         |
| 3   | 118094842 | 118094871 | 1        | -0.105087   | 5    | 0.012    | 0.13     | 0.18891  | 0.29399  | 0.042700096 | TSS        | NM_031045       | Itпка         |
| 3   | 118095582 | 118095774 | 1        | -0.10288    | 12   | 0.0015   | 0.015    | 0.13909  | 0.24197  | 0.01019337  | Intragenic | NM_031045       | Itпка         |
| 3   | 118958423 | 118958532 | 0.077    | -0.181764   | 5    | 8.50E-08 | 2.70E-07 | 0.21895  | 0.40071  | 5.45E-06    | Intergenic | NA              | NA            |
| 3   | 125543956 | 125544054 | 1        | -0.081508   | 5    | 0.0041   | 0.015    | 0.033669 | 0.11518  | 0.020486121 | TSS        | NM_031736       | Slc27a2       |
| 3   | 127227078 | 127227169 | 1        | -0.202689   | 7    | 0.0035   | 0.027    | 0.48856  | 0.69125  | 0.018410549 | TSS        | NM_138857       | Prom2         |
| 3   | 127670819 | 127671000 | 1        | 0.143367    | 7    | 0.0011   | 0.0027   | 0.77927  | 0.63591  | 0.007982301 | Intergenic | NA              | NA            |
| 3   | 129605354 | 129605379 | 1        | -0.114149   | 5    | 0.01     | 0.087    | 0.13735  | 0.2515   | 0.037614679 | TSS        | NM_012996       | Oxt           |
| 3   | 129613243 | 129613353 | 1        | 0.125171    | 7    | 0.012    | 0.056    | 0.81563  | 0.69046  | 0.042700096 | Intergenic | NA              | NA            |
| 3   | 129677796 | 129677907 | 0.046    | -0.149153   | 9    | 3.60E-07 | 1.70E-07 | 0.032631 | 0.18178  | 1.68E-05    | TSS        | NM_172022       | Lzts3         |
| 3   | 129677958 | 129677991 | 1        | -0.06054    | 5    | 0.0019   | 0.00052  | 0.077408 | 0.13795  | 0.011943782 | TSS        | NM_172022       | Lzts3         |
| 3   | 144408279 | 144408319 | 1        | -0.064353   | 8    | 2.60E-05 | 0.00024  | 0.038064 | 0.10242  | 0.00048949  | TSS        | NM_031555       | Bfsp1         |
| 3   | 146020366 | 146020591 | 1        | -0.109239   | 5    | 0.002    | 0.0031   | 0.08544  | 0.19468  | 0.012269327 | Intragenic | NM_053505       | Slc24a3       |
| 3   | 146483309 | 146483792 | 0.13     | -0.053241   | 20   | 8.60E-12 | 4.80E-07 | 0.020342 | 0.073582 | 1.92E-09    | Intragenic | NM_001107786    | Rin2          |
| 3   | 146561738 | 146561776 | 1        | -0.174048   | 7    | 2.20E-05 | 1.60E-05 | 0.15618  | 0.33023  | 0.000427263 | TSS        | NM_053797       | Crnkl1        |
| 3   | 154572336 | 154572404 | 1        | -0.176913   | 5    | 0.0016   | 0.015    | 0.142    | 0.31891  | 0.010628263 | Intragenic | NM_001107789    | Hm13          |
| 3   | 154572424 | 154572521 | 7.80E-08 | -0.243556   | 9    | 3.40E-13 | 2.80E-13 | 0.14874  | 0.39229  | 1.14E-10    | Intragenic | NM_001107789    | Hm13          |
| 3   | 156428292 | 156428485 | 0.0011   | -0.093189   | 16   | 4.90E-12 | 3.90E-09 | 0.062404 | 0.15559  | 1.17E-09    | Intragenic | NM_001098724    | Necab3        |
| 3   | 156559360 | 156559442 | 0.00021  | -0.115449   | 13   | 1.20E-08 | 7.40E-10 | 0.053448 | 0.1689   | 1.11E-06    | Intergenic | NA              | NA            |
| 3   | 157390524 | 157390654 | 1        | -0.226858   | 5    | 0.0058   | 0.0032   | 0.53944  | 0.7663   | 0.026163814 | Intragenic | NM_130423       | Ggt7          |
| 3   | 157514199 | 157514366 | 1        | -0.076926   | 5    | 0.0022   | 0.0055   | 0.051757 | 0.12868  | 0.01321074  | Intragenic | NM_001107794    | Myh7b         |
| 3   | 158266880 | 158267035 | 1        | 0.057937    | 9    | 0.0039   | 0.0015   | 0.89279  | 0.83485  | 0.0199875   | Intragenic | NM_031577       | Ghrh          |
| 3   | 158902130 | 158902274 | 1        | -0.144829   | 10   | 0.0054   | 0.12     | 0.46819  | 0.61302  | 0.025095718 | Intragenic | NM_173145       | Dlgap4        |
| 3   | 159169715 | 159169771 | 1        | -0.190441   | 5    | 0.00021  | 0.00027  | 0.38144  | 0.57188  | 0.002348182 | Intergenic | NA              | NA            |
| 3   | 160836385 | 160836497 | 1        | -0.235144   | 5    | 0.015    | 0.088    | 0.39479  | 0.62993  | 0.049419643 | Intergenic | NA              | NA            |
| 3   | 160981067 | 160981122 | 1        | -0.171945   | 5    | 0.01     | 0.00098  | 0.065143 | 0.23709  | 0.037614679 | Intragenic | NM_019386       | Tgm2          |
| 3   | 160982336 | 160982464 | 1        | -0.236878   | 5    | 0.00039  | 0.00014  | 0.063921 | 0.3008   | 0.003723415 | Intragenic | NM_019386       | Tgm2          |
| 3   | 161375186 | 161375290 | 1        | -0.061415   | 5    | 0.014    | 0.13     | 0.060378 | 0.12179  | 0.04726441  | Intragenic | NM_001024870    | Ctnnbl1       |
| 3   | 161419638 | 161419873 | 1        | -0.097054   | 6    | 2.60E-05 | 0.00095  | 0.049238 | 0.14629  | 0.00048949  | Intergenic | NA              | NA            |
| 3   | 161555322 | 161555409 | 1        | -0.124669   | 13   | 3.00E-06 | 0.00094  | 0.12357  | 0.24824  | 8.86E-05    | TSS        | NM_001270867:NM | Nnat:Nnat:Nna |
| 3   | 162410179 | 162410376 | 1        | -0.105789   | 6    | 0.012    | 0.083    | 0.18221  | 0.288    | 0.042700096 | Intergenic | NA              | NA            |
| 3   | 165518193 | 165518491 | 1        | -0.12659    | 13   | 5.40E-05 | 0.0083   | 0.12705  | 0.25364  | 0.000855193 | Intergenic | NA              | NA            |
| 3   | 165557723 | 165557906 | 1        | -0.091114   | 5    | 0.00032  | 0.0018   | 0.034666 | 0.12578  | 0.003243956 | TSS        | NM_134463       | Sgk2          |
| 3   | 165947066 | 165947108 | 1        | 0.151663    | 7    | 0.001    | 0.0022   | 0.78449  | 0.63282  | 0.007409639 | Intragenic | NM_001037974    | Jph2          |
| 3   | 166179029 | 166179258 | 1        | -0.091855   | 5    | 0.014    | 0.18     | 0.088328 | 0.18018  | 0.04726441  | Intergenic | NA              | NA            |
| 3   | 166743990 | 166744014 | 1        | -0.082278   | 5    | 0.014    | 0.18     | 0.14852  | 0.23079  | 0.04726441  | Intragenic | NM_053954       | Kcns1         |
| 3   | 166748556 | 166748691 | 1        | -0.176517   | 8    | 0.0064   | 0.067    | 0.36405  | 0.54057  | 0.028147795 | Intergenic | NA              | NA            |
| 3   | 167034068 | 167034155 | 1        | -0.051061   | 7    | 3.40E-05 | 0.0035   | 0.023379 | 0.07444  | 0.000597429 | TSS        | NM_001108604:NM | Rbpjl:Matn4   |



| chr | start     | stop      | q-value | methy.diff | CpGs | pMWU     | p2DKS    | MCWLS    | MCWHS    | pMWU.fdr    | cgi.type   | transcript   | gene   |
|-----|-----------|-----------|---------|------------|------|----------|----------|----------|----------|-------------|------------|--------------|--------|
| 3   | 167197652 | 167197704 | 1       | 0.34259    | 5    | 0.0008   | 0.0031   | 0.63039  | 0.2878   | 0.006267516 | TSS        | NM_173109    | Wfdc2  |
| 3   | 167870575 | 167870658 | 1       | -0.127439  | 12   | 0.00053  | 0.0099   | 0.25546  | 0.3829   | 0.004710638 | Intragenic | NM_019161    | Cdh22  |
| 3   | 168061066 | 168061149 | 1       | -0.123699  | 12   | 0.00088  | 0.013    | 0.25927  | 0.38297  | 0.006722981 | Intragenic | NM_019161    | Cdh22  |
| 3   | 168111210 | 168111279 | 1       | -0.118108  | 5    | 0.0016   | 0.0055   | 0.071073 | 0.18918  | 0.010628263 | Intragenic | NM_019161    | Cdh22  |
| 3   | 168264539 | 168264688 | 1       | -0.164808  | 5    | 0.0024   | 0.015    | 0.046932 | 0.21174  | 0.014124402 | Intergenic | NA           | NA     |
| 3   | 168420960 | 168421392 | 0.85    | -0.109045  | 8    | 2.90E-08 | 3.00E-06 | 0.033858 | 0.1429   | 2.43E-06    | Intergenic | NA           | NA     |
| 3   | 168471934 | 168472028 | 1       | -0.057574  | 7    | 0.0013   | 0.018    | 0.053187 | 0.11076  | 0.009111111 | Intergenic | NA           | NA     |
| 3   | 168679008 | 168679065 | 1       | -0.156687  | 6    | 0.00049  | 0.0044   | 0.18372  | 0.3404   | 0.004431618 | Intragenic | NM_001100838 | Zmynd8 |
| 3   | 168725766 | 168725956 | 1       | -0.155993  | 10   | 8.00E-07 | 1.40E-05 | 0.10338  | 0.25937  | 3.24E-05    | Intragenic | NM_001100838 | Zmynd8 |
| 3   | 170094460 | 170094486 | 1       | -0.113446  | 5    | 5.60E-05 | 7.00E-05 | 0.11538  | 0.22883  | 0.000873742 | TSS        | NM_013186    | Kcnb1  |
| 3   | 170426583 | 170426706 | 1       | -0.15501   | 7    | 0.0017   | 0.0052   | 0.26107  | 0.41608  | 0.011044014 | TSS        | NM_053805    | Snai1  |
| 3   | 170484409 | 170484472 | 1       | -0.143693  | 5    | 0.0041   | 0.024    | 0.18633  | 0.33003  | 0.020486121 | Intergenic | NA           | NA     |
| 3   | 170668498 | 170668755 | 1       | -0.052232  | 9    | 0.0027   | 0.081    | 0.046463 | 0.098695 | 0.015434547 | Intergenic | NA           | NA     |
| 3   | 170749500 | 170749646 | 1       | -0.087081  | 5    | 4.40E-05 | 7.60E-06 | 0.13598  | 0.22306  | 0.000729708 | Intergenic | NA           | NA     |
| 3   | 170988399 | 170988450 | 1       | -0.142298  | 5    | 0.0094   | 0.0018   | 0.22709  | 0.36939  | 0.036473186 | Intragenic | NM_001108609 | Pard6b |
| 3   | 171845847 | 171845880 | 1       | -0.062845  | 5    | 2.80E-05 | 0.0018   | 0.039545 | 0.10239  | 0.000511485 | Intergenic | NA           | NA     |
| 3   | 171848005 | 171848171 | 1       | 0.065912   | 16   | 5.20E-05 | 5.30E-05 | 0.8817   | 0.81579  | 0.000830649 | Intragenic | NM_001012093 | Zfp64  |
| 3   | 172027730 | 172027796 | 1       | 0.064205   | 5    | 0.0011   | 0.0032   | 0.97804  | 0.91383  | 0.007982301 | Intergenic | NA           | NA     |
| 3   | 172158563 | 172158613 | 1       | -0.185185  | 5    | 0.00059  | 0.00098  | 0.40858  | 0.59377  | 0.005010587 | Intergenic | NA           | NA     |
| 3   | 172410141 | 172410285 | 1       | -0.087787  | 7    | 0.01     | 0.054    | 0.18169  | 0.26947  | 0.037614679 | Intergenic | NA           | NA     |
| 3   | 172860633 | 172860687 | 1       | 0.060625   | 5    | 0.0058   | 0.015    | 0.9776   | 0.91698  | 0.026163814 | Intergenic | NA           | NA     |
| 3   | 172969701 | 172969827 | 1       | -0.067857  | 9    | 0.0013   | 0.062    | 0.058808 | 0.12667  | 0.009111111 | Intergenic | NA           | NA     |
| 3   | 173085573 | 173085682 | 1       | -0.185328  | 5    | 0.0058   | 0.0093   | 0.17661  | 0.36194  | 0.026163814 | Intergenic | NA           | NA     |
| 3   | 173353452 | 173353813 | 1       | 0.194946   | 5    | 0.0068   | 0.038    | 0.76198  | 0.56704  | 0.029075319 | Intergenic | NA           | NA     |
| 3   | 174028198 | 174028498 | 1       | -0.095829  | 13   | 3.80E-05 | 0.00083  | 0.13503  | 0.23086  | 0.000652186 | Intergenic | NA           | NA     |
| 3   | 174155989 | 174156085 | 1       | -0.078743  | 5    | 0.0049   | 0.015    | 0.12397  | 0.20271  | 0.023345384 | Intergenic | NA           | NA     |
| 3   | 174193288 | 174193549 | 1       | -0.059718  | 8    | 0.00043  | 0.0085   | 0.049925 | 0.10964  | 0.004073684 | Intergenic | NA           | NA     |
| 3   | 174536675 | 174536783 | 1       | -0.175414  | 5    | 0.0074   | 0.025    | 0.36287  | 0.53829  | 0.030871679 | Intragenic | NM_001109344 | Dok5   |
| 3   | 175960231 | 175960285 | 1       | -0.13052   | 5    | 7.00E-05 | 0.00014  | 0.036609 | 0.16713  | 0.001035271 | Intergenic | NA           | NA     |
| 3   | 176374218 | 176374426 | 1       | -0.088209  | 5    | 0.0058   | 0.039    | 0.078116 | 0.16632  | 0.026163814 | Intergenic | NA           | NA     |
| 3   | 176622636 | 176622672 | 1       | -0.131484  | 5    | 0.0008   | 0.0054   | 0.14482  | 0.27631  | 0.006267516 | Intergenic | NA           | NA     |
| 3   | 176659066 | 176659203 | 1       | 0.059631   | 9    | 0.014    | 0.058    | 0.9327   | 0.87307  | 0.04726441  | Intergenic | NA           | NA     |
| 3   | 176787424 | 176787473 | 1       | -0.132928  | 5    | 0.0063   | 0.088    | 0.2786   | 0.41153  | 0.027757612 | Intergenic | NA           | NA     |
| 3   | 176918444 | 176918496 | 1       | -0.15403   | 5    | 5.00E-05 | 0.0032   | 0.12642  | 0.28045  | 0.000803922 | Intergenic | NA           | NA     |
| 3   | 176967124 | 176967241 | 1       | -0.091291  | 7    | 9.00E-05 | 0.0005   | 0.017894 | 0.10919  | 0.001248496 | Intragenic | NM_001191856 | Bmp7   |
| 3   | 177136958 | 177137074 | 0.97    | -0.2396    | 5    | 8.50E-07 | 3.40E-06 | 0.07136  | 0.31096  | 3.35E-05    | Intergenic | NA           | NA     |
| 3   | 177153850 | 177153934 | 1       | -0.105991  | 5    | 0.00017  | 0.00095  | 0.08417  | 0.19016  | 0.002036688 | Intergenic | NA           | NA     |
| 3   | 177280735 | 177280964 | 0.24    | -0.233623  | 8    | 4.60E-08 | 8.70E-07 | 0.089885 | 0.32351  | 3.43E-06    | TSS        | NM_198780    | Pck1   |
| 3   | 177305707 | 177305749 | 0.078   | -0.104287  | 5    | 2.10E-07 | 2.80E-07 | 0.030731 | 0.13502  | 1.11E-05    | Intergenic | NA           | NA     |

| chr | start     | stop      | q-value  | methy.diff | CpGs | pMWU     | p2DKS    | MCWLS     | MCWHS    | pMWU.fdr    | cgi.type   | transcript      | gene      |
|-----|-----------|-----------|----------|------------|------|----------|----------|-----------|----------|-------------|------------|-----------------|-----------|
| 3   | 177802794 | 177802848 | 1        | 0.052941   | 5    | 0.013    | 1        | 0.052941  | 5.00E-08 | 0.04506341  | TSS        | NM_001108966    | Rab22a    |
| 3   | 178426511 | 178426771 | 3.00E-05 | -0.114893  | 20   | 7.50E-14 | 1.10E-10 | 0.097765  | 0.21266  | 3.20E-11    | TSS        | NM_001159656:NM | Gnas:Gnas |
| 3   | 178471493 | 178471563 | 0.002    | -0.153019  | 8    | 9.70E-11 | 7.20E-09 | 0.17673   | 0.32975  | 1.63E-08    | TSS        | NM_019132       | Gnas      |
| 3   | 178472033 | 178472094 | 1        | -0.140323  | 7    | 6.00E-05 | 5.50E-05 | 0.18671   | 0.32704  | 0.0009225   | TSS        | NM_019132       | Gnas      |
| 3   | 178472104 | 178472148 | 1        | -0.111468  | 5    | 0.00065  | 0.015    | 0.059979  | 0.17145  | 0.005335929 | TSS        | NM_019132       | Gnas      |
| 3   | 178472211 | 178472241 | 1        | -0.162867  | 5    | 0.00048  | 0.00014  | 0.10894   | 0.27181  | 0.004351843 | TSS        | NM_019132       | Gnas      |
| 3   | 179647721 | 179647748 | 1        | -0.204291  | 5    | 0.00054  | 0.0018   | 0.34012   | 0.54442  | 0.004710638 | Intergenic | NA              | NA        |
| 3   | 179864540 | 179864766 | 1        | -0.101698  | 15   | 8.10E-05 | 0.0012   | 0.13465   | 0.23634  | 0.001154015 | Intergenic | NA              | NA        |
| 3   | 179959009 | 179959153 | 1        | -0.084538  | 5    | 0.008    | 0.023    | 0.055722  | 0.14026  | 0.03243956  | Intergenic | NA              | NA        |
| 3   | 181119231 | 181119258 | 1        | -0.234732  | 5    | 0.00021  | 0.0031   | 0.32155   | 0.55628  | 0.002348182 | Intergenic | NA              | NA        |
| 3   | 182743765 | 182743898 | 1        | -0.192429  | 7    | 0.00069  | 0.00029  | 0.21839   | 0.41082  | 0.00562053  | Intergenic | NA              | NA        |
| 3   | 183696755 | 183696916 | 1        | -0.094007  | 12   | 5.50E-06 | 4.10E-06 | 0.11447   | 0.20847  | 0.000141923 | Intergenic | NA              | NA        |
| 4   | 2535291   | 2535347   | 1        | -0.343735  | 7    | 6.10E-06 | 4.60E-06 | 0.21904   | 0.56278  | 0.000154171 | Intergenic | NA              | NA        |
| 4   | 6497479   | 6497781   | 1        | -0.127445  | 9    | 4.30E-05 | 0.018    | 0.15147   | 0.27891  | 0.00072287  | Intergenic | NA              | NA        |
| 4   | 6680047   | 6680117   | 1        | -0.138036  | 5    | 2.20E-06 | 7.50E-06 | 0.10001   | 0.23805  | 6.91E-05    | Intergenic | NA              | NA        |
| 4   | 7115137   | 7115244   | 1        | -0.088202  | 5    | 0.002    | 0.0017   | 0.098737  | 0.18694  | 0.012269327 | Intragenic | NM_001011966    | Smarcd3   |
| 4   | 7231395   | 7231530   | 1        | -0.08933   | 17   | 3.60E-09 | 5.90E-06 | 0.036571  | 0.1259   | 3.69E-07    | Intragenic | NM_001108616    | Agap3     |
| 4   | 7234256   | 7234331   | 1        | -0.136011  | 7    | 0.003    | 0.0048   | 0.057544  | 0.19355  | 0.01668425  | Intragenic | NM_001108616    | Agap3     |
| 4   | 7291743   | 7291807   | 1        | -0.055974  | 5    | 0.0019   | 0.0054   | 0.0014286 | 0.057402 | 0.011943782 | TSS        | NM_017048       | Slc4a2    |
| 4   | 10449004  | 10449099  | 1        | -0.072418  | 5    | 0.013    | 0.0017   | 0.81179   | 0.88421  | 0.04506341  | Intragenic | NM_001107845    | Gsap      |
| 4   | 20037060  | 20037145  | 1        | -0.096076  | 7    | 0.0016   | 0.013    | 0.073944  | 0.17002  | 0.010628263 | Intergenic | NA              | NA        |
| 4   | 21982256  | 21982389  | 1        | -0.096261  | 5    | 0.0017   | 0.0054   | 0.14245   | 0.23871  | 0.011044014 | Intergenic | NA              | NA        |
| 4   | 25627697  | 25627900  | 1        | -0.126342  | 8    | 0.0022   | 0.0025   | 0.23827   | 0.36461  | 0.01321074  | Intergenic | NA              | NA        |
| 4   | 26406378  | 26406544  | 1        | -0.125401  | 5    | 0.014    | 0.0093   | 0.079296  | 0.2047   | 0.04726441  | Intergenic | NA              | NA        |
| 4   | 27002964  | 27003123  | 1        | 0.084306   | 7    | 0.014    | 0.19     | 0.93859   | 0.85429  | 0.04726441  | Intergenic | NA              | NA        |
| 4   | 27754383  | 27754520  | 0.046    | -0.095795  | 9    | 9.30E-05 | 1.60E-07 | 0.033596  | 0.12939  | 0.001278101 | Intragenic | NM_001191861    | Cdk6      |
| 4   | 29704099  | 29704207  | 1        | -0.129628  | 8    | 0.00056  | 0.0039   | 0.2872    | 0.41683  | 0.004873585 | Intergenic | NA              | NA        |
| 4   | 30592614  | 30592646  | 1        | -0.081333  | 5    | 0.012    | 0.038    | 0.066335  | 0.14767  | 0.042700096 | Intergenic | NA              | NA        |
| 4   | 31675189  | 31675235  | 1        | -0.162614  | 5    | 2.80E-05 | 0.00027  | 0.079457  | 0.24207  | 0.000511485 | Intergenic | NA              | NA        |
| 4   | 32915252  | 32915365  | 1        | -0.053336  | 7    | 0.011    | 0.027    | 0.86607   | 0.91941  | 0.040408163 | Intergenic | NA              | NA        |
| 4   | 36932821  | 36932859  | 1        | 0.073467   | 5    | 6.20E-05 | 3.40E-05 | 0.98671   | 0.91324  | 0.000939548 | Intergenic | NA              | NA        |
| 4   | 38242198  | 38242364  | 1        | -0.094825  | 7    | 0.0076   | 0.14     | 0.59185   | 0.68668  | 0.031563309 | Intergenic | NA              | NA        |
| 4   | 46830825  | 46830925  | 1        | 0.100033   | 5    | 0.00088  | 0.0054   | 0.94195   | 0.84192  | 0.006722981 | Intergenic | NA              | NA        |
| 4   | 55458230  | 55458283  | 1        | -0.11962   | 5    | 0.0019   | 0.0031   | 0.10392   | 0.22354  | 0.011943782 | Intergenic | NA              | NA        |
| 4   | 57264971  | 57265177  | 1        | -0.143199  | 5    | 0.0016   | 0.0032   | 0.080954  | 0.22415  | 0.010628263 | Intergenic | NA              | NA        |
| 4   | 57811120  | 57811170  | 1        | -0.13407   | 5    | 0.0017   | 0.003    | 0.30384   | 0.43792  | 0.011044014 | TSS        | NM_001009617    | Mest      |
| 4   | 58378716  | 58378807  | 1        | -0.160934  | 5    | 0.00036  | 0.0032   | 0.087311  | 0.24824  | 0.003505013 | Intergenic | NA              | NA        |
| 4   | 58419305  | 58419430  | 1        | -0.073861  | 5    | 0.0024   | 0.038    | 0.042413  | 0.11627  | 0.014124402 | Intergenic | NA              | NA        |
| 4   | 61104024  | 61104074  | 1        | -0.144672  | 5    | 0.0012   | 0.0092   | 0.1152    | 0.25987  | 0.008573088 | Intergenic | NA              | NA        |

| chr | start     | stop      | q-value | methy.diff | CpGs | pMWU     | p2DKS    | MCWLS    | MCWHS    | pMWU.fdr    | cgi.type   | transcript   | gene       |
|-----|-----------|-----------|---------|------------|------|----------|----------|----------|----------|-------------|------------|--------------|------------|
| 4   | 62127913  | 62127978  | 1       | -0.073187  | 5    | 0.0094   | 0.086    | 0.061918 | 0.13511  | 0.036473186 | TSS        | NM_001024325 | LOC500077  |
| 4   | 62128037  | 62128088  | 1       | -0.082503  | 5    | 0.014    | 0.087    | 0.14661  | 0.22912  | 0.04726441  | TSS        | NM_001024325 | LOC500077  |
| 4   | 62641259  | 62641397  | 1       | -0.095452  | 7    | 0.00065  | 0.039    | 0.087439 | 0.18289  | 0.005335929 | Intergenic | NA           | NA         |
| 4   | 65217768  | 65217877  | 1       | 0.082994   | 5    | 0.0058   | 0.024    | 0.86179  | 0.7788   | 0.026163814 | Intergenic | NA           | NA         |
| 4   | 66148323  | 66148384  | 1       | -0.135388  | 6    | 0.00057  | 0.00095  | 0.83359  | 0.96898  | 0.004925761 | Intragenic | NM_001107853 | Luc7l2     |
| 4   | 66435886  | 66435962  | 1       | -0.1685    | 5    | 0.0041   | 0.088    | 0.23401  | 0.40251  | 0.020486121 | TSS        | NM_001108622 | Hipk2      |
| 4   | 66867485  | 66867567  | 0.00037 | -0.114383  | 13   | 1.80E-08 | 1.30E-09 | 0.054514 | 0.1689   | 1.58E-06    | TSS        | NM_001276456 | Chmp4bl1   |
| 4   | 142394252 | 142394278 | 1       | 0.052245   | 5    | 0.002    | 0.0018   | 0.96934  | 0.9171   | 0.012269327 | Intragenic | NM_001100852 | Zfp746     |
| 4   | 142941088 | 142941293 | 1       | -0.202999  | 7    | 1.40E-07 | 1.60E-05 | 0.068779 | 0.27178  | 8.14E-06    | Intergenic | NA           | NA         |
| 4   | 145245850 | 145245927 | 1       | 0.106008   | 5    | 0.00048  | 0.0055   | 0.94174  | 0.83573  | 0.004351843 | Intergenic | NA           | NA         |
| 4   | 145992907 | 145993078 | 1       | -0.111435  | 7    | 0.00033  | 0.00028  | 0.057158 | 0.16859  | 0.003313469 | Intragenic | NM_001013085 | Snx10      |
| 4   | 146889378 | 146889482 | 1       | -0.115471  | 9    | 5.30E-05 | 0.0041   | 0.10436  | 0.21983  | 0.000841161 | Intergenic | NA           | NA         |
| 4   | 146924829 | 146925089 | 1       | -0.051538  | 16   | 0.00013  | 2.10E-05 | 0.029499 | 0.081037 | 0.001648454 | Intragenic | NR_132648    | Hoxaas3    |
| 4   | 146970923 | 146971000 | 1       | 0.118657   | 7    | 0.012    | 0.008    | 0.3557   | 0.23704  | 0.042700096 | Intragenic | NR_132628    | RGD1564419 |
| 4   | 146974902 | 146975006 | 1       | -0.11482   | 9    | 5.00E-05 | 0.0041   | 0.10501  | 0.21983  | 0.000803922 | Intergenic | NA           | NA         |
| 4   | 148632341 | 148632511 | 1       | -0.065771  | 18   | 1.30E-05 | 0.00078  | 0.056828 | 0.1226   | 0.000273333 | Intragenic | NM_001034010 | Tril       |
| 4   | 150203794 | 150203857 | 1       | -0.142992  | 5    | 0.011    | 0.039    | 0.18081  | 0.3238   | 0.040408163 | TSS        | NM_012778    | Aqp1       |
| 4   | 152520009 | 152520085 | 1       | -0.140195  | 7    | 0.0087   | 0.0012   | 0.61303  | 0.75322  | 0.034705946 | Intergenic | NA           | NA         |
| 4   | 162675440 | 162675649 | 1       | -0.08517   | 8    | 0.00034  | 0.00024  | 0.078853 | 0.16402  | 0.0034      | Intergenic | NA           | NA         |
| 4   | 174366662 | 174366731 | 1       | 0.110882   | 6    | 0.013    | 0.039    | 0.77107  | 0.66019  | 0.04506341  | Intergenic | NA           | NA         |
| 4   | 177619419 | 177619545 | 1       | -0.094047  | 5    | 0.0045   | 0.025    | 0.026772 | 0.12082  | 0.021964286 | Intergenic | NA           | NA         |
| 4   | 177667052 | 177667185 | 1       | -0.201539  | 5    | 2.80E-05 | 3.40E-05 | 0.54696  | 0.7485   | 0.000511485 | Intergenic | NA           | NA         |
| 4   | 178388835 | 178388879 | 1       | -0.189694  | 5    | 9.80E-05 | 0.0055   | 0.1135   | 0.30319  | 0.001307848 | Intergenic | NA           | NA         |
| 4   | 180704319 | 180704463 | 1       | -0.079136  | 5    | 0.0063   | 0.039    | 0.028632 | 0.10777  | 0.027757612 | Intergenic | NA           | NA         |
| 4   | 181550346 | 181550412 | 1       | -0.070389  | 13   | 0.0022   | 0.0049   | 0.16884  | 0.23923  | 0.01321074  | Intergenic | NA           | NA         |
| 4   | 181844207 | 181844231 | 1       | 0.071845   | 5    | 0.0058   | 0.039    | 0.13751  | 0.065669 | 0.026163814 | Intragenic | NM_001107871 | Fbxo41     |
| 4   | 182676296 | 182676353 | 1       | -0.142215  | 8    | 0.0046   | 0.069    | 0.54059  | 0.68281  | 0.022422721 | Intergenic | NA           | NA         |
| 4   | 184307405 | 184307541 | 1       | 0.067631   | 7    | 0.0048   | 0.078    | 0.91611  | 0.84848  | 0.023320606 | TSS        | NM_153729    | Vom1r90    |
| 4   | 185267704 | 185267734 | 1       | 0.084258   | 5    | 0.0058   | 0.0055   | 0.92747  | 0.84322  | 0.026163814 | Intergenic | NA           | NA         |
| 4   | 185405233 | 185405336 | 1       | -0.22794   | 8    | 8.30E-06 | 9.10E-05 | 0.26528  | 0.49322  | 0.000194457 | Intergenic | NA           | NA         |
| 4   | 185689731 | 185689771 | 1       | -0.078317  | 5    | 0.00054  | 0.009    | 0.033714 | 0.11203  | 0.004710638 | Intergenic | NA           | NA         |
| 4   | 186766656 | 186766687 | 1       | -0.13129   | 5    | 0.0058   | 0.009    | 0.58292  | 0.71421  | 0.026163814 | Intragenic | NM_001191974 | Chst13     |
| 4   | 186910602 | 186910729 | 1       | -0.165806  | 5    | 9.20E-06 | 1.60E-05 | 0.043238 | 0.20904  | 0.000206371 | Intragenic | NM_053536    | Klf15      |
| 4   | 188095025 | 188095333 | 1       | -0.053673  | 5    | 0.0041   | 0.015    | 0.033098 | 0.086771 | 0.020486121 | Intergenic | NA           | NA         |
| 4   | 188222584 | 188222643 | 1       | -0.094117  | 5    | 0.002    | 0.0054   | 0.032033 | 0.12615  | 0.012269327 | Intragenic | NM_017206    | Slc6a6     |
| 4   | 192313519 | 192313700 | 1       | -0.123094  | 12   | 0.00088  | 0.0038   | 0.28482  | 0.40791  | 0.006722981 | Intragenic | NM_001100750 | Suclg2     |
| 4   | 194182336 | 194182697 | 1       | -0.065841  | 5    | 0.0058   | 0.0054   | 0.053434 | 0.11928  | 0.026163814 | Intergenic | NA           | NA         |
| 4   | 196200558 | 196200658 | 1       | 0.094397   | 7    | 0.0023   | 0.018    | 0.88296  | 0.78856  | 0.013777597 | Intergenic | NA           | NA         |
| 4   | 196787210 | 196787350 | 1       | -0.069856  | 10   | 0.0089   | 0.016    | 0.16231  | 0.23217  | 0.035427184 | Intergenic | NA           | NA         |

| chr | start     | stop      | q-value | methy.diff | CpGs | pMWU     | p2DKS    | MCWLS    | MCWHS    | pMWU.fdr    | cgi.type   | transcript      | gene          |
|-----|-----------|-----------|---------|------------|------|----------|----------|----------|----------|-------------|------------|-----------------|---------------|
| 4   | 208749197 | 208749364 | 1       | 0.134241   | 10   | 0.0075   | 0.048    | 0.76395  | 0.62971  | 0.031235892 | Intragenic | NM_001309463    | Prmt3         |
| 4   | 208852024 | 208852178 | 1       | -0.073332  | 12   | 0.0078   | 0.029    | 0.12685  | 0.20019  | 0.032284913 | TSS        | NM_001109251    | Fancd2os      |
| 4   | 209834866 | 209834991 | 0.43    | -0.366931  | 5    | 2.10E-07 | 1.50E-06 | 0.25095  | 0.61788  | 1.11E-05    | Intergenic | NA              | NA            |
| 4   | 210723614 | 210723674 | 1       | -0.155746  | 5    | 0.00032  | 7.10E-05 | 0.055701 | 0.21145  | 0.003243956 | Intragenic | NM_019159       | Syn2          |
| 4   | 211701358 | 211701505 | 1       | -0.191617  | 5    | 0.0017   | 0.0018   | 0.1459   | 0.33752  | 0.011044014 | Intergenic | NA              | NA            |
| 4   | 220129171 | 220129260 | 1       | -0.156813  | 5    | 0.015    | 0.014    | 0.27296  | 0.42978  | 0.049419643 | Intergenic | NA              | NA            |
| 4   | 220735200 | 220735323 | 1       | -0.117057  | 5    | 0.00039  | 0.0055   | 0.04377  | 0.16083  | 0.003723415 | Intergenic | NA              | NA            |
| 4   | 224254906 | 224254984 | 1       | 0.100326   | 5    | 0.0022   | 0.059    | 0.82949  | 0.72916  | 0.01321074  | TSS        | NR_031887:NR_03 | Mir141:Mir357 |
| 4   | 224613139 | 224613189 | 1       | -0.05004   | 5    | 0.0068   | 0.0055   | 0.010144 | 0.060184 | 0.029075319 | Intergenic | NA              | NA            |
| 4   | 225149651 | 225150169 | 1       | -0.058009  | 17   | 0.0019   | 0.0014   | 0.15622  | 0.21423  | 0.011943782 | Intragenic | NM_053889       | Vwf           |
| 4   | 226925863 | 226925943 | 1       | -0.123645  | 5    | 5.50E-06 | 3.40E-05 | 0.057803 | 0.18145  | 0.000141923 | Intergenic | NA              | NA            |
| 4   | 227274139 | 227274282 | 0.0016  | -0.213572  | 11   | 9.40E-11 | 5.60E-09 | 0.16674  | 0.38031  | 1.61E-08    | TSS        | NM_001024337    | LOC500331     |
| 4   | 227350877 | 227351020 | 0.0016  | -0.213572  | 11   | 9.40E-11 | 5.60E-09 | 0.16674  | 0.38031  | 1.61E-08    | TSS        | NM_001024337    | LOC500331     |
| 4   | 232049412 | 232049816 | 1       | -0.053629  | 13   | 0.00029  | 0.0088   | 0.060899 | 0.11453  | 0.002984937 | TSS        | NM_131908       | Fgf6          |
| 4   | 232415932 | 232416260 | 1       | -0.054331  | 18   | 0.00017  | 0.002    | 0.042048 | 0.096378 | 0.002036688 | Intergenic | NA              | NA            |
| 4   | 232637554 | 232637618 | 1       | -0.148879  | 8    | 9.30E-05 | 9.00E-05 | 0.1582   | 0.30708  | 0.001278101 | Intergenic | NA              | NA            |
| 4   | 232998223 | 232998246 | 1       | -0.118367  | 5    | 0.00029  | 0.0032   | 0.11884  | 0.23721  | 0.002984937 | Intergenic | NA              | NA            |
| 4   | 233085626 | 233085683 | 1       | -0.109548  | 5    | 0.01     | 0.038    | 0.19237  | 0.30192  | 0.037614679 | Intergenic | NA              | NA            |
| 4   | 241351360 | 241351401 | 1       | -0.187375  | 5    | 0.00012  | 0.0031   | 0.079938 | 0.26731  | 0.00153218  | Intragenic | NM_012813       | St8sia1       |
| 4   | 241593951 | 241594061 | 1       | -0.075955  | 5    | 0.0012   | 0.00052  | 0.064668 | 0.14062  | 0.008573088 | Intergenic | NA              | NA            |
| 4   | 243566619 | 243566667 | 1       | -0.251445  | 5    | 0.0008   | 0.015    | 0.24922  | 0.50066  | 0.006267516 | Intergenic | NA              | NA            |
| 4   | 243805715 | 243805769 | 1       | -0.089007  | 5    | 0.0032   | 0.0091   | 0.10962  | 0.19863  | 0.017454545 | Intergenic | NA              | NA            |
| 4   | 245005929 | 245005956 | 1       | -0.10313   | 5    | 0.00059  | 0.00053  | 0.16363  | 0.26676  | 0.005010587 | Intergenic | NA              | NA            |
| 4   | 246784336 | 246784409 | 1       | -0.126786  | 5    | 0.002    | 0.015    | 0.53793  | 0.66472  | 0.012269327 | Intergenic | NA              | NA            |
| 4   | 246879884 | 246879986 | 1       | -0.25075   | 7    | 6.10E-06 | 0.00017  | 0.28279  | 0.53354  | 0.000154171 | TSS        | NM_001109612    | Rps4y2        |
| 5   | 6901      | 7029      | 1       | 0.051799   | 9    | 0.012    | 0.046    | 0.94174  | 0.88994  | 0.042700096 | Intergenic | NA              | NA            |
| 5   | 2899890   | 2899959   | 1       | -0.108179  | 5    | 0.0041   | 0.0091   | 0.56544  | 0.67362  | 0.020486121 | Intergenic | NA              | NA            |
| 5   | 10163346  | 10163535  | 1       | 0.124679   | 7    | 0.0027   | 0.037    | 0.83454  | 0.70986  | 0.015434547 | Intergenic | NA              | NA            |
| 5   | 10576740  | 10576879  | 0.0036  | -0.15341   | 12   | 2.90E-08 | 1.30E-08 | 0.1124   | 0.26581  | 2.43E-06    | Intergenic | NA              | NA            |
| 5   | 10646124  | 10646190  | 1       | 0.054537   | 5    | 0.015    | 0.039    | 0.96915  | 0.91462  | 0.049419643 | Intergenic | NA              | NA            |
| 5   | 20195312  | 20195422  | 1       | -0.115947  | 5    | 0.0016   | 0.015    | 0.11746  | 0.2334   | 0.010628263 | Intergenic | NA              | NA            |
| 5   | 21516046  | 21516106  | 1       | 0.055743   | 5    | 0.0017   | 0.015    | 0.96035  | 0.9046   | 0.011044014 | Intergenic | NA              | NA            |
| 5   | 26480571  | 26480625  | 1       | -0.180053  | 9    | 0.0076   | 0.032    | 0.33221  | 0.51227  | 0.031563309 | Intergenic | NA              | NA            |
| 5   | 28117816  | 28117892  | 1       | -0.166624  | 5    | 0.0058   | 0.015    | 0.37356  | 0.54019  | 0.026163814 | Intergenic | NA              | NA            |
| 5   | 28905270  | 28905346  | 1       | -0.18106   | 5    | 0.0029   | 0.015    | 0.36098  | 0.54204  | 0.016164653 | Intergenic | NA              | NA            |
| 5   | 42651733  | 42651881  | 1       | -0.164952  | 5    | 0.00048  | 0.038    | 0.19047  | 0.35542  | 0.004351843 | Intergenic | NA              | NA            |
| 5   | 52007445  | 52007551  | 1       | -0.176919  | 5    | 0.008    | 0.0052   | 0.10029  | 0.27721  | 0.03243956  | Intergenic | NA              | NA            |
| 5   | 52183385  | 52183512  | 1       | 0.18041    | 5    | 0.0053   | 0.0032   | 0.78173  | 0.60132  | 0.024662043 | Intragenic | NM_001135754    | Bach2         |
| 5   | 52745709  | 52746021  | 1       | -0.085057  | 6    | 0.0094   | 0.083    | 0.16038  | 0.24543  | 0.036473186 | Intragenic | NM_001134969    | Ankrd6        |

| chr | start     | stop      | q-value | methy.diff | CpGs | pMWU     | p2DKS    | MCWLS    | MCWHS    | pMWU.fdr    | cgi.type   | transcript      | gene          |
|-----|-----------|-----------|---------|------------|------|----------|----------|----------|----------|-------------|------------|-----------------|---------------|
| 5   | 53084210  | 53084305  | 1       | -0.106429  | 5    | 0.0049   | 0.0092   | 0.05449  | 0.16092  | 0.023345384 | Intragenic | NM_173322       | Pnrc1         |
| 5   | 54727643  | 54727698  | 1       | 0.15651    | 5    | 0.0058   | 0.0017   | 0.69215  | 0.53564  | 0.026163814 | Intragenic | NM_001079701    | Cfap206       |
| 5   | 55012256  | 55012509  | 1       | -0.092177  | 10   | 0.012    | 0.07     | 0.046483 | 0.13866  | 0.042700096 | Intragenic | NM_001108970    | Mob3b         |
| 5   | 55047013  | 55047207  | 1       | -0.078149  | 5    | 0.0024   | 0.015    | 0.024465 | 0.10261  | 0.014124402 | Intragenic | NM_001108970    | Mob3b         |
| 5   | 55714096  | 55714349  | 1       | -0.090328  | 10   | 0.015    | 0.091    | 0.047517 | 0.13784  | 0.049419643 | Intergenic | NA              | NA            |
| 5   | 55748856  | 55749050  | 1       | -0.078149  | 5    | 0.0024   | 0.015    | 0.024465 | 0.10261  | 0.014124402 | Intergenic | NA              | NA            |
| 5   | 56382313  | 56382411  | 1       | 0.084261   | 5    | 0.013    | 0.038    | 0.89168  | 0.80742  | 0.04506341  | Intergenic | NA              | NA            |
| 5   | 58835933  | 58836092  | 1       | -0.081757  | 5    | 0.0013   | 0.0031   | 0.91007  | 0.99183  | 0.009111111 | Intergenic | NA              | NA            |
| 5   | 61760483  | 61760540  | 1       | -0.093146  | 5    | 0.002    | 0.039    | 0.14693  | 0.24008  | 0.012269327 | Intergenic | NA              | NA            |
| 5   | 62603612  | 62603755  | 1       | -0.085561  | 5    | 0.0032   | 0.0053   | 0.090864 | 0.17642  | 0.017454545 | Intergenic | NA              | NA            |
| 5   | 62917704  | 62917847  | 1       | -0.056807  | 5    | 0.015    | 0.059    | 0.027074 | 0.08388  | 0.049419643 | TSS        | NM_001108004    | Dnajb5        |
| 5   | 64392743  | 64392862  | 1       | -0.116376  | 9    | 0.0064   | 0.041    | 0.23528  | 0.35166  | 0.028147795 | Intergenic | NA              | NA            |
| 5   | 65040927  | 65040993  | 1       | -0.199463  | 5    | 2.20E-05 | 3.40E-05 | 0.1678   | 0.36726  | 0.000427263 | Intragenic | NM_001113754    | Grhpr         |
| 5   | 65098558  | 65098669  | 1       | -0.174489  | 5    | 0.0032   | 0.059    | 0.25784  | 0.43233  | 0.017454545 | Intergenic | NA              | NA            |
| 5   | 65520133  | 65520380  | 1       | -0.066371  | 5    | 0.0058   | 0.0017   | 0.063453 | 0.12982  | 0.026163814 | Intergenic | NA              | NA            |
| 5   | 66229373  | 66229418  | 1       | -0.110832  | 5    | 0.0094   | 0.038    | 0.25256  | 0.36339  | 0.036473186 | Intragenic | NM_001108663    | Tstd2         |
| 5   | 67397854  | 67397997  | 1       | -0.154693  | 9    | 2.70E-05 | 2.90E-05 | 0.27997  | 0.43466  | 0.000503182 | Intragenic | NM_001100535    | Col15a1       |
| 5   | 68305350  | 68305389  | 1       | -0.056484  | 5    | 0.00054  | 0.0018   | 0.01627  | 0.072754 | 0.004710638 | Intragenic | NM_031628       | Nr4a3         |
| 5   | 68989267  | 68989410  | 1       | -0.142727  | 9    | 7.40E-05 | 0.00013  | 0.29194  | 0.43466  | 0.00109006  | Intergenic | NA              | NA            |
| 5   | 79988758  | 79988811  | 1       | -0.168568  | 5    | 6.20E-05 | 0.00052  | 0.070971 | 0.23954  | 0.000939548 | Intergenic | NA              | NA            |
| 5   | 80478681  | 80478782  | 1       | -0.086685  | 5    | 0.0074   | 0.015    | 0.76481  | 0.8515   | 0.030871679 | Intergenic | NA              | NA            |
| 5   | 80685634  | 80685879  | 1       | -0.127607  | 5    | 0.0035   | 0.0031   | 0.16214  | 0.28975  | 0.018410549 | Intergenic | NA              | NA            |
| 5   | 81199775  | 81199879  | 1       | -0.060824  | 5    | 0.0094   | 0.088    | 0.098021 | 0.15884  | 0.036473186 | Intragenic | NM_001106651    | Snx30         |
| 5   | 82489173  | 82489267  | 1       | -0.141109  | 5    | 3.50E-05 | 0.00053  | 0.047255 | 0.18836  | 0.000606338 | Intragenic | NM_012899       | Alad          |
| 5   | 83126150  | 83126280  | 1       | -0.083416  | 5    | 0.013    | 0.088    | 0.096085 | 0.1795   | 0.04506341  | TSS        | NM_001012102    | Kif12         |
| 5   | 83175912  | 83176139  | 1       | -0.139734  | 8    | 8.30E-05 | 0.00015  | 0.064698 | 0.20443  | 0.001175701 | Intragenic | NM_198747       | Col27a1       |
| 5   | 83352384  | 83352466  | 1       | -0.178374  | 6    | 0.0094   | 0.011    | 0.25226  | 0.43064  | 0.036473186 | Intragenic | NM_181088       | Dfnb31        |
| 5   | 92832959  | 92833133  | 1       | 0.061886   | 8    | 0.0052   | 0.026    | 0.91982  | 0.85793  | 0.024631579 | Intergenic | NA              | NA            |
| 5   | 95166186  | 95166283  | 1       | -0.083626  | 5    | 0.00017  | 0.00053  | 0.1103   | 0.19392  | 0.002036688 | Intergenic | NA              | NA            |
| 5   | 95168446  | 95169081  | 1       | -0.072791  | 62   | 8.60E-07 | 0.00013  | 0.15175  | 0.18395  | 3.38E-05    | Intergenic | NA              | NA            |
| 5   | 95173702  | 95173732  | 1       | 0.139019   | 5    | 0.00021  | 0.0018   | 0.37329  | 0.23427  | 0.002348182 | TSS        | NR_046238       | Rn5-8s        |
| 5   | 95175624  | 95175637  | 1       | -0.169833  | 5    | 0.0038   | 0.058    | 0.29653  | 0.46636  | 0.019583799 | TSS        | NR_046238:NR_04 | Rn5-8s:Rn5-8s |
| 5   | 95175641  | 95177864  | 1       | -0.058682  | 281  | 9.80E-05 | 0.0069   | 0.17055  | 0.18781  | 0.001307848 | TSS        | NR_046238:NR_04 | Rn5-8s:Rn5-8s |
| 5   | 95177867  | 95177882  | 1       | -0.270197  | 5    | 9.80E-05 | 0.0018   | 0.19454  | 0.46473  | 0.001307848 | TSS        | NR_046238       | Rn5-8s        |
| 5   | 99698367  | 99698436  | 1       | -0.110223  | 5    | 0.0038   | 0.0054   | 0.56864  | 0.67886  | 0.019583799 | Intergenic | NA              | NA            |
| 5   | 102704388 | 102704446 | 0.0019  | -0.20848   | 5    | 6.30E-08 | 6.80E-09 | 0.075377 | 0.28386  | 4.39E-06    | Intergenic | NA              | NA            |
| 5   | 102973426 | 102973495 | 1       | -0.108573  | 5    | 0.0032   | 0.0054   | 0.56687  | 0.67544  | 0.017454545 | Intergenic | NA              | NA            |
| 5   | 105381919 | 105382037 | 1       | 0.133036   | 7    | 0.01     | 0.069    | 0.31395  | 0.18092  | 0.037614679 | Intragenic | NM_001106665    | Ttc39b        |
| 5   | 117983961 | 117984074 | 1       | -0.123453  | 8    | 0.0054   | 0.0087   | 0.22855  | 0.35201  | 0.025095718 | Intergenic | NA              | NA            |

| chr | start     | stop      | q-value  | methy.diff | CpGs | pMWU     | p2DKS    | MCWLS    | MCWHS    | pMWU.fdr    | cgi.type   | transcript      | gene          |
|-----|-----------|-----------|----------|------------|------|----------|----------|----------|----------|-------------|------------|-----------------|---------------|
| 5   | 131284029 | 131284084 | 1        | -0.197728  | 5    | 0.00029  | 0.00053  | 0.18312  | 0.38085  | 0.002984937 | Intergenic | NA              | NA            |
| 5   | 131284583 | 131284646 | 1        | -0.185649  | 5    | 0.00023  | 0.0055   | 0.10956  | 0.29521  | 0.002525893 | Intergenic | NA              | NA            |
| 5   | 131294596 | 131294620 | 1        | -0.184785  | 5    | 2.40E-05 | 0.00028  | 0.099539 | 0.28432  | 0.000455321 | Intergenic | NA              | NA            |
| 5   | 131507773 | 131507824 | 1        | -0.1338    | 5    | 2.80E-05 | 0.00053  | 0.075274 | 0.20907  | 0.000511485 | Intragenic | NM_138508       | Scp2          |
| 5   | 134827346 | 134827509 | 1        | -0.103298  | 5    | 0.00054  | 0.00094  | 0.68037  | 0.78367  | 0.004710638 | Intergenic | NA              | NA            |
| 5   | 134827701 | 134827770 | 1        | 0.081555   | 5    | 0.014    | 0.088    | 0.87045  | 0.7889   | 0.04726441  | Intergenic | NA              | NA            |
| 5   | 137258639 | 137258727 | 1        | -0.083427  | 5    | 0.012    | 0.015    | 0.096056 | 0.17948  | 0.042700096 | Intergenic | NA              | NA            |
| 5   | 137356709 | 137356797 | 1        | -0.073542  | 6    | 0.00057  | 0.0027   | 0.050679 | 0.12422  | 0.004925761 | Intergenic | NA              | NA            |
| 5   | 138533385 | 138533451 | 1        | 0.129928   | 5    | 0.008    | 0.025    | 0.34845  | 0.21852  | 0.03243956  | Intergenic | NA              | NA            |
| 5   | 139195655 | 139195741 | 1        | -0.120516  | 5    | 0.00097  | 0.015    | 0.083097 | 0.20361  | 0.007223613 | TSS        | NM_001035001    | Tmem69        |
| 5   | 139956278 | 139956482 | 8.90E-05 | -0.08489   | 24   | 1.60E-11 | 3.20E-10 | 0.027577 | 0.11247  | 3.28E-09    | Intergenic | NA              | NA            |
| 5   | 139964625 | 139964656 | 1        | -0.173564  | 5    | 0.0035   | 0.009    | 0.2505   | 0.42407  | 0.018410549 | Intergenic | NA              | NA            |
| 5   | 139974408 | 139974473 | 1        | -0.126493  | 5    | 7.80E-05 | 0.00053  | 0.10998  | 0.23647  | 0.001113424 | Intergenic | NA              | NA            |
| 5   | 140009518 | 140009726 | 1        | -0.268939  | 7    | 8.40E-08 | 3.00E-05 | 0.19115  | 0.46009  | 5.44E-06    | Intergenic | NA              | NA            |
| 5   | 140014309 | 140014375 | 1        | -0.101441  | 5    | 0.0016   | 0.025    | 0.11065  | 0.21209  | 0.010628263 | Intergenic | NA              | NA            |
| 5   | 140043824 | 140043979 | 1        | -0.084128  | 14   | 4.10E-10 | 1.40E-05 | 0.03641  | 0.12054  | 5.82E-08    | Intergenic | NA              | NA            |
| 5   | 140696863 | 140696933 | 1        | -0.183271  | 5    | 0.00097  | 0.038    | 0.13144  | 0.31471  | 0.007223613 | Intragenic | NM_031697       | St3gal3       |
| 5   | 141050276 | 141050439 | 1        | -0.050775  | 9    | 0.0062   | 7.50E-05 | 0.36633  | 0.41711  | 0.027757612 | Intragenic | NM_171993       | Cdc20         |
| 5   | 141061695 | 141061838 | 1        | -0.11978   | 6    | 0.00012  | 0.00094  | 0.04912  | 0.1689   | 0.00153218  | Intergenic | NA              | NA            |
| 5   | 141108490 | 141108590 | 0.098    | 0.056842   | 10   | 0.00025  | 3.50E-07 | 0.25145  | 0.19461  | 0.002725258 | Intragenic | NM_053545       | Tie1          |
| 5   | 141147270 | 141147331 | 1        | -0.207773  | 5    | 1.50E-05 | 7.60E-06 | 0.25633  | 0.4641   | 0.000310955 | Intragenic | NM_001108674    | RGD1305347    |
| 5   | 141824398 | 141824456 | 1        | 0.059669   | 5    | 0.0068   | 0.015    | 0.96529  | 0.90562  | 0.029075319 | Intragenic | NM_001106682    | Lao1          |
| 5   | 142994634 | 142994676 | 1        | -0.081188  | 5    | 0.01     | 0.015    | 0.052482 | 0.13367  | 0.037614679 | Intergenic | NA              | NA            |
| 5   | 143009279 | 143009303 | 1        | 0.056084   | 5    | 2.10E-07 | 0.93     | 0.056085 | 2.50E-07 | 1.11E-05    | Intergenic | NA              | NA            |
| 5   | 144603430 | 144603535 | 1        | -0.148179  | 5    | 0.012    | 0.18     | 0.19636  | 0.34454  | 0.042700096 | TSS        | NM_001012221    | Oxct2a        |
| 5   | 144809195 | 144809300 | 1        | -0.143028  | 5    | 0.014    | 0.18     | 0.19973  | 0.34276  | 0.04726441  | TSS        | NM_001012221    | Oxct2a        |
| 5   | 144853724 | 144853867 | 1        | -0.218023  | 5    | 0.011    | 0.015    | 0.21837  | 0.43639  | 0.040408163 | Intragenic | NM_001135758    | Macf1         |
| 5   | 146774957 | 146775042 | 1        | -0.187529  | 5    | 0.0074   | 0.0055   | 0.20199  | 0.38952  | 0.030871679 | Intragenic | NM_001107980    | Rspo1         |
| 5   | 147752127 | 147752245 | 1        | -0.118098  | 5    | 0.0012   | 0.0018   | 0.095658 | 0.21376  | 0.008573088 | Intergenic | NA              | NA            |
| 5   | 149220834 | 149220958 | 0.8      | -0.148121  | 8    | 2.60E-06 | 2.80E-06 | 0.010399 | 0.15852  | 7.93E-05    | Intergenic | NA              | NA            |
| 5   | 150080107 | 150080213 | 1        | -0.051258  | 11   | 3.50E-05 | 0.00011  | 0.015484 | 0.066742 | 0.000606338 | TSS        | NM_001107981    | RGD1563072    |
| 5   | 150777276 | 150777457 | 1        | -0.06805   | 8    | 0.015    | 0.036    | 0.13435  | 0.2024   | 0.049419643 | Intergenic | NA              | NA            |
| 5   | 151215682 | 151215869 | 1        | -0.120189  | 9    | 0.0058   | 0.06     | 0.30167  | 0.42186  | 0.026163814 | Intragenic | NM_001108683    | Sync          |
| 5   | 151349443 | 151349484 | 1        | -0.199366  | 5    | 0.012    | 0.18     | 0.39654  | 0.59591  | 0.042700096 | Intragenic | NM_001109265    | Zbtb8b        |
| 5   | 151413548 | 151413613 | 1        | -0.149688  | 5    | 0.00023  | 0.0092   | 0.090126 | 0.23981  | 0.002525893 | TSS        | NM_001007650:NM | Tssk3:Fam229a |
| 5   | 151625166 | 151625262 | 1        | -0.122535  | 7    | 1.10E-05 | 3.00E-05 | 0.054017 | 0.17655  | 0.000239469 | Intragenic | NM_001014192    | Tmem39b       |
| 5   | 151747937 | 151748096 | 1        | -0.062964  | 8    | 0.0088   | 0.13     | 0.10345  | 0.16642  | 0.03504803  | Intergenic | NA              | NA            |
| 5   | 151935286 | 151935352 | 1        | -0.192695  | 5    | 7.00E-05 | 0.00097  | 0.094893 | 0.28759  | 0.001035271 | Intragenic | NM_001107914    | Adgrb2        |
| 5   | 151935392 | 151935432 | 1        | -0.236669  | 5    | 0.00012  | 0.0017   | 0.34073  | 0.5774   | 0.00153218  | Intragenic | NM_001107914    | Adgrb2        |

| chr | start     | stop      | q-value | methy.diff | CpGs | pMWU     | p2DKS    | MCWLS    | MCWHS    | pMWU.fdr    | cgi.type   | transcript      | gene       |
|-----|-----------|-----------|---------|------------|------|----------|----------|----------|----------|-------------|------------|-----------------|------------|
| 5   | 152116599 | 152116694 | 1       | 0.099364   | 5    | 0.015    | 0.0053   | 0.86091  | 0.76155  | 0.049419643 | Intergenic | NA              | NA         |
| 5   | 152147954 | 152148413 | 1       | -0.067964  | 13   | 0.0041   | 0.055    | 0.10669  | 0.17466  | 0.020486121 | Intergenic | NA              | NA         |
| 5   | 152246560 | 152246613 | 1       | -0.050211  | 5    | 0.00021  | 0.0018   | 0.018593 | 0.068804 | 0.002348182 | TSS        | NM_024162       | Fabp3      |
| 5   | 153738776 | 153738827 | 1       | -0.161396  | 5    | 0.0038   | 0.0054   | 0.33712  | 0.49851  | 0.019583799 | Intragenic | NM_001108685    | Srsf4      |
| 5   | 153757320 | 153757434 | 1       | -0.050132  | 14   | 0.0003   | 0.0017   | 0.054902 | 0.10503  | 0.003083565 | Intergenic | NA              | NA         |
| 5   | 154022582 | 154022702 | 1       | -0.087981  | 5    | 0.002    | 0.0055   | 0.033299 | 0.12128  | 0.012269327 | Intergenic | NA              | NA         |
| 5   | 154253315 | 154253433 | 1       | -0.062774  | 5    | 0.015    | 0.038    | 0.091509 | 0.15428  | 0.049419643 | Intergenic | NA              | NA         |
| 5   | 154931009 | 154931526 | 1       | -0.1219    | 8    | 7.80E-08 | 9.60E-06 | 0.041247 | 0.16315  | 5.14E-06    | Intragenic | NM_001134956    | Ahdc1      |
| 5   | 155117556 | 155117606 | 1       | -0.061143  | 5    | 0.012    | 0.038    | 0.065609 | 0.12675  | 0.042700096 | Intragenic | NM_001025651    | Sytl1      |
| 5   | 155117611 | 155117658 | 1       | -0.120306  | 5    | 0.00065  | 0.0018   | 0.095264 | 0.21557  | 0.005335929 | Intragenic | NM_001025651    | Sytl1      |
| 5   | 155360206 | 155360320 | 1       | -0.094405  | 9    | 0.014    | 0.024    | 0.33523  | 0.42964  | 0.04726441  | Intragenic | NM_001107907    | Fam46b     |
| 5   | 155430919 | 155431108 | 0.015   | -0.066401  | 19   | 2.30E-12 | 5.40E-08 | 0.030926 | 0.097327 | 5.85E-10    | TSS        | NM_001004268    | Kdf1       |
| 5   | 155439220 | 155439337 | 1       | -0.102777  | 9    | 0.0011   | 0.0027   | 0.20449  | 0.30727  | 0.007982301 | Intragenic | NM_001004268    | Kdf1       |
| 5   | 155753290 | 155753345 | 1       | 0.067774   | 8    | 0.0017   | 0.0017   | 0.86868  | 0.80091  | 0.011044014 | Intergenic | NA              | NA         |
| 5   | 155976662 | 155976770 | 1       | -0.106448  | 5    | 1.70E-05 | 0.00014  | 0.050079 | 0.15653  | 0.000342787 | Intergenic | NA              | NA         |
| 5   | 156011964 | 156012002 | 1       | -0.130848  | 5    | 5.00E-05 | 0.00051  | 0.46217  | 0.59302  | 0.000803922 | TSS        | NM_053983       | Cd52       |
| 5   | 156105212 | 156105401 | 0.023   | -0.066601  | 19   | 1.90E-12 | 8.30E-08 | 0.030726 | 0.097327 | 5.01E-10    | TSS        | NM_001004268    | Kdf1       |
| 5   | 156113511 | 156113628 | 1       | -0.102777  | 9    | 0.0011   | 0.0027   | 0.20449  | 0.30727  | 0.007982301 | Intragenic | NM_001080151:NM | Cep85:Kdf1 |
| 5   | 156292559 | 156292832 | 1       | -0.096239  | 13   | 0.0015   | 0.019    | 0.19831  | 0.29455  | 0.01019337  | TSS        | NM_080903       | Trim63     |
| 5   | 156407770 | 156407896 | 1       | -0.103442  | 5    | 0.0017   | 0.0092   | 0.038797 | 0.14224  | 0.011044014 | Intragenic | NM_177932       | Pafah2     |
| 5   | 156503849 | 156503901 | 1       | -0.120875  | 5    | 0.0045   | 0.039    | 0.10237  | 0.22325  | 0.021964286 | TSS        | NM_001034081    | Paqr7      |
| 5   | 157273755 | 157273968 | 1       | -0.064263  | 13   | 0.00063  | 0.0024   | 0.090856 | 0.15512  | 0.00531968  | TSS        | NM_130425       | Runx3      |
| 5   | 157278095 | 157278132 | 1       | -0.065065  | 7    | 0.00024  | 0.00049  | 0.095054 | 0.16012  | 0.002620118 | Intragenic | NM_130425       | Runx3      |
| 5   | 157291337 | 157291369 | 1       | -0.105509  | 5    | 0.0029   | 0.00098  | 0.10875  | 0.21426  | 0.016164653 | Intragenic | NM_130425       | Runx3      |
| 5   | 157300216 | 157300293 | 1       | -0.181563  | 5    | 0.0049   | 0.015    | 0.20861  | 0.39018  | 0.023345384 | Intragenic | NM_130425       | Runx3      |
| 5   | 157433975 | 157434125 | 1       | -0.136625  | 5    | 9.20E-06 | 3.30E-05 | 0.033326 | 0.16995  | 0.000206371 | Intergenic | NA              | NA         |
| 5   | 158199192 | 158199333 | 1       | -0.085452  | 8    | 6.30E-07 | 9.80E-06 | 0.042795 | 0.12825  | 2.67E-05    | Intergenic | NA              | NA         |
| 5   | 158303951 | 158304099 | 1       | -0.09192   | 5    | 0.0027   | 0.039    | 0.046582 | 0.1385   | 0.015434547 | Intergenic | NA              | NA         |
| 5   | 158385290 | 158385387 | 1       | -0.195199  | 5    | 1.30E-05 | 3.20E-05 | 0.068898 | 0.2641   | 0.000273333 | Intragenic | NM_001015008    | Tcea3      |
| 5   | 158409459 | 158409538 | 1       | -0.130025  | 5    | 0.015    | 0.13     | 0.15317  | 0.2832   | 0.049419643 | TSS        | NR_036617       | RGD1564482 |
| 5   | 158572978 | 158573053 | 1       | -0.153264  | 5    | 0.00012  | 0.00053  | 0.40596  | 0.55923  | 0.00153218  | Intergenic | NA              | NA         |
| 5   | 158586060 | 158586274 | 1       | -0.203911  | 9    | 1.40E-06 | 4.40E-05 | 0.17069  | 0.3746   | 4.97E-05    | Intergenic | NA              | NA         |
| 5   | 158887541 | 158887588 | 1       | -0.050996  | 5    | 0.0063   | 0.038    | 0.048667 | 0.099664 | 0.027757612 | Intragenic | NM_001127319    | Ephb2      |
| 5   | 159824467 | 159824495 | 1       | -0.134769  | 5    | 0.0035   | 0.039    | 0.17587  | 0.31064  | 0.018410549 | Intragenic | NM_001100713    | Rap1gap    |
| 5   | 159824512 | 159824704 | 1       | -0.071668  | 7    | 0.0041   | 0.0082   | 0.10024  | 0.17191  | 0.020486121 | Intragenic | NM_001100713    | Rap1gap    |
| 5   | 160629677 | 160630233 | 1       | -0.098875  | 9    | 5.50E-05 | 0.00033  | 0.076218 | 0.17509  | 0.000869165 | Intergenic | NA              | NA         |
| 5   | 161685726 | 161685898 | 1       | -0.091842  | 5    | 0.0068   | 0.0055   | 0.040791 | 0.13263  | 0.029075319 | Intragenic | NM_001039026    | Ubr4       |
| 5   | 161877605 | 161877761 | 1       | -0.068166  | 7    | 0.0065   | 0.013    | 0.13166  | 0.19983  | 0.028502674 | Intergenic | NA              | NA         |
| 5   | 162044299 | 162044487 | 1       | -0.064793  | 9    | 0.01     | 0.046    | 0.046391 | 0.11118  | 0.037614679 | TSS        | NM_001191984    | Pax7       |

| chr | start     | stop      | q-value | methy.diff | CpGs | pMWU     | p2DKS    | MCWLS    | MCWHS    | pMWU.fdr    | cgi.type   | transcript   | gene     |
|-----|-----------|-----------|---------|------------|------|----------|----------|----------|----------|-------------|------------|--------------|----------|
| 5   | 162291229 | 162291358 | 1       | -0.161652  | 5    | 0.00048  | 0.0091   | 0.19776  | 0.35941  | 0.004351843 | Intragenic | NM_001271454 | Igsf21   |
| 5   | 162404406 | 162404482 | 1       | -0.085972  | 5    | 3.30E-06 | 3.40E-05 | 0.035023 | 0.121    | 9.48E-05    | Intragenic | NM_001271454 | Igsf21   |
| 5   | 162407511 | 162407590 | 1       | -0.113231  | 5    | 0.00021  | 0.0018   | 0.084507 | 0.19774  | 0.002348182 | Intragenic | NM_001271454 | Igsf21   |
| 5   | 162803979 | 162804199 | 1       | -0.07496   | 8    | 0.0026   | 0.026    | 0.05349  | 0.12845  | 0.015204437 | Intergenic | NA           | NA       |
| 5   | 162845509 | 162845679 | 1       | -0.086463  | 5    | 0.0035   | 0.059    | 0.034826 | 0.12129  | 0.018410549 | Intergenic | NA           | NA       |
| 5   | 163541824 | 163541981 | 1       | -0.122089  | 5    | 6.20E-05 | 7.10E-05 | 0.040549 | 0.16264  | 0.000939548 | Intergenic | NA           | NA       |
| 5   | 163564948 | 163565374 | 0.89    | -0.145044  | 15   | 2.90E-07 | 3.20E-06 | 0.12581  | 0.27085  | 1.41E-05    | Intragenic | NM_001108977 | Epha2    |
| 5   | 163573427 | 163573464 | 1       | -0.151928  | 5    | 1.20E-05 | 0.00027  | 0.02737  | 0.1793   | 0.000257442 | Intragenic | NM_001108977 | Epha2    |
| 5   | 163893662 | 163894087 | 1       | -0.104613  | 12   | 6.80E-06 | 0.00067  | 0.1418   | 0.24641  | 0.000166172 | TSS        | NM_001013936 | Slc25a34 |
| 5   | 165014176 | 165014358 | 1       | 0.249718   | 5    | 0.0041   | 0.0054   | 0.54175  | 0.29203  | 0.020486121 | Intergenic | NA           | NA       |
| 5   | 165257222 | 165257341 | 1       | -0.140466  | 5    | 0.0032   | 0.0017   | 0.17629  | 0.31676  | 0.017454545 | Intergenic | NA           | NA       |
| 5   | 168385147 | 168385339 | 1       | -0.083774  | 12   | 0.00037  | 0.0052   | 0.20163  | 0.28541  | 0.003597628 | Intragenic | NM_053827    | Plod1    |
| 5   | 169152015 | 169152086 | 1       | -0.17556   | 5    | 0.0068   | 0.015    | 0.3665   | 0.54206  | 0.029075319 | Intergenic | NA           | NA       |
| 5   | 169332595 | 169332655 | 1       | -0.10543   | 7    | 0.0017   | 0.025    | 0.11345  | 0.21888  | 0.011044014 | Intergenic | NA           | NA       |
| 5   | 169366568 | 169366697 | 1       | -0.09957   | 5    | 0.014    | 0.024    | 0.12192  | 0.22149  | 0.04726441  | Intergenic | NA           | NA       |
| 5   | 169424604 | 169424677 | 1       | -0.076489  | 9    | 0.0037   | 0.016    | 0.2379   | 0.31438  | 0.019379702 | Intergenic | NA           | NA       |
| 5   | 169858238 | 169858409 | 1       | 0.112633   | 8    | 0.0016   | 0.0011   | 0.78408  | 0.67145  | 0.010628263 | Intragenic | NM_001271198 | Ube4b    |
| 5   | 170155927 | 170155978 | 1       | -0.339778  | 5    | 0.00065  | 0.0018   | 0.385    | 0.72477  | 0.005335929 | Intragenic | NM_001173388 | Ctnnbip1 |
| 5   | 170275939 | 170275992 | 1       | -0.086513  | 5    | 0.00029  | 0.00097  | 0.083829 | 0.17034  | 0.002984937 | TSS        | NM_001108978 | Pik3cd   |
| 5   | 170512687 | 170512813 | 1       | -0.074399  | 8    | 0.00022  | 0.001    | 0.075254 | 0.14965  | 0.002452568 | Intergenic | NA           | NA       |
| 5   | 170661255 | 170661506 | 1       | -0.138123  | 8    | 4.20E-05 | 0.001    | 0.066918 | 0.20504  | 0.000709291 | Intragenic | NM_001106698 | H6pd     |
| 5   | 170843866 | 170844092 | 1       | -0.059929  | 9    | 0.0029   | 0.033    | 0.035506 | 0.095435 | 0.016164653 | Intergenic | NA           | NA       |
| 5   | 171545522 | 171545600 | 1       | -0.141519  | 5    | 2.90E-06 | 3.40E-05 | 0.081371 | 0.22289  | 8.70E-05    | Intergenic | NA           | NA       |
| 5   | 171739398 | 171739501 | 1       | -0.12633   | 7    | 0.00065  | 0.0083   | 0.24201  | 0.36834  | 0.005335929 | Intragenic | NM_001195559 | Camta1   |
| 5   | 172018916 | 172018970 | 1       | -0.130627  | 5    | 0.0063   | 0.015    | 0.14404  | 0.27466  | 0.027757612 | Intragenic | NM_001195559 | Camta1   |
| 5   | 172174625 | 172174817 | 1       | -0.053891  | 7    | 0.0065   | 0.012    | 0.084564 | 0.13846  | 0.028502674 | Intragenic | NM_001195559 | Camta1   |
| 5   | 172827754 | 172827817 | 1       | -0.105988  | 9    | 0.009    | 0.0094   | 0.34891  | 0.4549   | 0.035786638 | Intragenic | NM_201272    | Plekhg5  |
| 5   | 172838807 | 172838867 | 1       | -0.129591  | 5    | 3.50E-05 | 7.10E-05 | 0.025267 | 0.15486  | 0.000606338 | Intragenic | NM_201272    | Plekhg5  |
| 5   | 172838877 | 172839009 | 1       | -0.078025  | 7    | 0.0053   | 0.14     | 0.081879 | 0.1599   | 0.024662043 | Intragenic | NM_201272    | Plekhg5  |
| 5   | 172859456 | 172859697 | 1       | -0.168747  | 9    | 3.80E-05 | 0.00071  | 0.17151  | 0.34025  | 0.000652186 | Intragenic | NM_019622    | Espn     |
| 5   | 173048056 | 173048151 | 1       | -0.056603  | 5    | 0.00021  | 0.00014  | 0.011233 | 0.067835 | 0.002348182 | Intergenic | NA           | NA       |
| 5   | 174189741 | 174189933 | 1       | -0.090392  | 5    | 0.00019  | 0.00096  | 0.05413  | 0.14452  | 0.002222187 | Intragenic | NM_001101014 | Ajap1    |
| 5   | 175150047 | 175150166 | 1       | -0.147485  | 5    | 0.0049   | 0.024    | 0.12495  | 0.27243  | 0.023345384 | Intergenic | NA           | NA       |
| 5   | 175236592 | 175236699 | 1       | -0.126855  | 5    | 0.0011   | 0.0093   | 0.089178 | 0.21603  | 0.007982301 | Intergenic | NA           | NA       |
| 5   | 175342356 | 175342443 | 1       | -0.078666  | 5    | 0.00097  | 0.0017   | 0.12299  | 0.20166  | 0.007223613 | Intergenic | NA           | NA       |
| 5   | 175395906 | 175395976 | 1       | -0.192746  | 7    | 0.0076   | 0.039    | 0.4369   | 0.62965  | 0.031563309 | Intergenic | NA           | NA       |
| 5   | 175462992 | 175463080 | 1       | -0.105365  | 5    | 0.013    | 0.038    | 0.091641 | 0.19701  | 0.04506341  | Intergenic | NA           | NA       |
| 5   | 175573022 | 175573070 | 1       | -0.137428  | 5    | 0.00023  | 0.00098  | 0.40447  | 0.54189  | 0.002525893 | Intergenic | NA           | NA       |
| 5   | 175674340 | 175674559 | 1       | -0.085579  | 15   | 0.00023  | 0.0043   | 0.09348  | 0.17906  | 0.002525893 | Intergenic | NA           | NA       |



| chr | start     | stop      | q-value | methy.diff | CpGs | pMWU     | p2DKS    | MCWLS    | MCWHS    | pMWU.fdr    | cgi.type   | transcript      | gene            |
|-----|-----------|-----------|---------|------------|------|----------|----------|----------|----------|-------------|------------|-----------------|-----------------|
| 5   | 176693861 | 176693930 | 1       | -0.149085  | 5    | 0.00065  | 0.00053  | 0.069164 | 0.21825  | 0.005335929 | Intragenic | NM_001013938    | Vwa1            |
| 6   | 883582    | 883624    | 1       | -0.195306  | 5    | 0.0035   | 0.0031   | 0.18659  | 0.38189  | 0.018410549 | Intragenic | NM_001169103    | Crim1           |
| 6   | 2431064   | 2431218   | 1       | -0.118122  | 8    | 0.015    | 0.051    | 0.23097  | 0.34909  | 0.049419643 | Intergenic | NA              | NA              |
| 6   | 3624568   | 3624749   | 1       | -0.084613  | 8    | 0.0024   | 0.037    | 0.036944 | 0.12156  | 0.014124402 | TSS        | NM_001004282    | Tmem178a        |
| 6   | 3682631   | 3682949   | 1       | -0.1235    | 10   | 0.00053  | 0.016    | 0.058936 | 0.18244  | 0.004710638 | Intragenic | NM_001004282    | Tmem178a        |
| 6   | 4377702   | 4377948   | 1       | -0.072357  | 8    | 0.00068  | 0.013    | 0.058822 | 0.13118  | 0.005563636 | Intragenic | NM_001270772:NM | Slc8a1:Slc8a1:S |
| 6   | 7005923   | 7006034   | 1       | -0.174633  | 7    | 2.00E-06 | 5.10E-05 | 0.14261  | 0.31725  | 6.50E-05    | TSS        | NM_020076       | Haa0            |
| 6   | 7584531   | 7584801   | 1       | 0.083081   | 9    | 0.0044   | 0.025    | 0.84616  | 0.76308  | 0.021881402 | Intragenic | NM_001191769    | Thada           |
| 6   | 8217643   | 8217817   | 1       | -0.132123  | 5    | 0.0074   | 0.039    | 0.12835  | 0.26048  | 0.030871679 | TSS        | NM_017216       | Slc3a1          |
| 6   | 8230990   | 8231084   | 1       | -0.183027  | 5    | 7.10E-06 | 3.40E-05 | 0.56525  | 0.74828  | 0.000169026 | Intragenic | NM_017216       | Slc3a1          |
| 6   | 8942275   | 8942547   | 1       | -0.071385  | 7    | 0.0035   | 0.025    | 0.067284 | 0.13867  | 0.018410549 | Intergenic | NA              | NA              |
| 6   | 9052679   | 9052764   | 1       | -0.152482  | 5    | 0.0032   | 0.0054   | 0.28167  | 0.43415  | 0.017454545 | Intergenic | NA              | NA              |
| 6   | 9402356   | 9402443   | 1       | -0.069266  | 6    | 0.011    | 0.027    | 0.015253 | 0.084519 | 0.040408163 | Intergenic | NA              | NA              |
| 6   | 9630497   | 9630584   | 1       | -0.123932  | 5    | 0.0013   | 0.015    | 0.11197  | 0.2359   | 0.009111111 | Intragenic | NM_017171       | Prkce           |
| 6   | 20807337  | 20807542  | 1       | -0.114314  | 5    | 0.014    | 0.088    | 0.73466  | 0.84898  | 0.04726441  | Intergenic | NA              | NA              |
| 6   | 21279158  | 21279228  | 1       | -0.076864  | 5    | 0.0068   | 0.0018   | 0.20091  | 0.27778  | 0.029075319 | TSS        | NM_138541       | Epcam           |
| 6   | 22228526  | 22228619  | 1       | -0.23147   | 5    | 0.00054  | 0.015    | 0.38344  | 0.61491  | 0.004710638 | Intragenic | NM_001271305    | Ppp1r21         |
| 6   | 25209142  | 25209249  | 1       | -0.171887  | 5    | 0.0049   | 0.0092   | 0.37144  | 0.54333  | 0.023345384 | Intergenic | NA              | NA              |
| 6   | 28251323  | 28251385  | 0.92    | -0.15187   | 9    | 1.50E-05 | 3.30E-06 | 0.1415   | 0.29337  | 0.000310955 | Intergenic | NA              | NA              |
| 6   | 31693678  | 31693719  | 1       | -0.173998  | 5    | 8.80E-05 | 0.0018   | 0.195    | 0.36899  | 0.00123     | Intragenic | NM_001106706    | Ttc27           |
| 6   | 34387462  | 34387503  | 1       | -0.122559  | 5    | 0.00012  | 0.0018   | 0.091368 | 0.21393  | 0.00153218  | Intergenic | NA              | NA              |
| 6   | 36305703  | 36305925  | 1       | -0.068992  | 18   | 3.10E-06 | 0.0027   | 0.061073 | 0.13007  | 9.11E-05    | TSS        | NM_001109674    | Krtcap3         |
| 6   | 36623376  | 36623489  | 1       | -0.06562   | 13   | 0.0093   | 0.072    | 0.61579  | 0.68141  | 0.036473186 | Intragenic | NM_139087       | Cgref1          |
| 6   | 36637354  | 36637454  | 1       | -0.08319   | 7    | 0.00074  | 0.0083   | 0.09131  | 0.1745   | 0.005916793 | TSS        | NM_031855       | Khk             |
| 6   | 36739033  | 36739117  | 1       | -0.135421  | 5    | 0.00048  | 0.0018   | 0.13132  | 0.26674  | 0.004351843 | Intergenic | NA              | NA              |
| 6   | 37306129  | 37306189  | 1       | -0.103633  | 7    | 0.0083   | 0.019    | 0.18665  | 0.29028  | 0.033563836 | Intragenic | NM_001134754    | Seli            |
| 6   | 37445180  | 37445291  | 1       | -0.055203  | 8    | 0.013    | 0.05     | 0.031286 | 0.086489 | 0.04506341  | Intragenic | NM_001191874    | Garem2          |
| 6   | 38192155  | 38192218  | 1       | -0.0597    | 5    | 0.014    | 0.088    | 0.05768  | 0.11738  | 0.04726441  | TSS        | NM_139326       | Pomc            |
| 6   | 38853210  | 38853227  | 1       | -0.05169   | 5    | 0.0087   | 0.059    | 0.17021  | 0.2219   | 0.034705946 | Intergenic | NA              | NA              |
| 6   | 38853662  | 38853689  | 1       | -0.108621  | 5    | 0.00072  | 0.0018   | 0.1687   | 0.27732  | 0.005769381 | Intergenic | NA              | NA              |
| 6   | 38854063  | 38854140  | 1       | -0.180324  | 11   | 1.70E-05 | 0.00095  | 0.10286  | 0.28318  | 0.000342787 | Intergenic | NA              | NA              |
| 6   | 39262697  | 39262727  | 1       | -0.229386  | 5    | 0.0019   | 0.0093   | 0.079235 | 0.30862  | 0.011943782 | Intergenic | NA              | NA              |
| 6   | 39263294  | 39263317  | 1       | 0.065672   | 5    | 0.0087   | 0.088    | 0.56705  | 0.50137  | 0.034705946 | Intergenic | NA              | NA              |
| 6   | 39265020  | 39265040  | 1       | 0.129865   | 5    | 2.40E-05 | 1.60E-05 | 0.30537  | 0.17551  | 0.000455321 | Intergenic | NA              | NA              |
| 6   | 39265516  | 39265558  | 1       | 0.116608   | 9    | 4.10E-06 | 5.70E-06 | 0.30993  | 0.19332  | 0.000112483 | Intergenic | NA              | NA              |
| 6   | 39270241  | 39270259  | 1       | -0.257105  | 5    | 9.80E-05 | 0.00098  | 0.18209  | 0.43919  | 0.001307848 | TSS        | NR_046238       | Rn5-8s          |
| 6   | 39270471  | 39270484  | 1       | -0.163177  | 5    | 0.0049   | 0.058    | 0.2986   | 0.46178  | 0.023345384 | TSS        | NR_046238       | Rn5-8s          |
| 6   | 39272381  | 39272409  | 1       | 0.113586   | 5    | 0.00048  | 0.0032   | 0.31441  | 0.20083  | 0.004351843 | TSS        | NR_046238       | Rn5-8s          |
| 6   | 39274736  | 39274764  | 1       | 0.126985   | 5    | 0.00019  | 0.00098  | 0.33242  | 0.20543  | 0.002222187 | Intergenic | NA              | NA              |

| chr | start     | stop      | q-value | methy.diff | CpGs | pMWU     | p2DKS    | MCWLS     | MCWHS    | pMWU.fdr    | cgi.type   | transcript                | gene              |
|-----|-----------|-----------|---------|------------|------|----------|----------|-----------|----------|-------------|------------|---------------------------|-------------------|
| 6   | 42956281  | 42956413  | 1       | -0.148809  | 5    | 0.013    | 0.038    | 0.21984   | 0.36865  | 0.04506341  | TSS        | NM_019287                 | Apob              |
| 6   | 43375627  | 43375893  | 1       | -0.117596  | 7    | 0.0056   | 0.039    | 0.15769   | 0.27528  | 0.025943503 | Intergenic | NA                        | NA                |
| 6   | 52470219  | 52470364  | 1       | -0.054259  | 10   | 0.0061   | 0.022    | 0.91458   | 0.96884  | 0.027399878 | Intergenic | NA                        | NA                |
| 6   | 53082681  | 53082743  | 1       | -0.058296  | 5    | 0.00072  | 0.0055   | 0.0059764 | 0.064273 | 0.005769381 | Intergenic | NA                        | NA                |
| 6   | 53256869  | 53256965  | 1       | -0.118253  | 7    | 0.0065   | 0.0034   | 0.16149   | 0.27974  | 0.028502674 | Intergenic | NA                        | NA                |
| 6   | 58842754  | 58842905  | 1       | -0.118786  | 7    | 0.011    | 0.012    | 0.27871   | 0.3975   | 0.040408163 | Intergenic | NA                        | NA                |
| 6   | 59472896  | 59472997  | 0.00017 | -0.092216  | 7    | 5.90E-10 | 6.00E-10 | 0.011178  | 0.10339  | 7.78E-08    | Intergenic | NA                        | NA                |
| 6   | 62512042  | 62512107  | 1       | 0.116161   | 5    | 0.0068   | 0.015    | 0.84115   | 0.72499  | 0.029075319 | Intergenic | NA                        | NA                |
| 6   | 64604297  | 64604428  | 1       | -0.074372  | 5    | 0.0094   | 0.088    | 0.081653  | 0.15603  | 0.036473186 | Intragenic | NM_001308254:NM_001308254 | Ahr:Ahr:Ahr:Ahr   |
| 6   | 72383865  | 72383894  | 0.016   | -0.219926  | 10   | 0.0005   | 5.80E-08 | 0.11604   | 0.33597  | 0.004511002 | Intergenic | NA                        | NA                |
| 6   | 72511453  | 72511528  | 1       | 0.062603   | 5    | 0.01     | 0.038    | 0.90201   | 0.83941  | 0.037614679 | Intergenic | NA                        | NA                |
| 6   | 79534384  | 79534562  | 1       | -0.052221  | 20   | 2.00E-06 | 0.00014  | 0.060525  | 0.11275  | 6.50E-05    | TSS        | NM_012560                 | Foxg1             |
| 6   | 86184979  | 86185028  | 1       | -0.122159  | 5    | 0.008    | 0.015    | 0.40239   | 0.52455  | 0.03243956  | Intragenic | NM_020083                 | Ralgapa1          |
| 6   | 87559121  | 87559178  | 1       | -0.091071  | 5    | 0.0035   | 0.025    | 0.10283   | 0.1939   | 0.018410549 | Intragenic | NM_133614                 | Slc25a21          |
| 6   | 87636484  | 87636507  | 1       | -0.070081  | 5    | 0.013    | 0.088    | 0.1238    | 0.19388  | 0.04506341  | TSS        | NM_133614                 | Slc25a21          |
| 6   | 88156843  | 88156901  | 1       | -0.132684  | 5    | 0.014    | 0.039    | 0.15857   | 0.29125  | 0.04726441  | Intergenic | NA                        | NA                |
| 6   | 89654601  | 89654657  | 1       | -0.057308  | 5    | 0.013    | 0.0089   | 0.10141   | 0.15872  | 0.04506341  | Intergenic | NA                        | NA                |
| 6   | 92426811  | 92426861  | 0.32    | -0.118967  | 7    | 5.80E-08 | 1.10E-06 | 0.070025  | 0.18899  | 4.28E-06    | Intergenic | NA                        | NA                |
| 6   | 92500488  | 92500538  | 0.32    | -0.11386   | 7    | 3.20E-07 | 1.10E-06 | 0.075132  | 0.18899  | 1.52E-05    | Intergenic | NA                        | NA                |
| 6   | 100830354 | 100830429 | 1       | -0.285041  | 5    | 1.50E-06 | 3.50E-05 | 0.25652   | 0.54156  | 5.17E-05    | Intergenic | NA                        | NA                |
| 6   | 100915685 | 100915802 | 0.1     | -0.119376  | 11   | 4.40E-07 | 3.60E-07 | 0.092473  | 0.21185  | 1.96E-05    | TSS        | NM_012876:NR_110377       | Rps29:Rn7sl1      |
| 6   | 101136721 | 101136838 | 0.49    | -0.110273  | 11   | 4.80E-07 | 1.80E-06 | 0.087484  | 0.19776  | 2.08E-05    | TSS        | NR_110377                 | Rn7sl1            |
| 6   | 101558159 | 101558290 | 1       | -0.114904  | 8    | 0.0029   | 5.30E-05 | 0.10392   | 0.21882  | 0.016164653 | Intragenic | NM_001025121              | Cdkl1             |
| 6   | 103151061 | 103151194 | 1       | -0.162488  | 5    | 5.00E-05 | 0.0032   | 0.084606  | 0.24709  | 0.000803922 | Intergenic | NA                        | NA                |
| 6   | 104278904 | 104278922 | 1       | -0.074169  | 5    | 0.00029  | 0.00098  | 0.077305  | 0.15147  | 0.002984937 | TSS        | NM_001108031:NM_001108031 | L3hypdh:Jkamp     |
| 6   | 105727978 | 105728089 | 1       | -0.130391  | 8    | 1.10E-07 | 4.20E-05 | 0.052162  | 0.18255  | 6.65E-06    | Intergenic | NA                        | NA                |
| 6   | 106198743 | 106198914 | 1       | -0.054976  | 7    | 0.0021   | 0.0021   | 0.054969  | 0.10995  | 0.012840099 | Intergenic | NA                        | NA                |
| 6   | 108300407 | 108300472 | 0.43    | -0.061544  | 5    | 1.90E-05 | 1.50E-06 | 0.012045  | 0.073589 | 0.000376935 | Intergenic | NA                        | NA                |
| 6   | 108844717 | 108844737 | 1       | 0.06184    | 5    | 0.00029  | 0.0055   | 0.084901  | 0.023061 | 0.002984937 | TSS        | NM_021863                 | Hspa2             |
| 6   | 108926580 | 108926625 | 1       | -0.064739  | 5    | 0.013    | 0.058    | 0.74401   | 0.80875  | 0.04506341  | Intragenic | NM_001004444              | Zbtb1             |
| 6   | 108926658 | 108926750 | 1       | 0.083966   | 5    | 0.012    | 0.038    | 0.89668   | 0.81271  | 0.042700096 | Intragenic | NM_001004444              | Zbtb1             |
| 6   | 109517774 | 109517869 | 1       | 0.057875   | 7    | 0.0035   | 0.0043   | 0.88577   | 0.82789  | 0.018410549 | Intergenic | NA                        | NA                |
| 6   | 112780253 | 112780368 | 1       | -0.129663  | 8    | 0.00027  | 0.0039   | 0.16325   | 0.29292  | 0.002883647 | Intragenic | NM_001195505:NM_001195505 | Srsf5:Srsf5:Srsf5 |
| 6   | 113415395 | 113415505 | 1       | -0.126253  | 5    | 9.20E-06 | 0.00014  | 0.19429   | 0.32054  | 0.000206371 | Intergenic | NA                        | NA                |
| 6   | 114142601 | 114142712 | 1       | -0.175731  | 5    | 0.015    | 0.015    | 0.33686   | 0.51259  | 0.049419643 | Intergenic | NA                        | NA                |
| 6   | 114659164 | 114659247 | 1       | -0.114495  | 5    | 0.0074   | 0.0017   | 0.48865   | 0.60315  | 0.030871679 | Intragenic | NM_019342                 | Rgs6              |
| 6   | 115906026 | 115906086 | 1       | -0.125103  | 5    | 0.0045   | 0.025    | 0.15538   | 0.28048  | 0.021964286 | Intergenic | NA                        | NA                |
| 6   | 116056376 | 116056448 | 0.013   | -0.162743  | 9    | 1.50E-06 | 4.60E-08 | 0.24836   | 0.4111   | 5.17E-05    | Intragenic | NM_031005                 | Actn1             |
| 6   | 116943212 | 116943327 | 1       | -0.068282  | 5    | 0.012    | 0.038    | 0.096198  | 0.16448  | 0.042700096 | Intergenic | NA                        | NA                |

| chr | start     | stop      | q-value | methy.diff | CpGs | pMWU     | p2DKS    | MCWLS     | MCWHS    | pMWU.fdr    | cgi.type   | transcript      | gene          |
|-----|-----------|-----------|---------|------------|------|----------|----------|-----------|----------|-------------|------------|-----------------|---------------|
| 6   | 119377889 | 119378112 | 1       | -0.051763  | 15   | 4.30E-06 | 0.00085  | 0.045145  | 0.096908 | 0.000114978 | Intergenic | NA              | NA            |
| 6   | 120194200 | 120194260 | 1       | -0.082155  | 5    | 0.0074   | 0.025    | 0.11439   | 0.19655  | 0.030871679 | TSS        | NM_001012470    | Irf2bpl       |
| 6   | 120194507 | 120194795 | 0.00047 | -0.052199  | 21   | 1.90E-13 | 1.70E-09 | 0.027163  | 0.079362 | 7.01E-11    | TSS        | NM_001012470    | Irf2bpl       |
| 6   | 121966136 | 121966257 | 1       | 0.071763   | 8    | 0.0096   | 0.0038   | 0.86965   | 0.79789  | 0.037112624 | Intragenic | NM_053817       | Nrxn3         |
| 6   | 127947189 | 127947228 | 1       | -0.217662  | 5    | 1.50E-05 | 0.00053  | 0.11372   | 0.33139  | 0.000310955 | Intergenic | NA              | NA            |
| 6   | 132502092 | 132502168 | 1       | 0.050523   | 5    | 0.0049   | 0.0055   | 0.99347   | 0.94295  | 0.023345384 | Intragenic | NM_001108047    | Foxn3         |
| 6   | 132770778 | 132770955 | 1       | -0.204416  | 6    | 0.0014   | 0.0073   | 0.24984   | 0.45425  | 0.00960223  | Intragenic | NM_001108047    | Foxn3         |
| 6   | 133725562 | 133725667 | 1       | -0.171708  | 8    | 3.10E-07 | 3.10E-05 | 0.096497  | 0.26821  | 1.49E-05    | Intergenic | NA              | NA            |
| 6   | 134723676 | 134723725 | 1       | 0.064447   | 5    | 0.0032   | 0.0092   | 0.89748   | 0.83304  | 0.017454545 | Intragenic | NM_001025152    | Tc2n          |
| 6   | 134954049 | 134954133 | 1       | -0.241704  | 5    | 9.80E-07 | 3.40E-05 | 0.36579   | 0.60749  | 3.73E-05    | Intergenic | NA              | NA            |
| 6   | 135692825 | 135692996 | 0.85    | -0.120444  | 8    | 7.80E-08 | 3.00E-06 | 0.035356  | 0.1558   | 5.14E-06    | Intragenic | NM_001191985    | Itpk1         |
| 6   | 136408978 | 136409048 | 1       | -0.195741  | 5    | 0.0041   | 0.015    | 0.38581   | 0.58155  | 0.020486121 | Intergenic | NA              | NA            |
| 6   | 137325953 | 137326140 | 1       | -0.092541  | 10   | 0.00012  | 0.0059   | 0.084113  | 0.17665  | 0.00153218  | TSS        | NM_001047975    | LOC690435     |
| 6   | 137725249 | 137725388 | 1       | -0.099993  | 5    | 1.70E-05 | 1.60E-05 | 0.0097722 | 0.10977  | 0.000342787 | Intragenic | NM_001106755    | Clmn          |
| 6   | 137796223 | 137796331 | 1       | -0.100499  | 6    | 0.0021   | 0.0045   | 0.0076932 | 0.10819  | 0.012840099 | Intergenic | NA              | NA            |
| 6   | 138099665 | 138099783 | 1       | -0.174246  | 5    | 0.012    | 0.087    | 0.29545   | 0.4697   | 0.042700096 | Intergenic | NA              | NA            |
| 6   | 138177814 | 138177884 | 1       | -0.199301  | 5    | 0.0027   | 0.024    | 0.38225   | 0.58155  | 0.015434547 | Intergenic | NA              | NA            |
| 6   | 138379504 | 138379646 | 1       | -0.078682  | 5    | 0.00097  | 0.0055   | 0.017984  | 0.096667 | 0.007223613 | Intergenic | NA              | NA            |
| 6   | 138672452 | 138672556 | 1       | -0.165738  | 6    | 0.012    | 0.04     | 0.33806   | 0.5038   | 0.042700096 | Intergenic | NA              | NA            |
| 6   | 138884671 | 138884714 | 1       | -0.050756  | 5    | 0.0016   | 0.0054   | 0.047034  | 0.09779  | 0.010628263 | Intergenic | NA              | NA            |
| 6   | 141287557 | 141287629 | 1       | -0.160644  | 5    | 0.002    | 0.025    | 0.24708   | 0.40772  | 0.012269327 | Intergenic | NA              | NA            |
| 6   | 141296507 | 141296637 | 1       | -0.169023  | 5    | 0.0008   | 0.015    | 0.11706   | 0.28608  | 0.006267516 | Intergenic | NA              | NA            |
| 6   | 141410487 | 141410514 | 1       | -0.058039  | 5    | 0.0068   | 0.0055   | 0.022059  | 0.080098 | 0.029075319 | Intergenic | NA              | NA            |
| 6   | 142748373 | 142748736 | 0.00039 | -0.093929  | 30   | 4.30E-05 | 1.40E-09 | 0.18766   | 0.28159  | 0.00072287  | Intragenic | NM_053744       | Dlk1          |
| 6   | 142896898 | 142896989 | 1       | -0.066027  | 7    | 0.013    | 0.019    | 0.16693   | 0.23296  | 0.04506341  | TSS        | NR_031785:NR_03 | Mir341:Mir118 |
| 6   | 144504880 | 144504935 | 1       | -0.275418  | 5    | 0.00054  | 0.00098  | 0.46221   | 0.73763  | 0.004710638 | Intergenic | NA              | NA            |
| 6   | 144521293 | 144521350 | 1       | -0.094405  | 5    | 0.0038   | 0.0032   | 0.072004  | 0.16641  | 0.019583799 | Intragenic | NM_001137633    | Tnfaip2       |
| 6   | 144657549 | 144657648 | 0.016   | -0.237093  | 10   | 8.80E-11 | 5.90E-08 | 0.29224   | 0.52933  | 1.58E-08    | Intragenic | NM_053620       | Cdc42bpb      |
| 6   | 144673007 | 144673056 | 1       | -0.136767  | 5    | 0.014    | 0.038    | 0.15605   | 0.29281  | 0.04726441  | Intergenic | NA              | NA            |
| 6   | 144683187 | 144683635 | 1       | -0.06942   | 46   | 0.0015   | 0.00095  | 0.2034    | 0.19414  | 0.01019337  | Intragenic | NM_001108061    | Amn           |
| 6   | 144683636 | 144683746 | 1       | -0.126895  | 5    | 3.10E-05 | 0.00052  | 0.02138   | 0.14828  | 0.000549952 | Intragenic | NM_001108061    | Amn           |
| 6   | 144683752 | 144683803 | 1       | -0.076409  | 5    | 0.0045   | 0.088    | 0.036766  | 0.11317  | 0.021964286 | Intragenic | NM_001108061    | Amn           |
| 6   | 144683840 | 144683882 | 1       | -0.103734  | 5    | 0.00065  | 0.00052  | 0.010571  | 0.1143   | 0.005335929 | Intragenic | NM_001108061    | Amn           |
| 6   | 144684527 | 144684551 | 1       | -0.099007  | 5    | 9.80E-05 | 0.00014  | 0.10661   | 0.20562  | 0.001307848 | Intragenic | NM_001108061    | Amn           |
| 6   | 144684862 | 144684894 | 1       | 0.107315   | 5    | 0.0017   | 0.015    | 0.28602   | 0.1787   | 0.011044014 | Intragenic | NM_001108061    | Amn           |
| 6   | 145524525 | 145524607 | 1       | -0.114391  | 5    | 0.0045   | 0.038    | 0.11793   | 0.23233  | 0.021964286 | Intergenic | NA              | NA            |
| 6   | 145689282 | 145689409 | 1       | 0.076106   | 5    | 0.0035   | 0.0055   | 0.94919   | 0.87308  | 0.018410549 | Intergenic | NA              | NA            |
| 6   | 145759328 | 145759460 | 0.24    | -0.218086  | 8    | 5.20E-09 | 8.70E-07 | 0.2041    | 0.42219  | 5.19E-07    | Intragenic | NM_001170348    | Kif26a        |
| 6   | 146343045 | 146343141 | 1       | -0.111247  | 5    | 0.012    | 0.088    | 0.38843   | 0.49968  | 0.042700096 | Intergenic | NA              | NA            |

| chr | start     | stop      | q-value | methy.diff | CpGs | pMWU     | p2DKS    | MCWLS    | MCWHS    | pMWU.fdr    | cgi.type   | transcript      | gene             |
|-----|-----------|-----------|---------|------------|------|----------|----------|----------|----------|-------------|------------|-----------------|------------------|
| 6   | 146649792 | 146649920 | 1       | 0.062552   | 9    | 0.00076  | 0.0017   | 0.90533  | 0.84277  | 0.006057019 | Intragenic | NM_001170595    | Gpr132           |
| 6   | 155338330 | 155338435 | 1       | -0.14596   | 5    | 0.0049   | 0.088    | 0.50566  | 0.65162  | 0.023345384 | Intergenic | NA              | NA               |
| 7   | 1610230   | 1610332   | 1       | -0.054117  | 8    | 0.0029   | 0.0059   | 0.01992  | 0.074037 | 0.016164653 | Intergenic | NA              | NA               |
| 7   | 1610800   | 1610924   | 1       | -0.072203  | 13   | 1.50E-08 | 0.0001   | 0.050577 | 0.12278  | 1.35E-06    | Intergenic | NA              | NA               |
| 7   | 1611802   | 1611913   | 1       | -0.06792   | 5    | 0.0019   | 0.0092   | 0.1097   | 0.17762  | 0.011943782 | Intergenic | NA              | NA               |
| 7   | 2877154   | 2877213   | 1       | -0.14291   | 5    | 0.00029  | 3.40E-05 | 0.10666  | 0.24957  | 0.002984937 | Intergenic | NA              | NA               |
| 7   | 9506913   | 9507012   | 1       | -0.28431   | 5    | 0.012    | 0.0052   | 0.24423  | 0.52854  | 0.042700096 | Intergenic | NA              | NA               |
| 7   | 11246081  | 11246129  | 1       | -0.231081  | 5    | 0.0032   | 0.059    | 0.36513  | 0.59621  | 0.017454545 | TSS        | NM_001108075    | S1pr4            |
| 7   | 11313666  | 11313726  | 1       | -0.11496   | 5    | 0.00036  | 0.00052  | 0.059628 | 0.17459  | 0.003505013 | Intergenic | NA              | NA               |
| 7   | 11383826  | 11384007  | 1       | -0.06989   | 15   | 0.0061   | 0.0053   | 0.22495  | 0.29484  | 0.027399878 | TSS        | NM_001109605    | LOC690617        |
| 7   | 11392933  | 11393040  | 1       | -0.171906  | 5    | 0.0045   | 0.0092   | 0.37144  | 0.54335  | 0.021964286 | Intergenic | NA              | NA               |
| 7   | 11407106  | 11407148  | 1       | -0.136776  | 5    | 0.0041   | 0.025    | 0.60725  | 0.74403  | 0.020486121 | TSS        | NM_001108731    | Hmg20b           |
| 7   | 11421546  | 11421570  | 1       | -0.301741  | 5    | 0.00039  | 0.0054   | 0.30712  | 0.60886  | 0.003723415 | Intragenic | NM_017054       | Tbxa2r           |
| 7   | 11421631  | 11421682  | 1       | -0.397182  | 7    | 4.00E-08 | 3.00E-05 | 0.16678  | 0.56396  | 3.14E-06    | Intragenic | NM_017054       | Tbxa2r           |
| 7   | 11421715  | 11421773  | 1       | -0.072526  | 5    | 0.0087   | 0.0093   | 0.096707 | 0.16923  | 0.034705946 | Intragenic | NM_017054       | Tbxa2r           |
| 7   | 11421963  | 11421993  | 1       | -0.131706  | 5    | 0.00036  | 0.0054   | 0.21647  | 0.34818  | 0.003505013 | Intragenic | NM_017054       | Tbxa2r           |
| 7   | 11562342  | 11562381  | 1       | -0.225782  | 5    | 5.00E-05 | 0.00052  | 0.14025  | 0.36603  | 0.000803922 | Intragenic | NM_022546       | Dapk3            |
| 7   | 11772387  | 11772565  | 1       | -0.070718  | 10   | 0.00015  | 9.60E-05 | 0.1723   | 0.24302  | 0.001835821 | Intragenic | NM_024138       | Gng7             |
| 7   | 11913912  | 11913951  | 1       | -0.100806  | 7    | 0.0087   | 0.012    | 0.47824  | 0.57905  | 0.034705946 | Intragenic | NM_001109609    | Lingo3           |
| 7   | 12163338  | 12163680  | 1       | -0.069261  | 25   | 0.013    | 0.0035   | 0.50115  | 0.57041  | 0.04506341  | Intragenic | NM_001006983    | Abhd17a          |
| 7   | 12286469  | 12286685  | 1       | -0.063097  | 10   | 0.012    | 0.12     | 0.084467 | 0.14756  | 0.042700096 | Intergenic | NA              | NA               |
| 7   | 12434084  | 12434161  | 1       | -0.21291   | 10   | 8.40E-06 | 0.00025  | 0.41075  | 0.62366  | 0.000195558 | Intragenic | NM_001106769    | Apc2             |
| 7   | 12443973  | 12444170  | 1       | -0.074239  | 5    | 0.014    | 0.024    | 0.088363 | 0.1626   | 0.04726441  | TSS        | NM_001106769    | Apc2             |
| 7   | 12458949  | 12459060  | 1       | -0.142659  | 5    | 0.00036  | 0.0031   | 0.068913 | 0.21157  | 0.003505013 | Intergenic | NA              | NA               |
| 7   | 12462883  | 12463224  | 1       | -0.074958  | 10   | 0.0061   | 0.0057   | 0.10623  | 0.18119  | 0.027399878 | Intragenic | NM_001025742    | Dazap1           |
| 7   | 12570817  | 12570913  | 1       | -0.098418  | 5    | 2.20E-06 | 7.60E-06 | 0.053492 | 0.15191  | 6.91E-05    | TSS        | NM_001109283    | RGD1562114       |
| 7   | 12686537  | 12686600  | 1       | -0.204887  | 5    | 0.00021  | 0.0018   | 0.28533  | 0.49022  | 0.002348182 | Intragenic | NM_001039849:NM | Gpx4:Gpx4        |
| 7   | 12779162  | 12779220  | 1       | 0.05171    | 5    | 0.0041   | 0.039    | 0.06783  | 0.016121 | 0.020486121 | TSS        | NM_001301151:NM | Kiss1r:Kiss1r:R3 |
| 7   | 12779591  | 12779712  | 1       | 0.065593   | 7    | 0.0046   | 0.14     | 0.10642  | 0.040824 | 0.022422721 | TSS        | NM_001301151:NM | Kiss1r:Kiss1r:R3 |
| 7   | 12830912  | 12831046  | 1       | -0.159434  | 5    | 0.00059  | 0.0018   | 0.059895 | 0.21933  | 0.005010587 | Intragenic | NM_001108067:NM | Hmha1:Plppr3     |
| 7   | 12832289  | 12832388  | 1       | -0.111419  | 5    | 0.00097  | 0.0018   | 0.089808 | 0.20123  | 0.007223613 | Intragenic | NM_001108067:NM | Hmha1:Plppr3     |
| 7   | 12876079  | 12876227  | 1       | -0.136012  | 7    | 0.0012   | 0.0012   | 0.06123  | 0.19724  | 0.008573088 | TSS        | NM_001109284    | Misp             |
| 7   | 12901944  | 12901983  | 1       | -0.130887  | 6    | 0.0094   | 0.027    | 0.66241  | 0.7933   | 0.036473186 | Intragenic | NM_001108067:NM | Hmha1:Palms      |
| 7   | 13008159  | 13008290  | 1       | -0.057711  | 6    | 0.011    | 0.059    | 0.033749 | 0.09146  | 0.040408163 | Intergenic | NA              | NA               |
| 7   | 13021524  | 13021558  | 1       | 0.099297   | 5    | 0.002    | 0.0089   | 0.91201  | 0.81272  | 0.012269327 | Intergenic | NA              | NA               |
| 7   | 13021808  | 13021860  | 1       | -0.167254  | 5    | 0.0029   | 0.003    | 0.31817  | 0.48542  | 0.016164653 | Intergenic | NA              | NA               |
| 7   | 13021865  | 13021910  | 0.67    | -0.208962  | 7    | 4.90E-07 | 2.40E-06 | 0.19622  | 0.40518  | 2.11E-05    | Intergenic | NA              | NA               |
| 7   | 13047614  | 13047717  | 1       | -0.109757  | 7    | 0.0051   | 0.027    | 0.16653  | 0.27629  | 0.024220077 | Intragenic | NM_001109882:NM | Bsg:Bsg          |
| 7   | 13144027  | 13144485  | 1       | -0.197951  | 8    | 4.20E-05 | 1.60E-05 | 0.12399  | 0.32194  | 0.000709291 | TSS        | NM_001109285    | C2cd4c           |

| chr | start    | stop     | q-value  | methy.diff | CpGs | pMWU     | p2DKS    | MCWLS    | MCWHS    | pMWU.fdr    | cgi.type   | transcript     | gene       |
|-----|----------|----------|----------|------------|------|----------|----------|----------|----------|-------------|------------|----------------|------------|
| 7   | 13144583 | 13144834 | 1        | -0.101317  | 21   | 0.0032   | 0.078    | 0.22099  | 0.19106  | 0.017454545 | TSS        | NM_001109285   | C2cd4c     |
| 7   | 14273406 | 14273451 | 1        | -0.122372  | 5    | 0.0022   | 0.015    | 0.20783  | 0.33021  | 0.01321074  | Intergenic | NA             | NA         |
| 7   | 14559960 | 14560039 | 1        | -0.082046  | 6    | 0.002    | 0.0003   | 0.043949 | 0.12599  | 0.012269327 | Intragenic | NM_001134562   | Rasal3     |
| 7   | 14563801 | 14564243 | 1        | -0.063343  | 15   | 8.60E-08 | 4.20E-06 | 0.036408 | 0.099751 | 5.47E-06    | Intragenic | NM_001134562   | Rasal3     |
| 7   | 14564530 | 14564672 | 1        | -0.070489  | 5    | 0.0068   | 0.038    | 0.14943  | 0.21992  | 0.029075319 | Intragenic | NM_001134562   | Rasal3     |
| 7   | 15550645 | 15550683 | 1        | -0.126328  | 5    | 7.00E-05 | 0.00051  | 0.46885  | 0.59518  | 0.001035271 | Intergenic | NA             | NA         |
| 7   | 16759642 | 16759711 | 1        | 0.067951   | 5    | 0.0045   | 0.059    | 0.94047  | 0.87252  | 0.021964286 | Intergenic | NA             | NA         |
| 7   | 18811784 | 18811869 | 1        | -0.057387  | 5    | 0.015    | 0.015    | 0.050609 | 0.108    | 0.049419643 | TSS        | NM_199115      | Angptl4    |
| 7   | 22168936 | 22169093 | 1        | -0.133678  | 8    | 0.0037   | 0.025    | 0.5813   | 0.71498  | 0.019379702 | Intergenic | NA             | NA         |
| 7   | 22618565 | 22618584 | 1        | -0.105259  | 5    | 0.0074   | 0.088    | 0.23676  | 0.34202  | 0.030871679 | Intergenic | NA             | NA         |
| 7   | 23726346 | 23726572 | 1        | -0.057617  | 6    | 0.0034   | 0.018    | 0.038836 | 0.096454 | 0.018409391 | Intragenic | NM_017109:NM_0 | Syn3:Timp3 |
| 7   | 26443620 | 26443678 | 1        | 0.099158   | 5    | 0.012    | 0.0018   | 0.80502  | 0.70586  | 0.042700096 | Intergenic | NA             | NA         |
| 7   | 26496967 | 26497007 | 1        | -0.20274   | 5    | 0.00054  | 0.0054   | 0.48199  | 0.68473  | 0.004710638 | Intergenic | NA             | NA         |
| 7   | 27484083 | 27484165 | 1        | -0.20547   | 5    | 0.01     | 0.087    | 0.40501  | 0.61048  | 0.037614679 | Intergenic | NA             | NA         |
| 7   | 30205932 | 30205959 | 1        | -0.105723  | 5    | 0.0038   | 0.00098  | 0.045413 | 0.15114  | 0.019583799 | Intragenic | NM_021745      | Nr1h4      |
| 7   | 34465417 | 34465688 | 1        | -0.057019  | 15   | 0.00089  | 0.0029   | 0.13708  | 0.19409  | 0.006792347 | Intragenic | NM_001191781   | Amdhd1     |
| 7   | 34792308 | 34792449 | 0.34     | -0.128794  | 7    | 1.30E-07 | 1.20E-06 | 0.034675 | 0.16347  | 7.61E-06    | Intragenic | NM_001108083   | Usp44      |
| 7   | 35413096 | 35413213 | 1        | -0.240937  | 5    | 0.00036  | 0.0031   | 0.17028  | 0.41121  | 0.003505013 | Intergenic | NA             | NA         |
| 7   | 36026191 | 36026306 | 1        | -0.118528  | 9    | 3.00E-06 | 2.80E-05 | 0.023054 | 0.14158  | 8.86E-05    | Intergenic | NA             | NA         |
| 7   | 36121119 | 36121154 | 1        | -0.103478  | 5    | 0.01     | 0.015    | 0.33228  | 0.43575  | 0.037614679 | Intergenic | NA             | NA         |
| 7   | 36411721 | 36411990 | 1        | -0.149555  | 5    | 0.01     | 0.038    | 0.17123  | 0.32079  | 0.037614679 | Intergenic | NA             | NA         |
| 7   | 36700269 | 36700361 | 1        | -0.113222  | 5    | 0.0058   | 0.00053  | 0.063925 | 0.17715  | 0.026163814 | Intragenic | NM_053598      | Nudt4      |
| 7   | 36917020 | 36917105 | 0.005    | -0.2083    | 5    | 6.30E-08 | 1.80E-08 | 0.048637 | 0.25694  | 4.39E-06    | Intergenic | NA             | NA         |
| 7   | 56709938 | 56710005 | 1        | -0.109474  | 5    | 0.0094   | 0.015    | 0.70243  | 0.81191  | 0.036473186 | Intergenic | NA             | NA         |
| 7   | 59722236 | 59722358 | 1        | 0.062398   | 5    | 0.0063   | 0.0031   | 0.96281  | 0.90041  | 0.027757612 | Intergenic | NA             | NA         |
| 7   | 63252848 | 63252889 | 1        | -0.111256  | 5    | 0.0019   | 0.0053   | 0.086311 | 0.19757  | 0.011943782 | Intragenic | NM_001134780   | Parvb      |
| 7   | 70335581 | 70335675 | 1        | 0.070081   | 5    | 0.0016   | 0.00098  | 0.89478  | 0.8247   | 0.010628263 | Intergenic | NA             | NA         |
| 7   | 70542250 | 70542971 | 1.20E-05 | -0.087777  | 41   | 6.80E-14 | 4.30E-11 | 0.072127 | 0.1599   | 3.20E-11    | TSS        | NM_023026      | Agap2      |
| 7   | 70553666 | 70553858 | 1.50E-07 | -0.05461   | 22   | 4.70E-14 | 5.50E-13 | 0.01756  | 0.072169 | 3.20E-11    | Intragenic | NM_023026      | Agap2      |
| 7   | 70634756 | 70634821 | 1        | -0.120046  | 5    | 0.0024   | 0.038    | 0.13106  | 0.25111  | 0.014124402 | Intragenic | NM_022860      | B4galnt1   |
| 7   | 70635506 | 70635637 | 1        | -0.138517  | 5    | 0.00097  | 0.015    | 0.09496  | 0.23348  | 0.007223613 | Intragenic | NM_022860      | B4galnt1   |
| 7   | 70635666 | 70635746 | 0.0034   | -0.202577  | 9    | 1.50E-10 | 1.20E-08 | 0.095286 | 0.29786  | 2.41E-08    | Intragenic | NM_022860      | B4galnt1   |
| 7   | 70635774 | 70635831 | 1        | -0.09761   | 5    | 0.00039  | 0.0032   | 0.065987 | 0.1636   | 0.003723415 | Intragenic | NM_022860      | B4galnt1   |
| 7   | 70635836 | 70635895 | 1        | -0.111532  | 5    | 0.00065  | 0.015    | 0.076691 | 0.18822  | 0.005335929 | Intragenic | NM_022860      | B4galnt1   |
| 7   | 70653874 | 70653916 | 1        | -0.076576  | 5    | 0.0016   | 0.0054   | 0.10674  | 0.18332  | 0.010628263 | TSS        | NM_199395      | Arhgef25   |
| 7   | 70816058 | 70816137 | 1        | -0.084412  | 5    | 0.0045   | 0.015    | 0.056041 | 0.14045  | 0.021964286 | TSS        | NM_031815      | Inhbe      |
| 7   | 71283158 | 71283243 | 0.018    | -0.306746  | 9    | 3.40E-09 | 6.50E-08 | 0.15715  | 0.4639   | 3.53E-07    | Intergenic | NA             | NA         |
| 7   | 71643782 | 71643925 | 0.14     | -0.102616  | 13   | 1.70E-07 | 5.00E-07 | 0.080169 | 0.18279  | 9.65E-06    | Intergenic | NA             | NA         |
| 7   | 71786598 | 71786741 | 0.14     | -0.102616  | 13   | 1.70E-07 | 5.00E-07 | 0.080169 | 0.18279  | 9.65E-06    | Intragenic | NM_013082      | Sdc2       |

| chr | start     | stop      | q-value | methy.diff | CpGs | pMWU     | p2DKS    | MCWLS    | MCWHS    | pMWU.fdr    | cgi.type   | transcript     | gene      |
|-----|-----------|-----------|---------|------------|------|----------|----------|----------|----------|-------------|------------|----------------|-----------|
| 7   | 73248282  | 73248318  | 1       | -0.335494  | 5    | 2.40E-05 | 0.00028  | 0.20419  | 0.53969  | 0.000455321 | Intergenic | NA             | NA        |
| 7   | 74055129  | 74055196  | 1       | -0.117473  | 5    | 0.0019   | 0.0055   | 0.12538  | 0.24285  | 0.011943782 | TSS        | NM_031735      | Stk3      |
| 7   | 74495643  | 74495734  | 0.013   | -0.051677  | 16   | 6.90E-14 | 4.50E-08 | 0.13009  | 0.18177  | 3.20E-11    | Intragenic | NM_001134886   | Vps13b    |
| 7   | 75922216  | 75922389  | 1       | -0.149795  | 5    | 0.0016   | 0.0054   | 0.076814 | 0.22661  | 0.010628263 | Intergenic | NA             | NA        |
| 7   | 76003532  | 76003579  | 1       | -0.450256  | 5    | 1.50E-06 | 7.60E-06 | 0.21189  | 0.66214  | 5.17E-05    | Intergenic | NA             | NA        |
| 7   | 77366257  | 77366322  | 1       | -0.151931  | 5    | 0.011    | 0.0054   | 0.64545  | 0.79738  | 0.040408163 | Intergenic | NA             | NA        |
| 7   | 89748716  | 89748784  | 1       | -0.06087   | 5    | 0.0068   | 0.0092   | 0.90267  | 0.96354  | 0.029075319 | Intergenic | NA             | NA        |
| 7   | 100115779 | 100115881 | 1       | 0.060197   | 5    | 0.0058   | 0.015    | 0.9301   | 0.8699   | 0.026163814 | Intergenic | NA             | NA        |
| 7   | 100115958 | 100116065 | 1       | -0.296863  | 5    | 0.00011  | 0.00014  | 0.61031  | 0.90717  | 0.001431746 | Intergenic | NA             | NA        |
| 7   | 100835036 | 100835185 | 1       | -0.132951  | 5    | 0.013    | 0.0054   | 0.52316  | 0.65611  | 0.04506341  | Intergenic | NA             | NA        |
| 7   | 104477215 | 104477588 | 1       | 0.095058   | 9    | 0.00082  | 0.0019   | 0.84045  | 0.74539  | 0.006410593 | Intergenic | NA             | NA        |
| 7   | 115478522 | 115478597 | 1       | -0.130308  | 5    | 8.10E-06 | 0.00014  | 0.043393 | 0.1737   | 0.000191596 | Intergenic | NA             | NA        |
| 7   | 117251004 | 117251178 | 1       | 0.309207   | 7    | 0.00045  | 0.0021   | 0.54356  | 0.23435  | 0.00418262  | TSS        | NM_022401:NM_0 | Plec:Plec |
| 7   | 117506847 | 117506901 | 1       | -0.099392  | 8    | 3.90E-06 | 0.00039  | 0.056779 | 0.15617  | 0.000108203 | TSS        | NM_001130508   | Scx       |
| 7   | 117717541 | 117717647 | 1       | -0.149192  | 9    | 1.90E-06 | 1.70E-05 | 0.088682 | 0.23787  | 6.26E-05    | Intragenic | NM_198752      | Kifc2     |
| 7   | 117771410 | 117771516 | 1       | -0.173138  | 5    | 3.90E-05 | 0.00096  | 0.12391  | 0.29704  | 0.000661655 | Intragenic | NM_001135896   | Lrrc24    |
| 7   | 117777655 | 117777711 | 1       | -0.145863  | 5    | 6.30E-06 | 0.0018   | 0.15183  | 0.29769  | 0.000156545 | TSS        | NM_001007751   | MGC94207  |
| 7   | 117948692 | 117948867 | 1       | -0.138086  | 5    | 0.0094   | 0.088    | 0.11789  | 0.25598  | 0.036473186 | TSS        | NM_139108      | Commd5    |
| 7   | 118496097 | 118496272 | 1       | -0.140574  | 5    | 0.0074   | 0.038    | 0.11541  | 0.25598  | 0.030871679 | TSS        | NM_139108      | Commd5    |
| 7   | 119132615 | 119132723 | 0.092   | -0.191323  | 6    | 1.30E-07 | 3.30E-07 | 0.037543 | 0.22887  | 7.61E-06    | Intergenic | NA             | NA        |
| 7   | 119222911 | 119222945 | 1       | -0.108283  | 5    | 0.0038   | 0.015    | 0.030306 | 0.13859  | 0.019583799 | Intragenic | NM_053351      | Cacng2    |
| 7   | 119613136 | 119613276 | 1       | -0.142707  | 6    | 0.0015   | 0.0073   | 0.11657  | 0.25928  | 0.01019337  | TSS        | NM_012808      | Tst       |
| 7   | 120015088 | 120015146 | 1       | -0.209328  | 5    | 2.50E-06 | 0.00014  | 0.074607 | 0.28393  | 7.69E-05    | Intragenic | NM_001130554   | Card10    |
| 7   | 120017693 | 120017811 | 1       | -0.192956  | 5    | 1.70E-05 | 0.00027  | 0.21218  | 0.40513  | 0.000342787 | TSS        | NM_001130554   | Card10    |
| 7   | 120203779 | 120203848 | 1       | -0.124976  | 5    | 0.00039  | 0.0018   | 0.073499 | 0.19848  | 0.003723415 | Intragenic | NM_001013220   | Triobp    |
| 7   | 121086372 | 121086557 | 1       | -0.072063  | 11   | 0.015    | 0.02     | 0.096741 | 0.1688   | 0.049419643 | Intergenic | NA             | NA        |
| 7   | 121402971 | 121403128 | 1       | -0.136959  | 5    | 0.0029   | 0.0018   | 0.067993 | 0.20495  | 0.016164653 | Intragenic | NM_019239      | Mgat3     |
| 7   | 121507445 | 121507525 | 1       | -0.146037  | 5    | 4.40E-05 | 0.00027  | 0.10752  | 0.25356  | 0.000729708 | TSS        | NM_020084      | Cacna1i   |
| 7   | 121537588 | 121537690 | 1       | 0.074026   | 5    | 0.00048  | 0.0018   | 0.94666  | 0.87264  | 0.004351843 | Intragenic | NM_020084      | Cacna1i   |
| 7   | 121552823 | 121552950 | 1       | -0.052904  | 5    | 0.0068   | 0.039    | 0.039109 | 0.092012 | 0.029075319 | Intragenic | NM_020084      | Cacna1i   |
| 7   | 121579882 | 121579981 | 1       | -0.114547  | 5    | 9.80E-07 | 1.60E-05 | 0.045041 | 0.15959  | 3.73E-05    | Intragenic | NM_020084      | Cacna1i   |
| 7   | 121580033 | 121580115 | 1       | -0.115614  | 5    | 1.20E-05 | 1.60E-05 | 0.15019  | 0.2658   | 0.000257442 | Intragenic | NM_020084      | Cacna1i   |
| 7   | 122151974 | 122152006 | 0.078   | -0.169944  | 5    | 1.80E-07 | 2.80E-07 | 0.28903  | 0.45897  | 9.99E-06    | TSS        | NM_001008373   | Srek1ip1  |
| 7   | 123424230 | 123424269 | 1       | -0.065256  | 7    | 0.001    | 0.013    | 0.071242 | 0.1365   | 0.007409639 | Intragenic | NM_001207022   | Shisa8    |
| 7   | 123439787 | 123439869 | 1       | -0.065579  | 5    | 0.0032   | 0.025    | 0.061654 | 0.12723  | 0.017454545 | Intergenic | NA             | NA        |
| 7   | 123759236 | 123759320 | 1       | -0.082403  | 10   | 0.0011   | 0.016    | 0.13281  | 0.21521  | 0.007982301 | Intergenic | NA             | NA        |
| 7   | 124415994 | 124416055 | 1       | -0.141191  | 5    | 0.013    | 0.059    | 0.24961  | 0.39081  | 0.04506341  | Intergenic | NA             | NA        |
| 7   | 124668366 | 124668421 | 1       | -0.255455  | 5    | 0.0038   | 0.059    | 0.30966  | 0.56511  | 0.019583799 | Intergenic | NA             | NA        |
| 7   | 125306716 | 125306834 | 1       | -0.111307  | 5    | 0.0049   | 0.00052  | 0.011426 | 0.12273  | 0.023345384 | Intergenic | NA             | NA        |

| chr | start     | stop      | q-value | methy.diff | CpGs | pMWU     | p2DKS    | MCWLS    | MCWHS    | pMWU.fdr    | cgi.type   | transcript   | gene      |
|-----|-----------|-----------|---------|------------|------|----------|----------|----------|----------|-------------|------------|--------------|-----------|
| 7   | 126257276 | 126257367 | 1       | -0.269953  | 7    | 1.10E-06 | 0.00029  | 0.13309  | 0.40304  | 4.02E-05    | Intergenic | NA           | NA        |
| 7   | 126721888 | 126721951 | 1       | -0.187015  | 5    | 0.0053   | 0.024    | 0.3842   | 0.57121  | 0.024662043 | Intergenic | NA           | NA        |
| 7   | 127423938 | 127424040 | 1       | -0.246579  | 5    | 0.00059  | 0.015    | 0.17553  | 0.42211  | 0.005010587 | Intergenic | NA           | NA        |
| 7   | 127559162 | 127559197 | 1       | -0.143509  | 5    | 8.10E-06 | 6.90E-05 | 0.096372 | 0.23988  | 0.000191596 | Intergenic | NA           | NA        |
| 7   | 128530268 | 128530420 | 1       | -0.078578  | 7    | 0.0015   | 0.039    | 0.061465 | 0.14004  | 0.01019337  | Intergenic | NA           | NA        |
| 7   | 129546532 | 129546659 | 1       | -0.081973  | 8    | 0.0021   | 0.0087   | 0.057495 | 0.13947  | 0.012840099 | TSS        | NM_022602    | Pim3      |
| 7   | 130183238 | 130183768 | 1       | -0.131186  | 32   | 0.0039   | 0.0057   | 0.21359  | 0.13512  | 0.0199875   | Intragenic | NM_021676    | Shank3    |
| 7   | 130207604 | 130207635 | 1       | -0.184722  | 5    | 0.0068   | 0.0054   | 0.3316   | 0.51632  | 0.029075319 | Intragenic | NM_021676    | Shank3    |
| 7   | 135424697 | 135424763 | 1       | 0.109393   | 5    | 0.0049   | 0.0053   | 0.87544  | 0.76604  | 0.023345384 | Intragenic | NM_001309489 | Muc19     |
| 7   | 137608034 | 137608113 | 1       | -0.101183  | 5    | 0.012    | 0.015    | 0.74489  | 0.84607  | 0.042700096 | Intragenic | NM_138832    | Slc38a1   |
| 7   | 138090016 | 138090129 | 0.0043  | -0.417913  | 7    | 6.50E-10 | 1.50E-08 | 0.25007  | 0.66798  | 8.42E-08    | Intragenic | NM_130748    | Slc38a4   |
| 7   | 138459946 | 138460070 | 1       | -0.161909  | 5    | 0.014    | 0.024    | 0.24085  | 0.40276  | 0.04726441  | Intragenic | NM_001039454 | Pced1b    |
| 7   | 140033302 | 140033410 | 1       | -0.160906  | 5    | 0.00088  | 0.0055   | 0.1878   | 0.34871  | 0.006722981 | Intergenic | NA           | NA        |
| 7   | 140521801 | 140521858 | 1       | -0.108623  | 5    | 0.01     | 0.015    | 0.30759  | 0.41621  | 0.037614679 | Intergenic | NA           | NA        |
| 7   | 140887118 | 140887250 | 1       | -0.093505  | 8    | 0.0067   | 0.094    | 0.13096  | 0.22446  | 0.029075319 | TSS        | NM_001101675 | Krt83     |
| 7   | 141541459 | 141541662 | 1       | -0.098203  | 11   | 0.012    | 0.12     | 0.14831  | 0.24651  | 0.042700096 | Intergenic | NA           | NA        |
| 7   | 142369838 | 142369952 | 1       | 0.261672   | 5    | 0.012    | 0.025    | 0.47544  | 0.21377  | 0.042700096 | TSS        | NM_001308636 | Hoxc10    |
| 7   | 142374619 | 142374838 | 1       | -0.05828   | 18   | 0.0009   | 0.0036   | 0.12081  | 0.17909  | 0.006847423 | TSS        | NR_031913    | Mir196a   |
| 7   | 142439496 | 142439562 | 1       | -0.082225  | 5    | 0.012    | 0.038    | 0.12277  | 0.205    | 0.042700096 | TSS        | NM_001109884 | Hoxc4     |
| 7   | 142439601 | 142439626 | 1       | -0.127319  | 5    | 9.20E-06 | 7.10E-05 | 0.064742 | 0.19206  | 0.000206371 | TSS        | NM_001109884 | Hoxc4     |
| 7   | 142591826 | 142591939 | 1       | -0.081935  | 7    | 0.001    | 0.019    | 0.12585  | 0.20779  | 0.007409639 | Intergenic | NA           | NA        |
| 8   | 934334    | 934425    | 1       | -0.058253  | 5    | 0.0016   | 0.015    | 0.89798  | 0.95623  | 0.010628263 | Intergenic | NA           | NA        |
| 8   | 2834135   | 2834204   | 1       | -0.066631  | 5    | 0.014    | 0.059    | 0.071883 | 0.13851  | 0.04726441  | Intergenic | NA           | NA        |
| 8   | 4308765   | 4308842   | 1       | -0.306983  | 5    | 0.00023  | 0.00028  | 0.13055  | 0.43753  | 0.002525893 | Intergenic | NA           | NA        |
| 8   | 16016192  | 16016219  | 1       | 0.157161   | 5    | 0.00048  | 3.30E-05 | 0.59701  | 0.43985  | 0.004351843 | Intergenic | NA           | NA        |
| 8   | 21950842  | 21951275  | 1       | -0.153657  | 9    | 0.00079  | 0.017    | 0.35919  | 0.51285  | 0.006267516 | Intragenic | NM_001025054 | LOC500956 |
| 8   | 22063249  | 22063320  | 1       | -0.138987  | 5    | 0.0063   | 0.038    | 0.64796  | 0.78695  | 0.027757612 | Intergenic | NA           | NA        |
| 8   | 22111625  | 22111653  | 1       | -0.107185  | 5    | 0.00026  | 0.0055   | 0.093745 | 0.20093  | 0.002784906 | Intragenic | NM_001172079 | Icam5     |
| 8   | 22906266  | 22906367  | 1       | -0.086386  | 7    | 0.014    | 0.078    | 0.15979  | 0.24618  | 0.04726441  | Intragenic | NM_001108997 | Dock6     |
| 8   | 23008931  | 23009000  | 1       | -0.076143  | 5    | 0.0027   | 0.058    | 0.048908 | 0.12505  | 0.015434547 | Intragenic | NM_001005881 | Plppr2    |
| 8   | 30755539  | 30755883  | 1       | -0.063186  | 11   | 0.002    | 0.011    | 0.046755 | 0.10994  | 0.012269327 | Intergenic | NA           | NA        |
| 8   | 33457234  | 33457308  | 1       | -0.133547  | 5    | 0.012    | 0.0092   | 0.24012  | 0.37366  | 0.042700096 | Intragenic | NM_017297    | Kcnj5     |
| 8   | 33706799  | 33706874  | 1       | -0.068356  | 5    | 0.0068   | 0.00098  | 0.011088 | 0.079444 | 0.029075319 | Intergenic | NA           | NA        |
| 8   | 36194990  | 36195046  | 1       | -0.202431  | 5    | 0.0041   | 0.038    | 0.2396   | 0.44203  | 0.020486121 | Intragenic | NM_001048215 | Kirrel3   |
| 8   | 36262511  | 36262556  | 1       | -0.063591  | 5    | 0.012    | 0.038    | 0.065013 | 0.1286   | 0.042700096 | Intragenic | NM_001048215 | Kirrel3   |
| 8   | 39613771  | 39613909  | 1       | -0.195346  | 5    | 0.0058   | 0.087    | 0.35782  | 0.55316  | 0.026163814 | Intergenic | NA           | NA        |
| 8   | 40123087  | 40123182  | 1       | -0.09069   | 8    | 0.0011   | 0.00013  | 0.11533  | 0.20602  | 0.007982301 | TSS        | NM_001009344 | Tbrg1     |
| 8   | 41393715  | 41393776  | 1       | -0.10998   | 5    | 0.011    | 0.057    | 0.53914  | 0.64912  | 0.040408163 | Intergenic | NA           | NA        |
| 8   | 45083362  | 45083479  | 1       | 0.125006   | 11   | 0.0055   | 0.046    | 0.59267  | 0.46766  | 0.025544368 | Intragenic | NM_001106814 | Tecta     |

| chr | start     | stop      | q-value  | methy.diff | CpGs | pMWU     | p2DKS    | MCWLS    | MCWHS    | pMWU.fdr    | cgi.type   | transcript   | gene     |
|-----|-----------|-----------|----------|------------|------|----------|----------|----------|----------|-------------|------------|--------------|----------|
| 8   | 45083492  | 45083590  | 1        | 0.201904   | 8    | 4.80E-07 | 0.00015  | 0.73625  | 0.53434  | 2.08E-05    | Intragenic | NM_001106814 | Tecta    |
| 8   | 45702909  | 45703009  | 1        | -0.094573  | 5    | 0.0063   | 0.059    | 0.10864  | 0.20322  | 0.027757612 | Intergenic | NA           | NA       |
| 8   | 46103898  | 46103985  | 0.077    | -0.178752  | 5    | 2.80E-07 | 2.80E-07 | 0.065482 | 0.24423  | 1.37E-05    | Intragenic | NM_173154    | Clmp     |
| 8   | 46312474  | 46312560  | 1        | -0.10048   | 6    | 4.90E-05 | 0.0027   | 0.053194 | 0.15367  | 0.0008036   | Intragenic | NM_001106815 | Trim29   |
| 8   | 46486144  | 46486259  | 1        | -0.141069  | 5    | 0.0049   | 0.00053  | 0.078743 | 0.21981  | 0.023345384 | Intergenic | NA           | NA       |
| 8   | 47198984  | 47199052  | 1        | -0.199636  | 5    | 0.00054  | 0.0017   | 0.29909  | 0.49873  | 0.004710638 | TSS        | NM_001191996 | Pdzd3    |
| 8   | 47543160  | 47543395  | 1.00E-05 | -0.090281  | 13   | 3.90E-13 | 3.60E-11 | 0.037943 | 0.12822  | 1.25E-10    | TSS        | NM_001109292 | Ddx6     |
| 8   | 47661275  | 47661408  | 1        | -0.248218  | 5    | 0.0032   | 0.0054   | 0.54326  | 0.79147  | 0.017454545 | Intergenic | NA           | NA       |
| 8   | 47960995  | 47961070  | 1        | 0.073338   | 5    | 0.01     | 0.015    | 0.89146  | 0.81812  | 0.037614679 | TSS        | NM_001106818 | Mpzl2    |
| 8   | 58470187  | 58470295  | 1        | -0.132923  | 9    | 0.00021  | 0.0017   | 0.14166  | 0.27459  | 0.002348182 | Intergenic | NA           | NA       |
| 8   | 63013109  | 63013226  | 0.1      | -0.119376  | 11   | 4.40E-07 | 3.60E-07 | 0.092473 | 0.21185  | 1.96E-05    | Intergenic | NA           | NA       |
| 8   | 63184111  | 63184156  | 1        | 0.128773   | 8    | 0.015    | 0.094    | 0.71795  | 0.58918  | 0.049419643 | Intragenic | NM_019380    | Nptn     |
| 8   | 63797695  | 63797791  | 1        | -0.201387  | 5    | 0.0087   | 0.058    | 0.27972  | 0.48111  | 0.034705946 | Intergenic | NA           | NA       |
| 8   | 63914723  | 63915059  | 1        | -0.118494  | 9    | 0.0027   | 0.017    | 0.34166  | 0.46015  | 0.015434547 | TSS        | NM_001106826 | Bbs4     |
| 8   | 64611887  | 64611927  | 1        | -0.191027  | 5    | 0.013    | 0.038    | 0.42147  | 0.6125   | 0.04506341  | Intergenic | NA           | NA       |
| 8   | 66437569  | 66437702  | 1        | -0.072486  | 9    | 0.00029  | 0.0027   | 0.04834  | 0.12083  | 0.002984937 | Intergenic | NA           | NA       |
| 8   | 66719909  | 66720011  | 1        | -0.198053  | 8    | 0.00034  | 0.0087   | 0.35591  | 0.55396  | 0.0034      | Intergenic | NA           | NA       |
| 8   | 67042477  | 67043226  | 1        | -0.0555    | 11   | 0.0013   | 0.026    | 0.069983 | 0.12548  | 0.009111111 | Intergenic | NA           | NA       |
| 8   | 67710579  | 67710683  | 1        | -0.116036  | 10   | 9.60E-06 | 0.00016  | 0.11217  | 0.22821  | 0.000214042 | Intergenic | NA           | NA       |
| 8   | 68397670  | 68397703  | 1        | 0.052318   | 5    | 1.10E-06 | 1        | 0.052318 | 0        | 4.02E-05    | TSS        | NM_013095    | Smad3    |
| 8   | 69816672  | 69816757  | 1        | -0.068501  | 9    | 0.013    | 0.079    | 0.15419  | 0.22269  | 0.04506341  | Intergenic | NA           | NA       |
| 8   | 70811550  | 70811575  | 1        | 0.147407   | 5    | 0.0058   | 0.024    | 0.28307  | 0.13566  | 0.026163814 | TSS        | NM_001044253 | Pif1     |
| 8   | 71490590  | 71490750  | 1        | -0.079268  | 8    | 9.30E-05 | 8.80E-05 | 0.019627 | 0.098895 | 0.001278101 | Intergenic | NA           | NA       |
| 8   | 85303949  | 85303993  | 1        | -0.057618  | 7    | 0.0027   | 0.0082   | 0.040524 | 0.098143 | 0.015434547 | Intergenic | NA           | NA       |
| 8   | 86726281  | 86726454  | 1        | -0.126478  | 5    | 0.0038   | 0.025    | 0.07833  | 0.20481  | 0.019583799 | Intergenic | NA           | NA       |
| 8   | 89874803  | 89874936  | 1        | -0.113972  | 5    | 0.0068   | 0.0055   | 0.25758  | 0.37155  | 0.029075319 | Intragenic | NM_001277283 | lrak1bp1 |
| 8   | 90428919  | 90428948  | 1        | -0.242508  | 5    | 0.0014   | 0.024    | 0.40986  | 0.65237  | 0.00960223  | Intergenic | NA           | NA       |
| 8   | 90503641  | 90503737  | 1        | -0.233149  | 7    | 0.00054  | 0.025    | 0.37269  | 0.60584  | 0.004710638 | TSS        | NM_001013954 | Lca5     |
| 8   | 102961877 | 102961932 | 1        | 0.160583   | 5    | 0.0053   | 0.0017   | 0.69387  | 0.53329  | 0.024662043 | Intragenic | NM_053558    | Trpc1    |
| 8   | 103810221 | 103810384 | 1        | -0.07621   | 7    | 0.0026   | 0.0054   | 0.10895  | 0.18516  | 0.015204437 | Intergenic | NA           | NA       |
| 8   | 104198437 | 104198568 | 1        | -0.184374  | 5    | 0.0094   | 0.0088   | 0.54835  | 0.73272  | 0.036473186 | Intragenic | NM_001007710 | Pxylp1   |
| 8   | 104534484 | 104534573 | 1        | -0.125122  | 8    | 2.10E-05 | 5.50E-06 | 0.33802  | 0.46314  | 0.00041328  | Intergenic | NA           | NA       |
| 8   | 107231871 | 107232031 | 1        | -0.055949  | 11   | 0.00033  | 0.0079   | 0.039932 | 0.095881 | 0.003313469 | Intragenic | NM_001173354 | Armc8    |
| 8   | 107813089 | 107813231 | 1        | -0.08579   | 5    | 0.008    | 0.13     | 0.097131 | 0.18292  | 0.03243956  | Intergenic | NA           | NA       |
| 8   | 110339935 | 110340056 | 1        | -0.108575  | 7    | 0.01     | 0.027    | 0.12526  | 0.23384  | 0.037614679 | Intergenic | NA           | NA       |
| 8   | 110607008 | 110607343 | 1        | -0.055248  | 12   | 0.00069  | 0.0028   | 0.13091  | 0.18616  | 0.00562053  | Intragenic | NM_031717    | Amotl2   |
| 8   | 110666127 | 110666264 | 1        | -0.065839  | 5    | 0.00029  | 0.0032   | 0.02724  | 0.093079 | 0.002984937 | Intergenic | NA           | NA       |
| 8   | 111425686 | 111425756 | 1        | -0.172     | 5    | 0.00054  | 0.015    | 0.10742  | 0.27942  | 0.004710638 | Intergenic | NA           | NA       |
| 8   | 113488301 | 113488394 | 1        | -0.106418  | 6    | 0.0012   | 0.018    | 0.069705 | 0.17612  | 0.008573088 | Intergenic | NA           | NA       |



| chr | start     | stop      | q-value | methy.diff | CpGs | pMWU     | p2DKS    | MCWLS    | MCWHS    | pMWU.fdr    | cgi.type   | transcript      | gene          |
|-----|-----------|-----------|---------|------------|------|----------|----------|----------|----------|-------------|------------|-----------------|---------------|
| 8   | 114215541 | 114215782 | 1       | -0.22528   | 10   | 8.30E-08 | 2.50E-05 | 0.1809   | 0.40618  | 5.42E-06    | Intragenic | NM_001109449    | Glyctk        |
| 8   | 114216099 | 114216354 | 1       | -0.155735  | 6    | 0.00022  | 0.00087  | 0.07371  | 0.22945  | 0.002452568 | Intragenic | NM_001109449    | Glyctk        |
| 8   | 115710582 | 115710650 | 1       | -0.182376  | 5    | 0.0013   | 0.038    | 0.23447  | 0.41685  | 0.009111111 | Intragenic | NM_001079942    | Sema3b        |
| 8   | 116242818 | 116242992 | 1       | -0.113806  | 8    | 0.00053  | 0.0017   | 0.11351  | 0.22731  | 0.004710638 | Intragenic | NM_019146       | Bsn           |
| 8   | 117561677 | 117561727 | 1       | -0.115913  | 7    | 2.40E-06 | 1.60E-05 | 0.041144 | 0.15706  | 7.47E-05    | TSS        | NM_001106861    | Smarcc1       |
| 8   | 117884474 | 117884588 | 1       | -0.139804  | 6    | 0.0015   | 0.058    | 0.11134  | 0.25115  | 0.01019337  | Intragenic | NM_001108782    | Elp6          |
| 8   | 121299236 | 121299580 | 1       | -0.229571  | 5    | 0.0045   | 0.038    | 0.22103  | 0.4506   | 0.021964286 | Intergenic | NA              | NA            |
| 8   | 121767136 | 121767200 | 1       | -0.151432  | 5    | 8.50E-07 | 1.60E-05 | 0.036599 | 0.18803  | 3.35E-05    | Intragenic | NM_001108192    | Glb1          |
| 8   | 122936923 | 122936972 | 1       | -0.138724  | 5    | 0.00065  | 0.038    | 0.62824  | 0.76697  | 0.005335929 | Intergenic | NA              | NA            |
| 8   | 123147872 | 123147895 | 1       | 0.176833   | 5    | 0.0017   | 0.0032   | 0.90618  | 0.72934  | 0.011044014 | Intergenic | NA              | NA            |
| 8   | 123148615 | 123148725 | 1       | 0.149266   | 5    | 0.0038   | 0.0092   | 0.90096  | 0.75169  | 0.019583799 | Intergenic | NA              | NA            |
| 8   | 124621055 | 124621156 | 1       | -0.126144  | 5    | 0.00044  | 0.015    | 0.10724  | 0.23339  | 0.0041      | Intergenic | NA              | NA            |
| 8   | 124692708 | 124692749 | 1       | -0.119184  | 6    | 4.30E-06 | 9.00E-05 | 0.040941 | 0.16012  | 0.000114978 | Intergenic | NA              | NA            |
| 8   | 126408859 | 126408981 | 1       | -0.208055  | 8    | 4.40E-06 | 1.70E-05 | 0.13575  | 0.3438   | 0.000117227 | Intragenic | NM_001106865:NM | Ctdspl:Golga4 |
| 8   | 126579723 | 126579900 | 1       | -0.178137  | 10   | 6.40E-06 | 0.0027   | 0.21039  | 0.38852  | 0.000157967 | Intragenic | NM_001106865    | Ctdspl        |
| 8   | 126856419 | 126856691 | 1       | -0.081021  | 7    | 0.00018  | 9.30E-05 | 0.003348 | 0.084369 | 0.002142581 | Intragenic | NM_001106865    | Ctdspl        |
| 8   | 131033964 | 131034237 | 1       | -0.114474  | 16   | 0.0014   | 0.017    | 0.25187  | 0.36634  | 0.00960223  | Intergenic | NA              | NA            |
| 8   | 131841424 | 131841469 | 1       | 0.147894   | 6    | 0.0023   | 0.00095  | 0.93664  | 0.78875  | 0.013777597 | Intergenic | NA              | NA            |
| 8   | 132359608 | 132359645 | 1       | -0.183636  | 5    | 0.00039  | 0.0054   | 0.22773  | 0.41137  | 0.003723415 | Intergenic | NA              | NA            |
| 9   | 1461284   | 1461376   | 1       | -0.086655  | 5    | 0.008    | 0.059    | 0.3783   | 0.46495  | 0.03243956  | Intragenic | NM_001134762    | Tbc1d5        |
| 9   | 3237759   | 3237781   | 1       | -0.05374   | 5    | 0.01     | 0.059    | 0.012448 | 0.066188 | 0.037614679 | Intragenic | NM_001013177    | Sult1c2a      |
| 9   | 6514430   | 6514452   | 1       | -0.050239  | 5    | 0.0019   | 0.038    | 0.057327 | 0.10757  | 0.011943782 | Intergenic | NA              | NA            |
| 9   | 6514530   | 6514595   | 1       | -0.184838  | 5    | 0.00019  | 0.00014  | 0.22262  | 0.40746  | 0.002222187 | Intergenic | NA              | NA            |
| 9   | 7414634   | 7414676   | 1       | -0.054916  | 5    | 0.015    | 0.015    | 0.026483 | 0.081399 | 0.049419643 | Intergenic | NA              | NA            |
| 9   | 9042454   | 9042510   | 0.0019  | -0.261912  | 5    | 6.30E-08 | 6.80E-09 | 0.070509 | 0.33242  | 4.39E-06    | Intragenic | NM_001007711    | Gtf2f1        |
| 9   | 9576582   | 9576666   | 1       | -0.096942  | 5    | 0.0017   | 0.015    | 0.13149  | 0.22843  | 0.011044014 | TSS        | NM_019140       | Ptprs         |
| 9   | 9937269   | 9937330   | 1       | 0.070456   | 8    | 0.015    | 0.035    | 0.23352  | 0.16306  | 0.049419643 | Intragenic | NM_053471       | Sema6b        |
| 9   | 10081770  | 10081894  | 1       | -0.197506  | 5    | 0.0027   | 0.015    | 0.23982  | 0.43732  | 0.015434547 | TSS        | NM_001108223    | Shd           |
| 9   | 11340784  | 11340827  | 1       | -0.077395  | 5    | 0.0063   | 0.039    | 0.049373 | 0.12677  | 0.027757612 | Intergenic | NA              | NA            |
| 9   | 11647970  | 11648100  | 1       | -0.163404  | 5    | 0.0013   | 0.0093   | 0.52277  | 0.68617  | 0.009111111 | Intergenic | NA              | NA            |
| 9   | 11648885  | 11648944  | 1       | -0.077305  | 5    | 0.012    | 0.059    | 0.19783  | 0.27513  | 0.042700096 | Intergenic | NA              | NA            |
| 9   | 12131093  | 12131174  | 1       | 0.079762   | 5    | 0.0011   | 0.00051  | 0.95905  | 0.87929  | 0.007982301 | Intergenic | NA              | NA            |
| 9   | 12611040  | 12611088  | 1       | -0.101722  | 5    | 0.00054  | 0.0018   | 0.045952 | 0.14767  | 0.004710638 | Intergenic | NA              | NA            |
| 9   | 13126675  | 13126740  | 1       | 0.061842   | 5    | 0.01     | 0.0053   | 0.88003  | 0.81819  | 0.037614679 | Intergenic | NA              | NA            |
| 9   | 13426449  | 13426499  | 1       | -0.051226  | 5    | 0.0011   | 0.00052  | 0.027418 | 0.078644 | 0.007982301 | Intragenic | NM_001106882    | Unc5cl        |
| 9   | 13883344  | 13883375  | 1       | -0.110264  | 5    | 5.60E-05 | 0.0018   | 0.053715 | 0.16398  | 0.000873742 | Intergenic | NA              | NA            |
| 9   | 14135174  | 14135301  | 1       | -0.140119  | 5    | 0.0087   | 0.0018   | 0.21368  | 0.3538   | 0.034705946 | Intragenic | NM_001025707    | Tfeb          |
| 9   | 14218840  | 14218985  | 1       | -0.110038  | 5    | 0.0068   | 0.015    | 0.14783  | 0.25786  | 0.029075319 | Intergenic | NA              | NA            |
| 9   | 14470479  | 14470505  | 1       | -0.06205   | 5    | 0.013    | 0.038    | 0.073754 | 0.1358   | 0.04506341  | Intergenic | NA              | NA            |

| chr | start    | stop     | q-value | methy.diff | CpGs | pMWU     | p2DKS    | MCWLS    | MCWHS    | pMWU.fdr    | cgi.type   | transcript   | gene     |
|-----|----------|----------|---------|------------|------|----------|----------|----------|----------|-------------|------------|--------------|----------|
| 9   | 14470733 | 14471050 | 1       | -0.117686  | 8    | 7.80E-07 | 0.00066  | 0.036643 | 0.15433  | 3.18E-05    | Intergenic | NA           | NA       |
| 9   | 14494120 | 14494161 | 1       | 0.137779   | 7    | 1.10E-07 | 1.60E-05 | 0.85012  | 0.71234  | 6.65E-06    | Intergenic | NA           | NA       |
| 9   | 15064041 | 15064072 | 1       | -0.110264  | 5    | 5.60E-05 | 0.0018   | 0.053715 | 0.16398  | 0.000873742 | Intragenic | NM_013021    | Prph2    |
| 9   | 15908237 | 15908322 | 1       | 0.085299   | 5    | 0.015    | 0.088    | 0.85785  | 0.77256  | 0.049419643 | Intergenic | NA           | NA       |
| 9   | 16120932 | 16121007 | 1       | 0.075924   | 5    | 0.0094   | 0.038    | 0.086758 | 0.010833 | 0.036473186 | TSS        | NM_001108205 | Rsph9    |
| 9   | 16733693 | 16733859 | 1       | -0.122284  | 19   | 5.10E-05 | 0.007    | 0.16736  | 0.26606  | 0.000818217 | TSS        | NM_001191804 | Tmem151b |
| 9   | 16733924 | 16733977 | 1       | -0.181531  | 5    | 5.00E-05 | 0.0018   | 0.11431  | 0.29584  | 0.000803922 | TSS        | NM_001191804 | Tmem151b |
| 9   | 16733982 | 16734004 | 1       | -0.235389  | 5    | 0.00011  | 0.0018   | 0.14583  | 0.38122  | 0.001431746 | TSS        | NM_001191804 | Tmem151b |
| 9   | 16734011 | 16734064 | 1       | -0.161279  | 5    | 0.0027   | 0.0092   | 0.11752  | 0.2788   | 0.015434547 | TSS        | NM_001191804 | Tmem151b |
| 9   | 16734457 | 16734647 | 0.58    | -0.178893  | 15   | 2.20E-07 | 2.10E-06 | 0.16092  | 0.33982  | 1.14E-05    | Intragenic | NM_001191804 | Tmem151b |
| 9   | 16986044 | 16986154 | 1       | -0.137123  | 5    | 0.012    | 0.13     | 0.17234  | 0.30946  | 0.042700096 | Intergenic | NA           | NA       |
| 9   | 18795236 | 18795286 | 1       | -0.066486  | 7    | 0.0039   | 0.038    | 0.02993  | 0.096416 | 0.0199875   | TSS        | NM_001191583 | Tdrd6    |
| 9   | 18796480 | 18796555 | 1       | 0.155426   | 5    | 0.0038   | 0.015    | 0.84381  | 0.68839  | 0.019583799 | TSS        | NM_001191583 | Tdrd6    |
| 9   | 19390658 | 19390708 | 1       | -0.114007  | 5    | 1.90E-05 | 0.0018   | 0.090993 | 0.205    | 0.000376935 | Intergenic | NA           | NA       |
| 9   | 20030973 | 20031107 | 1       | 0.081486   | 5    | 0.015    | 0.038    | 0.84184  | 0.76036  | 0.049419643 | Intergenic | NA           | NA       |
| 9   | 25517086 | 25517160 | 1       | 0.072023   | 5    | 0.0094   | 0.024    | 0.88026  | 0.80824  | 0.036473186 | Intergenic | NA           | NA       |
| 9   | 29291705 | 29291890 | 1       | -0.110366  | 11   | 0.0052   | 0.035    | 0.53177  | 0.64213  | 0.024631579 | Intragenic | NM_001100842 | Col9a1   |
| 9   | 29510396 | 29510477 | 1       | -0.134777  | 5    | 0.012    | 0.088    | 0.59351  | 0.72829  | 0.042700096 | Intergenic | NA           | NA       |
| 9   | 35916591 | 35916821 | 1       | -0.189962  | 5    | 0.015    | 0.009    | 0.2018   | 0.39176  | 0.049419643 | Intragenic | NM_001108791 | Phf3     |
| 9   | 36059294 | 36059408 | 1       | -0.143798  | 5    | 0.0041   | 0.024    | 0.18894  | 0.33274  | 0.020486121 | Intergenic | NA           | NA       |
| 9   | 37646528 | 37646573 | 1       | -0.162463  | 5    | 0.00029  | 0.00014  | 0.0951   | 0.25756  | 0.002984937 | Intergenic | NA           | NA       |
| 9   | 37774100 | 37774244 | 1       | -0.113901  | 5    | 0.00012  | 0.0018   | 0.046417 | 0.16032  | 0.00153218  | Intergenic | NA           | NA       |
| 9   | 37774498 | 37774599 | 1       | -0.119773  | 5    | 0.00072  | 0.00014  | 0.095139 | 0.21491  | 0.005769381 | Intergenic | NA           | NA       |
| 9   | 37782264 | 37782391 | 1       | -0.215417  | 10   | 7.60E-07 | 8.80E-06 | 0.27009  | 0.48551  | 3.12E-05    | Intergenic | NA           | NA       |
| 9   | 38216473 | 38216534 | 1       | -0.120913  | 5    | 0.01     | 0.088    | 0.59657  | 0.71748  | 0.037614679 | TSS        | NM_001024762 | Prim2    |
| 9   | 38638840 | 38638910 | 1       | 0.133172   | 9    | 0.0058   | 0.045    | 0.606    | 0.47283  | 0.026163814 | Intergenic | NA           | NA       |
| 9   | 38871106 | 38871208 | 1       | -0.10763   | 5    | 0.00097  | 0.0055   | 0.085043 | 0.19267  | 0.007223613 | Intergenic | NA           | NA       |
| 9   | 40359348 | 40359397 | 1       | -0.066392  | 5    | 0.0027   | 0.0092   | 0.89977  | 0.96616  | 0.015434547 | Intergenic | NA           | NA       |
| 9   | 40965510 | 40965532 | 1       | -0.066854  | 5    | 0.0087   | 0.038    | 0.071876 | 0.13873  | 0.034705946 | Intergenic | NA           | NA       |
| 9   | 42244319 | 42244353 | 1       | -0.142396  | 5    | 0.00029  | 0.00098  | 0.13355  | 0.27594  | 0.002984937 | Intergenic | NA           | NA       |
| 9   | 42281333 | 42281546 | 1       | -0.11367   | 6    | 0.0088   | 0.011    | 0.1817   | 0.29537  | 0.03504803  | Intragenic | NM_001108210 | Hs6st1   |
| 9   | 42521889 | 42521911 | 1       | 0.130016   | 5    | 0.0049   | 0.0018   | 0.14555  | 0.015538 | 0.023345384 | Intergenic | NA           | NA       |
| 9   | 42989956 | 42990024 | 1       | -0.132081  | 5    | 0.00029  | 0.0018   | 0.11065  | 0.24273  | 0.002984937 | Intragenic | NM_001012002 | Zap70    |
| 9   | 43000012 | 43000249 | 1       | -0.12196   | 9    | 0.0079   | 0.11     | 0.18839  | 0.31035  | 0.03243956  | Intragenic | NM_001012002 | Zap70    |
| 9   | 43519428 | 43519631 | 1       | 0.20994    | 5    | 0.01     | 0.0031   | 0.55477  | 0.34483  | 0.037614679 | Intergenic | NA           | NA       |
| 9   | 43895914 | 43896038 | 1       | -0.143093  | 5    | 0.0035   | 0.025    | 0.074047 | 0.21714  | 0.018410549 | Intergenic | NA           | NA       |
| 9   | 43923240 | 43923353 | 1       | 0.113398   | 5    | 0.008    | 0.024    | 0.82638  | 0.71298  | 0.03243956  | Intergenic | NA           | NA       |
| 9   | 44568317 | 44568403 | 1       | 0.134072   | 5    | 0.0029   | 0.00096  | 0.83658  | 0.70251  | 0.016164653 | Intragenic | NM_001191887 | Aff3     |
| 9   | 44900236 | 44900307 | 1       | -0.154228  | 5    | 0.0045   | 0.024    | 0.55256  | 0.70679  | 0.021964286 | TSS        | NM_001191887 | Aff3     |

| chr | start     | stop      | q-value | methy.diff | CpGs | pMWU     | p2DKS    | MCWLS    | MCWHS    | pMWU.fdr    | cgi.type   | transcript     | gene          |
|-----|-----------|-----------|---------|------------|------|----------|----------|----------|----------|-------------|------------|----------------|---------------|
| 9   | 46224554  | 46224792  | 1       | -0.253106  | 9    | 4.30E-07 | 4.70E-06 | 0.10304  | 0.35615  | 1.96E-05    | Intergenic | NA             | NA            |
| 9   | 46466239  | 46466345  | 1       | -0.105589  | 5    | 0.014    | 0.015    | 0.19169  | 0.29728  | 0.04726441  | Intragenic | NM_001106904   | Map4k4        |
| 9   | 54531389  | 54531446  | 1       | -0.055279  | 5    | 0.0014   | 0.0055   | 0.04938  | 0.10466  | 0.00960223  | Intergenic | NA             | NA            |
| 9   | 62238439  | 62238505  | 1       | -0.119132  | 7    | 0.0011   | 0.0054   | 0.41522  | 0.53436  | 0.007982301 | Intergenic | NA             | NA            |
| 9   | 62972363  | 62972433  | 1       | -0.166233  | 7    | 6.00E-05 | 0.0032   | 0.16786  | 0.33409  | 0.0009225   | Intergenic | NA             | NA            |
| 9   | 64769360  | 64769436  | 1       | 0.069466   | 5    | 0.014    | 0.015    | 0.85439  | 0.78493  | 0.04726441  | Intragenic | NM_019363      | Aox1          |
| 9   | 65344494  | 65344597  | 1       | -0.200018  | 5    | 3.90E-05 | 7.10E-05 | 0.13881  | 0.33883  | 0.000661655 | Intragenic | NM_057138:NM_0 | Cflar:Cflar   |
| 9   | 65570281  | 65570368  | 1       | -0.080218  | 9    | 6.90E-08 | 1.60E-05 | 0.12056  | 0.20078  | 4.76E-06    | TSS        | NM_133560:NM_0 | Trak2:Stradb  |
| 9   | 69605903  | 69606060  | 1       | -0.102415  | 9    | 0.015    | 0.024    | 0.35681  | 0.45923  | 0.049419643 | Intergenic | NA             | NA            |
| 9   | 69675352  | 69675518  | 1       | -0.145323  | 6    | 0.00011  | 0.00031  | 0.081825 | 0.22715  | 0.001431746 | TSS        | NM_001191809   | Ino80d        |
| 9   | 69850537  | 69850577  | 1       | 0.31044    | 5    | 0.0024   | 0.025    | 0.61796  | 0.30752  | 0.014124402 | Intergenic | NA             | NA            |
| 9   | 70719957  | 70720060  | 1       | -0.193276  | 5    | 0.0008   | 0.0031   | 0.058447 | 0.25172  | 0.006267516 | Intergenic | NA             | NA            |
| 9   | 71121589  | 71121946  | 1       | -0.144312  | 22   | 2.40E-09 | 5.90E-06 | 0.21306  | 0.35737  | 2.60E-07    | TSS        | NM_173838      | Fzd5          |
| 9   | 80951602  | 80951701  | 1       | -0.134333  | 5    | 0.01     | 0.038    | 0.11976  | 0.2541   | 0.037614679 | Intergenic | NA             | NA            |
| 9   | 81073382  | 81073680  | 1       | -0.082358  | 5    | 0.00036  | 0.0032   | 0.023484 | 0.10584  | 0.003505013 | Intragenic | NM_001191810   | Tns1          |
| 9   | 81083102  | 81083228  | 1       | -0.173902  | 5    | 0.0068   | 0.0054   | 0.33566  | 0.50956  | 0.029075319 | Intragenic | NM_001191810   | Tns1          |
| 9   | 81980622  | 81980683  | 1       | -0.114354  | 5    | 2.80E-05 | 3.40E-05 | 0.01904  | 0.13339  | 0.000511485 | Intragenic | NM_053384      | Ihh           |
| 9   | 82325884  | 82325908  | 1       | -0.063206  | 5    | 0.0041   | 0.038    | 0.053617 | 0.11682  | 0.020486121 | TSS        | NM_022531      | Des           |
| 9   | 83156796  | 83157430  | 1       | -0.087178  | 21   | 0.013    | 0.16     | 0.56547  | 0.60592  | 0.04506341  | Intergenic | NA             | NA            |
| 9   | 86027303  | 86027448  | 1       | -0.073617  | 7    | 0.00018  | 0.0014   | 0.75552  | 0.82914  | 0.002142581 | Intergenic | NA             | NA            |
| 9   | 86239533  | 86239685  | 1       | -0.106171  | 7    | 0.011    | 0.14     | 0.48108  | 0.58725  | 0.040408163 | Intergenic | NA             | NA            |
| 9   | 93056489  | 93056599  | 1       | -0.077758  | 10   | 0.004    | 0.016    | 0.14228  | 0.22004  | 0.020485774 | TSS        | NM_001012134   | B3gnt7        |
| 9   | 93273341  | 93273394  | 0.25    | -0.202823  | 8    | 1.20E-08 | 8.70E-07 | 0.12671  | 0.32953  | 1.11E-06    | TSS        | NM_021740      | Ptma          |
| 9   | 95891102  | 95891173  | 1       | -0.112284  | 5    | 0.0094   | 0.0093   | 0.24466  | 0.35694  | 0.036473186 | Intergenic | NA             | NA            |
| 9   | 95971863  | 95971934  | 1       | -0.118343  | 5    | 0.0068   | 0.0093   | 0.2386   | 0.35694  | 0.029075319 | Intragenic | NM_022693      | Sh3bp4        |
| 9   | 96330053  | 96330149  | 1       | -0.106799  | 7    | 1.00E-07 | 4.50E-06 | 0.01333  | 0.12013  | 6.15E-06    | Intergenic | NA             | NA            |
| 9   | 96605654  | 96605765  | 1       | -0.093849  | 5    | 0.0045   | 0.059    | 0.10384  | 0.19769  | 0.021964286 | Intragenic | NM_001108230   | Agap1         |
| 9   | 97500683  | 97500798  | 1       | -0.130713  | 5    | 0.00065  | 0.00052  | 0.11364  | 0.24436  | 0.005335929 | Intergenic | NA             | NA            |
| 9   | 98126083  | 98126353  | 1       | -0.131443  | 8    | 0.00065  | 0.0079   | 0.12737  | 0.25882  | 0.005335929 | Intragenic | NM_001007755   | Scly          |
| 9   | 99316810  | 99316835  | 0.29    | -0.257038  | 9    | 0.00079  | 1.00E-06 | 0.068134 | 0.32517  | 0.006267516 | TSS        | NM_182671:NM_1 | Ndufa10l1:Ndu |
| 9   | 99682366  | 99682445  | 1       | -0.055652  | 7    | 0.0024   | 0.0054   | 0.03004  | 0.085692 | 0.014124402 | TSS        | NR_128668      | Mir149        |
| 9   | 101894782 | 101894867 | 1       | 0.242469   | 5    | 1.10E-06 | 1.60E-05 | 0.61707  | 0.3746   | 4.02E-05    | Intergenic | NA             | NA            |
| 9   | 105975295 | 105975369 | 1       | -0.29863   | 7    | 1.30E-06 | 0.0005   | 0.42465  | 0.72329  | 4.66E-05    | Intergenic | NA             | NA            |
| 9   | 106497624 | 106497699 | 1       | -0.10482   | 7    | 0.0035   | 0.00029  | 0.47192  | 0.57674  | 0.018410549 | Intergenic | NA             | NA            |
| 9   | 109457764 | 109457806 | 1       | -0.144371  | 5    | 0.00054  | 0.00098  | 0.80483  | 0.9492   | 0.004710638 | Intergenic | NA             | NA            |
| 9   | 109896188 | 109896280 | 1       | -0.080869  | 6    | 0.0044   | 0.018    | 0.082444 | 0.16331  | 0.021881402 | TSS        | NM_053903      | Efna5         |
| 9   | 109955715 | 109955771 | 1       | 0.082061   | 5    | 0.00021  | 0.0018   | 0.97304  | 0.89097  | 0.002348182 | Intergenic | NA             | NA            |
| 9   | 109969871 | 109969927 | 1       | -0.305919  | 5    | 1.10E-06 | 1.60E-05 | 0.39174  | 0.69766  | 4.02E-05    | Intergenic | NA             | NA            |
| 9   | 110503675 | 110503774 | 1       | -0.060316  | 5    | 0.014    | 0.13     | 0.040452 | 0.10077  | 0.04726441  | TSS        | NM_001108235   | Fbxl17        |

| chr | start     | stop      | q-value | methy.diff | CpGs | pMWU     | p2DKS    | MCWLS    | MCWHS    | pMWU.fdr    | cgi.type   | transcript     | gene          |
|-----|-----------|-----------|---------|------------|------|----------|----------|----------|----------|-------------|------------|----------------|---------------|
| 9   | 111689520 | 111689584 | 1       | -0.13775   | 5    | 7.80E-05 | 0.0018   | 0.061243 | 0.19899  | 0.001113424 | Intergenic | NA             | NA            |
| 9   | 116324816 | 116324978 | 1       | 0.068885   | 7    | 0.00099  | 0.0053   | 0.93084  | 0.86196  | 0.007357704 | Intergenic | NA             | NA            |
| 9   | 118362726 | 118362876 | 1       | -0.094635  | 5    | 0.0063   | 0.024    | 0.070657 | 0.16529  | 0.027757612 | Intragenic | NM_022946:NM_0 | Dlgap1:Dlgap1 |
| 9   | 118591412 | 118591574 | 1       | -0.110197  | 5    | 0.0074   | 0.015    | 0.26751  | 0.37771  | 0.030871679 | Intragenic | NM_022946:NM_0 | Dlgap1:Dlgap1 |
| 9   | 118603829 | 118604012 | 1       | -0.090638  | 7    | 5.60E-05 | 0.00049  | 0.095087 | 0.18573  | 0.000873742 | Intragenic | NM_022946:NM_0 | Dlgap1:Dlgap1 |
| X   | 7844072   | 7844099   | 1       | -0.166358  | 5    | 9.20E-06 | 0.00014  | 0.097522 | 0.26388  | 0.000206371 | Intergenic | NA             | NA            |
| X   | 9422967   | 9423007   | 1       | 0.051143   | 5    | 0.0068   | 0.024    | 0.94688  | 0.89574  | 0.029075319 | Intergenic | NA             | NA            |
| X   | 10997238  | 10997256  | 1       | -0.063604  | 5    | 0.002    | 0.0055   | 0.071733 | 0.13534  | 0.012269327 | Intragenic | NM_001100967   | Nyx           |
| X   | 16104565  | 16104776  | 1       | -0.166479  | 13   | 0.01     | 0.044    | 0.571    | 0.73748  | 0.037614679 | Intragenic | NM_019279      | Pcsk1n        |
| X   | 16206372  | 16206617  | 1       | -0.131412  | 16   | 0.014    | 0.094    | 0.54093  | 0.67235  | 0.04726441  | Intragenic | NM_019279      | Pcsk1n        |
| X   | 21307976  | 21308023  | 1       | -0.178077  | 5    | 3.10E-05 | 0.0018   | 0.085275 | 0.26335  | 0.000549952 | Intergenic | NA             | NA            |
| X   | 22418059  | 22418106  | 1       | -0.181151  | 5    | 3.10E-05 | 0.0018   | 0.083631 | 0.26478  | 0.000549952 | Intergenic | NA             | NA            |
| X   | 34801381  | 34801523  | 1       | -0.074273  | 5    | 0.0019   | 0.0055   | 0.021378 | 0.095651 | 0.011943782 | Intragenic | NM_001191733   | Nhs           |
| X   | 35816937  | 35817054  | 0.1     | -0.119376  | 11   | 4.40E-07 | 3.60E-07 | 0.092473 | 0.21185  | 1.96E-05    | Intergenic | NA             | NA            |
| X   | 37907907  | 37907941  | 1       | -0.061064  | 5    | 0.0022   | 0.009    | 0.039623 | 0.10069  | 0.01321074  | Intergenic | NA             | NA            |
| X   | 44166058  | 44166190  | 0.077   | -0.102542  | 12   | 2.60E-10 | 2.70E-07 | 0.050438 | 0.15298  | 3.92E-08    | Intergenic | NA             | NA            |
| X   | 74088921  | 74088974  | 1       | 0.11808    | 5    | 0.008    | 0.015    | 0.84486  | 0.72678  | 0.03243956  | Intergenic | NA             | NA            |
| X   | 81277282  | 81277389  | 1       | -0.168779  | 5    | 0.0053   | 0.015    | 0.37692  | 0.5457   | 0.024662043 | Intergenic | NA             | NA            |
| X   | 81281954  | 81282089  | 0.016   | -0.120159  | 11   | 6.00E-09 | 5.80E-08 | 0.060385 | 0.18054  | 5.83E-07    | Intergenic | NA             | NA            |
| X   | 93028059  | 93028141  | 1       | -0.095703  | 5    | 0.00021  | 0.015    | 0.76451  | 0.86022  | 0.002348182 | Intragenic | NM_001271228   | Pcdh11x       |
| X   | 102275076 | 102275136 | 1       | -0.091835  | 5    | 4.40E-05 | 0.0018   | 0.77198  | 0.86382  | 0.000729708 | Intergenic | NA             | NA            |
| X   | 114788914 | 114788938 | 1       | -0.083242  | 5    | 0.014    | 0.039    | 0.11963  | 0.20287  | 0.04726441  | Intragenic | NM_012821:NM_0 | Adcy6:Adcy6   |
| X   | 114960657 | 114960761 | 1       | -0.09231   | 5    | 0.014    | 0.088    | 0.11741  | 0.20972  | 0.04726441  | Intragenic | NM_001108111   | Wnt10b        |
| X   | 115115574 | 115115726 | 1       | -0.150306  | 5    | 0.00065  | 0.009    | 0.11443  | 0.26474  | 0.005335929 | Intergenic | NA             | NA            |
| X   | 115231575 | 115231685 | 1       | -0.137256  | 5    | 0.0013   | 0.0054   | 0.13437  | 0.27163  | 0.009111111 | Intergenic | NA             | NA            |
| X   | 115875230 | 115875427 | 1       | -0.064634  | 5    | 0.00021  | 0.0018   | 0.027055 | 0.09169  | 0.002348182 | TSS        | NM_022215      | Gpd1          |
| X   | 115934930 | 115935595 | 1       | -0.073653  | 21   | 0.0034   | 0.034    | 0.20404  | 0.27769  | 0.018409391 | Intragenic | NM_001191615   | Lima1         |
| X   | 116947781 | 116948327 | 1       | -0.067312  | 12   | 0.013    | 0.11     | 0.10729  | 0.1746   | 0.04506341  | Intergenic | NA             | NA            |
| X   | 119281784 | 119281858 | 1       | -0.099686  | 7    | 0.0037   | 0.027    | 0.224    | 0.32369  | 0.019379702 | Intergenic | NA             | NA            |
| X   | 119304759 | 119304930 | 0.22    | -0.056721  | 20   | 7.50E-07 | 7.70E-07 | 0.053592 | 0.11031  | 3.09E-05    | Intergenic | NA             | NA            |
| X   | 119678027 | 119678198 | 0.22    | -0.056868  | 20   | 7.10E-07 | 7.70E-07 | 0.053446 | 0.11031  | 2.96E-05    | Intergenic | NA             | NA            |
| X   | 124228169 | 124228352 | 1       | -0.130742  | 9    | 0.0042   | 0.034    | 0.56332  | 0.69406  | 0.020943243 | Intergenic | NA             | NA            |
| X   | 132371337 | 132371448 | 1       | 0.065851   | 5    | 0.0045   | 0.015    | 0.91294  | 0.84708  | 0.021964286 | Intergenic | NA             | NA            |
| X   | 134618232 | 134618286 | 1       | -0.075023  | 5    | 0.0038   | 0.015    | 0.038283 | 0.11331  | 0.019583799 | Intergenic | NA             | NA            |
| X   | 139524113 | 139524168 | 1       | -0.186689  | 5    | 0.00015  | 0.0053   | 0.26583  | 0.45252  | 0.001835821 | Intergenic | NA             | NA            |
| X   | 145891651 | 145891868 | 1       | 0.059869   | 16   | 0.0016   | 0.016    | 0.10383  | 0.043963 | 0.010628263 | Intergenic | NA             | NA            |
| X   | 154301610 | 154301675 | 1       | 0.113799   | 5    | 0.0094   | 0.038    | 0.80185  | 0.68805  | 0.036473186 | Intergenic | NA             | NA            |

| chr                       | start     | stop      | q-value | methyl.diff | CpGs | pMWU     | p2DKS    | MCWLS    | MCWHS    | pMWU.fdr    | cgi.type   | transcript   | gene     |
|---------------------------|-----------|-----------|---------|-------------|------|----------|----------|----------|----------|-------------|------------|--------------|----------|
| <b>Figure2C Blood MCW</b> |           |           |         |             |      |          |          |          |          |             |            |              |          |
| chr                       | start     | stop      | q-value | methyl.diff | CpGs | pMWU     | p2DKS    | MCWLS    | MCWHS    | pMWU.fdr    | cgi.type   | transcript   | gene     |
| 1                         | 13550441  | 13550592  | 1       | 0.07068     | 8    | 0.0014   | 0.037    | 0.35392  | 0.28324  | 0.018132456 | Intergenic | NA           | NA       |
| 1                         | 13553531  | 13553597  | 1       | 0.091632    | 5    | 0.00065  | 0.00094  | 0.23777  | 0.14613  | 0.010905966 | Intergenic | NA           | NA       |
| 1                         | 13553598  | 13553975  | 1       | 0.063449    | 34   | 0.003    | 0.026    | 0.22809  | 0.19335  | 0.028762987 | Intergenic | NA           | NA       |
| 1                         | 13558916  | 13558945  | 1       | 0.081166    | 5    | 0.0032   | 0.024    | 0.37659  | 0.29543  | 0.029622571 | TSS        | NR_046238    | Rn5-8s   |
| 1                         | 13560821  | 13560890  | 1       | 0.074194    | 12   | 1.20E-05 | 0.00046  | 0.25816  | 0.18396  | 0.000656222 | TSS        | NR_046238    | Rn5-8s   |
| 1                         | 16847995  | 16848142  | 1       | 0.092685    | 5    | 0.00088  | 0.0093   | 0.14833  | 0.055641 | 0.013258367 | Intragenic | NM_001107522 | Slc35d3  |
| 1                         | 26230305  | 26230431  | 1       | -0.074618   | 5    | 0.0041   | 0.015    | 0.89937  | 0.97398  | 0.034891354 | Intergenic | NA           | NA       |
| 1                         | 47610306  | 47610369  | 1       | -0.074168   | 5    | 0.00026  | 0.0018   | 0.90958  | 0.98375  | 0.005687259 | Intergenic | NA           | NA       |
| 1                         | 51547702  | 51547778  | 1       | 0.055608    | 7    | 0.00045  | 8.80E-06 | 0.1481   | 0.09249  | 0.008410443 | Intragenic | NM_012756    | Igf2r    |
| 1                         | 51577260  | 51577299  | 1       | -0.076022   | 5    | 2.80E-05 | 7.10E-05 | 0.34316  | 0.41918  | 0.001164563 | TSS        | NM_012756    | Igf2r    |
| 1                         | 51811825  | 51811995  | 1       | 0.082453    | 5    | 0.0027   | 0.00052  | 0.15357  | 0.07112  | 0.026665886 | Intergenic | NA           | NA       |
| 1                         | 51811998  | 51812072  | 1       | 0.10646     | 5    | 0.00072  | 7.10E-05 | 0.21788  | 0.11142  | 0.011618361 | Intergenic | NA           | NA       |
| 1                         | 57362972  | 57362993  | 1       | 0.107549    | 5    | 0.0032   | 0.0092   | 0.21391  | 0.10636  | 0.029622571 | TSS        | NM_001107464 | Dact2    |
| 1                         | 70694351  | 70694419  | 1       | 0.096272    | 5    | 0.00044  | 0.0054   | 0.13017  | 0.033897 | 0.008275924 | Intergenic | NA           | NA       |
| 1                         | 72776396  | 72776439  | 1       | 0.062362    | 6    | 0.0065   | 0.04     | 0.97064  | 0.90828  | 0.048106516 | Intragenic | NM_001169143 | Zfp444   |
| 1                         | 79686886  | 79686921  | 1       | -0.108877   | 5    | 0.00059  | 0.0032   | 0.017857 | 0.12673  | 0.010070925 | TSS        | NM_001107479 | Npas1    |
| 1                         | 79793247  | 79793275  | 1       | 0.083501    | 5    | 0.00014  | 0.00014  | 0.5341   | 0.4506   | 0.003658584 | Intragenic | NM_001271132 | Arhgap35 |
| 1                         | 80058664  | 80058691  | 1       | 0.126175    | 5    | 0.0019   | 0.0018   | 0.3523   | 0.22612  | 0.022002745 | Intragenic | NM_001191947 | Dact3    |
| 1                         | 81681958  | 81682006  | 1       | 0.207497    | 5    | 2.80E-05 | 0.00098  | 0.54502  | 0.33752  | 0.001164563 | TSS        | NM_001109410 | Trappc6a |
| 1                         | 82555000  | 82555438  | 1       | -0.052505   | 19   | 0.0012   | 0.011    | 0.79339  | 0.8459   | 0.016180822 | Intragenic | NM_001014016 | Irgc     |
| 1                         | 86025578  | 86025625  | 1       | 0.069906    | 5    | 0.0053   | 0.088    | 0.56203  | 0.49212  | 0.041404497 | Intragenic | NM_030862    | Marcks1  |
| 1                         | 89196572  | 89196604  | 1       | 0.287691    | 6    | 3.50E-06 | 4.90E-05 | 0.68128  | 0.39359  | 0.000229678 | Intergenic | NA           | NA       |
| 1                         | 97334327  | 97334421  | 1       | -0.068928   | 6    | 0.0042   | 0.059    | 0.8792   | 0.94813  | 0.035436    | Intergenic | NA           | NA       |
| 1                         | 99720690  | 99720711  | 1       | 0.055491    | 5    | 8.80E-05 | 0.00028  | 0.18506  | 0.12957  | 0.00259864  | Intergenic | NA           | NA       |
| 1                         | 101395330 | 101395431 | 1       | 0.195048    | 5    | 0.00036  | 0.0091   | 0.62836  | 0.43331  | 0.0073825   | Intragenic | NM_031751    | Shank1   |
| 1                         | 102329320 | 102329396 | 1       | -0.086266   | 12   | 0.00013  | 0.0038   | 0.10372  | 0.18998  | 0.003521927 | Intergenic | NA           | NA       |
| 1                         | 102861843 | 102861946 | 1       | 0.065401    | 7    | 0.00078  | 0.0013   | 0.90126  | 0.83586  | 0.012383548 | Intergenic | NA           | NA       |
| 1                         | 134622852 | 134622917 | 1       | 0.152518    | 5    | 0.0024   | 0.039    | 0.74221  | 0.5897   | 0.024867368 | Intergenic | NA           | NA       |
| 1                         | 142494506 | 142494646 | 1       | 0.083035    | 5    | 0.0049   | 0.015    | 0.12038  | 0.037344 | 0.038897043 | TSS        | NM_001107531 | Mesp1    |
| 1                         | 146957753 | 146957805 | 1       | -0.182856   | 5    | 0.00023  | 0.0031   | 0.12661  | 0.30947  | 0.005145379 | TSS        | NM_001013149 | Mesdc1   |
| 1                         | 147153856 | 147153917 | 1       | -0.058848   | 6    | 0.0011   | 0.0073   | 0.043504 | 0.10235  | 0.015250235 | Intergenic | NA           | NA       |
| 1                         | 149777279 | 149777393 | 1       | 0.070079    | 7    | 0.00018  | 0.0082   | 0.087272 | 0.017192 | 0.004504576 | Intergenic | NA           | NA       |
| 1                         | 151966704 | 151966905 | 1       | -0.124709   | 18   | 2.30E-07 | 7.30E-05 | 0.11245  | 0.23716  | 2.95E-05    | Intergenic | NA           | NA       |
| 1                         | 151967568 | 151967680 | 0.27    | 0.056814    | 19   | 1.90E-05 | 6.60E-07 | 0.23937  | 0.18256  | 0.000904952 | Intergenic | NA           | NA       |
| 1                         | 151968209 | 151968314 | 1       | -0.098869   | 10   | 0.0049   | 0.038    | 0.29452  | 0.37169  | 0.038897043 | Intergenic | NA           | NA       |

| chr | start     | stop      | q-value  | methy.diff | CpGs | pMWU     | p2DKS    | MCWLS    | MCWHS    | pMWU.fdr    | cgi.type   | transcript             | gene        |
|-----|-----------|-----------|----------|------------|------|----------|----------|----------|----------|-------------|------------|------------------------|-------------|
| 1   | 151975018 | 151975089 | 1        | -0.181542  | 7    | 0.00048  | 0.00049  | 0.50008  | 0.68162  | 0.00874963  | Intergenic | NA                     | NA          |
| 1   | 151976385 | 151976475 | 1        | 0.097036   | 6    | 0.0069   | 0.0071   | 0.30057  | 0.20354  | 0.049818337 | Intergenic | NA                     | NA          |
| 1   | 153406724 | 153406788 | 1        | 0.083639   | 5    | 0.0016   | 0.015    | 0.10562  | 0.021981 | 0.019935865 | Intergenic | NA                     | NA          |
| 1   | 161113830 | 161113987 | 1        | -0.065222  | 5    | 0.00017  | 0.0055   | 0.0316   | 0.096822 | 0.004327672 | Intergenic | NA                     | NA          |
| 1   | 161204177 | 161204334 | 1        | -0.068678  | 5    | 9.80E-05 | 0.0018   | 0.028143 | 0.096822 | 0.002837196 | Intergenic | NA                     | NA          |
| 1   | 169351174 | 169351310 | 1        | -0.074124  | 11   | 2.90E-05 | 0.0026   | 0.13896  | 0.21309  | 0.001189403 | Intragenic | NM_001106211           | B3gnt6      |
| 1   | 184739799 | 184739818 | 1        | -0.054374  | 5    | 0.0019   | 0.039    | 0.042715 | 0.097089 | 0.022002745 | Intergenic | NA                     | NA          |
| 1   | 199477347 | 199477462 | 1        | -0.110174  | 9    | 0.0011   | 0.012    | 0.41664  | 0.52682  | 0.015250235 | Intragenic | NM_012713:NM_001172305 | Prkcb:Prkcb |
| 1   | 206989587 | 206989617 | 1        | -0.069784  | 5    | 0.00054  | 0.00053  | 0.032698 | 0.10248  | 0.009435621 | TSS        | NM_001011936           | Bag3        |
| 1   | 218198821 | 218198853 | 1        | 0.143172   | 5    | 0.00044  | 0.0018   | 0.35942  | 0.21625  | 0.008275924 | Intergenic | NA                     | NA          |
| 1   | 227607017 | 227607126 | 7.20E-06 | 0.085819   | 23   | 4.00E-14 | 1.80E-11 | 0.38786  | 0.30204  | 3.47E-11    | Intragenic | NM_001024290           | Gal3st3     |
| 1   | 231400181 | 231400237 | 1        | 0.103761   | 5    | 0.0016   | 0.038    | 0.40026  | 0.2965   | 0.019935865 | Intragenic | NM_134380              | Ust5r       |
| 1   | 232386574 | 232386751 | 1        | 0.053218   | 10   | 0.0031   | 0.016    | 0.92989  | 0.87668  | 0.029622571 | Intergenic | NA                     | NA          |
| 1   | 241849384 | 241849401 | 1        | 0.141726   | 5    | 0.00011  | 0.00014  | 0.49573  | 0.35401  | 0.003123365 | TSS        | NM_001024292:NM_148892 | Nmrk1:Ostf1 |
| 1   | 254335407 | 254335522 | 1        | 0.086738   | 12   | 2.00E-05 | 0.00029  | 0.23981  | 0.15307  | 0.00093746  | Intergenic | NA                     | NA          |
| 1   | 272335520 | 272335720 | 1        | 0.061246   | 8    | 0.00018  | 0.0038   | 0.09126  | 0.030014 | 0.004504576 | TSS        | NM_001109166           | Tlx1        |
| 1   | 284732957 | 284733096 | 1        | 0.240947   | 9    | 5.10E-07 | 0.00021  | 0.75484  | 0.5139   | 5.38E-05    | Intragenic | NM_001106201           | Dclre1a     |
| 1   | 284919416 | 284919479 | 1        | 0.088407   | 5    | 0.0053   | 0.039    | 0.11102  | 0.022611 | 0.041404497 | TSS        | NM_012701              | Adrb1       |
| 10  | 5916479   | 5916597   | 1        | -0.124951  | 5    | 0.0008   | 0.00098  | 0.7204   | 0.84535  | 0.012433684 | Intragenic | NM_031003              | Abat        |
| 10  | 8240171   | 8240287   | 1        | 0.099837   | 5    | 0.0017   | 0.0054   | 0.28102  | 0.18118  | 0.020324291 | Intergenic | NA                     | NA          |
| 10  | 9013783   | 9013874   | 1        | -0.055371  | 5    | 0.002    | 0.025    | 0.89832  | 0.95369  | 0.022286792 | Intergenic | NA                     | NA          |
| 10  | 12939517  | 12939555  | 1        | -0.118403  | 5    | 0.00019  | 0.00027  | 0.10568  | 0.22408  | 0.004561545 | Intergenic | NA                     | NA          |
| 10  | 16180922  | 16180992  | 1        | 0.064529   | 6    | 0.0039   | 0.058    | 0.9798   | 0.91527  | 0.033872647 | Intergenic | NA                     | NA          |
| 10  | 16947954  | 16948132  | 1        | 0.097662   | 28   | 3.00E-09 | 2.70E-06 | 0.59217  | 0.49451  | 6.33E-07    | Intragenic | NM_001142652           | Neurl1b     |
| 10  | 31693055  | 31693094  | 1        | 0.07469    | 8    | 4.50E-05 | 0.0026   | 0.30274  | 0.22805  | 0.001640556 | Intergenic | NA                     | NA          |
| 10  | 45236914  | 45236977  | 1        | -0.051721  | 7    | 1.10E-06 | 3.70E-06 | 0.033054 | 0.084776 | 9.55E-05    | Intergenic | NA                     | NA          |
| 10  | 54081854  | 54081975  | 1        | 0.078705   | 13   | 0.00083  | 0.0066   | 0.53447  | 0.45576  | 0.012765573 | Intergenic | NA                     | NA          |
| 10  | 62345000  | 62345061  | 1        | -0.057717  | 5    | 0.00088  | 0.0091   | 0.042166 | 0.099883 | 0.013258367 | TSS        | NM_001107025           | Abhd15      |
| 10  | 62388126  | 62388328  | 1        | 0.076556   | 18   | 1.90E-05 | 8.80E-05 | 0.91344  | 0.83689  | 0.000904952 | Intergenic | NA                     | NA          |
| 10  | 63810684  | 63810718  | 1        | 0.064446   | 5    | 0.00048  | 0.015    | 0.24819  | 0.18375  | 0.00874963  | TSS        | NM_001007611           | Fam101b     |
| 10  | 74844000  | 74844134  | 1        | 0.216707   | 5    | 0.0063   | 0.009    | 0.46072  | 0.24401  | 0.046861209 | Intergenic | NA                     | NA          |
| 10  | 75929951  | 75930178  | 1        | -0.095404  | 12   | 8.30E-05 | 0.0013   | 0.29523  | 0.39063  | 0.002526794 | Intergenic | NA                     | NA          |
| 10  | 83993545  | 83993595  | 1        | 0.054864   | 6    | 0.0016   | 0.0044   | 0.28205  | 0.22718  | 0.019935865 | TSS        | NM_001107042           | Hoxb3       |
| 10  | 90413664  | 90413700  | 1        | 0.061258   | 5    | 0.00044  | 0.0032   | 0.9596   | 0.89834  | 0.008275924 | Intergenic | NA                     | NA          |
| 10  | 96388239  | 96388265  | 1        | -0.065236  | 5    | 0.002    | 0.024    | 0.048669 | 0.1139   | 0.022286792 | TSS        | NM_001105849           | Cep112      |
| 10  | 96904174  | 96904319  | 1        | 0.126226   | 9    | 5.70E-07 | 7.80E-05 | 0.24822  | 0.122    | 5.61E-05    | Intergenic | NA                     | NA          |
| 10  | 96950881  | 96950951  | 1        | 0.133723   | 5    | 0.00039  | 0.00051  | 0.79013  | 0.65641  | 0.007729329 | Intragenic | NM_024355              | Axin2       |

| chr | start     | stop      | q-value | methy.diff | CpGs | pMWU     | p2DKS    | MCWLS    | MCWHS    | pMWU.fdr    | cgi.type   | transcript   | gene      |
|-----|-----------|-----------|---------|------------|------|----------|----------|----------|----------|-------------|------------|--------------|-----------|
| 10  | 97627022  | 97627101  | 1       | -0.082876  | 5    | 0.00054  | 0.00027  | 0.055752 | 0.13863  | 0.009435621 | Intergenic | NA           | NA        |
| 10  | 101203520 | 101203567 | 1       | -0.062564  | 5    | 0.0027   | 0.025    | 0.090555 | 0.15312  | 0.026665886 | Intergenic | NA           | NA        |
| 10  | 103879382 | 103879452 | 1       | -0.074404  | 9    | 0.0056   | 0.018    | 0.10054  | 0.17495  | 0.043403675 | Intergenic | NA           | NA        |
| 10  | 107391633 | 107391818 | 1       | 0.057631   | 12   | 0.0025   | 0.0095   | 0.96     | 0.90236  | 0.025812937 | Intergenic | NA           | NA        |
| 10  | 107703087 | 107703166 | 1       | 0.161201   | 5    | 0.00059  | 0.0032   | 0.59636  | 0.43516  | 0.010070925 | Intragenic | NM_001134688 | Ccdc40    |
| 10  | 110810057 | 110810125 | 1       | -0.198118  | 5    | 6.20E-05 | 0.00052  | 0.64541  | 0.84353  | 0.002057146 | Intergenic | NA           | NA        |
| 10  | 111446173 | 111446241 | 1       | -0.198118  | 5    | 6.20E-05 | 0.00052  | 0.64541  | 0.84353  | 0.002057146 | Intragenic | NM_001099458 | Vom2r4    |
| 10  | 111452847 | 111452915 | 1       | -0.198118  | 5    | 6.20E-05 | 0.00052  | 0.64541  | 0.84353  | 0.002057146 | Intragenic | NM_001099458 | Vom2r4    |
| 10  | 111716358 | 111716426 | 1       | -0.198118  | 5    | 6.20E-05 | 0.00052  | 0.64541  | 0.84353  | 0.002057146 | Intragenic | NM_001099458 | Vom2r4    |
| 11  | 2145212   | 2145336   | 0.43    | -0.062256  | 14   | 1.90E-08 | 1.10E-06 | 0.19202  | 0.25428  | 3.51E-06    | Intergenic | NA           | NA        |
| 11  | 2795617   | 2795788   | 1       | -0.128301  | 8    | 0.0044   | 0.026    | 0.28724  | 0.41555  | 0.036708564 | Intergenic | NA           | NA        |
| 11  | 19604076  | 19604119  | 1       | 0.074703   | 5    | 2.20E-05 | 3.40E-05 | 0.20343  | 0.12873  | 0.000984333 | Intergenic | NA           | NA        |
| 11  | 24567562  | 24567618  | 1       | 0.103746   | 5    | 0.0017   | 0.024    | 0.38581  | 0.28206  | 0.020324291 | Intergenic | NA           | NA        |
| 11  | 31871224  | 31871293  | 1       | 0.106071   | 5    | 0.002    | 0.003    | 0.6261   | 0.52003  | 0.022286792 | Intergenic | NA           | NA        |
| 11  | 33326532  | 33326612  | 1       | -0.074599  | 5    | 0.0032   | 0.015    | 0.86411  | 0.93871  | 0.029622571 | Intergenic | NA           | NA        |
| 11  | 46563093  | 46563210  | 1       | -0.05224   | 5    | 0.0035   | 0.038    | 0.91525  | 0.96749  | 0.031319697 | Intergenic | NA           | NA        |
| 11  | 65253860  | 65253945  | 1       | -0.052127  | 5    | 0.00072  | 0.0031   | 0.076715 | 0.12884  | 0.011618361 | Intergenic | NA           | NA        |
| 11  | 72880448  | 72880569  | 0.0091  | -0.092505  | 12   | 1.40E-06 | 2.20E-08 | 0.40315  | 0.49565  | 0.000114839 | Intragenic | NM_032062    | Kalrn     |
| 11  | 78188572  | 78188605  | 1       | 0.079514   | 5    | 0.00097  | 0.024    | 0.16234  | 0.082821 | 0.01432205  | TSS        | NM_001105871 | Hrasls    |
| 11  | 81727109  | 81727229  | 1       | 0.158972   | 5    | 0.0014   | 0.003    | 0.43434  | 0.27537  | 0.018132456 | Intergenic | NA           | NA        |
| 11  | 90303335  | 90303378  | 1       | -0.089158  | 7    | 0.0069   | 0.018    | 0.27305  | 0.3622   | 0.049818337 | Intergenic | NA           | NA        |
| 12  | 922679    | 922723    | 1       | 0.064947   | 5    | 0.0019   | 0.015    | 0.82236  | 0.75741  | 0.022002745 | Intergenic | NA           | NA        |
| 12  | 6055942   | 6055979   | 1       | 0.088586   | 9    | 7.80E-08 | 4.20E-05 | 0.27705  | 0.18846  | 1.15E-05    | Intergenic | NA           | NA        |
| 12  | 9458556   | 9458677   | 1       | -0.051898  | 5    | 0.00014  | 0.0018   | 0.93297  | 0.98486  | 0.003658584 | Intergenic | NA           | NA        |
| 12  | 11754826  | 11754910  | 1       | 0.209869   | 5    | 1.70E-06 | 7.20E-06 | 0.59612  | 0.38625  | 0.000128721 | Intergenic | NA           | NA        |
| 12  | 11971724  | 11971825  | 1       | -0.143411  | 5    | 1.70E-05 | 0.00027  | 0.78954  | 0.93295  | 0.000850864 | Intragenic | NM_001113570 | Gtf3a     |
| 12  | 15952144  | 15952339  | 1       | 0.115206   | 8    | 0.00075  | 0.0026   | 0.86089  | 0.74568  | 0.012036685 | TSS        | NM_001105911 | Slc29a4   |
| 12  | 18742580  | 18742682  | 1       | -0.113566  | 7    | 0.0056   | 0.04     | 0.47997  | 0.59354  | 0.043403675 | Intragenic | NM_001105913 | Elfn1     |
| 12  | 19201368  | 19201437  | 1       | 0.06559    | 5    | 0.0032   | 0.0054   | 0.1472   | 0.081611 | 0.029622571 | Intragenic | NM_001047923 | LOC498152 |
| 12  | 27512985  | 27513105  | 1       | 0.093344   | 12   | 0.001    | 0.00093  | 0.41439  | 0.32104  | 0.014404878 | Intragenic | NM_053734    | Ncf1      |
| 12  | 33553697  | 33553740  | 1       | -0.100078  | 5    | 0.0013   | 0.0018   | 0.63455  | 0.73463  | 0.017137946 | TSS        | NM_001108853 | Piwil1    |
| 12  | 33768402  | 33768418  | 1       | -0.062412  | 5    | 0.00065  | 0.0055   | 0.058875 | 0.12129  | 0.010905966 | Intergenic | NA           | NA        |
| 12  | 38923694  | 38923778  | 1       | 0.103935   | 8    | 0.00079  | 0.0058   | 0.18649  | 0.082556 | 0.012433684 | TSS        | NM_001109547 | Fam101a   |
| 12  | 39142699  | 39142819  | 1       | -0.064649  | 7    | 0.0065   | 0.076    | 0.32121  | 0.38586  | 0.048106516 | Intergenic | NA           | NA        |
| 12  | 43505814  | 43505980  | 1       | 0.118068   | 9    | 0.0035   | 0.082    | 0.48755  | 0.36948  | 0.031319697 | Intergenic | NA           | NA        |
| 12  | 43706219  | 43706279  | 1       | -0.106791  | 7    | 0.00031  | 0.0022   | 0.81076  | 0.91755  | 0.006585827 | Intergenic | NA           | NA        |
| 12  | 43724151  | 43724243  | 1       | 0.070107   | 5    | 0.0024   | 0.0091   | 0.18468  | 0.11457  | 0.024867368 | Intergenic | NA           | NA        |
| 12  | 45073549  | 45073674  | 1       | 0.064131   | 5    | 0.0035   | 0.0092   | 0.97213  | 0.90799  | 0.031319697 | Intergenic | NA           | NA        |
| 12  | 45115604  | 45115729  | 1       | 0.064131   | 5    | 0.0035   | 0.0092   | 0.97213  | 0.90799  | 0.031319697 | Intergenic | NA           | NA        |

| chr | start     | stop      | q-value | methy.diff | CpGs | pMWU     | p2DKS    | MCWLS    | MCWHS    | pMWU.fdr    | cgi.type   | transcript                    | gene                |
|-----|-----------|-----------|---------|------------|------|----------|----------|----------|----------|-------------|------------|-------------------------------|---------------------|
| 12  | 45705149  | 45705237  | 1       | -0.084713  | 5    | 0.0049   | 0.0055   | 0.84764  | 0.93235  | 0.038897043 | Intergenic | NA                            | NA                  |
| 12  | 48669948  | 48670022  | 1       | 0.09282    | 10   | 0.0017   | 0.03     | 0.71535  | 0.62253  | 0.020324291 | Intragenic | NM_001107147                  | Sirt4               |
| 12  | 50085024  | 50085085  | 1       | -0.121295  | 5    | 0.0045   | 0.0055   | 0.23188  | 0.35318  | 0.036708564 | Intragenic | NM_134404                     | Svop                |
| 12  | 50129492  | 50129527  | 1       | 0.193714   | 5    | 0.0022   | 0.0018   | 0.74175  | 0.54803  | 0.02345343  | Intragenic | NM_134404                     | Svop                |
| 12  | 50385469  | 50385484  | 1       | 0.11684    | 5    | 0.0019   | 0.0054   | 0.87543  | 0.75859  | 0.022002745 | Intragenic | NM_001107155                  | Tmem119             |
| 12  | 52989819  | 52989838  | 1       | 0.136433   | 5    | 5.00E-05 | 0.00052  | 0.77626  | 0.63983  | 0.001778916 | Intragenic | NM_001191928                  | Mn1                 |
| 12  | 52991048  | 52991173  | 1       | -0.153792  | 7    | 0.0027   | 0.036    | 0.28378  | 0.43757  | 0.026665886 | TSS        | NM_001191928                  | Mn1                 |
| 13  | 41485089  | 41485218  | 1       | -0.055764  | 11   | 7.40E-05 | 0.015    | 0.045775 | 0.10154  | 0.002349699 | TSS        | NM_001105949                  | C1ql2               |
| 13  | 55055570  | 55055595  | 1       | 0.079247   | 5    | 0.0038   | 0.0054   | 0.15263  | 0.073382 | 0.033101475 | Intergenic | NA                            | NA                  |
| 13  | 55493412  | 55493463  | 1       | -0.06251   | 9    | 0.0007   | 0.0017   | 0.0926   | 0.15511  | 0.011618361 | Intragenic | NM_001105952                  | Sox13               |
| 13  | 59205596  | 59205663  | 1       | 0.064515   | 5    | 0.0022   | 0.015    | 0.21006  | 0.14554  | 0.02345343  | Intergenic | NA                            | NA                  |
| 13  | 85507423  | 85507479  | 0.046   | 0.068786   | 5    | 4.20E-07 | 1.10E-07 | 0.41971  | 0.35093  | 4.59E-05    | TSS        | NR_111961                     | Prrc2c              |
| 13  | 90162139  | 90162162  | 1       | 0.138418   | 5    | 0.0016   | 0.0054   | 0.46208  | 0.32366  | 0.019935865 | Intragenic | NM_001009631:N<br>M_001009631 | Tmco1:Tmco1         |
| 13  | 90267190  | 90267213  | 1       | 0.138418   | 5    | 0.0016   | 0.0054   | 0.46208  | 0.32366  | 0.019935865 | Intergenic | NA                            | NA                  |
| 13  | 100007523 | 100007648 | 1       | -0.06681   | 5    | 0.0035   | 0.0092   | 0.87029  | 0.9371   | 0.031319697 | Intergenic | NA                            | NA                  |
| 13  | 104173490 | 104173621 | 1       | -0.15605   | 5    | 0.0049   | 0.0052   | 0.25933  | 0.41538  | 0.038897043 | TSS        | NM_001007556                  | Lefty2              |
| 13  | 115071854 | 115071886 | 1       | 0.187467   | 5    | 0.00026  | 0.0018   | 0.4949   | 0.30743  | 0.005687259 | TSS        | NM_053691                     | Nek2                |
| 13  | 115306385 | 115306416 | 1       | 0.091404   | 7    | 0.00027  | 0.0005   | 0.52321  | 0.43181  | 0.005819781 | Intergenic | NA                            | NA                  |
| 13  | 118702292 | 118702323 | 1       | 0.077383   | 5    | 0.0032   | 0.059    | 0.75507  | 0.67769  | 0.029622571 | Intergenic | NA                            | NA                  |
| 14  | 129753    | 129821    | 1       | -0.219548  | 5    | 9.20E-06 | 0.00027  | 0.62861  | 0.84816  | 0.000532698 | Intergenic | NA                            | NA                  |
| 14  | 12313741  | 12313885  | 1       | 0.073375   | 7    | 0.00062  | 0.00011  | 0.8902   | 0.81682  | 0.010522184 | Intragenic | NM_017105                     | Bmp3                |
| 14  | 18965526  | 18965645  | 1       | 0.128139   | 7    | 0.00038  | 0.00027  | 0.41626  | 0.28813  | 0.007729329 | Intergenic | NA                            | NA                  |
| 14  | 44617237  | 44617350  | 1       | -0.095462  | 12   | 0.00077  | 0.00029  | 0.80948  | 0.90495  | 0.012290865 | Intergenic | NA                            | NA                  |
| 14  | 45874256  | 45874301  | 1       | -0.135248  | 5    | 0.0029   | 0.00052  | 0.81561  | 0.95086  | 0.028170066 | Intragenic | NM_001017500                  | LOC498368           |
| 14  | 46699332  | 46699488  | 1       | 0.062934   | 18   | 0.0011   | 0.039    | 0.17848  | 0.1432   | 0.015250235 | Intergenic | NA                            | NA                  |
| 14  | 46700677  | 46700694  | 1       | 0.058974   | 5    | 0.0058   | 0.0031   | 0.32126  | 0.26229  | 0.043692347 | Intergenic | NA                            | NA                  |
| 14  | 46742270  | 46742421  | 1       | 0.071068   | 8    | 0.0012   | 0.037    | 0.35376  | 0.28269  | 0.016180822 | Intergenic | NA                            | NA                  |
| 14  | 46808715  | 46808866  | 1       | 0.071022   | 8    | 0.0013   | 0.051    | 0.354    | 0.28298  | 0.017137946 | Intergenic | NA                            | NA                  |
| 14  | 46813186  | 46813290  | 1       | 0.074476   | 11   | 6.00E-05 | 0.015    | 0.24387  | 0.1694   | 0.002057146 | TSS        | NM_001025002                  | LOC310926           |
| 14  | 46816394  | 46816880  | 1       | 0.066982   | 74   | 0.0053   | 0.015    | 0.26407  | 0.22168  | 0.041404497 | TSS        | NM_001025002                  | LOC310926           |
| 14  | 46823474  | 46823503  | 1       | 0.081166   | 5    | 0.0032   | 0.024    | 0.37659  | 0.29543  | 0.029622571 | TSS        | NR_046238                     | Rn5-8s              |
| 14  | 46825379  | 46825448  | 1       | 0.074194   | 12   | 1.20E-05 | 0.00046  | 0.25816  | 0.18396  | 0.000656222 | TSS        | NR_046238                     | Rn5-8s              |
| 14  | 46830105  | 46830128  | 1       | 0.053203   | 5    | 0.00097  | 0.0054   | 0.19202  | 0.13882  | 0.01432205  | TSS        | NM_147136                     | LOC257642           |
| 14  | 46831386  | 46831403  | 1       | 0.058937   | 5    | 0.0058   | 0.0031   | 0.32122  | 0.26228  | 0.043692347 | TSS        | NM_147136                     | LOC257642           |
| 14  | 46833488  | 46833505  | 1       | 0.058974   | 5    | 0.0058   | 0.0031   | 0.32126  | 0.26229  | 0.043692347 | Intragenic | NM_001025002:N<br>R_046239    | LOC310926:R<br>n45s |
| 14  | 46864072  | 46864102  | 1       | 0.083771   | 5    | 3.10E-05 | 0.00052  | 0.25257  | 0.1688   | 0.001237068 | TSS        | NR_046238                     | Rn5-8s              |
| 14  | 47849967  | 47850186  | 1       | -0.065352  | 24   | 3.70E-06 | 0.00072  | 0.076946 | 0.1423   | 0.000237524 | Intergenic | NA                            | NA                  |



| chr | start     | stop      | q-value | methy.diff | CpGs | pMWU     | p2DKS    | MCWLS    | MCWHS      | pMWU.fdr    | cgi.type   | transcript   | gene    |
|-----|-----------|-----------|---------|------------|------|----------|----------|----------|------------|-------------|------------|--------------|---------|
| 14  | 61072275  | 61072382  | 1       | -0.204224  | 9    | 1.20E-05 | 0.00068  | 0.60792  | 0.81215    | 0.000656222 | Intragenic | NM_012880    | Sod3    |
| 14  | 84928356  | 84928501  | 1       | -0.108656  | 13   | 3.80E-05 | 0.00094  | 0.30868  | 0.41733    | 0.0014765   | Intragenic | NM_001109447 | Gal3st1 |
| 14  | 86391902  | 86392131  | 1       | 0.162402   | 8    | 0.0057   | 0.018    | 0.73004  | 0.56764    | 0.043692347 | Intergenic | NA           | NA      |
| 14  | 91914066  | 91914095  | 1       | 0.116438   | 7    | 0.00027  | 0.0014   | 0.46983  | 0.35339    | 0.005819781 | TSS        | NM_001109093 | Grb10   |
| 14  | 103943645 | 103943691 | 1       | 0.175659   | 7    | 0.0022   | 5.50E-05 | 0.55087  | 0.37521    | 0.02345343  | Intragenic | NM_001047094 | Spred2  |
| 14  | 107824620 | 107824758 | 1       | 0.097757   | 11   | 5.40E-06 | 5.10E-05 | 0.49203  | 0.39427    | 0.000332213 | TSS        | NM_001017504 | Zrsr1   |
| 15  | 115307    | 115384    | 1       | 0.062114   | 5    | 1.90E-05 | 0.038    | 0.065447 | 0.00333333 | 0.000904952 | Intergenic | NA           | NA      |
| 15  | 2361884   | 2361975   | 1       | -0.08273   | 7    | 0.0035   | 0.0083   | 0.31872  | 0.40145    | 0.031319697 | Intergenic | NA           | NA      |
| 15  | 9215402   | 9215453   | 1       | -0.055004  | 10   | 0.0002   | 0.00059  | 0.093651 | 0.14865    | 0.0047248   | Intergenic | NA           | NA      |
| 15  | 34359901  | 34360039  | 1       | 0.065636   | 9    | 0.001    | 0.013    | 0.81788  | 0.75224    | 0.014404878 | Intergenic | NA           | NA      |
| 15  | 36639500  | 36639622  | 1       | -0.063122  | 5    | 0.00054  | 0.0018   | 0.061787 | 0.12491    | 0.009435621 | Intergenic | NA           | NA      |
| 15  | 41226254  | 41226329  | 1       | -0.111395  | 5    | 8.10E-06 | 1.60E-05 | 0.6636   | 0.77499    | 0.000488149 | Intragenic | NM_001004099 | Gjb2    |
| 15  | 41652409  | 41652553  | 0.0033  | 0.145998   | 16   | 7.40E-08 | 8.20E-09 | 0.75839  | 0.61239    | 1.15E-05    | Intergenic | NA           | NA      |
| 15  | 45820830  | 45820894  | 1       | -0.154744  | 5    | 0.0063   | 0.13     | 0.63806  | 0.7928     | 0.046861209 | Intergenic | NA           | NA      |
| 15  | 47578792  | 47578924  | 1       | -0.064509  | 7    | 0.0032   | 0.012    | 0.072607 | 0.13712    | 0.029622571 | Intragenic | NM_001108383 | Ebf2    |
| 15  | 61598803  | 61598847  | 0.0063  | -0.072705  | 7    | 1.50E-09 | 1.50E-08 | 0.37944  | 0.45214    | 3.69E-07    | TSS        | NM_053867    | Tpt1    |
| 16  | 19775995  | 19776138  | 1       | 0.092356   | 21   | 0.0056   | 0.00027  | 0.5669   | 0.47454    | 0.043403675 | Intragenic | NM_020086    | Plvap   |
| 16  | 20444416  | 20444439  | 1       | -0.063812  | 7    | 0.0021   | 0.0029   | 0.86555  | 0.92936    | 0.02305316  | Intragenic | NM_001014236 | Ssbp4   |
| 16  | 20937536  | 20937558  | 1       | 0.066085   | 5    | 0.0022   | 0.0055   | 0.076348 | 0.010263   | 0.02345343  | TSS        | NM_001108398 | Hapln4  |
| 16  | 60662261  | 60662376  | 1       | -0.099684  | 8    | 0.0018   | 0.026    | 0.29942  | 0.3991     | 0.021346988 | Intragenic | NM_001106084 | Tnks    |
| 16  | 66680449  | 66680469  | 1       | 0.05795    | 5    | 0.0013   | 0.024    | 0.11328  | 0.055325   | 0.017137946 | TSS        | NM_001107319 | Unc5d   |
| 16  | 69635363  | 69635431  | 1       | 0.096272   | 5    | 0.00044  | 0.0054   | 0.13017  | 0.033897   | 0.008275924 | Intergenic | NA           | NA      |
| 16  | 73294822  | 73294949  | 1       | 0.063818   | 8    | 0.0012   | 0.00032  | 0.89058  | 0.82676    | 0.016180822 | Intergenic | NA           | NA      |
| 16  | 73686922  | 73687034  | 1       | -0.066339  | 5    | 0.00039  | 0.0018   | 0.89488  | 0.96122    | 0.007729329 | Intergenic | NA           | NA      |
| 16  | 81964778  | 81965036  | 1       | -0.054173  | 5    | 0.0045   | 0.015    | 0.019004 | 0.073177   | 0.036708564 | Intergenic | NA           | NA      |
| 16  | 90047758  | 90047811  | 1       | -0.081523  | 5    | 0.0022   | 0.025    | 0.18652  | 0.26805    | 0.02345343  | Intergenic | NA           | NA      |
| 17  | 1840822   | 1840909   | 1       | 0.112891   | 5    | 0.0068   | 0.015    | 0.43323  | 0.32034    | 0.049459113 | Intergenic | NA           | NA      |
| 17  | 7955118   | 7955248   | 1       | 0.10308    | 8    | 0.0048   | 0.025    | 0.81747  | 0.71438    | 0.038897043 | Intergenic | NA           | NA      |
| 17  | 13834289  | 13834402  | 1       | 0.097598   | 5    | 0.0011   | 0.015    | 0.9135   | 0.8159     | 0.015250235 | Intergenic | NA           | NA      |
| 17  | 19877298  | 19877383  | 1       | -0.07698   | 7    | 0.0069   | 0.019    | 0.22247  | 0.29945    | 0.049818337 | TSS        | NM_199236    | Nhlrc1  |
| 17  | 23056493  | 23056613  | 1       | 0.085617   | 5    | 0.0029   | 0.015    | 0.97037  | 0.88475    | 0.028170066 | Intergenic | NA           | NA      |
| 17  | 28774780  | 28774900  | 1       | -0.078495  | 5    | 0.0063   | 0.015    | 0.066983 | 0.14548    | 0.046861209 | Intergenic | NA           | NA      |
| 17  | 45850278  | 45850332  | 1       | 0.056033   | 8    | 0.001    | 0.0086   | 0.80055  | 0.74451    | 0.014404878 | Intergenic | NA           | NA      |
| 17  | 57882398  | 57882509  | 1       | 0.193194   | 5    | 0.00088  | 0.015    | 0.51553  | 0.32234    | 0.013258367 | Intergenic | NA           | NA      |
| 17  | 59052983  | 59053116  | 1       | 0.077068   | 18   | 0.00039  | 0.012    | 0.50126  | 0.42419    | 0.007729329 | Intergenic | NA           | NA      |
| 17  | 68942346  | 68942775  | 1       | -0.050244  | 32   | 0.0011   | 0.015    | 0.19235  | 0.24259    | 0.015250235 | Intergenic | NA           | NA      |
| 17  | 87550514  | 87550678  | 1       | -0.088704  | 7    | 0.0012   | 0.0083   | 0.71537  | 0.80407    | 0.016180822 | Intergenic | NA           | NA      |
| 18  | 2441206   | 2441270   | 1       | 0.150709   | 5    | 0.0016   | 0.0031   | 0.60601  | 0.4553     | 0.019935865 | Intragenic | NM_019185    | Gata6   |
| 18  | 29702298  | 29702402  | 1       | -0.130577  | 5    | 0.00054  | 0.015    | 0.10712  | 0.2377     | 0.009435621 | TSS        | NM_199508    | Pcdha9  |

| chr | start     | stop      | q-value | methy.diff | CpGs | pMWU     | p2DKS    | MCWLS    | MCWHS     | pMWU.fdr    | cgi.type   | transcript                | gene           |
|-----|-----------|-----------|---------|------------|------|----------|----------|----------|-----------|-------------|------------|---------------------------|----------------|
| 18  | 53109424  | 53109545  | 1       | 0.163247   | 5    | 0.0041   | 0.0018   | 0.74232  | 0.57908   | 0.034891354 | Intergenic | NA                        | NA             |
| 18  | 56244679  | 56244749  | 1       | 0.083985   | 7    | 0.002    | 0.027    | 0.81365  | 0.72966   | 0.022286792 | Intragenic | NM_053789                 | Il17b          |
| 18  | 73968445  | 73968611  | 1       | 0.054113   | 7    | 0.0044   | 0.004    | 0.83823  | 0.78411   | 0.036708564 | Intergenic | NA                        | NA             |
| 18  | 76682500  | 76682633  | 1       | -0.070151  | 7    | 0.0024   | 0.0083   | 0.85935  | 0.9295    | 0.024867368 | TSS        | NM_001108892              | Sall3          |
| 19  | 5824926   | 5825077   | 1       | 0.070844   | 8    | 0.0013   | 0.037    | 0.35392  | 0.28308   | 0.017137946 | Intergenic | NA                        | NA             |
| 19  | 9908245   | 9908329   | 1       | -0.085724  | 5    | 0.0016   | 0.0031   | 0.25852  | 0.34424   | 0.019935865 | Intergenic | NA                        | NA             |
| 19  | 10180130  | 10180265  | 1       | -0.144418  | 5    | 0.0049   | 0.015    | 0.68238  | 0.8268    | 0.038897043 | Intragenic | NM_031809                 | Cngb1          |
| 19  | 28554111  | 28554283  | 1       | -0.07756   | 10   | 0.0015   | 0.012    | 0.13235  | 0.20991   | 0.019342795 | Intergenic | NA                        | NA             |
| 19  | 30435664  | 30435736  | 1       | -0.121418  | 15   | 0.0035   | 0.025    | 0.31474  | 0.43615   | 0.031319697 | Intragenic | NM_001024999              | Snx20          |
| 19  | 35773774  | 35773864  | 1       | 0.114041   | 8    | 5.00E-05 | 0.00061  | 0.86745  | 0.75341   | 0.001778916 | TSS        | NM_053341                 | Gipc1          |
| 19  | 37102656  | 37102676  | 1       | 0.074602   | 5    | 8.80E-05 | 0.00098  | 0.096518 | 0.021916  | 0.00259864  | Intragenic | NM_001108895              | Best2          |
| 19  | 44895375  | 44895430  | 1       | 0.107884   | 5    | 2.20E-06 | 3.40E-05 | 0.69659  | 0.5887    | 0.000154681 | Intergenic | NA                        | NA             |
| 19  | 51965879  | 51965976  | 1       | -0.155724  | 5    | 0.0027   | 0.015    | 0.52145  | 0.67718   | 0.026665886 | Intergenic | NA                        | NA             |
| 19  | 52495045  | 52495090  | 1       | 0.065069   | 5    | 1.50E-05 | 0.00053  | 0.73201  | 0.66694   | 0.000763707 | Intergenic | NA                        | NA             |
| 19  | 59968803  | 59968890  | 1       | -0.150424  | 5    | 0.0058   | 0.088    | 0.24662  | 0.39704   | 0.043692347 | Intergenic | NA                        | NA             |
| 19  | 60273825  | 60273949  | 0.00024 | 0.059134   | 18   | 5.90E-13 | 6.00E-10 | 0.28477  | 0.22563   | 2.90E-10    | TSS        | NM_001191786              | Atmin          |
| 19  | 63028469  | 63028522  | 1       | 0.096579   | 5    | 0.0045   | 0.038    | 0.86928  | 0.7727    | 0.036708564 | Intragenic | NM_001107435              | Kcng4          |
| 19  | 63824001  | 63824199  | 1       | -0.180352  | 7    | 0.00021  | 0.00073  | 0.45522  | 0.63558   | 0.004882913 | Intergenic | NA                        | NA             |
| 19  | 65192980  | 65193009  | 1       | 0.054811   | 5    | 0.00029  | 0.015    | 0.064697 | 0.0098856 | 0.00620558  | Intergenic | NA                        | NA             |
| 19  | 65865012  | 65865079  | 1       | 0.085212   | 10   | 6.20E-07 | 6.40E-05 | 0.65354  | 0.56833   | 5.91E-05    | Intragenic | NM_001242627              | Zfpm1          |
| 19  | 66274116  | 66274201  | 1       | 0.063996   | 5    | 0.0027   | 0.00053  | 0.98003  | 0.91603   | 0.026665886 | Intergenic | NA                        | NA             |
| 19  | 66582231  | 66582300  | 1       | 0.05729    | 5    | 0.0049   | 0.0091   | 0.96235  | 0.90506   | 0.038897043 | Intergenic | NA                        | NA             |
| 19  | 67960730  | 67960906  | 1       | 0.085322   | 5    | 0.0038   | 0.0092   | 0.96841  | 0.88309   | 0.033101475 | Intergenic | NA                        | NA             |
| 19  | 68570629  | 68570737  | 1       | -0.110108  | 8    | 0.0042   | 0.07     | 0.6798   | 0.78991   | 0.035436    | Intragenic | NM_175596                 | Disc1          |
| 19  | 68763307  | 68763513  | 1       | -0.060918  | 11   | 0.004    | 0.011    | 0.7562   | 0.81711   | 0.034639296 | Intragenic | NM_175596                 | Disc1          |
| 2   | 118255    | 118327    | 0.009   | 0.107462   | 12   | 5.40E-12 | 2.20E-08 | 0.168    | 0.060537  | 2.28E-09    | Intergenic | NA                        | NA             |
| 2   | 43695461  | 43695655  | 1       | 0.17265    | 5    | 0.0058   | 0.059    | 0.54298  | 0.37033   | 0.043692347 | Intergenic | NA                        | NA             |
| 2   | 48971426  | 48971502  | 1       | 0.090701   | 7    | 0.0021   | 0.018    | 0.53348  | 0.44278   | 0.02305316  | Intergenic | NA                        | NA             |
| 2   | 141939298 | 141939483 | 1       | -0.070157  | 6    | 0.003    | 0.0045   | 0.89551  | 0.96567   | 0.028762987 | Intergenic | NA                        | NA             |
| 2   | 142510127 | 142510211 | 1       | 0.109545   | 5    | 0.0027   | 0.015    | 0.27875  | 0.16921   | 0.026665886 | Intragenic | NM_001047885              | Arse           |
| 2   | 145134748 | 145134817 | 1       | 0.067695   | 7    | 0.00088  | 0.0035   | 0.7232   | 0.65551   | 0.013258367 | Intergenic | NA                        | NA             |
| 2   | 148414965 | 148415078 | 1       | -0.084778  | 7    | 0.0022   | 0.0051   | 0.45964  | 0.54442   | 0.02345343  | Intergenic | NA                        | NA             |
| 2   | 148415727 | 148415766 | 1       | -0.083885  | 5    | 0.00048  | 0.0054   | 0.16154  | 0.24542   | 0.00874963  | Intergenic | NA                        | NA             |
| 2   | 159920570 | 159920769 | 1       | 0.148847   | 8    | 0.0002   | 0.017    | 0.82861  | 0.67976   | 0.0047248   | Intragenic | NM_001109556              | Mgarp          |
| 2   | 180912484 | 180912573 | 1       | -0.10658   | 9    | 1.70E-06 | 3.20E-06 | 0.85417  | 0.96075   | 0.000128721 | Intergenic | NA                        | NA             |
| 2   | 180916184 | 180916303 | 0.53    | -0.174832  | 13   | 3.40E-09 | 1.30E-06 | 0.34383  | 0.51866   | 6.69E-07    | Intergenic | NA                        | NA             |
| 2   | 182662087 | 182662237 | 1       | -0.053097  | 5    | 0.00039  | 0.0032   | 0.91753  | 0.97063   | 0.007729329 | Intergenic | NA                        | NA             |
| 2   | 206705346 | 206705367 | 1       | 0.052133   | 5    | 0.0068   | 0.015    | 0.15445  | 0.10231   | 0.049459113 | TSS        | NM_001007741:NM_001014173 | Isg20l2:Rrnad1 |

| chr | start     | stop      | q-value | methyl.diff | CpGs | pMWU     | p2DKS    | MCWLS    | MCWHS    | pMWU.fdr    | cgi.type   | transcript             | gene          |
|-----|-----------|-----------|---------|-------------|------|----------|----------|----------|----------|-------------|------------|------------------------|---------------|
| 2   | 215839196 | 215839209 | 1       | 0.098791    | 5    | 0.0045   | 0.0018   | 0.61436  | 0.51557  | 0.036708564 | Intragenic | NM_001024302:NM_017308 | Lysmd1:Sema6c |
| 2   | 215840379 | 215840537 | 1       | -0.067557   | 5    | 0.0024   | 0.0055   | 0.021478 | 0.089035 | 0.024867368 | Intragenic | NM_001024302:NM_017308 | Lysmd1:Sema6c |
| 2   | 242812692 | 242812822 | 1       | 0.116259    | 6    | 0.002    | 0.0042   | 0.74078  | 0.62452  | 0.022286792 | Intergenic | NA                     | NA            |
| 2   | 246771807 | 246771855 | 1       | -0.051526   | 5    | 0.0049   | 0.038    | 0.041212 | 0.092739 | 0.038897043 | TSS        | NM_001191963           | Synpo2        |
| 2   | 272545573 | 272545691 | 1       | -0.05776    | 5    | 0.0068   | 0.039    | 0.87161  | 0.92937  | 0.049459113 | Intergenic | NA                     | NA            |
| 2   | 278040554 | 278040735 | 1       | -0.071644   | 11   | 0.0027   | 0.014    | 0.72204  | 0.79368  | 0.026665886 | Intergenic | NA                     | NA            |
| 2   | 279312106 | 279312191 | 1       | 0.072789    | 5    | 0.0038   | 0.015    | 0.91041  | 0.83762  | 0.033101475 | Intergenic | NA                     | NA            |
| 20  | 55852     | 56022     | 1       | -0.11965    | 8    | 0.00091  | 0.018    | 0.18204  | 0.30169  | 0.013640761 | Intergenic | NA                     | NA            |
| 20  | 4021442   | 4021589   | 1       | 0.0957      | 18   | 0.00098  | 0.00066  | 0.78905  | 0.69335  | 0.014397711 | Intragenic | NM_031028              | Gabbr1        |
| 20  | 6690565   | 6690637   | 1       | 0.183595    | 7    | 0.0037   | 0.018    | 0.678    | 0.4944   | 0.033009366 | TSS        | NM_031522              | Neu1          |
| 20  | 6897355   | 6897451   | 1       | -0.085244   | 7    | 9.60E-05 | 0.0008   | 0.05826  | 0.1435   | 0.002806812 | TSS        | NM_133300              | Ddx39b        |
| 20  | 9426826   | 9426952   | 1       | -0.098014   | 10   | 0.00012  | 0.0001   | 0.67218  | 0.77019  | 0.003343019 | Intergenic | NA                     | NA            |
| 20  | 10851738  | 10851808  | 1       | 0.227431    | 5    | 0.00044  | 0.00097  | 0.57289  | 0.34546  | 0.008275924 | Intergenic | NA                     | NA            |
| 20  | 20547188  | 20547233  | 1       | 0.065069    | 5    | 1.50E-05 | 0.00053  | 0.73201  | 0.66694  | 0.000763707 | Intergenic | NA                     | NA            |
| 20  | 21548491  | 21548676  | 1       | -0.137261   | 8    | 2.20E-07 | 9.60E-06 | 0.063977 | 0.20124  | 2.95E-05    | Intergenic | NA                     | NA            |
| 20  | 25185930  | 25186036  | 1       | -0.067617   | 7    | 0.0012   | 0.0035   | 0.85437  | 0.92199  | 0.016180822 | Intergenic | NA                     | NA            |
| 20  | 47778406  | 47778475  | 1       | -0.076507   | 5    | 0.0068   | 0.015    | 0.23544  | 0.31195  | 0.049459113 | Intergenic | NA                     | NA            |
| 20  | 48516690  | 48516812  | 1       | -0.131713   | 9    | 0.0023   | 0.0027   | 0.42051  | 0.55222  | 0.024431295 | Intergenic | NA                     | NA            |
| 20  | 51157822  | 51157975  | 1       | -0.068349   | 8    | 1.80E-06 | 9.60E-06 | 0.011448 | 0.079797 | 0.000132885 | Intergenic | NA                     | NA            |
| 3   | 493393    | 493422    | 1       | 0.067256    | 5    | 0.0022   | 0.025    | 0.11691  | 0.049649 | 0.02345343  | Intergenic | NA                     | NA            |
| 3   | 10215450  | 10215489  | 1       | 0.07469     | 8    | 4.50E-05 | 0.0026   | 0.30274  | 0.22805  | 0.001640556 | Intergenic | NA                     | NA            |
| 3   | 10814087  | 10814126  | 1       | 0.07469     | 8    | 4.50E-05 | 0.0026   | 0.30274  | 0.22805  | 0.001640556 | TSS        | NM_001015014           | Surf6         |
| 3   | 13091219  | 13091277  | 1       | -0.148633   | 5    | 0.0041   | 0.038    | 0.37839  | 0.52702  | 0.034891354 | Intragenic | NM_001107825           | Ntng2         |
| 3   | 38799102  | 38799118  | 1       | -0.083597   | 5    | 0.0038   | 0.059    | 0.064731 | 0.14833  | 0.033101475 | TSS        | NM_001108581           | Epc2          |
| 3   | 65897941  | 65898002  | 1       | 0.106705    | 5    | 0.0045   | 0.039    | 0.87342  | 0.76671  | 0.036708564 | Intergenic | NA                     | NA            |
| 3   | 100812163 | 100812254 | 1       | -0.085958   | 5    | 0.0014   | 0.0055   | 0.7944   | 0.88036  | 0.018132456 | Intergenic | NA                     | NA            |
| 3   | 101763967 | 101764055 | 1       | -0.078078   | 5    | 0.00059  | 0.0092   | 0.030489 | 0.10857  | 0.010070925 | Intragenic | NM_031534              | Wt1           |
| 3   | 118959555 | 118959610 | 1       | 0.086573    | 5    | 0.0027   | 0.039    | 0.22113  | 0.13456  | 0.026665886 | Intergenic | NA                     | NA            |
| 3   | 125460702 | 125460772 | 1       | -0.054476   | 5    | 0.0016   | 0.0054   | 0.93741  | 0.99188  | 0.019935865 | Intergenic | NA                     | NA            |
| 3   | 128441935 | 128441984 | 1       | 0.089438    | 7    | 0.0024   | 0.011    | 0.15574  | 0.066303 | 0.024867368 | Intergenic | NA                     | NA            |
| 3   | 129677796 | 129677907 | 1       | 0.156386    | 9    | 0.0019   | 0.025    | 0.6783   | 0.52191  | 0.022002745 | TSS        | NM_172022              | Lzts3         |
| 3   | 146387698 | 146387862 | 1       | -0.119373   | 8    | 0.0042   | 0.018    | 0.38839  | 0.50776  | 0.035436    | Intragenic | NM_001107786           | Rin2          |
| 3   | 146483453 | 146483561 | 1       | -0.094286   | 10   | 0.00048  | 0.071    | 0.30603  | 0.40031  | 0.00874963  | Intragenic | NM_001107786           | Rin2          |
| 3   | 150210272 | 150210346 | 1       | -0.127541   | 7    | 0.0021   | 0.0077   | 0.63827  | 0.76581  | 0.02305316  | Intergenic | NA                     | NA            |
| 3   | 156559417 | 156559437 | 1       | 0.062519    | 5    | 0.0017   | 0.00014  | 0.42508  | 0.36256  | 0.020324291 | Intergenic | NA                     | NA            |

| chr | start     | stop      | q-value  | methyl.diff | CpGs | pMWU     | p2DKS    | MCWLS    | MCWHS    | pMWU.fdr    | cgi.type   | transcript                                           | gene                       |
|-----|-----------|-----------|----------|-------------|------|----------|----------|----------|----------|-------------|------------|------------------------------------------------------|----------------------------|
| 3   | 161555610 | 161555779 | 1        | 0.15732     | 14   | 1.10E-06 | 0.00031  | 0.49465  | 0.33733  | 9.55E-05    | TSS        | NM_001270867:NM_053601:NM_181687:NR_073089:NM_133582 | Nnat:Nnat:Nnat:Nnat:Blcap  |
| 3   | 162794101 | 162794176 | 1        | 0.124068    | 5    | 0.0049   | 0.058    | 0.6764   | 0.55233  | 0.038897043 | Intergenic | NA                                                   | NA                         |
| 3   | 165771466 | 165771558 | 1        | -0.149445   | 5    | 0.0029   | 0.038    | 0.20312  | 0.35256  | 0.028170066 | Intragenic | NM_199392                                            | Tox2                       |
| 3   | 168471953 | 168472010 | 1        | 0.132735    | 5    | 0.0024   | 0.015    | 0.56913  | 0.4364   | 0.024867368 | Intergenic | NA                                                   | NA                         |
| 3   | 169294924 | 169294978 | 1        | 0.156668    | 5    | 0.0038   | 0.014    | 0.38049  | 0.22382  | 0.033101475 | Intergenic | NA                                                   | NA                         |
| 3   | 171161135 | 171161163 | 1        | 0.064614    | 5    | 0.00044  | 0.015    | 0.84967  | 0.78506  | 0.008275924 | Intragenic | NM_001106545                                         | Kcng1                      |
| 3   | 171755775 | 171755806 | 1        | -0.085628   | 5    | 0.0027   | 0.038    | 0.25568  | 0.34131  | 0.026665886 | Intergenic | NA                                                   | NA                         |
| 3   | 172804983 | 172805104 | 1        | 0.059548    | 9    | 0.001    | 6.40E-05 | 0.9162   | 0.85665  | 0.014404878 | Intergenic | NA                                                   | NA                         |
| 3   | 173704389 | 173704597 | 1        | -0.062229   | 6    | 0.0018   | 0.0045   | 0.021745 | 0.083973 | 0.021346988 | Intergenic | NA                                                   | NA                         |
| 3   | 175094120 | 175094174 | 1        | -0.065664   | 5    | 0.0032   | 0.024    | 0.90665  | 0.97231  | 0.029622571 | Intergenic | NA                                                   | NA                         |
| 3   | 176001994 | 176002092 | 1        | 0.075633    | 5    | 0.00014  | 0.00014  | 0.97029  | 0.89466  | 0.003658584 | Intergenic | NA                                                   | NA                         |
| 3   | 178426623 | 178426771 | 0.038    | 0.132944    | 17   | 2.60E-11 | 9.20E-08 | 0.4597   | 0.32675  | 9.60E-09    | TSS        | NM_001159656:NM_001159653                            | Gnas:Gnas                  |
| 3   | 178438693 | 178438737 | 1        | -0.122136   | 5    | 2.20E-05 | 7.10E-05 | 0.49554  | 0.61768  | 0.000984333 | TSS        | NM_001024823:NM_021845                               | Gnas:Gnas                  |
| 3   | 178440528 | 178440694 | 1.10E-05 | -0.215288   | 21   | 1.10E-10 | 2.70E-11 | 0.2278   | 0.44309  | 3.61E-08    | TSS        | NM_001024823:NM_021845                               | Gnas:Gnas                  |
| 3   | 178470665 | 178470749 | 1        | 0.1337      | 8    | 8.30E-05 | 5.20E-05 | 0.48626  | 0.35256  | 0.002526794 | Intragenic | NM_001159656:NM_001159653:NM_001024823:NM_021845     | Gnas:Gnas:Gnas:Gnas        |
| 3   | 178472211 | 178472309 | 1        | -0.112003   | 15   | 9.10E-10 | 1.10E-05 | 0.12717  | 0.23918  | 2.44E-07    | TSS        | NM_019132                                            | Gnas                       |
| 3   | 183138018 | 183138050 | 1        | -0.159673   | 5    | 0.0017   | 0.039    | 0.28831  | 0.44798  | 0.020324291 | TSS        | NM_001109564                                         | Ppp1r3d                    |
| 3   | 183696760 | 183696916 | 1        | 0.084186    | 11   | 0.00023  | 0.00088  | 0.54394  | 0.45976  | 0.005145379 | Intergenic | NA                                                   | NA                         |
| 4   | 711436    | 711472    | 1        | -0.071701   | 5    | 0.00054  | 0.00098  | 0.04273  | 0.11443  | 0.009435621 | Intragenic | NM_017221                                            | Shh                        |
| 4   | 16105165  | 16105261  | 1        | 0.053026    | 12   | 3.60E-05 | 0.00066  | 0.076131 | 0.023105 | 0.00141744  | TSS        | NM_001110848:NM_001110847:NM_012919                  | Cacna2d1:Cacna2d1:Cacna2d1 |
| 4   | 20036831  | 20037030  | 1        | 0.138961    | 9    | 0.0017   | 0.025    | 0.46721  | 0.32825  | 0.020324291 | Intergenic | NA                                                   | NA                         |
| 4   | 42281276  | 42281297  | 1        | -0.061609   | 5    | 0.0045   | 0.059    | 0.038522 | 0.10013  | 0.036708564 | TSS        | NM_031506                                            | Cftr                       |
| 4   | 51126221  | 51126347  | 1        | -0.105664   | 5    | 0.0035   | 0.0054   | 0.84834  | 0.954    | 0.031319697 | Intergenic | NA                                                   | NA                         |
| 4   | 66148309  | 66148335  | 1        | 0.053821    | 5    | 6.20E-05 | 3.40E-05 | 0.97404  | 0.92022  | 0.002057146 | Intragenic | NM_001107853                                         | Luc7l2                     |
| 4   | 66867542  | 66867562  | 1        | 0.062519    | 5    | 0.0017   | 0.00014  | 0.42508  | 0.36256  | 0.020324291 | TSS        | NM_001276456                                         | Chmp4bl1                   |
| 4   | 146804431 | 146804517 | 1        | 0.070494    | 10   | 0.0004   | 0.0006   | 0.49788  | 0.42739  | 0.007874667 | Intergenic | NA                                                   | NA                         |
| 4   | 146808464 | 146808559 | 1        | -0.121898   | 5    | 0.00032  | 0.0017   | 0.24646  | 0.36836  | 0.006701844 | Intergenic | NA                                                   | NA                         |
| 4   | 146839209 | 146839259 | 1        | 0.061449    | 5    | 0.002    | 0.0018   | 0.49844  | 0.43699  | 0.022286792 | Intragenic | NR_132648                                            | Hoxaas3                    |

| chr | start     | stop      | q-value  | methy.diff | CpGs | pMWU     | p2DKS    | MCWLS    | MCWHS    | pMWU.fdr    | cgi.type   | transcript          | gene          |
|-----|-----------|-----------|----------|------------|------|----------|----------|----------|----------|-------------|------------|---------------------|---------------|
| 4   | 146839473 | 146839593 | 7.80E-09 | 0.146514   | 17   | 4.40E-14 | 1.90E-14 | 0.35434  | 0.20783  | 3.47E-11    | Intragenic | NR_132648           | Hoxaas3       |
| 4   | 146925004 | 146925054 | 1        | 0.061449   | 5    | 0.002    | 0.0018   | 0.49844  | 0.43699  | 0.022286792 | Intragenic | NR_132648           | Hoxaas3       |
| 4   | 146925268 | 146925388 | 7.80E-09 | 0.146514   | 17   | 4.40E-14 | 1.90E-14 | 0.35434  | 0.20783  | 3.47E-11    | Intragenic | NR_132648           | Hoxaas3       |
| 4   | 162294486 | 162294534 | 1        | 0.088627   | 5    | 0.0038   | 0.024    | 0.8222   | 0.73357  | 0.033101475 | Intergenic | NA                  | NA            |
| 4   | 180894263 | 180894458 | 1        | -0.069706  | 5    | 0.0041   | 0.009    | 0.68858  | 0.75829  | 0.034891354 | Intergenic | NA                  | NA            |
| 4   | 182119619 | 182119676 | 1        | 0.133983   | 5    | 1.70E-06 | 1.60E-05 | 0.29109  | 0.15711  | 0.000128721 | Intergenic | NA                  | NA            |
| 4   | 196200558 | 196200658 | 0.11     | 0.110379   | 7    | 7.50E-07 | 2.60E-07 | 0.37056  | 0.26018  | 6.92E-05    | Intergenic | NA                  | NA            |
| 4   | 197362206 | 197362302 | 1        | 0.138623   | 5    | 7.00E-05 | 0.0018   | 0.93709  | 0.79847  | 0.002296778 | Intergenic | NA                  | NA            |
| 4   | 197362560 | 197362605 | 1        | 0.062872   | 5    | 3.90E-05 | 0.00098  | 0.72982  | 0.66695  | 0.001495675 | Intergenic | NA                  | NA            |
| 4   | 198429312 | 198429359 | 1        | 0.084233   | 5    | 0.00015  | 7.00E-05 | 0.11442  | 0.030185 | 0.003885526 | TSS        | NM_001271251        | Pdzrn3        |
| 4   | 210737336 | 210737396 | 1        | -0.060845  | 5    | 0.0017   | 0.00052  | 2.00E-07 | 0.060845 | 0.020324291 | Intragenic | NM_019159           | Syn2          |
| 4   | 219073749 | 219073822 | 0.5      | 0.107384   | 7    | 2.20E-05 | 1.20E-06 | 0.15284  | 0.045455 | 0.000984333 | TSS        | NM_001271276        | Fbxl14        |
| 4   | 219699738 | 219699842 | 1        | 0.127978   | 5    | 5.60E-07 | 1.60E-05 | 0.90769  | 0.77971  | 5.61E-05    | Intergenic | NA                  | NA            |
| 4   | 221005937 | 221006103 | 1        | 0.129835   | 5    | 0.0053   | 0.0018   | 0.16699  | 0.037154 | 0.041404497 | Intergenic | NA                  | NA            |
| 4   | 245332300 | 245332412 | 1        | 0.167511   | 5    | 0.0011   | 0.00052  | 0.72568  | 0.55816  | 0.015250235 | Intergenic | NA                  | NA            |
| 4   | 245395612 | 245395724 | 1        | 0.159994   | 5    | 0.0038   | 0.0018   | 0.72612  | 0.56613  | 0.033101475 | Intergenic | NA                  | NA            |
| 4   | 246879768 | 246879851 | 1        | 0.074172   | 7    | 0.0035   | 0.0013   | 0.91637  | 0.8422   | 0.031319697 | TSS        | NM_001109612        | Rps4y2        |
| 5   | 33530215  | 33530392  | 0.04     | 0.118517   | 14   | 2.50E-10 | 9.80E-08 | 0.17119  | 0.052677 | 7.38E-08    | Intergenic | NA                  | NA            |
| 5   | 52064656  | 52064783  | 1        | 0.155539   | 10   | 4.00E-05 | 0.002    | 0.66034  | 0.5048   | 0.001514359 | Intergenic | NA                  | NA            |
| 5   | 76666440  | 76666620  | 1        | -0.056187  | 5    | 0.0012   | 0.0032   | 0.16309  | 0.21928  | 0.016180822 | Intergenic | NA                  | NA            |
| 5   | 83430829  | 83430859  | 1        | -0.109079  | 5    | 0.0038   | 0.025    | 0.084126 | 0.19321  | 0.033101475 | TSS        | NM_181088           | Dfnb31        |
| 5   | 95175697  | 95175727  | 1        | 0.084394   | 5    | 2.40E-05 | 0.00052  | 0.25294  | 0.16854  | 0.001057791 | TSS        | NR_046238:NR_046238 | Rn5-8s:Rn5-8s |
| 5   | 95177715  | 95177745  | 1        | 0.084346   | 5    | 3.10E-05 | 0.00052  | 0.25294  | 0.16859  | 0.001237068 | TSS        | NR_046238           | Rn5-8s        |
| 5   | 95180571  | 95180588  | 1        | 0.058937   | 5    | 0.0058   | 0.0031   | 0.32122  | 0.26228  | 0.043692347 | Intergenic | NA                  | NA            |
| 5   | 102704384 | 102704440 | 0.11     | 0.071495   | 5    | 4.20E-07 | 2.80E-07 | 0.42146  | 0.34997  | 4.59E-05    | Intergenic | NA                  | NA            |
| 5   | 110579080 | 110579139 | 1        | 0.054411   | 5    | 0.0063   | 0.0053   | 0.79814  | 0.74373  | 0.046861209 | Intergenic | NA                  | NA            |
| 5   | 110931525 | 110931564 | 1        | 0.064281   | 5    | 0.0022   | 0.015    | 0.10293  | 0.038649 | 0.02345343  | Intergenic | NA                  | NA            |
| 5   | 117983884 | 117984099 | 1        | 0.064038   | 14   | 0.00019  | 0.014    | 0.22922  | 0.16518  | 0.004561545 | Intergenic | NA                  | NA            |
| 5   | 122244958 | 122245097 | 1        | 0.102833   | 5    | 0.002    | 0.024    | 0.17502  | 0.072187 | 0.022286792 | Intergenic | NA                  | NA            |
| 5   | 125548131 | 125548191 | 1        | 0.068593   | 5    | 0.00023  | 0.00052  | 0.85998  | 0.79138  | 0.005145379 | Intergenic | NA                  | NA            |
| 5   | 130071946 | 130072068 | 1        | -0.185623  | 5    | 0.0068   | 0.024    | 0.24696  | 0.43258  | 0.049459113 | TSS        | NM_001106671        | Ttc22         |
| 5   | 144276829 | 144276847 | 1        | -0.16901   | 5    | 0.00026  | 0.00028  | 0.23495  | 0.40396  | 0.005687259 | Intergenic | NA                  | NA            |
| 5   | 148531798 | 148532104 | 1        | 0.073977   | 5    | 0.00012  | 0.0018   | 0.088327 | 0.014349 | 0.003343019 | TSS        | NM_001191764        | Tfap2e        |
| 5   | 151976461 | 151976802 | 1        | -0.070027  | 23   | 0.0027   | 0.015    | 0.20205  | 0.27208  | 0.026665886 | TSS        | NM_001302967        | Col16a1       |
| 5   | 153759031 | 153759062 | 1        | -0.051362  | 8    | 0.00011  | 0.00041  | 0.019107 | 0.070469 | 0.003123365 | Intergenic | NA                  | NA            |
| 5   | 155169290 | 155169344 | 1        | 0.104072   | 5    | 0.00019  | 6.60E-05 | 0.40568  | 0.30161  | 0.004561545 | Intragenic | NM_001107908        | Wdtdc1        |
| 5   | 158572986 | 158573068 | 1        | -0.119434  | 5    | 0.0053   | 0.00097  | 0.54248  | 0.66192  | 0.041404497 | Intergenic | NA                  | NA            |
| 5   | 168694001 | 168694135 | 1        | -0.055191  | 9    | 8.50E-05 | 0.0028   | 0.06195  | 0.11714  | 0.002561276 | Intergenic | NA                  | NA            |

| chr | start     | stop      | q-value | methy.diff | CpGs | pMWU     | p2DKS    | MCWLS    | MCWHS    | pMWU.fdr    | cgi.type   | transcript             | gene         |
|-----|-----------|-----------|---------|------------|------|----------|----------|----------|----------|-------------|------------|------------------------|--------------|
| 5   | 169319407 | 169319524 | 1       | 0.11185    | 8    | 0.00072  | 0.0088   | 0.79401  | 0.68216  | 0.011618361 | Intergenic | NA                     | NA           |
| 5   | 169858273 | 169858307 | 1       | -0.148607  | 5    | 0.0014   | 0.0092   | 0.34447  | 0.49308  | 0.018132456 | Intragenic | NM_001271198           | Ube4b        |
| 5   | 170512713 | 170512800 | 1       | -0.159442  | 5    | 0.00017  | 0.00096  | 0.37559  | 0.53503  | 0.004327672 | Intergenic | NA                     | NA           |
| 5   | 171734518 | 171734636 | 1       | 0.071431   | 7    | 0.00013  | 0.00015  | 0.78958  | 0.71815  | 0.003521927 | Intragenic | NM_001195559           | Camta1       |
| 5   | 171803052 | 171803165 | 1       | 0.058001   | 8    | 0.0026   | 0.026    | 0.92939  | 0.87139  | 0.026566782 | Intragenic | NM_001195559           | Camta1       |
| 5   | 172592178 | 172592292 | 1       | 0.097319   | 7    | 9.00E-06 | 0.00049  | 0.93433  | 0.83701  | 0.00053154  | Intergenic | NA                     | NA           |
| 5   | 174868016 | 174868076 | 1       | 0.091995   | 5    | 0.0035   | 0.0031   | 0.16114  | 0.06914  | 0.031319697 | Intragenic | NM_001108696           | Tp73         |
| 6   | 6640975   | 6641127   | 1       | 0.098177   | 9    | 0.00033  | 0.00052  | 0.62283  | 0.52465  | 0.006862606 | Intergenic | NA                     | NA           |
| 6   | 9405006   | 9405046   | 1       | 0.162877   | 5    | 0.0053   | 0.038    | 0.39993  | 0.23705  | 0.041404497 | TSS        | NM_017171              | Prkce        |
| 6   | 25209334  | 25209399  | 1       | 0.154186   | 5    | 0.0017   | 0.039    | 0.74467  | 0.59048  | 0.020324291 | Intergenic | NA                     | NA           |
| 6   | 38197437  | 38197456  | 1       | 0.050991   | 5    | 0.0008   | 0.0018   | 0.064555 | 0.013564 | 0.012433684 | Intragenic | NM_139326              | Pomc         |
| 6   | 38855782  | 38855805  | 1       | 0.083377   | 5    | 0.00032  | 0.0032   | 0.26195  | 0.17858  | 0.006701844 | Intergenic | NA                     | NA           |
| 6   | 39269572  | 39269590  | 1       | 0.05075    | 5    | 0.0045   | 0.038    | 0.28464  | 0.23389  | 0.036708564 | Intergenic | NA                     | NA           |
| 6   | 43652896  | 43652928  | 1       | -0.068054  | 5    | 0.00072  | 0.0031   | 0.89211  | 0.96016  | 0.011618361 | Intergenic | NA                     | NA           |
| 6   | 72383869  | 72383894  | 1       | 0.219217   | 9    | 1.10E-07 | 1.70E-05 | 0.63415  | 0.41493  | 1.55E-05    | Intergenic | NA                     | NA           |
| 6   | 84455226  | 84455284  | 1       | 0.074636   | 7    | 1.20E-06 | 8.10E-06 | 0.095185 | 0.020549 | 0.000101246 | Intergenic | NA                     | NA           |
| 6   | 84814411  | 84814525  | 1       | -0.093295  | 5    | 0.0035   | 0.0018   | 0.10524  | 0.19853  | 0.031319697 | Intergenic | NA                     | NA           |
| 6   | 88835290  | 88835385  | 1       | -0.060389  | 5    | 0.0013   | 0.00053  | 0.014598 | 0.074987 | 0.017137946 | TSS        | NM_001014077           | Clec14a      |
| 6   | 97686964  | 97687254  | 1       | 0.072394   | 5    | 0.0032   | 0.0052   | 0.95339  | 0.88099  | 0.029622571 | Intergenic | NA                     | NA           |
| 6   | 101136740 | 101136838 | 1       | -0.064924  | 9    | 0.00013  | 0.00081  | 0.38858  | 0.4535   | 0.003521927 | TSS        | NR_110377              | Rn7sl1       |
| 6   | 118775222 | 118775371 | 1       | 0.082969   | 7    | 0.003    | 0.0014   | 0.23297  | 0.15     | 0.028762987 | Intergenic | NA                     | NA           |
| 6   | 142109216 | 142109283 | 1       | -0.133307  | 12   | 2.70E-05 | 0.0038   | 0.57018  | 0.70349  | 0.001155522 | Intragenic | NM_024163:NM_001111115 | Begain:Begin |
| 6   | 142748561 | 142748725 | 1       | -0.086148  | 13   | 0.0029   | 0.027    | 0.36864  | 0.45479  | 0.028170066 | Intragenic | NM_053744              | Dlk1         |
| 6   | 142820946 | 142821006 | 1       | 0.105349   | 5    | 0.0058   | 0.088    | 0.60776  | 0.50242  | 0.043692347 | TSS        | NR_131064              | RGD1566401   |
| 6   | 144521393 | 144521597 | 1       | 0.072143   | 17   | 3.40E-07 | 5.80E-06 | 0.69754  | 0.6254   | 4.18E-05    | Intragenic | NM_001137633           | Tnfaip2      |
| 7   | 719465    | 719510    | 1       | 0.060532   | 5    | 0.0068   | 1        | 0.060532 | 0        | 0.049459113 | Intergenic | NA                     | NA           |
| 7   | 855253    | 855281    | 1       | 0.106252   | 5    | 0.0058   | 0.0092   | 0.72938  | 0.62313  | 0.043692347 | Intergenic | NA                     | NA           |
| 7   | 12145981  | 12146039  | 1       | -0.105344  | 5    | 0.00072  | 0.0018   | 0.85341  | 0.95875  | 0.011618361 | TSS        | NM_001103361           | Adat3        |
| 7   | 12941121  | 12941147  | 1       | 0.077197   | 5    | 0.0058   | 0.039    | 0.91099  | 0.8338   | 0.043692347 | Intragenic | NM_130829:NM_001100886 | Palm:Tmem259 |
| 7   | 22616060  | 22616179  | 1       | -0.122554  | 10   | 4.00E-06 | 0.00025  | 0.55291  | 0.67546  | 0.000251319 | Intergenic | NA                     | NA           |
| 7   | 27134245  | 27134359  | 1       | 0.060618   | 9    | 0.0032   | 0.033    | 0.6372   | 0.57658  | 0.029622571 | Intergenic | NA                     | NA           |
| 7   | 29872019  | 29872079  | 1       | 0.068417   | 5    | 0.00021  | 0.00097  | 0.85925  | 0.79083  | 0.004882913 | Intragenic | NM_001106778           | Ano4         |
| 7   | 31628043  | 31628068  | 1       | 0.068904   | 8    | 0.0011   | 0.0011   | 0.11235  | 0.043443 | 0.015250235 | Intragenic | NM_001271371           | Anks1b       |
| 7   | 45933041  | 45933091  | 1       | -0.07083   | 5    | 0.0058   | 0.025    | 0.87808  | 0.94891  | 0.043692347 | Intergenic | NA                     | NA           |
| 7   | 64473399  | 64473542  | 1       | -0.072735  | 7    | 0.0011   | 0.0083   | 0.046056 | 0.11879  | 0.015250235 | TSS        | NM_001191784           | Srgap1       |
| 7   | 71643804  | 71643925  | 1       | -0.063011  | 12   | 0.00023  | 0.0013   | 0.37283  | 0.43584  | 0.005145379 | Intergenic | NA                     | NA           |
| 7   | 71786620  | 71786741  | 1       | -0.063011  | 12   | 0.00023  | 0.0013   | 0.37283  | 0.43584  | 0.005145379 | Intragenic | NM_013082              | Sdc2         |

| chr | start     | stop      | q-value  | methy.diff | CpGs | pMWU     | p2DKS    | MCWLS    | MCWHS    | pMWU.fdr    | cgi.type   | transcript          | gene             |
|-----|-----------|-----------|----------|------------|------|----------|----------|----------|----------|-------------|------------|---------------------|------------------|
| 7   | 74495643  | 74495743  | 2.70E-07 | 0.065341   | 18   | 4.70E-14 | 6.70E-13 | 0.30299  | 0.23765  | 3.47E-11    | Intragenic | NM_001134886        | Vps13b           |
| 7   | 104689539 | 104689719 | 1        | -0.133438  | 5    | 4.20E-07 | 1.60E-05 | 0.65824  | 0.79168  | 4.59E-05    | Intergenic | NA                  | NA               |
| 7   | 122151974 | 122152006 | 1        | 0.057231   | 5    | 2.20E-06 | 3.50E-05 | 0.54692  | 0.48969  | 0.000154681 | TSS        | NM_001008373        | Srek1ip1         |
| 7   | 125891002 | 125891125 | 1        | -0.050133  | 5    | 0.002    | 3.30E-05 | 0.74373  | 0.79387  | 0.022286792 | Intergenic | NA                  | NA               |
| 7   | 125933665 | 125933733 | 1        | 0.136979   | 5    | 0.00054  | 0.015    | 0.75854  | 0.62156  | 0.009435621 | Intergenic | NA                  | NA               |
| 7   | 129736424 | 129736509 | 1        | 0.099348   | 10   | 0.00071  | 0.0013   | 0.85719  | 0.75784  | 0.011618361 | Intragenic | NM_199409           | Panx2            |
| 7   | 130183094 | 130183131 | 1        | -0.086339  | 5    | 0.002    | 0.0055   | 0.11098  | 0.19732  | 0.022286792 | Intragenic | NM_021676           | Shank3           |
| 7   | 130183174 | 130183230 | 1.60E-06 | 0.081118   | 11   | 7.20E-14 | 3.90E-12 | 0.58918  | 0.50807  | 4.25E-11    | Intragenic | NM_021676           | Shank3           |
| 7   | 130183312 | 130183330 | 1        | 0.231883   | 5    | 1.30E-05 | 0.00028  | 0.56053  | 0.32865  | 0.000697982 | Intragenic | NM_021676           | Shank3           |
| 7   | 135507000 | 135507018 | 1        | -0.158032  | 5    | 0.00036  | 0.00053  | 0.23495  | 0.39298  | 0.0073825   | TSS        | NM_001008521        | Twf1             |
| 7   | 140497357 | 140497406 | 1        | -0.050207  | 8    | 2.50E-05 | 0.0016   | 0.062306 | 0.11251  | 0.001085662 | Intergenic | NA                  | NA               |
| 8   | 45083362  | 45083461  | 1        | -0.154652  | 10   | 6.00E-08 | 6.20E-05 | 0.46624  | 0.62089  | 1.04E-05    | Intragenic | NM_001106814        | Tecta            |
| 8   | 48601058  | 48601123  | 1        | -0.141814  | 8    | 0.00059  | 0.0059   | 0.60762  | 0.74943  | 0.010070925 | Intragenic | NM_001108141        | Dscaml1          |
| 8   | 62575392  | 62575539  | 1        | 0.149767   | 7    | 3.30E-06 | 1.40E-05 | 0.91474  | 0.76498  | 0.000221475 | TSS        | NM_017286           | Cyp11a1          |
| 8   | 64278915  | 64278994  | 1        | -0.151163  | 7    | 0.00093  | 0.018    | 0.27491  | 0.42608  | 0.013870152 | Intergenic | NA                  | NA               |
| 8   | 85304006  | 85304104  | 1        | 0.057044   | 9    | 0.0045   | 0.08     | 0.19093  | 0.13389  | 0.036708564 | Intergenic | NA                  | NA               |
| 8   | 106881601 | 106881741 | 0.69     | -0.084176  | 14   | 7.60E-08 | 1.70E-06 | 0.87652  | 0.9607   | 1.15E-05    | Intergenic | NA                  | NA               |
| 8   | 111401420 | 111401519 | 1        | 0.058196   | 5    | 0.0024   | 0.0054   | 0.97381  | 0.91561  | 0.024867368 | Intergenic | NA                  | NA               |
| 8   | 114979115 | 114979129 | 1        | 0.068748   | 5    | 0.0029   | 0.015    | 0.10499  | 0.036241 | 0.028170066 | Intergenic | NA                  | NA               |
| 8   | 116237247 | 116237278 | 1        | 0.061004   | 5    | 0.0063   | 0.024    | 0.97544  | 0.91443  | 0.046861209 | Intragenic | NM_019146           | Bsn              |
| 8   | 116246757 | 116246890 | 1        | 0.150484   | 9    | 0.00019  | 0.004    | 0.60875  | 0.45826  | 0.004561545 | Intragenic | NM_019146           | Bsn              |
| 8   | 117229744 | 117229859 | 1        | 0.174764   | 5    | 0.0041   | 0.0093   | 0.83569  | 0.66093  | 0.034891354 | Intergenic | NA                  | NA               |
| 8   | 117561677 | 117561709 | 1        | 0.105043   | 5    | 7.80E-05 | 3.50E-05 | 0.35861  | 0.25357  | 0.002424568 | TSS        | NM_001106861        | Smarcc1          |
| 8   | 119867651 | 119867700 | 1        | -0.126634  | 5    | 0.00014  | 0.00028  | 0.63011  | 0.75675  | 0.003658584 | Intergenic | NA                  | NA               |
| 8   | 126105955 | 126106046 | 1        | -0.05304   | 6    | 0.0026   | 0.027    | 0.064387 | 0.11743  | 0.026566782 | Intergenic | NA                  | NA               |
| 8   | 126878452 | 126878553 | 1        | -0.114674  | 7    | 0.00054  | 0.0034   | 0.69913  | 0.8138   | 0.009435621 | Intragenic | NM_001106865        | Ctdspl           |
| 8   | 129683330 | 129683493 | 1        | 0.071037   | 7    | 0.0026   | 0.013    | 0.90849  | 0.83746  | 0.026566782 | Intergenic | NA                  | NA               |
| 9   | 11340826  | 11340901  | 1        | 0.094071   | 5    | 2.50E-06 | 1.60E-05 | 0.17369  | 0.079621 | 0.000171686 | Intergenic | NA                  | NA               |
| 9   | 12664998  | 12665010  | 1        | 0.070611   | 5    | 0.00019  | 0.00052  | 0.95062  | 0.88001  | 0.004561545 | Intergenic | NA                  | NA               |
| 9   | 16108985  | 16109074  | 1        | 0.088741   | 14   | 0.00043  | 0.0058   | 0.72387  | 0.63513  | 0.008275924 | Intergenic | NA                  | NA               |
| 9   | 43200992  | 43201037  | 1        | 0.065069   | 5    | 1.50E-05 | 0.00053  | 0.73201  | 0.66694  | 0.000763707 | Intergenic | NA                  | NA               |
| 9   | 69850537  | 69850662  | 1        | 0.117383   | 7    | 0.0046   | 0.027    | 0.46816  | 0.35078  | 0.037420937 | Intergenic | NA                  | NA               |
| 9   | 73807383  | 73807400  | 1        | 0.099049   | 5    | 7.80E-05 | 0.18     | 0.11959  | 0.020541 | 0.002424568 | Intergenic | NA                  | NA               |
| 9   | 94667362  | 94667431  | 1        | 0.082156   | 5    | 0.0008   | 0.0031   | 0.69618  | 0.61403  | 0.012433684 | Intragenic | NM_013023           | Sag              |
| 9   | 96816491  | 96816507  | 1        | 0.052981   | 5    | 0.0017   | 0.024    | 0.19308  | 0.14009  | 0.020324291 | Intragenic | NM_001108231        | Asb18            |
| 9   | 99316810  | 99316835  | 1        | 0.229562   | 9    | 2.70E-09 | 5.70E-06 | 0.62806  | 0.3985   | 6.13E-07    | TSS        | NM_182671:NM_199495 | Ndufa101:Ndufa10 |
| 9   | 103960100 | 103960196 | 1        | 0.052354   | 7    | 0.003    | 0.0082   | 0.079085 | 0.026731 | 0.028762987 | TSS        | NM_001002024        | Slco4c1          |
| X   | 51976130  | 51976256  | 1        | 0.115254   | 8    | 0.00083  | 0.013    | 0.95865  | 0.84339  | 0.012765573 | Intergenic | NA                  | NA               |

| chr | start     | stop      | q-value | methy.diff | CpGs | pMWU     | p2DKS  | MCWLS    | MCWHS    | pMWU.fdr    | cgi.type   | transcript | gene |
|-----|-----------|-----------|---------|------------|------|----------|--------|----------|----------|-------------|------------|------------|------|
| X   | 63596303  | 63596325  | 1       | 0.056845   | 5    | 0.0068   | 0.014  | 0.93354  | 0.87669  | 0.049459113 | Intergenic | NA         | NA   |
| X   | 63596459  | 63596481  | 1       | 0.063484   | 5    | 0.0019   | 0.0017 | 0.93424  | 0.87075  | 0.022002745 | Intergenic | NA         | NA   |
| X   | 72374165  | 72374395  | 1       | 0.055488   | 10   | 0.0021   | 0.016  | 0.88581  | 0.83032  | 0.02305316  | Intergenic | NA         | NA   |
| X   | 107640227 | 107640345 | 1       | -0.050003  | 6    | 0.0044   | 0.058  | 0.039694 | 0.089698 | 0.036708564 | Intergenic | NA         | NA   |
| X   | 123967440 | 123967489 | 1       | -0.08872   | 7    | 7.30E-05 | 0.0021 | 0.16381  | 0.25253  | 0.002343141 | Intergenic | NA         | NA   |
| X   | 124121821 | 124121870 | 1       | -0.08872   | 7    | 7.30E-05 | 0.0021 | 0.16381  | 0.25253  | 0.002343141 | Intergenic | NA         | NA   |
| X   | 124155778 | 124155795 | 1       | -0.061211  | 5    | 0.0045   | 0.0091 | 0.11607  | 0.17728  | 0.036708564 | Intergenic | NA         | NA   |
| X   | 134052101 | 134052235 | 1       | -0.088133  | 5    | 0.0041   | 0.015  | 0.82702  | 0.91515  | 0.034891354 | Intergenic | NA         | NA   |

### Figure2C Blood CRL

| chr | start     | stop      | q-value  | methy.diff | CpGs | pMWU     | p2DKS    | CRLLS    | CRLHS    | pMWU.fdr    | cgi.type   | transcript                                  | gene                  |
|-----|-----------|-----------|----------|------------|------|----------|----------|----------|----------|-------------|------------|---------------------------------------------|-----------------------|
| 1   | 26631936  | 26631982  | 1        | 0.057292   | 5    | 0.0022   | 0.038    | 0.17951  | 0.12221  | 0.024379767 | TSS        | NM_001108459                                | Clvs2                 |
| 1   | 32872113  | 32872135  | 1        | 0.096428   | 5    | 0.00039  | 0.0091   | 0.77073  | 0.6743   | 0.008107445 | Intergenic | NA                                          | NA                    |
| 1   | 35323526  | 35323621  | 1        | 0.059451   | 5    | 0.0019   | 0.00052  | 0.088019 | 0.028568 | 0.023154472 | Intragenic | NM_001107331                                | Irx1                  |
| 1   | 39933952  | 39934039  | 1        | 0.075424   | 5    | 0.0058   | 0.0055   | 0.88284  | 0.80741  | 0.04538022  | Intergenic | NA                                          | NA                    |
| 1   | 51577046  | 51577134  | 1        | 0.0882     | 17   | 2.00E-05 | 1.30E-05 | 0.44362  | 0.35542  | 0.001054815 | TSS        | NM_012756                                   | Igf2r                 |
| 1   | 68161468  | 68161619  | 2.30E-06 | 0.114278   | 16   | 4.20E-14 | 5.60E-12 | 0.95122  | 0.83694  | 4.46E-11    | Intragenic | NM_147135                                   | Sbk1                  |
| 1   | 81596417  | 81596449  | 1        | 0.082139   | 5    | 0.00072  | 0.0018   | 0.30467  | 0.22254  | 0.012503415 | Intragenic | NM_012530                                   | Ckm                   |
| 1   | 81644587  | 81644849  | 1        | -0.089229  | 14   | 0.00024  | 0.0027   | 0.35424  | 0.44347  | 0.005792542 | Intergenic | NA                                          | NA                    |
| 1   | 88743729  | 88744112  | 1        | 0.057972   | 33   | 0.0025   | 0.0066   | 0.37758  | 0.31961  | 0.026666667 | Intergenic | NA                                          | NA                    |
| 1   | 88850623  | 88851006  | 1        | 0.057972   | 33   | 0.0025   | 0.0066   | 0.37758  | 0.31961  | 0.026666667 | Intergenic | NA                                          | NA                    |
| 1   | 89196344  | 89196435  | 1        | 0.057986   | 9    | 0.002    | 0.0086   | 0.36704  | 0.30906  | 0.023154472 | Intergenic | NA                                          | NA                    |
| 1   | 89204428  | 89204481  | 1        | 0.098245   | 5    | 9.20E-06 | 0.00028  | 0.72226  | 0.62401  | 0.000557481 | Intergenic | NA                                          | NA                    |
| 1   | 90084469  | 90084511  | 1        | 0.082397   | 5    | 0.0013   | 0.024    | 0.23257  | 0.15017  | 0.018238424 | Intragenic | NM_022628                                   | Nphs1                 |
| 1   | 102230961 | 102231020 | 1        | -0.082918  | 5    | 0.0022   | 0.0054   | 0.029416 | 0.11233  | 0.024379767 | Intragenic | NM_053859                                   | Slc17a7               |
| 1   | 116822487 | 116822620 | 1        | -0.097228  | 5    | 0.0049   | 0.0031   | 0.80946  | 0.90669  | 0.039645455 | Intergenic | NA                                          | NA                    |
| 1   | 151967870 | 151968013 | 1        | -0.119288  | 14   | 9.50E-08 | 0.00011  | 0.24485  | 0.36414  | 1.42E-05    | Intergenic | NA                                          | NA                    |
| 1   | 151969248 | 151969336 | 1        | -0.080447  | 13   | 4.60E-05 | 0.001    | 0.092691 | 0.17314  | 0.001926588 | Intergenic | NA                                          | NA                    |
| 1   | 151971059 | 151971138 | 1        | -0.075387  | 5    | 0.00088  | 0.0018   | 0.1084   | 0.18379  | 0.014571163 | Intergenic | NA                                          | NA                    |
| 1   | 151971933 | 151972046 | 1        | -0.09778   | 9    | 0.00082  | 0.0042   | 0.28783  | 0.38561  | 0.013737412 | Intergenic | NA                                          | NA                    |
| 1   | 151975034 | 151975075 | 1        | -0.148419  | 5    | 0.0049   | 7.10E-05 | 0.50343  | 0.65185  | 0.039645455 | Intergenic | NA                                          | NA                    |
| 1   | 157106484 | 157106540 | 1        | 0.091463   | 5    | 0.0038   | 0.0092   | 0.23031  | 0.13885  | 0.033926019 | TSS        | NM_053524                                   | Nox4                  |
| 1   | 161113830 | 161113987 | 1        | 0.090527   | 5    | 9.20E-06 | 7.10E-05 | 0.10762  | 0.017096 | 0.000557481 | Intergenic | NA                                          | NA                    |
| 1   | 161204177 | 161204334 | 1        | 0.090527   | 5    | 9.20E-06 | 7.10E-05 | 0.10762  | 0.017096 | 0.000557481 | Intergenic | NA                                          | NA                    |
| 1   | 184027942 | 184028039 | 1        | 0.149302   | 5    | 0.0032   | 0.038    | 0.30801  | 0.15871  | 0.030277741 | Intergenic | NA                                          | NA                    |
| 1   | 191163945 | 191163966 | 1        | -0.182624  | 5    | 7.00E-05 | 0.00098  | 0.63889  | 0.82151  | 0.002730959 | TSS        | NM_001033955:N<br>M_001033956:N<br>M_017338 | Calca:Calca:Ca<br>lca |



| chr | start     | stop      | q-value | methyL.diff | CpGs | pMWU     | p2DKS    | MCWLS     | MCWHS     | pMWU.fdr    | cgi.type   | transcript   | gene     |
|-----|-----------|-----------|---------|-------------|------|----------|----------|-----------|-----------|-------------|------------|--------------|----------|
| 1   | 198267172 | 198267281 | 1       | -0.054762   | 11   | 0.0012   | 0.0053   | 0.094404  | 0.14917   | 0.017616495 | TSS        | NM_181370    | Hs3st2   |
| 1   | 204661355 | 204661450 | 1       | -0.073763   | 9    | 0.0014   | 0.017    | 0.45586   | 0.52963   | 0.01935534  | Intergenic | NA           | NA       |
| 1   | 227606956 | 227606985 | 1       | 0.094527    | 5    | 0.00036  | 0.00052  | 0.43839   | 0.34386   | 0.007708872 | Intragenic | NM_001024290 | Gal3st3  |
| 1   | 229174134 | 229174208 | 1       | -0.07634    | 9    | 0.00012  | 0.0061   | 0.085784  | 0.16212   | 0.003755604 | Intragenic | NM_053804    | Kcnk4    |
| 1   | 243806100 | 243806135 | 1       | -0.189823   | 5    | 0.00023  | 0.00097  | 0.27908   | 0.46891   | 0.005646897 | TSS        | NM_001014106 | Rfk      |
| 1   | 260158264 | 260158311 | 1       | -0.052985   | 5    | 0.00048  | 0.015    | 0.91098   | 0.96397   | 0.009174765 | Intergenic | NA           | NA       |
| 1   | 268744228 | 268744333 | 1       | -0.102995   | 5    | 0.0022   | 0.0018   | 0.12188   | 0.22487   | 0.024379767 | TSS        | NM_001106355 | Hoga1    |
| 1   | 274548968 | 274549029 | 1       | 0.123927    | 5    | 0.0041   | 0.088    | 0.64922   | 0.5253    | 0.035065465 | Intragenic | NM_001107606 | Sh3pxd2a |
| 1   | 287994904 | 287994942 | 1       | 0.05318     | 8    | 0.0013   | 0.0039   | 0.086051  | 0.032872  | 0.018238424 | TSS        | NM_001109169 | Emx2     |
| 10  | 1866528   | 1866643   | 1       | 0.053189    | 5    | 0.0049   | 0.0055   | 0.7257    | 0.67251   | 0.039645455 | Intergenic | NA           | NA       |
| 10  | 6083426   | 6083464   | 1       | -0.05498    | 5    | 0.0017   | 0.0031   | 0.0015152 | 0.056495  | 0.022007273 | TSS        | NM_001134638 | Tmem114  |
| 10  | 6200608   | 6200740   | 1       | 0.05982     | 5    | 0.0058   | 0.0031   | 0.90443   | 0.84461   | 0.04538022  | Intergenic | NA           | NA       |
| 10  | 12700818  | 12700958  | 1       | 0.083473    | 5    | 0.0029   | 1        | 0.083473  | 0         | 0.028284932 | Intergenic | NA           | NA       |
| 10  | 16948000  | 16948046  | 1       | 0.129592    | 10   | 1.40E-06 | 6.50E-05 | 0.49343   | 0.36384   | 0.00013749  | Intragenic | NM_001142652 | Neur1b   |
| 10  | 20146463  | 20146539  | 1       | 0.148455    | 5    | 0.0041   | 0.0054   | 0.76368   | 0.61522   | 0.035065465 | Intragenic | NM_031321    | Slit3    |
| 10  | 34201684  | 34201738  | 1       | 0.111232    | 5    | 0.0049   | 0.088    | 0.38853   | 0.2773    | 0.039645455 | Intergenic | NA           | NA       |
| 10  | 39105873  | 39105905  | 1       | 0.063857    | 5    | 1.90E-05 | 0.015    | 0.063858  | 2.50E-07  | 0.001020981 | Intragenic | NM_022270    | Slc22a4  |
| 10  | 52504151  | 52504359  | 1       | 0.094338    | 14   | 9.00E-06 | 0.00087  | 0.82156   | 0.72723   | 0.000557481 | Intragenic | NM_001191922 | Shisa6   |
| 10  | 54081872  | 54081975  | 1       | 0.08637     | 12   | 0.0011   | 0.0014   | 0.47943   | 0.39306   | 0.016934054 | Intergenic | NA           | NA       |
| 10  | 55743876  | 55743931  | 1       | 0.12826     | 5    | 0.00032  | 0.00052  | 0.9458    | 0.81754   | 0.007064806 | TSS        | NM_001128155 | Tmem88   |
| 10  | 62345000  | 62345061  | 1       | -0.062461   | 5    | 7.80E-05 | 0.00013  | 0.044912  | 0.10737   | 0.002742519 | TSS        | NM_001107025 | Abhd15   |
| 10  | 63810591  | 63810620  | 1       | -0.081003   | 5    | 0.00021  | 0.00053  | 0.2886    | 0.3696    | 0.005246316 | TSS        | NM_001007611 | Fam101b  |
| 10  | 74610233  | 74610335  | 1       | -0.101209   | 5    | 0.0012   | 0.0055   | 0.85791   | 0.95912   | 0.017616495 | TSS        | NM_001013971 | Cuedc1   |
| 10  | 75191623  | 75191768  | 1       | -0.081259   | 20   | 2.10E-06 | 3.80E-05 | 0.80983   | 0.89109   | 0.0001869   | Intergenic | NA           | NA       |
| 10  | 81584803  | 81584898  | 1       | 0.11282     | 5    | 0.0008   | 0.025    | 0.27679   | 0.16397   | 0.013561905 | Intragenic | NM_001108290 | Spag9    |
| 10  | 83971582  | 83971688  | 1       | 0.055322    | 10   | 0.00055  | 0.0084   | 0.20103   | 0.14571   | 0.010305263 | TSS        | NM_001100787 | Hoxb4    |
| 10  | 83993545  | 83993652  | 1       | -0.052163   | 13   | 0.0037   | 0.0063   | 0.20286   | 0.25502   | 0.033882958 | TSS        | NM_001107042 | Hoxb3    |
| 10  | 86361394  | 86361470  | 1       | 0.115319    | 5    | 0.0049   | 0.025    | 0.66519   | 0.54987   | 0.039645455 | Intergenic | NA           | NA       |
| 10  | 86641791  | 86641861  | 1       | 0.125982    | 5    | 0.0027   | 0.024    | 0.36983   | 0.24384   | 0.027462857 | Intergenic | NA           | NA       |
| 10  | 86641884  | 86641923  | 1       | 0.08908     | 5    | 0.00019  | 0.0092   | 0.17458   | 0.085496  | 0.004874955 | Intergenic | NA           | NA       |
| 10  | 86641957  | 86642002  | 1       | 0.081028    | 5    | 0.0016   | 0.0055   | 0.19217   | 0.11114   | 0.021393427 | Intergenic | NA           | NA       |
| 10  | 88876340  | 88876434  | 1       | -0.070989   | 12   | 7.60E-06 | 0.00021  | 0.87191   | 0.9429    | 0.000527922 | Intragenic | NM_001037202 | Plekhh3  |
| 10  | 90070992  | 90071164  | 1       | 0.129871    | 5    | 0.0045   | 0.039    | 0.68314   | 0.55327   | 0.03780531  | Intergenic | NA           | NA       |
| 10  | 94449702  | 94449908  | 1       | 0.061131    | 5    | 0.0045   | 0.015    | 0.062982  | 0.0018519 | 0.03780531  | Intergenic | NA           | NA       |
| 10  | 95764751  | 95764889  | 1       | 0.050614    | 5    | 0.0012   | 0.025    | 0.079236  | 0.028622  | 0.017616495 | Intergenic | NA           | NA       |
| 10  | 96904074  | 96904326  | 1       | 0.050564    | 15   | 0.0048   | 0.0006   | 0.17062   | 0.12006   | 0.039645455 | Intergenic | NA           | NA       |
| 10  | 97206383  | 97206420  | 1       | 0.106567    | 5    | 0.0038   | 0.015    | 0.7752    | 0.66863   | 0.033926019 | Intergenic | NA           | NA       |
| 10  | 103884254 | 103884284 | 1       | -0.059011   | 5    | 0.0049   | 0.015    | 0.91439   | 0.9734    | 0.039645455 | Intragenic | NM_001127549 | Llg12    |
| 10  | 104354954 | 104355094 | 1       | -0.160386   | 5    | 0.00044  | 0.015    | 0.33243   | 0.49282   | 0.008950857 | Intergenic | NA           | NA       |

| chr | start     | stop      | q-value  | methy.diff | CpGs | pMWU     | p2DKS    | MCWLS    | MCWHS    | pMWU.fdr    | cgi.type   | transcript          | gene        |
|-----|-----------|-----------|----------|------------|------|----------|----------|----------|----------|-------------|------------|---------------------|-------------|
| 10  | 105926621 | 105926776 | 1        | 0.056166   | 5    | 0.0027   | 0.0055   | 0.99565  | 0.93949  | 0.027462857 | Intragenic | NM_176856:NM_031837 | Sept9:Sept9 |
| 10  | 107368289 | 107368415 | 1        | 0.127647   | 5    | 0.0045   | 0.0032   | 0.8281   | 0.70045  | 0.03780531  | Intergenic | NA                  | NA          |
| 10  | 109419647 | 109419690 | 1        | 0.077319   | 5    | 0.0029   | 0.0052   | 0.77893  | 0.70161  | 0.028284932 | TSS        | NM_001128185        | Myadml2     |
| 10  | 110810096 | 110810151 | 1        | -0.07006   | 7    | 7.80E-05 | 0.0032   | 0.81282  | 0.88288  | 0.002742519 | Intergenic | NA                  | NA          |
| 10  | 111446212 | 111446267 | 1        | -0.07006   | 7    | 7.80E-05 | 0.0032   | 0.81282  | 0.88288  | 0.002742519 | Intragenic | NM_001099458        | Vom2r4      |
| 10  | 111452886 | 111452941 | 1        | -0.07006   | 7    | 7.80E-05 | 0.0032   | 0.81282  | 0.88288  | 0.002742519 | Intragenic | NM_001099458        | Vom2r4      |
| 10  | 111716397 | 111716452 | 1        | -0.07006   | 7    | 7.80E-05 | 0.0032   | 0.81282  | 0.88288  | 0.002742519 | Intragenic | NM_001099458        | Vom2r4      |
| 10  | 112120599 | 112120616 | 1        | 0.151948   | 5    | 0.0027   | 0.015    | 0.72457  | 0.57263  | 0.027462857 | Intergenic | NA                  | NA          |
| 11  | 2145179   | 2145336   | 0.0038   | -0.073199  | 15   | 2.40E-11 | 9.40E-09 | 0.24784  | 0.32104  | 9.76E-09    | Intergenic | NA                  | NA          |
| 11  | 10098981  | 10099044  | 1        | 0.059979   | 5    | 0.0019   | 0.015    | 0.9773   | 0.91732  | 0.023154472 | Intergenic | NA                  | NA          |
| 11  | 35913313  | 35913409  | 0.23     | 0.074207   | 10   | 7.80E-10 | 5.60E-07 | 0.17162  | 0.09741  | 1.99E-07    | Intergenic | NA                  | NA          |
| 11  | 85801932  | 85802049  | 1        | 0.060887   | 5    | 0.0041   | 0.0055   | 0.080747 | 0.01986  | 0.035065465 | Intragenic | NM_001044279        | Liph        |
| 11  | 91143944  | 91143971  | 1        | 0.067544   | 5    | 0.0032   | 0.015    | 0.18305  | 0.11551  | 0.030277741 | TSS        | NM_001013863        | Ydjc        |
| 12  | 327498    | 327605    | 0.027    | 0.06518    | 11   | 1.40E-10 | 6.70E-08 | 0.10335  | 0.038173 | 4.43E-08    | Intergenic | NA                  | NA          |
| 12  | 356009    | 356084    | 1        | 0.226145   | 7    | 0.00013  | 0.0008   | 0.53418  | 0.30804  | 0.003938723 | Intergenic | NA                  | NA          |
| 12  | 3853628   | 3853724   | 1        | 0.057442   | 5    | 0.0011   | 0.003    | 0.94068  | 0.88324  | 0.016934054 | Intragenic | NM_017071           | Insr        |
| 12  | 9432834   | 9433024   | 1        | -0.050095  | 11   | 2.30E-05 | 1.30E-05 | 0.012737 | 0.062832 | 0.0011392   | Intergenic | NA                  | NA          |
| 12  | 10565379  | 10565544  | 1        | -0.09034   | 12   | 0.005    | 0.018    | 0.5419   | 0.63224  | 0.040112676 | Intergenic | NA                  | NA          |
| 12  | 11754635  | 11754687  | 1        | 0.087168   | 5    | 0.0041   | 0.025    | 0.48299  | 0.39582  | 0.035065465 | Intergenic | NA                  | NA          |
| 12  | 19370029  | 19370061  | 1        | 0.067419   | 5    | 0.0032   | 0.0018   | 0.91447  | 0.84705  | 0.030277741 | Intergenic | NA                  | NA          |
| 12  | 25870987  | 25871047  | 1        | 0.050118   | 8    | 0.0052   | 0.013    | 0.93587  | 0.88575  | 0.041367598 | Intragenic | NM_001277394        | Srrm3       |
| 12  | 26355871  | 26355914  | 1        | -0.082482  | 5    | 0.0038   | 0.0055   | 0.64986  | 0.73234  | 0.033926019 | Intragenic | NM_181080           | Trim50      |
| 12  | 26761869  | 26761910  | 1        | -0.152638  | 5    | 0.0029   | 0.039    | 0.38996  | 0.5426   | 0.028284932 | TSS        | NM_001012022        | Cldn4       |
| 12  | 27513011  | 27513105  | 1        | 0.084398   | 10   | 1.60E-07 | 8.90E-06 | 0.37965  | 0.29526  | 2.28E-05    | Intragenic | NM_053734           | Ncf1        |
| 12  | 30927459  | 30927553  | 1        | 0.06896    | 10   | 2.10E-05 | 0.0029   | 0.37305  | 0.30409  | 0.001087418 | Intragenic | NM_001025112        | Wbscr17     |
| 12  | 38867805  | 38867888  | 1        | -0.113836  | 7    | 0.0024   | 0.019    | 0.12175  | 0.23559  | 0.025890909 | Intragenic | NM_001108334        | Ncor2       |
| 12  | 39196619  | 39196824  | 1        | -0.091544  | 15   | 0.00029  | 0.012    | 0.3314   | 0.42294  | 0.006554921 | Intergenic | NA                  | NA          |
| 12  | 42547079  | 42547102  | 1        | 0.0934     | 5    | 0.00032  | 0.0055   | 0.37387  | 0.28047  | 0.007064806 | TSS        | NM_001047900        | Naa25       |
| 12  | 43324801  | 43324912  | 1        | 0.21489    | 5    | 0.0038   | 0.0089   | 0.63553  | 0.42064  | 0.033926019 | Intergenic | NA                  | NA          |
| 12  | 44299735  | 44299904  | 1        | -0.075471  | 9    | 0.005    | 0.023    | 0.15191  | 0.22738  | 0.040112676 | Intergenic | NA                  | NA          |
| 12  | 44331014  | 44331048  | 1        | -0.050777  | 5    | 0.0024   | 0.038    | 0.047531 | 0.098308 | 0.025890909 | Intragenic | NM_181638           | Tbx3        |
| 12  | 45679114  | 45679236  | 1        | 0.146853   | 5    | 0.00065  | 0.0093   | 0.25735  | 0.1105   | 0.011642767 | Intergenic | NA                  | NA          |
| 12  | 46828955  | 46829101  | 1        | -0.07539   | 5    | 0.0029   | 0.0092   | 0.90147  | 0.97686  | 0.028284932 | Intergenic | NA                  | NA          |
| 12  | 52471308  | 52471342  | 1        | 0.138358   | 5    | 0.00039  | 0.024    | 0.56302  | 0.42466  | 0.008107445 | Intergenic | NA                  | NA          |
| 12  | 52991202  | 52991317  | 1        | 0.118324   | 7    | 0.00058  | 0.0083   | 0.52118  | 0.40285  | 0.010726234 | TSS        | NM_001191928        | Mn1         |
| 13  | 22841754  | 22841862  | 1        | 0.1088     | 5    | 0.002    | 0.00098  | 0.50756  | 0.39876  | 0.023154472 | Intergenic | NA                  | NA          |
| 13  | 40560835  | 40560861  | 1        | 0.114562   | 5    | 0.0022   | 0.0017   | 0.20646  | 0.091901 | 0.024379767 | TSS        | NM_080771           | Inhbb       |
| 13  | 52702989  | 52703084  | 3.60E-12 | -0.098921  | 16   | 4.20E-14 | 8.80E-18 | 0.037213 | 0.13613  | 4.46E-11    | Intragenic | NM_001014843        | Fcmr        |

| chr | start     | stop      | q-value  | methy.diff | CpGs | pMWU     | p2DKS    | MCWLS    | MCWHS    | pMWU.fdr    | cgi.type   | transcript                    | gene                |
|-----|-----------|-----------|----------|------------|------|----------|----------|----------|----------|-------------|------------|-------------------------------|---------------------|
| 13  | 54357126  | 54357219  | 1        | -0.069365  | 5    | 0.0013   | 0.0054   | 0.90195  | 0.97131  | 0.018238424 | Intergenic | NA                            | NA                  |
| 13  | 55055457  | 55055586  | 0.39     | 0.116357   | 9    | 4.70E-08 | 9.60E-07 | 0.22742  | 0.11107  | 8.92E-06    | Intergenic | NA                            | NA                  |
| 13  | 59205560  | 59205663  | 1        | 0.102893   | 8    | 9.30E-05 | 0.013    | 0.27981  | 0.17692  | 0.003230049 | Intergenic | NA                            | NA                  |
| 13  | 79190428  | 79190517  | 1        | -0.143399  | 5    | 0.0024   | 0.024    | 0.6701   | 0.8135   | 0.025890909 | Intragenic | NM_001107186:N<br>M_001009683 | Abl2:Tor3a          |
| 13  | 88792326  | 88792594  | 1        | -0.05673   | 11   | 0.002    | 0.044    | 0.10999  | 0.16672  | 0.023154472 | Intragenic | NM_001108349                  | Rcsd1               |
| 13  | 95110567  | 95110652  | 7.80E-07 | -0.054102  | 11   | 4.70E-14 | 1.90E-12 | 0.01914  | 0.073242 | 4.46E-11    | TSS        | NM_001013231                  | Pea15               |
| 13  | 102380775 | 102380949 | 1        | -0.06427   | 9    | 0.0015   | 0.0082   | 0.74263  | 0.8069   | 0.020538462 | Intragenic | NM_001025762                  | Smyd3               |
| 13  | 110058461 | 110058652 | 1        | 0.081794   | 19   | 0.00024  | 0.0088   | 0.65303  | 0.57124  | 0.005792542 | TSS        | NM_001108858                  | Ddx3y               |
| 13  | 115306385 | 115306459 | 1        | 0.096381   | 12   | 7.60E-05 | 0.00031  | 0.56791  | 0.47153  | 0.002742519 | Intergenic | NA                            | NA                  |
| 14  | 129727    | 129782    | 1        | -0.069654  | 7    | 0.00015  | 0.0051   | 0.81106  | 0.88072  | 0.004272    | Intergenic | NA                            | NA                  |
| 14  | 2391299   | 2391334   | 1        | 0.069127   | 5    | 0.00026  | 0.00052  | 0.091224 | 0.022097 | 0.006020163 | Intergenic | NA                            | NA                  |
| 14  | 4967047   | 4967114   | 1        | -0.066232  | 5    | 0.00039  | 0.0018   | 0.87652  | 0.94275  | 0.008107445 | Intergenic | NA                            | NA                  |
| 14  | 13219070  | 13219151  | 0.14     | -0.08615   | 15   | 1.70E-07 | 3.40E-07 | 0.035565 | 0.12171  | 2.31E-05    | Intergenic | NA                            | NA                  |
| 14  | 33453217  | 33453259  | 1        | 0.087892   | 5    | 0.0049   | 0.0092   | 0.24782  | 0.15992  | 0.039645455 | Intergenic | NA                            | NA                  |
| 14  | 38043747  | 38043806  | 1        | -0.177878  | 5    | 0.0029   | 0.0053   | 0.41519  | 0.59307  | 0.028284932 | Intragenic | NM_001170438                  | Nfxl1               |
| 14  | 46699334  | 46699357  | 1        | -0.099928  | 5    | 1.50E-05 | 0.00052  | 0.20267  | 0.3026   | 0.000837647 | Intergenic | NA                            | NA                  |
| 14  | 46765669  | 46765692  | 1        | -0.102981  | 5    | 1.90E-05 | 0.0018   | 0.20598  | 0.30896  | 0.001020981 | Intergenic | NA                            | NA                  |
| 14  | 46824766  | 46825019  | 1        | 0.068476   | 30   | 0.0019   | 0.071    | 0.47936  | 0.42729  | 0.023154472 | TSS        | NR_046238                     | Rn5-8s              |
| 14  | 46827270  | 46827293  | 1        | -0.102651  | 5    | 2.40E-05 | 0.0018   | 0.20631  | 0.30896  | 0.0011392   | TSS        | NR_046246                     | Rn28s               |
| 14  | 46829246  | 46829269  | 1        | -0.094936  | 5    | 2.40E-05 | 0.00052  | 0.20837  | 0.30331  | 0.0011392   | TSS        | NR_046246:NM_1<br>47136       | Rn28s:LOC25<br>7642 |
| 14  | 46830105  | 46830128  | 1        | -0.099664  | 5    | 2.40E-05 | 0.00014  | 0.21036  | 0.31002  | 0.0011392   | TSS        | NM_147136                     | LOC257642           |
| 14  | 46832141  | 46832164  | 1        | -0.099928  | 5    | 1.50E-05 | 0.00052  | 0.20267  | 0.3026   | 0.000837647 | Intragenic | NM_001025002:N<br>R_046239    | LOC310926:R<br>n45s |
| 14  | 47180334  | 47180445  | 1        | -0.082653  | 5    | 0.0045   | 0.038    | 0.88401  | 0.96667  | 0.03780531  | Intergenic | NA                            | NA                  |
| 14  | 47487736  | 47487847  | 1        | -0.089996  | 5    | 0.0041   | 0.038    | 0.87667  | 0.96667  | 0.035065465 | Intergenic | NA                            | NA                  |
| 14  | 48003072  | 48003111  | 1        | 0.085598   | 7    | 7.30E-05 | 8.90E-05 | 0.80027  | 0.71467  | 0.002742519 | Intergenic | NA                            | NA                  |
| 14  | 48476703  | 48476742  | 1        | 0.083376   | 7    | 0.0001   | 5.00E-05 | 0.80027  | 0.7169   | 0.003273563 | Intergenic | NA                            | NA                  |
| 14  | 76837263  | 76837387  | 1        | 0.115189   | 5    | 0.00072  | 0.00051  | 0.29868  | 0.18349  | 0.012503415 | Intergenic | NA                            | NA                  |
| 14  | 76837412  | 76837526  | 1        | -0.089152  | 9    | 4.50E-07 | 9.90E-06 | 0.14354  | 0.23269  | 5.57E-05    | Intergenic | NA                            | NA                  |
| 14  | 77686576  | 77686627  | 1        | 0.109775   | 5    | 0.00021  | 0.0031   | 0.15362  | 0.043847 | 0.005246316 | Intergenic | NA                            | NA                  |
| 14  | 81634834  | 81634931  | 1        | -0.082684  | 5    | 0.0035   | 0.0092   | 0.59193  | 0.67462  | 0.032154839 | Intragenic | NM_001130062                  | Dok7                |
| 14  | 84928496  | 84928746  | 1        | 0.088469   | 23   | 0.0025   | 0.082    | 0.33536  | 0.25777  | 0.026666667 | Intragenic | NM_001109447                  | Gal3st1             |
| 14  | 84928763  | 84928806  | 1        | 0.205848   | 5    | 0.0019   | 0.0093   | 0.43447  | 0.22862  | 0.023154472 | Intragenic | NM_001109447                  | Gal3st1             |
| 14  | 88844549  | 88844671  | 1        | -0.149265  | 5    | 0.00026  | 0.0005   | 0.21509  | 0.36436  | 0.006020163 | Intergenic | NA                            | NA                  |
| 14  | 91914450  | 91914468  | 1        | -0.096054  | 5    | 0.0063   | 0.0054   | 0.45999  | 0.55605  | 0.047592573 | TSS        | NM_001109093                  | Grb10               |
| 14  | 103053478 | 103053517 | 1        | -0.101459  | 5    | 0.00097  | 0.015    | 0.65047  | 0.75193  | 0.015696364 | Intragenic | NM_001134702                  | Meis1               |
| 14  | 107824620 | 107824758 | 1        | -0.098969  | 11   | 1.00E-06 | 0.00095  | 0.42697  | 0.52594  | 0.000105481 | TSS        | NM_001017504                  | Zrsr1               |

| chr | start     | stop      | q-value | methy.diff | CpGs | pMWU     | p2DKS    | MCWLS    | MCWHS    | pMWU.fdr    | cgi.type   | transcript             | gene        |
|-----|-----------|-----------|---------|------------|------|----------|----------|----------|----------|-------------|------------|------------------------|-------------|
| 14  | 107824891 | 107825320 | 1       | 0.099275   | 26   | 0.0018   | 0.018    | 0.40821  | 0.33267  | 0.022988341 | TSS        | NM_001017504           | Zrsr1       |
| 15  | 9214596   | 9214617   | 1       | 0.134767   | 5    | 0.00019  | 0.0032   | 0.27498  | 0.14021  | 0.004874955 | Intergenic | NA                     | NA          |
| 15  | 9329952   | 9330109   | 1       | -0.053621  | 15   | 3.50E-05 | 0.00043  | 0.47524  | 0.52886  | 0.001582222 | Intergenic | NA                     | NA          |
| 15  | 9393064   | 9393099   | 1       | 0.104783   | 5    | 0.0022   | 0.024    | 0.72552  | 0.62073  | 0.024379767 | Intragenic | NM_134459              | Cd99l2      |
| 15  | 9795686   | 9795721   | 1       | 0.105787   | 5    | 0.0017   | 0.015    | 0.72562  | 0.61983  | 0.022007273 | Intragenic | NM_134459              | Cd99l2      |
| 15  | 24798809  | 24798898  | 1       | 0.07807    | 5    | 0.0041   | 0.015    | 0.92864  | 0.85057  | 0.035065465 | Intergenic | NA                     | NA          |
| 15  | 37660545  | 37660596  | 1       | 0.066396   | 5    | 0.0035   | 0.088    | 0.91819  | 0.85179  | 0.032154839 | TSS        | NM_001003711           | Jph4        |
| 15  | 41652409  | 41652451  | 1       | 0.087139   | 11   | 0.00098  | 0.00012  | 0.79771  | 0.71057  | 0.015768588 | Intergenic | NA                     | NA          |
| 15  | 51052351  | 51052440  | 1       | 0.05453    | 6    | 0.0016   | 0.0071   | 0.08355  | 0.02902  | 0.021393427 | TSS        | NM_001106045           | Sox7        |
| 15  | 64360616  | 64360662  | 1       | 0.108849   | 5    | 0.0041   | 0.059    | 0.61876  | 0.50991  | 0.035065465 | Intergenic | NA                     | NA          |
| 15  | 90887823  | 90888007  | 1       | 0.075796   | 9    | 0.002    | 0.025    | 0.40009  | 0.3243   | 0.023154472 | Intergenic | NA                     | NA          |
| 15  | 107337356 | 107337415 | 1       | -0.082226  | 5    | 0.00097  | 0.0092   | 0.089164 | 0.17139  | 0.015696364 | Intragenic | NM_133411              | Abcc4       |
| 16  | 6357943   | 6358091   | 1       | 0.062323   | 5    | 0.0053   | 0.0054   | 0.94759  | 0.88526  | 0.042045682 | Intergenic | NA                     | NA          |
| 16  | 9576676   | 9576700   | 1       | -0.052702  | 5    | 0.0022   | 0.015    | 0.031449 | 0.084152 | 0.024379767 | TSS        | NR_031790              | Mir346      |
| 16  | 10787855  | 10787882  | 1       | -0.050406  | 5    | 0.0013   | 0.0092   | 0.038734 | 0.089141 | 0.018238424 | TSS        | NM_145767              | Drgx        |
| 16  | 19893039  | 19893142  | 1       | -0.079185  | 9    | 2.10E-06 | 5.70E-06 | 0.067804 | 0.14699  | 0.0001869   | Intragenic | NM_001100908           | Fam129c     |
| 16  | 38850141  | 38850197  | 1       | -0.051679  | 5    | 0.00011  | 0.0032   | 0.039189 | 0.090869 | 0.003480889 | Intergenic | NA                     | NA          |
| 16  | 73294819  | 73294885  | 1       | 0.060218   | 7    | 0.0027   | 0.0014   | 0.89393  | 0.83371  | 0.027462857 | Intergenic | NA                     | NA          |
| 16  | 78023712  | 78023794  | 1       | -0.062865  | 5    | 0.0035   | 0.024    | 0.9082   | 0.97107  | 0.032154839 | Intragenic | NM_001037327           | Csmd1       |
| 17  | 8772366   | 8772445   | 1       | 0.093926   | 9    | 0.00028  | 0.0027   | 0.8299   | 0.73597  | 0.006430968 | Intergenic | NA                     | NA          |
| 17  | 11327400  | 11327515  | 1       | 0.08019    | 8    | 0.0062   | 0.013    | 0.66938  | 0.58919  | 0.047592573 | Intragenic | NM_001024998           | Txndc15     |
| 17  | 12323388  | 12323553  | 1       | 0.079413   | 9    | 0.0047   | 0.034    | 0.70959  | 0.63018  | 0.039369412 | Intergenic | NA                     | NA          |
| 17  | 15895002  | 15895110  | 1       | 0.061168   | 8    | 2.80E-06 | 3.10E-05 | 0.12446  | 0.063293 | 0.000234541 | Intergenic | NA                     | NA          |
| 17  | 23056490  | 23056549  | 1       | -0.067599  | 5    | 0.0035   | 0.0091   | 0.87705  | 0.94465  | 0.032154839 | Intergenic | NA                     | NA          |
| 17  | 39327242  | 39327267  | 1       | 0.082419   | 5    | 0.0049   | 0.059    | 0.39549  | 0.31307  | 0.039645455 | Intergenic | NA                     | NA          |
| 17  | 74118872  | 74119035  | 1       | -0.099739  | 8    | 0.0057   | 0.0011   | 0.16576  | 0.2655   | 0.044968421 | Intragenic | NM_133293              | Gata3       |
| 17  | 79284890  | 79284993  | 1       | 0.081867   | 9    | 0.00016  | 0.0019   | 0.64234  | 0.56048  | 0.004511683 | Intragenic | NM_138523              | Prpf18      |
| 18  | 18899204  | 18899262  | 1       | 0.053986   | 5    | 0.0041   | 0.038    | 0.98121  | 0.92722  | 0.035065465 | Intergenic | NA                     | NA          |
| 18  | 28157616  | 28157644  | 1       | 0.062972   | 5    | 0.0027   | 0.015    | 0.093558 | 0.030586 | 0.027462857 | Intergenic | NA                     | NA          |
| 18  | 29992981  | 29993049  | 1       | 0.077287   | 5    | 0.00048  | 0.0054   | 0.28005  | 0.20277  | 0.009174765 | Intergenic | NA                     | NA          |
| 18  | 30514824  | 30515007  | 1       | -0.160619  | 8    | 0.00022  | 0.0016   | 0.4591   | 0.61972  | 0.005448348 | TSS        | NM_001037154           | Pcdhga3     |
| 18  | 30844669  | 30844719  | 1       | 0.160315   | 5    | 9.20E-06 | 0.00014  | 0.51868  | 0.35837  | 0.000557481 | Intergenic | NA                     | NA          |
| 18  | 32283447  | 32283566  | 1       | -0.142887  | 5    | 0.0027   | 0.015    | 0.24212  | 0.38501  | 0.027462857 | Intragenic | NM_012576:NM_001106150 | Nr3c1:Spry4 |
| 18  | 43961721  | 43961837  | 0.016   | -0.118501  | 13   | 1.60E-09 | 3.90E-08 | 0.26234  | 0.38084  | 3.51E-07    | TSS        | NM_001107387           | Tnfaip8     |
| 18  | 59225807  | 59225931  | 1       | 0.058075   | 14   | 0.00017  | 0.0024   | 0.92423  | 0.86616  | 0.004567547 | Intragenic | NM_001106140           | Atp8b1      |
| 18  | 78983791  | 78983885  | 1       | 0.087342   | 6    | 0.0028   | 0.0073   | 0.95789  | 0.87055  | 0.028278014 | Intergenic | NA                     | NA          |
| 19  | 10290058  | 10290103  | 1       | 0.13432    | 5    | 0.0019   | 0.0053   | 0.60761  | 0.47329  | 0.023154472 | Intergenic | NA                     | NA          |
| 19  | 11127504  | 11127565  | 1       | -0.064508  | 5    | 0.0032   | 0.038    | 0.13533  | 0.19984  | 0.030277741 | TSS        | NR_031884              | Mir138-2    |

| chr | start     | stop      | q-value | methyl.diff | CpGs | pMWU     | p2DKS    | MCWLS    | MCWHS    | pMWU.fdr    | cgi.type   | transcript                    | gene               |
|-----|-----------|-----------|---------|-------------|------|----------|----------|----------|----------|-------------|------------|-------------------------------|--------------------|
| 19  | 25776027  | 25776154  | 1       | 0.093458    | 5    | 0.0063   | 0.015    | 0.94606  | 0.85261  | 0.047592573 | Intragenic | NM_133568                     | Rasd2              |
| 19  | 27427453  | 27427542  | 1       | 0.069252    | 9    | 0.00013  | 0.0008   | 0.93748  | 0.86822  | 0.003938723 | Intergenic | NA                            | NA                 |
| 19  | 30435664  | 30435736  | 1       | 0.10877     | 15   | 0.0011   | 0.025    | 0.48688  | 0.37811  | 0.016934054 | Intragenic | NM_001024999                  | Snx20              |
| 19  | 31556421  | 31556520  | 1       | 0.169132    | 7    | 0.00045  | 0.012    | 0.56568  | 0.39655  | 0.009089362 | Intergenic | NA                            | NA                 |
| 19  | 35773803  | 35773877  | 1       | 0.054076    | 7    | 0.0015   | 0.011    | 0.88688  | 0.8328   | 0.020538462 | TSS        | NM_053341                     | Gipc1              |
| 19  | 36874634  | 36874695  | 1       | 0.092314    | 5    | 0.0041   | 0.025    | 0.1807   | 0.088387 | 0.035065465 | Intragenic | NM_030866                     | Nfix               |
| 19  | 38661572  | 38661680  | 1       | 0.1088      | 5    | 0.002    | 0.00098  | 0.50756  | 0.39876  | 0.023154472 | Intergenic | NA                            | NA                 |
| 19  | 39033302  | 39033410  | 1       | 0.1088      | 5    | 0.002    | 0.00098  | 0.50756  | 0.39876  | 0.023154472 | Intergenic | NA                            | NA                 |
| 19  | 53039492  | 53039889  | 1       | 0.075626    | 7    | 0.0024   | 0.012    | 0.92825  | 0.85262  | 0.025890909 | Intergenic | NA                            | NA                 |
| 19  | 62487522  | 62487643  | 1       | -0.059645   | 10   | 0.0038   | 0.028    | 0.81298  | 0.87263  | 0.033926019 | Intragenic | NM_138889                     | Cdh13              |
| 19  | 63452264  | 63452354  | 1       | -0.11026    | 5    | 0.0016   | 0.0054   | 0.36485  | 0.47511  | 0.021393427 | Intragenic | NM_138518                     | Crispld2           |
| 19  | 65037345  | 65037367  | 1       | 0.073708    | 5    | 0.0017   | 0.0017   | 0.72077  | 0.64706  | 0.022007273 | TSS        | NM_001008722                  | Irf8               |
| 19  | 65758153  | 65758242  | 1       | -0.110276   | 7    | 2.90E-05 | 5.50E-05 | 0.048368 | 0.15864  | 0.001332129 | Intergenic | NA                            | NA                 |
| 19  | 65758567  | 65758604  | 1       | -0.154577   | 5    | 0.00014  | 0.0018   | 0.053756 | 0.20833  | 0.004153333 | Intergenic | NA                            | NA                 |
| 19  | 68763285  | 68763333  | 1       | -0.195789   | 6    | 1.10E-06 | 9.20E-05 | 0.74595  | 0.94174  | 0.000111886 | Intragenic | NM_175596                     | Disc1              |
| 19  | 71984774  | 71984852  | 1       | -0.073169   | 5    | 5.60E-05 | 0.00028  | 0.013301 | 0.086469 | 0.0022784   | TSS        | NM_145098                     | Nrp1               |
| 2   | 537732    | 537768    | 1       | 0.088098    | 5    | 0.00017  | 0.00027  | 0.10418  | 0.016081 | 0.004567547 | Intergenic | NA                            | NA                 |
| 2   | 135373351 | 135373418 | 1       | -0.058824   | 7    | 0.0012   | 0.0014   | 0.066335 | 0.12516  | 0.017616495 | TSS        | NM_001134615                  | Slc7a14            |
| 2   | 148414965 | 148415427 | 1       | 0.081693    | 17   | 0.0064   | 0.088    | 0.34694  | 0.27415  | 0.048220106 | Intergenic | NA                            | NA                 |
| 2   | 177898499 | 177898648 | 1       | 0.085792    | 7    | 0.0023   | 0.0016   | 0.68461  | 0.59882  | 0.02529112  | Intergenic | NA                            | NA                 |
| 2   | 180916233 | 180916316 | 1       | 0.131242    | 11   | 6.00E-05 | 0.00043  | 0.58054  | 0.4493   | 0.002406761 | Intergenic | NA                            | NA                 |
| 2   | 180995860 | 180995903 | 1       | -0.1007     | 5    | 0.0027   | 0.038    | 0.22106  | 0.32176  | 0.027462857 | Intergenic | NA                            | NA                 |
| 2   | 206705354 | 206705376 | 1       | 0.06527     | 5    | 0.00015  | 0.00014  | 0.29827  | 0.233    | 0.004272    | TSS        | NM_001007741:N<br>M_001014173 | Isg20l2:Rrnad<br>1 |
| 2   | 207915746 | 207915828 | 1       | -0.112165   | 5    | 0.0032   | 0.024    | 0.08785  | 0.20001  | 0.030277741 | Intragenic | NM_001107690                  | Fam189b            |
| 2   | 207966590 | 207966695 | 1       | 0.068676    | 5    | 0.0058   | 0.088    | 0.93895  | 0.87028  | 0.04538022  | Intragenic | NM_001107691                  | Trim46             |
| 2   | 207967472 | 207967521 | 1       | 0.10505     | 5    | 0.00036  | 0.00098  | 0.53351  | 0.42846  | 0.007708872 | Intragenic | NM_001107691                  | Trim46             |
| 2   | 214982952 | 214983013 | 1       | 0.100386    | 5    | 0.0063   | 0.059    | 0.63804  | 0.53765  | 0.047592573 | Intragenic | NM_001100985                  | RGD1563667         |
| 2   | 215839833 | 215839863 | 1       | -0.071318   | 5    | 0.0019   | 0.038    | 0.092713 | 0.16403  | 0.023154472 | Intragenic | NM_001024302:N<br>M_017308    | Lysmd1:Sema<br>6c  |
| 2   | 215840017 | 215840069 | 1       | 0.116067    | 7    | 0.0021   | 0.0033   | 0.28826  | 0.1722   | 0.024213765 | Intragenic | NM_001024302:N<br>M_017308    | Lysmd1:Sema<br>6c  |
| 2   | 252953162 | 252953387 | 1       | -0.0565     | 12   | 0.0033   | 0.04     | 0.098995 | 0.1555   | 0.031017822 | Intergenic | NA                            | NA                 |
| 2   | 254619680 | 254619733 | 1       | 0.085692    | 5    | 0.0035   | 0.058    | 0.25062  | 0.16493  | 0.032154839 | Intergenic | NA                            | NA                 |
| 2   | 254619749 | 254619869 | 1       | -0.106462   | 5    | 0.002    | 0.0054   | 0.05848  | 0.16494  | 0.023154472 | Intergenic | NA                            | NA                 |
| 2   | 268714882 | 268714987 | 0.0028  | -0.112543   | 5    | 6.30E-08 | 6.80E-09 | 0.019802 | 0.13235  | 9.97E-06    | Intergenic | NA                            | NA                 |
| 2   | 279312106 | 279312243 | 1       | -0.147892   | 7    | 0.00018  | 0.0013   | 0.75627  | 0.90416  | 0.004791028 | Intergenic | NA                            | NA                 |
| 20  | 4669883   | 4669970   | 1       | 0.162115    | 7    | 0.00013  | 0.0013   | 0.69157  | 0.52945  | 0.003938723 | Intergenic | NA                            | NA                 |
| 20  | 7605721   | 7605821   | 1       | -0.060507   | 5    | 0.0027   | 0.0054   | 0.011264 | 0.071771 | 0.027462857 | TSS        | NM_001113409                  | Syngap1            |

| chr | start     | stop      | q-value | methy1.diff | CpGs | pMWU     | p2DKS    | MCWLS    | MCWHS    | pMWU.fdr    | cgi.type   | transcript                                           | gene                 |
|-----|-----------|-----------|---------|-------------|------|----------|----------|----------|----------|-------------|------------|------------------------------------------------------|----------------------|
| 20  | 7853783   | 7854047   | 1       | 0.16246     | 8    | 0.00075  | 0.0058   | 0.80085  | 0.63839  | 0.012945455 | Intragenic | NM_001013906                                         | Lhfp15               |
| 20  | 8995595   | 8995656   | 1       | 0.136531    | 5    | 4.80E-06 | 3.30E-05 | 0.56795  | 0.43142  | 0.000350523 | Intragenic | NM_001034188:NM_022666                               | Ppil1:Grm4           |
| 20  | 9426826   | 9426952   | 0.76    | 0.22035     | 10   | 2.00E-09 | 1.90E-06 | 0.87588  | 0.65553  | 4.07E-07    | Intergenic | NA                                                   | NA                   |
| 20  | 10851757  | 10851825  | 1       | -0.172859   | 5    | 0.00059  | 0.0054   | 0.33453  | 0.50739  | 0.010840774 | Intergenic | NA                                                   | NA                   |
| 20  | 12346751  | 12346819  | 1       | 0.120165    | 5    | 0.002    | 0.015    | 0.26338  | 0.14322  | 0.023154472 | Intragenic | NM_138543                                            | Pde9a                |
| 20  | 12546391  | 12546632  | 1       | 0.12434     | 8    | 0.0011   | 0.03     | 0.78137  | 0.65703  | 0.016934054 | Intergenic | NA                                                   | NA                   |
| 20  | 17919770  | 17919816  | 1       | 0.058925    | 5    | 0.0017   | 0.0031   | 0.094994 | 0.036069 | 0.022007273 | Intergenic | NA                                                   | NA                   |
| 20  | 21547804  | 21547975  | 1       | 0.050943    | 11   | 0.0016   | 0.02     | 0.14769  | 0.096743 | 0.021393427 | Intergenic | NA                                                   | NA                   |
| 20  | 39332334  | 39332490  | 0.22    | 0.113967    | 15   | 1.30E-10 | 5.50E-07 | 0.32821  | 0.21425  | 4.43E-08    | Intragenic | NM_001014032                                         | Msl3l2               |
| 20  | 39332874  | 39333116  | 1       | 0.104051    | 17   | 5.30E-07 | 5.10E-05 | 0.4557   | 0.36866  | 6.29E-05    | Intragenic | NM_001014032                                         | Msl3l2               |
| 20  | 47521466  | 47521491  | 1       | -0.075015   | 5    | 0.0038   | 0.024    | 0.097502 | 0.17252  | 0.033926019 | TSS        | NM_031806                                            | Gpr6                 |
| 20  | 49241640  | 49241792  | 1       | 0.084088    | 8    | 2.00E-06 | 0.00015  | 0.66833  | 0.58424  | 0.0001869   | Intergenic | NA                                                   | NA                   |
| 3   | 1826433   | 1826466   | 1       | 0.116393    | 5    | 0.00054  | 0.015    | 0.52758  | 0.41119  | 0.010184901 | Intragenic | NM_147141:NM_001195199                               | Cacna1b:Cacna1b      |
| 3   | 10426455  | 10426585  | 1       | 0.054566    | 5    | 0.0049   | 0.0053   | 0.87812  | 0.82355  | 0.039645455 | Intergenic | NA                                                   | NA                   |
| 3   | 65897941  | 65898116  | 1       | 0.130198    | 8    | 0.00015  | 0.0059   | 0.7873   | 0.6571   | 0.004272    | Intergenic | NA                                                   | NA                   |
| 3   | 68115373  | 68115443  | 1       | 0.05345     | 5    | 0.0035   | 0.038    | 0.095502 | 0.042052 | 0.032154839 | TSS        | NR_031815                                            | Mir10b               |
| 3   | 75809008  | 75809162  | 1       | 0.062592    | 5    | 0.00017  | 0.0054   | 0.11065  | 0.048059 | 0.004567547 | Intergenic | NA                                                   | NA                   |
| 3   | 82359499  | 82359548  | 1       | -0.073659   | 7    | 0.0004   | 0.0021   | 0.27061  | 0.34427  | 0.008195683 | Intergenic | NA                                                   | NA                   |
| 3   | 96412184  | 96412228  | 1       | -0.157902   | 6    | 0.003    | 0.025    | 0.27241  | 0.43031  | 0.029061224 | Intergenic | NA                                                   | NA                   |
| 3   | 105718716 | 105718894 | 1       | -0.061016   | 5    | 0.00097  | 0.00052  | 0.91525  | 0.97626  | 0.015696364 | Intergenic | NA                                                   | NA                   |
| 3   | 129384062 | 129384102 | 1       | 0.089791    | 7    | 0.0011   | 0.0083   | 0.13135  | 0.041562 | 0.016934054 | Intragenic | NM_001191076                                         | Ebf4                 |
| 3   | 129677958 | 129677991 | 1       | 0.085563    | 5    | 0.0049   | 0.015    | 0.71996  | 0.63439  | 0.039645455 | TSS        | NM_172022                                            | Lzts3                |
| 3   | 156428433 | 156428548 | 1       | -0.097622   | 10   | 0.0013   | 0.011    | 0.26214  | 0.35977  | 0.018238424 | Intragenic | NM_001098724                                         | Necab3               |
| 3   | 160742922 | 160742997 | 1       | 0.089698    | 5    | 0.0012   | 0.0054   | 0.1481   | 0.0584   | 0.017616495 | TSS        | NM_001258011                                         | Shhg11               |
| 3   | 161555673 | 161555735 | 1       | 0.162439    | 5    | 3.90E-05 | 0.0018   | 0.52649  | 0.36405  | 0.001657791 | TSS        | NM_001270867:NM_053601:NM_181687:NR_073089:NM_133582 | Nnat:Nnat:Nnat:Blcap |
| 3   | 162794241 | 162794375 | 1       | 0.050462    | 7    | 0.0051   | 0.0013   | 0.89314  | 0.84268  | 0.0408      | Intergenic | NA                                                   | NA                   |
| 3   | 166743323 | 166743391 | 1       | 0.084349    | 7    | 0.0062   | 0.056    | 0.30873  | 0.22438  | 0.047592573 | Intragenic | NM_053954                                            | Kcns1                |
| 3   | 167290284 | 167290435 | 1       | 0.095049    | 9    | 0.0028   | 0.033    | 0.37762  | 0.28257  | 0.028278014 | Intragenic | NM_001008868                                         | Wfdc9                |
| 3   | 167599505 | 167599536 | 1       | -0.06526    | 5    | 0.0012   | 0.0054   | 0.19142  | 0.25668  | 0.017616495 | TSS        | NM_031055                                            | Mmp9                 |
| 3   | 171161004 | 171161076 | 1       | 0.147599    | 5    | 0.00036  | 0.0018   | 0.75087  | 0.60328  | 0.007708872 | Intragenic | NM_001106545                                         | Kcng1                |
| 3   | 171755795 | 171755821 | 1       | 0.093846    | 5    | 0.0027   | 0.088    | 0.38927  | 0.29542  | 0.027462857 | Intergenic | NA                                                   | NA                   |
| 3   | 171845815 | 171845880 | 1       | 0.065216    | 7    | 0.0034   | 0.0077   | 0.398    | 0.33279  | 0.031852632 | Intergenic | NA                                                   | NA                   |
| 3   | 172805006 | 172805104 | 1       | 0.14905     | 7    | 5.30E-08 | 4.30E-06 | 0.8635   | 0.71445  | 9.43E-06    | Intergenic | NA                                                   | NA                   |
| 3   | 173704389 | 173704558 | 1       | 0.157002    | 5    | 5.50E-06 | 7.60E-06 | 0.22365  | 0.066647 | 0.0003916   | Intergenic | NA                                                   | NA                   |

| chr | start     | stop      | q-value  | methy.diff | CpGs | pMWU     | p2DKS    | MCWLS    | MCWHS     | pMWU.fdr    | cgi.type   | transcript                                       | gene                |
|-----|-----------|-----------|----------|------------|------|----------|----------|----------|-----------|-------------|------------|--------------------------------------------------|---------------------|
| 3   | 178426126 | 178426159 | 1        | 0.053694   | 5    | 0.00097  | 0.0032   | 0.2387   | 0.18501   | 0.015696364 | TSS        | NM_001159656:NM_001159653                        | Gnas:Gnas           |
| 3   | 178438683 | 178438754 | 1        | 0.122634   | 7    | 0.00014  | 7.60E-05 | 0.59546  | 0.47283   | 0.004153333 | TSS        | NM_001024823:NM_021845                           | Gnas:Gnas           |
| 3   | 178441339 | 178441514 | 1        | -0.137329  | 9    | 8.60E-07 | 5.40E-06 | 0.37581  | 0.51314   | 9.42E-05    | Intragenic | NM_001159656:NM_001159653:NM_001024823:NM_021845 | Gnas:Gnas:Gnas:Gnas |
| 3   | 178472119 | 178472309 | 1        | -0.05428   | 22   | 0.0001   | 0.00016  | 0.29725  | 0.35153   | 0.003273563 | TSS        | NM_019132                                        | Gnas                |
| 3   | 178472706 | 178472728 | 1        | 0.091028   | 5    | 7.80E-05 | 0.00014  | 0.16609  | 0.075062  | 0.002742519 | TSS        | NM_019132                                        | Gnas                |
| 3   | 183696811 | 183696916 | 1        | 0.055077   | 8    | 0.0017   | 0.00061  | 0.54273  | 0.48765   | 0.022007273 | Intergenic | NA                                               | NA                  |
| 4   | 20036858  | 20036986  | 0.5      | -0.212724  | 7    | 5.80E-07 | 1.20E-06 | 0.43168  | 0.6444    | 6.61E-05    | Intergenic | NA                                               | NA                  |
| 4   | 25612513  | 25612659  | 1        | -0.082594  | 9    | 0.00064  | 0.0041   | 0.81851  | 0.9011    | 0.011642767 | Intergenic | NA                                               | NA                  |
| 4   | 29704099  | 29704221  | 0.068    | 0.201505   | 9    | 8.40E-10 | 1.70E-07 | 0.63421  | 0.4327    | 1.99E-07    | Intergenic | NA                                               | NA                  |
| 4   | 46830825  | 46830990  | 1        | 0.055659   | 9    | 0.0033   | 0.0061   | 0.93595  | 0.8803    | 0.031017822 | Intergenic | NA                                               | NA                  |
| 4   | 66842179  | 66842315  | 1        | -0.097877  | 5    | 0.00029  | 0.00014  | 0.122    | 0.21988   | 0.006554921 | Intergenic | NA                                               | NA                  |
| 4   | 66984926  | 66985060  | 1        | 0.098379   | 14   | 4.40E-06 | 9.60E-06 | 0.81077  | 0.71239   | 0.000329768 | Intergenic | NA                                               | NA                  |
| 4   | 146839302 | 146839363 | 6.40E-05 | 0.122978   | 9    | 2.10E-11 | 1.60E-10 | 0.56094  | 0.43796   | 9.76E-09    | Intragenic | NR_132648                                        | Hoxaas3             |
| 4   | 146839365 | 146839624 | 1        | 0.069861   | 31   | 0.0018   | 0.008    | 0.39008  | 0.35389   | 0.022988341 | Intragenic | NR_132648                                        | Hoxaas3             |
| 4   | 146839627 | 146839665 | 1        | 0.120743   | 5    | 0.00017  | 0.00051  | 0.5154   | 0.39466   | 0.004567547 | Intragenic | NR_132648                                        | Hoxaas3             |
| 4   | 146925097 | 146925158 | 6.40E-05 | 0.123079   | 9    | 2.10E-11 | 1.60E-10 | 0.56104  | 0.43796   | 9.76E-09    | Intragenic | NR_132648                                        | Hoxaas3             |
| 4   | 146925160 | 146925419 | 1        | 0.07005    | 31   | 0.0018   | 0.008    | 0.39015  | 0.35389   | 0.022988341 | Intragenic | NR_132648                                        | Hoxaas3             |
| 4   | 146925422 | 146925460 | 1        | 0.120743   | 5    | 0.00017  | 0.00051  | 0.5154   | 0.39466   | 0.004567547 | Intragenic | NR_132648                                        | Hoxaas3             |
| 4   | 182119619 | 182119676 | 1        | -0.102348  | 5    | 0.0038   | 0.025    | 0.21093  | 0.31327   | 0.033926019 | Intergenic | NA                                               | NA                  |
| 4   | 197362179 | 197362265 | 1        | 0.145156   | 7    | 0.0065   | 0.017    | 0.76286  | 0.6177    | 0.048844327 | Intergenic | NA                                               | NA                  |
| 4   | 216573431 | 216573509 | 1        | 0.19158    | 5    | 6.20E-05 | 0.00052  | 0.84758  | 0.656     | 0.002452444 | Intragenic | NM_012517                                        | Cacna1c             |
| 4   | 219073614 | 219073704 | 1        | 0.060547   | 5    | 8.10E-06 | 0.015    | 0.064865 | 0.0043183 | 0.000549257 | TSS        | NM_001271276                                     | Fbxl14              |
| 4   | 219073749 | 219073822 | 0.0001   | 0.268755   | 7    | 3.90E-10 | 2.50E-10 | 0.27702  | 0.0082686 | 1.11E-07    | TSS        | NM_001271276                                     | Fbxl14              |
| 4   | 220129171 | 220129260 | 1        | 0.15777    | 5    | 0.0029   | 0.037    | 0.65098  | 0.49321   | 0.028284932 | Intergenic | NA                                               | NA                  |
| 4   | 222392162 | 222392223 | 1        | -0.193203  | 5    | 0.0019   | 0.0018   | 0.59501  | 0.78821   | 0.023154472 | Intragenic | NM_001100779                                     | aicda               |
| 4   | 226190421 | 226190453 | 1        | -0.075644  | 5    | 0.0014   | 0.039    | 0.082616 | 0.15826   | 0.01935534  | TSS        | NM_173095                                        | Kcna1               |
| 4   | 232998223 | 232998246 | 1        | 0.090299   | 5    | 0.00048  | 0.0055   | 0.37387  | 0.28357   | 0.009174765 | Intergenic | NA                                               | NA                  |
| 4   | 243406474 | 243406582 | 1        | 0.051874   | 5    | 0.0063   | 0.087    | 0.89377  | 0.84189   | 0.047592573 | Intergenic | NA                                               | NA                  |
| 4   | 243584944 | 243585040 | 1        | -0.055886  | 5    | 0.00088  | 0.0018   | 0.88178  | 0.93766   | 0.014571163 | Intergenic | NA                                               | NA                  |
| 4   | 243805577 | 243805634 | 1        | -0.102552  | 5    | 0.0008   | 0.0055   | 0.75923  | 0.86179   | 0.013561905 | Intergenic | NA                                               | NA                  |
| 4   | 246879768 | 246879900 | 0.00091  | 0.201854   | 12   | 2.90E-13 | 2.20E-09 | 0.92768  | 0.72582   | 2.06E-10    | TSS        | NM_001109612                                     | Rps4y2              |
| 5   | 20708     | 20732     | 1        | 0.126956   | 7    | 0.0041   | 0.078    | 0.71244  | 0.58548   | 0.035065465 | Intergenic | NA                                               | NA                  |
| 5   | 10576762  | 10576883  | 1        | 0.055553   | 12   | 0.00015  | 0.0018   | 0.60232  | 0.54676   | 0.004272    | Intergenic | NA                                               | NA                  |
| 5   | 50111467  | 50111609  | 1        | 0.070902   | 13   | 0.006    | 0.016    | 0.7535   | 0.6826    | 0.046688525 | Intergenic | NA                                               | NA                  |

| chr | start     | stop      | q-value | methy.diff | CpGs | pMWU     | p2DKS    | MCWLS    | MCWHS    | pMWU.fdr    | cgi.type   | transcript                                     | gene                                   |
|-----|-----------|-----------|---------|------------|------|----------|----------|----------|----------|-------------|------------|------------------------------------------------|----------------------------------------|
| 5   | 64061885  | 64061953  | 1       | 0.120314   | 5    | 0.0016   | 0.00028  | 0.58077  | 0.46046  | 0.021393427 | Intragenic | NM_053765                                      | Gne                                    |
| 5   | 66985618  | 66985803  | 1       | 0.089638   | 8    | 0.0014   | 0.0014   | 0.8576   | 0.76796  | 0.01935534  | Intragenic | NM_031802                                      | Gabbr2                                 |
| 5   | 68305445  | 68305489  | 1       | -0.162188  | 7    | 0.0012   | 0.0022   | 0.19193  | 0.35412  | 0.017616495 | Intragenic | NM_031628                                      | Nr4a3                                  |
| 5   | 76246310  | 76246386  | 1       | -0.069818  | 5    | 0.0022   | 0.0055   | 0.91502  | 0.98484  | 0.024379767 | Intergenic | NA                                             | NA                                     |
| 5   | 126926825 | 126926860 | 1       | 0.110577   | 5    | 0.00048  | 0.0018   | 0.73473  | 0.62415  | 0.009174765 | Intergenic | NA                                             | NA                                     |
| 5   | 133979545 | 133979560 | 1       | -0.066897  | 5    | 0.0029   | 0.00097  | 0.052976 | 0.11987  | 0.028284932 | Intergenic | NA                                             | NA                                     |
| 5   | 137504498 | 137504626 | 1       | -0.071892  | 5    | 0.0032   | 0.0055   | 0.065103 | 0.137    | 0.030277741 | Intergenic | NA                                             | NA                                     |
| 5   | 138533367 | 138533399 | 1       | -0.065707  | 5    | 0.0008   | 0.0055   | 0.1911   | 0.25681  | 0.013561905 | Intergenic | NA                                             | NA                                     |
| 5   | 144823583 | 144823650 | 1       | 0.061019   | 7    | 0.0004   | 0.0008   | 0.12256  | 0.061541 | 0.008195683 | TSS        | NM_001109432                                   | Bmp8a                                  |
| 5   | 148829223 | 148829300 | 1       | 0.186415   | 5    | 0.0022   | 0.0017   | 0.82752  | 0.6411   | 0.024379767 | Intergenic | NA                                             | NA                                     |
| 5   | 151350135 | 151350187 | 1       | -0.176104  | 5    | 1.30E-05 | 6.90E-05 | 0.70566  | 0.88176  | 0.000771333 | Intragenic | NM_001109265                                   | Zbtb8b                                 |
| 5   | 155981577 | 155981628 | 1       | -0.095658  | 5    | 0.002    | 0.0018   | 0.073346 | 0.169    | 0.023154472 | Intergenic | NA                                             | NA                                     |
| 5   | 159192635 | 159192755 | 1       | 0.185837   | 5    | 0.00032  | 0.00052  | 0.751    | 0.56516  | 0.007064806 | Intragenic | NR_036653                                      | Bc1                                    |
| 5   | 160957307 | 160957406 | 1       | 0.111335   | 5    | 0.0012   | 0.015    | 0.96508  | 0.85375  | 0.017616495 | Intergenic | NA                                             | NA                                     |
| 5   | 164161675 | 164161781 | 1       | -0.094703  | 7    | 0.0001   | 0.0005   | 0.14101  | 0.23571  | 0.003273563 | Intergenic | NA                                             | NA                                     |
| 5   | 168710864 | 168710958 | 1       | 0.05852    | 8    | 0.00068  | 0.0025   | 0.96463  | 0.90611  | 0.012104    | Intergenic | NA                                             | NA                                     |
| 5   | 169135995 | 169136145 | 1       | 0.178847   | 5    | 0.0012   | 0.0053   | 0.66098  | 0.48213  | 0.017616495 | Intergenic | NA                                             | NA                                     |
| 5   | 170155936 | 170155985 | 1       | 0.083967   | 5    | 0.0027   | 0.0053   | 0.75701  | 0.67305  | 0.027462857 | Intragenic | NM_001173388                                   | Ctnnbip1                               |
| 5   | 172609154 | 172609263 | 1       | 0.079552   | 8    | 0.00019  | 7.40E-05 | 0.16937  | 0.089815 | 0.004874955 | Intergenic | NA                                             | NA                                     |
| 5   | 173018113 | 173018171 | 1       | 0.083545   | 7    | 0.0039   | 0.027    | 0.23373  | 0.15019  | 0.03449441  | Intergenic | NA                                             | NA                                     |
| 5   | 174868016 | 174868384 | 1       | 0.08728    | 11   | 3.90E-05 | 0.004    | 0.17227  | 0.08499  | 0.001657791 | Intragenic | NM_001108696                                   | Tp73                                   |
| 5   | 175674455 | 175674559 | 1       | 0.080818   | 5    | 0.0063   | 0.015    | 0.2473   | 0.16648  | 0.047592573 | Intergenic | NA                                             | NA                                     |
| 5   | 176866659 | 176866719 | 1       | 0.067142   | 7    | 0.0044   | 0.019    | 0.87458  | 0.80744  | 0.037406567 | TSS        | NM_001108000                                   | Fam132a                                |
| 6   | 6138299   | 6138347   | 1       | 0.128421   | 5    | 0.0029   | 0.0018   | 0.8078   | 0.67938  | 0.028284932 | Intergenic | NA                                             | NA                                     |
| 6   | 6641034   | 6641122   | 0.028   | -0.080583  | 7    | 2.20E-07 | 6.70E-08 | 0.73292  | 0.8135   | 2.85E-05    | Intergenic | NA                                             | NA                                     |
| 6   | 33048081  | 33048178  | 1       | 0.089849   | 5    | 0.00026  | 0.00051  | 0.28745  | 0.1976   | 0.006020163 | Intragenic | NM_001169101                                   | Alk                                    |
| 6   | 38855782  | 38855820  | 1       | -0.089929  | 8    | 0.005    | 0.0037   | 0.28455  | 0.37448  | 0.040112676 | Intergenic | NA                                             | NA                                     |
| 6   | 39265520  | 39265548  | 1       | -0.099665  | 7    | 0.003    | 0.0083   | 0.23874  | 0.33841  | 0.029061224 | Intergenic | NA                                             | NA                                     |
| 6   | 39272758  | 39272863  | 1       | 0.053702   | 17   | 2.60E-05 | 0.0023   | 0.44564  | 0.39194  | 0.001213902 | TSS        | NR_046238                                      | Rn5-8s                                 |
| 6   | 43683673  | 43683762  | 1       | 0.221758   | 5    | 3.90E-05 | 3.40E-05 | 0.46181  | 0.24005  | 0.001657791 | Intragenic | NM_013026                                      | Sdc1                                   |
| 6   | 110663387 | 110663495 | 1       | 0.1088     | 5    | 0.002    | 0.00098  | 0.50756  | 0.39876  | 0.023154472 | Intergenic | NA                                             | NA                                     |
| 6   | 113415423 | 113415517 | 1       | 0.07968    | 5    | 0.002    | 0.0092   | 0.54379  | 0.46411  | 0.023154472 | Intergenic | NA                                             | NA                                     |
| 6   | 117842024 | 117842144 | 1       | -0.107224  | 5    | 0.0041   | 0.024    | 0.7874   | 0.89462  | 0.035065465 | Intergenic | NA                                             | NA                                     |
| 6   | 118813369 | 118813407 | 1       | 0.082797   | 5    | 0.00026  | 0.0018   | 0.41961  | 0.33682  | 0.006020163 | Intergenic | NA                                             | NA                                     |
| 6   | 135842331 | 135842385 | 1       | -0.052773  | 6    | 0.00057  | 0.0003   | 0.026229 | 0.079002 | 0.010610196 | TSS        | NM_001142942:N<br>M_001142941:N<br>M_001007705 | LOC10023317<br>6:LOC100233<br>176:Ubr7 |
| 6   | 141922862 | 141922959 | 1       | 0.211387   | 5    | 0.002    | 0.015    | 0.80774  | 0.59635  | 0.023154472 | Intergenic | NA                                             | NA                                     |



| chr | start     | stop      | q-value | methyl.diff | CpGs | pMWU     | p2DKS    | MCWLS    | MCWHS     | pMWU.fdr    | cgi.type   | transcript                             | gene            |
|-----|-----------|-----------|---------|-------------|------|----------|----------|----------|-----------|-------------|------------|----------------------------------------|-----------------|
| 6   | 142896843 | 142896989 | 0.35    | 0.051961    | 18   | 3.20E-06 | 8.50E-07 | 0.38685  | 0.33489   | 0.000253156 | TSS        | NR_031785:NR_037363                    | Mir341:Mir1188  |
| 6   | 144521395 | 144521529 | 0.2     | -0.12956    | 13   | 5.90E-08 | 5.00E-07 | 0.51347  | 0.64303   | 9.88E-06    | Intragenic | NM_001137633                           | Tnfaip2         |
| 6   | 145189701 | 145189766 | 1       | 0.050489    | 7    | 0.0024   | 0.0035   | 0.9751   | 0.92461   | 0.025890909 | Intragenic | NM_001100894                           | Wdr20           |
| 6   | 146630764 | 146630844 | 1       | 0.139742    | 7    | 0.00026  | 0.00014  | 0.59137  | 0.45163   | 0.006020163 | Intergenic | NA                                     | NA              |
| 7   | 14824156  | 14824194  | 1       | 0.090071    | 7    | 0.0039   | 0.0052   | 0.89645  | 0.80638   | 0.03449441  | Intragenic | NM_173124                              | Cyp4f5          |
| 7   | 14923460  | 14923498  | 1       | 0.090071    | 7    | 0.0039   | 0.0052   | 0.89645  | 0.80638   | 0.03449441  | Intragenic | NM_173124                              | Cyp4f5          |
| 7   | 22616230  | 22616362  | 1       | 0.125654    | 7    | 0.00065  | 0.019    | 0.67904  | 0.55339   | 0.011642767 | Intergenic | NA                                     | NA              |
| 7   | 26714184  | 26714291  | 1       | 0.073707    | 8    | 0.0054   | 0.0055   | 0.8127   | 0.73899   | 0.04272     | Intragenic | NM_001108742                           | Slc41a2         |
| 7   | 29995603  | 29995641  | 1       | 0.06351     | 5    | 0.00036  | 0.024    | 0.071181 | 0.0076706 | 0.007708872 | Intragenic | NM_001106778                           | Ano4            |
| 7   | 34465525  | 34465624  | 1       | -0.114619   | 7    | 0.0002   | 0.0013   | 0.49187  | 0.60649   | 0.005085714 | Intragenic | NM_001191781                           | Amdhd1          |
| 7   | 38986738  | 38986818  | 1       | 0.156206    | 5    | 0.00048  | 0.0055   | 0.85701  | 0.7008    | 0.009174765 | TSS        | NM_001025052                           | Ccer1           |
| 7   | 57675445  | 57675473  | 1       | -0.08105    | 5    | 0.0019   | 0.0093   | 0.12845  | 0.2095    | 0.023154472 | Intragenic | NM_001108991                           | Trhde           |
| 7   | 57675958  | 57675998  | 1       | 0.065981    | 5    | 0.00054  | 0.00027  | 0.10027  | 0.034287  | 0.010184901 | Intragenic | NM_001108991                           | Trhde           |
| 7   | 68800475  | 68800540  | 1       | 0.053192    | 7    | 0.0059   | 0.074    | 0.093942 | 0.04075   | 0.046036164 | Intergenic | NA                                     | NA              |
| 7   | 100115982 | 100116065 | 1       | 0.052422    | 8    | 0.0013   | 0.0038   | 0.92554  | 0.87312   | 0.018238424 | Intergenic | NA                                     | NA              |
| 7   | 114146620 | 114146762 | 1       | -0.096815   | 10   | 0.0013   | 0.0009   | 0.29497  | 0.39178   | 0.018238424 | Intragenic | NM_001034156                           | Trappc9         |
| 7   | 117273694 | 117273766 | 1       | -0.132812   | 5    | 3.90E-05 | 1.60E-05 | 0.013443 | 0.14626   | 0.001657791 | TSS        | NM_001164297:NM_001164296              | Plec:Plec       |
| 7   | 117569110 | 117569159 | 1       | 0.143482    | 5    | 0.0027   | 0.0093   | 0.61811  | 0.47463   | 0.027462857 | Intergenic | NA                                     | NA              |
| 7   | 117571630 | 117571666 | 1       | 0.084945    | 5    | 0.0027   | 0.00097  | 0.15161  | 0.066667  | 0.027462857 | Intragenic | NM_001130570                           | Scrt1           |
| 7   | 119222922 | 119222952 | 1       | 0.088085    | 5    | 0.0063   | 0.039    | 0.31026  | 0.22218   | 0.047592573 | Intragenic | NM_053351                              | Cacng2          |
| 7   | 119613408 | 119613439 | 1       | 0.120138    | 5    | 0.0017   | 0.0031   | 0.7244   | 0.60426   | 0.022007273 | TSS        | NM_012808                              | Tst             |
| 7   | 122459180 | 122459256 | 1       | -0.120373   | 5    | 0.0029   | 0.015    | 0.86255  | 0.98293   | 0.028284932 | Intergenic | NA                                     | NA              |
| 7   | 125933665 | 125933733 | 1       | -0.087762   | 5    | 0.0063   | 0.024    | 0.56053  | 0.6483    | 0.047592573 | Intergenic | NA                                     | NA              |
| 7   | 129736250 | 129736292 | 1       | 0.075976    | 5    | 0.0011   | 0.00053  | 0.95603  | 0.88006   | 0.016934054 | Intragenic | NM_199409                              | Panx2           |
| 7   | 130183168 | 130183230 | 1       | 0.089157    | 12   | 2.50E-06 | 0.00026  | 0.64773  | 0.55857   | 0.000215758 | Intragenic | NM_021676                              | Shank3          |
| 7   | 134709925 | 134709987 | 1       | 0.14037     | 5    | 0.0013   | 0.0093   | 0.66035  | 0.51998   | 0.018238424 | Intragenic | NM_001309489                           | Muc19           |
| 7   | 140496525 | 140496550 | 1       | 0.126078    | 5    | 0.00048  | 0.0018   | 0.27421  | 0.14813   | 0.009174765 | Intergenic | NA                                     | NA              |
| 7   | 141507249 | 141507356 | 1       | 0.070413    | 5    | 0.00072  | 0.0053   | 0.89591  | 0.82549   | 0.012503415 | Intergenic | NA                                     | NA              |
| 7   | 142720764 | 142720882 | 1       | -0.077272   | 7    | 3.80E-06 | 9.70E-05 | 0.88954  | 0.96681   | 0.000292497 | Intragenic | NM_001135088:NM_001135089:NM_001109470 | Zfp385a:Zfp385a |
| 8   | 59846168  | 59846261  | 1       | -0.108432   | 11   | 2.20E-05 | 0.0001   | 0.4335   | 0.54193   | 0.001118857 | Intragenic | NM_001100722                           | Lingo1          |
| 8   | 68672680  | 68672822  | 1       | -0.160119   | 5    | 0.00072  | 0.00051  | 0.66803  | 0.82815   | 0.012503415 | Intragenic | NM_001109002                           | Smad6           |
| 8   | 84287724  | 84287786  | 1       | 0.091158    | 5    | 0.0038   | 0.058    | 0.94949  | 0.85833   | 0.033926019 | Intergenic | NA                                     | NA              |
| 8   | 90428888  | 90429015  | 1       | 0.1131      | 8    | 0.002    | 0.069    | 0.80381  | 0.69071   | 0.023154472 | Intergenic | NA                                     | NA              |
| 8   | 90503610  | 90503737  | 1       | 0.1131      | 8    | 0.002    | 0.069    | 0.80381  | 0.69071   | 0.023154472 | TSS        | NM_001013954                           | Lca5            |
| 8   | 91108286  | 91108404  | 1       | -0.055055   | 5    | 0.0029   | 0.038    | 0.92932  | 0.98437   | 0.028284932 | Intragenic | NM_019267                              | Bckdhh          |

| chr | start     | stop      | q-value | methy.diff | CpGs | pMWU     | p2DKS    | MCWLS    | MCWHS    | pMWU.fdr    | cgi.type   | transcript             | gene         |
|-----|-----------|-----------|---------|------------|------|----------|----------|----------|----------|-------------|------------|------------------------|--------------|
| 8   | 107532999 | 107533072 | 1       | -0.058067  | 8    | 0.0052   | 0.049    | 0.11415  | 0.17222  | 0.041367598 | TSS        | NM_001106850           | Sox14        |
| 8   | 111025338 | 111025403 | 1       | -0.074498  | 5    | 2.90E-06 | 3.50E-05 | 0.77915  | 0.85365  | 0.000235977 | Intragenic | NM_001108775           | Rab6b        |
| 8   | 126108611 | 126108646 | 1       | 0.110577   | 5    | 0.00048  | 0.0018   | 0.73473  | 0.62415  | 0.009174765 | Intergenic | NA                     | NA           |
| 8   | 126122612 | 126122647 | 1       | 0.110577   | 5    | 0.00048  | 0.0018   | 0.73473  | 0.62415  | 0.009174765 | Intergenic | NA                     | NA           |
| 8   | 129134739 | 129134793 | 1       | -0.099868  | 5    | 0.0011   | 0.0054   | 0.76118  | 0.86105  | 0.016934054 | Intergenic | NA                     | NA           |
| 8   | 129236815 | 129236978 | 1       | -0.103582  | 8    | 0.0013   | 0.012    | 0.1731   | 0.27668  | 0.018238424 | Intragenic | NM_001134565           | Trak1        |
| 9   | 1972722   | 1972744   | 1       | -0.051868  | 5    | 0.0022   | 0.0018   | 0.039282 | 0.09115  | 0.024379767 | TSS        | NM_001106880           | Plcl2        |
| 9   | 6514530   | 6514595   | 1       | 0.105664   | 5    | 0.0049   | 0.0092   | 0.48245  | 0.37679  | 0.039645455 | Intergenic | NA                     | NA           |
| 9   | 6515153   | 6515246   | 1       | 0.127305   | 5    | 0.00065  | 0.025    | 0.8243   | 0.697    | 0.011642767 | Intergenic | NA                     | NA           |
| 9   | 9626801   | 9626825   | 1       | -0.124329  | 5    | 0.00019  | 0.00053  | 0.81171  | 0.93603  | 0.004874955 | Intragenic | NM_019140              | Ptprs        |
| 9   | 11340886  | 11340988  | 1       | 0.072197   | 8    | 0.00011  | 0.0016   | 0.2432   | 0.17101  | 0.003480889 | Intergenic | NA                     | NA           |
| 9   | 15798883  | 15798936  | 1       | -0.12804   | 9    | 1.50E-05 | 2.80E-05 | 0.094133 | 0.22217  | 0.000837647 | Intergenic | NA                     | NA           |
| 9   | 25475930  | 25476053  | 1       | 0.059494   | 8    | 0.0042   | 0.13     | 0.21216  | 0.15267  | 0.035813174 | Intergenic | NA                     | NA           |
| 9   | 65570258  | 65570368  | 1       | -0.0691    | 10   | 0.0023   | 0.0077   | 0.39133  | 0.46043  | 0.02529112  | TSS        | NM_133560:NM_001109307 | Trak2:Stradb |
| 9   | 82151507  | 82151545  | 1       | -0.056833  | 7    | 0.0022   | 0.019    | 0.015199 | 0.072032 | 0.024379767 | TSS        | NM_080582              | Abcb6        |
| 9   | 88152939  | 88153040  | 1       | 0.091644   | 5    | 0.00039  | 0.0018   | 0.47301  | 0.38136  | 0.008107445 | Intragenic | NM_001135759           | Col4a3       |
| 9   | 113464173 | 113464373 | 1       | -0.064573  | 10   | 0.00081  | 0.0083   | 0.16187  | 0.22644  | 0.013650178 | Intergenic | NA                     | NA           |
| 9   | 113891829 | 113891911 | 1       | 0.177305   | 7    | 0.0017   | 0.0083   | 0.81809  | 0.64078  | 0.022007273 | Intergenic | NA                     | NA           |
| 9   | 115022569 | 115022703 | 1       | -0.145681  | 7    | 0.00011  | 0.0013   | 0.2699   | 0.41558  | 0.003480889 | Intragenic | NM_001168632           | Ptprm        |
| X   | 9050350   | 9050509   | 1       | 0.158354   | 7    | 0.0011   | 0.0069   | 0.5941   | 0.43575  | 0.016934054 | Intergenic | NA                     | NA           |
| X   | 10997140  | 10997285  | 1       | 0.098205   | 21   | 5.00E-05 | 0.0014   | 0.59491  | 0.49671  | 0.002063768 | Intragenic | NM_001100967           | Nyx          |
| X   | 88078478  | 88078593  | 1       | 0.050559   | 5    | 0.0063   | 0.0018   | 0.7309   | 0.68034  | 0.047592573 | Intergenic | NA                     | NA           |
| X   | 92992662  | 92992769  | 1       | 0.069792   | 5    | 0.002    | 0.024    | 0.87912  | 0.80933  | 0.023154472 | Intragenic | NM_001271228           | Pcdh11x      |
| X   | 100637126 | 100637177 | 1       | 0.054397   | 5    | 0.0032   | 0.0092   | 0.95975  | 0.90535  | 0.030277741 | Intergenic | NA                     | NA           |
| X   | 118226193 | 118226214 | 1       | 0.055217   | 5    | 0.0063   | 0.015    | 0.076906 | 0.021689 | 0.047592573 | TSS        | NM_012765              | Htr2c        |
| X   | 119304850 | 119304930 | 1       | 0.07069    | 8    | 9.90E-05 | 0.0015   | 0.35544  | 0.28475  | 0.003273563 | Intergenic | NA                     | NA           |
| X   | 119678118 | 119678198 | 1       | 0.07069    | 8    | 9.90E-05 | 0.0015   | 0.35544  | 0.28475  | 0.003273563 | Intergenic | NA                     | NA           |
| X   | 134618094 | 134618150 | 1       | 0.113495   | 7    | 0.0026   | 0.078    | 0.36167  | 0.24817  | 0.027462857 | Intergenic | NA                     | NA           |

Figure 3C MCWLS

| RRBS     |            |          |             |            |         | RNAseq   |           |          |                  |              |               |                  |            |         |
|----------|------------|----------|-------------|------------|---------|----------|-----------|----------|------------------|--------------|---------------|------------------|------------|---------|
| gene     | Blood      | Kidney   | methyl.diff | pMWU.fdr   | Match ? | gene     | blood     | kidney   | log2(fold_ratio) | blood+ 0.001 | kidney+ 0.001 | log2(fold_ratio) | q_value    | Match ? |
| 42987    | 0.73421    | 0.067793 | -0.666417   | 1.97E-09   | Yes     | 42987    | 276.094   | 54.738   | -2.3345449       | 276.095      | 54.739        | -2.3345238       | 0.00022079 | Yes     |
| Adcy3    | 0.16712    | 0.026579 | -0.140541   | 7.99E-06   | Yes     | Adcy3    | 13.2496   | 1.21189  | -3.4506181       | 13.2506      | 1.21289       | -3.4495371       | 0.00909283 | Yes     |
| Adora2a  | 0.54787    | 0.11852  | -0.42935    | 1.31E-06   | Yes     | Adora2a  | 10.2919   | 3.30159  | -1.6402765       | 10.2929      | 3.30259       | -1.6399797       | 0.00164037 | Yes     |
| Aes      | 0.0043408  | 0.1022   | 0.0978592   | 0.0001571  | Yes     | Aes      | 198.247   | 364.423  | 0.87831498       | 198.248      | 364.424       | 0.87831166       | 0.0194084  | Yes     |
| Aff3     | 0.97008    | 0.62337  | -0.34671    | 3.82E-07   | Yes     | Aff3     | 13.911    | 2.38329  | -2.5451997       | 13.912       | 2.38429       | -2.5446982       | 0.00022079 | Yes     |
| Agap2    | 0.87716    | 0.109    | -0.76816    | 1.81E-12   | Yes     | Agap2    | 21.106    | 1.41827  | -3.8954491       | 21.107       | 1.41927       | -3.8945006       | 0.00022079 | Yes     |
| Amigo2   | 0.81457    | 0.58855  | -0.22602    | 0.00010222 | Yes     | Amigo2   | 1.42934   | 0.347659 | -2.0396043       | 1.43034      | 0.348659      | -2.0364695       | 0.0387563  | Yes     |
| Ankra2   | 0.11714    | 0.049796 | -0.067344   | 3.98E-06   | Yes     | Ankra2   | 14.4618   | 7.03875  | -1.038856        | 14.4628      | 7.03975       | -1.0387508       | 0.0162859  | Yes     |
| Arf6     | 0.15881    | 0.056561 | -0.102249   | 0.01406934 | Yes     | Arf6     | 193.162   | 65.0906  | -1.5692902       | 193.163      | 65.0916       | -1.5692755       | 0.00022079 | Yes     |
| Arhgef25 | 0.093503   | 0.30365  | 0.210147    | 7.75E-05   | Yes     | Arhgef25 | 0.462311  | 3.39174  | 2.87508999       | 0.463311     | 3.39274       | 2.87239803       | 0.00407863 | Yes     |
| Atmin    | 0.30319    | 0.14814  | -0.15505    | 1.81E-12   | Yes     | Atmin    | 8.94429   | 4.91943  | -0.8624758       | 8.94529      | 4.92043       | -0.8623439       | 0.0308614  | Yes     |
| Bcl2l11  | 0.073372   | 0.020624 | -0.052748   | 0.00320916 | Yes     | BCL2L11  | 9.33052   | 2.61068  | -1.8375319       | 9.33152      | 2.61168       | -1.837134        | 0.00022079 | Yes     |
| Bdh1     | 0.017736   | 0.13631  | 0.118574    | 5.49E-05   | Yes     | Bdh1     | 16.6124   | 30.123   | 0.85860494       | 16.6134      | 30.124        | 0.85856599       | 0.0438233  | Yes     |
| Cactin   | 0.8182     | 0.65887  | -0.15933    | 0.00034271 | Yes     | Cactin   | 32.7639   | 9.83446  | -1.7361894       | 32.7649      | 9.83546       | -1.7360867       | 0.00022079 | Yes     |
| Cbs      | 0.10448    | 0.2549   | 0.15042     | 0.04101176 | Yes     | Cbs      | 0.0567727 | 45.6388  | 9.65084779       | 0.0577727    | 45.6398       | 9.62568883       | 0.00022079 | Yes     |
| Ccnjl    | 0.13262    | 0.039592 | -0.093028   | 0.00636684 | Yes     | Ccnjl    | 2.87696   | 0.555101 | -2.373723        | 2.87796      | 0.556101      | -2.3716277       | 0.00164037 | Yes     |
| Cdc20    | 0          | 0.085685 | 0.085685    | 4.45E-05   | Yes     | Cdc20    | 0.859802  | 5.17824  | 2.59038546       | 0.860802     | 5.17924       | 2.58898708       | 0.00096553 | Yes     |
| Cflar    | 0.81806    | 0.17162  | -0.64644    | 5.43E-10   | Yes     | CFLAR    | 97.1321   | 27.4182  | -1.8248143       | 97.1331      | 27.4192       | -1.8247765       | 0.00096553 | Yes     |
| Chmp4bl1 | 0.29408    | 0.088818 | -0.205262   | 7.37E-11   | Yes     | Chmp4bl1 | 172.21    | 105.715  | -0.7039888       | 172.211      | 105.716       | -0.7039836       | 0.0388459  | Yes     |
| Cyld     | 0.87284    | 0.60074  | -0.2721     | 2.50E-05   | Yes     | Cyld     | 28.1636   | 6.30455  | -2.1593665       | 28.1646      | 6.30555       | -2.1591889       | 0.00022079 | Yes     |
| Ddx21    | 0.069172   | 0        | -0.069172   | 3.82E-07   | Yes     | Ddx21    | 47.4905   | 6.72901  | -2.8191728       | 47.4915      | 6.73001       | -2.8189888       | 0.00022079 | Yes     |
| Ddx54    | 0.82135    | 0.26923  | -0.55212    | 3.38E-09   | Yes     | Ddx54    | 26.6929   | 15.3961  | -0.7938911       | 26.6939      | 15.3971       | -0.7938515       | 0.0153152  | Yes     |
| Ddx6     | 0.20959    | 0.063291 | -0.146299   | 2.78E-11   | Yes     | Ddx6     | 89.6667   | 19.9873  | -2.1654887       | 89.6677      | 19.9883       | -2.1654326       | 0.00022079 | Yes     |
| Depdc5   | 0.86851    | 0.43774  | -0.43077    | 4.83E-07   | Yes     | Depdc5   | 9.72313   | 4.40673  | -1.1417123       | 9.72413      | 4.40773       | -1.1415333       | 0.00422081 | Yes     |
| Dffb     | 0.79044    | 0.6145   | -0.17594    | 0.0021362  | Yes     | Dffb     | 11.4604   | 5.20408  | -1.1389424       | 11.4614      | 5.20508       | -1.138791        | 0.0123897  | Yes     |
| Eef1g    | 0.84266    | 0.24159  | -0.60107    | 7.25E-09   | Yes     | Eef1g    | 1393.45   | 345.102  | -2.0135665       | 1393.451     | 345.103       | -2.0135634       | 0.00022079 | Yes     |
| Eef2     | 0.10307    | 0.015113 | -0.087957   | 2.44E-07   | Yes     | Eef2     | 1775.35   | 425.593  | -2.0605571       | 1775.351     | 425.594       | -2.0605546       | 0.0497157  | Yes     |
| Eng      | 0.10919    | 0.36694  | 0.25775     | 7.27E-07   | Yes     | Eng      | 0.109428  | 18.7733  | 7.42255653       | 0.110428     | 18.7743       | 7.40950928       | 0.00565535 | Yes     |
| Epb41l4b | 0.070028   | 0.23057  | 0.160542    | 6.77E-07   | Yes     | Epb41l4b | 0         | 16.189   | inf              | 0.001        | 16.19         | 13.9828154       | 0.00022079 | Yes     |
| Etaa1    | 0.50629    | 0.24906  | -0.25723    | 1.81E-12   | Yes     | Etaa1    | 9.846     | 1.78743  | -2.461651        | 9.847        | 1.78843       | -2.4609906       | 0.00022079 | Yes     |
| Fam101b  | 0.2458     | 0.09575  | -0.15005    | 1.81E-12   | Yes     | Fam101b  | 56.3523   | 7.61961  | -2.8866854       | 56.3533      | 7.62061       | -2.8865217       | 0.00022079 | Yes     |
| Fam189b  | 0.37632    | 0.12623  | -0.25009    | 3.07E-06   | Yes     | Fam189b  | 178.156   | 14.4004  | -3.6289603       | 178.157      | 14.4014       | -3.6288682       | 0.00022079 | Yes     |
| Fbxo46   | 0.61484    | 0.16204  | -0.4528     | 7.31E-08   | Yes     | Fbxo46   | 6.33986   | 2.62546  | -1.2718808       | 6.34086      | 2.62646       | -1.2715589       | 0.00242102 | Yes     |
| Fhod1    | 0.49564    | 0.13274  | -0.3629     | 0.00011578 | Yes     | Fhod1    | 25.77     | 14.3238  | -0.8472783       | 25.771       | 14.3248       | -0.8472335       | 0.0448987  | Yes     |
| Gcnt2    | 0.022434   | 0.17448  | 0.152046    | 5.42E-11   | Yes     | Gcnt2    | 0.0623076 | 18.0045  | 8.17473367       | 0.0633076    | 18.0055       | 8.15184324       | 0.00022079 | Yes     |
| Gna15    | 0.13317    | 0.37931  | 0.24614     | 5.45E-07   | Yes     | Gna15    | 3.76274   | 10.5268  | 1.48421143       | 3.76374      | 10.5278       | 1.48396511       | 0.00333723 | Yes     |
| Gpc1     | 0.016271   | 0.092087 | 0.075816    | 0.00017491 | Yes     | Gpc1     | 0.101404  | 3.71961  | 5.1969649        | 0.102404     | 3.72061       | 5.1831952        | 0.00164037 | Yes     |
| Gramd1b  | 0.00099364 | 0.07641  | 0.07541636  | 1.81E-12   | Yes     | Gramd1b  | 6.93057   | 20.2502  | 1.54689024       | 6.93157      | 20.2512       | 1.54675333       | 0.00333723 | Yes     |
| Gtf2ird1 | 0.049907   | 0.11754  | 0.067633    | 0.01660198 | Yes     | Gtf2ird1 | 5.1461    | 11.1357  | 1.11364085       | 5.1471       | 11.1367       | 1.11349008       | 0.0448987  | Yes     |
| Hk1      | 0.026853   | 0.142    | 0.115147    | 2.29E-05   | Yes     | Hk1      | 29.1667   | 72.8115  | 1.31984417       | 29.1677      | 72.8125       | 1.31981452       | 0.00022079 | Yes     |

| RRBS    |           |           |             |            |         | RNAseq  |           |          |                  |              |               |                  |            |         |
|---------|-----------|-----------|-------------|------------|---------|---------|-----------|----------|------------------|--------------|---------------|------------------|------------|---------|
| gene    | Blood     | Kidney    | methyl.diff | pMWU.fdr   | Match ? | gene    | blood     | kidney   | log2(fold_ratio) | blood+ 0.001 | kidney+ 0.001 | log2(fold_ratio) | q_value    | Match ? |
| Hnrnpa3 | 0.64133   | 0.37463   | -0.2667     | 0.0002817  | Yes     | Hnrnpa3 | 8.25041   | 3.12092  | -1.4024944       | 8.25141      | 3.12192       | -1.4022071       | 0.0249599  | Yes     |
| Hoxa2   | 0.14325   | 0.35743   | 0.21418     | 4.55E-07   | Yes     | Hoxa2   | 0         | 2.66685  | inf              | 0.001        | 2.66785       | 11.3814618       | 0.00022079 | Yes     |
| Hoxc5   | 0.05174   | 0.16028   | 0.10854     | 4.67E-09   | Yes     | Hoxc5   | 3.60187   | 28.5937  | 2.9888793        | 3.60287      | 28.5947       | 2.98852927       | 0.00022079 | Yes     |
| Hoxd3   | 0.13752   | 0.41578   | 0.27826     | 6.38E-06   | Yes     | Hoxd3   | 0         | 19.0078  | inf              | 0.001        | 19.0088       | 14.2143798       | 0.00022079 | Yes     |
| Hspa2   | 0.024535  | 0.12149   | 0.096955    | 0.00113933 | Yes     | Hspa2   | 0.354669  | 33.7575  | 6.57259102       | 0.355669     | 33.7585       | 6.56857176       | 0.00113657 | Yes     |
| Ifi30   | 0.19925   | 0.32283   | 0.12358     | 0.02144384 | Yes     | Ifi30   | 12.9994   | 89.3143  | 2.78044615       | 13.0004      | 89.3153       | 2.78035132       | 0.00022079 | Yes     |
| Il27ra  | 0.78925   | 0.34727   | -0.44198    | 6.38E-06   | Yes     | Il27ra  | 33.1731   | 0.801336 | -5.3714627       | 33.1741      | 0.802336      | -5.369707        | 0.00022079 | Yes     |
| Ino80d  | 0.93172   | 0.18557   | -0.74615    | 3.82E-07   | Yes     | Ino80d  | 11.5725   | 2.49259  | -2.2149831       | 11.5735      | 2.49359       | -2.214529        | 0.0276556  | Yes     |
| Irf4    | 0.32296   | 0.11283   | -0.21013    | 0.0074695  | Yes     | Irf4    | 1.99652   | 0.342971 | -2.541329        | 1.99752      | 0.343971      | -2.5378511       | 0.00257873 | Yes     |
| Irs2    | 0.13486   | 0.0053571 | -0.1295029  | 6.26E-05   | Yes     | Irs2    | 9.75389   | 5.07288  | -0.9431727       | 9.75489      | 5.07388       | -0.9430362       | 0.0117698  | Yes     |
| Irx5    | 0.0026568 | 0.082606  | 0.0799492   | 0.04318305 | Yes     | Irx5    | 0         | 15.0591  | inf              | 0.001        | 15.0601       | 13.8784437       | 0.00022079 | Yes     |
| Kat2a   | 0.46372   | 0.33482   | -0.1289     | 0.02616573 | Yes     | Kat2a   | 29.6629   | 9.57978  | -1.6305952       | 29.6639      | 9.58078       | -1.6304933       | 0.00022079 | Yes     |
| Kbtbd8  | 0.53742   | 0.27906   | -0.25836    | 0.00290027 | Yes     | Kbtbd8  | 2.96049   | 0.994297 | -1.5740872       | 2.96149      | 0.995297      | -1.5731242       | 0.0182773  | Yes     |
| Kdm2a   | 0.1155    | 0.019661  | -0.095839   | 2.59E-07   | Yes     | Kdm2a   | 58.3659   | 15.8237  | -1.8830387       | 58.3669      | 15.8247       | -1.8829723       | 0.00022079 | Yes     |
| Kif3c   | 0.66955   | 0.26336   | -0.40619    | 1.67E-06   | Yes     | Kif3c   | 3.0723    | 1.02723  | -1.5805599       | 3.0733       | 1.02823       | -1.5796256       | 0.00949299 | Yes     |
| Klhl29  | 0.061649  | 0.24656   | 0.184911    | 1.03E-05   | Yes     | Klhl29  | 0.0655684 | 1.00387  | 3.93642795       | 0.0665684    | 1.00487       | 3.91602757       | 0.00494367 | Yes     |
| Lats2   | 0.082156  | 0.2469    | 0.164744    | 0.0002817  | Yes     | Lats2   | 0.0587648 | 14.6483  | 7.96156529       | 0.0597648    | 14.6493       | 7.93731999       | 0.00060553 | Yes     |
| Map4k2  | 0.87161   | 0.0965    | -0.77511    | 3.82E-07   | Yes     | Map4k2  | 52.8373   | 6.47517  | -3.0285668       | 52.8383      | 6.47617       | -3.0283713       | 0.00022079 | Yes     |
| Mettl7a | 0.0062926 | 0.090864  | 0.0845714   | 2.29E-05   | Yes     | Mettl7a | 12.7686   | 30.4343  | 1.25309783       | 12.7696      | 30.4353       | 1.25303225       | 0.00180113 | Yes     |
| Mex3b   | 0.14025   | 0.059613  | -0.080637   | 0.00553374 | Yes     | Mex3b   | 5.85899   | 0.594152 | -3.301748        | 5.85999      | 0.595152      | -3.2995681       | 0.00022079 | Yes     |
| Naa25   | 0.33293   | 0.11773   | -0.2152     | 4.83E-07   | Yes     | Naa25   | 10.451    | 3.67232  | -1.5088773       | 10.452       | 3.67332       | -1.5086225       | 0.00041963 | Yes     |
| Nfkb1   | 0.088787  | 0.023492  | -0.065295   | 7.75E-05   | Yes     | Nfkb1   | 54.1761   | 18.5444  | -1.546673        | 54.1771      | 18.5454       | -1.5466218       | 0.00022079 | Yes     |
| Nfkbia  | 0.31782   | 0.081957  | -0.235863   | 0.00146579 | Yes     | Nfkbia  | 136.026   | 70.5518  | -0.9471276       | 136.027      | 70.5528       | -0.9471178       | 0.00422081 | Yes     |
| Nlk     | 0.11502   | 0.047135  | -0.067885   | 2.32E-08   | Yes     | Nlk     | 21.3691   | 7.74561  | -1.4640754       | 21.3701      | 7.74661       | -1.4639566       | 0.00022079 | Yes     |
| Nr4a2   | 0.12948   | 0.24388   | 0.1144      | 0.00334577 | Yes     | Nr4a2   | 0.335009  | 2.51005  | 2.90544434       | 0.336009     | 2.51105       | 2.90171897       | 0.0208857  | Yes     |
| Nt5c3a  | 0.81028   | 0.73877   | -0.07151    | 0.00813698 | Yes     | Nt5c3a  | 26.2634   | 13.3865  | -0.9722749       | 26.2644      | 13.3875       | -0.9722221       | 0.011893   | Yes     |
| Ntng2   | 0.49291   | 0.079397  | -0.413513   | 1.81E-12   | Yes     | Ntng2   | 60.2538   | 1.88098  | -5.0014958       | 60.2548      | 1.88198       | -5.000753        | 0.00022079 | Yes     |
| Olfm1   | 0.28554   | 0.10597   | -0.17957    | 0.01155321 | Yes     | Olfm1   | 7.92036   | 2.67408  | -1.5665234       | 7.92136      | 2.67508       | -1.5661661       | 0.00536605 | Yes     |
| Orc2    | 0.89238   | 0.7468    | -0.14558    | 0.00049864 | Yes     | Orc2    | 26.7904   | 10.1856  | -1.3951852       | 26.7914      | 10.1866       | -1.3950974       | 0.00022079 | Yes     |
| Pced1b  | 0.74467   | 0.4694    | -0.27527    | 0.00135614 | Yes     | Pced1b  | 47.2332   | 4.07074  | -3.5364383       | 47.2342      | 4.07174       | -3.5361145       | 0.00022079 | Yes     |
| Pde2a   | 0.38631   | 0.22188   | -0.16443    | 0.0007628  | Yes     | Pde2a   | 103.888   | 4.80087  | -4.4355893       | 103.889      | 4.80187       | -4.4353027       | 0.00022079 | Yes     |
| Pde4d   | 0.36846   | 0.089169  | -0.279291   | 3.82E-07   | Yes     | Pde4d   | 66.7651   | 4.75914  | -3.8103214       | 66.7661      | 4.76014       | -3.8100399       | 0.00022079 | Yes     |
| Pdlim2  | 0.26966   | 0.09044   | -0.17922    | 2.79E-05   | Yes     | Pdlim2  | 50.629    | 25.6933  | -0.9785718       | 50.63        | 25.6943       | -0.9785441       | 0.0138632  | Yes     |
| Peli1   | 0.11818   | 0.054886  | -0.063294   | 4.28E-07   | Yes     | Peli1   | 37.5499   | 8.283    | -2.1805838       | 37.5509      | 8.284         | -2.180448        | 0.00022079 | Yes     |
| Pik3cd  | 0.88252   | 0.13257   | -0.74995    | 1.81E-12   | Yes     | Pik3cd  | 318.476   | 17.8193  | -4.1596721       | 318.477      | 17.8203       | -4.1595957       | 0.00378481 | Yes     |
| Pld4    | 0.37306   | 0.69895   | 0.32589     | 0.00017491 | Yes     | Pld4    | 0.747938  | 16.3285  | 4.44832977       | 0.748938     | 16.3295       | 4.44649052       | 0.00022079 | Yes     |
| Pou2f2  | 0.71302   | 0.37057   | -0.34245    | 4.99E-05   | Yes     | POU2F2  | 4.54816   | 0.674559 | -2.7532665       | 4.54916      | 0.675559      | -2.7514465       | 0.00022079 | Yes     |
| Ppan    | 0.70375   | 0.61543   | -0.08832    | 0.04985963 | Yes     | Ppan    | 47.1858   | 25.399   | -0.8935811       | 47.1868      | 25.4          | -0.8935548       | 0.0117698  | Yes     |
| Ppp1cc  | 0.81865   | 0.73627   | -0.08238    | 0.04531279 | Yes     | PPP1CC  | 224.443   | 129.24   | -0.7962964       | 224.444      | 129.241       | -0.7962917       | 0.0350649  | Yes     |
| Prdm1   | 0.27783   | 0.13862   | -0.13921    | 0.00934082 | Yes     | Prdm1   | 1.56331   | 0.421076 | -1.8924513       | 1.56431      | 0.422076      | -1.8899517       | 0.00164037 | Yes     |
| Prrc2c  | 0.41971   | 0.10623   | -0.31348    | 3.82E-07   | Yes     | Prrc2c  | 37.132    | 10.7407  | -1.789575        | 37.133       | 10.7417       | -1.7894795       | 0.00078858 | Yes     |
| Ptk7    | 0.0056914 | 0.091924  | 0.0862326   | 1.81E-12   | Yes     | Ptk7    | 0.0586288 | 5.77651  | 6.62244478       | 0.0596288    | 5.77751       | 6.59829474       | 0.00480115 | Yes     |

| RRBS    |          |          |             |            |         | RNAseq  |           |          |                  |              |               |                  |            |         |
|---------|----------|----------|-------------|------------|---------|---------|-----------|----------|------------------|--------------|---------------|------------------|------------|---------|
| gene    | Blood    | Kidney   | methyl.diff | pMWU.fdr   | Match ? | gene    | blood     | kidney   | log2(fold_ratio) | blood+ 0.001 | kidney+ 0.001 | log2(fold_ratio) | q_value    | Match ? |
| Ptprs   | 0.78419  | 0.1429   | -0.64129    | 3.70E-09   | Yes     | Ptprs   | 26.543    | 5.39421  | -2.2988478       | 26.544       | 5.39521       | -2.2986348       | 0.00022079 | Yes     |
| Pwp2    | 0.38655  | 0.089291 | -0.297259   | 0.0002817  | Yes     | Pwp2    | 14.3667   | 6.05124  | -1.247426        | 14.3677      | 6.05224       | -1.247288        | 0.00211842 | Yes     |
| Pwwp2b  | 0.13123  | 0.24942  | 0.11819     | 0.00568595 | Yes     | Pwwp2b  | 0.0668975 | 16.7167  | 7.96512206       | 0.0678975    | 16.7177       | 7.94380221       | 0.00060553 | Yes     |
| Pygb    | 0.017624 | 0.094326 | 0.076702    | 0.00181792 | Yes     | Pygb    | 5.36592   | 20.2739  | 1.91772619       | 5.36692      | 20.2749       | 1.91752851       | 0.00022079 | Yes     |
| Rassf5  | 0.76841  | 0.52846  | -0.23995    | 0.00244273 | Yes     | Rassf5  | 55.5765   | 10.8616  | -2.3552383       | 55.5775      | 10.8626       | -2.3551315       | 0.00022079 | Yes     |
| Rbm3    | 0.56676  | 0.12001  | -0.44675    | 0.00049864 | Yes     | Rbm3    | 270.592   | 63.5995  | -2.0890319       | 270.593      | 63.6005       | -2.0890145       | 0.00022079 | Yes     |
| Ret     | 0.20526  | 0.069496 | -0.135764   | 0.00135614 | Yes     | RET     | 12.0817   | 0.481171 | -4.65013         | 12.0827      | 0.482171      | -4.6472542       | 0.00060553 | Yes     |
| Rfx3    | 0.27559  | 0.068906 | -0.206684   | 0.0007955  | Yes     | Rfx3    | 6.01662   | 1.45124  | -2.0516671       | 6.01762      | 1.45224       | -2.0509131       | 0.00078858 | Yes     |
| Rpl10a  | 0.21154  | 0.059601 | -0.151939   | 0.0022928  | Yes     | Rpl10a  | 1953.24   | 679.199  | -1.523963        | 1953.241     | 679.2         | -1.5239616       | 0.00041963 | Yes     |
| Rpl13   | 0.76137  | 0.46251  | -0.29886    | 1.43E-10   | Yes     | Rpl13   | 4218.8    | 1420.91  | -1.5700175       | 4218.801     | 1420.911      | -1.5700168       | 0.0142227  | Yes     |
| Rpl18a  | 0.88797  | 0.66706  | -0.22091    | 2.48E-06   | Yes     | Rpl18a  | 6277.05   | 2345.7   | -1.4200682       | 6277.051     | 2345.701      | -1.4200678       | 0.0147132  | Yes     |
| Rpl6    | 0.87103  | 0.56775  | -0.30328    | 1.86E-08   | Yes     | Rpl6    | 908.611   | 172.13   | -2.4001642       | 908.612      | 172.131       | -2.4001574       | 0.00022079 | Yes     |
| Rps10   | 0.4844   | 0.34086  | -0.14354    | 0.00063341 | Yes     | Rps10   | 2437.37   | 952.093  | -1.3561509       | 2437.371     | 952.094       | -1.3561499       | 0.00242102 | Yes     |
| Rps15   | 0.43302  | 0.11905  | -0.31397    | 0.00021466 | Yes     | Rps15   | 5786.95   | 2484.47  | -1.2198651       | 5786.951     | 2484.471      | -1.2198647       | 0.0467065  | Yes     |
| Rps17   | 0.64673  | 0.3283   | -0.31843    | 3.28E-10   | Yes     | Rps17   | 6848.6    | 2115.27  | -1.6949673       | 6848.601     | 2115.271      | -1.6949668       | 0.0019604  | Yes     |
| Rps29   | 0.39193  | 0.13017  | -0.26176    | 2.29E-12   | Yes     | RPS29   | 42.9581   | 9.57115  | -2.166166        | 42.9591      | 9.57215       | -2.1660489       | 0.00022079 | Yes     |
| Runx1   | 0.45118  | 0.099709 | -0.351471   | 3.03E-12   | Yes     | Runx1   | 24.4447   | 2.77086  | -3.141116        | 24.4457      | 2.77186       | -3.1406544       | 0.00022079 | Yes     |
| Runx3   | 0.69362  | 0.066112 | -0.627508   | 4.45E-05   | Yes     | Runx3   | 37.2684   | 5.07468  | -2.8765641       | 37.2694      | 5.07568       | -2.8763186       | 0.00022079 | Yes     |
| Scaf11  | 0.17126  | 0.015977 | -0.155283   | 0.00017491 | Yes     | Scaf11  | 33.9521   | 14.2146  | -1.2561273       | 33.9531      | 14.2156       | -1.2560683       | 0.00113657 | Yes     |
| Scrn1   | 0.17775  | 0.087597 | -0.090153   | 0.02257431 | Yes     | Scrn1   | 15.8213   | 3.06235  | -2.3691571       | 15.8223      | 3.06335       | -2.3687772       | 0.00022079 | Yes     |
| Sec23ip | 0.62624  | 0.33017  | -0.29607    | 0.00553374 | Yes     | Sec23ip | 21.438    | 9.99741  | -1.100544        | 21.439       | 9.99841       | -1.100467        | 0.00164037 | Yes     |
| Sertad4 | 0.39319  | 0.5961   | 0.20291     | 0.00866691 | Yes     | Sertad4 | 0         | 1.82659  | inf              | 0.001        | 1.82759       | 10.8357267       | 0.00022079 | Yes     |
| Sh3gl1  | 0.2334   | 0.13065  | -0.10275    | 0.00123983 | Yes     | Sh3gl1  | 44.6197   | 22.6359  | -0.9790681       | 44.6207      | 22.6369       | -0.9790367       | 0.0362414  | Yes     |
| Shank2  | 0.046063 | 0.26821  | 0.222147    | 1.81E-12   | Yes     | Shank2  | 0         | 7.97969  | inf              | 0.001        | 7.98069       | 12.9622978       | 0.00022079 | Yes     |
| Skp2    | 0.22784  | 0.048729 | -0.179111   | 0.0017676  | Yes     | Skp2    | 4.66421   | 0.90001  | -2.3736198       | 4.66521      | 0.90101       | -2.372327        | 0.00041963 | Yes     |
| Slc12a5 | 0.055253 | 0.013698 | -0.041555   | 4.99E-05   | Yes     | Slc12a5 | 2.43575   | 0.261857 | -3.217515        | 2.43675      | 0.262857      | -3.2126082       | 0.00304332 | Yes     |
| Slc44a2 | 0.63236  | 0.13562  | -0.49674    | 1.74E-09   | Yes     | Slc44a2 | 220.739   | 22.8099  | -3.2746095       | 220.74       | 22.8109       | -3.2745528       | 0.00022079 | Yes     |
| Smarcc1 | 0.35686  | 0.073629 | -0.283231   | 2.83E-08   | Yes     | Smarcc1 | 25.1123   | 10.6821  | -1.2331989       | 25.1133      | 10.6831       | -1.2331213       | 0.00113657 | Yes     |
| Smim3   | 0.001    | 0.29214  | 0.29114     | 0.0001571  | Yes     | Smim3   | 2.90943   | 28.5842  | 3.29640947       | 2.91043      | 28.5852       | 3.29596416       | 0.0100165  | Yes     |
| Smyd2   | 0.77331  | 0.10828  | -0.66503    | 1.67E-06   | Yes     | Smyd2   | 97.6863   | 44.5322  | -1.1333074       | 97.6873      | 44.5332       | -1.1332897       | 0.0123897  | Yes     |
| Socs3   | 0.057259 | 0.36474  | 0.307481    | 7.75E-05   | Yes     | Socs3   | 27.8729   | 82.3398  | 1.56272683       | 27.8739      | 82.3408       | 1.56269259       | 0.00022079 | Yes     |
| Sstr3   | 0.32026  | 0.093848 | -0.226412   | 0.01333327 | Yes     | Sstr3   | 15.0805   | 1.70183  | -3.1475254       | 15.0815      | 1.70283       | -3.1467736       | 0.00022079 | Yes     |
| Stx16   | 0.30491  | 0.19431  | -0.1106     | 0.03531391 | Yes     | Stx16   | 26.3203   | 13.064   | -1.0105792       | 26.3213      | 13.065        | -1.0105236       | 0.00422081 | Yes     |
| Syk     | 0.0751   | 0.46278  | 0.38768     | 1.74E-09   | Yes     | Syk     | 2.8294    | 5.73338  | 1.01888975       | 2.8304       | 5.73438       | 1.01863156       | 0.0261671  | Yes     |
| Tbkbp1  | 0.3291   | 0.073952 | -0.255148   | 0.00510288 | Yes     | Tbkbp1  | 4.35055   | 1.63021  | -1.41614         | 4.35155      | 1.63121       | -1.4155868       | 0.0106524  | Yes     |
| Tbx2    | 0.070251 | 0.21492  | 0.144669    | 0.00197715 | Yes     | Tbx2    | 0.0545455 | 10.2363  | 7.55201844       | 0.0555455    | 10.2373       | 7.52594951       | 0.00422081 | Yes     |
| Tcf21   | 0.13313  | 0.21376  | 0.08063     | 0.00799193 | Yes     | Tcf21   | 0         | 3.87648  | inf              | 0.001        | 3.87748       | 11.9209036       | 0.00022079 | Yes     |
| Tifa    | 0.028967 | 0.1072   | 0.078233    | 0.0074695  | Yes     | Tifa    | 1.88602   | 15.2602  | 3.01635699       | 1.88702      | 15.2612       | 3.01568679       | 0.00579147 | Yes     |
| Tmem163 | 0.078105 | 0.025944 | -0.052161   | 0.01078302 | Yes     | Tmem163 | 9.32282   | 0.174666 | -5.7380957       | 9.32382      | 0.175666      | -5.7300143       | 0.00348745 | Yes     |
| Tpt1    | 0.36122  | 0.17033  | -0.19089    | 0.00018672 | Yes     | Tpt1    | 12932.3   | 3194.51  | -2.0173123       | 12932.301    | 3194.511      | -2.017312        | 0.0130042  | Yes     |
| Ttc22   | 0.13348  | 0.28063  | 0.14715     | 0.00135614 | Yes     | Ttc22   | 0.372369  | 4.11756  | 3.4669848        | 0.373369     | 4.11856       | 3.46346595       | 0.00022079 | Yes     |
| Tuba8   | 0.022956 | 0.077382 | 0.054426    | 0.0074695  | Yes     | Tuba8   | 0.297139  | 3.71136  | 3.64273807       | 0.298139     | 3.71236       | 3.63827961       | 0.0182773  | Yes     |

| RRBS     |           |          |             |            |         | RNAseq   |           |          |                  |              |               |                  |            |         |
|----------|-----------|----------|-------------|------------|---------|----------|-----------|----------|------------------|--------------|---------------|------------------|------------|---------|
| gene     | Blood     | Kidney   | methyl.diff | pMWU.fdr   | Match ? | gene     | blood     | kidney   | log2(fold_ratio) | blood+ 0.001 | kidney+ 0.001 | log2(fold_ratio) | q_value    | Match ? |
| Twf2     | 0.33432   | 0.13821  | -0.19611    | 0.00510288 | Yes     | Twf2     | 55.0623   | 11.2896  | -2.2860705       | 55.0633      | 11.2906       | -2.2859689       | 0.00022079 | Yes     |
| Utp15    | 0.12326   | 0.050251 | -0.073009   | 8.60E-07   | Yes     | Utp15    | 9.62106   | 4.65319  | -1.0479758       | 9.62206      | 4.65419       | -1.0478157       | 0.00579147 | Yes     |
| Zfp148   | 0.13172   | 0.02557  | -0.10615    | 0.0074695  | Yes     | Zfp148   | 23.1113   | 8.59952  | -1.4262704       | 23.1123      | 8.60052       | -1.426165        | 0.00257873 | Yes     |
| Zfp3     | 0.57156   | 0.27463  | -0.29693    | 0.01155321 | Yes     | Zfp3     | 9.49784   | 5.19929  | -0.8692848       | 9.49884      | 5.20029       | -0.8691593       | 0.0490106  | Yes     |
| Zfp385a  | 0.065646  | 0.26085  | 0.195204    | 0.00113933 | Yes     | Zfp385a  | 0.214086  | 9.11872  | 5.41256897       | 0.215086     | 9.11972       | 5.406004         | 0.00022079 | Yes     |
| Aard     | 0.19675   | 0.058958 | -0.137792   | 0.0022928  | Yes     | Aard     | 0         | 1.14596  | inf              | 0.001        | 1.14696       | 10.1635994       | 0.00022079 | Yes     |
| Abcb9    | 0.62736   | 0.22706  | -0.4003     | 0.00011578 | Yes     | Abcb9    | 0.0340201 | 3.27047  | 6.58696679       | 0.0350201    | 3.27147       | 6.54561203       | 0.0019604  | Yes     |
| Abcc8    | 0.070447  | 0        | -0.070447   | 4.32E-06   | Yes     | Abcc8    | 0         | 1.55069  | inf              | 0.001        | 1.55169       | 10.5996246       | 0.00022079 | Yes     |
| Abhd14a  | 0.13902   | 0.033063 | -0.105957   | 5.03E-06   | Yes     | Abhd14a  | 2.31273   | 51.6415  | 4.48086215       | 2.31373      | 51.6425       | 4.48026642       | 0.0344255  | Yes     |
| Abhd8    | 0.42821   | 0.22037  | -0.20784    | 0.00046099 | Yes     | Abhd8    | 6.20134   | 15.5031  | 1.32190483       | 6.20234      | 15.5041       | 1.32176526       | 0.00242102 | Yes     |
| Abo      | 0.19324   | 0.047921 | -0.145319   | 0.0190918  | Yes     | Abo      | 0         | 7.21124  | inf              | 0.001        | 7.21224       | 12.8162317       | 0.00022079 | Yes     |
| Acbd4    | 0.94458   | 0.26968  | -0.6749     | 5.45E-07   | Yes     | Acbd4    | 11.4356   | 40.6949  | 1.83131594       | 11.4366      | 40.6959       | 1.83122524       | 0.00022079 | Yes     |
| Acer2    | 0.22506   | 0.072671 | -0.152389   | 0.00934082 | Yes     | Acer2    | 0.0576656 | 13.8456  | 7.90750091       | 0.0586656    | 13.8466       | 7.88280126       | 0.00022079 | Yes     |
| Acot12   | 0.58025   | 0.1367   | -0.44355    | 3.82E-07   | Yes     | Acot12   | 0         | 1.99947  | inf              | 0.001        | 2.00047       | 10.9661233       | 0.00022079 | Yes     |
| Adam15   | 0.71879   | 0.098031 | -0.620759   | 1.81E-12   | Yes     | Adam15   | 0.118782  | 21.2808  | 7.48509235       | 0.119782     | 21.2818       | 7.47306524       | 0.0387563  | Yes     |
| Adamts15 | 0.086875  | 0.029509 | -0.057366   | 0.00148947 | Yes     | Adamts15 | 0         | 2.3262   | inf              | 0.001        | 2.3272        | 11.1843795       | 0.00022079 | Yes     |
| Adra2b   | 0.075741  | 0.018464 | -0.057277   | 7.02E-06   | Yes     | Adra2b   | 0         | 4.98247  | inf              | 0.001        | 4.98347       | 12.2829349       | 0.00022079 | Yes     |
| Agmat    | 0.62963   | 0.12052  | -0.50911    | 8.25E-10   | Yes     | Agmat    | 0         | 42.5687  | inf              | 0.001        | 42.5697       | 15.3775393       | 0.0432137  | Yes     |
| Ahnak    | 0.40944   | 0.13445  | -0.27499    | 0.00011578 | Yes     | AHNAK    | 10.6079   | 21.1699  | 0.99687537       | 10.6089      | 21.1709       | 0.99680753       | 0.00536605 | Yes     |
| Akap12   | 0.66216   | 0.09631  | -0.56585    | 4.78E-09   | Yes     | Akap12   | 0.160989  | 37.1252  | 7.84929287       | 0.161989     | 37.1262       | 7.840398         | 0.00022079 | Yes     |
| Aldoa    | 0.61093   | 0.2156   | -0.39533    | 3.61E-06   | Yes     | Aldoa    | 134.17    | 1016.59  | 2.92160391       | 134.171      | 1016.591      | 2.92159458       | 0.00022079 | Yes     |
| Amn      | 0.17471   | 0.023301 | -0.151409   | 0.01000157 | Yes     | Amn      | 0.0585359 | 31.4755  | 9.07069188       | 0.0595359    | 31.4765       | 9.04629954       | 0.00579147 | Yes     |
| Amotl2   | 0.13894   | 0.031933 | -0.107007   | 3.48E-07   | Yes     | Amotl2   | 0.0816331 | 67.1176  | 9.68332117       | 0.0826331    | 67.1186       | 9.66577712       | 0.00022079 | Yes     |
| Ampd3    | 0.74236   | 0.40185  | -0.34051    | 0.00113933 | Yes     | Ampd3    | 1.02979   | 20.6808  | 4.32786992       | 1.03079      | 20.6818       | 4.3265394        | 0.00022079 | Yes     |
| Ank3     | 0.76892   | 0.13168  | -0.63724    | 2.29E-09   | Yes     | Ank3     | 0.1059    | 40.2337  | 8.56955802       | 0.1069       | 40.2347       | 8.55603461       | 0.00022079 | Yes     |
| Anxa6    | 0.0043003 | 0.17233  | 0.1680297   | 0.00049864 | Yes     | Anxa6    | 208.733   | 61.9512  | -1.7524546       | 208.734      | 61.9522       | -1.7524382       | 0.00022079 | Yes     |
| Ap1m2    | 0.53647   | 0.11417  | -0.4223     | 2.15E-11   | Yes     | Ap1m2    | 0.723494  | 56.0274  | 6.27500768       | 0.724494     | 56.0284       | 6.27304074       | 0.00022079 | Yes     |
| Apoe     | 0.35455   | 0.065196 | -0.289354   | 1.28E-05   | Yes     | Apoe     | 11.3858   | 307.319  | 4.7544294        | 11.3868      | 307.32        | 4.75430739       | 0.00022079 | Yes     |
| Arhgap25 | 0         | 0.25273  | 0.25273     | 4.45E-05   | Yes     | Arhgap25 | 41.7013   | 5.82458  | -2.8398664       | 41.7023      | 5.82558       | -2.8396534       | 0.00022079 | Yes     |
| Arhgap8  | 0.58269   | 0.20058  | -0.38211    | 1.02E-08   | Yes     | Arhgap8  | 0         | 11.0531  | inf              | 0.001        | 11.0541       | 13.4322939       | 0.00022079 | Yes     |
| Arhgef15 | 0.59674   | 0.13757  | -0.45917    | 5.85E-10   | Yes     | Arhgef15 | 0.231241  | 6.59478  | 4.83385541       | 0.232241     | 6.59578       | 4.82784868       | 0.00318754 | Yes     |
| Arhgef3  | 0.0032232 | 0.096897 | 0.0936738   | 3.92E-06   | Yes     | Arhgef3  | 88.691    | 17.1802  | -2.3680409       | 88.692       | 17.1812       | -2.3679732       | 0.00022079 | Yes     |
| Arhgef37 | 0.6223    | 0.31524  | -0.30706    | 0.00049864 | Yes     | Arhgef37 | 0         | 1.52533  | inf              | 0.001        | 1.52633       | 10.5758512       | 0.00022079 | Yes     |
| Arl4d    | 0.41186   | 0.093502 | -0.318358   | 1.81E-12   | Yes     | Arl4d    | 3.14785   | 47.6272  | 3.91934703       | 3.14885      | 47.6282       | 3.91891909       | 0.00022079 | Yes     |
| Art4     | 0.058977  | 0.30825  | 0.249273    | 1.28E-05   | Yes     | Art4     | 39.4865   | 0.943209 | -5.3876382       | 39.4875      | 0.944209      | -5.386146        | 0.00022079 | Yes     |
| Arvcf    | 0.12544   | 0.023941 | -0.101499   | 0.00014343 | Yes     | Arvcf    | 2.09883   | 13.6888  | 2.70533876       | 2.09983      | 13.6898       | 2.70475693       | 0.00022079 | Yes     |
| Asb2     | 0.71746   | 0.10827  | -0.60919    | 9.69E-09   | Yes     | Asb2     | 0.69662   | 14.0988  | 4.33905667       | 0.69762      | 14.0998       | 4.33708949       | 0.00022079 | Yes     |
| Atg4d    | 0.16242   | 0.036863 | -0.125557   | 0.0190918  | Yes     | Atg4d    | 12.6757   | 39.3446  | 1.63410022       | 12.6767      | 39.3456       | 1.63402308       | 0.00363736 | Yes     |
| Atp11a   | 0.080844  | 0.010277 | -0.070567   | 0.00010392 | Yes     | Atp11a   | 10.4375   | 67.7924  | 2.69934735       | 10.4385      | 67.7934       | 2.69923041       | 0.00022079 | Yes     |
| Atp2a3   | 0         | 0.079622 | 0.079622    | 4.45E-05   | Yes     | Atp2a3   | 105.109   | 24.1598  | -2.1212058       | 105.11       | 24.1608       | -2.1211598       | 0.00060553 | Yes     |
| Atp5g1   | 0.2797    | 0.045779 | -0.233921   | 4.68E-10   | Yes     | Atp5g1   | 88.6317   | 907.227  | 3.35556889       | 88.6327      | 907.228       | 3.3555542        | 0.00022079 | Yes     |
| Atp5g3   | 0.14145   | 0.029426 | -0.112024   | 0.0021362  | Yes     | ATP5G3   | 220.326   | 1540.78  | 2.80594922       | 220.327      | 1540.781      | 2.80594361       | 0.00022079 | Yes     |

| RRBS     |           |          |             |            |         | RNAseq   |           |         |                  |              |               |                  |            |         |
|----------|-----------|----------|-------------|------------|---------|----------|-----------|---------|------------------|--------------|---------------|------------------|------------|---------|
| gene     | Blood     | Kidney   | methyl.diff | pMWU.fdr   | Match ? | gene     | blood     | kidney  | log2(fold_ratio) | blood+ 0.001 | kidney+ 0.001 | log2(fold_ratio) | q_value    | Match ? |
| Atp6v1c2 | 0.16931   | 0.042145 | -0.127165   | 3.48E-07   | Yes     | Atp6v1c2 | 1.77797   | 13.6413 | 2.93967825       | 1.77897      | 13.6423       | 2.93897281       | 0.00022079 | Yes     |
| Atp6v1g2 | 0.070585  | 0.020566 | -0.050019   | 1.82E-05   | Yes     | Atp6v1g2 | 0         | 3.23209 | inf              | 0.001        | 3.23309       | 11.658698        | 0.0107821  | Yes     |
| Auh      | 0.8354    | 0.66216  | -0.17324    | 0.00197715 | Yes     | AUH      | 22.7118   | 66.8619 | 1.5577423        | 22.7128      | 66.8629       | 1.55770036       | 0.00022079 | Yes     |
| Axin2    | 0.0005144 | 0.05828  | 0.0577656   | 1.07E-06   | Yes     | Axin2    | 23.247    | 1.11193 | -4.3859067       | 23.248       | 1.11293       | -4.3846718       | 0.00022079 | Yes     |
| B3gnt7   | 0.46503   | 0.1591   | -0.30593    | 7.75E-05   | Yes     | B3gnt7   | 0.70443   | 8.07935 | 3.51971097       | 0.70543      | 8.08035       | 3.51784295       | 0.00022079 | Yes     |
| Bcat2    | 0.4543    | 0.17474  | -0.27956    | 0.00276056 | Yes     | Bcat2    | 16.2384   | 59.2549 | 1.86752497       | 16.2394      | 59.2559       | 1.86746048       | 0.00022079 | Yes     |
| Bhmt     | 0.79174   | 0.2789   | -0.51284    | 1.81E-12   | Yes     | Bhmt     | 0.464238  | 30.2698 | 6.02687071       | 0.465238     | 30.2708       | 6.02381405       | 0.00022079 | Yes     |
| Bhmt2    | 0.66376   | 0.12566  | -0.5381     | 7.02E-06   | Yes     | Bhmt2    | 0         | 82.7527 | inf              | 0.001        | 82.7537       | 16.3365362       | 0.00022079 | Yes     |
| Bmp4     | 0.15877   | 0.028491 | -0.130279   | 0.00066856 | Yes     | Bmp4     | 0.344202  | 30.8565 | 6.48617514       | 0.345202     | 30.8575       | 6.48203655       | 0.00022079 | Yes     |
| Btbd3    | 0.69015   | 0.05301  | -0.63714    | 1.12E-07   | Yes     | Btbd3    | 0.814803  | 7.26928 | 3.15728928       | 0.815803     | 7.27028       | 3.15571821       | 0.00022079 | Yes     |
| C1qtnf3  | 0.68988   | 0.15587  | -0.53401    | 4.45E-05   | Yes     | C1qtnf3  | 0         | 4.94664 | inf              | 0.001        | 4.94764       | 12.2725248       | 0.00022079 | Yes     |
| C1r      | 0.51819   | 0.20054  | -0.31765    | 0.01155321 | Yes     | C1r      | 0.2615    | 6.07005 | 4.53682555       | 0.2625       | 6.07105       | 4.53155673       | 0.00113657 | Yes     |
| Calcr    | 0.21221   | 0.095339 | -0.116871   | 0.0365298  | Yes     | Calcr    | 0         | 2.36119 | inf              | 0.001        | 2.36219       | 11.2059093       | 0.00022079 | Yes     |
| Camk2n1  | 0.33979   | 0.16627  | -0.17352    | 0.01078302 | Yes     | Camk2n1  | 1.60862   | 112.627 | 6.12958535       | 1.60962      | 112.628       | 6.12870159       | 0.00130998 | Yes     |
| Capn2    | 0.1017    | 0.038071 | -0.063629   | 0.00934082 | Yes     | Capn2    | 25.8657   | 54.4056 | 1.07271492       | 25.8667      | 54.4066       | 1.07268566       | 0.00041963 | Yes     |
| Car3     | 0.10778   | 0.017855 | -0.089925   | 8.11E-07   | Yes     | Car3     | 0         | 4.38412 | inf              | 0.001        | 4.38512       | 12.0984006       | 0.00022079 | Yes     |
| Car4     | 0.13116   | 0.011454 | -0.119706   | 0.00012978 | Yes     | Car4     | 0         | 79.7557 | inf              | 0.001        | 79.7567       | 16.2833181       | 0.00022079 | Yes     |
| Card10   | 0.92354   | 0.21003  | -0.71351    | 3.82E-07   | Yes     | Card10   | 0.0319977 | 19.4142 | 9.24492834       | 0.0329977    | 19.4152       | 9.20060538       | 0.00211842 | Yes     |
| Casr     | 0.19404   | 0.048109 | -0.145931   | 1.44E-07   | Yes     | Casr     | 0         | 35.822  | inf              | 0.001        | 35.823        | 15.1285985       | 0.00022079 | Yes     |
| Cbx2     | 0         | 0.14328  | 0.14328     | 4.32E-06   | Yes     | Cbx2     | 18.3226   | 1.06391 | -4.1061762       | 18.3236      | 1.06491       | -4.1048996       | 0.00022079 | Yes     |
| Ccbl1    | 0.71967   | 0.40902  | -0.31065    | 2.88E-05   | Yes     | Ccbl1    | 27.875    | 110.823 | 1.99121362       | 27.876       | 110.824       | 1.99117488       | 0.00022079 | Yes     |
| Ccdc64b  | 0.13795   | 0.049519 | -0.088431   | 0.00074247 | Yes     | Ccdc64b  | 0.221015  | 7.34075 | 5.05371128       | 0.222015     | 7.34175       | 5.04739493       | 0.00022079 | Yes     |
| Ccl28    | 0.6921    | 0.45524  | -0.23686    | 0.00799193 | Yes     | Ccl28    | 0         | 6.68331 | inf              | 0.001        | 6.68431       | 12.7065629       | 0.00022079 | Yes     |
| Cd151    | 0.79269   | 0.14634  | -0.64635    | 1.81E-12   | Yes     | Cd151    | 0.581363  | 2.54398 | 2.12957617       | 0.582363     | 2.54498       | 2.12766372       | 0.00288641 | Yes     |
| Cd24     | 0.16341   | 0.084246 | -0.079164   | 0.03091383 | Yes     | Cd24     | 0.76317   | 812.92  | 10.0568932       | 0.76417      | 812.921       | 10.0550058       | 0.00022079 | Yes     |
| Cd37     | 0.019729  | 0.4271   | 0.407371    | 8.96E-07   | Yes     | Cd37     | 394.693   | 32.2738 | -3.6122956       | 394.694      | 32.2748       | -3.6122545       | 0.00022079 | Yes     |
| Cd38     | 3.57E-08  | 0.066163 | 0.06616296  | 4.71E-06   | Yes     | Cd38     | 85.3228   | 3.74747 | -4.5089425       | 85.3238      | 3.74847       | -4.5085745       | 0.00022079 | Yes     |
| Cd8a     | 0.40328   | 0.64176  | 0.23848     | 0.00066856 | Yes     | Cd8a     | 429.003   | 84.5423 | -2.3432425       | 429.004      | 84.5433       | -2.3432288       | 0.00022079 | Yes     |
| Cdc42bpg | 0.18805   | 0.036101 | -0.151949   | 0.00068845 | Yes     | Cdc42bpg | 2.4865    | 14.9113 | 2.5842177        | 2.4875       | 14.9123       | 2.58373436       | 0.00022079 | Yes     |
| Cdc42ep5 | 0.75478   | 0.098473 | -0.656307   | 2.97E-07   | Yes     | Cdc42ep5 | 0.804792  | 11.9081 | 3.88718347       | 0.805792     | 11.9091       | 3.8855131        | 0.0373662  | Yes     |
| Cdh11    | 0.10404   | 0.024337 | -0.079703   | 0.00934082 | Yes     | Cdh11    | 0         | 3.08136 | inf              | 0.001        | 3.08236       | 11.5898197       | 0.00022079 | Yes     |
| Cdh3     | 0.47957   | 0.068341 | -0.411229   | 1.31E-06   | Yes     | Cdh3     | 0         | 7.74377 | inf              | 0.001        | 7.74477       | 12.9190067       | 0.00022079 | Yes     |
| Cdk14    | 0.077972  | 0.017029 | -0.060943   | 0.00553374 | Yes     | Cdk14    | 0         | 6.30591 | inf              | 0.001        | 6.30691       | 12.6227176       | 0.00022079 | Yes     |
| Cdkn1c   | 0.17748   | 0.080847 | -0.096633   | 1.74E-09   | Yes     | Cdkn1c   | 0.577006  | 3.96693 | 2.78136471       | 0.578006     | 3.96793       | 2.7792302        | 0.00579147 | Yes     |
| Ceacam1  | 0.9635    | 0.9096   | -0.0539     | 0.00095268 | Yes     | Ceacam1  | 0.691197  | 5.1949  | 2.90992712       | 0.692197     | 5.1959        | 2.90811907       | 0.00022079 | Yes     |
| Cebpb    | 0.29395   | 0.041097 | -0.252853   | 0.00113933 | Yes     | Cebpb    | 8.19124   | 64.4773 | 2.97663756       | 8.19224      | 64.4783       | 2.97648382       | 0.00022079 | Yes     |
| Cep112   | 0.30271   | 0.069292 | -0.233418   | 0.00026127 | Yes     | Cep112   | 0.221952  | 2.63896 | 3.57164987       | 0.222952     | 2.63996       | 3.56571102       | 0.00523184 | Yes     |
| Chchd10  | 0.068507  | 2.50E-07 | -0.0685068  | 1.15E-06   | Yes     | Chchd10  | 41.0684   | 1117.44 | 4.76602482       | 41.0694      | 1117.441      | 4.76599098       | 0.00022079 | Yes     |
| Chmp4c   | 0.097174  | 0.018371 | -0.078803   | 1.11E-09   | Yes     | Chmp4c   | 0         | 23.739  | inf              | 0.001        | 23.74         | 14.5350323       | 0.00022079 | Yes     |
| Chpt1    | 0.069365  | 0.01391  | -0.055455   | 0.0074695  | Yes     | Chpt1    | 1.41507   | 35.2397 | 4.63825632       | 1.41607      | 35.2407       | 4.63727809       | 0.00022079 | Yes     |
| Ciao1    | 0.34575   | 0.13949  | -0.20626    | 4.32E-06   | Yes     | Ciao1    | 18.4542   | 33.8134 | 0.87364589       | 18.4552      | 33.8144       | 0.87361038       | 0.029572   | Yes     |
| Ckap4    | 0.11209   | 0.022359 | -0.089731   | 6.38E-06   | Yes     | Ckap4    | 1.41542   | 14.6791 | 3.3744614        | 1.41642      | 14.6801       | 3.37354077       | 0.00022079 | Yes     |

| RRBS    |           |          |             |            |         | RNAseq  |            |         |                  |              |               |                  |            |         |
|---------|-----------|----------|-------------|------------|---------|---------|------------|---------|------------------|--------------|---------------|------------------|------------|---------|
| gene    | Blood     | Kidney   | methyl.diff | pMWU.fdr   | Match ? | gene    | blood      | kidney  | log2(fold_ratio) | blood+ 0.001 | kidney+ 0.001 | log2(fold_ratio) | q_value    | Match ? |
| Ckb     | 0.50003   | 0.21677  | -0.28326    | 0.00148947 | Yes     | Ckb     | 2.5309     | 235.128 | 6.53765204       | 2.5319       | 235.129       | 6.53708825       | 0.00022079 | Yes     |
| Ckmt1b  | 0.15582   | 0.037001 | -0.118819   | 0.00074247 | Yes     | Ckmt1b  | 0          | 124.985 | inf              | 0.001        | 124.986       | 16.931407        | 0.00022079 | Yes     |
| Cldn4   | 0.41551   | 0.1132   | -0.30231    | 1.81E-12   | Yes     | Cldn4   | 0.141992   | 68.2609 | 8.90910598       | 0.142992     | 68.2619       | 8.89900233       | 0.00698733 | Yes     |
| Clec14a | 0.17466   | 0.05908  | -0.11558    | 0.00334577 | Yes     | Clec14a | 0          | 1.85769 | inf              | 0.001        | 1.85869       | 10.8600705       | 0.00022079 | Yes     |
| Cmb1    | 0.60074   | 0.1056   | -0.49514    | 1.07E-06   | Yes     | Cmb1    | 1.01759    | 75.2492 | 6.20844794       | 1.01859      | 75.2502       | 6.20705005       | 0.00022079 | Yes     |
| Cndp2   | 0.25787   | 0.052515 | -0.205355   | 5.89E-07   | Yes     | Cndp2   | 14.2463    | 187.031 | 3.71461823       | 14.2473      | 187.032       | 3.71452468       | 0.00022079 | Yes     |
| Cnksr1  | 0.33991   | 0.057993 | -0.281917   | 1.81E-12   | Yes     | Cnksr1  | 0          | 23.6763 | inf              | 0.001        | 23.6773       | 14.531217        | 0.00022079 | Yes     |
| Cnnm2   | 0.5976    | 0.084622 | -0.512978   | 1.74E-09   | Yes     | Cnnm2   | 0.447981   | 7.087   | 3.9836656        | 0.448981     | 7.088         | 3.9806523        | 0.00022079 | Yes     |
| Col18a1 | 0.11031   | 0.029313 | -0.080997   | 0.00017491 | Yes     | Col18a1 | 0.0608186  | 105.923 | 10.7662157       | 0.0618186    | 105.924       | 10.7427009       | 0.00022079 | Yes     |
| Col27a1 | 0.38804   | 0.02939  | -0.35865    | 6.77E-07   | Yes     | Col27a1 | 0.416373   | 28.3967 | 6.09170295       | 0.417373     | 28.3977       | 6.088293         | 0.00022079 | Yes     |
| Coq2    | 0.11118   | 0.045588 | -0.065592   | 0.00290027 | Yes     | Coq2    | 7.62561    | 49.9706 | 2.71215489       | 7.62661      | 49.9716       | 2.71199458       | 0.00022079 | Yes     |
| Coro6   | 0.31156   | 0.10069  | -0.21087    | 0.00026127 | Yes     | Coro6   | 0.830857   | 5.73529 | 2.78719434       | 0.831857     | 5.73629       | 2.78571051       | 0.00022079 | Yes     |
| Cpt1b   | 0.84326   | 0.23714  | -0.60612    | 3.21E-11   | Yes     | Cpt1b   | 2.04462    | 7.60954 | 1.89597651       | 2.04562      | 7.61054       | 1.89546065       | 0.00022079 | Yes     |
| Crb3    | 0.10794   | 0.013354 | -0.094586   | 0.00044355 | Yes     | Crb3    | 0.384656   | 43.3602 | 6.81665879       | 0.385656     | 43.3612       | 6.81294632       | 0.00022079 | Yes     |
| Crip2   | 0.18147   | 0.044897 | -0.136573   | 1.85E-05   | Yes     | Crip2   | 0.88033    | 166.01  | 7.55901          | 0.88133      | 166.011       | 7.55738081       | 0.00022079 | Yes     |
| Csad    | 0.84097   | 0.63969  | -0.20128    | 6.05E-05   | Yes     | Csad    | 6.13116    | 27.6938 | 2.17533107       | 6.13216      | 27.6948       | 2.17514787       | 0.00579147 | Yes     |
| Cspg4   | 0.25199   | 0.10367  | -0.14832    | 0.00105615 | Yes     | Cspg4   | 0          | 2.84059 | inf              | 0.001        | 2.84159       | 11.4724827       | 0.00022079 | Yes     |
| Ctnn    | 0.58679   | 0.082885 | -0.503905   | 5.89E-07   | Yes     | Ctnn    | 0.0269397  | 1.0596  | 5.29764215       | 0.0279397    | 1.0606        | 5.24642031       | 0.0171138  | Yes     |
| Cuedc1  | 0.87225   | 0.61639  | -0.25586    | 1.95E-12   | Yes     | Cuedc1  | 0.389958   | 9.84811 | 4.65845622       | 0.390958     | 9.84911       | 4.65490783       | 0.0344255  | Yes     |
| Cwc27   | 0.31582   | 0.15055  | -0.16527    | 3.07E-06   | Yes     | Cwc27   | 14.7144    | 39.8927 | 1.43889605       | 14.7154      | 39.8937       | 1.43883418       | 0.00392909 | Yes     |
| Cwh43   | 0.20102   | 0.040176 | -0.160844   | 1.15E-06   | Yes     | Cwh43   | 0.108471   | 17.2113 | 7.30990287       | 0.109471     | 17.2123       | 7.29674735       | 0.0430208  | Yes     |
| Cx3cl1  | 0.76422   | 0.068602 | -0.695618   | 1.74E-09   | Yes     | Cx3cl1  | 0          | 28.9897 | inf              | 0.001        | 28.9907       | 14.8233025       | 0.00022079 | Yes     |
| Cxcl1   | 0.49455   | 0.24764  | -0.24691    | 0.01245124 | Yes     | Cxcl1   | 0          | 16.81   | inf              | 0.001        | 16.811        | 14.0371179       | 0.00022079 | Yes     |
| Cxxc5   | 0.57362   | 0.222    | -0.35162    | 5.51E-09   | Yes     | CXXC5   | 18.283     | 75.7165 | 2.05010491       | 18.284       | 75.7175       | 2.05004505       | 0.00022079 | Yes     |
| Cyp24a1 | 0.087291  | 0.021124 | -0.066167   | 0.02144384 | Yes     | Cyp24a1 | 0          | 4.6844  | inf              | 0.001        | 4.6854        | 12.1939565       | 0.00022079 | Yes     |
| Dab2ip  | 0.72662   | 0.29044  | -0.43618    | 0.00066856 | Yes     | Dab2ip  | 0.101175   | 13.5046 | 7.06045425       | 0.102175     | 13.5056       | 7.04637168       | 0.00022079 | Yes     |
| Dact2   | 0.49467   | 0.079559 | -0.415111   | 3.19E-07   | Yes     | Dact2   | 0          | 17.4065 | inf              | 0.001        | 17.4075       | 14.0874214       | 0.00022079 | Yes     |
| Dao     | 0.93252   | 0.15095  | -0.78157    | 1.22E-10   | Yes     | Dao     | 0          | 292.27  | inf              | 0.001        | 292.271       | 18.1569472       | 0.00022079 | Yes     |
| Dapk1   | 0.75506   | 0.41009  | -0.34497    | 0.00042212 | Yes     | Dapk1   | 2.67255    | 9.76127 | 1.86885192       | 2.67355      | 9.76227       | 1.86846          | 0.00180113 | Yes     |
| Dapp1   | 0.072942  | 0.34631  | 0.273368    | 1.28E-05   | Yes     | Dapp1   | 17.521     | 2.32397 | -2.9144218       | 17.522       | 2.32497       | -2.9138835       | 0.00022079 | Yes     |
| Dcxr    | 0.79184   | 0.077006 | -0.714834   | 1.74E-09   | Yes     | Dcxr    | 10.7396    | 222.1   | 4.37019723       | 10.7406      | 222.101       | 4.37006939       | 0.00022079 | Yes     |
| Ddah2   | 0.7275    | 0.19829  | -0.52921    | 1.81E-12   | Yes     | Ddah2   | 0.234874   | 98.6408 | 8.71415367       | 0.235874     | 98.6418       | 8.70803891       | 0.00818469 | Yes     |
| Ddr1    | 0.56204   | 0.064977 | -0.497063   | 3.39E-05   | Yes     | Ddr1    | 0.00360689 | 28.6008 | 12.9530125       | 0.00460689   | 28.6018       | 12.6000252       | 0.00022079 | Yes     |
| Depdc7  | 0.80686   | 0.19699  | -0.60987    | 3.82E-07   | Yes     | Depdc7  | 0.15608    | 8.14409 | 5.70539592       | 0.15708      | 8.14509       | 5.69635923       | 0.00348745 | Yes     |
| Des     | 0.14494   | 0.060447 | -0.084493   | 8.49E-05   | Yes     | Des     | 0          | 6.09875 | inf              | 0.001        | 6.09975       | 12.5745344       | 0.00022079 | Yes     |
| Dhcr24  | 0.90217   | 0.15447  | -0.7477     | 3.82E-07   | Yes     | Dhcr24  | 10.1868    | 35.4949 | 1.80091082       | 10.1878      | 35.4959       | 1.80080985       | 0.00022079 | Yes     |
| Dmrt2   | 0.11252   | 0.046152 | -0.066368   | 0.04318305 | Yes     | Dmrt2   | 0          | 2.56144 | inf              | 0.001        | 2.56244       | 11.3233025       | 0.00022079 | Yes     |
| Dnmt3a  | 0.0075189 | 0.27383  | 0.2663111   | 1.67E-08   | Yes     | Dnmt3a  | 23.3556    | 4.64709 | -2.329369        | 23.3566      | 4.64809       | -2.3291204       | 0.00022079 | Yes     |
| Dock1   | 0.12631   | 0.004878 | -0.121432   | 0.00197715 | Yes     | Dock1   | 0.106134   | 33.7548 | 8.31306196       | 0.107134     | 33.7558       | 8.29957519       | 0.0103977  | Yes     |
| Dock6   | 0.18203   | 0.066325 | -0.115705   | 0.00290027 | Yes     | Dock6   | 0.0112868  | 12.8693 | 10.1550814       | 0.0122868    | 12.8703       | 10.0327207       | 0.035911   | Yes     |
| Dock9   | 0.11181   | 0.022604 | -0.089206   | 0.00693052 | Yes     | Dock9   | 1.82193    | 20.9496 | 3.52338326       | 1.82293      | 20.9506       | 3.52266049       | 0.00022079 | Yes     |
| Dok2    | 0.19439   | 0.62428  | 0.42989     | 6.49E-12   | Yes     | Dok2    | 107.821    | 10.5605 | -3.3518881       | 107.822      | 10.5615       | -3.3517649       | 0.00022079 | Yes     |



| RRBS    |          |            |             |            |         | RNAseq  |           |          |                  |              |               |                  |            |         |
|---------|----------|------------|-------------|------------|---------|---------|-----------|----------|------------------|--------------|---------------|------------------|------------|---------|
| gene    | Blood    | Kidney     | methyl.diff | pMWU.fdr   | Match ? | gene    | blood     | kidney   | log2(fold_ratio) | blood+ 0.001 | kidney+ 0.001 | log2(fold_ratio) | q_value    | Match ? |
| Dok3    | 0.77813  | 0.4577     | -0.32043    | 0.00553374 | Yes     | Dok3    | 3.23966   | 10.5302  | 1.70061852       | 3.24066      | 10.5312       | 1.70031027       | 0.00113657 | Yes     |
| Dok4    | 0.086745 | 0.010968   | -0.075777   | 1.28E-05   | Yes     | Dok4    | 0.109891  | 10.1061  | 6.52300932       | 0.110891     | 10.1071       | 6.51008302       | 0.00975879 | Yes     |
| Dolk    | 0.18045  | 0.077325   | -0.103125   | 0.00123983 | Yes     | Dolk    | 1.4488    | 10.9255  | 2.91476895       | 1.4498       | 10.9265       | 2.91390555       | 0.00164037 | Yes     |
| Dpys    | 0.4885   | 0.18347    | -0.30503    | 0.00135614 | Yes     | Dpys    | 0         | 23.3497  | inf              | 0.001        | 23.3507       | 14.5111782       | 0.00022079 | Yes     |
| Dtnb    | 0.082248 | 0.015873   | -0.066375   | 2.66E-05   | Yes     | Dtnb    | 15.5096   | 51.9898  | 1.74506713       | 15.5106      | 51.9908       | 1.74500186       | 0.00022079 | Yes     |
| Duoxa1  | 0.20186  | 0.082921   | -0.118939   | 0.02144384 | Yes     | Duoxa1  | 0         | 5.22581  | inf              | 0.001        | 5.22681       | 12.351715        | 0.00022079 | Yes     |
| Dusp14  | 0.16749  | 0.04166    | -0.12583    | 1.41E-11   | Yes     | Dusp14  | 0.25082   | 6.44012  | 4.68236327       | 0.25182      | 6.44112       | 4.6768468        | 0.00022079 | Yes     |
| Dusp3   | 0.27456  | 0.09342    | -0.18114    | 0.00161991 | Yes     | Dusp3   | 7.04517   | 23.0535  | 1.71027937       | 7.04617      | 23.0545       | 1.71013719       | 0.00022079 | Yes     |
| Dyrk2   | 0.037081 | 0.33333    | 0.296249    | 5.46E-08   | Yes     | Dyrk2   | 100.018   | 7.82765  | -3.6755366       | 100.019      | 7.82865       | -3.6753667       | 0.00022079 | Yes     |
| Eci1    | 0.061762 | 0.00069444 | -0.0610676  | 1.04E-07   | Yes     | Eci1    | 16.0869   | 136.249  | 3.0822874        | 16.0879      | 136.25        | 3.08220831       | 0.00022079 | Yes     |
| Edc4    | 0.11714  | 0.040265   | -0.076875   | 0.00290027 | Yes     | Edc4    | 15.896    | 89.6044  | 2.4949058        | 15.897       | 89.6054       | 2.49483114       | 0.00022079 | Yes     |
| Efcab10 | 0.071712 | 0.0052827  | -0.0664293  | 0.00066856 | Yes     | Efcab10 | 0         | 1.20495  | inf              | 0.001        | 1.20595       | 10.2359544       | 0.00022079 | Yes     |
| Efna1   | 0.66589  | 0.063185   | -0.602705   | 3.82E-07   | Yes     | Efna1   | 0.09524   | 19.3117  | 7.66369183       | 0.09624      | 19.3127       | 7.64869752       | 0.00147497 | Yes     |
| Efs     | 0.22906  | 0.092994   | -0.136066   | 2.94E-05   | Yes     | Efs     | 0         | 0.956876 | inf              | 0.001        | 0.957876      | 9.9036951        | 0.00022079 | Yes     |
| Egfl8   | 0.64297  | 0.1189     | -0.52407    | 2.97E-07   | Yes     | Egfl8   | 9.06816   | 69.7697  | 2.94371888       | 9.06916      | 69.7707       | 2.94358047       | 0.0135008  | Yes     |
| Egr1    | 0.7222   | 0.06653    | -0.65567    | 5.43E-10   | Yes     | Egr1    | 1.43564   | 69.9383  | 5.6063168        | 1.43664      | 69.9393       | 5.60533286       | 0.00022079 | Yes     |
| Ehd3    | 0.022404 | 0.14151    | 0.119106    | 0.00466526 | Yes     | Ehd3    | 75.2511   | 11.2176  | -2.7459486       | 75.2521      | 11.2186       | -2.7458392       | 0.00022079 | Yes     |
| Emb     | 0.31474  | 0.071435   | -0.243305   | 0.0007955  | Yes     | Emb     | 1.68141   | 56.6829  | 5.07517011       | 1.68241      | 56.6839       | 5.07433779       | 0.00022079 | Yes     |
| Eml2    | 0.089786 | 0.022783   | -0.067003   | 0.00466526 | Yes     | Eml2    | 2.55254   | 14.003   | 2.45573047       | 2.55354      | 14.004        | 2.4552684        | 0.00022079 | Yes     |
| Emx2    | 0.077189 | 0.016272   | -0.060917   | 0.00568595 | Yes     | Emx2    | 0         | 13.7388  | inf              | 0.001        | 13.7398       | 13.7460734       | 0.00022079 | Yes     |
| Endou   | 0.76276  | 0.51989    | -0.24287    | 0.00095268 | Yes     | Endou   | 0         | 0.910901 | inf              | 0.001        | 0.911901      | 9.8327334        | 0.00022079 | Yes     |
| Ephb1   | 0.14357  | 0.063859   | -0.079711   | 0.00113933 | Yes     | Ephb1   | 0         | 0.842775 | inf              | 0.001        | 0.843775      | 9.72071453       | 0.00022079 | Yes     |
| Epn2    | 0.12557  | 0.032939   | -0.092631   | 1.91E-07   | Yes     | Epn2    | 0.135945  | 10.2475  | 6.23610509       | 0.136945     | 10.2485       | 6.22567237       | 0.00022079 | Yes     |
| Epsti1  | 0.033331 | 0.32453    | 0.291199    | 2.07E-09   | Yes     | Epsti1  | 63.5417   | 4.36248  | -3.8644833       | 63.5427      | 4.36348       | -3.8641753       | 0.00022079 | Yes     |
| Esm1    | 0.7549   | 0.3821     | -0.3728     | 1.20E-09   | Yes     | Esm1    | 0         | 2.96603  | inf              | 0.001        | 2.96703       | 11.5348038       | 0.00022079 | Yes     |
| Espn    | 0.52147  | 0.17959    | -0.34188    | 6.75E-05   | Yes     | Espn    | 0.159538  | 61.0581  | 8.58013879       | 0.160538     | 61.0591       | 8.57114768       | 0.00078858 | Yes     |
| Esrrg   | 0.73386  | 0.17538    | -0.55848    | 2.59E-07   | Yes     | Esrrg   | 0         | 118.618  | inf              | 0.001        | 118.619       | 16.8559756       | 0.00022079 | Yes     |
| Esyt1   | 0        | 0.054377   | 0.054377    | 0.00088439 | Yes     | Esyt1   | 135.868   | 17.9424  | -2.9207609       | 135.869      | 17.9434       | -2.9206911       | 0.00147497 | Yes     |
| Ethe1   | 0.97553  | 0.22179    | -0.75374    | 3.82E-07   | Yes     | Ethe1   | 6.76207   | 155.402  | 4.52239631       | 6.76307      | 155.403       | 4.52219226       | 0.00022079 | Yes     |
| Etv3    | 0.22006  | 0.62964    | 0.40958     | 1.28E-05   | Yes     | Etv3    | 29.2015   | 4.14988  | -2.814901        | 29.2025      | 4.15088       | -2.8146028       | 0.00022079 | Yes     |
| Eva1b   | 0.83172  | 0.25177    | -0.57995    | 1.81E-12   | Yes     | Eva1b   | 19.8892   | 37.7263  | 0.92358537       | 19.8902      | 37.7273       | 0.92355107       | 0.0377756  | Yes     |
| Evc2    | 0.063851 | 0.0092012  | -0.0546498  | 1.61E-05   | Yes     | Evc2    | 0         | 3.92139  | inf              | 0.001        | 3.92239       | 11.9375173       | 0.00022079 | Yes     |
| Evpl    | 0.57151  | 0.046675   | -0.524835   | 1.74E-09   | Yes     | Evpl    | 0.0293102 | 8.08873  | 8.10836658       | 0.0303102    | 8.08973       | 8.06014437       | 0.0261671  | Yes     |
| Fam110a | 0.73003  | 0.54578    | -0.18425    | 0.01406934 | Yes     | Fam110a | 1.93758   | 8.70795  | 2.16807725       | 1.93858      | 8.70895       | 2.16749852       | 0.00096553 | Yes     |
| Fam110c | 0.40455  | 0.075338   | -0.329212   | 3.82E-07   | Yes     | Fam110c | 0         | 1.9503   | inf              | 0.001        | 1.9513        | 10.9302199       | 0.00022079 | Yes     |
| Fam129b | 0.28745  | 0.085226   | -0.202224   | 1.28E-05   | Yes     | Fam129b | 1.57339   | 25.2979  | 4.00706941       | 1.57439      | 25.2989       | 4.00620979       | 0.00041963 | Yes     |
| Fam19a5 | 0.16587  | 0.042693   | -0.123177   | 1.46E-05   | Yes     | Fam19a5 | 0         | 3.82375  | inf              | 0.001        | 3.82475       | 11.9011497       | 0.00022079 | Yes     |
| Fam213b | 0.14019  | 0.06273    | -0.07746    | 0.0074695  | Yes     | Fam213b | 2.82353   | 58.5001  | 4.37286723       | 2.82453      | 58.5011       | 4.37238102       | 0.00022079 | Yes     |
| Fam43a  | 0.42501  | 0.20001    | -0.225      | 0.00934082 | Yes     | Fam43a  | 0.818733  | 29.2855  | 5.16064967       | 0.819733     | 29.2865       | 5.1589379        | 0.00022079 | Yes     |
| Fam69b  | 0.56288  | 0.30495    | -0.25793    | 0.00026127 | Yes     | Fam69b  | 0.365205  | 4.19678  | 3.52250442       | 0.366205     | 4.19778       | 3.51890316       | 0.00645389 | Yes     |
| Fam83b  | 0.10625  | 0.025401   | -0.080849   | 0.00364323 | Yes     | Fam83b  | 0         | 1.72436  | inf              | 0.001        | 1.72536       | 10.7526817       | 0.00022079 | Yes     |
| Fam83h  | 0.20667  | 0.038868   | -0.167802   | 7.02E-06   | Yes     | Fam83h  | 0.382702  | 6.60635  | 4.10956006       | 0.383702     | 6.60735       | 4.10601358       | 0.00022079 | Yes     |

| RRBS     |           |           |             |            |         | RNAseq   |           |         |                  |              |               |                  |            |         |
|----------|-----------|-----------|-------------|------------|---------|----------|-----------|---------|------------------|--------------|---------------|------------------|------------|---------|
| gene     | Blood     | Kidney    | methyl.diff | pMWU.fdr   | Match ? | gene     | blood     | kidney  | log2(fold_ratio) | blood+ 0.001 | kidney+ 0.001 | log2(fold_ratio) | q_value    | Match ? |
| Fam84a   | 0.086796  | 0.02042   | -0.066376   | 4.99E-09   | Yes     | Fam84a   | 0         | 15.3553 | inf              | 0.001        | 15.3563       | 13.906543        | 0.00022079 | Yes     |
| Fancd2os | 0.91108   | 0.16969   | -0.74139    | 1.81E-12   | Yes     | Fancd2os | 0.0139719 | 4.22229 | 8.23935364       | 0.0149719    | 4.22329       | 8.13996619       | 0.0377756  | Yes     |
| Fbp1     | 0.40814   | 0.13449   | -0.27365    | 3.03E-06   | Yes     | Fbp1     | 0.0548916 | 346.686 | 12.6247566       | 0.0558916    | 346.687       | 12.5987146       | 0.0241707  | Yes     |
| Fbp2     | 0.18928   | 0.060041  | -0.129239   | 0.0021362  | Yes     | Fbp2     | 0.88268   | 3.39103 | 1.94176113       | 0.88368      | 3.39203       | 1.94055299       | 0.0143389  | Yes     |
| Fbxl15   | 0.095098  | 0.026887  | -0.068211   | 2.82E-05   | Yes     | Fbxl15   | 1.55065   | 8.01163 | 2.36922271       | 1.55165      | 8.01263       | 2.36847269       | 0.00348745 | Yes     |
| Fcgr2a   | 0.26078   | 0.14728   | -0.1135     | 0.00799193 | Yes     | FCGR2A   | 1.63039   | 7.41976 | 2.18615541       | 1.63139      | 7.42076       | 2.18546523       | 0.00242102 | Yes     |
| Fgd3     | 0.0077605 | 0.43866   | 0.4308995   | 1.81E-12   | Yes     | Fgd3     | 41.1388   | 11.265  | -1.8686524       | 41.1398      | 11.266        | -1.8685594       | 0.00022079 | Yes     |
| Fgr      | 0.31128   | 0.051164  | -0.260116   | 1.12E-07   | Yes     | Fgr      | 1.4968    | 3.96024 | 1.4037064        | 1.4978       | 3.96124       | 1.40310712       | 0.0288046  | Yes     |
| Fhdc1    | 0.1264    | 0.048203  | -0.078197   | 5.49E-05   | Yes     | Fhdc1    | 1.48701   | 3.22839 | 1.11840052       | 1.48801      | 3.22939       | 1.11787746       | 0.0311608  | Yes     |
| Fhod3    | 0.082898  | 0.020034  | -0.062864   | 1.82E-05   | Yes     | Fhod3    | 0         | 17.0836 | inf              | 0.001        | 17.0846       | 14.0604089       | 0.00288641 | Yes     |
| Flvcr2   | 0.76229   | 0.63166   | -0.13063    | 0.03756776 | Yes     | Flvcr2   | 2.44885   | 18.2881 | 2.90072889       | 2.44985      | 18.2891       | 2.90021876       | 0.00480115 | Yes     |
| Fn3krp   | 0.10288   | 0.023732  | -0.079148   | 0.00023579 | Yes     | Fn3krp   | 4.06385   | 15.1092 | 1.89450822       | 4.06485      | 15.1102       | 1.89424874       | 0.00022079 | Yes     |
| Fnbp1l   | 0.94116   | 0.13622   | -0.80494    | 2.83E-08   | Yes     | Fnbp1l   | 0.765654  | 24.6499 | 5.0087454        | 0.766654     | 24.6509       | 5.00692089       | 0.00022079 | Yes     |
| Fndc3b   | 0.9264    | 0.83147   | -0.09493    | 6.54E-05   | Yes     | Fndc3b   | 0.233822  | 14.7584 | 5.97998184       | 0.234822     | 14.7594       | 5.97392269       | 0.00022079 | Yes     |
| Foxi1    | 0.74046   | 0.52909   | -0.21137    | 0.01406934 | Yes     | Foxi1    | 0.105134  | 3.32588 | 4.9834349        | 0.106134     | 3.32688       | 4.97021103       | 0.0173596  | Yes     |
| Ftl1     | 0.62543   | 0.36661   | -0.25882    | 1.74E-09   | Yes     | FTL1     | 258.289   | 2433.42 | 3.23592724       | 258.29       | 2433.421      | 3.23592224       | 0.00022079 | Yes     |
| Fundc2   | 0.16712   | 0.057818  | -0.109302   | 1.67E-08   | Yes     | Fundc2   | 10.7556   | 32.6702 | 1.60288728       | 10.7566      | 32.6712       | 1.60279731       | 0.0305572  | Yes     |
| Fxyd1    | 0.93697   | 0.35381   | -0.58316    | 3.82E-07   | Yes     | Fxyd1    | 0         | 10.9095 | inf              | 0.001        | 10.9105       | 13.4134296       | 0.00022079 | Yes     |
| Fxyd2    | 0.81586   | 0.4333    | -0.38256    | 7.02E-06   | Yes     | FXYD2    | 0.533085  | 2925.54 | 12.4220497       | 0.534085     | 2925.541      | 12.4193465       | 0.00022079 | Yes     |
| Gab1     | 0.15963   | 0.058268  | -0.101362   | 0.01155321 | Yes     | Gab1     | 0.094767  | 10.9226 | 6.84871583       | 0.095767     | 10.9236       | 6.83370407       | 0.00096553 | Yes     |
| Gabbr1   | 0.0053057 | 0.055767  | 0.0504613   | 0.00290027 | Yes     | Gabbr1   | 63.7444   | 10.0819 | -2.6605311       | 63.7454      | 10.0829       | -2.6604106       | 0.00022079 | Yes     |
| Gadd45b  | 0.58709   | 0.10144   | -0.48565    | 6.77E-07   | Yes     | Gadd45b  | 1.21968   | 39.1286 | 5.0036489        | 1.22068      | 39.1296       | 5.00250341       | 0.00022079 | Yes     |
| Galnt14  | 0.12847   | 0.017321  | -0.111149   | 0.00055683 | Yes     | Galnt14  | 0         | 13.7496 | inf              | 0.001        | 13.7506       | 13.747207        | 0.00022079 | Yes     |
| Gas2l1   | 0.80209   | 0.56038   | -0.24171    | 7.27E-07   | Yes     | Gas2l1   | 0.246836  | 14.5181 | 5.87815603       | 0.247836     | 14.5191       | 5.87242245       | 0.00022079 | Yes     |
| Gata3    | 0.0028222 | 0.078794  | 0.0759718   | 6.01E-11   | Yes     | Gata3    | 46.261    | 15.1135 | -1.6139587       | 46.262       | 15.1145       | -1.6138944       | 0.00022079 | Yes     |
| Gatsl3   | 0.029276  | 0.0082048 | -0.0210712  | 0.01135039 | Yes     | Gatsl3   | 9.58214   | 30.4535 | 1.66818825       | 9.58314      | 30.4545       | 1.66808507       | 0.00022079 | Yes     |
| Gipc1    | 0.81143   | 0.45601   | -0.35542    | 3.48E-07   | Yes     | Gipc1    | 20.8347   | 50.1222 | 1.26646141       | 20.8357      | 50.1232       | 1.26642095       | 0.00022079 | Yes     |
| Gja4     | 0.078661  | 0.02229   | -0.056371   | 0.03196657 | Yes     | Gja4     | 0         | 6.49695 | inf              | 0.001        | 6.49795       | 12.6657689       | 0.00022079 | Yes     |
| Glb1l2   | 0.088268  | 0.021067  | -0.067201   | 0.00088439 | Yes     | Glb1l2   | 0         | 9.32719 | inf              | 0.001        | 9.32819       | 13.1873815       | 0.00022079 | Yes     |
| Glis2    | 0.65576   | 0.01577   | -0.63999    | 1.31E-06   | Yes     | Glis2    | 0.187006  | 46.2053 | 7.94882998       | 0.188006     | 46.2063       | 7.94116705       | 0.00022079 | Yes     |
| Gpc3     | 0.11286   | 0.026429  | -0.086431   | 6.75E-05   | Yes     | Gpc3     | 0         | 131.702 | inf              | 0.001        | 131.703       | 17.0069287       | 0.00022079 | Yes     |
| Gpc4     | 0.070705  | 0.010258  | -0.060447   | 0.00141078 | Yes     | Gpc4     | 0         | 61.3427 | inf              | 0.001        | 61.3437       | 15.9046276       | 0.00022079 | Yes     |
| Gpd1     | 0.37048   | 0.050215  | -0.320265   | 3.17E-08   | Yes     | Gpd1     | 0.23622   | 40.568  | 7.42406725       | 0.23722      | 40.569        | 7.41800828       | 0.00078858 | Yes     |
| Gpr137   | 0.16408   | 0.035865  | -0.128215   | 2.29E-05   | Yes     | Gpr137   | 2.76441   | 21.213  | 2.93990516       | 2.76541      | 21.214        | 2.93945138       | 0.00022079 | Yes     |
| Gprc5a   | 0.36679   | 0.14406   | -0.22273    | 2.06E-05   | Yes     | Gprc5a   | 0.0554125 | 20.8026 | 8.55233668       | 0.0564125    | 20.8036       | 8.52660262       | 0.0448987  | Yes     |
| Gprc5c   | 0.075497  | 0.017046  | -0.058451   | 0.00018202 | Yes     | Gprc5c   | 0         | 91.9057 | inf              | 0.001        | 91.9067       | 16.4878824       | 0.00022079 | Yes     |
| Grik5    | 0.47672   | 0.14428   | -0.33244    | 0.02027674 | Yes     | Grik5    | 0.0513149 | 10.3071 | 7.65004497       | 0.0523149    | 10.3081       | 7.62234082       | 0.00022079 | Yes     |
| Grk5     | 0.20626   | 0.047697  | -0.158563   | 0.00161991 | Yes     | Grk5     | 1.88094   | 7.1212  | 1.92066654       | 1.88194      | 7.1222        | 1.92010232       | 0.00273202 | Yes     |
| Gtpbp3   | 0.88588   | 0.76725   | -0.11863    | 8.74E-05   | Yes     | Gtpbp3   | 2.70458   | 7.4105  | 1.45416631       | 2.70558      | 7.4115        | 1.45382766       | 0.00407863 | Yes     |
| H1f0     | 0.06525   | 0.013837  | -0.051413   | 2.85E-05   | Yes     | H1f0     | 12.8384   | 100.021 | 2.96176561       | 12.8394      | 100.022       | 2.96166767       | 0.00022079 | Yes     |
| Haao     | 0.93101   | 0.25035   | -0.68066    | 1.81E-12   | Yes     | Haao     | 0.160287  | 162.263 | 9.98346093       | 0.161287     | 162.264       | 9.97449708       | 0.00060553 | Yes     |
| Habp4    | 0.42738   | 0.11437   | -0.31301    | 0.00290027 | Yes     | Habp4    | 6.31694   | 13.033  | 1.04487143       | 6.31794      | 13.034        | 1.04475376       | 0.0197348  | Yes     |

| RRBS     |          |           |             |            |         | RNAseq   |           |          |                  |              |               |                  |            |         |
|----------|----------|-----------|-------------|------------|---------|----------|-----------|----------|------------------|--------------|---------------|------------------|------------|---------|
| gene     | Blood    | Kidney    | methyl.diff | pMWU.fdr   | Match ? | gene     | blood     | kidney   | log2(fold_ratio) | blood+ 0.001 | kidney+ 0.001 | log2(fold_ratio) | q_value    | Match ? |
| Hcst     | 0.081381 | 0.48682   | 0.405439    | 7.63E-07   | Yes     | Hcst     | 268.163   | 89.9538  | -1.5758541       | 268.164      | 89.9548       | -1.5758434       | 0.00333723 | Yes     |
| Hexa     | 0.44296  | 0.05778   | -0.38518    | 2.84E-09   | Yes     | Hexa     | 20.9355   | 85.1258  | 2.02364508       | 20.9365      | 85.1268       | 2.02359312       | 0.00022079 | Yes     |
| Hid1     | 0.33373  | 0.15988   | -0.17385    | 0.010925   | Yes     | Hid1     | 0.0688735 | 9.23926  | 7.0676845        | 0.0698735    | 9.24026       | 7.04704423       | 0.011657   | Yes     |
| Hlx      | 0.25629  | 0.070051  | -0.186239   | 3.48E-07   | Yes     | Hlx      | 0.0898977 | 1.65516  | 4.20254267       | 0.0908977    | 1.65616       | 4.18745446       | 0.011893   | Yes     |
| Hmg20b   | 0.97608  | 0.57812   | -0.39796    | 3.82E-07   | Yes     | Hmg20b   | 13.59     | 37.897   | 1.47953819       | 13.591       | 37.898        | 1.4794701        | 0.00022079 | Yes     |
| Hnf1a    | 0.81135  | 0.060359  | -0.750991   | 1.81E-12   | Yes     | Hnf1a    | 3.36693   | 9.24849  | 1.45778411       | 3.36793      | 9.24949       | 1.45751167       | 0.00022079 | Yes     |
| Hnf1b    | 0.16829  | 0.025602  | -0.142688   | 1.24E-06   | Yes     | Hnf1b    | 0         | 192.793  | inf              | 0.001        | 192.794       | 17.5567006       | 0.00022079 | Yes     |
| Hoxa6    | 0.57222  | 0.10825   | -0.46397    | 4.22E-11   | Yes     | HOXA6    | 0         | 6.75863  | inf              | 0.001        | 6.75963       | 12.7227286       | 0.00022079 | Yes     |
| Hoxb3    | 0.64017  | 0.11976   | -0.52041    | 3.91E-10   | Yes     | HOXB3    | 0.119896  | 57.0793  | 8.8950403        | 0.120896     | 57.0803       | 8.8830826        | 0.00022079 | Yes     |
| Hoxb5    | 0.14176  | 0.073035  | -0.068725   | 0.02144384 | Yes     | Hoxb5    | 0         | 100.389  | inf              | 0.001        | 100.39        | 16.615256        | 0.00022079 | Yes     |
| Hoxb7    | 0.16451  | 0.013265  | -0.151245   | 3.45E-06   | Yes     | Hoxb7    | 0         | 46.1714  | inf              | 0.001        | 46.1724       | 15.4947431       | 0.00022079 | Yes     |
| Hoxb9    | 0.076262 | 0.011356  | -0.064906   | 0.00123983 | Yes     | Hoxb9    | 0         | 24.7309  | inf              | 0.001        | 24.7319       | 14.5940855       | 0.00022079 | Yes     |
| Hoxd10   | 0.13974  | 0.023068  | -0.116672   | 1.00E-05   | Yes     | Hoxd10   | 0         | 54.2073  | inf              | 0.001        | 54.2083       | 15.7262261       | 0.00022079 | Yes     |
| Hr       | 0.35974  | 0.10577   | -0.25397    | 0.0250308  | Yes     | Hr       | 0.202327  | 1.68039  | 3.05403534       | 0.203327     | 1.68139       | 3.04778069       | 0.0102697  | Yes     |
| Hs6st1   | 0.13964  | 0.036065  | -0.103575   | 0.00066856 | Yes     | Hs6st1   | 5.70482   | 25.2901  | 2.14831947       | 5.70582      | 25.2911       | 2.14812365       | 0.00022079 | Yes     |
| Hsd17b1  | 0.84423  | 0.15301   | -0.69122    | 1.81E-12   | Yes     | Hsd17b1  | 0.625981  | 4.24444  | 2.76138345       | 0.626981     | 4.24544       | 2.75942045       | 0.0173596  | Yes     |
| Hspa12a  | 0.3509   | 0.067688  | -0.283212   | 3.82E-07   | Yes     | Hspa12a  | 0         | 16.5468  | inf              | 0.001        | 16.5478       | 14.0143518       | 0.00022079 | Yes     |
| Id4      | 0.022355 | 0.0099814 | -0.0123736  | 0.00123983 | Yes     | Id4      | 0         | 38.5592  | inf              | 0.001        | 38.5602       | 15.2348249       | 0.00022079 | Yes     |
| Igf2r    | 0.37914  | 0.13011   | -0.24903    | 1.81E-12   | Yes     | Igf2r    | 12.6469   | 30.1022  | 1.25108513       | 12.6479      | 30.1032       | 1.25101899       | 0.00022079 | Yes     |
| Igfals   | 0.56541  | 0.066724  | -0.498686   | 4.83E-07   | Yes     | Igfals   | 0.234     | 1.52656  | 2.70570386       | 0.235        | 1.52756       | 2.70049639       | 0.0242871  | Yes     |
| Igfbp3   | 0.10643  | 0.04191   | -0.06452    | 0.00161585 | Yes     | Igfbp3   | 0         | 3.99493  | inf              | 0.001        | 3.99593       | 11.9643156       | 0.00022079 | Yes     |
| Ihh      | 0.12786  | 0.021729  | -0.106131   | 0.0021362  | Yes     | Ihh      | 0.598973  | 4.77886  | 2.99610363       | 0.599973     | 4.77986       | 2.99399888       | 0.00818469 | Yes     |
| Il3ra    | 0.14669  | 0.042646  | -0.104044   | 6.39E-07   | Yes     | Il3ra    | 2.53531   | 87.7834  | 5.11371408       | 2.53631      | 87.7844       | 5.11316159       | 0.00022079 | Yes     |
| Inpp1    | 0.31635  | 0.063774  | -0.252576   | 0.00010392 | Yes     | Inpp1    | 10.1082   | 25.7807  | 1.35076532       | 10.1092      | 25.7817       | 1.35067856       | 0.00022079 | Yes     |
| Irf2bpl  | 0.8264   | 0.074743  | -0.751657   | 1.81E-12   | Yes     | Irf2bpl  | 7.31406   | 22.4137  | 1.61563646       | 7.31506      | 22.4147       | 1.61550359       | 0.00022079 | Yes     |
| Irx1     | 0.11415  | 0.029557  | -0.084593   | 4.45E-05   | Yes     | Irx1     | 0         | 50.7032  | inf              | 0.001        | 50.7042       | 15.6298176       | 0.00022079 | Yes     |
| Irx2     | 0.25733  | 0.088996  | -0.168334   | 7.56E-05   | Yes     | Irx2     | 0         | 20.9914  | inf              | 0.001        | 20.9924       | 14.3575795       | 0.00022079 | Yes     |
| Irx3     | 0.10556  | 0.022801  | -0.082759   | 2.57E-05   | Yes     | Irx3     | 0         | 30.143   | inf              | 0.001        | 30.144        | 14.8795832       | 0.00022079 | Yes     |
| Isyna1   | 0.91153  | 0.75489   | -0.15664    | 0.00038311 | Yes     | Isyna1   | 51.1232   | 82.9067  | 0.69751055       | 51.1242      | 82.9077       | 0.69749973       | 0.028906   | Yes     |
| Itgal    | 0.07031  | 0.36855   | 0.29824     | 7.75E-05   | Yes     | Itgal    | 74.7565   | 3.36089  | -4.4752838       | 74.7575      | 3.36189       | -4.4748739       | 0.00022079 | Yes     |
| Itgb4    | 0.087516 | 0.035984  | -0.051532   | 0.01078302 | Yes     | Itgb4    | 0.0626748 | 19.0289  | 8.24609096       | 0.0636748    | 19.0299       | 8.22332974       | 0.0139821  | Yes     |
| Itpkb    | 0        | 0.054718  | 0.054718    | 4.45E-05   | Yes     | Itpkb    | 84.7893   | 25.6488  | -1.7249909       | 84.7903      | 25.6498       | -1.7249517       | 0.00022079 | Yes     |
| Itpripl2 | 0.72603  | 0.36469   | -0.36134    | 1.86E-08   | Yes     | Itpripl2 | 0.272079  | 1.71269  | 2.65416653       | 0.273079     | 1.71369       | 2.64971588       | 0.0247343  | Yes     |
| Jag1     | 0.071087 | 0.0065472 | -0.0645398  | 0.00244273 | Yes     | Jag1     | 0.072284  | 33.6894  | 8.86440268       | 0.073284     | 33.6904       | 8.84462359       | 0.00096553 | Yes     |
| Junb     | 0.25862  | 0.01356   | -0.24506    | 1.81E-12   | Yes     | Junb     | 40.4996   | 128.899  | 1.67026151       | 40.5006      | 128.9         | 1.67023708       | 0.00022079 | Yes     |
| Kazn     | 0.16161  | 0.020969  | -0.140641   | 2.14E-06   | Yes     | KAZN     | 0.0387597 | 38.2094  | 9.94515448       | 0.0397597    | 38.2104       | 9.90844277       | 0.00422081 | Yes     |
| Kcna3    | 0.15952  | 0.33248   | 0.17296     | 0.00011422 | Yes     | Kcna3    | 3.93846   | 0.437376 | -3.1706857       | 3.93946      | 0.438376      | -3.1677572       | 0.0133754  | Yes     |
| Kcnip4   | 0.11811  | 0.034638  | -0.083472   | 6.38E-06   | Yes     | Kcnip4   | 0         | 5.98856  | inf              | 0.001        | 5.98956       | 12.5482343       | 0.00022079 | Yes     |
| Kcnk5    | 0.4488   | 0.20408   | -0.24472    | 0.00799193 | Yes     | Kcnk5    | 0.584117  | 12.6749  | 4.43957318       | 0.585117     | 12.6759       | 4.43721924       | 0.00022079 | Yes     |
| Kcnn4    | 0.049999 | 0.63028   | 0.580281    | 1.74E-09   | Yes     | Kcnn4    | 173.46    | 37.6545  | -2.2037088       | 173.461      | 37.6555       | -2.2036788       | 0.00022079 | Yes     |
| Khk      | 0.87641  | 0.10171   | -0.7747     | 1.81E-12   | Yes     | Khk      | 8.36996   | 285.161  | 5.09041215       | 8.37096      | 285.162       | 5.09024485       | 0.00022079 | Yes     |
| Kif12    | 0.86861  | 0.096016  | -0.772594   | 1.82E-12   | Yes     | Kif12    | 0         | 176.483  | inf              | 0.001        | 176.484       | 17.4291779       | 0.00022079 | Yes     |

| RRBS     |            |           |             |            |         | RNAseq   |            |         |                  |              |               |                  |            |         |
|----------|------------|-----------|-------------|------------|---------|----------|------------|---------|------------------|--------------|---------------|------------------|------------|---------|
| gene     | Blood      | Kidney    | methyl.diff | pMWU.fdr   | Match ? | gene     | blood      | kidney  | log2(fold_ratio) | blood+ 0.001 | kidney+ 0.001 | log2(fold_ratio) | q_value    | Match ? |
| Kl       | 0.31563    | 0.070951  | -0.244679   | 1.81E-12   | Yes     | Kl       | 0          | 29.3078 | inf              | 0.001        | 29.3088       | 14.8390463       | 0.00022079 | Yes     |
| Klf2     | 0.021042   | 0.30153   | 0.280488    | 1.85E-12   | Yes     | Klf2     | 331.001    | 33.7279 | -3.2948212       | 331.002      | 33.7289       | -3.2947828       | 0.00022079 | Yes     |
| Klf5     | 0.12991    | 0.056127  | -0.073783   | 0.00393505 | Yes     | Klf5     | 0.0608542  | 9.08547 | 7.2220605        | 0.0618542    | 9.08647       | 7.19870456       | 0.0122712  | Yes     |
| Krt19    | 0.090947   | 0.022932  | -0.068015   | 2.06E-05   | Yes     | Krt19    | 0          | 131.192 | inf              | 0.001        | 131.193       | 17.0013312       | 0.00022079 | Yes     |
| Krtcap3  | 0.8216     | 0.054986  | -0.766614   | 1.81E-12   | Yes     | Krtcap3  | 1.28027    | 16.0457 | 3.64766673       | 1.28127      | 16.0467       | 3.64663021       | 0.00022079 | Yes     |
| L3hypadh | 0.66621    | 0.091686  | -0.574524   | 8.88E-12   | Yes     | L3hypadh | 0.0869777  | 14.6098 | 7.39207515       | 0.0879777    | 14.6108       | 7.37568157       | 0.00494367 | Yes     |
| Lactb2   | 0.19473    | 0.040412  | -0.154318   | 7.02E-06   | Yes     | Lactb2   | 13.8336    | 82.5224 | 2.57660913       | 13.8346      | 82.5234       | 2.57652233       | 0.00022079 | Yes     |
| Lama1    | 0.13829    | 0.03914   | -0.09915    | 0.02731997 | Yes     | Lama1    | 0.811193   | 3.32777 | 2.03643862       | 0.812193     | 3.32877       | 2.03509469       | 0.00022079 | Yes     |
| Lama5    | 0.14892    | 0.028176  | -0.120744   | 0.00290027 | Yes     | Lama5    | 0.188712   | 22.5593 | 6.90139233       | 0.189712     | 22.5603       | 6.8938315        | 0.00022079 | Yes     |
| Lamb2    | 0.11516    | 0.041519  | -0.073641   | 0.03531391 | Yes     | Lamb2    | 0.022305   | 55.7073 | 11.2862835       | 0.023305     | 55.7083       | 11.2230371       | 0.0208857  | Yes     |
| Lamc1    | 0.067225   | 0.016929  | -0.050296   | 0.0006129  | Yes     | Lamc1    | 1.252      | 14.994  | 3.58207884       | 1.253        | 14.995        | 3.5810232        | 0.00022079 | Yes     |
| Large    | 0.38047    | 0.15614   | -0.22433    | 0.01000157 | Yes     | Large    | 0.47572    | 7.12934 | 3.90558394       | 0.47672      | 7.13034       | 3.90275681       | 0.00022079 | Yes     |
| Lat      | 0.00040258 | 0.33706   | 0.33665742  | 1.22E-10   | Yes     | Lat      | 494.114    | 91.4181 | -2.4342922       | 494.115      | 91.4191       | -2.4342793       | 0.00022079 | Yes     |
| Lax1     | 0.055872   | 0.40075   | 0.344878    | 0.00334577 | Yes     | Lax1     | 13.7859    | 1.05971 | -3.701452        | 13.7869      | 1.06071       | -3.7001959       | 0.00022079 | Yes     |
| Lbh      | 0          | 0.097535  | 0.097535    | 1.31E-06   | Yes     | Lbh      | 132.342    | 21.9281 | -2.5934183       | 132.343      | 21.9291       | -2.5933634       | 0.00022079 | Yes     |
| Lgalsl   | 0.77684    | 0.045678  | -0.731162   | 2.07E-09   | Yes     | Lgalsl   | 0.475125   | 16.6054 | 5.12720155       | 0.476125     | 16.6064       | 5.12425516       | 0.00022079 | Yes     |
| Loxl1    | 0.6031     | 0.31187   | -0.29123    | 1.06E-08   | Yes     | Loxl1    | 0          | 3.88824 | inf              | 0.001        | 3.88924       | 11.9252725       | 0.00022079 | Yes     |
| Lpl      | 0.061957   | 0.011756  | -0.050201   | 0.00276056 | Yes     | Lpl      | 0          | 4.35963 | inf              | 0.001        | 4.36063       | 12.0903209       | 0.00022079 | Yes     |
| Lrp4     | 0.39429    | 0.20137   | -0.19292    | 0.02027674 | Yes     | Lrp4     | 0.00619239 | 3.41417 | 9.10682284       | 0.00719239   | 3.41517       | 8.89127043       | 0.0490996  | Yes     |
| Lrrc16a  | 0.42345    | 0.0303    | -0.39315    | 9.40E-10   | Yes     | Lrrc16a  | 0.280897   | 12.9406 | 5.52571948       | 0.281897     | 12.9416       | 5.52070406       | 0.00022079 | Yes     |
| Lrrc24   | 0.11075    | 0.0091006 | -0.1016494  | 5.49E-05   | Yes     | Lrrc24   | 8.81118    | 42.7046 | 2.27698434       | 8.81218      | 42.7056       | 2.27685439       | 0.00022079 | Yes     |
| Ltbp3    | 0.61263    | 0.22001   | -0.39262    | 5.45E-07   | Yes     | Ltbp3    | 0.0225728  | 14.8295 | 9.35966885       | 0.0235728    | 14.8305       | 9.29722839       | 0.00257873 | Yes     |
| Ltbp4    | 0.075372   | 0.02426   | -0.051112   | 0.00244273 | Yes     | Ltbp4    | 0.236197   | 17.2916 | 6.19393692       | 0.237197     | 17.2926       | 6.18792523       | 0.00022079 | Yes     |
| Ltbr     | 0.75619    | 0.059947  | -0.696243   | 3.82E-07   | Yes     | Ltbr     | 0.19962    | 33.9263 | 7.40900402       | 0.20062      | 33.9273       | 7.40183738       | 0.00022079 | Yes     |
| Lurap1l  | 0.37231    | 0.10626   | -0.26605    | 0.00105615 | Yes     | Lurap1l  | 0          | 10.9454 | inf              | 0.001        | 10.9464       | 13.4181689       | 0.00022079 | Yes     |
| Lzts3    | 0.65266    | 0.08561   | -0.56705    | 1.81E-12   | Yes     | Lzts3    | 1.40542    | 66.3369 | 5.56073836       | 1.40642      | 66.3379       | 5.55973395       | 0.00022079 | Yes     |
| Map10    | 0.39764    | 0.1876    | -0.21004    | 9.44E-05   | Yes     | Map10    | 0.0431085  | 1.1151  | 4.69305692       | 0.0441085    | 1.1161        | 4.66126579       | 0.0384399  | Yes     |
| Map11c3a | 0.12118    | 0.033696  | -0.087484   | 0.02144384 | Yes     | Map11c3a | 14.1037    | 133.424 | 3.2418726        | 14.1047      | 133.425       | 3.24178113       | 0.00022079 | Yes     |
| Map4k1   | 0          | 0.21142   | 0.21142     | 4.45E-05   | Yes     | Map4k1   | 64.7918    | 13.4669 | -2.2663934       | 64.7928      | 13.4679       | -2.2663086       | 0.00022079 | Yes     |
| Map4k5   | 0.080051   | 0.01772   | -0.062331   | 0.0001571  | Yes     | Map4k5   | 1.07767    | 7.5996  | 2.81800802       | 1.07867      | 7.6006        | 2.81685975       | 0.00022079 | Yes     |
| Map6     | 0.078914   | 0.015354  | -0.06356    | 0.0007955  | Yes     | Map6     | 2.23782    | 5.09365 | 1.18660583       | 2.23882      | 5.09465       | 1.1862445        | 0.0344255  | Yes     |
| Mapk4    | 0.92232    | 0.21368   | -0.70864    | 2.29E-09   | Yes     | Mapk4    | 0          | 2.21874 | inf              | 0.001        | 2.21974       | 11.116175        | 0.00672121 | Yes     |
| Marveld1 | 0.53475    | 0.14051   | -0.39424    | 1.81E-12   | Yes     | Marveld1 | 0.381183   | 8.35151 | 4.45348138       | 0.382183     | 8.35251       | 4.44987429       | 0.00180113 | Yes     |
| Megf8    | 0.23231    | 0.037363  | -0.194947   | 1.81E-12   | Yes     | Megf8    | 0.0219077  | 6.132   | 8.12877586       | 0.0229077    | 6.133         | 8.06461653       | 0.0019604  | Yes     |
| Mest     | 0.4156     | 0.30453   | -0.11107    | 0.00105615 | Yes     | Mest     | 0.259475   | 2.43005 | 3.22731855       | 0.260475     | 2.43105       | 3.22236275       | 0.0356158  | Yes     |
| Metrn    | 0.48377    | 0.1396    | -0.34417    | 8.25E-10   | Yes     | Metrn    | 0.433781   | 17.3068 | 5.31822832       | 0.434781     | 17.3078       | 5.31498965       | 0.00022079 | Yes     |
| Mfhas1   | 0.20954    | 0.077588  | -0.131952   | 0.00148947 | Yes     | Mfhas1   | 0.30303    | 7.20393 | 4.57125163       | 0.30403      | 7.20493       | 4.56669882       | 0.00022079 | Yes     |
| Misp     | 0.72194    | 0.066111  | -0.655829   | 0.00088439 | Yes     | Misp     | 0          | 2.22852 | inf              | 0.001        | 2.22952       | 11.1225174       | 0.00113657 | Yes     |
| Mixl1    | 0.14738    | 0.056817  | -0.090563   | 0.00034271 | Yes     | Mixl1    | 0.0504303  | 1.5841  | 4.97322879       | 0.0514303    | 1.5851        | 4.94581148       | 0.043912   | Yes     |
| Mlf2     | 0.81009    | 0.52115   | -0.28894    | 0.01013329 | Yes     | Mlf2     | 73.3912    | 146.342 | 0.99566489       | 73.3922      | 146.343       | 0.99565509       | 0.00288641 | Yes     |
| Mlph     | 0.094166   | 0.034227  | -0.059939   | 0.00438283 | Yes     | Mlph     | 0          | 15.2005 | inf              | 0.001        | 15.2015       | 13.8919261       | 0.00022079 | Yes     |
| Mlycd    | 0.20862    | 0.07052   | -0.1381     | 0.00510288 | Yes     | Mlycd    | 6.08774    | 27.7432 | 2.18815555       | 6.08874      | 27.7442       | 2.18797059       | 0.00022079 | Yes     |

| RRBS     |           |           |             |            |         | RNAseq   |           |         |                  |              |               |                  |            |         |
|----------|-----------|-----------|-------------|------------|---------|----------|-----------|---------|------------------|--------------|---------------|------------------|------------|---------|
| gene     | Blood     | Kidney    | methyl.diff | pMWU.fdr   | Match ? | gene     | blood     | kidney  | log2(fold_ratio) | blood+ 0.001 | kidney+ 0.001 | log2(fold_ratio) | q_value    | Match ? |
| Mmp11    | 0.45909   | 0.073443  | -0.385647   | 1.67E-06   | Yes     | Mmp11    | 0.611283  | 5.06552 | 3.05079803       | 0.612283     | 5.06652       | 3.04872462       | 0.00060553 | Yes     |
| Mmp23    | 0.62647   | 0.44819   | -0.17828    | 0.00553374 | Yes     | Mmp23    | 0         | 1.46321 | inf              | 0.001        | 1.46421       | 10.5159068       | 0.00022079 | Yes     |
| Moap1    | 0.32037   | 0.086108  | -0.234262   | 0.0017676  | Yes     | Moap1    | 8.31698   | 35.1815 | 2.08068533       | 8.31798      | 35.1825       | 2.08055288       | 0.00022079 | Yes     |
| Mpp6     | 0.60494   | 0.21578   | -0.38916    | 1.07E-06   | Yes     | Mpp6     | 8.01762   | 19.1743 | 1.25792796       | 8.01862      | 19.1753       | 1.25782327       | 0.00113657 | Yes     |
| Mpped1   | 0.35701   | 0.17567   | -0.18134    | 0.00021466 | Yes     | Mpped1   | 0         | 1.26246 | inf              | 0.001        | 1.26346       | 10.3031643       | 0.00022079 | Yes     |
| Mpped2   | 0.059361  | 0.0055223 | -0.0538387  | 0.00148947 | Yes     | Mpped2   | 0.147887  | 4.08102 | 4.78636264       | 0.148887     | 4.08202       | 4.77699355       | 0.00164037 | Yes     |
| Mpst     | 0.93718   | 0.1544    | -0.78278    | 1.22E-10   | Yes     | MPST     | 15.1018   | 117.514 | 2.96004022       | 15.1028      | 117.515       | 2.95995697       | 0.00022079 | Yes     |
| Mrap     | 0.71227   | 0.22129   | -0.49098    | 1.67E-06   | Yes     | Mrap     | 0         | 9.89062 | inf              | 0.001        | 9.89162       | 13.2719911       | 0.00022079 | Yes     |
| Mrpl38   | 0.78313   | 0.087668  | -0.695462   | 4.29E-07   | Yes     | Mrpl38   | 13.8761   | 36.2529 | 1.38549426       | 13.8771      | 36.2539       | 1.38543009       | 0.00096553 | Yes     |
| Msrb2    | 0.7264    | 0.15851   | -0.56789    | 5.73E-06   | Yes     | Msrb2    | 13.545    | 31.8054 | 1.23151134       | 13.546       | 31.8064       | 1.23145019       | 0.00658515 | Yes     |
| Mt1      | 0.10409   | 0.04018   | -0.06391    | 0.00320916 | Yes     | MT1      | 0.886545  | 22.4209 | 4.66050652       | 0.887545     | 22.4219       | 4.65894446       | 0.0228245  | Yes     |
| Mt2A     | 0.61527   | 0.091366  | -0.523904   | 0.0007955  | Yes     | Mt2A     | 1.66928   | 3255.4  | 10.9293931       | 1.67028      | 3255.401      | 10.9285296       | 0.00113657 | Yes     |
| Mxd3     | 0.069213  | 0.015059  | -0.054154   | 0.03196657 | Yes     | Mxd3     | 0.313898  | 1.74385 | 2.47390821       | 0.314898     | 1.74485       | 2.47014652       | 0.0484179  | Yes     |
| Myh11    | 0.92243   | 0.37892   | -0.54351    | 4.29E-07   | Yes     | Myh11    | 1.42229   | 8.02228 | 2.49579667       | 1.42329      | 8.02328       | 2.4949625        | 0.00164037 | Yes     |
| Myh14    | 0.14887   | 0.027287  | -0.121583   | 0.00276056 | Yes     | Myh14    | 0.0451506 | 10.8263 | 7.9055794        | 0.0461506    | 10.8273       | 7.8741084        | 0.00022079 | Yes     |
| Myo1c    | 0.87549   | 0.52883   | -0.34666    | 0.00017491 | Yes     | Myo1c    | 4.13925   | 46.6113 | 3.49323846       | 4.14025      | 46.6123       | 3.49292091       | 0.00022079 | Yes     |
| Myo5b    | 0.23483   | 0.024829  | -0.210001   | 6.77E-07   | Yes     | Myo5b    | 0.0108889 | 29.5835 | 11.4077188       | 0.0118889    | 29.5845       | 11.2810106       | 0.00022079 | Yes     |
| N4bp3    | 0.88452   | 0.72359   | -0.16093    | 0.00125879 | Yes     | N4bp3    | 0.161193  | 2.9078  | 4.17306704       | 0.162193     | 2.9088        | 4.16464064       | 0.00480115 | Yes     |
| Nav2     | 0.22134   | 0.087606  | -0.133734   | 0.0153478  | Yes     | Nav2     | 0.746426  | 14.6412 | 4.29389075       | 0.747426     | 14.6422       | 4.29205778       | 0.00022079 | Yes     |
| Nbl1     | 0.15142   | 0.055829  | -0.095591   | 0.00393505 | Yes     | Nbl1     | 0.121847  | 41.1122 | 8.39835203       | 0.122847     | 41.1132       | 8.38659523       | 0.00060553 | Yes     |
| Ncf4     | 0.85874   | 0.70635   | -0.15239    | 0.0007955  | Yes     | Ncf4     | 0.86483   | 4.36909 | 2.33684435       | 0.86583      | 4.37009       | 2.3355073        | 0.00363736 | Yes     |
| Nckap1l  | 0.0020803 | 0.36252   | 0.3604397   | 3.82E-07   | Yes     | Nckap1l  | 45.1893   | 4.54353 | -3.3140957       | 45.1903      | 4.54453       | -3.3138101       | 0.00022079 | Yes     |
| NdrG4    | 0.20447   | 0.057155  | -0.147315   | 6.75E-05   | Yes     | NdrG4    | 0.851781  | 25.2893 | 4.89190074       | 0.852781     | 25.2903       | 4.89026505       | 0.00022079 | Yes     |
| Ndufb4   | 0.41179   | 0.17939   | -0.2324     | 0.00105615 | Yes     | Ndufb4   | 132.87    | 582.974 | 2.13341614       | 132.871      | 582.975       | 2.13340776       | 0.00022079 | Yes     |
| Ndufs5   | 0.19841   | 0.089742  | -0.108668   | 4.99E-05   | Yes     | NDUFS5   | 10.8836   | 53.4567 | 2.29621494       | 10.8846      | 53.4577       | 2.29610938       | 0.00022079 | Yes     |
| Nefm     | 0.1325    | 0.022677  | -0.109823   | 2.14E-06   | Yes     | Nefm     | 0         | 1.23965 | inf              | 0.001        | 1.24065       | 10.2768805       | 0.00022079 | Yes     |
| Nfib     | 0.067537  | 0.015862  | -0.051675   | 6.26E-05   | Yes     | Nfib     | 0         | 4.9928  | inf              | 0.001        | 4.9938        | 12.2859223       | 0.00605729 | Yes     |
| Nfic     | 0.76824   | 0.10238   | -0.66586    | 0.00017491 | Yes     | Nfic     | 4.39528   | 26.2674 | 2.57924643       | 4.39628      | 26.2684       | 2.57897315       | 0.00022079 | Yes     |
| Nid2     | 0.11376   | 0.019627  | -0.094133   | 0.0074695  | Yes     | Nid2     | 0.10382   | 101.609 | 9.93472809       | 0.10482      | 101.61        | 9.92091266       | 0.00022079 | Yes     |
| Nipsnap1 | 0.10023   | 0.027099  | -0.073131   | 0.00163733 | Yes     | Nipsnap1 | 20.0984   | 50.8662 | 1.33962667       | 20.0994      | 50.8672       | 1.33958325       | 0.00022079 | Yes     |
| Nkain4   | 0.10612   | 0.039622  | -0.066498   | 0.00113933 | Yes     | Nkain4   | 0         | 7.09389 | inf              | 0.001        | 7.09489       | 12.7925646       | 0.00022079 | Yes     |
| Nkx2-1   | 0.087331  | 0.028     | -0.059331   | 0.00032353 | Yes     | Nkx2-1   | 0.437452  | 87.893  | 7.65047974       | 0.438452     | 87.894        | 7.64720196       | 0.00022079 | Yes     |
| Nmrk1    | 0.49573   | 0.22837   | -0.26736    | 9.44E-05   | Yes     | Nmrk1    | 0.964671  | 20.4682 | 4.40720343       | 0.965671     | 20.4692       | 4.40577916       | 0.00242102 | Yes     |
| Notch1   | 0.11752   | 0.25672   | 0.1392      | 0.00015953 | Yes     | Notch1   | 34.5623   | 6.76598 | -2.3528284       | 34.5633      | 6.76698       | -2.3526569       | 0.00022079 | Yes     |
| Nox4     | 0.27951   | 0.084239  | -0.195271   | 5.73E-06   | Yes     | Nox4     | 0         | 10.1236 | inf              | 0.001        | 10.1246       | 13.3055773       | 0.00022079 | Yes     |
| Npr2     | 0.19537   | 0.074081  | -0.121289   | 0.00032353 | Yes     | Npr2     | 1.11497   | 5.02745 | 2.17282194       | 1.11597      | 5.02845       | 2.17181552       | 0.00551024 | Yes     |
| Nr1h3    | 0.50987   | 0.080351  | -0.429519   | 1.15E-06   | Yes     | Nr1h3    | 0.0994888 | 19.5693 | 7.61984231       | 0.1004888    | 19.5703       | 7.60548735       | 0.00164037 | Yes     |
| Nr2f2    | 0.14412   | 0.027493  | -0.116627   | 3.67E-05   | Yes     | Nr2f2    | 0         | 69.694  | inf              | 0.001        | 69.695        | 16.0887675       | 0.00022079 | Yes     |
| Nr2f6    | 0.50922   | 0.086238  | -0.422982   | 1.81E-12   | Yes     | Nr2f6    | 3.42941   | 76.2007 | 4.47377195       | 3.43041      | 76.2017       | 4.47337026       | 0.00022079 | Yes     |
| Nrg1     | 0.076372  | 0.019407  | -0.056965   | 0.00095268 | Yes     | Nrg1     | 0.0116116 | 2.49624 | 7.74804606       | 0.0126116    | 2.49724       | 7.62943935       | 0.0147132  | Yes     |
| Nrip3    | 0.076365  | 0.009233  | -0.067132   | 0.00055683 | Yes     | Nrip3    | 0.112332  | 1.15442 | 3.36132733       | 0.113332     | 1.15542       | 3.34979019       | 0.0402662  | Yes     |
| Nrp1     | 0.66134   | 0.069733  | -0.591607   | 2.83E-08   | Yes     | Nrp1     | 3.40297   | 15.5306 | 2.19024723       | 3.40397      | 15.5316       | 2.18991623       | 0.00022079 | Yes     |

| RRBS     |          |          |             |            |         | RNAseq   |           |         |                  |              |               |                  |            |         |
|----------|----------|----------|-------------|------------|---------|----------|-----------|---------|------------------|--------------|---------------|------------------|------------|---------|
| gene     | Blood    | Kidney   | methyl.diff | pMWU.fdr   | Match ? | gene     | blood     | kidney  | log2(fold_ratio) | blood+ 0.001 | kidney+ 0.001 | log2(fold_ratio) | q_value    | Match ? |
| Nrxn2    | 0.066528 | 0.016378 | -0.05015    | 9.27E-05   | Yes     | Nrxn2    | 0         | 2.38387 | inf              | 0.001        | 2.38487       | 11.2196949       | 0.00022079 | Yes     |
| Nt5c1a   | 0.32174  | 0.10149  | -0.22025    | 0.00010392 | Yes     | Nt5c1a   | 0         | 2.08273 | inf              | 0.001        | 2.08373       | 11.0249526       | 0.00022079 | Yes     |
| Ntf3     | 0.12317  | 0.049232 | -0.073938   | 0.0074695  | Yes     | Ntf3     | 0         | 3.10405 | inf              | 0.001        | 3.10505       | 11.6004008       | 0.00022079 | Yes     |
| Nuak1    | 0.11248  | 0.033612 | -0.078868   | 0.00034271 | Yes     | Nuak1    | 0.533262  | 7.61064 | 3.83510135       | 0.534262     | 7.61164       | 3.83258802       | 0.00480115 | Yes     |
| Nudt22   | 0.86938  | 0.52717  | -0.34221    | 2.06E-05   | Yes     | Nudt22   | 5.24272   | 17.5    | 1.73896752       | 5.24372      | 17.501        | 1.7387748        | 0.00164037 | Yes     |
| Olfml2a  | 0.95158  | 0.41977  | -0.53181    | 3.82E-07   | Yes     | Olfml2a  | 0         | 1.24049 | inf              | 0.001        | 1.24149       | 10.2778569       | 0.00022079 | Yes     |
| P2ry2    | 0.12132  | 0.01344  | -0.10788    | 8.70E-08   | Yes     | P2ry2    | 0.0661294 | 12.188  | 7.52595388       | 0.0671294    | 12.189        | 7.50441931       | 0.00975879 | Yes     |
| P4ha2    | 0.27695  | 0.12593  | -0.15102    | 0.01406934 | Yes     | P4ha2    | 0.0164635 | 12.986  | 9.62347033       | 0.0174635    | 12.987        | 9.53850976       | 0.0412912  | Yes     |
| Pabpc4   | 0.35944  | 0.23648  | -0.12296    | 0.01314831 | Yes     | Pabpc4   | 45.5832   | 86.6458 | 0.92662761       | 45.5842      | 86.6468       | 0.92661261       | 0.0197348  | Yes     |
| Pacsin3  | 0.6534   | 0.15552  | -0.49788    | 7.63E-07   | Yes     | Pacsin3  | 0.150062  | 22.7459 | 7.24390402       | 0.151062     | 22.7469       | 7.23438534       | 0.00022079 | Yes     |
| Palm     | 0.61146  | 0.090112 | -0.521348   | 3.67E-05   | Yes     | Palm     | 2.79579   | 83.6317 | 4.90272198       | 2.79679      | 83.6327       | 4.9022233        | 0.00242102 | Yes     |
| Paqr6    | 0.78836  | 0.11597  | -0.67239    | 3.82E-07   | Yes     | Paqr6    | 0.740204  | 12.6001 | 4.08936844       | 0.741204     | 12.6011       | 4.0875352        | 0.00022079 | Yes     |
| Pard6b   | 0.12664  | 0.016097 | -0.110543   | 7.75E-05   | Yes     | Pard6b   | 4.60387   | 33.9921 | 2.88428049       | 4.60487      | 33.9931       | 2.8840096        | 0.00022079 | Yes     |
| Parp16   | 0.58538  | 0.080493 | -0.504887   | 8.58E-09   | Yes     | Parp16   | 0.902242  | 9.87753 | 3.45256397       | 0.903242     | 9.87853       | 3.4511119        | 0.00022079 | Yes     |
| Parp3    | 0.68733  | 0.3917   | -0.29563    | 0.00055683 | Yes     | Parp3    | 2.43031   | 15.233  | 2.64798784       | 2.43131      | 15.234        | 2.64748904       | 0.00022079 | Yes     |
| Pax2     | 0.11537  | 0.025891 | -0.089479   | 1.06E-05   | Yes     | Pax2     | 0         | 33.54   | inf              | 0.001        | 33.541        | 15.0336381       | 0.00022079 | Yes     |
| Pcdhga12 | 0.46238  | 0.23933  | -0.22305    | 9.43E-07   | Yes     | Pcdhga12 | 1.44388   | 8.38613 | 2.53805435       | 1.44488      | 8.38713       | 2.53722754       | 0.0396448  | Yes     |
| Pclo     | 0.13334  | 0.046823 | -0.086517   | 0.0022928  | Yes     | Pclo     | 0         | 2.30532 | inf              | 0.001        | 2.30632       | 11.171377        | 0.00022079 | Yes     |
| Pcsk5    | 0.084342 | 0.020391 | -0.063951   | 0.00068845 | Yes     | Pcsk5    | 0         | 3.59757 | inf              | 0.001        | 3.59857       | 11.813208        | 0.00022079 | Yes     |
| Pde1b    | 0.30422  | 0.054134 | -0.250086   | 1.31E-05   | Yes     | Pde1b    | 0.0568886 | 1.79339 | 4.97840587       | 0.0578886    | 1.79439       | 4.95407041       | 0.0450008  | Yes     |
| Pde4a    | 0.070059 | 0.014628 | -0.055431   | 0.00042212 | Yes     | Pde4a    | 0.137785  | 3.27593 | 4.57141379       | 0.138785     | 3.27693       | 4.5614213        | 0.00022079 | Yes     |
| Pdia5    | 0.10779  | 0.043973 | -0.063817   | 0.01155321 | Yes     | Pdia5    | 0.20213   | 2.41861 | 3.58082279       | 0.20313      | 2.41961       | 3.5742993        | 0.029572   | Yes     |
| Pdlim4   | 0.089556 | 0.029725 | -0.059831   | 0.0153478  | Yes     | Pdlim4   | 0         | 11.4692 | inf              | 0.001        | 11.4702       | 13.4856029       | 0.00022079 | Yes     |
| Pdzd3    | 0.86113  | 0.51424  | -0.34689    | 4.99E-05   | Yes     | Pdzd3    | 0.143429  | 8.25608 | 5.84704829       | 0.144429     | 8.25708       | 5.83719933       | 0.00392909 | Yes     |
| Pdzrn3   | 0.27696  | 0.11893  | -0.15803    | 0.03196657 | Yes     | Pdzrn3   | 0         | 2.44104 | inf              | 0.001        | 2.44204       | 11.2538711       | 0.0019604  | Yes     |
| Pea15    | 0.082348 | 0.028113 | -0.054235   | 4.99E-05   | Yes     | Pea15    | 15.1801   | 54.9217 | 1.85519499       | 15.1811      | 54.9227       | 1.85512622       | 0.038944   | Yes     |
| Peg3     | 0.41572  | 0.27076  | -0.14496    | 0.0074695  | Yes     | Peg3     | 0.0360269 | 2.2526  | 5.96637283       | 0.0370269    | 2.2536        | 5.92751389       | 0.00884258 | Yes     |
| Peli2    | 0.48542  | 0.076231 | -0.409189   | 4.29E-07   | Yes     | Peli2    | 0.0398006 | 7.47906 | 7.55392297       | 0.0408006    | 7.48006       | 7.51831566       | 0.0176974  | Yes     |
| Perp     | 0.39585  | 0.088962 | -0.306888   | 0.00012978 | Yes     | Perp     | 0         | 36.7913 | inf              | 0.001        | 36.7923       | 15.1671162       | 0.00022079 | Yes     |
| Pex10    | 0.87679  | 0.45513  | -0.42166    | 2.06E-05   | Yes     | Pex10    | 1.44722   | 7.85244 | 2.43985676       | 1.44822      | 7.85344       | 2.43904395       | 0.00022079 | Yes     |
| Pfkl     | 0.63455  | 0.27453  | -0.36002    | 7.02E-06   | Yes     | Pfkl     | 19.7062   | 48.7207 | 1.30588526       | 19.7072      | 48.7217       | 1.30584166       | 0.00022079 | Yes     |
| Pgm3     | 0.31545  | 0.11197  | -0.20348    | 0.0250308  | Yes     | Pgm3     | 1.1826    | 6.46145 | 2.44989577       | 1.1836       | 6.46245       | 2.44889961       | 0.0145886  | Yes     |
| Phlda2   | 0.28434  | 0.092204 | -0.192136   | 0.01660198 | Yes     | PHLDA2   | 0.839747  | 11.4792 | 3.77292356       | 0.840747     | 11.4802       | 3.77133224       | 0.00060553 | Yes     |
| Phpt1    | 0.2924   | 0.055432 | -0.236968   | 0.00023579 | Yes     | Phpt1    | 54.2651   | 213.904 | 1.97886691       | 54.2661      | 213.905       | 1.97884707       | 0.00022079 | Yes     |
| Pim3     | 0.90298  | 0.095324 | -0.807656   | 1.74E-09   | Yes     | Pim3     | 9.77313   | 45.6313 | 2.22313117       | 9.77413      | 45.6323       | 2.22301517       | 0.00022079 | Yes     |
| Pitx2    | 0.10076  | 0.011129 | -0.089631   | 2.85E-05   | Yes     | Pitx2    | 0         | 22.8205 | inf              | 0.001        | 22.8215       | 14.478106        | 0.00022079 | Yes     |
| Piwil1   | 0.65797  | 0.22355  | -0.43442    | 4.99E-05   | Yes     | Piwil1   | 0.150263  | 9.6718  | 6.0082227        | 0.151263     | 9.6728        | 5.99880253       | 0.00022079 | Yes     |
| Pklr     | 0.83996  | 0.20798  | -0.63198    | 5.89E-07   | Yes     | Pklr     | 0.0549184 | 22.7745 | 8.69591407       | 0.0559184    | 22.7755       | 8.66994393       | 0.00022079 | Yes     |
| Pkp3     | 0.82432  | 0.057546 | -0.766774   | 1.55E-10   | Yes     | Pkp3     | 0.445155  | 8.84309 | 4.31217091       | 0.446155     | 8.84409       | 4.30909679       | 0.0219049  | Yes     |
| Plekha5  | 0.13878  | 0.032868 | -0.105912   | 0.00023579 | Yes     | Plekha5  | 1.08058   | 19.6321 | 4.18333671       | 1.08158      | 19.6331       | 4.1820757        | 0.00022079 | Yes     |
| Plekhh3  | 0.16404  | 0.027686 | -0.136354   | 1.67E-06   | Yes     | Plekhh3  | 1.17434   | 12.2099 | 3.37812932       | 1.17534      | 12.2109       | 3.37701948       | 0.00078858 | Yes     |
| Pnpla3   | 0.079323 | 0.026581 | -0.052742   | 0.00244273 | Yes     | Pnpla3   | 0.225345  | 7.0214  | 4.96155137       | 0.226345     | 7.0224        | 4.95536883       | 0.00975879 | Yes     |

| RRBS       |           |          |             |            |         | RNAseq     |           |          |                  |              |               |                  |            |         |
|------------|-----------|----------|-------------|------------|---------|------------|-----------|----------|------------------|--------------|---------------|------------------|------------|---------|
| gene       | Blood     | Kidney   | methyl.diff | pMWU.fdr   | Match ? | gene       | blood     | kidney   | log2(fold_ratio) | blood+ 0.001 | kidney+ 0.001 | log2(fold_ratio) | q_value    | Match ? |
| Polr2i     | 0.96066   | 0.65122  | -0.30944    | 7.56E-05   | Yes     | Polr2i     | 5.31602   | 22.5167  | 2.08257697       | 5.31702      | 22.5177       | 2.08236968       | 0.00041963 | Yes     |
| Polr2k     | 0.28952   | 0.10261  | -0.18691    | 1.99E-10   | Yes     | Polr2k     | 31.3899   | 101.998  | 1.70016853       | 31.3909      | 101.999       | 1.70013671       | 0.00022079 | Yes     |
| Polr3h     | 0.31002   | 0.46714  | 0.15712     | 0.00466526 | Yes     | Polr3h     | 36.1645   | 13.8488  | -1.3848132       | 36.1655      | 13.8498       | -1.384749        | 0.00041963 | Yes     |
| Pomc       | 0.3532    | 0.11298  | -0.24022    | 0.00034271 | Yes     | Pomc       | 0.880394  | 11.823   | 3.74730303       | 0.881394     | 11.824        | 3.74578729       | 0.00605729 | Yes     |
| Pou3f3     | 0.090685  | 0.015459 | -0.075226   | 0.00866691 | Yes     | Pou3f3     | 0         | 45.805   | inf              | 0.001        | 45.806        | 15.483249        | 0.00022079 | Yes     |
| Ppm1j      | 0.7701    | 0.13821  | -0.63189    | 1.36E-07   | Yes     | Ppm1j      | 1.07143   | 3.87063  | 1.85303081       | 1.07243      | 3.87163       | 1.8520576        | 0.0327215  | Yes     |
| Ppp1r15a   | 0.3124    | 0.08513  | -0.22727    | 0.0002817  | Yes     | Ppp1r15a   | 16.9666   | 88.0392  | 2.37544855       | 16.9676      | 88.0402       | 2.37537991       | 0.00022079 | Yes     |
| Ppp1r9b    | 0.028557  | 0.089963 | 0.061406    | 1.91E-06   | Yes     | Ppp1r9b    | 65.2023   | 17.3214  | -1.9123673       | 65.2033      | 17.3224       | -1.9123062       | 0.00022079 | Yes     |
| Pramef8    | 0.16392   | 0.042024 | -0.121896   | 1.04E-07   | Yes     | Pramef8    | 0.362132  | 2.9797   | 3.04057951       | 0.363132     | 2.9807        | 3.0370852        | 0.00022079 | Yes     |
| Proc       | 0.71539   | 0.12874  | -0.58665    | 2.42E-08   | Yes     | Proc       | 0         | 15.4092  | inf              | 0.001        | 15.4102       | 13.911598        | 0.00022079 | Yes     |
| Prodh      | 0.59263   | 0.21317  | -0.37946    | 4.50E-07   | Yes     | Prodh      | 0.145603  | 25.2511  | 7.43816235       | 0.146603     | 25.2521       | 7.42834493       | 0.00227055 | Yes     |
| Prom2      | 0.4388    | 0.1735   | -0.2653     | 1.49E-05   | Yes     | Prom2      | 0         | 17.7722  | inf              | 0.001        | 17.7732       | 14.1174158       | 0.00022079 | Yes     |
| Proz       | 0.7306    | 0.19476  | -0.53584    | 1.95E-06   | Yes     | Proz       | 0.171626  | 2.23151  | 3.70068024       | 0.172626     | 2.23251       | 3.69294496       | 0.00536605 | Yes     |
| Prph       | 0.07217   | 0.021583 | -0.050587   | 0.00074247 | Yes     | Prph       | 0         | 1.27794  | inf              | 0.001        | 1.27894       | 10.3207329       | 0.00022079 | Yes     |
| Ptgds      | 0.86186   | 0.52873  | -0.33313    | 3.04E-09   | Yes     | Ptgds      | 0         | 34.8527  | inf              | 0.001        | 34.8537       | 15.0890242       | 0.00022079 | Yes     |
| Ptms       | 0.56227   | 0.16683  | -0.39544    | 0.00135614 | Yes     | Ptms       | 194.148   | 707.586  | 1.86574866       | 194.149      | 707.587       | 1.86574327       | 0.00022079 | Yes     |
| Ptpn14     | 0.19472   | 0.041439 | -0.153281   | 7.63E-07   | Yes     | Ptpn14     | 0.0197746 | 10.1992  | 9.01059177       | 0.0207746    | 10.2002       | 8.93956103       | 0.00698733 | Yes     |
| Ptrf       | 0.11561   | 0.03712  | -0.07849    | 9.27E-05   | Yes     | Ptrf       | 0.0864981 | 77.5838  | 9.80887128       | 0.0874981    | 77.5848       | 9.79230663       | 0.0164052  | Yes     |
| Pxdc1      | 0.23488   | 0.10708  | -0.1278     | 9.43E-07   | Yes     | Pxdc1      | 1.45321   | 6.96392  | 2.26065643       | 1.45421      | 6.96492       | 2.25987116       | 0.00041963 | Yes     |
| Rab20      | 0.19597   | 0.033423 | -0.162547   | 0.02387993 | Yes     | Rab20      | 3.2246    | 22.8322  | 2.82387776       | 3.2256       | 22.8332       | 2.82349361       | 0.00022079 | Yes     |
| Rab31      | 0.6407    | 0.45808  | -0.18262    | 0.03196657 | Yes     | Rab31      | 1.08931   | 3.30444  | 1.60099122       | 1.09031      | 3.30544       | 1.60010394       | 0.00858283 | Yes     |
| Rab34      | 0.58688   | 0.086311 | -0.500569   | 1.36E-07   | Yes     | Rab34      | 0         | 36.2035  | inf              | 0.001        | 36.2045       | 15.1438814       | 0.00022079 | Yes     |
| Rab3a      | 0.71997   | 0.42783  | -0.29214    | 5.03E-06   | Yes     | Rab3a      | 1.78767   | 16.9788  | 3.24758215       | 1.78867      | 16.9798       | 3.24686032       | 0.00022079 | Yes     |
| Ramp1      | 0.0051151 | 0.1838   | 0.1786849   | 8.97E-06   | Yes     | Ramp1      | 167.278   | 8.95577  | -4.2232864       | 167.279      | 8.95677       | -4.223134        | 0.00022079 | Yes     |
| Rap1gap    | 0.10052   | 0.018302 | -0.082218   | 0.00013482 | Yes     | RAP1GAP    | 0.0460086 | 41.0928  | 9.80276636       | 0.0470086    | 41.0938       | 9.77178031       | 0.00022079 | Yes     |
| Rasgrp2    | 0         | 0.054681 | 0.054681    | 0.00034271 | Yes     | Rasgrp2    | 142.23    | 11.2498  | -3.6602545       | 142.231      | 11.2508       | -3.6601364       | 0.00022079 | Yes     |
| Rbck1      | 0.0016074 | 0.23786  | 0.2362526   | 7.75E-05   | Yes     | Rbck1      | 123.568   | 40.086   | -1.6241348       | 123.569      | 40.087        | -1.6241105       | 0.00022079 | Yes     |
| Rbm20      | 0.14508   | 0.071516 | -0.073564   | 0.03196657 | Yes     | Rbm20      | 0.208508  | 1.82962  | 3.1333694        | 0.209508     | 1.83062       | 3.12725511       | 0.00022079 | Yes     |
| Rbpms2     | 0.45495   | 0.09767  | -0.35728    | 1.48E-10   | Yes     | Rbpms2     | 0.0919822 | 29.418   | 8.32112875       | 0.0929822    | 29.419        | 8.30557793       | 0.00022079 | Yes     |
| Ren        | 0.95752   | 0.81501  | -0.14251    | 0.00161991 | Yes     | Ren        | 0         | 2.06509  | inf              | 0.001        | 2.06609       | 11.0126874       | 0.00022079 | Yes     |
| Rfk        | 0.47187   | 0.23006  | -0.24181    | 3.09E-05   | Yes     | Rfk        | 11.2825   | 78.5043  | 2.7986849        | 11.2835      | 78.5053       | 2.79857541       | 0.00022079 | Yes     |
| RGD1305347 | 0.18281   | 0.049366 | -0.133444   | 8.49E-05   | Yes     | RGD1305347 | 0         | 55.8044  | inf              | 0.001        | 55.8054       | 15.7681171       | 0.00022079 | Yes     |
| RGD1310587 | 0.73204   | 0.1004   | -0.63164    | 1.15E-06   | Yes     | RGD1310587 | 0         | 25.3072  | inf              | 0.001        | 25.3082       | 14.6273173       | 0.00022079 | Yes     |
| RGD1561149 | 0.76043   | 0.06897  | -0.69146    | 6.39E-07   | Yes     | RGD1561149 | 0.0351176 | 23.7784  | 9.40324168       | 0.0361176    | 23.7794       | 9.36279457       | 0.00988585 | Yes     |
| RGD1564053 | 0.070423  | 0.0145   | -0.055923   | 2.07E-09   | Yes     | RGD1564053 | 0         | 0.944376 | inf              | 0.001        | 0.945376      | 9.88474443       | 0.00227055 | Yes     |
| RGD1566239 | 0.75817   | 0.24563  | -0.51254    | 1.95E-08   | Yes     | RGD1566239 | 24.7482   | 52.024   | 1.07185373       | 24.7492      | 52.025        | 1.07182317       | 0.00818469 | Yes     |
| Rgl1       | 0.17297   | 0.039189 | -0.133781   | 2.14E-06   | Yes     | Rgl1       | 0.0593246 | 11.4173  | 7.58837533       | 0.0603246    | 11.4183       | 7.56438571       | 0.00041963 | Yes     |

| RRBS     |          |           |             |            |         | RNAseq   |            |         |                  |              |               |                  |            |         |
|----------|----------|-----------|-------------|------------|---------|----------|------------|---------|------------------|--------------|---------------|------------------|------------|---------|
| gene     | Blood    | Kidney    | methyl.diff | pMWU.fdr   | Match ? | gene     | blood      | kidney  | log2(fold_ratio) | blood+ 0.001 | kidney+ 0.001 | log2(fold_ratio) | q_value    | Match ? |
| Rgl3     | 0.22942  | 0.13745   | -0.09197    | 0.01783979 | Yes     | Rgl3     | 0          | 46.4661 | inf              | 0.001        | 46.4671       | 15.503922        | 0.00022079 | Yes     |
| Rhcg     | 0.072774 | 0.016058  | -0.056716   | 2.22E-07   | Yes     | Rhcg     | 0          | 19.0568 | inf              | 0.001        | 19.0578       | 14.218094        | 0.00022079 | Yes     |
| Rhobtb1  | 0.11817  | 0.0054087 | -0.1127613  | 0.00049864 | Yes     | Rhobtb1  | 3.4051     | 20.3291 | 2.57777727       | 3.4061       | 20.3301       | 2.57742461       | 0.00022079 | Yes     |
| Rilpl1   | 0.21043  | 0.077725  | -0.132705   | 0.00181792 | Yes     | Rilpl1   | 0.360485   | 16.8498 | 5.54664843       | 0.361485     | 16.8508       | 5.54273749       | 0.00041963 | Yes     |
| Rnd2     | 0.31994  | 0.11211   | -0.20783    | 0.00123983 | Yes     | Rnd2     | 0.107872   | 13.8514 | 7.00456755       | 0.108872     | 13.8524       | 6.99135918       | 0.0433217  | Yes     |
| Rnf144b  | 0.30297  | 0.16572   | -0.13725    | 0.03425917 | Yes     | Rnf144b  | 2.23797    | 4.47773 | 1.00057684       | 2.23897      | 4.47873       | 1.0002545        | 0.0138632  | Yes     |
| Rngtt    | 0.020061 | 0.13915   | 0.119089    | 0.01197107 | Yes     | Rngtt    | 11.4927    | 5.2138  | -1.1403106       | 11.4937      | 5.2148        | -1.1401595       | 0.00227055 | Yes     |
| Ror2     | 0.4252   | 0.16484   | -0.26036    | 5.45E-07   | Yes     | Ror2     | 0.0905591  | 2.97878 | 5.03971815       | 0.0915591    | 2.97978       | 5.02435873       | 0.00096553 | Yes     |
| Rsph9    | 0.065533 | 0.014931  | -0.050602   | 0.00065362 | Yes     | Rsph9    | 0.0556484  | 11.8926 | 7.73950823       | 0.0566484    | 11.8936       | 7.71393454       | 0.00845215 | Yes     |
| RT1-Bb   | 0.25659  | 0.039031  | -0.217559   | 7.02E-06   | Yes     | RT1-Bb   | 14.4129    | 57.0289 | 1.98433256       | 14.4139      | 57.0299       | 1.98425776       | 0.00022079 | Yes     |
| S100a1   | 0.11482  | 0.022503  | -0.092317   | 0.00014343 | Yes     | S100a1   | 0.855024   | 531.221 | 9.27913155       | 0.856024     | 531.222       | 9.27744793       | 0.0424075  | Yes     |
| Sall1    | 0.099694 | 0.027374  | -0.07232    | 7.02E-06   | Yes     | Sall1    | 0          | 24.0781 | inf              | 0.001        | 24.0791       | 14.5554938       | 0.00022079 | Yes     |
| Sardh    | 0.16092  | 0.01872   | -0.1422     | 0.00197715 | Yes     | Sardh    | 0.0438623  | 8.90634 | 7.66570741       | 0.0448623    | 8.90734       | 7.63334727       | 0.0323868  | Yes     |
| Sat2     | 0.38533  | 0.1367    | -0.24863    | 0.0250308  | Yes     | Sat2     | 0.0248429  | 106.777 | 12.0694797       | 0.0258429    | 106.778       | 12.0125588       | 0.0324948  | Yes     |
| Satb2    | 0.07673  | 0.026534  | -0.050196   | 0.00636684 | Yes     | Satb2    | 0          | 7.05297 | inf              | 0.001        | 7.05397       | 12.7842197       | 0.00022079 | Yes     |
| Scin     | 0.44422  | 0.20198   | -0.24224    | 0.01169604 | Yes     | Scin     | 0.63614    | 48.3143 | 6.24696214       | 0.63714      | 48.3153       | 6.2447259        | 0.00022079 | Yes     |
| Scnn1a   | 0.64869  | 0.13495   | -0.51374    | 1.81E-12   | Yes     | Scnn1a   | 0.0578293  | 16.0965 | 8.12073067       | 0.0588293    | 16.0975       | 8.09608606       | 0.00870822 | Yes     |
| Sdc4     | 0.10606  | 0.012405  | -0.093655   | 4.67E-09   | Yes     | Sdc4     | 0.177465   | 293.797 | 10.6930694       | 0.178465     | 293.798       | 10.6849677       | 0.00130998 | Yes     |
| Sdhb     | 0.10088  | 0.025548  | -0.075332   | 0.04318305 | Yes     | Sdhb     | 85.7508    | 410.255 | 2.25829888       | 85.7518      | 410.256       | 2.25828557       | 0.00022079 | Yes     |
| Sema3b   | 0.76273  | 0.092364  | -0.670366   | 3.51E-08   | Yes     | Sema3b   | 0.00818902 | 29.9991 | 11.8389408       | 0.00918902   | 30.0001       | 11.6727687       | 0.00022079 | Yes     |
| Serpinb6 | 0.082651 | 0.021958  | -0.060693   | 3.39E-05   | Yes     | Serpinb6 | 2.14893    | 64.8014 | 4.91433459       | 2.14993      | 64.8024       | 4.91368565       | 0.00273202 | Yes     |
| Serping1 | 0.42966  | 0.12992   | -0.29974    | 0.00066856 | Yes     | Serping1 | 0          | 13.8611 | inf              | 0.001        | 13.8621       | 13.7588582       | 0.00022079 | Yes     |
| Serpinh1 | 0.542    | 0.097585  | -0.444415   | 5.49E-05   | Yes     | Serpinh1 | 0          | 82.3532 | inf              | 0.001        | 82.3542       | 16.3295546       | 0.00022079 | Yes     |
| Shh      | 0.11255  | 0.042711  | -0.069839   | 0.00026127 | Yes     | Shh      | 0          | 1.43285 | inf              | 0.001        | 1.43385       | 10.4856784       | 0.0117698  | Yes     |
| Sim2     | 0.11437  | 0.049547  | -0.064823   | 0.00693052 | Yes     | Sim2     | 0.0266771  | 15.8798 | 9.21737518       | 0.0276771    | 15.8808       | 9.16437509       | 0.0438233  | Yes     |
| Sipa1l2  | 0.16956  | 0.048851  | -0.120709   | 0.00021466 | Yes     | Sipa1l2  | 0.0347958  | 3.49376 | 6.64972352       | 0.0357958    | 3.49476       | 6.60925925       | 0.0290073  | Yes     |
| Slc12a3  | 0.7912   | 0.57651   | -0.21469    | 0.00087534 | Yes     | Slc12a3  | 6.75052    | 33.4798 | 2.31022037       | 6.75152      | 33.4808       | 2.31004976       | 0.00147497 | Yes     |
| Slc12a8  | 0.35725  | 0.062788  | -0.294462   | 6.38E-06   | Yes     | Slc12a8  | 0.170973   | 6.29269 | 5.20183645       | 0.171973     | 6.29369       | 5.19365214       | 0.00060553 | Yes     |
| Slc16a11 | 0.2451   | 0.070978  | -0.174122   | 0.02257431 | Yes     | SLC16A11 | 0.207106   | 19.5369 | 6.55968841       | 0.208106     | 19.5379       | 6.55281304       | 0.00022079 | Yes     |
| Slc21a4  | 0.83597  | 0.25223   | -0.58374    | 3.92E-06   | Yes     | Slc21a4  | 0          | 18.1545 | inf              | 0.001        | 18.1555       | 14.148119        | 0.00022079 | Yes     |
| Slc22a6  | 0.86223  | 0.14033   | -0.7219     | 3.70E-09   | Yes     | Slc22a6  | 0          | 137.302 | inf              | 0.001        | 137.303       | 17.0670036       | 0.00022079 | Yes     |
| Slc22a8  | 0.92534  | 0.090027  | -0.835313   | 3.82E-07   | Yes     | Slc22a8  | 0          | 87.7842 | inf              | 0.001        | 87.7852       | 16.4216901       | 0.00022079 | Yes     |
| Slc25a23 | 0.64122  | 0.08728   | -0.55394    | 3.82E-07   | Yes     | Slc25a23 | 15.0905    | 75.1929 | 2.31695584       | 15.0915      | 75.1939       | 2.31687942       | 0.00022079 | Yes     |
| Slc25a4  | 0.52124  | 0.26783   | -0.25341    | 0.01406934 | Yes     | Slc25a4  | 44.2474    | 260.792 | 2.55923503       | 44.2484      | 260.793       | 2.55920795       | 0.00022079 | Yes     |
| Slc26a1  | 0.78162  | 0.051673  | -0.729947   | 9.44E-05   | Yes     | Slc26a1  | 0.192916   | 12.354  | 6.00086162       | 0.193916     | 12.355        | 5.99351936       | 0.00022079 | Yes     |
| Slc27a2  | 0.36688  | 0.050955  | -0.315925   | 6.24E-09   | Yes     | Slc27a2  | 0.0413483  | 44.5749 | 10.0741878       | 0.0423483    | 44.5759       | 10.0397442       | 0.0191747  | Yes     |
| Slc2a8   | 0.14369  | 0.046538  | -0.097152   | 0.00074247 | Yes     | Slc2a8   | 2.50073    | 10.0161 | 2.00189967       | 2.50173      | 10.0171       | 2.0014669        | 0.00130998 | Yes     |
| Slc30a2  | 0.073307 | 0.010983  | -0.062324   | 2.47E-05   | Yes     | Slc30a2  | 0.0659448  | 1.83045 | 4.79479565       | 0.0669448    | 1.83145       | 4.77387051       | 0.0230222  | Yes     |
| Slc34a2  | 0.076116 | 0.017981  | -0.058135   | 6.64E-09   | Yes     | Slc34a2  | 0          | 79.4027 | inf              | 0.001        | 79.4037       | 16.2769186       | 0.00022079 | Yes     |
| Slc3a1   | 0.99064  | 0.21761   | -0.77303    | 3.82E-07   | Yes     | Slc3a1   | 0.203834   | 215.02  | 10.0428604       | 0.204834     | 215.021       | 10.0358066       | 0.00565535 | Yes     |
| Slc6a6   | 0.71977  | 0.11186   | -0.60791    | 7.02E-06   | Yes     | Slc6a6   | 18.1104    | 72.8798 | 2.00870059       | 18.1114      | 72.8808       | 2.00864073       | 0.00022079 | Yes     |
| Slc7a5   | 0        | 0.071152  | 0.071152    | 4.32E-06   | Yes     | Slc7a5   | 8.26471    | 3.33727 | -1.3082958       | 8.26571      | 3.33827       | -1.3080381       | 0.0338019  | Yes     |



| RRBS       |           |          |             |             |         | RNAseq     |           |          |                  |              |               |                  |            |         |
|------------|-----------|----------|-------------|-------------|---------|------------|-----------|----------|------------------|--------------|---------------|------------------|------------|---------|
| gene       | Blood     | Kidney   | methyl.diff | pMWU.fdr    | Match ? | gene       | blood     | kidney   | log2(fold_ratio) | blood+ 0.001 | kidney+ 0.001 | log2(fold_ratio) | q_value    | Match ? |
| Slc9a3     | 0.086166  | 0.017098 | -0.069068   | 9.27E-05    | Yes     | Slc9a3     | 0.0207932 | 24.5618  | 10.2060888       | 0.0217932    | 24.5628       | 10.1383813       | 0.00605729 | Yes     |
| Slco2a1    | 0.084114  | 0.0255   | -0.058614   | 0.00113933  | Yes     | Slco2a1    | 0         | 23.4902  | inf              | 0.001        | 23.4912       | 14.5198328       | 0.00605729 | Yes     |
| Smim5      | 0.25989   | 0.14423  | -0.11566    | 0.04223487  | Yes     | SMIM5      | 0.370756  | 15.4499  | 5.38098365       | 0.371756     | 15.4509       | 5.37719104       | 0.00022079 | Yes     |
| Smo        | 0.092856  | 0.042125 | -0.050731   | 0.02144384  | Yes     | Smo        | 0         | 4.78635  | inf              | 0.001        | 4.78735       | 12.2250116       | 0.00022079 | Yes     |
| Smoc2      | 0.17824   | 0.064371 | -0.113869   | 0.00032353  | Yes     | Smoc2      | 0         | 1.41895  | inf              | 0.001        | 1.41995       | 10.4716244       | 0.00022079 | Yes     |
| Snx10      | 0         | 0.076175 | 0.076175    | 4.45E-05    | Yes     | Snx10      | 7.30956   | 2.67694  | -1.4491998       | 7.31056      | 2.67794       | -1.4488583       | 0.00451708 | Yes     |
| Snx33      | 0.24342   | 0.033216 | -0.210204   | 1.81E-12    | Yes     | Snx33      | 1.78756   | 13.6605  | 2.93394672       | 1.78856      | 13.6615       | 2.93324548       | 0.00022079 | Yes     |
| Sox11      | 0.10603   | 0.020603 | -0.085427   | 7.52E-12    | Yes     | Sox11      | 0         | 3.62915  | inf              | 0.001        | 3.63015       | 11.8258134       | 0.00022079 | Yes     |
| Sox13      | 0.075411  | 0.018604 | -0.056807   | 0.00113933  | Yes     | Sox13      | 0.0838865 | 8.56265  | 6.67347489       | 0.0848865    | 8.56365       | 6.65654689       | 0.00348745 | Yes     |
| Sp5        | 0.10652   | 0.025891 | -0.080629   | 2.90E-07    | Yes     | Sp5        | 0         | 3.07265  | inf              | 0.001        | 3.07365       | 11.5857372       | 0.00022079 | Yes     |
| Sparcl1    | 0.50284   | 0.18237  | -0.32047    | 0.00042212  | Yes     | Sparcl1    | 0         | 3.09222  | inf              | 0.001        | 3.09322       | 11.5948937       | 0.00022079 | Yes     |
| Spint1     | 0.29546   | 0.071766 | -0.223694   | 1.15E-05    | Yes     | Spint1     | 0.57069   | 35.9962  | 5.97899352       | 0.57169      | 35.9972       | 5.97650783       | 0.00022079 | Yes     |
| Spock2     | 0.41065   | 0.12066  | -0.28999    | 2.40E-06    | Yes     | Spock2     | 0.679402  | 4.64755  | 2.77413302       | 0.680402     | 4.64855       | 2.77232149       | 0.00180113 | Yes     |
| Spry4      | 0.60627   | 0.11143  | -0.49484    | 1.87E-11    | Yes     | Spry4      | 0.111286  | 1.65817  | 3.89724791       | 0.112286     | 1.65917       | 3.88521175       | 0.00392909 | Yes     |
| Spryd4     | 0.20598   | 0.082177 | -0.123803   | 0.003933505 | Yes     | Spryd4     | 5.52743   | 11.8335  | 1.09819609       | 5.52843      | 11.8345       | 1.09805702       | 0.0136242  | Yes     |
| Spsb4      | 0.11521   | 0.021421 | -0.093789   | 7.63E-07    | Yes     | Spsb4      | 0.0326961 | 16.0519  | 8.9394098        | 0.0336961    | 16.0529       | 8.89603661       | 0.0497157  | Yes     |
| Sptbn2     | 0.12202   | 0.02078  | -0.10124    | 7.36E-06    | Yes     | Sptbn2     | 0.0461938 | 2.40157  | 5.70013482       | 0.0471938    | 2.40257       | 5.66983731       | 0.00060553 | Yes     |
| Srsf12     | 0.015208  | 0.076114 | 0.060906    | 0.0001571   | Yes     | Srsf12     | 24.6476   | 4.60896  | -2.418934        | 24.6486      | 4.60996       | -2.4186796       | 0.00022079 | Yes     |
| Ssh3       | 0.24142   | 0.030972 | -0.210448   | 3.19E-07    | Yes     | Ssh3       | 2.14899   | 16.6552  | 2.954242         | 2.14999      | 16.6562       | 2.95365744       | 0.00022079 | Yes     |
| Ssna1      | 0.7474    | 0.47257  | -0.27483    | 0.003933505 | Yes     | Ssna1      | 27.2231   | 77.8089  | 1.51510382       | 27.2241      | 77.8099       | 1.51506937       | 0.00022079 | Yes     |
| St6galnac2 | 0.26043   | 0.10464  | -0.15579    | 0.00135614  | Yes     | St6galnac2 | 0.0765992 | 68.1234  | 9.7966054        | 0.0775992    | 68.1244       | 9.77791412       | 0.00022079 | Yes     |
| Stard10    | 0.36417   | 0.075687 | -0.288483   | 0.0153478   | Yes     | Stard10    | 28.7832   | 180.151  | 2.64590776       | 28.7842      | 180.152       | 2.64586565       | 0.00022079 | Yes     |
| Steap1     | 0.076062  | 0.021076 | -0.054986   | 0.00636684  | Yes     | Steap1     | 0         | 3.17053  | inf              | 0.001        | 3.17153       | 11.6309633       | 0.00022079 | Yes     |
| Stk10      | 2.00E-07  | 0.08536  | 0.0853598   | 0.00595469  | Yes     | Stk10      | 94.6404   | 6.36126  | -3.8950717       | 94.6414      | 6.36226       | -3.8948602       | 0.00022079 | Yes     |
| Stk3       | 0.30325   | 0.10572  | -0.19753    | 1.02E-06    | Yes     | Stk3       | 2.53438   | 10.7611  | 2.0861208        | 2.53538      | 10.7621       | 2.08568572       | 0.00022079 | Yes     |
| Stk32b     | 0.075421  | 0.019777 | -0.055644   | 1.55E-06    | Yes     | Stk32b     | 0         | 6.62496  | inf              | 0.001        | 6.62596       | 12.6939138       | 0.00022079 | Yes     |
| Stox2      | 0.026526  | 0.16876  | 0.142234    | 1.06E-08    | Yes     | Stox2      | 3.09053   | 0.629823 | -2.2948359       | 3.09153      | 0.630823      | -2.2930138       | 0.00022079 | Yes     |
| Stx3       | 0.78668   | 0.38584  | -0.40084    | 9.44E-05    | Yes     | Stx3       | 6.31127   | 12.4885  | 0.98459796       | 6.31227      | 12.4895       | 0.9844849        | 0.0139821  | Yes     |
| Sult2b1    | 0.15789   | 0.076744 | -0.081146   | 7.72E-06    | Yes     | Sult2b1    | 8.17206   | 59.7073  | 2.86913563       | 8.17306      | 59.7083       | 2.86898326       | 0.00975879 | Yes     |
| Susd2      | 0.56294   | 0.091018 | -0.471922   | 3.21E-11    | Yes     | Susd2      | 0.914886  | 14.6893  | 4.00502985       | 0.915886     | 14.6903       | 4.00355201       | 0.00022079 | Yes     |
| Syne4      | 0.82507   | 0.12296  | -0.70211    | 1.81E-12    | Yes     | Syne4      | 0.26648   | 8.63742  | 5.01850128       | 0.26748      | 8.63842       | 5.01326453       | 0.00738919 | Yes     |
| Sypl2      | 0.1984    | 0.044863 | -0.153537   | 5.49E-05    | Yes     | Sypl2      | 0         | 1.05819  | inf              | 0.001        | 1.05919       | 10.0487457       | 0.00022079 | Yes     |
| Syt7       | 0.11832   | 0.036793 | -0.081527   | 1.03E-05    | Yes     | Syt7       | 0         | 1.26845  | inf              | 0.001        | 1.26945       | 10.3099879       | 0.00738919 | Yes     |
| Taok3      | 0.0014266 | 0.27627  | 0.2748434   | 3.82E-07    | Yes     | Taok3      | 16.5011   | 2.22259  | -2.8922485       | 16.5021      | 2.22359       | -2.8916869       | 0.0135008  | Yes     |
| Tbc1d9     | 0.20486   | 0.073936 | -0.130924   | 0.00105615  | Yes     | Tbc1d9     | 0.0383105 | 11.3169  | 8.20652325       | 0.0393105    | 11.3179       | 8.16947587       | 0.00242102 | Yes     |
| Tbx3       | 0.16223   | 0.072715 | -0.089515   | 3.09E-05    | Yes     | Tbx3       | 0         | 1.37409  | inf              | 0.001        | 1.37509       | 10.4253103       | 0.00022079 | Yes     |
| Tctex1d2   | 0.17698   | 0.021335 | -0.155645   | 7.75E-05    | Yes     | Tctex1d2   | 0.295342  | 14.1843  | 5.58576461       | 0.296342     | 14.1853       | 5.58098974       | 0.00791314 | Yes     |
| Tead1      | 0.081236  | 0.018241 | -0.062995   | 5.49E-05    | Yes     | Tead1      | 0.209714  | 17.8693  | 6.41291613       | 0.210714     | 17.8703       | 6.40613387       | 0.00022079 | Yes     |
| Tgfb1      | 0.82594   | 0.68483  | -0.14111    | 0.0002817   | Yes     | Tgfb1      | 0.837003  | 6.81998  | 3.02646281       | 0.838003     | 6.82098       | 3.02495172       | 0.00060553 | Yes     |
| Tgfbr3     | 0.57486   | 0.35554  | -0.21932    | 0.01406934  | Yes     | Tgfbr3     | 0.246086  | 11.7332  | 5.57529014       | 0.247086     | 11.7342       | 5.56956241       | 0.00022079 | Yes     |
| Timm23     | 0.17147   | 0.027788 | -0.143682   | 1.74E-09    | Yes     | Timm23     | 69.0095   | 113.775  | 0.7213167        | 69.0105      | 113.776       | 0.72130848       | 0.0265154  | Yes     |
| Tk1        | 0.9371    | 0.54899  | -0.38811    | 0.00038311  | Yes     | Tk1        | 1.1441    | 13.0509  | 3.51186424       | 1.1451       | 13.0519       | 3.51071434       | 0.00060553 | Yes     |

| RRBS      |           |          |             |            |         | RNAseq    |           |          |                  |              |               |                  |            |         |
|-----------|-----------|----------|-------------|------------|---------|-----------|-----------|----------|------------------|--------------|---------------|------------------|------------|---------|
| gene      | Blood     | Kidney   | methyl.diff | pMWU.fdr   | Match ? | gene      | blood     | kidney   | log2(fold_ratio) | blood+ 0.001 | kidney+ 0.001 | log2(fold_ratio) | q_value    | Match ? |
| Tle3      | 0.0025966 | 0.087075 | 0.0844784   | 0.00049864 | Yes     | Tle3      | 57.9594   | 15.6355  | -1.8902173       | 57.9604      | 15.6365       | -1.8901499       | 0.00022079 | Yes     |
| Tm4sf1    | 0.93841   | 0.30189  | -0.63652    | 3.82E-07   | Yes     | Tm4sf1    | 0         | 26.433   | inf              | 0.001        | 26.434        | 14.6901071       | 0.00022079 | Yes     |
| Tmc8      | 1.07E-07  | 0.259    | 0.25899989  | 1.06E-08   | Yes     | Tmc8      | 79.353    | 5.08591  | -3.9637069       | 79.354       | 5.08691       | -3.9634415       | 0.00022079 | Yes     |
| Tmem107   | 0.15758   | 0.061638 | -0.095942   | 0.0250308  | Yes     | Tmem107   | 0.460188  | 11.7064  | 4.66893031       | 0.461188     | 11.7074       | 4.66592193       | 0.00257873 | Yes     |
| Tmem125   | 0.9626    | 0.82424  | -0.13836    | 7.99E-06   | Yes     | Tmem125   | 0         | 3.32089  | inf              | 0.001        | 3.32189       | 11.6977886       | 0.00022079 | Yes     |
| Tmem171   | 0.68746   | 0.14159  | -0.54587    | 3.82E-07   | Yes     | Tmem171   | 0         | 67.7372  | inf              | 0.001        | 67.7382       | 16.047682        | 0.00022079 | Yes     |
| Tmem184a  | 0.68108   | 0.35609  | -0.32499    | 0.00074247 | Yes     | Tmem184a  | 0         | 15.8682  | inf              | 0.001        | 15.8692       | 13.9539418       | 0.00022079 | Yes     |
| Tmem231   | 0.20667   | 0.056713 | -0.149957   | 1.99E-10   | Yes     | Tmem231   | 0.100835  | 4.10236  | 5.34638571       | 0.101835     | 4.10336       | 5.33250034       | 0.00041963 | Yes     |
| Tmem252   | 0.11779   | 0.018805 | -0.098985   | 3.93E-05   | Yes     | Tmem252   | 0.0674144 | 26.3368  | 8.60980756       | 0.0684144    | 26.3378       | 8.58861911       | 0.0309567  | Yes     |
| Tmem30b   | 0.36842   | 0.16277  | -0.20565    | 3.67E-05   | Yes     | Tmem30b   | 0         | 11.0684  | inf              | 0.001        | 11.0694       | 13.4342894       | 0.00022079 | Yes     |
| Tmem69    | 0.30499   | 0.082064 | -0.222926   | 0.00334577 | Yes     | Tmem69    | 3.44122   | 8.4277   | 1.29221883       | 3.44222      | 8.4287        | 1.29197083       | 0.00778313 | Yes     |
| Tmem72    | 0.89812   | 0.44412  | -0.454      | 5.45E-07   | Yes     | Tmem72    | 0         | 55.8096  | inf              | 0.001        | 55.8106       | 15.7682515       | 0.00022079 | Yes     |
| Tmod4     | 0.84304   | 0.64648  | -0.19656    | 5.36E-07   | Yes     | Tmod4     | 0.20661   | 5.41461  | 4.71187544       | 0.20761      | 5.41561       | 4.70517601       | 0.0330481  | Yes     |
| Tmprss2   | 0.14533   | 0.040287 | -0.105043   | 0.00364323 | Yes     | Tmprss2   | 0.0820698 | 54.9091  | 9.38597811       | 0.0830698    | 54.9101       | 9.36853174       | 0.00022079 | Yes     |
| Tnfaip2   | 0.094241  | 0.038381 | -0.05586    | 0.00934082 | Yes     | Tnfaip2   | 0.0835457 | 21.0987  | 7.98037282       | 0.0845457    | 21.0997       | 7.96327539       | 0.00022079 | Yes     |
| Tnfrsf12a | 0.11989   | 0.022074 | -0.097816   | 0.00105615 | Yes     | Tnfrsf12a | 1.08571   | 18.1672  | 4.06462538       | 1.08671      | 18.1682       | 4.06337659       | 0.0367675  | Yes     |
| Tnfrsf9   | 0.81497   | 0.3343   | -0.48067    | 1.76E-07   | Yes     | Tnfrsf9   | 2.45535   | 13.4974  | 2.45868093       | 2.45635      | 13.4984       | 2.45820036       | 0.00022079 | Yes     |
| Tnfsf12   | 0.59647   | 0.158    | -0.43847    | 0.00010392 | Yes     | Tnfsf12   | 0.523109  | 18.8012  | 5.16756934       | 0.524109     | 18.8022       | 5.16489078       | 0.0167554  | Yes     |
| Tnfsf8    | 0.0056226 | 0.1808   | 0.1751774   | 1.15E-05   | Yes     | Tnfsf8    | 15.2111   | 0.277472 | -5.7766385       | 15.2121      | 0.278472      | -5.7715432       | 0.0460899  | Yes     |
| Tonsl     | 0.31243   | 0.16984  | -0.14259    | 0.03531391 | Yes     | Tonsl     | 48.3894   | 115.253  | 1.25204135       | 48.3904      | 115.254       | 1.25202405       | 0.00041963 | Yes     |
| Tpbg      | 0.14522   | 0.066616 | -0.078604   | 0.00799193 | Yes     | Tpbg      | 0.406782  | 9.12383  | 4.48731182       | 0.407782     | 9.12483       | 4.48392768       | 0.00227055 | Yes     |
| Tpd52     | 0.90227   | 0.2081   | -0.69417    | 3.82E-07   | Yes     | Tpd52     | 0.374659  | 66.2565  | 7.46634008       | 0.375659     | 66.2575       | 7.46251629       | 0.00022079 | Yes     |
| Tpd52l1   | 0.06603   | 0.010876 | -0.055154   | 0.00181792 | Yes     | Tpd52l1   | 0.131542  | 9.00385  | 6.09694661       | 0.132542     | 9.00485       | 6.08618074       | 0.00392909 | Yes     |
| Tpm2      | 0.63374   | 0.27443  | -0.35931    | 3.45E-06   | Yes     | Tpm2      | 0.0473198 | 19.0216  | 8.65097891       | 0.0483198    | 19.0226       | 8.62088425       | 0.0252737  | Yes     |
| Trak2     | 0.39369   | 0.14329  | -0.2504     | 8.88E-12   | Yes     | Trak2     | 17.4725   | 37.0744  | 1.0853373        | 17.4735      | 37.0754       | 1.08529364       | 0.0128843  | Yes     |
| Trappc6a  | 0.81795   | 0.18694  | -0.63101    | 1.81E-12   | Yes     | Trappc6a  | 42.7375   | 136.54   | 1.67574923       | 42.7385      | 136.541       | 1.67572604       | 0.00022079 | Yes     |
| Trim63    | 0.85114   | 0.2473   | -0.60384    | 1.81E-12   | Yes     | Trim63    | 0         | 5.9466   | inf              | 0.001        | 5.9476        | 12.5380919       | 0.00022079 | Yes     |
| Tsku      | 0.30285   | 0.06375  | -0.2391     | 4.32E-06   | Yes     | Tsku      | 0.103766  | 4.41607  | 5.41135733       | 0.104766     | 4.41707       | 5.3978472        | 0.00022079 | Yes     |
| Tspan33   | 0.1461    | 0.016772 | -0.129328   | 5.46E-08   | Yes     | Tspan33   | 0.181297  | 32.711   | 7.495277         | 0.182297     | 32.712        | 7.48738534       | 0.00273202 | Yes     |
| Tspan9    | 0.1176    | 0.058098 | -0.059502   | 0.00063341 | Yes     | Tspan9    | 0.0800732 | 13.9009  | 7.43964311       | 0.0810732    | 13.9019       | 7.42184127       | 0.00022079 | Yes     |
| Ttc21b    | 0.062651  | 0.012254 | -0.050397   | 0.0006129  | Yes     | Ttc21b    | 0         | 17.5027  | inf              | 0.001        | 17.5037       | 14.0953723       | 0.00022079 | Yes     |
| Ttc30a1   | 0.25257   | 0.15174  | -0.10083    | 0.00055683 | Yes     | Ttc30a1   | 1.65399   | 4.76025  | 1.52508683       | 1.65499      | 4.76125       | 1.52451788       | 0.0156977  | Yes     |
| Ttc39b    | 0.1074    | 0.015401 | -0.091999   | 8.97E-06   | Yes     | Ttc39b    | 0.181283  | 4.41396  | 4.60575801       | 0.182283     | 4.41496       | 4.59814844       | 0.00096553 | Yes     |
| Ttc8      | 0.27587   | 0.085059 | -0.190811   | 5.49E-05   | Yes     | Ttc8      | 0         | 6.89397  | inf              | 0.001        | 6.89497       | 12.7513286       | 0.00022079 | Yes     |
| Tuba1c    | 0.43352   | 0.12951  | -0.30401    | 2.28E-05   | Yes     | Tuba1c    | 119.705   | 339.551  | 1.50414487       | 119.706      | 339.552       | 1.50413706       | 0.00022079 | Yes     |
| Tuba4a    | 0.80626   | 0.28881  | -0.51745    | 3.82E-07   | Yes     | Tuba4a    | 34.9831   | 158.119  | 2.17628069       | 34.9841      | 158.12        | 2.17624858       | 0.00022079 | Yes     |
| Twf1      | 0.23495   | 0.12899  | -0.10596    | 0.00636684 | Yes     | Twf1      | 29.774    | 64.8084  | 1.12212776       | 29.775       | 64.8094       | 1.12210157       | 0.00257873 | Yes     |
| Twist1    | 0.164     | 0.036854 | -0.127146   | 0.00055683 | Yes     | Twist1    | 0         | 9.58508  | inf              | 0.001        | 9.58608       | 13.2267253       | 0.00022079 | Yes     |
| Tysnd1    | 0.44898   | 0.1015   | -0.34748    | 3.07E-06   | Yes     | Tysnd1    | 6.55825   | 14.4376  | 1.13844814       | 6.55925      | 14.4386       | 1.13832809       | 0.0103977  | Yes     |
| Uap1      | 0.16115   | 0.062079 | -0.099071   | 0.03531391 | Yes     | Uap1      | 4.01017   | 9.26815  | 1.208618         | 4.01117      | 9.26915       | 1.20841394       | 0.00632443 | Yes     |
| Ubash3a   | 0.0010638 | 0.14961  | 0.1485462   | 5.03E-06   | Yes     | Ubash3a   | 21.7852   | 1.11287  | -4.2909914       | 21.7862      | 1.11387       | -4.2897618       | 0.00041963 | Yes     |
| Ugt8      | 0.16311   | 0.053638 | -0.109472   | 0.00595469 | Yes     | Ugt8      | 0         | 34.6335  | inf              | 0.001        | 34.6345       | 15.0799222       | 0.00022079 | Yes     |

| RRBS     |            |           |             |            |         | RNAseq         |           |          |                  |              |               |                  |            |         |
|----------|------------|-----------|-------------|------------|---------|----------------|-----------|----------|------------------|--------------|---------------|------------------|------------|---------|
| gene     | Blood      | Kidney    | methyl.diff | pMWU.fdr   | Match ? | gene           | blood     | kidney   | log2(fold_ratio) | blood+ 0.001 | kidney+ 0.001 | log2(fold_ratio) | q_value    | Match ? |
| Uqcr11   | 0.071945   | 0.018853  | -0.053092   | 0.01660198 | Yes     | Uqcr11         | 102.228   | 835.58   | 3.03098756       | 102.229      | 835.581       | 3.03097517       | 0.00022079 | Yes     |
| Ush1c    | 0.32624    | 0.050301  | -0.275939   | 3.51E-08   | Yes     | Ush1c          | 0         | 73.3245  | inf              | 0.001        | 73.3255       | 16.1620274       | 0.00022079 | Yes     |
| Usp44    | 0.00050302 | 0.07629   | 0.07578698  | 7.02E-06   | Yes     | Usp44          | 22.9195   | 0.527655 | -5.4408368       | 22.9205      | 0.528655      | -5.4381682       | 0.00022079 | Yes     |
| Vav2     | 0.68878    | 0.11921   | -0.56957    | 2.51E-09   | Yes     | Vav2           | 1.37471   | 12.3928  | 3.17230297       | 1.37571      | 12.3938       | 3.17137031       | 0.00022079 | Yes     |
| Vcl      | 0.093498   | 0.025321  | -0.068177   | 0.00466526 | Yes     | Vcl            | 1.46655   | 10.0476  | 2.77635277       | 1.46755      | 10.0486       | 2.77551295       | 0.00022079 | Yes     |
| Vps37d   | 0.9204     | 0.053489  | -0.866911   | 1.81E-12   | Yes     | Vps37d         | 0.287359  | 16.0657  | 5.8049858        | 0.288359     | 16.0667       | 5.80006378       | 0.00022079 | Yes     |
| Vstm2b   | 0.22529    | 0.047884  | -0.177406   | 6.77E-07   | Yes     | Vstm2b         | 0         | 2.96821  | inf              | 0.001        | 2.96921       | 11.5358634       | 0.00022079 | Yes     |
| Wfdc2    | 0.62012    | 0.25883   | -0.36129    | 1.52E-07   | Yes     | Wfdc2          | 1.41158   | 320.018  | 7.82469835       | 1.41258      | 320.019       | 7.82368118       | 0.00022079 | Yes     |
| Wscd1    | 0.74724    | 0.44671   | -0.30053    | 0.00036477 | Yes     | Wscd1          | 0.0930121 | 6.70533  | 6.17174612       | 0.0940121    | 6.70633       | 6.15653321       | 0.00022079 | Yes     |
| Ybx2     | 0.54188    | 0.14539   | -0.39649    | 1.57E-08   | Yes     | Ybx2           | 0.621164  | 4.7213   | 2.92613803       | 0.622164     | 4.7223        | 2.92412287       | 0.00022079 | Yes     |
| Zbtb10   | 0.15315    | 0.032811  | -0.120339   | 0.00135614 | Yes     | Zbtb10         | 0.606014  | 2.3754   | 1.97074745       | 0.607014     | 2.3764        | 1.968976         | 0.014108   | Yes     |
| Zbtb16   | 0.058159   | 0.0059028 | -0.0522562  | 0.02965439 | Yes     | Zbtb16         | 0.10846   | 1.03401  | 3.25301516       | 0.10946      | 1.03501       | 3.24116904       | 0.0212313  | Yes     |
| Zbtb42   | 0.069389   | 0.0059696 | -0.0634194  | 4.99E-05   | Yes     | Zbtb42         | 1.65966   | 5.52963  | 1.73629523       | 1.66066      | 5.53063       | 1.7356871        | 0.00164037 | Yes     |
| Zc3h7b   | 0.61129    | 0.28947   | -0.32182    | 7.01E-05   | Yes     | Zc3h7b         | 14.5698   | 25.9685  | 0.83378161       | 14.5708      | 25.9695       | 0.83373815       | 0.0302413  | Yes     |
| Zdhhc2   | 0.12145    | 0.020411  | -0.101039   | 0.00023579 | Yes     | ZDHC2          | 0.117001  | 5.76022  | 5.62153115       | 0.118001     | 5.76122       | 5.60950336       | 0.010907   | Yes     |
| Zfp358   | 0.54173    | 0.27519   | -0.26654    | 0.00636684 | Yes     | Zfp358         | 7.01881   | 13.5019  | 0.94386408       | 7.01981      | 13.5029       | 0.9437654        | 0.0251614  | Yes     |
| Zfp46    | 0.87994    | 0.76734   | -0.1126     | 0.00364323 | Yes     | Zfp46          | 1.93323   | 3.67524  | 0.92682518       | 1.93423      | 3.67624       | 0.9264716        | 0.0479925  | Yes     |
| Zfp575   | 0.87104    | 0.72937   | -0.14167    | 0.00553374 | Yes     | Zfp575         | 0.895811  | 3.46489  | 1.95154326       | 0.896811     | 3.46589       | 1.95034999       | 0.0145886  | Yes     |
| Zfp652   | 0.028188   | 0.30745   | 0.279262    | 3.99E-07   | Yes     | Zfp652         | 29.2592   | 12.3916  | -1.2395278       | 29.2602      | 12.3926       | -1.2394607       | 0.00180113 | Yes     |
| Zfp703   | 0.25937    | 0.053682  | -0.205688   | 2.88E-05   | Yes     | Zfp703         | 0.986973  | 5.66746  | 2.52161978       | 0.987973     | 5.66846       | 2.52041332       | 0.00022079 | Yes     |
| 42795    | 0.36314    | 0.072213  | -0.290927   | 3.92E-06   | No      | 42801          | 85.7503   | 15.9008  | -2.4310424       | 85.7513      | 15.9018       | -2.4309685       | 0.00022079 | No      |
| Aanat    | 0.47346    | 0.18768   | -0.28578    | 0.01000157 | No      | 42802          | 2.15201   | 30.519   | 3.825951         | 2.15301      | 30.52         | 3.82532804       | 0.00022079 | No      |
| Aatk     | 0.52016    | 0.17295   | -0.34721    | 2.96E-09   | No      | 42979          | 394.175   | 51.9356  | -2.9240406       | 394.176      | 51.9366       | -2.9240165       | 0.00022079 | No      |
| Abca13   | 0.81242    | 0.43861   | -0.37381    | 0.00026127 | No      | 42982          | 0.193712  | 145.893  | 9.55678162       | 0.194712     | 145.894       | 9.54936304       | 0.0102697  | No      |
| Abcc9    | 0.10161    | 0.039019  | -0.062591   | 0.00276056 | No      | 42983          | 0.161777  | 1.611    | 3.31587808       | 0.162777     | 1.612         | 3.30788297       | 0.00304332 | No      |
| Abcg4    | 0.16959    | 0.045579  | -0.124011   | 0.00019244 | No      | 42984          | 167.374   | 3.63928  | -5.5232786       | 167.375      | 3.64028       | -5.5228908       | 0.00022079 | No      |
| Abhd15   | 0.052406   | 0.23688   | 0.184474    | 7.06E-09   | No      | 42985          | 105.448   | 38.2465  | -1.4631321       | 105.449      | 38.2475       | -1.4631081       | 0.00022079 | No      |
| Abhd16b  | 0.97243    | 0.62513   | -0.3473     | 4.14E-09   | No      | 42986          | 0.0774052 | 23.9638  | 8.27421049       | 0.0784052    | 23.9648       | 8.25575184       | 0.00022079 | No      |
| Acot5    | 0.18845    | 0.083929  | -0.104521   | 0.0153478  | No      | 42988          | 0.0646229 | 7.31383  | 6.82243779       | 0.0656229    | 7.31483       | 6.80048117       | 0.00022079 | No      |
| Acta1    | 0.19838    | 0.10319   | -0.09519    | 0.00046099 | No      | 0610030E20 Rik | 18.272    | 6.65159  | -1.4578634       | 18.273       | 6.65259       | -1.4577255       | 0.00685176 | No      |
| Acta2    | 0.8786     | 0.17244   | -0.70616    | 3.82E-07   | No      | 1100001G20 Rik | 0         | 1.61995  | inf              | 0.001        | 1.62095       | 10.6626239       | 0.00096553 | No      |
| Actn3    | 0.56938    | 0.30759   | -0.26179    | 0.00161991 | No      | 1110034G24 Rik | 17.0763   | 2.57089  | -2.7316556       | 17.0773      | 2.57189       | -2.7311791       | 0.00022079 | No      |
| Actr3b   | 0.75395    | 0.42984   | -0.32411    | 0.00088439 | No      | 1110058L19 Rik | 18.4485   | 65.8151  | 1.8349151        | 18.4495      | 65.8161       | 1.83485882       | 0.012511   | No      |
| Adam23   | 0.069782   | 0.0095833 | -0.0601987  | 0.00105615 | No      | 1190007I07 Rik | 18.2581   | 46.0148  | 1.33356132       | 18.2591      | 46.0158       | 1.33351365       | 0.030773   | No      |
| Adamts14 | 0.62498    | 0.31349   | -0.31149    | 4.71E-06   | No      | 1500011K16 Rik | 61.7392   | 136.493  | 1.14456827       | 61.7402      | 136.494       | 1.14455547       | 0.00685176 | No      |

| RRBS      |           |          |             |            |         | RNAseq        |           |          |                  |              |               |                  |            |         |
|-----------|-----------|----------|-------------|------------|---------|---------------|-----------|----------|------------------|--------------|---------------|------------------|------------|---------|
| gene      | Blood     | Kidney   | methyl.diff | pMWU.fdr   | Match ? | gene          | blood     | kidney   | log2(fold_ratio) | blood+ 0.001 | kidney+ 0.001 | log2(fold_ratio) | q_value    | Match ? |
| Adamts18  | 0.079793  | 0.023746 | -0.056047   | 0.00131307 | No      | 1600014C10Rik | 16.4762   | 8.04471  | -1.0342712       | 16.4772      | 8.04571       | -1.0341795       | 0.00422081 | No      |
| Adamts19  | 0.08435   | 0.028291 | -0.056059   | 0.00074247 | No      | 1700021F05Rik | 8.1051    | 26.8281  | 1.72684299       | 8.1061       | 26.8291       | 1.72671878       | 0.00022079 | No      |
| Adamts4   | 0.56999   | 0.15459  | -0.4154     | 8.79E-12   | No      | 1700112E06Rik | 0.249057  | 14.7222  | 5.88537351       | 0.250057     | 14.7232       | 5.87969046       | 0.0421044  | No      |
| Adamtsl4  | 0.30205   | 0.048477 | -0.253573   | 6.75E-05   | No      | 1810037117Rik | 31.0567   | 113.503  | 1.86975398       | 31.0577      | 113.504       | 1.86972024       | 0.00022079 | No      |
| Adamtsl5  | 0.18591   | 0.094582 | -0.091328   | 0.02965439 | No      | 1810043H04Rik | 52.7154   | 177.357  | 1.75035988       | 52.7164      | 177.358       | 1.75034065       | 0.00962607 | No      |
| Adcy2     | 0.068599  | 0.01728  | -0.051319   | 1.47E-06   | No      | 2210018M11Rik | 11.7057   | 3.54584  | -1.7230119       | 11.7067      | 3.54684       | -1.7227283       | 0.00022079 | No      |
| Adcyap1r1 | 0.089234  | 0.028934 | -0.0603     | 0.00010392 | No      | 2310030G06Rik | 0.681082  | 29.3492  | 5.42934886       | 0.682082     | 29.3502       | 5.42728133       | 0.00078858 | No      |
| Adgre5    | 0.032227  | 0.42074  | 0.388513    | 3.82E-07   | No      | 2510049J12Rik | 0         | 16.8193  | inf              | 0.001        | 16.8203       | 14.0379158       | 0.00618779 | No      |
| Adgrl4    | 0.23407   | 0.079358 | -0.154712   | 2.87E-06   | No      | 2610008E11Rik | 9.20026   | 3.94102  | -1.2231056       | 9.20126      | 3.94202       | -1.2228963       | 0.00273202 | No      |
| Adm2      | 0.75549   | 0.14778  | -0.60771    | 0.00049864 | No      | 2810408A11Rik | 2.31962   | 11.7207  | 2.33709835       | 2.32062      | 11.7217       | 2.33659961       | 0.00078858 | No      |
| Ado       | 0.43956   | 0.17295  | -0.26661    | 0.00066856 | No      | 3110057O12Rik | 19.519    | 3.1859   | -2.6151063       | 19.52        | 3.1869        | -2.6147274       | 0.00858283 | No      |
| Adprhl1   | 0.82565   | 0.54026  | -0.28539    | 1.41E-05   | No      | 4930538K18Rik | 0.115489  | 2.43009  | 4.3951824        | 0.116489     | 2.43109       | 4.38333767       | 0.0201925  | No      |
| Adprhl2   | 0.86367   | 0.74371  | -0.11996    | 0.00095268 | No      | 4933426M11Rik | 37.7705   | 17.0772  | -1.1451884       | 37.7715      | 17.0782       | -1.1451422       | 0.0265154  | No      |
| Adra1a    | 0.079613  | 0.233    | 0.153387    | 1.47E-06   | No      | 5830418K08Rik | 8.00558   | 0.81029  | -3.3044957       | 8.00658      | 0.81129       | -3.3028965       | 0.00765035 | No      |
| Adra1b    | 0.11258   | 0.029809 | -0.082771   | 0.00393505 | No      | 5830473C10Rik | 0.271386  | 28.991   | 6.73911499       | 0.272386     | 28.992        | 6.7338585        | 0.00022079 | No      |
| Adra1d    | 0.18104   | 0.093987 | -0.087053   | 0.0021362  | No      | 5S_rRNA       | 0         | 875.907  | inf              | 0.001        | 875.908       | 19.7404198       | 0.00022079 | No      |
| Adra2c    | 0.227     | 0.059433 | -0.167567   | 4.87E-08   | No      | 9230110C19Rik | 0         | 4.07619  | inf              | 0.001        | 4.07719       | 11.9933595       | 0.00022079 | No      |
| Adrb1     | 0.12097   | 0.033771 | -0.087199   | 1.76E-08   | No      | A1cf          | 0         | 1.41296  | inf              | 0.001        | 1.41396       | 10.4655256       | 0.0205337  | No      |
| Agap3     | 0.0061665 | 0.085354 | 0.0791875   | 4.99E-05   | No      | A330021E22Rik | 0         | 6.08125  | inf              | 0.001        | 6.08225       | 12.5703894       | 0.00022079 | No      |
| Agpat3    | 0.21684   | 0.34138  | 0.12454     | 0.01155321 | No      | A3galt2       | 0.101257  | 11.2603  | 6.79707981       | 0.102257     | 11.2613       | 6.78302996       | 0.00422081 | No      |
| Agxt      | 0.82777   | 0.41257  | -0.4152     | 1.61E-05   | No      | A430105I19Rik | 0.0287288 | 13.9305  | 8.92153359       | 0.0297288    | 13.9315       | 8.87227366       | 0.0229153  | No      |
| Ajap1     | 0.26518   | 0.53452  | 0.26934     | 7.75E-05   | No      | A4galt        | 0         | 4.53483  | inf              | 0.001        | 4.53583       | 12.1471509       | 0.00022079 | No      |
| Ajuba     | 0.15185   | 0.051997 | -0.099853   | 3.93E-05   | No      | A830010M20Rik | 3.36746   | 0.886516 | -1.9254422       | 3.36846      | 0.887516      | -1.9242441       | 0.00022079 | No      |

| RRBS     |           |          |             |            |         | RNAseq  |           |          |                  |              |               |                  |            |         |
|----------|-----------|----------|-------------|------------|---------|---------|-----------|----------|------------------|--------------|---------------|------------------|------------|---------|
| gene     | Blood     | Kidney   | methyl.diff | pMWU.fdr   | Match ? | gene    | blood     | kidney   | log2(fold_ratio) | blood+ 0.001 | kidney+ 0.001 | log2(fold_ratio) | q_value    | Match ? |
| Akap17a  | 0.82243   | 0.53931  | -0.28312    | 0.000202   | No      | Aacs    | 16.7634   | 6.30303  | -1.4111974       | 16.7644      | 6.30403       | -1.4110545       | 0.00022079 | No      |
| Aldh1a2  | 0.07856   | 0.015014 | -0.063546   | 0.0074695  | No      | Aaed1   | 1.29928   | 34.3183  | 4.72319381       | 1.30028      | 34.3193       | 4.7221259        | 0.00022079 | No      |
| Alg3     | 0.82386   | 0.53206  | -0.2918     | 3.67E-05   | No      | Aamdc   | 7.59542   | 34.3286  | 2.17620937       | 7.59642      | 34.3296       | 2.17606147       | 0.00130998 | No      |
| Alox12b  | 0.079933  | 0.028813 | -0.05112    | 0.00453998 | No      | AAR2    | 5.39866   | 10.3769  | 0.94270225       | 5.39966      | 10.3779       | 0.94257407       | 0.0122712  | No      |
| Alox12e  | 0.69865   | 0.40941  | -0.28924    | 0.00019244 | No      | Aars    | 19.587    | 58.6476  | 1.58217562       | 19.588       | 58.6486       | 1.58212657       | 0.00147497 | No      |
| Alox15b  | 0.25889   | 0.10136  | -0.15753    | 0.00466526 | No      | Aass    | 0         | 42.9295  | inf              | 0.001        | 42.9305       | 15.3897154       | 0.00022079 | No      |
| Alox5    | 0.12785   | 0.055388 | -0.072462   | 6.38E-06   | No      | Abat    | 0.675259  | 12.035   | 4.15565137       | 0.676259     | 12.036        | 4.15363631       | 0.00022079 | No      |
| Alpi     | 0.69079   | 0.42599  | -0.2648     | 0.00466526 | No      | Abca1   | 0.0923805 | 0.954999 | 3.36983896       | 0.0933805    | 0.955999      | 3.35581589       | 0.00618779 | No      |
| Alpk3    | 0.77399   | 0.58904  | -0.18495    | 0.00097226 | No      | Abca5   | 0.0335863 | 0.976439 | 4.86158514       | 0.0345863    | 0.977439      | 4.82073408       | 0.0154422  | No      |
| Alx4     | 0.11633   | 0.045143 | -0.071187   | 0.00095268 | No      | Abcb10  | 4.3097    | 13.9238  | 1.69189365       | 4.3107       | 13.9248       | 1.69166254       | 0.00022079 | No      |
| Amh      | 0.90092   | 0.79779  | -0.10313    | 4.61E-08   | No      | Abcb6   | 1.80509   | 24.9067  | 3.78639121       | 1.80609      | 24.9077       | 3.78565012       | 0.00022079 | No      |
| Amigo3   | 0.85771   | 0.74398  | -0.11373    | 0.00651881 | No      | Abcc1   | 12.4524   | 3.66918  | -1.7628942       | 12.4534      | 3.67018       | -1.762617        | 0.00113657 | No      |
| Amz2     | 0.79173   | 0.71543  | -0.0763     | 0.04438607 | No      | Abcc3   | 0.0499622 | 1.2814   | 4.68074008       | 0.0509622    | 1.2824        | 4.65327496       | 0.0420093  | No      |
| Angpt4   | 0.78327   | 0.51623  | -0.26704    | 0.00244273 | No      | ABCC4   | 4.32737   | 23.2429  | 2.4252277        | 4.32837      | 23.2439       | 2.42495642       | 0.00022079 | No      |
| Ank1     | 0.08439   | 0.032259 | -0.052131   | 5.03E-06   | No      | Abcc6   | 0         | 5.90564  | inf              | 0.001        | 5.90664       | 12.528122        | 0.00022079 | No      |
| Ankef1   | 0.57964   | 0.22517  | -0.35447    | 4.45E-05   | No      | Abcd3   | 14.0703   | 29.5123  | 1.06866327       | 14.0713      | 29.5133       | 1.06860962       | 0.00242102 | No      |
| Ankrd23  | 0.8075    | 0.11328  | -0.69422    | 2.74E-06   | No      | Abce1   | 31.9536   | 16.7757  | -0.9296055       | 31.9546      | 16.7767       | -0.9295647       | 0.00645389 | No      |
| Ankrd34a | 0.16042   | 0.077819 | -0.082601   | 0.00167254 | No      | Abcg1   | 31.4613   | 9.36034  | -1.7489454       | 31.4623      | 9.36134       | -1.7488372       | 0.00022079 | No      |
| Ankrd34b | 0.086381  | 0.021556 | -0.064825   | 0.00095268 | No      | Abcg2   | 0.0802538 | 12.8254  | 7.3202184        | 0.0812538    | 12.8264       | 7.3024653        | 0.00022079 | No      |
| Ankrd42  | 0.092166  | 0.023543 | -0.068623   | 0.02144384 | No      | Abhd10  | 15.8809   | 6.76684  | -1.2307385       | 15.8819      | 6.76784       | -1.2306161       | 0.0305572  | No      |
| Ankrd65  | 0.83181   | 0.094231 | -0.737579   | 1.81E-12   | No      | Abhd12  | 11.2982   | 25.5489  | 1.17716823       | 11.2992      | 25.5499       | 1.17709701       | 0.00164037 | No      |
| Anks1b   | 0.17932   | 0.061081 | -0.118239   | 0.00364323 | No      | Abhd14b | 0.725801  | 132.145  | 7.50833208       | 0.726801     | 132.146       | 7.50635664       | 0.00022079 | No      |
| Ano4     | 0.079547  | 0.025738 | -0.053809   | 0.00244273 | No      | Abhd17a | 45.211    | 89.587   | 0.98661557       | 45.212       | 89.588        | 0.98659976       | 0.0453842  | No      |
| Ap1g1    | 0.7972    | 0.63108  | -0.16612    | 0.01078302 | No      | Abhd17c | 24.4145   | 68.5381  | 1.48916797       | 24.4155      | 68.5391       | 1.48912992       | 0.00022079 | No      |
| Ap1s3    | 0.75013   | 0.48983  | -0.2603     | 0.00636684 | No      | Abhd3   | 0.120752  | 6.09403  | 5.65727761       | 0.121752     | 6.09503       | 5.64561595       | 0.0102697  | No      |
| Ap3d1    | 0.26189   | 0.081834 | -0.180056   | 4.56E-09   | No      | Abhd4   | 12.897    | 40.0949  | 1.63638322       | 12.898       | 40.0959       | 1.63630735       | 0.00022079 | No      |
| Apba1    | 0.28981   | 0.092257 | -0.197553   | 6.38E-06   | No      | Abhd5   | 5.57523   | 21.6748  | 1.95891545       | 5.57623      | 21.6758       | 1.95872327       | 0.00022079 | No      |
| Apc2     | 0.65156   | 0.13364  | -0.51792    | 4.32E-06   | No      | Abi1    | 67.0022   | 16.8321  | -1.9929933       | 67.0032      | 16.8331       | -1.9929291       | 0.00022079 | No      |
| Apob     | 0.83878   | 0.24928  | -0.5895     | 3.82E-07   | No      | Abi2    | 1.66119   | 6.20392  | 1.90096299       | 1.66219      | 6.20492       | 1.90032731       | 0.00130998 | No      |
| Apod     | 0.74737   | 0.33566  | -0.41171    | 0.00034271 | No      | Abi3    | 20.969    | 48.8975  | 1.22150264       | 20.97        | 48.8985       | 1.22146335       | 0.0428089  | No      |
| Aqp1     | 0.7819    | 0.18752  | -0.59438    | 7.63E-07   | No      | Abi3bp  | 0         | 1.616    | inf              | 0.001        | 1.617         | 10.659104        | 0.00022079 | No      |
| Aqp5     | 0.15943   | 0.08842  | -0.07101    | 0.00197715 | No      | Ablim1  | 180.785   | 58.6929  | -1.6230171       | 180.786      | 58.6939       | -1.6230005       | 0.012146   | No      |
| Aqp8     | 0.60134   | 0.4072   | -0.19414    | 0.00123983 | No      | Ablim3  | 0         | 34.3309  | inf              | 0.001        | 34.3319       | 15.0672621       | 0.00022079 | No      |
| Ar       | 0.24039   | 0.10245  | -0.13794    | 0.00334577 | No      | Abr     | 25.9743   | 10.4858  | -1.3086479       | 25.9753      | 10.4868       | -1.3085659       | 0.00022079 | No      |
| Arfgap1  | 0.37007   | 0.10843  | -0.26164    | 3.77E-08   | No      | Abracl  | 271.678   | 78.9275  | -1.7832978       | 271.679      | 78.9285       | -1.7832848       | 0.00022079 | No      |
| Arhgap27 | 0.73347   | 0.27807  | -0.4554     | 5.85E-10   | No      | Abt1    | 37.5455   | 19.6439  | -0.9345586       | 37.5465      | 19.6449       | -0.9345236       | 0.0230222  | No      |
| Arhgap30 | 0.0017605 | 0.20818  | 0.2064195   | 1.86E-06   | No      | Abtb2   | 15.7515   | 2.29998  | -2.775796        | 15.7525      | 2.30098       | -2.7752605       | 0.00022079 | No      |
| Arhgef16 | 0.19558   | 0.075685 | -0.119895   | 0.0022928  | No      | Acaa1a  | 22.7404   | 67.8921  | 1.57798608       | 22.7414      | 67.8931       | 1.57794389       | 0.00022079 | No      |
| Arhgef2  | 0.019068  | 0.18036  | 0.161292    | 1.15E-06   | No      | Acaa2   | 34.9719   | 129.974  | 1.89395497       | 34.9729      | 129.975       | 1.89392482       | 0.00022079 | No      |
| Arhgef7  | 0.77082   | 0.62203  | -0.14879    | 0.01406934 | No      | Acacb   | 0.128163  | 34.4788  | 8.07158593       | 0.129163     | 34.4798       | 8.06041474       | 0.00022079 | No      |
| Arid3a   | 0.84143   | 0.66643  | -0.175      | 3.57E-06   | No      | Acad10  | 4.69919   | 18.6176  | 1.9861831        | 4.70019      | 18.6186       | 1.98595361       | 0.00041963 | No      |
| Armc5    | 0.31078   | 0.032385 | -0.278395   | 0.0021362  | No      | Acad11  | 3.17605   | 17.1562  | 2.43342451       | 3.17705      | 17.1572       | 2.43305443       | 0.00022079 | No      |

| RRBS    |           |           |             |            |         | RNAseq |          |         |                  |              |               |                  |            |         |
|---------|-----------|-----------|-------------|------------|---------|--------|----------|---------|------------------|--------------|---------------|------------------|------------|---------|
| gene    | Blood     | Kidney    | methyl.diff | pMWU.fdr   | Match ? | gene   | blood    | kidney  | log2(fold_ratio) | blood+ 0.001 | kidney+ 0.001 | log2(fold_ratio) | q_value    | Match ? |
| Arpin   | 0.091466  | 0.0067781 | -0.0846879  | 1.61E-05   | No      | Acadl  | 29.9135  | 110.493 | 1.88508635       | 29.9145      | 110.494       | 1.88505118       | 0.00022079 | No      |
| Arsi    | 0.16402   | 0.096749  | -0.067271   | 0.02965439 | No      | Acadm  | 44.199   | 186.036 | 2.07349619       | 44.2         | 186.037       | 2.07347131       | 0.00022079 | No      |
| Art1    | 0.71357   | 0.51676   | -0.19681    | 4.32E-06   | No      | Acads  | 14.621   | 40.5989 | 1.47339865       | 14.622       | 40.5999       | 1.47333552       | 0.00022079 | No      |
| Asb10   | 0.45496   | 0.09148   | -0.36348    | 2.06E-05   | No      | Acadsb | 2.96897  | 17.7722 | 2.58158786       | 2.96997      | 17.7732       | 2.58118319       | 0.00022079 | No      |
| Ascl1   | 0.14033   | 0.035019  | -0.105311   | 3.45E-06   | No      | Acadvl | 33.6239  | 73.3993 | 1.12627923       | 33.6249      | 73.4003       | 1.12625598       | 0.00211842 | No      |
| Ascl2   | 0.066424  | 0.016213  | -0.050211   | 0.00044355 | No      | Acap1  | 469.994  | 220.388 | -1.0925967       | 469.995      | 220.389       | -1.0925932       | 0.0301242  | No      |
| Asic3   | 0.70699   | 0.36788   | -0.33911    | 0.00105615 | No      | Acap2  | 11.7396  | 5.55963 | -1.0783225       | 11.7406      | 5.56063       | -1.0781859       | 0.0320442  | No      |
| Asic4   | 0.48867   | 0.58458   | 0.09591     | 0.04531279 | No      | Acat1  | 52.903   | 271.963 | 2.36198895       | 52.904       | 271.964       | 2.36196698       | 0.00022079 | No      |
| Asna1   | 0.5692    | 0.24194   | -0.32726    | 1.81E-12   | No      | Ace2   | 0        | 1.46058 | inf              | 0.001        | 1.46158       | 10.5133131       | 0.00022079 | No      |
| Asphd2  | 0.25181   | 0.096914  | -0.154896   | 0.00510288 | No      | Ace3   | 0        | 2.37864 | inf              | 0.001        | 2.37964       | 11.2165276       | 0.00022079 | No      |
| Astn1   | 0.08925   | 0.021237  | -0.068013   | 0.00040483 | No      | Acer3  | 4.45346  | 9.14878 | 1.03865274       | 4.45446      | 9.14978       | 1.03848651       | 0.0355065  | No      |
| Astn2   | 0.071758  | 0.009705  | -0.062053   | 0.0001571  | No      | Acly   | 61.1867  | 32.4801 | -0.913662        | 61.1877      | 32.4811       | -0.9136412       | 0.0277684  | No      |
| Atf7ip2 | 0.083276  | 0.013873  | -0.069403   | 3.39E-05   | No      | Acmsd  | 0        | 31.1579 | inf              | 0.001        | 31.1589       | 14.9273567       | 0.00022079 | No      |
| Atp2b2  | 0.23635   | 0.072041  | -0.164309   | 0.00095268 | No      | Acn9   | 5.96368  | 62.2638 | 3.38411888       | 5.96468      | 62.2648       | 3.38390015       | 0.00096553 | No      |
| Atp2c2  | 0.18372   | 0.022693  | -0.161027   | 1.83E-10   | No      | Aco1   | 6.05098  | 78.5643 | 3.69863317       | 6.05198      | 78.5653       | 3.69841313       | 0.00022079 | No      |
| Avp     | 0.50144   | 0.31859   | -0.18285    | 0.03196657 | No      | Aco2   | 42.8234  | 174.616 | 2.02771451       | 42.8244      | 174.617       | 2.02768908       | 0.00022079 | No      |
| Azin2   | 0.26824   | 0.55307   | 0.28483     | 0.00012978 | No      | Acot1  | 16.1592  | 68.3811 | 2.08124185       | 16.1602      | 68.3821       | 2.08117368       | 0.00022079 | No      |
| B3galt4 | 0.018815  | 0.098535  | 0.07972     | 0.00466526 | No      | Acot13 | 5.24342  | 48.4943 | 3.20923517       | 5.24442      | 48.4953       | 3.2089898        | 0.00022079 | No      |
| B3gnt3  | 0.49445   | 0.2206    | -0.27385    | 0.01245124 | No      | Acot7  | 146.585  | 35.9529 | -2.0275574       | 146.586      | 35.9539       | -2.0275271       | 0.00022079 | No      |
| B3gnt8  | 0.79396   | 0.45898   | -0.33498    | 0.00011578 | No      | Acox1  | 12.5339  | 64.7922 | 2.36998476       | 12.5349      | 64.7932       | 2.36989192       | 0.00022079 | No      |
| B4galt2 | 0.17314   | 0.04239   | -0.13075    | 8.60E-07   | No      | Acp1   | 38.9393  | 62.2948 | 0.67788479       | 38.9403      | 62.2958       | 0.6778709        | 0.0450883  | No      |
| B4gat1  | 0.26772   | 0.016557  | -0.251163   | 7.63E-07   | No      | Acp2   | 4.8541   | 26.8422 | 2.46722719       | 4.8551       | 26.8432       | 2.46698375       | 0.0131304  | No      |
| Bace1   | 0.084025  | 0.014933  | -0.069092   | 2.29E-09   | No      | Acpl2  | 17.9423  | 6.36685 | -1.4947132       | 17.9433      | 6.36785       | -1.494567        | 0.00022079 | No      |
| Bag3    | 0.35155   | 0.059826  | -0.291724   | 5.77E-05   | No      | Acpp   | 8.20979  | 3.20455 | -1.3572235       | 8.21079      | 3.20555       | -1.3569491       | 0.00022079 | No      |
| Barhl1  | 0.10482   | 0.042249  | -0.062571   | 0.00019244 | No      | Acsf3  | 4.81405  | 50.0083 | 3.37684453       | 4.81505      | 50.0093       | 3.37657373       | 0.00022079 | No      |
| Batf3   | 0.11666   | 0.013967  | -0.102693   | 1.52E-05   | No      | Acs1   | 3.35834  | 29.4682 | 3.13333874       | 3.35934      | 29.4692       | 3.13295817       | 0.00022079 | No      |
| Bbs4    | 0.61542   | 0.28209   | -0.33333    | 1.81E-12   | No      | Acs13  | 3.59187  | 10.5967 | 1.56080801       | 3.59287      | 10.5977       | 1.56054255       | 0.00565535 | No      |
| Bbs7    | 0.16266   | 0.041472  | -0.121188   | 5.73E-06   | No      | Acs14  | 7.32327  | 19.6822 | 1.4263316        | 7.32427      | 19.6832       | 1.42620791       | 0.00022079 | No      |
| Bcan    | 0.072889  | 0.018126  | -0.054763   | 0.00085531 | No      | Acsm1  | 0        | 8.04271 | inf              | 0.001        | 8.04371       | 12.9736454       | 0.00022079 | No      |
| Bcat1   | 0.45626   | 0.19221   | -0.26405    | 3.09E-05   | No      | Acsm2a | 0        | 87.2261 | inf              | 0.001        | 87.2271       | 16.4124888       | 0.00022079 | No      |
| Bcdin3d | 0.003125  | 0.24084   | 0.237715    | 1.47E-06   | No      | ACSM5  | 0        | 3.96777 | inf              | 0.001        | 3.96877       | 11.9544762       | 0.00022079 | No      |
| Bckdk   | 0.94902   | 0.47507   | -0.47395    | 6.77E-07   | No      | Acss2  | 3.65417  | 51.592  | 3.81953172       | 3.65517      | 51.593        | 3.81916493       | 0.00022079 | No      |
| Bcl3    | 0.12919   | 0.058909  | -0.070281   | 2.32E-08   | No      | Acss3  | 0        | 20.8025 | inf              | 0.001        | 20.8035       | 14.3445386       | 0.00022079 | No      |
| Bcor    | 0.0089135 | 0.11374   | 0.1048265   | 2.44E-07   | No      | Actg1  | 463.666  | 1074.01 | 1.21184958       | 463.667      | 1074.011      | 1.21184781       | 0.0083198  | No      |
| Bdnf    | 0.13233   | 0.02685   | -0.10548    | 7.99E-06   | No      | Actn4  | 66.0484  | 134.698 | 1.02813291       | 66.0494      | 134.699       | 1.02812178       | 0.00711928 | No      |
| Begain  | 0.072286  | 0.016595  | -0.055691   | 0.03196657 | No      | Actr1b | 14.8761  | 26.5552 | 0.83599804       | 14.8771      | 26.5562       | 0.83595539       | 0.0143389  | No      |
| Bhlhe23 | 0.11234   | 0.017618  | -0.094722   | 0.01245124 | No      | Actr2  | 203.874  | 68.1598 | -1.5806848       | 203.875      | 68.1608       | -1.5806707       | 0.0138632  | No      |
| Bik     | 0.05306   | 0.15292   | 0.09986     | 0.01406934 | No      | Actr3  | 404.147  | 97.7289 | -2.048023        | 404.148      | 97.7299       | -2.0480118       | 0.00022079 | No      |
| Bmi1    | 0.068991  | 0.14859   | 0.079599    | 6.05E-05   | No      | Acvr1b | 6.86248  | 14.0488 | 1.03364496       | 6.86348      | 14.0498       | 1.03353743       | 0.0191747  | No      |
| Bmp2    | 0.12376   | 0.031215  | -0.092545   | 0.0007955  | No      | Acy1   | 16.6226  | 371.372 | 4.48164708       | 16.6236      | 371.373       | 4.48156418       | 0.00022079 | No      |
| Bmp3    | 0.08036   | 0.02307   | -0.05729    | 4.52E-08   | No      | Acy3   | 0.824891 | 197.946 | 7.9066877        | 0.825891     | 197.947       | 7.9049471        | 0.00022079 | No      |
| Bmp8a   | 0.16118   | 0.027585  | -0.133595   | 0.0002817  | No      | Ada    | 22.9389  | 11.292  | -1.0224952       | 22.9399      | 11.293        | -1.0224303       | 0.0137492  | No      |

| RRBS     |          |          |             |            |         | RNAseq   |           |          |                  |              |               |                  |            |         |
|----------|----------|----------|-------------|------------|---------|----------|-----------|----------|------------------|--------------|---------------|------------------|------------|---------|
| gene     | Blood    | Kidney   | methyl.diff | pMWU.fdr   | Match ? | gene     | blood     | kidney   | log2(fold_ratio) | blood+ 0.001 | kidney+ 0.001 | log2(fold_ratio) | q_value    | Match ? |
| Bmyc     | 0.092411 | 0.035243 | -0.057168   | 0.00170783 | No      | Adal     | 5.08716   | 1.33012  | -1.9353041       | 5.08816      | 1.33112       | -1.9345034       | 0.00211842 | No      |
| Bnc1     | 0.074142 | 0.017227 | -0.056915   | 0.00042212 | No      | Adam10   | 70.1743   | 15.4417  | -2.1841112       | 70.1753      | 15.4427       | -2.1840383       | 0.00022079 | No      |
| Boll     | 0.22267  | 0.11484  | -0.10783    | 0.00010908 | No      | Adam19   | 74.5162   | 1.3267   | -5.81164         | 74.5172      | 1.3277        | -5.8105724       | 0.00022079 | No      |
| Borcs6   | 0.78955  | 0.37406  | -0.41549    | 0.0001571  | No      | Adam8    | 6.38906   | 1.68889  | -1.9195283       | 6.39006      | 1.68989       | -1.9189001       | 0.00096553 | No      |
| Borcs7   | 0.63012  | 0.3201   | -0.31002    | 5.77E-05   | No      | Adam9    | 2.13995   | 10.9268  | 2.35222196       | 2.14095      | 10.9278       | 2.35167998       | 0.00022079 | No      |
| Bpifb3   | 0.9402   | 0.6941   | -0.2461     | 4.32E-06   | No      | Adamts10 | 57.8435   | 19.4668  | -1.5711391       | 57.8445      | 19.4678       | -1.5710899       | 0.00536605 | No      |
| Btbd16   | 0.83107  | 0.60262  | -0.22845    | 0.00095268 | No      | Adamts16 | 0         | 1.09425  | inf              | 0.001        | 1.09525       | 10.0970445       | 0.0178094  | No      |
| C1ql1    | 0.11993  | 0.041406 | -0.078524   | 3.34E-06   | No      | Adamts5  | 0         | 20.6253  | inf              | 0.001        | 20.6263       | 14.3321974       | 0.00022079 | No      |
| C1ql2    | 0.11893  | 0.016518 | -0.102412   | 7.99E-06   | No      | Adamts11 | 0         | 2.20325  | inf              | 0.001        | 2.20425       | 11.1060721       | 0.00632443 | No      |
| C1qtnf2  | 0.48296  | 0.10573  | -0.37723    | 0.00017491 | No      | Adap1    | 0.890331  | 14.3002  | 4.00554972       | 0.891331     | 14.3012       | 4.00403111       | 0.00022079 | No      |
| C1qtnf5  | 0.83852  | 0.46721  | -0.37131    | 1.01E-11   | No      | Adar     | 34.9003   | 14.761   | -1.241449        | 34.9013      | 14.762        | -1.2413926       | 0.0019604  | No      |
| C2cd4c   | 0.86717  | 0.20361  | -0.66356    | 1.81E-12   | No      | Adat1    | 2.32003   | 0.482155 | -2.2665745       | 2.32103      | 0.483155      | -2.2642072       | 0.00565535 | No      |
| Cabp7    | 0.08306  | 0.0239   | -0.05916    | 2.14E-07   | No      | Adat2    | 30.0375   | 4.72224  | -2.6692215       | 30.0385      | 4.72324       | -2.668964        | 0.00022079 | No      |
| Cacna1e  | 0.35349  | 0.13204  | -0.22145    | 5.46E-08   | No      | Adck1    | 5.13072   | 11.2821  | 1.13680243       | 5.13172      | 11.2831       | 1.13664914       | 0.0221192  | No      |
| Cacna1i  | 0.85814  | 0.14672  | -0.71142    | 2.57E-11   | No      | Adck4    | 14.6803   | 33.2225  | 1.17827919       | 14.6813      | 33.2235       | 1.17822434       | 0.0251614  | No      |
| Cacna1s  | 0.27761  | 0.069014 | -0.208596   | 1.28E-05   | No      | Adcy4    | 1.66916   | 10.535   | 2.65799616       | 1.67016      | 10.536        | 2.65726903       | 0.0072515  | No      |
| Cacna2d1 | 0.072724 | 0.013772 | -0.058952   | 0.00066856 | No      | Adcy7    | 49.0677   | 8.05989  | -2.6059416       | 49.0687      | 8.06089       | -2.605792        | 0.0201925  | No      |
| Cacna2d2 | 0.15374  | 0.035185 | -0.118555   | 0.00393505 | No      | Add3     | 196.872   | 27.5914  | -2.8349674       | 196.873      | 27.5924       | -2.8349224       | 0.00022079 | No      |
| Calb2    | 0.28434  | 0.063539 | -0.220801   | 4.32E-06   | No      | Adh1     | 0         | 46.6078  | inf              | 0.001        | 46.6088       | 15.5083147       | 0.00022079 | No      |
| Calhm1   | 0.781    | 0.3629   | -0.4181     | 6.01E-10   | No      | Adhfe1   | 0.110487  | 49.4318  | 8.805419         | 0.111487     | 49.4328       | 8.79244932       | 0.00022079 | No      |
| Camk2n2  | 0.25142  | 0.061965 | -0.189455   | 1.03E-05   | No      | Adi1     | 25.958    | 103.698  | 1.99813693       | 25.959       | 103.699       | 1.99809527       | 0.00022079 | No      |
| Cap2     | 0.081804 | 0.016965 | -0.064839   | 0.0021362  | No      | Adipor1  | 39.3391   | 112.939  | 1.52150791       | 39.3401      | 112.94        | 1.52148401       | 0.00022079 | No      |
| Car13    | 0.61754  | 0.19788  | -0.41966    | 0.00042212 | No      | Adk      | 32.8599   | 68.0432  | 1.0501229        | 32.8609      | 68.0442       | 1.0501002        | 0.00096553 | No      |
| Car9     | 0.34609  | 0.074335 | -0.271755   | 7.99E-06   | No      | Adora1   | 0         | 7.28442  | inf              | 0.001        | 7.28542       | 12.8307964       | 0.00022079 | No      |
| Carkd    | 0.76869  | 0.35136  | -0.41733    | 0.00011578 | No      | Adpgk    | 14.7582   | 6.38189  | -1.2094611       | 14.7592      | 6.38289       | -1.2093328       | 0.0457858  | No      |
| Cartpt   | 0.34375  | 0.18364  | -0.16011    | 0.01660198 | No      | Adprh    | 35.8474   | 16.7643  | -1.0964762       | 35.8484      | 16.7653       | -1.0964304       | 0.00227055 | No      |
| Cass4    | 0        | 0.12233  | 0.12233     | 9.43E-07   | No      | Adprm    | 25.5943   | 14.2737  | -0.8424632       | 25.5953      | 14.2747       | -0.8424185       | 0.0271748  | No      |
| Cav3     | 0.93014  | 0.39884  | -0.5313     | 3.82E-07   | No      | Adrbk1   | 143.766   | 25.7242  | -2.4825244       | 143.767      | 25.7252       | -2.4824784       | 0.00022079 | No      |
| Cbln1    | 0.11156  | 0.024235 | -0.087325   | 0.0006129  | No      | Aebp1    | 0.070052  | 5.99285  | 6.41867221       | 0.071052     | 5.99385       | 6.39846391       | 0.00211842 | No      |
| Cbln4    | 0.081196 | 0.022316 | -0.05888    | 5.62E-11   | No      | Afap111  | 0.0785708 | 14.1963  | 7.497306         | 0.0795708    | 14.1973       | 7.47916177       | 0.00130998 | No      |
| Ccdc105  | 0.2897   | 0.082642 | -0.207058   | 7.35E-09   | No      | Afap112  | 0         | 6.1918   | inf              | 0.001        | 6.1928        | 12.5963761       | 0.00022079 | No      |
| Ccdc166  | 0.33545  | 0.1001   | -0.23535    | 0.00010392 | No      | Aff4     | 13.8958   | 7.95137  | -0.8053735       | 13.8968      | 7.95237       | -0.8052959       | 0.0199689  | No      |
| Ccdc184  | 0.17308  | 0.06438  | -0.1087     | 0.0017676  | No      | Afg311   | 11.2043   | 24.4278  | 1.12447142       | 11.2053      | 24.4288       | 1.12440172       | 0.0200735  | No      |
| Ccdc24   | 0.57456  | 0.18324  | -0.39132    | 2.07E-07   | No      | Afmid    | 0.873568  | 24.0045  | 4.78024107       | 0.874568     | 24.0055       | 4.77865061       | 0.00022079 | No      |
| Ccdc67   | 0.5545   | 0.059934 | -0.494566   | 3.17E-08   | No      | Agap1    | 5.6223    | 14.491   | 1.36592481       | 5.6233       | 14.492        | 1.36576779       | 0.00392909 | No      |
| Ccdc7    | 0.84351  | 0.75813  | -0.08538    | 0.00595469 | No      | Agbl3    | 7.98013   | 40.0523  | 2.32740094       | 7.98113      | 40.0533       | 2.32725618       | 0.00022079 | No      |
| Ccdc89   | 0.34117  | 0.056931 | -0.284239   | 1.15E-06   | No      | Agfg2    | 10.7628   | 22.2102  | 1.04516893       | 10.7638      | 22.2112       | 1.04509985       | 0.00227055 | No      |
| Ccer1    | 0.75617  | 0.63235  | -0.12382    | 0.04318305 | No      | Ago1     | 20.1093   | 7.15101  | -1.4916439       | 20.1103      | 7.15201       | -1.4915139       | 0.00022079 | No      |
| Ccl27    | 0.23417  | 0.057765 | -0.176405   | 2.44E-07   | No      | Ago2     | 7.59306   | 1.94716  | -1.96331         | 7.59406      | 1.94816       | -1.9627592       | 0.00022079 | No      |
| Cct8l1   | 0.77643  | 0.67378  | -0.10265    | 0.03196657 | No      | Ago3     | 1.97474   | 0.927058 | -1.0909312       | 1.97574      | 0.928058      | -1.0901062       | 0.0199689  | No      |
| Cd164l2  | 0.44839  | 0.067836 | -0.380554   | 4.19E-08   | No      | Agpat2   | 1.35237   | 20.5697  | 3.92695893       | 1.35337      | 20.5707       | 3.92596267       | 0.00130998 | No      |
| Cd248    | 0.53108  | 0.18036  | -0.35072    | 2.07E-09   | No      | Agpat4   | 2.25906   | 10.4528  | 2.21009496       | 2.26006      | 10.4538       | 2.20959448       | 0.00022079 | No      |

| RRBS     |           |          |             |            |         | RNAseq   |           |          |                  |              |               |                  |            |         |
|----------|-----------|----------|-------------|------------|---------|----------|-----------|----------|------------------|--------------|---------------|------------------|------------|---------|
| gene     | Blood     | Kidney   | methyl.diff | pMWU.fdr   | Match ? | gene     | blood     | kidney   | log2(fold_ratio) | blood+ 0.001 | kidney+ 0.001 | log2(fold_ratio) | q_value    | Match ? |
| Cd52     | 0.65693   | 0.4158   | -0.24113    | 2.74E-06   | No      | Agpat9   | 0.19685   | 5.80526  | 4.88219206       | 0.19785      | 5.80626       | 4.87513021       | 0.00041963 | No      |
| Cd7      | 0.0055331 | 0.18951  | 0.1839769   | 0.00049864 | No      | Agrrn    | 1.42492   | 47.389   | 5.05559939       | 1.42592      | 47.39         | 5.05461771       | 0.00022079 | No      |
| Cd72     | 0.10538   | 0.27386  | 0.16848     | 0.00553374 | No      | Agtpbp1  | 3.39567   | 17.1115  | 2.33319807       | 3.39667      | 17.1125       | 2.33285757       | 0.00022079 | No      |
| Cdc42ep3 | 0.1116    | 0.032117 | -0.079483   | 0.00553374 | No      | Agtr1a   | 0         | 4.6179   | inf              | 0.001        | 4.6189        | 12.1733336       | 0.00022079 | No      |
| Cdh13    | 0.58766   | 0.19541  | -0.39225    | 3.77E-07   | No      | Agtrap   | 8.50289   | 45.9469  | 2.43394235       | 8.50389      | 45.9479       | 2.43380409       | 0.00022079 | No      |
| Cdh22    | 0.1161    | 0.015498 | -0.100602   | 3.82E-07   | No      | Agxt2    | 0         | 166.016  | inf              | 0.001        | 166.017       | 17.3409715       | 0.00022079 | No      |
| Cdh8     | 0.088025  | 0.019998 | -0.068027   | 6.47E-08   | No      | Ahctf1   | 13.68     | 6.06679  | -1.173063        | 13.681       | 6.06779       | -1.1729306       | 0.00242102 | No      |
| Cdk5r1   | 0.22508   | 0.10671  | -0.11837    | 0.00063341 | No      | Ahcyl2   | 8.22779   | 36.0688  | 2.13217455       | 8.22879      | 36.0698       | 2.13203921       | 0.00022079 | No      |
| Cdk5r2   | 0.079354  | 0.018468 | -0.060886   | 1.55E-06   | No      | Al462493 | 45.2361   | 126.731  | 1.48622301       | 45.2371      | 126.732       | 1.4862025        | 0.00022079 | No      |
| Cdon     | 0.80726   | 0.58934  | -0.21792    | 0.00119531 | No      | Aida     | 24.5014   | 13.9616  | -0.8113999       | 24.5024      | 13.9626       | -0.8113555       | 0.0214583  | No      |
| Cdx2     | 0.10077   | 0.02557  | -0.0752     | 0.00595469 | No      | Aif1     | 1.83909   | 88.2422  | 5.58440477       | 1.84009      | 88.2432       | 5.58363687       | 0.00536605 | No      |
| Ceacam4  | 0.93958   | 0.84832  | -0.09126    | 0.00290027 | No      | Aifm1    | 32.6881   | 70.9009  | 1.11703842       | 32.6891      | 70.9019       | 1.11701463       | 0.00060553 | No      |
| Cebpe    | 0.9716    | 0.5052   | -0.4664     | 3.82E-07   | No      | Aifm2    | 0.52207   | 4.3184   | 3.04818172       | 0.52307      | 4.3194        | 3.04575499       | 0.00060553 | No      |
| Cela1    | 0.016885  | 0.11085  | 0.093965    | 7.27E-07   | No      | Aifm3    | 4.28507   | 1.0991   | -1.9629961       | 4.28607      | 1.1001        | -1.9620207       | 0.0245052  | No      |
| Celf3    | 0.18695   | 0.079214 | -0.107736   | 0.00497651 | No      | Aim1     | 2.90074   | 0.726274 | -1.9978352       | 2.90174      | 0.727274      | -1.9963474       | 0.0019604  | No      |
| Celf4    | 0.076837  | 0.023305 | -0.053532   | 0.00290027 | No      | Aim1l    | 0.564123  | 1.56536  | 1.47241282       | 0.565123     | 1.56636       | 1.47077902       | 0.0227145  | No      |
| Celsr3   | 0.078876  | 0.017293 | -0.061583   | 5.13E-10   | No      | Aim2     | 32.0576   | 2.70353  | -3.5677502       | 32.0586      | 2.70453       | -3.5672616       | 0.00022079 | No      |
| Cers4    | 0.0048376 | 0.074571 | 0.0697334   | 7.63E-07   | No      | Ak1      | 0         | 11.8751  | inf              | 0.001        | 11.8761       | 13.5357735       | 0.00022079 | No      |
| Cfb      | 0.76902   | 0.26199  | -0.50703    | 4.83E-07   | No      | Ak3      | 66.791    | 207.79   | 1.63740061       | 66.792       | 207.791       | 1.63738595       | 0.00130998 | No      |
| Cfd      | 0.42321   | 0.07309  | -0.35012    | 3.82E-07   | No      | Ak4      | 0.0544086 | 57.9936  | 10.0578433       | 0.0554086    | 57.9946       | 10.0315929       | 0.00348745 | No      |
| Cftr     | 0.083203  | 0.011436 | -0.071767   | 3.61E-09   | No      | Akap1    | 4.28296   | 10.1879  | 1.2501766        | 4.28396      | 10.1889       | 1.24998139       | 0.00363736 | No      |
| Cgref1   | 0.72467   | 0.389    | -0.33567    | 0.00030384 | No      | Akap13   | 48.2332   | 11.142   | -2.1140183       | 48.2342      | 11.143        | -2.1139187       | 0.00022079 | No      |
| Chad     | 0.74153   | 0.61104  | -0.13049    | 0.0002817  | No      | Akap17b  | 12.4551   | 1.7921   | -2.7970136       | 12.4561      | 1.7931        | -2.7963246       | 0.00022079 | No      |
| Chchd2   | 0.71386   | 0.36243  | -0.35143    | 0.00135614 | No      | Akap2    | 4.38518   | 37.4778  | 3.0953283        | 4.38618      | 37.4788       | 3.09503784       | 0.00022079 | No      |
| Chchd5   | 0.12535   | 0.01355  | -0.1118     | 7.99E-06   | No      | Akap7    | 2.05912   | 8.26807  | 2.00552269       | 2.06012      | 8.26907       | 2.00499671       | 0.0019604  | No      |
| Chd5     | 0.25368   | 0.091358 | -0.162322   | 6.26E-05   | No      | Akap8    | 83.7115   | 32.8272  | -1.3505341       | 83.7125      | 32.8282       | -1.3505074       | 0.00022079 | No      |
| Chrd     | 0.055277  | 0.25284  | 0.197563    | 3.77E-08   | No      | Akirin1  | 55.0937   | 20.0565  | -1.4578175       | 55.0947      | 20.0575       | -1.4577717       | 0.00022079 | No      |
| Chrdl2   | 0.2373    | 0.060633 | -0.176667   | 0.00011578 | No      | Akna     | 56.2104   | 4.11014  | -3.7735776       | 56.2114      | 4.11114       | -3.7732523       | 0.00022079 | No      |
| Chrm1    | 0.65899   | 0.32223  | -0.33676    | 0.00244273 | No      | Akr1a1   | 181.558   | 582.179  | 1.6810323        | 181.559      | 582.18        | 1.68102683       | 0.00022079 | No      |
| Chrna4   | 0.20313   | 0.11753  | -0.0856     | 0.00068845 | No      | Akr1b10  | 0         | 1.05843  | inf              | 0.001        | 1.05943       | 10.0490726       | 0.0114056  | No      |
| Cilp2    | 0.21988   | 0.090699 | -0.129181   | 0.02731997 | No      | Akr1c1   | 0         | 35.745   | inf              | 0.001        | 35.746        | 15.1254942       | 0.00022079 | No      |
| Cistr    | 0.02231   | 0.079562 | 0.057252    | 0.00161991 | No      | Akr1c12  | 0         | 2.17616  | inf              | 0.001        | 2.17716       | 11.0882317       | 0.00022079 | No      |
| Ckm      | 0.69679   | 0.1417   | -0.55509    | 1.02E-06   | No      | Akr1e2   | 1.21397   | 31.74    | 4.70849745       | 1.21497      | 31.741        | 4.70735498       | 0.00022079 | No      |
| Cldn19   | 0.65438   | 0.36074  | -0.29364    | 0.00105615 | No      | Akr7a2   | 20.2543   | 245.251  | 3.59795889       | 20.2553      | 245.252       | 3.59789354       | 0.00022079 | No      |
| Cldn3    | 0.098973  | 0.034581 | -0.064392   | 4.78E-08   | No      | Akr7a3   | 1.83863   | 220.819  | 6.90808932       | 1.83963      | 220.82        | 6.9073114        | 0.00022079 | No      |
| Cldn7    | 0.14368   | 0.035256 | -0.108424   | 8.49E-05   | No      | Akt2     | 53.3597   | 21.0249  | -1.3436516       | 53.3607      | 21.0259       | -1.34361         | 0.00022079 | No      |
| Cldn8    | 0.89078   | 0.64484  | -0.24594    | 0.00021466 | No      | Akt3     | 14.6123   | 4.01779  | -1.8627092       | 14.6133      | 4.01879       | -1.8624489       | 0.0475016  | No      |
| Clic6    | 0.094465  | 0.025672 | -0.068793   | 0.0074695  | No      | Aktip    | 8.5611    | 143.592  | 4.06803539       | 8.5621       | 143.593       | 4.06787693       | 0.00022079 | No      |
| Clmp     | 0.11044   | 0.05064  | -0.0598     | 0.01660198 | No      | Alad     | 5.65127   | 75.9536  | 3.74847132       | 5.65227      | 75.9546       | 3.74823505       | 0.00022079 | No      |
| Clps     | 0.73765   | 0.26335  | -0.4743     | 1.81E-12   | No      | Alas1    | 6.25721   | 40.2455  | 2.68523605       | 6.25821      | 40.2465       | 2.68504135       | 0.00022079 | No      |
| Clvs2    | 0.098704  | 0.035875 | -0.062829   | 8.98E-09   | No      | Alas2    | 0.153411  | 6.21347  | 5.33992535       | 0.154411     | 6.21447       | 5.33078392       | 0.0348495  | No      |
| Cmss1    | 0.37489   | 0.11125  | -0.26364    | 1.28E-05   | No      | Alcam    | 0.474629  | 5.44128  | 3.51907391       | 0.475629     | 5.44228       | 3.5163026        | 0.00022079 | No      |



| RRBS     |           |           |             |            |         | RNAseq   |           |          |                  |              |               |                  |            |         |
|----------|-----------|-----------|-------------|------------|---------|----------|-----------|----------|------------------|--------------|---------------|------------------|------------|---------|
| gene     | Blood     | Kidney    | methyl.diff | pMWU.fdr   | Match ? | gene     | blood     | kidney   | log2(fold_ratio) | blood+ 0.001 | kidney+ 0.001 | log2(fold_ratio) | q_value    | Match ? |
| Cnfn     | 0.12096   | 0.036344  | -0.084616   | 0.00197715 | No      | Aldh16a1 | 13.4208   | 47.2306  | 1.81525119       | 13.4218      | 47.2316       | 1.81517424       | 0.00022079 | No      |
| Cnn1     | 0.082191  | 0.026086  | -0.056105   | 0.04868237 | No      | Aldh18a1 | 8.30499   | 1.85798  | -2.1602435       | 8.30599      | 1.85898       | -2.1596409       | 0.00022079 | No      |
| Cnnm1    | 0.23226   | 0.09564   | -0.13662    | 1.52E-05   | No      | Aldh1l1  | 0         | 121.21   | inf              | 0.001        | 121.211       | 16.8871611       | 0.00022079 | No      |
| Cntn2    | 0.17337   | 0.047389  | -0.125981   | 0.0022928  | No      | Aldh6a1  | 7.27183   | 105.389  | 3.85726201       | 7.27283      | 105.39        | 3.85707732       | 0.00022079 | No      |
| Cntnap4  | 0.13573   | 0.08444   | -0.05129    | 0.04985963 | No      | Aldh7a1  | 0.899287  | 103.828  | 6.85119823       | 0.900287     | 103.829       | 6.84960875       | 0.00022079 | No      |
| Col11a2  | 0.32683   | 0.12635   | -0.20048    | 1.86E-06   | No      | Aldh8a1  | 0.104216  | 47.5578  | 8.83396138       | 0.105216     | 47.5588       | 8.82021439       | 0.00896558 | No      |
| Col16a1  | 0.28809   | 0.068056  | -0.220034   | 7.23E-08   | No      | Aldh9a1  | 32.036    | 93.5161  | 1.54552074       | 32.037       | 93.5171       | 1.54549113       | 0.00022079 | No      |
| Col26a1  | 0.23179   | 0.060253  | -0.171537   | 0.00123983 | No      | Alg10    | 36.7134   | 7.39653  | -2.3113862       | 36.7144      | 7.39753       | -2.3112305       | 0.00022079 | No      |
| Col5a3   | 0.20463   | 0.047151  | -0.157479   | 3.82E-07   | No      | Alg14    | 6.05553   | 17.7844  | 1.55428716       | 6.05653      | 17.7854       | 1.55413006       | 0.00060553 | No      |
| Commd5   | 0.55538   | 0.11455   | -0.44083    | 1.15E-05   | No      | Alkbh1   | 22.3606   | 7.42365  | -1.5907583       | 22.3616      | 7.42465       | -1.5906285       | 0.0395387  | No      |
| Comp     | 0.099951  | 0.02903   | -0.070921   | 9.27E-05   | No      | Alkbh2   | 9.43031   | 22.4473  | 1.25116482       | 9.43131      | 22.4483       | 1.25107612       | 0.0199689  | No      |
| Copz2    | 0.28698   | 0.15922   | -0.12776    | 0.00364323 | No      | Alkbh4   | 18.4997   | 4.60115  | -2.0074355       | 18.5007      | 4.60215       | -2.0071999       | 0.00022079 | No      |
| Corin    | 0.064156  | 0.013065  | -0.051091   | 3.39E-05   | No      | Alkbh7   | 25.8173   | 71.0013  | 1.45950731       | 25.8183      | 71.0023       | 1.45947175       | 0.0410904  | No      |
| Cort     | 0.65105   | 0.39417   | -0.25688    | 0.00866691 | No      | Alms1    | 9.58259   | 3.94911  | -1.2788881       | 9.58359      | 3.95011       | -1.2786734       | 0.00436941 | No      |
| Cox6b2   | 0.89015   | 0.53626   | -0.35389    | 1.60E-07   | No      | Alox15   | 0.108258  | 1.04182  | 3.26656049       | 0.109258     | 1.04282       | 3.25467933       | 0.0245052  | No      |
| Cpeb1    | 0.26794   | 0.067739  | -0.200201   | 0.00012978 | No      | Alox5ap  | 1.41868   | 4.2135   | 1.57046992       | 1.41968      | 4.2145        | 1.5697957        | 0.039861   | No      |
| Cplx1    | 0.089384  | 0.028615  | -0.060769   | 6.26E-05   | No      | Aloxe3   | 0         | 0.975659 | inf              | 0.001        | 0.976659      | 9.93171112       | 0.00022079 | No      |
| Cpne6    | 0.73509   | 0.17588   | -0.55921    | 3.07E-06   | No      | Alpl     | 0.160197  | 27.5194  | 7.42445807       | 0.161197     | 27.5204       | 7.41553273       | 0.00041963 | No      |
| Cpne7    | 0.14227   | 0.069841  | -0.072429   | 0.02965439 | No      | Als2     | 1.10001   | 4.30418  | 1.96822177       | 1.10101      | 4.30518       | 1.96724599       | 0.00022079 | No      |
| Cpne9    | 0.23767   | 0.067288  | -0.170382   | 1.03E-05   | No      | Alx1     | 0         | 1.85551  | inf              | 0.001        | 1.85651       | 10.8583774       | 0.00022079 | No      |
| Cpt1c    | 0.14626   | 0.020909  | -0.125351   | 0.00466526 | No      | Amacr    | 6.76457   | 62.7994  | 3.21468064       | 6.76557      | 62.8004       | 3.21449036       | 0.00022079 | No      |
| Crabp2   | 0.54658   | 0.21375   | -0.33283    | 0.00049864 | No      | Amd1     | 19.7437   | 49.3715  | 1.3222861        | 19.7447      | 49.3725       | 1.32224225       | 0.00022079 | No      |
| Cracr2b  | 0.1482    | 0.025452  | -0.122748   | 0.0022928  | No      | Amdhd2   | 9.37929   | 51.227   | 2.44935378       | 9.38029      | 51.228        | 2.44922814       | 0.00022079 | No      |
| Crb2     | 0.59894   | 0.14346   | -0.45548    | 4.14E-09   | No      | Amhr2    | 0.635666  | 5.77368  | 3.18315032       | 0.636666     | 5.77468       | 3.18113238       | 0.00147497 | No      |
| Creb3l4  | 0.78358   | 0.30475   | -0.47883    | 3.82E-07   | No      | Amica1   | 11.3124   | 2.24405  | -2.3337283       | 11.3134      | 2.24505       | -2.3332131       | 0.00060553 | No      |
| Crhr1    | 0.093997  | 0.022436  | -0.071561   | 4.32E-06   | No      | Amigo1   | 10.4405   | 3.55751  | -1.5532511       | 10.4415      | 3.55851       | -1.5529838       | 0.00022079 | No      |
| Crip1    | 0.0012755 | 0.33046   | 0.3291845   | 1.74E-09   | No      | Amotl1   | 0.211624  | 3.56967  | 4.07621555       | 0.212624     | 3.57067       | 4.06981845       | 0.0219049  | No      |
| Crlf1    | 0.12107   | 0.053081  | -0.067989   | 0.04868237 | No      | Amph     | 0.0172431 | 8.78101  | 8.99222391       | 0.0182431    | 8.78201       | 8.91105646       | 0.0195167  | No      |
| Crlf2    | 0.030131  | 0.16458   | 0.134449    | 1.15E-05   | No      | Amt      | 14.2691   | 50.7249  | 1.82979977       | 14.2701      | 50.7259       | 1.82972711       | 0.00022079 | No      |
| Crnde    | 0.14686   | 0.025237  | -0.121623   | 3.09E-05   | No      | Amz1     | 0.347524  | 3.13846  | 3.1748723        | 0.348524     | 3.13946       | 3.17118652       | 0.0126352  | No      |
| Crnk1l   | 0.38286   | 0.20544   | -0.17742    | 0.0022928  | No      | Anapc10  | 12.2542   | 4.76195  | -1.3636519       | 12.2552      | 4.76295       | -1.3634667       | 0.00147497 | No      |
| Cryba2   | 0.09253   | 0.020875  | -0.071655   | 0.00021466 | No      | Anapc13  | 87.4338   | 267.455  | 1.61303317       | 87.4348      | 267.456       | 1.61302206       | 0.00060553 | No      |
| Crygn    | 0.69379   | 0.49466   | -0.19913    | 6.75E-05   | No      | Anapc15  | 36.7246   | 73.0581  | 0.99229746       | 36.7256      | 73.0591       | 0.99227792       | 0.0133754  | No      |
| Csmd1    | 0.11908   | 0.032229  | -0.086851   | 0.00012978 | No      | Anapc5   | 65.7107   | 119.459  | 0.86231533       | 65.7117      | 119.46        | 0.86230546       | 0.00818469 | No      |
| Ctgf     | 0.80497   | 0.63245   | -0.17252    | 0.00032353 | No      | Anapc7   | 24.4915   | 10.9236  | -1.1648327       | 24.4925      | 10.9246       | -1.1647596       | 0.00288641 | No      |
| Ctnna2   | 0.12103   | 0.0056414 | -0.1153886  | 1.43E-09   | No      | Ang      | 0.711544  | 7.85062  | 3.46378172       | 0.712544     | 7.85162       | 3.46193934       | 0.00096553 | No      |
| Cubn     | 0.74334   | 0.095932  | -0.647408   | 2.83E-08   | No      | Angel2   | 25.3262   | 10.0503  | -1.3333921       | 25.3272      | 10.0513       | -1.3333055       | 0.0444112  | No      |
| Cux2     | 0.28694   | 0.088356  | -0.198584   | 0.00014343 | No      | Angptl4  | 0.13808   | 2.28582  | 4.04913553       | 0.13908      | 2.28682       | 4.03935594       | 0.0117698  | No      |
| Cxcr2    | 0.03061   | 0.1844    | 0.15379     | 0.00105615 | No      | Ank2     | 0.803825  | 5.8189   | 2.8557931        | 0.804825     | 5.8199        | 2.85424734       | 0.00022079 | No      |
| Cyb561d1 | 0.86619   | 0.74323   | -0.12296    | 0.03531391 | No      | Ankh     | 31.5104   | 3.18748  | -3.3053399       | 31.5114      | 3.18848       | -3.3049331       | 0.00318754 | No      |
| Cybb     | 0.034698  | 0.45979   | 0.425092    | 3.17E-08   | No      | Ankib1   | 15.6561   | 5.89255  | -1.4097609       | 15.6571      | 5.89355       | -1.4096082       | 0.00022079 | No      |
| Cyp26a1  | 0.13457   | 0.066242  | -0.068328   | 0.00011422 | No      | Ankle1   | 0.465699  | 3.00401  | 2.68941993       | 0.466699     | 3.00501       | 2.68680551       | 0.045297   | No      |

| RRBS   |          |           |             |            |         | RNAseq   |           |         |                  |              |               |                  |            |         |
|--------|----------|-----------|-------------|------------|---------|----------|-----------|---------|------------------|--------------|---------------|------------------|------------|---------|
| gene   | Blood    | Kidney    | methyl.diff | pMWU.fdr   | Match ? | gene     | blood     | kidney  | log2(fold_ratio) | blood+ 0.001 | kidney+ 0.001 | log2(fold_ratio) | q_value    | Match ? |
| Cyp2t1 | 0.22565  | 0.048934  | -0.176716   | 5.45E-07   | No      | Ankle2   | 25.7111   | 7.72422 | -1.7349302       | 25.7121      | 7.72522       | -1.7347995       | 0.00870822 | No      |
| Cyp4x1 | 0.085926 | 0.19537   | 0.109444    | 0.00038311 | No      | Ankrd1   | 0         | 3.40449 | inf              | 0.001        | 3.40549       | 11.7336467       | 0.00022079 | No      |
| Cysrt1 | 0.21455  | 0.06322   | -0.15133    | 5.77E-05   | No      | ANKRD10  | 48.0491   | 17.8237 | -1.4307126       | 48.0501      | 17.8247       | -1.4306616       | 0.00078858 | No      |
| Cyth2  | 0.82859  | 0.39311   | -0.43548    | 2.19E-09   | No      | Ankrd11  | 105.249   | 22.5442 | -2.2229783       | 105.25       | 22.5452       | -2.222928        | 0.00022079 | No      |
| Dagla  | 0.10619  | 0.038428  | -0.067762   | 2.74E-06   | No      | Ankrd12  | 15.9854   | 3.62858 | -2.1392779       | 15.9864      | 3.62958       | -2.1389706       | 0.00022079 | No      |
| Dbx1   | 0.24937  | 0.05472   | -0.19465    | 0.00034271 | No      | Ankrd13a | 163.301   | 70.047  | -1.2211385       | 163.302      | 70.048        | -1.2211267       | 0.0019604  | No      |
| Dcaf12 | 0.07379  | 0.021302  | -0.052488   | 0.00776108 | No      | Ankrd24  | 0.439938  | 4.26964 | 3.27874231       | 0.440938     | 4.27064       | 3.27580457       | 0.00451708 | No      |
| Dcc    | 0.10191  | 0.013002  | -0.088908   | 1.46E-05   | No      | Ankrd29  | 0.153055  | 3.81015 | 4.63772571       | 0.154055     | 3.81115       | 4.62870898       | 0.00304332 | No      |
| Dcdc2c | 0.86569  | 0.59717   | -0.26852    | 3.92E-06   | No      | Ankrd33b | 0.186713  | 3.29375 | 4.14083677       | 0.187713     | 3.29475       | 4.13356853       | 0.00523184 | No      |
| Ddx39b | 0.092861 | 0.029406  | -0.063455   | 0.00393505 | No      | Ankrd40  | 14.716    | 26.5709 | 0.85246151       | 14.717       | 26.5719       | 0.85241778       | 0.0165181  | No      |
| Ddx3y  | 0.48633  | 0.5952    | 0.10887     | 0.04101176 | No      | Ankrd44  | 51.2274   | 4.88887 | -3.3893427       | 51.2284      | 4.88987       | -3.3890758       | 0.00022079 | No      |
| Ddx4   | 0.97112  | 0.91806   | -0.05306    | 0.00380411 | No      | Ankrd46  | 13.8164   | 27.6749 | 1.00219635       | 13.8174      | 27.6759       | 1.00214406       | 0.00988585 | No      |
| Degs1  | 0.063634 | 0.0019204 | -0.0617136  | 6.38E-06   | No      | Ankrd52  | 11.0758   | 5.5293  | -1.0022422       | 11.0768      | 5.5303        | -1.0021115       | 0.0162859  | No      |
| Dhh    | 0.077859 | 0.02005   | -0.057809   | 2.85E-05   | No      | Ankrd6   | 0.764056  | 2.87295 | 1.9107826        | 0.765056     | 2.87395       | 1.9093977        | 0.00711928 | No      |
| Diras2 | 0.85879  | 0.80319   | -0.0556     | 0.0153478  | No      | Ankrd9   | 2.14749   | 8.32553 | 1.9548907        | 2.14849      | 8.32653       | 1.95439233       | 0.0253888  | No      |
| Dkkl1  | 0.7446   | 0.32276   | -0.42184    | 0.00014343 | No      | Anks4b   | 0.224242  | 19.8204 | 6.46578575       | 0.225242     | 19.8214       | 6.45943919       | 0.0309567  | No      |
| Dlg2   | 0.334    | 0.093508  | -0.240492   | 1.91E-07   | No      | Anks6    | 0.551913  | 11.532  | 4.38505806       | 0.552913     | 11.533        | 4.38257154       | 0.00022079 | No      |
| Dlg3   | 0.26965  | 0.13362   | -0.13603    | 0.00024022 | No      | Anp32a   | 180.437   | 105.38  | -0.7758941       | 180.438      | 105.381       | -0.7758884       | 0.0229153  | No      |
| Dlgap2 | 0.31335  | 0.089879  | -0.223471   | 1.31E-06   | No      | Anp32e   | 96.1054   | 41.4411 | -1.2135552       | 96.1064      | 41.4421       | -1.2135354       | 0.00096553 | No      |
| Dlgap4 | 0.35706  | 0.24358   | -0.11348    | 0.03319751 | No      | Anpep    | 0.16798   | 59.0836 | 8.45832445       | 0.16898      | 59.0846       | 8.44978584       | 0.00041963 | No      |
| Dlk1   | 0.10846  | 0.026244  | -0.082216   | 0.00088439 | No      | Antxr1   | 0.0301352 | 4.19058 | 7.11955649       | 0.0311352    | 4.19158       | 7.07280381       | 0.0123897  | No      |
| Dlk2   | 0.13079  | 0.02879   | -0.102      | 0.00055683 | No      | Antxr2   | 23.1373   | 2.95472 | -2.9691272       | 23.1383      | 2.95572       | -2.9687014       | 0.00022079 | No      |
| Dll1   | 0.035343 | 0.20876   | 0.173417    | 1.84E-06   | No      | Anxa1    | 24.5043   | 172.712 | 2.81726148       | 24.5053      | 172.713       | 2.81721096       | 0.00022079 | No      |
| Dll3   | 0.17465  | 0.058449  | -0.116201   | 2.12E-06   | No      | Anxa11   | 76.8446   | 183.15  | 1.25300991       | 76.8456      | 183.151       | 1.25299902       | 0.00022079 | No      |
| Dll4   | 0.032234 | 0.12109   | 0.088856    | 0.00012333 | No      | Anxa13   | 0         | 2.23355 | inf              | 0.001        | 2.23455       | 11.1257686       | 0.00022079 | No      |
| Dlx5   | 0.072507 | 0.016992  | -0.055515   | 2.40E-06   | No      | Anxa4    | 3.31477   | 120.946 | 5.18931048       | 3.31577      | 120.947       | 5.18888724       | 0.00022079 | No      |
| Dmrt1  | 0.15545  | 0.04614   | -0.10931    | 0.00012978 | No      | Anxa5    | 5.92845   | 388.95  | 6.03578594       | 5.92945      | 388.951       | 6.03554632       | 0.00022079 | No      |
| Dmrt3  | 0.086011 | 0.0338    | -0.052211   | 0.00553374 | No      | Anxa7    | 23.5367   | 46.8061 | 0.9917845        | 23.5377      | 46.8071       | 0.99175403       | 0.00494367 | No      |
| Dmrta1 | 0.13575  | 0.037442  | -0.098308   | 3.82E-07   | No      | Anxa8    | 0         | 8.11279 | inf              | 0.001        | 8.11379       | 12.9861602       | 0.00022079 | No      |
| Dnai2  | 0.7101   | 0.46081   | -0.24929    | 0.00197715 | No      | Anxa9    | 0         | 1.34987 | inf              | 0.001        | 1.35087       | 10.3996731       | 0.00022079 | No      |
| Dnaja2 | 0.14112  | 0.04253   | -0.09859    | 0.02144384 | No      | Ap1g2    | 42.9449   | 14.4449 | -1.5719266       | 42.9459      | 14.4459       | -1.5718603       | 0.010907   | No      |
| Dnajb5 | 0.5573   | 0.07836   | -0.47894    | 1.02E-06   | No      | Ap1s1    | 21.9098   | 62.0628 | 1.50215247       | 21.9108      | 62.0638       | 1.50210987       | 0.00022079 | No      |
| Doc2a  | 0.50982  | 0.3045    | -0.20532    | 0.03196657 | No      | Ap1s2    | 9.36804   | 4.02381 | -1.2191851       | 9.36904      | 4.02481       | -1.2189806       | 0.0102697  | No      |
| Dok5   | 0.12358  | 0.034697  | -0.088883   | 0.00017491 | No      | Ap2a2    | 18.9953   | 43.7938 | 1.20508414       | 18.9963      | 43.7948       | 1.20504114       | 0.00022079 | No      |
| Dpm1   | 0.47117  | 0.26011   | -0.21106    | 3.77E-07   | No      | Ap2s1    | 85.8297   | 153.483 | 0.83853001       | 85.8307      | 153.484       | 0.8385226        | 0.0139821  | No      |
| Dpp6   | 0.10561  | 0.028904  | -0.076706   | 1.64E-06   | No      | Ap3m2    | 11.2685   | 3.65815 | -1.6231093       | 11.2695      | 3.65915       | -1.622843        | 0.00022079 | No      |
| Dpysl4 | 0.099181 | 0.026024  | -0.073157   | 1.15E-05   | No      | Ap3s2    | 8.74843   | 46.1365 | 2.39881252       | 8.74943      | 46.1375       | 2.39867889       | 0.00022079 | No      |
| Drc1   | 0.74365  | 0.10875   | -0.6349     | 8.88E-12   | No      | Ap4b1    | 37.7393   | 9.86736 | -1.9353316       | 37.7403      | 9.86836       | -1.9352236       | 0.00022079 | No      |
| Drd2   | 0.12797  | 0.027491  | -0.100479   | 0.00334577 | No      | Ap4e1    | 6.41421   | 2.46703 | -1.3784963       | 6.41521      | 2.46803       | -1.3781366       | 0.00078858 | No      |
| Drd5   | 0.13806  | 0.049018  | -0.089042   | 0.00095268 | No      | Ap5m1    | 10.6233   | 4.348   | -1.2888081       | 10.6243      | 4.349         | -1.2886122       | 0.0388459  | No      |
| Drgx   | 0.19138  | 0.053563  | -0.137817   | 0.00553374 | No      | Apaf1    | 20.8871   | 2.29016 | -3.1890919       | 20.8881      | 2.29116       | -3.1885312       | 0.00022079 | No      |
| Drp2   | 0.35374  | 0.053796  | -0.299944   | 0.00042212 | No      | Apba3    | 10.399    | 24.9605 | 1.26320203       | 10.4         | 24.9615       | 1.2631211        | 0.00164037 | No      |

| RRBS     |          |          |             |            |         | RNAseq    |          |         |                  |              |               |                  |            |         |
|----------|----------|----------|-------------|------------|---------|-----------|----------|---------|------------------|--------------|---------------|------------------|------------|---------|
| gene     | Blood    | Kidney   | methyl.diff | pMWU.fdr   | Match ? | gene      | blood    | kidney  | log2(fold_ratio) | blood+ 0.001 | kidney+ 0.001 | log2(fold_ratio) | q_value    | Match ? |
| Dsc3     | 0.55423  | 0.37153  | -0.1827     | 3.98E-06   | No      | Apbb1     | 3.38371  | 11.0685 | 1.70978189       | 3.38471      | 11.0695       | 1.70948592       | 0.00041963 | No      |
| Dscam    | 0.06863  | 0.016838 | -0.051792   | 1.06E-05   | No      | Apbb1ip   | 70.7242  | 6.98511 | -3.3398492       | 70.7252      | 6.98611       | -3.3396631       | 0.00022079 | No      |
| Dscam1   | 0.12032  | 0.013718 | -0.106602   | 0.00049864 | No      | Apcdd1l   | 0.445052 | 5.77162 | 3.6969305        | 0.446052     | 5.77262       | 3.69394245       | 0.0112749  | No      |
| Dynl1    | 0.20019  | 0.05685  | -0.14334    | 3.93E-05   | No      | Apcs      | 0        | 30.4639 | inf              | 0.001        | 30.4649       | 14.8948604       | 0.00022079 | No      |
| E2f4     | 0.3163   | 0.0851   | -0.2312     | 0.0002817  | No      | Apitd1    | 45.666   | 87.735  | 0.94203206       | 45.667       | 87.736        | 0.94201692       | 0.048528   | No      |
| Ear11    | 0.65165  | 0.20251  | -0.44914    | 0.00074247 | No      | Aplf      | 42.4815  | 12.7032 | -1.7416427       | 42.4825      | 12.7042       | -1.7415631       | 0.00022079 | No      |
| Ebf3     | 0.099794 | 0.022907 | -0.076887   | 2.22E-06   | No      | Aplnr     | 0.187926 | 3.73647 | 4.31343935       | 0.188926     | 3.73747       | 4.30616883       | 0.00211842 | No      |
| Ebpl     | 0.70866  | 0.063974 | -0.644686   | 3.82E-07   | No      | ALPL1     | 0.285298 | 7.18112 | 4.65366733       | 0.286298     | 7.18212       | 4.64882026       | 0.00022079 | No      |
| Echdc2   | 0.30556  | 0.081888 | -0.223672   | 0.00017491 | No      | Aplp2     | 23.2379  | 98.7049 | 2.08664201       | 23.2389      | 98.7059       | 2.08659454       | 0.00022079 | No      |
| Eef1d    | 0.84818  | 0.72676  | -0.12142    | 0.00063341 | No      | Apmap     | 8.61574  | 36.9051 | 2.09877358       | 8.61674      | 36.9061       | 2.09864523       | 0.00022079 | No      |
| Efna5    | 0.39137  | 0.14911  | -0.24226    | 3.92E-06   | No      | Apoa1     | 0.707084 | 11.95   | 4.07898519       | 0.708084     | 11.951        | 4.07706701       | 0.00378481 | No      |
| Efnb3    | 0.079718 | 0.026086 | -0.053632   | 0.03756776 | No      | APOA1BP   | 20.8547  | 58.0765 | 1.47758195       | 20.8557      | 58.0775       | 1.47753762       | 0.00041963 | No      |
| Egfem1   | 0.12417  | 0.02048  | -0.10369    | 0.00334577 | No      | Apobec3b  | 12.62    | 1.86762 | -2.7564391       | 12.621       | 1.86862       | -2.7557811       | 0.00022079 | No      |
| Egflam   | 0.1164   | 0.014085 | -0.102315   | 0.00553374 | No      | Apobr     | 5.02048  | 1.86966 | -1.4250494       | 5.02148      | 1.87066       | -1.4245653       | 0.00765035 | No      |
| Egr3     | 0.35731  | 0.12719  | -0.23012    | 2.40E-06   | No      | Apoc1     | 0        | 12.407  | inf              | 0.001        | 12.408        | 13.598983        | 0.00022079 | No      |
| Egr4     | 0.12127  | 0.036564 | -0.084706   | 0.0006129  | No      | Apoc2     | 0        | 4.37919 | inf              | 0.001        | 4.38019       | 12.0967777       | 0.00022079 | No      |
| Ehbp11   | 1.79E-07 | 0.079258 | 0.07925782  | 0.00078236 | No      | Apold1    | 0.446551 | 3.2782  | 2.87600702       | 0.447551     | 3.2792        | 2.8732199        | 0.00078858 | No      |
| Eid3     | 0.87251  | 0.69401  | -0.1785     | 0.00113933 | No      | Apom      | 5.00594  | 108.71  | 4.44069985       | 5.00694      | 108.711       | 4.44042495       | 0.0159346  | No      |
| Eif4ebp3 | 0.81879  | 0.3462   | -0.47259    | 2.97E-10   | No      | Apoo      | 8.38989  | 54.0937 | 2.68873678       | 8.39089      | 54.0947       | 2.6885915        | 0.00022079 | No      |
| Eif5a2   | 0.34963  | 0.19238  | -0.15725    | 0.01148416 | No      | Apool     | 6.43365  | 22.4336 | 1.80195179       | 6.43465      | 22.4346       | 1.80179188       | 0.00078858 | No      |
| Elavl2   | 0.086737 | 0.035074 | -0.051663   | 0.0153478  | No      | App       | 58.1065  | 445.714 | 2.93934681       | 58.1075      | 445.715       | 2.93932522       | 0.00041963 | No      |
| Elavl3   | 0.078571 | 0.026905 | -0.051666   | 0.02257431 | No      | Appl2     | 0.558899 | 11.717  | 4.38987183       | 0.559899     | 11.718        | 4.38741594       | 0.00022079 | No      |
| Emc10    | 0.41424  | 0.11621  | -0.29803    | 4.22E-05   | No      | Aqp2      | 0        | 135.008 | inf              | 0.001        | 135.009       | 17.0426961       | 0.00022079 | No      |
| Emid1    | 0.93731  | 0.12031  | -0.817      | 8.88E-12   | No      | Aqp3      | 0        | 37.1747 | inf              | 0.001        | 37.1757       | 15.1820723       | 0.00022079 | No      |
| Eno2     | 0.84348  | 0.57149  | -0.27199    | 0.00048245 | No      | Aqp4      | 0        | 1.57191 | inf              | 0.001        | 1.57291       | 10.6192204       | 0.00022079 | No      |
| Enpp1    | 0.073732 | 0.021612 | -0.05212    | 0.0190918  | No      | Aqp7      | 0        | 21.0403 | inf              | 0.001        | 21.0413       | 14.3609362       | 0.00022079 | No      |
| Enpp3    | 0.16737  | 0.05822  | -0.10915    | 0.00123983 | No      | Aqr       | 22.3085  | 10.0645 | -1.148318        | 22.3095      | 10.0655       | -1.1482393       | 0.0412912  | No      |
| Epcam    | 0.81133  | 0.1405   | -0.67083    | 4.83E-07   | No      | Arap1     | 43.2921  | 19.0567 | -1.1838055       | 43.2931      | 19.0577       | -1.1837631       | 0.00392909 | No      |
| Epha4    | 0.099516 | 0.026793 | -0.072723   | 2.88E-05   | No      | Arap2     | 8.55697  | 3.41867 | -1.3236649       | 8.55797      | 3.41967       | -1.3234115       | 0.0147132  | No      |
| Ephb3    | 0.34554  | 0.19884  | -0.1467     | 0.0153478  | No      | Arap3     | 3.85583  | 12.5718 | 1.70507788       | 3.85683      | 12.5728       | 1.70481852       | 0.00227055 | No      |
| Epn1     | 0.88929  | 0.1065   | -0.78279    | 1.81E-12   | No      | Arel1     | 24.2996  | 10.6259 | -1.1933475       | 24.3006      | 10.6269       | -1.1932711       | 0.00060553 | No      |
| Epo      | 0.25331  | 0.054572 | -0.198738   | 0.00123983 | No      | Arf2      | 4.19207  | 9.93293 | 1.24455654       | 4.19307      | 9.93393       | 1.24435767       | 0.00536605 | No      |
| Erf      | 0.82842  | 0.64981  | -0.17861    | 0.00197715 | No      | Arf4      | 63.2454  | 108.022 | 0.77229271       | 63.2464      | 108.023       | 0.77228325       | 0.0160426  | No      |
| Erich6   | 0.41276  | 0.18185  | -0.23091    | 4.32E-06   | No      | Arglu1    | 184.442  | 57.3529 | -1.6852289       | 184.443      | 57.3539       | -1.6852115       | 0.00022079 | No      |
| Espnl    | 0.83112  | 0.25938  | -0.57174    | 7.63E-07   | No      | Arhgap1   | 54.2828  | 22.842  | -1.2488062       | 54.2838      | 22.843        | -1.2487696       | 0.00164037 | No      |
| Esr1     | 0.22911  | 0.10053  | -0.12858    | 0.00135614 | No      | Arhgap10  | 2.57242  | 11.4855 | 2.15861555       | 2.57342      | 11.4865       | 2.15818043       | 0.00022079 | No      |
| Esrp2    | 0.19022  | 0.048697 | -0.141523   | 1.31E-06   | No      | Arhgap11a | 0.420198 | 2.13639 | 2.34603384       | 0.421198     | 2.13739       | 2.34327968       | 0.00422081 | No      |
| Evx1     | 0.22833  | 0.10047  | -0.12786    | 0.00934082 | No      | Arhgap12  | 15.1107  | 8.21014 | -0.8800918       | 15.1117      | 8.21114       | -0.8800115       | 0.0164052  | No      |
| Exoc3l4  | 0.18752  | 0.061852 | -0.125668   | 0.00290027 | No      | Arhgap15  | 114.235  | 5.5564  | -4.3617105       | 114.236      | 5.5574        | -4.3614635       | 0.00022079 | No      |
| Fabp3    | 0.26579  | 0.055387 | -0.210403   | 0.00010392 | No      | Arhgap17  | 62.0553  | 27.1716 | -1.1914549       | 62.0563      | 27.1726       | -1.1914251       | 0.00333723 | No      |
| Fabp7    | 0.87012  | 0.39526  | -0.47486    | 5.45E-07   | No      | Arhgap18  | 3.07677  | 20.4686 | 2.73392392       | 3.07777      | 20.4696       | 2.73352558       | 0.00022079 | No      |
| Fam101a  | 0.60071  | 0.096897 | -0.503813   | 5.45E-07   | No      | Arhgap20  | 0        | 1.34462 | inf              | 0.001        | 1.34562       | 10.3940553       | 0.00022079 | No      |

| RRBS    |           |           |             |            |         | RNAseq    |           |         |                  |              |               |                  |            |         |
|---------|-----------|-----------|-------------|------------|---------|-----------|-----------|---------|------------------|--------------|---------------|------------------|------------|---------|
| gene    | Blood     | Kidney    | methyl.diff | pMWU.fdr   | Match ? | gene      | blood     | kidney  | log2(fold_ratio) | blood+ 0.001 | kidney+ 0.001 | log2(fold_ratio) | q_value    | Match ? |
| Fam129a | 0.0013082 | 0.063487  | 0.0621788   | 2.88E-05   | No      | Arhgap21  | 0.492363  | 6.0801  | 3.6263008        | 0.493363     | 6.0811        | 3.62361088       | 0.00022079 | No      |
| Fam131b | 0.11255   | 0.036282  | -0.076268   | 0.00197715 | No      | Arhgap22  | 0.0837066 | 12.8887 | 7.26654966       | 0.0847066    | 12.8897       | 7.24952859       | 0.00022079 | No      |
| Fam132a | 0.78519   | 0.2343    | -0.55089    | 2.15E-11   | No      | Arhgap24  | 0.203593  | 156.244 | 9.58389711       | 0.204593     | 156.245       | 9.57683752       | 0.00022079 | No      |
| Fam150b | 0.062406  | 0.010086  | -0.05232    | 1.67E-05   | No      | Arhgap29  | 0.0242656 | 35.4305 | 10.5118636       | 0.0252656    | 35.4315       | 10.4536424       | 0.00022079 | No      |
| Fam163b | 0.13925   | 0.022516  | -0.116734   | 6.26E-05   | No      | Arhgap32  | 0         | 5.17266 | inf              | 0.001        | 5.17366       | 12.3369695       | 0.0421044  | No      |
| Fam193b | 0.46741   | 0.20902   | -0.25839    | 0.00393505 | No      | Arhgap35  | 2.49731   | 13.115  | 2.39277098       | 2.49831      | 13.116        | 2.3923034        | 0.00022079 | No      |
| Fam19a4 | 0.063132  | 0.011394  | -0.051738   | 1.76E-08   | No      | Arhgap39  | 1.34151   | 2.70647 | 1.01255459       | 1.34251      | 2.70747       | 1.01201252       | 0.0465045  | No      |
| Fam20a  | 0.08059   | 0.01964   | -0.06095    | 0.00088439 | No      | Arhgap4   | 122.538   | 67.983  | -0.8499833       | 122.539      | 67.984        | -0.8499738       | 0.0391441  | No      |
| Fam217a | 0.30712   | 0.067779  | -0.239341   | 1.81E-12   | No      | Arhgap42  | 0         | 4.43542 | inf              | 0.001        | 4.43642       | 12.1151802       | 0.00022079 | No      |
| Fam221b | 0.20857   | 0.063243  | -0.145327   | 0.0017676  | No      | Arhgap44  | 0.0672321 | 3.0074  | 5.48322274       | 0.0682321    | 3.0084        | 5.46240197       | 0.00022079 | No      |
| Fam55b  | 0.93038   | 0.15792   | -0.77246    | 2.83E-08   | No      | Arhgap5   | 0.201441  | 12.9518 | 6.00665145       | 0.202441     | 12.9528       | 5.99961868       | 0.00022079 | No      |
| Fam71e2 | 0.97014   | 0.84617   | -0.12397    | 9.44E-05   | No      | Arhgap6   | 0.725127  | 4.04025 | 2.47813897       | 0.726127     | 4.04125       | 2.4765078        | 0.00041963 | No      |
| Fam83f  | 0.40927   | 0.050503  | -0.358767   | 2.29E-09   | No      | Arhgap9   | 173.855   | 69.3592 | -1.3257254       | 173.856      | 69.3602       | -1.3257129       | 0.00096553 | No      |
| Fam89a  | 0.022333  | 0.201     | 0.178667    | 2.22E-06   | No      | Arhgdib   | 1942.32   | 203.35  | -3.255744        | 1942.321     | 203.351       | -3.2557377       | 0.00022079 | No      |
| Fance   | 0.33738   | 0.26333   | -0.07405    | 0.00667305 | No      | Arhgef1   | 515.068   | 54.364  | -3.2440394       | 515.069      | 54.365        | -3.2440157       | 0.00022079 | No      |
| Fat1    | 0.096754  | 0.02284   | -0.073914   | 0.00113933 | No      | Arhgef10l | 0.117731  | 24.783  | 7.71771278       | 0.118731     | 24.784        | 7.70556858       | 0.00022079 | No      |
| Fat3    | 0.17902   | 0.058187  | -0.120833   | 0.00014343 | No      | Arhgef12  | 1.29193   | 15.7823 | 3.61070766       | 1.29293      | 15.7833       | 3.6096828        | 0.00022079 | No      |
| Fbxl14  | 0.1805    | 0.04503   | -0.13547    | 5.45E-07   | No      | Arhgef18  | 54.1809   | 13.8379 | -1.9691593       | 54.1819      | 13.8389       | -1.9690817       | 0.00022079 | No      |
| Fbxl17  | 0.27955   | 0.063434  | -0.216116   | 0.00636684 | No      | Arhgef19  | 0         | 4.84129 | inf              | 0.001        | 4.84229       | 12.2414738       | 0.00022079 | No      |
| Fbxo24  | 0.86907   | 0.51433   | -0.35474    | 4.68E-10   | No      | Arhgef28  | 0.0291482 | 22.0539 | 9.56341129       | 0.0301482    | 22.0549       | 9.51481164       | 0.00113657 | No      |
| Fbxw17  | 0.29976   | 0.035095  | -0.264665   | 4.70E-08   | No      | Arhgef40  | 0.0476235 | 9.08033 | 7.57492727       | 0.0486235    | 9.08133       | 7.54510605       | 0.00022079 | No      |
| Fcgr3a  | 0.82911   | 0.72082   | -0.10829    | 0.03425917 | No      | Arhgef6   | 55.6521   | 5.19017 | -3.4225824       | 55.6531      | 5.19117       | -3.4223304       | 0.00022079 | No      |
| Fdps    | 0.13044   | 0.016777  | -0.113663   | 0.00092233 | No      | Arid1a    | 67.0353   | 14.6741 | -2.191649        | 67.0363      | 14.6751       | -2.1915722       | 0.00022079 | No      |
| Fez1    | 0.40219   | 0.14258   | -0.25961    | 1.41E-05   | No      | Arid3b    | 13.4744   | 1.78596 | -2.9154494       | 13.4754      | 1.78696       | -2.9147489       | 0.00022079 | No      |
| Fezf2   | 0.083622  | 0.01859   | -0.065032   | 3.45E-06   | No      | Arid4a    | 28.6449   | 7.35782 | -1.960928        | 28.6459      | 7.35882       | -1.9607823       | 0.0383328  | No      |
| Ffar1   | 0.59911   | 0.39877   | -0.20034    | 0.02257431 | No      | Arid4b    | 12.9991   | 2.28975 | -2.5051497       | 13.0001      | 2.29075       | -2.5046308       | 0.00022079 | No      |
| Ffar2   | 0.83666   | 0.41943   | -0.41723    | 1.47E-06   | No      | Arid5a    | 13.7962   | 4.59937 | -1.5847628       | 13.7972      | 4.60037       | -1.5845537       | 0.00211842 | No      |
| Fgf16   | 0.069388  | 0.0074763 | -0.0619117  | 0.00088439 | No      | Arid5b    | 20.006    | 3.78198 | -2.4032191       | 20.007       | 3.78298       | -2.4029098       | 0.00022079 | No      |
| Fgf19   | 0.11998   | 0.05119   | -0.06879    | 0.03196657 | No      | Arih1     | 25.2207   | 15.4277 | -0.7090853       | 25.2217      | 15.4287       | -0.709049        | 0.0424075  | No      |
| Fgf21   | 0.81746   | 0.66641   | -0.15105    | 0.00290027 | No      | Arih2     | 30.6944   | 14.4777 | -1.084143        | 30.6954      | 14.4787       | -1.0840904       | 0.00096553 | No      |
| Fgf3    | 0.11429   | 0.038739  | -0.075551   | 0.00510288 | No      | Arl1      | 22.3393   | 91.0601 | 2.02723506       | 22.3403      | 91.0611       | 2.02718633       | 0.00022079 | No      |
| Fgf4    | 0.12379   | 0.014169  | -0.109621   | 1.28E-05   | No      | Arl15     | 7.12642   | 21.3805 | 1.58504617       | 7.12742      | 21.3815       | 1.58491122       | 0.00130998 | No      |
| Fgf6    | 0.74971   | 0.10135   | -0.64836    | 1.81E-12   | No      | Arl2      | 28.0157   | 105.013 | 1.90626049       | 28.0167      | 105.014       | 1.90622273       | 0.00041963 | No      |
| Fhl3    | 0.012568  | 0.22505   | 0.212482    | 1.86E-06   | No      | Arl3      | 53.1896   | 118.963 | 1.16129684       | 53.1906      | 118.964       | 1.16128185       | 0.00113657 | No      |
| Fibp    | 0.74126   | 0.5449    | -0.19636    | 0.0074695  | No      | Arl5b     | 6.33938   | 3.75298 | -0.7563051       | 6.34038      | 3.75398       | -0.7561483       | 0.0395387  | No      |
| Fitm1   | 0.23614   | 0.11791   | -0.11823    | 0.0153478  | No      | Arl5c     | 83.8043   | 8.27843 | -3.3395952       | 83.8053      | 8.27943       | -3.3394381       | 0.00022079 | No      |
| Flnc    | 0.1474    | 0.041912  | -0.105488   | 4.45E-05   | No      | ARL6      | 1.60643   | 17.1497 | 3.41625332       | 1.60743      | 17.1507       | 3.41543964       | 0.00022079 | No      |
| Flrt3   | 0.10871   | 0.040425  | -0.068285   | 0.00290027 | No      | Arl6ip1   | 25.6848   | 41.6969 | 0.69902529       | 25.6858      | 41.6979       | 0.69900372       | 0.0310553  | No      |
| Fn3k    | 0.92937   | 0.18878   | -0.74059    | 3.82E-07   | No      | Arl6ip5   | 147.276   | 38.3547 | -1.9410471       | 147.277      | 38.3557       | -1.9410192       | 0.00022079 | No      |
| Foxa3   | 0.11544   | 0.027335  | -0.088105   | 2.91E-06   | No      | Armc9     | 5.25268   | 11.2664 | 1.100901         | 5.25368      | 11.2674       | 1.10075441       | 0.0455876  | No      |
| Foxc2   | 0.11674   | 0.030702  | -0.086038   | 0.0002817  | No      | Armcx3    | 2.04724   | 11.8168 | 2.52908726       | 2.04824      | 11.8178       | 2.52850481       | 0.00022079 | No      |
| Foxd1   | 0.072201  | 0.012454  | -0.059747   | 0.04101176 | No      | Arnt2     | 0         | 18.6341 | inf              | 0.001        | 18.6351       | 14.1857349       | 0.00022079 | No      |

| RRBS    |           |          |             |            |         | RNAseq  |           |         |                  |              |               |                  |            |         |
|---------|-----------|----------|-------------|------------|---------|---------|-----------|---------|------------------|--------------|---------------|------------------|------------|---------|
| gene    | Blood     | Kidney   | methyl.diff | pMWU.fdr   | Match ? | gene    | blood     | kidney  | log2(fold_ratio) | blood+ 0.001 | kidney+ 0.001 | log2(fold_ratio) | q_value    | Match ? |
| Foxe1   | 0.22179   | 0.065922 | -0.155868   | 0.00038311 | No      | Arpc1a  | 75.2791   | 120.596 | 0.67986077       | 75.2801      | 120.597       | 0.67985357       | 0.0391441  | No      |
| Foxe3   | 0.2598    | 0.077407 | -0.182393   | 0.00023579 | No      | Arpc1b  | 744.832   | 144.815 | -2.362704        | 744.833      | 144.816       | -2.362696        | 0.00022079 | No      |
| Foxg1   | 0.4122    | 0.11917  | -0.29303    | 3.82E-07   | No      | Arpc2   | 891.699   | 361.418 | -1.3028884       | 891.7        | 361.419       | -1.3028861       | 0.020304   | No      |
| Foxj1   | 0.78479   | 0.22199  | -0.5628     | 1.22E-10   | No      | Arpc3   | 336.895   | 188.318 | -0.8391281       | 336.896      | 188.319       | -0.8391247       | 0.0142227  | No      |
| Foxn4   | 0.098924  | 0.028533 | -0.070391   | 5.03E-06   | No      | Arpc5   | 238.825   | 85.2192 | -1.4867035       | 238.826      | 85.2202       | -1.4866926       | 0.00022079 | No      |
| Foxo3   | 0.016475  | 0.18735  | 0.170875    | 1.15E-06   | No      | Arpp21  | 99.715    | 17.5864 | -2.5033504       | 99.716       | 17.5874       | -2.5032828       | 0.00022079 | No      |
| Foxp4   | 0.0018519 | 0.063739 | 0.0618871   | 2.88E-05   | No      | Arrb2   | 158.643   | 22.6727 | -2.8067558       | 158.644      | 22.6737       | -2.8067012       | 0.00022079 | No      |
| Foxred2 | 0.47553   | 0.086932 | -0.388598   | 1.81E-12   | No      | Arrdc1  | 34.7757   | 62.8822 | 0.85457214       | 34.7767      | 62.8832       | 0.8545536        | 0.0165181  | No      |
| Foxs1   | 0.77815   | 0.56686  | -0.21129    | 2.09E-05   | No      | Arrdc2  | 34.3349   | 11.0983 | -1.6293371       | 34.3359      | 11.0993       | -1.6292491       | 0.00041963 | No      |
| Frg1    | 0.48695   | 0.098564 | -0.388386   | 0.00042212 | No      | Arrdc3  | 32.4332   | 101.935 | 1.65210622       | 32.4342      | 101.936       | 1.65207589       | 0.00041963 | No      |
| Frmf3   | 0.13621   | 0.019982 | -0.116228   | 1.81E-12   | No      | Arrdc4  | 0.282875  | 4.33398 | 3.93745591       | 0.283875     | 4.33498       | 3.93269763       | 0.00022079 | No      |
| Fry     | 0.65329   | 0.32291  | -0.33038    | 1.74E-09   | No      | Arsa    | 2.82393   | 28.3042 | 3.32523991       | 2.82493      | 28.3052       | 3.32478009       | 0.00022079 | No      |
| Fscn2   | 0.86214   | 0.7888   | -0.07334    | 0.00048245 | No      | Arsb    | 3.96712   | 33.3438 | 3.07125459       | 3.96812      | 33.3448       | 3.07093424       | 0.00022079 | No      |
| Fut1    | 0.96133   | 0.87257  | -0.08876    | 0.00123983 | No      | Arse    | 6.38058   | 14.3427 | 1.16855716       | 6.38158      | 14.3437       | 1.16843165       | 0.0224751  | No      |
| Fut2    | 0.8074    | 0.65856  | -0.14884    | 0.00148947 | No      | Arsg    | 0.72826   | 3.15162 | 2.11356808       | 0.72926      | 3.15262       | 2.11204612       | 0.00672121 | No      |
| Fut7    | 0.71549   | 0.60436  | -0.11113    | 0.03319751 | No      | Art2b   | 176.502   | 2.64008 | -6.0629591       | 176.503      | 2.64108       | -6.0624209       | 0.00022079 | No      |
| Fzd10   | 0.045013  | 0.20484  | 0.159827    | 1.61E-05   | No      | As3mt   | 9.89007   | 31.2852 | 1.66142769       | 9.89107      | 31.2862       | 1.66132794       | 0.00022079 | No      |
| Fzd2    | 0.070558  | 0.015072 | -0.055486   | 0.00095268 | No      | Asah1   | 4.80687   | 36.4271 | 2.92184245       | 4.80787      | 36.4281       | 2.92158196       | 0.00022079 | No      |
| Fzd5    | 0.88804   | 0.31797  | -0.57007    | 1.82E-12   | No      | Asah2   | 0         | 1.09837 | inf              | 0.001        | 1.09937       | 10.1024613       | 0.00022079 | No      |
| Gabbr2  | 0.16726   | 0.049167 | -0.118093   | 0.00163733 | No      | Asap1   | 28.2705   | 3.50821 | -3.0104904       | 28.2715      | 3.50921       | -3.0101302       | 0.00022079 | No      |
| Gabra1  | 0.079654  | 0.024597 | -0.055057   | 4.22E-07   | No      | Asap2   | 0.0745946 | 10.3145 | 7.11138698       | 0.0755946    | 10.3155       | 7.09231485       | 0.00022079 | No      |
| Gabra5  | 0.10369   | 0.015987 | -0.087703   | 2.29E-05   | No      | Asap3   | 0.380637  | 2.16074 | 2.50503777       | 0.381637     | 2.16174       | 2.50192006       | 0.0145886  | No      |
| Gabrb1  | 0.067641  | 0.016368 | -0.051273   | 0.00306475 | No      | Asb13   | 38.687    | 19.7384 | -0.9708438       | 38.688       | 19.7394       | -0.970808        | 0.00765035 | No      |
| Gabrg3  | 0.093708  | 0.013893 | -0.079815   | 7.02E-06   | No      | Asb3    | 10.8312   | 4.93502 | -1.1340653       | 10.8322      | 4.93602       | -1.1339061       | 0.00962607 | No      |
| Gabrr1  | 0.86251   | 0.68735  | -0.17516    | 0.00055683 | No      | Ascc3   | 19.2954   | 7.46459 | -1.370122        | 19.2964      | 7.46559       | -1.3700035       | 0.0269702  | No      |
| Gad1    | 0.18724   | 0.054293 | -0.132947   | 3.09E-05   | No      | Asgr1   | 0         | 3.70494 | inf              | 0.001        | 3.70594       | 11.8556238       | 0.00022079 | No      |
| Gal     | 0.14581   | 0.052112 | -0.093698   | 0.01000157 | No      | Asl     | 7.43901   | 70.2377 | 3.23906306       | 7.44001      | 70.2387       | 3.23888968       | 0.00211842 | No      |
| Gal3st1 | 0.46053   | 0.13133  | -0.3292     | 1.86E-06   | No      | Asmtl   | 28.3528   | 108.354 | 1.93418929       | 28.3538      | 108.355       | 1.93415172       | 0.00022079 | No      |
| Gal3st3 | 0.057666  | 0.12387  | 0.066204    | 0.00636684 | No      | Aspa    | 0.221949  | 47.1875 | 7.73203272       | 0.222949     | 47.1885       | 7.72557777       | 0.00022079 | No      |
| Galnt16 | 0.20578   | 0.058549 | -0.147231   | 6.75E-05   | No      | Aspdh   | 14.1182   | 91.4776 | 2.69586235       | 14.1192      | 91.4786       | 2.69577594       | 0.00022079 | No      |
| Galnt2  | 0.77034   | 0.3389   | -0.43144    | 4.32E-06   | No      | ASPH    | 0.743802  | 8.93006 | 3.58567934       | 0.744802     | 8.93106       | 3.58390256       | 0.00022079 | No      |
| Galnt4  | 0.87861   | 0.81142  | -0.06719    | 0.01155321 | No      | Aspscr1 | 31.2556   | 122.05  | 1.96528569       | 31.2566      | 122.051       | 1.96525136       | 0.00113657 | No      |
| Galnt9  | 0.1517    | 0.048203 | -0.103497   | 0.00510288 | No      | Asun    | 26.0647   | 12.6039 | -1.048227        | 26.0657      | 12.6049       | -1.0481679       | 0.00765035 | No      |
| Galr1   | 0.11481   | 0.039242 | -0.075568   | 1.41E-11   | No      | Asxl1   | 40.2288   | 9.77627 | -2.0408727       | 40.2298      | 9.77727       | -2.040761        | 0.00022079 | No      |
| Galr2   | 0.2417    | 0.07492  | -0.16678    | 0.00799193 | No      | Asxl2   | 11.4199   | 3.80259 | -1.5864957       | 11.4209      | 3.80359       | -1.5862427       | 0.00022079 | No      |
| Garem2  | 0.22776   | 0.075652 | -0.152108   | 0.00026127 | No      | Atad2   | 11.4404   | 1.63032 | -2.8109104       | 11.4414      | 1.63132       | -2.8101519       | 0.00022079 | No      |
| Gas2l2  | 0.7127    | 0.30837  | -0.40433    | 2.88E-05   | No      | Atf1    | 55.7333   | 22.5378 | -1.3061929       | 55.7343      | 22.5388       | -1.3061548       | 0.00060553 | No      |
| Gas6    | 0.037207  | 0.22209  | 0.184883    | 2.14E-06   | No      | Atf3    | 0.0658001 | 58.4469 | 9.79482101       | 0.0668001    | 58.4479       | 9.77308521       | 0.00909283 | No      |
| Gata2   | 0.56215   | 0.11334  | -0.44881    | 3.82E-07   | No      | Atf7ip  | 53.2827   | 12.2505 | -2.1208266       | 53.2837      | 12.2515       | -2.1207359       | 0.00060553 | No      |
| Gata4   | 0.072516  | 0.019028 | -0.053488   | 0.01660198 | No      | ATG101  | 28.9711   | 55.4839 | 0.93745474       | 28.9721      | 55.4849       | 0.93743094       | 0.0110257  | No      |
| Gata5   | 0.048909  | 0.15418  | 0.105271    | 0.00023579 | No      | Atg12   | 46.2104   | 15.3691 | -1.5881849       | 46.2114      | 15.3701       | -1.5881222       | 0.00022079 | No      |
| Gata6   | 0.14703   | 0.06456  | -0.08247    | 0.00026127 | No      | Atg14   | 7.41553   | 4.07619 | -0.8633285       | 7.41653      | 4.07719       | -0.8631692       | 0.030773   | No      |

| RRBS    |           |          |             |            |         | RNAseq   |           |         |                  |              |               |                  |            |         |
|---------|-----------|----------|-------------|------------|---------|----------|-----------|---------|------------------|--------------|---------------|------------------|------------|---------|
| gene    | Blood     | Kidney   | methyl.diff | pMWU.fdr   | Match ? | gene     | blood     | kidney  | log2(fold_ratio) | blood+ 0.001 | kidney+ 0.001 | log2(fold_ratio) | q_value    | Match ? |
| Gba     | 0.97799   | 0.62884  | -0.34915    | 3.82E-07   | No      | Atg2b    | 12.6741   | 4.49622 | -1.4950988       | 12.6751      | 4.49722       | -1.4948918       | 0.00022079 | No      |
| Gbx2    | 0.24758   | 0.07664  | -0.17094    | 0.00020679 | No      | Atg9a    | 32.0635   | 15.1774 | -1.0790072       | 32.0645      | 15.1784       | -1.0789572       | 0.00130998 | No      |
| Gcs1    | 0.70725   | 0.6223   | -0.08495    | 0.01783979 | No      | Atic     | 51.0042   | 30.0698 | -0.7623008       | 51.0052      | 30.0708       | -0.7622811       | 0.0189519  | No      |
| Gdap1   | 0.08324   | 0.020559 | -0.062681   | 5.77E-05   | No      | Atl1     | 0.34909   | 1.25483 | 1.84582099       | 0.35009      | 1.25583       | 1.84284342       | 0.0191747  | No      |
| Gdap1l1 | 0.11054   | 0.027662 | -0.082878   | 0.00866691 | No      | Atl2     | 31.3195   | 11.7754 | -1.4112851       | 31.3205      | 11.7764       | -1.4112087       | 0.00022079 | No      |
| Gdf10   | 0.21925   | 0.061929 | -0.157321   | 2.74E-06   | No      | Atm      | 29.3125   | 3.34601 | -3.1310024       | 29.3135      | 3.34701       | -3.1306205       | 0.00022079 | No      |
| Gdf15   | 0.53823   | 0.10111  | -0.43712    | 3.82E-07   | No      | Atoh8    | 0         | 1.38638 | inf              | 0.001        | 1.38738       | 10.4381473       | 0.00022079 | No      |
| Gdf7    | 0.09226   | 0.039449 | -0.052811   | 0.00019244 | No      | Atox1    | 62.8509   | 236.832 | 1.91385872       | 62.8519      | 236.833       | 1.91384186       | 0.00022079 | No      |
| Gfer    | 0.89298   | 0.81043  | -0.08255    | 0.00197715 | No      | Atp10b   | 0         | 1.07723 | inf              | 0.001        | 1.07823       | 10.0744492       | 0.00022079 | No      |
| Gfod1   | 0.45856   | 0.16362  | -0.29494    | 0.00105615 | No      | ATP11B   | 39.6854   | 8.15936 | -2.2820804       | 39.6864      | 8.16036       | -2.28194         | 0.00022079 | No      |
| Gfpt2   | 0.61356   | 0.10618  | -0.50738    | 1.31E-05   | No      | Atp13a1  | 73.5139   | 29.9289 | -1.2964778       | 73.5149      | 29.9299       | -1.2964492       | 0.00022079 | No      |
| Ggn     | 0.77242   | 0.61075  | -0.16167    | 0.01245124 | No      | Atp1a1   | 83.2501   | 1030.89 | 3.63029458       | 83.2511      | 1030.891      | 3.63027865       | 0.00022079 | No      |
| Ghsr    | 0.21245   | 0.099862 | -0.112588   | 2.57E-12   | No      | Atp1b1   | 2.10062   | 1285.75 | 9.25757923       | 2.10162      | 1285.751      | 9.25689373       | 0.00022079 | No      |
| Gipc3   | 0.80717   | 0.27234  | -0.53483    | 2.84E-09   | No      | Atp2b1   | 16.1366   | 6.08831 | -1.4062229       | 16.1376      | 6.08931       | -1.4060754       | 0.00022079 | No      |
| Gja3    | 0.72001   | 0.5123   | -0.20771    | 0.0153478  | No      | Atp2b4   | 10.1299   | 5.52301 | -0.8750933       | 10.1309      | 5.52401       | -0.8749745       | 0.0308614  | No      |
| Gja8    | 0.11481   | 0.4646   | 0.34979     | 2.06E-05   | No      | Atp2c1   | 8.32767   | 31.7656 | 1.93148046       | 8.32867      | 31.7666       | 1.93135265       | 0.00022079 | No      |
| Gjd2    | 0.06853   | 0.015441 | -0.053089   | 0.00019244 | No      | Atp5a1   | 269.585   | 852.839 | 1.66153319       | 269.586      | 852.84        | 1.66152953       | 0.00022079 | No      |
| Gldn    | 0.079682  | 0.029361 | -0.050321   | 0.00049864 | No      | Atp5b    | 362.94    | 1911.41 | 2.3968343        | 362.941      | 1911.411      | 2.39683108       | 0.00022079 | No      |
| Glra1   | 0.14296   | 0.02151  | -0.12145    | 0.00046099 | No      | Atp5c1   | 133.241   | 515.709 | 1.95251914       | 133.242      | 515.71        | 1.95251111       | 0.00022079 | No      |
| Gnas    | 0.35987   | 0.14186  | -0.21801    | 1.96E-12   | No      | Atp5d    | 133.763   | 683.503 | 2.35326856       | 133.764      | 683.504       | 2.35325989       | 0.00022079 | No      |
| Gnaz    | 0.76819   | 0.25415  | -0.51404    | 1.81E-12   | No      | Atp5e    | 782.902   | 2210.02 | 1.49715579       | 782.903      | 2210.021      | 1.4971546        | 0.0127657  | No      |
| Gng11   | 0.020077  | 0.086082 | 0.066005    | 5.48E-07   | No      | ATP5F1   | 58.9049   | 172.555 | 1.55059672       | 58.9059      | 172.556       | 1.55058059       | 0.00022079 | No      |
| Gng7    | 0.55544   | 0.11975  | -0.43569    | 8.96E-07   | No      | Atp5i    | 404.834   | 3378.91 | 3.06115556       | 404.835      | 3378.911      | 3.06115242       | 0.00022079 | No      |
| Gnmt    | 0.78635   | 0.27181  | -0.51454    | 4.29E-07   | No      | Atp5j    | 279.827   | 973.7   | 1.79894217       | 279.828      | 973.701       | 1.7989385        | 0.00022079 | No      |
| Gp1bb   | 0.31307   | 0.19842  | -0.11465    | 0.02731997 | No      | Atp5j2   | 516.357   | 1925.01 | 1.89842517       | 516.358      | 1925.011      | 1.89842313       | 0.00022079 | No      |
| Gpr139  | 0.063983  | 0.012317 | -0.051666   | 1.44E-07   | No      | Atp5l    | 318.129   | 1304.88 | 2.03623334       | 318.13       | 1304.881      | 2.03622991       | 0.00022079 | No      |
| Gpr146  | 0.58147   | 0.050547 | -0.530923   | 1.74E-09   | No      | Atp5o    | 132.615   | 994.933 | 2.90735541       | 132.616      | 994.934       | 2.90734598       | 0.00022079 | No      |
| Gpr150  | 0.23745   | 0.095115 | -0.142335   | 0.00161991 | No      | Atp5s    | 0.674195  | 19.5947 | 4.86115375       | 0.675195     | 19.5957       | 4.85908908       | 0.00113657 | No      |
| Gpr26   | 0.28479   | 0.093762 | -0.191028   | 9.51E-11   | No      | Atp6ap2  | 16.8418   | 93.8799 | 2.47876997       | 16.8428      | 93.8809       | 2.47869968       | 0.00022079 | No      |
| Gpr4    | 0.98874   | 0.93274  | -0.056      | 0.00135614 | No      | Atp6v0a1 | 2.01997   | 15.6187 | 2.95086861       | 2.02097      | 15.6197       | 2.95024693       | 0.00022079 | No      |
| Gpr50   | 0.19464   | 0.044201 | -0.150439   | 0.00438283 | No      | Atp6v0a2 | 21.2582   | 11.0942 | -0.9382138       | 21.2592      | 11.0952       | -0.9381516       | 0.00738919 | No      |
| Gpr6    | 0.14848   | 0.072651 | -0.075829   | 0.00438283 | No      | Atp6v0a4 | 0.0331314 | 37.8291 | 10.1570816       | 0.0341314    | 37.8301       | 10.1142193       | 0.00022079 | No      |
| Gpr81   | 0.88686   | 0.12838  | -0.75848    | 3.82E-07   | No      | Atp6v0b  | 50.8678   | 184.682 | 1.86021866       | 50.8688      | 184.683       | 1.86019811       | 0.00022079 | No      |
| Gpr83   | 0.45314   | 0.17078  | -0.28236    | 3.57E-06   | No      | Atp6v0c  | 140.811   | 453.299 | 1.68670294       | 140.812      | 453.3         | 1.68669588       | 0.00022079 | No      |
| Gpsm3   | 0.0064286 | 0.16441  | 0.1579814   | 0.0001571  | No      | Atp6v0d1 | 104.792   | 282.548 | 1.43096739       | 104.793      | 282.549       | 1.43095873       | 0.00022079 | No      |
| Gpx2    | 0.49138   | 0.15407  | -0.33731    | 1.95E-08   | No      | Atp6v0d2 | 0         | 37.3235 | inf              | 0.001        | 37.3245       | 15.1878353       | 0.00022079 | No      |
| Gpx7    | 0.29773   | 0.19736  | -0.10037    | 0.00693052 | No      | Atp6v0e1 | 89.4299   | 264.124 | 1.56238623       | 89.4309      | 264.125       | 1.56237556       | 0.00022079 | No      |
| Grasp   | 0.02107   | 0.33811  | 0.31704     | 3.82E-07   | No      | Atp6v0e2 | 15.3309   | 55.0916 | 1.84538997       | 15.3319      | 55.0926       | 1.84532206       | 0.00022079 | No      |
| Grb10   | 0.55779   | 0.20449  | -0.3533     | 7.75E-05   | No      | Atp6v1a  | 8.1369    | 63.3663 | 2.96116461       | 8.1379       | 63.3673       | 2.96101009       | 0.00022079 | No      |
| Grhl2   | 0.09869   | 0.029476 | -0.069214   | 0.02731997 | No      | Atp6v1b1 | 0.050776  | 78.795  | 10.5997416       | 0.051776     | 78.796        | 10.5716232       | 0.00618779 | No      |
| Grid1   | 0.10431   | 0.040132 | -0.064178   | 0.04318305 | No      | Atp6v1b2 | 29.3675   | 85.8517 | 1.54762625       | 29.3685      | 85.8527       | 1.54759392       | 0.00022079 | No      |
| Grik1   | 0.090432  | 0.028497 | -0.061935   | 1.81E-12   | No      | Atp6v1c1 | 32.0596   | 51.6856 | 0.68900597       | 32.0606      | 51.6866       | 0.68898888       | 0.0379944  | No      |

| RRBS      |           |           |             |            |         | RNAseq        |          |         |                  |              |               |                  |            |         |
|-----------|-----------|-----------|-------------|------------|---------|---------------|----------|---------|------------------|--------------|---------------|------------------|------------|---------|
| gene      | Blood     | Kidney    | methyl.diff | pMWU.fdr   | Match ? | gene          | blood    | kidney  | log2(fold_ratio) | blood+ 0.001 | kidney+ 0.001 | log2(fold_ratio) | q_value    | Match ? |
| Grik3     | 0.10233   | 0.030512  | -0.071818   | 2.40E-06   | No      | Atp6v1d       | 34.6409  | 81.0059 | 1.22555058       | 34.6419      | 81.0069       | 1.22552674       | 0.00022079 | No      |
| Grin2a    | 0.14474   | 0.033812  | -0.110928   | 6.75E-05   | No      | Atp6v1e1      | 24.2859  | 156.267 | 2.68582229       | 24.2869      | 156.268       | 2.68577212       | 0.00022079 | No      |
| Grin2c    | 0.31235   | 0.09905   | -0.2133     | 2.29E-05   | No      | Atp6v1f       | 77.6425  | 257.554 | 1.72995647       | 77.6435      | 257.555       | 1.72994349       | 0.00022079 | No      |
| Grin2d    | 0.42511   | 0.22579   | -0.19932    | 0.00290027 | No      | Atp6v1g3      | 0.302619 | 48.7818 | 7.33269661       | 0.303619     | 48.7828       | 7.32796668       | 0.0258481  | No      |
| Grm1      | 0.15822   | 0.044334  | -0.113886   | 4.68E-10   | No      | Atp6v1h       | 18.5476  | 35.5682 | 0.93935545       | 18.5486      | 35.5692       | 0.93931823       | 0.0112749  | No      |
| Grm7      | 0.11748   | 0.028833  | -0.088647   | 1.81E-12   | No      | Atp8a1        | 16.1591  | 6.94353 | -1.2186056       | 16.1601      | 6.94453       | -1.2184872       | 0.00022079 | No      |
| Grwd1     | 0.14863   | 0.065547  | -0.083083   | 0.03531391 | No      | Atp8b1        | 0        | 5.31238 | inf              | 0.001        | 5.31338       | 12.3754142       | 0.00022079 | No      |
| Gsc       | 0.10802   | 0.049041  | -0.058979   | 0.0021362  | No      | Atp8b2        | 10.4465  | 3.75725 | -1.4752706       | 10.4475      | 3.75825       | -1.4750248       | 0.00096553 | No      |
| Gspt2     | 0.021476  | 0.0054059 | -0.0160701  | 0.0076165  | No      | Atp9a         | 0.564206 | 45.5303 | 6.33446115       | 0.565206     | 45.5313       | 6.33193806       | 0.00022079 | No      |
| Gstt3     | 0.31929   | 0.084202  | -0.235088   | 0.0006129  | No      | Atpaf1        | 5.33303  | 11.0124 | 1.04610157       | 5.33403      | 11.0134       | 1.04596207       | 0.00378481 | No      |
| Gsx1      | 0.077066  | 0.021805  | -0.055261   | 0.0017676  | No      | Atpaf2        | 15.1457  | 31.255  | 1.04517874       | 15.1467      | 31.256        | 1.04512965       | 0.0123897  | No      |
| Guca1a    | 0.025862  | 0.22316   | 0.197298    | 5.73E-06   | No      | Atpif1        | 182.582  | 945.856 | 2.37307602       | 182.583      | 945.857       | 2.37306964       | 0.00041963 | No      |
| Gucy2e    | 0.29451   | 0.39678   | 0.10227     | 0.02027674 | No      | Atr           | 3.45352  | 1.36868 | -1.3352824       | 3.45452      | 1.36968       | -1.3346464       | 0.00318754 | No      |
| H1fnt     | 0.98054   | 0.78733   | -0.19321    | 0.0006129  | No      | Atraid        | 9.68055  | 35.5188 | 1.87542192       | 9.68155      | 35.5198       | 1.87531351       | 0.0478822  | No      |
| H2afx     | 0.075912  | 0.010094  | -0.065818   | 1.99E-06   | No      | Atrip         | 13.128   | 58.1587 | 2.14734788       | 13.129       | 58.1597       | 2.14726279       | 0.0200735  | No      |
| H2afy2    | 0.093751  | 0.039492  | -0.054259   | 0.00197715 | No      | Atrn          | 5.118    | 12.7558 | 1.31750133       | 5.119        | 12.7568       | 1.31733257       | 0.00078858 | No      |
| Hal       | 0.58998   | 0.30177   | -0.28821    | 0.00334577 | No      | Atrnl1        | 0.564159 | 7.74567 | 3.77921631       | 0.565159     | 7.74667       | 3.77684757       | 0.00022079 | No      |
| Hamp      | 0.80799   | 0.35045   | -0.45754    | 5.45E-07   | No      | Atrx          | 29.6251  | 13.0901 | -1.1783439       | 29.6261      | 13.0911       | -1.1782824       | 0.0415916  | No      |
| Hand1     | 0.19549   | 0.097576  | -0.097914   | 0.01155321 | No      | Atxn2l        | 81.8151  | 23.022  | -1.829354        | 81.8161      | 23.023        | -1.8293089       | 0.00022079 | No      |
| Hand2     | 0.15765   | 0.071419  | -0.086231   | 0.01328856 | No      | Atxn7         | 18.9097  | 4.47703 | -2.0785126       | 18.9107      | 4.47803       | -2.0782667       | 0.00022079 | No      |
| Haplnc4   | 0.091269  | 0.03157   | -0.059699   | 0.0015077  | No      | ATXN7L2       | 24.1628  | 6.58724 | -1.8750416       | 24.1638      | 6.58824       | -1.8748823       | 0.00041963 | No      |
| Has2      | 0.11151   | 0.039617  | -0.071893   | 0.02616573 | No      | Atxn7l3       | 28.9219  | 11.7867 | -1.2950025       | 28.9229      | 11.7877       | -1.29493         | 0.00466383 | No      |
| Has3      | 0.31318   | 0.11375   | -0.19943    | 5.11E-08   | No      | Atxn7l4       | 15.8709  | 2.42972 | -2.707522        | 15.8719      | 2.43072       | -2.7070192       | 0.00022079 | No      |
| Hcn1      | 0.06497   | 0.0071862 | -0.0577838  | 0.00693052 | No      | AU040320      | 10.1693  | 23.2105 | 1.19055723       | 10.1703      | 23.2115       | 1.19047752       | 0.00480115 | No      |
| Hcn4      | 0.13514   | 0.21781   | 0.08267     | 0.04531279 | No      | Aurkaip1      | 70.4301  | 144.576 | 1.03756404       | 70.4311      | 144.577       | 1.03755354       | 0.00288641 | No      |
| Hes2      | 0.17773   | 0.068322  | -0.109408   | 0.00148947 | No      | Aven          | 22.9223  | 10.77   | -1.0897336       | 22.9233      | 10.771        | -1.0896625       | 0.010907   | No      |
| Hes7      | 0.70325   | 0.44819   | -0.25506    | 0.00019244 | No      | Avl9          | 10.3443  | 5.62142 | -0.8798295       | 10.3453      | 5.62242       | -0.8797123       | 0.0130042  | No      |
| Hfe2      | 0.031677  | 0.087436  | 0.055759    | 0.00113933 | No      | Avpi1         | 7.95765  | 41.4434 | 2.38072801       | 7.95865      | 41.4444       | 2.38058154       | 0.00022079 | No      |
| Hhatl     | 0.78058   | 0.16122   | -0.61936    | 3.82E-07   | No      | Avpr2         | 4.03897  | 10.7088 | 1.40673749       | 4.03997      | 10.7098       | 1.40651505       | 0.0451951  | No      |
| Hhex      | 0.020125  | 0.14006   | 0.119935    | 3.57E-06   | No      | Axin1         | 34.3107  | 13.7512 | -1.319101        | 34.3117      | 13.7522       | -1.3190382       | 0.00022079 | No      |
| Hic1      | 0.39632   | 0.14663   | -0.24969    | 1.83E-10   | No      | Axl           | 0        | 3.55044 | inf              | 0.001        | 3.55144       | 11.7941884       | 0.00605729 | No      |
| Hint1     | 0.3563    | 0.21186   | -0.14444    | 0.00113933 | No      | Azi1          | 4.45125  | 20.5963 | 2.21010275       | 4.45225      | 20.5973       | 2.20984872       | 0.00022079 | No      |
| Hist1h1b  | 0.021153  | 0.12793   | 0.106777    | 2.57E-05   | No      | Azi2          | 44.1417  | 20.5108 | -1.1057584       | 44.1427      | 20.5118       | -1.1057208       | 0.00078858 | No      |
| Hist1h2bo | 0.0057802 | 0.085412  | 0.0796318   | 8.11E-07   | No      | B230118H07Rik | 4.95343  | 81.1158 | 4.03348318       | 4.95443      | 81.1168       | 4.03320975       | 0.00022079 | No      |
| Hmx1      | 0.18581   | 0.045639  | -0.140171   | 0.00032353 | No      | B230307C23Rik | 6.96249  | 1.4245  | -2.2891477       | 6.96349      | 1.4255        | -2.2883425       | 0.0399581  | No      |
| Hnf4a     | 0.77435   | 0.21307   | -0.56128    | 6.64E-09   | No      | B2m           | 2852.52  | 567.526 | -2.3294786       | 2852.521     | 567.527       | -2.3294766       | 0.0213411  | No      |
| Hoxa11    | 0.13572   | 0.19466   | 0.05894     | 0.04101176 | No      | B3gat1        | 0        | 1.48269 | inf              | 0.001        | 1.48369       | 10.534974        | 0.00130998 | No      |
| Hoxb4     | 0.17261   | 0.014299  | -0.158311   | 1.81E-12   | No      | B3glct        | 2.8835   | 6.7339  | 1.22362127       | 2.8845       | 6.7349        | 1.22333526       | 0.0175851  | No      |
| Hoxc11    | 0.11611   | 0.047529  | -0.068581   | 0.00105615 | No      | B3gnt2        | 89.4325  | 13.2235 | -2.7576951       | 89.4335      | 13.2245       | -2.7576022       | 0.00022079 | No      |
| Hoxc12    | 0.17842   | 0.098027  | -0.080393   | 0.0007955  | No      | B4galnt1      | 54.1092  | 7.61104 | -2.8297084       | 54.1102      | 7.61204       | -2.8295455       | 0.035814   | No      |

| RRBS     |          |           |             |            |         | RNAseq            |           |          |                  |              |               |                  |            |         |
|----------|----------|-----------|-------------|------------|---------|-------------------|-----------|----------|------------------|--------------|---------------|------------------|------------|---------|
| gene     | Blood    | Kidney    | methyl.diff | pMWU.fdr   | Match ? | gene              | blood     | kidney   | log2(fold_ratio) | blood+ 0.001 | kidney+ 0.001 | log2(fold_ratio) | q_value    | Match ? |
| Hoxc4    | 0.069261 | 0.17024   | 0.100979    | 0.00934082 | No      | B4galnt2          | 0.153868  | 1.06356  | 2.78913629       | 0.154868     | 1.06456       | 2.78114628       | 0.0368717  | No      |
| Hoxc9    | 0.075602 | 0.013705  | -0.061897   | 0.00161991 | No      | B4galt1           | 37.4017   | 16.5627  | -1.175166        | 37.4027      | 16.5637       | -1.1751174       | 0.01483    | No      |
| Hoxd1    | 0.18178  | 0.066265  | -0.115515   | 0.0002817  | No      | B4galt3           | 18.258    | 33.4986  | 0.87557206       | 18.259       | 33.4996       | 0.87553611       | 0.0143389  | No      |
| Hoxd12   | 0.22309  | 0.53356   | 0.31047     | 3.70E-07   | No      | B4galt4           | 0.31814   | 5.47783  | 4.10587081       | 0.31914      | 5.47883       | 4.10160649       | 0.00147497 | No      |
| Hoxd9    | 0.21937  | 0.42408   | 0.20471     | 0.00049864 | No      | B4galt6           | 0.0930058 | 5.68158  | 5.93282769       | 0.0940058    | 5.68258       | 5.91765251       | 0.00041963 | No      |
| Hpd1     | 0.77414  | 0.44304   | -0.3311     | 1.34E-05   | No      | B630005N1<br>4Rik | 12.2517   | 4.62687  | -1.4048735       | 12.2527      | 4.62787       | -1.4046795       | 0.00060553 | No      |
| Hpn      | 0.72746  | 0.099726  | -0.627734   | 5.03E-06   | No      | B9d1              | 1.51144   | 13.7392  | 3.18430239       | 1.51244      | 13.7402       | 3.18345319       | 0.00022079 | No      |
| Hrasls   | 0.18051  | 0.056876  | -0.123634   | 8.97E-06   | No      | Baalc             | 0         | 0.999461 | inf              | 0.001        | 1.000461      | 9.96644921       | 0.00022079 | No      |
| Hs3st2   | 0.12868  | 0.03148   | -0.0972     | 0.00014343 | No      | Babam1            | 45.8011   | 74.8841  | 0.70927718       | 45.8021      | 74.8851       | 0.70926495       | 0.0476819  | No      |
| Hs3st5   | 0.06455  | 0.0035787 | -0.0609713  | 0.00038311 | No      | Bach2             | 33.873    | 1.73841  | -4.2842955       | 33.874       | 1.73941       | -4.2835084       | 0.00022079 | No      |
| Hs6st2   | 0.07137  | 0.017663  | -0.053707   | 6.38E-06   | No      | Bad               | 22.3965   | 42.3276  | 0.9183254        | 22.3975      | 42.3286       | 0.91829506       | 0.0180483  | No      |
| Hsbp1l1  | 0.11445  | 0.023547  | -0.090903   | 3.10E-06   | No      | Bag2              | 0.830546  | 14.954   | 4.17032755       | 0.831546     | 14.955        | 4.16868803       | 0.00022079 | No      |
| Hsd17b14 | 0.75341  | 0.13094   | -0.62247    | 0.0001571  | No      | Bahcc1            | 0         | 1.17457  | inf              | 0.001        | 1.17557       | 10.1991447       | 0.00022079 | No      |
| Hsf4     | 0.62865  | 0.14784   | -0.48081    | 1.81E-12   | No      | Bai1              | 0         | 5.48647  | inf              | 0.001        | 5.48747       | 12.4219254       | 0.00022079 | No      |
| Hspa5    | 0.16666  | 0.084534  | -0.082126   | 0.01783979 | No      | Baiap2            | 5.05037   | 28.0168  | 2.47183119       | 5.05137      | 28.0178       | 2.47159705       | 0.00022079 | No      |
| Htr1a    | 0.092335 | 0.028538  | -0.063797   | 3.03E-06   | No      | Baiap2l1          | 0.850541  | 10.2583  | 3.59226708       | 0.851541     | 10.2593       | 3.59071249       | 0.00022079 | No      |
| Htr5a    | 0.2683   | 0.091784  | -0.176516   | 0.00049864 | No      | Baiap2l2          | 2.05153   | 87.1663  | 5.40899832       | 2.05253      | 87.1673       | 5.40831181       | 0.00022079 | No      |
| Htr6     | 0.32498  | 0.24037   | -0.08461    | 0.04531279 | No      | Baiap3            | 44.9872   | 1.99622  | -4.4941719       | 44.9882      | 1.99722       | -4.4934815       | 0.00257873 | No      |
| Htra3    | 0.090402 | 0.024588  | -0.065814   | 1.46E-05   | No      | Bambi             | 0.538664  | 30.9828  | 5.84593807       | 0.539664     | 30.9838       | 5.84330883       | 0.00060553 | No      |
| Ibsp     | 0.67868  | 0.10147   | -0.57721    | 0.0002817  | No      | Banp              | 22.2253   | 11.8475  | -0.9076202       | 22.2263      | 11.8485       | -0.9075634       | 0.0222379  | No      |
| Icam4    | 0.28552  | 0.094437  | -0.191083   | 3.03E-06   | No      | Baz1a             | 21.7631   | 3.37227  | -2.6900921       | 21.7641      | 3.37327       | -2.6897307       | 0.00022079 | No      |
| Ido1     | 0.94623  | 0.67789   | -0.26834    | 7.63E-07   | No      | Baz1b             | 37.9026   | 14.9851  | -1.3387681       | 37.9036      | 14.9861       | -1.3387099       | 0.00022079 | No      |
| Ifitm3   | 0.25658  | 0.12428   | -0.1323     | 0.03531391 | No      | Baz2a             | 71.464    | 14.6014  | -2.29111         | 71.465       | 14.6024       | -2.2910313       | 0.00022079 | No      |
| Igf2     | 0.54819  | 0.21145   | -0.33674    | 0.00042212 | No      | Bbs1              | 0.304226  | 7.96647  | 4.71072524       | 0.305226     | 7.96747       | 4.70617192       | 0.00022079 | No      |
| Igf2bp1  | 0.067514 | 0.014683  | -0.052831   | 6.75E-05   | No      | Bbs2              | 7.48011   | 33.7819  | 2.17511908       | 7.48111      | 33.7829       | 2.17496893       | 0.00022079 | No      |
| Igf2bp2  | 0.15528  | 0.043874  | -0.111406   | 7.56E-05   | No      | Bbs5              | 1.42827   | 10.9226  | 2.93497568       | 1.42927      | 10.9236       | 2.93409801       | 0.00096553 | No      |
| Igfbp6   | 0.41585  | 0.16667   | -0.24918    | 3.09E-05   | No      | BC021891          | 0         | 11.8789  | inf              | 0.001        | 11.8799       | 13.5362351       | 0.00022079 | No      |
| Igfbp7   | 0.073214 | 0.015931  | -0.057283   | 5.49E-05   | No      | BC030307          | 0.198589  | 2.63375  | 3.72926079       | 0.199589     | 2.63475       | 3.72256196       | 0.00318754 | No      |
| Igsf21   | 0.28845  | 0.10018   | -0.18827    | 0.0021362  | No      | BC030336          | 2.16858   | 6.33295  | 1.54612702       | 2.16958      | 6.33395       | 1.54568969       | 0.00211842 | No      |
| Il11     | 0.32182  | 0.089313  | -0.232507   | 2.69E-06   | No      | BC068281          | 1.09693   | 5.77948  | 2.39746823       | 1.09793      | 5.78048       | 2.39640322       | 0.00536605 | No      |
| Il17c    | 0.85668  | 0.61796   | -0.23872    | 0.00055683 | No      | Bcap29            | 76.5731   | 8.8679   | -3.1101733       | 76.5741      | 8.8689        | -3.1100294       | 0.00022079 | No      |
| Il1r2    | 0.84159  | 0.18813   | -0.65346    | 3.82E-07   | No      | Bcar1             | 0.0818488 | 36.0421  | 8.78250609       | 0.0828488    | 36.0431       | 8.76502658       | 0.00022079 | No      |
| Il1rapl2 | 0.16321  | 0.056536  | -0.106674   | 0.01333327 | No      | Bcar3             | 0.393806  | 8.96432  | 4.50863715       | 0.394806     | 8.96532       | 4.50513926       | 0.00022079 | No      |
| Il1rl2   | 0.11442  | 0.059834  | -0.054586   | 0.00306475 | No      | Bcas2             | 94.1252   | 40.5028  | -1.2165594       | 94.1262      | 40.5038       | -1.2165391       | 0.00022079 | No      |
| Il4      | 0.76466  | 0.15471   | -0.60995    | 0.00123983 | No      | Bckdha            | 29.0261   | 122.112  | 2.07278233       | 29.0271      | 122.113       | 2.07274445       | 0.00022079 | No      |
| Ina      | 0.10317  | 0.040036  | -0.063134   | 0.00466526 | No      | Bckdha            | 25.9787   | 123.121  | 2.24467571       | 25.9797      | 123.122       | 2.2446319        | 0.00022079 | No      |
| Inhbb    | 0.091722 | 0.033782  | -0.05794    | 1.74E-11   | No      | BCL11B            | 57.5802   | 1.24764  | -5.5282992       | 57.5812      | 1.24864       | -5.5271684       | 0.00022079 | No      |
| Inhbe    | 0.60498  | 0.13416   | -0.47082    | 9.69E-09   | No      | Bcl2              | 28.6042   | 4.39272  | -2.7030405       | 28.6052      | 4.39372       | -2.7027626       | 0.00022079 | No      |
| Inpp5a   | 0.71001  | 0.3262    | -0.38381    | 2.88E-05   | No      | Bcl2a1            | 13.385    | 45.123   | 1.75324585       | 13.386       | 45.124        | 1.75317004       | 0.00422081 | No      |
| Insig1   | 0.23228  | 0.075455  | -0.156825   | 3.07E-06   | No      | Bcl2l1            | 5.05223   | 87.3562  | 4.11191788       | 5.05323      | 87.3572       | 4.11164886       | 0.00022079 | No      |
| Irf2bp1  | 0.69588  | 0.068328  | -0.627552   | 1.81E-12   | No      | Bcl2l14           | 0.212602  | 5.6484   | 4.73161519       | 0.213602     | 5.6494        | 4.72510059       | 0.00113657 | No      |



| RRBS    |           |          |             |            |         | RNAseq  |           |          |                  |              |               |                  |            |         |
|---------|-----------|----------|-------------|------------|---------|---------|-----------|----------|------------------|--------------|---------------|------------------|------------|---------|
| gene    | Blood     | Kidney   | methyl.diff | pMWU.fdr   | Match ? | gene    | blood     | kidney   | log2(fold_ratio) | blood+ 0.001 | kidney+ 0.001 | log2(fold_ratio) | q_value    | Match ? |
| Irf5    | 0.15961   | 0.087133 | -0.072477   | 0.0250308  | No      | Bcl6    | 3.79481   | 7.70998  | 1.02269946       | 3.79581      | 7.71098       | 1.02250645       | 0.0110257  | No      |
| Irf6    | 0.23555   | 0.046684 | -0.188866   | 4.45E-05   | No      | Bcl7a   | 1.31739   | 10.2846  | 2.96473127       | 1.31839      | 10.2856       | 2.96377684       | 0.00022079 | No      |
| Irf8    | 0.66903   | 0.39739  | -0.27164    | 2.44E-07   | No      | Bcl9l   | 30.0024   | 8.49118  | -1.821041        | 30.0034      | 8.49218       | -1.8209191       | 0.00022079 | No      |
| Irgm    | 0.0081239 | 0.10161  | 0.0934861   | 0.00014343 | No      | Bclaf1  | 87.9583   | 25.8183  | -1.7684257       | 87.9593      | 25.8193       | -1.7683862       | 0.00022079 | No      |
| Irx4    | 0.087405  | 0.032538 | -0.054867   | 0.00049864 | No      | Bcs1l   | 2.47425   | 6.48685  | 1.3905268        | 2.47525      | 6.48785       | 1.39016622       | 0.011657   | No      |
| Isg20l2 | 0.14283   | 0.014147 | -0.128683   | 3.70E-09   | No      | Bdh2    | 2.82807   | 70.1283  | 4.63210702       | 2.82907      | 70.1293       | 4.63161755       | 0.00022079 | No      |
| Itga8   | 0.83979   | 0.22334  | -0.61645    | 1.02E-06   | No      | Bdp1    | 11.8613   | 4.11336  | -1.5278729       | 11.8623      | 4.11436       | -1.5276438       | 0.00022079 | No      |
| Itgb5   | 0.5245    | 0.052584 | -0.471916   | 1.19E-06   | No      | Bend5   | 2.90423   | 15.7857  | 2.44239062       | 2.90523      | 15.7867       | 2.44198534       | 0.00041963 | No      |
| Itgb1   | 0.617     | 0.34442  | -0.27258    | 1.03E-05   | No      | Bet1    | 13.5177   | 31.1917  | 1.20631248       | 13.5187      | 31.1927       | 1.20625201       | 0.00466383 | No      |
| Itih1   | 0.79505   | 0.66435  | -0.1307     | 0.00197715 | No      | Bex1    | 11.4781   | 54.1373  | 2.23773909       | 11.4791      | 54.1383       | 2.23764005       | 0.00022079 | No      |
| ItpkA   | 0.46719   | 0.17301  | -0.29418    | 1.67E-08   | No      | Bex2    | 2.0006    | 8.65507  | 2.11311274       | 2.0016       | 8.65607       | 2.11255847       | 0.00858283 | No      |
| Jmjd8   | 0.96393   | 0.76464  | -0.19929    | 1.28E-05   | No      | Bhlhe40 | 3.17096   | 30.7129  | 3.27585316       | 3.17196      | 30.7139       | 3.27544523       | 0.00022079 | No      |
| Jph3    | 0.10345   | 0.029576 | -0.073874   | 3.98E-06   | No      | Bicc1   | 0.135386  | 45.4608  | 8.3914007        | 0.136386     | 45.4618       | 8.38081544       | 0.00022079 | No      |
| Jph4    | 0.5935    | 0.46283  | -0.13067    | 0.00113933 | No      | Bid     | 41.5287   | 7.49136  | -2.4708092       | 41.5297      | 7.49236       | -2.4706513       | 0.00060553 | No      |
| Katnal1 | 0.22727   | 0.036069 | -0.191201   | 0.00088439 | No      | Bin1    | 160.272   | 80.093   | -1.0007743       | 160.273      | 80.094        | -1.0007653       | 0.0355065  | No      |
| Kb23    | 0.69496   | 0.42888  | -0.26608    | 3.38E-06   | No      | Birc2   | 25.8171   | 11.7554  | -1.1350033       | 25.8181      | 11.7564       | -1.1349365       | 0.00645389 | No      |
| Kbtbd4  | 0.57574   | 0.34123  | -0.23451    | 0.04318305 | No      | Blcap   | 20.3739   | 37.5174  | 0.88083768       | 20.3749      | 37.5184       | 0.88080533       | 0.00791314 | No      |
| Kbtbd6  | 0.3402    | 0.14268  | -0.19752    | 9.43E-07   | No      | Blnk    | 1.0944    | 24.5349  | 4.48662335       | 1.0954       | 24.5359       | 4.4853645        | 0.00022079 | No      |
| Kbtbd7  | 0.3402    | 0.14268  | -0.19752    | 9.43E-07   | No      | Bloc1s1 | 62.4828   | 266.073  | 2.09029111       | 62.4838      | 266.074       | 2.09027344       | 0.00022079 | No      |
| Kcna1   | 0.092057  | 0.030117 | -0.06194    | 6.39E-11   | No      | Bloc1s5 | 9.76886   | 25.4095  | 1.37910587       | 9.76986      | 25.4105       | 1.37901497       | 0.00078858 | No      |
| Kcnb1   | 0.46869   | 0.29248  | -0.17621    | 1.22E-05   | No      | Bloc1s6 | 6.48673   | 11.7812  | 0.8609232        | 6.48773      | 11.7822       | 0.86082326       | 0.0370591  | No      |
| Kcnc1   | 0.51094   | 0.14061  | -0.37033    | 4.83E-07   | No      | Blvra   | 15.6523   | 41.998   | 1.42394596       | 15.6533      | 41.999        | 1.42388814       | 0.00041963 | No      |
| Kcnc3   | 0.17247   | 0.034156 | -0.138314   | 4.32E-06   | No      | BLVRB   | 6.83676   | 19.5158  | 1.51325792       | 6.83776      | 19.5168       | 1.51312083       | 0.0083198  | No      |
| Kcnd1   | 0.52962   | 0.22893  | -0.30069    | 0.02144384 | No      | Blzf1   | 13.3832   | 6.83362  | -0.9697012       | 13.3842      | 6.83462       | -0.9695979       | 0.0192929  | No      |
| Kcne2   | 0.73942   | 0.21609  | -0.52333    | 1.08E-09   | No      | Bmf     | 1.33894   | 5.18436  | 1.95307459       | 1.33994      | 5.18536       | 1.95227575       | 0.00164037 | No      |
| Kcnf1   | 0.75822   | 0.51082  | -0.2474     | 0.00276056 | No      | Bmp1    | 0.680899  | 10.0993  | 3.89067068       | 0.681899     | 10.1003       | 3.88869627       | 0.00022079 | No      |
| Kcng1   | 0.11618   | 0.23791  | 0.12173     | 0.00693052 | No      | Bmp7    | 2.95442   | 26.2486  | 3.15129364       | 2.95542      | 26.2496       | 3.15086036       | 0.00022079 | No      |
| Kcnh2   | 0.59566   | 0.40743  | -0.18823    | 0.00320916 | No      | Bmpr1a  | 0.0953046 | 12.117   | 6.99027099       | 0.0963046    | 12.118        | 6.97533119       | 0.00805135 | No      |
| Kcnh3   | 0.1916    | 0.069342 | -0.122258   | 0.00021466 | No      | Bmpr2   | 3.62599   | 9.19948  | 1.34317737       | 3.62699      | 9.20048       | 1.34293636       | 0.00041963 | No      |
| Kcnh7   | 0.13769   | 0.037125 | -0.100565   | 0.00066856 | No      | Bms1    | 29.0493   | 12.9756  | -1.1627021       | 29.0503      | 12.9766       | -1.1626406       | 0.0019604  | No      |
| Kcnip1  | 0.1182    | 0.035236 | -0.082964   | 1.76E-10   | No      | Bnip2   | 34.7535   | 19.7297  | -0.8167893       | 34.7545      | 19.7307       | -0.8167576       | 0.0390462  | No      |
| Kcnj14  | 0.46929   | 0.080118 | -0.389172   | 1.74E-09   | No      | Bnip3   | 1.70314   | 93.6954  | 5.78170928       | 1.70414      | 93.6964       | 5.78087785       | 0.00022079 | No      |
| Kcnj3   | 0.10937   | 0.025824 | -0.083546   | 6.31E-10   | No      | Bnip3l  | 58.9346   | 33.4955  | -0.8151476       | 58.9356      | 33.4965       | -0.815129        | 0.0165181  | No      |
| Kcnj5   | 0.45324   | 0.085847 | -0.367393   | 1.74E-05   | No      | Boc     | 0.259576  | 5.35613  | 4.36696207       | 0.260576     | 5.35713       | 4.36168419       | 0.00022079 | No      |
| Kcnk13  | 0.023307  | 0.22728  | 0.203973    | 3.92E-06   | No      | BOD1    | 8.24255   | 24.9375  | 1.5971542        | 8.24355      | 24.9385       | 1.59703703       | 0.00078858 | No      |
| Kcnk2   | 0.086267  | 0.014327 | -0.07194    | 0.00066856 | No      | Bod1l   | 27.3537   | 10.0696  | -1.4417296       | 27.3547      | 10.0706       | -1.4416391       | 0.00508519 | No      |
| Kcnk3   | 0.066113  | 0.011731 | -0.054382   | 3.67E-05   | No      | Bola1   | 17.4672   | 58.7478  | 1.74988646       | 17.4682      | 58.7488       | 1.74982843       | 0.00022079 | No      |
| Kcnk4   | 0.19133   | 0.029149 | -0.162181   | 1.05E-10   | No      | Bola3   | 22.2898   | 62.6822  | 1.49167214       | 22.2908      | 62.6832       | 1.49163044       | 0.00096553 | No      |
| Kcnk9   | 0.15006   | 0.053042 | -0.097018   | 0.00334577 | No      | Bora    | 8.32122   | 1.65554  | -2.3294932       | 8.32222      | 1.65654       | -2.3287954       | 0.0328292  | No      |
| Kcnn1   | 0.43077   | 0.077531 | -0.353239   | 7.63E-07   | No      | Bpgm    | 12.8592   | 38.821   | 1.59403639       | 12.8602      | 38.822        | 1.59396136       | 0.00022079 | No      |
| Kcnn2   | 0.087475  | 0.012761 | -0.074714   | 0.00023579 | No      | Bphl    | 0.447505  | 46.4818  | 6.69861833       | 0.448505     | 46.4828       | 6.6954291        | 0.00022079 | No      |
| Kctd11  | 0.79837   | 0.3541   | -0.44427    | 1.36E-07   | No      | Bpifb4  | 1.00172   | 0.157551 | -2.6685885       | 1.00272      | 0.158551      | -2.6608999       | 0.0290073  | No      |

| RRBS         |          |           |             |            |         | RNAseq    |          |           |                  |              |               |                  |            |         |
|--------------|----------|-----------|-------------|------------|---------|-----------|----------|-----------|------------------|--------------|---------------|------------------|------------|---------|
| gene         | Blood    | Kidney    | methyl.diff | pMWU.fdr   | Match ? | gene      | blood    | kidney    | log2(fold_ratio) | blood+ 0.001 | kidney+ 0.001 | log2(fold_ratio) | q_value    | Match ? |
| Kdf1         | 0.91188  | 0.064886  | -0.846994   | 3.82E-07   | No      | Bpnt1     | 10.1666  | 27.7696   | 1.44966911       | 10.1676      | 27.7706       | 1.44957917       | 0.00130998 | No      |
| Kdm6b        | 0.9043   | 0.39945   | -0.50485    | 7.88E-09   | No      | Brd1      | 39.6764  | 12.7484   | -1.6379649       | 39.6774      | 12.7494       | -1.6378881       | 0.00022079 | No      |
| Kdsr         | 0.51834  | 0.1147    | -0.40364    | 1.74E-09   | No      | Brd4      | 46.2388  | 14.4288   | -1.6801526       | 46.2398      | 14.4298       | -1.6800839       | 0.00022079 | No      |
| Khdrbs2      | 0.10229  | 0.011699  | -0.090591   | 0.00012978 | No      | Bre       | 25.5739  | 53.0426   | 1.05247931       | 25.5749      | 53.0436       | 1.05245009       | 0.00392909 | No      |
| Khdrbs3      | 0.90303  | 0.35437   | -0.54866    | 4.29E-07   | No      | Bri3      | 61.377   | 291.156   | 2.24602231       | 61.378       | 291.157       | 2.24600376       | 0.00022079 | No      |
| Kiaa0895l    | 0.25417  | 0.031968  | -0.222202   | 8.97E-06   | No      | Bricd5    | 5.94022  | 28.2212   | 2.24819107       | 5.94122      | 28.2222       | 2.24799934       | 0.0105196  | No      |
| Kif2b        | 0.94627  | 0.61289   | -0.33338    | 1.15E-06   | No      | Brix1     | 30.806   | 13.221    | -1.2203801       | 30.807       | 13.222        | -1.2203178       | 0.0351784  | No      |
| Kirrel2      | 0.26644  | 0.16381   | -0.10263    | 0.02616573 | No      | Brpf1     | 16.198   | 7.11153   | -1.1875838       | 16.199       | 7.11253       | -1.18747         | 0.00078858 | No      |
| Kiss1r       | 0.079956 | 0.028733  | -0.051223   | 0.00799193 | No      | Brpf3     | 9.82663  | 4.54931   | -1.111049        | 9.82763      | 4.55031       | -1.1108787       | 0.00407863 | No      |
| Klf14        | 0.34792  | 0.14135   | -0.20657    | 2.57E-05   | No      | Brsk1     | 0.825787 | 4.58056   | 2.47168237       | 0.826787     | 4.58156       | 2.4702513        | 0.0231371  | No      |
| Klf15        | 0.068631 | 0.0089222 | -0.0597088  | 0.00042212 | No      | Brwd1     | 15.6383  | 6.86383   | -1.187998        | 15.6393      | 6.86483       | -1.18788         | 0.00523184 | No      |
| Klf16        | 0.018594 | 0.076495  | 0.057901    | 4.71E-06   | No      | Brwd3     | 4.24737  | 1.48118   | -1.5198228       | 4.24837      | 1.48218       | -1.5191888       | 0.00227055 | No      |
| Klhl22       | 0.7066   | 0.4173    | -0.2893     | 0.0074695  | No      | Bscl2     | 35.9554  | 60.9881   | 0.76231931       | 35.9564      | 60.9891       | 0.76230284       | 0.0279776  | No      |
| Klhl38       | 0.88921  | 0.75729   | -0.13192    | 0.0022928  | No      | Bsdc1     | 7.81991  | 17.7325   | 1.18117204       | 7.82091      | 17.7335       | 1.18106892       | 0.0019604  | No      |
| Krt25        | 0.76121  | 0.58455   | -0.17666    | 0.01660198 | No      | Bsg       | 86.3084  | 623.915   | 2.85377661       | 86.3094      | 623.916       | 2.85376221       | 0.00022079 | No      |
| Krt72        | 0.76829  | 0.59073   | -0.17756    | 0.0153478  | No      | Bsnd      | 0        | 22.814    | inf              | 0.001        | 22.815        | 14.477695        | 0.00022079 | No      |
| Krt73        | 0.81159  | 0.71393   | -0.09766    | 0.04318305 | No      | Bspry     | 3.37647  | 47.3205   | 3.80887767       | 3.37747      | 47.3215       | 3.80848094       | 0.00022079 | No      |
| Krt75        | 0.75329  | 0.41939   | -0.3339     | 0.0007955  | No      | Bst1      | 4.18354  | 102.381   | 4.61307996       | 4.18454      | 102.382       | 4.61274925       | 0.00022079 | No      |
| Krt8         | 0.75922  | 0.3506    | -0.40862    | 0.0001571  | No      | Btaf1     | 11.6763  | 4.66027   | -1.3250977       | 11.6773      | 4.66127       | -1.3249117       | 0.00041963 | No      |
| Krt81        | 0.55736  | 0.35395   | -0.20341    | 3.22E-06   | No      | Btbd10    | 12.4151  | 6.43606   | -0.9478462       | 12.4161      | 6.43706       | -0.9477383       | 0.0205337  | No      |
| Krt83        | 0.79383  | 0.21238   | -0.58145    | 1.81E-12   | No      | Btbd2     | 14.2586  | 28.322    | 0.99009081       | 14.2596      | 28.323        | 0.99004057       | 0.00685176 | No      |
| Ky           | 0.081115 | 0.017352  | -0.063763   | 0.00510288 | No      | Btbd6     | 3.28148  | 19.2638   | 2.55347377       | 3.28248      | 19.2648       | 2.55310908       | 0.0427098  | No      |
| Lamp5        | 0.11927  | 0.049568  | -0.069702   | 0.00038311 | No      | Btc       | 0        | 2.53672   | inf              | 0.001        | 2.53772       | 11.3093172       | 0.00022079 | No      |
| Lbx1         | 0.11626  | 0.014458  | -0.101802   | 0.00019244 | No      | Btf3      | 685.698  | 347.569   | -0.9802739       | 685.699      | 347.57        | -0.9802719       | 0.00480115 | No      |
| Lbx2         | 0.16587  | 0.076018  | -0.089852   | 0.00161585 | No      | Btg1      | 1489.27  | 161.768   | -3.2026072       | 1489.271     | 161.769       | -3.2025992       | 0.00022079 | No      |
| Lca5         | 0.67279  | 0.44592   | -0.22687    | 2.73E-05   | No      | Btg2      | 345.703  | 62.1322   | -2.4761201       | 345.704      | 62.1332       | -2.476101        | 0.00022079 | No      |
| Lca5l        | 0.87643  | 0.76221   | -0.11422    | 0.00320916 | No      | Btg3      | 2.6949   | 22.4011   | 3.05526593       | 2.6959       | 22.4021       | 3.05479509       | 0.00022079 | No      |
| Lcmt2        | 0.066006 | 0.0095732 | -0.0564328  | 0.00012978 | No      | Btla      | 10.9695  | 0.0887557 | -6.9494423       | 10.9705      | 0.0897557     | -6.93341         | 0.0246183  | No      |
| Leap2        | 0.82164  | 0.60717   | -0.21447    | 0.00799193 | No      | Bzw1      | 76.0195  | 43.8937   | -0.7923556       | 76.0205      | 43.8947       | -0.7923418       | 0.0368717  | No      |
| Lect1        | 0.7214   | 0.5984    | -0.123      | 0.03531391 | No      | Bzw2      | 53.94    | 21.7777   | -1.3085039       | 53.941       | 21.7787       | -1.3084644       | 0.00022079 | No      |
| Lefty1       | 0.223    | 0.02588   | -0.19712    | 7.48E-08   | No      | C1galt1   | 14.0874  | 8.53549   | -0.7228595       | 14.0884      | 8.53649       | -0.7227929       | 0.0434203  | No      |
| Lgals7       | 0.75263  | 0.50587   | -0.24676    | 0.00032353 | No      | C1galt1c1 | 4.77133  | 20.6243   | 2.11188178       | 4.77233      | 20.6253       | 2.11164939       | 0.00022079 | No      |
| Lhcgr        | 0.15664  | 0.085074  | -0.071566   | 0.00553374 | No      | C1qa      | 0        | 22.0019   | inf              | 0.001        | 22.0029       | 14.4254061       | 0.00022079 | No      |
| Lhfpl4       | 0.12217  | 0.014474  | -0.107696   | 2.06E-05   | No      | C1qb      | 0        | 37.2885   | inf              | 0.001        | 37.2895       | 15.1864818       | 0.00022079 | No      |
| Lhx5         | 0.10878  | 0.018282  | -0.090498   | 1.47E-06   | No      | C1qc      | 0        | 26.7828   | inf              | 0.001        | 26.7838       | 14.709073        | 0.00022079 | No      |
| Lif          | 0.31266  | 0.10457   | -0.20809    | 0.00510288 | No      | C1qtnf7   | 0        | 0.969223  | inf              | 0.001        | 0.970223      | 9.92217257       | 0.00022079 | No      |
| Lin7a        | 0.10581  | 0.029089  | -0.076721   | 0.03756776 | No      | C1s       | 0        | 3.68726   | inf              | 0.001        | 3.68826       | 11.8487246       | 0.00022079 | No      |
| Lingo3       | 0.16821  | 0.06285   | -0.10536    | 0.00042212 | No      | C2        | 0.509285 | 5.54828   | 3.44549547       | 0.510285     | 5.54928       | 3.44292546       | 0.00022079 | No      |
| Lmx1a        | 0.19002  | 0.077754  | -0.112266   | 0.01660198 | No      | C2cd2     | 2.57753  | 4.59547   | 0.8342232        | 2.57853      | 4.59647       | 0.83397749       | 0.0392505  | No      |
| Lmx1b        | 0.09613  | 0.032956  | -0.063174   | 1.07E-08   | No      | C2cd3     | 14.8282  | 4.55476   | -1.7028965       | 14.8292      | 4.55576       | -1.7026771       | 0.00147497 | No      |
| LOC100125362 | 0.19112  | 0.10856   | -0.08256    | 0.03196657 | No      | C3        | 0.318696 | 3.0092    | 3.23912718       | 0.319696     | 3.0102        | 3.23508675       | 0.00022079 | No      |

| RRBS         |            |          |             |            |         | RNAseq  |           |          |                  |              |               |                  |            |         |
|--------------|------------|----------|-------------|------------|---------|---------|-----------|----------|------------------|--------------|---------------|------------------|------------|---------|
| gene         | Blood      | Kidney   | methyl.diff | pMWU.fdr   | Match ? | gene    | blood     | kidney   | log2(fold_ratio) | blood+ 0.001 | kidney+ 0.001 | log2(fold_ratio) | q_value    | Match ? |
| LOC100909539 | 0.11743    | 0.02697  | -0.09046    | 0.00011578 | No      | C3ar1   | 0.0828523 | 1.21469  | 3.87390261       | 0.0838523    | 1.21569       | 3.85778122       | 0.00632443 | No      |
| LOC102549772 | 0.76564    | 0.63458  | -0.13106    | 0.03756776 | No      | C4b     | 0.858883  | 13.337   | 3.95682876       | 0.859883     | 13.338        | 3.95525817       | 0.0184986  | No      |
| LOC102553190 | 0.070635   | 0.13253  | 0.061895    | 0.01245124 | No      | C5      | 0.0226999 | 4.10169  | 7.49738871       | 0.0236999    | 4.10269       | 7.43554537       | 0.0458921  | No      |
| LOC106182250 | 0.63587    | 0.18318  | -0.45269    | 0.0002817  | No      | C5ar1   | 0.475324  | 3.15946  | 2.73269485       | 0.476324     | 3.16046       | 2.73011941       | 0.0296827  | No      |
| LOC106736471 | 0.62       | 0.3396   | -0.2804     | 0.00306475 | No      | C7      | 0         | 3.65295  | inf              | 0.001        | 3.65395       | 11.8352412       | 0.00022079 | No      |
| LOC257642    | 0.28793    | 0.10065  | -0.18728    | 3.82E-07   | No      | Caap1   | 14.5144   | 6.43963  | -1.1724352       | 14.5154      | 6.44063       | -1.1723106       | 0.00593001 | No      |
| LOC310926    | 0.4546     | 0.20807  | -0.24653    | 3.09E-05   | No      | Cables1 | 0.118822  | 4.56159  | 5.2626629        | 0.119822     | 4.56259       | 5.25088829       | 0.00060553 | No      |
| LOC500077    | 0.36098    | 0.15744  | -0.20354    | 1.82E-05   | No      | Cabp1   | 0.450915  | 78.1904  | 7.43799218       | 0.451915     | 78.1914       | 7.43481469       | 0.00096553 | No      |
| LOC500331    | 0.89468    | 0.30552  | -0.58916    | 1.81E-12   | No      | Cacfd1  | 5.97393   | 21.7896  | 1.86688747       | 5.97493      | 21.7906       | 1.86671221       | 0.00378481 | No      |
| LOC681383    | 0.44321    | 0.10933  | -0.33388    | 7.02E-06   | No      | Cacna1d | 0.0415281 | 1.46708  | 5.14271587       | 0.0425281    | 1.46808       | 5.10937037       | 0.0131304  | No      |
| LOC681766    | 0.43456    | 0.18229  | -0.25227    | 8.25E-10   | No      | Cacnb2  | 0.458271  | 2.17159  | 2.24447885       | 0.459271     | 2.17259       | 2.24199835       | 0.00451708 | No      |
| LOC682102    | 0.20295    | 0.046599 | -0.156351   | 1.68E-07   | No      | Cacnb3  | 0.112659  | 3.85016  | 5.09488392       | 0.113659     | 3.85116       | 5.08250923       | 0.0135008  | No      |
| LOC687707    | 0.80347    | 0.6778   | -0.12567    | 0.04531279 | No      | Cacul1  | 25.1788   | 13.2886  | -0.9220204       | 25.1798      | 13.2896       | -0.9219691       | 0.00845215 | No      |
| LOC688765    | 0.083638   | 0.023449 | -0.060189   | 0.00066856 | No      | Cad     | 26.436    | 11.0842  | -1.2539993       | 26.437       | 11.0852       | -1.2539237       | 0.00227055 | No      |
| LOC688924    | 0.72364    | 0.55533  | -0.16831    | 0.04318305 | No      | Cadm1   | 0.234804  | 9.17414  | 5.28804403       | 0.235804     | 9.17514       | 5.28207008       | 0.00096553 | No      |
| LOC690435    | 0.73161    | 0.097178 | -0.634432   | 7.52E-12   | No      | Cadps2  | 0.0180751 | 10.8942  | 9.23534091       | 0.0190751    | 10.8952       | 9.15778634       | 0.015076   | No      |
| LOC690617    | 0.85382    | 0.18982  | -0.664      | 1.81E-12   | No      | Calb1   | 0         | 39.092   | inf              | 0.001        | 39.093        | 15.2546227       | 0.00022079 | No      |
| LOC691153    | 0.57293    | 0.080413 | -0.492517   | 1.81E-12   | No      | Calcl   | 7.10891   | 3.16597  | -1.1669808       | 7.10991      | 3.16697       | -1.1667281       | 0.0200735  | No      |
| Lonrf3       | 0.088478   | 0.013417 | -0.075061   | 0.00095268 | No      | Cald1   | 0.0319045 | 88.5903  | 11.4391731       | 0.0329045    | 88.5913       | 11.3946644       | 0.035911   | No      |
| Loxl4        | 0.073716   | 0.01226  | -0.061456   | 0.0007955  | No      | Calm3   | 73.7769   | 158.511  | 1.10334189       | 73.7779      | 158.512       | 1.10333143       | 0.00333723 | No      |
| Lrat         | 0.078666   | 0.025939 | -0.052727   | 4.99E-07   | No      | Calml3  | 0         | 2.46822  | inf              | 0.001        | 2.46922       | 11.2698397       | 0.00022079 | No      |
| Lrfn1        | 0.81561    | 0.71265  | -0.10296    | 0.02257431 | No      | Calml4  | 1.11413   | 120.8    | 6.76055906       | 1.11513      | 120.801       | 6.75927668       | 0.00022079 | No      |
| Lrfn3        | 0.34392    | 0.20263  | -0.14129    | 0.01000157 | No      | Caln1   | 0         | 11.5195  | inf              | 0.001        | 11.5205       | 13.4919157       | 0.00022079 | No      |
| Lrfn4        | 0.00043275 | 0.1025   | 0.10206725  | 1.81E-12   | No      | Camk1   | 0.247255  | 30.7834  | 6.96000908       | 0.248255     | 30.7844       | 6.95423287       | 0.00078858 | No      |
| Lrfn5        | 0.099544   | 0.020197 | -0.079347   | 0.00095268 | No      | Camk1d  | 4.02168   | 0.639871 | -2.6519453       | 4.02268      | 0.640871      | -2.6500511       | 0.00022079 | No      |
| Lrg1         | 0.3711     | 0.144    | -0.2271     | 0.00034271 | No      | Camk2d  | 20.7737   | 11.2215  | -0.8884927       | 20.7747      | 11.2225       | -0.8884335       | 0.0111498  | No      |
| Lrrc10b      | 0.06791    | 0.014402 | -0.053508   | 0.02027674 | No      | Camk2g  | 32.2106   | 7.58072  | -2.0871288       | 32.2116      | 7.58172       | -2.0869832       | 0.00022079 | No      |
| Lrrc14b      | 0.82642    | 0.73742  | -0.089      | 0.00244273 | No      | Camk4   | 54.7965   | 4.88589  | -3.4873905       | 54.7975      | 4.88689       | -3.4871215       | 0.00022079 | No      |
| Lrrc20       | 0.0014423  | 0.080373 | 0.0789307   | 1.67E-06   | No      | Camta1  | 7.08284   | 0.347171 | -4.3506096       | 7.08384      | 0.348171      | -4.3466637       | 0.00022079 | No      |
| Lrrc23       | 0.043223   | 0.13844  | 0.095217    | 0.00021466 | No      | Cand2   | 0.644478  | 2.61793  | 2.02222351       | 0.645478     | 2.61893       | 2.02053767       | 0.00180113 | No      |
| Lrrc26       | 0.11466    | 0.025534 | -0.089126   | 1.81E-12   | No      | Cap1    | 188.755   | 68.3037  | -1.4664792       | 188.756      | 68.3047       | -1.4664657       | 0.00022079 | No      |
| Lrrc38       | 0.16038    | 0.038872 | -0.121508   | 1.86E-06   | No      | Capg    | 12.7322   | 80.4937  | 2.66039415       | 12.7332      | 80.4947       | 2.66029876       | 0.00022079 | No      |
| Lrrc43       | 0.080238   | 0.013704 | -0.066534   | 0.02144384 | No      | Capn13  | 0         | 1.67428  | inf              | 0.001        | 1.67528       | 10.7101865       | 0.00022079 | No      |
| Lrrc4b       | 0.10817    | 0.039016 | -0.069154   | 0.00276056 | No      | Capn6   | 0         | 2.76056  | inf              | 0.001        | 2.76156       | 11.4312678       | 0.00022079 | No      |
| Lrrc55       | 0.077143   | 0.019114 | -0.058029   | 0.02257431 | No      | Capza1  | 153.24    | 26.2049  | -2.5478844       | 153.241      | 26.2059       | -2.5478388       | 0.00022079 | No      |
| Lrrc71       | 0.59986    | 0.10611  | -0.49375    | 7.02E-06   | No      | Capza2  | 94.5275   | 56.268   | -0.7484194       | 94.5285      | 56.269        | -0.748409        | 0.0164052  | No      |
| Lrrc73       | 0.13645    | 0.059005 | -0.077445   | 0.03196657 | No      | Capzb   | 358.492   | 155.593  | -1.2041638       | 358.493      | 155.594       | -1.2041585       | 0.00022079 | No      |

| RRBS      |           |           |             |            |         | RNAseq   |           |          |                  |              |               |                  |            |         |
|-----------|-----------|-----------|-------------|------------|---------|----------|-----------|----------|------------------|--------------|---------------|------------------|------------|---------|
| gene      | Blood     | Kidney    | methyl.diff | pMWU.fdr   | Match ? | gene     | blood     | kidney   | log2(fold_ratio) | blood+ 0.001 | kidney+ 0.001 | log2(fold_ratio) | q_value    | Match ? |
| Lrrc8d    | 0.88568   | 0.25642   | -0.62926    | 3.82E-07   | No      | Car11    | 1.70626   | 30.9832  | 4.18257675       | 1.70726      | 30.9842       | 4.18177803       | 0.00022079 | No      |
| Lrrc8e    | 0.53712   | 0.064947  | -0.472173   | 7.99E-06   | No      | Car12    | 0.256374  | 169.627  | 9.36990015       | 0.257374     | 169.628       | 9.3642923        | 0.00022079 | No      |
| Lrrfip1   | 0.0044118 | 0.21786   | 0.2134482   | 2.57E-05   | No      | Car2     | 40.0231   | 375.329  | 3.22925094       | 40.0241      | 375.33        | 3.22921874       | 0.00022079 | No      |
| Lrrn4cl   | 0.81159   | 0.68241   | -0.12918    | 0.00123983 | No      | Car5b    | 0.0928579 | 39.7951  | 8.74335043       | 0.0938579    | 39.7961       | 8.72793316       | 0.00022079 | No      |
| LRRTM1    | 0.11847   | 0.034613  | -0.083857   | 0.00014343 | No      | Car8     | 0.0600685 | 11.5764  | 7.59036232       | 0.0610685    | 11.5774       | 7.56666717       | 0.00738919 | No      |
| Lta       | 0.028438  | 0.42005   | 0.391612    | 2.09E-12   | No      | Card11   | 29.6321   | 5.39989  | -2.4561589       | 29.6331      | 5.40089       | -2.4559405       | 0.00022079 | No      |
| Ltb4r     | 0.12732   | 0.025154  | -0.102166   | 5.10E-09   | No      | Card6    | 25.1642   | 1.99155  | -3.6594091       | 25.1652      | 1.99255       | -3.6587422       | 0.00022079 | No      |
| Ltbp2     | 0.12774   | 0.04823   | -0.07951    | 1.68E-07   | No      | Card9    | 0.255377  | 7.01347  | 4.77942791       | 0.256377     | 7.01447       | 4.77399535       | 0.0112749  | No      |
| Ltk       | 0.020885  | 0.079686  | 0.058801    | 5.77E-05   | No      | Carf     | 5.49489   | 1.70815  | -1.6856559       | 5.49589      | 1.70915       | -1.6850741       | 0.0196176  | No      |
| Ly49i7    | 0.77463   | 0.56312   | -0.21151    | 0.00105615 | No      | Casc3    | 22.1615   | 8.42815  | -1.3947676       | 22.1625      | 8.42915       | -1.3946616       | 0.00022079 | No      |
| Lypd6b    | 0.12352   | 0.052077  | -0.071443   | 0.00176231 | No      | Casd1    | 27.9713   | 6.40003  | -2.1277967       | 27.9723      | 6.40103       | -2.1276229       | 0.00022079 | No      |
| Lyrn1     | 0.23272   | 0.069864  | -0.162856   | 2.80E-12   | No      | Cask     | 0.964221  | 4.74726  | 2.29965931       | 0.965221     | 4.74826       | 2.29846773       | 0.0137492  | No      |
| Lyzl6     | 0.16365   | 0.058254  | -0.105396   | 0.00866691 | No      | Caskin2  | 0.233439  | 13.792   | 5.88464226       | 0.234439     | 13.793        | 5.87857988       | 0.00451708 | No      |
| Mab21l1   | 0.061541  | 0.18776   | 0.126219    | 0.00466526 | No      | Casp1    | 66.5514   | 13.0639  | -2.3488834       | 66.5524      | 13.0649       | -2.3487946       | 0.00022079 | No      |
| Mab21l2   | 0.010713  | 0.41634   | 0.405627    | 1.81E-12   | No      | Casp12   | 0.306803  | 5.5513   | 4.17744117       | 0.307803     | 5.5523        | 4.17300632       | 0.00211842 | No      |
| Mael      | 0.85307   | 0.72619   | -0.12688    | 0.01245124 | No      | Casp7    | 5.82752   | 12.4817  | 1.09886049       | 5.82852      | 12.4827       | 1.09872852       | 0.0171138  | No      |
| Mafb      | 0.32463   | 0.063553  | -0.261077   | 8.96E-07   | No      | Casp8ap2 | 6.49463   | 1.99439  | -1.7032998       | 6.49563      | 1.99539       | -1.7027987       | 0.00022079 | No      |
| Mafk      | 0.83486   | 0.59923   | -0.23563    | 5.03E-06   | No      | Casp9    | 3.99998   | 7.81625  | 0.96648383       | 4.00098      | 7.81725       | 0.96630776       | 0.0372667  | No      |
| Man1c1    | 0.0080746 | 0.059102  | 0.0510274   | 0.00095268 | No      | Casz1    | 0.650849  | 7.01597  | 3.4302478        | 0.651849     | 7.01697       | 3.42823848       | 0.00022079 | No      |
| Map3k10   | 0.54288   | 0.18473   | -0.35815    | 0.00014343 | No      | Cat      | 23.4278   | 174.747  | 2.8989743        | 23.4288      | 174.748       | 2.89892098       | 0.00022079 | No      |
| Map3k6    | 0.12512   | 0.014033  | -0.111087   | 0.00023579 | No      | Cav1     | 0.070087  | 12.7028  | 7.50178395       | 0.071087     | 12.7038       | 7.48145864       | 0.014108   | No      |
| Map3k9    | 0.13114   | 0.023511  | -0.107629   | 0.0190918  | No      | Cav2     | 1.02146   | 18.4662  | 4.1761824        | 1.02246      | 18.4672       | 4.17484883       | 0.00022079 | No      |
| Map7d1    | 0         | 0.064314  | 0.064314    | 0.00088439 | No      | Cbfb     | 67.882    | 14.2842  | -2.2486088       | 67.883       | 14.2852       | -2.2485291       | 0.00022079 | No      |
| Mapk12    | 0.16571   | 0.023722  | -0.141988   | 1.15E-06   | No      | Cbl      | 19.2646   | 3.21775  | -2.5818281       | 19.2656      | 3.21875       | -2.5814547       | 0.00022079 | No      |
| Mapk13    | 0.75808   | 0.56583   | -0.19225    | 0.0017676  | No      | Cblb     | 30.7584   | 5.76317  | -2.416046        | 30.7594      | 5.76417       | -2.4158426       | 0.00022079 | No      |
| Mapk1ip1l | 0.14398   | 0.070286  | -0.073694   | 8.13E-08   | No      | Cblc     | 0         | 8.94716  | inf              | 0.001        | 8.94816       | 13.1273753       | 0.00022079 | No      |
| Mapk9     | 0.072145  | 0.013032  | -0.059113   | 0.00320916 | No      | Cbll1    | 18.165    | 3.6321   | -2.3222855       | 18.166       | 3.6331        | -2.3219678       | 0.00022079 | No      |
| Mark3     | 0.11657   | 0.017484  | -0.099086   | 9.44E-05   | No      | CBR1     | 9.269     | 23.3162  | 1.33084708       | 9.27         | 23.3172       | 1.33075331       | 0.00632443 | No      |
| Marveld2  | 0.18439   | 0.039652  | -0.144738   | 5.73E-06   | No      | Cbx3     | 143.369   | 81.2075  | -0.8200482       | 143.37       | 81.2085       | -0.8200405       | 0.0111498  | No      |
| Marveld3  | 0.12108   | 0.0092642 | -0.1118158  | 1.82E-05   | No      | Cbx4     | 34.0164   | 4.8736   | -2.8031707       | 34.0174      | 4.8746        | -2.8029171       | 0.00022079 | No      |
| Matn3     | 0.34078   | 0.15526   | -0.18552    | 0.04868237 | No      | Cbx5     | 11.3827   | 27.7469  | 1.28548379       | 11.3837      | 27.7479       | 1.28540904       | 0.0132548  | No      |
| Matn4     | 0.59673   | 0.41623   | -0.1805     | 0.03756776 | No      | Cbx6     | 2.20161   | 25.3543  | 3.52559961       | 2.20261      | 25.3553       | 3.52500137       | 0.00022079 | No      |
| Mb21d2    | 0.51852   | 0.18129   | -0.33723    | 1.15E-05   | No      | Cbx7     | 42.3583   | 15.7347  | -1.428695        | 42.3593      | 15.7357       | -1.4286374       | 0.00130998 | No      |
| Mboat4    | 0.819     | 0.60845   | -0.21055    | 0.00018672 | No      | CBY1     | 3.88561   | 21.4195  | 2.46271179       | 3.88661      | 21.4205       | 2.4624079        | 0.00022079 | No      |
| Mc3r      | 0.68791   | 0.51188   | -0.17603    | 0.00161991 | No      | Cc2d1a   | 14.4522   | 90.9832  | 2.65431105       | 14.4532      | 90.9842       | 2.65422709       | 0.00022079 | No      |
| Mdga2     | 0.10419   | 0.029605  | -0.074585   | 0.00866691 | No      | Cc2d2a   | 0.0674172 | 6.38605  | 6.56566333       | 0.0684172    | 6.38705       | 6.54464687       | 0.0189519  | No      |
| Mdk       | 0.67879   | 0.25844   | -0.42035    | 6.74E-12   | No      | Ccar1    | 28.0236   | 11.9872  | -1.2251476       | 28.0246      | 11.9882       | -1.2250787       | 0.00022079 | No      |
| Mesdc1    | 0.23845   | 0.071009  | -0.167441   | 5.49E-05   | No      | Ccbl2    | 4.45279   | 10.6934  | 1.26393916       | 4.45379      | 10.6944       | 1.2637501        | 0.0259566  | No      |
| Mfap2     | 0.48317   | 0.19842   | -0.28475    | 1.61E-05   | No      | CCDC101  | 40.7446   | 19.7334  | -1.0459693       | 40.7456      | 19.7344       | -1.0459316       | 0.00870822 | No      |
| Mfge8     | 0.02048   | 0.27621   | 0.25573     | 9.44E-05   | No      | Ccdc102a | 5.00202   | 11.2471  | 1.16897033       | 5.00302      | 11.2481       | 1.1688102        | 0.00579147 | No      |
| Mfsd2a    | 0.3035    | 0.17715   | -0.12635    | 0.01333327 | No      | Ccdc104  | 15.8862   | 46.9284  | 1.5626872        | 15.8872      | 46.9294       | 1.56262713       | 0.00022079 | No      |
| Mgat4c    | 0.65433   | 0.16858   | -0.48575    | 0.0006129  | No      | Ccdc111  | 2.34014   | 0.350915 | -2.7374013       | 2.34114      | 0.351915      | -2.7339123       | 0.012511   | No      |

| RRBS      |           |           |             |            |         | RNAseq   |          |          |                  |              |               |                  |            |         |
|-----------|-----------|-----------|-------------|------------|---------|----------|----------|----------|------------------|--------------|---------------|------------------|------------|---------|
| gene      | Blood     | Kidney    | methyl.diff | pMWU.fdr   | Match ? | gene     | blood    | kidney   | log2(fold_ratio) | blood+ 0.001 | kidney+ 0.001 | log2(fold_ratio) | q_value    | Match ? |
| Mgat4d    | 0.45019   | 0.10934   | -0.34085    | 2.97E-07   | No      | Ccdc113  | 0.734651 | 31.7414  | 5.4331629        | 0.735651     | 31.7424       | 5.4312459        | 0.00060553 | No      |
| MGC114492 | 0.88979   | 0.70268   | -0.18711    | 0.00364323 | No      | CCDC115  | 61.9496  | 27.8801  | -1.1518592       | 61.9506      | 27.8811       | -1.1518308       | 0.00022079 | No      |
| MGC94207  | 0.79318   | 0.19497   | -0.59821    | 1.81E-12   | No      | Ccdc12   | 46.7096  | 85.8183  | 0.87756623       | 46.7106      | 85.8193       | 0.87755216       | 0.0238376  | No      |
| MGC95208  | 0.44298   | 0.11483   | -0.32815    | 3.09E-05   | No      | Ccdc124  | 48.5554  | 105.736  | 1.122763         | 48.5564      | 105.737       | 1.12274693       | 0.0019604  | No      |
| Miat      | 0.11915   | 0.044047  | -0.075103   | 9.96E-05   | No      | Ccdc126  | 2.2101   | 8.74911  | 1.98502462       | 2.2111       | 8.75011       | 1.98453688       | 0.00041963 | No      |
| Mical1    | 0.028495  | 0.098985  | 0.07049     | 0.0190918  | No      | Ccdc127  | 2.173    | 7.33329  | 1.75477242       | 2.174        | 7.33429       | 1.75430537       | 0.00378481 | No      |
| Mir1247   | 0.14735   | 0.05134   | -0.09601    | 0.00055683 | No      | Ccdc137  | 12.3878  | 6.21217  | -0.9957508       | 12.3888      | 6.21317       | -0.995635        | 0.0221192  | No      |
| Mir126    | 0.90954   | 0.77419   | -0.13535    | 2.85E-05   | No      | Ccdc138  | 0.276164 | 3.07502  | 3.47699862       | 0.277164     | 3.07602       | 3.4722531        | 0.00041963 | No      |
| Mir129-1  | 0.24798   | 0.36616   | 0.11818     | 0.02027674 | No      | Ccdc160  | 0        | 4.99944  | inf              | 0.001        | 5.00044       | 12.2878393       | 0.00022079 | No      |
| Mir129-2  | 0.07265   | 0.019269  | -0.053381   | 0.0017676  | No      | Ccdc181  | 4.91765  | 20.8171  | 2.08172814       | 4.91865      | 20.8181       | 2.0815041        | 0.00022079 | No      |
| Mir137    | 0.082393  | 0.030644  | -0.051749   | 0.00334577 | No      | Ccdc27   | 0        | 1.52619  | inf              | 0.001        | 1.52719       | 10.5766638       | 0.0283842  | No      |
| Mir138-2  | 0.20551   | 0.33339   | 0.12788     | 0.00776108 | No      | Ccdc28b  | 37.3489  | 17.6461  | -1.0817164       | 37.3499      | 17.6471       | -1.0816733       | 0.00605729 | No      |
| Mir141    | 0.77449   | 0.56528   | -0.20921    | 4.32E-06   | No      | Ccdc30   | 0.495579 | 5.86491  | 3.56492201       | 0.496579     | 5.86591       | 3.56225978       | 0.00022079 | No      |
| Mir149    | 0.066531  | 0.24237   | 0.175839    | 0.00113933 | No      | Ccdc34   | 2.68191  | 5.57074  | 1.05460816       | 2.68291      | 5.57174       | 1.05432928       | 0.0496219  | No      |
| Mir196a   | 0.053787  | 0.16778   | 0.113993    | 4.27E-08   | No      | Ccdc37   | 0.583802 | 8.65894  | 3.89063937       | 0.584802     | 8.65994       | 3.88833688       | 0.0392505  | No      |
| Mir196c   | 0.077308  | 0.31715   | 0.239842    | 6.98E-11   | No      | Ccdc51   | 2.76197  | 9.92073  | 1.84474863       | 2.76297      | 9.92173       | 1.8443718        | 0.00060553 | No      |
| Mir203    | 0.087144  | 0.022479  | -0.064665   | 6.96E-09   | No      | Ccdc53   | 27.3221  | 53.881   | 0.97970825       | 27.3231      | 53.882        | 0.97968223       | 0.00909283 | No      |
| Mir25     | 0.90223   | 0.67981   | -0.22242    | 0.0001571  | No      | Ccdc6    | 12.2658  | 41.6166  | 1.76251777       | 12.2668      | 41.6176       | 1.76243482       | 0.00022079 | No      |
| Mir295-1  | 0.72569   | 0.4689    | -0.25679    | 6.26E-05   | No      | Ccdc64   | 99.2915  | 30.539   | -1.7010174       | 99.2925      | 30.54         | -1.7009847       | 0.00041963 | No      |
| Mir2964   | 0.81366   | 0.3995    | -0.41416    | 1.81E-12   | No      | Ccdc68   | 0        | 6.0046   | inf              | 0.001        | 6.0056        | 12.5520927       | 0.00022079 | No      |
| Mir3065   | 0.75418   | 0.079428  | -0.674752   | 1.81E-12   | No      | Ccdc69   | 51.7027  | 3.09594  | -4.0617902       | 51.7037      | 3.09694       | -4.0613522       | 0.00022079 | No      |
| Mir331    | 0.97746   | 0.85682   | -0.12064    | 0.00049864 | No      | Ccdc71l  | 11.0749  | 2.13876  | -2.3724472       | 11.0759      | 2.13976       | -2.371903        | 0.0353972  | No      |
| Mir341    | 0.30193   | 0.13017   | -0.17176    | 8.94E-11   | No      | Ccdc82   | 30.9673  | 6.5352   | -2.2444423       | 30.9683      | 6.5362        | -2.2442682       | 0.00022079 | No      |
| Mir346    | 0.11337   | 0.031373  | -0.081997   | 0.0021362  | No      | Ccdc88b  | 46.0569  | 11.682   | -1.97913         | 46.0579      | 11.683        | -1.9790379       | 0.00022079 | No      |
| Mir34a    | 0.85301   | 0.56402   | -0.28899    | 0.00123983 | No      | Ccdc88c  | 34.5375  | 9.46742  | -1.8671204       | 34.5385      | 9.46842       | -1.8670098       | 0.00022079 | No      |
| Mir3547   | 0.87205   | 0.54542   | -0.32663    | 7.36E-06   | No      | Ccdc9    | 91.4456  | 37.8327  | -1.27328         | 91.4466      | 37.8337       | -1.2732577       | 0.0223592  | No      |
| Mir3569   | 0.092623  | 0.0098375 | -0.0827855  | 4.32E-06   | No      | Ccdc92   | 0.487707 | 6.36686  | 3.70649546       | 0.488707     | 6.36786       | 3.70376694       | 0.00022079 | No      |
| Mir3590   | 0.2786    | 0.051084  | -0.227516   | 1.15E-06   | No      | Ccdc94   | 22.942   | 11.3063  | -1.0208643       | 22.943       | 11.3073       | -1.0207996       | 0.00988585 | No      |
| Mir378    | 0.52768   | 0.095463  | -0.432217   | 3.67E-05   | No      | Cchr1    | 6.36626  | 22.8596  | 1.84428218       | 6.36726      | 22.8606       | 1.84411869       | 0.00022079 | No      |
| Mir455    | 0.78617   | 0.30574   | -0.48043    | 2.14E-06   | No      | Ccl17    | 0        | 3.26691  | inf              | 0.001        | 3.26791       | 11.6741525       | 0.00022079 | No      |
| Mir6314   | 0.45222   | 0.14286   | -0.30936    | 0.00010392 | No      | Ccl21    | 0        | 0.925136 | inf              | 0.001        | 0.926136      | 9.85508025       | 0.00022079 | No      |
| Mir6316   | 0.76126   | 0.59512   | -0.16614    | 0.01333327 | No      | Ccl3     | 24.788   | 95.141   | 1.94042532       | 24.789       | 95.142        | 1.94038228       | 0.00022079 | No      |
| Mir6326   | 0.17886   | 0.017597  | -0.161263   | 9.44E-05   | No      | Ccl4     | 4.75735  | 23.774   | 2.32115458       | 4.75835      | 23.775        | 2.32091204       | 0.0347515  | No      |
| Mir6328   | 0.0054361 | 0.2735    | 0.2680639   | 8.88E-12   | No      | Ccl6     | 1.65599  | 6.49003  | 1.97053119       | 1.65699      | 6.49103       | 1.96988253       | 0.0171138  | No      |
| Mir6333   | 0.5064    | 0.087567  | -0.418833   | 1.31E-06   | No      | Ccl7     | 0        | 0.974879 | inf              | 0.001        | 0.975879      | 9.93055847       | 0.00022079 | No      |
| Mir671    | 0.74106   | 0.60643   | -0.13463    | 0.04531279 | No      | Ccl9     | 1.09819  | 15.4488  | 3.8142952        | 1.09919      | 15.4498       | 3.81307547       | 0.00022079 | No      |
| Mir675    | 0.57252   | 0.34356   | -0.22896    | 0.0250308  | No      | Ccm2     | 71.1026  | 31.95    | -1.1540864       | 71.1036      | 31.951        | -1.1540615       | 0.00164037 | No      |
| Mir702    | 0.8945    | 0.79749   | -0.09701    | 0.00466526 | No      | Ccnb1ip1 | 2.47761  | 0.228336 | -3.4397189       | 2.47861      | 0.229336      | -3.4339965       | 0.0360158  | No      |
| Mir7b     | 0.37558   | 0.2326    | -0.14298    | 0.02144384 | No      | CCND2    | 14.5422  | 2.60877  | -2.4788039       | 14.5432      | 2.60977       | -2.4783502       | 0.00363736 | No      |
| Mir9-1    | 0.13692   | 0.036619  | -0.100301   | 0.00095268 | No      | Ccng2    | 27.7612  | 15.1999  | -0.8690081       | 27.7622      | 15.2009       | -0.8689652       | 0.00765035 | No      |
| Mir9-3    | 0.22981   | 0.062971  | -0.166839   | 0.0021362  | No      | CCNJ     | 6.59505  | 2.2028   | -1.5820451       | 6.59605      | 2.2038        | -1.581609        | 0.00078858 | No      |

| RRBS     |           |           |             |            |         | RNAseq  |          |          |                  |              |               |                  |            |         |
|----------|-----------|-----------|-------------|------------|---------|---------|----------|----------|------------------|--------------|---------------|------------------|------------|---------|
| gene     | Blood     | Kidney    | methyl.diff | pMWU.fdr   | Match ? | gene    | blood    | kidney   | log2(fold_ratio) | blood+ 0.001 | kidney+ 0.001 | log2(fold_ratio) | q_value    | Match ? |
| Mir99b   | 0.82399   | 0.25581   | -0.56818    | 1.81E-12   | No      | Ccnk    | 20.0217  | 12.2109  | -0.7133949       | 20.0227      | 12.2119       | -0.7133488       | 0.0423219  | No      |
| Mki67    | 0.083342  | 0.0023811 | -0.0809609  | 0.00095268 | No      | Ccnl1   | 154.428  | 42.1673  | -1.8727378       | 154.429      | 42.1683       | -1.8727129       | 0.00022079 | No      |
| Mlst8    | 0.4502    | 0.36596   | -0.08424    | 0.04318305 | No      | CCNL2   | 161.434  | 71.1529  | -1.18195         | 161.435      | 71.1539       | -1.1819387       | 0.0159346  | No      |
| Mlxipl   | 0.16377   | 0.040014  | -0.123756   | 6.75E-05   | No      | Ccno    | 0        | 1.15455  | inf              | 0.001        | 1.15555       | 10.174364        | 0.00022079 | No      |
| Mmd2     | 0.16467   | 0.05285   | -0.11182    | 8.49E-05   | No      | Ccnt2   | 32.2316  | 7.70504  | -2.0646015       | 32.2326      | 7.70604       | -2.064459        | 0.00022079 | No      |
| Mmel1    | 0.69056   | 0.47586   | -0.2147     | 0.00541332 | No      | Ccp110  | 6.07039  | 2.02637  | -1.5828916       | 6.07139      | 2.02737       | -1.5824174       | 0.00658515 | No      |
| Mmp14    | 0.11577   | 0.049405  | -0.066365   | 0.00141078 | No      | Ccpg1   | 84.4209  | 28.5669  | -1.5632557       | 84.4219      | 28.5679       | -1.5632223       | 0.00022079 | No      |
| Mmp2     | 0.079045  | 0.042597  | -0.036448   | 0.01660198 | No      | Ccpg1os | 2.62659  | 11.7266  | 2.15852186       | 2.62759      | 11.7276       | 2.15809572       | 0.0105196  | No      |
| Mmp9     | 0.23205   | 0.12345   | -0.1086     | 9.44E-05   | No      | Ccr4    | 4.2144   | 0.589498 | -2.8377684       | 4.2154       | 0.590498      | -2.8356655       | 0.0153152  | No      |
| Mn1      | 0.88041   | 0.20819   | -0.67222    | 1.81E-12   | No      | Ccr6    | 4.59837  | 0.874199 | -2.3950889       | 4.59937      | 0.875199      | -2.3937533       | 0.0102697  | No      |
| Mob3a    | 0.0010638 | 0.18326   | 0.1821962   | 5.03E-06   | No      | Ccr7    | 298.545  | 2.05403  | -7.1833473       | 298.546      | 2.05503       | -7.18265         | 0.00022079 | No      |
| Mog      | 0.94585   | 0.86869   | -0.07716    | 0.00553374 | No      | Ccr9    | 15.5715  | 0.181206 | -6.4251334       | 15.5725      | 0.182206      | -6.4172863       | 0.00180113 | No      |
| Mrap2    | 0.46679   | 0.21911   | -0.24768    | 5.73E-06   | No      | Ccr2    | 0.191613 | 3.10904  | 4.02020183       | 0.192613     | 3.11004       | 4.01315615       | 0.00060553 | No      |
| Mrc2     | 0.83814   | 0.18239   | -0.65575    | 2.07E-09   | No      | Ccser1  | 0.277204 | 2.77887  | 3.32547836       | 0.278204     | 2.77987       | 3.32080235       | 0.0303513  | No      |
| Mrpl14   | 0.29726   | 0.070565  | -0.226695   | 0.00038311 | No      | Ccser2  | 6.33819  | 11.7129  | 0.8859555        | 6.33919      | 11.7139       | 0.88585107       | 0.01483    | No      |
| Msc      | 0.30941   | 0.10853   | -0.20088    | 0.00197715 | No      | Cct2    | 137.797  | 78.8548  | -0.805274        | 137.798      | 78.8558       | -0.8052662       | 0.0142227  | No      |
| Mst1r    | 0.47935   | 0.1884    | -0.29095    | 1.82E-05   | No      | Cct4    | 176.887  | 95.526   | -0.8888627       | 176.888      | 95.527        | -0.8888557       | 0.0103977  | No      |
| Msx3     | 0.054183  | 0         | -0.054183   | 0.00019244 | No      | Ccz1    | 36.9174  | 22.0301  | -0.7448249       | 36.9184      | 22.0311       | -0.7447985       | 0.0312769  | No      |
| Mtnr1b   | 0.46924   | 0.62673   | 0.15749     | 0.0153478  | No      | Cd14    | 0.241487 | 10.3386  | 5.4199515        | 0.242487     | 10.3396       | 5.41412916       | 0.00022079 | No      |
| Mvp      | 0.84336   | 0.33537   | -0.50799    | 8.96E-07   | No      | Cd1d1   | 15.4978  | 3.59981  | -2.1060708       | 15.4988      | 3.60081       | -2.1057631       | 0.00022079 | No      |
| Myadml2  | 0.81172   | 0.64487   | -0.16685    | 0.00038311 | No      | Cd2     | 287.201  | 31.1939  | -3.2027249       | 287.202      | 31.1949       | -3.2026837       | 0.00022079 | No      |
| Mybpc2   | 0.10583   | 0.052323  | -0.053507   | 0.00350701 | No      | Cd200   | 3.24374  | 13.1635  | 2.02081304       | 3.24474      | 13.1645       | 2.02047794       | 0.00022079 | No      |
| Mycs     | 0.089269  | 0.021973  | -0.067296   | 0.0022928  | No      | Cd226   | 25.3866  | 0.727117 | -5.1257359       | 25.3876      | 0.728117      | -5.1238099       | 0.00022079 | No      |
| Myh10    | 0.16857   | 0.029976  | -0.138594   | 0.00012978 | No      | Cd247   | 270.597  | 7.98876  | -5.0820304       | 270.598      | 7.98976       | -5.0818552       | 0.00022079 | No      |
| Myh6     | 0.57949   | 0.14577   | -0.43372    | 5.89E-07   | No      | Cd27    | 253.453  | 8.94767  | -4.8240624       | 253.454      | 8.94867       | -4.8239068       | 0.00022079 | No      |
| Myocd    | 0.25257   | 0.10083   | -0.15174    | 3.00E-05   | No      | Cd274   | 19.6539  | 2.39948  | -3.0340219       | 19.6549      | 2.40048       | -3.0334942       | 0.00022079 | No      |
| Myod1    | 0.12117   | 0.061543  | -0.059627   | 0.00044355 | No      | Cd28    | 152.75   | 1.8      | -6.4070317       | 152.751      | 1.801         | -6.4062398       | 0.00022079 | No      |
| Mypn     | 0.81261   | 0.64352   | -0.16909    | 0.00095268 | No      | Cd302   | 0.947354 | 7.90437  | 3.06067495       | 0.948354     | 7.90537       | 3.0593354        | 0.00288641 | No      |
| Nacad    | 0.14608   | 0.063475  | -0.082605   | 0.00012978 | No      | Cd320   | 73.9145  | 308.997  | 2.06366352       | 73.9155      | 308.998       | 2.06364867       | 0.00022079 | No      |
| Nalcn    | 0.1628    | 0.044761  | -0.118039   | 2.35E-12   | No      | Cd36    | 0.116665 | 1.99282  | 4.09436769       | 0.117665     | 1.99382       | 4.08277802       | 0.0211214  | No      |
| Nap15    | 0.51688   | 0.6051    | 0.08822     | 0.01148416 | No      | Cd3d    | 711.235  | 97.9867  | -2.8596685       | 711.236      | 97.9877       | -2.8596558       | 0.00022079 | No      |
| Naprt    | 0.448     | 0.075843  | -0.372157   | 2.29E-09   | No      | Cd3e    | 772.479  | 36.706   | -4.3954079       | 772.48       | 36.707        | -4.3953705       | 0.00022079 | No      |
| Nat8f5   | 0.77922   | 0.053378  | -0.725842   | 3.82E-07   | No      | Cd3eap  | 10.1932  | 52.7496  | 2.37155312       | 10.1942      | 52.7506       | 2.37143894       | 0.00022079 | No      |
| Ncam2    | 0.057066  | 1.50E-07  | -0.0570659  | 8.96E-07   | No      | Cd3g    | 1144.39  | 86.5439  | -3.7250029       | 1144.391     | 86.5449       | -3.7249874       | 0.00022079 | No      |
| Ncan     | 0.089332  | 0.024273  | -0.065059   | 9.43E-07   | No      | Cd4     | 131.369  | 6.50178  | -4.3366463       | 131.37       | 6.50278       | -4.3364354       | 0.00022079 | No      |
| Nck2     | 0.015929  | 0.075447  | 0.059518    | 0.0021362  | No      | Cd40    | 0.517187 | 5.87896  | 3.50680304       | 0.518187     | 5.87996       | 3.50426161       | 0.00078858 | No      |
| Ncs1     | 0.51213   | 0.23152   | -0.28061    | 3.03E-05   | No      | Cd44    | 133.582  | 22.9871  | -2.5388292       | 133.583      | 22.9881       | -2.5387773       | 0.00022079 | No      |
| Ndn      | 0.19456   | 0.080335  | -0.114225   | 1.81E-12   | No      | Cd47    | 103.382  | 29.0137  | -1.8331788       | 103.383      | 29.0147       | -1.8331431       | 0.00022079 | No      |
| Ndnl2    | 0.074047  | 0.010553  | -0.063494   | 0.0002817  | No      | Cd48    | 161.743  | 50.2459  | -1.6866255       | 161.744      | 50.2469       | -1.6866057       | 0.00022079 | No      |
| Ndufa101 | 0.62806   | 0.089763  | -0.538297   | 8.88E-12   | No      | Cd5     | 12.7078  | 0.318967 | -5.3161633       | 12.7088      | 0.319967      | -5.3117609       | 0.00022079 | No      |
| Ndufs6   | 0.97254   | 0.81418   | -0.15836    | 4.83E-07   | No      | Cd53    | 399.868  | 15.4436  | -4.6944428       | 399.869      | 15.4446       | -4.694353        | 0.00022079 | No      |
| Necab2   | 0.012744  | 0.13839   | 0.125646    | 5.03E-06   | No      | Cd55    | 0.925545 | 4.44853  | 2.26495364       | 0.926545     | 4.44953       | 2.26372          | 0.00318754 | No      |

| RRBS      |          |          |             |            |         | RNAseq   |           |          |                  |              |               |                  |            |         |
|-----------|----------|----------|-------------|------------|---------|----------|-----------|----------|------------------|--------------|---------------|------------------|------------|---------|
| gene      | Blood    | Kidney   | methyl.diff | pMWU.fdr   | Match ? | gene     | blood     | kidney   | log2(fold_ratio) | blood+ 0.001 | kidney+ 0.001 | log2(fold_ratio) | q_value    | Match ? |
| Nectin4   | 0.74344  | 0.48472  | -0.25872    | 0.00799193 | No      | Cd59     | 0.801123  | 167.952  | 7.7118095        | 0.802123     | 167.953       | 7.71001837       | 0.00022079 | No      |
| Neil2     | 0.81767  | 0.26902  | -0.54865    | 2.35E-06   | No      | Cd6      | 134.214   | 20.1395  | -2.7364354       | 134.215      | 20.1405       | -2.7363745       | 0.00022079 | No      |
| Nek2      | 0.50113  | 0.19824  | -0.30289    | 6.38E-06   | No      | Cd63     | 4.64661   | 774.918  | 7.38172128       | 4.64761      | 774.919       | 7.3814127        | 0.00022079 | No      |
| Nelfb     | 0.75469  | 0.37632  | -0.37837    | 5.89E-08   | No      | Cd68     | 1.53728   | 12.0489  | 2.97044958       | 1.53828      | 12.0499       | 2.96963114       | 0.00060553 | No      |
| Neur1     | 0.21199  | 0.083611 | -0.128379   | 0.0074695  | No      | Cd69     | 138.529   | 12.9105  | -3.4235712       | 138.53       | 12.9115       | -3.4234699       | 0.00022079 | No      |
| Neurod2   | 0.07264  | 0.014882 | -0.057758   | 0.02731997 | No      | Cd74     | 114.939   | 547.083  | 2.25089132       | 114.94       | 547.084       | 2.25088141       | 0.00022079 | No      |
| Neurog1   | 0.080614 | 0.021305 | -0.059309   | 0.0017676  | No      | Cd79b    | 14.3197   | 1.91898  | -2.8995897       | 14.3207      | 1.91998       | -2.8989388       | 0.00113657 | No      |
| Neurog3   | 0.17332  | 0.017338 | -0.155982   | 7.75E-05   | No      | Cd81     | 100.84    | 160.488  | 0.6703974        | 100.841      | 160.489       | 0.67039209       | 0.0434203  | No      |
| Nfasc     | 0.31944  | 0.11238  | -0.20706    | 0.00078236 | No      | Cd86     | 0.334066  | 2.75979  | 3.04635343       | 0.335066     | 2.76079       | 3.04256395       | 0.00242102 | No      |
| Nfyb      | 0.30446  | 0.11464  | -0.18982    | 0.03531391 | No      | Cd8b     | 82.0037   | 4.76395  | -4.1054588       | 82.0047      | 4.76495       | -4.1051736       | 0.00022079 | No      |
| Ngb       | 0.10422  | 0.041561 | -0.062659   | 9.43E-07   | No      | Cd9      | 16.1164   | 125.685  | 2.96321106       | 16.1174      | 125.686       | 2.96313302       | 0.00022079 | No      |
| Nhlh2     | 0.078735 | 0.025105 | -0.05363    | 0.00636684 | No      | Cd93     | 0.031414  | 3.8748   | 6.94657038       | 0.032414     | 3.8758        | 6.90173325       | 0.0438233  | No      |
| Nhlrc1    | 0.24765  | 0.10037  | -0.14728    | 5.15E-07   | No      | Cd96     | 45.3011   | 4.77686  | -3.2454116       | 45.3021      | 4.77786       | -3.2451414       | 0.00022079 | No      |
| Nipsnap3a | 0.83818  | 0.61221  | -0.22597    | 0.00088439 | No      | Cd97     | 172.348   | 19.3938  | -3.1516571       | 172.349      | 19.3948       | -3.1515911       | 0.00022079 | No      |
| Nkain3    | 0.086995 | 0.033273 | -0.053722   | 0.00055683 | No      | Cd99     | 32.6095   | 390.566  | 3.58220214       | 32.6105      | 390.567       | 3.58216159       | 0.00022079 | No      |
| Nkx1-2    | 0.11197  | 0.037609 | -0.074361   | 0.00320916 | No      | Cdc14b   | 6.30782   | 16.4785  | 1.38537153       | 6.30882      | 16.4795       | 1.38523038       | 0.00685176 | No      |
| Nkx2-5    | 0.51862  | 0.25022  | -0.2684     | 0.00017491 | No      | Cdc23    | 25.3181   | 13.6274  | -0.8936588       | 25.3191      | 13.6284       | -0.8936099       | 0.0250666  | No      |
| Nkx2-8    | 0.092521 | 0.039404 | -0.053117   | 2.37E-07   | No      | Cdc25a   | 3.531     | 6.34134  | 0.84471091       | 3.532        | 6.34234       | 0.84452988       | 0.0466155  | No      |
| Nkx3-1    | 0.1179   | 0.03429  | -0.08361    | 2.15E-05   | No      | Cdc25b   | 104.149   | 2.74751  | -5.2443804       | 104.15       | 2.74851       | -5.2438693       | 0.00022079 | No      |
| Nkx6-1    | 0.16778  | 0.096925 | -0.070855   | 0.03999251 | No      | Cdc25c   | 4.37056   | 1.46046  | -1.5813953       | 4.37156      | 1.46146       | -1.5807379       | 0.00227055 | No      |
| Nkx6-2    | 0.081719 | 0.024761 | -0.056958   | 4.52E-08   | No      | Cdc42    | 593.748   | 222.103  | -1.4186219       | 593.749      | 222.104       | -1.4186178       | 0.00041963 | No      |
| Nlgn3     | 0.16348  | 0.042317 | -0.121163   | 2.75E-07   | No      | Cdc42bpa | 0.0540333 | 8.95209  | 7.37223194       | 0.0550333    | 8.95309       | 7.34593704       | 0.00113657 | No      |
| Nlrp6     | 0.21046  | 0.080289 | -0.130171   | 0.00148947 | No      | Cdc42bpb | 0.0238671 | 16.7857  | 9.45799371       | 0.0248671    | 16.7867       | 9.39886466       | 0.0245052  | No      |
| Nmnat2    | 0.081553 | 0.031158 | -0.050395   | 4.32E-06   | No      | Cdc42ep2 | 0.0857081 | 30.0543  | 8.45392415       | 0.0867081    | 30.0553       | 8.43723693       | 0.00022079 | No      |
| Nmur2     | 0.078107 | 0.017195 | -0.060912   | 2.88E-05   | No      | Cdc42ep4 | 0.246586  | 7.41812  | 4.91089081       | 0.247586     | 7.41912       | 4.90524643       | 0.00466383 | No      |
| Nnat      | 0.90932  | 0.259    | -0.65032    | 1.97E-09   | No      | Cdc42se1 | 250.36    | 117.421  | -1.0923136       | 250.361      | 117.422       | -1.0923071       | 0.0195167  | No      |
| Nodal     | 0.34989  | 0.090794 | -0.259096   | 6.38E-06   | No      | Cdc42se2 | 178.086   | 27.6286  | -2.6883397       | 178.087      | 27.6296       | -2.6882956       | 0.00022079 | No      |
| Nol3      | 0.79287  | 0.61075  | -0.18212    | 0.00078236 | No      | Cdc6     | 0.515809  | 10.28    | 4.31685951       | 0.516809     | 10.281        | 4.31420559       | 0.00022079 | No      |
| Nol4      | 0.20203  | 0.02638  | -0.17565    | 1.61E-05   | No      | Cdca3    | 0.739744  | 6.47521  | 3.12982899       | 0.740744     | 6.47621       | 3.12810283       | 0.00060553 | No      |
| Notch3    | 0.1883   | 0.069917 | -0.118383   | 0.00105615 | No      | Cdca7    | 4.83085   | 0.922032 | -2.3893883       | 4.83185      | 0.923032      | -2.3881231       | 0.00480115 | No      |
| Npas4     | 0.20538  | 0.076182 | -0.129198   | 1.97E-09   | No      | Cdca7l   | 29.6594   | 6.19218  | -2.2599701       | 29.6604      | 6.19318       | -2.2597858       | 0.00022079 | No      |
| Npb       | 0.7577   | 0.20096  | -0.55674    | 1.81E-12   | No      | Cdcp1    | 0         | 4.85098  | inf              | 0.001        | 4.85198       | 12.2443579       | 0.00022079 | No      |
| Npc111    | 0.80231  | 0.51268  | -0.28963    | 0.00866691 | No      | Cdh1     | 0.0784503 | 39.4916  | 8.97555114       | 0.0794503    | 39.4926       | 8.95731397       | 0.00022079 | No      |
| Npr1      | 0.49544  | 0.23165  | -0.26379    | 0.0002817  | No      | Cdh16    | 0         | 388.27   | inf              | 0.001        | 388.271       | 18.5667044       | 0.00022079 | No      |
| Nptx2     | 0.10161  | 0.027801 | -0.073809   | 0.00017491 | No      | Cdh5     | 0         | 9.04582  | inf              | 0.001        | 9.04682       | 13.1431951       | 0.00022079 | No      |
| Npy       | 0.10394  | 0.037413 | -0.066527   | 0.02257431 | No      | CDH6     | 0         | 7.35181  | inf              | 0.001        | 7.35281       | 12.84408         | 0.00022079 | No      |
| Npy5r     | 0.17041  | 0.091641 | -0.078769   | 0.00438283 | No      | Cdhr1    | 0.271659  | 3.05603  | 3.49178996       | 0.272659     | 3.05703       | 3.48696103       | 0.00022079 | No      |
| Nrk       | 0.48225  | 0.22871  | -0.25354    | 0.01660198 | No      | Cdhr2    | 0.132278  | 1.87382  | 3.82433733       | 0.133278     | 1.87482       | 3.81424153       | 0.00579147 | No      |
| Nrsn2     | 0.83924  | 0.37139  | -0.46785    | 4.29E-07   | No      | Cdip1    | 10.5152   | 25.0883  | 1.25453843       | 10.5162      | 25.0893       | 1.25445873       | 0.0155671  | No      |
| Nsd1      | 0.088618 | 0.17778  | 0.089162    | 0.0007955  | No      | Cdk1     | 0.807571  | 6.03713  | 2.90220186       | 0.808571     | 6.03813       | 2.90065545       | 0.00022079 | No      |
| Nt5e      | 0.081799 | 0.030395 | -0.051404   | 0.00119531 | No      | CDK12    | 26.0105   | 7.96814  | -1.7067792       | 26.0115      | 7.96914       | -1.7066536       | 0.00494367 | No      |
| Ntn1      | 0.14087  | 0.057965 | -0.082905   | 0.00123983 | No      | Cdk13    | 49.5137   | 11.049   | -2.163912        | 49.5147      | 11.05         | -2.1638105       | 0.00022079 | No      |

| RRBS    |          |           |             |            |         | RNAseq   |           |          |                  |              |               |                  |            |         |
|---------|----------|-----------|-------------|------------|---------|----------|-----------|----------|------------------|--------------|---------------|------------------|------------|---------|
| gene    | Blood    | Kidney    | methyl.diff | pMWU.fdr   | Match ? | gene     | blood     | kidney   | log2(fold_ratio) | blood+ 0.001 | kidney+ 0.001 | log2(fold_ratio) | q_value    | Match ? |
| Ntn3    | 0.1801   | 0.014269  | -0.165831   | 7.63E-07   | No      | Cdk17    | 20.2879   | 6.06187  | -1.7427847       | 20.2889      | 6.06287       | -1.7426179       | 0.00022079 | No      |
| Ntn4    | 0.29343  | 0.156     | -0.13743    | 0.00693052 | No      | Cdk18    | 0         | 10.7482  | inf              | 0.001        | 10.7492       | 13.3919417       | 0.00022079 | No      |
| Ntrk2   | 0.08582  | 0.0077469 | -0.0780731  | 0.00055683 | No      | Cdk19    | 34.4554   | 9.68114  | -1.8314813       | 34.4564      | 9.68214       | -1.8313741       | 0.00022079 | No      |
| Ntsr1   | 0.1073   | 0.0235    | -0.0838     | 5.49E-05   | No      | Cdk2     | 25.2904   | 8.78474  | -1.5255184       | 25.2914      | 8.78574       | -1.5254112       | 0.00022079 | No      |
| Numbl   | 0.87479  | 0.62583   | -0.24896    | 3.93E-05   | No      | Cdk2ap2  | 55.3114   | 124.967  | 1.17589841       | 55.3124      | 124.968       | 1.17588387       | 0.00022079 | No      |
| Oaz1    | 0.62101  | 0.096519  | -0.524491   | 1.86E-06   | No      | Cdk6     | 9.79102   | 4.87002  | -1.0075315       | 9.79202      | 4.87102       | -1.0073826       | 0.00632443 | No      |
| Ogfod1  | 0.17021  | 0.071445  | -0.098765   | 7.02E-06   | No      | Cdk9     | 88.3567   | 55.2123  | -0.6783498       | 88.3577      | 55.2133       | -0.67834         | 0.0336988  | No      |
| Olfm2   | 0.13406  | 0.061064  | -0.072996   | 0.0074695  | No      | Cdkl1    | 0.0285249 | 357.117  | 13.6118874       | 0.0295249    | 357.118       | 13.5621811       | 0.00022079 | No      |
| Olig1   | 0.11592  | 0.044619  | -0.071301   | 0.01155321 | No      | Cdkn1a   | 0.166213  | 8.98387  | 5.75623192       | 0.167213     | 8.98487       | 5.74773871       | 0.00078858 | No      |
| Olig2   | 0.09563  | 0.04259   | -0.05304    | 0.0153478  | No      | Cdkn1b   | 230.937   | 42.3379  | -2.4474777       | 230.938      | 42.3389       | -2.4474499       | 0.00022079 | No      |
| Olig3   | 0.13277  | 0.04093   | -0.09184    | 0.01000157 | No      | Cdkn2aip | 17.6768   | 7.76937  | -1.1859876       | 17.6778      | 7.77037       | -1.1858835       | 0.00211842 | No      |
| Olr1462 | 0.65329  | 0.47614   | -0.17715    | 0.00320916 | No      | Cdo1     | 0.173438  | 27.1253  | 7.28907526       | 0.174438     | 27.1263       | 7.28083411       | 0.00147497 | No      |
| Olr1474 | 0.87969  | 0.81467   | -0.06502    | 0.00866691 | No      | Cdr2     | 1.15487   | 20.2317  | 4.13081518       | 1.15587      | 20.2327       | 4.1296378        | 0.00022079 | No      |
| Onecut1 | 0.097279 | 0.024247  | -0.073032   | 0.0190918  | No      | Cdr2l    | 0.123074  | 1.50936  | 3.61633902       | 0.124074     | 1.51036       | 3.60561973       | 0.0286013  | No      |
| Opcml   | 0.072425 | 0.019997  | -0.052428   | 1.24E-06   | No      | Cds1     | 0.0355743 | 17.749   | 8.96268666       | 0.0365743    | 17.75         | 8.92277306       | 0.0309567  | No      |
| Oprm1   | 0.071455 | 0.018516  | -0.052939   | 0.00026127 | No      | Cds2     | 25.0085   | 11.3611  | -1.138316        | 25.0095      | 11.3621       | -1.1382467       | 0.00778313 | No      |
| Osbp18  | 0.29648  | 0.086988  | -0.209492   | 4.29E-07   | No      | Cdv3     | 49.8339   | 26.3016  | -0.9219769       | 49.8349      | 26.3026       | -0.921951        | 0.0393438  | No      |
| Osm     | 0        | 0.31287   | 0.31287     | 2.83E-08   | No      | Cdyl     | 7.93307   | 3.86892  | -1.0359484       | 7.93407      | 3.86992       | -1.0357574       | 0.0143389  | No      |
| Otop2   | 0.28846  | 0.11458   | -0.17388    | 9.44E-05   | No      | Cdyl2    | 8.7786    | 1.54822  | -2.5033804       | 8.7796       | 1.54922       | -2.5026132       | 0.00060553 | No      |
| Otp     | 0.24261  | 0.081528  | -0.161082   | 0.00393505 | No      | Cebpa    | 0.153467  | 6.6168   | 5.4301333        | 0.154467     | 6.6178        | 5.42098113       | 0.0186157  | No      |
| Ovol1   | 0.18915  | 0.064929  | -0.124221   | 0.02965439 | No      | Cebpd    | 0.145872  | 15.7306  | 6.7527269        | 0.146872     | 15.7316       | 6.74296222       | 0.0208857  | No      |
| Oxct2a  | 0.58694  | 0.23922   | -0.34772    | 0.00017491 | No      | Cebpz    | 35.2008   | 16.2812  | -1.1124012       | 35.2018      | 16.2822       | -1.1123536       | 0.00378481 | No      |
| Oxsr1   | 0.06954  | 0.007498  | -0.062042   | 0.00046099 | No      | Cecr2    | 0.321814  | 1.03132  | 1.68019305       | 0.322814     | 1.03232       | 1.6771152        | 0.0279776  | No      |
| P2rx2   | 0.71978  | 0.49304   | -0.22674    | 0.02616573 | No      | Celf2    | 61.5647   | 6.18564  | -3.3151086       | 61.5657      | 6.18664       | -3.3148988       | 0.00022079 | No      |
| P2rx7   | 0.71069  | 0.25054   | -0.46015    | 1.94E-11   | No      | Celsr2   | 2.18799   | 36.929   | 4.07707615       | 2.18899      | 36.93         | 4.07645599       | 0.00022079 | No      |
| P3h2    | 0.079763 | 0.02646   | -0.053303   | 0.0074695  | No      | Cenpc    | 8.30271   | 2.99156  | -1.4726843       | 8.30371      | 2.99256       | -1.4723759       | 0.00022079 | No      |
| Pabpc5  | 0.10432  | 0.036776  | -0.067544   | 0.00799193 | No      | Cenpo    | 5.45567   | 1.29746  | -2.0720663       | 5.45667      | 1.29846       | -2.0712192       | 0.0420093  | No      |
| Padi1   | 0.6646   | 0.4506    | -0.214      | 0.02616573 | No      | Cenpp    | 1.41324   | 19.1547  | 3.76062004       | 1.41424      | 19.1557       | 3.75967487       | 0.00508519 | No      |
| Pak7    | 0.32062  | 0.079499  | -0.241121   | 3.92E-06   | No      | Cenpv    | 6.77845   | 20.8835  | 1.6233362        | 6.77945      | 20.8845       | 1.62319246       | 0.0131304  | No      |
| Palmd   | 0.51744  | 0.20228   | -0.31516    | 0.00095268 | No      | Cep120   | 17.8664   | 6.32424  | -1.4982849       | 17.8674      | 6.32524       | -1.4981376       | 0.00022079 | No      |
| Papalb  | 0.38904  | 0.21348   | -0.17556    | 3.98E-06   | No      | Cep135   | 2.84449   | 0.693166 | -2.0368972       | 2.84549      | 0.694166      | -2.0353245       | 0.0019604  | No      |
| Pappa   | 0.13541  | 0.049521  | -0.085889   | 0.00066856 | No      | Cep152   | 4.16095   | 1.70111  | -1.2904365       | 4.16195      | 1.70211       | -1.2899354       | 0.00975879 | No      |
| Paqr4   | 0.46595  | 0.24849   | -0.21746    | 1.19E-05   | No      | CEP170   | 7.0963    | 1.52731  | -2.2160741       | 7.0973       | 1.52831       | -2.2153331       | 0.00022079 | No      |
| Paqr7   | 0.79964  | 0.11693   | -0.68271    | 3.82E-07   | No      | Cep170b  | 2.57186   | 15.9145  | 2.62945781       | 2.57286      | 15.9155       | 2.62898762       | 0.00022079 | No      |
| Pard3   | 0.070054 | 0.014968  | -0.055086   | 3.61E-09   | No      | Cep19    | 8.69676   | 30.1859  | 1.79532489       | 8.69776      | 30.1869       | 1.7952068        | 0.00022079 | No      |
| Pawr    | 0.070268 | 0.017257  | -0.053011   | 0.00276056 | No      | Cep250   | 12.5862   | 5.64162  | -1.1576614       | 12.5872      | 5.64262       | -1.1575203       | 0.00645389 | No      |
| Pax7    | 0.10853  | 0.043397  | -0.065133   | 1.07E-08   | No      | Cep350   | 11.988    | 4.76655  | -1.3305737       | 11.989       | 4.76755       | -1.3303914       | 0.00041963 | No      |
| Pcdh7   | 0.30437  | 0.16397   | -0.1404     | 0.00055683 | No      | Cep41    | 7.99332   | 1.4786   | -2.434563        | 7.99432      | 1.4796        | -2.4337681       | 0.00022079 | No      |
| Pcdh8   | 0.14059  | 0.040772  | -0.099818   | 2.49E-12   | No      | Cep57l1  | 11.6896   | 5.58483  | -1.0656403       | 11.6906      | 5.58583       | -1.0655054       | 0.0166327  | No      |
| Pcdh9   | 0.024177 | 0.13016   | 0.105983    | 0.00040483 | No      | Cep70    | 2.3567    | 9.50501  | 2.01192002       | 2.3577       | 9.50601       | 2.01145976       | 0.00392909 | No      |
| Pcdha9  | 0.36525  | 0.1569    | -0.20835    | 3.45E-06   | No      | Cep85    | 16.4258   | 5.68391  | -1.531008        | 16.4268      | 5.68491       | -1.5308421       | 0.00752743 | No      |
| Pcdhac1 | 0.28627  | 0.12315   | -0.16312    | 0.0006129  | No      | Cep85l   | 5.01046   | 1.06891  | -2.2288027       | 5.01146      | 1.06991       | -2.2277415       | 0.00022079 | No      |



| RRBS     |           |          |             |            |         | RNAseq  |           |         |                  |              |               |                  |            |         |
|----------|-----------|----------|-------------|------------|---------|---------|-----------|---------|------------------|--------------|---------------|------------------|------------|---------|
| gene     | Blood     | Kidney   | methyl.diff | pMWU.fdr   | Match ? | gene    | blood     | kidney  | log2(fold_ratio) | blood+ 0.001 | kidney+ 0.001 | log2(fold_ratio) | q_value    | Match ? |
| Pcdhac2  | 0.16081   | 0.044004 | -0.116806   | 1.15E-05   | No      | Cep89   | 3.75683   | 12.9273 | 1.78283325       | 3.75783      | 12.9283       | 1.78256087       | 0.00022079 | No      |
| Pcdhb3   | 0.72305   | 0.57201  | -0.15104    | 0.0190918  | No      | Cep97   | 12.1971   | 1.34159 | -3.1845224       | 12.1981      | 1.34259       | -3.1835657       | 0.0369799  | No      |
| Pcdhga1  | 0.32277   | 0.21767  | -0.1051     | 1.77E-05   | No      | Cerk    | 39.6119   | 4.99945 | -2.9860926       | 39.6129      | 5.00045       | -2.9858405       | 0.00022079 | No      |
| Pcdhga10 | 0.38015   | 0.16388  | -0.21627    | 7.63E-07   | No      | Cers5   | 39.2095   | 15.8647 | -1.305383        | 39.2105      | 15.8657       | -1.3053289       | 0.00022079 | No      |
| Pcdhga2  | 0.49299   | 0.31843  | -0.17456    | 2.57E-05   | No      | Ces1d   | 0         | 4.9874  | inf              | 0.001        | 4.9884        | 12.2843614       | 0.00022079 | No      |
| Pcdhga3  | 0.38127   | 0.18699  | -0.19428    | 1.81E-12   | No      | Ces1e   | 0         | 11.7638 | inf              | 0.001        | 11.7648       | 13.5221892       | 0.00022079 | No      |
| Pcdhga8  | 0.71443   | 0.49834  | -0.21609    | 0.00088439 | No      | Ces2g   | 0         | 6.83161 | inf              | 0.001        | 6.83261       | 12.7382211       | 0.00022079 | No      |
| Pcdhgb7  | 0.45118   | 0.29823  | -0.15295    | 0.00032353 | No      | Ces1    | 0         | 69.7556 | inf              | 0.001        | 69.7566       | 16.0900421       | 0.00288641 | No      |
| Pcdhgb8  | 0.69754   | 0.51349  | -0.18405    | 0.01245124 | No      | Cfh     | 0.105166  | 4.44596 | 5.4017547        | 0.106166     | 4.44696       | 5.38842571       | 0.00078858 | No      |
| Pcsk1n   | 0.16259   | 0.034524 | -0.128066   | 0.00123983 | No      | Cfi     | 0         | 1.51056 | inf              | 0.001        | 1.51156       | 10.5618225       | 0.00022079 | No      |
| Pcsk2    | 0.12142   | 0.028065 | -0.093355   | 0.00032353 | No      | Cfl1    | 1422.44   | 589.922 | -1.2697717       | 1422.441     | 589.923       | -1.2697703       | 0.00711928 | No      |
| Pcsk9    | 0.09438   | 0.019442 | -0.074938   | 0.00088439 | No      | Cfl2    | 3.78347   | 25.5876 | 2.75766292       | 3.78447      | 25.5886       | 2.75733804       | 0.00022079 | No      |
| Pde10a   | 0.12442   | 0.072335 | -0.052085   | 0.02858085 | No      | Cggbp1  | 48.8677   | 14.6275 | -1.740198        | 48.8687      | 14.6285       | -1.7401289       | 0.00022079 | No      |
| Pde11a   | 0.77266   | 0.47401  | -0.29865    | 6.38E-06   | No      | Cgn     | 0.0347053 | 14.3994 | 8.69663698       | 0.0357053    | 14.4004       | 8.65575493       | 0.00858283 | No      |
| Pde6c    | 0.65856   | 0.50891  | -0.14965    | 0.00334577 | No      | Cgnl1   | 52.6522   | 198.261 | 1.91283519       | 52.6532      | 198.262       | 1.91281507       | 0.00078858 | No      |
| Pdgfra   | 0.092554  | 0.019506 | -0.073048   | 0.00034271 | No      | Chac1   | 0.0807249 | 1.02148 | 3.6615034        | 0.0817249    | 1.02248       | 3.64515311       | 0.035911   | No      |
| Pdlim3   | 0.10347   | 0.045311 | -0.058159   | 8.49E-05   | No      | Chchd1  | 55.6448   | 123.938 | 1.15529981       | 55.6458      | 123.939       | 1.15528553       | 0.00348745 | No      |
| Pdx1     | 0.14358   | 0.044772 | -0.098808   | 2.18E-05   | No      | Chchd4  | 7.82654   | 18.7572 | 1.26099793       | 7.82754      | 18.7582       | 1.26089052       | 0.00551024 | No      |
| Peg12    | 0.16033   | 0.078824 | -0.081506   | 4.02E-11   | No      | Chchd6  | 7.66519   | 22.5822 | 1.55879258       | 7.66619      | 22.5832       | 1.55866827       | 0.00180113 | No      |
| Pf4      | 0.03617   | 0.20035  | 0.16418     | 4.22E-05   | No      | Chd1    | 50.9805   | 10.0341 | -2.3450343       | 50.9815      | 10.0351       | -2.3449188       | 0.00022079 | No      |
| Pgbd5    | 0.14588   | 0.070887 | -0.074993   | 0.0190918  | No      | Chd2    | 233.752   | 37.3148 | -2.6471589       | 233.753      | 37.3158       | -2.6471264       | 0.00022079 | No      |
| Pgc      | 0.92864   | 0.80554  | -0.1231     | 0.00095268 | No      | Chd3    | 193.839   | 21.6169 | -3.1646273       | 193.84       | 21.6179       | -3.164568        | 0.00022079 | No      |
| Pgp      | 0.24647   | 0.049345 | -0.197125   | 5.95E-12   | No      | Chd4    | 83.7512   | 41.5317 | -1.0118969       | 83.7522      | 41.5327       | -1.0118794       | 0.00870822 | No      |
| Phf1     | 0.7347    | 0.49921  | -0.23549    | 9.96E-05   | No      | Chd6    | 22.7331   | 8.83494 | -1.3635022       | 22.7341      | 8.83594       | -1.3634024       | 0.00333723 | No      |
| Phldb3   | 0.38485   | 0.06855  | -0.3163     | 0.00074247 | No      | Chd7    | 7.27584   | 3.18235 | -1.1930213       | 7.27684      | 3.18335       | -1.1927663       | 0.0441272  | No      |
| Phlpp1   | 0.4989    | 0.083607 | -0.415293   | 1.42E-10   | No      | Chd8    | 38.8509   | 14.438  | -1.4280771       | 38.8519      | 14.439        | -1.4280143       | 0.00180113 | No      |
| Phox2a   | 0.25723   | 0.081826 | -0.175404   | 7.75E-05   | No      | Chdh    | 0         | 30.524  | inf              | 0.001        | 30.525        | 14.8977037       | 0.00022079 | No      |
| Pif1     | 0.0025158 | 0.10328  | 0.1007642   | 1.81E-12   | No      | Chek2   | 4.06282   | 1.70062 | -1.2564206       | 4.06382      | 1.70162       | -1.2559276       | 0.0242871  | No      |
| Pih1d3   | 0.13757   | 0.040234 | -0.097336   | 0.01245124 | No      | Chic2   | 63.0444   | 16.223  | -1.9583276       | 63.0454      | 16.224        | -1.9582616       | 0.00022079 | No      |
| Pla2g10  | 0.41449   | 0.087074 | -0.327416   | 0.00276056 | No      | Chka    | 7.97635   | 21.2279 | 1.41216104       | 7.97735      | 21.2289       | 1.41204814       | 0.00041963 | No      |
| Pla2g3   | 0.47772   | 0.30536  | -0.17236    | 0.0250308  | No      | Chm     | 15.8417   | 5.13702 | -1.6247236       | 15.8427      | 5.13802       | -1.6245338       | 0.00022079 | No      |
| Pla2r1   | 0.40071   | 0.20726  | -0.19345    | 0.01406934 | No      | Chmp2a  | 122.253   | 300.836 | 1.29910735       | 122.254      | 300.837       | 1.29910035       | 0.00180113 | No      |
| Plac9    | 0.22347   | 0.1026   | -0.12087    | 6.18E-11   | No      | Chmp2b  | 9.92875   | 24.2988 | 1.29120106       | 9.92975      | 24.2998       | 1.29111514       | 0.00022079 | No      |
| Plagl1   | 0.47588   | 0.22231  | -0.25357    | 7.99E-06   | No      | Chmp3   | 79.5185   | 158.947 | 0.99918334       | 79.5195      | 158.948       | 0.99917427       | 0.00348745 | No      |
| Plcg2    | 0.0090715 | 0.077628 | 0.0685565   | 1.28E-05   | No      | Chmp5   | 21.7139   | 92.2985 | 2.08768833       | 21.7149      | 92.2995       | 2.08763752       | 0.00022079 | No      |
| Plec     | 0.85585   | 0.54717  | -0.30868    | 0.00088439 | No      | Chn2    | 4.67971   | 17.7719 | 1.92510689       | 4.68071      | 17.7729       | 1.92487982       | 0.00022079 | No      |
| Plek2    | 0.11698   | 0.019538 | -0.097442   | 0.00017491 | No      | Chordc1 | 31.2392   | 18.2331 | -0.7767976       | 31.2402      | 18.2341       | -0.7767647       | 0.0290073  | No      |
| Plg      | 0.84272   | 0.78944  | -0.05328    | 0.01333327 | No      | Chp1    | 23.3799   | 59.7068 | 1.35262649       | 23.3809      | 59.7078       | 1.35258895       | 0.00022079 | No      |
| Plod1    | 0.19765   | 0.088622 | -0.109028   | 0.02616573 | No      | Chrm3   | 0         | 1.33442 | inf              | 0.001        | 1.33542       | 10.3830778       | 0.00022079 | No      |
| Plpp3    | 0.078114  | 0.020706 | -0.057408   | 2.83E-06   | No      | Chrnb1  | 0.209932  | 3.05613 | 3.86371191       | 0.210932     | 3.05713       | 3.85732802       | 0.00618779 | No      |
| Plpp4    | 0.094827  | 0.03719  | -0.057637   | 0.00799193 | No      | Chst15  | 5.51257   | 1.72666 | -1.674741        | 5.51357      | 1.72766       | -1.6741674       | 0.00022079 | No      |
| Plpp6    | 0.12817   | 0.018503 | -0.109667   | 3.93E-05   | No      | Chst2   | 3.35144   | 10.5786 | 1.6582957        | 3.35244      | 10.5796       | 1.65800167       | 0.00273202 | No      |

| RRBS     |          |          |             |            |         | RNAseq  |           |          |                  |              |               |                  |            |         |
|----------|----------|----------|-------------|------------|---------|---------|-----------|----------|------------------|--------------|---------------|------------------|------------|---------|
| gene     | Blood    | Kidney   | methyl.diff | pMWU.fdr   | Match ? | gene    | blood     | kidney   | log2(fold_ratio) | blood+ 0.001 | kidney+ 0.001 | log2(fold_ratio) | q_value    | Match ? |
| Plpp7    | 0.78913  | 0.30596  | -0.48317    | 1.81E-12   | No      | Chst9   | 0         | 19.5282  | inf              | 0.001        | 19.5292       | 14.2533452       | 0.00022079 | No      |
| Plppr4   | 0.10263  | 0.025545 | -0.077085   | 0.00034271 | No      | Chsy1   | 9.11926   | 3.05754  | -1.5765454       | 9.12026      | 3.05854       | -1.5762318       | 0.00022079 | No      |
| Plppr5   | 0.09893  | 0.010779 | -0.088151   | 1.46E-05   | No      | Churc1  | 126.284   | 255.082  | 1.01428923       | 126.285      | 255.083       | 1.01428347       | 0.00672121 | No      |
| Plscr3   | 0.82457  | 0.42507  | -0.3995     | 5.97E-08   | No      | Ciapin1 | 14.2761   | 44.3115  | 1.63407925       | 14.2771      | 44.3125       | 1.63401076       | 0.00022079 | No      |
| Plvap    | 0.36444  | 0.14613  | -0.21831    | 0.00088439 | No      | Cib1    | 98.9383   | 179.138  | 0.85647039       | 98.9393      | 179.139       | 0.85646386       | 0.00685176 | No      |
| Plxbn2   | 0.11187  | 0.02001  | -0.09186    | 0.00018202 | No      | Cib2    | 0.066167  | 5.91052  | 6.48102938       | 0.067167     | 5.91152       | 6.45963273       | 0.0159346  | No      |
| Pmaip1   | 0.54152  | 0.1607   | -0.38082    | 1.81E-12   | No      | Cidea   | 0         | 7.54731  | inf              | 0.001        | 7.54831       | 12.881938        | 0.00022079 | No      |
| Pnck     | 0.70822  | 0.4674   | -0.24082    | 0.00595469 | No      | Cideb   | 0.294217  | 11.9181  | 5.34012984       | 0.295217     | 11.9191       | 5.33535569       | 0.00304332 | No      |
| Pnkp     | 0.30781  | 0.075962 | -0.231848   | 0.00553374 | No      | Cir1    | 57.3112   | 19.4704  | -1.5575346       | 57.3122      | 19.4714       | -1.5574857       | 0.00022079 | No      |
| Pnmt     | 0.1525   | 0.36415  | 0.21165     | 8.01E-05   | No      | Cirh1a  | 38.8888   | 12.6098  | -1.6248093       | 38.8898      | 12.6108       | -1.624732        | 0.0159346  | No      |
| Pnpla1   | 0.48196  | 0.088239 | -0.393721   | 4.29E-07   | No      | Cisd1   | 76.2446   | 438.588  | 2.52415927       | 76.2456      | 438.589       | 2.52414364       | 0.00022079 | No      |
| Polg2    | 0.38507  | 0.023634 | -0.361436   | 0.00010392 | No      | Cisd2   | 11.747    | 18.7298  | 0.67304313       | 11.748       | 18.7308       | 0.67299735       | 0.0469889  | No      |
| Pou3f2   | 0.21861  | 0.0793   | -0.13931    | 0.00364323 | No      | Cisd3   | 25.2539   | 98.8053  | 1.96808223       | 25.2549      | 98.8063       | 1.9680397        | 0.00022079 | No      |
| Pou4f2   | 0.10175  | 0.026432 | -0.075318   | 0.00364323 | No      | Cit     | 0.132184  | 2.05797  | 3.96060249       | 0.133184     | 2.05897       | 3.95043013       | 0.00060553 | No      |
| Pou4f3   | 0.1003   | 0.032704 | -0.067596   | 3.09E-05   | No      | Cited2  | 46.6696   | 88.1705  | 0.91781294       | 46.6706      | 88.1715       | 0.91779839       | 0.00480115 | No      |
| Pou5f1   | 0.80952  | 0.55416  | -0.25536    | 0.00044355 | No      | Cited4  | 0         | 1.28828  | inf              | 0.001        | 1.28928       | 10.3323499       | 0.00022079 | No      |
| Pou6f1   | 0.76016  | 0.37174  | -0.38842    | 0.0001571  | No      | Cks2    | 2.61859   | 19.4491  | 2.8928413        | 2.61959      | 19.4501       | 2.89236464       | 0.00436941 | No      |
| Ppara    | 0.43968  | 0.069915 | -0.369765   | 1.18E-08   | No      | CLASP1  | 12.4449   | 7.00078  | -0.8299671       | 12.4459      | 7.00178       | -0.8298769       | 0.0261671  | No      |
| Pparg    | 0.10239  | 0.030959 | -0.071431   | 7.02E-06   | No      | Clasp2  | 11.3491   | 6.39357  | -0.8278843       | 11.3501      | 6.39457       | -0.8277858       | 0.0415916  | No      |
| Ppfia2   | 0.14446  | 0.034368 | -0.110092   | 6.38E-06   | No      | Clca2   | 0         | 1.01835  | inf              | 0.001        | 1.01935       | 9.99343378       | 0.00022079 | No      |
| Ppfia3   | 0.30937  | 0.037545 | -0.271825   | 6.38E-06   | No      | Clcn2   | 0.0256044 | 1.85557  | 6.17932686       | 0.0266044    | 1.85657       | 6.12483103       | 0.011893   | No      |
| Ppp1r14a | 0.72261  | 0.34667  | -0.37594    | 1.51E-09   | No      | Clcn4   | 0.232755  | 3.48376  | 3.90376117       | 0.233755     | 3.48476       | 3.89799017       | 0.00022079 | No      |
| Ppp1r14b | 0.28393  | 0.15894  | -0.12499    | 1.18E-09   | No      | Clcnka  | 0         | 16.7144  | inf              | 0.001        | 16.7154       | 14.0288903       | 0.00022079 | No      |
| Ppp1r3b  | 0.11819  | 0.020722 | -0.097468   | 7.75E-05   | No      | Clcnkb  | 0.168801  | 286.366  | 10.728321        | 0.169801     | 286.367       | 10.7198046       | 0.00022079 | No      |
| Ppp1r3d  | 0.21428  | 0.04037  | -0.17391    | 1.81E-12   | No      | Cldn10  | 1.79419   | 201.959  | 6.81458595       | 1.79519      | 201.96        | 6.81378923       | 0.00022079 | No      |
| Ppp2r5b  | 0.72747  | 0.07633  | -0.65114    | 6.77E-07   | No      | Cldn16  | 0         | 71.2123  | inf              | 0.001        | 71.2133       | 16.1198591       | 0.00022079 | No      |
| Prkag3   | 0.032299 | 0.084521 | 0.052222    | 0.00010654 | No      | Cldn17  | 0         | 25.9734  | inf              | 0.001        | 25.9744       | 14.6648028       | 0.00022079 | No      |
| Prkar1a  | 0.093566 | 0.28188  | 0.188314    | 0.0017676  | No      | Cldn6   | 0.147756  | 3.02192  | 4.35417685       | 0.148756     | 3.02292       | 4.34492303       | 0.0308614  | No      |
| Prkdbp   | 0.36812  | 0.1607   | -0.20742    | 0.00066856 | No      | Clec10a | 0.217426  | 5.92998  | 4.76943086       | 0.218426     | 5.93098       | 4.76305401       | 0.0019604  | No      |
| Prkce    | 0.52414  | 0.037142 | -0.486998   | 1.81E-12   | No      | Clec16a | 5.02692   | 14.9113  | 1.56865941       | 5.02792      | 14.9123       | 1.56846919       | 0.00022079 | No      |
| Prkd1    | 0.078802 | 0.022168 | -0.056634   | 1.44E-06   | No      | Clec2d2 | 29.2977   | 0.532663 | -5.7814205       | 29.2987      | 0.533663      | -5.7787639       | 0.00022079 | No      |
| Prlhr    | 0.088655 | 0.03213  | -0.056525   | 0.00161991 | No      | Clec4a1 | 0.937191  | 4.63203  | 2.30522959       | 0.938191     | 4.63303       | 2.30400246       | 0.0189519  | No      |
| Prmt8    | 0.13479  | 0.025172 | -0.109618   | 2.14E-07   | No      | Clec4a3 | 0.940387  | 13.1938  | 3.81046174       | 0.941387     | 13.1948       | 3.80903774       | 0.00022079 | No      |
| Proca1   | 0.25959  | 0.037067 | -0.222523   | 2.14E-06   | No      | Clec7a  | 0.587361  | 3.36051  | 2.51636082       | 0.588361     | 3.36151       | 2.51433592       | 0.0174725  | No      |
| Prok2    | 0.11949  | 0.066758 | -0.052732   | 0.02965439 | No      | Clic1   | 62.7576   | 282.917  | 2.17251678       | 62.7586      | 282.918       | 2.17249889       | 0.0412912  | No      |
| Prpf3    | 0.44439  | 0.065739 | -0.378651   | 2.74E-06   | No      | Clic2   | 0.308711  | 13.8151  | 5.4838453        | 0.309711     | 13.8161       | 5.479284         | 0.00147497 | No      |
| Prpf31   | 0.55385  | 0.30799  | -0.24586    | 3.17E-08   | No      | Clic4   | 7.10548   | 144.349  | 4.34448519       | 7.10648      | 144.35        | 4.34429216       | 0.00022079 | No      |
| Prss23   | 0.14803  | 0.041754 | -0.106276   | 3.72E-06   | No      | CLIC5   | 1.12829   | 9.25144  | 3.03554001       | 1.12929      | 9.25244       | 3.03441786       | 0.00022079 | No      |
| Prss32   | 0.55268  | 0.26658  | -0.2861     | 0.00334577 | No      | Clip2   | 3.37107   | 10.0378  | 1.57416462       | 3.37207      | 10.0388       | 1.57388044       | 0.00022079 | No      |
| Prss34   | 0.74757  | 0.43832  | -0.30925    | 0.00095268 | No      | Clk1    | 168.491   | 101.111  | -0.7367316       | 168.492      | 101.112       | -0.7367259       | 0.0371671  | No      |
| Prss36   | 0.89042  | 0.51052  | -0.3799     | 6.77E-07   | No      | Clk2    | 70.6858   | 30.304   | -1.2219122       | 70.6868      | 30.305        | -1.221885        | 0.00060553 | No      |
| Psapl1   | 0.75273  | 0.4446   | -0.30813    | 0.00161991 | No      | Clk4    | 48.6331   | 26.9661  | -0.8507917       | 48.6341      | 26.9671       | -0.8507678       | 0.0174725  | No      |

| RRBS       |          |          |             |            |         | RNAseq |          |          |                  |              |               |                  |            |         |
|------------|----------|----------|-------------|------------|---------|--------|----------|----------|------------------|--------------|---------------|------------------|------------|---------|
| gene       | Blood    | Kidney   | methyl.diff | pMWU.fdr   | Match ? | gene   | blood    | kidney   | log2(fold_ratio) | blood+ 0.001 | kidney+ 0.001 | log2(fold_ratio) | q_value    | Match ? |
| Psd        | 0.59447  | 0.39909  | -0.19538    | 0.00707993 | No      | Clmn   | 0        | 17.3501  | inf              | 0.001        | 17.3511       | 14.0827395       | 0.00022079 | No      |
| Psmas8     | 0.86645  | 0.75051  | -0.11594    | 0.00723072 | No      | Cln5   | 0.978959 | 5.47208  | 2.48276898       | 0.979959     | 5.47308       | 2.48155965       | 0.00318754 | No      |
| Psemb10    | 0.87357  | 0.068597 | -0.804973   | 3.82E-07   | No      | Cln8   | 3.29647  | 6.64788  | 1.01197239       | 3.29747      | 6.64888       | 1.01175181       | 0.0421044  | No      |
| Psmes2     | 0.2087   | 0.035918 | -0.172782   | 0.0002817  | No      | Clns1a | 72.7297  | 35.8255  | -1.0215578       | 72.7307      | 35.8265       | -1.0215374       | 0.00348745 | No      |
| Ptgr1      | 0.085935 | 0.02214  | -0.063795   | 0.00197715 | No      | Clp1   | 10.6423  | 4.54962  | -1.225992        | 10.6433      | 4.55062       | -1.2258105       | 0.0261671  | No      |
| Pth2       | 0.14615  | 0.060915 | -0.085235   | 0.00438283 | No      | Clpb   | 7.44166  | 36.236   | 2.28372733       | 7.44266      | 36.237        | 2.28357329       | 0.00022079 | No      |
| Pth2r      | 0.10067  | 0.03039  | -0.07028    | 3.14E-06   | No      | Clpx   | 18.7373  | 34.8308  | 0.89445053       | 18.7383      | 34.8318       | 0.89441496       | 0.00858283 | No      |
| Ptma       | 0.41419  | 0.16742  | -0.24677    | 1.22E-10   | No      | Clrn3  | 0        | 3.06912  | inf              | 0.001        | 3.07012       | 11.5840793       | 0.00022079 | No      |
| Ptx3       | 0.019844 | 0.10699  | 0.087146    | 0.00088439 | No      | Cltas  | 164.603  | 306.641  | 0.89755998       | 164.604      | 306.642       | 0.89755592       | 0.00480115 | No      |
| Purg       | 0.34513  | 0.053451 | -0.291679   | 6.03E-09   | No      | Cltb   | 18.6441  | 91.674   | 2.29779347       | 18.6451      | 91.675        | 2.29773183       | 0.00022079 | No      |
| Pvrl2      | 0.366    | 0.16713  | -0.19887    | 0.00066856 | No      | Cltc   | 23.7734  | 80.7554  | 1.76421049       | 23.7744      | 80.7564       | 1.76416767       | 0.00022079 | No      |
| Rab12      | 0.13936  | 0.038247 | -0.101113   | 0.04101176 | No      | Clu    | 1.76556  | 278.492  | 7.30136623       | 1.76656      | 278.493       | 7.30055451       | 0.00022079 | No      |
| Rab13      | 0.075655 | 0.0025   | -0.073155   | 0.00148947 | No      | Cluh   | 13.629   | 67.1705  | 2.30114806       | 13.63        | 67.1715       | 2.30106368       | 0.00022079 | No      |
| Rab15      | 0.10634  | 0.03381  | -0.07253    | 0.00799193 | No      | Cmah   | 74.483   | 10.7489  | -2.7927222       | 74.484       | 10.7499       | -2.7926073       | 0.00022079 | No      |
| Rab24      | 0.6534   | 0.22116  | -0.43224    | 5.63E-08   | No      | CMC2   | 20.8733  | 89.4419  | 2.09929213       | 20.8743      | 89.4429       | 2.09923915       | 0.00022079 | No      |
| Rab26      | 0.86373  | 0.7759   | -0.08783    | 0.04101176 | No      | Cml1   | 0.226358 | 11.863   | 5.71171879       | 0.227358     | 11.864        | 5.70548092       | 0.00565535 | No      |
| Rab36      | 0.79496  | 0.56634  | -0.22862    | 0.00148947 | No      | Cmtm3  | 15.83    | 4.36097  | -1.8599403       | 15.831       | 4.36197       | -1.8597006       | 0.00022079 | No      |
| Radil      | 0.11724  | 0.028689 | -0.088551   | 0.00636684 | No      | Cmtm4  | 0.682021 | 5.14052  | 2.91402624       | 0.683021     | 5.14152       | 2.91219309       | 0.0175851  | No      |
| Rai1       | 0.63534  | 0.2529   | -0.38244    | 3.10E-06   | No      | Cmtm7  | 90.0848  | 42.4023  | -1.0871412       | 90.0858      | 42.4033       | -1.0871232       | 0.0305572  | No      |
| Rapgef3    | 0.13216  | 0.025323 | -0.106837   | 0.01783979 | No      | Cmtm8  | 0.685493 | 16.7947  | 4.61472028       | 0.686493     | 16.7957       | 4.6127031        | 0.00579147 | No      |
| Rasef      | 0.19681  | 0.037044 | -0.159766   | 5.01E-11   | No      | Cmtr2  | 5.67757  | 2.08921  | -1.4423161       | 5.67857      | 2.09021       | -1.4418798       | 0.00147497 | No      |
| Rasgef1c   | 0.021679 | 0.41778  | 0.396101    | 3.82E-07   | No      | Cnbp   | 448.39   | 200.854  | -1.1586069       | 448.391      | 200.855       | -1.1586029       | 0.00436941 | No      |
| Rasgrp4    | 0.92527  | 0.65598  | -0.26929    | 5.89E-07   | No      | Cnga1  | 3.51776  | 0.152688 | -4.5259985       | 3.51876      | 0.153688      | -4.5169907       | 0.01483    | No      |
| Rasl10b    | 0.011484 | 0.23014  | 0.218656    | 1.28E-05   | No      | Cnksr3 | 6.43494  | 12.3922  | 0.94543373       | 6.43594      | 12.3932       | 0.94532597       | 0.0281894  | No      |
| Rax        | 0.13744  | 0.051785 | -0.085655   | 0.00553374 | No      | Cnn2   | 313.345  | 17.3626  | -4.1736971       | 313.346      | 17.3636       | -4.1736186       | 0.0199689  | No      |
| Rbfox3     | 0.79352  | 0.17599  | -0.61753    | 1.74E-09   | No      | Cnn3   | 29.4935  | 139.979  | 2.24674146       | 29.4945      | 139.98        | 2.24670286       | 0.00022079 | No      |
| Rbm46      | 0.31407  | 0.087127 | -0.226943   | 1.15E-05   | No      | Cnot10 | 38.4495  | 22.6262  | -0.7649705       | 38.4505      | 22.6272       | -0.7649443       | 0.0308614  | No      |
| Rbp3       | 0.84662  | 0.75806  | -0.08856    | 0.00610512 | No      | Cnot2  | 56.3632  | 26.1754  | -1.1065419       | 56.3642      | 26.1764       | -1.1065124       | 0.00113657 | No      |
| Rbpjl      | 0.057608 | 0.29849  | 0.240882    | 7.99E-06   | No      | Cnot3  | 27.4162  | 14.0422  | -0.9652596       | 27.4172      | 14.0432       | -0.9652095       | 0.0253888  | No      |
| Rcor2      | 0.25325  | 0.09794  | -0.15531    | 1.08E-09   | No      | Cnot4  | 16.2819  | 7.23168  | -1.1708663       | 16.2829      | 7.23268       | -1.1707554       | 0.00318754 | No      |
| Rdh10      | 0.19174  | 0.036037 | -0.155703   | 0.00021466 | No      | Cnot6l | 30.0666  | 10.8346  | -1.4725158       | 30.0676      | 10.8356       | -1.4724307       | 0.00022079 | No      |
| Rem1       | 0.5168   | 0.10407  | -0.41273    | 2.92E-08   | No      | Cnp    | 125.981  | 13.5156  | -3.2205087       | 125.982      | 13.5166       | -3.2204134       | 0.00022079 | No      |
| Retn       | 0.81625  | 0.41043  | -0.40582    | 4.22E-07   | No      | Cnppd1 | 124.956  | 31.8669  | -1.9712896       | 124.957      | 31.8679       | -1.9712559       | 0.00022079 | No      |
| RGD1309036 | 0.8086   | 0.42181  | -0.38679    | 2.40E-06   | No      | Cnpy1  | 0        | 8.63358  | inf              | 0.001        | 8.63458       | 13.0759103       | 0.00022079 | No      |
| RGD1309362 | 0.85068  | 0.67948  | -0.1712     | 0.00119531 | No      | Cnpy2  | 78.7379  | 134.433  | 0.77175719       | 78.7389      | 134.434       | 0.7717496        | 0.0283842  | No      |
| RGD1359334 | 0.81334  | 0.73021  | -0.08313    | 0.00065362 | No      | Cnrip1 | 4.54358  | 1.26435  | -1.8454336       | 4.54458      | 1.26535       | -1.8446105       | 0.0138632  | No      |
| RGD1560108 | 0.86511  | 0.088992 | -0.776118   | 3.82E-07   | No      | Cntf   | 36.0725  | 94.0863  | 1.38308525       | 36.0735      | 94.0873       | 1.38306059       | 0.00508519 | No      |

| RRBS       |          |           |             |            |         | RNAseq   |           |         |                  |              |               |                  |            |         |
|------------|----------|-----------|-------------|------------|---------|----------|-----------|---------|------------------|--------------|---------------|------------------|------------|---------|
| gene       | Blood    | Kidney    | methyL.diff | pMWU.fdr   | Match ? | gene     | blood     | kidney  | log2(fold_ratio) | blood+ 0.001 | kidney+ 0.001 | log2(fold_ratio) | q_value    | Match ? |
| RGD1560394 | 0.68834  | 0.4227    | -0.26564    | 0.00135614 | No      | Cntln    | 0.115146  | 1.3814  | 3.58459493       | 0.116146     | 1.3824        | 3.57316375       | 0.0195167  | No      |
| RGD1560608 | 0.15574  | 0.09661   | -0.05913    | 0.01660198 | No      | Cntrl    | 23.9509   | 7.23567 | -1.7268814       | 23.9519      | 7.23667       | -1.7267422       | 0.00022079 | No      |
| RGD1561870 | 0.55253  | 0.22634   | -0.32619    | 0.00088439 | No      | Coa3     | 43.0054   | 131.53  | 1.61280216       | 43.0064      | 131.531       | 1.61277959       | 0.0212313  | No      |
| RGD1562114 | 0.86259  | 0.14918   | -0.71341    | 1.81E-12   | No      | Coa4     | 4.6608    | 16.7799 | 1.84808461       | 4.6618       | 16.7809       | 1.84786108       | 0.00022079 | No      |
| RGD1562218 | 0.79576  | 0.31954   | -0.47622    | 1.03E-05   | No      | Coa5     | 16.9646   | 48.3042 | 1.50962122       | 16.9656      | 48.3052       | 1.50956605       | 0.0421044  | No      |
| RGD1562726 | 0.68988  | 0.16672   | -0.52316    | 1.81E-12   | No      | Coasy    | 28.5589   | 57.2915 | 1.0043807        | 28.5599      | 57.2925       | 1.00435536       | 0.00805135 | No      |
| RGD1563072 | 0.083193 | 0.016507  | -0.066686   | 2.14E-08   | No      | Cobl     | 0         | 27.5337 | inf              | 0.001        | 27.5347       | 14.7489633       | 0.00022079 | No      |
| RGD1563348 | 0.46679  | 0.21973   | -0.24706    | 1.15E-05   | No      | Cobl1    | 2.21249   | 39.7918 | 4.16872832       | 2.21349      | 39.7928       | 4.16811266       | 0.00022079 | No      |
| RGD1563425 | 0.37394  | 0.29474   | -0.0792     | 0.03531391 | No      | Cog3     | 14.6417   | 7.14015 | -1.0360568       | 14.6427      | 7.14115       | -1.0359533       | 0.00227055 | No      |
| RGD1564482 | 0.7612   | 0.1572    | -0.604      | 1.15E-06   | No      | Col12a1  | 0.0119519 | 7.40824 | 9.27574704       | 0.0129519    | 7.40924       | 9.160018         | 0.0176974  | No      |
| RGD1565611 | 0.22435  | 0.10812   | -0.11623    | 0.01078302 | No      | Col1a1   | 0         | 1.73053 | inf              | 0.001        | 1.73153       | 10.7578317       | 0.00022079 | No      |
| RGD1566401 | 0.47033  | 0.25713   | -0.2132     | 1.44E-07   | No      | COL4A3   | 63.364    | 106.554 | 0.74984944       | 63.365       | 106.555       | 0.74984021       | 0.0271748  | No      |
| Rgma       | 0.098179 | 0.022599  | -0.07558    | 5.03E-06   | No      | Col4a3bp | 26.7995   | 14.9521 | -0.841858        | 26.8005      | 14.9531       | -0.8418153       | 0.010144   | No      |
| Rgn        | 0.57588  | 0.22689   | -0.34899    | 7.36E-06   | No      | Col4a5   | 0         | 43.4106 | inf              | 0.001        | 43.4116       | 15.405793        | 0.00022079 | No      |
| Rgs17      | 0.069969 | 0.018609  | -0.05136    | 0.00019244 | No      | Col5a2   | 0         | 2.60326 | inf              | 0.001        | 2.60426       | 11.3466578       | 0.00022079 | No      |
| Rgs20      | 0.08244  | 0.018923  | -0.063517   | 0.00261188 | No      | Col6a1   | 0         | 1.79099 | inf              | 0.001        | 1.79199       | 10.8073469       | 0.00022079 | No      |
| Rgs7       | 0.10031  | 0.022263  | -0.078047   | 2.74E-06   | No      | Col8a1   | 0         | 1.16109 | inf              | 0.001        | 1.16209       | 10.1825061       | 0.00022079 | No      |
| Rhbd1      | 0.22756  | 0.055163  | -0.172397   | 3.82E-07   | No      | Comm1    | 37.9044   | 103.167 | 1.44454434       | 37.9054      | 103.168       | 1.44452026       | 0.00536605 | No      |
| Rhoc       | 0.69112  | 0.039309  | -0.651811   | 2.83E-08   | No      | Comm10   | 18.9159   | 35.5487 | 0.91019738       | 18.9169      | 35.5497       | 0.9101617        | 0.0126352  | No      |
| Rhoh       | 0.08154  | 0.41371   | 0.33217     | 1.03E-05   | No      | Comm3    | 28.7542   | 98.5459 | 1.77702315       | 28.7552      | 98.5469       | 1.77698762       | 0.00022079 | No      |
| Ric3       | 0.088312 | 0.029449  | -0.058863   | 0.00070889 | No      | Comm7    | 81.6604   | 30.435  | -1.4239053       | 81.6614      | 30.436        | -1.4238755       | 0.00022079 | No      |
| Rims2      | 0.13413  | 0.048086  | -0.086044   | 0.00334577 | No      | Comm9    | 28.8374   | 77.4643 | 1.42559049       | 28.8384      | 77.4653       | 1.42555909       | 0.00022079 | No      |
| Rin1       | 0.49663  | 0.078785  | -0.417845   | 3.82E-07   | No      | Comt     | 21.6683   | 116.844 | 2.43092578       | 21.6693      | 116.845       | 2.43087155       | 0.00022079 | No      |
| Ripk4      | 0.072054 | 0.0049341 | -0.0671199  | 7.75E-05   | No      | COPE     | 62.7617   | 126.824 | 1.01487145       | 62.7627      | 126.825       | 1.01485984       | 0.00164037 | No      |
| Rmrp       | 0.33014  | 0.1626    | -0.16754    | 0.00032353 | No      | Copg1    | 33.7459   | 59.5076 | 0.8183617        | 33.7469      | 59.5086       | 0.8183432        | 0.00818469 | No      |
| Rn28s      | 0.050999 | 0.21005   | 0.159051    | 0.00021466 | No      | Coprs    | 20.2383   | 106.838 | 2.40026486       | 20.2393      | 106.839       | 2.40020708       | 0.00022079 | No      |
| Rn45s      | 0.26945  | 0.10551   | -0.16394    | 1.81E-12   | No      | Cops7a   | 15.9701   | 46.4773 | 1.54115291       | 15.9711      | 46.4783       | 1.54109362       | 0.00022079 | No      |
| Rn5-8s     | 0.49895  | 0.19086   | -0.30809    | 0.00055683 | No      | Cops7b   | 12.9133   | 5.71549 | -1.1759086       | 12.9143      | 5.71649       | -1.175768        | 0.00257873 | No      |
| Rn7sl1     | 0.37286  | 0.12862   | -0.24424    | 9.90E-12   | No      | Coq10b   | 12.0679   | 23.7916 | 0.97927765       | 12.0689      | 23.7926       | 0.97921874       | 0.0123897  | No      |
| Rnase17    | 0.65165  | 0.20275   | -0.4489     | 0.00074247 | No      | Coq3     | 6.40047   | 20.4052 | 1.6726871        | 6.40147      | 20.4062       | 1.67253241       | 0.00645389 | No      |

| RRBS     |          |          |             |            |         | RNAseq   |          |         |                  |              |               |                  |            |         |
|----------|----------|----------|-------------|------------|---------|----------|----------|---------|------------------|--------------|---------------|------------------|------------|---------|
| gene     | Blood    | Kidney   | methyl.diff | pMWU.fdr   | Match ? | gene     | blood    | kidney  | log2(fold_ratio) | blood+ 0.001 | kidney+ 0.001 | log2(fold_ratio) | q_value    | Match ? |
| Rnaset2  | 0.31143  | 0.034972 | -0.276458   | 5.73E-06   | No      | Coq7     | 7.69577  | 53.7709 | 2.80468803       | 7.69677      | 53.7719       | 2.80452741       | 0.00022079 | No      |
| Rnf113a2 | 0.31871  | 0.099633 | -0.219077   | 2.85E-05   | No      | Coq9     | 20.624   | 76.3039 | 1.88743263       | 20.625       | 76.3049       | 1.88738158       | 0.00022079 | No      |
| Rnf126   | 0.28813  | 0.17232  | -0.11581    | 0.02257431 | No      | Coro1a   | 1187.96  | 182.836 | -2.6998642       | 1187.961     | 182.837       | -2.6998575       | 0.00022079 | No      |
| Rnf151   | 0.74184  | 0.57955  | -0.16229    | 0.01078302 | No      | Coro2a   | 5.12294  | 0.67716 | -2.9194033       | 5.12394      | 0.67816       | -2.917556        | 0.00022079 | No      |
| Rnf186   | 0.92452  | 0.26976  | -0.65476    | 1.83E-10   | No      | Coro2b   | 4.55861  | 0.67378 | -2.7582445       | 4.55961      | 0.67478       | -2.7564213       | 0.00041963 | No      |
| Rnf225   | 0.75789  | 0.43886  | -0.31903    | 0.00244273 | No      | Cotl1    | 450.687  | 154.815 | -1.5415806       | 450.688      | 154.816       | -1.5415745       | 0.00022079 | No      |
| Rnf26    | 0.73543  | 0.57078  | -0.16465    | 0.00320916 | No      | Cox15    | 11.3812  | 18.6028 | 0.70886711       | 11.3822      | 18.6038       | 0.7088179        | 0.0406701  | No      |
| Rnf8     | 0.85348  | 0.51157  | -0.34191    | 6.39E-07   | No      | Cox17    | 148.137  | 587.439 | 1.98750702       | 148.138      | 587.44        | 1.98749974       | 0.00022079 | No      |
| Robo2    | 0.28799  | 0.067773 | -0.220217   | 5.45E-07   | No      | Cox18    | 26.6415  | 13.3932 | -0.9921746       | 26.6425      | 13.3942       | -0.992121        | 0.0270805  | No      |
| Robo4    | 0.75107  | 0.64808  | -0.10299    | 0.01078302 | No      | Cox19    | 18.6096  | 53.5342 | 1.5244138        | 18.6106      | 53.5352       | 1.52436322       | 0.00078858 | No      |
| Rogdi    | 0.64043  | 0.21471  | -0.42572    | 3.67E-05   | No      | Cox4i1   | 738.002  | 1797.52 | 1.28431119       | 738.003      | 1797.521      | 1.28431004       | 0.0110257  | No      |
| Rom1     | 0.20469  | 0.033375 | -0.171315   | 1.31E-06   | No      | Cox5a    | 236.533  | 941.215 | 1.99248284       | 236.534      | 941.216       | 1.99247827       | 0.00022079 | No      |
| Ropn1    | 0.76666  | 0.2431   | -0.52356    | 2.74E-06   | No      | Cox5b    | 258.917  | 1041.94 | 2.0087106        | 258.918      | 1041.941      | 2.00870642       | 0.00022079 | No      |
| Rpl38    | 0.21377  | 0.093143 | -0.120627   | 0.00681832 | No      | Cox6a1   | 380.305  | 1151.24 | 1.59795981       | 380.306      | 1151.241      | 1.59795727       | 0.00022079 | No      |
| Rplp0    | 0.7525   | 0.46854  | -0.28396    | 6.39E-08   | No      | COX6A2   | 0        | 2.21991 | inf              | 0.001        | 2.22091       | 11.1169352       | 0.00022079 | No      |
| Rprm     | 0.082095 | 0.014605 | -0.06749    | 0.00197715 | No      | Cox6c    | 517.77   | 1974.03 | 1.93076063       | 517.771      | 1974.031      | 1.93075858       | 0.00022079 | No      |
| Rps4y2   | 0.89547  | 0.35233  | -0.54314    | 1.74E-09   | No      | Cox7a2   | 142.057  | 556.065 | 1.96878361       | 142.058      | 556.066       | 1.96877605       | 0.00022079 | No      |
| Rsph6a   | 0.91015  | 0.64614  | -0.26401    | 3.93E-09   | No      | Cox7a2l  | 400.934  | 140.981 | -1.507864        | 400.935      | 140.982       | -1.5078574       | 0.00022079 | No      |
| Rspo2    | 0.10399  | 0.022807 | -0.081183   | 1.46E-05   | No      | Cox7a2l2 | 17.8824  | 85.4002 | 2.25569907       | 17.8834      | 85.4012       | 2.25563529       | 0.00041963 | No      |
| RT1-Db2  | 0.16663  | 0.35733  | 0.1907      | 0.00393505 | No      | Cox7b    | 346.044  | 1730.21 | 2.32191976       | 346.045      | 1730.211      | 2.32191642       | 0.00022079 | No      |
| RT1-M5   | 0.10206  | 0.03714  | -0.06492    | 0.0014834  | No      | Cox7c    | 291.387  | 1167.78 | 2.00276009       | 291.388      | 1167.781      | 2.00275637       | 0.00022079 | No      |
| RT1-T18  | 0.45238  | 0.13999  | -0.31239    | 1.77E-05   | No      | Cox8a    | 251.009  | 1665.17 | 2.72985847       | 251.01       | 1665.171      | 2.72985359       | 0.00022079 | No      |
| Rtkn     | 0.5109   | 0.12943  | -0.38147    | 2.40E-06   | No      | Cp       | 0.319051 | 11.2416 | 5.13891652       | 0.320051     | 11.2426       | 5.13453009       | 0.00060553 | No      |
| Ruvbl2   | 0.7789   | 0.42939  | -0.34951    | 0.0007955  | No      | Cpe      | 0.800929 | 4.4014  | 2.45821623       | 0.801929     | 4.4024        | 2.45674382       | 0.00227055 | No      |
| Rxfp3    | 0.53065  | 0.35325  | -0.1774     | 0.00380411 | No      | Cpeb3    | 0.702052 | 7.17147 | 3.35261907       | 0.703052     | 7.17247       | 3.35076672       | 0.00022079 | No      |
| S100a3   | 0.78321  | 0.66713  | -0.11608    | 0.04531279 | No      | Cplx2    | 0        | 3.69296 | inf              | 0.001        | 3.69396       | 11.8509525       | 0.00605729 | No      |
| S1pr2    | 0.14518  | 0.06334  | -0.08184    | 0.00595469 | No      | Cpm      | 0.332567 | 7.35537 | 4.46708099       | 0.333567     | 7.35637       | 4.46294557       | 0.00022079 | No      |
| S1pr4    | 0.17907  | 0.38063  | 0.20156     | 1.51E-06   | No      | Cpne3    | 8.09285  | 19.7918 | 1.29018307       | 8.09385      | 19.7928       | 1.2900777        | 0.00022079 | No      |
| Sall3    | 0.82268  | 0.60788  | -0.2148     | 0.00104938 | No      | Cpne8    | 0.188692 | 4.36426 | 4.53163189       | 0.189692     | 4.36526       | 4.52433684       | 0.00257873 | No      |
| Samd14   | 0.31364  | 0.099586 | -0.214054   | 0.00019244 | No      | Cpped1   | 0.63954  | 25.5382 | 5.31947844       | 0.64054      | 25.5392       | 5.31728086       | 0.00022079 | No      |
| Scarf2   | 0.25753  | 0.075629 | -0.181901   | 3.31E-06   | No      | Cpsf4    | 27.8043  | 15.3738 | -0.8548342       | 27.8053      | 15.3748       | -0.8547923       | 0.0245052  | No      |
| Scn2b    | 0.1844   | 0.096567 | -0.087833   | 0.0153478  | No      | Cpsf6    | 32.9798  | 8.69984 | -1.9225219       | 32.9808      | 8.70084       | -1.9223998       | 0.00022079 | No      |
| Scn4a    | 0.57298  | 0.11916  | -0.45382    | 1.44E-06   | No      | Cpsf7    | 56.1286  | 22.8294 | -1.2978431       | 56.1296      | 22.8304       | -1.2978056       | 0.00870822 | No      |
| Scn8a    | 0.97808  | 0.82984  | -0.14824    | 2.57E-05   | No      | Cpt2     | 1.84441  | 20.6987 | 3.48830886       | 1.84541      | 20.6997       | 3.48759657       | 0.00022079 | No      |
| Scrt1    | 0.15961  | 0.043132 | -0.116478   | 2.29E-05   | No      | Cr1l     | 72.551   | 42.1717 | -0.7827203       | 72.552       | 42.1727       | -0.782706        | 0.0417961  | No      |
| Scube3   | 0.80377  | 0.53083  | -0.27294    | 6.75E-05   | No      | Crabp1   | 0        | 4.31046 | inf              | 0.001        | 4.31146       | 12.0739608       | 0.00022079 | No      |
| Scx      | 0.64504  | 0.11895  | -0.52609    | 1.81E-12   | No      | Cradd    | 10.6881  | 3.51855 | -1.6029525       | 10.6891      | 3.51955       | -1.6026775       | 0.0191747  | No      |
| Sdccag3  | 0.21372  | 0.071063 | -0.142657   | 1.81E-12   | No      | Cramp1l  | 11.9627  | 3.67142 | -1.704133        | 11.9637      | 3.67242       | -1.7038607       | 0.00022079 | No      |
| Sdr42e1  | 0.40639  | 0.19973  | -0.20666    | 0.00066856 | No      | Crat     | 2.281    | 50.7927 | 4.47688281       | 2.282        | 50.7937       | 4.47627887       | 0.00022079 | No      |
| Sds      | 0.69615  | 0.5571   | -0.13905    | 0.01000157 | No      | Creb1    | 14.1242  | 4.55818 | -1.6316394       | 14.1252      | 4.55918       | -1.631425        | 0.00022079 | No      |
| Sec1     | 0.92466  | 0.86141  | -0.06325    | 0.00244273 | No      | Creb3l1  | 0.110725 | 5.19762 | 5.55279826       | 0.111725     | 5.19862       | 5.54010475       | 0.00211842 | No      |
| Selv     | 0.096367 | 0.037126 | -0.059241   | 0.00334577 | No      | Creb3l2  | 1.2999   | 26.0409 | 4.32430676       | 1.3009       | 26.0419       | 4.32325274       | 0.00022079 | No      |

| RRBS     |          |          |             |            |         | RNAseq     |           |          |                  |              |               |                  |            |         |
|----------|----------|----------|-------------|------------|---------|------------|-----------|----------|------------------|--------------|---------------|------------------|------------|---------|
| gene     | Blood    | Kidney   | methyl.diff | pMWU.fdr   | Match ? | gene       | blood     | kidney   | log2(fold_ratio) | blood+ 0.001 | kidney+ 0.001 | log2(fold_ratio) | q_value    | Match ? |
| Sema6d   | 0.10162  | 0.024331 | -0.077289   | 0.0017676  | No      | Crebbp     | 77.7094   | 14.128   | -2.4595319       | 77.7104      | 14.129        | -2.4594483       | 0.010144   | No      |
| Senp3    | 0.74983  | 0.5113   | -0.23853    | 0.0074695  | No      | Crebrf     | 38.3328   | 6.68166  | -2.5203009       | 38.3338      | 6.68266       | -2.5201226       | 0.00022079 | No      |
| Serpinf2 | 0.9505   | 0.20911  | -0.74139    | 3.82E-07   | No      | CREBZF     | 47.9259   | 10.6267  | -2.1731119       | 47.9269      | 10.6277       | -2.1730062       | 0.00022079 | No      |
| Sez6l    | 0.22727  | 0.06453  | -0.16274    | 4.32E-06   | No      | Creg1      | 1.84622   | 16.7279  | 3.17960996       | 1.84722      | 16.7289       | 3.17891498       | 0.00022079 | No      |
| Sfmbt1   | 0.21854  | 0.11102  | -0.10752    | 0.03425917 | No      | Creld1     | 3.60126   | 12.5075  | 1.79621979       | 3.60226      | 12.5085       | 1.79593457       | 0.00060553 | No      |
| Sftpa1   | 0.9692   | 0.43693  | -0.53227    | 3.82E-07   | No      | Creld2     | 10.5629   | 23.9394  | 1.18038102       | 10.5639      | 23.9404       | 1.18030471       | 0.00685176 | No      |
| Sgcd     | 0.7878   | 0.55115  | -0.23665    | 0.0074695  | No      | Crim1      | 0.718806  | 36.5051  | 5.66635177       | 0.719806     | 36.5061       | 5.66438561       | 0.00022079 | No      |
| Sgk2     | 0.5406   | 0.065858 | -0.474742   | 1.81E-12   | No      | Cript      | 69.8276   | 38.0764  | -0.8749003       | 69.8286      | 38.0774       | -0.8748831       | 0.00805135 | No      |
| Shank3   | 0.41295  | 0.17208  | -0.24087    | 0.00393505 | No      | Crispld2   | 0.353186  | 4.90422  | 3.79552364       | 0.354186     | 4.90522       | 3.79173875       | 0.00022079 | No      |
| Shc4     | 0.61907  | 0.18208  | -0.43699    | 1.03E-05   | No      | Crk        | 13.5156   | 28.4863  | 1.07564269       | 13.5166      | 28.4873       | 1.07558659       | 0.00096553 | No      |
| Shcbp1l  | 0.40086  | 0.16188  | -0.23898    | 0.00148947 | No      | Crlf3      | 186.995   | 7.81093  | -4.5813616       | 186.996      | 7.81193       | -4.5811846       | 0.00022079 | No      |
| Shisa3   | 0.090717 | 0.032432 | -0.058285   | 0.02965439 | No      | Crmp1      | 5.94747   | 0.531758 | -3.4834344       | 5.94847      | 0.532758      | -3.4809664       | 0.00022079 | No      |
| Shisa6   | 0.047107 | 0.013208 | -0.033899   | 7.02E-06   | No      | Crocc      | 3.16888   | 23.4303  | 2.88633049       | 3.16988      | 23.4313       | 2.88593687       | 0.00022079 | No      |
| Shisa7   | 0.50098  | 0.12499  | -0.37599    | 5.84E-09   | No      | Crot       | 10.937    | 23.6996  | 1.11564565       | 10.938       | 23.7006       | 1.11557462       | 0.0183813  | No      |
| Sigirr   | 0.55577  | 0.13384  | -0.42193    | 2.40E-06   | No      | Crtam      | 10.5782   | 0.400078 | -4.724669        | 10.5792      | 0.401078      | -4.7212039       | 0.00593001 | No      |
| Sirt4    | 0.79319  | 0.15576  | -0.63743    | 3.82E-07   | No      | CRTAP      | 10.3026   | 78.65    | 2.9324383        | 10.3036      | 78.651        | 2.93231662       | 0.00022079 | No      |
| Six2     | 0.020301 | 0.098738 | 0.078437    | 6.26E-05   | No      | Crtc2      | 52.1491   | 22.5342  | -1.2105261       | 52.1501      | 22.5352       | -1.2104898       | 0.00242102 | No      |
| Six3     | 0.068257 | 0.014101 | -0.054156   | 2.95E-06   | No      | Cryab      | 0.0250018 | 1312.6   | 15.6800358       | 0.0260018    | 1312.601      | 15.6234574       | 0.00180113 | No      |
| Six6     | 0.18686  | 0.054296 | -0.132564   | 6.38E-06   | No      | Cryba4     | 1.64278   | 10.6716  | 2.6995653        | 1.64378      | 10.6726       | 2.69882255       | 0.00536605 | No      |
| Slamf8   | 0.61708  | 0.32734  | -0.28974    | 0.0021362  | No      | Cryga      | 0         | 18.1328  | inf              | 0.001        | 18.1338       | 14.1463937       | 0.00022079 | No      |
| Slc10a4  | 0.1713   | 0.054581 | -0.116719   | 1.13E-05   | No      | Cryl1      | 5.38611   | 111.456  | 4.37108678       | 5.38711      | 111.457       | 4.37083189       | 0.00022079 | No      |
| Slc13a3  | 0.87286  | 0.23749  | -0.63537    | 3.82E-07   | No      | Cryz       | 0.615008  | 126.447  | 7.68371192       | 0.616008     | 126.448       | 7.68137942       | 0.00022079 | No      |
| Slc13a5  | 0.30439  | 0.10015  | -0.20424    | 5.40E-06   | No      | Cryzl1     | 5.96519   | 14.1011  | 1.24116771       | 5.96619      | 14.1021       | 1.24102819       | 0.00551024 | No      |
| Slc15a1  | 0.15384  | 0.077182 | -0.076658   | 1.00E-05   | No      | Csdc2      | 1.73314   | 5.66778  | 1.70939556       | 1.73414      | 5.66878       | 1.70881791       | 0.00273202 | No      |
| Slc16a3  | 0.066942 | 0.007876 | -0.059066   | 0.00019244 | No      | Cse1l      | 24.7209   | 12.5299  | -0.9803564       | 24.7219      | 12.5309       | -0.9802996       | 0.00407863 | No      |
| Slc17a6  | 0.094465 | 0.02443  | -0.070035   | 5.89E-07   | No      | Csf1       | 0.362981  | 5.95138  | 4.0352583        | 0.363981     | 5.95238       | 4.03153158       | 0.00765035 | No      |
| Slc17a9  | 0.038166 | 0.36082  | 0.322654    | 3.82E-07   | No      | Csf1r      | 3.03356   | 18.2358  | 2.58768974       | 3.03456      | 18.2368       | 2.58729335       | 0.00022079 | No      |
| Slc18a3  | 0.11957  | 0.064025 | -0.055545   | 0.00104938 | No      | Csf2rb     | 0.284535  | 17.279   | 5.92426979       | 0.285535     | 17.28         | 5.91929181       | 0.00022079 | No      |
| Slc19a3  | 0.12374  | 0.030962 | -0.092778   | 4.74E-05   | No      | Csgalnact1 | 0.121946  | 3.70665  | 4.92580155       | 0.122946     | 3.70765       | 4.91440836       | 0.00242102 | No      |
| Slc1a6   | 0.088393 | 0.020621 | -0.067772   | 1.61E-05   | No      | Csgalnact2 | 9.55874   | 3.59628  | -1.4103151       | 9.55974      | 3.59728       | -1.4100649       | 0.00645389 | No      |
| Slc22a17 | 0.68682  | 0.3209   | -0.36592    | 0.00011578 | No      | Csk        | 172.663   | 40.5719  | -2.0894062       | 172.664      | 40.5729       | -2.089379        | 0.00022079 | No      |
| Slc22a4  | 0.21737  | 0.036735 | -0.180635   | 0.00023579 | No      | Csnk1a1    | 100.226   | 49.0207  | -1.0317938       | 100.227      | 49.0217       | -1.0317788       | 0.00508519 | No      |
| Slc25a21 | 0.2147   | 0.09039  | -0.12431    | 1.81E-12   | No      | Csnk1e     | 28.8701   | 14.0782  | -1.0361132       | 28.8711      | 14.0792       | -1.0360607       | 0.00318754 | No      |
| Slc25a34 | 0.69596  | 0.154    | -0.54196    | 1.81E-12   | No      | Csnk1g1    | 7.78241   | 1.26791  | -2.6177646       | 7.78341      | 1.26891       | -2.6168126       | 0.00022079 | No      |
| Slc26a10 | 0.087004 | 0.030622 | -0.056382   | 0.01000157 | No      | Csnk1g3    | 45.8618   | 17.9503  | -1.353285        | 45.8628      | 17.9513       | -1.3532361       | 0.00060553 | No      |
| Slc26a4  | 0.074327 | 0.017257 | -0.05707    | 0.0250308  | No      | Csnk2a1    | 42.9036   | 22.784   | -0.9130777       | 42.9046      | 22.785        | -0.913048        | 0.0158283  | No      |
| Slc27a3  | 0.71085  | 0.43566  | -0.27519    | 0.0021362  | No      | Csrnp3     | 0         | 1.05506  | inf              | 0.001        | 1.05606       | 10.0444761       | 0.00022079 | No      |
| Slc30a3  | 0.11446  | 0.21873  | 0.10427     | 0.00034271 | No      | Csrp1      | 31.5794   | 107.837  | 1.7717966        | 31.5804      | 107.838       | 1.7717643        | 0.00022079 | No      |
| Slc32a1  | 0.15477  | 0.060389 | -0.094381   | 0.0048196  | No      | Csrp2      | 0.42443   | 127.015  | 8.22525653       | 0.42543      | 127.016       | 8.22187276       | 0.0117698  | No      |
| Slc44a4  | 0.67354  | 0.15286  | -0.52068    | 0.00066856 | No      | Csrp3      | 0         | 2.19019  | inf              | 0.001        | 2.19119       | 11.0974989       | 0.00022079 | No      |
| Slc45a1  | 0.20934  | 0.12204  | -0.0873     | 0.04985963 | No      | Cst3       | 66.3542   | 489.236  | 2.88227088       | 66.3552      | 489.237       | 2.88225208       | 0.00022079 | No      |
| Slc46a2  | 0.090888 | 0.023785 | -0.067103   | 0.00148947 | No      | Cstb       | 72.9166   | 206.505  | 1.50185752       | 72.9176      | 206.506       | 1.50184472       | 0.00022079 | No      |

| RRBS     |          |           |             |            |         | RNAseq   |           |         |                  |              |               |                  |            |         |
|----------|----------|-----------|-------------|------------|---------|----------|-----------|---------|------------------|--------------|---------------|------------------|------------|---------|
| gene     | Blood    | Kidney    | methyl.diff | pMWU.fdr   | Match ? | gene     | blood     | kidney  | log2(fold_ratio) | blood+ 0.001 | kidney+ 0.001 | log2(fold_ratio) | q_value    | Match ? |
| Slc47a2  | 0.01041  | 0.060958  | 0.050548    | 3.93E-05   | No      | Ctage5   | 56.9099   | 24.191  | -1.2342092       | 56.9109      | 24.192        | -1.234175        | 0.00041963 | No      |
| Slc4a10  | 0.66563  | 0.077543  | -0.588087   | 0.00014343 | No      | Ctbp2    | 0.569753  | 35.1635 | 5.94759825       | 0.570753     | 35.1645       | 5.94510936       | 0.00022079 | No      |
| Slc4a2   | 0.22987  | 0.028434  | -0.201436   | 0.00026127 | No      | Ctbs     | 4.53064   | 21.4454 | 2.24288146       | 4.53164      | 21.4464       | 2.24263034       | 0.00041963 | No      |
| Slc5a4   | 0.44663  | 0.19163   | -0.255      | 0.01406934 | No      | Ctc1     | 9.76311   | 28.7626 | 1.5587814        | 9.76411      | 28.7636       | 1.5586838        | 0.0136242  | No      |
| Slc5a5   | 0.21777  | 0.11947   | -0.0983     | 0.02616573 | No      | Ctcf     | 55.6434   | 18.3862 | -1.5975872       | 55.6444      | 18.3872       | -1.5975347       | 0.00060553 | No      |
| Slc6a2   | 0.12537  | 0.047053  | -0.078317   | 0.00014343 | No      | Ctdnep1  | 76.4516   | 45.0176 | -0.7640575       | 76.4526      | 45.0186       | -0.7640444       | 0.0233831  | No      |
| Slc6a3   | 0.22484  | 0.091528  | -0.133312   | 0.00030384 | No      | Ctdp1    | 31.738    | 10.8813 | -1.5443603       | 31.739       | 10.8823       | -1.5442732       | 0.00022079 | No      |
| Slc6a7   | 0.2978   | 0.067609  | -0.230191   | 0.00123983 | No      | Ctdsp2   | 69.3482   | 34.8452 | -0.9928985       | 69.3492      | 34.8462       | -0.9928779       | 0.00227055 | No      |
| Slc7a10  | 0.07465  | 0.16815   | 0.0935      | 9.44E-05   | No      | Ctdspl   | 0.105999  | 30.3123 | 8.15970886       | 0.106999     | 30.3133       | 8.14620979       | 0.00022079 | No      |
| Slc7a14  | 0.25206  | 0.064153  | -0.187907   | 1.22E-05   | No      | Ctdspl2  | 15.5614   | 5.0468  | -1.624531        | 15.5624      | 5.0478        | -1.6243379       | 0.00022079 | No      |
| Slc7a15  | 0.84853  | 0.2088    | -0.63973    | 5.45E-07   | No      | Ctf1     | 0.659699  | 15.3034 | 4.53590049       | 0.660699     | 15.3044       | 4.53380951       | 0.00022079 | No      |
| Slc9a3r1 | 0.25485  | 0.061978  | -0.192872   | 0.0007955  | No      | Cth      | 0.65694   | 63.1956 | 6.58791869       | 0.65794      | 63.1966       | 6.58574711       | 0.00022079 | No      |
| Slit1    | 0.10243  | 0.031518  | -0.070912   | 2.12E-06   | No      | Ctla2a   | 62.8997   | 27.57   | -1.1899539       | 62.9007      | 27.571        | -1.1899245       | 0.00096553 | No      |
| Slit3    | 0.073497 | 0.022323  | -0.051174   | 0.02965439 | No      | Ctla4    | 28.7648   | 4.27694 | -2.7496536       | 28.7658      | 4.27794       | -2.7493664       | 0.00022079 | No      |
| Smad3    | 0.65534  | 0.17559   | -0.47975    | 5.45E-07   | No      | Ctnna1   | 3.15751   | 105.489 | 5.06216145       | 3.15851      | 105.49        | 5.06171829       | 0.00022079 | No      |
| Smpd3    | 0.085086 | 0.028619  | -0.056467   | 0.00276056 | No      | Ctnnal1  | 3.38601   | 23.5029 | 2.79518064       | 3.38701      | 23.5039       | 2.79481601       | 0.0330481  | No      |
| Smpdl3b  | 0.017232 | 0.074221  | 0.056989    | 0.03531391 | No      | Ctnnbip1 | 0.0834683 | 9.26495 | 6.79441099       | 0.0844683    | 9.26595       | 6.77738507       | 0.00060553 | No      |
| Smtnl2   | 0.32453  | 0.070054  | -0.254476   | 7.99E-06   | No      | Ctnnb1   | 45.2378   | 21.5398 | -1.0705239       | 45.2388      | 21.5408       | -1.0704888       | 0.0019604  | No      |
| Smug1    | 0.91602  | 0.55531   | -0.36071    | 1.65E-09   | No      | Ctnnd1   | 15.1285   | 38.9179 | 1.36316491       | 15.1295      | 38.9189       | 1.36310662       | 0.00022079 | No      |
| Snai1    | 0.60112  | 0.33429   | -0.26683    | 3.42E-07   | No      | Ctr9     | 31.1659   | 13.9298 | -1.1617938       | 31.1669      | 13.9308       | -1.1617366       | 0.00060553 | No      |
| Snap25   | 0.086675 | 0.016795  | -0.06988    | 0.00290027 | No      | Ctrc     | 1.28583   | 7.12543 | 2.47027716       | 1.28683      | 7.12643       | 2.46935806       | 0.012146   | No      |
| Sncb     | 0.078867 | 0.025904  | -0.052963   | 0.00466526 | No      | Ctsb     | 68.6694   | 404.491 | 2.55836834       | 68.6704      | 404.492       | 2.5583509        | 0.00022079 | No      |
| Snrpn    | 0.42839  | 0.20971   | -0.21868    | 0.00017491 | No      | Ctsd     | 31.2729   | 188.354 | 2.59046176       | 31.2739      | 188.355       | 2.59042328       | 0.00022079 | No      |
| Sntg2    | 0.068195 | 0.0078125 | -0.0603825  | 0.00018672 | No      | Ctse     | 168.446   | 14.1105 | -3.5774452       | 168.447      | 14.1115       | -3.5773515       | 0.00022079 | No      |
| Snx19    | 0.085372 | 0.010598  | -0.074774   | 0.00049864 | No      | Ctsh     | 3.83314   | 306.942 | 6.32329557       | 3.83414      | 306.943       | 6.32292394       | 0.00022079 | No      |
| Snx22    | 0.22657  | 0.095412  | -0.131158   | 0.00197715 | No      | Ctsl1    | 21.5314   | 935.523 | 5.44125909       | 21.5324      | 935.524       | 5.44119363       | 0.00022079 | No      |
| Sorcs1   | 0.13104  | 0.026714  | -0.104326   | 8.49E-05   | No      | Ctss     | 92.1665   | 34.7912 | -1.40552         | 92.1675      | 34.7922       | -1.4054942       | 0.00096553 | No      |
| Sorcs2   | 0.14426  | 0.040952  | -0.103308   | 0.00934082 | No      | Ctsw     | 248.013   | 87.5966 | -1.501469        | 248.014      | 87.5976       | -1.5014583       | 0.00096553 | No      |
| Sorcs3   | 0.094824 | 0.030088  | -0.064736   | 0.0001571  | No      | Ctsz     | 9.22307   | 44.8466 | 2.28167966       | 9.22407      | 44.8476       | 2.28155542       | 0.0319323  | No      |
| Sox10    | 0.80624  | 0.65846   | -0.14778    | 9.44E-05   | No      | Cttnbp2  | 0.241578  | 1.18053 | 2.28887372       | 0.242578     | 1.18153       | 2.28413564       | 0.00536605 | No      |
| Sox14    | 0.21852  | 0.079008  | -0.139512   | 0.00026127 | No      | Ctxn1    | 0.159216  | 2.3945  | 3.91066721       | 0.160216     | 2.3955        | 3.90223668       | 0.0142227  | No      |
| Sox15    | 0.76434  | 0.18909   | -0.57525    | 3.82E-07   | No      | Cul1     | 43.4915   | 27.6154 | -0.6552604       | 43.4925      | 27.6164       | -0.6552414       | 0.0453842  | No      |
| Sox18    | 0.4087   | 0.086228  | -0.322472   | 9.69E-09   | No      | Cul3     | 73.2869   | 34.8807 | -1.0711263       | 73.2879      | 34.8817       | -1.0711047       | 0.0019604  | No      |
| Sox2     | 0.017124 | 0.072386  | 0.055262    | 0.00135614 | No      | Cul4b    | 23.5233   | 9.35345 | -1.33052         | 23.5243      | 9.35445       | -1.3304271       | 0.00022079 | No      |
| Sox7     | 0.12936  | 0.039011  | -0.090349   | 0.00038311 | No      | Cul5     | 21.6135   | 9.94867 | -1.1193571       | 21.6145      | 9.94967       | -1.1192789       | 0.00348745 | No      |
| Spag4    | 0.4561   | 0.11162   | -0.34448    | 0.00038311 | No      | Cul7     | 2.24515   | 4.70863 | 1.06849553       | 2.24615      | 4.70963       | 1.06815945       | 0.0133754  | No      |
| Spag6l   | 0.094636 | 0.022278  | -0.072358   | 0.00042212 | No      | Cuta     | 79.7491   | 132.432 | 0.73171162       | 79.7501      | 132.433       | 0.73170443       | 0.0447184  | No      |
| Spag8    | 0.72624  | 0.32731   | -0.39893    | 0.00034271 | No      | Cux1     | 26.657    | 48.9203 | 0.87591882       | 26.658       | 48.9213       | 0.87589419       | 0.0454908  | No      |
| Spata1   | 0.18508  | 0.023748  | -0.161332   | 3.82E-07   | No      | Cwc22    | 32.3156   | 10.7901 | -1.5825225       | 32.3166      | 10.7911       | -1.5824335       | 0.00041963 | No      |
| Spata18  | 0.07013  | 0.016206  | -0.053924   | 0.00148947 | No      | Cxcl10   | 0.90923   | 14.209  | 3.96601593       | 0.91023      | 14.21         | 3.96453161       | 0.00022079 | No      |
| Spata2   | 0.18025  | 0.05653   | -0.12372    | 0.00393505 | No      | Cxcl13   | 0         | 3.05604 | inf              | 0.001        | 3.05704       | 11.5779197       | 0.00022079 | No      |
| Spata3   | 0.2927   | 0.17095   | -0.12175    | 0.02257431 | No      | Cxcl16   | 0.575459  | 111.51  | 7.59824424       | 0.576459     | 111.511       | 7.59575231       | 0.00147497 | No      |

| RRBS     |           |          |             |            |         | RNAseq        |           |          |                  |              |               |                  |            |         |
|----------|-----------|----------|-------------|------------|---------|---------------|-----------|----------|------------------|--------------|---------------|------------------|------------|---------|
| gene     | Blood     | Kidney   | methyl.diff | pMWU.fdr   | Match ? | gene          | blood     | kidney   | log2(fold_ratio) | blood+ 0.001 | kidney+ 0.001 | log2(fold_ratio) | q_value    | Match ? |
| Spata32  | 0.20805   | 0.077789 | -0.130261   | 3.69E-06   | No      | Cxcl2         | 0.207223  | 4.92237  | 4.57009706       | 0.208223     | 4.92337       | 4.56344482       | 0.00858283 | No      |
| Speg     | 0.25899   | 0.18663  | -0.07236    | 0.0250308  | No      | Cxcr4         | 497.653   | 40.1599  | -3.6313126       | 497.654      | 40.1609       | -3.6312795       | 0.00022079 | No      |
| Spg7     | 0.55767   | 0.31673  | -0.24094    | 0.01000157 | No      | Cxhc1         | 39.003    | 22.5597  | -0.7898372       | 39.004       | 22.5607       | -0.7898103       | 0.0159346  | No      |
| Spock3   | 0.095088  | 0.020221 | -0.074867   | 2.22E-07   | No      | Cyb5a         | 43.2366   | 285.923  | 2.72530169       | 43.2376      | 285.924       | 2.72527337       | 0.00022079 | No      |
| Spred3   | 0.52356   | 0.10742  | -0.41614    | 2.14E-06   | No      | Cyb5b         | 24.7734   | 120.314  | 2.27994074       | 24.7744      | 120.315       | 2.2798945        | 0.00022079 | No      |
| Sprn     | 0.36359   | 0.060304 | -0.303286   | 1.15E-06   | No      | Cyb5r1        | 5.69873   | 34.8589  | 2.6128147        | 5.69973      | 34.8599       | 2.61260295       | 0.00022079 | No      |
| Spry2    | 0.85679   | 0.33201  | -0.52478    | 1.22E-10   | No      | Cyb5r2        | 0         | 1.31184  | inf              | 0.001        | 1.31284       | 10.3584754       | 0.00022079 | No      |
| Spryd3   | 0.32082   | 0.10938  | -0.21144    | 4.83E-07   | No      | Cyb5r3        | 15.0972   | 62.1911  | 2.04242713       | 15.0982      | 62.1921       | 2.04235477       | 0.00022079 | No      |
| Sptb     | 0.22565   | 0.035618 | -0.190032   | 0.0007955  | No      | Cyba          | 99.8116   | 237.608  | 1.25130401       | 99.8126      | 237.609       | 1.25129563       | 0.0488116  | No      |
| Srd5a2   | 0.30264   | 0.14782  | -0.15482    | 0.02616573 | No      | Cybrd1        | 3.33211   | 0.719596 | -2.211177        | 3.33311      | 0.720596      | -2.2096064       | 0.00022079 | No      |
| Srek1ip1 | 0.54692   | 0.27658  | -0.27034    | 4.83E-07   | No      | CYC1          | 60.5774   | 256.333  | 2.08116766       | 60.5784      | 256.334       | 2.08114947       | 0.00022079 | No      |
| Srsf9    | 0.0034944 | 0.088363 | 0.0848686   | 1.86E-06   | No      | Cyca          | 41.4834   | 474.382  | 3.51544322       | 41.4844      | 474.383       | 3.51541149       | 0.00022079 | No      |
| Ssr3     | 0.89079   | 0.71563  | -0.17516    | 0.00135614 | No      | Cyp11a1       | 0.095166  | 2.83939  | 4.89899098       | 0.096166     | 2.84039       | 4.88441831       | 0.0153152  | No      |
| Sstr1    | 0.15155   | 0.031784 | -0.119766   | 1.74E-09   | No      | Cyp20a1       | 6.85862   | 15.6257  | 1.18793059       | 6.85962      | 15.6267       | 1.18781258       | 0.00698733 | No      |
| Sstr5    | 0.1085    | 0.014212 | -0.094288   | 6.03E-09   | No      | Cyp2c11       | 0         | 1.66854  | inf              | 0.001        | 1.66954       | 10.7052349       | 0.00022079 | No      |
| St8sia3  | 0.15107   | 0.04418  | -0.10689    | 1.82E-05   | No      | Cyp2c24       | 0         | 4.57817  | inf              | 0.001        | 4.57917       | 12.1608704       | 0.00022079 | No      |
| St8sia5  | 0.21633   | 0.060684 | -0.155646   | 0.00088439 | No      | Cyp2d2        | 2.34019   | 29.7645  | 3.66889509       | 2.34119      | 29.7655       | 3.6683272        | 0.00022079 | No      |
| Steap4   | 0.1028    | 0.022568 | -0.080232   | 1.51E-09   | No      | Cyp2d4        | 0.210001  | 1.39972  | 2.73667016       | 0.211001     | 1.40072       | 2.73084685       | 0.0333701  | No      |
| Stx11    | 0.037228  | 0.088702 | 0.051474    | 0.0017676  | No      | Cyp2j4        | 0         | 1.778    | inf              | 0.001        | 1.779         | 10.7968508       | 0.00022079 | No      |
| Stx5     | 0.10223   | 0.017981 | -0.084249   | 0.00010392 | No      | Cyp2r1        | 0.557903  | 1.99133  | 1.83564611       | 0.558903     | 1.99233       | 1.8337868        | 0.0288046  | No      |
| Stxbp5l  | 0.11998   | 0.016331 | -0.103649   | 0.00017491 | No      | Cyp39a1       | 0         | 2.03001  | inf              | 0.001        | 2.03101       | 10.9879816       | 0.00618779 | No      |
| Surf6    | 0.30274   | 0.027417 | -0.275323   | 1.22E-10   | No      | Cyp4a1        | 0         | 5.20861  | inf              | 0.001        | 5.20961       | 12.3469597       | 0.0133754  | No      |
| Sv2c     | 0.088345  | 0.022907 | -0.065438   | 0.00866691 | No      | Cyp4a2        | 0.0295192 | 484.012  | 14.0011016       | 0.0305192    | 484.013       | 13.953041        | 0.00022079 | No      |
| Syce2    | 0.41329   | 0.16897  | -0.24432    | 2.41E-09   | No      | Cyp4f1        | 0         | 21.883   | inf              | 0.001        | 21.884        | 14.4175888       | 0.00022079 | No      |
| Sycp1    | 0.96961   | 0.87697  | -0.09264    | 2.31E-06   | No      | Cyp4f17       | 18.6561   | 3.41569  | -2.4493985       | 18.6571      | 3.41669       | -2.4490535       | 0.00022079 | No      |
| Syn2     | 0.10822   | 0.032142 | -0.076078   | 0.00074247 | No      | Cyp4f6        | 6.25062   | 23.2613  | 1.89586052       | 6.25162      | 23.2623       | 1.89569175       | 0.00022079 | No      |
| Sync     | 0.24303   | 0.12197  | -0.12106    | 0.00595469 | No      | Cystm1        | 0.436629  | 152.846  | 8.45145513       | 0.437629     | 152.847       | 8.44816418       | 0.00022079 | No      |
| Syngap1  | 0.77462   | 0.31421  | -0.46041    | 1.67E-06   | No      | Cyth1         | 51.8535   | 12.5428  | -2.0475819       | 51.8545      | 12.5438       | -2.0474947       | 0.00022079 | No      |
| Syt1     | 0.11582   | 0.033406 | -0.082414   | 1.47E-06   | No      | Cyth4         | 31.7803   | 12.7031  | -1.3229521       | 31.7813      | 12.7041       | -1.322884        | 0.00022079 | No      |
| Syt10    | 0.14756   | 0.05663  | -0.09093    | 0.00595469 | No      | Cytip         | 443.389   | 21.4583  | -4.3689653       | 443.39       | 21.4593       | -4.3689013       | 0.00022079 | No      |
| Syt6     | 0.11085   | 0.040027 | -0.070823   | 0.00438283 | No      | Cyt11         | 0         | 2.31999  | inf              | 0.001        | 2.32099       | 11.1805246       | 0.00022079 | No      |
| Sytl3    | 0.83286   | 0.29754  | -0.53532    | 1.81E-12   | No      | D2hgdh        | 3.10721   | 19.9438  | 2.68224867       | 3.10821      | 19.9448       | 2.68185677       | 0.00022079 | No      |
| T        | 0.17354   | 0.034252 | -0.139288   | 0.0002817  | No      | D5Erd579e     | 18.5902   | 39.13    | 1.07373282       | 18.5912      | 39.131        | 1.07369208       | 0.00536605 | No      |
| Tac1     | 0.23974   | 0.11507  | -0.12467    | 0.01000157 | No      | D630039A03Rik | 0         | 11.8942  | inf              | 0.001        | 11.8952       | 13.5380919       | 0.00022079 | No      |
| Tac3     | 0.75189   | 0.53252  | -0.21937    | 0.00161991 | No      | D930015E06Rik | 70.3027   | 17.5207  | -2.0045197       | 70.3037      | 17.5217       | -2.0044579       | 0.00022079 | No      |
| Tacr3    | 0.24378   | 0.12633  | -0.11745    | 0.00088439 | No      | Daam1         | 3.53319   | 8.59312  | 1.28221071       | 3.53419      | 8.59412       | 1.28197032       | 0.00818469 | No      |
| Tada2b   | 0.081352  | 0.017119 | -0.064233   | 8.11E-07   | No      | Dab2          | 0.294383  | 150.541  | 8.99824638       | 0.295383     | 150.542       | 8.99336353       | 0.00022079 | No      |
| Tagln2   | 0.075818  | 0.017049 | -0.058769   | 0.02144384 | No      | Dad1          | 114.286   | 230.287  | 1.01078429       | 114.287      | 230.288       | 1.01077793       | 0.00096553 | No      |
| Tal1     | 0.20274   | 0.042068 | -0.160672   | 5.49E-05   | No      | Dag1          | 11.1537   | 87.424   | 2.97050702       | 11.1547      | 87.425        | 2.97039418       | 0.00022079 | No      |
| Tapbp    | 0.75236   | 0.16641  | -0.58595    | 1.81E-12   | No      | DAGLB         | 0.818275  | 9.19327  | 3.48992043       | 0.819275     | 9.19427       | 3.48831534       | 0.00022079 | No      |



| RRBS     |           |           |             |            |         | RNAseq  |           |          |                  |              |               |                  |            |         |
|----------|-----------|-----------|-------------|------------|---------|---------|-----------|----------|------------------|--------------|---------------|------------------|------------|---------|
| gene     | Blood     | Kidney    | methyl.diff | pMWU.fdr   | Match ? | gene    | blood     | kidney   | log2(fold_ratio) | blood+ 0.001 | kidney+ 0.001 | log2(fold_ratio) | q_value    | Match ? |
| Tbccd1   | 0.86567   | 0.63586   | -0.22981    | 0.00042212 | No      | Dak     | 3.04422   | 51.0215  | 4.06696079       | 3.04522      | 51.0225       | 4.06651523       | 0.00022079 | No      |
| Tbrg1    | 0.25636   | 0.12137   | -0.13499    | 1.68E-07   | No      | Dap     | 22.3248   | 123.525  | 2.4680839        | 22.3258      | 123.526       | 2.46803096       | 0.00022079 | No      |
| Tbx18    | 0.15228   | 0.077354  | -0.074926   | 0.00030384 | No      | Dapk3   | 51.7      | 110.679  | 1.09814533       | 51.701       | 110.68        | 1.09813046       | 0.00523184 | No      |
| Tbx4     | 0.21138   | 0.34891   | 0.13753     | 0.02616573 | No      | Dapl1   | 0         | 57.6551  | inf              | 0.001        | 57.6561       | 15.8151856       | 0.00022079 | No      |
| Tbx5     | 0.29412   | 0.11598   | -0.17814    | 1.15E-05   | No      | Dars2   | 8.13043   | 18.8102  | 1.21011163       | 8.13143      | 18.8112       | 1.21001089       | 0.0182773  | No      |
| Tbx6     | 0.24417   | 0.066196  | -0.177974   | 8.06E-09   | No      | Dazap2  | 348.152   | 195.355  | -0.8336191       | 348.153      | 195.356       | -0.8336159       | 0.0447184  | No      |
| Tcerg1l  | 0.076972  | 0.0097801 | -0.0671919  | 0.00135614 | No      | Dbf4    | 2.70905   | 0.183282 | -3.88565         | 2.71005      | 0.184282      | -3.8783324       | 0.029572   | No      |
| Tcf19    | 0.72115   | 0.44075   | -0.2804     | 0.00244273 | No      | Dbi     | 56.4322   | 886.357  | 3.97329739       | 56.4332      | 886.358       | 3.97327346       | 0.00022079 | No      |
| Tchp     | 0.19757   | 0.3252    | 0.12763     | 0.00276056 | No      | Dbn1    | 0.359224  | 16.0342  | 5.48012482       | 0.360224     | 16.0352       | 5.47620423       | 0.00022079 | No      |
| Tdrd6    | 0.54614   | 0.34721   | -0.19893    | 0.00290027 | No      | Dbn2    | 2.19952   | 45.3258  | 4.36507186       | 2.20052      | 45.3268       | 4.36444792       | 0.00022079 | No      |
| Teddm1   | 0.88684   | 0.78998   | -0.09686    | 0.01197107 | No      | Dbt     | 8.83367   | 22.7025  | 1.36176633       | 8.83467      | 22.7035       | 1.36166657       | 0.00022079 | No      |
| Tekt4    | 0.52881   | 0.088676  | -0.440134   | 2.83E-08   | No      | Dcaf15  | 36.9561   | 11.9967  | -1.6231749       | 36.9571      | 11.9977       | -1.6230937       | 0.00022079 | No      |
| Tescl    | 0.62549   | 0.36083   | -0.26466    | 1.35E-06   | No      | Dcaf17  | 7.49043   | 3.58468  | -1.0632042       | 7.49143      | 3.58568       | -1.0629944       | 0.00211842 | No      |
| Tfam     | 0.010262  | 0.25047   | 0.240208    | 1.28E-05   | No      | Dcaf5   | 15.8556   | 7.20189  | -1.138545        | 15.8566      | 7.20289       | -1.1384357       | 0.00436941 | No      |
| Tfap2c   | 0.069691  | 0.015856  | -0.053835   | 9.70E-05   | No      | Dcdc2   | 0         | 5.94519  | inf              | 0.001        | 5.94619       | 12.5377498       | 0.00022079 | No      |
| Tfap2e   | 0.093269  | 0.010276  | -0.082993   | 0.00012978 | No      | Dck     | 21.1845   | 2.27275  | -3.2204982       | 21.1855      | 2.27375       | -3.2199316       | 0.00022079 | No      |
| Tgfa     | 0.35013   | 0.11388   | -0.23625    | 5.49E-05   | No      | Dclk1   | 0.0738711 | 3.6198   | 5.61475612       | 0.0748711    | 3.6208        | 5.59575573       | 0.0117698  | No      |
| Tgfb1i1  | 0.26265   | 0.15529   | -0.10736    | 0.00051947 | No      | Dclk2   | 0.208192  | 1.85849  | 3.15814439       | 0.209192     | 1.85949       | 3.1520074        | 0.0444112  | No      |
| Tgfb3    | 0.60994   | 0.25057   | -0.35937    | 0.00334577 | No      | Dclk3   | 0         | 29.1526  | inf              | 0.001        | 29.1536       | 14.8313864       | 0.00022079 | No      |
| Tgif2    | 0.48778   | 0.27222   | -0.21556    | 0.00799193 | No      | Dclre1c | 18.4835   | 4.67334  | -1.9837121       | 18.4845      | 4.67434       | -1.9834814       | 0.00022079 | No      |
| Thbs2    | 0.23788   | 0.12786   | -0.11002    | 0.04769919 | No      | Dcn     | 0         | 10.6341  | inf              | 0.001        | 10.6351       | 13.376546        | 0.00022079 | No      |
| Thegl    | 0.85003   | 0.26141   | -0.58862    | 1.55E-10   | No      | Dcps    | 41.0383   | 15.5237  | -1.4024985       | 41.0393      | 15.5247       | -1.4024407       | 0.00113657 | No      |
| Thpo     | 0.49007   | 0.20607   | -0.284      | 0.00049864 | No      | Dcstamp | 0         | 1.55206  | inf              | 0.001        | 1.55306       | 10.6008979       | 0.00422081 | No      |
| Thyn1    | 0.077822  | 0.016513  | -0.061309   | 0.00799193 | No      | Dctd    | 15.1153   | 7.70855  | -0.9714782       | 15.1163      | 7.70955       | -0.9713865       | 0.0183813  | No      |
| Tifab    | 0.77919   | 0.6573    | -0.12189    | 0.02027674 | No      | Dctn3   | 34.1766   | 69.7291  | 1.02875198       | 34.1776      | 69.7301       | 1.02873046       | 0.0196176  | No      |
| Tjap1    | 0.64657   | 0.26385   | -0.38272    | 0.00244273 | No      | Dctpp1  | 3.78957   | 14.4262  | 1.92858527       | 3.79057      | 14.4272       | 1.92830462       | 0.0228245  | No      |
| Tlr6     | 0.69652   | 0.54686   | -0.14966    | 0.03756776 | No      | Dcun1d4 | 3.45852   | 9.79601  | 1.50203945       | 3.45952      | 9.79701       | 1.50176963       | 0.00022079 | No      |
| Tlx1     | 0.26292   | 0.066375  | -0.196545   | 3.93E-05   | No      | Dcun1d5 | 65.0834   | 38.8068  | -0.7459801       | 65.0844      | 38.8078       | -0.7459651       | 0.0334772  | No      |
| Tm6sf2   | 0.74727   | 0.074234  | -0.673036   | 3.93E-08   | No      | Ddah1   | 0.295889  | 98.6372  | 8.38093197       | 0.296889     | 98.6382       | 8.37607902       | 0.00022079 | No      |
| Tm9sf1   | 0.19249   | 0.021637  | -0.170853   | 0.0074695  | No      | Ddb2    | 17.922    | 3.27707  | -2.4512532       | 17.923       | 3.27807       | -2.4508936       | 0.00884258 | No      |
| Tmcc2    | 0.58611   | 0.28064   | -0.30547    | 0.00113933 | No      | Ddc     | 0.138366  | 26.3255  | 7.57182764       | 0.139366     | 26.3265       | 7.56149328       | 0.00113657 | No      |
| Tmem104  | 0.099926  | 0.041248  | -0.058678   | 0.02257431 | No      | Ddhd1   | 17.4604   | 5.58628  | -1.6441268       | 17.4614      | 5.58728       | -1.6439512       | 0.00060553 | No      |
| Tmem114  | 0.18329   | 0.051447  | -0.131843   | 0.0250308  | No      | Ddhd2   | 22.2711   | 8.98434  | -1.3096884       | 22.2721      | 8.98534       | -1.3095926       | 0.00022079 | No      |
| Tmem119  | 0.72679   | 0.48933   | -0.23746    | 0.0022928  | No      | Ddrnk1  | 32.4632   | 61.0571  | 0.91135385       | 32.4642      | 61.0581       | 0.91133304       | 0.00593001 | No      |
| Tmem132d | 0.18804   | 0.047837  | -0.140203   | 1.02E-06   | No      | Ddt     | 66.6343   | 514.119  | 2.94776543       | 66.6353      | 514.12        | 2.94774658       | 0.00022079 | No      |
| Tmem151b | 0.65044   | 0.18802   | -0.46242    | 1.93E-12   | No      | Ddx10   | 11.924    | 5.58586  | -1.094017        | 11.925       | 5.58686       | -1.0938797       | 0.00227055 | No      |
| Tmem178a | 0.37345   | 0.068451  | -0.304999   | 1.03E-05   | No      | Ddx11   | 8.0746    | 2.35931  | -1.7750258       | 8.0756       | 2.36031       | -1.7745931       | 0.0105196  | No      |
| Tmem229a | 0.22443   | 0.083234  | -0.141196   | 0.00197715 | No      | Ddx17   | 196.355   | 81.3234  | -1.2717219       | 196.356      | 81.3244       | -1.2717115       | 0.0135008  | No      |
| Tmem88   | 0.85389   | 0.24252   | -0.61137    | 4.78E-08   | No      | Ddx18   | 21.4168   | 10.4332  | -1.0375612       | 21.4178      | 10.4342       | -1.0374903       | 0.00508519 | No      |
| Tmod1    | 0.11769   | 0.034166  | -0.083524   | 0.0190918  | No      | Ddx19a  | 28.0701   | 53.0157  | 0.91738546       | 28.0711      | 53.0167       | 0.91736127       | 0.00685176 | No      |
| Tmprss3  | 0.84479   | 0.69064   | -0.15415    | 0.00010392 | No      | Ddx20   | 34.6625   | 5.96532  | -2.5387043       | 34.6635      | 5.96632       | -2.5385041       | 0.00022079 | No      |
| Tmsb4x   | 0.0014287 | 0.12361   | 0.1221813   | 7.02E-06   | No      | Ddx26b  | 59.7566   | 9.17878  | -2.7027237       | 59.7576      | 9.17978       | -2.7025907       | 0.00022079 | No      |

| RRBS     |           |           |             |            |         | RNAseq  |          |         |                  |              |               |                  |            |         |
|----------|-----------|-----------|-------------|------------|---------|---------|----------|---------|------------------|--------------|---------------|------------------|------------|---------|
| gene     | Blood     | Kidney    | methyl.diff | pMWU.fdr   | Match ? | gene    | blood    | kidney  | log2(fold_ratio) | blood+ 0.001 | kidney+ 0.001 | log2(fold_ratio) | q_value    | Match ? |
| Tnfaip8  | 0.22678   | 0.049578  | -0.177202   | 8.55E-08   | No      | Ddx27   | 37.2848  | 13.8802 | -1.4255592       | 37.2858      | 13.8812       | -1.425494        | 0.00022079 | No      |
| Tnfrsf18 | 0.0034483 | 0.11514   | 0.1116917   | 8.49E-05   | No      | DDX39A  | 86.3786  | 34.6046 | -1.3197101       | 86.3796      | 34.6056       | -1.3196851       | 0.00022079 | No      |
| Tnfrsf25 | 2.50E-07  | 0.27983   | 0.27982975  | 3.82E-07   | No      | Ddx42   | 45.7198  | 14.8896 | -1.6185141       | 45.7208      | 14.8906       | -1.6184488       | 0.00022079 | No      |
| Tnk2     | 0.7965    | 0.23113   | -0.56537    | 4.32E-06   | No      | Ddx5    | 1223.6   | 211.84  | -2.5300851       | 1223.601     | 211.841       | -2.5300794       | 0.00022079 | No      |
| Tnnc2    | 0.1194    | 0.034998  | -0.084402   | 4.78E-08   | No      | Ddx51   | 13.836   | 6.42546 | -1.1065553       | 13.837       | 6.42646       | -1.106435        | 0.0159346  | No      |
| Tnxa-ps1 | 0.76917   | 0.43387   | -0.3353     | 1.03E-05   | No      | Deb1    | 39.2269  | 95.3168 | 1.28088719       | 39.2279      | 95.3178       | 1.28086555       | 0.00579147 | No      |
| Tppp3    | 0.2822    | 0.065362  | -0.216838   | 1.86E-06   | No      | Decr1   | 26.145   | 93.3899 | 1.83673146       | 26.146       | 93.3909       | 1.83669173       | 0.00022079 | No      |
| Tradd    | 0.70343   | 0.11595   | -0.58748    | 7.96E-09   | No      | Decr2   | 1.50324  | 114.098 | 6.24605433       | 1.50424      | 114.099       | 6.24510757       | 0.00022079 | No      |
| Tram11   | 0.081332  | 0.024194  | -0.057138   | 0.01783979 | No      | Dedd2   | 33.6613  | 11.9792 | -1.4905593       | 33.6623      | 11.9802       | -1.4904818       | 0.00273202 | No      |
| Trank1   | 0.18483   | 0.065563  | -0.119267   | 0.00244273 | No      | Def6    | 54.3502  | 7.274   | -2.9014645       | 54.3512      | 7.275         | -2.9012927       | 0.00022079 | No      |
| Trhr2    | 0.9397    | 0.72902   | -0.21068    | 7.99E-06   | No      | Def8    | 2.36114  | 14.2955 | 2.59800559       | 2.36214      | 14.2965       | 2.59749562       | 0.00022079 | No      |
| Trim15   | 0.19566   | 0.039152  | -0.156508   | 7.99E-06   | No      | Defb1   | 0        | 549.905 | inf              | 0.001        | 549.906       | 19.0688255       | 0.00022079 | No      |
| Trim26   | 0.98024   | 0.92619   | -0.05405    | 0.00393505 | No      | Defb28  | 0        | 10.6149 | inf              | 0.001        | 10.6159       | 13.3739391       | 0.00022079 | No      |
| Trim50   | 0.66974   | 0.49571   | -0.17403    | 0.04531279 | No      | Defb29  | 0        | 7.15315 | inf              | 0.001        | 7.15415       | 12.8045647       | 0.00022079 | No      |
| Trim6    | 0.84412   | 0.23008   | -0.61404    | 2.92E-08   | No      | Degs2   | 0.146619 | 70.7903 | 8.91533581       | 0.147619     | 70.7913       | 8.90554984       | 0.00378481 | No      |
| Trim71   | 0.064634  | 0.0043417 | -0.0602923  | 0.00693052 | No      | Dennd1a | 4.35608  | 10.9743 | 1.33302657       | 4.35708      | 10.9753       | 1.33282687       | 0.00022079 | No      |
| Trip6    | 0.68904   | 0.097871  | -0.591169   | 1.81E-12   | No      | Dennd1c | 398.936  | 66.7728 | -2.5788249       | 398.937      | 66.7738       | -2.5788069       | 0.00407863 | No      |
| Triqk    | 0.093752  | 0.022898  | -0.070854   | 0.02257431 | No      | Dennd2d | 117.698  | 18.5713 | -2.6639431       | 117.699      | 18.5723       | -2.6638777       | 0.00041963 | No      |
| Trmt2a   | 0.25921   | 0.15496   | -0.10425    | 0.03756776 | No      | Dennd3  | 18.8423  | 7.43729 | -1.3411261       | 18.8433      | 7.43829       | -1.3410087       | 0.00022079 | No      |
| Trmt61a  | 0.81739   | 0.48319   | -0.3342     | 6.75E-05   | No      | Dennd4b | 57.5789  | 12.8085 | -2.1684387       | 57.5799      | 12.8095       | -2.1683511       | 0.00022079 | No      |
| Trpv4    | 0.066259  | 0.0084652 | -0.0577938  | 0.00066856 | No      | Dennd5b | 0.227021 | 2.32616 | 3.35705267       | 0.228021     | 2.32716       | 3.3513318        | 0.00147497 | No      |
| Tsks     | 0.84797   | 0.7333    | -0.11467    | 0.00334577 | No      | Dennd6a | 40.9817  | 17.1619 | -1.2557705       | 40.9827      | 17.1629       | -1.2557217       | 0.00113657 | No      |
| Tssk3    | 0.70058   | 0.13793   | -0.56265    | 1.81E-12   | No      | DEPP    | 0        | 10.1047 | inf              | 0.001        | 10.1057       | 13.3028816       | 0.012511   | No      |
| Tst      | 0.68685   | 0.11772   | -0.56913    | 1.81E-12   | No      | Deptor  | 0.194156 | 16.0178 | 6.36631591       | 0.195156     | 16.0188       | 6.35899445       | 0.00022079 | No      |
| Ttc30b   | 0.25353   | 0.1477    | -0.10583    | 0.00049864 | No      | Dera    | 34.7518  | 55.2905 | 0.66994391       | 34.7528      | 55.2915       | 0.66992849       | 0.0489163  | No      |
| Tubb2b   | 0.045498  | 0.18321   | 0.137712    | 0.00276056 | No      | Desi1   | 6.49523  | 13.4505 | 1.05020729       | 6.49623      | 13.4515       | 1.05009244       | 0.020304   | No      |
| Tubg2    | 0.10127   | 0.020513  | -0.080757   | 1.81E-12   | No      | Dexi    | 22.8122  | 52.9207 | 1.21402656       | 22.8132      | 52.9217       | 1.21399058       | 0.00022079 | No      |
| Tug1     | 0.23819   | 0.10077   | -0.13742    | 0.00026127 | No      | Dfna5   | 0.326498 | 3.2487  | 3.31471647       | 0.327498     | 3.2497        | 3.31074854       | 0.00333723 | No      |
| Ubb      | 0.1024    | 0.038972  | -0.063428   | 0.02257431 | No      | Dfnb31  | 2.11528  | 8.00225 | 1.91955706       | 2.11628      | 8.00325       | 1.91905546       | 0.00022079 | No      |
| Ube2ql1  | 0.14361   | 0.069017  | -0.074593   | 0.04868237 | No      | Dgat1   | 2.08232  | 13.95   | 2.74400143       | 2.08332      | 13.951        | 2.74341218       | 0.00022079 | No      |
| Ubfd1    | 0.20174   | 0.05696   | -0.14478    | 2.29E-09   | No      | Dgat2   | 0.335977 | 13.4389 | 5.32190877       | 0.336977     | 13.4399       | 5.31772847       | 0.00022079 | No      |
| Ublcp1   | 0.097031  | 0.023773  | -0.073258   | 6.75E-05   | No      | Dgcr6   | 4.68628  | 58.0741 | 3.63137983       | 4.68728      | 58.0751       | 3.63109685       | 0.00022079 | No      |
| Ubxn10   | 0.0096219 | 0.51383   | 0.5042081   | 9.25E-12   | No      | Dgcr8   | 11.6313  | 6.18547 | -0.9110572       | 11.6323      | 6.18647       | -0.910948        | 0.0105196  | No      |
| Ucn      | 0.2322    | 0.037389  | -0.194811   | 1.28E-05   | No      | Dgka    | 451.333  | 31.6945 | -3.8318879       | 451.334      | 31.6955       | -3.8318455       | 0.00022079 | No      |
| Uhmk1    | 0.55535   | 0.27027   | -0.28508    | 1.15E-05   | No      | Dgkd    | 24.3497  | 8.46309 | -1.5246476       | 24.3507      | 8.46409       | -1.5245364       | 0.00180113 | No      |
| Unc5c    | 0.070928  | 0.0053223 | -0.0656057  | 9.31E-06   | No      | Dgkg    | 0.801422 | 3.58258 | 2.1603649        | 0.802422     | 3.58358       | 2.1589685        | 0.0346416  | No      |
| Unc5d    | 0.12398   | 0.016349  | -0.107631   | 0.00197715 | No      | Dgkz    | 182.178  | 32.3608 | -2.4930296       | 182.179      | 32.3618       | -2.4929929       | 0.00022079 | No      |
| Uncx     | 0.10308   | 0.022634  | -0.080446   | 0.00244273 | No      | Dhcr7   | 3.35822  | 7.35516 | 1.13105998       | 3.35922      | 7.35616       | 1.13082658       | 0.0142227  | No      |
| Ushbp1   | 0.83693   | 0.44673   | -0.3902     | 0.00046099 | No      | Dhdds   | 4.70018  | 35.1596 | 2.90313074       | 4.70118      | 35.1606       | 2.90286486       | 0.00022079 | No      |
| Usp46    | 0.72574   | 0.34771   | -0.37803    | 9.31E-06   | No      | Dhfr    | 3.83031  | 27.5889 | 2.84855487       | 3.83131      | 27.5899       | 2.84823056       | 0.00022079 | No      |
| Utf1     | 0.10027   | 0.024189  | -0.076081   | 0.00026127 | No      | Dhrs3   | 1.16446  | 68.3259 | 5.87469957       | 1.16546      | 68.3269       | 5.87348228       | 0.00022079 | No      |
| Vasn     | 0.75783   | 0.13805   | -0.61978    | 2.15E-10   | No      | Dhrs4   | 11.8957  | 72.818  | 2.61385495       | 11.8967      | 72.819        | 2.61375349       | 0.00022079 | No      |

| RRBS    |          |           |             |            |         | RNAseq   |           |          |                  |              |               |                  |            |         |
|---------|----------|-----------|-------------|------------|---------|----------|-----------|----------|------------------|--------------|---------------|------------------|------------|---------|
| gene    | Blood    | Kidney    | methyl.diff | pMWU.fdr   | Match ? | gene     | blood     | kidney   | log2(fold_ratio) | blood+ 0.001 | kidney+ 0.001 | log2(fold_ratio) | q_value    | Match ? |
| Vax1    | 0.19753  | 0.082742  | -0.114788   | 0.00553374 | No      | Dhtkd1   | 0.0313072 | 7.55371  | 7.9145471        | 0.0323072    | 7.55471       | 7.86937685       | 0.00909283 | No      |
| Vgf     | 0.14127  | 0.087869  | -0.053401   | 0.01155321 | No      | Dhx15    | 95.0475   | 44.4089  | -1.0977998       | 95.0485      | 44.4099       | -1.0977825       | 0.0111498  | No      |
| Vldlr   | 0.053735 | 0.36576   | 0.312025    | 6.10E-06   | No      | Dhx29    | 12.3672   | 6.52419  | -0.9226482       | 12.3682      | 6.52519       | -0.9225437       | 0.0256186  | No      |
| Vom1r70 | 0.74025  | 0.53499   | -0.20526    | 0.00568595 | No      | Dhx35    | 16.027    | 7.32775  | -1.1290622       | 16.028       | 7.32875       | -1.1289554       | 0.0323868  | No      |
| Vpreb1  | 0.96666  | 0.79881   | -0.16785    | 0.0007955  | No      | Dhx36    | 26.8056   | 7.3764   | -1.8615456       | 26.8066      | 7.3774        | -1.8614039       | 0.00022079 | No      |
| Vpreb2  | 0.88689  | 0.65595   | -0.23094    | 0.00049864 | No      | Dhx37    | 8.78728   | 3.86275  | -1.1857884       | 8.78828      | 3.86375       | -1.1855791       | 0.00407863 | No      |
| Vsx2    | 0.18092  | 0.081217  | -0.099703   | 0.01013329 | No      | Dhx38    | 17.607    | 8.17714  | -1.1064809       | 17.608       | 8.17814       | -1.1063864       | 0.00288641 | No      |
| Vwc2    | 0.099333 | 0.025635  | -0.073698   | 0.00320916 | No      | Dhx8     | 14.2368   | 6.28544  | -1.1795393       | 14.2378      | 6.28644       | -1.1794111       | 0.00113657 | No      |
| Vwc2l   | 0.19039  | 0.054116  | -0.136274   | 1.15E-05   | No      | Dicer1   | 15.6452   | 8.07739  | -0.953759        | 15.6462      | 8.07839       | -0.9536726       | 0.0172336  | No      |
| Vwce    | 0.15974  | 0.037512  | -0.122228   | 6.77E-07   | No      | Dido1    | 16.3956   | 5.71779  | -1.5197792       | 16.3966      | 5.71879       | -1.5196149       | 0.00022079 | No      |
| Wars    | 0.53631  | 0.27074   | -0.26557    | 2.91E-06   | No      | Diexf    | 14.4711   | 5.9434   | -1.2838142       | 14.4721      | 5.9444        | -1.2836712       | 0.00227055 | No      |
| Wbscr17 | 0.2491   | 0.088995  | -0.160105   | 0.00046099 | No      | Dip2a    | 1.44347   | 4.97606  | 1.78546276       | 1.44447      | 4.97706       | 1.78475354       | 0.00022079 | No      |
| Wfdc11  | 0.35404  | 0.15318   | -0.20086    | 0.0022928  | No      | Dip2b    | 19.5474   | 3.60797  | -2.4377175       | 19.5484      | 3.60897       | -2.4373915       | 0.00022079 | No      |
| Wfdc15b | 0.81821  | 0.73565   | -0.08256    | 0.00595469 | No      | Dip2c    | 0.763069  | 2.31793  | 1.60295158       | 0.764069     | 2.31893       | 1.60168444       | 0.0143389  | No      |
| Wfdc6a  | 0.8546   | 0.6483    | -0.2063     | 0.0006129  | No      | Dis3     | 10.1564   | 4.16173  | -1.2871338       | 10.1574      | 4.16273       | -1.2869293       | 0.00333723 | No      |
| Wnk2    | 0.20591  | 0.073691  | -0.132219   | 1.71E-05   | No      | Dis3l    | 6.69659   | 51.2826  | 2.93697086       | 6.69759      | 51.2836       | 2.93678357       | 0.00022079 | No      |
| Wnt1    | 0.15658  | 0.039911  | -0.116669   | 0.00042212 | No      | Dixdc1   | 0.149397  | 2.37572  | 3.99114173       | 0.150397     | 2.37672       | 3.98212426       | 0.00658515 | No      |
| Wnt10a  | 0.46968  | 0.17148   | -0.2982     | 0.00113933 | No      | Dkk2     | 0         | 2.77304  | inf              | 0.001        | 2.77404       | 11.4377729       | 0.00022079 | No      |
| Wnt10b  | 0.094069 | 0.023575  | -0.070494   | 3.93E-05   | No      | Dlat     | 7.27409   | 33.329   | 2.19593935       | 7.27509      | 33.33         | 2.19578432       | 0.00845215 | No      |
| Wnt7a   | 0.074881 | 0.018173  | -0.056708   | 0.0017676  | No      | Dlc1     | 0.119853  | 1.01429  | 3.08113227       | 0.120853     | 1.01529       | 3.07056668       | 0.0437345  | No      |
| Wnt8a   | 0.48686  | 0.19362   | -0.29324    | 0.00074247 | No      | Dld      | 38.8746   | 88.9413  | 1.19402566       | 38.8756      | 88.9423       | 1.19400477       | 0.00041963 | No      |
| Wnt9a   | 0.055104 | 0.0022921 | -0.0528119  | 0.0007955  | No      | Dleu7    | 0         | 3.16806  | inf              | 0.001        | 3.16906       | 11.6298393       | 0.00022079 | No      |
| Wnt9b   | 0.055509 | 0.004959  | -0.05055    | 4.74E-05   | No      | Dlg4     | 8.10924   | 2.58503  | -1.6493857       | 8.11024      | 2.58603       | -1.6490056       | 0.00147497 | No      |
| Xkr4    | 0.089225 | 0         | -0.089225   | 0.00012978 | No      | Dlst     | 27.6208   | 71.9159  | 1.38055567       | 27.6218      | 71.9169       | 1.3805235        | 0.00022079 | No      |
| Xkr6    | 0.15796  | 0.036502  | -0.121458   | 1.20E-07   | No      | DMD      | 0.0924619 | 3.22234  | 5.12310591       | 0.0934619    | 3.22334       | 5.1080342        | 0.00041963 | No      |
| Yap1    | 0.1289   | 0.031882  | -0.097018   | 0.00021466 | No      | Dmpk     | 0.179305  | 26.9653  | 7.23254456       | 0.180305     | 26.9663       | 7.22457437       | 0.00022079 | No      |
| Ydjc    | 0.060468 | 0.15316   | 0.092692    | 5.89E-07   | No      | Dmrtc1b  | 0         | 1.69359  | inf              | 0.001        | 1.69459       | 10.7267205       | 0.00022079 | No      |
| Zar1    | 0.089948 | 0.031949  | -0.057999   | 0.00595469 | No      | Dmrtc1c1 | 0         | 3.81531  | inf              | 0.001        | 3.81631       | 11.8979627       | 0.00022079 | No      |
| Zbed5   | 0.72219  | 0.38334   | -0.33885    | 0.00049864 | No      | Dmtf1    | 37.641    | 10.9111  | -1.7865084       | 37.642       | 10.9121       | -1.7864145       | 0.00022079 | No      |
| Zbtb24  | 0.77366  | 0.14341   | -0.63025    | 1.86E-06   | No      | Dmtn     | 0.0812173 | 79.1432  | 9.92846262       | 0.0822173    | 79.1442       | 9.91082592       | 0.00022079 | No      |
| Zbtb39  | 0.95351  | 0.8487    | -0.10481    | 0.0002817  | No      | Dmwd     | 0.307115  | 5.73164  | 4.22209712       | 0.308115     | 5.73264       | 4.21765886       | 0.00060553 | No      |
| Zc2hc1c | 0.12028  | 0.030609  | -0.089671   | 0.00044355 | No      | Dmxl1    | 7.90792   | 3.20861  | -1.3013498       | 7.90892      | 3.20961       | -1.3010827       | 0.00113657 | No      |
| Zcrb1   | 0.10598  | 0.039301  | -0.066679   | 0.01155321 | No      | DNAH17   | 4.90202   | 0.303283 | -4.0146398       | 4.90302      | 0.304283      | -4.010185        | 0.00536605 | No      |
| Zdhhc19 | 0.57249  | 0.17859   | -0.3939     | 2.74E-06   | No      | Dnaja4   | 17.1131   | 34.7204  | 1.02068244       | 17.1141      | 34.7214       | 1.02063969       | 0.00922576 | No      |
| Zdhhc22 | 0.071998 | 0.013255  | -0.058743   | 3.39E-05   | No      | Dnajib1  | 23.8408   | 48.7023  | 1.03055726       | 23.8418      | 48.7033       | 1.03052637       | 0.00164037 | No      |
| Zdhhc7  | 0.1869   | 0.083561  | -0.103339   | 0.02616573 | No      | Dnajib2  | 25.9564   | 62.7884  | 1.27440775       | 25.9574      | 62.7894       | 1.27437514       | 0.011893   | No      |
| Zfand2b | 0.85433  | 0.35625   | -0.49808    | 1.46E-05   | No      | Dnajib4  | 34.153    | 16.5238  | -1.0474668       | 34.154       | 16.5248       | -1.0474217       | 0.00645389 | No      |
| Zfp219  | 0.86299  | 0.38746   | -0.47553    | 1.05E-10   | No      | Dnajib6  | 94.4992   | 37.0657  | -1.3502174       | 94.5002      | 37.0667       | -1.3501937       | 0.0281894  | No      |
| Zfp37   | 0.34556  | 0.087795  | -0.257765   | 0.00038311 | No      | Dnajc10  | 9.9741    | 19.2233  | 0.94659745       | 9.9751       | 19.2243       | 0.94652786       | 0.00523184 | No      |
| Zfp385d | 0.060129 | 0.0061855 | -0.0539435  | 0.00320916 | No      | Dnajc12  | 1.9162    | 12.5483  | 2.71117187       | 1.9172       | 12.5493       | 2.71053414       | 0.00078858 | No      |
| Zfp414  | 0.61996  | 0.14847   | -0.47149    | 1.02E-06   | No      | Dnajc15  | 13.5884   | 66.4296  | 2.28945063       | 13.5894      | 66.4306       | 2.28936619       | 0.00022079 | No      |
| Zfp57   | 0.18244  | 0.067654  | -0.114786   | 0.01406934 | No      | Dnajc22  | 0.0390992 | 21.9683  | 9.13406843       | 0.0400992    | 21.9693       | 9.09769973       | 0.0469889  | No      |

| RRBS    |           |           |             |            |         | RNAseq   |          |         |                  |              |               |                  |            |         |
|---------|-----------|-----------|-------------|------------|---------|----------|----------|---------|------------------|--------------|---------------|------------------|------------|---------|
| gene    | Blood     | Kidney    | methyl.diff | pMWU.fdr   | Match ? | gene     | blood    | kidney  | log2(fold_ratio) | blood+ 0.001 | kidney+ 0.001 | log2(fold_ratio) | q_value    | Match ? |
| Zfp622  | 0.23136   | 0.11709   | -0.11427    | 3.38E-06   | No      | Dnajc25  | 0.708546 | 4.89237 | 2.78760009       | 0.709546     | 4.89337       | 2.78586025       | 0.00164037 | No      |
| Zfp710  | 0.88349   | 0.75505   | -0.12844    | 0.02027674 | No      | Dnajc28  | 0.328759 | 3.91306 | 3.57319494       | 0.329759     | 3.91406       | 3.56918193       | 0.00791314 | No      |
| Zfp772  | 0.8407    | 0.69458   | -0.14612    | 0.0021362  | No      | Dnajc4   | 5.58837  | 26.4925 | 2.24508454       | 5.58937      | 26.4935       | 2.24488086       | 0.00022079 | No      |
| Zfp93   | 0.15051   | 0.064291  | -0.086219   | 0.00044355 | No      | Dnajc5   | 42.1617  | 19.9071 | -1.08265         | 42.1627      | 19.9081       | -1.0826117       | 0.00242102 | No      |
| Zfpm2   | 0.057089  | 0.0062034 | -0.0508856  | 0.0021362  | No      | Dnajc7   | 130.932  | 48.379  | -1.4363649       | 130.933      | 48.38         | -1.4363461       | 0.00022079 | No      |
| Zic1    | 0.11316   | 0.037688  | -0.075472   | 0.04318305 | No      | DNAJC9   | 68.3752  | 26.4291 | -1.3713459       | 68.3762      | 26.4301       | -1.3713124       | 0.0207777  | No      |
| Zic3    | 0.11159   | 0.018671  | -0.092919   | 0.0022928  | No      | Dnal4    | 1.23096  | 11.6453 | 3.24189202       | 1.23196      | 11.6463       | 3.24084437       | 0.00022079 | No      |
| Zic4    | 0.17046   | 0.054223  | -0.116237   | 0.00636684 | No      | Dnase1   | 0.199005 | 153.653 | 9.59265554       | 0.200005     | 153.654       | 9.58543354       | 0.00022079 | No      |
| Zic5    | 0.12257   | 0.048353  | -0.074217   | 0.00636684 | No      | Dnase111 | 39.7528  | 12.7864 | -1.6364463       | 39.7538      | 12.7874       | -1.6363698       | 0.00096553 | No      |
| Zkscan5 | 0.4318    | 0.1193    | -0.3125     | 4.83E-07   | No      | DNLZ     | 25.7831  | 108.998 | 2.07980402       | 25.7841      | 108.999       | 2.07976131       | 0.00022079 | No      |
| Zmym6nb | 0.0029277 | 0.059598  | 0.0566703   | 0.00034271 | No      | Dnm1     | 0.895396 | 28.7225 | 5.00351164       | 0.896396     | 28.7235       | 5.00195153       | 0.00022079 | No      |
| Znrf4   | 0.55791   | 0.31381   | -0.2441     | 1.91E-07   | No      | Dnmbp    | 0.991885 | 15.3487 | 3.95179979       | 0.992885     | 15.3497       | 3.95044002       | 0.00022079 | No      |
| Zranb2  | 0.38805   | 0.14101   | -0.24704    | 7.99E-06   | No      | Dnmt1    | 23.523   | 6.43114 | -1.8709257       | 23.524       | 6.43214       | -1.8707627       | 0.00022079 | No      |
| Zrsr1   | 0.37139   | 0.1822    | -0.18919    | 3.34E-06   | No      | Dnmt3b   | 9.86623  | 1.38446 | -2.8331755       | 9.86723      | 1.38546       | -2.8322801       | 0.00022079 | No      |
|         |           |           |             |            |         | Dnph1    | 0.39827  | 9.62649 | 4.59519114       | 0.39927      | 9.62749       | 4.59172314       | 0.0268504  | No      |
|         |           |           |             |            |         | Doc2g    | 23.3434  | 57.1775 | 1.29243283       | 23.3444      | 57.1785       | 1.29239626       | 0.00698733 | No      |
|         |           |           |             |            |         | Dock11   | 45.9824  | 6.91431 | -2.7334246       | 45.9834      | 6.91531       | -2.7332473       | 0.00242102 | No      |
|         |           |           |             |            |         | Dock2    | 93.2621  | 5.4842  | -4.0879378       | 93.2631      | 5.4852        | -4.0876903       | 0.00022079 | No      |
|         |           |           |             |            |         | Dock5    | 0.206497 | 1.45045 | 2.81230784       | 0.207497     | 1.45145       | 2.80633249       | 0.0401695  | No      |
|         |           |           |             |            |         | Dock7    | 1.25473  | 8.97628 | 2.83874073       | 1.25573      | 8.97728       | 2.8377521        | 0.00211842 | No      |
|         |           |           |             |            |         | Dohh     | 15.3829  | 28.4759 | 0.88841393       | 15.3839      | 28.4769       | 0.88837081       | 0.0156977  | No      |
|         |           |           |             |            |         | Donson   | 14.1037  | 2.62497 | -2.4257009       | 14.1047      | 2.62597       | -2.4252536       | 0.0258481  | No      |
|         |           |           |             |            |         | Dopey1   | 24.115   | 9.20828 | -1.3889272       | 24.116       | 9.20928       | -1.3888304       | 0.00605729 | No      |
|         |           |           |             |            |         | Dpcd     | 6.71178  | 43.3961 | 2.69279806       | 6.71278      | 43.3971       | 2.69261637       | 0.00022079 | No      |
|         |           |           |             |            |         | Dpep2    | 0.546129 | 2.0889  | 1.93542976       | 0.547129     | 2.0899        | 1.93348098       | 0.0434203  | No      |
|         |           |           |             |            |         | Dpf2     | 52.2792  | 29.2299 | -0.8387922       | 52.2802      | 29.2309       | -0.8387704       | 0.0127657  | No      |
|         |           |           |             |            |         | Dph2     | 6.55948  | 2.71927 | -1.270362        | 6.56048      | 2.72027       | -1.2700515       | 0.0115315  | No      |
|         |           |           |             |            |         | Dph5     | 14.1536  | 4.98115 | -1.5066183       | 14.1546      | 4.98215       | -1.5064306       | 0.0019604  | No      |
|         |           |           |             |            |         | Dpm2     | 15.0254  | 30.2842 | 1.0111619        | 15.0264      | 30.2852       | 1.01111353       | 0.0252737  | No      |
|         |           |           |             |            |         | Dpp7     | 42.3691  | 84.7153 | 0.99961007       | 42.3701      | 84.7163       | 0.99959305       | 0.00870822 | No      |
|         |           |           |             |            |         | Dpp9     | 38.4469  | 21.1727 | -0.860662        | 38.4479      | 21.1737       | -0.8606314       | 0.0171138  | No      |
|         |           |           |             |            |         | Dpyd     | 0        | 2.85787 | inf              | 0.001        | 2.85887       | 11.4812293       | 0.00022079 | No      |
|         |           |           |             |            |         | Dpysl3   | 0        | 1.85674 | inf              | 0.001        | 1.85774       | 10.8593329       | 0.00022079 | No      |
|         |           |           |             |            |         | Dr1      | 21.803   | 12.7278 | -0.7765436       | 21.804       | 12.7288       | -0.7764964       | 0.0211214  | No      |
|         |           |           |             |            |         | Dram1    | 1.76893  | 10.9163 | 2.62553508       | 1.76993      | 10.9173       | 2.62485189       | 0.00022079 | No      |
|         |           |           |             |            |         | Dsc2     | 0.151704 | 0.99287 | 2.71034571       | 0.152704     | 0.99387       | 2.7023193        | 0.0282852  | No      |
|         |           |           |             |            |         | Dse      | 11.6109  | 3.16647 | -1.8745325       | 11.6119      | 3.16747       | -1.8742012       | 0.00022079 | No      |
|         |           |           |             |            |         | Dsg2     | 0        | 2.25185 | inf              | 0.001        | 2.25285       | 11.1375355       | 0.00022079 | No      |
|         |           |           |             |            |         | Dsn1     | 9.44163  | 1.51017 | -2.644325        | 9.44263      | 1.51117       | -2.6435228       | 0.00022079 | No      |
|         |           |           |             |            |         | Dstn     | 96.2644  | 246.443 | 1.35617973       | 96.2654      | 246.444       | 1.3561706        | 0.00022079 | No      |
|         |           |           |             |            |         | Dtna     | 0        | 3.06623 | inf              | 0.001        | 3.06723       | 11.5827206       | 0.00022079 | No      |
|         |           |           |             |            |         | Dtnbp1   | 3.80313  | 14.4376 | 1.92457178       | 3.80413      | 14.4386       | 1.92429241       | 0.00378481 | No      |

| RRBS |       |        |             |          |         | RNAseq   |          |          |                  |              |               |                  |            |         |
|------|-------|--------|-------------|----------|---------|----------|----------|----------|------------------|--------------|---------------|------------------|------------|---------|
| gene | Blood | Kidney | methyl.diff | pMWU.fdr | Match ? | gene     | blood    | kidney   | log2(fold_ratio) | blood+ 0.001 | kidney+ 0.001 | log2(fold_ratio) | q_value    | Match ? |
|      |       |        |             |          |         | Dtx3     | 18.2778  | 43.4518  | 1.24932351       | 18.2788      | 43.4528       | 1.24927778       | 0.00113657 | No      |
|      |       |        |             |          |         | Dtx4     | 0.210241 | 2.28272  | 3.44063796       | 0.211241     | 2.28372       | 3.434424         | 0.0278747  | No      |
|      |       |        |             |          |         | Dusp1    | 25.1704  | 162.536  | 2.69095925       | 25.1714      | 162.537       | 2.69091081       | 0.00022079 | No      |
|      |       |        |             |          |         | Dusp10   | 10.2484  | 1.09696  | -3.2238159       | 10.2494      | 1.09796       | -3.2226421       | 0.00022079 | No      |
|      |       |        |             |          |         | Dusp2    | 35.2358  | 16.793   | -1.069182        | 35.2368      | 16.794        | -1.069137        | 0.0102697  | No      |
|      |       |        |             |          |         | Dusp22   | 8.24355  | 21.9242  | 1.41118654       | 8.24455      | 21.9252       | 1.41107735       | 0.00685176 | No      |
|      |       |        |             |          |         | Dusp6    | 6.47475  | 24.1196  | 1.89730959       | 6.47575      | 24.1206       | 1.8971466        | 0.00022079 | No      |
|      |       |        |             |          |         | Dusp9    | 0        | 3.47414  | inf              | 0.001        | 3.47514       | 11.7628554       | 0.00022079 | No      |
|      |       |        |             |          |         | Dut      | 27.9672  | 70.2832  | 1.32944406       | 27.9682      | 70.2842       | 1.329413         | 0.00060553 | No      |
|      |       |        |             |          |         | Dvl1     | 26.7023  | 46.161   | 0.78971046       | 26.7033      | 46.162        | 0.78968769       | 0.0322751  | No      |
|      |       |        |             |          |         | Dync1li2 | 12.1878  | 20.4629  | 0.74757289       | 12.1888      | 20.4639       | 0.74752502       | 0.0498147  | No      |
|      |       |        |             |          |         | Dync2li1 | 0.22052  | 17.0897  | 6.27607375       | 0.22152      | 17.0907       | 6.26963072       | 0.00022079 | No      |
|      |       |        |             |          |         | Dynll2   | 25.5726  | 110.718  | 2.11421903       | 25.5736      | 110.719       | 2.11417565       | 0.00022079 | No      |
|      |       |        |             |          |         | Dynlrb1  | 141.919  | 262.789  | 0.88883714       | 141.92       | 262.79        | 0.88883246       | 0.00685176 | No      |
|      |       |        |             |          |         | Dynlt1   | 20.8342  | 66.4441  | 1.6731874        | 20.8352      | 66.4451       | 1.67313986       | 0.0406701  | No      |
|      |       |        |             |          |         | DYRK1A   | 41.4988  | 11.6779  | -1.8292888       | 41.4998      | 11.6789       | -1.8292          | 0.00022079 | No      |
|      |       |        |             |          |         | Dysf     | 0        | 7.90171  | inf              | 0.001        | 7.90271       | 12.9481318       | 0.00022079 | No      |
|      |       |        |             |          |         | Dzip1l   | 0        | 9.12928  | inf              | 0.001        | 9.13028       | 13.1564434       | 0.00022079 | No      |
|      |       |        |             |          |         | Dzip3    | 6.67823  | 2.22539  | -1.5854076       | 6.67923      | 2.22639       | -1.5849755       | 0.00041963 | No      |
|      |       |        |             |          |         | E2f2     | 13.5695  | 2.63214  | -2.3660594       | 13.5705      | 2.63314       | -2.3656177       | 0.00022079 | No      |
|      |       |        |             |          |         | Eaf1     | 5.39138  | 16.3377  | 1.59947839       | 5.39238      | 16.3387       | 1.59929913       | 0.00060553 | No      |
|      |       |        |             |          |         | Ebf4     | 0        | 2.15495  | inf              | 0.001        | 2.15595       | 11.074108        | 0.00022079 | No      |
|      |       |        |             |          |         | Ece1     | 9.53581  | 22.0014  | 1.20616793       | 9.53681      | 22.0024       | 1.20608222       | 0.00147497 | No      |
|      |       |        |             |          |         | Ech1     | 81.2465  | 185.778  | 1.1932021        | 81.2475      | 185.779       | 1.19319211       | 0.00022079 | No      |
|      |       |        |             |          |         | Eci2     | 13.7596  | 51.0613  | 1.89179174       | 13.7606      | 51.0623       | 1.89171515       | 0.00022079 | No      |
|      |       |        |             |          |         | Eci3     | 5.31156  | 205.662  | 5.2749958        | 5.31256      | 205.663       | 5.27473123       | 0.00022079 | No      |
|      |       |        |             |          |         | Ecm1     | 2.33659  | 11.4193  | 2.2889977        | 2.33759      | 11.4203       | 2.28850673       | 0.00022079 | No      |
|      |       |        |             |          |         | Ecscr    | 0        | 5.5474   | inf              | 0.001        | 5.5484        | 12.4378561       | 0.00605729 | No      |
|      |       |        |             |          |         | Ecsit    | 10.9075  | 49.1564  | 2.17205879       | 10.9085      | 49.1574       | 2.17195588       | 0.00022079 | No      |
|      |       |        |             |          |         | Ect2     | 0.170431 | 1.36907  | 3.00593653       | 0.171431     | 1.37007       | 2.99854968       | 0.0457858  | No      |
|      |       |        |             |          |         | Edem1    | 52.8561  | 14.5928  | -1.8568133       | 52.8571      | 14.5938       | -1.8567417       | 0.00022079 | No      |
|      |       |        |             |          |         | Edem2    | 17.6114  | 9.34502  | -0.9142399       | 17.6124      | 9.34602       | -0.9141675       | 0.0213411  | No      |
|      |       |        |             |          |         | Edn1     | 0        | 1.81467  | inf              | 0.001        | 1.81567       | 10.8262863       | 0.00022079 | No      |
|      |       |        |             |          |         | Ednra    | 0        | 1.99831  | inf              | 0.001        | 1.99931       | 10.9652865       | 0.00022079 | No      |
|      |       |        |             |          |         | Eed      | 26.9338  | 13.064   | -1.0438211       | 26.9348      | 13.065        | -1.0437642       | 0.00451708 | No      |
|      |       |        |             |          |         | Eef1a1   | 9598.61  | 2272.65  | -2.07845         | 9598.611     | 2272.651      | -2.0784495       | 0.00858283 | No      |
|      |       |        |             |          |         | Eef1b2   | 1135.32  | 393.438  | -1.5288908       | 1135.321     | 393.439       | -1.5288884       | 0.00022079 | No      |
|      |       |        |             |          |         | Efcab4a  | 0.244135 | 8.42975  | 5.1097388        | 0.245135     | 8.43075       | 5.10401259       | 0.00672121 | No      |
|      |       |        |             |          |         | Efcab4b  | 15.2216  | 0.510592 | -4.8978053       | 15.2226      | 0.511592      | -4.8950773       | 0.00022079 | No      |
|      |       |        |             |          |         | Efcab7   | 1.60079  | 4.65963  | 1.54143134       | 1.60179      | 4.66063       | 1.54083997       | 0.0123897  | No      |
|      |       |        |             |          |         | Efemp1   | 0        | 42.2296  | inf              | 0.001        | 42.2306       | 15.3660011       | 0.00022079 | No      |
|      |       |        |             |          |         | EFEMP2   | 1.62518  | 7.24798  | 2.15697946       | 1.62618      | 7.24898       | 2.15629105       | 0.00078858 | No      |

| RRBS |       |        |             |          |         | RNAseq    |           |         |                  |              |               |                  |            |         |
|------|-------|--------|-------------|----------|---------|-----------|-----------|---------|------------------|--------------|---------------|------------------|------------|---------|
| gene | Blood | Kidney | methyl.diff | pMWU.fdr | Match ? | gene      | blood     | kidney  | log2(fold_ratio) | blood+ 0.001 | kidney+ 0.001 | log2(fold_ratio) | q_value    | Match ? |
|      |       |        |             |          |         | Efhc2     | 0.0723897 | 3.50304 | 5.59667921       | 0.0733897    | 3.50404       | 5.57729783       | 0.00658515 | No      |
|      |       |        |             |          |         | Efhd1     | 0.0725864 | 305.402 | 12.0387226       | 0.0735864    | 305.403       | 12.0189875       | 0.0257334  | No      |
|      |       |        |             |          |         | Efhd2     | 62.5824   | 29.3209 | -1.0938276       | 62.5834      | 29.3219       | -1.0938014       | 0.00022079 | No      |
|      |       |        |             |          |         | Efna4     | 0.457427  | 6.83436 | 3.90119281       | 0.458427     | 6.83536       | 3.8982534        | 0.00211842 | No      |
|      |       |        |             |          |         | Efnb1     | 0.492037  | 16.8273 | 5.09589309       | 0.493037     | 16.8283       | 5.09304971       | 0.00022079 | No      |
|      |       |        |             |          |         | Efnb2     | 0.478054  | 7.17256 | 3.90724264       | 0.479054     | 7.17356       | 3.90442906       | 0.00022079 | No      |
|      |       |        |             |          |         | Efr3b     | 0         | 1.05289 | inf              | 0.001        | 1.05389       | 10.0415086       | 0.00685176 | No      |
|      |       |        |             |          |         | Eftud1    | 18.8326   | 8.66511 | -1.1199422       | 18.8336      | 8.66611       | -1.1198523       | 0.0366551  | No      |
|      |       |        |             |          |         | Egf       | 0.0950657 | 51.8905 | 9.09232982       | 0.0960657    | 51.8915       | 9.07726111       | 0.00041963 | No      |
|      |       |        |             |          |         | Egfr      | 0         | 2.27134 | inf              | 0.001        | 2.27234       | 11.149963        | 0.00022079 | No      |
|      |       |        |             |          |         | Egln3     | 1.93889   | 7.54267 | 1.95984435       | 1.93989      | 7.54367       | 1.95929172       | 0.00060553 | No      |
|      |       |        |             |          |         | Egr2      | 0.060817  | 1.16427 | 4.2588072        | 0.061817     | 1.16527       | 4.23651682       | 0.0111498  | No      |
|      |       |        |             |          |         | Ehd1      | 8.63083   | 35.7874 | 2.05188052       | 8.63183      | 35.7884       | 2.05175369       | 0.00022079 | No      |
|      |       |        |             |          |         | Ehd4      | 4.34666   | 15.559  | 1.83977018       | 4.34766      | 15.56         | 1.83953103       | 0.00022079 | No      |
|      |       |        |             |          |         | Ehf       | 0         | 26.803  | inf              | 0.001        | 26.804        | 14.7101607       | 0.00022079 | No      |
|      |       |        |             |          |         | Ehhadh    | 1.91899   | 12.2127 | 2.66996309       | 1.91999      | 12.2137       | 2.66932961       | 0.00022079 | No      |
|      |       |        |             |          |         | Ehmt1     | 13.4525   | 5.44333 | -1.3053129       | 13.4535      | 5.44433       | -1.3051551       | 0.00147497 | No      |
|      |       |        |             |          |         | Eid2b     | 7.93241   | 2.88252 | -1.4604286       | 7.93341      | 2.88352       | -1.4601101       | 0.0406701  | No      |
|      |       |        |             |          |         | Eif1b     | 48.4132   | 109.037 | 1.17134541       | 48.4142      | 109.038       | 1.17132884       | 0.00078858 | No      |
|      |       |        |             |          |         | Eif2ak3   | 19.9642   | 7.0534  | -1.5010245       | 19.9652      | 7.0544        | -1.5008922       | 0.00022079 | No      |
|      |       |        |             |          |         | Eif2s3    | 110.037   | 29.6848 | -1.8901924       | 110.038      | 29.6858       | -1.8901569       | 0.00022079 | No      |
|      |       |        |             |          |         | Eif3a     | 62.7787   | 35.3481 | -0.8286425       | 62.7797      | 35.3491       | -0.8286247       | 0.0114056  | No      |
|      |       |        |             |          |         | Eif3e     | 357.924   | 91.815  | -1.9628515       | 357.925      | 91.816        | -1.9628398       | 0.00022079 | No      |
|      |       |        |             |          |         | EIF3F     | 301.353   | 161.073 | -0.9037397       | 301.354      | 161.074       | -0.9037356       | 0.0153152  | No      |
|      |       |        |             |          |         | Eif3h     | 199.347   | 93.1535 | -1.0976          | 199.348      | 93.1545       | -1.0975918       | 0.00022079 | No      |
|      |       |        |             |          |         | Eif3m     | 258.177   | 137.502 | -0.9089079       | 258.178      | 137.503       | -0.908903        | 0.00333723 | No      |
|      |       |        |             |          |         | Eif4b     | 177.511   | 72.6131 | -1.2896067       | 177.512      | 72.6141       | -1.2895949       | 0.00096553 | No      |
|      |       |        |             |          |         | Eif4e3    | 8.49104   | 4.71105 | -0.8498926       | 8.49204      | 4.71205       | -0.8497563       | 0.0487223  | No      |
|      |       |        |             |          |         | Eif4enif1 | 21.5191   | 9.36778 | -1.1998386       | 21.5201      | 9.36878       | -1.1997517       | 0.00333723 | No      |
|      |       |        |             |          |         | Eif5      | 137.566   | 50.3866 | -1.4490119       | 137.567      | 50.3876       | -1.4489938       | 0.00022079 | No      |
|      |       |        |             |          |         | Eif6      | 95.2255   | 154.754 | 0.70055684       | 95.2265      | 154.755       | 0.70055101       | 0.0414004  | No      |
|      |       |        |             |          |         | Elac1     | 0.654171  | 2.96009 | 2.17790133       | 0.655171     | 2.96109       | 2.17618494       | 0.00698733 | No      |
|      |       |        |             |          |         | Elavl1    | 42.4614   | 19.7966 | -1.1008993       | 42.4624      | 19.7976       | -1.1008604       | 0.0100165  | No      |
|      |       |        |             |          |         | Elf1      | 77.8707   | 13.7828 | -2.4982116       | 77.8717      | 13.7838       | -2.4981254       | 0.00022079 | No      |
|      |       |        |             |          |         | Elf2      | 49.1108   | 13.1348 | -1.9026461       | 49.1118      | 13.1358       | -1.9025656       | 0.00022079 | No      |
|      |       |        |             |          |         | Elf4      | 36.2712   | 2.66145 | -3.7685401       | 36.2722      | 2.66245       | -3.7680379       | 0.00022079 | No      |
|      |       |        |             |          |         | Elk1      | 27.005    | 54.8818 | 1.02310125       | 27.006       | 54.8828       | 1.02307412       | 0.0174725  | No      |
|      |       |        |             |          |         | Elk3      | 30.6015   | 11.7163 | -1.3850853       | 30.6025      | 11.7173       | -1.3850093       | 0.00041963 | No      |
|      |       |        |             |          |         | Elk4      | 45.5941   | 5.31411 | -3.1009472       | 45.5951      | 5.31511       | -3.1007073       | 0.00113657 | No      |
|      |       |        |             |          |         | ElI3      | 1.87829   | 10.0592 | 2.42102384       | 1.87929      | 10.0602       | 2.42039937       | 0.00041963 | No      |
|      |       |        |             |          |         | Elmo1     | 21.7939   | 2.8433  | -2.9382862       | 21.7949      | 2.8443        | -2.937845        | 0.00022079 | No      |
|      |       |        |             |          |         | Elmsan1   | 21.5817   | 6.17507 | -1.8052811       | 21.5827      | 6.17607       | -1.8051143       | 0.00211842 | No      |

| RRBS |       |        |             |          |         | RNAseq   |           |         |                  |              |               |                  |            |         |
|------|-------|--------|-------------|----------|---------|----------|-----------|---------|------------------|--------------|---------------|------------------|------------|---------|
| gene | Blood | Kidney | methyl.diff | pMWU.fdr | Match ? | gene     | blood     | kidney  | log2(fold_ratio) | blood+ 0.001 | kidney+ 0.001 | log2(fold_ratio) | q_value    | Match ? |
|      |       |        |             |          |         | Elof1    | 25.2938   | 107.422 | 2.08643379       | 25.2948      | 107.423       | 2.08639018       | 0.00022079 | No      |
|      |       |        |             |          |         | Elov5    | 151.838   | 20.3092 | -2.9023276       | 151.839      | 20.3102       | -2.902266        | 0.00022079 | No      |
|      |       |        |             |          |         | Elov7    | 0.0689702 | 70.9243 | 10.0060911       | 0.0699702    | 70.9253       | 9.98534402       | 0.00579147 | No      |
|      |       |        |             |          |         | Elp6     | 13.8339   | 28.0154 | 1.01801216       | 13.8349      | 28.0164       | 1.01795937       | 0.0194084  | No      |
|      |       |        |             |          |         | Emc2     | 27.2181   | 55.9122 | 1.03859675       | 27.2191      | 55.9132       | 1.03856955       | 0.00896558 | No      |
|      |       |        |             |          |         | Emcn     | 0         | 38.35   | inf              | 0.001        | 38.351        | 15.2269766       | 0.00022079 | No      |
|      |       |        |             |          |         | Emilin1  | 0.357169  | 7.1723  | 4.32775706       | 0.358169     | 7.1733        | 4.32392459       | 0.00022079 | No      |
|      |       |        |             |          |         | Eml4     | 41.8208   | 8.62897 | -2.2769604       | 41.8218      | 8.62997       | -2.2768277       | 0.00022079 | No      |
|      |       |        |             |          |         | Emp1     | 3.11965   | 11.1824 | 1.84177377       | 3.12065      | 11.1834       | 1.8414404        | 0.00022079 | No      |
|      |       |        |             |          |         | Emp2     | 0         | 5.58245 | inf              | 0.001        | 5.58345       | 12.4469411       | 0.00022079 | No      |
|      |       |        |             |          |         | Emp3     | 206.773   | 61.5794 | -1.7475281       | 206.774      | 61.5804       | -1.7475116       | 0.00096553 | No      |
|      |       |        |             |          |         | Emr1     | 0.140134  | 1.8669  | 3.73576571       | 0.141134     | 1.8679        | 3.72627973       | 0.00180113 | No      |
|      |       |        |             |          |         | Emx1     | 0         | 11.6598 | inf              | 0.001        | 11.6608       | 13.5093791       | 0.00022079 | No      |
|      |       |        |             |          |         | En2      | 0         | 1.4011  | inf              | 0.001        | 1.4021        | 10.4533735       | 0.00022079 | No      |
|      |       |        |             |          |         | Enah     | 0.0695457 | 8.10444 | 6.86460738       | 0.0705457    | 8.10544       | 6.84418855       | 0.00164037 | No      |
|      |       |        |             |          |         | Enc1     | 0.0617869 | 4.50654 | 6.18857539       | 0.0627869    | 4.50754       | 6.1657329        | 0.00378481 | No      |
|      |       |        |             |          |         | Endod1   | 1.23403   | 21.0805 | 4.09445971       | 1.23503      | 21.0815       | 4.09335953       | 0.00022079 | No      |
|      |       |        |             |          |         | Enkd1    | 0.352069  | 12.9577 | 5.20180765       | 0.353069     | 12.9587       | 5.19782703       | 0.00147497 | No      |
|      |       |        |             |          |         | Eno1     | 227.097   | 832.27  | 1.87374299       | 227.098      | 832.271       | 1.87373837       | 0.00022079 | No      |
|      |       |        |             |          |         | Enox1    | 0         | 6.52777 | inf              | 0.001        | 6.52877       | 12.6725955       | 0.00022079 | No      |
|      |       |        |             |          |         | Enpp2    | 4.13422   | 1.31321 | -1.6545175       | 4.13522      | 1.31421       | -1.6537683       | 0.00988585 | No      |
|      |       |        |             |          |         | Enpp5    | 1.03099   | 25.0161 | 4.60075465       | 1.03199      | 25.0171       | 4.59941366       | 0.00022079 | No      |
|      |       |        |             |          |         | Enpp6    | 0         | 17.8253 | inf              | 0.001        | 17.8263       | 14.1217197       | 0.00022079 | No      |
|      |       |        |             |          |         | Entpd2   | 4.95457   | 109.996 | 4.4725474        | 4.95557      | 109.997       | 4.47226936       | 0.00022079 | No      |
|      |       |        |             |          |         | Eny2     | 20.8415   | 35.5094 | 0.76874187       | 20.8425      | 35.5104       | 0.76871328       | 0.0319323  | No      |
|      |       |        |             |          |         | Eomes    | 6.22093   | 1.45089 | -2.1001921       | 6.22193      | 1.45189       | -2.09943         | 0.00211842 | No      |
|      |       |        |             |          |         | EP300    | 11.994    | 3.01721 | -1.9910259       | 11.995       | 3.01821       | -1.9906681       | 0.00022079 | No      |
|      |       |        |             |          |         | Ep400    | 23.7376   | 8.00974 | -1.5673468       | 23.7386      | 8.01074       | -1.5672274       | 0.00022079 | No      |
|      |       |        |             |          |         | Epas1    | 0.48332   | 29.0456 | 5.90919713       | 0.48432      | 29.0466       | 5.90626491       | 0.00022079 | No      |
|      |       |        |             |          |         | Epb4.1   | 107.885   | 17.9745 | -2.5854707       | 107.886      | 17.9755       | -2.5854039       | 0.00022079 | No      |
|      |       |        |             |          |         | Epb4.1l5 | 2.10993   | 16.7305 | 2.98721352       | 2.11093      | 16.7315       | 2.98661615       | 0.00022079 | No      |
|      |       |        |             |          |         | Epb4l1l  | 0.016254  | 48.8774 | 11.554157        | 0.017254     | 48.8784       | 11.4680505       | 0.00022079 | No      |
|      |       |        |             |          |         | Epb4l12  | 28.1157   | 8.13061 | -1.7899405       | 28.1167      | 8.13161       | -1.7898143       | 0.00022079 | No      |
|      |       |        |             |          |         | Epb4l13  | 0         | 31.6648 | inf              | 0.001        | 31.6658       | 14.9506379       | 0.00022079 | No      |
|      |       |        |             |          |         | Epb4l14a | 0.0241879 | 16.3012 | 9.39647694       | 0.0251879    | 16.3022       | 9.33812011       | 0.00579147 | No      |
|      |       |        |             |          |         | EPC1     | 71.9206   | 17.7442 | -2.0190575       | 71.9216      | 17.7452       | -2.0189963       | 0.00022079 | No      |
|      |       |        |             |          |         | Epc2     | 32.4802   | 9.49026 | -1.775041        | 32.4812      | 9.49126       | -1.7749334       | 0.00304332 | No      |
|      |       |        |             |          |         | Epg5     | 15.4114   | 3.22511 | -2.2565777       | 15.4124      | 3.22611       | -2.256224        | 0.00022079 | No      |
|      |       |        |             |          |         | Epha1    | 0.204325  | 12.2036 | 5.90029725       | 0.205325     | 12.2046       | 5.8933719        | 0.00022079 | No      |
|      |       |        |             |          |         | Ephb6    | 18.9359   | 2.97808 | -2.6686696       | 18.9369      | 2.97908       | -2.6682614       | 0.00022079 | No      |
|      |       |        |             |          |         | Ephx1    | 4.80913   | 41.8029 | 3.1197552        | 4.81013      | 41.8039       | 3.11948975       | 0.00022079 | No      |
|      |       |        |             |          |         | Epn3     | 0         | 35.3102 | inf              | 0.001        | 35.3112       | 15.1078382       | 0.00022079 | No      |

| RRBS |       |        |             |          |         | RNAseq  |           |         |                  |              |               |                  |            |         |
|------|-------|--------|-------------|----------|---------|---------|-----------|---------|------------------|--------------|---------------|------------------|------------|---------|
| gene | Blood | Kidney | methyl.diff | pMWU.fdr | Match ? | gene    | blood     | kidney  | log2(fold_ratio) | blood+ 0.001 | kidney+ 0.001 | log2(fold_ratio) | q_value    | Match ? |
|      |       |        |             |          |         | Eps15   | 34.5005   | 12.7839 | -1.4322892       | 34.5015      | 12.7849       | -1.4322182       | 0.00022079 | No      |
|      |       |        |             |          |         | Eps15l1 | 44.3898   | 20.8472 | -1.0903746       | 44.3908      | 20.8482       | -1.0903379       | 0.0282852  | No      |
|      |       |        |             |          |         | Eps8    | 0.214362  | 19.3139 | 6.49344652       | 0.215362     | 19.3149       | 6.48680669       | 0.00022079 | No      |
|      |       |        |             |          |         | Eps8l1  | 0.0440839 | 18.0552 | 8.67794682       | 0.0450839    | 18.0562       | 8.64566627       | 0.00752743 | No      |
|      |       |        |             |          |         | Eps8l2  | 0.159513  | 154.383 | 9.91862418       | 0.160513     | 154.384       | 9.90961738       | 0.00363736 | No      |
|      |       |        |             |          |         | Ept1    | 10.5524   | 3.81784 | -1.4667426       | 10.5534      | 3.81884       | -1.4665015       | 0.00436941 | No      |
|      |       |        |             |          |         | Erbp2ip | 69.9521   | 34.2905 | -1.0285584       | 69.9531      | 34.2915       | -1.028537        | 0.00884258 | No      |
|      |       |        |             |          |         | Erbp3   | 0.262637  | 5.47213 | 4.38096042       | 0.263637     | 5.47313       | 4.37574136       | 0.00022079 | No      |
|      |       |        |             |          |         | Erbp4   | 0         | 4.37802 | inf              | 0.001        | 4.37902       | 12.0963923       | 0.00022079 | No      |
|      |       |        |             |          |         | Ercc2   | 15.5341   | 7.30841 | -1.0878092       | 15.5351      | 7.30941       | -1.0877047       | 0.00909283 | No      |
|      |       |        |             |          |         | Ercc6   | 11.2929   | 4.36171 | -1.3724503       | 11.2939      | 4.36271       | -1.3722473       | 0.00180113 | No      |
|      |       |        |             |          |         | Erg     | 0         | 2.51259 | inf              | 0.001        | 2.51359       | 11.2955336       | 0.00022079 | No      |
|      |       |        |             |          |         | Eri1    | 17.2007   | 9.8039  | -0.8110396       | 17.2017      | 9.8049        | -0.8109763       | 0.0198519  | No      |
|      |       |        |             |          |         | Eri2    | 2.54092   | 25.4679 | 3.32525715       | 2.54192      | 25.4689       | 3.32474612       | 0.0248413  | No      |
|      |       |        |             |          |         | Erich1  | 4.02774   | 10.5535 | 1.38967908       | 4.02874      | 10.5545       | 1.38945763       | 0.020304   | No      |
|      |       |        |             |          |         | Erich2  | 0         | 5.75645 | inf              | 0.001        | 5.75745       | 12.4912143       | 0.00022079 | No      |
|      |       |        |             |          |         | Erlec1  | 21.5512   | 38.737  | 0.84594403       | 21.5522      | 38.738        | 0.84591433       | 0.0123897  | No      |
|      |       |        |             |          |         | Erlin2  | 4.35772   | 14.2912 | 1.71348166       | 4.35872      | 14.2922       | 1.71325157       | 0.00022079 | No      |
|      |       |        |             |          |         | Erp29   | 22.5893   | 89.8056 | 1.99116584       | 22.5903      | 89.8066       | 1.99111804       | 0.00022079 | No      |
|      |       |        |             |          |         | ERRF1   | 1.78494   | 51.3241 | 4.84568894       | 1.78594      | 51.3251       | 4.84490902       | 0.00022079 | No      |
|      |       |        |             |          |         | Esam    | 0.0529888 | 73.0559 | 10.4290976       | 0.0539888    | 73.0569       | 10.4021447       | 0.0262873  | No      |
|      |       |        |             |          |         | Esco1   | 26.3518   | 12.9103 | -1.029379        | 26.3528      | 12.9113       | -1.029322        | 0.0316175  | No      |
|      |       |        |             |          |         | Esd     | 22.5392   | 211.87  | 3.23267111       | 22.5402      | 211.871       | 3.23261391       | 0.00022079 | No      |
|      |       |        |             |          |         | Esrp1   | 0         | 5.98389 | inf              | 0.001        | 5.98489       | 12.547109        | 0.00022079 | No      |
|      |       |        |             |          |         | Esrrb   | 0         | 3.09188 | inf              | 0.001        | 3.09288       | 11.5947351       | 0.00791314 | No      |
|      |       |        |             |          |         | Esyt2   | 94.0447   | 16.4183 | -2.5180419       | 94.0457      | 16.4193       | -2.5179694       | 0.00022079 | No      |
|      |       |        |             |          |         | Etfa    | 34.4324   | 164.538 | 2.25658216       | 34.4334      | 164.539       | 2.25654903       | 0.00022079 | No      |
|      |       |        |             |          |         | Etfb    | 27.1328   | 444.261 | 4.03329766       | 27.1338      | 444.262       | 4.03324773       | 0.00022079 | No      |
|      |       |        |             |          |         | Etdh    | 10.0156   | 39.1073 | 1.96518908       | 10.0166      | 39.1083       | 1.96508194       | 0.00022079 | No      |
|      |       |        |             |          |         | Etnk2   | 0         | 3.29869 | inf              | 0.001        | 3.29969       | 11.6881148       | 0.00022079 | No      |
|      |       |        |             |          |         | Etnppl  | 0         | 6.11769 | inf              | 0.001        | 6.11869       | 12.5790071       | 0.00022079 | No      |
|      |       |        |             |          |         | Ets1    | 622.394   | 23.5956 | -4.7212384       | 622.395      | 23.5966       | -4.7211796       | 0.00022079 | No      |
|      |       |        |             |          |         | Ets2    | 4.55098   | 20.6598 | 2.18257714       | 4.55198      | 20.6608       | 2.18232999       | 0.00022079 | No      |
|      |       |        |             |          |         | Etv5    | 0.543903  | 3.10068 | 2.51116335       | 0.544903     | 3.10168       | 2.50897851       | 0.0019604  | No      |
|      |       |        |             |          |         | Eva1a   | 0         | 20.5951 | inf              | 0.001        | 20.5961       | 14.3300836       | 0.00022079 | No      |
|      |       |        |             |          |         | Evi2a   | 42.7227   | 3.88312 | -3.4597146       | 42.7237      | 3.88412       | -3.4593769       | 0.0304578  | No      |
|      |       |        |             |          |         | Evi2b   | 32.8642   | 2.01569 | -4.0271712       | 32.8652      | 2.01669       | -4.0264995       | 0.00273202 | No      |
|      |       |        |             |          |         | Evi5    | 6.23735   | 48.2811 | 2.95245342       | 6.23835      | 48.2821       | 2.95225202       | 0.0144657  | No      |
|      |       |        |             |          |         | Evl     | 582.742   | 60.7716 | -3.2613881       | 582.743      | 60.7726       | -3.2613668       | 0.00022079 | No      |
|      |       |        |             |          |         | Exoc3l2 | 0.107694  | 2.69708 | 4.64638854       | 0.108694     | 2.69808       | 4.63358892       | 0.0326064  | No      |
|      |       |        |             |          |         | Exoc6   | 6.12306   | 24.9793 | 2.02840832       | 6.12406      | 24.9803       | 2.02823048       | 0.00022079 | No      |
|      |       |        |             |          |         | Exosc2  | 17.3633   | 9.42634 | -0.8812715       | 17.3643      | 9.42734       | -0.8812016       | 0.0384399  | No      |



| RRBS |       |        |             |          |         | RNAseq   |           |          |                  |              |               |                  |            |         |
|------|-------|--------|-------------|----------|---------|----------|-----------|----------|------------------|--------------|---------------|------------------|------------|---------|
| gene | Blood | Kidney | methyl.diff | pMWU.fdr | Match ? | gene     | blood     | kidney   | log2(fold_ratio) | blood+ 0.001 | kidney+ 0.001 | log2(fold_ratio) | q_value    | Match ? |
|      |       |        |             |          |         | Exosc9   | 27.0759   | 11.5714  | -1.2264459       | 27.0769      | 11.5724       | -1.2263745       | 0.00164037 | No      |
|      |       |        |             |          |         | Exph5    | 0.0797365 | 2.9748   | 5.22140859       | 0.0807365    | 2.9758        | 5.20391271       | 0.00022079 | No      |
|      |       |        |             |          |         | Eya1     | 0         | 0.908959 | inf              | 0.001        | 0.909959      | 9.82965773       | 0.00022079 | No      |
|      |       |        |             |          |         | Eya3     | 13.6945   | 6.76697  | -1.0170147       | 13.6955      | 6.76797       | -1.0169069       | 0.00698733 | No      |
|      |       |        |             |          |         | F11r     | 0.770727  | 69.5329  | 6.49533202       | 0.771727     | 69.5339       | 6.49348212       | 0.00022079 | No      |
|      |       |        |             |          |         | F2       | 0.0702677 | 2.07612  | 4.88488435       | 0.0712677    | 2.07712       | 4.86519239       | 0.0305572  | No      |
|      |       |        |             |          |         | F2r      | 3.11046   | 20.3801  | 2.71196127       | 3.11146      | 20.3811       | 2.71156831       | 0.00022079 | No      |
|      |       |        |             |          |         | F2r1     | 0.0755509 | 10.9738  | 7.18239853       | 0.0765509    | 10.9748       | 7.16355959       | 0.00273202 | No      |
|      |       |        |             |          |         | F3       | 0         | 17.6388  | inf              | 0.001        | 17.6398       | 14.1065466       | 0.00022079 | No      |
|      |       |        |             |          |         | F8       | 8.03338   | 2.52816  | -1.6679194       | 8.03438      | 2.52916       | -1.6675284       | 0.00041963 | No      |
|      |       |        |             |          |         | Fabp4    | 0         | 54.9962  | inf              | 0.001        | 54.9972       | 15.7470706       | 0.00022079 | No      |
|      |       |        |             |          |         | Fabp5    | 2.88863   | 82.0524  | 4.8280882        | 2.88963      | 82.0534       | 4.82760643       | 0.00022079 | No      |
|      |       |        |             |          |         | Fads3    | 0.129719  | 22.6307  | 7.44674759       | 0.130719     | 22.6317       | 7.4357323        | 0.0120267  | No      |
|      |       |        |             |          |         | Fads6    | 0.178317  | 3.43565  | 4.26806692       | 0.179317     | 3.43665       | 4.26041876       | 0.00579147 | No      |
|      |       |        |             |          |         | Faf2     | 17.9375   | 9.88923  | -0.8590487       | 17.9385      | 9.89023       | -0.8589833       | 0.0367675  | No      |
|      |       |        |             |          |         | Fah      | 11.7834   | 215.98   | 4.19606994       | 11.7844      | 215.981       | 4.19595419       | 0.00022079 | No      |
|      |       |        |             |          |         | Fahd1    | 8.66846   | 63.685   | 2.87710599       | 8.66946      | 63.686        | 2.87696222       | 0.00022079 | No      |
|      |       |        |             |          |         | Fahd2a   | 18.173    | 120.678  | 2.73129419       | 18.174       | 120.679       | 2.73122676       | 0.00022079 | No      |
|      |       |        |             |          |         | Faim3    | 9.09548   | 3.50645  | -1.3751386       | 9.09648      | 3.50745       | -1.3748858       | 0.0246183  | No      |
|      |       |        |             |          |         | FALZ     | 39.621    | 9.86203  | -2.0063087       | 39.622       | 9.86303       | -2.0061989       | 0.0019604  | No      |
|      |       |        |             |          |         | Fam102a  | 56.2031   | 11.33    | -2.3105018       | 56.2041      | 11.331        | -2.3104002       | 0.00022079 | No      |
|      |       |        |             |          |         | Fam105a  | 134.333   | 5.12594  | -4.7118534       | 134.334      | 5.12694       | -4.7115827       | 0.00022079 | No      |
|      |       |        |             |          |         | Fam105b  | 86.4375   | 22.4729  | -1.943471        | 86.4385      | 22.4739       | -1.9434235       | 0.00022079 | No      |
|      |       |        |             |          |         | Fam107b  | 89.1371   | 46.3854  | -0.9423552       | 89.1381      | 46.3864       | -0.9423403       | 0.00422081 | No      |
|      |       |        |             |          |         | Fam110b  | 0.371889  | 5.47346  | 3.87950913       | 0.372889     | 5.47446       | 3.87589852       | 0.00494367 | No      |
|      |       |        |             |          |         | Fam115a  | 0.0865236 | 5.81807  | 6.07130315       | 0.0875236    | 5.81907       | 6.05497271       | 0.00022079 | No      |
|      |       |        |             |          |         | Fam117a  | 122.999   | 11.6974  | -3.3943868       | 123          | 11.6984       | -3.3942752       | 0.00022079 | No      |
|      |       |        |             |          |         | Fam117b  | 27.4961   | 6.36974  | -2.1099206       | 27.4971      | 6.37074       | -2.1097466       | 0.00022079 | No      |
|      |       |        |             |          |         | Fam118a  | 8.88658   | 2.14338  | -2.0517407       | 8.88758      | 2.14438       | -2.0512301       | 0.00022079 | No      |
|      |       |        |             |          |         | FAM120C  | 0.624438  | 2.84464  | 2.18761585       | 0.625438     | 2.84564       | 2.18581438       | 0.00060553 | No      |
|      |       |        |             |          |         | Fam126a  | 4.98784   | 1.13394  | -2.1370709       | 4.98884      | 1.13494       | -2.1360884       | 0.00022079 | No      |
|      |       |        |             |          |         | Fam127b  | 45.6943   | 101.545  | 1.15203309       | 45.6953      | 101.546       | 1.15201572       | 0.00130998 | No      |
|      |       |        |             |          |         | Fam131c  | 0         | 3.22719  | inf              | 0.001        | 3.22819       | 11.6565098       | 0.00022079 | No      |
|      |       |        |             |          |         | Fam133b  | 28.0374   | 16.6256  | -0.7539462       | 28.0384      | 16.6266       | -0.7539108       | 0.0490996  | No      |
|      |       |        |             |          |         | Fam134c  | 60.7604   | 16.5112  | -1.8796864       | 60.7614      | 16.5122       | -1.8796228       | 0.00022079 | No      |
|      |       |        |             |          |         | Fam135a  | 0.0103465 | 7.1091   | 9.4243803        | 0.0113465    | 7.1101        | 9.2914787        | 0.00060553 | No      |
|      |       |        |             |          |         | Fam136a  | 4.9828    | 13.5439  | 1.44261465       | 4.9838       | 13.5449       | 1.44243166       | 0.00022079 | No      |
|      |       |        |             |          |         | Fam13a   | 0         | 8.09017  | inf              | 0.001        | 8.09117       | 12.9821326       | 0.012146   | No      |
|      |       |        |             |          |         | Fam13b   | 41.4819   | 17.033   | -1.2841494       | 41.4829      | 17.034        | -1.2840995       | 0.00041963 | No      |
|      |       |        |             |          |         | Fam149a  | 0.0107677 | 25.6248  | 11.2166149       | 0.0117677    | 25.6258       | 11.088549        | 0.00288641 | No      |
|      |       |        |             |          |         | Fam151a  | 0.523513  | 15.6662  | 4.90328611       | 0.524513     | 15.6672       | 4.90062503       | 0.0115315  | No      |
|      |       |        |             |          |         | Fam160a1 | 0         | 4.90723  | inf              | 0.001        | 4.90823       | 12.2609871       | 0.00022079 | No      |

| RRBS |       |        |             |          |         | RNAseq   |           |          |                  |              |               |                  |            |         |
|------|-------|--------|-------------|----------|---------|----------|-----------|----------|------------------|--------------|---------------|------------------|------------|---------|
| gene | Blood | Kidney | methyl.diff | pMWU.fdr | Match ? | gene     | blood     | kidney   | log2(fold_ratio) | blood+ 0.001 | kidney+ 0.001 | log2(fold_ratio) | q_value    | Match ? |
|      |       |        |             |          |         | Fam162a  | 79.9648   | 161.734  | 1.01618602       | 79.9658      | 161.735       | 1.0161769        | 0.00909283 | No      |
|      |       |        |             |          |         | Fam168b  | 70.3339   | 28.6659  | -1.2948846       | 70.3349      | 28.6669       | -1.2948548       | 0.00022079 | No      |
|      |       |        |             |          |         | Fam169b  | 89.6332   | 1.42089  | -5.9791664       | 89.6342      | 1.42189       | -5.9781675       | 0.00022079 | No      |
|      |       |        |             |          |         | Fam171a2 | 1.46359   | 12.1078  | 3.04835338       | 1.46459      | 12.1088       | 3.04748714       | 0.0184986  | No      |
|      |       |        |             |          |         | Fam172a  | 20.2067   | 10.5752  | -0.9341488       | 20.2077      | 10.5762       | -0.9340838       | 0.0362414  | No      |
|      |       |        |             |          |         | Fam175a  | 9.28757   | 3.86204  | -1.2659381       | 9.28857      | 3.86304       | -1.2657199       | 0.0213411  | No      |
|      |       |        |             |          |         | Fam178a  | 12.4878   | 5.08289  | -1.2967984       | 12.4888      | 5.08389       | -1.2966301       | 0.00378481 | No      |
|      |       |        |             |          |         | Fam184a  | 0.126894  | 4.26766  | 5.07174948       | 0.127894     | 4.26866       | 5.06076277       | 0.00242102 | No      |
|      |       |        |             |          |         | Fam185a  | 33.711    | 7.59503  | -2.1500919       | 33.712       | 7.59603       | -2.1499447       | 0.00022079 | No      |
|      |       |        |             |          |         | Fam188b  | 0.406565  | 3.23172  | 2.99074428       | 0.407565     | 3.23272       | 2.98764649       | 0.00304332 | No      |
|      |       |        |             |          |         | Fam195a  | 1.06325   | 53.4512  | 5.65166958       | 1.06425      | 53.4522       | 5.65034033       | 0.00022079 | No      |
|      |       |        |             |          |         | Fam195b  | 38.6875   | 94.7226  | 1.29184118       | 38.6885      | 94.7236       | 1.29181912       | 0.00022079 | No      |
|      |       |        |             |          |         | Fam198b  | 0.0416666 | 0.917596 | 4.46089582       | 0.0426666    | 0.918596      | 4.42825145       | 0.0271748  | No      |
|      |       |        |             |          |         | Fam19a3  | 42.7385   | 11.0762  | -1.9480733       | 42.7395      | 11.0772       | -1.9479768       | 0.00022079 | No      |
|      |       |        |             |          |         | Fam203a  | 19.1429   | 9.27578  | -1.0452689       | 19.1439      | 9.27678       | -1.0451887       | 0.00536605 | No      |
|      |       |        |             |          |         | Fam208a  | 35.5785   | 9.82421  | -1.8565924       | 35.5795      | 9.82521       | -1.8564861       | 0.00078858 | No      |
|      |       |        |             |          |         | Fam20b   | 9.16903   | 17.013   | 0.89179654       | 9.17003      | 17.014        | 0.891724         | 0.0393438  | No      |
|      |       |        |             |          |         | Fam20c   | 0.104345  | 81.689   | 9.61263654       | 0.105345     | 81.69         | 9.59889383       | 0.00022079 | No      |
|      |       |        |             |          |         | Fam213a  | 1.41215   | 6.39866  | 2.17987647       | 1.41315      | 6.39966       | 2.17908065       | 0.00962607 | No      |
|      |       |        |             |          |         | Fam214a  | 20.7552   | 9.5482   | -1.1201721       | 20.7562      | 9.5492        | -1.1200906       | 0.0115315  | No      |
|      |       |        |             |          |         | Fam214b  | 1.15441   | 12.2012  | 3.40179544       | 1.15541      | 12.2022       | 3.40066449       | 0.00022079 | No      |
|      |       |        |             |          |         | Fam216a  | 4.63858   | 22.4713  | 2.27632846       | 4.63958      | 22.4723       | 2.27608167       | 0.00022079 | No      |
|      |       |        |             |          |         | Fam221a  | 0.150248  | 1.52886  | 3.34703861       | 0.151248     | 1.52986       | 3.33841167       | 0.00896558 | No      |
|      |       |        |             |          |         | Fam26f   | 90.6217   | 8.23876  | -3.4593574       | 90.6227      | 8.23976       | -3.4591983       | 0.00022079 | No      |
|      |       |        |             |          |         | Fam3c    | 15.4904   | 29.355   | 0.92223186       | 15.4914      | 29.356        | 0.92218787       | 0.0372667  | No      |
|      |       |        |             |          |         | Fam46c   | 25.0153   | 3.96255  | -2.6583097       | 25.0163      | 3.96355       | -2.6580033       | 0.00022079 | No      |
|      |       |        |             |          |         | FAM49B   | 134.2     | 21.0973  | -2.6692544       | 134.201      | 21.0983       | -2.6691968       | 0.00022079 | No      |
|      |       |        |             |          |         | Fam53c   | 14.8863   | 7.70803  | -0.9495511       | 14.8873      | 7.70903       | -0.9494609       | 0.00658515 | No      |
|      |       |        |             |          |         | Fam60a   | 18.7722   | 10.3862  | -0.8539298       | 18.7732      | 10.3872       | -0.8538678       | 0.01483    | No      |
|      |       |        |             |          |         | Fam63a   | 9.46527   | 34.913   | 1.88304876       | 9.46627      | 34.914        | 1.88293768       | 0.00022079 | No      |
|      |       |        |             |          |         | Fam65b   | 134.965   | 3.42996  | -5.2982498       | 134.966      | 3.43096       | -5.2978399       | 0.00022079 | No      |
|      |       |        |             |          |         | Fam71a   | 0         | 2.85666  | inf              | 0.001        | 2.85766       | 11.4806186       | 0.00022079 | No      |
|      |       |        |             |          |         | Fam73b   | 9.51517   | 18.3627  | 0.94847687       | 9.51617      | 18.3637       | 0.94840382       | 0.00658515 | No      |
|      |       |        |             |          |         | Fam76b   | 18.5225   | 4.9504   | -1.9036618       | 18.5235      | 4.9514        | -1.9034483       | 0.00022079 | No      |
|      |       |        |             |          |         | Fam78a   | 26.9641   | 2.02136  | -3.7376417       | 26.9651      | 2.02236       | -3.7369816       | 0.00022079 | No      |
|      |       |        |             |          |         | Fam83e   | 0.11947   | 15.7136  | 7.03922154       | 0.12047      | 15.7146       | 7.02728782       | 0.0174725  | No      |
|      |       |        |             |          |         | Fam84b   | 30.3088   | 13.486   | -1.1682742       | 30.3098      | 13.487        | -1.1682149       | 0.00041963 | No      |
|      |       |        |             |          |         | Fam92a1  | 11.1436   | 70.6882  | 2.66525403       | 11.1446      | 70.6892       | 2.66514498       | 0.00022079 | No      |
|      |       |        |             |          |         | Fam96b   | 24.1696   | 91.4488  | 1.91977064       | 24.1706      | 91.4498       | 1.91972673       | 0.00022079 | No      |
|      |       |        |             |          |         | Fancg    | 3.65509   | 1.43731  | -1.3465357       | 3.65609      | 1.43831       | -1.3459269       | 0.0336988  | No      |
|      |       |        |             |          |         | Farp1    | 0.606965  | 23.0374  | 5.24622077       | 0.607965     | 23.0384       | 5.24390844       | 0.00022079 | No      |
|      |       |        |             |          |         | Fars2    | 10.231    | 48.0617  | 2.23194052       | 10.232       | 48.0627       | 2.23182953       | 0.00565535 | No      |

| RRBS |       |        |             |          |         | RNAseq  |           |          |                  |              |               |                  |            |         |
|------|-------|--------|-------------|----------|---------|---------|-----------|----------|------------------|--------------|---------------|------------------|------------|---------|
| gene | Blood | Kidney | methyl.diff | pMWU.fdr | Match ? | gene    | blood     | kidney   | log2(fold_ratio) | blood+ 0.001 | kidney+ 0.001 | log2(fold_ratio) | q_value    | Match ? |
|      |       |        |             |          |         | Fastkd1 | 26.9205   | 10.9932  | -1.2920938       | 26.9215      | 10.9942       | -1.2920162       | 0.00711928 | No      |
|      |       |        |             |          |         | Faxdc2  | 1.55492   | 10.9293  | 2.81328874       | 1.55592      | 10.9303       | 2.81249321       | 0.02809    | No      |
|      |       |        |             |          |         | Fbf1    | 12.1983   | 29.006   | 1.24967126       | 12.1993      | 29.007        | 1.24960273       | 0.0401695  | No      |
|      |       |        |             |          |         | Fbl     | 125.252   | 72.0568  | -0.7976272       | 125.253      | 72.0578       | -0.7976186       | 0.0211214  | No      |
|      |       |        |             |          |         | Fbln5   | 0         | 9.52219  | inf              | 0.001        | 9.52319       | 13.2172292       | 0.00022079 | No      |
|      |       |        |             |          |         | Fbrs    | 44.8091   | 11.296   | -1.9879798       | 44.8101      | 11.297        | -1.9878842       | 0.00022079 | No      |
|      |       |        |             |          |         | Fbxl12  | 59.8941   | 16.0912  | -1.896142        | 59.8951      | 16.0922       | -1.8960764       | 0.00363736 | No      |
|      |       |        |             |          |         | Fbxl20  | 20.4202   | 5.91046  | -1.7886547       | 20.4212      | 5.91146       | -1.7884813       | 0.00180113 | No      |
|      |       |        |             |          |         | Fbxl21  | 0.156793  | 1.60817  | 3.35848687       | 0.157793     | 1.60917       | 3.35021164       | 0.0211214  | No      |
|      |       |        |             |          |         | Fbxo11  | 26.9571   | 10.4299  | -1.36994         | 26.9581      | 10.4309       | -1.3698552       | 0.00164037 | No      |
|      |       |        |             |          |         | Fbxo16  | 0         | 3.94379  | inf              | 0.001        | 3.94479       | 11.9457328       | 0.00022079 | No      |
|      |       |        |             |          |         | Fbxo21  | 5.67268   | 15.1022  | 1.41265634       | 5.67368      | 15.1032       | 1.41249756       | 0.00041963 | No      |
|      |       |        |             |          |         | Fbxo3   | 69.8016   | 33.3481  | -1.0656555       | 69.8026      | 33.3491       | -1.0656329       | 0.012511   | No      |
|      |       |        |             |          |         | Fbxo32  | 6.03162   | 1.54354  | -1.9663027       | 6.03262      | 1.54454       | -1.9656075       | 0.00711928 | No      |
|      |       |        |             |          |         | Fbxo33  | 22.1579   | 6.66881  | -1.7323199       | 22.1589      | 6.66981       | -1.7321687       | 0.00022079 | No      |
|      |       |        |             |          |         | Fbxo34  | 10.128    | 5.16056  | -0.9727498       | 10.129       | 5.16156       | -0.9726127       | 0.0189519  | No      |
|      |       |        |             |          |         | Fbxo4   | 0.664251  | 8.97348  | 3.75586718       | 0.665251     | 8.97448       | 3.75385767       | 0.00022079 | No      |
|      |       |        |             |          |         | Fbxo44  | 19.8218   | 70.3136  | 1.82671578       | 19.8228      | 70.3146       | 1.82666352       | 0.00022079 | No      |
|      |       |        |             |          |         | Fbxo5   | 3.79531   | 1.7385   | -1.1263747       | 3.79631      | 1.7395        | -1.1259251       | 0.0490996  | No      |
|      |       |        |             |          |         | Fbxo8   | 9.16199   | 16.0361  | 0.80759043       | 9.16299      | 16.0371       | 0.80752293       | 0.0462825  | No      |
|      |       |        |             |          |         | Fbxw2   | 40.3992   | 23.8842  | -0.7582702       | 40.4002      | 23.8852       | -0.7582455       | 0.0240684  | No      |
|      |       |        |             |          |         | Fbxw5   | 35.4709   | 59.1041  | 0.73662228       | 35.4719      | 59.1051       | 0.73660601       | 0.0406701  | No      |
|      |       |        |             |          |         | Fbxw8   | 0.220599  | 9.44413  | 5.41991974       | 0.221599     | 9.44513       | 5.41354738       | 0.0105196  | No      |
|      |       |        |             |          |         | Fcamr   | 0         | 1.68978  | inf              | 0.001        | 1.69078       | 10.7234732       | 0.00022079 | No      |
|      |       |        |             |          |         | Fcer1g  | 23.6698   | 114.976  | 2.28021332       | 23.6708      | 114.977       | 2.28016492       | 0.00022079 | No      |
|      |       |        |             |          |         | Fcgr1a  | 0.85663   | 5.96869  | 2.80067022       | 0.85763      | 5.96969       | 2.79922874       | 0.00022079 | No      |
|      |       |        |             |          |         | Fcgrt   | 6.20438   | 57.486   | 3.21185169       | 6.20538      | 57.487        | 3.21164428       | 0.00022079 | No      |
|      |       |        |             |          |         | Fcho1   | 69.443    | 8.66873  | -3.0019367       | 69.444       | 8.66973       | -3.0017911       | 0.00022079 | No      |
|      |       |        |             |          |         | Fcho2   | 11.9773   | 30.867   | 1.36576255       | 11.9783      | 30.868        | 1.36568884       | 0.00078858 | No      |
|      |       |        |             |          |         | Fchsd2  | 25.1425   | 6.19083  | -2.0219234       | 25.1435      | 6.19183       | -2.0217477       | 0.00096553 | No      |
|      |       |        |             |          |         | Fcrl1   | 1.82671   | 0        | #NUM!            | 1.82771      | 0.001         | -10.835821       | 0.00022079 | No      |
|      |       |        |             |          |         | Fcrl5   | 3.00618   | 0.770283 | -1.9644709       | 3.00718      | 0.771283      | -1.963079        | 0.011657   | No      |
|      |       |        |             |          |         | Fdft1   | 7.58449   | 26.016   | 1.77827508       | 7.58549      | 26.017        | 1.77814033       | 0.00022079 | No      |
|      |       |        |             |          |         | Fdx1    | 12.0887   | 49.3155  | 2.02838205       | 12.0897      | 49.3165       | 2.02829197       | 0.00022079 | No      |
|      |       |        |             |          |         | Fdx1l   | 33.8661   | 74.3079  | 1.13367374       | 33.8671      | 74.3089       | 1.13365056       | 0.00551024 | No      |
|      |       |        |             |          |         | Fech    | 4.49375   | 17.654   | 1.97400333       | 4.49475      | 17.655        | 1.97376404       | 0.00022079 | No      |
|      |       |        |             |          |         | Fem1b   | 21.5106   | 7.21349  | -1.5762784       | 21.5116      | 7.21449       | -1.5761455       | 0.00022079 | No      |
|      |       |        |             |          |         | Fermt2  | 1.04928   | 32.7267  | 4.96299652       | 1.05028      | 32.7277       | 4.96166632       | 0.00022079 | No      |
|      |       |        |             |          |         | Fermt3  | 110.407   | 20.8528  | -2.4045186       | 110.408      | 20.8538       | -2.4044625       | 0.00022079 | No      |
|      |       |        |             |          |         | Fert2   | 0.0439631 | 2.17193  | 5.62654068       | 0.0449631    | 2.17293       | 5.59475638       | 0.00765035 | No      |
|      |       |        |             |          |         | Fes     | 0.518182  | 8.74521  | 4.07696222       | 0.519182     | 8.74621       | 4.07434572       | 0.00060553 | No      |
|      |       |        |             |          |         | FEZ2    | 5.4393    | 31.9265  | 2.5532615        | 5.4403       | 31.9275       | 2.55304148       | 0.00022079 | No      |

| RRBS |       |        |             |          |         | RNAseq   |           |         |                  |              |               |                  |            |         |
|------|-------|--------|-------------|----------|---------|----------|-----------|---------|------------------|--------------|---------------|------------------|------------|---------|
| gene | Blood | Kidney | methyl.diff | pMWU.fdr | Match ? | gene     | blood     | kidney  | log2(fold_ratio) | blood+ 0.001 | kidney+ 0.001 | log2(fold_ratio) | q_value    | Match ? |
|      |       |        |             |          |         | Fgd4     | 0.0670973 | 1.50905 | 4.49124208       | 0.0680973    | 1.51005       | 4.47085491       | 0.00605729 | No      |
|      |       |        |             |          |         | Fgf1     | 0         | 35.4624 | inf              | 0.001        | 35.4634       | 15.1140432       | 0.00022079 | No      |
|      |       |        |             |          |         | Fgf12    | 0         | 8.10908 | inf              | 0.001        | 8.11008       | 12.9855004       | 0.00022079 | No      |
|      |       |        |             |          |         | Fgfbp1   | 0         | 1.30896 | inf              | 0.001        | 1.30996       | 10.355307        | 0.00022079 | No      |
|      |       |        |             |          |         | Fgfbp3   | 0.584449  | 2.32481 | 1.99196377       | 0.585449     | 2.32581       | 1.99011784       | 0.0112749  | No      |
|      |       |        |             |          |         | Fgfr1    | 0.496715  | 19.6816 | 5.30828538       | 0.497715     | 19.6826       | 5.30545713       | 0.00022079 | No      |
|      |       |        |             |          |         | Fgfr1op  | 12.1085   | 4.6243  | -1.3887133       | 12.1095      | 4.6253        | -1.3885204       | 0.00698733 | No      |
|      |       |        |             |          |         | Fgfr1op2 | 38.018    | 23.6472 | -0.6850133       | 38.019       | 23.6482       | -0.6849902       | 0.0342245  | No      |
|      |       |        |             |          |         | Fgfr4    | 0         | 23.867  | inf              | 0.001        | 23.868        | 14.5427901       | 0.00022079 | No      |
|      |       |        |             |          |         | Fggy     | 4.25971   | 56.1787 | 3.72119612       | 4.26071      | 56.1797       | 3.72088316       | 0.00130998 | No      |
|      |       |        |             |          |         | Fgl2     | 61.1669   | 3.67778 | -4.0558441       | 61.1679      | 3.67878       | -4.0554754       | 0.00022079 | No      |
|      |       |        |             |          |         | Fh       | 12.687    | 110.676 | 3.12491954       | 12.688       | 110.677       | 3.12481886       | 0.00022079 | No      |
|      |       |        |             |          |         | Fhit     | 5.39591   | 30.2063 | 2.48491129       | 5.39691      | 30.2073       | 2.4846917        | 0.00022079 | No      |
|      |       |        |             |          |         | Fhl1     | 0.138454  | 5.33496 | 5.26799881       | 0.139454     | 5.33596       | 5.25788663       | 0.00022079 | No      |
|      |       |        |             |          |         | Fitm2    | 1.17504   | 3.98212 | 1.76082683       | 1.17604      | 3.98312       | 1.75996181       | 0.00164037 | No      |
|      |       |        |             |          |         | Fjx1     | 0         | 5.60284 | inf              | 0.001        | 5.60384       | 12.4522          | 0.00022079 | No      |
|      |       |        |             |          |         | Fkbp10   | 0.614523  | 2.34217 | 1.93030688       | 0.615523     | 2.34317       | 1.92857696       | 0.0139821  | No      |
|      |       |        |             |          |         | Fkbp14   | 20.1377   | 6.246   | -1.6888944       | 20.1387      | 6.247         | -1.6887351       | 0.00078858 | No      |
|      |       |        |             |          |         | Fkbp2    | 24.7495   | 170.336 | 2.78291209       | 24.7505      | 170.337       | 2.78286227       | 0.00022079 | No      |
|      |       |        |             |          |         | Fkbp5    | 26.652    | 8.16805 | -1.7061802       | 26.653       | 8.16905       | -1.7060577       | 0.00022079 | No      |
|      |       |        |             |          |         | Fln      | 25.0486   | 13.3511 | -0.9077714       | 25.0496      | 13.3521       | -0.9077209       | 0.0171138  | No      |
|      |       |        |             |          |         | Flna     | 161.356   | 23.5051 | -2.7792015       | 161.357      | 23.5061       | -2.7791491       | 0.00022079 | No      |
|      |       |        |             |          |         | Flnb     | 0.138623  | 20.5821 | 7.21407973       | 0.139623     | 20.5831       | 7.20377986       | 0.00022079 | No      |
|      |       |        |             |          |         | Flrt1    | 0.0101638 | 5.17759 | 8.99269702       | 0.0111638    | 5.17859       | 8.85758735       | 0.0283842  | No      |
|      |       |        |             |          |         | Flywch1  | 14.6519   | 37.3861 | 1.35141422       | 14.6529      | 37.3871       | 1.35135435       | 0.00348745 | No      |
|      |       |        |             |          |         | Flywch2  | 0         | 6.5185  | inf              | 0.001        | 6.5195        | 12.6705456       | 0.00022079 | No      |
|      |       |        |             |          |         | Fmn1     | 233.124   | 26.9364 | -3.1134686       | 233.125      | 26.9374       | -3.1134212       | 0.00022079 | No      |
|      |       |        |             |          |         | Fmn2     | 0.501782  | 3.85222 | 2.94055747       | 0.502782     | 3.85322       | 2.93805965       | 0.00645389 | No      |
|      |       |        |             |          |         | Fmo3     | 0         | 47.6953 | inf              | 0.001        | 47.6963       | 15.5415897       | 0.00022079 | No      |
|      |       |        |             |          |         | Fmo4     | 0.515227  | 26.8517 | 5.70366142       | 0.516227     | 26.8527       | 5.70091775       | 0.00022079 | No      |
|      |       |        |             |          |         | FMR1     | 38.2549   | 10.879  | -1.8140986       | 38.2559      | 10.88         | -1.8140037       | 0.00022079 | No      |
|      |       |        |             |          |         | FN1      | 2.48956   | 10.8569 | 2.12464953       | 2.49056      | 10.8579       | 2.12420303       | 0.00022079 | No      |
|      |       |        |             |          |         | Fnbp1    | 75.9969   | 10.8178 | -2.8125334       | 75.9979      | 10.8188       | -2.8124191       | 0.00022079 | No      |
|      |       |        |             |          |         | Fnbp4    | 116.45    | 18.1347 | -2.6828859       | 116.451      | 18.1357       | -2.6828187       | 0.00022079 | No      |
|      |       |        |             |          |         | Fnip1    | 15.9086   | 3.84489 | -2.0487927       | 15.9096      | 3.84589       | -2.0485082       | 0.00022079 | No      |
|      |       |        |             |          |         | Fnip2    | 1.36126   | 10.6252 | 2.96447545       | 1.36226      | 10.6262       | 2.96355179       | 0.00022079 | No      |
|      |       |        |             |          |         | Fntb     | 25.2694   | 3.491   | -2.8556791       | 25.2704      | 3.492         | -2.855323        | 0.00022079 | No      |
|      |       |        |             |          |         | Folh1    | 0         | 2.67358 | inf              | 0.001        | 2.67458       | 11.3850966       | 0.00022079 | No      |
|      |       |        |             |          |         | FOLR2    | 0.16896   | 321.704 | 10.8948364       | 0.16996      | 321.705       | 10.8863274       | 0.00022079 | No      |
|      |       |        |             |          |         | Fos      | 4.4358    | 244.642 | 5.78533398       | 4.4368       | 244.643       | 5.78501467       | 0.00022079 | No      |
|      |       |        |             |          |         | Fosb     | 0.707432  | 44.2901 | 5.96824896       | 0.708432     | 44.2911       | 5.96624364       | 0.00022079 | No      |
|      |       |        |             |          |         | Fosl2    | 1.86978   | 15.129  | 3.01637619       | 1.87078      | 15.13         | 3.01570017       | 0.0296827  | No      |

| RRBS |       |        |             |          |         | RNAseq |           |         |                  |              |               |                  |            |         |
|------|-------|--------|-------------|----------|---------|--------|-----------|---------|------------------|--------------|---------------|------------------|------------|---------|
| gene | Blood | Kidney | methyl.diff | pMWU.fdr | Match ? | gene   | blood     | kidney  | log2(fold_ratio) | blood+ 0.001 | kidney+ 0.001 | log2(fold_ratio) | q_value    | Match ? |
|      |       |        |             |          |         | Foxj2  | 19.394    | 8.22156 | -1.2381263       | 19.395       | 8.22256       | -1.2380252       | 0.00318754 | No      |
|      |       |        |             |          |         | Foxk1  | 18.8152   | 3.44947 | -2.447452        | 18.8162      | 3.45047       | -2.4471105       | 0.00041963 | No      |
|      |       |        |             |          |         | Foxn2  | 30.98     | 6.47582 | -2.2582024       | 30.981       | 6.47682       | -2.2580262       | 0.00022079 | No      |
|      |       |        |             |          |         | Foxn3  | 34.2916   | 6.92613 | -2.3077338       | 34.2926      | 6.92713       | -2.3075676       | 0.00022079 | No      |
|      |       |        |             |          |         | Foxo1  | 65.5736   | 4.58612 | -3.8377691       | 65.5746      | 4.58712       | -3.8374765       | 0.00022079 | No      |
|      |       |        |             |          |         | Foxp1  | 49.1716   | 12.5812 | -1.9665558       | 49.1726      | 12.5822       | -1.9664704       | 0.00685176 | No      |
|      |       |        |             |          |         | Fpgs   | 4.43308   | 28.4049 | 2.67975852       | 4.43408      | 28.4059       | 2.67948391       | 0.00022079 | No      |
|      |       |        |             |          |         | Fras1  | 0         | 4.35043 | inf              | 0.001        | 4.35143       | 12.0872739       | 0.00164037 | No      |
|      |       |        |             |          |         | Frat2  | 54.0608   | 6.90882 | -2.9680716       | 54.0618      | 6.90982       | -2.9678895       | 0.00022079 | No      |
|      |       |        |             |          |         | Frem1  | 0         | 4.15333 | inf              | 0.001        | 4.15433       | 12.0204001       | 0.00022079 | No      |
|      |       |        |             |          |         | Frg1l1 | 15.3009   | 6.20215 | -1.3027762       | 15.3019      | 6.20315       | -1.3026379       | 0.0445136  | No      |
|      |       |        |             |          |         | Frk    | 0         | 4.02356 | inf              | 0.001        | 4.02456       | 11.9746153       | 0.00022079 | No      |
|      |       |        |             |          |         | Frmd4a | 0.634623  | 3.91178 | 2.62385352       | 0.635623     | 3.91278       | 2.62195076       | 0.0373662  | No      |
|      |       |        |             |          |         | Frmd4b | 1.90217   | 27.3509 | 3.84587021       | 1.90317      | 27.3519       | 3.84516471       | 0.00022079 | No      |
|      |       |        |             |          |         | Frmd8  | 13.9757   | 23.9301 | 0.77590588       | 13.9767      | 23.9311       | 0.77586294       | 0.0297932  | No      |
|      |       |        |             |          |         | Frs2   | 6.99877   | 3.79386 | -0.883435        | 6.99977      | 3.79486       | -0.8832609       | 0.0139821  | No      |
|      |       |        |             |          |         | Frs3   | 1.0328    | 5.48672 | 2.40938305       | 1.0338       | 5.48772       | 2.40824977       | 0.00078858 | No      |
|      |       |        |             |          |         | Fryl   | 21.5521   | 9.42849 | -1.1927298       | 21.5531      | 9.42949       | -1.1926437       | 0.0216846  | No      |
|      |       |        |             |          |         | Frzb   | 0         | 4.1196  | inf              | 0.001        | 4.1206        | 12.0086387       | 0.00022079 | No      |
|      |       |        |             |          |         | Fst    | 0.342796  | 402.013 | 10.1956762       | 0.343796     | 402.014       | 10.1914773       | 0.00242102 | No      |
|      |       |        |             |          |         | Ftcd   | 1.53986   | 14.9626 | 3.28048979       | 1.54086      | 14.9636       | 3.27964961       | 0.035911   | No      |
|      |       |        |             |          |         | Fth1   | 668.136   | 5690.77 | 3.09041017       | 668.137      | 5690.771      | 3.09040827       | 0.00436941 | No      |
|      |       |        |             |          |         | Ftl    | 19.6977   | 194.126 | 3.30089427       | 19.6987      | 194.127       | 3.30082846       | 0.00022079 | No      |
|      |       |        |             |          |         | Ftsj2  | 1.95256   | 5.93308 | 1.60341435       | 1.95356      | 5.93408       | 1.60291881       | 0.0117698  | No      |
|      |       |        |             |          |         | Ftsj3  | 35.9153   | 10.4256 | -1.7844682       | 35.9163      | 10.4266       | -1.7843699       | 0.00962607 | No      |
|      |       |        |             |          |         | Fuca2  | 0.971757  | 17.9825 | 4.2098542        | 0.972757     | 17.9835       | 4.20845056       | 0.00022079 | No      |
|      |       |        |             |          |         | Fundc1 | 39.1951   | 17.7987 | -1.1389014       | 39.1961      | 17.7997       | -1.1388572       | 0.00060553 | No      |
|      |       |        |             |          |         | Fuom   | 2.18777   | 15.4343 | 2.81860707       | 2.18877      | 15.4353       | 2.81804126       | 0.00041963 | No      |
|      |       |        |             |          |         | Fv1    | 30.6284   | 10.3251 | -1.5687142       | 30.6294      | 10.3261       | -1.5686216       | 0.00022079 | No      |
|      |       |        |             |          |         | Fxyd3  | 0.615002  | 45.1527 | 6.19807735       | 0.616002     | 45.1537       | 6.19576537       | 0.0123897  | No      |
|      |       |        |             |          |         | Fxyd4  | 0.034476  | 65.8774 | 10.8999755       | 0.035476     | 65.8784       | 10.8587464       | 0.00130998 | No      |
|      |       |        |             |          |         | Fxyd6  | 0         | 6.16195 | inf              | 0.001        | 6.16295       | 12.5894054       | 0.00022079 | No      |
|      |       |        |             |          |         | Fyb    | 158.908   | 3.35744 | -5.5646863       | 158.909      | 3.35844       | -5.5642658       | 0.00022079 | No      |
|      |       |        |             |          |         | Fyco1  | 26.0359   | 14.0822 | -0.8866295       | 26.0369      | 14.0832       | -0.8865825       | 0.0494183  | No      |
|      |       |        |             |          |         | Fyn    | 111.75    | 7.72089 | -3.8553639       | 111.751      | 7.72189       | -3.8551899       | 0.00022079 | No      |
|      |       |        |             |          |         | Fytd1  | 35.9994   | 16.8719 | -1.0933504       | 36.0004      | 16.8729       | -1.093305        | 0.00041963 | No      |
|      |       |        |             |          |         | Fzd1   | 0         | 11.0743 | inf              | 0.001        | 11.0753       | 13.4350582       | 0.00022079 | No      |
|      |       |        |             |          |         | Fzd3   | 0.0824305 | 1.42615 | 4.11280367       | 0.0834305    | 1.42715       | 4.09641827       | 0.0100165  | No      |
|      |       |        |             |          |         | Fzd4   | 0         | 32.4719 | inf              | 0.001        | 32.4729       | 14.9869486       | 0.00022079 | No      |
|      |       |        |             |          |         | Fzd8   | 0.0989049 | 1.82219 | 4.20348759       | 0.0999049    | 1.82319       | 4.18976567       | 0.00845215 | No      |
|      |       |        |             |          |         | G0s2   | 1.05444   | 83.0733 | 6.29983596       | 1.05544      | 83.0743       | 6.29848576       | 0.00022079 | No      |
|      |       |        |             |          |         | G2E3   | 7.70924   | 1.76452 | -2.1273129       | 7.71024      | 1.76552       | -2.1266826       | 0.00022079 | No      |

| RRBS |       |        |             |          |         | RNAseq     |           |          |                  |              |               |                  |            |         |
|------|-------|--------|-------------|----------|---------|------------|-----------|----------|------------------|--------------|---------------|------------------|------------|---------|
| gene | Blood | Kidney | methyl.diff | pMWU.fdr | Match ? | gene       | blood     | kidney   | log2(fold_ratio) | blood+ 0.001 | kidney+ 0.001 | log2(fold_ratio) | q_value    | Match ? |
|      |       |        |             |          |         | Gaa        | 2.65135   | 13.2951  | 2.32609559       | 2.65235      | 13.2961       | 2.32566007       | 0.00022079 | No      |
|      |       |        |             |          |         | Gab2       | 1.45075   | 5.2293   | 1.84981891       | 1.45175      | 5.2303        | 1.84910067       | 0.00436941 | No      |
|      |       |        |             |          |         | Gabarap    | 259.239   | 503.554  | 0.95786372       | 259.24       | 503.555       | 0.95786102       | 0.00333723 | No      |
|      |       |        |             |          |         | Gabarapl1  | 28.0069   | 231.609  | 3.04783711       | 28.0079      | 231.61        | 3.04779182       | 0.00022079 | No      |
|      |       |        |             |          |         | Gabarapl2  | 38.0046   | 70.0621  | 0.88246018       | 38.0056      | 70.0631       | 0.88244281       | 0.00711928 | No      |
|      |       |        |             |          |         | Gabpb1     | 21.5244   | 7.97687  | -1.4320784       | 21.5254      | 7.97787       | -1.4319645       | 0.00022079 | No      |
|      |       |        |             |          |         | Gabpb2     | 13.3943   | 5.5087   | -1.2818354       | 13.3953      | 5.5097        | -1.2816812       | 0.00211842 | No      |
|      |       |        |             |          |         | Gabrp      | 0         | 7.53198  | inf              | 0.001        | 7.53298       | 12.879005        | 0.00022079 | No      |
|      |       |        |             |          |         | Gadd45a    | 35.0126   | 141.974  | 2.01968065       | 35.0136      | 141.975       | 2.0196496        | 0.00022079 | No      |
|      |       |        |             |          |         | Gadd45g    | 1.08077   | 275.671  | 7.99474416       | 1.08177      | 275.672       | 7.99341514       | 0.00022079 | No      |
|      |       |        |             |          |         | Gadd45gip1 | 65.252    | 158.759  | 1.28274435       | 65.253       | 158.76        | 1.28273133       | 0.00096553 | No      |
|      |       |        |             |          |         | Galc       | 3.24053   | 8.29066  | 1.35525717       | 3.24153      | 8.29166       | 1.35498603       | 0.00130998 | No      |
|      |       |        |             |          |         | Galm       | 11.33     | 86.2415  | 2.92823441       | 11.331       | 86.2425       | 2.92812381       | 0.00022079 | No      |
|      |       |        |             |          |         | Galnt1     | 42.5095   | 14.3175  | -1.5700057       | 42.5105      | 14.3185       | -1.5699389       | 0.00022079 | No      |
|      |       |        |             |          |         | Galnt10    | 26.0402   | 9.76561  | -1.4149585       | 26.0412      | 9.76661       | -1.4148661       | 0.0482079  | No      |
|      |       |        |             |          |         | Galnt12    | 9.62944   | 2.13657  | -2.1721553       | 9.63044      | 2.13757       | -2.17163         | 0.00041963 | No      |
|      |       |        |             |          |         | Galnt13    | 0         | 16.4728  | inf              | 0.001        | 16.4738       | 14.0078858       | 0.00060553 | No      |
|      |       |        |             |          |         | Galnt18    | 0         | 95.8645  | inf              | 0.001        | 95.8655       | 16.5487241       | 0.00022079 | No      |
|      |       |        |             |          |         | Galnt3     | 0.0882441 | 5.56446  | 5.97859806       | 0.0892441    | 5.56546       | 5.96260033       | 0.00147497 | No      |
|      |       |        |             |          |         | Galnt6     | 34.0427   | 4.47139  | -2.9285502       | 34.0437      | 4.47239       | -2.9282699       | 0.00022079 | No      |
|      |       |        |             |          |         | Galnt7     | 7.64029   | 3.83079  | -0.9959855       | 7.64129      | 3.83179       | -0.9957977       | 0.0114056  | No      |
|      |       |        |             |          |         | Galt       | 26.2052   | 103.574  | 1.98273687       | 26.2062      | 103.575       | 1.98269574       | 0.00022079 | No      |
|      |       |        |             |          |         | Gamt       | 7.42413   | 95.5788  | 3.68639678       | 7.42513      | 95.5798       | 3.68621756       | 0.00022079 | No      |
|      |       |        |             |          |         | Gan        | 3.18838   | 1.23758  | -1.3653018       | 3.18938      | 1.23858       | -1.3645889       | 0.00022079 | No      |
|      |       |        |             |          |         | Gapdh      | 345.116   | 1398.42  | 2.01864446       | 345.117      | 1398.421      | 2.01864131       | 0.00022079 | No      |
|      |       |        |             |          |         | Garem      | 0.0984051 | 4.25707  | 5.43498392       | 0.0994051    | 4.25807       | 5.42073599       | 0.0440196  | No      |
|      |       |        |             |          |         | Garnl3     | 6.99788   | 2.89111  | -1.2752944       | 6.99888      | 2.89211       | -1.2750016       | 0.00480115 | No      |
|      |       |        |             |          |         | Gart       | 35.3746   | 12.2123  | -1.5343789       | 35.3756      | 12.2133       | -1.5343016       | 0.00022079 | No      |
|      |       |        |             |          |         | Gas1       | 0         | 3.29033  | inf              | 0.001        | 3.29133       | 11.684455        | 0.00022079 | No      |
|      |       |        |             |          |         | Gas2       | 0.16728   | 4.37598  | 4.70926927       | 0.16828      | 4.37698       | 4.70100016       | 0.00022079 | No      |
|      |       |        |             |          |         | Gatad2a    | 30.0758   | 14.0494  | -1.0980946       | 30.0768      | 14.0504       | -1.0980399       | 0.00022079 | No      |
|      |       |        |             |          |         | Gatad2b    | 69.2042   | 13.7319  | -2.3333283       | 69.2052      | 13.7329       | -2.3332441       | 0.00022079 | No      |
|      |       |        |             |          |         | Gatc       | 6.61275   | 18.6272  | 1.49408856       | 6.61375      | 18.6282       | 1.49394786       | 0.0251614  | No      |
|      |       |        |             |          |         | Gatm       | 0.15177   | 689.201  | 12.1488224       | 0.15277      | 689.202       | 12.1393499       | 0.0019604  | No      |
|      |       |        |             |          |         | Gatsl2     | 3.70292   | 0.930508 | -1.9925729       | 3.70392      | 0.931508      | -1.9914129       | 0.00022079 | No      |
|      |       |        |             |          |         | Gba3       | 0         | 34.8597  | inf              | 0.001        | 34.8607       | 15.0893139       | 0.00022079 | No      |
|      |       |        |             |          |         | Gbas       | 39.9741   | 108.157  | 1.43598958       | 39.9751      | 108.158       | 1.43596683       | 0.00022079 | No      |
|      |       |        |             |          |         | Gbp2       | 27.0598   | 9.7492   | -1.4727954       | 27.0608      | 9.7502        | -1.4727008       | 0.00022079 | No      |
|      |       |        |             |          |         | Gbp4       | 3.30512   | 0.92567  | -1.8361328       | 3.30612      | 0.92667       | -1.8350115       | 0.00257873 | No      |
|      |       |        |             |          |         | Gbp5       | 34.5597   | 4.04561  | -3.0946615       | 34.5607      | 4.04661       | -3.0943467       | 0.00022079 | No      |
|      |       |        |             |          |         | Gbp7       | 74.8509   | 6.0351   | -3.6325701       | 74.8519      | 6.0361        | -3.6323503       | 0.00022079 | No      |

| RRBS |       |        |             |          |         | RNAseq |          |         |                  |              |               |                  |            |         |
|------|-------|--------|-------------|----------|---------|--------|----------|---------|------------------|--------------|---------------|------------------|------------|---------|
| gene | Blood | Kidney | methyl.diff | pMWU.fdr | Match ? | gene   | blood    | kidney  | log2(fold_ratio) | blood+ 0.001 | kidney+ 0.001 | log2(fold_ratio) | q_value    | Match ? |
|      |       |        |             |          |         | Gc     | 0        | 9.99768 | inf              | 0.001        | 9.99868       | 13.2875219       | 0.00022079 | No      |
|      |       |        |             |          |         | Gca    | 0.595868 | 36.6403 | 5.94229473       | 0.596868     | 36.6413       | 5.93991497       | 0.00022079 | No      |
|      |       |        |             |          |         | Gcat   | 0.45991  | 18.3672 | 5.31963633       | 0.46091      | 18.3682       | 5.31658138       | 0.00022079 | No      |
|      |       |        |             |          |         | Gcdh   | 11.5044  | 113.44  | 3.30167179       | 11.5054      | 113.441       | 3.30155911       | 0.00022079 | No      |
|      |       |        |             |          |         | Gcfc2  | 7.76846  | 2.69306 | -1.5283823       | 7.76946      | 2.69406       | -1.5280323       | 0.00618779 | No      |
|      |       |        |             |          |         | GCGR   | 0.119292 | 47.3307 | 8.63213515       | 0.120292     | 47.3317       | 8.62012223       | 0.0112749  | No      |
|      |       |        |             |          |         | Gchfr  | 0.407825 | 68.2193 | 7.38608592       | 0.408825     | 68.2203       | 7.38257387       | 0.0072515  | No      |
|      |       |        |             |          |         | Gclc   | 11.1609  | 173.706 | 3.96012231       | 11.1619      | 173.707       | 3.96000136       | 0.00022079 | No      |
|      |       |        |             |          |         | Gclm   | 8.56196  | 148.172 | 4.11318794       | 8.56296      | 148.173       | 4.11302919       | 0.00022079 | No      |
|      |       |        |             |          |         | Gcm1   | 0        | 1.40386 | inf              | 0.001        | 1.40486       | 10.4562107       | 0.00022079 | No      |
|      |       |        |             |          |         | Gcn1l1 | 25.5917  | 14.0921 | -0.8607894       | 25.5927      | 14.0931       | -0.8607434       | 0.0219049  | No      |
|      |       |        |             |          |         | Gcsh   | 7.8808   | 164.017 | 4.37935946       | 7.8818       | 164.018       | 4.3791852        | 0.00022079 | No      |
|      |       |        |             |          |         | Gde1   | 22.6157  | 66.7845 | 1.56218866       | 22.6167      | 66.7855       | 1.56214647       | 0.00022079 | No      |
|      |       |        |             |          |         | Gdi1   | 242.733  | 102.721 | -1.2406391       | 242.734      | 102.722       | -1.240631        | 0.00096553 | No      |
|      |       |        |             |          |         | Gdpd1  | 2.92384  | 8.42207 | 1.5263105        | 2.92484      | 8.42307       | 1.52598845       | 0.00466383 | No      |
|      |       |        |             |          |         | Gdpd5  | 0.113016 | 3.62368 | 5.00285662       | 0.114016     | 3.62468       | 4.99054544       | 0.00348745 | No      |
|      |       |        |             |          |         | Gemin2 | 23.8612  | 10.6667 | -1.1615527       | 23.8622      | 10.6677       | -1.1614779       | 0.0072515  | No      |
|      |       |        |             |          |         | Gemin6 | 6.09885  | 26.8971 | 2.14084149       | 6.09985      | 26.8981       | 2.1406586        | 0.00022079 | No      |
|      |       |        |             |          |         | Get4   | 14.317   | 25.6004 | 0.83843713       | 14.318       | 25.6014       | 0.83839272       | 0.0179279  | No      |
|      |       |        |             |          |         | Gfm1   | 12.8605  | 32.6321 | 1.3433451        | 12.8615      | 32.6331       | 1.34327713       | 0.00060553 | No      |
|      |       |        |             |          |         | Gfod2  | 1.01305  | 3.40809 | 1.75025805       | 1.01405      | 3.40909       | 1.7492579        | 0.0241707  | No      |
|      |       |        |             |          |         | Gfra1  | 0        | 1.86942 | inf              | 0.001        | 1.87042       | 10.8691465       | 0.00022079 | No      |
|      |       |        |             |          |         | Gfra3  | 73.037   | 41.3451 | -0.8209111       | 73.038       | 41.3461       | -0.820896        | 0.010144   | No      |
|      |       |        |             |          |         | Gfra4  | 0        | 5.56764 | inf              | 0.001        | 5.56864       | 12.4431093       | 0.0174725  | No      |
|      |       |        |             |          |         | Gga2   | 19.7214  | 39.4879 | 1.00164868       | 19.7224      | 39.4889       | 1.00161206       | 0.00273202 | No      |
|      |       |        |             |          |         | Gga3   | 22.7296  | 10.5309 | -1.1099436       | 22.7306      | 10.5319       | -1.10987         | 0.0423219  | No      |
|      |       |        |             |          |         | Ggact  | 18.9624  | 70.2181 | 1.88870139       | 18.9634      | 70.2191       | 1.88864585       | 0.00022079 | No      |
|      |       |        |             |          |         | Ggct   | 24.4747  | 356.866 | 3.86601938       | 24.4757      | 356.867       | 3.86596447       | 0.00022079 | No      |
|      |       |        |             |          |         | Ggcx   | 4.53965  | 12.6265 | 1.47580181       | 4.54065      | 12.6275       | 1.4755983        | 0.00242102 | No      |
|      |       |        |             |          |         | Ggh    | 3.00993  | 34.7007 | 3.52716293       | 3.01093      | 34.7017       | 3.52672527       | 0.00022079 | No      |
|      |       |        |             |          |         | GGNBP2 | 58.8782  | 26.0797 | -1.1748063       | 58.8792      | 26.0807       | -1.1747755       | 0.00164037 | No      |
|      |       |        |             |          |         | Ggt1   | 2.86212  | 110.074 | 5.26524577       | 2.86312      | 110.075       | 5.2647549        | 0.00022079 | No      |
|      |       |        |             |          |         | Ggt6   | 0        | 3.09089 | inf              | 0.001        | 3.09189       | 11.5942733       | 0.00022079 | No      |
|      |       |        |             |          |         | Ggt7   | 1.73145  | 0.2076  | -3.0601024       | 1.73245      | 0.2086        | -3.0540027       | 0.0072515  | No      |
|      |       |        |             |          |         | Ghrhr  | 0        | 26.3864 | inf              | 0.001        | 26.3874       | 14.6875616       | 0.00022079 | No      |
|      |       |        |             |          |         | Gimap1 | 80.8348  | 6.19896 | -3.7048784       | 80.8358      | 6.19996       | -3.7046636       | 0.00022079 | No      |
|      |       |        |             |          |         | Gimap4 | 174.748  | 17.3067 | -3.3358734       | 174.749      | 17.3077       | -3.3357983       | 0.00022079 | No      |
|      |       |        |             |          |         | GIMAP5 | 175.273  | 6.29077 | -4.8002233       | 175.274      | 6.29177       | -4.8000023       | 0.00022079 | No      |
|      |       |        |             |          |         | Gimap6 | 138.042  | 9.66062 | -3.8368477       | 138.043      | 9.66162       | -3.8367088       | 0.00022079 | No      |
|      |       |        |             |          |         | Gimap7 | 457.733  | 23.3368 | -4.2938277       | 457.734      | 23.3378       | -4.293769        | 0.00022079 | No      |
|      |       |        |             |          |         | Gimap8 | 80.0875  | 2.4289  | -5.0432021       | 80.0885      | 2.4299        | -5.0426263       | 0.00022079 | No      |
|      |       |        |             |          |         | Gimap9 | 93.5867  | 4.58534 | -4.3512029       | 93.5877      | 4.58634       | -4.3509037       | 0.00022079 | No      |

| RRBS |       |        |             |          |         | RNAseq  |           |         |                  |              |               |                  |            |         |
|------|-------|--------|-------------|----------|---------|---------|-----------|---------|------------------|--------------|---------------|------------------|------------|---------|
| gene | Blood | Kidney | methyl.diff | pMWU.fdr | Match ? | gene    | blood     | kidney  | log2(fold_ratio) | blood+ 0.001 | kidney+ 0.001 | log2(fold_ratio) | q_value    | Match ? |
|      |       |        |             |          |         | Ginm1   | 18.9358   | 37.9995 | 1.00486406       | 18.9368      | 38.0005       | 1.00482584       | 0.00318754 | No      |
|      |       |        |             |          |         | Git2    | 107.742   | 28.4891 | -1.9190988       | 107.743      | 28.4901       | -1.9190616       | 0.00022079 | No      |
|      |       |        |             |          |         | Gja1    | 0.0694973 | 4.31405 | 5.95594216       | 0.0704973    | 4.31505       | 5.93566546       | 0.00711928 | No      |
|      |       |        |             |          |         | Gjb2    | 0.214259  | 7.28885 | 5.0882635        | 0.215259     | 7.28985       | 5.08174367       | 0.00078858 | No      |
|      |       |        |             |          |         | Gjb5    | 0         | 3.10283 | inf              | 0.001        | 3.10383       | 11.5998338       | 0.00022079 | No      |
|      |       |        |             |          |         | Gjb6    | 0         | 0.95794 | inf              | 0.001        | 0.95894       | 9.90529674       | 0.00765035 | No      |
|      |       |        |             |          |         | Gk      | 2.93066   | 18.4557 | 2.65476895       | 2.93166      | 18.4567       | 2.65435493       | 0.00022079 | No      |
|      |       |        |             |          |         | Gkap1   | 7.63931   | 28.9734 | 1.92321475       | 7.64031      | 28.9744       | 1.92307571       | 0.00022079 | No      |
|      |       |        |             |          |         | Glb1l   | 1.06183   | 7.54901 | 2.82973465       | 1.06283      | 7.55001       | 2.8285677        | 0.00422081 | No      |
|      |       |        |             |          |         | Glcci1  | 33.2591   | 10.5502 | -1.6564788       | 33.2601      | 10.5512       | -1.6563854       | 0.00022079 | No      |
|      |       |        |             |          |         | Glce    | 10.8452   | 4.32494 | -1.3263046       | 10.8462      | 4.32594       | -1.3261041       | 0.00096553 | No      |
|      |       |        |             |          |         | Gldc    | 0.230493  | 17.9637 | 6.28421779       | 0.231493     | 17.9647       | 6.27805246       | 0.00227055 | No      |
|      |       |        |             |          |         | Gle1    | 50.1788   | 18.6092 | -1.4310619       | 50.1798      | 18.6102       | -1.4310132       | 0.00565535 | No      |
|      |       |        |             |          |         | Glg1    | 16.3935   | 8.8289  | -0.8928183       | 16.3945      | 8.8299        | -0.8927429       | 0.0105196  | No      |
|      |       |        |             |          |         | Glipr1  | 178.508   | 13.8144 | -3.6917439       | 178.509      | 13.8154       | -3.6916476       | 0.00022079 | No      |
|      |       |        |             |          |         | Glis1   | 0.0607163 | 2.92866 | 5.59201303       | 0.0617163    | 2.92966       | 5.56893786       | 0.0114056  | No      |
|      |       |        |             |          |         | Glis3   | 0         | 14.4014 | inf              | 0.001        | 14.4024       | 13.8140216       | 0.00022079 | No      |
|      |       |        |             |          |         | Glod5   | 12.0122   | 45.183  | 1.91127966       | 12.0132      | 45.184        | 1.9111915        | 0.00022079 | No      |
|      |       |        |             |          |         | Glrx    | 67.6459   | 23.7343 | -1.511029        | 67.6469      | 23.7353       | -1.5109895       | 0.00022079 | No      |
|      |       |        |             |          |         | Glrx5   | 33.6645   | 134.066 | 1.99364346       | 33.6655      | 134.067       | 1.99361137       | 0.00022079 | No      |
|      |       |        |             |          |         | Gls     | 40.8582   | 95.6151 | 1.22661283       | 40.8592      | 95.6161       | 1.2265926        | 0.00698733 | No      |
|      |       |        |             |          |         | Gltscr1 | 24.9315   | 7.79272 | -1.6777708       | 24.9325      | 7.79372       | -1.6776435       | 0.00022079 | No      |
|      |       |        |             |          |         | Glud1   | 94.1601   | 169.909 | 0.85157452       | 94.1611      | 169.91        | 0.85156769       | 0.0195167  | No      |
|      |       |        |             |          |         | Glyat   | 0         | 249.646 | inf              | 0.001        | 249.647       | 17.92953         | 0.00022079 | No      |
|      |       |        |             |          |         | Glyctk  | 1.52959   | 29.4554 | 4.26731524       | 1.53059      | 29.4564       | 4.26642134       | 0.00022079 | No      |
|      |       |        |             |          |         | Glyr1   | 59.8807   | 180.804 | 1.5942636        | 59.8817      | 180.805       | 1.59424749       | 0.00022079 | No      |
|      |       |        |             |          |         | Gm101   | 0         | 4.66183 | inf              | 0.001        | 4.66283       | 12.1869901       | 0.0362414  | No      |
|      |       |        |             |          |         | Gm11992 | 6.40611   | 22.3033 | 1.79973671       | 6.40711      | 22.3043       | 1.79957621       | 0.00022079 | No      |
|      |       |        |             |          |         | Gm14378 | 44.3663   | 13.3879 | -1.7285346       | 44.3673      | 13.3889       | -1.7284593       | 0.00022079 | No      |
|      |       |        |             |          |         | Gm166   | 0.279453  | 2.89492 | 3.37284591       | 0.280453     | 2.89592       | 3.36819083       | 0.0174725  | No      |
|      |       |        |             |          |         | Gm17615 | 3.61311   | 63.3556 | 4.13215906       | 3.61411      | 63.3566       | 4.13178259       | 0.00022079 | No      |
|      |       |        |             |          |         | Gmnds   | 7.16157   | 20.7883 | 1.53742398       | 7.16257      | 20.7893       | 1.53729194       | 0.00257873 | No      |
|      |       |        |             |          |         | Gmeb2   | 10.3317   | 3.31015 | -1.6421092       | 10.3327      | 3.31115       | -1.641813        | 0.00022079 | No      |
|      |       |        |             |          |         | Gmfg    | 775.736   | 176.783 | -2.1335862       | 775.737      | 176.784       | -2.1335799       | 0.00022079 | No      |
|      |       |        |             |          |         | Gmnn    | 3.10419   | 7.97574 | 1.36140152       | 3.10519      | 7.97674       | 1.36111771       | 0.0267305  | No      |
|      |       |        |             |          |         | Gmppa   | 18.1945   | 46.1827 | 1.34385012       | 18.1955      | 46.1837       | 1.34380206       | 0.0308614  | No      |
|      |       |        |             |          |         | Gmpr    | 0.264121  | 23.7961 | 6.49338232       | 0.265121     | 23.7971       | 6.48799101       | 0.00227055 | No      |
|      |       |        |             |          |         | Gna12   | 3.32057   | 38.1627 | 3.52266043       | 3.32157      | 38.1637       | 3.52226382       | 0.00022079 | No      |
|      |       |        |             |          |         | Gna13   | 40.5662   | 13.9497 | -1.5400441       | 40.5672      | 13.9507       | -1.5399762       | 0.00022079 | No      |
|      |       |        |             |          |         | Gna14   | 0.148184  | 3.27952 | 4.46802309       | 0.149184     | 3.28052       | 4.4587598        | 0.00363736 | No      |
|      |       |        |             |          |         | Gnai1   | 0.602349  | 26.2278 | 5.44435336       | 0.603349     | 26.2288       | 5.44201524       | 0.00022079 | No      |
|      |       |        |             |          |         | Gnai2   | 365.785   | 117.091 | -1.6433657       | 365.786      | 117.092       | -1.6433573       | 0.00022079 | No      |



| RRBS |       |        |             |          |         | RNAseq  |           |          |                  |              |               |                  |            |         |
|------|-------|--------|-------------|----------|---------|---------|-----------|----------|------------------|--------------|---------------|------------------|------------|---------|
| gene | Blood | Kidney | methyl.diff | pMWU.fdr | Match ? | gene    | blood     | kidney   | log2(fold_ratio) | blood+ 0.001 | kidney+ 0.001 | log2(fold_ratio) | q_value    | Match ? |
|      |       |        |             |          |         | Gnai3   | 71.6571   | 38.2237  | -0.9066422       | 71.6581      | 38.2247       | -0.9066246       | 0.00407863 | No      |
|      |       |        |             |          |         | Gnat3   | 0         | 1.42686  | inf              | 0.001        | 1.42786       | 10.4796388       | 0.00632443 | No      |
|      |       |        |             |          |         | Gnb2l1  | 2643.82   | 716.884  | -1.8828124       | 2643.821     | 716.885       | -1.8828109       | 0.00211842 | No      |
|      |       |        |             |          |         | Gne     | 44.1834   | 19.4115  | -1.1865928       | 44.1844      | 19.4125       | -1.1865512       | 0.00318754 | No      |
|      |       |        |             |          |         | Gng10   | 24.9198   | 53.3018  | 1.09689176       | 24.9208      | 53.3028       | 1.09686094       | 0.00060553 | No      |
|      |       |        |             |          |         | Gng12   | 26.8748   | 159.543  | 2.56961939       | 26.8758      | 159.544       | 2.56957475       | 0.0019604  | No      |
|      |       |        |             |          |         | Gng2    | 35.8054   | 4.76937  | -2.9083066       | 35.8064      | 4.77037       | -2.9080444       | 0.00022079 | No      |
|      |       |        |             |          |         | Gng5    | 35.2886   | 67.4644  | 0.93492422       | 35.2896      | 67.4654       | 0.93490472       | 0.0284928  | No      |
|      |       |        |             |          |         | Gnl2    | 40.6068   | 19.5477  | -1.0547225       | 40.6078      | 19.5487       | -1.0546842       | 0.00288641 | No      |
|      |       |        |             |          |         | Gnl3    | 61.9859   | 14.6653  | -2.0795335       | 61.9869      | 14.6663       | -2.0794584       | 0.00130998 | No      |
|      |       |        |             |          |         | Gnpda1  | 13.6153   | 32.836   | 1.27004962       | 13.6163      | 32.837        | 1.2699876        | 0.00022079 | No      |
|      |       |        |             |          |         | Gnpda2  | 22.6617   | 5.74506  | -1.9798622       | 22.6627      | 5.74606       | -1.9796748       | 0.0111498  | No      |
|      |       |        |             |          |         | Gnpnat1 | 19.2078   | 37.3263  | 0.95850022       | 19.2088      | 37.3273       | 0.95846376       | 0.014108   | No      |
|      |       |        |             |          |         | Golgb1  | 8.64894   | 46.4653  | 2.42555849       | 8.64994      | 46.4663       | 2.42542274       | 0.00333723 | No      |
|      |       |        |             |          |         | Golim4  | 7.10705   | 13.9687  | 0.97487501       | 7.10805      | 13.9697       | 0.9747753        | 0.0114056  | No      |
|      |       |        |             |          |         | Golt1a  | 0         | 12.4435  | inf              | 0.001        | 12.4445       | 13.6032206       | 0.00022079 | No      |
|      |       |        |             |          |         | Gon4l   | 16.1646   | 6.61227  | -1.2896203       | 16.1656      | 6.61327       | -1.2894913       | 0.00318754 | No      |
|      |       |        |             |          |         | Gorasp1 | 0.524787  | 14.864   | 4.82394661       | 0.525787     | 14.865        | 4.82129718       | 0.00022079 | No      |
|      |       |        |             |          |         | Got1    | 23.4595   | 77.9572  | 1.73251001       | 23.4605      | 77.9582       | 1.73246702       | 0.00022079 | No      |
|      |       |        |             |          |         | Got2    | 54.8425   | 140.807  | 1.36035281       | 54.8435      | 140.808       | 1.36033675       | 0.00022079 | No      |
|      |       |        |             |          |         | Gp2     | 0         | 13.0924  | inf              | 0.001        | 13.0934       | 13.6765522       | 0.00022079 | No      |
|      |       |        |             |          |         | Gpam    | 0.921315  | 8.88144  | 3.2690272        | 0.922315     | 8.88244       | 3.26762457       | 0.00022079 | No      |
|      |       |        |             |          |         | Gpatch4 | 10.905    | 3.47211  | -1.6511052       | 10.906       | 3.47311       | -1.6508221       | 0.00078858 | No      |
|      |       |        |             |          |         | Gpatch8 | 18.8159   | 6.15384  | -1.6123935       | 18.8169      | 6.15484       | -1.6122357       | 0.00022079 | No      |
|      |       |        |             |          |         | Gppb1   | 64.2938   | 24.2618  | -1.405993        | 64.2948      | 24.2628       | -1.405956        | 0.00060553 | No      |
|      |       |        |             |          |         | GPBP1L1 | 63.283    | 25.1138  | -1.3333377       | 63.284       | 25.1148       | -1.333303        | 0.00288641 | No      |
|      |       |        |             |          |         | Gpcpd1  | 41.7536   | 7.42547  | -2.4913463       | 41.7546      | 7.42647       | -2.4911866       | 0.00022079 | No      |
|      |       |        |             |          |         | Gpd1l   | 9.51451   | 32.34    | 1.76511841       | 9.51551      | 32.341        | 1.7650114        | 0.00022079 | No      |
|      |       |        |             |          |         | Gphn    | 1.33769   | 11.5279  | 3.107314         | 1.33869      | 11.5289       | 3.10636105       | 0.00022079 | No      |
|      |       |        |             |          |         | Gpkow   | 15.4697   | 7.44123  | -1.0558322       | 15.4707      | 7.44223       | -1.0557316       | 0.00211842 | No      |
|      |       |        |             |          |         | Gpm6a   | 0         | 14.7893  | inf              | 0.001        | 14.7903       | 13.8523637       | 0.00022079 | No      |
|      |       |        |             |          |         | Gpm6b   | 0.0643905 | 0.83146  | 3.6907271        | 0.0653905    | 0.83246       | 3.67022799       | 0.0477719  | No      |
|      |       |        |             |          |         | Gpnmb   | 0.118573  | 13.3611  | 6.81611944       | 0.119573     | 13.3621       | 6.80411129       | 0.00407863 | No      |
|      |       |        |             |          |         | Gpr116  | 0         | 16.7132  | inf              | 0.001        | 16.7142       | 14.0287867       | 0.00022079 | No      |
|      |       |        |             |          |         | Gpr125  | 0.330609  | 24.843   | 6.23156959       | 0.331609     | 24.844        | 6.2272705        | 0.00022079 | No      |
|      |       |        |             |          |         | Gpr132  | 34.3509   | 3.09632  | -3.4717214       | 34.3519      | 3.09732       | -3.4712975       | 0.00022079 | No      |
|      |       |        |             |          |         | Gpr137b | 0.112801  | 15.628   | 7.11420949       | 0.113801     | 15.629        | 7.10156843       | 0.00022079 | No      |
|      |       |        |             |          |         | Gpr15   | 3.40041   | 0.182794 | -4.2174181       | 3.40141      | 0.183794      | -4.2099713       | 0.00130998 | No      |
|      |       |        |             |          |         | Gpr155  | 8.74819   | 0.28458  | -4.9420784       | 8.74919      | 0.28558       | -4.9371826       | 0.00022079 | No      |
|      |       |        |             |          |         | Gpr162  | 0.0694757 | 2.39176  | 5.10542035       | 0.0704757    | 2.39276       | 5.08540599       | 0.00870822 | No      |
|      |       |        |             |          |         | Gpr171  | 29.5193   | 6.68157  | -2.1433995       | 29.5203      | 6.68257       | -2.1432324       | 0.00022079 | No      |
|      |       |        |             |          |         | Gpr174  | 15.6304   | 0.574348 | -4.7662858       | 15.6314      | 0.575348      | -4.7638684       | 0.00022079 | No      |

| RRBS |       |        |             |          |         | RNAseq  |            |          |                  |              |               |                  |            |         |
|------|-------|--------|-------------|----------|---------|---------|------------|----------|------------------|--------------|---------------|------------------|------------|---------|
| gene | Blood | Kidney | methyl.diff | pMWU.fdr | Match ? | gene    | blood      | kidney   | log2(fold_ratio) | blood+ 0.001 | kidney+ 0.001 | log2(fold_ratio) | q_value    | Match ? |
|      |       |        |             |          |         | Gpr176  | 0.0372837  | 4.27923  | 6.84266237       | 0.0382837    | 4.28023       | 6.80481424       | 0.0304578  | No      |
|      |       |        |             |          |         | Gpr183  | 32.0925    | 3.92207  | -3.032549        | 32.0935      | 3.92307       | -3.0322262       | 0.0341219  | No      |
|      |       |        |             |          |         | Gpr56   | 0.105406   | 120.644  | 10.1605835       | 0.106406     | 120.645       | 10.1469729       | 0.00022079 | No      |
|      |       |        |             |          |         | Gpr65   | 10.0937    | 0.64916  | -3.9587372       | 10.0947      | 0.65016       | -3.9566594       | 0.00022079 | No      |
|      |       |        |             |          |         | Gpr68   | 18.8838    | 2.11974  | -3.1551899       | 18.8848      | 2.12074       | -3.1545858       | 0.00022079 | No      |
|      |       |        |             |          |         | Gpr89b  | 16.4054    | 35.2602  | 1.10386989       | 16.4064      | 35.2612       | 1.10382286       | 0.0291184  | No      |
|      |       |        |             |          |         | Gprc5b  | 0          | 5.13817  | inf              | 0.001        | 5.13917       | 12.3273197       | 0.00605729 | No      |
|      |       |        |             |          |         | Gprin3  | 4.86768    | 0.223723 | -4.4434488       | 4.86868      | 0.224723      | -4.437311        | 0.00022079 | No      |
|      |       |        |             |          |         | Gpt     | 1.05675    | 8.30817  | 2.97489662       | 1.05775      | 8.30917       | 2.97370569       | 0.00041963 | No      |
|      |       |        |             |          |         | Gpx1    | 132.961    | 891.895  | 2.74587074       | 132.962      | 891.896       | 2.74586151       | 0.00022079 | No      |
|      |       |        |             |          |         | GPX4    | 114.524    | 463.434  | 2.01671393       | 114.525      | 463.435       | 2.01670444       | 0.00022079 | No      |
|      |       |        |             |          |         | Gramd1a | 242.361    | 47.4122  | -2.3538273       | 242.362      | 47.4132       | -2.3538028       | 0.00022079 | No      |
|      |       |        |             |          |         | Gramd3  | 0.206979   | 9.11278  | 5.46033493       | 0.207979     | 9.11378       | 5.45353978       | 0.00022079 | No      |
|      |       |        |             |          |         | Gramd4  | 52.2082    | 10.1019  | -2.3696498       | 52.2092      | 10.1029       | -2.3695346       | 0.00022079 | No      |
|      |       |        |             |          |         | Grap    | 138.61     | 11.5422  | -3.5860412       | 138.611      | 11.5432       | -3.5859266       | 0.00593001 | No      |
|      |       |        |             |          |         | Grap2   | 97.1424    | 2.37771  | -5.3524565       | 97.1434      | 2.37871       | -5.3518647       | 0.00022079 | No      |
|      |       |        |             |          |         | Grb2    | 89.7955    | 43.438   | -1.0476855       | 89.7965      | 43.439        | -1.0476683       | 0.00041963 | No      |
|      |       |        |             |          |         | Grb7    | 0.306101   | 22.2579  | 6.18416591       | 0.307101     | 22.2589       | 6.17952528       | 0.00022079 | No      |
|      |       |        |             |          |         | Grhl3   | 0.420665   | 3.10587  | 2.88425375       | 0.421665     | 3.10687       | 2.88129269       | 0.00147497 | No      |
|      |       |        |             |          |         | Grhpr   | 7.09119    | 345.075  | 5.60473839       | 7.09219      | 345.076       | 5.60453914       | 0.00022079 | No      |
|      |       |        |             |          |         | Grik2   | 0          | 5.36683  | inf              | 0.001        | 5.36783       | 12.3901233       | 0.00022079 | No      |
|      |       |        |             |          |         | Grina   | 89.6057    | 183.045  | 1.03053595       | 89.6067      | 183.046       | 1.03052773       | 0.00078858 | No      |
|      |       |        |             |          |         | Gripap1 | 32.3992    | 16.2348  | -0.9968686       | 32.4002      | 16.2358       | -0.9968242       | 0.0112749  | No      |
|      |       |        |             |          |         | Grk6    | 282.104    | 29.4962  | -3.2576261       | 282.105      | 29.4972       | -3.2575823       | 0.00022079 | No      |
|      |       |        |             |          |         | Grn     | 25.3923    | 120.773  | 2.24983498       | 25.3933      | 120.774       | 2.24979011       | 0.00022079 | No      |
|      |       |        |             |          |         | Grpel1  | 27.3242    | 72.1226  | 1.40027215       | 27.3252      | 72.1236       | 1.40023935       | 0.00022079 | No      |
|      |       |        |             |          |         | Grtp1   | 0.0913288  | 45.1313  | 8.94884274       | 0.0923288    | 45.1323       | 8.93316385       | 0.00022079 | No      |
|      |       |        |             |          |         | Gsdma   | 3.37272    | 7.66348  | 1.18408712       | 3.37372      | 7.66448       | 1.18384767       | 0.00605729 | No      |
|      |       |        |             |          |         | Gsdmd   | 21.7039    | 4.41939  | -2.2960351       | 21.7049      | 4.42039       | -2.2957752       | 0.00022079 | No      |
|      |       |        |             |          |         | Gsg2    | 25.5745    | 1.85825  | -3.7826895       | 25.5755      | 1.85925       | -3.7819698       | 0.00870822 | No      |
|      |       |        |             |          |         | Gsn     | 32.4588    | 74.9414  | 1.20715326       | 32.4598      | 74.9424       | 1.20712807       | 0.00022079 | No      |
|      |       |        |             |          |         | Gsr     | 21.0001    | 117.031  | 2.47842263       | 21.0011      | 117.032       | 2.47836626       | 0.00022079 | No      |
|      |       |        |             |          |         | Gss     | 8.17949    | 102.814  | 3.65188202       | 8.18049      | 102.815       | 3.65171969       | 0.00022079 | No      |
|      |       |        |             |          |         | GSTA1   | 0.042629   | 155.474  | 11.8325505       | 0.043629     | 155.475       | 11.7991076       | 0.00765035 | No      |
|      |       |        |             |          |         | Gsta2   | 0          | 81.5628  | inf              | 0.001        | 81.5638       | 16.3156414       | 0.00022079 | No      |
|      |       |        |             |          |         | Gsta3   | 0.00921559 | 79.1477  | 13.0681833       | 0.01021559   | 79.1487       | 12.9195774       | 0.028703   | No      |
|      |       |        |             |          |         | GSTA6   | 6.45288    | 21.0298  | 1.70442003       | 6.45388      | 21.0308       | 1.70426507       | 0.00466383 | No      |
|      |       |        |             |          |         | Gstk1   | 2.06135    | 39.8227  | 4.27192965       | 2.06235      | 39.8237       | 4.27126617       | 0.00022079 | No      |
|      |       |        |             |          |         | Gstm2   | 0          | 264.034  | inf              | 0.001        | 264.035       | 18.0103697       | 0.00022079 | No      |
|      |       |        |             |          |         | Gstm7   | 0.810503   | 26.3799  | 5.02447776       | 0.811503     | 26.3809       | 5.02275355       | 0.00022079 | No      |
|      |       |        |             |          |         | Gstp1   | 263.39     | 533.263  | 1.01764666       | 263.391      | 533.264       | 1.01764389       | 0.00536605 | No      |
|      |       |        |             |          |         | GSTT2   | 13.2251    | 37.2954  | 1.49571907       | 13.2261      | 37.2964       | 1.49564867       | 0.00022079 | No      |

| RRBS |       |        |            |          |         | RNAseq   |           |          |                  |              |               |                  |            |         |
|------|-------|--------|------------|----------|---------|----------|-----------|----------|------------------|--------------|---------------|------------------|------------|---------|
| gene | Blood | Kidney | methy.diff | pMWU.fdr | Match ? | gene     | blood     | kidney   | log2(fold_ratio) | blood+ 0.001 | kidney+ 0.001 | log2(fold_ratio) | q_value    | Match ? |
|      |       |        |            |          |         | Gtf2f1   | 26.598    | 65.8619  | 1.30812636       | 26.599       | 65.8629       | 1.30809403       | 0.00242102 | No      |
|      |       |        |            |          |         | Gtf2h1   | 22.1231   | 13.0934  | -0.7567138       | 22.1241      | 13.0944       | -0.7566688       | 0.0261671  | No      |
|      |       |        |            |          |         | Gtf2h3   | 14.0974   | 5.67103  | -1.3137464       | 14.0984      | 5.67203       | -1.3135944       | 0.00113657 | No      |
|      |       |        |            |          |         | Gtf2h5   | 16.8508   | 43.8726  | 1.38050312       | 16.8518      | 43.8736       | 1.38045039       | 0.00164037 | No      |
|      |       |        |            |          |         | Gtf2i    | 149.844   | 67.4355  | -1.1518811       | 149.845      | 67.4365       | -1.1518694       | 0.0230222  | No      |
|      |       |        |            |          |         | GTF2IRD2 | 9.22071   | 3.44584  | -1.4200221       | 9.22171      | 3.44684       | -1.41976         | 0.0469032  | No      |
|      |       |        |            |          |         | Gtf3c1   | 28.3137   | 12.2745  | -1.205836        | 28.3147      | 12.2755       | -1.2057695       | 0.00060553 | No      |
|      |       |        |            |          |         | Gtf3c4   | 7.93581   | 3.29604  | -1.2676437       | 7.93681      | 3.29704       | -1.2673879       | 0.00147497 | No      |
|      |       |        |            |          |         | Guca2b   | 0         | 8.9683   | inf              | 0.001        | 8.9693        | 13.1307797       | 0.00022079 | No      |
|      |       |        |            |          |         | GUCD1    | 5.94739   | 18.4801  | 1.63564397       | 5.94839      | 18.4811       | 1.63547948       | 0.00022079 | No      |
|      |       |        |            |          |         | Gucy1a3  | 4.38067   | 0.515657 | -3.0866679       | 4.38167      | 0.516657      | -3.0842021       | 0.00022079 | No      |
|      |       |        |            |          |         | Gucy1b2  | 0.0235333 | 26.821   | 10.1544437       | 0.0245333    | 26.822        | 10.0944598       | 0.00060553 | No      |
|      |       |        |            |          |         | Gucy2g   | 0         | 2.9179   | inf              | 0.001        | 2.9189        | 11.5112091       | 0.00765035 | No      |
|      |       |        |            |          |         | Guk1     | 60.746    | 144.145  | 1.24665948       | 60.747       | 144.146       | 1.24664574       | 0.00022079 | No      |
|      |       |        |            |          |         | Gulp1    | 0         | 17.6815  | inf              | 0.001        | 17.6825       | 14.1100346       | 0.00022079 | No      |
|      |       |        |            |          |         | Gxylt1   | 17.4146   | 9.08661  | -0.9384833       | 17.4156      | 9.08761       | -0.9384074       | 0.0219049  | No      |
|      |       |        |            |          |         | Gyg1     | 6.71633   | 18.1183  | 1.43170257       | 6.71733      | 18.1193       | 1.43156741       | 0.00096553 | No      |
|      |       |        |            |          |         | Gylt1b   | 1.31826   | 12.2181  | 3.21231311       | 1.31926      | 12.2191       | 3.2113372        | 0.00242102 | No      |
|      |       |        |            |          |         | Gypc     | 8.41087   | 2.03791  | -2.0451647       | 8.41187      | 2.03891       | -2.0446285       | 0.00041963 | No      |
|      |       |        |            |          |         | Gys1     | 0.738531  | 9.70431  | 3.71589525       | 0.739531     | 9.70531       | 3.71409177       | 0.00022079 | No      |
|      |       |        |            |          |         | Gzmk     | 7.48654   | 3.05417  | -1.2935187       | 7.48754      | 3.05517       | -1.2932391       | 0.043912   | No      |
|      |       |        |            |          |         | Gzmm     | 81.4903   | 31.8829  | -1.3538455       | 81.4913      | 31.8839       | -1.3538179       | 0.00211842 | No      |
|      |       |        |            |          |         | H1fx     | 24.6167   | 56.0682  | 1.18754538       | 24.6177      | 56.0692       | 1.18751251       | 0.00658515 | No      |
|      |       |        |            |          |         | H2afj    | 44.3215   | 179.104  | 2.01471894       | 44.3225      | 179.105       | 2.01469445       | 0.00022079 | No      |
|      |       |        |            |          |         | H2afz    | 201.013   | 101.347  | -0.9879854       | 201.014      | 101.348       | -0.9879784       | 0.0195167  | No      |
|      |       |        |            |          |         | H6pd     | 0.465694  | 7.15327  | 3.9411487        | 0.466694     | 7.15427       | 3.93825574       | 0.00022079 | No      |
|      |       |        |            |          |         | Hacl1    | 2.27595   | 12.361   | 2.44125469       | 2.27695      | 12.362        | 2.44073765       | 0.00304332 | No      |
|      |       |        |            |          |         | Hadh     | 21.4847   | 156.417  | 2.86401578       | 21.4857      | 156.418       | 2.86395786       | 0.00022079 | No      |
|      |       |        |            |          |         | Hadha    | 66.7691   | 148.684  | 1.15499691       | 66.7701      | 148.685       | 1.154985         | 0.00242102 | No      |
|      |       |        |            |          |         | Hadhb    | 42.7461   | 98.7793  | 1.20841595       | 42.7471      | 98.7803       | 1.2083968        | 0.00022079 | No      |
|      |       |        |            |          |         | Hagh     | 12.0022   | 107.521  | 3.16324768       | 12.0032      | 107.522       | 3.1631409        | 0.00022079 | No      |
|      |       |        |            |          |         | Hao1     | 0         | 0.996544 | inf              | 0.001        | 0.997544      | 9.96223667       | 0.00022079 | No      |
|      |       |        |            |          |         | Hao2     | 0         | 1018.65  | inf              | 0.001        | 1018.651      | 19.9582284       | 0.00022079 | No      |
|      |       |        |            |          |         | Hap1     | 11.1387   | 1.14262  | -3.2851633       | 11.1397      | 1.14362       | -3.2840307       | 0.00022079 | No      |
|      |       |        |            |          |         | Haus1    | 5.68811   | 2.68744  | -1.0817168       | 5.68911      | 2.68844       | -1.0814337       | 0.00896558 | No      |
|      |       |        |            |          |         | Haus4    | 4.70115   | 18.4765  | 1.97460587       | 4.70215      | 18.4775       | 1.97437711       | 0.00147497 | No      |
|      |       |        |            |          |         | Haus6    | 3.56726   | 0.869093 | -2.0372339       | 3.56826      | 0.870093      | -2.0359792       | 0.00060553 | No      |
|      |       |        |            |          |         | Havcr1   | 0.0767859 | 20.6016  | 8.06769925       | 0.0777859    | 20.6026       | 8.04910203       | 0.00130998 | No      |
|      |       |        |            |          |         | Hba1     | 30.7032   | 2254.6   | 6.19833866       | 30.7042      | 2254.601      | 6.19829232       | 0.00022079 | No      |
|      |       |        |            |          |         | Hba2     | 15.113    | 1146.36  | 6.24512629       | 15.114       | 1146.361      | 6.2450321        | 0.00022079 | No      |
|      |       |        |            |          |         | Hbb      | 13.2952   | 553.256  | 5.37896981       | 13.2962      | 553.257       | 5.37886391       | 0.00022079 | No      |
|      |       |        |            |          |         | Hcfc1r1  | 117.221   | 266.786  | 1.18645191       | 117.222      | 266.787       | 1.18644501       | 0.0406701  | No      |

| RRBS |       |        |             |          |         | RNAseq  |          |         |                  |              |               |                  |            |         |
|------|-------|--------|-------------|----------|---------|---------|----------|---------|------------------|--------------|---------------|------------------|------------|---------|
| gene | Blood | Kidney | methyl.diff | pMWU.fdr | Match ? | gene    | blood    | kidney  | log2(fold_ratio) | blood+ 0.001 | kidney+ 0.001 | log2(fold_ratio) | q_value    | Match ? |
|      |       |        |             |          |         | Hcfc2   | 24.1838  | 8.27933 | -1.546455        | 24.1848      | 8.28033       | -1.5463404       | 0.015076   | No      |
|      |       |        |             |          |         | Hck     | 1.46701  | 6.30104 | 2.10271126       | 1.46801      | 6.30204       | 2.10195712       | 0.00060553 | No      |
|      |       |        |             |          |         | Hcls1   | 128.757  | 25.5945 | -2.3307451       | 128.758      | 25.5955       | -2.3307          | 0.00022079 | No      |
|      |       |        |             |          |         | Hcn2    | 0.235861 | 16.6341 | 6.14006311       | 0.236861     | 16.6351       | 6.13404606       | 0.0019604  | No      |
|      |       |        |             |          |         | Hdac1   | 89.5839  | 45.7657 | -0.9689727       | 89.5849      | 45.7667       | -0.9689573       | 0.00211842 | No      |
|      |       |        |             |          |         | Hdac10  | 18.1117  | 9.07362 | -0.9971718       | 18.1127      | 9.07462       | -0.9970925       | 0.0364343  | No      |
|      |       |        |             |          |         | Hdac11  | 0.290909 | 26.9793 | 6.53514118       | 0.291909     | 26.9803       | 6.53024389       | 0.00022079 | No      |
|      |       |        |             |          |         | Hdac4   | 7.52638  | 2.23616 | -1.7509327       | 7.52738      | 2.23716       | -1.7504794       | 0.00022079 | No      |
|      |       |        |             |          |         | Hdac7   | 47.7545  | 15.5128 | -1.6221776       | 47.7555      | 15.5138       | -1.6221148       | 0.00227055 | No      |
|      |       |        |             |          |         | Hddc3   | 2.81404  | 48.3482 | 4.10274744       | 2.81504      | 48.3492       | 4.10226469       | 0.00022079 | No      |
|      |       |        |             |          |         | Hdhd3   | 0.271323 | 14.6635 | 5.75607434       | 0.272323     | 14.6645       | 5.75086524       | 0.0189519  | No      |
|      |       |        |             |          |         | Hdlbp   | 33.5129  | 59.0357 | 0.81687111       | 33.5139      | 59.0367       | 0.8168525        | 0.0192929  | No      |
|      |       |        |             |          |         | HEBP1   | 1.46589  | 8.70475 | 2.57002602       | 1.46689      | 8.70575       | 2.5692079        | 0.00242102 | No      |
|      |       |        |             |          |         | Heca    | 195.3    | 10.169  | -4.2634422       | 195.301      | 10.17         | -4.2633078       | 0.00022079 | No      |
|      |       |        |             |          |         | Helb    | 23.234   | 4.45693 | -2.3821153       | 23.235       | 4.45793       | -2.3818538       | 0.00096553 | No      |
|      |       |        |             |          |         | Helq    | 5.53385  | 2.69792 | -1.036436        | 5.53485      | 2.69892       | -1.036162        | 0.0437345  | No      |
|      |       |        |             |          |         | Helz2   | 23.9633  | 6.94038 | -1.78774         | 23.9643      | 6.94138       | -1.7875924       | 0.00180113 | No      |
|      |       |        |             |          |         | Herc1   | 53.5863  | 14.9545 | -1.8412845       | 53.5873      | 14.9555       | -1.841215        | 0.00896558 | No      |
|      |       |        |             |          |         | Herc4   | 30.9143  | 8.34356 | -1.8895394       | 30.9153      | 8.34456       | -1.8894131       | 0.00288641 | No      |
|      |       |        |             |          |         | Herc6   | 18.7131  | 4.36407 | -2.1003024       | 18.7141      | 4.36507       | -2.100049        | 0.00022079 | No      |
|      |       |        |             |          |         | Herpud2 | 40.262   | 15.0383 | -1.4207774       | 40.263       | 15.0393       | -1.4207173       | 0.00022079 | No      |
|      |       |        |             |          |         | Hes1    | 0.225914 | 66.9118 | 8.21034317       | 0.226914     | 66.9128       | 8.20399278       | 0.00022079 | No      |
|      |       |        |             |          |         | Hes6    | 22.8701  | 59.1496 | 1.37090574       | 22.8711      | 59.1506       | 1.37086705       | 0.00022079 | No      |
|      |       |        |             |          |         | Hexb    | 5.53684  | 70.6664 | 3.67388968       | 5.53784      | 70.6674       | 3.67364955       | 0.00022079 | No      |
|      |       |        |             |          |         | Hexim1  | 74.1322  | 43.4626 | -0.7703258       | 74.1332      | 43.4636       | -0.7703121       | 0.0212313  | No      |
|      |       |        |             |          |         | Heyl    | 0        | 4.6135  | inf              | 0.001        | 4.6145        | 12.1719586       | 0.00022079 | No      |
|      |       |        |             |          |         | Hgd     | 0        | 125.232 | inf              | 0.001        | 125.233       | 16.9342552       | 0.00022079 | No      |
|      |       |        |             |          |         | Hgs     | 19.5461  | 41.6789 | 1.09243642       | 19.5471      | 41.6799       | 1.09239723       | 0.00466383 | No      |
|      |       |        |             |          |         | Hgsnat  | 49.4359  | 17.4963 | -1.4985092       | 49.4369      | 17.4973       | -1.498456        | 0.00113657 | No      |
|      |       |        |             |          |         | Hiat1   | 43.3867  | 19.8592 | -1.1274454       | 43.3877      | 19.8602       | -1.127406        | 0.00130998 | No      |
|      |       |        |             |          |         | Hibadh  | 41.5469  | 157.529 | 1.9228047        | 41.5479      | 157.53        | 1.92277914       | 0.00022079 | No      |
|      |       |        |             |          |         | Hibch   | 7.77693  | 16.3406 | 1.0711883        | 7.77793      | 16.3416       | 1.07109109       | 0.0165181  | No      |
|      |       |        |             |          |         | Hif1a   | 57.7888  | 28.4534 | -1.0221889       | 57.7898      | 28.4544       | -1.0221631       | 0.00304332 | No      |
|      |       |        |             |          |         | Higd1a  | 21.3655  | 71.3357 | 1.73934118       | 21.3665      | 71.3367       | 1.73929388       | 0.00579147 | No      |
|      |       |        |             |          |         | Higd2a  | 74.0412  | 147.038 | 0.98978887       | 74.0422      | 147.039       | 0.98977919       | 0.00508519 | No      |
|      |       |        |             |          |         | Hint2   | 54.5517  | 299.837 | 2.45848236       | 54.5527      | 299.838       | 2.45846073       | 0.00022079 | No      |
|      |       |        |             |          |         | Hint3   | 9.54652  | 20.3554 | 1.09236474       | 9.54752      | 20.3564       | 1.0922845        | 0.0213411  | No      |
|      |       |        |             |          |         | Hip1    | 0.264929 | 7.75766 | 4.87194387       | 0.265929     | 7.75866       | 4.86669449       | 0.00022079 | No      |
|      |       |        |             |          |         | Hip1r   | 33.0254  | 10.4601 | -1.6586794       | 33.0264      | 10.4611       | -1.6585852       | 0.00022079 | No      |
|      |       |        |             |          |         | Hipk1   | 69.8117  | 19.1876 | -1.8632946       | 69.8127      | 19.1886       | -1.8632401       | 0.00022079 | No      |
|      |       |        |             |          |         | Hipk2   | 2.62537  | 10.6844 | 2.02491323       | 2.62637      | 10.6854       | 2.02449883       | 0.00078858 | No      |
|      |       |        |             |          |         | Hira    | 13.5204  | 3.7457  | -1.8518306       | 13.5214      | 3.7467        | -1.8515522       | 0.00022079 | No      |

| RRBS |       |        |             |          |         | RNAseq     |          |         |                  |              |               |                  |            |         |
|------|-------|--------|-------------|----------|---------|------------|----------|---------|------------------|--------------|---------------|------------------|------------|---------|
| gene | Blood | Kidney | methyl.diff | pMWU.fdr | Match ? | gene       | blood    | kidney  | log2(fold_ratio) | blood+ 0.001 | kidney+ 0.001 | log2(fold_ratio) | q_value    | Match ? |
|      |       |        |             |          |         | Hist1h3a   | 0.499322 | 4.80662 | 3.26698037       | 0.500322     | 4.80762       | 3.26439407       | 0.0475016  | No      |
|      |       |        |             |          |         | HIST1H4B   | 1.41048  | 8.69335 | 2.62372602       | 1.41148      | 8.69435       | 2.62286949       | 0.0467065  | No      |
|      |       |        |             |          |         | Hist2h2aa3 | 38.1033  | 267.002 | 2.80886269       | 38.1043      | 267.003       | 2.80883023       | 0.00022079 | No      |
|      |       |        |             |          |         | Hist3h2a   | 7.54476  | 28.59   | 1.92196371       | 7.54576      | 28.591        | 1.92182296       | 0.00022079 | No      |
|      |       |        |             |          |         | Hivep2     | 10.455   | 2.75291 | -1.9251637       | 10.456       | 2.75391       | -1.9247777       | 0.00022079 | No      |
|      |       |        |             |          |         | Hlcs       | 4.90914  | 2.33953 | -1.0692516       | 4.91014      | 2.34053       | -1.0689289       | 0.0130042  | No      |
|      |       |        |             |          |         | Hlf        | 0.406802 | 6.72193 | 4.04647684       | 0.407802     | 6.72293       | 4.04314937       | 0.00436941 | No      |
|      |       |        |             |          |         | Hltf       | 28.6345  | 8.75355 | -1.7098143       | 28.6355      | 8.75455       | -1.7096999       | 0.00333723 | No      |
|      |       |        |             |          |         | Hm13       | 99.4554  | 224.917 | 1.1772711        | 99.4564      | 224.918       | 1.17726301       | 0.011893   | No      |
|      |       |        |             |          |         | Hmbox1     | 15.1059  | 6.75966 | -1.1600896       | 15.1069      | 6.76066       | -1.1599716       | 0.00227055 | No      |
|      |       |        |             |          |         | Hmbs       | 10.4218  | 20.8068 | 0.99745063       | 10.4228      | 20.8078       | 0.99738154       | 0.0159346  | No      |
|      |       |        |             |          |         | Hmg20a     | 53.3772  | 9.60639 | -2.4741573       | 53.3782      | 9.60739       | -2.4740342       | 0.00022079 | No      |
|      |       |        |             |          |         | Hmgb2      | 435.237  | 58.7503 | -2.8891331       | 435.238      | 58.7513       | -2.8891118       | 0.00022079 | No      |
|      |       |        |             |          |         | Hmgcl      | 19.1937  | 58.8231 | 1.61574997       | 19.1947      | 58.8241       | 1.61569933       | 0.00022079 | No      |
|      |       |        |             |          |         | Hmgcs1     | 8.69623  | 16.9818 | 0.96552738       | 8.69723      | 16.9828       | 0.96544645       | 0.00645389 | No      |
|      |       |        |             |          |         | Hmgcs2     | 0.120716 | 14.3887 | 6.89717553       | 0.121716     | 14.3897       | 6.88537388       | 0.00041963 | No      |
|      |       |        |             |          |         | Hmgn3      | 24.3705  | 60.903  | 1.32137744       | 24.3715      | 60.904        | 1.32134194       | 0.00041963 | No      |
|      |       |        |             |          |         | Hmgn5b     | 4.52946  | 9.55648 | 1.07714026       | 4.53046      | 9.55748       | 1.07697273       | 0.028906   | No      |
|      |       |        |             |          |         | Hmox1      | 0.20272  | 10.9345 | 5.75325501       | 0.20372      | 10.9355       | 5.74628775       | 0.00242102 | No      |
|      |       |        |             |          |         | Hmox2      | 19.5701  | 42.9302 | 1.13334177       | 19.5711      | 42.9312       | 1.13330165       | 0.0239545  | No      |
|      |       |        |             |          |         | Hmx2       | 0        | 1.98333 | inf              | 0.001        | 1.98433       | 10.9544363       | 0.00022079 | No      |
|      |       |        |             |          |         | Hn1        | 111.512  | 58.9071 | -0.9206855       | 111.513      | 58.9081       | -0.920674        | 0.00791314 | No      |
|      |       |        |             |          |         | Hnf4g      | 0        | 1.61267 | inf              | 0.001        | 1.61367       | 10.6561299       | 0.00022079 | No      |
|      |       |        |             |          |         | Hnmt       | 0        | 17.2861 | inf              | 0.001        | 17.2871       | 14.0774082       | 0.00022079 | No      |
|      |       |        |             |          |         | Hnrnpa0    | 503.608  | 106.238 | -2.2450013       | 503.609      | 106.239       | -2.2449906       | 0.00022079 | No      |
|      |       |        |             |          |         | HNRNPA1    | 874.613  | 139.007 | -2.6534873       | 874.614      | 139.008       | -2.6534785       | 0.00022079 | No      |
|      |       |        |             |          |         | Hnrnpa2b1  | 602.259  | 246.944 | -1.2862001       | 602.26       | 246.945       | -1.2861967       | 0.012146   | No      |
|      |       |        |             |          |         | Hnrnpab    | 151.077  | 94.0584 | -0.6836553       | 151.078      | 94.0594       | -0.6836496       | 0.0409854  | No      |
|      |       |        |             |          |         | Hnrnpdl    | 142.446  | 45.5088 | -1.6461977       | 142.447      | 45.5098       | -1.6461761       | 0.00022079 | No      |
|      |       |        |             |          |         | Hnrnpf     | 309.826  | 118.517 | -1.3863642       | 309.827      | 118.518       | -1.3863567       | 0.00022079 | No      |
|      |       |        |             |          |         | Hnrnpk     | 326.788  | 176.93  | -0.8851763       | 326.789      | 176.931       | -0.8851726       | 0.0236064  | No      |
|      |       |        |             |          |         | Hnrnpl     | 375.746  | 191.745 | -0.9705688       | 375.747      | 191.746       | -0.9705651       | 0.0132548  | No      |
|      |       |        |             |          |         | Hnrnpm     | 178.531  | 89.9662 | -0.9887196       | 178.532      | 89.9672       | -0.9887117       | 0.00242102 | No      |
|      |       |        |             |          |         | Hnrnpr     | 63.9809  | 30.531  | -1.0673664       | 63.9819      | 30.532        | -1.0673417       | 0.00333723 | No      |
|      |       |        |             |          |         | Hnrnpu     | 239.183  | 97.0795 | -1.3008763       | 239.184      | 97.0805       | -1.3008674       | 0.00407863 | No      |
|      |       |        |             |          |         | Hnrnpul2   | 90.938   | 32.1805 | -1.4986965       | 90.939       | 32.1815       | -1.4986676       | 0.00909283 | No      |
|      |       |        |             |          |         | Hnrpd      | 213.471  | 67.5625 | -1.6597455       | 213.472      | 67.5635       | -1.6597309       | 0.00022079 | No      |
|      |       |        |             |          |         | Hoga1      | 0.749617 | 108.593 | 7.17856172       | 0.750617     | 108.594       | 7.17665171       | 0.00022079 | No      |
|      |       |        |             |          |         | Homer1     | 0.208607 | 2.66848 | 3.67715872       | 0.209607     | 2.66948       | 3.67079994       | 0.0072515  | No      |
|      |       |        |             |          |         | Homer2     | 0        | 4.21855 | inf              | 0.001        | 4.21955       | 12.0428734       | 0.00022079 | No      |
|      |       |        |             |          |         | Homez      | 0.691921 | 2.71934 | 1.97457731       | 0.692921     | 2.72034       | 1.97302419       | 0.033901   | No      |
|      |       |        |             |          |         | Hook1      | 0.467222 | 7.3974  | 3.98483818       | 0.468222     | 7.3984        | 3.98194867       | 0.00022079 | No      |

| RRBS |       |        |             |          |         | RNAseq   |           |         |                  |              |               |                  |            |         |
|------|-------|--------|-------------|----------|---------|----------|-----------|---------|------------------|--------------|---------------|------------------|------------|---------|
| gene | Blood | Kidney | methyl.diff | pMWU.fdr | Match ? | gene     | blood     | kidney  | log2(fold_ratio) | blood+ 0.001 | kidney+ 0.001 | log2(fold_ratio) | q_value    | Match ? |
|      |       |        |             |          |         | Hook2    | 2.42718   | 26.1565 | 3.4298165        | 2.42818      | 26.1575       | 3.42927738       | 0.00022079 | No      |
|      |       |        |             |          |         | Hoxa3    | 0         | 2.27449 | inf              | 0.001        | 2.27549       | 11.1519615       | 0.00022079 | No      |
|      |       |        |             |          |         | Hoxa7    | 0         | 1.45932 | inf              | 0.001        | 1.46032       | 10.5120688       | 0.0228245  | No      |
|      |       |        |             |          |         | Hoxa9    | 0         | 2.90056 | inf              | 0.001        | 2.90156       | 11.502613        | 0.00242102 | No      |
|      |       |        |             |          |         | Hoxb2    | 0         | 34.7769 | inf              | 0.001        | 34.7779       | 15.0858832       | 0.00022079 | No      |
|      |       |        |             |          |         | Hoxb8    | 0         | 39.1977 | inf              | 0.001        | 39.1987       | 15.2585182       | 0.00022079 | No      |
|      |       |        |             |          |         | Hoxc10   | 0         | 5.93444 | inf              | 0.001        | 5.93544       | 12.5351393       | 0.00022079 | No      |
|      |       |        |             |          |         | Hoxd8    | 0         | 215.622 | inf              | 0.001        | 215.623       | 17.7181515       | 0.00022079 | No      |
|      |       |        |             |          |         | Hps4     | 9.7263    | 21.9238 | 1.17253488       | 9.7273       | 21.9248       | 1.17245236       | 0.0184986  | No      |
|      |       |        |             |          |         | Hps5     | 14.2833   | 6.95955 | -1.0372634       | 14.2843      | 6.96055       | -1.0371571       | 0.0233831  | No      |
|      |       |        |             |          |         | Hpse     | 19.6128   | 1.80314 | -3.4432122       | 19.6138      | 1.80414       | -3.4424859       | 0.00022079 | No      |
|      |       |        |             |          |         | Hpx      | 0.308128  | 2.91069 | 3.2397595        | 0.309128     | 2.91169       | 3.23558052       | 0.00466383 | No      |
|      |       |        |             |          |         | Hrct1    | 0         | 14.7837 | inf              | 0.001        | 14.7847       | 13.8518173       | 0.00022079 | No      |
|      |       |        |             |          |         | Hrsp12   | 31.2066   | 984.948 | 4.98012447       | 31.2076      | 984.949       | 4.98007971       | 0.00022079 | No      |
|      |       |        |             |          |         | Hs1bp3   | 4.98422   | 11.0339 | 1.14650316       | 4.98522      | 11.0349       | 1.14634448       | 0.00605729 | No      |
|      |       |        |             |          |         | Hs2st1   | 17.3257   | 9.47656 | -0.8704783       | 17.3267      | 9.47756       | -0.8704093       | 0.00896558 | No      |
|      |       |        |             |          |         | Hs3st3b1 | 2.89246   | 6.28522 | 1.11966624       | 2.89346      | 6.28622       | 1.11939706       | 0.0436314  | No      |
|      |       |        |             |          |         | Hsbp1    | 65.0087   | 276.267 | 2.08735853       | 65.0097      | 276.268       | 2.08734156       | 0.00022079 | No      |
|      |       |        |             |          |         | Hsd11b1  | 6.81887   | 90.532  | 3.73082324       | 6.81987      | 90.533        | 3.73062762       | 0.00022079 | No      |
|      |       |        |             |          |         | Hsd11b2  | 0.0451312 | 76.997  | 10.7364614       | 0.0461312    | 76.998        | 10.7048624       | 0.00791314 | No      |
|      |       |        |             |          |         | Hsd17b10 | 82.1525   | 234.501 | 1.51321769       | 82.1535      | 234.502       | 1.51320628       | 0.00022079 | No      |
|      |       |        |             |          |         | Hsd17b11 | 19.1413   | 46.8481 | 1.29130172       | 19.1423      | 46.8491       | 1.29125715       | 0.00041963 | No      |
|      |       |        |             |          |         | Hsd17b2  | 0         | 2.60572 | inf              | 0.001        | 2.60672       | 11.3480199       | 0.00022079 | No      |
|      |       |        |             |          |         | Hsd17b4  | 16.5429   | 67.8295 | 2.03570069       | 16.5439      | 67.8305       | 2.03563476       | 0.00022079 | No      |
|      |       |        |             |          |         | Hsd3b7   | 29.6641   | 16.2158 | -0.8713178       | 29.6651      | 16.2168       | -0.8712775       | 0.0349553  | No      |
|      |       |        |             |          |         | Hsdl1    | 21.8711   | 10.2261 | -1.0967697       | 21.8721      | 10.2271       | -1.0966946       | 0.00096553 | No      |
|      |       |        |             |          |         | Hsdl2    | 7.05579   | 36.8722 | 2.38565397       | 7.05679      | 36.8732       | 2.38548864       | 0.00022079 | No      |
|      |       |        |             |          |         | Hsf2     | 3.79531   | 8.18791 | 1.10927752       | 3.79631      | 8.18891       | 1.10907363       | 0.0161624  | No      |
|      |       |        |             |          |         | Hsh2d    | 20.4362   | 2.99537 | -2.7703208       | 20.4372      | 2.99637       | -2.7699099       | 0.00022079 | No      |
|      |       |        |             |          |         | Hsp90aa1 | 98.5275   | 198.491 | 1.01047524       | 98.5285      | 198.492       | 1.01046786       | 0.00480115 | No      |
|      |       |        |             |          |         | Hspa4l   | 0.96082   | 3.1116  | 1.69531853       | 0.96182      | 3.1126        | 1.69428136       | 0.0117698  | No      |
|      |       |        |             |          |         | Hspa9    | 53.5706   | 103.437 | 0.94923898       | 53.5716      | 103.438       | 0.949226         | 0.00480115 | No      |
|      |       |        |             |          |         | Hspb6    | 5.0824    | 47.6188 | 3.22794944       | 5.0834       | 47.6198       | 3.2276959        | 0.00778313 | No      |
|      |       |        |             |          |         | Hspb8    | 0         | 3.05318 | inf              | 0.001        | 3.05418       | 11.5765694       | 0.00022079 | No      |
|      |       |        |             |          |         | Hspbap1  | 29.6488   | 12.8411 | -1.2072049       | 29.6498      | 12.8421       | -1.2071412       | 0.0405826  | No      |
|      |       |        |             |          |         | Hspbp1   | 18.3467   | 37.5782 | 1.03437537       | 18.3477      | 37.5792       | 1.03433513       | 0.00738919 | No      |
|      |       |        |             |          |         | Hspd1    | 64.987    | 164.123 | 1.33655438       | 64.988       | 164.124       | 1.33654097       | 0.00711928 | No      |
|      |       |        |             |          |         | Hspe1    | 192.619   | 474.688 | 1.30122956       | 192.62       | 474.689       | 1.30122511       | 0.0456891  | No      |
|      |       |        |             |          |         | Htatsf1  | 43.7491   | 26.8284 | -0.7054923       | 43.7501      | 26.8294       | -0.7054715       | 0.0346416  | No      |
|      |       |        |             |          |         | Htt      | 9.03284   | 3.83711 | -1.2351595       | 9.03384      | 3.83811       | -1.2349433       | 0.00078858 | No      |
|      |       |        |             |          |         | Huwe1    | 129.67    | 37.6629 | -1.7836287       | 129.671      | 37.6639       | -1.7836016       | 0.00022079 | No      |
|      |       |        |             |          |         | Hyal1    | 12.3578   | 24.9717 | 1.01487211       | 12.3588      | 24.9727       | 1.01481314       | 0.0270805  | No      |

| RRBS |       |        |             |          |         | RNAseq   |           |         |                  |              |               |                  |            |         |
|------|-------|--------|-------------|----------|---------|----------|-----------|---------|------------------|--------------|---------------|------------------|------------|---------|
| gene | Blood | Kidney | methyl.diff | pMWU.fdr | Match ? | gene     | blood     | kidney  | log2(fold_ratio) | blood+ 0.001 | kidney+ 0.001 | log2(fold_ratio) | q_value    | Match ? |
|      |       |        |             |          |         | Hyal2    | 0.586826  | 14.8201 | 4.65847858       | 0.587826     | 14.8211       | 4.65611954       | 0.00022079 | No      |
|      |       |        |             |          |         | Hykk     | 0         | 22.9145 | inf              | 0.001        | 22.9155       | 14.4840361       | 0.00022079 | No      |
|      |       |        |             |          |         | Hypk     | 151.496   | 272.701 | 0.84804029       | 151.497      | 272.702       | 0.84803606       | 0.0153152  | No      |
|      |       |        |             |          |         | lah1     | 79.2278   | 199.73  | 1.3339724        | 79.2288      | 199.731       | 1.33396141       | 0.00022079 | No      |
|      |       |        |             |          |         | lba57    | 2.63185   | 7.66483 | 1.54217653       | 2.63285      | 7.66583       | 1.54181667       | 0.00257873 | No      |
|      |       |        |             |          |         | lca1     | 0.333312  | 14.1425 | 5.4070201        | 0.334312     | 14.1435       | 5.40280023       | 0.00022079 | No      |
|      |       |        |             |          |         | lcam1    | 3.07261   | 11.8649 | 1.94916338       | 3.07361      | 11.8659       | 1.94881551       | 0.00022079 | No      |
|      |       |        |             |          |         | lcam2    | 156.118   | 37.4294 | -2.0603931       | 156.119      | 37.4304       | -2.0603638       | 0.00180113 | No      |
|      |       |        |             |          |         | lcmt     | 3.80359   | 8.42667 | 1.14760089       | 3.80459      | 8.42767       | 1.14739283       | 0.0229153  | No      |
|      |       |        |             |          |         | lcos     | 41.8001   | 3.26178 | -3.679775        | 41.8011      | 3.26278       | -3.6793673       | 0.00022079 | No      |
|      |       |        |             |          |         | lcoslg   | 2.40482   | 20.3555 | 3.08141784       | 2.40582      | 20.3565       | 3.08088892       | 0.00022079 | No      |
|      |       |        |             |          |         | lct1     | 37.096    | 83.2084 | 1.16546555       | 37.097       | 83.2094       | 1.16544399       | 0.00078858 | No      |
|      |       |        |             |          |         | ld3      | 46.3015   | 86.9695 | 0.90945061       | 46.3025      | 86.9705       | 0.90943604       | 0.00870822 | No      |
|      |       |        |             |          |         | ldh1     | 4.8219    | 98.6232 | 4.35425343       | 4.8229       | 98.6242       | 4.35396889       | 0.00022079 | No      |
|      |       |        |             |          |         | ldh2     | 12.6937   | 546.32  | 5.42756168       | 12.6947      | 546.321       | 5.42745067       | 0.00022079 | No      |
|      |       |        |             |          |         | ldh3a    | 35.3867   | 71.7608 | 1.01998874       | 35.3877      | 71.7618       | 1.01996808       | 0.00211842 | No      |
|      |       |        |             |          |         | ldh3B    | 58.0145   | 141.042 | 1.2816394        | 58.0155      | 141.043       | 1.28162476       | 0.00022079 | No      |
|      |       |        |             |          |         | ldh3g    | 94.0855   | 217.388 | 1.208228         | 94.0865      | 217.389       | 1.2082193        | 0.00022079 | No      |
|      |       |        |             |          |         | ldi1     | 3.21131   | 7.97502 | 1.3123262        | 3.21231      | 7.97602       | 1.3120579        | 0.0417961  | No      |
|      |       |        |             |          |         | ldua     | 39.5909   | 16.4298 | -1.2688539       | 39.5919      | 16.4308       | -1.2688026       | 0.0175851  | No      |
|      |       |        |             |          |         | ler2     | 28.023    | 82.5097 | 1.55795232       | 28.024       | 82.5107       | 1.55791833       | 0.00022079 | No      |
|      |       |        |             |          |         | ler3     | 2.02349   | 97.5235 | 5.59083228       | 2.02449      | 97.5245       | 5.59013427       | 0.00022079 | No      |
|      |       |        |             |          |         | ler5l    | 0.0664015 | 13.1964 | 7.63471287       | 0.0674015    | 13.1974       | 7.61325732       | 0.028906   | No      |
|      |       |        |             |          |         | lffo1    | 50.862    | 18.7622 | -1.4387592       | 50.863       | 18.7632       | -1.4387107       | 0.00022079 | No      |
|      |       |        |             |          |         | lfi202b  | 315.4     | 7.62889 | -5.3695657       | 315.401      | 7.62989       | -5.3693812       | 0.00022079 | No      |
|      |       |        |             |          |         | lfi2712b | 1279.93   | 341.712 | -1.9052121       | 1279.931     | 341.713       | -1.905209        | 0.00022079 | No      |
|      |       |        |             |          |         | lfi44    | 77.2309   | 27.5029 | -1.4895944       | 77.2319      | 27.5039       | -1.4895607       | 0.00022079 | No      |
|      |       |        |             |          |         | lfi44l   | 57.2559   | 6.351   | -3.1723687       | 57.2569      | 6.352         | -3.1721667       | 0.00022079 | No      |
|      |       |        |             |          |         | lfi47    | 52.8248   | 10.0514 | -2.3938189       | 52.8258      | 10.0524       | -2.3937027       | 0.00451708 | No      |
|      |       |        |             |          |         | lfit1lb  | 9.92684   | 22.849  | 1.20272458       | 9.92784      | 22.85         | 1.2026424        | 0.0110257  | No      |
|      |       |        |             |          |         | lfitm1   | 418.333   | 66.4613 | -2.6540654       | 418.334      | 66.4623       | -2.6540471       | 0.00022079 | No      |
|      |       |        |             |          |         | lfitm2   | 168.775   | 372.302 | 1.14137215       | 168.776      | 372.303       | 1.14136747       | 0.00884258 | No      |
|      |       |        |             |          |         | lFNAR1   | 55.9484   | 11.3041 | -2.3072507       | 55.9494      | 11.3051       | -2.3071489       | 0.00022079 | No      |
|      |       |        |             |          |         | lfnar2   | 13.1642   | 5.68356 | -1.2117531       | 13.1652      | 5.68456       | -1.2116088       | 0.00752743 | No      |
|      |       |        |             |          |         | lfngr2   | 22.4005   | 10.1104 | -1.1476909       | 22.4015      | 10.1114       | -1.1476126       | 0.00242102 | No      |
|      |       |        |             |          |         | lft122   | 0.823116  | 19.5087 | 4.56687807       | 0.824116     | 19.5097       | 4.56520036       | 0.00022079 | No      |
|      |       |        |             |          |         | lft172   | 3.57949   | 20.4421 | 2.51371746       | 3.58049      | 20.4431       | 2.51338504       | 0.00536605 | No      |
|      |       |        |             |          |         | lft20    | 44.3143   | 78.5911 | 0.82659362       | 44.3153      | 78.5921       | 0.82657942       | 0.0282852  | No      |
|      |       |        |             |          |         | lft43    | 0.97012   | 16.3093 | 4.07138784       | 0.97112      | 16.3103       | 4.06998993       | 0.00022079 | No      |
|      |       |        |             |          |         | lft46    | 11.8479   | 33.4629 | 1.49793111       | 11.8489      | 33.4639       | 1.49785246       | 0.00022079 | No      |
|      |       |        |             |          |         | lft57    | 0.887852  | 14.4217 | 4.02177822       | 0.888852     | 14.4227       | 4.02025424       | 0.00022079 | No      |
|      |       |        |             |          |         | lft80    | 25.6906   | 8.30576 | -1.6290565       | 25.6916      | 8.30676       | -1.628939        | 0.00480115 | No      |

| RRBS |       |        |             |          |         | RNAseq  |           |          |                  |              |               |                  |            |         |
|------|-------|--------|-------------|----------|---------|---------|-----------|----------|------------------|--------------|---------------|------------------|------------|---------|
| gene | Blood | Kidney | methyl.diff | pMWU.fdr | Match ? | gene    | blood     | kidney   | log2(fold_ratio) | blood+ 0.001 | kidney+ 0.001 | log2(fold_ratio) | q_value    | Match ? |
|      |       |        |             |          |         | lft81   | 2.1515    | 11.6258  | 2.43391525       | 2.1525       | 11.6268       | 2.43336894       | 0.00022079 | No      |
|      |       |        |             |          |         | lgf1    | 0         | 26.2379  | inf              | 0.001        | 26.2389       | 14.6794196       | 0.00022079 | No      |
|      |       |        |             |          |         | lgf1r   | 14.723    | 8.69646  | -0.7595715       | 14.724       | 8.69746       | -0.7595036       | 0.0379944  | No      |
|      |       |        |             |          |         | lgfbp1  | 0         | 30.2652  | inf              | 0.001        | 30.2662       | 14.8854199       | 0.00022079 | No      |
|      |       |        |             |          |         | lgfbp4  | 1.08079   | 22.9109  | 4.405876         | 1.08179      | 22.9119       | 4.40460473       | 0.00022079 | No      |
|      |       |        |             |          |         | lgfbp5  | 0         | 153.41   | inf              | 0.001        | 153.411       | 17.2270424       | 0.00022079 | No      |
|      |       |        |             |          |         | IGG-2A  | 182.221   | 25.1969  | -2.8543711       | 182.222      | 25.1979       | -2.8543217       | 0.00022079 | No      |
|      |       |        |             |          |         | IGJ     | 12.3822   | 1.68418  | -2.8781494       | 12.3832      | 1.68518       | -2.8774096       | 0.00022079 | No      |
|      |       |        |             |          |         | lgkc    | 70.3509   | 7.61939  | -3.2068215       | 70.3519      | 7.62039       | -3.2066526       | 0.00022079 | No      |
|      |       |        |             |          |         | lglon5  | 0.330884  | 5.0023   | 3.91819415       | 0.331884     | 5.0033        | 3.91412898       | 0.00180113 | No      |
|      |       |        |             |          |         | lgsf5   | 0         | 62.279   | inf              | 0.001        | 62.28         | 15.9264813       | 0.00022079 | No      |
|      |       |        |             |          |         | lgsf9   | 1.04384   | 4.99136  | 2.25753237       | 1.04484      | 4.99236       | 2.25643994       | 0.00422081 | No      |
|      |       |        |             |          |         | lkbip   | 3.74736   | 11.7516  | 1.64891071       | 3.74836      | 11.7526       | 1.64864853       | 0.0243977  | No      |
|      |       |        |             |          |         | lkbkb   | 56.1365   | 25.9932  | -1.1108049       | 56.1375      | 25.9942       | -1.1107751       | 0.00227055 | No      |
|      |       |        |             |          |         | lkbke   | 117.17    | 33.1405  | -1.821936        | 117.171      | 33.1415       | -1.8219047       | 0.00180113 | No      |
|      |       |        |             |          |         | lkbkg   | 14.1085   | 4.22523  | -1.7394628       | 14.1095      | 4.22623       | -1.7392237       | 0.00078858 | No      |
|      |       |        |             |          |         | lkzf1   | 217.091   | 8.05466  | -4.7523324       | 217.092      | 8.05566       | -4.75216         | 0.00022079 | No      |
|      |       |        |             |          |         | lkzf2   | 12.9573   | 1.47368  | -3.1362699       | 12.9583      | 1.47468       | -3.1354026       | 0.00022079 | No      |
|      |       |        |             |          |         | lkzf3   | 55.0916   | 2.61479  | -4.3970654       | 55.0926      | 2.61579       | -4.3965399       | 0.00078858 | No      |
|      |       |        |             |          |         | lkzf5   | 14.1847   | 5.02036  | -1.4984729       | 14.1857      | 5.02136       | -1.4982873       | 0.00022079 | No      |
|      |       |        |             |          |         | ll10ra  | 15.4184   | 0.656851 | -4.5529431       | 15.4194      | 0.657851      | -4.550842        | 0.00022079 | No      |
|      |       |        |             |          |         | ll10rb  | 26.1871   | 14.0646  | -0.8967878       | 26.1881      | 14.0656       | -0.8967403       | 0.0221192  | No      |
|      |       |        |             |          |         | ll11ra1 | 0.048046  | 51.8903  | 10.0768328       | 0.049046     | 51.8913       | 10.0471415       | 0.0117698  | No      |
|      |       |        |             |          |         | ll12rb1 | 2.30771   | 6.22278  | 1.4310973        | 2.30871      | 6.22378       | 1.4307041        | 0.0196176  | No      |
|      |       |        |             |          |         | ll13ra1 | 0.160609  | 13.5261  | 6.39604938       | 0.161609     | 13.5271       | 6.38720123       | 0.0373662  | No      |
|      |       |        |             |          |         | ll15ra  | 0.456052  | 3.21022  | 2.81540193       | 0.457052     | 3.21122       | 2.81269129       | 0.00618779 | No      |
|      |       |        |             |          |         | ll16    | 43.9814   | 3.58954  | -3.6150226       | 43.9824      | 3.59054       | -3.6146536       | 0.00227055 | No      |
|      |       |        |             |          |         | ll17rd  | 0.0313904 | 7.80779  | 7.95844703       | 0.0323904    | 7.80879       | 7.91338892       | 0.0344255  | No      |
|      |       |        |             |          |         | ll17re  | 0.279857  | 7.74477  | 4.79046066       | 0.280857     | 7.74577       | 4.785501         | 0.00242102 | No      |
|      |       |        |             |          |         | ll18    | 2.16102   | 12.0441  | 2.47854226       | 2.16202      | 12.0451       | 2.4779946        | 0.0467065  | No      |
|      |       |        |             |          |         | ll18r1  | 18.3831   | 2.23581  | -3.0395106       | 18.3841      | 2.23681       | -3.0389439       | 0.00022079 | No      |
|      |       |        |             |          |         | ll18RAP | 9.54791   | 3.27653  | -1.5430162       | 9.54891      | 3.27753       | -1.5427271       | 0.00041963 | No      |
|      |       |        |             |          |         | ll19    | 0.393973  | 3.04378  | 2.94969542       | 0.394973     | 3.04478       | 2.94651205       | 0.0133754  | No      |
|      |       |        |             |          |         | ll1b    | 1.30078   | 11.9754  | 3.20262496       | 1.30178      | 11.9764       | 3.20163675       | 0.00180113 | No      |
|      |       |        |             |          |         | ll1r1   | 0.232773  | 2.82769  | 3.60262834       | 0.233773     | 2.82869       | 3.59695386       | 0.0183813  | No      |
|      |       |        |             |          |         | ll1rn   | 0.596769  | 3.69908  | 2.631922         | 0.597769     | 3.70008       | 2.62989648       | 0.00180113 | No      |
|      |       |        |             |          |         | ll21r   | 152.824   | 6.82959  | -4.4839283       | 152.825      | 6.83059       | -4.4837266       | 0.00022079 | No      |
|      |       |        |             |          |         | ll2ra   | 23.272    | 7.64061  | -1.6068355       | 23.273       | 7.64161       | -1.6067087       | 0.00645389 | No      |
|      |       |        |             |          |         | ll2rb   | 78.2747   | 20.5447  | -1.9297798       | 78.2757      | 20.5457       | -1.929728        | 0.00022079 | No      |
|      |       |        |             |          |         | ll2rg   | 496.334   | 22.1314  | -4.4871447       | 496.335      | 22.1324       | -4.4870824       | 0.00022079 | No      |
|      |       |        |             |          |         | ll34    | 0.0884531 | 17.1439  | 7.59856692       | 0.0894531    | 17.1449       | 7.58243229       | 0.0424075  | No      |
|      |       |        |             |          |         | ll4r    | 163.489   | 20.7515  | -2.977906        | 163.49       | 20.7525       | -2.9778453       | 0.00022079 | No      |



| RRBS |       |        |             |          |         | RNAseq |           |         |                  |              |               |                  |            |         |
|------|-------|--------|-------------|----------|---------|--------|-----------|---------|------------------|--------------|---------------|------------------|------------|---------|
| gene | Blood | Kidney | methyl.diff | pMWU.fdr | Match ? | gene   | blood     | kidney  | log2(fold_ratio) | blood+ 0.001 | kidney+ 0.001 | log2(fold_ratio) | q_value    | Match ? |
|      |       |        |             |          |         | Il6r   | 57.2665   | 1.45818 | -5.2954507       | 57.2675      | 1.45918       | -5.2944869       | 0.00022079 | No      |
|      |       |        |             |          |         | Il6st  | 29.3829   | 11.9225 | -1.30129         | 29.3839      | 11.9235       | -1.3012181       | 0.00022079 | No      |
|      |       |        |             |          |         | Illdr1 | 0.301237  | 26.1647 | 6.44057892       | 0.302237     | 26.1657       | 6.43585276       | 0.00022079 | No      |
|      |       |        |             |          |         | Illdr2 | 0         | 1.28384 | inf              | 0.001        | 1.28484       | 10.327373        | 0.0144657  | No      |
|      |       |        |             |          |         | Ilf2   | 42.2033   | 70.5312 | 0.74090577       | 42.2043      | 70.5322       | 0.74089204       | 0.0333701  | No      |
|      |       |        |             |          |         | Ilvbl  | 6.53312   | 11.9361 | 0.86948748       | 6.53412      | 11.9371       | 0.86938754       | 0.0385511  | No      |
|      |       |        |             |          |         | Immt   | 53.7983   | 141.185 | 1.39195433       | 53.7993      | 141.186       | 1.39193773       | 0.00022079 | No      |
|      |       |        |             |          |         | Impa2  | 16.4929   | 61.6673 | 1.90266059       | 16.4939      | 61.6683       | 1.90259651       | 0.00022079 | No      |
|      |       |        |             |          |         | Impact | 92.362    | 11.5895 | -2.9944811       | 92.363       | 11.5905       | -2.9943722       | 0.00022079 | No      |
|      |       |        |             |          |         | Impad1 | 4.77258   | 9.44148 | 0.98424365       | 4.77358      | 9.44248       | 0.98409419       | 0.00378481 | No      |
|      |       |        |             |          |         | Impdh1 | 47.3823   | 8.27475 | -2.5175606       | 47.3833      | 8.27575       | -2.5174167       | 0.00022079 | No      |
|      |       |        |             |          |         | Impdh2 | 285.247   | 70.296  | -2.0206972       | 285.248      | 70.297        | -2.0206817       | 0.00022079 | No      |
|      |       |        |             |          |         | Inadl  | 6.33659   | 25.7108 | 2.02059592       | 6.33759      | 25.7118       | 2.02042438       | 0.00022079 | No      |
|      |       |        |             |          |         | Ing1   | 75.7396   | 21.1272 | -1.8419462       | 75.7406      | 21.1282       | -1.841897        | 0.00022079 | No      |
|      |       |        |             |          |         | Ing3   | 21.1453   | 5.49984 | -1.9428755       | 21.1463      | 5.50084       | -1.9426814       | 0.00022079 | No      |
|      |       |        |             |          |         | Ing5   | 11.8382   | 7.13821 | -0.7298155       | 11.8392      | 7.13921       | -0.7297353       | 0.0490996  | No      |
|      |       |        |             |          |         | Inip   | 22.7995   | 8.86043 | -1.3635536       | 22.8005      | 8.86143       | -1.363454        | 0.0387563  | No      |
|      |       |        |             |          |         | Inmt   | 0         | 56.8314 | inf              | 0.001        | 56.8324       | 15.794426        | 0.00022079 | No      |
|      |       |        |             |          |         | Ino80  | 16.0705   | 5.08438 | -1.6602711       | 16.0715      | 5.08538       | -1.6600771       | 0.00022079 | No      |
|      |       |        |             |          |         | Inpp4b | 30.3671   | 3.38632 | -3.1647189       | 30.3681      | 3.38732       | -3.1643405       | 0.00113657 | No      |
|      |       |        |             |          |         | Inpp5b | 37.6387   | 12.2651 | -1.6176578       | 37.6397      | 12.2661       | -1.6175785       | 0.00818469 | No      |
|      |       |        |             |          |         | Inpp5d | 29.0452   | 3.22161 | -3.172446        | 29.0462      | 3.22261       | -3.1720479       | 0.00022079 | No      |
|      |       |        |             |          |         | Inpp5j | 0         | 21.2026 | inf              | 0.001        | 21.2036       | 14.3720216       | 0.00022079 | No      |
|      |       |        |             |          |         | Inpp5k | 27.8585   | 11.9613 | -1.2197434       | 27.8595      | 11.9623       | -1.2196746       | 0.011893   | No      |
|      |       |        |             |          |         | Insig2 | 5.35943   | 12.3445 | 1.20371693       | 5.36043      | 12.3455       | 1.20356463       | 0.00060553 | No      |
|      |       |        |             |          |         | Insl3  | 93.1865   | 24.7279 | -1.9139812       | 93.1875      | 24.7289       | -1.9139384       | 0.00022079 | No      |
|      |       |        |             |          |         | Ints10 | 22.9532   | 12.4756 | -0.8795861       | 22.9542      | 12.4766       | -0.8795333       | 0.035911   | No      |
|      |       |        |             |          |         | INTS6  | 37.898    | 6.61625 | -2.5180361       | 37.899       | 6.61725       | -2.5178561       | 0.00022079 | No      |
|      |       |        |             |          |         | Ip6k1  | 64.4867   | 27.2216 | -1.2442498       | 64.4877      | 27.2226       | -1.2442192       | 0.00022079 | No      |
|      |       |        |             |          |         | Ip6k2  | 48.4427   | 21.4293 | -1.1766946       | 48.4437      | 21.4303       | -1.176657        | 0.00113657 | No      |
|      |       |        |             |          |         | Ipcef1 | 26.4625   | 1.51497 | -4.1265882       | 26.4635      | 1.51597       | -4.1256908       | 0.00022079 | No      |
|      |       |        |             |          |         | Ipmk   | 6.10005   | 21.0403 | 1.7862623        | 6.10105      | 21.0413       | 1.78609438       | 0.00022079 | No      |
|      |       |        |             |          |         | Ipo9   | 29.4495   | 9.60249 | -1.6167627       | 29.4505      | 9.60349       | -1.6166614       | 0.00022079 | No      |
|      |       |        |             |          |         | Iqcb1  | 7.31424   | 3.74292 | -0.9665438       | 7.31524      | 3.74392       | -0.9663556       | 0.0402662  | No      |
|      |       |        |             |          |         | IQCD   | 0         | 15.6927 | inf              | 0.001        | 15.6937       | 13.9378979       | 0.00022079 | No      |
|      |       |        |             |          |         | Iqce   | 0.956109  | 6.6128  | 2.79001426       | 0.957109     | 6.6138        | 2.78872428       | 0.00164037 | No      |
|      |       |        |             |          |         | Iqch   | 11.6756   | 39.9322 | 1.77405587       | 11.6766      | 39.9332       | 1.77396843       | 0.00164037 | No      |
|      |       |        |             |          |         | Iqgap1 | 58.0582   | 22.1036 | -1.3932185       | 58.0592      | 22.1046       | -1.3931781       | 0.00022079 | No      |
|      |       |        |             |          |         | Iqgap2 | 44.1125   | 7.47616 | -2.5608182       | 44.1135      | 7.47716       | -2.5606579       | 0.00022079 | No      |
|      |       |        |             |          |         | Iqgap3 | 0.0743586 | 1.07255 | 3.85040149       | 0.0753586    | 1.07355       | 3.83247341       | 0.023492   | No      |
|      |       |        |             |          |         | Iqsec1 | 2.5442    | 48.6322 | 4.25662787       | 2.5452       | 48.6332       | 4.25609059       | 0.00022079 | No      |
|      |       |        |             |          |         | Iqsec2 | 0.674434  | 5.93525 | 3.13755963       | 0.675434     | 5.93625       | 3.13566514       | 0.00078858 | No      |

| RRBS |       |        |             |          |         | RNAseq             |          |         |                  |              |               |                  |            |         |
|------|-------|--------|-------------|----------|---------|--------------------|----------|---------|------------------|--------------|---------------|------------------|------------|---------|
| gene | Blood | Kidney | methyl.diff | pMWU.fdr | Match ? | gene               | blood    | kidney  | log2(fold_ratio) | blood+ 0.001 | kidney+ 0.001 | log2(fold_ratio) | q_value    | Match ? |
|      |       |        |             |          |         | Irak1              | 44.6358  | 26.3734 | -0.7591177       | 44.6368      | 26.3744       | -0.7590953       | 0.023492   | No      |
|      |       |        |             |          |         | IRAK1BP1           | 0.429754 | 16.6043 | 5.27190203       | 0.430754     | 16.6053       | 5.26863578       | 0.00041963 | No      |
|      |       |        |             |          |         | Irak3              | 16.3461  | 5.10313 | -1.6794922       | 16.3471      | 5.10413       | -1.6792977       | 0.00060553 | No      |
|      |       |        |             |          |         | Irak4              | 13.3841  | 6.89494 | -0.9569102       | 13.3851      | 6.89594       | -0.9568088       | 0.0321597  | No      |
|      |       |        |             |          |         | Ireb2              | 17.4344  | 9.37716 | -0.8947138       | 17.4354      | 9.37816       | -0.8946427       | 0.00738919 | No      |
|      |       |        |             |          |         | Irf1               | 86.4379  | 39.0208 | -1.1474207       | 86.4389      | 39.0218       | -1.1474004       | 0.0414961  | No      |
|      |       |        |             |          |         | Irf2               | 90.7672  | 12.9628 | -2.8077937       | 90.7682      | 12.9638       | -2.8076983       | 0.00022079 | No      |
|      |       |        |             |          |         | Irf9               | 55.9486  | 17.4132 | -1.6839207       | 55.9496      | 17.4142       | -1.6838636       | 0.00304332 | No      |
|      |       |        |             |          |         | Irs1               | 0.470142 | 1.42035 | 1.59507801       | 0.471142     | 1.42135       | 1.593028         | 0.0192929  | No      |
|      |       |        |             |          |         | IscA1              | 31.4652  | 73.6422 | 1.22677561       | 31.4662      | 73.6432       | 1.22674935       | 0.00022079 | No      |
|      |       |        |             |          |         | IscA2              | 30.3311  | 72.4919 | 1.25702198       | 30.3321      | 72.4929       | 1.25699432       | 0.0450008  | No      |
|      |       |        |             |          |         | Iscu               | 50.4968  | 238.213 | 2.23798828       | 50.4978      | 238.214       | 2.23796576       | 0.00022079 | No      |
|      |       |        |             |          |         | IsoC1              | 14.1516  | 46.821  | 1.72619057       | 14.1526      | 46.822        | 1.72611944       | 0.00022079 | No      |
|      |       |        |             |          |         | IsoC2b             | 14.6079  | 77.5423 | 2.40823473       | 14.6089      | 77.5433       | 2.40815458       | 0.00022079 | No      |
|      |       |        |             |          |         | Ily1               | 80.3783  | 35.9436 | -1.1610712       | 80.3793      | 35.9446       | -1.161049        | 0.00113657 | No      |
|      |       |        |             |          |         | Itch               | 28.3211  | 15.0053 | -0.9164051       | 28.3221      | 15.0063       | -0.9163599       | 0.00645389 | No      |
|      |       |        |             |          |         | Itfg1              | 6.90933  | 30.8225 | 2.15736616       | 6.91033      | 30.8235       | 2.15720418       | 0.00022079 | No      |
|      |       |        |             |          |         | Itfg3              | 1.61007  | 48.4352 | 4.91086058       | 1.61107      | 48.4362       | 4.9099946        | 0.00022079 | No      |
|      |       |        |             |          |         | Itga1              | 11.5609  | 47.2161 | 2.03002517       | 11.5619      | 47.2171       | 2.02993094       | 0.00022079 | No      |
|      |       |        |             |          |         | Itga2b             | 2.17928  | 4.64166 | 1.09078928       | 2.18028      | 4.64266       | 1.09043821       | 0.0320442  | No      |
|      |       |        |             |          |         | Itga3              | 2.07771  | 29.0011 | 3.80304142       | 2.07871      | 29.0021       | 3.80239696       | 0.00022079 | No      |
|      |       |        |             |          |         | Itga4              | 86.6233  | 1.11913 | -6.2743056       | 86.6243      | 1.12013       | -6.2730337       | 0.00022079 | No      |
|      |       |        |             |          |         | Itga5              | 0.084143 | 2.45681 | 4.86779922       | 0.085143     | 2.45781       | 4.85134166       | 0.00147497 | No      |
|      |       |        |             |          |         | Itgav              | 5.22218  | 27.4617 | 2.39469685       | 5.22318      | 27.4627       | 2.39447314       | 0.00022079 | No      |
|      |       |        |             |          |         | Itgb2              | 111.605  | 4.87483 | -4.5169059       | 111.606      | 4.87583       | -4.516623        | 0.00022079 | No      |
|      |       |        |             |          |         | Itgb3              | 18.1356  | 5.94931 | -1.6080302       | 18.1366      | 5.95031       | -1.6078673       | 0.018847   | No      |
|      |       |        |             |          |         | Itgb6              | 0        | 14.2639 | inf              | 0.001        | 14.2649       | 13.800182        | 0.00022079 | No      |
|      |       |        |             |          |         | Itgb7              | 118.047  | 18.7123 | -2.6573026       | 118.048      | 18.7133       | -2.6572377       | 0.00022079 | No      |
|      |       |        |             |          |         | Itgb8              | 0.138802 | 7.22191 | 5.70128018       | 0.139802     | 7.22291       | 5.69112329       | 0.00022079 | No      |
|      |       |        |             |          |         | Itih3              | 0.570319 | 7.28376 | 3.67484238       | 0.571319     | 7.28476       | 3.67251303       | 0.00227055 | No      |
|      |       |        |             |          |         | Itih5              | 0        | 30.2728 | inf              | 0.001        | 30.2738       | 14.8857822       | 0.00022079 | No      |
|      |       |        |             |          |         | Itk                | 119.726  | 3.55185 | -5.075022        | 119.727      | 3.55285       | -5.0746279       | 0.00022079 | No      |
|      |       |        |             |          |         | Itm2a              | 77.8742  | 3.56218 | -4.4503131       | 77.8752      | 3.56318       | -4.4499267       | 0.00022079 | No      |
|      |       |        |             |          |         | Itm2b              | 398.738  | 825.055 | 1.04904919       | 398.739      | 825.056       | 1.04904732       | 0.0411953  | No      |
|      |       |        |             |          |         | Itm2c              | 53.5978  | 217.576 | 2.02127374       | 53.5988      | 217.577       | 2.02125345       | 0.00022079 | No      |
|      |       |        |             |          |         | Itpkc              | 2.02171  | 4.5013  | 1.15476565       | 2.02271      | 4.5023        | 1.1543727        | 0.0231371  | No      |
|      |       |        |             |          |         | Itpr2              | 14.3774  | 2.08452 | -2.7860157       | 14.3784      | 2.08552       | -2.7854241       | 0.00022079 | No      |
|      |       |        |             |          |         | Itpr3              | 32.501   | 15.5717 | -1.0615577       | 32.502       | 15.5727       | -1.0615094       | 0.00988585 | No      |
|      |       |        |             |          |         | Itns1              | 16.2463  | 322.157 | 4.30958085       | 16.2473      | 322.158       | 4.30949653       | 0.00022079 | No      |
|      |       |        |             |          |         | Ivd                | 20.3522  | 58.0848 | 1.51297593       | 20.3532      | 58.0858       | 1.51292988       | 0.00022079 | No      |
|      |       |        |             |          |         | IVNS1ABP_PREDICTED | 44.7828  | 220.179 | 2.29766024       | 44.7838      | 220.18        | 2.29763457       | 0.00022079 | No      |

| RRBS |       |        |             |          |         | RNAseq  |           |         |                  |              |               |                  |            |         |
|------|-------|--------|-------------|----------|---------|---------|-----------|---------|------------------|--------------|---------------|------------------|------------|---------|
| gene | Blood | Kidney | methyl.diff | pMWU.fdr | Match ? | gene    | blood     | kidney  | log2(fold_ratio) | blood+ 0.001 | kidney+ 0.001 | log2(fold_ratio) | q_value    | Match ? |
|      |       |        |             |          |         | lyd     | 0         | 12.0408 | inf              | 0.001        | 12.0418       | 13.5557634       | 0.00022079 | No      |
|      |       |        |             |          |         | Izumo4  | 17.2981   | 2.12104 | -3.0277698       | 17.2991      | 2.12204       | -3.0271732       | 0.00685176 | No      |
|      |       |        |             |          |         | Jag2    | 0.245959  | 6.04645 | 4.6195986        | 0.246959     | 6.04745       | 4.61398348       | 0.00022079 | No      |
|      |       |        |             |          |         | Jak1    | 248.735   | 28.2105 | -3.1403054       | 248.736      | 28.2115       | -3.14026         | 0.00022079 | No      |
|      |       |        |             |          |         | Jak2    | 39.3181   | 6.60143 | -2.5743431       | 39.3191      | 6.60243       | -2.5741613       | 0.00022079 | No      |
|      |       |        |             |          |         | Jakmip1 | 53.3652   | 5.05572 | -3.3999108       | 53.3662      | 5.05672       | -3.3996525       | 0.00022079 | No      |
|      |       |        |             |          |         | Jkamp   | 11.3624   | 23.9311 | 1.07461911       | 11.3634      | 23.9321       | 1.07455243       | 0.0103977  | No      |
|      |       |        |             |          |         | Jmjd7   | 9.21942   | 4.54654 | -1.0199069       | 9.22042      | 4.54754       | -1.0197461       | 0.0228245  | No      |
|      |       |        |             |          |         | Jun     | 34.1169   | 204.491 | 2.58347888       | 34.1179      | 204.492       | 2.58344365       | 0.00022079 | No      |
|      |       |        |             |          |         | Jund    | 268.212   | 144.713 | -0.8901793       | 268.213      | 144.714       | -0.8901747       | 0.00632443 | No      |
|      |       |        |             |          |         | Jup     | 25.5538   | 46.504  | 0.86381697       | 25.5548      | 46.505        | 0.86379154       | 0.0083198  | No      |
|      |       |        |             |          |         | Kalrn   | 0.0232749 | 16.746  | 9.49082585       | 0.0242749    | 16.747        | 9.43022161       | 0.0100165  | No      |
|      |       |        |             |          |         | Kank1   | 0.100246  | 33.8712 | 8.40037062       | 0.101246     | 33.8722       | 8.38609297       | 0.00022079 | No      |
|      |       |        |             |          |         | Kank2   | 0.35537   | 13.364  | 5.23288618       | 0.35637      | 13.365        | 5.22894013       | 0.00022079 | No      |
|      |       |        |             |          |         | Kank3   | 0.878078  | 5.69078 | 2.6962054        | 0.879078     | 5.69178       | 2.69481681       | 0.0200735  | No      |
|      |       |        |             |          |         | Kank4   | 0.0653462 | 1.01053 | 3.950865         | 0.0663462    | 1.01153       | 3.93038146       | 0.00765035 | No      |
|      |       |        |             |          |         | Kansl1  | 101.946   | 21.6241 | -2.2370932       | 101.947      | 21.6251       | -2.2370406       | 0.00022079 | No      |
|      |       |        |             |          |         | Kansl1l | 3.26862   | 16.3486 | 2.32241353       | 3.26962      | 16.3496       | 2.32206046       | 0.0238376  | No      |
|      |       |        |             |          |         | Kat6a   | 24.7606   | 6.93973 | -1.8350948       | 24.7616      | 6.94073       | -1.8349452       | 0.00022079 | No      |
|      |       |        |             |          |         | Kat7    | 34.2811   | 16.0569 | -1.09422         | 34.2821      | 16.0579       | -1.0941723       | 0.00113657 | No      |
|      |       |        |             |          |         | Katna1  | 24.2958   | 11.3519 | -1.0977732       | 24.2968      | 11.3529       | -1.0977054       | 0.00211842 | No      |
|      |       |        |             |          |         | Kbtbd11 | 43.1428   | 4.82309 | -3.1610902       | 43.1438      | 4.82409       | -3.1608245       | 0.00022079 | No      |
|      |       |        |             |          |         | Kbtbd2  | 43.0452   | 10.1907 | -2.0785992       | 43.0462      | 10.1917       | -2.0784912       | 0.00022079 | No      |
|      |       |        |             |          |         | Kcnab2  | 58.7267   | 5.80387 | -3.3389295       | 58.7277      | 5.80487       | -3.3387055       | 0.00022079 | No      |
|      |       |        |             |          |         | Kcne1   | 0         | 2.14414 | inf              | 0.001        | 2.14514       | 11.0668561       | 0.00962607 | No      |
|      |       |        |             |          |         | Kcne3   | 0         | 1.23728 | inf              | 0.001        | 1.23828       | 10.2741219       | 0.00022079 | No      |
|      |       |        |             |          |         | Kcng4   | 0.588946  | 2.18814 | 1.89349778       | 0.589946     | 2.18914       | 1.89170941       | 0.00242102 | No      |
|      |       |        |             |          |         | Kcnip3  | 0         | 2.64687 | inf              | 0.001        | 2.64787       | 11.3706166       | 0.00022079 | No      |
|      |       |        |             |          |         | Kcnj1   | 0.0153726 | 102.866 | 12.7081174       | 0.0163726    | 102.867       | 12.6172092       | 0.00022079 | No      |
|      |       |        |             |          |         | Kcnk1   | 0.137512  | 64.6022 | 8.87588196       | 0.138512     | 64.6032       | 8.86545085       | 0.00060553 | No      |
|      |       |        |             |          |         | Kcnk6   | 8.1311    | 2.47334 | -1.71699         | 8.1321       | 2.47434       | -1.7165842       | 0.00318754 | No      |
|      |       |        |             |          |         | Kcnt1   | 0         | 109.796 | inf              | 0.001        | 109.797       | 16.7444791       | 0.00022079 | No      |
|      |       |        |             |          |         | Kctd1   | 4.24127   | 44.7014 | 3.39775178       | 4.24227      | 44.7024       | 3.39744394       | 0.00022079 | No      |
|      |       |        |             |          |         | Kctd13  | 2.89122   | 7.35474 | 1.34699595       | 2.89222      | 7.35574       | 1.34669319       | 0.00896558 | No      |
|      |       |        |             |          |         | Kctd14  | 0.0518226 | 3.53215 | 6.0908214        | 0.0528226    | 3.53315       | 6.06365588       | 0.0417961  | No      |
|      |       |        |             |          |         | Kctd17  | 0.638871  | 24.5551 | 5.26435423       | 0.639871     | 24.5561       | 5.26215656       | 0.00022079 | No      |
|      |       |        |             |          |         | Kctd18  | 28.7939   | 9.39219 | -1.6162297       | 28.7949      | 9.39319       | -1.6161262       | 0.00022079 | No      |
|      |       |        |             |          |         | Kctd20  | 18.0909   | 4.98942 | -1.8583202       | 18.0919      | 4.99042       | -1.8581108       | 0.00022079 | No      |
|      |       |        |             |          |         | Kctd6   | 4.49007   | 24.6088 | 2.45436447       | 4.49107      | 24.6098       | 2.45410182       | 0.00022079 | No      |
|      |       |        |             |          |         | Kdelc2  | 2.85703   | 12.7556 | 2.15854267       | 2.85803      | 12.7566       | 2.1581509        | 0.00022079 | No      |
|      |       |        |             |          |         | Kdelr1  | 31.7475   | 83.7631 | 1.39967185       | 31.7485      | 83.7641       | 1.39964363       | 0.00022079 | No      |
|      |       |        |             |          |         | Kdelr2  | 14.767    | 27.8071 | 0.91307653       | 14.768       | 27.8081       | 0.91303072       | 0.0238376  | No      |

| RRBS |       |        |             |          |         | RNAseq    |           |          |                  |              |               |                  |            |         |
|------|-------|--------|-------------|----------|---------|-----------|-----------|----------|------------------|--------------|---------------|------------------|------------|---------|
| gene | Blood | Kidney | methyl.diff | pMWU.fdr | Match ? | gene      | blood     | kidney   | log2(fold_ratio) | blood+ 0.001 | kidney+ 0.001 | log2(fold_ratio) | q_value    | Match ? |
|      |       |        |             |          |         | Kdm1b     | 25.0639   | 7.23039  | -1.7934655       | 25.0649      | 7.23139       | -1.7933236       | 0.00022079 | No      |
|      |       |        |             |          |         | KDM2B     | 11.9226   | 6.07985  | -0.9715912       | 11.9236      | 6.08085       | -0.971475        | 0.0114056  | No      |
|      |       |        |             |          |         | Kdm3a     | 57.0378   | 14.6612  | -1.9599151       | 57.0388      | 14.6622       | -1.959842        | 0.00022079 | No      |
|      |       |        |             |          |         | Kdm3b     | 26.3827   | 8.55026  | -1.625552        | 26.3837      | 8.55126       | -1.625438        | 0.00022079 | No      |
|      |       |        |             |          |         | Kdm4a     | 37.2243   | 12.2247  | -1.6064457       | 37.2253      | 12.2257       | -1.6063664       | 0.00022079 | No      |
|      |       |        |             |          |         | Kdm4b     | 23.1758   | 10.8819  | -1.0906887       | 23.1768      | 10.8829       | -1.0906183       | 0.0142227  | No      |
|      |       |        |             |          |         | Kdm5a     | 33.4172   | 8.22725  | -2.0221087       | 33.4182      | 8.22825       | -2.0219765       | 0.00022079 | No      |
|      |       |        |             |          |         | Kdm5b     | 17.3618   | 9.07225  | -0.9363842       | 17.3628      | 9.07325       | -0.9363083       | 0.00451708 | No      |
|      |       |        |             |          |         | Kdm5c     | 13.1924   | 7.52181  | -0.8105553       | 13.1934      | 7.52281       | -0.8104728       | 0.0450883  | No      |
|      |       |        |             |          |         | Kdm6a     | 24.9237   | 6.37096  | -1.9679356       | 24.9247      | 6.37196       | -1.967767        | 0.00022079 | No      |
|      |       |        |             |          |         | Kdm7a     | 16.649    | 3.01504  | -2.4651865       | 16.65        | 3.01604       | -2.4647947       | 0.00022079 | No      |
|      |       |        |             |          |         | Kdr       | 0.0639825 | 2.59762  | 5.34336922       | 0.0649825    | 2.59862       | 5.32155062       | 0.00164037 | No      |
|      |       |        |             |          |         | Khdrbs1   | 77.1338   | 33.6229  | -1.197919        | 77.1348      | 33.6239       | -1.1978948       | 0.00022079 | No      |
|      |       |        |             |          |         | Khyn      | 81.569    | 30.4699  | -1.4206362       | 81.57        | 30.4709       | -1.4206065       | 0.0175851  | No      |
|      |       |        |             |          |         | Khsrp     | 38.8775   | 19.0109  | -1.0321086       | 38.8785      | 19.0119       | -1.0320698       | 0.0192929  | No      |
|      |       |        |             |          |         | Kidins220 | 32.0335   | 13.8316  | -1.2116134       | 32.0345      | 13.8326       | -1.2115541       | 0.00078858 | No      |
|      |       |        |             |          |         | Kif11     | 0.916479  | 4.73277  | 2.36851108       | 0.917479     | 4.73377       | 2.36724257       | 0.00022079 | No      |
|      |       |        |             |          |         | Kif13b    | 7.06402   | 13.6276  | 0.94797017       | 7.06502      | 13.6286       | 0.94787182       | 0.0170023  | No      |
|      |       |        |             |          |         | Kif15     | 3.63819   | 1.01795  | -1.8375542       | 3.63919      | 1.01895       | -1.8365341       | 0.00078858 | No      |
|      |       |        |             |          |         | Kif16b    | 3.06472   | 9.13306  | 1.57534304       | 3.06572      | 9.13406       | 1.57503033       | 0.00022079 | No      |
|      |       |        |             |          |         | Kif18b    | 0.273346  | 0.903605 | 1.72496399       | 0.274346     | 0.904605      | 1.72129143       | 0.0250666  | No      |
|      |       |        |             |          |         | Kif1c     | 11.7118   | 107.769  | 3.20190752       | 11.7128      | 107.77        | 3.20179772       | 0.00022079 | No      |
|      |       |        |             |          |         | Kif21a    | 0.0308844 | 10.3769  | 8.3922815        | 0.0318844    | 10.3779       | 8.34644809       | 0.00022079 | No      |
|      |       |        |             |          |         | Kif21b    | 58.514    | 2.8071   | -4.3816295       | 58.515       | 2.8081        | -4.3811403       | 0.00022079 | No      |
|      |       |        |             |          |         | Kif26a    | 0         | 2.9974   | inf              | 0.001        | 2.9984        | 11.5499771       | 0.00022079 | No      |
|      |       |        |             |          |         | Kif2a     | 21.1639   | 7.72723  | -1.4535823       | 21.1649      | 7.72823       | -1.4534637       | 0.00508519 | No      |
|      |       |        |             |          |         | Kif9      | 0.0450299 | 1.88761  | 5.38953364       | 0.0460299    | 1.88861       | 5.3586097        | 0.0279776  | No      |
|      |       |        |             |          |         | Kifap3    | 4.38289   | 22.6491  | 2.36949935       | 4.38389      | 22.6501       | 2.36923392       | 0.00022079 | No      |
|      |       |        |             |          |         | Kifc1     | 3.4869    | 7.18986  | 1.04401869       | 3.4879       | 7.19086       | 1.04380564       | 0.0365427  | No      |
|      |       |        |             |          |         | Kifc3     | 0.683118  | 77.9979  | 6.83515666       | 0.684118     | 77.9989       | 6.83306478       | 0.00022079 | No      |
|      |       |        |             |          |         | Kirrel    | 0         | 2.16515  | inf              | 0.001        | 2.16615       | 11.0809174       | 0.00022079 | No      |
|      |       |        |             |          |         | Kit       | 0.145801  | 1.34586  | 3.20645582       | 0.146801     | 1.34686       | 3.1976662        | 0.0117698  | No      |
|      |       |        |             |          |         | Kitlg     | 0.23824   | 11.604   | 5.60606273       | 0.23924      | 11.605        | 5.60014409       | 0.00022079 | No      |
|      |       |        |             |          |         | Klc2      | 13.876    | 30.7208  | 1.14662404       | 13.877       | 30.7218       | 1.14656703       | 0.00130998 | No      |
|      |       |        |             |          |         | Klc4      | 11.8445   | 54.9418  | 2.21368688       | 11.8455      | 54.9428       | 2.21359134       | 0.00022079 | No      |
|      |       |        |             |          |         | Klf10     | 2.67134   | 8.17982  | 1.61450549       | 2.67234      | 8.18082       | 1.61414189       | 0.00022079 | No      |
|      |       |        |             |          |         | Klf11     | 15.2611   | 5.56444  | -1.4555505       | 15.2621      | 5.56544       | -1.4553858       | 0.00022079 | No      |
|      |       |        |             |          |         | Klf12     | 10.2641   | 1.50337  | -2.7713351       | 10.2651      | 1.50437       | -2.7705163       | 0.00022079 | No      |
|      |       |        |             |          |         | Klf13     | 58.2203   | 8.23026  | -2.8225124       | 58.2213      | 8.23126       | -2.8223619       | 0.00022079 | No      |
|      |       |        |             |          |         | Klf3      | 77.2587   | 24.1435  | -1.6780626       | 77.2597      | 24.1445       | -1.6780215       | 0.00022079 | No      |
|      |       |        |             |          |         | Klf4      | 1.55865   | 25.3867  | 4.02570396       | 1.55965      | 25.3877       | 4.02483548       | 0.00022079 | No      |
|      |       |        |             |          |         | KLF7      | 7.28909   | 2.8711   | -1.3441351       | 7.29009      | 2.8721        | -1.3438306       | 0.00022079 | No      |

| RRBS |       |        |             |          |         | RNAseq  |            |          |                  |              |               |                  |            |         |
|------|-------|--------|-------------|----------|---------|---------|------------|----------|------------------|--------------|---------------|------------------|------------|---------|
| gene | Blood | Kidney | methyl.diff | pMWU.fdr | Match ? | gene    | blood      | kidney   | log2(fold_ratio) | blood+ 0.001 | kidney+ 0.001 | log2(fold_ratio) | q_value    | Match ? |
|      |       |        |             |          |         | Klf9    | 51.5479    | 21.3794  | -1.2696923       | 51.5489      | 21.3804       | -1.2696528       | 0.00022079 | No      |
|      |       |        |             |          |         | KLHDC1  | 11.7991    | 2.2102   | -2.416428        | 11.8001      | 2.2112        | -2.4158977       | 0.00022079 | No      |
|      |       |        |             |          |         | Klhdc10 | 6.65592    | 19.2039  | 1.52868933       | 6.65692      | 19.2049       | 1.52854772       | 0.00022079 | No      |
|      |       |        |             |          |         | KLHDC2  | 75.845     | 26.9548  | -1.4925119       | 75.846       | 26.9558       | -1.4924774       | 0.00022079 | No      |
|      |       |        |             |          |         | Klhdc4  | 15.7157    | 28.7759  | 0.87265452       | 15.7167      | 28.7769       | 0.87261286       | 0.0283842  | No      |
|      |       |        |             |          |         | Klhdc7a | 0          | 17.3959  | inf              | 0.001        | 17.3969       | 14.0865426       | 0.00022079 | No      |
|      |       |        |             |          |         | Klhl11  | 7.67694    | 2.58195  | -1.5720703       | 7.67794      | 2.58295       | -1.5716996       | 0.00551024 | No      |
|      |       |        |             |          |         | Klhl13  | 0.0751172  | 2.12283  | 4.82070174       | 0.0761172    | 2.12383       | 4.80230199       | 0.0131304  | No      |
|      |       |        |             |          |         | Klhl14  | 0.113622   | 7.17458  | 5.98058027       | 0.114622     | 7.17558       | 5.96813957       | 0.0278747  | No      |
|      |       |        |             |          |         | Klhl2   | 34.1984    | 18.4542  | -0.8899796       | 34.1994      | 18.4552       | -0.8899436       | 0.0127657  | No      |
|      |       |        |             |          |         | Klhl23  | 0.129755   | 0.84061  | 2.69564649       | 0.130755     | 0.84161       | 2.68628573       | 0.0267305  | No      |
|      |       |        |             |          |         | Klhl25  | 3.19608    | 9.33071  | 1.54568334       | 3.19708      | 9.33171       | 1.54538663       | 0.00022079 | No      |
|      |       |        |             |          |         | Klhl26  | 0.578331   | 3.18282  | 2.46033823       | 0.579331     | 3.18382       | 2.458299         | 0.00022079 | No      |
|      |       |        |             |          |         | Klhl28  | 5.38606    | 1.40799  | -1.9355932       | 5.38706      | 1.40899       | -1.9348368       | 0.00060553 | No      |
|      |       |        |             |          |         | Klhl42  | 22.0057    | 55.1934  | 1.3266185        | 22.0067      | 55.1944       | 1.32657908       | 0.00227055 | No      |
|      |       |        |             |          |         | Klhl6   | 46.7641    | 1.02579  | -5.5105941       | 46.7651      | 1.02679       | -5.5092192       | 0.00022079 | No      |
|      |       |        |             |          |         | Klhl9   | 9.849      | 19.0849  | 0.95438247       | 9.85         | 19.0859       | 0.95431159       | 0.00508519 | No      |
|      |       |        |             |          |         | Klk1    | 0          | 92.362   | inf              | 0.001        | 92.363        | 16.4950274       | 0.00022079 | No      |
|      |       |        |             |          |         | Klk1b3  | 0          | 121.437  | inf              | 0.001        | 121.438       | 16.8898604       | 0.00022079 | No      |
|      |       |        |             |          |         | Klk1c10 | 0          | 7.87189  | inf              | 0.001        | 7.87289       | 12.9426776       | 0.00022079 | No      |
|      |       |        |             |          |         | Klra17  | 8.90638    | 26.4445  | 1.57005663       | 8.90738      | 26.4455       | 1.5699492        | 0.0112749  | No      |
|      |       |        |             |          |         | Klrb1c  | 63.6423    | 2.31166  | -4.7829848       | 63.6433      | 2.31266       | -4.7823836       | 0.00022079 | No      |
|      |       |        |             |          |         | Klrc1   | 1.78358    | 0.155393 | -3.5207825       | 1.78458      | 0.156393      | -3.5123367       | 0.0112749  | No      |
|      |       |        |             |          |         | Klrd1   | 76.7679    | 12.9644  | -2.5659477       | 76.7689      | 12.9654       | -2.5658553       | 0.00022079 | No      |
|      |       |        |             |          |         | Klrg2   | 0.148411   | 4.38899  | 4.88621905       | 0.149411     | 4.38999       | 4.87685938       | 0.0399581  | No      |
|      |       |        |             |          |         | Klrk1   | 175.441    | 8.1071   | -4.4356562       | 175.442      | 8.1081        | -4.4354865       | 0.00022079 | No      |
|      |       |        |             |          |         | Kmt2a   | 17.6315    | 4.98384  | -1.8228256       | 17.6325      | 4.98484       | -1.8226179       | 0.00022079 | No      |
|      |       |        |             |          |         | Kmt2b   | 24.713     | 7.72093  | -1.6784236       | 24.714       | 7.72193       | -1.6782952       | 0.00242102 | No      |
|      |       |        |             |          |         | Kmt2c   | 41.3042    | 9.41221  | -2.1336831       | 41.3052      | 9.41321       | -2.1335647       | 0.00022079 | No      |
|      |       |        |             |          |         | Kmt2e   | 56.3148    | 17.2004  | -1.711072        | 56.3158      | 17.2014       | -1.7110138       | 0.00078858 | No      |
|      |       |        |             |          |         | KNG1L1  | 0          | 131.197  | inf              | 0.001        | 131.198       | 17.0013862       | 0.00022079 | No      |
|      |       |        |             |          |         | Kpna1   | 31.4961    | 7.68784  | -2.034523        | 31.4971      | 7.68884       | -2.0343811       | 0.00022079 | No      |
|      |       |        |             |          |         | Kpna5   | 18.1892    | 4.87255  | -1.9003332       | 18.1902      | 4.87355       | -1.9001165       | 0.00022079 | No      |
|      |       |        |             |          |         | KPTN    | 12.42      | 22.3404  | 0.84698984       | 12.421       | 22.3414       | 0.84693827       | 0.0213411  | No      |
|      |       |        |             |          |         | Kri1    | 47.1301    | 15.7715  | -1.5793289       | 47.1311      | 15.7725       | -1.579268        | 0.0399581  | No      |
|      |       |        |             |          |         | Krit1   | 29.2015    | 10.2473  | -1.5107986       | 29.2025      | 10.2483       | -1.5107073       | 0.00022079 | No      |
|      |       |        |             |          |         | Krt14   | 0          | 10.3454  | inf              | 0.001        | 10.3464       | 13.3368413       | 0.00022079 | No      |
|      |       |        |             |          |         | Krt15   | 0          | 34.8299  | inf              | 0.001        | 34.8309       | 15.0880801       | 0.00022079 | No      |
|      |       |        |             |          |         | Krt17   | 0          | 1.28377  | inf              | 0.001        | 1.28477       | 10.3272944       | 0.00022079 | No      |
|      |       |        |             |          |         | Krt18   | 2.5668     | 63.3931  | 4.62628303       | 2.5678       | 63.3941       | 4.62574383       | 0.00022079 | No      |
|      |       |        |             |          |         | Krt23   | 0          | 9.83192  | inf              | 0.001        | 9.83292       | 13.2634042       | 0.00022079 | No      |
|      |       |        |             |          |         | Krt5    | 0.00680611 | 7.61803  | 10.1283718       | 0.00780611   | 7.61903       | 9.93078783       | 0.0340153  | No      |

| RRBS |       |        |             |          |         | RNAseq  |          |          |                  |              |               |                  |            |         |
|------|-------|--------|-------------|----------|---------|---------|----------|----------|------------------|--------------|---------------|------------------|------------|---------|
| gene | Blood | Kidney | methyl.diff | pMWU.fdr | Match ? | gene    | blood    | kidney   | log2(fold_ratio) | blood+ 0.001 | kidney+ 0.001 | log2(fold_ratio) | q_value    | Match ? |
|      |       |        |             |          |         | Krt80   | 0        | 10.4809  | inf              | 0.001        | 10.4819       | 13.3556126       | 0.00022079 | No      |
|      |       |        |             |          |         | Kynu    | 0.176774 | 11.3445  | 6.00394312       | 0.177774     | 11.3455       | 5.99593204       | 0.00078858 | No      |
|      |       |        |             |          |         | L1cam   | 4.05078  | 26.2804  | 2.6977156        | 4.05178      | 26.2814       | 2.69741438       | 0.00022079 | No      |
|      |       |        |             |          |         | L2hgdh  | 2.15548  | 5.02903  | 1.22227098       | 2.15648      | 5.03003       | 1.22188867       | 0.0149559  | No      |
|      |       |        |             |          |         | L3mbtl2 | 35.3108  | 17.0717  | -1.0485028       | 35.3118      | 17.0727       | -1.0484591       | 0.00579147 | No      |
|      |       |        |             |          |         | L3mbtl3 | 62.3028  | 3.93975  | -3.983121        | 62.3038      | 3.94075       | -3.982778        | 0.00022079 | No      |
|      |       |        |             |          |         | Lace1   | 4.06727  | 28.5422  | 2.81096387       | 4.06827      | 28.5432       | 2.81065975       | 0.00022079 | No      |
|      |       |        |             |          |         | Lactb   | 7.9263   | 30.6272  | 1.950094         | 7.9273       | 30.6282       | 1.9499591        | 0.00022079 | No      |
|      |       |        |             |          |         | Lad1    | 0        | 94.9368  | inf              | 0.001        | 94.9378       | 16.534695        | 0.00022079 | No      |
|      |       |        |             |          |         | Lage3   | 37.5271  | 72.7297  | 0.95461182       | 37.5281      | 72.7307       | 0.95459321       | 0.0103977  | No      |
|      |       |        |             |          |         | Lama2   | 1.42781  | 0.273584 | -2.3837482       | 1.42881      | 0.274584      | -2.3794946       | 0.00645389 | No      |
|      |       |        |             |          |         | Lamp1   | 98.4097  | 244.349  | 1.31207077       | 98.4107      | 244.35        | 1.31206201       | 0.00041963 | No      |
|      |       |        |             |          |         | Lamp2   | 25.0393  | 76.6217  | 1.6135588        | 25.0403      | 76.6227       | 1.61352002       | 0.00022079 | No      |
|      |       |        |             |          |         | Lamtor1 | 54.2025  | 125.164  | 1.20738837       | 54.2035      | 125.165       | 1.20737328       | 0.00041963 | No      |
|      |       |        |             |          |         | Lamtor3 | 16.4856  | 27.8103  | 0.75441291       | 16.4866      | 27.8113       | 0.75437728       | 0.0487223  | No      |
|      |       |        |             |          |         | Lamtor4 | 47.1095  | 148.115  | 1.65262783       | 47.1105      | 148.116       | 1.65260694       | 0.00022079 | No      |
|      |       |        |             |          |         | Lamtor5 | 55.2327  | 121.129  | 1.13294975       | 55.2337      | 121.13        | 1.13293554       | 0.00227055 | No      |
|      |       |        |             |          |         | Lap3    | 19.8325  | 53.2582  | 1.42513712       | 19.8335      | 53.2592       | 1.42509147       | 0.00022079 | No      |
|      |       |        |             |          |         | Laptm4a | 89.0177  | 260.568  | 1.54949579       | 89.0187      | 260.569       | 1.54948512       | 0.00022079 | No      |
|      |       |        |             |          |         | Laptm5  | 622.882  | 64.5643  | -3.2701503       | 622.883      | 64.5653       | -3.2701303       | 0.00022079 | No      |
|      |       |        |             |          |         | Larp1   | 53.962   | 22.178   | -1.2828146       | 53.963       | 22.179        | -1.2827762       | 0.00060553 | No      |
|      |       |        |             |          |         | Larp1b  | 32.1204  | 14.7475  | -1.1230194       | 32.1214      | 14.7485       | -1.1229665       | 0.00041963 | No      |
|      |       |        |             |          |         | Lars    | 33.445   | 14.4514  | -1.2105813       | 33.446       | 14.4524       | -1.2105246       | 0.00022079 | No      |
|      |       |        |             |          |         | LAS2    | 4.80837  | 1.45412  | -1.7254016       | 4.80937      | 1.45512       | -1.7247098       | 0.0138632  | No      |
|      |       |        |             |          |         | Layn    | 0.123589 | 1.42597  | 3.52832138       | 0.124589     | 1.42697       | 3.5177064        | 0.0407797  | No      |
|      |       |        |             |          |         | Lbp     | 0.144032 | 2.99173  | 4.3765187        | 0.145032     | 2.99273       | 4.36701897       | 0.011657   | No      |
|      |       |        |             |          |         | Lbr     | 66.73    | 7.15261  | -3.2217938       | 66.731       | 7.15361       | -3.2216138       | 0.00022079 | No      |
|      |       |        |             |          |         | Lcat    | 6.68633  | 19.008   | 1.50732028       | 6.68733      | 19.009        | 1.50718042       | 0.00060553 | No      |
|      |       |        |             |          |         | Lck     | 501.939  | 31.305   | -4.003047        | 501.94       | 31.306        | -4.0030038       | 0.00022079 | No      |
|      |       |        |             |          |         | Lclat1  | 2.34366  | 10.4685  | 2.15921954       | 2.34466      | 10.4695       | 2.15874191       | 0.00096553 | No      |
|      |       |        |             |          |         | Lcn2    | 0.148853 | 152.844  | 10.0039559       | 0.149853     | 152.845       | 9.99430568       | 0.00130998 | No      |
|      |       |        |             |          |         | Lcor    | 13.2363  | 3.84605  | -1.7830505       | 13.2373      | 3.84705       | -1.7827844       | 0.00022079 | No      |
|      |       |        |             |          |         | Lcp1    | 378.329  | 28.4165  | -3.7348406       | 378.33       | 28.4175       | -3.7347936       | 0.00022079 | No      |
|      |       |        |             |          |         | Lcp2    | 97.0678  | 6.55257  | -3.88886         | 97.0688      | 6.55357       | -3.8886547       | 0.00022079 | No      |
|      |       |        |             |          |         | Ldb1    | 290.861  | 24.7968  | -3.552104        | 290.862      | 24.7978       | -3.5520508       | 0.00022079 | No      |
|      |       |        |             |          |         | Ldb2    | 0        | 3.23365  | inf              | 0.001        | 3.23465       | 11.6593939       | 0.00022079 | No      |
|      |       |        |             |          |         | Ldhd    | 7.93378  | 864.011  | 6.76689748       | 7.93478      | 864.012       | 6.76671732       | 0.00022079 | No      |
|      |       |        |             |          |         | Ldhd    | 0.929258 | 37.494   | 5.33443673       | 0.930258     | 37.495        | 5.33292352       | 0.00022079 | No      |
|      |       |        |             |          |         | Ldlr    | 1.44775  | 8.51565  | 2.55630416       | 1.44875      | 8.51665       | 2.5554774        | 0.00022079 | No      |
|      |       |        |             |          |         | Ldlrad1 | 5.75795  | 2.30504  | -1.3207635       | 5.75895      | 2.30604       | -1.3203883       | 0.0136242  | No      |
|      |       |        |             |          |         | Ldlrap1 | 152.984  | 8.79402  | -4.1207142       | 152.985      | 8.79502       | -4.1205595       | 0.00022079 | No      |
|      |       |        |             |          |         | Lect2   | 0        | 1.46988  | inf              | 0.001        | 1.47088       | 10.5224638       | 0.00022079 | No      |

| RRBS |       |        |             |          |         | RNAseq  |           |         |                  |              |               |                  |            |         |
|------|-------|--------|-------------|----------|---------|---------|-----------|---------|------------------|--------------|---------------|------------------|------------|---------|
| gene | Blood | Kidney | methyl.diff | pMWU.fdr | Match ? | gene    | blood     | kidney  | log2(fold_ratio) | blood+ 0.001 | kidney+ 0.001 | log2(fold_ratio) | q_value    | Match ? |
|      |       |        |             |          |         | Lef1    | 202.818   | 5.52392 | -5.1983495       | 202.819      | 5.52492       | -5.1980954       | 0.00022079 | No      |
|      |       |        |             |          |         | Lemd3   | 12.0878   | 5.34009 | -1.1786157       | 12.0888      | 5.34109       | -1.1784649       | 0.00363736 | No      |
|      |       |        |             |          |         | Leng8   | 213.802   | 36.5175 | -2.5496154       | 213.803      | 36.5185       | -2.5495827       | 0.00022079 | No      |
|      |       |        |             |          |         | Lepre1  | 4.68787   | 14.8846 | 1.66681598       | 4.68887      | 14.8856       | 1.66660519       | 0.00060553 | No      |
|      |       |        |             |          |         | Leprel1 | 0         | 24.036  | inf              | 0.001        | 24.037        | 14.5529692       | 0.00022079 | No      |
|      |       |        |             |          |         | Leprel2 | 0.165836  | 42.4986 | 8.00151428       | 0.166836     | 42.4996       | 7.99287482       | 0.00022079 | No      |
|      |       |        |             |          |         | Lfng    | 47.3618   | 4.53861 | -3.3834015       | 47.3628      | 4.53961       | -3.3831141       | 0.00022079 | No      |
|      |       |        |             |          |         | Lgals1  | 469.223   | 217.339 | -1.1103267       | 469.224      | 217.34        | -1.1103231       | 0.00060553 | No      |
|      |       |        |             |          |         | Lgals3  | 1.90521   | 68.8092 | 5.17457954       | 1.90621      | 68.8102       | 5.17384347       | 0.00022079 | No      |
|      |       |        |             |          |         | Lgals8  | 13.089    | 21.8114 | 0.7367275        | 13.09        | 21.8124       | 0.73668342       | 0.0471951  | No      |
|      |       |        |             |          |         | Lgals9  | 183.578   | 32.5101 | -2.4974333       | 183.579      | 32.5111       | -2.4973968       | 0.00022079 | No      |
|      |       |        |             |          |         | Lgmn    | 74.8287   | 168.775 | 1.1734376        | 74.8297      | 168.776       | 1.17342687       | 0.00022079 | No      |
|      |       |        |             |          |         | Lgr4    | 0.514051  | 28.0108 | 5.76792788       | 0.515051     | 28.0118       | 5.76517559       | 0.00022079 | No      |
|      |       |        |             |          |         | Lhfp    | 0.069606  | 9.96741 | 7.16186319       | 0.070606     | 9.96841       | 7.14142881       | 0.0346416  | No      |
|      |       |        |             |          |         | Lhx1    | 0         | 2.87984 | inf              | 0.001        | 2.88084       | 11.4922738       | 0.00022079 | No      |
|      |       |        |             |          |         | Lias    | 3.84455   | 18.7315 | 2.28457979       | 3.84555      | 18.7325       | 2.2842816        | 0.00022079 | No      |
|      |       |        |             |          |         | Lifr    | 0.0454868 | 46.0364 | 9.98311136       | 0.0464868    | 46.0374       | 9.95176952       | 0.00870822 | No      |
|      |       |        |             |          |         | Lig4    | 48.4131   | 10.0507 | -2.2681015       | 48.4141      | 10.0517       | -2.2679878       | 0.00022079 | No      |
|      |       |        |             |          |         | Lilrb4  | 2.73921   | 45.6034 | 4.05730961       | 2.74021      | 45.6044       | 4.05681466       | 0.00022079 | No      |
|      |       |        |             |          |         | Lima1   | 0.440625  | 11.466  | 4.70166702       | 0.441625     | 11.467        | 4.69852235       | 0.00765035 | No      |
|      |       |        |             |          |         | Limch1  | 0         | 11.6318 | inf              | 0.001        | 11.6328       | 13.5059108       | 0.00022079 | No      |
|      |       |        |             |          |         | Limd2   | 756.392   | 57.2301 | -3.7242881       | 756.393      | 57.2311       | -3.7242648       | 0.00022079 | No      |
|      |       |        |             |          |         | Lims1   | 23.095    | 13.4955 | -0.7751021       | 23.096       | 13.4965       | -0.7750577       | 0.0286013  | No      |
|      |       |        |             |          |         | Lin52   | 7.43575   | 19.6826 | 1.40437064       | 7.43675      | 19.6836       | 1.40424992       | 0.0238376  | No      |
|      |       |        |             |          |         | Lin54   | 4.76713   | 2.31506 | -1.0420714       | 4.76813      | 2.31606       | -1.0417509       | 0.0270805  | No      |
|      |       |        |             |          |         | Lix1l   | 2.03224   | 5.20885 | 1.3578941        | 2.03324      | 5.20985       | 1.35746132       | 0.00618779 | No      |
|      |       |        |             |          |         | Llg12   | 9.2077    | 43.7981 | 2.24995555       | 9.2087       | 43.7991       | 2.24983182       | 0.00022079 | No      |
|      |       |        |             |          |         | Lman1   | 8.47705   | 25.2117 | 1.5724592        | 8.47805      | 25.2127       | 1.57234624       | 0.00363736 | No      |
|      |       |        |             |          |         | Lman2l  | 9.87705   | 19.8951 | 1.01026103       | 9.87805      | 19.8961       | 1.01018749       | 0.00845215 | No      |
|      |       |        |             |          |         | Lmcd1   | 0         | 9.55222 | inf              | 0.001        | 9.55322       | 13.2217714       | 0.00022079 | No      |
|      |       |        |             |          |         | Lmna    | 1.33451   | 32.3057 | 4.59740671       | 1.33551      | 32.3067       | 4.59637071       | 0.00022079 | No      |
|      |       |        |             |          |         | Lmnb1   | 11.3308   | 4.20388 | -1.4304563       | 11.3318      | 4.20488       | -1.4302405       | 0.00147497 | No      |
|      |       |        |             |          |         | Lmnb2   | 10.4432   | 5.49818 | -0.9255378       | 10.4442      | 5.49918       | -0.9254136       | 0.0133754  | No      |
|      |       |        |             |          |         | Lmo1    | 0         | 3.04832 | inf              | 0.001        | 3.04932       | 11.5742718       | 0.00022079 | No      |
|      |       |        |             |          |         | Lmo2    | 2.89125   | 12.2476 | 2.08273381       | 2.89225      | 12.2486       | 2.08235269       | 0.00147497 | No      |
|      |       |        |             |          |         | Lmo7    | 2.32101   | 42.9085 | 4.20843882       | 2.32201      | 42.9095       | 4.207851         | 0.00022079 | No      |
|      |       |        |             |          |         | Lnx2    | 15.9476   | 5.21532 | -1.6125116       | 15.9486      | 5.21632       | -1.6123255       | 0.00022079 | No      |
|      |       |        |             |          |         | Lonp2   | 18.746    | 74.7771 | 1.99601373       | 18.747       | 74.7781       | 1.99595607       | 0.0019604  | No      |
|      |       |        |             |          |         | Lonrf1  | 0.191323  | 1.14114 | 2.57639357       | 0.192323     | 1.14214       | 2.57013629       | 0.0320442  | No      |
|      |       |        |             |          |         | Lpar3   | 0         | 1.7978  | inf              | 0.001        | 1.7988        | 10.8128191       | 0.00022079 | No      |
|      |       |        |             |          |         | Lpar6   | 51.375    | 10.8599 | -2.2420557       | 51.376       | 10.8609       | -2.2419509       | 0.00060553 | No      |
|      |       |        |             |          |         | Lpcat1  | 12.8674   | 6.0478  | -1.0892382       | 12.8684      | 6.0488        | -1.0891118       | 0.0107821  | No      |

| RRBS |       |        |             |          |         | RNAseq  |           |          |                  |              |               |                  |            |         |
|------|-------|--------|-------------|----------|---------|---------|-----------|----------|------------------|--------------|---------------|------------------|------------|---------|
| gene | Blood | Kidney | methyl.diff | pMWU.fdr | Match ? | gene    | blood     | kidney   | log2(fold_ratio) | blood+ 0.001 | kidney+ 0.001 | log2(fold_ratio) | q_value    | Match ? |
|      |       |        |             |          |         | Lpcat4  | 18.7973   | 5.98733  | -1.6505408       | 18.7983      | 5.98833       | -1.6503766       | 0.00022079 | No      |
|      |       |        |             |          |         | Lpgat1  | 4.69358   | 12.6058  | 1.42532702       | 4.69458      | 12.6068       | 1.42513412       | 0.00147497 | No      |
|      |       |        |             |          |         | Lphn1   | 12.5204   | 5.07587  | -1.3025536       | 12.5214      | 5.07687       | -1.3023847       | 0.00022079 | No      |
|      |       |        |             |          |         | Lphn2   | 0.07882   | 6.32925  | 6.32732899       | 0.07982      | 6.33025       | 6.30936839       | 0.00022079 | No      |
|      |       |        |             |          |         | Lphn3   | 0         | 0.885164 | inf              | 0.001        | 0.886164      | 9.79142991       | 0.00022079 | No      |
|      |       |        |             |          |         | Lpin1   | 27.0551   | 5.84161  | -2.2114626       | 27.0561      | 5.84261       | -2.211269        | 0.00618779 | No      |
|      |       |        |             |          |         | Lpxn    | 118.233   | 7.64474  | -3.9510215       | 118.234      | 7.64574       | -3.950845        | 0.00022079 | No      |
|      |       |        |             |          |         | Lrch1   | 11.6342   | 5.44225  | -1.0960969       | 11.6352      | 5.44325       | -1.0959558       | 0.012511   | No      |
|      |       |        |             |          |         | Lrch3   | 19.1355   | 7.77031  | -1.3002075       | 19.1365      | 7.77131       | -1.3000973       | 0.00041963 | No      |
|      |       |        |             |          |         | Lrch4   | 82.1763   | 21.8392  | -1.9118024       | 82.1773      | 21.8402       | -1.9117539       | 0.00022079 | No      |
|      |       |        |             |          |         | Lrig1   | 58.0558   | 4.94125  | -3.5544922       | 58.0568      | 4.94225       | -3.5542252       | 0.00022079 | No      |
|      |       |        |             |          |         | Lrig2   | 10.5206   | 3.25441  | -1.6927491       | 10.5216      | 3.25541       | -1.692443        | 0.0336988  | No      |
|      |       |        |             |          |         | LRIG3   | 0.110001  | 5.15024  | 5.54905112       | 0.111001     | 5.15124       | 5.53627518       | 0.0249599  | No      |
|      |       |        |             |          |         | Lrmp    | 38.7115   | 9.45188  | -2.034089        | 38.7125      | 9.45288       | -2.0339736       | 0.00096553 | No      |
|      |       |        |             |          |         | Lrp1    | 0.182811  | 1.43452  | 2.9721433        | 0.183811     | 1.43552       | 2.96527842       | 0.00022079 | No      |
|      |       |        |             |          |         | Lrp12   | 0.177658  | 3.82481  | 4.42821352       | 0.178658     | 3.82581       | 4.42049281       | 0.00164037 | No      |
|      |       |        |             |          |         | Lrp5    | 1.73899   | 37.4265  | 4.4277386        | 1.73999      | 37.4275       | 4.42694777       | 0.00022079 | No      |
|      |       |        |             |          |         | Lrpap1  | 10.7946   | 86.7701  | 3.00688821       | 10.7956      | 86.7711       | 3.00677119       | 0.00022079 | No      |
|      |       |        |             |          |         | Lrrc1   | 10.0467   | 19.938   | 0.988799         | 10.0477      | 19.939        | 0.98872776       | 0.0128843  | No      |
|      |       |        |             |          |         | Lrrc19  | 0.099637  | 7.95381  | 6.31882071       | 0.100637     | 7.95481       | 6.30459475       | 0.01483    | No      |
|      |       |        |             |          |         | Lrrc25  | 0.16816   | 3.01573  | 4.16460079       | 0.16916      | 3.01673       | 4.15652521       | 0.00180113 | No      |
|      |       |        |             |          |         | Lrrc29  | 0.747965  | 2.8781   | 1.94407405       | 0.748965     | 2.8791        | 1.94264769       | 0.0197348  | No      |
|      |       |        |             |          |         | Lrrc34  | 24.1791   | 1.58043  | -3.9353715       | 24.1801      | 1.58143       | -3.9345186       | 0.00022079 | No      |
|      |       |        |             |          |         | Lrrc39  | 6.25391   | 1.67418  | -1.9013038       | 6.25491      | 1.67518       | -1.900673        | 0.0196176  | No      |
|      |       |        |             |          |         | Lrrc58  | 0.46692   | 10.4787  | 4.48814055       | 0.46792      | 10.4797       | 4.48519171       | 0.00147497 | No      |
|      |       |        |             |          |         | Lrrc59  | 14.438    | 28.303   | 0.97108407       | 14.439       | 28.304        | 0.97103512       | 0.00273202 | No      |
|      |       |        |             |          |         | Lrrc61  | 0.154727  | 1.71979  | 3.47443554       | 0.155727     | 1.72079       | 3.46598004       | 0.0247343  | No      |
|      |       |        |             |          |         | Lrrc66  | 0.0709251 | 5.25621  | 6.21158283       | 0.0719251    | 5.25721       | 6.19165823       | 0.0019604  | No      |
|      |       |        |             |          |         | Lrrc8a  | 32.6729   | 115.843  | 1.82600445       | 32.6739      | 115.844       | 1.82597275       | 0.00180113 | No      |
|      |       |        |             |          |         | Lrrc8b  | 32.9624   | 4.76928  | -2.7889779       | 32.9634      | 4.77028       | -2.7887192       | 0.00022079 | No      |
|      |       |        |             |          |         | Lrrc8c  | 44.529    | 3.57184  | -3.6400059       | 44.53        | 3.57284       | -3.6396344       | 0.00022079 | No      |
|      |       |        |             |          |         | Lrrfip2 | 11.4053   | 27.0154  | 1.24407765       | 11.4063      | 27.0164       | 1.24400456       | 0.00180113 | No      |
|      |       |        |             |          |         | Lrrk1   | 0.321946  | 11.9986  | 5.21990355       | 0.322946     | 11.9996       | 5.21554955       | 0.00022079 | No      |
|      |       |        |             |          |         | Lrrk2   | 0.644749  | 10.2636  | 3.99265541       | 0.645749     | 10.2646       | 3.99056009       | 0.00318754 | No      |
|      |       |        |             |          |         | Lrsam1  | 2.34545   | 16.5314  | 2.81727226       | 2.34645      | 16.5324       | 2.81674455       | 0.00113657 | No      |
|      |       |        |             |          |         | Lrtm2   | 0.190517  | 5.37784  | 4.81903519       | 0.191517     | 5.37884       | 4.81175071       | 0.00147497 | No      |
|      |       |        |             |          |         | Lrwd1   | 45.5209   | 8.71083  | -2.385647        | 45.5219      | 8.71183       | -2.3855131       | 0.00392909 | No      |
|      |       |        |             |          |         | Lsm14a  | 70.8875   | 28.8299  | -1.2979654       | 70.8885      | 28.8309       | -1.2979357       | 0.00022079 | No      |
|      |       |        |             |          |         | Lsm14b  | 51.7604   | 18.2016  | -1.5077835       | 51.7614      | 18.2026       | -1.5077321       | 0.00022079 | No      |
|      |       |        |             |          |         | Lsm5    | 146.816   | 79.9146  | -0.8774782       | 146.817      | 79.9156       | -0.87747         | 0.0200735  | No      |
|      |       |        |             |          |         | LSP1    | 213.287   | 48.3709  | -2.1405847       | 213.288      | 48.3719       | -2.1405617       | 0.00022079 | No      |
|      |       |        |             |          |         | Lsr     | 1.69925   | 43.6108  | 4.68171543       | 1.70025      | 43.6118       | 4.68089974       | 0.00180113 | No      |



| RRBS |       |        |             |          |         | RNAseq  |           |          |                  |              |               |                  |            |         |
|------|-------|--------|-------------|----------|---------|---------|-----------|----------|------------------|--------------|---------------|------------------|------------|---------|
| gene | Blood | Kidney | methyl.diff | pMWU.fdr | Match ? | gene    | blood     | kidney   | log2(fold_ratio) | blood+ 0.001 | kidney+ 0.001 | log2(fold_ratio) | q_value    | Match ? |
|      |       |        |             |          |         | Lta4h   | 14.9899   | 26.253   | 0.80849153       | 14.9909      | 26.254        | 0.80845025       | 0.0265154  | No      |
|      |       |        |             |          |         | Ltb     | 353.462   | 20.1396  | -4.1334482       | 353.463      | 20.1406       | -4.1333806       | 0.0261671  | No      |
|      |       |        |             |          |         | Ltbp1   | 0.0529852 | 12.2316  | 7.85080798       | 0.0539852    | 12.2326       | 7.82395141       | 0.00211842 | No      |
|      |       |        |             |          |         | Ltn1    | 18.495    | 8.61867  | -1.1015981       | 18.496       | 8.61967       | -1.1015088       | 0.0132548  | No      |
|      |       |        |             |          |         | Luc7l   | 42.0764   | 22.5183  | -0.9019134       | 42.0774      | 22.5193       | -0.9018836       | 0.0381059  | No      |
|      |       |        |             |          |         | Luc7l3  | 96.9901   | 46.6748  | -1.0551937       | 96.9911      | 46.6758       | -1.0551776       | 0.00257873 | No      |
|      |       |        |             |          |         | Lurap1  | 0         | 1.85818  | inf              | 0.001        | 1.85918       | 10.8604507       | 0.00022079 | No      |
|      |       |        |             |          |         | Ly6al   | 0.667083  | 18.7275  | 4.81114824       | 0.668083     | 18.7285       | 4.8090642        | 0.00041963 | No      |
|      |       |        |             |          |         | Ly6c    | 279.991   | 91.3947  | -1.615198        | 279.992      | 91.3957       | -1.6151874       | 0.00022079 | No      |
|      |       |        |             |          |         | Ly6e    | 597.197   | 168.082  | -1.8290417       | 597.198      | 168.083       | -1.8290355       | 0.00022079 | No      |
|      |       |        |             |          |         | Ly6i    | 0.0765975 | 99.3729  | 10.3413394       | 0.0775975    | 99.3739       | 10.3226411       | 0.0344255  | No      |
|      |       |        |             |          |         | Ly75    | 7.81389   | 0.479308 | -4.027016        | 7.81489      | 0.480308      | -4.0241938       | 0.00022079 | No      |
|      |       |        |             |          |         | Ly9     | 84.0014   | 2.23455  | -5.2323571       | 84.0024      | 2.23555       | -5.2317288       | 0.00022079 | No      |
|      |       |        |             |          |         | Lyar    | 19.6997   | 9.82918  | -1.0030307       | 19.7007      | 9.83018       | -1.0029572       | 0.0110257  | No      |
|      |       |        |             |          |         | Lyn     | 3.14055   | 11.5639  | 1.88053889       | 3.14155      | 11.5649       | 1.88020434       | 0.00022079 | No      |
|      |       |        |             |          |         | Lynx1   | 0.296706  | 13.5417  | 5.51223095       | 0.297706     | 13.5427       | 5.50748329       | 0.00480115 | No      |
|      |       |        |             |          |         | Lypd1   | 0.0601743 | 6.90754  | 6.84288075       | 0.0611743    | 6.90854       | 6.81931136       | 0.0394543  | No      |
|      |       |        |             |          |         | Lypd3   | 0.542269  | 2.99539  | 2.46566325       | 0.543269     | 2.99639       | 2.46348678       | 0.00113657 | No      |
|      |       |        |             |          |         | Lyplal1 | 0.59478   | 25.6688  | 5.43151591       | 0.59578      | 25.6698       | 5.42914855       | 0.00147497 | No      |
|      |       |        |             |          |         | Lyrn2   | 16.3105   | 27.0545  | 0.73006757       | 16.3115      | 27.0555       | 0.73003245       | 0.0352839  | No      |
|      |       |        |             |          |         | Lyrn7   | 3.4973    | 11.7141  | 1.74393265       | 3.4983       | 11.7151       | 1.74364335       | 0.00022079 | No      |
|      |       |        |             |          |         | Lyrn9   | 4.21014   | 12.8497  | 1.60979456       | 4.21114      | 12.8507       | 1.6095642        | 0.0249599  | No      |
|      |       |        |             |          |         | Lysmd2  | 8.2639    | 3.15471  | -1.3893154       | 8.2649       | 3.15571       | -1.3890327       | 0.0217988  | No      |
|      |       |        |             |          |         | Lysmd3  | 7.86013   | 3.7147   | -1.0813075       | 7.86113      | 3.7157        | -1.0811027       | 0.011657   | No      |
|      |       |        |             |          |         | Lyve1   | 0.0642307 | 1.28447  | 4.32176637       | 0.0652307    | 1.28547       | 4.30060102       | 0.0100165  | No      |
|      |       |        |             |          |         | Lyz2    | 41.327    | 225.36   | 2.44707492       | 41.328       | 225.361       | 2.44704642       | 0.00022079 | No      |
|      |       |        |             |          |         | Lzic    | 17.0683   | 8.13106  | -1.069804        | 17.0693      | 8.13206       | -1.0697111       | 0.00422081 | No      |
|      |       |        |             |          |         | Lztf1   | 3.05214   | 16.7275  | 2.4543288        | 3.05314      | 16.7285       | 2.45394244       | 0.00022079 | No      |
|      |       |        |             |          |         | Lzts2   | 3.758     | 17.8647  | 2.24907472       | 3.759        | 17.8657       | 2.24877162       | 0.00022079 | No      |
|      |       |        |             |          |         | MacroD1 | 1.07625   | 85.4045  | 6.31022695       | 1.07725      | 85.4055       | 6.30890398       | 0.00022079 | No      |
|      |       |        |             |          |         | Mad1l1  | 15.3114   | 7.59766  | -1.0109791       | 15.3124      | 7.59866       | -1.0108835       | 0.0228245  | No      |
|      |       |        |             |          |         | Madd    | 38.8816   | 11.7742  | -1.7234585       | 38.8826      | 11.7752       | -1.7233731       | 0.00022079 | No      |
|      |       |        |             |          |         | Maea    | 36.807    | 132.067  | 1.84321795       | 36.808       | 132.068       | 1.84318968       | 0.00022079 | No      |
|      |       |        |             |          |         | Maf     | 5.80688   | 36.1983  | 2.64008682       | 5.80788      | 36.1993       | 2.63987825       | 0.00022079 | No      |
|      |       |        |             |          |         | Maf1    | 149.225   | 65.546   | -1.1869096       | 149.226      | 65.547        | -1.1868973       | 0.00466383 | No      |
|      |       |        |             |          |         | Mafg    | 2.88987   | 11.8863  | 2.0402232        | 2.89087      | 11.8873       | 2.03984543       | 0.00022079 | No      |
|      |       |        |             |          |         | Maged2  | 3.74819   | 19.2515  | 2.36070487       | 3.74919      | 19.2525       | 2.36039495       | 0.00022079 | No      |
|      |       |        |             |          |         | Mageh1  | 1.48199   | 20.5779  | 3.79548814       | 1.48299      | 20.5789       | 3.79458509       | 0.00022079 | No      |
|      |       |        |             |          |         | Magi1   | 0.335046  | 9.49129  | 4.82417309       | 0.336046     | 9.49229       | 4.82002554       | 0.00060553 | No      |
|      |       |        |             |          |         | Magi3   | 3.59085   | 15.962   | 2.15224414       | 3.59185      | 15.963        | 2.1519328        | 0.00022079 | No      |
|      |       |        |             |          |         | Mal     | 0.700943  | 162.649  | 7.85824911       | 0.701943     | 162.65        | 7.85620122       | 0.00022079 | No      |
|      |       |        |             |          |         | Mall    | 0         | 1.46878  | inf              | 0.001        | 1.46978       | 10.5213845       | 0.00022079 | No      |

| RRBS |       |        |             |          |         | RNAseq   |           |         |                  |              |               |                  |            |         |
|------|-------|--------|-------------|----------|---------|----------|-----------|---------|------------------|--------------|---------------|------------------|------------|---------|
| gene | Blood | Kidney | methyl.diff | pMWU.fdr | Match ? | gene     | blood     | kidney  | log2(fold_ratio) | blood+ 0.001 | kidney+ 0.001 | log2(fold_ratio) | q_value    | Match ? |
|      |       |        |             |          |         | Malsu1   | 11.141    | 39.9681 | 1.84297026       | 11.142       | 39.9691       | 1.84287687       | 0.00022079 | No      |
|      |       |        |             |          |         | Malt1    | 24.5022   | 2.5738  | -3.2509394       | 24.5032      | 2.5748        | -3.2504379       | 0.00022079 | No      |
|      |       |        |             |          |         | MAMDC2   | 0         | 2.03231 | inf              | 0.001        | 2.03331       | 10.9896145       | 0.00022079 | No      |
|      |       |        |             |          |         | Maml2    | 11.3556   | 1.73937 | -2.7067672       | 11.3566      | 1.74037       | -2.706065        | 0.00022079 | No      |
|      |       |        |             |          |         | Man1a1   | 60.688    | 3.2625  | -4.2173615       | 60.689       | 3.2635        | -4.2169431       | 0.00022079 | No      |
|      |       |        |             |          |         | Man2a1   | 35.961    | 12.6981 | -1.5018205       | 35.962       | 12.6991       | -1.501747        | 0.00022079 | No      |
|      |       |        |             |          |         | Manba    | 11.538    | 25.3385 | 1.13493795       | 11.539       | 25.3395       | 1.13486986       | 0.00096553 | No      |
|      |       |        |             |          |         | Manbal   | 23.9938   | 54.1956 | 1.17551407       | 23.9948      | 54.1966       | 1.17548056       | 0.00113657 | No      |
|      |       |        |             |          |         | Manea    | 1.91955   | 3.7735  | 0.97513513       | 1.92055      | 3.7745        | 0.97476602       | 0.0364343  | No      |
|      |       |        |             |          |         | Mansc1   | 0.0544981 | 9.88527 | 7.50293063       | 0.0554981    | 9.88627       | 7.47684412       | 0.0142227  | No      |
|      |       |        |             |          |         | Maoa     | 0.221153  | 9.84683 | 5.47654263       | 0.222153     | 9.84783       | 5.47018033       | 0.00242102 | No      |
|      |       |        |             |          |         | Maob     | 0.0669146 | 1.12349 | 4.06952245       | 0.0679146    | 1.12449       | 4.04940527       | 0.0230222  | No      |
|      |       |        |             |          |         | Map1lc3b | 102.77    | 183.918 | 0.8396435        | 102.771      | 183.919       | 0.83963731       | 0.0397551  | No      |
|      |       |        |             |          |         | Map2k2   | 60.0395   | 198.531 | 1.72538043       | 60.0405      | 198.532       | 1.72536367       | 0.00022079 | No      |
|      |       |        |             |          |         | Map2k3   | 3.71247   | 11.7509 | 1.66231998       | 3.71347      | 11.7519       | 1.6620542        | 0.00078858 | No      |
|      |       |        |             |          |         | Map2k6   | 22.4361   | 5.5056  | -2.0268502       | 22.4371      | 5.5066        | -2.0266525       | 0.00022079 | No      |
|      |       |        |             |          |         | Map3k14  | 19.4446   | 3.53063 | -2.461372        | 19.4456      | 3.53163       | -2.4610376       | 0.00022079 | No      |
|      |       |        |             |          |         | Map3k8   | 9.9378    | 2.93721 | -1.7584801       | 9.9388       | 2.93821       | -1.7581342       | 0.00022079 | No      |
|      |       |        |             |          |         | Map4k3   | 7.30237   | 33.2616 | 2.18742089       | 7.30337      | 33.2626       | 2.18726672       | 0.00022079 | No      |
|      |       |        |             |          |         | Map4k4   | 52.6341   | 12.5142 | -2.0724317       | 52.6351      | 12.5152       | -2.0723438       | 0.00022079 | No      |
|      |       |        |             |          |         | Map7     | 0.320947  | 25.8046 | 6.32914938       | 0.321947     | 25.8056       | 6.32471716       | 0.00022079 | No      |
|      |       |        |             |          |         | Map9     | 1.37398   | 3.11405 | 1.1804311        | 1.37498      | 3.11505       | 1.17984469       | 0.0283842  | No      |
|      |       |        |             |          |         | Mapk3    | 19.8408   | 51.8737 | 1.38653308       | 19.8418      | 51.8747       | 1.38648818       | 0.00022079 | No      |
|      |       |        |             |          |         | Mapk7    | 0.992166  | 3.48712 | 1.81338259       | 0.993166     | 3.48812       | 1.81234289       | 0.00407863 | No      |
|      |       |        |             |          |         | Mapk8ip1 | 0.210417  | 35.7169 | 7.40721179       | 0.211417     | 35.7179       | 7.40041206       | 0.00022079 | No      |
|      |       |        |             |          |         | Mapk8ip3 | 29.7864   | 9.49156 | -1.6499366       | 29.7874      | 9.49256       | -1.6498331       | 0.00022079 | No      |
|      |       |        |             |          |         | Mapkbp1  | 7.79987   | 2.3496  | -1.7310349       | 7.80087      | 2.3506        | -1.730606        | 0.00022079 | No      |
|      |       |        |             |          |         | Mapre1   | 64.3973   | 32.7402 | -0.9759371       | 64.3983      | 32.7412       | -0.9759154       | 0.00257873 | No      |
|      |       |        |             |          |         | Mapre2   | 58.1472   | 25.2399 | -1.2040035       | 58.1482      | 25.2409       | -1.2039712       | 0.00060553 | No      |
|      |       |        |             |          |         | Mapre3   | 2.49396   | 20.2165 | 3.01902302       | 2.49496      | 20.2175       | 3.01851602       | 0.00022079 | No      |
|      |       |        |             |          |         | Mapt     | 0.0674765 | 13.7013 | 7.66571193       | 0.0684765    | 13.7023       | 7.6445934        | 0.00022079 | No      |
|      |       |        |             |          |         | Marcks   | 0.909956  | 4.53746 | 2.31801623       | 0.910956     | 4.53846       | 2.31674956       | 0.00242102 | No      |
|      |       |        |             |          |         | Marcksl1 | 3.79068   | 21.854  | 2.52736879       | 3.79168      | 21.855        | 2.52705426       | 0.00041963 | No      |
|      |       |        |             |          |         | Marf1    | 18.5125   | 8.1953  | -1.1756311       | 18.5135      | 8.1963        | -1.175533        | 0.0110257  | No      |
|      |       |        |             |          |         | Mark2    | 49.1017   | 26.8909 | -0.8686549       | 49.1027      | 26.8919       | -0.8686307       | 0.0282852  | No      |
|      |       |        |             |          |         | Mast2    | 6.04488   | 13.5506 | 1.16457113       | 6.04588      | 13.5516       | 1.16443895       | 0.00896558 | No      |
|      |       |        |             |          |         | Mast3    | 33.458    | 14.0434 | -1.2524589       | 33.459       | 14.0444       | -1.2523993       | 0.00130998 | No      |
|      |       |        |             |          |         | Matk     | 0.512418  | 3.33274 | 2.70131571       | 0.513418     | 3.33374       | 2.69893581       | 0.0131304  | No      |
|      |       |        |             |          |         | Matr3    | 107.691   | 43.4196 | -1.3104793       | 107.692      | 43.4206       | -1.3104595       | 0.00022079 | No      |
|      |       |        |             |          |         | MAU2     | 57.2909   | 18.2519 | -1.6502593       | 57.2919      | 18.2529       | -1.6502055       | 0.029468   | No      |
|      |       |        |             |          |         | Mavs     | 6.15327   | 36.7279 | 2.57745121       | 6.15427      | 36.7289       | 2.57725605       | 0.00022079 | No      |
|      |       |        |             |          |         | Max      | 166.98    | 40.9707 | -2.0270109       | 166.981      | 40.9717       | -2.0269843       | 0.00022079 | No      |

| RRBS |       |        |             |          |         | RNAseq  |          |          |                  |              |               |                  |            |         |
|------|-------|--------|-------------|----------|---------|---------|----------|----------|------------------|--------------|---------------|------------------|------------|---------|
| gene | Blood | Kidney | methyl.diff | pMWU.fdr | Match ? | gene    | blood    | kidney   | log2(fold_ratio) | blood+ 0.001 | kidney+ 0.001 | log2(fold_ratio) | q_value    | Match ? |
|      |       |        |             |          |         | Maz     | 91.9252  | 38.86    | -1.2421745       | 91.9262      | 38.861        | -1.2421531       | 0.00060553 | No      |
|      |       |        |             |          |         | Mbd4    | 5.87546  | 1.23233  | -2.2533132       | 5.87646      | 1.23333       | -2.2523885       | 0.00022079 | No      |
|      |       |        |             |          |         | Mbd5    | 4.8704   | 1.87608  | -1.3763189       | 4.8714       | 1.87708       | -1.3758463       | 0.00304332 | No      |
|      |       |        |             |          |         | Mbl1    | 0        | 3.81007  | inf              | 0.001        | 3.81107       | 11.8959804       | 0.00022079 | No      |
|      |       |        |             |          |         | Mblac1  | 2.16027  | 7.01607  | 1.6994515        | 2.16127      | 7.01707       | 1.69898944       | 0.0350649  | No      |
|      |       |        |             |          |         | Mbn1    | 376.528  | 53.0385  | -2.8276453       | 376.529      | 53.0395       | -2.8276219       | 0.00022079 | No      |
|      |       |        |             |          |         | Mbn2    | 14.1958  | 26.1998  | 0.88409164       | 14.1968      | 26.2008       | 0.88404508       | 0.015076   | No      |
|      |       |        |             |          |         | Mbn3    | 3.39415  | 1.84777  | -0.8772651       | 3.39515      | 1.84877       | -0.8769096       | 0.0333701  | No      |
|      |       |        |             |          |         | Mboat1  | 1.76327  | 10.5509  | 2.58104076       | 1.76427      | 10.5519       | 2.58035953       | 0.00022079 | No      |
|      |       |        |             |          |         | Mboat7  | 6.69878  | 15.8587  | 1.24330424       | 6.69978      | 15.8597       | 1.24317985       | 0.012146   | No      |
|      |       |        |             |          |         | MBP     | 69.1751  | 10.6158  | -2.7040397       | 69.1761      | 10.6168       | -2.7039247       | 0.00022079 | No      |
|      |       |        |             |          |         | Mbtd1   | 22.6561  | 6.12472  | -1.8871837       | 22.6571      | 6.12572       | -1.8870119       | 0.00022079 | No      |
|      |       |        |             |          |         | Mbtps1  | 157.058  | 51.5132  | -1.6082834       | 157.059      | 51.5142       | -1.6082645       | 0.040486   | No      |
|      |       |        |             |          |         | Mbtps2  | 7.98276  | 3.73746  | -1.0948295       | 7.98376      | 3.73846       | -1.0946243       | 0.0111498  | No      |
|      |       |        |             |          |         | Mcam    | 0.292155 | 6.89453  | 4.56064632       | 0.293155     | 6.89553       | 4.55592588       | 0.00022079 | No      |
|      |       |        |             |          |         | Mcart1l | 41.5307  | 0.367245 | -6.8212915       | 41.5317      | 0.368245      | -6.8174032       | 0.00022079 | No      |
|      |       |        |             |          |         | Mccc2   | 4.24678  | 39.5525  | 3.21932761       | 4.24778      | 39.5535       | 3.21902441       | 0.00022079 | No      |
|      |       |        |             |          |         | Mcee    | 5.66237  | 69.6552  | 3.62075313       | 5.66337      | 69.6562       | 3.62051908       | 0.00022079 | No      |
|      |       |        |             |          |         | Mcf2l   | 0.661972 | 10.1812  | 3.94299361       | 0.662972     | 10.1822       | 3.94095756       | 0.00273202 | No      |
|      |       |        |             |          |         | Mcm3    | 32.2443  | 3.96132  | -3.024991        | 32.2453      | 3.96232       | -3.0246716       | 0.00022079 | No      |
|      |       |        |             |          |         | Mcm3ap  | 16.3101  | 7.50458  | -1.1199224       | 16.3111      | 7.50558       | -1.1198186       | 0.00130998 | No      |
|      |       |        |             |          |         | Mcm4    | 12.2369  | 3.8821   | -1.6563289       | 12.2379      | 3.8831        | -1.6560752       | 0.00022079 | No      |
|      |       |        |             |          |         | Mcm6    | 19.4669  | 6.87941  | -1.5006664       | 19.4679      | 6.88041       | -1.5005308       | 0.00022079 | No      |
|      |       |        |             |          |         | Mcm7    | 39.9243  | 16.5107  | -1.2738658       | 39.9253      | 16.5117       | -1.2738146       | 0.0136242  | No      |
|      |       |        |             |          |         | Mcoln1  | 9.59635  | 16.9569  | 0.82131476       | 9.59735      | 16.9579       | 0.82124951       | 0.0438233  | No      |
|      |       |        |             |          |         | Mdfic   | 1.08549  | 9.47589  | 3.12591502       | 1.08649      | 9.47689       | 3.1247388        | 0.00022079 | No      |
|      |       |        |             |          |         | Mdh1    | 88.7351  | 697.903  | 2.97544974       | 88.7361      | 697.904       | 2.97543555       | 0.00022079 | No      |
|      |       |        |             |          |         | Mdh2    | 107.87   | 306.759  | 1.50781198       | 107.871      | 306.76        | 1.50780331       | 0.00022079 | No      |
|      |       |        |             |          |         | Mdm2    | 27.087   | 12.8628  | -1.0743959       | 27.088       | 12.8638       | -1.074337        | 0.00227055 | No      |
|      |       |        |             |          |         | Mdm4    | 104.324  | 12.0957  | -3.1085049       | 104.325      | 12.0967       | -3.1083995       | 0.00022079 | No      |
|      |       |        |             |          |         | Me1     | 0.13173  | 28.9195  | 7.77831486       | 0.13273      | 28.9205       | 7.7674542        | 0.00022079 | No      |
|      |       |        |             |          |         | Me3     | 0        | 19.5936  | inf              | 0.001        | 19.5946       | 14.2581685       | 0.00022079 | No      |
|      |       |        |             |          |         | Mecp2   | 9.46425  | 4.32219  | -1.1307257       | 9.46525      | 4.32319       | -1.1305444       | 0.00407863 | No      |
|      |       |        |             |          |         | Mecr    | 3.92092  | 13.59    | 1.79328134       | 3.92192      | 13.591        | 1.7930196        | 0.00257873 | No      |
|      |       |        |             |          |         | Med1    | 26.4798  | 10.2169  | -1.3739347       | 26.4808      | 10.2179       | -1.373848        | 0.00551024 | No      |
|      |       |        |             |          |         | Med12   | 55.5037  | 21.9929  | -1.3355461       | 55.5047      | 21.9939       | -1.3355065       | 0.00536605 | No      |
|      |       |        |             |          |         | Med13   | 16.4504  | 5.79289  | -1.5057675       | 16.4514      | 5.79389       | -1.5056062       | 0.00022079 | No      |
|      |       |        |             |          |         | Med13l  | 12.5789  | 5.12897  | -1.2942647       | 12.5799      | 5.12997       | -1.2940982       | 0.00022079 | No      |
|      |       |        |             |          |         | Med15   | 66.018   | 24.1411  | -1.451368        | 66.019       | 24.1421       | -1.4513301       | 0.00078858 | No      |
|      |       |        |             |          |         | Med18   | 45.3367  | 10.4553  | -2.1164449       | 45.3377      | 10.4563       | -2.1163388       | 0.00022079 | No      |
|      |       |        |             |          |         | MED20   | 6.82355  | 17.8232  | 1.38516197       | 6.82455      | 17.8242       | 1.3850315        | 0.00096553 | No      |
|      |       |        |             |          |         | Med22   | 4.43935  | 15.9215  | 1.8425559        | 4.44035      | 15.9225       | 1.84232157       | 0.00078858 | No      |

| RRBS |       |        |             |          |         | RNAseq    |           |         |                  |              |               |                  |            |         |
|------|-------|--------|-------------|----------|---------|-----------|-----------|---------|------------------|--------------|---------------|------------------|------------|---------|
| gene | Blood | Kidney | methyl.diff | pMWU.fdr | Match ? | gene      | blood     | kidney  | log2(fold_ratio) | blood+ 0.001 | kidney+ 0.001 | log2(fold_ratio) | q_value    | Match ? |
|      |       |        |             |          |         | Med23     | 18.7011   | 9.28282 | -1.0104881       | 18.7021      | 9.28382       | -1.0104098       | 0.0165181  | No      |
|      |       |        |             |          |         | Med25     | 52.44     | 121.832 | 1.21615353       | 52.441       | 121.833       | 1.21613786       | 0.00078858 | No      |
|      |       |        |             |          |         | Med29     | 48.7288   | 192.535 | 1.98227413       | 48.7298      | 192.536       | 1.98225202       | 0.00022079 | No      |
|      |       |        |             |          |         | Med31     | 20.1729   | 61.5009 | 1.60818903       | 20.1739      | 61.5019       | 1.60814097       | 0.00022079 | No      |
|      |       |        |             |          |         | Med9      | 2.6465    | 8.11957 | 1.61731767       | 2.6475       | 8.12057       | 1.61695031       | 0.00333723 | No      |
|      |       |        |             |          |         | Medag     | 0         | 10.6489 | inf              | 0.001        | 10.6499       | 13.3785523       | 0.00022079 | No      |
|      |       |        |             |          |         | Mef2a     | 21.1202   | 12.1351 | -0.7994375       | 21.1212      | 12.1361       | -0.7993869       | 0.0190658  | No      |
|      |       |        |             |          |         | Mef2d     | 46.4614   | 10.4098 | -2.1580903       | 46.4624      | 10.4108       | -2.1579827       | 0.00022079 | No      |
|      |       |        |             |          |         | Megf11    | 0         | 10.7874 | inf              | 0.001        | 10.7884       | 13.3971933       | 0.00022079 | No      |
|      |       |        |             |          |         | Megf9     | 0.724838  | 3.26879 | 2.1730262        | 0.725838     | 3.26979       | 2.17147849       | 0.00022079 | No      |
|      |       |        |             |          |         | Melk      | 0.321379  | 10.2108 | 4.98967643       | 0.322379     | 10.2118       | 4.98533561       | 0.00022079 | No      |
|      |       |        |             |          |         | Memo1     | 76.9995   | 29.9406 | -1.3627459       | 77.0005      | 29.9416       | -1.3627165       | 0.00022079 | No      |
|      |       |        |             |          |         | Mep1a     | 0         | 34.9096 | inf              | 0.001        | 34.9106       | 15.0913775       | 0.00022079 | No      |
|      |       |        |             |          |         | Mep1b     | 0         | 10.9706 | inf              | 0.001        | 10.9716       | 13.4214863       | 0.00022079 | No      |
|      |       |        |             |          |         | Mertk     | 0         | 1.27288 | inf              | 0.001        | 1.27388       | 10.3150137       | 0.00022079 | No      |
|      |       |        |             |          |         | Mesdc2    | 20.4344   | 39.5307 | 0.95197362       | 20.4354      | 39.5317       | 0.95193951       | 0.00765035 | No      |
|      |       |        |             |          |         | Met       | 0         | 30.8283 | inf              | 0.001        | 30.8293       | 14.9120145       | 0.00022079 | No      |
|      |       |        |             |          |         | Metrl     | 1.41903   | 16.5379 | 3.54279906       | 1.42003      | 16.5389       | 3.54186997       | 0.00164037 | No      |
|      |       |        |             |          |         | Mettl13   | 10.9131   | 5.60804 | -0.9604924       | 10.9141      | 5.60904       | -0.9603674       | 0.020657   | No      |
|      |       |        |             |          |         | Mettl14   | 25.4928   | 13.4458 | -0.9229342       | 25.4938      | 13.4468       | -0.9228835       | 0.0194084  | No      |
|      |       |        |             |          |         | Mettl23   | 52.7315   | 15.3672 | -1.7788107       | 52.7325      | 15.3682       | -1.7787442       | 0.00022079 | No      |
|      |       |        |             |          |         | Mettl9    | 17.2516   | 61.0255 | 1.82268204       | 17.2526      | 61.0265       | 1.82262206       | 0.00022079 | No      |
|      |       |        |             |          |         | Mex3d     | 0.903872  | 4.24182 | 2.23049301       | 0.904872     | 4.24282       | 2.22923784       | 0.00658515 | No      |
|      |       |        |             |          |         | Mfap3l    | 0.0705929 | 21.1455 | 8.22661187       | 0.0715929    | 21.1465       | 8.20638666       | 0.00022079 | No      |
|      |       |        |             |          |         | Mfap5     | 0         | 1.41176 | inf              | 0.001        | 1.41276       | 10.4643007       | 0.00022079 | No      |
|      |       |        |             |          |         | Mfng      | 45.062    | 4.9056  | -3.1994098       | 45.063       | 4.9066        | -3.1991478       | 0.00022079 | No      |
|      |       |        |             |          |         | Mfsd1     | 14.3621   | 22.8446 | 0.66958647       | 14.3631      | 22.8456       | 0.66954917       | 0.0444112  | No      |
|      |       |        |             |          |         | Mfsd10    | 15.1857   | 5.53367 | -1.4564049       | 15.1867      | 5.53467       | -1.4562392       | 0.00273202 | No      |
|      |       |        |             |          |         | Mga       | 16.7369   | 6.3378  | -1.4009783       | 16.7379      | 6.3388        | -1.4008369       | 0.00494367 | No      |
|      |       |        |             |          |         | Mgam      | 0.12575   | 39.2964 | 8.28769494       | 0.12675      | 39.2974       | 8.27630431       | 0.00022079 | No      |
|      |       |        |             |          |         | Mgat2     | 22.2284   | 12.0069 | -0.8885404       | 22.2294      | 12.0079       | -0.8884851       | 0.011657   | No      |
|      |       |        |             |          |         | Mgat4b    | 5.36703   | 47.0527 | 3.13208165       | 5.36803      | 47.0537       | 3.13184353       | 0.00022079 | No      |
|      |       |        |             |          |         | MGC105649 | 16.5644   | 7.53159 | -1.1370596       | 16.5654      | 7.53259       | -1.1369551       | 0.0128843  | No      |
|      |       |        |             |          |         | MGC108823 | 48.9552   | 8.13635 | -2.5890085       | 48.9562      | 8.13735       | -2.5888606       | 0.00022079 | No      |
|      |       |        |             |          |         | MGC112715 | 124.924   | 18.202  | -2.7788818       | 124.925      | 18.203        | -2.7788141       | 0.00022079 | No      |
|      |       |        |             |          |         | MGC94199  | 1.6213    | 8.24172 | 2.34579438       | 1.6223       | 8.24272       | 2.34507986       | 0.00164037 | No      |
|      |       |        |             |          |         | Mgea5     | 71.6167   | 28.954  | -1.3065334       | 71.6177      | 28.955        | -1.3065037       | 0.0303513  | No      |
|      |       |        |             |          |         | Mgll      | 0.0891968 | 148.415 | 10.7003573       | 0.0901968    | 148.416       | 10.6842828       | 0.00041963 | No      |
|      |       |        |             |          |         | Mgrn1     | 20.6795   | 50.9693 | 1.30142724       | 20.6805      | 50.9703       | 1.30138578       | 0.00078858 | No      |

| RRBS |       |        |             |          |         | RNAseq   |           |          |                  |              |               |                  |            |         |
|------|-------|--------|-------------|----------|---------|----------|-----------|----------|------------------|--------------|---------------|------------------|------------|---------|
| gene | Blood | Kidney | methyl.diff | pMWU.fdr | Match ? | gene     | blood     | kidney   | log2(fold_ratio) | blood+ 0.001 | kidney+ 0.001 | log2(fold_ratio) | q_value    | Match ? |
|      |       |        |             |          |         | Mgst1    | 3.22941   | 96.5042  | 4.90124921       | 3.23041      | 96.5052       | 4.90081749       | 0.00022079 | No      |
|      |       |        |             |          |         | Mgst2    | 4.54661   | 15.0128  | 1.72332991       | 4.54761      | 15.0138       | 1.72310873       | 0.00672121 | No      |
|      |       |        |             |          |         | Mgst3    | 7.9576    | 339.057  | 5.41305064       | 7.9586       | 339.058       | 5.41287361       | 0.00041963 | No      |
|      |       |        |             |          |         | Mia3     | 32.8951   | 14.3104  | -1.2008087       | 32.8961      | 14.3114       | -1.2007517       | 0.00096553 | No      |
|      |       |        |             |          |         | Mical3   | 2.88654   | 8.76705  | 1.60275026       | 2.88754      | 8.76805       | 1.60241509       | 0.00022079 | No      |
|      |       |        |             |          |         | Micu1    | 6.9167    | 14.1996  | 1.0376945        | 6.9177       | 14.2006       | 1.03758753       | 0.00752743 | No      |
|      |       |        |             |          |         | Mid1     | 0.135598  | 4.39061  | 5.01701359       | 0.136598     | 4.39161       | 5.00674167       | 0.00765035 | No      |
|      |       |        |             |          |         | Mid1ip1  | 15.2625   | 41.6654  | 1.44885854       | 15.2635      | 41.6664       | 1.44879864       | 0.00022079 | No      |
|      |       |        |             |          |         | Mid2     | 0.268997  | 2.05988  | 2.93689831       | 0.269997     | 2.06088       | 2.93224522       | 0.0183813  | No      |
|      |       |        |             |          |         | Midn     | 20.0808   | 32.9374  | 0.71390993       | 20.0818      | 32.9384       | 0.71388189       | 0.0281894  | No      |
|      |       |        |             |          |         | Mien1    | 26.1411   | 66.9111  | 1.35592571       | 26.1421      | 66.9121       | 1.35589209       | 0.00318754 | No      |
|      |       |        |             |          |         | Mier1    | 58.0509   | 15.5572  | -1.899736        | 58.0519      | 15.5582       | -1.8996681       | 0.00022079 | No      |
|      |       |        |             |          |         | Mif      | 301.224   | 879.874  | 1.54646022       | 301.225      | 879.875       | 1.54645707       | 0.00022079 | No      |
|      |       |        |             |          |         | Milr1    | 19.1468   | 1.00943  | -4.2454905       | 19.1478      | 1.01043       | -4.2441374       | 0.00022079 | No      |
|      |       |        |             |          |         | Minos1   | 171.857   | 519.101  | 1.59480665       | 171.858      | 519.102       | 1.59480104       | 0.00022079 | No      |
|      |       |        |             |          |         | Minpp1   | 3.86643   | 27.2754  | 2.81852636       | 3.86743      | 27.2764       | 2.81820616       | 0.00022079 | No      |
|      |       |        |             |          |         | Miox     | 0.0603998 | 1288.69  | 14.381002        | 0.0613998    | 1288.691      | 14.3573129       | 0.012511   | No      |
|      |       |        |             |          |         | Mipep    | 2.94564   | 21.1221  | 2.84210025       | 2.94664      | 21.1231       | 2.84167886       | 0.00022079 | No      |
|      |       |        |             |          |         | Mipol1   | 1.15202   | 4.36363  | 1.92136301       | 1.15302      | 4.36463       | 1.92044182       | 0.00508519 | No      |
|      |       |        |             |          |         | Mir101a  | 1.67582   | 0.491838 | -1.7686121       | 1.67682      | 0.492838      | -1.7665424       | 0.0487223  | No      |
|      |       |        |             |          |         | Mir101b  | 19.1798   | 8.93383  | -1.102237        | 19.1808      | 8.93483       | -1.1021507       | 0.0128843  | No      |
|      |       |        |             |          |         | Mir150   | 9.3839    | 0.578269 | -4.020375        | 9.3849       | 0.579269      | -4.018036        | 0.0166327  | No      |
|      |       |        |             |          |         | Mir186   | 70.2994   | 22.5096  | -1.642972        | 70.3004      | 22.5106       | -1.6429284       | 0.00022079 | No      |
|      |       |        |             |          |         | Mir22    | 1.9836    | 10.905   | 2.45879673       | 1.9846       | 10.906        | 2.4582019        | 0.00022079 | No      |
|      |       |        |             |          |         | Mir221   | 0.421049  | 2.60493  | 2.62918456       | 0.422049     | 2.60593       | 2.62631592       | 0.0255067  | No      |
|      |       |        |             |          |         | Mir349   | 0.644953  | 54.9302  | 6.4122617        | 0.645953     | 54.9312       | 6.4100528        | 0.00022079 | No      |
|      |       |        |             |          |         | Mis18bp1 | 8.25267   | 0.574707 | -3.8439624       | 8.25367      | 0.575707      | -3.8416291       | 0.029572   | No      |
|      |       |        |             |          |         | Mitd1    | 16.1519   | 7.253    | -1.1550541       | 16.1529      | 7.254         | -1.1549446       | 0.0301242  | No      |
|      |       |        |             |          |         | Mitf     | 0.11322   | 13.5162  | 6.89941696       | 0.11422      | 13.5172       | 6.88683724       | 0.00022079 | No      |
|      |       |        |             |          |         | Mkl1     | 38.4618   | 5.11731  | -2.9099687       | 38.4628      | 5.11831       | -2.9097244       | 0.00022079 | No      |
|      |       |        |             |          |         | Mknk1    | 26.0047   | 11.9569  | -1.120929        | 26.0057      | 11.9579       | -1.1208638       | 0.00242102 | No      |
|      |       |        |             |          |         | Mknk2    | 110.109   | 42.762   | -1.3645312       | 110.11       | 42.763        | -1.3645105       | 0.00022079 | No      |
|      |       |        |             |          |         | Mlec     | 15.7823   | 36.6291  | 1.21468278       | 15.7833      | 36.6301       | 1.21463076       | 0.00041963 | No      |
|      |       |        |             |          |         | Mllt10   | 34.284    | 12.8473  | -1.4160702       | 34.285       | 12.8483       | -1.416           | 0.00551024 | No      |
|      |       |        |             |          |         | Mllt3    | 17.29     | 3.51172  | -2.2996881       | 17.291       | 3.51272       | -2.2993608       | 0.00022079 | No      |
|      |       |        |             |          |         | Mllt4    | 0.0570903 | 38.1833  | 9.38548043       | 0.0580903    | 38.1843       | 9.36046658       | 0.00022079 | No      |
|      |       |        |             |          |         | Mllt6    | 43.416    | 18.459   | -1.2339024       | 43.417       | 18.46         | -1.2338575       | 0.0182773  | No      |
|      |       |        |             |          |         | Mlxip    | 6.86096   | 2.82268  | -1.2813449       | 6.86196      | 2.82368       | -1.2810441       | 0.00422081 | No      |
|      |       |        |             |          |         | Mmachc   | 2.63202   | 9.49559  | 1.85108719       | 2.63302      | 9.49659       | 1.85069109       | 0.00180113 | No      |
|      |       |        |             |          |         | Mmadhc   | 15.1152   | 46.669   | 1.62646449       | 15.1162      | 46.67         | 1.62639996       | 0.00022079 | No      |
|      |       |        |             |          |         | Mme      | 0         | 34.0407  | inf              | 0.001        | 34.0417       | 15.0550155       | 0.00022079 | No      |
|      |       |        |             |          |         | Mmp12    | 0         | 4.39954  | inf              | 0.001        | 4.40054       | 12.1034649       | 0.00022079 | No      |

| RRBS |       |        |             |          |         | RNAseq    |           |          |                  |              |               |                  |            |         |
|------|-------|--------|-------------|----------|---------|-----------|-----------|----------|------------------|--------------|---------------|------------------|------------|---------|
| gene | Blood | Kidney | methyl.diff | pMWU.fdr | Match ? | gene      | blood     | kidney   | log2(fold_ratio) | blood+ 0.001 | kidney+ 0.001 | log2(fold_ratio) | q_value    | Match ? |
|      |       |        |             |          |         | Mmp24     | 0.545926  | 9.46832  | 4.11633115       | 0.546926     | 9.46932       | 4.11384328       | 0.00060553 | No      |
|      |       |        |             |          |         | Mmrn2     | 0.340513  | 5.84215  | 4.10071762       | 0.341513     | 5.84315       | 4.09673392       | 0.00022079 | No      |
|      |       |        |             |          |         | Mnda      | 0.280734  | 1.95492  | 2.79983386       | 0.281734     | 1.95592       | 2.79544178       | 0.0178094  | No      |
|      |       |        |             |          |         | Mnf1      | 32.6177   | 141.889  | 2.12103579       | 32.6187      | 141.89        | 2.12100173       | 0.00022079 | No      |
|      |       |        |             |          |         | Mnt       | 11.1261   | 4.11848  | -1.4337641       | 11.1271      | 4.11948       | -1.4335435       | 0.00060553 | No      |
|      |       |        |             |          |         | Mob1a     | 41.8097   | 16.0824  | -1.378355        | 41.8107      | 16.0834       | -1.3782998       | 0.00022079 | No      |
|      |       |        |             |          |         | Mob3b     | 0.996144  | 9.45362  | 3.24644066       | 0.997144     | 9.45462       | 3.24514571       | 0.00022079 | No      |
|      |       |        |             |          |         | Mocos     | 0.111698  | 1.90745  | 4.09396998       | 0.112698     | 1.90845       | 4.08186757       | 0.00333723 | No      |
|      |       |        |             |          |         | Mok       | 0.123771  | 10.8394  | 6.45246776       | 0.124771     | 10.8404       | 6.44099153       | 0.00022079 | No      |
|      |       |        |             |          |         | MON1A     | 25.7597   | 73.5346  | 1.51330744       | 25.7607      | 73.5356       | 1.51327106       | 0.00988585 | No      |
|      |       |        |             |          |         | Mon2      | 49.4325   | 14.0629  | -1.8135657       | 49.4335      | 14.0639       | -1.8134923       | 0.018847   | No      |
|      |       |        |             |          |         | Morc3     | 60.7856   | 9.0646   | -2.7454143       | 60.7866      | 9.0656        | -2.7452789       | 0.00022079 | No      |
|      |       |        |             |          |         | Morf4l2   | 43.3641   | 84.3712  | 0.96024945       | 43.3651      | 84.3722       | 0.96023328       | 0.00180113 | No      |
|      |       |        |             |          |         | Morn1     | 0.211988  | 3.73951  | 4.14079474       | 0.212988     | 3.74051       | 4.13439093       | 0.0126352  | No      |
|      |       |        |             |          |         | MORN2     | 0.239328  | 12.5327  | 5.71056425       | 0.240328     | 12.5337       | 5.70466381       | 0.00858283 | No      |
|      |       |        |             |          |         | Mospd1    | 1.39327   | 4.57616  | 1.71566263       | 1.39427      | 4.57716       | 1.71494276       | 0.010144   | No      |
|      |       |        |             |          |         | Mov10     | 97.3101   | 14.0152  | -2.7955972       | 97.3111      | 14.0162       | -2.7955091       | 0.00022079 | No      |
|      |       |        |             |          |         | MP68      | 70.7561   | 289.783  | 2.03404653       | 70.7571      | 289.784       | 2.03403112       | 0.00022079 | No      |
|      |       |        |             |          |         | Mpa2l     | 213.623   | 12.0764  | -4.1448046       | 213.624      | 12.0774       | -4.1446919       | 0.00022079 | No      |
|      |       |        |             |          |         | Mpc1      | 45.8387   | 538.959  | 3.55553749       | 45.8397      | 538.96        | 3.5555087        | 0.00022079 | No      |
|      |       |        |             |          |         | Mpc2      | 42.2987   | 301.167  | 2.83187847       | 42.2997      | 301.168       | 2.83184915       | 0.00022079 | No      |
|      |       |        |             |          |         | Mpdu1     | 24.8945   | 52.0008  | 1.06270678       | 24.8955      | 52.0018       | 1.06267657       | 0.00778313 | No      |
|      |       |        |             |          |         | Mpdz      | 0         | 5.57882  | inf              | 0.001        | 5.57982       | 12.4460029       | 0.00022079 | No      |
|      |       |        |             |          |         | Mphosph10 | 25.7964   | 10.6965  | -1.2700309       | 25.7974      | 10.6975       | -1.269952        | 0.00060553 | No      |
|      |       |        |             |          |         | Mphosph9  | 8.85788   | 1.22631  | -2.8526377       | 8.85888      | 1.22731       | -2.8516246       | 0.0370591  | No      |
|      |       |        |             |          |         | Mpi       | 13.6717   | 42.4333  | 1.63400423       | 13.6727      | 42.4343       | 1.63393271       | 0.0110257  | No      |
|      |       |        |             |          |         | Mpnd      | 104.4     | 204.434  | 0.96951344       | 104.401      | 204.435       | 0.96950668       | 0.0194084  | No      |
|      |       |        |             |          |         | Mpp4      | 4.49702   | 0.870755 | -2.3686305       | 4.49802      | 0.871755      | -2.3672954       | 0.00975879 | No      |
|      |       |        |             |          |         | Mpp5      | 4.42247   | 15.9197  | 1.84788889       | 4.42347      | 15.9207       | 1.84765333       | 0.00022079 | No      |
|      |       |        |             |          |         | Mpp7      | 0.97898   | 3.85246  | 1.97642869       | 0.97998      | 3.85346       | 1.9753302        | 0.0128843  | No      |
|      |       |        |             |          |         | Mprip     | 23.0696   | 75.4905  | 1.71030211       | 23.0706      | 75.4915       | 1.71025869       | 0.0240684  | No      |
|      |       |        |             |          |         | Mpv17l    | 0.0679168 | 14.7089  | 7.75870516       | 0.0689168    | 14.7099       | 7.73771601       | 0.0175851  | No      |
|      |       |        |             |          |         | Mpv17l2   | 19.6254   | 55.5558  | 1.50121548       | 19.6264      | 55.5568       | 1.50116794       | 0.00022079 | No      |
|      |       |        |             |          |         | Mpzl1     | 3.71176   | 14.363   | 1.95218178       | 3.71276      | 14.364        | 1.95189359       | 0.00022079 | No      |
|      |       |        |             |          |         | Mpzl2     | 0.602701  | 12.6892  | 4.39601485       | 0.603701     | 12.6902       | 4.39373681       | 0.00060553 | No      |
|      |       |        |             |          |         | Mr1       | 12.7507   | 0.32866  | -5.2778368       | 12.7517      | 0.32966       | -5.2735669       | 0.00078858 | No      |
|      |       |        |             |          |         | Mras      | 0.712061  | 28.9855  | 5.34718672       | 0.713061     | 28.9865       | 5.34521183       | 0.00022079 | No      |
|      |       |        |             |          |         | Mri1      | 14.6575   | 33.1635  | 1.17795722       | 14.6585      | 33.1645       | 1.17790229       | 0.00164037 | No      |
|      |       |        |             |          |         | Mroh2a    | 0.0347379 | 2.46337  | 6.14797899       | 0.0357379    | 2.46437       | 6.10762021       | 0.044811   | No      |
|      |       |        |             |          |         | Mroh6     | 1.37765   | 3.86712  | 1.48905012       | 1.37865      | 3.86812       | 1.48837631       | 0.0143389  | No      |
|      |       |        |             |          |         | Mrpl10    | 17.5356   | 35.3793  | 1.01261871       | 17.5366      | 35.3803       | 1.01257722       | 0.00147497 | No      |

| RRBS |       |        |             |          |         | RNAseq  |          |         |                  |              |               |                  |            |         |
|------|-------|--------|-------------|----------|---------|---------|----------|---------|------------------|--------------|---------------|------------------|------------|---------|
| gene | Blood | Kidney | methyl.diff | pMWU.fdr | Match ? | gene    | blood    | kidney  | log2(fold_ratio) | blood+ 0.001 | kidney+ 0.001 | log2(fold_ratio) | q_value    | Match ? |
|      |       |        |             |          |         | mrpl11  | 28.8297  | 64.9744 | 1.17231558       | 28.8307      | 64.9754       | 1.17228774       | 0.00273202 | No      |
|      |       |        |             |          |         | Mrpl12  | 38.923   | 202.849 | 2.38171137       | 38.924       | 202.85        | 2.38168142       | 0.00022079 | No      |
|      |       |        |             |          |         | Mrpl13  | 38.9075  | 99.0698 | 1.34839706       | 38.9085      | 99.0708       | 1.34837454       | 0.0195167  | No      |
|      |       |        |             |          |         | Mrpl15  | 26.6563  | 134.937 | 2.33973754       | 26.6573      | 134.938       | 2.33969412       | 0.00022079 | No      |
|      |       |        |             |          |         | Mrpl16  | 9.71457  | 48.2339 | 2.31182542       | 9.71557      | 48.2349       | 2.31170683       | 0.00022079 | No      |
|      |       |        |             |          |         | Mrpl17  | 57.2524  | 137.839 | 1.26757606       | 57.2534      | 137.84        | 1.26756133       | 0.00022079 | No      |
|      |       |        |             |          |         | Mrpl2   | 21.8186  | 55.1489 | 1.33777358       | 21.8196      | 55.1499       | 1.33773362       | 0.00041963 | No      |
|      |       |        |             |          |         | Mrpl22  | 22.9917  | 62.7087 | 1.44755247       | 22.9927      | 62.7097       | 1.44751273       | 0.00022079 | No      |
|      |       |        |             |          |         | Mrpl27  | 36.8267  | 145.72  | 1.98437487       | 36.8277      | 145.721       | 1.9843456        | 0.00022079 | No      |
|      |       |        |             |          |         | Mrpl28  | 29.5816  | 79.1706 | 1.4202647        | 29.5826      | 79.1716       | 1.42023415       | 0.00060553 | No      |
|      |       |        |             |          |         | Mrpl3   | 19.5746  | 44.6994 | 1.19127264       | 19.5756      | 44.7004       | 1.19123121       | 0.00041963 | No      |
|      |       |        |             |          |         | MRPL30  | 9.75044  | 30.8015 | 1.65946138       | 9.75144      | 30.8025       | 1.65936026       | 0.00805135 | No      |
|      |       |        |             |          |         | Mrpl34  | 56.0457  | 120.803 | 1.10798069       | 56.0467      | 120.804       | 1.10796689       | 0.00211842 | No      |
|      |       |        |             |          |         | Mrpl35  | 24.5936  | 49.8938 | 1.02057762       | 24.5946      | 49.8948       | 1.02054788       | 0.0172336  | No      |
|      |       |        |             |          |         | Mrpl36  | 34.8666  | 69.0523 | 0.98584378       | 34.8676      | 69.0533       | 0.9858233        | 0.00480115 | No      |
|      |       |        |             |          |         | Mrpl40  | 6.02219  | 14.6749 | 1.28499054       | 6.02319      | 14.6759       | 1.28484931       | 0.00096553 | No      |
|      |       |        |             |          |         | Mrpl41  | 28.8599  | 74.3497 | 1.36526062       | 28.8609      | 74.3507       | 1.36523004       | 0.00022079 | No      |
|      |       |        |             |          |         | Mrpl42  | 45.6995  | 109.367 | 1.2589272        | 45.7005      | 109.368       | 1.25890883       | 0.00658515 | No      |
|      |       |        |             |          |         | MRPL48  | 23.2965  | 72.8194 | 1.64420963       | 23.2975      | 72.8204       | 1.64416751       | 0.00022079 | No      |
|      |       |        |             |          |         | Mrpl49  | 9.46969  | 40.6629 | 2.10232401       | 9.47069      | 40.6639       | 2.10220714       | 0.00022079 | No      |
|      |       |        |             |          |         | Mrpl50  | 7.30094  | 38.3343 | 2.39248171       | 7.30194      | 38.3353       | 2.39232175       | 0.00022079 | No      |
|      |       |        |             |          |         | Mrpl51  | 5.53128  | 14.2048 | 1.36069324       | 5.53228      | 14.2058       | 1.360534         | 0.0106524  | No      |
|      |       |        |             |          |         | Mrpl52  | 46.5304  | 116.413 | 1.32300668       | 46.5314      | 116.414       | 1.32298807       | 0.00685176 | No      |
|      |       |        |             |          |         | Mrpl54  | 51.6936  | 192.83  | 1.89927194       | 51.6946      | 192.831       | 1.89925151       | 0.00022079 | No      |
|      |       |        |             |          |         | Mrpl55  | 26.9738  | 80.6519 | 1.58014974       | 26.9748      | 80.6529       | 1.58011415       | 0.00060553 | No      |
|      |       |        |             |          |         | Mrps11  | 18.901   | 46.2554 | 1.29115923       | 18.902       | 46.2564       | 1.29111141       | 0.0319323  | No      |
|      |       |        |             |          |         | Mrps12  | 24.4248  | 67.1363 | 1.45874628       | 24.4258      | 67.1373       | 1.4587087        | 0.0149559  | No      |
|      |       |        |             |          |         | Mrps14  | 15.1716  | 32.415  | 1.09528833       | 15.1726      | 32.416        | 1.09523775       | 0.00304332 | No      |
|      |       |        |             |          |         | Mrps15  | 69.2987  | 34.6424 | -1.0002894       | 69.2997      | 34.6434       | -1.0002686       | 0.00288641 | No      |
|      |       |        |             |          |         | Mrps17  | 27.5576  | 49.1694 | 0.8353105        | 27.5586      | 49.1704       | 0.83528749       | 0.0282852  | No      |
|      |       |        |             |          |         | Mrps18a | 33.9762  | 97.4121 | 1.51957648       | 33.9772      | 97.4131       | 1.51954883       | 0.00022079 | No      |
|      |       |        |             |          |         | Mrps18b | 34.893   | 63.6397 | 0.86698939       | 34.894       | 63.6407       | 0.86697072       | 0.0180483  | No      |
|      |       |        |             |          |         | Mrps18c | 30.297   | 68.5501 | 1.17798383       | 30.298       | 68.5511       | 1.17795725       | 0.00227055 | No      |
|      |       |        |             |          |         | MRPS21  | 135.93   | 257.227 | 0.92017819       | 135.931      | 257.228       | 0.92017318       | 0.0143389  | No      |
|      |       |        |             |          |         | MRPS23  | 59.1106  | 136.924 | 1.21188657       | 59.1116      | 136.925       | 1.2118727        | 0.0115315  | No      |
|      |       |        |             |          |         | Mrps25  | 51.4553  | 137.203 | 1.41492044       | 51.4563      | 137.204       | 1.41490291       | 0.00022079 | No      |
|      |       |        |             |          |         | Mrps34  | 65.537   | 198.834 | 1.60118294       | 65.538       | 198.835       | 1.60116818       | 0.00060553 | No      |
|      |       |        |             |          |         | Mrps36  | 27.7504  | 94.3154 | 1.76498479       | 27.7514      | 94.3164       | 1.7649481        | 0.00022079 | No      |
|      |       |        |             |          |         | Mrvi1   | 0.327591 | 5.37996 | 4.03762782       | 0.328591     | 5.38096       | 4.03349871       | 0.00022079 | No      |
|      |       |        |             |          |         | Ms4a4c  | 205.444  | 4.22852 | -5.6024486       | 205.445      | 4.22952       | -5.6021145       | 0.00022079 | No      |
|      |       |        |             |          |         | Ms4a6b  | 273.777  | 9.36168 | -4.87009         | 273.778      | 9.36268       | -4.8699412       | 0.00022079 | No      |
|      |       |        |             |          |         | Msantd2 | 25.81    | 13.0709 | -0.9815717       | 25.811       | 13.0719       | -0.9815172       | 0.023492   | No      |

| RRBS |       |        |             |          |         | RNAseq  |           |          |                  |              |               |                  |            |         |
|------|-------|--------|-------------|----------|---------|---------|-----------|----------|------------------|--------------|---------------|------------------|------------|---------|
| gene | Blood | Kidney | methyl.diff | pMWU.fdr | Match ? | gene    | blood     | kidney   | log2(fold_ratio) | blood+ 0.001 | kidney+ 0.001 | log2(fold_ratio) | q_value    | Match ? |
|      |       |        |             |          |         | Msantd3 | 0         | 5.00994  | inf              | 0.001        | 5.01094       | 12.2908655       | 0.00022079 | No      |
|      |       |        |             |          |         | Msantd4 | 5.61953   | 14.4773  | 1.36527119       | 5.62053      | 14.4783       | 1.36511413       | 0.00060553 | No      |
|      |       |        |             |          |         | Msh2    | 28.461    | 12.4711  | -1.1903976       | 28.462       | 12.4721       | -1.1903326       | 0.00041963 | No      |
|      |       |        |             |          |         | Msl1    | 57.2755   | 16.7019  | -1.7779059       | 57.2765      | 16.7029       | -1.7778447       | 0.00022079 | No      |
|      |       |        |             |          |         | Msl2    | 36.2398   | 11.2098  | -1.6928145       | 36.2408      | 11.2108       | -1.6927256       | 0.00113657 | No      |
|      |       |        |             |          |         | Msln    | 0         | 4.49326  | inf              | 0.001        | 4.49426       | 12.1338679       | 0.00022079 | No      |
|      |       |        |             |          |         | Msmo1   | 7.30351   | 27.5156  | 1.91358791       | 7.30451      | 27.5166       | 1.91344282       | 0.00022079 | No      |
|      |       |        |             |          |         | Msn     | 321.606   | 139.928  | -1.2006096       | 321.607      | 139.929       | -1.2006038       | 0.00791314 | No      |
|      |       |        |             |          |         | Msra    | 3.84091   | 119.996  | 4.96539435       | 3.84191      | 119.997       | 4.9650308        | 0.00022079 | No      |
|      |       |        |             |          |         | Mst4    | 67.9157   | 4.29925  | -3.9815882       | 67.9167      | 4.30025       | -3.9812739       | 0.00022079 | No      |
|      |       |        |             |          |         | Mt1a    | 67.4478   | 2123.42  | 4.97647456       | 67.4488      | 2123.421      | 4.97645385       | 0.00022079 | No      |
|      |       |        |             |          |         | Mta3    | 43.3604   | 19.3588  | -1.1633885       | 43.3614      | 19.3598       | -1.1633473       | 0.00508519 | No      |
|      |       |        |             |          |         | Mtap    | 15.7096   | 6.02024  | -1.3837535       | 15.7106      | 6.02124       | -1.3836058       | 0.0111498  | No      |
|      |       |        |             |          |         | Mtch1   | 83.2486   | 145.914  | 0.8096204        | 83.2496      | 145.915       | 0.80961295       | 0.0122712  | No      |
|      |       |        |             |          |         | Mtch2   | 28.7114   | 72.3823  | 1.33401327       | 28.7124      | 72.3833       | 1.33398296       | 0.00022079 | No      |
|      |       |        |             |          |         | Mtf2    | 14.7381   | 4.72197  | -1.6420898       | 14.7391      | 4.72297       | -1.6418822       | 0.0122712  | No      |
|      |       |        |             |          |         | Mtfp1   | 1.2376    | 11.5217  | 3.21873659       | 1.2386       | 11.5227       | 3.21769655       | 0.00022079 | No      |
|      |       |        |             |          |         | Mthfd1l | 11.4119   | 1.09972  | -3.3753309       | 11.4129      | 1.10072       | -3.374146        | 0.00022079 | No      |
|      |       |        |             |          |         | Mthfd2  | 53.8842   | 9.26881  | -2.5394063       | 53.8852      | 9.26981       | -2.5392774       | 0.00022079 | No      |
|      |       |        |             |          |         | Mthfr   | 0.65745   | 4.4338   | 2.75359061       | 0.65845      | 4.4348        | 2.75172325       | 0.00378481 | No      |
|      |       |        |             |          |         | Mtm1    | 6.55061   | 17.874   | 1.44816137       | 6.55161      | 17.875        | 1.44802186       | 0.00041963 | No      |
|      |       |        |             |          |         | Mtmr10  | 0.755913  | 11.5046  | 3.92784681       | 0.756913     | 11.5056       | 3.92606492       | 0.00022079 | No      |
|      |       |        |             |          |         | Mtmr11  | 0.357486  | 31.5613  | 6.46412608       | 0.358486     | 31.5623       | 6.46014175       | 0.00022079 | No      |
|      |       |        |             |          |         | MTMR12  | 19.7081   | 6.75308  | -1.5451711       | 19.7091      | 6.75408       | -1.5450307       | 0.00022079 | No      |
|      |       |        |             |          |         | Mto1    | 3.89377   | 8.70923  | 1.1613775        | 3.89477      | 8.71023       | 1.16117268       | 0.0204275  | No      |
|      |       |        |             |          |         | Mtpap   | 18.2281   | 9.39721  | -0.9558598       | 18.2291      | 9.39821       | -0.9557854       | 0.0480976  | No      |
|      |       |        |             |          |         | Mtrf1   | 1.07356   | 9.04721  | 3.07507014       | 1.07456      | 9.04821       | 3.07388637       | 0.00060553 | No      |
|      |       |        |             |          |         | Mtss1l  | 0.0951306 | 4.44237  | 5.54527627       | 0.0961306    | 4.44337       | 5.53051473       | 0.00593001 | No      |
|      |       |        |             |          |         | Mtus1   | 0.988281  | 13.5602  | 3.77831334       | 0.989281     | 13.5612       | 3.77696067       | 0.00022079 | No      |
|      |       |        |             |          |         | Muc1    | 0.534088  | 67.7086  | 6.98611781       | 0.535088     | 67.7096       | 6.98344041       | 0.00022079 | No      |
|      |       |        |             |          |         | Muc20   | 0.152221  | 29.9931  | 7.62231943       | 0.153221     | 29.9941       | 7.61292089       | 0.0214583  | No      |
|      |       |        |             |          |         | Muc6    | 7.57012   | 0.521546 | -3.8594498       | 7.57112      | 0.522546      | -3.8568768       | 0.00060553 | No      |
|      |       |        |             |          |         | Mum1    | 31.5193   | 15.8735  | -0.9896152       | 31.5203      | 15.8745       | -0.9895701       | 0.00711928 | No      |
|      |       |        |             |          |         | Mut     | 6.28034   | 25.6173  | 2.02820386       | 6.28134      | 25.6183       | 2.02803048       | 0.00022079 | No      |
|      |       |        |             |          |         | Mutyh   | 28.1984   | 7.44517  | -1.9212366       | 28.1994      | 7.44617       | -1.921094        | 0.033901   | No      |
|      |       |        |             |          |         | Mvb12a  | 20.3611   | 78.9699  | 1.95548736       | 20.3621      | 78.9709       | 1.95543477       | 0.00022079 | No      |
|      |       |        |             |          |         | Mx1     | 145.577   | 5.85387  | -4.6362479       | 145.578      | 5.85487       | -4.6360114       | 0.00022079 | No      |
|      |       |        |             |          |         | Mxi1    | 18.693    | 52.2042  | 1.48166776       | 18.694       | 52.2052       | 1.48161822       | 0.00022079 | No      |
|      |       |        |             |          |         | Mxra7   | 0.722589  | 12.6364  | 4.12826641       | 0.723589     | 12.6374       | 4.12638539       | 0.00593001 | No      |
|      |       |        |             |          |         | Mxra8   | 0.379277  | 3.75127  | 3.30605531       | 0.380277     | 3.75227       | 3.30264105       | 0.0182773  | No      |
|      |       |        |             |          |         | Myb     | 20.0628   | 1.26775  | -3.9841808       | 20.0638      | 1.26875       | -3.9831151       | 0.00022079 | No      |
|      |       |        |             |          |         | Mybbp1a | 27.6339   | 12.0351  | -1.1991911       | 27.6349      | 12.0361       | -1.1991234       | 0.0267305  | No      |



| RRBS |       |        |             |          |         | RNAseq  |           |          |                  |              |               |                  |            |         |
|------|-------|--------|-------------|----------|---------|---------|-----------|----------|------------------|--------------|---------------|------------------|------------|---------|
| gene | Blood | Kidney | methyl.diff | pMWU.fdr | Match ? | gene    | blood     | kidney   | log2(fold_ratio) | blood+ 0.001 | kidney+ 0.001 | log2(fold_ratio) | q_value    | Match ? |
|      |       |        |             |          |         | Myc     | 70.5056   | 20.7955  | -1.7614665       | 70.5066      | 20.7965       | -1.7614176       | 0.00022079 | No      |
|      |       |        |             |          |         | Mycbp2  | 60.7497   | 9.5871   | -2.6637109       | 60.7507      | 9.5881        | -2.6635842       | 0.00022079 | No      |
|      |       |        |             |          |         | Mycbpap | 0.0935879 | 5.05456  | 5.75511969       | 0.0945879    | 5.05556       | 5.74007146       | 0.0139821  | No      |
|      |       |        |             |          |         | Mycn    | 0         | 1.0268   | inf              | 0.001        | 1.0278        | 10.0053438       | 0.00022079 | No      |
|      |       |        |             |          |         | Myd88   | 26.9074   | 16.2049  | -0.7315729       | 26.9084      | 16.2059       | -0.7315375       | 0.0259566  | No      |
|      |       |        |             |          |         | Myeov2  | 98.1252   | 305.917  | 1.64044469       | 98.1262      | 305.918       | 1.6404347        | 0.00022079 | No      |
|      |       |        |             |          |         | Myh1    | 0         | 2.41335  | inf              | 0.001        | 2.41435       | 11.2374191       | 0.00022079 | No      |
|      |       |        |             |          |         | Myh7b   | 0.0869786 | 20.2408  | 7.86239011       | 0.0879786    | 20.2418       | 7.84596923       | 0.00164037 | No      |
|      |       |        |             |          |         | Myl12a  | 141.483   | 364.21   | 1.36414182       | 141.484      | 364.211       | 1.36413558       | 0.00022079 | No      |
|      |       |        |             |          |         | Myl9    | 3.12347   | 20.0394  | 2.68161773       | 3.12447      | 20.0404       | 2.68122791       | 0.00022079 | No      |
|      |       |        |             |          |         | Mylip   | 66.3149   | 14.2597  | -2.2173894       | 66.3159      | 14.2607       | -2.21731         | 0.00022079 | No      |
|      |       |        |             |          |         | Mylk    | 0.281049  | 11.2906  | 5.32815666       | 0.282049     | 11.2916       | 5.3231603        | 0.00022079 | No      |
|      |       |        |             |          |         | Mynn    | 9.09693   | 2.86151  | -1.6686031       | 9.09793      | 2.86251       | -1.6682576       | 0.00348745 | No      |
|      |       |        |             |          |         | Myo10   | 1.70831   | 15.6353  | 3.1941652        | 1.70931      | 15.6363       | 3.1934132        | 0.00022079 | No      |
|      |       |        |             |          |         | MYO18A  | 6.06122   | 27.1166  | 2.16149619       | 6.06222      | 27.1176       | 2.16131139       | 0.00022079 | No      |
|      |       |        |             |          |         | Myo1d   | 0.41631   | 36.3335  | 6.44749832       | 0.41731      | 36.3345       | 6.44407675       | 0.00022079 | No      |
|      |       |        |             |          |         | Myo1e   | 0.597346  | 18.2339  | 4.93191253       | 0.598346     | 18.2349       | 4.9295785        | 0.00022079 | No      |
|      |       |        |             |          |         | Myo1g   | 72.3547   | 17.2014  | -2.0725607       | 72.3557      | 17.2024       | -2.0724968       | 0.00022079 | No      |
|      |       |        |             |          |         | Myo3b   | 0         | 0.873653 | inf              | 0.001        | 0.874653      | 9.77256696       | 0.00407863 | No      |
|      |       |        |             |          |         | Myo5c   | 3.07255   | 20.6033  | 2.74536704       | 3.07355      | 20.6043       | 2.74496759       | 0.00022079 | No      |
|      |       |        |             |          |         | Myo6    | 0.0560222 | 43.301   | 9.59418599       | 0.0570222    | 43.302        | 9.56869424       | 0.00022079 | No      |
|      |       |        |             |          |         | Myo9a   | 2.61568   | 6.21298  | 1.24809936       | 2.61668      | 6.21398       | 1.24778009       | 0.00022079 | No      |
|      |       |        |             |          |         | Myo9b   | 85.105    | 25.792   | -1.7223202       | 85.106       | 25.793        | -1.7222813       | 0.00113657 | No      |
|      |       |        |             |          |         | Myof    | 0.315465  | 32.5855  | 6.69060637       | 0.316465     | 32.5865       | 6.68608464       | 0.00022079 | No      |
|      |       |        |             |          |         | Myrf    | 0.260938  | 2.60388  | 3.318884         | 0.261938     | 2.60488       | 3.31391964       | 0.035709   | No      |
|      |       |        |             |          |         | Mysm1   | 18.6313   | 5.61636  | -1.730021        | 18.6323      | 5.61736       | -1.7298416       | 0.00022079 | No      |
|      |       |        |             |          |         | Mzf1    | 0.712992  | 1.7998   | 1.3358788        | 0.713992     | 1.8008        | 1.33465815       | 0.037664   | No      |
|      |       |        |             |          |         | N4bp2   | 207.443   | 19.8714  | -3.3839496       | 207.444      | 19.8724       | -3.3838839       | 0.00022079 | No      |
|      |       |        |             |          |         | N4bp2l1 | 20.0499   | 3.00265  | -2.7392868       | 20.0509      | 3.00365       | -2.7388784       | 0.00147497 | No      |
|      |       |        |             |          |         | N4bp2l2 | 56.778    | 20.5446  | -1.4665728       | 56.779       | 20.5456       | -1.466528        | 0.00022079 | No      |
|      |       |        |             |          |         | N6amt1  | 8.28924   | 21.3889  | 1.36755055       | 8.29024      | 21.3899       | 1.36744396       | 0.0128843  | No      |
|      |       |        |             |          |         | Naa15   | 15.8658   | 7.64896  | -1.0525848       | 15.8668      | 7.64996       | -1.0524871       | 0.00227055 | No      |
|      |       |        |             |          |         | Naa16   | 26.392    | 6.41551  | -2.0404648       | 26.393       | 6.41651       | -2.0402946       | 0.00022079 | No      |
|      |       |        |             |          |         | Naa20   | 24.4592   | 48.8517  | 0.99803155       | 24.4602      | 48.8527       | 0.9980021        | 0.00896558 | No      |
|      |       |        |             |          |         | Naa40   | 3.22932   | 6.43618  | 0.99497427       | 3.23032      | 6.43718       | 0.99475172       | 0.0457858  | No      |
|      |       |        |             |          |         | Naca    | 1541.81   | 744.862  | -1.0495799       | 1541.811     | 744.863       | -1.0495789       | 0.0205337  | No      |
|      |       |        |             |          |         | Nacc2   | 0.0279532 | 11.306   | 8.65985944       | 0.0289532    | 11.307        | 8.60927768       | 0.00392909 | No      |
|      |       |        |             |          |         | Nadk2   | 19.9711   | 8.72963  | -1.1939214       | 19.9721      | 8.73063       | -1.1938284       | 0.00422081 | No      |
|      |       |        |             |          |         | Naga    | 5.5518    | 30.1657  | 2.44188156       | 5.5528       | 30.1667       | 2.44166955       | 0.00022079 | No      |
|      |       |        |             |          |         | Nagk    | 5.98109   | 26.4403  | 2.14425821       | 5.98209      | 26.4413       | 2.14407159       | 0.00778313 | No      |
|      |       |        |             |          |         | Naglu   | 2.82565   | 6.34801  | 1.16772162       | 2.82665      | 6.34901       | 1.16743839       | 0.028703   | No      |
|      |       |        |             |          |         | Nampt   | 8.61576   | 33.2437  | 1.94803099       | 8.61676      | 33.2447       | 1.94790695       | 0.00022079 | No      |

| RRBS |       |        |             |          |         | RNAseq  |            |         |                  |              |               |                  |            |         |
|------|-------|--------|-------------|----------|---------|---------|------------|---------|------------------|--------------|---------------|------------------|------------|---------|
| gene | Blood | Kidney | methyl.diff | pMWU.fdr | Match ? | gene    | blood      | kidney  | log2(fold_ratio) | blood+ 0.001 | kidney+ 0.001 | log2(fold_ratio) | q_value    | Match ? |
|      |       |        |             |          |         | Nanos1  | 0.989791   | 0       | #NUM!            | 0.990791     | 0.001         | -9.952437        | 0.00022079 | No      |
|      |       |        |             |          |         | Nans    | 19.4152    | 40.6163 | 1.06487225       | 19.4162      | 40.6173       | 1.06483347       | 0.00164037 | No      |
|      |       |        |             |          |         | Nap1l1  | 411.205    | 62.6452 | -2.7145819       | 411.206      | 62.6462       | -2.7145624       | 0.00022079 | No      |
|      |       |        |             |          |         | Nap1l2  | 0.166496   | 2.0807  | 3.64350955       | 0.167496     | 2.0817        | 3.63556362       | 0.0205337  | No      |
|      |       |        |             |          |         | Nap1l3  | 0          | 4.09072 | inf              | 0.001        | 4.09172       | 11.9984917       | 0.00022079 | No      |
|      |       |        |             |          |         | Nap1l4  | 76.2337    | 39.967  | -0.9316196       | 76.2347      | 39.968        | -0.9316024       | 0.00494367 | No      |
|      |       |        |             |          |         | Naprt1  | 0.610906   | 104.329 | 7.41597411       | 0.611906     | 104.33        | 7.4136283        | 0.00022079 | No      |
|      |       |        |             |          |         | Napsa   | 2.49641    | 108.271 | 5.43864817       | 2.49741      | 108.272       | 5.4380837        | 0.00022079 | No      |
|      |       |        |             |          |         | Nasp    | 31.8484    | 16.7713 | -0.9252264       | 31.8494      | 16.7723       | -0.9251857       | 0.0343424  | No      |
|      |       |        |             |          |         | Nbea    | 0.00631948 | 7.30119 | 10.1741101       | 0.00731948   | 7.30219       | 9.96237233       | 0.00348745 | No      |
|      |       |        |             |          |         | Nbeal1  | 1.38028    | 2.66648 | 0.94997555       | 1.38128      | 2.66748       | 0.94947166       | 0.012511   | No      |
|      |       |        |             |          |         | Ncald   | 2.92306    | 6.10722 | 1.06303637       | 2.92406      | 6.10822       | 1.06277911       | 0.00988585 | No      |
|      |       |        |             |          |         | Ncaph2  | 27.9175    | 13.5087 | -1.0472809       | 27.9185      | 13.5097       | -1.0472258       | 0.0176974  | No      |
|      |       |        |             |          |         | Ncbp2   | 31.7959    | 19.2519 | -0.7238399       | 31.7969      | 19.2529       | -0.7238103       | 0.0454908  | No      |
|      |       |        |             |          |         | Ncf1    | 6.26981    | 12.6404 | 1.01154849       | 6.27081      | 12.6414       | 1.01143253       | 0.0126352  | No      |
|      |       |        |             |          |         | Nckap1  | 0.918445   | 73.0502 | 6.31355108       | 0.919445     | 73.0512       | 6.31200088       | 0.00022079 | No      |
|      |       |        |             |          |         | Nckap5  | 0          | 1.63613 | inf              | 0.001        | 1.63713       | 10.6769532       | 0.00392909 | No      |
|      |       |        |             |          |         | Nckap5l | 6.70983    | 2.3927  | -1.4876367       | 6.71083      | 2.3937        | -1.4872489       | 0.00022079 | No      |
|      |       |        |             |          |         | Ncl     | 252.86     | 131.862 | -0.93931         | 252.861      | 131.863       | -0.9393047       | 0.0144657  | No      |
|      |       |        |             |          |         | Ncln    | 117.33     | 50.4338 | -1.2181091       | 117.331      | 50.4348       | -1.2180928       | 0.00113657 | No      |
|      |       |        |             |          |         | Ncoa2   | 16.5701    | 5.7107  | -1.5368428       | 16.5711      | 5.7117        | -1.5366773       | 0.00022079 | No      |
|      |       |        |             |          |         | Ncoa3   | 49.1174    | 6.34353 | -2.9528764       | 49.1184      | 6.34453       | -2.9526784       | 0.00022079 | No      |
|      |       |        |             |          |         | Ncoa4   | 24.2859    | 62.9432 | 1.37393157       | 24.2869      | 62.9442       | 1.37389509       | 0.00022079 | No      |
|      |       |        |             |          |         | Ndc1    | 5.59714    | 3.037   | -0.8820429       | 5.59814      | 3.038         | -0.8818257       | 0.0401695  | No      |
|      |       |        |             |          |         | Ndrg1   | 11.4893    | 319.601 | 4.79790911       | 11.4903      | 319.602       | 4.79778807       | 0.00022079 | No      |
|      |       |        |             |          |         | Ndrg2   | 3.4829     | 49.5834 | 3.83149625       | 3.4839       | 49.5844       | 3.83111118       | 0.00022079 | No      |
|      |       |        |             |          |         | Ndst1   | 0.0798366  | 34.3106 | 8.74738836       | 0.0808366    | 34.3116       | 8.72947204       | 0.00022079 | No      |
|      |       |        |             |          |         | Ndufa1  | 268.869    | 735.006 | 1.4508526        | 268.87       | 735.007       | 1.4508492        | 0.00022079 | No      |
|      |       |        |             |          |         | Ndufa10 | 41.3288    | 106.43  | 1.36468549       | 41.3298      | 106.431       | 1.36466414       | 0.00022079 | No      |
|      |       |        |             |          |         | Ndufa11 | 75.4494    | 778.98  | 3.36800496       | 75.4504      | 778.981       | 3.36798769       | 0.00022079 | No      |
|      |       |        |             |          |         | Ndufa12 | 72.3065    | 376.459 | 2.3802955        | 72.3075      | 376.46        | 2.38027938       | 0.00022079 | No      |
|      |       |        |             |          |         | Ndufa13 | 129.513    | 532.175 | 2.03880382       | 129.514      | 532.176       | 2.03879539       | 0.00022079 | No      |
|      |       |        |             |          |         | Ndufa2  | 61.9916    | 344.906 | 2.47605858       | 61.9926      | 344.907       | 2.47603949       | 0.00022079 | No      |
|      |       |        |             |          |         | Ndufa3  | 116.142    | 568.702 | 2.29178309       | 116.143      | 568.703       | 2.29177321       | 0.00022079 | No      |
|      |       |        |             |          |         | Ndufa4  | 180.104    | 828.917 | 2.20239743       | 180.105      | 828.918       | 2.20239116       | 0.00022079 | No      |
|      |       |        |             |          |         | Ndufa5  | 48.0748    | 347.181 | 2.85233524       | 48.0758      | 347.182       | 2.85230938       | 0.00022079 | No      |
|      |       |        |             |          |         | Ndufa6  | 157.597    | 482.169 | 1.61329883       | 157.598      | 482.17        | 1.61329266       | 0.00022079 | No      |
|      |       |        |             |          |         | Ndufa8  | 54.7713    | 163.064 | 1.57394628       | 54.7723      | 163.065       | 1.57392879       | 0.00022079 | No      |
|      |       |        |             |          |         | Ndufa9  | 55.8298    | 177.112 | 1.66555467       | 55.8308      | 177.113       | 1.66553698       | 0.00022079 | No      |
|      |       |        |             |          |         | Ndufab1 | 62.5859    | 346.7   | 2.46977826       | 62.5869      | 346.701       | 2.46975937       | 0.00113657 | No      |
|      |       |        |             |          |         | Ndufaf1 | 2.44765    | 7.23705 | 1.56400446       | 2.44865      | 7.23805       | 1.5636145        | 0.00593001 | No      |
|      |       |        |             |          |         | Ndufaf4 | 30.768     | 15.3773 | -1.0006285       | 30.769       | 15.3783       | -1.0005815       | 0.00480115 | No      |

| RRBS |       |        |             |          |         | RNAseq  |          |         |                  |              |               |                  |            |         |
|------|-------|--------|-------------|----------|---------|---------|----------|---------|------------------|--------------|---------------|------------------|------------|---------|
| gene | Blood | Kidney | methyl.diff | pMWU.fdr | Match ? | gene    | blood    | kidney  | log2(fold_ratio) | blood+ 0.001 | kidney+ 0.001 | log2(fold_ratio) | q_value    | Match ? |
|      |       |        |             |          |         | Ndufaf5 | 11.3827  | 26.892  | 1.24033425       | 11.3837      | 26.893        | 1.24026115       | 0.018847   | No      |
|      |       |        |             |          |         | Ndufaf6 | 5.58162  | 14.6486 | 1.39200698       | 5.58262      | 14.6496       | 1.39184701       | 0.0176974  | No      |
|      |       |        |             |          |         | Ndufb10 | 129.202  | 479.785 | 1.89275965       | 129.203      | 479.786       | 1.89275149       | 0.00022079 | No      |
|      |       |        |             |          |         | Ndufb11 | 171.532  | 415.178 | 1.27525226       | 171.533      | 415.179       | 1.27524732       | 0.00041963 | No      |
|      |       |        |             |          |         | Ndufb2  | 133.776  | 536.817 | 2.00461105       | 133.777      | 536.818       | 2.00460295       | 0.00022079 | No      |
|      |       |        |             |          |         | Ndufb3  | 60.6761  | 288.475 | 2.24924603       | 60.6771      | 288.476       | 2.24922726       | 0.00022079 | No      |
|      |       |        |             |          |         | Ndufb5  | 54.4704  | 259.775 | 2.25371823       | 54.4714      | 259.776       | 2.2536973        | 0.00022079 | No      |
|      |       |        |             |          |         | Ndufb6  | 70.3104  | 351.781 | 2.32286756       | 70.3114      | 351.782       | 2.32285114       | 0.00022079 | No      |
|      |       |        |             |          |         | Ndufb7  | 59.813   | 597.278 | 3.3198716        | 59.814       | 597.279       | 3.31984989       | 0.00022079 | No      |
|      |       |        |             |          |         | Ndufb8  | 143.154  | 468.457 | 1.71034865       | 143.155      | 468.458       | 1.71034165       | 0.00022079 | No      |
|      |       |        |             |          |         | Ndufb9  | 99.736   | 590.23  | 2.565091         | 99.737       | 590.231       | 2.56507898       | 0.0019604  | No      |
|      |       |        |             |          |         | Ndufc1  | 40.4773  | 367.479 | 3.18247684       | 40.4783      | 367.48        | 3.18244513       | 0.00022079 | No      |
|      |       |        |             |          |         | Ndufc2  | 91.319   | 224.554 | 1.29807545       | 91.32        | 224.555       | 1.29806608       | 0.00022079 | No      |
|      |       |        |             |          |         | Ndufs1  | 18.1677  | 94.8322 | 2.38400122       | 18.1687      | 94.8332       | 2.38393702       | 0.00333723 | No      |
|      |       |        |             |          |         | Ndufs2  | 59.2748  | 210.582 | 1.82889133       | 59.2758      | 210.583       | 1.82887384       | 0.00022079 | No      |
|      |       |        |             |          |         | Ndufs3  | 51.1048  | 301.035 | 2.55840053       | 51.1058      | 301.036       | 2.55837709       | 0.00022079 | No      |
|      |       |        |             |          |         | Ndufs4  | 20.16    | 65.2605 | 1.6947144        | 20.161       | 65.2615       | 1.69466495       | 0.00022079 | No      |
|      |       |        |             |          |         | Ndufs7  | 112.7    | 556.477 | 2.30383454       | 112.701      | 556.478       | 2.30382434       | 0.00022079 | No      |
|      |       |        |             |          |         | Ndufs8  | 54.0371  | 372.957 | 2.78698715       | 54.0381      | 372.958       | 2.78696432       | 0.00022079 | No      |
|      |       |        |             |          |         | Ndufv1  | 74.8138  | 231.529 | 1.62981659       | 74.8148      | 231.53        | 1.62980354       | 0.00022079 | No      |
|      |       |        |             |          |         | Ndufv2  | 79.9444  | 370.079 | 2.21076439       | 79.9454      | 370.08        | 2.21075024       | 0.00022079 | No      |
|      |       |        |             |          |         | Ndufv3  | 43.4905  | 84.5563 | 0.95921195       | 43.4915      | 84.5573       | 0.95919584       | 0.00113657 | No      |
|      |       |        |             |          |         | Necap2  | 51.2976  | 26.1814 | -0.9703491       | 51.2986      | 26.1824       | -0.9703221       | 0.00451708 | No      |
|      |       |        |             |          |         | Nedd4   | 40.0467  | 69.4149 | 0.79356201       | 40.0477      | 69.4159       | 0.79354677       | 0.0438233  | No      |
|      |       |        |             |          |         | Nedd4l  | 1.47103  | 24.8119 | 4.07613364       | 1.47203      | 24.8129       | 4.07521138       | 0.00022079 | No      |
|      |       |        |             |          |         | Neil1   | 41.6397  | 9.90139 | -2.0722567       | 41.6407      | 9.90239       | -2.0721456       | 0.00022079 | No      |
|      |       |        |             |          |         | Nek4    | 1.25333  | 3.88378 | 1.63169516       | 1.25433      | 3.88478       | 1.63091594       | 0.0133754  | No      |
|      |       |        |             |          |         | NEK6    | 2.76932  | 8.93225 | 1.68949186       | 2.77032      | 8.93325       | 1.68913251       | 0.00466383 | No      |
|      |       |        |             |          |         | Nek7    | 64.6528  | 33.7457 | -0.9380092       | 64.6538      | 33.7467       | -0.9379887       | 0.00451708 | No      |
|      |       |        |             |          |         | Nek8    | 4.44482  | 11.5471 | 1.37733367       | 4.44582      | 11.5481       | 1.37713406       | 0.00273202 | No      |
|      |       |        |             |          |         | Nelfa   | 23.3859  | 13.5457 | -0.787804        | 23.3869      | 13.5467       | -0.7877592       | 0.035814   | No      |
|      |       |        |             |          |         | Nelfe   | 14.1614  | 49.8735 | 1.81630955       | 14.1624      | 49.8745       | 1.81623661       | 0.00022079 | No      |
|      |       |        |             |          |         | Nemf    | 33.5792  | 11.1304 | -1.5930624       | 33.5802      | 11.1314       | -1.5929758       | 0.00041963 | No      |
|      |       |        |             |          |         | Nenf    | 6.10739  | 75.4642 | 3.62716452       | 6.10839      | 75.4652       | 3.62694743       | 0.00022079 | No      |
|      |       |        |             |          |         | Neo1    | 0.214946 | 13.3975 | 5.96184574       | 0.215946     | 13.3985       | 5.95525709       | 0.00022079 | No      |
|      |       |        |             |          |         | Net1    | 5.45676  | 59.6971 | 3.45154435       | 5.45776      | 59.6981       | 3.45130416       | 0.00022079 | No      |
|      |       |        |             |          |         | Neto2   | 0.826276 | 4.68237 | 2.50254327       | 0.827276     | 4.68337       | 2.50110639       | 0.00113657 | No      |
|      |       |        |             |          |         | Neurl1b | 0        | 7.16483 | inf              | 0.001        | 7.16583       | 12.8069181       | 0.00022079 | No      |
|      |       |        |             |          |         | Nfam1   | 0.640132 | 2.66932 | 2.06003093       | 0.641132     | 2.67032       | 2.05831932       | 0.00922576 | No      |
|      |       |        |             |          |         | Nfat5   | 18.4333  | 71.636  | 1.95837041       | 18.4343      | 71.637        | 1.95831229       | 0.00022079 | No      |
|      |       |        |             |          |         | Nfatc1  | 49.3792  | 8.50078 | -2.5382363       | 49.3802      | 8.50178       | -2.5380958       | 0.00022079 | No      |
|      |       |        |             |          |         | Nfatc2  | 10.4738  | 2.67978 | -1.9665985       | 10.4748      | 2.68078       | -1.966198        | 0.00022079 | No      |

| RRBS |       |        |             |          |         | RNAseq   |          |         |                  |              |               |                  |            |         |
|------|-------|--------|-------------|----------|---------|----------|----------|---------|------------------|--------------|---------------|------------------|------------|---------|
| gene | Blood | Kidney | methyl.diff | pMWU.fdr | Match ? | gene     | blood    | kidney  | log2(fold_ratio) | blood+ 0.001 | kidney+ 0.001 | log2(fold_ratio) | q_value    | Match ? |
|      |       |        |             |          |         | Nfatc2ip | 5.8257   | 2.34681 | -1.3117304       | 5.8267       | 2.34781       | -1.3113634       | 0.00273202 | No      |
|      |       |        |             |          |         | Nfatc3   | 59.3105  | 6.44264 | -3.2025636       | 59.3115      | 6.44364       | -3.2023641       | 0.00870822 | No      |
|      |       |        |             |          |         | NFE2L1   | 10.3128  | 47.0037 | 2.18833824       | 10.3138      | 47.0047       | 2.18822904       | 0.00022079 | No      |
|      |       |        |             |          |         | Nfe2l2   | 7.51333  | 53.1199 | 2.82172806       | 7.51433      | 53.1209       | 2.82156321       | 0.00392909 | No      |
|      |       |        |             |          |         | Nfia     | 2.01817  | 5.76672 | 1.51470327       | 2.01917      | 5.76772       | 1.51423875       | 0.0311608  | No      |
|      |       |        |             |          |         | Nfil3    | 2.26473  | 13.4675 | 2.5720711        | 2.26573      | 13.4685       | 2.57154133       | 0.00022079 | No      |
|      |       |        |             |          |         | Nfix     | 1.27453  | 14.6947 | 3.52725867       | 1.27553      | 14.6957       | 3.52622534       | 0.00022079 | No      |
|      |       |        |             |          |         | Nfrkb    | 58.328   | 7.79599 | -2.9033845       | 58.329       | 7.79699       | -2.9032242       | 0.00022079 | No      |
|      |       |        |             |          |         | Nfs1     | 13.4318  | 69.9239 | 2.380133         | 13.4328      | 69.9249       | 2.38004623       | 0.00022079 | No      |
|      |       |        |             |          |         | Nfx1     | 18.77    | 9.17112 | -1.0332588       | 18.771       | 9.17212       | -1.0331784       | 0.012146   | No      |
|      |       |        |             |          |         | Ngdn     | 71.4958  | 38.9449 | -0.8764241       | 71.4968      | 38.9459       | -0.8764072       | 0.0208857  | No      |
|      |       |        |             |          |         | Ngef     | 0        | 2.35044 | inf              | 0.001        | 2.35144       | 11.1993288       | 0.00022079 | No      |
|      |       |        |             |          |         | Ngfrap1  | 53.9223  | 177.161 | 1.71610711       | 53.9233      | 177.162       | 1.71608849       | 0.00022079 | No      |
|      |       |        |             |          |         | Ngly1    | 38.133   | 21.4416 | -0.8306275       | 38.134       | 21.4426       | -0.830598        | 0.0138632  | No      |
|      |       |        |             |          |         | Nhej1    | 9.03895  | 3.14227 | -1.524348        | 9.03995      | 3.14327       | -1.5240486       | 0.00711928 | No      |
|      |       |        |             |          |         | Nhlrc3   | 23.0713  | 8.41069 | -1.4558032       | 23.0723      | 8.41169       | -1.4556942       | 0.00022079 | No      |
|      |       |        |             |          |         | Nhsl1    | 0.458227 | 3.46599 | 2.91913312       | 0.459227     | 3.46699       | 2.9164043        | 0.01483    | No      |
|      |       |        |             |          |         | Nid1     | 0        | 9.68257 | inf              | 0.001        | 9.68357       | 13.2413233       | 0.00022079 | No      |
|      |       |        |             |          |         | Ninj1    | 5.5152   | 152.841 | 4.79247459       | 5.5162       | 152.842       | 4.79222247       | 0.00022079 | No      |
|      |       |        |             |          |         | Nip7     | 26.3863  | 13.4448 | -0.9727408       | 26.3873      | 13.4458       | -0.9726881       | 0.0156977  | No      |
|      |       |        |             |          |         | Nipal1   | 29.9018  | 1.58106 | -4.2412683       | 29.9028      | 1.58206       | -4.2404044       | 0.00022079 | No      |
|      |       |        |             |          |         | Nipal2   | 7.87509  | 35.4651 | 2.1710317        | 7.87609      | 35.4661       | 2.17088919       | 0.00022079 | No      |
|      |       |        |             |          |         | Nipbl    | 34.7818  | 9.91759 | -1.8102711       | 34.7828      | 9.91859       | -1.8101671       | 0.00022079 | No      |
|      |       |        |             |          |         | Nit1     | 39.7345  | 150.762 | 1.92380874       | 39.7355      | 150.763       | 1.923782         | 0.00022079 | No      |
|      |       |        |             |          |         | Nit2     | 46.6511  | 144.85  | 1.63457668       | 46.6521      | 144.851       | 1.63455572       | 0.00378481 | No      |
|      |       |        |             |          |         | Nkain1   | 10.0156  | 2.43908 | -2.0378399       | 10.0166      | 2.44008       | -2.0373925       | 0.00096553 | No      |
|      |       |        |             |          |         | Nkap     | 27.2375  | 9.45412 | -1.5265792       | 27.2385      | 9.45512       | -1.5264796       | 0.00605729 | No      |
|      |       |        |             |          |         | Nkd2     | 0.989671 | 6.79057 | 2.77851177       | 0.990671     | 6.79157       | 2.77726719       | 0.00022079 | No      |
|      |       |        |             |          |         | NKIRAS1  | 4.46738  | 1.58154 | -1.4980989       | 4.46838      | 1.58254       | -1.4975099       | 0.020657   | No      |
|      |       |        |             |          |         | Nktr     | 28.9863  | 9.07146 | -1.6759645       | 28.9873      | 9.07246       | -1.6758553       | 0.00022079 | No      |
|      |       |        |             |          |         | Nle1     | 17.6037  | 5.50634 | -1.6767131       | 17.6047      | 5.50734       | -1.6765331       | 0.00041963 | No      |
|      |       |        |             |          |         | Nlrc3    | 30.2856  | 2.11351 | -3.8409191       | 30.2866      | 2.11451       | -3.8402843       | 0.00348745 | No      |
|      |       |        |             |          |         | Nlrc5    | 91.2897  | 10.504  | -3.1195133       | 91.2907      | 10.505        | -3.1193917       | 0.0142227  | No      |
|      |       |        |             |          |         | Nlrp1a   | 23.0339  | 2.26201 | -3.3480815       | 23.0349      | 2.26301       | -3.3475065       | 0.00022079 | No      |
|      |       |        |             |          |         | Nlrx1    | 0.490051 | 7.44109 | 3.92451016       | 0.491051     | 7.44209       | 3.92176306       | 0.00060553 | No      |
|      |       |        |             |          |         | Nmd3     | 31.0739  | 16.5625 | -0.9077829       | 31.0749      | 16.5635       | -0.9077422       | 0.00988585 | No      |
|      |       |        |             |          |         | Nme2     | 321.84   | 770.366 | 1.25920039       | 321.841      | 770.367       | 1.25919778       | 0.00096553 | No      |
|      |       |        |             |          |         | NME4     | 4.84457  | 44.0713 | 3.18539893       | 4.84557      | 44.0723       | 3.1851339        | 0.00022079 | No      |
|      |       |        |             |          |         | Nme5     | 0        | 1.88599 | inf              | 0.001        | 1.88699       | 10.8818711       | 0.00022079 | No      |
|      |       |        |             |          |         | Nme6     | 2.71776  | 15.6569 | 2.52630863       | 2.71876      | 15.6579       | 2.52587003       | 0.00022079 | No      |
|      |       |        |             |          |         | Nmi      | 99.1754  | 41.8877 | -1.2434556       | 99.1764      | 41.8887       | -1.2434357       | 0.00565535 | No      |
|      |       |        |             |          |         | Nmnat1   | 5.59224  | 11.9021 | 1.08971796       | 5.59324      | 11.9031       | 1.08958121       | 0.00711928 | No      |

| RRBS |       |        |             |          |         | RNAseq  |           |         |                  |              |               |                  |            |         |
|------|-------|--------|-------------|----------|---------|---------|-----------|---------|------------------|--------------|---------------|------------------|------------|---------|
| gene | Blood | Kidney | methyl.diff | pMWU.fdr | Match ? | gene    | blood     | kidney  | log2(fold_ratio) | blood+ 0.001 | kidney+ 0.001 | log2(fold_ratio) | q_value    | Match ? |
|      |       |        |             |          |         | Nmral1  | 3.60251   | 15.8675 | 2.1390005        | 3.60351      | 15.8685       | 2.13869101       | 0.00180113 | No      |
|      |       |        |             |          |         | Nmt2    | 2.84192   | 7.83114 | 1.4623564        | 2.84292      | 7.83214       | 1.46203305       | 0.00096553 | No      |
|      |       |        |             |          |         | Nnmt    | 0         | 2.61557 | inf              | 0.001        | 2.61657       | 11.3534611       | 0.00022079 | No      |
|      |       |        |             |          |         | Nnt     | 9.24584   | 56.9496 | 2.62280941       | 9.24684      | 56.9506       | 2.62267871       | 0.00022079 | No      |
|      |       |        |             |          |         | Noa1    | 11.9313   | 3.39707 | -1.8123884       | 11.9323      | 3.39807       | -1.8120847       | 0.00022079 | No      |
|      |       |        |             |          |         | Noc3l   | 15.2964   | 7.57144 | -1.0145525       | 15.2974      | 7.57244       | -1.0144563       | 0.00632443 | No      |
|      |       |        |             |          |         | Nol10   | 11.356    | 4.34004 | -1.3876745       | 11.357       | 4.34104       | -1.3874692       | 0.00060553 | No      |
|      |       |        |             |          |         | Nol12   | 14.172    | 26.3431 | 0.89438176       | 14.173       | 26.3441       | 0.89433473       | 0.0386537  | No      |
|      |       |        |             |          |         | Nolc1   | 31.2409   | 16.0848 | -0.957738        | 31.2419      | 16.0858       | -0.9576945       | 0.0019604  | No      |
|      |       |        |             |          |         | Nono    | 188.988   | 85.7768 | -1.1396352       | 188.989      | 85.7778       | -1.139626        | 0.00041963 | No      |
|      |       |        |             |          |         | Nop10   | 97.2667   | 166.541 | 0.77585951       | 97.2677      | 166.542       | 0.77585335       | 0.0243977  | No      |
|      |       |        |             |          |         | Nop2    | 25.0928   | 11.4301 | -1.1344354       | 25.0938      | 11.4311       | -1.1343667       | 0.00242102 | No      |
|      |       |        |             |          |         | Nop56   | 102.391   | 54.5451 | -0.9085674       | 102.392      | 54.5461       | -0.908555        | 0.0181685  | No      |
|      |       |        |             |          |         | Nop58   | 61.7233   | 23.3052 | -1.4051633       | 61.7243      | 23.3062       | -1.4051248       | 0.00022079 | No      |
|      |       |        |             |          |         | Nos1    | 0         | 2.47672 | inf              | 0.001        | 2.47772       | 11.2747974       | 0.0158283  | No      |
|      |       |        |             |          |         | Nos1ap  | 0.128254  | 8.29935 | 6.01592262       | 0.129254     | 8.30035       | 6.00489134       | 0.00022079 | No      |
|      |       |        |             |          |         | Nos3    | 0.0738463 | 5.685   | 6.2664909        | 0.0748463    | 5.686         | 6.24733929       | 0.00288641 | No      |
|      |       |        |             |          |         | NOSIP   | 56.8327   | 117.055 | 1.0423934        | 56.8337      | 117.056       | 1.04238034       | 0.0166327  | No      |
|      |       |        |             |          |         | Nostrin | 0         | 3.18298 | inf              | 0.001        | 3.18398       | 11.6366156       | 0.00022079 | No      |
|      |       |        |             |          |         | Npas2   | 0.261383  | 10.2686 | 5.29593038       | 0.262383     | 10.2696       | 5.29056193       | 0.00242102 | No      |
|      |       |        |             |          |         | Npat    | 7.17199   | 3.24847 | -1.1426131       | 7.17299      | 3.24947       | -1.1423702       | 0.00725151 | No      |
|      |       |        |             |          |         | Npc2    | 54.3725   | 118.662 | 1.12590894       | 54.3735      | 118.663       | 1.12589456       | 0.00593001 | No      |
|      |       |        |             |          |         | Npepo   | 3.78893   | 40.7991 | 3.42867494       | 3.78993      | 40.8001       | 3.42832958       | 0.00022079 | No      |
|      |       |        |             |          |         | Nphp1   | 0.187658  | 14.289  | 6.25065535       | 0.188658     | 14.29         | 6.24308883       | 0.00022079 | No      |
|      |       |        |             |          |         | Npl     | 0.127445  | 4.33445 | 5.08790226       | 0.128445     | 4.33545       | 5.07695911       | 0.00378481 | No      |
|      |       |        |             |          |         | Nploc4  | 20.9545   | 12.6879 | -0.7238068       | 20.9555      | 12.6889       | -0.7237619       | 0.0309567  | No      |
|      |       |        |             |          |         | Npm1    | 1010.85   | 243.279 | -2.0548852       | 1010.851     | 243.28        | -2.0548807       | 0.00022079 | No      |
|      |       |        |             |          |         | Npnt    | 0.322332  | 54.7246 | 7.40749827       | 0.323332     | 54.7256       | 7.40305576       | 0.00022079 | No      |
|      |       |        |             |          |         | Npr3    | 0         | 1.96845 | inf              | 0.001        | 1.96945       | 10.9435771       | 0.00022079 | No      |
|      |       |        |             |          |         | Nqo1    | 0.309982  | 10.4378 | 5.07348941       | 0.310982     | 10.4388       | 5.06898099       | 0.00257873 | No      |
|      |       |        |             |          |         | Nqo2    | 0.720568  | 28.7442 | 5.31799248       | 0.721568     | 28.7452       | 5.3160419        | 0.0248413  | No      |
|      |       |        |             |          |         | Nr1d1   | 5.83883   | 42.1375 | 2.85135351       | 5.83983      | 42.1385       | 2.85114068       | 0.0467065  | No      |
|      |       |        |             |          |         | Nr1h4   | 0.611643  | 25.1524 | 5.36186242       | 0.612643     | 25.1534       | 5.35956298       | 0.00130998 | No      |
|      |       |        |             |          |         | Nr2c2   | 16.3854   | 7.09932 | -1.2066581       | 16.3864      | 7.10032       | -1.206543        | 0.00318754 | No      |
|      |       |        |             |          |         | Nr3c1   | 23.0758   | 12.936  | -0.8349891       | 23.0768      | 12.937        | -0.8349401       | 0.0105196  | No      |
|      |       |        |             |          |         | Nr4a1   | 2.56279   | 15.7741 | 2.62177052       | 2.56379      | 15.7751       | 2.62129915       | 0.00022079 | No      |
|      |       |        |             |          |         | Nrarp   | 1.19929   | 4.07514 | 1.76466906       | 1.20029      | 4.07614       | 1.76382059       | 0.00523184 | No      |
|      |       |        |             |          |         | Nrbp2   | 4.4092    | 15.3289 | 1.79766535       | 4.4102       | 15.3299       | 1.7974323        | 0.00022079 | No      |
|      |       |        |             |          |         | Nrde2   | 13.2102   | 4.07015 | -1.6984984       | 13.2112      | 4.07115       | -1.6982532       | 0.0371671  | No      |
|      |       |        |             |          |         | Nrep    | 0         | 60.4995 | inf              | 0.001        | 60.5005       | 15.8846594       | 0.00022079 | No      |
|      |       |        |             |          |         | Nrf1    | 25.0707   | 11.4012 | -1.1368166       | 25.0717      | 11.4022       | -1.1367476       | 0.00480115 | No      |
|      |       |        |             |          |         | Nrgn    | 2.7725    | 8.10686 | 1.54795577       | 2.7735       | 8.10786       | 1.54761345       | 0.00363736 | No      |

| RRBS |       |        |             |          |         | RNAseq   |          |         |                  |              |               |                  |            |         |
|------|-------|--------|-------------|----------|---------|----------|----------|---------|------------------|--------------|---------------|------------------|------------|---------|
| gene | Blood | Kidney | methyl.diff | pMWU.fdr | Match ? | gene     | blood    | kidney  | log2(fold_ratio) | blood+ 0.001 | kidney+ 0.001 | log2(fold_ratio) | q_value    | Match ? |
|      |       |        |             |          |         | Nrros    | 44.9491  | 5.85748 | -2.9399402       | 44.9501      | 5.85848       | -2.939726        | 0.00022079 | No      |
|      |       |        |             |          |         | Nsa2     | 117.663  | 60.0929 | -0.9693943       | 117.664      | 60.0939       | -0.9693825       | 0.00180113 | No      |
|      |       |        |             |          |         | Nsfl1c   | 45.7896  | 79.4745 | 0.79547207       | 45.7906      | 79.4755       | 0.79545872       | 0.0306704  | No      |
|      |       |        |             |          |         | Nsg2     | 24.7617  | 1.22765 | -4.3341391       | 24.7627      | 1.22865       | -4.3330227       | 0.00022079 | No      |
|      |       |        |             |          |         | Nsmaf    | 20.5058  | 9.67457 | -1.0837626       | 20.5068      | 9.67557       | -1.0836838       | 0.00922576 | No      |
|      |       |        |             |          |         | Nsmce2   | 11.5193  | 41.2206 | 1.83931245       | 11.5203      | 41.2216       | 1.83922222       | 0.00022079 | No      |
|      |       |        |             |          |         | NSMF     | 0.692087 | 3.65097 | 2.3992545        | 0.693087     | 3.65197       | 2.39756655       | 0.00147497 | No      |
|      |       |        |             |          |         | Nsrp1    | 21.1905  | 11.7063 | -0.8561325       | 21.1915      | 11.7073       | -0.8560773       | 0.0216846  | No      |
|      |       |        |             |          |         | Nsun2    | 40.8163  | 15.1588 | -1.4289899       | 40.8173      | 15.1598       | -1.42893         | 0.00022079 | No      |
|      |       |        |             |          |         | Nsun6    | 5.15307  | 2.27582 | -1.1790457       | 5.15407      | 2.27682       | -1.1786919       | 0.0310553  | No      |
|      |       |        |             |          |         | Nt5c2    | 12.5785  | 26.856  | 1.09428455       | 12.5795      | 26.857        | 1.09422358       | 0.00392909 | No      |
|      |       |        |             |          |         | Nt5c3b   | 31.7689  | 16.5974 | -0.9366579       | 31.7699      | 16.5984       | -0.9366164       | 0.00870822 | No      |
|      |       |        |             |          |         | Nt5dc1   | 29.9334  | 14.7639 | -1.0196823       | 29.9344      | 14.7649       | -1.0196328       | 0.0137492  | No      |
|      |       |        |             |          |         | Nt5dc2   | 2.43529  | 5.42505 | 1.15554285       | 2.43629      | 5.42605       | 1.15521647       | 0.0326064  | No      |
|      |       |        |             |          |         | Nt5m     | 0.619195 | 6.99507 | 3.49787277       | 0.620195     | 6.99607       | 3.49575092       | 0.0178094  | No      |
|      |       |        |             |          |         | Ntan1    | 198.208  | 81.9777 | -1.2737118       | 198.209      | 81.9787       | -1.2737015       | 0.00257873 | No      |
|      |       |        |             |          |         | Ntmt1    | 9.25442  | 23.9333 | 1.37080485       | 9.25542      | 23.9343       | 1.37070925       | 0.0414961  | No      |
|      |       |        |             |          |         | Ntpcr    | 8.66434  | 31.2638 | 1.85133138       | 8.66534      | 31.2648       | 1.85121103       | 0.00022079 | No      |
|      |       |        |             |          |         | Nuak2    | 0.271818 | 76.4441 | 8.13562035       | 0.272818     | 76.4451       | 8.13034139       | 0.00022079 | No      |
|      |       |        |             |          |         | Nub1     | 54.9821  | 29.1901 | -0.9134829       | 54.9831      | 29.1911       | -0.9134597       | 0.00494367 | No      |
|      |       |        |             |          |         | Nubp1    | 105.091  | 46.039  | -1.1907107       | 105.092      | 46.04         | -1.1906931       | 0.00041963 | No      |
|      |       |        |             |          |         | Nubpl    | 3.7209   | 8.20685 | 1.14117697       | 3.7219       | 8.20785       | 1.14096507       | 0.0453842  | No      |
|      |       |        |             |          |         | Nucb2    | 6.06059  | 29.7964 | 2.29760788       | 6.06159      | 29.7974       | 2.29741827       | 0.00022079 | No      |
|      |       |        |             |          |         | Nudt10   | 0        | 1.6393  | inf              | 0.001        | 1.6403        | 10.679744        | 0.00022079 | No      |
|      |       |        |             |          |         | Nudt12   | 2.70175  | 7.42961 | 1.4593923        | 2.70275      | 7.43061       | 1.45905258       | 0.00041963 | No      |
|      |       |        |             |          |         | Nudt16l1 | 25.2232  | 42.2922 | 0.74564029       | 25.2242      | 42.2932       | 0.74561721       | 0.0415916  | No      |
|      |       |        |             |          |         | Nudt19   | 9.57765  | 24.7495 | 1.36965576       | 9.57865      | 24.7505       | 1.36956343       | 0.00536605 | No      |
|      |       |        |             |          |         | Nudt2    | 19.2169  | 80.2675 | 2.06244034       | 19.2179      | 80.2685       | 2.06238324       | 0.00022079 | No      |
|      |       |        |             |          |         | NUDT21   | 67.7149  | 23.6833 | -1.5156032       | 67.7159      | 23.6843       | -1.5155636       | 0.00041963 | No      |
|      |       |        |             |          |         | Nudt4    | 32.7181  | 134.915 | 2.04388988       | 32.7191      | 134.916       | 2.04385648       | 0.00022079 | No      |
|      |       |        |             |          |         | Nudt7    | 8.72038  | 34.0005 | 1.96309305       | 8.72138      | 34.0015       | 1.96297005       | 0.00022079 | No      |
|      |       |        |             |          |         | Nudt9    | 23.4232  | 45.0262 | 0.94282654       | 23.4242      | 45.0272       | 0.94279699       | 0.0183813  | No      |
|      |       |        |             |          |         | Numa1    | 70.2997  | 24.0056 | -1.5501475       | 70.3007      | 24.0066       | -1.550108        | 0.00022079 | No      |
|      |       |        |             |          |         | Numb     | 12.0981  | 30.4218 | 1.33032503       | 12.0991      | 30.4228       | 1.3302532        | 0.00318754 | No      |
|      |       |        |             |          |         | Nup107   | 7.84657  | 3.34189 | -1.2313979       | 7.84757      | 3.34289       | -1.2311501       | 0.00645389 | No      |
|      |       |        |             |          |         | Nup153   | 46.4892  | 8.22885 | -2.4981329       | 46.4902      | 8.22985       | -2.4979886       | 0.00022079 | No      |
|      |       |        |             |          |         | Nup188   | 12.4779  | 5.14474 | -1.2782051       | 12.4789      | 5.14574       | -1.2780403       | 0.00022079 | No      |
|      |       |        |             |          |         | Nup210   | 27.7911  | 3.56754 | -2.9616214       | 27.7921      | 3.56854       | -2.961269        | 0.00022079 | No      |
|      |       |        |             |          |         | Nup62    | 20.0702  | 9.80744 | -1.0331065       | 20.0712      | 9.80844       | -1.0330313       | 0.0483129  | No      |
|      |       |        |             |          |         | Nup93    | 16.2596  | 9.36192 | -0.7964154       | 16.2606      | 9.36292       | -0.7963501       | 0.0372667  | No      |
|      |       |        |             |          |         | Nup98    | 19.1068  | 9.30547 | -1.0379353       | 19.1078      | 9.30647       | -1.0378557       | 0.00451708 | No      |
|      |       |        |             |          |         | NUPR1    | 0        | 148.472 | inf              | 0.001        | 148.473       | 17.1798411       | 0.00022079 | No      |

| RRBS |       |        |             |          |         | RNAseq  |           |          |                  |              |               |                  |            |         |
|------|-------|--------|-------------|----------|---------|---------|-----------|----------|------------------|--------------|---------------|------------------|------------|---------|
| gene | Blood | Kidney | methyl.diff | pMWU.fdr | Match ? | gene    | blood     | kidney   | log2(fold_ratio) | blood+ 0.001 | kidney+ 0.001 | log2(fold_ratio) | q_value    | Match ? |
|      |       |        |             |          |         | Nupr1l  | 3.07273   | 15.7135  | 2.35441165       | 3.07373      | 15.7145       | 2.35403402       | 0.0402662  | No      |
|      |       |        |             |          |         | Nusap1  | 0.571496  | 2.19902  | 1.94404542       | 0.572496     | 2.20002       | 1.94217912       | 0.0271748  | No      |
|      |       |        |             |          |         | Nxn     | 4.15771   | 10.2088  | 1.29595225       | 4.15871      | 10.2098       | 1.29574662       | 0.0182773  | No      |
|      |       |        |             |          |         | Nxpe3   | 5.55848   | 1.29802  | -2.0983778       | 5.55948      | 1.29902       | -2.0975263       | 0.00227055 | No      |
|      |       |        |             |          |         | Nxt1    | 29.357    | 16.3319  | -0.8460119       | 29.358       | 16.3329       | -0.8459727       | 0.0453842  | No      |
|      |       |        |             |          |         | Nynrin  | 2.16888   | 4.31304  | 0.99175486       | 2.16988      | 4.31404       | 0.99142429       | 0.0276556  | No      |
|      |       |        |             |          |         | Oaf     | 7.07522   | 43.5707  | 2.62251138       | 7.07622      | 43.5717       | 2.6223406        | 0.00022079 | No      |
|      |       |        |             |          |         | Oas1b   | 9.01261   | 2.45032  | -1.8789748       | 9.01361      | 2.45132       | -1.8785462       | 0.00022079 | No      |
|      |       |        |             |          |         | Oasl2   | 15.3751   | 5.24642  | -1.5511906       | 15.3761      | 5.24742       | -1.5510095       | 0.00022079 | No      |
|      |       |        |             |          |         | Oat     | 14.4967   | 106.951  | 2.88315354       | 14.4977      | 106.952       | 2.88306752       | 0.00022079 | No      |
|      |       |        |             |          |         | Oaz2    | 35.0234   | 61.5063  | 0.81241505       | 35.0244      | 61.5073       | 0.81239731       | 0.014108   | No      |
|      |       |        |             |          |         | Obsl1   | 1.10999   | 11.2694  | 3.34379212       | 1.11099      | 11.2704       | 3.34262098       | 0.00273202 | No      |
|      |       |        |             |          |         | Ocln    | 4.71863   | 23.6703  | 2.32663804       | 4.71963      | 23.6713       | 2.32639327       | 0.00022079 | No      |
|      |       |        |             |          |         | Odc1    | 43.5834   | 84.0889  | 0.94813663       | 43.5844      | 84.0899       | 0.94812068       | 0.00632443 | No      |
|      |       |        |             |          |         | Ofd1    | 16.5466   | 5.60238  | -1.5624231       | 16.5476      | 5.60338       | -1.5622528       | 0.00363736 | No      |
|      |       |        |             |          |         | Ogdh    | 37.0591   | 110.854  | 1.58076108       | 37.0601      | 110.855       | 1.58073516       | 0.00022079 | No      |
|      |       |        |             |          |         | Ogdhl   | 0.22433   | 6.76045  | 4.91342481       | 0.22533      | 6.76145       | 4.90722136       | 0.0019604  | No      |
|      |       |        |             |          |         | Ogfr    | 53.1028   | 31.9913  | -0.7311083       | 53.1038      | 31.9923       | -0.7310904       | 0.0281894  | No      |
|      |       |        |             |          |         | Ogfrl1  | 0.892638  | 14.9857  | 4.06936744       | 0.893638     | 14.9867       | 4.0678484        | 0.00022079 | No      |
|      |       |        |             |          |         | Ogn     | 0.0175272 | 5.46815  | 8.28531347       | 0.0185272    | 5.46915       | 8.20552796       | 0.0461862  | No      |
|      |       |        |             |          |         | Ogt     | 173.253   | 33.0132  | -2.3917654       | 173.254      | 33.0142       | -2.3917301       | 0.00022079 | No      |
|      |       |        |             |          |         | Ola1    | 55.2903   | 32.8305  | -0.7519897       | 55.2913      | 32.8315       | -0.7519718       | 0.0178094  | No      |
|      |       |        |             |          |         | Olfml1  | 0         | 9.47252  | inf              | 0.001        | 9.47352       | 13.2096849       | 0.00022079 | No      |
|      |       |        |             |          |         | Olfml2b | 0         | 1.33795  | inf              | 0.001        | 1.33895       | 10.3868864       | 0.00022079 | No      |
|      |       |        |             |          |         | Olfml3  | 0.832319  | 3.373    | 2.01882384       | 0.833319     | 3.374         | 2.01751919       | 0.0138632  | No      |
|      |       |        |             |          |         | Olr155  | 0         | 1.33664  | inf              | 0.001        | 1.33764       | 10.3854742       | 0.00022079 | No      |
|      |       |        |             |          |         | Olr1668 | 0         | 1.05868  | inf              | 0.001        | 1.05968       | 10.049413        | 0.00022079 | No      |
|      |       |        |             |          |         | Oosp1   | 0.258146  | 8.74213  | 5.08172568       | 0.259146     | 8.74313       | 5.07631282       | 0.00096553 | No      |
|      |       |        |             |          |         | OPA3    | 5.84425   | 15.3207  | 1.39039242       | 5.84525      | 15.3217       | 1.39023974       | 0.00022079 | No      |
|      |       |        |             |          |         | Ophn1   | 0.0205437 | 5.86297  | 8.15679182       | 0.0215437    | 5.86397       | 8.08846787       | 0.00778313 | No      |
|      |       |        |             |          |         | Oplah   | 0.622178  | 68.7631  | 6.78816339       | 0.623178     | 68.7641       | 6.78586745       | 0.00022079 | No      |
|      |       |        |             |          |         | Opn3    | 0.526883  | 2.80882  | 2.41440964       | 0.527883     | 2.80982       | 2.4121876        | 0.0259566  | No      |
|      |       |        |             |          |         | Orai2   | 40.3026   | 2.53035  | -3.9934641       | 40.3036      | 2.53135       | -3.9929298       | 0.00022079 | No      |
|      |       |        |             |          |         | Orai3   | 4.00201   | 15.542   | 1.95737549       | 4.00301      | 15.543        | 1.95710786       | 0.00022079 | No      |
|      |       |        |             |          |         | Orc3    | 12.3743   | 5.75643  | -1.1041006       | 12.3753      | 5.75743       | -1.1039666       | 0.038944   | No      |
|      |       |        |             |          |         | Orc4    | 15.6096   | 7.60847  | -1.0367553       | 15.6106      | 7.60947       | -1.0366581       | 0.0433217  | No      |
|      |       |        |             |          |         | Os9     | 59.1551   | 33.7191  | -0.8109365       | 59.1561      | 33.7201       | -0.8109181       | 0.0207777  | No      |
|      |       |        |             |          |         | Osbp2   | 0         | 0.948098 | inf              | 0.001        | 0.949098      | 9.89041325       | 0.00041963 | No      |
|      |       |        |             |          |         | Osbpl11 | 12.3068   | 4.81676  | -1.3533207       | 12.3078      | 4.81776       | -1.3531385       | 0.00041963 | No      |
|      |       |        |             |          |         | Osbpl3  | 2.72473   | 28.9559  | 3.40967216       | 2.72573      | 28.9569       | 3.4091926        | 0.00022079 | No      |
|      |       |        |             |          |         | Osbpl6  | 0.113898  | 2.55619  | 4.48818076       | 0.114898     | 2.55719       | 4.47613377       | 0.0450883  | No      |
|      |       |        |             |          |         | Osbpl7  | 13.2074   | 5.77535  | -1.1933662       | 13.2084      | 5.77635       | -1.1932257       | 0.00164037 | No      |

| RRBS |       |        |             |          |         | RNAseq   |           |          |                  |              |               |                  |            |         |
|------|-------|--------|-------------|----------|---------|----------|-----------|----------|------------------|--------------|---------------|------------------|------------|---------|
| gene | Blood | Kidney | methyl.diff | pMWU.fdr | Match ? | gene     | blood     | kidney   | log2(fold_ratio) | blood+ 0.001 | kidney+ 0.001 | log2(fold_ratio) | q_value    | Match ? |
|      |       |        |             |          |         | Oscar    | 0.197312  | 1.64158  | 3.05653445       | 0.198312     | 1.64258       | 3.05011975       | 0.043912   | No      |
|      |       |        |             |          |         | Osgepl1  | 10.7766   | 3.71398  | -1.5368641       | 10.7776      | 3.71498       | -1.5366096       | 0.00778313 | No      |
|      |       |        |             |          |         | Osgin1   | 0.286024  | 53.2844  | 7.5414332        | 0.287024     | 53.2854       | 7.53642511       | 0.00096553 | No      |
|      |       |        |             |          |         | Osgin2   | 7.15777   | 3.50419  | -1.0304292       | 7.15877      | 3.50519       | -1.0302191       | 0.0409854  | No      |
|      |       |        |             |          |         | Osmr     | 0         | 16.9533  | inf              | 0.001        | 16.9543       | 14.0493636       | 0.00022079 | No      |
|      |       |        |             |          |         | OST4     | 211.388   | 428.128  | 1.01814871       | 211.389      | 428.129       | 1.01814526       | 0.00257873 | No      |
|      |       |        |             |          |         | Otud1    | 23.5252   | 7.73444  | -1.6048382       | 23.5262      | 7.73544       | -1.6047131       | 0.00180113 | No      |
|      |       |        |             |          |         | Otud4    | 27.6035   | 9.73233  | -1.5039941       | 27.6045      | 9.73333       | -1.5038981       | 0.00022079 | No      |
|      |       |        |             |          |         | Otud5    | 170.722   | 75.5026  | -1.1770508       | 170.723      | 75.5036       | -1.1770401       | 0.00791314 | No      |
|      |       |        |             |          |         | Oxa1l    | 60.4813   | 103.255  | 0.77165059       | 60.4823      | 103.256       | 0.77164071       | 0.035709   | No      |
|      |       |        |             |          |         | Oxct1    | 27.2019   | 214.875  | 2.98171831       | 27.2029      | 214.876       | 2.98167199       | 0.00022079 | No      |
|      |       |        |             |          |         | Oxgr1    | 0         | 1.83716  | inf              | 0.001        | 1.83816       | 10.8440466       | 0.00022079 | No      |
|      |       |        |             |          |         | P2ry1    | 0.101432  | 0.947202 | 3.22315926       | 0.102432     | 0.948202      | 3.21052795       | 0.0184986  | No      |
|      |       |        |             |          |         | P2ry10   | 66.2301   | 2.97936  | -4.4744127       | 66.2311      | 2.98036       | -4.4739503       | 0.00022079 | No      |
|      |       |        |             |          |         | P2ry4    | 13.7748   | 38.376   | 1.47817297       | 13.7758      | 38.377        | 1.47810584       | 0.00333723 | No      |
|      |       |        |             |          |         | P2ry6    | 0.0952093 | 1.47206  | 3.95059016       | 0.0962093    | 1.47306       | 3.93649603       | 0.00818469 | No      |
|      |       |        |             |          |         | P33MONOX | 14.5716   | 128.389  | 3.1392904        | 14.5726      | 128.39        | 3.13920263       | 0.00022079 | No      |
|      |       |        |             |          |         | P4ha1    | 7.81741   | 30.9793  | 1.98654194       | 7.81841      | 30.9803       | 1.98640397       | 0.00022079 | No      |
|      |       |        |             |          |         | P4hb     | 71.2491   | 138.721  | 0.96124251       | 71.2501      | 138.722       | 0.96123266       | 0.00494367 | No      |
|      |       |        |             |          |         | Pabpc1   | 1238.76   | 169.649  | -2.8682719       | 1238.761     | 169.65        | -2.8682645       | 0.00022079 | No      |
|      |       |        |             |          |         | Pacs1    | 50.5416   | 12.819   | -1.9791876       | 50.5426      | 12.82         | -1.9791036       | 0.00022079 | No      |
|      |       |        |             |          |         | Pacsin1  | 22.4551   | 2.66141  | -3.0767805       | 22.4561      | 2.66241       | -3.0763027       | 0.00022079 | No      |
|      |       |        |             |          |         | Pacsin2  | 19.54     | 74.6007  | 1.9327587        | 19.541       | 74.6017       | 1.93270421       | 0.00022079 | No      |
|      |       |        |             |          |         | Paf1     | 36.927    | 63.5211  | 0.78255984       | 36.928       | 63.5221       | 0.78254348       | 0.0168842  | No      |
|      |       |        |             |          |         | Pag1     | 14.6457   | 5.07139  | -1.530024        | 14.6467      | 5.07239       | -1.5298381       | 0.00845215 | No      |
|      |       |        |             |          |         | Pah      | 0         | 145.913  | inf              | 0.001        | 145.914       | 17.1547588       | 0.00022079 | No      |
|      |       |        |             |          |         | Pak1     | 0.151253  | 12.6138  | 6.3818954        | 0.152253     | 12.6148       | 6.37250287       | 0.00060553 | No      |
|      |       |        |             |          |         | Pak1ip1  | 18.3129   | 5.82731  | -1.6519583       | 18.3139      | 5.82831       | -1.6517895       | 0.00041963 | No      |
|      |       |        |             |          |         | Pak4     | 2.01676   | 19.5873  | 3.27980723       | 2.01776      | 19.5883       | 3.27916571       | 0.00022079 | No      |
|      |       |        |             |          |         | Pald     | 0.603555  | 6.06921  | 3.32995159       | 0.604555     | 6.07021       | 3.32780093       | 0.00022079 | No      |
|      |       |        |             |          |         | Palm3    | 0.601162  | 7.25399  | 3.59294903       | 0.602162     | 7.25499       | 3.59075005       | 0.00022079 | No      |
|      |       |        |             |          |         | Pam      | 0.0301325 | 22.463   | 9.54201453       | 0.0311325    | 22.464        | 9.49497769       | 0.00060553 | No      |
|      |       |        |             |          |         | Pamr1    | 0         | 27.2334  | inf              | 0.001        | 27.2344       | 14.7331425       | 0.00022079 | No      |
|      |       |        |             |          |         | Pan2     | 28.0637   | 14.2655  | -0.9761749       | 28.0647      | 14.2665       | -0.9761252       | 0.0143389  | No      |
|      |       |        |             |          |         | Pan3     | 96.0297   | 17.5192  | -2.4545438       | 96.0307      | 17.5202       | -2.4544764       | 0.00060553 | No      |
|      |       |        |             |          |         | Pank1    | 1.40878   | 33.9765  | 4.59201901       | 1.40978      | 33.9775       | 4.59103776       | 0.00022079 | No      |
|      |       |        |             |          |         | Panx2    | 0         | 4.83797  | inf              | 0.001        | 4.83897       | 12.2404843       | 0.00022079 | No      |
|      |       |        |             |          |         | Papd4    | 23.8051   | 8.6096   | -1.4672526       | 23.8061      | 8.6106        | -1.4671456       | 0.00022079 | No      |
|      |       |        |             |          |         | Papd5    | 33.5847   | 8.67653  | -1.9526141       | 33.5857      | 8.67753       | -1.9524907       | 0.00022079 | No      |
|      |       |        |             |          |         | Papola   | 55.1128   | 30.2278  | -0.8665114       | 55.1138      | 30.2288       | -0.8664899       | 0.0174725  | No      |
|      |       |        |             |          |         | Papolg   | 18.5277   | 3.15593  | -2.5535467       | 18.5287      | 3.15693       | -2.5531675       | 0.00022079 | No      |



| RRBS |       |        |             |          |         | RNAseq  |           |          |                  |              |               |                  |            |         |
|------|-------|--------|-------------|----------|---------|---------|-----------|----------|------------------|--------------|---------------|------------------|------------|---------|
| gene | Blood | Kidney | methyl.diff | pMWU.fdr | Match ? | gene    | blood     | kidney   | log2(fold_ratio) | blood+ 0.001 | kidney+ 0.001 | log2(fold_ratio) | q_value    | Match ? |
|      |       |        |             |          |         | Papss1  | 13.9107   | 61.9895  | 2.15582885       | 13.9117      | 61.9905       | 2.15574841       | 0.00022079 | No      |
|      |       |        |             |          |         | Papss2  | 0.360432  | 46.6452  | 7.01585772       | 0.361432     | 46.6462       | 7.0118915        | 0.00022079 | No      |
|      |       |        |             |          |         | Paqr5   | 19.5193   | 32.0231  | 0.71421166       | 19.5203      | 32.0241       | 0.7141828        | 0.0493191  | No      |
|      |       |        |             |          |         | Paqr9   | 0         | 1.92193  | inf              | 0.001        | 1.92293       | 10.9090905       | 0.00022079 | No      |
|      |       |        |             |          |         | Park2   | 0         | 2.16686  | inf              | 0.001        | 2.16786       | 11.0820559       | 0.0111498  | No      |
|      |       |        |             |          |         | Parm1   | 0.0856492 | 79.323   | 9.85508376       | 0.0866492    | 79.324        | 9.83835528       | 0.00022079 | No      |
|      |       |        |             |          |         | Parp1   | 49.6917   | 22.1704  | -1.1643701       | 49.6927      | 22.1714       | -1.1643341       | 0.00658515 | No      |
|      |       |        |             |          |         | Parp14  | 38.0787   | 9.89245  | -1.9445845       | 38.0797      | 9.89345       | -1.9444765       | 0.00022079 | No      |
|      |       |        |             |          |         | Parp6   | 29.2507   | 15.7235  | -0.8955488       | 29.2517      | 15.7245       | -0.8955063       | 0.0111498  | No      |
|      |       |        |             |          |         | Parp8   | 46.5554   | 16.153   | -1.5271464       | 46.5564      | 16.154        | -1.5270881       | 0.00318754 | No      |
|      |       |        |             |          |         | Parp9   | 41.923    | 10.1982  | -2.0394274       | 41.924       | 10.1992       | -2.0393204       | 0.00022079 | No      |
|      |       |        |             |          |         | Parva   | 0         | 59.1813  | inf              | 0.001        | 59.1823       | 15.8528781       | 0.00022079 | No      |
|      |       |        |             |          |         | Parvb   | 0.287118  | 3.85925  | 3.74860482       | 0.288118     | 3.86025       | 3.74396258       | 0.00480115 | No      |
|      |       |        |             |          |         | Parvg   | 35.6816   | 2.92456  | -3.6088888       | 35.6826      | 2.92556       | -3.608436        | 0.00022079 | No      |
|      |       |        |             |          |         | Patl1   | 19.8526   | 8.86077  | -1.163824        | 19.8536      | 8.86177       | -1.1637338       | 0.00096553 | No      |
|      |       |        |             |          |         | Patl2   | 4.84045   | 0.186238 | -4.6999218       | 4.84145      | 0.187238      | -4.692494        | 0.00022079 | No      |
|      |       |        |             |          |         | Pax5    | 6.65387   | 21.7349  | 1.70774787       | 6.65487      | 21.7359       | 1.70759744       | 0.0204275  | No      |
|      |       |        |             |          |         | Pax8    | 0.102767  | 93.8712  | 9.83516172       | 0.103767     | 93.8722       | 9.82120645       | 0.00022079 | No      |
|      |       |        |             |          |         | Paxbp1  | 34.5824   | 10.8666  | -1.6701374       | 34.5834      | 10.8676       | -1.6700463       | 0.00022079 | No      |
|      |       |        |             |          |         | Paxip1  | 16.0529   | 5.36273  | -1.5817944       | 16.0539      | 5.36373       | -1.5816153       | 0.00022079 | No      |
|      |       |        |             |          |         | Pbk     | 0.274094  | 2.10572  | 2.94157096       | 0.275094     | 2.10672       | 2.937002         | 0.0181685  | No      |
|      |       |        |             |          |         | Pbrm1   | 20.9036   | 7.88285  | -1.4069622       | 20.9046      | 7.88385       | -1.4068482       | 0.00363736 | No      |
|      |       |        |             |          |         | Pbx1    | 1.49182   | 16.2233  | 3.44292193       | 1.49282      | 16.2243       | 3.44204411       | 0.00022079 | No      |
|      |       |        |             |          |         | Pbx3    | 1.3711    | 8.72616  | 2.67001313       | 1.3721       | 8.72716       | 2.66912662       | 0.00022079 | No      |
|      |       |        |             |          |         | Pbx4    | 0.436803  | 16.1258  | 5.20624416       | 0.437803     | 16.1268       | 5.20303455       | 0.00022079 | No      |
|      |       |        |             |          |         | Pbxip1  | 149.116   | 64.0825  | -1.2184327       | 149.117      | 64.0835       | -1.2184199       | 0.00147497 | No      |
|      |       |        |             |          |         | Pc      | 0.645553  | 41.6107  | 6.0102752        | 0.646553     | 41.6117       | 6.00807678       | 0.00022079 | No      |
|      |       |        |             |          |         | Pcbd1   | 0.439658  | 218.123  | 8.95454447       | 0.440658     | 218.124       | 8.9512734        | 0.00363736 | No      |
|      |       |        |             |          |         | Pcbd2   | 59.9496   | 164.668  | 1.45773819       | 59.9506      | 164.669       | 1.45772289       | 0.00022079 | No      |
|      |       |        |             |          |         | Pcbp4   | 8.99912   | 26.725   | 1.57033411       | 9.00012      | 26.726        | 1.57022779       | 0.00022079 | No      |
|      |       |        |             |          |         | Pcca    | 9.59931   | 61.4213  | 2.67773643       | 9.60031      | 61.4223       | 2.67760964       | 0.00041963 | No      |
|      |       |        |             |          |         | Pccb    | 11.3834   | 150.165  | 3.72154516       | 11.3844      | 150.166       | 3.72142804       | 0.00022079 | No      |
|      |       |        |             |          |         | Pcdh1   | 0         | 4.06735  | inf              | 0.001        | 4.06835       | 11.9902281       | 0.00022079 | No      |
|      |       |        |             |          |         | Pcdh17  | 0         | 2.07212  | inf              | 0.001        | 2.07312       | 11.0175879       | 0.00022079 | No      |
|      |       |        |             |          |         | Pcdhb19 | 0.191214  | 1.1935   | 2.64193851       | 0.192214     | 1.1945        | 2.63562153       | 0.0369799  | No      |
|      |       |        |             |          |         | Pcf11   | 36.2794   | 6.79508  | -2.4165882       | 36.2804      | 6.79608       | -2.4164156       | 0.00022079 | No      |
|      |       |        |             |          |         | Pcgf2   | 2.17294   | 16.6608  | 2.93873743       | 2.17394      | 16.6618       | 2.93816024       | 0.00022079 | No      |
|      |       |        |             |          |         | Pcgf6   | 15.726    | 4.71267  | -1.7385352       | 15.727       | 4.71367       | -1.7383208       | 0.00022079 | No      |
|      |       |        |             |          |         | Pck2    | 2.24478   | 20.8987  | 3.21876724       | 2.24578      | 20.8997       | 3.21819372       | 0.00022079 | No      |
|      |       |        |             |          |         | Pcmtd1  | 119.323   | 34.4127  | -1.7938592       | 119.324      | 34.4137       | -1.7938293       | 0.00022079 | No      |
|      |       |        |             |          |         | Pcmtd2  | 55.7363   | 15.3767  | -1.8578713       | 55.7373      | 15.3777       | -1.8578034       | 0.00022079 | No      |
|      |       |        |             |          |         | Pcolce  | 0.193428  | 8.82031  | 5.51096081       | 0.194428     | 8.82131       | 5.50368501       | 0.0475969  | No      |

| RRBS |       |        |             |          |         | RNAseq   |           |          |                  |              |               |                  |            |         |
|------|-------|--------|-------------|----------|---------|----------|-----------|----------|------------------|--------------|---------------|------------------|------------|---------|
| gene | Blood | Kidney | methyl.diff | pMWU.fdr | Match ? | gene     | blood     | kidney   | log2(fold_ratio) | blood+ 0.001 | kidney+ 0.001 | log2(fold_ratio) | q_value    | Match ? |
|      |       |        |             |          |         | PCOLCE2  | 0         | 15.0321  | inf              | 0.001        | 15.0331       | 13.8758549       | 0.00022079 | No      |
|      |       |        |             |          |         | Pcp4l1   | 0         | 1.33378  | inf              | 0.001        | 1.33478       | 10.3823863       | 0.00022079 | No      |
|      |       |        |             |          |         | Pcsk6    | 0         | 12.0719  | inf              | 0.001        | 12.0729       | 13.5594846       | 0.00022079 | No      |
|      |       |        |             |          |         | Pcyt1a   | 3.44813   | 11.8629  | 1.78257066       | 3.44913      | 11.8639       | 1.78227393       | 0.00022079 | No      |
|      |       |        |             |          |         | Pcyt2    | 25.7665   | 61.4446  | 1.25378964       | 25.7675      | 61.4456       | 1.25375713       | 0.00078858 | No      |
|      |       |        |             |          |         | Pdcd10   | 78.0511   | 36.4552  | -1.0982943       | 78.0521      | 36.4562       | -1.0982733       | 0.00130998 | No      |
|      |       |        |             |          |         | Pdcd11   | 20.515    | 9.3373   | -1.1356018       | 20.516       | 9.3383        | -1.1355176       | 0.00060553 | No      |
|      |       |        |             |          |         | Pdcd4    | 544.457   | 84.966   | -2.6798606       | 544.458      | 84.967        | -2.6798462       | 0.00022079 | No      |
|      |       |        |             |          |         | Pdcd6ip  | 28.307    | 48.3301  | 0.77176312       | 28.308       | 48.3311       | 0.77174201       | 0.0210061  | No      |
|      |       |        |             |          |         | Pde12    | 12.8474   | 5.92136  | -1.1174759       | 12.8484      | 5.92236       | -1.1173446       | 0.0372667  | No      |
|      |       |        |             |          |         | Pde1a    | 0         | 17.307   | inf              | 0.001        | 17.308        | 14.0791514       | 0.00022079 | No      |
|      |       |        |             |          |         | Pde3b    | 46.8387   | 1.62466  | -4.8494913       | 46.8397      | 1.62566       | -4.8486344       | 0.00022079 | No      |
|      |       |        |             |          |         | Pde4b    | 79.1668   | 2.92888  | -4.7564745       | 79.1678      | 2.92988       | -4.7560003       | 0.00022079 | No      |
|      |       |        |             |          |         | Pde4c    | 4.92824   | 12.9308  | 1.39166711       | 4.92924      | 12.9318       | 1.39148597       | 0.015076   | No      |
|      |       |        |             |          |         | Pde7b    | 0.285419  | 12.709   | 5.47662533       | 0.286419     | 12.71         | 5.47169302       | 0.00022079 | No      |
|      |       |        |             |          |         | Pde8a    | 0.337155  | 17.3391  | 5.68447321       | 0.338155     | 17.3401       | 5.68028372       | 0.00211842 | No      |
|      |       |        |             |          |         | Pde9a    | 0.215412  | 13.6773  | 5.98854103       | 0.216412     | 13.6783       | 5.98196463       | 0.00022079 | No      |
|      |       |        |             |          |         | Pdgfb    | 0.605386  | 14.3527  | 4.56732304       | 0.606386     | 14.3537       | 4.56504242       | 0.00022079 | No      |
|      |       |        |             |          |         | Pdgfd    | 0         | 1.68097  | inf              | 0.001        | 1.68197       | 10.7159363       | 0.00022079 | No      |
|      |       |        |             |          |         | Pdgfrb   | 0         | 1.21474  | inf              | 0.001        | 1.21574       | 10.247619        | 0.00022079 | No      |
|      |       |        |             |          |         | Pdha1    | 80.8783   | 183.065  | 1.17853141       | 80.8793      | 183.066       | 1.17852145       | 0.0196176  | No      |
|      |       |        |             |          |         | Pdhb     | 31.1637   | 132.376  | 2.08670315       | 31.1647      | 132.377       | 2.08666775       | 0.00022079 | No      |
|      |       |        |             |          |         | Pdhx     | 5.53687   | 15.3245  | 1.46869745       | 5.53787      | 15.3255       | 1.46853105       | 0.00041963 | No      |
|      |       |        |             |          |         | Pdk1     | 22.45     | 9.6845   | -1.212966        | 22.451       | 9.6855        | -1.2128813       | 0.010907   | No      |
|      |       |        |             |          |         | Pdk2     | 9.8308    | 109.731  | 3.48051852       | 9.8318       | 109.732       | 3.48038493       | 0.00022079 | No      |
|      |       |        |             |          |         | Pdlim1   | 53.3441   | 17.5762  | -1.6017055       | 53.3451      | 17.5772       | -1.6016505       | 0.00022079 | No      |
|      |       |        |             |          |         | Pdp2     | 1.57644   | 7.82353  | 2.31114944       | 1.57744      | 7.82453       | 2.31041896       | 0.00022079 | No      |
|      |       |        |             |          |         | Pdpk1    | 23.0151   | 10.635   | -1.1137607       | 23.0161      | 10.636        | -1.1136877       | 0.0237207  | No      |
|      |       |        |             |          |         | Pdpn     | 0         | 11.501   | inf              | 0.001        | 11.502        | 13.4895971       | 0.00022079 | No      |
|      |       |        |             |          |         | Pds5a    | 40.7895   | 12.9847  | -1.6513851       | 40.7905      | 12.9857       | -1.6513094       | 0.00022079 | No      |
|      |       |        |             |          |         | Pds5b    | 19.8323   | 6.0877   | -1.7038828       | 19.8333      | 6.0887        | -1.7037186       | 0.00022079 | No      |
|      |       |        |             |          |         | Pdxk     | 4.33088   | 24.3837  | 2.49318495       | 4.33188      | 24.3847       | 2.49291104       | 0.00022079 | No      |
|      |       |        |             |          |         | Pdzd2    | 0.0406081 | 1.16976  | 4.84830122       | 0.0416081    | 1.17076       | 4.81443714       | 0.00078858 | No      |
|      |       |        |             |          |         | Pdzd4    | 4.77554   | 0.473165 | -3.3352486       | 4.77654      | 0.474165      | -3.3325049       | 0.00022079 | No      |
|      |       |        |             |          |         | Pdzd8    | 3.7321    | 6.95308  | 0.89766455       | 3.7331       | 6.95408       | 0.89748551       | 0.0306704  | No      |
|      |       |        |             |          |         | Pdzk1    | 0.824799  | 166.561  | 7.65779234       | 0.825799     | 166.562       | 7.65605291       | 0.00022079 | No      |
|      |       |        |             |          |         | Pdzk1ip1 | 0.0773318 | 372.598  | 12.2342705       | 0.0783318    | 372.599       | 12.2157381       | 0.026068   | No      |
|      |       |        |             |          |         | Pebp1    | 97.5585   | 553.783  | 2.50498129       | 97.5595      | 553.784       | 2.5049691        | 0.00022079 | No      |
|      |       |        |             |          |         | Pecr     | 12.5403   | 184.507  | 3.87903178       | 12.5413      | 184.508       | 3.87892456       | 0.00022079 | No      |
|      |       |        |             |          |         | Pef1     | 26.761    | 43.6853  | 0.70701587       | 26.762       | 43.6863       | 0.70699499       | 0.0370591  | No      |
|      |       |        |             |          |         | Peo1     | 4.44556   | 13.0746  | 1.55632974       | 4.44656      | 13.0756       | 1.55611559       | 0.00164037 | No      |
|      |       |        |             |          |         | Per2     | 1.67368   | 11.549   | 2.78667231       | 1.67468      | 11.55         | 2.7859355        | 0.00041963 | No      |

| RRBS |       |        |             |          |         | RNAseq   |           |          |                  |              |               |                  |            |         |
|------|-------|--------|-------------|----------|---------|----------|-----------|----------|------------------|--------------|---------------|------------------|------------|---------|
| gene | Blood | Kidney | methyl.diff | pMWU.fdr | Match ? | gene     | blood     | kidney   | log2(fold_ratio) | blood+ 0.001 | kidney+ 0.001 | log2(fold_ratio) | q_value    | Match ? |
|      |       |        |             |          |         | Perld1   | 3.32279   | 7.71592  | 1.21544307       | 3.32379      | 7.71692       | 1.21519592       | 0.00565535 | No      |
|      |       |        |             |          |         | Pes1     | 62.8386   | 40.0019  | -0.6515825       | 62.8396      | 40.0029       | -0.6515694       | 0.0460899  | No      |
|      |       |        |             |          |         | Pet100   | 15.3847   | 55.7934  | 1.85859816       | 15.3857      | 55.7944       | 1.85853025       | 0.00022079 | No      |
|      |       |        |             |          |         | Pex11a   | 0.0921542 | 11.9444  | 7.01806875       | 0.0931542    | 11.9454       | 7.00261863       | 0.00022079 | No      |
|      |       |        |             |          |         | Pex11g   | 0.610607  | 7.78641  | 3.67264228       | 0.611607     | 7.78741       | 3.67046676       | 0.0072515  | No      |
|      |       |        |             |          |         | Pex12    | 1.06126   | 4.58417  | 2.1108824        | 1.06226      | 4.58517       | 2.1098383        | 0.00113657 | No      |
|      |       |        |             |          |         | Pex13    | 10.9859   | 21.3253  | 0.95691297       | 10.9869      | 21.3263       | 0.95684931       | 0.0180483  | No      |
|      |       |        |             |          |         | Pex2     | 5.24881   | 13.8556  | 1.40040691       | 5.24981      | 13.8566       | 1.40023619       | 0.00242102 | No      |
|      |       |        |             |          |         | Pex7     | 0.95648   | 10.495   | 3.45582355       | 0.95748      | 10.496        | 3.45445346       | 0.00022079 | No      |
|      |       |        |             |          |         | Pfdn5    | 185.037   | 385.185  | 1.05773774       | 185.038      | 385.186       | 1.05773369       | 0.00632443 | No      |
|      |       |        |             |          |         | Pfkb2    | 11.6224   | 5.36842  | -1.1143386       | 11.6234      | 5.36942       | -1.114194        | 0.00805135 | No      |
|      |       |        |             |          |         | Pfkm     | 11.0611   | 31.4741  | 1.50867026       | 11.0621      | 31.4751       | 1.50858567       | 0.00022079 | No      |
|      |       |        |             |          |         | Pfn1     | 2597.73   | 743.723  | -1.8044142       | 2597.731     | 743.724       | -1.8044128       | 0.00096553 | No      |
|      |       |        |             |          |         | Pfn2     | 1.30769   | 26.6191  | 4.34736931       | 1.30869      | 26.6201       | 4.34632069       | 0.00949299 | No      |
|      |       |        |             |          |         | Pgam1    | 75.5254   | 234.737  | 1.63601144       | 75.5264      | 234.738       | 1.63599848       | 0.00022079 | No      |
|      |       |        |             |          |         | Pgam5    | 25.9654   | 15.4355  | -0.7503382       | 25.9664      | 15.4365       | -0.7503003       | 0.037664   | No      |
|      |       |        |             |          |         | Pgk1     | 160.322   | 338.918  | 1.07996385       | 160.323      | 338.919       | 1.07995911       | 0.00288641 | No      |
|      |       |        |             |          |         | Pgls     | 28.9291   | 71.8125  | 1.31171355       | 28.9301      | 71.8135       | 1.31168377       | 0.00304333 | No      |
|      |       |        |             |          |         | Pgm1     | 4.43136   | 20.6     | 2.2168229        | 4.43236      | 20.601        | 2.2165674        | 0.00022079 | No      |
|      |       |        |             |          |         | PGM2     | 5.19388   | 13.1701  | 1.34238171       | 5.19488      | 13.1711       | 1.34221351       | 0.00096553 | No      |
|      |       |        |             |          |         | Pgm2l1   | 9.53932   | 0.935076 | -3.3507309       | 9.54032      | 0.936076      | -3.3493401       | 0.00022079 | No      |
|      |       |        |             |          |         | Pgm5     | 0         | 1.88874  | inf              | 0.001        | 1.88974       | 10.883972        | 0.00022079 | No      |
|      |       |        |             |          |         | Pgpep1   | 3.05574   | 60.3672  | 4.30417119       | 3.05674      | 60.3682       | 4.30372304       | 0.00022079 | No      |
|      |       |        |             |          |         | Phactr4  | 7.43629   | 15.631   | 1.07175514       | 7.43729      | 15.632        | 1.07165344       | 0.00147497 | No      |
|      |       |        |             |          |         | Phb      | 37.2583   | 104.489  | 1.48771732       | 37.2593      | 104.49        | 1.4876924        | 0.00022079 | No      |
|      |       |        |             |          |         | Phc1     | 14.498    | 8.49318  | -0.7714772       | 14.499       | 8.49418       | -0.7714068       | 0.0335918  | No      |
|      |       |        |             |          |         | Phc3     | 22.1877   | 5.33021  | -2.0574958       | 22.1887      | 5.33121       | -2.0572902       | 0.00022079 | No      |
|      |       |        |             |          |         | Phf11b   | 853.933   | 117.033  | -2.8672075       | 853.934      | 117.034       | -2.8671969       | 0.00022079 | No      |
|      |       |        |             |          |         | Phf12    | 37.538    | 12.6692  | -1.5670264       | 37.539       | 12.6702       | -1.5669509       | 0.00022079 | No      |
|      |       |        |             |          |         | Phf15    | 24.6688   | 9.36189  | -1.3978158       | 24.6698      | 9.36289       | -1.3977202       | 0.00022079 | No      |
|      |       |        |             |          |         | PHF20L1  | 25.5445   | 7.63942  | -1.7414777       | 25.5455      | 7.64042       | -1.7413453       | 0.00022079 | No      |
|      |       |        |             |          |         | Phf21a   | 34.2553   | 12.7033  | -1.4311239       | 34.2563      | 12.7043       | -1.4310524       | 0.00164037 | No      |
|      |       |        |             |          |         | Phf23    | 32.9404   | 19.5083  | -0.75577         | 32.9414      | 19.5093       | -0.7557399       | 0.0334772  | No      |
|      |       |        |             |          |         | Phf3     | 20.7961   | 10.738   | -0.9535877       | 20.7971      | 10.739        | -0.9535227       | 0.0072515  | No      |
|      |       |        |             |          |         | Phf8     | 26.6812   | 5.12052  | -2.3814613       | 26.6822      | 5.12152       | -2.3812337       | 0.00022079 | No      |
|      |       |        |             |          |         | Phgdh    | 20.9813   | 37.035   | 0.81978527       | 20.9823      | 37.036        | 0.81975546       | 0.0200735  | No      |
|      |       |        |             |          |         | Phip     | 25.3492   | 5.01114  | -2.3387295       | 25.3502      | 5.01214       | -2.3384985       | 0.00022079 | No      |
|      |       |        |             |          |         | PHKG2    | 4.77497   | 1.72599  | -1.4680676       | 4.77597      | 1.72699       | -1.467534        | 0.00436941 | No      |
|      |       |        |             |          |         | Phlda3   | 0.213898  | 9.66916  | 5.49839566       | 0.214898     | 9.67016       | 5.4918158        | 0.00480115 | No      |
|      |       |        |             |          |         | Phldb1   | 0.0430009 | 25.9918  | 9.23947398       | 0.0440009    | 25.9928       | 9.2063633        | 0.00022079 | No      |
|      |       |        |             |          |         | Phospho2 | 11.1439   | 5.89337  | -0.9190895       | 11.1449      | 5.89437       | -0.9189741       | 0.0160426  | No      |
|      |       |        |             |          |         | Phtf1    | 28.6444   | 15.166   | -0.9174125       | 28.6454      | 15.167        | -0.9173677       | 0.0205337  | No      |

| RRBS |       |        |             |          |         | RNAseq  |          |          |                  |              |               |                  |            |         |
|------|-------|--------|-------------|----------|---------|---------|----------|----------|------------------|--------------|---------------|------------------|------------|---------|
| gene | Blood | Kidney | methyl.diff | pMWU.fdr | Match ? | gene    | blood    | kidney   | log2(fold_ratio) | blood+ 0.001 | kidney+ 0.001 | log2(fold_ratio) | q_value    | Match ? |
|      |       |        |             |          |         | Phtf2   | 12.0508  | 4.44342  | -1.4393865       | 12.0518      | 4.44442       | -1.4391816       | 0.00022079 | No      |
|      |       |        |             |          |         | Phyh    | 31.9574  | 381.111  | 3.57598931       | 31.9584      | 381.112       | 3.57594795       | 0.00022079 | No      |
|      |       |        |             |          |         | Pias1   | 26.4002  | 13.2124  | -0.9986563       | 26.4012      | 13.2134       | -0.9986018       | 0.0428089  | No      |
|      |       |        |             |          |         | Picalm  | 33.52    | 133.416  | 1.99283764       | 33.521       | 133.417       | 1.99280541       | 0.00022079 | No      |
|      |       |        |             |          |         | Pick1   | 7.53205  | 17.3165  | 1.20103288       | 7.53305      | 17.3175       | 1.20092466       | 0.00436941 | No      |
|      |       |        |             |          |         | Pigh    | 2.22898  | 14.1081  | 2.66206813       | 2.22998      | 14.1091       | 2.66152329       | 0.00022079 | No      |
|      |       |        |             |          |         | Pigk    | 18.8754  | 33.6262  | 0.83307854       | 18.8764      | 33.6272       | 0.83304501       | 0.0251614  | No      |
|      |       |        |             |          |         | Pigm    | 6.56609  | 2.6149   | -1.3282787       | 6.56709      | 2.6159        | -1.3279468       | 0.0195167  | No      |
|      |       |        |             |          |         | Pigr    | 0.205873 | 59.5246  | 8.17558758       | 0.206873     | 59.5256       | 8.16862108       | 0.00318754 | No      |
|      |       |        |             |          |         | Pigx    | 26.7575  | 14.392   | -0.8946762       | 26.7585      | 14.393        | -0.8946299       | 0.0391441  | No      |
|      |       |        |             |          |         | Pigy    | 15.7239  | 48.6636  | 1.62988396       | 15.7249      | 48.6646       | 1.62982185       | 0.00022079 | No      |
|      |       |        |             |          |         | Pik3ap1 | 4.18191  | 7.99628  | 0.93516698       | 4.18291      | 7.99728       | 0.93500244       | 0.0178094  | No      |
|      |       |        |             |          |         | Pik3c2b | 9.75717  | 2.33323  | -2.0641342       | 9.75817      | 2.33423       | -2.0636639       | 0.00022079 | No      |
|      |       |        |             |          |         | PIK3CA  | 26.852   | 10.9398  | -1.2954432       | 26.853       | 10.9408       | -1.295365        | 0.00022079 | No      |
|      |       |        |             |          |         | Pik3cb  | 2.60297  | 8.3088   | 1.67448145       | 2.60397      | 8.3098        | 1.67410093       | 0.00494367 | No      |
|      |       |        |             |          |         | Pik3cg  | 11.7201  | 0.940941 | -3.6387368       | 11.7211      | 0.941941      | -3.6373275       | 0.00022079 | No      |
|      |       |        |             |          |         | Pik3ip1 | 219.396  | 5.35922  | -5.3553704       | 219.397      | 5.36022       | -5.3551078       | 0.00130998 | No      |
|      |       |        |             |          |         | Pik3r1  | 80.0934  | 33.9396  | -1.2387138       | 80.0944      | 33.9406       | -1.2386893       | 0.0208857  | No      |
|      |       |        |             |          |         | Pik3r2  | 9.20057  | 15.5606  | 0.75810254       | 9.20157      | 15.5616       | 0.75803846       | 0.0361326  | No      |
|      |       |        |             |          |         | Pik3r3  | 1.4856   | 8.65555  | 2.54257978       | 1.4866       | 8.65655       | 2.54177565       | 0.00288641 | No      |
|      |       |        |             |          |         | Pik3r5  | 41.9555  | 2.87353  | -3.8679639       | 41.9565      | 2.87453       | -3.8674963       | 0.00022079 | No      |
|      |       |        |             |          |         | Pikfyve | 10.6164  | 4.89431  | -1.1171172       | 10.6174      | 4.89531       | -1.1169584       | 0.00211842 | No      |
|      |       |        |             |          |         | Pim2    | 40.5489  | 12.5759  | -1.6890011       | 40.5499      | 12.5769       | -1.688922        | 0.00022079 | No      |
|      |       |        |             |          |         | Pin1    | 28.4976  | 57.6747  | 1.01709817       | 28.4986      | 57.6757       | 1.01707256       | 0.00605729 | No      |
|      |       |        |             |          |         | Pin4    | 83.8481  | 164.706  | 0.97404311       | 83.8491      | 164.707       | 0.97403467       | 0.0128843  | No      |
|      |       |        |             |          |         | Pink1   | 19.1624  | 59.5977  | 1.63697839       | 19.1634      | 59.5987       | 1.63692731       | 0.00096553 | No      |
|      |       |        |             |          |         | Pinlyp  | 0        | 3.43781  | inf              | 0.001        | 3.43881       | 11.7476937       | 0.00022079 | No      |
|      |       |        |             |          |         | Pip4k2a | 85.5478  | 7.63609  | -3.4858247       | 85.5488      | 7.63709       | -3.4856527       | 0.00022079 | No      |
|      |       |        |             |          |         | Pip4k2b | 20.5049  | 6.73168  | -1.6069302       | 20.5059      | 6.73268       | -1.6067863       | 0.012511   | No      |
|      |       |        |             |          |         | Pip4k2c | 13.1976  | 28.9901  | 1.13528471       | 13.1986      | 28.9911       | 1.13522517       | 0.00060553 | No      |
|      |       |        |             |          |         | Pip5k1a | 20.9326  | 11.4726  | -0.8675591       | 20.9336      | 11.4736       | -0.8675023       | 0.0184986  | No      |
|      |       |        |             |          |         | PIP5K1C | 30.4834  | 12.0693  | -1.3366818       | 30.4844      | 12.0703       | -1.3366096       | 0.00022079 | No      |
|      |       |        |             |          |         | Pirt    | 0        | 2.57408  | inf              | 0.001        | 2.57508       | 11.3304015       | 0.00022079 | No      |
|      |       |        |             |          |         | Pitpna  | 181.988  | 72.2283  | -1.3332072       | 181.989      | 72.2293       | -1.3331952       | 0.00022079 | No      |
|      |       |        |             |          |         | Pitpnm2 | 65.8454  | 9.64619  | -2.7710515       | 65.8464      | 9.64719       | -2.7709239       | 0.00022079 | No      |
|      |       |        |             |          |         | Pitpnm3 | 0        | 7.09201  | inf              | 0.001        | 7.09301       | 12.7921823       | 0.00605729 | No      |
|      |       |        |             |          |         | Pja1    | 11.0427  | 42.4817  | 1.94374854       | 11.0437      | 42.4827       | 1.94365186       | 0.00022079 | No      |
|      |       |        |             |          |         | Pkd2    | 0.174328 | 20.0672  | 6.84689121       | 0.175328     | 20.0682       | 6.838711         | 0.00022079 | No      |
|      |       |        |             |          |         | Pkdcc   | 3.28987  | 17.0519  | 2.37383002       | 3.29087      | 17.0529       | 2.37347616       | 0.00022079 | No      |
|      |       |        |             |          |         | Pkhd1   | 0        | 33.6277  | inf              | 0.001        | 33.6287       | 15.0374054       | 0.00022079 | No      |
|      |       |        |             |          |         | Pkia    | 0.599214 | 6.02068  | 3.3287832        | 0.600214     | 6.02168       | 3.32661717       | 0.00022079 | No      |
|      |       |        |             |          |         | Pkig    | 0.280005 | 72.0193  | 8.00678718       | 0.281005     | 72.0203       | 8.001664         | 0.00022079 | No      |

| RRBS |       |        |             |          |         | RNAseq   |           |         |                  |              |               |                  |            |         |
|------|-------|--------|-------------|----------|---------|----------|-----------|---------|------------------|--------------|---------------|------------------|------------|---------|
| gene | Blood | Kidney | methyl.diff | pMWU.fdr | Match ? | gene     | blood     | kidney  | log2(fold_ratio) | blood+ 0.001 | kidney+ 0.001 | log2(fold_ratio) | q_value    | Match ? |
|      |       |        |             |          |         | Pkmyt1   | 8.10639   | 2.54284 | -1.6726189       | 8.10739      | 2.54384       | -1.6722296       | 0.00922576 | No      |
|      |       |        |             |          |         | Pkn3     | 80.7668   | 37.0674 | -1.1236115       | 80.7678      | 37.0684       | -1.1235904       | 0.0341219  | No      |
|      |       |        |             |          |         | Pknox1   | 10.7433   | 4.27541 | -1.3293025       | 10.7443      | 4.27641       | -1.3290994       | 0.00480115 | No      |
|      |       |        |             |          |         | Pkp1     | 0         | 1.52109 | inf              | 0.001        | 1.52209       | 10.571838        | 0.00698733 | No      |
|      |       |        |             |          |         | PKP2     | 0         | 17.6385 | inf              | 0.001        | 17.6395       | 14.106522        | 0.00022079 | No      |
|      |       |        |             |          |         | Pkp4     | 8.22332   | 60.2938 | 2.87421678       | 8.22432      | 60.2948       | 2.87406528       | 0.00022079 | No      |
|      |       |        |             |          |         | Pla2g12a | 4.49049   | 23.6766 | 2.39851714       | 4.49149      | 23.6776       | 2.39825683       | 0.00022079 | No      |
|      |       |        |             |          |         | Pla2g15  | 2.59849   | 16.7653 | 2.68973289       | 2.59949      | 16.7663       | 2.68926384       | 0.00565535 | No      |
|      |       |        |             |          |         | Pla2g16  | 334.537   | 163.766 | -1.0305299       | 334.538      | 163.767       | -1.0305254       | 0.00363736 | No      |
|      |       |        |             |          |         | Pla2g4a  | 0.108332  | 4.62302 | 5.41530424       | 0.109332     | 4.62402       | 5.40236001       | 0.00407863 | No      |
|      |       |        |             |          |         | Pla2g6   | 6.16351   | 17.3394 | 1.4922299        | 6.16451      | 17.3404       | 1.49207905       | 0.00273202 | No      |
|      |       |        |             |          |         | Pla2g7   | 0.542635  | 3.77834 | 2.79969852       | 0.543635     | 3.77934       | 2.79742407       | 0.01483    | No      |
|      |       |        |             |          |         | Plac8    | 2120.25   | 248.002 | -3.0958107       | 2120.251     | 248.003       | -3.0958056       | 0.00022079 | No      |
|      |       |        |             |          |         | Plagl2   | 9.89905   | 2.23499 | -2.1470217       | 9.90005      | 2.23599       | -2.1465221       | 0.00022079 | No      |
|      |       |        |             |          |         | Plat     | 1.47997   | 108.523 | 6.19628909       | 1.48097      | 108.524       | 6.1953279        | 0.00022079 | No      |
|      |       |        |             |          |         | Plau     | 0         | 294.088 | inf              | 0.001        | 294.089       | 18.1658933       | 0.00022079 | No      |
|      |       |        |             |          |         | Plaur    | 0.701305  | 3.07009 | 2.13016703       | 0.702305     | 3.07109       | 2.12858118       | 0.0486226  | No      |
|      |       |        |             |          |         | Plbd1    | 0.683974  | 2.07852 | 1.60354324       | 0.684974     | 2.07952       | 1.60212943       | 0.0450883  | No      |
|      |       |        |             |          |         | Plbd2    | 17.5202   | 40.4169 | 1.20593943       | 17.5212      | 40.4179       | 1.20589278       | 0.00407863 | No      |
|      |       |        |             |          |         | Plcb1    | 0.0284797 | 6.36282 | 7.80358855       | 0.0294797    | 6.36382       | 7.75402738       | 0.0229153  | No      |
|      |       |        |             |          |         | Plcb3    | 0.702171  | 5.69912 | 3.02084485       | 0.703171     | 5.70012       | 3.01904481       | 0.00041963 | No      |
|      |       |        |             |          |         | Plcd1    | 2.31579   | 5.80245 | 1.32515775       | 2.31679      | 5.80345       | 1.32478352       | 0.0229153  | No      |
|      |       |        |             |          |         | Plcd3    | 0.0355431 | 5.26178 | 7.2098376        | 0.0365431    | 5.26278       | 7.17008225       | 0.00060553 | No      |
|      |       |        |             |          |         | Plce1    | 0         | 1.39839 | inf              | 0.001        | 1.39939       | 10.4505824       | 0.00022079 | No      |
|      |       |        |             |          |         | Plcg1    | 198.373   | 32.9639 | -2.5892568       | 198.374      | 32.9649       | -2.5892203       | 0.00022079 | No      |
|      |       |        |             |          |         | Plch2    | 0.63033   | 4.74461 | 2.91211027       | 0.63133      | 4.74561       | 2.91012733       | 0.00242102 | No      |
|      |       |        |             |          |         | Plcl1    | 0.669946  | 6.25313 | 3.22246179       | 0.670946     | 6.25413       | 3.22054064       | 0.0123897  | No      |
|      |       |        |             |          |         | Plcl2    | 60.549    | 8.23287 | -2.8786358       | 60.55        | 8.23387       | -2.8784844       | 0.00022079 | No      |
|      |       |        |             |          |         | Pld1     | 0.0514321 | 4.39465 | 6.4169354        | 0.0524321    | 4.39565       | 6.38948238       | 0.00041963 | No      |
|      |       |        |             |          |         | Pld3     | 8.51716   | 19.9468 | 1.22771296       | 8.51816      | 19.9478       | 1.22761591       | 0.0019604  | No      |
|      |       |        |             |          |         | Plekha2  | 36.3948   | 14.1902 | -1.3588374       | 36.3958      | 14.1912       | -1.3587754       | 0.00022079 | No      |
|      |       |        |             |          |         | Plekha6  | 0.494967  | 24.5212 | 5.63055343       | 0.495967     | 24.5222       | 5.62770047       | 0.00022079 | No      |
|      |       |        |             |          |         | Plekha7  | 5.44435   | 16.6508 | 1.61275977       | 5.44535      | 16.6518       | 1.61258145       | 0.00022079 | No      |
|      |       |        |             |          |         | Plekha1  | 0.275474  | 8.66256 | 4.97480538       | 0.276474     | 8.66356       | 4.96974426       | 0.00896558 | No      |
|      |       |        |             |          |         | Plekha2  | 4.0901    | 80.2863 | 4.29494581       | 4.0911       | 80.2873       | 4.29461109       | 0.00022079 | No      |
|      |       |        |             |          |         | Plekhd1  | 0.233564  | 1.42467 | 2.60873795       | 0.234564     | 1.42567       | 2.60358656       | 0.0315052  | No      |
|      |       |        |             |          |         | Plekhd2  | 21.0928   | 40.0169 | 0.92385879       | 21.0938      | 40.0179       | 0.92382644       | 0.00392909 | No      |
|      |       |        |             |          |         | Plekhd3  | 12.6138   | 3.33382 | -1.9197548       | 12.6148      | 3.33482       | -1.9194365       | 0.00022079 | No      |
|      |       |        |             |          |         | Plekhd4  | 1.04801   | 35.3032 | 5.07407457       | 1.04901      | 35.3042       | 5.07273949       | 0.00022079 | No      |
|      |       |        |             |          |         | Plekhd5  | 43.6929   | 8.4156  | -2.3762608       | 43.6939      | 8.4166        | -2.3761224       | 0.00022079 | No      |
|      |       |        |             |          |         | Plekhd6  | 0.664271  | 1.98121 | 1.57653797       | 0.665271     | 1.98221       | 1.57509576       | 0.0431196  | No      |
|      |       |        |             |          |         | Plekhd7  | 0.0574168 | 5.58526 | 6.6040077        | 0.0584168    | 5.58626       | 6.57935558       | 0.00348745 | No      |

| RRBS |       |        |             |          |         | RNAseq  |           |          |                  |              |               |                  |            |         |
|------|-------|--------|-------------|----------|---------|---------|-----------|----------|------------------|--------------|---------------|------------------|------------|---------|
| gene | Blood | Kidney | methyl.diff | pMWU.fdr | Match ? | gene    | blood     | kidney   | log2(fold_ratio) | blood+ 0.001 | kidney+ 0.001 | log2(fold_ratio) | q_value    | Match ? |
|      |       |        |             |          |         | Plekhh2 | 0         | 1.97388  | inf              | 0.001        | 1.97488       | 10.9475493       | 0.00605729 | No      |
|      |       |        |             |          |         | Plekhh1 | 16.1454   | 7.87362  | -1.0360242       | 16.1464      | 7.87462       | -1.0359303       | 0.00645389 | No      |
|      |       |        |             |          |         | Plekho1 | 1.69169   | 14.3057  | 3.08005297       | 1.69269      | 14.3067       | 3.07930125       | 0.00022079 | No      |
|      |       |        |             |          |         | Plekho2 | 6.94527   | 3.98778  | -0.800445        | 6.94627      | 3.98878       | -0.8002909       | 0.0310553  | No      |
|      |       |        |             |          |         | Plgrkt  | 2.40583   | 7.7784   | 1.69293872       | 2.40683      | 7.7794        | 1.69252464       | 0.0208857  | No      |
|      |       |        |             |          |         | Plin2   | 1.38628   | 39.6289  | 4.83726234       | 1.38728      | 39.6299       | 4.83625842       | 0.00022079 | No      |
|      |       |        |             |          |         | Plk2    | 0.819342  | 7.9574   | 3.27975945       | 0.820342     | 7.9584        | 3.27818101       | 0.00022079 | No      |
|      |       |        |             |          |         | Plk3    | 0.496381  | 3.97936  | 3.00301662       | 0.497381     | 3.98036       | 3.00047562       | 0.00060553 | No      |
|      |       |        |             |          |         | Plod2   | 0.109709  | 29.3623  | 8.06413929       | 0.110709     | 29.3633       | 8.05109779       | 0.00022079 | No      |
|      |       |        |             |          |         | Pls1    | 0.334275  | 22.5296  | 6.07464243       | 0.335275     | 22.5306       | 6.07039701       | 0.00022079 | No      |
|      |       |        |             |          |         | Pls3    | 0         | 35.669   | inf              | 0.001        | 35.67         | 15.1224236       | 0.00022079 | No      |
|      |       |        |             |          |         | Plscr1  | 0.237901  | 18.7037  | 6.29681855       | 0.238901     | 18.7047       | 6.29084412       | 0.00022079 | No      |
|      |       |        |             |          |         | Plxdc2  | 3.57938   | 62.1633  | 4.11828147       | 3.58038      | 62.1643       | 4.11790168       | 0.00022079 | No      |
|      |       |        |             |          |         | Plxna2  | 0         | 0.879392 | inf              | 0.001        | 0.880392      | 9.78200223       | 0.00060553 | No      |
|      |       |        |             |          |         | Plxna3  | 0.0523989 | 0.910883 | 4.11965733       | 0.0533989    | 0.911883      | 4.0939668        | 0.00436941 | No      |
|      |       |        |             |          |         | Plxnb1  | 0.235456  | 5.53373  | 4.55472286       | 0.236456     | 5.53473       | 4.54886928       | 0.00022079 | No      |
|      |       |        |             |          |         | Plxnc1  | 1.49203   | 0.300848 | -2.3101699       | 1.49303      | 0.301848      | -2.306349        | 0.00494367 | No      |
|      |       |        |             |          |         | Pm20d1  | 0.0718268 | 18.3135  | 7.99416958       | 0.0728268    | 18.3145       | 7.97430114       | 0.00096553 | No      |
|      |       |        |             |          |         | Pm20d2  | 0.284025  | 1.75229  | 2.62515173       | 0.285025     | 1.75329       | 2.62090427       | 0.0322751  | No      |
|      |       |        |             |          |         | Pmepa1  | 4.99522   | 104.961  | 4.39316134       | 4.99622      | 104.962       | 4.3928863        | 0.00022079 | No      |
|      |       |        |             |          |         | Pmfbp1  | 0         | 18.7907  | inf              | 0.001        | 18.7917       | 14.197808        | 0.00022079 | No      |
|      |       |        |             |          |         | Pmm1    | 13.4165   | 95.1519  | 2.8262241        | 13.4175      | 95.1529       | 2.82613174       | 0.00022079 | No      |
|      |       |        |             |          |         | Pmp22   | 0.117843  | 2.45939  | 4.38336256       | 0.118843     | 2.46039       | 4.37175818       | 0.010907   | No      |
|      |       |        |             |          |         | Pmpcb   | 49.3839   | 86.806   | 0.81375399       | 49.3849      | 86.807        | 0.8137414        | 0.0496219  | No      |
|      |       |        |             |          |         | Pnlsr   | 197.063   | 28.7612  | -2.7764611       | 197.064      | 28.7622       | -2.7764183       | 0.00022079 | No      |
|      |       |        |             |          |         | Pnkd    | 39.8848   | 191.295  | 2.26188822       | 39.8858      | 191.296       | 2.26185959       | 0.044811   | No      |
|      |       |        |             |          |         | Pnn     | 170.012   | 32.2621  | -2.3977243       | 170.013      | 32.2631       | -2.3976881       | 0.00022079 | No      |
|      |       |        |             |          |         | Pnpla6  | 6.17192   | 15.27    | 1.3069088        | 6.17292      | 15.271        | 1.30676954       | 0.0130042  | No      |
|      |       |        |             |          |         | Pnpt1   | 13.4815   | 7.61414  | -0.824228        | 13.4825      | 7.61514       | -0.8241456       | 0.0498147  | No      |
|      |       |        |             |          |         | Pnrc1   | 164.66    | 60.9002  | -1.4349713       | 164.661      | 60.9012       | -1.4349563       | 0.00022079 | No      |
|      |       |        |             |          |         | Pnrc2   | 75.9866   | 47.6857  | -0.6721883       | 75.9876      | 47.6867       | -0.6721771       | 0.0360158  | No      |
|      |       |        |             |          |         | Podn    | 0.0565067 | 3.54661  | 5.97187495       | 0.0575067    | 3.54761       | 5.94697356       | 0.0351784  | No      |
|      |       |        |             |          |         | Podxl   | 0.037284  | 14.5892  | 8.61212841       | 0.038284     | 14.5902       | 8.57404237       | 0.00672121 | No      |
|      |       |        |             |          |         | Pofut2  | 9.04666   | 30.2535  | 1.7416449        | 9.04766      | 30.2545       | 1.74153312       | 0.00022079 | No      |
|      |       |        |             |          |         | Pogz    | 21.2295   | 7.20717  | -1.5585656       | 21.2305      | 7.20817       | -1.5584334       | 0.00022079 | No      |
|      |       |        |             |          |         | Pola1   | 4.03403   | 2.14588  | -0.9106524       | 4.03503      | 2.14688       | -0.9103378       | 0.0315052  | No      |
|      |       |        |             |          |         | Pola2   | 8.28101   | 23.5361  | 1.50699664       | 8.28201      | 23.5371       | 1.50688373       | 0.00392909 | No      |
|      |       |        |             |          |         | Pold2   | 19.0251   | 8.72558  | -1.1245811       | 19.0261      | 8.72658       | -1.1244916       | 0.00618779 | No      |
|      |       |        |             |          |         | Poldip2 | 20.2372   | 71.9983  | 1.83095315       | 20.2382      | 71.9993       | 1.8309019        | 0.00022079 | No      |
|      |       |        |             |          |         | Poldip3 | 24.0093   | 14.1975  | -0.7579564       | 24.0103      | 14.1985       | -0.7579149       | 0.0313964  | No      |
|      |       |        |             |          |         | Pole2   | 9.94212   | 0.952284 | -3.3840897       | 9.94312      | 0.953284      | -3.3827206       | 0.00022079 | No      |
|      |       |        |             |          |         | Poli    | 3.39093   | 1.22765  | -1.4657817       | 3.39193      | 1.22865       | -1.4650324       | 0.0189519  | No      |

| RRBS |       |        |             |          |         | RNAseq  |           |         |                  |              |               |                  |            |         |
|------|-------|--------|-------------|----------|---------|---------|-----------|---------|------------------|--------------|---------------|------------------|------------|---------|
| gene | Blood | Kidney | methyl.diff | pMWU.fdr | Match ? | gene    | blood     | kidney  | log2(fold_ratio) | blood+ 0.001 | kidney+ 0.001 | log2(fold_ratio) | q_value    | Match ? |
|      |       |        |             |          |         | Polk    | 3.10823   | 1.31084 | -1.2456017       | 3.10923      | 1.31184       | -1.2449656       | 0.0241707  | No      |
|      |       |        |             |          |         | Poll    | 7.64856   | 13.3838 | 0.80722773       | 7.64956      | 13.3848       | 0.80714691       | 0.0445136  | No      |
|      |       |        |             |          |         | Polm    | 15.6536   | 4.35629 | -1.8453226       | 15.6546      | 4.35729       | -1.8450836       | 0.00022079 | No      |
|      |       |        |             |          |         | Polr1b  | 17.7838   | 4.41828 | -2.0090069       | 17.7848      | 4.41928       | -2.0087615       | 0.00022079 | No      |
|      |       |        |             |          |         | Polr1e  | 20.9313   | 6.33717 | -1.7237513       | 20.9323      | 6.33817       | -1.7235926       | 0.00022079 | No      |
|      |       |        |             |          |         | Polr2d  | 55.5031   | 26.6164 | -1.0602529       | 55.5041      | 26.6174       | -1.0602247       | 0.00318754 | No      |
|      |       |        |             |          |         | Polr2f  | 16.5023   | 46.0485 | 1.48048705       | 16.5033      | 46.0495       | 1.48043096       | 0.00022079 | No      |
|      |       |        |             |          |         | Polr3e  | 24.4911   | 9.78577 | -1.3235003       | 24.4921      | 9.78677       | -1.3234118       | 0.00130998 | No      |
|      |       |        |             |          |         | Polr3f  | 7.7362    | 3.04114 | -1.3470129       | 7.7372       | 3.04214       | -1.346725        | 0.02809    | No      |
|      |       |        |             |          |         | Polr3k  | 30.7493   | 63.993  | 1.05736053       | 30.7503      | 63.994        | 1.05733616       | 0.0019604  | No      |
|      |       |        |             |          |         | Pom121  | 15.5706   | 5.59194 | -1.4774038       | 15.5716      | 5.59294       | -1.4772384       | 0.00022079 | No      |
|      |       |        |             |          |         | Pomgnt1 | 9.57888   | 28.6155 | 1.57886793       | 9.57988      | 28.6165       | 1.57876774       | 0.00022079 | No      |
|      |       |        |             |          |         | Pon2    | 91.7164   | 28.9629 | -1.6629737       | 91.7174      | 28.9639       | -1.6629396       | 0.00022079 | No      |
|      |       |        |             |          |         | Pop1    | 2.428     | 6.03725 | 1.31412312       | 2.429        | 6.03825       | 1.313768         | 0.0251614  | No      |
|      |       |        |             |          |         | Popdc2  | 0.406443  | 1.32475 | 1.70459518       | 0.407443     | 1.32575       | 1.7021386        | 0.0427098  | No      |
|      |       |        |             |          |         | Por     | 16.1677   | 32.5696 | 1.01041154       | 16.1687      | 32.5706       | 1.01036661       | 0.00257873 | No      |
|      |       |        |             |          |         | Porcn   | 0.0929983 | 6.81658 | 6.19569994       | 0.0939983    | 6.81758       | 6.18048125       | 0.00318754 | No      |
|      |       |        |             |          |         | Pot1    | 18.6252   | 5.76764 | -1.6912029       | 18.6262      | 5.76864       | -1.6910302       | 0.00022079 | No      |
|      |       |        |             |          |         | Pot1b   | 16.092    | 3.91969 | -2.0375322       | 16.093       | 3.92069       | -2.0372538       | 0.00523184 | No      |
|      |       |        |             |          |         | Pou2af1 | 7.82824   | 3.63456 | -1.1069073       | 7.82924      | 3.63556       | -1.1066947       | 0.018847   | No      |
|      |       |        |             |          |         | Pou2f1  | 7.05156   | 2.83565 | -1.314263        | 7.05256      | 2.83665       | -1.3139589       | 0.00551024 | No      |
|      |       |        |             |          |         | Ppa2    | 21.8365   | 80.2157 | 1.877143         | 21.8375      | 80.2167       | 1.87709491       | 0.00022079 | No      |
|      |       |        |             |          |         | Ppap2a  | 2.09658   | 76.6296 | 5.19179199       | 2.09758      | 76.6306       | 5.19112286       | 0.00022079 | No      |
|      |       |        |             |          |         | Ppap2b  | 0.167176  | 42.1306 | 7.9773569        | 0.168176     | 42.1316       | 7.96878706       | 0.00130998 | No      |
|      |       |        |             |          |         | Ppap2c  | 3.23985   | 29.6763 | 3.1953123        | 3.24085      | 29.6773       | 3.19491569       | 0.00022079 | No      |
|      |       |        |             |          |         | Ppapdc2 | 13.5784   | 7.66937 | -0.8241335       | 13.5794      | 7.67037       | -0.8240517       | 0.0467065  | No      |
|      |       |        |             |          |         | Ppard   | 4.61351   | 12.5876 | 1.44806655       | 4.61451      | 12.5886       | 1.44786848       | 0.00022079 | No      |
|      |       |        |             |          |         | Ppcdc   | 3.82153   | 9.23514 | 1.27298348       | 3.82253      | 9.23614       | 1.27276222       | 0.00896558 | No      |
|      |       |        |             |          |         | Ppdpf   | 65.0995   | 188.428 | 1.53329499       | 65.1005      | 188.429       | 1.53328049       | 0.00022079 | No      |
|      |       |        |             |          |         | Ppfia1  | 16.5355   | 9.34137 | -0.8238606       | 16.5365      | 9.34237       | -0.8237934       | 0.0133754  | No      |
|      |       |        |             |          |         | Ppfia4  | 2.85889   | 11.7805 | 2.04287376       | 2.85989      | 11.7815       | 2.04249167       | 0.0279776  | No      |
|      |       |        |             |          |         | Ppfibp1 | 9.36911   | 43.766  | 2.22382662       | 9.37011      | 43.767        | 2.22370561       | 0.00022079 | No      |
|      |       |        |             |          |         | Ppfibp2 | 0.11979   | 10.4345 | 6.44471018       | 0.12079      | 10.4355       | 6.43285489       | 0.00242102 | No      |
|      |       |        |             |          |         | Pphln1  | 15.83     | 6.58085 | -1.2663154       | 15.831       | 6.58185       | -1.2661873       | 0.00022079 | No      |
|      |       |        |             |          |         | Ppic    | 0         | 68.6979 | inf              | 0.001        | 68.6989       | 16.0679994       | 0.00022079 | No      |
|      |       |        |             |          |         | Ppig    | 36.0918   | 14.6437 | -1.301391        | 36.0928      | 14.6447       | -1.3013324       | 0.00022079 | No      |
|      |       |        |             |          |         | Ppil4   | 20.3137   | 7.07611 | -1.5214247       | 20.3147      | 7.07711       | -1.5212918       | 0.00022079 | No      |
|      |       |        |             |          |         | Ppip5k1 | 4.0212    | 12.9611 | 1.68849017       | 4.0222       | 12.9621       | 1.68824274       | 0.00060553 | No      |
|      |       |        |             |          |         | Ppl     | 1.70414   | 17.9123 | 3.39383483       | 1.70514      | 17.9133       | 3.39306903       | 0.00022079 | No      |
|      |       |        |             |          |         | Ppm1a   | 62.1893   | 29.9803 | -1.0526516       | 62.1903      | 29.9813       | -1.0526266       | 0.0117698  | No      |
|      |       |        |             |          |         | Ppm1d   | 19.3276   | 6.86341 | -1.4936651       | 19.3286      | 6.86441       | -1.4935295       | 0.00304332 | No      |
|      |       |        |             |          |         | Ppm1f   | 9.97917   | 4.62373 | -1.1098627       | 9.98017      | 4.62473       | -1.1096952       | 0.00130998 | No      |

| RRBS |       |        |             |          |         | RNAseq   |          |         |                  |              |               |                  |            |         |
|------|-------|--------|-------------|----------|---------|----------|----------|---------|------------------|--------------|---------------|------------------|------------|---------|
| gene | Blood | Kidney | methyl.diff | pMWU.fdr | Match ? | gene     | blood    | kidney  | log2(fold_ratio) | blood+ 0.001 | kidney+ 0.001 | log2(fold_ratio) | q_value    | Match ? |
|      |       |        |             |          |         | Ppm1g    | 72.1629  | 44.2881 | -0.7043382       | 72.1639      | 44.2891       | -0.7043256       | 0.0300208  | No      |
|      |       |        |             |          |         | Ppox     | 6.58438  | 28.1019 | 2.09354817       | 6.58538      | 28.1029       | 2.09338042       | 0.00022079 | No      |
|      |       |        |             |          |         | PPP1R10  | 17.4338  | 9.37899 | -0.8943826       | 17.4348      | 9.37999       | -0.8943115       | 0.0178094  | No      |
|      |       |        |             |          |         | PPP1R12A | 49.6106  | 9.57842 | -2.3727888       | 49.6116      | 9.57942       | -2.3726673       | 0.00022079 | No      |
|      |       |        |             |          |         | PPP1R12B | 11.6227  | 4.48872 | -1.3725692       | 11.6237      | 4.48972       | -1.372372        | 0.00022079 | No      |
|      |       |        |             |          |         | PPP1R13B | 2.41727  | 7.29221 | 1.59297748       | 2.41827      | 7.29321       | 1.5925786        | 0.00778313 | No      |
|      |       |        |             |          |         | PPP1R13L | 0.281223 | 4.33192 | 3.9452201        | 0.282223     | 4.33292       | 3.94043213       | 0.00523184 | No      |
|      |       |        |             |          |         | PPP1R15B | 25.0646  | 10.8994 | -1.2014025       | 25.0656      | 10.9004       | -1.2013277       | 0.00022079 | No      |
|      |       |        |             |          |         | PPP1R16A | 2.02102  | 27.1159 | 3.74598355       | 2.02202      | 27.1169       | 3.74532309       | 0.00022079 | No      |
|      |       |        |             |          |         | PPP1R16B | 41.4476  | 7.16331 | -2.5325903       | 41.4486      | 7.16431       | -2.5324237       | 0.00022079 | No      |
|      |       |        |             |          |         | PPP1R18  | 47.1707  | 14.4611 | -1.7057137       | 47.1717      | 14.4621       | -1.7056445       | 0.0172336  | No      |
|      |       |        |             |          |         | PPP1R1B  | 0        | 53.7988 | inf              | 0.001        | 53.7998       | 15.7153132       | 0.00022079 | No      |
|      |       |        |             |          |         | PPP1R26  | 0.33836  | 3.55261 | 3.39224839       | 0.33936      | 3.55361       | 3.38839693       | 0.00022079 | No      |
|      |       |        |             |          |         | PPP1R36  | 0.511987 | 30.6391 | 5.90312293       | 0.512987     | 30.6401       | 5.90035493       | 0.00227055 | No      |
|      |       |        |             |          |         | PPP1R3C  | 0        | 2.36938 | inf              | 0.001        | 2.37038       | 11.2109026       | 0.00022079 | No      |
|      |       |        |             |          |         | PPP1R9A  | 0        | 5.07355 | inf              | 0.001        | 5.07455       | 12.3090642       | 0.00022079 | No      |
|      |       |        |             |          |         | PPP2CB   | 34.7057  | 95.8189 | 1.46513762       | 34.7067      | 95.8199       | 1.46511111       | 0.00022079 | No      |
|      |       |        |             |          |         | PPP2R1A  | 54.8631  | 100.061 | 0.86697173       | 54.8641      | 100.062       | 0.86695985       | 0.0161624  | No      |
|      |       |        |             |          |         | PPP2R1B  | 8.02811  | 22.1769 | 1.46592542       | 8.02911      | 22.1779       | 1.46581078       | 0.00041963 | No      |
|      |       |        |             |          |         | PPP2R2A  | 59.1968  | 28.6631 | -1.0463245       | 59.1978      | 28.6641       | -1.0462986       | 0.00096553 | No      |
|      |       |        |             |          |         | PPP2R2B  | 0        | 8.97559 | inf              | 0.001        | 8.97659       | 13.1319518       | 0.00022079 | No      |
|      |       |        |             |          |         | PPP2R3A  | 0.165924 | 8.14672 | 5.61762484       | 0.166924     | 8.14772       | 5.6091331        | 0.00060553 | No      |
|      |       |        |             |          |         | PPP2R5A  | 117.465  | 68.1727 | -0.7849649       | 117.466      | 68.1737       | -0.784956        | 0.0258481  | No      |
|      |       |        |             |          |         | PPP2R5C  | 142.94   | 40.1287 | -1.8327034       | 142.941      | 40.1297       | -1.8326775       | 0.00022079 | No      |
|      |       |        |             |          |         | PPP4C    | 69.0549  | 41.4382 | -0.7367825       | 69.0559      | 41.4392       | -0.7367685       | 0.0236064  | No      |
|      |       |        |             |          |         | PPP4R2   | 40.9295  | 22.4568 | -0.8659887       | 40.9305      | 22.4578       | -0.8659597       | 0.0110257  | No      |
|      |       |        |             |          |         | PPP6R1   | 137.261  | 68.3008 | -1.0069474       | 137.262      | 68.3018       | -1.0069368       | 0.0145886  | No      |
|      |       |        |             |          |         | PPP6R2   | 39.3218  | 12.5032 | -1.653032        | 39.3228      | 12.5042       | -1.6529533       | 0.012146   | No      |
|      |       |        |             |          |         | PPRC1    | 9.70627  | 3.86373 | -1.3289227       | 9.70727      | 3.86473       | -1.328698        | 0.00022079 | No      |
|      |       |        |             |          |         | PQLC1    | 3.75497  | 42.0028 | 3.48361222       | 3.75597      | 42.0038       | 3.48326241       | 0.00022079 | No      |
|      |       |        |             |          |         | PQLC2    | 1.9091   | 4.87514 | 1.35255098       | 1.9101       | 4.87614       | 1.35209138       | 0.0395387  | No      |
|      |       |        |             |          |         | Pragmin  | 1.01686  | 4.43698 | 2.12545699       | 1.01786      | 4.43798       | 2.12436402       | 0.00078858 | No      |
|      |       |        |             |          |         | Prc1     | 0.77732  | 3.06569 | 1.97963128       | 0.77832      | 3.06669       | 1.978247         | 0.00791314 | No      |
|      |       |        |             |          |         | Prcp     | 7.67496  | 2.99107 | -1.3594976       | 7.67596      | 2.99207       | -1.3592033       | 0.00436941 | No      |
|      |       |        |             |          |         | Prdm15   | 8.14848  | 1.86657 | -2.1261414       | 8.14948      | 1.86757       | -2.1255457       | 0.00022079 | No      |
|      |       |        |             |          |         | Prdm2    | 26.1167  | 12.2824 | -1.0883801       | 26.1177      | 12.2834       | -1.0883179       | 0.012146   | No      |
|      |       |        |             |          |         | Prdx1    | 117.581  | 329.444 | 1.4863783        | 117.582      | 329.445       | 1.48637041       | 0.00022079 | No      |
|      |       |        |             |          |         | Prdx2    | 124.941  | 413.52  | 1.72671013       | 124.942      | 413.521       | 1.72670207       | 0.00022079 | No      |
|      |       |        |             |          |         | Prdx3    | 18.0932  | 79.2699 | 2.13132557       | 18.0942      | 79.2709       | 2.13126403       | 0.00022079 | No      |
|      |       |        |             |          |         | Prdx5    | 78.0466  | 766.245 | 3.29539807       | 78.0476      | 766.246       | 3.29538146       | 0.00022079 | No      |
|      |       |        |             |          |         | Prdx6    | 61.0902  | 185.67  | 1.60372786       | 61.0912      | 185.671       | 1.60371201       | 0.00022079 | No      |
|      |       |        |             |          |         | Preb     | 11.8706  | 38.1976 | 1.68608914       | 11.8716      | 38.1986       | 1.68600538       | 0.00022079 | No      |



| RRBS |       |        |             |          |         | RNAseq   |           |         |                  |              |               |                  |            |         |
|------|-------|--------|-------------|----------|---------|----------|-----------|---------|------------------|--------------|---------------|------------------|------------|---------|
| gene | Blood | Kidney | methyl.diff | pMWU.fdr | Match ? | gene     | blood     | kidney  | log2(fold_ratio) | blood+ 0.001 | kidney+ 0.001 | log2(fold_ratio) | q_value    | Match ? |
|      |       |        |             |          |         | Prex1    | 109.469   | 7.72926 | -3.8240483       | 109.47       | 7.73026       | -3.8238748       | 0.00022079 | No      |
|      |       |        |             |          |         | Prf1     | 31.8726   | 1.03849 | -4.9397575       | 31.8736      | 1.03949       | -4.9384142       | 0.00022079 | No      |
|      |       |        |             |          |         | Prickle1 | 0.199737  | 3.05274 | 3.93393121       | 0.200737     | 3.05374       | 3.92719877       | 0.00022079 | No      |
|      |       |        |             |          |         | Prickle3 | 34.7105   | 17.9802 | -0.9489631       | 34.7115      | 17.9812       | -0.9489244       | 0.0245052  | No      |
|      |       |        |             |          |         | Prim1    | 17.5566   | 9.50697 | -0.884956        | 17.5576      | 9.50797       | -0.8848864       | 0.037664   | No      |
|      |       |        |             |          |         | Prkaa1   | 29.6182   | 11.0054 | -1.4282724       | 29.6192      | 11.0064       | -1.42819         | 0.00022079 | No      |
|      |       |        |             |          |         | Prkaa2   | 0.0335862 | 11.1401 | 8.37367789       | 0.0345862    | 11.1411       | 8.33147945       | 0.00060553 | No      |
|      |       |        |             |          |         | Prkab1   | 44.8514   | 79.2758 | 0.82172751       | 44.8524      | 79.2768       | 0.82171355       | 0.0083198  | No      |
|      |       |        |             |          |         | Prkacb   | 52.128    | 15.7223 | -1.7292462       | 52.129       | 15.7233       | -1.7291821       | 0.00022079 | No      |
|      |       |        |             |          |         | Prkar1b  | 0         | 12.1725 | inf              | 0.001        | 12.1735       | 13.5714564       | 0.00022079 | No      |
|      |       |        |             |          |         | Prkar2b  | 33.5947   | 4.72758 | -2.8290599       | 33.5957      | 4.72858       | -2.8287977       | 0.00022079 | No      |
|      |       |        |             |          |         | Prkca    | 21.4957   | 6.32463 | -1.7649951       | 21.4967      | 6.32563       | -1.7648341       | 0.00022079 | No      |
|      |       |        |             |          |         | Prkcb    | 70.1192   | 11.4418 | -2.6154955       | 70.1202      | 11.4428       | -2.61539         | 0.00022079 | No      |
|      |       |        |             |          |         | Prkcd    | 11.9079   | 23.8483 | 1.00196742       | 11.9089      | 23.8493       | 1.00190676       | 0.00672121 | No      |
|      |       |        |             |          |         | Prkch    | 126.635   | 8.58698 | -3.8823816       | 126.636      | 8.58798       | -3.8822249       | 0.00022079 | No      |
|      |       |        |             |          |         | Prkci    | 6.64287   | 23.1983 | 1.8041405        | 6.64387      | 23.1993       | 1.80398553       | 0.00022079 | No      |
|      |       |        |             |          |         | Prkccq   | 150.432   | 35.4636 | -2.0847006       | 150.433      | 35.4646       | -2.0846695       | 0.00022079 | No      |
|      |       |        |             |          |         | Prkcz    | 4.35235   | 28.3263 | 2.70227569       | 4.35335      | 28.3273       | 2.70199518       | 0.00022079 | No      |
|      |       |        |             |          |         | Prkd2    | 86.2598   | 19.6755 | -2.1322881       | 86.2608      | 19.6765       | -2.1322315       | 0.00022079 | No      |
|      |       |        |             |          |         | Prkd3    | 22.1707   | 6.61664 | -1.7444836       | 22.1717      | 6.61764       | -1.7443307       | 0.00022079 | No      |
|      |       |        |             |          |         | Prkdc    | 11.5403   | 2.96262 | -1.9617352       | 11.5413      | 2.96362       | -1.9613734       | 0.00022079 | No      |
|      |       |        |             |          |         | Prkra    | 10.1753   | 38.1236 | 1.90561303       | 10.1763      | 38.1246       | 1.90550909       | 0.00041963 | No      |
|      |       |        |             |          |         | Prkrir   | 29.5885   | 12.129  | -1.286576        | 29.5895      | 12.13         | -1.2865058       | 0.00022079 | No      |
|      |       |        |             |          |         | Prkx     | 12.1736   | 7.39221 | -0.7196782       | 12.1746      | 7.39321       | -0.7196016       | 0.0456891  | No      |
|      |       |        |             |          |         | Prlr     | 0.167306  | 8.4056  | 5.65078971       | 0.168306     | 8.4066        | 5.64236392       | 0.00022079 | No      |
|      |       |        |             |          |         | Prmt3    | 17.8544   | 6.92754 | -1.3658646       | 17.8554      | 6.92854       | -1.3657372       | 0.00211842 | No      |
|      |       |        |             |          |         | Prmt7    | 13.9773   | 6.9101  | -1.0163072       | 13.9783      | 6.9111        | -1.0162017       | 0.0153152  | No      |
|      |       |        |             |          |         | Prnp     | 12.1636   | 21.2106 | 0.80221515       | 12.1646      | 21.2116       | 0.80216457       | 0.0299071  | No      |
|      |       |        |             |          |         | Prodh2   | 0         | 81.5985 | inf              | 0.001        | 81.5995       | 16.3162727       | 0.00022079 | No      |
|      |       |        |             |          |         | Prom1    | 0.749401  | 19.8704 | 4.7287392        | 0.750401     | 19.8714       | 4.72688796       | 0.00022079 | No      |
|      |       |        |             |          |         | Pros1    | 1.24205   | 3.848   | 1.63138555       | 1.24305      | 3.849         | 1.63059934       | 0.00333723 | No      |
|      |       |        |             |          |         | Prosc    | 19.944    | 43.648  | 1.12996076       | 19.945       | 43.649        | 1.12992148       | 0.00494367 | No      |
|      |       |        |             |          |         | Proser1  | 12.6518   | 4.17376 | -1.5999231       | 12.6528      | 4.17476       | -1.5996915       | 0.00022079 | No      |
|      |       |        |             |          |         | Proser2  | 0         | 21.7748 | inf              | 0.001        | 21.7758       | 14.4104381       | 0.00022079 | No      |
|      |       |        |             |          |         | Prpf18   | 29.713    | 13.4349 | -1.1451087       | 29.714       | 13.4359       | -1.1450499       | 0.0170023  | No      |
|      |       |        |             |          |         | Prpf38a  | 29.0932   | 13.7854 | -1.0775409       | 29.0942      | 13.7864       | -1.0774858       | 0.00333723 | No      |
|      |       |        |             |          |         | Prpf38b  | 70.7156   | 24.9463 | -1.5032027       | 70.7166      | 24.9473       | -1.5031652       | 0.00022079 | No      |
|      |       |        |             |          |         | Prpf39   | 62.5175   | 23.4664 | -1.4136636       | 62.5185      | 23.4674       | -1.4136252       | 0.00022079 | No      |
|      |       |        |             |          |         | Prpf4    | 19.5707   | 7.83545 | -1.3206073       | 19.5717      | 7.83645       | -1.3204969       | 0.00041963 | No      |
|      |       |        |             |          |         | Prpf40a  | 31.1417   | 13.3069 | -1.2266732       | 31.1427      | 13.3079       | -1.2266111       | 0.00060553 | No      |
|      |       |        |             |          |         | Prpf8    | 51.012    | 22.0792 | -1.2081488       | 51.013       | 22.0802       | -1.2081117       | 0.00041963 | No      |
|      |       |        |             |          |         | PRPS1    | 33.6126   | 8.95981 | -1.9074621       | 33.6136      | 8.96081       | -1.907344        | 0.00022079 | No      |

| RRBS |       |        |             |          |         | RNAseq  |          |          |                  |              |               |                  |            |         |
|------|-------|--------|-------------|----------|---------|---------|----------|----------|------------------|--------------|---------------|------------------|------------|---------|
| gene | Blood | Kidney | methyl.diff | pMWU.fdr | Match ? | gene    | blood    | kidney   | log2(fold_ratio) | blood+ 0.001 | kidney+ 0.001 | log2(fold_ratio) | q_value    | Match ? |
|      |       |        |             |          |         | Prps2   | 65.2466  | 30.996   | -1.0738207       | 65.2476      | 30.997        | -1.0737962       | 0.00096553 | No      |
|      |       |        |             |          |         | Prr12   | 12.6176  | 6.79871  | -0.8921046       | 12.6186      | 6.79971       | -0.8920067       | 0.00909283 | No      |
|      |       |        |             |          |         | Prr13   | 192.524  | 90.6989  | -1.0858813       | 192.525      | 90.6999       | -1.0858729       | 0.00227055 | No      |
|      |       |        |             |          |         | Prr14l  | 10.8434  | 5.00593  | -1.1151072       | 10.8444      | 5.00693       | -1.114952        | 0.00778313 | No      |
|      |       |        |             |          |         | Prr15l  | 0        | 83.1905  | inf              | 0.001        | 83.1915       | 16.3441485       | 0.00022079 | No      |
|      |       |        |             |          |         | Prr16   | 0        | 1.52013  | inf              | 0.001        | 1.52113       | 10.5709277       | 0.00022079 | No      |
|      |       |        |             |          |         | Prr5    | 0.661319 | 11.3351  | 4.09930696       | 0.662319     | 11.3361       | 4.09725433       | 0.00711928 | No      |
|      |       |        |             |          |         | Prr7    | 22.4348  | 3.22963  | -2.7962975       | 22.4358      | 3.23063       | -2.7959152       | 0.00022079 | No      |
|      |       |        |             |          |         | Prrc1   | 3.47336  | 7.60987  | 1.13153986       | 3.47436      | 7.61087       | 1.13131413       | 0.0257334  | No      |
|      |       |        |             |          |         | Prrc2b  | 49.3052  | 18.0618  | -1.4487981       | 49.3062      | 18.0628       | -1.4487475       | 0.00147497 | No      |
|      |       |        |             |          |         | Prrg2   | 0.618076 | 15.1863  | 4.61884236       | 0.619076     | 15.1873       | 4.61660507       | 0.00096553 | No      |
|      |       |        |             |          |         | Prss12  | 0        | 3.05097  | inf              | 0.001        | 3.05197       | 11.5755251       | 0.00022079 | No      |
|      |       |        |             |          |         | Prss39  | 13.5452  | 3.40047  | -1.9939756       | 13.5462      | 3.40147       | -1.9936579       | 0.00041963 | No      |
|      |       |        |             |          |         | Prss53  | 1.23529  | 8.60819  | 2.80086015       | 1.23629      | 8.60919       | 2.79986031       | 0.00318754 | No      |
|      |       |        |             |          |         | Prss8   | 1.32739  | 72.6092  | 5.77348814       | 1.32839      | 72.6102       | 5.77242155       | 0.010144   | No      |
|      |       |        |             |          |         | Prune   | 5.71658  | 20.8637  | 1.86777083       | 5.71758      | 20.8647       | 1.86758763       | 0.00130998 | No      |
|      |       |        |             |          |         | Psap    | 141.917  | 271.81   | 0.93755112       | 141.918      | 271.811       | 0.93754626       | 0.00949299 | No      |
|      |       |        |             |          |         | Psat1   | 6.53099  | 58.1633  | 3.15473552       | 6.53199      | 58.1643       | 3.15453944       | 0.00022079 | No      |
|      |       |        |             |          |         | Psca    | 0.031915 | 107.138  | 11.712948        | 0.032915     | 107.139       | 11.6684509       | 0.020304   | No      |
|      |       |        |             |          |         | Psd4    | 43.7557  | 6.0017   | -2.8660279       | 43.7567      | 6.0027        | -2.8658205       | 0.00022079 | No      |
|      |       |        |             |          |         | Psip1   | 69.9356  | 9.10064  | -2.9419871       | 69.9366      | 9.10164       | -2.9418492       | 0.00022079 | No      |
|      |       |        |             |          |         | Psma3l  | 2.47717  | 0.527107 | -2.2325251       | 2.47817      | 0.528107      | -2.230373        | 0.0458921  | No      |
|      |       |        |             |          |         | Psmb11  | 0.240773 | 6.25102  | 4.69834609       | 0.241773     | 6.25202       | 4.69259735       | 0.00466383 | No      |
|      |       |        |             |          |         | Psmb5   | 106.22   | 216.239  | 1.02557131       | 106.221      | 216.24        | 1.0255644        | 0.00147497 | No      |
|      |       |        |             |          |         | Psmb6   | 75.8009  | 165.573  | 1.12718055       | 75.8019      | 165.574       | 1.12717023       | 0.00257873 | No      |
|      |       |        |             |          |         | Psmb7   | 89.475   | 156.973  | 0.81095989       | 89.476       | 156.974       | 0.81095295       | 0.0142227  | No      |
|      |       |        |             |          |         | Psmb8   | 165.513  | 72.5996  | -1.188911        | 165.514      | 72.6006       | -1.1888999       | 0.0220188  | No      |
|      |       |        |             |          |         | Psmb9   | 135.409  | 47.6715  | -1.5061247       | 135.41       | 47.6725       | -1.5061051       | 0.00022079 | No      |
|      |       |        |             |          |         | Psm8    | 30.5386  | 79.779   | 1.38537511       | 30.5396      | 79.78         | 1.38534596       | 0.00022079 | No      |
|      |       |        |             |          |         | Psme1   | 768.012  | 433.274  | -0.8258492       | 768.013      | 433.275       | -0.8258477       | 0.0274201  | No      |
|      |       |        |             |          |         | Psmg1   | 28.5669  | 56.4047  | 0.98147089       | 28.5679      | 56.4057       | 0.98144597       | 0.00870822 | No      |
|      |       |        |             |          |         | PSMG3   | 12.2724  | 37.9883  | 1.63013774       | 12.2734      | 37.9893       | 1.63005817       | 0.00147497 | No      |
|      |       |        |             |          |         | Psph    | 10.3982  | 38.118   | 1.87413862       | 10.3992      | 38.119        | 1.87403773       | 0.00022079 | No      |
|      |       |        |             |          |         | Pstpip1 | 116.051  | 53.6224  | -1.1138513       | 116.052      | 53.6234       | -1.1138368       | 0.0130042  | No      |
|      |       |        |             |          |         | Ptbp2   | 22.5981  | 5.18966  | -2.1224896       | 22.5991      | 5.19066       | -2.1222754       | 0.00022079 | No      |
|      |       |        |             |          |         | Ptbp3   | 69.957   | 21.6452  | -1.6924213       | 69.958       | 21.6462       | -1.6923753       | 0.00022079 | No      |
|      |       |        |             |          |         | Ptch1   | 3.75673  | 7.80768  | 1.05541649       | 3.75773      | 7.80868       | 1.05521728       | 0.0130042  | No      |
|      |       |        |             |          |         | Ptchd3  | 0        | 1.04657  | inf              | 0.001        | 1.04757       | 10.0328309       | 0.00022079 | No      |
|      |       |        |             |          |         | Pten    | 60.9937  | 23.0919  | -1.4012734       | 60.9947      | 23.0929       | -1.4012345       | 0.00022079 | No      |
|      |       |        |             |          |         | Pter    | 1.28735  | 77.6053  | 5.91367894       | 1.28835      | 77.6063       | 5.91257729       | 0.00022079 | No      |
|      |       |        |             |          |         | Ptger2  | 11.9195  | 5.05162  | -1.2385057       | 11.9205      | 5.05262       | -1.2383412       | 0.033901   | No      |
|      |       |        |             |          |         | Ptger3  | 1.31956  | 39.2233  | 4.89358206       | 1.32056      | 39.2243       | 4.89252594       | 0.00022079 | No      |

| RRBS |       |        |             |          |         | RNAseq   |           |         |                  |              |               |                  |            |         |
|------|-------|--------|-------------|----------|---------|----------|-----------|---------|------------------|--------------|---------------|------------------|------------|---------|
| gene | Blood | Kidney | methyl.diff | pMWU.fdr | Match ? | gene     | blood     | kidney  | log2(fold_ratio) | blood+ 0.001 | kidney+ 0.001 | log2(fold_ratio) | q_value    | Match ? |
|      |       |        |             |          |         | Ptger4   | 22.2503   | 5.35658 | -2.0544407       | 22.2513      | 5.35758       | -2.0542362       | 0.0149559  | No      |
|      |       |        |             |          |         | Ptges2   | 8.87477   | 35.9636 | 2.01875581       | 8.87577      | 35.9646       | 2.01863337       | 0.00022079 | No      |
|      |       |        |             |          |         | Ptges3l1 | 12.3334   | 3.62257 | -1.7674851       | 12.3344      | 3.62357       | -1.7672039       | 0.0162859  | No      |
|      |       |        |             |          |         | Ptgr     | 0         | 1.64766 | inf              | 0.001        | 1.64866       | 10.6870782       | 0.00022079 | No      |
|      |       |        |             |          |         | Ptgrn    | 0.44611   | 21.9321 | 5.61950066       | 0.44711      | 21.9331       | 5.61633611       | 0.00022079 | No      |
|      |       |        |             |          |         | Ptgr2    | 11.0445   | 33.0493 | 1.58129161       | 11.0455      | 33.0503       | 1.58120464       | 0.00022079 | No      |
|      |       |        |             |          |         | Ptgs1    | 0.345267  | 15.7577 | 5.51220071       | 0.346267     | 15.7587       | 5.50811981       | 0.00022079 | No      |
|      |       |        |             |          |         | Pth1r    | 0         | 162.081 | inf              | 0.001        | 162.082       | 17.3063644       | 0.00022079 | No      |
|      |       |        |             |          |         | Ptk2     | 2.83292   | 22.428  | 2.98493921       | 2.83392      | 22.429        | 2.98449436       | 0.00022079 | No      |
|      |       |        |             |          |         | Ptk2b    | 70.3857   | 15.8228 | -2.1532774       | 70.3867      | 15.8238       | -2.1532068       | 0.00022079 | No      |
|      |       |        |             |          |         | Ptn      | 0         | 17.7605 | inf              | 0.001        | 17.7615       | 14.1164658       | 0.00022079 | No      |
|      |       |        |             |          |         | PTP4A2   | 349.98    | 147.137 | -1.2501124       | 349.981      | 147.138       | -1.2501067       | 0.0083198  | No      |
|      |       |        |             |          |         | Ptp4a3   | 78.4489   | 16.6346 | -2.237566        | 78.4499      | 16.6356       | -2.2374977       | 0.00022079 | No      |
|      |       |        |             |          |         | Ptpdc1   | 2.83907   | 8.5536  | 1.59111332       | 2.84007      | 8.5546        | 1.59077391       | 0.00022079 | No      |
|      |       |        |             |          |         | Ptpla    | 1.32775   | 11.3005 | 3.08933117       | 1.32875      | 11.3015       | 3.08837267       | 0.00658515 | No      |
|      |       |        |             |          |         | Ptplad1  | 7.53837   | 13.6405 | 0.85557202       | 7.53937      | 13.6415       | 0.85548641       | 0.0222379  | No      |
|      |       |        |             |          |         | Ptplad2  | 0.221768  | 16.0435 | 6.17679389       | 0.222768     | 16.0445       | 6.17039301       | 0.00096553 | No      |
|      |       |        |             |          |         | Ptpn1    | 32.9755   | 8.63752 | -1.9327055       | 32.9765      | 8.63852       | -1.9325822       | 0.00022079 | No      |
|      |       |        |             |          |         | Ptpn12   | 11.8075   | 19.3091 | 0.70957739       | 11.8085      | 19.3101       | 0.70952992       | 0.0486226  | No      |
|      |       |        |             |          |         | Ptpn13   | 0.621931  | 69.4487 | 6.80304935       | 0.622931     | 69.4497       | 6.80075228       | 0.00022079 | No      |
|      |       |        |             |          |         | Ptpn18   | 172.204   | 60.1711 | -1.516976        | 172.205      | 60.1721       | -1.5169604       | 0.00022079 | No      |
|      |       |        |             |          |         | PTPN2    | 51.8583   | 20.9381 | -1.3084444       | 51.8593      | 20.9391       | -1.3084033       | 0.0019604  | No      |
|      |       |        |             |          |         | Ptpn21   | 0.0671448 | 7.86811 | 6.87259764       | 0.0681448    | 7.86911       | 6.85145309       | 0.00022079 | No      |
|      |       |        |             |          |         | Ptpn22   | 170.253   | 8.37365 | -4.3456798       | 170.254      | 8.37465       | -4.345516        | 0.00022079 | No      |
|      |       |        |             |          |         | Ptpn23   | 6.23718   | 14.5456 | 1.22161701       | 6.23818      | 14.5466       | 1.2214849        | 0.00130998 | No      |
|      |       |        |             |          |         | Ptpn7    | 12.9722   | 4.1624  | -1.6399357       | 12.9732      | 4.1634        | -1.6397003       | 0.00060553 | No      |
|      |       |        |             |          |         | Ptprb    | 0         | 4.87627 | inf              | 0.001        | 4.87727       | 12.2518581       | 0.00022079 | No      |
|      |       |        |             |          |         | Ptprc    | 761.188   | 10.8482 | -6.1327252       | 761.189      | 10.8492       | -6.1325941       | 0.00022079 | No      |
|      |       |        |             |          |         | Ptprcap  | 496.189   | 85.5996 | -2.5352138       | 496.19       | 85.6006       | -2.5351998       | 0.00113657 | No      |
|      |       |        |             |          |         | Ptprd    | 0         | 7.62004 | inf              | 0.001        | 7.62104       | 12.8957722       | 0.00022079 | No      |
|      |       |        |             |          |         | Ptprf    | 15.6709   | 36.2896 | 1.21146812       | 15.6719      | 36.2906       | 1.21141581       | 0.00288641 | No      |
|      |       |        |             |          |         | PTPRG    | 0.272859  | 4.12165 | 3.91699446       | 0.273859     | 4.12265       | 3.91206679       | 0.00147497 | No      |
|      |       |        |             |          |         | Ptprj    | 1.79568   | 14.4462 | 3.00808787       | 1.79668      | 14.4472       | 3.00738453       | 0.00536605 | No      |
|      |       |        |             |          |         | Ptprk    | 1.69059   | 16.3773 | 3.2760988        | 1.69159      | 16.3783       | 3.27533378       | 0.00022079 | No      |
|      |       |        |             |          |         | Ptprm    | 0.636676  | 8.46772 | 3.73334228       | 0.637676     | 8.46872       | 3.73124844       | 0.00022079 | No      |
|      |       |        |             |          |         | Ptpro    | 0.747592  | 4.29978 | 2.52393981       | 0.748592     | 4.30078       | 2.5223468        | 0.00436941 | No      |
|      |       |        |             |          |         | Ptprrr   | 0         | 9.49044 | inf              | 0.001        | 9.49144       | 13.2124113       | 0.00022079 | No      |
|      |       |        |             |          |         | Ptpru    | 0         | 1.21968 | inf              | 0.001        | 1.22068       | 10.2534693       | 0.00022079 | No      |
|      |       |        |             |          |         | Pttglip  | 39.292    | 267.917 | 2.76947862       | 39.293       | 267.918       | 2.76944729       | 0.00022079 | No      |
|      |       |        |             |          |         | Pum1     | 58.6134   | 15.5309 | -1.9160891       | 58.6144      | 15.5319       | -1.9160208       | 0.00022079 | No      |
|      |       |        |             |          |         | Pum2     | 97.126    | 24.1101 | -2.0102199       | 97.127       | 24.1111       | -2.0101749       | 0.00022079 | No      |
|      |       |        |             |          |         | Pus1     | 33.4623   | 19.1767 | -0.8031821       | 33.4633      | 19.1777       | -0.80315         | 0.0301242  | No      |

| RRBS |       |        |             |          |         | RNAseq    |           |          |                  |              |               |                  |            |         |
|------|-------|--------|-------------|----------|---------|-----------|-----------|----------|------------------|--------------|---------------|------------------|------------|---------|
| gene | Blood | Kidney | methyl.diff | pMWU.fdr | Match ? | gene      | blood     | kidney   | log2(fold_ratio) | blood+ 0.001 | kidney+ 0.001 | log2(fold_ratio) | q_value    | Match ? |
|      |       |        |             |          |         | Pus10     | 7.68587   | 1.8364   | -2.0653282       | 7.68687      | 1.8374        | -2.0647305       | 0.00288641 | No      |
|      |       |        |             |          |         | Pus3      | 17.1746   | 4.69905  | -1.8698355       | 17.1756      | 4.70005       | -1.8696125       | 0.00041963 | No      |
|      |       |        |             |          |         | Pus7      | 4.50871   | 1.92329  | -1.2291384       | 4.50971      | 1.92429       | -1.2287084       | 0.0406701  | No      |
|      |       |        |             |          |         | Pus7l     | 7.22595   | 0.963473 | -2.9068711       | 7.22695      | 0.964473      | -2.9055742       | 0.0308614  | No      |
|      |       |        |             |          |         | PVR       | 1.16979   | 4.47954  | 1.93710103       | 1.17079      | 4.48054       | 1.93619029       | 0.00211842 | No      |
|      |       |        |             |          |         | Pvrl3     | 0.0454115 | 5.67825  | 6.96624487       | 0.0464115    | 5.67925       | 6.93507428       | 0.00041963 | No      |
|      |       |        |             |          |         | Pwwp2a    | 31.5331   | 6.11332  | -2.366839        | 31.5341      | 6.11432       | -2.3666488       | 0.00022079 | No      |
|      |       |        |             |          |         | Pxmp2     | 1.49943   | 45.0435  | 4.90883286       | 1.50043      | 45.0445       | 4.90790304       | 0.00180113 | No      |
|      |       |        |             |          |         | Pycard    | 100.96    | 46.4321  | -1.1205894       | 100.961      | 46.4331       | -1.1205726       | 0.0160426  | No      |
|      |       |        |             |          |         | Pygl      | 22.6914   | 11.0515  | -1.0379034       | 22.6924      | 11.0525       | -1.0378365       | 0.00494367 | No      |
|      |       |        |             |          |         | Pyroxd2   | 3.00379   | 137.711  | 5.51871604       | 3.00479      | 137.712       | 5.5182463        | 0.00022079 | No      |
|      |       |        |             |          |         | Qars      | 81.4004   | 45.0702  | -0.852862        | 81.4014      | 45.0712       | -0.8528477       | 0.0083198  | No      |
|      |       |        |             |          |         | Qdpr      | 34.1641   | 109.319  | 1.67799114       | 34.1651      | 109.32        | 1.67796211       | 0.00022079 | No      |
|      |       |        |             |          |         | QK        | 25.989    | 16.2405  | -0.6783051       | 25.99        | 16.2415       | -0.6782718       | 0.0390462  | No      |
|      |       |        |             |          |         | Qrsl1     | 5.32249   | 11.6486  | 1.12998333       | 5.32349      | 11.6496       | 1.12983615       | 0.0135008  | No      |
|      |       |        |             |          |         | Qser1     | 1.17191   | 2.99197  | 1.35223393       | 1.17291      | 2.99297       | 1.3514855        | 0.00645389 | No      |
|      |       |        |             |          |         | Qsox1     | 2.341     | 9.81531  | 2.0679089        | 2.342        | 9.81631       | 2.06743973       | 0.00022079 | No      |
|      |       |        |             |          |         | Qtrtd1    | 4.42616   | 1.71453  | -1.3682425       | 4.42716      | 1.71553       | -1.3677272       | 0.0128843  | No      |
|      |       |        |             |          |         | R3hdm1    | 23.2369   | 6.76033  | -1.781252        | 23.2379      | 6.76133       | -1.7811007       | 0.00022079 | No      |
|      |       |        |             |          |         | Rab1      | 23.8601   | 81.3939  | 1.77032059       | 23.8611      | 81.3949       | 1.77027785       | 0.00022079 | No      |
|      |       |        |             |          |         | Rab11a    | 29.305    | 109.661  | 1.90383179       | 29.306       | 109.662       | 1.90379572       | 0.00022079 | No      |
|      |       |        |             |          |         | Rab11fip1 | 2.29668   | 17.7821  | 2.95280395       | 2.29768      | 17.7831       | 2.95225705       | 0.00022079 | No      |
|      |       |        |             |          |         | Rab11fip4 | 75.4603   | 14.1276  | -2.4172014       | 75.4613      | 14.1286       | -2.4171184       | 0.00022079 | No      |
|      |       |        |             |          |         | Rab11fip5 | 0.425297  | 29.7193  | 6.12678565       | 0.426297     | 29.7203       | 6.12344597       | 0.00022079 | No      |
|      |       |        |             |          |         | Rab17     | 0         | 122.927  | inf              | 0.001        | 122.928       | 16.907454        | 0.00022079 | No      |
|      |       |        |             |          |         | Rab18     | 14.4073   | 43.6154  | 1.59803763       | 14.4083      | 43.6164       | 1.59797057       | 0.00022079 | No      |
|      |       |        |             |          |         | Rab19     | 11.6401   | 3.21931  | -1.85428         | 11.6411      | 3.22031       | -1.8539559       | 0.00273202 | No      |
|      |       |        |             |          |         | Rab23     | 6.01732   | 16.1622  | 1.42543061       | 6.01832      | 16.1632       | 1.42528013       | 0.00022079 | No      |
|      |       |        |             |          |         | Rab25     | 8.25697   | 42.0635  | 2.34888453       | 8.25797      | 42.0645       | 2.34874411       | 0.00022079 | No      |
|      |       |        |             |          |         | Rab27a    | 90.8457   | 6.64515  | -3.7730446       | 90.8467      | 6.64615       | -3.7728434       | 0.00022079 | No      |
|      |       |        |             |          |         | Rab27b    | 0.147111  | 0.963723 | 2.71171341       | 0.148111     | 0.964723      | 2.70343597       | 0.0231371  | No      |
|      |       |        |             |          |         | Rab33b    | 7.59809   | 4.319    | -0.8149395       | 7.59909      | 4.32          | -0.8147954       | 0.0476819  | No      |
|      |       |        |             |          |         | Rab35     | 74.6604   | 29.403   | -1.3443799       | 74.6614      | 29.404        | -1.3443501       | 0.0279776  | No      |
|      |       |        |             |          |         | RAB37     | 35.8829   | 1.71676  | -4.3855362       | 35.8839      | 1.71776       | -4.3847363       | 0.00022079 | No      |
|      |       |        |             |          |         | Rab3d     | 13.6654   | 6.5045   | -1.0710176       | 13.6664      | 6.5055        | -1.0709014       | 0.0187326  | No      |
|      |       |        |             |          |         | Rab3ip    | 415.866   | 78.2832  | -2.4093441       | 415.867      | 78.2842       | -2.4093291       | 0.00022079 | No      |
|      |       |        |             |          |         | Rab40b    | 0.116096  | 2.15947  | 4.2172871        | 0.117096     | 2.16047       | 4.2055815        | 0.0112749  | No      |
|      |       |        |             |          |         | Rab4a     | 11.7394   | 29.7419  | 1.34113814       | 11.7404      | 29.7429       | 1.34106376       | 0.0264045  | No      |
|      |       |        |             |          |         | Rab6b     | 0.252495  | 1.51798  | 2.58782606       | 0.253495     | 1.51898       | 2.58307368       | 0.00180113 | No      |
|      |       |        |             |          |         | Rab7a     | 91.8426   | 192.811  | 1.06995197       | 91.8436      | 192.812       | 1.06994375       | 0.00113657 | No      |
|      |       |        |             |          |         | Rab8a     | 165.621   | 65.3705  | -1.341174        | 165.622      | 65.3715       | -1.3411606       | 0.00041963 | No      |
|      |       |        |             |          |         | Rab9a     | 19.033    | 46.3236  | 1.2832444        | 19.034       | 46.3246       | 1.28319974       | 0.00041963 | No      |

| RRBS |       |        |             |          |         | RNAseq   |           |         |                  |              |               |                  |            |         |
|------|-------|--------|-------------|----------|---------|----------|-----------|---------|------------------|--------------|---------------|------------------|------------|---------|
| gene | Blood | Kidney | methyl.diff | pMWU.fdr | Match ? | gene     | blood     | kidney  | log2(fold_ratio) | blood+ 0.001 | kidney+ 0.001 | log2(fold_ratio) | q_value    | Match ? |
|      |       |        |             |          |         | Rabl2a   | 0.177405  | 14.3206 | 6.33490146       | 0.178405     | 14.3216       | 6.32689282       | 0.00022079 | No      |
|      |       |        |             |          |         | Rabl5    | 0.703973  | 11.7947 | 4.06647482       | 0.704973     | 11.7957       | 4.06454922       | 0.00060553 | No      |
|      |       |        |             |          |         | Rac2     | 1040.72   | 146.286 | -2.8307184       | 1040.721     | 146.287       | -2.8307099       | 0.00022079 | No      |
|      |       |        |             |          |         | Rad1     | 14.4401   | 4.33088 | -1.7373486       | 14.4411      | 4.33188       | -1.7371155       | 0.00096553 | No      |
|      |       |        |             |          |         | Rad50    | 11.1349   | 6.69091 | -0.7348143       | 11.1359      | 6.69191       | -0.7347282       | 0.0472957  | No      |
|      |       |        |             |          |         | Rae1     | 44.2902   | 23.6789 | -0.9033854       | 44.2912      | 23.6799       | -0.9033571       | 0.0132548  | No      |
|      |       |        |             |          |         | Raf1     | 50.486    | 27.1215 | -0.8964464       | 50.487       | 27.1225       | -0.8964218       | 0.0373662  | No      |
|      |       |        |             |          |         | Rai2     | 0         | 4.6069  | inf              | 0.001        | 4.6079        | 12.1698937       | 0.00022079 | No      |
|      |       |        |             |          |         | Ralb     | 5.35653   | 20.8367 | 1.95975619       | 5.35753      | 20.8377       | 1.95955612       | 0.00022079 | No      |
|      |       |        |             |          |         | Ralgps2  | 15.4027   | 2.47107 | -2.6399755       | 15.4037      | 2.47207       | -2.6394854       | 0.00022079 | No      |
|      |       |        |             |          |         | Raly     | 277.606   | 122.98  | -1.174615        | 277.607      | 122.981       | -1.1746085       | 0.00078858 | No      |
|      |       |        |             |          |         | Ramp2    | 0.247589  | 28.6413 | 6.85400595       | 0.248589     | 28.6423       | 6.84824108       | 0.0170023  | No      |
|      |       |        |             |          |         | Ramp3    | 2.66849   | 13.0126 | 2.28581374       | 2.66949      | 13.0136       | 2.28538407       | 0.00113657 | No      |
|      |       |        |             |          |         | Ranbp10  | 27.0719   | 8.82061 | -1.6178458       | 27.0729      | 8.82161       | -1.6177355       | 0.00022079 | No      |
|      |       |        |             |          |         | Ranbp6   | 7.34279   | 3.21575 | -1.1911731       | 7.34379      | 3.21675       | -1.190921        | 0.00536605 | No      |
|      |       |        |             |          |         | Ranbp9   | 50.6578   | 16.0172 | -1.6611625       | 50.6588      | 16.0182       | -1.6611009       | 0.00022079 | No      |
|      |       |        |             |          |         | Rangap1  | 48.2723   | 25.6797 | -0.9105672       | 48.2733      | 25.6807       | -0.9105409       | 0.00508519 | No      |
|      |       |        |             |          |         | Rap1a    | 140.594   | 47.3787 | -1.5692245       | 140.595      | 47.3797       | -1.5692043       | 0.00113657 | No      |
|      |       |        |             |          |         | Rap1b    | 228.586   | 72.7992 | -1.6507425       | 228.587      | 72.8002       | -1.650729        | 0.00022079 | No      |
|      |       |        |             |          |         | Rap1gap2 | 4.31416   | 14.4432 | 1.74323883       | 4.31516      | 14.4442       | 1.74300434       | 0.00022079 | No      |
|      |       |        |             |          |         | Rap1gds1 | 34.7135   | 10.0171 | -1.7930319       | 34.7145      | 10.0181       | -1.7929295       | 0.00022079 | No      |
|      |       |        |             |          |         | Rap2c    | 26.2645   | 5.81452 | -2.1753821       | 26.2655      | 5.81552       | -2.1751889       | 0.00022079 | No      |
|      |       |        |             |          |         | Rapgef1  | 25.152    | 11.6878 | -1.1056697       | 25.153       | 11.6888       | -1.1056037       | 0.00180113 | No      |
|      |       |        |             |          |         | Rapgef2  | 11.9626   | 4.36228 | -1.4553767       | 11.9636      | 4.36328       | -1.4551666       | 0.00508519 | No      |
|      |       |        |             |          |         | Rapgef5  | 0.144239  | 1.36508 | 3.2424523        | 0.145239     | 1.36608       | 3.23354117       | 0.00022079 | No      |
|      |       |        |             |          |         | Rapgef6  | 53.6959   | 2.51368 | -4.416939        | 53.6969      | 2.51468       | -4.4163921       | 0.00022079 | No      |
|      |       |        |             |          |         | RAPGEFL1 | 0.119169  | 4.57615 | 5.26305345       | 0.120169     | 4.57715       | 5.25131289       | 0.0019604  | No      |
|      |       |        |             |          |         | Rapsn    | 0.777525  | 13.3826 | 4.10532556       | 0.778525     | 13.3836       | 4.10357905       | 0.00022079 | No      |
|      |       |        |             |          |         | Rara     | 30.1675   | 14.9347 | -1.0143269       | 30.1685      | 14.9357       | -1.0142781       | 0.00579147 | No      |
|      |       |        |             |          |         | Rarres2  | 0         | 25.4914 | inf              | 0.001        | 25.4924       | 14.6377796       | 0.00672121 | No      |
|      |       |        |             |          |         | Rars2    | 5.16301   | 12.3404 | 1.25710486       | 5.16401      | 12.3414       | 1.25694236       | 0.0123897  | No      |
|      |       |        |             |          |         | Rasa1    | 29.1532   | 11.0193 | -1.4036217       | 29.1542      | 11.0203       | -1.4035402       | 0.00041963 | No      |
|      |       |        |             |          |         | Rasa3    | 79.8462   | 2.4421  | -5.0310296       | 79.8472      | 2.4431        | -5.030457        | 0.00022079 | No      |
|      |       |        |             |          |         | RASA4    | 26.1487   | 5.38292 | -2.2802783       | 26.1497      | 5.38392       | -2.2800655       | 0.00022079 | No      |
|      |       |        |             |          |         | Rasal3   | 88.529    | 6.15545 | -3.8462139       | 88.53        | 6.15645       | -3.8459958       | 0.00022079 | No      |
|      |       |        |             |          |         | Rasd1    | 0.799675  | 8.97428 | 3.48831051       | 0.800675     | 8.97528       | 3.48666828       | 0.00022079 | No      |
|      |       |        |             |          |         | Rasgef1b | 21.369    | 5.33018 | -2.0032632       | 21.37        | 5.33118       | -2.0030601       | 0.00022079 | No      |
|      |       |        |             |          |         | Rasgrp1  | 92.7261   | 6.25865 | -3.8890521       | 92.7271      | 6.25965       | -3.8888371       | 0.00022079 | No      |
|      |       |        |             |          |         | Rasgrp3  | 0.374118  | 5.63365 | 3.91250465       | 0.375118     | 5.63465       | 3.9089096        | 0.00935956 | No      |
|      |       |        |             |          |         | Rasip1   | 0.784823  | 6.69239 | 3.09208229       | 0.785823     | 6.69339       | 3.09046078       | 0.00022079 | No      |
|      |       |        |             |          |         | Rasl10a  | 0.0652287 | 7.04929 | 6.75582727       | 0.0662287    | 7.05029       | 6.73408225       | 0.023492   | No      |
|      |       |        |             |          |         | Rasl11a  | 0.4408    | 9.76882 | 4.46998818       | 0.4418       | 9.76982       | 4.46686666       | 0.00378481 | No      |

| RRBS |       |        |             |          |         | RNAseq  |          |         |                  |              |               |                  |            |         |
|------|-------|--------|-------------|----------|---------|---------|----------|---------|------------------|--------------|---------------|------------------|------------|---------|
| gene | Blood | Kidney | methyl.diff | pMWU.fdr | Match ? | gene    | blood    | kidney  | log2(fold_ratio) | blood+ 0.001 | kidney+ 0.001 | log2(fold_ratio) | q_value    | Match ? |
|      |       |        |             |          |         | Rasl11b | 1.92487  | 24.3662 | 3.66204836       | 1.92587      | 24.3672       | 3.66135826       | 0.00022079 | No      |
|      |       |        |             |          |         | Rasl12  | 0        | 3.58648 | inf              | 0.001        | 3.58748       | 11.8087551       | 0.00022079 | No      |
|      |       |        |             |          |         | Rassf2  | 24.7219  | 4.76176 | -2.3762228       | 24.7229      | 4.76276       | -2.3759782       | 0.00022079 | No      |
|      |       |        |             |          |         | Rassf6  | 0.108238 | 23.6337 | 7.77049461       | 0.109238     | 23.6347       | 7.75728794       | 0.020304   | No      |
|      |       |        |             |          |         | Rassf7  | 2.49277  | 37.9298 | 3.92751008       | 2.49377      | 37.9308       | 3.92696948       | 0.0290073  | No      |
|      |       |        |             |          |         | Rassf8  | 0.123066 | 24.7418 | 7.65137441       | 0.124066     | 24.7428       | 7.63975716       | 0.00022079 | No      |
|      |       |        |             |          |         | Rassf9  | 0        | 6.0326  | inf              | 0.001        | 6.0336        | 12.5588033       | 0.00022079 | No      |
|      |       |        |             |          |         | Raver1  | 45.4251  | 22.3642 | -1.0222985       | 45.4261      | 22.3652       | -1.0222658       | 0.00211842 | No      |
|      |       |        |             |          |         | Rbbp5   | 20.3198  | 9.40862 | -1.1108312       | 20.3208      | 9.40962       | -1.1107488       | 0.00632443 | No      |
|      |       |        |             |          |         | Rbm19   | 4.14678  | 1.78589 | -1.2153483       | 4.14778      | 1.78689       | -1.2148885       | 0.0308614  | No      |
|      |       |        |             |          |         | Rbm22   | 40.3683  | 16.4729 | -1.2931283       | 40.3693      | 16.4739       | -1.2930764       | 0.00022079 | No      |
|      |       |        |             |          |         | Rbm25   | 69.9929  | 23.3895 | -1.5813476       | 69.9939      | 23.3905       | -1.5813065       | 0.00022079 | No      |
|      |       |        |             |          |         | Rbm27   | 19.683   | 6.44921 | -1.6097558       | 19.684       | 6.45021       | -1.6096054       | 0.00041963 | No      |
|      |       |        |             |          |         | Rbm33   | 53.3612  | 8.27279 | -2.6893452       | 53.3622      | 8.27379       | -2.6891979       | 0.00022079 | No      |
|      |       |        |             |          |         | Rbm34   | 12.6348  | 5.47453 | -1.2065958       | 12.6358      | 5.47553       | -1.2064465       | 0.00180113 | No      |
|      |       |        |             |          |         | Rbm38   | 42.1667  | 11.0302 | -1.9346452       | 42.1677      | 11.0312       | -1.9345486       | 0.00022079 | No      |
|      |       |        |             |          |         | Rbm39   | 72.2986  | 28.8556 | -1.3251164       | 72.2996      | 28.8566       | -1.3250863       | 0.00022079 | No      |
|      |       |        |             |          |         | Rbm41   | 9.19052  | 1.557   | -2.5613775       | 9.19152      | 1.558         | -2.5606082       | 0.0421044  | No      |
|      |       |        |             |          |         | Rbm48   | 10.885   | 3.47453 | -1.6474517       | 10.886       | 3.47553       | -1.647169        | 0.00672121 | No      |
|      |       |        |             |          |         | Rbm5    | 74.1811  | 37.8971 | -0.9689642       | 74.1821      | 37.8981       | -0.9689456       | 0.00645389 | No      |
|      |       |        |             |          |         | Rbm7    | 46.2774  | 19.7091 | -1.2314459       | 46.2784      | 19.7101       | -1.2314039       | 0.0019604  | No      |
|      |       |        |             |          |         | Rbms3   | 0        | 4.97599 | inf              | 0.001        | 4.97699       | 12.2810578       | 0.00765035 | No      |
|      |       |        |             |          |         | Rbmx    | 39.4847  | 18.9901 | -1.0560462       | 39.4857      | 18.9911       | -1.0560068       | 0.0164052  | No      |
|      |       |        |             |          |         | Rbp1    | 0        | 127.568 | inf              | 0.001        | 127.569       | 16.9609183       | 0.00022079 | No      |
|      |       |        |             |          |         | Rbp4    | 0        | 1.40381 | inf              | 0.001        | 1.40481       | 10.4561593       | 0.00022079 | No      |
|      |       |        |             |          |         | Rbpms   | 2.11815  | 131.584 | 5.9570355        | 2.11915      | 131.585       | 5.95636552       | 0.00022079 | No      |
|      |       |        |             |          |         | Rc3h1   | 23.3234  | 7.33031 | -1.669832        | 23.3244      | 7.33131       | -1.6696971       | 0.00078858 | No      |
|      |       |        |             |          |         | Rc3h2   | 23.4042  | 9.71509 | -1.2684682       | 23.4052      | 9.71609       | -1.2683813       | 0.00113657 | No      |
|      |       |        |             |          |         | Rcan1   | 7.19302  | 34.4774 | 2.26098146       | 7.19402      | 34.4784       | 2.26082275       | 0.00022079 | No      |
|      |       |        |             |          |         | Rcan3   | 35.5548  | 7.18676 | -2.3066309       | 35.5558      | 7.18776       | -2.3064708       | 0.00022079 | No      |
|      |       |        |             |          |         | Rcc1    | 13.732   | 5.68594 | -1.272071        | 13.733       | 5.68694       | -1.2719223       | 0.00645389 | No      |
|      |       |        |             |          |         | Rcc2    | 109.343  | 39.4039 | -1.4724505       | 109.344      | 39.4049       | -1.4724271       | 0.00022079 | No      |
|      |       |        |             |          |         | Rcn2    | 5.21771  | 14.9852 | 1.52204967       | 5.21871      | 14.9862       | 1.52186947       | 0.00060553 | No      |
|      |       |        |             |          |         | Rcn3    | 1.65644  | 5.50318 | 1.73217957       | 1.65744      | 5.50418       | 1.73157101       | 0.0257334  | No      |
|      |       |        |             |          |         | Rcsd1   | 111.85   | 7.33721 | -3.9301899       | 111.851      | 7.33821       | -3.9300062       | 0.00022079 | No      |
|      |       |        |             |          |         | Rdh14   | 6.60396  | 15.0156 | 1.18505884       | 6.60496      | 15.0166       | 1.18493647       | 0.0190658  | No      |
|      |       |        |             |          |         | Rdh16   | 1.94117  | 10.6484 | 2.4556383        | 1.94217      | 10.6494       | 2.45503076       | 0.00363736 | No      |
|      |       |        |             |          |         | Rdx     | 15.4568  | 39.7805 | 1.36381974       | 15.4578      | 39.7815       | 1.36376267       | 0.0328292  | No      |
|      |       |        |             |          |         | Reck    | 0.363908 | 3.84017 | 3.39952451       | 0.364908     | 3.84117       | 3.39594113       | 0.00494367 | No      |
|      |       |        |             |          |         | Reep4   | 28.709   | 11.9843 | -1.2603574       | 28.71        | 11.9853       | -1.2602873       | 0.00257873 | No      |
|      |       |        |             |          |         | Reep6   | 0.170903 | 6.92204 | 5.33994765       | 0.171903     | 6.92304       | 5.33173906       | 0.00022079 | No      |
|      |       |        |             |          |         | Rel     | 8.02266  | 2.01055 | -1.9964904       | 8.02366      | 2.01155       | -1.9959529       | 0.00988585 | No      |

| RRBS |       |        |             |          |         | RNAseq     |          |         |                  |              |               |                  |            |         |
|------|-------|--------|-------------|----------|---------|------------|----------|---------|------------------|--------------|---------------|------------------|------------|---------|
| gene | Blood | Kidney | methyl.diff | pMWU.fdr | Match ? | gene       | blood    | kidney  | log2(fold_ratio) | blood+ 0.001 | kidney+ 0.001 | log2(fold_ratio) | q_value    | Match ? |
|      |       |        |             |          |         | Relt       | 16.2982  | 2.37739 | -2.7772621       | 16.2992      | 2.37839       | -2.7767439       | 0.00022079 | No      |
|      |       |        |             |          |         | Rem2       | 0.227361 | 2.23226 | 3.29544836       | 0.228361     | 2.23326       | 3.28976303       | 0.0117698  | No      |
|      |       |        |             |          |         | Repin1     | 0.766914 | 13.2626 | 4.11215501       | 0.767914     | 13.2636       | 4.11038384       | 0.00022079 | No      |
|      |       |        |             |          |         | Reps2      | 0        | 1.14121 | inf              | 0.001        | 1.14221       | 10.1576122       | 0.00041963 | No      |
|      |       |        |             |          |         | Resp18     | 26.4027  | 8.39339 | -1.6533599       | 26.4037      | 8.39439       | -1.6532427       | 0.00130998 | No      |
|      |       |        |             |          |         | Rexo1      | 42.1802  | 15.0098 | -1.4906612       | 42.1812      | 15.0108       | -1.4905993       | 0.00022079 | No      |
|      |       |        |             |          |         | Rexo4      | 49.8263  | 24.3089 | -1.0354228       | 49.8273      | 24.3099       | -1.0353924       | 0.00164037 | No      |
|      |       |        |             |          |         | Rfc5       | 20.3847  | 8.68474 | -1.2309322       | 20.3857      | 8.68574       | -1.2308368       | 0.00164037 | No      |
|      |       |        |             |          |         | Rftn1      | 29.823   | 4.399   | -2.7611779       | 29.824       | 4.4           | -2.7608983       | 0.00022079 | No      |
|      |       |        |             |          |         | Rfx1       | 73.976   | 10.8626 | -2.7676878       | 73.977       | 10.8636       | -2.7675745       | 0.00022079 | No      |
|      |       |        |             |          |         | Rfx7       | 26.1134  | 3.75576 | -2.7976135       | 26.1144      | 3.75676       | -2.7972847       | 0.00022079 | No      |
|      |       |        |             |          |         | Rfxap      | 33.7356  | 13.8672 | -1.2825953       | 33.7366      | 13.8682       | -1.282534        | 0.00096553 | No      |
|      |       |        |             |          |         | Rgcc       | 110.336  | 8.28185 | -3.7358067       | 110.337      | 8.28285       | -3.7356456       | 0.00022079 | No      |
|      |       |        |             |          |         | RGD1302996 | 28.2245  | 87.2372 | 1.62799544       | 28.2255      | 87.2382       | 1.62796087       | 0.00022079 | No      |
|      |       |        |             |          |         | RGD1303003 | 87.756   | 212.71  | 1.27731819       | 87.757       | 212.711       | 1.27730853       | 0.00022079 | No      |
|      |       |        |             |          |         | RGD1303130 | 22.6707  | 39.9242 | 0.81643456       | 22.6717      | 39.9252       | 0.81640706       | 0.0220188  | No      |
|      |       |        |             |          |         | RGD1304567 | 18.7364  | 39.0286 | 1.05868793       | 18.7374      | 39.0296       | 1.0586479        | 0.0105196  | No      |
|      |       |        |             |          |         | RGD1304595 | 13.9903  | 1.87613 | -2.8985952       | 13.9913      | 1.87713       | -2.8979295       | 0.00022079 | No      |
|      |       |        |             |          |         | RGD1304622 | 0.647638 | 34.9641 | 5.75454292       | 0.648638     | 34.9651       | 5.75235828       | 0.00022079 | No      |
|      |       |        |             |          |         | RGD1304694 | 4.74995  | 15.9157 | 1.74446638       | 4.75095      | 15.9167       | 1.74425333       | 0.00022079 | No      |
|      |       |        |             |          |         | RGD1304704 | 114.013  | 229.292 | 1.00798769       | 114.014      | 229.293       | 1.00798133       | 0.00494367 | No      |
|      |       |        |             |          |         | RGD1304770 | 0.237756 | 15.5794 | 6.03401411       | 0.238756     | 15.5804       | 6.02805147       | 0.00022079 | No      |
|      |       |        |             |          |         | RGD1304884 | 0.408681 | 3.82363 | 3.22589585       | 0.409681     | 3.82463       | 3.2227473        | 0.00041963 | No      |
|      |       |        |             |          |         | RGD1304982 | 3.32372  | 29.2241 | 3.13628784       | 3.32472      | 29.2251       | 3.13590321       | 0.00022079 | No      |
|      |       |        |             |          |         | RGD1305110 | 2.09254  | 3.89681 | 0.89703839       | 2.09354      | 3.89781       | 0.89671928       | 0.0455876  | No      |
|      |       |        |             |          |         | RGD1305422 | 6.0646   | 13.3052 | 1.1335058        | 6.0656       | 13.3062       | 1.13337636       | 0.00060553 | No      |
|      |       |        |             |          |         | RGD1305508 | 27.3735  | 13.4195 | -1.028449        | 27.3745      | 13.4205       | -1.0283942       | 0.0161624  | No      |

| RRBS |       |        |             |          |         | RNAseq     |          |          |                  |              |               |                  |            |         |
|------|-------|--------|-------------|----------|---------|------------|----------|----------|------------------|--------------|---------------|------------------|------------|---------|
| gene | Blood | Kidney | methyl.diff | pMWU.fdr | Match ? | gene       | blood    | kidney   | log2(fold_ratio) | blood+ 0.001 | kidney+ 0.001 | log2(fold_ratio) | q_value    | Match ? |
|      |       |        |             |          |         | RGD1305587 | 22.0614  | 39.185   | 0.82877715       | 22.0624      | 39.186        | 0.82874857       | 0.026068   | No      |
|      |       |        |             |          |         | RGD1305645 | 0        | 56.198   | inf              | 0.001        | 56.199        | 15.7782568       | 0.00022079 | No      |
|      |       |        |             |          |         | RGD1305743 | 20.4462  | 7.96871  | -1.3594146       | 20.4472      | 7.96971       | -1.3593042       | 0.00022079 | No      |
|      |       |        |             |          |         | RGD1305834 | 3.9116   | 0.661292 | -2.5643995       | 3.9126       | 0.662292      | -2.5625883       | 0.00022079 | No      |
|      |       |        |             |          |         | RGD1306058 | 23.8892  | 51.8733  | 1.11863361       | 23.8902      | 51.8743       | 1.11860103       | 0.00392909 | No      |
|      |       |        |             |          |         | RGD1306151 | 0.690104 | 16.1692  | 4.5502907        | 0.691104     | 16.1702       | 4.54829088       | 0.00022079 | No      |
|      |       |        |             |          |         | RGD1306215 | 24.848   | 51.9937  | 1.06520709       | 24.849       | 51.9947       | 1.06517678       | 0.00711928 | No      |
|      |       |        |             |          |         | RGD1306353 | 26.4265  | 12.5324  | -1.0763226       | 26.4275      | 12.5334       | -1.0762621       | 0.00765035 | No      |
|      |       |        |             |          |         | RGD1306739 | 8.23995  | 23.4784  | 1.51062661       | 8.24095      | 23.4794       | 1.51051298       | 0.0190658  | No      |
|      |       |        |             |          |         | RGD1306820 | 9.62476  | 4.22343  | -1.1883354       | 9.62576      | 4.22443       | -1.1881438       | 0.00096553 | No      |
|      |       |        |             |          |         | RGD1306941 | 1.62948  | 3.71969  | 1.19077075       | 1.63048      | 3.72069       | 1.19027345       | 0.0243977  | No      |
|      |       |        |             |          |         | RGD1307235 | 41.4593  | 11.2383  | -1.8832719       | 41.4603      | 11.2393       | -1.8831784       | 0.00022079 | No      |
|      |       |        |             |          |         | RGD1307262 | 15.5213  | 52.9678  | 1.77086619       | 15.5223      | 52.9688       | 1.77080048       | 0.00022079 | No      |
|      |       |        |             |          |         | RGD1307315 | 0.611412 | 7.59802  | 3.63540674       | 0.612412     | 7.59902       | 3.63323892       | 0.00304332 | No      |
|      |       |        |             |          |         | RGD1307365 | 7.51033  | 2.35547  | -1.6728613       | 7.51133      | 2.35647       | -1.6724411       | 0.00041963 | No      |
|      |       |        |             |          |         | RGD1307526 | 82.5072  | 29.7314  | -1.4725326       | 82.5082      | 29.7324       | -1.4725016       | 0.00147497 | No      |
|      |       |        |             |          |         | RGD1307554 | 7.82704  | 3.00505  | -1.3810778       | 7.82804      | 3.00605       | -1.3807821       | 0.0115315  | No      |
|      |       |        |             |          |         | RGD1308005 | 5.26628  | 2.1362   | -1.3017375       | 5.26728      | 2.1372        | -1.3013362       | 0.00672121 | No      |
|      |       |        |             |          |         | RGD1308234 | 174.494  | 46.0811  | -1.9209304       | 174.495      | 46.0821       | -1.9209073       | 0.00022079 | No      |
|      |       |        |             |          |         | RGD1308297 | 34.8933  | 14.1114  | -1.3060889       | 34.8943      | 14.1124       | -1.306028        | 0.00022079 | No      |
|      |       |        |             |          |         | RGD1308601 | 11.3381  | 6.52253  | -0.7976753       | 11.3391      | 6.52353       | -0.7975814       | 0.0250666  | No      |



| RRBS |       |        |             |          |         | RNAseq     |           |          |                  |              |               |                  |            |         |
|------|-------|--------|-------------|----------|---------|------------|-----------|----------|------------------|--------------|---------------|------------------|------------|---------|
| gene | Blood | Kidney | methyl.diff | pMWU.fdr | Match ? | gene       | blood     | kidney   | log2(fold_ratio) | blood+ 0.001 | kidney+ 0.001 | log2(fold_ratio) | q_value    | Match ? |
|      |       |        |             |          |         | RGD1308706 | 12.3095   | 27.3779  | 1.15323963       | 12.3105      | 27.3789       | 1.15317513       | 0.00672121 | No      |
|      |       |        |             |          |         | RGD1309079 | 4.90904   | 9.66938  | 0.97798246       | 4.91004      | 9.67038       | 0.9778378        | 0.0105196  | No      |
|      |       |        |             |          |         | RGD1309104 | 37.6169   | 5.66421  | -2.7314343       | 37.6179      | 5.66521       | -2.731218        | 0.00022079 | No      |
|      |       |        |             |          |         | RGD1309148 | 33.5714   | 18.5058  | -0.8592552       | 33.5724      | 18.5068       | -0.8592202       | 0.0432137  | No      |
|      |       |        |             |          |         | RGD1309350 | 0.963657  | 4.97067  | 2.36684869       | 0.964657     | 4.97167       | 2.36564257       | 0.0318275  | No      |
|      |       |        |             |          |         | RGD1309534 | 1.57585   | 80.0793  | 5.66722724       | 1.57685      | 80.0803       | 5.66633005       | 0.00022079 | No      |
|      |       |        |             |          |         | RGD1309594 | 2.55229   | 15.0388  | 2.55882529       | 2.55329      | 15.0398       | 2.55835607       | 0.00022079 | No      |
|      |       |        |             |          |         | RGD1309747 | 20.2559   | 6.37597  | -1.6676254       | 20.2569      | 6.37697       | -1.6674704       | 0.0102697  | No      |
|      |       |        |             |          |         | RGD1309808 | 326.355   | 13.6415  | -4.5803679       | 326.356      | 13.6425       | -4.5802666       | 0.00022079 | No      |
|      |       |        |             |          |         | RGD1309821 | 0.0860546 | 3.42362  | 5.31412646       | 0.0870546    | 3.42462       | 5.29787957       | 0.00113657 | No      |
|      |       |        |             |          |         | RGD1309823 | 31.5137   | 13.8481  | -1.1862911       | 31.5147      | 13.8491       | -1.1862327       | 0.0196176  | No      |
|      |       |        |             |          |         | RGD1309903 | 0         | 1.49179  | inf              | 0.001        | 1.49279       | 10.5437955       | 0.00022079 | No      |
|      |       |        |             |          |         | RGD1309995 | 53.1888   | 10.8495  | -2.2934939       | 53.1898      | 10.8505       | -2.2933881       | 0.00022079 | No      |
|      |       |        |             |          |         | RGD1310127 | 18.666    | 47.1361  | 1.3364196        | 18.667       | 47.1371       | 1.33637291       | 0.0138632  | No      |
|      |       |        |             |          |         | RGD1310352 | 14.6456   | 54.1948  | 1.88768713       | 14.6466      | 54.1958       | 1.88761525       | 0.00022079 | No      |
|      |       |        |             |          |         | RGD1310553 | 7.12829   | 3.30543  | -1.1087181       | 7.12929      | 3.30643       | -1.108484        | 0.0167554  | No      |
|      |       |        |             |          |         | RGD1310592 | 26.2092   | 12.5366  | -1.0639272       | 26.2102      | 12.5376       | -1.0638672       | 0.0387563  | No      |
|      |       |        |             |          |         | RGD1310727 | 25.6144   | 14.143   | -0.8568669       | 25.6154      | 14.144        | -0.8568212       | 0.0241707  | No      |
|      |       |        |             |          |         | RGD1310819 | 0         | 0.982508 | inf              | 0.001        | 0.983508      | 9.94179298       | 0.0228245  | No      |
|      |       |        |             |          |         | RGD1311021 | 0.0546634 | 23.3861  | 8.74086038       | 0.0556634    | 23.3871       | 8.71476823       | 0.00494367 | No      |
|      |       |        |             |          |         | RGD1311345 | 11.2726   | 30.5569  | 1.43867788       | 11.2736      | 30.5579       | 1.43859712       | 0.00041963 | No      |

| RRBS |       |        |             |          |         | RNAseq     |          |          |                  |              |               |                  |            |         |
|------|-------|--------|-------------|----------|---------|------------|----------|----------|------------------|--------------|---------------|------------------|------------|---------|
| gene | Blood | Kidney | methyl.diff | pMWU.fdr | Match ? | gene       | blood    | kidney   | log2(fold_ratio) | blood+ 0.001 | kidney+ 0.001 | log2(fold_ratio) | q_value    | Match ? |
|      |       |        |             |          |         | RGD1311458 | 20.6134  | 6.16955  | -1.7403453       | 20.6144      | 6.17055       | -1.7401815       | 0.00022079 | No      |
|      |       |        |             |          |         | RGD1311517 | 9.54442  | 1.53503  | -2.6363907       | 9.54542      | 1.53603       | -2.6356023       | 0.00022079 | No      |
|      |       |        |             |          |         | RGD1311564 | 1.29153  | 4.49633  | 1.79966677       | 1.29253      | 4.49733       | 1.79887098       | 0.00378481 | No      |
|      |       |        |             |          |         | RGD1311756 | 0.206204 | 12.0945  | 5.874135         | 0.207204     | 12.0955       | 5.86727474       | 0.00041963 | No      |
|      |       |        |             |          |         | RGD1311805 | 22.3714  | 8.03828  | -1.4766968       | 22.3724      | 8.03928       | -1.4765818       | 0.00593001 | No      |
|      |       |        |             |          |         | RGD1359108 | 6.77947  | 2.47939  | -1.4511873       | 6.78047      | 2.48039       | -1.4508183       | 0.00113657 | No      |
|      |       |        |             |          |         | RGD1359127 | 11.7246  | 25.2157  | 1.10478357       | 11.7256      | 25.2167       | 1.10471774       | 0.00422081 | No      |
|      |       |        |             |          |         | RGD1359158 | 35.8546  | 19.2957  | -0.8938788       | 35.8556      | 19.2967       | -0.8938443       | 0.0130042  | No      |
|      |       |        |             |          |         | RGD1359529 | 434.035  | 138.842  | -1.6443673       | 434.036      | 138.843       | -1.6443603       | 0.00242102 | No      |
|      |       |        |             |          |         | RGD1559442 | 0.460732 | 8.39764  | 4.18798423       | 0.461732     | 8.39864       | 4.1850281        | 0.00022079 | No      |
|      |       |        |             |          |         | RGD1559600 | 0        | 1.24185  | inf              | 0.001        | 1.24285       | 10.2794365       | 0.00022079 | No      |
|      |       |        |             |          |         | RGD1559786 | 8.67945  | 29.0552  | 1.74312086       | 8.68045      | 29.0562       | 1.7430043        | 0.00022079 | No      |
|      |       |        |             |          |         | RGD1559841 | 3.33305  | 12.3745  | 1.89245537       | 3.33405      | 12.3755       | 1.89213917       | 0.0353972  | No      |
|      |       |        |             |          |         | RGD1559891 | 0        | 2.8223   | inf              | 0.001        | 2.8233        | 11.4631667       | 0.00022079 | No      |
|      |       |        |             |          |         | RGD1559896 | 5.81315  | 22.6432  | 1.96168582       | 5.81415      | 22.6442       | 1.96150137       | 0.00022079 | No      |
|      |       |        |             |          |         | RGD1559899 | 0        | 3.79163  | inf              | 0.001        | 3.79263       | 11.8889829       | 0.00022079 | No      |
|      |       |        |             |          |         | RGD1559904 | 9.57011  | 4.37648  | -1.1287645       | 9.57111      | 4.37748       | -1.1285857       | 0.00113657 | No      |
|      |       |        |             |          |         | RGD1560289 | 1.33416  | 0.14674  | -3.1845976       | 1.33516      | 0.14774       | -3.1758803       | 0.0117698  | No      |
|      |       |        |             |          |         | RGD1560398 | 4.6077   | 12.3289  | 1.41992539       | 4.6087       | 12.3299       | 1.41972933       | 0.00480115 | No      |
|      |       |        |             |          |         | RGD1560470 | 2.13811  | 0.591748 | -1.8532812       | 2.13911      | 0.592748      | -1.8515199       | 0.00242102 | No      |
|      |       |        |             |          |         | RGD1560648 | 189.953  | 484.443  | 1.35068443       | 189.954      | 484.444       | 1.35067981       | 0.00060553 | No      |

| RRBS |       |        |             |          |         | RNAseq     |           |          |                  |              |               |                  |            |         |
|------|-------|--------|-------------|----------|---------|------------|-----------|----------|------------------|--------------|---------------|------------------|------------|---------|
| gene | Blood | Kidney | methyl.diff | pMWU.fdr | Match ? | gene       | blood     | kidney   | log2(fold_ratio) | blood+ 0.001 | kidney+ 0.001 | log2(fold_ratio) | q_value    | Match ? |
|      |       |        |             |          |         | RGD1560687 | 2.91702   | 16.1104  | 2.46542513       | 2.91802      | 16.1114       | 2.46502019       | 0.00022079 | No      |
|      |       |        |             |          |         | RGD1560849 | 35.0749   | 0.172644 | -7.666495        | 35.0759      | 0.173644      | -7.6582038       | 0.00022079 | No      |
|      |       |        |             |          |         | RGD1560871 | 0.636248  | 4.08969  | 2.68433037       | 0.637248     | 4.09069       | 2.68241737       | 0.00022079 | No      |
|      |       |        |             |          |         | RGD1560880 | 0.317192  | 4.40324  | 3.79513719       | 0.318192     | 4.40424       | 3.79092362       | 0.00288641 | No      |
|      |       |        |             |          |         | RGD1560888 | 18.5539   | 9.12056  | -1.0245282       | 18.5549      | 9.12156       | -1.0244477       | 0.00508519 | No      |
|      |       |        |             |          |         | RGD1561145 | 35.8496   | 2.35101  | -3.9306044       | 35.8506      | 2.35201       | -3.9300312       | 0.00022079 | No      |
|      |       |        |             |          |         | RGD1561157 | 13.539    | 4.16708  | -1.7000125       | 13.54        | 4.16808       | -1.6997729       | 0.00022079 | No      |
|      |       |        |             |          |         | RGD1561161 | 0         | 18.1965  | inf              | 0.001        | 18.1975       | 14.1514526       | 0.00022079 | No      |
|      |       |        |             |          |         | RGD1561328 | 32.1777   | 55.3408  | 0.78228229       | 32.1787      | 55.3418       | 0.78226353       | 0.0469889  | No      |
|      |       |        |             |          |         | RGD1561530 | 0         | 10.7164  | inf              | 0.001        | 10.7174       | 13.3876673       | 0.00022079 | No      |
|      |       |        |             |          |         | RGD1561662 | 0.0206445 | 9.39335  | 8.82973848       | 0.0216445    | 9.39435       | 8.76164906       | 0.00273202 | No      |
|      |       |        |             |          |         | RGD1561796 | 0.567585  | 10.8072  | 4.25101252       | 0.568585     | 10.8082       | 4.24860643       | 0.0215651  | No      |
|      |       |        |             |          |         | RGD1561931 | 0         | 0.954349 | inf              | 0.001        | 0.955349      | 9.89988405       | 0.00022079 | No      |
|      |       |        |             |          |         | RGD1561963 | 84.6768   | 10.1274  | -3.0637029       | 84.6778      | 10.1284       | -3.0635775       | 0.00022079 | No      |
|      |       |        |             |          |         | RGD1562037 | 2.63718   | 9.35649  | 1.82697137       | 2.63818      | 9.35749       | 1.8265786        | 0.00022079 | No      |
|      |       |        |             |          |         | RGD1562084 | 0         | 21.9384  | inf              | 0.001        | 21.9394       | 14.4212365       | 0.00022079 | No      |
|      |       |        |             |          |         | RGD1562107 | 0         | 3.47727  | inf              | 0.001        | 3.47827       | 11.7641542       | 0.00022079 | No      |
|      |       |        |             |          |         | RGD1562136 | 12.5291   | 22.8847  | 0.86910059       | 12.5301      | 22.8857       | 0.86904849       | 0.0111498  | No      |
|      |       |        |             |          |         | RGD1562178 | 25.4706   | 67.4335  | 1.40463253       | 25.4716      | 67.4345       | 1.40459729       | 0.00022079 | No      |
|      |       |        |             |          |         | RGD1562200 | 8.27191   | 25.8839  | 1.64576261       | 8.27291      | 25.8849       | 1.64564395       | 0.039861   | No      |
|      |       |        |             |          |         | RGD1562469 | 6371.75   | 2228.45  | -1.5156491       | 6371.751     | 2228.451      | -1.5156487       | 0.00818469 | No      |

| RRBS |       |        |             |          |         | RNAseq     |          |          |                  |              |               |                  |            |         |
|------|-------|--------|-------------|----------|---------|------------|----------|----------|------------------|--------------|---------------|------------------|------------|---------|
| gene | Blood | Kidney | methyl.diff | pMWU.fdr | Match ? | gene       | blood    | kidney   | log2(fold_ratio) | blood+ 0.001 | kidney+ 0.001 | log2(fold_ratio) | q_value    | Match ? |
|      |       |        |             |          |         | RGD1562484 | 3.59276  | 16.1114  | 2.16491739       | 3.59376      | 16.1124       | 2.16460543       | 0.00565535 | No      |
|      |       |        |             |          |         | RGD1562618 | 0        | 11.9926  | inf              | 0.001        | 11.9936       | 13.5499771       | 0.00022079 | No      |
|      |       |        |             |          |         | RGD1562673 | 0        | 1.8722   | inf              | 0.001        | 1.8732        | 10.8712892       | 0.00022079 | No      |
|      |       |        |             |          |         | RGD1562987 | 48.7615  | 113.004  | 1.21255943       | 48.7625      | 113.005       | 1.21254261       | 0.00022079 | No      |
|      |       |        |             |          |         | RGD1563084 | 2.15921  | 6.59944  | 1.61184005       | 2.16021      | 6.60044       | 1.61139063       | 0.00022079 | No      |
|      |       |        |             |          |         | RGD1563150 | 0        | 0.921307 | inf              | 0.001        | 0.922307      | 9.84910324       | 0.00022079 | No      |
|      |       |        |             |          |         | RGD1563231 | 1.10766  | 0        | #NUM!            | 1.10866      | 0.001         | -10.114601       | 0.00451708 | No      |
|      |       |        |             |          |         | RGD1563319 | 0.104334 | 10.0997  | 6.59695925       | 0.105334     | 10.1007       | 6.58334028       | 0.00211842 | No      |
|      |       |        |             |          |         | RGD1563547 | 0.140292 | 203.19   | 10.5001809       | 0.141292     | 203.191       | 10.489941        | 0.0257334  | No      |
|      |       |        |             |          |         | RGD1563888 | 55.9533  | 4.50791  | -3.6336926       | 55.9543      | 4.50891       | -3.6333984       | 0.00022079 | No      |
|      |       |        |             |          |         | RGD1563941 | 7.30012  | 135.957  | 4.21908644       | 7.30112      | 135.958       | 4.21889944       | 0.00022079 | No      |
|      |       |        |             |          |         | RGD1564184 | 2.74135  | 0        | #NUM!            | 2.74235      | 0.001         | -11.421197       | 0.00060553 | No      |
|      |       |        |             |          |         | RGD1564212 | 3.01368  | 0        | #NUM!            | 3.01468      | 0.001         | -11.557789       | 0.00022079 | No      |
|      |       |        |             |          |         | RGD1564379 | 8.18381  | 24.1373  | 1.56041975       | 8.18481      | 24.1383       | 1.56030324       | 0.00022079 | No      |
|      |       |        |             |          |         | RGD1564419 | 0        | 6.01047  | inf              | 0.001        | 6.01147       | 12.5535021       | 0.00022079 | No      |
|      |       |        |             |          |         | RGD1564804 | 5.00165  | 13.972   | 1.48206254       | 5.00265      | 13.973        | 1.48187737       | 0.00508519 | No      |
|      |       |        |             |          |         | RGD1564865 | 0        | 82.087   | inf              | 0.001        | 82.088        | 16.3248837       | 0.00022079 | No      |
|      |       |        |             |          |         | RGD1565059 | 2.08832  | 5.76281  | 1.46442966       | 2.08932      | 5.76381       | 1.46398931       | 0.0201925  | No      |
|      |       |        |             |          |         | RGD1565168 | 0        | 81.2331  | inf              | 0.001        | 81.2341       | 16.3097978       | 0.00022079 | No      |
|      |       |        |             |          |         | RGD1565222 | 3.27728  | 6.3038   | 0.94372283       | 3.27828      | 6.3048        | 0.94351153       | 0.037664   | No      |
|      |       |        |             |          |         | RGD1565252 | 1.40438  | 0        | #NUM!            | 1.40538      | 0.001         | -10.456745       | 0.0019604  | No      |

| RRBS |       |        |             |          |         | RNAseq     |           |          |                  |              |               |                  |            |         |
|------|-------|--------|-------------|----------|---------|------------|-----------|----------|------------------|--------------|---------------|------------------|------------|---------|
| gene | Blood | Kidney | methyl.diff | pMWU.fdr | Match ? | gene       | blood     | kidney   | log2(fold_ratio) | blood+ 0.001 | kidney+ 0.001 | log2(fold_ratio) | q_value    | Match ? |
|      |       |        |             |          |         | RGD1565363 | 319.19    | 586.703  | 0.87821492       | 319.191      | 586.704       | 0.87821285       | 0.0399581  | No      |
|      |       |        |             |          |         | RGD1565498 | 4.84893   | 2.27067  | -1.0945484       | 4.84993      | 2.27167       | -1.0942107       | 0.0408848  | No      |
|      |       |        |             |          |         | RGD1565616 | 16.9753   | 74.4907  | 2.13362325       | 16.9763      | 74.4917       | 2.13355763       | 0.00227055 | No      |
|      |       |        |             |          |         | RGD1565647 | 4.34901   | 1.5698   | -1.4701063       | 4.35001      | 1.5708        | -1.4695192       | 0.00791314 | No      |
|      |       |        |             |          |         | RGD1565660 | 0         | 1.66168  | inf              | 0.001        | 1.66268       | 10.6992948       | 0.0229153  | No      |
|      |       |        |             |          |         | RGD1565775 | 45.6643   | 18.0113  | -1.3421644       | 45.6653      | 18.0123       | -1.3421159       | 0.00147497 | No      |
|      |       |        |             |          |         | RGD1566189 | 0.266174  | 2.27008  | 3.09230158       | 0.267174     | 2.27108       | 3.087527         | 0.0412912  | No      |
|      |       |        |             |          |         | RGD1566243 | 19.5328   | 0.831424 | -4.5541706       | 19.5338      | 0.832424      | -4.5525103       | 0.00022079 | No      |
|      |       |        |             |          |         | RGD1566344 | 465.739   | 242.93   | -0.938981        | 465.74       | 242.931       | -0.9389782       | 0.0365427  | No      |
|      |       |        |             |          |         | RGD1566368 | 0.0895199 | 8.08034  | 6.49606376       | 0.0905199    | 8.08134       | 6.48021573       | 0.00022079 | No      |
|      |       |        |             |          |         | RGD1566386 | 1.40583   | 3.14591  | 1.16205525       | 1.40683      | 3.14691       | 1.16148791       | 0.0345355  | No      |
|      |       |        |             |          |         | Rgmb       | 0.364997  | 6.67706  | 4.19325649       | 0.365997     | 6.67806       | 4.18952533       | 0.00147497 | No      |
|      |       |        |             |          |         | Rgs1       | 72.3464   | 23.601   | -1.6160732       | 72.3474      | 23.602        | -1.6160321       | 0.00022079 | No      |
|      |       |        |             |          |         | Rgs10      | 225.399   | 32.5532  | -2.7916098       | 225.4        | 32.5542       | -2.7915719       | 0.00022079 | No      |
|      |       |        |             |          |         | Rgs11      | 0.0953865 | 2.72133  | 4.83438301       | 0.0963865    | 2.72233       | 4.81986706       | 0.00022079 | No      |
|      |       |        |             |          |         | Rgs14      | 41.7216   | 5.6773   | -2.8775176       | 41.7226      | 5.6783        | -2.8772981       | 0.00022079 | No      |
|      |       |        |             |          |         | Rgs19      | 39.3432   | 7.51721  | -2.3878451       | 39.3442      | 7.51821       | -2.3876899       | 0.00022079 | No      |
|      |       |        |             |          |         | RGS3       | 15.981    | 31.3129  | 0.97039944       | 15.982       | 31.3139       | 0.97035524       | 0.0179279  | No      |
|      |       |        |             |          |         | Rgs5       | 1.02232   | 7.2361   | 2.8233655        | 1.02332      | 7.2371        | 2.82215435       | 0.0250666  | No      |
|      |       |        |             |          |         | RGS6       | 0.0980939 | 3.79628  | 5.27427917       | 0.0990939    | 3.79728       | 5.26002632       | 0.012146   | No      |
|      |       |        |             |          |         | Rhbdd2     | 8.26059   | 17.2936  | 1.06592149       | 8.26159      | 17.2946       | 1.06583028       | 0.0160426  | No      |
|      |       |        |             |          |         | Rhbdf1     | 0.0832995 | 22.3491  | 8.06769318       | 0.0842995    | 22.3501       | 8.0505415        | 0.00022079 | No      |
|      |       |        |             |          |         | Rhbdl2     | 0         | 3.8483   | inf              | 0.001        | 3.8493        | 11.9103804       | 0.00022079 | No      |
|      |       |        |             |          |         | Rhbdl3     | 0.0554058 | 10.6972  | 7.5929805        | 0.0564058    | 10.6982       | 7.56730885       | 0.012146   | No      |
|      |       |        |             |          |         | Rhbg       | 1.27811   | 19.7696  | 3.95119977       | 1.27911      | 19.7706       | 3.95014441       | 0.00022079 | No      |
|      |       |        |             |          |         | Rhebl1     | 11.1557   | 0.714523 | -3.9646568       | 11.1567      | 0.715523      | -3.9627684       | 0.00022079 | No      |
|      |       |        |             |          |         | Rhob       | 45.304    | 190.431  | 2.07155801       | 45.305       | 190.432       | 2.07153374       | 0.00022079 | No      |
|      |       |        |             |          |         | Rhof       | 104.97    | 13.7368  | -2.9338592       | 104.971      | 13.7378       | -2.9337679       | 0.00022079 | No      |
|      |       |        |             |          |         | Rhog       | 223.577   | 62.7044  | -1.8341332       | 223.578      | 62.7054       | -1.8341166       | 0.00022079 | No      |
|      |       |        |             |          |         | Rhoj       | 0         | 2.33578  | inf              | 0.001        | 2.33678       | 11.1903062       | 0.00022079 | No      |
|      |       |        |             |          |         | Rhoq       | 6.39093   | 17.5462  | 1.45706083       | 6.39193      | 17.5472       | 1.45691732       | 0.00273202 | No      |

| RRBS |       |        |             |          |         | RNAseq   |           |          |                  |              |               |                  |            |         |
|------|-------|--------|-------------|----------|---------|----------|-----------|----------|------------------|--------------|---------------|------------------|------------|---------|
| gene | Blood | Kidney | methyl.diff | pMWU.fdr | Match ? | gene     | blood     | kidney   | log2(fold_ratio) | blood+ 0.001 | kidney+ 0.001 | log2(fold_ratio) | q_value    | Match ? |
|      |       |        |             |          |         | Rhov     | 0.159305  | 3.13516  | 4.29867562       | 0.160305     | 3.13616       | 4.29010783       | 0.00658515 | No      |
|      |       |        |             |          |         | Rhpn2    | 0.0674215 | 8.3557   | 6.95340816       | 0.0684215    | 8.3567        | 6.9323398        | 0.0430208  | No      |
|      |       |        |             |          |         | Ribc1    | 1.17165   | 5.01099  | 2.09655399       | 1.17265      | 5.01199       | 2.09561106       | 0.00896558 | No      |
|      |       |        |             |          |         | Rictor   | 24.8663   | 3.59992  | -2.7881551       | 24.8673      | 3.60092       | -2.7878124       | 0.00022079 | No      |
|      |       |        |             |          |         | Rif1     | 13.721    | 4.16132  | -1.7212725       | 13.722       | 4.16232       | -1.721031        | 0.00022079 | No      |
|      |       |        |             |          |         | Rilp     | 0.365148  | 16.5524  | 5.50241528       | 0.366148     | 16.5534       | 5.49855685       | 0.00022079 | No      |
|      |       |        |             |          |         | Rilpl2   | 225.986   | 76.1242  | -1.5698063       | 225.987      | 76.1252       | -1.5697938       | 0.00022079 | No      |
|      |       |        |             |          |         | Rin2     | 0.0934002 | 32.4369  | 8.43999459       | 0.0944002    | 32.4379       | 8.42467479       | 0.00022079 | No      |
|      |       |        |             |          |         | Rin3     | 27.8309   | 11.2206  | -1.3105377       | 27.8319      | 11.2216       | -1.310461        | 0.00022079 | No      |
|      |       |        |             |          |         | Rinl     | 27.7641   | 4.05581  | -2.7751587       | 27.7651      | 4.05681       | -2.774855        | 0.00022079 | No      |
|      |       |        |             |          |         | Riok1    | 27.1176   | 11.4392  | -1.2452433       | 27.1186      | 11.4402       | -1.2451704       | 0.00164037 | No      |
|      |       |        |             |          |         | Ripk2    | 13.9501   | 5.37602  | -1.3756651       | 13.9511      | 5.37702       | -1.3755001       | 0.00041963 | No      |
|      |       |        |             |          |         | Rlf      | 28.4797   | 8.1995   | -1.7963261       | 28.4807      | 8.2005        | -1.7962008       | 0.0105196  | No      |
|      |       |        |             |          |         | Rmdn1    | 2.86308   | 26.7318  | 3.2229171        | 2.86408      | 26.7328       | 3.22246726       | 0.00022079 | No      |
|      |       |        |             |          |         | Rmdn3    | 6.95337   | 13.4429  | 0.95106014       | 6.95437      | 13.4439       | 0.95095999       | 0.0103977  | No      |
|      |       |        |             |          |         | Rmnd5a   | 56.2777   | 31.0511  | -0.857919        | 56.2787      | 31.0521       | -0.8578982       | 0.035709   | No      |
|      |       |        |             |          |         | Rnaseh1  | 19.9471   | 8.35336  | -1.2557505       | 19.9481      | 8.35436       | -1.2556501       | 0.00618779 | No      |
|      |       |        |             |          |         | Rnasek   | 85.0531   | 378.601  | 2.1542425        | 85.0541      | 378.602       | 2.15422934       | 0.00022079 | No      |
|      |       |        |             |          |         | Rnd1     | 0.547268  | 5.65793  | 3.36995492       | 0.548268     | 5.65893       | 3.36757611       | 0.0299071  | No      |
|      |       |        |             |          |         | Rnd3     | 0.0957509 | 15.2415  | 7.31450313       | 0.0967509    | 15.2425       | 7.29960875       | 0.00480115 | No      |
|      |       |        |             |          |         | Rnf103   | 7.60643   | 13.548   | 0.83278849       | 7.60743      | 13.549        | 0.83270532       | 0.0363419  | No      |
|      |       |        |             |          |         | Rnf111   | 30.9689   | 8.25843  | -1.9068807       | 30.9699      | 8.25943       | -1.9067526       | 0.00022079 | No      |
|      |       |        |             |          |         | Rnf113a1 | 6.84126   | 1.2675   | -2.4322763       | 6.84226      | 1.2685        | -2.4313494       | 0.00618779 | No      |
|      |       |        |             |          |         | Rnf115   | 54.0006   | 21.6914  | -1.3158523       | 54.0016      | 21.6924       | -1.3158125       | 0.00078858 | No      |
|      |       |        |             |          |         | RNF125   | 29.688    | 1.06428  | -4.8019302       | 29.689       | 1.06528       | -4.8006239       | 0.00022079 | No      |
|      |       |        |             |          |         | Rnf138   | 23.9235   | 5.8839   | -2.0235838       | 23.9245      | 5.8849        | -2.023399        | 0.00022079 | No      |
|      |       |        |             |          |         | Rnf14    | 90.0878   | 29.4859  | -1.6113065       | 90.0888      | 29.4869       | -1.6112736       | 0.00022079 | No      |
|      |       |        |             |          |         | Rnf145   | 96.1643   | 17.8931  | -2.4260981       | 96.1653      | 17.8941       | -2.4260324       | 0.00022079 | No      |
|      |       |        |             |          |         | Rnf146   | 46.7115   | 15.9871  | -1.5468695       | 46.7125      | 15.9881       | -1.5468102       | 0.00022079 | No      |
|      |       |        |             |          |         | Rnf149   | 40.8577   | 20.1472  | -1.0200286       | 40.8587      | 20.1482       | -1.0199923       | 0.029572   | No      |
|      |       |        |             |          |         | Rnf150   | 0.177748  | 4.91159  | 4.7882849        | 0.178748     | 4.91259       | 4.78048483       | 0.00523184 | No      |
|      |       |        |             |          |         | Rnf157   | 26.2392   | 3.9549   | -2.7300106       | 26.2402      | 3.9559        | -2.7297009       | 0.00022079 | No      |
|      |       |        |             |          |         | Rnf167   | 115.99    | 54.9417  | -1.078027        | 115.991      | 54.9427       | -1.0780132       | 0.00147497 | No      |
|      |       |        |             |          |         | Rnf168   | 10.36     | 4.07165  | -1.3473385       | 10.361       | 4.07265       | -1.3471235       | 0.00060553 | No      |
|      |       |        |             |          |         | Rnf169   | 5.18209   | 0.992411 | -2.3845244       | 5.18309      | 0.993411      | -2.3833498       | 0.00147497 | No      |
|      |       |        |             |          |         | Rnf180   | 0         | 1.33609  | inf              | 0.001        | 1.33709       | 10.3848809       | 0.00022079 | No      |
|      |       |        |             |          |         | Rnf183   | 0         | 27.8743  | inf              | 0.001        | 27.8753       | 14.7666997       | 0.00022079 | No      |
|      |       |        |             |          |         | Rnf185   | 5.61967   | 13.9789  | 1.31469352       | 5.62067      | 13.9799       | 1.31454002       | 0.00060553 | No      |
|      |       |        |             |          |         | Rnf187   | 68.8515   | 112.902  | 0.71351105       | 68.8525      | 112.903       | 0.71350288       | 0.0324948  | No      |
|      |       |        |             |          |         | Rnf19b   | 38.6503   | 13.8169  | -1.4840456       | 38.6513      | 13.8179       | -1.4839786       | 0.00022079 | No      |
|      |       |        |             |          |         | Rnf2     | 31.5475   | 10.8612  | -1.5383422       | 31.5485      | 10.8622       | -1.5382551       | 0.00022079 | No      |
|      |       |        |             |          |         | Rnf20    | 22.0771   | 10.0335  | -1.1377257       | 22.0781      | 10.0345       | -1.1376473       | 0.00060553 | No      |

| RRBS |       |        |             |          |         | RNAseq    |           |         |                  |              |               |                  |            |         |
|------|-------|--------|-------------|----------|---------|-----------|-----------|---------|------------------|--------------|---------------|------------------|------------|---------|
| gene | Blood | Kidney | methyl.diff | pMWU.fdr | Match ? | gene      | blood     | kidney  | log2(fold_ratio) | blood+ 0.001 | kidney+ 0.001 | log2(fold_ratio) | q_value    | Match ? |
|      |       |        |             |          |         | Rnf208    | 1.51331   | 26.5501 | 4.13293784       | 1.51431      | 26.5511       | 4.13203915       | 0.00022079 | No      |
|      |       |        |             |          |         | Rnf213    | 49.9603   | 12.1759 | -2.0367537       | 49.9613      | 12.1769       | -2.0366641       | 0.00022079 | No      |
|      |       |        |             |          |         | Rnf217    | 4.1933    | 12.836  | 1.61403774       | 4.1943       | 12.837        | 1.61380612       | 0.00211842 | No      |
|      |       |        |             |          |         | Rnf219    | 5.1253    | 1.64068 | -1.6433426       | 5.1263       | 1.64168       | -1.642745        | 0.0019604  | No      |
|      |       |        |             |          |         | Rnf220    | 93.2626   | 33.2051 | -1.4898938       | 93.2636      | 33.2061       | -1.4898658       | 0.00022079 | No      |
|      |       |        |             |          |         | Rnf32     | 0.0197557 | 2.42644 | 6.94042841       | 0.0207557    | 2.42744       | 6.86978424       | 0.0329443  | No      |
|      |       |        |             |          |         | Rnf38     | 30.2045   | 10.2403 | -1.5605055       | 30.2055      | 10.2413       | -1.5604124       | 0.00022079 | No      |
|      |       |        |             |          |         | Rnf43     | 1.92935   | 4.95566 | 1.36096233       | 1.93035      | 4.95666       | 1.36050585       | 0.00422081 | No      |
|      |       |        |             |          |         | Rnf44     | 86.4932   | 21.9426 | -1.9788522       | 86.4942      | 21.9436       | -1.9788032       | 0.00022079 | No      |
|      |       |        |             |          |         | Rnft1     | 21.2143   | 7.91527 | -1.4223266       | 21.2153      | 7.91627       | -1.4222124       | 0.0344255  | No      |
|      |       |        |             |          |         | RNMT      | 24.7888   | 6.10656 | -2.0212566       | 24.7898      | 6.10756       | -2.0210786       | 0.00022079 | No      |
|      |       |        |             |          |         | Rnpc3     | 24.9293   | 9.61545 | -1.3744161       | 24.9303      | 9.61645       | -1.3743239       | 0.00242102 | No      |
|      |       |        |             |          |         | Rnpep     | 8.02854   | 49.1862 | 2.61504404       | 8.02954      | 49.1872       | 2.61489369       | 0.00022079 | No      |
|      |       |        |             |          |         | Rnps1     | 148.152   | 69.1884 | -1.098476        | 148.153      | 69.1894       | -1.0984649       | 0.00060553 | No      |
|      |       |        |             |          |         | Robo3     | 0         | 3.33659 | inf              | 0.001        | 3.33759       | 11.704591        | 0.00949299 | No      |
|      |       |        |             |          |         | Rock1     | 35.3482   | 9.83787 | -1.8452189       | 35.3492      | 9.83887       | -1.845113        | 0.00022079 | No      |
|      |       |        |             |          |         | Romo1     | 123.526   | 416.85  | 1.7547136        | 123.527      | 416.851       | 1.75470538       | 0.00022079 | No      |
|      |       |        |             |          |         | RORC      | 1.23704   | 12.4098 | 3.32651581       | 1.23804      | 12.4108       | 3.32546628       | 0.00022079 | No      |
|      |       |        |             |          |         | Rpa2      | 48.0231   | 11.8789 | -2.0153273       | 48.0241      | 11.8799       | -2.0152359       | 0.00022079 | No      |
|      |       |        |             |          |         | Rpl10     | 2887.68   | 835.599 | -1.7890282       | 2887.681     | 835.6         | -1.789027        | 0.00022079 | No      |
|      |       |        |             |          |         | Rpl11     | 3953.9    | 1495.59 | -1.4025617       | 3953.901     | 1495.591      | -1.4025611       | 0.00909283 | No      |
|      |       |        |             |          |         | RPL12     | 3320.97   | 740.19  | -2.1656371       | 3320.971     | 740.191       | -2.1656356       | 0.00022079 | No      |
|      |       |        |             |          |         | Rpl15     | 2816.26   | 636.504 | -2.145539        | 2816.261     | 636.505       | -2.1455373       | 0.00022079 | No      |
|      |       |        |             |          |         | Rpl17     | 5349.09   | 1656.42 | -1.691225        | 5349.091     | 1656.421      | -1.6912243       | 0.011657   | No      |
|      |       |        |             |          |         | Rpl21     | 734.122   | 273.558 | -1.4241731       | 734.123      | 273.559       | -1.4241698       | 0.00022079 | No      |
|      |       |        |             |          |         | Rpl22     | 1558.6    | 669.662 | -1.2187457       | 1558.601     | 669.663       | -1.2187445       | 0.00685176 | No      |
|      |       |        |             |          |         | Rpl22l1   | 371.944   | 152.61  | -1.2852359       | 371.945      | 152.611       | -1.2852304       | 0.00113657 | No      |
|      |       |        |             |          |         | Rpl23     | 5991.67   | 1296.97 | -2.2078131       | 5991.671     | 1296.971      | -2.2078122       | 0.00041963 | No      |
|      |       |        |             |          |         | Rpl23a    | 4842.74   | 1669.89 | -1.5360705       | 4842.741     | 1669.891      | -1.5360699       | 0.00658515 | No      |
|      |       |        |             |          |         | Rpl24     | 4545.88   | 1417.92 | -1.6807835       | 4545.881     | 1417.921      | -1.6807828       | 0.00257873 | No      |
|      |       |        |             |          |         | RPL26     | 7364.72   | 2438.72 | -1.5945066       | 7364.721     | 2438.721      | -1.5945062       | 0.00645389 | No      |
|      |       |        |             |          |         | Rpl27     | 3411.63   | 1231.75 | -1.4697517       | 3411.631     | 1231.751      | -1.469751        | 0.00318754 | No      |
|      |       |        |             |          |         | Rpl27a    | 2365.82   | 787.43  | -1.5871167       | 2365.821     | 787.431       | -1.5871155       | 0.0102697  | No      |
|      |       |        |             |          |         | Rpl29     | 3292.76   | 1514.92 | -1.1200558       | 3292.761     | 1514.921      | -1.1200552       | 0.0274201  | No      |
|      |       |        |             |          |         | Rpl3      | 2672.42   | 782.581 | -1.7718348       | 2672.421     | 782.582       | -1.7718335       | 0.00257873 | No      |
|      |       |        |             |          |         | Rpl30     | 6642.4    | 1746.03 | -1.9276263       | 6642.401     | 1746.031      | -1.9276256       | 0.00060553 | No      |
|      |       |        |             |          |         | Rpl31     | 2858.64   | 534.933 | -2.4178988       | 2858.641     | 534.934       | -2.4178966       | 0.00022079 | No      |
|      |       |        |             |          |         | Rpl32     | 6571.18   | 2135.1  | -1.6218488       | 6571.181     | 2135.101      | -1.6218484       | 0.00949299 | No      |
|      |       |        |             |          |         | Rpl32-ps1 | 19.661    | 5.62783 | -1.804686        | 19.662       | 5.62883       | -1.8045031       | 0.0162859  | No      |
|      |       |        |             |          |         | Rpl34     | 4356.52   | 1848.03 | -1.237188        | 4356.521     | 1848.031      | -1.2371875       | 0.0261671  | No      |
|      |       |        |             |          |         | Rpl35a    | 1526.26   | 291.166 | -2.3900869       | 1526.261     | 291.167       | -2.3900829       | 0.00022079 | No      |
|      |       |        |             |          |         | Rpl36a    | 3016.67   | 836.31  | -1.8508472       | 3016.671     | 836.311       | -1.8508459       | 0.00096553 | No      |

| RRBS |       |        |             |          |         | RNAseq    |           |          |                  |              |               |                  |            |         |
|------|-------|--------|-------------|----------|---------|-----------|-----------|----------|------------------|--------------|---------------|------------------|------------|---------|
| gene | Blood | Kidney | methyl.diff | pMWU.fdr | Match ? | gene      | blood     | kidney   | log2(fold_ratio) | blood+ 0.001 | kidney+ 0.001 | log2(fold_ratio) | q_value    | Match ? |
|      |       |        |             |          |         | Rpl36-ps3 | 46.3327   | 12.1248  | -1.9340698       | 46.3337      | 12.1258       | -1.933982        | 0.00242102 | No      |
|      |       |        |             |          |         | Rpl37     | 4387      | 2017.88  | -1.1203943       | 4387.001     | 2017.881      | -1.1203939       | 0.0364343  | No      |
|      |       |        |             |          |         | RPL37A    | 5480.13   | 2118.82  | -1.3709491       | 5480.131     | 2118.821      | -1.3709487       | 0.0253888  | No      |
|      |       |        |             |          |         | Rpl39     | 6374.87   | 1890.92  | -1.7533076       | 6374.871     | 1890.921      | -1.7533071       | 0.00022079 | No      |
|      |       |        |             |          |         | Rpl4      | 3162.24   | 815.303  | -1.9555386       | 3162.241     | 815.304       | -1.9555373       | 0.00227055 | No      |
|      |       |        |             |          |         | Rpl7      | 4515.91   | 1220.12  | -1.8879937       | 4515.911     | 1220.121      | -1.8879928       | 0.00041963 | No      |
|      |       |        |             |          |         | Rpl8      | 378.346   | 137.818  | -1.4569419       | 378.347      | 137.819       | -1.4569352       | 0.00147497 | No      |
|      |       |        |             |          |         | Rpl9      | 5030.49   | 1671.5   | -1.5895556       | 5030.491     | 1671.501      | -1.589555        | 0.0164052  | No      |
|      |       |        |             |          |         | Rpp40     | 34.3318   | 14.4921  | -1.2442788       | 34.3328      | 14.4931       | -1.2442213       | 0.00164037 | No      |
|      |       |        |             |          |         | Rprd1b    | 5.52946   | 9.64719  | 0.80297018       | 5.53046      | 9.64819       | 0.80285884       | 0.0440196  | No      |
|      |       |        |             |          |         | Rprd2     | 24.2356   | 2.96857  | -3.0292878       | 24.2366      | 2.96957       | -3.0288614       | 0.00022079 | No      |
|      |       |        |             |          |         | Rps13     | 5097.75   | 1247.22  | -2.0311447       | 5097.751     | 1247.221      | -2.0311438       | 0.00022079 | No      |
|      |       |        |             |          |         | Rps14     | 3954.39   | 1257.01  | -1.653459        | 3954.391     | 1257.011      | -1.6534583       | 0.00022079 | No      |
|      |       |        |             |          |         | Rps15a    | 5427.45   | 1678.87  | -1.692784        | 5427.451     | 1678.871      | -1.6927834       | 0.00407863 | No      |
|      |       |        |             |          |         | Rps15a14  | 49.1213   | 14.0325  | -1.8075767       | 49.1223      | 14.0335       | -1.8075032       | 0.00288641 | No      |
|      |       |        |             |          |         | Rps16     | 5471.57   | 1646.65  | -1.7324209       | 5471.571     | 1646.651      | -1.7324203       | 0.0259566  | No      |
|      |       |        |             |          |         | Rps18     | 7948.62   | 2179.8   | -1.8665086       | 7948.621     | 2179.801      | -1.8665082       | 0.0153152  | No      |
|      |       |        |             |          |         | Rps19bp1  | 62.3655   | 117.849  | 0.91811945       | 62.3665      | 117.85        | 0.91810856       | 0.0246183  | No      |
|      |       |        |             |          |         | Rps2      | 2896.22   | 900.249  | -1.6857752       | 2896.221     | 900.25        | -1.6857741       | 0.00096553 | No      |
|      |       |        |             |          |         | Rps20     | 3420.58   | 1329.24  | -1.3636394       | 3420.581     | 1329.241      | -1.3636387       | 0.00180113 | No      |
|      |       |        |             |          |         | Rps21     | 4223.48   | 1696.52  | -1.3158538       | 4223.481     | 1696.521      | -1.3158533       | 0.00922576 | No      |
|      |       |        |             |          |         | Rps23     | 6668.71   | 1752.16  | -1.9282732       | 6668.711     | 1752.161      | -1.9282726       | 0.0019604  | No      |
|      |       |        |             |          |         | Rps24     | 8719.26   | 2624.66  | -1.7320752       | 8719.261     | 2624.661      | -1.7320748       | 0.00765035 | No      |
|      |       |        |             |          |         | Rps25     | 3642.26   | 869.696  | -2.0662508       | 3642.261     | 869.697       | -2.0662495       | 0.00022079 | No      |
|      |       |        |             |          |         | Rps26     | 4718.69   | 1850.49  | -1.3504791       | 4718.691     | 1850.491      | -1.3504786       | 0.0072515  | No      |
|      |       |        |             |          |         | Rps27     | 14713.2   | 4241.7   | -1.7943966       | 14713.201    | 4241.701      | -1.7943963       | 0.0019604  | No      |
|      |       |        |             |          |         | Rps27a    | 4879.46   | 1326     | -1.8796407       | 4879.461     | 1326.001      | -1.8796399       | 0.00078858 | No      |
|      |       |        |             |          |         | Rps27l    | 83.2348   | 226.95   | 1.44711575       | 83.2358      | 226.951       | 1.44710477       | 0.00022079 | No      |
|      |       |        |             |          |         | Rps27l3   | 183.745   | 77.3321  | -1.2485657       | 183.746      | 77.3331       | -1.2485549       | 0.00378481 | No      |
|      |       |        |             |          |         | RPS2-PS6  | 5.57415   | 0.973892 | -2.5169181       | 5.57515      | 0.974892      | -2.5156963       | 0.0342245  | No      |
|      |       |        |             |          |         | Rps3      | 4559.33   | 1110.73  | -2.0373137       | 4559.331     | 1110.731      | -2.0373127       | 0.00078858 | No      |
|      |       |        |             |          |         | Rps3a     | 4862.33   | 948.154  | -2.3584545       | 4862.331     | 948.155       | -2.3584533       | 0.00060553 | No      |
|      |       |        |             |          |         | Rps4x     | 451.934   | 154.495  | -1.548552        | 451.935      | 154.496       | -1.5485458       | 0.00022079 | No      |
|      |       |        |             |          |         | RPS5      | 3020.35   | 1095.53  | -1.4630867       | 3020.351     | 1095.531      | -1.4630859       | 0.00658515 | No      |
|      |       |        |             |          |         | RPS6      | 842.404   | 221.685  | -1.9260011       | 842.405      | 221.686       | -1.9259963       | 0.00022079 | No      |
|      |       |        |             |          |         | Rps6ka1   | 95.1984   | 43.466   | -1.13105         | 95.1994      | 43.467        | -1.131032        | 0.00508519 | No      |
|      |       |        |             |          |         | Rps6ka4   | 4.51121   | 16.0182  | 1.82812569       | 4.51221      | 16.0192       | 1.82789598       | 0.00022079 | No      |
|      |       |        |             |          |         | Rps6kb1   | 23.6724   | 10.7458  | -1.1394331       | 23.6734      | 10.7468       | -1.1393598       | 0.0431196  | No      |
|      |       |        |             |          |         | Rps6kl1   | 0.0340064 | 2.58418  | 6.24775647       | 0.0350064    | 2.58518       | 6.20650222       | 0.0183813  | No      |
|      |       |        |             |          |         | RPS7      | 420.038   | 91.1452  | -2.2042813       | 420.039      | 91.1462       | -2.2042689       | 0.00022079 | No      |
|      |       |        |             |          |         | Rps8      | 3607.47   | 926.196  | -1.961598        | 3607.471     | 926.197       | -1.9615968       | 0.00022079 | No      |
|      |       |        |             |          |         | Rptor     | 3.03603   | 5.62426  | 0.88947724       | 3.03703      | 5.62526       | 0.88925862       | 0.0172336  | No      |



| RRBS |       |        |             |          |         | RNAseq   |           |          |                  |              |               |                  |            |         |
|------|-------|--------|-------------|----------|---------|----------|-----------|----------|------------------|--------------|---------------|------------------|------------|---------|
| gene | Blood | Kidney | methyl.diff | pMWU.fdr | Match ? | gene     | blood     | kidney   | log2(fold_ratio) | blood+ 0.001 | kidney+ 0.001 | log2(fold_ratio) | q_value    | Match ? |
|      |       |        |             |          |         | Rqcd1    | 20.7822   | 9.09305  | -1.1925122       | 20.7832      | 9.09405       | -1.192423        | 0.00022079 | No      |
|      |       |        |             |          |         | Rragd    | 2.8835    | 29.4304  | 3.35141422       | 2.8845       | 29.4314       | 3.350963         | 0.00022079 | No      |
|      |       |        |             |          |         | Rras2    | 76.4425   | 38.2139  | -1.0002775       | 76.4435      | 38.2149       | -1.0002586       | 0.0019604  | No      |
|      |       |        |             |          |         | Rrbp1    | 14.2667   | 36.474   | 1.35421676       | 14.2677      | 36.475        | 1.35415519       | 0.00022079 | No      |
|      |       |        |             |          |         | Rrm2     | 1.52133   | 3.21657  | 1.08018996       | 1.52233      | 3.21757       | 1.07969041       | 0.0475969  | No      |
|      |       |        |             |          |         | Rrp12    | 13.4932   | 4.39063  | -1.6197327       | 13.4942      | 4.39163       | -1.619511        | 0.00022079 | No      |
|      |       |        |             |          |         | Rrp1b    | 8.36615   | 4.80311  | -0.800595        | 8.36715      | 4.80411       | -0.8004671       | 0.030773   | No      |
|      |       |        |             |          |         | Rrs1     | 15.8642   | 7.39886  | -1.1003999       | 15.8652      | 7.39986       | -1.1002958       | 0.0213411  | No      |
|      |       |        |             |          |         | Rsad2    | 0.48249   | 2.40013  | 2.3145416        | 0.48349      | 2.40113       | 2.31215556       | 0.00273202 | No      |
|      |       |        |             |          |         | Rsb1     | 22.8336   | 3.51175  | -2.7008963       | 22.8346      | 3.51275       | -2.7005487       | 0.00022079 | No      |
|      |       |        |             |          |         | Rsb1l    | 29.263    | 5.06213  | -2.5312612       | 29.264       | 5.06313       | -2.5310255       | 0.00022079 | No      |
|      |       |        |             |          |         | Rsf1     | 18.2735   | 5.7477   | -1.6686963       | 18.2745      | 5.7487        | -1.6685243       | 0.00022079 | No      |
|      |       |        |             |          |         | Rsl24d1  | 44.0731   | 25.6174  | -0.7827743       | 44.0741      | 25.6184       | -0.7827507       | 0.0230222  | No      |
|      |       |        |             |          |         | Rsph3    | 1.12828   | 4.60487  | 2.02903529       | 1.12928      | 4.60587       | 2.02807045       | 0.00791314 | No      |
|      |       |        |             |          |         | Rsrc2    | 63.7579   | 34.662   | -0.8792492       | 63.7589      | 34.663        | -0.8792302       | 0.00711928 | No      |
|      |       |        |             |          |         | RT1-A3   | 178.87    | 51.9183  | -1.7845964       | 178.871      | 51.9193       | -1.7845767       | 0.00022079 | No      |
|      |       |        |             |          |         | RT1-Ba   | 12.5063   | 26.0042  | 1.05608963       | 12.5073      | 26.0052       | 1.05602975       | 0.020304   | No      |
|      |       |        |             |          |         | RT1-CE1  | 578.338   | 134.901  | -2.1000119       | 578.339      | 134.902       | -2.1000037       | 0.00022079 | No      |
|      |       |        |             |          |         | RT1-Da   | 37.9687   | 121.34   | 1.67617271       | 37.9697      | 121.341       | 1.6761466        | 0.00022079 | No      |
|      |       |        |             |          |         | RT1-Db1  | 8.14085   | 35.4189  | 2.12126807       | 8.14185      | 35.4199       | 2.12113159       | 0.00130998 | No      |
|      |       |        |             |          |         | RT1-DOb  | 17.9692   | 0.810911 | -4.4698388       | 17.9702      | 0.811911      | -4.4681411       | 0.00022079 | No      |
|      |       |        |             |          |         | RT1-M3-1 | 58.3678   | 12.4228  | -2.2321823       | 58.3688      | 12.4238       | -2.2320909       | 0.00022079 | No      |
|      |       |        |             |          |         | RT1-N3   | 78.3464   | 17.1635  | -2.1905232       | 78.3474      | 17.1645       | -2.1904576       | 0.00632443 | No      |
|      |       |        |             |          |         | RT1-S3   | 105.517   | 18.525   | -2.50993         | 105.518      | 18.526        | -2.5098658       | 0.00242102 | No      |
|      |       |        |             |          |         | Rtcd1    | 15.4706   | 37.0342  | 1.25932902       | 15.4716      | 37.0352       | 1.25927473       | 0.00078858 | No      |
|      |       |        |             |          |         | RTN1     | 0         | 2.12826  | inf              | 0.001        | 2.12926       | 11.0561364       | 0.00022079 | No      |
|      |       |        |             |          |         | Rtn4     | 36.9583   | 155.554  | 2.07344519       | 36.9593      | 155.555       | 2.07341543       | 0.00022079 | No      |
|      |       |        |             |          |         | Rtn4ip1  | 3.91098   | 11.0396  | 1.49708584       | 3.91198      | 11.0406       | 1.49684768       | 0.0221192  | No      |
|      |       |        |             |          |         | Rtn4r    | 0         | 2.99827  | inf              | 0.001        | 2.99927       | 11.5503957       | 0.00022079 | No      |
|      |       |        |             |          |         | Rttn     | 3.625     | 1.52509  | -1.2490866       | 3.626        | 1.52609       | -1.2485389       | 0.0476819  | No      |
|      |       |        |             |          |         | Rufy3    | 8.47173   | 15.5777  | 0.87875372       | 8.47273      | 15.5787       | 0.87867605       | 0.0189519  | No      |
|      |       |        |             |          |         | Rusc2    | 0.0723951 | 1.8004   | 4.63628161       | 0.0733951    | 1.8014        | 4.61729101       | 0.00147497 | No      |
|      |       |        |             |          |         | Rwdd2a   | 0.690008  | 9.6479   | 3.80552996       | 0.691008     | 9.6489        | 3.80359016       | 0.00022079 | No      |
|      |       |        |             |          |         | Rwdd2b   | 3.01035   | 7.95418  | 1.40178198       | 3.01135      | 7.95518       | 1.40148418       | 0.0102697  | No      |
|      |       |        |             |          |         | Rxrg     | 0.14559   | 5.16336  | 5.14832702       | 0.14659      | 5.16436       | 5.13873098       | 0.0180483  | No      |
|      |       |        |             |          |         | Ryk      | 11.9198   | 25.324   | 1.08714527       | 11.9208      | 25.325        | 1.08708121       | 0.00318754 | No      |
|      |       |        |             |          |         | S100a11  | 30.8511   | 2195.06  | 6.15279464       | 30.8521      | 2195.061      | 6.15274853       | 0.00022079 | No      |
|      |       |        |             |          |         | S100a4   | 82.8835   | 271.317  | 1.71082261       | 82.8845      | 271.318       | 1.71081053       | 0.00022079 | No      |
|      |       |        |             |          |         | S100a5   | 0         | 3.9973   | inf              | 0.001        | 3.9983        | 11.965171        | 0.00022079 | No      |
|      |       |        |             |          |         | S100a6   | 41.6696   | 1311.17  | 4.97571569       | 41.6706      | 1311.171      | 4.97568217       | 0.00022079 | No      |
|      |       |        |             |          |         | S100a9   | 15.6018   | 5.96353  | -1.387474        | 15.6028      | 5.96453       | -1.3873246       | 0.0486226  | No      |
|      |       |        |             |          |         | S100pbp  | 26.6054   | 7.0481   | -1.9164128       | 26.6064      | 7.0491        | -1.9162623       | 0.00022079 | No      |

| RRBS |       |        |             |          |         | RNAseq |           |          |                  |              |               |                  |            |         |
|------|-------|--------|-------------|----------|---------|--------|-----------|----------|------------------|--------------|---------------|------------------|------------|---------|
| gene | Blood | Kidney | methyl.diff | pMWU.fdr | Match ? | gene   | blood     | kidney   | log2(fold_ratio) | blood+ 0.001 | kidney+ 0.001 | log2(fold_ratio) | q_value    | Match ? |
|      |       |        |             |          |         | S1pr1  | 494.213   | 13.3171  | -5.2137811       | 494.214      | 13.3181       | -5.2136757       | 0.00022079 | No      |
|      |       |        |             |          |         | Sacm1l | 13.134    | 26.4465  | 1.00977044       | 13.135       | 26.4475       | 1.00971515       | 0.00392909 | No      |
|      |       |        |             |          |         | Sacs   | 6.14053   | 0.486895 | -3.6566806       | 6.14153      | 0.487895      | -3.6539555       | 0.0243977  | No      |
|      |       |        |             |          |         | Safb   | 76.8251   | 40.5307  | -0.9225626       | 76.8261      | 40.5317       | -0.9225458       | 0.0165181  | No      |
|      |       |        |             |          |         | Samd10 | 1.48056   | 8.25951  | 2.47991324       | 1.48156      | 8.26051       | 2.4791138        | 0.0471951  | No      |
|      |       |        |             |          |         | SAMD11 | 0.210424  | 5.03642  | 4.58102743       | 0.211424     | 5.03742       | 4.57447396       | 0.0211214  | No      |
|      |       |        |             |          |         | Samd5  | 0         | 3.30854  | inf              | 0.001        | 3.30954       | 11.692415        | 0.00022079 | No      |
|      |       |        |             |          |         | Samd9l | 47.9339   | 16.4275  | -1.5449334       | 47.9349      | 16.4285       | -1.5448757       | 0.0122712  | No      |
|      |       |        |             |          |         | Samhd1 | 71.9388   | 6.68228  | -3.4283578       | 71.9398      | 6.68328       | -3.4281619       | 0.00022079 | No      |
|      |       |        |             |          |         | Samm50 | 49.8216   | 168.585  | 1.75863292       | 49.8226      | 168.586       | 1.75861252       | 0.00022079 | No      |
|      |       |        |             |          |         | Sap30  | 17.225    | 8.25879  | -1.0605017       | 17.226       | 8.25979       | -1.0604107       | 0.0220188  | No      |
|      |       |        |             |          |         | Sar1b  | 22.7994   | 49.5534  | 1.11998819       | 22.8004      | 49.5544       | 1.11995403       | 0.0282852  | No      |
|      |       |        |             |          |         | SARG   | 0.138554  | 26.9193  | 7.60204872       | 0.139554     | 26.9203       | 7.5917272        | 0.00022079 | No      |
|      |       |        |             |          |         | Sart3  | 26.1611   | 12.8525  | -1.0253742       | 26.1621      | 12.8535       | -1.0253171       | 0.00805135 | No      |
|      |       |        |             |          |         | Sash3  | 172.573   | 7.61887  | -4.5014859       | 172.574      | 7.61987       | -4.5013049       | 0.00022079 | No      |
|      |       |        |             |          |         | Sat1   | 87.6468   | 518.412  | 2.56432579       | 87.6478      | 518.413       | 2.56431211       | 0.00022079 | No      |
|      |       |        |             |          |         | Satb1  | 362.229   | 6.11352  | -5.888755        | 362.23       | 6.11452       | -5.888523        | 0.00022079 | No      |
|      |       |        |             |          |         | Sav1   | 3.53721   | 26.081   | 2.88231541       | 3.53821      | 26.082        | 2.88196292       | 0.00022079 | No      |
|      |       |        |             |          |         | Saysd1 | 6.15884   | 22.9276  | 1.89635479       | 6.15984      | 22.9286       | 1.89618348       | 0.00363736 | No      |
|      |       |        |             |          |         | Sbds   | 29.0939   | 66.0924  | 1.18376768       | 29.0949      | 66.0934       | 1.18373993       | 0.00113657 | No      |
|      |       |        |             |          |         | Sbk1   | 7.34948   | 3.19404  | -1.2022598       | 7.35048      | 3.19504       | -1.2020045       | 0.00227055 | No      |
|      |       |        |             |          |         | Sbno1  | 46.2366   | 14.6008  | -1.6629879       | 46.2376      | 14.6018       | -1.6629203       | 0.00022079 | No      |
|      |       |        |             |          |         | Scaf8  | 32.0214   | 12.997   | -1.3008577       | 32.0224      | 12.998        | -1.3007918       | 0.00078858 | No      |
|      |       |        |             |          |         | SCAI   | 7.91895   | 1.85657  | -2.0926694       | 7.91995      | 1.85757       | -2.0920747       | 0.00022079 | No      |
|      |       |        |             |          |         | Scamp1 | 4.35341   | 22.1744  | 2.34867727       | 4.35441      | 22.1754       | 2.34841097       | 0.00022079 | No      |
|      |       |        |             |          |         | SCCPDH | 2.05906   | 33.9749  | 4.04441153       | 2.06006      | 33.9759       | 4.04375351       | 0.00698733 | No      |
|      |       |        |             |          |         | Scd    | 56.7288   | 15.6876  | -1.8544567       | 56.7298      | 15.6886       | -1.8543902       | 0.00022079 | No      |
|      |       |        |             |          |         | Schip1 | 0.0546962 | 20.3515  | 8.53947881       | 0.0556962    | 20.3525       | 8.5134114        | 0.00060553 | No      |
|      |       |        |             |          |         | Scly   | 3.41628   | 71.0585  | 4.37850911       | 3.41728      | 71.0595       | 4.37810717       | 0.00022079 | No      |
|      |       |        |             |          |         | Scml4  | 74.4636   | 2.66013  | -4.8069667       | 74.4646      | 2.66113       | -4.8064438       | 0.00022079 | No      |
|      |       |        |             |          |         | Scnm1  | 12.9648   | 82.995   | 2.67842447       | 12.9658      | 82.996        | 2.67833058       | 0.00658515 | No      |
|      |       |        |             |          |         | Scnn1g | 0         | 4.9912   | inf              | 0.001        | 4.9922        | 12.28546         | 0.00022079 | No      |
|      |       |        |             |          |         | Scoc   | 15.8864   | 32.1748  | 1.01813895       | 15.8874      | 32.1758       | 1.01809297       | 0.00288641 | No      |
|      |       |        |             |          |         | Scp2   | 44.0622   | 88.209   | 1.00138433       | 44.0632      | 88.21         | 1.00136795       | 0.0019604  | No      |
|      |       |        |             |          |         | Scrn2  | 6.79531   | 15.7731  | 1.21485496       | 6.79631      | 15.7741       | 1.21473413       | 0.0239545  | No      |
|      |       |        |             |          |         | Scrn3  | 3.05289   | 9.00201  | 1.56007156       | 3.05389      | 9.00301       | 1.55975932       | 0.00060553 | No      |
|      |       |        |             |          |         | Sctr   | 0         | 8.0504   | inf              | 0.001        | 8.0514        | 12.9750239       | 0.00022079 | No      |
|      |       |        |             |          |         | Scyl3  | 21.085    | 7.59667  | -1.472778        | 21.086       | 7.59767       | -1.4726565       | 0.00041963 | No      |
|      |       |        |             |          |         | Sdad1  | 13.9992   | 4.28461  | -1.7081086       | 14.0002      | 4.28561       | -1.707875        | 0.00022079 | No      |
|      |       |        |             |          |         | Sdc1   | 0.108752  | 13.132   | 6.91590091       | 0.109752     | 13.133        | 6.90280547       | 0.00227055 | No      |
|      |       |        |             |          |         | Sdc2   | 0         | 141.524  | inf              | 0.001        | 141.525       | 17.1106974       | 0.00022079 | No      |
|      |       |        |             |          |         | SDC3   | 0.505161  | 3.5503   | 2.81312577       | 0.506161     | 3.5513        | 2.81067898       | 0.00130998 | No      |

| RRBS |       |        |             |          |         | RNAseq   |           |          |                  |              |               |                  |            |         |
|------|-------|--------|-------------|----------|---------|----------|-----------|----------|------------------|--------------|---------------|------------------|------------|---------|
| gene | Blood | Kidney | methyl.diff | pMWU.fdr | Match ? | gene     | blood     | kidney   | log2(fold_ratio) | blood+ 0.001 | kidney+ 0.001 | log2(fold_ratio) | q_value    | Match ? |
|      |       |        |             |          |         | Sdcbp    | 72.4548   | 138.098  | 0.93053925       | 72.4558      | 138.099       | 0.93052979       | 0.00658515 | No      |
|      |       |        |             |          |         | Sde2     | 21.4473   | 8.36029  | -1.3591711       | 21.4483      | 8.36129       | -1.3590659       | 0.00022079 | No      |
|      |       |        |             |          |         | Sdha     | 67.8492   | 196.555  | 1.53452935       | 67.8502      | 196.556       | 1.53451543       | 0.00022079 | No      |
|      |       |        |             |          |         | Sdhaf2   | 16.1326   | 66.7539  | 2.04887316       | 16.1336      | 66.7549       | 2.04880535       | 0.0448987  | No      |
|      |       |        |             |          |         | Sdhc     | 72.555    | 370.314  | 2.35160215       | 72.556       | 370.315       | 2.35158616       | 0.00022079 | No      |
|      |       |        |             |          |         | Sdhd     | 72.1183   | 251.578  | 1.80256847       | 72.1193      | 251.579       | 1.8025542        | 0.00022079 | No      |
|      |       |        |             |          |         | Sdpr     | 0         | 10.7192  | inf              | 0.001        | 10.7202       | 13.3880442       | 0.00022079 | No      |
|      |       |        |             |          |         | Sec11c   | 27.7324   | 52.0147  | 0.90734693       | 27.7334      | 52.0157       | 0.90732264       | 0.0283842  | No      |
|      |       |        |             |          |         | Sec14l1  | 8.28003   | 30.873   | 1.89863778       | 8.28103      | 30.874        | 1.89851028       | 0.00022079 | No      |
|      |       |        |             |          |         | Sec14l2  | 6.16654   | 2.46097  | -1.3252342       | 6.16754      | 2.46197       | -1.324882        | 0.0137492  | No      |
|      |       |        |             |          |         | Sec16b   | 0.151871  | 2.33986  | 3.9455039        | 0.152871     | 2.34086       | 3.936652         | 0.00422081 | No      |
|      |       |        |             |          |         | Sec22a   | 5.74123   | 14.6752  | 1.35394841       | 5.74223      | 14.6762       | 1.35379545       | 0.00494367 | No      |
|      |       |        |             |          |         | Sec24b   | 24.0002   | 9.81128  | -1.2905332       | 24.0012      | 9.81228       | -1.2904462       | 0.00113657 | No      |
|      |       |        |             |          |         | Sec24d   | 2.64725   | 10.6811  | 2.01249388       | 2.64825      | 10.6821       | 2.01208407       | 0.00022079 | No      |
|      |       |        |             |          |         | Sec31b   | 2.77119   | 0.168419 | -4.0403788       | 2.77219      | 0.169419      | -4.0323586       | 0.00096553 | No      |
|      |       |        |             |          |         | Sec61b   | 103.232   | 209.529  | 1.02125969       | 103.233      | 209.53        | 1.0212526        | 0.00333723 | No      |
|      |       |        |             |          |         | Sec62    | 37.8267   | 95.0267  | 1.32892801       | 37.8277      | 95.0277       | 1.32890505       | 0.00022079 | No      |
|      |       |        |             |          |         | Sectm1b  | 0.561684  | 25.7001  | 5.51587146       | 0.562684     | 25.7011       | 5.51336136       | 0.0019604  | No      |
|      |       |        |             |          |         | Sel1l3   | 0         | 1.87107  | inf              | 0.001        | 1.87207       | 10.8704187       | 0.00022079 | No      |
|      |       |        |             |          |         | Selenbp1 | 0         | 26.7224  | inf              | 0.001        | 26.7234       | 14.705816        | 0.00022079 | No      |
|      |       |        |             |          |         | Sell     | 841.335   | 7.44889  | -6.8195111       | 841.336      | 7.44989       | -6.8193191       | 0.00022079 | No      |
|      |       |        |             |          |         | Selp     | 2.04823   | 0.412534 | -2.3117928       | 2.04923      | 0.413534      | -2.3090041       | 0.0332704  | No      |
|      |       |        |             |          |         | Selplg   | 82.5372   | 5.25431  | -3.9734713       | 82.5382      | 5.25531       | -3.9732142       | 0.00022079 | No      |
|      |       |        |             |          |         | Selrc1   | 1.45076   | 3.63869  | 1.32661027       | 1.45176      | 3.63969       | 1.32601261       | 0.0128843  | No      |
|      |       |        |             |          |         | Sema3c   | 0         | 23.3794  | inf              | 0.001        | 23.3804       | 14.513012        | 0.00022079 | No      |
|      |       |        |             |          |         | Sema3d   | 0         | 1.18301  | inf              | 0.001        | 1.18401       | 10.2094656       | 0.00022079 | No      |
|      |       |        |             |          |         | Sema3f   | 0.273811  | 8.45251  | 4.94812751       | 0.274811     | 8.45351       | 4.94303883       | 0.00022079 | No      |
|      |       |        |             |          |         | Sema3g   | 0.249892  | 6.67961  | 4.74038725       | 0.250892     | 6.68061       | 4.73484147       | 0.00164037 | No      |
|      |       |        |             |          |         | Sema4c   | 0.0549662 | 1.2996   | 4.56337909       | 0.0559662    | 1.3006        | 4.53847772       | 0.00752743 | No      |
|      |       |        |             |          |         | Sema4d   | 57.4203   | 9.26337  | -2.6319518       | 57.4213      | 9.26437       | -2.6318212       | 0.00022079 | No      |
|      |       |        |             |          |         | Sema4f   | 0.72116   | 2.35088  | 1.70480962       | 0.72216      | 2.35188       | 1.70342403       | 0.0153152  | No      |
|      |       |        |             |          |         | Sema4g   | 0.554621  | 3.88377  | 2.80788362       | 0.555621     | 3.88477       | 2.80565615       | 0.00164037 | No      |
|      |       |        |             |          |         | Sema6c   | 0.161365  | 1.15737  | 2.84245056       | 0.162365     | 1.15837       | 2.83478357       | 0.00593001 | No      |
|      |       |        |             |          |         | Sema7a   | 1.95975   | 25.2429  | 3.68713613       | 1.96075      | 25.2439       | 3.68645731       | 0.00022079 | No      |
|      |       |        |             |          |         | Senp6    | 55.6649   | 23.7924  | -1.2262671       | 55.6659      | 23.7934       | -1.2262324       | 0.00078858 | No      |
|      |       |        |             |          |         | Senp7    | 20.3692   | 4.32212  | -2.2365783       | 20.3702      | 4.32312       | -2.2363154       | 0.00022079 | No      |
|      |       |        |             |          |         | Senp8    | 1.22354   | 4.53425  | 1.88980267       | 1.22454      | 4.53525       | 1.88894218       | 0.0127657  | No      |
|      |       |        |             |          |         | Sephs2   | 22.9809   | 37.8988  | 0.72171687       | 22.9819      | 37.8998       | 0.72169216       | 0.028703   | No      |
|      |       |        |             |          |         | Sepr1    | 0.556564  | 7.53715  | 3.75939961       | 0.557564     | 7.53815       | 3.75700118       | 0.00523184 | No      |
|      |       |        |             |          |         | SERBP1   | 279.777   | 90.8319  | -1.6230064       | 279.778      | 90.8329       | -1.6229957       | 0.00022079 | No      |
|      |       |        |             |          |         | Serf1    | 1.91284   | 48.0841  | 4.65177181       | 1.91384      | 48.0851       | 4.65104779       | 0.00113657 | No      |
|      |       |        |             |          |         | Sergef   | 13.417    | 29.9619  | 1.15906699       | 13.418       | 29.9629       | 1.15900761       | 0.0248413  | No      |

| RRBS |       |        |             |          |         | RNAseq    |           |          |                  |              |               |                  |            |         |
|------|-------|--------|-------------|----------|---------|-----------|-----------|----------|------------------|--------------|---------------|------------------|------------|---------|
| gene | Blood | Kidney | methyl.diff | pMWU.fdr | Match ? | gene      | blood     | kidney   | log2(fold_ratio) | blood+ 0.001 | kidney+ 0.001 | log2(fold_ratio) | q_value    | Match ? |
|      |       |        |             |          |         | Serinc1   | 47.5283   | 86.3539  | 0.86147454       | 47.5293      | 86.3549       | 0.86146089       | 0.02809    | No      |
|      |       |        |             |          |         | Serinc2   | 0.165927  | 29.0227  | 7.45048927       | 0.166927     | 29.0237       | 7.44187031       | 0.00078858 | No      |
|      |       |        |             |          |         | Serinc5   | 2.25702   | 5.97638  | 1.40485268       | 2.25802      | 5.97738       | 1.404455         | 0.00130998 | No      |
|      |       |        |             |          |         | Serpinb1a | 0.490063  | 36.2841  | 6.21022645       | 0.491063     | 36.2851       | 6.20732531       | 0.00022079 | No      |
|      |       |        |             |          |         | Serpinb5  | 0         | 2.2564   | inf              | 0.001        | 2.2574        | 11.1404464       | 0.00605729 | No      |
|      |       |        |             |          |         | Serpinb6b | 219.41    | 16.6472  | -3.7202778       | 219.411      | 16.6482       | -3.7201977       | 0.00022079 | No      |
|      |       |        |             |          |         | Serpinb9  | 69.4979   | 9.30635  | -2.900682        | 69.4989      | 9.30735       | -2.9005478       | 0.00022079 | No      |
|      |       |        |             |          |         | Serpinc1  | 0.192555  | 6.57758  | 5.0942144        | 0.193555     | 6.57858       | 5.08696073       | 0.00658515 | No      |
|      |       |        |             |          |         | Serpine2  | 0.127778  | 2.91918  | 4.5138518        | 0.128778     | 2.92018       | 4.50309925       | 0.00378481 | No      |
|      |       |        |             |          |         | Serpini1  | 6.7788    | 0.450951 | -3.9099873       | 6.7798       | 0.451951      | -3.9070044       | 0.00022079 | No      |
|      |       |        |             |          |         | Sertad1   | 2.83064   | 30.9904  | 3.45262119       | 2.83164      | 30.9914       | 3.45215816       | 0.00022079 | No      |
|      |       |        |             |          |         | Sertad2   | 16.4204   | 7.13105  | -1.2033028       | 16.4214      | 7.13205       | -1.2031884       | 0.00022079 | No      |
|      |       |        |             |          |         | Sesn1     | 131.687   | 16.3326  | -3.0112866       | 131.688      | 16.3336       | -3.0112092       | 0.00022079 | No      |
|      |       |        |             |          |         | Sesn2     | 5.50293   | 16.977   | 1.62530966       | 5.50393      | 16.978        | 1.62513249       | 0.00022079 | No      |
|      |       |        |             |          |         | Sesn3     | 64.1789   | 18.4634  | -1.7974308       | 64.1799      | 18.4644       | -1.7973752       | 0.00022079 | No      |
|      |       |        |             |          |         | Set       | 207.093   | 77.9372  | -1.4098948       | 207.094      | 77.9382       | -1.4098832       | 0.00022079 | No      |
|      |       |        |             |          |         | Setd1b    | 38.8689   | 9.50546  | -2.0317879       | 38.8699      | 9.50646       | -2.0316733       | 0.00022079 | No      |
|      |       |        |             |          |         | Setd2     | 43.354    | 15.0912  | -1.5224576       | 43.355       | 15.0922       | -1.5223953       | 0.0344255  | No      |
|      |       |        |             |          |         | Setd5     | 26.9201   | 6.87003  | -1.9702955       | 26.9211      | 6.87103       | -1.9701391       | 0.00022079 | No      |
|      |       |        |             |          |         | Setd7     | 24.0857   | 8.92511  | -1.432235        | 24.0867      | 8.92611       | -1.4321333       | 0.00022079 | No      |
|      |       |        |             |          |         | Setdb1    | 23.3309   | 8.77054  | -1.4115044       | 23.3319      | 8.77154       | -1.4114017       | 0.0250666  | No      |
|      |       |        |             |          |         | Setx      | 105.451   | 9.94058  | -3.4070989       | 105.452      | 9.94158       | -3.4069675       | 0.00022079 | No      |
|      |       |        |             |          |         | Sf1       | 181.096   | 67.1287  | -1.4317531       | 181.097      | 67.1297       | -1.4317395       | 0.00130998 | No      |
|      |       |        |             |          |         | Sf3b1     | 194.315   | 50.6467  | -1.9398571       | 194.316      | 50.6477       | -1.939836        | 0.00022079 | No      |
|      |       |        |             |          |         | Sf3b2     | 81.865    | 47.6713  | -0.7801258       | 81.866       | 47.6723       | -0.7801132       | 0.0172336  | No      |
|      |       |        |             |          |         | Sf3b3     | 57.3076   | 18.2195  | -1.6532431       | 57.3086      | 18.2205       | -1.6531891       | 0.00022079 | No      |
|      |       |        |             |          |         | Sf3b5     | 101.425   | 215.467  | 1.08705363       | 101.426      | 215.468       | 1.0870461        | 0.00451708 | No      |
|      |       |        |             |          |         | Sf3b6     | 104.463   | 60.0963  | -0.797644        | 104.464      | 60.0973       | -0.7976338       | 0.0375607  | No      |
|      |       |        |             |          |         | Sfn       | 1.69687   | 6.94171  | 2.03241505       | 1.69787      | 6.94271       | 2.03177291       | 0.012146   | No      |
|      |       |        |             |          |         | SFR1      | 80.6148   | 34.7013  | -1.216055        | 80.6158      | 34.7023       | -1.2160313       | 0.00078858 | No      |
|      |       |        |             |          |         | Sfrp1     | 0         | 5.71612  | inf              | 0.001        | 5.71712       | 12.4810729       | 0.00022079 | No      |
|      |       |        |             |          |         | Sfta2     | 0         | 10.9237  | inf              | 0.001        | 10.9247       | 13.415306        | 0.00022079 | No      |
|      |       |        |             |          |         | Sfxn1     | 16.6284   | 38.216   | 1.20052742       | 16.6294      | 38.217        | 1.20047842       | 0.00022079 | No      |
|      |       |        |             |          |         | Sfxn2     | 6.27587   | 16.8813  | 1.42753863       | 6.27687      | 16.8823       | 1.42739423       | 0.00041963 | No      |
|      |       |        |             |          |         | Sfxn4     | 7.59011   | 19.326   | 1.34835037       | 7.59111      | 19.327        | 1.34823495       | 0.0282852  | No      |
|      |       |        |             |          |         | Sgcb      | 1.45223   | 3.60891  | 1.3132932        | 1.45323      | 3.60991       | 1.31269982       | 0.0196176  | No      |
|      |       |        |             |          |         | Sgk1      | 13.9666   | 67.4897  | 2.27268648       | 13.9676      | 67.4907       | 2.27260457       | 0.00022079 | No      |
|      |       |        |             |          |         | Sgms1     | 5.12304   | 29.6507  | 2.5329941        | 5.12404      | 29.6517       | 2.53276118       | 0.00022079 | No      |
|      |       |        |             |          |         | Sgms2     | 0.0936342 | 7.39327  | 6.30303322       | 0.0946342    | 7.39427       | 6.28790226       | 0.00060553 | No      |
|      |       |        |             |          |         | Sgsh      | 10.5462   | 3.01942  | -1.8043799       | 10.5472      | 3.02042       | -1.804039        | 0.0195167  | No      |
|      |       |        |             |          |         | Sgsm1     | 0.0274565 | 1.43675  | 5.70951751       | 0.0284565    | 1.43775       | 5.6589108        | 0.0248413  | No      |
|      |       |        |             |          |         | Sgsm2     | 2.64593   | 6.22332  | 1.23390954       | 2.64693      | 6.22432       | 1.23359619       | 0.00778313 | No      |

| RRBS |       |        |             |          |         | RNAseq   |           |          |                  |              |               |                  |            |         |
|------|-------|--------|-------------|----------|---------|----------|-----------|----------|------------------|--------------|---------------|------------------|------------|---------|
| gene | Blood | Kidney | methyl.diff | pMWU.fdr | Match ? | gene     | blood     | kidney   | log2(fold_ratio) | blood+ 0.001 | kidney+ 0.001 | log2(fold_ratio) | q_value    | Match ? |
|      |       |        |             |          |         | Sgsm3    | 0.883631  | 9.14178  | 3.37095916       | 0.884631     | 9.14278       | 3.3694852        | 0.00318754 | No      |
|      |       |        |             |          |         | Sgta     | 38.8416   | 104.78   | 1.43168883       | 38.8426      | 104.781       | 1.43166546       | 0.00022079 | No      |
|      |       |        |             |          |         | Sh2b3    | 11.5272   | 6.61456  | -0.801325        | 11.5282      | 6.61556       | -0.8012321       | 0.0309567  | No      |
|      |       |        |             |          |         | Sh2d1a   | 47.4242   | 2.04782  | -4.5334626       | 47.4252      | 2.04882       | -4.5327887       | 0.00022079 | No      |
|      |       |        |             |          |         | Sh3bgrl2 | 0.239063  | 23.2065  | 6.60099428       | 0.240063     | 23.2075       | 6.59503424       | 0.00022079 | No      |
|      |       |        |             |          |         | Sh3bgrl3 | 234.784   | 134.564  | -0.8030416       | 234.785      | 134.565       | -0.803037        | 0.0138632  | No      |
|      |       |        |             |          |         | Sh3bp1   | 24.1162   | 7.1671   | -1.7505412       | 24.1172      | 7.1681        | -1.7503998       | 0.0467974  | No      |
|      |       |        |             |          |         | Sh3bp4   | 0.274161  | 9.74018  | 5.15085317       | 0.275161     | 9.74118       | 5.14574864       | 0.00022079 | No      |
|      |       |        |             |          |         | Sh3bp5   | 2.87638   | 38.8794  | 3.75667977       | 2.87738      | 38.8804       | 3.75621539       | 0.00022079 | No      |
|      |       |        |             |          |         | Sh3bp5l  | 3.7589    | 11.5578  | 1.62048437       | 3.7599       | 11.5588       | 1.62022543       | 0.00022079 | No      |
|      |       |        |             |          |         | Sh3glb2  | 12.9101   | 30.6919  | 1.24935778       | 12.9111      | 30.6929       | 1.24929304       | 0.00242102 | No      |
|      |       |        |             |          |         | Sh3kbp1  | 143.685   | 7.74085  | -4.2142737       | 143.686      | 7.74185       | -4.2140973       | 0.00022079 | No      |
|      |       |        |             |          |         | Sh3rf1   | 1.61725   | 20.0583  | 3.63258472       | 1.61825      | 20.0593       | 3.63176485       | 0.00147497 | No      |
|      |       |        |             |          |         | Sh3rf2   | 0         | 3.33691  | inf              | 0.001        | 3.33791       | 11.7047293       | 0.00022079 | No      |
|      |       |        |             |          |         | Sh3tc1   | 2.22404   | 35.5983  | 4.00055371       | 2.22504      | 35.5993       | 3.9999457        | 0.00022079 | No      |
|      |       |        |             |          |         | Sh3tc2   | 0         | 17.8438  | inf              | 0.001        | 17.8448       | 14.1232161       | 0.00022079 | No      |
|      |       |        |             |          |         | Sh3yl1   | 0.396689  | 33.4223  | 6.39665881       | 0.397689     | 33.4233       | 6.39306971       | 0.0110257  | No      |
|      |       |        |             |          |         | Shb      | 5.9411    | 94.3033  | 3.98850628       | 5.9421       | 94.3043       | 3.98827877       | 0.00060553 | No      |
|      |       |        |             |          |         | Shf      | 1.21812   | 8.37995  | 2.78228537       | 1.21912      | 8.38095       | 2.78127365       | 0.011893   | No      |
|      |       |        |             |          |         | Shisa4   | 0.108591  | 4.8407   | 5.47823924       | 0.109591     | 4.8417        | 5.46531246       | 0.0467974  | No      |
|      |       |        |             |          |         | Shisa5   | 431.222   | 80.9388  | -2.4135274       | 431.223      | 80.9398       | -2.4135129       | 0.00022079 | No      |
|      |       |        |             |          |         | Shpk     | 3.28645   | 6.17101  | 0.9089766        | 3.28745      | 6.17201       | 0.90877145       | 0.0448987  | No      |
|      |       |        |             |          |         | Shroom2  | 0         | 5.35559  | inf              | 0.001        | 5.35659       | 12.3870992       | 0.00022079 | No      |
|      |       |        |             |          |         | Siah1a   | 3.98256   | 11.5927  | 1.54144861       | 3.98356      | 11.5937       | 1.54121085       | 0.00096553 | No      |
|      |       |        |             |          |         | Siah2    | 3.08965   | 6.16995  | 0.99781538       | 3.09065      | 6.17095       | 0.99758232       | 0.0406701  | No      |
|      |       |        |             |          |         | Sidt1    | 9.08464   | 0.408475 | -4.4751097       | 9.08564      | 0.409475      | -4.4717409       | 0.00022079 | No      |
|      |       |        |             |          |         | Siglec1  | 0.059653  | 1.86487  | 4.96633656       | 0.060653     | 1.86587       | 4.94312566       | 0.0136242  | No      |
|      |       |        |             |          |         | Sil1     | 10.0685   | 52.2444  | 2.37542764       | 10.0695      | 52.2454       | 2.37531197       | 0.00022079 | No      |
|      |       |        |             |          |         | Sipa1    | 94.5582   | 26.385   | -1.8414846       | 94.5592      | 26.386        | -1.8414452       | 0.00022079 | No      |
|      |       |        |             |          |         | Sipa1l3  | 6.09353   | 15.011   | 1.30066996       | 6.09453      | 15.012        | 1.30052932       | 0.0233831  | No      |
|      |       |        |             |          |         | Sirpa    | 0.577164  | 8.36589  | 3.85746581       | 0.578164     | 8.36689       | 3.85514078       | 0.00022079 | No      |
|      |       |        |             |          |         | Sirt3    | 7.30921   | 20.9473  | 1.51897691       | 7.31021      | 20.9483       | 1.51884841       | 0.00180113 | No      |
|      |       |        |             |          |         | Sirt5    | 21.7972   | 37.7762  | 0.79333476       | 21.7982      | 37.7772       | 0.79330677       | 0.037478   | No      |
|      |       |        |             |          |         | Sirt7    | 59.8836   | 22.332   | -1.4230485       | 59.8846      | 22.333        | -1.423008        | 0.00022079 | No      |
|      |       |        |             |          |         | Sit1     | 65.7181   | 9.91418  | -2.7287254       | 65.7191      | 9.91518       | -2.7286019       | 0.00022079 | No      |
|      |       |        |             |          |         | Six4     | 0.253998  | 1.4947   | 2.55696691       | 0.254998     | 1.4957        | 2.552263         | 0.00227055 | No      |
|      |       |        |             |          |         | Six5     | 0.0882481 | 7.5112   | 6.41133439       | 0.0892481    | 7.5122        | 6.39527021       | 0.00060553 | No      |
|      |       |        |             |          |         | Skap1    | 256.963   | 35.912   | -2.8390227       | 256.964      | 35.913        | -2.8389882       | 0.00022079 | No      |
|      |       |        |             |          |         | Skap2    | 11.3531   | 34.5996  | 1.60766908       | 11.3541      | 34.6006       | 1.6075837        | 0.00022079 | No      |
|      |       |        |             |          |         | Ski      | 38.8615   | 20.4665  | -0.9250772       | 38.8625      | 20.4675       | -0.9250438       | 0.00579147 | No      |
|      |       |        |             |          |         | Skida1   | 0.249997  | 1.49029  | 2.57561041       | 0.250997     | 1.49129       | 2.57081881       | 0.0356158  | No      |
|      |       |        |             |          |         | Skp1     | 184.887   | 314.497  | 0.76640247       | 184.888      | 314.498       | 0.76639925       | 0.0483129  | No      |

| RRBS |       |        |             |          |         | RNAseq   |           |          |                  |              |               |                  |            |         |
|------|-------|--------|-------------|----------|---------|----------|-----------|----------|------------------|--------------|---------------|------------------|------------|---------|
| gene | Blood | Kidney | methyl.diff | pMWU.fdr | Match ? | gene     | blood     | kidney   | log2(fold_ratio) | blood+ 0.001 | kidney+ 0.001 | log2(fold_ratio) | q_value    | Match ? |
|      |       |        |             |          |         | Slc      | 40.0782   | 1.83319  | -4.4503895       | 40.0792      | 1.83419       | -4.4496387       | 0.00022079 | No      |
|      |       |        |             |          |         | Slain1   | 13.4989   | 4.30199  | -1.6497658       | 13.4999      | 4.30299       | -1.6495373       | 0.00288641 | No      |
|      |       |        |             |          |         | Slamf6   | 55.5093   | 1.2376   | -5.4871125       | 55.5103      | 1.2386        | -5.4859732       | 0.00022079 | No      |
|      |       |        |             |          |         | Slamf9   | 0.200087  | 10.3005  | 5.68594312       | 0.201087     | 10.3015       | 5.6788908        | 0.0154422  | No      |
|      |       |        |             |          |         | Slc10a2  | 0         | 0.943746 | inf              | 0.001        | 0.944746      | 9.88378269       | 0.00022079 | No      |
|      |       |        |             |          |         | Slc11a2  | 13.1002   | 24.9823  | 0.93131747       | 13.1012      | 24.9833       | 0.93126509       | 0.0110257  | No      |
|      |       |        |             |          |         | Slc12a2  | 4.80834   | 13.4038  | 1.47903125       | 4.80934      | 13.4048       | 1.47883887       | 0.00022079 | No      |
|      |       |        |             |          |         | Slc12a6  | 28.3266   | 5.84058  | -2.2779739       | 28.3276      | 5.84158       | -2.2777778       | 0.00022079 | No      |
|      |       |        |             |          |         | Slc12a7  | 44.843    | 20.0918  | -1.158276        | 44.844       | 20.0928       | -1.1582363       | 0.00060553 | No      |
|      |       |        |             |          |         | Slc13a1  | 0         | 25.6148  | inf              | 0.001        | 25.6158       | 14.6447463       | 0.00022079 | No      |
|      |       |        |             |          |         | Slc13a2  | 0         | 13.2055  | inf              | 0.001        | 13.2065       | 13.6889606       | 0.00022079 | No      |
|      |       |        |             |          |         | Slc14a1  | 37.7763   | 10.2233  | -1.8856204       | 37.7773      | 10.2243       | -1.8855175       | 0.00022079 | No      |
|      |       |        |             |          |         | Slc16a1  | 12.8868   | 5.24497  | -1.2968876       | 12.8878      | 5.24597       | -1.2967245       | 0.00041963 | No      |
|      |       |        |             |          |         | Slc16a13 | 1.026     | 12.0578  | 3.55486407       | 1.027        | 12.0588       | 3.55357826       | 0.00022079 | No      |
|      |       |        |             |          |         | Slc16a14 | 0.0121493 | 11.9602  | 9.94315261       | 0.0131493    | 11.9612       | 9.82916042       | 0.00211842 | No      |
|      |       |        |             |          |         | Slc16a4  | 0.505875  | 10.0872  | 4.31760101       | 0.506875     | 10.0882       | 4.31489496       | 0.0435283  | No      |
|      |       |        |             |          |         | Slc16a6  | 25.936    | 9.58824  | -1.4356181       | 25.937       | 9.58924       | -1.4355232       | 0.00041963 | No      |
|      |       |        |             |          |         | Slc16a7  | 0.0688887 | 44.6608  | 9.34052603       | 0.0698887    | 44.6618       | 9.31976647       | 0.00022079 | No      |
|      |       |        |             |          |         | Slc16a9  | 0         | 9.59478  | inf              | 0.001        | 9.59578       | 13.2281844       | 0.00022079 | No      |
|      |       |        |             |          |         | Slc17a1  | 0         | 13.9317  | inf              | 0.001        | 13.9327       | 13.7661872       | 0.00022079 | No      |
|      |       |        |             |          |         | Slc17a2  | 0         | 3.83663  | inf              | 0.001        | 3.83763       | 11.9059999       | 0.00022079 | No      |
|      |       |        |             |          |         | Slc17a3  | 0         | 29.8349  | inf              | 0.001        | 29.8359       | 14.8647617       | 0.00022079 | No      |
|      |       |        |             |          |         | Slc17a4  | 0         | 7.54072  | inf              | 0.001        | 7.54172       | 12.8806779       | 0.00605729 | No      |
|      |       |        |             |          |         | Slc17a5  | 4.29249   | 8.21982  | 0.93729203       | 4.29349      | 8.22082       | 0.93713147       | 0.0283842  | No      |
|      |       |        |             |          |         | Slc18b1  | 0.154496  | 6.49138  | 5.39288382       | 0.155496     | 6.49238       | 5.38379807       | 0.00436941 | No      |
|      |       |        |             |          |         | Slc19a1  | 8.70729   | 35.5551  | 2.02976084       | 8.70829      | 35.5561       | 2.02963573       | 0.00022079 | No      |
|      |       |        |             |          |         | Slc19a2  | 3.77188   | 7.58096  | 1.00709677       | 3.77288      | 7.58196       | 1.00690463       | 0.0224751  | No      |
|      |       |        |             |          |         | Slc1a4   | 0.152802  | 1.03221  | 2.75600118       | 0.153802     | 1.03321       | 2.74798734       | 0.0227145  | No      |
|      |       |        |             |          |         | Slc20a1  | 50.7878   | 18.5764  | -1.451011        | 50.7888      | 18.5774       | -1.4509618       | 0.00022079 | No      |
|      |       |        |             |          |         | Slc20a2  | 35.1175   | 16.3312  | -1.1045593       | 35.1185      | 16.3322       | -1.1045121       | 0.00949299 | No      |
|      |       |        |             |          |         | Slc22a1  | 0         | 26.7424  | inf              | 0.001        | 26.7434       | 14.7068953       | 0.00022079 | No      |
|      |       |        |             |          |         | Slc22a15 | 0.10104   | 5.2416   | 5.69700881       | 0.10204      | 5.2426        | 5.68307577       | 0.0103977  | No      |
|      |       |        |             |          |         | Slc22a18 | 2.88086   | 37.5384  | 3.7037957        | 2.88186      | 37.5394       | 3.70333343       | 0.00022079 | No      |
|      |       |        |             |          |         | Slc22a2  | 0         | 48.4956  | inf              | 0.001        | 48.4966       | 15.565596        | 0.00022079 | No      |
|      |       |        |             |          |         | Slc22a22 | 0         | 17.4846  | inf              | 0.001        | 17.4856       | 14.0938797       | 0.00022079 | No      |
|      |       |        |             |          |         | Slc22a23 | 0.0136238 | 5.45653  | 8.64571081       | 0.0146238    | 5.45753       | 8.5437861        | 0.00227055 | No      |
|      |       |        |             |          |         | Slc22a24 | 0         | 1.45853  | inf              | 0.001        | 1.45953       | 10.5112881       | 0.00022079 | No      |
|      |       |        |             |          |         | Slc22a25 | 0         | 12.5425  | inf              | 0.001        | 12.5435       | 13.6146523       | 0.00022079 | No      |
|      |       |        |             |          |         | Slc22a5  | 1.44158   | 38.5372  | 4.74052895       | 1.44258      | 38.5382       | 4.73956596       | 0.00022079 | No      |
|      |       |        |             |          |         | Slc22a7  | 0         | 2.95053  | inf              | 0.001        | 2.95153       | 11.5272473       | 0.00022079 | No      |
|      |       |        |             |          |         | Slc23a2  | 18.4822   | 5.1261   | -1.850203        | 18.4832      | 5.1271        | -1.8499996       | 0.00022079 | No      |
|      |       |        |             |          |         | Slc23a3  | 0.377624  | 2.88143  | 2.93176261       | 0.378624     | 2.88243       | 2.9284478        | 0.0189519  | No      |

| RRBS |       |        |             |          |         | RNAseq     |           |         |                  |              |               |                  |            |         |
|------|-------|--------|-------------|----------|---------|------------|-----------|---------|------------------|--------------|---------------|------------------|------------|---------|
| gene | Blood | Kidney | methyl.diff | pMWU.fdr | Match ? | gene       | blood     | kidney  | log2(fold_ratio) | blood+ 0.001 | kidney+ 0.001 | log2(fold_ratio) | q_value    | Match ? |
|      |       |        |             |          |         | Slc24a6    | 4.40079   | 28.2946 | 2.68469231       | 4.40179      | 28.2956       | 2.68441551       | 0.00078858 | No      |
|      |       |        |             |          |         | Slc25a1    | 11.982    | 60.2363 | 2.32976442       | 11.983       | 60.2373       | 2.32966797       | 0.00022079 | No      |
|      |       |        |             |          |         | Slc25a10   | 6.22      | 105.179 | 4.07978829       | 6.221        | 105.18        | 4.07957009       | 0.00022079 | No      |
|      |       |        |             |          |         | Slc25a11   | 39.038    | 130.934 | 1.74588873       | 39.039       | 130.935       | 1.74586279       | 0.00022079 | No      |
|      |       |        |             |          |         | Slc25a13   | 0.511325  | 22.0391 | 5.42968094       | 0.512325     | 22.0401       | 5.42692767       | 0.00022079 | No      |
|      |       |        |             |          |         | Slc25a15   | 4.43387   | 13.1703 | 1.57064983       | 4.43487      | 13.1713       | 1.57043403       | 0.00022079 | No      |
|      |       |        |             |          |         | Slc25a20   | 15.6136   | 31.6058 | 1.01738612       | 15.6146      | 31.6068       | 1.01733937       | 0.00304332 | No      |
|      |       |        |             |          |         | Slc25a24   | 1.86399   | 8.62324 | 2.20983591       | 1.86499      | 8.62424       | 2.20922943       | 0.00022079 | No      |
|      |       |        |             |          |         | Slc25a25   | 2.90139   | 25.765  | 3.15059645       | 2.90239      | 25.766        | 3.15015529       | 0.00022079 | No      |
|      |       |        |             |          |         | Slc25a28   | 31.0724   | 51.2645 | 0.72232645       | 31.0734      | 51.2655       | 0.72230816       | 0.0476819  | No      |
|      |       |        |             |          |         | Slc25a29   | 2.71567   | 17.1242 | 2.65665651       | 2.71667      | 17.1252       | 2.6562096        | 0.00022079 | No      |
|      |       |        |             |          |         | Slc25a3    | 255.52    | 575.559 | 1.17152761       | 255.521      | 575.56        | 1.17152447       | 0.00227055 | No      |
|      |       |        |             |          |         | Slc25a30   | 17.3171   | 82.5336 | 2.25278422       | 17.3181      | 82.5346       | 2.25271839       | 0.00022079 | No      |
|      |       |        |             |          |         | Slc25a35   | 1.65571   | 17.1425 | 3.37205561       | 1.65671      | 17.1435       | 3.37126869       | 0.0178094  | No      |
|      |       |        |             |          |         | Slc25a36l1 | 104.19    | 25.975  | -2.0040212       | 104.191      | 25.976        | -2.0039795       | 0.00041963 | No      |
|      |       |        |             |          |         | Slc25a38   | 21.3834   | 53.9658 | 1.33555415       | 21.3844      | 53.9668       | 1.33551342       | 0.00022079 | No      |
|      |       |        |             |          |         | Slc25a39   | 73.0793   | 187.429 | 1.35880947       | 73.0803      | 187.43        | 1.35879743       | 0.00022079 | No      |
|      |       |        |             |          |         | Slc25a45   | 0.23908   | 19.5051 | 6.35021414       | 0.24008      | 19.5061       | 6.34426632       | 0.00022079 | No      |
|      |       |        |             |          |         | Slc25a46   | 28.4422   | 14.8196 | -0.9405266       | 28.4432      | 14.8206       | -0.9404799       | 0.0442394  | No      |
|      |       |        |             |          |         | Slc25a48   | 0         | 20.6232 | inf              | 0.001        | 20.6242       | 14.3320505       | 0.00022079 | No      |
|      |       |        |             |          |         | Slc25a5    | 298.781   | 885.647 | 1.56764338       | 298.782      | 885.648       | 1.56764018       | 0.00022079 | No      |
|      |       |        |             |          |         | Slc26a8    | 85.9223   | 33.5976 | -1.3546744       | 85.9233      | 33.5986       | -1.3546483       | 0.00022079 | No      |
|      |       |        |             |          |         | Slc28a2    | 101.342   | 8.49384 | -3.5766715       | 101.343      | 8.49484       | -3.5765159       | 0.00022079 | No      |
|      |       |        |             |          |         | Slc29a3    | 2.00124   | 21.9169 | 3.45307765       | 2.00224      | 21.9179       | 3.45242276       | 0.00022079 | No      |
|      |       |        |             |          |         | Slc2a1     | 9.39357   | 41.2199 | 2.13359555       | 9.39457      | 41.2209       | 2.13347697       | 0.00022079 | No      |
|      |       |        |             |          |         | Slc2a12    | 0.103472  | 1.71721 | 4.05275415       | 0.104472     | 1.71821       | 4.03971814       | 0.00318754 | No      |
|      |       |        |             |          |         | Slc2a2     | 0         | 7.16213 | inf              | 0.001        | 7.16313       | 12.8063744       | 0.00022079 | No      |
|      |       |        |             |          |         | Slc2a9     | 3.70323   | 1.07935 | -1.7786214       | 3.70423      | 1.08035       | -1.7776749       | 0.0241707  | No      |
|      |       |        |             |          |         | Slc30a4    | 1.61454   | 5.22661 | 1.69475233       | 1.61554      | 5.22761       | 1.69413504       | 0.00022079 | No      |
|      |       |        |             |          |         | Slc30a7    | 12.1867   | 4.10641 | -1.5693579       | 12.1877      | 4.10741       | -1.569125        | 0.00147497 | No      |
|      |       |        |             |          |         | Slc31a1    | 5.87536   | 24.5285 | 2.06170985       | 5.87636      | 24.5295       | 2.06152314       | 0.0111498  | No      |
|      |       |        |             |          |         | Slc31a2    | 6.67581   | 45.1218 | 2.75680982       | 6.67681      | 45.1228       | 2.7566257        | 0.00113657 | No      |
|      |       |        |             |          |         | Slc34a1    | 0.0409981 | 488.087 | 13.5392937       | 0.0419981    | 488.088       | 13.5045296       | 0.00022079 | No      |
|      |       |        |             |          |         | Slc34a3    | 0         | 5.39275 | inf              | 0.001        | 5.39375       | 12.3970729       | 0.00022079 | No      |
|      |       |        |             |          |         | Slc35a1    | 8.98477   | 21.6688 | 1.27006578       | 8.98577      | 21.6698       | 1.2699718        | 0.00113657 | No      |
|      |       |        |             |          |         | Slc35b4    | 23.5978   | 10.968  | -1.1053519       | 23.5988      | 10.969        | -1.1052815       | 0.00348745 | No      |
|      |       |        |             |          |         | Slc35d1    | 2.6755    | 6.43922 | 1.26707741       | 2.6765       | 6.44022       | 1.26676232       | 0.0400682  | No      |
|      |       |        |             |          |         | Slc35d2    | 10.3999   | 3.04126 | -1.7738286       | 10.4009      | 3.04226       | -1.773493        | 0.00060553 | No      |
|      |       |        |             |          |         | Slc35e2b   | 7.81345   | 4.09299 | -0.9328046       | 7.81445      | 4.09399       | -0.9326368       | 0.0143389  | No      |
|      |       |        |             |          |         | Slc35e3    | 2.16263   | 8.37752 | 1.95373637       | 2.16363      | 8.37852       | 1.95324162       | 0.00022079 | No      |
|      |       |        |             |          |         | Slc35f5    | 4.58872   | 12.823  | 1.48257014       | 4.58972      | 12.824        | 1.48236828       | 0.00022079 | No      |
|      |       |        |             |          |         | Slc35g1    | 0.270677  | 2.88392 | 3.41338694       | 0.271677     | 2.88492       | 3.40856697       | 0.018847   | No      |

| RRBS |       |        |             |          |         | RNAseq   |           |         |                  |              |               |                  |            |         |
|------|-------|--------|-------------|----------|---------|----------|-----------|---------|------------------|--------------|---------------|------------------|------------|---------|
| gene | Blood | Kidney | methyl.diff | pMWU.fdr | Match ? | gene     | blood     | kidney  | log2(fold_ratio) | blood+ 0.001 | kidney+ 0.001 | log2(fold_ratio) | q_value    | Match ? |
|      |       |        |             |          |         | Slc37a4  | 19.7813   | 40.2783 | 1.02586555       | 19.7823      | 40.2793       | 1.02582844       | 0.00273202 | No      |
|      |       |        |             |          |         | Slc38a1  | 36.8489   | 13.0576 | -1.4967318       | 36.8499      | 13.0586       | -1.4966605       | 0.00022079 | No      |
|      |       |        |             |          |         | Slc38a3  | 0         | 13.5054 | inf              | 0.001        | 13.5064       | 13.7213556       | 0.00022079 | No      |
|      |       |        |             |          |         | Slc38a9  | 6.98193   | 2.49095 | -1.4869298       | 6.98293      | 2.49195       | -1.4865574       | 0.0100165  | No      |
|      |       |        |             |          |         | Slc39a1  | 8.02618   | 31.8454 | 1.98829958       | 8.02718      | 31.8464       | 1.98816514       | 0.00022079 | No      |
|      |       |        |             |          |         | Slc39a12 | 0         | 4.77786 | inf              | 0.001        | 4.77886       | 12.2224508       | 0.0122712  | No      |
|      |       |        |             |          |         | Slc39a13 | 2.56955   | 15.6995 | 2.61113098       | 2.57055      | 15.7005       | 2.61066152       | 0.00022079 | No      |
|      |       |        |             |          |         | Slc39a14 | 4.91594   | 2.25117 | -1.1267923       | 4.91694      | 2.25217       | -1.126445        | 0.0128843  | No      |
|      |       |        |             |          |         | Slc39a6  | 11.7856   | 4.90731 | -1.2640209       | 11.7866      | 4.90831       | -1.2638493       | 0.00096553 | No      |
|      |       |        |             |          |         | Slc3a2   | 32.7077   | 88.1301 | 1.43000453       | 32.7087      | 88.1311       | 1.42997679       | 0.00022079 | No      |
|      |       |        |             |          |         | Slc40a1  | 0.267551  | 10.6014 | 5.30829707       | 0.268551     | 10.6024       | 5.30305097       | 0.00022079 | No      |
|      |       |        |             |          |         | Slc41a1  | 7.90437   | 4.19233 | -0.9148982       | 7.90537      | 4.19333       | -0.9147366       | 0.0107821  | No      |
|      |       |        |             |          |         | Slc41a3  | 8.39013   | 1.55723 | -2.4297111       | 8.39113      | 1.55823       | -2.4289569       | 0.00113657 | No      |
|      |       |        |             |          |         | Slc44a1  | 0.0836067 | 28.6005 | 8.41820609       | 0.0846067    | 28.6015       | 8.40110318       | 0.00022079 | No      |
|      |       |        |             |          |         | Slc44a3  | 0         | 16.0867 | inf              | 0.001        | 16.0877       | 13.9736705       | 0.00022079 | No      |
|      |       |        |             |          |         | Slc45a3  | 0.11928   | 8.47463 | 6.15072631       | 0.12028      | 8.47563       | 6.13885193       | 0.00022079 | No      |
|      |       |        |             |          |         | SLC45A4  | 3.32169   | 14.0213 | 2.07763077       | 3.32269      | 14.0223       | 2.0772994        | 0.00022079 | No      |
|      |       |        |             |          |         | Slc47a1  | 0         | 34.7574 | inf              | 0.001        | 34.7584       | 15.0850741       | 0.00022079 | No      |
|      |       |        |             |          |         | Slc48a1  | 6.2315    | 36.7946 | 2.56184267       | 6.2325       | 36.7956       | 2.56165038       | 0.0425114  | No      |
|      |       |        |             |          |         | Slc4a11  | 32.7444   | 160.848 | 2.2963779        | 32.7454      | 160.849       | 2.29634281       | 0.00022079 | No      |
|      |       |        |             |          |         | Slc4a7   | 26.4762   | 2.61723 | -3.3385835       | 26.4772      | 2.61823       | -3.3380868       | 0.00022079 | No      |
|      |       |        |             |          |         | Slc50a1  | 68.5931   | 40.3175 | -0.7666573       | 68.5941      | 40.3185       | -0.7666425       | 0.0348495  | No      |
|      |       |        |             |          |         | Slc51b   | 0         | 57.1959 | inf              | 0.001        | 57.1969       | 15.8036493       | 0.00022079 | No      |
|      |       |        |             |          |         | SLC52A2  | 2.55297   | 6.68694 | 1.38916959       | 2.55397      | 6.68794       | 1.38882033       | 0.0379944  | No      |
|      |       |        |             |          |         | Slc52a3  | 0.445145  | 3.23975 | 2.86353523       | 0.446145     | 3.24075       | 2.86074315       | 0.00765035 | No      |
|      |       |        |             |          |         | Slc5a10  | 0.140866  | 58.0133 | 8.68591644       | 0.141866     | 58.0143       | 8.67573587       | 0.00711928 | No      |
|      |       |        |             |          |         | Slc5a12  | 0         | 5.17896 | inf              | 0.001        | 5.17996       | 12.3387252       | 0.00022079 | No      |
|      |       |        |             |          |         | Slc5a2   | 0.0342262 | 8.69448 | 7.98885481       | 0.0352262    | 8.69548       | 7.947473         | 0.00466383 | No      |
|      |       |        |             |          |         | Slc5a6   | 8.71301   | 22.9658 | 1.39824394       | 8.71401      | 22.9668       | 1.39814118       | 0.0183813  | No      |
|      |       |        |             |          |         | Slc5a9   | 0         | 2.4983  | inf              | 0.001        | 2.4993        | 11.2873084       | 0.00022079 | No      |
|      |       |        |             |          |         | Slc6a12  | 0.453699  | 25.4553 | 5.81008678       | 0.454699     | 25.4563       | 5.8069671        | 0.00022079 | No      |
|      |       |        |             |          |         | Slc6a13  | 0         | 3.45111 | inf              | 0.001        | 3.45211       | 11.7532627       | 0.00022079 | No      |
|      |       |        |             |          |         | Slc6a18  | 0         | 150.697 | inf              | 0.001        | 150.698       | 17.2013007       | 0.00022079 | No      |
|      |       |        |             |          |         | Slc6a19  | 0         | 18.1064 | inf              | 0.001        | 18.1074       | 14.1442918       | 0.00022079 | No      |
|      |       |        |             |          |         | Slc6a8   | 0.859671  | 52.5054 | 5.93253736       | 0.860671     | 52.5064       | 5.93088761       | 0.00022079 | No      |
|      |       |        |             |          |         | Slc7a1   | 6.04294   | 2.02572 | -1.5768158       | 6.04394      | 2.02672       | -1.5763426       | 0.00060553 | No      |
|      |       |        |             |          |         | Slc7a12  | 0         | 5.2113  | inf              | 0.001        | 5.2123        | 12.3477044       | 0.00022079 | No      |
|      |       |        |             |          |         | Slc7a13  | 0         | 69.1228 | inf              | 0.001        | 69.1238       | 16.0768949       | 0.00022079 | No      |
|      |       |        |             |          |         | Slc7a4   | 0.0289497 | 2.91255 | 6.65259061       | 0.0299497    | 2.91355       | 6.60409271       | 0.00096553 | No      |
|      |       |        |             |          |         | Slc7a6   | 15.5439   | 4.06549 | -1.9348474       | 15.5449      | 4.06649       | -1.9345854       | 0.00022079 | No      |
|      |       |        |             |          |         | Slc7a6os | 22.8713   | 11.9364 | -0.9381706       | 22.8723      | 11.9374       | -0.9381128       | 0.0164052  | No      |
|      |       |        |             |          |         | Slc7a7   | 0.452158  | 50.9776 | 6.81689265       | 0.453158     | 50.9786       | 6.81373379       | 0.00022079 | No      |



| RRBS |       |        |             |          |         | RNAseq  |          |          |                  |              |               |                  |            |         |
|------|-------|--------|-------------|----------|---------|---------|----------|----------|------------------|--------------|---------------|------------------|------------|---------|
| gene | Blood | Kidney | methyl.diff | pMWU.fdr | Match ? | gene    | blood    | kidney   | log2(fold_ratio) | blood+ 0.001 | kidney+ 0.001 | log2(fold_ratio) | q_value    | Match ? |
|      |       |        |             |          |         | Slc7a8  | 0.146964 | 8.08246  | 5.78125976       | 0.147964     | 8.08346       | 5.77165484       | 0.00060553 | No      |
|      |       |        |             |          |         | Slc7a9  | 0        | 33.2395  | inf              | 0.001        | 33.2405       | 15.0206545       | 0.00022079 | No      |
|      |       |        |             |          |         | Slc9a1  | 51.7055  | 12.329   | -2.068262        | 51.7065      | 12.33         | -2.0681729       | 0.00022079 | No      |
|      |       |        |             |          |         | Slc9a7  | 12.3136  | 0.779111 | -3.9822799       | 12.3146      | 0.780111      | -3.9805465       | 0.00022079 | No      |
|      |       |        |             |          |         | SLCO1A1 | 0        | 7.06222  | inf              | 0.001        | 7.06322       | 12.7861103       | 0.00022079 | No      |
|      |       |        |             |          |         | Slco1a6 | 0        | 45.9027  | inf              | 0.001        | 45.9037       | 15.4863228       | 0.00022079 | No      |
|      |       |        |             |          |         | Slco3a1 | 3.28068  | 11.1738  | 1.76805312       | 3.28168      | 11.1748       | 1.76774254       | 0.00022079 | No      |
|      |       |        |             |          |         | Slco4a1 | 0.485887 | 14.4721  | 4.89650964       | 0.486887     | 14.4731       | 4.89364318       | 0.00022079 | No      |
|      |       |        |             |          |         | Slfn13  | 72.4875  | 11.2493  | -2.687897        | 72.4885      | 11.2503       | -2.6877887       | 0.00041963 | No      |
|      |       |        |             |          |         | Slfn2   | 365.435  | 30.0406  | -3.6046293       | 365.436      | 30.0416       | -3.6045852       | 0.00022079 | No      |
|      |       |        |             |          |         | Slfn3   | 28.3297  | 8.57119  | -1.7247479       | 28.3307      | 8.57219       | -1.7246305       | 0.00096553 | No      |
|      |       |        |             |          |         | Slfn5   | 175.072  | 24.5887  | -2.831881        | 175.073      | 24.5897       | -2.8318306       | 0.00022079 | No      |
|      |       |        |             |          |         | Slirp   | 25.1835  | 133.421  | 2.40543505       | 25.1845      | 133.422       | 2.40538858       | 0.0171138  | No      |
|      |       |        |             |          |         | Slit2   | 0        | 5.50543  | inf              | 0.001        | 5.50643       | 12.4269016       | 0.00022079 | No      |
|      |       |        |             |          |         | Slk     | 7.4928   | 20.134   | 1.42605697       | 7.4938       | 20.135        | 1.42593609       | 0.00022079 | No      |
|      |       |        |             |          |         | Slpi    | 0.523526 | 5.28971  | 3.33685554       | 0.524526     | 5.29071       | 3.33437515       | 0.00685176 | No      |
|      |       |        |             |          |         | Slu7    | 31.3783  | 19.0581  | -0.7193629       | 31.3793      | 19.0591       | -0.7193332       | 0.0447184  | No      |
|      |       |        |             |          |         | Slx4    | 14.1475  | 8.49319  | -0.7361687       | 14.1485      | 8.49419       | -0.7361008       | 0.0407797  | No      |
|      |       |        |             |          |         | Smad1   | 1.8564   | 10.4495  | 2.4928544        | 1.8574       | 10.4505       | 2.49221552       | 0.00022079 | No      |
|      |       |        |             |          |         | Smad2   | 27.4732  | 15.2642  | -0.847873        | 27.4742      | 15.2652       | -0.847831        | 0.0328292  | No      |
|      |       |        |             |          |         | Smad4   | 104.854  | 22.6043  | -2.2137128       | 104.855      | 22.6053       | -2.2136627       | 0.00022079 | No      |
|      |       |        |             |          |         | Smad5   | 26.0274  | 10.5234  | -1.3064303       | 26.0284      | 10.5244       | -1.3063486       | 0.00060553 | No      |
|      |       |        |             |          |         | SMAGP   | 3.94998  | 183.405  | 5.53704381       | 3.95098      | 183.406       | 5.53668648       | 0.00022079 | No      |
|      |       |        |             |          |         | Smad2   | 108.956  | 18.9384  | -2.5243593       | 108.957      | 18.9394       | -2.5242964       | 0.00618779 | No      |
|      |       |        |             |          |         | Smarca5 | 39.5683  | 17.5393  | -1.1737539       | 39.5693      | 17.5403       | -1.1737081       | 0.00022079 | No      |
|      |       |        |             |          |         | Smarcc2 | 71.9625  | 36.8407  | -0.9659448       | 71.9635      | 36.8417       | -0.9659257       | 0.00791314 | No      |
|      |       |        |             |          |         | Smarcd1 | 20.2811  | 9.52699  | -1.0900435       | 20.2821      | 9.52799       | -1.0899632       | 0.00318754 | No      |
|      |       |        |             |          |         | Smarcd3 | 0.227362 | 30.7532  | 7.07960158       | 0.228362     | 30.7542       | 7.07331704       | 0.00022079 | No      |
|      |       |        |             |          |         | Smc1a   | 44.8052  | 18.7333  | -1.2580611       | 44.8062      | 18.7343       | -1.2580163       | 0.00130998 | No      |
|      |       |        |             |          |         | Smc4    | 191.592  | 9.32907  | -4.3601602       | 191.593      | 9.33007       | -4.3600131       | 0.00022079 | No      |
|      |       |        |             |          |         | Smc5    | 11.2372  | 5.02115  | -1.1621929       | 11.2382      | 5.02215       | -1.162034        | 0.00022079 | No      |
|      |       |        |             |          |         | Smchd1  | 67.4798  | 8.12274  | -3.0544173       | 67.4808      | 8.12374       | -3.0542611       | 0.00022079 | No      |
|      |       |        |             |          |         | Smdt1   | 81.8373  | 416.743  | 2.34832751       | 81.8383      | 416.744       | 2.34831335       | 0.00022079 | No      |
|      |       |        |             |          |         | Smek1   | 58.5897  | 19.6029  | -1.57958         | 58.5907      | 19.6039       | -1.579531        | 0.00022079 | No      |
|      |       |        |             |          |         | Smek2   | 29.3911  | 10.9179  | -1.428684        | 29.3921      | 10.9189       | -1.4286009       | 0.00022079 | No      |
|      |       |        |             |          |         | Smg1    | 44.6127  | 8.79786  | -2.3422299       | 44.6137      | 8.79886       | -2.3420983       | 0.00022079 | No      |
|      |       |        |             |          |         | Smg5    | 31.3351  | 14.4905  | -1.1126722       | 31.3361      | 14.4915       | -1.1126187       | 0.00096553 | No      |
|      |       |        |             |          |         | Smg7    | 29.9439  | 7.93844  | -1.9153347       | 29.9449      | 7.93944       | -1.9152012       | 0.00022079 | No      |
|      |       |        |             |          |         | Smg8    | 5.22423  | 2.4697   | -1.0808826       | 5.22523      | 2.4707        | -1.0805747       | 0.026068   | No      |
|      |       |        |             |          |         | Smim1   | 0.39485  | 49.1547  | 6.95988087       | 0.39585      | 49.1557       | 6.95626106       | 0.00022079 | No      |
|      |       |        |             |          |         | Smim12  | 40.0106  | 93.881   | 1.23045095       | 40.0116      | 93.882        | 1.23043026       | 0.0286013  | No      |
|      |       |        |             |          |         | SMIM15  | 40.0306  | 21.2196  | -0.9157058       | 40.0316      | 21.2206       | -0.9156738       | 0.0159346  | No      |

| RRBS |       |        |             |          |         | RNAseq   |           |         |                  |              |               |                  |            |         |
|------|-------|--------|-------------|----------|---------|----------|-----------|---------|------------------|--------------|---------------|------------------|------------|---------|
| gene | Blood | Kidney | methyl.diff | pMWU.fdr | Match ? | gene     | blood     | kidney  | log2(fold_ratio) | blood+ 0.001 | kidney+ 0.001 | log2(fold_ratio) | q_value    | Match ? |
|      |       |        |             |          |         | Smim19   | 22.6666   | 51.4456 | 1.18247969       | 22.6676      | 51.4466       | 1.18244409       | 0.00227055 | No      |
|      |       |        |             |          |         | Smim20   | 33.0262   | 96.6104 | 1.54856752       | 33.0272      | 96.6114       | 1.54853877       | 0.00022079 | No      |
|      |       |        |             |          |         | Smim24   | 3.9867    | 232.939 | 5.86861335       | 3.9877       | 232.94        | 5.86825771       | 0.00022079 | No      |
|      |       |        |             |          |         | Smim4    | 13.9962   | 42.7289 | 1.61017699       | 13.9972      | 42.7299       | 1.61010768       | 0.0391441  | No      |
|      |       |        |             |          |         | Smim7    | 24.9437   | 52.9571 | 1.08614864       | 24.9447      | 52.9581       | 1.08611804       | 0.00130998 | No      |
|      |       |        |             |          |         | Smox     | 15.0159   | 2.84324 | -2.4008832       | 15.0169      | 2.84424       | -2.4004719       | 0.00022079 | No      |
|      |       |        |             |          |         | Smpd1    | 26.2382   | 43.4647 | 0.72817544       | 26.2392      | 43.4657       | 0.72815364       | 0.0278747  | No      |
|      |       |        |             |          |         | Smpx     | 0         | 24.0378 | inf              | 0.001        | 24.0388       | 14.5530773       | 0.00022079 | No      |
|      |       |        |             |          |         | Smtn     | 0.0668542 | 22.8621 | 8.41772402       | 0.0678542    | 22.8631       | 8.3963672        | 0.00022079 | No      |
|      |       |        |             |          |         | Smurf1   | 15.8637   | 7.93031 | -1.0002801       | 15.8647      | 7.93131       | -1.0001892       | 0.00304332 | No      |
|      |       |        |             |          |         | Smurf2   | 23.0153   | 10.0922 | -1.1893525       | 23.0163      | 10.0932       | -1.1892723       | 0.00022079 | No      |
|      |       |        |             |          |         | Snap47   | 4.80565   | 10.0752 | 1.06800499       | 4.80665      | 10.0762       | 1.067848         | 0.0311608  | No      |
|      |       |        |             |          |         | Snapc2   | 17.3178   | 39.5955 | 1.19308081       | 17.3188      | 39.5965       | 1.19303394       | 0.00078858 | No      |
|      |       |        |             |          |         | Snapc4   | 2.80264   | 5.44228 | 0.95742474       | 2.80364      | 5.44328       | 0.95717514       | 0.0318275  | No      |
|      |       |        |             |          |         | Sncg     | 0         | 14.8737 | inf              | 0.001        | 14.8747       | 13.860573        | 0.00022079 | No      |
|      |       |        |             |          |         | Snd1     | 43.5999   | 19.3554 | -1.1715887       | 43.6009      | 19.3564       | -1.1715473       | 0.00022079 | No      |
|      |       |        |             |          |         | Sned1    | 0.0334001 | 19.4078 | 9.18256845       | 0.0344001    | 19.4088       | 9.14008245       | 0.00147497 | No      |
|      |       |        |             |          |         | Snf8     | 56.3444   | 145.036 | 1.36406691       | 56.3454      | 145.037       | 1.36405125       | 0.0136242  | No      |
|      |       |        |             |          |         | Snrk     | 23.3245   | 8.80415 | -1.4055905       | 23.3255      | 8.80515       | -1.4054885       | 0.00022079 | No      |
|      |       |        |             |          |         | Snrnp200 | 37.0838   | 16.2103 | -1.1938783       | 37.0848      | 16.2113       | -1.1938282       | 0.00022079 | No      |
|      |       |        |             |          |         | Snrnp35  | 13.489    | 32.3442 | 1.26172363       | 13.49        | 32.3452       | 1.26166129       | 0.00378481 | No      |
|      |       |        |             |          |         | Snrnp40  | 32.6954   | 12.7857 | -1.3545565       | 32.6964      | 12.7867       | -1.3544878       | 0.00041963 | No      |
|      |       |        |             |          |         | Snrnp48  | 72.4287   | 22.5987 | -1.6803217       | 72.4297      | 22.5997       | -1.6802778       | 0.00022079 | No      |
|      |       |        |             |          |         | Snrpb    | 147.957   | 91.6136 | -0.6915443       | 147.958      | 91.6146       | -0.6915383       | 0.030773   | No      |
|      |       |        |             |          |         | Snrpb2   | 80.4651   | 40.1517 | -1.0029021       | 80.4661      | 40.1527       | -1.0028841       | 0.00227055 | No      |
|      |       |        |             |          |         | Snrpe1   | 1010.16   | 318.71  | -1.6642676       | 1010.161     | 318.711       | -1.6642645       | 0.00022079 | No      |
|      |       |        |             |          |         | Snrpf    | 158.74    | 64.7125 | -1.2945494       | 158.741      | 64.7135       | -1.2945362       | 0.00022079 | No      |
|      |       |        |             |          |         | Snta1    | 0.152562  | 32.2117 | 7.72204533       | 0.153562     | 32.2127       | 7.71266452       | 0.00752743 | No      |
|      |       |        |             |          |         | Sntb2    | 2.64406   | 6.85105 | 1.3735702        | 2.64506      | 6.85205       | 1.37323523       | 0.00752743 | No      |
|      |       |        |             |          |         | Snurf    | 0.138923  | 23.2939 | 7.38952292       | 0.139923     | 23.2949       | 7.3792372        | 0.0428089  | No      |
|      |       |        |             |          |         | Snx18    | 4.842     | 9.95312 | 1.03954576       | 4.843        | 9.95412       | 1.03939278       | 0.00422081 | No      |
|      |       |        |             |          |         | Snx2     | 32.9755   | 64.4601 | 0.96701189       | 32.9765      | 64.4611       | 0.96699052       | 0.00180113 | No      |
|      |       |        |             |          |         | Snx20    | 60.6263   | 8.54592 | -2.8266361       | 60.6273      | 8.54692       | -2.8264911       | 0.00022079 | No      |
|      |       |        |             |          |         | Snx21    | 0.46462   | 18.8334 | 5.34109841       | 0.46562      | 18.8344       | 5.33807324       | 0.00022079 | No      |
|      |       |        |             |          |         | Snx29    | 7.88159   | 31.7688 | 2.01105199       | 7.88259      | 31.7698       | 2.01091437       | 0.00988585 | No      |
|      |       |        |             |          |         | Snx30    | 0.522783  | 6.5176  | 3.64005668       | 0.523783     | 6.5186        | 3.63752101       | 0.00022079 | No      |
|      |       |        |             |          |         | Snx32    | 10.2808   | 2.20255 | -2.2227059       | 10.2818      | 2.20355       | -2.2221913       | 0.0019604  | No      |
|      |       |        |             |          |         | SNX5     | 124.848   | 62.6213 | -0.9954473       | 124.849      | 62.6223       | -0.9954359       | 0.015076   | No      |
|      |       |        |             |          |         | Snx7     | 3.16021   | 26.4795 | 3.06678355       | 3.16121      | 26.4805       | 3.06638158       | 0.00022079 | No      |
|      |       |        |             |          |         | Snx9     | 1.13047   | 45.3068 | 5.32473299       | 1.13147      | 45.3078       | 5.3234892        | 0.00022079 | No      |
|      |       |        |             |          |         | Soat1    | 2.30344   | 20.9582 | 3.18565289       | 2.30444      | 20.9592       | 3.18509554       | 0.00022079 | No      |
|      |       |        |             |          |         | Socs1    | 14.8584   | 3.35847 | -2.1454027       | 14.8594      | 3.35947       | -2.1450703       | 0.00791314 | No      |

| RRBS |       |        |             |          |         | RNAseq  |           |         |                  |              |               |                  |            |         |
|------|-------|--------|-------------|----------|---------|---------|-----------|---------|------------------|--------------|---------------|------------------|------------|---------|
| gene | Blood | Kidney | methyl.diff | pMWU.fdr | Match ? | gene    | blood     | kidney  | log2(fold_ratio) | blood+ 0.001 | kidney+ 0.001 | log2(fold_ratio) | q_value    | Match ? |
|      |       |        |             |          |         | Socs2   | 32.9239   | 3.77512 | -3.1245408       | 32.9249      | 3.77612       | -3.1242025       | 0.00022079 | No      |
|      |       |        |             |          |         | Socs4   | 9.75542   | 3.54783 | -1.4592671       | 9.75642      | 3.54883       | -1.4590084       | 0.00060553 | No      |
|      |       |        |             |          |         | Socs5   | 19.1854   | 11.5787 | -0.7285356       | 19.1864      | 11.5797       | -0.7284862       | 0.0363419  | No      |
|      |       |        |             |          |         | Sod1    | 249.643   | 1391.95 | 2.47916903       | 249.644      | 1391.951      | 2.47916429       | 0.00022079 | No      |
|      |       |        |             |          |         | Sod2    | 25.2087   | 124.762 | 2.30718496       | 25.2097      | 124.763       | 2.30713929       | 0.00022079 | No      |
|      |       |        |             |          |         | Soga1   | 0.160232  | 11.4144 | 6.15454892       | 0.161232     | 11.4154       | 6.1456995        | 0.00022079 | No      |
|      |       |        |             |          |         | Soga2   | 0         | 2.32455 | inf              | 0.001        | 2.32555       | 11.1833562       | 0.00022079 | No      |
|      |       |        |             |          |         | Sorbs1  | 0.94683   | 11.3879 | 3.5882525        | 0.94783      | 11.3889       | 3.58685628       | 0.00022079 | No      |
|      |       |        |             |          |         | Sorbs2  | 0         | 14.4081 | inf              | 0.001        | 14.4091       | 13.8146926       | 0.00022079 | No      |
|      |       |        |             |          |         | Sorbs3  | 0.298291  | 29.4873 | 6.62722947       | 0.299291     | 29.4883       | 6.62244995       | 0.00022079 | No      |
|      |       |        |             |          |         | Sord    | 10.1778   | 100.186 | 3.29918327       | 10.1788      | 100.187       | 3.29905593       | 0.00022079 | No      |
|      |       |        |             |          |         | Sort1   | 2.52727   | 37.2001 | 3.87965479       | 2.52827      | 37.2011       | 3.87912284       | 0.00022079 | No      |
|      |       |        |             |          |         | Sos1    | 22.8851   | 6.22505 | -1.8782513       | 22.8861      | 6.22605       | -1.8780826       | 0.00022079 | No      |
|      |       |        |             |          |         | Sos2    | 4.47804   | 7.96425 | 0.83067109       | 4.47904      | 7.96525       | 0.83053009       | 0.0496219  | No      |
|      |       |        |             |          |         | Sostdc1 | 0         | 148.576 | inf              | 0.001        | 148.577       | 17.1808513       | 0.00022079 | No      |
|      |       |        |             |          |         | Sowahb  | 0         | 4.51671 | inf              | 0.001        | 4.51771       | 12.1413759       | 0.00022079 | No      |
|      |       |        |             |          |         | Sowahc  | 0.211471  | 4.71373 | 4.47833739       | 0.212471     | 4.71473       | 4.47183731       | 0.00180113 | No      |
|      |       |        |             |          |         | Sox17   | 0         | 7.71842 | inf              | 0.001        | 7.71942       | 12.9142767       | 0.00605729 | No      |
|      |       |        |             |          |         | Sox9    | 0         | 5.96083 | inf              | 0.001        | 5.96183       | 12.5415395       | 0.00022079 | No      |
|      |       |        |             |          |         | Sp1     | 26.7449   | 9.51254 | -1.4913613       | 26.7459      | 9.51354       | -1.4912636       | 0.00022079 | No      |
|      |       |        |             |          |         | Sp140   | 129.567   | 24.2051 | -2.4203154       | 129.568      | 24.2061       | -2.4202669       | 0.00242102 | No      |
|      |       |        |             |          |         | Sp3     | 39.7104   | 15.7004 | -1.3387156       | 39.7114      | 15.7014       | -1.33866         | 0.0346416  | No      |
|      |       |        |             |          |         | Sp4     | 9.53156   | 2.17846 | -2.1294037       | 9.53256      | 2.17946       | -2.128893        | 0.00022079 | No      |
|      |       |        |             |          |         | Spa17   | 1.64112   | 35.2146 | 4.42342106       | 1.64212      | 35.2156       | 4.4225832        | 0.00096553 | No      |
|      |       |        |             |          |         | Spaca6  | 0.636507  | 13.7984 | 4.4381808        | 0.637507     | 13.7994       | 4.43602055       | 0.00022079 | No      |
|      |       |        |             |          |         | Spag1   | 0.337262  | 5.28153 | 3.96901424       | 0.338262     | 5.28253       | 3.96501603       | 0.00060553 | No      |
|      |       |        |             |          |         | Sparc   | 7.39528   | 132.625 | 4.16460417       | 7.39628      | 132.626       | 4.16441998       | 0.00022079 | No      |
|      |       |        |             |          |         | Spast   | 24.4498   | 13.8484 | -0.8201034       | 24.4508      | 13.8494       | -0.8200582       | 0.0470945  | No      |
|      |       |        |             |          |         | Spata13 | 70.0477   | 5.9737  | -3.551641        | 70.0487      | 5.9747        | -3.5514201       | 0.00022079 | No      |
|      |       |        |             |          |         | Spata24 | 0.50972   | 14.5927 | 4.83939807       | 0.51072      | 14.5937       | 4.83666934       | 0.0133754  | No      |
|      |       |        |             |          |         | Spata5  | 9.37626   | 3.34849 | -1.4855019       | 9.37726      | 3.34949       | -1.485225        | 0.00022079 | No      |
|      |       |        |             |          |         | Spata6  | 20.0462   | 5.97588 | -1.7461057       | 20.0472      | 5.97688       | -1.7459363       | 0.00022079 | No      |
|      |       |        |             |          |         | Spata7  | 0.911624  | 12.6506 | 3.79462309       | 0.912624     | 12.6516       | 3.79315544       | 0.00022079 | No      |
|      |       |        |             |          |         | Spats2l | 0.0509623 | 8.49645 | 7.38128598       | 0.0519623    | 8.49745       | 7.35342087       | 0.00022079 | No      |
|      |       |        |             |          |         | Spcs2   | 82.1291   | 25.0575 | -1.712651        | 82.1301      | 25.0585       | -1.712611        | 0.00022079 | No      |
|      |       |        |             |          |         | Spcs3   | 60.4586   | 19.9923 | -1.5965031       | 60.4596      | 19.9933       | -1.5964548       | 0.00022079 | No      |
|      |       |        |             |          |         | Specc1  | 0.682472  | 11.1535 | 4.03058284       | 0.683472     | 11.1545       | 4.0285998        | 0.00988585 | No      |
|      |       |        |             |          |         | Sphk1   | 4.69919   | 28.7163 | 2.61138587       | 4.70019      | 28.7173       | 2.61112913       | 0.00022079 | No      |
|      |       |        |             |          |         | Sphkap  | 0         | 1.6188  | inf              | 0.001        | 1.6198        | 10.6616          | 0.00273202 | No      |
|      |       |        |             |          |         | Spi1    | 2.08063   | 10.0718 | 2.2752292        | 2.08163      | 10.0728       | 2.27467921       | 0.00022079 | No      |
|      |       |        |             |          |         | Spink1  | 0         | 338.378 | inf              | 0.001        | 338.379       | 18.3682805       | 0.00022079 | No      |
|      |       |        |             |          |         | Spint2  | 84.4303   | 861.26  | 3.35061608       | 84.4313      | 861.261       | 3.35060067       | 0.00022079 | No      |

| RRBS |       |        |             |          |         | RNAseq |           |         |                  |              |               |                  |            |         |
|------|-------|--------|-------------|----------|---------|--------|-----------|---------|------------------|--------------|---------------|------------------|------------|---------|
| gene | Blood | Kidney | methyl.diff | pMWU.fdr | Match ? | gene   | blood     | kidney  | log2(fold_ratio) | blood+ 0.001 | kidney+ 0.001 | log2(fold_ratio) | q_value    | Match ? |
|      |       |        |             |          |         | Spire1 | 1.28883   | 16.138  | 3.64632791       | 1.28983      | 16.139        | 3.64529835       | 0.00022079 | No      |
|      |       |        |             |          |         | Spns1  | 26.782    | 61.8183 | 1.20677028       | 26.783       | 61.8193       | 1.20673975       | 0.0195167  | No      |
|      |       |        |             |          |         | Spns2  | 6.15145   | 21.2344 | 1.78740492       | 6.15245      | 21.2354       | 1.78723835       | 0.0333701  | No      |
|      |       |        |             |          |         | Spns3  | 0.113074  | 4.3583  | 5.26842636       | 0.114074     | 4.3593        | 5.25605458       | 0.0132548  | No      |
|      |       |        |             |          |         | Spon1  | 0.366562  | 71.9633 | 7.6170603        | 0.367562     | 71.9643       | 7.61314996       | 0.00022079 | No      |
|      |       |        |             |          |         | Spop   | 49.5659   | 29.6302 | -0.7422796       | 49.5669      | 29.6312       | -0.74226         | 0.0243977  | No      |
|      |       |        |             |          |         | Spp2   | 0         | 190.688 | inf              | 0.001        | 190.689       | 17.5408621       | 0.00022079 | No      |
|      |       |        |             |          |         | Spr    | 11.0942   | 58.4781 | 2.3980908        | 11.0952      | 58.4791       | 2.39798543       | 0.00022079 | No      |
|      |       |        |             |          |         | Sprr1a | 0         | 61.2361 | inf              | 0.001        | 61.2371       | 15.9021183       | 0.00022079 | No      |
|      |       |        |             |          |         | Sprtn  | 9.27438   | 4.00808 | -1.2103395       | 9.27538      | 4.00908       | -1.2101352       | 0.00078858 | No      |
|      |       |        |             |          |         | Spry1  | 0.734415  | 14.6239 | 4.31558877       | 0.735415     | 14.6249       | 4.31372435       | 0.00022079 | No      |
|      |       |        |             |          |         | Spryd7 | 1.61607   | 36.6307 | 4.50249168       | 1.61707      | 36.6317       | 4.50163862       | 0.00022079 | No      |
|      |       |        |             |          |         | Spsb2  | 2.25607   | 11.9586 | 2.40616477       | 2.25707      | 11.9596       | 2.40564607       | 0.00164037 | No      |
|      |       |        |             |          |         | Sptssb | 0         | 5.72573 | inf              | 0.001        | 5.72673       | 12.4834959       | 0.00022079 | No      |
|      |       |        |             |          |         | Sqrdl  | 2.16597   | 13.956  | 2.68780034       | 2.16697      | 13.957        | 2.68723779       | 0.00022079 | No      |
|      |       |        |             |          |         | Srbd1  | 12.3706   | 5.72382 | -1.1118653       | 12.3716      | 5.72482       | -1.1117299       | 0.0215651  | No      |
|      |       |        |             |          |         | Src    | 4.8329    | 17.1448 | 1.82681003       | 4.8339       | 17.1458       | 1.82659569       | 0.00022079 | No      |
|      |       |        |             |          |         | Srcin1 | 71.9068   | 11.9526 | -2.5888037       | 71.9078      | 11.9536       | -2.5887031       | 0.00022079 | No      |
|      |       |        |             |          |         | Srd5a1 | 0.533961  | 4.12974 | 2.95124468       | 0.534961     | 4.13074       | 2.94889463       | 0.00130998 | No      |
|      |       |        |             |          |         | Srd5a3 | 33.2551   | 9.63415 | -1.7873463       | 33.2561      | 9.63515       | -1.78724         | 0.00022079 | No      |
|      |       |        |             |          |         | Sreb2  | 37.1645   | 18.5858 | -0.9997244       | 37.1655      | 18.5868       | -0.9996856       | 0.00288641 | No      |
|      |       |        |             |          |         | Srgap2 | 17.5647   | 9.03375 | -0.959282        | 17.5657      | 9.03475       | -0.9592045       | 0.0375607  | No      |
|      |       |        |             |          |         | Srgap3 | 0.645704  | 7.38258 | 3.51518022       | 0.646704     | 7.38358       | 3.51314305       | 0.00022079 | No      |
|      |       |        |             |          |         | Srgn   | 174.353   | 25.6749 | -2.7635806       | 174.354      | 25.6759       | -2.7635327       | 0.00022079 | No      |
|      |       |        |             |          |         | Srrm1  | 101.212   | 38.5077 | -1.3941615       | 101.213      | 38.5087       | -1.3941383       | 0.00242102 | No      |
|      |       |        |             |          |         | Srsf1  | 158.392   | 55.625  | -1.5096941       | 158.393      | 55.626        | -1.5096773       | 0.00130998 | No      |
|      |       |        |             |          |         | Srsf10 | 37.9822   | 17.7858 | -1.0945976       | 37.9832      | 17.7868       | -1.0945545       | 0.00551024 | No      |
|      |       |        |             |          |         | Srsf11 | 126.398   | 39.4786 | -1.6788309       | 126.399      | 39.4796       | -1.6788058       | 0.00022079 | No      |
|      |       |        |             |          |         | Srsf2  | 462.294   | 216.47  | -1.0946435       | 462.295      | 216.471       | -1.09464         | 0.0072515  | No      |
|      |       |        |             |          |         | Srsf3  | 139.956   | 78.3116 | -0.8376754       | 139.957      | 78.3126       | -0.8376673       | 0.0212313  | No      |
|      |       |        |             |          |         | Srsf5  | 917.625   | 173.27  | -2.4048828       | 917.626      | 173.271       | -2.4048761       | 0.00022079 | No      |
|      |       |        |             |          |         | Srsf6  | 140.554   | 35.1043 | -2.0014048       | 140.555      | 35.1053       | -2.001374        | 0.00022079 | No      |
|      |       |        |             |          |         | Srsf7  | 184.905   | 55.2128 | -1.7437096       | 184.906      | 55.2138       | -1.7436912       | 0.00022079 | No      |
|      |       |        |             |          |         | SRXN1  | 0.0368889 | 3.46012 | 6.55149149       | 0.0378889    | 3.46112       | 6.5133199        | 0.0388459  | No      |
|      |       |        |             |          |         | Ss18   | 64.7751   | 40.4334 | -0.6798918       | 64.7761      | 40.4344       | -0.6798784       | 0.0345355  | No      |
|      |       |        |             |          |         | Ssb    | 116.138   | 53.2141 | -1.1259596       | 116.139      | 53.2151       | -1.1259449       | 0.00180113 | No      |
|      |       |        |             |          |         | Ssbp2  | 8.12019   | 22.0962 | 1.44421289       | 8.12119      | 22.0972       | 1.44410053       | 0.00363736 | No      |
|      |       |        |             |          |         | Ssbp3  | 126.836   | 21.238  | -2.5782445       | 126.837      | 21.239        | -2.5781879       | 0.00022079 | No      |
|      |       |        |             |          |         | Ssbp4  | 38.4268   | 22.5304 | -0.7702399       | 38.4278      | 22.5314       | -0.7702134       | 0.0379944  | No      |
|      |       |        |             |          |         | Ssfa2  | 9.21722   | 21.1364 | 1.19732608       | 9.21822      | 21.1374       | 1.19723783       | 0.00060553 | No      |
|      |       |        |             |          |         | Ssh2   | 45.019    | 3.67482 | -3.6147885       | 45.02        | 3.67582       | -3.614428        | 0.00022079 | No      |
|      |       |        |             |          |         | Sspo   | 0.0628019 | 5.86021 | 6.54400035       | 0.0638019    | 5.86121       | 6.52145533       | 0.00022079 | No      |

| RRBS |       |        |             |          |         | RNAseq     |           |          |                  |              |               |                  |            |         |
|------|-------|--------|-------------|----------|---------|------------|-----------|----------|------------------|--------------|---------------|------------------|------------|---------|
| gene | Blood | Kidney | methyl.diff | pMWU.fdr | Match ? | gene       | blood     | kidney   | log2(fold_ratio) | blood+ 0.001 | kidney+ 0.001 | log2(fold_ratio) | q_value    | Match ? |
|      |       |        |             |          |         | Ssr1       | 39.6162   | 24.1734  | -0.7126701       | 39.6172      | 24.1744       | -0.7126468       | 0.0420093  | No      |
|      |       |        |             |          |         | Ssr4       | 208.879   | 119.069  | -0.8108696       | 208.88       | 119.07        | -0.8108644       | 0.0178094  | No      |
|      |       |        |             |          |         | Ssrp1      | 100.85    | 52.0485  | -0.9542826       | 100.851      | 52.0495       | -0.9542692       | 0.00273202 | No      |
|      |       |        |             |          |         | Sssca1     | 14.3835   | 42.8176  | 1.57378916       | 14.3845      | 42.8186       | 1.57372255       | 0.00060553 | No      |
|      |       |        |             |          |         | Ssuh2      | 0         | 1.57891  | inf              | 0.001        | 1.57991       | 10.6256267       | 0.00672121 | No      |
|      |       |        |             |          |         | Ssx2ip     | 3.95451   | 9.42554  | 1.25307633       | 3.95551      | 9.42654       | 1.25286461       | 0.00147497 | No      |
|      |       |        |             |          |         | St13       | 44.2972   | 125.793  | 1.50576423       | 44.2982      | 125.794       | 1.50574313       | 0.00022079 | No      |
|      |       |        |             |          |         | St14       | 1.02847   | 59.4644  | 5.8534546        | 1.02947      | 59.4654       | 5.85207679       | 0.00022079 | No      |
|      |       |        |             |          |         | St3gal1    | 32.1071   | 3.46781  | -3.2107956       | 32.1081      | 3.46881       | -3.2104246       | 0.00022079 | No      |
|      |       |        |             |          |         | St3gal2    | 2.59929   | 11.7075  | 2.17124353       | 2.60029      | 11.7085       | 2.17081183       | 0.00022079 | No      |
|      |       |        |             |          |         | St3gal3    | 0.602595  | 11.8109  | 4.29278639       | 0.603595     | 11.8119       | 4.29051638       | 0.00022079 | No      |
|      |       |        |             |          |         | St3gal5    | 1.64653   | 37.8779  | 4.52385564       | 1.64753      | 37.8789       | 4.52301779       | 0.00022079 | No      |
|      |       |        |             |          |         | St3gal6    | 7.56083   | 57.9397  | 2.93793569       | 7.56183      | 57.9407       | 2.93776979       | 0.00022079 | No      |
|      |       |        |             |          |         | St6galnac3 | 1.03386   | 25.2563  | 4.61053056       | 1.03486      | 25.2573       | 4.60919291       | 0.00022079 | No      |
|      |       |        |             |          |         | ST7        | 2.50897   | 9.22742  | 1.8788321        | 2.50997      | 9.22842       | 1.87841354       | 0.00348745 | No      |
|      |       |        |             |          |         | St8sia1    | 67.3916   | 2.49954  | -4.7528343       | 67.3926      | 2.50054       | -4.7522786       | 0.00022079 | No      |
|      |       |        |             |          |         | St8sia4    | 22.0774   | 1.04167  | -4.4056001       | 22.0784      | 1.04267       | -4.4042811       | 0.00022079 | No      |
|      |       |        |             |          |         | St8sia6    | 9.36478   | 0.243815 | -5.2633863       | 9.36578      | 0.244815      | -5.2576353       | 0.0220188  | No      |
|      |       |        |             |          |         | Stag1      | 11.7547   | 5.88994  | -0.9969129       | 11.7557      | 5.89094       | -0.9967907       | 0.00378481 | No      |
|      |       |        |             |          |         | Stag2      | 43.6458   | 15.8025  | -1.46569         | 43.6468      | 15.8035       | -1.4656318       | 0.00022079 | No      |
|      |       |        |             |          |         | Stam       | 5.92859   | 14.193   | 1.25941863       | 5.92959      | 14.194        | 1.25927695       | 0.00060553 | No      |
|      |       |        |             |          |         | Stampb     | 6.71366   | 18.2654  | 1.44394197       | 6.71466      | 18.2664       | 1.44380608       | 0.00180113 | No      |
|      |       |        |             |          |         | Stamppl1   | 24.037    | 4.151    | -2.533726        | 24.038       | 4.152         | -2.5334385       | 0.00022079 | No      |
|      |       |        |             |          |         | Stap1      | 14.2073   | 1.8713   | -2.9245196       | 14.2083      | 1.8723        | -2.9238504       | 0.0425114  | No      |
|      |       |        |             |          |         | Stap2      | 0.0877832 | 37.8704  | 8.75291008       | 0.0887832    | 37.8714       | 8.73660633       | 0.0186157  | No      |
|      |       |        |             |          |         | Stard13    | 0.509368  | 3.67987  | 2.85287457       | 0.510368     | 3.68087       | 2.85043702       | 0.00242102 | No      |
|      |       |        |             |          |         | Stard4     | 8.71015   | 3.97739  | -1.1308755       | 8.71115      | 3.97839       | -1.1306785       | 0.00565535 | No      |
|      |       |        |             |          |         | Stard5     | 3.46275   | 28.8951  | 3.06083472       | 3.46375      | 28.8961       | 3.06046808       | 0.00845215 | No      |
|      |       |        |             |          |         | Stat1      | 108.657   | 56.827   | -0.9351327       | 108.658      | 56.828        | -0.9351206       | 0.026068   | No      |
|      |       |        |             |          |         | Stat4      | 64.7611   | 4.69422  | -3.7861701       | 64.7621      | 4.69522       | -3.7858851       | 0.00022079 | No      |
|      |       |        |             |          |         | Stat5a     | 27.559    | 4.45353  | -2.6295023       | 27.56        | 4.45453       | -2.6292308       | 0.00022079 | No      |
|      |       |        |             |          |         | Stat5b     | 67.2115   | 8.147    | -3.0443673       | 67.2125      | 8.148         | -3.0442117       | 0.00022079 | No      |
|      |       |        |             |          |         | Stat6      | 45.0162   | 10.8103  | -2.0580377       | 45.0172      | 10.8113       | -2.0579363       | 0.0412912  | No      |
|      |       |        |             |          |         | Stau2      | 1.62934   | 14.0567  | 3.10889835       | 1.63034      | 14.0577       | 3.1081158        | 0.00113657 | No      |
|      |       |        |             |          |         | Steap2     | 0         | 12.5067  | inf              | 0.001        | 12.5077       | 13.6105289       | 0.00022079 | No      |
|      |       |        |             |          |         | Steap3     | 0.293533  | 2.15988  | 2.87935655       | 0.294533     | 2.16088       | 2.87511777       | 0.0179279  | No      |
|      |       |        |             |          |         | Stim1      | 66.0956   | 6.13522  | -3.4293673       | 66.0966      | 6.13622       | -3.4291539       | 0.00022079 | No      |
|      |       |        |             |          |         | Stim2      | 20.0979   | 5.41448  | -1.8921501       | 20.0989      | 5.41548       | -1.8919554       | 0.00060553 | No      |
|      |       |        |             |          |         | Stk16      | 19.2259   | 41.6022  | 1.11360869       | 19.2269      | 41.6032       | 1.11356833       | 0.00752743 | No      |
|      |       |        |             |          |         | Stk17b     | 270.686   | 9.80458  | -4.7870206       | 270.687      | 9.80558       | -4.7868788       | 0.00022079 | No      |
|      |       |        |             |          |         | Stk24      | 114.931   | 45.8892  | -1.3245414       | 114.932      | 45.8902       | -1.3245225       | 0.0139821  | No      |
|      |       |        |             |          |         | Stk32a     | 0         | 2.5897   | inf              | 0.001        | 2.5907        | 11.3391262       | 0.00605729 | No      |

| RRBS |       |        |             |          |         | RNAseq   |            |          |                  |              |               |                  |            |         |
|------|-------|--------|-------------|----------|---------|----------|------------|----------|------------------|--------------|---------------|------------------|------------|---------|
| gene | Blood | Kidney | methyl.diff | pMWU.fdr | Match ? | gene     | blood      | kidney   | log2(fold_ratio) | blood+ 0.001 | kidney+ 0.001 | log2(fold_ratio) | q_value    | Match ? |
|      |       |        |             |          |         | Stk36    | 0.135492   | 1.40269  | 3.37191663       | 0.136492     | 1.40369       | 3.36233606       | 0.0282852  | No      |
|      |       |        |             |          |         | Stk38    | 277.139    | 32.4536  | -3.0941593       | 277.14       | 32.4546       | -3.0941201       | 0.00022079 | No      |
|      |       |        |             |          |         | Stk39    | 16.7346    | 31.6849  | 0.92096139       | 16.7356      | 31.6859       | 0.92092072       | 0.00536605 | No      |
|      |       |        |             |          |         | Stk4     | 63.8248    | 9.05262  | -2.8177098       | 63.8258      | 9.05362       | -2.8175731       | 0.00022079 | No      |
|      |       |        |             |          |         | Stmn1    | 91.3135    | 178.804  | 0.96947894       | 91.3145      | 178.805       | 0.96947121       | 0.00896558 | No      |
|      |       |        |             |          |         | Stom     | 55.6196    | 11.2957  | -2.2998197       | 55.6206      | 11.2967       | -2.2997179       | 0.00022079 | No      |
|      |       |        |             |          |         | Strip1   | 26.5348    | 14.5752  | -0.86437         | 26.5358      | 14.5762       | -0.8643254       | 0.00685176 | No      |
|      |       |        |             |          |         | Strn     | 18.6624    | 10.9924  | -0.7636281       | 18.6634      | 10.9934       | -0.7635742       | 0.0317262  | No      |
|      |       |        |             |          |         | Stub1    | 458.546    | 98.8056  | -2.2144018       | 458.547      | 98.8066       | -2.2143903       | 0.00022079 | No      |
|      |       |        |             |          |         | Stx12    | 10.9764    | 31.966   | 1.54213326       | 10.9774      | 31.967        | 1.54204697       | 0.00022079 | No      |
|      |       |        |             |          |         | Stx18    | 15.4999    | 40.9902  | 1.40302012       | 15.5009      | 40.9912       | 1.40296224       | 0.00318754 | No      |
|      |       |        |             |          |         | Stx1a    | 11.8142    | 2.28367  | -2.3710958       | 11.8152      | 2.28467       | -2.3705863       | 0.00818469 | No      |
|      |       |        |             |          |         | Stx6     | 54.2621    | 15.2044  | -1.835456        | 54.2631      | 15.2054       | -1.8353877       | 0.00022079 | No      |
|      |       |        |             |          |         | Stx7     | 13.9675    | 74.7411  | 2.41982798       | 13.9685      | 74.7421       | 2.41974399       | 0.00022079 | No      |
|      |       |        |             |          |         | Stx8     | 39.7797    | 83.6121  | 1.07167934       | 39.7807      | 83.6131       | 1.07166033       | 0.00508519 | No      |
|      |       |        |             |          |         | Stxbp1   | 2.03642    | 9.00471  | 2.14464467       | 2.03742      | 9.00571       | 2.14409661       | 0.00060553 | No      |
|      |       |        |             |          |         | Stxbp4   | 1.53595    | 9.40766  | 2.61470467       | 1.53695      | 9.40866       | 2.61391903       | 0.00273202 | No      |
|      |       |        |             |          |         | Styk1    | 5.84537    | 1.47766  | -1.98398         | 5.84637      | 1.47866       | -1.9832508       | 0.0019604  | No      |
|      |       |        |             |          |         | Styx     | 26.8965    | 6.9928   | -1.9434763       | 26.8975      | 6.9938        | -1.9433236       | 0.010144   | No      |
|      |       |        |             |          |         | Styx11   | 1.63638    | 5.36377  | 1.71273957       | 1.63738      | 5.36477       | 1.71212714       | 0.0275395  | No      |
|      |       |        |             |          |         | Sucla2   | 32.9426    | 85.3231  | 1.37298196       | 32.9436      | 85.3241       | 1.37295507       | 0.00022079 | No      |
|      |       |        |             |          |         | Suclg1   | 79.94      | 253.324  | 1.66399429       | 79.941       | 253.325       | 1.66398193       | 0.00022079 | No      |
|      |       |        |             |          |         | Suclg2   | 60.5253    | 145.882  | 1.26919165       | 60.5263      | 145.883       | 1.26917771       | 0.00022079 | No      |
|      |       |        |             |          |         | Sugt1    | 23.619     | 42.7524  | 0.85605753       | 23.62        | 42.7534       | 0.85603019       | 0.0216846  | No      |
|      |       |        |             |          |         | Sulf2    | 0.0886728  | 22.8155  | 8.00730692       | 0.0896728    | 22.8165       | 7.99119134       | 0.00593001 | No      |
|      |       |        |             |          |         | Sult1a1  | 0.516158   | 24.9068  | 5.59258311       | 0.517158     | 24.9078       | 5.58984868       | 0.00645389 | No      |
|      |       |        |             |          |         | Sult1b1  | 0          | 30.4005  | inf              | 0.001        | 30.4015       | 14.8918549       | 0.00022079 | No      |
|      |       |        |             |          |         | Sult1c2  | 0          | 103.351  | inf              | 0.001        | 103.352       | 16.6572068       | 0.00022079 | No      |
|      |       |        |             |          |         | Sult1c2  | 0          | 60.5497  | inf              | 0.001        | 60.5507       | 15.885856        | 0.00022079 | No      |
|      |       |        |             |          |         | Sult1c2a | 0.00359342 | 181.718  | 15.6259842       | 0.00459342   | 181.719       | 15.271781        | 0.0159346  | No      |
|      |       |        |             |          |         | Sult1c3  | 0          | 3.16565  | inf              | 0.001        | 3.16665       | 11.6287417       | 0.00022079 | No      |
|      |       |        |             |          |         | Sumo3    | 48.8747    | 96.4437  | 0.98059915       | 48.8757      | 96.4447       | 0.98058459       | 0.00494367 | No      |
|      |       |        |             |          |         | Sun2     | 89.4445    | 30.707   | -1.5424252       | 89.4455      | 30.708        | -1.5423943       | 0.00060553 | No      |
|      |       |        |             |          |         | Suox     | 0.277583   | 29.4296  | 6.72820491       | 0.278583     | 29.4306       | 6.72306592       | 0.00022079 | No      |
|      |       |        |             |          |         | Supt20   | 45.675     | 20.6107  | -1.1480112       | 45.676       | 20.6117       | -1.1479728       | 0.00480115 | No      |
|      |       |        |             |          |         | Suv39h1  | 14.8325    | 3.52647  | -2.0724651       | 14.8335      | 3.52747       | -2.0721533       | 0.00022079 | No      |
|      |       |        |             |          |         | Suv39h2  | 1.28565    | 0.432715 | -1.5710089       | 1.28665      | 0.433715      | -1.5688004       | 0.0470945  | No      |
|      |       |        |             |          |         | Suv420h1 | 23.7922    | 7.25066  | -1.7143045       | 23.7932      | 7.25166       | -1.7141661       | 0.00022079 | No      |
|      |       |        |             |          |         | Suz12    | 33.995     | 8.37128  | -2.0218024       | 33.996       | 8.37228       | -2.0216725       | 0.00022079 | No      |
|      |       |        |             |          |         | Sv2b     | 21.4229    | 0.127503 | -7.3924788       | 21.4239      | 0.128503      | -7.3812753       | 0.0242871  | No      |
|      |       |        |             |          |         | Svil     | 16.1231    | 3.47142  | -2.2155313       | 16.1241      | 3.47242       | -2.2152053       | 0.00022079 | No      |
|      |       |        |             |          |         | Svip     | 1.51848    | 28.092   | 4.20945953       | 1.51948      | 28.093        | 4.2085611        | 0.00078858 | No      |

| RRBS |       |        |             |          |         | RNAseq   |           |          |                  |              |               |                  |            |         |
|------|-------|--------|-------------|----------|---------|----------|-----------|----------|------------------|--------------|---------------|------------------|------------|---------|
| gene | Blood | Kidney | methyl.diff | pMWU.fdr | Match ? | gene     | blood     | kidney   | log2(fold_ratio) | blood+ 0.001 | kidney+ 0.001 | log2(fold_ratio) | q_value    | Match ? |
|      |       |        |             |          |         | Swap70   | 2.28715   | 13.0038  | 2.50731038       | 2.28815      | 13.0048       | 2.50679068       | 0.00022079 | No      |
|      |       |        |             |          |         | Swt1     | 11.6303   | 6.34703  | -0.8737347       | 11.6313      | 6.34803       | -0.8736315       | 0.0411953  | No      |
|      |       |        |             |          |         | Sybu     | 0.0336316 | 1.18484  | 5.13873103       | 0.0346316    | 1.18584       | 5.09767651       | 0.0291184  | No      |
|      |       |        |             |          |         | Syde2    | 0.173045  | 7.34469  | 5.40748244       | 0.174045     | 7.34569       | 5.39936574       | 0.00022079 | No      |
|      |       |        |             |          |         | Syngn1   | 2.22754   | 18.7389  | 3.07251302       | 2.22854      | 18.7399       | 3.07194249       | 0.00022079 | No      |
|      |       |        |             |          |         | SYNGR2   | 21.5092   | 79.139   | 1.87943497       | 21.5102      | 79.14         | 1.87938613       | 0.00022079 | No      |
|      |       |        |             |          |         | Synj1    | 17.085    | 4.1029   | -2.0580144       | 17.086       | 4.1039        | -2.0577472       | 0.00022079 | No      |
|      |       |        |             |          |         | Synj2bp  | 18.7428   | 53.1107  | 1.50266605       | 18.7438      | 53.1117       | 1.50261624       | 0.00113657 | No      |
|      |       |        |             |          |         | Synpo2   | 0         | 0.868412 | inf              | 0.001        | 0.869412      | 9.7638962        | 0.0019604  | No      |
|      |       |        |             |          |         | Syt11    | 5.45565   | 2.78237  | -0.9714368       | 5.45665      | 2.78337       | -0.9711828       | 0.0471951  | No      |
|      |       |        |             |          |         | Syt1     | 88.9814   | 33.4769  | -1.4103379       | 88.9824      | 33.4779       | -1.410311        | 0.00041963 | No      |
|      |       |        |             |          |         | Szt2     | 15.1113   | 6.9525   | -1.120024        | 15.1123      | 6.9535        | -1.119912        | 0.0305572  | No      |
|      |       |        |             |          |         | Tab2     | 102.352   | 16.942   | -2.5948632       | 102.353      | 16.943        | -2.5947921       | 0.00022079 | No      |
|      |       |        |             |          |         | Tab3     | 5.1685    | 2.13005  | -1.2788583       | 5.1695       | 2.13105       | -1.2784603       | 0.00164037 | No      |
|      |       |        |             |          |         | Tacc1    | 23.1292   | 10.7512  | -1.1052177       | 23.1302      | 10.7522       | -1.1051459       | 0.00605729 | No      |
|      |       |        |             |          |         | Tacc2    | 9.5372    | 40.7986  | 2.09688197       | 9.5382       | 40.7996       | 2.09676607       | 0.0147132  | No      |
|      |       |        |             |          |         | Tacc3    | 47.9301   | 8.11704  | -2.5619063       | 47.9311      | 8.11804       | -2.5617587       | 0.0159346  | No      |
|      |       |        |             |          |         | Taco1    | 2.04914   | 7.83769  | 1.93540996       | 2.05014      | 7.83869       | 1.93489014       | 0.0137492  | No      |
|      |       |        |             |          |         | Taf1     | 18.8877   | 4.86191  | -1.9578519       | 18.8887      | 4.86291       | -1.9576316       | 0.00022079 | No      |
|      |       |        |             |          |         | Taf1b    | 8.12102   | 3.04979  | -1.412951        | 8.12202      | 3.05079       | -1.4126557       | 0.00752743 | No      |
|      |       |        |             |          |         | Taf1c    | 15.2711   | 6.39998  | -1.2546647       | 15.2721      | 6.40098       | -1.2545337       | 0.00113657 | No      |
|      |       |        |             |          |         | Taf2     | 10.6866   | 4.23786  | -1.3343951       | 10.6876      | 4.23886       | -1.3341897       | 0.00041963 | No      |
|      |       |        |             |          |         | Taf4a    | 25.0999   | 9.02967  | -1.4749364       | 25.1009      | 9.03067       | -1.4748342       | 0.00022079 | No      |
|      |       |        |             |          |         | Taf5l    | 18.9542   | 6.26751  | -1.5965533       | 18.9552      | 6.26851       | -1.5963992       | 0.00022079 | No      |
|      |       |        |             |          |         | Taf7     | 19.3213   | 6.98071  | -1.4687465       | 19.3223      | 6.98171       | -1.4686145       | 0.00041963 | No      |
|      |       |        |             |          |         | Taf8     | 18.753    | 7.59485  | -1.304028        | 18.754       | 7.59585       | -1.303915        | 0.00078858 | No      |
|      |       |        |             |          |         | TAF9     | 111.445   | 62.5536  | -0.8331671       | 111.446      | 62.5546       | -0.833157        | 0.0138632  | No      |
|      |       |        |             |          |         | Tagap    | 94.528    | 5.97752  | -3.9831228       | 94.529       | 5.97852       | -3.9828967       | 0.00022079 | No      |
|      |       |        |             |          |         | Tagln    | 1.62701   | 24.3244  | 3.9021092        | 1.62801      | 24.3254       | 3.90128206       | 0.0149559  | No      |
|      |       |        |             |          |         | Tanc1    | 0.626439  | 31.1558  | 5.63618292       | 0.627439     | 31.1568       | 5.63392805       | 0.00022079 | No      |
|      |       |        |             |          |         | Tango2   | 9.71332   | 27.2533  | 1.48839453       | 9.71432      | 27.2543       | 1.48829895       | 0.00113657 | No      |
|      |       |        |             |          |         | Tank     | 42.4596   | 5.10781  | -3.055314        | 42.4606      | 5.10881       | -3.0550656       | 0.00022079 | No      |
|      |       |        |             |          |         | Taok1    | 29.554    | 15.8609  | -0.8978788       | 29.555       | 15.8619       | -0.8978366       | 0.0297932  | No      |
|      |       |        |             |          |         | Tap1     | 52.4014   | 16.5814  | -1.6600395       | 52.4024      | 16.5824       | -1.6599801       | 0.00273202 | No      |
|      |       |        |             |          |         | Tapbpl   | 50.4015   | 8.93316  | -2.4962242       | 50.4025      | 8.93416       | -2.4960913       | 0.00022079 | No      |
|      |       |        |             |          |         | Tapt1    | 30.5604   | 9.44089  | -1.6946687       | 30.5614      | 9.44189       | -1.6945631       | 0.00022079 | No      |
|      |       |        |             |          |         | Tardbp   | 108.11    | 52.7787  | -1.0344723       | 108.111      | 52.7797       | -1.0344583       | 0.0284928  | No      |
|      |       |        |             |          |         | Tas1r1   | 1.21742   | 13.686   | 3.49080198       | 1.21842      | 13.687        | 3.48972283       | 0.00022079 | No      |
|      |       |        |             |          |         | Tas1r2   | 18.312    | 43.7626  | 1.25690909       | 18.313       | 43.7636       | 1.25686327       | 0.00022079 | No      |
|      |       |        |             |          |         | Tax1bp3  | 4.98397   | 60.4838  | 3.60118149       | 4.98497      | 60.4848       | 3.60091591       | 0.00022079 | No      |
|      |       |        |             |          |         | Tbc1d10a | 18.4518   | 33.7374  | 0.87058724       | 18.4528      | 33.7384       | 0.87055181       | 0.0174725  | No      |
|      |       |        |             |          |         | Tbc1d15  | 40.9641   | 10.1099  | -2.0185914       | 40.9651      | 10.1109       | -2.0184839       | 0.00022079 | No      |

| RRBS |       |        |             |          |         | RNAseq  |           |         |                  |              |               |                  |            |         |
|------|-------|--------|-------------|----------|---------|---------|-----------|---------|------------------|--------------|---------------|------------------|------------|---------|
| gene | Blood | Kidney | methyl.diff | pMWU.fdr | Match ? | gene    | blood     | kidney  | log2(fold_ratio) | blood+ 0.001 | kidney+ 0.001 | log2(fold_ratio) | q_value    | Match ? |
|      |       |        |             |          |         | Tbc1d16 | 11.32     | 6.41924 | -0.8183996       | 11.321       | 6.42024       | -0.8183023       | 0.0160426  | No      |
|      |       |        |             |          |         | Tbc1d17 | 42.512    | 76.4795 | 0.84720296       | 42.513       | 76.4805       | 0.84718789       | 0.0494183  | No      |
|      |       |        |             |          |         | Tbc1d19 | 0.953223  | 12.1186 | 3.66826547       | 0.954223     | 12.1196       | 3.66687181       | 0.00022079 | No      |
|      |       |        |             |          |         | Tbc1d2  | 0.893319  | 4.40991 | 2.30350186       | 0.894319     | 4.41091       | 2.30221489       | 0.0083198  | No      |
|      |       |        |             |          |         | Tbc1d20 | 104.212   | 24.1854 | -2.1073131       | 104.213      | 24.1864       | -2.1072673       | 0.00022079 | No      |
|      |       |        |             |          |         | Tbc1d2b | 11.7218   | 3.84923 | -1.6065523       | 11.7228      | 3.85023       | -1.6063007       | 0.00022079 | No      |
|      |       |        |             |          |         | Tbc1d4  | 24.959    | 11.6739 | -1.0962735       | 24.96        | 11.6749       | -1.0962077       | 0.00130998 | No      |
|      |       |        |             |          |         | Tbc1d5  | 10.9712   | 5.69265 | -0.946549        | 10.9722      | 5.69365       | -0.9464271       | 0.0271748  | No      |
|      |       |        |             |          |         | Tbcel   | 13.7496   | 7.8176  | -0.814592        | 13.7506      | 7.8186        | -0.8145124       | 0.0306704  | No      |
|      |       |        |             |          |         | Tbk1    | 19.7367   | 9.26711 | -1.0906894       | 19.7377      | 9.26811       | -1.0906068       | 0.00257873 | No      |
|      |       |        |             |          |         | Tbl1x   | 21.4117   | 11.7076 | -0.870954        | 21.4127      | 11.7086       | -0.8708981       | 0.00805135 | No      |
|      |       |        |             |          |         | Tbl1xr1 | 24.7486   | 9.28504 | -1.4143669       | 24.7496      | 9.28604       | -1.4142698       | 0.00022079 | No      |
|      |       |        |             |          |         | Tbx10   | 0.0794703 | 5.28489 | 6.05531384       | 0.0804703    | 5.28589       | 6.03754618       | 0.0288046  | No      |
|      |       |        |             |          |         | Tc2n    | 0         | 3.55844 | inf              | 0.001        | 3.55944       | 11.7974346       | 0.00022079 | No      |
|      |       |        |             |          |         | Tcaim   | 6.8809    | 26.1625 | 1.92683122       | 6.8819       | 26.1635       | 1.92667672       | 0.00022079 | No      |
|      |       |        |             |          |         | Tcea1   | 80.1122   | 41.18   | -0.9600781       | 80.1132      | 41.181        | -0.9600611       | 0.00579147 | No      |
|      |       |        |             |          |         | Tcea3   | 0         | 50.0045 | inf              | 0.001        | 50.0055       | 15.6097992       | 0.00022079 | No      |
|      |       |        |             |          |         | Tceal1  | 0.142508  | 11.8204 | 6.37409214       | 0.143508     | 11.8214       | 6.36412593       | 0.00922576 | No      |
|      |       |        |             |          |         | Tceal8  | 9.24951   | 84.0473 | 3.18375263       | 9.25051      | 84.0483       | 3.18361383       | 0.00022079 | No      |
|      |       |        |             |          |         | Tceb2   | 243.228   | 632.94  | 1.37975943       | 243.229      | 632.941       | 1.37975577       | 0.00022079 | No      |
|      |       |        |             |          |         | Tcerg1  | 69.3553   | 15.3075 | -2.1797675       | 69.3563      | 15.3085       | -2.179694        | 0.00022079 | No      |
|      |       |        |             |          |         | Tcf15   | 0         | 1.3469  | inf              | 0.001        | 1.3479        | 10.3964978       | 0.00022079 | No      |
|      |       |        |             |          |         | Tcf20   | 31.5561   | 6.37433 | -2.3075733       | 31.5571      | 6.37533       | -2.3073927       | 0.00022079 | No      |
|      |       |        |             |          |         | Tcf3    | 62.0046   | 22.9396 | -1.434535        | 62.0056      | 22.9406       | -1.4344954       | 0.00022079 | No      |
|      |       |        |             |          |         | TCF7    | 579.098   | 12.7544 | -5.5047406       | 579.099      | 12.7554       | -5.50463         | 0.00022079 | No      |
|      |       |        |             |          |         | Tcf7l2  | 0.207034  | 6.83964 | 5.04598077       | 0.208034     | 6.84064       | 5.03924007       | 0.00022079 | No      |
|      |       |        |             |          |         | Tcn2    | 5.21572   | 44.6742 | 3.09850357       | 5.21672      | 44.6752       | 3.09825928       | 0.00022079 | No      |
|      |       |        |             |          |         | Tcof1   | 27.2971   | 11.8473 | -1.2041894       | 27.2981      | 11.8483       | -1.2041205       | 0.00041963 | No      |
|      |       |        |             |          |         | Tcp11l1 | 0.0614345 | 2.27982 | 5.21372705       | 0.0624345    | 2.28082       | 5.19106533       | 0.0262873  | No      |
|      |       |        |             |          |         | Tcp11l2 | 102.224   | 15.7529 | -2.6980446       | 102.225      | 15.7539       | -2.6979671       | 0.00022079 | No      |
|      |       |        |             |          |         | TCRB    | 2295.41   | 200.032 | -3.5204491       | 2295.411     | 200.033       | -3.5204426       | 0.00022079 | No      |
|      |       |        |             |          |         | Tctn1   | 0.895996  | 6.6427  | 2.89020556       | 0.896996     | 6.6437        | 2.88881347       | 0.00022079 | No      |
|      |       |        |             |          |         | Tdp2    | 54.6063   | 18.0887 | -1.5939787       | 54.6073      | 18.0897       | -1.5939253       | 0.00022079 | No      |
|      |       |        |             |          |         | TDRD3   | 7.98593   | 15.761  | 0.98082674       | 7.98693      | 15.762        | 0.98073763       | 0.0128843  | No      |
|      |       |        |             |          |         | Tdrp    | 0.0288967 | 21.8706 | 9.56387234       | 0.0298967    | 21.8716       | 9.5148568        | 0.00618779 | No      |
|      |       |        |             |          |         | Tead3   | 0.0469032 | 7.60835 | 7.34175345       | 0.0479032    | 7.60935       | 7.31150738       | 0.00363736 | No      |
|      |       |        |             |          |         | Tead4   | 0         | 2.15763 | inf              | 0.001        | 2.15863       | 11.0759003       | 0.00378481 | No      |
|      |       |        |             |          |         | Tecpr1  | 47.742    | 14.2387 | -1.7454416       | 47.743       | 14.2397       | -1.7453705       | 0.00022079 | No      |
|      |       |        |             |          |         | Tef     | 3.81595   | 11.3454 | 1.5719933        | 3.81695      | 11.3464       | 1.57174244       | 0.00022079 | No      |
|      |       |        |             |          |         | Tefm    | 2.25857   | 12.6089 | 2.48096089       | 2.25957      | 12.6099       | 2.48043668       | 0.00022079 | No      |
|      |       |        |             |          |         | Tenc1   | 0.0598699 | 9.09918 | 7.24776187       | 0.0608699    | 9.10018       | 7.22402228       | 0.00273202 | No      |
|      |       |        |             |          |         | Tenm3   | 0         | 2.11259 | inf              | 0.001        | 2.11359       | 11.0454798       | 0.00605729 | No      |



| RRBS |       |        |             |          |         | RNAseq  |           |         |                  |              |               |                  |            |         |
|------|-------|--------|-------------|----------|---------|---------|-----------|---------|------------------|--------------|---------------|------------------|------------|---------|
| gene | Blood | Kidney | methyl.diff | pMWU.fdr | Match ? | gene    | blood     | kidney  | log2(fold_ratio) | blood+ 0.001 | kidney+ 0.001 | log2(fold_ratio) | q_value    | Match ? |
|      |       |        |             |          |         | Terf2   | 22.5371   | 7.23019 | -1.6401964       | 22.5381      | 7.23119       | -1.6400609       | 0.00041963 | No      |
|      |       |        |             |          |         | Tes     | 42.3383   | 18.0243 | -1.2320201       | 42.3393      | 18.0253       | -1.2319741       | 0.00041963 | No      |
|      |       |        |             |          |         | Tesk1   | 6.03358   | 13.7364 | 1.18691778       | 6.03458      | 13.7374       | 1.18678371       | 0.00593001 | No      |
|      |       |        |             |          |         | Tet2    | 5.73726   | 2.49621 | -1.2006226       | 5.73826      | 2.49721       | -1.2002962       | 0.0388459  | No      |
|      |       |        |             |          |         | Tet3    | 28.2264   | 5.67711 | -2.3138165       | 28.2274      | 5.67811       | -2.3136135       | 0.00022079 | No      |
|      |       |        |             |          |         | Tex10   | 19.6066   | 4.67947 | -2.0669223       | 19.6076      | 4.68047       | -2.0666876       | 0.00022079 | No      |
|      |       |        |             |          |         | Tex14   | 0.473806  | 15.9462 | 5.07277239       | 0.474806     | 15.9472       | 5.06982116       | 0.00022079 | No      |
|      |       |        |             |          |         | Tex2    | 30.2071   | 12.405  | -1.283966        | 30.2081      | 12.406        | -1.2838974       | 0.00022079 | No      |
|      |       |        |             |          |         | Tex264  | 36.1837   | 85.2274 | 1.23597738       | 36.1847      | 85.2284       | 1.23595444       | 0.00041963 | No      |
|      |       |        |             |          |         | Tex36   | 0         | 8.02175 | inf              | 0.001        | 8.02275       | 12.9698811       | 0.00022079 | No      |
|      |       |        |             |          |         | Tf      | 9.46947   | 35.0652 | 1.88868437       | 9.47047      | 35.0662       | 1.88857317       | 0.00022079 | No      |
|      |       |        |             |          |         | Tfap2a  | 0         | 1.4316  | inf              | 0.001        | 1.4326        | 10.4844201       | 0.00022079 | No      |
|      |       |        |             |          |         | Tfcp2l1 | 0.0265822 | 13.9113 | 9.03158102       | 0.0275822    | 13.9123       | 8.9784077        | 0.0175851  | No      |
|      |       |        |             |          |         | Tfdp2   | 2.28783   | 8.85196 | 1.95201708       | 2.28883      | 8.85296       | 1.95154959       | 0.00962607 | No      |
|      |       |        |             |          |         | Tfe3    | 4.1472    | 10.4699 | 1.33603813       | 4.1482       | 10.4709       | 1.33582809       | 0.00147497 | No      |
|      |       |        |             |          |         | Tff3    | 0         | 732.066 | inf              | 0.001        | 732.067       | 19.4816162       | 0.00022079 | No      |
|      |       |        |             |          |         | Tfg     | 14.623    | 26.3055 | 0.84712515       | 14.624       | 26.3065       | 0.84708134       | 0.0178094  | No      |
|      |       |        |             |          |         | Tfrc    | 20.3632   | 6.47512 | -1.6529855       | 20.3642      | 6.47612       | -1.6528335       | 0.00022079 | No      |
|      |       |        |             |          |         | Tgfb1   | 98.0341   | 29.7647 | -1.7196813       | 98.0351      | 29.7657       | -1.7196476       | 0.00022079 | No      |
|      |       |        |             |          |         | Tgfb2   | 0.0405048 | 4.70831 | 6.86097262       | 0.0415048    | 4.70931       | 6.82609369       | 0.0239545  | No      |
|      |       |        |             |          |         | Tgm3    | 0         | 2.08444 | inf              | 0.001        | 2.08544       | 11.0261361       | 0.00022079 | No      |
|      |       |        |             |          |         | Tgs1    | 7.06392   | 2.78325 | -1.3436985       | 7.06492      | 2.78425       | -1.3433845       | 0.00536605 | No      |
|      |       |        |             |          |         | Thap4   | 10.0386   | 176.893 | 4.13924697       | 10.0396      | 176.894       | 4.13911142       | 0.00022079 | No      |
|      |       |        |             |          |         | Thap7   | 9.36415   | 23.4877 | 1.3266855        | 9.36515      | 23.4887       | 1.32659286       | 0.00392909 | No      |
|      |       |        |             |          |         | Thbs1   | 0.250756  | 119.384 | 8.89510956       | 0.251756     | 119.385       | 8.8893797        | 0.00022079 | No      |
|      |       |        |             |          |         | Them6   | 9.58984   | 32.5941 | 1.76503219       | 9.59084      | 32.5951       | 1.76492602       | 0.00041963 | No      |
|      |       |        |             |          |         | Them7   | 0         | 3.9737  | inf              | 0.001        | 3.9747        | 11.9566303       | 0.0198519  | No      |
|      |       |        |             |          |         | Thns12  | 0.694066  | 69.6096 | 6.64806962       | 0.695066     | 69.6106       | 6.64601322       | 0.00022079 | No      |
|      |       |        |             |          |         | Thoc2   | 23.9832   | 6.53693 | -1.875339        | 23.9842      | 6.53793       | -1.8751785       | 0.0368717  | No      |
|      |       |        |             |          |         | Thoc3   | 26.7176   | 14.1441 | -0.91759         | 26.7186      | 14.1451       | -0.917542        | 0.0083198  | No      |
|      |       |        |             |          |         | Thra    | 13.6806   | 39.6903 | 1.53665496       | 13.6816      | 39.6913       | 1.53658586       | 0.0415916  | No      |
|      |       |        |             |          |         | Thrap3  | 67.1509   | 27.9026 | -1.2670072       | 67.1519      | 27.9036       | -1.266977        | 0.00022079 | No      |
|      |       |        |             |          |         | Thrb    | 3.89749   | 9.92987 | 1.34922951       | 3.89849      | 9.93087       | 1.34900468       | 0.00041963 | No      |
|      |       |        |             |          |         | Thsd4   | 0.0597889 | 6.08349 | 6.66887773       | 0.0607889    | 6.08449       | 6.64518462       | 0.00022079 | No      |
|      |       |        |             |          |         | Thumpd2 | 11.462    | 5.03723 | -1.1861563       | 11.463       | 5.03823       | -1.1859958       | 0.0159346  | No      |
|      |       |        |             |          |         | Tia1    | 32.6853   | 8.85203 | -1.8845617       | 32.6863      | 8.85303       | -1.8844429       | 0.00180113 | No      |
|      |       |        |             |          |         | Tial1   | 73.9113   | 24.0945 | -1.6170911       | 73.9123      | 24.0955       | -1.6170507       | 0.00022079 | No      |
|      |       |        |             |          |         | Tie1    | 1.99133   | 14.4245 | 2.85671708       | 1.99233      | 14.4255       | 2.85609279       | 0.00022079 | No      |
|      |       |        |             |          |         | Tigd2   | 25.0844   | 4.06495 | -2.6254809       | 25.0854      | 4.06595       | -2.6251836       | 0.00022079 | No      |
|      |       |        |             |          |         | Tigd5   | 0.104836  | 1.6425  | 3.96968725       | 0.105836     | 1.6435        | 3.95686911       | 0.0100165  | No      |
|      |       |        |             |          |         | Timd2   | 0.623577  | 24.0761 | 5.27089019       | 0.624577     | 24.0771       | 5.26863838       | 0.00022079 | No      |
|      |       |        |             |          |         | Timm10  | 17.1994   | 54.7328 | 1.67004743       | 17.2004      | 54.7338       | 1.66998991       | 0.00078858 | No      |

| RRBS |       |        |             |          |         | RNAseq   |           |          |                  |              |               |                  |            |         |
|------|-------|--------|-------------|----------|---------|----------|-----------|----------|------------------|--------------|---------------|------------------|------------|---------|
| gene | Blood | Kidney | methyl.diff | pMWU.fdr | Match ? | gene     | blood     | kidney   | log2(fold_ratio) | blood+ 0.001 | kidney+ 0.001 | log2(fold_ratio) | q_value    | Match ? |
|      |       |        |             |          |         | TIMM10B  | 10.647    | 28.3654  | 1.41368523       | 10.648       | 28.3664       | 1.41360059       | 0.00870822 | No      |
|      |       |        |             |          |         | Timm13   | 58.869    | 228.636  | 1.95747256       | 58.87        | 228.637       | 1.95745436       | 0.00022079 | No      |
|      |       |        |             |          |         | Timm17a  | 30.7782   | 101.584  | 1.72269242       | 30.7792      | 101.585       | 1.72265975       | 0.00022079 | No      |
|      |       |        |             |          |         | Timm21   | 10.6878   | 29.842   | 1.48137931       | 10.6888      | 29.843        | 1.48129268       | 0.00022079 | No      |
|      |       |        |             |          |         | Timm22   | 9.4888    | 32.4029  | 1.77182538       | 9.4898       | 32.4039       | 1.77171787       | 0.00022079 | No      |
|      |       |        |             |          |         | Timp2    | 0.43117   | 45.6959  | 6.72766412       | 0.43217      | 45.6969       | 6.72435356       | 0.00022079 | No      |
|      |       |        |             |          |         | Timp3    | 0.0366069 | 484.041  | 13.690726        | 0.0376069    | 484.042       | 13.6518472       | 0.00858283 | No      |
|      |       |        |             |          |         | Timp4    | 0         | 2.24852  | inf              | 0.001        | 2.24952       | 11.1354015       | 0.00022079 | No      |
|      |       |        |             |          |         | Tiparp   | 20.2308   | 8.13625  | -1.3141175       | 20.2318      | 8.13725       | -1.3140115       | 0.00147497 | No      |
|      |       |        |             |          |         | Tjp1     | 0.0300791 | 13.1207  | 8.76886757       | 0.0310791    | 13.1217       | 8.7217942        | 0.00022079 | No      |
|      |       |        |             |          |         | Tjp2     | 0.0793584 | 19.0213  | 7.9050172        | 0.0803584    | 19.0223       | 7.88702714       | 0.00022079 | No      |
|      |       |        |             |          |         | Tjp3     | 0.687062  | 14.9414  | 4.44273123       | 0.688062     | 14.9424       | 4.44072951       | 0.00096553 | No      |
|      |       |        |             |          |         | Tkt      | 76.1707   | 170.254  | 1.16038063       | 76.1717      | 170.255       | 1.16037017       | 0.00022079 | No      |
|      |       |        |             |          |         | Tlcd1    | 1.04572   | 28.1625  | 4.75120689       | 1.04672      | 28.1635       | 4.74987916       | 0.00022079 | No      |
|      |       |        |             |          |         | Tle2     | 0.0506326 | 243.451  | 12.2312772       | 0.0516326    | 243.452       | 12.2030675       | 0.00022079 | No      |
|      |       |        |             |          |         | Tle4     | 32.1638   | 7.16458  | -2.1664838       | 32.1648      | 7.16558       | -2.1663273       | 0.00022079 | No      |
|      |       |        |             |          |         | Tlk2     | 23.8212   | 11.4813  | -1.0529601       | 23.8222      | 11.4823       | -1.052895        | 0.0115315  | No      |
|      |       |        |             |          |         | Tln1     | 64.8852   | 29.0586  | -1.1589242       | 64.8862      | 29.0596       | -1.1588968       | 0.0242871  | No      |
|      |       |        |             |          |         | Tlr12    | 0         | 1.67315  | inf              | 0.001        | 1.67415       | 10.7092131       | 0.00022079 | No      |
|      |       |        |             |          |         | Tlr3     | 0.61731   | 11.7879  | 4.25516775       | 0.61831      | 11.7889       | 4.25295496       | 0.00022079 | No      |
|      |       |        |             |          |         | Tm2d2    | 19.7029   | 46.9843  | 1.25377076       | 19.7039      | 46.9853       | 1.25372825       | 0.00113657 | No      |
|      |       |        |             |          |         | Tm9sf2   | 14.7331   | 54.8548  | 1.89655685       | 14.7341      | 54.8558       | 1.89648523       | 0.00022079 | No      |
|      |       |        |             |          |         | Tmc3     | 0         | 3.74294  | inf              | 0.001        | 3.74394       | 11.8703416       | 0.00022079 | No      |
|      |       |        |             |          |         | Tmc4     | 0.088336  | 24.2352  | 8.09988677       | 0.089336     | 24.2362       | 8.08370614       | 0.00845215 | No      |
|      |       |        |             |          |         | Tmcc1    | 15.7234   | 5.2472   | -1.5832935       | 15.7244      | 5.2482        | -1.5831104       | 0.00060553 | No      |
|      |       |        |             |          |         | Tmcc3    | 1.0529    | 3.89266  | 1.88638792       | 1.0539       | 3.89366       | 1.88538893       | 0.00022079 | No      |
|      |       |        |             |          |         | Tmed3    | 8.07269   | 23.0883  | 1.51604055       | 8.07369      | 23.0893       | 1.51592434       | 0.00078858 | No      |
|      |       |        |             |          |         | Tmed5    | 15.3999   | 6.91805  | -1.1544836       | 15.4009      | 6.91905       | -1.1543688       | 0.00988585 | No      |
|      |       |        |             |          |         | Tmed7    | 12.6973   | 26.2854  | 1.04973994       | 12.6983      | 26.2864       | 1.04968121       | 0.0370591  | No      |
|      |       |        |             |          |         | Tmem100  | 0         | 0.795397 | inf              | 0.001        | 0.796397      | 9.63734398       | 0.00022079 | No      |
|      |       |        |             |          |         | Tmem106a | 1.71708   | 28.6651  | 4.06126615       | 1.71808      | 28.6661       | 4.06047652       | 0.00022079 | No      |
|      |       |        |             |          |         | Tmem106b | 14.7991   | 27.8765  | 0.91354          | 14.8001      | 27.8775       | 0.91349427       | 0.0200735  | No      |
|      |       |        |             |          |         | Tmem106c | 5.15814   | 15.8314  | 1.61786601       | 5.15914      | 15.8324       | 1.61767747       | 0.00041963 | No      |
|      |       |        |             |          |         | Tmem108  | 0.0340867 | 1.75591  | 5.68686615       | 0.0350867    | 1.75691       | 5.64597221       | 0.010907   | No      |
|      |       |        |             |          |         | Tmem109  | 9.92703   | 18.606   | 0.90633387       | 9.92803      | 18.607        | 0.90626609       | 0.0170023  | No      |
|      |       |        |             |          |         | TMEM11   | 13.9665   | 28.6235  | 1.03522956       | 13.9675      | 28.6245       | 1.03517667       | 0.00579147 | No      |
|      |       |        |             |          |         | Tmem116  | 0.0596684 | 11.2255  | 7.5555969        | 0.0606684    | 11.2265       | 7.53174724       | 0.00466383 | No      |
|      |       |        |             |          |         | Tmem117  | 0.0538347 | 8.33641  | 7.27474604       | 0.0548347    | 8.33741       | 7.24836634       | 0.0424075  | No      |
|      |       |        |             |          |         | Tmem120a | 11.4294   | 23.1391  | 1.01758308       | 11.4304      | 23.1401       | 1.01751921       | 0.0155671  | No      |
|      |       |        |             |          |         | Tmem123  | 146.403   | 87.0277  | -0.7503985       | 146.404      | 87.0287       | -0.7503918       | 0.0427098  | No      |
|      |       |        |             |          |         | Tmem132a | 0.619799  | 14.2158  | 4.51955105       | 0.620799     | 14.2168       | 4.51732673       | 0.00022079 | No      |
|      |       |        |             |          |         | Tmem135  | 6.05881   | 14.7165  | 1.28032823       | 6.05981      | 14.7175       | 1.28018816       | 0.00078858 | No      |

| RRBS |       |        |             |          |         | RNAseq   |           |         |                  |              |               |                  |            |         |
|------|-------|--------|-------------|----------|---------|----------|-----------|---------|------------------|--------------|---------------|------------------|------------|---------|
| gene | Blood | Kidney | methyl.diff | pMWU.fdr | Match ? | gene     | blood     | kidney  | log2(fold_ratio) | blood+ 0.001 | kidney+ 0.001 | log2(fold_ratio) | q_value    | Match ? |
|      |       |        |             |          |         | Tmem136  | 0.0635356 | 8.49666 | 7.06318684       | 0.0645356    | 8.49766       | 7.04082659       | 0.012146   | No      |
|      |       |        |             |          |         | Tmem141  | 12.5802   | 36.8375 | 1.5500203        | 12.5812      | 36.8385       | 1.54994478       | 0.00466383 | No      |
|      |       |        |             |          |         | Tmem14a  | 10.0286   | 23.6135 | 1.23549168       | 10.0296      | 23.6145       | 1.23540892       | 0.00422081 | No      |
|      |       |        |             |          |         | Tmem150a | 1.12461   | 69.7319 | 5.95432211       | 1.12561      | 69.7329       | 5.95306052       | 0.00022079 | No      |
|      |       |        |             |          |         | Tmem154  | 57.2232   | 3.651   | -3.9702366       | 57.2242      | 3.652         | -3.9698667       | 0.00022079 | No      |
|      |       |        |             |          |         | Tmem156  | 57.8819   | 3.34873 | -4.1114263       | 57.8829      | 3.34973       | -4.1110205       | 0.00022079 | No      |
|      |       |        |             |          |         | Tmem160  | 44.8946   | 105.443 | 1.23184949       | 44.8956      | 105.444       | 1.23183104       | 0.00698733 | No      |
|      |       |        |             |          |         | Tmem169  | 0         | 4.946   | inf              | 0.001        | 4.947         | 12.2723382       | 0.00935956 | No      |
|      |       |        |             |          |         | Tmem17   | 1.41687   | 7.63792 | 2.43047241       | 1.41787      | 7.63892       | 2.42964342       | 0.00536605 | No      |
|      |       |        |             |          |         | Tmem170b | 6.31784   | 2.88142 | -1.1326514       | 6.31884      | 2.88242       | -1.1323792       | 0.0212313  | No      |
|      |       |        |             |          |         | Tmem173  | 145.538   | 16.5001 | -3.1408492       | 145.539      | 16.5011       | -3.1407717       | 0.00022079 | No      |
|      |       |        |             |          |         | Tmem174  | 0         | 131.408 | inf              | 0.001        | 131.409       | 17.0037046       | 0.00022079 | No      |
|      |       |        |             |          |         | Tmem176a | 4.34177   | 84.3575 | 4.28016113       | 4.34277      | 84.3585       | 4.27984599       | 0.00022079 | No      |
|      |       |        |             |          |         | Tmem176b | 3.95695   | 126.015 | 4.99306283       | 3.95795      | 126.016       | 4.99270972       | 0.00022079 | No      |
|      |       |        |             |          |         | Tmem177  | 2.0712    | 5.59583 | 1.43388526       | 2.0722       | 5.59683       | 1.43344667       | 0.0232628  | No      |
|      |       |        |             |          |         | Tmem184b | 7.73363   | 17.1213 | 1.1465746        | 7.73463      | 17.1223       | 1.14647232       | 0.00147497 | No      |
|      |       |        |             |          |         | Tmem194  | 4.38124   | 1.61748 | -1.4375914       | 4.38224      | 1.61848       | -1.437029        | 0.00935956 | No      |
|      |       |        |             |          |         | Tmem194b | 22.9547   | 2.96529 | -2.9525445       | 22.9557      | 2.96629       | -2.9521209       | 0.00022079 | No      |
|      |       |        |             |          |         | Tmem2    | 0.133854  | 4.57965 | 5.09650519       | 0.134854     | 4.58065       | 5.08608211       | 0.00022079 | No      |
|      |       |        |             |          |         | Tmem204  | 29.1517   | 5.44841 | -2.4196728       | 29.1527      | 5.44941       | -2.4194576       | 0.0189519  | No      |
|      |       |        |             |          |         | Tmem205  | 3.3583    | 35.5668 | 3.40472816       | 3.3593       | 35.5678       | 3.4043392        | 0.00022079 | No      |
|      |       |        |             |          |         | Tmem207  | 0         | 69.1324 | inf              | 0.001        | 69.1334       | 16.0770953       | 0.00022079 | No      |
|      |       |        |             |          |         | Tmem213  | 0         | 399.321 | inf              | 0.001        | 399.322       | 18.607193        | 0.00022079 | No      |
|      |       |        |             |          |         | Tmem216  | 5.74624   | 20.8339 | 1.85824277       | 5.74724      | 20.8349       | 1.85806097       | 0.00041963 | No      |
|      |       |        |             |          |         | Tmem221  | 0         | 2.22137 | inf              | 0.001        | 2.22237       | 11.1178833       | 0.00022079 | No      |
|      |       |        |             |          |         | Tmem229b | 25.5887   | 2.64443 | -3.2744782       | 25.5897      | 2.64543       | -3.2739891       | 0.00022079 | No      |
|      |       |        |             |          |         | Tmem237  | 1.61072   | 9.32401 | 2.53324483       | 1.61172      | 9.32501       | 2.53250414       | 0.00318754 | No      |
|      |       |        |             |          |         | Tmem238  | 1.37086   | 66.5756 | 5.60184038       | 1.37186      | 66.5766       | 5.60081003       | 0.00041963 | No      |
|      |       |        |             |          |         | Tmem245  | 11.9345   | 5.16563 | -1.2081219       | 11.9355      | 5.16663       | -1.2079635       | 0.00041963 | No      |
|      |       |        |             |          |         | Tmem25   | 0.430985  | 6.33103 | 3.87673067       | 0.431985     | 6.33203       | 3.87361497       | 0.00022079 | No      |
|      |       |        |             |          |         | Tmem256  | 28.3403   | 165.305 | 2.54420343       | 28.3413      | 165.306       | 2.54416125       | 0.00022079 | No      |
|      |       |        |             |          |         | Tmem27   | 0         | 190.658 | inf              | 0.001        | 190.659       | 17.5406351       | 0.00022079 | No      |
|      |       |        |             |          |         | Tmem38a  | 0.639741  | 8.70679 | 3.76658108       | 0.640741     | 8.70779       | 3.7644934        | 0.00022079 | No      |
|      |       |        |             |          |         | Tmem38b  | 4.95713   | 15.7964 | 1.67201881       | 4.95813      | 15.7974       | 1.67181913       | 0.00022079 | No      |
|      |       |        |             |          |         | Tmem42   | 13.8574   | 28.4901 | 1.03980409       | 13.8584      | 28.4911       | 1.03975062       | 0.00551024 | No      |
|      |       |        |             |          |         | Tmem43   | 20.4615   | 11.6608 | -0.8112451       | 20.4625      | 11.6618       | -0.8111919       | 0.0168842  | No      |
|      |       |        |             |          |         | Tmem45b  | 0.0991272 | 4.96647 | 5.64679601       | 0.1001272    | 4.96747       | 5.63260541       | 0.00096553 | No      |
|      |       |        |             |          |         | Tmem50a  | 219.694   | 106.491 | -1.044764        | 219.695      | 106.492       | -1.044757        | 0.00113657 | No      |
|      |       |        |             |          |         | Tmem50b  | 1.55318   | 54.7253 | 5.13891102       | 1.55418      | 54.7263       | 5.13800881       | 0.00022079 | No      |
|      |       |        |             |          |         | Tmem51   | 0.896139  | 18.2146 | 4.34522898       | 0.897139     | 18.2156       | 4.34369918       | 0.00022079 | No      |
|      |       |        |             |          |         | Tmem52   | 0         | 4.8526  | inf              | 0.001        | 4.8536        | 12.2448395       | 0.010907   | No      |
|      |       |        |             |          |         | Tmem52b  | 0         | 79.0175 | inf              | 0.001        | 79.0185       | 16.2699028       | 0.00022079 | No      |

| RRBS |       |        |             |          |         | RNAseq    |           |          |                  |              |               |                  |            |         |
|------|-------|--------|-------------|----------|---------|-----------|-----------|----------|------------------|--------------|---------------|------------------|------------|---------|
| gene | Blood | Kidney | methyl.diff | pMWU.fdr | Match ? | gene      | blood     | kidney   | log2(fold_ratio) | blood+ 0.001 | kidney+ 0.001 | log2(fold_ratio) | q_value    | Match ? |
|      |       |        |             |          |         | Tmem53    | 2.7606    | 15.7894  | 2.51590258       | 2.7616       | 15.7904       | 2.51547144       | 0.00022079 | No      |
|      |       |        |             |          |         | Tmem54    | 0         | 6.2858   | inf              | 0.001        | 6.2868        | 12.6181102       | 0.00022079 | No      |
|      |       |        |             |          |         | Tmem55a   | 0.323695  | 17.2247  | 5.73369996       | 0.324695     | 17.2257       | 5.72933363       | 0.00060553 | No      |
|      |       |        |             |          |         | Tmem56    | 0         | 1.78123  | inf              | 0.001        | 1.78223       | 10.7994678       | 0.00022079 | No      |
|      |       |        |             |          |         | Tmem60    | 4.60475   | 10.3019  | 1.1617157        | 4.60575      | 10.3029       | 1.16154247       | 0.0155671  | No      |
|      |       |        |             |          |         | Tmem64    | 1.76623   | 7.11412  | 2.01001209       | 1.76723      | 7.11512       | 2.00939827       | 0.0126352  | No      |
|      |       |        |             |          |         | Tmem66    | 124.762   | 51.4242  | -1.2786592       | 124.763      | 51.4252       | -1.2786427       | 0.00022079 | No      |
|      |       |        |             |          |         | Tmem67    | 0.195812  | 2.78914  | 3.83227927       | 0.196812     | 2.79014       | 3.82544742       | 0.00466383 | No      |
|      |       |        |             |          |         | Tmem70    | 6.84082   | 28.804   | 2.074028         | 6.84182      | 28.805        | 2.0738672        | 0.00022079 | No      |
|      |       |        |             |          |         | Tmem71    | 75.0778   | 1.10424  | -6.0872607       | 75.0788      | 1.10524       | -6.085974        | 0.00022079 | No      |
|      |       |        |             |          |         | Tmem79    | 0.233141  | 9.43548  | 5.33882127       | 0.234141     | 9.43648       | 5.33279932       | 0.00041963 | No      |
|      |       |        |             |          |         | Tmem86a   | 0.530699  | 32.1957  | 5.92283038       | 0.531699     | 32.1967       | 5.92015926       | 0.00022079 | No      |
|      |       |        |             |          |         | Tmem86b   | 7.67432   | 2.17224  | -1.8208554       | 7.67532      | 2.17324       | -1.8203794       | 0.0182773  | No      |
|      |       |        |             |          |         | Tmem87a   | 59.4426   | 21.8242  | -1.4455684       | 59.4436      | 21.8252       | -1.4455266       | 0.00922576 | No      |
|      |       |        |             |          |         | Tmem87b   | 17.9863   | 10.6735  | -0.7528651       | 17.9873      | 10.6745       | -0.7528102       | 0.0332704  | No      |
|      |       |        |             |          |         | TMEM9     | 17.6799   | 32.2165  | 0.86568965       | 17.6809      | 32.2175       | 0.86565284       | 0.0145886  | No      |
|      |       |        |             |          |         | Tmem97    | 3.91056   | 12.8207  | 1.71302791       | 3.91156      | 12.8217       | 1.71277156       | 0.00211842 | No      |
|      |       |        |             |          |         | Tmlhe     | 8.26653   | 51.1087  | 2.62821513       | 8.26753      | 51.1097       | 2.62806884       | 0.00022079 | No      |
|      |       |        |             |          |         | Tmod3     | 51.3711   | 20.785   | -1.3054142       | 51.3721      | 20.786        | -1.3053729       | 0.00041963 | No      |
|      |       |        |             |          |         | Tmpo      | 47.8266   | 19.9389  | -1.2622274       | 47.8276      | 19.9399       | -1.2621852       | 0.00041963 | No      |
|      |       |        |             |          |         | Tmprss13  | 0         | 4.61558  | inf              | 0.001        | 4.61658       | 12.1726088       | 0.00022079 | No      |
|      |       |        |             |          |         | Tmsb10    | 8246.45   | 1502.72  | -2.456197        | 8246.451     | 1502.721      | -2.4561962       | 0.00022079 | No      |
|      |       |        |             |          |         | Tmsbl1    | 70.6723   | 9.46938  | -2.899803        | 70.6733      | 9.47038       | -2.8996711       | 0.00041963 | No      |
|      |       |        |             |          |         | Tmtc1     | 0.0085542 | 7.01171  | 9.67891767       | 0.0095542    | 7.01271       | 9.51962128       | 0.0186157  | No      |
|      |       |        |             |          |         | Tmtc3     | 1.02686   | 2.59821  | 1.33927854       | 1.02786      | 2.59921       | 1.33842942       | 0.00523184 | No      |
|      |       |        |             |          |         | Tmtc4     | 2.08967   | 14.7957  | 2.82383092       | 2.09067      | 14.7967       | 2.82323819       | 0.00022079 | No      |
|      |       |        |             |          |         | Tnfaip1   | 5.61072   | 26.117   | 2.21873136       | 5.61172      | 26.118        | 2.21852949       | 0.00022079 | No      |
|      |       |        |             |          |         | Tnfaip3   | 86.6145   | 8.69903  | -3.3156821       | 86.6155      | 8.70003       | -3.3155329       | 0.00022079 | No      |
|      |       |        |             |          |         | Tnfaip6   | 0         | 1.26516  | inf              | 0.001        | 1.26616       | 10.306244        | 0.00022079 | No      |
|      |       |        |             |          |         | Tnfaip8l1 | 19.1389   | 2.14662  | -3.1563692       | 19.1399      | 2.14762       | -3.1557726       | 0.0139821  | No      |
|      |       |        |             |          |         | Tnfrsf14  | 516.61    | 24.7307  | -4.3847006       | 516.611      | 24.7317       | -4.384645        | 0.00022079 | No      |
|      |       |        |             |          |         | Tnfrsf1a  | 6.56171   | 24.2675  | 1.88688175       | 6.56271      | 24.2685       | 1.88672135       | 0.00022079 | No      |
|      |       |        |             |          |         | Tnfrsf1b  | 24.2321   | 3.23794  | -2.9037713       | 24.2331      | 3.23894       | -2.9033853       | 0.00022079 | No      |
|      |       |        |             |          |         | Tnfrsf21  | 2.34821   | 52.4722  | 4.48191994       | 2.34921      | 52.4732       | 4.48133318       | 0.00022079 | No      |
|      |       |        |             |          |         | Tnfrsf26  | 118.091   | 6.67319  | -4.1453786       | 118.092      | 6.67419       | -4.1451747       | 0.00022079 | No      |
|      |       |        |             |          |         | Tnfsf10   | 5.59245   | 13.452   | 1.26626833       | 5.59345      | 13.453        | 1.26611762       | 0.0111498  | No      |
|      |       |        |             |          |         | Tnfsf11   | 1.23563   | 0        | #NUM!            | 1.23663      | 0.001         | -10.272198       | 0.00022079 | No      |
|      |       |        |             |          |         | Tnfsf13   | 0.667728  | 22.0476  | 5.04521727       | 0.668728     | 22.0486       | 5.04312372       | 0.00022079 | No      |
|      |       |        |             |          |         | Tnik      | 9.355     | 0.612604 | -3.932711        | 9.356        | 0.613604      | -3.9305121       | 0.00022079 | No      |
|      |       |        |             |          |         | Tnip1     | 67.6615   | 30.5855  | -1.1454873       | 67.6625      | 30.5865       | -1.1454615       | 0.00022079 | No      |
|      |       |        |             |          |         | Tnks1bp1  | 2.84794   | 14.1927  | 2.31715841       | 2.84894      | 14.1937       | 2.31675358       | 0.00022079 | No      |
|      |       |        |             |          |         | Tnks2     | 14.0771   | 6.81368  | -1.0468441       | 14.0781      | 6.81468       | -1.0467348       | 0.00096553 | No      |

| RRBS |       |        |             |          |         | RNAseq   |           |         |                  |              |               |                  |            |         |
|------|-------|--------|-------------|----------|---------|----------|-----------|---------|------------------|--------------|---------------|------------------|------------|---------|
| gene | Blood | Kidney | methyl.diff | pMWU.fdr | Match ? | gene     | blood     | kidney  | log2(fold_ratio) | blood+ 0.001 | kidney+ 0.001 | log2(fold_ratio) | q_value    | Match ? |
|      |       |        |             |          |         | Tnni1    | 0         | 1.24418 | inf              | 0.001        | 1.24518       | 10.2821386       | 0.00022079 | No      |
|      |       |        |             |          |         | Tnni3k   | 0.053394  | 1.81818 | 5.08967359       | 0.054394     | 1.81918       | 5.06369697       | 0.0182773  | No      |
|      |       |        |             |          |         | Tnnt2    | 0.144638  | 9.62705 | 6.05657524       | 0.145638     | 9.62805       | 6.04678489       | 0.00022079 | No      |
|      |       |        |             |          |         | Tnnt3    | 33.6793   | 12.1237 | -1.4740321       | 33.6803      | 12.1247       | -1.4739559       | 0.00672121 | No      |
|      |       |        |             |          |         | Tnrc6a   | 28.7398   | 8.74831 | -1.7159738       | 28.7408      | 8.74931       | -1.7158591       | 0.00022079 | No      |
|      |       |        |             |          |         | Tnrc6b   | 20.1173   | 3.83054 | -2.392817        | 20.1183      | 3.83154       | -2.3925121       | 0.00060553 | No      |
|      |       |        |             |          |         | Tnrc6c   | 25.2203   | 9.29909 | -1.439424        | 25.2213      | 9.30009       | -1.4393261       | 0.0130042  | No      |
|      |       |        |             |          |         | Tns1     | 0.0993432 | 103.07  | 10.0189156       | 0.1003432    | 103.071       | 10.0044799       | 0.00022079 | No      |
|      |       |        |             |          |         | Tns3     | 0.064005  | 44.4196 | 9.43879607       | 0.065005     | 44.4206       | 9.41646247       | 0.00022079 | No      |
|      |       |        |             |          |         | Tob1     | 16.4711   | 53.509  | 1.69984466       | 16.4721      | 53.51         | 1.69978404       | 0.00022079 | No      |
|      |       |        |             |          |         | Tob2     | 7.33446   | 12.1951 | 0.73353893       | 7.33546      | 12.1961       | 0.73346054       | 0.0364343  | No      |
|      |       |        |             |          |         | Tollip   | 9.91721   | 17.2214 | 0.79619622       | 9.91821      | 17.2224       | 0.79613452       | 0.0251614  | No      |
|      |       |        |             |          |         | Tom1     | 10.3351   | 31.9508 | 1.62829971       | 10.3361      | 31.9518       | 1.62820527       | 0.00022079 | No      |
|      |       |        |             |          |         | Tom1l2   | 15.6324   | 29.7881 | 0.93019682       | 15.6334      | 29.7891       | 0.93015296       | 0.0181685  | No      |
|      |       |        |             |          |         | Tomm34   | 42.5423   | 16.6047 | -1.3573064       | 42.5433      | 16.6057       | -1.3572534       | 0.00022079 | No      |
|      |       |        |             |          |         | Tomm40l  | 5.61404   | 12.7201 | 1.17999876       | 5.61504      | 12.7211       | 1.17985522       | 0.0467974  | No      |
|      |       |        |             |          |         | Top1mt   | 5.93167   | 11.6513 | 0.97398069       | 5.93267      | 11.6523       | 0.97386131       | 0.0347515  | No      |
|      |       |        |             |          |         | Top2a    | 1.0921    | 2.5057  | 1.19810873       | 1.0931       | 2.5067        | 1.19736396       | 0.014108   | No      |
|      |       |        |             |          |         | Top2b    | 19.2053   | 6.29244 | -1.609813        | 19.2063      | 6.29344       | -1.6096589       | 0.00242102 | No      |
|      |       |        |             |          |         | Top3a    | 8.77767   | 3.14522 | -1.4806771       | 8.77867      | 3.14622       | -1.4803828       | 0.00113657 | No      |
|      |       |        |             |          |         | Topbp1   | 18.3545   | 3.53419 | -2.3766823       | 18.3555      | 3.53519       | -2.3763528       | 0.00022079 | No      |
|      |       |        |             |          |         | Tor1a    | 25.6077   | 14.6618 | -0.8045154       | 25.6087      | 14.6628       | -0.8044734       | 0.0431196  | No      |
|      |       |        |             |          |         | Tor4a    | 14.2899   | 2.93891 | -2.2816427       | 14.2909      | 2.93991       | -2.2812529       | 0.00022079 | No      |
|      |       |        |             |          |         | Tox      | 20.0788   | 2.84878 | -2.8172569       | 20.0798      | 2.84978       | -2.8168224       | 0.00022079 | No      |
|      |       |        |             |          |         | Tox3     | 0         | 1.32673 | inf              | 0.001        | 1.32773       | 10.3747461       | 0.00022079 | No      |
|      |       |        |             |          |         | Tp53     | 198.002   | 57.2562 | -1.7900112       | 198.003      | 57.2572       | -1.7899933       | 0.00147497 | No      |
|      |       |        |             |          |         | Tp53bp2  | 6.56855   | 13.3805 | 1.02648519       | 6.56955      | 13.3815       | 1.02637339       | 0.00436941 | No      |
|      |       |        |             |          |         | Tp53inp1 | 33.88     | 10.2028 | -1.7314687       | 33.881       | 10.2038       | -1.7313699       | 0.00593001 | No      |
|      |       |        |             |          |         | TP53INP2 | 0.635737  | 53.776  | 6.40238858       | 0.636737     | 53.777        | 6.40014787       | 0.00022079 | No      |
|      |       |        |             |          |         | Tp63     | 0         | 1.06884 | inf              | 0.001        | 1.06984       | 10.0631793       | 0.00618779 | No      |
|      |       |        |             |          |         | Tpcn1    | 19.3298   | 68.7496 | 1.83052461       | 19.3308      | 68.7506       | 1.83047096       | 0.00022079 | No      |
|      |       |        |             |          |         | Tpgs1    | 12.0087   | 31.8943 | 1.40921863       | 12.0097      | 31.8953       | 1.40914373       | 0.00022079 | No      |
|      |       |        |             |          |         | Tpi1     | 14.6125   | 226.025 | 3.95120742       | 14.6135      | 226.026       | 3.95111508       | 0.00022079 | No      |
|      |       |        |             |          |         | Tpk1     | 1.24838   | 5.81693 | 2.22020079       | 1.24938      | 5.81793       | 2.2192936        | 0.0019604  | No      |
|      |       |        |             |          |         | TPM1     | 10.6291   | 206.623 | 4.28090951       | 10.6301      | 206.624       | 4.28078076       | 0.00022079 | No      |
|      |       |        |             |          |         | Tpm3     | 389.951   | 138.137 | -1.4971931       | 389.952      | 138.138       | -1.4971863       | 0.00022079 | No      |
|      |       |        |             |          |         | Tpmt     | 102.799   | 48.4317 | -1.0858027       | 102.8        | 48.4327       | -1.0857869       | 0.0138632  | No      |
|      |       |        |             |          |         | Tpp1     | 19.7371   | 36.4047 | 0.88321469       | 19.7381      | 36.4057       | 0.88318123       | 0.0187326  | No      |
|      |       |        |             |          |         | Tpp2     | 34.555    | 12.718  | -1.4420227       | 34.556       | 12.719        | -1.441951        | 0.00022079 | No      |
|      |       |        |             |          |         | Tpr      | 51.3135   | 18.272  | -1.4897039       | 51.3145      | 18.273        | -1.489653        | 0.00022079 | No      |
|      |       |        |             |          |         | Tpra1    | 22.9075   | 47.2052 | 1.04312577       | 22.9085      | 47.2062       | 1.04309336       | 0.015076   | No      |
|      |       |        |             |          |         | TPRG1L   | 121.231   | 73.4862 | -0.7222134       | 121.232      | 73.4872       | -0.7222057       | 0.0282852  | No      |

| RRBS |       |        |             |          |         | RNAseq   |           |          |                  |              |               |                  |            |         |
|------|-------|--------|-------------|----------|---------|----------|-----------|----------|------------------|--------------|---------------|------------------|------------|---------|
| gene | Blood | Kidney | methyl.diff | pMWU.fdr | Match ? | gene     | blood     | kidney   | log2(fold_ratio) | blood+ 0.001 | kidney+ 0.001 | log2(fold_ratio) | q_value    | Match ? |
|      |       |        |             |          |         | Tprn     | 4.31227   | 15.9463  | 1.8867023        | 4.31327      | 15.9473       | 1.88645825       | 0.00022079 | No      |
|      |       |        |             |          |         | Tpst2    | 65.5194   | 35.5277  | -0.8829779       | 65.5204      | 35.5287       | -0.8829593       | 0.0072515  | No      |
|      |       |        |             |          |         | Tra2a    | 97.9971   | 43.7008  | -1.1650794       | 97.9981      | 43.7018       | -1.1650611       | 0.00164037 | No      |
|      |       |        |             |          |         | Tra2b    | 173.849   | 55.698   | -1.6421373       | 173.85       | 55.699        | -1.6421197       | 0.00022079 | No      |
|      |       |        |             |          |         | Trabd2b  | 0.0191561 | 32.0338  | 10.7075754       | 0.0201561    | 32.0348       | 10.6342077       | 0.00022079 | No      |
|      |       |        |             |          |         | Trac     | 986.661   | 123.467  | -2.998429        | 986.662      | 123.468       | -2.9984188       | 0.00022079 | No      |
|      |       |        |             |          |         | Traf2    | 33.5544   | 18.3019  | -0.8745085       | 33.5554      | 18.3029       | -0.8744727       | 0.0215651  | No      |
|      |       |        |             |          |         | Traf3    | 16.3827   | 5.76694  | -1.5062952       | 16.3837      | 5.76794       | -1.5061331       | 0.00022079 | No      |
|      |       |        |             |          |         | Traf3ip3 | 201.824   | 17.8242  | -3.5011885       | 201.825      | 17.8252       | -3.5011147       | 0.00466383 | No      |
|      |       |        |             |          |         | Traf4    | 12.6324   | 42.2179  | 1.74072606       | 12.6334      | 42.2189       | 1.74064603       | 0.00022079 | No      |
|      |       |        |             |          |         | Traf6    | 14.2457   | 3.07469  | -2.2120136       | 14.2467      | 3.07569       | -2.2116458       | 0.00022079 | No      |
|      |       |        |             |          |         | Trak1    | 7.71339   | 16.734   | 1.11734538       | 7.71439      | 16.735        | 1.11724456       | 0.00466383 | No      |
|      |       |        |             |          |         | Tram1    | 99.4923   | 49.7875  | -0.9988013       | 99.4933      | 49.7885       | -0.9987868       | 0.0019604  | No      |
|      |       |        |             |          |         | Trappc1  | 29.7477   | 125.401  | 2.07569882       | 29.7487      | 125.402       | 2.07566183       | 0.00022079 | No      |
|      |       |        |             |          |         | Trappc10 | 14.6601   | 9.09704  | -0.6884258       | 14.6611      | 9.09804       | -0.6883657       | 0.0388459  | No      |
|      |       |        |             |          |         | TRAPPC2  | 5.94119   | 31.8216  | 2.42118254       | 5.94219      | 31.8226       | 2.42098507       | 0.00060553 | No      |
|      |       |        |             |          |         | Trappc2l | 31.4633   | 103.764  | 1.7215641        | 31.4643      | 103.765       | 1.72153215       | 0.00022079 | No      |
|      |       |        |             |          |         | Trappc3  | 24.168    | 42.0574  | 0.79926158       | 24.169       | 42.0584       | 0.79923619       | 0.0318275  | No      |
|      |       |        |             |          |         | Trappc8  | 13.6895   | 7.71041  | -0.8281903       | 13.6905      | 7.71141       | -0.8281086       | 0.0297932  | No      |
|      |       |        |             |          |         | Trappc9  | 17.9585   | 9.37833  | -0.9372639       | 17.9595      | 9.37933       | -0.9371904       | 0.0240684  | No      |
|      |       |        |             |          |         | Trat1    | 58.4007   | 1.7963   | -5.0228854       | 58.4017      | 1.7973        | -5.0221072       | 0.00022079 | No      |
|      |       |        |             |          |         | Trav4-2  | 5.83335   | 0        | #NUM!            | 5.83435      | 0.001         | -12.510356       | 0.00022079 | No      |
|      |       |        |             |          |         | Trav5-4  | 2.40813   | 0        | #NUM!            | 2.40913      | 0.001         | -11.234297       | 0.00041963 | No      |
|      |       |        |             |          |         | Trdmt1   | 7.94266   | 4.07368  | -0.9632896       | 7.94366      | 4.07468       | -0.9631171       | 0.0198519  | No      |
|      |       |        |             |          |         | Trem2    | 0.138204  | 5.0102   | 5.17999692       | 0.139204     | 5.0112        | 5.16988355       | 0.00113657 | No      |
|      |       |        |             |          |         | Trem12   | 55.4916   | 1.60415  | -5.1123884       | 55.4926      | 1.60515       | -5.1115154       | 0.00022079 | No      |
|      |       |        |             |          |         | Trerf1   | 11.869    | 3.26699  | -1.8611644       | 11.87        | 3.26799       | -1.8608445       | 0.00632443 | No      |
|      |       |        |             |          |         | Triap1   | 16.1379   | 39.9725  | 1.30855495       | 16.1389      | 39.9735       | 1.30850165       | 0.00041963 | No      |
|      |       |        |             |          |         | Trib1    | 0.627344  | 5.02965  | 3.00312935       | 0.628344     | 5.03065       | 3.00111831       | 0.00060553 | No      |
|      |       |        |             |          |         | Trib2    | 102.29    | 8.96954  | -3.5114873       | 102.291      | 8.97054       | -3.5113406       | 0.00022079 | No      |
|      |       |        |             |          |         | Trib3    | 2.19557   | 0.241943 | -3.1818564       | 2.19657      | 0.242943      | -3.1765627       | 0.011893   | No      |
|      |       |        |             |          |         | Tril     | 0         | 16.0486  | inf              | 0.001        | 16.0496       | 13.9702497       | 0.00022079 | No      |
|      |       |        |             |          |         | Trim14   | 27.8122   | 3.08923  | -3.1703987       | 27.8132      | 3.09023       | -3.1699836       | 0.00022079 | No      |
|      |       |        |             |          |         | Trim21   | 34.074    | 9.41953  | -1.8549443       | 34.075       | 9.42053       | -1.8548335       | 0.00022079 | No      |
|      |       |        |             |          |         | Trim28   | 93.1119   | 57.2356  | -0.7020528       | 93.1129      | 57.2366       | -0.7020431       | 0.035709   | No      |
|      |       |        |             |          |         | Trim29   | 0         | 8.78122  | inf              | 0.001        | 8.78222       | 13.10037         | 0.00022079 | No      |
|      |       |        |             |          |         | Trim3    | 6.05589   | 12.8925  | 1.09012114       | 6.05689      | 12.8935       | 1.08999483       | 0.011657   | No      |
|      |       |        |             |          |         | Trim32   | 4.14724   | 10.9002  | 1.39413116       | 4.14824      | 10.9012       | 1.39391569       | 0.00022079 | No      |
|      |       |        |             |          |         | Trim33   | 26.3184   | 5.72893  | -2.1997342       | 26.3194      | 5.72993       | -2.1995372       | 0.00022079 | No      |
|      |       |        |             |          |         | Trim44   | 18.4797   | 37.3452  | 1.01498149       | 18.4807      | 37.3462       | 1.01494205       | 0.0288046  | No      |
|      |       |        |             |          |         | Trim5    | 164.772   | 17.9854  | -3.195573        | 164.773      | 17.9864       | -3.1955015       | 0.00022079 | No      |
|      |       |        |             |          |         | Trip10   | 9.932     | 43.2578  | 2.12280413       | 9.933        | 43.2588       | 2.12269223       | 0.00022079 | No      |

| RRBS |       |        |             |          |         | RNAseq  |           |          |                  |              |               |                  |            |         |
|------|-------|--------|-------------|----------|---------|---------|-----------|----------|------------------|--------------|---------------|------------------|------------|---------|
| gene | Blood | Kidney | methyl.diff | pMWU.fdr | Match ? | gene    | blood     | kidney   | log2(fold_ratio) | blood+ 0.001 | kidney+ 0.001 | log2(fold_ratio) | q_value    | Match ? |
|      |       |        |             |          |         | Trip13  | 1.23485   | 0.236063 | -2.387092        | 1.23585      | 0.237063      | -2.3821612       | 0.033901   | No      |
|      |       |        |             |          |         | Trmt12  | 1.54311   | 5.79788  | 1.90968457       | 1.54411      | 5.79888       | 1.90899875       | 0.00130998 | No      |
|      |       |        |             |          |         | Trmt13  | 15.7556   | 2.95645  | -2.4139269       | 15.7566      | 2.95745       | -2.4135306       | 0.00242102 | No      |
|      |       |        |             |          |         | Trmt6   | 17.8764   | 5.00054  | -1.8379004       | 17.8774      | 5.00154       | -1.8376927       | 0.00022079 | No      |
|      |       |        |             |          |         | Troap   | 0.106541  | 2.24201  | 4.39531208       | 0.107541     | 2.24301       | 4.38247736       | 0.0239545  | No      |
|      |       |        |             |          |         | Trpc1   | 0.227801  | 4.74639  | 4.38098466       | 0.228801     | 4.74739       | 4.37496931       | 0.00180113 | No      |
|      |       |        |             |          |         | Trpc3   | 0         | 1.68791  | inf              | 0.001        | 1.68891       | 10.7218767       | 0.00022079 | No      |
|      |       |        |             |          |         | Trpc4ap | 69.5089   | 38.581   | -0.8493072       | 69.5099      | 38.582        | -0.8492905       | 0.038944   | No      |
|      |       |        |             |          |         | Trpc6   | 0         | 2.33357  | inf              | 0.001        | 2.33457       | 11.1889411       | 0.00605729 | No      |
|      |       |        |             |          |         | Trpm4   | 0.0709131 | 3.19109  | 5.49185332       | 0.0719131    | 3.19209       | 5.47210292       | 0.00392909 | No      |
|      |       |        |             |          |         | TRPM6   | 27.6723   | 4.86078  | -2.5091828       | 27.6733      | 4.86178       | -2.5089382       | 0.00348745 | No      |
|      |       |        |             |          |         | Trpm7   | 42.0109   | 12.8933  | -1.7041421       | 42.0119      | 12.8943       | -1.7040646       | 0.00022079 | No      |
|      |       |        |             |          |         | Trpv1   | 0.758206  | 16.4265  | 4.43729143       | 0.759206     | 16.4275       | 4.43547774       | 0.00022079 | No      |
|      |       |        |             |          |         | Trpv2   | 11.3637   | 3.79513  | -1.5822114       | 11.3647      | 3.79613       | -1.5819583       | 0.00227055 | No      |
|      |       |        |             |          |         | Trpv3   | 3.60298   | 0.150676 | -4.5796691       | 3.60398      | 0.151676      | -4.5705263       | 0.00765035 | No      |
|      |       |        |             |          |         | Tsc1    | 11.2948   | 6.36511  | -0.8274014       | 11.2958      | 6.36611       | -0.8273025       | 0.0217988  | No      |
|      |       |        |             |          |         | Tsc22d1 | 28.3121   | 405.003  | 3.83844193       | 28.3131      | 405.004       | 3.83839453       | 0.00022079 | No      |
|      |       |        |             |          |         | Tsc22d3 | 469.444   | 91.7498  | -2.3551762       | 469.445      | 91.7508       | -2.3551635       | 0.00022079 | No      |
|      |       |        |             |          |         | Tsen15  | 6.73832   | 32.6991  | 2.27879008       | 6.73932      | 32.7001       | 2.27862011       | 0.00022079 | No      |
|      |       |        |             |          |         | Tsg101  | 32.6144   | 71.2948  | 1.12828777       | 32.6154      | 71.2958       | 1.12826377       | 0.0117698  | No      |
|      |       |        |             |          |         | Tsn     | 34.3357   | 17.0573  | -1.0093201       | 34.3367      | 17.0583       | -1.0092775       | 0.00242102 | No      |
|      |       |        |             |          |         | Tspan12 | 0.223422  | 47.837   | 7.74221185       | 0.224422     | 47.838        | 7.73579916       | 0.00022079 | No      |
|      |       |        |             |          |         | Tspan13 | 94.1855   | 47.4734  | -0.9883856       | 94.1865      | 47.4744       | -0.9883705       | 0.00363736 | No      |
|      |       |        |             |          |         | Tspan14 | 36.1415   | 11.2473  | -1.6840777       | 36.1425      | 11.2483       | -1.6839893       | 0.00022079 | No      |
|      |       |        |             |          |         | Tspan17 | 1.51017   | 6.10353  | 2.01493291       | 1.51117      | 6.10453       | 2.01421426       | 0.0497157  | No      |
|      |       |        |             |          |         | Tspan18 | 0.062461  | 7.19506  | 6.84790724       | 0.063461     | 7.19606       | 6.82519315       | 0.00022079 | No      |
|      |       |        |             |          |         | Tspan3  | 12.8742   | 81.1149  | 2.65548416       | 12.8752      | 81.1159       | 2.65538989       | 0.00022079 | No      |
|      |       |        |             |          |         | Tspan32 | 136.986   | 3.23712  | -5.4031738       | 136.987      | 3.23812       | -5.4027387       | 0.00022079 | No      |
|      |       |        |             |          |         | Tspan4  | 0.362216  | 6.99179  | 4.27073967       | 0.363216     | 6.99279       | 4.26696852       | 0.00060553 | No      |
|      |       |        |             |          |         | Tspan5  | 1.24582   | 32.2889  | 4.69587075       | 1.24682      | 32.2899       | 4.69475787       | 0.00022079 | No      |
|      |       |        |             |          |         | Tspan6  | 0.451694  | 24.0975  | 5.73739392       | 0.452694     | 24.0985       | 5.73426335       | 0.00130998 | No      |
|      |       |        |             |          |         | Tspan7  | 0         | 38.6292  | inf              | 0.001        | 38.6302       | 15.2374415       | 0.00022079 | No      |
|      |       |        |             |          |         | Tspo2   | 0         | 2.10162  | inf              | 0.001        | 2.10262       | 11.0379724       | 0.0160426  | No      |
|      |       |        |             |          |         | Tspyl2  | 25.0034   | 8.65783  | -1.5300469       | 25.0044      | 8.65883       | -1.529938        | 0.00022079 | No      |
|      |       |        |             |          |         | Tstd3   | 4.12057   | 10.9871  | 1.41489482       | 4.12157      | 10.9881       | 1.41467604       | 0.00348745 | No      |
|      |       |        |             |          |         | Ttc13   | 17.9518   | 8.77936  | -1.0319408       | 17.9528      | 8.78036       | -1.0318569       | 0.00909283 | No      |
|      |       |        |             |          |         | Ttc14   | 20.3091   | 4.66994  | -2.1206504       | 20.3101      | 4.67094       | -2.1204125       | 0.00022079 | No      |
|      |       |        |             |          |         | Ttc18   | 0.724209  | 5.77024  | 2.99415331       | 0.725209     | 5.77124       | 2.99241259       | 0.00113657 | No      |
|      |       |        |             |          |         | Ttc25   | 0.07995   | 3.60143  | 5.49332802       | 0.08095      | 3.60243       | 5.47579551       | 0.00508519 | No      |
|      |       |        |             |          |         | Ttc28   | 13.3753   | 1.3434   | -3.3156104       | 13.3763      | 1.3444        | -3.3146448       | 0.00022079 | No      |
|      |       |        |             |          |         | Ttc37   | 29.9557   | 10.8402  | -1.4664392       | 29.9567      | 10.8412       | -1.4663543       | 0.00164037 | No      |
|      |       |        |             |          |         | Ttc7b   | 6.06359   | 20.1441  | 1.73211324       | 6.06459      | 20.1451       | 1.73194695       | 0.00113657 | No      |

| RRBS |       |        |             |          |         | RNAseq  |           |          |                  |              |               |                  |            |         |
|------|-------|--------|-------------|----------|---------|---------|-----------|----------|------------------|--------------|---------------|------------------|------------|---------|
| gene | Blood | Kidney | methyl.diff | pMWU.fdr | Match ? | gene    | blood     | kidney   | log2(fold_ratio) | blood+ 0.001 | kidney+ 0.001 | log2(fold_ratio) | q_value    | Match ? |
|      |       |        |             |          |         | Ttc9    | 0.394816  | 6.26886  | 3.98895075       | 0.395816     | 6.26986       | 3.98553139       | 0.00363736 | No      |
|      |       |        |             |          |         | Ttf1    | 14.7514   | 4.28322  | -1.7840842       | 14.7524      | 4.28422       | -1.7838452       | 0.00022079 | No      |
|      |       |        |             |          |         | Ttf2    | 6.52853   | 2.29267  | -1.5097295       | 6.52953      | 2.29367       | -1.5093213       | 0.00113657 | No      |
|      |       |        |             |          |         | Ttll10  | 0.0124409 | 10.192   | 9.67813061       | 0.0134409    | 10.193        | 9.56673327       | 0.00480115 | No      |
|      |       |        |             |          |         | Ttll3   | 1.37435   | 5.2041   | 1.92089923       | 1.37535      | 5.2051        | 1.92012708       | 0.0137492  | No      |
|      |       |        |             |          |         | Ttll4   | 6.38955   | 2.18996  | -1.5448098       | 6.39055      | 2.19096       | -1.544377        | 0.00348745 | No      |
|      |       |        |             |          |         | Ttll7   | 0.33824   | 3.19082  | 3.23780804       | 0.33924      | 3.19182       | 3.2340011        | 0.00523184 | No      |
|      |       |        |             |          |         | Ttpa    | 0         | 0.914292 | inf              | 0.001        | 0.915292      | 9.83808826       | 0.00022079 | No      |
|      |       |        |             |          |         | Ttpal   | 8.82259   | 3.26123  | -1.4357861       | 8.82359      | 3.26223       | -1.4355073       | 0.00078858 | No      |
|      |       |        |             |          |         | Ttr     | 0         | 14.5096  | inf              | 0.001        | 14.5106       | 13.8248196       | 0.00022079 | No      |
|      |       |        |             |          |         | Ttyh2   | 0.0559181 | 1.83421  | 5.03569967       | 0.0569181    | 1.83521       | 5.01091384       | 0.0112749  | No      |
|      |       |        |             |          |         | Ttyh3   | 98.1156   | 16.0452  | -2.6123408       | 98.1166      | 16.0462       | -2.6122656       | 0.00022079 | No      |
|      |       |        |             |          |         | Tubb2a  | 4.43317   | 50.468   | 3.50895832       | 4.43417      | 50.469        | 3.50866151       | 0.00022079 | No      |
|      |       |        |             |          |         | Tubb4b  | 33.6625   | 109.169  | 1.69734901       | 33.6635      | 109.17        | 1.69731937       | 0.00022079 | No      |
|      |       |        |             |          |         | Tubb5   | 325.089   | 84.7405  | -1.9397112       | 325.09       | 84.7415       | -1.9396986       | 0.00022079 | No      |
|      |       |        |             |          |         | Tube1   | 15.1457   | 2.1022   | -2.8489364       | 15.1467      | 2.1032        | -2.8483456       | 0.0083198  | No      |
|      |       |        |             |          |         | Tubgcp3 | 16.6688   | 7.71701  | -1.1110364       | 16.6698      | 7.71801       | -1.110936        | 0.0153152  | No      |
|      |       |        |             |          |         | Tufm    | 28.3612   | 96.7245  | 1.76996279       | 28.3622      | 96.7255       | 1.76992684       | 0.00022079 | No      |
|      |       |        |             |          |         | Tuft1   | 0.0262487 | 7.88259  | 8.23027995       | 0.0272487    | 7.88359       | 8.17652154       | 0.00407863 | No      |
|      |       |        |             |          |         | Tulp3   | 0.388069  | 9.11448  | 4.55377525       | 0.389069     | 9.11548       | 4.55022069       | 0.00022079 | No      |
|      |       |        |             |          |         | Tulp4   | 3.84185   | 6.08     | 0.66227013       | 3.84285      | 6.081         | 0.66213193       | 0.0455876  | No      |
|      |       |        |             |          |         | Tusc2   | 9.78516   | 34.8546  | 1.83268172       | 9.78616      | 34.8556       | 1.83257569       | 0.00022079 | No      |
|      |       |        |             |          |         | Tusc3   | 0.675364  | 31.7927  | 5.55688645       | 0.676364     | 31.7937       | 5.55479724       | 0.00022079 | No      |
|      |       |        |             |          |         | Twistnb | 10.4111   | 3.5899   | -1.5361069       | 10.4121      | 3.5909        | -1.5358437       | 0.00022079 | No      |
|      |       |        |             |          |         | Twsg1   | 3.61705   | 21.5111  | 2.57219585       | 3.61805      | 21.5121       | 2.57186412       | 0.00022079 | No      |
|      |       |        |             |          |         | Txk     | 86.0003   | 5.89202  | -3.8675075       | 86.0013      | 5.89302       | -3.8672794       | 0.00022079 | No      |
|      |       |        |             |          |         | Txlng   | 19.3139   | 2.83037  | -2.7705769       | 19.3149      | 2.83137       | -2.770142        | 0.0265154  | No      |
|      |       |        |             |          |         | Txn1    | 212.821   | 801.629  | 1.91329419       | 212.822      | 801.63        | 1.91328921       | 0.00022079 | No      |
|      |       |        |             |          |         | Txn2    | 36.0493   | 125.189  | 1.79606465       | 36.0503      | 125.19        | 1.79603616       | 0.00022079 | No      |
|      |       |        |             |          |         | Txndc16 | 21.1954   | 3.47781  | -2.6075002       | 21.1964      | 3.47881       | -2.6071535       | 0.00022079 | No      |
|      |       |        |             |          |         | Txndc17 | 18.4259   | 69.5553  | 1.91642536       | 18.4269      | 69.5563       | 1.91636781       | 0.00022079 | No      |
|      |       |        |             |          |         | Txnip   | 2146.11   | 199.205  | -3.4293983       | 2146.111     | 199.206       | -3.4293917       | 0.00113657 | No      |
|      |       |        |             |          |         | Txn1l   | 34.7234   | 76.1491  | 1.13291877       | 34.7244      | 76.1501       | 1.13289617       | 0.00242102 | No      |
|      |       |        |             |          |         | Txnrd1  | 11.6742   | 51.0432  | 2.12839509       | 11.6752      | 51.0442       | 2.12829978       | 0.00022079 | No      |
|      |       |        |             |          |         | Tyk2    | 22.2425   | 9.31363  | -1.2559035       | 22.2435      | 9.31463       | -1.2558134       | 0.00113657 | No      |
|      |       |        |             |          |         | Tyms    | 1.21618   | 9.54601  | 2.97254108       | 1.21718      | 9.54701       | 2.97150644       | 0.0469889  | No      |
|      |       |        |             |          |         | Tyro3   | 0.078684  | 2.96819  | 5.23736933       | 0.079684     | 2.96919       | 5.21963553       | 0.00363736 | No      |
|      |       |        |             |          |         | Tyrobp  | 13.1949   | 139.354  | 3.40070209       | 13.1959      | 139.355       | 3.40060311       | 0.00022079 | No      |
|      |       |        |             |          |         | U2af2   | 164.16    | 55.201   | -1.5723363       | 164.161      | 55.202        | -1.572319        | 0.00022079 | No      |
|      |       |        |             |          |         | Uap1l1  | 5.6691    | 62.7781  | 3.46906974       | 5.6701       | 62.7791       | 3.46883826       | 0.00022079 | No      |
|      |       |        |             |          |         | Uba2    | 50.987    | 20.3921  | -1.3221191       | 50.988       | 20.3931       | -1.3220767       | 0.00060553 | No      |
|      |       |        |             |          |         | Uba6    | 7.6522    | 3.45516  | -1.1471221       | 7.6532       | 3.45616       | -1.1468931       | 0.00451708 | No      |



| RRBS |       |        |             |          |         | RNAseq   |          |         |                  |              |               |                  |            |         |
|------|-------|--------|-------------|----------|---------|----------|----------|---------|------------------|--------------|---------------|------------------|------------|---------|
| gene | Blood | Kidney | methyl.diff | pMWU.fdr | Match ? | gene     | blood    | kidney  | log2(fold_ratio) | blood+ 0.001 | kidney+ 0.001 | log2(fold_ratio) | q_value    | Match ? |
|      |       |        |             |          |         | Ubac1    | 18.1398  | 36.5313 | 1.00997454       | 18.1408      | 36.5323       | 1.00993451       | 0.00363736 | No      |
|      |       |        |             |          |         | Ubald2   | 458.446  | 135.906 | -1.7541427       | 458.447      | 135.907       | -1.7541352       | 0.00041963 | No      |
|      |       |        |             |          |         | Ubap1    | 10.9242  | 20.1307 | 0.88186971       | 10.9252      | 20.1317       | 0.88180931       | 0.0142227  | No      |
|      |       |        |             |          |         | Ubap2l   | 42.2158  | 25.0174 | -0.7548512       | 42.2168      | 25.0184       | -0.7548277       | 0.0390462  | No      |
|      |       |        |             |          |         | Ubc      | 67.525   | 216.012 | 1.67761782       | 67.526       | 216.013       | 1.67760313       | 0.00022079 | No      |
|      |       |        |             |          |         | Ubd      | 8.76582  | 52.0105 | 2.56884195       | 8.76682      | 52.0115       | 2.56870511       | 0.00022079 | No      |
|      |       |        |             |          |         | Ube2b    | 78.1212  | 48.1035 | -0.6995722       | 78.1222      | 48.1045       | -0.6995607       | 0.0386537  | No      |
|      |       |        |             |          |         | Ube2d3   | 258.592  | 129.301 | -0.9999442       | 258.593      | 129.302       | -0.9999386       | 0.0155671  | No      |
|      |       |        |             |          |         | Ube2e2   | 2.86485  | 27.563  | 3.26620141       | 2.86585      | 27.564        | 3.26575026       | 0.00078858 | No      |
|      |       |        |             |          |         | Ube2f    | 15.1649  | 36.8816 | 1.28216526       | 15.1659      | 36.8826       | 1.28210925       | 0.00304332 | No      |
|      |       |        |             |          |         | Ube2g1   | 52.2065  | 27.3702 | -0.9316235       | 52.2075      | 27.3712       | -0.9315984       | 0.0103977  | No      |
|      |       |        |             |          |         | Ube2h    | 62.7656  | 22.4574 | -1.4827832       | 62.7666      | 22.4584       | -1.4827419       | 0.00022079 | No      |
|      |       |        |             |          |         | Ube2i    | 167.513  | 74.839  | -1.1624109       | 167.514      | 74.84         | -1.1624002       | 0.0105196  | No      |
|      |       |        |             |          |         | Ube2j1   | 27.0706  | 16.1789 | -0.7426133       | 27.0716      | 16.1799       | -0.7425775       | 0.0315052  | No      |
|      |       |        |             |          |         | Ube2j2   | 97.7296  | 45.1992 | -1.1124983       | 97.7306      | 45.2002       | -1.1124812       | 0.0179279  | No      |
|      |       |        |             |          |         | Ube2l6   | 1.30542  | 5.59132 | 2.09867487       | 1.30642      | 5.59232       | 2.09782813       | 0.00884258 | No      |
|      |       |        |             |          |         | Ube2o    | 29.5467  | 8.8958  | -1.7318008       | 29.5477      | 8.8968        | -1.7316874       | 0.00022079 | No      |
|      |       |        |             |          |         | Ube4a    | 21.4642  | 9.39595 | -1.1918215       | 21.4652      | 9.39695       | -1.1917351       | 0.00022079 | No      |
|      |       |        |             |          |         | Ubl4a    | 6.79355  | 17.6479 | 1.37725896       | 6.79455      | 17.6489       | 1.37712836       | 0.00022079 | No      |
|      |       |        |             |          |         | Ubn1     | 21.7249  | 8.00363 | -1.4406232       | 21.7259      | 8.00463       | -1.4405093       | 0.00022079 | No      |
|      |       |        |             |          |         | Ubn2     | 10.1489  | 3.9989  | -1.3436483       | 10.1499      | 3.9999        | -1.3434297       | 0.00022079 | No      |
|      |       |        |             |          |         | Ubp1     | 82.7946  | 23.1733 | -1.8370732       | 82.7956      | 23.1743       | -1.8370283       | 0.00022079 | No      |
|      |       |        |             |          |         | Ubr1     | 21.2797  | 10.34   | -1.0412416       | 21.2807      | 10.341        | -1.0411699       | 0.00579147 | No      |
|      |       |        |             |          |         | Ubr2     | 33.7865  | 12.2097 | -1.4684192       | 33.7875      | 12.2107       | -1.4683437       | 0.00022079 | No      |
|      |       |        |             |          |         | Ubr4     | 60.3248  | 23.787  | -1.3425779       | 60.3258      | 23.788        | -1.3425412       | 0.0165181  | No      |
|      |       |        |             |          |         | Ubr7     | 18.0559  | 8.65871 | -1.0602463       | 18.0569      | 8.65971       | -1.0601596       | 0.0019604  | No      |
|      |       |        |             |          |         | Ubxn11   | 0.331857 | 10.7252 | 5.01429903       | 0.332857     | 10.7262       | 5.01009274       | 0.00078858 | No      |
|      |       |        |             |          |         | Ubxn8    | 3.87138  | 9.07849 | 1.22960443       | 3.87238      | 9.07949       | 1.22939073       | 0.00805135 | No      |
|      |       |        |             |          |         | Uchl1    | 7.86871  | 103.308 | 3.71468103       | 7.86971      | 103.309       | 3.71451166       | 0.00022079 | No      |
|      |       |        |             |          |         | UCMA     | 0        | 5.59625 | inf              | 0.001        | 5.59725       | 12.4505025       | 0.00022079 | No      |
|      |       |        |             |          |         | Ucp1     | 0        | 1.31671 | inf              | 0.001        | 1.31771       | 10.3638172       | 0.00022079 | No      |
|      |       |        |             |          |         | Ucp2     | 571.097  | 75.3119 | -2.9227861       | 571.098      | 75.3129       | -2.9227694       | 0.00022079 | No      |
|      |       |        |             |          |         | Ufsp1    | 1.90545  | 9.47285 | 2.31366679       | 1.90645      | 9.47385       | 2.31306214       | 0.00392909 | No      |
|      |       |        |             |          |         | Ufsp2    | 19.1786  | 37.6059 | 0.97146161       | 19.1796      | 37.6069       | 0.97142475       | 0.0453842  | No      |
|      |       |        |             |          |         | Ugcg     | 43.1472  | 15.7952 | -1.4497807       | 43.1482      | 15.7962       | -1.4497228       | 0.00022079 | No      |
|      |       |        |             |          |         | Ugdh     | 13.7486  | 39.3415 | 1.51676725       | 13.7496      | 39.3425       | 1.51669899       | 0.00022079 | No      |
|      |       |        |             |          |         | Uggt1    | 30.9567  | 9.08116 | -1.7693032       | 30.9577      | 9.08216       | -1.7691909       | 0.00022079 | No      |
|      |       |        |             |          |         | Ugp2     | 24.8779  | 43.6241 | 0.81026066       | 24.8789      | 43.6251       | 0.81023574       | 0.0135008  | No      |
|      |       |        |             |          |         | Ugt1a2   | 1.42837  | 75.2861 | 5.71994188       | 1.42937      | 75.2871       | 5.71895137       | 0.00022079 | No      |
|      |       |        |             |          |         | Ugt2b35  | 0        | 24.1209 | inf              | 0.001        | 24.1219       | 14.5580559       | 0.00022079 | No      |
|      |       |        |             |          |         | Uhrf1bp1 | 0.165817 | 8.06241 | 5.60354732       | 0.166817     | 8.06341       | 5.59505186       | 0.00022079 | No      |
|      |       |        |             |          |         | Uhrf2    | 116.407  | 26.4701 | -2.1367423       | 116.408      | 26.4711       | -2.1367002       | 0.00022079 | No      |

| RRBS |       |        |             |          |         | RNAseq  |          |          |                  |              |               |                  |            |         |
|------|-------|--------|-------------|----------|---------|---------|----------|----------|------------------|--------------|---------------|------------------|------------|---------|
| gene | Blood | Kidney | methyl.diff | pMWU.fdr | Match ? | gene    | blood    | kidney   | log2(fold_ratio) | blood+ 0.001 | kidney+ 0.001 | log2(fold_ratio) | q_value    | Match ? |
|      |       |        |             |          |         | Ulk1    | 14.3083  | 24.7519  | 0.790687         | 14.3093      | 24.7529       | 0.79064446       | 0.0472957  | No      |
|      |       |        |             |          |         | Unc13b  | 1.50319  | 4.63718  | 1.62522035       | 1.50419      | 4.63818       | 1.624572         | 0.00041963 | No      |
|      |       |        |             |          |         | Unc5b   | 4.50779  | 2.03061  | -1.1505071       | 4.50879      | 2.03161       | -1.1501168       | 0.0154422  | No      |
|      |       |        |             |          |         | Unc5cl  | 1.60581  | 7.83015  | 2.28573874       | 1.60681      | 7.83115       | 2.28502484       | 0.00113657 | No      |
|      |       |        |             |          |         | Unc93b1 | 3.33616  | 10.3141  | 1.62835755       | 3.33716      | 10.3151       | 1.62806504       | 0.00041963 | No      |
|      |       |        |             |          |         | Ung     | 9.5034   | 21.0582  | 1.14786646       | 9.5044       | 21.0592       | 1.14778317       | 0.00242102 | No      |
|      |       |        |             |          |         | Unkl    | 27.2327  | 6.13711  | -2.1497087       | 27.2337      | 6.13811       | -2.1495266       | 0.00022079 | No      |
|      |       |        |             |          |         | Upf2    | 45.3541  | 20.256   | -1.1628837       | 45.3551      | 20.257        | -1.1628443       | 0.00180113 | No      |
|      |       |        |             |          |         | Upf3b   | 42.3903  | 10.0113  | -2.0821049       | 42.3913      | 10.0123       | -2.0819948       | 0.00022079 | No      |
|      |       |        |             |          |         | Upk1a   | 0.493547 | 47.8599  | 6.59948609       | 0.494547     | 47.8609       | 6.59659608       | 0.00870822 | No      |
|      |       |        |             |          |         | Upk1b   | 0        | 11.1221  | inf              | 0.001        | 11.1231       | 13.4412713       | 0.00022079 | No      |
|      |       |        |             |          |         | Upk2    | 0        | 22.6443  | inf              | 0.001        | 22.6453       | 14.466924        | 0.00022079 | No      |
|      |       |        |             |          |         | Upk3a   | 0        | 36.1083  | inf              | 0.001        | 36.1093       | 15.1400828       | 0.00022079 | No      |
|      |       |        |             |          |         | Upk3bl  | 0        | 10.8328  | inf              | 0.001        | 10.8338       | 13.4032517       | 0.00022079 | No      |
|      |       |        |             |          |         | Upp1    | 0.708188 | 17.279   | 4.60874352       | 0.709188     | 17.28         | 4.60679128       | 0.00130998 | No      |
|      |       |        |             |          |         | Upp2    | 0        | 0.907283 | inf              | 0.001        | 0.908283      | 9.82699807       | 0.00022079 | No      |
|      |       |        |             |          |         | Uqcc    | 15.9929  | 28.3905  | 0.82797669       | 15.9939      | 28.3915       | 0.8279373        | 0.0300208  | No      |
|      |       |        |             |          |         | UQCRB   | 49.4833  | 242.318  | 2.29188796       | 49.4843      | 242.319       | 2.29186475       | 0.00022079 | No      |
|      |       |        |             |          |         | Uqcrc1  | 83.6488  | 283.259  | 1.75970505       | 83.6498      | 283.26        | 1.75969289       | 0.00022079 | No      |
|      |       |        |             |          |         | Uqcrc2  | 65.3003  | 127.097  | 0.96076845       | 65.3013      | 127.098       | 0.96075771       | 0.0437345  | No      |
|      |       |        |             |          |         | Uqcrfs1 | 87.6914  | 257.311  | 1.55300587       | 87.6924      | 257.312       | 1.55299502       | 0.00022079 | No      |
|      |       |        |             |          |         | Uqcrh   | 520.816  | 997.436  | 0.9374505        | 520.817      | 997.437       | 0.93744918       | 0.0264045  | No      |
|      |       |        |             |          |         | Uqcrq   | 236.037  | 1658.02  | 2.81237648       | 236.038      | 1658.021      | 2.81237124       | 0.00022079 | No      |
|      |       |        |             |          |         | Urad    | 0        | 9.81035  | inf              | 0.001        | 9.81135       | 13.2602359       | 0.00022079 | No      |
|      |       |        |             |          |         | Urb1    | 8.03036  | 1.09485  | -2.8747314       | 8.03136      | 1.09585       | -2.873594        | 0.00022079 | No      |
|      |       |        |             |          |         | Urgcp   | 6.57578  | 13.7882  | 1.06820019       | 6.57678      | 13.7892       | 1.06808544       | 0.00765035 | No      |
|      |       |        |             |          |         | Uri1    | 51.1637  | 12.9257  | -1.9848782       | 51.1647      | 12.9267       | -1.9847948       | 0.00022079 | No      |
|      |       |        |             |          |         | Urod    | 31.0107  | 85.1377  | 1.45703202       | 31.0117      | 85.1387       | 1.45700245       | 0.00022079 | No      |
|      |       |        |             |          |         | Uros    | 1.70182  | 3.98275  | 1.22668647       | 1.70282      | 3.98375       | 1.22620117       | 0.0490106  | No      |
|      |       |        |             |          |         | Use1    | 124.396  | 311.763  | 1.32550962       | 124.397      | 311.764       | 1.32550265       | 0.00041963 | No      |
|      |       |        |             |          |         | Usmg5   | 371.477  | 1924.85  | 2.37340123       | 371.478      | 1924.851      | 2.3733981        | 0.00022079 | No      |
|      |       |        |             |          |         | Usp1    | 22.1586  | 7.79465  | -1.5073106       | 22.1596      | 7.79565       | -1.5071906       | 0.00022079 | No      |
|      |       |        |             |          |         | Usp20   | 7.25335  | 17.0134  | 1.22995211       | 7.25435      | 17.0144       | 1.22983802       | 0.0019604  | No      |
|      |       |        |             |          |         | Usp24   | 40.103   | 17.8094  | -1.1710713       | 40.104       | 17.8104       | -1.1710262       | 0.0456891  | No      |
|      |       |        |             |          |         | Usp25   | 35.3397  | 15.4071  | -1.1976945       | 35.3407      | 15.4081       | -1.1976416       | 0.0131304  | No      |
|      |       |        |             |          |         | Usp28   | 93.4483  | 6.37668  | -3.873291        | 93.4493      | 6.37768       | -3.8730802       | 0.00022079 | No      |
|      |       |        |             |          |         | Usp31   | 3.04055  | 0.992517 | -1.6151686       | 3.04155      | 0.993517      | -1.6141902       | 0.00022079 | No      |
|      |       |        |             |          |         | Usp33   | 24.7866  | 14.2883  | -0.7947261       | 24.7876      | 14.2893       | -0.7946833       | 0.0335918  | No      |
|      |       |        |             |          |         | Usp37   | 8.16592  | 3.8471   | -1.0858441       | 8.16692      | 3.8481        | -1.0856458       | 0.0444112  | No      |
|      |       |        |             |          |         | Usp38   | 22.5386  | 5.70195  | -1.9828706       | 22.5396      | 5.70295       | -1.9826816       | 0.00022079 | No      |
|      |       |        |             |          |         | Usp40   | 46.3204  | 8.97178  | -2.3681816       | 46.3214      | 8.97278       | -2.3680519       | 0.00022079 | No      |
|      |       |        |             |          |         | Usp43   | 0        | 3.96509  | inf              | 0.001        | 3.96609       | 11.9535017       | 0.00605729 | No      |

| RRBS |       |        |             |          |         | RNAseq |           |          |                  |              |               |                  |            |         |
|------|-------|--------|-------------|----------|---------|--------|-----------|----------|------------------|--------------|---------------|------------------|------------|---------|
| gene | Blood | Kidney | methyl.diff | pMWU.fdr | Match ? | gene   | blood     | kidney   | log2(fold_ratio) | blood+ 0.001 | kidney+ 0.001 | log2(fold_ratio) | q_value    | Match ? |
|      |       |        |             |          |         | Usp45  | 12.498    | 3.1931   | -1.9686676       | 12.499       | 3.1941        | -1.9683313       | 0.00022079 | No      |
|      |       |        |             |          |         | Usp48  | 69.8055   | 13.7314  | -2.345862        | 69.8065      | 13.7324       | -2.3457776       | 0.00022079 | No      |
|      |       |        |             |          |         | Usp53  | 5.38345   | 11.5111  | 1.09642277       | 5.38445      | 11.5121       | 1.09628014       | 0.00685176 | No      |
|      |       |        |             |          |         | Usp6nl | 11.1817   | 4.50755  | -1.3107241       | 11.1827      | 4.50855       | -1.3105331       | 0.00113657 | No      |
|      |       |        |             |          |         | Usp7   | 78.4459   | 30.6124  | -1.3575819       | 78.4469      | 30.6134       | -1.3575532       | 0.00022079 | No      |
|      |       |        |             |          |         | Usp9x  | 20.7344   | 11.7675  | -0.8172184       | 20.7354      | 11.7685       | -0.8171654       | 0.0173596  | No      |
|      |       |        |             |          |         | Ust    | 5.53206   | 0.530154 | -3.3833334       | 5.53306      | 0.531154      | -3.3808755       | 0.00041963 | No      |
|      |       |        |             |          |         | Utp14a | 15.5569   | 5.81417  | -1.4199094       | 15.5579      | 5.81517       | -1.4197541       | 0.00022079 | No      |
|      |       |        |             |          |         | Utp18  | 18.0174   | 9.0311   | -0.9964172       | 18.0184      | 9.0321        | -0.9963375       | 0.00765035 | No      |
|      |       |        |             |          |         | Utp20  | 6.02861   | 2.13637  | -1.4966639       | 6.02961      | 2.13737       | -1.496228        | 0.00022079 | No      |
|      |       |        |             |          |         | Vamp1  | 64.7985   | 6.69511  | -3.2747808       | 64.7995      | 6.69611       | -3.2745875       | 0.00022079 | No      |
|      |       |        |             |          |         | Vamp4  | 20.8573   | 7.226    | -1.5292833       | 20.8583      | 7.227         | -1.5291528       | 0.00022079 | No      |
|      |       |        |             |          |         | Vamp8  | 65.708    | 264.33   | 2.00819924       | 65.709       | 264.331       | 2.00818274       | 0.00041963 | No      |
|      |       |        |             |          |         | Vangl1 | 0.220046  | 2.62583  | 3.57689647       | 0.221046     | 2.62683       | 3.5709043        | 0.0251614  | No      |
|      |       |        |             |          |         | Vapb   | 22.0917   | 39.8527  | 0.85117303       | 22.0927      | 39.8537       | 0.85114393       | 0.0201925  | No      |
|      |       |        |             |          |         | Vash2  | 0.0591299 | 6.02899  | 6.67188469       | 0.0601299    | 6.02999       | 6.64792924       | 0.00227055 | No      |
|      |       |        |             |          |         | Vasp   | 83.7952   | 32.862   | -1.3504473       | 83.7962      | 32.863        | -1.3504206       | 0.00022079 | No      |
|      |       |        |             |          |         | Vat1   | 6.09263   | 56.8259  | 3.22141159       | 6.09363      | 56.8269       | 3.22120021       | 0.00022079 | No      |
|      |       |        |             |          |         | Vav1   | 39.4355   | 1.70103  | -4.5350144       | 39.4365      | 1.70203       | -4.5342031       | 0.00022079 | No      |
|      |       |        |             |          |         | Vcan   | 0.155644  | 3.33416  | 4.42100147       | 0.156644     | 3.33516       | 4.41219456       | 0.010907   | No      |
|      |       |        |             |          |         | Vcpip1 | 15.8745   | 6.21419  | -1.3530729       | 15.8755      | 6.21519       | -1.3529316       | 0.00060553 | No      |
|      |       |        |             |          |         | Vdac1  | 22.5521   | 237.968  | 3.3994339        | 22.5531      | 237.969       | 3.39937599       | 0.00022079 | No      |
|      |       |        |             |          |         | Vdac2  | 87.1884   | 167.162  | 0.93903882       | 87.1894      | 167.163       | 0.9390309        | 0.00909283 | No      |
|      |       |        |             |          |         | Vdac3  | 81.1289   | 149.258  | 0.87952043       | 81.1299      | 149.259       | 0.87951231       | 0.00536605 | No      |
|      |       |        |             |          |         | Vdr    | 0.260196  | 43.9302  | 7.39947047       | 0.261196     | 43.9312       | 7.39396929       | 0.00022079 | No      |
|      |       |        |             |          |         | Vegfa  | 0.123981  | 61.4405  | 8.9529271        | 0.124981     | 61.4415       | 8.94136084       | 0.00022079 | No      |
|      |       |        |             |          |         | Vegfb  | 2.41203   | 41.9895  | 4.12170885       | 2.41303      | 41.9905       | 4.12114521       | 0.00022079 | No      |
|      |       |        |             |          |         | Vegfc  | 0.0810684 | 3.45192  | 5.41211555       | 0.0820684    | 3.45292       | 5.39484627       | 0.0350649  | No      |
|      |       |        |             |          |         | Veph1  | 0         | 10.4809  | inf              | 0.001        | 10.4819       | 13.3556126       | 0.00022079 | No      |
|      |       |        |             |          |         | Vill   | 0         | 71.591   | inf              | 0.001        | 71.592        | 16.1275108       | 0.00022079 | No      |
|      |       |        |             |          |         | Vipr2  | 5.45424   | 0.320542 | -4.0887929       | 5.45524      | 0.321542      | -4.0845636       | 0.00022079 | No      |
|      |       |        |             |          |         | Vkorc1 | 6.80801   | 84.1808  | 3.62818616       | 6.80901      | 84.1818       | 3.6279914        | 0.00022079 | No      |
|      |       |        |             |          |         | Vma21  | 5.20886   | 11.0869  | 1.08981646       | 5.20986      | 11.0879       | 1.08966964       | 0.00422081 | No      |
|      |       |        |             |          |         | Vmo1   | 0.244823  | 2.87657  | 3.55453857       | 0.245823     | 2.87757       | 3.54915921       | 0.0472957  | No      |
|      |       |        |             |          |         | Vnn1   | 0.727565  | 17.76    | 4.60941163       | 0.728565     | 17.761        | 4.60751131       | 0.00022079 | No      |
|      |       |        |             |          |         | Vopp1  | 60.7102   | 22.5527  | -1.4286388       | 60.7112      | 22.5537       | -1.4285986       | 0.00022079 | No      |
|      |       |        |             |          |         | Vps13a | 31.3653   | 11.1446  | -1.4928245       | 31.3663      | 11.1456       | -1.4927411       | 0.00022079 | No      |
|      |       |        |             |          |         | Vps18  | 2.2986    | 4.76059  | 1.05038495       | 2.2996       | 4.76159       | 1.05006047       | 0.0229153  | No      |
|      |       |        |             |          |         | Vps25  | 52.6881   | 131.836  | 1.32319532       | 52.6891      | 131.837       | 1.32317888       | 0.00422081 | No      |
|      |       |        |             |          |         | Vps29  | 22.2485   | 79.0536  | 1.82912309       | 22.2495      | 79.0546       | 1.8290765        | 0.00022079 | No      |
|      |       |        |             |          |         | Vps36  | 50.7198   | 22.5875  | -1.1670245       | 50.7208      | 22.5885       | -1.166989        | 0.00392909 | No      |
|      |       |        |             |          |         | Vps37b | 83.4521   | 9.44042  | -3.1440254       | 83.4531      | 9.44142       | -3.1438899       | 0.00022079 | No      |

| RRBS |       |        |             |          |         | RNAseq  |           |          |                  |              |               |                  |            |         |
|------|-------|--------|-------------|----------|---------|---------|-----------|----------|------------------|--------------|---------------|------------------|------------|---------|
| gene | Blood | Kidney | methyl.diff | pMWU.fdr | Match ? | gene    | blood     | kidney   | log2(fold_ratio) | blood+ 0.001 | kidney+ 0.001 | log2(fold_ratio) | q_value    | Match ? |
|      |       |        |             |          |         | Vps45   | 9.12205   | 42.3508  | 2.21495924       | 9.12305      | 42.3518       | 2.21483516       | 0.0405826  | No      |
|      |       |        |             |          |         | Vps9d1  | 11.2695   | 28.1178  | 1.31906021       | 11.2705      | 28.1188       | 1.31898351       | 0.00949299 | No      |
|      |       |        |             |          |         | Vrk1    | 32.7882   | 10.794   | -1.6029471       | 32.7892      | 10.795        | -1.6028575       | 0.00022079 | No      |
|      |       |        |             |          |         | Vsig10  | 0.117569  | 9.4979   | 6.33602895       | 0.118569     | 9.4989        | 6.32396168       | 0.00022079 | No      |
|      |       |        |             |          |         | Vsig10l | 0.869025  | 10.7971  | 3.63510238       | 0.870025     | 10.7981       | 3.63357682       | 0.00022079 | No      |
|      |       |        |             |          |         | Vti1b   | 41.5751   | 69.5198  | 0.7417042        | 41.5761      | 69.5208       | 0.74169025       | 0.0488116  | No      |
|      |       |        |             |          |         | Vwa2    | 0         | 7.51718  | inf              | 0.001        | 7.51818       | 12.8761677       | 0.00022079 | No      |
|      |       |        |             |          |         | Vwa7    | 0.0597043 | 3.4018   | 5.83231967       | 0.0607043    | 3.4028        | 5.80877984       | 0.0111498  | No      |
|      |       |        |             |          |         | Vwa8    | 8.81585   | 27.7069  | 1.65207372       | 8.81685      | 27.7079       | 1.65196215       | 0.00041963 | No      |
|      |       |        |             |          |         | Vwf     | 17.1547   | 5.36174  | -1.6778307       | 17.1557      | 5.36274       | -1.6776458       | 0.00022079 | No      |
|      |       |        |             |          |         | Wac     | 117.555   | 45.9684  | -1.3546215       | 117.556      | 45.9694       | -1.3546024       | 0.00288641 | No      |
|      |       |        |             |          |         | Wapal   | 42.8799   | 12.7836  | -1.7460074       | 42.8809      | 12.7846       | -1.7459282       | 0.00022079 | No      |
|      |       |        |             |          |         | Was     | 108.734   | 10.5983  | -3.3588984       | 108.735      | 10.5993       | -3.3587755       | 0.00022079 | No      |
|      |       |        |             |          |         | Wasf1   | 0.0575764 | 1.52218  | 4.72451757       | 0.0585764    | 1.52318       | 4.7006231        | 0.0248413  | No      |
|      |       |        |             |          |         | Wasf2   | 42.8902   | 13.4889  | -1.6688753       | 42.8912      | 13.4899       | -1.668802        | 0.00022079 | No      |
|      |       |        |             |          |         | Wasf3   | 0         | 5.61075  | inf              | 0.001        | 5.61175       | 12.454235        | 0.00022079 | No      |
|      |       |        |             |          |         | Wbp1l   | 70.7147   | 25.1292  | -1.4926454       | 70.7157      | 25.1302       | -1.4926084       | 0.00022079 | No      |
|      |       |        |             |          |         | Wbp5    | 9.62071   | 194.88   | 4.34029886       | 9.62171      | 194.881       | 4.34015631       | 0.00022079 | No      |
|      |       |        |             |          |         | Wdfy1   | 2.01847   | 13.3423  | 2.72467334       | 2.01947      | 13.3433       | 2.72406689       | 0.00022079 | No      |
|      |       |        |             |          |         | Wdfy3   | 0.0510855 | 14.2167  | 8.12045705       | 0.0520855    | 14.2177       | 8.09259058       | 0.00022079 | No      |
|      |       |        |             |          |         | Wdhd1   | 6.24057   | 0.976769 | -2.6755885       | 6.24157      | 0.977769      | -2.6743434       | 0.00022079 | No      |
|      |       |        |             |          |         | Wdpcp   | 0.426547  | 4.36839  | 3.35632504       | 0.427547     | 4.36939       | 3.35327695       | 0.00041963 | No      |
|      |       |        |             |          |         | Wdr11   | 5.57527   | 18.5399  | 1.73351988       | 5.57627      | 18.5409       | 1.73333895       | 0.00041963 | No      |
|      |       |        |             |          |         | Wdr13   | 9.90084   | 16.4049  | 0.72850396       | 9.90184      | 16.4059       | 0.7284462        | 0.0414004  | No      |
|      |       |        |             |          |         | Wdr19   | 0.371122  | 2.53201  | 2.77031767       | 0.372122     | 2.53301       | 2.76700518       | 0.00078858 | No      |
|      |       |        |             |          |         | Wdr26   | 79.7484   | 17.2825  | -2.2061436       | 79.7494      | 17.2835       | -2.2060783       | 0.00022079 | No      |
|      |       |        |             |          |         | Wdr27   | 0.0870491 | 9.80146  | 6.81502347       | 0.0880491    | 9.80246       | 6.79869178       | 0.00022079 | No      |
|      |       |        |             |          |         | Wdr3    | 19.6896   | 6.38871  | -1.6238372       | 19.6906      | 6.38971       | -1.6236847       | 0.00022079 | No      |
|      |       |        |             |          |         | Wdr35   | 0.660559  | 11.7096  | 4.14786056       | 0.661559     | 11.7106       | 4.14580136       | 0.00022079 | No      |
|      |       |        |             |          |         | Wdr37   | 11.7653   | 4.88847  | -1.2670832       | 11.7663      | 4.88947       | -1.2669107       | 0.00096553 | No      |
|      |       |        |             |          |         | Wdr4    | 9.21239   | 4.55723  | -1.0154183       | 9.21339      | 4.55823       | -1.0152584       | 0.0375607  | No      |
|      |       |        |             |          |         | Wdr43   | 32.3031   | 10.3601  | -1.6406347       | 32.3041      | 10.3611       | -1.6405401       | 0.00022079 | No      |
|      |       |        |             |          |         | Wdr44   | 7.56986   | 2.06157  | -1.8765232       | 7.57086      | 2.06257       | -1.8760141       | 0.00022079 | No      |
|      |       |        |             |          |         | Wdr45   | 49.4875   | 24.1931  | -1.0324685       | 49.4885      | 24.1941       | -1.032438        | 0.00658515 | No      |
|      |       |        |             |          |         | Wdr5    | 28.0227   | 14.4258  | -0.9579446       | 28.0237      | 14.4268       | -0.9578961       | 0.00494367 | No      |
|      |       |        |             |          |         | Wdr54   | 0.126618  | 17.0093  | 7.06969745       | 0.127618     | 17.0103       | 7.05843295       | 0.0395387  | No      |
|      |       |        |             |          |         | WDR55   | 119.891   | 59.2743  | -1.0162447       | 119.892      | 59.2753       | -1.0162324       | 0.00211842 | No      |
|      |       |        |             |          |         | Wdr6    | 9.80389   | 19.6199  | 1.00089149       | 9.80489      | 19.6209       | 1.00081787       | 0.0334772  | No      |
|      |       |        |             |          |         | Wdr60   | 0.269222  | 3.71248  | 3.78551504       | 0.270222     | 3.71348       | 3.78055477       | 0.00211842 | No      |
|      |       |        |             |          |         | Wdr61   | 20.2845   | 43.1559  | 1.08918007       | 20.2855      | 43.1569       | 1.08914238       | 0.00551024 | No      |
|      |       |        |             |          |         | Wdr72   | 0         | 14.0965  | inf              | 0.001        | 14.0975       | 13.7831517       | 0.00022079 | No      |
|      |       |        |             |          |         | Wdr73   | 5.84663   | 17.3509  | 1.5693333        | 5.84763      | 17.3519       | 1.56916971       | 0.0110257  | No      |

| RRBS |       |        |             |          |         | RNAseq   |          |          |                  |              |               |                  |            |         |
|------|-------|--------|-------------|----------|---------|----------|----------|----------|------------------|--------------|---------------|------------------|------------|---------|
| gene | Blood | Kidney | methyl.diff | pMWU.fdr | Match ? | gene     | blood    | kidney   | log2(fold_ratio) | blood+ 0.001 | kidney+ 0.001 | log2(fold_ratio) | q_value    | Match ? |
|      |       |        |             |          |         | Wdr75    | 28.4664  | 10.6505  | -1.4183389       | 28.4674      | 10.6515       | -1.4182541       | 0.00022079 | No      |
|      |       |        |             |          |         | Wdr91    | 13.764   | 34.9006  | 1.34235204       | 13.765       | 34.9016       | 1.34228857       | 0.0316175  | No      |
|      |       |        |             |          |         | Wdsub1   | 1.76418  | 12.1774  | 2.78713646       | 1.76518      | 12.1784       | 2.78643739       | 0.00041963 | No      |
|      |       |        |             |          |         | Wfdc1    | 0        | 5.17654  | inf              | 0.001        | 5.17754       | 12.3380511       | 0.00022079 | No      |
|      |       |        |             |          |         | Wfdc10   | 0        | 10.5065  | inf              | 0.001        | 10.5075       | 13.3591318       | 0.00022079 | No      |
|      |       |        |             |          |         | Wfdc3    | 0        | 6.77138  | inf              | 0.001        | 6.77238       | 12.7254472       | 0.0200735  | No      |
|      |       |        |             |          |         | Wfs1     | 0.610047 | 6.75364  | 3.46867298       | 0.611047     | 6.75464       | 3.46652362       | 0.00022079 | No      |
|      |       |        |             |          |         | Wibg     | 106.789  | 28.2207  | -1.9199374       | 106.79       | 28.2217       | -1.9198998       | 0.00022079 | No      |
|      |       |        |             |          |         | Wipf1    | 79.7438  | 5.52814  | -3.8505063       | 79.7448      | 5.52914       | -3.8502634       | 0.00022079 | No      |
|      |       |        |             |          |         | Wipf3    | 6.57786  | 1.18737  | -2.4698487       | 6.57886      | 1.18837       | -2.4688535       | 0.00022079 | No      |
|      |       |        |             |          |         | Wipi1    | 0.166105 | 10.6979  | 6.00908831       | 0.167105     | 10.6989       | 6.00056376       | 0.0019604  | No      |
|      |       |        |             |          |         | Wisp3    | 7.45056  | 1.79241  | -2.0554482       | 7.45156      | 1.79341       | -2.0548371       | 0.00508519 | No      |
|      |       |        |             |          |         | Wls      | 5.18809  | 135.667  | 4.70872252       | 5.18909      | 135.668       | 4.7084551        | 0.00022079 | No      |
|      |       |        |             |          |         | Wnt5a    | 0        | 1.76589  | inf              | 0.001        | 1.76689       | 10.7869965       | 0.00022079 | No      |
|      |       |        |             |          |         | Wnt7b    | 0        | 22.5074  | inf              | 0.001        | 22.5084       | 14.4581759       | 0.00022079 | No      |
|      |       |        |             |          |         | Wrap73   | 15.7526  | 5.72667  | -1.4598216       | 15.7536      | 5.72767       | -1.4596613       | 0.00858283 | No      |
|      |       |        |             |          |         | Wrb      | 3.75757  | 10.4436  | 1.47474722       | 3.75857      | 10.4446       | 1.47450146       | 0.00096553 | No      |
|      |       |        |             |          |         | Wrn      | 12.2188  | 3.74109  | -1.707572        | 12.2198      | 3.74209       | -1.7073045       | 0.00022079 | No      |
|      |       |        |             |          |         | Wsb2     | 8.57004  | 50.7019  | 2.56466597       | 8.57104      | 50.7029       | 2.56452609       | 0.00022079 | No      |
|      |       |        |             |          |         | Wt1      | 0        | 0.966422 | inf              | 0.001        | 0.967422      | 9.91800154       | 0.00738919 | No      |
|      |       |        |             |          |         | Wtap     | 61.774   | 19.1321  | -1.6910045       | 61.775       | 19.1331       | -1.6909525       | 0.00022079 | No      |
|      |       |        |             |          |         | Wwc1     | 0.127539 | 91.8204  | 9.49173243       | 0.128539     | 91.8214       | 9.48048047       | 0.00022079 | No      |
|      |       |        |             |          |         | Wwc2     | 0.110592 | 29.9434  | 8.08084721       | 0.111592     | 29.9444       | 8.06790881       | 0.00022079 | No      |
|      |       |        |             |          |         | Wwc3     | 1.36537  | 7.14629  | 2.3879025        | 1.36637      | 7.14729       | 2.38704812       | 0.00022079 | No      |
|      |       |        |             |          |         | Wwox     | 4.55375  | 21.1315  | 2.21426818       | 4.55475      | 21.1325       | 2.21401967       | 0.00164037 | No      |
|      |       |        |             |          |         | Wwp1     | 0.953177 | 28.4017  | 4.89708934       | 0.954177     | 28.4027       | 4.89562736       | 0.00022079 | No      |
|      |       |        |             |          |         | Wwtr1    | 0        | 28.1885  | inf              | 0.001        | 28.1895       | 14.7828703       | 0.00022079 | No      |
|      |       |        |             |          |         | XAF1     | 20.9731  | 5.19271  | -2.0139806       | 20.9741      | 5.19371       | -2.0137715       | 0.0375607  | No      |
|      |       |        |             |          |         | XBP1     | 22.8883  | 56.9885  | 1.31606051       | 22.8893      | 56.9895       | 1.31602279       | 0.00022079 | No      |
|      |       |        |             |          |         | Xdh      | 0.775505 | 9.01049  | 3.53839758       | 0.776505     | 9.01149       | 3.53669855       | 0.00022079 | No      |
|      |       |        |             |          |         | Xkrx     | 20.5641  | 0.668721 | -4.9425797       | 20.5651      | 0.669721      | -4.9404941       | 0.00022079 | No      |
|      |       |        |             |          |         | Xpnpep1  | 16.6006  | 94.5498  | 2.50983902       | 16.6016      | 94.5508       | 2.50976738       | 0.00022079 | No      |
|      |       |        |             |          |         | Xpnpep2  | 0.217722 | 10.162   | 5.54455337       | 0.218722     | 10.163        | 5.53808418       | 0.00060553 | No      |
|      |       |        |             |          |         | Xpo1     | 39.1143  | 19.1289  | -1.0319422       | 39.1153      | 19.1299       | -1.0319037       | 0.00180113 | No      |
|      |       |        |             |          |         | Xpo4     | 11.6495  | 3.51438  | -1.7289259       | 11.6505      | 3.51538       | -1.7286393       | 0.00022079 | No      |
|      |       |        |             |          |         | Xrcc4    | 1.8615   | 4.9251   | 1.4036874        | 1.8625       | 4.9261        | 1.40320549       | 0.026623   | No      |
|      |       |        |             |          |         | Xrcc6bp1 | 8.42001  | 40.1741  | 2.25437185       | 8.42101      | 40.1751       | 2.25423643       | 0.00022079 | No      |
|      |       |        |             |          |         | Xrn1     | 12.4056  | 4.96686  | -1.3205855       | 12.4066      | 4.96786       | -1.3204114       | 0.00060553 | No      |
|      |       |        |             |          |         | Xrn2     | 54.1229  | 12.318   | -2.1354711       | 54.1239      | 12.319        | -2.1353806       | 0.00022079 | No      |
|      |       |        |             |          |         | Xxylt1   | 5.99777  | 13.2783  | 1.14657235       | 5.99877      | 13.2793       | 1.14644048       | 0.0145886  | No      |
|      |       |        |             |          |         | Xylb     | 5.5088   | 61.7563  | 3.48677633       | 5.5098       | 61.7573       | 3.48653782       | 0.00022079 | No      |
|      |       |        |             |          |         | Xylt2    | 28.2361  | 8.55292  | -1.7230519       | 28.2371      | 8.55392       | -1.7229343       | 0.00022079 | No      |

| RRBS |       |        |             |          |         | RNAseq  |          |         |                  |              |               |                  |            |         |
|------|-------|--------|-------------|----------|---------|---------|----------|---------|------------------|--------------|---------------|------------------|------------|---------|
| gene | Blood | Kidney | methyl.diff | pMWU.fdr | Match ? | gene    | blood    | kidney  | log2(fold_ratio) | blood+ 0.001 | kidney+ 0.001 | log2(fold_ratio) | q_value    | Match ? |
|      |       |        |             |          |         | Yae1d1  | 3.89901  | 10.1777 | 1.38423181       | 3.90001      | 10.1787       | 1.38400359       | 0.00060553 | No      |
|      |       |        |             |          |         | Ybx1    | 129.363  | 256.124 | 0.98541741       | 129.364      | 256.125       | 0.98541189       | 0.00242102 | No      |
|      |       |        |             |          |         | Ybx3    | 33.7644  | 55.2688 | 0.71096237       | 33.7654      | 55.2698       | 0.71094574       | 0.0348495  | No      |
|      |       |        |             |          |         | Yeats4  | 42.42    | 25.1161 | -0.7561322       | 42.421       | 25.1171       | -0.7561087       | 0.0394543  | No      |
|      |       |        |             |          |         | Yif1a   | 10.4518  | 34.3789 | 1.71777196       | 10.4528      | 34.3799       | 1.7176759        | 0.00022079 | No      |
|      |       |        |             |          |         | Yif1b   | 22.4036  | 50.2471 | 1.16530976       | 22.4046      | 50.2481       | 1.16527408       | 0.0180483  | No      |
|      |       |        |             |          |         | Yipf4   | 21.1192  | 35.2749 | 0.74008681       | 21.1202      | 35.2759       | 0.74005939       | 0.0303513  | No      |
|      |       |        |             |          |         | YME1L1  | 13.8589  | 7.18516 | -0.9477206       | 13.8599      | 7.18616       | -0.9476239       | 0.00791314 | No      |
|      |       |        |             |          |         | Ypel1   | 0.346752 | 4.29267 | 3.62989916       | 0.347752     | 4.29367       | 3.6260806        | 0.0331555  | No      |
|      |       |        |             |          |         | Ypel3   | 318.553  | 103.097 | -1.6275311       | 318.554      | 103.098       | -1.6275216       | 0.00022079 | No      |
|      |       |        |             |          |         | Yrdc    | 39.555   | 16.5691 | -1.2553648       | 39.556       | 16.5701       | -1.2553142       | 0.00618779 | No      |
|      |       |        |             |          |         | Ythdc1  | 76.8877  | 31.9217 | -1.2682153       | 76.8887      | 31.9227       | -1.2681889       | 0.00022079 | No      |
|      |       |        |             |          |         | Ythdc2  | 9.9718   | 3.47623 | -1.5203304       | 9.9728       | 3.47723       | -1.5200601       | 0.00022079 | No      |
|      |       |        |             |          |         | Ythdf1  | 31.7179  | 16.7911 | -0.9176005       | 31.7189      | 16.7921       | -0.9175601       | 0.00242102 | No      |
|      |       |        |             |          |         | Ythdf2  | 19.754   | 10.1962 | -0.9541132       | 19.755       | 10.1972       | -0.9540448       | 0.0432137  | No      |
|      |       |        |             |          |         | Ywhae   | 109.761  | 295.382 | 1.42821638       | 109.762      | 295.383       | 1.42820812       | 0.00022079 | No      |
|      |       |        |             |          |         | Ywhag   | 10.2644  | 41.3138 | 2.00897447       | 10.2654      | 41.3148       | 2.00886884       | 0.00022079 | No      |
|      |       |        |             |          |         | Zadh2   | 8.07373  | 14.3692 | 0.8316725        | 8.07473      | 14.3702       | 0.83159422       | 0.0241707  | No      |
|      |       |        |             |          |         | Zak     | 1.12665  | 10.05   | 3.15708419       | 1.12765      | 10.051        | 3.15594779       | 0.00022079 | No      |
|      |       |        |             |          |         | Zap70   | 130.879  | 17.6564 | -2.8899705       | 130.88       | 17.6574       | -2.8898998       | 0.00022079 | No      |
|      |       |        |             |          |         | Zbed3   | 6.13744  | 13.4552 | 1.13245491       | 6.13844      | 13.4562       | 1.13232709       | 0.00480115 | No      |
|      |       |        |             |          |         | Zbed4   | 5.80261  | 3.33203 | -0.8003006       | 5.80361      | 3.33303       | -0.8001163       | 0.0448987  | No      |
|      |       |        |             |          |         | Zbp1    | 57.8697  | 26.3034 | -1.1375589       | 57.8707      | 26.3044       | -1.137529        | 0.00845215 | No      |
|      |       |        |             |          |         | Zbtb32  | 6.07657  | 1.6717  | -1.8619412       | 6.07757      | 1.6727        | -1.8613159       | 0.011893   | No      |
|      |       |        |             |          |         | Zbtb34  | 9.35535  | 1.46061 | -2.6792206       | 9.35635      | 1.46161       | -2.6783874       | 0.00022079 | No      |
|      |       |        |             |          |         | Zbtb38  | 2.39984  | 6.97231 | 1.53869849       | 2.40084      | 6.97331       | 1.53830436       | 0.00022079 | No      |
|      |       |        |             |          |         | Zbtb4   | 9.70473  | 20.1807 | 1.05621624       | 9.70573      | 20.1817       | 1.05613907       | 0.00392909 | No      |
|      |       |        |             |          |         | Zbtb40  | 25.8033  | 7.13516 | -1.8545379       | 25.8043      | 7.13616       | -1.8543916       | 0.00022079 | No      |
|      |       |        |             |          |         | Zbtb43  | 7.01747  | 3.839   | -0.8702204       | 7.01847      | 3.84          | -0.8700503       | 0.020304   | No      |
|      |       |        |             |          |         | Zbtb44  | 26.2143  | 7.02959 | -1.8988416       | 26.2153      | 7.03059       | -1.8986914       | 0.00022079 | No      |
|      |       |        |             |          |         | Zbtb6   | 9.33301  | 3.7306  | -1.3229348       | 9.33401      | 3.7316        | -1.3227027       | 0.00333723 | No      |
|      |       |        |             |          |         | Zbtb8a  | 0.253611 | 3.90979 | 3.94640189       | 0.254611     | 3.91079       | 3.94109341       | 0.00096553 | No      |
|      |       |        |             |          |         | Zc2hc1a | 0        | 9.18459 | inf              | 0.001        | 9.18559       | 13.1651567       | 0.00022079 | No      |
|      |       |        |             |          |         | Zc3h11a | 64.0431  | 23.6265 | -1.4386372       | 64.0441      | 23.6275       | -1.4385987       | 0.00022079 | No      |
|      |       |        |             |          |         | Zc3h12d | 42.0534  | 2.6056  | -4.0125349       | 42.0544      | 2.6066        | -4.0120156       | 0.00022079 | No      |
|      |       |        |             |          |         | Zc3h15  | 69.661   | 37.5982 | -0.8896876       | 69.662       | 37.5992       | -0.8896699       | 0.00436941 | No      |
|      |       |        |             |          |         | Zc3h4   | 24.7421  | 10.5183 | -1.2340664       | 24.7431      | 10.5193       | -1.2339876       | 0.00022079 | No      |
|      |       |        |             |          |         | Zc3h7a  | 99.0025  | 18.2197 | -2.4419658       | 99.0035      | 18.2207       | -2.4419011       | 0.00022079 | No      |
|      |       |        |             |          |         | Zc3hav1 | 86.5303  | 9.05567 | -3.2563121       | 86.5313      | 9.05667       | -3.2561695       | 0.00022079 | No      |
|      |       |        |             |          |         | Zc3hc1  | 19.7647  | 11.0508 | -0.8387752       | 19.7657      | 11.0518       | -0.8387177       | 0.026623   | No      |
|      |       |        |             |          |         | Zc4h2   | 6.33179  | 2.73793 | -1.2095278       | 6.33279      | 2.73893       | -1.2092288       | 0.0120267  | No      |
|      |       |        |             |          |         | Zcchc11 | 12.5131  | 4.86567 | -1.3627289       | 12.5141      | 4.86667       | -1.3625477       | 0.00333723 | No      |

| RRBS |       |        |             |          |         | RNAseq  |           |          |                  |              |               |                  |            |         |
|------|-------|--------|-------------|----------|---------|---------|-----------|----------|------------------|--------------|---------------|------------------|------------|---------|
| gene | Blood | Kidney | methyl.diff | pMWU.fdr | Match ? | gene    | blood     | kidney   | log2(fold_ratio) | blood+ 0.001 | kidney+ 0.001 | log2(fold_ratio) | q_value    | Match ? |
|      |       |        |             |          |         | Zcchc14 | 0.0784959 | 4.91968  | 5.96980337       | 0.0794959    | 4.92068       | 5.95183343       | 0.0120267  | No      |
|      |       |        |             |          |         | Zcchc16 | 0         | 1.11362  | inf              | 0.001        | 1.11462       | 10.1223362       | 0.00022079 | No      |
|      |       |        |             |          |         | Zcchc2  | 30.0184   | 4.79599  | -2.6459465       | 30.0194      | 4.79699       | -2.6456938       | 0.00022079 | No      |
|      |       |        |             |          |         | Zcchc6  | 28.9173   | 10.2964  | -1.4897928       | 28.9183      | 10.2974       | -1.4897026       | 0.0256186  | No      |
|      |       |        |             |          |         | Zcchc7  | 55.6092   | 15.5886  | -1.8348322       | 55.6102      | 15.5896       | -1.8347656       | 0.00022079 | No      |
|      |       |        |             |          |         | Zcchc8  | 31.993    | 12.2491  | -1.3850805       | 31.994       | 12.2501       | -1.3850078       | 0.00096553 | No      |
|      |       |        |             |          |         | Zcchc9  | 28.2946   | 14.1297  | -1.0017959       | 28.2956      | 14.1307       | -1.0017448       | 0.00551024 | No      |
|      |       |        |             |          |         | Zdhhc1  | 0.505013  | 20.2869  | 5.32808409       | 0.506013     | 20.2879       | 5.32530128       | 0.00022079 | No      |
|      |       |        |             |          |         | Zdhhc15 | 0.0607636 | 3.38082  | 5.79802205       | 0.0617636    | 3.38182       | 5.77489922       | 0.0186157  | No      |
|      |       |        |             |          |         | Zdhhc23 | 1.16627   | 8.32426  | 2.83542021       | 1.16727      | 8.32526       | 2.83435702       | 0.00022079 | No      |
|      |       |        |             |          |         | Zdhhc4  | 16.4974   | 32.4469  | 0.97584198       | 16.4984      | 32.4479       | 0.97579899       | 0.0166327  | No      |
|      |       |        |             |          |         | Zdhhc9  | 4.26486   | 11.8739  | 1.47722358       | 4.26586      | 11.8749       | 1.47700684       | 0.00022079 | No      |
|      |       |        |             |          |         | Zeb1    | 9.75136   | 2.51276  | -1.9563306       | 9.75236      | 2.51376       | -1.9559045       | 0.00022079 | No      |
|      |       |        |             |          |         | Zfand6  | 111.922   | 55.4449  | -1.013367        | 111.923      | 55.4459       | -1.0133539       | 0.00257873 | No      |
|      |       |        |             |          |         | Zfat    | 45.7144   | 1.80352  | -4.6637614       | 45.7154      | 1.80452       | -4.6629932       | 0.00318754 | No      |
|      |       |        |             |          |         | Zfc3h1  | 65.1515   | 11.3901  | -2.516018        | 65.1525      | 11.3911       | -2.5159135       | 0.00022079 | No      |
|      |       |        |             |          |         | Zfhx3   | 0.0724559 | 1.36417  | 4.23477646       | 0.0734559    | 1.36517       | 4.21605843       | 0.015076   | No      |
|      |       |        |             |          |         | Zfp101  | 7.9036    | 1.38592  | -2.511666        | 7.9046       | 1.38692       | -2.5108079       | 0.00022079 | No      |
|      |       |        |             |          |         | Zfp110  | 24.6855   | 10.0814  | -1.2919679       | 24.6865      | 10.0824       | -1.2918832       | 0.00041963 | No      |
|      |       |        |             |          |         | Zfp120  | 9.31077   | 2.81708  | -1.7246999       | 9.31177      | 2.81808       | -1.7243429       | 0.00022079 | No      |
|      |       |        |             |          |         | Zfp128  | 4.44665   | 1.85517  | -1.2611675       | 4.44765      | 1.85617       | -1.2607144       | 0.0212313  | No      |
|      |       |        |             |          |         | Zfp131  | 28.6554   | 7.79468  | -1.8782453       | 28.6564      | 7.79568       | -1.8781106       | 0.00022079 | No      |
|      |       |        |             |          |         | Zfp142  | 23.3997   | 8.85067  | -1.4026315       | 23.4007      | 8.85167       | -1.4025301       | 0.00041963 | No      |
|      |       |        |             |          |         | Zfp167  | 0.330578  | 1.4284   | 2.11133742       | 0.331578     | 1.4294        | 2.1079895        | 0.0250666  | No      |
|      |       |        |             |          |         | Zfp169  | 3.78237   | 0.839798 | -2.1711762       | 3.78337      | 0.840798      | -2.1698407       | 0.0019604  | No      |
|      |       |        |             |          |         | Zfp18   | 17.3295   | 9.18422  | -0.9160009       | 17.3305      | 9.18522       | -0.9159271       | 0.0228245  | No      |
|      |       |        |             |          |         | Zfp182  | 9.99388   | 3.70101  | -1.4331259       | 9.99488      | 3.70201       | -1.4328805       | 0.00022079 | No      |
|      |       |        |             |          |         | Zfp185  | 0.0389731 | 10.2725  | 8.04209292       | 0.0399731    | 10.2735       | 8.00568259       | 0.00022079 | No      |
|      |       |        |             |          |         | Zfp187  | 56.2421   | 12.3467  | -2.187525        | 56.2431      | 12.3477       | -2.1874338       | 0.00022079 | No      |
|      |       |        |             |          |         | ZFP212  | 14.603    | 4.98024  | -1.5519776       | 14.604       | 4.98124       | -1.5517867       | 0.00022079 | No      |
|      |       |        |             |          |         | Zfp217  | 16.9043   | 5.99684  | -1.4951159       | 16.9053      | 5.99784       | -1.4949607       | 0.00022079 | No      |
|      |       |        |             |          |         | Zfp236  | 13.1514   | 3.26309  | -2.0109057       | 13.1524      | 3.26409       | -2.0105733       | 0.00022079 | No      |
|      |       |        |             |          |         | Zfp238  | 30.9754   | 9.19126  | -1.7527884       | 30.9764      | 9.19226       | -1.752678        | 0.00022079 | No      |
|      |       |        |             |          |         | Zfp259  | 55.8381   | 21.7516  | -1.3601283       | 55.8391      | 21.7526       | -1.3600878       | 0.00022079 | No      |
|      |       |        |             |          |         | Zfp26   | 9.99285   | 2.18369  | -2.1941281       | 9.99385      | 2.18469       | -2.193612        | 0.00022079 | No      |
|      |       |        |             |          |         | Zfp275  | 6.49718   | 1.76192  | -1.8826653       | 6.49818      | 1.76292       | -1.8820687       | 0.00022079 | No      |
|      |       |        |             |          |         | Zfp280c | 4.88012   | 1.7097   | -1.5131734       | 4.88112      | 1.7107        | -1.5126254       | 0.0290073  | No      |
|      |       |        |             |          |         | Zfp280d | 20.3403   | 9.19987  | -1.1446556       | 20.3413      | 9.20087       | -1.1445697       | 0.0229153  | No      |
|      |       |        |             |          |         | Zfp281  | 10.6628   | 3.139    | -1.7642094       | 10.6638      | 3.14          | -1.7638852       | 0.00022079 | No      |
|      |       |        |             |          |         | Zfp287  | 5.92361   | 2.05986  | -1.5239304       | 5.92461      | 2.06086       | -1.5234737       | 0.00333723 | No      |
|      |       |        |             |          |         | Zfp292  | 13.6339   | 3.43596  | -1.9884132       | 13.6349      | 3.43696       | -1.9880992       | 0.00022079 | No      |
|      |       |        |             |          |         | Zfp316  | 1.11954   | 2.59191  | 1.21110955       | 1.12054      | 2.59291       | 1.21037798       | 0.0231371  | No      |

| RRBS |       |        |             |          |         | RNAseq  |           |          |                  |              |               |                  |            |         |
|------|-------|--------|-------------|----------|---------|---------|-----------|----------|------------------|--------------|---------------|------------------|------------|---------|
| gene | Blood | Kidney | methyl.diff | pMWU.fdr | Match ? | gene    | blood     | kidney   | log2(fold_ratio) | blood+ 0.001 | kidney+ 0.001 | log2(fold_ratio) | q_value    | Match ? |
|      |       |        |             |          |         | Zfp317  | 9.89615   | 4.94566  | -1.0007043       | 9.89715      | 4.94666       | -1.0005584       | 0.0226016  | No      |
|      |       |        |             |          |         | Zfp346  | 5.61211   | 10.1356  | 0.8528163        | 5.61311      | 10.1366       | 0.85270159       | 0.0278747  | No      |
|      |       |        |             |          |         | Zfp354a | 0.582256  | 12.7434  | 4.45195284       | 0.583256     | 12.7444       | 4.4495904        | 0.00022079 | No      |
|      |       |        |             |          |         | Zfp354c | 4.84144   | 0.861971 | -2.489725        | 4.84244      | 0.862971      | -2.4883502       | 0.0462825  | No      |
|      |       |        |             |          |         | Zfp3612 | 504.527   | 48.6982  | -3.3729911       | 504.528      | 48.6992       | -3.3729644       | 0.00022079 | No      |
|      |       |        |             |          |         | Zfp382  | 2.51255   | 0.724982 | -1.7931352       | 2.51355      | 0.725982      | -1.7917207       | 0.0178094  | No      |
|      |       |        |             |          |         | Zfp383  | 5.34274   | 1.84956  | -1.5303977       | 5.34374      | 1.85056       | -1.5298879       | 0.00288641 | No      |
|      |       |        |             |          |         | Zfp384  | 32.8429   | 16.2867  | -1.0118872       | 32.8439      | 16.2877       | -1.0118426       | 0.00333723 | No      |
|      |       |        |             |          |         | Zfp385c | 15.4666   | 0.551166 | -4.8105254       | 15.4676      | 0.552166      | -4.8080035       | 0.00022079 | No      |
|      |       |        |             |          |         | Zfp386  | 52.0375   | 13.4078  | -1.9564791       | 52.0385      | 13.4088       | -1.9563992       | 0.00022079 | No      |
|      |       |        |             |          |         | Zfp394  | 17.5076   | 3.67618  | -2.251702        | 17.5086      | 3.67718       | -2.251392        | 0.00022079 | No      |
|      |       |        |             |          |         | Zfp398  | 4.41484   | 1.63124  | -1.4363921       | 4.41584      | 1.63224       | -1.4358347       | 0.00711928 | No      |
|      |       |        |             |          |         | Zfp40   | 2.56823   | 0.568953 | -2.174393        | 2.56923      | 0.569953      | -2.1724212       | 0.00752743 | No      |
|      |       |        |             |          |         | Zfp407  | 10.7991   | 3.30623  | -1.7076521       | 10.8001      | 3.30723       | -1.7073494       | 0.00022079 | No      |
|      |       |        |             |          |         | Zfp418  | 0.230103  | 1.52965  | 2.73284989       | 0.231103     | 1.53065       | 2.72753654       | 0.00096553 | No      |
|      |       |        |             |          |         | Zfp444  | 10.1959   | 22.8885  | 1.16663379       | 10.1969      | 22.8895       | 1.16655533       | 0.00962607 | No      |
|      |       |        |             |          |         | Zfp449  | 0         | 0.86094  | inf              | 0.001        | 0.86194       | 9.75144364       | 0.00022079 | No      |
|      |       |        |             |          |         | Zfp455  | 38.9774   | 11.0401  | -1.8198846       | 38.9784      | 11.0411       | -1.819791        | 0.00022079 | No      |
|      |       |        |             |          |         | Zfp462  | 0.0719945 | 10.4824  | 7.18586666       | 0.0729945    | 10.4834       | 7.16610321       | 0.0451951  | No      |
|      |       |        |             |          |         | Zfp467  | 5.73916   | 13.5056  | 1.23464623       | 5.74016      | 13.5066       | 1.2345017        | 0.00147497 | No      |
|      |       |        |             |          |         | Zfp472  | 24.5863   | 3.46682  | -2.8261698       | 24.5873      | 3.46782       | -2.8258124       | 0.00022079 | No      |
|      |       |        |             |          |         | Zfp496  | 13.3236   | 7.04548  | -0.919214        | 13.3246      | 7.04648       | -0.9191176       | 0.0136242  | No      |
|      |       |        |             |          |         | Zfp503  | 0.0784155 | 18.2958  | 7.86615793       | 0.0794155    | 18.2968       | 7.84795502       | 0.00711928 | No      |
|      |       |        |             |          |         | Zfp512b | 12.9613   | 7.3344   | -0.8214596       | 12.9623      | 7.3354        | -0.8213742       | 0.0309567  | No      |
|      |       |        |             |          |         | Zfp518a | 6.09053   | 2.19764  | -1.4706127       | 6.09153      | 2.19864       | -1.4701932       | 0.00022079 | No      |
|      |       |        |             |          |         | Zfp523  | 4.9687    | 18.5518  | 1.90061883       | 4.9697       | 18.5528       | 1.90040627       | 0.00022079 | No      |
|      |       |        |             |          |         | Zfp54   | 57.5356   | 15.7646  | -1.8677663       | 57.5366      | 15.7656       | -1.8676999       | 0.00022079 | No      |
|      |       |        |             |          |         | Zfp574  | 2.90057   | 13.0833  | 2.17331814       | 2.90157      | 13.0843       | 2.1729311        | 0.00022079 | No      |
|      |       |        |             |          |         | Zfp592  | 13.5184   | 6.15844  | -1.1342876       | 13.5194      | 6.15944       | -1.13416         | 0.00022079 | No      |
|      |       |        |             |          |         | Zfp597  | 6.12235   | 1.55543  | -1.9767721       | 6.12335      | 1.55643       | -1.9760805       | 0.00022079 | No      |
|      |       |        |             |          |         | Zfp598  | 25.7835   | 14.4736  | -0.8330243       | 25.7845      | 14.4746       | -0.8329806       | 0.0208857  | No      |
|      |       |        |             |          |         | Zfp612  | 1.54872   | 4.7143   | 1.60596723       | 1.54972      | 4.7153        | 1.60534199       | 0.00078858 | No      |
|      |       |        |             |          |         | Zfp628  | 8.12892   | 3.08591  | -1.3973677       | 8.12992      | 3.08691       | -1.3970777       | 0.00392909 | No      |
|      |       |        |             |          |         | Zfp629  | 1.39758   | 5.74877  | 2.04032244       | 1.39858      | 5.74977       | 2.03954147       | 0.00130998 | No      |
|      |       |        |             |          |         | Zfp646  | 17.192    | 4.17706  | -2.0411776       | 17.193       | 4.17806       | -2.0409162       | 0.00022079 | No      |
|      |       |        |             |          |         | Zfp654  | 10.8274   | 3.45293  | -1.6487939       | 10.8284      | 3.45393       | -1.6485093       | 0.00022079 | No      |
|      |       |        |             |          |         | Zfp658  | 1.55764   | 0.664521 | -1.2289751       | 1.55864      | 0.665521      | -1.2277317       | 0.0495227  | No      |
|      |       |        |             |          |         | Zfp664  | 7.99075   | 22.6747  | 1.50468064       | 7.99175      | 22.6757       | 1.50456373       | 0.0083198  | No      |
|      |       |        |             |          |         | Zfp668  | 4.7702    | 1.43927  | -1.7287125       | 4.7712       | 1.44027       | -1.7280129       | 0.0296827  | No      |
|      |       |        |             |          |         | Zfp68   | 12.0554   | 7.38817  | -0.7063906       | 12.0564      | 7.38917       | -0.706315        | 0.0446209  | No      |
|      |       |        |             |          |         | Zfp691  | 2.71548   | 10.0258  | 1.88443822       | 2.71648      | 10.0268       | 1.88405092       | 0.00242102 | No      |
|      |       |        |             |          |         | Zfp704  | 0         | 1.18251  | inf              | 0.001        | 1.18351       | 10.2088562       | 0.00778313 | No      |



| RRBS |       |        |             |          |         | RNAseq  |           |          |                  |              |               |                  |            |         |
|------|-------|--------|-------------|----------|---------|---------|-----------|----------|------------------|--------------|---------------|------------------|------------|---------|
| gene | Blood | Kidney | methyl.diff | pMWU.fdr | Match ? | gene    | blood     | kidney   | log2(fold_ratio) | blood+ 0.001 | kidney+ 0.001 | log2(fold_ratio) | q_value    | Match ? |
|      |       |        |             |          |         | Zfp709  | 7.1307    | 3.15866  | -1.1747311       | 7.1317       | 3.15966       | -1.1744767       | 0.00508519 | No      |
|      |       |        |             |          |         | Zfp715  | 20.8069   | 5.02605  | -2.0495651       | 20.8079      | 5.02705       | -2.0493474       | 0.00022079 | No      |
|      |       |        |             |          |         | Zfp740  | 32.7879   | 13.2851  | -1.3033544       | 32.7889      | 13.2861       | -1.3032898       | 0.0191747  | No      |
|      |       |        |             |          |         | Zfp746  | 15.3659   | 5.98865  | -1.3594295       | 15.3669      | 5.98965       | -1.3592825       | 0.0019604  | No      |
|      |       |        |             |          |         | Zfp768  | 0.19392   | 11.0936  | 5.8381222        | 0.19492      | 11.0946       | 5.83083172       | 0.00060553 | No      |
|      |       |        |             |          |         | Zfp775  | 6.04082   | 12.1975  | 1.01376918       | 6.04182      | 12.1985       | 1.01364865       | 0.0172336  | No      |
|      |       |        |             |          |         | Zfp777  | 19.1544   | 7.45401  | -1.3615872       | 19.1554      | 7.45501       | -1.361469        | 0.00022079 | No      |
|      |       |        |             |          |         | Zfp788  | 13.2471   | 4.79813  | -1.4651324       | 13.2481      | 4.79913       | -1.4649407       | 0.0330481  | No      |
|      |       |        |             |          |         | Zfp800  | 18.7655   | 4.34942  | -2.1091878       | 18.7665      | 4.35042       | -2.108933        | 0.00022079 | No      |
|      |       |        |             |          |         | Zfp830  | 16.1937   | 7.21854  | -1.1656537       | 16.1947      | 7.21954       | -1.1655429       | 0.00778313 | No      |
|      |       |        |             |          |         | Zfp84   | 8.40053   | 3.59349  | -1.2250947       | 8.40153      | 3.59449       | -1.224865        | 0.00041963 | No      |
|      |       |        |             |          |         | Zfp85   | 2.66669   | 1.00223  | -1.4118365       | 2.66769      | 1.00323       | -1.4109386       | 0.0311608  | No      |
|      |       |        |             |          |         | Zfp850  | 4.13184   | 1.254    | -1.720247        | 4.13284      | 1.255         | -1.7194461       | 0.0308614  | No      |
|      |       |        |             |          |         | Zfp853  | 0.187504  | 2.47447  | 3.72212627       | 0.188504     | 2.47547       | 3.71503542       | 0.0388459  | No      |
|      |       |        |             |          |         | Zfp862  | 4.0625    | 0.492416 | -3.0444183       | 4.0635       | 0.493416      | -3.0418465       | 0.00022079 | No      |
|      |       |        |             |          |         | Zfp868  | 96.5604   | 22.8727  | -2.077805        | 96.5614      | 22.8737       | -2.0777568       | 0.00022079 | No      |
|      |       |        |             |          |         | ZFP87   | 12.8189   | 7.00917  | -0.8709569       | 12.8199      | 7.01017       | -0.8708637       | 0.0405826  | No      |
|      |       |        |             |          |         | Zfp870  | 0.192162  | 2.07193  | 3.43058029       | 0.193162     | 2.07293       | 3.42378819       | 0.0217988  | No      |
|      |       |        |             |          |         | Zfp871  | 16.1709   | 6.257    | -1.369857        | 16.1719      | 6.258         | -1.3697156       | 0.00022079 | No      |
|      |       |        |             |          |         | Zfp882  | 3.43556   | 1.26197  | -1.4448677       | 3.43656      | 1.26297       | -1.4441448       | 0.00593001 | No      |
|      |       |        |             |          |         | Zfp94   | 5.92381   | 2.6793   | -1.1446692       | 5.92481      | 2.6803        | -1.1443744       | 0.0310553  | No      |
|      |       |        |             |          |         | Zfp943  | 9.75205   | 3.39249  | -1.523361        | 9.75305      | 3.39349       | -1.5230837       | 0.0152053  | No      |
|      |       |        |             |          |         | Zfp956  | 10.8926   | 2.15113  | -2.3401817       | 10.8936      | 2.15213       | -2.3396437       | 0.00022079 | No      |
|      |       |        |             |          |         | Zfp958  | 52.6756   | 19.6374  | -1.4235309       | 52.6766      | 19.6384       | -1.4234848       | 0.0338019  | No      |
|      |       |        |             |          |         | Zfpm1   | 24.3647   | 4.96664  | -2.2944504       | 24.3657      | 4.96764       | -2.2942191       | 0.00022079 | No      |
|      |       |        |             |          |         | Zfx     | 16.3907   | 5.83501  | -1.4900704       | 16.3917      | 5.83601       | -1.4899112       | 0.00022079 | No      |
|      |       |        |             |          |         | Zfyve16 | 1.20396   | 7.21911  | 2.58403353       | 1.20496      | 7.22011       | 2.58303556       | 0.00022079 | No      |
|      |       |        |             |          |         | Zfyve21 | 2.90645   | 46.6406  | 4.00425635       | 2.90745      | 46.6416       | 4.00379099       | 0.00022079 | No      |
|      |       |        |             |          |         | Zfyve9  | 0.0858876 | 4.6811   | 5.76825392       | 0.0868876    | 4.6821        | 5.75186164       | 0.00022079 | No      |
|      |       |        |             |          |         | Zhx3    | 7.17533   | 23.85    | 1.73287218       | 7.17633      | 23.851        | 1.73273162       | 0.0210062  | No      |
|      |       |        |             |          |         | Zim1    | 0         | 1.42276  | inf              | 0.001        | 1.42376       | 10.4754903       | 0.00022079 | No      |
|      |       |        |             |          |         | Zmym1   | 19.6028   | 4.87604  | -2.0072779       | 19.6038      | 4.87704       | -2.0070556       | 0.00022079 | No      |
|      |       |        |             |          |         | Zmym2   | 30.9934   | 10.8338  | -1.5164217       | 30.9944      | 10.8348       | -1.5163351       | 0.00022079 | No      |
|      |       |        |             |          |         | Zmynd15 | 0.0814611 | 10.0045  | 6.94032206       | 0.0824611    | 10.0055       | 6.92286384       | 0.0241707  | No      |
|      |       |        |             |          |         | Zmynd8  | 53.0141   | 19.3276  | -1.4557136       | 53.0151      | 19.3286       | -1.4556662       | 0.00060553 | No      |
|      |       |        |             |          |         | Znhit1  | 23.2261   | 81.2488  | 1.80659958       | 23.2271      | 81.2498       | 1.80655522       | 0.0105196  | No      |
|      |       |        |             |          |         | Znrf2   | 43.9931   | 14.1058  | -1.6409888       | 43.9941      | 14.1068       | -1.6409193       | 0.00022079 | No      |
|      |       |        |             |          |         | Zppb2   | 26.3984   | 6.3097   | -2.0648072       | 26.3994      | 6.3107        | -2.0646332       | 0.0240684  | No      |
|      |       |        |             |          |         | Zranb3  | 2.75111   | 0.966157 | -1.5096843       | 2.75211      | 0.967157      | -1.5087161       | 0.00975879 | No      |
|      |       |        |             |          |         | Zrsr2   | 23.636    | 11.977   | -0.9807193       | 23.637       | 11.978        | -0.9806599       | 0.0256186  | No      |
|      |       |        |             |          |         | ZSCAN12 | 2.40864   | 8.04588  | 1.74003144       | 2.40964      | 8.04688       | 1.73961189       | 0.0019604  | No      |
|      |       |        |             |          |         | Zswim6  | 14.8888   | 3.01421  | -2.3043756       | 14.8898      | 3.01521       | -2.303994        | 0.00022079 | No      |

| RRBS |       |        |             |          |         | RNAseq |         |         |                  |              |               |                  |            |         |
|------|-------|--------|-------------|----------|---------|--------|---------|---------|------------------|--------------|---------------|------------------|------------|---------|
| gene | Blood | Kidney | methyl.diff | pMWU.fdr | Match ? | gene   | blood   | kidney  | log2(fold_ratio) | blood+ 0.001 | kidney+ 0.001 | log2(fold_ratio) | q_value    | Match ? |
|      |       |        |             |          |         | Zswim7 | 4.19181 | 12.3167 | 1.55497054       | 4.19281      | 12.3177       | 1.55474354       | 0.029468   | No      |
|      |       |        |             |          |         | Zufsp  | 38.1086 | 13.8486 | -1.4603765       | 38.1096      | 13.8496       | -1.4603102       | 0.00466383 | No      |
|      |       |        |             |          |         | Zw10   | 12.1164 | 6.43501 | -0.9129468       | 12.1174      | 6.43601       | -0.9128417       | 0.0200735  | No      |
|      |       |        |             |          |         | Zzef1  | 15.4645 | 4.82223 | -1.6811878       | 15.4655      | 4.82323       | -1.680982        | 0.00022079 | No      |
|      |       |        |             |          |         | Zzz3   | 22.1113 | 9.43155 | -1.2292171       | 22.1123      | 9.43255       | -1.2291293       | 0.00288641 | No      |

Figure 3C MCWHS

| RRBS     |           |          |             |            |         | RNAseq   |           |          |                  |              |               |                  |            |         |
|----------|-----------|----------|-------------|------------|---------|----------|-----------|----------|------------------|--------------|---------------|------------------|------------|---------|
| gene     | Blood     | Kidney   | methyl.diff | pMWU.fdr   | Match ? | gene     | blood     | kidney   | log2(fold_ratio) | blood+ 0.001 | kidney+ 0.001 | log2(fold_ratio) | q_value    | Match ? |
| 42987    | 0.84073   | 0.25045  | -0.59028    | 6.50E-07   | Yes     | 42987    | 291.252   | 82.7627  | -1.81521         | 291.253      | 82.7637       | -1.8152029       | 0.00018329 | Yes     |
| 43348    | 0.36326   | 0.45524  | 0.09198     | 0.01761018 | Yes     | 43348    | 0.0868296 | 4.14854  | 5.57827          | 0.0878296    | 4.14954       | 5.56210037       | 0.0499918  | Yes     |
| Adcy3    | 0.15381   | 0.06071  | -0.0931     | 0.02915203 | Yes     | Adcy3    | 11.9409   | 1.4988   | -2.99404         | 11.9419      | 1.4998        | -2.9931904       | 0.0118093  | Yes     |
| Adora2a  | 0.51173   | 0.17741  | -0.33432    | 6.98E-06   | Yes     | Adora2a  | 11.9857   | 5.11579  | -1.22828         | 11.9867      | 5.11679       | -1.2281236       | 0.00018329 | Yes     |
| Aebp1    | 0.026564  | 0.086414 | 0.05985     | 0.03760671 | Yes     | Aebp1    | 0.082388  | 4.3581   | 5.72512          | 0.083388     | 4.3591        | 5.7080467        | 0.00018329 | Yes     |
| Aes      | 0.026166  | 0.1851   | 0.158934    | 1.00E-09   | Yes     | Aes      | 233.143   | 362.807  | 0.637988         | 233.144      | 362.808       | 0.63798497       | 0.0295293  | Yes     |
| Aff3     | 0.8521    | 0.67634  | -0.17576    | 6.33E-05   | Yes     | Aff3     | 11.3293   | 2.4331   | -2.21919         | 11.3303      | 2.4341        | -2.2187257       | 0.00018329 | Yes     |
| Agap2    | 0.87839   | 0.24421  | -0.63418    | 3.95E-12   | Yes     | Agap2    | 19.9527   | 3.62858  | -2.45911         | 19.9537      | 3.62958       | -2.4587818       | 0.00018329 | Yes     |
| Agpat3   | 0.2001    | 0.45548  | 0.25538     | 3.76E-05   | Yes     | Agpat3   | 28.7228   | 52.4705  | 0.869311         | 28.7238      | 52.4715       | 0.86928741       | 0.0458374  | Yes     |
| Amigo2   | 0.87714   | 0.70025  | -0.17689    | 0.00070202 | Yes     | Amigo2   | 1.59412   | 0.380446 | -2.06699         | 1.59512      | 0.381446      | -2.0641142       | 0.00154856 | Yes     |
| Angptl4  | 0.015826  | 0.068327 | 0.052501    | 0.0279946  | Yes     | Angptl4  | 0.125199  | 6.1431   | 5.61667          | 0.126199     | 6.1441        | 5.60542931       | 0.00035173 | Yes     |
| Arhgef25 | 0.11541   | 0.23918  | 0.12377     | 0.00120161 | Yes     | Arhgef25 | 0.392116  | 4.74796  | 3.59796          | 0.393116     | 4.74896       | 3.59458462       | 0.00018329 | Yes     |
| Bbc3     | 0.91049   | 0.84574  | -0.06475    | 0.00389531 | Yes     | Bbc3     | 28.4042   | 16.972   | -0.74295         | 28.4052      | 16.973        | -0.7429135       | 0.0232058  | Yes     |
| Bdh1     | 0.013192  | 0.16501  | 0.151818    | 1.01E-05   | Yes     | Bdh1     | 18.0205   | 36.9252  | 1.03496          | 18.0215      | 36.9262       | 1.03492571       | 0.0026435  | Yes     |
| Begain   | 0.10532   | 0.038154 | -0.067166   | 0.04893199 | Yes     | Begain   | 2.71196   | 0.411217 | -2.72137         | 2.71296      | 0.412217      | -2.7183919       | 0.00018329 | Yes     |
| Cables1  | 0.026429  | 0.097069 | 0.07064     | 0.00722274 | Yes     | Cables1  | 0.0619091 | 6.55066  | 6.72534          | 0.0629091    | 6.55166       | 6.70244796       | 0.00555427 | Yes     |
| Cactin   | 0.87419   | 0.71707  | -0.15712    | 0.00832699 | Yes     | Cactin   | 36.9753   | 16.3016  | -1.18155         | 36.9763      | 16.3026       | -1.1814988       | 0.00082046 | Yes     |
| Camk2g   | 0.87935   | 0.80641  | -0.07294    | 0.01413852 | Yes     | Camk2g   | 28.6522   | 9.80959  | -1.54638         | 28.6532      | 9.81059       | -1.5462845       | 0.00018329 | Yes     |
| Ccno     | 0.019786  | 0.092423 | 0.072637    | 9.14E-07   | Yes     | Ccno     | 0         | 1.49765  | inf              | 0.001        | 1.49865       | 10.5494478       | 0.00018329 | Yes     |
| Cdc20    | 0.0066202 | 0.080245 | 0.0736248   | 1.26E-05   | Yes     | Cdc20    | 0.983414  | 6.84464  | 2.7991           | 0.984414     | 6.84564       | 2.79784835       | 0.00018329 | Yes     |
| Crmp1    | 0.068343  | 0.014091 | -0.054252   | 0.00142182 | Yes     | Crmp1    | 6.51094   | 2.35181  | -1.46909         | 6.51194      | 2.35281       | -1.4687026       | 0.00018329 | Yes     |
| Csnk1e   | 0.90734   | 0.71081  | -0.19653    | 2.88E-06   | Yes     | Csnk1e   | 27.7399   | 16.505   | -0.749063        | 27.7409      | 16.506        | -0.749024        | 0.00591487 | Yes     |
| Cybb     | 0.026342  | 0.49792  | 0.471578    | 6.50E-07   | Yes     | Cybb     | 4.01495   | 17.3204  | 2.10902          | 4.01595      | 17.3214       | 2.10874233       | 0.00018329 | Yes     |
| Cyld     | 0.85303   | 0.71481  | -0.13822    | 0.00073118 | Yes     | Cyld     | 25.7267   | 6.95177  | -1.88781         | 25.7277      | 6.95277       | -1.8876627       | 0.00018329 | Yes     |
| Cyp11a1  | 0.67814   | 0.77802  | 0.09988     | 0.01496635 | Yes     | Cyp11a1  | 0.0851048 | 1.68305  | 4.30569          | 0.0861048    | 1.68405       | 4.2896975        | 0.0138771  | Yes     |
| Dcaf15   | 0.77084   | 0.67602  | -0.09482    | 0.03760671 | Yes     | Dcaf15   | 37.5211   | 18.017   | -1.05835         | 37.5221      | 18.018        | -1.0583017       | 0.00018329 | Yes     |
| Dkk3     | 0.10687   | 0.16851  | 0.06164     | 0.03760671 | Yes     | Dkk3     | 0         | 0.804662 | inf              | 0.001        | 0.805662      | 9.6540309        | 0.00018329 | Yes     |
| Dll1     | 0.029299  | 0.19868  | 0.169381    | 8.06E-06   | Yes     | Dll1     | 0.05154   | 0.784455 | 3.92793          | 0.05254      | 0.785455      | 3.90204052       | 0.00354878 | Yes     |
| Dnaja2   | 0.14934   | 0.054387 | -0.094953   | 0.01178248 | Yes     | Dnaja2   | 87.5332   | 52.8699  | -0.727384        | 87.5342      | 52.8709       | -0.7273729       | 0.00777671 | Yes     |
| Dusp9    | 0.030419  | 0.081619 | 0.0512      | 0.00275507 | Yes     | Dusp9    | 0         | 3.31016  | inf              | 0.001        | 3.31116       | 11.693121        | 0.00018329 | Yes     |
| Ebpl     | 0.62695   | 0.17211  | -0.45484    | 4.05E-07   | Yes     | Ebpl     | 12.8926   | 4.88362  | -1.40052         | 12.8936      | 4.88462       | -1.4003369       | 0.00018329 | Yes     |

| RRBS     |            |          |             |            |         | RNAseq   |           |          |                  |              |               |                  |            |         |
|----------|------------|----------|-------------|------------|---------|----------|-----------|----------|------------------|--------------|---------------|------------------|------------|---------|
| gene     | Blood      | Kidney   | methyl.diff | pMWU.fdr   | Match ? | gene     | blood     | kidney   | log2(fold_ratio) | blood+ 0.001 | kidney+ 0.001 | log2(fold_ratio) | q_value    | Match ? |
| Eef1d    | 0.83923    | 0.74593  | -0.0933     | 0.00034724 | Yes     | Eef1d    | 384.204   | 259.616  | -0.56549         | 384.205      | 259.617       | -0.5654914       | 0.0487801  | Yes     |
| Eef1g    | 0.8221     | 0.39653  | -0.42557    | 6.45E-07   | Yes     | Eef1g    | 1526.43   | 409.312  | -1.89889         | 1526.431     | 409.313       | -1.898886        | 0.00018329 | Yes     |
| Eef2     | 0.10297    | 0.032228 | -0.070742   | 0.00017846 | Yes     | Eef2     | 1712.25   | 576.797  | -1.56975         | 1712.251     | 576.798       | -1.5697561       | 0.00251301 | Yes     |
| Egfl7    | 0.3585     | 0.50154  | 0.14304     | 0.03032002 | Yes     | EGFL7    | 0.0972978 | 5.23368  | 5.74927          | 0.0982978    | 5.23468       | 5.73479841       | 0.033148   | Yes     |
| Egln3    | 0.13465    | 0.31705  | 0.1824      | 0.00575049 | Yes     | Egln3    | 2.19301   | 9.67805  | 2.1418           | 2.19401      | 9.67905       | 2.14129535       | 0.00018329 | Yes     |
| Emid1    | 0.91191    | 0.34233  | -0.56958    | 1.74E-11   | Yes     | Emid1    | 33.6967   | 12.3879  | -1.44367         | 33.6977      | 12.3889       | -1.443602        | 0.00126492 | Yes     |
| Eng      | 0.21201    | 0.44639  | 0.23438     | 1.37E-05   | Yes     | Eng      | 0.0832457 | 10.438   | 6.97025          | 0.0842457    | 10.439        | 6.95316475       | 0.00393885 | Yes     |
| Epas1    | 0.070826   | 0.34402  | 0.273194    | 0.00025534 | Yes     | Epas1    | 0.34268   | 16.4208  | 5.58252          | 0.34368      | 16.4218       | 5.57840256       | 0.00018329 | Yes     |
| Epb41l4b | 0.071827   | 0.20343  | 0.131603    | 3.58E-09   | Yes     | Epb41l4b | 0         | 11.8069  | inf              | 0.001        | 11.8079       | 13.5274648       | 0.00018329 | Yes     |
| Epc2     | 0.14833    | 0.050394 | -0.097936   | 0.00212541 | Yes     | Epc2     | 30.7454   | 8.85811  | -1.7953          | 30.7464      | 8.85911       | -1.7951838       | 0.00018329 | Yes     |
| Fam101a  | 0.56307    | 0.23038  | -0.33269    | 5.90E-05   | Yes     | Fam101a  | 16.4423   | 2.96026  | -2.47362         | 16.4433      | 2.96126       | -2.4732168       | 0.00018329 | Yes     |
| Fam101b  | 0.28096    | 0.22958  | -0.05138    | 0.0445679  | Yes     | Fam101b  | 48.5934   | 4.87849  | -3.31626         | 48.5944      | 4.87949       | -3.3159878       | 0.00018329 | Yes     |
| Fam189b  | 0.42061    | 0.2046   | -0.21601    | 1.79E-05   | Yes     | Fam189b  | 203.279   | 26.0629  | -2.96339         | 203.28       | 26.0639       | -2.9633434       | 0.00018329 | Yes     |
| Fbxl12   | 0.083656   | 0.031627 | -0.052029   | 0.01448681 | Yes     | Fbxl12   | 51.8081   | 18.5444  | -1.4822          | 51.8091      | 18.5454       | -1.4821441       | 0.00018329 | Yes     |
| Fbxo46   | 0.71703    | 0.23457  | -0.48246    | 6.09E-10   | Yes     | Fbxo46   | 7.16892   | 3.13529  | -1.19316         | 7.16992      | 3.13629       | -1.1928981       | 0.00051281 | Yes     |
| Flnb     | 0.23986    | 0.44106  | 0.2012      | 0.00196002 | Yes     | Flnb     | 0.149349  | 18.2657  | 6.93431          | 0.150349     | 18.2667       | 6.92475694       | 0.00018329 | Yes     |
| Gas6     | 0.046455   | 0.23674  | 0.190285    | 6.50E-07   | Yes     | Gas6     | 0.0683518 | 289.299  | 12.0473          | 0.0693518    | 289.3         | 12.0263454       | 0.0195672  | Yes     |
| Gldc     | 0.026807   | 0.088522 | 0.061715    | 0.00085417 | Yes     | Gldc     | 0.151593  | 10.1324  | 6.06263          | 0.152593     | 10.1334       | 6.05328572       | 0.00018329 | Yes     |
| Gna15    | 0.12402    | 0.47164  | 0.34762     | 6.50E-07   | Yes     | Gna15    | 4.34103   | 12.5765  | 1.53462          | 4.34203      | 12.5775       | 1.53440359       | 0.00018329 | Yes     |
| Gpc1     | 0.017549   | 0.11764  | 0.100091    | 1.79E-05   | Yes     | Gpc1     | 0.132478  | 4.76808  | 5.16959          | 0.133478     | 4.76908       | 5.1590371        | 0.00018329 | Yes     |
| Gpr146   | 0.68435    | 0.18201  | -0.50234    | 9.79E-07   | Yes     | Gpr146   | 6.8851    | 3.51041  | -0.971838        | 6.8861       | 3.51141       | -0.9716367       | 0.0166578  | Yes     |
| Gpr150   | 0.20264    | 0.11518  | -0.08746    | 0.00575049 | Yes     | Gpr150   | 3.86906   | 0.252891 | -3.9354          | 3.87006      | 0.253891      | -3.9300748       | 0.02885    | Yes     |
| Gpr65    | 0.80025    | 0.68145  | -0.1188     | 0.00542685 | Yes     | Gpr65    | 12.0357   | 3.62531  | -1.73115         | 12.0367      | 3.62631       | -1.7308657       | 0.0018326  | Yes     |
| Gramd1b  | 0.00042488 | 0.079136 | 0.07871112  | 3.77E-12   | Yes     | Gramd1b  | 5.5919    | 13.4552  | 1.26675          | 5.5929       | 13.4562       | 1.26660261       | 0.00197017 | Yes     |
| Grb2     | 0.64931    | 0.3786   | -0.27071    | 0.00405617 | Yes     | Grb2     | 94.6782   | 49.3166  | -0.94096         | 94.6792      | 49.3176       | -0.9409449       | 0.00018329 | Yes     |
| Gxylt1   | 0.7625     | 0.5086   | -0.2539     | 0.00420619 | Yes     | Gxylt1   | 16.2313   | 9.14244  | -0.828127        | 16.2323      | 9.14344       | -0.8280585       | 0.0151736  | Yes     |
| Hist1h1b | 0.014749   | 0.13592  | 0.121171    | 2.75E-06   | Yes     | Hist1h1b | 1.54234   | 4.08166  | 1.40404          | 1.54334      | 4.08266       | 1.4034535        | 0.043182   | Yes     |
| Hk1      | 0.048532   | 0.12901  | 0.080478    | 0.00674226 | Yes     | Hk1      | 32.2047   | 94.365   | 1.55098          | 32.2057      | 94.366        | 1.5509511        | 0.00018329 | Yes     |
| Hnrnpa3  | 0.62715    | 0.44112  | -0.18603    | 0.00098302 | Yes     | Hnrnpa3  | 8.36267   | 2.84526  | -1.5554          | 8.36367      | 2.84626       | -1.5550687       | 0.00154856 | Yes     |
| Hoxa2    | 0.14312    | 0.48147  | 0.33835     | 1.06E-09   | Yes     | Hoxa2    | 0         | 3.47575  | inf              | 0.001        | 3.47675       | 11.7635236       | 0.00018329 | Yes     |
| Hoxc5    | 0.096595   | 0.17554  | 0.078945    | 0.00768781 | Yes     | Hoxc5    | 4.98308   | 36.5989  | 2.87669          | 4.98408      | 36.5999       | 2.87644058       | 0.00018329 | Yes     |
| Hoxd3    | 0.16093    | 0.43074  | 0.26981     | 0.00054569 | Yes     | Hoxd3    | 0         | 16.4132  | inf              | 0.001        | 16.4142       | 14.0026568       | 0.00018329 | Yes     |
| Ifi30    | 0.19197    | 0.34931  | 0.15734     | 0.00080795 | Yes     | Ifi30    | 15.3925   | 111.28   | 2.85389          | 15.3935      | 111.281       | 2.85381409       | 0.00018329 | Yes     |
| Il27ra   | 0.80737    | 0.50128  | -0.30609    | 1.97E-06   | Yes     | Il27ra   | 31.7083   | 3.28007  | -3.27307         | 31.7093      | 3.28107       | -3.2726678       | 0.00018329 | Yes     |
| Inhbb    | 0.193      | 0.34813  | 0.15513     | 0.01544668 | Yes     | Inhbb    | 0         | 1.99134  | inf              | 0.001        | 1.99234       | 10.9602482       | 0.00018329 | Yes     |
| Ino80d   | 0.93019    | 0.39063  | -0.53956    | 6.50E-07   | Yes     | Ino80d   | 8.23275   | 2.30695  | -1.83539         | 8.23375      | 2.30795       | -1.8349377       | 0.018938   | Yes     |
| Irf4     | 0.088628   | 0.034006 | -0.054622   | 0.00786631 | Yes     | Irf4     | 2.27183   | 0.741356 | -1.61562         | 2.27283      | 0.742356      | -1.6143067       | 0.00018329 | Yes     |
| Irx5     | 0.010714   | 0.099477 | 0.088763    | 4.45E-07   | Yes     | Irx5     | 0         | 10.159   | inf              | 0.001        | 10.16         | 13.3106128       | 0.00018329 | Yes     |
| Itga5    | 0.0057317  | 0.058567 | 0.0528353   | 4.32E-05   | Yes     | Itga5    | 0.0688461 | 2.2331   | 5.01953          | 0.0698461    | 2.2341        | 4.99937039       | 0.00018329 | Yes     |
| Kat2a    | 0.6385     | 0.47475  | -0.16375    | 0.0279946  | Yes     | Kat2a    | 28.6267   | 15.4862  | -0.886384        | 28.6277      | 15.4872       | -0.8863354       | 0.00111812 | Yes     |
| Kcns3    | 0.090329   | 0.17962  | 0.089291    | 0.01544668 | Yes     | Kcns3    | 0.0491956 | 4.93675  | 6.64889          | 0.0501956    | 4.93775       | 6.62014908       | 0.00197017 | Yes     |
| Kdm2a    | 0.13556    | 0.073578 | -0.061982   | 1.63E-06   | Yes     | Kdm2a    | 46.9197   | 18.6435  | -1.33152         | 46.9207      | 18.6445       | -1.3314744       | 0.00018329 | Yes     |

| RRBS    |            |          |             |            |         | RNAseq  |           |          |                  |              |               |                  |            |         |
|---------|------------|----------|-------------|------------|---------|---------|-----------|----------|------------------|--------------|---------------|------------------|------------|---------|
| gene    | Blood      | Kidney   | methyl.diff | pMWU.fdr   | Match ? | gene    | blood     | kidney   | log2(fold_ratio) | blood+ 0.001 | kidney+ 0.001 | log2(fold_ratio) | q_value    | Match ? |
| Kif3c   | 0.66932    | 0.35084  | -0.31848    | 0.0001006  | Yes     | Kif3c   | 2.54643   | 1.29421  | -0.976401        | 2.54743      | 1.29521       | -0.9758565       | 0.0214018  | Yes     |
| Klf13   | 0.50311    | 0.31943  | -0.18368    | 0.03521493 | Yes     | Klf13   | 48.1007   | 8.27394  | -2.53941         | 48.1017      | 8.27494       | -2.5392671       | 0.00018329 | Yes     |
| Klhl29  | 0.072383   | 0.19442  | 0.122037    | 5.69E-12   | Yes     | Klhl29  | 0.0467737 | 1.06697  | 4.51168          | 0.0477737    | 1.06797       | 4.4825107        | 0.00035173 | Yes     |
| Lats2   | 0.081005   | 0.3155   | 0.234495    | 6.35E-06   | Yes     | Lats2   | 0.0552767 | 10.8193  | 7.61272          | 0.0562767    | 10.8203       | 7.58698705       | 0.00018329 | Yes     |
| Lrfn4   | 0.00058824 | 0.10963  | 0.10904176  | 6.50E-07   | Yes     | Lrfn4   | 0.579431  | 5.55904  | 3.26213          | 0.580431     | 5.56004       | 3.25989878       | 0.00238141 | Yes     |
| Lrrc8b  | 0.9941     | 0.93731  | -0.05679    | 0.00015368 | Yes     | Lrrc8b  | 27.7075   | 4.47848  | -2.6292          | 27.7085      | 4.47948       | -2.6289254       | 0.00018329 | Yes     |
| Map2k6  | 0.81519    | 0.73799  | -0.0772     | 0.04680399 | Yes     | Map2k6  | 22.0345   | 7.14377  | -1.62501         | 22.0355      | 7.14477       | -1.6248702       | 0.00018329 | Yes     |
| Map4k2  | 0.86884    | 0.24298  | -0.62586    | 6.50E-07   | Yes     | Map4k2  | 46.1578   | 8.83128  | -2.38588         | 46.1588      | 8.83228       | -2.3857479       | 0.00018329 | Yes     |
| Mcm3ap  | 0.7951     | 0.63637  | -0.15873    | 0.00674226 | Yes     | Mcm3ap  | 14.0592   | 7.46087  | -0.914098        | 14.0602      | 7.46187       | -0.914008        | 0.00097029 | Yes     |
| Mdk     | 0.8641     | 0.51243  | -0.35167    | 4.67E-05   | Yes     | Mdk     | 16.6878   | 9.57191  | -0.801916        | 16.6888      | 9.57291       | -0.8018508       | 0.0453771  | Yes     |
| Meis2   | 0.04603    | 0.099802 | 0.053772    | 4.56E-07   | Yes     | Meis2   | 0         | 3.74168  | inf              | 0.001        | 3.74268       | 11.869856        | 0.00018329 | Yes     |
| Mex3b   | 0.17701    | 0.088947 | -0.088063   | 0.0103156  | Yes     | Mex3b   | 7.36904   | 1.78091  | -2.04886         | 7.37004      | 1.78191       | -2.048248        | 0.00018329 | Yes     |
| Mn1     | 0.83129    | 0.35992  | -0.47137    | 3.77E-12   | Yes     | Mn1     | 1.25248   | 0.306942 | -2.02876         | 1.25348      | 0.307942      | -2.0252084       | 0.0181001  | Yes     |
| Nckap5l | 0.97589    | 0.73933  | -0.23656    | 2.08E-07   | Yes     | Nckap5l | 6.2675    | 2.8697   | -1.12699         | 6.2685       | 2.8707        | -1.1267177       | 0.00018329 | Yes     |
| Neil1   | 0.98654    | 0.92299  | -0.06355    | 0.00368736 | Yes     | Neil1   | 40.1816   | 11.5365  | -1.80033         | 40.1826      | 11.5375       | -1.8002403       | 0.00018329 | Yes     |
| Nfix    | 0.058333   | 0.17781  | 0.119477    | 0.00212541 | Yes     | Nfix    | 1.11067   | 16.2819  | 3.87378          | 1.11167      | 16.2829       | 3.87255718       | 0.00018329 | Yes     |
| Nfkb1   | 0.11395    | 0.043418 | -0.070532   | 0.00054569 | Yes     | Nfkb1   | 55.1099   | 24.7036  | -1.15759         | 55.1109      | 24.7046       | -1.157558        | 0.00018329 | Yes     |
| Nlgn3   | 0.14875    | 0.05249  | -0.09626    | 4.41E-05   | Yes     | Nlgn3   | 1.38055   | 0.417123 | -1.7267          | 1.38155      | 0.418123      | -1.7242885       | 0.00066911 | Yes     |
| Nr1d1   | 0.34968    | 0.63174  | 0.28206     | 9.35E-05   | Yes     | Nr1d1   | 5.36355   | 37.1933  | 2.79378          | 5.36455      | 37.1943       | 2.79355248       | 0.0016929  | Yes     |
| Nr4a2   | 0.14242    | 0.26607  | 0.12365     | 5.95E-08   | Yes     | Nr4a2   | 0.169463  | 6.05255  | 5.1585           | 0.170463     | 6.05355       | 5.1502509        | 0.00018329 | Yes     |
| Nt5c3b  | 0.90491    | 0.76191  | -0.143      | 0.00095473 | Yes     | Nt5c3b  | 32.9999   | 21.0833  | -0.64636         | 33.0009      | 21.0843       | -0.6463362       | 0.0227188  | Yes     |
| Ntng2   | 0.72056    | 0.306    | -0.41456    | 6.98E-06   | Yes     | Ntng2   | 53.169    | 10.0589  | -2.40211         | 53.17        | 10.0599       | -2.4019965       | 0.00018329 | Yes     |
| Orc2    | 0.8988     | 0.77973  | -0.11907    | 4.32E-05   | Yes     | Orc2    | 24.3136   | 12.8741  | -0.917294        | 24.3146      | 12.8751       | -0.9172392       | 0.00082046 | Yes     |
| Pced1b  | 0.76058    | 0.60813  | -0.15245    | 0.01098497 | Yes     | Pced1b  | 50.8105   | 7.12563  | -2.83404         | 50.8115      | 7.12663       | -2.8338631       | 0.00018329 | Yes     |
| Pde4d   | 0.37331    | 0.11984  | -0.25347    | 6.50E-07   | Yes     | Pde4d   | 44.5877   | 4.83552  | -3.2049          | 44.5887      | 4.83652       | -3.2046369       | 0.00018329 | Yes     |
| Pdlim2  | 0.2963     | 0.1423   | -0.154      | 0.00275507 | Yes     | Pdlim2  | 53.5269   | 31.4891  | -0.765411        | 53.5279      | 31.4901       | -0.7653927       | 0.0121287  | Yes     |
| Pik3cd  | 0.87951    | 0.29022  | -0.58929    | 3.77E-12   | Yes     | Pik3cd  | 281.659   | 31.8695  | -3.1437          | 281.66       | 31.8705       | -3.1436611       | 0.00822601 | Yes     |
| Plcg2   | 0.0098121  | 0.074946 | 0.0651339   | 2.48E-05   | Yes     | Plcg2   | 7.86775   | 14.1364  | 0.845389         | 7.86875      | 14.1374       | 0.84531044       | 0.0327554  | Yes     |
| Pou2f2  | 0.72461    | 0.40622  | -0.31839    | 0.00034148 | Yes     | POU2F2  | 4.37277   | 1.92398  | -1.18445         | 4.37377      | 1.92498       | -1.1840339       | 0.00097029 | Yes     |
| Ppan    | 0.81739    | 0.67826  | -0.13913    | 0.00334228 | Yes     | Ppan    | 49.0154   | 32.9876  | -0.57131         | 49.0164      | 32.9886       | -0.571297        | 0.0463588  | Yes     |
| Ppl     | 0.034479   | 0.11706  | 0.082581    | 0.00073118 | Yes     | Ppl     | 1.51124   | 16.6475  | 3.4615           | 1.51224      | 16.6485       | 3.46063317       | 0.00018329 | Yes     |
| Ppp1cc  | 0.78186    | 0.66849  | -0.11337    | 0.03171089 | Yes     | PPP1CC  | 246.564   | 119.376  | -1.04645         | 246.565      | 119.377       | -1.0464431       | 0.00051281 | Yes     |
| Psmb10  | 0.85978    | 0.20703  | -0.65275    | 6.50E-07   | Yes     | Psmb10  | 193.714   | 86.8014  | -1.15814         | 193.715      | 86.8024       | -1.1581288       | 0.00018329 | Yes     |
| Ptp4a3  | 0.88753    | 0.83069  | -0.05684    | 0.00542685 | Yes     | Ptp4a3  | 100.35    | 29.9654  | -1.74367         | 100.351      | 29.9664       | -1.7436373       | 0.00018329 | Yes     |
| Ptprs   | 0.79117    | 0.31456  | -0.47661    | 1.69E-06   | Yes     | Ptprs   | 23.1403   | 12.9014  | -0.842883        | 23.1413      | 12.9024       | -0.8428305       | 0.00445502 | Yes     |
| Pwp2    | 0.38789    | 0.12697  | -0.26092    | 0.00164763 | Yes     | Pwp2    | 16.2585   | 7.8242   | -1.05518         | 16.2595      | 7.8252        | -1.0550834       | 0.00018329 | Yes     |
| Pwwp2b  | 0.12964    | 0.46333  | 0.33369     | 7.36E-08   | Yes     | Pwwp2b  | 0.0421384 | 12.9948  | 8.26858          | 0.0431384    | 12.9958       | 8.23485706       | 0.00197017 | Yes     |
| Pygb    | 0.01938    | 0.089008 | 0.069628    | 0.00164763 | Yes     | Pygb    | 5.63189   | 19.9732  | 1.82637          | 5.63289      | 19.9742       | 1.82619052       | 0.00018329 | Yes     |
| Rbm20   | 0.024586   | 0.077113 | 0.052527    | 0.02535502 | Yes     | Rbm20   | 0.206049  | 1.53737  | 2.8994           | 0.207049     | 1.53837       | 2.89335839       | 0.00018329 | Yes     |
| Rbm3    | 0.47793    | 0.20334  | -0.27459    | 0.00120161 | Yes     | Rbm3    | 289.53    | 100.981  | -1.51963         | 289.531      | 100.982       | -1.5196197       | 0.00018329 | Yes     |
| Rbpjl   | 0.061079   | 0.34552  | 0.284441    | 6.50E-07   | Yes     | Rbpjl   | 1.13546   | 3.45802  | 1.60667          | 1.13646      | 3.45902       | 1.60581645       | 0.00591487 | Yes     |
| Rfx3    | 0.25742    | 0.068092 | -0.189328   | 0.00054569 | Yes     | Rfx3    | 4.54127   | 1.2595   | -1.85024         | 4.54227      | 1.2605        | -1.8494173       | 0.00018329 | Yes     |

| RRBS    |           |          |             |            |         | RNAseq  |           |          |                  |              |               |                  |            |         |
|---------|-----------|----------|-------------|------------|---------|---------|-----------|----------|------------------|--------------|---------------|------------------|------------|---------|
| gene    | Blood     | Kidney   | methyl.diff | pMWU.fdr   | Match ? | gene    | blood     | kidney   | log2(fold_ratio) | blood+ 0.001 | kidney+ 0.001 | log2(fold_ratio) | q_value    | Match ? |
| Rgl1    | 0.14992   | 0.20349  | 0.05357     | 0.00070202 | Yes     | Rgl1    | 0.0401646 | 6.38181  | 7.3119           | 0.0411646    | 6.38281       | 7.27664369       | 0.00035173 | Yes     |
| Rgl3    | 0.31547   | 0.49757  | 0.1821      | 0.03275343 | Yes     | Rgl3    | 0         | 41.0586  | inf              | 0.001        | 41.0596       | 15.325432        | 0.00018329 | Yes     |
| Rpl11   | 0.77892   | 0.64722  | -0.1317     | 0.00256829 | Yes     | Rpl11   | 4976.95   | 1549.36  | -1.68359         | 4976.951     | 1549.361      | -1.6835889       | 0.00018329 | Yes     |
| Rpl18a  | 0.92525   | 0.65502  | -0.27023    | 7.36E-08   | Yes     | Rpl18a  | 7797.16   | 2593.28  | -1.58817         | 7797.161     | 2593.281      | -1.5881704       | 0.00018329 | Yes     |
| Rpl38   | 0.49246   | 0.37942  | -0.11304    | 0.0341213  | Yes     | Rpl38   | 6912.7    | 3422.35  | -1.01426         | 6912.701     | 3422.351      | -1.0142618       | 0.00111812 | Yes     |
| Rpl6    | 0.9438    | 0.64625  | -0.29755    | 6.50E-07   | Yes     | Rpl6    | 2956.21   | 778.224  | -1.92549         | 2956.211     | 778.225       | -1.92549         | 0.00018329 | Yes     |
| Rpl7    | 0.72713   | 0.56398  | -0.16315    | 0.03032002 | Yes     | Rpl7    | 5765.65   | 1329.66  | -2.11643         | 5765.651     | 1329.661      | -2.116425        | 0.00018329 | Yes     |
| Rplp0   | 0.74891   | 0.52228  | -0.22663    | 4.32E-07   | Yes     | Rplp0   | 4985.08   | 1689.42  | -1.56109         | 4985.081     | 1689.421      | -1.5610881       | 0.00615197 | Yes     |
| Rpp14   | 0.78595   | 0.69741  | -0.08854    | 0.03032002 | Yes     | Rpp14   | 28.9296   | 13.9304  | -1.05431         | 28.9306      | 13.9314       | -1.054256        | 0.0261426  | Yes     |
| Rps10   | 0.46951   | 0.39838  | -0.07113    | 0.00020185 | Yes     | Rps10   | 3119.55   | 966.889  | -1.68992         | 3119.551     | 966.89        | -1.6899147       | 0.00018329 | Yes     |
| Rps29   | 0.45493   | 0.36491  | -0.09002    | 1.20E-07   | Yes     | Rps29   | 17545.5   | 5897.06  | -1.57303         | 17545.501    | 5897.061      | -1.5730331       | 0.00018329 | Yes     |
| RT1-T18 | 0.45738   | 0.21062  | -0.24676    | 0.00046463 | Yes     | RT1-T18 | 19.6697   | 3.27118  | -2.58809         | 19.6707      | 3.27218       | -2.5877243       | 0.0100349  | Yes     |
| Runx1   | 0.55618   | 0.24486  | -0.31132    | 0.00022466 | Yes     | Runx1   | 23.5522   | 6.16284  | -1.9342          | 23.5532      | 6.16384       | -1.9340218       | 0.00018329 | Yes     |
| Runx3   | 0.64593   | 0.16659  | -0.47934    | 0.00102242 | Yes     | Runx3   | 40.387    | 15.7817  | -1.35564         | 40.388       | 15.7827       | -1.3555827       | 0.00018329 | Yes     |
| Scrn1   | 0.19522   | 0.095591 | -0.099629   | 0.01105145 | Yes     | Scrn1   | 16.1412   | 1.96757  | -3.03626         | 16.1422      | 1.96857       | -3.0356173       | 0.00018329 | Yes     |
| Sec23ip | 0.64378   | 0.4172   | -0.22658    | 0.02160305 | Yes     | Sec23ip | 21.1795   | 12.2331  | -0.791877        | 21.1805      | 12.2341       | -0.7918287       | 0.00822601 | Yes     |
| Sertad4 | 0.3572    | 0.60776  | 0.25056     | 0.00120161 | Yes     | Sertad4 | 0         | 1.05896  | inf              | 0.001        | 1.05996       | 10.0497941       | 0.00018329 | Yes     |
| Shank2  | 0.052676  | 0.24639  | 0.193714    | 3.77E-12   | Yes     | Shank2  | 0         | 8.03241  | inf              | 0.001        | 8.03341       | 12.9717968       | 0.00018329 | Yes     |
| Slc12a5 | 0.096981  | 0.03201  | -0.064971   | 0.00011533 | Yes     | Slc12a5 | 2.35156   | 0.514092 | -2.19352         | 2.35256      | 0.515092      | -2.1913295       | 0.00035173 | Yes     |
| Slc30a3 | 0.082235  | 0.18105  | 0.098815    | 8.22E-05   | Yes     | Slc30a3 | 0         | 5.14153  | inf              | 0.001        | 5.14253       | 12.3282626       | 0.00018329 | Yes     |
| Slc44a2 | 0.69075   | 0.22594  | -0.46481    | 1.20E-08   | Yes     | Slc44a2 | 204.798   | 39.0183  | -2.39198         | 204.799      | 39.0193       | -2.3919489       | 0.00018329 | Yes     |
| Slc7a5  | 0.7482    | 0.58297  | -0.16523    | 0.02028318 | Yes     | Slc7a5  | 7.90447   | 3.83139  | -1.0448          | 7.90547      | 3.83239       | -1.0446069       | 0.00140841 | Yes     |
| Smim3   | 0.0016026 | 0.28217  | 0.2805674   | 0.00031102 | Yes     | Smim3   | 3.37999   | 25.5595  | 2.91877          | 3.38099      | 25.5605       | 2.9183984        | 0.00788539 | Yes     |
| Smurf1  | 0.85964   | 0.6325   | -0.22714    | 0.00389531 | Yes     | Smurf1  | 11.8525   | 6.88443  | -0.783783        | 11.8535      | 6.88543       | -0.7836944       | 0.00494262 | Yes     |
| Smyd2   | 0.78431   | 0.33976  | -0.44455    | 8.22E-05   | Yes     | Smyd2   | 109.397   | 48.8192  | -1.16405         | 109.398      | 48.8202       | -1.1640363       | 0.00251301 | Yes     |
| Socs3   | 0.054217  | 0.36293  | 0.308713    | 2.79E-05   | Yes     | Socs3   | 28.6764   | 106.413  | 1.89174          | 28.6774      | 106.414       | 1.89170183       | 0.00018329 | Yes     |
| Speg    | 0.19588   | 0.10526  | -0.09062    | 0.02160305 | Yes     | Speg    | 3.11311   | 0.799533 | -1.96113         | 3.11411      | 0.800533      | -1.9597871       | 0.0076683  | Yes     |
| Sstr3   | 0.29423   | 0.13149  | -0.16274    | 0.04893199 | Yes     | Sstr3   | 13.6261   | 3.03989  | -2.16428         | 13.6271      | 3.04089       | -2.163913        | 0.00018329 | Yes     |
| Stx16   | 0.44208   | 0.28783  | -0.15425    | 0.0103156  | Yes     | Stx16   | 23.8744   | 14.7408  | -0.695651        | 23.8754      | 14.7418       | -0.6956122       | 0.0147272  | Yes     |
| Syk     | 0.16773   | 0.53863  | 0.3709      | 3.77E-12   | Yes     | Syk     | 2.30621   | 7.51104  | 1.70349          | 2.30721      | 7.51204       | 1.70305542       | 0.00018329 | Yes     |
| Sytl3   | 0.82665   | 0.44628  | -0.38037    | 8.39E-10   | Yes     | Sytl3   | 6.1346    | 3.56096  | -0.784701        | 6.1356       | 3.56196       | -0.7845331       | 0.0409149  | Yes     |
| Tardbp  | 0.75377   | 0.61217  | -0.1416     | 0.01621946 | Yes     | Tardbp  | 95.9729   | 52.2968  | -0.875906        | 95.9739      | 52.2978       | -0.8758919       | 0.0124598  | Yes     |
| Thegl   | 0.84405   | 0.37029  | -0.47376    | 6.19E-09   | Yes     | THEGL   | 4.52802   | 1.02505  | -2.14318         | 4.52902      | 1.02605       | -2.1420979       | 0.00755425 | Yes     |
| Tifa    | 0.020031  | 0.1302   | 0.110169    | 3.15E-05   | Yes     | Tifa    | 1.65129   | 15.4568  | 3.22658          | 1.65229      | 15.4578       | 3.22579618       | 0.00018329 | Yes     |
| Tnfaip8 | 0.25217   | 0.063031 | -0.189139   | 3.77E-12   | Yes     | Tnfaip8 | 101.695   | 50.4107  | -1.01245         | 101.696      | 50.4117       | -1.0124324       | 0.00035173 | Yes     |
| Tox2    | 0.080832  | 0.017917 | -0.062915   | 0.00077922 | Yes     | Tox2    | 1.08437   | 0.376479 | -1.52621         | 1.08537      | 0.377479      | -1.5237186       | 0.0226206  | Yes     |
| Tprg1l  | 0.58043   | 0.2859   | -0.29453    | 0.03760671 | Yes     | TPRG1L  | 131.143   | 71.5229  | -0.874666        | 131.144      | 71.5239       | -0.8746545       | 0.00097029 | Yes     |
| Trib3   | 0.86263   | 0.76168  | -0.10095    | 0.002125   | Yes     | Trib3   | 2.47477   | 0.734356 | -1.75275         | 2.47577      | 0.735356      | -1.7513625       | 0.00342383 | Yes     |
| Ttc22   | 0.1622    | 0.32699  | 0.16479     | 3.49E-06   | Yes     | Ttc22   | 0.522284  | 3.45675  | 2.72651          | 0.523284     | 3.45775       | 2.72416751       | 0.00018329 | Yes     |
| Ttf2    | 0.13582   | 0.074937 | -0.060883   | 0.03863139 | Yes     | Ttf2    | 5.76176   | 3.36579  | -0.775566        | 5.76276      | 3.36679       | -0.7753862       | 0.0144181  | Yes     |
| Tubb6   | 0.53439   | 0.75802  | 0.22363     | 0.04893199 | Yes     | Tubb6   | 0.0964824 | 4.76006  | 5.62457          | 0.0974824    | 4.76106       | 5.60999723       | 0.00290302 | Yes     |
| Tube3p3 | 0.6949    | 0.49976  | -0.19514    | 0.0279946  | Yes     | Tube3p3 | 16.2329   | 9.8598   | -0.719295        | 16.2339      | 9.8608        | -0.719233        | 0.0457543  | Yes     |

| RRBS     |           |          |             |            |         | RNAseq   |           |          |                  |              |               |                  |            |         |
|----------|-----------|----------|-------------|------------|---------|----------|-----------|----------|------------------|--------------|---------------|------------------|------------|---------|
| gene     | Blood     | Kidney   | methyl.diff | pMWU.fdr   | Match ? | gene     | blood     | kidney   | log2(fold_ratio) | blood+ 0.001 | kidney+ 0.001 | log2(fold_ratio) | q_value    | Match ? |
| Ubash3b  | 0.47053   | 0.28204  | -0.18849    | 0.03275343 | Yes     | Ubash3b  | 13.1762   | 7.2068   | -0.870503        | 13.1772      | 7.2078        | -0.870413        | 0.0363907  | Yes     |
| Wdr4     | 0.78163   | 0.6507   | -0.13093    | 0.0023061  | Yes     | Wdr4     | 9.65443   | 5.56601  | -0.794549        | 9.65543      | 5.56701       | -0.7944378       | 0.0332437  | Yes     |
| Zfp148   | 0.18545   | 0.07043  | -0.11502    | 0.00489594 | Yes     | Zfp148   | 20.455    | 11.8084  | -0.792637        | 20.456       | 11.8094       | -0.7925884       | 0.0237237  | Yes     |
| Zfp217   | 0.87993   | 0.78367  | -0.09626    | 0.01899425 | Yes     | Zfp217   | 16.984    | 7.14839  | -1.24849         | 16.985       | 7.14939       | -1.2483692       | 0.00018329 | Yes     |
| Zfp385a  | 0.063525  | 0.23266  | 0.169135    | 4.67E-05   | Yes     | Zfp385a  | 0.292228  | 8.65306  | 4.88804          | 0.293228     | 8.65406       | 4.88328235       | 0.00018329 | Yes     |
| Zfp507   | 0.85042   | 0.78389  | -0.06653    | 0.00027275 | Yes     | Zfp507   | 7.86584   | 3.09723  | -1.34462         | 7.86684      | 3.09823       | -1.34434         | 0.043182   | Yes     |
| 42795    | 0.34322   | 0.10866  | -0.23456    | 4.67E-05   | Yes     | 42795    | 0.0879147 | 2.22592  | 4.66215          | 0.0889147    | 2.22692       | 4.64648397       | 0.00154856 | Yes     |
| Abhd8    | 0.97167   | 0.85745  | -0.11422    | 2.88E-07   | Yes     | Abhd8    | 6.81468   | 18.7644  | 1.46128          | 6.81568      | 18.7654       | 1.46114554       | 0.00018329 | Yes     |
| Abo      | 0.18865   | 0.061132 | -0.127518   | 0.00955793 | Yes     | Abo      | 0         | 8.55833  | inf              | 0.001        | 8.55933       | 13.0632822       | 0.00018329 | Yes     |
| Acbd4    | 0.84816   | 0.48143  | -0.36673    | 2.21E-07   | Yes     | Acbd4    | 11.6153   | 26.191   | 1.17305          | 11.6163      | 26.192        | 1.17297561       | 0.00140841 | Yes     |
| Acer2    | 0.22546   | 0.067154 | -0.158306   | 0.00142182 | Yes     | Acer2    | 0.0678496 | 19.4932  | 8.16642          | 0.0688496    | 19.4942       | 8.14538096       | 0.00018329 | Yes     |
| Acot12   | 0.59296   | 0.26884  | -0.32412    | 2.42E-06   | Yes     | Acot12   | 0         | 1.14338  | inf              | 0.001        | 1.14438       | 10.1603505       | 0.00018329 | Yes     |
| Acs1     | 0.97239   | 0.78221  | -0.19018    | 1.90E-08   | Yes     | Acs1     | 3.10531   | 34.4924  | 3.47347          | 3.10631      | 34.4934       | 3.47304662       | 0.00018329 | Yes     |
| Acy3     | 0.20361   | 0.081408 | -0.122202   | 0.00489594 | Yes     | Acy3     | 0.788878  | 89.8549  | 6.83165          | 0.789878     | 89.8559       | 6.82983958       | 0.00018329 | Yes     |
| Adam15   | 0.68043   | 0.19049  | -0.48994    | 3.77E-12   | Yes     | Adam15   | 0.120009  | 14.9008  | 6.9561           | 0.121009     | 14.9018       | 6.94422844       | 0.00018329 | Yes     |
| Agmat    | 0.61298   | 0.20499  | -0.40799    | 2.45E-08   | Yes     | Agmat    | 0         | 25.7446  | inf              | 0.001        | 25.7456       | 14.6520383       | 0.0295293  | Yes     |
| Ahnak    | 0.1028    | 0.016632 | -0.086168   | 0.0001006  | Yes     | AHNAK    | 8.82748   | 22.2528  | 1.33391          | 8.82848      | 22.2538       | 1.33381473       | 0.00018329 | Yes     |
| Ajuba    | 0.17183   | 0.054969 | -0.116861   | 4.46E-06   | Yes     | Ajuba    | 0.0231591 | 21.0441  | 9.82762          | 0.0241591    | 21.0451       | 9.76670194       | 0.0496987  | Yes     |
| Akap12   | 0.76546   | 0.23768  | -0.52778    | 3.20E-09   | Yes     | Akap12   | 0.169581  | 30.9454  | 7.51161          | 0.170581     | 30.9464       | 7.50317082       | 0.00018329 | Yes     |
| Akna     | 1.25E-07  | 0.27148  | 0.27147988  | 2.61E-07   | Yes     | Akna     | 46.5903   | 10.0864  | -2.20762         | 46.5913      | 10.0874       | -2.2075062       | 0.00018329 | Yes     |
| Aldoa    | 0.71758   | 0.31669  | -0.40089    | 0.00011533 | Yes     | Aldoa    | 173.289   | 959.835  | 2.4696           | 173.29       | 959.836       | 2.46959952       | 0.00018329 | Yes     |
| Amdhd2   | 0.13475   | 0.057256 | -0.077494   | 0.03863139 | Yes     | Amdhd2   | 9.46201   | 31.3996  | 1.73053          | 9.46301      | 31.4006       | 1.73042107       | 0.00018329 | Yes     |
| Amhr2    | 0.7376    | 0.63057  | -0.10703    | 0.02915203 | Yes     | Amhr2    | 0.867429  | 3.07676  | 1.82659          | 0.868429     | 3.07776       | 1.82540093       | 0.00303839 | Yes     |
| Amigo1   | 0.34839   | 0.77324  | 0.42485     | 8.08E-07   | Yes     | Amigo1   | 11.1321   | 3.97296  | -1.48644         | 11.1331      | 3.97396       | -1.4862061       | 0.00018329 | Yes     |
| Amotl2   | 0.15184   | 0.055463 | -0.096377   | 1.35E-06   | Yes     | Amotl2   | 0.125259  | 57.87    | 8.85176          | 0.126259     | 57.871        | 8.84031053       | 0.00018329 | Yes     |
| Ampd3    | 0.7409    | 0.48393  | -0.25697    | 0.01544668 | Yes     | Ampd3    | 1.08363   | 25.2303  | 4.54121          | 1.08463      | 25.2313       | 4.53993966       | 0.00018329 | Yes     |
| Amph     | 0.069858  | 0.019605 | -0.050253   | 0.00028052 | Yes     | Amph     | 0.0121475 | 6.45761  | 9.0542           | 0.0131475    | 6.45861       | 8.9402914        | 0.0253382  | Yes     |
| Ank3     | 0.78404   | 0.28668  | -0.49736    | 4.18E-09   | Yes     | Ank3     | 0.0377666 | 40.5635  | 10.0689          | 0.0387666    | 40.5645       | 10.0311878       | 0.00018329 | Yes     |
| Ankrd24  | 0.9652    | 0.65171  | -0.31349    | 9.14E-07   | Yes     | Ankrd24  | 0.407129  | 3.36024  | 3.04501          | 0.408129     | 3.36124       | 3.04189643       | 0.00018329 | Yes     |
| Anxa6    | 0.0037042 | 0.2259   | 0.2221958   | 3.49E-06   | Yes     | Anxa6    | 219.651   | 98.6702  | -1.15453         | 219.652      | 98.6712       | -1.1545187       | 0.00018329 | Yes     |
| Ap1m2    | 0.67345   | 0.24758  | -0.42587    | 1.12E-11   | Yes     | Ap1m2    | 0.802449  | 64.5186  | 6.32916          | 0.803449     | 64.5196       | 6.32738723       | 0.00018329 | Yes     |
| Apobec3b | 0.015983  | 0.081236 | 0.065253    | 0.00077922 | Yes     | Apobec3b | 15.3532   | 4.834    | -1.66725         | 15.3542      | 4.835         | -1.6670456       | 0.00018329 | Yes     |
| Apoe     | 0.30779   | 0.1189   | -0.18889    | 0.00142182 | Yes     | Apoe     | 11.4898   | 523.098  | 5.50865          | 11.4908      | 523.099       | 5.50853286       | 0.00018329 | Yes     |
| Aqp7     | 0.80727   | 0.63002  | -0.17725    | 0.00542685 | Yes     | Aqp7     | 0         | 9.78547  | inf              | 0.001        | 9.78647       | 13.2565729       | 0.00018329 | Yes     |
| Arhgap25 | 0         | 0.30991  | 0.30991     | 2.26E-05   | Yes     | Arhgap25 | 42.1027   | 15.5831  | -1.43393         | 42.1037      | 15.5841       | -1.4338722       | 0.00018329 | Yes     |
| Arhgap8  | 0.47073   | 0.24264  | -0.22809    | 0.00010449 | Yes     | Arhgap8  | 0         | 13.6959  | inf              | 0.001        | 13.6969       | 13.7415618       | 0.00018329 | Yes     |
| Arhgef15 | 0.64512   | 0.30747  | -0.33765    | 0.00021759 | Yes     | Arhgef15 | 0.240938  | 4.41976  | 4.19723          | 0.241938     | 4.42076       | 4.19158512       | 0.00018329 | Yes     |
| Arhgef3  | 0.0015663 | 0.07162  | 0.0700537   | 1.41E-11   | Yes     | Arhgef3  | 89.4378   | 23.2558  | -1.9433          | 89.4388      | 23.2568       | -1.9432482       | 0.00018329 | Yes     |
| Arhgef37 | 0.62479   | 0.38316  | -0.24163    | 0.00351975 | Yes     | Arhgef37 | 0         | 0.896912 | inf              | 0.001        | 0.897912      | 9.81043025       | 0.00018329 | Yes     |
| Arl10    | 0.088748  | 0.032788 | -0.05596    | 0.00212541 | Yes     | ARL10    | 2.74187   | 5.69567  | 1.0547           | 2.74287      | 5.69667       | 1.05443259       | 0.0031651  | Yes     |
| Arl4d    | 0.36385   | 0.18907  | -0.17478    | 3.41E-07   | Yes     | Arl4d    | 3.86538   | 71.499   | 4.20924          | 3.86638      | 71.5          | 4.2088879        | 0.00018329 | Yes     |
| Art4     | 0.046548  | 0.32406  | 0.277512    | 1.27E-06   | Yes     | Art4     | 41.0593   | 1.66204  | -4.62669         | 41.0603      | 1.66304       | -4.6258494       | 0.00018329 | Yes     |

| RRBS     |           |           |             |            |         | RNAseq   |           |          |                  |              |               |                  |            |         |
|----------|-----------|-----------|-------------|------------|---------|----------|-----------|----------|------------------|--------------|---------------|------------------|------------|---------|
| gene     | Blood     | Kidney    | methyl.diff | pMWU.fdr   | Match ? | gene     | blood     | kidney   | log2(fold_ratio) | blood+ 0.001 | kidney+ 0.001 | log2(fold_ratio) | q_value    | Match ? |
| Arvcf    | 0.12888   | 0.036083  | -0.092797   | 0.00040512 | Yes     | Arvcf    | 2.03232   | 11.271   | 2.47141          | 2.03332      | 11.272        | 2.47083433       | 0.00018329 | Yes     |
| Asb2     | 0.72232   | 0.28605   | -0.43627    | 6.31E-06   | Yes     | Asb2     | 1.00945   | 19.0579  | 4.23875          | 1.01045      | 19.0589       | 4.23739502       | 0.00018329 | Yes     |
| Atg4d    | 0.15682   | 0.039866  | -0.116954   | 0.0445679  | Yes     | Atg4d    | 13.2197   | 35.2817  | 1.41624          | 13.2207      | 35.2827       | 1.4161624        | 0.00380824 | Yes     |
| Atp2a3   | 0.0014814 | 0.076857  | 0.0753756   | 4.61E-10   | Yes     | Atp2a3   | 101.212   | 28.971   | -1.80471         | 101.213      | 28.972        | -1.8046634       | 0.00035173 | Yes     |
| Atp5g1   | 0.29321   | 0.089633  | -0.203577   | 1.19E-07   | Yes     | Atp5g1   | 107.735   | 689.432  | 2.67792          | 107.736      | 689.433       | 2.67790995       | 0.00018329 | Yes     |
| Auh      | 0.8261    | 0.68941   | -0.13669    | 0.00100996 | Yes     | AUH      | 24.5855   | 65.4302  | 1.41215          | 24.5865      | 65.4312       | 1.41211235       | 0.00018329 | Yes     |
| B3gnt7   | 0.4535    | 0.26127   | -0.19223    | 0.00542685 | Yes     | B3gnt7   | 0.846211  | 8.38751  | 3.30915          | 0.847211     | 8.38851       | 3.30762135       | 0.00018329 | Yes     |
| Bai1     | 0.86475   | 0.79193   | -0.07282    | 0.00575049 | Yes     | Bai1     | 0         | 4.97777  | inf              | 0.001        | 4.97877       | 12.2815737       | 0.00018329 | Yes     |
| Bcat1    | 0.60405   | 0.34622   | -0.25783    | 7.11E-05   | Yes     | Bcat1    | 1.90074   | 5.48897  | 1.52997          | 1.90174      | 5.48997       | 1.52947825       | 0.00018329 | Yes     |
| Bcat2    | 0.47892   | 0.25946   | -0.21946    | 0.01448681 | Yes     | Bcat2    | 17.2514   | 61.1383  | 1.82536          | 17.2524      | 61.1393       | 1.82530296       | 0.00018329 | Yes     |
| Bcl3     | 0.13873   | 0.067084  | -0.071646   | 1.71E-05   | Yes     | Bcl3     | 3.6322    | 12.4972  | 1.78268          | 3.6332       | 12.4982       | 1.78240764       | 0.00018329 | Yes     |
| Bhmt     | 0.90245   | 0.51872   | -0.38373    | 1.74E-11   | Yes     | Bhmt     | 0.437048  | 16.8519  | 5.26898          | 0.438048     | 16.8529       | 5.26576409       | 0.00018329 | Yes     |
| Bhmt2    | 0.63767   | 0.31119   | -0.32648    | 8.08E-07   | Yes     | Bhmt2    | 0         | 48.0462  | inf              | 0.001        | 48.0472       | 15.5521647       | 0.00018329 | Yes     |
| Bmp3     | 0.10125   | 0.038118  | -0.063132   | 0.0006534  | Yes     | Bmp3     | 0         | 1.87728  | inf              | 0.001        | 1.87828       | 10.8751964       | 0.00018329 | Yes     |
| Bmp4     | 0.078166  | 0.0092249 | -0.0689411  | 0.00722274 | Yes     | Bmp4     | 0.292601  | 33.6323  | 6.84477          | 0.293601     | 33.6333       | 6.83988965       | 0.00018329 | Yes     |
| Bsdc1    | 0.49127   | 0.14736   | -0.34391    | 0.0023061  | Yes     | Bsdc1    | 7.58979   | 15.1007  | 0.992487         | 7.59079      | 15.1017       | 0.99238902       | 0.00066911 | Yes     |
| Btbd3    | 0.70991   | 0.15622   | -0.55369    | 1.97E-06   | Yes     | Btbd3    | 0.906306  | 4.69273  | 2.37236          | 0.907306     | 4.69373       | 2.37107375       | 0.00018329 | Yes     |
| C1qtnf2  | 0.44682   | 0.18859   | -0.25823    | 0.00455632 | Yes     | C1qtnf2  | 0         | 1.32507  | inf              | 0.001        | 1.32607       | 10.3729412       | 0.00018329 | Yes     |
| C1qtnf3  | 0.68301   | 0.17385   | -0.50916    | 7.48E-05   | Yes     | C1qtnf3  | 0         | 3.14239  | inf              | 0.001        | 3.14339       | 11.6181056       | 0.00018329 | Yes     |
| C1r      | 0.49053   | 0.23409   | -0.25644    | 0.01098497 | Yes     | C1r      | 0.240286  | 5.90288  | 4.6186           | 0.241286     | 5.90388       | 4.61284728       | 0.00018329 | Yes     |
| Cabp1    | 0.78161   | 0.6808    | -0.10081    | 0.0279946  | Yes     | Cabp1    | 0.738427  | 86.4774  | 6.87173          | 0.739427     | 86.4784       | 6.8697883        | 0.00018329 | Yes     |
| Cacna2d3 | 0.083383  | 0.024478  | -0.058905   | 0.00025534 | Yes     | Cacna2d3 | 0         | 0.665089 | inf              | 0.001        | 0.666089      | 9.37957115       | 0.00018329 | Yes     |
| Camk2n1  | 0.35476   | 0.18556   | -0.1692     | 0.01105145 | Yes     | Camk2n1  | 1.89618   | 131.548  | 6.11635          | 1.89718      | 131.549       | 6.11559991       | 0.00018329 | Yes     |
| Camk2n2  | 0.24997   | 0.13209   | -0.11788    | 0.00120161 | Yes     | Camk2n2  | 0         | 0.851501 | inf              | 0.001        | 0.852501      | 9.73555772       | 0.00698138 | Yes     |
| Cap2     | 0.10371   | 0.038852  | -0.064858   | 4.67E-05   | Yes     | Cap2     | 0         | 0.648026 | inf              | 0.001        | 0.649026      | 9.34213246       | 0.00018329 | Yes     |
| Capn2    | 0.10189   | 0.033128  | -0.068762   | 0.00405617 | Yes     | Capn2    | 28.3563   | 58.8089  | 1.05236          | 28.3573      | 58.8099       | 1.05233886       | 0.00018329 | Yes     |
| Car13    | 0.56298   | 0.34636   | -0.21662    | 0.00722274 | Yes     | Car13    | 0         | 0.626612 | inf              | 0.001        | 0.627612      | 9.29372913       | 0.00018329 | Yes     |
| Car4     | 0.091835  | 0.031692  | -0.060143   | 0.00012321 | Yes     | Car4     | 0         | 130.634  | inf              | 0.001        | 130.635       | 16.995182        | 0.00018329 | Yes     |
| Card10   | 0.89113   | 0.35024   | -0.54089    | 6.50E-07   | Yes     | Card10   | 0.0283487 | 22.2583  | 9.61685          | 0.0293487    | 22.2593       | 9.56689591       | 0.0318913  | Yes     |
| Casr     | 0.18297   | 0.063879  | -0.119091   | 4.45E-05   | Yes     | Casr     | 0         | 34.9119  | inf              | 0.001        | 34.9129       | 15.0914726       | 0.00018329 | Yes     |
| Cbr1     | 0.097861  | 0.04254   | -0.055321   | 0.03275343 | Yes     | CBR1     | 9.65513   | 28.144   | 1.54346          | 9.65613      | 28.145        | 1.54336164       | 0.00018329 | Yes     |
| Cbx2     | 0         | 0.10522   | 0.10522     | 2.26E-05   | Yes     | Cbx2     | 18.8476   | 2.54047  | -2.89121         | 18.8486      | 2.54147       | -2.8907223       | 0.00018329 | Yes     |
| Ccbl1    | 0.7742    | 0.67565   | -0.09855    | 0.00037654 | Yes     | Ccbl1    | 31.1029   | 76.6944  | 1.30207          | 31.1039      | 76.6954       | 1.30204457       | 0.00018329 | Yes     |
| Ccbl2    | 0.26681   | 0.10363   | -0.16318    | 0.00092821 | Yes     | Ccbl2    | 4.73628   | 10.3488  | 1.12763          | 4.73728      | 10.3498       | 1.12747204       | 0.0112711  | Yes     |
| Ccdc64b  | 0.13387   | 0.047166  | -0.086704   | 0.00196002 | Yes     | Ccdc64b  | 0.414926  | 8.22603  | 4.30927          | 0.415926     | 8.22703       | 4.30597293       | 0.00018329 | Yes     |
| Cd151    | 0.80386   | 0.28467   | -0.51919    | 3.77E-12   | Yes     | Cd151    | 0.811067  | 3.43904  | 2.08411          | 0.812067     | 3.44004       | 2.08275467       | 0.00018329 | Yes     |
| Cd37     | 0.029939  | 0.44173   | 0.411791    | 3.06E-06   | Yes     | Cd37     | 434.289   | 93.3096  | -2.21856         | 434.29       | 93.3106       | -2.2185458       | 0.00018329 | Yes     |
| Cd38     | 0         | 0.071035  | 0.071035    | 5.06E-06   | Yes     | Cd38     | 77.7903   | 10.1686  | -2.93548         | 77.7913      | 10.1696       | -2.9353459       | 0.00018329 | Yes     |
| Cd8a     | 0.42464   | 0.6419    | 0.21726     | 1.37E-05   | Yes     | Cd8a     | 485.623   | 124.173  | -1.96749         | 485.624      | 124.174       | -1.9674766       | 0.00018329 | Yes     |
| Cdc42bpb | 0.1516    | 0.035455  | -0.116145   | 0.0017951  | Yes     | Cdc42bpb | 0.0231681 | 14.1249  | 9.25189          | 0.0241681    | 14.1259       | 9.19102301       | 0.0116961  | Yes     |
| Cdc42ep5 | 0.76821   | 0.2529    | -0.51531    | 6.36E-08   | Yes     | Cdc42ep5 | 0.758962  | 9.62948  | 3.66536          | 0.759962     | 9.63048       | 3.66360852       | 0.0101506  | Yes     |
| Cdcp1    | 0.62792   | 0.40697   | -0.22095    | 0.01575704 | Yes     | Cdcp1    | 0         | 4.72456  | inf              | 0.001        | 4.72556       | 12.2062696       | 0.00018329 | Yes     |

| RRBS     |          |          |             |            |         | RNAseq   |           |          |                  |              |               |                  |            |         |
|----------|----------|----------|-------------|------------|---------|----------|-----------|----------|------------------|--------------|---------------|------------------|------------|---------|
| gene     | Blood    | Kidney   | methyl.diff | pMWU.fdr   | Match ? | gene     | blood     | kidney   | log2(fold_ratio) | blood+ 0.001 | kidney+ 0.001 | log2(fold_ratio) | q_value    | Match ? |
| Cdh3     | 0.51033  | 0.21915  | -0.29118    | 0.00028052 | Yes     | Cdh3     | 0         | 11.2517  | inf              | 0.001        | 11.2527       | 13.4579836       | 0.00018329 | Yes     |
| Cdk18    | 0.93335  | 0.8614   | -0.07195    | 0.0279946  | Yes     | Cdk18    | 0         | 9.06995  | inf              | 0.001        | 9.07095       | 13.1470379       | 0.00018329 | Yes     |
| Cdkn1c   | 0.20088  | 0.086989 | -0.113891   | 0.03521493 | Yes     | Cdkn1c   | 0.827035  | 4.85329  | 2.55294          | 0.828035     | 4.85429       | 2.55149664       | 0.00018329 | Yes     |
| Cebpb    | 0.24623  | 0.11481  | -0.13142    | 0.03275343 | Yes     | Cebpb    | 8.43803   | 170.923  | 4.34029          | 8.43903      | 170.924       | 4.34013399       | 0.00018329 | Yes     |
| Cep112   | 0.34281  | 0.10054  | -0.24227    | 0.00275507 | Yes     | Cep112   | 0.323946  | 1.75586  | 2.43835          | 0.324946     | 1.75686       | 2.43472734       | 0.0182096  | Yes     |
| Cfd      | 0.37497  | 0.11548  | -0.25949    | 0.00455632 | Yes     | Cfd      | 0.177143  | 8.94834  | 5.65863          | 0.178143     | 8.94934       | 5.65067359       | 0.0350954  | Yes     |
| Chmp4bl1 | 0.36256  | 0.41567  | 0.05311     | 0.02915203 | Yes     | Chmp4bl1 | 212.983   | 138.178  | -0.624216        | 212.984      | 138.179       | -0.6242067       | 0.0198773  | Yes     |
| Ckap4    | 0.82418  | 0.53885  | -0.28533    | 1.37E-05   | Yes     | Ckap4    | 1.44993   | 14.6802  | 3.33981          | 1.45093      | 14.6812       | 3.33892007       | 0.00018329 | Yes     |
| Ckb      | 0.53632  | 0.3249   | -0.21142    | 0.00955793 | Yes     | Ckb      | 3.6868    | 339.967  | 6.52688          | 3.6878       | 339.968       | 6.52649473       | 0.00018329 | Yes     |
| Ckmt1b   | 0.133    | 0.051073 | -0.081927   | 0.00722274 | Yes     | Ckmt1b   | 0         | 150.157  | inf              | 0.001        | 150.158       | 17.1961218       | 0.00018329 | Yes     |
| Cldn19   | 0.67468  | 0.46424  | -0.21044    | 0.01265586 | Yes     | Cldn19   | 0         | 181.616  | inf              | 0.001        | 181.617       | 17.4705397       | 0.00018329 | Yes     |
| Cldn4    | 0.45812  | 0.20871  | -0.24941    | 3.77E-12   | Yes     | Cldn4    | 0.0986709 | 109.727  | 10.119           | 0.0996709    | 109.728       | 10.1044717       | 0.0112711  | Yes     |
| Clec14a  | 0.16756  | 0.07217  | -0.09539    | 0.00894698 | Yes     | Clec14a  | 0         | 0.871354 | inf              | 0.001        | 0.872354      | 9.76876989       | 0.00018329 | Yes     |
| Cmb1     | 0.57942  | 0.19833  | -0.38109    | 0.00012584 | Yes     | Cmb1     | 0.828352  | 40.3014  | 5.60444          | 0.829352     | 40.3024       | 5.60273739       | 0.00018329 | Yes     |
| Cndp2    | 0.11353  | 0.052051 | -0.061479   | 0.00722274 | Yes     | Cndp2    | 15.825    | 129.2    | 3.02933          | 15.826       | 129.201       | 3.02924867       | 0.00018329 | Yes     |
| Cnm2     | 0.68384  | 0.3676   | -0.31624    | 3.91E-05   | Yes     | Cnm2     | 0.386062  | 7.2434   | 4.22976          | 0.387062     | 7.2444        | 4.22622962       | 0.00018329 | Yes     |
| Col15a1  | 0.1717   | 0.078863 | -0.092837   | 0.01265586 | Yes     | COL15A1  | 0.0328598 | 1.71903  | 5.70913          | 0.0338598    | 1.72003       | 5.66671647       | 0.0018326  | Yes     |
| Col18a1  | 0.10346  | 0.037639 | -0.065821   | 0.00955793 | Yes     | Col18a1  | 0.0426167 | 97.8604  | 11.1651          | 0.0436167    | 97.8614       | 11.1316436       | 0.00018329 | Yes     |
| Col27a1  | 0.39289  | 0.11633  | -0.27656    | 0.00120161 | Yes     | Col27a1  | 0.331849  | 25.1039  | 6.24124          | 0.332849     | 25.1049       | 6.23695733       | 0.00018329 | Yes     |
| Coq2     | 0.13878  | 0.074162 | -0.064618   | 0.0023061  | Yes     | Coq2     | 9.00637   | 22.2558  | 1.30516          | 9.00737      | 22.2568       | 1.30506835       | 0.00018329 | Yes     |
| Coro6    | 0.11316  | 0.037008 | -0.076152   | 3.76E-05   | Yes     | Coro6    | 0.478624  | 10.3973  | 4.44117          | 0.479624     | 10.3983       | 4.43830002       | 0.00018329 | Yes     |
| Cplx2    | 0.17685  | 0.083333 | -0.093517   | 0.03521493 | Yes     | Cplx2    | 0         | 2.43114  | inf              | 0.001        | 2.43214       | 11.2480106       | 0.00018329 | Yes     |
| Cpt1b    | 0.89484  | 0.49333  | -0.40151    | 3.78E-12   | Yes     | Cpt1b    | 1.9126    | 16.9566  | 3.14824          | 1.9136       | 16.9576       | 3.1475708        | 0.00018329 | Yes     |
| Crb3     | 0.10065  | 0.036897 | -0.063753   | 0.00275507 | Yes     | Crb3     | 0.287933  | 38.2507  | 7.05361          | 0.288933     | 38.2517       | 7.04864507       | 0.00018329 | Yes     |
| Crip1    | 0.053387 | 0.33964  | 0.286253    | 2.97E-11   | Yes     | Crip1    | 754.786   | 408.728  | -0.884929        | 754.787      | 408.729       | -0.884925        | 0.00290302 | Yes     |
| Crip2    | 0.46703  | 0.28152  | -0.18551    | 0.0031273  | Yes     | Crip2    | 1.08699   | 183.003  | 7.39539          | 1.08799      | 183.004       | 7.39406608       | 0.00018329 | Yes     |
| Csad     | 0.86727  | 0.75259  | -0.11468    | 1.26E-05   | Yes     | Csad     | 6.4419    | 24.6525  | 1.93618          | 6.4429       | 24.6535       | 1.93601037       | 0.0142025  | Yes     |
| Ctbp2    | 0.82603  | 0.71033  | -0.1157     | 0.00068356 | Yes     | Ctbp2    | 0.416997  | 29.7567  | 6.15703          | 0.417997     | 29.7577       | 6.15362663       | 0.00018329 | Yes     |
| Ctgf     | 0.42498  | 0.16262  | -0.26236    | 0.00011533 | Yes     | Ctgf     | 0         | 29.6597  | inf              | 0.001        | 29.6607       | 14.856265        | 0.00018329 | Yes     |
| Ctrc     | 0.82947  | 0.68518  | -0.14429    | 0.01137984 | Yes     | Ctrc     | 1.19325   | 4.41029  | 1.88598          | 1.19425      | 4.41129       | 1.88509573       | 0.00650199 | Yes     |
| Cuedc1   | 0.88224  | 0.69844  | -0.1838     | 7.11E-08   | Yes     | Cuedc1   | 0.374172  | 8.29977  | 4.4713           | 0.375172     | 8.30077       | 4.46762111       | 0.0259489  | Yes     |
| Cwh43    | 0.12744  | 0.037793 | -0.089647   | 4.72E-06   | Yes     | Cwh43    | 0.158756  | 23.7543  | 7.22523          | 0.159756     | 23.7553       | 7.2162355        | 0.00018329 | Yes     |
| Cx3cl1   | 0.75606  | 0.24299  | -0.51307    | 3.20E-09   | Yes     | Cx3cl1   | 0         | 28.0312  | inf              | 0.001        | 28.0322       | 14.7747974       | 0.00018329 | Yes     |
| Cxxc5    | 0.91096  | 0.79125  | -0.11971    | 0.00021046 | Yes     | CXXC5    | 21.5474   | 77.2102  | 1.84127          | 21.5484      | 77.2112       | 1.84122938       | 0.00018329 | Yes     |
| Cyp24a1  | 0.077411 | 0.021702 | -0.055709   | 0.0279946  | Yes     | Cyp24a1  | 0         | 4.52828  | inf              | 0.001        | 4.52928       | 12.145066        | 0.00018329 | Yes     |
| Cyp7b1   | 0.12916  | 0.03567  | -0.09349    | 0.00028052 | Yes     | Cyp7b1   | 0.111152  | 2.36283  | 4.40991          | 0.112152     | 2.36383       | 4.39759903       | 0.0116961  | Yes     |
| Dab2ip   | 0.72008  | 0.47525  | -0.24483    | 0.0031273  | Yes     | Dab2ip   | 0.0768819 | 11.653   | 7.24385          | 0.0778819    | 11.654        | 7.22532142       | 0.00018329 | Yes     |
| Dao      | 0.93356  | 0.37223  | -0.56133    | 2.68E-10   | Yes     | Dao      | 0         | 156.364  | inf              | 0.001        | 156.365       | 17.2545581       | 0.00018329 | Yes     |
| Dapk1    | 0.77433  | 0.60546  | -0.16887    | 0.01621946 | Yes     | Dapk1    | 2.56167   | 12.6817  | 2.30759          | 2.56267      | 12.6827       | 2.30714229       | 0.00018329 | Yes     |
| Dapp1    | 0.064087 | 0.52746  | 0.463373    | 8.08E-07   | Yes     | Dapp1    | 15.3642   | 4.59703  | -1.7408          | 15.3652      | 4.59803       | -1.7405788       | 0.00018329 | Yes     |
| Dcxr     | 0.81018  | 0.28208  | -0.5281     | 3.01E-07   | Yes     | Dcxr     | 12.2443   | 121.018  | 3.30504          | 12.2453      | 121.019       | 3.30493354       | 0.00018329 | Yes     |
| Ddah2    | 0.76163  | 0.36813  | -0.3935     | 3.77E-12   | Yes     | Ddah2    | 0.419714  | 115.399  | 8.103            | 0.420714     | 115.4         | 8.09958768       | 0.00082046 | Yes     |



| RRBS    |           |          |             |            |         | RNAseq  |           |         |                  |              |               |                  |            |         |
|---------|-----------|----------|-------------|------------|---------|---------|-----------|---------|------------------|--------------|---------------|------------------|------------|---------|
| gene    | Blood     | Kidney   | methyl.diff | pMWU.fdr   | Match ? | gene    | blood     | kidney  | log2(fold_ratio) | blood+ 0.001 | kidney+ 0.001 | log2(fold_ratio) | q_value    | Match ? |
| Ddr1    | 0.69455   | 0.18586  | -0.50869    | 0.00017122 | Yes     | Ddr1    | 0.0280151 | 31.9213 | 10.1541          | 0.0290151    | 31.9223       | 10.103545        | 0.00018329 | Yes     |
| Ddx6    | 0.19567   | 0.2681   | 0.07243     | 0.00012584 | Yes     | Ddx6    | 70.4191   | 18.7345 | -1.91027         | 70.4201      | 18.7355       | -1.9102128       | 0.00018329 | Yes     |
| Depdc7  | 0.84065   | 0.38305  | -0.4576     | 9.14E-07   | Yes     | Depdc7  | 0.110953  | 4.44316 | 5.32357          | 0.111953     | 4.44416       | 5.31094566       | 0.00051281 | Yes     |
| Des     | 0.10954   | 0.056036 | -0.053504   | 1.63E-06   | Yes     | Des     | 0         | 2.71657 | inf              | 0.001        | 2.71757       | 11.4081015       | 0.00018329 | Yes     |
| Dgat1   | 0.079337  | 0.02348  | -0.055857   | 0.00046463 | Yes     | Dgat1   | 2.54795   | 12.6531 | 2.31208          | 2.54895      | 12.6541       | 2.31162992       | 0.00018329 | Yes     |
| Dhcr24  | 0.25088   | 0.093687 | -0.157193   | 1.11E-07   | Yes     | Dhcr24  | 10.3913   | 38.1944 | 1.87798          | 10.3923      | 38.1954       | 1.87788392       | 0.00018329 | Yes     |
| Dlg3    | 0.29842   | 0.16547  | -0.13295    | 0.00368736 | Yes     | Dlg3    | 3.63324   | 13.3208 | 1.87435          | 3.63424      | 13.3218       | 1.87406343       | 0.00419853 | Yes     |
| Dnmt3a  | 0.0085349 | 0.32118  | 0.3126451   | 6.50E-07   | Yes     | Dnmt3a  | 16.6685   | 5.67031 | -1.55563         | 16.6695      | 5.67131       | -1.5554569       | 0.00018329 | Yes     |
| Dock1   | 0.11954   | 0.028387 | -0.091153   | 0.00722274 | Yes     | Dock1   | 0.176256  | 32.4628 | 7.52497          | 0.177256     | 32.4638       | 7.51685361       | 0.00018329 | Yes     |
| Dok2    | 0.19049   | 0.61407  | 0.42358     | 1.07E-11   | Yes     | Dok2    | 105.967   | 19.5296 | -2.43988         | 105.968      | 19.5306       | -2.4398205       | 0.00018329 | Yes     |
| Dok3    | 0.76144   | 0.49622  | -0.26522    | 0.00832699 | Yes     | Dok3    | 3.85457   | 12.1457 | 1.6558           | 3.85557      | 12.1467       | 1.65554835       | 0.00018329 | Yes     |
| Dolk    | 0.18064   | 0.075515 | -0.105125   | 0.00275507 | Yes     | Dolk    | 1.81732   | 12.6121 | 2.79492          | 1.81832      | 12.6131       | 2.79424488       | 0.00018329 | Yes     |
| Dpys    | 0.43118   | 0.22559  | -0.20559    | 0.00368736 | Yes     | Dpys    | 0         | 12.4943 | inf              | 0.001        | 12.4953       | 13.6090979       | 0.00018329 | Yes     |
| Dtnb    | 0.18056   | 0.0676   | -0.11296    | 0.0031273  | Yes     | Dtnb    | 16.058    | 42.9098 | 1.41801          | 16.059       | 42.9108       | 1.41795874       | 0.00035173 | Yes     |
| Duoxa1  | 0.20949   | 0.090474 | -0.119016   | 0.03760671 | Yes     | Duoxa1  | 0         | 11.2651 | inf              | 0.001        | 11.2661       | 13.4597006       | 0.00018329 | Yes     |
| Dyrk2   | 0.055627  | 0.4051   | 0.349473    | 1.40E-10   | Yes     | Dyrk2   | 88.9248   | 9.97185 | -3.15665         | 88.9258      | 9.97285       | -3.1565243       | 0.00018329 | Yes     |
| Edn3    | 0.19394   | 0.1147   | -0.07924    | 0.0445679  | Yes     | Edn3    | 0         | 1.34291 | inf              | 0.001        | 1.34391       | 10.3922208       | 0.00018329 | Yes     |
| Efemp2  | 0.6771    | 0.47073  | -0.20637    | 0.0279946  | Yes     | EFEMP2  | 1.64492   | 11.3475 | 2.78628          | 1.64592      | 11.3485       | 2.7855355        | 0.00018329 | Yes     |
| Efna1   | 0.55554   | 0.19573  | -0.35981    | 7.28E-07   | Yes     | Efna1   | 0.140591  | 22.155  | 7.29998          | 0.141591     | 22.156        | 7.28982407       | 0.00018329 | Yes     |
| Efs     | 0.25126   | 0.12893  | -0.12233    | 0.00030067 | Yes     | Efs     | 0         | 2.36214 | inf              | 0.001        | 2.36314       | 11.2064894       | 0.00018329 | Yes     |
| Egfl8   | 0.7636    | 0.2688   | -0.4948     | 0.00049132 | Yes     | Egfl8   | 9.68871   | 53.5557 | 2.46666          | 9.68971      | 53.5567       | 2.46654168       | 0.0450989  | Yes     |
| Egr1    | 0.70362   | 0.19403  | -0.50959    | 1.95E-09   | Yes     | Egr1    | 1.09398   | 113.963 | 6.70284          | 1.09498      | 113.964       | 6.70152984       | 0.00018329 | Yes     |
| Ehd3    | 0.019538  | 0.12791  | 0.108372    | 0.00275507 | Yes     | Ehd3    | 73.9552   | 11.8374 | -2.6433          | 73.9562      | 11.8384       | -2.643197        | 0.00018329 | Yes     |
| Ehf     | 0.55487   | 0.35225  | -0.20262    | 0.04893199 | Yes     | Ehf     | 0         | 20.6616 | inf              | 0.001        | 20.6626       | 14.3347342       | 0.00018329 | Yes     |
| Emb     | 0.3811    | 0.21507  | -0.16603    | 0.02160305 | Yes     | Emb     | 1.85211   | 76.4623 | 5.3675           | 1.85311      | 76.4633       | 5.36674704       | 0.00018329 | Yes     |
| Emx2    | 0.13578   | 0.036485 | -0.099295   | 0.01761018 | Yes     | Emx2    | 0         | 11.8076 | inf              | 0.001        | 11.8086       | 13.5275503       | 0.00018329 | Yes     |
| Enpep   | 0.84796   | 0.27171  | -0.57625    | 6.50E-07   | Yes     | Enpep   | 0         | 32.0696 | inf              | 0.001        | 32.0706       | 14.9689637       | 0.00018329 | Yes     |
| Epcam   | 0.81304   | 0.28985  | -0.52319    | 8.06E-06   | Yes     | Epcam   | 0.189034  | 672.906 | 11.7975          | 0.190034     | 672.907       | 11.7899339       | 0.00035173 | Yes     |
| Ephb2   | 0.83568   | 0.70642  | -0.12926    | 1.07E-05   | Yes     | Ephb2   | 0.0428654 | 4.72812 | 6.78531          | 0.0438654    | 4.72912       | 6.75234452       | 0.0063852  | Yes     |
| Epn2    | 0.15421   | 0.069617 | -0.084593   | 0.00031102 | Yes     | Epn2    | 0.180198  | 10.3226 | 5.84008          | 0.181198     | 10.3236       | 5.83223531       | 0.00018329 | Yes     |
| Epsti1  | 0.038026  | 0.50167  | 0.463644    | 6.50E-07   | Yes     | Epsti1  | 76.0096   | 10.6382 | -2.83692         | 76.0106      | 10.6392       | -2.8368109       | 0.00018329 | Yes     |
| Esam    | 0.18454   | 0.083415 | -0.101125   | 0.00625768 | Yes     | Esam    | 0.070175  | 61.2768 | 9.77017          | 0.071175     | 61.2778       | 9.7497782        | 0.00018329 | Yes     |
| Esm1    | 0.76396   | 0.51197  | -0.25199    | 9.20E-07   | Yes     | Esm1    | 0         | 2.72307 | inf              | 0.001        | 2.72407       | 11.4115481       | 0.00018329 | Yes     |
| Espn    | 0.48536   | 0.19142  | -0.29394    | 2.79E-05   | Yes     | Espn    | 0.036347  | 26.1484 | 9.49067          | 0.037347     | 26.1494       | 9.45156977       | 0.0247294  | Yes     |
| Esrrg   | 0.77326   | 0.29478  | -0.47848    | 1.17E-05   | Yes     | Esrrg   | 0         | 74.4508 | inf              | 0.001        | 74.4518       | 16.1840191       | 0.00018329 | Yes     |
| Ethe1   | 0.95778   | 0.34642  | -0.61136    | 6.50E-07   | Yes     | Ethe1   | 7.39626   | 98.8663 | 3.74061          | 7.39726      | 98.8673       | 3.74043054       | 0.00018329 | Yes     |
| Etv3    | 0.2114    | 0.66293  | 0.45153     | 6.50E-07   | Yes     | Etv3    | 25.6815   | 5.955   | -2.10856         | 25.6825      | 5.956         | -2.10837         | 0.00018329 | Yes     |
| Eva1b   | 0.83849   | 0.42822  | -0.41027    | 3.77E-12   | Yes     | Eva1b   | 26.5057   | 51.7609 | 0.965558         | 26.5067      | 51.7619       | 0.9655335        | 0.00354878 | Yes     |
| Evc2    | 0.15779   | 0.022527 | -0.135263   | 0.00405617 | Yes     | Evc2    | 0         | 3.33816 | inf              | 0.001        | 3.33916       | 11.7052695       | 0.00018329 | Yes     |
| F2r     | 0.96756   | 0.89708  | -0.07048    | 0.00420619 | Yes     | F2r     | 3.57372   | 25.1092 | 2.81271          | 3.57472      | 25.1102       | 2.81237137       | 0.00018329 | Yes     |
| F2rl1   | 0.112     | 0.035944 | -0.076056   | 3.91E-05   | Yes     | F2rl1   | 0.15027   | 11.8081 | 6.29608          | 0.15127      | 11.8091       | 6.28662931       | 0.00018329 | Yes     |
| Fam110a | 0.72786   | 0.60165  | -0.12621    | 0.03760671 | Yes     | Fam110a | 2.54065   | 9.06337 | 1.83485          | 2.54165      | 9.06437       | 1.83444138       | 0.00018329 | Yes     |

| RRBS     |           |          |             |            |         | RNAseq   |            |          |                  |              |               |                  |            |         |
|----------|-----------|----------|-------------|------------|---------|----------|------------|----------|------------------|--------------|---------------|------------------|------------|---------|
| gene     | Blood     | Kidney   | methyl.diff | pMWU.fdr   | Match ? | gene     | blood      | kidney   | log2(fold_ratio) | blood+ 0.001 | kidney+ 0.001 | log2(fold_ratio) | q_value    | Match ? |
| Fam110c  | 0.38316   | 0.14086  | -0.2423     | 2.48E-05   | Yes     | Fam110c  | 0          | 1.64123  | inf              | 0.001        | 1.64223       | 10.6814405       | 0.00018329 | Yes     |
| Fam129b  | 0.34323   | 0.15498  | -0.18825    | 0.00049132 | Yes     | Fam129b  | 1.55319    | 22.3484  | 3.84686          | 1.55419      | 22.3494       | 3.84600131       | 0.00018329 | Yes     |
| Fam19a5  | 0.1717    | 0.08419  | -0.08751    | 0.00542685 | Yes     | Fam19a5  | 0          | 5.00508  | inf              | 0.001        | 5.00608       | 12.2894656       | 0.00018329 | Yes     |
| Fam217a  | 0.32702   | 0.15374  | -0.17328    | 5.02E-08   | Yes     | FAM217A  | 0.124873   | 0.751576 | 2.58945          | 0.125873     | 0.752576      | 2.57986843       | 0.0086849  | Yes     |
| Fam43a   | 0.53405   | 0.18515  | -0.3489     | 2.49E-10   | Yes     | Fam43a   | 0.875029   | 33.4273  | 5.25555          | 0.876029     | 33.4283       | 5.25394755       | 0.00018329 | Yes     |
| Fam69b   | 0.57193   | 0.35731  | -0.21462    | 0.00095473 | Yes     | Fam69b   | 0.350893   | 5.41784  | 3.94861          | 0.351893     | 5.41884       | 3.94477533       | 0.00018329 | Yes     |
| Fam83f   | 0.38133   | 0.17385  | -0.20748    | 2.61E-07   | Yes     | Fam83f   | 0.0428193  | 6.63756  | 7.27625          | 0.0438193    | 6.63856       | 7.24316009       | 0.00277264 | Yes     |
| Fam83h   | 0.26167   | 0.045249 | -0.216421   | 9.79E-07   | Yes     | Fam83h   | 0.330722   | 7.07802  | 4.41966          | 0.331722     | 7.07902       | 4.41550305       | 0.00018329 | Yes     |
| Fam84a   | 0.10343   | 0.040799 | -0.062631   | 7.19E-07   | Yes     | Fam84a   | 0          | 16.7974  | inf              | 0.001        | 16.7984       | 14.0360362       | 0.00018329 | Yes     |
| Fancd2os | 0.91087   | 0.36484  | -0.54603    | 3.77E-12   | Yes     | Fancd2os | 0.00895631 | 4.67275  | 9.02715          | 0.00995631   | 4.67375       | 8.8747537        | 0.0311417  | Yes     |
| Fcgr3a   | 0.84455   | 0.68907  | -0.15548    | 0.00026585 | Yes     | Fcgr3a   | 0.48792    | 23.88    | 5.61301          | 0.48892      | 23.881        | 5.61012102       | 0.00445502 | Yes     |
| Fermt2   | 0.10107   | 0.035547 | -0.065523   | 0.00092821 | Yes     | Fermt2   | 0.995442   | 31.4815  | 4.98302          | 0.996442     | 31.4825       | 4.98162047       | 0.00018329 | Yes     |
| Fgd3     | 0.0067205 | 0.50034  | 0.4936195   | 3.77E-12   | Yes     | Fgd3     | 34.6155    | 10.7735  | -1.68393         | 34.6165      | 10.7745       | -1.6838389       | 0.00018329 | Yes     |
| Fgr      | 0.35014   | 0.12524  | -0.2249     | 0.00012962 | Yes     | Fgr      | 1.49562    | 11.8174  | 2.9821           | 1.49662      | 11.8184       | 2.98125487       | 0.00018329 | Yes     |
| Fhdc1    | 0.19281   | 0.10292  | -0.08989    | 0.03760671 | Yes     | Fhdc1    | 1.3927     | 3.57477  | 1.35996          | 1.3937       | 3.57577       | 1.35933389       | 0.00018329 | Yes     |
| Fn1      | 0.56975   | 0.38457  | -0.18518    | 0.01265586 | Yes     | FN1      | 2.46158    | 11.5031  | 2.22437          | 2.46258      | 11.5041       | 2.22390562       | 0.00018329 | Yes     |
| Fn3k     | 0.93376   | 0.37022  | -0.56354    | 6.50E-07   | Yes     | Fn3k     | 0          | 14.2706  | inf              | 0.001        | 14.2716       | 13.8008595       | 0.00018329 | Yes     |
| Fn3krp   | 0.10608   | 0.035275 | -0.070805   | 0.00152471 | Yes     | Fn3krp   | 4.07621    | 11.6515  | 1.51521          | 4.07721      | 11.6525       | 1.51498534       | 0.00018329 | Yes     |
| Fnbp1l   | 0.9273    | 0.40784  | -0.51946    | 5.02E-08   | Yes     | Fnbp1l   | 0.645549   | 19.464   | 4.91414          | 0.646549     | 19.465        | 4.91197882       | 0.00018329 | Yes     |
| Foxe1    | 0.12169   | 0.064045 | -0.057645   | 2.03E-05   | Yes     | Foxe1    | 0          | 0.958593 | inf              | 0.001        | 0.959593      | 9.90627882       | 0.00018329 | Yes     |
| Foxi1    | 0.73179   | 0.58016  | -0.15163    | 0.03760671 | Yes     | Foxi1    | 0.0444429  | 2.54214  | 5.83794          | 0.0454429    | 2.54314       | 5.80641217       | 0.00419853 | Yes     |
| Foxo3    | 0.074851  | 0.25582  | 0.180969    | 0.00017122 | Yes     | Foxo3    | 23.876     | 14.1946  | -0.750217        | 23.877       | 14.1956       | -0.7501778       | 0.00948282 | Yes     |
| Ftl1     | 0.66131   | 0.61105  | -0.05026    | 0.0279946  | Yes     | FTL1     | 337.663    | 1747.85  | 2.37192          | 337.664      | 1747.851      | 2.37192192       | 0.00018329 | Yes     |
| Fxyd1    | 0.94226   | 0.56764  | -0.37462    | 6.50E-07   | Yes     | Fxyd1    | 0          | 16.5828  | inf              | 0.001        | 16.5838       | 14.017487        | 0.00018329 | Yes     |
| Fxyd2    | 0.83399   | 0.57339  | -0.2606     | 8.22E-05   | Yes     | FXYD2    | 0.964638   | 2473.33  | 11.3242          | 0.965638     | 2473.331      | 11.3226853       | 0.00018329 | Yes     |
| Fxyd3    | 0.89091   | 0.58531  | -0.3056     | 0.00054569 | Yes     | Fxyd3    | 0.334278   | 51.7048  | 7.27311          | 0.335278     | 51.7058       | 7.26882449       | 0.0257522  | Yes     |
| Gadd45b  | 0.49851   | 0.25168  | -0.24683    | 0.00015368 | Yes     | Gadd45b  | 1.89774    | 63.0169  | 5.05339          | 1.89874      | 63.0179       | 5.05264741       | 0.00018329 | Yes     |
| Galnt14  | 0.13418   | 0.061376 | -0.072804   | 0.03032002 | Yes     | Galnt14  | 0          | 8.35632  | inf              | 0.001        | 8.35732       | 13.0288247       | 0.00018329 | Yes     |
| Gapdh    | 0.4571    | 0.10329  | -0.35381    | 5.59E-07   | Yes     | Gapdh    | 411.31     | 1110.81  | 1.43332          | 411.311      | 1110.811      | 1.43331181       | 0.00018329 | Yes     |
| Gas2l1   | 0.82387   | 0.67159  | -0.15228    | 2.34E-07   | Yes     | Gas2l1   | 0.344132   | 12.0465  | 5.12951          | 0.345132     | 12.0475       | 5.12544175       | 0.00018329 | Yes     |
| Gas8     | 0.21036   | 0.070494 | -0.139866   | 0.00351975 | Yes     | Gas8     | 0.671509   | 4.53281  | 2.75493          | 0.672509     | 4.53381       | 2.75309845       | 0.00277264 | Yes     |
| Gata3    | 0.0012842 | 0.11234  | 0.1110558   | 3.77E-12   | Yes     | Gata3    | 57.8156    | 26.2464  | -1.13934         | 57.8166      | 26.2474       | -1.1393093       | 0.00018329 | Yes     |
| Gatsl3   | 0.14661   | 0.03726  | -0.10935    | 0.00489594 | Yes     | Gatsl3   | 10.4555    | 28.5929  | 1.4514           | 10.4565      | 28.5939       | 1.45130737       | 0.00018329 | Yes     |
| Gipc1    | 0.69352   | 0.57704  | -0.11648    | 0.00529214 | Yes     | Gipc1    | 21.8441    | 50.0489  | 1.19609          | 21.8451      | 50.0499       | 1.19605748       | 0.00018329 | Yes     |
| Gjb3     | 0.98357   | 0.91787  | -0.0657     | 0.00022961 | Yes     | Gjb3     | 0          | 1.01345  | inf              | 0.001        | 1.01445       | 9.98648204       | 0.00018329 | Yes     |
| Glis2    | 0.65627   | 0.16167  | -0.4946     | 0.00102242 | Yes     | Glis2    | 0.138639   | 41.2481  | 8.21685          | 0.139639     | 41.2491       | 8.2065169        | 0.00035173 | Yes     |
| Gpc3     | 0.11237   | 0.043211 | -0.069159   | 0.01761018 | Yes     | Gpc3     | 0          | 102.423  | inf              | 0.001        | 102.424       | 16.6441943       | 0.00018329 | Yes     |
| Gpd1     | 0.40254   | 0.15566  | -0.24688    | 3.06E-06   | Yes     | Gpd1     | 0.173816   | 22.234   | 6.99907          | 0.174816     | 22.235        | 6.99085136       | 0.00018329 | Yes     |
| Gpr137   | 0.15896   | 0.036569 | -0.122391   | 1.79E-05   | Yes     | Gpr137   | 2.75307    | 20.663   | 2.90794          | 2.75407      | 20.664        | 2.90748241       | 0.00018329 | Yes     |
| Gpr176   | 0.29932   | 0.16162  | -0.1377     | 0.02284827 | Yes     | Gpr176   | 0.0547145  | 2.33017  | 5.41237          | 0.0557145    | 2.33117       | 5.38685756       | 0.00035173 | Yes     |
| Gpr27    | 0.17191   | 0.098759 | -0.073151   | 0.02412126 | Yes     | Gpr27    | 0          | 1.04896  | inf              | 0.001        | 1.04996       | 10.0361187       | 0.00018329 | Yes     |
| Gprc5a   | 0.3603    | 0.16296  | -0.19734    | 7.48E-05   | Yes     | Gprc5a   | 0.0498675  | 18.1228  | 8.50549          | 0.0508675    | 18.1238       | 8.47692557       | 0.0258543  | Yes     |

| RRBS     |          |          |             |            |         | RNAseq   |           |          |                  |              |               |                  |            |         |
|----------|----------|----------|-------------|------------|---------|----------|-----------|----------|------------------|--------------|---------------|------------------|------------|---------|
| gene     | Blood    | Kidney   | methyl.diff | pMWU.fdr   | Match ? | gene     | blood     | kidney   | log2(fold_ratio) | blood+ 0.001 | kidney+ 0.001 | log2(fold_ratio) | q_value    | Match ? |
| Grap2    | 0        | 0.65095  | 0.65095     | 1.74E-11   | Yes     | Grap2    | 85.2707   | 5.03429  | -4.08219         | 85.2717      | 5.03529       | -4.0819202       | 0.00018329 | Yes     |
| Grb10    | 0.67155  | 0.49315  | -0.1784     | 0.03275343 | Yes     | Grb10    | 0.0109565 | 3.49688  | 8.31814          | 0.0119565    | 3.49788       | 8.19254185       | 0.00481718 | Yes     |
| Grk5     | 0.18922  | 0.084698 | -0.104522   | 0.02915203 | Yes     | Grk5     | 1.90373   | 5.56765  | 1.54824          | 1.90473      | 5.56865       | 1.54774111       | 0.00018329 | Yes     |
| Gtpbp3   | 0.81571  | 0.72531  | -0.0904     | 0.00108973 | Yes     | Gtpbp3   | 2.48364   | 5.50314  | 1.1478           | 2.48464      | 5.50414       | 1.14748033       | 0.00406781 | Yes     |
| Gypc     | 0.028946 | 0.51108  | 0.482134    | 9.14E-07   | Yes     | Gypc     | 9.49927   | 4.63324  | -1.03579         | 9.50027      | 4.63424       | -1.0356358       | 0.00238141 | Yes     |
| H1f0     | 0.40339  | 0.25263  | -0.15076    | 0.02915203 | Yes     | H1f0     | 13.5073   | 135.121  | 3.32244          | 13.5083      | 135.122       | 3.32234456       | 0.00018329 | Yes     |
| Habp4    | 0.49289  | 0.19207  | -0.30082    | 0.0019357  | Yes     | Habp4    | 6.93702   | 13.3246  | 0.941699         | 6.93802      | 13.3256       | 0.94160459       | 0.00788539 | Yes     |
| Hcst     | 0.025893 | 0.43856  | 0.412667    | 6.50E-07   | Yes     | Hcst     | 309.653   | 81.4732  | -1.92625         | 309.654      | 81.4742       | -1.9262419       | 0.00018329 | Yes     |
| Hes6     | 0.58345  | 0.38901  | -0.19444    | 0.00125283 | Yes     | Hes6     | 25.3334   | 60.9629  | 1.26689          | 25.3344      | 60.9639       | 1.26685754       | 0.00018329 | Yes     |
| Hid1     | 0.29022  | 0.15489  | -0.13533    | 0.00832699 | Yes     | Hid1     | 0.0864962 | 9.75698  | 6.81765          | 0.0874962    | 9.75798       | 6.80121835       | 0.00018329 | Yes     |
| Hlx      | 0.19117  | 0.076563 | -0.114607   | 3.41E-07   | Yes     | Hlx      | 0.148365  | 2.61499  | 4.13959          | 0.149365     | 2.61599       | 4.13044299       | 0.00082046 | Yes     |
| Hmg20b   | 0.73353  | 0.40364  | -0.32989    | 0.00152471 | Yes     | Hmg20b   | 14.7452   | 48.8141  | 1.72705          | 14.7462      | 48.8151       | 1.72698426       | 0.00018329 | Yes     |
| Hnf1a    | 0.82509  | 0.2244   | -0.60069    | 1.08E-09   | Yes     | Hnf1a    | 2.71454   | 6.27612  | 1.20916          | 2.71554      | 6.27712       | 1.20886367       | 0.00018329 | Yes     |
| Hnf1b    | 0.14557  | 0.046159 | -0.099411   | 0.01105145 | Yes     | Hnf1b    | 0         | 164.741  | inf              | 0.001        | 164.742       | 17.3298489       | 0.00018329 | Yes     |
| Hnf4a    | 0.80737  | 0.42492  | -0.38245    | 1.67E-07   | Yes     | Hnf4a    | 0         | 105.595  | inf              | 0.001        | 105.596       | 16.6881957       | 0.00018329 | Yes     |
| Hoxa6    | 0.45712  | 0.16338  | -0.29374    | 3.29E-08   | Yes     | HOXA6    | 0         | 10.6815  | inf              | 0.001        | 10.6825       | 13.3829617       | 0.00018329 | Yes     |
| Hoxb3    | 0.94084  | 0.3991   | -0.54174    | 3.20E-09   | Yes     | HOXB3    | 0.236863  | 62.499   | 8.04363          | 0.237863     | 62.5          | 8.0375815        | 0.00018329 | Yes     |
| Hoxb5    | 0.65793  | 0.37842  | -0.27951    | 1.14E-10   | Yes     | Hoxb5    | 0         | 141.103  | inf              | 0.001        | 141.104       | 17.1063994       | 0.00018329 | Yes     |
| Hoxb7    | 0.09272  | 0.03156  | -0.06116    | 0.0103156  | Yes     | Hoxb7    | 0         | 46.3627  | inf              | 0.001        | 46.3637       | 15.5007081       | 0.00018329 | Yes     |
| Hoxd10   | 0.13304  | 0.043773 | -0.089267   | 9.35E-05   | Yes     | Hoxd10   | 0         | 70.703   | inf              | 0.001        | 70.704        | 16.1095042       | 0.00018329 | Yes     |
| Hpd1     | 0.76479  | 0.45805  | -0.30674    | 0.00046463 | Yes     | Hpd1     | 0         | 2.48339  | inf              | 0.001        | 2.48439       | 11.278676        | 0.00018329 | Yes     |
| Hr       | 0.3952   | 0.19756  | -0.19764    | 0.03863139 | Yes     | Hr       | 0.125388  | 2.25394  | 4.16798          | 0.126388     | 2.25494       | 4.15715765       | 0.00082046 | Yes     |
| Hs6st1   | 0.17674  | 0.075484 | -0.101256   | 0.00405617 | Yes     | Hs6st1   | 5.09462   | 26.3732  | 2.37203          | 5.09562      | 26.3742       | 2.37179773       | 0.00018329 | Yes     |
| Hsd17b1  | 0.92571  | 0.36572  | -0.55999    | 4.46E-12   | Yes     | Hsd17b1  | 0.705317  | 2.17137  | 1.62226          | 0.706317     | 2.17237       | 1.62088212       | 0.00579773 | Yes     |
| Hspa2    | 0.18997  | 0.098279 | -0.091691   | 0.01024368 | Yes     | Hspa2    | 0.469407  | 30.4824  | 6.02099          | 0.470407     | 30.4834       | 6.01797049       | 0.00380824 | Yes     |
| Igf2r    | 0.39972  | 0.26472  | -0.135      | 3.32E-11   | Yes     | Igf2r    | 10.7387   | 22.5032  | 1.06731          | 10.7397      | 22.5042       | 1.06724059       | 0.00035173 | Yes     |
| lhh      | 0.12886  | 0.025192 | -0.103668   | 0.00455632 | Yes     | lhh      | 0.400362  | 3.69262  | 3.20527          | 0.401362     | 3.69362       | 3.20205951       | 0.00018329 | Yes     |
| Il3ra    | 0.39256  | 0.14226  | -0.2503     | 0.00256829 | Yes     | Il3ra    | 2.38171   | 70.1972  | 4.88134          | 2.38271      | 70.1982       | 4.88075876       | 0.00018329 | Yes     |
| Irf2bpl  | 0.81763  | 0.16809  | -0.64954    | 3.77E-12   | Yes     | Irf2bpl  | 9.19097   | 22.4291  | 1.28708          | 9.19197      | 22.4301       | 1.28699006       | 0.00018329 | Yes     |
| Irx1     | 0.09963  | 0.043645 | -0.055985   | 3.15E-05   | Yes     | Irx1     | 0         | 55.6726  | inf              | 0.001        | 55.6736       | 15.7647058       | 0.00018329 | Yes     |
| Irx2     | 0.18212  | 0.050162 | -0.131958   | 9.35E-05   | Yes     | Irx2     | 0         | 25.1231  | inf              | 0.001        | 25.1241       | 14.6167843       | 0.00018329 | Yes     |
| Irx3     | 0.10307  | 0.037249 | -0.065821   | 0.00052221 | Yes     | Irx3     | 0         | 21.6305  | inf              | 0.001        | 21.6315       | 14.4008461       | 0.00018329 | Yes     |
| Itgal    | 0.064842 | 0.40773  | 0.342888    | 6.35E-06   | Yes     | Itgal    | 68.5715   | 11.0793  | -2.62974         | 68.5725      | 11.0803       | -2.6296332       | 0.00018329 | Yes     |
| Itgb4    | 0.093901 | 0.03255  | -0.061351   | 0.00674226 | Yes     | Itgb4    | 0.0456238 | 16.3611  | 8.48627          | 0.0466238    | 16.3621       | 8.45507561       | 0.00419853 | Yes     |
| Itgb5    | 0.71846  | 0.23213  | -0.48633    | 6.98E-06   | Yes     | Itgb5    | 0.732543  | 47.8211  | 6.02859          | 0.733543     | 47.8221       | 6.02665214       | 0.00970533 | Yes     |
| Itih3    | 0.62685  | 0.4137   | -0.21315    | 0.04097311 | Yes     | Itih3    | 0.836727  | 3.50522  | 2.06667          | 0.837727     | 3.50622       | 2.06536444       | 0.00744054 | Yes     |
| Itpripl2 | 0.65634  | 0.47469  | -0.18165    | 5.51E-05   | Yes     | Itpripl2 | 0.331578  | 1.67742  | 2.33883          | 0.332578     | 1.67842       | 2.33533913       | 0.0101506  | Yes     |
| Junb     | 0.27274  | 0.060427 | -0.212313   | 4.18E-09   | Yes     | Junb     | 38.4732   | 245.531  | 2.67398          | 38.4742      | 245.532       | 2.67394783       | 0.00018329 | Yes     |
| Kcna3    | 0.18001  | 0.29657  | 0.11656     | 0.00894698 | Yes     | Kcna3    | 3.13587   | 0.573859 | -2.4501          | 3.13687      | 0.574859      | -2.4480457       | 0.00066911 | Yes     |
| Kcnc3    | 0.14949  | 0.044357 | -0.105133   | 5.62E-06   | Yes     | Kcnc3    | 0         | 0.806942 | inf              | 0.001        | 0.807942      | 9.65810792       | 0.00018329 | Yes     |
| Kcnip4   | 0.10962  | 0.050164 | -0.059456   | 4.67E-05   | Yes     | Kcnip4   | 0         | 5.00393  | inf              | 0.001        | 5.00493       | 12.2891342       | 0.00018329 | Yes     |
| Kcnn4    | 0.039009 | 0.46885  | 0.429841    | 3.77E-12   | Yes     | Kcnn4    | 173.866   | 44.2859  | -1.97306         | 173.867      | 44.2869       | -1.9730322       | 0.00018329 | Yes     |

| RRBS    |           |           |             |            |         | RNAseq  |           |          |                  |              |               |                  |            |         |
|---------|-----------|-----------|-------------|------------|---------|---------|-----------|----------|------------------|--------------|---------------|------------------|------------|---------|
| gene    | Blood     | Kidney    | methyl.diff | pMWU.fdr   | Match ? | gene    | blood     | kidney   | log2(fold_ratio) | blood+ 0.001 | kidney+ 0.001 | log2(fold_ratio) | q_value    | Match ? |
| Khk     | 0.8673    | 0.27117   | -0.59613    | 3.77E-12   | Yes     | Khk     | 8.46521   | 136.961  | 4.01608          | 8.46621      | 136.962       | 4.01591559       | 0.00018329 | Yes     |
| Kif12   | 0.86191   | 0.28774   | -0.57417    | 3.78E-12   | Yes     | Kif12   | 0         | 144.405  | inf              | 0.001        | 144.406       | 17.1397712       | 0.00018329 | Yes     |
| Kif21b  | 0.034773  | 0.40601   | 0.371237    | 4.56E-07   | Yes     | Kif21b  | 49.5427   | 8.21267  | -2.59275         | 49.5437      | 8.21367       | -2.5926027       | 0.00018329 | Yes     |
| Kifc3   | 0.90215   | 0.75069   | -0.15146    | 0.00070202 | Yes     | Kifc3   | 0.685614  | 73.1428  | 6.73718          | 0.686614     | 73.1438       | 6.7350925        | 0.00018329 | Yes     |
| Kirrel3 | 0.13608   | 0.04806   | -0.08802    | 0.03275343 | Yes     | Kirrel3 | 0.0199011 | 3.56407  | 7.48453          | 0.0209011    | 3.56507       | 7.41420772       | 0.0270219  | Yes     |
| Kl      | 0.34434   | 0.10694   | -0.2374     | 0.00070202 | Yes     | Kl      | 0         | 28.9031  | inf              | 0.001        | 28.9041       | 14.8189865       | 0.00018329 | Yes     |
| Klf2    | 0.033058  | 0.4524    | 0.419342    | 3.77E-12   | Yes     | Klf2    | 448.566   | 63.8868  | -2.81173         | 448.567      | 63.8878       | -2.8117111       | 0.00018329 | Yes     |
| Klhdc8a | 0.090199  | 0.022416  | -0.067783   | 0.00256829 | Yes     | Klhdc8a | 0         | 74.7003  | inf              | 0.001        | 74.7013       | 16.1888457       | 0.00018329 | Yes     |
| Krt19   | 0.11731   | 0.041056  | -0.076254   | 0.00060029 | Yes     | Krt19   | 0         | 163.334  | inf              | 0.001        | 163.335       | 17.3174744       | 0.00018329 | Yes     |
| Krt8    | 0.72917   | 0.40622   | -0.32295    | 0.0031273  | Yes     | Krt8    | 0.088958  | 104.146  | 10.1932          | 0.089958     | 104.147       | 10.1770821       | 0.00197017 | Yes     |
| Krt80   | 0.66413   | 0.31417   | -0.34996    | 0.00120161 | Yes     | Krt80   | 0         | 6.15456  | inf              | 0.001        | 6.15556       | 12.5876744       | 0.00018329 | Yes     |
| Krtcap3 | 0.73259   | 0.20769   | -0.5249     | 3.77E-12   | Yes     | Krtcap3 | 1.45918   | 19.9013  | 3.76963          | 1.46018      | 19.9023       | 3.76871704       | 0.00018329 | Yes     |
| Lactb2  | 0.11983   | 0.052829  | -0.067001   | 0.00174433 | Yes     | Lactb2  | 16.0069   | 61.5282  | 1.94255          | 16.0079      | 61.5292       | 1.94248717       | 0.00018329 | Yes     |
| Lama4   | 0.37824   | 0.21399   | -0.16425    | 0.03032002 | Yes     | Lama4   | 0.0139662 | 0.725373 | 5.69872          | 0.0149662    | 0.726373      | 5.60093071       | 0.0409941  | Yes     |
| Lama5   | 0.12968   | 0.03687   | -0.09281    | 0.01178248 | Yes     | Lama5   | 0.193159  | 22.9917  | 6.89517          | 0.194159     | 22.9927       | 6.8877935        | 0.00018329 | Yes     |
| Lat     | 0.0004085 | 0.3155    | 0.3150915   | 5.63E-11   | Yes     | Lat     | 609.165   | 125.827  | -2.2754          | 609.166      | 125.828       | -2.2753824       | 0.00018329 | Yes     |
| Lax1    | 0.055316  | 0.32873   | 0.273414    | 7.89E-05   | Yes     | Lax1    | 13.5121   | 3.61891  | -1.90062         | 13.5131      | 3.61991       | -1.9003329       | 0.00018329 | Yes     |
| Lbh     | 0         | 0.090702  | 0.090702    | 2.16E-06   | Yes     | Lbh     | 154.218   | 28.3275  | -2.44469         | 154.219      | 28.3285       | -2.4446544       | 0.00018329 | Yes     |
| Lca5    | 0.648     | 0.51037   | -0.13763    | 0.00159707 | Yes     | Lca5    | 0         | 1.31368  | inf              | 0.001        | 1.31468       | 10.360496        | 0.00018329 | Yes     |
| Lgalsl  | 0.78462   | 0.27181   | -0.51281    | 3.27E-07   | Yes     | Lgalsl  | 0.437353  | 13.3119  | 4.92777          | 0.438353     | 13.3129       | 4.92458794       | 0.00018329 | Yes     |
| Llgl2   | 0.083097  | 0.006381  | -0.076716   | 0.00768781 | Yes     | Llgl2   | 9.05066   | 42.1141  | 2.21821          | 9.05166      | 42.1151       | 2.21808329       | 0.00018329 | Yes     |
| Lmna    | 0.50147   | 0.09572   | -0.40575    | 8.08E-07   | Yes     | Lmna    | 1.60469   | 28.3558  | 4.14328          | 1.60569      | 28.3568       | 4.14242944       | 0.00018329 | Yes     |
| Loxl1   | 0.55653   | 0.36517   | -0.19136    | 3.56E-06   | Yes     | Loxl1   | 0         | 4.56656  | inf              | 0.001        | 4.56756       | 12.157208        | 0.00018329 | Yes     |
| Lpgat1  | 0.084772  | 0.0091645 | -0.0756075  | 0.01105145 | Yes     | Lpgat1  | 4.52558   | 10.8615  | 1.26305          | 4.52658      | 10.8625       | 1.26286282       | 0.00224282 | Yes     |
| Lrch1   | 1.50E-07  | 0.11169   | 0.11168985  | 4.46E-06   | Yes     | Lrch1   | 9.94178   | 4.87415  | -1.02835         | 9.94278      | 4.87515       | -1.0282027       | 0.0130082  | Yes     |
| Lrg1    | 0.36319   | 0.16333   | -0.19986    | 0.00275507 | Yes     | Lrg1    | 0.801594  | 2.69692  | 1.75037          | 0.802594     | 2.69792       | 1.74910529       | 0.00406781 | Yes     |
| Lrrc16a | 0.60317   | 0.14985   | -0.45332    | 9.79E-07   | Yes     | Lrrc16a | 0.479038  | 13.2218  | 4.78663          | 0.480038     | 13.2228       | 4.78373528       | 0.00018329 | Yes     |
| Lrrc23  | 0.032739  | 0.11692   | 0.084181    | 9.15E-06   | Yes     | Lrrc23  | 72.2559   | 32.1303  | -1.16918         | 72.2569      | 32.1313       | -1.169156        | 0.0066167  | Yes     |
| Lrrk2   | 0.2531    | 0.11564   | -0.13746    | 0.00420619 | Yes     | Lrrk2   | 0.630432  | 9.75067  | 3.95109          | 0.631432     | 9.75167       | 3.94895002       | 0.00018329 | Yes     |
| Ltbp3   | 0.60949   | 0.2466    | -0.36289    | 6.50E-07   | Yes     | Ltbp3   | 0.044051  | 20.9196  | 8.89147          | 0.045051     | 20.9206       | 8.85914938       | 0.00154856 | Yes     |
| Ltbr    | 0.75586   | 0.23892   | -0.51694    | 4.45E-08   | Yes     | Ltbr    | 0.267349  | 36.375   | 7.08808          | 0.268349     | 36.376        | 7.08273259       | 0.00018329 | Yes     |
| Lurap1l | 0.28293   | 0.16005   | -0.12288    | 0.01544668 | Yes     | Lurap1l | 0         | 5.62822  | inf              | 0.001        | 5.62922       | 12.4587193       | 0.00018329 | Yes     |
| Lypd3   | 0.10853   | 0.055457  | -0.053073   | 0.0023061  | Yes     | Lypd3   | 0.689961  | 3.26965  | 2.24455          | 0.690961     | 3.27065       | 2.24290119       | 0.00018329 | Yes     |
| Lypd6b  | 0.14165   | 0.071427  | -0.070223   | 0.02412126 | Yes     | Lypd6b  | 0         | 4.23849  | inf              | 0.001        | 4.23949       | 12.049675        | 0.00018329 | Yes     |
| Lzts3   | 0.547     | 0.24472   | -0.30228    | 3.77E-12   | Yes     | Lzts3   | 1.14137   | 42.0551  | 5.20344          | 1.14237      | 42.0561       | 5.20221317       | 0.00018329 | Yes     |
| Mafb    | 0.26402   | 0.1004    | -0.16362    | 1.56E-06   | Yes     | Mafb    | 0.0994719 | 8.74356  | 6.45779          | 0.1004719    | 8.74456       | 6.44352182       | 0.0354586  | Yes     |
| Mafk    | 0.85824   | 0.65226   | -0.20598    | 4.69E-07   | Yes     | Mafk    | 11.9052   | 20.6226  | 0.792635         | 11.9062      | 20.6236       | 0.79258315       | 0.00579773 | Yes     |
| Mal     | 0.074241  | 0.022091  | -0.05215    | 0.00142182 | Yes     | Mal     | 0.63993   | 179.589  | 8.13257          | 0.64093      | 179.59        | 8.1303245        | 0.00018329 | Yes     |
| Map10   | 0.41342   | 0.29913   | -0.11429    | 0.00034148 | Yes     | Map10   | 0.0559331 | 0.855202 | 3.93449          | 0.0569331    | 0.856202      | 3.91061164       | 0.00238141 | Yes     |
| Map4k1  | 0.0029762 | 0.36839   | 0.3654138   | 5.64E-08   | Yes     | Map4k1  | 65.9392   | 24.7288  | -1.41494         | 65.9402      | 24.7298       | -1.4149077       | 0.00018329 | Yes     |
| Map6    | 0.12789   | 0.031857  | -0.096033   | 0.00015368 | Yes     | Map6    | 2.23368   | 6.02859  | 1.4324           | 2.23468      | 6.02959       | 1.43199165       | 0.00051281 | Yes     |
| Mapk13  | 0.74566   | 0.58045   | -0.16521    | 0.00164763 | Yes     | Mapk13  | 0.0273072 | 26.624   | 9.92923          | 0.0283072    | 26.625        | 9.87739676       | 0.0226206  | Yes     |

| RRBS     |          |          |             |            |         | RNAseq   |           |          |                  |              |               |                  |            |         |
|----------|----------|----------|-------------|------------|---------|----------|-----------|----------|------------------|--------------|---------------|------------------|------------|---------|
| gene     | Blood    | Kidney   | methyl.diff | pMWU.fdr   | Match ? | gene     | blood     | kidney   | log2(fold_ratio) | blood+ 0.001 | kidney+ 0.001 | log2(fold_ratio) | q_value    | Match ? |
| Mapk4    | 0.9748   | 0.64112  | -0.33368    | 6.50E-07   | Yes     | Mapk4    | 0         | 1.10264  | inf              | 0.001        | 1.10364       | 10.1080539       | 0.00018329 | Yes     |
| Marveld2 | 0.183    | 0.042963 | -0.140037   | 1.79E-05   | Yes     | Marveld2 | 0.0514176 | 6.25978  | 6.92771          | 0.0524176    | 6.26078       | 6.9001473        | 0.0321839  | Yes     |
| Marveld3 | 0.82786  | 0.43788  | -0.38998    | 9.15E-06   | Yes     | Marveld3 | 0         | 7.12001  | inf              | 0.001        | 7.12101       | 12.7978662       | 0.00018329 | Yes     |
| Matn1    | 0.80764  | 0.69435  | -0.11329    | 0.00102242 | Yes     | Matn1    | 0.0493682 | 3.38069  | 6.09759          | 0.0503682    | 3.38169       | 6.06908743       | 0.0409941  | Yes     |
| Mb21d2   | 0.53406  | 0.3073   | -0.22676    | 0.00013988 | Yes     | Mb21d2   | 0         | 4.93846  | inf              | 0.001        | 4.93946       | 12.2701376       | 0.00018329 | Yes     |
| Megf8    | 0.37816  | 0.10936  | -0.2688     | 1.01E-05   | Yes     | Megf8    | 0.0158825 | 5.35984  | 8.39861          | 0.0168825    | 5.36084       | 8.31078671       | 0.00111812 | Yes     |
| Metrn    | 0.48372  | 0.19401  | -0.28971    | 1.80E-08   | Yes     | Metrn    | 0.412013  | 8.59554  | 4.38283          | 0.413013     | 8.59654       | 4.37949701       | 0.00018329 | Yes     |
| Mfap2    | 0.74712  | 0.38754  | -0.35958    | 0.00077922 | Yes     | Mfap2    | 0.119917  | 0.609022 | 2.34445          | 0.120917     | 0.610022      | 2.33484418       | 0.0365736  | Yes     |
| Mfhas1   | 0.84356  | 0.77107  | -0.07249    | 0.00489594 | Yes     | Mfhas1   | 0.301233  | 6.37426  | 4.40331          | 0.302233     | 6.37526       | 4.39875108       | 0.00018329 | Yes     |
| Mir349   | 0.79057  | 0.70477  | -0.0858     | 0.02412126 | Yes     | Mir349   | 0.573453  | 57.3842  | 6.64483          | 0.574453     | 57.3852       | 6.64234603       | 0.00018329 | Yes     |
| Mlf2     | 0.86626  | 0.67293  | -0.19333    | 0.01899425 | Yes     | Mlf2     | 92.141    | 139.128  | 0.594495         | 92.142       | 139.129       | 0.59449235       | 0.0268173  | Yes     |
| Mlph     | 0.099002 | 0.037737 | -0.061265   | 0.00625768 | Yes     | Mlph     | 0         | 9.3208   | inf              | 0.001        | 9.3218        | 13.1863928       | 0.00018329 | Yes     |
| Mlxipl   | 0.17268  | 0.055468 | -0.117212   | 0.0017951  | Yes     | Mlxipl   | 0         | 8.52906  | inf              | 0.001        | 8.53006       | 13.0583402       | 0.00018329 | Yes     |
| Mlycd    | 0.24952  | 0.083083 | -0.166437   | 0.00542685 | Yes     | Mlycd    | 7.51863   | 25.5085  | 1.76244          | 7.51963      | 25.5095       | 1.76230104       | 0.00018329 | Yes     |
| Mmp11    | 0.52757  | 0.17633  | -0.35124    | 2.79E-05   | Yes     | Mmp11    | 0.766741  | 4.2204   | 2.46057          | 0.767741     | 4.2214        | 2.45902994       | 0.00018329 | Yes     |
| Mob3a    | 0        | 0.23481  | 0.23481     | 5.02E-08   | Yes     | Mob3a    | 51.9122   | 14.4634  | -1.84367         | 51.9132      | 14.4644       | -1.8435949       | 0.0158179  | Yes     |
| Mob3b    | 0.43695  | 0.12592  | -0.31103    | 0.00911887 | Yes     | Mob3b    | 0.733267  | 7.46299  | 3.34734          | 0.734267     | 7.46399       | 3.34557039       | 0.00018329 | Yes     |
| Mpp6     | 0.62312  | 0.34348  | -0.27964    | 0.00023303 | Yes     | Mpp6     | 8.43314   | 13.6911  | 0.699098         | 8.43414      | 13.6921       | 0.69903086       | 0.0255527  | Yes     |
| Mpped1   | 0.34162  | 0.25547  | -0.08615    | 0.00575049 | Yes     | Mpped1   | 0         | 0.897091 | inf              | 0.001        | 0.898091      | 9.81071782       | 0.00018329 | Yes     |
| Mpst     | 0.9402   | 0.5354   | -0.4048     | 2.30E-10   | Yes     | MPST     | 18.9091   | 96.8224  | 2.35626          | 18.9101      | 96.8234       | 2.35619876       | 0.00018329 | Yes     |
| Mrap     | 0.70272  | 0.2881   | -0.41462    | 1.79E-05   | Yes     | Mrap     | 0         | 3.06591  | inf              | 0.001        | 3.06691       | 11.5825701       | 0.00018329 | Yes     |
| Mri1     | 0.8941   | 0.80362  | -0.09048    | 0.00894698 | Yes     | Mri1     | 17.1766   | 28.0331  | 0.706689         | 17.1776      | 28.0341       | 0.70665427       | 0.0228125  | Yes     |
| Mrpl38   | 0.75996  | 0.36124  | -0.39872    | 5.90E-05   | Yes     | Mrpl38   | 15.0488   | 36.9521  | 1.29601          | 15.0498      | 36.9531       | 1.29595108       | 0.00018329 | Yes     |
| Mt1      | 0.86764  | 0.23403  | -0.63361    | 6.50E-07   | Yes     | MT1      | 1.82289   | 22.2274  | 3.60804          | 1.82389      | 22.2284       | 3.60731348       | 0.0317975  | Yes     |
| Mt2A     | 0.59299  | 0.15785  | -0.43514    | 3.76E-05   | Yes     | Mt2A     | 2.59042   | 3458.55  | 10.3828          | 2.59142      | 3458.551      | 10.3822092       | 0.00018329 | Yes     |
| Myh11    | 0.94036  | 0.46806  | -0.4723     | 6.50E-07   | Yes     | Myh11    | 1.38304   | 15.0142  | 3.44042          | 1.38404      | 15.0152       | 3.43946615       | 0.00018329 | Yes     |
| Myh14    | 0.15221  | 0.052865 | -0.099345   | 0.00196002 | Yes     | Myh14    | 0.0360801 | 10.8693  | 8.23484          | 0.0370801    | 10.8703       | 8.19553091       | 0.00018329 | Yes     |
| Myo1c    | 0.87701  | 0.62246  | -0.25455    | 4.00E-05   | Yes     | Myo1c    | 4.09798   | 43.0395  | 3.39268          | 4.09898      | 43.0405       | 3.39235798       | 0.00018329 | Yes     |
| Myo5b    | 0.27505  | 0.11527  | -0.15978    | 0.02412126 | Yes     | Myo5b    | 0.0337611 | 25.557   | 9.56414          | 0.0347611    | 25.558        | 9.52208549       | 0.0407233  | Yes     |
| N4bp3    | 0.81677  | 0.51181  | -0.30496    | 0.00012584 | Yes     | N4bp3    | 0.228226  | 4.26259  | 4.22319          | 0.229226     | 4.26359       | 4.21722611       | 0.00018329 | Yes     |
| Nacc2    | 0.12453  | 0.039802 | -0.084728   | 0.01178248 | Yes     | Nacc2    | 0.0343785 | 8.57684  | 7.96279          | 0.0353785    | 8.57784       | 7.92159771       | 0.00111812 | Yes     |
| Napsa    | 0.72817  | 0.44759  | -0.28058    | 0.00108973 | Yes     | Napsa    | 3.08544   | 82.5898  | 4.74241          | 3.08644      | 82.5908       | 4.74196543       | 0.00018329 | Yes     |
| Nat14    | 0.9961   | 0.92686  | -0.06924    | 0.00152471 | Yes     | Nat14    | 0.467994  | 2.11698  | 2.17745          | 0.468994     | 2.11798       | 2.1750476        | 0.0018326  | Yes     |
| Nav2     | 0.17227  | 0.062493 | -0.109777   | 6.66E-08   | Yes     | Nav2     | 0.639665  | 14.9586  | 4.54752          | 0.640665     | 14.9596       | 4.54535761       | 0.00018329 | Yes     |
| Ncf4     | 0.88398  | 0.7836   | -0.10038    | 0.00275507 | Yes     | Ncf4     | 1.00451   | 8.08672  | 3.00906          | 1.00551      | 8.08772       | 3.00780562       | 0.00018329 | Yes     |
| Nckap1l  | 0        | 0.4317   | 0.4317      | 6.50E-07   | Yes     | Nckap1l  | 42.8356   | 9.81692  | -2.12547         | 42.8366      | 9.81792       | -2.1253547       | 0.00018329 | Yes     |
| Ncs1     | 0.48697  | 0.29076  | -0.19621    | 0.00542685 | Yes     | Ncs1     | 0         | 11.319   | inf              | 0.001        | 11.32         | 13.4665863       | 0.00018329 | Yes     |
| NdrG4    | 0.23554  | 0.092802 | -0.142738   | 0.00509659 | Yes     | NdrG4    | 0.764515  | 46.6824  | 5.93219          | 0.765515     | 46.6834       | 5.93033518       | 0.00018329 | Yes     |
| Nefm     | 0.1384   | 0.048024 | -0.090376   | 0.00022961 | Yes     | Nefm     | 0         | 0.66486  | inf              | 0.001        | 0.66586       | 9.37907507       | 0.00018329 | Yes     |
| Nkx2-1   | 0.08273  | 0.02523  | -0.0575     | 0.0017951  | Yes     | Nkx2-1   | 1.98574   | 44.718   | 4.49311          | 1.98674      | 44.719        | 4.49241294       | 0.00018329 | Yes     |
| Notch1   | 0.12972  | 0.34006  | 0.21034     | 5.96E-07   | Yes     | Notch1   | 31.3569   | 10.1106  | -1.63291         | 31.3579      | 10.1116       | -1.6328176       | 0.00018329 | Yes     |
| Nox4     | 0.28551  | 0.10257  | -0.18294    | 0.00054569 | Yes     | Nox4     | 0         | 6.30067  | inf              | 0.001        | 6.30167       | 12.6215185       | 0.00018329 | Yes     |

| RRBS     |          |          |             |            |         | RNAseq   |           |          |                  |              |               |                  |            |         |
|----------|----------|----------|-------------|------------|---------|----------|-----------|----------|------------------|--------------|---------------|------------------|------------|---------|
| gene     | Blood    | Kidney   | methyl.diff | pMWU.fdr   | Match ? | gene     | blood     | kidney   | log2(fold_ratio) | blood+ 0.001 | kidney+ 0.001 | log2(fold_ratio) | q_value    | Match ? |
| Npr1     | 0.22736  | 0.12274  | -0.10462    | 0.01265586 | Yes     | Npr1     | 0.0716407 | 2.60435  | 5.184            | 0.0726407    | 2.60535       | 5.16455528       | 0.00018329 | Yes     |
| Npr2     | 0.87251  | 0.68302  | -0.18949    | 0.00256829 | Yes     | Npr2     | 0.93517   | 7.25133  | 2.95494          | 0.93617      | 7.25233       | 2.95360213       | 0.00018329 | Yes     |
| Nr1h3    | 0.38501  | 0.11209  | -0.27292    | 5.87E-06   | Yes     | Nr1h3    | 0.177248  | 13.6944  | 6.27167          | 0.178248     | 13.6954       | 6.2636617        | 0.00018329 | Yes     |
| Nr2f6    | 0.52315  | 0.16531  | -0.35784    | 3.77E-12   | Yes     | Nr2f6    | 3.80568   | 69.9367  | 4.19982          | 3.80668      | 69.9377       | 4.19946515       | 0.00018329 | Yes     |
| Nrp1     | 0.64821  | 0.20959  | -0.43862    | 6.21E-07   | Yes     | Nrp1     | 3.21383   | 15.9642  | 2.31248          | 3.21483      | 15.9652       | 2.31211627       | 0.00018329 | Yes     |
| Nt5dc2   | 0.81655  | 0.17311  | -0.64344    | 4.58E-09   | Yes     | Nt5dc2   | 2.60007   | 4.91006  | 0.917192         | 2.60107      | 4.91106       | 0.91692922       | 0.018521   | Yes     |
| Ntf3     | 0.12434  | 0.033555 | -0.090785   | 0.00049132 | Yes     | Ntf3     | 0         | 3.11756  | inf              | 0.001        | 3.11856       | 11.6066643       | 0.00018329 | Yes     |
| Ntn4     | 0.087468 | 0.020055 | -0.067413   | 9.35E-05   | Yes     | Ntn4     | 0         | 18.22    | inf              | 0.001        | 18.221        | 14.1533145       | 0.00018329 | Yes     |
| Nudt22   | 0.88719  | 0.59812  | -0.28907    | 5.90E-05   | Yes     | Nudt22   | 6.74704   | 12.7299  | 0.915893         | 6.74804      | 12.7309       | 0.91579398       | 0.0145263  | Yes     |
| Pacsin3  | 0.63785  | 0.28975  | -0.3481     | 7.48E-05   | Yes     | Pacsin3  | 0.104914  | 21.7165  | 7.69344          | 0.105914     | 21.7175       | 7.67982093       | 0.0247294  | Yes     |
| Palm     | 0.59891  | 0.19715  | -0.40176    | 0.00164763 | Yes     | Palm     | 3.29002   | 75.155   | 4.5137           | 3.29102      | 75.156        | 4.51328159       | 0.00834357 | Yes     |
| Palmd    | 0.52388  | 0.27526  | -0.24862    | 0.02284827 | Yes     | Palmd    | 0         | 1.71929  | inf              | 0.001        | 1.72029       | 10.7484361       | 0.00018329 | Yes     |
| Paqr6    | 0.81301  | 0.23158  | -0.58143    | 6.98E-06   | Yes     | Paqr6    | 0.98542   | 11.9011  | 3.59422          | 0.98642      | 11.9021       | 3.59287028       | 0.00018329 | Yes     |
| Parp16   | 0.77645  | 0.3065   | -0.46995    | 6.77E-07   | Yes     | Parp16   | 0.982597  | 7.67323  | 2.96516          | 0.983597     | 7.67423       | 2.96388276       | 0.00018329 | Yes     |
| Parp3    | 0.65287  | 0.52274  | -0.13013    | 0.03863139 | Yes     | Parp3    | 2.73317   | 13.6968  | 2.32519          | 2.73417      | 13.6978       | 2.32476935       | 0.00018329 | Yes     |
| Parvg    | 1.50E-07 | 0.32739  | 0.32738985  | 6.50E-07   | Yes     | Parvg    | 31.1631   | 11.0987  | -1.48944         | 31.1641      | 11.0997       | -1.4893644       | 0.00018329 | Yes     |
| Pax2     | 0.13219  | 0.035364 | -0.096826   | 0.01761018 | Yes     | Pax2     | 0         | 31.2899  | inf              | 0.001        | 31.2909       | 14.9334555       | 0.00018329 | Yes     |
| Pcdhga12 | 0.46759  | 0.39897  | -0.06862    | 0.04893199 | Yes     | Pcdhga12 | 1.27837   | 9.61176  | 2.9105           | 1.27937      | 9.61276       | 2.90951716       | 0.0417433  | Yes     |
| Pcsk5    | 0.091017 | 0.023579 | -0.067438   | 7.48E-05   | Yes     | Pcsk5    | 0         | 3.02344  | inf              | 0.001        | 3.02444       | 11.5624523       | 0.00018329 | Yes     |
| Pde1b    | 0.14144  | 0.070401 | -0.071039   | 0.00455632 | Yes     | Pde1b    | 0.0339962 | 2.9834   | 6.45544          | 0.0349962    | 2.9844        | 6.41409883       | 0.0465444  | Yes     |
| Pde9a    | 0.90478  | 0.67793  | -0.22685    | 0.00021046 | Yes     | Pde9a    | 0.23561   | 13.6119  | 5.85232          | 0.23661      | 13.6129       | 5.84631958       | 0.00018329 | Yes     |
| Pdgfa    | 0.46556  | 0.27411  | -0.19145    | 0.00663046 | Yes     | Pdgfa    | 0         | 110.278  | inf              | 0.001        | 110.279       | 16.7507986       | 0.00018329 | Yes     |
| Pdgfra   | 0.086934 | 0.024922 | -0.062012   | 0.00489594 | Yes     | Pdgfra   | 0         | 0.703592 | inf              | 0.001        | 0.704592      | 9.46064428       | 0.00018329 | Yes     |
| Pdlim4   | 0.088651 | 0.026331 | -0.06232    | 0.00052221 | Yes     | Pdlim4   | 0         | 11.6452  | inf              | 0.001        | 11.6462       | 13.5075717       | 0.00018329 | Yes     |
| Pdzd3    | 0.84439  | 0.54872  | -0.29567    | 0.00037654 | Yes     | Pdzd3    | 0.113768  | 5.56846  | 5.61311          | 0.114768     | 5.56946       | 5.60074511       | 0.00018329 | Yes     |
| Pebp1    | 0.91934  | 0.7257   | -0.19364    | 0.00275507 | Yes     | Pebp1    | 106.749   | 451.706  | 2.08117          | 106.75       | 451.707       | 2.0811512        | 0.00018329 | Yes     |
| Pex10    | 0.7379   | 0.53219  | -0.20571    | 0.00740016 | Yes     | Pex10    | 1.87484   | 5.94706  | 1.6654           | 1.87584      | 5.94806       | 1.66488242       | 0.00018329 | Yes     |
| Pfkfb3   | 0.41937  | 0.1617   | -0.25767    | 0.02284827 | Yes     | Pfkfb3   | 11.4679   | 18.7723  | 0.711            | 11.4689      | 18.7733       | 0.71095524       | 0.0339945  | Yes     |
| Pfkl     | 0.62071  | 0.43243  | -0.18828    | 0.00420619 | Yes     | Pfkl     | 21.9825   | 46.5587  | 1.08269          | 21.9835      | 46.5597       | 1.08266067       | 0.00018329 | Yes     |
| Pgm5     | 0.91316  | 0.64608  | -0.26708    | 0.00012584 | Yes     | Pgm5     | 0         | 0.97636  | inf              | 0.001        | 0.97736       | 9.93274625       | 0.00018329 | Yes     |
| Phlda2   | 0.20439  | 0.079163 | -0.125227   | 0.00822556 | Yes     | PHLDA2   | 0.714176  | 10.4513  | 3.87126          | 0.715176     | 10.4523       | 3.8693783        | 0.00018329 | Yes     |
| Phlpp1   | 0.65549  | 0.24118  | -0.41431    | 3.06E-06   | Yes     | Phlpp1   | 1.52098   | 3.0126   | 0.986004         | 1.52198      | 3.0136        | 0.98553854       | 0.0018326  | Yes     |
| Phpt1    | 0.28598  | 0.081824 | -0.204156   | 0.00120161 | Yes     | Phpt1    | 70.3761   | 164.785  | 1.22742          | 70.3771      | 164.786       | 1.22741571       | 0.00018329 | Yes     |
| Pim3     | 0.9426   | 0.28055  | -0.66205    | 3.20E-09   | Yes     | Pim3     | 9.14116   | 47.7315  | 2.38449          | 9.14216      | 47.7325       | 2.38436493       | 0.00018329 | Yes     |
| Pinlyp   | 0.90976  | 0.71119  | -0.19857    | 0.00152471 | Yes     | Pinlyp   | 0         | 8.72777  | inf              | 0.001        | 8.72877       | 13.0915627       | 0.00018329 | Yes     |
| Pirt     | 0.76614  | 0.63038  | -0.13576    | 0.00205366 | Yes     | Pirt     | 0         | 0.860332 | inf              | 0.001        | 0.861332      | 9.75042562       | 0.00035173 | Yes     |
| Pitx2    | 0.083284 | 0.029013 | -0.054271   | 0.0103156  | Yes     | Pitx2    | 0         | 17.3256  | inf              | 0.001        | 17.3266       | 14.080701        | 0.00018329 | Yes     |
| Piwil1   | 0.61335  | 0.30587  | -0.30748    | 0.00212541 | Yes     | Piwil1   | 0.133962  | 1.50752  | 3.49228          | 0.134962     | 1.50852       | 3.48250866       | 0.00018329 | Yes     |
| Pklr     | 0.82866  | 0.42796  | -0.4007     | 0.00012584 | Yes     | Pklr     | 0.0593489 | 16.0299  | 8.07733          | 0.0603489    | 16.0309       | 8.05331223       | 0.00018329 | Yes     |
| Pkp3     | 0.8219   | 0.21546  | -0.60644    | 2.39E-11   | Yes     | Pkp3     | 0.380359  | 8.43135  | 4.47033          | 0.381359     | 8.43235       | 4.4667131        | 0.0273913  | Yes     |
| Plac9    | 0.3548   | 0.13862  | -0.21618    | 0.00256829 | Yes     | Plac9    | 0         | 5.6109   | inf              | 0.001        | 5.6119        | 12.4542736       | 0.00018329 | Yes     |
| Plaur    | 0.095801 | 0.028858 | -0.066943   | 0.01105145 | Yes     | Plaur    | 0.590046  | 5.75154  | 3.28505          | 0.591046     | 5.75254       | 3.28285679       | 0.00018329 | Yes     |

| RRBS       |           |          |             |            |         | RNAseq     |           |          |                  |              |               |                  |            |         |
|------------|-----------|----------|-------------|------------|---------|------------|-----------|----------|------------------|--------------|---------------|------------------|------------|---------|
| gene       | Blood     | Kidney   | methyl.diff | pMWU.fdr   | Match ? | gene       | blood     | kidney   | log2(fold_ratio) | blood+ 0.001 | kidney+ 0.001 | log2(fold_ratio) | q_value    | Match ? |
| Plek2      | 0.36917   | 0.15015  | -0.21902    | 0.03275343 | Yes     | Plek2      | 0.0664441 | 1.53939  | 4.53408          | 0.0674441    | 1.54039       | 4.51345961       | 0.0166578  | Yes     |
| Plekha5    | 0.14045   | 0.06039  | -0.08006    | 0.00141755 | Yes     | Plekha5    | 1.10491   | 25.4311  | 4.52459          | 1.10591      | 25.4321       | 4.52334471       | 0.00018329 | Yes     |
| Plekhd1    | 0.099271  | 0.028559 | -0.070712   | 0.00256829 | Yes     | Plekhd1    | 0.236201  | 1.32659  | 2.48963          | 0.237201     | 1.32759       | 2.48462767       | 0.00082046 | Yes     |
| Plekhh3    | 0.169     | 0.047443 | -0.121557   | 1.26E-05   | Yes     | Plekhh3    | 1.34165   | 14.874   | 3.47071          | 1.34265      | 14.875        | 3.46973449       | 0.00018329 | Yes     |
| Pls1       | 0.87082   | 0.64503  | -0.22579    | 0.00092821 | Yes     | Pls1       | 0.425233  | 16.7904  | 5.30324          | 0.426233     | 16.7914       | 5.29993642       | 0.00018329 | Yes     |
| Plxna2     | 0.13077   | 0.077498 | -0.053272   | 0.02284827 | Yes     | Plxna2     | 0         | 0.769771 | inf              | 0.001        | 0.770771      | 9.59015848       | 0.00018329 | Yes     |
| Polr2i     | 0.81217   | 0.57766  | -0.23451    | 3.19E-05   | Yes     | Polr2i     | 6.29013   | 11.8088  | 0.908697         | 6.29113      | 11.8098       | 0.90859345       | 0.0401475  | Yes     |
| Polr3h     | 0.30756   | 0.65945  | 0.35189     | 6.50E-07   | Yes     | Polr3h     | 42.6606   | 18.683   | -1.19117         | 42.6616      | 18.684        | -1.1911347       | 0.00018329 | Yes     |
| Pomc       | 0.37407   | 0.15058  | -0.22349    | 0.00142182 | Yes     | Pomc       | 1.14033   | 5.82182  | 2.35202          | 1.14133      | 5.82282       | 2.35100203       | 0.00097029 | Yes     |
| Pomgnt2    | 0.77338   | 0.65846  | -0.11492    | 0.02160305 | Yes     | Pomgnt2    | 0         | 2.64655  | inf              | 0.001        | 2.64755       | 11.3704422       | 0.00018329 | Yes     |
| Ppm1j      | 0.76933   | 0.36707  | -0.40226    | 6.69E-05   | Yes     | Ppm1j      | 0.891261  | 2.49903  | 1.48745          | 0.892261     | 2.50003       | 1.48640772       | 0.0285734  | Yes     |
| Ppp1r15a   | 0.33594   | 0.16772  | -0.16822    | 0.0031273  | Yes     | Ppp1r15a   | 16.5788   | 93.2537  | 2.49182          | 16.5798      | 93.2547       | 2.49174983       | 0.00018329 | Yes     |
| Ppp1r9b    | 0.016934  | 0.087754 | 0.07082     | 4.39E-09   | Yes     | Ppp1r9b    | 65.6913   | 31.5383  | -1.0586          | 65.6923      | 31.5393       | -1.0585736       | 0.00018329 | Yes     |
| Pramef8    | 0.12505   | 0.05919  | -0.06586    | 0.00334228 | Yes     | Pramef8    | 0.42425   | 2.43547  | 2.52121          | 0.42525      | 2.43647       | 2.51840932       | 0.00018329 | Yes     |
| Prkcdbp    | 0.36813   | 0.18534  | -0.18279    | 0.00489594 | Yes     | Prkcdbp    | 0.154361  | 36.4963  | 7.8853           | 0.155361     | 36.4973       | 7.87602154       | 0.00432763 | Yes     |
| Prodh      | 0.54867   | 0.31433  | -0.23434    | 3.48E-05   | Yes     | Prodh      | 0.127212  | 22.1428  | 7.44346          | 0.128212     | 22.1438       | 7.43222771       | 0.0352739  | Yes     |
| Prom2      | 0.41621   | 0.20373  | -0.21248    | 0.00052221 | Yes     | Prom2      | 0         | 30.9226  | inf              | 0.001        | 30.9236       | 14.9164207       | 0.00018329 | Yes     |
| Proz       | 0.81236   | 0.39143  | -0.42093    | 0.00017122 | Yes     | Proz       | 0.143528  | 1.50228  | 3.38775          | 0.144528     | 1.50328       | 3.37869283       | 0.00154856 | Yes     |
| Prr7       | 0.016483  | 0.096995 | 0.080512    | 7.19E-07   | Yes     | Prr7       | 25.0449   | 8.27691  | -1.59735         | 25.0459      | 8.27791       | -1.597236        | 0.00018329 | Yes     |
| Prrc2c     | 0.35093   | 0.42882  | 0.07789     | 0.00164763 | Yes     | Prrc2c     | 26.5403   | 9.17904  | -1.53177         | 26.5413      | 9.18004       | -1.5316667       | 0.00018329 | Yes     |
| Prss36     | 0.97423   | 0.6934   | -0.28083    | 6.50E-07   | Yes     | Prss36     | 1.12112   | 4.24683  | 1.92145          | 1.12212      | 4.24783       | 1.92049906       | 0.00097029 | Yes     |
| Psmb8      | 0.30783   | 0.56504  | 0.25721     | 0.00212541 | Yes     | Psmb8      | 220.419   | 99.4793  | -1.14778         | 220.42       | 99.4803       | -1.1477724       | 0.00419853 | Yes     |
| Ptgds      | 0.86063   | 0.64501  | -0.21562    | 6.87E-07   | Yes     | Ptgds      | 0         | 47.1079  | inf              | 0.001        | 47.1089       | 15.523712        | 0.00018329 | Yes     |
| Ptms       | 0.50399   | 0.23436  | -0.26963    | 0.00894698 | Yes     | Ptms       | 273.217   | 829.543  | 1.60227          | 273.218      | 829.544       | 1.60226597       | 0.00018329 | Yes     |
| Ptrf       | 0.77681   | 0.692    | -0.08481    | 0.03760671 | Yes     | Ptrf       | 0.0983795 | 70.1392  | 9.47765          | 0.0993795    | 70.1402       | 9.46307755       | 0.00732142 | Yes     |
| Purg       | 0.65362   | 0.20524  | -0.44838    | 9.15E-06   | Yes     | Purg       | 0.878579  | 2.42385  | 1.46406          | 0.879579     | 2.42485       | 1.46301044       | 0.0076683  | Yes     |
| Pvrl2      | 0.31692   | 0.19972  | -0.1172     | 0.00768781 | Yes     | Pvrl2      | 0         | 35.2766  | inf              | 0.001        | 35.2776       | 15.1064648       | 0.00018329 | Yes     |
| Pxdc1      | 0.21642   | 0.11526  | -0.10116    | 0.00529214 | Yes     | Pxdc1      | 1.8996    | 8.50118  | 2.16196          | 1.9006       | 8.50218       | 2.16137787       | 0.00018329 | Yes     |
| Pyroxd2    | 0.18573   | 0.058855 | -0.126875   | 0.01621946 | Yes     | Pyroxd2    | 3.07141   | 122.602  | 5.31894          | 3.07241      | 122.603       | 5.31847972       | 0.00018329 | Yes     |
| Rab26      | 0.82102   | 0.73378  | -0.08724    | 0.03760671 | Yes     | Rab26      | 0.428854  | 3.98962  | 3.21769          | 0.429854     | 3.99062       | 3.21469427       | 0.00140841 | Yes     |
| Rab3a      | 0.72532   | 0.53074  | -0.19458    | 0.00028052 | Yes     | Rab3a      | 1.86685   | 16.1823  | 3.11574          | 1.86785      | 16.1833       | 3.11505532       | 0.00018329 | Yes     |
| Ramp1      | 0.0021832 | 0.11422  | 0.1120368   | 3.06E-06   | Yes     | Ramp1      | 196.044   | 22.3615  | -3.13208         | 196.045      | 22.3625       | -3.1320315       | 0.00018329 | Yes     |
| Rarres2    | 0.76664   | 0.40085  | -0.36579    | 0.00164763 | Yes     | Rarres2    | 0         | 17.2932  | inf              | 0.001        | 17.2942       | 14.0780007       | 0.00615197 | Yes     |
| Rasef      | 0.16231   | 0.07273  | -0.08958    | 1.46E-11   | Yes     | Rasef      | 0         | 0.714389 | inf              | 0.001        | 0.715389      | 9.48258413       | 0.00018329 | Yes     |
| Rasgrp2    | 0         | 0.074668 | 0.074668    | 6.98E-06   | Yes     | Rasgrp2    | 144.039   | 22.8858  | -2.65394         | 144.04       | 22.8868       | -2.6538818       | 0.00018329 | Yes     |
| Rbck1      | 0.011276  | 0.16755  | 0.156274    | 0.0001006  | Yes     | Rbck1      | 127.409   | 53.687   | -1.24682         | 127.41       | 53.688        | -1.2468069       | 0.00018329 | Yes     |
| Rbp1       | 0.81524   | 0.69489  | -0.12035    | 0.00351975 | Yes     | Rbp1       | 0         | 59.7287  | inf              | 0.001        | 59.7297       | 15.8661609       | 0.00018329 | Yes     |
| Rbpms2     | 0.46791   | 0.16671  | -0.3012     | 2.48E-07   | Yes     | Rbpms2     | 0.111889  | 24.7179  | 7.78735          | 0.112889     | 24.7189       | 7.77456582       | 0.00018329 | Yes     |
| Rfk        | 0.50312   | 0.32366  | -0.17946    | 0.00674226 | Yes     | Rfk        | 13.0558   | 67.3129  | 2.36619          | 13.0568      | 67.3139       | 2.36610309       | 0.00018329 | Yes     |
| RGD1305347 | 0.21633   | 0.047188 | -0.169142   | 0.00040512 | Yes     | RGD1305347 | 0         | 48.1164  | inf              | 0.001        | 48.1174       | 15.5542711       | 0.00018329 | Yes     |

| RRBS       |          |          |             |            |         | RNAseq     |            |          |                  |              |               |                  |            |         |
|------------|----------|----------|-------------|------------|---------|------------|------------|----------|------------------|--------------|---------------|------------------|------------|---------|
| gene       | Blood    | Kidney   | methyl.diff | pMWU.fdr   | Match ? | gene       | blood      | kidney   | log2(fold_ratio) | blood+ 0.001 | kidney+ 0.001 | log2(fold_ratio) | q_value    | Match ? |
| RGD1310587 | 0.75959  | 0.33902  | -0.42057    | 5.51E-05   | Yes     | RGD1310587 | 0          | 14.293   | inf              | 0.001        | 14.294        | 13.8031221       | 0.00018329 | Yes     |
| RGD1311946 | 0.13084  | 0.058374 | -0.072466   | 0.02535502 | Yes     | RGD1311946 | 0.0405687  | 1.93283  | 5.57421          | 0.0415687    | 1.93383       | 5.53981953       | 0.0133341  | Yes     |
| RGD1560394 | 0.67926  | 0.52032  | -0.15894    | 0.01397625 | Yes     | RGD1560394 | 0          | 2.8465   | inf              | 0.001        | 2.8475        | 11.4754801       | 0.00018329 | Yes     |
| RGD1561149 | 0.82997  | 0.29016  | -0.53981    | 6.50E-07   | Yes     | RGD1561149 | 0.0368588  | 18.9731  | 9.00773          | 0.0378588    | 18.9741       | 8.96918706       | 0.00018329 | Yes     |
| RGD1563888 | 0.20948  | 0.59983  | 0.39035     | 0.00037654 | Yes     | RGD1563888 | 53.6556    | 9.82474  | -2.44924         | 53.6566      | 9.82574       | -2.4491177       | 0.00018329 | Yes     |
| RGD1564053 | 0.082025 | 0.031284 | -0.050741   | 5.34E-07   | Yes     | RGD1564053 | 0          | 0.751121 | inf              | 0.001        | 0.752121      | 9.55482097       | 0.00290302 | Yes     |
| Rgn        | 0.50172  | 0.19151  | -0.31021    | 2.96E-08   | Yes     | Rgn        | 0          | 34.5431  | inf              | 0.001        | 34.5441       | 15.0761517       | 0.00018329 | Yes     |
| Rhcg       | 0.12014  | 0.048501 | -0.071639   | 0.00046463 | Yes     | Rhcg       | 0          | 16.9447  | inf              | 0.001        | 16.9457       | 14.0486316       | 0.00018329 | Yes     |
| Rhobtb1    | 0.095836 | 0.011383 | -0.084453   | 0.00049132 | Yes     | Rhobtb1    | 3.46394    | 15.2184  | 2.13533          | 3.46494      | 15.2194       | 2.13500921       | 0.00018329 | Yes     |
| Rhov       | 0.73753  | 0.66861  | -0.06892    | 0.02028318 | Yes     | Rhov       | 0.170253   | 4.52799  | 4.73311          | 0.171253     | 4.52899       | 4.72498819       | 0.00018329 | Yes     |
| Rilpl1     | 0.10518  | 0.032507 | -0.072673   | 0.00025081 | Yes     | Rilpl1     | 0.302779   | 17.5456  | 5.8567           | 0.303779     | 17.5466       | 5.85202556       | 0.00097029 | Yes     |
| Rnaset2    | 0.8032   | 0.60642  | -0.19678    | 0.00489594 | Yes     | Rnaset2    | 88.1539    | 147.018  | 0.737894         | 88.1549      | 147.019       | 0.73788995       | 0.00686277 | Yes     |
| Rnd2       | 0.31944  | 0.19463  | -0.12481    | 0.0279946  | Yes     | Rnd2       | 0.0719457  | 10.6541  | 7.21028          | 0.0729457    | 10.6551       | 7.19050548       | 0.0339945  | Yes     |
| Rnf186     | 0.90603  | 0.48274  | -0.42329    | 1.33E-08   | Yes     | Rnf186     | 0.181088   | 7.34864  | 5.34271          | 0.182088     | 7.34964       | 5.33496583       | 0.00066911 | Yes     |
| Rnf208     | 0.88606  | 0.58828  | -0.29778    | 1.26E-05   | Yes     | Rnf208     | 1.8401     | 31.2852  | 4.08762          | 1.8411       | 31.2862       | 4.08688655       | 0.00018329 | Yes     |
| Robo2      | 0.26936  | 0.12304  | -0.14632    | 2.48E-05   | Yes     | Robo2      | 0          | 0.753979 | inf              | 0.001        | 0.754979      | 9.56029271       | 0.00018329 | Yes     |
| Ror2       | 0.42432  | 0.25299  | -0.17133    | 0.00102242 | Yes     | Ror2       | 0.0648323  | 2.15657  | 5.05588          | 0.0658323    | 2.15757       | 5.03446795       | 0.00018329 | Yes     |
| Rps4y2     | 0.79236  | 0.56343  | -0.22893    | 3.77E-12   | Yes     | Rps4y2     | 6.15993    | 24.3599  | 1.98352          | 6.16093      | 24.3609       | 1.98334738       | 0.0148363  | Yes     |
| Rsph9      | 0.34487  | 0.12159  | -0.22328    | 5.20E-10   | Yes     | Rsph9      | 0.1109     | 11.6472  | 6.71458          | 0.1119       | 11.6482       | 6.70175319       | 0.00097029 | Yes     |
| RT1-Bb     | 0.22323  | 0.094463 | -0.128767   | 0.00405617 | Yes     | RT1-Bb     | 16.0075    | 128.891  | 3.00934          | 16.0085      | 128.892       | 3.00925268       | 0.00018329 | Yes     |
| Rtkn       | 0.48095  | 0.15504  | -0.32591    | 1.12E-06   | Yes     | Rtkn       | 0.0159837  | 11.4667  | 9.48663          | 0.0169837    | 11.4677       | 9.39920956       | 0.00799878 | Yes     |
| S1pr1      | 0.006983 | 0.08133  | 0.074347    | 4.05E-06   | Yes     | S1pr1      | 460.838    | 22.2354  | -4.37333         | 460.839      | 22.2364       | -4.3732677       | 0.00018329 | Yes     |
| Sall1      | 0.073615 | 0.018013 | -0.055602   | 0.01349957 | Yes     | Sall1      | 0          | 26.2267  | inf              | 0.001        | 26.2277       | 14.6788037       | 0.00018329 | Yes     |
| Samd5      | 0.1454   | 0.06862  | -0.07678    | 0.00625768 | Yes     | Samd5      | 0          | 2.80402  | inf              | 0.001        | 2.80502       | 11.4537953       | 0.00018329 | Yes     |
| Sardh      | 0.18401  | 0.029702 | -0.154308   | 0.00049132 | Yes     | Sardh      | 0.0663137  | 9.12494  | 7.10436          | 0.0673137    | 9.12594       | 7.0829292        | 0.00018329 | Yes     |
| Sat2       | 0.57209  | 0.35566  | -0.21643    | 0.03275343 | Yes     | Sat2       | 0.0206978  | 84.0343  | 11.9873          | 0.0216978    | 84.0353       | 11.919231        | 0.0186283  | Yes     |
| Scaf11     | 0.090895 | 0.18272  | 0.091825    | 0.04680399 | Yes     | Scaf11     | 30.5044    | 13.1248  | -1.21672         | 30.5054      | 13.1258       | -1.2166593       | 0.00018329 | Yes     |
| Scin       | 0.64884  | 0.44206  | -0.20678    | 0.0031273  | Yes     | Scin       | 0.840409   | 67.9591  | 6.33743          | 0.841409     | 67.9601       | 6.33573692       | 0.00018329 | Yes     |
| Scnn1a     | 0.66685  | 0.22952  | -0.43733    | 3.77E-12   | Yes     | Scnn1a     | 0.0625304  | 17.4084  | 8.12101          | 0.0635304    | 17.4094       | 8.09820366       | 0.00018329 | Yes     |
| Scx        | 0.61183  | 0.20745  | -0.40438    | 3.77E-12   | Yes     | Scx        | 0.407171   | 21.5853  | 5.72827          | 0.408171     | 21.5863       | 5.72479848       | 0.012344   | Yes     |
| Sdc4       | 0.083435 | 0.026134 | -0.057301   | 2.05E-06   | Yes     | Sdc4       | 0.202041   | 284.012  | 10.4571          | 0.203041     | 284.013       | 10.4499702       | 0.00018329 | Yes     |
| Sdccag3    | 0.18294  | 0.1319   | -0.05104    | 1.44E-07   | Yes     | Sdccag3    | 33.0293    | 51.4057  | 0.638184         | 33.0303      | 51.4067       | 0.63816633       | 0.0263234  | Yes     |
| Sema3b     | 0.75793  | 0.17609  | -0.58184    | 4.61E-10   | Yes     | Sema3b     | 0.00196435 | 45.712   | 14.5062          | 0.00296435   | 45.713        | 13.9126011       | 0.00018329 | Yes     |
| Serping1   | 0.42731  | 0.14879  | -0.27852    | 0.00575049 | Yes     | Serping1   | 0          | 7.65975  | inf              | 0.001        | 7.66075       | 12.9032699       | 0.00018329 | Yes     |
| Serpinh1   | 0.66153  | 0.1575   | -0.50403    | 3.29E-08   | Yes     | Serpinh1   | 0          | 82.3681  | inf              | 0.001        | 82.3691       | 16.3298156       | 0.00018329 | Yes     |
| Sfrp1      | 0.10508  | 0.042586 | -0.062494   | 0.00046463 | Yes     | Sfrp1      | 0          | 2.49317  | inf              | 0.001        | 2.49417       | 11.2843441       | 0.00018329 | Yes     |



| RRBS     |           |          |             |            |         | RNAseq   |           |         |                  |              |               |                  |            |         |
|----------|-----------|----------|-------------|------------|---------|----------|-----------|---------|------------------|--------------|---------------|------------------|------------|---------|
| gene     | Blood     | Kidney   | methyl.diff | pMWU.fdr   | Match ? | gene     | blood     | kidney  | log2(fold_ratio) | blood+ 0.001 | kidney+ 0.001 | log2(fold_ratio) | q_value    | Match ? |
| Sgk2     | 0.60244   | 0.19446  | -0.40798    | 1.93E-10   | Yes     | Sgk2     | 0         | 12.2034 | inf              | 0.001        | 12.2044       | 13.5751137       | 0.00018329 | Yes     |
| Sh3rf2   | 0.81001   | 0.72503  | -0.08498    | 0.00489594 | Yes     | Sh3rf2   | 0         | 2.88417 | inf              | 0.001        | 2.88517       | 11.4944406       | 0.00018329 | Yes     |
| Sim1     | 0.10906   | 0.046969 | -0.062091   | 0.04097311 | Yes     | Sim1     | 0         | 8.81896 | inf              | 0.001        | 8.81996       | 13.1065564       | 0.00018329 | Yes     |
| Sipa1    | 0.071377  | 0.23047  | 0.159093    | 1.32E-05   | Yes     | Sipa1    | 103.083   | 46.1222 | -1.16028         | 103.084      | 46.1232       | -1.1602559       | 0.00018329 | Yes     |
| Sipa1l2  | 0.43669   | 0.26061  | -0.17608    | 0.02535502 | Yes     | Sipa1l2  | 0.0642095 | 4.81767 | 6.2294           | 0.0652095    | 4.81867       | 6.20740904       | 0.00018329 | Yes     |
| Slc12a3  | 0.78178   | 0.66261  | -0.11917    | 0.00181887 | Yes     | Slc12a3  | 6.38238   | 43.8236 | 2.77954          | 6.38338      | 43.8246       | 2.77934848       | 0.00018329 | Yes     |
| Slc13a2  | 0.83984   | 0.39684  | -0.443      | 1.17E-05   | Yes     | Slc13a2  | 0         | 11.4849 | inf              | 0.001        | 11.4859       | 13.4875763       | 0.00018329 | Yes     |
| Slc13a3  | 0.83837   | 0.46093  | -0.37744    | 3.06E-06   | Yes     | Slc13a3  | 0         | 56.8678 | inf              | 0.001        | 56.8688       | 15.7953497       | 0.00018329 | Yes     |
| Slc17a9  | 0.32032   | 0.089032 | -0.231288   | 0.00152471 | Yes     | Slc17a9  | 0.419655  | 0.99767 | 1.24936          | 0.420655     | 0.99867       | 1.24737054       | 0.0403432  | Yes     |
| Slc21a4  | 0.93683   | 0.5298   | -0.40703    | 1.74E-11   | Yes     | Slc21a4  | 0         | 12.6546 | inf              | 0.001        | 12.6556       | 13.6274883       | 0.00018329 | Yes     |
| Slc22a1  | 0.92825   | 0.46669  | -0.46156    | 6.50E-07   | Yes     | Slc22a1  | 0         | 17.9165 | inf              | 0.001        | 17.9175       | 14.1290817       | 0.00018329 | Yes     |
| Slc22a6  | 0.857     | 0.43408  | -0.42292    | 1.42E-06   | Yes     | Slc22a6  | 0         | 116.894 | inf              | 0.001        | 116.895       | 16.8348537       | 0.00018329 | Yes     |
| Slc22a7  | 0.86512   | 0.80006  | -0.06506    | 0.00405617 | Yes     | Slc22a7  | 0         | 1.5567  | inf              | 0.001        | 1.5577        | 10.6052017       | 0.00018329 | Yes     |
| Slc22a8  | 0.90999   | 0.37164  | -0.53835    | 7.19E-07   | Yes     | Slc22a8  | 0         | 58.564  | inf              | 0.001        | 58.565        | 15.8377511       | 0.00018329 | Yes     |
| Slc25a23 | 0.66111   | 0.17075  | -0.49036    | 6.50E-07   | Yes     | Slc25a23 | 14.2959   | 64.851  | 2.18153          | 14.2969      | 64.852        | 2.18144871       | 0.00018329 | Yes     |
| Slc26a1  | 0.77619   | 0.29933  | -0.47686    | 0.00142182 | Yes     | Slc26a1  | 0.103625  | 10.8698 | 6.71282          | 0.104625     | 10.8708       | 6.69908668       | 0.0139848  | Yes     |
| Slc27a2  | 0.65628   | 0.13604  | -0.52024    | 7.19E-07   | Yes     | Slc27a2  | 0.100421  | 50.1487 | 8.96401          | 0.101421     | 50.1497       | 8.94974086       | 0.00018329 | Yes     |
| Slc27a3  | 0.73313   | 0.57003  | -0.1631     | 0.02160305 | Yes     | Slc27a3  | 0.530904  | 2.61516 | 2.30037          | 0.531904     | 2.61616       | 2.29821298       | 0.00126492 | Yes     |
| Slc2a8   | 0.13245   | 0.029614 | -0.102836   | 4.04E-05   | Yes     | Slc2a8   | 2.99959   | 9.12354 | 1.60483          | 3.00059      | 9.12454       | 1.60450563       | 0.00018329 | Yes     |
| Slc34a1  | 0.74411   | 0.48786  | -0.25625    | 0.01544668 | Yes     | Slc34a1  | 0.0203707 | 404.194 | 14.2763          | 0.0213707    | 404.195       | 14.2071297       | 0.00018329 | Yes     |
| Slc34a2  | 0.083533  | 0.032158 | -0.051375   | 3.95E-08   | Yes     | Slc34a2  | 0         | 69.16   | inf              | 0.001        | 69.161        | 16.0776711       | 0.00018329 | Yes     |
| Slc3a1   | 0.98357   | 0.4645   | -0.51907    | 6.50E-07   | Yes     | Slc3a1   | 0.209874  | 144.46  | 9.42693          | 0.210874     | 144.461       | 9.42008312       | 0.0448123  | Yes     |
| Slc4a11  | 0.91408   | 0.70661  | -0.20747    | 0.00060029 | Yes     | Slc4a11  | 32.1636   | 93.5992 | 1.54107          | 32.1646      | 93.6002       | 1.54103787       | 0.00018329 | Yes     |
| Slc4a2   | 0.21911   | 0.067313 | -0.151797   | 0.0279946  | Yes     | Slc4a2   | 15.0031   | 27.303  | 0.863801         | 15.0041      | 27.304        | 0.86375554       | 0.0369285  | Yes     |
| Slc6a6   | 0.71878   | 0.34548  | -0.3733     | 0.00108973 | Yes     | Slc6a6   | 14.8025   | 57.0531 | 1.94646          | 14.8035      | 57.0541       | 1.94639225       | 0.00018329 | Yes     |
| Smarcc1  | 0.25296   | 0.35778  | 0.10482     | 0.00894698 | Yes     | Smarcc1  | 21.0967   | 10.1885 | -1.05008         | 21.0977      | 10.1895       | -1.0500025       | 0.0018326  | Yes     |
| Snx10    | 0.01671   | 0.30363  | 0.28692     | 4.36E-05   | Yes     | Snx10    | 7.59342   | 2.80169 | -1.43845         | 7.59442      | 2.80269       | -1.4381276       | 0.00111812 | Yes     |
| Snx33    | 0.23715   | 0.088858 | -0.148292   | 1.13E-08   | Yes     | Snx33    | 1.6145    | 12.1856 | 2.91602          | 1.6155       | 12.1866       | 2.91524302       | 0.00018329 | Yes     |
| Sorcs2   | 0.11876   | 0.039145 | -0.079615   | 0.04680399 | Yes     | Sorcs2   | 0         | 3.26303 | inf              | 0.001        | 3.26403       | 11.6724386       | 0.00018329 | Yes     |
| Sox13    | 0.082389  | 0.024998 | -0.057391   | 4.46E-06   | Yes     | Sox13    | 0.0879025 | 8.68442 | 6.62638          | 0.0889025    | 8.68542       | 6.61022782       | 0.00018329 | Yes     |
| Sp5      | 0.0955    | 0.029469 | -0.066031   | 0.02535502 | Yes     | Sp5      | 0         | 1.11141 | inf              | 0.001        | 1.11241       | 10.1194729       | 0.00018329 | Yes     |
| Sparcl1  | 0.62387   | 0.36706  | -0.25681    | 1.98E-05   | Yes     | Sparcl1  | 0         | 2.73167 | inf              | 0.001        | 2.73267       | 11.4160955       | 0.00018329 | Yes     |
| Spint1   | 0.34074   | 0.10581  | -0.23493    | 2.48E-05   | Yes     | Spint1   | 0.653669  | 40.8011 | 5.9639           | 0.654669     | 40.8021       | 5.96173393       | 0.00018329 | Yes     |
| Spock2   | 0.47495   | 0.23943  | -0.23552    | 0.00022961 | Yes     | Spock2   | 0.496369  | 4.50471 | 3.18195          | 0.497369     | 4.50571       | 3.17936597       | 0.00018329 | Yes     |
| Spon1    | 0.57215   | 0.45514  | -0.11701    | 0.04893199 | Yes     | Spon1    | 0.372366  | 72.1203 | 7.59754          | 0.373366     | 72.1213       | 7.59369103       | 0.00018329 | Yes     |
| Spry2    | 0.91158   | 0.44175  | -0.46983    | 3.77E-12   | Yes     | Spry2    | 12.6279   | 25.0514 | 0.988277         | 12.6289      | 25.0524       | 0.98821984       | 0.00082046 | Yes     |
| Spry4    | 0.62287   | 0.19718  | -0.42569    | 3.03E-09   | Yes     | Spry4    | 0.110782  | 2.24192 | 4.33894          | 0.111782     | 2.24292       | 4.32661837       | 0.00018329 | Yes     |
| Srsf12   | 0.0046394 | 0.12893  | 0.1242906   | 0.00019103 | Yes     | Srsf12   | 23.1672   | 5.1574  | -2.16737         | 23.1682      | 5.1584        | -2.1671504       | 0.00018329 | Yes     |
| Ssh3     | 0.22354   | 0.077565 | -0.145975   | 0.00015139 | Yes     | Ssh3     | 1.42649   | 14.4663 | 3.34216          | 1.42749      | 14.4673       | 3.34124316       | 0.00018329 | Yes     |
| St13     | 0.95112   | 0.81182  | -0.1393     | 1.11E-05   | Yes     | St13     | 51.834    | 96.5027 | 0.896671         | 51.835       | 96.5037       | 0.89665769       | 0.00035173 | Yes     |
| Stard10  | 0.53569   | 0.17706  | -0.35863    | 0.0023061  | Yes     | Stard10  | 34.3147   | 122.498 | 1.83586          | 34.3157      | 122.499       | 1.83582928       | 0.00018329 | Yes     |
| Steap1   | 0.093705  | 0.024713 | -0.068992   | 0.00060029 | Yes     | Steap1   | 0         | 4.11108 | inf              | 0.001        | 4.11208       | 12.0056526       | 0.00018329 | Yes     |

| RRBS      |           |          |             |            |         | RNAseq    |           |          |                  |              |               |                  |            |         |
|-----------|-----------|----------|-------------|------------|---------|-----------|-----------|----------|------------------|--------------|---------------|------------------|------------|---------|
| gene      | Blood     | Kidney   | methyl.diff | pMWU.fdr   | Match ? | gene      | blood     | kidney   | log2(fold_ratio) | blood+ 0.001 | kidney+ 0.001 | log2(fold_ratio) | q_value    | Match ? |
| Stk10     | 0         | 0.051637 | 0.051637    | 2.36E-05   | Yes     | Stk10     | 83.5431   | 13.7692  | -2.60108         | 83.5441      | 13.7702       | -2.6009884       | 0.00018329 | Yes     |
| Stox2     | 0.029938  | 0.10797  | 0.078032    | 4.18E-09   | Yes     | Stox2     | 2.0893    | 0.781702 | -1.41833         | 2.0903       | 0.782702      | -1.417175        | 0.00018329 | Yes     |
| Stx3      | 0.80765   | 0.48319  | -0.32446    | 0.00028052 | Yes     | Stx3      | 5.99217   | 10.8677  | 0.858895         | 5.99317      | 10.8687       | 0.85878819       | 0.00721079 | Yes     |
| Sult2b1   | 0.5062    | 0.32928  | -0.17692    | 0.03760671 | Yes     | Sult2b1   | 9.18914   | 44.9526  | 2.2904           | 9.19014      | 44.9536       | 2.29027791       | 0.00018329 | Yes     |
| Surf6     | 0.22805   | 0.29923  | 0.07118     | 7.11E-05   | Yes     | Surf6     | 30.8222   | 18.1919  | -0.760679        | 30.8232      | 18.1929       | -0.7606411       | 0.00732142 | Yes     |
| Susd2     | 0.60699   | 0.24985  | -0.35714    | 6.51E-08   | Yes     | Susd2     | 0.98518   | 10.7236  | 3.44426          | 0.98618      | 10.7246       | 3.44292903       | 0.00018329 | Yes     |
| Syne4     | 0.80854   | 0.19767  | -0.61087    | 3.77E-12   | Yes     | Syne4     | 0.250844  | 3.04894  | 3.60345          | 0.251844     | 3.04994       | 3.5981786        | 0.0146209  | Yes     |
| Syngap1   | 0.84815   | 0.60444  | -0.24371    | 0.00054569 | Yes     | Syngap1   | 0.501664  | 3.83961  | 2.93617          | 0.502664     | 3.84061       | 2.9336692        | 0.00018329 | Yes     |
| Synpo2    | 0.092739  | 0.018749 | -0.07399    | 0.00015368 | Yes     | Synpo2    | 0         | 0.667764 | inf              | 0.001        | 0.668764      | 9.38535338       | 0.00018329 | Yes     |
| Syt7      | 0.23201   | 0.082716 | -0.149294   | 0.00275507 | Yes     | Syt7      | 0         | 0.626993 | inf              | 0.001        | 0.627993      | 9.29460467       | 0.00579773 | Yes     |
| Tacstd2   | 0.11317   | 0.049719 | -0.063451   | 0.00013988 | Yes     | Tacstd2   | 0         | 40.3788  | inf              | 0.001        | 40.3798       | 15.3013461       | 0.00018329 | Yes     |
| Tas1r1    | 0.73686   | 0.55748  | -0.17938    | 0.00159707 | Yes     | Tas1r1    | 0.869071  | 23.7709  | 4.77358          | 0.870071     | 23.7719       | 4.77198027       | 0.00018329 | Yes     |
| Tbc1d9    | 0.20284   | 0.091161 | -0.111679   | 0.00368736 | Yes     | Tbc1d9    | 0.0440425 | 10.895   | 7.95055          | 0.0450425    | 10.896        | 7.91829599       | 0.00018329 | Yes     |
| Tbx3      | 0.10237   | 0.048664 | -0.053706   | 5.25E-06   | Yes     | Tbx3      | 0         | 0.920226 | inf              | 0.001        | 0.921226      | 9.84741132       | 0.00018329 | Yes     |
| Tctex1d2  | 0.15314   | 0.043617 | -0.109523   | 0.03275343 | Yes     | Tctex1d2  | 0.34374   | 14.8054  | 5.42866          | 0.34474      | 14.8064       | 5.4245684        | 0.00035173 | Yes     |
| Tfam      | 0.012471  | 0.44267  | 0.430199    | 6.50E-07   | Yes     | Tfam      | 56.8434   | 35.8395  | -0.665443        | 56.8444      | 35.8405       | -0.6654275       | 0.0110491  | Yes     |
| Tgfb3     | 0.62495   | 0.39014  | -0.23481    | 0.02028318 | Yes     | Tgfb3     | 0.0301334 | 0.574676 | 4.25331          | 0.0311334    | 0.575676      | 4.20872202       | 0.0486948  | Yes     |
| Tgfb1     | 0.7937    | 0.71828  | -0.07542    | 0.0031273  | Yes     | Tgfb1     | 0.767177  | 12.923   | 4.07423          | 0.768177     | 12.924        | 4.07247008       | 0.00018329 | Yes     |
| Tjp3      | 0.49747   | 0.33869  | -0.15878    | 0.02915203 | Yes     | Tjp3      | 0.779001  | 18.0824  | 4.53682          | 0.780001     | 18.0834       | 4.53504617       | 0.00111812 | Yes     |
| Tk1       | 0.72949   | 0.51238  | -0.21711    | 0.02284827 | Yes     | Tk1       | 1.37261   | 10.1002  | 2.8794           | 1.37361      | 10.1012       | 2.87848234       | 0.00018329 | Yes     |
| Tle1      | 0.1391    | 0.034394 | -0.104706   | 0.00832699 | Yes     | Tle1      | 0.0355829 | 3.26894  | 6.52149          | 0.0365829    | 3.26994       | 6.48195091       | 0.00744054 | Yes     |
| Tmc8      | 0.0017857 | 0.24944  | 0.2476543   | 6.50E-07   | Yes     | Tmc8      | 73.6614   | 18.7287  | -1.97566         | 73.6624      | 18.7297       | -1.9756006       | 0.00018329 | Yes     |
| Tmcc2     | 0.63185   | 0.35461  | -0.27724    | 0.00120161 | Yes     | Tmcc2     | 0.0238079 | 0.669298 | 4.81314          | 0.0248079    | 0.670298      | 4.75593111       | 0.0295293  | Yes     |
| Tmem125   | 0.96892   | 0.85     | -0.11892    | 1.26E-05   | Yes     | Tmem125   | 0         | 2.83885  | inf              | 0.001        | 2.83985       | 11.471599        | 0.00018329 | Yes     |
| Tmem132e  | 0.082372  | 0.027386 | -0.054986   | 0.00022961 | Yes     | Tmem132e  | 0         | 0.698406 | inf              | 0.001        | 0.699406      | 9.44998636       | 0.00018329 | Yes     |
| Tmem150a  | 0.10414   | 0.026802 | -0.077338   | 0.0103156  | Yes     | Tmem150a  | 1.19459   | 49.3896  | 5.36962          | 1.19559      | 49.3906       | 5.36844185       | 0.00018329 | Yes     |
| Tmem171   | 0.6578    | 0.404    | -0.2538     | 4.67E-05   | Yes     | Tmem171   | 0         | 58.8203  | inf              | 0.001        | 58.8213       | 15.844051        | 0.00018329 | Yes     |
| Tmem231   | 0.16983   | 0.075778 | -0.094052   | 9.79E-07   | Yes     | Tmem231   | 0.105766  | 4.61393  | 5.44705          | 0.106766     | 4.61493       | 5.43378457       | 0.00018329 | Yes     |
| Tmem30b   | 0.3081    | 0.16536  | -0.14274    | 0.00043712 | Yes     | Tmem30b   | 0         | 12.1712  | inf              | 0.001        | 12.1722       | 13.5713023       | 0.00018329 | Yes     |
| Tmem37    | 0.77847   | 0.21155  | -0.56692    | 7.19E-07   | Yes     | Tmem37    | 0.297015  | 62.9243  | 7.72694          | 0.298015     | 62.9253       | 7.72211143       | 0.00097029 | Yes     |
| Tmem72    | 0.75908   | 0.46356  | -0.29552    | 4.18E-06   | Yes     | Tmem72    | 0         | 83.8893  | inf              | 0.001        | 83.8903       | 16.3562164       | 0.00018329 | Yes     |
| Tmod4     | 0.8485    | 0.71502  | -0.13348    | 2.23E-06   | Yes     | Tmod4     | 0.17706   | 11.7967  | 6.058            | 0.17806      | 11.7977       | 6.04999836       | 0.00481718 | Yes     |
| Tmprss2   | 0.17727   | 0.053877 | -0.123393   | 0.00674226 | Yes     | Tmprss2   | 0.0351331 | 55.2541  | 10.619           | 0.0361331    | 55.2551       | 10.5785709       | 0.00018329 | Yes     |
| Tnfrsf12a | 0.13654   | 0.030936 | -0.105604   | 0.00077922 | Yes     | Tnfrsf12a | 1.24118   | 32.2381  | 4.69898          | 1.24218      | 32.2391       | 4.69786532       | 0.0275792  | Yes     |
| Tnfrsf9   | 0.83711   | 0.45822  | -0.37889    | 3.27E-06   | Yes     | Tnfrsf9   | 3.61736   | 19.2096  | 2.40882          | 3.61836      | 19.2106       | 2.40849472       | 0.00018329 | Yes     |
| Tnfsf12   | 0.2906    | 0.085198 | -0.205402   | 0.00031102 | Yes     | Tnfsf12   | 0.468174  | 22.1822  | 5.56622          | 0.469174     | 22.1832       | 5.56320062       | 0.00018329 | Yes     |
| Tnfsf8    | 0.012156  | 0.30541  | 0.293254    | 8.08E-07   | Yes     | Tnfsf8    | 13.6202   | 0.891004 | -3.93417         | 13.6212      | 0.892004      | -3.9326598       | 0.00018329 | Yes     |
| Tns3      | 0.75008   | 0.63659  | -0.11349    | 0.0445679  | Yes     | Tns3      | 0.0958953 | 39.9708  | 8.70327          | 0.0968953    | 39.9718       | 8.68834014       | 0.00018329 | Yes     |
| Tox3      | 0.95674   | 0.88589  | -0.07085    | 0.00070202 | Yes     | Tox3      | 0         | 1.2255   | inf              | 0.001        | 1.2265        | 10.2603315       | 0.00018329 | Yes     |
| Tpb1      | 0.14695   | 0.080301 | -0.066649   | 0.03032002 | Yes     | Tpb1      | 0.463312  | 7.09333  | 3.93641          | 0.464312     | 7.09433       | 3.93349997       | 0.00018329 | Yes     |
| Tpd52     | 0.8225    | 0.40845  | -0.41405    | 9.35E-05   | Yes     | Tpd52     | 0.339493  | 58.4665  | 7.42808          | 0.340493     | 58.4675       | 7.42386596       | 0.00018329 | Yes     |
| Tpi1      | 0.6741    | 0.17615  | -0.49795    | 0.00120161 | Yes     | Tpi1      | 19.8159   | 217.393  | 3.45558          | 19.8169      | 217.394       | 3.45550892       | 0.00018329 | Yes     |

| RRBS     |            |          |             |            |         | RNAseq   |           |          |                  |              |               |                  |            |         |
|----------|------------|----------|-------------|------------|---------|----------|-----------|----------|------------------|--------------|---------------|------------------|------------|---------|
| gene     | Blood      | Kidney   | methyl.diff | pMWU.fdr   | Match ? | gene     | blood     | kidney   | log2(fold_ratio) | blood+ 0.001 | kidney+ 0.001 | log2(fold_ratio) | q_value    | Match ? |
| Tpm2     | 0.59064    | 0.3287   | -0.26194    | 0.00011533 | Yes     | Tpm2     | 0.111037  | 17.3721  | 7.2896           | 0.112037     | 17.3731       | 7.27673614       | 0.0203707  | Yes     |
| Tprn     | 0.10153    | 0.029714 | -0.071816   | 0.0006534  | Yes     | Tprn     | 4.33731   | 15.8981  | 1.87398          | 4.33831      | 15.8991       | 1.87374005       | 0.00018329 | Yes     |
| Trak1    | 0.94989    | 0.89125  | -0.05864    | 0.0279946  | Yes     | Trak1    | 6.46335   | 14.9298  | 1.20784          | 6.46435      | 14.9308       | 1.20771425       | 0.00018329 | Yes     |
| Trak2    | 0.43011    | 0.28283  | -0.14728    | 1.53E-09   | Yes     | Trak2    | 14.7731   | 30.1168  | 1.0276           | 14.7741      | 30.1178       | 1.02754614       | 0.00481718 | Yes     |
| Trappc6a | 0.74744    | 0.29988  | -0.44756    | 3.77E-12   | Yes     | Trappc6a | 52.8024   | 91.2981  | 0.789982         | 52.8034      | 91.2991       | 0.78996981       | 0.00627425 | Yes     |
| Trpm2    | 0.74897    | 0.44386  | -0.30511    | 3.48E-05   | Yes     | Trpm2    | 7.26733   | 14.3973  | 0.986304         | 7.26833      | 14.3983       | 0.98620266       | 0.0145263  | Yes     |
| Tsku     | 0.28241    | 0.16723  | -0.11518    | 0.01899425 | Yes     | Tsku     | 0.10344   | 3.87261  | 5.22644          | 0.10444      | 3.87361       | 5.21293244       | 0.00018329 | Yes     |
| Tspan33  | 0.12421    | 0.034144 | -0.090066   | 0.00095473 | Yes     | Tspan33  | 0.21185   | 29.1944  | 7.1065           | 0.21285      | 29.1954       | 7.09976018       | 0.00018329 | Yes     |
| Tspan9   | 0.12877    | 0.065199 | -0.063571   | 0.00085417 | Yes     | Tspan9   | 0.097538  | 8.93654  | 6.51761          | 0.098538     | 8.93754       | 6.50305379       | 0.00018329 | Yes     |
| Tst      | 0.72002    | 0.21058  | -0.50944    | 3.77E-12   | Yes     | Tst      | 0.219254  | 71.1185  | 8.34148          | 0.220254     | 71.1195       | 8.33493315       | 0.00018329 | Yes     |
| Ttc39b   | 0.098508   | 0.025896 | -0.072612   | 4.36E-05   | Yes     | Ttc39b   | 0.131532  | 3.5856   | 4.76873          | 0.132532     | 3.5866        | 4.75820421       | 0.00018329 | Yes     |
| Tuba1c   | 0.52181    | 0.23277  | -0.28904    | 0.00031102 | Yes     | Tuba1c   | 138.596   | 277.022  | 0.999112         | 138.597      | 277.023       | 0.99910973       | 0.00051281 | Yes     |
| Tuba4a   | 0.80195    | 0.37074  | -0.43121    | 6.50E-07   | Yes     | Tuba4a   | 45.9645   | 140.123  | 1.6081           | 45.9655      | 140.124       | 1.60808074       | 0.00018329 | Yes     |
| Twf1     | 0.39298    | 0.28706  | -0.10592    | 0.01349957 | Yes     | Twf1     | 26.1373   | 53.3772  | 1.03012          | 26.1383      | 53.3782       | 1.03008534       | 0.00111812 | Yes     |
| Twf2     | 0.00067568 | 0.10838  | 0.10770432  | 0.00025534 | Yes     | Twf2     | 60.7025   | 16.9637  | -1.83931         | 60.7035      | 16.9647       | -1.8392438       | 0.00018329 | Yes     |
| Tysnd1   | 0.47185    | 0.15895  | -0.3129     | 5.90E-05   | Yes     | Tysnd1   | 7.15571   | 11.8842  | 0.731876         | 7.15671      | 11.8852       | 0.73179775       | 0.0268173  | Yes     |
| Uap1l1   | 0.77206    | 0.60289  | -0.16917    | 0.03032002 | Yes     | Uap1l1   | 6.44758   | 51.1907  | 2.98905          | 6.44858      | 51.1917       | 2.9888565        | 0.00018329 | Yes     |
| Ubash3a  | 2.27E-08   | 0.22954  | 0.22953998  | 8.03E-11   | Yes     | Ubash3a  | 20.8782   | 2.69735  | -2.95239         | 20.8792      | 2.69835       | -2.951917        | 0.00238141 | Yes     |
| Uncx     | 0.13389    | 0.032282 | -0.101608   | 0.00196002 | Yes     | Uncx     | 0         | 1.14227  | inf              | 0.001        | 1.14327       | 10.1589504       | 0.00018329 | Yes     |
| Uqcr11   | 0.096376   | 0.013045 | -0.083331   | 0.00021046 | Yes     | Uqcr11   | 132.429   | 714.733  | 2.43218          | 132.43       | 714.734       | 2.43217644       | 0.00018329 | Yes     |
| Ush1c    | 0.3383     | 0.11487  | -0.22343    | 2.75E-06   | Yes     | Ush1c    | 0         | 36.1202  | inf              | 0.001        | 36.1212       | 15.1405582       | 0.00018329 | Yes     |
| Usp44    | 0.0026949  | 0.097884 | 0.0951891   | 7.19E-07   | Yes     | Usp44    | 21.5712   | 1.0251   | -4.39527         | 21.5722      | 1.0261        | -4.3939301       | 0.00018329 | Yes     |
| Vasn     | 0.75967    | 0.21397  | -0.5457     | 3.78E-09   | Yes     | Vasn     | 0.292351  | 11.938   | 5.35172          | 0.293351     | 11.939        | 5.34691028       | 0.0138771  | Yes     |
| Vat1     | 0.074353   | 0.018632 | -0.055721   | 0.01178248 | Yes     | Vat1     | 7.03524   | 49.7056  | 2.82074          | 7.03624      | 49.7066       | 2.82056083       | 0.00018329 | Yes     |
| Vav2     | 0.66099    | 0.21846  | -0.44253    | 8.72E-07   | Yes     | Vav2     | 1.29607   | 12.9859  | 3.32473          | 1.29707      | 12.9869       | 3.32372885       | 0.00018329 | Yes     |
| Vax1     | 0.11121    | 0.032374 | -0.078836   | 0.00011533 | Yes     | Vax1     | 0         | 0.76227  | inf              | 0.001        | 0.76327       | 9.57604968       | 0.00018329 | Yes     |
| Vps37d   | 0.9189     | 0.21804  | -0.70086    | 3.77E-12   | Yes     | Vps37d   | 0.302011  | 18.1312  | 5.90773          | 0.303011     | 18.1322       | 5.90304          | 0.00018329 | Yes     |
| Vsig10   | 0.73023    | 0.5841   | -0.14613    | 0.04893199 | Yes     | Vsig10   | 0.0932012 | 7.76971  | 6.38137          | 0.0942012    | 7.77071       | 6.36615717       | 0.00018329 | Yes     |
| Vstm2b   | 0.2161     | 0.08597  | -0.13013    | 1.61E-05   | Yes     | Vstm2b   | 0         | 1.59613  | inf              | 0.001        | 1.59713       | 10.641266        | 0.00018329 | Yes     |
| Wdr13    | 0.97661    | 0.91725  | -0.05936    | 0.00674226 | Yes     | Wdr13    | 9.28184   | 17.4323  | 0.90928          | 9.28284      | 17.4333       | 0.90920753       | 0.00066911 | Yes     |
| Wfdc2    | 0.61514    | 0.3102   | -0.30494    | 2.49E-06   | Yes     | Wfdc2    | 1.53148   | 464.668  | 8.24513          | 1.53248      | 464.669       | 8.24419134       | 0.00018329 | Yes     |
| Wipf1    | 0          | 0.13558  | 0.13558     | 6.98E-06   | Yes     | Wipf1    | 75.6882   | 9.8062   | -2.9483          | 75.6892      | 9.8072        | -2.9481743       | 0.00018329 | Yes     |
| Wnt7b    | 0.088053   | 0.023861 | -0.064192   | 0.00142182 | Yes     | Wnt7b    | 0         | 17.3839  | inf              | 0.001        | 17.3849       | 14.0855471       | 0.00018329 | Yes     |
| Wnt9a    | 0.20432    | 0.072743 | -0.131577   | 0.00674226 | Yes     | Wnt9a    | 0         | 0.616972 | inf              | 0.001        | 0.617972      | 9.27139766       | 0.00018329 | Yes     |
| Xylb     | 0.70983    | 0.40847  | -0.30136    | 0.00722274 | Yes     | Xylb     | 5.08643   | 57.5374  | 3.49977          | 5.08743      | 57.5384       | 3.49951616       | 0.00018329 | Yes     |
| Yap1     | 0.10215    | 0.044891 | -0.057259   | 0.01448681 | Yes     | Yap1     | 0.0191956 | 27.3285  | 10.4754          | 0.0201956    | 27.3295       | 10.4022023       | 0.0409941  | Yes     |
| Ybx2     | 0.52533    | 0.21633  | -0.309      | 5.49E-08   | Yes     | Ybx2     | 0.603979  | 7.773    | 3.6859           | 0.604979     | 7.774         | 3.68370014       | 0.00018329 | Yes     |
| Zbtb10   | 0.15205    | 0.078122 | -0.073928   | 0.04097311 | Yes     | Zbtb10   | 0.408256  | 1.61639  | 1.98523          | 0.409256     | 1.61739       | 1.98259212       | 0.00035173 | Yes     |
| Zbtb42   | 0.8564     | 0.78115  | -0.07525    | 0.0445679  | Yes     | Zbtb42   | 1.79377   | 5.3034   | 1.56393          | 1.79477      | 5.3044        | 1.5633906        | 0.00018329 | Yes     |
| Zc3h7b   | 0.68209    | 0.49652  | -0.18557    | 0.0006534  | Yes     | Zc3h7b   | 13.5827   | 29.7346  | 1.13037          | 13.5837      | 29.7356       | 1.13031468       | 0.00018329 | Yes     |
| Zc3hav1  | 0          | 0.3305   | 0.3305      | 6.50E-07   | Yes     | Zc3hav1  | 77.4514   | 15.0485  | -2.36367         | 77.4524      | 15.0495       | -2.3635944       | 0.00018329 | Yes     |
| Zfp219   | 0.83097    | 0.45176  | -0.37921    | 1.43E-08   | Yes     | Zfp219   | 15.593    | 27.9548  | 0.842196         | 15.594       | 27.9558       | 0.84215659       | 0.0228125  | Yes     |

| RRBS     |          |          |             |            |         | RNAseq         |           |          |                  |              |               |                  |            |         |
|----------|----------|----------|-------------|------------|---------|----------------|-----------|----------|------------------|--------------|---------------|------------------|------------|---------|
| gene     | Blood    | Kidney   | methyl.diff | pMWU.fdr   | Match ? | gene           | blood     | kidney   | log2(fold_ratio) | blood+ 0.001 | kidney+ 0.001 | log2(fold_ratio) | q_value    | Match ? |
| Zfp358   | 0.53543  | 0.36292  | -0.17251    | 0.0279946  | Yes     | Zfp358         | 8.25078   | 13.1347  | 0.67078          | 8.25178      | 13.1357       | 0.67071582       | 0.0339087  | Yes     |
| Zfp46    | 0.83678  | 0.68398  | -0.1528     | 0.01105145 | Yes     | Zfp46          | 1.9827    | 3.72687  | 0.9105           | 1.9837       | 3.72787       | 0.91015769       | 0.00834357 | Yes     |
| Zfp629   | 0.77105  | 0.44484  | -0.32621    | 0.00152471 | Yes     | Zfp629         | 1.43489   | 6.23187  | 2.11873          | 1.43589      | 6.23287       | 2.11795139       | 0.00018329 | Yes     |
| Zfp652   | 0.032897 | 0.47138  | 0.438483    | 7.66E-08   | Yes     | Zfp652         | 23.7819   | 12.4188  | -0.937334        | 23.7829      | 12.4198       | -0.9372827       | 0.00111812 | Yes     |
| Zfp703   | 0.243    | 0.10546  | -0.13754    | 0.0023061  | Yes     | Zfp703         | 0.983727  | 5.65963  | 2.52438          | 0.984727     | 5.66063       | 2.52316691       | 0.00018329 | Yes     |
| Zfp710   | 0.7939   | 0.72802  | -0.06588    | 0.00455632 | Yes     | Zfp710         | 4.46797   | 7.62458  | 0.771039         | 4.46897      | 7.62558       | 0.77090471       | 0.0375863  | Yes     |
| Zfp93    | 0.14112  | 0.068567 | -0.072553   | 0.00294427 | Yes     | Zfp93          | 0.0812746 | 1.5023   | 4.20823          | 0.0822746    | 1.5033        | 4.19154203       | 0.00530972 | Yes     |
| Zkscan5  | 0.48089  | 0.32917  | -0.15172    | 0.00625768 | Yes     | Zkscan5        | 4.16021   | 7.10627  | 0.772436         | 4.16121      | 7.10727       | 0.77229241       | 0.0110491  | Yes     |
| 42804    | 0.030532 | 0.10404  | 0.073508    | 0.0103156  | No      | 42796          | 50.6827   | 85.8553  | 0.760413         | 50.6837      | 85.8563       | 0.76040215       | 0.00519348 | No      |
| 42983    | 0.24367  | 0.11883  | -0.12484    | 0.01178248 | No      | 42801          | 85.7988   | 15.8667  | -2.43496         | 85.7998      | 15.8677       | -2.4348813       | 0.00018329 | No      |
| Aaas     | 0.1915   | 0.11784  | -0.07366    | 0.02284827 | No      | 42802          | 2.27994   | 20.2169  | 3.14849          | 2.28094      | 20.2179       | 3.14793275       | 0.00018329 | No      |
| Aatk     | 0.60622  | 0.28667  | -0.31955    | 6.98E-06   | No      | 42803          | 8.83762   | 15.1974  | 0.782091         | 8.83862      | 15.1984       | 0.78202641       | 0.0205807  | No      |
| Abca13   | 0.8131   | 0.60318  | -0.20992    | 0.00351975 | No      | 42979          | 437.08    | 92.7078  | -2.23713         | 437.081      | 92.7088       | -2.2371225       | 0.0018326  | No      |
| Abcb9    | 0.59689  | 0.30606  | -0.29083    | 0.00294427 | No      | 42982          | 0.209386  | 149.449  | 9.47927          | 0.210386     | 149.45        | 9.47240848       | 0.00018329 | No      |
| Abcc9    | 0.091066 | 0.028936 | -0.06213    | 0.00768781 | No      | 42984          | 166.786   | 12.6876  | -3.71651         | 166.787      | 12.6886       | -3.716402        | 0.00018329 | No      |
| Abcf3    | 0.858    | 0.80257  | -0.05543    | 0.01098497 | No      | 42985          | 116.596   | 39.0318  | -1.57879         | 116.597      | 39.0328       | -1.5787718       | 0.00018329 | No      |
| Abcg4    | 0.24325  | 0.088687 | -0.154563   | 0.00955793 | No      | 42986          | 0.0642941 | 19.7366  | 8.26198          | 0.0652941    | 19.7376       | 8.23977822       | 0.00018329 | No      |
| Abhd15   | 0.082967 | 0.27363  | 0.190663    | 7.28E-10   | No      | 42988          | 0.0898706 | 6.66859  | 6.21339          | 0.0908706    | 6.66959       | 6.19764066       | 0.0438054  | No      |
| Abhd16b  | 0.97138  | 0.71048  | -0.2609     | 3.20E-09   | No      | 0610030E20 Rik | 18.2378   | 7.86559  | -1.2133          | 18.2388      | 7.86659       | -1.2132005       | 0.00290302 | No      |
| Acbd7    | 0.79085  | 0.69062  | -0.10023    | 0.01448681 | No      | 1100001G20 Rik | 0         | 3.31708  | inf              | 0.001        | 3.31808       | 11.696133        | 0.00018329 | No      |
| Acot5    | 0.19007  | 0.11017  | -0.0799     | 0.00420619 | No      | 1110034G24 Rik | 15.2372   | 2.2821   | -2.73916         | 15.2382      | 2.2831        | -2.7386265       | 0.00018329 | No      |
| Acta1    | 0.15295  | 0.090034 | -0.062916   | 0.00911887 | No      | 1110058L19 Rik | 21.9442   | 57.4583  | 1.38868          | 21.9452      | 57.4593       | 1.388635         | 0.00354878 | No      |
| Acta2    | 0.89311  | 0.3851   | -0.50801    | 6.50E-07   | No      | 1700003E16 Rik | 0         | 0.820854 | inf              | 0.001        | 0.821854      | 9.68273832       | 0.00018329 | No      |
| Actn3    | 0.48409  | 0.25506  | -0.22903    | 0.00768781 | No      | 1700021F05 Rik | 10.4789   | 29.227   | 1.47982          | 10.4799      | 29.228        | 1.47972616       | 0.00018329 | No      |
| Actr3b   | 0.74111  | 0.533    | -0.20811    | 0.00152471 | No      | 1810037I17 Rik | 37.5676   | 101.803  | 1.43823          | 37.5686      | 101.804       | 1.43819499       | 0.00018329 | No      |
| Adam32   | 0.98948  | 0.93342  | -0.05606    | 0.00046463 | No      | 2200002D01 Rik | 0.87554   | 225.688  | 8.00994          | 0.87654      | 225.689       | 8.00830046       | 0.00686277 | No      |
| Adam5    | 0.96095  | 0.77437  | -0.18658    | 2.79E-05   | No      | 2210018M1 1Rik | 9.99832   | 3.48071  | -1.5223          | 9.99932      | 3.48171       | -1.5220339       | 0.00018329 | No      |
| Adamts14 | 0.66998  | 0.41143  | -0.25855    | 0.00102242 | No      | 2310030G06 Rik | 1.028     | 25.2159  | 4.61642          | 1.029        | 25.2169       | 4.61507604       | 0.00018329 | No      |
| Adamts15 | 0.17231  | 0.093108 | -0.079202   | 0.00077922 | No      | 2510002D24 Rik | 13.5618   | 7.60042  | -0.835395        | 13.5628      | 7.60142       | -0.8353142       | 0.0162458  | No      |
| Adamts4  | 0.60337  | 0.29222  | -0.31115    | 2.11E-08   | No      | 2610008E11 Rik | 7.79959   | 3.67354  | -1.08623         | 7.80059      | 3.67454       | -1.0860196       | 0.00051281 | No      |

| RRBS     |          |          |             |            |         | RNAseq        |           |          |                  |              |               |                  |            |         |
|----------|----------|----------|-------------|------------|---------|---------------|-----------|----------|------------------|--------------|---------------|------------------|------------|---------|
| gene     | Blood    | Kidney   | methyl.diff | pMWU.fdr   | Match ? | gene          | blood     | kidney   | log2(fold_ratio) | blood+ 0.001 | kidney+ 0.001 | log2(fold_ratio) | q_value    | Match ? |
| Adamts15 | 0.12389  | 0.039476 | -0.084414   | 0.00368736 | No      | 2610528A11Rik | 0.623082  | 3.72565  | 2.58             | 0.624082     | 3.72665       | 2.57807182       | 0.00788539 | No      |
| Adarb1   | 0.050976 | 0.13506  | 0.084084    | 0.03032002 | No      | 2700089E24Rik | 72.9626   | 44.7831  | -0.704202        | 72.9636      | 44.7841       | -0.7041903       | 0.0086849  | No      |
| Adat3    | 0.96101  | 0.87692  | -0.08409    | 9.35E-05   | No      | 2810408A11Rik | 2.55495   | 13.4028  | 2.39117          | 2.55595      | 13.4038       | 2.39071055       | 0.00018329 | No      |
| Adcy2    | 0.0774   | 0.023393 | -0.054007   | 0.00013988 | No      | 3110052M02Rik | 11.1339   | 2.8073   | -1.98771         | 11.1349      | 2.8083        | -1.9873196       | 0.00210945 | No      |
| Adcy8    | 0.07355  | 0.018372 | -0.055178   | 1.43E-07   | No      | 3110057O12Rik | 16.0367   | 3.15409  | -2.34609         | 16.0377      | 3.15509       | -2.3457142       | 0.00111812 | No      |
| Adgre5   | 0.058072 | 0.41813  | 0.360058    | 6.50E-07   | No      | 4930451G09Rik | 0.372556  | 0.947573 | 1.34678          | 0.373556     | 0.948573      | 1.34443427       | 0.0496139  | No      |
| Adgrl4   | 0.20183  | 0.092557 | -0.109273   | 5.51E-05   | No      | 4930538K18Rik | 0.0842407 | 0.81988  | 3.28282          | 0.0852407    | 0.82088       | 3.26755699       | 0.0119236  | No      |
| Ado      | 0.40213  | 0.24095  | -0.16118    | 0.00768781 | No      | 4933426M11Rik | 29.7752   | 19.7319  | -0.593581        | 29.7762      | 19.7329       | -0.5935567       | 0.0453771  | No      |
| Adprhl1  | 0.84592  | 0.67011  | -0.17581    | 1.57E-05   | No      | 4933430I17Rik | 0.44225   | 1.4896   | 1.75199          | 0.44325      | 1.4906        | 1.74970063       | 0.0332437  | No      |
| Adprhl2  | 0.8771   | 0.77088  | -0.10622    | 0.00102242 | No      | 5730508B09Rik | 22.3869   | 8.80632  | -1.34604         | 22.3879      | 8.80732       | -1.3459442       | 0.00303839 | No      |
| Adra1a   | 0.08648  | 0.26898  | 0.1825      | 3.15E-05   | No      | 5830473C10Rik | 0.192553  | 13.5061  | 6.13221          | 0.193553     | 13.5071       | 6.12484548       | 0.00018329 | No      |
| Adra1b   | 0.22846  | 0.1007   | -0.12776    | 0.00455632 | No      | 6430531B16Rik | 0.433741  | 5.84799  | 3.75304          | 0.434741     | 5.84899       | 3.74995946       | 0.00530972 | No      |
| Adra2c   | 0.21663  | 0.078899 | -0.137731   | 0.00046463 | No      | 9430038I01Rik | 17.2389   | 7.18163  | -1.26329         | 17.2399      | 7.18263       | -1.2631673       | 0.030294   | No      |
| Adrb1    | 0.15963  | 0.050396 | -0.109234   | 1.61E-05   | No      | A330021E22Rik | 0         | 5.64378  | inf              | 0.001        | 5.64478       | 12.4627016       | 0.00018329 | No      |
| Agap3    | 0.073822 | 0.17494  | 0.101118    | 0.00832699 | No      | A4galt        | 0         | 4.83527  | inf              | 0.001        | 4.83627       | 12.2396791       | 0.00018329 | No      |
| Ajap1    | 0.85968  | 0.80781  | -0.05187    | 0.02028318 | No      | A4gnt         | 1.50786   | 0.153121 | -3.29975         | 1.50886      | 0.154121      | -3.2913236       | 0.01749    | No      |
| Akap17a  | 0.79903  | 0.63362  | -0.16541    | 0.00142182 | No      | A830010M20Rik | 2.56993   | 1.07939  | -1.25151         | 2.57093      | 1.08039       | -1.2507381       | 0.0018326  | No      |
| Aldh1b1  | 0.046448 | 0.10611  | 0.059662    | 0.00102242 | No      | Aacs          | 17.5167   | 7.36044  | -1.25087         | 17.5177      | 7.36144       | -1.2507535       | 0.00018329 | No      |
| Aldh1l2  | 0.80853  | 0.73328  | -0.07525    | 0.01899425 | No      | Aaed1         | 1.13212   | 27.9433  | 4.62541          | 1.13312      | 27.9443       | 4.62418148       | 0.00018329 | No      |
| Alg3     | 0.8369   | 0.66877  | -0.16813    | 0.00104929 | No      | Aamdc         | 10.0119   | 33.2508  | 1.73167          | 10.0129      | 33.2518       | 1.73157256       | 0.00018329 | No      |
| Alox12b  | 0.14534  | 0.081643 | -0.063697   | 0.01349957 | No      | AAR2          | 6.03283   | 10.1332  | 0.748183         | 6.03383      | 10.1342       | 0.74808625       | 0.0101506  | No      |
| Alox12e  | 0.66355  | 0.27899  | -0.38456    | 2.48E-05   | No      | Aars          | 21.9435   | 59.523   | 1.43965          | 21.9445      | 59.524        | 1.43961208       | 0.00018329 | No      |
| Alox5    | 0.1299   | 0.058714 | -0.071186   | 0.00136617 | No      | Aass          | 0         | 30.0172  | inf              | 0.001        | 30.0182       | 14.8735498       | 0.00018329 | No      |
| Alpi     | 0.67626  | 0.48824  | -0.18802    | 0.01761018 | No      | AB124611      | 2.23901   | 13.3905  | 2.58028          | 2.24001      | 13.3915       | 2.57974049       | 0.00018329 | No      |
| Alpk3    | 0.78167  | 0.64057  | -0.1411     | 1.37E-05   | No      | Abat          | 0.600311  | 6.76432  | 3.49416          | 0.601311     | 6.76532       | 3.49197492       | 0.00018329 | No      |
| Alx1     | 0.10795  | 0.034494 | -0.073456   | 0.00054569 | No      | Abca2         | 17.5086   | 47.8029  | 1.44904          | 17.5096      | 47.8039       | 1.4489822        | 0.00018329 | No      |
| Amh      | 0.89308  | 0.78862  | -0.10446    | 0.00489594 | No      | ABCA3         | 11.781    | 31.0028  | 1.39594          | 11.782       | 31.0038       | 1.39586059       | 0.00035173 | No      |

| RRBS     |           |          |             |            |         | RNAseq  |           |          |                  |              |               |                  |            |         |
|----------|-----------|----------|-------------|------------|---------|---------|-----------|----------|------------------|--------------|---------------|------------------|------------|---------|
| gene     | Blood     | Kidney   | methyl.diff | pMWU.fdr   | Match ? | gene    | blood     | kidney   | log2(fold_ratio) | blood+ 0.001 | kidney+ 0.001 | log2(fold_ratio) | q_value    | Match ? |
| Amigo3   | 0.90253   | 0.76696  | -0.13557    | 0.00060029 | No      | Abca5   | 0.026563  | 0.698411 | 4.71659          | 0.027563     | 0.699411      | 4.66533566       | 0.00970533 | No      |
| Amn      | 0.13564   | 0.035609 | -0.100031   | 0.00023303 | No      | Abcb10  | 3.75347   | 16.7674  | 2.15936          | 3.75447      | 16.7684       | 2.15906387       | 0.00018329 | No      |
| Amz2     | 0.93636   | 0.8191   | -0.11726    | 5.62E-06   | No      | Abcb6   | 2.06274   | 28.1742  | 3.77174          | 2.06374      | 28.1752       | 3.77109272       | 0.00018329 | No      |
| Angpt4   | 0.77628   | 0.60367  | -0.17261    | 0.01448681 | No      | Abcc1   | 8.52063   | 3.44275  | -1.3074          | 8.52163      | 3.44375       | -1.307149        | 0.00018329 | No      |
| Ank1     | 0.067679  | 0.016519 | -0.05116    | 2.05E-06   | No      | ABCC4   | 4.06097   | 24.1087  | 2.56965          | 4.06197      | 24.1097       | 2.56936221       | 0.00018329 | No      |
| Ankef1   | 0.55072   | 0.45774  | -0.09298    | 0.04680399 | No      | Abcc5   | 39.4466   | 20.9173  | -0.915205        | 39.4476      | 20.9183       | -0.9151719       | 0.0263234  | No      |
| Ankrd23  | 0.79795   | 0.45587  | -0.34208    | 0.00014754 | No      | Abcc6   | 0         | 2.79134  | inf              | 0.001        | 2.79234       | 11.4472589       | 0.00018329 | No      |
| Ankrd34a | 0.12162   | 0.05998  | -0.06164    | 0.00057636 | No      | Abcc8   | 0         | 1.75334  | inf              | 0.001        | 1.75434       | 10.7767127       | 0.00018329 | No      |
| Ankrd34b | 0.073269  | 0.019904 | -0.053365   | 0.00031102 | No      | Abcd3   | 13.2768   | 24.9224  | 0.908534         | 13.2778      | 24.9234       | 0.90848477       | 0.00140841 | No      |
| Ankrd55  | 0.75632   | 0.65614  | -0.10018    | 0.03863139 | No      | Abce1   | 29.0227   | 16.0155  | -0.857712        | 29.0237      | 16.0165       | -0.8576725       | 0.00111812 | No      |
| Ankrd65  | 0.87571   | 0.25376  | -0.62195    | 4.30E-12   | No      | Abcg1   | 27.9471   | 13.567   | -1.0426          | 27.9481      | 13.568        | -1.0425421       | 0.00018329 | No      |
| Ankrd9   | 0.903     | 0.72281  | -0.18019    | 9.28E-08   | No      | Abcg2   | 0.0688162 | 6.15961  | 6.48395          | 0.0698162    | 6.16061       | 6.46336756       | 0.00018329 | No      |
| Ano4     | 0.10928   | 0.03687  | -0.07241    | 0.00196002 | No      | Abhd10  | 13.9359   | 7.21086  | -0.950558        | 13.9369      | 7.21186       | -0.9504664       | 0.034649   | No      |
| Ap1g1    | 0.80475   | 0.61234  | -0.19241    | 0.01105145 | No      | Abhd11  | 16.5525   | 28.2808  | 0.772778         | 16.5535      | 28.2818       | 0.77273766       | 0.0122333  | No      |
| Ap1s3    | 0.90925   | 0.63045  | -0.2788     | 3.42E-09   | No      | Abhd12  | 12.2328   | 34.1973  | 1.48313          | 12.2338      | 34.1983       | 1.48305201       | 0.00018329 | No      |
| Apba1    | 0.23619   | 0.12519  | -0.111      | 1.37E-05   | No      | Abhd14a | 3.08012   | 26.5137  | 3.10568          | 3.08112      | 26.5147       | 3.10526565       | 0.00051281 | No      |
| Apc2     | 0.68798   | 0.33505  | -0.35293    | 0.00019103 | No      | Abhd14b | 0.93361   | 102.118  | 6.7732           | 0.93461      | 102.119       | 6.77167113       | 0.00018329 | No      |
| Apob     | 0.83215   | 0.43623  | -0.39592    | 6.35E-06   | No      | Abhd17b | 17.5371   | 8.9917   | -0.96374         | 17.5381      | 8.9927        | -0.9636662       | 0.00018329 | No      |
| Apod     | 0.73258   | 0.50462  | -0.22796    | 0.00368736 | No      | Abhd17c | 23.7421   | 61.2156  | 1.36645          | 23.7431      | 61.2166       | 1.36641461       | 0.00018329 | No      |
| Aqp1     | 0.78049   | 0.41711  | -0.36338    | 0.00037654 | No      | Abhd3   | 0.141291  | 5.16608  | 5.19233          | 0.142291     | 5.16708       | 5.1824329        | 0.00018329 | No      |
| Aqp5     | 0.17651   | 0.107    | -0.06951    | 0.00256829 | No      | Abhd4   | 14.1015   | 45.7583  | 1.69819          | 14.1025      | 45.7593       | 1.69811405       | 0.00018329 | No      |
| Aqp8     | 0.57213   | 0.48798  | -0.08415    | 0.04097311 | No      | Abhd5   | 6.57679   | 16.5063  | 1.32756          | 6.57779      | 16.5073       | 1.32742931       | 0.00018329 | No      |
| Arfgap1  | 0.39835   | 0.19023  | -0.20812    | 2.84E-05   | No      | Abi1    | 65.8165   | 18.8787  | -1.80169         | 65.8175      | 18.8797       | -1.8016354       | 0.00018329 | No      |
| Arhgap27 | 0.77498   | 0.44431  | -0.33067    | 8.08E-07   | No      | Abi2    | 1.42511   | 4.68309  | 1.71638          | 1.42611      | 4.68409       | 1.71568353       | 0.00018329 | No      |
| Arhgap30 | 0.00475   | 0.45142  | 0.44667     | 6.50E-07   | No      | Abi3    | 20.6356   | 42.2412  | 1.03352          | 20.6366      | 42.2422       | 1.03347968       | 0.0226206  | No      |
| Arhgef16 | 0.25089   | 0.11381  | -0.13708    | 0.00575049 | No      | Abi3bp  | 0         | 2.13643  | inf              | 0.001        | 2.13743       | 11.0616615       | 0.00018329 | No      |
| Arhgef2  | 0.0049205 | 0.18989  | 0.1849695   | 3.06E-06   | No      | Ablim1  | 157.397   | 50.4023  | -1.64284         | 157.398      | 50.4033       | -1.6428271       | 0.00018329 | No      |
| Arhgef7  | 0.77498   | 0.71383  | -0.06115    | 0.03521493 | No      | Ablim2  | 0.0836479 | 0.692856 | 3.05015          | 0.0846479    | 0.693856      | 3.0350901        | 0.0440856  | No      |
| Arid3a   | 0.86758   | 0.69922  | -0.16836    | 1.00E-09   | No      | Ablim3  | 0         | 15.8126  | inf              | 0.001        | 15.8136       | 13.9488782       | 0.00018329 | No      |
| Arl9     | 0.80714   | 0.74929  | -0.05785    | 0.00786631 | No      | Abr     | 21.7497   | 11.4246  | -0.928857        | 21.7507      | 11.4256       | -0.9287919       | 0.00018329 | No      |
| Armc3    | 0.32474   | 0.53258  | 0.20784     | 0.01527608 | No      | Abracl  | 365.524   | 100.82   | -1.85818         | 365.525      | 100.821       | -1.8581739       | 0.00018329 | No      |
| Armcx6   | 0.95968   | 0.90815  | -0.05153    | 0.04680399 | No      | Abt1    | 41.6117   | 16.7127  | -1.31605         | 41.6127      | 16.7137       | -1.3159928       | 0.00018329 | No      |
| Arpin    | 0.77202   | 0.3296   | -0.44242    | 0.00142182 | No      | Abtb2   | 13.9832   | 3.28434  | -2.09002         | 13.9842      | 3.28534       | -2.0896831       | 0.00018329 | No      |
| Arsi     | 0.13098   | 0.25173  | 0.12075     | 0.02284827 | No      | Acaa1a  | 26.4664   | 54.2192  | 1.03464          | 26.4674      | 54.2202       | 1.03461395       | 0.00066911 | No      |
| Art1     | 0.78614   | 0.61024  | -0.1759     | 1.89E-05   | No      | Acaa2   | 40.9998   | 112.48   | 1.45598          | 41.0008      | 112.481       | 1.45595736       | 0.00018329 | No      |
| Asb10    | 0.45887   | 0.18398  | -0.27489    | 0.0017951  | No      | Acacb   | 0.122551  | 52.2585  | 8.73614          | 0.123551     | 52.2595       | 8.72444282       | 0.00018329 | No      |
| Ascl1    | 0.11365   | 0.042475 | -0.071175   | 0.00046463 | No      | Acad10  | 4.78668   | 13.077   | 1.44994          | 4.78768      | 13.078        | 1.44974329       | 0.00018329 | No      |
| Asic2    | 0.80394   | 0.74067  | -0.06327    | 0.04361089 | No      | Acad11  | 2.89688   | 22.184   | 2.93695          | 2.89788      | 22.185        | 2.93651479       | 0.00018329 | No      |
| Asic3    | 0.70714   | 0.45491  | -0.25223    | 0.00625768 | No      | Acadl   | 35.3886   | 104.742  | 1.56549          | 35.3896      | 104.743       | 1.56545647       | 0.00018329 | No      |
| Asic4    | 0.4166    | 0.5867   | 0.1701      | 0.00455632 | No      | Acadm   | 50.9337   | 156.494  | 1.61942          | 50.9347      | 156.495       | 1.61939581       | 0.00018329 | No      |
| Asna1    | 0.55947   | 0.45578  | -0.10369    | 5.51E-05   | No      | Acads   | 16.5924   | 33.774   | 1.02539          | 16.5934      | 33.775        | 1.02534624       | 0.00018329 | No      |
| Asphd2   | 0.38298   | 0.18601  | -0.19697    | 0.00389531 | No      | Acadsb  | 1.79866   | 12.5574  | 2.80355          | 1.79966      | 12.5584       | 2.80285639       | 0.00018329 | No      |

| RRBS     |           |          |             |            |         | RNAseq |           |          |                  |              |               |                  |            |         |
|----------|-----------|----------|-------------|------------|---------|--------|-----------|----------|------------------|--------------|---------------|------------------|------------|---------|
| gene     | Blood     | Kidney   | methyl.diff | pMWU.fdr   | Match ? | gene   | blood     | kidney   | log2(fold_ratio) | blood+ 0.001 | kidney+ 0.001 | log2(fold_ratio) | q_value    | Match ? |
| Atcay    | 0.79197   | 0.66848  | -0.12349    | 0.01178248 | No      | Acadvl | 35.1775   | 79.6895  | 1.17973          | 35.1785      | 79.6905       | 1.17971378       | 0.00018329 | No      |
| Atf7ip2  | 0.10285   | 0.035613 | -0.067237   | 0.0001006  | No      | Acap1  | 511.245   | 246.478  | -1.05255         | 511.246      | 246.479       | -1.0525529       | 0.00393885 | No      |
| Atp2c2   | 0.22025   | 0.082512 | -0.137738   | 0.0031273  | No      | Acap2  | 8.1965    | 4.4556   | -0.879388        | 8.1975       | 4.4566        | -0.8792405       | 0.0132293  | No      |
| Atp6v1g2 | 0.10659   | 0.039003 | -0.067587   | 0.00034148 | No      | Acat1  | 62.7069   | 284.623  | 2.18236          | 62.7079      | 284.624       | 2.18233821       | 0.00018329 | No      |
| Aurkc    | 0.86003   | 0.77296  | -0.08707    | 1.76E-05   | No      | Ace2   | 0         | 1.19949  | inf              | 0.001        | 1.20049       | 10.2294077       | 0.00018329 | No      |
| Azin2    | 0.30121   | 0.56043  | 0.25922     | 0.00019103 | No      | Ace3   | 0         | 1.2699   | inf              | 0.001        | 1.2709        | 10.3116348       | 0.00018329 | No      |
| B3galt4  | 0.0052083 | 0.12924  | 0.1240317   | 1.76E-05   | No      | Acer3  | 4.28703   | 9.79746  | 1.19243          | 4.28803      | 9.79846       | 1.19224002       | 0.0108214  | No      |
| B3gnt3   | 0.46949   | 0.1986   | -0.27089    | 0.00294427 | No      | Acly   | 62.0048   | 37.0538  | -0.742758        | 62.0058      | 37.0548       | -0.7427427       | 0.0302128  | No      |
| B3gnt8   | 0.74674   | 0.52413  | -0.22261    | 0.0103156  | No      | Acn9   | 11.3365   | 44.811   | 1.98288          | 11.3375      | 44.812        | 1.98278257       | 0.00018329 | No      |
| B4galt2  | 0.012176  | 0.086446 | 0.07427     | 0.00025534 | No      | Aco1   | 6.79575   | 75.054   | 3.46523          | 6.79675      | 75.055        | 3.46503122       | 0.00018329 | No      |
| B4gat1   | 0.26721   | 0.098017 | -0.169193   | 0.00060029 | No      | Aco2   | 41.297    | 167.082  | 2.01645          | 41.298       | 167.083       | 2.01642113       | 0.00018329 | No      |
| Bace1    | 0.21543   | 0.066529 | -0.148901   | 0.00832699 | No      | Acot1  | 15.836    | 45.4941  | 1.52248          | 15.837       | 45.4951       | 1.5224121        | 0.00018329 | No      |
| Bace2    | 0.1293    | 0.044527 | -0.084773   | 5.51E-05   | No      | Acot13 | 8.89698   | 55.9922  | 2.65384          | 8.89798      | 55.9932       | 2.65370187       | 0.00018329 | No      |
| Bag3     | 0.32445   | 0.073239 | -0.251211   | 2.48E-05   | No      | Acot7  | 175.004   | 48.1915  | -1.86054         | 175.005      | 48.1925       | -1.8605156       | 0.00018329 | No      |
| Barhl1   | 0.21311   | 0.11356  | -0.09955    | 0.03032002 | No      | Acox1  | 10.5555   | 50.0834  | 2.24634          | 10.5565      | 50.0844       | 2.24622972       | 0.00018329 | No      |
| Bbs7     | 0.12676   | 0.049751 | -0.077009   | 5.12E-05   | No      | Acox3  | 8.13048   | 12.9585  | 0.672486         | 8.13148      | 12.9595       | 0.67242019       | 0.0166578  | No      |
| Bcan     | 0.094234  | 0.027075 | -0.067159   | 0.00420619 | No      | Acp2   | 4.67794   | 25.1156  | 2.42464          | 4.67894      | 25.1166       | 2.42438755       | 0.00126492 | No      |
| Bcas1    | 0.90697   | 0.78977  | -0.1172     | 0.00405617 | No      | Acpl2  | 18.0488   | 8.96654  | -1.00928         | 18.0498      | 8.96754       | -1.0091987       | 0.00051281 | No      |
| Bcdin3d  | 0.011203  | 0.23215  | 0.220947    | 1.76E-08   | No      | Acsf3  | 4.60109   | 37.8926  | 3.04187          | 4.60209      | 37.8936       | 3.0415931        | 0.00018329 | No      |
| Bckdk    | 0.93867   | 0.54426  | -0.39441    | 7.19E-07   | No      | Acsl3  | 4.22562   | 10.1358  | 1.26222          | 4.22662      | 10.1368       | 1.26202598       | 0.00066911 | No      |
| Bcl6b    | 0.83303   | 0.71657  | -0.11646    | 2.77E-05   | No      | Acsl4  | 6.28594   | 16.5532  | 1.39691          | 6.28694      | 16.5542       | 1.39676739       | 0.00018329 | No      |
| Bcor     | 0.053475  | 0.388    | 0.334525    | 3.91E-05   | No      | Acsm1  | 0         | 4.23543  | inf              | 0.001        | 4.23643       | 12.0486333       | 0.00018329 | No      |
| Bdnf     | 0.13354   | 0.056197 | -0.077343   | 0.00019103 | No      | Acsm2a | 0         | 57.2526  | inf              | 0.001        | 57.2536       | 15.8050788       | 0.00018329 | No      |
| Bex3     | 0.066515  | 0.4006   | 0.334085    | 0.00060029 | No      | Acsm3  | 0.0350347 | 35.7776  | 9.99606          | 0.0360347    | 35.7786       | 9.95549439       | 0.0359108  | No      |
| Bfsp1    | 0.31293   | 0.20381  | -0.10912    | 0.02284827 | No      | ACSM5  | 0         | 2.61835  | inf              | 0.001        | 2.61935       | 11.3549931       | 0.00018329 | No      |
| Bhlha15  | 0.97625   | 0.74583  | -0.23042    | 1.12E-06   | No      | Acss2  | 3.90632   | 41.5474  | 3.41087          | 3.90732      | 41.5484       | 3.4105416        | 0.00018329 | No      |
| Bhlhe23  | 0.10555   | 0.034221 | -0.071329   | 0.00832699 | No      | Acss3  | 0         | 13.2109  | inf              | 0.001        | 13.2119       | 13.6895503       | 0.00018329 | No      |
| Bik      | 0.024487  | 0.10788  | 0.083393    | 0.00085417 | No      | Actg1  | 586.829   | 1126.14  | 0.940367         | 586.83       | 1126.141      | 0.94037294       | 0.010379   | No      |
| Bmi1     | 0.041872  | 0.11649  | 0.074618    | 6.51E-08   | No      | Actn4  | 63.673    | 118.621  | 0.897611         | 63.674       | 118.622       | 0.8975953        | 0.0016929  | No      |
| Bmp8a    | 0.23121   | 0.14001  | -0.0912     | 0.02412126 | No      | Actr1b | 15.4408   | 24.0976  | 0.642143         | 15.4418      | 24.0986       | 0.6421084        | 0.0195672  | No      |
| Bmyc     | 0.086646  | 0.031413 | -0.055233   | 0.00037654 | No      | Actr2  | 191.651   | 55.233   | -1.79488         | 191.652      | 55.234        | -1.7948605       | 0.00035173 | No      |
| Bnc1     | 0.12794   | 0.051944 | -0.075996   | 0.00625768 | No      | Actr3  | 456.873   | 121.047  | -1.91623         | 456.874      | 121.048       | -1.9162171       | 0.00018329 | No      |
| Boll     | 0.15814   | 0.10107  | -0.05707    | 0.00389531 | No      | Acvr1  | 0.104308  | 7.86558  | 6.23664          | 0.105308     | 7.86658       | 6.22304962       | 0.0036827  | No      |
| Borcs6   | 0.77787   | 0.41378  | -0.36409    | 0.00012584 | No      | Acvr1b | 5.95879   | 15.108   | 1.34222          | 5.95979      | 15.109        | 1.34207478       | 0.00018329 | No      |
| Borcs7   | 0.7024    | 0.44408  | -0.25832    | 0.00012584 | No      | Acvrl1 | 0.0398566 | 3.18458  | 6.32014          | 0.0408566    | 3.18558       | 6.28484311       | 0.0130082  | No      |
| Bpifb3   | 0.93467   | 0.77188  | -0.16279    | 1.61E-05   | No      | Acy1   | 19.4984   | 204.899  | 3.39349          | 19.4994      | 204.9         | 3.39341835       | 0.00018329 | No      |
| Brpf3    | 0.93308   | 0.87131  | -0.06177    | 1.76E-05   | No      | Acyp2  | 0.218923  | 6.62874  | 4.92024          | 0.219923     | 6.62974       | 4.9138819        | 0.00018329 | No      |
| Btbd16   | 0.58992   | 0.30156  | -0.28836    | 3.48E-05   | No      | Ada    | 25.9211   | 10.7812  | -1.2656          | 25.9221      | 10.7822       | -1.265531        | 0.00018329 | No      |
| C1q1     | 0.21585   | 0.073126 | -0.142724   | 0.01761018 | No      | Adam10 | 62.9613   | 15.1578  | -2.0544          | 62.9623      | 15.1588       | -2.0543327       | 0.00018329 | No      |
| C1q12    | 0.13692   | 0.037587 | -0.099333   | 0.00060029 | No      | Adam19 | 59.7424   | 4.77871  | -3.64406         | 59.7434      | 4.77971       | -3.6437844       | 0.00018329 | No      |
| C1qtnf5  | 0.92115   | 0.58168  | -0.33947    | 2.75E-06   | No      | Adam22 | 0         | 0.666936 | inf              | 0.001        | 0.667936      | 9.38356606       | 0.00018329 | No      |
| C1qtnf9  | 0.85374   | 0.74959  | -0.10415    | 0.00489594 | No      | Adam28 | 0         | 1.57192  | inf              | 0.001        | 1.57292       | 10.6192296       | 0.00937155 | No      |

| RRBS     |           |          |             |            |         | RNAseq   |           |           |                  |              |               |                  |            |         |
|----------|-----------|----------|-------------|------------|---------|----------|-----------|-----------|------------------|--------------|---------------|------------------|------------|---------|
| gene     | Blood     | Kidney   | methyl.diff | pMWU.fdr   | Match ? | gene     | blood     | kidney    | log2(fold_ratio) | blood+ 0.001 | kidney+ 0.001 | log2(fold_ratio) | q_value    | Match ? |
| C2cd4c   | 0.84958   | 0.36173  | -0.48785    | 3.77E-12   | No      | Adam33   | 0         | 1.27802   | inf              | 0.001        | 1.27902       | 10.3208231       | 0.00018329 | No      |
| Cacna1b  | 0.15015   | 0.035386 | -0.114764   | 0.00013988 | No      | Adam6    | 0.600014  | 0.0569397 | -3.39749         | 0.601014     | 0.0579397     | -3.3747745       | 0.0114728  | No      |
| Cacna1e  | 0.33762   | 0.20245  | -0.13517    | 0.00011255 | No      | Adam8    | 5.21205   | 2.59164   | -1.00799         | 5.21305      | 2.59264       | -1.0077058       | 0.00948282 | No      |
| Cacna1i  | 0.86636   | 0.36931  | -0.49705    | 2.29E-09   | No      | Adam9    | 1.85063   | 8.38741   | 2.18021          | 1.85163      | 8.38841       | 2.17960154       | 0.00018329 | No      |
| Cacna2d1 | 0.18409   | 0.078295 | -0.105795   | 0.01761018 | No      | Adamts1  | 0         | 13.2552   | inf              | 0.001        | 13.2562       | 13.6943797       | 0.00018329 | No      |
| Cacng2   | 0.23545   | 0.11443  | -0.12102    | 0.00076068 | No      | Adamts10 | 55.5754   | 26.1066   | -1.09003         | 55.5764      | 26.1076       | -1.0900025       | 0.00698138 | No      |
| Cadm4    | 0.26634   | 0.46055  | 0.19421     | 0.00054569 | No      | Adamts16 | 0         | 1.40226   | inf              | 0.001        | 1.40326       | 10.4545666       | 0.0186283  | No      |
| Calb1    | 0.091901  | 0.025669 | -0.066232   | 0.00040512 | No      | Adamts9  | 0         | 0.734374  | inf              | 0.001        | 0.735374      | 9.52233436       | 0.00018329 | No      |
| Calb2    | 0.20624   | 0.079452 | -0.126788   | 6.50E-07   | No      | Adamts11 | 0         | 1.14809   | inf              | 0.001        | 1.14909       | 10.1662761       | 0.00018329 | No      |
| Calhm1   | 0.8646    | 0.50852  | -0.35608    | 1.28E-09   | No      | Adap1    | 0.98513   | 17.5864   | 4.158            | 0.98613      | 17.5874       | 4.15662056       | 0.00018329 | No      |
| Calhm3   | 0.76717   | 0.6724   | -0.09477    | 0.04893199 | No      | Adar     | 30.9526   | 17.4383   | -0.827797        | 30.9536      | 17.4393       | -0.8277651       | 0.00891798 | No      |
| Capn12   | 0.97447   | 0.75008  | -0.22439    | 9.79E-07   | No      | Adat2    | 25.2342   | 4.92554   | -2.35703         | 25.2352      | 4.92654       | -2.3567908       | 0.00018329 | No      |
| Capn3    | 0.83729   | 0.73013  | -0.10716    | 0.00351975 | No      | Adc      | 0         | 2.69525   | inf              | 0.001        | 2.69625       | 11.3967386       | 0.00018329 | No      |
| Car5a    | 0.71401   | 0.59984  | -0.11417    | 0.03275343 | No      | Adck1    | 4.86555   | 10.38     | 1.09313          | 4.86655      | 10.381        | 1.09297414       | 0.00494262 | No      |
| Car9     | 0.32339   | 0.14684  | -0.17655    | 0.01448681 | No      | Adck4    | 15.0453   | 28.2948   | 0.911228         | 15.0463      | 28.2958       | 0.91117917       | 0.0146209  | No      |
| Carkd    | 0.7156    | 0.33047  | -0.38513    | 2.67E-05   | No      | Adcy4    | 1.2048    | 10.247    | 3.08834          | 1.2058       | 10.248        | 3.08727984       | 0.00051281 | No      |
| Cartpt   | 0.26527   | 0.11335  | -0.15192    | 0.02535502 | No      | Adcy7    | 46.2026   | 14.3123   | -1.69072         | 46.2036      | 14.3133       | -1.6906489       | 0.0127876  | No      |
| Cass4    | 0.0012977 | 0.11709  | 0.1157923   | 2.74E-07   | No      | Add1     | 210.822   | 127.793   | -0.722214        | 210.823      | 127.794       | -0.7222122       | 0.0309526  | No      |
| Cav3     | 0.90552   | 0.51863  | -0.38689    | 9.79E-07   | No      | Add3     | 190.457   | 27.4124   | -2.79656         | 190.458      | 27.4134       | -2.7965197       | 0.00018329 | No      |
| Cbln1    | 0.11923   | 0.053771 | -0.065459   | 4.53E-06   | No      | Adh1     | 0         | 19.3593   | inf              | 0.001        | 19.3603       | 14.2408137       | 0.00018329 | No      |
| Ccdc105  | 0.49066   | 0.12221  | -0.36845    | 5.62E-06   | No      | Adh5     | 87.6948   | 58.1102   | -0.5937          | 87.6958      | 58.1112       | -0.5936915       | 0.0250354  | No      |
| Ccdc166  | 0.72377   | 0.51733  | -0.20644    | 6.69E-05   | No      | Adhfe1   | 0.0917833 | 46.0882   | 8.97195          | 0.0927833    | 46.0892       | 8.95634785       | 0.00018329 | No      |
| Ccdc184  | 0.16655   | 0.071526 | -0.095024   | 0.00368736 | No      | Adi1     | 28.1672   | 95.4212   | 1.7603           | 28.1682      | 95.4222       | 1.76025757       | 0.00018329 | No      |
| Ccdc185  | 0.88404   | 0.81027  | -0.07377    | 0.01621946 | No      | Adipoq   | 0.0853795 | 2.31312   | 4.75981          | 0.0863795    | 2.31412       | 4.7436309        | 0.0135584  | No      |
| Ccdc24   | 0.58116   | 0.2852   | -0.29596    | 2.48E-05   | No      | Adipor1  | 45.9126   | 112.416   | 1.29188          | 45.9136      | 112.417       | 1.29186676       | 0.00018329 | No      |
| Ccdc67   | 0.48409   | 0.22726  | -0.25683    | 1.61E-05   | No      | Adm2     | 0         | 13.3272   | inf              | 0.001        | 13.3282       | 13.7021943       | 0.00018329 | No      |
| Ccdc7    | 0.85097   | 0.76678  | -0.08419    | 0.00275507 | No      | Adora1   | 0         | 4.052     | inf              | 0.001        | 4.053         | 11.9847745       | 0.00018329 | No      |
| Ccdc89   | 0.32473   | 0.14008  | -0.18465    | 5.51E-05   | No      | Adpgk    | 14.5965   | 7.34262   | -0.991253        | 14.5975      | 7.34362       | -0.991158        | 0.0431009  | No      |
| Ccer1    | 0.72007   | 0.85325  | 0.13318     | 0.00025534 | No      | Adprh    | 44.0136   | 24.6574   | -0.83593         | 44.0146      | 24.6584       | -0.835903        | 0.0026435  | No      |
| Ccl27    | 0.23265   | 0.097056 | -0.135594   | 0.00027275 | No      | Adprm    | 30.8129   | 16.8231   | -0.873091        | 30.8139      | 16.8241       | -0.873052        | 0.00445502 | No      |
| Ccl28    | 0.7162    | 0.53306  | -0.18314    | 0.03275343 | No      | Adrb2    | 1.58216   | 0.611752  | -1.37088         | 1.58316      | 0.612752      | -1.3694319       | 0.0468163  | No      |
| Cd164l2  | 0.50959   | 0.21032  | -0.29927    | 6.50E-07   | No      | Adrbk1   | 136.237   | 33.4803   | -2.02473         | 136.238      | 33.4813       | -2.0247017       | 0.00018329 | No      |
| Cd244    | 0.94921   | 0.87998  | -0.06923    | 0.00868315 | No      | Adrm1    | 60.4824   | 88.8348   | 0.554609         | 60.4834      | 88.8358       | 0.55460195       | 0.0446289  | No      |
| Cd248    | 0.77138   | 0.39613  | -0.37525    | 1.12E-06   | No      | Adtrp    | 0.110681  | 6.76361   | 5.93332          | 0.111681     | 6.76461       | 5.92055109       | 0.0248275  | No      |
| Cd300lb  | 0.77419   | 0.70631  | -0.06788    | 0.00894698 | No      | Aebp2    | 15.2456   | 10.4192   | -0.549141        | 15.2466      | 10.4202       | -0.5491046       | 0.0433593  | No      |
| Cd72     | 0.096202  | 0.21952  | 0.123318    | 0.01761018 | No      | Afap111  | 0.0617379 | 12.9331   | 7.71069          | 0.0627379    | 12.9341       | 7.68762672       | 0.00051281 | No      |
| Cdh13    | 0.56483   | 0.29203  | -0.2728     | 1.01E-05   | No      | Afg3l1   | 12.5566   | 28.7345   | 1.19434          | 12.5576      | 28.7355       | 1.19427339       | 0.0122333  | No      |
| Cdh22    | 0.097293  | 0.025272 | -0.072021   | 4.94E-08   | No      | Afm      | 0         | 21.0692   | inf              | 0.001        | 21.0702       | 14.3629164       | 0.00018329 | No      |
| Cdh8     | 0.17573   | 0.068398 | -0.107332   | 4.67E-05   | No      | Afmid    | 0.793348  | 21.3108   | 4.74749          | 0.794348     | 21.3118       | 4.74573745       | 0.00018329 | No      |
| Cdk5r1   | 0.28205   | 0.17073  | -0.11132    | 0.01098497 | No      | Agap1    | 5.02966   | 15.3771   | 1.61225          | 5.03066      | 15.3781       | 1.61205767       | 0.00018329 | No      |
| Cdk5r2   | 0.094228  | 0.030252 | -0.063976   | 0.00043712 | No      | Agbl2    | 0.171382  | 0.598337  | 1.80375          | 0.172382     | 0.599337      | 1.7977583        | 0.0214018  | No      |
| Ceacam16 | 0.78461   | 0.56791  | -0.2167     | 0.0017951  | No      | Agbl3    | 9.79725   | 30.2144   | 1.62479          | 9.79825      | 30.2154       | 1.62468803       | 0.00224282 | No      |



| RRBS    |           |          |             |            |         | RNAseq   |           |          |                  |              |               |                  |            |         |
|---------|-----------|----------|-------------|------------|---------|----------|-----------|----------|------------------|--------------|---------------|------------------|------------|---------|
| gene    | Blood     | Kidney   | methyl.diff | pMWU.fdr   | Match ? | gene     | blood     | kidney   | log2(fold_ratio) | blood+ 0.001 | kidney+ 0.001 | log2(fold_ratio) | q_value    | Match ? |
| Ceacam4 | 0.96237   | 0.84684  | -0.11553    | 2.79E-05   | No      | Agfg2    | 11.055    | 22.6958  | 1.03773          | 11.056       | 22.6968       | 1.03765939       | 0.00018329 | No      |
| Cebpe   | 0.88327   | 0.64988  | -0.23339    | 8.39E-11   | No      | Ago1     | 17.4611   | 8.31614  | -1.07016         | 17.4621      | 8.31714       | -1.0700676       | 0.00018329 | No      |
| Cela1   | 0.020833  | 0.13124  | 0.110407    | 5.22E-12   | No      | Ago2     | 4.37394   | 1.57131  | -1.47696         | 4.37494      | 1.57231       | -1.4763775       | 0.00035173 | No      |
| Celf4   | 0.12416   | 0.036055 | -0.088105   | 0.00542685 | No      | Agpat2   | 1.49544   | 25.6021  | 4.09762          | 1.49644      | 25.6031       | 4.09671216       | 0.00018329 | No      |
| Celf6   | 0.097624  | 0.035411 | -0.062213   | 0.00256829 | No      | Agpat4   | 2.61408   | 12.7522  | 2.28637          | 2.61508      | 12.7532       | 2.2859323        | 0.00018329 | No      |
| Celsr3  | 0.082598  | 0.030143 | -0.052455   | 2.31E-06   | No      | Agpat9   | 0.177203  | 4.48257  | 4.66085          | 0.178203     | 4.48357       | 4.65305439       | 0.00018329 | No      |
| Cep131  | 0.78372   | 0.56185  | -0.22187    | 0.00256829 | No      | Agrn     | 1.33657   | 43.8956  | 5.03747          | 1.33757      | 43.8966       | 5.0364229        | 0.00018329 | No      |
| Cep63   | 0.091866  | 0.022392 | -0.069474   | 0.00625768 | No      | Agrp     | 0.432907  | 2.00421  | 2.21091          | 0.433907     | 2.00521       | 2.20829557       | 0.0238252  | No      |
| Cers4   | 0.0018018 | 0.072836 | 0.0710342   | 9.14E-07   | No      | Agt      | 0.128009  | 4.48947  | 5.13223          | 0.129009     | 4.49047       | 5.12132283       | 0.0219099  | No      |
| Cfb     | 0.78247   | 0.48366  | -0.29881    | 0.00054569 | No      | Agtpbp1  | 4.18533   | 15.0852  | 1.84972          | 4.18633      | 15.0862       | 1.84947151       | 0.00481718 | No      |
| Cgref1  | 0.68615   | 0.50278  | -0.18337    | 0.02028318 | No      | Agtr1a   | 0         | 3.94256  | inf              | 0.001        | 3.94356       | 11.9452829       | 0.00018329 | No      |
| Chad    | 0.89859   | 0.79139  | -0.1072     | 3.34E-06   | No      | Agtrap   | 8.53719   | 34.9043  | 2.03157          | 8.53819      | 34.9053       | 2.03144394       | 0.00018329 | No      |
| Chchd2  | 0.69467   | 0.43395  | -0.26072    | 0.00368736 | No      | Agxt2    | 0         | 81.9384  | inf              | 0.001        | 81.9394       | 16.3222697       | 0.00018329 | No      |
| Chchd5  | 0.13351   | 0.059643 | -0.073867   | 0.01761018 | No      | Ahctf1   | 12.5371   | 7.82377  | -0.680268        | 12.5381      | 7.82477       | -0.6801985       | 0.0190448  | No      |
| Chd5    | 0.025747  | 0.012305 | -0.013442   | 0.00405617 | No      | Ahcyl2   | 8.31921   | 23.2784  | 1.48447          | 8.32021      | 23.2794       | 1.48436203       | 0.00018329 | No      |
| Chml    | 0.8306    | 0.78024  | -0.05036    | 0.0422999  | No      | Ahdc1    | 8.4349    | 19.758   | 1.228            | 8.4359       | 19.759        | 1.22789604       | 0.0264199  | No      |
| Chrd    | 0.031433  | 0.20884  | 0.177407    | 1.80E-09   | No      | Ahsa1    | 109.03    | 75.6922  | -0.526512        | 109.031      | 75.6932       | -0.5265028       | 0.0487801  | No      |
| Chrdl2  | 0.15444   | 0.083657 | -0.070783   | 0.03521493 | No      | Al429214 | 0.754638  | 2.14705  | 1.5085           | 0.755638     | 2.14805       | 1.50726042       | 0.0354586  | No      |
| Chrm4   | 0.086258  | 0.041898 | -0.04436    | 0.01899425 | No      | Al462493 | 59.0997   | 114.906  | 0.959235         | 59.1007      | 114.907       | 0.95921956       | 0.00097029 | No      |
| Chrna10 | 0.79918   | 0.6792   | -0.11998    | 0.00083683 | No      | Al467606 | 67.6994   | 23.6492  | -1.51735         | 67.7004      | 23.6502       | -1.517312        | 0.00856745 | No      |
| Chrna4  | 0.29699   | 0.15626  | -0.14073    | 0.00768781 | No      | Aida     | 23.9356   | 16.3829  | -0.546969        | 23.9366      | 16.3839       | -0.5469394       | 0.0473671  | No      |
| Chst3   | 0.77551   | 0.84594  | 0.07043     | 0.00334228 | No      | Aif1     | 1.91488   | 108.927  | 5.82997          | 1.91588      | 108.928       | 5.82922384       | 0.00432763 | No      |
| Chst5   | 0.087088  | 0.028051 | -0.059037   | 0.00120161 | No      | Aif1l    | 0.0819112 | 220.859  | 11.3968          | 0.0829112    | 220.86        | 11.3792775       | 0.00018329 | No      |
| Cilp2   | 0.10979   | 0.05167  | -0.05812    | 0.00663046 | No      | Aifm1    | 37.568    | 69.1641  | 0.880518         | 37.569       | 69.1651       | 0.88050154       | 0.00251301 | No      |
| Cistr   | 0.022998  | 0.10356  | 0.080562    | 0.00011533 | No      | Aifm2    | 0.521934  | 3.45243  | 2.72567          | 0.522934     | 3.45343       | 2.7233292        | 0.00035173 | No      |
| Ciz1    | 0.58222   | 0.39548  | -0.18674    | 0.03863139 | No      | Aim1     | 2.19476   | 0.902846 | -1.28151         | 2.19576      | 0.903846      | -1.2805715       | 0.00082046 | No      |
| Ckm     | 0.70893   | 0.3335   | -0.37543    | 0.0001006  | No      | Aim1l    | 0.548759  | 1.867    | 1.76648          | 0.549759     | 1.868         | 1.76462323       | 0.00018329 | No      |
| Cldn1   | 0.09198   | 0.027823 | -0.064157   | 0.00108973 | No      | Aim2     | 32.6112   | 8.71111  | -1.90444         | 32.6122      | 8.71211       | -1.9043177       | 0.00018329 | No      |
| Cldn3   | 0.11425   | 0.036688 | -0.077562   | 0.00275507 | No      | Ak3      | 75.3958   | 168.661  | 1.16157          | 75.3968      | 168.662       | 1.16155977       | 0.0031651  | No      |
| Cldn7   | 0.13915   | 0.052119 | -0.087031   | 0.00275507 | No      | Ak4      | 0.0482136 | 34.3479  | 9.47657          | 0.0492136    | 34.3489       | 9.44699113       | 0.00111812 | No      |
| Cldn8   | 0.86709   | 0.75051  | -0.11658    | 0.00164763 | No      | Akap1    | 3.88403   | 9.65498  | 1.31372          | 3.88503      | 9.65598       | 1.31349695       | 0.00018329 | No      |
| Cldnd1  | 0.84698   | 0.75697  | -0.09001    | 0.00768781 | No      | Akap10   | 10.2711   | 5.42416  | -0.921125        | 10.2721      | 5.42516       | -0.9209936       | 0.00799878 | No      |
| Clec4f  | 0.78549   | 0.66305  | -0.12244    | 0.03275343 | No      | Akap13   | 41.2611   | 13.5624  | -1.60517         | 41.2621      | 13.5634       | -1.6050984       | 0.00018329 | No      |
| Clps    | 0.70752   | 0.39785  | -0.30967    | 3.77E-12   | No      | Akap17b  | 11.1646   | 2.45793  | -2.18342         | 11.1656      | 2.45893       | -2.1829582       | 0.00018329 | No      |
| Cluap1  | 0.88587   | 0.76428  | -0.12159    | 0.00768781 | No      | Akap2    | 4.03757   | 23.6915  | 2.55281          | 4.03857      | 23.6925       | 2.55251399       | 0.00018329 | No      |
| Clvs2   | 0.29475   | 0.15903  | -0.13572    | 0.03275343 | No      | Akap7    | 2.19386   | 6.87065  | 1.64697          | 2.19486      | 6.87165       | 1.64652764       | 0.00018329 | No      |
| Cnksr1  | 0.29092   | 0.10236  | -0.18856    | 4.92E-10   | No      | Akap8    | 82.6706   | 43.2782  | -0.933734        | 82.6716      | 43.2792       | -0.933718        | 0.00051281 | No      |
| Cnn1    | 0.090037  | 0.033818 | -0.056219   | 0.00017122 | No      | Akap8l   | 105.213   | 68.1697  | -0.626105        | 105.214      | 68.1707       | -0.626103        | 0.0244274  | No      |
| Cnnm1   | 0.20746   | 0.13014  | -0.07732    | 0.00022961 | No      | Akirin1  | 62.2019   | 19.7773  | -1.65311         | 62.2029      | 19.7783       | -1.6530634       | 0.00018329 | No      |
| Cntnap4 | 0.23158   | 0.080519 | -0.151061   | 9.35E-05   | No      | Akr1a1   | 216.987   | 381.485  | 0.814021         | 216.988      | 381.486       | 0.81401485       | 0.00393885 | No      |
| Col11a2 | 0.37729   | 0.26139  | -0.1159     | 0.00019103 | No      | Akr1b1   | 97.8345   | 57.8585  | -0.757814        | 97.8355      | 57.8595       | -0.7578042       | 0.0026435  | No      |
| Col16a1 | 0.3801    | 0.12202  | -0.25808    | 2.78E-09   | No      | Akr1b10  | 0         | 0.633341 | inf              | 0.001        | 0.634341      | 9.30911478       | 0.00902869 | No      |

| RRBS     |          |          |             |            |         | RNAseq    |          |          |                  |              |               |                  |            |         |
|----------|----------|----------|-------------|------------|---------|-----------|----------|----------|------------------|--------------|---------------|------------------|------------|---------|
| gene     | Blood    | Kidney   | methyl.diff | pMWU.fdr   | Match ? | gene      | blood    | kidney   | log2(fold_ratio) | blood+ 0.001 | kidney+ 0.001 | log2(fold_ratio) | q_value    | Match ? |
| Col26a1  | 0.23479  | 0.11798  | -0.11681    | 0.00031102 | No      | Akr1c1    | 0        | 15.3491  | inf              | 0.001        | 15.3501       | 13.9059604       | 0.00018329 | No      |
| Col5a3   | 0.21637  | 0.081774 | -0.134596   | 9.79E-07   | No      | Akr1c12   | 0        | 1.91309  | inf              | 0.001        | 1.91409       | 10.902443        | 0.00018329 | No      |
| Col7a1   | 0.27881  | 0.11201  | -0.1668     | 4.05E-06   | No      | Akr1c12l1 | 0        | 65.0083  | inf              | 0.001        | 65.0093       | 15.9883585       | 0.00018329 | No      |
| Col9a2   | 0.10422  | 0.033766 | -0.070454   | 0.00256829 | No      | Akr1e2    | 1.33446  | 28.8127  | 4.43238          | 1.33546      | 28.8137       | 4.43134626       | 0.00018329 | No      |
| Commd5   | 0.59499  | 0.35611  | -0.23888    | 0.0023061  | No      | Akr7a2    | 24.5413  | 134.81   | 2.45765          | 24.5423      | 134.811       | 2.45759586       | 0.00018329 | No      |
| Cort     | 0.75012  | 0.55202  | -0.1981     | 0.02284827 | No      | Akr7a3    | 2.56841  | 77.5016  | 4.91528          | 2.56941      | 77.5026       | 4.91473569       | 0.00251301 | No      |
| Cox6b2   | 0.91372  | 0.59193  | -0.32179    | 3.07E-10   | No      | Akt2      | 49.8521  | 27.2677  | -0.870463        | 49.8531      | 27.2687       | -0.8704373       | 0.00066911 | No      |
| Cpeb1    | 0.27493  | 0.083532 | -0.191398   | 0.00034148 | No      | Akt3      | 13.2078  | 3.27197  | -2.01316         | 13.2088      | 3.27297       | -2.0128271       | 0.00140841 | No      |
| Cplx1    | 0.12068  | 0.059417 | -0.061263   | 2.31E-05   | No      | Aktip     | 9.96599  | 155.213  | 3.96109          | 9.96699      | 155.214       | 3.960957         | 0.00111812 | No      |
| Cpne6    | 0.73555  | 0.32114  | -0.41441    | 9.72E-06   | No      | Alad      | 6.2011   | 45.3581  | 2.87076          | 6.2021       | 45.3591       | 2.87056332       | 0.00018329 | No      |
| Cpne9    | 0.18903  | 0.070841 | -0.118189   | 3.91E-05   | No      | Alas1     | 7.76356  | 43.5799  | 2.48887          | 7.76456      | 43.5809       | 2.48871991       | 0.00018329 | No      |
| Cpxm2    | 0.14578  | 0.064087 | -0.081693   | 0.00294427 | No      | Alcam     | 0.365449 | 7.19242  | 4.29873          | 0.366449     | 7.19342       | 4.29499351       | 0.00018329 | No      |
| Crabp2   | 0.65689  | 0.30392  | -0.35297    | 5.90E-05   | No      | Aldh16a1  | 13.6175  | 37.0033  | 1.44219          | 13.6185      | 37.0043       | 1.44212512       | 0.00018329 | No      |
| Cracr2b  | 0.17598  | 0.039373 | -0.136607   | 0.03863139 | No      | Aldh18a1  | 8.81647  | 3.43795  | -1.35865         | 8.81747      | 3.43895       | -1.3583966       | 0.00018329 | No      |
| Crb2     | 0.54601  | 0.24736  | -0.29865    | 4.58E-09   | No      | Aldh1a1   | 0        | 159.026  | inf              | 0.001        | 159.027       | 17.2789122       | 0.00018329 | No      |
| Creb3l4  | 0.93559  | 0.44819  | -0.4874     | 6.50E-07   | No      | Aldh1a2   | 0        | 13.5122  | inf              | 0.001        | 13.5132       | 13.7220817       | 0.00018329 | No      |
| Crhr1    | 0.11948  | 0.032898 | -0.086582   | 1.54E-08   | No      | Aldh1l1   | 0        | 71.6456  | inf              | 0.001        | 71.6466       | 16.1286106       | 0.00018329 | No      |
| Crlf2    | 0.024663 | 0.17834  | 0.153677    | 8.72E-07   | No      | ALDH2     | 79.7799  | 52.2972  | -0.60929         | 79.7809      | 52.2982       | -0.6092821       | 0.0208908  | No      |
| Crnde    | 0.096981 | 0.04299  | -0.053991   | 0.00060029 | No      | Aldh3b1   | 0.135612 | 1.62949  | 3.58686          | 0.136612     | 1.63049       | 3.57714947       | 0.0325782  | No      |
| Crtac1   | 0.069488 | 0.027274 | -0.042214   | 0.00116936 | No      | Aldh5a1   | 1.46641  | 8.35734  | 2.51075          | 1.46741      | 8.35834       | 2.50994442       | 0.00018329 | No      |
| Crygn    | 0.67063  | 0.50294  | -0.16769    | 0.00054569 | No      | Aldh6a1   | 6.83973  | 68.7295  | 3.32892          | 6.84073      | 68.7305       | 3.32872826       | 0.00018329 | No      |
| Crygs    | 0.79261  | 0.31101  | -0.4816     | 9.35E-05   | No      | Aldh7a1   | 0.884573 | 82.6675  | 6.5462           | 0.885573     | 82.6685       | 6.54458266       | 0.00018329 | No      |
| Csmd1    | 0.13301  | 0.061664 | -0.071346   | 0.00120161 | No      | Aldh9a1   | 35.0603  | 76.9145  | 1.13342          | 35.0613      | 76.9155       | 1.13339487       | 0.00277264 | No      |
| Cspg4    | 0.273    | 0.18376  | -0.08924    | 0.00722274 | No      | Alg10     | 23.5914  | 8.62949  | -1.45091         | 23.5924      | 8.63049       | -1.4508078       | 0.00018329 | No      |
| Cspg5    | 0.92441  | 0.69925  | -0.22516    | 1.26E-05   | No      | Alg14     | 7.18     | 15.6677  | 1.12574          | 7.181        | 15.6687       | 1.12562882       | 0.00082046 | No      |
| Cstf2t   | 0.78436  | 0.44583  | -0.33853    | 0.00028052 | No      | Alg9      | 3.5268   | 10.1025  | 1.51828          | 3.5278       | 10.1035       | 1.51801447       | 0.00018329 | No      |
| Ctnna2   | 0.080822 | 0.028882 | -0.05194    | 0.00768781 | No      | Alkbh1    | 16.438   | 5.11156  | -1.6852          | 16.439       | 5.11256       | -1.6850048       | 0.0139848  | No      |
| Ctsa     | 0.22624  | 0.082223 | -0.144017   | 0.04097311 | No      | Alkbh2    | 11.3768  | 20.8349  | 0.872908         | 11.3778      | 20.8359       | 0.87284979       | 0.0197773  | No      |
| Cttn     | 0.58551  | 0.18904  | -0.39647    | 0.00021046 | No      | Alkbh4    | 18.8075  | 5.97115  | -1.65523         | 18.8085      | 5.97215       | -1.6550625       | 0.00018329 | No      |
| Cubn     | 0.76218  | 0.3585   | -0.40368    | 1.89E-05   | No      | Alkbh8    | 1.54639  | 0.467036 | -1.7273          | 1.54739      | 0.468036      | -1.7251454       | 0.00822601 | No      |
| Cux2     | 0.26588  | 0.14175  | -0.12413    | 0.0100756  | No      | Alms1     | 8.6421   | 5.15464  | -0.745511        | 8.6431       | 5.15564       | -0.7453973       | 0.0184137  | No      |
| Cyb561d1 | 0.86144  | 0.73956  | -0.12188    | 0.02284827 | No      | Alox12    | 0.431108 | 3.85627  | 3.16108          | 0.432108     | 3.85727       | 3.15811629       | 0.00018329 | No      |
| Cyp2d5   | 0.91753  | 0.80068  | -0.11685    | 0.0006534  | No      | Alox5ap   | 1.06872  | 14.6145  | 3.77344          | 1.06972      | 14.6155       | 3.77219406       | 0.00018329 | No      |
| Cyp2t1   | 0.19643  | 0.09282  | -0.10361    | 0.00031102 | No      | Aloxe3    | 0        | 0.73819  | inf              | 0.001        | 0.73919       | 9.52980143       | 0.00018329 | No      |
| Cyp4x1   | 0.071369 | 0.16326  | 0.091891    | 0.00040512 | No      | Alpl      | 0.159636 | 15.1855  | 6.57177          | 0.160636     | 15.1865       | 6.56285035       | 0.00018329 | No      |
| Cyr61    | 0.63321  | 0.4176   | -0.21561    | 0.00025534 | No      | Als2      | 1.01779  | 4.34756  | 2.09477          | 1.01879      | 4.34856       | 2.09368104       | 0.00018329 | No      |
| Cysrt1   | 0.33812  | 0.083089 | -0.255031   | 2.42E-06   | No      | Amacr     | 8.76006  | 46.4523  | 2.40674          | 8.76106      | 46.4533       | 2.40660375       | 0.00018329 | No      |
| Cyth2    | 0.93628  | 0.51743  | -0.41885    | 2.21E-11   | No      | Ambp      | 0        | 12.4331  | inf              | 0.001        | 12.4341       | 13.6020145       | 0.00018329 | No      |
| Dact2    | 0.42047  | 0.25854  | -0.16193    | 0.00136617 | No      | Amd1      | 20.3479  | 43.5088  | 1.09643          | 20.3489      | 43.5098       | 1.09638958       | 0.00018329 | No      |
| Dagla    | 0.18971  | 0.082589 | -0.107121   | 0.00128825 | No      | Amica1    | 11.1184  | 5.20659  | -1.09454         | 11.1194      | 5.20759       | -1.0943912       | 0.00354878 | No      |
| Daxx     | 0.88829  | 0.55649  | -0.3318     | 4.28E-12   | No      | Ammecr1   | 2.83813  | 0.575067 | -2.30314         | 2.83913      | 0.576067      | -2.3011404       | 0.00732142 | No      |
| Dazl     | 0.92534  | 0.80136  | -0.12398    | 1.37E-05   | No      | Amotl1    | 0.148922 | 2.48898  | 4.06293          | 0.149922     | 2.48998       | 4.05385015       | 0.00126492 | No      |

| RRBS    |          |          |             |            |         | RNAseq   |           |          |                  |              |               |                  |            |         |
|---------|----------|----------|-------------|------------|---------|----------|-----------|----------|------------------|--------------|---------------|------------------|------------|---------|
| gene    | Blood    | Kidney   | methyl.diff | pMWU.fdr   | Match ? | gene     | blood     | kidney   | log2(fold_ratio) | blood+ 0.001 | kidney+ 0.001 | log2(fold_ratio) | q_value    | Match ? |
| Dbx1    | 0.18523  | 0.074992 | -0.110238   | 0.00012321 | No      | Amt      | 15.2672   | 40.0839  | 1.39258          | 15.2682      | 40.0849       | 1.39252889       | 0.00018329 | No      |
| Dcdc2c  | 0.80861  | 0.73531  | -0.0733     | 0.00028052 | No      | Amz1     | 0.324553  | 2.54344  | 2.97026          | 0.325553     | 2.54444       | 2.96638383       | 0.00018329 | No      |
| Ddo     | 0.75312  | 0.42487  | -0.32825    | 6.50E-07   | No      | Anapc10  | 14.257    | 6.81062  | -1.06582         | 14.258       | 6.81162       | -1.0657018       | 0.00018329 | No      |
| Ddx39b  | 0.16404  | 0.054227 | -0.109813   | 3.63E-06   | No      | Anapc13  | 121.347   | 236.638  | 0.963547         | 121.348      | 236.639       | 0.96353753       | 0.00543198 | No      |
| Ddx3y   | 0.58631  | 0.70399  | 0.11768     | 0.00040512 | No      | Anapc15  | 42.5974   | 79.6412  | 0.902747         | 42.5984      | 79.6422       | 0.90273383       | 0.0031651  | No      |
| Ddx54   | 0.95517  | 0.42356  | -0.53161    | 6.50E-07   | No      | Anapc5   | 69.2364   | 120.061  | 0.79416          | 69.2374      | 120.062       | 0.79415615       | 0.0018326  | No      |
| Defb21  | 0.73629  | 0.49848  | -0.23781    | 0.01105145 | No      | Anapc7   | 21.4233   | 13.0774  | -0.712108        | 21.4243      | 13.0784       | -0.712062        | 0.0202696  | No      |
| Depdc5  | 0.80712  | 0.56366  | -0.24346    | 2.12E-06   | No      | Ang      | 1.02629   | 9.73314  | 3.24547          | 1.02729      | 9.73414       | 3.24421002       | 0.00018329 | No      |
| Dffb    | 0.79085  | 0.67067  | -0.12018    | 0.00294427 | No      | Angel2   | 23.8639   | 9.82566  | -1.2802          | 23.8649      | 9.82666       | -1.2801172       | 0.0018326  | No      |
| Dhh     | 0.07532  | 0.020285 | -0.055035   | 0.00149777 | No      | Ank2     | 0.592127  | 5.89525  | 3.31557          | 0.593127     | 5.89625       | 3.31338474       | 0.00018329 | No      |
| Diras2  | 0.79921  | 0.7399   | -0.05931    | 0.02412126 | No      | Ankh     | 29.2663   | 2.84883  | -3.3608          | 29.2673      | 2.84983       | -3.3603419       | 0.00018329 | No      |
| Dkk1    | 0.78504  | 0.42686  | -0.35818    | 0.0006534  | No      | Ankib1   | 13.1186   | 5.41648  | -1.27619         | 13.1196      | 5.41748       | -1.2760299       | 0.00018329 | No      |
| Dlg2    | 0.35374  | 0.18613  | -0.16761    | 0.00025534 | No      | Ankle1   | 0.181725  | 2.72864  | 3.90835          | 0.182725     | 2.72964       | 3.90096475       | 0.00111812 | No      |
| Dlgap2  | 0.29711  | 0.11725  | -0.17986    | 0.00019103 | No      | Ankle2   | 21.8178   | 8.53734  | -1.35365         | 21.8188      | 8.53834       | -1.3535442       | 0.0018326  | No      |
| Dlk2    | 0.1397   | 0.043181 | -0.096519   | 0.00077922 | No      | Ankra2   | 14.905    | 7.52927  | -0.985212        | 14.906       | 7.53027       | -0.9851197       | 0.0026435  | No      |
| Dll4    | 0.03728  | 0.13047  | 0.09319     | 0.00077922 | No      | Ankrd1   | 0         | 1.91609  | inf              | 0.001        | 1.91709       | 10.9047024       | 0.00018329 | No      |
| Dlx3    | 0.10756  | 0.024154 | -0.083406   | 0.01178248 | No      | ANKRD10  | 47.9853   | 26.2779  | -0.86874         | 47.9863      | 26.2789       | -0.8687177       | 0.00948282 | No      |
| Dmrt1   | 0.14983  | 0.057187 | -0.092643   | 0.00108973 | No      | Ankrd11  | 90.4765   | 30.1453  | -1.58561         | 90.4775      | 30.1463       | -1.5855781       | 0.00082046 | No      |
| Dnai2   | 0.43076  | 0.19559  | -0.23517    | 0.02284827 | No      | Ankrd12  | 13.2201   | 4.36163  | -1.5998          | 13.2211      | 4.36263       | -1.5995722       | 0.00018329 | No      |
| Dnajb12 | 0.11233  | 0.19123  | 0.0789      | 0.0279946  | No      | Ankrd13a | 160.972   | 95.4899  | -0.753385        | 160.973      | 95.4909       | -0.7533836       | 0.015599   | No      |
| Dnajb5  | 0.54767  | 0.16723  | -0.38044    | 1.69E-06   | No      | Ankrd22  | 0         | 1.13556  | inf              | 0.001        | 1.13656       | 10.1504581       | 0.00018329 | No      |
| Dnase2b | 0.8942   | 0.82864  | -0.06556    | 0.00663046 | No      | Ankrd26  | 4.55445   | 2.20188  | -1.04854         | 4.55545      | 2.20288       | -1.0482027       | 0.0251381  | No      |
| Dnmt3l  | 0.27719  | 0.47358  | 0.19639     | 0.0103156  | No      | Ankrd29  | 0.129299  | 3.15307  | 4.60798          | 0.130299     | 3.15407       | 4.59731676       | 0.00035173 | No      |
| Doxl2   | 0.94905  | 0.87728  | -0.07177    | 0.03760671 | No      | Ankrd33b | 0.256915  | 3.6482   | 3.82782          | 0.257915     | 3.6492        | 3.82261264       | 0.00018329 | No      |
| Dpep3   | 0.7813   | 0.65704  | -0.12426    | 0.04893199 | No      | Ankrd40  | 14.9187   | 23.8429  | 0.67644          | 14.9197      | 23.8439       | 0.6764017        | 0.0206835  | No      |
| Dpm1    | 0.37474  | 0.26432  | -0.11042    | 0.00198389 | No      | Ankrd44  | 49.9901   | 6.54594  | -2.93297         | 49.9911      | 6.54694       | -2.9327786       | 0.00018329 | No      |
| Dpysl4  | 0.094574 | 0.037146 | -0.057428   | 0.00046463 | No      | Ankrd46  | 14.237    | 26.1198  | 0.875492         | 14.238       | 26.1208       | 0.87545258       | 0.0063852  | No      |
| Dpysl5  | 0.11325  | 0.055974 | -0.057276   | 0.00894698 | No      | Ankrd52  | 8.04772   | 4.04709  | -0.991695        | 8.04872      | 4.04809       | -0.991518        | 0.00197017 | No      |
| Drc1    | 0.68803  | 0.18033  | -0.5077     | 9.52E-11   | No      | Ankrd6   | 0.620371  | 2.72453  | 2.1348           | 0.621371     | 2.72553       | 2.13300998       | 0.00018329 | No      |
| Drd5    | 0.12936  | 0.064998 | -0.064362   | 0.00405617 | No      | Anks1a   | 10.6834   | 25.1589  | 1.23569          | 10.6844      | 25.1599       | 1.23562029       | 0.00082046 | No      |
| Drgx    | 0.19326  | 0.056112 | -0.137148   | 0.00142182 | No      | Anks6    | 0.490837  | 11.3823  | 4.53541          | 0.491837     | 11.3833       | 4.53259477       | 0.00018329 | No      |
| Drp2    | 0.29589  | 0.12133  | -0.17456    | 0.00722274 | No      | Anp32a   | 241.105   | 143.073  | -0.752914        | 241.106      | 143.074       | -0.752906        | 0.00494262 | No      |
| Dsc3    | 0.57246  | 0.47248  | -0.09998    | 0.00722274 | No      | Anp32e   | 99.3024   | 42.1885  | -1.23498         | 99.3034      | 42.1895       | -1.2349591       | 0.00018329 | No      |
| Dscam   | 0.078403 | 0.02486  | -0.053543   | 1.61E-05   | No      | Anpep    | 0.0814234 | 52.4684  | 9.33179          | 0.0824234    | 52.4694       | 9.3142066        | 0.00018329 | No      |
| Dscam1  | 0.22088  | 0.074899 | -0.145981   | 0.00019103 | No      | Anxa1    | 31.3116   | 217.064  | 2.79335          | 31.3126      | 217.065       | 2.79331191       | 0.00018329 | No      |
| Dsn1    | 0.91417  | 0.76614  | -0.14803    | 0.02160305 | No      | Anxa11   | 86.2827   | 177.794  | 1.04307          | 86.2837      | 177.795       | 1.0430548        | 0.00018329 | No      |
| Dync1i1 | 0.95222  | 0.88614  | -0.06608    | 0.00017122 | No      | Anxa13   | 0         | 0.715812 | inf              | 0.001        | 0.716812      | 9.48545098       | 0.00018329 | No      |
| E2f4    | 0.32807  | 0.14666  | -0.18141    | 0.0279946  | No      | Anxa3    | 0.0738454 | 81.756   | 10.1126          | 0.0748454    | 81.757        | 10.0932129       | 0.00018329 | No      |
| Ear11   | 0.6422   | 0.40469  | -0.23751    | 0.04893199 | No      | Anxa4    | 4.42097   | 111.996  | 4.66294          | 4.42197      | 111.997       | 4.66262704       | 0.00018329 | No      |
| Ebf3    | 0.10433  | 0.041782 | -0.062548   | 0.00011533 | No      | Anxa5    | 7.33255   | 368.267  | 5.6503           | 7.33355      | 368.268       | 5.65010049       | 0.00018329 | No      |
| Echdc2  | 0.11633  | 0.051741 | -0.064589   | 0.00768781 | No      | Anxa7    | 26.5192   | 58.8095  | 1.14901          | 26.5202      | 58.8105       | 1.1489821        | 0.00018329 | No      |
| Eef1a2  | 0.072031 | 0.017154 | -0.054877   | 0.00017463 | No      | Anxa8    | 0         | 10.2758  | inf              | 0.001        | 10.2768       | 13.3271035       | 0.00018329 | No      |

| RRBS     |           |          |             |            |         | RNAseq  |          |          |                  |              |               |                  |            |         |
|----------|-----------|----------|-------------|------------|---------|---------|----------|----------|------------------|--------------|---------------|------------------|------------|---------|
| gene     | Blood     | Kidney   | methyl.diff | pMWU.fdr   | Match ? | gene    | blood    | kidney   | log2(fold_ratio) | blood+ 0.001 | kidney+ 0.001 | log2(fold_ratio) | q_value    | Match ? |
| Efcc1    | 0.20261   | 0.10538  | -0.09723    | 0.00575049 | No      | Ap1ar   | 15.2088  | 9.60105  | -0.663644        | 15.2098      | 9.60205       | -0.6635868       | 0.0202696  | No      |
| Efhd2    | 0.277     | 0.51423  | 0.23723     | 0.00275507 | No      | Ap1g2   | 40.6036  | 19.6883  | -1.04427         | 40.6046      | 19.6893       | -1.0442314       | 0.0115803  | No      |
| Efna2    | 0.97602   | 0.88635  | -0.08967    | 0.00011533 | No      | Ap1s1   | 23.9762  | 69.5686  | 1.53683          | 23.9772      | 69.5696       | 1.53679383       | 0.00018329 | No      |
| Efna5    | 0.17258   | 0.10521  | -0.06737    | 0.00046463 | No      | Ap1s2   | 10.9709  | 6.59886  | -0.733389        | 10.9719      | 6.59986       | -0.7333061       | 0.0344723  | No      |
| Efnb3    | 0.18243   | 0.049808 | -0.132622   | 1.01E-05   | No      | Ap2a2   | 18.4138  | 32.0361  | 0.79891          | 18.4148      | 32.0371       | 0.79887783       | 0.00224282 | No      |
| Egfem1   | 0.12407   | 0.04543  | -0.07864    | 3.49E-06   | No      | Ap3m1   | 18.2658  | 11.4835  | -0.669584        | 18.2668      | 11.4845       | -0.6695359       | 0.0175951  | No      |
| Egflam   | 0.1438    | 0.039953 | -0.103847   | 0.00052221 | No      | Ap3s2   | 11.0912  | 42.4232  | 1.93544          | 11.0922      | 42.4242       | 1.93534192       | 0.00018329 | No      |
| Egln2    | 0.83803   | 0.78405  | -0.05398    | 0.03995795 | No      | Ap4b1   | 37.8478  | 13.3682  | -1.50141         | 37.8488      | 13.3692       | -1.5013344       | 0.00018329 | No      |
| Egr3     | 0.3592    | 0.1817   | -0.1775     | 5.90E-05   | No      | Ap4e1   | 5.33255  | 2.14333  | -1.31497         | 5.33355      | 2.14433       | -1.3145692       | 0.00018329 | No      |
| Egr4     | 0.089852  | 0.034555 | -0.055297   | 0.00054569 | No      | Ap5m1   | 8.32824  | 3.70622  | -1.16806         | 8.32924      | 3.70722       | -1.1678471       | 0.00097029 | No      |
| Eif4ebp3 | 0.90844   | 0.49071  | -0.41773    | 1.40E-10   | No      | Apaf1   | 19.7289  | 4.14669  | -2.25028         | 19.7299      | 4.14769       | -2.2500037       | 0.00018329 | No      |
| Eif5a2   | 0.42599   | 0.25364  | -0.17235    | 0.0031273  | No      | Apba3   | 11.3086  | 24.6292  | 1.12295          | 11.3096      | 24.6302       | 1.12288044       | 0.00051281 | No      |
| Elavl2   | 0.084601  | 0.022766 | -0.061835   | 2.48E-05   | No      | Apbb1   | 4.29734  | 10.5494  | 1.29564          | 4.29834      | 10.5504       | 1.29544619       | 0.00018329 | No      |
| Elavl3   | 0.14958   | 0.046549 | -0.103031   | 0.00164763 | No      | Apbb1ip | 77.1819  | 11.0287  | -2.807           | 77.1829      | 11.0297       | -2.8068877       | 0.00018329 | No      |
| Elfn1    | 0.13347   | 0.04821  | -0.08526    | 0.00405617 | No      | Apccd1  | 0.065464 | 13.9051  | 7.73069          | 0.066464     | 13.9061       | 7.70892903       | 0.0317095  | No      |
| Elovl6   | 0.10687   | 0.045872 | -0.060998   | 0.03760671 | No      | Apccd1l | 0.260707 | 4.47492  | 4.10136          | 0.261707     | 4.47592       | 4.09615983       | 0.00018329 | No      |
| Emc10    | 0.38792   | 0.17929  | -0.20863    | 0.00128825 | No      | Apcs    | 0        | 17.5497  | inf              | 0.001        | 17.5507       | 14.099241        | 0.00018329 | No      |
| Emilin3  | 0.18202   | 0.10447  | -0.07755    | 0.01448681 | No      | Apex1   | 64.5035  | 36.1491  | -0.835415        | 64.5045      | 36.1501       | -0.8354002       | 0.0107084  | No      |
| Endou    | 0.81446   | 0.5436   | -0.27086    | 3.08E-05   | No      | Apex2   | 9.88825  | 4.49244  | -1.13822         | 9.88925      | 4.49344       | -1.1380408       | 0.0016929  | No      |
| Eno2     | 0.8063    | 0.64002  | -0.16628    | 0.00955793 | No      | Api5    | 38.0821  | 24.2556  | -0.650795        | 38.0831      | 24.2566       | -0.6507736       | 0.0125688  | No      |
| Enpp3    | 0.13876   | 0.070822 | -0.067938   | 0.01047909 | No      | Apitd1  | 51.7565  | 106.845  | 1.0457           | 51.7575      | 106.846       | 1.04569306       | 0.00066911 | No      |
| Epha10   | 0.085233  | 0.032077 | -0.053156   | 6.58E-07   | No      | Ap1f    | 39.3124  | 17.5766  | -1.16133         | 39.3134      | 17.5776       | -1.161283        | 0.00018329 | No      |
| Epha2    | 0.22551   | 0.53522  | 0.30971     | 0.00542685 | No      | Aplnr   | 0.191739 | 0.907133 | 2.24217          | 0.192739     | 0.908133      | 2.23625508       | 0.0016929  | No      |
| Ephb1    | 0.19886   | 0.092922 | -0.105938   | 0.0103156  | No      | APLP1   | 0.312945 | 7.75095  | 4.63039          | 0.313945     | 7.75195       | 4.62597552       | 0.00018329 | No      |
| Ephb3    | 0.77916   | 0.6313   | -0.14786    | 0.01105145 | No      | Aplp2   | 22.7672  | 114.287  | 2.32764          | 22.7682      | 114.288       | 2.32758179       | 0.00018329 | No      |
| Epn1     | 0.88366   | 0.35702  | -0.52664    | 5.18E-12   | No      | Apmap   | 7.91643  | 27.7458  | 1.80935          | 7.91743      | 27.7468       | 1.80921728       | 0.00018329 | No      |
| Epo      | 0.23225   | 0.12468  | -0.10757    | 0.0341213  | No      | Apoa1   | 0.771706 | 2.17743  | 1.4965           | 0.772706     | 2.17843       | 1.49529725       | 0.0313274  | No      |
| Eras     | 0.83086   | 0.59972  | -0.23114    | 3.48E-05   | No      | APOA1BP | 22.0013  | 46.6156  | 1.08322          | 22.0023      | 46.6166       | 1.08318944       | 0.00018329 | No      |
| Erf      | 0.92965   | 0.54082  | -0.38883    | 3.43E-10   | No      | Apoc1   | 0        | 5.43766  | inf              | 0.001        | 5.43866       | 12.4090355       | 0.00018329 | No      |
| Erich6   | 0.38195   | 0.19948  | -0.18247    | 3.15E-05   | No      | Apoc2   | 0        | 2.30008  | inf              | 0.001        | 2.30108       | 11.1680954       | 0.00018329 | No      |
| Espnl    | 0.83947   | 0.39605  | -0.44342    | 1.79E-05   | No      | Apoc3   | 0        | 7.55506  | inf              | 0.001        | 7.55606       | 12.8834184       | 0.00018329 | No      |
| Esrp2    | 0.15443   | 0.072149 | -0.082281   | 0.00034148 | No      | Apold1  | 0.451625 | 2.40982  | 2.41573          | 0.452625     | 2.41082       | 2.41313576       | 0.00018329 | No      |
| Evpl     | 0.63661   | 0.19673  | -0.43988    | 4.56E-07   | No      | Apom    | 5.91649  | 76.2494  | 3.68791          | 5.91749      | 76.2504       | 3.68768764       | 0.0350954  | No      |
| Evx1     | 0.24101   | 0.13099  | -0.11002    | 0.01448681 | No      | Apoo    | 8.50726  | 45.6461  | 2.42373          | 8.50826      | 45.6471       | 2.42358718       | 0.00018329 | No      |
| Exoc8    | 0.66765   | 0.31183  | -0.35582    | 8.62E-05   | No      | Apool   | 7.87811  | 18.0133  | 1.19314          | 7.87911      | 18.0143       | 1.19303801       | 0.00035173 | No      |
| Extl3    | 0.76387   | 0.69722  | -0.06665    | 0.03275343 | No      | App     | 57.0819  | 413.69   | 2.85744          | 57.0829      | 413.691       | 2.85742304       | 0.00018329 | No      |
| F10      | 0.84436   | 0.7128   | -0.13156    | 0.01047909 | No      | Appbp2  | 14.8536  | 8.87378  | -0.743194        | 14.8546      | 8.87478       | -0.7431265       | 0.00445502 | No      |
| F2r13    | 0.16638   | 0.36585  | 0.19947     | 0.00955793 | No      | Appl2   | 0.498062 | 10.1861  | 4.35414          | 0.499062     | 10.1871       | 4.35138055       | 0.00018329 | No      |
| Faap20   | 0.62156   | 0.20165  | -0.41991    | 5.00E-06   | No      | Aprt    | 319.872  | 190.217  | -0.749846        | 319.873      | 190.218       | -0.7498454       | 0.00567465 | No      |
| Fabp3    | 0.29032   | 0.10352  | -0.1868     | 0.0031273  | No      | Aptx    | 13.5647  | 6.57123  | -1.04563         | 13.5657      | 6.57223       | -1.0455086       | 0.0115803  | No      |
| Fabp7    | 0.87766   | 0.51991  | -0.35775    | 9.15E-06   | No      | Aqp2    | 0        | 86.2789  | inf              | 0.001        | 86.2799       | 16.3967369       | 0.00018329 | No      |
| Fam129a  | 0.0028948 | 0.065492 | 0.0625972   | 5.51E-05   | No      | Aqp3    | 0        | 35.5989  | inf              | 0.001        | 35.5999       | 15.1195856       | 0.00018329 | No      |

| RRBS    |           |          |             |            |         | RNAseq    |           |          |                  |              |               |                  |            |         |
|---------|-----------|----------|-------------|------------|---------|-----------|-----------|----------|------------------|--------------|---------------|------------------|------------|---------|
| gene    | Blood     | Kidney   | methyl.diff | pMWU.fdr   | Match ? | gene      | blood     | kidney   | log2(fold_ratio) | blood+ 0.001 | kidney+ 0.001 | log2(fold_ratio) | q_value    | Match ? |
| Fam132a | 0.72647   | 0.40119  | -0.32528    | 0.00010449 | No      | Aqp4      | 0         | 1.208    | inf              | 0.001        | 1.209         | 10.2395985       | 0.00018329 | No      |
| Fam163b | 0.14668   | 0.05444  | -0.09224    | 0.00489594 | No      | Aqr       | 23.43     | 11.9391  | -0.972659        | 23.431       | 11.9401       | -0.9726036       | 0.0400568  | No      |
| FAM187A | 0.79201   | 0.72146  | -0.07055    | 0.00237    | No      | Arap2     | 8.7594    | 4.29362  | -1.02864         | 8.7604       | 4.29462       | -1.0284663       | 0.00481718 | No      |
| Fam193b | 0.41892   | 0.18899  | -0.22993    | 0.0103156  | No      | Arap3     | 4.26649   | 13.161   | 1.62515          | 4.26749      | 13.162        | 1.62491905       | 0.00018329 | No      |
| Fam20a  | 0.098617  | 0.045374 | -0.053243   | 0.00575049 | No      | Arc       | 0.168815  | 0.897588 | 2.41061          | 0.169815     | 0.898588      | 2.4036959        | 0.0018326  | No      |
| Fam212a | 0.2662    | 0.42416  | 0.15796     | 0.04680399 | No      | Areg      | 0         | 0.890161 | inf              | 0.001        | 0.891161      | 9.79954229       | 0.00018329 | No      |
| Fam221b | 0.12527   | 0.043324 | -0.081946   | 0.0445679  | No      | Arel1     | 21.3826   | 13.4805  | -0.665564        | 21.3836      | 13.4815       | -0.6655237       | 0.0202696  | No      |
| Fam55b  | 0.90084   | 0.39942  | -0.50142    | 5.02E-08   | No      | Arf2      | 4.62219   | 8.82913  | 0.933694         | 4.62319      | 8.83013       | 0.93354602       | 0.00469886 | No      |
| Fam64a  | 0.20427   | 0.084609 | -0.119661   | 0.01544668 | No      | Arf6      | 204.568   | 109.491  | -0.901771        | 204.569      | 109.492       | -0.9017621       | 0.00591487 | No      |
| Fam71e2 | 0.89836   | 0.65561  | -0.24275    | 0.0001006  | No      | Arglu1    | 158.703   | 56.673   | -1.4856          | 158.704      | 56.674        | -1.4855796       | 0.00018329 | No      |
| Fam89a  | 0.018946  | 0.35608  | 0.337134    | 9.76E-12   | No      | Arhgap1   | 49.1194   | 20.2105  | -1.28119         | 49.1204      | 20.2115       | -1.2811459       | 0.00018329 | No      |
| Fasn    | 0.75015   | 0.4549   | -0.29525    | 0.0103156  | No      | Arhgap10  | 2.65466   | 10.5312  | 1.98807          | 2.65566      | 10.5322       | 1.98766447       | 0.00018329 | No      |
| Fat1    | 0.18443   | 0.041768 | -0.142662   | 0.00034148 | No      | Arhgap11a | 0.461992  | 2.62771  | 2.50786          | 0.462992     | 2.62871       | 2.50529582       | 0.00018329 | No      |
| Fat3    | 0.20524   | 0.070543 | -0.134697   | 3.48E-05   | No      | Arhgap12  | 13.8418   | 7.81761  | -0.82423         | 13.8428      | 7.81861       | -0.8241517       | 0.0026435  | No      |
| Faxc    | 0.11398   | 0.057122 | -0.056858   | 0.03521493 | No      | Arhgap15  | 127.22    | 11.7754  | -3.43348         | 127.221      | 11.7764       | -3.4333663       | 0.00018329 | No      |
| Fbln5   | 0.10774   | 0.05147  | -0.05627    | 0.00256829 | No      | Arhgap17  | 60.3122   | 29.4031  | -1.03648         | 60.3132      | 29.4041       | -1.0364564       | 0.00018329 | No      |
| Fbn1    | 0.4542    | 0.23071  | -0.22349    | 0.02160305 | No      | Arhgap18  | 3.65837   | 21.4185  | 2.54959          | 3.65937      | 21.4195       | 2.5492576        | 0.00018329 | No      |
| Fbp1    | 0.42778   | 0.25136  | -0.17642    | 0.00674226 | No      | Arhgap21  | 0.429201  | 5.8827   | 3.77675          | 0.430201     | 5.8837        | 3.7736409        | 0.00018329 | No      |
| Fbxl14  | 0.045455  | 0.097577 | 0.052122    | 0.01178248 | No      | Arhgap22  | 0.0596515 | 16.8738  | 8.14401          | 0.0606515    | 16.8748       | 8.12011136       | 0.00018329 | No      |
| Fbxo24  | 0.84336   | 0.74952  | -0.09384    | 4.36E-05   | No      | Arhgap24  | 0.176806  | 132.698  | 9.55177          | 0.177806     | 132.699       | 9.54363778       | 0.00018329 | No      |
| Fbxw17  | 0.30174   | 0.086865 | -0.214875   | 0.0006534  | No      | Arhgap28  | 0.0224034 | 1.25236  | 5.80478          | 0.0234034    | 1.25336       | 5.74293891       | 0.0416461  | No      |
| Fcgbpl1 | 0.93663   | 0.86601  | -0.07062    | 0.01544668 | No      | Arhgap29  | 0.0265167 | 28.9074  | 10.0903          | 0.0275167    | 28.9084       | 10.0369656       | 0.00018329 | No      |
| Fez1    | 0.35597   | 0.1481   | -0.20787    | 0.00098302 | No      | Arhgap31  | 0.143108  | 0.64124  | 2.16376          | 0.144108     | 0.64224       | 2.15596209       | 0.0191514  | No      |
| Fezf2   | 0.13982   | 0.046077 | -0.093743   | 0.00077922 | No      | Arhgap33  | 2.43295   | 0.541769 | -2.16696         | 2.43395      | 0.542769      | -2.1648893       | 0.0209932  | No      |
| Ffar1   | 0.79961   | 0.70241  | -0.0972     | 0.00368736 | No      | Arhgap35  | 1.87858   | 9.2161   | 2.29451          | 1.87958      | 9.2171        | 2.29390258       | 0.00018329 | No      |
| Ffar2   | 0.81765   | 0.60295  | -0.2147     | 0.00085417 | No      | Arhgap39  | 1.12529   | 3.78093  | 1.74844          | 1.12629      | 3.78193       | 1.74754432       | 0.00018329 | No      |
| Ffar3   | 0.83339   | 0.70027  | -0.13312    | 0.00120161 | No      | Arhgap4   | 122.401   | 64.4928  | -0.924406        | 122.402      | 64.4938       | -0.9243947       | 0.00277264 | No      |
| Fgf11   | 0.097346  | 0.041996 | -0.05535    | 0.00722274 | No      | Arhgap42  | 0         | 3.71918  | inf              | 0.001        | 3.72018       | 11.8611567       | 0.00018329 | No      |
| Fgf2    | 0.83655   | 0.61437  | -0.22218    | 0.00455632 | No      | Arhgap44  | 0.0680075 | 2.71477  | 5.31899          | 0.0690075    | 2.71577       | 5.29846432       | 0.00018329 | No      |
| Fgf21   | 0.91515   | 0.7563   | -0.15885    | 0.00142182 | No      | Arhgap5   | 0.200013  | 7.7201   | 5.27046          | 0.201013     | 7.7211        | 5.26344569       | 0.00018329 | No      |
| Fgf3    | 0.092991  | 0.029825 | -0.063166   | 0.02284827 | No      | Arhgap6   | 0.811705  | 3.16274  | 1.96215          | 0.812705     | 3.16374       | 1.96082737       | 0.00035173 | No      |
| Fgf4    | 0.12098   | 0.041786 | -0.079194   | 4.67E-05   | No      | Arhgap9   | 193.245   | 109.102  | -0.82476         | 193.246      | 109.103       | -0.8247478       | 0.00329119 | No      |
| Fgf6    | 0.74322   | 0.23775  | -0.50547    | 3.77E-12   | No      | Arhgdib   | 2282.69   | 359.267  | -2.6676          | 2282.691     | 359.268       | -2.6676032       | 0.00018329 | No      |
| Fgf8    | 0.1275    | 0.052114 | -0.075386   | 0.04680399 | No      | Arhgef1   | 495.22    | 118.855  | -2.05886         | 495.221      | 118.856       | -2.0588578       | 0.00018329 | No      |
| Fgfr2   | 0.068616  | 0.015457 | -0.053159   | 0.00196002 | No      | Arhgef10l | 0.092408  | 25.1551  | 8.08862          | 0.093408     | 25.1561       | 8.07314644       | 0.00018329 | No      |
| Fhl3    | 0.0060504 | 0.21531  | 0.2092596   | 3.06E-06   | No      | Arhgef11  | 2.19684   | 12.3235  | 2.48791          | 2.19784      | 12.3245       | 2.48737085       | 0.0206835  | No      |
| Fhod1   | 0.55596   | 0.19483  | -0.36113    | 0.00013988 | No      | Arhgef12  | 0.797974  | 11.1955  | 3.81043          | 0.798974     | 11.1965       | 3.80875545       | 0.00018329 | No      |
| Fibcd1  | 0.011434  | 0.068794 | 0.05736     | 1.98E-05   | No      | Arhgef17  | 0.125348  | 33.8471  | 8.07695          | 0.126348     | 33.8481       | 8.06552822       | 0.00035173 | No      |
| Fitm1   | 0.25301   | 0.39662  | 0.14361     | 0.00120161 | No      | Arhgef18  | 47.8074   | 16.782   | -1.51032         | 47.8084      | 16.783        | -1.5102635       | 0.00018329 | No      |
| Fkbpl   | 0.75913   | 0.23893  | -0.5202     | 0.00152471 | No      | Arhgef19  | 0         | 5.98383  | inf              | 0.001        | 5.98483       | 12.5470946       | 0.00018329 | No      |
| Fmo5    | 0.14207   | 0.40881  | 0.26674     | 3.03E-06   | No      | Arhgef40  | 0.102107  | 9.90365  | 6.5998           | 0.103107     | 9.90465       | 6.58589181       | 0.00018329 | No      |
| Foxa3   | 0.1245    | 0.047272 | -0.077228   | 0.0006534  | No      | Arhgef5   | 0         | 8.0359   | inf              | 0.001        | 8.0369        | 12.9724234       | 0.00018329 | No      |

| RRBS    |           |          |             |            |         | RNAseq  |           |          |                  |              |               |                  |            |         |
|---------|-----------|----------|-------------|------------|---------|---------|-----------|----------|------------------|--------------|---------------|------------------|------------|---------|
| gene    | Blood     | Kidney   | methyl.diff | pMWU.fdr   | Match ? | gene    | blood     | kidney   | log2(fold_ratio) | blood+ 0.001 | kidney+ 0.001 | log2(fold_ratio) | q_value    | Match ? |
| Foxc2   | 0.10457   | 0.19465  | 0.09008     | 0.01331217 | No      | Arhgef6 | 53.737    | 7.85513  | -2.77421         | 53.738       | 7.85613       | -2.7740519       | 0.00018329 | No      |
| Foxe3   | 0.2412    | 0.10196  | -0.13924    | 0.00152471 | No      | Arid1a  | 54.3148   | 16.6853  | -1.70276         | 54.3158      | 16.6863       | -1.7027078       | 0.00018329 | No      |
| Foxg1   | 0.45832   | 0.18069  | -0.27763    | 6.02E-11   | No      | Arid3b  | 10.1677   | 1.56042  | -2.70398         | 10.1687      | 1.56142       | -2.7032047       | 0.00018329 | No      |
| Foxj1   | 0.7782    | 0.38003  | -0.39817    | 3.29E-08   | No      | Arid4a  | 26.138    | 6.71268  | -1.96118         | 26.139       | 6.71368       | -1.9610283       | 0.00530972 | No      |
| Foxn4   | 0.11015   | 0.043228 | -0.066922   | 6.46E-06   | No      | Arid4b  | 12.7652   | 2.75999  | -2.20948         | 12.7662      | 2.76099       | -2.2090716       | 0.00018329 | No      |
| Foxp4   | 0.0036058 | 0.064762 | 0.0611562   | 1.77E-06   | No      | Arid5a  | 14.171    | 5.20113  | -1.44605         | 14.172       | 5.20213       | -1.445869        | 0.00018329 | No      |
| Foxred2 | 0.44769   | 0.17185  | -0.27584    | 2.74E-10   | No      | Arid5b  | 15.2704   | 4.63346  | -1.72058         | 15.2714      | 4.63446       | -1.7203592       | 0.00018329 | No      |
| Foxs1   | 0.80888   | 0.63925  | -0.16963    | 0.00015756 | No      | Arih2   | 28.2007   | 14.2778  | -0.981961        | 28.2017      | 14.2788       | -0.9819074       | 0.00051281 | No      |
| Frmrd3  | 0.12358   | 0.038948 | -0.084632   | 9.28E-12   | No      | Arl1    | 23.4814   | 74.0864  | 1.65769          | 23.4824      | 74.0874       | 1.65764834       | 0.00018329 | No      |
| Fry     | 0.67109   | 0.4179   | -0.25319    | 0.00013988 | No      | Arl11   | 0.122211  | 5.23924  | 5.42191          | 0.123211     | 5.24024       | 5.41042992       | 0.00066911 | No      |
| Fscn2   | 0.84544   | 0.73165  | -0.11379    | 0.03275343 | No      | Arl15   | 6.90492   | 13.6561  | 0.983849         | 6.90592      | 13.6571       | 0.98374564       | 0.0026435  | No      |
| Fut4    | 0.2387    | 0.088677 | -0.150023   | 0.00275507 | No      | Arl2    | 32.4887   | 61.2312  | 0.914327         | 32.4897      | 61.2322       | 0.9143081        | 0.0160313  | No      |
| Fut7    | 0.75862   | 0.67104  | -0.08758    | 0.02915203 | No      | Arl3    | 67.8645   | 107.48   | 0.66334          | 67.8655      | 107.481       | 0.66333139       | 0.0150649  | No      |
| Fxyd7   | 0.075784  | 0.018486 | -0.057298   | 0.02412126 | No      | Arl4a   | 22.1612   | 14.0265  | -0.65988         | 22.1622      | 14.0275       | -0.6598432       | 0.0447246  | No      |
| Fzd10   | 0.03979   | 0.21679  | 0.177       | 7.94E-08   | No      | Arl5c   | 89.0472   | 13.067   | -2.76865         | 89.0482      | 13.068        | -2.7685481       | 0.00018329 | No      |
| Fzd2    | 0.072496  | 0.13909  | 0.066594    | 1.49E-08   | No      | ARL6    | 1.72692   | 12.7881  | 2.88853          | 1.72792      | 12.7891       | 2.88780641       | 0.00018329 | No      |
| Fzd5    | 0.88822   | 0.50194  | -0.38628    | 3.77E-12   | No      | Arl6ip5 | 176.508   | 58.97    | -1.58168         | 176.509      | 58.971        | -1.5816642       | 0.00018329 | No      |
| Fzd9    | 0.90955   | 0.81824  | -0.09131    | 0.00033772 | No      | Armc9   | 5.77743   | 15.5595  | 1.4293           | 5.77843      | 15.5605       | 1.42913895       | 0.00066911 | No      |
| G6b     | 0.078117  | 0.3232   | 0.245083    | 6.35E-06   | No      | Armcx3  | 2.01722   | 12.5501  | 2.63725          | 2.01822      | 12.5511       | 2.63665846       | 0.00018329 | No      |
| Gabbr2  | 0.14179   | 0.063803 | -0.077987   | 0.02284827 | No      | Arnt2   | 0         | 19.5913  | inf              | 0.001        | 19.5923       | 14.2579991       | 0.00018329 | No      |
| Gabrb2  | 0.07811   | 0.014847 | -0.063263   | 0.00489594 | No      | Arpc1b  | 866.068   | 228.839  | -1.92014         | 866.069      | 228.84        | -1.9201427       | 0.00018329 | No      |
| Gabrb3  | 0.12545   | 0.055541 | -0.069909   | 0.00674226 | No      | Arpc2   | 1019.81   | 361.924  | -1.49454         | 1019.811     | 361.925       | -1.4945391       | 0.00018329 | No      |
| Gabbr1  | 0.79965   | 0.70776  | -0.09189    | 0.00131475 | No      | Arpc3   | 436.366   | 230.029  | -0.923725        | 436.367      | 230.03        | -0.92372         | 0.00051281 | No      |
| Gad1    | 0.17554   | 0.082753 | -0.092787   | 0.00625768 | No      | Arpc5   | 279.346   | 102.21   | -1.45052         | 279.347      | 102.211       | -1.4505079       | 0.00018329 | No      |
| Gal     | 0.16991   | 0.066732 | -0.103178   | 0.00405617 | No      | Arpp21  | 124.164   | 30.1662  | -2.04124         | 124.165      | 30.1672       | -2.0412059       | 0.00018329 | No      |
| Gal3st1 | 0.49247   | 0.17544  | -0.31703    | 1.79E-05   | No      | Arrb2   | 172.64    | 44.9401  | -1.94169         | 172.641      | 44.9411       | -1.9416678       | 0.00018329 | No      |
| Gal3st3 | 0.056462  | 0.10846  | 0.051998    | 0.01349957 | No      | Arrdc2  | 33.9819   | 15.915   | -1.09438         | 33.9829      | 15.916        | -1.0943312       | 0.00097029 | No      |
| Galnt16 | 0.096245  | 0.043621 | -0.052624   | 0.03863139 | No      | Arrdc3  | 22.8227   | 77.6789  | 1.76705          | 22.8237      | 77.6799       | 1.76700865       | 0.00018329 | No      |
| Galnt2  | 0.8605    | 0.45597  | -0.40453    | 1.41E-05   | No      | Arrdc4  | 0.372171  | 4.94464  | 3.73183          | 0.373171     | 4.94564       | 3.72824845       | 0.00018329 | No      |
| Galnt9  | 0.10629   | 0.029907 | -0.076383   | 1.61E-05   | No      | Arsa    | 2.83406   | 37.9902  | 3.74469          | 2.83506      | 37.9912       | 3.74421411       | 0.00018329 | No      |
| Galr1   | 0.15238   | 0.067749 | -0.084631   | 1.87E-09   | No      | Arsb    | 4.13743   | 26.679   | 2.6889           | 4.13843      | 26.68         | 2.68860321       | 0.00018329 | No      |
| Galr2   | 0.17861   | 0.078045 | -0.100565   | 0.00674226 | No      | Arse    | 6.41018   | 23.0686  | 1.84749          | 6.41118      | 23.0696       | 1.84733117       | 0.00018329 | No      |
| Garem2  | 0.28199   | 0.14372  | -0.13827    | 0.01621946 | No      | Arsg    | 0.644421  | 2.33726  | 1.85874          | 0.645421     | 2.33826       | 1.85712293       | 0.00210945 | No      |
| Gas2l2  | 0.71626   | 0.53263  | -0.18363    | 0.01105145 | No      | Art2b   | 213.981   | 7.97532  | -4.7458          | 213.982      | 7.97632       | -4.7456223       | 0.00018329 | No      |
| Gata2   | 0.52925   | 0.2322   | -0.29705    | 1.27E-06   | No      | As3mt   | 11.2016   | 26.9083  | 1.26434          | 11.2026      | 26.9093       | 1.26427126       | 0.00018329 | No      |
| Gata4   | 0.14669   | 0.085139 | -0.061551   | 0.00894698 | No      | Asah1   | 5.41676   | 34.4319  | 2.66824          | 5.41776      | 34.4329       | 2.6680193        | 0.00018329 | No      |
| Gata5   | 0.057199  | 0.15823  | 0.101031    | 0.00095473 | No      | Asah2   | 0         | 0.626903 | inf              | 0.001        | 0.627903      | 9.2943979        | 0.00018329 | No      |
| Gba     | 0.97403   | 0.71699  | -0.25704    | 6.50E-07   | No      | Asap1   | 25.0967   | 4.45943  | -2.49257         | 25.0977      | 4.46043       | -2.4923005       | 0.00018329 | No      |
| Gbx2    | 0.30014   | 0.14425  | -0.15589    | 0.01105145 | No      | Asap2   | 0.0710153 | 8.73426  | 6.94241          | 0.0720153    | 8.73526       | 6.92240339       | 0.00018329 | No      |
| Gck     | 0.93999   | 0.80217  | -0.13782    | 1.26E-05   | No      | Asap3   | 0.367847  | 2.48513  | 2.75614          | 0.368847     | 2.48613       | 2.75280733       | 0.00018329 | No      |
| Gcnt2   | 0.023006  | 0.1371   | 0.114094    | 9.80E-10   | No      | Asb1    | 2.50578   | 1.45176  | -0.787458        | 2.50678      | 1.45276       | -0.787039        | 0.0229171  | No      |
| Gdap111 | 0.14083   | 0.064197 | -0.076633   | 0.02915203 | No      | Asb13   | 36.2467   | 16.7956  | -1.10977         | 36.2477      | 16.7966       | -1.1097202       | 0.00018329 | No      |

| RRBS   |          |           |             |            |         | RNAseq  |           |          |                  |              |               |                  |            |         |
|--------|----------|-----------|-------------|------------|---------|---------|-----------|----------|------------------|--------------|---------------|------------------|------------|---------|
| gene   | Blood    | Kidney    | methyl.diff | pMWU.fdr   | Match ? | gene    | blood     | kidney   | log2(fold_ratio) | blood+ 0.001 | kidney+ 0.001 | log2(fold_ratio) | q_value    | Match ? |
| Gdf10  | 0.20904  | 0.099629  | -0.109411   | 0.00025534 | No      | Asb3    | 8.89318   | 5.6022   | -0.666706        | 8.89418      | 5.6032        | -0.6666106       | 0.0450989  | No      |
| Gdf15  | 0.42998  | 0.20836   | -0.22162    | 1.94E-07   | No      | Ascc3   | 21.4445   | 10.1379  | -1.08084         | 21.4455      | 10.1389       | -1.0807738       | 0.0287615  | No      |
| Gdf2   | 0.92563  | 0.62098   | -0.30465    | 2.79E-05   | No      | Asgr2   | 0         | 2.83768  | inf              | 0.001        | 2.83868       | 11.4710045       | 0.00018329 | No      |
| Gdnf   | 0.084299 | 0.0076908 | -0.0766082  | 0.00542685 | No      | Asl     | 7.97999   | 49.9951  | 2.64733          | 7.98099      | 49.9961       | 2.64717594       | 0.0350203  | No      |
| Gfap   | 0.79179  | 0.57807   | -0.21372    | 0.00107599 | No      | Asmtl   | 33.9827   | 95.1282  | 1.48507          | 33.9837      | 95.1292       | 1.48504531       | 0.00018329 | No      |
| Gfer   | 0.22195  | 0.29793   | 0.07598     | 0.01464158 | No      | Asns    | 4.75031   | 8.1164   | 0.772819         | 4.75131      | 8.1174        | 0.77269237       | 0.0201703  | No      |
| Ggn    | 0.77485  | 0.64801   | -0.12684    | 0.0445679  | No      | Aspa    | 0.250544  | 25.4849  | 6.66843          | 0.251544     | 25.4859       | 6.66274471       | 0.00035173 | No      |
| Ghsr   | 0.32326  | 0.2034    | -0.11986    | 0.00562348 | No      | Aspdh   | 18.3133   | 54.138   | 1.56375          | 18.3143      | 54.139        | 1.56369768       | 0.00018329 | No      |
| Gipc3  | 0.71892  | 0.39333   | -0.32559    | 1.21E-06   | No      | ASPH    | 0.676737  | 10.1838  | 3.91154          | 0.677737     | 10.1848       | 3.9095483        | 0.00018329 | No      |
| Gja3   | 0.72166  | 0.56539   | -0.15627    | 0.02160305 | No      | Aspscr1 | 34.4046   | 68.3267  | 0.989846         | 34.4056      | 68.3277       | 0.98982716       | 0.00902869 | No      |
| Gja8   | 0.1028   | 0.53485   | 0.43205     | 5.62E-06   | No      | Ass1    | 0.0712455 | 119.67   | 10.714           | 0.0722455    | 119.671       | 10.6938782       | 0.00530972 | No      |
| Glr1   | 0.091763 | 0.036473  | -0.05529    | 0.00455632 | No      | Asun    | 26.9761   | 16.1765  | -0.737782        | 26.9771      | 16.1775       | -0.7377466       | 0.0109365  | No      |
| Gnas   | 0.1313   | 0.34854   | 0.21724     | 1.42E-08   | No      | Asxl1   | 29.8309   | 11.8788  | -1.32842         | 29.8319      | 11.8798       | -1.3283453       | 0.00018329 | No      |
| Gnaz   | 0.82107  | 0.3563    | -0.46477    | 3.77E-12   | No      | Asxl2   | 9.30195   | 4.77418  | -0.962282        | 9.30295      | 4.77518       | -0.9621332       | 0.0432746  | No      |
| Gng7   | 0.58012  | 0.20975   | -0.37037    | 2.26E-05   | No      | Atad2   | 9.62579   | 2.45454  | -1.97145         | 9.62679      | 2.45554       | -1.9710145       | 0.00018329 | No      |
| Gnmt   | 0.68631  | 0.25697   | -0.42934    | 2.16E-06   | No      | Atf1    | 57.1075   | 23.1804  | -1.30077         | 57.1085      | 23.1814       | -1.3007378       | 0.00018329 | No      |
| Gnrhr  | 0.77413  | 0.62877   | -0.14536    | 0.04097311 | No      | Atf2    | 24.2302   | 14.0575  | -0.785469        | 24.2312      | 14.0585       | -0.7854232       | 0.00406781 | No      |
| Gp1bb  | 0.037118 | 0.10968   | 0.072562    | 0.00054569 | No      | Atf3    | 0.103683  | 91.786   | 9.78995          | 0.104683     | 91.787        | 9.77611885       | 0.00018329 | No      |
| Gpaa1  | 0.93326  | 0.82362   | -0.10964    | 0.00012584 | No      | Atf5    | 3.8804    | 20.5205  | 2.40279          | 3.8814       | 20.5215       | 2.40248716       | 0.0214018  | No      |
| Gpr139 | 0.09024  | 0.032113  | -0.058127   | 0.0031273  | No      | Atg10   | 15.2913   | 7.58233  | -1.012           | 15.2923      | 7.58333       | -1.011902        | 0.0430274  | No      |
| Gpr26  | 0.20741  | 0.068957  | -0.138453   | 0.00128825 | No      | Atg12   | 44.2111   | 13.3218  | -1.73062         | 44.2121      | 13.3228       | -1.7305439       | 0.00018329 | No      |
| Gpr31  | 0.76395  | 0.59247   | -0.17148    | 0.01265586 | No      | Atg13   | 21.9825   | 12.8813  | -0.771073        | 21.9835      | 12.8823       | -0.7710309       | 0.00469886 | No      |
| Gpr50  | 0.1025   | 0.028565  | -0.073935   | 0.0001006  | No      | Atg14   | 6.3688    | 4.12903  | -0.625219        | 6.3698       | 4.13003       | -0.6250958       | 0.0478786  | No      |
| Gpr6   | 0.14155  | 0.046102  | -0.095448   | 0.00542685 | No      | Atg2b   | 10.3447   | 5.09554  | -1.02159         | 10.3457      | 5.09654       | -1.0214412       | 0.00051281 | No      |
| Gpr81  | 0.86549  | 0.32715   | -0.53834    | 2.75E-06   | No      | Atg9a   | 30.679    | 18.0924  | -0.761864        | 30.68        | 18.0934       | -0.7618349       | 0.00567465 | No      |
| Gpr83  | 0.42595  | 0.24762   | -0.17833    | 0.00832699 | No      | Atic    | 54.7422   | 31.2625  | -0.808221        | 54.7432      | 31.2635       | -0.8082005       | 0.00140841 | No      |
| Gpsm3  | 0.015029 | 0.18583   | 0.170801    | 0.00054569 | No      | Atl1    | 0.272982  | 0.764349 | 1.48543          | 0.273982     | 0.765349      | 1.48203665       | 0.0350954  | No      |
| Gpx2   | 0.50569  | 0.23653   | -0.26916    | 1.69E-06   | No      | Atl2    | 29.3001   | 11.2462  | -1.38147         | 29.3011      | 11.2472       | -1.3813889       | 0.00018329 | No      |
| Grasp  | 0.036151 | 0.33792   | 0.301769    | 6.50E-07   | No      | Atm     | 26.4166   | 5.15826  | -2.35649         | 26.4176      | 5.15926       | -2.3562633       | 0.00018329 | No      |
| Gria4  | 0.13181  | 0.027925  | -0.103885   | 0.00405617 | No      | Atoh8   | 0         | 1.44702  | inf              | 0.001        | 1.44802       | 10.4998658       | 0.00018329 | No      |
| Grik1  | 0.13688  | 0.053907  | -0.082973   | 0.0103156  | No      | Atox1   | 78.1452   | 168.186  | 1.10583          | 78.1462      | 168.187       | 1.10581857       | 0.00018329 | No      |
| Grik3  | 0.093542 | 0.031531  | -0.062011   | 7.48E-05   | No      | Atp11a  | 10.0761   | 75.6222  | 2.90787          | 10.0771      | 75.6232       | 2.90774838       | 0.00018329 | No      |
| Grik5  | 0.43654  | 0.16518   | -0.27136    | 0.01105145 | No      | ATP11B  | 36.9216   | 10.1276  | -1.86616         | 36.9226      | 10.1286       | -1.8660694       | 0.00018329 | No      |
| Grin2a | 0.11386  | 0.030886  | -0.082974   | 0.00063042 | No      | Atp13a1 | 67.4342   | 35.219   | -0.937128        | 67.4352      | 35.22         | -0.9371069       | 0.00097029 | No      |
| Grin2b | 0.10023  | 0.031169  | -0.069061   | 0.00894698 | No      | Atp13a2 | 22.3413   | 34.5914  | 0.6307           | 22.3423      | 34.5924       | 0.6306774        | 0.0328513  | No      |
| Grin2d | 0.40122  | 0.25999   | -0.14123    | 0.00674226 | No      | Atp13a3 | 13.675    | 8.56257  | -0.675428        | 13.676       | 8.56357       | -0.6753621       | 0.0144181  | No      |
| Grin3b | 0.96776  | 0.87887   | -0.08889    | 0.00102242 | No      | Atp1a1  | 85.9738   | 1362.32  | 3.98602          | 85.9748      | 1362.321      | 3.98600902       | 0.00018329 | No      |
| Grm1   | 0.18076  | 0.089903  | -0.090857   | 2.21E-07   | No      | Atp1a3  | 0.214911  | 1.38569  | 2.6888           | 0.215911     | 1.38669       | 2.68313665       | 0.00051281 | No      |
| Grm7   | 0.15252  | 0.062165  | -0.090355   | 0.00164763 | No      | Atp1b1  | 2.11535   | 1232.07  | 9.18598          | 2.11635      | 1232.071      | 9.18529144       | 0.00018329 | No      |
| Grp    | 0.087209 | 0.022899  | -0.06431    | 0.00021759 | No      | Atp1b2  | 0.102733  | 5.40974  | 5.71858          | 0.103733     | 5.41074       | 5.70487909       | 0.00035173 | No      |
| Gspt2  | 0.087849 | 0.021096  | -0.066753   | 0.00489594 | No      | ATP2A2  | 21.1834   | 35.9737  | 0.76401          | 21.1844      | 35.9747       | 0.76398039       | 0.00329119 | No      |
| Gstt3  | 0.2556   | 0.099132  | -0.156468   | 0.00294427 | No      | Atp2b1  | 11.904    | 5.75263  | -1.04915         | 11.905       | 5.75363       | -1.0490233       | 0.00082046 | No      |

| RRBS      |           |           |             |            |         | RNAseq   |           |         |                  |              |               |                  |            |         |
|-----------|-----------|-----------|-------------|------------|---------|----------|-----------|---------|------------------|--------------|---------------|------------------|------------|---------|
| gene      | Blood     | Kidney    | methyl.diff | pMWU.fdr   | Match ? | gene     | blood     | kidney  | log2(fold_ratio) | blood+ 0.001 | kidney+ 0.001 | log2(fold_ratio) | q_value    | Match ? |
| Gsx1      | 0.16642   | 0.064854  | -0.101566   | 6.69E-05   | No      | Atp2b4   | 8.13656   | 5.34165 | -0.607135        | 8.13756      | 5.34265       | -0.6070408       | 0.0286648  | No      |
| Guca1a    | 0.0079874 | 0.2276    | 0.2196126   | 5.61E-09   | No      | Atp2c1   | 7.97472   | 32.5011 | 2.02698          | 7.97572      | 32.5021       | 2.02684627       | 0.00018329 | No      |
| Gucy2e    | 0.26852   | 0.35354   | 0.08502     | 0.00275507 | No      | Atp5a1   | 296.721   | 724.693 | 1.28827          | 296.722      | 724.694       | 1.28826005       | 0.00018329 | No      |
| H2afx     | 0.077558  | 0.021217  | -0.056341   | 9.35E-05   | No      | Atp5b    | 403.894   | 1765.84 | 2.12831          | 403.895      | 1765.841      | 2.12830325       | 0.00018329 | No      |
| H2afy2    | 0.049434  | 0.024603  | -0.024831   | 0.00043712 | No      | Atp5c1   | 166.754   | 457.968 | 1.45753          | 166.755      | 457.969       | 1.45751993       | 0.00018329 | No      |
| Haa0      | 0.92775   | 0.34359   | -0.58416    | 3.77E-12   | No      | Atp5d    | 170.521   | 519.999 | 1.60856          | 170.522      | 520           | 1.60855374       | 0.00018329 | No      |
| Hal       | 0.59806   | 0.43432   | -0.16374    | 0.03760671 | No      | Atp5e    | 1053.88   | 1653.09 | 0.649465         | 1053.881     | 1653.091      | 0.64945417       | 0.0243241  | No      |
| Hamp      | 0.78559   | 0.42337   | -0.36222    | 2.16E-06   | No      | ATP5F1   | 70.6499   | 129.666 | 0.876042         | 70.6509      | 129.667       | 0.87603152       | 0.00506686 | No      |
| Hapln4    | 0.10895   | 0.045476  | -0.063474   | 0.00152471 | No      | ATP5G3   | 267.818   | 1165.47 | 2.12159          | 267.819      | 1165.471      | 2.12158289       | 0.00018329 | No      |
| Has3      | 0.18923   | 0.099208  | -0.090022   | 0.00894698 | No      | Atp5i    | 504.38    | 2093.76 | 2.05351          | 504.381      | 2093.761      | 2.05351093       | 0.00018329 | No      |
| Hcn4      | 0.13326   | 0.26271   | 0.12945     | 0.00832699 | No      | Atp5j    | 344.193   | 959.078 | 1.47843          | 344.194      | 959.079       | 1.47842771       | 0.00051281 | No      |
| Herpud1   | 0.20343   | 0.11784   | -0.08559    | 0.02160305 | No      | Atp5j2   | 709.865   | 1470.2  | 1.05039          | 709.866      | 1470.201      | 1.05039479       | 0.00018329 | No      |
| Hes7      | 0.70442   | 0.47758   | -0.22684    | 0.00022961 | No      | Atp5l    | 417.561   | 1068.55 | 1.35559          | 417.562      | 1068.551      | 1.35559344       | 0.00018329 | No      |
| Hfe2      | 0.032513  | 0.089346  | 0.056833    | 0.00095473 | No      | Atp5o    | 174.663   | 743.208 | 2.08919          | 174.664      | 743.209       | 2.08918569       | 0.00018329 | No      |
| Hhatl     | 0.76487   | 0.29066   | -0.47421    | 4.36E-05   | No      | Atp5s    | 0.792598  | 17.7763 | 4.48723          | 0.793598     | 17.7773       | 4.48548403       | 0.0144181  | No      |
| Hhex      | 0.044824  | 0.28898   | 0.244156    | 3.77E-12   | No      | Atp6ap2  | 19.6731   | 82.8887 | 2.07495          | 19.6741      | 82.8897       | 2.0748952        | 0.00018329 | No      |
| Hic1      | 0.38001   | 0.20495   | -0.17506    | 1.94E-07   | No      | Atp6v0a1 | 1.61708   | 16.8039 | 3.37733          | 1.61808      | 16.8049       | 3.37652711       | 0.00018329 | No      |
| Hils1     | 0.97015   | 0.82751   | -0.14264    | 2.48E-05   | No      | Atp6v0a2 | 18.1561   | 11.5342 | -0.654539        | 18.1571      | 11.5352       | -0.6544908       | 0.0232058  | No      |
| Hist1h2bo | 0.0073998 | 0.087262  | 0.0798622   | 1.77E-06   | No      | Atp6v0a4 | 0.0317032 | 36.8347 | 10.1822          | 0.0327032    | 36.8357       | 10.1374571       | 0.0201703  | No      |
| Hmces     | 0.77397   | 0.64886   | -0.12511    | 0.02160305 | No      | Atp6v0b  | 58.6774   | 162.884 | 1.47297          | 58.6784      | 162.885       | 1.47295231       | 0.00018329 | No      |
| Hmga1     | 0.17302   | 0.39328   | 0.22026     | 0.00212541 | No      | Atp6v0c  | 169.639   | 427.513 | 1.3335           | 169.64       | 427.514       | 1.33349528       | 0.00018329 | No      |
| Hmgcl1    | 0.77273   | 0.66858   | -0.10415    | 0.00542685 | No      | Atp6v0d1 | 128.739   | 228.456 | 0.82747          | 128.74       | 228.457       | 0.82746227       | 0.00469886 | No      |
| Hmha1     | 0         | 0.31644   | 0.31644     | 5.08E-07   | No      | Atp6v0e1 | 123.639   | 237.148 | 0.939654         | 123.64       | 237.149       | 0.93964823       | 0.00051281 | No      |
| Hmx1      | 0.27989   | 0.090523  | -0.189367   | 0.00046463 | No      | Atp6v0e2 | 17.8825   | 43.064  | 1.26794          | 17.8835      | 43.065        | 1.26788672       | 0.00018329 | No      |
| Hoxa11    | 0.13568   | 0.22596   | 0.09028     | 0.00351975 | No      | Atp6v1a  | 9.2667    | 44.5686 | 2.2659           | 9.2677       | 44.5696       | 2.26577676       | 0.00018329 | No      |
| Hoxb13    | 0.085674  | 0.02891   | -0.056764   | 0.02028318 | No      | Atp6v1b1 | 0.0189674 | 72.4349 | 11.8989          | 0.0199674    | 72.4359       | 11.8248427       | 0.00834357 | No      |
| Hoxb4     | 0.17897   | 0.067216  | -0.111754   | 4.03E-12   | No      | Atp6v1b2 | 31.8426   | 72.3452 | 1.18394          | 31.8436      | 72.3462       | 1.1839138        | 0.00018329 | No      |
| Hoxc11    | 0.13079   | 0.048695  | -0.082095   | 0.00054569 | No      | Atp6v1c2 | 1.32042   | 11.8902 | 3.17071          | 1.32142      | 11.8912       | 3.16973332       | 0.00018329 | No      |
| Hoxc12    | 0.15064   | 0.082774  | -0.067866   | 0.00420619 | No      | Atp6v1d  | 42.834    | 76.8151 | 0.842633         | 42.835       | 76.8161       | 0.84261863       | 0.00111812 | No      |
| Hoxc4     | 0.05635   | 0.17125   | 0.1149      | 3.77E-12   | No      | Atp6v1e1 | 29.5882   | 151.461 | 2.35585          | 29.5892      | 151.462       | 2.35581329       | 0.00018329 | No      |
| Hoxc9     | 0.085684  | 0.022896  | -0.062788   | 0.00768781 | No      | Atp6v1f  | 97.4656   | 187.551 | 0.944316         | 97.4666      | 187.552       | 0.94431082       | 0.00035173 | No      |
| Hoxd1     | 0.17218   | 0.075837  | -0.096343   | 0.00021046 | No      | Atp6v1g3 | 0.343109  | 19.0921 | 5.79816          | 0.344109     | 19.0931       | 5.79404193       | 0.00018329 | No      |
| Hoxd12    | 0.15803   | 0.5599    | 0.40187     | 1.12E-06   | No      | Atp6v1h  | 19.3249   | 32.3775 | 0.744534         | 19.3259      | 32.3785       | 0.74450055       | 0.00445502 | No      |
| Hoxd9     | 0.1583    | 0.39291   | 0.23461     | 8.66E-06   | No      | Atp8a1   | 13.5603   | 7.69172 | -0.818012        | 13.5613      | 7.69272       | -0.8179298       | 0.00755425 | No      |
| Hpd       | 0.96706   | 0.60733   | -0.35973    | 6.50E-07   | No      | Atp8b2   | 8.52897   | 3.64341 | -1.22708         | 8.52997      | 3.64441       | -1.2268554       | 0.00018329 | No      |
| Hpn       | 0.69329   | 0.22965   | -0.46364    | 1.12E-06   | No      | Atp8b5   | 0.729138  | 3.24814 | 2.15535          | 0.730138     | 3.24914       | 2.15381684       | 0.0413654  | No      |
| Hpse2     | 0.094568  | 0.022986  | -0.071582   | 0.00256829 | No      | Atp9a    | 0.533713  | 47.6461 | 6.48015          | 0.534713     | 47.6471       | 6.47747985       | 0.00018329 | No      |
| Hras      | 0.94708   | 0.84552   | -0.10156    | 0.00722274 | No      | Atpaf1   | 5.29795   | 9.9503  | 0.909305         | 5.29895      | 9.9513        | 0.90917849       | 0.00277264 | No      |
| Hrasls    | 0.10524   | 0.05211   | -0.05313    | 0.00011924 | No      | Atpif1   | 249.245   | 972.299 | 1.96384          | 249.246      | 972.3         | 1.96383117       | 0.00035173 | No      |
| Hrh3      | 0.082542  | 0.015657  | -0.066885   | 0.02915203 | No      | Atr      | 3.11873   | 1.33563 | -1.22344         | 3.11973      | 1.33663       | -1.222821        | 0.00018329 | No      |
| Hs3st5    | 0.068167  | 0.0083333 | -0.0598337  | 0.00420619 | No      | Atraid   | 11.5508   | 30.2384 | 1.38838          | 11.5518      | 30.2394       | 1.38831184       | 0.0259489  | No      |
| Hs6st2    | 0.14448   | 0.021503  | -0.122977   | 2.88E-06   | No      | Atrip    | 17.2543   | 35.6719 | 1.04783          | 17.2553      | 35.6729       | 1.04778895       | 0.0310472  | No      |



| RRBS     |          |          |             |            |         | RNAseq            |           |           |                  |              |               |                  |            |         |
|----------|----------|----------|-------------|------------|---------|-------------------|-----------|-----------|------------------|--------------|---------------|------------------|------------|---------|
| gene     | Blood    | Kidney   | methyl.diff | pMWU.fdr   | Match ? | gene              | blood     | kidney    | log2(fold_ratio) | blood+ 0.001 | kidney+ 0.001 | log2(fold_ratio) | q_value    | Match ? |
| Hs6st3   | 0.083672 | 0.028261 | -0.055411   | 5.90E-05   | No      | Atrn              | 4.52243   | 12.5869   | 1.47676          | 4.52343      | 12.5879       | 1.47654857       | 0.00018329 | No      |
| Hsbp1l1  | 0.15269  | 0.051908 | -0.100782   | 0.00019103 | No      | Atrnl1            | 0.439432  | 8.25662   | 4.23184          | 0.440432     | 8.25762       | 4.22873483       | 0.00018329 | No      |
| Hsd17b14 | 0.72697  | 0.27227  | -0.4547     | 0.00060029 | No      | Atrx              | 27.6261   | 11.6271   | -1.24854         | 27.6271      | 11.6281       | -1.2484687       | 0.00140841 | No      |
| Hsf4     | 0.76097  | 0.3186   | -0.44237    | 4.80E-09   | No      | Atxn2             | 14.8099   | 35.4585   | 1.25957          | 14.8109      | 35.4595       | 1.25951288       | 0.00406781 | No      |
| Hspa12a  | 0.24622  | 0.072982 | -0.173238   | 0.00017122 | No      | Atxn2l            | 68.158    | 26.9092   | -1.34078         | 68.159       | 26.9102       | -1.3407511       | 0.00018329 | No      |
| Hspb2    | 0.76636  | 0.3951   | -0.37126    | 1.41E-05   | No      | Atxn7             | 14.9858   | 4.02814   | -1.89542         | 14.9868      | 4.02914       | -1.8951485       | 0.00018329 | No      |
| Htr5a    | 0.38673  | 0.2108   | -0.17593    | 0.00894698 | No      | ATXN7L2           | 24.8491   | 12.0495   | -1.04421         | 24.8501      | 12.0505       | -1.0441586       | 0.00082046 | No      |
| Htra3    | 0.18495  | 0.045361 | -0.139589   | 0.00017122 | No      | Atxn7l3           | 26.5461   | 12.6347   | -1.07111         | 26.5471      | 12.6357       | -1.0710487       | 0.00469886 | No      |
| lbsp     | 0.69381  | 0.33033  | -0.36348    | 0.00120161 | No      | Atxn7l4           | 13.0705   | 3.17034   | -2.04361         | 13.0715      | 3.17134       | -2.0432602       | 0.00018329 | No      |
| lcam4    | 0.3257   | 0.16193  | -0.16377    | 0.00022961 | No      | AU040320          | 10.8449   | 30.5469   | 1.49401          | 10.8459      | 30.5479       | 1.49392343       | 0.00018329 | No      |
| lido1    | 0.91477  | 0.75532  | -0.15945    | 1.09E-07   | No      | Aven              | 25.944    | 16.5945   | -0.644695        | 25.945       | 16.5955       | -0.6446644       | 0.047797   | No      |
| lfgf2    | 0.52774  | 0.34234  | -0.1854     | 0.04680399 | No      | Avl9              | 8.46272   | 4.7728    | -0.826285        | 8.46372      | 4.7738        | -0.8261538       | 0.00970533 | No      |
| lfgfbp6  | 0.39518  | 0.23099  | -0.16419    | 0.00085417 | No      | Avpi1             | 10.5523   | 37.0501   | 1.81192          | 10.5533      | 37.0511       | 1.81182218       | 0.00018329 | No      |
| lfgfbp7  | 0.071927 | 0.018318 | -0.053609   | 2.08E-07   | No      | Avpr1a            | 0         | 1.10218   | inf              | 0.001        | 1.10318       | 10.1074525       | 0.00018329 | No      |
| lgsf21   | 0.22917  | 0.11042  | -0.11875    | 0.01761018 | No      | Avpr2             | 2.3595    | 16.5356   | 2.80902          | 2.3605       | 16.5366       | 2.80849825       | 0.00018329 | No      |
| ll11     | 0.31891  | 0.13378  | -0.18513    | 8.22E-05   | No      | Axin1             | 30.5418   | 14.0598   | -1.11921         | 30.5428      | 14.0608       | -1.1191536       | 0.00018329 | No      |
| ll17c    | 0.8213   | 0.67996  | -0.14134    | 0.00092821 | No      | Axin2             | 21.1491   | 2.48182   | -3.09113         | 21.1501      | 2.48282       | -3.0906129       | 0.00018329 | No      |
| ll1r2    | 0.8012   | 0.29943  | -0.50177    | 6.50E-07   | No      | Axl               | 0         | 6.03576   | inf              | 0.001        | 6.03676       | 12.5595587       | 0.00018329 | No      |
| ll1rapl2 | 0.20411  | 0.088888 | -0.115222   | 0.01544668 | No      | Azi1              | 4.94222   | 21.032    | 2.08936          | 4.94322      | 21.033        | 2.08913162       | 0.00018329 | No      |
| ll22ra1  | 0.71038  | 0.50955  | -0.20083    | 0.03760671 | No      | Azi2              | 47.7467   | 24.9387   | -0.937012        | 47.7477      | 24.9397       | -0.9369871       | 0.00082046 | No      |
| ll4      | 0.7583   | 0.26424  | -0.49406    | 0.00142182 | No      | B230118H07<br>Rik | 5.62372   | 70.1355   | 3.64055          | 5.62472      | 70.1365       | 3.64031225       | 0.00018329 | No      |
| lna      | 0.11332  | 0.047391 | -0.065929   | 0.00049132 | No      | B230216G23<br>Rik | 0.0746092 | 3.55438   | 5.5741           | 0.0756092    | 3.55538       | 5.55529816       | 0.0100349  | No      |
| lnhbe    | 0.5146   | 0.15627  | -0.35833    | 7.19E-07   | No      | B2m               | 3309.15   | 838.624   | -1.98037         | 3309.151     | 838.625       | -1.9803634       | 0.00799878 | No      |
| lnpp5a   | 0.68682  | 0.42666  | -0.26016    | 0.00034148 | No      | B3galnt2          | 21.4012   | 8.30828   | -1.36507         | 21.4022      | 8.30928       | -1.3649637       | 0.0116961  | No      |
| linsig1  | 0.26108  | 0.18716  | -0.07392    | 5.90E-05   | No      | B3galt5           | 1.45385   | 2.77582   | 0.933034         | 1.45485      | 2.77682       | 0.93256325       | 0.0118093  | No      |
| lrf2bp1  | 0.71418  | 0.19828  | -0.5159     | 3.77E-12   | No      | B3gat1            | 0         | 0.638355  | inf              | 0.001        | 0.639355      | 9.3204734        | 0.00603614 | No      |
| lrf6     | 0.24545  | 0.079384 | -0.166066   | 0.00142182 | No      | B3glct            | 2.45056   | 5.94573   | 1.27874          | 2.45156      | 5.94673       | 1.2783965        | 0.00018329 | No      |
| lrf8     | 0.63353  | 0.43781  | -0.19572    | 0.00275507 | No      | B3gnt2            | 98.0637   | 19.3368   | -2.34237         | 98.0647      | 19.3378       | -2.3423102       | 0.00018329 | No      |
| lrgm     | 0.001528 | 0.092159 | 0.090631    | 5.08E-07   | No      | B3gnt5            | 0.915476  | 0.0628257 | -3.86509         | 0.916476     | 0.0638257     | -3.8438877       | 0.0063852  | No      |
| lrx4     | 0.074306 | 0.014972 | -0.059334   | 4.00E-05   | No      | B4galnt1          | 51.8903   | 12.7033   | -2.03026         | 51.8913      | 12.7043       | -2.0301758       | 0.00051281 | No      |
| lsg2012  | 0.094328 | 0.18171  | 0.087382    | 0.00034724 | No      | B4galnt2          | 0.0965544 | 1.48244   | 3.94049          | 0.0975544    | 1.48344       | 3.92659582       | 0.016558   | No      |
| ltga8    | 0.82515  | 0.43762  | -0.38753    | 3.15E-05   | No      | B4galnt4          | 0.479417  | 2.6545    | 2.46909          | 0.480417     | 2.6555        | 2.46662442       | 0.00111812 | No      |
| ltgbl1   | 0.64543  | 0.43808  | -0.20735    | 2.26E-05   | No      | B4galt1           | 35.4576   | 16.0777   | -1.14104         | 35.4586      | 16.0787       | -1.1409848       | 0.00082046 | No      |
| ltih1    | 0.70013  | 0.51749  | -0.18264    | 0.03032002 | No      | B4galt3           | 18.3298   | 32.9179   | 0.844685         | 18.3308      | 32.9189       | 0.84464638       | 0.0063852  | No      |
| ltpka    | 0.47511  | 0.19628  | -0.27883    | 6.21E-07   | No      | B4galt4           | 0.348673  | 3.90025   | 3.48362          | 0.349673     | 3.90125       | 3.47985814       | 0.00018329 | No      |
| lmjd8    | 0.96691  | 0.75153  | -0.21538    | 2.16E-06   | No      | B4galt5           | 8.34031   | 16.1605   | 0.954301         | 8.34131      | 16.1615       | 0.95421522       | 0.0111567  | No      |
| ljph2    | 0.85237  | 0.55882  | -0.29355    | 8.22E-05   | No      | B4galt6           | 0.11743   | 5.73157   | 5.60906          | 0.11843      | 5.73257       | 5.59707558       | 0.00018329 | No      |
| ljph3    | 0.10811  | 0.042184 | -0.065926   | 0.00017463 | No      | B630005N1<br>4Rik | 9.87962   | 3.98171   | -1.31107         | 9.88062      | 3.98271       | -1.3108511       | 0.00018329 | No      |

| RRBS      |          |           |             |            |         | RNAseq         |           |          |                  |              |               |                  |            |         |
|-----------|----------|-----------|-------------|------------|---------|----------------|-----------|----------|------------------|--------------|---------------|------------------|------------|---------|
| gene      | Blood    | Kidney    | methyl.diff | pMWU.fdr   | Match ? | gene           | blood     | kidney   | log2(fold_ratio) | blood+ 0.001 | kidney+ 0.001 | log2(fold_ratio) | q_value    | Match ? |
| Kbtbd4    | 0.82287  | 0.51679   | -0.30608    | 3.76E-05   | No      | B930041F14 Rik | 0         | 0.799905 | inf              | 0.001        | 0.800905      | 9.64548732       | 0.00018329 | No      |
| Kbtbd6    | 0.31539  | 0.16634   | -0.14905    | 1.12E-06   | No      | B9d1           | 1.92571   | 11.4757  | 2.57512          | 1.92671      | 11.4767       | 2.57449653       | 0.00018329 | No      |
| Kbtbd7    | 0.31539  | 0.16634   | -0.14905    | 1.12E-06   | No      | Baat           | 0.0338036 | 0.779398 | 4.52711          | 0.0348036    | 0.780398      | 4.48690163       | 0.017077   | No      |
| Kcna5     | 0.1844   | 0.33241   | 0.14801     | 4.05E-06   | No      | Bach1          | 7.52062   | 3.8916   | -0.950488        | 7.52162      | 3.8926        | -0.9503093       | 0.0183081  | No      |
| Kcnb1     | 0.46056  | 0.37271   | -0.08785    | 0.01464158 | No      | Bach2          | 29.7142   | 4.02073  | -2.88562         | 29.7152      | 4.02173       | -2.885313        | 0.00018329 | No      |
| Kcnc1     | 0.53807  | 0.18842   | -0.34965    | 1.12E-06   | No      | Bag2           | 0.815543  | 12.3547  | 3.92116          | 0.816543     | 12.3557       | 3.91950408       | 0.00018329 | No      |
| Kcnd1     | 0.55757  | 0.32297   | -0.2346     | 0.04893199 | No      | Bahcc1         | 0         | 0.739698 | inf              | 0.001        | 0.740698      | 9.53274163       | 0.00018329 | No      |
| Kcnd3     | 0.17551  | 0.039381  | -0.136129   | 0.0023061  | No      | Baiap2         | 5.56094   | 21.0524  | 1.92059          | 5.56194      | 21.0534       | 1.92039315       | 0.00035173 | No      |
| Kcne2     | 0.80521  | 0.40344   | -0.40177    | 1.01E-05   | No      | Baiap2l1       | 1.09728   | 8.66888  | 2.98192          | 1.09828      | 8.66988       | 2.98076612       | 0.00018329 | No      |
| Kcne5     | 0.65248  | 0.33252   | -0.31996    | 0.00022961 | No      | Baiap2l2       | 2.26422   | 41.6377  | 4.20081          | 2.26522      | 41.6387       | 4.20020195       | 0.00018329 | No      |
| Kcnf1     | 0.74568  | 0.61362   | -0.13206    | 0.0445679  | No      | Baiap3         | 41.3157   | 9.0388   | -2.19249         | 41.3167      | 9.0398        | -2.1923623       | 0.00066911 | No      |
| Kcng1     | 0.090781 | 0.25439   | 0.163609    | 5.44E-06   | No      | Bambi          | 0.490607  | 38.7067  | 6.30187          | 0.491607     | 38.7077       | 6.29897132       | 0.00018329 | No      |
| Kcng4     | 0.09838  | 0.16328   | 0.0649      | 0.02160305 | No      | Bank1          | 1.48808   | 0.351906 | -2.08019         | 1.48908      | 0.352906      | -2.0770654       | 0.00018329 | No      |
| Kcnh1     | 0.063101 | 0.0096612 | -0.0534398  | 0.00125283 | No      | Barx2          | 0         | 0.643875 | inf              | 0.001        | 0.644875      | 9.33287573       | 0.00018329 | No      |
| Kcnh3     | 0.093546 | 0.036081  | -0.057465   | 0.00049132 | No      | Baz1a          | 21.3067   | 7.35532  | -1.53445         | 21.3077      | 7.35632       | -1.5343187       | 0.00018329 | No      |
| Kcnh7     | 0.089945 | 0.030022  | -0.059923   | 3.58E-09   | No      | Baz1b          | 33.9323   | 17.5492  | -0.951252        | 33.9333      | 17.5502       | -0.9512143       | 0.00082046 | No      |
| Kcnip1    | 0.12746  | 0.046164  | -0.081296   | 1.67E-09   | No      | Baz2a          | 55.2186   | 14.9549  | -1.88454         | 55.2196      | 14.9559       | -1.8844657       | 0.00018329 | No      |
| Kcnj14    | 0.5164   | 0.24953   | -0.26687    | 3.77E-12   | No      | Baz2b          | 32.2152   | 10.3096  | -1.64375         | 32.2162      | 10.3106       | -1.643658        | 0.00018329 | No      |
| Kcnj3     | 0.087516 | 0.033431  | -0.054085   | 5.43E-09   | No      | Bbs1           | 0.339378  | 7.66883  | 4.49804          | 0.340378     | 7.66983       | 4.4939849        | 0.00018329 | No      |
| Kcnk13    | 0.074256 | 0.25048   | 0.176224    | 0.00017463 | No      | Bbs2           | 8.98972   | 38.1837  | 2.08661          | 8.99072      | 38.1847       | 2.08648613       | 0.00018329 | No      |
| Kcnk2     | 0.07452  | 0.017045  | -0.057475   | 7.89E-05   | No      | Bbs5           | 1.62541   | 8.99859  | 2.46889          | 1.62641      | 8.99959       | 2.46816829       | 0.00018329 | No      |
| Kcnk4     | 0.16444  | 0.060466  | -0.103974   | 1.77E-06   | No      | BC021891       | 0         | 6.01936  | inf              | 0.001        | 6.02036       | 12.555634        | 0.00018329 | No      |
| Kcnk9     | 0.16056  | 0.072804  | -0.087756   | 0.00368736 | No      | BC030307       | 0.196848  | 1.08774  | 2.46618          | 0.197848     | 1.08874       | 2.46019508       | 0.00615197 | No      |
| Kcnma1    | 0.074116 | 0.0092864 | -0.0648296  | 0.00768781 | No      | BC030867       | 0.0553804 | 0.588427 | 3.40941          | 0.0563804    | 0.589427      | 3.38604753       | 0.00709238 | No      |
| Kcnn1     | 0.43082  | 0.13392   | -0.2969     | 3.27E-07   | No      | BC068281       | 1.45478   | 3.88844  | 1.41839          | 1.45578      | 3.88944       | 1.4177701        | 0.0242348  | No      |
| Kcns2     | 0.1      | 0.03823   | -0.06177    | 0.00219565 | No      | Bcam           | 0         | 184.362  | inf              | 0.001        | 184.363       | 17.4921896       | 0.00018329 | No      |
| Kctd11    | 0.84507  | 0.50719   | -0.33788    | 2.23E-06   | No      | Bcap29         | 85.0489   | 12.4011  | -2.77782         | 85.0499      | 12.4021       | -2.7777251       | 0.00018329 | No      |
| Kctd7     | 0.8264   | 0.69619   | -0.13021    | 0.00455632 | No      | Bcar1          | 0.0597075 | 28.4288  | 8.89522          | 0.0607075    | 28.4298       | 8.87131347       | 0.046173   | No      |
| Kdf1      | 0.66876  | 0.17981   | -0.48895    | 2.30E-10   | No      | Bcar3          | 0.473922  | 9.7135   | 4.35727          | 0.474922     | 9.7145        | 4.35437725       | 0.00018329 | No      |
| Kdm6b     | 0.89876  | 0.5609    | -0.33786    | 8.72E-07   | No      | Bcas2          | 112.913   | 51.4336  | -1.13442         | 112.914      | 51.4346       | -1.1344133       | 0.00018329 | No      |
| Kdsr      | 0.48929  | 0.19404   | -0.29525    | 1.22E-08   | No      | Bckdha         | 29.8032   | 111.41   | 1.90234          | 29.8042      | 111.411       | 1.90230413       | 0.00018329 | No      |
| Khdrbs2   | 0.097184 | 0.032252  | -0.064932   | 0.00013739 | No      | Bckdhb         | 27.7648   | 109.062  | 1.97383          | 27.7658      | 109.063       | 1.97378088       | 0.00018329 | No      |
| Khdrbs3   | 0.89822  | 0.63776   | -0.26046    | 5.90E-05   | No      | BCL11B         | 54.0527   | 3.81681  | -3.82393         | 54.0537      | 3.81781       | -3.8235762       | 0.00018329 | No      |
| Kiaa0895l | 0.22649  | 0.076296  | -0.150194   | 0.0103156  | No      | Bcl2           | 25.4561   | 4.91514  | -2.37271         | 25.4571      | 4.91614       | -2.3724702       | 0.00018329 | No      |
| Kif26a    | 0.28759  | 0.079667  | -0.207923   | 0.00120161 | No      | Bcl2a1         | 19.1612   | 61.3811  | 1.67961          | 19.1622      | 61.3821       | 1.6795548        | 0.00018329 | No      |
| Kif2b     | 0.9271   | 0.71958   | -0.20752    | 9.15E-06   | No      | Bcl2l1         | 5.89002   | 70.1187  | 3.57346          | 5.89102      | 70.1197       | 3.57323047       | 0.00018329 | No      |
| Kiss1r    | 0.11011  | 0.042296  | -0.067814   | 0.01265586 | No      | BCL2L11        | 9.51787   | 2.97245  | -1.67899         | 9.51887      | 2.97345       | -1.6786525       | 0.00018329 | No      |
| Klc1      | 0.20075  | 0.056028  | -0.144722   | 0.00294427 | No      | Bcl2l14        | 0.20412   | 4.08178  | 4.32171          | 0.20512      | 4.08278       | 4.31501176       | 0.00018329 | No      |
| Klf14     | 0.29394  | 0.13998   | -0.15396    | 1.72E-09   | No      | Bcl6           | 4.40353   | 9.32729  | 1.0828           | 4.40453      | 9.32829       | 1.08262456       | 0.00051281 | No      |
| Klf16     | 0.015449 | 0.068482  | 0.053033    | 0.00011533 | No      | Bcl7a          | 1.07871   | 7.64638  | 2.82547          | 1.07971      | 7.64738       | 2.82432169       | 0.00018329 | No      |
| Klhl38    | 0.88755  | 0.79033   | -0.09722    | 0.01544668 | No      | Bcl9l          | 26.0577   | 9.42092  | -1.46777         | 26.0587      | 9.42192       | -1.4676721       | 0.00018329 | No      |

| RRBS         |          |          |             |            |         | RNAseq  |           |           |                  |              |               |                  |            |         |
|--------------|----------|----------|-------------|------------|---------|---------|-----------|-----------|------------------|--------------|---------------|------------------|------------|---------|
| gene         | Blood    | Kidney   | methyl.diff | pMWU.fdr   | Match ? | gene    | blood     | kidney    | log2(fold_ratio) | blood+ 0.001 | kidney+ 0.001 | log2(fold_ratio) | q_value    | Match ? |
| Klhl41       | 0.87637  | 0.62126  | -0.25511    | 0.00120161 | No      | Bclaf1  | 77.1156   | 40.4568   | -0.93064         | 77.1166      | 40.4578       | -0.9306236       | 0.0323887  | No      |
| Krt1         | 0.85449  | 0.74172  | -0.11277    | 0.00832699 | No      | Bcs1l   | 2.69937   | 6.02769   | 1.15898          | 2.70037      | 6.02869       | 1.15868745       | 0.00224282 | No      |
| Krt25        | 0.76171  | 0.64618  | -0.11553    | 0.02915203 | No      | Bdh2    | 3.14663   | 37.1589   | 3.56183          | 3.14763      | 37.1599       | 3.56140875       | 0.00018329 | No      |
| Krt27        | 0.86563  | 0.80628  | -0.05935    | 0.01349957 | No      | Bdp1    | 10.6177   | 4.40002   | -1.27089         | 10.6187      | 4.40102       | -1.2706973       | 0.00018329 | No      |
| Krt72        | 0.91694  | 0.73783  | -0.17911    | 1.17E-05   | No      | Bend5   | 2.86798   | 14.0599   | 2.29347          | 2.86898      | 14.0609       | 2.29307912       | 0.00018329 | No      |
| Krt75        | 0.74583  | 0.5972   | -0.14863    | 0.02160305 | No      | Bend7   | 0         | 3.8014    | inf              | 0.001        | 3.8024        | 11.8926946       | 0.00018329 | No      |
| Krt83        | 0.77074  | 0.37677  | -0.39397    | 3.77E-12   | No      | Bex1    | 15.1562   | 36.2193   | 1.25685          | 15.1572      | 36.2203       | 1.25679523       | 0.00051281 | No      |
| Krtap19-5    | 0.96341  | 0.86343  | -0.09998    | 0.00142182 | No      | Bex2    | 2.37686   | 8.28274   | 1.80105          | 2.37786      | 8.28374       | 1.8006185        | 0.00154856 | No      |
| Kxd1         | 0.90347  | 0.76837  | -0.1351     | 0.0017951  | No      | Bhlhe22 | 3.50226   | 0.0842539 | -5.3774          | 3.50326      | 0.0852539     | -5.3607884       | 0.00018329 | No      |
| L3hypdh      | 0.63203  | 0.14656  | -0.48547    | 5.63E-11   | No      | Bhlhe40 | 3.39028   | 34.3372   | 3.34029          | 3.39128      | 34.3382       | 3.33991261       | 0.00018329 | No      |
| Lag3         | 0.1655   | 0.34687  | 0.18137     | 7.55E-07   | No      | Bicc1   | 0.157657  | 31.087    | 7.62338          | 0.158657     | 31.088        | 7.61430282       | 0.00018329 | No      |
| Lamp5        | 0.071019 | 0.044168 | -0.026851   | 0.00692761 | No      | Bicd2   | 9.37347   | 21.4      | 1.19095          | 9.37447      | 21.401        | 1.19086918       | 0.0128946  | No      |
| Lbx1         | 0.10575  | 0.035448 | -0.070302   | 0.00542685 | No      | Bid     | 44.0734   | 10.2836   | -2.09957         | 44.0744      | 10.2846       | -2.0994552       | 0.00066911 | No      |
| Lbx2         | 0.15394  | 0.077501 | -0.076439   | 0.00294427 | No      | Bin1    | 186.164   | 78.0495   | -1.25411         | 186.165      | 78.0505       | -1.2541021       | 0.00018329 | No      |
| Lect1        | 0.84549  | 0.77404  | -0.07145    | 0.0103156  | No      | Bin2    | 163.717   | 96.0002   | -0.77009         | 163.718      | 96.0012       | -0.7700886       | 0.012679   | No      |
| Lefty1       | 0.22117  | 0.072169 | -0.149001   | 2.72E-05   | No      | Birc2   | 29.3787   | 14.6327   | -1.00557         | 29.3797      | 14.6337       | -1.0055251       | 0.00035173 | No      |
| Lgals7       | 0.8876   | 0.69036  | -0.19724    | 1.79E-05   | No      | Birc5   | 2.01597   | 5.10201   | 1.33959          | 2.01697      | 5.10301       | 1.33915884       | 0.00698138 | No      |
| Lhx2         | 0.089673 | 0.17451  | 0.084837    | 0.00368736 | No      | BIVM    | 6.57576   | 11.909    | 0.856827         | 6.57676      | 11.91         | 0.85672448       | 0.0122333  | No      |
| Lhx5         | 0.11142  | 0.038178 | -0.073242   | 7.48E-05   | No      | Blcap   | 21.0019   | 37.8571   | 0.850047         | 21.0029      | 37.8581       | 0.85001346       | 0.00097029 | No      |
| Lhx6         | 0.099409 | 0.042615 | -0.056794   | 0.00955793 | No      | Blk     | 1.27528   | 0.548696  | -1.21673         | 1.27628      | 0.549696      | -1.215239        | 0.0341877  | No      |
| Lif          | 0.29442  | 0.098228 | -0.196192   | 0.00368736 | No      | Blnk    | 1.48539   | 26.1307   | 4.13683          | 1.48639      | 26.1317       | 4.13591638       | 0.00018329 | No      |
| Lin7a        | 0.08344  | 0.03263  | -0.05081    | 0.0031273  | No      | Bloc1s1 | 80.113    | 172.205   | 1.10402          | 80.114       | 172.206       | 1.10400913       | 0.00035173 | No      |
| Lingo3       | 0.7506   | 0.56202  | -0.18858    | 0.00186467 | No      | Bloc1s2 | 66.2678   | 32.099    | -1.04578         | 66.2688      | 32.1          | -1.0457565       | 0.00018329 | No      |
| Lmx1a        | 0.18093  | 0.068674 | -0.112256   | 0.01349957 | No      | Bloc1s5 | 11.3739   | 24.1099   | 1.0839           | 11.3749      | 24.1109       | 1.08383164       | 0.00066911 | No      |
| Lmx1b        | 0.093629 | 0.041899 | -0.05173    | 1.42E-08   | No      | Blvra   | 18.6559   | 33.4183   | 0.841008         | 18.6569      | 33.4193       | 0.84097222       | 0.00788539 | No      |
| LOC100125364 | 0.24956  | 0.087806 | -0.161754   | 0.00011924 | No      | BLVRB   | 8.55382   | 16.0474   | 0.907701         | 8.55482      | 16.0484       | 0.90762007       | 0.0183081  | No      |
| LOC100362783 | 0.96045  | 0.2751   | -0.68535    | 1.74E-11   | No      | Blzf1   | 11.5739   | 5.5607    | -1.05753         | 11.5749      | 5.5617        | -1.0574019       | 0.00066911 | No      |
| LOC100909539 | 0.13615  | 0.053673 | -0.082477   | 0.00128825 | No      | Bmf     | 1.01181   | 3.99784   | 1.98229          | 1.01281      | 3.99884       | 1.981218         | 0.00035173 | No      |
| LOC100911068 | 0.96103  | 0.9032   | -0.05783    | 0.01544668 | No      | Bmp1    | 0.576002  | 12.7866   | 4.47241          | 0.577002     | 12.7876       | 4.47002539       | 0.00018329 | No      |
| LOC102549772 | 0.92296  | 0.82155  | -0.10141    | 0.00351975 | No      | Bmp2    | 0         | 1.75448   | inf              | 0.001        | 1.75548       | 10.7776498       | 0.00018329 | No      |
| LOC102553190 | 0.0403   | 0.15841  | 0.11811     | 1.12E-06   | No      | Bmp7    | 3.07567   | 28.528    | 3.2134           | 3.07667      | 28.529        | 3.21298756       | 0.00018329 | No      |
| LOC106182250 | 0.85813  | 0.6085   | -0.24963    | 4.67E-05   | No      | Bmpr1a  | 0.0640864 | 8.46914   | 7.04605          | 0.0650864    | 8.47014       | 7.02388589       | 0.00018329 | No      |
| LOC106736471 | 0.65175  | 0.41229  | -0.23946    | 0.00868315 | No      | Bmpr1b  | 0         | 0.624474  | inf              | 0.001        | 0.625474      | 9.2888061        | 0.00018329 | No      |
| LOC257642    | 0.32255  | 0.18826  | -0.13429    | 3.15E-05   | No      | Bmpr2   | 3.11028   | 7.45059   | 1.26031          | 3.11128      | 7.45159       | 1.26004006       | 0.00018329 | No      |

| RRBS      |           |          |             |            |         | RNAseq         |          |          |                  |              |               |                  |            |         |
|-----------|-----------|----------|-------------|------------|---------|----------------|----------|----------|------------------|--------------|---------------|------------------|------------|---------|
| gene      | Blood     | Kidney   | methyl.diff | pMWU.fdr   | Match ? | gene           | blood    | kidney   | log2(fold_ratio) | blood+ 0.001 | kidney+ 0.001 | log2(fold_ratio) | q_value    | Match ? |
| LOC310926 | 0.4119    | 0.27097  | -0.14093    | 0.00077922 | No      | Bms1           | 26.7825  | 15.1755  | -0.819545        | 26.7835      | 15.1765       | -0.8195054       | 0.00506686 | No      |
| LOC500077 | 0.3324    | 0.25041  | -0.08199    | 0.00128825 | No      | Bnip3          | 2.08897  | 63.9664  | 4.93645          | 2.08997      | 63.9674       | 4.93578271       | 0.00018329 | No      |
| LOC500331 | 0.92468   | 0.44109  | -0.48359    | 3.77E-12   | No      | Bnip3l         | 59.1838  | 31.831   | -0.894767        | 59.1848      | 31.832        | -0.8947489       | 0.00066911 | No      |
| LOC500567 | 0.95021   | 0.5444   | -0.40581    | 3.78E-09   | No      | Boc            | 0.275186 | 4.68088  | 4.0883           | 0.276186     | 4.68188       | 4.08337586       | 0.00018329 | No      |
| LOC681383 | 0.39637   | 0.17458  | -0.22179    | 0.00021046 | No      | BOD1           | 9.17676  | 21.0647  | 1.19877          | 9.17776      | 21.0657       | 1.19868187       | 0.00111812 | No      |
| LOC681766 | 0.43616   | 0.24755  | -0.18861    | 1.14E-07   | No      | Bod1l          | 26.2173  | 11.5891  | -1.17776         | 26.2183      | 11.5901       | -1.1776811       | 0.00238141 | No      |
| LOC682102 | 0.22248   | 0.083684 | -0.138796   | 3.48E-05   | No      | Bola1          | 26.6568  | 53.6929  | 1.01023          | 26.6578      | 53.6939       | 1.01020047       | 0.00126492 | No      |
| LOC687707 | 0.90292   | 0.77863  | -0.12429    | 0.00351975 | No      | Bora           | 6.46064  | 1.88068  | -1.78042         | 6.46164      | 1.88168       | -1.7798791       | 0.015599   | No      |
| LOC688765 | 0.17698   | 0.080306 | -0.096674   | 0.00196002 | No      | Bpgm           | 13.873   | 28.2966  | 1.02835          | 13.874       | 28.2976       | 1.02829591       | 0.00082046 | No      |
| LOC689959 | 0.15328   | 0.058418 | -0.094862   | 0.0445679  | No      | Bphl           | 0.268133 | 32.6703  | 6.92889          | 0.269133     | 32.6713       | 6.92356075       | 0.00018329 | No      |
| LOC690435 | 0.73449   | 0.28638  | -0.44811    | 3.77E-12   | No      | Bpnt1          | 11.7622  | 25.6568  | 1.12519          | 11.7632      | 25.6578       | 1.1251169        | 0.00018329 | No      |
| LOC690617 | 0.85468   | 0.42471  | -0.42997    | 3.77E-12   | No      | Brap           | 19.9595  | 10.7207  | -0.896672        | 19.9605      | 10.7217       | -0.8966142       | 0.0229171  | No      |
| LOC691153 | 0.49758   | 0.1447   | -0.35288    | 3.77E-12   | No      | Brd1           | 35.1384  | 14.6497  | -1.26217         | 35.1394      | 14.6507       | -1.26212         | 0.00018329 | No      |
| Lrp4      | 0.13677   | 0.044288 | -0.092482   | 5.85E-07   | No      | Brd4           | 37.5859  | 14.4846  | -1.37567         | 37.5869      | 14.4856       | -1.3756105       | 0.00018329 | No      |
| Lrrc14b   | 0.96318   | 0.89175  | -0.07143    | 5.00E-06   | No      | Brf2           | 11.379   | 6.76012  | -0.751257        | 11.38        | 6.76112       | -0.7511664       | 0.0339945  | No      |
| Lrrc26    | 0.25601   | 0.1008   | -0.15521    | 2.23E-06   | No      | Bri3           | 75.9482  | 258.175  | 1.76526          | 75.9492      | 258.176       | 1.76524822       | 0.00018329 | No      |
| Lrrc3     | 0.46102   | 0.18501  | -0.27601    | 0.00832699 | No      | Bricd5         | 6.81182  | 22.0781  | 1.6965           | 6.81282      | 22.0791       | 1.69635737       | 0.00948282 | No      |
| Lrrc4b    | 0.0973    | 0.045988 | -0.051312   | 0.03275343 | No      | Brk1           | 109.439  | 68.2351  | -0.681541        | 109.44       | 68.2361       | -0.681533        | 0.00811172 | No      |
| Lrrc52    | 0.89128   | 0.59776  | -0.29352    | 3.48E-05   | No      | Brpf1          | 14.6566  | 8.23518  | -0.831679        | 14.6576      | 8.23618       | -0.8316016       | 0.00380824 | No      |
| Lrrc55    | 0.9588    | 0.89552  | -0.06328    | 0.00955793 | No      | Brsk1          | 0.781819 | 2.88002  | 1.88117          | 0.782819     | 2.88102       | 1.879829         | 0.0258543  | No      |
| Lrrc71    | 0.60264   | 0.19829  | -0.40435    | 0.00034148 | No      | Brwd3          | 2.18998  | 1.01909  | -1.10364         | 2.19098      | 1.02009       | -1.1028799       | 0.012679   | No      |
| Lrrc8d    | 0.87831   | 0.34535  | -0.53296    | 1.12E-06   | No      | Bsg            | 103.962  | 604.716  | 2.54019          | 103.963      | 604.717       | 2.54018997       | 0.00018329 | No      |
| Lrrc8e    | 0.5137    | 0.17545  | -0.33825    | 0.00054569 | No      | Bsnd           | 0        | 26.9754  | inf              | 0.001        | 26.9764       | 14.7194102       | 0.00018329 | No      |
| Lrrfip1   | 0.0027273 | 0.19229  | 0.1895627   | 8.08E-07   | No      | Bspry          | 3.9024   | 44.4433  | 3.50953          | 3.9034       | 44.4443       | 3.50919519       | 0.00018329 | No      |
| Lrrn4cl   | 0.90869   | 0.77091  | -0.13778    | 0.00060029 | No      | Bst1           | 4.89546  | 76.0546  | 3.95752          | 4.89646      | 76.0556       | 3.95724347       | 0.00018329 | No      |
| Lta       | 0.0059001 | 0.37687  | 0.3709699   | 4.09E-12   | No      | Btaf1          | 10.4357  | 5.04707  | -1.048           | 10.4367      | 5.04807       | -1.0478618       | 0.00051281 | No      |
| Ltb4r     | 0.59967   | 0.44762  | -0.15205    | 0.02160305 | No      | Btbd2          | 14.8712  | 24.3619  | 0.712109         | 14.8722      | 24.3629       | 0.7120678        | 0.0134442  | No      |
| Ltbp2     | 0.10919   | 0.043471 | -0.065719   | 2.95E-10   | No      | Btc            | 0        | 0.94522  | inf              | 0.001        | 0.94622       | 9.88603184       | 0.00018329 | No      |
| Ly49i7    | 0.75105   | 0.61697  | -0.13408    | 0.0279946  | No      | Btd            | 5.50431  | 23.691   | 2.10571          | 5.50531      | 23.692        | 2.10550428       | 0.00018329 | No      |
| Lypd2     | 0.7413    | 0.51749  | -0.22381    | 0.01448681 | No      | Btf3           | 877.798  | 391.996  | -1.16305         | 877.799      | 391.997       | -1.163048        | 0.00018329 | No      |
| Lyzl6     | 0.20401   | 0.064762 | -0.139248   | 0.01105145 | No      | Btg1           | 1805.16  | 336.123  | -2.42506         | 1805.161     | 336.124       | -2.4250621       | 0.00018329 | No      |
| Mab211i   | 0.060751  | 0.16229  | 0.101539    | 1.42E-06   | No      | Btg2           | 345.88   | 106.392  | -1.70089         | 345.881      | 106.393       | -1.7008725       | 0.00018329 | No      |
| Mab211l2  | 0.042813  | 0.50736  | 0.464547    | 2.30E-10   | No      | Btg3           | 3.30313  | 20.4912  | 2.6331           | 3.30413      | 20.4922       | 2.63273252       | 0.00018329 | No      |
| Madcam1   | 0.68615   | 0.56778  | -0.11837    | 0.03275343 | No      | Btla           | 12.1262  | 0.650804 | -4.21976         | 12.1272      | 0.651804      | -4.2176645       | 0.0114728  | No      |
| Mael      | 0.93535   | 0.82043  | -0.11492    | 0.00102242 | No      | Bub1           | 0.423772 | 1.2711   | 1.58472          | 0.424772     | 1.2721        | 1.58245151       | 0.00018329 | No      |
| Map3k10   | 0.62539   | 0.3818   | -0.24359    | 0.00085417 | No      | Bub1b          | 0.131985 | 0.591073 | 2.16296          | 0.132985     | 0.592073      | 2.15451154       | 0.0160313  | No      |
| Map3k6    | 0.11877   | 0.041187 | -0.077583   | 0.00674226 | No      | Bzw1           | 79.8647  | 39.575   | -1.01297         | 79.8657      | 39.576        | -1.0129502       | 0.00018329 | No      |
| Map3k7cl  | 0.63973   | 0.27642  | -0.36331    | 0.00455632 | No      | Bzw2           | 60.1783  | 30.7043  | -0.970802        | 60.1793      | 30.7053       | -0.9707796       | 0.00051281 | No      |
| Map7d1    | 0.00125   | 0.064327 | 0.063077    | 9.35E-05   | No      | C030039L03 Rik | 1.58518  | 0.465265 | -1.76852         | 1.58618      | 0.466265      | -1.7663345       | 0.00018329 | No      |
| Mapk12    | 0.16056   | 0.058386 | -0.102174   | 1.41E-05   | No      | C1galt1        | 11.9181  | 6.58713  | -0.855428        | 11.9191      | 6.58813       | -0.8553344       | 0.00210945 | No      |
| Mapk9     | 0.11099   | 0.039834 | -0.071156   | 0.0341213  | No      | C1galt1c1      | 5.88236  | 17.989   | 1.61265          | 5.88336      | 17.99         | 1.61248296       | 0.00018329 | No      |

| RRBS      |          |          |             |            |         | RNAseq  |           |          |                  |              |               |                  |            |         |
|-----------|----------|----------|-------------|------------|---------|---------|-----------|----------|------------------|--------------|---------------|------------------|------------|---------|
| gene      | Blood    | Kidney   | methyl.diff | pMWU.fdr   | Match ? | gene    | blood     | kidney   | log2(fold_ratio) | blood+ 0.001 | kidney+ 0.001 | log2(fold_ratio) | q_value    | Match ? |
| Mark3     | 0.13539  | 0.040811 | -0.094579   | 0.00575049 | No      | C1qa    | 0         | 33.6204  | inf              | 0.001        | 33.6214       | 15.0370922       | 0.00018329 | No      |
| Mbd6      | 0.4547   | 0.23436  | -0.22034    | 0.01105145 | No      | C1qb    | 0         | 28.6658  | inf              | 0.001        | 28.6668       | 14.8070932       | 0.00018329 | No      |
| Mboat4    | 0.82151  | 0.65182  | -0.16969    | 0.00023303 | No      | C1qc    | 0         | 41.7427  | inf              | 0.001        | 41.7437       | 15.3492709       | 0.00018329 | No      |
| Mc3r      | 0.7127   | 0.60004  | -0.11266    | 0.00202969 | No      | C1ql4   | 0         | 2.47751  | inf              | 0.001        | 2.47851       | 11.2752574       | 0.00018329 | No      |
| Mchr1     | 0.92913  | 0.80688  | -0.12225    | 9.72E-06   | No      | C2      | 0.448407  | 9.00696  | 4.32816          | 0.449407     | 9.00796       | 4.32510592       | 0.00018329 | No      |
| Mdga2     | 0.1104   | 0.014327 | -0.096073   | 0.00625768 | No      | C2cd2   | 2.20001   | 3.86812  | 0.814127         | 2.20101      | 3.86912       | 0.81383977       | 0.0115803  | No      |
| Mesdc1    | 0.28698  | 0.043154 | -0.243826   | 3.07E-10   | No      | C3      | 0.28039   | 5.6444   | 4.33132          | 0.28139      | 5.6454        | 4.32643284       | 0.00018329 | No      |
| Mfge8     | 0.035257 | 0.32137  | 0.286113    | 4.46E-06   | No      | C3ar1   | 0.0836    | 2.01848  | 4.59362          | 0.0846       | 2.01948       | 4.57718238       | 0.00481718 | No      |
| Mgarp     | 0.66481  | 0.43086  | -0.23395    | 0.02284827 | No      | C4b     | 0.6827    | 14.5405  | 4.41268          | 0.6837       | 14.5415       | 4.41066886       | 0.0256525  | No      |
| Mgat4c    | 0.66278  | 0.25854  | -0.40424    | 0.00142182 | No      | C4bpb   | 0.0815558 | 0.902064 | 3.46737          | 0.0825558    | 0.903064      | 3.45138675       | 0.030565   | No      |
| Mgat4d    | 0.45061  | 0.20615  | -0.24446    | 0.0001006  | No      | C5      | 0.0531841 | 4.35785  | 6.35648          | 0.0541841    | 4.35885       | 6.32993418       | 0.00035173 | No      |
| MGC116121 | 0.78719  | 0.64413  | -0.14306    | 0.00692761 | No      | C5ar1   | 0.539698  | 5.40278  | 3.32348          | 0.540698     | 5.40378       | 3.32107402       | 0.00018329 | No      |
| MGC94207  | 0.79647  | 0.30123  | -0.49524    | 3.85E-12   | No      | Caap1   | 16.3125   | 7.37023  | -1.1462          | 16.3135      | 7.37123       | -1.1460891       | 0.00018329 | No      |
| Miat      | 0.10023  | 0.048448 | -0.051782   | 0.00405617 | No      | Cacfd1  | 6.26361   | 22.2779  | 1.83055          | 6.26461      | 22.2789       | 1.8303814        | 0.00097029 | No      |
| Mif4gd    | 0.96911  | 0.79542  | -0.17369    | 2.26E-05   | No      | Cacna1d | 0.0124975 | 2.52697  | 7.65962          | 0.0134975    | 2.52797       | 7.54914332       | 0.0147272  | No      |
| Mir1199   | 0.079521 | 0.0234   | -0.056121   | 0.01349957 | No      | Cacnb2  | 0.4122    | 1.07663  | 1.3851           | 0.4132       | 1.07763       | 1.38294976       | 0.00799878 | No      |
| Mir124-3  | 0.10517  | 0.034895 | -0.070275   | 0.04680399 | No      | Cacnb3  | 0.109435  | 6.23974  | 5.83333          | 0.110435     | 6.24074       | 5.82044773       | 0.00393885 | No      |
| Mir1247   | 0.17216  | 0.057595 | -0.114565   | 2.79E-05   | No      | Cacul1  | 20.9466   | 11.3617  | -0.882536        | 20.9476      | 11.3627       | -0.8824793       | 0.00445502 | No      |
| Mir126    | 0.83765  | 0.76907  | -0.06858    | 0.00509659 | No      | Cad     | 26.1712   | 12.016   | -1.12302         | 26.1722      | 12.017        | -1.1229584       | 0.00051281 | No      |
| Mir137    | 0.10399  | 0.045896 | -0.058094   | 0.00575049 | No      | Cadm1   | 0.151442  | 7.10838  | 5.55268          | 0.152442     | 7.10938       | 5.5433914        | 0.00018329 | No      |
| Mir138-2  | 0.26987  | 0.49076  | 0.22089     | 4.04E-05   | No      | Cadps2  | 0.198404  | 7.0747   | 5.15616          | 0.199404     | 7.0757        | 5.14910663       | 0.0161386  | No      |
| Mir141    | 0.85519  | 0.69004  | -0.16515    | 0.00033772 | No      | Calcr   | 0         | 2.37883  | inf              | 0.001        | 2.37983       | 11.2166428       | 0.00018329 | No      |
| Mir149    | 0.084276 | 0.23425  | 0.149974    | 0.00128825 | No      | Calcl   | 7.23954   | 1.43649  | -2.33335         | 7.24054      | 1.43749       | -2.3325454       | 0.00018329 | No      |
| Mir182    | 0.56818  | 0.76166  | 0.19348     | 0.00085417 | No      | Cald1   | 0.0164713 | 66.8845  | 11.9875          | 0.0174713    | 66.8855       | 11.9024908       | 0.00018329 | No      |
| Mir196a   | 0.061669 | 0.19532  | 0.133651    | 2.61E-11   | No      | Calhm2  | 3.43068   | 5.92682  | 0.788763         | 3.43168      | 5.92782       | 0.78858661       | 0.0371206  | No      |
| Mir196c   | 0.11282  | 0.41976  | 0.30694     | 3.77E-12   | No      | Calml1  | 267.172   | 139.043  | -0.942237        | 267.173      | 139.044       | -0.9422327       | 0.00140841 | No      |
| Mir203    | 0.1071   | 0.029164 | -0.077936   | 2.64E-06   | No      | Calml3  | 0         | 3.57615  | inf              | 0.001        | 3.57715       | 11.8045949       | 0.00018329 | No      |
| Mir205    | 0.87981  | 0.78123  | -0.09858    | 0.02412126 | No      | Calml4  | 1.09064   | 57.2669  | 5.71446          | 1.09164      | 57.2679       | 5.71315763       | 0.00018329 | No      |
| Mir25     | 0.92712  | 0.71538  | -0.21174    | 6.69E-05   | No      | Caln1   | 0         | 10.2345  | inf              | 0.001        | 10.2355       | 13.321294        | 0.00018329 | No      |
| Mir295-1  | 0.73903  | 0.53269  | -0.20634    | 0.0001859  | No      | Camk1   | 0.35053   | 23.0403  | 6.03848          | 0.35153      | 23.0413       | 6.03443049       | 0.00066911 | No      |
| Mir2964   | 0.97582  | 0.61033  | -0.36549    | 6.50E-07   | No      | Camk1d  | 3.62943   | 1.05063  | -1.78848         | 3.63043      | 1.05163       | -1.7875132       | 0.00018329 | No      |
| Mir3065   | 0.79495  | 0.2281   | -0.56685    | 3.77E-12   | No      | Camk2d  | 19.6612   | 12.4555  | -0.658566        | 19.6622      | 12.4565       | -0.658526        | 0.0181001  | No      |
| Mir326    | 0.77306  | 0.4879   | -0.28516    | 0.00102242 | No      | Camk4   | 57.1621   | 13.1373  | -2.1214          | 57.1631      | 13.1383       | -2.1213055       | 0.00018329 | No      |
| Mir331    | 0.86092  | 0.73359  | -0.12733    | 0.01265586 | No      | Camsap3 | 0.0362802 | 19.4078  | 9.06324          | 0.0372802    | 19.4088       | 9.02408561       | 0.0317975  | No      |
| Mir341    | 0.41734  | 0.28063  | -0.13671    | 3.06E-06   | No      | Camta1  | 6.16341   | 0.573241 | -3.42651         | 6.16441      | 0.574241      | -3.4242346       | 0.00018329 | No      |
| Mir34a    | 0.85828  | 0.68346  | -0.17482    | 0.0023061  | No      | Cand2   | 0.692148  | 3.49227  | 2.33501          | 0.693148     | 3.49327       | 2.33334282       | 0.00018329 | No      |
| Mir3547   | 0.96485  | 0.74605  | -0.2188     | 7.19E-07   | No      | Cap1    | 197.889   | 90.1195  | -1.13478         | 197.89       | 90.1205       | -1.1347715       | 0.00018329 | No      |
| Mir3558   | 0.81141  | 0.75091  | -0.0605     | 0.0279946  | No      | Capg    | 17.1365   | 95.8823  | 2.48419          | 17.1375      | 95.8833       | 2.4841229        | 0.00018329 | No      |
| Mir3569   | 0.57083  | 0.14633  | -0.4245     | 1.35E-07   | No      | Capn1   | 48.187    | 72.8485  | 0.596256         | 48.188       | 72.8495       | 0.59624515       | 0.0286648  | No      |
| Mir3590   | 0.24054  | 0.10578  | -0.13476    | 0.00028052 | No      | Capn13  | 0         | 0.89876  | inf              | 0.001        | 0.89976       | 9.81339642       | 0.00018329 | No      |
| Mir378    | 0.50265  | 0.18662  | -0.31603    | 0.00164763 | No      | Capn5   | 15.0105   | 22.9833  | 0.614609         | 15.0115      | 22.9843       | 0.61458059       | 0.0255527  | No      |

| RRBS    |           |          |             |            |         | RNAseq   |           |         |                  |              |               |                  |            |         |
|---------|-----------|----------|-------------|------------|---------|----------|-----------|---------|------------------|--------------|---------------|------------------|------------|---------|
| gene    | Blood     | Kidney   | methyl.diff | pMWU.fdr   | Match ? | gene     | blood     | kidney  | log2(fold_ratio) | blood+ 0.001 | kidney+ 0.001 | log2(fold_ratio) | q_value    | Match ? |
| Mir431  | 0.84579   | 0.7722   | -0.07359    | 0.02915203 | No      | Capn6    | 0         | 2.2324  | inf              | 0.001        | 2.2334        | 11.1250259       | 0.00018329 | No      |
| Mir455  | 0.78481   | 0.48333  | -0.30148    | 8.62E-05   | No      | Caprin2  | 5.48751   | 10.0143 | 0.86784          | 5.48851      | 10.0153       | 0.86771919       | 0.0434518  | No      |
| Mir6314 | 0.42695   | 0.23261  | -0.19434    | 0.00142182 | No      | Capza1   | 153.105   | 27.5922 | -2.47219         | 153.106      | 27.5932       | -2.4721461       | 0.00018329 | No      |
| Mir6315 | 0.8204    | 0.76828  | -0.05212    | 0.02680411 | No      | Capza2   | 96.5865   | 51.0053 | -0.921173        | 96.5875      | 51.0063       | -0.921161        | 0.00018329 | No      |
| Mir6316 | 0.77068   | 0.67234  | -0.09834    | 0.03863139 | No      | Capzb    | 412.094   | 173.819 | -1.24539         | 412.095      | 173.82        | -1.2453829       | 0.00018329 | No      |
| Mir6326 | 0.19577   | 0.036579 | -0.159191   | 0.00108973 | No      | Car11    | 3.18879   | 33.4512 | 3.39098          | 3.18979      | 33.4522       | 3.39056774       | 0.00018329 | No      |
| Mir6328 | 0.0049476 | 0.33094  | 0.3259924   | 6.02E-11   | No      | Car12    | 0.23236   | 174.999 | 9.55677          | 0.23336      | 175           | 9.55058192       | 0.00018329 | No      |
| Mir6333 | 0.55403   | 0.21969  | -0.33434    | 3.91E-05   | No      | Car2     | 47.0121   | 291.016 | 2.62999          | 47.0131      | 291.017       | 2.62996871       | 0.00018329 | No      |
| Mir671  | 0.76539   | 0.69344  | -0.07195    | 0.04680399 | No      | Car3     | 0         | 3.15197 | inf              | 0.001        | 3.15297       | 11.6224957       | 0.00018329 | No      |
| Mir675  | 0.59671   | 0.40325  | -0.19346    | 0.03760671 | No      | Car5b    | 0.161108  | 23.353  | 7.17944          | 0.162108     | 23.354        | 7.17057057       | 0.00018329 | No      |
| Mir678  | 0.97902   | 0.92224  | -0.05678    | 0.00294427 | No      | Card11   | 28.8822   | 10.0186 | -1.5275          | 28.8832      | 10.0196       | -1.5274057       | 0.00018329 | No      |
| Mir702  | 0.89818   | 0.82796  | -0.07022    | 0.01621946 | No      | Card6    | 23.5662   | 3.29423 | -2.8387          | 23.5672      | 3.29523       | -2.8383293       | 0.00018329 | No      |
| Mir711  | 0.91344   | 0.8322   | -0.08124    | 0.00625768 | No      | Card9    | 0.273747  | 12.8916 | 5.55745          | 0.274747     | 12.8926       | 5.5522957        | 0.00018329 | No      |
| Mir9-1  | 0.1399    | 0.053897 | -0.086003   | 0.02028318 | No      | Carf     | 4.41645   | 2.25956 | -0.966848        | 4.41745      | 2.26056       | -0.9665336       | 0.0368491  | No      |
| Mir92b  | 0.89716   | 0.78708  | -0.11008    | 0.00085417 | No      | Casc3    | 20.7651   | 6.45479 | -1.68572         | 20.7661      | 6.45579       | -1.6855647       | 0.00018329 | No      |
| Mir9-3  | 0.10944   | 0.030724 | -0.078716   | 1.57E-05   | No      | Casd1    | 27.7361   | 6.95026 | -1.99663         | 27.7371      | 6.95126       | -1.9964705       | 0.00018329 | No      |
| Mir99b  | 0.83063   | 0.41425  | -0.41638    | 3.77E-12   | No      | Cask     | 1.19215   | 3.18543 | 1.41793          | 1.19315      | 3.18643       | 1.41716554       | 0.0125688  | No      |
| Misp    | 0.9057    | 0.31264  | -0.59306    | 6.50E-07   | No      | Caskin2  | 0.210495  | 13.0254 | 5.9514           | 0.211495     | 13.0264       | 5.94467107       | 0.00591487 | No      |
| Mixl1   | 0.14185   | 0.038228 | -0.103622   | 0.00040512 | No      | Casp1    | 80.4621   | 22.7295 | -1.82374         | 80.4631      | 22.7305       | -1.8236979       | 0.00018329 | No      |
| Mk1     | 0.88585   | 0.72058  | -0.16527    | 0.00102242 | No      | Casp12   | 0.253229  | 6.40338 | 4.66032          | 0.254229     | 6.40438       | 4.6548584        | 0.00018329 | No      |
| Mmd2    | 0.16864   | 0.06717  | -0.10147    | 0.00575049 | No      | Casp3    | 16.6797   | 11.3094 | -0.560571        | 16.6807      | 11.3104       | -0.5605299       | 0.0496987  | No      |
| Mmel1   | 0.64267   | 0.50139  | -0.14128    | 0.01527608 | No      | Casp7    | 6.1193    | 13.4214 | 1.1331           | 6.1203       | 13.4224       | 1.13296838       | 0.00018329 | No      |
| Mmp14   | 0.14652   | 0.05882  | -0.0877     | 0.01899425 | No      | Casp8ap2 | 5.59519   | 1.81453 | -1.62459         | 5.59619      | 1.81553       | -1.6240542       | 0.00018329 | No      |
| Mmp16   | 0.10712   | 0.050819 | -0.056301   | 7.48E-05   | No      | Casz1    | 0.731368  | 8.66373 | 3.56632          | 0.732368     | 8.66473       | 3.56451413       | 0.00018329 | No      |
| Mos     | 0.29574   | 0.1208   | -0.17494    | 0.00351975 | No      | Cat      | 23.887    | 126.949 | 2.40996          | 23.888       | 126.95        | 2.40990242       | 0.00018329 | No      |
| Mpp3    | 0.92647   | 0.7396   | -0.18687    | 9.35E-05   | No      | Catip    | 0         | 1.28704 | inf              | 0.001        | 1.28804       | 10.3309617       | 0.00393885 | No      |
| Mrc2    | 0.75851   | 0.3586   | -0.39991    | 1.25E-07   | No      | Catsper4 | 0         | 1.76725 | inf              | 0.001        | 1.76825       | 10.7881065       | 0.00018329 | No      |
| Mrpl14  | 0.49951   | 0.19473  | -0.30478    | 0.00212541 | No      | Cav1     | 0.091287  | 9.42352 | 6.68971          | 0.092287     | 9.42452       | 6.6741479        | 0.00018329 | No      |
| Mrpl43  | 0.84634   | 0.70149  | -0.14485    | 0.00015139 | No      | Cav2     | 1.08776   | 14.8661 | 3.7726           | 1.08876      | 14.8671       | 3.77136539       | 0.00018329 | No      |
| Mrpl53  | 0.97665   | 0.90477  | -0.07188    | 3.91E-05   | No      | Cbfb     | 72.957    | 17.54   | -2.05639         | 72.958       | 17.541        | -2.0563352       | 0.00018329 | No      |
| Mrps2   | 0.3534    | 0.48838  | 0.13498     | 0.02284827 | No      | Cbl      | 14.7043   | 3.72748 | -1.97997         | 14.7053      | 3.72848       | -1.9796767       | 0.00018329 | No      |
| Mrps24  | 0.73397   | 0.62773  | -0.10624    | 0.0445679  | No      | Cblb     | 23.9663   | 7.84801 | -1.61061         | 23.9673      | 7.84901       | -1.6104848       | 0.00018329 | No      |
| Msc     | 0.34153   | 0.15051  | -0.19102    | 0.00542685 | No      | Cblc     | 0         | 10.379  | inf              | 0.001        | 10.38         | 13.3415188       | 0.00018329 | No      |
| Msrb2   | 0.69429   | 0.22915  | -0.46514    | 6.50E-07   | No      | Cbll1    | 15.178    | 4.83509 | -1.65036         | 15.179       | 4.83609       | -1.6501637       | 0.00018329 | No      |
| Mst1r   | 0.43779   | 0.53969  | 0.1019      | 0.04893199 | No      | Cbx3     | 150.939   | 76.3472 | -0.983315        | 150.94       | 76.3482       | -0.9833091       | 0.00018329 | No      |
| Mta2    | 0.89342   | 0.52908  | -0.36434    | 3.76E-05   | No      | Cbx4     | 35.2034   | 10.2795 | -1.77595         | 35.2044      | 10.2805       | -1.7758453       | 0.00018329 | No      |
| Mtnr1b  | 0.29412   | 0.43741  | 0.14329     | 0.00021759 | No      | Cbx5     | 12.8044   | 28.0927 | 1.13356          | 12.8054      | 28.0937       | 1.13349432       | 0.00494262 | No      |
| Mvp     | 0.84407   | 0.45664  | -0.38743    | 4.36E-05   | No      | Cbx6     | 2.33409   | 23.2345 | 3.31534          | 2.33509      | 23.2355       | 3.31478063       | 0.00018329 | No      |
| Myh10   | 0.14829   | 0.048966 | -0.099324   | 3.91E-05   | No      | Cbx7     | 39.2953   | 15.3069 | -1.36018         | 39.2963      | 15.3079       | -1.3601171       | 0.00018329 | No      |
| Myh6    | 0.58561   | 0.30187  | -0.28374    | 1.26E-05   | No      | CBY1     | 4.42688   | 21.4458 | 2.27633          | 4.42788      | 21.4468       | 2.27607438       | 0.00018329 | No      |
| Myocd   | 0.19218   | 0.066075 | -0.126105   | 0.00060029 | No      | Cc2d1a   | 16.9962   | 62.4468 | 1.87741          | 16.9972      | 62.4478       | 1.87735364       | 0.00018329 | No      |
| Myod1   | 0.095853  | 0.03311  | -0.062743   | 0.00663046 | No      | Cc2d2a   | 0.0971826 | 7.17188 | 6.20551          | 0.0981826    | 7.17288       | 6.19094131       | 0.00018329 | No      |

| RRBS      |          |          |             |            |         | RNAseq   |           |          |                  |              |               |                  |            |         |
|-----------|----------|----------|-------------|------------|---------|----------|-----------|----------|------------------|--------------|---------------|------------------|------------|---------|
| gene      | Blood    | Kidney   | methyl.diff | pMWU.fdr   | Match ? | gene     | blood     | kidney   | log2(fold_ratio) | blood+ 0.001 | kidney+ 0.001 | log2(fold_ratio) | q_value    | Match ? |
| Myoz1     | 0.73221  | 0.49642  | -0.23579    | 0.00740016 | No      | Ccar1    | 25.9396   | 15.3123  | -0.760466        | 25.9406      | 15.3133       | -0.7604266       | 0.00432763 | No      |
| Mypn      | 0.82562  | 0.68357  | -0.14205    | 0.00085417 | No      | CCDC101  | 46.4761   | 20.3712  | -1.18996         | 46.4771      | 20.3722       | -1.1899183       | 0.00018329 | No      |
| Mzb1      | 0.16072  | 0.61376  | 0.45304     | 6.50E-07   | No      | Ccdc102a | 6.55635   | 13.1836  | 1.00778          | 6.55735      | 13.1846       | 1.007669         | 0.0016929  | No      |
| Nab2      | 0.10913  | 0.43279  | 0.32366     | 0.00128825 | No      | Ccdc104  | 19.396    | 48.8172  | 1.33163          | 19.397       | 48.8182       | 1.33158556       | 0.00018329 | No      |
| Nacad     | 0.783    | 0.56881  | -0.21419    | 0.00120161 | No      | Ccdc111  | 2.03845   | 0.706772 | -1.52816         | 2.03945      | 0.707772      | -1.5268235       | 0.00732142 | No      |
| Nagpa     | 0.85567  | 0.78145  | -0.07422    | 0.00455632 | No      | Ccdc113  | 0.338172  | 22.4456  | 6.05253          | 0.339172     | 22.4466       | 6.04833605       | 0.038364   | No      |
| Nalcn     | 0.2926   | 0.12985  | -0.16275    | 0.00722274 | No      | Ccdc114  | 1.31264   | 0.586207 | -1.16299         | 1.31364      | 0.587207      | -1.1616289       | 0.0473671  | No      |
| Nap15     | 0.38877  | 0.62143  | 0.23266     | 1.49E-07   | No      | CCDC115  | 64.8816   | 29.2284  | -1.15044         | 64.8826      | 29.2294       | -1.1504114       | 0.00018329 | No      |
| Naprt     | 0.9006   | 0.40122  | -0.49938    | 6.19E-09   | No      | Ccdc124  | 62.5528   | 115.341  | 0.882755         | 62.5538      | 115.342       | 0.88274851       | 0.0018326  | No      |
| Narfl     | 0.75996  | 0.60314  | -0.15682    | 0.04893199 | No      | Ccdc126  | 2.66736   | 7.47081  | 1.48585          | 2.66836      | 7.47181       | 1.48550445       | 0.00018329 | No      |
| Nat8      | 0.71005  | 0.25671  | -0.45334    | 8.06E-06   | No      | Ccdc127  | 2.56202   | 6.05223  | 1.24018          | 2.56302      | 6.05323       | 1.23986043       | 0.00686277 | No      |
| Nat8f5    | 0.78817  | 0.29792  | -0.49025    | 2.26E-05   | No      | Ccdc137  | 12.9624   | 5.87494  | -1.14169         | 12.9634      | 5.87594       | -1.1415526       | 0.00066911 | No      |
| Ndc80     | 0.78187  | 0.73025  | -0.05162    | 0.01621946 | No      | Ccdc138  | 0.34861   | 4.21945  | 3.59737          | 0.34961      | 4.22045       | 3.59357848       | 0.00018329 | No      |
| Ndn       | 0.15709  | 0.10564  | -0.05145    | 0.00214889 | No      | Ccdc141  | 0         | 9.89148  | inf              | 0.001        | 9.89248       | 13.2721165       | 0.00018329 | No      |
| Ndn12     | 0.082063 | 0.01613  | -0.065933   | 2.79E-05   | No      | Ccdc15   | 1.91997   | 0.429264 | -2.16114         | 1.92097      | 0.430264      | -2.1585409       | 0.00018329 | No      |
| Ndufa10l1 | 0.3985   | 0.61846  | 0.21996     | 5.20E-10   | No      | Ccdc155  | 1.04082   | 0.25154  | -2.04886         | 1.04182      | 0.25254       | -2.0445222       | 0.0204738  | No      |
| Ndufs6    | 0.82269  | 0.73649  | -0.0862     | 0.00389531 | No      | Ccdc157  | 0.558182  | 2.45451  | 2.13662          | 0.559182     | 2.45551       | 2.13463287       | 0.0167708  | No      |
| Necab2    | 0.79056  | 0.68805  | -0.10251    | 0.00091144 | No      | CCDC159  | 0.324592  | 4.90691  | 3.91811          | 0.325592     | 4.90791       | 3.91397164       | 0.0164547  | No      |
| Nectin4   | 0.74272  | 0.56782  | -0.1749     | 0.02284827 | No      | Ccdc160  | 0         | 3.69118  | inf              | 0.001        | 3.69218       | 11.8502572       | 0.00018329 | No      |
| Neil2     | 0.69918  | 0.47346  | -0.22572    | 0.01178248 | No      | Ccdc163  | 2.41843   | 5.45351  | 1.17311          | 2.41943      | 5.45451       | 1.1727824        | 0.00755425 | No      |
| Nelfb     | 0.78405  | 0.60078  | -0.18327    | 4.00E-05   | No      | Ccdc173  | 0.0950009 | 2.76348  | 4.8624           | 0.0960009    | 2.76448       | 4.84781639       | 0.0063852  | No      |
| Nelfcd    | 0.96057  | 0.84577  | -0.1148     | 0.00722274 | No      | Ccdc181  | 5.59365   | 14.3833  | 1.36253          | 5.59465      | 14.3843       | 1.36237523       | 0.00018329 | No      |
| Nell1     | 0.086019 | 0.016748 | -0.069271   | 6.69E-05   | No      | Ccdc27   | 0         | 2.43223  | inf              | 0.001        | 2.43323       | 11.248657        | 0.0257522  | No      |
| Neto1     | 0.072288 | 0.020908 | -0.05138    | 0.00049132 | No      | Ccdc28b  | 34.3052   | 21.5521  | -0.670603        | 34.3062      | 21.5531       | -0.6705739       | 0.0429385  | No      |
| Neu1      | 0.43376  | 0.21796  | -0.2158     | 5.81E-06   | No      | Ccdc30   | 0.578615  | 6.51422  | 3.49292          | 0.579615     | 6.51522       | 3.49064706       | 0.00018329 | No      |
| Neur1     | 0.23437  | 0.12697  | -0.1074     | 0.01621946 | No      | Ccdc32   | 8.61246   | 4.10535  | -1.06892         | 8.61346      | 4.10635       | -1.0687363       | 0.00251301 | No      |
| Neurod2   | 0.12553  | 0.065225 | -0.060305   | 0.04680399 | No      | Ccdc37   | 0.635449  | 6.13389  | 3.27095          | 0.636449     | 6.13489       | 3.26892066       | 0.0355427  | No      |
| Neurog1   | 0.14904  | 0.039067 | -0.109973   | 0.00015368 | No      | Ccdc51   | 2.9977    | 6.77118  | 1.17555          | 2.9987       | 6.77218       | 1.17528312       | 0.00342383 | No      |
| Neurog3   | 0.2225   | 0.067665 | -0.154835   | 0.00102242 | No      | Ccdc53   | 34.0126   | 51.9131  | 0.61003          | 34.0136      | 51.9141       | 0.61001472       | 0.0349324  | No      |
| Nfasc     | 0.30857  | 0.14202  | -0.16655    | 0.00885528 | No      | Ccdc6    | 9.93984   | 31.9572  | 1.68485          | 9.94084      | 31.9582       | 1.68474648       | 0.00018329 | No      |
| Nfkb1a    | 0.3558   | 0.17406  | -0.18174    | 0.02284827 | No      | Ccdc64   | 96.0129   | 46.0302  | -1.06065         | 96.0139      | 46.0312       | -1.0606312       | 0.00419853 | No      |
| Ngb       | 0.315    | 0.15914  | -0.15586    | 0.00152471 | No      | Ccdc68   | 0         | 2.97559  | inf              | 0.001        | 2.97659       | 11.5394448       | 0.00018329 | No      |
| Ngfr      | 0.10667  | 0.043829 | -0.062841   | 0.03760671 | No      | Ccdc69   | 54.9853   | 12.7356  | -2.11018         | 54.9863      | 12.7366       | -2.110092        | 0.00018329 | No      |
| Nhlrc1    | 0.2607   | 0.17149  | -0.08921    | 0.00256829 | No      | Ccdc71   | 26.1073   | 11.3815  | -1.19777         | 26.1083      | 11.3825       | -1.1976911       | 0.0310472  | No      |
| Nipsnap3a | 0.85566  | 0.73652  | -0.11914    | 0.00420619 | No      | Ccdc71l  | 11.6809   | 4.64874  | -1.32924         | 11.6819      | 4.64974       | -1.329053        | 0.0178047  | No      |
| Nkx1-2    | 0.10449  | 0.034689 | -0.069801   | 0.00196002 | No      | Ccdc74a  | 0         | 2.16253  | inf              | 0.001        | 2.16353       | 11.0791714       | 0.00018329 | No      |
| Nkx2-5    | 0.50332  | 0.28827  | -0.21505    | 0.00294427 | No      | Ccdc82   | 34.438    | 5.98837  | -2.52377         | 34.439       | 5.98937       | -2.5235671       | 0.00018329 | No      |
| Nkx2-8    | 0.12797  | 0.056064 | -0.071906   | 1.98E-05   | No      | Ccdc88b  | 44.4657   | 17.4713  | -1.3477          | 44.4667      | 17.4723       | -1.3476558       | 0.00018329 | No      |
| Nkx3-1    | 0.10353  | 0.051751 | -0.051779   | 0.03863139 | No      | Ccdc88c  | 29.6329   | 9.30977  | -1.67038         | 29.6339      | 9.31077       | -1.6702761       | 0.00018329 | No      |
| Nkx6-2    | 0.1019   | 0.039414 | -0.062486   | 0.00054569 | No      | Ccdc92   | 0.754732  | 5.80495  | 2.94325          | 0.755732     | 5.80595       | 2.94158553       | 0.00018329 | No      |
| Nln       | 0.36445  | 0.18369  | -0.18076    | 0.00275507 | No      | Ccdc94   | 24.8576   | 12.7147  | -0.967191        | 24.8586      | 12.7157       | -0.9671342       | 0.00066911 | No      |
| Nlrp6     | 0.79734  | 0.72483  | -0.07251    | 0.00144766 | No      | Ccdc96   | 0.136671  | 0.879409 | 2.68582          | 0.137671     | 0.880409      | 2.6769492        | 0.0153859  | No      |

| RRBS    |          |           |             |            |         | RNAseq   |           |          |                  |              |               |                  |            |         |
|---------|----------|-----------|-------------|------------|---------|----------|-----------|----------|------------------|--------------|---------------|------------------|------------|---------|
| gene    | Blood    | Kidney    | methyl.diff | pMWU.fdr   | Match ? | gene     | blood     | kidney   | log2(fold_ratio) | blood+ 0.001 | kidney+ 0.001 | log2(fold_ratio) | q_value    | Match ? |
| Nmnat2  | 0.09971  | 0.045827  | -0.053883   | 0.00010449 | No      | Cchcr1   | 7.31994   | 27.8235  | 1.9264           | 7.32094      | 27.8245       | 1.92625496       | 0.00018329 | No      |
| Nnat    | 0.92929  | 0.50269   | -0.4266     | 5.17E-08   | No      | Ccl19    | 0         | 0.596258 | inf              | 0.001        | 0.597258      | 9.22221046       | 0.00018329 | No      |
| Nodal   | 0.23067  | 0.12153   | -0.10914    | 0.01105145 | No      | Ccl20    | 0         | 1.42082  | inf              | 0.001        | 1.42182       | 10.4735231       | 0.00018329 | No      |
| Nol3    | 0.20896  | 0.34983   | 0.14087     | 1.01E-05   | No      | Ccl3     | 24.4345   | 242.133  | 3.30881          | 24.4355      | 242.134       | 3.30875514       | 0.00018329 | No      |
| Nol4    | 0.17792  | 0.059882  | -0.118038   | 0.00012584 | No      | Ccl4     | 5.93192   | 44.3073  | 2.90097          | 5.93292      | 44.3083       | 2.90076274       | 0.00154856 | No      |
| Notch3  | 0.17804  | 0.062222  | -0.115818   | 0.00070202 | No      | Ccl6     | 0.895405  | 16.3352  | 4.1893           | 0.896405     | 16.3362       | 4.18777793       | 0.00018329 | No      |
| Notch4  | 0.6908   | 0.45525   | -0.23555    | 0.00077922 | No      | Ccl7     | 0         | 6.81861  | inf              | 0.001        | 6.81961       | 12.7354735       | 0.00018329 | No      |
| Notum   | 0.1272   | 0.042864  | -0.084336   | 0.0031273  | No      | Ccl9     | 0.881631  | 3.14868  | 1.8365           | 0.882631     | 3.14968       | 1.83532294       | 0.00154856 | No      |
| Npas1   | 0.12673  | 0.047678  | -0.079052   | 0.0279946  | No      | Ccm2     | 73.4139   | 32.3662  | -1.18157         | 73.4149      | 32.3672       | -1.1815403       | 0.00018329 | No      |
| Npas4   | 0.25551  | 0.11113   | -0.14438    | 2.26E-05   | No      | Ccm2l    | 0         | 1.4904   | inf              | 0.001        | 1.4914        | 10.5424515       | 0.00018329 | No      |
| Npb     | 0.79096  | 0.31318   | -0.47778    | 3.77E-12   | No      | Ccna2    | 0.671047  | 2.20159  | 1.71406          | 0.672047     | 2.20259       | 1.71256693       | 0.0031651  | No      |
| Npbwr1  | 0.098918 | 0.035551  | -0.063367   | 0.00019103 | No      | Ccnb1ip1 | 3.14947   | 0.703879 | -2.16171         | 3.15047      | 0.704879      | -2.1601195       | 0.00018329 | No      |
| Npc111  | 0.79561  | 0.61045   | -0.18516    | 0.03032002 | No      | Ccnb2    | 0.792299  | 2.31345  | 1.54593          | 0.793299     | 2.31445       | 1.54473276       | 0.00856745 | No      |
| Nphs2   | 0.25267  | 0.4016    | 0.14893     | 0.04097311 | No      | Ccnc     | 22.3106   | 9.36433  | -1.25248         | 22.3116      | 9.36533       | -1.2523922       | 0.00035173 | No      |
| Nptx2   | 0.1264   | 0.055248  | -0.071152   | 0.00351975 | No      | Ccnd1    | 0.0504272 | 56.3201  | 10.1252          | 0.0514272    | 56.3211       | 10.0969282       | 0.00035173 | No      |
| Npy5r   | 0.10851  | 0.064505  | -0.044005   | 0.00095473 | No      | CCND2    | 12.3434   | 3.3558   | -1.87901         | 12.3444      | 3.3568        | -1.8786982       | 0.00018329 | No      |
| Nr0b2   | 0.15746  | 0.35166   | 0.1942      | 0.00077922 | No      | Ccnf     | 0.242889  | 0.862226 | 1.82777          | 0.243889     | 0.863226      | 1.82351363       | 0.00140841 | No      |
| Nr2f2   | 0.14462  | 0.05601   | -0.08861    | 9.35E-05   | No      | Ccng1    | 31.9232   | 20.5634  | -0.634529        | 31.9242      | 20.5644       | -0.6345015       | 0.0232058  | No      |
| Nradd   | 0.90213  | 0.13334   | -0.76879    | 1.74E-11   | No      | Ccng2    | 31.2716   | 14.868   | -1.07264         | 31.2726      | 14.869        | -1.0725915       | 0.00018329 | No      |
| Nrg1    | 0.093321 | 0.034369  | -0.058952   | 0.00768781 | No      | CCNJ     | 5.7483    | 1.76288  | -1.7052          | 5.7493       | 1.76388       | -1.7046339       | 0.00018329 | No      |
| Nrk     | 0.039147 | 0.018481  | -0.020666   | 0.00368736 | No      | Ccnj1    | 3.00171   | 0.727614 | -2.04454         | 3.00271      | 0.728614      | -2.0430385       | 0.00018329 | No      |
| Nrsn2   | 0.74056  | 0.47953   | -0.26103    | 0.00128825 | No      | Ccnk     | 21.6858   | 13.0447  | -0.733281        | 21.6868      | 13.0457       | -0.7332428       | 0.00970533 | No      |
| Nrtn    | 0.78833  | 0.69658   | -0.09175    | 0.01575704 | No      | Ccnl1    | 149.817   | 76.9121  | -0.961921        | 149.818      | 76.9131       | -0.9619097       | 0.0108214  | No      |
| Nrxn1   | 0.92304  | 0.84924   | -0.0738     | 0.00542685 | No      | Ccnt2    | 27.8993   | 8.87083  | -1.65309         | 27.9003      | 8.87183       | -1.652977        | 0.00018329 | No      |
| Nrxn2   | 0.068194 | 0.0054545 | -0.0627395  | 0.00405617 | No      | Ccny     | 45.6064   | 25.1611  | -0.858042        | 45.6074      | 25.1621       | -0.8580156       | 0.00419853 | No      |
| Nsd1    | 0.096306 | 0.18211   | 0.085804    | 1.56E-06   | No      | Ccp110   | 5.39959   | 3.16738  | -0.769558        | 5.40059      | 3.16838       | -0.7693717       | 0.0468163  | No      |
| Nt5c1a  | 0.42054  | 0.14902   | -0.27152    | 0.00022961 | No      | Ccpg1    | 81.5298   | 25.6793  | -1.66672         | 81.5308      | 25.6803       | -1.6666831       | 0.00018329 | No      |
| Ntn3    | 0.16128  | 0.056785  | -0.104495   | 3.46E-08   | No      | Ccpg1os  | 3.87508   | 12.1356  | 1.64695          | 3.87608      | 12.1366       | 1.64669406       | 0.00018329 | No      |
| Ntrk2   | 0.192    | 0.055076  | -0.136924   | 0.00768781 | No      | Ccr1     | 0.126429  | 1.05592  | 3.0621           | 0.127429     | 1.05692       | 3.05210064       | 0.00481718 | No      |
| Numbl   | 0.90285  | 0.69754   | -0.20531    | 0.00022961 | No      | Ccr3     | 1.2499    | 0.467343 | -1.41926         | 1.2509       | 0.468343      | -1.4173291       | 0.00709238 | No      |
| Nup214  | 0.7601   | 0.68561   | -0.07449    | 0.01761018 | No      | Ccr4     | 4.49517   | 1.23716  | -1.86135         | 4.49617      | 1.23816       | -1.8604988       | 0.00698138 | No      |
| Nvl     | 0.9535   | 0.86149   | -0.09201    | 0.00046463 | No      | Ccr5     | 1.9665    | 5.16546  | 1.39327          | 1.9675       | 5.16646       | 1.39281246       | 0.0018326  | No      |
| Oaz1    | 0.70094  | 0.20428   | -0.49666    | 6.50E-07   | No      | Ccr6     | 5.13297   | 2.4457   | -1.06955         | 5.13397      | 2.4467        | -1.0692376       | 0.00406781 | No      |
| Odf3l2  | 0.83315  | 0.72313   | -0.11002    | 0.00612912 | No      | Ccr7     | 351.35    | 4.4325   | -6.30864         | 351.351      | 4.4335        | -6.3083231       | 0.00018329 | No      |
| Ogfod1  | 0.1547   | 0.099555  | -0.055145   | 0.0100756  | No      | Ccr9     | 20.4686   | 0.779652 | -4.71444         | 20.4696      | 0.780652      | -4.7126595       | 0.0302128  | No      |
| Olfm1   | 0.043223 | 0.11233   | 0.069107    | 0.01047909 | No      | Ccrl2    | 0.267683  | 5.48657  | 4.3573           | 0.268683     | 5.48757       | 4.35219049       | 0.00018329 | No      |
| Olfml2a | 0.96088  | 0.50818   | -0.4527     | 6.50E-07   | No      | Ccsap    | 11.2239   | 1.43776  | -2.96469         | 11.2249      | 1.43876       | -2.9638047       | 0.0313274  | No      |
| Olig3   | 0.068269 | 0.017411  | -0.050858   | 0.01761018 | No      | Ccser1   | 0.254678  | 2.23664  | 3.13459          | 0.255678     | 2.23764       | 3.12957802       | 0.00035173 | No      |
| Olr1111 | 0.72672  | 0.86531   | 0.13859     | 0.00542685 | No      | Ccser2   | 5.15874   | 8.16722  | 0.662825         | 5.15974      | 8.16822       | 0.66272335       | 0.0203707  | No      |
| Olr120  | 0.86942  | 0.72715   | -0.14227    | 0.00405617 | No      | Cct2     | 154.504   | 80.1039  | -0.947698        | 154.505      | 80.1049       | -0.9476911       | 0.00035173 | No      |
| Olr1279 | 0.89188  | 0.80059   | -0.09129    | 0.00100996 | No      | Cct3     | 167.539   | 114.262  | -0.552144        | 167.54       | 114.263       | -0.5521473       | 0.0397771  | No      |
| Olr43   | 0.95056  | 0.88387   | -0.06669    | 0.00275507 | No      | Cct4     | 210.637   | 105.75   | -0.994094        | 210.638      | 105.751       | -0.9940944       | 0.00018329 | No      |



| RRBS     |            |          |             |            |         | RNAseq  |          |          |                  |              |               |                  |            |         |
|----------|------------|----------|-------------|------------|---------|---------|----------|----------|------------------|--------------|---------------|------------------|------------|---------|
| gene     | Blood      | Kidney   | methyl.diff | pMWU.fdr   | Match ? | gene    | blood    | kidney   | log2(fold_ratio) | blood+ 0.001 | kidney+ 0.001 | log2(fold_ratio) | q_value    | Match ? |
| Olr857   | 0.57416    | 0.36011  | -0.21405    | 0.02412126 | No      | Cct5    | 292.913  | 125.828  | -1.21901         | 292.914      | 125.829       | -1.2190127       | 0.00018329 | No      |
| Omp      | 0.83106    | 0.65183  | -0.17923    | 0.00142182 | No      | Cct6a   | 69.4378  | 46.4336  | -0.580552        | 69.4388      | 46.4346       | -0.5805418       | 0.019979   | No      |
| Onecut1  | 0.16681    | 0.061445 | -0.105365   | 0.00768781 | No      | Cct7    | 125.468  | 77.215   | -0.700368        | 125.469      | 77.216        | -0.7003592       | 0.00822601 | No      |
| Opcml    | 0.099662   | 0.045065 | -0.054597   | 5.12E-05   | No      | Cct8    | 120.389  | 67.8799  | -0.826644        | 120.39       | 67.8809       | -0.826638        | 0.00914594 | No      |
| Osbpl8   | 0.29726    | 0.12962  | -0.16764    | 6.50E-07   | No      | Ccz1    | 36.4333  | 23.6252  | -0.624929        | 36.4343      | 23.6262       | -0.6249097       | 0.0236267  | No      |
| Osgep    | 0.83163    | 0.77438  | -0.05725    | 0.00052221 | No      | Cd101   | 7.38338  | 2.83541  | -1.38072         | 7.38438      | 2.83641       | -1.3804107       | 0.00154856 | No      |
| Osm      | 0.00037994 | 0.3915   | 0.39112006  | 3.20E-09   | No      | Cd14    | 0.218701 | 12.7513  | 5.86554          | 0.219701     | 12.7523       | 5.85907223       | 0.00018329 | No      |
| Otog     | 0.18126    | 0.38041  | 0.19915     | 0.01178248 | No      | Cd180   | 0.72192  | 3.36231  | 2.21954          | 0.72292      | 3.36331       | 2.21797385       | 0.00018329 | No      |
| Otop2    | 0.36041    | 0.24291  | -0.1175     | 0.01137984 | No      | Cd19    | 4.84762  | 0.735926 | -2.71964         | 4.84862      | 0.736926      | -2.7179825       | 0.0388119  | No      |
| Otp      | 0.23223    | 0.089806 | -0.142424   | 9.79E-07   | No      | Cd1d1   | 16.7041  | 4.91767  | -1.76415         | 16.7051      | 4.91867       | -1.7639484       | 0.00018329 | No      |
| Ovol3    | 0.91081    | 0.6389   | -0.27191    | 5.81E-06   | No      | Cd2     | 343.022  | 67.0684  | -2.3546          | 343.023      | 67.0694       | -2.3545787       | 0.00018329 | No      |
| Oxct2a   | 0.58931    | 0.38267  | -0.20664    | 0.0031273  | No      | Cd200   | 3.52     | 6.63635  | 0.914814         | 3.521        | 6.63735       | 0.91462213       | 0.00845618 | No      |
| Oxtr     | 0.14567    | 0.095261 | -0.050409   | 0.0459045  | No      | Cd200r1 | 7.37296  | 1.26267  | -2.54577         | 7.37396      | 1.26367       | -2.5448198       | 0.00018329 | No      |
| P2rx1    | 0.32577    | 0.47308  | 0.14731     | 0.01464158 | No      | Cd226   | 22.0126  | 2.1448   | -3.35941         | 22.0136      | 2.1458        | -3.3588076       | 0.00018329 | No      |
| P2rx2    | 0.74076    | 0.58386  | -0.1569     | 0.03032002 | No      | Cd24    | 0.985653 | 738.355  | 9.54902          | 0.986653     | 738.356       | 9.54755808       | 0.00018329 | No      |
| P2rx7    | 0.83307    | 0.42066  | -0.41241    | 6.50E-07   | No      | Cd247   | 307.813  | 24.7592  | -3.63602         | 307.814      | 24.7602       | -3.635964        | 0.00018329 | No      |
| P2ry2    | 0.1061     | 0.032512 | -0.073588   | 1.01E-05   | No      | Cd27    | 245.112  | 38.4714  | -2.67158         | 245.113      | 38.4724       | -2.6715513       | 0.00018329 | No      |
| P3h3     | 0.86475    | 0.77055  | -0.0942     | 0.01761018 | No      | Cd274   | 16.4377  | 3.80043  | -2.11277         | 16.4387      | 3.80143       | -2.1124821       | 0.00018329 | No      |
| Pabpc4   | 0.29096    | 0.21183  | -0.07913    | 0.00710774 | No      | Cd28    | 117.349  | 4.68489  | -4.64665         | 117.35       | 4.68589       | -4.6463509       | 0.00018329 | No      |
| Pabpc5   | 0.10196    | 0.036847 | -0.065113   | 0.02412126 | No      | Cd300a  | 0.700784 | 17.9025  | 4.67505          | 0.701784     | 17.9035       | 4.67307078       | 0.00018329 | No      |
| Padi4    | 0.75924    | 0.5754   | -0.18384    | 0.00593782 | No      | Cd300le | 1.04634  | 15.3171  | 3.87172          | 1.04734      | 15.3181       | 3.87043559       | 0.00018329 | No      |
| Pak7     | 0.17738    | 0.074545 | -0.102835   | 2.08E-05   | No      | Cd300lf | 0.121267 | 2.43461  | 4.32743          | 0.122267     | 2.43561       | 4.31617616       | 0.0140981  | No      |
| Papolb   | 0.31021    | 0.22039  | -0.08982    | 0.00489594 | No      | Cd302   | 1.09711  | 11.8914  | 3.43813          | 1.09811      | 11.8924       | 3.43694541       | 0.00018329 | No      |
| Pappa    | 0.096938   | 0.031396 | -0.065542   | 0.00455632 | No      | Cd320   | 90.2952  | 269.489  | 1.57751          | 90.2962      | 269.49        | 1.57749456       | 0.00018329 | No      |
| Paqr4    | 0.36905    | 0.24075  | -0.1283     | 0.02915203 | No      | Cd36    | 0.146678 | 2.45683  | 4.06607          | 0.147678     | 2.45783       | 4.05685831       | 0.00018329 | No      |
| Paqr7    | 0.80071    | 0.40553  | -0.39518    | 0.0001006  | No      | Cd3d    | 850.314  | 122.156  | -2.79927         | 850.315      | 122.157       | -2.7992609       | 0.00018329 | No      |
| Pard3    | 0.1052     | 0.034881 | -0.070319   | 0.00015368 | No      | Cd3e    | 860.768  | 98.9671  | -3.1206          | 860.769      | 98.9681       | -3.1205906       | 0.00018329 | No      |
| Pard6g   | 0.80538    | 0.66043  | -0.14495    | 0.00575049 | No      | Cd3g    | 1473.77  | 164.154  | -3.16639         | 1473.771     | 164.155       | -3.1663818       | 0.00018329 | No      |
| Pawr     | 0.091459   | 0.015467 | -0.075992   | 0.00085417 | No      | Cd4     | 116.011  | 19.0555  | -2.60598         | 116.012      | 19.0565       | -2.605919        | 0.00018329 | No      |
| Pax1     | 0.088739   | 0.03731  | -0.051429   | 4.11E-06   | No      | Cd40    | 0.600867 | 4.78216  | 2.99254          | 0.601867     | 4.78316       | 2.99044743       | 0.00018329 | No      |
| Pax7     | 0.20344    | 0.056393 | -0.147047   | 0.01544668 | No      | Cd40lg  | 117.289  | 3.59583  | -5.0276          | 117.29       | 3.59683       | -5.0272102       | 0.00018329 | No      |
| Pbx2     | 0.82933    | 0.57231  | -0.25702    | 1.06E-09   | No      | Cd44    | 133.703  | 36.4674  | -1.87435         | 133.704      | 36.4684       | -1.8743238       | 0.00018329 | No      |
| Pbx4     | 0.49337    | 0.61734  | 0.12397     | 0.02915203 | No      | Cd46    | 1.56536  | 0.557252 | -1.49009         | 1.56636      | 0.558252      | -1.4884274       | 0.046635   | No      |
| Pcdh7    | 0.33206    | 0.22994  | -0.10212    | 0.00575049 | No      | Cd47    | 102.051  | 30.8457  | -1.72615         | 102.052      | 30.8467       | -1.7261164       | 0.00018329 | No      |
| Pcdh8    | 0.1744     | 0.092712 | -0.081688   | 4.92E-10   | No      | Cd48    | 191.741  | 51.7344  | -1.88996         | 191.742      | 51.7354       | -1.8899427       | 0.00018329 | No      |
| Pcdh9    | 0.048244   | 0.17108  | 0.122836    | 0.00125283 | No      | Cd5     | 12.5446  | 1.06377  | -3.55981         | 12.5456      | 1.06477       | -3.5585677       | 0.00018329 | No      |
| Pcdha2   | 0.62597    | 0.50366  | -0.12231    | 0.01346881 | No      | Cd53    | 410.801  | 47.5367  | -3.11133         | 410.802      | 47.5377       | -3.1112992       | 0.00018329 | No      |
| Pcdhac2  | 0.14573    | 0.054342 | -0.091388   | 0.00128825 | No      | Cd55    | 0.948008 | 2.95777  | 1.64154          | 0.949008     | 2.95877       | 1.6405054        | 0.00035173 | No      |
| Pcdhga10 | 0.47313    | 0.32792  | -0.14521    | 0.00832699 | No      | Cd59    | 0.792046 | 179.245  | 7.82213          | 0.793046     | 179.246       | 7.82032066       | 0.00018329 | No      |
| Pcdhga2  | 0.51386    | 0.39985  | -0.11401    | 0.00060029 | No      | Cd6     | 130.045  | 26.666   | -2.28594         | 130.046      | 26.667        | -2.2858946       | 0.00018329 | No      |
| Pcdhga3  | 0.37865    | 0.2582   | -0.12045    | 2.23E-05   | No      | Cd63    | 6.01393  | 986.582  | 7.35799          | 6.01493      | 986.583       | 7.35774867       | 0.00018329 | No      |
| Pcdhga8  | 0.66032    | 0.46082  | -0.1995     | 3.48E-05   | No      | Cd68    | 1.78097  | 32.2674  | 4.17934          | 1.78197      | 32.2684       | 4.17857709       | 0.00018329 | No      |

| RRBS    |           |           |             |            |         | RNAseq   |           |          |                  |              |               |                  |            |         |
|---------|-----------|-----------|-------------|------------|---------|----------|-----------|----------|------------------|--------------|---------------|------------------|------------|---------|
| gene    | Blood     | Kidney    | methyl.diff | pMWU.fdr   | Match ? | gene     | blood     | kidney   | log2(fold_ratio) | blood+ 0.001 | kidney+ 0.001 | log2(fold_ratio) | q_value    | Match ? |
| Pcdhga9 | 0.59337   | 0.46978   | -0.12359    | 0.0445679  | No      | Cd69     | 151.047   | 41.1374  | -1.87648         | 151.048      | 41.1384       | -1.8764495       | 0.00018329 | No      |
| Pcdhgb7 | 0.67723   | 0.50491   | -0.17232    | 0.01178248 | No      | Cd74     | 143.93    | 864.245  | 2.58608          | 143.931      | 864.246       | 2.58606467       | 0.00018329 | No      |
| Pcna    | 0.63435   | 0.4138    | -0.22055    | 0.01544668 | No      | Cd79b    | 18.5457   | 4.35497  | -2.09035         | 18.5467      | 4.35597       | -2.0900966       | 0.00018329 | No      |
| Pcsk9   | 0.15891   | 0.0879    | -0.07101    | 0.02028318 | No      | Cd80     | 3.06019   | 1.02986  | -1.57118         | 3.06119      | 1.03086       | -1.5702442       | 0.00018329 | No      |
| Pde10a  | 0.13862   | 0.057774  | -0.080846   | 0.01349957 | No      | Cd81     | 114.57    | 189.387  | 0.725104         | 114.571      | 189.388       | 0.725103         | 0.00494262 | No      |
| Pde3a   | 0.097876  | 0.038241  | -0.059635   | 0.00389531 | No      | Cd83     | 2.36045   | 7.4705   | 1.66214          | 2.36145      | 7.4715        | 1.66172492       | 0.00018329 | No      |
| Pde6c   | 0.65995   | 0.57323   | -0.08672    | 0.03275343 | No      | Cd86     | 0.290352  | 3.98174  | 3.77752          | 0.291352     | 3.98274       | 3.77292618       | 0.00018329 | No      |
| Pdgfrb  | 0.23829   | 0.09876   | -0.13953    | 0.04097311 | No      | Cd8b     | 97.9503   | 14.4385  | -2.76213         | 97.9513      | 14.4395       | -2.7620439       | 0.00018329 | No      |
| Pdia2   | 0.88711   | 0.75344   | -0.13367    | 0.00049132 | No      | Cd9      | 20.2249   | 133.01   | 2.71734          | 20.2259      | 133.011       | 2.71726976       | 0.00018329 | No      |
| Pdx1    | 0.19535   | 0.1022    | -0.09315    | 0.04097311 | No      | Cd93     | 0.0441197 | 1.73525  | 5.29758          | 0.0451197    | 1.73625       | 5.26607341       | 0.00445502 | No      |
| Pdzd9   | 0.81516   | 0.7617    | -0.05346    | 0.00612912 | No      | Cd96     | 46.1976   | 10.2813  | -2.16779         | 46.1986      | 10.2823       | -2.1676861       | 0.00018329 | No      |
| Peli2   | 0.41938   | 0.11222   | -0.30716    | 7.48E-05   | No      | Cd97     | 160.836   | 24.8187  | -2.69609         | 160.837      | 24.8197       | -2.6960417       | 0.00018329 | No      |
| Pelo    | 0.82725   | 0.66724   | -0.16001    | 0.00102242 | No      | Cd99     | 43.9775   | 399.4    | 3.183            | 43.9785      | 399.401       | 3.18296764       | 0.00018329 | No      |
| Perp    | 0.33568   | 0.14262   | -0.19306    | 0.01105145 | No      | Cda      | 0         | 1.04033  | inf              | 0.001        | 1.04133       | 10.0242116       | 0.00018329 | No      |
| Pgbd5   | 0.17359   | 0.063321  | -0.110269   | 0.00164763 | No      | Cdc14a   | 7.83557   | 5.0249   | -0.640943        | 7.83657      | 5.0259        | -0.6408404       | 0.0366633  | No      |
| Pgc     | 0.7558    | 0.66683   | -0.08897    | 0.04097311 | No      | Cdc14b   | 5.78224   | 14.1092  | 1.28693          | 5.78324      | 14.1102       | 1.28678856       | 0.00519348 | No      |
| Pgf     | 0.0022321 | 0.22958   | 0.2273479   | 3.20E-09   | No      | Cdc23    | 24.4065   | 13.5054  | -0.853724        | 24.4075      | 13.5064       | -0.8536813       | 0.00530972 | No      |
| Pgp     | 0.24493   | 0.082312  | -0.162618   | 1.67E-09   | No      | Cdc25a   | 3.31681   | 5.29816  | 0.675694         | 3.31781      | 5.29916       | 0.67553242       | 0.039679   | No      |
| Phf1    | 0.72457   | 0.53988   | -0.18469    | 0.00085417 | No      | Cdc25b   | 98.3916   | 9.30974  | -3.40172         | 98.3926      | 9.31074       | -3.4015821       | 0.00018329 | No      |
| Phf21b  | 0.06097   | 0.0087737 | -0.0521963  | 0.01349957 | No      | Cdc25c   | 3.63891   | 1.92242  | -0.920578        | 3.63991      | 1.92342       | -0.920229        | 0.00799878 | No      |
| Phldb3  | 0.28263   | 0.092425  | -0.190205   | 0.01349957 | No      | Cdc26    | 29.8962   | 14.7981  | -1.01456         | 29.8972      | 14.7991       | -1.0145009       | 0.00111812 | No      |
| Phox2a  | 0.28477   | 0.11197   | -0.1728     | 0.00031102 | No      | Cdc27    | 8.32743   | 5.2717   | -0.659603        | 8.32843      | 5.2727        | -0.6595026       | 0.0259489  | No      |
| Pif1    | 0.0016129 | 0.11564   | 0.1140271   | 6.50E-07   | No      | Cdc40    | 16.1972   | 9.52609  | -0.765791        | 16.1982      | 9.52709       | -0.765726        | 0.0180048  | No      |
| Pigc    | 0.97062   | 0.90662   | -0.064      | 0.0017951  | No      | Cdc42    | 646.171   | 222.4    | -1.53876         | 646.172      | 222.401       | -1.538755        | 0.00018329 | No      |
| Pih1d3  | 0.15283   | 0.046654  | -0.106176   | 0.00164763 | No      | Cdc42bpa | 0.055932  | 7.90173  | 7.14235          | 0.056932     | 7.90273       | 7.11696753       | 0.00111812 | No      |
| Pik3r1  | 0.95953   | 0.75035   | -0.20918    | 8.76E-11   | No      | Cdc42bpg | 2.41866   | 12.1505  | 2.32874          | 2.41966      | 12.1515       | 2.32825817       | 0.00018329 | No      |
| Pipox   | 0.85245   | 0.76309   | -0.08936    | 0.03032002 | No      | Cdc42ep2 | 0.0253769 | 28.3741  | 10.1268          | 0.0263769    | 28.3751       | 10.0711347       | 0.0228125  | No      |
| Pla1a   | 0.17925   | 0.34923   | 0.16998     | 0.02028318 | No      | Cdc42ep4 | 0.273151  | 8.27292  | 4.92063          | 0.274151     | 8.27392       | 4.91552837       | 0.00018329 | No      |
| Pla2g10 | 0.3822    | 0.14948   | -0.23272    | 0.00575049 | No      | Cdc42se1 | 262.815   | 100.348  | -1.38904         | 262.816      | 100.349       | -1.3890269       | 0.00066911 | No      |
| Pld5    | 0.065463  | 0.0082359 | -0.0572271  | 0.00405617 | No      | Cdc42se2 | 170.671   | 32.251   | -2.4038          | 170.672      | 32.252        | -2.4037659       | 0.00018329 | No      |
| Plec    | 0.85114   | 0.61992   | -0.23122    | 5.20E-10   | No      | Cdc5l    | 33.0949   | 22.2762  | -0.571109        | 33.0959      | 22.2772       | -0.5710846       | 0.0350954  | No      |
| Plekhj1 | 0.79179   | 0.40913   | -0.38266    | 0.00070202 | No      | Cdc6     | 0.522936  | 4.00483  | 2.93704          | 0.523936     | 4.00583       | 2.9346387        | 0.00018329 | No      |
| Plg     | 0.87702   | 0.81047   | -0.06655    | 0.00674226 | No      | Cdc7     | 4.59854   | 2.21307  | -1.05513         | 4.59954      | 2.21407       | -1.0547887       | 0.0104928  | No      |
| Plip    | 0.15939   | 0.074566  | -0.084824   | 0.04893199 | No      | Cdca3    | 0.876343  | 7.51891  | 3.10096          | 0.877343     | 7.51991       | 3.09950251       | 0.00018329 | No      |
| Plpp4   | 0.071269  | 0.020827  | -0.050442   | 0.00955793 | No      | Cdca7    | 5.69917   | 2.37988  | -1.25987         | 5.70017      | 2.38088       | -1.25951         | 0.00154856 | No      |
| Plpp6   | 0.092107  | 0.025599  | -0.066508   | 0.00102242 | No      | Cdca7l   | 29.75     | 5.10836  | -2.54196         | 29.751       | 5.10936       | -2.5417237       | 0.00018329 | No      |
| Plpp7   | 0.80865   | 0.4841    | -0.32455    | 5.59E-12   | No      | Cdca8    | 4.79247   | 8.76185  | 0.870467         | 4.79347      | 8.76285       | 0.87032976       | 0.0271125  | No      |
| Plscr3  | 0.84579   | 0.68033   | -0.16546    | 3.48E-05   | No      | Cdh1     | 0.119066  | 51.4959  | 8.75656          | 0.120066     | 51.4969       | 8.74451411       | 0.00018329 | No      |
| Plvap   | 0.37274   | 0.23875   | -0.13399    | 0.03275343 | No      | Cdh11    | 0         | 2.96636  | inf              | 0.001        | 2.96736       | 11.5349642       | 0.00018329 | No      |
| Plxdc1  | 0.67116   | 0.47665   | -0.19451    | 0.04680399 | No      | Cdh15    | 2.54469   | 0.719836 | -1.82175         | 2.54569      | 0.720836      | -1.8203138       | 0.0153859  | No      |
| Plxnb2  | 0.10296   | 0.01875   | -0.08421    | 0.00019103 | No      | Cdh16    | 0         | 367.329  | inf              | 0.001        | 367.33        | 18.4867172       | 0.00018329 | No      |
| Pmaip1  | 0.53922   | 0.25965   | -0.27957    | 4.36E-11   | No      | Cdh24    | 1.62983   | 2.99633  | 0.878482         | 1.63083      | 2.99733       | 0.87807153       | 0.0389103  | No      |

| RRBS     |          |          |             |            |         | RNAseq     |           |          |                  |              |               |                  |            |         |
|----------|----------|----------|-------------|------------|---------|------------|-----------|----------|------------------|--------------|---------------|------------------|------------|---------|
| gene     | Blood    | Kidney   | methyl.diff | pMWU.fdr   | Match ? | gene       | blood     | kidney   | log2(fold_ratio) | blood+ 0.001 | kidney+ 0.001 | log2(fold_ratio) | q_value    | Match ? |
| Pnma1    | 0.95668  | 0.71905  | -0.23763    | 1.48E-06   | No      | CDH6       | 0         | 6.31573  | inf              | 0.001        | 6.31673       | 12.6249622       | 0.00018329 | No      |
| Pnmt     | 0.17694  | 0.45854  | 0.2816      | 1.07E-05   | No      | Cdhr1      | 0.18495   | 2.80495  | 3.92277          | 0.18595      | 2.80595       | 3.91550265       | 0.00018329 | No      |
| Pnpla1   | 0.51378  | 0.21704  | -0.29674    | 2.16E-06   | No      | Cdhr2      | 0.158051  | 2.05568  | 3.70115          | 0.159051     | 2.05668       | 3.69275599       | 0.00018329 | No      |
| Poc5     | 0.68398  | 0.55235  | -0.13163    | 0.01621946 | No      | Cdip1      | 10.2004   | 20.9681  | 1.03958          | 10.2014      | 20.9691       | 1.03949779       | 0.0196752  | No      |
| Polg     | 0.87648  | 0.81542  | -0.06106    | 0.00405617 | No      | Cdk1       | 1.08038   | 8.57967  | 2.98938          | 1.08138      | 8.58067       | 2.98821672       | 0.00018329 | No      |
| Polg2    | 0.38018  | 0.059966 | -0.320214   | 0.00142182 | No      | CDK12      | 22.0007   | 8.93274  | -1.30038         | 22.0017      | 8.93374       | -1.3002788       | 0.00018329 | No      |
| Pou2f3   | 0.042148 | 0.13031  | 0.088162    | 0.00368736 | No      | Cdk13      | 39.142    | 13.0667  | -1.58282         | 39.143       | 13.0677       | -1.5827491       | 0.00018329 | No      |
| Pou3f1   | 0.1209   | 0.2711   | 0.1502      | 0.0445679  | No      | Cdk14      | 0         | 4.95407  | inf              | 0.001        | 4.95507       | 12.2746897       | 0.00018329 | No      |
| Pou3f2   | 0.11841  | 0.049516 | -0.068894   | 0.00010449 | No      | Cdk17      | 16.2725   | 5.97975  | -1.44428         | 16.2735      | 5.98075       | -1.4441263       | 0.00018329 | No      |
| Pou3f3   | 0.079398 | 0.01923  | -0.060168   | 0.00894698 | No      | Cdk19      | 30.8897   | 8.76443  | -1.81739         | 30.8907      | 8.76543       | -1.8172758       | 0.00018329 | No      |
| Pou4f2   | 0.14551  | 0.050369 | -0.095141   | 0.00674226 | No      | Cdk2       | 26.3643   | 10.6677  | -1.30534         | 26.3653      | 10.6687       | -1.305256        | 0.00018329 | No      |
| Pou5f1   | 0.8173   | 0.70269  | -0.11461    | 0.00164763 | No      | Cdk2ap2    | 71.3429   | 122.789  | 0.783335         | 71.3439      | 122.79        | 0.78333108       | 0.00277264 | No      |
| Pou6f1   | 0.76046  | 0.49622  | -0.26424    | 0.00420619 | No      | Cdk5rap1   | 14.9274   | 35.8065  | 1.26226          | 14.9284      | 35.8075       | 1.26220225       | 0.00303839 | No      |
| Ppara    | 0.45902  | 0.13751  | -0.32151    | 1.94E-07   | No      | Cdkl1      | 0.0235359 | 268.852  | 13.4797          | 0.0245359    | 268.853       | 13.4196358       | 0.00018329 | No      |
| Ppfia2   | 0.12662  | 0.057712 | -0.068908   | 0.00054569 | No      | Cdkn1a     | 0.183945  | 11.1372  | 5.91997          | 0.184945     | 11.1382       | 5.912276         | 0.00018329 | No      |
| Ppfia3   | 0.11541  | 0.040325 | -0.075085   | 0.00420619 | No      | Cdkn1b     | 238.88    | 52.4438  | -2.18744         | 238.881      | 52.4448       | -2.1874205       | 0.00018329 | No      |
| Ppp1r14a | 0.72478  | 0.43864  | -0.28614    | 9.20E-07   | No      | Cdkn2aip   | 17.4337   | 6.54005  | -1.41451         | 17.4347      | 6.54105       | -1.4143674       | 0.00018329 | No      |
| Ppp1r3d  | 0.36519  | 0.14763  | -0.21756    | 4.92E-10   | No      | Cdkn2aipnl | 54.0193   | 34.4393  | -0.64942         | 54.0203      | 34.4403       | -0.6494039       | 0.0122333  | No      |
| Ppp2r5b  | 0.74122  | 0.30041  | -0.44081    | 0.0001006  | No      | CDKN3      | 3.46623   | 9.13254  | 1.39765          | 3.46723      | 9.13354       | 1.39739059       | 0.00251301 | No      |
| Prim2    | 0.92952  | 0.85944  | -0.07008    | 0.03760671 | No      | Cdo1       | 0.298277  | 17.1065  | 5.84175          | 0.299277     | 17.1075       | 5.83700373       | 0.00018329 | No      |
| Prkag3   | 0.026825 | 0.082042 | 0.055217    | 7.59E-06   | No      | Cdr2       | 1.56876   | 14.6092  | 3.21919          | 1.56976      | 14.6102       | 3.21836002       | 0.00018329 | No      |
| Prkar1a  | 0.096333 | 0.32458  | 0.228247    | 0.00077922 | No      | Cdr2l      | 0.104239  | 1.28252  | 3.62102          | 0.105239     | 1.28352       | 3.60836443       | 0.00732142 | No      |
| Prkce    | 0.23277  | 0.10267  | -0.1301     | 0.00012321 | No      | Cdv3       | 48.175    | 21.2847  | -1.17847         | 48.176       | 21.2857       | -1.1784301       | 0.00140841 | No      |
| Prlh     | 0.090224 | 0.39155  | 0.301326    | 9.15E-06   | No      | Cdyl       | 8.29514   | 4.34718  | -0.932187        | 8.29614      | 4.34818       | -0.9320286       | 0.00329119 | No      |
| Prlhr    | 0.1586   | 0.071301 | -0.087299   | 0.00674226 | No      | Cdyl2      | 6.50188   | 2.7699   | -1.23102         | 6.50288      | 2.7709        | -1.2307242       | 0.00880015 | No      |
| Prm2     | 0.91139  | 0.72292  | -0.18847    | 4.32E-05   | No      | Ceacam1    | 0.582626  | 2.99165  | 2.3603           | 0.583626     | 2.99265       | 2.3583075        | 0.00018329 | No      |
| Prmt8    | 0.19356  | 0.067367 | -0.126193   | 0.00031102 | No      | Cebpa      | 0.244293  | 8.60737  | 5.13889          | 0.245293     | 8.60837       | 5.13316212       | 0.00018329 | No      |
| Proc     | 0.86829  | 0.31305  | -0.55524    | 6.50E-07   | No      | Cebpd      | 0.217569  | 23.5292  | 6.75684          | 0.218569     | 23.5302       | 6.75028098       | 0.00721079 | No      |
| Proca1   | 0.10182  | 0.023988 | -0.077832   | 3.48E-05   | No      | Cebpz      | 36.9952   | 17.47    | -1.08246         | 36.9962      | 17.471        | -1.0824149       | 0.00018329 | No      |
| Prpf3    | 0.4271   | 0.15487  | -0.27223    | 0.00021046 | No      | Cel        | 0.929527  | 0.320908 | -1.53434         | 0.930527     | 0.321908      | -1.5313996       | 0.0242348  | No      |
| Prpf31   | 0.62057  | 0.40742  | -0.21315    | 1.27E-06   | No      | Celf2      | 52.6442   | 8.03876  | -2.71123         | 52.6452      | 8.03976       | -2.7110777       | 0.00018329 | No      |
| Prr15    | 0.86477  | 0.53995  | -0.32482    | 3.58E-09   | No      | Celsr2     | 2.33082   | 48.039   | 4.3653           | 2.33182      | 48.04         | 4.36470782       | 0.00018329 | No      |
| Prrt1    | 0.22107  | 0.38853  | 0.16746     | 0.04680399 | No      | Cenpc      | 7.66605   | 2.82661  | -1.43941         | 7.66705      | 2.82761       | -1.4390884       | 0.00018329 | No      |
| Prss32   | 0.53967  | 0.34982  | -0.18985    | 0.02284827 | No      | Cenpe      | 0.267211  | 0.587502 | 1.13662          | 0.268211     | 0.588502      | 1.13367891       | 0.0273913  | No      |
| Prss33   | 0.77311  | 0.6049   | -0.16821    | 0.01105145 | No      | Cenpf      | 0.176495  | 0.982318 | 2.47656          | 0.177495     | 0.983318      | 2.46987967       | 0.00018329 | No      |
| Prss34   | 0.74374  | 0.56603  | -0.17771    | 0.01178248 | No      | CENPL      | 5.43377   | 3.18475  | -0.770773        | 5.43477      | 3.18575       | -0.7705859       | 0.0477111  | No      |
| Prss41   | 0.80573  | 0.708    | -0.09773    | 0.0031273  | No      | Cenpp      | 2.12883   | 10.485   | 2.30019          | 2.12983      | 10.486        | 2.29965426       | 0.0130082  | No      |
| Psma8    | 0.9635   | 0.89219  | -0.07131    | 0.00025534 | No      | Cenpt      | 0.401935  | 2.16592  | 2.42994          | 0.402935     | 2.16692       | 2.42702686       | 0.00494262 | No      |
| Psme2    | 0.2369   | 0.090151 | -0.146749   | 0.00894698 | No      | Cenpw      | 0.441952  | 1.54602  | 1.8066           | 0.442952     | 1.54702       | 1.80426957       | 0.00992433 | No      |
| Ptgdr    | 0.14611  | 0.069281 | -0.076829   | 0.00019103 | No      | Cep104     | 4.62021   | 11.3419  | 1.29564          | 4.62121      | 11.3429       | 1.29544698       | 0.00845618 | No      |
| Pth2     | 0.18445  | 0.096387 | -0.088063   | 0.00294427 | No      | Cep120     | 17.6134   | 8.86252  | -0.990885        | 17.6144      | 8.86352       | -0.9908037       | 0.00445502 | No      |
| Pth2r    | 0.11954  | 0.043128 | -0.076412   | 1.11E-05   | No      | Cep135     | 2.57423   | 1.16308  | -1.1462          | 2.57523      | 1.16408       | -1.1455111       | 0.00197017 | No      |

| RRBS       |           |          |             |            |         | RNAseq  |           |          |                  |              |               |                  |            |         |
|------------|-----------|----------|-------------|------------|---------|---------|-----------|----------|------------------|--------------|---------------|------------------|------------|---------|
| gene       | Blood     | Kidney   | methyl.diff | pMWU.fdr   | Match ? | gene    | blood     | kidney   | log2(fold_ratio) | blood+ 0.001 | kidney+ 0.001 | log2(fold_ratio) | q_value    | Match ? |
| Ptk7       | 0.0086267 | 0.093389 | 0.0847623   | 3.77E-12   | No      | Cep164  | 7.02511   | 4.49658  | -0.643693        | 7.02611      | 4.49758       | -0.6435772       | 0.030565   | No      |
| Ptpn14     | 0.1937    | 0.058388 | -0.135312   | 6.46E-06   | No      | CEP170  | 6.69808   | 2.05256  | -1.70632         | 6.69908      | 2.05356       | -1.7058359       | 0.00018329 | No      |
| Pycr1      | 0.97371   | 0.89487  | -0.07884    | 0.00489594 | No      | Cep170b | 2.0927    | 16.2643  | 2.95827          | 2.0937       | 16.2653       | 2.95767079       | 0.00018329 | No      |
| Rab24      | 0.65644   | 0.20467  | -0.45177    | 4.46E-06   | No      | Cep19   | 12.0912   | 23.1421  | 0.936561         | 12.0922      | 23.1431       | 0.93650538       | 0.0018326  | No      |
| Rab34      | 0.45883   | 0.16229  | -0.29654    | 0.00420619 | No      | Cep250  | 12.0766   | 7.64777  | -0.659104        | 12.0776      | 7.64877       | -0.6590341       | 0.0439935  | No      |
| Rab36      | 0.87313   | 0.66876  | -0.20437    | 9.35E-05   | No      | Cep350  | 10.1413   | 3.71777  | -1.44773         | 10.1423      | 3.71877       | -1.4474874       | 0.00018329 | No      |
| Radil      | 0.17317   | 0.084242 | -0.088928   | 0.04808135 | No      | Cep41   | 7.78578   | 1.46848  | -2.40652         | 7.78678      | 1.46948       | -2.4057211       | 0.00018329 | No      |
| Rai1       | 0.64231   | 0.27088  | -0.37143    | 0.00013739 | No      | Cep571l | 12.649    | 8.07042  | -0.648302        | 12.65        | 8.07142       | -0.648243        | 0.0491506  | No      |
| Raph1      | 0.098147  | 0.033164 | -0.064983   | 0.01761018 | No      | Cep70   | 2.77713   | 10.1868  | 1.87503          | 2.77813      | 10.1878       | 1.87465653       | 0.00066911 | No      |
| Rasgef1c   | 0.043458  | 0.35512  | 0.311662    | 9.14E-07   | No      | Cep85   | 13.9384   | 6.84992  | -1.02491         | 13.9394      | 6.85092       | -1.0247988       | 0.00082046 | No      |
| Rasgrp4    | 0.91874   | 0.71715  | -0.20159    | 5.87E-06   | No      | Cep85l  | 4.02308   | 1.22329  | -1.71754         | 4.02408      | 1.22429       | -1.7167137       | 0.00018329 | No      |
| Rasl10b    | 0.011695  | 0.33329  | 0.321595    | 7.19E-07   | No      | Cep89   | 4.0632    | 10.7023  | 1.39723          | 4.0642       | 10.7033       | 1.39701237       | 0.00018329 | No      |
| Rax        | 0.19667   | 0.087388 | -0.109282   | 0.00542685 | No      | Cep97   | 10.473    | 3.12432  | -1.74506         | 10.474       | 3.12532       | -1.7447367       | 0.00018329 | No      |
| Rbfox3     | 0.75057   | 0.33159  | -0.41898    | 1.90E-08   | No      | Cerk    | 36.1906   | 8.26775  | -2.13005         | 36.1916      | 8.26875       | -2.1299137       | 0.00018329 | No      |
| Rbm46      | 0.24073   | 0.075769 | -0.164961   | 0.0017951  | No      | Cers2   | 27.3279   | 54.7013  | 1.0012           | 27.3289      | 54.7023       | 1.0011741        | 0.0263234  | No      |
| Rbp3       | 0.93279   | 0.89151  | -0.04128    | 0.01024368 | No      | Cers5   | 41.8072   | 19.8559  | -1.07418         | 41.8082      | 19.8569       | -1.0741455       | 0.00066911 | No      |
| Rcor2      | 0.36409   | 0.20167  | -0.16242    | 1.27E-06   | No      | Ces1d   | 0         | 3.60908  | inf              | 0.001        | 3.61008       | 11.8178151       | 0.00018329 | No      |
| Rdh10      | 0.2127    | 0.068395 | -0.144305   | 0.00015368 | No      | Ces2g   | 0         | 3.93672  | inf              | 0.001        | 3.93772       | 11.9431448       | 0.00018329 | No      |
| Reln       | 0.08518   | 0.02112  | -0.06406    | 3.48E-05   | No      | CE52H   | 0         | 2.06722  | inf              | 0.001        | 2.06822       | 11.0141739       | 0.00018329 | No      |
| Rem1       | 0.4821    | 0.23204  | -0.25006    | 8.22E-05   | No      | Ces4a   | 0         | 0.582935 | inf              | 0.001        | 0.583935      | 9.18966398       | 0.00018329 | No      |
| Renbp      | 0.97274   | 0.4212   | -0.55154    | 6.50E-07   | No      | Cesl1   | 0         | 57.3298  | inf              | 0.001        | 57.3308       | 15.8070228       | 0.00066911 | No      |
| Retn       | 0.70285   | 0.48224  | -0.22061    | 0.00077922 | No      | Cetn4   | 0.574903  | 1.88956  | 1.71666          | 0.575903     | 1.89056       | 1.71491589       | 0.00615197 | No      |
| RGD1309036 | 0.81249   | 0.5075   | -0.30499    | 5.62E-06   | No      | Cfh     | 0.125923  | 7.29655  | 5.8566           | 0.126923     | 7.29755       | 5.84538676       | 0.00018329 | No      |
| RGD1309049 | 0.98861   | 0.93497  | -0.05364    | 3.91E-05   | No      | Cfl1    | 1797.51   | 751.446  | -1.25826         | 1797.511     | 751.447       | -1.2582573       | 0.00018329 | No      |
| RGD1309362 | 0.95928   | 0.83424  | -0.12504    | 3.49E-06   | No      | Cfl2    | 3.78974   | 21.4908  | 2.50355          | 3.79074      | 21.4918       | 2.5032349        | 0.00018329 | No      |
| RGD1359334 | 0.92126   | 0.83199  | -0.08927    | 0.00405617 | No      | CFLAR   | 100.388   | 36.1021  | -1.47543         | 100.389      | 36.1031       | -1.4754066       | 0.00097029 | No      |
| RGD1560108 | 0.91058   | 0.39945  | -0.51113    | 3.77E-12   | No      | Cfp     | 5.29075   | 29.2721  | 2.46798          | 5.29175      | 29.2731       | 2.46775872       | 0.00018329 | No      |
| RGD1560608 | 0.17294   | 0.10853  | -0.06441    | 0.02284827 | No      | Cggbp1  | 50.1384   | 13.7094  | -1.87075         | 50.1394      | 13.7104       | -1.8706741       | 0.00018329 | No      |
| RGD1561870 | 0.55726   | 0.35255  | -0.20471    | 0.04097311 | No      | Cgn     | 0.0495776 | 14.0797  | 8.14972          | 0.0505776    | 14.0807       | 8.12100476       | 0.00082046 | No      |
| RGD1562114 | 0.90332   | 0.25189  | -0.65143    | 3.98E-12   | No      | Cgnl1   | 47.1679   | 179.822  | 1.93069          | 47.1689      | 179.823       | 1.9306697        | 0.00018329 | No      |
| RGD1562218 | 0.81868   | 0.44077  | -0.37791    | 3.48E-05   | No      | Ch25h   | 0.0770993 | 4.17499  | 5.75891          | 0.0780993    | 4.17599       | 5.74066483       | 0.00111812 | No      |
| RGD1562726 | 0.70426   | 0.25258  | -0.45168    | 3.77E-12   | No      | Chac1   | 0.0540555 | 1.13741  | 4.39517          | 0.0550555    | 1.13841       | 4.36998973       | 0.0269158  | No      |

| RRBS       |          |          |             |            |         | RNAseq  |           |          |                  |              |               |                  |            |         |
|------------|----------|----------|-------------|------------|---------|---------|-----------|----------|------------------|--------------|---------------|------------------|------------|---------|
| gene       | Blood    | Kidney   | methyl.diff | pMWU.fdr   | Match ? | gene    | blood     | kidney   | log2(fold_ratio) | blood+ 0.001 | kidney+ 0.001 | log2(fold_ratio) | q_value    | Match ? |
| RGD1562885 | 0.97235  | 0.72104  | -0.25131    | 1.27E-06   | No      | Chadl   | 0.0389582 | 1.36388  | 5.12965          | 0.0399582    | 1.36488       | 5.09413871       | 0.0231105  | No      |
| RGD1563072 | 0.093848 | 0.03913  | -0.054718   | 8.78E-12   | No      | Chaf1b  | 1.41426   | 7.9213   | 2.48569          | 1.41526      | 7.9223        | 2.48485222       | 0.00329119 | No      |
| RGD1563217 | 0.32774  | 0.6815   | 0.35376     | 9.52E-11   | No      | Chchd10 | 50.2109   | 1019.71  | 4.34402          | 50.2119      | 1019.711      | 4.3439872        | 0.00018329 | No      |
| RGD1563425 | 0.40904  | 0.34543  | -0.06361    | 0.01544668 | No      | Chchd6  | 8.45449   | 21.6774  | 1.3584           | 8.45549      | 21.6784       | 1.35829801       | 0.00018329 | No      |
| RGD1564482 | 0.74749  | 0.36179  | -0.3857     | 0.00128825 | No      | Chd1    | 45.1115   | 11.6444  | -1.95385         | 45.1125      | 11.6454       | -1.953767        | 0.00018329 | No      |
| RGD1565611 | 0.27593  | 0.1378   | -0.13813    | 0.00275507 | No      | Chd1l   | 14.7875   | 32.6183  | 1.1413           | 14.7885      | 32.6193       | 1.1412501        | 0.012344   | No      |
| RGD1566239 | 0.90739  | 0.40655  | -0.50084    | 6.50E-07   | No      | Chd2    | 233.156   | 60.8457  | -1.93807         | 233.157      | 60.8467       | -1.9380508       | 0.00126492 | No      |
| Rgma       | 0.089339 | 0.030273 | -0.059066   | 4.32E-05   | No      | Chd3    | 153.67    | 22.7943  | -2.75309         | 153.671      | 22.7953       | -2.7530366       | 0.00018329 | No      |
| Rhbd1l     | 0.24369  | 0.099459 | -0.144231   | 3.76E-05   | No      | Chd4    | 82.3476   | 53.5284  | -0.621422        | 82.3486      | 53.5294       | -0.6214126       | 0.0298279  | No      |
| Rhoc       | 0.67889  | 0.17397  | -0.50492    | 5.59E-07   | No      | Chd6    | 20.4846   | 11.205   | -0.870399        | 20.4856      | 11.206        | -0.8703388       | 0.0271125  | No      |
| Rhoh       | 0.073496 | 0.4513   | 0.377804    | 3.92E-06   | No      | Chd7    | 6.77597   | 3.21809  | -1.07422         | 6.77697      | 3.21909       | -1.0739875       | 0.0339945  | No      |
| Ric3       | 0.10359  | 0.044095 | -0.059495   | 0.00489594 | No      | Chd8    | 35.5822   | 14.0232  | -1.34334         | 35.5832      | 14.0242       | -1.3432778       | 0.00018329 | No      |
| Rin1       | 0.50822  | 0.16787  | -0.34035    | 9.14E-07   | No      | Chdh    | 0         | 25.4742  | inf              | 0.001        | 25.4752       | 14.6368059       | 0.00018329 | No      |
| Ring1      | 0.90469  | 0.81007  | -0.09462    | 0.00040512 | No      | Chfr    | 21.4696   | 6.89687  | -1.63828         | 21.4706      | 6.89787       | -1.6381397       | 0.0309526  | No      |
| Ripk4      | 0.13573  | 0.038682 | -0.097048   | 8.72E-07   | No      | Chi3l1  | 0.657926  | 3.62107  | 2.46042          | 0.658926     | 3.62207       | 2.45862607       | 0.00018329 | No      |
| Rmnd1      | 0.70795  | 0.52495  | -0.183      | 0.03521493 | No      | Chic2   | 67.615    | 17.418   | -1.95677         | 67.616       | 17.419        | -1.9567029       | 0.00018329 | No      |
| Rmrp       | 0.34324  | 0.21527  | -0.12797    | 0.00275507 | No      | Chka    | 8.19337   | 29.3085  | 1.83879          | 8.19437      | 29.3095       | 1.83866342       | 0.00018329 | No      |
| Rn28s      | 0.35654  | 0.22395  | -0.13259    | 5.62E-06   | No      | Chm     | 15.7754   | 4.40552  | -1.8403          | 15.7764      | 4.40652       | -1.8400564       | 0.00018329 | No      |
| Rn45s      | 0.35688  | 0.21322  | -0.14366    | 6.35E-06   | No      | Chmp1a  | 57.6564   | 35.1246  | -0.715           | 57.6574      | 35.1256       | -0.7149829       | 0.00543198 | No      |
| Rn5-8s     | 0.3906   | 0.22035  | -0.17025    | 1.01E-05   | No      | Chmp2a  | 153.401   | 261.614  | 0.770136         | 153.402      | 261.615       | 0.77012797       | 0.0114728  | No      |
| Rn7sl1     | 0.45208  | 0.36878  | -0.0833     | 6.10E-08   | No      | Chmp2b  | 10.142    | 17.5012  | 0.787121         | 10.143       | 17.5022       | 0.78705186       | 0.0138771  | No      |
| Rnase10    | 0.85126  | 0.76286  | -0.0884     | 0.03521493 | No      | Chmp4c  | 0         | 21.3631  | inf              | 0.001        | 21.3641       | 14.3829009       | 0.00018329 | No      |
| Rnase11    | 0.86083  | 0.8065   | -0.05433    | 0.00663046 | No      | Chmp5   | 27.2924   | 75.3703  | 1.4655           | 27.2934      | 75.3713       | 1.46546315       | 0.00018329 | No      |
| Rnase17    | 0.6422   | 0.40389  | -0.23831    | 0.04893199 | No      | Chn2    | 4.56615   | 13.1857  | 1.52992          | 4.56715      | 13.1867       | 1.52971749       | 0.00018329 | No      |
| Rnf113a2   | 0.205    | 0.10323  | -0.10177    | 0.0006534  | No      | Chordc1 | 36.4106   | 16.5204  | -1.14011         | 36.4116      | 16.5214       | -1.1400622       | 0.00018329 | No      |
| Rnf126     | 0.33838  | 0.13746  | -0.20092    | 0.00028052 | No      | Chp1    | 27.0566   | 47.0289  | 0.797566         | 27.0576      | 47.0299       | 0.79754439       | 0.00197017 | No      |
| Rnf128     | 0.083507 | 0.016638 | -0.066869   | 0.00025534 | No      | Chp2    | 0         | 0.678409 | inf              | 0.001        | 0.679409      | 9.40813652       | 0.00018329 | No      |
| Rnf151     | 0.8627   | 0.68319  | -0.17951    | 0.00077922 | No      | Chpt1   | 1.49052   | 23.5932  | 3.98448          | 1.49152      | 23.5942       | 3.98357703       | 0.00018329 | No      |
| Rnf225     | 0.76088  | 0.57923  | -0.18165    | 0.01448681 | No      | Chrm3   | 0         | 0.853855 | inf              | 0.001        | 0.854855      | 9.73953592       | 0.00018329 | No      |
| Rnf26      | 0.85605  | 0.75269  | -0.10336    | 0.00722274 | No      | Chrna2  | 0.797752  | 0.271578 | -1.55458         | 0.798752     | 0.272578      | -1.5510785       | 0.0478786  | No      |
| Rnf8       | 0.87634  | 0.65067  | -0.22567    | 6.66E-08   | No      | Chrbn1  | 0.16419   | 3.1958   | 4.28273          | 0.16519      | 3.1968        | 4.27443023       | 0.00018329 | No      |
| Robo4      | 0.96015  | 0.903    | -0.05715    | 0.01349957 | No      | Chst12  | 1.42743   | 5.74912  | 2.00993          | 1.42843      | 5.75012       | 2.00916173       | 0.00018329 | No      |
| Rogdi      | 0.71826  | 0.22169  | -0.49657    | 1.89E-06   | No      | Chst14  | 1.96299   | 3.80474  | 0.954744         | 1.96399      | 3.80574       | 0.95438942       | 0.0248275  | No      |
| Rom1       | 0.21379  | 0.068672 | -0.145118   | 1.61E-05   | No      | Chst15  | 5.7498    | 2.9456   | -0.964952        | 5.7508       | 2.9466        | -0.9647114       | 0.00970533 | No      |
| Ropn1      | 0.78233  | 0.3604   | -0.42193    | 5.51E-05   | No      | Chst2   | 3.55294   | 9.99438  | 1.49211          | 3.55394      | 9.99538       | 1.49184209       | 0.00018329 | No      |

| RRBS     |          |          |             |            |         | RNAseq  |           |          |                  |              |               |                  |            |         |
|----------|----------|----------|-------------|------------|---------|---------|-----------|----------|------------------|--------------|---------------|------------------|------------|---------|
| gene     | Blood    | Kidney   | methyl.diff | pMWU.fdr   | Match ? | gene    | blood     | kidney   | log2(fold_ratio) | blood+ 0.001 | kidney+ 0.001 | log2(fold_ratio) | q_value    | Match ? |
| Rsph6a   | 0.94953  | 0.64762  | -0.30191    | 9.79E-07   | No      | Chst9   | 0         | 18.4183  | inf              | 0.001        | 18.4193       | 14.1689306       | 0.00018329 | No      |
| RT1-Db2  | 0.15023  | 0.351    | 0.20077     | 0.00085417 | No      | Chsy1   | 10.06     | 4.96747  | -1.01804         | 10.061       | 4.96847       | -1.0179001       | 0.00066911 | No      |
| RT1-M5   | 0.09029  | 0.038198 | -0.052092   | 0.01349957 | No      | Chuk    | 18.3832   | 10.7205  | -0.778014        | 18.3842      | 10.7215       | -0.7779596       | 0.00627425 | No      |
| Ruvbl2   | 0.77635  | 0.58928  | -0.18707    | 0.02028318 | No      | Ciapin1 | 18.1311   | 32.8373  | 0.856869         | 18.1321      | 32.8383       | 0.85683342       | 0.00329119 | No      |
| Rxfp3    | 0.75776  | 0.57073  | -0.18703    | 0.00054569 | No      | Cidea   | 0         | 3.72338  | inf              | 0.001        | 3.72438       | 11.8627846       | 0.00018329 | No      |
| S100a1   | 0.16125  | 0.076084 | -0.085166   | 0.02028318 | No      | Cideb   | 0.21354   | 8.83173  | 5.37012          | 0.21454      | 8.83273       | 5.36354085       | 0.00709238 | No      |
| S1pr4    | 0.1875   | 0.51739  | 0.32989     | 4.84E-11   | No      | Ciita   | 0.479247  | 1.30313  | 1.44314          | 0.480247     | 1.30413       | 1.44123918       | 0.00469886 | No      |
| Sall3    | 0.96086  | 0.80485  | -0.15601    | 7.19E-07   | No      | Cir1    | 67.1552   | 25.7793  | -1.38129         | 67.1562      | 25.7803       | -1.3812515       | 0.00018329 | No      |
| Samd14   | 0.3017   | 0.13033  | -0.17137    | 8.62E-05   | No      | Cirh1a  | 35.8113   | 13.1762  | -1.44248         | 35.8123      | 13.1772       | -1.4424113       | 0.00342383 | No      |
| Scara5   | 0.64842  | 0.5116   | -0.13682    | 0.03521493 | No      | Cisd1   | 98.2832   | 353.655  | 1.84732          | 98.2842      | 353.656       | 1.84731532       | 0.00018329 | No      |
| Scarf2   | 0.2012   | 0.096195 | -0.105005   | 3.56E-06   | No      | Cisd3   | 32.71     | 53.8255  | 0.718559         | 32.711       | 53.8265       | 0.71854075       | 0.0267263  | No      |
| Scarna15 | 0.84604  | 0.76185  | -0.08419    | 0.03032002 | No      | Cit     | 0.0671319 | 2.70587  | 5.33295          | 0.0681319    | 2.70687       | 5.31215135       | 0.00018329 | No      |
| Scn3b    | 0.10128  | 0.026499 | -0.074781   | 0.00405617 | No      | Cited2  | 51.2966   | 74.5437  | 0.539225         | 51.2976      | 74.5447       | 0.53921445       | 0.0486053  | No      |
| Scn4a    | 0.75841  | 0.35674  | -0.40167    | 3.22E-10   | No      | Cklf    | 25.1419   | 9.4666   | -1.40917         | 25.1429      | 9.4676        | -1.4090804       | 0.00097029 | No      |
| Scn5a    | 0.081374 | 0.025437 | -0.055937   | 0.00136617 | No      | Cks2    | 2.89915   | 34.5127  | 3.57343          | 2.90015      | 34.5137       | 3.57296972       | 0.00018329 | No      |
| Scn8a    | 0.88677  | 0.78698  | -0.09979    | 1.57E-05   | No      | Clca2   | 0         | 1.57927  | inf              | 0.001        | 1.58027       | 10.6259554       | 0.00018329 | No      |
| Scrt1    | 0.097656 | 0.031761 | -0.065895   | 1.76E-05   | No      | Clcn4   | 0.313551  | 4.70997  | 3.90894          | 0.314551     | 4.71097       | 3.90465829       | 0.00018329 | No      |
| Scube3   | 0.82049  | 0.62628  | -0.19421    | 6.33E-05   | No      | Clcn5   | 1.95151   | 3.3755   | 0.79051          | 1.95251      | 3.3765        | 0.79019862       | 0.00937155 | No      |
| Sdr42e1  | 0.21856  | 0.29237  | 0.07381     | 0.03760671 | No      | Clcnkb  | 0.0781762 | 303.205  | 11.9213          | 0.0791762    | 303.206       | 11.9029439       | 0.00018329 | No      |
| Sds      | 0.68127  | 0.57433  | -0.10694    | 0.00625768 | No      | Cldn10  | 2.86041   | 292.095  | 6.67408          | 2.86141      | 292.096       | 6.67357256       | 0.00018329 | No      |
| Senp3    | 0.7806   | 0.6058   | -0.1748     | 0.0103156  | No      | Cldn16  | 0         | 65.0565  | inf              | 0.001        | 65.0575       | 15.9894278       | 0.00018329 | No      |
| Serpinf2 | 0.96702  | 0.414    | -0.55302    | 6.50E-07   | No      | Cldn17  | 0         | 22.4784  | inf              | 0.001        | 22.4794       | 14.4563159       | 0.00018329 | No      |
| Sez6l    | 0.24794  | 0.102    | -0.14594    | 1.17E-05   | No      | Cldn6   | 0.285821  | 6.73856  | 4.55926          | 0.286821     | 6.73956       | 4.55443184       | 0.00018329 | No      |
| Sftpa1   | 0.96271  | 0.5762   | -0.38651    | 6.50E-07   | No      | Clec10a | 0.260455  | 13.7317  | 5.72033          | 0.261455     | 13.7327       | 5.71490883       | 0.00018329 | No      |
| Sgcd     | 0.77992  | 0.66332  | -0.1166     | 0.03275343 | No      | Clec11a | 0         | 0.745851 | inf              | 0.001        | 0.746851      | 9.54467664       | 0.00018329 | No      |
| Sh2b2    | 0.21205  | 0.027983 | -0.184067   | 0.00063042 | No      | Clec16a | 4.38927   | 12.3909  | 1.49723          | 4.39027      | 12.3919       | 1.49701583       | 0.00018329 | No      |
| Sh3gl1   | 0.23172  | 0.13098  | -0.10074    | 0.00955793 | No      | Clec1b  | 3.44942   | 1.2651   | -1.44711         | 3.45042      | 1.2661        | -1.4463806       | 0.0215079  | No      |
| Shank3   | 0.41128  | 0.20337  | -0.20791    | 0.00142182 | No      | Clec2d2 | 22.463    | 1.62653  | -3.78768         | 22.464       | 1.62753       | -3.7868588       | 0.00066911 | No      |
| Shc1     | 0.35943  | 0.17852  | -0.18091    | 0.03275343 | No      | Clec2g  | 89.4176   | 30.9311  | -1.5315          | 89.4186      | 30.9321       | -1.5314702       | 0.00506686 | No      |
| Shc4     | 0.38235  | 0.17778  | -0.20457    | 5.51E-05   | No      | Clec4a  | 0         | 1.63149  | inf              | 0.001        | 1.63249       | 10.6728584       | 0.00018329 | No      |
| Shd      | 0.79569  | 0.45389  | -0.3418     | 1.66E-05   | No      | Clec4a1 | 1.31578   | 17.3169  | 3.71819          | 1.31678      | 17.3179       | 3.71717776       | 0.00018329 | No      |
| Shisa7   | 0.79113  | 0.36005  | -0.43108    | 8.08E-07   | No      | Clec4a3 | 1.07085   | 21.4649  | 4.32515          | 1.07185      | 21.4659       | 4.32387173       | 0.00018329 | No      |
| Shtn1    | 0.064605 | 0.014093 | -0.050512   | 0.00832699 | No      | Clec4e  | 0.212107  | 2.64419  | 3.63996          | 0.213107     | 2.64519       | 3.63372146       | 0.0118093  | No      |
| Sigirr   | 0.58151  | 0.20308  | -0.37843    | 6.95E-08   | No      | Clec7a  | 0.300941  | 7.1635   | 4.57311          | 0.301941     | 7.1645        | 4.56852745       | 0.00018329 | No      |
| Sirt4    | 0.78876  | 0.30977  | -0.47899    | 2.42E-06   | No      | Clic2   | 0.56271   | 8.61718  | 3.93675          | 0.56371      | 8.61818       | 3.93435817       | 0.00018329 | No      |
| Six2     | 0.032671 | 0.13408  | 0.101409    | 1.84E-06   | No      | Clic4   | 7.40083   | 97.9497  | 3.72628          | 7.40183      | 97.9507       | 3.7261019        | 0.00018329 | No      |
| Six6     | 0.19597  | 0.075514 | -0.120456   | 0.00054569 | No      | CLIC5   | 0.884585  | 4.44587  | 2.32939          | 0.885585     | 4.44687       | 2.32808754       | 0.00018329 | No      |
| Slc10a4  | 0.19087  | 0.068691 | -0.122179   | 0.00025534 | No      | Clip2   | 3.07279   | 10.9774  | 1.83692          | 3.07379      | 10.9784       | 1.8365773        | 0.00018329 | No      |
| Slc10a6  | 0.82432  | 0.73737  | -0.08695    | 0.04893199 | No      | Clk2    | 72.1089   | 42.0751  | -0.77721         | 72.1099      | 42.0761       | -0.7771964       | 0.00567465 | No      |
| Slc13a5  | 0.32008  | 0.18452  | -0.13556    | 0.00164763 | No      | Clk4    | 49.9923   | 32.7283  | -0.611169        | 49.9933      | 32.7293       | -0.611152        | 0.0408246  | No      |
| Slc15a1  | 0.1403   | 0.078903 | -0.061397   | 0.00033098 | No      | Clmn    | 0         | 12.8861  | inf              | 0.001        | 12.8871       | 13.65364         | 0.00018329 | No      |
| Slc16a3  | 0.10243  | 0.015197 | -0.087233   | 0.00019103 | No      | Cln3    | 13.6815   | 27.6121  | 1.01307          | 13.6825      | 27.6131       | 1.01302101       | 0.00035173 | No      |

| RRBS     |            |          |             |            |         | RNAseq |          |           |                  |              |               |                  |            |         |
|----------|------------|----------|-------------|------------|---------|--------|----------|-----------|------------------|--------------|---------------|------------------|------------|---------|
| gene     | Blood      | Kidney   | methyl.diff | pMWU.fdr   | Match ? | gene   | blood    | kidney    | log2(fold_ratio) | blood+ 0.001 | kidney+ 0.001 | log2(fold_ratio) | q_value    | Match ? |
| Slc17a6  | 0.0882     | 0.035781 | -0.052419   | 1.01E-05   | No      | Cln5   | 1.00477  | 3.94771   | 1.97415          | 1.00577      | 3.94871       | 1.97308099       | 0.00035173 | No      |
| Slc19a3  | 0.14795    | 0.054275 | -0.093675   | 0.00040512 | No      | Cln8   | 3.90242  | 8.49201   | 1.12174          | 3.90342      | 8.49301       | 1.12153725       | 0.00126492 | No      |
| Slc22a17 | 0.70056    | 0.46751  | -0.23305    | 0.00108973 | No      | Clns1a | 82.2633  | 35.503    | -1.21231         | 82.2643      | 35.504        | -1.2122849       | 0.00018329 | No      |
| Slc22a3  | 0.42801    | 0.21752  | -0.21049    | 0.02535502 | No      | Clp1   | 10.4978  | 4.82974   | -1.12007         | 10.4988      | 4.83074       | -1.1199083       | 0.00210945 | No      |
| Slc24a1  | 0.90672    | 0.77669  | -0.13003    | 0.01544668 | No      | Clpb   | 7.70861  | 37.4349   | 2.27984          | 7.70961      | 37.4359       | 2.27969265       | 0.00018329 | No      |
| Slc25a21 | 0.36207    | 0.23885  | -0.12322    | 0.00152471 | No      | Clptm1 | 45.9561  | 67.3497   | 0.551414         | 45.9571      | 67.3507       | 0.55140518       | 0.0345543  | No      |
| Slc25a34 | 0.78704    | 0.35229  | -0.43475    | 3.77E-12   | No      | Clpx   | 19.3637  | 35.2636   | 0.864826         | 19.3647      | 35.2646       | 0.86479152       | 0.00082046 | No      |
| Slc26a9  | 0.11025    | 0.28237  | 0.17212     | 0.01178248 | No      | Clstn1 | 9.88267  | 39.4019   | 1.99529          | 9.88367      | 39.4029       | 1.99518307       | 0.0469027  | No      |
| Slc29a1  | 0.085948   | 0.031366 | -0.054582   | 1.35E-08   | No      | Clstn3 | 0.942623 | 0.0689614 | -3.77282         | 0.943623     | 0.0699614     | -3.7535795       | 0.00992433 | No      |
| Slc29a4  | 0.74315    | 0.87309  | 0.12994     | 0.00674226 | No      | Clta   | 209.482  | 326.895   | 0.641997         | 209.483      | 326.896       | 0.64199855       | 0.0138771  | No      |
| Slc32a1  | 0.18111    | 0.10231  | -0.0788     | 0.02680411 | No      | Cltb   | 23.7478  | 76.8065   | 1.69343          | 23.7488      | 76.8075       | 1.69339257       | 0.00018329 | No      |
| Slc35f1  | 0.12153    | 0.044847 | -0.076683   | 9.15E-06   | No      | Cltc   | 22.3548  | 61.0451   | 1.44929          | 22.3558      | 61.0461       | 1.44924996       | 0.00018329 | No      |
| Slc38a4  | 0.67666    | 0.54528  | -0.13138    | 0.03275343 | No      | Clu    | 2.18694  | 350.654   | 7.32499          | 2.18794      | 350.655       | 7.32433531       | 0.00018329 | No      |
| Slc44a4  | 0.79514    | 0.46552  | -0.32962    | 0.00102242 | No      | Cluh   | 13.0013  | 66.9796   | 2.36506          | 13.0023      | 66.9806       | 2.36497645       | 0.00018329 | No      |
| Slc45a1  | 0.29534    | 0.18282  | -0.11252    | 0.0279946  | No      | Clvs1  | 0.156017 | 2.71064   | 4.11886          | 0.157017     | 2.71164       | 4.11017299       | 0.00051281 | No      |
| Slc46a2  | 0.11904    | 0.031138 | -0.087902   | 5.90E-05   | No      | Cmah   | 55.8408  | 13.538    | -2.04431         | 55.8418      | 13.539        | -2.0442243       | 0.00018329 | No      |
| Slc47a2  | 0.00079369 | 0.053717 | 0.05292331  | 9.79E-07   | No      | Cmas   | 40.2065  | 23.1193   | -0.798329        | 40.2075      | 23.1203       | -0.7983045       | 0.00494262 | No      |
| Slc4a10  | 0.68119    | 0.21217  | -0.46902    | 0.00142182 | No      | Cmc1   | 35.8852  | 19.5958   | -0.872846        | 35.8862      | 19.5968       | -0.8728111       | 0.0086849  | No      |
| Slc51a   | 0.73903    | 0.47102  | -0.26801    | 0.00674226 | No      | CMC2   | 24.0985  | 65.9653   | 1.45277          | 24.0995      | 65.9663       | 1.45272597       | 0.00035173 | No      |
| Slc5a4   | 0.48473    | 0.20033  | -0.2844     | 0.00489594 | No      | Cmklr1 | 0.038141 | 1.70801   | 5.48483          | 0.039141     | 1.70901       | 5.44833641       | 0.0325782  | No      |
| Slc6a2   | 0.15974    | 0.057247 | -0.102493   | 0.01761018 | No      | Cml1   | 0.25645  | 4.86637   | 4.2461           | 0.25745      | 4.86737       | 4.24077827       | 0.00615197 | No      |
| Slc6a3   | 0.28062    | 0.12692  | -0.1537     | 0.0279946  | No      | Cml3   | 0        | 8.80871   | inf              | 0.001        | 8.80971       | 13.1048788       | 0.00018329 | No      |
| Slc6a7   | 0.28202    | 0.099031 | -0.182989   | 0.01761018 | No      | Cmpk2  | 5.65891  | 3.34269   | -0.759516        | 5.65991      | 3.34369       | -0.759338        | 0.0227188  | No      |
| Slc7a10  | 0.089709   | 0.16044  | 0.070731    | 0.0017951  | No      | Cmtm3  | 17.8222  | 5.52919   | -1.68853         | 17.8232      | 5.53019       | -1.6883554       | 0.00018329 | No      |
| Slc7a14  | 0.25298    | 0.090114 | -0.162866   | 3.91E-05   | No      | Cmtm4  | 0.617009 | 3.01626   | 2.2894           | 0.618009     | 3.01726       | 2.28753927       | 0.00210945 | No      |
| Slc7a15  | 0.85934    | 0.38862  | -0.47072    | 1.27E-06   | No      | Cmtm7  | 107.279  | 54.5762   | -0.975025        | 107.28       | 54.5772       | -0.9750109       | 0.0224259  | No      |
| Slc9b2   | 0.84397    | 0.66826  | -0.17571    | 0.00542685 | No      | Cmtr2  | 5.25946  | 2.16727   | -1.27904         | 5.26046      | 2.16827       | -1.2786445       | 0.00035173 | No      |
| Slit1    | 0.096935   | 0.032452 | -0.064483   | 0.00405617 | No      | Cnbp   | 509.213  | 232.657   | -1.13006         | 509.214      | 232.658       | -1.1300613       | 0.00018329 | No      |
| Slitrk1  | 0.083565   | 0.024177 | -0.059388   | 0.01544668 | No      | Cndp1  | 0        | 3.07535   | inf              | 0.001        | 3.07635       | 11.5870039       | 0.00018329 | No      |
| Smad3    | 0.66283    | 0.28175  | -0.38108    | 2.75E-06   | No      | Cnga1  | 3.54534  | 0.155206  | -4.51367         | 3.54634      | 0.156206      | -4.5048091       | 0.00018329 | No      |
| Smoc2    | 0.17443    | 0.066612 | -0.107818   | 1.37E-05   | No      | Cnih3  | 2.03039  | 0.379809  | -2.41841         | 2.03139      | 0.380809      | -2.4153278       | 0.0347435  | No      |
| Smpd3    | 0.18875    | 0.069652 | -0.119098   | 0.0103156  | No      | Cnih4  | 41.0562  | 24.932    | -0.719599        | 41.0572      | 24.933        | -0.7195788       | 0.0434518  | No      |
| Smpd5    | 0.14264    | 0.30287  | 0.16023     | 1.94E-08   | No      | Cnksr3 | 6.02273  | 16.5985   | 1.46257          | 6.02373      | 16.5995       | 1.46241078       | 0.00018329 | No      |
| Smpdl3b  | 0.017951   | 0.10209  | 0.084139    | 0.00674226 | No      | Cnn3   | 35.0507  | 113.36    | 1.6934           | 35.0517      | 113.361       | 1.69336807       | 0.00018329 | No      |
| Smug1    | 0.88481    | 0.55354  | -0.33127    | 2.75E-06   | No      | Cnm4   | 5.20822  | 9.58337   | 0.879742         | 5.20922      | 9.58437       | 0.87961624       | 0.00777671 | No      |
| Snai1    | 0.74152    | 0.48999  | -0.25153    | 0.00128825 | No      | Cnot10 | 38.9377  | 21.4347   | -0.86122         | 38.9387      | 21.4357       | -0.8611892       | 0.0026435  | No      |
| Snai2    | 0.079598   | 0.022641 | -0.056957   | 0.01544668 | No      | Cnot2  | 52.1056  | 24.778    | -1.07238         | 52.1066      | 24.779        | -1.0723482       | 0.00018329 | No      |
| Snap91   | 0.080391   | 0.021991 | -0.0584     | 2.42E-06   | No      | Cnot3  | 27.0502  | 13.1162   | -1.04429         | 27.0512      | 13.1172       | -1.0442328       | 0.00251301 | No      |
| Sncb     | 0.097933   | 0.021635 | -0.076298   | 0.0006534  | No      | Cnot4  | 15.7635  | 8.46627   | -0.896786        | 15.7645      | 8.46727       | -0.8967106       | 0.0016929  | No      |
| Sncg     | 0.91089    | 0.85678  | -0.05411    | 0.00542685 | No      | Cnot6l | 24.2583  | 8.59683   | -1.4966          | 24.2593      | 8.59783       | -1.4964934       | 0.00018329 | No      |
| Snrpc    | 0.90418    | 0.71369  | -0.19049    | 0.00013988 | No      | Cnot7  | 42.3021  | 22.7975   | -0.891853        | 42.3031      | 22.7985       | -0.8918245       | 0.00627425 | No      |
| Sntg2    | 0.080397   | 0.015772 | -0.064625   | 0.00420619 | No      | Cnp    | 130.02   | 21.6759   | -2.58456         | 130.021      | 21.6769       | -2.5845143       | 0.00018329 | No      |

| RRBS       |           |          |             |            |         | RNAseq   |           |          |                  |              |               |                  |            |         |
|------------|-----------|----------|-------------|------------|---------|----------|-----------|----------|------------------|--------------|---------------|------------------|------------|---------|
| gene       | Blood     | Kidney   | methyl.diff | pMWU.fdr   | Match ? | gene     | blood     | kidney   | log2(fold_ratio) | blood+ 0.001 | kidney+ 0.001 | log2(fold_ratio) | q_value    | Match ? |
| Sorcs1     | 0.10577   | 0.0303   | -0.07547    | 7.59E-06   | No      | Cnppd1   | 132.497   | 47.78    | -1.47148         | 132.498      | 47.781        | -1.4714616       | 0.00018329 | No      |
| Sox10      | 0.18884   | 0.073829 | -0.115011   | 3.48E-05   | No      | Cnpy1    | 0         | 4.63451  | inf              | 0.001        | 4.63551       | 12.1785124       | 0.00018329 | No      |
| Sox14      | 0.15899   | 0.054817 | -0.104173   | 6.98E-06   | No      | Cnr2     | 3.2879    | 0.841105 | -1.96681         | 3.2889       | 0.842105      | -1.9655331       | 0.00051281 | No      |
| Sox15      | 0.77278   | 0.38694  | -0.38584    | 6.50E-07   | No      | Cnrip1   | 5.6221    | 1.30133  | -2.11112         | 5.6231       | 1.30233       | -2.1102706       | 0.00035173 | No      |
| Sox18      | 0.2774    | 0.087948 | -0.189452   | 4.18E-12   | No      | Cntf     | 31.0201   | 68.3865  | 1.14051          | 31.0211      | 68.3875       | 1.14048281       | 0.0337151  | No      |
| Sox7       | 0.4199    | 0.24658  | -0.17332    | 0.01265586 | No      | Cntln    | 0.0690086 | 1.37183  | 4.31318          | 0.0700086    | 1.37283       | 4.29347702       | 0.00458064 | No      |
| Sp8        | 0.066607  | 0.035585 | -0.031022   | 0.00722274 | No      | Cntnap1  | 1.94356   | 10.2544  | 2.39948          | 1.94456      | 10.2554       | 2.39886811       | 0.00018329 | No      |
| Spaca1     | 0.91944   | 0.85248  | -0.06696    | 4.11E-11   | No      | Cntrl    | 23.2068   | 9.13064  | -1.34576         | 23.2078      | 9.13164       | -1.3456639       | 0.00018329 | No      |
| Spaca4     | 0.93358   | 0.5808   | -0.35278    | 2.48E-05   | No      | Coa3     | 57.3306   | 125.834  | 1.13415          | 57.3316      | 125.835       | 1.1341308        | 0.0262294  | No      |
| Spag4      | 0.41226   | 0.15452  | -0.25774    | 0.00095473 | No      | Coa4     | 6.94774   | 14.6354  | 1.07484          | 6.94874      | 14.6364       | 1.07473744       | 0.00082046 | No      |
| Spag6l     | 0.05955   | 0.14357  | 0.08402     | 0.00692761 | No      | Coasy    | 32.2923   | 50.4014  | 0.642273         | 32.2933      | 50.4024       | 0.64225756       | 0.0355427  | No      |
| Spag8      | 0.71397   | 0.38457  | -0.3294     | 0.00043712 | No      | Cobl     | 0         | 17.4412  | inf              | 0.001        | 17.4422       | 14.0902944       | 0.00018329 | No      |
| Spata32    | 0.19778   | 0.12915  | -0.06863    | 0.00542685 | No      | Cobll1   | 2.55634   | 29.1691  | 3.51229          | 2.55734      | 29.1701       | 3.51177445       | 0.00018329 | No      |
| Spg7       | 0.57656   | 0.35243  | -0.22413    | 0.00455632 | No      | Cog3     | 12.3232   | 6.8775   | -0.841423        | 12.3242      | 6.8785        | -0.8413281       | 0.00197017 | No      |
| Sphk2      | 0.33705   | 0.10115  | -0.2359     | 0.03521493 | No      | Col11a1  | 1.94763   | 3.3358   | 0.776316         | 1.94863      | 3.3368        | 0.77600504       | 0.0203707  | No      |
| Spink2     | 0.76802   | 0.47274  | -0.29528    | 0.00092821 | No      | COL4A3   | 71.7002   | 107.125  | 0.579247         | 71.7012      | 107.126       | 0.5792395        | 0.0413654  | No      |
| Spock3     | 0.17328   | 0.062043 | -0.111237   | 4.36E-05   | No      | Col4a3bp | 21.1856   | 12.4742  | -0.764134        | 21.1866      | 12.4752       | -0.7640891       | 0.00393885 | No      |
| Spred3     | 0.54881   | 0.16548  | -0.38333    | 0.00013988 | No      | Col4a5   | 0         | 37.6252  | inf              | 0.001        | 37.6262       | 15.19945         | 0.00018329 | No      |
| Sprn       | 0.38484   | 0.14938  | -0.23546    | 0.00034148 | No      | Col5a1   | 0.0387603 | 4.88984  | 6.97906          | 0.0397603    | 4.89084       | 6.94260982       | 0.00277264 | No      |
| Spryd3     | 0.34939   | 0.15644  | -0.19295    | 1.41E-05   | No      | Col5a2   | 0         | 1.80647  | inf              | 0.001        | 1.80747       | 10.819756        | 0.00018329 | No      |
| Spsb4      | 0.12115   | 0.044488 | -0.076662   | 6.33E-05   | No      | Col6a2   | 0         | 1.36329  | inf              | 0.001        | 1.36429       | 10.4139346       | 0.00018329 | No      |
| Sptb       | 0.2662    | 0.081856 | -0.184344   | 0.01761018 | No      | Col6a4   | 1.82276   | 0.58719  | -1.63422         | 1.82376      | 0.58819       | -1.6325617       | 0.0113722  | No      |
| Spx        | 0.20653   | 0.08333  | -0.1232     | 3.15E-05   | No      | Comm1    | 49.4962   | 95.174   | 0.943251         | 49.4972      | 95.175        | 0.94323575       | 0.0326623  | No      |
| Srgap1     | 0.11015   | 0.027903 | -0.082247   | 0.00034724 | No      | Comm3    | 35.1866   | 99.8796  | 1.50516          | 35.1876      | 99.8806       | 1.50513737       | 0.00018329 | No      |
| Srsf9      | 0.0015385 | 0.06992  | 0.0683815   | 2.75E-06   | No      | Comm7    | 93.6277   | 32.0049  | -1.54864         | 93.6287      | 32.0059       | -1.5486129       | 0.00018329 | No      |
| Sstr1      | 0.10206   | 0.046984 | -0.055076   | 6.46E-06   | No      | Comm8    | 35.0231   | 22.9313  | -0.610992        | 35.0241      | 22.9323       | -0.6109669       | 0.03047    | No      |
| Sstr2      | 0.1006    | 0.03105  | -0.06955    | 0.00894698 | No      | Comm9    | 34.8183   | 62.4234  | 0.842241         | 34.8193      | 62.4244       | 0.84222285       | 0.00519348 | No      |
| Sstr5      | 0.18451   | 0.066857 | -0.117653   | 0.02915203 | No      | Comt     | 23.2037   | 104.489  | 2.17092          | 23.2047      | 104.49        | 2.17087593       | 0.00018329 | No      |
| St6gal2    | 0.23262   | 0.097769 | -0.134851   | 0.00092821 | No      | Copb2    | 39.5947   | 24.8638  | -0.671261        | 39.5957      | 24.8648       | -0.6712389       | 0.0231105  | No      |
| St6galnac2 | 0.25019   | 0.13512  | -0.11507    | 0.01544668 | No      | COPE     | 77.882    | 120.658  | 0.631564         | 77.883       | 120.659       | 0.63155517       | 0.017174   | No      |
| St8sia3    | 0.13518   | 0.045641 | -0.089539   | 0.00070202 | No      | Coprs    | 25.7023   | 70.7651  | 1.46114          | 25.7033      | 70.7661       | 1.46110482       | 0.00018329 | No      |
| St8sia5    | 0.22634   | 0.10783  | -0.11851    | 0.0103156  | No      | Cops7a   | 17.7356   | 43.4111  | 1.29141          | 17.7366      | 43.4121       | 1.29136773       | 0.00018329 | No      |
| Stoml3     | 0.75546   | 0.51045  | -0.24501    | 0.00128825 | No      | Cops7b   | 12.7785   | 7.89398  | -0.694897        | 12.7795      | 7.89498       | -0.6948239       | 0.021204   | No      |
| Stx11      | 0.94332   | 0.86773  | -0.07559    | 0.00489594 | No      | Copz2    | 0.184832  | 20.8493  | 6.81763          | 0.185832     | 20.8503       | 6.80992538       | 0.00140841 | No      |
| Sv2a       | 0.89391   | 0.82624  | -0.06767    | 1.79E-05   | No      | Coq10b   | 11.1102   | 19.8868  | 0.839923         | 11.1112      | 19.8878       | 0.83986906       | 0.00603614 | No      |
| Svs4       | 0.82941   | 0.72737  | -0.10204    | 0.00832699 | No      | Coq3     | 7.04669   | 16.7173  | 1.24633          | 7.04769      | 16.7183       | 1.24620578       | 0.00051281 | No      |
| Syce2      | 0.42277   | 0.25175  | -0.17102    | 1.20E-07   | No      | Coq7     | 9.63757   | 50.5454  | 2.39084          | 9.63857      | 50.5464       | 2.39071732       | 0.00018329 | No      |
| Sycp1      | 0.8362    | 0.71791  | -0.11829    | 0.00092821 | No      | Coq9     | 21.874    | 76.6749  | 1.80954          | 21.875       | 76.6759       | 1.80949018       | 0.00018329 | No      |
| Sypl2      | 0.21532   | 0.05834  | -0.15698    | 6.69E-05   | No      | Coro1a   | 1406      | 297.12   | -2.24247         | 1406.001     | 297.121       | -2.2424751       | 0.00018329 | No      |
| Syt1       | 0.12344   | 0.050701 | -0.072739   | 2.26E-05   | No      | Coro2a   | 4.69908   | 0.87003  | -2.43324         | 4.70008      | 0.87103       | -2.431891        | 0.00018329 | No      |
| Syt10      | 0.61953   | 0.48392  | -0.13561    | 0.03863139 | No      | Coro2b   | 5.02009   | 0.650971 | -2.94705         | 5.02109      | 0.651971      | -2.9451209       | 0.00018329 | No      |
| T          | 0.15564   | 0.059205 | -0.096435   | 3.48E-05   | No      | Coro7    | 55.5883   | 16.7104  | -1.73403         | 55.5893      | 16.7114       | -1.7339746       | 0.0420159  | No      |



| RRBS     |            |          |             |            |         | RNAseq   |           |          |                  |              |               |                  |            |         |
|----------|------------|----------|-------------|------------|---------|----------|-----------|----------|------------------|--------------|---------------|------------------|------------|---------|
| gene     | Blood      | Kidney   | methyl.diff | pMWU.fdr   | Match ? | gene     | blood     | kidney   | log2(fold_ratio) | blood+ 0.001 | kidney+ 0.001 | log2(fold_ratio) | q_value    | Match ? |
| Tac3     | 0.74895    | 0.6462   | -0.10275    | 0.01621946 | No      | Cotl1    | 518.436   | 181.684  | -1.51274         | 518.437      | 181.685       | -1.5127294       | 0.00018329 | No      |
| Tacr3    | 0.21765    | 0.12045  | -0.0972     | 0.01448681 | No      | Cox15    | 11.0947   | 16.2317  | 0.548941         | 11.0957      | 16.2327       | 0.5489023        | 0.0495248  | No      |
| Tal1     | 0.19701    | 0.072235 | -0.124775   | 0.01349957 | No      | Cox17    | 215.68    | 644.251  | 1.57873          | 215.681      | 644.252       | 1.57872602       | 0.00018329 | No      |
| Taok3    | 0.00037542 | 0.34849  | 0.34811458  | 5.02E-08   | No      | Cox18    | 26.4846   | 13.6479  | -0.956471        | 26.4856      | 13.6489       | -0.9564235       | 0.00458064 | No      |
| Tapbp    | 0.78349    | 0.30523  | -0.47826    | 3.77E-12   | No      | Cox19    | 22.371    | 39.222   | 0.810035         | 22.372       | 39.223        | 0.81000565       | 0.0210997  | No      |
| Tbcb     | 0.81912    | 0.57566  | -0.24346    | 0.00034085 | No      | Cox4i1   | 913.45    | 1910.98  | 1.06492          | 913.451      | 1910.981      | 1.06491419       | 0.00277264 | No      |
| Tbccd1   | 0.86544    | 0.70918  | -0.15626    | 0.00092821 | No      | Cox5a    | 294.782   | 847.416  | 1.52342          | 294.783      | 847.417       | 1.52341874       | 0.00018329 | No      |
| Tbr1     | 0.10352    | 0.034967 | -0.068553   | 0.01178248 | No      | Cox5b    | 297.666   | 951.592  | 1.67665          | 297.667      | 951.593       | 1.67664537       | 0.00018329 | No      |
| Tbx1     | 0.080001   | 0.15223  | 0.072229    | 0.00046463 | No      | Cox6a1   | 496.836   | 1290.06  | 1.3766           | 496.837      | 1290.061      | 1.37659476       | 0.00018329 | No      |
| Tbx18    | 0.13035    | 0.047039 | -0.083311   | 0.00015368 | No      | Cox6c    | 674.573   | 1818.14  | 1.43042          | 674.574      | 1818.141      | 1.43041547       | 0.00018329 | No      |
| Tbx2     | 0.15941    | 0.36292  | 0.20351     | 1.89E-05   | No      | Cox7a2   | 180.901   | 567.671  | 1.64986          | 180.902      | 567.672       | 1.64984923       | 0.00018329 | No      |
| Tbx4     | 0.20795    | 0.37644  | 0.16849     | 0.00894698 | No      | Cox7a2l  | 464.519   | 156.421  | -1.5703          | 464.52       | 156.422       | -1.5702973       | 0.00018329 | No      |
| Tbx5     | 0.35564    | 0.11901  | -0.23663    | 9.14E-07   | No      | Cox7a2l2 | 13.8574   | 36.2998  | 1.3893           | 13.8584      | 36.3008       | 1.38924064       | 0.00082046 | No      |
| Tbx6     | 0.79442    | 0.57892  | -0.2155     | 0.00625768 | No      | Cox7b    | 425.469   | 1436.3   | 1.75523          | 425.47       | 1436.301      | 1.75522881       | 0.00018329 | No      |
| Tcerg1l  | 0.27149    | 0.045993 | -0.225497   | 0.00025534 | No      | Cox7c    | 366.087   | 945.168  | 1.36838          | 366.088      | 945.169       | 1.36838183       | 0.00018329 | No      |
| Tcf19    | 0.7365     | 0.54693  | -0.18957    | 0.00040512 | No      | Cox8a    | 287.831   | 1439.58  | 2.32235          | 287.832      | 1439.581      | 2.32235007       | 0.00018329 | No      |
| Tchp     | 0.17722    | 0.49777  | 0.32055     | 3.58E-09   | No      | Cp       | 0.256336  | 13.7704  | 5.74739          | 0.257336     | 13.7714       | 5.74187812       | 0.00018329 | No      |
| Tcirg1   | 0.87059    | 0.65945  | -0.21114    | 0.00196002 | No      | Cpe      | 1.00881   | 7.97621  | 2.98306          | 1.00981      | 7.97721       | 2.98180039       | 0.00018329 | No      |
| Tdrd6    | 0.59389    | 0.51611  | -0.07778    | 0.00205366 | No      | Cpeb3    | 0.537118  | 5.9277   | 3.46416          | 0.538118     | 5.9287        | 3.46172133       | 0.00018329 | No      |
| Tead3    | 0.08329    | 0.030308 | -0.052982   | 0.00644918 | No      | Cpm      | 0.280036  | 7.17149  | 4.67859          | 0.281036     | 7.17249       | 4.6736472        | 0.00018329 | No      |
| Tekt4    | 0.53976    | 0.19242  | -0.34734    | 4.05E-07   | No      | Cpn1     | 0         | 1.88703  | inf              | 0.001        | 1.88803       | 10.882666        | 0.00018329 | No      |
| Tert     | 0.89888    | 0.83608  | -0.0628     | 0.01448681 | No      | Cpne2    | 5.17628   | 12.3388  | 1.25322          | 5.17728      | 12.3398       | 1.25305276       | 0.0031651  | No      |
| Tescl    | 0.63021    | 0.54829  | -0.08192    | 0.01761018 | No      | Cpne3    | 7.91726   | 16.614   | 1.06933          | 7.91826      | 16.615        | 1.06923095       | 0.00018329 | No      |
| Tex101   | 0.97251    | 0.89964  | -0.07287    | 0.00625768 | No      | Cpne8    | 0.214032  | 4.29863  | 4.32798          | 0.215032     | 4.29963       | 4.32158924       | 0.00018329 | No      |
| Tfap2e   | 0.18327    | 0.07035  | -0.11292    | 0.01448681 | No      | Cpped1   | 0.69105   | 27.2951  | 5.30371          | 0.69205      | 27.2961       | 5.30167475       | 0.00018329 | No      |
| Tfeb     | 0.88628    | 0.81366  | -0.07262    | 0.00625768 | No      | Cpsf2    | 15.581    | 7.74411  | -1.00861         | 15.582       | 7.74511       | -1.0085228       | 0.0188386  | No      |
| Tfip11   | 0.76843    | 0.7137   | -0.05473    | 0.0100756  | No      | Cpsf4    | 26.9438   | 14.7582  | -0.868434        | 26.9448      | 14.7592       | -0.8683924       | 0.00432763 | No      |
| Tgfa     | 0.35029    | 0.18371  | -0.16658    | 0.03863139 | No      | Cpsf6    | 27.3315   | 7.73792  | -1.82054         | 27.3325      | 7.73892       | -1.8204133       | 0.00018329 | No      |
| Tgfb1i1  | 0.15363    | 0.071574 | -0.082056   | 0.00128825 | No      | Cpsf7    | 47.923    | 24.2151  | -0.984811        | 47.924       | 24.2161       | -0.9847818       | 0.010379   | No      |
| Thbs2    | 0.39685    | 0.19332  | -0.20353    | 0.00455632 | No      | Cpt1a    | 23.1004   | 41.6352  | 0.849884         | 23.1014      | 41.6362       | 0.84985812       | 0.00329119 | No      |
| Theg     | 0.94799    | 0.82987  | -0.11812    | 0.00542685 | No      | Cpt1c    | 0.0338681 | 0.860617 | 4.66737          | 0.0348681    | 0.861617      | 4.62706706       | 0.016558   | No      |
| Thtpa    | 0.13499    | 0.026413 | -0.108577   | 0.00102242 | No      | Cpt2     | 2.03411   | 17.4351  | 3.09953          | 2.03511      | 17.4361       | 3.0988987        | 0.00018329 | No      |
| Timm23   | 0.15425    | 0.23435  | 0.0801      | 0.01527608 | No      | Cpz      | 0.0642452 | 1.56431  | 4.60579          | 0.0652452    | 1.56531       | 4.58443282       | 0.0162458  | No      |
| Tjap1    | 0.63654    | 0.44007  | -0.19647    | 0.03032002 | No      | Cr1l     | 79.2489   | 44.8763  | -0.820435        | 79.2499      | 44.8773       | -0.8204232       | 0.00902869 | No      |
| Tlx1     | 0.22523    | 0.10403  | -0.1212     | 0.00212541 | No      | Crabp1   | 0         | 2.01464  | inf              | 0.001        | 2.01564       | 10.9770223       | 0.00018329 | No      |
| Tm4sf1   | 0.95441    | 0.55517  | -0.39924    | 6.50E-07   | No      | Cradd    | 11.1958   | 3.24055  | -1.78865         | 11.1968      | 3.24155       | -1.7883307       | 0.00035173 | No      |
| Tm6sf2   | 0.74949    | 0.28069  | -0.4688     | 1.12E-06   | No      | Cramp1l  | 9.15212   | 3.85875  | -1.24597         | 9.15312      | 3.85975       | -1.2457562       | 0.00018329 | No      |
| Tmed6    | 0.8915     | 0.59427  | -0.29723    | 6.69E-05   | No      | Crat     | 2.22212   | 43.4135  | 4.28813          | 2.22312      | 43.4145       | 4.28751924       | 0.00018329 | No      |
| Tmem114  | 0.11534    | 0.023144 | -0.092196   | 0.00025534 | No      | Creb1    | 11.3612   | 4.04808  | -1.4888          | 11.3622      | 4.04908       | -1.4885762       | 0.00018329 | No      |
| Tmem119  | 0.83972    | 0.55709  | -0.28263    | 0.00368736 | No      | Creb3l1  | 0.0668456 | 6.21083  | 6.53781          | 0.0678456    | 6.21183       | 6.51661928       | 0.00082046 | No      |
| Tmem132d | 0.26964    | 0.10766  | -0.16198    | 5.51E-05   | No      | Creb3l2  | 1.20722   | 24.4416  | 4.33957          | 1.20822      | 24.4426       | 4.33844268       | 0.00018329 | No      |
| Tmem151b | 0.77101    | 0.29877  | -0.47224    | 6.50E-07   | No      | Crebrf   | 26.4336   | 3.90809  | -2.75784         | 26.4346      | 3.90909       | -2.7575228       | 0.00018329 | No      |

| RRBS     |           |           |             |            |         | RNAseq     |           |          |                  |              |               |                  |            |         |
|----------|-----------|-----------|-------------|------------|---------|------------|-----------|----------|------------------|--------------|---------------|------------------|------------|---------|
| gene     | Blood     | Kidney    | methyl.diff | pMWU.fdr   | Match ? | gene       | blood     | kidney   | log2(fold_ratio) | blood+ 0.001 | kidney+ 0.001 | log2(fold_ratio) | q_value    | Match ? |
| Tmem178a | 0.29007   | 0.13835   | -0.15172    | 0.00060029 | No      | CREBZF     | 43.5596   | 10.3804  | -2.06912         | 43.5606      | 10.3814       | -2.0690228       | 0.00018329 | No      |
| Tmem178b | 0.058403  | 0.0060897 | -0.0523133  | 0.00128825 | No      | Creg1      | 1.91821   | 27.9198  | 3.86346          | 1.91921      | 27.9208       | 3.86275579       | 0.00018329 | No      |
| Tmem181  | 0.37178   | 0.14141   | -0.23037    | 0.01349957 | No      | Creld1     | 3.51972   | 13.914   | 1.98301          | 3.52072      | 13.915        | 1.98269851       | 0.00018329 | No      |
| Tmem184a | 0.6899    | 0.38127   | -0.30863    | 0.00212541 | No      | Creld2     | 12.241    | 26.6782  | 1.12394          | 12.242       | 26.6792       | 1.12387613       | 0.00035173 | No      |
| Tmem229a | 0.22672   | 0.089955  | -0.136765   | 0.00128825 | No      | Crim1      | 0.753577  | 27.9263  | 5.21172          | 0.754577     | 27.9273       | 5.20986416       | 0.00018329 | No      |
| Tmem262  | 0.86556   | 0.79982   | -0.06574    | 0.00420619 | No      | Cript      | 75.4839   | 37.1324  | -1.02349         | 75.4849      | 37.1334       | -1.0234707       | 0.00018329 | No      |
| Tmem88   | 0.86135   | 0.38195   | -0.4794     | 4.45E-07   | No      | Crispld1   | 0         | 0.852149 | inf              | 0.001        | 0.853149      | 9.73665392       | 0.00018329 | No      |
| Tmprss3  | 0.82291   | 0.71975   | -0.10316    | 0.00256829 | No      | Crispld2   | 0.300867  | 4.17824  | 3.7957           | 0.301867     | 4.17924       | 3.79125565       | 0.00018329 | No      |
| Tmsb4x   | 0         | 0.1043    | 0.1043      | 1.49E-07   | No      | Crk        | 14.2243   | 24.5989  | 0.790238         | 14.2253      | 24.5999       | 0.79019337       | 0.00210945 | No      |
| Tmub1    | 0.81772   | 0.73425   | -0.08347    | 0.03521493 | No      | Crkl       | 43.6048   | 24.0533  | -0.858253        | 43.6058      | 24.0543       | -0.8582252       | 0.0112711  | No      |
| Tnfrsf18 | 0.0073479 | 0.28255   | 0.2752021   | 4.30E-12   | No      | Crlf3      | 194.505   | 15.4787  | -3.65145         | 194.506      | 15.4797       | -3.6513652       | 0.00018329 | No      |
| Tnfrsf25 | 0         | 0.22693   | 0.22693     | 2.16E-06   | No      | Crnk1      | 16.6237   | 10.6499  | -0.642404        | 16.6247      | 10.6509       | -0.642353        | 0.0264199  | No      |
| Tnfsf13b | 0.2349    | 0.12047   | -0.11443    | 0.00786631 | No      | Crocc      | 3.77871   | 31.3499  | 3.05249          | 3.77971      | 31.3509       | 3.05215941       | 0.00018329 | No      |
| Tnk2     | 0.80367   | 0.41809   | -0.38558    | 9.35E-05   | No      | Crot       | 10.328    | 17.7279  | 0.779469         | 10.329       | 17.7289       | 0.77940244       | 0.032482   | No      |
| Tnnc2    | 0.22733   | 0.42708   | 0.19975     | 0.00034148 | No      | Crtam      | 12.7592   | 3.21187  | -1.99006         | 12.7602      | 3.21287       | -1.9897164       | 0.00018329 | No      |
| Tor1a    | 0.34211   | 0.1135    | -0.22861    | 2.57E-06   | No      | CRTAP      | 11.1702   | 73.7488  | 2.72296          | 11.1712      | 73.7498       | 2.72285497       | 0.00018329 | No      |
| Tppp3    | 0.25197   | 0.10769   | -0.14428    | 0.00212541 | No      | Crtc2      | 53.5826   | 28.343   | -0.918771        | 53.5836      | 28.344        | -0.9187481       | 0.00811172 | No      |
| Tradd    | 0.68604   | 0.23182   | -0.45422    | 1.79E-05   | No      | Crtc3      | 3.11697   | 0.855288 | -1.86566         | 3.11797      | 0.856288      | -1.864439        | 0.00140841 | No      |
| Traf3ip1 | 0.15621   | 0.052854  | -0.103356   | 0.03521493 | No      | Cry1       | 16.4196   | 5.29834  | -1.6318          | 16.4206      | 5.29934       | -1.6316222       | 0.00140841 | No      |
| Trank1   | 0.19189   | 0.11067   | -0.08122    | 0.00128825 | No      | Cryab      | 0.018353  | 839.86   | 15.4818          | 0.019353     | 839.861       | 15.4053057       | 0.0018326  | No      |
| Trem2    | 0.75199   | 0.56828   | -0.18371    | 0.00542685 | No      | Cryba4     | 2.05433   | 5.61626  | 1.45094          | 2.05533      | 5.61726       | 1.45049653       | 0.0127876  | No      |
| Trhr2    | 0.92877   | 0.7956    | -0.13317    | 0.00021046 | No      | Cryga      | 0         | 9.03638  | inf              | 0.001        | 9.03738       | 13.1416889       | 0.00018329 | No      |
| Trim15   | 0.21741   | 0.070408  | -0.147002   | 5.90E-05   | No      | Cryl1      | 6.61907   | 46.0086  | 2.7972           | 6.62007      | 46.0096       | 2.79701654       | 0.00018329 | No      |
| Trim26   | 0.97416   | 0.89768   | -0.07648    | 0.00351975 | No      | Cryz       | 0.712894  | 74.877   | 6.71469          | 0.713894     | 74.878        | 6.71268821       | 0.00018329 | No      |
| Trim36   | 0.18988   | 0.10565   | -0.08423    | 0.02412126 | No      | Cryzl1     | 6.44179   | 12.1677  | 0.917526         | 6.44279      | 12.1687       | 0.91741757       | 0.00530972 | No      |
| Trim46   | 0.76027   | 0.42667   | -0.3336     | 0.00054569 | No      | Csdc2      | 1.78934   | 4.80052  | 1.42376          | 1.79034      | 4.80152       | 1.42325759       | 0.00082046 | No      |
| Trim6    | 0.93638   | 0.49882   | -0.43756    | 9.79E-07   | No      | Csde1      | 123.842   | 73.8184  | -0.746449        | 123.843      | 73.8194       | -0.7464404       | 0.0107084  | No      |
| Trim63   | 0.84385   | 0.4723    | -0.37155    | 7.86E-10   | No      | Cse1l      | 24.0708   | 10.2309  | -1.23435         | 24.0718      | 10.2319       | -1.23427         | 0.00018329 | No      |
| Trip6    | 0.68305   | 0.20406   | -0.47899    | 4.78E-12   | No      | Csf1       | 0.330969  | 8.63817  | 4.70596          | 0.331969     | 8.63917       | 4.70177228       | 0.00018329 | No      |
| Trmt2a   | 0.32377   | 0.16315   | -0.16062    | 0.01448681 | No      | Csf1r      | 2.42053   | 65.437   | 4.75671          | 2.42153      | 65.438        | 4.75613787       | 0.00018329 | No      |
| Trmt61a  | 0.45441   | 0.19584   | -0.25857    | 0.00085417 | No      | Csf2ra     | 1.99498   | 14.4374  | 2.85537          | 1.99598      | 14.4384       | 2.85474171       | 0.00018329 | No      |
| Tsks     | 0.81954   | 0.75866   | -0.06088    | 0.02915203 | No      | Csf2rb     | 0.366757  | 15.4363  | 5.39536          | 0.367757     | 15.4373       | 5.39152383       | 0.00018329 | No      |
| Tspan11  | 0.11857   | 0.041333  | -0.077237   | 4.67E-05   | No      | Csf3r      | 0.251393  | 1.97368  | 2.97287          | 0.252393     | 1.97468       | 2.96787508       | 0.00018329 | No      |
| Tssk3    | 0.70714   | 0.24504   | -0.4621     | 3.77E-12   | No      | Csgalnact1 | 0.0871384 | 1.75799  | 4.33448          | 0.0881384    | 1.75899       | 4.31883276       | 0.00051281 | No      |
| Ttc8     | 0.26184   | 0.074516  | -0.187324   | 0.00013988 | No      | Csgalnact2 | 9.01989   | 5.40607  | -0.738531        | 9.02089      | 5.40707       | -0.7384227       | 0.0378663  | No      |
| Ttc9b    | 0.084591  | 0.032091  | -0.0525     | 0.00489594 | No      | Csk        | 192.242   | 63.2294  | -1.60425         | 192.243      | 63.2304       | -1.6042408       | 0.00018329 | No      |
| Ttl2     | 0.80227   | 0.67126   | -0.13101    | 0.00085417 | No      | Csnk1a1    | 102.779   | 46.5961  | -1.14127         | 102.78       | 46.5971       | -1.1412475       | 0.00051281 | No      |
| Tubb2b   | 0.055617  | 0.17845   | 0.122833    | 0.0003275  | No      | Csnk1g1    | 5.31357   | 2.11601  | -1.32834         | 5.31457      | 2.11701       | -1.3279249       | 0.0301202  | No      |
| Tubg2    | 0.10154   | 0.037403  | -0.064137   | 3.42E-09   | No      | Csnk1g2    | 138.097   | 86.3486  | -0.677434        | 138.098      | 86.3496       | -0.677431        | 0.0106031  | No      |
| Tug1     | 0.94832   | 0.86865   | -0.07967    | 0.00368736 | No      | Csnk1g3    | 39.724    | 14.8091  | -1.42353         | 39.725       | 14.8101       | -1.4234658       | 0.00018329 | No      |
| Twist2   | 0.069392  | 0.013861  | -0.055531   | 0.00455632 | No      | Csnk2a1    | 40.6193   | 21.3146  | -0.930324        | 40.6203      | 21.3156       | -0.9302912       | 0.00066911 | No      |
| Ube2ql1  | 0.13504   | 0.057669  | -0.077371   | 0.00040512 | No      | Csrp1      | 35.7532   | 109.077  | 1.6092           | 35.7542      | 109.078       | 1.60917552       | 0.00018329 | No      |

| RRBS    |           |          |             |            |         | RNAseq   |           |         |                  |              |               |                  |            |         |
|---------|-----------|----------|-------------|------------|---------|----------|-----------|---------|------------------|--------------|---------------|------------------|------------|---------|
| gene    | Blood     | Kidney   | methyl.diff | pMWU.fdr   | Match ? | gene     | blood     | kidney  | log2(fold_ratio) | blood+ 0.001 | kidney+ 0.001 | log2(fold_ratio) | q_value    | Match ? |
| Ublcp1  | 0.1063    | 0.0247   | -0.0816     | 0.00040512 | No      | Csrp2    | 0.653476  | 76.1414 | 6.8644           | 0.654476     | 76.1424       | 6.86221595       | 0.0031651  | No      |
| Ubxn10  | 0.0049413 | 0.52971  | 0.5247687   | 3.77E-12   | No      | Csrp3    | 0         | 4.87245 | inf              | 0.001        | 4.87345       | 12.2507277       | 0.00018329 | No      |
| Ucn     | 0.21576   | 0.077694 | -0.138066   | 0.00625768 | No      | Cst3     | 84.8521   | 488.202 | 2.52446          | 84.8531      | 488.203       | 2.52444189       | 0.00018329 | No      |
| Unc13d  | 8.33E-08  | 0.090804 | 0.09080392  | 0.00052221 | No      | Cst7     | 6.36661   | 12.7368 | 1.00041          | 6.36761      | 12.7378       | 1.00029224       | 0.0076683  | No      |
| Unc5c   | 0.074267  | 0.019071 | -0.055196   | 0.00542685 | No      | Cstb     | 87.5849   | 196.397 | 1.16502          | 87.5859      | 196.398       | 1.1650097        | 0.00018329 | No      |
| Upk3a   | 0.080265  | 0.026094 | -0.054171   | 0.00420619 | No      | Ctage5   | 52.7574   | 27.519  | -0.938947        | 52.7584      | 27.52         | -0.9389203       | 0.00018329 | No      |
| Usf2    | 0.91713   | 0.77303  | -0.1441     | 0.00164763 | No      | Ctbs     | 4.52144   | 21.9362 | 2.27846          | 4.52244      | 21.9372       | 2.27820613       | 0.00018329 | No      |
| Ushbp1  | 0.83856   | 0.75021  | -0.08835    | 7.11E-05   | No      | Ctc1     | 10.7834   | 34.4636 | 1.67627          | 10.7844      | 34.4646       | 1.67616936       | 0.00018329 | No      |
| Usp19   | 0.89326   | 0.81201  | -0.08125    | 0.00119528 | No      | Ctcf     | 57.2692   | 22.8968 | -1.32262         | 57.2702      | 22.8978       | -1.3225756       | 0.0016929  | No      |
| Usp46   | 0.73007   | 0.56138  | -0.16869    | 0.00275507 | No      | Ctdnep1  | 87.1674   | 54.0257 | -0.690142        | 87.1684      | 54.0267       | -0.6901327       | 0.00822601 | No      |
| Vgf     | 0.088332  | 0.029224 | -0.059108   | 0.00034148 | No      | Ctdp1    | 29.8054   | 15.8125 | -0.914512        | 29.8064      | 15.8135       | -0.9144654       | 0.00154856 | No      |
| Vldlr   | 0.071017  | 0.33911  | 0.268093    | 1.37E-05   | No      | Ctdsp2   | 62.1604   | 34.569  | -0.846519        | 62.1614      | 34.57         | -0.8464984       | 0.00140841 | No      |
| Vom1r70 | 0.74472   | 0.60758  | -0.13714    | 0.04893199 | No      | Ctdspl   | 0.114378  | 27.6538 | 7.91753          | 0.115378     | 27.6548       | 7.90501794       | 0.00018329 | No      |
| Vom2r55 | 0.8117    | 0.74454  | -0.06716    | 0.00334228 | No      | Ctdspl2  | 12.4657   | 5.11969 | -1.28383         | 12.4667      | 5.12069       | -1.2836695       | 0.00018329 | No      |
| Vom2r61 | 0.85172   | 0.79755  | -0.05417    | 0.02160305 | No      | Ctf1     | 0.766205  | 14.4254 | 4.23474          | 0.767205     | 14.4264       | 4.2329554        | 0.00018329 | No      |
| Vpreb1  | 0.8352    | 0.73639  | -0.09881    | 4.67E-05   | No      | Cth      | 0.936509  | 46.786  | 5.64264          | 0.937509     | 46.787        | 5.64113137       | 0.00018329 | No      |
| Vpreb2  | 0.43411   | 0.6508   | 0.21669     | 0.01448681 | No      | Ctla2a   | 73.5817   | 41.3271 | -0.832261        | 73.5827      | 41.3281       | -0.8322436       | 0.00380824 | No      |
| Vsx2    | 0.14659   | 0.082471 | -0.064119   | 0.01227906 | No      | Ctla4    | 29.4585   | 16.8937 | -0.802199        | 29.4595      | 16.8947       | -0.8021622       | 0.0311417  | No      |
| Vwc2    | 0.7263    | 0.63725  | -0.08905    | 0.01899425 | No      | Ctnna1   | 3.29219   | 105.457 | 5.00146          | 3.29319      | 105.458       | 5.00103898       | 0.00018329 | No      |
| Vwc2l   | 0.37875   | 0.26974  | -0.10901    | 0.03760671 | No      | Ctnna3   | 0         | 1.41783 | inf              | 0.001        | 1.41883       | 10.470486        | 0.00018329 | No      |
| Vwce    | 0.18842   | 0.10288  | -0.08554    | 0.00100996 | No      | Ctnnal1  | 3.07519   | 21.032  | 2.77384          | 3.07619      | 21.033        | 2.77343812       | 0.00097029 | No      |
| Wbscr17 | 0.16322   | 0.045236 | -0.117984   | 0.00013988 | No      | Ctnnbip1 | 0.0923694 | 7.19371 | 6.28318          | 0.0933694    | 7.19471       | 6.26784291       | 0.00018329 | No      |
| Wfdc15a | 0.95417   | 0.85979  | -0.09438    | 0.00625768 | No      | Ctnnb1   | 49.8508   | 25.2701 | -0.980183        | 49.8518      | 25.2711       | -0.9801571       | 0.00051281 | No      |
| Wfdc15b | 0.97317   | 0.90832  | -0.06485    | 1.79E-05   | No      | Ctnnd1   | 14.0691   | 30.7667 | 1.12884          | 14.0701      | 30.7677       | 1.12878402       | 0.00018329 | No      |
| Wfdc6a  | 0.72191   | 0.61593  | -0.10598    | 0.01193781 | No      | Ctps2    | 28.9449   | 16.9346 | -0.773337        | 28.9459      | 16.9356       | -0.7732999       | 0.00615197 | No      |
| Wnk2    | 0.3097    | 0.095392 | -0.214308   | 1.46E-05   | No      | Ctr9     | 31.4889   | 17.1574 | -0.876012        | 31.4899      | 17.1584       | -0.8759741       | 0.00111812 | No      |
| Wnt1    | 0.1629    | 0.06859  | -0.09431    | 0.02412126 | No      | Ctsb     | 77.644    | 442.267 | 2.50997          | 77.645       | 442.268       | 2.50995593       | 0.00018329 | No      |
| Wnt10a  | 0.43912   | 0.31165  | -0.12747    | 0.02915203 | No      | Ctsd     | 34.9062   | 272.181 | 2.96301          | 34.9072      | 272.182       | 2.96297512       | 0.00018329 | No      |
| Wnt2b   | 0.033545  | 0.095849 | 0.062304    | 0.03275343 | No      | Ctse     | 179.292   | 20.8423 | -3.10472         | 179.293      | 20.8433       | -3.1046635       | 0.00018329 | No      |
| Wnt6    | 0.10916   | 0.043839 | -0.065321   | 0.0445679  | No      | Ctsh     | 4.08491   | 255.289 | 5.96568          | 4.08591      | 255.29        | 5.96533579       | 0.00018329 | No      |
| Wnt8a   | 0.49954   | 0.284    | -0.21554    | 0.00768781 | No      | Ctsl1    | 22.9336   | 677.584 | 4.88486          | 22.9346      | 677.585       | 4.88480429       | 0.00018329 | No      |
| Wnt9b   | 0.085198  | 0.024204 | -0.060994   | 0.00625768 | No      | Ctss     | 115.281   | 61.5356 | -0.905655        | 115.282      | 61.5366       | -0.9056506       | 0.0026435  | No      |
| Xkr6    | 0.15951   | 0.061169 | -0.098341   | 0.00043712 | No      | Ctsw     | 304.685   | 132.568 | -1.20058         | 304.686      | 132.569       | -1.2005798       | 0.00018329 | No      |
| Ydjc    | 0.075216  | 0.20406  | 0.128844    | 7.63E-07   | No      | Ctsz     | 9.64525   | 69.4175 | 2.84741          | 9.64625      | 69.4185       | 2.84728009       | 0.00018329 | No      |
| Zbed5   | 0.7158    | 0.4656   | -0.2502     | 0.00152471 | No      | Cttbnp2  | 0.202048  | 1.02321 | 2.34033          | 0.203048     | 1.02421       | 2.33461883       | 0.00018329 | No      |
| Zbtb17  | 0.42328   | 0.18949  | -0.23379    | 0.01544668 | No      | Ctu1     | 6.83346   | 3.24539 | -1.07423         | 6.83446      | 3.24639       | -1.073991        | 0.0031651  | No      |
| Zbtb24  | 0.76256   | 0.40038  | -0.36218    | 0.00070202 | No      | Ctxn1    | 0.243786  | 2.63421 | 3.43368          | 0.244786     | 2.63521       | 3.42832498       | 0.00251301 | No      |
| Zc2hc1c | 0.75287   | 0.45489  | -0.29798    | 0.00128825 | No      | Cul1     | 40.6206   | 26.6083 | -0.610336        | 40.6216      | 26.6093       | -0.6103165       | 0.0193605  | No      |
| Zcrb1   | 0.13696   | 0.064258 | -0.072702   | 0.00768781 | No      | Cul3     | 70.0811   | 38.0991 | -0.87927         | 70.0821      | 38.1001       | -0.8792512       | 0.00097029 | No      |
| Zdhhc19 | 0.58141   | 0.33398  | -0.24743    | 0.0031273  | No      | Cul4b    | 23.4338   | 10.0016 | -1.22836         | 23.4348      | 10.0026       | -1.2282774       | 0.00018329 | No      |
| Zdhhc22 | 0.087613  | 0.033537 | -0.054076   | 0.04097311 | No      | Cul5     | 18.4848   | 7.73084 | -1.25764         | 18.4858      | 7.73184       | -1.2575338       | 0.00018329 | No      |
| Zfand2b | 0.79155   | 0.57435  | -0.2172     | 6.69E-05   | No      | Cul7     | 2.02214   | 5.56538 | 1.46059          | 2.02314      | 5.56638       | 1.46014324       | 0.00018329 | No      |

| RRBS    |          |          |             |            |         | RNAseq  |          |          |                  |              |               |                  |            |         |
|---------|----------|----------|-------------|------------|---------|---------|----------|----------|------------------|--------------|---------------|------------------|------------|---------|
| gene    | Blood    | Kidney   | methyl.diff | pMWU.fdr   | Match ? | gene    | blood    | kidney   | log2(fold_ratio) | blood+ 0.001 | kidney+ 0.001 | log2(fold_ratio) | q_value    | Match ? |
| Zfp133  | 0.76018  | 0.30203  | -0.45815    | 0.00142182 | No      | Cux1    | 24.5335  | 39.7847  | 0.697464         | 24.5345      | 39.7857       | 0.69743811       | 0.0365736  | No      |
| Zfp37   | 0.35451  | 0.10307  | -0.25144    | 0.00164763 | No      | Cwc22   | 32.2446  | 20.0173  | -0.687808        | 32.2456      | 20.0183       | -0.6877829       | 0.0438054  | No      |
| Zfp385d | 0.1066   | 0.041493 | -0.065107   | 0.01178248 | No      | Cwc27   | 19.3475  | 32.8234  | 0.762574         | 19.3485      | 32.8244       | 0.76254692       | 0.049342   | No      |
| Zfp414  | 0.61453  | 0.34653  | -0.268      | 0.00152471 | No      | Cwf19l1 | 39.7296  | 20.9051  | -0.926358        | 39.7306      | 20.9061       | -0.9263266       | 0.0275792  | No      |
| Zfp428  | 0.2432   | 0.45092  | 0.20772     | 0.00021046 | No      | Cx3cr1  | 0.557713 | 2.33315  | 2.06469          | 0.558713     | 2.33415       | 2.06271798       | 0.00469886 | No      |
| Zfp451  | 0.7869   | 0.62911  | -0.15779    | 0.00475457 | No      | Cxcl1   | 0        | 34.796   | inf              | 0.001        | 34.797        | 15.0866753       | 0.00018329 | No      |
| Zfp496  | 0.91109  | 0.53678  | -0.37431    | 1.27E-06   | No      | Cxcl10  | 1.05006  | 20.8749  | 4.31323          | 1.05106      | 20.8759       | 4.31192146       | 0.00018329 | No      |
| Zfp516  | 0.90244  | 0.80035  | -0.10209    | 8.62E-05   | No      | Cxcl12  | 0        | 83.9087  | inf              | 0.001        | 83.9097       | 16.35655         | 0.00018329 | No      |
| Zfp521  | 0.31261  | 0.41377  | 0.10116     | 0.04680399 | No      | Cxcl13  | 0        | 6.20145  | inf              | 0.001        | 6.20245       | 12.5986225       | 0.00018329 | No      |
| Zfp532  | 0.096531 | 0.024405 | -0.072126   | 0.00368736 | No      | Cxcl16  | 0.50845  | 110.387  | 7.76225          | 0.50945      | 110.388       | 7.75942707       | 0.00018329 | No      |
| Zfp575  | 0.92301  | 0.84786  | -0.07515    | 0.03863139 | No      | Cxcl2   | 0.23583  | 10.7839  | 5.51499          | 0.23683      | 10.7849       | 5.50901715       | 0.00224282 | No      |
| Zfp579  | 0.9003   | 0.8216   | -0.0787     | 1.52E-05   | No      | Cxcl9   | 0        | 0.745097 | inf              | 0.001        | 0.746097      | 9.5432194        | 0.00018329 | No      |
| Zfp772  | 0.87049  | 0.74895  | -0.12154    | 0.00152471 | No      | Cxcr4   | 480.878  | 132.669  | -1.85784         | 480.879      | 132.67        | -1.8578317       | 0.00018329 | No      |
| Zfp949  | 0.74361  | 0.31711  | -0.4265     | 0.00070202 | No      | Cxxc1   | 40.8676  | 28.1809  | -0.53624         | 40.8686      | 28.1819       | -0.5362239       | 0.0447246  | No      |
| Zic3    | 0.059873 | 0.03097  | -0.028903   | 0.04097311 | No      | Cyb5a   | 54.2569  | 205.77   | 1.92315          | 54.2579      | 205.771       | 1.92313456       | 0.00018329 | No      |
| Zmynd10 | 0.76551  | 0.67741  | -0.0881     | 0.01621946 | No      | Cyb5b   | 23.5916  | 111.908  | 2.24598          | 23.5926      | 111.909       | 2.24591974       | 0.00018329 | No      |
| Znf4    | 0.50771  | 0.32186  | -0.18585    | 2.48E-05   | No      | Cyb5r1  | 6.28761  | 39.8745  | 2.66488          | 6.28861      | 39.8755       | 2.66468954       | 0.00018329 | No      |
| Zp3     | 0.67136  | 0.5183   | -0.15306    | 0.01105145 | No      | Cyb5r2  | 0        | 1.22857  | inf              | 0.001        | 1.22957       | 10.2639382       | 0.00018329 | No      |
| Zranb2  | 0.34726  | 0.22401  | -0.12325    | 0.00575049 | No      | Cyb5r3  | 17.8303  | 52.768   | 1.56533          | 17.8313      | 52.769        | 1.56527876       | 0.00018329 | No      |
| Zrsr1   | 0.34794  | 0.26102  | -0.08692    | 0.00022961 | No      | Cybrd1  | 3.0089   | 0.910226 | -1.72494         | 3.0099       | 0.911226      | -1.7238347       | 0.00018329 | No      |
|         |          |          |             |            |         | CYC1    | 63.337   | 240.338  | 1.92394          | 63.338       | 240.339       | 1.92392756       | 0.00018329 | No      |
|         |          |          |             |            |         | Cycs    | 50.5138  | 347.436  | 2.782            | 50.5148      | 347.437       | 2.78197336       | 0.00018329 | No      |
|         |          |          |             |            |         | Cyfp1   | 2.65517  | 32.492   | 3.61321          | 2.65617      | 32.493        | 3.61270956       | 0.0327554  | No      |
|         |          |          |             |            |         | Cyp20a1 | 6.93908  | 13.954   | 1.00786          | 6.94008      | 13.955        | 1.00775793       | 0.00755425 | No      |
|         |          |          |             |            |         | Cyp26a1 | 0        | 1.21236  | inf              | 0.001        | 1.21336       | 10.2447919       | 0.00018329 | No      |
|         |          |          |             |            |         | Cyp2c11 | 0        | 2.12742  | inf              | 0.001        | 2.12842       | 11.0555671       | 0.00018329 | No      |
|         |          |          |             |            |         | Cyp2c23 | 0        | 103.615  | inf              | 0.001        | 103.616       | 16.6608873       | 0.00018329 | No      |
|         |          |          |             |            |         | Cyp2c24 | 0        | 3.15118  | inf              | 0.001        | 3.15218       | 11.6221342       | 0.00018329 | No      |
|         |          |          |             |            |         | Cyp2d1  | 0        | 14.8034  | inf              | 0.001        | 14.8044       | 13.8537384       | 0.00018329 | No      |
|         |          |          |             |            |         | Cyp2d2  | 1.64019  | 22.0426  | 3.74836          | 1.64119      | 22.0436       | 3.74754568       | 0.00018329 | No      |
|         |          |          |             |            |         | Cyp2d4  | 0.251981 | 2.07021  | 3.03839          | 0.252981     | 2.07121       | 3.03337289       | 0.00018329 | No      |
|         |          |          |             |            |         | Cyp2j10 | 0        | 1.5938   | inf              | 0.001        | 1.5948        | 10.6391598       | 0.00018329 | No      |
|         |          |          |             |            |         | Cyp2j4  | 0        | 1.10372  | inf              | 0.001        | 1.10472       | 10.109465        | 0.00018329 | No      |
|         |          |          |             |            |         | CYP2S1  | 1.77817  | 0.234083 | -2.9253          | 1.77917      | 0.235083      | -2.9199622       | 0.0247294  | No      |
|         |          |          |             |            |         | Cyp2u1  | 11.8237  | 5.10685  | -1.21118         | 11.8247      | 5.10785       | -1.2110155       | 0.0209932  | No      |
|         |          |          |             |            |         | Cyp4a1  | 0        | 5.08881  | inf              | 0.001        | 5.08981       | 12.3133961       | 0.00970533 | No      |
|         |          |          |             |            |         | Cyp4a2  | 0        | 325.059  | inf              | 0.001        | 325.06        | 18.3103465       | 0.00018329 | No      |
|         |          |          |             |            |         | Cyp4f1  | 0        | 17.3588  | inf              | 0.001        | 17.3598       | 14.0834627       | 0.00018329 | No      |
|         |          |          |             |            |         | Cyp4f17 | 16.2615  | 4.98995  | -1.70436         | 16.2625      | 4.99095       | -1.7041627       | 0.00018329 | No      |
|         |          |          |             |            |         | Cyp4f6  | 7.02627  | 23.2025  | 1.72345          | 7.02727      | 23.2035       | 1.7233062        | 0.00018329 | No      |
|         |          |          |             |            |         | CYP51A1 | 9.78683  | 17.853   | 0.867251         | 9.78783      | 17.854        | 0.86718638       | 0.00210945 | No      |
|         |          |          |             |            |         | Cys1    | 0        | 32.8355  | inf              | 0.001        | 32.8365       | 15.0030127       | 0.00018329 | No      |

| RRBS |       |        |             |          |         | RNAseq         |           |          |                  |              |               |                  |            |         |
|------|-------|--------|-------------|----------|---------|----------------|-----------|----------|------------------|--------------|---------------|------------------|------------|---------|
| gene | Blood | Kidney | methyl.diff | pMWU.fdr | Match ? | gene           | blood     | kidney   | log2(fold_ratio) | blood+ 0.001 | kidney+ 0.001 | log2(fold_ratio) | q_value    | Match ? |
|      |       |        |             |          |         | Cystm1         | 0.540061  | 110.919  | 7.68217          | 0.541061     | 110.92        | 7.67951255       | 0.00018329 | No      |
|      |       |        |             |          |         | Cyth1          | 48.9506   | 17.2229  | -1.507           | 48.9516      | 17.2239       | -1.5069442       | 0.00018329 | No      |
|      |       |        |             |          |         | Cytip          | 455.352   | 44.256   | -3.36304         | 455.353      | 44.257        | -3.3630078       | 0.00018329 | No      |
|      |       |        |             |          |         | D030056L22 Rik | 18.626    | 7.6735   | -1.27937         | 18.627       | 7.6745        | -1.2792507       | 0.00018329 | No      |
|      |       |        |             |          |         | D17Wsu104 e    | 21.6896   | 34.8821  | 0.685484         | 21.6906      | 34.8831       | 0.68545829       | 0.0476294  | No      |
|      |       |        |             |          |         | D2hgdh         | 3.10024   | 19.4093  | 2.6463           | 3.10124      | 19.4103       | 2.64590533       | 0.00018329 | No      |
|      |       |        |             |          |         | D5Ertd579e     | 16.1542   | 36.1147  | 1.16068          | 16.1552      | 36.1157       | 1.16062752       | 0.00018329 | No      |
|      |       |        |             |          |         | D630039A03 Rik | 0         | 8.98235  | inf              | 0.001        | 8.98335       | 13.1330378       | 0.00018329 | No      |
|      |       |        |             |          |         | D930015E06 Rik | 64.2957   | 26.4988  | -1.27879         | 64.2967      | 26.4998       | -1.2787632       | 0.00251301 | No      |
|      |       |        |             |          |         | Daam1          | 3.57038   | 8.73938  | 1.29145          | 3.57138      | 8.74038       | 1.29121436       | 0.00066911 | No      |
|      |       |        |             |          |         | Dab2           | 0.231463  | 77.9808  | 8.39619          | 0.232463     | 77.9818       | 8.38999254       | 0.00018329 | No      |
|      |       |        |             |          |         | Dach1          | 0         | 2.44106  | inf              | 0.001        | 2.44206       | 11.2538829       | 0.00018329 | No      |
|      |       |        |             |          |         | Dad1           | 152.635   | 282.223  | 0.886752         | 152.636      | 282.224       | 0.88674541       | 0.00066911 | No      |
|      |       |        |             |          |         | Dag1           | 10.3552   | 66.7688  | 2.68881          | 10.3562      | 66.7698       | 2.68870099       | 0.00018329 | No      |
|      |       |        |             |          |         | DAGLB          | 0.906676  | 9.42738  | 3.3782           | 0.907676     | 9.42838       | 3.37676059       | 0.00018329 | No      |
|      |       |        |             |          |         | Dak            | 3.08175   | 30.9673  | 3.32892          | 3.08275      | 30.9683       | 3.32850239       | 0.00018329 | No      |
|      |       |        |             |          |         | Dap            | 25.7233   | 114.871  | 2.15887          | 25.7243      | 114.872       | 2.15882346       | 0.00018329 | No      |
|      |       |        |             |          |         | Dapk3          | 65.1426   | 102.189  | 0.649568         | 65.1436      | 102.19        | 0.64955867       | 0.0192579  | No      |
|      |       |        |             |          |         | Dapl1          | 0         | 49.6985  | inf              | 0.001        | 49.6995       | 15.6009437       | 0.00018329 | No      |
|      |       |        |             |          |         | Dazap2         | 360.698   | 189.26   | -0.93042         | 360.699      | 189.261       | -0.9304183       | 0.00506686 | No      |
|      |       |        |             |          |         | Dbf4           | 2.81      | 0.619311 | -2.18184         | 2.811        | 0.620311      | -2.1800198       | 0.00066911 | No      |
|      |       |        |             |          |         | Dbi            | 76.1825   | 770.329  | 3.33794          | 76.1835      | 770.33        | 3.33792614       | 0.00018329 | No      |
|      |       |        |             |          |         | Dbn1           | 0.456451  | 21.1843  | 5.53639          | 0.457451     | 21.1853       | 5.53330253       | 0.00018329 | No      |
|      |       |        |             |          |         | Dbnnd2         | 2.41758   | 44.8452  | 4.21332          | 2.41858      | 44.8462       | 4.21275358       | 0.00018329 | No      |
|      |       |        |             |          |         | Dbt            | 9.12787   | 20.8833  | 1.194            | 9.12887      | 20.8843       | 1.19391059       | 0.00018329 | No      |
|      |       |        |             |          |         | Dcaf17         | 6.26176   | 3.15368  | -0.989535        | 6.26276      | 3.15468       | -0.9893049       | 0.00035173 | No      |
|      |       |        |             |          |         | Dcaf5          | 14.7533   | 7.96316  | -0.889627        | 14.7543      | 7.96416       | -0.8895414       | 0.0018326  | No      |
|      |       |        |             |          |         | Dcakd          | 3.9313    | 30.2931  | 2.94591          | 3.9323       | 30.2941       | 2.94559155       | 0.00224282 | No      |
|      |       |        |             |          |         | Dcbld1         | 12.4343   | 7.23745  | -0.780768        | 12.4353      | 7.23845       | -0.7806886       | 0.0134442  | No      |
|      |       |        |             |          |         | Dcdc2          | 0         | 6.66376  | inf              | 0.001        | 6.66476       | 12.7023372       | 0.00018329 | No      |
|      |       |        |             |          |         | Dck            | 19.7516   | 2.38016  | -3.05284         | 19.7526      | 2.38116       | -3.0523061       | 0.00018329 | No      |
|      |       |        |             |          |         | Dclk1          | 0.0398356 | 3.0096   | 6.23937          | 0.0408356    | 3.0106        | 6.2040798        | 0.00035173 | No      |
|      |       |        |             |          |         | Dclk3          | 0         | 25.3205  | inf              | 0.001        | 25.3215       | 14.6280752       | 0.00018329 | No      |
|      |       |        |             |          |         | Dclre1a        | 4.17441   | 19.6025  | 2.23139          | 4.17541      | 19.6035       | 2.23112148       | 0.00035173 | No      |
|      |       |        |             |          |         | Dclre1c        | 16.3624   | 8.7715   | -0.899492        | 16.3634      | 8.7725        | -0.8994126       | 0.00406781 | No      |
|      |       |        |             |          |         | Dcn            | 0         | 2.10764  | inf              | 0.001        | 2.10864       | 11.0420971       | 0.00018329 | No      |
|      |       |        |             |          |         | Dcp1b          | 10.9584   | 6.16823  | -0.829106        | 10.9594      | 6.16923       | -0.8290065       | 0.0168685  | No      |
|      |       |        |             |          |         | Dcp2           | 1.43208   | 0.407964 | -1.8116          | 1.43308      | 0.408964      | -1.8090734       | 0.0118093  | No      |

| RRBS |       |        |             |          |         | RNAseq  |          |         |                  |              |               |                  |            |         |
|------|-------|--------|-------------|----------|---------|---------|----------|---------|------------------|--------------|---------------|------------------|------------|---------|
| gene | Blood | Kidney | methyl.diff | pMWU.fdr | Match ? | gene    | blood    | kidney  | log2(fold_ratio) | blood+ 0.001 | kidney+ 0.001 | log2(fold_ratio) | q_value    | Match ? |
|      |       |        |             |          |         | Dcps    | 39.0631  | 19.1603 | -1.02769         | 39.0641      | 19.1613       | -1.0276479       | 0.00210945 | No      |
|      |       |        |             |          |         | Dcstamp | 0        | 0.68569 | inf              | 0.001        | 0.68669       | 9.42351514       | 0.00290302 | No      |
|      |       |        |             |          |         | Dctd    | 17.4989  | 7.58292 | -1.20644         | 17.4999      | 7.58392       | -1.206331        | 0.00018329 | No      |
|      |       |        |             |          |         | Dctn3   | 37.6963  | 61.724  | 0.711408         | 37.6973      | 61.725        | 0.71139373       | 0.0395808  | No      |
|      |       |        |             |          |         | Dctpp1  | 4.0249   | 11.4842 | 1.51263          | 4.0259       | 11.4852       | 1.51239274       | 0.00126492 | No      |
|      |       |        |             |          |         | Dcun1d1 | 13.5081  | 7.72905 | -0.805459        | 13.5091      | 7.73005       | -0.8053819       | 0.0368491  | No      |
|      |       |        |             |          |         | Dcun1d4 | 2.81168  | 8.70511 | 1.63043          | 2.81268      | 8.70611       | 1.63008282       | 0.00018329 | No      |
|      |       |        |             |          |         | Dcun1d5 | 77.1639  | 45.6476 | -0.757387        | 77.1649      | 45.6486       | -0.7573741       | 0.00555427 | No      |
|      |       |        |             |          |         | Ddah1   | 0.226193 | 55.9497 | 7.95044          | 0.227193     | 55.9507       | 7.94409399       | 0.00018329 | No      |
|      |       |        |             |          |         | Ddb2    | 15.9129  | 3.43553 | -2.21159         | 15.9139      | 3.43653       | -2.211263        | 0.0128946  | No      |
|      |       |        |             |          |         | Ddc     | 0.206799 | 11.9585 | 5.85366          | 0.207799     | 11.9595       | 5.84682455       | 0.00018329 | No      |
|      |       |        |             |          |         | Ddhd1   | 16.5211  | 9.52158 | -0.795039        | 16.5221      | 9.52258       | -0.7949727       | 0.0175951  | No      |
|      |       |        |             |          |         | Ddhd2   | 18.8172  | 8.70998 | -1.11131         | 18.8182      | 8.71098       | -1.1112217       | 0.00018329 | No      |
|      |       |        |             |          |         | DDIT3   | 22.5002  | 87.0412 | 1.95176          | 22.5012      | 87.0422       | 1.95171308       | 0.00902869 | No      |
|      |       |        |             |          |         | Ddit4   | 43.6864  | 28.6989 | -0.606187        | 43.6874      | 28.6999       | -0.6061715       | 0.0287615  | No      |
|      |       |        |             |          |         | Ddit4l  | 0        | 4.97833 | inf              | 0.001        | 4.97933       | 12.2817359       | 0.00018329 | No      |
|      |       |        |             |          |         | Ddrnk1  | 39.4236  | 74.4768 | 0.917733         | 39.4246      | 74.4778       | 0.91771434       | 0.00035173 | No      |
|      |       |        |             |          |         | Ddt     | 86.4796  | 336.904 | 1.9619           | 86.4806      | 336.905       | 1.9618934        | 0.00018329 | No      |
|      |       |        |             |          |         | Ddx10   | 12.6629  | 6.22029 | -1.02556         | 12.6639      | 6.22129       | -1.0254361       | 0.00051281 | No      |
|      |       |        |             |          |         | Ddx11   | 7.55645  | 3.40535 | -1.1499          | 7.55745      | 3.40635       | -1.1496729       | 0.00354878 | No      |
|      |       |        |             |          |         | Ddx17   | 158.124  | 82.4641 | -0.939216        | 158.125      | 82.4651       | -0.9392099       | 0.00591487 | No      |
|      |       |        |             |          |         | Ddx18   | 26.3972  | 13.4298 | -0.974943        | 26.3982      | 13.4308       | -0.9748943       | 0.00035173 | No      |
|      |       |        |             |          |         | Ddx20   | 28.6986  | 9.59605 | -1.58047         | 28.6996      | 9.59705       | -1.5803677       | 0.00018329 | No      |
|      |       |        |             |          |         | Ddx21   | 46.4316  | 8.80191 | -2.39922         | 46.4326      | 8.80291       | -2.3990856       | 0.00018329 | No      |
|      |       |        |             |          |         | Ddx26b  | 56.5862  | 14.552  | -1.95924         | 56.5872      | 14.553        | -1.9591592       | 0.00018329 | No      |
|      |       |        |             |          |         | Ddx27   | 38.8801  | 18.8843 | -1.04184         | 38.8811      | 18.8853       | -1.0418053       | 0.00035173 | No      |
|      |       |        |             |          |         | DDX39A  | 98.8347  | 58.2417 | -0.762967        | 98.8357      | 58.2427       | -0.762955        | 0.00902869 | No      |
|      |       |        |             |          |         | DDX3X   | 87.6313  | 52.0077 | -0.752721        | 87.6323      | 52.0087       | -0.7527097       | 0.00834357 | No      |
|      |       |        |             |          |         | Ddx42   | 41.1542  | 17.0537 | -1.27096         | 41.1552      | 17.0547       | -1.2709054       | 0.00035173 | No      |
|      |       |        |             |          |         | Ddx5    | 742.052  | 211.361 | -1.81181         | 742.053      | 211.362       | -1.8118062       | 0.00018329 | No      |
|      |       |        |             |          |         | Ddx52   | 35.4591  | 21.7913 | -0.702406        | 35.4601      | 21.7923       | -0.7023781       | 0.0465444  | No      |
|      |       |        |             |          |         | Decr1   | 32.1581  | 79.3856 | 1.30369          | 32.1591      | 79.3866       | 1.30366848       | 0.00018329 | No      |
|      |       |        |             |          |         | Decr2   | 1.24649  | 50.2184 | 5.33227          | 1.24749      | 50.2194       | 5.33114464       | 0.00018329 | No      |
|      |       |        |             |          |         | Dedd2   | 32.16    | 15.4423 | -1.05838         | 32.161       | 15.4433       | -1.0583312       | 0.00445502 | No      |
|      |       |        |             |          |         | Def6    | 56.0298  | 19.4258 | -1.52822         | 56.0308      | 19.4268       | -1.5281718       | 0.00018329 | No      |
|      |       |        |             |          |         | Def8    | 2.12812  | 12.1901 | 2.51805          | 2.12912      | 12.1911       | 2.51749914       | 0.00018329 | No      |
|      |       |        |             |          |         | Defb28  | 0        | 10.8837 | inf              | 0.001        | 10.8847       | 13.410014        | 0.00018329 | No      |
|      |       |        |             |          |         | Defb29  | 0        | 16.449  | inf              | 0.001        | 16.45         | 14.0058          | 0.00018329 | No      |
|      |       |        |             |          |         | Dek     | 64.9075  | 36.266  | -0.839767        | 64.9085      | 36.267        | -0.83975         | 0.00111812 | No      |
|      |       |        |             |          |         | Dennd1a | 3.95355  | 7.68603 | 0.959091         | 3.95455      | 7.68703       | 0.95891276       | 0.00154856 | No      |
|      |       |        |             |          |         | Dennd1b | 8.69588  | 4.98634 | -0.802352        | 8.69688      | 4.98734       | -0.8022274       | 0.00834357 | No      |
|      |       |        |             |          |         | Dennd1c | 369.791  | 103.772 | -1.8333          | 369.792      | 103.773       | -1.8332829       | 0.00097029 | No      |

| RRBS |       |        |             |          |         | RNAseq  |           |         |                  |              |               |                  |            |         |
|------|-------|--------|-------------|----------|---------|---------|-----------|---------|------------------|--------------|---------------|------------------|------------|---------|
| gene | Blood | Kidney | methyl.diff | pMWU.fdr | Match ? | gene    | blood     | kidney  | log2(fold_ratio) | blood+ 0.001 | kidney+ 0.001 | log2(fold_ratio) | q_value    | Match ? |
|      |       |        |             |          |         | Dennd2d | 118.074   | 20.7094 | -2.51133         | 118.075      | 20.7104       | -2.5112762       | 0.00519348 | No      |
|      |       |        |             |          |         | Dennd3  | 15.6305   | 6.95666 | -1.1679          | 15.6315      | 6.95766       | -1.1677821       | 0.00018329 | No      |
|      |       |        |             |          |         | Dennd4a | 4.77711   | 2.84646 | -0.746971        | 4.77811      | 2.84746       | -0.7467645       | 0.0394791  | No      |
|      |       |        |             |          |         | Dennd4b | 53.2163   | 18.3497 | -1.53611         | 53.2173      | 18.3507       | -1.5360602       | 0.00018329 | No      |
|      |       |        |             |          |         | Dennd5b | 0.234463  | 1.37275 | 2.54964          | 0.235463     | 1.37375       | 2.5445472        | 0.00777671 | No      |
|      |       |        |             |          |         | Dennd6a | 37.7177   | 16.3731 | -1.20392         | 37.7187      | 16.3741       | -1.2038643       | 0.00018329 | No      |
|      |       |        |             |          |         | Denr    | 85.6808   | 51.2641 | -0.741023        | 85.6818      | 51.2651       | -0.7410118       | 0.00925991 | No      |
|      |       |        |             |          |         | DEPP    | 0         | 4.95175 | inf              | 0.001        | 4.95275       | 12.2740141       | 0.0135584  | No      |
|      |       |        |             |          |         | Deptor  | 0.186107  | 12.6233 | 6.08382          | 0.187107     | 12.6243       | 6.07619605       | 0.00018329 | No      |
|      |       |        |             |          |         | Dexi    | 27.544    | 61.6751 | 1.16295          | 27.545       | 61.6761       | 1.16292108       | 0.00018329 | No      |
|      |       |        |             |          |         | Dfna5   | 0.350758  | 2.32727 | 2.73009          | 0.351758     | 2.32827       | 2.72660323       | 0.00035173 | No      |
|      |       |        |             |          |         | Dfnb31  | 1.69341   | 12.3136 | 2.86225          | 1.69441      | 12.3146       | 2.86151485       | 0.00018329 | No      |
|      |       |        |             |          |         | Dfnb59  | 0.159394  | 1.19743 | 2.90928          | 0.160394     | 1.19843       | 2.90145356       | 0.0133341  | No      |
|      |       |        |             |          |         | Dgat2   | 0.266429  | 15.5219 | 5.86441          | 0.267429     | 15.5229       | 5.85909838       | 0.00018329 | No      |
|      |       |        |             |          |         | Dgcr6   | 6.04004   | 54.0284 | 3.16109          | 6.04104      | 54.0294       | 3.16087582       | 0.00018329 | No      |
|      |       |        |             |          |         | Dgcr8   | 11.3      | 6.66942 | -0.760695        | 11.301       | 6.67042       | -0.7606009       | 0.00755425 | No      |
|      |       |        |             |          |         | Dgka    | 404.775   | 78.0137 | -2.37532         | 404.776      | 78.0147       | -2.3753059       | 0.00018329 | No      |
|      |       |        |             |          |         | Dgke    | 4.66382   | 1.73332 | -1.42797         | 4.66482      | 1.73432       | -1.4274513       | 0.00126492 | No      |
|      |       |        |             |          |         | Dgkz    | 164.791   | 52.1298 | -1.66046         | 164.792      | 52.1308       | -1.6604383       | 0.00018329 | No      |
|      |       |        |             |          |         | Dhcr7   | 3.6481    | 8.0401  | 1.14007          | 3.6491       | 8.0411        | 1.13985218       | 0.00111812 | No      |
|      |       |        |             |          |         | Dhdds   | 5.13338   | 21.1504 | 2.0427           | 5.13438      | 21.1514       | 2.04249118       | 0.00018329 | No      |
|      |       |        |             |          |         | Dhfr    | 4.13708   | 17.5777 | 2.08706          | 4.13808      | 17.5787       | 2.08679494       | 0.00018329 | No      |
|      |       |        |             |          |         | Dhrs11  | 27.1054   | 44.5229 | 0.715967         | 27.1064      | 44.5239       | 0.71594645       | 0.0232058  | No      |
|      |       |        |             |          |         | Dhrs3   | 1.78174   | 97.1807 | 5.76931          | 1.78274      | 97.1817       | 5.76851645       | 0.00018329 | No      |
|      |       |        |             |          |         | Dhrs4   | 13.9199   | 57.0166 | 2.03423          | 13.9209      | 57.0176       | 2.03415483       | 0.00018329 | No      |
|      |       |        |             |          |         | Dhtkd1  | 0.0255722 | 6.03273 | 7.88209          | 0.0265722    | 6.03373       | 7.82698865       | 0.0229171  | No      |
|      |       |        |             |          |         | Dhx15   | 89.6612   | 37.1419 | -1.27144         | 89.6622      | 37.1429       | -1.2714134       | 0.00018329 | No      |
|      |       |        |             |          |         | Dhx29   | 12.3335   | 7.01295 | -0.814493        | 12.3345      | 7.01395       | -0.8144002       | 0.0158179  | No      |
|      |       |        |             |          |         | Dhx33   | 5.05832   | 2.15005 | -1.23429         | 5.05932      | 2.15105       | -1.2339024       | 0.00051281 | No      |
|      |       |        |             |          |         | Dhx36   | 22.3206   | 8.70101 | -1.35912         | 22.3216      | 8.70201       | -1.3590199       | 0.00018329 | No      |
|      |       |        |             |          |         | Dhx37   | 8.06479   | 4.8898  | -0.721863        | 8.06579      | 4.8908        | -0.7217454       | 0.0254479  | No      |
|      |       |        |             |          |         | Dhx38   | 16.0149   | 9.08099 | -0.818497        | 16.0159      | 9.08199       | -0.8184245       | 0.00197017 | No      |
|      |       |        |             |          |         | Dhx8    | 13.202    | 6.95585 | -0.924457        | 13.203       | 6.95685       | -0.9243597       | 0.00051281 | No      |
|      |       |        |             |          |         | Dhx9    | 39.3266   | 17.3134 | -1.18361         | 39.3276      | 17.3144       | -1.1835698       | 0.00018329 | No      |
|      |       |        |             |          |         | Dido1   | 12.2109   | 5.91457 | -1.04583         | 12.2119      | 5.91557       | -1.0456986       | 0.00210945 | No      |
|      |       |        |             |          |         | Diexf   | 14.3691   | 7.39736 | -0.957882        | 14.3701      | 7.39836       | -0.9577927       | 0.00154856 | No      |
|      |       |        |             |          |         | Dip2a   | 1.34547   | 4.94567 | 1.87806          | 1.34647      | 4.94667       | 1.87727557       | 0.00018329 | No      |
|      |       |        |             |          |         | Dip2b   | 13.5219   | 3.28858 | -2.03976         | 13.5229      | 3.28958       | -2.0394293       | 0.00018329 | No      |
|      |       |        |             |          |         | Dip2c   | 0.566548  | 1.66778 | 1.55765          | 0.567548     | 1.66878       | 1.55597945       | 0.00097029 | No      |
|      |       |        |             |          |         | Dirc2   | 28.5034   | 19.0953 | -0.577918        | 28.5044      | 19.0963       | -0.5778915       | 0.0384488  | No      |
|      |       |        |             |          |         | Dis3    | 9.25562   | 3.66676 | -1.33582         | 9.25662      | 3.66776       | -1.3355863       | 0.00051281 | No      |
|      |       |        |             |          |         | Dis3l   | 7.72201   | 59.6715 | 2.94999          | 7.72301      | 59.6725       | 2.94983108       | 0.00018329 | No      |

| RRBS |       |        |             |          |         | RNAseq   |          |          |                  |              |               |                  |            |         |
|------|-------|--------|-------------|----------|---------|----------|----------|----------|------------------|--------------|---------------|------------------|------------|---------|
| gene | Blood | Kidney | methyl.diff | pMWU.fdr | Match ? | gene     | blood    | kidney   | log2(fold_ratio) | blood+ 0.001 | kidney+ 0.001 | log2(fold_ratio) | q_value    | Match ? |
|      |       |        |             |          |         | Disc1    | 2.12998  | 0.444857 | -2.25942         | 2.13098      | 0.445857      | -2.2568641       | 0.00018329 | No      |
|      |       |        |             |          |         | Dixdc1   | 0.158758 | 2.37473  | 3.90286          | 0.159758     | 2.37573       | 3.8944108        | 0.00018329 | No      |
|      |       |        |             |          |         | Dkk2     | 0        | 1.28729  | inf              | 0.001        | 1.28829       | 10.3312417       | 0.00018329 | No      |
|      |       |        |             |          |         | Dlat     | 7.76647  | 25.6759  | 1.72508          | 7.76747      | 25.6769       | 1.72495437       | 0.0108214  | No      |
|      |       |        |             |          |         | Dlc1     | 0.141037 | 0.60018  | 2.08932          | 0.142037     | 0.60118       | 2.08153022       | 0.00303839 | No      |
|      |       |        |             |          |         | Dld      | 41.2417  | 75.6215  | 0.874691         | 41.2427      | 75.6225       | 0.87467676       | 0.0016929  | No      |
|      |       |        |             |          |         | Dleu7    | 0        | 1.48266  | inf              | 0.001        | 1.48366       | 10.5349448       | 0.00018329 | No      |
|      |       |        |             |          |         | Dlg4     | 7.00227  | 2.15386  | -1.7009          | 7.00327      | 2.15486       | -1.7004346       | 0.00018329 | No      |
|      |       |        |             |          |         | Dlg5     | 0        | 2.75462  | inf              | 0.001        | 2.75562       | 11.4281612       | 0.00018329 | No      |
|      |       |        |             |          |         | Dlgap1   | 0        | 1.98506  | inf              | 0.001        | 1.98606       | 10.9556935       | 0.0366633  | No      |
|      |       |        |             |          |         | Dlgap4   | 16.0681  | 25.6444  | 0.674443         | 16.0691      | 25.6454       | 0.67441095       | 0.0178047  | No      |
|      |       |        |             |          |         | Dlst     | 26.3422  | 65.674   | 1.31794          | 26.3432      | 65.675        | 1.31791369       | 0.00018329 | No      |
|      |       |        |             |          |         | DMD      | 0.117917 | 3.22195  | 4.77209          | 0.118917     | 3.22295       | 4.76035493       | 0.00018329 | No      |
|      |       |        |             |          |         | Dmgdh    | 0        | 17.2066  | inf              | 0.001        | 17.2076       | 14.0707583       | 0.00018329 | No      |
|      |       |        |             |          |         | Dmpk     | 0.170504 | 26.8205  | 7.29738          | 0.171504     | 26.8215       | 7.28900389       | 0.00018329 | No      |
|      |       |        |             |          |         | Dmrt2    | 0        | 2.5089   | inf              | 0.001        | 2.5099        | 11.2934142       | 0.00018329 | No      |
|      |       |        |             |          |         | Dmrtc1b  | 0        | 0.630739 | inf              | 0.001        | 0.631739      | 9.30318483       | 0.00018329 | No      |
|      |       |        |             |          |         | Dmtf1    | 33.3349  | 12.5198  | -1.41282         | 33.3359      | 12.5208       | -1.4127499       | 0.00018329 | No      |
|      |       |        |             |          |         | Dmtn     | 0.117714 | 74.7982  | 9.31157          | 0.118714     | 74.7992       | 9.29938895       | 0.00018329 | No      |
|      |       |        |             |          |         | Dmwd     | 0.29207  | 5.91495  | 4.33998          | 0.29307      | 5.91595       | 4.33529266       | 0.00018329 | No      |
|      |       |        |             |          |         | Dmxl1    | 6.37901  | 2.43048  | -1.39209         | 6.38001      | 2.43148       | -1.391724        | 0.00018329 | No      |
|      |       |        |             |          |         | Dnajib1  | 28.3684  | 54.3201  | 0.937202         | 28.3694      | 54.3211       | 0.93717706       | 0.00051281 | No      |
|      |       |        |             |          |         | Dnajib4  | 32.2659  | 20.4954  | -0.654709        | 32.2669      | 20.4964       | -0.6546844       | 0.0474615  | No      |
|      |       |        |             |          |         | Dnajib6  | 98.1052  | 34.5221  | -1.50681         | 98.1062      | 34.5231       | -1.5067823       | 0.00018329 | No      |
|      |       |        |             |          |         | Dnajc10  | 10.0049  | 16.7026  | 0.739366         | 10.0059      | 16.7036       | 0.73930813       | 0.00788539 | No      |
|      |       |        |             |          |         | Dnajc12  | 2.76439  | 12.1446  | 2.13529          | 2.76539      | 12.1456       | 2.1348789        | 0.00018329 | No      |
|      |       |        |             |          |         | Dnajc15  | 18.2452  | 58.8806  | 1.69027          | 18.2462      | 58.8816       | 1.69022084       | 0.00018329 | No      |
|      |       |        |             |          |         | Dnajc25  | 0.550156 | 4.40578  | 3.00148          | 0.551156     | 4.40678       | 2.99919225       | 0.00018329 | No      |
|      |       |        |             |          |         | Dnajc28  | 0.439303 | 3.91942  | 3.15735          | 0.440303     | 3.92042       | 3.15443964       | 0.00018329 | No      |
|      |       |        |             |          |         | Dnajc4   | 5.35105  | 21.9211  | 2.03443          | 5.35205      | 21.9221       | 2.03422251       | 0.00018329 | No      |
|      |       |        |             |          |         | Dnajc5   | 38.6568  | 18.0208  | -1.10106         | 38.6578      | 18.0218       | -1.1010164       | 0.00035173 | No      |
|      |       |        |             |          |         | Dnajc7   | 139.907  | 68.6723  | -1.02667         | 139.908      | 68.6733       | -1.0266573       | 0.00018329 | No      |
|      |       |        |             |          |         | DNAJC9   | 80.2962  | 26.2237  | -1.61446         | 80.2972      | 26.2247       | -1.6144234       | 0.00018329 | No      |
|      |       |        |             |          |         | Dnal1    | 0.336709 | 2.12554  | 2.65825          | 0.337709     | 2.12654       | 2.65465546       | 0.00277264 | No      |
|      |       |        |             |          |         | Dnal4    | 1.51669  | 13.0717  | 3.10744          | 1.51769      | 13.0727       | 3.1066081        | 0.00018329 | No      |
|      |       |        |             |          |         | Dnase1l1 | 42.9851  | 18.8521  | -1.18911         | 42.9861      | 18.8531       | -1.1890685       | 0.00051281 | No      |
|      |       |        |             |          |         | DNLZ     | 32.0825  | 88.1862  | 1.45877          | 32.0835      | 88.1872       | 1.45873774       | 0.00018329 | No      |
|      |       |        |             |          |         | Dnm1     | 0.873846 | 49.1413  | 5.81341          | 0.874846     | 49.1423       | 5.81179249       | 0.00018329 | No      |
|      |       |        |             |          |         | Dnm3     | 0        | 7.98265  | inf              | 0.001        | 7.98365       | 12.9628328       | 0.00018329 | No      |
|      |       |        |             |          |         | Dnmbp    | 0.836652 | 15.7251  | 4.2323           | 0.837652     | 15.7261       | 4.23066612       | 0.00018329 | No      |
|      |       |        |             |          |         | Dnmt1    | 21.2504  | 8.62965  | -1.30012         | 21.2514      | 8.63065       | -1.3000168       | 0.00018329 | No      |
|      |       |        |             |          |         | Dnmt3b   | 11.2704  | 2.10994  | -2.41727         | 11.2714      | 2.11094       | -2.4167092       | 0.00018329 | No      |



| RRBS |       |        |             |          |         | RNAseq  |           |          |                  |              |               |                  |            |         |
|------|-------|--------|-------------|----------|---------|---------|-----------|----------|------------------|--------------|---------------|------------------|------------|---------|
| gene | Blood | Kidney | methyl.diff | pMWU.fdr | Match ? | gene    | blood     | kidney   | log2(fold_ratio) | blood+ 0.001 | kidney+ 0.001 | log2(fold_ratio) | q_value    | Match ? |
|      |       |        |             |          |         | Dnph1   | 0.43357   | 8.69508  | 4.32586          | 0.43457      | 8.69608       | 4.32270472       | 0.00097029 | No      |
|      |       |        |             |          |         | Dnttip2 | 27.3841   | 17.8779  | -0.615163        | 27.3851      | 17.8789       | -0.6151332       | 0.0227188  | No      |
|      |       |        |             |          |         | Doc2g   | 29.4439   | 59.7633  | 1.02129          | 29.4449      | 59.7643       | 1.02126618       | 0.012679   | No      |
|      |       |        |             |          |         | Dock11  | 48.2878   | 6.653    | -2.85958         | 48.2888      | 6.654         | -2.8593948       | 0.00018329 | No      |
|      |       |        |             |          |         | Dock2   | 84.9874   | 17.7936  | -2.25589         | 84.9884      | 17.7946       | -2.2558264       | 0.00018329 | No      |
|      |       |        |             |          |         | Dock5   | 0.134497  | 1.02852  | 2.93492          | 0.135497     | 1.02952       | 2.92563904       | 0.00018329 | No      |
|      |       |        |             |          |         | Dock6   | 0.0234268 | 12.9143  | 9.1066           | 0.0244268    | 12.9153       | 9.04640056       | 0.00018329 | No      |
|      |       |        |             |          |         | Dock7   | 1.32756   | 9.55656  | 2.84772          | 1.32856      | 9.55756       | 2.84677897       | 0.00018329 | No      |
|      |       |        |             |          |         | Dock9   | 1.63811   | 15.2429  | 3.21803          | 1.63911      | 15.2439       | 3.21724747       | 0.00018329 | No      |
|      |       |        |             |          |         | Dohh    | 18.8267   | 29.959   | 0.670213         | 18.8277      | 29.96         | 0.67018085       | 0.0251381  | No      |
|      |       |        |             |          |         | Dok4    | 0.125554  | 10.9383  | 6.44494          | 0.126554     | 10.9393       | 6.43362351       | 0.0031651  | No      |
|      |       |        |             |          |         | Dopey1  | 22.8823   | 11.0542  | -1.04963         | 22.8833      | 11.0552       | -1.04957         | 0.0422061  | No      |
|      |       |        |             |          |         | Dpagt1  | 10.5462   | 25.915   | 1.29706          | 10.5472      | 25.916        | 1.29698301       | 0.00051281 | No      |
|      |       |        |             |          |         | Dpcd    | 8.06139   | 38.178   | 2.24364          | 8.06239      | 38.179        | 2.24349984       | 0.00018329 | No      |
|      |       |        |             |          |         | Dpep2   | 0.585516  | 3.18614  | 2.44403          | 0.586516     | 3.18714       | 2.44202002       | 0.00018329 | No      |
|      |       |        |             |          |         | Dpf2    | 54.6894   | 34.8976  | -0.648134        | 54.6904      | 34.8986       | -0.6481185       | 0.0146209  | No      |
|      |       |        |             |          |         | Dpf3    | 0.069847  | 1.21772  | 4.12384          | 0.070847     | 1.21872       | 4.10451613       | 0.0444336  | No      |
|      |       |        |             |          |         | Dph2    | 6.69007   | 3.43129  | -0.96327         | 6.69107      | 3.43229       | -0.9630655       | 0.0063852  | No      |
|      |       |        |             |          |         | Dph5    | 17.1321   | 5.36327  | -1.67552         | 17.1331      | 5.36427       | -1.6753325       | 0.00018329 | No      |
|      |       |        |             |          |         | Dpm2    | 17.7814   | 30.6914  | 0.787463         | 17.7824      | 30.6924       | 0.78743141       | 0.017174   | No      |
|      |       |        |             |          |         | Dpp7    | 44.9384   | 94.5392  | 1.07296          | 44.9394      | 94.5402       | 1.07294705       | 0.00018329 | No      |
|      |       |        |             |          |         | Dpy19l1 | 7.30442   | 12.8187  | 0.811409         | 7.30542      | 12.8197       | 0.81132338       | 0.0066167  | No      |
|      |       |        |             |          |         | Dpy30   | 171.955   | 93.984   | -0.871545        | 171.956      | 93.985        | -0.871537        | 0.00126492 | No      |
|      |       |        |             |          |         | Dpyd    | 0         | 1.61883  | inf              | 0.001        | 1.61983       | 10.6616267       | 0.00018329 | No      |
|      |       |        |             |          |         | Dpysl3  | 0         | 1.01106  | inf              | 0.001        | 1.01206       | 9.98307911       | 0.00018329 | No      |
|      |       |        |             |          |         | Dr1     | 23.1017   | 12.9725  | -0.83254         | 23.1027      | 12.9735       | -0.8324937       | 0.00197017 | No      |
|      |       |        |             |          |         | Dram1   | 1.45762   | 7.33576  | 2.33133          | 1.45862      | 7.33676       | 2.33053901       | 0.00018329 | No      |
|      |       |        |             |          |         | Drg1    | 36.3      | 20.6858  | -0.811326        | 36.301       | 20.6868       | -0.8112988       | 0.00277264 | No      |
|      |       |        |             |          |         | Dsc2    | 0.147539  | 1.0185   | 2.78728          | 0.148539     | 1.0195        | 2.7789481        | 0.00018329 | No      |
|      |       |        |             |          |         | Dse     | 12.1567   | 5.6022   | -1.11768         | 12.1577      | 5.6032        | -1.1175474       | 0.00018329 | No      |
|      |       |        |             |          |         | Dsg2    | 0         | 1.15261  | inf              | 0.001        | 1.15361       | 10.1719399       | 0.00018329 | No      |
|      |       |        |             |          |         | Dst     | 24.3799   | 82.9092  | 1.76584          | 24.3809      | 82.9102       | 1.76579822       | 0.00140841 | No      |
|      |       |        |             |          |         | Dstn    | 113.96    | 220.21   | 0.950345         | 113.961      | 220.211       | 0.95034635       | 0.00018329 | No      |
|      |       |        |             |          |         | Dsty    | 2.64217   | 5.36642  | 1.02223          | 2.64317      | 5.36742       | 1.02195957       | 0.0026435  | No      |
|      |       |        |             |          |         | Dtd1    | 44.8824   | 26.2537  | -0.773628        | 44.8834      | 26.2547       | -0.7736063       | 0.00650199 | No      |
|      |       |        |             |          |         | Dtna    | 0         | 2.54617  | inf              | 0.001        | 2.54717       | 11.3146795       | 0.00018329 | No      |
|      |       |        |             |          |         | Dtnbp1  | 4.50303   | 14.8642  | 1.72288          | 4.50403      | 14.8652       | 1.72265053       | 0.00018329 | No      |
|      |       |        |             |          |         | Dtx1    | 10.731    | 0.894937 | -3.58385         | 10.732       | 0.895937      | -3.5823779       | 0.00925991 | No      |
|      |       |        |             |          |         | Dtx3    | 17.7454   | 46.4981  | 1.38973          | 17.7464      | 46.4991       | 1.3896764        | 0.00018329 | No      |
|      |       |        |             |          |         | Dtx4    | 0.135042  | 1.35114  | 3.3227           | 0.136042     | 1.35214       | 3.31312051       | 0.0142025  | No      |
|      |       |        |             |          |         | Dus2    | 32.9825   | 18.0334  | -0.871027        | 32.9835      | 18.0344       | -0.8709931       | 0.0148363  | No      |
|      |       |        |             |          |         | Dus4l   | 2.38804   | 1.08081  | -1.14371         | 2.38904      | 1.08181       | -1.1429839       | 0.0133341  | No      |

| RRBS |       |        |             |          |         | RNAseq         |          |         |                  |              |               |                  |            |         |
|------|-------|--------|-------------|----------|---------|----------------|----------|---------|------------------|--------------|---------------|------------------|------------|---------|
| gene | Blood | Kidney | methyl.diff | pMWU.fdr | Match ? | gene           | blood    | kidney  | log2(fold_ratio) | blood+ 0.001 | kidney+ 0.001 | log2(fold_ratio) | q_value    | Match ? |
|      |       |        |             |          |         | Dusp1          | 23.7248  | 262.188 | 3.46614          | 23.7258      | 262.189       | 3.46607852       | 0.00018329 | No      |
|      |       |        |             |          |         | Dusp10         | 8.65318  | 2.72198 | -1.66858         | 8.65418      | 2.72298       | -1.6682107       | 0.00018329 | No      |
|      |       |        |             |          |         | Dusp14         | 0.295299 | 5.02411 | 4.08862          | 0.296299     | 5.02511       | 4.08402951       | 0.00018329 | No      |
|      |       |        |             |          |         | Dusp3          | 7.1779   | 15.9919 | 1.15571          | 7.1789       | 15.9929       | 1.15559686       | 0.00018329 | No      |
|      |       |        |             |          |         | Dusp5          | 4.19727  | 21.0387 | 2.32552          | 4.19827      | 21.0397       | 2.32524728       | 0.00018329 | No      |
|      |       |        |             |          |         | Dusp6          | 8.12395  | 26.0452 | 1.68077          | 8.12495      | 26.0462       | 1.68064207       | 0.00018329 | No      |
|      |       |        |             |          |         | Dut            | 30.3394  | 58.3537 | 0.943631         | 30.3404      | 58.3547       | 0.94360875       | 0.00290302 | No      |
|      |       |        |             |          |         | Dvl1           | 24.9971  | 46.2107 | 0.886467         | 24.9981      | 46.2117       | 0.88643972       | 0.0018326  | No      |
|      |       |        |             |          |         | Dync2li1       | 0.188603 | 12.285  | 6.02539          | 0.189603     | 12.286        | 6.01788969       | 0.00018329 | No      |
|      |       |        |             |          |         | Dynll2         | 27.7664  | 84.6085 | 1.60746          | 27.7674      | 84.6095       | 1.60742756       | 0.00018329 | No      |
|      |       |        |             |          |         | DYRK1A         | 34.139   | 11.5095 | -1.56859         | 34.14        | 11.5105       | -1.5685126       | 0.00018329 | No      |
|      |       |        |             |          |         | Dzip1l         | 0        | 8.67192 | inf              | 0.001        | 8.67292       | 13.0823021       | 0.00018329 | No      |
|      |       |        |             |          |         | Dzip3          | 5.98633  | 2.15065 | -1.4769          | 5.98733      | 2.15165       | -1.4764694       | 0.00018329 | No      |
|      |       |        |             |          |         | E130012A19 Rik | 5.32383  | 1.43493 | -1.89148         | 5.32483      | 1.43593       | -1.89075         | 0.00018329 | No      |
|      |       |        |             |          |         | E2f2           | 13.172   | 3.20229 | -2.0403          | 13.173       | 3.20329       | -2.0399576       | 0.00018329 | No      |
|      |       |        |             |          |         | E2f6           | 23.302   | 15.1857 | -0.617738        | 23.303       | 15.1867       | -0.6177073       | 0.0280932  | No      |
|      |       |        |             |          |         | Eaf1           | 5.05917  | 12.6781 | 1.32536          | 5.06017      | 12.6791       | 1.32519458       | 0.00035173 | No      |
|      |       |        |             |          |         | Eapp           | 54.0937  | 31.5866 | -0.776149        | 54.0947      | 31.5876       | -0.7761289       | 0.0265238  | No      |
|      |       |        |             |          |         | Ebag9          | 30.882   | 15.8926 | -0.958409        | 30.883       | 15.8936       | -0.958367        | 0.00082046 | No      |
|      |       |        |             |          |         | Ebf4           | 0        | 2.20248 | inf              | 0.001        | 2.20348       | 11.1055681       | 0.00018329 | No      |
|      |       |        |             |          |         | Ebi3           | 2.05465  | 7.56398 | 1.88025          | 2.05565      | 7.56498       | 1.87974162       | 0.0104928  | No      |
|      |       |        |             |          |         | Ebp            | 24.3082  | 43.6034 | 0.842997         | 24.3092      | 43.6044       | 0.8429713        | 0.00603614 | No      |
|      |       |        |             |          |         | Ece1           | 9.04591  | 24.0989 | 1.41363          | 9.04691      | 24.0999       | 1.41353014       | 0.00018329 | No      |
|      |       |        |             |          |         | Ech1           | 93.5891  | 153.466 | 0.713507         | 93.5901      | 153.467       | 0.71350063       | 0.00674218 | No      |
|      |       |        |             |          |         | Echdc3         | 0.177916 | 21.9249 | 6.94522          | 0.178916     | 21.9259       | 6.93720984       | 0.00914594 | No      |
|      |       |        |             |          |         | Eci1           | 20.172   | 102.334 | 2.34286          | 20.173       | 102.335       | 2.3428021        | 0.00018329 | No      |
|      |       |        |             |          |         | Eci2           | 14.6245  | 43.6109 | 1.5763           | 14.6255      | 43.6119       | 1.5762359        | 0.00018329 | No      |
|      |       |        |             |          |         | Eci3           | 6.55145  | 125.482 | 4.25953          | 6.55245      | 125.483       | 4.25931368       | 0.00018329 | No      |
|      |       |        |             |          |         | Ecm1           | 2.53245  | 8.15493 | 1.68714          | 2.53345      | 8.15593       | 1.68674604       | 0.00018329 | No      |
|      |       |        |             |          |         | Ecscr          | 0        | 3.44626 | inf              | 0.001        | 3.44726       | 11.7512344       | 0.00018329 | No      |
|      |       |        |             |          |         | Ecsit          | 13.3398  | 48.1846 | 1.85283          | 13.3408      | 48.1856       | 1.85275689       | 0.00035173 | No      |
|      |       |        |             |          |         | Ect2           | 0.138056 | 1.44881 | 3.39153          | 0.139056     | 1.44981       | 3.38212594       | 0.00018329 | No      |
|      |       |        |             |          |         | Edc4           | 14.0346  | 48.5728 | 1.79116          | 14.0356      | 48.5738       | 1.79108762       | 0.00277264 | No      |
|      |       |        |             |          |         | Edem1          | 46.683   | 16.7694 | -1.47707         | 46.684       | 16.7704       | -1.4770111       | 0.00018329 | No      |
|      |       |        |             |          |         | Edn1           | 0        | 1.248   | inf              | 0.001        | 1.249         | 10.2865578       | 0.00018329 | No      |
|      |       |        |             |          |         | Ednra          | 0        | 1.60328 | inf              | 0.001        | 1.60428       | 10.6477102       | 0.00018329 | No      |
|      |       |        |             |          |         | Ednrb          | 0        | 1.51138 | inf              | 0.001        | 1.51238       | 10.562605        | 0.00018329 | No      |
|      |       |        |             |          |         | Eea1           | 3.26312  | 7.50118 | 1.20087          | 3.26412      | 7.50218       | 1.20061578       | 0.0230128  | No      |
|      |       |        |             |          |         | Eed            | 29.7712  | 14.0474 | -1.08362         | 29.7722      | 14.0484       | -1.08356         | 0.00018329 | No      |
|      |       |        |             |          |         | Eef1a1         | 10957.1  | 2468.04 | -2.15042         | 10957.101    | 2468.041      | -2.1504279       | 0.00018329 | No      |
|      |       |        |             |          |         | Eef1b2         | 1494.28  | 398.167 | -1.90801         | 1494.281     | 398.168       | -1.9080023       | 0.00018329 | No      |

| RRBS |       |        |            |          |         | RNAseq    |           |          |                  |              |               |                  |            |         |
|------|-------|--------|------------|----------|---------|-----------|-----------|----------|------------------|--------------|---------------|------------------|------------|---------|
| gene | Blood | Kidney | methy.diff | pMWU.fdr | Match ? | gene      | blood     | kidney   | log2(fold_ratio) | blood+ 0.001 | kidney+ 0.001 | log2(fold_ratio) | q_value    | Match ? |
|      |       |        |            |          |         | EEF1B2L   | 0         | 1.09111  | inf              | 0.001        | 1.09211       | 10.0929025       | 0.00018329 | No      |
|      |       |        |            |          |         | Eef2k     | 11.4908   | 22.395   | 0.962694         | 11.4918      | 22.396        | 0.9626363        | 0.0101506  | No      |
|      |       |        |            |          |         | Efcab4a   | 0.26673   | 7.88912  | 4.88641          | 0.26773      | 7.89012       | 4.88119653       | 0.00018329 | No      |
|      |       |        |            |          |         | Efcab4b   | 12.3577   | 1.09018  | -3.50277         | 12.3587      | 1.09118       | -3.501566        | 0.012679   | No      |
|      |       |        |            |          |         | Efcab7    | 1.63024   | 3.44743  | 1.08044          | 1.63124      | 3.44843       | 1.07997062       | 0.00822601 | No      |
|      |       |        |            |          |         | Efemp1    | 0         | 51.0487  | inf              | 0.001        | 51.0497       | 15.6396149       | 0.00018329 | No      |
|      |       |        |            |          |         | Efhc2     | 0.0717445 | 1.8129   | 4.65928          | 0.0727445    | 1.8139        | 4.64011294       | 0.00238141 | No      |
|      |       |        |            |          |         | Efna4     | 0.398317  | 7.00186  | 4.13575          | 0.399317     | 7.00286       | 4.13233785       | 0.00018329 | No      |
|      |       |        |            |          |         | Efnb1     | 0.486474  | 12.2755  | 4.65728          | 0.487474     | 12.2765       | 4.65443023       | 0.00018329 | No      |
|      |       |        |            |          |         | Efnb2     | 0.364066  | 4.03379  | 3.46987          | 0.365066     | 4.03479       | 3.46626437       | 0.00018329 | No      |
|      |       |        |            |          |         | Efr3a     | 21.2384   | 12.984   | -0.70994         | 21.2394      | 12.985        | -0.709897        | 0.0107084  | No      |
|      |       |        |            |          |         | Efr3b     | 0         | 0.676359 | inf              | 0.001        | 0.677359      | 9.40377685       | 0.00744054 | No      |
|      |       |        |            |          |         | Eftud2    | 36.5668   | 22.6492  | -0.691075        | 36.5678      | 22.6502       | -0.69105         | 0.00799878 | No      |
|      |       |        |            |          |         | Egf       | 0.14771   | 49.2213  | 8.38038          | 0.14871      | 49.2223       | 8.3706666        | 0.00018329 | No      |
|      |       |        |            |          |         | Egfr      | 0         | 1.66354  | inf              | 0.001        | 1.66454       | 10.7009078       | 0.00018329 | No      |
|      |       |        |            |          |         | Egr2      | 0.085328  | 1.66591  | 4.28715          | 0.086328     | 1.66691       | 4.27120384       | 0.00018329 | No      |
|      |       |        |            |          |         | Ehbp1     | 0.767299  | 4.68594  | 2.61048          | 0.768299     | 4.68694       | 2.60890655       | 0.00018329 | No      |
|      |       |        |            |          |         | Ehd1      | 9.31048   | 26.2687  | 1.49642          | 9.31148      | 26.2697       | 1.49631733       | 0.00018329 | No      |
|      |       |        |            |          |         | Ehd4      | 5.112     | 15.3614  | 1.58735          | 5.113        | 15.3624       | 1.58716169       | 0.00018329 | No      |
|      |       |        |            |          |         | Ehhadh    | 1.66264   | 8.60671  | 2.37198          | 1.66364      | 8.60771       | 2.3712862        | 0.00018329 | No      |
|      |       |        |            |          |         | Ehmt1     | 11.0874   | 4.18327  | -1.40622         | 11.0884      | 4.18427       | -1.4060034       | 0.00018329 | No      |
|      |       |        |            |          |         | Eid2b     | 7.84994   | 2.72811  | -1.52478         | 7.85094      | 2.72911       | -1.5244349       | 0.00018329 | No      |
|      |       |        |            |          |         | Eif1b     | 55.9503   | 98.576   | 0.817089         | 55.9513      | 98.577        | 0.81707942       | 0.00342383 | No      |
|      |       |        |            |          |         | Eif2ak3   | 15.4348   | 5.86787  | -1.39528         | 15.4358      | 5.86887       | -1.3951256       | 0.00018329 | No      |
|      |       |        |            |          |         | Eif2b3    | 15.4548   | 9.73571  | -0.6667          | 15.4558      | 9.73671       | -0.6666421       | 0.0414627  | No      |
|      |       |        |            |          |         | Eif2s2    | 105.735   | 58.8283  | -0.845876        | 105.736      | 58.8293       | -0.8458599       | 0.00126492 | No      |
|      |       |        |            |          |         | Eif2s3    | 115.201   | 28.5998  | -2.01008         | 115.202      | 28.6008       | -2.0100384       | 0.00018329 | No      |
|      |       |        |            |          |         | Eif3a     | 61.61     | 34.6574  | -0.830001        | 61.611       | 34.6584       | -0.8299829       | 0.00154856 | No      |
|      |       |        |            |          |         | Eif3c     | 82.9667   | 53.2421  | -0.639964        | 82.9677      | 53.2431       | -0.6399552       | 0.0214018  | No      |
|      |       |        |            |          |         | Eif3d     | 89.7141   | 58.8793  | -0.607574        | 89.7151      | 58.8803       | -0.6075658       | 0.0221058  | No      |
|      |       |        |            |          |         | Eif3e     | 412.223   | 96.526   | -2.09444         | 412.224      | 96.527        | -2.0944241       | 0.00018329 | No      |
|      |       |        |            |          |         | EIF3F     | 376.982   | 152.379  | -1.30683         | 376.983      | 152.38        | -1.3068259       | 0.00018329 | No      |
|      |       |        |            |          |         | Eif3g     | 319.298   | 155.726  | -1.03589         | 319.299      | 155.727       | -1.0358889       | 0.00018329 | No      |
|      |       |        |            |          |         | Eif3h     | 232.673   | 89.3848  | -1.3802          | 232.674      | 89.3858       | -1.3801924       | 0.00018329 | No      |
|      |       |        |            |          |         | Eif3i     | 174.296   | 95.4709  | -0.868402        | 174.297      | 95.4719       | -0.8683997       | 0.00238141 | No      |
|      |       |        |            |          |         | Eif3m     | 320.805   | 135.782  | -1.2404          | 320.806      | 135.783       | -1.2403983       | 0.00018329 | No      |
|      |       |        |            |          |         | Eif4b     | 180.348   | 82.0965  | -1.13539         | 180.349      | 82.0975       | -1.1353812       | 0.00018329 | No      |
|      |       |        |            |          |         | Eif4e     | 43.4002   | 28.7434  | -0.59447         | 43.4012      | 28.7444       | -0.594454        | 0.0321839  | No      |
|      |       |        |            |          |         | Eif4e2    | 62.96     | 39.8752  | -0.658943        | 62.961       | 39.8762       | -0.6589305       | 0.0217091  | No      |
|      |       |        |            |          |         | Eif4e3    | 8.79719   | 4.10067  | -1.10118         | 8.79819      | 4.10167       | -1.1009953       | 0.00035173 | No      |
|      |       |        |            |          |         | Eif4enif1 | 20.2665   | 12.1225  | -0.741414        | 20.2675      | 12.1235       | -0.7413619       | 0.0187317  | No      |
|      |       |        |            |          |         | Eif4g1    | 22.0155   | 13.9153  | -0.66184         | 22.0165      | 13.9163       | -0.6618095       | 0.0300303  | No      |

| RRBS |       |        |             |          |         | RNAseq   |           |          |                  |              |               |                  |            |         |
|------|-------|--------|-------------|----------|---------|----------|-----------|----------|------------------|--------------|---------------|------------------|------------|---------|
| gene | Blood | Kidney | methyl.diff | pMWU.fdr | Match ? | gene     | blood     | kidney   | log2(fold_ratio) | blood+ 0.001 | kidney+ 0.001 | log2(fold_ratio) | q_value    | Match ? |
|      |       |        |             |          |         | Eif4h    | 160.369   | 95.7498  | -0.744055        | 160.37       | 95.7508       | -0.7440478       | 0.00419853 | No      |
|      |       |        |             |          |         | Eif5     | 125.614   | 50.5424  | -1.31343         | 125.615      | 50.5434       | -1.3134141       | 0.00018329 | No      |
|      |       |        |             |          |         | Elac1    | 0.437445  | 1.52338  | 1.8001           | 0.438445     | 1.52438       | 1.7977548        | 0.00018329 | No      |
|      |       |        |             |          |         | Elf1     | 72.2611   | 13.516   | -2.41856         | 72.2621      | 13.517        | -2.4184642       | 0.00018329 | No      |
|      |       |        |             |          |         | Elf2     | 41.4891   | 13.4462  | -1.62553         | 41.4901      | 13.4472       | -1.6254613       | 0.00018329 | No      |
|      |       |        |             |          |         | Elf4     | 30.0531   | 4.02487  | -2.9005          | 30.0541      | 4.02587       | -2.9001893       | 0.00018329 | No      |
|      |       |        |             |          |         | Elk1     | 33.4787   | 59.2572  | 0.823746         | 33.4797      | 59.2582       | 0.8237282        | 0.0268173  | No      |
|      |       |        |             |          |         | Elk3     | 33.4498   | 11.1764  | -1.58154         | 33.4508      | 11.1774       | -1.5814561       | 0.00018329 | No      |
|      |       |        |             |          |         | Elk4     | 40.2889   | 6.74856  | -2.57773         | 40.2899      | 6.74956       | -2.5775529       | 0.00018329 | No      |
|      |       |        |             |          |         | ElI3     | 2.34988   | 8.72555  | 1.89266          | 2.35088      | 8.72655       | 1.89221051       | 0.00018329 | No      |
|      |       |        |             |          |         | Elmo1    | 21.1667   | 4.36796  | -2.27677         | 21.1677      | 4.36896       | -2.2765027       | 0.00018329 | No      |
|      |       |        |             |          |         | Elmsan1  | 19.0471   | 5.77193  | -1.72245         | 19.0481      | 5.77293       | -1.7222715       | 0.00018329 | No      |
|      |       |        |             |          |         | Elof1    | 32.6789   | 80.8466  | 1.30683          | 32.6799      | 80.8476       | 1.30680138       | 0.00018329 | No      |
|      |       |        |             |          |         | Elovl5   | 155.276   | 29.656   | -2.38844         | 155.277      | 29.657        | -2.3883996       | 0.00018329 | No      |
|      |       |        |             |          |         | Emc3     | 31.1788   | 48.6956  | 0.643223         | 31.1798      | 48.6966       | 0.64320937       | 0.0125688  | No      |
|      |       |        |             |          |         | Emcn     | 0         | 14.9101  | inf              | 0.001        | 14.9111       | 13.8640991       | 0.00018329 | No      |
|      |       |        |             |          |         | Emilin1  | 0.291158  | 6.61517  | 4.5059           | 0.292158     | 6.61617       | 4.50117561       | 0.00018329 | No      |
|      |       |        |             |          |         | Eml2     | 2.58997   | 16.1902  | 2.64412          | 2.59097      | 16.1912       | 2.6436457        | 0.00018329 | No      |
|      |       |        |             |          |         | Eml4     | 37.292    | 13.4069  | -1.47589         | 37.293       | 13.4079       | -1.4758216       | 0.00018329 | No      |
|      |       |        |             |          |         | Emp1     | 3.41959   | 8.91426  | 1.38229          | 3.42059      | 8.91526       | 1.38203168       | 0.00018329 | No      |
|      |       |        |             |          |         | Emp2     | 0         | 6.36439  | inf              | 0.001        | 6.36539       | 12.6360332       | 0.00018329 | No      |
|      |       |        |             |          |         | Emp3     | 272.456   | 105.908  | -1.36321         | 272.457      | 105.909       | -1.3632034       | 0.00018329 | No      |
|      |       |        |             |          |         | Emr1     | 0.224049  | 2.71823  | 3.60078          | 0.225049     | 2.71923       | 3.59488712       | 0.00018329 | No      |
|      |       |        |             |          |         | Emx1     | 0         | 10.145   | inf              | 0.001        | 10.146        | 13.3086234       | 0.00018329 | No      |
|      |       |        |             |          |         | En2      | 0         | 1.12346  | inf              | 0.001        | 1.12446       | 10.1350166       | 0.00018329 | No      |
|      |       |        |             |          |         | Enah     | 0.081104  | 7.1577   | 6.46358          | 0.082104     | 7.1587        | 6.4461013        | 0.00018329 | No      |
|      |       |        |             |          |         | Enc1     | 0.0616547 | 5.10082  | 6.37037          | 0.0626547    | 5.10182       | 6.34744545       | 0.00035173 | No      |
|      |       |        |             |          |         | Endod1   | 1.10945   | 12.9698  | 3.54723          | 1.11045      | 12.9708       | 3.54605112       | 0.00018329 | No      |
|      |       |        |             |          |         | Enkd1    | 0.539991  | 8.43399  | 3.96521          | 0.540991     | 8.43499       | 3.96270986       | 0.00018329 | No      |
|      |       |        |             |          |         | Enkur    | 0.113502  | 1.105    | 3.28327          | 0.114502     | 1.106         | 3.27190668       | 0.036101   | No      |
|      |       |        |             |          |         | Eno1     | 267.723   | 692.759  | 1.37161          | 267.724      | 692.76        | 1.37160916       | 0.00018329 | No      |
|      |       |        |             |          |         | Enox1    | 0         | 5.01149  | inf              | 0.001        | 5.01249       | 12.2913117       | 0.00018329 | No      |
|      |       |        |             |          |         | Enpp2    | 4.29778   | 0.977598 | -2.13628         | 4.29878      | 0.978598      | -2.135139        | 0.00018329 | No      |
|      |       |        |             |          |         | Enpp5    | 1.01129   | 25.7176  | 4.66849          | 1.01229      | 25.7186       | 4.66711755       | 0.00018329 | No      |
|      |       |        |             |          |         | Enpp6    | 0         | 12.1533  | inf              | 0.001        | 12.1543       | 13.5691792       | 0.00018329 | No      |
|      |       |        |             |          |         | Entpd2   | 5.15038   | 150.346  | 4.86746          | 5.15138      | 150.347       | 4.8671933        | 0.00018329 | No      |
|      |       |        |             |          |         | Entpd6   | 5.7654    | 3.38317  | -0.769046        | 5.7664       | 3.38417       | -0.7688689       | 0.02885    | No      |
|      |       |        |             |          |         | EP300    | 5.7288    | 2.42493  | -1.24029         | 5.7298       | 2.42593       | -1.2399469       | 0.0220133  | No      |
|      |       |        |             |          |         | Ep400    | 21.8724   | 13.1964  | -0.728963        | 21.8734      | 13.1974       | -0.7289238       | 0.0342763  | No      |
|      |       |        |             |          |         | Epb4.1   | 96.6097   | 25.8582  | -1.90155         | 96.6107      | 25.8592       | -1.9015053       | 0.00018329 | No      |
|      |       |        |             |          |         | Epb4.1I5 | 1.46012   | 16.8667  | 3.53002          | 1.46112      | 16.8677       | 3.52911669       | 0.00018329 | No      |
|      |       |        |             |          |         | Epb4111  | 0.0342414 | 38.2486  | 10.1254          | 0.0352414    | 38.2496       | 10.0839577       | 0.00948282 | No      |

| RRBS |       |        |             |          |         | RNAseq  |           |          |                  |              |               |                  |            |         |
|------|-------|--------|-------------|----------|---------|---------|-----------|----------|------------------|--------------|---------------|------------------|------------|---------|
| gene | Blood | Kidney | methyl.diff | pMWU.fdr | Match ? | gene    | blood     | kidney   | log2(fold_ratio) | blood+ 0.001 | kidney+ 0.001 | log2(fold_ratio) | q_value    | Match ? |
|      |       |        |             |          |         | Epb4112 | 29.4198   | 11.8963  | -1.30628         | 29.4208      | 11.8973       | -1.3062023       | 0.00018329 | No      |
|      |       |        |             |          |         | EPC1    | 66.6976   | 19.689   | -1.76025         | 66.6986      | 19.69         | -1.7601934       | 0.00018329 | No      |
|      |       |        |             |          |         | Epg5    | 12.1673   | 3.67862  | -1.72578         | 12.1683      | 3.67962       | -1.7254989       | 0.00018329 | No      |
|      |       |        |             |          |         | Epha1   | 0.333314  | 12.7625  | 5.25888          | 0.334314     | 12.7635       | 5.25467642       | 0.00035173 | No      |
|      |       |        |             |          |         | Epha4   | 0         | 8.08905  | inf              | 0.001        | 8.09005       | 12.9819329       | 0.00018329 | No      |
|      |       |        |             |          |         | Epha7   | 0         | 14.1639  | inf              | 0.001        | 14.1649       | 13.7900328       | 0.00018329 | No      |
|      |       |        |             |          |         | Ephb6   | 19.2582   | 6.63316  | -1.53771         | 19.2592      | 6.63416       | -1.5375621       | 0.00018329 | No      |
|      |       |        |             |          |         | Ephx1   | 5.99966   | 41.6764  | 2.79628          | 6.00066      | 41.6774       | 2.79607219       | 0.00018329 | No      |
|      |       |        |             |          |         | Epn3    | 0         | 30.8054  | inf              | 0.001        | 30.8064       | 14.9109425       | 0.00018329 | No      |
|      |       |        |             |          |         | Eps15   | 33.0634   | 11.3827  | -1.53839         | 33.0644      | 11.3837       | -1.5383092       | 0.00018329 | No      |
|      |       |        |             |          |         | Eps8    | 0.262572  | 15.0052  | 5.8366           | 0.263572     | 15.0062       | 5.83121776       | 0.00018329 | No      |
|      |       |        |             |          |         | Eps8l1  | 0.0632891 | 14.9999  | 7.88878          | 0.0642891    | 15.0009       | 7.86625919       | 0.00082046 | No      |
|      |       |        |             |          |         | Eps8l2  | 0.177484  | 127.163  | 9.48477          | 0.178484     | 127.164       | 9.47667984       | 0.00035173 | No      |
|      |       |        |             |          |         | Ept1    | 9.22801   | 3.62797  | -1.34686         | 9.22901      | 3.62897       | -1.3466158       | 0.00018329 | No      |
|      |       |        |             |          |         | Erb2ip  | 59.5203   | 32.4299  | -0.87606         | 59.5213      | 32.4309       | -0.876037        | 0.00698138 | No      |
|      |       |        |             |          |         | Erb3    | 0.266811  | 3.3875   | 3.66633          | 0.267811     | 3.3885        | 3.66135965       | 0.00018329 | No      |
|      |       |        |             |          |         | Erb4    | 0         | 4.29337  | inf              | 0.001        | 4.29437       | 12.0682308       | 0.00018329 | No      |
|      |       |        |             |          |         | Ercc1   | 9.73422   | 26.0204  | 1.4185           | 9.73522      | 26.0214       | 1.4184131        | 0.00406781 | No      |
|      |       |        |             |          |         | Ercc3   | 33.3852   | 21.159   | -0.657933        | 33.3862      | 21.16         | -0.6579123       | 0.0440856  | No      |
|      |       |        |             |          |         | Ercc6   | 9.66392   | 5.07554  | -0.929046        | 9.66492      | 5.07654       | -0.9289123       | 0.00506686 | No      |
|      |       |        |             |          |         | Ercc6l  | 0.922244  | 0.244859 | -1.9132          | 0.923244     | 0.245859      | -1.9088808       | 0.00111812 | No      |
|      |       |        |             |          |         | Erg     | 0         | 1.72537  | inf              | 0.001        | 1.72637       | 10.753526        | 0.00018329 | No      |
|      |       |        |             |          |         | Ergic3  | 47.8964   | 97.9702  | 1.03243          | 47.8974      | 97.9712       | 1.03241037       | 0.00018329 | No      |
|      |       |        |             |          |         | Erh     | 265.841   | 171.504  | -0.632318        | 265.842      | 171.505       | -0.6323184       | 0.0183081  | No      |
|      |       |        |             |          |         | Eri1    | 18.119    | 10.4213  | -0.797972        | 18.12        | 10.4223       | -0.7979093       | 0.00481718 | No      |
|      |       |        |             |          |         | Eri2    | 2.29531   | 15.2731  | 2.73423          | 2.29631      | 15.2741       | 2.73369805       | 0.0186283  | No      |
|      |       |        |             |          |         | Eri3    | 21.5104   | 43.3326  | 1.01042          | 21.5114      | 43.3336       | 1.01038467       | 0.0036827  | No      |
|      |       |        |             |          |         | Erich1  | 5.63336   | 9.96355  | 0.822664         | 5.63436      | 9.96455       | 0.82255291       | 0.0374015  | No      |
|      |       |        |             |          |         | Erich2  | 0         | 6.02926  | inf              | 0.001        | 6.03026       | 12.5580045       | 0.00018329 | No      |
|      |       |        |             |          |         | Erlec1  | 22.8047   | 36.8682  | 0.693045         | 22.8057      | 36.8692       | 0.69302166       | 0.0124598  | No      |
|      |       |        |             |          |         | Erlin2  | 3.57576   | 11.472   | 1.68179          | 3.57676      | 11.473        | 1.68151746       | 0.00018329 | No      |
|      |       |        |             |          |         | Ermp1   | 10.8153   | 20.8711  | 0.94844          | 10.8163      | 20.8721       | 0.94836869       | 0.0127876  | No      |
|      |       |        |             |          |         | Ern1    | 1.65112   | 3.38978  | 1.03774          | 1.65212      | 3.39078       | 1.0372987        | 0.00140841 | No      |
|      |       |        |             |          |         | Erp29   | 26.1229   | 94.3128  | 1.85214          | 26.1239      | 94.3138       | 1.85209859       | 0.00018329 | No      |
|      |       |        |             |          |         | ERRFI1  | 2.18434   | 46.2836  | 4.40523          | 2.18534      | 46.2846       | 4.40460259       | 0.00018329 | No      |
|      |       |        |             |          |         | Esco1   | 27.3326   | 15.5364  | -0.814971        | 27.3336      | 15.5374       | -0.8149304       | 0.0355427  | No      |
|      |       |        |             |          |         | Esd     | 24.3078   | 92.0852  | 1.92155          | 24.3088      | 92.0862       | 1.92150629       | 0.00018329 | No      |
|      |       |        |             |          |         | Esf1    | 12.9256   | 7.56988  | -0.771894        | 12.9266      | 7.57088       | -0.77181         | 0.0086849  | No      |
|      |       |        |             |          |         | Esrp1   | 0         | 8.13209  | inf              | 0.001        | 8.13309       | 12.9895879       | 0.00018329 | No      |
|      |       |        |             |          |         | Esrrb   | 0         | 4.51315  | inf              | 0.001        | 4.51415       | 12.1402386       | 0.00018329 | No      |
|      |       |        |             |          |         | Esyt1   | 139.893   | 33.0821  | -2.0802          | 139.894      | 33.0831       | -2.0801678       | 0.00018329 | No      |
|      |       |        |             |          |         | Esyt2   | 80.4406   | 19.4041  | -2.05157         | 80.4416      | 19.4051       | -2.0515059       | 0.00018329 | No      |

| RRBS |       |        |             |          |         | RNAseq  |           |          |                  |              |               |                  |            |         |
|------|-------|--------|-------------|----------|---------|---------|-----------|----------|------------------|--------------|---------------|------------------|------------|---------|
| gene | Blood | Kidney | methyl.diff | pMWU.fdr | Match ? | gene    | blood     | kidney   | log2(fold_ratio) | blood+ 0.001 | kidney+ 0.001 | log2(fold_ratio) | q_value    | Match ? |
|      |       |        |             |          |         | Etaa1   | 6.94506   | 1.48545  | -2.22509         | 6.94606      | 1.48645       | -2.2243239       | 0.00018329 | No      |
|      |       |        |             |          |         | Etfa    | 40.2114   | 135.789  | 1.75569          | 40.2124      | 135.79        | 1.75566489       | 0.00018329 | No      |
|      |       |        |             |          |         | Etfb    | 33.3673   | 388.028  | 3.53966          | 33.3683      | 388.029       | 3.53961439       | 0.00018329 | No      |
|      |       |        |             |          |         | Etfdh   | 11.3149   | 32.3669  | 1.5163           | 11.3159      | 32.3679       | 1.51621244       | 0.00018329 | No      |
|      |       |        |             |          |         | Etl4    | 0         | 10.6524  | inf              | 0.001        | 10.6534       | 13.3790263       | 0.00018329 | No      |
|      |       |        |             |          |         | Etnk2   | 0         | 1.16382  | inf              | 0.001        | 1.16482       | 10.1858913       | 0.00018329 | No      |
|      |       |        |             |          |         | Etnppl  | 0         | 7.03909  | inf              | 0.001        | 7.04009       | 12.7813782       | 0.00018329 | No      |
|      |       |        |             |          |         | Ets1    | 566.55    | 36.8857  | -3.94107         | 566.551      | 36.8867       | -3.9410332       | 0.00018329 | No      |
|      |       |        |             |          |         | Ets2    | 4.73996   | 20.9396  | 2.14329          | 4.74096      | 20.9406       | 2.14305165       | 0.00018329 | No      |
|      |       |        |             |          |         | Etv5    | 0.66228   | 2.59531  | 1.97039          | 0.66328      | 2.59631       | 1.96877272       | 0.00018329 | No      |
|      |       |        |             |          |         | Eva1a   | 0         | 27.0637  | inf              | 0.001        | 27.0647       | 14.7241248       | 0.00018329 | No      |
|      |       |        |             |          |         | Evc     | 0         | 22.0086  | inf              | 0.001        | 22.0096       | 14.4258453       | 0.00018329 | No      |
|      |       |        |             |          |         | Evi2a   | 53.4989   | 12.4813  | -2.09974         | 53.4999      | 12.4823       | -2.0996524       | 0.0374015  | No      |
|      |       |        |             |          |         | Evi2b   | 40.5381   | 7.00281  | -2.53327         | 40.5391      | 7.00381       | -2.5331022       | 0.0284818  | No      |
|      |       |        |             |          |         | Evi5    | 4.68266   | 26.5259  | 2.502            | 4.68366      | 26.5269       | 2.50174783       | 0.00354878 | No      |
|      |       |        |             |          |         | Evl     | 643.476   | 101.724  | -2.66123         | 643.477      | 101.725       | -2.6612143       | 0.00018329 | No      |
|      |       |        |             |          |         | Ewsr1   | 5.78113   | 2.67986  | -1.1092          | 5.78213      | 2.68086       | -1.1089052       | 0.00481718 | No      |
|      |       |        |             |          |         | Exoc3l2 | 0.128424  | 1.32624  | 3.36836          | 0.129424     | 1.32724       | 3.3582522        | 0.00066911 | No      |
|      |       |        |             |          |         | Exoc3l4 | 0         | 0.805354 | inf              | 0.001        | 0.806354      | 9.65526953       | 0.00018329 | No      |
|      |       |        |             |          |         | Exoc5   | 17.1645   | 10.1503  | -0.757901        | 17.1655      | 10.1513       | -0.7578474       | 0.0111567  | No      |
|      |       |        |             |          |         | Exoc6   | 7.60339   | 20.7535  | 1.44864          | 7.60439      | 20.7545       | 1.44851975       | 0.00035173 | No      |
|      |       |        |             |          |         | Exog    | 3.79597   | 1.82045  | -1.06017         | 3.79697      | 1.82145       | -1.0597612       | 0.00329119 | No      |
|      |       |        |             |          |         | Exosc1  | 45.4967   | 24.7428  | -0.878753        | 45.4977      | 24.7438       | -0.8787265       | 0.00579773 | No      |
|      |       |        |             |          |         | Exosc2  | 19.2737   | 11.8311  | -0.704045        | 19.2747      | 11.8321       | -0.7040023       | 0.0292465  | No      |
|      |       |        |             |          |         | Exosc6  | 9.6769    | 5.01861  | -0.947259        | 9.6779       | 5.01961       | -0.9471188       | 0.0423961  | No      |
|      |       |        |             |          |         | Exosc9  | 29.924    | 12.8889  | -1.21518         | 29.925       | 12.8899       | -1.2151102       | 0.00018329 | No      |
|      |       |        |             |          |         | Exph5   | 0.0468224 | 1.85571  | 5.30862          | 0.0478224    | 1.85671       | 5.27891815       | 0.00018329 | No      |
|      |       |        |             |          |         | Ext1    | 8.36847   | 15.8681  | 0.923098         | 8.36947      | 15.8691       | 0.92301214       | 0.00126492 | No      |
|      |       |        |             |          |         | Extl2   | 0.565133  | 1.39354  | 1.30209          | 0.566133     | 1.39454       | 1.30057639       | 0.0232058  | No      |
|      |       |        |             |          |         | Eya3    | 11.4192   | 6.81699  | -0.74425         | 11.4202      | 6.81799       | -0.7441695       | 0.00650199 | No      |
|      |       |        |             |          |         | F11r    | 0.554156  | 63.3193  | 6.83621          | 0.555156     | 63.3203       | 6.83363105       | 0.00018329 | No      |
|      |       |        |             |          |         | F3      | 0         | 17.3478  | inf              | 0.001        | 17.3488       | 14.0825483       | 0.00018329 | No      |
|      |       |        |             |          |         | F5      | 2.06054   | 8.39193  | 2.02598          | 2.06154      | 8.39293       | 2.02545209       | 0.00018329 | No      |
|      |       |        |             |          |         | F8      | 7.3472    | 3.74922  | -0.970605        | 7.3482       | 3.75022       | -0.9704157       | 0.00210945 | No      |
|      |       |        |             |          |         | Fa2h    | 0         | 12.305   | inf              | 0.001        | 12.306        | 13.5870743       | 0.00018329 | No      |
|      |       |        |             |          |         | Fabp4   | 0         | 29.4582  | inf              | 0.001        | 29.4592       | 14.8464306       | 0.00018329 | No      |
|      |       |        |             |          |         | Fabp5   | 3.81969   | 66.2345  | 4.11606          | 3.82069      | 66.2355       | 4.11569955       | 0.00018329 | No      |
|      |       |        |             |          |         | Fads1   | 0.022843  | 9.03664  | 8.62789          | 0.023843     | 9.03764       | 8.56623651       | 0.0454685  | No      |
|      |       |        |             |          |         | Fads6   | 0.179763  | 3.22404  | 4.1647           | 0.180763     | 3.22504       | 4.15714574       | 0.00051281 | No      |
|      |       |        |             |          |         | Fah     | 13.3485   | 90.3949  | 2.75957          | 13.3495      | 90.3959       | 2.75947163       | 0.00018329 | No      |
|      |       |        |             |          |         | Fahd1   | 11.6958   | 58.1987  | 2.315            | 11.6968      | 58.1997       | 2.31489782       | 0.00018329 | No      |
|      |       |        |             |          |         | Fahd2a  | 21.4923   | 81.7731  | 1.9278           | 21.4933      | 81.7741       | 1.92775697       | 0.00018329 | No      |

| RRBS |       |        |             |          |         | RNAseq   |           |         |                  |              |               |                  |            |         |
|------|-------|--------|-------------|----------|---------|----------|-----------|---------|------------------|--------------|---------------|------------------|------------|---------|
| gene | Blood | Kidney | methyl.diff | pMWU.fdr | Match ? | gene     | blood     | kidney  | log2(fold_ratio) | blood+ 0.001 | kidney+ 0.001 | log2(fold_ratio) | q_value    | Match ? |
|      |       |        |             |          |         | Faim3    | 11.125    | 4.07255 | -1.44981         | 11.126       | 4.07355       | -1.4495765       | 0.00035173 | No      |
|      |       |        |             |          |         | FALZ     | 31.823    | 10.255  | -1.63374         | 31.824       | 10.256        | -1.633647        | 0.00197017 | No      |
|      |       |        |             |          |         | Fam102a  | 42.82     | 9.8224  | -2.12414         | 42.821       | 9.8234        | -2.1240241       | 0.00018329 | No      |
|      |       |        |             |          |         | Fam105a  | 125.58    | 14.6702 | -3.09765         | 125.581      | 14.6712       | -3.0975594       | 0.00018329 | No      |
|      |       |        |             |          |         | Fam105b  | 94.1895   | 21.6783 | -2.11931         | 94.1905      | 21.6793       | -2.1192634       | 0.00018329 | No      |
|      |       |        |             |          |         | Fam107b  | 91.8061   | 45.515  | -1.01225         | 91.8071      | 45.516        | -1.012232        | 0.00018329 | No      |
|      |       |        |             |          |         | Fam110b  | 0.400785  | 5.81519 | 3.85892          | 0.401785     | 5.81619       | 3.85557879       | 0.00018329 | No      |
|      |       |        |             |          |         | Fam111a  | 0.278519  | 1.56983 | 2.49476          | 0.279519     | 1.57083       | 2.4905088        | 0.00018329 | No      |
|      |       |        |             |          |         | Fam114a1 | 0.049941  | 1.84193 | 5.20485          | 0.050941     | 1.84293       | 5.17703018       | 0.00051281 | No      |
|      |       |        |             |          |         | Fam115a  | 0.0673425 | 6.12422 | 6.50686          | 0.0683425    | 6.12522       | 6.48583483       | 0.00018329 | No      |
|      |       |        |             |          |         | Fam115c  | 9.99774   | 3.15035 | -1.66609         | 9.99874      | 3.15135       | -1.6657763       | 0.0016929  | No      |
|      |       |        |             |          |         | Fam117a  | 133.57    | 16.5714 | -3.01083         | 133.571      | 16.5724       | -3.0107524       | 0.00018329 | No      |
|      |       |        |             |          |         | Fam117b  | 23.6444   | 5.83005 | -2.01992         | 23.6454      | 5.83105       | -2.0197319       | 0.00018329 | No      |
|      |       |        |             |          |         | Fam118a  | 10.2238   | 2.35288 | -2.11943         | 10.2248      | 2.35388       | -2.1189599       | 0.00018329 | No      |
|      |       |        |             |          |         | FAM120C  | 0.444709  | 1.91246 | 2.1045           | 0.445709     | 1.91346       | 2.10200974       | 0.00018329 | No      |
|      |       |        |             |          |         | Fam126a  | 3.82714   | 1.13353 | -1.75545         | 3.82814      | 1.13453       | -1.7545488       | 0.00018329 | No      |
|      |       |        |             |          |         | Fam127b  | 53.687    | 111.508 | 1.05451          | 53.688       | 111.509       | 1.05448859       | 0.00066911 | No      |
|      |       |        |             |          |         | Fam131c  | 0         | 3.40448 | inf              | 0.001        | 3.40548       | 11.7336424       | 0.00018329 | No      |
|      |       |        |             |          |         | Fam133b  | 29.1881   | 17.0389 | -0.776544        | 29.1891      | 17.0399       | -0.7765129       | 0.00543198 | No      |
|      |       |        |             |          |         | Fam134b  | 10.342    | 17.173  | 0.731623         | 10.343       | 17.174        | 0.7315714        | 0.0109365  | No      |
|      |       |        |             |          |         | Fam134c  | 62.5233   | 20.233  | -1.62768         | 62.5243      | 20.234        | -1.6276355       | 0.00018329 | No      |
|      |       |        |             |          |         | Fam135a  | 0.0489783 | 6.24668 | 6.9948           | 0.0499783    | 6.24768       | 6.96587492       | 0.00018329 | No      |
|      |       |        |             |          |         | Fam136a  | 6.32927   | 11.5408 | 0.866633         | 6.33027      | 11.5418       | 0.8665293        | 0.00788539 | No      |
|      |       |        |             |          |         | Fam13a   | 0         | 6.69622 | inf              | 0.001        | 6.69722       | 12.7093466       | 0.0104928  | No      |
|      |       |        |             |          |         | Fam13b   | 35.8745   | 16.6495 | -1.10748         | 35.8755      | 16.6505       | -1.1074334       | 0.00018329 | No      |
|      |       |        |             |          |         | Fam149a  | 0.0286521 | 19.959  | 9.44418          | 0.0296521    | 19.96         | 9.39476172       | 0.00082046 | No      |
|      |       |        |             |          |         | Fam151a  | 0.388976  | 7.48715 | 4.26666          | 0.389976     | 7.48815       | 4.26315209       | 0.0203707  | No      |
|      |       |        |             |          |         | Fam162a  | 95.8729   | 147.169 | 0.618282         | 95.8739      | 147.17        | 0.61827359       | 0.0475434  | No      |
|      |       |        |             |          |         | Fam168b  | 61.989    | 26.4264 | -1.23003         | 61.99        | 26.4274       | -1.230001        | 0.00018329 | No      |
|      |       |        |             |          |         | Fam169b  | 76.791    | 4.88448 | -3.97466         | 76.792       | 4.88548       | -3.9743838       | 0.00018329 | No      |
|      |       |        |             |          |         | Fam171a1 | 0         | 19.0549 | inf              | 0.001        | 19.0559       | 14.2179501       | 0.00018329 | No      |
|      |       |        |             |          |         | Fam171a2 | 1.58894   | 11.1018 | 2.80466          | 1.58994      | 11.1028       | 2.80387933       | 0.00018329 | No      |
|      |       |        |             |          |         | Fam172a  | 19.6552   | 10.4408 | -0.912672        | 19.6562      | 10.4418       | -0.912614        | 0.0213082  | No      |
|      |       |        |             |          |         | Fam174b  | 0.169563  | 3.80823 | 4.48923          | 0.170563     | 3.80923       | 4.48112278       | 0.012344   | No      |
|      |       |        |             |          |         | Fam175a  | 9.65902   | 5.00923 | -0.94729         | 9.66002      | 5.01023       | -0.9471493       | 0.0114728  | No      |
|      |       |        |             |          |         | Fam175b  | 15.6638   | 9.8597  | -0.667819        | 15.6648      | 9.8607        | -0.6677644       | 0.0208908  | No      |
|      |       |        |             |          |         | Fam178a  | 11.1596   | 4.57779 | -1.28557         | 11.1606      | 4.57879       | -1.2853763       | 0.00018329 | No      |
|      |       |        |             |          |         | Fam179b  | 11.7251   | 6.98958 | -0.746324        | 11.7261      | 6.99058       | -0.7462392       | 0.0478786  | No      |
|      |       |        |             |          |         | Fam184a  | 0.0358474 | 5.11615 | 7.15705          | 0.0368474    | 5.11715       | 7.11763389       | 0.0451903  | No      |
|      |       |        |             |          |         | Fam185a  | 34.0964   | 11.1222 | -1.61618         | 34.0974      | 11.1232       | -1.6160898       | 0.00018329 | No      |
|      |       |        |             |          |         | Fam188b  | 0.3346    | 1.9416  | 2.53674          | 0.3356       | 1.9426        | 2.53317425       | 0.00018329 | No      |
|      |       |        |             |          |         | Fam189a2 | 0         | 4.86043 | inf              | 0.001        | 4.86143       | 12.247165        | 0.00018329 | No      |

| RRBS |       |        |             |          |         | RNAseq  |           |          |                  |              |               |                  |            |         |
|------|-------|--------|-------------|----------|---------|---------|-----------|----------|------------------|--------------|---------------|------------------|------------|---------|
| gene | Blood | Kidney | methyl.diff | pMWU.fdr | Match ? | gene    | blood     | kidney   | log2(fold_ratio) | blood+ 0.001 | kidney+ 0.001 | log2(fold_ratio) | q_value    | Match ? |
|      |       |        |             |          |         | Fam195a | 1.52054   | 49.2307  | 5.0169           | 1.52154      | 49.2317       | 5.01598339       | 0.00018329 | No      |
|      |       |        |             |          |         | Fam195b | 46.7141   | 81.8065  | 0.808357         | 46.7151      | 81.8075       | 0.80834416       | 0.00277264 | No      |
|      |       |        |             |          |         | Fam198b | 0.0567723 | 1.27076  | 4.48436          | 0.0577723    | 1.27176       | 4.4603047        | 0.00051281 | No      |
|      |       |        |             |          |         | Fam19a1 | 0.865474  | 0        | -inf             | 0.866474     | 0.001         | -9.7590126       | 0.0168685  | No      |
|      |       |        |             |          |         | Fam19a3 | 40.2249   | 13.1844  | -1.60926         | 40.2259      | 13.1854       | -1.6091834       | 0.00018329 | No      |
|      |       |        |             |          |         | Fam203a | 20.4989   | 11.6727  | -0.812409        | 20.4999      | 11.6737       | -0.812355        | 0.00530972 | No      |
|      |       |        |             |          |         | Fam204a | 5.19831   | 2.84353  | -0.870359        | 5.19931      | 2.84453       | -0.8701299       | 0.0133341  | No      |
|      |       |        |             |          |         | Fam208a | 35.1985   | 11.6067  | -1.60055         | 35.1995      | 11.6077       | -1.6004728       | 0.00018329 | No      |
|      |       |        |             |          |         | Fam20b  | 9.42473   | 16.1229  | 0.774584         | 9.42573      | 16.1239       | 0.77452448       | 0.047797   | No      |
|      |       |        |             |          |         | Fam20c  | 0.109719  | 82.4953  | 9.55436          | 0.110719     | 82.4963       | 9.54128279       | 0.00018329 | No      |
|      |       |        |             |          |         | Fam213a | 1.57673   | 9.52502  | 2.59478          | 1.57773      | 9.52602       | 2.59402324       | 0.00018329 | No      |
|      |       |        |             |          |         | Fam213b | 3.73902   | 27.3243  | 2.86945          | 3.74002      | 27.3253       | 2.86911944       | 0.00018329 | No      |
|      |       |        |             |          |         | Fam214b | 1.34079   | 11.1379  | 3.05431          | 1.34179      | 11.1389       | 3.05337597       | 0.00018329 | No      |
|      |       |        |             |          |         | Fam216a | 5.5457    | 21.0543  | 1.92467          | 5.5467       | 21.0553       | 1.92448183       | 0.00018329 | No      |
|      |       |        |             |          |         | Fam221a | 0.0975411 | 1.06664  | 3.45092          | 0.0985411    | 1.06764       | 3.43755588       | 0.00224282 | No      |
|      |       |        |             |          |         | Fam229b | 0.200136  | 4.65175  | 4.53872          | 0.201136     | 4.65275       | 4.53184044       | 0.0325782  | No      |
|      |       |        |             |          |         | Fam26f  | 107.573   | 13.5548  | -2.98844         | 107.574      | 13.5558       | -2.9883473       | 0.00018329 | No      |
|      |       |        |             |          |         | Fam3c   | 18.3057   | 31.6381  | 0.789368         | 18.3067      | 31.6391       | 0.78933681       | 0.0146209  | No      |
|      |       |        |             |          |         | Fam46c  | 21.325    | 7.52239  | -1.50328         | 21.326       | 7.52339       | -1.5031586       | 0.00018329 | No      |
|      |       |        |             |          |         | FAM49B  | 140.915   | 24.0531  | -2.55053         | 140.916      | 24.0541       | -2.5504807       | 0.00018329 | No      |
|      |       |        |             |          |         | Fam53a  | 44.388    | 17.4706  | -1.34524         | 44.389       | 17.4716       | -1.3451905       | 0.0168685  | No      |
|      |       |        |             |          |         | Fam53c  | 13.1044   | 7.80096  | -0.748323        | 13.1054      | 7.80196       | -0.7482529       | 0.00777671 | No      |
|      |       |        |             |          |         | Fam60a  | 19.9394   | 10.3589  | -0.944751        | 19.9404      | 10.3599       | -0.9446843       | 0.00066911 | No      |
|      |       |        |             |          |         | Fam63a  | 9.83248   | 34.7801  | 1.82264          | 9.83348      | 34.7811       | 1.82252959       | 0.00018329 | No      |
|      |       |        |             |          |         | Fam65b  | 124.16    | 5.89306  | -4.39704         | 124.161      | 5.89406       | -4.3968065       | 0.00018329 | No      |
|      |       |        |             |          |         | Fam71a  | 0         | 2.53626  | inf              | 0.001        | 2.53726       | 11.3090556       | 0.00018329 | No      |
|      |       |        |             |          |         | Fam71b  | 2.30097   | 0.221618 | -3.3761          | 2.30197      | 0.222618      | -3.3702269       | 0.0481525  | No      |
|      |       |        |             |          |         | Fam73b  | 8.43482   | 19.9657  | 1.24309          | 8.43582      | 19.9667       | 1.24299569       | 0.00018329 | No      |
|      |       |        |             |          |         | Fam76b  | 16.3539   | 6.59983  | -1.30914         | 16.3549      | 6.60083       | -1.3090036       | 0.00018329 | No      |
|      |       |        |             |          |         | Fam78a  | 25.8256   | 3.25619  | -2.98755         | 25.8266      | 3.25719       | -2.9871579       | 0.00018329 | No      |
|      |       |        |             |          |         | Fam81a  | 0.0517875 | 22.8007  | 8.78226          | 0.0527875    | 22.8017       | 8.75472933       | 0.00018329 | No      |
|      |       |        |             |          |         | Fam83b  | 0         | 1.34747  | inf              | 0.001        | 1.34847       | 10.3971077       | 0.00469886 | No      |
|      |       |        |             |          |         | Fam83e  | 0.113953  | 19.6242  | 7.42806          | 0.114953     | 19.6252       | 7.41551943       | 0.030565   | No      |
|      |       |        |             |          |         | Fam84b  | 30.0182   | 12.7375  | -1.23675         | 30.0192      | 12.7385       | -1.2366901       | 0.00018329 | No      |
|      |       |        |             |          |         | Fam91a1 | 12.7823   | 20.5957  | 0.68819          | 12.7833      | 20.5967       | 0.68815289       | 0.0168685  | No      |
|      |       |        |             |          |         | Fam92a1 | 13.2393   | 55.9347  | 2.07892          | 13.2403      | 55.9357       | 2.07883354       | 0.00018329 | No      |
|      |       |        |             |          |         | Fam92b  | 0         | 0.866991 | inf              | 0.001        | 0.867991      | 9.76153627       | 0.00018329 | No      |
|      |       |        |             |          |         | Fam96b  | 35.4954   | 82.829   | 1.2225           | 35.4964      | 82.83         | 1.22248067       | 0.00018329 | No      |
|      |       |        |             |          |         | Fan1    | 1.57023   | 3.17087  | 1.0139           | 1.57123      | 3.17187       | 1.01343926       | 0.0269158  | No      |
|      |       |        |             |          |         | FanCb   | 4.67117   | 2.27997  | -1.03477         | 4.67217      | 2.28097       | -1.0344453       | 0.0237237  | No      |
|      |       |        |             |          |         | Fancc   | 1.54124   | 3.7104   | 1.26749          | 1.54224      | 3.7114        | 1.26693621       | 0.0016929  | No      |
|      |       |        |             |          |         | FanCg   | 3.42447   | 1.06224  | -1.68876         | 3.42547      | 1.06324       | -1.6878347       | 0.00018329 | No      |



| RRBS |       |        |             |          |         | RNAseq  |          |          |                  |              |               |                  |            |         |
|------|-------|--------|-------------|----------|---------|---------|----------|----------|------------------|--------------|---------------|------------------|------------|---------|
| gene | Blood | Kidney | methyl.diff | pMWU.fdr | Match ? | gene    | blood    | kidney   | log2(fold_ratio) | blood+ 0.001 | kidney+ 0.001 | log2(fold_ratio) | q_value    | Match ? |
|      |       |        |             |          |         | Fanci   | 1.39752  | 0.293698 | -2.25047         | 1.39852      | 0.294698      | -2.2465917       | 0.00066911 | No      |
|      |       |        |             |          |         | Far1    | 13.6317  | 7.02652  | -0.956079        | 13.6327      | 7.02752       | -0.9559838       | 0.00342383 | No      |
|      |       |        |             |          |         | Farp1   | 0.624648 | 24.4161  | 5.28865          | 0.625648     | 24.4171       | 5.28639685       | 0.00082046 | No      |
|      |       |        |             |          |         | Fars2   | 11.3564  | 35.3222  | 1.63707          | 11.3574      | 35.3232       | 1.63698344       | 0.00051281 | No      |
|      |       |        |             |          |         | Fastkd1 | 27.0453  | 15.785   | -0.776823        | 27.0463      | 15.786        | -0.7767856       | 0.0230128  | No      |
|      |       |        |             |          |         | Fat2    | 0        | 0.768117 | inf              | 0.001        | 0.769117      | 9.58705927       | 0.00018329 | No      |
|      |       |        |             |          |         | Fau     | 5264.02  | 2641.76  | -0.994669        | 5264.021     | 2641.761      | -0.9946653       | 0.00458064 | No      |
|      |       |        |             |          |         | Faxdc2  | 1.30528  | 11.5733  | 3.14837          | 1.30628      | 11.5743       | 3.14738887       | 0.0207821  | No      |
|      |       |        |             |          |         | Fbf1    | 12.6676  | 27.1298  | 1.09873          | 12.6686      | 27.1308       | 1.09867449       | 0.00744054 | No      |
|      |       |        |             |          |         | Fbl     | 157.583  | 85.3082  | -0.885357        | 157.584      | 85.3092       | -0.8853478       | 0.00097029 | No      |
|      |       |        |             |          |         | Fblim1  | 0.145695 | 3.39909  | 4.54412          | 0.146695     | 3.40009       | 4.53468133       | 0.0194611  | No      |
|      |       |        |             |          |         | Fbrs    | 38.0411  | 13.6522  | -1.47843         | 38.0421      | 13.6532       | -1.4783578       | 0.00018329 | No      |
|      |       |        |             |          |         | Fbxl15  | 2.24769  | 8.62616  | 1.94028          | 2.24869      | 8.62716       | 1.93980092       | 0.00018329 | No      |
|      |       |        |             |          |         | Fbxl20  | 18.2131  | 5.38348  | -1.75837         | 18.2141      | 5.38448       | -1.7581768       | 0.00018329 | No      |
|      |       |        |             |          |         | Fbxl21  | 0.171167 | 0.907673 | 2.40677          | 0.172167     | 0.908673      | 2.39995257       | 0.0187317  | No      |
|      |       |        |             |          |         | Fbxl22  | 76.8245  | 31.6585  | -1.27897         | 76.8255      | 31.6595       | -1.2789468       | 0.0434518  | No      |
|      |       |        |             |          |         | Fbxl3   | 48.5379  | 20.8257  | -1.22074         | 48.5389      | 20.8267       | -1.2207072       | 0.0488781  | No      |
|      |       |        |             |          |         | Fbxo11  | 23.4888  | 11.1178  | -1.07911         | 23.4898      | 11.1188       | -1.0790333       | 0.0016929  | No      |
|      |       |        |             |          |         | Fbxo16  | 0        | 5.08256  | inf              | 0.001        | 5.08356       | 12.3116235       | 0.00018329 | No      |
|      |       |        |             |          |         | Fbxo21  | 5.37785  | 13.6273  | 1.34139          | 5.37885      | 13.6283       | 1.34123595       | 0.00018329 | No      |
|      |       |        |             |          |         | Fbxo3   | 58.9653  | 30.9452  | -0.930151        | 58.9663      | 30.9462       | -0.9301284       | 0.0036827  | No      |
|      |       |        |             |          |         | Fbxo32  | 4.22695  | 1.12575  | -1.90873         | 4.22795      | 1.12675       | -1.9077909       | 0.0066167  | No      |
|      |       |        |             |          |         | Fbxo33  | 21.3498  | 6.0358   | -1.82261         | 21.3508      | 6.0368        | -1.8224342       | 0.00018329 | No      |
|      |       |        |             |          |         | Fbxo34  | 10.0723  | 5.64528  | -0.835274        | 10.0733      | 5.64628       | -0.8351638       | 0.00709238 | No      |
|      |       |        |             |          |         | Fbxo4   | 0.943962 | 7.89639  | 3.06439          | 0.944962     | 7.89739       | 3.06304772       | 0.00018329 | No      |
|      |       |        |             |          |         | Fbxo44  | 25.278   | 74.3266  | 1.55599          | 25.279       | 74.3276       | 1.55595863       | 0.00018329 | No      |
|      |       |        |             |          |         | Fbxo5   | 3.95665  | 1.9237   | -1.04039         | 3.95765      | 1.9247        | -1.0400104       | 0.00591487 | No      |
|      |       |        |             |          |         | Fbxw2   | 42.0969  | 24.2484  | -0.795823        | 42.0979      | 24.2494       | -0.7957992       | 0.00210945 | No      |
|      |       |        |             |          |         | Fbxw8   | 0.254408 | 8.82312  | 5.11607          | 0.255408     | 8.82412       | 5.11057679       | 0.00066911 | No      |
|      |       |        |             |          |         | Fcamr   | 0        | 1.15009  | inf              | 0.001        | 1.15109       | 10.1687849       | 0.00018329 | No      |
|      |       |        |             |          |         | Fcer1g  | 28.6391  | 257.151  | 3.16656          | 28.6401      | 257.152       | 3.16651294       | 0.00018329 | No      |
|      |       |        |             |          |         | Fcer2   | 2.37081  | 0.827678 | -1.51824         | 2.37181      | 0.828678      | -1.5171049       | 0.00777671 | No      |
|      |       |        |             |          |         | Fcf1    | 151.245  | 102.733  | -0.557981        | 151.246      | 102.734       | -0.5579833       | 0.0462639  | No      |
|      |       |        |             |          |         | Fcgr1a  | 0.536348 | 15.8478  | 4.88497          | 0.537348     | 15.8488       | 4.88237308       | 0.00018329 | No      |
|      |       |        |             |          |         | FCGR2A  | 1.96913  | 26.5793  | 3.75468          | 1.97013      | 26.5803       | 3.75399465       | 0.00018329 | No      |
|      |       |        |             |          |         | Fcgr2a  | 0.76933  | 8.11573  | 3.39905          | 0.77033      | 8.11673       | 3.39735011       | 0.0128946  | No      |
|      |       |        |             |          |         | Fcgr2b  | 1.0502   | 5.47331  | 2.38175          | 1.0512       | 5.47431       | 2.38063995       | 0.0340896  | No      |
|      |       |        |             |          |         | Fcgrt   | 6.88438  | 66.9568  | 3.28183          | 6.88538      | 66.9578       | 3.28164394       | 0.00018329 | No      |
|      |       |        |             |          |         | Fcho1   | 63.9259  | 16.5147  | -1.95265         | 63.9269      | 16.5157       | -1.952585        | 0.00018329 | No      |
|      |       |        |             |          |         | Fcho2   | 10.7497  | 20.4379  | 0.926952         | 10.7507      | 20.4389       | 0.92688695       | 0.00530972 | No      |
|      |       |        |             |          |         | Fchsd2  | 22.1404  | 5.88184  | -1.91234         | 22.1414      | 5.88284       | -1.9121617       | 0.00018329 | No      |
|      |       |        |             |          |         | Fcn1    | 0.216413 | 5.6768   | 4.71322          | 0.217413     | 5.6778        | 4.70682192       | 0.00018329 | No      |

| RRBS |       |        |             |          |         | RNAseq   |            |          |                  |              |               |                  |            |         |
|------|-------|--------|-------------|----------|---------|----------|------------|----------|------------------|--------------|---------------|------------------|------------|---------|
| gene | Blood | Kidney | methyl.diff | pMWU.fdr | Match ? | gene     | blood      | kidney   | log2(fold_ratio) | blood+ 0.001 | kidney+ 0.001 | log2(fold_ratio) | q_value    | Match ? |
|      |       |        |             |          |         | Fcnb     | 4.46705    | 14.3557  | 1.68422          | 4.46805      | 14.3567       | 1.68400694       | 0.00018329 | No      |
|      |       |        |             |          |         | Fcrl2    | 0.0501468  | 2.4827   | 5.62961          | 0.0511468    | 2.4837        | 5.60170313       | 0.0264199  | No      |
|      |       |        |             |          |         | Fdft1    | 7.36572    | 27.5755  | 1.90449          | 7.36672      | 27.5765       | 1.90434505       | 0.00018329 | No      |
|      |       |        |             |          |         | Fdx1     | 13.5986    | 44.581   | 1.71297          | 13.5996      | 44.582        | 1.71289712       | 0.00018329 | No      |
|      |       |        |             |          |         | Fech     | 4.43639    | 12.9342  | 1.54373          | 4.43739      | 12.9352       | 1.5435191        | 0.00018329 | No      |
|      |       |        |             |          |         | Fem1b    | 19.1593    | 7.37696  | -1.37695         | 19.1603      | 7.37796       | -1.3768263       | 0.00018329 | No      |
|      |       |        |             |          |         | Fem1c    | 5.45533    | 3.59252  | -0.60267         | 5.45633      | 3.59352       | -0.6025332       | 0.0378663  | No      |
|      |       |        |             |          |         | Fermt3   | 127.296    | 49.0892  | -1.37471         | 127.297      | 49.0902       | -1.3746915       | 0.00290302 | No      |
|      |       |        |             |          |         | Fert2    | 0.0640543  | 1.85191  | 4.85358          | 0.0650543    | 1.85291       | 4.83200458       | 0.0197773  | No      |
|      |       |        |             |          |         | Fes      | 0.456802   | 9.64249  | 4.39977          | 0.457802     | 9.64349       | 4.39675968       | 0.00018329 | No      |
|      |       |        |             |          |         | FEZ2     | 6.16785    | 27.9943  | 2.18229          | 6.16885      | 27.9953       | 2.18211117       | 0.00018329 | No      |
|      |       |        |             |          |         | Fgd1     | 0.0362285  | 0.866403 | 4.57984          | 0.0372285    | 0.867403      | 4.54222304       | 0.0439935  | No      |
|      |       |        |             |          |         | Fgd2     | 3.0591     | 9.32106  | 1.60739          | 3.0601       | 9.32206       | 1.60707          | 0.00018329 | No      |
|      |       |        |             |          |         | Fgf1     | 0          | 25.333   | inf              | 0.001        | 25.334        | 14.6287873       | 0.00018329 | No      |
|      |       |        |             |          |         | Fgf12    | 0          | 3.34617  | inf              | 0.001        | 3.34717       | 11.7087261       | 0.00018329 | No      |
|      |       |        |             |          |         | Fgf13    | 0.470499   | 3.61106  | 2.94016          | 0.471499     | 3.61206       | 2.93749524       | 0.00018329 | No      |
|      |       |        |             |          |         | Fgfbp3   | 0.627637   | 2.8274   | 2.17147          | 0.628637     | 2.8284        | 2.16968707       | 0.00035173 | No      |
|      |       |        |             |          |         | Fgfr1    | 0.620595   | 24.2532  | 5.28838          | 0.621595     | 24.2542       | 5.28611589       | 0.00018329 | No      |
|      |       |        |             |          |         | Fgfr1op  | 10.883     | 5.48215  | -0.989257        | 10.884       | 5.48315       | -0.989132        | 0.00251301 | No      |
|      |       |        |             |          |         | Fgfr1op2 | 42.2449    | 25.2461  | -0.742717        | 42.2459      | 25.2471       | -0.7426937       | 0.0031651  | No      |
|      |       |        |             |          |         | Fgfrl1   | 0.246441   | 6.60104  | 4.74338          | 0.247441     | 6.60204       | 4.73775541       | 0.00018329 | No      |
|      |       |        |             |          |         | Fggy     | 4.68279    | 54.8279  | 3.54947          | 4.68379      | 54.8289       | 3.54918823       | 0.0031651  | No      |
|      |       |        |             |          |         | Fgl2     | 70.924     | 8.49135  | -3.06221         | 70.925       | 8.49235       | -3.0620585       | 0.00018329 | No      |
|      |       |        |             |          |         | Fh       | 13.929     | 111.268  | 2.99787          | 13.93        | 111.269       | 2.99778454       | 0.00018329 | No      |
|      |       |        |             |          |         | Fhit     | 6.60072    | 16.2185  | 1.29694          | 6.60172      | 16.2195       | 1.29681549       | 0.00543198 | No      |
|      |       |        |             |          |         | Fhl1     | 0.213214   | 4.03916  | 4.24368          | 0.214214     | 4.04016       | 4.23728775       | 0.00018329 | No      |
|      |       |        |             |          |         | Fhod3    | 0          | 18.5211  | inf              | 0.001        | 18.5221       | 14.1769601       | 0.00224282 | No      |
|      |       |        |             |          |         | Fignl1   | 1.09304    | 0.424289 | -1.36522         | 1.09404      | 0.425289      | -1.36315         | 0.0219099  | No      |
|      |       |        |             |          |         | Fitm2    | 1.10305    | 3.34423  | 1.60017          | 1.10405      | 3.34523       | 1.5992999        | 0.00018329 | No      |
|      |       |        |             |          |         | Fjx1     | 0          | 7.19377  | inf              | 0.001        | 7.19477       | 12.8127329       | 0.00018329 | No      |
|      |       |        |             |          |         | Fkbp10   | 0.575051   | 3.25567  | 2.50119          | 0.576051     | 3.25667       | 2.49912909       | 0.00018329 | No      |
|      |       |        |             |          |         | Fkbp14   | 15.823     | 6.20634  | -1.35021         | 15.824       | 6.20734       | -1.3500673       | 0.00035173 | No      |
|      |       |        |             |          |         | Fkbp2    | 32.6391    | 139.594  | 2.09656          | 32.6401      | 139.595       | 2.09652989       | 0.00018329 | No      |
|      |       |        |             |          |         | Fkbp5    | 26.496     | 12.9728  | -1.03028         | 26.497       | 12.9738       | -1.0302279       | 0.00018329 | No      |
|      |       |        |             |          |         | Fkbp7    | 1.56928    | 4.34244  | 1.4684           | 1.57028      | 4.34344       | 1.46781628       | 0.0184137  | No      |
|      |       |        |             |          |         | Flna     | 139.447    | 36.3388  | -1.94014         | 139.448      | 36.3398       | -1.9401049       | 0.00018329 | No      |
|      |       |        |             |          |         | Flrt1    | 0.00207198 | 7.07449  | 11.7374          | 0.00307198   | 7.07549       | 11.1694455       | 0.0272082  | No      |
|      |       |        |             |          |         | Flt3     | 0.0768114  | 0.880145 | 3.51835          | 0.0778114    | 0.881145      | 3.501326         | 0.00290302 | No      |
|      |       |        |             |          |         | Flt3l    | 28.9453    | 16.8846  | -0.777621        | 28.9463      | 16.8856       | -0.7775855       | 0.033435   | No      |
|      |       |        |             |          |         | Flvcr2   | 2.37224    | 21.8936  | 3.20619          | 2.37324      | 21.8946       | 3.20564518       | 0.00579773 | No      |
|      |       |        |             |          |         | Flywch1  | 16.306     | 41.2029  | 1.33734          | 16.307       | 41.2039       | 1.3372895        | 0.00082046 | No      |
|      |       |        |             |          |         | Flywch2  | 0          | 11.953   | inf              | 0.001        | 11.954        | 13.5452058       | 0.00018329 | No      |

| RRBS |       |        |            |          |         | RNAseq |          |          |                  |              |               |                  |            |         |
|------|-------|--------|------------|----------|---------|--------|----------|----------|------------------|--------------|---------------|------------------|------------|---------|
| gene | Blood | Kidney | methy.diff | pMWU.fdr | Match ? | gene   | blood    | kidney   | log2(fold_ratio) | blood+ 0.001 | kidney+ 0.001 | log2(fold_ratio) | q_value    | Match ? |
|      |       |        |            |          |         | Fmn1   | 230.76   | 60.9526  | -1.92063         | 230.761      | 60.9536       | -1.9206161       | 0.00018329 | No      |
|      |       |        |            |          |         | Fmn2   | 0.509105 | 4.08054  | 3.00273          | 0.510105     | 4.08154       | 3.00024745       | 0.00018329 | No      |
|      |       |        |            |          |         | Fmn3   | 28.8095  | 15.4238  | -0.901383        | 28.8105      | 15.4248       | -0.9013429       | 0.0368491  | No      |
|      |       |        |            |          |         | Fmo1   | 0        | 30.6782  | inf              | 0.001        | 30.6792       | 14.9049732       | 0.00018329 | No      |
|      |       |        |            |          |         | Fmo2   | 0        | 3.2253   | inf              | 0.001        | 3.2263        | 11.6556649       | 0.00018329 | No      |
|      |       |        |            |          |         | Fmo3   | 0        | 34.3756  | inf              | 0.001        | 34.3766       | 15.0691392       | 0.00018329 | No      |
|      |       |        |            |          |         | Fmo4   | 0.541133 | 19.0142  | 5.13495          | 0.542133     | 19.0152       | 5.13236248       | 0.00018329 | No      |
|      |       |        |            |          |         | FMR1   | 32.8231  | 10.208   | -1.68501         | 32.8241      | 10.209        | -1.6849139       | 0.00018329 | No      |
|      |       |        |            |          |         | Fnbp1  | 72.4952  | 18.2902  | -1.98682         | 72.4962      | 18.2912       | -1.9867556       | 0.00018329 | No      |
|      |       |        |            |          |         | Fnbp4  | 105.446  | 33.7874  | -1.64194         | 105.447      | 33.7884       | -1.6419181       | 0.00018329 | No      |
|      |       |        |            |          |         | Fndc3b | 0.127637 | 10.3017  | 6.3347           | 0.128637     | 10.3027       | 6.32357299       | 0.00018329 | No      |
|      |       |        |            |          |         | Fnip1  | 12.6791  | 2.84897  | -2.15394         | 12.6801      | 2.84997       | -2.1535475       | 0.00018329 | No      |
|      |       |        |            |          |         | Fnip2  | 1.20759  | 9.89445  | 3.03449          | 1.20859      | 9.89545       | 3.03344041       | 0.00018329 | No      |
|      |       |        |            |          |         | Fntb   | 20.5641  | 4.01059  | -2.35824         | 20.5651      | 4.01159       | -2.357952        | 0.00018329 | No      |
|      |       |        |            |          |         | Folh1  | 0        | 1.86988  | inf              | 0.001        | 1.87088       | 10.8695013       | 0.00018329 | No      |
|      |       |        |            |          |         | FOLR2  | 0.327933 | 204.257  | 9.28277          | 0.328933     | 204.258       | 9.27838312       | 0.00018329 | No      |
|      |       |        |            |          |         | Fos    | 4.29891  | 358.874  | 6.38336          | 4.29991      | 358.875       | 6.38303115       | 0.00018329 | No      |
|      |       |        |            |          |         | Fosb   | 0.744321 | 96.1807  | 7.01368          | 0.745321     | 96.1817       | 7.01175671       | 0.00018329 | No      |
|      |       |        |            |          |         | Fosl2  | 1.47938  | 15.5369  | 3.39264          | 1.48038      | 15.5379       | 3.39175208       | 0.00082046 | No      |
|      |       |        |            |          |         | Foxa1  | 0        | 0.894613 | inf              | 0.001        | 0.895613      | 9.80673166       | 0.00018329 | No      |
|      |       |        |            |          |         | Foxh1  | 1.25316  | 6.13575  | 2.29167          | 1.25416      | 6.13675       | 2.2907534        | 0.017174   | No      |
|      |       |        |            |          |         | Foxj2  | 19.3056  | 11.9054  | -0.69741         | 19.3066      | 11.9064       | -0.6973569       | 0.0283795  | No      |
|      |       |        |            |          |         | Foxk1  | 15.1865  | 3.68304  | -2.04382         | 15.1875      | 3.68404       | -2.0435238       | 0.00018329 | No      |
|      |       |        |            |          |         | Foxm1  | 0.8335   | 1.81362  | 1.12162          | 0.8345       | 1.81462       | 1.12068351       | 0.0178968  | No      |
|      |       |        |            |          |         | Foxn2  | 26.3776  | 6.36143  | -2.05189         | 26.3786      | 6.36243       | -2.0517182       | 0.00018329 | No      |
|      |       |        |            |          |         | Foxn3  | 28.0246  | 7.13612  | -1.97348         | 28.0256      | 7.13712       | -1.9733313       | 0.00018329 | No      |
|      |       |        |            |          |         | Foxo1  | 48.496   | 4.8512   | -3.32145         | 48.497       | 4.8522        | -3.3211846       | 0.00018329 | No      |
|      |       |        |            |          |         | Foxp1  | 41.8583  | 7.98191  | -2.39071         | 41.8593      | 7.98291       | -2.3905615       | 0.00018329 | No      |
|      |       |        |            |          |         | Fpgs   | 4.95262  | 30.5814  | 2.62639          | 4.95362      | 30.5824       | 2.62614652       | 0.00018329 | No      |
|      |       |        |            |          |         | Fras1  | 0        | 2.81963  | inf              | 0.001        | 2.82063       | 11.4618017       | 0.00018329 | No      |
|      |       |        |            |          |         | Frat2  | 59.7131  | 13.2219  | -2.17512         | 59.7141      | 13.2229       | -2.175033        | 0.00018329 | No      |
|      |       |        |            |          |         | Frem1  | 0        | 3.88153  | inf              | 0.001        | 3.88253       | 11.9227814       | 0.00018329 | No      |
|      |       |        |            |          |         | Frem2  | 0        | 1.29062  | inf              | 0.001        | 1.29162       | 10.334966        | 0.00018329 | No      |
|      |       |        |            |          |         | Frg1   | 97.3649  | 56.1766  | -0.793432        | 97.3659      | 56.1776       | -0.7934216       | 0.00627425 | No      |
|      |       |        |            |          |         | Frg11  | 19.5544  | 10.4966  | -0.897569        | 19.5554      | 10.4976       | -0.8975075       | 0.0219099  | No      |
|      |       |        |            |          |         | Frk    | 0        | 3.23233  | inf              | 0.001        | 3.23333       | 11.658805        | 0.00018329 | No      |
|      |       |        |            |          |         | Frmd4a | 0.378657 | 4.86403  | 3.68319          | 0.379657     | 4.86503       | 3.67968019       | 0.0459285  | No      |
|      |       |        |            |          |         | Frmd4b | 2.0983   | 24.3404  | 3.53606          | 2.0993       | 24.3414       | 3.53543189       | 0.00018329 | No      |
|      |       |        |            |          |         | Frmd8  | 15.7467  | 23.8428  | 0.598506         | 15.7477      | 23.8438       | 0.59847304       | 0.0369285  | No      |
|      |       |        |            |          |         | Frs2   | 5.24658  | 3.06781  | -0.774166        | 5.24758      | 3.06881       | -0.7739729       | 0.00822601 | No      |
|      |       |        |            |          |         | Frs3   | 1.43731  | 5.62477  | 1.96843          | 1.43831      | 5.62577       | 1.96767592       | 0.00018329 | No      |
|      |       |        |            |          |         | Fst    | 0.35347  | 230.319  | 9.34783          | 0.35447      | 230.32        | 9.34376045       | 0.00035173 | No      |

| RRBS |       |        |             |          |         | RNAseq    |           |         |                  |              |               |                  |            |         |
|------|-------|--------|-------------|----------|---------|-----------|-----------|---------|------------------|--------------|---------------|------------------|------------|---------|
| gene | Blood | Kidney | methyl.diff | pMWU.fdr | Match ? | gene      | blood     | kidney  | log2(fold_ratio) | blood+ 0.001 | kidney+ 0.001 | log2(fold_ratio) | q_value    | Match ? |
|      |       |        |             |          |         | Ftcd      | 2.22813   | 7.5712  | 1.76468          | 2.22913      | 7.5722        | 1.76423176       | 0.0173814  | No      |
|      |       |        |             |          |         | Fth1      | 862.43    | 4228.24 | 2.29358          | 862.431      | 4228.241      | 2.29357667       | 0.00018329 | No      |
|      |       |        |             |          |         | Ftl       | 26.1767   | 118.126 | 2.17397          | 26.1777      | 118.127       | 2.1739285        | 0.00018329 | No      |
|      |       |        |             |          |         | Ftsj3     | 38.9249   | 16.9563 | -1.19888         | 38.9259      | 16.9573       | -1.1988239       | 0.0104928  | No      |
|      |       |        |             |          |         | Fubp1     | 38.8334   | 20.1916 | -0.94354         | 38.8344      | 20.1926       | -0.9435085       | 0.0190448  | No      |
|      |       |        |             |          |         | Fuca1     | 48.4602   | 83.8821 | 0.791561         | 48.4612      | 83.8831       | 0.79155005       | 0.0026435  | No      |
|      |       |        |             |          |         | Fuca2     | 1.0272    | 23.9855 | 4.54537          | 1.0282       | 23.9865       | 4.54402984       | 0.00018329 | No      |
|      |       |        |             |          |         | Fundc1    | 42.4852   | 15.4003 | -1.464           | 42.4862      | 15.4013       | -1.4639422       | 0.00018329 | No      |
|      |       |        |             |          |         | Fuom      | 2.20328   | 10.8302 | 2.29733          | 2.20428      | 10.8312       | 2.29681369       | 0.00018329 | No      |
|      |       |        |             |          |         | Fut8      | 17.3007   | 10.7675 | -0.684148        | 17.3017      | 10.7685       | -0.6840965       | 0.0202696  | No      |
|      |       |        |             |          |         | Fuz       | 1.88506   | 8.00169 | 2.0857           | 1.88606      | 8.00269       | 2.08510945       | 0.0365736  | No      |
|      |       |        |             |          |         | Fv1       | 28.4633   | 16.3324 | -0.801363        | 28.4643      | 16.3334       | -0.8013285       | 0.0289411  | No      |
|      |       |        |             |          |         | Fxyd4     | 0.0655101 | 18.5291 | 8.14386          | 0.0665101    | 18.5301       | 8.12208151       | 0.0428533  | No      |
|      |       |        |             |          |         | Fxyd6     | 0         | 3.69319 | inf              | 0.001        | 3.69419       | 11.8510424       | 0.00018329 | No      |
|      |       |        |             |          |         | Fyb       | 141.77    | 9.523   | -3.89599         | 141.771      | 9.524         | -3.895851        | 0.00018329 | No      |
|      |       |        |             |          |         | Fyco1     | 22.3029   | 11.8318 | -0.91456         | 22.3039      | 11.8328       | -0.9145045       | 0.0158179  | No      |
|      |       |        |             |          |         | Fyn       | 110.107   | 19.3448 | -2.50888         | 110.108      | 19.3458       | -2.508827        | 0.00018329 | No      |
|      |       |        |             |          |         | Fytd1     | 31.6703   | 14.1271 | -1.16466         | 31.6713      | 14.1281       | -1.1646086       | 0.00018329 | No      |
|      |       |        |             |          |         | Fzd1      | 0         | 11.0114 | inf              | 0.001        | 11.0124       | 13.4268413       | 0.00018329 | No      |
|      |       |        |             |          |         | Fzd3      | 0.0677874 | 1.26703 | 4.22429          | 0.0687874    | 1.26803       | 4.20430074       | 0.00914594 | No      |
|      |       |        |             |          |         | Fzd4      | 0         | 31.7123 | inf              | 0.001        | 31.7133       | 14.9528004       | 0.00018329 | No      |
|      |       |        |             |          |         | Fzd8      | 0.158939  | 1.84154 | 3.53437          | 0.159939     | 1.84254       | 3.52610226       | 0.00018329 | No      |
|      |       |        |             |          |         | G0s2      | 1.24753   | 58.5101 | 5.55154          | 1.24853      | 58.5111       | 5.55040795       | 0.00018329 | No      |
|      |       |        |             |          |         | G2E3      | 6.44903   | 1.87532 | -1.78195         | 6.45003      | 1.87632       | -1.7814          | 0.00018329 | No      |
|      |       |        |             |          |         | G3bp1     | 85.1865   | 54.0143 | -0.657283        | 85.1875      | 54.0153       | -0.6572736       | 0.0249303  | No      |
|      |       |        |             |          |         | G3bp2     | 30.9955   | 19.6223 | -0.659561        | 30.9965      | 19.6233       | -0.6595376       | 0.0328513  | No      |
|      |       |        |             |          |         | G6pc3     | 23.2379   | 44.7521 | 0.945478         | 23.2389      | 44.7531       | 0.94544584       | 0.00035173 | No      |
|      |       |        |             |          |         | Gaa       | 2.54404   | 16.5368 | 2.70049          | 2.54504      | 16.5378       | 2.70000709       | 0.00018329 | No      |
|      |       |        |             |          |         | Gab1      | 0.0934876 | 8.76165 | 6.55028          | 0.0944876    | 8.76265       | 6.53509841       | 0.00018329 | No      |
|      |       |        |             |          |         | Gab2      | 0.940646  | 2.51611 | 1.41947          | 0.941646     | 2.51711       | 1.41851156       | 0.00555427 | No      |
|      |       |        |             |          |         | Gabarapl1 | 28.4548   | 186.163 | 2.70982          | 28.4558      | 186.164       | 2.70977947       | 0.00018329 | No      |
|      |       |        |             |          |         | Gabbr1    | 53.2827   | 17.1039 | -1.63934         | 53.2837      | 17.1049       | -1.6392846       | 0.00018329 | No      |
|      |       |        |             |          |         | Gabpb1    | 22.8246   | 9.74114 | -1.22843         | 22.8256      | 9.74214       | -1.2283422       | 0.00018329 | No      |
|      |       |        |             |          |         | Gabpb1l   | 5.62272   | 1.97234 | -1.51136         | 5.62372      | 1.97334       | -1.5108852       | 0.00140841 | No      |
|      |       |        |             |          |         | Gabpb2    | 11.0796   | 5.03592 | -1.13757         | 11.0806      | 5.03692       | -1.1374223       | 0.0111567  | No      |
|      |       |        |             |          |         | Gabrp     | 0         | 10.9444 | inf              | 0.001        | 10.9454       | 13.4180371       | 0.00018329 | No      |
|      |       |        |             |          |         | Gadd45a   | 37.4669   | 181.238 | 2.2742           | 37.4679      | 181.239       | 2.27416641       | 0.00018329 | No      |
|      |       |        |             |          |         | Gadd45g   | 1.71787   | 298.197 | 7.4395           | 1.71887      | 298.198       | 7.43866633       | 0.00018329 | No      |
|      |       |        |             |          |         | Galc      | 2.91812   | 8.06208 | 1.46611          | 2.91912      | 8.06308       | 1.46579752       | 0.00018329 | No      |
|      |       |        |             |          |         | Galk1     | 16.9286   | 39.2963 | 1.21493          | 16.9296      | 39.2973       | 1.21488231       | 0.0414627  | No      |
|      |       |        |             |          |         | Galm      | 11.7758   | 74.9872 | 2.67082          | 11.7768      | 74.9882       | 2.67071601       | 0.00018329 | No      |
|      |       |        |             |          |         | Galnt1    | 42.4826   | 16.8165 | -1.33699         | 42.4836      | 16.8175       | -1.3369428       | 0.00018329 | No      |

| RRBS |       |        |             |          |         | RNAseq  |          |          |                  |              |               |                  |            |         |
|------|-------|--------|-------------|----------|---------|---------|----------|----------|------------------|--------------|---------------|------------------|------------|---------|
| gene | Blood | Kidney | methyl.diff | pMWU.fdr | Match ? | gene    | blood    | kidney   | log2(fold_ratio) | blood+ 0.001 | kidney+ 0.001 | log2(fold_ratio) | q_value    | Match ? |
|      |       |        |             |          |         | Galnt10 | 18.9163  | 7.61346  | -1.31301         | 18.9173      | 7.61446       | -1.3128926       | 0.0142025  | No      |
|      |       |        |             |          |         | Galnt12 | 9.81289  | 3.32887  | -1.55964         | 9.81389      | 3.32987       | -1.5593592       | 0.00018329 | No      |
|      |       |        |             |          |         | Galnt13 | 0        | 10.3977  | inf              | 0.001        | 10.3987       | 13.3441156       | 0.00035173 | No      |
|      |       |        |             |          |         | Galnt18 | 0        | 79.8982  | inf              | 0.001        | 79.8992       | 16.2858934       | 0.00018329 | No      |
|      |       |        |             |          |         | Galnt3  | 0.12589  | 4.64261  | 5.2047           | 0.12689      | 4.64361       | 5.19359653       | 0.00035173 | No      |
|      |       |        |             |          |         | Galnt6  | 31.3387  | 6.98808  | -2.16498         | 31.3397      | 6.98908       | -2.1648169       | 0.00018329 | No      |
|      |       |        |             |          |         | Galnt7  | 7.21071  | 3.61473  | -0.996253        | 7.21171      | 3.61573       | -0.9960544       | 0.0018326  | No      |
|      |       |        |             |          |         | Galt    | 25.9934  | 73.6697  | 1.50292          | 25.9944      | 73.6707       | 1.5028901        | 0.00018329 | No      |
|      |       |        |             |          |         | Gamt    | 8.63163  | 52.2561  | 2.59789          | 8.63263      | 52.2571       | 2.597755         | 0.00018329 | No      |
|      |       |        |             |          |         | Gan     | 2.3532   | 1.19795  | -0.974048        | 2.3542       | 1.19895       | -0.9734654       | 0.00035173 | No      |
|      |       |        |             |          |         | Ganc    | 9.3924   | 4.4983   | -1.06211         | 9.3934       | 4.4993        | -1.0619469       | 0.0320963  | No      |
|      |       |        |             |          |         | Garnl3  | 6.64876  | 1.89628  | -1.80992         | 6.64976      | 1.89728       | -1.8093697       | 0.00018329 | No      |
|      |       |        |             |          |         | Gart    | 33.9715  | 13.8653  | -1.29285         | 33.9725      | 13.8663       | -1.2927845       | 0.00018329 | No      |
|      |       |        |             |          |         | Gas1    | 0        | 4.98825  | inf              | 0.001        | 4.98925       | 12.2846072       | 0.00018329 | No      |
|      |       |        |             |          |         | Gas2    | 0.176747 | 2.33584  | 3.72418          | 0.177747     | 2.33684       | 3.71666184       | 0.00018329 | No      |
|      |       |        |             |          |         | Gas7    | 0.936201 | 1.64095  | 0.809639         | 0.937201     | 1.64195       | 0.8089798        | 0.0264199  | No      |
|      |       |        |             |          |         | Gatad2a | 28.4187  | 15.2142  | -0.90142         | 28.4197      | 15.2152       | -0.901378        | 0.00066911 | No      |
|      |       |        |             |          |         | Gatad2b | 59.9354  | 16.3968  | -1.86999         | 59.9364      | 16.3978       | -1.8699302       | 0.00018329 | No      |
|      |       |        |             |          |         | Gatm    | 0.100815 | 345.764  | 11.7439          | 0.101815     | 345.765       | 11.729626        | 0.00035173 | No      |
|      |       |        |             |          |         | Gatsl2  | 2.1662   | 0.640097 | -1.7588          | 2.1672       | 0.641097      | -1.7572177       | 0.00018329 | No      |
|      |       |        |             |          |         | Gba3    | 0        | 19.1509  | inf              | 0.001        | 19.1519       | 14.2251999       | 0.00018329 | No      |
|      |       |        |             |          |         | Gbas    | 41.5299  | 95.653   | 1.20366          | 41.5309      | 95.654        | 1.20364016       | 0.00018329 | No      |
|      |       |        |             |          |         | Gbp2    | 29.6455  | 15.6124  | -0.925119        | 29.6465      | 15.6134       | -0.9250771       | 0.00066911 | No      |
|      |       |        |             |          |         | Gbp5    | 33.9733  | 6.74015  | -2.33355         | 33.9743      | 6.74115       | -2.3333772       | 0.00018329 | No      |
|      |       |        |             |          |         | Gbp7    | 76.9867  | 10.6139  | -2.85865         | 76.9877      | 10.6149       | -2.8585372       | 0.00018329 | No      |
|      |       |        |             |          |         | Gc      | 0        | 5.94151  | inf              | 0.001        | 5.94251       | 12.5368567       | 0.00018329 | No      |
|      |       |        |             |          |         | Gca     | 0.631498 | 25.261   | 5.32199          | 0.632498     | 25.262        | 5.31976413       | 0.00018329 | No      |
|      |       |        |             |          |         | Gcat    | 0.540553 | 13.2776  | 4.61842          | 0.541553     | 13.2786       | 4.6158567        | 0.00018329 | No      |
|      |       |        |             |          |         | Gcdh    | 13.0602  | 76.161   | 2.54387          | 13.0612      | 76.162        | 2.54378391       | 0.00018329 | No      |
|      |       |        |             |          |         | Gcfc2   | 7.63904  | 3.96342  | -0.946647        | 7.64004      | 3.96442       | -0.9464704       | 0.00698138 | No      |
|      |       |        |             |          |         | Gch1    | 0.365459 | 2.07169  | 2.50303          | 0.366459     | 2.07269       | 2.49978066       | 0.0107084  | No      |
|      |       |        |             |          |         | Gchfr   | 0.32849  | 30.3512  | 6.52976          | 0.32949      | 30.3522       | 6.5254226        | 0.00126492 | No      |
|      |       |        |             |          |         | Gclc    | 10.8843  | 117.1    | 3.42743          | 10.8853      | 117.101       | 3.42730032       | 0.00018329 | No      |
|      |       |        |             |          |         | Gclm    | 10.1953  | 89.6158  | 3.13584          | 10.1963      | 89.6168       | 3.13572349       | 0.00018329 | No      |
|      |       |        |             |          |         | Gcm1    | 0        | 0.956586 | inf              | 0.001        | 0.957586      | 9.90325825       | 0.00018329 | No      |
|      |       |        |             |          |         | Gcsh    | 8.77823  | 95.2407  | 3.43958          | 8.77923      | 95.2417       | 3.43942706       | 0.00018329 | No      |
|      |       |        |             |          |         | Gde1    | 23.8169  | 64.9661  | 1.4477           | 23.8179      | 64.9671       | 1.44766309       | 0.00018329 | No      |
|      |       |        |             |          |         | Gdi1    | 240.764  | 107.977  | -1.1569          | 240.765      | 107.978       | -1.1568883       | 0.00018329 | No      |
|      |       |        |             |          |         | Gdpd1   | 2.96285  | 6.98982  | 1.23827          | 2.96385      | 6.99082       | 1.23798925       | 0.00097029 | No      |
|      |       |        |             |          |         | Gdpd5   | 0.194863 | 3.23166  | 4.05174          | 0.195863     | 3.23266       | 4.04480499       | 0.00018329 | No      |
|      |       |        |             |          |         | Gem     | 1.56755  | 6.30085  | 2.00703          | 1.56855      | 6.30185       | 2.0063439        | 0.00018329 | No      |
|      |       |        |             |          |         | Gemin2  | 25.9518  | 12.6683  | -1.03461         | 25.9528      | 12.6693       | -1.0345534       | 0.00140841 | No      |

| RRBS |       |        |             |          |         | RNAseq |           |          |                  |              |               |                  |            |         |
|------|-------|--------|-------------|----------|---------|--------|-----------|----------|------------------|--------------|---------------|------------------|------------|---------|
| gene | Blood | Kidney | methyl.diff | pMWU.fdr | Match ? | gene   | blood     | kidney   | log2(fold_ratio) | blood+ 0.001 | kidney+ 0.001 | log2(fold_ratio) | q_value    | Match ? |
|      |       |        |             |          |         | Gemin8 | 9.11029   | 14.891   | 0.708868         | 9.11129      | 14.892        | 0.70881029       | 0.0375863  | No      |
|      |       |        |             |          |         | Gfm1   | 13.8594   | 32.5427  | 1.23147          | 13.8604      | 32.5437       | 1.23140939       | 0.00018329 | No      |
|      |       |        |             |          |         | Gfod2  | 0.950083  | 3.34862  | 1.81744          | 0.951083     | 3.34962       | 1.81635428       | 0.00591487 | No      |
|      |       |        |             |          |         | Gfra1  | 0         | 1.27818  | inf              | 0.001        | 1.27918       | 10.3210036       | 0.00018329 | No      |
|      |       |        |             |          |         | Gfra2  | 0.0110814 | 0.808068 | 6.18826          | 0.0120814    | 0.809068      | 6.06540141       | 0.0243241  | No      |
|      |       |        |             |          |         | Gfra3  | 80.7598   | 50.25    | -0.684515        | 80.7608      | 50.251        | -0.6845029       | 0.00755425 | No      |
|      |       |        |             |          |         | Gfra4  | 0         | 1.70441  | inf              | 0.001        | 1.70541       | 10.7359029       | 0.00018329 | No      |
|      |       |        |             |          |         | Gga2   | 20.3011   | 34.2486  | 0.754488         | 20.3021      | 34.2496       | 0.75445817       | 0.00709238 | No      |
|      |       |        |             |          |         | Gga3   | 21.2498   | 12.2958  | -0.789283        | 21.2508      | 12.2968       | -0.7892342       | 0.0296252  | No      |
|      |       |        |             |          |         | Ggact  | 24.1661   | 81.0033  | 1.74499          | 24.1671      | 81.0043       | 1.74495413       | 0.00018329 | No      |
|      |       |        |             |          |         | Ggct   | 27.9946   | 231.112  | 3.04538          | 27.9956      | 231.113       | 3.04532641       | 0.00018329 | No      |
|      |       |        |             |          |         | Ggcx   | 4.27904   | 15.0018  | 1.80978          | 4.28004      | 15.0028       | 1.80953559       | 0.00018329 | No      |
|      |       |        |             |          |         | Ggh    | 3.14266   | 22.3416  | 2.82968          | 3.14366      | 22.3426       | 2.82927998       | 0.00018329 | No      |
|      |       |        |             |          |         | GGNBP2 | 58.1663   | 27.2706  | -1.09284         | 58.1673      | 27.2716       | -1.092809        | 0.00018329 | No      |
|      |       |        |             |          |         | Ggps1  | 12.362    | 4.92146  | -1.32875         | 12.363       | 4.92246       | -1.3285775       | 0.00018329 | No      |
|      |       |        |             |          |         | Ggt1   | 2.57188   | 84.2587  | 5.03393          | 2.57288      | 84.2597       | 5.0333867        | 0.00018329 | No      |
|      |       |        |             |          |         | Ggt6   | 0         | 2.09882  | inf              | 0.001        | 2.09982       | 11.0360499       | 0.00018329 | No      |
|      |       |        |             |          |         | Ghdc   | 1.61716   | 4.63116  | 1.51792          | 1.61816      | 4.63216       | 1.51733082       | 0.00035173 | No      |
|      |       |        |             |          |         | Ghrhr  | 0         | 11.9739  | inf              | 0.001        | 11.9749       | 13.547726        | 0.00018329 | No      |
|      |       |        |             |          |         | Gimap1 | 96.6879   | 20.346   | -2.24859         | 96.6889      | 20.347        | -2.2485342       | 0.00018329 | No      |
|      |       |        |             |          |         | Gimap4 | 233.684   | 39.8037  | -2.55358         | 233.685      | 39.8047       | -2.5535544       | 0.00018329 | No      |
|      |       |        |             |          |         | GIMAP5 | 196.182   | 27.2223  | -2.84933         | 196.183      | 27.2233       | -2.8492862       | 0.00018329 | No      |
|      |       |        |             |          |         | Gimap6 | 157.849   | 15.3568  | -3.3616          | 157.85       | 15.3578       | -3.3615108       | 0.00018329 | No      |
|      |       |        |             |          |         | Gimap7 | 572.002   | 65.1523  | -3.13413         | 572.003      | 65.1533       | -3.1341126       | 0.00018329 | No      |
|      |       |        |             |          |         | Gimap8 | 82.4684   | 7.78349  | -3.40535         | 82.4694      | 7.78449       | -3.4051845       | 0.00018329 | No      |
|      |       |        |             |          |         | Gimap9 | 109.405   | 7.89102  | -3.79333         | 109.406      | 7.89202       | -3.7931534       | 0.00018329 | No      |
|      |       |        |             |          |         | Ginm1  | 20.4333   | 37.6999  | 0.883637         | 20.4343      | 37.7009       | 0.88360614       | 0.00154856 | No      |
|      |       |        |             |          |         | Giot1  | 9.15253   | 3.27648  | -1.48203         | 9.15353      | 3.27748       | -1.4817412       | 0.00051281 | No      |
|      |       |        |             |          |         | Gipc2  | 0.206509  | 11.6525  | 5.81829          | 0.207509     | 11.6535       | 5.8114456        | 0.00210945 | No      |
|      |       |        |             |          |         | Gipr   | 0.742592  | 0.285431 | -1.37943         | 0.743592     | 0.286431      | -1.3763236       | 0.0366633  | No      |
|      |       |        |             |          |         | Git1   | 19.7848   | 31.0322  | 0.649374         | 19.7858      | 31.0332       | 0.64934707       | 0.0149499  | No      |
|      |       |        |             |          |         | Git2   | 105.196   | 46.6822  | -1.17213         | 105.197      | 46.6832       | -1.1721182       | 0.00018329 | No      |
|      |       |        |             |          |         | Gja1   | 0.110261  | 2.90924  | 4.72164          | 0.111261     | 2.91024       | 4.70911825       | 0.00018329 | No      |
|      |       |        |             |          |         | Gja4   | 0         | 3.83292  | inf              | 0.001        | 3.83392       | 11.9046045       | 0.00018329 | No      |
|      |       |        |             |          |         | Gjb2   | 0.18328   | 6.95959  | 5.24688          | 0.18428      | 6.96059       | 5.23923819       | 0.00018329 | No      |
|      |       |        |             |          |         | Gjb4   | 0         | 1.09323  | inf              | 0.001        | 1.09423       | 10.0957003       | 0.00018329 | No      |
|      |       |        |             |          |         | Gjb5   | 0         | 1.69621  | inf              | 0.001        | 1.69721       | 10.7289494       | 0.00018329 | No      |
|      |       |        |             |          |         | Gjb6   | 0         | 1.31056  | inf              | 0.001        | 1.31156       | 10.3570681       | 0.00018329 | No      |
|      |       |        |             |          |         | Gk     | 2.41742   | 11.9888  | 2.31015          | 2.41842      | 11.9898       | 2.30967087       | 0.00018329 | No      |
|      |       |        |             |          |         | Gkap1  | 8.61421   | 30.9992  | 1.84744          | 8.61521      | 31.0002       | 1.84731965       | 0.00018329 | No      |
|      |       |        |             |          |         | Glb1   | 37.7457   | 87.3325  | 1.21021          | 37.7467      | 87.3335       | 1.21018464       | 0.010379   | No      |
|      |       |        |             |          |         | Glb1l  | 0.797248  | 6.62057  | 3.05385          | 0.798248     | 6.62157       | 3.05226439       | 0.00788539 | No      |

| RRBS |       |        |             |          |         | RNAseq  |          |          |                  |              |               |                  |            |         |
|------|-------|--------|-------------|----------|---------|---------|----------|----------|------------------|--------------|---------------|------------------|------------|---------|
| gene | Blood | Kidney | methyl.diff | pMWU.fdr | Match ? | gene    | blood    | kidney   | log2(fold_ratio) | blood+ 0.001 | kidney+ 0.001 | log2(fold_ratio) | q_value    | Match ? |
|      |       |        |             |          |         | Glb1l2  | 0        | 10.1359  | inf              | 0.001        | 10.1369       | 13.3073289       | 0.00018329 | No      |
|      |       |        |             |          |         | Glcc1   | 28.856   | 8.75249  | -1.72111         | 28.857       | 8.75349       | -1.7209911       | 0.00018329 | No      |
|      |       |        |             |          |         | Glce    | 11.5756  | 3.82272  | -1.59842         | 11.5766      | 3.82372       | -1.5981628       | 0.00018329 | No      |
|      |       |        |             |          |         | Gle1    | 44.2665  | 19.2929  | -1.19814         | 44.2675      | 19.2939       | -1.1981031       | 0.0127876  | No      |
|      |       |        |             |          |         | Glg1    | 11.94    | 6.33774  | -0.913766        | 11.941       | 6.33874       | -0.9136557       | 0.00238141 | No      |
|      |       |        |             |          |         | Glpr1   | 198.411  | 25.4654  | -2.96189         | 198.412      | 25.4664       | -2.9618323       | 0.00018329 | No      |
|      |       |        |             |          |         | Glis3   | 0        | 7.79985  | inf              | 0.001        | 7.80085       | 12.9294156       | 0.00018329 | No      |
|      |       |        |             |          |         | Glo1    | 147.622  | 85.1006  | -0.794661        | 147.623      | 85.1016       | -0.7946594       | 0.00251301 | No      |
|      |       |        |             |          |         | Glrx    | 72.1316  | 32.9437  | -1.13063         | 72.1326      | 32.9447       | -1.130605        | 0.00018329 | No      |
|      |       |        |             |          |         | Glrx5   | 43.2678  | 119.09   | 1.46068          | 43.2688      | 119.091       | 1.46066537       | 0.00018329 | No      |
|      |       |        |             |          |         | Gls     | 35.4245  | 85.9942  | 1.27949          | 35.4255      | 85.9952       | 1.27946792       | 0.00018329 | No      |
|      |       |        |             |          |         | Gls2    | 0.343547 | 2.46912  | 2.84542          | 0.344547     | 2.47012       | 2.84180843       | 0.00018329 | No      |
|      |       |        |             |          |         | Gltscr1 | 21.8805  | 10.449   | -1.06628         | 21.8815      | 10.45         | -1.0662087       | 0.00035173 | No      |
|      |       |        |             |          |         | Gltscr2 | 241.373  | 156.944  | -0.621012        | 241.374      | 156.945       | -0.6210112       | 0.0213082  | No      |
|      |       |        |             |          |         | Glyat   | 0        | 114.836  | inf              | 0.001        | 114.837       | 16.809228        | 0.00018329 | No      |
|      |       |        |             |          |         | Glyat12 | 0        | 10.4954  | inf              | 0.001        | 10.4964       | 13.357607        | 0.00018329 | No      |
|      |       |        |             |          |         | Glyctk  | 1.51479  | 18.3304  | 3.59705          | 1.51579      | 18.3314       | 3.59617517       | 0.00018329 | No      |
|      |       |        |             |          |         | Glyr1   | 65.1154  | 132.091  | 1.02046          | 65.1164      | 132.092       | 1.02045025       | 0.00066911 | No      |
|      |       |        |             |          |         | Gm101   | 0        | 1.41911  | inf              | 0.001        | 1.42011       | 10.471787        | 0.00777671 | No      |
|      |       |        |             |          |         | Gm1043  | 1.70383  | 0.147119 | -3.53372         | 1.70483      | 0.148119      | -3.5247993       | 0.0473671  | No      |
|      |       |        |             |          |         | Gm11992 | 6.9812   | 15.4368  | 1.14482          | 6.9822       | 15.4378       | 1.14471359       | 0.00097029 | No      |
|      |       |        |             |          |         | Gm12253 | 0.756731 | 6.45562  | 3.0927           | 0.757731     | 6.45662       | 3.09102144       | 0.00018329 | No      |
|      |       |        |             |          |         | Gm14378 | 36.578   | 12.6886  | -1.52745         | 36.579       | 12.6896       | -1.527369        | 0.00018329 | No      |
|      |       |        |             |          |         | Gm166   | 0.102374 | 3.31962  | 5.0191           | 0.103374     | 3.32062       | 5.00550736       | 0.00469886 | No      |
|      |       |        |             |          |         | Gm17615 | 2.22548  | 34.0578  | 3.9358           | 2.22648      | 34.0588       | 3.93519105       | 0.00018329 | No      |
|      |       |        |             |          |         | Gm6377  | 0.127639 | 0.88547  | 2.79438          | 0.128639     | 0.88647       | 2.78474371       | 0.00567465 | No      |
|      |       |        |             |          |         | Gmids   | 8.69207  | 16.8219  | 0.952567         | 8.69307      | 16.8229       | 0.95248876       | 0.0200787  | No      |
|      |       |        |             |          |         | Gmeb2   | 8.57101  | 3.19546  | -1.42344         | 8.57201      | 3.19646       | -1.4231585       | 0.00018329 | No      |
|      |       |        |             |          |         | Gmfb    | 36.1799  | 23.2586  | -0.637422        | 36.1809      | 23.2596       | -0.637402        | 0.0194611  | No      |
|      |       |        |             |          |         | Gmfg    | 1019.69  | 272.681  | -1.90285         | 1019.691     | 272.682       | -1.9028407       | 0.00018329 | No      |
|      |       |        |             |          |         | Gmnn    | 4.275    | 16.0658  | 1.91             | 4.276        | 16.0668       | 1.90974886       | 0.00018329 | No      |
|      |       |        |             |          |         | Gmppa   | 19.6153  | 35.3242  | 0.848682         | 19.6163      | 35.3252       | 0.84864478       | 0.00543198 | No      |
|      |       |        |             |          |         | Gmpr    | 0.440868 | 26.2265  | 5.89454          | 0.441868     | 26.2275       | 5.89132103       | 0.00018329 | No      |
|      |       |        |             |          |         | Gna12   | 3.13539  | 31.8179  | 3.34312          | 3.13639      | 31.8189       | 3.34270709       | 0.00018329 | No      |
|      |       |        |             |          |         | Gna13   | 36.9026  | 15.1046  | -1.28873         | 36.9036      | 15.1056       | -1.2886781       | 0.00018329 | No      |
|      |       |        |             |          |         | Gna14   | 0.144468 | 3.01345  | 4.38259          | 0.145468     | 3.01445       | 4.37312107       | 0.00018329 | No      |
|      |       |        |             |          |         | Gnai1   | 0.595551 | 21.0457  | 5.14315          | 0.596551     | 21.0467       | 5.14080475       | 0.00018329 | No      |
|      |       |        |             |          |         | Gnai2   | 408.869  | 160.184  | -1.35191         | 408.87       | 160.185       | -1.3519032       | 0.00018329 | No      |
|      |       |        |             |          |         | Gnai3   | 75.0469  | 31.2747  | -1.2628          | 75.0479      | 31.2757       | -1.2627695       | 0.00018329 | No      |
|      |       |        |             |          |         | Gnat3   | 0        | 2.10549  | inf              | 0.001        | 2.10649       | 11.0406254       | 0.00018329 | No      |
|      |       |        |             |          |         | Gnb2l1  | 3070.67  | 763.342  | -2.00815         | 3070.671     | 763.343       | -2.0081506       | 0.00018329 | No      |
|      |       |        |             |          |         | Gng10   | 27.6141  | 56.1301  | 1.02337          | 27.6151      | 56.1311       | 1.02334298       | 0.00051281 | No      |

| RRBS |       |        |             |          |         | RNAseq  |           |          |                  |              |               |                  |            |         |
|------|-------|--------|-------------|----------|---------|---------|-----------|----------|------------------|--------------|---------------|------------------|------------|---------|
| gene | Blood | Kidney | methyl.diff | pMWU.fdr | Match ? | gene    | blood     | kidney   | log2(fold_ratio) | blood+ 0.001 | kidney+ 0.001 | log2(fold_ratio) | q_value    | Match ? |
|      |       |        |             |          |         | Gng12   | 28.212    | 119.154  | 2.07844          | 28.213       | 119.155       | 2.0784075        | 0.0178968  | No      |
|      |       |        |             |          |         | Gng2    | 34.4902   | 6.08235  | -2.50349         | 34.4912      | 6.08335       | -2.5032904       | 0.00018329 | No      |
|      |       |        |             |          |         | Gng5    | 40.6421   | 67.2483  | 0.726524         | 40.6431      | 67.2493       | 0.7265088        | 0.0274788  | No      |
|      |       |        |             |          |         | Gnl1    | 42.7684   | 29.0446  | -0.558274        | 42.7694      | 29.0456       | -0.5582593       | 0.0367562  | No      |
|      |       |        |             |          |         | Gnl3    | 56.1306   | 21.6408  | -1.37503         | 56.1316      | 21.6418       | -1.3749927       | 0.00481718 | No      |
|      |       |        |             |          |         | Gnl3l   | 34.817    | 20.891   | -0.73691         | 34.818       | 20.892        | -0.7368827       | 0.0113722  | No      |
|      |       |        |             |          |         | Gnpda1  | 14.9141   | 26.7039  | 0.840377         | 14.9151      | 26.7049       | 0.84033083       | 0.00277264 | No      |
|      |       |        |             |          |         | Gnpda2  | 23.3277   | 6.81988  | -1.77423         | 23.3287      | 6.82088       | -1.7740761       | 0.00082046 | No      |
|      |       |        |             |          |         | Golga2  | 10.9415   | 16.1438  | 0.561166         | 10.9425      | 16.1448       | 0.56112719       | 0.0430274  | No      |
|      |       |        |             |          |         | Golgb1  | 9.30681   | 56.225   | 2.59485          | 9.30781      | 56.226        | 2.59472375       | 0.00018329 | No      |
|      |       |        |             |          |         | Golim4  | 7.91163   | 12.7958  | 0.693628         | 7.91263      | 12.7968       | 0.69355389       | 0.0215079  | No      |
|      |       |        |             |          |         | Golt1a  | 0         | 10.1456  | inf              | 0.001        | 10.1466       | 13.3087088       | 0.00018329 | No      |
|      |       |        |             |          |         | Gopc    | 15.9185   | 9.88364  | -0.687589        | 15.9195      | 9.88464       | -0.6875347       | 0.00981659 | No      |
|      |       |        |             |          |         | Gorasp1 | 0.707026  | 13.0297  | 4.20389          | 0.708026     | 13.0307       | 4.20196844       | 0.00018329 | No      |
|      |       |        |             |          |         | Got1    | 26.756    | 90.1763  | 1.75289          | 26.757       | 90.1773       | 1.75284795       | 0.00018329 | No      |
|      |       |        |             |          |         | Got2    | 57.1472   | 117.212  | 1.03636          | 57.1482      | 117.213       | 1.03635262       | 0.00018329 | No      |
|      |       |        |             |          |         | Gp2     | 0         | 24.3496  | inf              | 0.001        | 24.3506       | 14.5716697       | 0.00018329 | No      |
|      |       |        |             |          |         | Gpam    | 0.656146  | 7.71107  | 3.55484          | 0.657146     | 7.71207       | 3.55283231       | 0.00018329 | No      |
|      |       |        |             |          |         | Gpatch4 | 12.6878   | 6.96179  | -0.865917        | 12.6888      | 6.96279       | -0.8658182       | 0.0252382  | No      |
|      |       |        |             |          |         | Gpatch8 | 13.7961   | 6.25303  | -1.14163         | 13.7971      | 6.25403       | -1.141507        | 0.00082046 | No      |
|      |       |        |             |          |         | Gbbp1   | 67.4523   | 32.4574  | -1.05532         | 67.4533      | 32.4584       | -1.0552971       | 0.00066911 | No      |
|      |       |        |             |          |         | GPBP1L1 | 60.397    | 29.4055  | -1.03839         | 60.398       | 29.4065       | -1.0383657       | 0.00018329 | No      |
|      |       |        |             |          |         | Gpc4    | 0         | 57.6604  | inf              | 0.001        | 57.6614       | 15.8153182       | 0.00018329 | No      |
|      |       |        |             |          |         | Gpcpd1  | 41.8388   | 11.1471  | -1.90818         | 41.8398      | 11.1481       | -1.9080781       | 0.00018329 | No      |
|      |       |        |             |          |         | Gpd1l   | 9.1029    | 31.1377  | 1.77427          | 9.1039       | 31.1387       | 1.7741521        | 0.00018329 | No      |
|      |       |        |             |          |         | GPD2    | 2.89148   | 6.94831  | 1.26485          | 2.89248      | 6.94931       | 1.26456276       | 0.0287615  | No      |
|      |       |        |             |          |         | Gphn    | 1.4379    | 11.1716  | 2.95779          | 1.4389       | 11.1726       | 2.95692672       | 0.00018329 | No      |
|      |       |        |             |          |         | Gpkow   | 14.8459   | 8.45132  | -0.812817        | 14.8469      | 8.45232       | -0.8127424       | 0.00354878 | No      |
|      |       |        |             |          |         | Gpld1   | 0.752945  | 3.96086  | 2.3952           | 0.753945     | 3.96186       | 2.39364671       | 0.0016929  | No      |
|      |       |        |             |          |         | Gpm6a   | 0         | 9.96692  | inf              | 0.001        | 9.96792       | 13.2830768       | 0.00018329 | No      |
|      |       |        |             |          |         | Gpn3    | 28.3161   | 17.0166  | -0.734684        | 28.3171      | 17.0176       | -0.7346459       | 0.0371206  | No      |
|      |       |        |             |          |         | Gpnmb   | 0.111829  | 50.5125  | 8.8192           | 0.112829     | 50.5135       | 8.80638727       | 0.00035173 | No      |
|      |       |        |             |          |         | Gpr116  | 0         | 7.80943  | inf              | 0.001        | 7.81043       | 12.9311863       | 0.00018329 | No      |
|      |       |        |             |          |         | Gpr124  | 0.0362317 | 0.823951 | 4.50723          | 0.0372317    | 0.824951      | 4.46970503       | 0.0114728  | No      |
|      |       |        |             |          |         | Gpr125  | 0.3478    | 19.8219  | 5.83269          | 0.3488       | 19.8229       | 5.82862419       | 0.00018329 | No      |
|      |       |        |             |          |         | Gpr132  | 29.8273   | 6.85007  | -2.12244         | 29.8283      | 6.85107       | -2.1222805       | 0.00018329 | No      |
|      |       |        |             |          |         | Gpr133  | 1.40669   | 0.384006 | -1.8731          | 1.40769      | 0.385006      | -1.8703768       | 0.00051281 | No      |
|      |       |        |             |          |         | Gpr137b | 0.123579  | 15.4454  | 6.96561          | 0.124579     | 15.4464       | 6.95406593       | 0.00051281 | No      |
|      |       |        |             |          |         | Gpr15   | 4.1671    | 1.01893  | -2.032           | 4.1681       | 1.01993       | -2.0309198       | 0.00018329 | No      |
|      |       |        |             |          |         | Gpr155  | 6.87559   | 0.532671 | -3.69017         | 6.87659      | 0.533671      | -3.6876708       | 0.00018329 | No      |
|      |       |        |             |          |         | Gpr162  | 0.0412434 | 5.14958  | 6.96415          | 0.0422434    | 5.15058       | 6.92986514       | 0.0317975  | No      |
|      |       |        |             |          |         | Gpr171  | 38.4957   | 11.9105  | -1.69246         | 38.4967      | 11.9115       | -1.6923797       | 0.00018329 | No      |



| RRBS |       |        |             |          |         | RNAseq  |           |          |                  |              |               |                  |            |         |
|------|-------|--------|-------------|----------|---------|---------|-----------|----------|------------------|--------------|---------------|------------------|------------|---------|
| gene | Blood | Kidney | methyl.diff | pMWU.fdr | Match ? | gene    | blood     | kidney   | log2(fold_ratio) | blood+ 0.001 | kidney+ 0.001 | log2(fold_ratio) | q_value    | Match ? |
|      |       |        |             |          |         | Gpr174  | 13.8286   | 1.7157   | -3.01079         | 13.8296      | 1.7167        | -3.0100496       | 0.00018329 | No      |
|      |       |        |             |          |         | Gpr19   | 4.40226   | 0.936579 | -2.23277         | 4.40326      | 0.937579      | -2.2315599       | 0.00018329 | No      |
|      |       |        |             |          |         | Gpr4    | 0         | 1.23714  | inf              | 0.001        | 1.23814       | 10.2739587       | 0.00018329 | No      |
|      |       |        |             |          |         | Gpr56   | 0.110178  | 107.562  | 9.93112          | 0.111178     | 107.563       | 9.91809485       | 0.00018329 | No      |
|      |       |        |             |          |         | Gpr68   | 25.2543   | 2.32399  | -3.44185         | 25.2553      | 2.32499       | -3.4412898       | 0.00018329 | No      |
|      |       |        |             |          |         | Gprc5c  | 0         | 84.5138  | inf              | 0.001        | 84.5148       | 16.3669164       | 0.00018329 | No      |
|      |       |        |             |          |         | Gprin3  | 3.78195   | 0.258664 | -3.86998         | 3.78295      | 0.259664      | -3.8647938       | 0.00018329 | No      |
|      |       |        |             |          |         | Gpsm2   | 0.489484  | 1.47133  | 1.58778          | 0.490484     | 1.47233       | 1.58582309       | 0.00603614 | No      |
|      |       |        |             |          |         | Gpt     | 1.12455   | 8.34987  | 2.89241          | 1.12555      | 8.35087       | 2.89129636       | 0.00018329 | No      |
|      |       |        |             |          |         | Gpx1    | 162.65    | 574.261  | 1.81994          | 162.651      | 574.262       | 1.81992941       | 0.00018329 | No      |
|      |       |        |             |          |         | GPX4    | 140.283   | 340.652  | 1.27995          | 140.284      | 340.653       | 1.27995244       | 0.00018329 | No      |
|      |       |        |             |          |         | Gpx7    | 0.0992649 | 3.82548  | 5.26821          | 0.1002649    | 3.82648       | 5.25412931       | 0.0350203  | No      |
|      |       |        |             |          |         | Gpx8    | 0         | 36.4458  | inf              | 0.001        | 36.4468       | 15.1535045       | 0.00018329 | No      |
|      |       |        |             |          |         | Gramd1a | 228.683   | 74.8884  | -1.61053         | 228.684      | 74.8894       | -1.610522        | 0.00018329 | No      |
|      |       |        |             |          |         | Gramd1c | 0.10246   | 0.785303 | 2.93819          | 0.10346      | 0.786303      | 2.92601226       | 0.0169745  | No      |
|      |       |        |             |          |         | Gramd3  | 0.159688  | 8.67505  | 5.76355          | 0.160688     | 8.67605       | 5.75470427       | 0.00018329 | No      |
|      |       |        |             |          |         | Gramd4  | 46.1408   | 15.2229  | -1.5998          | 46.1418      | 15.2239       | -1.5997363       | 0.00018329 | No      |
|      |       |        |             |          |         | Grap    | 144.629   | 28.1487  | -2.36122         | 144.63       | 28.1497       | -2.3611754       | 0.00018329 | No      |
|      |       |        |             |          |         | Grb14   | 0.444825  | 1.98252  | 2.15603          | 0.445825     | 1.98352       | 2.15351352       | 0.00035173 | No      |
|      |       |        |             |          |         | Grb7    | 0.397393  | 28.4844  | 6.16346          | 0.398393     | 28.4854       | 6.15988656       | 0.00018329 | No      |
|      |       |        |             |          |         | Grhl1   | 1.40573   | 0.695995 | -1.01417         | 1.40673      | 0.696995      | -1.0131252       | 0.0317095  | No      |
|      |       |        |             |          |         | Grhl3   | 0.634592  | 4.52604  | 2.83435          | 0.635592     | 4.52704       | 2.83239518       | 0.00018329 | No      |
|      |       |        |             |          |         | Grhpr   | 7.8203    | 181.901  | 4.53979          | 7.8213       | 181.902       | 4.53960917       | 0.00018329 | No      |
|      |       |        |             |          |         | Gria3   | 4.67268   | 0.187795 | -4.63702         | 4.67368      | 0.188795      | -4.6296665       | 0.00018329 | No      |
|      |       |        |             |          |         | Grik2   | 0         | 8.28435  | inf              | 0.001        | 8.28535       | 13.0163469       | 0.00018329 | No      |
|      |       |        |             |          |         | Grina   | 97.7117   | 162.678  | 0.73542          | 97.7127      | 162.679       | 0.73541004       | 0.00458064 | No      |
|      |       |        |             |          |         | Gripap1 | 29.5911   | 19.5356  | -0.599058        | 29.5921      | 19.5366       | -0.5990327       | 0.0475434  | No      |
|      |       |        |             |          |         | Grk6    | 259.78    | 43.4067  | -2.5813          | 259.781      | 43.4077       | -2.581273        | 0.00018329 | No      |
|      |       |        |             |          |         | Grn     | 27.4132   | 152.773  | 2.47845          | 27.4142      | 152.774       | 2.47840376       | 0.00018329 | No      |
|      |       |        |             |          |         | Grpel1  | 30.1642   | 52.6016  | 0.80227          | 30.1652      | 52.6026       | 0.80224896       | 0.00445502 | No      |
|      |       |        |             |          |         | Grtp1   | 0.0200972 | 22.8217  | 10.1492          | 0.0210972    | 22.8227       | 10.0792022       | 0.00018329 | No      |
|      |       |        |             |          |         | Gsdma   | 2.76841   | 5.97073  | 1.10885          | 2.76941      | 5.97173       | 1.10857028       | 0.00197017 | No      |
|      |       |        |             |          |         | Gsdmd   | 24.8685   | 7.58507  | -1.71309         | 24.8695      | 7.58607       | -1.7129529       | 0.00018329 | No      |
|      |       |        |             |          |         | Gsg2    | 27.4162   | 2.44368  | -3.4879          | 27.4172      | 2.44468       | -3.4873637       | 0.00732142 | No      |
|      |       |        |             |          |         | Gsk3a   | 63.7085   | 30.4083  | -1.06702         | 63.7095      | 30.4093       | -1.0669959       | 0.00035173 | No      |
|      |       |        |             |          |         | Gsn     | 33.8764   | 93.2843  | 1.46135          | 33.8774      | 93.2853       | 1.4613266        | 0.00018329 | No      |
|      |       |        |             |          |         | GSPT1   | 66.8552   | 38.7728  | -0.785994        | 66.8562      | 38.7738       | -0.7859792       | 0.0200787  | No      |
|      |       |        |             |          |         | Gsr     | 23.3266   | 105.14   | 2.17226          | 23.3276      | 105.141       | 2.17221557       | 0.00018329 | No      |
|      |       |        |             |          |         | Gss     | 8.23269   | 63.9732  | 2.95803          | 8.23369      | 63.9742       | 2.95787916       | 0.00018329 | No      |
|      |       |        |             |          |         | GSTA1   | 0.031565  | 65.1711  | 11.0117          | 0.032565     | 65.1721       | 10.9667165       | 0.00777671 | No      |
|      |       |        |             |          |         | Gsta2   | 0         | 35.0682  | inf              | 0.001        | 35.0692       | 15.0979169       | 0.00018329 | No      |
|      |       |        |             |          |         | Gsta3   | 0         | 66.5593  | inf              | 0.001        | 66.5603       | 16.0223743       | 0.0152837  | No      |

| RRBS |       |        |             |          |         | RNAseq   |           |          |                  |              |               |                  |            |         |
|------|-------|--------|-------------|----------|---------|----------|-----------|----------|------------------|--------------|---------------|------------------|------------|---------|
| gene | Blood | Kidney | methyl.diff | pMWU.fdr | Match ? | gene     | blood     | kidney   | log2(fold_ratio) | blood+ 0.001 | kidney+ 0.001 | log2(fold_ratio) | q_value    | Match ? |
|      |       |        |             |          |         | GSTA6    | 7.53825   | 18.0268  | 1.25784          | 7.53925      | 18.0278       | 1.25773043       | 0.00140841 | No      |
|      |       |        |             |          |         | Gstk1    | 2.63646   | 36.093   | 3.77505          | 2.63746      | 36.094        | 3.77453792       | 0.00018329 | No      |
|      |       |        |             |          |         | Gstm7    | 0.686941  | 18.0282  | 4.71392          | 0.687941     | 18.0292       | 4.71190673       | 0.00018329 | No      |
|      |       |        |             |          |         | Gsto1    | 186.02    | 111.301  | -0.740997        | 186.021      | 111.302       | -0.740986        | 0.00603614 | No      |
|      |       |        |             |          |         | GSTT2    | 15.6693   | 27.2618  | 0.798944         | 15.6703      | 27.2628       | 0.79890094       | 0.0121287  | No      |
|      |       |        |             |          |         | Gtf2e1   | 7.56975   | 3.86254  | -0.970696        | 7.57075      | 3.86354       | -0.9705129       | 0.00354878 | No      |
|      |       |        |             |          |         | Gtf2f1   | 31.6314   | 63.2558  | 0.99984          | 31.6324      | 63.2568       | 0.99981756       | 0.00111812 | No      |
|      |       |        |             |          |         | Gtf2f2   | 17.4529   | 9.76699  | -0.83748         | 17.4539      | 9.76799       | -0.8374158       | 0.0120339  | No      |
|      |       |        |             |          |         | Gtf2h1   | 23.6507   | 11.4778  | -1.04304         | 23.6517      | 11.4788       | -1.0429721       | 0.00018329 | No      |
|      |       |        |             |          |         | Gtf2h3   | 15.909    | 9.84352  | -0.692601        | 15.91        | 9.84452       | -0.6925411       | 0.0257522  | No      |
|      |       |        |             |          |         | Gtf2h5   | 19.7906   | 40.6112  | 1.03706          | 19.7916      | 40.6122       | 1.03702493       | 0.00126492 | No      |
|      |       |        |             |          |         | Gtf2i    | 148.55    | 80.2711  | -0.887995        | 148.551      | 80.2721       | -0.8879878       | 0.0162458  | No      |
|      |       |        |             |          |         | Gtf2ird1 | 5.07063   | 12.0238  | 1.24566          | 5.07163      | 12.0248       | 1.2454915        | 0.00210945 | No      |
|      |       |        |             |          |         | GTF2IRD2 | 8.29443   | 3.33036  | -1.31646         | 8.29543      | 3.33136       | -1.3162055       | 0.00111812 | No      |
|      |       |        |             |          |         | Gtf3c1   | 22.8337   | 13.1053  | -0.801015        | 22.8347      | 13.1063       | -0.8009674       | 0.0031651  | No      |
|      |       |        |             |          |         | Gtf3c2   | 75.3722   | 33.9469  | -1.15075         | 75.3732      | 33.9479       | -1.1507293       | 0.00992433 | No      |
|      |       |        |             |          |         | Gtf3c3   | 10.4456   | 3.87064  | -1.43225         | 10.4466      | 3.87164       | -1.4320168       | 0.00018329 | No      |
|      |       |        |             |          |         | Gtf3c4   | 6.41242   | 2.98136  | -1.1049          | 6.41342      | 2.98236       | -1.1046395       | 0.00051281 | No      |
|      |       |        |             |          |         | Gtpbp4   | 23.2623   | 13.9321  | -0.739576        | 23.2633      | 13.9331       | -0.7395395       | 0.0172708  | No      |
|      |       |        |             |          |         | Guca2b   | 0         | 4.58823  | inf              | 0.001        | 4.58923       | 12.1640364       | 0.00018329 | No      |
|      |       |        |             |          |         | GUCD1    | 6.94497   | 16.0303  | 1.20676          | 6.94597      | 16.0313       | 1.20664334       | 0.00018329 | No      |
|      |       |        |             |          |         | Gucy1a3  | 3.8979    | 0.489734 | -2.99263         | 3.8989       | 0.490734      | -2.990054        | 0.00018329 | No      |
|      |       |        |             |          |         | Gucy1b2  | 0.0465252 | 14.4884  | 8.28267          | 0.0475252    | 14.4894       | 8.25208944       | 0.00066911 | No      |
|      |       |        |             |          |         | Gucy2g   | 0         | 3.74541  | inf              | 0.001        | 3.74641       | 11.8712931       | 0.00018329 | No      |
|      |       |        |             |          |         | Guk1     | 71.8181   | 139.052  | 0.953205         | 71.8191      | 139.053       | 0.95319539       | 0.00035173 | No      |
|      |       |        |             |          |         | Gulp1    | 0         | 10.8298  | inf              | 0.001        | 10.8308       | 13.4028522       | 0.00018329 | No      |
|      |       |        |             |          |         | Gyg1     | 8.46725   | 15.0239  | 0.827292         | 8.46825      | 15.0249       | 0.82721962       | 0.0161386  | No      |
|      |       |        |             |          |         | Gylt1b   | 1.54896   | 23.4595  | 3.9208           | 1.54996      | 23.4605       | 3.91993087       | 0.0026435  | No      |
|      |       |        |             |          |         | Gys1     | 0.612205  | 9.6888   | 3.98423          | 0.613205     | 9.6898        | 3.98202552       | 0.00018329 | No      |
|      |       |        |             |          |         | Gzmb     | 1.00235   | 6.10143  | 2.60576          | 1.00335      | 6.10243       | 2.60455889       | 0.0272985  | No      |
|      |       |        |             |          |         | Gzmm     | 109.213   | 63.2631  | -0.787712        | 109.214      | 63.2641       | -0.7876988       | 0.00686277 | No      |
|      |       |        |             |          |         | H1fx     | 29.7803   | 80.3776  | 1.43244          | 29.7813      | 80.3786       | 1.43240472       | 0.00018329 | No      |
|      |       |        |             |          |         | H2afj    | 60.7142   | 109.553  | 0.851515         | 60.7152      | 109.554       | 0.85151252       | 0.00981659 | No      |
|      |       |        |             |          |         | H2afz    | 231.074   | 101.546  | -1.18622         | 231.075      | 101.547       | -1.1862136       | 0.00051281 | No      |
|      |       |        |             |          |         | H3f3c    | 372.337   | 232.076  | -0.682015        | 372.338      | 232.077       | -0.6820093       | 0.00811172 | No      |
|      |       |        |             |          |         | H6pd     | 0.422445  | 5.38182  | 3.67126          | 0.423445     | 5.38282       | 3.66811568       | 0.00018329 | No      |
|      |       |        |             |          |         | Hacl1    | 2.19976   | 10.2736  | 2.22352          | 2.20076      | 10.2746       | 2.2230085        | 0.00051281 | No      |
|      |       |        |             |          |         | Hadh     | 22.7296   | 119.417  | 2.39336          | 22.7306      | 119.418       | 2.39331264       | 0.00018329 | No      |
|      |       |        |             |          |         | Hadha    | 68.3012   | 137.387  | 1.00827          | 68.3022      | 137.388       | 1.00825205       | 0.00018329 | No      |
|      |       |        |             |          |         | Hadhb    | 47.1977   | 93.0183  | 0.978797         | 47.1987      | 93.0193       | 0.97878296       | 0.00018329 | No      |
|      |       |        |             |          |         | Hagh     | 13.6742   | 67.1142  | 2.29516          | 13.6752      | 67.1152       | 2.29507761       | 0.00018329 | No      |
|      |       |        |             |          |         | Hap1     | 10.554    | 1.19411  | -3.14378         | 10.555       | 1.19511       | -3.1427113       | 0.00018329 | No      |

| RRBS |       |        |             |          |         | RNAseq  |          |         |                  |              |               |                  |            |         |
|------|-------|--------|-------------|----------|---------|---------|----------|---------|------------------|--------------|---------------|------------------|------------|---------|
| gene | Blood | Kidney | methyl.diff | pMWU.fdr | Match ? | gene    | blood    | kidney  | log2(fold_ratio) | blood+ 0.001 | kidney+ 0.001 | log2(fold_ratio) | q_value    | Match ? |
|      |       |        |             |          |         | Haus1   | 6.20317  | 2.61115 | -1.24832         | 6.20417      | 2.61215       | -1.2480005       | 0.00018329 | No      |
|      |       |        |             |          |         | Haus4   | 5.89166  | 14.6368 | 1.31286          | 5.89266      | 14.6378       | 1.31270781       | 0.00051281 | No      |
|      |       |        |             |          |         | Haus6   | 3.39146  | 1.12425 | -1.59295         | 3.39246      | 1.12525       | -1.5920862       | 0.00018329 | No      |
|      |       |        |             |          |         | Havcr1  | 0.138081 | 22.2952 | 7.33507          | 0.139081     | 22.2962       | 7.32472869       | 0.0183081  | No      |
|      |       |        |             |          |         | Hba1    | 37.5134  | 229.735 | 2.61449          | 37.5144      | 229.736       | 2.61446056       | 0.00018329 | No      |
|      |       |        |             |          |         | Hba2    | 18.6075  | 122.707 | 2.72126          | 18.6085      | 122.708       | 2.72119564       | 0.00018329 | No      |
|      |       |        |             |          |         | Hbb     | 16.5099  | 50.2206 | 1.60495          | 16.5109      | 50.2216       | 1.60488923       | 0.00018329 | No      |
|      |       |        |             |          |         | Hbegf   | 0.109094 | 3.60052 | 5.04456          | 0.110094     | 3.60152       | 5.03179817       | 0.0124598  | No      |
|      |       |        |             |          |         | Hbp1    | 32.5385  | 20.7898 | -0.64627         | 32.5395      | 20.7908       | -0.6462468       | 0.0327554  | No      |
|      |       |        |             |          |         | Hcfc2   | 22.0067  | 9.07607 | -1.2778          | 22.0077      | 9.07707       | -1.2777098       | 0.00822601 | No      |
|      |       |        |             |          |         | Hck     | 1.39531  | 15.3151 | 3.4563           | 1.39631      | 15.3161       | 3.4553578        | 0.00018329 | No      |
|      |       |        |             |          |         | Hcls1   | 146.274  | 47.8565 | -1.61188         | 146.275      | 47.8575       | -1.6118663       | 0.00018329 | No      |
|      |       |        |             |          |         | Hcn2    | 0.236679 | 14.3961 | 5.9266           | 0.237679     | 14.3971       | 5.92061999       | 0.00018329 | No      |
|      |       |        |             |          |         | Hdac1   | 103.447  | 59.97   | -0.786578        | 103.448      | 59.971        | -0.7865688       | 0.0026435  | No      |
|      |       |        |             |          |         | Hdac10  | 19.1308  | 11.7233 | -0.706524        | 19.1318      | 11.7243       | -0.7064708       | 0.0299319  | No      |
|      |       |        |             |          |         | Hdac11  | 0.195733 | 23.9868 | 6.93721          | 0.196733     | 23.9878       | 6.92991806       | 0.00018329 | No      |
|      |       |        |             |          |         | Hdac2   | 71.8863  | 47.1629 | -0.608064        | 71.8873      | 47.1639       | -0.6080539       | 0.0221058  | No      |
|      |       |        |             |          |         | Hdac4   | 5.90242  | 2.66633 | -1.14645         | 5.90342      | 2.66733       | -1.1461547       | 0.00018329 | No      |
|      |       |        |             |          |         | Hdac7   | 46.4003  | 18.3631 | -1.33733         | 46.4013      | 18.3641       | -1.337277        | 0.00018329 | No      |
|      |       |        |             |          |         | Hddc3   | 3.81055  | 41.6341 | 3.44969          | 3.81155      | 41.6351       | 3.44935058       | 0.00018329 | No      |
|      |       |        |             |          |         | Hdgfrp3 | 8.78529  | 4.43835 | -0.985065        | 8.78629      | 4.43935       | -0.9849057       | 0.00937155 | No      |
|      |       |        |             |          |         | Hdhd3   | 0.251149 | 7.79715 | 4.95633          | 0.252149     | 7.79815       | 4.9507835        | 0.00856745 | No      |
|      |       |        |             |          |         | Hdlbp   | 29.8435  | 53.1381 | 0.832332         | 29.8445      | 53.1391       | 0.83230871       | 0.0016929  | No      |
|      |       |        |             |          |         | Heatr3  | 9.7654   | 3.70498 | -1.39821         | 9.7664       | 3.70598       | -1.3979718       | 0.0116961  | No      |
|      |       |        |             |          |         | HEBP1   | 1.38624  | 10.6283 | 2.93866          | 1.38724      | 10.6293       | 2.93775728       | 0.00018329 | No      |
|      |       |        |             |          |         | Hebp2   | 6.82075  | 3.4755  | -0.972711        | 6.82175      | 3.4765        | -0.9725063       | 0.0201703  | No      |
|      |       |        |             |          |         | Heca    | 194.555  | 15.8895 | -3.61403         | 194.556      | 15.8905       | -3.613949        | 0.00018329 | No      |
|      |       |        |             |          |         | Hectd1  | 29.3462  | 17.9272 | -0.711023        | 29.3472      | 17.9282       | -0.7109922       | 0.0357237  | No      |
|      |       |        |             |          |         | Helb    | 22.2117  | 7.46606 | -1.5729          | 22.2127      | 7.46706       | -1.5727725       | 0.00290302 | No      |
|      |       |        |             |          |         | Helz    | 12.9276  | 5.33665 | -1.27645         | 12.9286      | 5.33765       | -1.2762894       | 0.00018329 | No      |
|      |       |        |             |          |         | Helz2   | 23.5723  | 11.1588 | -1.07891         | 23.5733      | 11.1598       | -1.0788426       | 0.0272082  | No      |
|      |       |        |             |          |         | Herc1   | 53.498   | 19.8638 | -1.42935         | 53.499       | 19.8648       | -1.4292977       | 0.0226206  | No      |
|      |       |        |             |          |         | Herc3   | 14.4015  | 5.78076 | -1.31688         | 14.4025      | 5.78176       | -1.3167386       | 0.00035173 | No      |
|      |       |        |             |          |         | Herc4   | 29.2699  | 9.09624 | -1.68608         | 29.2709      | 9.09724       | -1.6859663       | 0.00082046 | No      |
|      |       |        |             |          |         | Herc6   | 15.9696  | 6.219   | -1.36057         | 15.9706      | 6.22          | -1.360432        | 0.00018329 | No      |
|      |       |        |             |          |         | Herpud2 | 41.8568  | 16.4308 | -1.34906         | 41.8578      | 16.4318       | -1.349006        | 0.00018329 | No      |
|      |       |        |             |          |         | Hes1    | 0.18347  | 81.3591 | 8.79261          | 0.18447      | 81.3601       | 8.78479143       | 0.00018329 | No      |
|      |       |        |             |          |         | Hexa    | 24.8413  | 89.7697 | 1.85349          | 24.8423      | 89.7707       | 1.85344589       | 0.00018329 | No      |
|      |       |        |             |          |         | Hexb    | 6.39742  | 59.9888 | 3.22913          | 6.39842      | 59.9898       | 3.22892962       | 0.00018329 | No      |
|      |       |        |             |          |         | Hexim1  | 80.312   | 53.5799 | -0.583923        | 80.313       | 53.5809       | -0.5839147       | 0.0317975  | No      |
|      |       |        |             |          |         | Heyl    | 0        | 5.46218 | inf              | 0.001        | 5.46318       | 12.4155252       | 0.00018329 | No      |
|      |       |        |             |          |         | Hgd     | 0        | 66.6379 | inf              | 0.001        | 66.6389       | 16.024077        | 0.00018329 | No      |

| RRBS |       |        |             |          |         | RNAseq     |         |          |                  |              |               |                  |            |         |
|------|-------|--------|-------------|----------|---------|------------|---------|----------|------------------|--------------|---------------|------------------|------------|---------|
| gene | Blood | Kidney | methyl.diff | pMWU.fdr | Match ? | gene       | blood   | kidney   | log2(fold_ratio) | blood+ 0.001 | kidney+ 0.001 | log2(fold_ratio) | q_value    | Match ? |
|      |       |        |             |          |         | Hgs        | 18.9928 | 38.1495  | 1.00621          | 18.9938      | 38.1505       | 1.0061734        | 0.00082046 | No      |
|      |       |        |             |          |         | Hgsnat     | 48.1419 | 22.1924  | -1.11723         | 48.1429      | 22.1934       | -1.1171923       | 0.00082046 | No      |
|      |       |        |             |          |         | Hhipl1     | 0       | 0.601027 | inf              | 0.001        | 0.602027      | 9.23368438       | 0.00018329 | No      |
|      |       |        |             |          |         | Hiat1      | 44.4294 | 23.8462  | -0.897758        | 44.4304      | 23.8472       | -0.8977272       | 0.00035173 | No      |
|      |       |        |             |          |         | Hibadh     | 46.8928 | 113.589  | 1.27639          | 46.8938      | 113.59        | 1.27636673       | 0.00018329 | No      |
|      |       |        |             |          |         | Hibch      | 9.14441 | 14.4688  | 0.661986         | 9.14541      | 14.4698       | 0.66192523       | 0.0381595  | No      |
|      |       |        |             |          |         | Hif1a      | 47.0198 | 25.8598  | -0.862556        | 47.0208      | 25.8608       | -0.8625322       | 0.00224282 | No      |
|      |       |        |             |          |         | Higd1a     | 22.7815 | 49.4626  | 1.11847          | 22.7825      | 49.4636       | 1.11844118       | 0.0128946  | No      |
|      |       |        |             |          |         | Hint2      | 66.8238 | 212.874  | 1.67157          | 66.8248      | 212.875       | 1.67155101       | 0.00018329 | No      |
|      |       |        |             |          |         | Hint3      | 10.15   | 20.7272  | 1.03004          | 10.151       | 20.7282       | 1.02997298       | 0.00380824 | No      |
|      |       |        |             |          |         | Hip1       | 0.2475  | 8.66898  | 5.13036          | 0.2485       | 8.66998       | 5.12471091       | 0.00018329 | No      |
|      |       |        |             |          |         | Hip1r      | 28.873  | 12.5821  | -1.19835         | 28.874       | 12.5831       | -1.1982836       | 0.00018329 | No      |
|      |       |        |             |          |         | Hipk1      | 57.5496 | 16.6152  | -1.79231         | 57.5506      | 16.6162       | -1.7922405       | 0.00018329 | No      |
|      |       |        |             |          |         | Hipk2      | 1.82812 | 7.01891  | 1.94089          | 1.82912      | 7.01991       | 1.94030281       | 0.00018329 | No      |
|      |       |        |             |          |         | Hira       | 13.9424 | 6.47897  | -1.10564         | 13.9434      | 6.47997       | -1.1055234       | 0.00140841 | No      |
|      |       |        |             |          |         | Hist1h4b   | 47.1029 | 26.3989  | -0.835338        | 47.1039      | 26.3999       | -0.835314        | 0.00154856 | No      |
|      |       |        |             |          |         | Hist2h2aa3 | 56.1799 | 215.174  | 1.93737          | 56.1809      | 215.175       | 1.93735883       | 0.00018329 | No      |
|      |       |        |             |          |         | Hist2h2ab  | 0       | 0.921859 | inf              | 0.001        | 0.922859      | 9.84996643       | 0.0031651  | No      |
|      |       |        |             |          |         | Hist3h2a   | 9.89383 | 25.6886  | 1.37653          | 9.89483      | 25.6896       | 1.3764376        | 0.00018329 | No      |
|      |       |        |             |          |         | Hivep1     | 4.61356 | 2.8794   | -0.680115        | 4.61456      | 2.8804        | -0.6799239       | 0.0310472  | No      |
|      |       |        |             |          |         | Hivep2     | 7.5927  | 3.14392  | -1.27205         | 7.5937       | 3.14492       | -1.2717797       | 0.00018329 | No      |
|      |       |        |             |          |         | Hlcs       | 4.22012 | 2.19758  | -0.941371        | 4.22112      | 2.19858       | -0.9410538       | 0.00224282 | No      |
|      |       |        |             |          |         | Hltf       | 29.1414 | 9.37994  | -1.63542         | 29.1424      | 9.38094       | -1.6353153       | 0.00018329 | No      |
|      |       |        |             |          |         | Hm13       | 99.9447 | 198.17   | 0.987539         | 99.9457      | 198.171       | 0.98752945       | 0.00458064 | No      |
|      |       |        |             |          |         | Hmbox1     | 12.922  | 6.07289  | -1.08938         | 12.923       | 6.07389       | -1.0892483       | 0.00066911 | No      |
|      |       |        |             |          |         | Hmbs       | 12.6366 | 20.2475  | 0.680132         | 12.6376      | 20.2485       | 0.68009253       | 0.0272985  | No      |
|      |       |        |             |          |         | Hmg20a     | 48.2219 | 11.5451  | -2.06241         | 48.2229      | 11.5461       | -2.0623128       | 0.00018329 | No      |
|      |       |        |             |          |         | Hmgb2      | 541.745 | 132.134  | -2.03561         | 541.746      | 132.135       | -2.0356039       | 0.00018329 | No      |
|      |       |        |             |          |         | Hmgcl      | 21.3002 | 51.6098  | 1.27678          | 21.3012      | 51.6108       | 1.27673829       | 0.00035173 | No      |
|      |       |        |             |          |         | Hmgcs1     | 10.0131 | 18.9528  | 0.920527         | 10.0141      | 18.9538       | 0.92045435       | 0.00111812 | No      |
|      |       |        |             |          |         | Hmgcs2     | 0.13687 | 13.3946  | 6.6127           | 0.13787      | 13.3956       | 6.60230683       | 0.00018329 | No      |
|      |       |        |             |          |         | Hmgn2      | 202.825 | 119.391  | -0.764537        | 202.826      | 119.392       | -0.7645364       | 0.00329119 | No      |
|      |       |        |             |          |         | Hmgn3      | 27.095  | 68.1912  | 1.33156          | 27.096       | 68.1922       | 1.33152684       | 0.00018329 | No      |
|      |       |        |             |          |         | Hmgn5b     | 4.86563 | 9.35462  | 0.943053         | 4.86663      | 9.35562       | 0.94291017       | 0.00721079 | No      |
|      |       |        |             |          |         | Hmox1      | 0.21425 | 20.983   | 6.61378          | 0.21525      | 20.984        | 6.60713266       | 0.00018329 | No      |
|      |       |        |             |          |         | Hmx2       | 0       | 0.823841 | inf              | 0.001        | 0.824841      | 9.68797224       | 0.00018329 | No      |
|      |       |        |             |          |         | Hn1        | 132.534 | 59.3208  | -1.15976         | 132.535      | 59.3218       | -1.1597391       | 0.00018329 | No      |
|      |       |        |             |          |         | Hnf4g      | 0       | 0.71793  | inf              | 0.001        | 0.71893       | 9.4897075        | 0.0066167  | No      |
|      |       |        |             |          |         | Hnmt       | 0       | 9.47819  | inf              | 0.001        | 9.47919       | 13.2105481       | 0.00018329 | No      |
|      |       |        |             |          |         | Hnrnpa0    | 554.993 | 170.376  | -1.70374         | 554.994      | 170.377       | -1.7037416       | 0.00018329 | No      |
|      |       |        |             |          |         | HNRNPA1    | 903.39  | 166.506  | -2.43978         | 903.391      | 166.507       | -2.4397677       | 0.00018329 | No      |
|      |       |        |             |          |         | Hnrnpa2b1  | 636.788 | 298.107  | -1.09498         | 636.789      | 298.108       | -1.0949803       | 0.0036827  | No      |

| RRBS |       |        |             |          |         | RNAseq   |          |          |                  |              |               |                  |            |         |
|------|-------|--------|-------------|----------|---------|----------|----------|----------|------------------|--------------|---------------|------------------|------------|---------|
| gene | Blood | Kidney | methyl.diff | pMWU.fdr | Match ? | gene     | blood    | kidney   | log2(fold_ratio) | blood+ 0.001 | kidney+ 0.001 | log2(fold_ratio) | q_value    | Match ? |
|      |       |        |             |          |         | Hnrnpdl  | 132.148  | 50.7314  | -1.38121         | 132.149      | 50.7324       | -1.3811862       | 0.00018329 | No      |
|      |       |        |             |          |         | Hnrnpf   | 346.483  | 130.011  | -1.41415         | 346.484      | 130.012       | -1.4141439       | 0.00018329 | No      |
|      |       |        |             |          |         | Hnrnp1   | 226.31   | 129.526  | -0.805055        | 226.311      | 129.527       | -0.8050538       | 0.0218106  | No      |
|      |       |        |             |          |         | Hnrnp2   | 45.2504  | 28.0542  | -0.689712        | 45.2514      | 28.0552       | -0.6896942       | 0.0127876  | No      |
|      |       |        |             |          |         | Hnrnpk   | 359.752  | 178.4    | -1.01189         | 359.753      | 178.401       | -1.011883        | 0.00051281 | No      |
|      |       |        |             |          |         | Hnrnpl   | 396.269  | 251.332  | -0.656887        | 396.27       | 251.333       | -0.6568836       | 0.0369285  | No      |
|      |       |        |             |          |         | Hnrnpm   | 203.846  | 92.9102  | -1.13357         | 203.847      | 92.9112       | -1.1335623       | 0.00018329 | No      |
|      |       |        |             |          |         | Hnrnpr   | 62.0336  | 28.2961  | -1.13245         | 62.0346      | 28.2971       | -1.1324189       | 0.00018329 | No      |
|      |       |        |             |          |         | Hnrnpu   | 242.573  | 116.019  | -1.06406         | 242.574      | 116.02        | -1.0640514       | 0.0018326  | No      |
|      |       |        |             |          |         | Hnrnpul2 | 88.4356  | 34.7188  | -1.34891         | 88.4366      | 34.7198       | -1.3488849       | 0.00018329 | No      |
|      |       |        |             |          |         | Hnrpd    | 224.033  | 105.417  | -1.08761         | 224.034      | 105.418       | -1.0875965       | 0.00018329 | No      |
|      |       |        |             |          |         | Hoga1    | 0.676162 | 79.6856  | 6.88081          | 0.677162     | 79.6866       | 6.87869232       | 0.00018329 | No      |
|      |       |        |             |          |         | Homer1   | 0.1841   | 1.76661  | 3.26242          | 0.1851       | 1.76761       | 3.2554232        | 0.00018329 | No      |
|      |       |        |             |          |         | Homer2   | 0        | 3.34373  | inf              | 0.001        | 3.34473       | 11.707674        | 0.00018329 | No      |
|      |       |        |             |          |         | Homer3   | 6.11215  | 18.7534  | 1.6174           | 6.11315      | 18.7544       | 1.61724124       | 0.00755425 | No      |
|      |       |        |             |          |         | Homez    | 0.774008 | 2.65768  | 1.77975          | 0.775008     | 2.65868       | 1.77842704       | 0.0018326  | No      |
|      |       |        |             |          |         | Hook1    | 0.438131 | 5.33411  | 3.60581          | 0.439131     | 5.33511       | 3.60279473       | 0.00018329 | No      |
|      |       |        |             |          |         | Hook2    | 2.40958  | 28.8749  | 3.58296          | 2.41058      | 28.8759       | 3.5824137        | 0.00018329 | No      |
|      |       |        |             |          |         | Hopx     | 9.96233  | 18.4205  | 0.886754         | 9.96333      | 18.4215       | 0.88669063       | 0.00698138 | No      |
|      |       |        |             |          |         | Hormad2  | 2.23257  | 7.21449  | 1.69219          | 2.23357      | 7.21549       | 1.6917459        | 0.00051281 | No      |
|      |       |        |             |          |         | Hoxa3    | 0        | 2.29359  | inf              | 0.001        | 2.29459       | 11.1640207       | 0.00018329 | No      |
|      |       |        |             |          |         | Hoxa7    | 0        | 0.587276 | inf              | 0.001        | 0.588276      | 9.20034937       | 0.0350203  | No      |
|      |       |        |             |          |         | Hoxa9    | 0        | 0.634548 | inf              | 0.001        | 0.635548      | 9.31185728       | 0.00018329 | No      |
|      |       |        |             |          |         | Hoxb2    | 0        | 40.5904  | inf              | 0.001        | 40.5914       | 15.3088865       | 0.00018329 | No      |
|      |       |        |             |          |         | Hoxb8    | 0        | 54.4689  | inf              | 0.001        | 54.4699       | 15.7331716       | 0.00018329 | No      |
|      |       |        |             |          |         | Hoxb9    | 0        | 34.6316  | inf              | 0.001        | 34.6326       | 15.0798431       | 0.00018329 | No      |
|      |       |        |             |          |         | Hoxc10   | 0        | 9.63946  | inf              | 0.001        | 9.64046       | 13.2348863       | 0.00018329 | No      |
|      |       |        |             |          |         | Hoxd8    | 0        | 143.517  | inf              | 0.001        | 143.518       | 17.1308722       | 0.00018329 | No      |
|      |       |        |             |          |         | Hpse     | 18.9603  | 3.36707  | -2.49342         | 18.9613      | 3.36807       | -2.4930639       | 0.00018329 | No      |
|      |       |        |             |          |         | Hpx      | 0.336677 | 4.28636  | 3.67032          | 0.337677     | 4.28736       | 3.66637374       | 0.00018329 | No      |
|      |       |        |             |          |         | Hrg      | 0        | 1.00007  | inf              | 0.001        | 1.00107       | 9.96732714       | 0.00018329 | No      |
|      |       |        |             |          |         | Hrsp12   | 37.7405  | 587.313  | 3.95994          | 37.7415      | 587.314       | 3.95990836       | 0.00018329 | No      |
|      |       |        |             |          |         | Hs1bp3   | 5.64009  | 9.2355   | 0.711472         | 5.64109      | 9.2365        | 0.71137232       | 0.0262294  | No      |
|      |       |        |             |          |         | Hs2st1   | 18.0952  | 7.88968  | -1.19757         | 18.0962      | 7.89068       | -1.1974652       | 0.00018329 | No      |
|      |       |        |             |          |         | Hs3st1   | 5.33526  | 2.57455  | -1.05124         | 5.33626      | 2.57555       | -1.0509484       | 0.0372165  | No      |
|      |       |        |             |          |         | Hs3st6   | 0        | 0.701691 | inf              | 0.001        | 0.702691      | 9.45674661       | 0.00018329 | No      |
|      |       |        |             |          |         | Hsbp1    | 83.6368  | 223.001  | 1.41484          | 83.6378      | 223.002       | 1.41482963       | 0.00018329 | No      |
|      |       |        |             |          |         | Hscb     | 46.1724  | 26.3072  | -0.811571        | 46.1734      | 26.3082       | -0.8115494       | 0.0152837  | No      |
|      |       |        |             |          |         | Hsd11b1  | 4.84819  | 47.8999  | 3.3045           | 4.84919      | 47.9009       | 3.30423708       | 0.00018329 | No      |
|      |       |        |             |          |         | Hsd17b10 | 100.309  | 194.859  | 0.957978         | 100.31       | 194.86        | 0.95797253       | 0.00018329 | No      |
|      |       |        |             |          |         | Hsd17b11 | 21.4064  | 54.2869  | 1.34256          | 21.4074      | 54.2879       | 1.34252109       | 0.00018329 | No      |
|      |       |        |             |          |         | Hsd17b2  | 0        | 1.46773  | inf              | 0.001        | 1.46873       | 10.5203535       | 0.00018329 | No      |

| RRBS |       |        |             |          |         | RNAseq  |           |         |                  |              |               |                  |            |         |
|------|-------|--------|-------------|----------|---------|---------|-----------|---------|------------------|--------------|---------------|------------------|------------|---------|
| gene | Blood | Kidney | methyl.diff | pMWU.fdr | Match ? | gene    | blood     | kidney  | log2(fold_ratio) | blood+ 0.001 | kidney+ 0.001 | log2(fold_ratio) | q_value    | Match ? |
|      |       |        |             |          |         | Hsd17b4 | 19.1938   | 51.5309 | 1.4248           | 19.1948      | 51.5319       | 1.42475026       | 0.00018329 | No      |
|      |       |        |             |          |         | Hsd1    | 21.1634   | 9.9083  | -1.09486         | 21.1644      | 9.9093        | -1.0947845       | 0.00018329 | No      |
|      |       |        |             |          |         | Hsd12   | 8.55284   | 35.9621 | 2.072            | 8.55384      | 35.9631       | 2.07187326       | 0.00018329 | No      |
|      |       |        |             |          |         | Hsf2    | 3.83519   | 7.0512  | 0.878571         | 3.83619      | 7.0522        | 0.87839921       | 0.00799878 | No      |
|      |       |        |             |          |         | Hsh2d   | 21.2323   | 5.37339 | -1.98236         | 21.2333      | 5.37439       | -1.9821557       | 0.00018329 | No      |
|      |       |        |             |          |         | Hsp90b1 | 108.528   | 162.476 | 0.582163         | 108.529      | 162.477       | 0.58215491       | 0.0318913  | No      |
|      |       |        |             |          |         | Hspa4l  | 0.852487  | 2.35294 | 1.46471          | 0.853487     | 2.35394       | 1.46363646       | 0.00066911 | No      |
|      |       |        |             |          |         | Hspa9   | 55.1269   | 86.5041 | 0.650011         | 55.1279      | 86.5051       | 0.65000255       | 0.0148363  | No      |
|      |       |        |             |          |         | Hspb1   | 0         | 95.2511 | inf              | 0.001        | 95.2521       | 16.5394633       | 0.00018329 | No      |
|      |       |        |             |          |         | Hspb6   | 5.59944   | 41.1433 | 2.8773           | 5.60044      | 41.1443       | 2.8770805        | 0.00035173 | No      |
|      |       |        |             |          |         | Hspb8   | 0         | 2.9176  | inf              | 0.001        | 2.9186        | 11.5110608       | 0.00018329 | No      |
|      |       |        |             |          |         | Hspbp1  | 22.1756   | 40.8778 | 0.882343         | 22.1766      | 40.8788       | 0.88231465       | 0.00303839 | No      |
|      |       |        |             |          |         | Hspd1   | 74.4966   | 138.227 | 0.891792         | 74.4976      | 138.228       | 0.89178403       | 0.0205807  | No      |
|      |       |        |             |          |         | Hspg2   | 0.0382994 | 34.2285 | 9.80366          | 0.0392994    | 34.2295       | 9.76651722       | 0.00018329 | No      |
|      |       |        |             |          |         | Htatif2 | 19.8197   | 10.5941 | -0.90368         | 19.8207      | 10.5951       | -0.9036107       | 0.00880015 | No      |
|      |       |        |             |          |         | Htatsf1 | 47.3799   | 29.738  | -0.671966        | 47.3809      | 29.739        | -0.6719495       | 0.00925991 | No      |
|      |       |        |             |          |         | Htt     | 7.61568   | 3.90269 | -0.964503        | 7.61668      | 3.90369       | -0.9643238       | 0.00035173 | No      |
|      |       |        |             |          |         | Huwe1   | 94.3372   | 36.1472 | -1.38394         | 94.3382      | 36.1482       | -1.3839183       | 0.00018329 | No      |
|      |       |        |             |          |         | Hyal1   | 13.2002   | 23.7029 | 0.844501         | 13.2012      | 23.7039       | 0.84445537       | 0.017077   | No      |
|      |       |        |             |          |         | Hyal2   | 1.0275    | 15.5681 | 3.92138          | 1.0285       | 15.5691       | 3.92007185       | 0.00018329 | No      |
|      |       |        |             |          |         | Hykk    | 0         | 13.1499 | inf              | 0.001        | 13.1509       | 13.6828739       | 0.00018329 | No      |
|      |       |        |             |          |         | Iah1    | 96.4281   | 143.439 | 0.57291          | 96.4291      | 143.44        | 0.57290691       | 0.0377809  | No      |
|      |       |        |             |          |         | Iba57   | 2.78435   | 4.7504  | 0.770707         | 2.78535      | 4.7514        | 0.77049404       | 0.0460114  | No      |
|      |       |        |             |          |         | Ibtk    | 16.7893   | 10.1547 | -0.725387        | 16.7903      | 10.1557       | -0.7253383       | 0.0209932  | No      |
|      |       |        |             |          |         | Ica1    | 0.362663  | 15.6029 | 5.42704          | 0.363663     | 15.6039       | 5.4231607        | 0.00018329 | No      |
|      |       |        |             |          |         | Icam1   | 3.00882   | 18.0029 | 2.58096          | 3.00982      | 18.0039       | 2.58056034       | 0.00018329 | No      |
|      |       |        |             |          |         | Icam2   | 162.616   | 41.2909 | -1.97757         | 162.617      | 41.2919       | -1.9775474       | 0.00018329 | No      |
|      |       |        |             |          |         | Icmt    | 3.94109   | 7.44942 | 0.918536         | 3.94209      | 7.45042       | 0.91836104       | 0.00970533 | No      |
|      |       |        |             |          |         | Icos    | 37.837    | 8.88374 | -2.09056         | 37.838       | 8.88474       | -2.0904344       | 0.00018329 | No      |
|      |       |        |             |          |         | Icoslg  | 2.84361   | 24.4257 | 3.1026           | 2.84461      | 24.4267       | 3.1021562        | 0.00018329 | No      |
|      |       |        |             |          |         | Ict1    | 48.1759   | 85.9756 | 0.835614         | 48.1769      | 85.9766       | 0.83560249       | 0.0026435  | No      |
|      |       |        |             |          |         | Id4     | 0         | 24.5928 | inf              | 0.001        | 24.5938       | 14.586007        | 0.00018329 | No      |
|      |       |        |             |          |         | Idh1    | 4.91604   | 58.0193 | 3.56096          | 4.91704      | 58.0203       | 3.56069576       | 0.00018329 | No      |
|      |       |        |             |          |         | Idh2    | 16.5312   | 573.763 | 5.11719          | 16.5322      | 573.764       | 5.11710682       | 0.00018329 | No      |
|      |       |        |             |          |         | Idh3a   | 35.3717   | 56.4823 | 0.675205         | 35.3727      | 56.4833       | 0.67518804       | 0.0108214  | No      |
|      |       |        |             |          |         | Idh3B   | 63.5636   | 144.669 | 1.18648          | 63.5646      | 144.67        | 1.18647035       | 0.00018329 | No      |
|      |       |        |             |          |         | Idh3g   | 103.532   | 192.613 | 0.89563          | 103.533      | 192.614       | 0.89562188       | 0.00051281 | No      |
|      |       |        |             |          |         | Idi1    | 3.41826   | 9.4265  | 1.46346          | 3.41926      | 9.4275        | 1.46319112       | 0.00018329 | No      |
|      |       |        |             |          |         | Ier2    | 32.9619   | 141.571 | 2.10265          | 32.9629      | 141.572       | 2.10262088       | 0.00018329 | No      |
|      |       |        |             |          |         | Ier3    | 2.41527   | 120.843 | 5.6448           | 2.41627      | 120.844       | 5.64422036       | 0.00018329 | No      |
|      |       |        |             |          |         | Ier5l   | 0.075376  | 24.5091 | 8.345            | 0.076376     | 24.5101       | 8.32604129       | 0.0246265  | No      |
|      |       |        |             |          |         | Iffo1   | 44.1741   | 19.5262 | -1.17779         | 44.1751      | 19.5272       | -1.1777483       | 0.00018329 | No      |

| RRBS |       |        |             |          |         | RNAseq   |           |         |                  |              |               |                  |            |         |
|------|-------|--------|-------------|----------|---------|----------|-----------|---------|------------------|--------------|---------------|------------------|------------|---------|
| gene | Blood | Kidney | methyl.diff | pMWU.fdr | Match ? | gene     | blood     | kidney  | log2(fold_ratio) | blood+ 0.001 | kidney+ 0.001 | log2(fold_ratio) | q_value    | Match ? |
|      |       |        |             |          |         | lfi202b  | 320.518   | 19.5537 | -4.03489         | 320.519      | 19.5547       | -4.0348226       | 0.00018329 | No      |
|      |       |        |             |          |         | lfi27    | 542.754   | 241.261 | -1.16971         | 542.755      | 241.262       | -1.1697004       | 0.00018329 | No      |
|      |       |        |             |          |         | lfi27l2b | 1640.59   | 335.574 | -2.28951         | 1640.591     | 335.575       | -2.2895085       | 0.00018329 | No      |
|      |       |        |             |          |         | lfi44    | 82.3501   | 36.2878 | -1.18228         | 82.3511      | 36.2888       | -1.1822636       | 0.00018329 | No      |
|      |       |        |             |          |         | lfi44l   | 58.5191   | 8.64163 | -2.75953         | 58.5201      | 8.64263       | -2.7593899       | 0.00018329 | No      |
|      |       |        |             |          |         | lfi47    | 67.155    | 27.9093 | -1.26675         | 67.156       | 27.9103       | -1.2667187       | 0.00380824 | No      |
|      |       |        |             |          |         | lfi47l   | 5.47083   | 3.4301  | -0.67351         | 5.47183      | 3.4311        | -0.6733522       | 0.0423961  | No      |
|      |       |        |             |          |         | lfit1lb  | 10.5743   | 26.7573 | 1.33938          | 10.5753      | 26.7583       | 1.33928787       | 0.00018329 | No      |
|      |       |        |             |          |         | lfitm1   | 494.543   | 161.369 | -1.61573         | 494.544      | 161.37        | -1.6157265       | 0.00018329 | No      |
|      |       |        |             |          |         | lfitm2   | 204.521   | 388.833 | 0.926898         | 204.522      | 388.834       | 0.92689834       | 0.00469886 | No      |
|      |       |        |             |          |         | lfitm3   | 0         | 72.2167 | inf              | 0.001        | 72.2177       | 16.1400649       | 0.00018329 | No      |
|      |       |        |             |          |         | lfnar1   | 50.3669   | 14.698  | -1.77685         | 50.3679      | 14.699        | -1.7767866       | 0.00018329 | No      |
|      |       |        |             |          |         | lfng     | 1.15911   | 8.21716 | 2.82563          | 1.16011      | 8.21816       | 2.82455381       | 0.00066911 | No      |
|      |       |        |             |          |         | lfngr2   | 22.5958   | 14.636  | -0.62653         | 22.5968      | 14.637        | -0.6264986       | 0.0437248  | No      |
|      |       |        |             |          |         | lfrd1    | 50.0396   | 31.8962 | -0.649689        | 50.0406      | 31.8972       | -0.6496693       | 0.0161386  | No      |
|      |       |        |             |          |         | lft122   | 1.12137   | 22.7202 | 4.34064          | 1.12237      | 22.7212       | 4.33941877       | 0.00018329 | No      |
|      |       |        |             |          |         | lft172   | 3.23495   | 23.7576 | 2.87657          | 3.23595      | 23.7586       | 2.8761886        | 0.00018329 | No      |
|      |       |        |             |          |         | lft20    | 59.6442   | 94.401  | 0.662419         | 59.6452      | 94.402        | 0.66241138       | 0.0137692  | No      |
|      |       |        |             |          |         | lft43    | 0.85693   | 23.5947 | 4.78314          | 0.85793      | 23.5957       | 4.78152022       | 0.00018329 | No      |
|      |       |        |             |          |         | lft46    | 13.64     | 29.3728 | 1.10664          | 13.641       | 29.3738       | 1.1065805        | 0.00018329 | No      |
|      |       |        |             |          |         | lft57    | 0.792285  | 14.1153 | 4.15509          | 0.793285     | 14.1163       | 4.15337892       | 0.00018329 | No      |
|      |       |        |             |          |         | lft80    | 22.5663   | 7.69985 | -1.55127         | 22.5673      | 7.70085       | -1.5511442       | 0.02934    | No      |
|      |       |        |             |          |         | lft81    | 1.85043   | 10.1702 | 2.45841          | 1.85143      | 10.1712       | 2.45777799       | 0.00018329 | No      |
|      |       |        |             |          |         | lfg1r    | 11.6014   | 7.16332 | -0.695599        | 11.6024      | 7.16432       | -0.6955216       | 0.0158179  | No      |
|      |       |        |             |          |         | lfgals   | 0.256313  | 1.24456 | 2.27966          | 0.257313     | 1.24556       | 2.27519827       | 0.0114728  | No      |
|      |       |        |             |          |         | lgfbp1   | 0         | 66.2956 | inf              | 0.001        | 66.2966       | 16.0166473       | 0.00018329 | No      |
|      |       |        |             |          |         | lgfbp2   | 0         | 74.6193 | inf              | 0.001        | 74.6203       | 16.1872805       | 0.00018329 | No      |
|      |       |        |             |          |         | lgfbp3   | 0         | 3.69306 | inf              | 0.001        | 3.69406       | 11.8509916       | 0.00018329 | No      |
|      |       |        |             |          |         | lgfbp4   | 1.52666   | 15.8874 | 3.37943          | 1.52766      | 15.8884       | 3.37857845       | 0.00018329 | No      |
|      |       |        |             |          |         | lgfbp5   | 0         | 121.212 | inf              | 0.001        | 121.213       | 16.8871849       | 0.00018329 | No      |
|      |       |        |             |          |         | lGG-2A   | 204.658   | 56.6828 | -1.85223         | 204.659      | 56.6838       | -1.8522137       | 0.00018329 | No      |
|      |       |        |             |          |         | lGJ      | 16.5511   | 6.11973 | -1.43538         | 16.5521      | 6.12073       | -1.4352386       | 0.00018329 | No      |
|      |       |        |             |          |         | lgkc     | 93.274    | 29.9797 | -1.63749         | 93.275       | 29.9807       | -1.6374564       | 0.00018329 | No      |
|      |       |        |             |          |         | lglon5   | 0.233755  | 9.46576 | 5.33965          | 0.234755     | 9.46676       | 5.33364296       | 0.00018329 | No      |
|      |       |        |             |          |         | lgsf1    | 0         | 1.61367 | inf              | 0.001        | 1.61467       | 10.6570236       | 0.00018329 | No      |
|      |       |        |             |          |         | lgsf3    | 0.0375039 | 6.73569 | 7.48864          | 0.0385039    | 6.73669       | 7.45089152       | 0.00018329 | No      |
|      |       |        |             |          |         | lgsf5    | 0         | 63.5681 | inf              | 0.001        | 63.5691       | 15.956038        | 0.00018329 | No      |
|      |       |        |             |          |         | lgsf9    | 1.51724   | 6.57158 | 2.11479          | 1.51824      | 6.57258       | 2.11405993       | 0.00018329 | No      |
|      |       |        |             |          |         | lkbip    | 4.73577   | 14.6819 | 1.63237          | 4.73677      | 14.6829       | 1.63216141       | 0.00051281 | No      |
|      |       |        |             |          |         | lkbkb    | 53.7369   | 32.2159 | -0.73814         | 53.7379      | 32.2169       | -0.7381223       | 0.0125688  | No      |
|      |       |        |             |          |         | lkbke    | 118.441   | 51.8273 | -1.19239         | 118.442      | 51.8283       | -1.1923688       | 0.0152837  | No      |
|      |       |        |             |          |         | lkbkg    | 12.1511   | 6.17396 | -0.976817        | 12.1521      | 6.17496       | -0.976704        | 0.0281852  | No      |

| RRBS |       |        |             |          |         | RNAseq  |           |           |                  |              |               |                  |            |         |
|------|-------|--------|-------------|----------|---------|---------|-----------|-----------|------------------|--------------|---------------|------------------|------------|---------|
| gene | Blood | Kidney | methyl.diff | pMWU.fdr | Match ? | gene    | blood     | kidney    | log2(fold_ratio) | blood+ 0.001 | kidney+ 0.001 | log2(fold_ratio) | q_value    | Match ? |
|      |       |        |             |          |         | lkzf1   | 190.058   | 15.5766   | -3.60899         | 190.059      | 15.5776       | -3.6089025       | 0.00018329 | No      |
|      |       |        |             |          |         | lkzf2   | 10.4673   | 2.94952   | -1.82734         | 10.4683      | 2.95052       | -1.826986        | 0.00018329 | No      |
|      |       |        |             |          |         | lkzf3   | 46.3075   | 5.62147   | -3.04223         | 46.3085      | 5.62247       | -3.0420011       | 0.00018329 | No      |
|      |       |        |             |          |         | lkzf5   | 11.6354   | 4.07301   | -1.51435         | 11.6364      | 4.07401       | -1.5141234       | 0.00018329 | No      |
|      |       |        |             |          |         | ll10ra  | 13.0482   | 2.00283   | -2.70374         | 13.0492      | 2.00383       | -2.7031293       | 0.00018329 | No      |
|      |       |        |             |          |         | ll10rb  | 28.4476   | 14.9131   | -0.931724        | 28.4486      | 14.9141       | -0.9316807       | 0.00140841 | No      |
|      |       |        |             |          |         | ll12rb1 | 2.40733   | 10.8432   | 2.17129          | 2.40833      | 10.8442       | 2.17081863       | 0.00018329 | No      |
|      |       |        |             |          |         | ll13ra1 | 0.177635  | 14.5063   | 6.35162          | 0.178635     | 14.5073       | 6.34362045       | 0.00018329 | No      |
|      |       |        |             |          |         | ll16    | 43.8974   | 6.81058   | -2.68829         | 43.8984      | 6.81158       | -2.688107        | 0.00432763 | No      |
|      |       |        |             |          |         | ll17a   | 0         | 1.5202    | inf              | 0.001        | 1.5212        | 10.5709941       | 0.00018329 | No      |
|      |       |        |             |          |         | ll17rb  | 0.0417309 | 1.50957   | 5.17687          | 0.0427309    | 1.51057       | 5.14366953       | 0.0159271  | No      |
|      |       |        |             |          |         | ll17rc  | 0.0782884 | 16.9976   | 7.76231          | 0.0792884    | 16.9986       | 7.7440904        | 0.00018329 | No      |
|      |       |        |             |          |         | ll17rd  | 0.0167946 | 7.60794   | 8.82336          | 0.0177946    | 7.60894       | 8.74011217       | 0.0138771  | No      |
|      |       |        |             |          |         | ll17re  | 0.223485  | 8.47603   | 5.24514          | 0.224485     | 8.47703       | 5.23886794       | 0.00018329 | No      |
|      |       |        |             |          |         | ll18    | 4.18816   | 19.7274   | 2.23581          | 4.18916      | 19.7284       | 2.23554106       | 0.00277264 | No      |
|      |       |        |             |          |         | ll18r1  | 16.9808   | 5.48076   | -1.63146         | 16.9818      | 5.48176       | -1.6312783       | 0.00018329 | No      |
|      |       |        |             |          |         | ll18RAP | 8.39257   | 5.30121   | -0.662793        | 8.39357      | 5.30221       | -0.6626907       | 0.033435   | No      |
|      |       |        |             |          |         | ll19    | 0.368029  | 5.82907   | 3.98537          | 0.369029     | 5.83007       | 3.98170711       | 0.00018329 | No      |
|      |       |        |             |          |         | ll1b    | 0.703545  | 14.7972   | 4.39454          | 0.704545     | 14.7982       | 4.39258604       | 0.00018329 | No      |
|      |       |        |             |          |         | ll1r1   | 0.230687  | 1.97492   | 3.09779          | 0.231687     | 1.97592       | 3.09227554       | 0.0188386  | No      |
|      |       |        |             |          |         | ll1rn   | 0.568093  | 9.58168   | 4.07608          | 0.569093     | 9.58268       | 4.07369285       | 0.00018329 | No      |
|      |       |        |             |          |         | ll2     | 1.10128   | 0.308915  | -1.8339          | 1.10228      | 0.309915      | -1.8305463       | 0.0485114  | No      |
|      |       |        |             |          |         | ll21r   | 151.056   | 16.1285   | -3.2274          | 151.057      | 16.1295       | -3.2273194       | 0.00018329 | No      |
|      |       |        |             |          |         | ll22ra2 | 0.683169  | 0.21929   | -1.6394          | 0.684169     | 0.22029       | -1.6349487       | 0.0147272  | No      |
|      |       |        |             |          |         | ll24    | 0.176055  | 4.09381   | 4.53935          | 0.177055     | 4.09481       | 4.53152702       | 0.00035173 | No      |
|      |       |        |             |          |         | ll2ra   | 21.397    | 13.0181   | -0.716889        | 21.398       | 13.0191       | -0.7168462       | 0.0375863  | No      |
|      |       |        |             |          |         | ll2rb   | 86.4071   | 43.9172   | -0.976365        | 86.4081      | 43.9182       | -0.9763476       | 0.00126492 | No      |
|      |       |        |             |          |         | ll2rg   | 518.45    | 74.8504   | -2.79212         | 518.451      | 74.8514       | -2.7921064       | 0.00018329 | No      |
|      |       |        |             |          |         | ll34    | 0.244362  | 17.0328   | 6.12316          | 0.245362     | 17.0338       | 6.11734467       | 0.00066911 | No      |
|      |       |        |             |          |         | ll4r    | 136.617   | 22.5368   | -2.59979         | 136.618      | 22.5378       | -2.599729        | 0.00018329 | No      |
|      |       |        |             |          |         | ll6r    | 48.6721   | 4.56995   | -3.41285         | 48.6731      | 4.57095       | -3.4125587       | 0.00018329 | No      |
|      |       |        |             |          |         | ll6st   | 21.4009   | 10.8323   | -0.982336        | 21.4019      | 10.8333       | -0.9822661       | 0.00018329 | No      |
|      |       |        |             |          |         | ll9r    | 1.4331    | 0.0823178 | -4.12179         | 1.4341       | 0.0833178     | -4.1053771       | 0.00650199 | No      |
|      |       |        |             |          |         | lldr1   | 0.313851  | 37.2172   | 6.88975          | 0.314851     | 37.2182       | 6.88519522       | 0.00018329 | No      |
|      |       |        |             |          |         | llf2    | 42.782    | 71.3296   | 0.737499         | 42.783       | 71.3306       | 0.73748346       | 0.0063852  | No      |
|      |       |        |             |          |         | llvbl   | 7.42027   | 16.6427   | 1.16534          | 7.42127      | 16.6437       | 1.16523819       | 0.00018329 | No      |
|      |       |        |             |          |         | lmmt    | 60.2472   | 129.112   | 1.09965          | 60.2482      | 129.113       | 1.09964422       | 0.00018329 | No      |
|      |       |        |             |          |         | lmpa2   | 16.6931   | 57.8171   | 1.79224          | 16.6941      | 57.8181       | 1.79218288       | 0.00018329 | No      |
|      |       |        |             |          |         | lmpact  | 73.6403   | 13.378    | -2.46064         | 73.6413      | 13.379        | -2.4605448       | 0.00018329 | No      |
|      |       |        |             |          |         | lmpad1  | 4.12441   | 7.53388   | 0.869204         | 4.12541      | 7.53488       | 0.86904703       | 0.00154856 | No      |
|      |       |        |             |          |         | lmpdh1  | 50.8201   | 12.9612   | -1.9712          | 50.8211      | 12.9622       | -1.971117        | 0.00018329 | No      |
|      |       |        |             |          |         | lmpdh2  | 326.072   | 77.8872   | -2.06573         | 326.073      | 77.8882       | -2.0657183       | 0.00018329 | No      |



| RRBS |       |        |             |          |         | RNAseq   |           |         |                  |              |               |                  |            |         |
|------|-------|--------|-------------|----------|---------|----------|-----------|---------|------------------|--------------|---------------|------------------|------------|---------|
| gene | Blood | Kidney | methyl.diff | pMWU.fdr | Match ? | gene     | blood     | kidney  | log2(fold_ratio) | blood+ 0.001 | kidney+ 0.001 | log2(fold_ratio) | q_value    | Match ? |
|      |       |        |             |          |         | Inadl    | 6.13791   | 21.2561 | 1.79206          | 6.13891      | 21.2571       | 1.79189037       | 0.00018329 | No      |
|      |       |        |             |          |         | Ing1     | 84.2218   | 34.4349 | -1.29032         | 84.2228      | 34.4359       | -1.2902975       | 0.00238141 | No      |
|      |       |        |             |          |         | Ing3     | 23.5443   | 5.97033 | -1.9795          | 23.5453      | 5.97133       | -1.9793149       | 0.00018329 | No      |
|      |       |        |             |          |         | Inip     | 25.1035   | 9.53195 | -1.39705         | 25.1045      | 9.53295       | -1.3969514       | 0.00126492 | No      |
|      |       |        |             |          |         | Inmt     | 0         | 48.7545 | inf              | 0.001        | 48.7555       | 15.5732774       | 0.00018329 | No      |
|      |       |        |             |          |         | Ino80    | 14.064    | 6.46661 | -1.12093         | 14.065       | 6.46761       | -1.120805        | 0.00066911 | No      |
|      |       |        |             |          |         | Inpp4b   | 24.4878   | 3.02569 | -3.01673         | 24.4888      | 3.02669       | -3.0163093       | 0.00018329 | No      |
|      |       |        |             |          |         | Inpp5b   | 43.2295   | 20.8607 | -1.05123         | 43.2305      | 20.8617       | -1.0511928       | 0.0159271  | No      |
|      |       |        |             |          |         | Inpp5d   | 28.3493   | 9.67649 | -1.55076         | 28.3503      | 9.67749       | -1.5506592       | 0.00018329 | No      |
|      |       |        |             |          |         | Inpp5j   | 0         | 25.1506 | inf              | 0.001        | 25.1516       | 14.6183626       | 0.00018329 | No      |
|      |       |        |             |          |         | Inpp5k   | 25.6075   | 12.8414 | -0.995758        | 25.6085      | 12.8424       | -0.9957079       | 0.00126492 | No      |
|      |       |        |             |          |         | Inpp1    | 9.20814   | 23.4681 | 1.34972          | 9.20914      | 23.4691       | 1.34962418       | 0.00018329 | No      |
|      |       |        |             |          |         | Insig2   | 5.67864   | 11.1173 | 0.969193         | 5.67964      | 11.1183       | 0.96906482       | 0.0016929  | No      |
|      |       |        |             |          |         | Insl3    | 96.247    | 46.1323 | -1.06097         | 96.248       | 46.1333       | -1.0609481       | 0.00018329 | No      |
|      |       |        |             |          |         | Ints10   | 24.192    | 13.7617 | -0.813871        | 24.193       | 13.7627       | -0.8138261       | 0.00948282 | No      |
|      |       |        |             |          |         | Ints2    | 4.93737   | 2.28121 | -1.11394         | 4.93837      | 2.28221       | -1.1136034       | 0.0016929  | No      |
|      |       |        |             |          |         | INTS6    | 31.2795   | 9.23495 | -1.76004         | 31.2805      | 9.23595       | -1.7599313       | 0.00018329 | No      |
|      |       |        |             |          |         | Ip6k1    | 59.3463   | 25.1682 | -1.23755         | 59.3473      | 25.1692       | -1.237523        | 0.00018329 | No      |
|      |       |        |             |          |         | Ipcef1   | 22.4898   | 3.15637 | -2.83293         | 22.4908      | 3.15737       | -2.8325397       | 0.00018329 | No      |
|      |       |        |             |          |         | Ipmk     | 5.151     | 16.6533 | 1.69288          | 5.152        | 16.6543       | 1.69269022       | 0.00018329 | No      |
|      |       |        |             |          |         | Ipo5     | 38.95     | 25.9257 | -0.587238        | 38.951       | 25.9267       | -0.5872218       | 0.0275792  | No      |
|      |       |        |             |          |         | Ipo9     | 22.598    | 9.64184 | -1.22882         | 22.599       | 9.64284       | -1.2287289       | 0.00035173 | No      |
|      |       |        |             |          |         | Iqcb1    | 7.83717   | 4.08045 | -0.941607        | 7.83817      | 4.08145       | -0.9414351       | 0.00755425 | No      |
|      |       |        |             |          |         | Iqce     | 1.02823   | 6.97314 | 2.76165          | 1.02923      | 6.97414       | 2.76044991       | 0.00018329 | No      |
|      |       |        |             |          |         | Iqch     | 13.8273   | 34.1273 | 1.30341          | 13.8283      | 34.1283       | 1.30334474       | 0.00154856 | No      |
|      |       |        |             |          |         | Iqgap1   | 48.1511   | 17.3857 | -1.46967         | 48.1521      | 17.3867       | -1.4696146       | 0.00018329 | No      |
|      |       |        |             |          |         | Iqgap2   | 44.2425   | 8.65884 | -2.35319         | 44.2435      | 8.65984       | -2.3530532       | 0.00018329 | No      |
|      |       |        |             |          |         | Iqgap3   | 0.0858221 | 1.05819 | 3.62411          | 0.0868221    | 1.05919       | 3.60875528       | 0.00018329 | No      |
|      |       |        |             |          |         | Iqsec1   | 2.05422   | 34.4765 | 4.06895          | 2.05522      | 34.4775       | 4.06829043       | 0.00018329 | No      |
|      |       |        |             |          |         | Iqsec2   | 0.76244   | 4.7826  | 2.6491           | 0.76344      | 4.7836        | 2.64751007       | 0.00018329 | No      |
|      |       |        |             |          |         | Iqub     | 0.498549  | 1.90333 | 1.93272          | 0.499549     | 1.90433       | 1.9305854        | 0.00035173 | No      |
|      |       |        |             |          |         | IRAK1BP1 | 0.418647  | 13.0457 | 4.96169          | 0.419647     | 13.0467       | 4.95836486       | 0.00018329 | No      |
|      |       |        |             |          |         | Irak3    | 16.4042   | 9.40062 | -0.80324         | 16.4052      | 9.40162       | -0.8031719       | 0.0136625  | No      |
|      |       |        |             |          |         | Irak4    | 14.9583   | 7.89136 | -0.922598        | 14.9593      | 7.89236       | -0.922514        | 0.00755425 | No      |
|      |       |        |             |          |         | Ireb2    | 15.3488   | 8.66562 | -0.82475         | 15.3498      | 8.66662       | -0.8246785       | 0.00111812 | No      |
|      |       |        |             |          |         | Irf2     | 95.1767   | 19.3241 | -2.30021         | 95.1777      | 19.3251       | -2.3001477       | 0.00018329 | No      |
|      |       |        |             |          |         | Irf5     | 2.22849   | 7.74474 | 1.79715          | 2.22949      | 7.74574       | 1.79668935       | 0.00018329 | No      |
|      |       |        |             |          |         | Irf9     | 52.6029   | 19.4583 | -1.43476         | 52.6039      | 19.4593       | -1.4347099       | 0.0298279  | No      |
|      |       |        |             |          |         | Irs1     | 0.340413  | 1.04399 | 1.61675          | 0.341413     | 1.04499       | 1.61389924       | 0.00210945 | No      |
|      |       |        |             |          |         | Isca1    | 33.9107   | 66.7197 | 0.976375         | 33.9117      | 66.7207       | 0.97635132       | 0.00018329 | No      |
|      |       |        |             |          |         | Iscu     | 66.5339   | 201.029 | 1.59524          | 66.5349      | 201.03        | 1.59522762       | 0.00018329 | No      |
|      |       |        |             |          |         | Isoc1    | 14.3074   | 39.5922 | 1.46845          | 14.3084      | 39.5932       | 1.46839032       | 0.00018329 | No      |

| RRBS |       |        |             |          |         | RNAseq                 |           |          |                  |              |               |                  |            |         |
|------|-------|--------|-------------|----------|---------|------------------------|-----------|----------|------------------|--------------|---------------|------------------|------------|---------|
| gene | Blood | Kidney | methyl.diff | pMWU.fdr | Match ? | gene                   | blood     | kidney   | log2(fold_ratio) | blood+ 0.001 | kidney+ 0.001 | log2(fold_ratio) | q_value    | Match ? |
|      |       |        |             |          |         | Isoc2a                 | 29.9154   | 57.2744  | 0.937002         | 29.9164      | 57.2754       | 0.93697905       | 0.00811172 | No      |
|      |       |        |             |          |         | Isoc2b                 | 18.1048   | 82.7583  | 2.19253          | 18.1058      | 82.7593       | 2.19246952       | 0.00018329 | No      |
|      |       |        |             |          |         | Ispd                   | 0.072117  | 6.19665  | 6.425            | 0.073117     | 6.19765       | 6.4053706        | 0.0066167  | No      |
|      |       |        |             |          |         | Ily1                   | 96.1699   | 39.3358  | -1.28974         | 96.1709      | 39.3368       | -1.2897208       | 0.00018329 | No      |
|      |       |        |             |          |         | Ilyna1                 | 56.9246   | 105.662  | 0.89233          | 56.9256      | 105.663       | 0.89232078       | 0.00018329 | No      |
|      |       |        |             |          |         | Itch                   | 25.8782   | 12.4918  | -1.05076         | 25.8792      | 12.4928       | -1.0506962       | 0.00018329 | No      |
|      |       |        |             |          |         | Itfg1                  | 6.78023   | 26.3695  | 1.95947          | 6.78123      | 26.3705       | 1.95930604       | 0.00018329 | No      |
|      |       |        |             |          |         | Itfg3                  | 1.86552   | 60.6887  | 5.02378          | 1.86652      | 60.6897       | 5.02302882       | 0.00018329 | No      |
|      |       |        |             |          |         | Itga1                  | 13.9743   | 45.6259  | 1.70707          | 13.9753      | 45.6269       | 1.70700538       | 0.00018329 | No      |
|      |       |        |             |          |         | Itga2                  | 3.06449   | 0.621206 | -2.30251         | 3.06549      | 0.622206      | -2.3006535       | 0.00018329 | No      |
|      |       |        |             |          |         | Itga3                  | 2.01986   | 31.1674  | 3.94771          | 2.02086      | 31.1684       | 3.94704281       | 0.00018329 | No      |
|      |       |        |             |          |         | Itga4                  | 54.6249   | 3.09049  | -4.14365         | 54.6259      | 3.09149       | -4.1432109       | 0.00018329 | No      |
|      |       |        |             |          |         | Itgam                  | 0.311914  | 1.44073  | 2.20758          | 0.312914     | 1.44173       | 2.2039629        | 0.00051281 | No      |
|      |       |        |             |          |         | Itgav                  | 4.24757   | 20.5541  | 2.27472          | 4.24857      | 20.5551       | 2.27444715       | 0.00018329 | No      |
|      |       |        |             |          |         | Itgax                  | 0.271499  | 1.6621   | 2.61399          | 0.272499     | 1.6631        | 2.60955208       | 0.00018329 | No      |
|      |       |        |             |          |         | Itgb2                  | 103.901   | 22.4866  | -2.20807         | 103.902      | 22.4876       | -2.2080218       | 0.00018329 | No      |
|      |       |        |             |          |         | Itgb3                  | 16.7671   | 7.92368  | -1.08139         | 16.7681      | 7.92468       | -1.0812946       | 0.0350203  | No      |
|      |       |        |             |          |         | Itgb7                  | 130.555   | 30.2999  | -2.10727         | 130.556      | 30.3009       | -2.1072362       | 0.00018329 | No      |
|      |       |        |             |          |         | Itgb8                  | 0.0904303 | 6.01278  | 6.05508          | 0.0914303    | 6.01378       | 6.03945593       | 0.00018329 | No      |
|      |       |        |             |          |         | Itih5                  | 0         | 9.54732  | inf              | 0.001        | 9.54832       | 13.2210312       | 0.00018329 | No      |
|      |       |        |             |          |         | Itk                    | 99.8354   | 11.0464  | -3.17598         | 99.8364      | 11.0474       | -3.175859        | 0.00018329 | No      |
|      |       |        |             |          |         | Itm2a                  | 79.2735   | 9.27823  | -3.09492         | 79.2745      | 9.27923       | -3.0947799       | 0.00018329 | No      |
|      |       |        |             |          |         | Itm2b                  | 454.614   | 970.954  | 1.09476          | 454.615      | 970.955       | 1.09475915       | 0.00197017 | No      |
|      |       |        |             |          |         | Itm2c                  | 60.3033   | 279.162  | 2.21079          | 60.3043      | 279.163       | 2.21077496       | 0.00018329 | No      |
|      |       |        |             |          |         | Itpk1                  | 21.3197   | 13.8225  | -0.625164        | 21.3207      | 13.8235       | -0.6251319       | 0.0345543  | No      |
|      |       |        |             |          |         | Itpkb                  | 73.3445   | 19.7628  | -1.89191         | 73.3455      | 19.7638       | -1.8918481       | 0.00018329 | No      |
|      |       |        |             |          |         | Itpkc                  | 2.06858   | 5.45497  | 1.39893          | 2.06958      | 5.45597       | 1.39849769       | 0.00018329 | No      |
|      |       |        |             |          |         | Itpr2                  | 11.8958   | 2.71001  | -2.13408         | 11.8968      | 2.71101       | -2.1336712       | 0.00018329 | No      |
|      |       |        |             |          |         | Ilysn1                 | 19.3457   | 354.921  | 4.19741          | 19.3467      | 354.922       | 4.19734259       | 0.00018329 | No      |
|      |       |        |             |          |         | Ilyd                   | 21.7348   | 52.041   | 1.25964          | 21.7358      | 52.042        | 1.25960321       | 0.00018329 | No      |
|      |       |        |             |          |         | IVNS1ABP_P<br>REDICTED | 48.8004   | 209.211  | 2.1              | 48.8014      | 209.212       | 2.09997116       | 0.00018329 | No      |
|      |       |        |             |          |         | Ilyd                   | 0         | 9.19373  | inf              | 0.001        | 9.19473       | 13.1665915       | 0.00018329 | No      |
|      |       |        |             |          |         | Ilyumo4                | 16.8845   | 3.74999  | -2.17074         | 16.8855      | 3.75099       | -2.1704416       | 0.0114728  | No      |
|      |       |        |             |          |         | Jag1                   | 0.0303414 | 31.695   | 10.0287          | 0.0313414    | 31.696        | 9.98201544       | 0.00018329 | No      |
|      |       |        |             |          |         | Jag2                   | 0.177118  | 3.46514  | 4.29013          | 0.178118     | 3.46614       | 4.2824247        | 0.00018329 | No      |
|      |       |        |             |          |         | Jak1                   | 229.724   | 35.6972  | -2.68602         | 229.725      | 35.6982       | -2.6859846       | 0.00018329 | No      |
|      |       |        |             |          |         | Jak2                   | 33.9077   | 8.07411  | -2.07024         | 33.9087      | 8.07511       | -2.0701017       | 0.00018329 | No      |
|      |       |        |             |          |         | Jakmip1                | 62.4031   | 5.10189  | -3.61251         | 62.4041      | 5.10289       | -3.6122544       | 0.00018329 | No      |
|      |       |        |             |          |         | Jup                    | 25.5409   | 44.5893  | 0.80389          | 25.5419      | 44.5903       | 0.80386406       | 0.00290302 | No      |
|      |       |        |             |          |         | Kalrn                  | 0.031457  | 13.1514  | 8.70761          | 0.032457     | 13.1524       | 8.66258071       | 0.00018329 | No      |
|      |       |        |             |          |         | Kank1                  | 0.0964353 | 34.1429  | 8.46781          | 0.0974353    | 34.1439       | 8.4529676        | 0.00018329 | No      |

| RRBS |       |        |             |          |         | RNAseq  |           |          |                  |              |               |                  |            |         |
|------|-------|--------|-------------|----------|---------|---------|-----------|----------|------------------|--------------|---------------|------------------|------------|---------|
| gene | Blood | Kidney | methyl.diff | pMWU.fdr | Match ? | gene    | blood     | kidney   | log2(fold_ratio) | blood+ 0.001 | kidney+ 0.001 | log2(fold_ratio) | q_value    | Match ? |
|      |       |        |             |          |         | Kank2   | 0.418466  | 12.3286  | 4.88076          | 0.419466     | 12.3296       | 4.87742831       | 0.00018329 | No      |
|      |       |        |             |          |         | Kank3   | 0.549221  | 4.58893  | 3.0627           | 0.550221     | 4.58993       | 3.06038904       | 0.00018329 | No      |
|      |       |        |             |          |         | Kans1   | 79.1028   | 21.0728  | -1.90835         | 79.1038      | 21.0738       | -1.9082965       | 0.00018329 | No      |
|      |       |        |             |          |         | Kans1l  | 2.12077   | 13.2035  | 2.63825          | 2.12177      | 13.2045       | 2.63768949       | 0.00035173 | No      |
|      |       |        |             |          |         | Kap     | 0         | 999.978  | inf              | 0.001        | 999.979       | 19.9315383       | 0.00018329 | No      |
|      |       |        |             |          |         | Kat6a   | 18.8629   | 7.09803  | -1.41006         | 18.8639      | 7.09903       | -1.4099342       | 0.00018329 | No      |
|      |       |        |             |          |         | Kat6b   | 11.1003   | 6.55755  | -0.759375        | 11.1013      | 6.55855       | -0.7592798       | 0.0472851  | No      |
|      |       |        |             |          |         | Kat7    | 30.5387   | 16.5183  | -0.886578        | 30.5397      | 16.5193       | -0.8865333       | 0.00197017 | No      |
|      |       |        |             |          |         | Katna1  | 27.5145   | 14.3068  | -0.943491        | 27.5155      | 14.3078       | -0.9434427       | 0.00097029 | No      |
|      |       |        |             |          |         | KAZN    | 0.0824307 | 34.1116  | 8.69287          | 0.0834307    | 34.1126       | 8.67551065       | 0.00018329 | No      |
|      |       |        |             |          |         | Kbtbd11 | 36.2389   | 3.31571  | -3.45015         | 36.2399      | 3.31671       | -3.4497542       | 0.00018329 | No      |
|      |       |        |             |          |         | Kbtbd2  | 38.8246   | 11.7539  | -1.72384         | 38.8256      | 11.7549       | -1.723746        | 0.00018329 | No      |
|      |       |        |             |          |         | Kbtbd8  | 3.05686   | 0.967234 | -1.66011         | 3.05786      | 0.968234      | -1.6590947       | 0.00035173 | No      |
|      |       |        |             |          |         | Kcnab2  | 60.1239   | 10.9368  | -2.45875         | 60.1249      | 10.9378       | -2.45864         | 0.00018329 | No      |
|      |       |        |             |          |         | Kcnab3  | 1.26446   | 0.146052 | -3.11397         | 1.26546      | 0.147052      | -3.1052636       | 0.00591487 | No      |
|      |       |        |             |          |         | Kcne1   | 0         | 1.28209  | inf              | 0.001        | 1.28309       | 10.3254067       | 0.00018329 | No      |
|      |       |        |             |          |         | Kcnip2  | 1.03268   | 0.12385  | -3.05973         | 1.03368      | 0.12485       | -3.0495219       | 0.00035173 | No      |
|      |       |        |             |          |         | Kcnip3  | 0         | 2.25216  | inf              | 0.001        | 2.25316       | 11.137734        | 0.00018329 | No      |
|      |       |        |             |          |         | Kcnj1   | 0.0566175 | 125.763  | 11.1172          | 0.0576175    | 125.764       | 11.0919243       | 0.00018329 | No      |
|      |       |        |             |          |         | Kcnj12  | 0.0621527 | 2.39676  | 5.26913          | 0.0631527    | 2.39776       | 5.24669904       | 0.0220133  | No      |
|      |       |        |             |          |         | Kcnj13  | 0.206555  | 2.99657  | 3.85872          | 0.207555     | 2.99757       | 3.85222785       | 0.0475434  | No      |
|      |       |        |             |          |         | Kcnj16  | 0         | 209.402  | inf              | 0.001        | 209.403       | 17.6759226       | 0.00018329 | No      |
|      |       |        |             |          |         | Kcnk1   | 0.195567  | 73.3096  | 8.5502           | 0.196567     | 73.3106       | 8.54285686       | 0.00018329 | No      |
|      |       |        |             |          |         | Kcnk5   | 0.653613  | 12.498   | 4.25712          | 0.654613     | 12.499        | 4.25502661       | 0.00018329 | No      |
|      |       |        |             |          |         | Kcnk6   | 9.27791   | 5.06584  | -0.872998        | 9.27891      | 5.06684       | -0.8728691       | 0.00902869 | No      |
|      |       |        |             |          |         | Kcnmb4  | 13.532    | 4.13316  | -1.71105         | 13.533       | 4.13416       | -1.7108156       | 0.00018329 | No      |
|      |       |        |             |          |         | Kcnn2   | 0         | 4.48707  | inf              | 0.001        | 4.48807       | 12.1318795       | 0.00018329 | No      |
|      |       |        |             |          |         | Kcnq1   | 0         | 8.05836  | inf              | 0.001        | 8.05936       | 12.9764496       | 0.00018329 | No      |
|      |       |        |             |          |         | Kcnt1   | 0         | 103.039  | inf              | 0.001        | 103.04        | 16.652845        | 0.00018329 | No      |
|      |       |        |             |          |         | Kctd1   | 4.44464   | 46.3222  | 3.38156          | 4.44564      | 46.3232       | 3.38127189       | 0.00018329 | No      |
|      |       |        |             |          |         | Kctd13  | 3.30369   | 6.80582  | 1.04269          | 3.30469      | 6.80682       | 1.04246601       | 0.00615197 | No      |
|      |       |        |             |          |         | Kctd17  | 0.829943  | 17.7708  | 4.42035          | 0.830943     | 17.7718       | 4.41869648       | 0.00018329 | No      |
|      |       |        |             |          |         | Kctd18  | 25.8311   | 10.6811  | -1.27406         | 25.8321      | 10.6821       | -1.2739696       | 0.00018329 | No      |
|      |       |        |             |          |         | Kctd20  | 16.8277   | 6.47007  | -1.37899         | 16.8287      | 6.47107       | -1.3788475       | 0.00018329 | No      |
|      |       |        |             |          |         | Kctd3   | 7.62474   | 12.8487  | 0.752865         | 7.62574      | 12.8497       | 0.75278543       | 0.0122333  | No      |
|      |       |        |             |          |         | Kctd6   | 4.93315   | 18.7283  | 1.92464          | 4.93415      | 18.7293       | 1.9244235        | 0.00018329 | No      |
|      |       |        |             |          |         | Kdelc2  | 2.91571   | 14.8817  | 2.35163          | 2.91671      | 14.8827       | 2.35122243       | 0.00018329 | No      |
|      |       |        |             |          |         | Kdelr1  | 36.2533   | 89.85    | 1.30941          | 36.2543      | 89.851        | 1.30938244       | 0.00018329 | No      |
|      |       |        |             |          |         | Kdelr2  | 16.9131   | 26.7018  | 0.658793         | 16.9141      | 26.7028       | 0.65876461       | 0.0418329  | No      |
|      |       |        |             |          |         | Kdm1b   | 25.2032   | 8.94679  | -1.49417         | 25.2042      | 8.94779       | -1.4940609       | 0.00018329 | No      |
|      |       |        |             |          |         | Kdm3a   | 55.3646   | 17.8028  | -1.63686         | 55.3656      | 17.8038       | -1.6368047       | 0.00018329 | No      |
|      |       |        |             |          |         | Kdm3b   | 21.9753   | 10.97    | -1.00232         | 21.9763      | 10.971        | -1.0022535       | 0.00018329 | No      |

| RRBS |       |        |             |          |         | RNAseq    |           |          |                  |              |               |                  |            |         |
|------|-------|--------|-------------|----------|---------|-----------|-----------|----------|------------------|--------------|---------------|------------------|------------|---------|
| gene | Blood | Kidney | methyl.diff | pMWU.fdr | Match ? | gene      | blood     | kidney   | log2(fold_ratio) | blood+ 0.001 | kidney+ 0.001 | log2(fold_ratio) | q_value    | Match ? |
|      |       |        |             |          |         | Kdm4a     | 32.8034   | 15.8188  | -1.05221         | 32.8044      | 15.8198       | -1.052158        | 0.00018329 | No      |
|      |       |        |             |          |         | Kdm4c     | 12.3444   | 6.7924   | -0.861867        | 12.3454      | 6.7934        | -0.8617679       | 0.00603614 | No      |
|      |       |        |             |          |         | Kdm5a     | 24.8759   | 6.61101  | -1.91181         | 24.8769      | 6.61201       | -1.9116459       | 0.00018329 | No      |
|      |       |        |             |          |         | Kdm5b     | 14.0004   | 8.9796   | -0.640742        | 14.0014      | 8.9806        | -0.6406873       | 0.015599   | No      |
|      |       |        |             |          |         | Kdm5c     | 10.3334   | 6.25356  | -0.724565        | 10.3344      | 6.25456       | -0.7244743       | 0.0175951  | No      |
|      |       |        |             |          |         | Kdm6a     | 19.6582   | 5.29762  | -1.89172         | 19.6592      | 5.29862       | -1.891516        | 0.00018329 | No      |
|      |       |        |             |          |         | Kdm7a     | 12.0585   | 2.86095  | -2.07549         | 12.0595      | 2.86195       | -2.0750997       | 0.00018329 | No      |
|      |       |        |             |          |         | Kdr       | 0.0400436 | 1.31281  | 5.03494          | 0.0410436    | 1.31381       | 5.00045556       | 0.00018329 | No      |
|      |       |        |             |          |         | Khdrbs1   | 81.034    | 36.0647  | -1.16794         | 81.035       | 36.0657       | -1.1679177       | 0.00018329 | No      |
|      |       |        |             |          |         | Khynyn    | 74.9722   | 35.8167  | -1.06572         | 74.9732      | 35.8177       | -1.0657023       | 0.0279905  | No      |
|      |       |        |             |          |         | Khsrp     | 40.4006   | 25.69    | -0.653169        | 40.4016      | 25.691        | -0.6531494       | 0.0483321  | No      |
|      |       |        |             |          |         | Kidins220 | 27.4073   | 16.7537  | -0.710083        | 27.4083      | 16.7547       | -0.710047        | 0.00744054 | No      |
|      |       |        |             |          |         | Kif11     | 0.824362  | 3.61418  | 2.13232          | 0.825362     | 3.61518       | 2.13096856       | 0.00018329 | No      |
|      |       |        |             |          |         | Kif13a    | 3.41302   | 5.9531   | 0.80259          | 3.41402      | 5.9541        | 0.80241194       | 0.0412791  | No      |
|      |       |        |             |          |         | Kif13b    | 6.59616   | 13.8619  | 1.07143          | 6.59716      | 13.8629       | 1.07131209       | 0.00210945 | No      |
|      |       |        |             |          |         | Kif15     | 3.3692    | 1.01924  | -1.72492         | 3.3702       | 1.02024       | -1.7239256       | 0.00018329 | No      |
|      |       |        |             |          |         | Kif16b    | 2.62193   | 7.72432  | 1.55878          | 2.62293      | 7.72532       | 1.55841539       | 0.00018329 | No      |
|      |       |        |             |          |         | Kif18b    | 0.21306   | 1.15233  | 2.43522          | 0.21406      | 1.15333       | 2.42971823       | 0.00018329 | No      |
|      |       |        |             |          |         | Kif1c     | 10.3454   | 92.9309  | 3.16717          | 10.3464      | 92.9319       | 3.16704503       | 0.00018329 | No      |
|      |       |        |             |          |         | Kif20b    | 0.2037    | 0.762691 | 1.90465          | 0.2047       | 0.763691      | 1.89947792       | 0.00224282 | No      |
|      |       |        |             |          |         | Kif22     | 0.485404  | 3.59897  | 2.89033          | 0.486404     | 3.59997       | 2.88775789       | 0.00018329 | No      |
|      |       |        |             |          |         | Kif23     | 1.17418   | 3.62624  | 1.62682          | 1.17518      | 3.62724       | 1.62599046       | 0.00018329 | No      |
|      |       |        |             |          |         | Kif2a     | 20.2868   | 8.04685  | -1.33405         | 20.2878      | 8.04785       | -1.3339371       | 0.00051281 | No      |
|      |       |        |             |          |         | Kif2c     | 0.220972  | 1.58507  | 2.84261          | 0.221972     | 1.58607       | 2.83700684       | 0.00082046 | No      |
|      |       |        |             |          |         | Kif3a     | 2.31313   | 4.63113  | 1.00152          | 2.31413      | 4.63213       | 1.00120583       | 0.0145263  | No      |
|      |       |        |             |          |         | Kif4a     | 0.168297  | 0.879651 | 2.38592          | 0.169297     | 0.880651      | 2.37901399       | 0.00126492 | No      |
|      |       |        |             |          |         | Kif5c     | 2.32405   | 0.601321 | -1.95044         | 2.32505      | 0.602321      | -1.9486573       | 0.0102693  | No      |
|      |       |        |             |          |         | Kif9      | 0.054471  | 0.721851 | 3.72814          | 0.055471     | 0.722851      | 3.70389266       | 0.0200787  | No      |
|      |       |        |             |          |         | Kifap3    | 4.34027   | 18.2112  | 2.06897          | 4.34127      | 18.2122       | 2.06871615       | 0.00018329 | No      |
|      |       |        |             |          |         | Kifc1     | 3.75088   | 8.97002  | 1.25788          | 3.75188      | 8.97102       | 1.25765834       | 0.00035173 | No      |
|      |       |        |             |          |         | Kifc2     | 4.04531   | 9.73984  | 1.26765          | 4.04631      | 9.74084       | 1.26743933       | 0.00494262 | No      |
|      |       |        |             |          |         | Kirrel    | 0         | 1.04613  | inf              | 0.001        | 1.04713       | 10.0322248       | 0.00018329 | No      |
|      |       |        |             |          |         | Kitlg     | 0.257139  | 7.26609  | 4.82056          | 0.258139     | 7.26709       | 4.81515775       | 0.00018329 | No      |
|      |       |        |             |          |         | Klc2      | 14.3151   | 30.6293  | 1.09737          | 14.3161      | 30.6303       | 1.09732097       | 0.00018329 | No      |
|      |       |        |             |          |         | Klc4      | 11.7393   | 41.1801  | 1.8106           | 11.7403      | 41.1811       | 1.81051309       | 0.00018329 | No      |
|      |       |        |             |          |         | Klf10     | 2.71851   | 9.13613  | 1.74877          | 2.71951      | 9.13713       | 1.74839435       | 0.00018329 | No      |
|      |       |        |             |          |         | Klf11     | 12.2933   | 6.70108  | -0.875408        | 12.2943      | 6.70208       | -0.8753088       | 0.00419853 | No      |
|      |       |        |             |          |         | Klf12     | 8.44146   | 2.17994  | -1.95321         | 8.44246      | 2.18094       | -1.9527134       | 0.00018329 | No      |
|      |       |        |             |          |         | Klf3      | 80.1902   | 24.0208  | -1.73914         | 80.1912      | 24.0218       | -1.7390997       | 0.00018329 | No      |
|      |       |        |             |          |         | Klf4      | 1.57646   | 32.1144  | 4.34846          | 1.57746      | 32.1154       | 4.34758994       | 0.00018329 | No      |
|      |       |        |             |          |         | Klf5      | 0.0675538 | 8.16399  | 6.91709          | 0.0685538    | 8.16499       | 6.89607067       | 0.00902869 | No      |
|      |       |        |             |          |         | KLF7      | 5.49027   | 2.95019  | -0.896067        | 5.49127      | 2.95119       | -0.895843        | 0.00111812 | No      |

| RRBS |       |        |             |          |         | RNAseq  |           |          |                  |              |               |                  |            |         |
|------|-------|--------|-------------|----------|---------|---------|-----------|----------|------------------|--------------|---------------|------------------|------------|---------|
| gene | Blood | Kidney | methyl.diff | pMWU.fdr | Match ? | gene    | blood     | kidney   | log2(fold_ratio) | blood+ 0.001 | kidney+ 0.001 | log2(fold_ratio) | q_value    | Match ? |
|      |       |        |             |          |         | Klf9    | 41.4776   | 17.366   | -1.25607         | 41.4786      | 17.367        | -1.2560186       | 0.00018329 | No      |
|      |       |        |             |          |         | KLHDC1  | 11.4519   | 1.53319  | -2.90097         | 11.4529      | 1.53419       | -2.9001639       | 0.00018329 | No      |
|      |       |        |             |          |         | Klhdc10 | 6.10739   | 15.5307  | 1.34649          | 6.10839      | 15.5317       | 1.34635167       | 0.00018329 | No      |
|      |       |        |             |          |         | KLHDC2  | 75.0121   | 24.6689  | -1.60443         | 75.0131      | 24.6699       | -1.6043907       | 0.00018329 | No      |
|      |       |        |             |          |         | Klhdc3  | 80.801    | 46.2905  | -0.803657        | 80.802       | 46.2915       | -0.8036437       | 0.00290302 | No      |
|      |       |        |             |          |         | Klhdc4  | 18.2112   | 29.2356  | 0.6829           | 18.2122      | 29.2366       | 0.68287034       | 0.0195672  | No      |
|      |       |        |             |          |         | Klhdc7a | 0         | 17.8325  | inf              | 0.001        | 17.8335       | 14.1223023       | 0.00018329 | No      |
|      |       |        |             |          |         | Klhl11  | 4.21104   | 1.8907   | -1.15526         | 4.21204      | 1.8917        | -1.1548358       | 0.00811172 | No      |
|      |       |        |             |          |         | Klhl12  | 8.98047   | 20.867   | 1.21636          | 8.98147      | 20.868        | 1.21626884       | 0.0271125  | No      |
|      |       |        |             |          |         | Klhl13  | 0.0569919 | 2.07405  | 5.18555          | 0.0579919    | 2.07505       | 5.16115088       | 0.00018329 | No      |
|      |       |        |             |          |         | Klhl14  | 0.0697372 | 8.0359   | 6.84839          | 0.0707372    | 8.0369        | 6.82802621       | 0.00277264 | No      |
|      |       |        |             |          |         | Klhl15  | 5.7817    | 1.45315  | -1.99231         | 5.7827       | 1.45415       | -1.9915672       | 0.00018329 | No      |
|      |       |        |             |          |         | Klhl2   | 32.3947   | 20.5608  | -0.655858        | 32.3957      | 20.5618       | -0.6558358       | 0.0225266  | No      |
|      |       |        |             |          |         | Klhl20  | 14.0255   | 4.76796  | -1.5566          | 14.0265      | 4.76896       | -1.5564085       | 0.00018329 | No      |
|      |       |        |             |          |         | Klhl23  | 0.115065  | 0.601512 | 2.38614          | 0.116065     | 0.602512      | 2.37605699       | 0.00197017 | No      |
|      |       |        |             |          |         | Klhl24  | 27.2222   | 15.4785  | -0.814522        | 27.2232      | 15.4795       | -0.8144778       | 0.0178047  | No      |
|      |       |        |             |          |         | Klhl25  | 3.2895    | 6.45768  | 0.973145         | 3.2905       | 6.45868       | 0.97293252       | 0.00277264 | No      |
|      |       |        |             |          |         | Klhl26  | 0.608619  | 2.49472  | 2.03526          | 0.609619     | 2.49572       | 2.03347631       | 0.00018329 | No      |
|      |       |        |             |          |         | Klhl28  | 4.02919   | 0.993387 | -2.02006         | 4.03019      | 0.994387      | -2.0189685       | 0.00018329 | No      |
|      |       |        |             |          |         | Klhl30  | 0         | 1.63879  | inf              | 0.001        | 1.63979       | 10.6792954       | 0.00018329 | No      |
|      |       |        |             |          |         | Klhl42  | 27.5628   | 50.651   | 0.87787          | 27.5638      | 50.652        | 0.87784444       | 0.0136625  | No      |
|      |       |        |             |          |         | Klhl6   | 47.6862   | 3.8001   | -3.64947         | 47.6872      | 3.8011        | -3.6491132       | 0.00018329 | No      |
|      |       |        |             |          |         | Klra17  | 9.15418   | 49.3546  | 2.43068          | 9.15518      | 49.3556       | 2.43055363       | 0.00018329 | No      |
|      |       |        |             |          |         | Klrb1c  | 61.2044   | 13.8014  | -2.14882         | 61.2054      | 13.8024       | -2.1487398       | 0.00018329 | No      |
|      |       |        |             |          |         | Klrd1   | 83.4574   | 23.1817  | -1.84805         | 83.4584      | 23.1827       | -1.8480087       | 0.00018329 | No      |
|      |       |        |             |          |         | Klrg2   | 0.0972325 | 3.79733  | 5.2874           | 0.0982325    | 3.79833       | 5.27302103       | 0.00354878 | No      |
|      |       |        |             |          |         | Klrk1   | 199.88    | 27.9649  | -2.83745         | 199.881      | 27.9659       | -2.8374007       | 0.00018329 | No      |
|      |       |        |             |          |         | Kmt2a   | 14.3815   | 4.67887  | -1.61998         | 14.3825      | 4.67987       | -1.6197741       | 0.00018329 | No      |
|      |       |        |             |          |         | Kmt2b   | 21.0837   | 9.65909  | -1.12617         | 21.0847      | 9.66009       | -1.126088        | 0.00755425 | No      |
|      |       |        |             |          |         | Kmt2c   | 42.6256   | 10.326   | -2.04544         | 42.6266      | 10.327        | -2.0453328       | 0.00018329 | No      |
|      |       |        |             |          |         | Kmt2e   | 45.3041   | 18.5177  | -1.29073         | 45.3051      | 18.5187       | -1.2906906       | 0.00035173 | No      |
|      |       |        |             |          |         | KNG1L1  | 0         | 105.924  | inf              | 0.001        | 105.925       | 16.6926836       | 0.00018329 | No      |
|      |       |        |             |          |         | Kpna1   | 25.385    | 6.30153  | -2.0102          | 25.386       | 6.30253       | -2.0100301       | 0.00018329 | No      |
|      |       |        |             |          |         | Kpna5   | 14.3382   | 4.00946  | -1.83838         | 14.3392      | 4.01046       | -1.8381249       | 0.00018329 | No      |
|      |       |        |             |          |         | KPTN    | 14.0878   | 25.1121  | 0.833933         | 14.0888      | 25.1131       | 0.83389139       | 0.00615197 | No      |
|      |       |        |             |          |         | Kri1    | 46.5884   | 21.4811  | -1.1169          | 46.5894      | 21.4821       | -1.1168667       | 0.0242348  | No      |
|      |       |        |             |          |         | Krit1   | 27.7458   | 11.9423  | -1.21619         | 27.7468      | 11.9433       | -1.2161199       | 0.00018329 | No      |
|      |       |        |             |          |         | Krt14   | 0         | 13.9116  | inf              | 0.001        | 13.9126       | 13.7641044       | 0.00018329 | No      |
|      |       |        |             |          |         | Krt15   | 0         | 60.8417  | inf              | 0.001        | 60.8427       | 15.8927966       | 0.00018329 | No      |
|      |       |        |             |          |         | Krt17   | 0         | 1.33255  | inf              | 0.001        | 1.33355       | 10.3810562       | 0.00018329 | No      |
|      |       |        |             |          |         | Krt18   | 3.0239    | 65.3234  | 4.43312          | 3.0249       | 65.3244       | 4.43266261       | 0.00018329 | No      |
|      |       |        |             |          |         | Krt23   | 0         | 5.96719  | inf              | 0.001        | 5.96819       | 12.5430777       | 0.00018329 | No      |

| RRBS |       |        |             |          |         | RNAseq  |           |          |                  |              |               |                  |            |         |
|------|-------|--------|-------------|----------|---------|---------|-----------|----------|------------------|--------------|---------------|------------------|------------|---------|
| gene | Blood | Kidney | methyl.diff | pMWU.fdr | Match ? | gene    | blood     | kidney   | log2(fold_ratio) | blood+ 0.001 | kidney+ 0.001 | log2(fold_ratio) | q_value    | Match ? |
|      |       |        |             |          |         | Krt5    | 0.0179185 | 15.1672  | 9.72528          | 0.0189185    | 15.1682       | 9.64703647       | 0.0237237  | No      |
|      |       |        |             |          |         | Kynu    | 0.178809  | 8.84627  | 5.62858          | 0.179809     | 8.84727       | 5.62069521       | 0.00290302 | No      |
|      |       |        |             |          |         | L1cam   | 3.32615   | 29.2763  | 3.13781          | 3.32715      | 29.2773       | 3.1374237        | 0.00018329 | No      |
|      |       |        |             |          |         | L2hgdh  | 1.87464   | 5.12471  | 1.45085          | 1.87564      | 5.12571       | 1.45036891       | 0.00018329 | No      |
|      |       |        |             |          |         | L3mbtl1 | 0.10584   | 1.85101  | 4.12835          | 0.10684      | 1.85201       | 4.1155681        | 0.00197017 | No      |
|      |       |        |             |          |         | L3mbtl2 | 32.8805   | 17.9753  | -0.871214        | 32.8815      | 17.9763       | -0.87118         | 0.00238141 | No      |
|      |       |        |             |          |         | L3mbtl3 | 55.089    | 6.49419  | -3.08454         | 55.09        | 6.49519       | -3.0843468       | 0.00018329 | No      |
|      |       |        |             |          |         | Lacc1   | 0.0921478 | 0.837734 | 3.18447          | 0.0931478    | 0.838734      | 3.17061974       | 0.00744054 | No      |
|      |       |        |             |          |         | Lace1   | 4.70434   | 19.962   | 2.08519          | 4.70534      | 19.963        | 2.08495766       | 0.00018329 | No      |
|      |       |        |             |          |         | Lactb   | 10.713    | 30.9998  | 1.53289          | 10.714       | 31.0008       | 1.53280824       | 0.00018329 | No      |
|      |       |        |             |          |         | Lama1   | 0.831326  | 2.33888  | 1.49233          | 0.832326     | 2.33988       | 1.49121393       | 0.00035173 | No      |
|      |       |        |             |          |         | Lama2   | 1.29016   | 0.245607 | -2.39312         | 1.29116      | 0.246607      | -2.3883821       | 0.00066911 | No      |
|      |       |        |             |          |         | Lamb1   | 0.0433122 | 37.4932  | 9.75764          | 0.0443122    | 37.4942       | 9.72474777       | 0.00018329 | No      |
|      |       |        |             |          |         | Lamb2   | 0.0191756 | 55.5889  | 11.5013          | 0.0201756    | 55.5899       | 11.4279955       | 0.0149499  | No      |
|      |       |        |             |          |         | Lamc1   | 0.909773  | 12.5962  | 3.79134          | 0.910773     | 12.5972       | 3.78986777       | 0.00018329 | No      |
|      |       |        |             |          |         | Lamc2   | 0.0271137 | 6.84315  | 7.97949          | 0.0281137    | 6.84415       | 7.92745423       | 0.00290302 | No      |
|      |       |        |             |          |         | Lamp1   | 103.508   | 218.588  | 1.07847          | 103.509      | 218.589       | 1.07846459       | 0.00018329 | No      |
|      |       |        |             |          |         | Lamp2   | 26.0437   | 61.3096  | 1.23518          | 26.0447      | 61.3106       | 1.2351467        | 0.00018329 | No      |
|      |       |        |             |          |         | Lamtor1 | 59.9359   | 99.4061  | 0.729915         | 59.9369      | 99.4071       | 0.72990443       | 0.0101506  | No      |
|      |       |        |             |          |         | Lamtor3 | 17.6462   | 29.6322  | 0.747804         | 17.6472      | 29.6332       | 0.74777513       | 0.00992433 | No      |
|      |       |        |             |          |         | Lamtor4 | 62.2193   | 137.753  | 1.14665          | 62.2203      | 137.754       | 1.14663696       | 0.00018329 | No      |
|      |       |        |             |          |         | Lap3    | 19.7709   | 39.1965  | 0.987346         | 19.7719      | 39.1975       | 0.98731013       | 0.00051281 | No      |
|      |       |        |             |          |         | Laptm4a | 100.346   | 266.183  | 1.40743          | 100.347      | 266.184       | 1.40742637       | 0.00018329 | No      |
|      |       |        |             |          |         | Laptm5  | 655.126   | 148.448  | -2.14182         | 655.127      | 148.449       | -2.1418072       | 0.00018329 | No      |
|      |       |        |             |          |         | Large   | 0.531443  | 6.11555  | 3.5245           | 0.532443     | 6.11655       | 3.52201915       | 0.00018329 | No      |
|      |       |        |             |          |         | Larp1   | 50.1374   | 26.6784  | -0.910214        | 50.1384      | 26.6794       | -0.9101897       | 0.00210945 | No      |
|      |       |        |             |          |         | Larp1b  | 33.9518   | 14.7229  | -1.20543         | 33.9528      | 14.7239       | -1.2053707       | 0.00018329 | No      |
|      |       |        |             |          |         | Lars    | 33.4365   | 19.2305  | -0.798028        | 33.4375      | 19.2315       | -0.7979957       | 0.0018326  | No      |
|      |       |        |             |          |         | LAS2    | 4.33434   | 1.02757  | -2.07657         | 4.33534      | 1.02857       | -2.0755052       | 0.00018329 | No      |
|      |       |        |             |          |         | Layn    | 0.140341  | 0.966803 | 2.78428          | 0.141341     | 0.967803      | 2.77553339       | 0.00650199 | No      |
|      |       |        |             |          |         | Lbp     | 0.0945111 | 5.89554  | 5.963            | 0.0955111    | 5.89654       | 5.94805643       | 0.00051281 | No      |
|      |       |        |             |          |         | Lbr     | 69.7683   | 9.26003  | -2.91348         | 69.7693      | 9.26103       | -2.9133478       | 0.00018329 | No      |
|      |       |        |             |          |         | Lcat    | 6.30373   | 24.3469  | 1.94946          | 6.30473      | 24.3479       | 1.94929085       | 0.00018329 | No      |
|      |       |        |             |          |         | Lck     | 536.256   | 70.7903  | -2.9213          | 536.257      | 70.7913       | -2.9212806       | 0.00018329 | No      |
|      |       |        |             |          |         | Lclat1  | 2.15348   | 8.15525  | 1.92106          | 2.15448      | 8.15625       | 1.92056629       | 0.00018329 | No      |
|      |       |        |             |          |         | Lcn10   | 0         | 1.56159  | inf              | 0.001        | 1.56259       | 10.6097236       | 0.00018329 | No      |
|      |       |        |             |          |         | Lcn8    | 0         | 0.981082 | inf              | 0.001        | 0.982082      | 9.93969968       | 0.00018329 | No      |
|      |       |        |             |          |         | Lcor    | 8.19897   | 2.49597  | -1.71584         | 8.19997      | 2.49697       | -1.7154401       | 0.00018329 | No      |
|      |       |        |             |          |         | Lcorl   | 3.77419   | 1.75551  | -1.10428         | 3.77519      | 1.75651       | -1.1038375       | 0.00937155 | No      |
|      |       |        |             |          |         | Lcp1    | 411.479   | 66.7603  | -2.62376         | 411.48       | 66.7613       | -2.6237384       | 0.00018329 | No      |
|      |       |        |             |          |         | Lcp2    | 98.1724   | 21.8288  | -2.16908         | 98.1734      | 21.8298       | -2.1690333       | 0.00018329 | No      |
|      |       |        |             |          |         | Ldb1    | 264.801   | 41.8952  | -2.66005         | 264.802      | 41.8962       | -2.6600227       | 0.00018329 | No      |

| RRBS |       |        |             |          |         | RNAseq  |           |          |                  |              |               |                  |            |         |
|------|-------|--------|-------------|----------|---------|---------|-----------|----------|------------------|--------------|---------------|------------------|------------|---------|
| gene | Blood | Kidney | methyl.diff | pMWU.fdr | Match ? | gene    | blood     | kidney   | log2(fold_ratio) | blood+ 0.001 | kidney+ 0.001 | log2(fold_ratio) | q_value    | Match ? |
|      |       |        |             |          |         | Ldb2    | 0         | 1.6815   | inf              | 0.001        | 1.6825        | 10.7163908       | 0.00018329 | No      |
|      |       |        |             |          |         | Ldhb    | 9.73455   | 952.162  | 6.61195          | 9.73555      | 952.163       | 6.61180227       | 0.00018329 | No      |
|      |       |        |             |          |         | Ldhd    | 0.953609  | 29.1686  | 4.93487          | 0.954609     | 29.1696       | 4.93341185       | 0.00018329 | No      |
|      |       |        |             |          |         | Ldlr    | 1.27111   | 7.37752  | 2.53704          | 1.27211      | 7.37852       | 2.53610804       | 0.00018329 | No      |
|      |       |        |             |          |         | Ldlrad3 | 0.332675  | 1.27177  | 1.93465          | 0.333675     | 1.27277       | 1.93145623       | 0.0338104  | No      |
|      |       |        |             |          |         | Ldlrap1 | 119.803   | 10.8591  | -3.46369         | 119.804      | 10.8601       | -3.4635668       | 0.00018329 | No      |
|      |       |        |             |          |         | Lef1    | 221.42    | 13.6884  | -4.01576         | 221.421      | 13.6894       | -4.0156609       | 0.00018329 | No      |
|      |       |        |             |          |         | Lekr1   | 0.261268  | 2.69245  | 3.36532          | 0.262268     | 2.69345       | 3.36034159       | 0.00822601 | No      |
|      |       |        |             |          |         | Lemd3   | 11.3236   | 5.0511   | -1.16467         | 11.3246      | 5.0521        | -1.164505        | 0.00035173 | No      |
|      |       |        |             |          |         | Leng8   | 174.63    | 50.6622  | -1.78532         | 174.631      | 50.6632       | -1.7852996       | 0.00018329 | No      |
|      |       |        |             |          |         | Lepre1  | 4.95904   | 17.8394  | 1.84694          | 4.96004      | 17.8404       | 1.8467243        | 0.00018329 | No      |
|      |       |        |             |          |         | Leprel1 | 0         | 24.3028  | inf              | 0.001        | 24.3038       | 14.5688943       | 0.00018329 | No      |
|      |       |        |             |          |         | Leprel2 | 0.185438  | 43.464   | 7.87274          | 0.186438     | 43.465        | 7.86501439       | 0.00018329 | No      |
|      |       |        |             |          |         | Leprel4 | 0.341667  | 2.11835  | 2.63228          | 0.342667     | 2.11935       | 2.62874269       | 0.00082046 | No      |
|      |       |        |             |          |         | Lfng    | 51.1373   | 6.90076  | -2.88955         | 51.1383      | 6.90176       | -2.889368        | 0.00018329 | No      |
|      |       |        |             |          |         | Lgals1  | 595.507   | 259.134  | -1.20042         | 595.508      | 259.135       | -1.200417        | 0.00018329 | No      |
|      |       |        |             |          |         | Lgals3  | 2.34022   | 105.741  | 5.49775          | 2.34122      | 105.742       | 5.4971442        | 0.00018329 | No      |
|      |       |        |             |          |         | Lgals9  | 208.073   | 55.4832  | -1.90696         | 208.074      | 55.4842       | -1.9069478       | 0.00018329 | No      |
|      |       |        |             |          |         | Lgmn    | 77.2707   | 164.659  | 1.09149          | 77.2717      | 164.66        | 1.09147809       | 0.00018329 | No      |
|      |       |        |             |          |         | Lgr4    | 0.547251  | 25.077   | 5.51802          | 0.548251     | 25.078        | 5.51544195       | 0.00018329 | No      |
|      |       |        |             |          |         | Lhfp    | 0.0722186 | 10.7534  | 7.21821          | 0.0732186    | 10.7544       | 7.19850113       | 0.012344   | No      |
|      |       |        |             |          |         | Lhfpl1  | 0         | 0.771587 | inf              | 0.001        | 0.772587      | 9.59355359       | 0.00018329 | No      |
|      |       |        |             |          |         | Lhfpl2  | 0.0258311 | 3.77466  | 7.19109          | 0.0268311    | 3.77566       | 7.13667884       | 0.00709238 | No      |
|      |       |        |             |          |         | Lias    | 4.49227   | 17.299   | 1.94517          | 4.49327      | 17.3          | 1.94493438       | 0.00018329 | No      |
|      |       |        |             |          |         | Lifr    | 0.0352726 | 34.9708  | 9.95338          | 0.0362726    | 34.9718       | 9.91309618       | 0.00018329 | No      |
|      |       |        |             |          |         | Lig4    | 42.7097   | 11.3548  | -1.91126         | 42.7107      | 11.3558       | -1.9111682       | 0.00018329 | No      |
|      |       |        |             |          |         | Lilrb3  | 0.136139  | 1.1278   | 3.05036          | 0.137139     | 1.1288        | 3.04107908       | 0.00251301 | No      |
|      |       |        |             |          |         | Lilrb3l | 0.410391  | 3.0224   | 2.88062          | 0.411391     | 3.0234        | 2.87758972       | 0.00018329 | No      |
|      |       |        |             |          |         | Lilrb4  | 1.74691   | 72.7566  | 5.3802           | 1.74791      | 72.7576       | 5.37939515       | 0.00018329 | No      |
|      |       |        |             |          |         | Lilrc2  | 0.215977  | 1.57469  | 2.86611          | 0.216977     | 1.57569       | 2.8603697        | 0.0142025  | No      |
|      |       |        |             |          |         | Lima1   | 0.371249  | 12.1264  | 5.02962          | 0.372249     | 12.1274       | 5.0258585        | 0.00018329 | No      |
|      |       |        |             |          |         | Limch1  | 0         | 9.00186  | inf              | 0.001        | 9.00286       | 13.1361677       | 0.00018329 | No      |
|      |       |        |             |          |         | Limd2   | 852.783   | 63.6326  | -3.74434         | 852.784      | 63.6336       | -3.7443197       | 0.00018329 | No      |
|      |       |        |             |          |         | Lims1   | 20.5419   | 10.2345  | -1.00513         | 20.5429      | 10.2355       | -1.0050583       | 0.00051281 | No      |
|      |       |        |             |          |         | Lin54   | 5.05002   | 2.63268  | -0.939755        | 5.05102      | 2.63368       | -0.9394947       | 0.00342383 | No      |
|      |       |        |             |          |         | Lins    | 1.38831   | 2.50852  | 0.85351          | 1.38931      | 2.50952       | 0.8530429        | 0.042303   | No      |
|      |       |        |             |          |         | Liph    | 0.068933  | 20.1793  | 8.19346          | 0.069933     | 20.1803       | 8.17275851       | 0.0168685  | No      |
|      |       |        |             |          |         | Lipt1   | 2.21631   | 1.02547  | -1.11188         | 2.21731      | 1.02647       | -1.111119        | 0.00914594 | No      |
|      |       |        |             |          |         | Llph    | 141.682   | 72.1935  | -0.972714        | 141.683      | 72.1945       | -0.9727058       | 0.00111812 | No      |
|      |       |        |             |          |         | Lman1   | 8.71598   | 22.2106  | 1.34951          | 8.71698      | 22.2116       | 1.34941302       | 0.00051281 | No      |
|      |       |        |             |          |         | Lman2   | 81.8022   | 127.165  | 0.636488         | 81.8032      | 127.166       | 0.63648381       | 0.0388119  | No      |
|      |       |        |             |          |         | Lman2l  | 9.63344   | 26.4784  | 1.45869          | 9.63444      | 26.4794       | 1.45859771       | 0.00018329 | No      |

| RRBS |       |        |             |          |         | RNAseq  |           |          |                  |              |               |                  |            |         |
|------|-------|--------|-------------|----------|---------|---------|-----------|----------|------------------|--------------|---------------|------------------|------------|---------|
| gene | Blood | Kidney | methyl.diff | pMWU.fdr | Match ? | gene    | blood     | kidney   | log2(fold_ratio) | blood+ 0.001 | kidney+ 0.001 | log2(fold_ratio) | q_value    | Match ? |
|      |       |        |             |          |         | Lmcd1   | 0         | 9.54377  | inf              | 0.001        | 9.54477       | 13.2204947       | 0.00018329 | No      |
|      |       |        |             |          |         | Lmf1    | 7.69833   | 14.5518  | 0.918578         | 7.69933      | 14.5528       | 0.91849195       | 0.00845618 | No      |
|      |       |        |             |          |         | Lmnb1   | 12.1758   | 6.53904  | -0.896861        | 12.1768      | 6.54004       | -0.8967637       | 0.00891798 | No      |
|      |       |        |             |          |         | Lmo1    | 0         | 3.30673  | inf              | 0.001        | 3.30773       | 11.6916258       | 0.00018329 | No      |
|      |       |        |             |          |         | Lmo2    | 3.23765   | 19.4571  | 2.58728          | 3.23865      | 19.4581       | 2.58690637       | 0.00018329 | No      |
|      |       |        |             |          |         | Lmo7    | 2.30267   | 29.9364  | 3.70052          | 2.30367      | 29.9374       | 3.69994296       | 0.00018329 | No      |
|      |       |        |             |          |         | Lmtk2   | 2.83978   | 4.22888  | 0.574495         | 2.84078      | 4.22988       | 0.57432963       | 0.0481525  | No      |
|      |       |        |             |          |         | Lnx2    | 14.1288   | 5.99118  | -1.23773         | 14.1298      | 5.99218       | -1.2375882       | 0.00018329 | No      |
|      |       |        |             |          |         | Lonp1   | 38.0479   | 54.8682  | 0.528155         | 38.0489      | 54.8692       | 0.5281418        | 0.0420159  | No      |
|      |       |        |             |          |         | Lonp2   | 22.7712   | 64.5347  | 1.50286          | 22.7722      | 64.5357       | 1.50282378       | 0.00035173 | No      |
|      |       |        |             |          |         | Lox     | 0         | 0.767654 | inf              | 0.001        | 0.768654      | 9.58619052       | 0.00018329 | No      |
|      |       |        |             |          |         | Lpar3   | 0         | 1.1139   | inf              | 0.001        | 1.1149        | 10.1226986       | 0.00018329 | No      |
|      |       |        |             |          |         | Lpar6   | 51.2159   | 19.2826  | -1.40929         | 51.2169      | 19.2836       | -1.4092455       | 0.0110491  | No      |
|      |       |        |             |          |         | Lpcat2  | 0.102344  | 7.29437  | 6.15528          | 0.103344     | 7.29537       | 6.14145461       | 0.00290302 | No      |
|      |       |        |             |          |         | Lpcat4  | 18.9811   | 11.6019  | -0.710209        | 18.9821      | 11.6029       | -0.7101542       | 0.0194611  | No      |
|      |       |        |             |          |         | Lphn1   | 10.472    | 4.51693  | -1.21312         | 10.473       | 4.51793       | -1.2129409       | 0.00018329 | No      |
|      |       |        |             |          |         | Lphn2   | 0.0943319 | 6.85892  | 6.18409          | 0.0953319    | 6.85992       | 6.16908889       | 0.00018329 | No      |
|      |       |        |             |          |         | Lphn3   | 0         | 0.613712 | inf              | 0.001        | 0.614712      | 9.26376684       | 0.00018329 | No      |
|      |       |        |             |          |         | Lpin1   | 24.23     | 7.31878  | -1.72712         | 24.231       | 7.31978       | -1.7269818       | 0.00111812 | No      |
|      |       |        |             |          |         | Lpin2   | 3.19751   | 6.29656  | 0.977613         | 3.19851      | 6.29756       | 0.97739297       | 0.00111812 | No      |
|      |       |        |             |          |         | Lpin3   | 12.458    | 24.6517  | 0.984613         | 12.459       | 24.6527       | 0.98455738       | 0.00140841 | No      |
|      |       |        |             |          |         | Lpo     | 0         | 0.772684 | inf              | 0.001        | 0.773684      | 9.59560063       | 0.00018329 | No      |
|      |       |        |             |          |         | Lppr2   | 0.264696  | 0.732738 | 1.46896          | 0.265696     | 0.733738      | 1.4654885        | 0.0484218  | No      |
|      |       |        |             |          |         | Lpxn    | 126.787   | 15.7703  | -3.00713         | 126.788      | 15.7713       | -3.0070447       | 0.00018329 | No      |
|      |       |        |             |          |         | Lrch3   | 14.7718   | 7.56397  | -0.965628        | 14.7728      | 7.56497       | -0.965537        | 0.00082046 | No      |
|      |       |        |             |          |         | Lrch4   | 69.5359   | 24.102   | -1.5286          | 69.5369      | 24.103        | -1.528566        | 0.00018329 | No      |
|      |       |        |             |          |         | Lrguk   | 0.091268  | 1.39499  | 3.934            | 0.092268     | 1.39599       | 3.91931441       | 0.0178968  | No      |
|      |       |        |             |          |         | Lrif1   | 8.67403   | 5.16421  | -0.748155        | 8.67503      | 5.16521       | -0.7480417       | 0.0472851  | No      |
|      |       |        |             |          |         | Lrig1   | 46.887    | 5.45642  | -3.10316         | 46.888       | 5.45742       | -3.1029278       | 0.00018329 | No      |
|      |       |        |             |          |         | Lrig2   | 9.18479   | 4.15385  | -1.1448          | 9.18579      | 4.15485       | -1.1446074       | 0.00251301 | No      |
|      |       |        |             |          |         | LRIG3   | 0.178333  | 6.84548  | 5.26251          | 0.179333     | 6.84648       | 5.25464955       | 0.00051281 | No      |
|      |       |        |             |          |         | Lrp1    | 0.143055  | 2.49006  | 4.12154          | 0.144055     | 2.49106       | 4.11206813       | 0.00018329 | No      |
|      |       |        |             |          |         | Lrp10   | 41.9224   | 67.8718  | 0.695089         | 41.9234      | 67.8728       | 0.69507781       | 0.00811172 | No      |
|      |       |        |             |          |         | Lrp12   | 0.196121  | 3.5194   | 4.16551          | 0.197121     | 3.5204        | 4.15858598       | 0.00018329 | No      |
|      |       |        |             |          |         | Lrp5    | 1.85714   | 59.6986  | 5.00654          | 1.85814      | 59.6996       | 5.00579016       | 0.00018329 | No      |
|      |       |        |             |          |         | Lrpap1  | 12.1467   | 64.8213  | 2.4159           | 12.1477      | 64.8223       | 2.41580703       | 0.00018329 | No      |
|      |       |        |             |          |         | Lrrc1   | 10.3407   | 20.1542  | 0.962755         | 10.3417      | 20.1552       | 0.96267874       | 0.00197017 | No      |
|      |       |        |             |          |         | Lrrc16b | 0.0928896 | 1.34724  | 3.85835          | 0.0938896    | 1.34824       | 3.84396816       | 0.00458064 | No      |
|      |       |        |             |          |         | Lrrc19  | 0.0544647 | 4.76752  | 6.45177          | 0.0554647    | 4.76852       | 6.42582788       | 0.0146209  | No      |
|      |       |        |             |          |         | Lrrc24  | 10.7546   | 41.6741  | 1.9542           | 10.7556      | 41.6751       | 1.95409765       | 0.00018329 | No      |
|      |       |        |             |          |         | Lrrc25  | 0.131988  | 6.20292  | 5.55447          | 0.132988     | 6.20392       | 5.54381211       | 0.00018329 | No      |
|      |       |        |             |          |         | Lrrc31  | 0         | 0.693195 | inf              | 0.001        | 0.694195      | 9.43919716       | 0.00018329 | No      |



| RRBS |       |        |             |          |         | RNAseq  |           |          |                  |              |               |                  |            |         |
|------|-------|--------|-------------|----------|---------|---------|-----------|----------|------------------|--------------|---------------|------------------|------------|---------|
| gene | Blood | Kidney | methyl.diff | pMWU.fdr | Match ? | gene    | blood     | kidney   | log2(fold_ratio) | blood+ 0.001 | kidney+ 0.001 | log2(fold_ratio) | q_value    | Match ? |
|      |       |        |             |          |         | Lrrc34  | 21.3489   | 3.50736  | -2.60571         | 21.3499      | 3.50836       | -2.6053606       | 0.00018329 | No      |
|      |       |        |             |          |         | Lrrc46  | 0.512034  | 1.70837  | 1.73831          | 0.513034     | 1.70937       | 1.73633836       | 0.0137692  | No      |
|      |       |        |             |          |         | Lrrc48  | 0.0815461 | 1.88418  | 4.53018          | 0.0825461    | 1.88518       | 4.51335842       | 0.00018329 | No      |
|      |       |        |             |          |         | Lrrc49  | 0.0344935 | 4.34816  | 6.97794          | 0.0354935    | 4.34916       | 6.93703813       | 0.00097029 | No      |
|      |       |        |             |          |         | Lrrc51  | 0.210281  | 2.10593  | 3.32407          | 0.211281     | 2.10693       | 3.31790744       | 0.00432763 | No      |
|      |       |        |             |          |         | Lrrc58  | 0.258695  | 5.12371  | 4.30786          | 0.259695     | 5.12471       | 4.30258022       | 0.00018329 | No      |
|      |       |        |             |          |         | Lrrc59  | 16.8038   | 26.8022  | 0.673565         | 16.8048      | 26.8032       | 0.67353188       | 0.00981659 | No      |
|      |       |        |             |          |         | Lrrc61  | 0.125425  | 1.85911  | 3.88972          | 0.126425     | 1.86011       | 3.87903426       | 0.00051281 | No      |
|      |       |        |             |          |         | Lrrc66  | 0.0646476 | 6.39543  | 6.6283           | 0.0656476    | 6.39643       | 6.60638085       | 0.00126492 | No      |
|      |       |        |             |          |         | Lrrc8a  | 31.6796   | 64.7434  | 1.03118          | 31.6806      | 64.7444       | 1.03115575       | 0.027785   | No      |
|      |       |        |             |          |         | Lrrc8c  | 43.7876   | 6.21178  | -2.81744         | 43.7886      | 6.21278       | -2.8172445       | 0.00018329 | No      |
|      |       |        |             |          |         | Lrrfip2 | 12.4886   | 31.0235  | 1.31276          | 12.4896      | 31.0245       | 1.31268069       | 0.00018329 | No      |
|      |       |        |             |          |         | Lrrk1   | 0.292059  | 10.3828  | 5.15179          | 0.293059     | 10.3838       | 5.14699955       | 0.00018329 | No      |
|      |       |        |             |          |         | Lrsam1  | 2.1729    | 15.3684  | 2.82228          | 2.1739       | 15.3694       | 2.82170336       | 0.00018329 | No      |
|      |       |        |             |          |         | Lrtm2   | 0.0959906 | 0.849296 | 3.1453           | 0.0969906    | 0.850296      | 3.13204831       | 0.0026435  | No      |
|      |       |        |             |          |         | Lrwd1   | 46.6815   | 14.917   | -1.64589         | 46.6825      | 14.918        | -1.6458277       | 0.0016929  | No      |
|      |       |        |             |          |         | Lsm12   | 74.3104   | 49.8659  | -0.57551         | 74.3114      | 49.8669       | -0.575501        | 0.0272985  | No      |
|      |       |        |             |          |         | Lsm14a  | 70.8764   | 31.2692  | -1.18056         | 70.8774      | 31.2702       | -1.1805372       | 0.00018329 | No      |
|      |       |        |             |          |         | Lsm14b  | 47.993    | 18.9824  | -1.33817         | 47.994       | 18.9834       | -1.3381156       | 0.00018329 | No      |
|      |       |        |             |          |         | Lsm5    | 165.837   | 82.464   | -1.00793         | 165.838      | 82.465        | -1.0079208       | 0.00018329 | No      |
|      |       |        |             |          |         | LSP1    | 243.335   | 98.5386  | -1.30418         | 243.336      | 98.5396       | -1.3041743       | 0.00018329 | No      |
|      |       |        |             |          |         | Lsr     | 1.76697   | 50.1547  | 4.82704          | 1.76797      | 50.1557       | 4.82624797       | 0.00066911 | No      |
|      |       |        |             |          |         | Lta4h   | 15.6101   | 23.5557  | 0.593595         | 15.6111      | 23.5567       | 0.59356525       | 0.0418329  | No      |
|      |       |        |             |          |         | Ltbp1   | 0.10227   | 6.34616  | 5.95543          | 0.10327      | 6.34716       | 5.94161809       | 0.00469886 | No      |
|      |       |        |             |          |         | Ltbp4   | 0.348427  | 21.7068  | 5.96115          | 0.349427     | 21.7078       | 5.95707862       | 0.00018329 | No      |
|      |       |        |             |          |         | Ltn1    | 17.6614   | 8.79296  | -1.00618         | 17.6624      | 8.79396       | -1.0060965       | 0.00329119 | No      |
|      |       |        |             |          |         | Ltv1    | 25.1419   | 16.3572  | -0.620165        | 25.1429      | 16.3582       | -0.6201371       | 0.0342763  | No      |
|      |       |        |             |          |         | Luc7l3  | 87.9725   | 44.6989  | -0.976813        | 87.9735      | 44.6999       | -0.9767974       | 0.00082046 | No      |
|      |       |        |             |          |         | Lurap1  | 0         | 2.37699  | inf              | 0.001        | 2.37799       | 11.2155269       | 0.00018329 | No      |
|      |       |        |             |          |         | Ly49s7  | 1.49915   | 5.93866  | 1.986            | 1.50015      | 5.93966       | 1.98527359       | 0.00018329 | No      |
|      |       |        |             |          |         | Ly6al   | 0.394114  | 9.22975  | 4.54961          | 0.395114     | 9.23075       | 4.546107         | 0.00018329 | No      |
|      |       |        |             |          |         | Ly6c    | 352.91    | 143.306  | -1.3002          | 352.911      | 143.307       | -1.3001953       | 0.00051281 | No      |
|      |       |        |             |          |         | Ly6e    | 702.75    | 182.519  | -1.94497         | 702.751      | 182.52        | -1.944959        | 0.00018329 | No      |
|      |       |        |             |          |         | Ly6g6e  | 0         | 0.949278 | inf              | 0.001        | 0.950278      | 9.89220582       | 0.00303839 | No      |
|      |       |        |             |          |         | Ly6i    | 0.0283491 | 92.0092  | 11.6643          | 0.0293491    | 92.0102       | 11.6142618       | 0.0323887  | No      |
|      |       |        |             |          |         | Ly75    | 6.91617   | 0.742456 | -3.2196          | 6.91717      | 0.743456      | -3.2178626       | 0.00018329 | No      |
|      |       |        |             |          |         | Ly86    | 3.04934   | 16.5622  | 2.44132          | 3.05034      | 16.5632       | 2.44093946       | 0.00018329 | No      |
|      |       |        |             |          |         | Ly9     | 73.7361   | 7.6215   | -3.27423         | 73.7371      | 7.6225        | -3.2740545       | 0.00018329 | No      |
|      |       |        |             |          |         | Lyar    | 22.7087   | 12.6359  | -0.845719        | 22.7097      | 12.6369       | -0.8456661       | 0.0036827  | No      |
|      |       |        |             |          |         | Lyl1    | 1.75648   | 16.1941  | 3.20471          | 1.75748      | 16.1951       | 3.2039772        | 0.0239196  | No      |
|      |       |        |             |          |         | Lyn     | 3.47648   | 15.4374  | 2.15073          | 3.47748      | 15.4384       | 2.15040912       | 0.00018329 | No      |
|      |       |        |             |          |         | Lynx1   | 0.602478  | 15.2742  | 4.66405          | 0.603478     | 15.2752       | 4.66174628       | 0.0102693  | No      |

| RRBS |       |        |             |          |         | RNAseq   |           |          |                  |              |               |                  |            |         |
|------|-------|--------|-------------|----------|---------|----------|-----------|----------|------------------|--------------|---------------|------------------|------------|---------|
| gene | Blood | Kidney | methyl.diff | pMWU.fdr | Match ? | gene     | blood     | kidney   | log2(fold_ratio) | blood+ 0.001 | kidney+ 0.001 | log2(fold_ratio) | q_value    | Match ? |
|      |       |        |             |          |         | Lyplal1  | 0.735335  | 19.6601  | 4.74072          | 0.736335     | 19.6611       | 4.73883795       | 0.00018329 | No      |
|      |       |        |             |          |         | Lyrn7    | 4.28147   | 12.3007  | 1.52256          | 4.28247      | 12.3017       | 1.52234265       | 0.00018329 | No      |
|      |       |        |             |          |         | Lyrn9    | 5.30518   | 13.7     | 1.3687           | 5.30618      | 13.701        | 1.36853567       | 0.0100349  | No      |
|      |       |        |             |          |         | Lysmd2   | 10.6342   | 5.13183  | -1.05116         | 10.6352      | 5.13283       | -1.0510208       | 0.00788539 | No      |
|      |       |        |             |          |         | Lysmd3   | 5.55438   | 3.24503  | -0.775393        | 5.55538      | 3.24603       | -0.7752093       | 0.0128946  | No      |
|      |       |        |             |          |         | Lyve1    | 0.0709246 | 1.50749  | 4.40972          | 0.0719246    | 1.50849       | 4.39047603       | 0.00051281 | No      |
|      |       |        |             |          |         | Lyz2     | 42.6285   | 577.012  | 3.75871          | 42.6295      | 577.013       | 3.75867978       | 0.00018329 | No      |
|      |       |        |             |          |         | Lzic     | 15.042    | 7.50105  | -1.00383         | 15.043       | 7.50205       | -1.0037355       | 0.00051281 | No      |
|      |       |        |             |          |         | Lztf1    | 3.1856    | 12.338   | 1.95348          | 3.1866       | 12.339        | 1.95313564       | 0.00018329 | No      |
|      |       |        |             |          |         | Lzts2    | 3.81777   | 21.3239  | 2.48167          | 3.81877      | 21.3249       | 2.48135904       | 0.00018329 | No      |
|      |       |        |             |          |         | Mab21l3  | 0         | 4.87565  | inf              | 0.001        | 4.87665       | 12.2516747       | 0.00018329 | No      |
|      |       |        |             |          |         | Macrocl1 | 1.63258   | 60.133   | 5.20293          | 1.63358      | 60.134        | 5.20207191       | 0.00018329 | No      |
|      |       |        |             |          |         | Mad1l1   | 14.8601   | 8.20849  | -0.856259        | 14.8611      | 8.20949       | -0.8561764       | 0.00959787 | No      |
|      |       |        |             |          |         | Mad2l1   | 7.24477   | 3.50006  | -1.04956         | 7.24577      | 3.50106       | -1.0493472       | 0.010379   | No      |
|      |       |        |             |          |         | Madd     | 37.526    | 18.1643  | -1.04678         | 37.527       | 18.1653       | -1.0467438       | 0.0016929  | No      |
|      |       |        |             |          |         | Maea     | 40.4663   | 104.061  | 1.36263          | 40.4673      | 104.062       | 1.36261484       | 0.00018329 | No      |
|      |       |        |             |          |         | Maf      | 5.74596   | 20.6946  | 1.84863          | 5.74696      | 20.6956       | 1.84845316       | 0.00018329 | No      |
|      |       |        |             |          |         | Maf1     | 155.374   | 70.2907  | -1.14434         | 155.375      | 70.2917       | -1.1443281       | 0.00111812 | No      |
|      |       |        |             |          |         | Maff     | 2.74104   | 5.22507  | 0.930723         | 2.74204      | 5.22607       | 0.93047683       | 0.0207821  | No      |
|      |       |        |             |          |         | Mafg     | 2.6457    | 12.7864  | 2.27289          | 2.6467       | 12.7874       | 2.27245638       | 0.00018329 | No      |
|      |       |        |             |          |         | Maged1   | 0.0395851 | 55.2811  | 10.4476          | 0.0405851    | 55.2821       | 10.4116465       | 0.00210945 | No      |
|      |       |        |             |          |         | Maged2   | 4.45828   | 18.1551  | 2.02581          | 4.45928      | 18.1561       | 2.02557164       | 0.00018329 | No      |
|      |       |        |             |          |         | Mageh1   | 1.95746   | 22.4724  | 3.52109          | 1.95846      | 22.4734       | 3.52042684       | 0.00018329 | No      |
|      |       |        |             |          |         | Magi1    | 0.222264  | 10.5458  | 5.56825          | 0.223264     | 10.5468       | 5.56191088       | 0.00018329 | No      |
|      |       |        |             |          |         | Magi3    | 3.83461   | 17.2458  | 2.1691           | 3.83561      | 17.2468       | 2.16880077       | 0.00018329 | No      |
|      |       |        |             |          |         | Magix    | 0.0658573 | 12.0442  | 7.51479          | 0.0668573    | 12.0452       | 7.49315754       | 0.0438054  | No      |
|      |       |        |             |          |         | Magoh    | 127.665   | 84.6367  | -0.593006        | 127.666      | 84.6377       | -0.593002        | 0.0337151  | No      |
|      |       |        |             |          |         | Mak16    | 20.0337   | 10.804   | -0.890867        | 20.0347      | 10.805        | -0.8908018       | 0.0140981  | No      |
|      |       |        |             |          |         | Mal2     | 0         | 33.0237  | inf              | 0.001        | 33.0247       | 15.0112578       | 0.00018329 | No      |
|      |       |        |             |          |         | Mall     | 0         | 1.40974  | inf              | 0.001        | 1.41074       | 10.4622364       | 0.00018329 | No      |
|      |       |        |             |          |         | Malsu1   | 13.7842   | 29.9571  | 1.11988          | 13.7852      | 29.9581       | 1.11982593       | 0.00224282 | No      |
|      |       |        |             |          |         | Malt1    | 20.1006   | 5.19302  | -1.95259         | 20.1016      | 5.19402       | -1.9523869       | 0.00018329 | No      |
|      |       |        |             |          |         | MAMDC2   | 0         | 2.02656  | inf              | 0.001        | 2.02756       | 10.9855289       | 0.00018329 | No      |
|      |       |        |             |          |         | Maml2    | 9.33526   | 1.94208  | -2.26508         | 9.33626      | 1.94308       | -2.2644994       | 0.00018329 | No      |
|      |       |        |             |          |         | Man1a1   | 56.2473   | 4.39717  | -3.67713         | 56.2483      | 4.39817       | -3.6768342       | 0.00018329 | No      |
|      |       |        |             |          |         | Man2a1   | 30.266    | 12.7808  | -1.24372         | 30.267       | 12.7818       | -1.2436547       | 0.00018329 | No      |
|      |       |        |             |          |         | Manba    | 11.0565   | 28.3348  | 1.35769          | 11.0575      | 28.3358       | 1.35760069       | 0.00018329 | No      |
|      |       |        |             |          |         | Manbal   | 30.6757   | 51.6556  | 0.751831         | 30.6767      | 51.6566       | 0.75180939       | 0.00788539 | No      |
|      |       |        |             |          |         | Manea    | 1.29772   | 3.44569  | 1.40882          | 1.29872      | 3.44669       | 1.40812112       | 0.00018329 | No      |
|      |       |        |             |          |         | Mansc1   | 0.0941548 | 9.62457  | 6.67554          | 0.0951548    | 9.62557       | 6.66045173       | 0.00018329 | No      |
|      |       |        |             |          |         | Maoa     | 0.178036  | 8.53261  | 5.58275          | 0.179036     | 8.53361       | 5.57483456       | 0.00018329 | No      |
|      |       |        |             |          |         | Maob     | 0.0562974 | 0.854852 | 3.92453          | 0.0572974    | 0.855852      | 3.90081976       | 0.0230128  | No      |

| RRBS |       |        |             |          |         | RNAseq    |           |         |                  |              |               |                  |            |         |
|------|-------|--------|-------------|----------|---------|-----------|-----------|---------|------------------|--------------|---------------|------------------|------------|---------|
| gene | Blood | Kidney | methyl.diff | pMWU.fdr | Match ? | gene      | blood     | kidney  | log2(fold_ratio) | blood+ 0.001 | kidney+ 0.001 | log2(fold_ratio) | q_value    | Match ? |
|      |       |        |             |          |         | Map1lc3a  | 17.9967   | 103.793 | 2.5279           | 17.9977      | 103.794       | 2.52783859       | 0.00018329 | No      |
|      |       |        |             |          |         | Map2k2    | 72.3537   | 130.865 | 0.854936         | 72.3547      | 130.866       | 0.85493168       | 0.00097029 | No      |
|      |       |        |             |          |         | Map2k3    | 4.39185   | 11.9393 | 1.44281          | 4.39285      | 11.9403       | 1.44260994       | 0.00035173 | No      |
|      |       |        |             |          |         | Map2k4    | 16.9903   | 9.02452 | -0.912787        | 16.9913      | 9.02552       | -0.9127143       | 0.0160313  | No      |
|      |       |        |             |          |         | Map3k13   | 10.6878   | 6.20858 | -0.783634        | 10.6888      | 6.20958       | -0.7835323       | 0.0345543  | No      |
|      |       |        |             |          |         | Map3k14   | 17.9309   | 5.10051 | -1.81374         | 17.9319      | 5.10151       | -1.8135321       | 0.00018329 | No      |
|      |       |        |             |          |         | Map3k2    | 9.5883    | 4.84452 | -0.98492         | 9.5893       | 4.84552       | -0.984774        | 0.00393885 | No      |
|      |       |        |             |          |         | Map3k5    | 13.6943   | 24.4391 | 0.835613         | 13.6953      | 24.4401       | 0.83556932       | 0.00458064 | No      |
|      |       |        |             |          |         | Map3k8    | 8.36424   | 5.14635 | -0.700684        | 8.36524      | 5.14735       | -0.700577        | 0.0354586  | No      |
|      |       |        |             |          |         | Map3k9    | 0.767251  | 2.47584 | 1.69015          | 0.768251     | 2.47684       | 1.68885103       | 0.00018329 | No      |
|      |       |        |             |          |         | Map4k3    | 6.85231   | 38.4942 | 2.48998          | 6.85331      | 38.4952       | 2.48980571       | 0.00018329 | No      |
|      |       |        |             |          |         | Map4k4    | 46.013    | 12.2276 | -1.9119          | 46.014       | 12.2286       | -1.9118136       | 0.00018329 | No      |
|      |       |        |             |          |         | Map4k5    | 1.0042    | 6.76036 | 2.75105          | 1.0052       | 6.76136       | 2.74983089       | 0.00018329 | No      |
|      |       |        |             |          |         | Map7      | 0.345644  | 21.9565 | 5.98922          | 0.346644     | 21.9575       | 5.9851152        | 0.00018329 | No      |
|      |       |        |             |          |         | Map9      | 1.09738   | 1.85022 | 0.753631         | 1.09838      | 1.85122       | 0.75309909       | 0.0429385  | No      |
|      |       |        |             |          |         | Mapk1     | 32.2475   | 19.7258 | -0.709103        | 32.2485      | 19.7268       | -0.7090751       | 0.0201703  | No      |
|      |       |        |             |          |         | Mapk15    | 0.056453  | 1.16768 | 4.37045          | 0.057453     | 1.16868       | 4.34635392       | 0.0436248  | No      |
|      |       |        |             |          |         | Mapk1ip1l | 27.3606   | 14.5405 | -0.912021        | 27.3616      | 14.5415       | -0.9119765       | 0.00097029 | No      |
|      |       |        |             |          |         | Mapk3     | 22.9001   | 49.7054 | 1.11805          | 22.9011      | 49.7064       | 1.11801472       | 0.00018329 | No      |
|      |       |        |             |          |         | Mapk7     | 0.989014  | 2.89488 | 1.54944          | 0.990014     | 2.89588       | 1.54848099       | 0.00051281 | No      |
|      |       |        |             |          |         | Mapk8     | 9.98021   | 4.60164 | -1.11692         | 9.98121      | 4.60264       | -1.1167531       | 0.00530972 | No      |
|      |       |        |             |          |         | Mapk8ip1  | 0.23199   | 30.135  | 7.02123          | 0.23299      | 30.136        | 7.01507609       | 0.00018329 | No      |
|      |       |        |             |          |         | Mapk8ip3  | 24.5061   | 13.5569 | -0.854112        | 24.5071      | 13.5579       | -0.854066        | 0.0026435  | No      |
|      |       |        |             |          |         | Mapkbp1   | 6.00945   | 2.09798 | -1.51823         | 6.01045      | 2.09898       | -1.5177846       | 0.00018329 | No      |
|      |       |        |             |          |         | Mapre1    | 68.5958   | 33.8207 | -1.02021         | 68.5968      | 33.8217       | -1.0201921       | 0.00018329 | No      |
|      |       |        |             |          |         | Mapre2    | 55.6752   | 29.3239 | -0.924959        | 55.6762      | 29.3249       | -0.9249346       | 0.00051281 | No      |
|      |       |        |             |          |         | Mapre3    | 3.08557   | 18.8527 | 2.61116          | 3.08657      | 18.8537       | 2.61077126       | 0.00018329 | No      |
|      |       |        |             |          |         | Mapt      | 0.0566501 | 9.22135 | 7.34676          | 0.0576501    | 9.22235       | 7.3216675        | 0.00018329 | No      |
|      |       |        |             |          |         | Marcks    | 0.882089  | 5.64897 | 2.67899          | 0.883089     | 5.64997       | 2.67761246       | 0.00018329 | No      |
|      |       |        |             |          |         | Marcksl1  | 5.12678   | 24.8151 | 2.27509          | 5.12778      | 24.8161       | 2.27487013       | 0.00018329 | No      |
|      |       |        |             |          |         | Marf1     | 20.1533   | 12.0437 | -0.742738        | 20.1543      | 12.0447       | -0.7426892       | 0.0248275  | No      |
|      |       |        |             |          |         | Mark2     | 47.7902   | 23.8187 | -1.00462         | 47.7912      | 23.8197       | -1.0045897       | 0.00051281 | No      |
|      |       |        |             |          |         | Mars      | 29.7371   | 62.2211 | 1.06514          | 29.7381      | 62.2221       | 1.06511461       | 0.0405279  | No      |
|      |       |        |             |          |         | Marveld1  | 0.455949  | 7.47826 | 4.03576          | 0.456949     | 7.47926       | 4.03279048       | 0.00018329 | No      |
|      |       |        |             |          |         | Mast2     | 5.41077   | 14.2348 | 1.39552          | 5.41177      | 14.2358       | 1.39535114       | 0.00018329 | No      |
|      |       |        |             |          |         | Mast4     | 0.0116932 | 4.33004 | 8.53257          | 0.0126932    | 4.33104       | 8.41451386       | 0.0448123  | No      |
|      |       |        |             |          |         | Mat2b     | 60.4015   | 36.4978 | -0.726777        | 60.4025      | 36.4988       | -0.7267592       | 0.00721079 | No      |
|      |       |        |             |          |         | Matk      | 0.463538  | 4.70206 | 3.34253          | 0.464538     | 4.70306       | 3.33973122       | 0.00018329 | No      |
|      |       |        |             |          |         | Matr3     | 111.684   | 42.4337 | -1.39613         | 111.685      | 42.4347       | -1.3961191       | 0.00018329 | No      |
|      |       |        |             |          |         | MAU2      | 51.3268   | 24.3993 | -1.07287         | 51.3278      | 24.4003       | -1.0728415       | 0.0309526  | No      |
|      |       |        |             |          |         | Mavs      | 5.90778   | 39.4109 | 2.73791          | 5.90878      | 39.4119       | 2.73769911       | 0.00018329 | No      |
|      |       |        |             |          |         | Max       | 183.823   | 49.9627 | -1.87939         | 183.824      | 49.9637       | -1.8793729       | 0.00018329 | No      |

| RRBS |       |        |             |          |         | RNAseq  |           |          |                  |              |               |                  |            |         |
|------|-------|--------|-------------|----------|---------|---------|-----------|----------|------------------|--------------|---------------|------------------|------------|---------|
| gene | Blood | Kidney | methyl.diff | pMWU.fdr | Match ? | gene    | blood     | kidney   | log2(fold_ratio) | blood+ 0.001 | kidney+ 0.001 | log2(fold_ratio) | q_value    | Match ? |
|      |       |        |             |          |         | Maz     | 102.367   | 53.0582  | -0.948105        | 102.368      | 53.0592       | -0.94809         | 0.00097029 | No      |
|      |       |        |             |          |         | Mbd4    | 4.77201   | 2.06062  | -1.21152         | 4.77301      | 2.06162       | -1.2111209       | 0.0326623  | No      |
|      |       |        |             |          |         | Mbd5    | 3.76789   | 2.09061  | -0.849834        | 3.76889      | 2.09161       | -0.8495258       | 0.017174   | No      |
|      |       |        |             |          |         | Mbip    | 11.003    | 5.98688  | -0.878023        | 11.004       | 5.98788       | -0.8779108       | 0.0121287  | No      |
|      |       |        |             |          |         | Mbl1    | 0         | 2.80557  | inf              | 0.001        | 2.80657       | 11.4545923       | 0.00018329 | No      |
|      |       |        |             |          |         | Mbn1    | 373.502   | 63.6785  | -2.55224         | 373.503      | 63.6795       | -2.5522189       | 0.00018329 | No      |
|      |       |        |             |          |         | Mbn2    | 11.8326   | 20.4695  | 0.790709         | 11.8336      | 20.4705       | 0.79065731       | 0.00674218 | No      |
|      |       |        |             |          |         | Mbn3    | 3.26595   | 2.02006  | -0.693105        | 3.26695      | 2.02106       | -0.6928322       | 0.0194611  | No      |
|      |       |        |             |          |         | Mboat1  | 1.76655   | 9.08222  | 2.36211          | 1.76755      | 9.08322       | 2.3614528        | 0.00018329 | No      |
|      |       |        |             |          |         | Mboat2  | 0.0280769 | 15.9922  | 9.15377          | 0.0290769    | 15.9932       | 9.10336945       | 0.0371206  | No      |
|      |       |        |             |          |         | Mboat7  | 6.78072   | 21.7588  | 1.68209          | 6.78172      | 21.7598       | 1.68194217       | 0.00018329 | No      |
|      |       |        |             |          |         | MBP     | 73.9774   | 20.698   | -1.83759         | 73.9784      | 20.699        | -1.837543        | 0.00018329 | No      |
|      |       |        |             |          |         | Mbtd1   | 19.009    | 6.80767  | -1.48145         | 19.01        | 6.80867       | -1.4813136       | 0.00018329 | No      |
|      |       |        |             |          |         | Mbtps1  | 150.906   | 81.1928  | -0.894227        | 150.907      | 81.1938       | -0.8942183       | 0.0460943  | No      |
|      |       |        |             |          |         | Mbtps2  | 7.69552   | 3.17625  | -1.2767          | 7.69652      | 3.17725       | -1.2764277       | 0.00018329 | No      |
|      |       |        |             |          |         | Mcam    | 0.375514  | 4.81987  | 3.68206          | 0.376514     | 4.82087       | 3.67851811       | 0.00018329 | No      |
|      |       |        |             |          |         | Mcart1l | 42.2768   | 1.35255  | -4.96611         | 42.2778      | 1.35355       | -4.9650802       | 0.00018329 | No      |
|      |       |        |             |          |         | Mccc2   | 4.07916   | 37.3095  | 3.1932           | 4.08016      | 37.3105       | 3.19288406       | 0.00018329 | No      |
|      |       |        |             |          |         | Mcee    | 6.12277   | 75.6152  | 3.62642          | 6.12377      | 75.6162       | 3.62620335       | 0.00018329 | No      |
|      |       |        |             |          |         | Mcf2l   | 0.779358  | 8.8698   | 3.50854          | 0.780358     | 8.8708        | 3.50685618       | 0.00018329 | No      |
|      |       |        |             |          |         | Mcm2    | 14.8942   | 9.45711  | -0.655275        | 14.8952      | 9.45811       | -0.6552237       | 0.0318913  | No      |
|      |       |        |             |          |         | Mcm3    | 35.1391   | 10.5077  | -1.74163         | 35.1401      | 10.5087       | -1.7415341       | 0.00018329 | No      |
|      |       |        |             |          |         | Mcm4    | 11.919    | 6.03304  | -0.982304        | 11.92        | 6.03404       | -0.9821881       | 0.00066911 | No      |
|      |       |        |             |          |         | Mcm6    | 19.7297   | 9.79715  | -1.00993         | 19.7307      | 9.79815       | -1.0098609       | 0.00035173 | No      |
|      |       |        |             |          |         | Mcm7    | 42.6904   | 17.5212  | -1.28481         | 42.6914      | 17.5222       | -1.2847616       | 0.00097029 | No      |
|      |       |        |             |          |         | Mcoln1  | 8.96759   | 24.2367  | 1.4344           | 8.96859      | 24.2377       | 1.43429971       | 0.00018329 | No      |
|      |       |        |             |          |         | Mcts1   | 49.6245   | 29.9754  | -0.727273        | 49.6255      | 29.9764       | -0.7272545       | 0.0164547  | No      |
|      |       |        |             |          |         | Mdfi    | 0         | 1.77739  | inf              | 0.001        | 1.77839       | 10.796356        | 0.00018329 | No      |
|      |       |        |             |          |         | Mdfic   | 1.13146   | 8.22963  | 2.86264          | 1.13246      | 8.23063       | 2.86154277       | 0.00018329 | No      |
|      |       |        |             |          |         | Mdh1    | 111.23    | 518.098  | 2.21968          | 111.231      | 518.099       | 2.21966888       | 0.00018329 | No      |
|      |       |        |             |          |         | Mdh2    | 124.334   | 274.407  | 1.1421           | 124.335      | 274.408       | 1.14209007       | 0.00018329 | No      |
|      |       |        |             |          |         | Mdm2    | 29.1717   | 17.8419  | -0.7093          | 29.1727      | 17.8429       | -0.7092688       | 0.00937155 | No      |
|      |       |        |             |          |         | Mdm4    | 73.7956   | 14.9834  | -2.30017         | 73.7966      | 14.9844       | -2.300093        | 0.00018329 | No      |
|      |       |        |             |          |         | Mdn1    | 2.43793   | 0.148807 | -4.03415         | 2.43893      | 0.149807      | -4.0250714       | 0.00018329 | No      |
|      |       |        |             |          |         | Mdp1    | 21.5107   | 10.2155  | -1.07429         | 21.5117      | 10.2165       | -1.0742205       | 0.00393885 | No      |
|      |       |        |             |          |         | Me1     | 0.145519  | 20.9379  | 7.16877          | 0.146519     | 20.9389       | 7.15895408       | 0.00018329 | No      |
|      |       |        |             |          |         | Me3     | 0         | 18.0122  | inf              | 0.001        | 18.0132       | 14.1367669       | 0.00018329 | No      |
|      |       |        |             |          |         | Mecom   | 0         | 44.1343  | inf              | 0.001        | 44.1353       | 15.4296454       | 0.00018329 | No      |
|      |       |        |             |          |         | Mecr    | 4.81843   | 12.407   | 1.36452          | 4.81943      | 12.408        | 1.36433616       | 0.00018329 | No      |
|      |       |        |             |          |         | Med1    | 25.2017   | 11.5301  | -1.12812         | 25.2027      | 11.5311       | -1.1280482       | 0.00686277 | No      |
|      |       |        |             |          |         | Med13   | 11.3216   | 5.33718  | -1.08493         | 11.3226      | 5.33818       | -1.0847854       | 0.00018329 | No      |
|      |       |        |             |          |         | Med13l  | 9.13041   | 5.41913  | -0.752619        | 9.13141      | 5.42013       | -0.7525102       | 0.00469886 | No      |

| RRBS |       |        |             |          |         | RNAseq    |           |          |                  |              |               |                  |            |         |
|------|-------|--------|-------------|----------|---------|-----------|-----------|----------|------------------|--------------|---------------|------------------|------------|---------|
| gene | Blood | Kidney | methyl.diff | pMWU.fdr | Match ? | gene      | blood     | kidney   | log2(fold_ratio) | blood+ 0.001 | kidney+ 0.001 | log2(fold_ratio) | q_value    | Match ? |
|      |       |        |             |          |         | Med15     | 61.0372   | 36.8581  | -0.727707        | 61.0382      | 36.8591       | -0.7276916       | 0.0316127  | No      |
|      |       |        |             |          |         | Med18     | 45.442    | 15.6614  | -1.53681         | 45.443       | 15.6624       | -1.5367528       | 0.00140841 | No      |
|      |       |        |             |          |         | Med22     | 4.68603   | 10.2865  | 1.13431          | 4.68703      | 10.2875       | 1.1341465        | 0.00277264 | No      |
|      |       |        |             |          |         | Med25     | 58.9255   | 112.974  | 0.939032         | 58.9265      | 112.975       | 0.93901507       | 0.00290302 | No      |
|      |       |        |             |          |         | Med26     | 4.99104   | 3.09424  | -0.689757        | 4.99204      | 3.09524       | -0.6895782       | 0.0385406  | No      |
|      |       |        |             |          |         | Med29     | 47.6116   | 307.071  | 2.68919          | 47.6126      | 307.072       | 2.68916165       | 0.00018329 | No      |
|      |       |        |             |          |         | Med31     | 26.2604   | 61.8367  | 1.23557          | 26.2614      | 61.8377       | 1.23554283       | 0.00018329 | No      |
|      |       |        |             |          |         | Med9      | 3.2719    | 8.48647  | 1.37504          | 3.2729       | 8.48747       | 1.37476505       | 0.00018329 | No      |
|      |       |        |             |          |         | Medag     | 0         | 8.66353  | inf              | 0.001        | 8.66453       | 13.0809058       | 0.00018329 | No      |
|      |       |        |             |          |         | Mef2a     | 18.0107   | 10.3633  | -0.797377        | 18.0117      | 10.3643       | -0.7973117       | 0.00342383 | No      |
|      |       |        |             |          |         | Mef2c     | 0.772677  | 1.69552  | 1.13379          | 0.773677     | 1.69652       | 1.13277515       | 0.00777671 | No      |
|      |       |        |             |          |         | Mef2d     | 35.8426   | 13.0369  | -1.45908         | 35.8436      | 13.0379       | -1.459004        | 0.00018329 | No      |
|      |       |        |             |          |         | Mefv      | 0.207413  | 2.32117  | 3.48427          | 0.208413     | 2.32217       | 3.47795642       | 0.00197017 | No      |
|      |       |        |             |          |         | Megf9     | 0.564474  | 2.33276  | 2.04706          | 0.565474     | 2.33376       | 2.04512361       | 0.00035173 | No      |
|      |       |        |             |          |         | Meis3     | 18.8849   | 7.22384  | -1.38639         | 18.8859      | 7.22484       | -1.386272        | 0.00018329 | No      |
|      |       |        |             |          |         | Melk      | 0.627549  | 5.88199  | 3.2285           | 0.628549     | 5.88299       | 3.22645246       | 0.00018329 | No      |
|      |       |        |             |          |         | Memo1     | 76.4821   | 36.8765  | -1.05242         | 76.4831      | 36.8775       | -1.0524001       | 0.00051281 | No      |
|      |       |        |             |          |         | Mertk     | 0         | 1.32727  | inf              | 0.001        | 1.32827       | 10.3753327       | 0.00018329 | No      |
|      |       |        |             |          |         | Mesdc2    | 23.9811   | 42.4459  | 0.82373          | 23.9821      | 42.4469       | 0.8237012        | 0.00238141 | No      |
|      |       |        |             |          |         | Mest      | 0.136402  | 1.42337  | 3.38338          | 0.137402     | 1.42437       | 3.37384905       | 0.0217091  | No      |
|      |       |        |             |          |         | Metrl     | 1.45519   | 30.2965  | 4.37987          | 1.45619      | 30.2975       | 4.37892824       | 0.00018329 | No      |
|      |       |        |             |          |         | Mettl14   | 23.5255   | 15.0314  | -0.64625         | 23.5265      | 15.0324       | -0.6462113       | 0.0388119  | No      |
|      |       |        |             |          |         | Mettl17   | 24.4835   | 13.0625  | -0.906374        | 24.4845      | 13.0635       | -0.9063273       | 0.00530972 | No      |
|      |       |        |             |          |         | Mettl18   | 9.22664   | 3.08627  | -1.57994         | 9.22764      | 3.08727       | -1.5796301       | 0.00018329 | No      |
|      |       |        |             |          |         | Mettl20   | 22.4371   | 13.6393  | -0.718119        | 22.4381      | 13.6403       | -0.7180751       | 0.0207821  | No      |
|      |       |        |             |          |         | Mettl23   | 59.7106   | 26.8636  | -1.15233         | 59.7116      | 26.8646       | -1.1523049       | 0.00018329 | No      |
|      |       |        |             |          |         | Mettl7a   | 12.8682   | 35.1671  | 1.45042          | 12.8692      | 35.1681       | 1.45034502       | 0.00018329 | No      |
|      |       |        |             |          |         | Mettl8    | 45.5798   | 24.2137  | -0.912569        | 45.5808      | 24.2147       | -0.9125431       | 0.0115803  | No      |
|      |       |        |             |          |         | Mettl9    | 20.0173   | 53.4607  | 1.41723          | 20.0183      | 53.4617       | 1.41718625       | 0.00018329 | No      |
|      |       |        |             |          |         | Mex3d     | 1.0319    | 3.30841  | 1.68084          | 1.0329       | 3.30941       | 1.67987345       | 0.00111812 | No      |
|      |       |        |             |          |         | Mfap1a    | 23.1198   | 14.4962  | -0.673449        | 23.1208      | 14.4972       | -0.673417        | 0.0221058  | No      |
|      |       |        |             |          |         | Mfap3l    | 0.0442949 | 20.3301  | 8.84226          | 0.0452949    | 20.3311       | 8.81012394       | 0.00018329 | No      |
|      |       |        |             |          |         | Mfng      | 52.2097   | 11.3799  | -2.19783         | 52.2107      | 11.3809       | -2.1977309       | 0.00018329 | No      |
|      |       |        |             |          |         | Mfsd1     | 15.026    | 23.3996  | 0.639016         | 15.027       | 23.4006       | 0.6389885        | 0.0157085  | No      |
|      |       |        |             |          |         | Mfsd7     | 0.264349  | 0.814737 | 1.62389          | 0.265349     | 0.815737      | 1.62021298       | 0.0252382  | No      |
|      |       |        |             |          |         | Mga       | 13.9213   | 8.02585  | -0.794567        | 13.9223      | 8.02685       | -0.7944917       | 0.0345543  | No      |
|      |       |        |             |          |         | Mgam      | 0.025794  | 32.407   | 10.2951          | 0.026794     | 32.408        | 10.2402243       | 0.00018329 | No      |
|      |       |        |             |          |         | Mgat2     | 23.4843   | 12.2931  | -0.933851        | 23.4853      | 12.2941       | -0.9337919       | 0.00051281 | No      |
|      |       |        |             |          |         | Mgat4b    | 5.43031   | 46.5026  | 3.09821          | 5.43131      | 46.5036       | 3.09797029       | 0.00018329 | No      |
|      |       |        |             |          |         | MGC105567 | 6.3078    | 3.62682  | -0.798433        | 6.3088       | 3.62782       | -0.7982627       | 0.0233145  | No      |

| RRBS |       |        |             |          |         | RNAseq    |           |          |                  |              |               |                  |            |         |
|------|-------|--------|-------------|----------|---------|-----------|-----------|----------|------------------|--------------|---------------|------------------|------------|---------|
| gene | Blood | Kidney | methyl.diff | pMWU.fdr | Match ? | gene      | blood     | kidney   | log2(fold_ratio) | blood+ 0.001 | kidney+ 0.001 | log2(fold_ratio) | q_value    | Match ? |
|      |       |        |             |          |         | MGC108823 | 55.8032   | 17.0498  | -1.71059         | 55.8042      | 17.0508       | -1.7105343       | 0.00018329 | No      |
|      |       |        |             |          |         | MGC112715 | 142.178   | 35.4192  | -2.00509         | 142.179      | 35.4202       | -2.0050641       | 0.00018329 | No      |
|      |       |        |             |          |         | MGC112830 | 25.5938   | 17.2947  | -0.565467        | 25.5948      | 17.2957       | -0.5654373       | 0.0370313  | No      |
|      |       |        |             |          |         | MGC94199  | 1.49067   | 9.41064  | 2.65833          | 1.49167      | 9.41164       | 2.65751773       | 0.00018329 | No      |
|      |       |        |             |          |         | Mgea5     | 66.4812   | 36.6962  | -0.857317        | 66.4822      | 36.6972       | -0.8572981       | 0.0458374  | No      |
|      |       |        |             |          |         | Mgll      | 0.109647  | 111.14   | 9.98529          | 0.110647     | 111.141       | 9.97221108       | 0.00018329 | No      |
|      |       |        |             |          |         | Mgrn1     | 18.6744   | 46.4377  | 1.31423          | 18.6754      | 46.4387       | 1.31418844       | 0.00018329 | No      |
|      |       |        |             |          |         | Mgst1     | 3.72435   | 118.045  | 4.98621          | 3.72535      | 118.046       | 4.98582937       | 0.00018329 | No      |
|      |       |        |             |          |         | Mgst2     | 6.79086   | 19.1716  | 1.49731          | 6.79186      | 19.1726       | 1.49716737       | 0.00066911 | No      |
|      |       |        |             |          |         | Mgst3     | 9.49463   | 276.101  | 4.86194          | 9.49563      | 276.102       | 4.86179381       | 0.00591487 | No      |
|      |       |        |             |          |         | Mia3      | 31.1754   | 19.9116  | -0.646802        | 31.1764      | 19.9126       | -0.6467727       | 0.0224259  | No      |
|      |       |        |             |          |         | Mib2      | 11.0945   | 18.477   | 0.735883         | 11.0955      | 18.478        | 0.73583393       | 0.0146209  | No      |
|      |       |        |             |          |         | Mical1    | 115.264   | 45.8022  | -1.33145         | 115.265      | 45.8032       | -1.3314342       | 0.0166578  | No      |
|      |       |        |             |          |         | Mical2    | 0.207432  | 2.13427  | 3.36303          | 0.208432     | 2.13527       | 3.35676981       | 0.00591487 | No      |
|      |       |        |             |          |         | Mical3    | 2.34823   | 10.0532  | 2.098            | 2.34923      | 10.0542       | 2.09753842       | 0.00018329 | No      |
|      |       |        |             |          |         | Micu1     | 7.64988   | 14.9137  | 0.96313          | 7.65088      | 14.9147       | 0.96303736       | 0.00097029 | No      |
|      |       |        |             |          |         | Mid1      | 0.149989  | 2.97746  | 4.31116          | 0.150989     | 2.97846       | 4.30205123       | 0.00018329 | No      |
|      |       |        |             |          |         | Mid1ip1   | 18.7239   | 56.4575  | 1.59229          | 18.7249      | 56.4585       | 1.59223279       | 0.00018329 | No      |
|      |       |        |             |          |         | Mid2      | 0.230807  | 1.38488  | 2.585            | 0.231807     | 1.38588       | 2.57980631       | 0.00051281 | No      |
|      |       |        |             |          |         | Midn      | 22.0678   | 38.9598  | 0.82004          | 22.0688      | 38.9608       | 0.82001512       | 0.0026435  | No      |
|      |       |        |             |          |         | Mier1     | 50.5083   | 19.1544  | -1.39884         | 50.5093      | 19.1554       | -1.3987979       | 0.00051281 | No      |
|      |       |        |             |          |         | Mif       | 397.489   | 640.723  | 0.688783         | 397.49       | 640.724       | 0.68878447       | 0.00822601 | No      |
|      |       |        |             |          |         | Milr1     | 20.617    | 3.69853  | -2.47881         | 20.618       | 3.69953       | -2.4784905       | 0.00018329 | No      |
|      |       |        |             |          |         | Minos1    | 217.845   | 508.917  | 1.22413          | 217.846      | 508.918       | 1.2241246        | 0.00018329 | No      |
|      |       |        |             |          |         | Minpp1    | 4.64114   | 23.7794  | 2.35716          | 4.64214      | 23.7804       | 2.35691104       | 0.00018329 | No      |
|      |       |        |             |          |         | Miox      | 0.0125096 | 648.235  | 15.6612          | 0.0135096    | 648.236       | 15.5502466       | 0.0106031  | No      |
|      |       |        |             |          |         | Mipep     | 3.42898   | 18.4878  | 2.43073          | 3.42998      | 18.4888       | 2.43037952       | 0.00018329 | No      |
|      |       |        |             |          |         | Mipol1    | 1.25431   | 4.24493  | 1.75885          | 1.25531      | 4.24593       | 1.7580369        | 0.00082046 | No      |
|      |       |        |             |          |         | Mir101a   | 1.42806   | 0.551233 | -1.37332         | 1.42906      | 0.552233      | -1.3717175       | 0.0460114  | No      |
|      |       |        |             |          |         | Mir101b   | 22.5617   | 12.3335  | -0.871297        | 22.5627      | 12.3345       | -0.8712405       | 0.00354878 | No      |
|      |       |        |             |          |         | Mir150    | 9.45221   | 1.29933  | -2.86289         | 9.45321      | 1.30033       | -2.8619265       | 0.027785   | No      |
|      |       |        |             |          |         | Mir186    | 68.549    | 21.8914  | -1.64677         | 68.55        | 21.8924       | -1.6467265       | 0.00018329 | No      |
|      |       |        |             |          |         | Mir22     | 1.95542   | 10.6413  | 2.44412          | 1.95642      | 10.6423       | 2.44352195       | 0.00018329 | No      |
|      |       |        |             |          |         | Mir221    | 0.689073  | 3.86727  | 2.48858          | 0.690073     | 3.86827       | 2.4868676        | 0.00380824 | No      |
|      |       |        |             |          |         | Mir223    | 0.142993  | 1.9715   | 3.78528          | 0.143993     | 1.9725        | 3.77595472       | 0.0271125  | No      |
|      |       |        |             |          |         | Mir632    | 110.576   | 64.9985  | -0.766566        | 110.577      | 64.9995       | -0.7665508       | 0.0248275  | No      |
|      |       |        |             |          |         | Mis18bp1  | 8.12243   | 1.09055  | -2.89686         | 8.12343      | 1.09155       | -2.8957108       | 0.00018329 | No      |
|      |       |        |             |          |         | Mitf      | 0.07742   | 13.6402  | 7.46094          | 0.07842      | 13.6412       | 7.4425332        | 0.00018329 | No      |
|      |       |        |             |          |         | Mkl1      | 35.554    | 6.88847  | -2.36776         | 35.555       | 6.88947       | -2.3675875       | 0.00018329 | No      |

| RRBS |       |        |             |          |         | RNAseq  |           |          |                  |              |               |                  |            |         |
|------|-------|--------|-------------|----------|---------|---------|-----------|----------|------------------|--------------|---------------|------------------|------------|---------|
| gene | Blood | Kidney | methyl.diff | pMWU.fdr | Match ? | gene    | blood     | kidney   | log2(fold_ratio) | blood+ 0.001 | kidney+ 0.001 | log2(fold_ratio) | q_value    | Match ? |
|      |       |        |             |          |         | Mknk1   | 23.6498   | 14.4026  | -0.715495        | 23.6508      | 14.4036       | -0.7154595       | 0.00981659 | No      |
|      |       |        |             |          |         | Mknk2   | 108.454   | 49.8503  | -1.12141         | 108.455      | 49.8513       | -1.1213935       | 0.00018329 | No      |
|      |       |        |             |          |         | Mkrn3   | 1.24651   | 0.426854 | -1.54608         | 1.24751      | 0.427854      | -1.5438609       | 0.0197773  | No      |
|      |       |        |             |          |         | Mkx     | 0         | 0.783307 | inf              | 0.001        | 0.784307      | 9.61527467       | 0.00018329 | No      |
|      |       |        |             |          |         | Mlec    | 15.381    | 32.1906  | 1.06549          | 15.382       | 32.1916       | 1.06544119       | 0.00051281 | No      |
|      |       |        |             |          |         | Mllt10  | 31.8686   | 13.6067  | -1.22781         | 31.8696      | 13.6077       | -1.2277577       | 0.00018329 | No      |
|      |       |        |             |          |         | Mllt3   | 16.4103   | 5.27648  | -1.63695         | 16.4113      | 5.27748       | -1.6367684       | 0.00018329 | No      |
|      |       |        |             |          |         | Mllt4   | 0.0435816 | 29.865   | 9.42052          | 0.0445816    | 29.866        | 9.38783992       | 0.00018329 | No      |
|      |       |        |             |          |         | Mllt6   | 36.9412   | 17.7564  | -1.05689         | 36.9422      | 17.7574       | -1.0568494       | 0.00432763 | No      |
|      |       |        |             |          |         | Mlxip   | 4.44439   | 1.77415  | -1.32486         | 4.44539      | 1.77515       | -1.3243691       | 0.00251301 | No      |
|      |       |        |             |          |         | Mmachc  | 3.74503   | 8.80776  | 1.2338           | 3.74603      | 8.80876       | 1.23357649       | 0.00051281 | No      |
|      |       |        |             |          |         | Mmadhc  | 18.9216   | 32.1775  | 0.76602          | 18.9226      | 32.1785       | 0.76598675       | 0.0106031  | No      |
|      |       |        |             |          |         | Mmd     | 5.78709   | 11.4223  | 0.980945         | 5.78809      | 11.4233       | 0.98082022       | 0.0018326  | No      |
|      |       |        |             |          |         | Mme     | 0         | 33.0336  | inf              | 0.001        | 33.0346       | 15.0116903       | 0.00018329 | No      |
|      |       |        |             |          |         | Mmp12   | 0         | 8.44603  | inf              | 0.001        | 8.44703       | 13.0442285       | 0.00018329 | No      |
|      |       |        |             |          |         | Mmp19   | 0.0521637 | 0.597799 | 3.51854          | 0.0531637    | 0.598799      | 3.49355839       | 0.0204738  | No      |
|      |       |        |             |          |         | Mmp23   | 0         | 0.670323 | inf              | 0.001        | 0.671323      | 9.39086326       | 0.00018329 | No      |
|      |       |        |             |          |         | Mmp24   | 0.783819  | 6.32583  | 3.01266          | 0.784819     | 6.32683       | 3.01105096       | 0.00035173 | No      |
|      |       |        |             |          |         | Mmp9    | 0.287643  | 0.769141 | 1.41897          | 0.288643     | 0.770141      | 1.41583637       | 0.0159271  | No      |
|      |       |        |             |          |         | Mmrn2   | 0.431808  | 3.17712  | 2.87926          | 0.432808     | 3.17812       | 2.87637453       | 0.00018329 | No      |
|      |       |        |             |          |         | Mnat1   | 37.0571   | 18.3703  | -1.01237         | 37.0581      | 18.3713       | -1.0123352       | 0.00290302 | No      |
|      |       |        |             |          |         | Mnda    | 0.391766  | 5.20312  | 3.73131          | 0.392766     | 5.20412       | 3.72791228       | 0.00018329 | No      |
|      |       |        |             |          |         | Mnf1    | 47.3936   | 111.45   | 1.23364          | 47.3946      | 111.451       | 1.23361496       | 0.00018329 | No      |
|      |       |        |             |          |         | Mnt     | 9.94504   | 4.85042  | -1.03587         | 9.94604      | 4.85142       | -1.0357152       | 0.00035173 | No      |
|      |       |        |             |          |         | Moap1   | 10.7487   | 32.1972  | 1.58277          | 10.7497      | 32.1982       | 1.58268364       | 0.00018329 | No      |
|      |       |        |             |          |         | Mob1a   | 40.9943   | 17.0828  | -1.26288         | 40.9953      | 17.0838       | -1.2628296       | 0.00018329 | No      |
|      |       |        |             |          |         | Mob2    | 61.4199   | 27.3877  | -1.16518         | 61.4209      | 27.3887       | -1.1651489       | 0.00018329 | No      |
|      |       |        |             |          |         | Mob4    | 22.9858   | 13.6162  | -0.755422        | 22.9868      | 13.6172       | -0.7553756       | 0.00555427 | No      |
|      |       |        |             |          |         | Mocos   | 0.190212  | 1.90549  | 3.32448          | 0.191212     | 1.90649       | 3.31767399       | 0.00018329 | No      |
|      |       |        |             |          |         | Mocs1   | 6.75708   | 10.7635  | 0.671669         | 6.75808      | 10.7645       | 0.67159598       | 0.030375   | No      |
|      |       |        |             |          |         | Mok     | 0.149037  | 10.072   | 6.07854          | 0.150037     | 10.073        | 6.06903129       | 0.0221058  | No      |
|      |       |        |             |          |         | Mon2    | 42.5133   | 15.4947  | -1.45614         | 42.5143      | 15.4957       | -1.4560803       | 0.00066911 | No      |
|      |       |        |             |          |         | Morc1   | 2.03012   | 0.241026 | -3.0743          | 2.03112      | 0.242026      | -3.0690415       | 0.00018329 | No      |
|      |       |        |             |          |         | Morc3   | 54.9563   | 12.6383  | -2.12049         | 54.9573      | 12.6393       | -2.1203946       | 0.00018329 | No      |
|      |       |        |             |          |         | MORF4L1 | 239.167   | 155.698  | -0.619268        | 239.168      | 155.699       | -0.6192647       | 0.0172708  | No      |
|      |       |        |             |          |         | Morf4l2 | 47.213    | 83.1707  | 0.816893         | 47.214       | 83.1717       | 0.81687801       | 0.00082046 | No      |
|      |       |        |             |          |         | Morn1   | 0.377014  | 4.1295   | 3.45328          | 0.378014     | 4.1305        | 3.44980486       | 0.00066911 | No      |
|      |       |        |             |          |         | Mospd1  | 1.43593   | 2.97805  | 1.05238          | 1.43693      | 2.97905       | 1.05186256       | 0.00856745 | No      |
|      |       |        |             |          |         | Mov10   | 89.1973   | 16.8976  | -2.40018         | 89.1983      | 16.8986       | -2.4001125       | 0.00018329 | No      |
|      |       |        |             |          |         | MP68    | 307.354   | 560.241  | 0.866145         | 307.355      | 560.242       | 0.86614419       | 0.0181001  | No      |
|      |       |        |             |          |         | Mpa2l   | 226.758   | 44.4463  | -2.35102         | 226.759      | 44.4473       | -2.3509921       | 0.00018329 | No      |
|      |       |        |             |          |         | Mpc1    | 56.327    | 610.593  | 3.43831          | 56.328       | 610.594       | 3.43828926       | 0.00018329 | No      |

| RRBS |       |        |             |          |         | RNAseq    |           |          |                  |              |               |                  |            |         |
|------|-------|--------|-------------|----------|---------|-----------|-----------|----------|------------------|--------------|---------------|------------------|------------|---------|
| gene | Blood | Kidney | methyl.diff | pMWU.fdr | Match ? | gene      | blood     | kidney   | log2(fold_ratio) | blood+ 0.001 | kidney+ 0.001 | log2(fold_ratio) | q_value    | Match ? |
|      |       |        |             |          |         | Mpc2      | 50.7183   | 231.243  | 2.18883          | 50.7193      | 231.244       | 2.18880919       | 0.00051281 | No      |
|      |       |        |             |          |         | Mpdu1     | 27.1683   | 55.0978  | 1.02007          | 27.1693      | 55.0988       | 1.0200435        | 0.00018329 | No      |
|      |       |        |             |          |         | Mpdz      | 0         | 3.76906  | inf              | 0.001        | 3.77006       | 11.8803718       | 0.00018329 | No      |
|      |       |        |             |          |         | Mpeg1     | 0.261623  | 2.41963  | 3.20923          | 0.262623     | 2.42063       | 3.2043174        | 0.00018329 | No      |
|      |       |        |             |          |         | Mphosph10 | 26.8934   | 12.1967  | -1.14076         | 26.8944      | 12.1977       | -1.1406967       | 0.00018329 | No      |
|      |       |        |             |          |         | Mphosph6  | 27.9762   | 17.8461  | -0.648593        | 27.9772      | 17.8471       | -0.6485619       | 0.0483321  | No      |
|      |       |        |             |          |         | Mphosph9  | 7.2854    | 1.64712  | -2.14507         | 7.2864       | 1.64812       | -2.1443849       | 0.0173814  | No      |
|      |       |        |             |          |         | Mpp4      | 4.20463   | 1.27724  | -1.71895         | 4.20563      | 1.27824       | -1.7181632       | 0.0036827  | No      |
|      |       |        |             |          |         | Mpp5      | 3.79453   | 10.0317  | 1.40257          | 3.79553      | 10.0327       | 1.40233666       | 0.00018329 | No      |
|      |       |        |             |          |         | Mpp7      | 0.845116  | 4.4886   | 2.40904          | 0.846116     | 4.4896        | 2.40765954       | 0.00018329 | No      |
|      |       |        |             |          |         | Mpped2    | 0.198376  | 3.45141  | 4.12088          | 0.199376     | 3.45241       | 4.11404015       | 0.00018329 | No      |
|      |       |        |             |          |         | Mprip     | 25.4591   | 90.9045  | 1.83617          | 25.4601      | 90.9055       | 1.8361295        | 0.00018329 | No      |
|      |       |        |             |          |         | Mpv17l    | 0.053552  | 8.12318  | 7.24496          | 0.054552     | 8.12418       | 7.2184463        | 0.0234164  | No      |
|      |       |        |             |          |         | Mpv17l2   | 25.3315   | 47.7446  | 0.914408         | 25.3325      | 47.7456       | 0.91437833       | 0.00354878 | No      |
|      |       |        |             |          |         | Mpzl1     | 3.73404   | 13.9277  | 1.89915          | 3.73504      | 13.9287       | 1.89886502       | 0.00018329 | No      |
|      |       |        |             |          |         | Mpzl2     | 0.331031  | 10.8118  | 5.0295           | 0.332031     | 10.8128       | 5.02527841       | 0.00018329 | No      |
|      |       |        |             |          |         | Mr1       | 10.666    | 1.2224   | -3.12522         | 10.667       | 1.2234        | -3.1241864       | 0.00018329 | No      |
|      |       |        |             |          |         | Mrap2     | 6.04561   | 0.399196 | -3.92072         | 6.04661      | 0.400196      | -3.9173479       | 0.031236   | No      |
|      |       |        |             |          |         | Mras      | 0.708933  | 21.8918  | 4.9486           | 0.709933     | 21.8928       | 4.94662979       | 0.00018329 | No      |
|      |       |        |             |          |         | Mrc1      | 0.0223581 | 0.873831 | 5.28848          | 0.0233581    | 0.874831      | 5.22700951       | 0.0063852  | No      |
|      |       |        |             |          |         | MRI       | 11.9003   | 4.01927  | -1.56599         | 11.9013      | 4.02027       | -1.5657549       | 0.0486948  | No      |
|      |       |        |             |          |         | Mro       | 0         | 21.296   | inf              | 0.001        | 21.297        | 14.3783626       | 0.00018329 | No      |
|      |       |        |             |          |         | Mroh1     | 28.5156   | 61.0014  | 1.09709          | 28.5166      | 61.0024       | 1.09706402       | 0.0205807  | No      |
|      |       |        |             |          |         | Mroh6     | 1.30409   | 3.91976  | 1.58772          | 1.30509      | 3.92076       | 1.58698403       | 0.00018329 | No      |
|      |       |        |             |          |         | Mrpl10    | 20.8815   | 31.7384  | 0.604004         | 20.8825      | 31.7394       | 0.60398042       | 0.0286648  | No      |
|      |       |        |             |          |         | mrpl11    | 32.5895   | 63.4507  | 0.961226         | 32.5905      | 63.4517       | 0.96120733       | 0.00251301 | No      |
|      |       |        |             |          |         | Mrpl12    | 48.2347   | 189.872  | 1.97688          | 48.2357      | 189.873       | 1.97686156       | 0.00018329 | No      |
|      |       |        |             |          |         | Mrpl13    | 46.8358   | 91.1183  | 0.96013          | 46.8368      | 91.1193       | 0.96011415       | 0.027893   | No      |
|      |       |        |             |          |         | Mrpl15    | 34.9302   | 121.634  | 1.80001          | 34.9312      | 121.635       | 1.79997031       | 0.00018329 | No      |
|      |       |        |             |          |         | Mrpl16    | 13.3187   | 37.0141  | 1.47462          | 13.3197      | 37.0151       | 1.47455234       | 0.00018329 | No      |
|      |       |        |             |          |         | Mrpl2     | 25.7425   | 50.5375  | 0.973202         | 25.7435      | 50.5385       | 0.97317463       | 0.00111812 | No      |
|      |       |        |             |          |         | Mrpl22    | 30.4153   | 65.2548  | 1.10129          | 30.4163      | 65.2558       | 1.10126147       | 0.00035173 | No      |
|      |       |        |             |          |         | Mrpl27    | 49.7502   | 109.485  | 1.13795          | 49.7512      | 109.486       | 1.13794317       | 0.00035173 | No      |
|      |       |        |             |          |         | Mrpl28    | 37.3959   | 75.8129  | 1.01956          | 37.3969      | 75.8139       | 1.0195437        | 0.00197017 | No      |
|      |       |        |             |          |         | Mrpl3     | 21.856    | 37.1963  | 0.767126         | 21.857       | 37.1973       | 0.76710251       | 0.0076683  | No      |
|      |       |        |             |          |         | Mrpl34    | 75.0847   | 123.262  | 0.715133         | 75.0857      | 123.263       | 0.71512973       | 0.0146209  | No      |
|      |       |        |             |          |         | Mrpl36    | 42.5144   | 63.9598  | 0.589213         | 42.5154      | 63.9608       | 0.58920247       | 0.032482   | No      |
|      |       |        |             |          |         | Mrpl40    | 6.60337   | 14.1871  | 1.10331          | 6.60437      | 14.1881       | 1.10318855       | 0.00035173 | No      |
|      |       |        |             |          |         | Mrpl41    | 42.5366   | 68.0509  | 0.677909         | 42.5376      | 68.0519       | 0.6778968        | 0.0191514  | No      |
|      |       |        |             |          |         | Mrpl42    | 55.909    | 95.9802  | 0.779657         | 55.91        | 95.9812       | 0.77964551       | 0.00591487 | No      |
|      |       |        |             |          |         | MRPL48    | 27.8339   | 65.5929  | 1.23669          | 27.8349      | 65.5939       | 1.23666676       | 0.00018329 | No      |



| RRBS |       |        |             |          |         | RNAseq  |         |          |                  |              |               |                  |            |         |
|------|-------|--------|-------------|----------|---------|---------|---------|----------|------------------|--------------|---------------|------------------|------------|---------|
| gene | Blood | Kidney | methyl.diff | pMWU.fdr | Match ? | gene    | blood   | kidney   | log2(fold_ratio) | blood+ 0.001 | kidney+ 0.001 | log2(fold_ratio) | q_value    | Match ? |
|      |       |        |             |          |         | Mrpl49  | 12.4004 | 28.609   | 1.20608          | 12.4014      | 28.61         | 1.2060165        | 0.00018329 | No      |
|      |       |        |             |          |         | Mrpl50  | 9.89852 | 22.907   | 1.2105           | 9.89952      | 22.908        | 1.21042103       | 0.0016929  | No      |
|      |       |        |             |          |         | Mrpl51  | 6.44768 | 13.0861  | 1.02119          | 6.44868      | 13.0871       | 1.02106966       | 0.0133341  | No      |
|      |       |        |             |          |         | Mrpl52  | 56.7146 | 94.7959  | 0.741106         | 56.7156      | 94.7969       | 0.74109427       | 0.0181001  | No      |
|      |       |        |             |          |         | Mrpl54  | 69.0106 | 176.936  | 1.35834          | 69.0116      | 176.937       | 1.35832498       | 0.00018329 | No      |
|      |       |        |             |          |         | Mrpl55  | 32.5505 | 57.0331  | 0.809122         | 32.5515      | 57.0341       | 0.80910072       | 0.0178968  | No      |
|      |       |        |             |          |         | mrpl9   | 70.3842 | 47.4377  | -0.569217        | 70.3852      | 47.4387       | -0.5692076       | 0.0399588  | No      |
|      |       |        |             |          |         | Mrps15  | 81.1752 | 35.4408  | -1.19563         | 81.1762      | 35.4418       | -1.1956049       | 0.00018329 | No      |
|      |       |        |             |          |         | Mrps16  | 45.6716 | 128.144  | 1.4884           | 45.6726      | 128.145       | 1.48837636       | 0.02885    | No      |
|      |       |        |             |          |         | Mrps18a | 43.7512 | 97.547   | 1.15678          | 43.7522      | 97.548        | 1.15675673       | 0.00018329 | No      |
|      |       |        |             |          |         | Mrps25  | 62.4358 | 107.93   | 0.789653         | 62.4368      | 107.931       | 0.78964079       | 0.00543198 | No      |
|      |       |        |             |          |         | Mrps34  | 82.498  | 162.714  | 0.979907         | 82.499       | 162.715       | 0.97989872       | 0.0018326  | No      |
|      |       |        |             |          |         | Mrps36  | 33.2912 | 84.1387  | 1.33763          | 33.2922      | 84.1397       | 1.33760247       | 0.00018329 | No      |
|      |       |        |             |          |         | Mrps7   | 21.9986 | 53.0003  | 1.26859          | 21.9996      | 53.0013       | 1.26855045       | 0.0393915  | No      |
|      |       |        |             |          |         | Mrvi1   | 0.16604 | 5.85211  | 5.13936          | 0.16704      | 5.85311       | 5.13093787       | 0.00018329 | No      |
|      |       |        |             |          |         | Ms4a4c  | 182.181 | 12.465   | -3.86942         | 182.182      | 12.466        | -3.8693099       | 0.00018329 | No      |
|      |       |        |             |          |         | Ms4a6b  | 275.429 | 22.0827  | -3.64069         | 275.43       | 22.0837       | -3.6406319       | 0.00018329 | No      |
|      |       |        |             |          |         | Ms4a7   | 0       | 0.60358  | inf              | 0.001        | 0.60458       | 9.23978944       | 0.00432763 | No      |
|      |       |        |             |          |         | Msantd3 | 0       | 5.44711  | inf              | 0.001        | 5.44811       | 12.4115401       | 0.00018329 | No      |
|      |       |        |             |          |         | Msantd4 | 6.24326 | 11.5514  | 0.887691         | 6.24426      | 11.5524       | 0.88759009       | 0.00303839 | No      |
|      |       |        |             |          |         | Msh2    | 28.7528 | 16.5231  | -0.799215        | 28.7538      | 16.5241       | -0.7991809       | 0.00277264 | No      |
|      |       |        |             |          |         | Msi1    | 0       | 0.619919 | inf              | 0.001        | 0.620919      | 9.27826127       | 0.00018329 | No      |
|      |       |        |             |          |         | Msl1    | 58.1197 | 19.636   | -1.56553         | 58.1207      | 19.637        | -1.5654775       | 0.00018329 | No      |
|      |       |        |             |          |         | Msl2    | 33.4287 | 12.7792  | -1.38729         | 33.4297      | 12.7802       | -1.38722         | 0.00035173 | No      |
|      |       |        |             |          |         | Msl3l2  | 3.62216 | 1.19146  | -1.60412         | 3.62316      | 1.19246       | -1.6033076       | 0.00902869 | No      |
|      |       |        |             |          |         | Msln    | 0       | 9.68626  | inf              | 0.001        | 9.68726       | 13.2418729       | 0.00018329 | No      |
|      |       |        |             |          |         | Mslnl   | 3.50042 | 1.53877  | -1.18575         | 3.50142      | 1.53977       | -1.1852253       | 0.0216117  | No      |
|      |       |        |             |          |         | Msmo1   | 9.12129 | 30.9754  | 1.76381          | 9.12229      | 30.9764       | 1.76370155       | 0.00018329 | No      |
|      |       |        |             |          |         | Msn     | 305.498 | 118.783  | -1.36284         | 305.499      | 118.784       | -1.3628271       | 0.00018329 | No      |
|      |       |        |             |          |         | Msra    | 4.94504 | 61.2477  | 3.6306           | 4.94604      | 61.2487       | 3.63033341       | 0.00018329 | No      |
|      |       |        |             |          |         | Mst4    | 67.9649 | 8.40146  | -3.01608         | 67.9659      | 8.40246       | -3.0159274       | 0.00018329 | No      |
|      |       |        |             |          |         | Msx2    | 0       | 1.66107  | inf              | 0.001        | 1.66207       | 10.6987654       | 0.00018329 | No      |
|      |       |        |             |          |         | Mt1a    | 83.3966 | 1916.15  | 4.52208          | 83.3976      | 1916.151      | 4.52206158       | 0.00018329 | No      |
|      |       |        |             |          |         | Mta3    | 45.5964 | 23.2193  | -0.973595        | 45.5974      | 23.2203       | -0.973565        | 0.0036827  | No      |
|      |       |        |             |          |         | Mtap    | 14.1779 | 7.06141  | -1.00562         | 14.1789      | 7.06241       | -1.0055131       | 0.00615197 | No      |
|      |       |        |             |          |         | Mtch1   | 95.1719 | 156.193  | 0.714722         | 95.1729      | 156.194       | 0.7147163        | 0.00591487 | No      |
|      |       |        |             |          |         | Mtch2   | 35.3544 | 62.7661  | 0.828095         | 35.3554      | 62.7671       | 0.82807797       | 0.00097029 | No      |
|      |       |        |             |          |         | Mtdh    | 23.0665 | 8.70493  | -1.40589         | 23.0675      | 8.70593       | -1.4057913       | 0.00251301 | No      |
|      |       |        |             |          |         | Mtf2    | 14.1414 | 5.23658  | -1.43323         | 14.1424      | 5.23758       | -1.4330547       | 0.00018329 | No      |
|      |       |        |             |          |         | Mtfmt   | 9.60787 | 23.0466  | 1.26226          | 9.60887      | 23.0476       | 1.26217784       | 0.00891798 | No      |
|      |       |        |             |          |         | Mtfp1   | 1.78938 | 11.9865  | 2.74388          | 1.79038      | 11.9875       | 2.74319308       | 0.00018329 | No      |
|      |       |        |             |          |         | Mthfd1l | 12.8373 | 2.52231  | -2.34753         | 12.8383      | 2.52331       | -2.3470648       | 0.00018329 | No      |

| RRBS |       |        |             |          |         | RNAseq  |           |          |                  |              |               |                  |            |         |
|------|-------|--------|-------------|----------|---------|---------|-----------|----------|------------------|--------------|---------------|------------------|------------|---------|
| gene | Blood | Kidney | methyl.diff | pMWU.fdr | Match ? | gene    | blood     | kidney   | log2(fold_ratio) | blood+ 0.001 | kidney+ 0.001 | log2(fold_ratio) | q_value    | Match ? |
|      |       |        |             |          |         | Mthfd2  | 56.8181   | 18.6558  | -1.60672         | 56.8191      | 18.6568       | -1.6066744       | 0.00018329 | No      |
|      |       |        |             |          |         | Mthfr   | 0.570456  | 2.28508  | 2.00205          | 0.571456     | 2.28608       | 2.00016157       | 0.00303839 | No      |
|      |       |        |             |          |         | Mtm1    | 6.96065   | 17.9668  | 1.36804          | 6.96165      | 17.9678       | 1.36791259       | 0.00018329 | No      |
|      |       |        |             |          |         | Mtmr10  | 0.792872  | 9.38816  | 3.56568          | 0.793872     | 9.38916       | 3.56401777       | 0.00018329 | No      |
|      |       |        |             |          |         | Mtmr11  | 0.234155  | 34.7641  | 7.21399          | 0.235155     | 34.7651       | 7.20788392       | 0.00018329 | No      |
|      |       |        |             |          |         | MTMR12  | 15.7108   | 6.89441  | -1.18826         | 15.7118      | 6.89541       | -1.1881402       | 0.00018329 | No      |
|      |       |        |             |          |         | Mtmr7   | 5.63136   | 17.3455  | 1.62301          | 5.63236      | 17.3465       | 1.62283315       | 0.0115803  | No      |
|      |       |        |             |          |         | Mtor    | 9.9682    | 21.0087  | 1.07558          | 9.9692       | 21.0097       | 1.07550592       | 0.0219099  | No      |
|      |       |        |             |          |         | Mtpap   | 17.3513   | 9.31993  | -0.896652        | 17.3523      | 9.32093       | -0.8965811       | 0.0335274  | No      |
|      |       |        |             |          |         | Mtrf1   | 1.41741   | 8.3583   | 2.55995          | 1.41841      | 8.3593        | 2.55910752       | 0.00018329 | No      |
|      |       |        |             |          |         | Mtrr    | 11.1156   | 5.77209  | -0.945423        | 11.1166      | 5.77309       | -0.9453          | 0.017077   | No      |
|      |       |        |             |          |         | Mtss1l  | 0.0433058 | 2.74791  | 5.98763          | 0.0443058    | 2.74891       | 5.95522029       | 0.027785   | No      |
|      |       |        |             |          |         | Mtus1   | 0.920597  | 8.67645  | 3.23646          | 0.921597     | 8.67745       | 3.23506322       | 0.00018329 | No      |
|      |       |        |             |          |         | Muc1    | 0.48197   | 85.0217  | 7.46274          | 0.48297      | 85.0227       | 7.45977069       | 0.00018329 | No      |
|      |       |        |             |          |         | Muc6    | 7.22378   | 0.871089 | -3.05186         | 7.22478      | 0.872089      | -3.0504064       | 0.00018329 | No      |
|      |       |        |             |          |         | Mum1    | 35.0063   | 19.7994  | -0.822157        | 35.0073      | 19.8004       | -0.8221262       | 0.00329119 | No      |
|      |       |        |             |          |         | Mut     | 6.49564   | 22.0501  | 1.76324          | 6.49664      | 22.0511       | 1.76308496       | 0.00018329 | No      |
|      |       |        |             |          |         | Mutyh   | 27.3071   | 7.38164  | -1.88726         | 27.3081      | 7.38264       | -1.8871202       | 0.00506686 | No      |
|      |       |        |             |          |         | Mvb12a  | 25.366    | 79.8438  | 1.65429          | 25.367       | 79.8448       | 1.65424554       | 0.00018329 | No      |
|      |       |        |             |          |         | Mx1     | 130.052   | 15.4133  | -3.07684         | 130.053      | 15.4143       | -3.0767584       | 0.00018329 | No      |
|      |       |        |             |          |         | Mxd3    | 0.246514  | 1.53348  | 2.63707          | 0.247514     | 1.53448       | 2.63216781       | 0.0113722  | No      |
|      |       |        |             |          |         | Mxi1    | 19.4398   | 44.519   | 1.1954           | 19.4408      | 44.52         | 1.195366         | 0.00018329 | No      |
|      |       |        |             |          |         | Mxra7   | 0.899426  | 13.0861  | 3.86289          | 0.900426     | 13.0871       | 3.86139392       | 0.00018329 | No      |
|      |       |        |             |          |         | Mxra8   | 0.252048  | 3.98283  | 3.98202          | 0.253048     | 3.98383       | 3.97667311       | 0.00018329 | No      |
|      |       |        |             |          |         | Myb     | 18.4148   | 4.06379  | -2.17997         | 18.4158      | 4.06479       | -2.1796913       | 0.00018329 | No      |
|      |       |        |             |          |         | Mybbp1a | 27.2067   | 15.6533  | -0.797499        | 27.2077      | 15.6543       | -0.797456        | 0.0302128  | No      |
|      |       |        |             |          |         | Mybl2   | 0.33969   | 0.874744 | 1.36464          | 0.34069      | 0.875744      | 1.3620496        | 0.00914594 | No      |
|      |       |        |             |          |         | Myc     | 82.8704   | 44.9111  | -0.883785        | 82.8714      | 44.9121       | -0.8837701       | 0.00251301 | No      |
|      |       |        |             |          |         | Mycbp   | 18.8774   | 42.9453  | 1.18584          | 18.8784      | 42.9463       | 1.18579735       | 0.0367562  | No      |
|      |       |        |             |          |         | Mycbp2  | 48.2111   | 10.3275  | -2.22288         | 48.2121      | 10.3285       | -2.2227645       | 0.00018329 | No      |
|      |       |        |             |          |         | Mycbpap | 0.0570237 | 5.95905  | 6.70738          | 0.0580237    | 5.96005       | 6.68253833       | 0.0147272  | No      |
|      |       |        |             |          |         | Myd88   | 28.5613   | 18.2002  | -0.650109        | 28.5623      | 18.2012       | -0.6500786       | 0.0168685  | No      |
|      |       |        |             |          |         | Myeov2  | 135.377   | 254.264  | 0.909343         | 135.378      | 254.265       | 0.90933958       | 0.00097029 | No      |
|      |       |        |             |          |         | Myh1    | 0         | 2.60115  | inf              | 0.001        | 2.60215       | 11.3454884       | 0.00018329 | No      |
|      |       |        |             |          |         | Myh7b   | 0.0626634 | 14.5181  | 7.85601          | 0.0636634    | 14.5191       | 7.8332721        | 0.00154856 | No      |
|      |       |        |             |          |         | Myl12a  | 178.936   | 314.937  | 0.815621         | 178.937      | 314.938       | 0.81561611       | 0.0018326  | No      |
|      |       |        |             |          |         | Myl12b  | 589.502   | 311.717  | -0.919258        | 589.503      | 311.718       | -0.9192577       | 0.00140841 | No      |
|      |       |        |             |          |         | Myl3    | 0         | 0.856366 | inf              | 0.001        | 0.857366      | 9.7437674        | 0.00018329 | No      |
|      |       |        |             |          |         | Myl9    | 3.31795   | 20.0652  | 2.59633          | 3.31895      | 20.0662       | 2.59596863       | 0.00018329 | No      |
|      |       |        |             |          |         | Mylip   | 57.326    | 13.0175  | -2.13873         | 57.327       | 13.0185       | -2.1386516       | 0.00018329 | No      |
|      |       |        |             |          |         | Mylk    | 0.315355  | 12.0545  | 5.25645          | 0.316355     | 12.0555       | 5.25200328       | 0.00018329 | No      |
|      |       |        |             |          |         | Mynn    | 8.27288   | 2.93458  | -1.49524         | 8.27388      | 2.93558       | -1.4949185       | 0.00035173 | No      |

| RRBS |       |        |             |          |         | RNAseq  |           |         |                  |              |               |                  |            |         |
|------|-------|--------|-------------|----------|---------|---------|-----------|---------|------------------|--------------|---------------|------------------|------------|---------|
| gene | Blood | Kidney | methyl.diff | pMWU.fdr | Match ? | gene    | blood     | kidney  | log2(fold_ratio) | blood+ 0.001 | kidney+ 0.001 | log2(fold_ratio) | q_value    | Match ? |
|      |       |        |             |          |         | Myo10   | 1.46735   | 13.4972 | 3.20137          | 1.46835      | 13.4982       | 3.20049924       | 0.00018329 | No      |
|      |       |        |             |          |         | MYO18A  | 5.45842   | 30.4653 | 2.48061          | 5.45942      | 30.4663       | 2.48039471       | 0.00018329 | No      |
|      |       |        |             |          |         | Myo1d   | 0.506497  | 28.8634 | 5.83254          | 0.507497     | 28.8644       | 5.82974813       | 0.00018329 | No      |
|      |       |        |             |          |         | Myo1e   | 0.5896    | 18.3669 | 4.96123          | 0.5906       | 18.3679       | 4.95886153       | 0.00018329 | No      |
|      |       |        |             |          |         | Myo1f   | 20.8145   | 52.1086 | 1.32393          | 20.8155      | 52.1096       | 1.32389097       | 0.00650199 | No      |
|      |       |        |             |          |         | Myo1g   | 71.0843   | 32.465  | -1.13065         | 71.0853      | 32.466        | -1.1306216       | 0.00018329 | No      |
|      |       |        |             |          |         | Myo5c   | 3.04485   | 21.2742 | 2.80467          | 3.04585      | 21.2752       | 2.80425589       | 0.00018329 | No      |
|      |       |        |             |          |         | Myo6    | 0.101797  | 35.4208 | 8.44276          | 0.102797     | 35.4218       | 8.42869555       | 0.00018329 | No      |
|      |       |        |             |          |         | Myo9a   | 2.35657   | 4.65564 | 0.982291         | 2.35757      | 4.65664       | 0.98198875       | 0.00111812 | No      |
|      |       |        |             |          |         | Myo9b   | 76.7531   | 37.4262 | -1.03618         | 76.7541      | 37.4272       | -1.0361567       | 0.0063852  | No      |
|      |       |        |             |          |         | Myof    | 0.242524  | 32.4125 | 7.06228          | 0.243524     | 32.4135       | 7.05638704       | 0.00018329 | No      |
|      |       |        |             |          |         | Myrf    | 0.213011  | 2.66533 | 3.64531          | 0.214011     | 2.66633       | 3.63909849       | 0.00082046 | No      |
|      |       |        |             |          |         | Mysm1   | 15.5784   | 5.97471 | -1.38261         | 15.5794      | 5.97571       | -1.3824576       | 0.00018329 | No      |
|      |       |        |             |          |         | Mzf1    | 0.659724  | 2.58876 | 1.97233          | 0.660724     | 2.58976       | 1.97069875       | 0.00018329 | No      |
|      |       |        |             |          |         | Mzt2b   | 22.7985   | 12.6828 | -0.846072        | 22.7995      | 12.6838       | -0.8460152       | 0.00981659 | No      |
|      |       |        |             |          |         | N4bp2   | 212.832   | 32.7526 | -2.70003         | 212.833      | 32.7536       | -2.6999965       | 0.00018329 | No      |
|      |       |        |             |          |         | N4bp2l1 | 19.3941   | 3.00465 | -2.69034         | 19.3951      | 3.00565       | -2.6899433       | 0.00018329 | No      |
|      |       |        |             |          |         | N4bp2l2 | 57.2215   | 24.7227 | -1.21072         | 57.2225      | 24.7237       | -1.2106879       | 0.00018329 | No      |
|      |       |        |             |          |         | N6amt1  | 9.71258   | 25.9134 | 1.41577          | 9.71358      | 25.9144       | 1.41567898       | 0.00035173 | No      |
|      |       |        |             |          |         | Naa15   | 14.467    | 6.98525 | -1.05039         | 14.468       | 6.98625       | -1.0502753       | 0.00018329 | No      |
|      |       |        |             |          |         | Naa16   | 25.7275   | 9.43384 | -1.44739         | 25.7285      | 9.43484       | -1.4472974       | 0.00018329 | No      |
|      |       |        |             |          |         | Naa20   | 27.465    | 51.6615 | 0.911493         | 27.466       | 51.6625       | 0.91147064       | 0.00097029 | No      |
|      |       |        |             |          |         | Naa25   | 8.47485   | 3.20029 | -1.40499         | 8.47585      | 3.20129       | -1.4047047       | 0.00018329 | No      |
|      |       |        |             |          |         | Naa38   | 69.2555   | 38.3762 | -0.851719        | 69.2565      | 38.3772       | -0.8517          | 0.00709238 | No      |
|      |       |        |             |          |         | Naa40   | 3.48338   | 6.19624 | 0.830904         | 3.48438      | 6.19724       | 0.83072387       | 0.0374939  | No      |
|      |       |        |             |          |         | Naaa    | 3.23982   | 6.26376 | 0.951117         | 3.24082      | 6.26476       | 0.95090035       | 0.0186283  | No      |
|      |       |        |             |          |         | Naca    | 2010.23   | 828.706 | -1.27843         | 2010.231     | 828.707       | -1.2784273       | 0.00018329 | No      |
|      |       |        |             |          |         | Nadk2   | 19.7489   | 9.37571 | -1.07477         | 19.7499      | 9.37671       | -1.0746916       | 0.00018329 | No      |
|      |       |        |             |          |         | Naga    | 6.73108   | 41.5508 | 2.62597          | 6.73208      | 41.5518       | 2.62578675       | 0.00018329 | No      |
|      |       |        |             |          |         | Nagk    | 6.08447   | 20.8962 | 1.78004          | 6.08547      | 20.8972       | 1.77986905       | 0.0063852  | No      |
|      |       |        |             |          |         | Naglt1  | 0.0831257 | 13.4529 | 7.33841          | 0.0841257    | 13.4539       | 7.32126212       | 0.0146209  | No      |
|      |       |        |             |          |         | Naglu   | 3.12852   | 9.15288 | 1.54875          | 3.12952      | 9.15388       | 1.54844198       | 0.00018329 | No      |
|      |       |        |             |          |         | Nampt   | 8.49167   | 33.065  | 1.96118          | 8.49267      | 33.066        | 1.96105844       | 0.00018329 | No      |
|      |       |        |             |          |         | Nanos1  | 1.09136   | 0       | -inf             | 1.09236      | 0.001         | -10.093233       | 0.00018329 | No      |
|      |       |        |             |          |         | Nanos3  | 0         | 6.80452 | inf              | 0.001        | 6.80552       | 12.7324897       | 0.00018329 | No      |
|      |       |        |             |          |         | Nans    | 20.9447   | 44.2537 | 1.07921          | 20.9457      | 44.2547       | 1.07917658       | 0.00035173 | No      |
|      |       |        |             |          |         | Nap1l1  | 456.446   | 71.9708 | -2.66496         | 456.447      | 71.9718       | -2.6649437       | 0.00018329 | No      |
|      |       |        |             |          |         | Nap1l2  | 0.101212  | 1.38975 | 3.77938          | 0.102212     | 1.39075       | 3.76622662       | 0.0329503  | No      |
|      |       |        |             |          |         | Nap1l3  | 0         | 3.22294 | inf              | 0.001        | 3.22394       | 11.6546092       | 0.00018329 | No      |
|      |       |        |             |          |         | Nap1l4  | 77.9238   | 33.6397 | -1.2119          | 77.9248      | 33.6407       | -1.2118748       | 0.00018329 | No      |
|      |       |        |             |          |         | Naprt1  | 0.542608  | 79.63   | 7.19726          | 0.543608     | 79.631        | 7.19461968       | 0.00018329 | No      |
|      |       |        |             |          |         | Nars    | 46.4832   | 29.0842 | -0.676474        | 46.4842      | 29.0852       | -0.6764552       | 0.00937155 | No      |

| RRBS |       |        |             |          |         | RNAseq   |            |          |                  |              |               |                  |            |         |
|------|-------|--------|-------------|----------|---------|----------|------------|----------|------------------|--------------|---------------|------------------|------------|---------|
| gene | Blood | Kidney | methyl.diff | pMWU.fdr | Match ? | gene     | blood      | kidney   | log2(fold_ratio) | blood+ 0.001 | kidney+ 0.001 | log2(fold_ratio) | q_value    | Match ? |
|      |       |        |             |          |         | Nasp     | 39.6043    | 20.0444  | -0.982462        | 39.6053      | 20.0454       | -0.9824223       | 0.00380824 | No      |
|      |       |        |             |          |         | Nat8b    | 15.9348    | 44.3166  | 1.47566          | 15.9358      | 44.3176       | 1.47560831       | 0.010379   | No      |
|      |       |        |             |          |         | Nav1     | 1.37796    | 2.9205   | 1.08368          | 1.37896      | 2.9215        | 1.08312868       | 0.0261426  | No      |
|      |       |        |             |          |         | Nbea     | 0.00753418 | 5.33548  | 9.46795          | 0.00853418   | 5.33648       | 9.28842018       | 0.00393885 | No      |
|      |       |        |             |          |         | Nbeal1   | 1.19397    | 2.26979  | 0.926799         | 1.19497      | 2.27079       | 0.92621989       | 0.00140841 | No      |
|      |       |        |             |          |         | Nbl1     | 0.0875431  | 42.5655  | 8.92548          | 0.0885431    | 42.5665       | 8.90912287       | 0.00018329 | No      |
|      |       |        |             |          |         | Ncald    | 3.42461    | 5.52829  | 0.690896         | 3.42561      | 5.52929       | 0.69073333       | 0.0301202  | No      |
|      |       |        |             |          |         | Ncam1    | 0          | 9.02167  | inf              | 0.001        | 9.02267       | 13.1393387       | 0.00018329 | No      |
|      |       |        |             |          |         | Ncapd3   | 3.56981    | 2.06107  | -0.792456        | 3.57081      | 2.06207       | -0.7921581       | 0.0178968  | No      |
|      |       |        |             |          |         | Ncapg2   | 1.53067    | 0.744319 | -1.04017         | 1.53167      | 0.745319      | -1.0391756       | 0.0228125  | No      |
|      |       |        |             |          |         | Ncaph2   | 27.7246    | 14.236   | -0.961625        | 27.7256      | 14.237        | -0.9615735       | 0.0108214  | No      |
|      |       |        |             |          |         | Ncbp2    | 35.317     | 20.0101  | -0.819635        | 35.318       | 20.0111       | -0.8196032       | 0.00354878 | No      |
|      |       |        |             |          |         | Nceh1    | 4.87431    | 8.29509  | 0.767062         | 4.87531      | 8.29609       | 0.76693759       | 0.0422061  | No      |
|      |       |        |             |          |         | Ncf1     | 5.79335    | 18.4968  | 1.67481          | 5.79435      | 18.4978       | 1.67463496       | 0.00018329 | No      |
|      |       |        |             |          |         | Ncf2     | 1.73846    | 5.32686  | 1.61548          | 1.73946      | 5.32786       | 1.61491667       | 0.00066911 | No      |
|      |       |        |             |          |         | Nck1     | 31.8419    | 14.0706  | -1.17825         | 31.8429      | 14.0716       | -1.1781854       | 0.00018329 | No      |
|      |       |        |             |          |         | Nckap1   | 0.743897   | 50.0149  | 6.07111          | 0.744897     | 50.0159       | 6.06920204       | 0.00018329 | No      |
|      |       |        |             |          |         | Nckap5   | 0          | 1.85068  | inf              | 0.001        | 1.85168       | 10.8546191       | 0.00018329 | No      |
|      |       |        |             |          |         | Ncl      | 278.285    | 140.586  | -0.985114        | 278.286      | 140.587       | -0.9851051       | 0.00051281 | No      |
|      |       |        |             |          |         | Ncln     | 121.435    | 63.9229  | -0.925783        | 121.436      | 63.9239       | -0.9257688       | 0.0016929  | No      |
|      |       |        |             |          |         | Ncoa2    | 14.3769    | 4.87695  | -1.5597          | 14.3779      | 4.87795       | -1.5595061       | 0.00018329 | No      |
|      |       |        |             |          |         | Ncoa3    | 41.3186    | 9.50418  | -2.12016         | 41.3196      | 9.50518       | -2.1200404       | 0.00018329 | No      |
|      |       |        |             |          |         | Ncoa4    | 25.2113    | 42.4229  | 0.750773         | 25.2123      | 42.4239       | 0.75074952       | 0.00744054 | No      |
|      |       |        |             |          |         | Ncoa6    | 11.0592    | 7.08163  | -0.64309         | 11.0602      | 7.08263       | -0.6430204       | 0.0228125  | No      |
|      |       |        |             |          |         | Ndc1     | 5.41334    | 2.99398  | -0.854456        | 5.41434      | 2.99498       | -0.8542391       | 0.0107084  | No      |
|      |       |        |             |          |         | Ndrg1    | 11.9903    | 214.584  | 4.1616           | 11.9913      | 214.585       | 4.16148925       | 0.00018329 | No      |
|      |       |        |             |          |         | Ndrg2    | 3.32821    | 49.742   | 3.90165          | 3.32921      | 49.743        | 3.90124174       | 0.00018329 | No      |
|      |       |        |             |          |         | Ndst1    | 0.0794942  | 27.9191  | 8.45619          | 0.0804942    | 27.9201       | 8.43820356       | 0.00018329 | No      |
|      |       |        |             |          |         | Ndufa1   | 327.127    | 602.933  | 0.882146         | 327.128      | 602.934       | 0.88214484       | 0.00082046 | No      |
|      |       |        |             |          |         | Ndufa10  | 44.2533    | 83.9144  | 0.923134         | 44.2543      | 83.9154       | 0.92311795       | 0.00035173 | No      |
|      |       |        |             |          |         | Ndufa11  | 105.413    | 496.417  | 2.2355           | 105.414      | 496.418       | 2.23548894       | 0.00018329 | No      |
|      |       |        |             |          |         | Ndufa12  | 97.6194    | 343.387  | 1.8146           | 97.6204      | 343.388       | 1.81458506       | 0.00018329 | No      |
|      |       |        |             |          |         | Ndufa13  | 178.643    | 561.323  | 1.65175          | 178.644      | 561.324       | 1.65174628       | 0.00018329 | No      |
|      |       |        |             |          |         | Ndufa2   | 78.9837    | 229.813  | 1.54083          | 78.9847      | 229.814       | 1.54082156       | 0.00018329 | No      |
|      |       |        |             |          |         | Ndufa3   | 146.416    | 359.991  | 1.29789          | 146.417      | 359.992       | 1.29788178       | 0.00018329 | No      |
|      |       |        |             |          |         | Ndufa4   | 227.352    | 763.97   | 1.74859          | 227.353      | 763.971       | 1.74858383       | 0.00018329 | No      |
|      |       |        |             |          |         | Ndufa4l2 | 0          | 1.48815  | inf              | 0.001        | 1.48915       | 10.5402734       | 0.00981659 | No      |
|      |       |        |             |          |         | Ndufa5   | 61.4976    | 338.274  | 2.45959          | 61.4986      | 338.275       | 2.45957109       | 0.00018329 | No      |
|      |       |        |             |          |         | Ndufa6   | 200.439    | 404.29   | 1.01223          | 200.44       | 404.291       | 1.01222364       | 0.00018329 | No      |
|      |       |        |             |          |         | Ndufa8   | 69.4422    | 147.669  | 1.08848          | 69.4432      | 147.67        | 1.08847143       | 0.00018329 | No      |
|      |       |        |             |          |         | Ndufa9   | 66.3086    | 174.288  | 1.39421          | 66.3096      | 174.289       | 1.39419186       | 0.00018329 | No      |
|      |       |        |             |          |         | Ndufab1  | 85.448     | 302.983  | 1.82612          | 85.449       | 302.984       | 1.8261061        | 0.00140841 | No      |

| RRBS |       |        |             |          |         | RNAseq  |          |         |                  |              |               |                  |            |         |
|------|-------|--------|-------------|----------|---------|---------|----------|---------|------------------|--------------|---------------|------------------|------------|---------|
| gene | Blood | Kidney | methyl.diff | pMWU.fdr | Match ? | gene    | blood    | kidney  | log2(fold_ratio) | blood+ 0.001 | kidney+ 0.001 | log2(fold_ratio) | q_value    | Match ? |
|      |       |        |             |          |         | Ndufaf1 | 2.70136  | 7.17169 | 1.40863          | 2.70236      | 7.17269       | 1.4082944        | 0.00051281 | No      |
|      |       |        |             |          |         | Ndufaf4 | 30.2686  | 14.2255 | -1.08934         | 30.2696      | 14.2265       | -1.0892888       | 0.00018329 | No      |
|      |       |        |             |          |         | Ndufaf5 | 12.9742  | 29.6722 | 1.19346          | 12.9752      | 29.6732       | 1.19340374       | 0.00051281 | No      |
|      |       |        |             |          |         | Ndufaf6 | 3.91055  | 9.01478 | 1.20492          | 3.91155      | 9.01578       | 1.20471191       | 0.030858   | No      |
|      |       |        |             |          |         | Ndufb10 | 165.879  | 390.324 | 1.23454          | 165.88       | 390.325       | 1.23453592       | 0.00018329 | No      |
|      |       |        |             |          |         | Ndufb11 | 215.554  | 347.689 | 0.689747         | 215.555      | 347.69        | 0.68974555       | 0.00709238 | No      |
|      |       |        |             |          |         | Ndufb2  | 164.683  | 401.82  | 1.28686          | 164.684      | 401.821       | 1.28685257       | 0.00018329 | No      |
|      |       |        |             |          |         | Ndufb3  | 76.67    | 254.163 | 1.72902          | 76.671       | 254.164       | 1.7290068        | 0.00018329 | No      |
|      |       |        |             |          |         | Ndufb4  | 177.276  | 508.559 | 1.52042          | 177.277      | 508.56        | 1.52041262       | 0.00018329 | No      |
|      |       |        |             |          |         | Ndufb5  | 61.8318  | 194.691 | 1.65476          | 61.8328      | 194.692       | 1.65474936       | 0.00018329 | No      |
|      |       |        |             |          |         | Ndufb6  | 87.9288  | 271.712 | 1.62767          | 87.9298      | 271.713       | 1.6276595        | 0.00018329 | No      |
|      |       |        |             |          |         | Ndufb7  | 78.531   | 426.26  | 2.4404           | 78.532       | 426.261       | 2.44038452       | 0.00018329 | No      |
|      |       |        |             |          |         | Ndufb8  | 174.947  | 418.614 | 1.2587           | 174.948      | 418.615       | 1.25869784       | 0.00018329 | No      |
|      |       |        |             |          |         | Ndufb9  | 135.993  | 569.047 | 2.06502          | 135.994      | 569.048       | 2.06500735       | 0.00051281 | No      |
|      |       |        |             |          |         | Ndufc1  | 52.0272  | 241.877 | 2.21693          | 52.0282      | 241.878       | 2.21691385       | 0.00018329 | No      |
|      |       |        |             |          |         | Ndufc2  | 122.041  | 277.006 | 1.18255          | 122.042      | 277.007       | 1.18254471       | 0.00018329 | No      |
|      |       |        |             |          |         | Ndufs1  | 19.8127  | 85.9894 | 2.11773          | 19.8137      | 85.9904       | 2.11767729       | 0.00018329 | No      |
|      |       |        |             |          |         | Ndufs2  | 65.0284  | 233.877 | 1.84661          | 65.0294      | 233.878       | 1.84659214       | 0.00018329 | No      |
|      |       |        |             |          |         | Ndufs3  | 61.3044  | 249.106 | 2.0227           | 61.3054      | 249.107       | 2.0226795        | 0.00018329 | No      |
|      |       |        |             |          |         | Ndufs4  | 22.9492  | 54.8183 | 1.25621          | 22.9502      | 54.8193       | 1.25617718       | 0.00018329 | No      |
|      |       |        |             |          |         | Ndufs5  | 113.598  | 335.451 | 1.56217          | 113.599      | 335.452       | 1.56215621       | 0.00018329 | No      |
|      |       |        |             |          |         | Ndufs7  | 137.197  | 454.774 | 1.72891          | 137.198      | 454.775       | 1.7288935        | 0.00018329 | No      |
|      |       |        |             |          |         | Ndufs8  | 72.3437  | 279.308 | 1.94892          | 72.3447      | 279.309       | 1.94890283       | 0.00018329 | No      |
|      |       |        |             |          |         | Ndufv1  | 84.399   | 227.907 | 1.43314          | 84.4         | 227.908       | 1.43313666       | 0.00018329 | No      |
|      |       |        |             |          |         | Ndufv2  | 100.866  | 368.125 | 1.86776          | 100.867      | 368.126       | 1.86774539       | 0.00018329 | No      |
|      |       |        |             |          |         | NDUFV3  | 16.0132  | 144.283 | 3.17157          | 16.0142      | 144.284       | 3.17148769       | 0.00251301 | No      |
|      |       |        |             |          |         | Necap2  | 57.2152  | 35.4743 | -0.689626        | 57.2162      | 35.4753       | -0.6896088       | 0.0122333  | No      |
|      |       |        |             |          |         | Nedd1   | 4.52363  | 2.16554 | -1.06275         | 4.52463      | 2.16654       | -1.0624069       | 0.0026435  | No      |
|      |       |        |             |          |         | Nedd4   | 37.432   | 58.2548 | 0.638106         | 37.433       | 58.2558       | 0.63809102       | 0.0301202  | No      |
|      |       |        |             |          |         | Nedd4l  | 1.43454  | 24.8678 | 4.11562          | 1.43554      | 24.8688       | 4.11467146       | 0.00018329 | No      |
|      |       |        |             |          |         | Nek3    | 5.68339  | 18.869  | 1.73119          | 5.68439      | 18.87         | 1.73101698       | 0.00111812 | No      |
|      |       |        |             |          |         | Nek4    | 1.1696   | 2.95391 | 1.33661          | 1.1706       | 2.95491       | 1.33586601       | 0.00126492 | No      |
|      |       |        |             |          |         | NEK6    | 3.40053  | 9.32652 | 1.45558          | 3.40153      | 9.32752       | 1.45530974       | 0.00035173 | No      |
|      |       |        |             |          |         | Nek7    | 62.8396  | 29.9372 | -1.06974         | 62.8406      | 29.9382       | -1.0697095       | 0.00018329 | No      |
|      |       |        |             |          |         | Nek8    | 4.17058  | 10.7487 | 1.36584          | 4.17158      | 10.7497       | 1.36563058       | 0.00018329 | No      |
|      |       |        |             |          |         | Nelfa   | 24.248   | 14.7026 | -0.721796        | 24.249       | 14.7036       | -0.7217558       | 0.0106031  | No      |
|      |       |        |             |          |         | Nelfe   | 17.1908  | 34.3444 | 0.998441         | 17.1918      | 34.3454       | 0.99839628       | 0.00051281 | No      |
|      |       |        |             |          |         | Nemf    | 31.15    | 13.3301 | -1.22455         | 31.151       | 13.3311       | -1.2244826       | 0.00018329 | No      |
|      |       |        |             |          |         | Nenf    | 7.62703  | 70.2254 | 3.2028           | 7.62803      | 70.2264       | 3.20263106       | 0.00018329 | No      |
|      |       |        |             |          |         | Neo1    | 0.434093 | 13.5737 | 4.96667          | 0.435093     | 13.5747       | 4.9634527        | 0.00018329 | No      |
|      |       |        |             |          |         | Net1    | 5.4366   | 50.3428 | 3.21101          | 5.4376       | 50.3438       | 3.21077218       | 0.00018329 | No      |
|      |       |        |             |          |         | Neto2   | 0.897932 | 5.15089 | 2.52014          | 0.898932     | 5.15189       | 2.5188179        | 0.00018329 | No      |

| RRBS |       |        |             |          |         | RNAseq   |           |         |                  |              |               |                  |            |         |
|------|-------|--------|-------------|----------|---------|----------|-----------|---------|------------------|--------------|---------------|------------------|------------|---------|
| gene | Blood | Kidney | methyl.diff | pMWU.fdr | Match ? | gene     | blood     | kidney  | log2(fold_ratio) | blood+ 0.001 | kidney+ 0.001 | log2(fold_ratio) | q_value    | Match ? |
|      |       |        |             |          |         | Neur1b   | 0         | 4.23131 | inf              | 0.001        | 4.23231       | 12.0472296       | 0.00018329 | No      |
|      |       |        |             |          |         | Neur13   | 59.5166   | 36.9152 | -0.689078        | 59.5176      | 36.9162       | -0.6890623       | 0.0230128  | No      |
|      |       |        |             |          |         | Nexn     | 0.378865  | 1.33922 | 1.82164          | 0.379865     | 1.34022       | 1.81891115       | 0.00822601 | No      |
|      |       |        |             |          |         | Nfam1    | 0.482465  | 6.61451 | 3.77714          | 0.483465     | 6.61551       | 3.77436902       | 0.00018329 | No      |
|      |       |        |             |          |         | Nfat5    | 13.0276   | 49.2084 | 1.91734          | 13.0286      | 49.2094       | 1.91725186       | 0.00018329 | No      |
|      |       |        |             |          |         | Nfatc1   | 45.8547   | 10.5314 | -2.12238         | 45.8557      | 10.5324       | -2.1222669       | 0.00018329 | No      |
|      |       |        |             |          |         | Nfatc2   | 8.81543   | 3.50986 | -1.32862         | 8.81643      | 3.51086       | -1.3283701       | 0.00018329 | No      |
|      |       |        |             |          |         | Nfatc2ip | 5.30893   | 2.38043 | -1.1572          | 5.30993      | 2.38143       | -1.1568647       | 0.00082046 | No      |
|      |       |        |             |          |         | Nfatc3   | 52.7979   | 6.64224 | -2.99074         | 52.7989      | 6.64324       | -2.9905489       | 0.00018329 | No      |
|      |       |        |             |          |         | Nfe2     | 0.711299  | 2.47088 | 1.7965           | 0.712299     | 2.47188       | 1.79505384       | 0.00277264 | No      |
|      |       |        |             |          |         | NFE2L1   | 10.334    | 43.9561 | 2.08866          | 10.335       | 43.9571       | 2.08855782       | 0.00018329 | No      |
|      |       |        |             |          |         | Nfe2l2   | 8.29406   | 43.7788 | 2.40008          | 8.29506      | 43.7798       | 2.39994104       | 0.00686277 | No      |
|      |       |        |             |          |         | Nfia     | 1.70797   | 4.26444 | 1.32008          | 1.70897      | 4.26544       | 1.3195675        | 0.0302128  | No      |
|      |       |        |             |          |         | Nfib     | 0         | 3.33065 | inf              | 0.001        | 3.33165       | 11.7020211       | 0.00018329 | No      |
|      |       |        |             |          |         | Nfic     | 4.15042   | 13.1238 | 1.66086          | 4.15142      | 13.1248       | 1.66061864       | 0.00018329 | No      |
|      |       |        |             |          |         | Nfil3    | 2.31349   | 13.8542 | 2.58218          | 2.31449      | 13.8552       | 2.5816613        | 0.00018329 | No      |
|      |       |        |             |          |         | Nfkb2    | 11.9583   | 24.1108 | 1.01167          | 11.9593      | 24.1118       | 1.01160641       | 0.00530972 | No      |
|      |       |        |             |          |         | Nfkbid   | 4.2709    | 8.52343 | 0.996896         | 4.2719       | 8.52443       | 0.99672549       | 0.0031651  | No      |
|      |       |        |             |          |         | Nfkbiz   | 20.8304   | 37.2443 | 0.838328         | 20.8314      | 37.2453       | 0.83829858       | 0.00303839 | No      |
|      |       |        |             |          |         | Nfrkb    | 49.5062   | 9.92182 | -2.31893         | 49.5072      | 9.92282       | -2.3188163       | 0.00018329 | No      |
|      |       |        |             |          |         | Nfs1     | 15.5745   | 54.3038 | 1.80187          | 15.5755      | 54.3048       | 1.80180125       | 0.00018329 | No      |
|      |       |        |             |          |         | Nfx1     | 17.3851   | 7.26601 | -1.25862         | 17.3861      | 7.26701       | -1.2585006       | 0.00018329 | No      |
|      |       |        |             |          |         | Nfxl1    | 13.1536   | 6.40558 | -1.03806         | 13.1546      | 6.40658       | -1.0379411       | 0.0378663  | No      |
|      |       |        |             |          |         | Nfyb     | 20.1288   | 10.2205 | -0.977787        | 20.1298      | 10.2215       | -0.9777259       | 0.0301202  | No      |
|      |       |        |             |          |         | Ngdn     | 80.1997   | 47.1795 | -0.765439        | 80.2007      | 47.1805       | -0.7654241       | 0.0104928  | No      |
|      |       |        |             |          |         | Ngef     | 0.0684488 | 2.02455 | 4.88643          | 0.0694488    | 2.02555       | 4.86622012       | 0.00082046 | No      |
|      |       |        |             |          |         | Ngfrap1  | 67.1441   | 169.732 | 1.33793          | 67.1451      | 169.733       | 1.33791306       | 0.00018329 | No      |
|      |       |        |             |          |         | Ngly1    | 40.654    | 24.0876 | -0.755107        | 40.655       | 24.0886       | -0.7550822       | 0.00354878 | No      |
|      |       |        |             |          |         | NGRN     | 45.1507   | 27.9391 | -0.692465        | 45.1517      | 27.9401       | -0.6924431       | 0.0246265  | No      |
|      |       |        |             |          |         | Nhej1    | 10.4557   | 4.43212 | -1.23821         | 10.4567      | 4.43312       | -1.2380333       | 0.0018326  | No      |
|      |       |        |             |          |         | Nhlrc3   | 20.7958   | 10.1393 | -1.03633         | 20.7968      | 10.1403       | -1.0362612       | 0.00469886 | No      |
|      |       |        |             |          |         | Nhp2     | 28.354    | 13.2731 | -1.09505         | 28.355       | 13.2741       | -1.0949891       | 0.00329119 | No      |
|      |       |        |             |          |         | Nhp2l1   | 127.838   | 60.6149 | -1.07657         | 127.839      | 60.6159       | -1.0765599       | 0.00018329 | No      |
|      |       |        |             |          |         | Nhsl1    | 0.355232  | 2.30443 | 2.69758          | 0.356232     | 2.30543       | 2.69414684       | 0.00018329 | No      |
|      |       |        |             |          |         | Nid1     | 0         | 6.35679 | inf              | 0.001        | 6.35779       | 12.6343096       | 0.00018329 | No      |
|      |       |        |             |          |         | Nid2     | 0.0620266 | 82.2503 | 10.3729          | 0.0630266    | 82.2513       | 10.3498619       | 0.00018329 | No      |
|      |       |        |             |          |         | Nim1     | 0.277427  | 1.18149 | 2.09043          | 0.278427     | 1.18249       | 2.08645696       | 0.0188386  | No      |
|      |       |        |             |          |         | Ninj1    | 5.99628   | 153.424 | 4.67731          | 5.99728      | 153.425       | 4.67708144       | 0.00018329 | No      |
|      |       |        |             |          |         | Nip7     | 29.4954   | 14.2358 | -1.05097         | 29.4964      | 14.2368       | -1.050914        | 0.00051281 | No      |
|      |       |        |             |          |         | Nipal1   | 24.7449   | 1.81607 | -3.76824         | 24.7459      | 1.81707       | -3.7675036       | 0.00018329 | No      |
|      |       |        |             |          |         | Nipal2   | 8.91637   | 39.6861 | 2.1541           | 8.91737      | 39.6871       | 2.15397996       | 0.00018329 | No      |
|      |       |        |             |          |         | Nipbl    | 33.0792   | 11.1464 | -1.56935         | 33.0802      | 11.1474       | -1.5692607       | 0.00018329 | No      |

| RRBS |       |        |             |          |         | RNAseq   |           |          |                  |              |               |                  |            |         |
|------|-------|--------|-------------|----------|---------|----------|-----------|----------|------------------|--------------|---------------|------------------|------------|---------|
| gene | Blood | Kidney | methyl.diff | pMWU.fdr | Match ? | gene     | blood     | kidney   | log2(fold_ratio) | blood+ 0.001 | kidney+ 0.001 | log2(fold_ratio) | q_value    | Match ? |
|      |       |        |             |          |         | Nipsnap1 | 21.4475   | 32.8383  | 0.614572         | 21.4485      | 32.8393       | 0.61454662       | 0.0316127  | No      |
|      |       |        |             |          |         | Nit1     | 46.8686   | 118.316  | 1.33595          | 46.8696      | 118.317       | 1.33593299       | 0.00018329 | No      |
|      |       |        |             |          |         | Nit2     | 48.3883   | 114.862  | 1.24717          | 48.3893      | 114.863       | 1.24715417       | 0.0066167  | No      |
|      |       |        |             |          |         | Nkain1   | 10.9203   | 1.96972  | -2.47095         | 10.9213      | 1.97072       | -2.4703499       | 0.00018329 | No      |
|      |       |        |             |          |         | Nkain4   | 0         | 9.26201  | inf              | 0.001        | 9.26301       | 13.1772654       | 0.00018329 | No      |
|      |       |        |             |          |         | Nkap     | 24.2543   | 8.35166  | -1.53811         | 24.2553      | 8.35266       | -1.5379924       | 0.00018329 | No      |
|      |       |        |             |          |         | Nkd2     | 0.971552  | 5.67694  | 2.54675          | 0.972552     | 5.67794       | 2.54552031       | 0.00018329 | No      |
|      |       |        |             |          |         | NKIRAS1  | 4.62293   | 2.02355  | -1.19192         | 4.62393      | 2.02455       | -1.1915183       | 0.0183081  | No      |
|      |       |        |             |          |         | Nkpd1    | 0.0358324 | 0.534791 | 3.89964          | 0.0368324    | 0.535791      | 3.86262304       | 0.0495248  | No      |
|      |       |        |             |          |         | Nktr     | 23.0755   | 9.54739  | -1.27318         | 23.0765      | 9.54839       | -1.273095        | 0.00018329 | No      |
|      |       |        |             |          |         | Nle1     | 19.4462   | 9.83787  | -0.983068        | 19.4472      | 9.83887       | -0.9829979       | 0.00140841 | No      |
|      |       |        |             |          |         | Nlgn2    | 0.134076  | 1.22967  | 3.19715          | 0.135076     | 1.23067       | 3.18760069       | 0.00051281 | No      |
|      |       |        |             |          |         | Nlk      | 20.3634   | 5.96663  | -1.77099         | 20.3644      | 5.96763       | -1.7708193       | 0.00018329 | No      |
|      |       |        |             |          |         | Nlrc4    | 0.106109  | 0.654224 | 2.62423          | 0.107109     | 0.655224      | 2.61290849       | 0.00380824 | No      |
|      |       |        |             |          |         | Nlrc5    | 77.7443   | 20.1706  | -1.94648         | 77.7453      | 20.1716       | -1.9464299       | 0.00018329 | No      |
|      |       |        |             |          |         | Nlrp1a   | 20.8118   | 3.43738  | -2.59802         | 20.8128      | 3.43838       | -2.5976702       | 0.00018329 | No      |
|      |       |        |             |          |         | Nlrp3    | 0.189864  | 0.81325  | 2.09873          | 0.190864     | 0.81425       | 2.0929268        | 0.00290302 | No      |
|      |       |        |             |          |         | Nlrx1    | 0.723125  | 10.0003  | 3.78965          | 0.724125     | 10.0013       | 3.78780497       | 0.00018329 | No      |
|      |       |        |             |          |         | Nmd3     | 37.77     | 23.2401  | -0.700623        | 37.771       | 23.2411       | -0.7006006       | 0.010379   | No      |
|      |       |        |             |          |         | Nme2     | 421.522   | 673.319  | 0.675682         | 421.523      | 673.32        | 0.67568097       | 0.0111567  | No      |
|      |       |        |             |          |         | NME4     | 4.80674   | 34.3829  | 2.83856          | 4.80774      | 34.3839       | 2.83830241       | 0.00018329 | No      |
|      |       |        |             |          |         | Nme5     | 0         | 0.965428 | inf              | 0.001        | 0.966428      | 9.91651844       | 0.00018329 | No      |
|      |       |        |             |          |         | Nme6     | 3.15423   | 14.5637  | 2.20702          | 3.15523      | 14.5647       | 2.20665891       | 0.00018329 | No      |
|      |       |        |             |          |         | Nmi      | 112.746   | 42.683   | -1.40134         | 112.747      | 42.684        | -1.4013218       | 0.00018329 | No      |
|      |       |        |             |          |         | Nmnat1   | 5.6167    | 12.7563  | 1.18342          | 5.6177       | 12.7573       | 1.18327154       | 0.00018329 | No      |
|      |       |        |             |          |         | Nmnat3   | 0.263984  | 5.4732   | 4.37386          | 0.264984     | 5.4742        | 4.36867099       | 0.00018329 | No      |
|      |       |        |             |          |         | Nmral1   | 5.08349   | 10.7761  | 1.08395          | 5.08449      | 10.7771       | 1.08379404       | 0.00856745 | No      |
|      |       |        |             |          |         | Nmrk1    | 0.744259  | 13.1898  | 4.14748          | 0.745259     | 13.1908       | 4.14564636       | 0.00018329 | No      |
|      |       |        |             |          |         | Nmt2     | 2.50608   | 6.48881  | 1.37252          | 2.50708      | 6.48981       | 1.37216821       | 0.00018329 | No      |
|      |       |        |             |          |         | Nnmt     | 0         | 1.58507  | inf              | 0.001        | 1.58607       | 10.6312407       | 0.00018329 | No      |
|      |       |        |             |          |         | Nnt      | 9.19121   | 60.4621  | 2.71771          | 9.19221      | 60.4631       | 2.71757129       | 0.00018329 | No      |
|      |       |        |             |          |         | Noa1     | 10.0201   | 5.1073   | -0.972266        | 10.0211      | 5.1083        | -0.9721257       | 0.00481718 | No      |
|      |       |        |             |          |         | Noc3l    | 14.9577   | 7.39946  | -1.0154          | 14.9587      | 7.40046       | -1.0152979       | 0.00066911 | No      |
|      |       |        |             |          |         | Nod1     | 3.08966   | 5.49964  | 0.831887         | 3.09066      | 5.50064       | 0.83168453       | 0.00992433 | No      |
|      |       |        |             |          |         | Nol10    | 11.8968   | 6.38327  | -0.898211        | 11.8978      | 6.38427       | -0.8981013       | 0.0086849  | No      |
|      |       |        |             |          |         | Nol11    | 11.5045   | 7.35138  | -0.646109        | 11.5055      | 7.35238       | -0.6460404       | 0.0317975  | No      |
|      |       |        |             |          |         | Nol7     | 140.457   | 90.5654  | -0.633095        | 140.458      | 90.5664       | -0.633091        | 0.0349324  | No      |
|      |       |        |             |          |         | Nolc1    | 32.1292   | 18.4244  | -0.802263        | 32.1302      | 18.4254       | -0.802234        | 0.0016929  | No      |
|      |       |        |             |          |         | Nono     | 196.223   | 109.135  | -0.846379        | 196.224      | 109.136       | -0.8463744       | 0.00111812 | No      |
|      |       |        |             |          |         | Nop2     | 28.8402   | 17.4706  | -0.723152        | 28.8412      | 17.4716       | -0.7231195       | 0.0101506  | No      |
|      |       |        |             |          |         | Nop56    | 107.941   | 72.1757  | -0.58066         | 107.942      | 72.1767       | -0.5806512       | 0.0442539  | No      |
|      |       |        |             |          |         | Nop58    | 64.89     | 30.5419  | -1.08721         | 64.891       | 30.5429       | -1.0871813       | 0.00018329 | No      |

| RRBS |       |        |             |          |         | RNAseq  |           |          |                  |              |               |                  |            |         |
|------|-------|--------|-------------|----------|---------|---------|-----------|----------|------------------|--------------|---------------|------------------|------------|---------|
| gene | Blood | Kidney | methyl.diff | pMWU.fdr | Match ? | gene    | blood     | kidney   | log2(fold_ratio) | blood+ 0.001 | kidney+ 0.001 | log2(fold_ratio) | q_value    | Match ? |
|      |       |        |             |          |         | Nos1    | 0         | 1.22706  | inf              | 0.001        | 1.22806       | 10.2621653       | 0.0162458  | No      |
|      |       |        |             |          |         | Nos1ap  | 0.142341  | 7.14301  | 5.6491           | 0.143341     | 7.14401       | 5.63921087       | 0.00018329 | No      |
|      |       |        |             |          |         | Nos3    | 0.0443251 | 2.06376  | 5.54101          | 0.0453251    | 2.06476       | 5.50952008       | 0.0076683  | No      |
|      |       |        |             |          |         | Nostrin | 0         | 1.56776  | inf              | 0.001        | 1.56876       | 10.6154089       | 0.00018329 | No      |
|      |       |        |             |          |         | Npap60  | 20.0589   | 10.9537  | -0.872826        | 20.0599      | 10.9547       | -0.8727644       | 0.00126492 | No      |
|      |       |        |             |          |         | Npas2   | 0.250639  | 8.88183  | 5.14717          | 0.251639     | 8.88283       | 5.14159194       | 0.00018329 | No      |
|      |       |        |             |          |         | Npat    | 6.60273   | 3.29646  | -1.00214         | 6.60373      | 3.29746       | -1.001926        | 0.0066167  | No      |
|      |       |        |             |          |         | Npc2    | 65.3416   | 138.027  | 1.07888          | 65.3426      | 138.028       | 1.07886519       | 0.00035173 | No      |
|      |       |        |             |          |         | Npepo   | 4.69584   | 37.7812  | 3.00821          | 4.69684      | 37.7822       | 3.00794436       | 0.00018329 | No      |
|      |       |        |             |          |         | Nphp1   | 0.171983  | 12.6192  | 6.19721          | 0.172983     | 12.6202       | 6.1889607        | 0.00018329 | No      |
|      |       |        |             |          |         | Nphp3   | 0.283942  | 0.772345 | 1.44365          | 0.284942     | 0.773345      | 1.44044388       | 0.0146209  | No      |
|      |       |        |             |          |         | Nphp4   | 0.304662  | 3.34675  | 3.45748          | 0.305662     | 3.34775       | 3.45318268       | 0.0215079  | No      |
|      |       |        |             |          |         | Npl     | 0.107876  | 2.38074  | 4.46397          | 0.108876     | 2.38174       | 4.45125806       | 0.00051281 | No      |
|      |       |        |             |          |         | Nploc4  | 20.8725   | 11.101   | -0.910907        | 20.8735      | 11.102        | -0.9108529       | 0.00035173 | No      |
|      |       |        |             |          |         | Npm1    | 1210.55   | 355.014  | -1.76972         | 1210.551     | 355.015       | -1.769712        | 0.00018329 | No      |
|      |       |        |             |          |         | Npnt    | 0.28881   | 36.3281  | 6.97482          | 0.28981      | 36.3291       | 6.96987444       | 0.00018329 | No      |
|      |       |        |             |          |         | Npr3    | 0         | 3.24321  | inf              | 0.001        | 3.24421       | 11.6636515       | 0.00018329 | No      |
|      |       |        |             |          |         | Nprl3   | 8.62848   | 15.4897  | 0.844131         | 8.62948      | 15.4907       | 0.84405681       | 0.0326623  | No      |
|      |       |        |             |          |         | Npy     | 9.77133   | 2.40998  | -2.01953         | 9.77233      | 2.41098       | -2.0190829       | 0.0031651  | No      |
|      |       |        |             |          |         | Nqo1    | 0.311267  | 8.69844  | 4.80454          | 0.312267     | 8.69944       | 4.80007051       | 0.00018329 | No      |
|      |       |        |             |          |         | Nr1h4   | 0.440257  | 23.6617  | 5.74806          | 0.441257     | 23.6627       | 5.74485172       | 0.00018329 | No      |
|      |       |        |             |          |         | Nr1i2   | 0.0552552 | 2.68517  | 5.60276          | 0.0562552    | 2.68617       | 5.57742034       | 0.0203707  | No      |
|      |       |        |             |          |         | Nr2c2   | 13.2153   | 6.92604  | -0.932103        | 13.2163      | 6.92704       | -0.9320074       | 0.00567465 | No      |
|      |       |        |             |          |         | Nr3c1   | 20.1353   | 12.2184  | -0.72067         | 20.1363      | 12.2194       | -0.7206252       | 0.00419853 | No      |
|      |       |        |             |          |         | Nr4a1   | 2.76439   | 32.0572  | 3.53562          | 2.76539      | 32.0582       | 3.53513856       | 0.00018329 | No      |
|      |       |        |             |          |         | Nr4a3   | 0.328265  | 0.838034 | 1.35215          | 0.329265     | 0.839034      | 1.34948011       | 0.0120339  | No      |
|      |       |        |             |          |         | Nrarp   | 1.26322   | 5.236    | 2.05135          | 1.26422      | 5.237         | 2.05049306       | 0.00018329 | No      |
|      |       |        |             |          |         | Nras    | 36.6986   | 15.8665  | -1.20974         | 36.6996      | 15.8675       | -1.2096895       | 0.00035173 | No      |
|      |       |        |             |          |         | Nrbf2   | 18.3684   | 10.3162  | -0.83231         | 18.3694      | 10.3172       | -0.832253        | 0.0161386  | No      |
|      |       |        |             |          |         | Nrbp2   | 4.07182   | 21.593   | 2.40682          | 4.07282      | 21.594        | 2.40653055       | 0.00018329 | No      |
|      |       |        |             |          |         | Nrde2   | 10.6221   | 5.19212  | -1.03267         | 10.6231      | 5.19312       | -1.0325314       | 0.0428533  | No      |
|      |       |        |             |          |         | Nrep    | 0         | 52.915   | inf              | 0.001        | 52.916        | 15.6914164       | 0.00018329 | No      |
|      |       |        |             |          |         | Nrf1    | 25.1023   | 11.5082  | -1.12516         | 25.1033      | 11.5092       | -1.1250895       | 0.00018329 | No      |
|      |       |        |             |          |         | Nrros   | 44.6418   | 17.7211  | -1.33293         | 44.6428      | 17.7221       | -1.3328779       | 0.00018329 | No      |
|      |       |        |             |          |         | Nsa2    | 147.234   | 63.0901  | -1.22262         | 147.235      | 63.0911       | -1.2226123       | 0.00018329 | No      |
|      |       |        |             |          |         | Nsg2    | 27.1389   | 1.59422  | -4.08944         | 27.1399      | 1.59522       | -4.0885881       | 0.00018329 | No      |
|      |       |        |             |          |         | Nsmce2  | 12.8446   | 39.6246  | 1.62524          | 12.8456      | 39.6256       | 1.6251585        | 0.00018329 | No      |
|      |       |        |             |          |         | NSMF    | 0.816396  | 3.93203  | 2.26793          | 0.817396     | 3.93303       | 2.2665341        | 0.00018329 | No      |
|      |       |        |             |          |         | Nsrp1   | 22.33     | 13.046   | -0.775377        | 22.331       | 13.047        | -0.7753297       | 0.00981659 | No      |
|      |       |        |             |          |         | Nsun2   | 43.7246   | 16.1481  | -1.43708         | 43.7256      | 16.1491       | -1.4370244       | 0.00018329 | No      |
|      |       |        |             |          |         | Nsun6   | 4.99319   | 2.96072  | -0.754015        | 4.99419      | 2.96172       | -0.7538155       | 0.047797   | No      |
|      |       |        |             |          |         | Nt5c2   | 12.4064   | 30.099   | 1.27863          | 12.4074      | 30.1          | 1.27856266       | 0.00018329 | No      |



| RRBS |       |        |             |          |         | RNAseq |          |          |                  |              |               |                  |            |         |
|------|-------|--------|-------------|----------|---------|--------|----------|----------|------------------|--------------|---------------|------------------|------------|---------|
| gene | Blood | Kidney | methyl.diff | pMWU.fdr | Match ? | gene   | blood    | kidney   | log2(fold_ratio) | blood+ 0.001 | kidney+ 0.001 | log2(fold_ratio) | q_value    | Match ? |
|      |       |        |             |          |         | Nt5c3a | 28.2858  | 12.8669  | -1.13642         | 28.2868      | 12.8679       | -1.1363523       | 0.00018329 | No      |
|      |       |        |             |          |         | Nt5dc1 | 30.7459  | 13.6206  | -1.17461         | 30.7469      | 13.6216       | -1.1745448       | 0.00018329 | No      |
|      |       |        |             |          |         | Nt5dc3 | 2.31131  | 4.08818  | 0.82275          | 2.31231      | 4.08918       | 0.82247674       | 0.0121287  | No      |
|      |       |        |             |          |         | Nt5m   | 0.867514 | 5.74043  | 2.7262           | 0.868514     | 5.74143       | 2.7247891        | 0.0295293  | No      |
|      |       |        |             |          |         | Ntan1  | 249.06   | 93.7965  | -1.40889         | 249.061      | 93.7975       | -1.4088778       | 0.00018329 | No      |
|      |       |        |             |          |         | Ntf4   | 0.345155 | 1.14758  | 1.73328          | 0.346155     | 1.14858       | 1.73036125       | 0.0177018  | No      |
|      |       |        |             |          |         | Ntpcr  | 10.2867  | 26.7853  | 1.38066          | 10.2877      | 26.7863       | 1.38057484       | 0.00018329 | No      |
|      |       |        |             |          |         | Nuak1  | 0.532119 | 5.29269  | 3.31418          | 0.533119     | 5.29369       | 3.31174421       | 0.00018329 | No      |
|      |       |        |             |          |         | Nuak2  | 0.282803 | 76.0092  | 8.07023          | 0.283803     | 76.0102       | 8.06515938       | 0.00018329 | No      |
|      |       |        |             |          |         | Nub1   | 55.3956  | 26.9099  | -1.04164         | 55.3966      | 26.9109       | -1.0416068       | 0.00018329 | No      |
|      |       |        |             |          |         | Nubp1  | 103.737  | 61.4691  | -0.754999        | 103.738      | 61.4701       | -0.7549877       | 0.00732142 | No      |
|      |       |        |             |          |         | Nubpl  | 3.61214  | 8.28867  | 1.19829          | 3.61314      | 8.28967       | 1.19806151       | 0.00458064 | No      |
|      |       |        |             |          |         | Nucb2  | 7.67096  | 25.3435  | 1.72414          | 7.67196      | 25.3445       | 1.7240056        | 0.00018329 | No      |
|      |       |        |             |          |         | Nudt1  | 25.9802  | 13.8305  | -0.909558        | 25.9812      | 13.8315       | -0.9095104       | 0.0178968  | No      |
|      |       |        |             |          |         | Nudt10 | 0        | 0.987307 | inf              | 0.001        | 0.988307      | 9.94881545       | 0.00018329 | No      |
|      |       |        |             |          |         | Nudt12 | 2.4025   | 5.54852  | 1.20757          | 2.4035       | 5.54952       | 1.20722619       | 0.00035173 | No      |
|      |       |        |             |          |         | Nudt16 | 4.75884  | 8.13062  | 0.772754         | 4.75984      | 8.13162       | 0.77262972       | 0.0497921  | No      |
|      |       |        |             |          |         | Nudt19 | 11.7203  | 26.5059  | 1.1773           | 11.7213      | 26.5069       | 1.17723537       | 0.00342383 | No      |
|      |       |        |             |          |         | Nudt2  | 23.2374  | 67.4142  | 1.5366           | 23.2384      | 67.4152       | 1.53656317       | 0.00018329 | No      |
|      |       |        |             |          |         | NUDT21 | 83.9473  | 31.1955  | -1.42815         | 83.9483      | 31.1965       | -1.4281169       | 0.00018329 | No      |
|      |       |        |             |          |         | Nudt4  | 33.1912  | 129.432  | 1.96332          | 33.1922      | 129.433       | 1.96328933       | 0.00018329 | No      |
|      |       |        |             |          |         | Nudt7  | 9.78204  | 36.5847  | 1.90303          | 9.78304      | 36.5857       | 1.90292512       | 0.00018329 | No      |
|      |       |        |             |          |         | Nudt9  | 29.9335  | 50.4024  | 0.751731         | 29.9345      | 50.4034       | 0.75171188       | 0.0119236  | No      |
|      |       |        |             |          |         | Nuf2   | 1.03209  | 2.7514   | 1.4146           | 1.03309      | 2.7524        | 1.41372421       | 0.00494262 | No      |
|      |       |        |             |          |         | Numa1  | 66.5741  | 30.6848  | -1.11743         | 66.5751      | 30.6858       | -1.1174115       | 0.00224282 | No      |
|      |       |        |             |          |         | Numb   | 10.9078  | 21.4571  | 0.976089         | 10.9088      | 21.4581       | 0.97602993       | 0.00445502 | No      |
|      |       |        |             |          |         | Nup107 | 8.38739  | 4.10186  | -1.03195         | 8.38839      | 4.10286       | -1.031764        | 0.00051281 | No      |
|      |       |        |             |          |         | Nup153 | 36.7444  | 7.52384  | -2.28798         | 36.7454      | 7.52484       | -2.2878308       | 0.00018329 | No      |
|      |       |        |             |          |         | Nup188 | 10.5437  | 5.75262  | -0.874095        | 10.5447      | 5.75362       | -0.8739762       | 0.00111812 | No      |
|      |       |        |             |          |         | Nup210 | 26.7573  | 7.35711  | -1.86272         | 26.7583      | 7.35811       | -1.8625793       | 0.00018329 | No      |
|      |       |        |             |          |         | Nup54  | 55.7929  | 31.5972  | -0.820286        | 55.7939      | 31.5982       | -0.820265        | 0.0113722  | No      |
|      |       |        |             |          |         | Nup62  | 21.134   | 11.7875  | -0.842306        | 21.135       | 11.7885       | -0.842254        | 0.0226206  | No      |
|      |       |        |             |          |         | Nup98  | 16.9833  | 9.98264  | -0.766625        | 16.9843      | 9.98364       | -0.7665639       | 0.00481718 | No      |
|      |       |        |             |          |         | Nupl1  | 14.5375  | 8.76396  | -0.73013         | 14.5385      | 8.76496       | -0.730059        | 0.0232058  | No      |
|      |       |        |             |          |         | NUPR1  | 0        | 151.505  | inf              | 0.001        | 151.506       | 17.2090154       | 0.00018329 | No      |
|      |       |        |             |          |         | Nusap1 | 0.604377 | 3.30442  | 2.45088          | 0.605377     | 3.30542       | 2.44892783       | 0.00018329 | No      |
|      |       |        |             |          |         | Nxn    | 4.07456  | 8.08258  | 0.98817          | 4.07556      | 8.08358       | 0.98799606       | 0.0112711  | No      |
|      |       |        |             |          |         | Nxpe3  | 5.78344  | 2.01984  | -1.51768         | 5.78444      | 2.02084       | -1.5172222       | 0.00018329 | No      |
|      |       |        |             |          |         | Nxt1   | 34.709   | 19.5444  | -0.828555        | 34.71        | 19.5454       | -0.8285223       | 0.00902869 | No      |
|      |       |        |             |          |         | Nxt2   | 5.88811  | 2.79257  | -1.07621         | 5.88911      | 2.79357       | -1.0759397       | 0.00140841 | No      |
|      |       |        |             |          |         | Nynrin | 1.74059  | 4.29588  | 1.30338          | 1.74159      | 4.29688       | 1.30288446       | 0.00051281 | No      |
|      |       |        |             |          |         | Oacyl  | 0        | 0.997657 | inf              | 0.001        | 0.998657      | 9.96384544       | 0.00018329 | No      |

| RRBS |       |        |             |          |         | RNAseq  |            |          |                  |              |               |                  |            |         |
|------|-------|--------|-------------|----------|---------|---------|------------|----------|------------------|--------------|---------------|------------------|------------|---------|
| gene | Blood | Kidney | methyl.diff | pMWU.fdr | Match ? | gene    | blood      | kidney   | log2(fold_ratio) | blood+ 0.001 | kidney+ 0.001 | log2(fold_ratio) | q_value    | Match ? |
|      |       |        |             |          |         | Oaf     | 7.94022    | 40.1563  | 2.33837          | 7.94122      | 40.1573       | 2.3382297        | 0.00018329 | No      |
|      |       |        |             |          |         | Oas1b   | 8.79071    | 4.89559  | -0.844498        | 8.79171      | 4.89659       | -0.8443664       | 0.0109365  | No      |
|      |       |        |             |          |         | Oas2    | 0.23606    | 1.09094  | 2.20835          | 0.23706      | 1.09194       | 2.20356943       | 0.00224282 | No      |
|      |       |        |             |          |         | Oasl    | 2.84885    | 8.26471  | 1.53658          | 2.84985      | 8.26571       | 1.53625276       | 0.00018329 | No      |
|      |       |        |             |          |         | Oat     | 15.6924    | 72.8504  | 2.21487          | 15.6934      | 72.8514       | 2.21479875       | 0.00018329 | No      |
|      |       |        |             |          |         | Oaz2    | 38.3228    | 58.9759  | 0.621921         | 38.3238      | 58.9769       | 0.62190937       | 0.0228125  | No      |
|      |       |        |             |          |         | Obsl1   | 1.49813    | 13.2934  | 3.14948          | 1.49913      | 13.2944       | 3.14862127       | 0.00018329 | No      |
|      |       |        |             |          |         | Ocln    | 5.55555    | 32.0548  | 2.52854          | 5.55655      | 32.0558       | 2.5283241        | 0.00018329 | No      |
|      |       |        |             |          |         | Odc1    | 44.9019    | 81.5252  | 0.860472         | 44.9029      | 81.5262       | 0.86045515       | 0.00126492 | No      |
|      |       |        |             |          |         | Ofd1    | 17.1018    | 7.29323  | -1.22952         | 17.1028      | 7.29423       | -1.2294049       | 0.00591487 | No      |
|      |       |        |             |          |         | Ogdh    | 35.485     | 107.443  | 1.5983           | 35.486       | 107.444       | 1.59826305       | 0.00018329 | No      |
|      |       |        |             |          |         | Ogdhl   | 0.236685   | 1.90373  | 3.00779          | 0.237685     | 1.90473       | 3.00246374       | 0.00303839 | No      |
|      |       |        |             |          |         | Ogfrl1  | 0.856286   | 12.908   | 3.91403          | 0.857286     | 12.909        | 3.91245685       | 0.00018329 | No      |
|      |       |        |             |          |         | Ogn     | 0.00822317 | 4.59403  | 9.12585          | 0.00922317   | 4.59503       | 8.96059588       | 0.0404374  | No      |
|      |       |        |             |          |         | Ogt     | 150.091    | 34.6068  | -2.11671         | 150.092      | 34.6078       | -2.1166779       | 0.00018329 | No      |
|      |       |        |             |          |         | Ola1    | 61.3448    | 34.9095  | -0.813322        | 61.3458      | 34.9105       | -0.8133036       | 0.0018326  | No      |
|      |       |        |             |          |         | Olah    | 2.21186    | 0.306572 | -2.85096         | 2.21286      | 0.307572      | -2.8469161       | 0.00111812 | No      |
|      |       |        |             |          |         | Olfm4   | 0          | 5.46856  | inf              | 0.001        | 5.46956       | 12.4172091       | 0.00018329 | No      |
|      |       |        |             |          |         | Olfml1  | 0          | 5.3365   | inf              | 0.001        | 5.3375        | 12.3819484       | 0.00018329 | No      |
|      |       |        |             |          |         | Olfml3  | 0.819944   | 2.09069  | 1.35038          | 0.820944     | 2.09169       | 1.34931333       | 0.00981659 | No      |
|      |       |        |             |          |         | Olr1    | 0.0266748  | 1.05357  | 5.30366          | 0.0276748    | 1.05457       | 5.25193816       | 0.0269158  | No      |
|      |       |        |             |          |         | Olr155  | 0          | 1.39545  | inf              | 0.001        | 1.39645       | 10.4475482       | 0.00018329 | No      |
|      |       |        |             |          |         | Olr1584 | 0.520013   | 3.58718  | 2.78623          | 0.521013     | 3.58818       | 2.78386099       | 0.00018329 | No      |
|      |       |        |             |          |         | Olr1668 | 0          | 0.832614 | inf              | 0.001        | 0.833614      | 9.7032357        | 0.00018329 | No      |
|      |       |        |             |          |         | Olr59   | 0          | 0.944486 | inf              | 0.001        | 0.945486      | 9.88491229       | 0.00018329 | No      |
|      |       |        |             |          |         | Oma1    | 5.31197    | 19.5329  | 1.87859          | 5.31297      | 19.5339       | 1.87838954       | 0.00018329 | No      |
|      |       |        |             |          |         | Oosp1   | 0.358894   | 6.95148  | 4.27569          | 0.359894     | 6.95248       | 4.27188373       | 0.00018329 | No      |
|      |       |        |             |          |         | OPA3    | 6.7795     | 13.1519  | 0.956023         | 6.7805       | 13.1529       | 0.95591736       | 0.00111812 | No      |
|      |       |        |             |          |         | Oplah   | 0.757835   | 59.7469  | 6.30084          | 0.758835     | 59.7479       | 6.29895797       | 0.00018329 | No      |
|      |       |        |             |          |         | Opn3    | 0.540123   | 4.58736  | 3.0863           | 0.541123     | 4.58836       | 3.08395012       | 0.00018329 | No      |
|      |       |        |             |          |         | Optc    | 8.15354    | 1.46844  | -2.47314         | 8.15454      | 1.46944       | -2.472337        | 0.00051281 | No      |
|      |       |        |             |          |         | Orai2   | 38.4837    | 6.1434   | -2.64714         | 38.4847      | 6.1444        | -2.646941        | 0.00018329 | No      |
|      |       |        |             |          |         | Orai3   | 4.51697    | 13.4171  | 1.57064          | 4.51797      | 13.4181       | 1.5704338        | 0.00018329 | No      |
|      |       |        |             |          |         | Ormdl3  | 29.3002    | 48.9538  | 0.74051          | 29.3012      | 48.9548       | 0.74049057       | 0.00721079 | No      |
|      |       |        |             |          |         | Osbpl11 | 11.0498    | 5.46319  | -1.01621         | 11.0508      | 5.46419       | -1.0160713       | 0.00035173 | No      |
|      |       |        |             |          |         | Osbpl3  | 2.38926    | 29.199   | 3.61129          | 2.39026      | 29.2          | 3.61072891       | 0.00018329 | No      |
|      |       |        |             |          |         | Osbpl6  | 0.136197   | 1.65141  | 3.59993          | 0.137197     | 1.65241       | 3.59025086       | 0.0146209  | No      |
|      |       |        |             |          |         | Oscar   | 0.0933523  | 0.818234 | 3.13176          | 0.0943523    | 0.819234      | 3.118146         | 0.0282824  | No      |
|      |       |        |             |          |         | Oser1   | 33.8493    | 22.6271  | -0.581077        | 33.8503      | 22.6281       | -0.5810532       | 0.036101   | No      |
|      |       |        |             |          |         | Osgin1  | 0.328304   | 26.1925  | 6.31798          | 0.329304     | 26.1935       | 6.313645         | 0.00018329 | No      |
|      |       |        |             |          |         | Osgin2  | 7.2617     | 3.57645  | -1.02178         | 7.2627       | 3.57745       | -1.0215744       | 0.00845618 | No      |
|      |       |        |             |          |         | Osr1    | 0          | 0.758198 | inf              | 0.001        | 0.759198      | 9.56833238       | 0.00018329 | No      |

| RRBS |       |        |             |          |         | RNAseq   |           |          |                  |              |               |                  |            |         |
|------|-------|--------|-------------|----------|---------|----------|-----------|----------|------------------|--------------|---------------|------------------|------------|---------|
| gene | Blood | Kidney | methyl.diff | pMWU.fdr | Match ? | gene     | blood     | kidney   | log2(fold_ratio) | blood+ 0.001 | kidney+ 0.001 | log2(fold_ratio) | q_value    | Match ? |
|      |       |        |             |          |         | Osr2     | 0         | 7.41312  | inf              | 0.001        | 7.41412       | 12.8560598       | 0.00018329 | No      |
|      |       |        |             |          |         | OST4     | 295.024   | 444.601  | 0.59168          | 295.025      | 444.602       | 0.59167723       | 0.0284818  | No      |
|      |       |        |             |          |         | Otud1    | 21.1004   | 7.33099  | -1.52519         | 21.1014      | 7.33199       | -1.525062        | 0.00018329 | No      |
|      |       |        |             |          |         | Otud4    | 22.5638   | 8.25713  | -1.4503          | 22.5648      | 8.25813       | -1.450187        | 0.00018329 | No      |
|      |       |        |             |          |         | Otud5    | 168.972   | 87.2774  | -0.953107        | 168.973      | 87.2784       | -0.9530962       | 0.00126492 | No      |
|      |       |        |             |          |         | Oxa1l    | 70.9336   | 109.781  | 0.63009          | 70.9346      | 109.782       | 0.63008012       | 0.0290402  | No      |
|      |       |        |             |          |         | Oxct1    | 28.2999   | 193.71   | 2.77503          | 28.3009      | 193.711       | 2.77498604       | 0.00018329 | No      |
|      |       |        |             |          |         | Oxgr1    | 0         | 0.976474 | inf              | 0.001        | 0.977474      | 9.93291452       | 0.00018329 | No      |
|      |       |        |             |          |         | P2RX3    | 0.0796858 | 0.871211 | 3.45063          | 0.0806858    | 0.872211      | 3.43429049       | 0.00329119 | No      |
|      |       |        |             |          |         | P2ry1    | 0.0956482 | 0.694502 | 2.86017          | 0.0966482    | 0.695502      | 2.84723989       | 0.00530972 | No      |
|      |       |        |             |          |         | P2ry10   | 59.4541   | 7.71101  | -2.94678         | 59.4551      | 7.71201       | -2.9466217       | 0.00018329 | No      |
|      |       |        |             |          |         | P2ry4    | 15.9966   | 30.9811  | 0.953628         | 15.9976      | 30.9821       | 0.95357945       | 0.0301202  | No      |
|      |       |        |             |          |         | P2ry6    | 0.135241  | 2.7915   | 4.36743          | 0.136241     | 2.7925        | 4.35732445       | 0.00018329 | No      |
|      |       |        |             |          |         | P33MONOX | 13.2641   | 74.6314  | 2.49226          | 13.2651      | 74.6324       | 2.49216653       | 0.00018329 | No      |
|      |       |        |             |          |         | P4ha1    | 8.58467   | 33.7534  | 1.9752           | 8.58567      | 33.7544       | 1.97507295       | 0.00018329 | No      |
|      |       |        |             |          |         | P4hb     | 72.9848   | 163.983  | 1.16788          | 72.9858      | 163.984       | 1.16786735       | 0.00018329 | No      |
|      |       |        |             |          |         | Pabpc1   | 1411.33   | 290.422  | -2.28084         | 1411.331     | 290.423       | -2.2808288       | 0.00018329 | No      |
|      |       |        |             |          |         | Pacs1    | 45.5616   | 14.5208  | -1.6497          | 45.5626      | 14.5218       | -1.6496298       | 0.00018329 | No      |
|      |       |        |             |          |         | Pacsin1  | 18.7289   | 2.5165   | -2.89578         | 18.7299      | 2.5175        | -2.8952795       | 0.00018329 | No      |
|      |       |        |             |          |         | Pacsin2  | 19.3037   | 63.8425  | 1.72564          | 19.3047      | 63.8435       | 1.72558761       | 0.00018329 | No      |
|      |       |        |             |          |         | Padi1    | 0         | 1.09801  | inf              | 0.001        | 1.09901       | 10.1019888       | 0.00018329 | No      |
|      |       |        |             |          |         | Paf1     | 43.7458   | 79.318   | 0.858505         | 43.7468      | 79.319        | 0.858489         | 0.00140841 | No      |
|      |       |        |             |          |         | Pafah1b1 | 58.3032   | 33.6345  | -0.793631        | 58.3042      | 33.6355       | -0.7936151       | 0.00530972 | No      |
|      |       |        |             |          |         | Pafah1b3 | 45.4315   | 27.6291  | -0.717504        | 45.4325      | 27.6301       | -0.7174839       | 0.0213082  | No      |
|      |       |        |             |          |         | Pag1     | 13.5017   | 7.3283   | -0.881593        | 13.5027      | 7.3293        | -0.8815006       | 0.0436248  | No      |
|      |       |        |             |          |         | Pah      | 0         | 81.5568  | inf              | 0.001        | 81.5578       | 16.3155352       | 0.00018329 | No      |
|      |       |        |             |          |         | Paip2    | 201.661   | 102.758  | -0.972683        | 201.662      | 102.759       | -0.9726745       | 0.00018329 | No      |
|      |       |        |             |          |         | Pak1     | 0.179824  | 10.2526  | 5.83326          | 0.180824     | 10.2536       | 5.82540054       | 0.00018329 | No      |
|      |       |        |             |          |         | Pak1ip1  | 21.8491   | 9.56194  | -1.1922          | 21.8501      | 9.56294       | -1.1921138       | 0.00018329 | No      |
|      |       |        |             |          |         | Pak2     | 3.7185    | 1.37839  | -1.43174         | 3.7195       | 1.37939       | -1.4310783       | 0.0364805  | No      |
|      |       |        |             |          |         | Pak4     | 1.67856   | 14.4318  | 3.10396          | 1.67956      | 14.4328       | 3.10319597       | 0.00018329 | No      |
|      |       |        |             |          |         | Pak6     | 4.53879   | 7.30666  | 0.686906         | 4.53979      | 7.30766       | 0.68678395       | 0.0301202  | No      |
|      |       |        |             |          |         | Palld    | 0.632581  | 5.85782  | 3.21104          | 0.633581     | 5.85882       | 3.20900915       | 0.00018329 | No      |
|      |       |        |             |          |         | Palm3    | 0.494284  | 6.04382  | 3.61205          | 0.495284     | 6.04482       | 3.60937146       | 0.00018329 | No      |
|      |       |        |             |          |         | Pam      | 0.0637882 | 16.6229  | 8.02567          | 0.0647882    | 16.6239       | 8.00331209       | 0.00018329 | No      |
|      |       |        |             |          |         | Pan3     | 82.0105   | 24.0836  | -1.76776         | 82.0115      | 24.0846       | -1.7677153       | 0.00018329 | No      |
|      |       |        |             |          |         | Pank1    | 1.21277   | 24.2847  | 4.32368          | 1.21377      | 24.2857       | 4.3225401        | 0.00018329 | No      |
|      |       |        |             |          |         | Pank2    | 32.2875   | 18.0148  | -0.841791        | 32.2885      | 18.0158       | -0.8417577       | 0.0206835  | No      |
|      |       |        |             |          |         | Panx2    | 0         | 2.31125  | inf              | 0.001        | 2.31225       | 11.1750817       | 0.00018329 | No      |
|      |       |        |             |          |         | Papd4    | 21.8617   | 9.25807  | -1.23962         | 21.8627      | 9.25907       | -1.2395324       | 0.00018329 | No      |
|      |       |        |             |          |         | Papd5    | 29.3722   | 7.96891  | -1.882           | 29.3732      | 7.96991       | -1.8818651       | 0.00018329 | No      |

| RRBS |       |        |             |          |         | RNAseq  |           |          |                  |              |               |                  |            |         |
|------|-------|--------|-------------|----------|---------|---------|-----------|----------|------------------|--------------|---------------|------------------|------------|---------|
| gene | Blood | Kidney | methyl.diff | pMWU.fdr | Match ? | gene    | blood     | kidney   | log2(fold_ratio) | blood+ 0.001 | kidney+ 0.001 | log2(fold_ratio) | q_value    | Match ? |
|      |       |        |             |          |         | Papola  | 54.5354   | 29.8216  | -0.870836        | 54.5364      | 29.8226       | -0.8708134       | 0.00519348 | No      |
|      |       |        |             |          |         | Papolg  | 14.6085   | 3.54218  | -2.04409         | 14.6095      | 3.54318       | -2.0437901       | 0.00018329 | No      |
|      |       |        |             |          |         | Papss1  | 14.0968   | 58.7774  | 2.0599           | 14.0978      | 58.7784       | 2.05981604       | 0.00018329 | No      |
|      |       |        |             |          |         | Papss2  | 0.288434  | 35.8184  | 6.95632          | 0.289434     | 35.8194       | 6.95136296       | 0.00018329 | No      |
|      |       |        |             |          |         | Paqr3   | 0.260906  | 1.0077   | 1.94946          | 0.261906     | 1.0087        | 1.94537615       | 0.0114728  | No      |
|      |       |        |             |          |         | Paqr5   | 18.9479   | 43.4055  | 1.19584          | 18.9489      | 43.4065       | 1.195797         | 0.00018329 | No      |
|      |       |        |             |          |         | Paqr9   | 0         | 1.42346  | inf              | 0.001        | 1.42446       | 10.4761994       | 0.00018329 | No      |
|      |       |        |             |          |         | Pard6a  | 0.749602  | 2.14911  | 1.51954          | 0.750602     | 2.15011       | 1.51829043       | 0.0109365  | No      |
|      |       |        |             |          |         | Pard6b  | 5.48382   | 27.8134  | 2.34252          | 5.48482      | 27.8144       | 2.3423158        | 0.00018329 | No      |
|      |       |        |             |          |         | Parm1   | 0.0677792 | 51.7454  | 9.57637          | 0.0687792    | 51.7464       | 9.55527045       | 0.00018329 | No      |
|      |       |        |             |          |         | Parp1   | 48.5482   | 28.7497  | -0.755872        | 48.5492      | 28.7507       | -0.7558504       | 0.0263234  | No      |
|      |       |        |             |          |         | Parp10  | 24.2086   | 13.7632  | -0.814708        | 24.2096      | 13.7642       | -0.8146585       | 0.0135584  | No      |
|      |       |        |             |          |         | Parp11  | 16.7162   | 5.63192  | -1.56955         | 16.7172      | 5.63292       | -1.5693783       | 0.00777671 | No      |
|      |       |        |             |          |         | Parp14  | 35.0461   | 14.122   | -1.31131         | 35.0471      | 14.123        | -1.3112485       | 0.00018329 | No      |
|      |       |        |             |          |         | Parp6   | 28.3497   | 16.8155  | -0.75354         | 28.3507      | 16.8165       | -0.7535069       | 0.00469886 | No      |
|      |       |        |             |          |         | Parp8   | 44.4666   | 25.3701  | -0.80959         | 44.4676      | 25.3711       | -0.8095685       | 0.012344   | No      |
|      |       |        |             |          |         | Parp9   | 39.778    | 13.9938  | -1.50719         | 39.779       | 13.9948       | -1.5071161       | 0.00018329 | No      |
|      |       |        |             |          |         | Parva   | 0         | 48.9462  | inf              | 0.001        | 48.9472       | 15.5789387       | 0.00018329 | No      |
|      |       |        |             |          |         | Parvb   | 0.356471  | 2.79277  | 2.96984          | 0.357471     | 2.79377       | 2.96631514       | 0.00018329 | No      |
|      |       |        |             |          |         | Patl1   | 18.7585   | 8.75149  | -1.09994         | 18.7595      | 8.75249       | -1.099856        | 0.00018329 | No      |
|      |       |        |             |          |         | Patl2   | 5.17561   | 0.418086 | -3.62986         | 5.17661      | 0.419086      | -3.6266894       | 0.0329503  | No      |
|      |       |        |             |          |         | Paxbp1  | 31.9768   | 14.6444  | -1.12668         | 31.9778      | 14.6454       | -1.1266231       | 0.00018329 | No      |
|      |       |        |             |          |         | Paxip1  | 13.7844   | 5.39414  | -1.35357         | 13.7854      | 5.39514       | -1.3534088       | 0.00018329 | No      |
|      |       |        |             |          |         | Pbdc1   | 20.2537   | 12.7716  | -0.665247        | 20.2547      | 12.7726       | -0.6652045       | 0.0339945  | No      |
|      |       |        |             |          |         | Pbk     | 0.176223  | 2.4387   | 3.79064          | 0.177223     | 2.4397        | 3.783066         | 0.00140841 | No      |
|      |       |        |             |          |         | Pbld1   | 0.0173102 | 110.596  | 12.6414          | 0.0183102    | 110.597       | 12.5603771       | 0.00224282 | No      |
|      |       |        |             |          |         | Pbrm1   | 19.9866   | 9.37814  | -1.09166         | 19.9876      | 9.37914       | -1.0915777       | 0.00732142 | No      |
|      |       |        |             |          |         | Pbx1    | 1.73759   | 17.5538  | 3.33662          | 1.73859      | 17.5548       | 3.3358759        | 0.00018329 | No      |
|      |       |        |             |          |         | Pbx3    | 1.43842   | 7.31146  | 2.34567          | 1.43942      | 7.31246       | 2.34486922       | 0.00018329 | No      |
|      |       |        |             |          |         | Pbxip1  | 148.252   | 82.4463  | -0.846527        | 148.253      | 82.4473       | -0.8465171       | 0.00406781 | No      |
|      |       |        |             |          |         | Pc      | 0.496851  | 29.7957  | 5.90614          | 0.497851     | 29.7967       | 5.90329472       | 0.00018329 | No      |
|      |       |        |             |          |         | Pcbd1   | 0.326997  | 154.427  | 8.88343          | 0.327997     | 154.428       | 8.87903602       | 0.00051281 | No      |
|      |       |        |             |          |         | Pcbd2   | 79.8898   | 137.388  | 0.782176         | 79.8908      | 137.389       | 0.78216522       | 0.00709238 | No      |
|      |       |        |             |          |         | PCBP2   | 219.915   | 138.381  | -0.6683          | 219.916      | 138.382       | -0.6682963       | 0.0375863  | No      |
|      |       |        |             |          |         | Pcbp4   | 8.86893   | 19.8793  | 1.16443          | 8.86993      | 19.8803       | 1.1643449        | 0.00051281 | No      |
|      |       |        |             |          |         | Pcca    | 10.0751   | 64.2563  | 2.67305          | 10.0761      | 64.2573       | 2.67292302       | 0.00035173 | No      |
|      |       |        |             |          |         | Pccb    | 12.218    | 142.915  | 3.54807          | 12.219       | 142.916       | 3.54796932       | 0.00018329 | No      |
|      |       |        |             |          |         | Pcdh12  | 0.768332  | 0.148846 | -2.36791         | 0.769332     | 0.149846      | -2.3601257       | 0.00111812 | No      |
|      |       |        |             |          |         | Pcdh17  | 0         | 0.945099 | inf              | 0.001        | 0.946099      | 9.88584735       | 0.00018329 | No      |
|      |       |        |             |          |         | Pcdh19  | 0         | 0.720372 | inf              | 0.001        | 0.721372      | 9.49459962       | 0.00018329 | No      |
|      |       |        |             |          |         | Pcdha8  | 0         | 1.19325  | inf              | 0.001        | 1.19425       | 10.2218892       | 0.00018329 | No      |
|      |       |        |             |          |         | Pcdhb19 | 0.0766436 | 0.942799 | 3.62071          | 0.0776436    | 0.943799      | 3.60354073       | 0.0153859  | No      |

| RRBS |       |        |             |          |         | RNAseq  |           |          |                  |              |               |                  |            |         |
|------|-------|--------|-------------|----------|---------|---------|-----------|----------|------------------|--------------|---------------|------------------|------------|---------|
| gene | Blood | Kidney | methyl.diff | pMWU.fdr | Match ? | gene    | blood     | kidney   | log2(fold_ratio) | blood+ 0.001 | kidney+ 0.001 | log2(fold_ratio) | q_value    | Match ? |
|      |       |        |             |          |         | Pcdhb20 | 0.0345529 | 0.774576 | 4.48653          | 0.0355529    | 0.775576      | 4.44722901       | 0.0204738  | No      |
|      |       |        |             |          |         | Pcdhga1 | 0.872844  | 0.11149  | -2.96882         | 0.873844     | 0.11249       | -2.957579        | 0.00380824 | No      |
|      |       |        |             |          |         | Pcdhga7 | 0.159612  | 0.630407 | 1.98171          | 0.160612     | 0.631407      | 1.97499057       | 0.00698138 | No      |
|      |       |        |             |          |         | Pcf11   | 29.9336   | 6.96199  | -2.1042          | 29.9346      | 6.96299       | -2.1040351       | 0.00018329 | No      |
|      |       |        |             |          |         | Pcgf2   | 2.01984   | 17.8407  | 3.14286          | 2.02084      | 17.8417       | 3.14222608       | 0.00018329 | No      |
|      |       |        |             |          |         | Pcgf6   | 14.6183   | 5.58253  | -1.38879         | 14.6193      | 5.58353       | -1.3886248       | 0.00018329 | No      |
|      |       |        |             |          |         | Pck2    | 2.30309   | 22.8498  | 3.31054          | 2.30409      | 22.8508       | 3.3099757        | 0.00018329 | No      |
|      |       |        |             |          |         | Pclo    | 0         | 2.76923  | inf              | 0.001        | 2.77023       | 11.43579         | 0.00018329 | No      |
|      |       |        |             |          |         | Pcmtd1  | 113.275   | 33.657   | -1.75085         | 113.276      | 33.658        | -1.7508209       | 0.00018329 | No      |
|      |       |        |             |          |         | Pcmtd2  | 48.3558   | 14.4446  | -1.74316         | 48.3568      | 14.4456       | -1.7430887       | 0.00018329 | No      |
|      |       |        |             |          |         | Pcnx    | 11.0161   | 21.8819  | 0.990128         | 11.0171      | 21.8829       | 0.99005942       | 0.0139848  | No      |
|      |       |        |             |          |         | Pcolce  | 0.109683  | 8.00754  | 6.18995          | 0.110683     | 8.00854       | 6.1770337        | 0.0234164  | No      |
|      |       |        |             |          |         | PCOLCE2 | 0         | 6.86429  | inf              | 0.001        | 6.86529       | 12.7451049       | 0.00018329 | No      |
|      |       |        |             |          |         | Pcsk4   | 0         | 5.50968  | inf              | 0.001        | 5.51068       | 12.4280146       | 0.00018329 | No      |
|      |       |        |             |          |         | Pcsk6   | 0         | 22.9541  | inf              | 0.001        | 22.9551       | 14.4865271       | 0.00018329 | No      |
|      |       |        |             |          |         | Pctp    | 13.014    | 7.96702  | -0.707948        | 13.015       | 7.96802       | -0.7078821       | 0.0306599  | No      |
|      |       |        |             |          |         | Pcyox1  | 8.76213   | 14.3397  | 0.710661         | 8.76313      | 14.3407       | 0.71059728       | 0.0191514  | No      |
|      |       |        |             |          |         | Pcyox1l | 13.546    | 22.0061  | 0.700034         | 13.547       | 22.0071       | 0.69999565       | 0.0220133  | No      |
|      |       |        |             |          |         | Pcyt1a  | 3.36465   | 9.95689  | 1.56524          | 3.36565      | 9.95789       | 1.56495492       | 0.00018329 | No      |
|      |       |        |             |          |         | Pcyt2   | 28.8996   | 59.0147  | 1.03003          | 28.9006      | 59.0157       | 1.02999936       | 0.00051281 | No      |
|      |       |        |             |          |         | Pdcd10  | 91.097    | 33.2742  | -1.453           | 91.098       | 33.2752       | -1.452972        | 0.00018329 | No      |
|      |       |        |             |          |         | Pdcd11  | 19.1254   | 11.4866  | -0.735532        | 19.1264      | 11.4876       | -0.7354879       | 0.00674218 | No      |
|      |       |        |             |          |         | Pdcd2   | 36.4854   | 21.0676  | -0.792296        | 36.4864      | 21.0686       | -0.7922644       | 0.00856745 | No      |
|      |       |        |             |          |         | Pdcd4   | 546.61    | 121.155  | -2.17365         | 546.611      | 121.156       | -2.1736486       | 0.00018329 | No      |
|      |       |        |             |          |         | Pdcd6ip | 26.5031   | 45.8241  | 0.789942         | 26.5041      | 45.8251       | 0.78992248       | 0.00277264 | No      |
|      |       |        |             |          |         | Pde1a   | 0         | 16.5302  | inf              | 0.001        | 16.5312       | 14.0129038       | 0.00018329 | No      |
|      |       |        |             |          |         | Pde2a   | 92.3229   | 5.69144  | -4.01982         | 92.3239      | 5.69244       | -4.0195851       | 0.00018329 | No      |
|      |       |        |             |          |         | Pde3b   | 40.1959   | 2.82993  | -3.82821         | 40.1969      | 2.83093       | -3.8277363       | 0.00018329 | No      |
|      |       |        |             |          |         | Pde4a   | 0.119409  | 2.25267  | 4.23765          | 0.120409     | 2.25367       | 4.22626114       | 0.00018329 | No      |
|      |       |        |             |          |         | Pde4b   | 68.2536   | 4.92025  | -3.7941          | 68.2546      | 4.92125       | -3.7938296       | 0.00018329 | No      |
|      |       |        |             |          |         | Pde4c   | 4.74289   | 27.5544  | 2.53844          | 4.74389      | 27.5554       | 2.53819261       | 0.00018329 | No      |
|      |       |        |             |          |         | Pde4dip | 21.5456   | 13.28    | -0.69814         | 21.5466      | 13.281        | -0.6980965       | 0.0315274  | No      |
|      |       |        |             |          |         | Pde7b   | 0.392726  | 14.0786  | 5.16383          | 0.393726     | 14.0796       | 5.16027055       | 0.00018329 | No      |
|      |       |        |             |          |         | Pde8a   | 0.317375  | 15.8135  | 5.63882          | 0.318375     | 15.8145       | 5.63437708       | 0.00018329 | No      |
|      |       |        |             |          |         | Pdgfb   | 0.636071  | 10.2759  | 4.01394          | 0.637071     | 10.2769       | 4.01180717       | 0.00018329 | No      |
|      |       |        |             |          |         | Pdgfd   | 0         | 1.06705  | inf              | 0.001        | 1.06805       | 10.0607635       | 0.00018329 | No      |
|      |       |        |             |          |         | Pdha1   | 82.6362   | 163.061  | 0.980566         | 82.6372      | 163.062       | 0.98055734       | 0.0134442  | No      |
|      |       |        |             |          |         | Pdhb    | 35.774    | 118.058  | 1.72251          | 35.775       | 118.059       | 1.72248435       | 0.00018329 | No      |
|      |       |        |             |          |         | Pdhx    | 5.60946   | 14.642   | 1.38418          | 5.61046      | 14.643        | 1.38402019       | 0.00018329 | No      |
|      |       |        |             |          |         | Pdia5   | 0.491383  | 3.81219  | 2.9557           | 0.492383     | 3.81319       | 2.95314556       | 0.00481718 | No      |
|      |       |        |             |          |         | Pdilt   | 0         | 0.589547 | inf              | 0.001        | 0.590547      | 9.20590807       | 0.00530972 | No      |
|      |       |        |             |          |         | Pdk1    | 21.9886   | 9.17949  | -1.26027         | 21.9896      | 9.18049       | -1.2601783       | 0.0031651  | No      |

| RRBS |       |        |             |          |         | RNAseq   |           |          |                  |              |               |                  |            |         |
|------|-------|--------|-------------|----------|---------|----------|-----------|----------|------------------|--------------|---------------|------------------|------------|---------|
| gene | Blood | Kidney | methyl.diff | pMWU.fdr | Match ? | gene     | blood     | kidney   | log2(fold_ratio) | blood+ 0.001 | kidney+ 0.001 | log2(fold_ratio) | q_value    | Match ? |
|      |       |        |             |          |         | Pdk2     | 11.8212   | 111.427  | 3.23666          | 11.8222      | 111.428       | 3.23654137       | 0.00018329 | No      |
|      |       |        |             |          |         | Pdk4     | 0         | 7.58169  | inf              | 0.001        | 7.58269       | 12.888494        | 0.00018329 | No      |
|      |       |        |             |          |         | Pdlim1   | 65.0231   | 19.9503  | -1.70454         | 65.0241      | 19.9513       | -1.7044918       | 0.00018329 | No      |
|      |       |        |             |          |         | Pdlim3   | 0         | 1.00718  | inf              | 0.001        | 1.00818       | 9.97753752       | 0.00018329 | No      |
|      |       |        |             |          |         | Pdp1     | 9.7341    | 5.30987  | -0.874372        | 9.7351       | 5.31087       | -0.8742476       | 0.00880015 | No      |
|      |       |        |             |          |         | Pdp2     | 1.81731   | 6.69739  | 1.88179          | 1.81831      | 6.69839       | 1.88121619       | 0.00018329 | No      |
|      |       |        |             |          |         | Pdpk1    | 19.5691   | 10.0985  | -0.954438        | 19.5701      | 10.0995       | -0.9543673       | 0.00880015 | No      |
|      |       |        |             |          |         | Pdpn     | 0         | 8.58538  | inf              | 0.001        | 8.58638       | 13.0678343       | 0.00018329 | No      |
|      |       |        |             |          |         | Pds5a    | 37.1242   | 14.775   | -1.3292          | 37.1252      | 14.776        | -1.329143        | 0.00018329 | No      |
|      |       |        |             |          |         | Pds5b    | 17.5277   | 5.23347  | -1.7438          | 17.5287      | 5.23447       | -1.7436036       | 0.00018329 | No      |
|      |       |        |             |          |         | Pdxk     | 4.02439   | 14.8577  | 1.88436          | 4.02539      | 14.8587       | 1.88410743       | 0.00035173 | No      |
|      |       |        |             |          |         | Pdxp     | 4.61221   | 2.48627  | -0.891477        | 4.61321      | 2.48727       | -0.8912078       | 0.0310472  | No      |
|      |       |        |             |          |         | Pdzd2    | 0.0223161 | 0.621849 | 4.8004           | 0.0233161    | 0.622849      | 4.73948405       | 0.00744054 | No      |
|      |       |        |             |          |         | Pdzd4    | 5.58536   | 1.47898  | -1.91704         | 5.58636      | 1.47998       | -1.9163309       | 0.00018329 | No      |
|      |       |        |             |          |         | Pdzd8    | 2.88817   | 6.48802  | 1.16762          | 2.88917      | 6.48902       | 1.16734552       | 0.00035173 | No      |
|      |       |        |             |          |         | Pdzk1    | 0.681394  | 84.5783  | 6.95566          | 0.682394     | 84.5793       | 6.95355585       | 0.00018329 | No      |
|      |       |        |             |          |         | Pdzk1ip1 | 0.139588  | 284.573  | 10.9934          | 0.140588     | 284.574       | 10.9831147       | 0.0252382  | No      |
|      |       |        |             |          |         | Pea15    | 16.6765   | 46.5041  | 1.47954          | 16.6775      | 46.5051       | 1.4794859        | 0.0261426  | No      |
|      |       |        |             |          |         | Pecam1   | 29.8575   | 14.8656  | -1.00611         | 29.8585      | 14.8666       | -1.006067        | 0.00018329 | No      |
|      |       |        |             |          |         | Pecr     | 15.0523   | 138.595  | 3.20282          | 15.0533      | 138.596       | 3.20273392       | 0.00018329 | No      |
|      |       |        |             |          |         | Peg3     | 0.0241025 | 1.65458  | 6.10114          | 0.0251025    | 1.65558       | 6.04336186       | 0.00277264 | No      |
|      |       |        |             |          |         | Peli1    | 35.9106   | 6.06977  | -2.5647          | 35.9116      | 6.07077       | -2.5644985       | 0.00018329 | No      |
|      |       |        |             |          |         | Peli3    | 3.88102   | 1.65727  | -1.22763         | 3.88202      | 1.65827       | -1.2271286       | 0.00481718 | No      |
|      |       |        |             |          |         | Peo1     | 4.92155   | 9.26216  | 0.912236         | 4.92255      | 9.26316       | 0.91209857       | 0.0140981  | No      |
|      |       |        |             |          |         | Pepd     | 12.2522   | 102.765  | 3.06823          | 12.2532      | 102.766       | 3.06813256       | 0.00018329 | No      |
|      |       |        |             |          |         | Per2     | 1.29039   | 2.79794  | 1.11656          | 1.29139      | 2.79894       | 1.1159558        | 0.00251301 | No      |
|      |       |        |             |          |         | Pes1     | 70.8786   | 46.8266  | -0.598021        | 70.8796      | 46.8276       | -0.5980114       | 0.0230128  | No      |
|      |       |        |             |          |         | Pet100   | 20.264    | 44.6096  | 1.13844          | 20.265       | 44.6106       | 1.13839638       | 0.00018329 | No      |
|      |       |        |             |          |         | Pex11a   | 0.133637  | 9.39483  | 6.13548          | 0.134637     | 9.39583       | 6.12487377       | 0.00018329 | No      |
|      |       |        |             |          |         | Pex11g   | 0.716428  | 2.70306  | 1.9157           | 0.717428     | 2.70406       | 1.91422121       | 0.00555427 | No      |
|      |       |        |             |          |         | Pex12    | 1.11237   | 3.49032  | 1.64973          | 1.11337      | 3.49132       | 1.64883948       | 0.00018329 | No      |
|      |       |        |             |          |         | Pex13    | 12.2531   | 21.7846  | 0.830157         | 12.2541      | 21.7856       | 0.83011032       | 0.00445502 | No      |
|      |       |        |             |          |         | Pex2     | 5.69926   | 13.0689  | 1.1973           | 5.70026      | 13.0699       | 1.19714847       | 0.00082046 | No      |
|      |       |        |             |          |         | Pex7     | 1.17483   | 10.2184  | 3.12064          | 1.17583      | 10.2194       | 3.1195591        | 0.00018329 | No      |
|      |       |        |             |          |         | Pf4      | 41.3957   | 15.2618  | -1.43956         | 41.3967      | 15.2628       | -1.4394961       | 0.00329119 | No      |
|      |       |        |             |          |         | Pfkfb2   | 9.28114   | 5.52615  | -0.748028        | 9.28214      | 5.52715       | -0.7479217       | 0.0192579  | No      |
|      |       |        |             |          |         | Pfkfb4   | 0.132723  | 1.23938  | 3.22313          | 0.133723     | 1.24038       | 3.21346264       | 0.00197017 | No      |
|      |       |        |             |          |         | Pfkm     | 11.1347   | 37.5115  | 1.75228          | 11.1357      | 37.5125       | 1.75217916       | 0.00018329 | No      |
|      |       |        |             |          |         | Pfn1     | 3188.57   | 1104.18  | -1.52994         | 3188.571     | 1104.181      | -1.5299333       | 0.00018329 | No      |
|      |       |        |             |          |         | Pfn3     | 0         | 23.5459  | inf              | 0.001        | 23.5469       | 14.5232495       | 0.00018329 | No      |
|      |       |        |             |          |         | Pgam1    | 90.0318   | 199.677  | 1.14916          | 90.0328      | 199.678       | 1.1491528        | 0.00018329 | No      |
|      |       |        |             |          |         | Pgam5    | 28.5538   | 16.4038  | -0.799653        | 28.5548      | 16.4048       | -0.7996153       | 0.0031651  | No      |

| RRBS |       |        |             |          |         | RNAseq   |           |          |                  |              |               |                  |            |         |
|------|-------|--------|-------------|----------|---------|----------|-----------|----------|------------------|--------------|---------------|------------------|------------|---------|
| gene | Blood | Kidney | methyl.diff | pMWU.fdr | Match ? | gene     | blood     | kidney   | log2(fold_ratio) | blood+ 0.001 | kidney+ 0.001 | log2(fold_ratio) | q_value    | Match ? |
|      |       |        |             |          |         | Pgk1     | 191.414   | 276.938  | 0.532864         | 191.415      | 276.939       | 0.53286435       | 0.046173   | No      |
|      |       |        |             |          |         | Pglyrp1  | 1.79248   | 7.06539  | 1.97881          | 1.79348      | 7.06639       | 1.97821172       | 0.00481718 | No      |
|      |       |        |             |          |         | Pglyrp2  | 6.0719    | 0.280166 | -4.4378          | 6.0729       | 0.281166      | -4.4328916       | 0.017077   | No      |
|      |       |        |             |          |         | Pgm1     | 4.88106   | 18.1821  | 1.89725          | 4.88206      | 18.1831       | 1.89703625       | 0.00018329 | No      |
|      |       |        |             |          |         | PGM2     | 6.14151   | 14.7608  | 1.26511          | 6.14251      | 14.7618       | 1.26496844       | 0.00018329 | No      |
|      |       |        |             |          |         | Pgm2l1   | 9.00708   | 1.41911  | -2.66608         | 9.00808      | 1.42011       | -2.665217        | 0.00018329 | No      |
|      |       |        |             |          |         | Pgpep1   | 2.24216   | 35.3815  | 3.98003          | 2.24316      | 35.3825       | 3.97943155       | 0.00018329 | No      |
|      |       |        |             |          |         | Pgrmc1   | 127.005   | 69.673   | -0.866214        | 127.006      | 69.674        | -0.8662044       | 0.00051281 | No      |
|      |       |        |             |          |         | Pgs1     | 24.4318   | 13.3867  | -0.867958        | 24.4328      | 13.3877       | -0.8679111       | 0.0300303  | No      |
|      |       |        |             |          |         | Phactr4  | 7.28816   | 13.0764  | 0.843334         | 7.28916      | 13.0774       | 0.84325126       | 0.00290302 | No      |
|      |       |        |             |          |         | Phb      | 43.5837   | 116.395  | 1.41717          | 43.5847      | 116.396       | 1.4171478        | 0.00018329 | No      |
|      |       |        |             |          |         | Phc3     | 16.2056   | 5.02613  | -1.68897         | 16.2066      | 5.02713       | -1.6887746       | 0.00018329 | No      |
|      |       |        |             |          |         | Phf11b   | 891.615   | 230.458  | -1.95191         | 891.616      | 230.459       | -1.9519124       | 0.00051281 | No      |
|      |       |        |             |          |         | Phf12    | 32.1663   | 16.0815  | -1.00015         | 32.1673      | 16.0825       | -1.0001032       | 0.00018329 | No      |
|      |       |        |             |          |         | Phf13    | 1.68043   | 2.90215  | 0.788296         | 1.68143      | 2.90315       | 0.7879304        | 0.0389103  | No      |
|      |       |        |             |          |         | Phf15    | 22.8832   | 8.37001  | -1.45099         | 22.8842      | 8.37101       | -1.4508783       | 0.00018329 | No      |
|      |       |        |             |          |         | Phf17    | 4.86796   | 7.42447  | 0.608971         | 4.86896      | 7.42547       | 0.6088687        | 0.0355427  | No      |
|      |       |        |             |          |         | Phf20    | 9.55742   | 5.81319  | -0.717291        | 9.55842      | 5.81419       | -0.7171939       | 0.0151736  | No      |
|      |       |        |             |          |         | PHF20L1  | 23.3892   | 7.54908  | -1.63147         | 23.3902      | 7.55008       | -1.6313404       | 0.00018329 | No      |
|      |       |        |             |          |         | Phf21a   | 33.5241   | 17.9829  | -0.898575        | 33.5251      | 17.9839       | -0.8985357       | 0.016558   | No      |
|      |       |        |             |          |         | Phf23    | 40.7106   | 22.3265  | -0.86665         | 40.7116      | 22.3275       | -0.8666182       | 0.0018326  | No      |
|      |       |        |             |          |         | Phf3     | 19.2221   | 9.56982  | -1.0062          | 19.2231      | 9.57082       | -1.0061266       | 0.00051281 | No      |
|      |       |        |             |          |         | Phf8     | 23.1905   | 6.34408  | -1.87005         | 23.1915      | 6.34508       | -1.8698859       | 0.00018329 | No      |
|      |       |        |             |          |         | Phip     | 21.0832   | 5.50392  | -1.93756         | 21.0842      | 5.50492       | -1.9373688       | 0.00018329 | No      |
|      |       |        |             |          |         | Phkb     | 5.96367   | 12.3423  | 1.04934          | 5.96467      | 12.3433       | 1.04921393       | 0.0460114  | No      |
|      |       |        |             |          |         | PHKG2    | 5.38447   | 1.64412  | -1.71149         | 5.38547      | 1.64512       | -1.7108794       | 0.00018329 | No      |
|      |       |        |             |          |         | Phlda3   | 0.2685    | 9.47266  | 5.14077          | 0.2695       | 9.47366       | 5.13556472       | 0.00018329 | No      |
|      |       |        |             |          |         | Phldb1   | 0.0971725 | 22.3983  | 7.84863          | 0.0981725    | 22.3993       | 7.83391898       | 0.00018329 | No      |
|      |       |        |             |          |         | Phospho1 | 0.908039  | 2.61148  | 1.52404          | 0.909039     | 2.61248       | 1.5230059        | 0.0214018  | No      |
|      |       |        |             |          |         | Phospho2 | 11.9148   | 6.56588  | -0.8597          | 11.9158      | 6.56688       | -0.8595958       | 0.00469886 | No      |
|      |       |        |             |          |         | Phtf2    | 10.3086   | 4.31938  | -1.25495         | 10.3096      | 4.32038       | -1.2547582       | 0.00018329 | No      |
|      |       |        |             |          |         | Phyh     | 35.685    | 386.319  | 3.4364           | 35.686       | 386.32        | 3.43636626       | 0.00018329 | No      |
|      |       |        |             |          |         | Phyhipl  | 0         | 46.7543  | inf              | 0.001        | 46.7553       | 15.5128423       | 0.00018329 | No      |
|      |       |        |             |          |         | Pias1    | 23.5934   | 12.5271  | -0.91333         | 23.5944      | 12.5281       | -0.9132769       | 0.0368491  | No      |
|      |       |        |             |          |         | Pias3    | 3.22654   | 7.20236  | 1.15848          | 3.22754      | 7.20336       | 1.15823503       | 0.0018326  | No      |
|      |       |        |             |          |         | Picalm   | 31.5531   | 102.615  | 1.70139          | 31.5541      | 102.616       | 1.70135632       | 0.00018329 | No      |
|      |       |        |             |          |         | Pick1    | 7.57238   | 17.6226  | 1.21861          | 7.57338      | 17.6236       | 1.21849943       | 0.00018329 | No      |
|      |       |        |             |          |         | Pid1     | 0.0668924 | 20.539   | 8.26231          | 0.0678924    | 20.54         | 8.24097038       | 0.0321839  | No      |
|      |       |        |             |          |         | Pidd     | 0.205758  | 1.70214  | 3.04833          | 0.206758     | 1.70314       | 3.04218197       | 0.00018329 | No      |
|      |       |        |             |          |         | Piezo1   | 13.7266   | 29.4023  | 1.09896          | 13.7276      | 29.4033       | 1.09889866       | 0.0119236  | No      |
|      |       |        |             |          |         | Pigh     | 2.40494   | 14.0367  | 2.54513          | 2.40594      | 14.0377       | 2.54463401       | 0.00018329 | No      |
|      |       |        |             |          |         | Pigk     | 21.3263   | 44.5446  | 1.06262          | 21.3273      | 44.5456       | 1.0625816        | 0.00018329 | No      |

| RRBS |       |        |             |          |         | RNAseq   |          |          |                  |              |               |                  |            |         |
|------|-------|--------|-------------|----------|---------|----------|----------|----------|------------------|--------------|---------------|------------------|------------|---------|
| gene | Blood | Kidney | methyl.diff | pMWU.fdr | Match ? | gene     | blood    | kidney   | log2(fold_ratio) | blood+ 0.001 | kidney+ 0.001 | log2(fold_ratio) | q_value    | Match ? |
|      |       |        |             |          |         | Pigm     | 4.70763  | 1.59201  | -1.56415         | 4.70863      | 1.59301       | -1.563552        | 0.00018329 | No      |
|      |       |        |             |          |         | Pign     | 3.17229  | 8.21754  | 1.37318          | 3.17329      | 8.21854       | 1.37290275       | 0.00018329 | No      |
|      |       |        |             |          |         | Pigr     | 0.188152 | 96.379   | 9.00068          | 0.189152     | 96.38         | 8.99304396       | 0.00018329 | No      |
|      |       |        |             |          |         | Pigx     | 32.0095  | 20.3968  | -0.650152        | 32.0105      | 20.3978       | -0.6501317       | 0.0401475  | No      |
|      |       |        |             |          |         | Pigy     | 20.2466  | 41.5254  | 1.03631          | 20.2476      | 41.5264       | 1.0362779        | 0.00066911 | No      |
|      |       |        |             |          |         | Pik3ap1  | 4.47465  | 8.19953  | 0.873768         | 4.47565      | 8.20053       | 0.87361993       | 0.0076683  | No      |
|      |       |        |             |          |         | Pik3c2b  | 7.55291  | 2.82398  | -1.4193          | 7.55391      | 2.82498       | -1.4189829       | 0.00018329 | No      |
|      |       |        |             |          |         | PIK3CA   | 22.6511  | 11.1391  | -1.02395         | 22.6521      | 11.1401       | -1.0238826       | 0.00018329 | No      |
|      |       |        |             |          |         | Pik3cb   | 1.69557  | 4.81226  | 1.50494          | 1.69657      | 4.81326       | 1.5043934        | 0.00097029 | No      |
|      |       |        |             |          |         | Pik3cg   | 11.6002  | 2.24243  | -2.37101         | 11.6012      | 2.24343       | -2.370496        | 0.00018329 | No      |
|      |       |        |             |          |         | Pik3ip1  | 200.682  | 10.8232  | -4.2127          | 200.683      | 10.8242       | -4.2125861       | 0.00018329 | No      |
|      |       |        |             |          |         | Pik3r2   | 9.31618  | 19.2074  | 1.04385          | 9.31718      | 19.2084       | 1.04377208       | 0.00018329 | No      |
|      |       |        |             |          |         | Pik3r3   | 1.0709   | 6.21029  | 2.53584          | 1.0719       | 6.21129       | 2.53472261       | 0.00018329 | No      |
|      |       |        |             |          |         | Pik3r5   | 34.3115  | 8.72487  | -1.97549         | 34.3125      | 8.72587       | -1.9753634       | 0.00018329 | No      |
|      |       |        |             |          |         | Pik3r6   | 0.20319  | 0.604187 | 1.57216          | 0.20419      | 0.605187      | 1.56746878       | 0.03047    | No      |
|      |       |        |             |          |         | Pikfyve  | 9.29572  | 4.36868  | -1.08937         | 9.29672      | 4.36968       | -1.0891942       | 0.00018329 | No      |
|      |       |        |             |          |         | Pim1     | 123.515  | 34.8857  | -1.82398         | 123.516      | 34.8867       | -1.8239489       | 0.00721079 | No      |
|      |       |        |             |          |         | Pim2     | 48.1925  | 14.1063  | -1.77247         | 48.1935      | 14.1073       | -1.7723967       | 0.00018329 | No      |
|      |       |        |             |          |         | Pin1     | 32.5209  | 50.1141  | 0.623847         | 32.5219      | 50.1151       | 0.62383382       | 0.0327554  | No      |
|      |       |        |             |          |         | Pink1    | 20.6889  | 53.7851  | 1.37835          | 20.6899      | 53.7861       | 1.37830671       | 0.00018329 | No      |
|      |       |        |             |          |         | Pip4k2a  | 88.3662  | 13.1761  | -2.74557         | 88.3672      | 13.1771       | -2.7454781       | 0.00018329 | No      |
|      |       |        |             |          |         | Pip4k2c  | 13.3039  | 25.2909  | 0.926768         | 13.3049      | 25.2919       | 0.92671775       | 0.00066911 | No      |
|      |       |        |             |          |         | Pip5k1a  | 19.2363  | 12.0646  | -0.673056        | 19.2373      | 12.0656       | -0.6730067       | 0.0178968  | No      |
|      |       |        |             |          |         | PIP5K1C  | 26.0636  | 14.4239  | -0.85358         | 26.0646      | 14.4249       | -0.8535304       | 0.00082046 | No      |
|      |       |        |             |          |         | Pir      | 0        | 1.20176  | inf              | 0.001        | 1.20276       | 10.2321331       | 0.00018329 | No      |
|      |       |        |             |          |         | Pitpna   | 216.623  | 80.0678  | -1.4359          | 216.624      | 80.0688       | -1.435881        | 0.00018329 | No      |
|      |       |        |             |          |         | Pitpnm2  | 56.7894  | 16.0417  | -1.8238          | 56.7904      | 16.0427       | -1.8237301       | 0.00018329 | No      |
|      |       |        |             |          |         | Pitpnm3  | 0        | 3.87698  | inf              | 0.001        | 3.87798       | 11.9210896       | 0.00018329 | No      |
|      |       |        |             |          |         | Pja1     | 12.6579  | 35.1491  | 1.47345          | 12.6589      | 35.1501       | 1.47337675       | 0.00018329 | No      |
|      |       |        |             |          |         | Pkd2     | 0.138674 | 15.7285  | 6.82554          | 0.139674     | 15.7295       | 6.81526551       | 0.00018329 | No      |
|      |       |        |             |          |         | Pkd2l2   | 5.05242  | 0.988774 | -2.35326         | 5.05342      | 0.989774      | -2.352089        | 0.0478786  | No      |
|      |       |        |             |          |         | Pkdcc    | 4.20033  | 17.2166  | 2.03522          | 4.20133      | 17.2176       | 2.03496604       | 0.00018329 | No      |
|      |       |        |             |          |         | Pkhd1    | 0        | 28.465   | inf              | 0.001        | 28.466        | 14.7969522       | 0.00018329 | No      |
|      |       |        |             |          |         | Pkia     | 0.543017 | 5.28635  | 3.2832           | 0.544017     | 5.28735       | 3.28082119       | 0.00018329 | No      |
|      |       |        |             |          |         | Pkib     | 1.32252  | 2.73742  | 1.04953          | 1.32352      | 2.73842       | 1.04896374       | 0.0462639  | No      |
|      |       |        |             |          |         | Pkig     | 0.140302 | 52.7836  | 8.55541          | 0.141302     | 52.7846       | 8.54519139       | 0.00018329 | No      |
|      |       |        |             |          |         | Pkm      | 227.346  | 359.758  | 0.662135         | 227.347      | 359.759       | 0.66213481       | 0.0221058  | No      |
|      |       |        |             |          |         | Pkn3     | 87.1202  | 35.692   | -1.28741         | 87.1212      | 35.693        | -1.2873827       | 0.00066911 | No      |
|      |       |        |             |          |         | Pknox1   | 9.80899  | 5.01838  | -0.966884        | 9.80999      | 5.01938       | -0.9667425       | 0.0018326  | No      |
|      |       |        |             |          |         | PKP2     | 0        | 15.4678  | inf              | 0.001        | 15.4688       | 13.9170737       | 0.00018329 | No      |
|      |       |        |             |          |         | Pkp4     | 8.11002  | 62.1165  | 2.9372           | 8.11102      | 62.1175       | 2.93704451       | 0.00018329 | No      |
|      |       |        |             |          |         | Pla2g12a | 4.94736  | 24.3798  | 2.30096          | 4.94836      | 24.3808       | 2.3007231        | 0.00018329 | No      |



| RRBS |       |        |             |          |         | RNAseq   |           |          |                  |              |               |                  |            |         |
|------|-------|--------|-------------|----------|---------|----------|-----------|----------|------------------|--------------|---------------|------------------|------------|---------|
| gene | Blood | Kidney | methyl.diff | pMWU.fdr | Match ? | gene     | blood     | kidney   | log2(fold_ratio) | blood+ 0.001 | kidney+ 0.001 | log2(fold_ratio) | q_value    | Match ? |
|      |       |        |             |          |         | Pla2g15  | 2.93608   | 21.4693  | 2.87031          | 2.93708      | 21.4703       | 2.86988788       | 0.0066167  | No      |
|      |       |        |             |          |         | Pla2g16  | 430.453   | 190.106  | -1.17905         | 430.454      | 190.107       | -1.1790474       | 0.00018329 | No      |
|      |       |        |             |          |         | Pla2g1b  | 0         | 0.610298 | inf              | 0.001        | 0.611298      | 9.25573204       | 0.00970533 | No      |
|      |       |        |             |          |         | Pla2g2d  | 0.194372  | 2.16155  | 3.47517          | 0.195372     | 2.16255       | 3.46843786       | 0.00035173 | No      |
|      |       |        |             |          |         | Pla2g4a  | 0.126113  | 4.54803  | 5.17245          | 0.127113     | 4.54903       | 5.16137546       | 0.00018329 | No      |
|      |       |        |             |          |         | Pla2g6   | 5.38015   | 10.8248  | 1.00863          | 5.38115      | 10.8258       | 1.00848721       | 0.00591487 | No      |
|      |       |        |             |          |         | Pla2g7   | 0.500141  | 11.39    | 4.50929          | 0.501141     | 11.391        | 4.50653402       | 0.00018329 | No      |
|      |       |        |             |          |         | Plaa     | 13.0851   | 8.05934  | -0.699189        | 13.0861      | 8.06034       | -0.6991226       | 0.0100349  | No      |
|      |       |        |             |          |         | Plac8    | 2602.32   | 326.428  | -2.99496         | 2602.321     | 326.429       | -2.9949578       | 0.00018329 | No      |
|      |       |        |             |          |         | Plagl1   | 0         | 9.67778  | inf              | 0.001        | 9.67878       | 13.2406095       | 0.00018329 | No      |
|      |       |        |             |          |         | Plagl2   | 9.64898   | 4.45956  | -1.11348         | 9.64998      | 4.46056       | -1.1133011       | 0.00018329 | No      |
|      |       |        |             |          |         | Plat     | 1.34104   | 68.8336  | 5.68169          | 1.34204      | 68.8346       | 5.68063435       | 0.00018329 | No      |
|      |       |        |             |          |         | Plau     | 0         | 302.797  | inf              | 0.001        | 302.798       | 18.2079962       | 0.00018329 | No      |
|      |       |        |             |          |         | Plbd1    | 0.787615  | 4.46707  | 2.50376          | 0.788615     | 4.46807       | 2.50225873       | 0.00018329 | No      |
|      |       |        |             |          |         | Plbd2    | 18.4862   | 39.8324  | 1.1075           | 18.4872      | 39.8334       | 1.10745189       | 0.00082046 | No      |
|      |       |        |             |          |         | Plcb3    | 0.660822  | 6.954    | 3.39551          | 0.661822     | 6.955         | 3.39353536       | 0.00018329 | No      |
|      |       |        |             |          |         | Plcb4    | 0.568032  | 2.67415  | 2.23504          | 0.569032     | 2.67515       | 2.2330381        | 0.00018329 | No      |
|      |       |        |             |          |         | Plcd1    | 2.45505   | 7.70276  | 1.64962          | 2.45605      | 7.70376       | 1.64922283       | 0.00018329 | No      |
|      |       |        |             |          |         | Plce1    | 0         | 1.251    | inf              | 0.001        | 1.252         | 10.2900188       | 0.00018329 | No      |
|      |       |        |             |          |         | Plcg1    | 170.084   | 35.5416  | -2.25867         | 170.085      | 35.5426       | -2.2586348       | 0.00018329 | No      |
|      |       |        |             |          |         | Plch1    | 0         | 0.675031 | inf              | 0.001        | 0.676031      | 9.40094559       | 0.00018329 | No      |
|      |       |        |             |          |         | Plch2    | 0.538804  | 4.22809  | 2.97217          | 0.539804     | 4.22909       | 2.96983969       | 0.00018329 | No      |
|      |       |        |             |          |         | Plcl1    | 0.504365  | 4.37635  | 3.11719          | 0.505365     | 4.37735       | 3.11466009       | 0.00018329 | No      |
|      |       |        |             |          |         | Plcl2    | 65.902    | 16.2827  | -2.01698         | 65.903       | 16.2837       | -2.0169156       | 0.00082046 | No      |
|      |       |        |             |          |         | Pld1     | 0.0402783 | 3.59147  | 6.47843          | 0.0412783    | 3.59247       | 6.44344874       | 0.00018329 | No      |
|      |       |        |             |          |         | PLD2     | 3.58325   | 10.5039  | 1.55159          | 3.58425      | 10.5049       | 1.55131926       | 0.00845618 | No      |
|      |       |        |             |          |         | Pld3     | 9.77039   | 26.7532  | 1.45322          | 9.77139      | 26.7542       | 1.45312968       | 0.00018329 | No      |
|      |       |        |             |          |         | Pld4     | 0.672501  | 23.1367  | 5.1045           | 0.673501     | 23.1377       | 5.10242156       | 0.00018329 | No      |
|      |       |        |             |          |         | Plek     | 10.7267   | 19.1451  | 0.835772         | 10.7277      | 19.1461       | 0.83570975       | 0.0285734  | No      |
|      |       |        |             |          |         | Plekha2  | 32.4989   | 13.4107  | -1.277           | 32.4999      | 13.4117       | -1.2769432       | 0.00018329 | No      |
|      |       |        |             |          |         | Plekha6  | 0.313762  | 26.8493  | 6.41907          | 0.314762     | 26.8503       | 6.41453302       | 0.00018329 | No      |
|      |       |        |             |          |         | Plekha7  | 4.63111   | 12.5835  | 1.4421           | 4.63211      | 12.5845       | 1.44190648       | 0.00018329 | No      |
|      |       |        |             |          |         | Plekha1  | 0.221142  | 5.29718  | 4.58218          | 0.222142     | 5.29818       | 4.57594277       | 0.0107084  | No      |
|      |       |        |             |          |         | Plekha2  | 3.45177   | 58.4123  | 4.08086          | 3.45277      | 58.4133       | 4.08047075       | 0.00018329 | No      |
|      |       |        |             |          |         | Plekha3  | 19.8302   | 30.1469  | 0.604307         | 19.8312      | 30.1479       | 0.60428553       | 0.0255527  | No      |
|      |       |        |             |          |         | Plekha4  | 10.3089   | 3.8459   | -1.4225          | 10.3099      | 3.8469        | -1.4222621       | 0.00018329 | No      |
|      |       |        |             |          |         | Plekha5  | 0.978887  | 31.3771  | 5.00242          | 0.979887     | 31.3781       | 5.0009988        | 0.00018329 | No      |
|      |       |        |             |          |         | Plekha6  | 45.8246   | 12.5285  | -1.87091         | 45.8256      | 12.5295       | -1.8708249       | 0.00018329 | No      |
|      |       |        |             |          |         | Plekha7  | 0.815178  | 2.676    | 1.71489          | 0.816178     | 2.677         | 1.71366141       | 0.00066911 | No      |
|      |       |        |             |          |         | Plekha8  | 0.130084  | 5.14151  | 5.30468          | 0.131084     | 5.14251       | 5.29390919       | 0.0163528  | No      |
|      |       |        |             |          |         | Plekha9  | 0         | 1.3146   | inf              | 0.001        | 1.3156        | 10.3615052       | 0.00018329 | No      |
|      |       |        |             |          |         | Plekha10 | 14.9185   | 9.55906  | -0.642158        | 14.9195      | 9.56006       | -0.6421076       | 0.0352739  | No      |

| RRBS |       |        |             |          |         | RNAseq  |           |          |                  |              |               |                  |            |         |
|------|-------|--------|-------------|----------|---------|---------|-----------|----------|------------------|--------------|---------------|------------------|------------|---------|
| gene | Blood | Kidney | methyl.diff | pMWU.fdr | Match ? | gene    | blood     | kidney   | log2(fold_ratio) | blood+ 0.001 | kidney+ 0.001 | log2(fold_ratio) | q_value    | Match ? |
|      |       |        |             |          |         | Plekho1 | 2.20739   | 16.005   | 2.85811          | 2.20839      | 16.006        | 2.85754594       | 0.00018329 | No      |
|      |       |        |             |          |         | PLET1   | 0         | 234.591  | inf              | 0.001        | 234.592       | 17.8397943       | 0.00018329 | No      |
|      |       |        |             |          |         | Plgrkt  | 3.12401   | 10.4962  | 1.7484           | 3.12501      | 10.4972       | 1.74807185       | 0.00051281 | No      |
|      |       |        |             |          |         | Plin2   | 1.49326   | 39.3024  | 4.71808          | 1.49426      | 39.3034       | 4.71715102       | 0.00018329 | No      |
|      |       |        |             |          |         | Plk2    | 0.771148  | 7.64619  | 3.30966          | 0.772148     | 7.64719       | 3.30798041       | 0.00018329 | No      |
|      |       |        |             |          |         | Plk3    | 0.675687  | 14.6364  | 4.43706          | 0.676687     | 14.6374       | 4.43502683       | 0.00018329 | No      |
|      |       |        |             |          |         | Plk5    | 0.454881  | 2.75388  | 2.5979           | 0.455881     | 2.75488       | 2.59526029       | 0.00154856 | No      |
|      |       |        |             |          |         | Plod2   | 0.112928  | 29.0145  | 8.00523          | 0.113928     | 29.0155       | 7.99255762       | 0.00018329 | No      |
|      |       |        |             |          |         | Pls3    | 0         | 32.0617  | inf              | 0.001        | 32.0627       | 14.9686083       | 0.00018329 | No      |
|      |       |        |             |          |         | Plscr1  | 0.22956   | 20.3209  | 6.46795          | 0.23056      | 20.3219       | 6.46174924       | 0.00051281 | No      |
|      |       |        |             |          |         | Plscr4  | 5.44234   | 2.8369   | -0.939913        | 5.44334      | 2.8379        | -0.9396684       | 0.0393915  | No      |
|      |       |        |             |          |         | Plxdc2  | 3.50552   | 60.2155  | 4.10244          | 3.50652      | 60.2165       | 4.10204699       | 0.00018329 | No      |
|      |       |        |             |          |         | Plxna3  | 0.0440016 | 1.13767  | 4.69238          | 0.0450016    | 1.13867       | 4.66122959       | 0.00066911 | No      |
|      |       |        |             |          |         | Plxnb1  | 0.198533  | 4.12486  | 4.3769           | 0.199533     | 4.12586       | 4.36999559       | 0.00018329 | No      |
|      |       |        |             |          |         | Plxnd1  | 2.59127   | 4.46331  | 0.784455         | 2.59227      | 4.46431       | 0.78422122       | 0.010379   | No      |
|      |       |        |             |          |         | Pmepa1  | 5.39412   | 130.147  | 4.59261          | 5.39512      | 130.148       | 4.59235428       | 0.00018329 | No      |
|      |       |        |             |          |         | Pmm1    | 17.1609   | 88.04    | 2.35904          | 17.1619      | 88.041        | 2.35896625       | 0.00018329 | No      |
|      |       |        |             |          |         | Pmp22   | 0.0589675 | 1.8308   | 4.95641          | 0.0599675    | 1.8318        | 4.93293736       | 0.0239196  | No      |
|      |       |        |             |          |         | Pmpcb   | 60.6384   | 97.0288  | 0.678182         | 60.6394      | 97.0298       | 0.67817242       | 0.0213082  | No      |
|      |       |        |             |          |         | Pmvk    | 22.9031   | 37.6045  | 0.715362         | 22.9041      | 37.6055       | 0.7153378        | 0.030294   | No      |
|      |       |        |             |          |         | Pnizr   | 184.584   | 41.8231  | -2.14191         | 184.585      | 41.8241       | -2.1418789       | 0.00018329 | No      |
|      |       |        |             |          |         | Pnmal2  | 0         | 1.78538  | inf              | 0.001        | 1.78638       | 10.8028233       | 0.00018329 | No      |
|      |       |        |             |          |         | Pnn     | 156.17    | 50.1241  | -1.63954         | 156.171      | 50.1251       | -1.6395215       | 0.00018329 | No      |
|      |       |        |             |          |         | Pno1    | 17.6532   | 10.9741  | -0.685831        | 17.6542      | 10.9751       | -0.6857774       | 0.0221058  | No      |
|      |       |        |             |          |         | Pnp     | 61.838    | 106.598  | 0.78562          | 61.839       | 106.599       | 0.78560501       | 0.00251301 | No      |
|      |       |        |             |          |         | Pnpla2  | 16.9666   | 27.3788  | 0.690356         | 16.9676      | 27.3798       | 0.69032939       | 0.0114728  | No      |
|      |       |        |             |          |         | Pnpla3  | 0.232574  | 4.41932  | 4.24806          | 0.233574     | 4.42032       | 4.24219922       | 0.00018329 | No      |
|      |       |        |             |          |         | Pnpla6  | 6.87673   | 22.1495  | 1.68748          | 6.87773      | 22.1505       | 1.68733488       | 0.00018329 | No      |
|      |       |        |             |          |         | Pnrc1   | 195.549   | 92.9447  | -1.07309         | 195.55       | 92.9457       | -1.0730775       | 0.00018329 | No      |
|      |       |        |             |          |         | Pnrc2   | 88.537    | 47.0774  | -0.911245        | 88.538       | 47.0784       | -0.9112315       | 0.00051281 | No      |
|      |       |        |             |          |         | Podn    | 0.0565718 | 3.08725  | 5.7701           | 0.0575718    | 3.08825       | 5.74528342       | 0.00051281 | No      |
|      |       |        |             |          |         | Podxl   | 0.0159251 | 5.77795  | 8.50311          | 0.0169251    | 5.77895       | 8.41549922       | 0.0326623  | No      |
|      |       |        |             |          |         | Pof1b   | 0         | 0.685631 | inf              | 0.001        | 0.686631      | 9.42339118       | 0.00018329 | No      |
|      |       |        |             |          |         | Pofut1  | 8.61542   | 3.82896  | -1.16997         | 8.61642      | 3.82996       | -1.1697592       | 0.00342383 | No      |
|      |       |        |             |          |         | Pofut2  | 9.61564   | 34.969   | 1.86262          | 9.61664      | 34.97         | 1.86251298       | 0.00018329 | No      |
|      |       |        |             |          |         | Poglut1 | 34.4939   | 54.0951  | 0.649156         | 34.4949      | 54.0961       | 0.64914151       | 0.0345543  | No      |
|      |       |        |             |          |         | Pogz    | 17.9004   | 7.01357  | -1.35177         | 17.9014      | 7.01457       | -1.3516458       | 0.00018329 | No      |
|      |       |        |             |          |         | Pola1   | 3.71252   | 1.58577  | -1.22722         | 3.71352      | 1.58677       | -1.2266943       | 0.00018329 | No      |
|      |       |        |             |          |         | Pola2   | 7.87522   | 19.3713  | 1.29853          | 7.87622      | 19.3723       | 1.29841994       | 0.00140841 | No      |
|      |       |        |             |          |         | Pold2   | 21.4107   | 10.5054  | -1.0272          | 21.4117      | 10.5064       | -1.0271309       | 0.00082046 | No      |
|      |       |        |             |          |         | Poldip2 | 21.0938   | 60.2418  | 1.51394          | 21.0948      | 60.2428       | 1.51390142       | 0.00018329 | No      |
|      |       |        |             |          |         | Poldip3 | 23.2061   | 13.6705  | -0.763437        | 23.2071      | 13.6715       | -0.7633947       | 0.00567465 | No      |

| RRBS |       |        |             |          |         | RNAseq  |           |         |                  |              |               |                  |            |         |
|------|-------|--------|-------------|----------|---------|---------|-----------|---------|------------------|--------------|---------------|------------------|------------|---------|
| gene | Blood | Kidney | methyl.diff | pMWU.fdr | Match ? | gene    | blood     | kidney  | log2(fold_ratio) | blood+ 0.001 | kidney+ 0.001 | log2(fold_ratio) | q_value    | Match ? |
|      |       |        |             |          |         | Pole2   | 8.82858   | 1.06661 | -3.04915         | 8.82958      | 1.06761       | -3.0479601       | 0.00018329 | No      |
|      |       |        |             |          |         | Polh    | 4.96193   | 2.79079 | -0.830227        | 4.96293      | 2.79179       | -0.8300017       | 0.0397771  | No      |
|      |       |        |             |          |         | Poli    | 2.88831   | 1.2235  | -1.23921         | 2.88931      | 1.2245        | -1.2385322       | 0.00845618 | No      |
|      |       |        |             |          |         | Polk    | 2.91333   | 1.73777 | -0.745433        | 2.91433      | 1.73877       | -0.7450971       | 0.0348348  | No      |
|      |       |        |             |          |         | Polm    | 17.4974   | 5.65248 | -1.63018         | 17.4984      | 5.65348       | -1.6300119       | 0.00018329 | No      |
|      |       |        |             |          |         | Polr1b  | 17.7072   | 6.63837 | -1.41544         | 17.7082      | 6.63937       | -1.4152993       | 0.00018329 | No      |
|      |       |        |             |          |         | Polr1e  | 23.0903   | 10.2286 | -1.17468         | 23.0913      | 10.2296       | -1.1745997       | 0.00018329 | No      |
|      |       |        |             |          |         | Polr2a  | 59.3934   | 29.7764 | -0.996131        | 59.3944      | 29.7774       | -0.9961091       | 0.00051281 | No      |
|      |       |        |             |          |         | Polr2c  | 34.4561   | 56.8495 | 0.722389         | 34.4571      | 56.8505       | 0.72237175       | 0.0357237  | No      |
|      |       |        |             |          |         | Polr2d  | 60.785    | 30.1342 | -1.01231         | 60.786       | 30.1352       | -1.0122894       | 0.00035173 | No      |
|      |       |        |             |          |         | Polr2f  | 22.2347   | 42.0787 | 0.920279         | 22.2357      | 42.0797       | 0.9202466        | 0.00140841 | No      |
|      |       |        |             |          |         | Polr2k  | 39.7795   | 69.5092 | 0.805178         | 39.7805      | 69.5102       | 0.80516329       | 0.0476294  | No      |
|      |       |        |             |          |         | Polr3b  | 8.86598   | 5.69954 | -0.637435        | 8.86698      | 5.70054       | -0.6373442       | 0.0344723  | No      |
|      |       |        |             |          |         | Polr3c  | 20.7436   | 13.4015 | -0.630279        | 20.7446      | 13.4025       | -0.6302337       | 0.0354586  | No      |
|      |       |        |             |          |         | Polr3e  | 24.3544   | 11.8748 | -1.03628         | 24.3554      | 11.8758       | -1.036217        | 0.00051281 | No      |
|      |       |        |             |          |         | Polr3f  | 7.23196   | 2.83798 | -1.34952         | 7.23296      | 2.83898       | -1.3492135       | 0.00419853 | No      |
|      |       |        |             |          |         | Polr3g  | 5.83121   | 3.4367  | -0.762769        | 5.83221      | 3.4377        | -0.762599        | 0.0251381  | No      |
|      |       |        |             |          |         | Pom121  | 14.0045   | 6.20074 | -1.17538         | 14.0055      | 6.20174       | -1.1752485       | 0.00018329 | No      |
|      |       |        |             |          |         | Pomgnt1 | 9.80087   | 22.1148 | 1.17403          | 9.80187      | 22.1158       | 1.17394851       | 0.00035173 | No      |
|      |       |        |             |          |         | Pomk    | 21.5549   | 13.2727 | -0.699551        | 21.5559      | 13.2737       | -0.6995122       | 0.00970533 | No      |
|      |       |        |             |          |         | Pomt2   | 30.9002   | 14.8413 | -1.05799         | 30.9012      | 14.8423       | -1.0579482       | 0.0177018  | No      |
|      |       |        |             |          |         | Pon2    | 100.098   | 33.6096 | -1.57447         | 100.099      | 33.6106       | -1.5744394       | 0.00018329 | No      |
|      |       |        |             |          |         | Pon3    | 0.049263  | 9.03985 | 7.51965          | 0.050263     | 9.04085       | 7.49081783       | 0.00051281 | No      |
|      |       |        |             |          |         | Pop1    | 2.90909   | 6.74646 | 1.21356          | 2.91009      | 6.74746       | 1.21328075       | 0.00277264 | No      |
|      |       |        |             |          |         | Popdc2  | 0.44881   | 1.52165 | 1.76146          | 0.44981      | 1.52265       | 1.75919672       | 0.0026435  | No      |
|      |       |        |             |          |         | Por     | 17.9244   | 33.6095 | 0.906944         | 17.9254      | 33.6105       | 0.90690669       | 0.00082046 | No      |
|      |       |        |             |          |         | Porcn   | 0.20104   | 6.92562 | 5.10639          | 0.20204      | 6.92662       | 5.09943868       | 0.00018329 | No      |
|      |       |        |             |          |         | Pot1    | 16.2422   | 5.48484 | -1.56622         | 16.2432      | 5.48584       | -1.5660514       | 0.00018329 | No      |
|      |       |        |             |          |         | Pot1b   | 14.9216   | 4.69623 | -1.66783         | 14.9226      | 4.69723       | -1.6676168       | 0.00018329 | No      |
|      |       |        |             |          |         | Pou2af1 | 9.21242   | 3.22079 | -1.51617         | 9.21342      | 3.22179       | -1.5158743       | 0.00018329 | No      |
|      |       |        |             |          |         | Ppa2    | 26.2624   | 60.3613 | 1.20062          | 26.2634      | 60.3623       | 1.20059408       | 0.00051281 | No      |
|      |       |        |             |          |         | Ppap2a  | 1.83281   | 77.9053 | 5.40959          | 1.83381      | 77.9063       | 5.40882392       | 0.00018329 | No      |
|      |       |        |             |          |         | Ppap2b  | 0.112154  | 33.0274 | 8.20203          | 0.113154     | 33.0284       | 8.18927569       | 0.00035173 | No      |
|      |       |        |             |          |         | Ppap2c  | 3.64443   | 36.2563 | 3.31447          | 3.64543      | 36.2573       | 3.31411059       | 0.00018329 | No      |
|      |       |        |             |          |         | Ppapdc2 | 14.3141   | 8.75715 | -0.708908        | 14.3151      | 8.75815       | -0.7088397       | 0.0132293  | No      |
|      |       |        |             |          |         | Ppard   | 4.50714   | 11.1993 | 1.31312          | 4.50814      | 11.2003       | 1.31293315       | 0.00018329 | No      |
|      |       |        |             |          |         | Pparg   | 0.0635743 | 4.70369 | 6.2092           | 0.0645743    | 4.70469       | 6.18699575       | 0.00018329 | No      |
|      |       |        |             |          |         | Ppcdc   | 4.32239   | 9.33888 | 1.11142          | 4.32339      | 9.33988       | 1.11124103       | 0.0031651  | No      |
|      |       |        |             |          |         | Ppdf    | 79.2689   | 142.961 | 0.850795         | 79.2699      | 142.962       | 0.85078666       | 0.00140841 | No      |
|      |       |        |             |          |         | Ppfibp1 | 8.6807    | 40.0216 | 2.2049           | 8.6817       | 40.0226       | 2.20476542       | 0.00018329 | No      |
|      |       |        |             |          |         | Ppfibp2 | 0.171352  | 8.61398 | 5.65164          | 0.172352     | 8.61498       | 5.6434175        | 0.00018329 | No      |
|      |       |        |             |          |         | Pphln1  | 15.0665   | 6.84585 | -1.13804         | 15.0675      | 6.84685       | -1.1379278       | 0.00035173 | No      |

| RRBS |       |        |             |          |         | RNAseq   |           |          |                  |              |               |                  |            |         |
|------|-------|--------|-------------|----------|---------|----------|-----------|----------|------------------|--------------|---------------|------------------|------------|---------|
| gene | Blood | Kidney | methyl.diff | pMWU.fdr | Match ? | gene     | blood     | kidney   | log2(fold_ratio) | blood+ 0.001 | kidney+ 0.001 | log2(fold_ratio) | q_value    | Match ? |
|      |       |        |             |          |         | Ppic     | 0         | 59.0838  | inf              | 0.001        | 59.0848       | 15.8504994       | 0.00018329 | No      |
|      |       |        |             |          |         | Ppid     | 50.7647   | 30.8633  | -0.717933        | 50.7657      | 30.8643       | -0.717915        | 0.0152837  | No      |
|      |       |        |             |          |         | Ppie     | 49.6985   | 28.9487  | -0.779704        | 49.6995      | 28.9497       | -0.7796829       | 0.0066167  | No      |
|      |       |        |             |          |         | Ppig     | 35.2905   | 17.8506  | -0.983307        | 35.2915      | 17.8516       | -0.9832674       | 0.00066911 | No      |
|      |       |        |             |          |         | Ppil4    | 20.3534   | 6.61904  | -1.62057         | 20.3544      | 6.62004       | -1.6204289       | 0.00018329 | No      |
|      |       |        |             |          |         | Ppip5k1  | 3.71719   | 14.7687  | 1.99026          | 3.71819      | 14.7697       | 1.98996812       | 0.00018329 | No      |
|      |       |        |             |          |         | Ppm1a    | 59.5557   | 33.2224  | -0.842082        | 59.5567      | 33.2234       | -0.8420641       | 0.015491   | No      |
|      |       |        |             |          |         | Ppm1b    | 74.2851   | 26.2503  | -1.50074         | 74.2861      | 26.2513       | -1.5007034       | 0.00140841 | No      |
|      |       |        |             |          |         | Ppm1d    | 20.2821   | 8.34969  | -1.28041         | 20.2831      | 8.35069       | -1.2803109       | 0.0018326  | No      |
|      |       |        |             |          |         | Ppm1f    | 9.12774   | 4.10298  | -1.15359         | 9.12874      | 4.10398       | -1.153392        | 0.00018329 | No      |
|      |       |        |             |          |         | Ppm1l    | 0.704963  | 1.80955  | 1.36001          | 0.705963     | 1.81055       | 1.35876354       | 0.0232058  | No      |
|      |       |        |             |          |         | Ppm1m    | 4.45394   | 2.33829  | -0.929627        | 4.45494      | 2.33929       | -0.9293353       | 0.0458374  | No      |
|      |       |        |             |          |         | Ppox     | 7.86527   | 20.4505  | 1.37857          | 7.86627      | 20.4515       | 1.37845505       | 0.00035173 | No      |
|      |       |        |             |          |         | PPP1ca   | 342.85    | 168.074  | -1.02848         | 342.851      | 168.075       | -1.0284766       | 0.0016929  | No      |
|      |       |        |             |          |         | PPP1r10  | 16.4472   | 9.35473  | -0.814075        | 16.4482      | 9.35573       | -0.8140076       | 0.0031651  | No      |
|      |       |        |             |          |         | PPP1r12a | 43.63     | 10.3788  | -2.07168         | 43.631       | 10.3798       | -2.0715749       | 0.00018329 | No      |
|      |       |        |             |          |         | PPP1r12b | 8.30917   | 4.35093  | -0.933382        | 8.31017      | 4.35193       | -0.9332226       | 0.00066911 | No      |
|      |       |        |             |          |         | PPP1r13b | 2.23293   | 6.16005  | 1.46401          | 2.23393      | 6.16105       | 1.46359226       | 0.00035173 | No      |
|      |       |        |             |          |         | PPP1r13l | 0.288064  | 5.01217  | 4.12097          | 0.289064     | 5.01317       | 4.11626231       | 0.00018329 | No      |
|      |       |        |             |          |         | PPP1r14c | 0         | 1.42993  | inf              | 0.001        | 1.43093       | 10.4827374       | 0.00018329 | No      |
|      |       |        |             |          |         | PPP1r16a | 1.92187   | 23.2073  | 3.594            | 1.92287      | 23.2083       | 3.59330772       | 0.00018329 | No      |
|      |       |        |             |          |         | PPP1r16b | 35.3568   | 8.13781  | -2.11928         | 35.3578      | 8.13881       | -2.1191387       | 0.00018329 | No      |
|      |       |        |             |          |         | PPP1r18  | 62.1204   | 26.5753  | -1.22498         | 62.1214      | 26.5763       | -1.2249501       | 0.00981659 | No      |
|      |       |        |             |          |         | PPP1r1a  | 0.0367743 | 747.893  | 14.3118          | 0.0377743    | 747.894       | 14.2731412       | 0.0369285  | No      |
|      |       |        |             |          |         | PPP1r2   | 101.999   | 47.3659  | -1.10664         | 102          | 47.3669       | -1.106618        | 0.0280932  | No      |
|      |       |        |             |          |         | PPP1r26  | 0.274657  | 2.18609  | 2.99265          | 0.275657     | 2.18709       | 2.98806645       | 0.00018329 | No      |
|      |       |        |             |          |         | PPP1r36  | 0.622568  | 31.0965  | 5.64237          | 0.623568     | 31.0975       | 5.6401079        | 0.0026435  | No      |
|      |       |        |             |          |         | PPP1r37  | 17.5722   | 28.8009  | 0.712818         | 17.5732      | 28.8019       | 0.71278706       | 0.0111567  | No      |
|      |       |        |             |          |         | PPP1r3b  | 0.309386  | 1.55925  | 2.33337          | 0.310386     | 1.56025       | 2.32964182       | 0.00018329 | No      |
|      |       |        |             |          |         | PPP1r3c  | 0         | 1.2618   | inf              | 0.001        | 1.2628        | 10.3024105       | 0.00018329 | No      |
|      |       |        |             |          |         | PPP1r3g  | 4.96715   | 0.33579  | -3.88678         | 4.96815      | 0.33679       | -3.8827875       | 0.00111812 | No      |
|      |       |        |             |          |         | PPP1r8   | 24.5325   | 15.7915  | -0.63554         | 24.5335      | 15.7925       | -0.6355135       | 0.0347435  | No      |
|      |       |        |             |          |         | PPP1r9a  | 0         | 4.52739  | inf              | 0.001        | 4.52839       | 12.1447825       | 0.00018329 | No      |
|      |       |        |             |          |         | PPP2ca   | 144.07    | 96.9852  | -0.570929        | 144.071      | 96.9862       | -0.5709286       | 0.031236   | No      |
|      |       |        |             |          |         | PPP2cb   | 37.9143   | 90.8937  | 1.26144          | 37.9153      | 90.8947       | 1.26141604       | 0.00018329 | No      |
|      |       |        |             |          |         | PPP2r1a  | 65.4807   | 102.369  | 0.644634         | 65.4817      | 102.37        | 0.64462931       | 0.0201703  | No      |
|      |       |        |             |          |         | PPP2r1b  | 8.27243   | 20.5748  | 1.31449          | 8.27343      | 20.5758       | 1.31439105       | 0.00018329 | No      |
|      |       |        |             |          |         | PPP2r2a  | 59.4041   | 32.0138  | -0.891868        | 59.4051      | 32.0148       | -0.8918478       | 0.00126492 | No      |
|      |       |        |             |          |         | PPP2r2b  | 0         | 6.37788  | inf              | 0.001        | 6.37888       | 12.6390874       | 0.00018329 | No      |
|      |       |        |             |          |         | PPP2r2c  | 0         | 0.988844 | inf              | 0.001        | 0.989844      | 9.95105736       | 0.00018329 | No      |
|      |       |        |             |          |         | PPP2r3a  | 0.13136   | 8.32587  | 5.98601          | 0.13236      | 8.32687       | 5.9752352        | 0.00111812 | No      |
|      |       |        |             |          |         | PPP2r5a  | 121.201   | 81.0036  | -0.581342        | 121.202      | 81.0046       | -0.5813378       | 0.0367562  | No      |

| RRBS |       |        |             |          |         | RNAseq   |           |          |                  |              |               |                  |            |         |
|------|-------|--------|-------------|----------|---------|----------|-----------|----------|------------------|--------------|---------------|------------------|------------|---------|
| gene | Blood | Kidney | methyl.diff | pMWU.fdr | Match ? | gene     | blood     | kidney   | log2(fold_ratio) | blood+ 0.001 | kidney+ 0.001 | log2(fold_ratio) | q_value    | Match ? |
|      |       |        |             |          |         | Ppp2r5c  | 141.237   | 37.4808  | -1.9139          | 141.238      | 37.4818       | -1.9138662       | 0.00018329 | No      |
|      |       |        |             |          |         | Ppp3r1   | 63.1843   | 34.162   | -0.887176        | 63.1853      | 34.163        | -0.8871543       | 0.00018329 | No      |
|      |       |        |             |          |         | Ppp4c    | 89.5168   | 54.3671  | -0.719426        | 89.5178      | 54.3681       | -0.7194142       | 0.00567465 | No      |
|      |       |        |             |          |         | Ppp4r2   | 42.2325   | 22.6735  | -0.897351        | 42.2335      | 22.6745       | -0.8973171       | 0.00018329 | No      |
|      |       |        |             |          |         | Ppp4r4   | 2.85812   | 1.25371  | -1.18887         | 2.85912      | 1.25471       | -1.1882172       | 0.0076683  | No      |
|      |       |        |             |          |         | Ppp5c    | 31.5639   | 46.4139  | 0.55628          | 31.5649      | 46.4149       | 0.55626683       | 0.0384488  | No      |
|      |       |        |             |          |         | Ppp6r1   | 144.33    | 87.1711  | -0.727447        | 144.331      | 87.1721       | -0.7274428       | 0.0218106  | No      |
|      |       |        |             |          |         | Ppp6r2   | 35.0789   | 15.6338  | -1.16594         | 35.0799      | 15.6348       | -1.1658839       | 0.0239196  | No      |
|      |       |        |             |          |         | Pprc1    | 9.04157   | 4.84445  | -0.900241        | 9.04257      | 4.84545       | -0.9001022       | 0.00290302 | No      |
|      |       |        |             |          |         | Pqbp1    | 69.4709   | 40.6111  | -0.774534        | 69.4719      | 40.6121       | -0.7745199       | 0.0142025  | No      |
|      |       |        |             |          |         | PQLC1    | 4.4135    | 32.837   | 2.89533          | 4.4145       | 32.838        | 2.89504431       | 0.00018329 | No      |
|      |       |        |             |          |         | Pqlc2    | 1.74216   | 3.65479  | 1.06891          | 1.74316      | 3.65579       | 1.0684782        | 0.0361976  | No      |
|      |       |        |             |          |         | Pqlc3    | 1.54416   | 3.95253  | 1.35596          | 1.54516      | 3.95353       | 1.35538514       | 0.00777671 | No      |
|      |       |        |             |          |         | Pragmin  | 1.07826   | 5.47821  | 2.345            | 1.07926      | 5.47921       | 2.34392544       | 0.00018329 | No      |
|      |       |        |             |          |         | Pram1    | 0.36952   | 3.77959  | 3.35451          | 0.37052      | 3.78059       | 3.35098808       | 0.00018329 | No      |
|      |       |        |             |          |         | Prc1     | 0.818738  | 4.41746  | 2.43174          | 0.819738     | 4.41846       | 2.43030884       | 0.00018329 | No      |
|      |       |        |             |          |         | Prdm1    | 1.53303   | 0.714733 | -1.10091         | 1.53403      | 0.715733      | -1.0998333       | 0.00755425 | No      |
|      |       |        |             |          |         | Prdm10   | 2.57472   | 0.897683 | -1.52014         | 2.57572      | 0.898683      | -1.5190916       | 0.00018329 | No      |
|      |       |        |             |          |         | Prdm15   | 5.87272   | 2.18322  | -1.42757         | 5.87372      | 2.18422       | -1.4271563       | 0.00018329 | No      |
|      |       |        |             |          |         | Prdm16   | 0.052452  | 0.908395 | 4.11425          | 0.053452     | 0.909395      | 4.08859124       | 0.00082046 | No      |
|      |       |        |             |          |         | Prdm2    | 24.6769   | 14.0829  | -0.809217        | 24.6779      | 14.0839       | -0.8091727       | 0.0279905  | No      |
|      |       |        |             |          |         | Prdm9    | 0.44368   | 1.00657  | 1.18186          | 0.44468      | 1.00757       | 1.18004065       | 0.0444336  | No      |
|      |       |        |             |          |         | Prdx1    | 153.415   | 235.129  | 0.616011         | 153.416      | 235.13        | 0.61600967       | 0.0164547  | No      |
|      |       |        |             |          |         | Prdx2    | 155.759   | 388.349  | 1.31803          | 155.76       | 388.35        | 1.31803268       | 0.00018329 | No      |
|      |       |        |             |          |         | Prdx3    | 21.9251   | 66.2441  | 1.59521          | 21.9261      | 66.2451       | 1.59516452       | 0.00018329 | No      |
|      |       |        |             |          |         | Prdx5    | 93.9863   | 790.104  | 3.07152          | 93.9873      | 790.105       | 3.07150666       | 0.00018329 | No      |
|      |       |        |             |          |         | Prdx6    | 69.9569   | 134.831  | 0.94661          | 69.9579      | 134.832       | 0.94660405       | 0.00018329 | No      |
|      |       |        |             |          |         | Preb     | 14.6736   | 30.327   | 1.04738          | 14.6746      | 30.328        | 1.04732918       | 0.00210945 | No      |
|      |       |        |             |          |         | Prelp    | 0.0360606 | 41.9346  | 10.1835          | 0.0370606    | 41.9356       | 10.1440735       | 0.0361976  | No      |
|      |       |        |             |          |         | Prex1    | 100.084   | 22.6834  | -2.14149         | 100.085      | 22.6844       | -2.1414534       | 0.00018329 | No      |
|      |       |        |             |          |         | Prf1     | 38.3556   | 4.83467  | -2.98795         | 38.3566      | 4.83567       | -2.9876871       | 0.00018329 | No      |
|      |       |        |             |          |         | Prickle1 | 0.129424  | 2.42718  | 4.22911          | 0.130424     | 2.42818       | 4.2185941        | 0.00018329 | No      |
|      |       |        |             |          |         | Prim1    | 20.4894   | 11.2353  | -0.866832        | 20.4904      | 11.2363       | -0.8667811       | 0.00530972 | No      |
|      |       |        |             |          |         | Prkaa1   | 23.5523   | 11.0085  | -1.09724         | 23.5533      | 11.0095       | -1.0971803       | 0.00082046 | No      |
|      |       |        |             |          |         | Prkaa2   | 0.0230165 | 6.88093  | 8.22379          | 0.0240165    | 6.88193       | 8.16264349       | 0.00018329 | No      |
|      |       |        |             |          |         | Prkab1   | 46.8083   | 90.9925  | 0.958983         | 46.8093      | 90.9935       | 0.9589683        | 0.00018329 | No      |
|      |       |        |             |          |         | Prkacb   | 49.7512   | 15.5615  | -1.67675         | 49.7522      | 15.5625       | -1.6766865       | 0.00018329 | No      |
|      |       |        |             |          |         | Prkar2b  | 32.0022   | 6.57164  | -2.28384         | 32.0032      | 6.57264       | -2.2836713       | 0.00018329 | No      |
|      |       |        |             |          |         | Prkca    | 17.4636   | 5.75575  | -1.60127         | 17.4646      | 5.75675       | -1.6011071       | 0.00018329 | No      |
|      |       |        |             |          |         | Prkcb    | 68.9607   | 10.4341  | -2.72446         | 68.9617      | 10.4351       | -2.7243509       | 0.00018329 | No      |
|      |       |        |             |          |         | Prkcd    | 12.0957   | 32.1737  | 1.41139          | 12.0967      | 32.1747       | 1.41131317       | 0.00018329 | No      |
|      |       |        |             |          |         | Prkch    | 122.399   | 19.707   | -2.63481         | 122.4        | 19.708        | -2.6347503       | 0.00018329 | No      |

| RRBS |       |        |             |          |         | RNAseq  |          |          |                  |              |               |                  |            |         |
|------|-------|--------|-------------|----------|---------|---------|----------|----------|------------------|--------------|---------------|------------------|------------|---------|
| gene | Blood | Kidney | methyl.diff | pMWU.fdr | Match ? | gene    | blood    | kidney   | log2(fold_ratio) | blood+ 0.001 | kidney+ 0.001 | log2(fold_ratio) | q_value    | Match ? |
|      |       |        |             |          |         | Prkci   | 6.54409  | 20.0234  | 1.61342          | 6.54509      | 20.0244       | 1.61327408       | 0.00018329 | No      |
|      |       |        |             |          |         | Prkccq  | 164.667  | 48.824   | -1.75389         | 164.668      | 48.825        | -1.7538683       | 0.00018329 | No      |
|      |       |        |             |          |         | Prkcz   | 4.00773  | 29.0475  | 2.85756          | 4.00873      | 29.0485       | 2.85724651       | 0.00018329 | No      |
|      |       |        |             |          |         | Prkd2   | 84.8963  | 28.5867  | -1.57036         | 84.8973      | 28.5877       | -1.5703241       | 0.00018329 | No      |
|      |       |        |             |          |         | Prkd3   | 21.4933  | 6.4632   | -1.73357         | 21.4943      | 6.4642        | -1.7334104       | 0.00018329 | No      |
|      |       |        |             |          |         | Prkdc   | 10.7163  | 3.1591   | -1.76222         | 10.7173      | 3.1601        | -1.7618994       | 0.00018329 | No      |
|      |       |        |             |          |         | Prkra   | 10.3068  | 40.6389  | 1.97927          | 10.3078      | 40.6399       | 1.9791604        | 0.00018329 | No      |
|      |       |        |             |          |         | Prkrir  | 30.3447  | 10.8546  | -1.48314         | 30.3457      | 10.8556       | -1.4830526       | 0.00018329 | No      |
|      |       |        |             |          |         | Prkx    | 11.6048  | 7.55833  | -0.618583        | 11.6058      | 7.55933       | -0.6185157       | 0.0267263  | No      |
|      |       |        |             |          |         | Prlr    | 0.037603 | 8.0359   | 7.73947          | 0.038603     | 8.0369        | 7.70178235       | 0.0133341  | No      |
|      |       |        |             |          |         | Prmt3   | 19.1234  | 6.51672  | -1.55312         | 19.1244      | 6.51772       | -1.5529752       | 0.00018329 | No      |
|      |       |        |             |          |         | Prmt6   | 4.85175  | 1.84904  | -1.39173         | 4.85275      | 1.85004       | -1.3912461       | 0.00018329 | No      |
|      |       |        |             |          |         | Prmt7   | 15.7131  | 8.42389  | -0.899406        | 15.7141      | 8.42489       | -0.8993299       | 0.00481718 | No      |
|      |       |        |             |          |         | Prnp    | 15.3633  | 24.0907  | 0.648986         | 15.3643      | 24.0917       | 0.64895416       | 0.022325   | No      |
|      |       |        |             |          |         | Prodh2  | 0        | 43.3904  | inf              | 0.001        | 43.3914       | 15.4051215       | 0.00018329 | No      |
|      |       |        |             |          |         | Prom1   | 0.912812 | 21.8557  | 4.58155          | 0.913812     | 21.8567       | 4.5800344        | 0.00018329 | No      |
|      |       |        |             |          |         | Pros1   | 1.3611   | 4.39639  | 1.69155          | 1.3621       | 4.39739       | 1.69081487       | 0.00018329 | No      |
|      |       |        |             |          |         | Prosc   | 22.1887  | 36.5679  | 0.720751         | 22.1897      | 36.5689       | 0.72072707       | 0.017077   | No      |
|      |       |        |             |          |         | Proser1 | 9.57938  | 4.17294  | -1.19887         | 9.58038      | 4.17394       | -1.198673        | 0.00018329 | No      |
|      |       |        |             |          |         | Prox1   | 0        | 1.05961  | inf              | 0.001        | 1.06061       | 10.0506785       | 0.00018329 | No      |
|      |       |        |             |          |         | Prpf18  | 29.3857  | 16.6625  | -0.818515        | 29.3867      | 16.6635       | -0.8184719       | 0.0338104  | No      |
|      |       |        |             |          |         | Prpf38a | 34.2964  | 19.7974  | -0.792749        | 34.2974      | 19.7984       | -0.7927154       | 0.00406781 | No      |
|      |       |        |             |          |         | Prpf38b | 66.5085  | 31.5765  | -1.07469         | 66.5095      | 31.5775       | -1.0746635       | 0.00126492 | No      |
|      |       |        |             |          |         | Prpf39  | 59.8748  | 28.0443  | -1.09424         | 59.8758      | 28.0453       | -1.094214        | 0.00035173 | No      |
|      |       |        |             |          |         | Prpf4   | 19.966   | 8.87629  | -1.16952         | 19.967       | 8.87729       | -1.1694264       | 0.00018329 | No      |
|      |       |        |             |          |         | Prpf40a | 28.8282  | 11.8472  | -1.28294         | 28.8292      | 11.8482       | -1.2828629       | 0.00018329 | No      |
|      |       |        |             |          |         | Prpf8   | 43.7304  | 19.3813  | -1.17397         | 43.7314      | 19.3823       | -1.1739298       | 0.00018329 | No      |
|      |       |        |             |          |         | Prph    | 0        | 1.40395  | inf              | 0.001        | 1.40495       | 10.4563031       | 0.00018329 | No      |
|      |       |        |             |          |         | PRPS1   | 32.0282  | 10.2622  | -1.642           | 32.0292      | 10.2632       | -1.6419071       | 0.00018329 | No      |
|      |       |        |             |          |         | Prps2   | 64.5     | 30.8414  | -1.06443         | 64.501       | 30.8424       | -1.0644065       | 0.00018329 | No      |
|      |       |        |             |          |         | Prr12   | 11.8123  | 7.7774   | -0.602927        | 11.8133      | 7.7784        | -0.6028667       | 0.0295293  | No      |
|      |       |        |             |          |         | Prr13   | 235.478  | 91.9184  | -1.35716         | 235.479      | 91.9194       | -1.3571571       | 0.00018329 | No      |
|      |       |        |             |          |         | Prr14   | 32.9326  | 12.8921  | -1.35303         | 32.9336      | 12.8931       | -1.352961        | 0.0016929  | No      |
|      |       |        |             |          |         | Prr14l  | 9.07193  | 5.08771  | -0.834393        | 9.07293      | 5.08871       | -0.8342686       | 0.0160313  | No      |
|      |       |        |             |          |         | Prr15l  | 0        | 66.4625  | inf              | 0.001        | 66.4635       | 16.0202746       | 0.00018329 | No      |
|      |       |        |             |          |         | Prr16   | 0        | 0.616817 | inf              | 0.001        | 0.617817      | 9.27103576       | 0.00018329 | No      |
|      |       |        |             |          |         | Prr5    | 1.149    | 8.52902  | 2.892            | 1.15         | 8.53002       | 2.89091526       | 0.00018329 | No      |
|      |       |        |             |          |         | Prrc2b  | 35.9764  | 18.6688  | -0.94642         | 35.9774      | 18.6698       | -0.9463845       | 0.00082046 | No      |
|      |       |        |             |          |         | Prrg1   | 0        | 0.895502 | inf              | 0.001        | 0.896502      | 9.80816299       | 0.00018329 | No      |
|      |       |        |             |          |         | Prrg2   | 0.415762 | 13.7877  | 5.05148          | 0.416762     | 13.7887       | 5.0481189        | 0.00018329 | No      |
|      |       |        |             |          |         | Prss12  | 0        | 4.47598  | inf              | 0.001        | 4.47698       | 12.1283102       | 0.00018329 | No      |
|      |       |        |             |          |         | Prss22  | 0        | 8.42056  | inf              | 0.001        | 8.42156       | 13.0398718       | 0.00018329 | No      |

| RRBS |       |        |             |          |         | RNAseq   |           |          |                  |              |               |                  |            |         |
|------|-------|--------|-------------|----------|---------|----------|-----------|----------|------------------|--------------|---------------|------------------|------------|---------|
| gene | Blood | Kidney | methyl.diff | pMWU.fdr | Match ? | gene     | blood     | kidney   | log2(fold_ratio) | blood+ 0.001 | kidney+ 0.001 | log2(fold_ratio) | q_value    | Match ? |
|      |       |        |             |          |         | Prss23   | 0         | 111.358  | inf              | 0.001        | 111.359       | 16.7648586       | 0.00018329 | No      |
|      |       |        |             |          |         | Prss30   | 0.581078  | 2.93888  | 2.33846          | 0.582078     | 2.93988       | 2.33647287       | 0.0191514  | No      |
|      |       |        |             |          |         | Prss53   | 1.035     | 15.9484  | 3.94571          | 1.036        | 15.9494       | 3.94440624       | 0.00018329 | No      |
|      |       |        |             |          |         | Prtfdc1  | 1.26624   | 4.74628  | 1.90625          | 1.26724      | 4.74728       | 1.90541136       | 0.0159271  | No      |
|      |       |        |             |          |         | Prune    | 6.89865   | 16.3239  | 1.2426           | 6.89965      | 16.3249       | 1.24247907       | 0.00567465 | No      |
|      |       |        |             |          |         | Prx      | 0.0785384 | 0.805533 | 3.35847          | 0.0795384    | 0.806533      | 3.34201012       | 0.00066911 | No      |
|      |       |        |             |          |         | Psap     | 145.084   | 393.306  | 1.43876          | 145.085      | 393.307       | 1.43875749       | 0.00018329 | No      |
|      |       |        |             |          |         | Psat1    | 7.15822   | 31.0003  | 2.11461          | 7.15922      | 31.0013       | 2.1144544        | 0.00018329 | No      |
|      |       |        |             |          |         | Psca     | 0.0337449 | 99.5615  | 11.5267          | 0.0347449    | 99.5625       | 11.4845855       | 0.0148363  | No      |
|      |       |        |             |          |         | Psd3     | 0.037795  | 0.783869 | 4.37434          | 0.038795     | 0.784869      | 4.33850925       | 0.0219099  | No      |
|      |       |        |             |          |         | Psd4     | 39.805    | 8.56208  | -2.21692         | 39.806       | 8.56308       | -2.2167842       | 0.00018329 | No      |
|      |       |        |             |          |         | Psip1    | 74.0181   | 12.2953  | -2.58977         | 74.0191      | 12.2963       | -2.5896733       | 0.00018329 | No      |
|      |       |        |             |          |         | Psemb11  | 0.215563  | 1.41177  | 2.71132          | 0.216563     | 1.41277       | 2.70566793       | 0.00329119 | No      |
|      |       |        |             |          |         | Psemb9   | 183.835   | 77.3368  | -1.24919         | 183.836      | 77.3378       | -1.2491737       | 0.00018329 | No      |
|      |       |        |             |          |         | Psm13    | 85.5072   | 56.4992  | -0.597816        | 85.5082      | 56.5002       | -0.5978068       | 0.0206835  | No      |
|      |       |        |             |          |         | Psm14    | 62.8832   | 34.5486  | -0.864048        | 62.8842      | 34.5496       | -0.8640286       | 0.00051281 | No      |
|      |       |        |             |          |         | Psm8     | 39.2726   | 75.1182  | 0.935638         | 39.2736      | 75.1192       | 0.93562185       | 0.00018329 | No      |
|      |       |        |             |          |         | Psm1     | 972.165   | 515.716  | -0.914624        | 972.166      | 515.717       | -0.9146231       | 0.00097029 | No      |
|      |       |        |             |          |         | Psmg1    | 35.0167   | 60.2424  | 0.782738         | 35.0177      | 60.2434       | 0.78271887       | 0.00555427 | No      |
|      |       |        |             |          |         | PSMG3    | 18.5922   | 35.381   | 0.928277         | 18.5932      | 35.382        | 0.92824051       | 0.00811172 | No      |
|      |       |        |             |          |         | Psph     | 13.681    | 23.8368  | 0.801022         | 13.682       | 23.8378       | 0.80097196       | 0.0136625  | No      |
|      |       |        |             |          |         | Pstpip1  | 125.522   | 58.0062  | -1.11366         | 125.523      | 58.0072       | -1.1136479       | 0.00018329 | No      |
|      |       |        |             |          |         | Ptafr    | 0.469029  | 2.38383  | 2.34553          | 0.470029     | 2.38483       | 2.34306475       | 0.00018329 | No      |
|      |       |        |             |          |         | Ptbp2    | 18.4927   | 6.8697   | -1.42864         | 18.4937      | 6.8707        | -1.4285049       | 0.00018329 | No      |
|      |       |        |             |          |         | Ptbp3    | 60.3933   | 19.157   | -1.65651         | 60.3943      | 19.158        | -1.6564654       | 0.00018329 | No      |
|      |       |        |             |          |         | Ptch1    | 3.12332   | 8.56176  | 1.45483          | 3.12432      | 8.56276       | 1.45453366       | 0.00018329 | No      |
|      |       |        |             |          |         | Ptchd3   | 0         | 1.27872  | inf              | 0.001        | 1.27972       | 10.3216125       | 0.00018329 | No      |
|      |       |        |             |          |         | Ptdss1   | 28.5191   | 11.3508  | -1.32913         | 28.5201      | 11.3518       | -1.329058        | 0.0272082  | No      |
|      |       |        |             |          |         | Pten     | 57.2317   | 22.4514  | -1.35001         | 57.2327      | 22.4524       | -1.34997         | 0.00018329 | No      |
|      |       |        |             |          |         | Pter     | 1.42588   | 42.1732  | 4.8864           | 1.42688      | 42.1742       | 4.88542479       | 0.00018329 | No      |
|      |       |        |             |          |         | Ptger2   | 12.7049   | 3.99222  | -1.67012         | 12.7059      | 3.99322       | -1.6698741       | 0.00018329 | No      |
|      |       |        |             |          |         | Ptger3   | 1.43002   | 73.361   | 5.68091          | 1.43102      | 73.362        | 5.67991723       | 0.00018329 | No      |
|      |       |        |             |          |         | Ptger4   | 21.5615   | 8.51146  | -1.34098         | 21.5625      | 8.51246       | -1.3408764       | 0.0307576  | No      |
|      |       |        |             |          |         | Ptges2   | 10.2485   | 36.4283  | 1.82965          | 10.2495      | 36.4293       | 1.82954574       | 0.00018329 | No      |
|      |       |        |             |          |         | Ptges3   | 133.851   | 89.8904  | -0.574391        | 133.852      | 89.8914       | -0.5743837       | 0.031236   | No      |
|      |       |        |             |          |         | Ptges3l1 | 13.3018   | 2.94005  | -2.17771         | 13.3028      | 2.94105       | -2.1773267       | 0.00035173 | No      |
|      |       |        |             |          |         | Ptgr1    | 0         | 1.80067  | inf              | 0.001        | 1.80167       | 10.8151191       | 0.00018329 | No      |
|      |       |        |             |          |         | Ptgrn    | 0.420176  | 20.5282  | 5.61047          | 0.421176     | 20.5292       | 5.60711037       | 0.00018329 | No      |
|      |       |        |             |          |         | Ptgr2    | 11.581    | 33.9621  | 1.55216          | 11.582       | 33.9631       | 1.55208375       | 0.00018329 | No      |
|      |       |        |             |          |         | Ptgs1    | 0.383546  | 13.3377  | 5.11997          | 0.384546     | 13.3387       | 5.11631807       | 0.00018329 | No      |
|      |       |        |             |          |         | Pth1r    | 0         | 118.327  | inf              | 0.001        | 118.328       | 16.852432        | 0.00018329 | No      |

| RRBS |       |        |             |          |         | RNAseq  |           |         |                  |              |               |                  |            |         |
|------|-------|--------|-------------|----------|---------|---------|-----------|---------|------------------|--------------|---------------|------------------|------------|---------|
| gene | Blood | Kidney | methyl.diff | pMWU.fdr | Match ? | gene    | blood     | kidney  | log2(fold_ratio) | blood+ 0.001 | kidney+ 0.001 | log2(fold_ratio) | q_value    | Match ? |
|      |       |        |             |          |         | Ptk2    | 2.54875   | 19.8517 | 2.9614           | 2.54975      | 19.8527       | 2.96090753       | 0.00018329 | No      |
|      |       |        |             |          |         | Ptk2b   | 64.152    | 20.2334 | -1.66476         | 64.153       | 20.2344       | -1.6647067       | 0.00018329 | No      |
|      |       |        |             |          |         | Ptn     | 0         | 12.0684 | inf              | 0.001        | 12.0694       | 13.5590663       | 0.00018329 | No      |
|      |       |        |             |          |         | PTP4A2  | 384.663   | 188.694 | -1.02755         | 384.664      | 188.695       | -1.0275426       | 0.0031651  | No      |
|      |       |        |             |          |         | Ptpdc1  | 2.88981   | 8.2366  | 1.51108          | 2.89081      | 8.2376        | 1.51075028       | 0.00035173 | No      |
|      |       |        |             |          |         | Ptpla   | 1.03102   | 6.37849 | 2.62914          | 1.03202      | 6.37949       | 2.62797016       | 0.00035173 | No      |
|      |       |        |             |          |         | Ptplad1 | 7.35991   | 14.447  | 0.973007         | 7.36091      | 14.448        | 0.97291376       | 0.00097029 | No      |
|      |       |        |             |          |         | Ptplad2 | 0.241785  | 15.3055 | 5.98418          | 0.242785     | 15.3065       | 5.97832133       | 0.00445502 | No      |
|      |       |        |             |          |         | Ptpmt1  | 6.80342   | 25.5305 | 1.90789          | 6.80442      | 25.5315       | 1.9077342        | 0.0351863  | No      |
|      |       |        |             |          |         | Ptpn1   | 31.2866   | 10.914  | -1.51936         | 31.2876      | 10.915        | -1.5192789       | 0.00018329 | No      |
|      |       |        |             |          |         | Ptpn12  | 11.736    | 18.5364 | 0.65942          | 11.737       | 18.5374       | 0.65937521       | 0.018521   | No      |
|      |       |        |             |          |         | Ptpn13  | 0.783914  | 76.4227 | 6.60716          | 0.784914     | 76.4237       | 6.6053417        | 0.00018329 | No      |
|      |       |        |             |          |         | Ptpn18  | 200.991   | 90.8073 | -1.14625         | 200.992      | 90.8083       | -1.146242        | 0.00018329 | No      |
|      |       |        |             |          |         | PTPN2   | 60.0712   | 27.4462 | -1.13007         | 60.0722      | 27.4472       | -1.1300385       | 0.00018329 | No      |
|      |       |        |             |          |         | Ptpn21  | 0.0872416 | 6.17224 | 6.14463          | 0.0882416    | 6.17324       | 6.12842512       | 0.00018329 | No      |
|      |       |        |             |          |         | Ptpn22  | 173.141   | 27.4341 | -2.65791         | 173.142      | 27.4351       | -2.657861        | 0.00018329 | No      |
|      |       |        |             |          |         | Ptpn23  | 5.35835   | 12.0407 | 1.16806          | 5.35935      | 12.0417       | 1.16790914       | 0.00018329 | No      |
|      |       |        |             |          |         | Ptpn7   | 14.5728   | 8.25155 | -0.820537        | 14.5738      | 8.25255       | -0.8204652       | 0.0063852  | No      |
|      |       |        |             |          |         | Ptprb   | 0         | 2.15124 | inf              | 0.001        | 2.15224       | 11.0716232       | 0.00018329 | No      |
|      |       |        |             |          |         | Ptprc   | 667.437   | 43.9734 | -3.92393         | 667.438      | 43.9744       | -3.923898        | 0.00018329 | No      |
|      |       |        |             |          |         | Ptprcap | 658.747   | 162.115 | -2.02271         | 658.748      | 162.116       | -2.0227002       | 0.00126492 | No      |
|      |       |        |             |          |         | Ptprd   | 0         | 7.72799 | inf              | 0.001        | 7.72899       | 12.9160642       | 0.00018329 | No      |
|      |       |        |             |          |         | Ptprf   | 13.2682   | 39.5679 | 1.57636          | 13.2692      | 39.5689       | 1.57628557       | 0.00018329 | No      |
|      |       |        |             |          |         | PTPRG   | 0.181641  | 3.35966 | 4.20915          | 0.182641     | 3.36066       | 4.20166202       | 0.00018329 | No      |
|      |       |        |             |          |         | Ptprj   | 1.31871   | 9.64224 | 2.87024          | 1.31971      | 9.64324       | 2.86929702       | 0.00111812 | No      |
|      |       |        |             |          |         | Ptprk   | 2.04485   | 17.7717 | 3.11952          | 2.04585      | 17.7727       | 3.11889059       | 0.00018329 | No      |
|      |       |        |             |          |         | Ptprm   | 0.707242  | 9.88234 | 3.80458          | 0.708242     | 9.88334       | 3.80268437       | 0.00018329 | No      |
|      |       |        |             |          |         | Ptpro   | 1.01472   | 12.6595 | 3.64108          | 1.01572      | 12.6605       | 3.63975972       | 0.00018329 | No      |
|      |       |        |             |          |         | Ptprr   | 0         | 8.51446 | inf              | 0.001        | 8.51546       | 13.0558688       | 0.00018329 | No      |
|      |       |        |             |          |         | Pttg1   | 3.23872   | 12.4276 | 1.94005          | 3.23972      | 12.4286       | 1.93972276       | 0.00018329 | No      |
|      |       |        |             |          |         | Pttg1ip | 41.5354   | 201.241 | 2.27651          | 41.5364      | 201.242       | 2.27648335       | 0.00018329 | No      |
|      |       |        |             |          |         | Pum1    | 55.1672   | 16.9664 | -1.70113         | 55.1682      | 16.9674       | -1.7010714       | 0.00018329 | No      |
|      |       |        |             |          |         | Pum2    | 92.4953   | 27.3792 | -1.7563          | 92.4963      | 27.3802       | -1.7562627       | 0.00018329 | No      |
|      |       |        |             |          |         | Pus1    | 39.1163   | 23.1449 | -0.757073        | 39.1173      | 23.1459       | -0.7570501       | 0.00811172 | No      |
|      |       |        |             |          |         | Pus10   | 6.97889   | 2.63187 | -1.40691         | 6.97989      | 2.63287       | -1.406568        | 0.0322893  | No      |
|      |       |        |             |          |         | Pus3    | 20.4191   | 6.48259 | -1.65528         | 20.4201      | 6.48359       | -1.6551252       | 0.00018329 | No      |
|      |       |        |             |          |         | Pus7    | 4.44732   | 2.36739 | -0.909642        | 4.44832      | 2.36839       | -0.9093539       | 0.0164547  | No      |
|      |       |        |             |          |         | Pus7l   | 7.24627   | 2.24871 | -1.68814         | 7.24727      | 2.24971       | -1.6876986       | 0.00579773 | No      |
|      |       |        |             |          |         | PVR     | 1.28839   | 5.31961 | 2.04575          | 1.28939      | 5.32061       | 2.04490296       | 0.00018329 | No      |
|      |       |        |             |          |         | Pvrl3   | 0.0529209 | 5.3325  | 6.65483          | 0.0539209    | 5.3335        | 6.6280942        | 0.00018329 | No      |
|      |       |        |             |          |         | Pwwp2a  | 29.7622   | 8.76465 | -1.76371         | 29.7632      | 8.76565       | -1.7635967       | 0.00018329 | No      |
|      |       |        |             |          |         | Pxdn    | 0.019963  | 1.30007 | 6.02512          | 0.020963     | 1.30107       | 5.95570958       | 0.0345543  | No      |



| RRBS |       |        |             |          |         | RNAseq    |           |          |                  |              |               |                  |            |         |
|------|-------|--------|-------------|----------|---------|-----------|-----------|----------|------------------|--------------|---------------|------------------|------------|---------|
| gene | Blood | Kidney | methyl.diff | pMWU.fdr | Match ? | gene      | blood     | kidney   | log2(fold_ratio) | blood+ 0.001 | kidney+ 0.001 | log2(fold_ratio) | q_value    | Match ? |
|      |       |        |             |          |         | Pxk       | 19.9867   | 31.4464  | 0.65386          | 19.9877      | 31.4474       | 0.65382827       | 0.0286648  | No      |
|      |       |        |             |          |         | Pxmp2     | 1.67026   | 26.2007  | 3.97146          | 1.67126      | 26.2017       | 3.97065232       | 0.00018329 | No      |
|      |       |        |             |          |         | Pycard    | 129.552   | 64.5977  | -1.00397         | 129.553      | 64.5987       | -1.0039654       | 0.00018329 | No      |
|      |       |        |             |          |         | Pygl      | 24.4096   | 9.88846  | -1.30363         | 24.4106      | 9.88946       | -1.3035441       | 0.00018329 | No      |
|      |       |        |             |          |         | Qars      | 81.3661   | 50.3686  | -0.691903        | 81.3671      | 50.3696       | -0.6918923       | 0.00721079 | No      |
|      |       |        |             |          |         | Qdpr      | 39.1468   | 62.472   | 0.674315         | 39.1478      | 62.473        | 0.67430158       | 0.0146209  | No      |
|      |       |        |             |          |         | QK        | 24.9402   | 15.0765  | -0.726175        | 24.9412      | 15.0775       | -0.7261336       | 0.00445502 | No      |
|      |       |        |             |          |         | Qprt      | 55.6483   | 27.8565  | -0.998326        | 55.6493      | 27.8575       | -0.9982977       | 0.00856745 | No      |
|      |       |        |             |          |         | Qrs1      | 6.29087   | 11.2233  | 0.835161         | 6.29187      | 11.2243       | 0.83506471       | 0.0110491  | No      |
|      |       |        |             |          |         | Qser1     | 0.716952  | 1.64988  | 1.20241          | 0.717952     | 1.65088       | 1.20127596       | 0.00469886 | No      |
|      |       |        |             |          |         | Qsox1     | 2.3301    | 7.69568  | 1.72365          | 2.3311       | 7.69668       | 1.72322537       | 0.00018329 | No      |
|      |       |        |             |          |         | Qtrtd1    | 4.36462   | 1.45008  | -1.58973         | 4.36562      | 1.45108       | -1.5890595       | 0.00018329 | No      |
|      |       |        |             |          |         | R3hdm1    | 20.4075   | 7.23471  | -1.49609         | 20.4085      | 7.23571       | -1.4959637       | 0.00018329 | No      |
|      |       |        |             |          |         | Rab1      | 24.935    | 68.0715  | 1.44888          | 24.936       | 68.0725       | 1.44884203       | 0.00018329 | No      |
|      |       |        |             |          |         | Rab11a    | 35.7168   | 89.4101  | 1.32383          | 35.7178      | 89.4111       | 1.32381072       | 0.00035173 | No      |
|      |       |        |             |          |         | Rab11b    | 108.433   | 157.055  | 0.534461         | 108.434      | 157.056       | 0.53446187       | 0.0451903  | No      |
|      |       |        |             |          |         | Rab11fip1 | 2.19797   | 15.4995  | 2.81798          | 2.19897      | 15.5005       | 2.81741493       | 0.00018329 | No      |
|      |       |        |             |          |         | Rab11fip4 | 56.6993   | 16.0872  | -1.81742         | 56.7003      | 16.0882       | -1.8173534       | 0.00018329 | No      |
|      |       |        |             |          |         | Rab11fip5 | 0.365293  | 21.7757  | 5.89752          | 0.366293     | 21.7767       | 5.89364341       | 0.00018329 | No      |
|      |       |        |             |          |         | Rab12     | 11.4638   | 22.8474  | 0.994945         | 11.4648      | 22.8484       | 0.99488195       | 0.0243241  | No      |
|      |       |        |             |          |         | Rab13     | 0.132232  | 26.7598  | 7.66085          | 0.133232     | 26.7608       | 7.6500368        | 0.00018329 | No      |
|      |       |        |             |          |         | Rab17     | 0         | 136.915  | inf              | 0.001        | 136.916       | 17.0629315       | 0.00018329 | No      |
|      |       |        |             |          |         | Rab18     | 15.183    | 35.2664  | 1.21584          | 15.184       | 35.2674       | 1.21578332       | 0.00018329 | No      |
|      |       |        |             |          |         | Rab19     | 13.3297   | 4.90329  | -1.44283         | 13.3307      | 4.90429       | -1.4426363       | 0.00018329 | No      |
|      |       |        |             |          |         | Rab20     | 3.22628   | 23.9666  | 2.89308          | 3.22728      | 23.9676       | 2.89269479       | 0.00018329 | No      |
|      |       |        |             |          |         | Rab23     | 5.35259   | 15.5201  | 1.53583          | 5.35359      | 15.5211       | 1.53565225       | 0.00018329 | No      |
|      |       |        |             |          |         | Rab25     | 10.619    | 42.4391  | 1.99875          | 10.62        | 42.4401       | 1.99864429       | 0.00018329 | No      |
|      |       |        |             |          |         | Rab27a    | 97.7487   | 15.4652  | -2.66005         | 97.7497      | 15.4662       | -2.6599735       | 0.00018329 | No      |
|      |       |        |             |          |         | Rab30     | 0.0839307 | 0.862573 | 3.36138          | 0.0849307    | 0.863573      | 3.34596009       | 0.0018326  | No      |
|      |       |        |             |          |         | Rab31     | 1.20469   | 5.03047  | 2.06204          | 1.20569      | 5.03147       | 2.06112094       | 0.00018329 | No      |
|      |       |        |             |          |         | Rab32     | 0.179921  | 6.45839  | 5.16574          | 0.180921     | 6.45939       | 5.15796615       | 0.00018329 | No      |
|      |       |        |             |          |         | Rab33a    | 13.3299   | 7.04853  | -0.919275        | 13.3309      | 7.04953       | -0.9191752       | 0.0281852  | No      |
|      |       |        |             |          |         | Rab33b    | 7.56176   | 4.14987  | -0.865655        | 7.56276      | 4.15087       | -0.8654991       | 0.00555427 | No      |
|      |       |        |             |          |         | Rab35     | 77.9061   | 30.0417  | -1.37477         | 77.9071      | 30.0427       | -1.3747403       | 0.00406781 | No      |
|      |       |        |             |          |         | RAB37     | 38.5626   | 4.16377  | -3.21124         | 38.5636      | 4.16477       | -3.210931        | 0.00018329 | No      |
|      |       |        |             |          |         | Rab38     | 0.0530737 | 2.47436  | 5.54291          | 0.0540737    | 2.47536       | 5.51656747       | 0.0444336  | No      |
|      |       |        |             |          |         | Rab3d     | 13.089    | 7.1735   | -0.867602        | 13.09        | 7.1745        | -0.8675149       | 0.00834357 | No      |
|      |       |        |             |          |         | Rab3ip    | 448.601   | 78.2451  | -2.51936         | 448.602      | 78.2461       | -2.5193453       | 0.00018329 | No      |
|      |       |        |             |          |         | Rab40b    | 0.169839  | 1.99754  | 3.55599          | 0.170839     | 1.99854       | 3.54823718       | 0.0016929  | No      |
|      |       |        |             |          |         | Rab4a     | 12.7832   | 29.402   | 1.20167          | 12.7842      | 29.403        | 1.20160148       | 0.00650199 | No      |
|      |       |        |             |          |         | Rab6b     | 0.240911  | 1.29715  | 2.42877          | 0.241911     | 1.29815       | 2.42390882       | 0.00018329 | No      |
|      |       |        |             |          |         | Rab7a     | 100.116   | 165.888  | 0.728534         | 100.117      | 165.889       | 0.72853126       | 0.0063852  | No      |

| RRBS |       |        |             |          |         | RNAseq   |            |          |                  |              |               |                  |            |         |
|------|-------|--------|-------------|----------|---------|----------|------------|----------|------------------|--------------|---------------|------------------|------------|---------|
| gene | Blood | Kidney | methyl.diff | pMWU.fdr | Match ? | gene     | blood      | kidney   | log2(fold_ratio) | blood+ 0.001 | kidney+ 0.001 | log2(fold_ratio) | q_value    | Match ? |
|      |       |        |             |          |         | RAB7B    | 0.204364   | 1.90194  | 3.21825          | 0.205364     | 1.90294       | 3.21197487       | 0.0225266  | No      |
|      |       |        |             |          |         | Rab7l1   | 123.787    | 81.5616  | -0.601903        | 123.788      | 81.5626       | -0.6018918       | 0.0258543  | No      |
|      |       |        |             |          |         | Rab8a    | 185.408    | 79.7877  | -1.21646         | 185.409      | 79.7887       | -1.2164549       | 0.00018329 | No      |
|      |       |        |             |          |         | Rab9a    | 22.0674    | 46.3024  | 1.06917          | 22.0684      | 46.3034       | 1.0691361        | 0.00018329 | No      |
|      |       |        |             |          |         | Rabepk   | 6.40155    | 10.791   | 0.753337         | 6.40255      | 10.792        | 0.75324373       | 0.0296252  | No      |
|      |       |        |             |          |         | Rabl2a   | 0.183665   | 16.983   | 6.53087          | 0.184665     | 16.984        | 6.52312201       | 0.00018329 | No      |
|      |       |        |             |          |         | Rabl3    | 2.37782    | 4.2042   | 0.822196         | 2.37882      | 4.2052        | 0.82192831       | 0.0374015  | No      |
|      |       |        |             |          |         | Rabl5    | 0.633857   | 9.76844  | 3.9459           | 0.634857     | 9.76944       | 3.9437723        | 0.00018329 | No      |
|      |       |        |             |          |         | Rac2     | 1230.16    | 271.507  | -2.17978         | 1230.161     | 271.508       | -2.1797805       | 0.00018329 | No      |
|      |       |        |             |          |         | Rad1     | 16.5896    | 5.76948  | -1.52377         | 16.5906      | 5.77048       | -1.5236028       | 0.00018329 | No      |
|      |       |        |             |          |         | Rad21    | 64.2362    | 41.8264  | -0.618975        | 64.2372      | 41.8274       | -0.6189607       | 0.0225266  | No      |
|      |       |        |             |          |         | Rad50    | 10.7335    | 7.04359  | -0.607742        | 10.7345      | 7.04459       | -0.6076673       | 0.041088   | No      |
|      |       |        |             |          |         | Rae1     | 46.7275    | 23.1272  | -1.01468         | 46.7285      | 23.1282       | -1.0146497       | 0.00051281 | No      |
|      |       |        |             |          |         | Rai14    | 0.00722896 | 8.6198   | 10.2197          | 0.00822896   | 8.6208        | 10.0328959       | 0.0203707  | No      |
|      |       |        |             |          |         | Rai2     | 0          | 4.38287  | inf              | 0.001        | 4.38387       | 12.0979893       | 0.00018329 | No      |
|      |       |        |             |          |         | Ralb     | 6.41685    | 20.8743  | 1.70179          | 6.41785      | 20.8753       | 1.70163495       | 0.00018329 | No      |
|      |       |        |             |          |         | Ralgapb  | 12.312     | 8.22528  | -0.581927        | 12.313       | 8.22628       | -0.5818702       | 0.0321839  | No      |
|      |       |        |             |          |         | Ralgps2  | 13.2023    | 1.76613  | -2.90213         | 13.2033      | 1.76713       | -2.9014185       | 0.00018329 | No      |
|      |       |        |             |          |         | Raly     | 306.967    | 144.572  | -1.0863          | 306.968      | 144.573       | -1.0862901       | 0.00018329 | No      |
|      |       |        |             |          |         | Ramp2    | 0.588731   | 19.8496  | 5.07535          | 0.589731     | 19.8506       | 5.07298177       | 0.00018329 | No      |
|      |       |        |             |          |         | Ramp3    | 3.08152    | 9.28182  | 1.59076          | 3.08252      | 9.28282       | 1.59045289       | 0.00018329 | No      |
|      |       |        |             |          |         | Ranbp10  | 22.6208    | 9.4631   | -1.25726         | 22.6218      | 9.4641        | -1.2571765       | 0.00018329 | No      |
|      |       |        |             |          |         | Ranbp6   | 6.08515    | 2.50394  | -1.28109         | 6.08615      | 2.50494       | -1.2807538       | 0.00018329 | No      |
|      |       |        |             |          |         | Ranbp9   | 45.5799    | 19.536   | -1.22226         | 45.5809      | 19.537        | -1.2222205       | 0.00018329 | No      |
|      |       |        |             |          |         | Rangap1  | 50.6696    | 28.7171  | -0.81921         | 50.6706      | 28.7181       | -0.8191886       | 0.00082046 | No      |
|      |       |        |             |          |         | Rap1a    | 157.675    | 47.6105  | -1.72761         | 157.676      | 47.6115       | -1.7275811       | 0.00018329 | No      |
|      |       |        |             |          |         | Rap1b    | 258.994    | 78.3785  | -1.72439         | 258.995      | 78.3795       | -1.724376        | 0.00018329 | No      |
|      |       |        |             |          |         | RAP1GAP  | 0.0456375  | 68.4893  | 10.5514          | 0.0466375    | 68.4903       | 10.5201935       | 0.00018329 | No      |
|      |       |        |             |          |         | Rap1gap2 | 4.05921    | 18.2052  | 2.16508          | 4.06021      | 18.2062       | 2.16480358       | 0.00018329 | No      |
|      |       |        |             |          |         | Rap1gds1 | 29.9411    | 9.83519  | -1.6061          | 29.9421      | 9.83619       | -1.6060039       | 0.00018329 | No      |
|      |       |        |             |          |         | Rap2b    | 13.5993    | 3.93531  | -1.78899         | 13.6003      | 3.93631       | -1.7887227       | 0.00154856 | No      |
|      |       |        |             |          |         | Rap2c    | 28.4128    | 6.41708  | -2.14655         | 28.4138      | 6.41808       | -2.1463781       | 0.00018329 | No      |
|      |       |        |             |          |         | Rapgef1  | 21.8445    | 12.4004  | -0.816881        | 21.8455      | 12.4014       | -0.8168331       | 0.0016929  | No      |
|      |       |        |             |          |         | Rapgef2  | 9.58545    | 3.99024  | -1.26437         | 9.58645      | 3.99124       | -1.2641596       | 0.00469886 | No      |
|      |       |        |             |          |         | Rapgef3  | 0.0420034  | 14.2429  | 8.40552          | 0.0430034    | 14.2439       | 8.37167777       | 0.00018329 | No      |
|      |       |        |             |          |         | Rapgef4  | 0          | 0.590448 | inf              | 0.001        | 0.591448      | 9.20810752       | 0.00018329 | No      |
|      |       |        |             |          |         | Rapgef5  | 0.156652   | 0.790778 | 2.33571          | 0.157652     | 0.791778      | 2.32835251       | 0.00018329 | No      |
|      |       |        |             |          |         | Rapgef6  | 42.3979    | 3.0089   | -3.81668         | 42.3989      | 3.0099        | -3.8162394       | 0.00018329 | No      |
|      |       |        |             |          |         | RAPGEFL1 | 0.0886266  | 3.8582   | 5.44405          | 0.0896266    | 3.8592        | 5.42823103       | 0.00018329 | No      |
|      |       |        |             |          |         | Rapsn    | 0.671436   | 14.434   | 4.42608          | 0.672436     | 14.435        | 4.42403033       | 0.00018329 | No      |
|      |       |        |             |          |         | Rars2    | 4.8122     | 9.50304  | 0.981691         | 4.8132       | 9.50404       | 0.98154454       | 0.0420159  | No      |
|      |       |        |             |          |         | Rasa1    | 25.2555    | 9.55899  | -1.40167         | 25.2565      | 9.55999       | -1.4015737       | 0.00018329 | No      |

| RRBS |       |        |             |          |         | RNAseq   |           |          |                  |              |               |                  |            |         |
|------|-------|--------|-------------|----------|---------|----------|-----------|----------|------------------|--------------|---------------|------------------|------------|---------|
| gene | Blood | Kidney | methyl.diff | pMWU.fdr | Match ? | gene     | blood     | kidney   | log2(fold_ratio) | blood+ 0.001 | kidney+ 0.001 | log2(fold_ratio) | q_value    | Match ? |
|      |       |        |             |          |         | Rasa2    | 6.97392   | 2.60755  | -1.41927         | 6.97492      | 2.60855       | -1.4189286       | 0.00018329 | No      |
|      |       |        |             |          |         | Rasa3    | 65.931    | 3.84443  | -4.10012         | 65.932       | 3.84543       | -4.099762        | 0.00018329 | No      |
|      |       |        |             |          |         | RASA4    | 25.9929   | 9.47745  | -1.45555         | 25.9939      | 9.47845       | -1.45545         | 0.00018329 | No      |
|      |       |        |             |          |         | Rasal3   | 86.5022   | 18.3749  | -2.235           | 86.5032      | 18.3759       | -2.2349386       | 0.00018329 | No      |
|      |       |        |             |          |         | Rasd1    | 0.759969  | 20.8674  | 4.77917          | 0.760969     | 20.8684       | 4.7773385        | 0.00018329 | No      |
|      |       |        |             |          |         | Rasd2    | 0         | 1.03741  | inf              | 0.001        | 1.03841       | 10.0201605       | 0.00018329 | No      |
|      |       |        |             |          |         | Rasgef1b | 20.6921   | 11.0465  | -0.905494        | 20.6931      | 11.0475       | -0.9054299       | 0.00277264 | No      |
|      |       |        |             |          |         | Rasgrp1  | 79.297    | 8.18434  | -3.27633         | 79.298       | 8.18534       | -3.2761702       | 0.00018329 | No      |
|      |       |        |             |          |         | Rasgrp3  | 0.473376  | 4.8515   | 3.35737          | 0.474376     | 4.8525        | 3.35462529       | 0.032482   | No      |
|      |       |        |             |          |         | Rasip1   | 0.92071   | 3.19488  | 1.79494          | 0.92171      | 3.19588       | 1.79382843       | 0.00018329 | No      |
|      |       |        |             |          |         | Rasl10a  | 0.0491018 | 6.67397  | 7.08663          | 0.0501018    | 6.67497       | 7.05775511       | 0.0222154  | No      |
|      |       |        |             |          |         | Rasl11a  | 0.446556  | 10.5003  | 4.55545          | 0.447556     | 10.5013       | 4.55235592       | 0.00018329 | No      |
|      |       |        |             |          |         | Rasl11b  | 1.73035   | 19.3943  | 3.48649          | 1.73135      | 19.3953       | 3.48573778       | 0.00018329 | No      |
|      |       |        |             |          |         | Rassf2   | 22.5804   | 6.47801  | -1.80145         | 22.5814      | 6.47901       | -1.8012896       | 0.00018329 | No      |
|      |       |        |             |          |         | Rassf4   | 0.28142   | 3.36266  | 3.57881          | 0.28242      | 3.36366       | 3.57411772       | 0.00277264 | No      |
|      |       |        |             |          |         | Rassf5   | 61.1907   | 15.2822  | -2.00146         | 61.1917      | 15.2832       | -2.0013893       | 0.00018329 | No      |
|      |       |        |             |          |         | Rassf6   | 0.130637  | 24.6251  | 7.55842          | 0.131637     | 24.6261       | 7.54747931       | 0.00018329 | No      |
|      |       |        |             |          |         | Rassf8   | 0.108576  | 20.3265  | 7.54851          | 0.109576     | 20.3275       | 7.53535714       | 0.00018329 | No      |
|      |       |        |             |          |         | Rassf9   | 0         | 6.28077  | inf              | 0.001        | 6.28177       | 12.6169554       | 0.00018329 | No      |
|      |       |        |             |          |         | RatNP-3b | 0         | 2.24286  | inf              | 0.001        | 2.24386       | 11.131767        | 0.00018329 | No      |
|      |       |        |             |          |         | Raver1   | 43.5169   | 24.4672  | -0.830729        | 43.5179      | 24.4682       | -0.830701        | 0.00097029 | No      |
|      |       |        |             |          |         | Rb1cc1   | 17.8221   | 8.52741  | -1.06348         | 17.8231      | 8.52841       | -1.0633996       | 0.0146209  | No      |
|      |       |        |             |          |         | Rbbp4    | 47.4324   | 31.8939  | -0.572592        | 47.4334      | 31.8949       | -0.5725775       | 0.0364805  | No      |
|      |       |        |             |          |         | Rbbp5    | 21.9138   | 10.8854  | -1.00944         | 21.9148      | 10.8864       | -1.0093786       | 0.0016929  | No      |
|      |       |        |             |          |         | Rbbp6    | 26.7933   | 12.7858  | -1.06733         | 26.7943      | 12.7868       | -1.0672709       | 0.0273913  | No      |
|      |       |        |             |          |         | Rbbp8nl  | 0.0184626 | 6.44064  | 8.44645          | 0.0194626    | 6.44164       | 8.37057977       | 0.0230128  | No      |
|      |       |        |             |          |         | Rbfox2   | 0.0556607 | 2.09002  | 5.23071          | 0.0566607    | 2.09102       | 5.20571463       | 0.0107084  | No      |
|      |       |        |             |          |         | Rbl1     | 1.48743   | 0.698973 | -1.08951         | 1.48843      | 0.699973      | -1.0884202       | 0.0348348  | No      |
|      |       |        |             |          |         | Rbm12b   | 8.19841   | 5.15248  | -0.670079        | 8.19941      | 5.15348       | -0.6699731       | 0.0399588  | No      |
|      |       |        |             |          |         | Rbm17    | 132.262   | 78.8533  | -0.746156        | 132.263      | 78.8543       | -0.7461482       | 0.0281852  | No      |
|      |       |        |             |          |         | Rbm19    | 3.29893   | 1.57292  | -1.06856         | 3.29993      | 1.57392       | -1.0680732       | 0.00481718 | No      |
|      |       |        |             |          |         | Rbm22    | 37.4578   | 17.7794  | -1.07506         | 37.4588      | 17.7804       | -1.0750169       | 0.00051281 | No      |
|      |       |        |             |          |         | Rbm25    | 59.0031   | 24.2748  | -1.28133         | 59.0041      | 24.2758       | -1.2812964       | 0.00018329 | No      |
|      |       |        |             |          |         | Rbm27    | 20.5803   | 9.43744  | -1.1248          | 20.5813      | 9.43844       | -1.1247138       | 0.00018329 | No      |
|      |       |        |             |          |         | Rbm33    | 41.0282   | 9.63524  | -2.09022         | 41.0292      | 9.63624       | -2.0901088       | 0.00018329 | No      |
|      |       |        |             |          |         | Rbm34    | 13.1115   | 6.60593  | -0.989001        | 13.1125      | 6.60693       | -0.9888908       | 0.00051281 | No      |
|      |       |        |             |          |         | Rbm38    | 51.149    | 13.3955  | -1.93296         | 51.15        | 13.3965       | -1.9328781       | 0.00018329 | No      |
|      |       |        |             |          |         | Rbm39    | 80.1381   | 36.0894  | -1.15091         | 80.1391      | 36.0904       | -1.1508912       | 0.00018329 | No      |
|      |       |        |             |          |         | Rbm41    | 6.71169   | 1.66102  | -2.01461         | 6.71269      | 1.66202       | -2.0139533       | 0.00018329 | No      |
|      |       |        |             |          |         | Rbm45    | 31.6489   | 20.9102  | -0.597951        | 31.6499      | 20.9112       | -0.5979251       | 0.0415563  | No      |
|      |       |        |             |          |         | Rbm48    | 11.5609   | 3.56767  | -1.6962          | 11.5619      | 3.56867       | -1.6959201       | 0.00018329 | No      |
|      |       |        |             |          |         | Rbm5     | 80.6057   | 50.6748  | -0.669613        | 80.6067      | 50.6758       | -0.6696028       | 0.030375   | No      |

| RRBS |       |        |             |          |         | RNAseq |          |          |                  |              |               |                  |            |         |
|------|-------|--------|-------------|----------|---------|--------|----------|----------|------------------|--------------|---------------|------------------|------------|---------|
| gene | Blood | Kidney | methyl.diff | pMWU.fdr | Match ? | gene   | blood    | kidney   | log2(fold_ratio) | blood+ 0.001 | kidney+ 0.001 | log2(fold_ratio) | q_value    | Match ? |
|      |       |        |             |          |         | Rbm6   | 33.6945  | 19.6021  | -0.781507        | 33.6955      | 19.6031       | -0.7814741       | 0.0384488  | No      |
|      |       |        |             |          |         | Rbm7   | 47.9858  | 25.8853  | -0.890476        | 47.9868      | 25.8863       | -0.8904488       | 0.00494262 | No      |
|      |       |        |             |          |         | Rbms3  | 0        | 4.45921  | inf              | 0.001        | 4.46021       | 12.1228959       | 0.00018329 | No      |
|      |       |        |             |          |         | Rbmx   | 38.471   | 21.1131  | -0.865637        | 38.472       | 21.1141       | -0.8656021       | 0.00721079 | No      |
|      |       |        |             |          |         | Rbmx2  | 11.0985  | 6.33323  | -0.809355        | 11.0995      | 6.33423       | -0.8092535       | 0.0387343  | No      |
|      |       |        |             |          |         | Rbp7   | 0        | 1.32497  | inf              | 0.001        | 1.32597       | 10.3728324       | 0.00018329 | No      |
|      |       |        |             |          |         | Rbpms  | 2.24586  | 145.66   | 6.01919          | 2.24686      | 145.661       | 6.01856061       | 0.00018329 | No      |
|      |       |        |             |          |         | Rc3h1  | 13.6578  | 5.22961  | -1.38495         | 13.6588      | 5.23061       | -1.3847796       | 0.00018329 | No      |
|      |       |        |             |          |         | Rc3h2  | 19.0686  | 10.3185  | -0.885968        | 19.0696      | 10.3195       | -0.8859015       | 0.00469886 | No      |
|      |       |        |             |          |         | Rcan1  | 7.08525  | 29.0097  | 2.03364          | 7.08625      | 29.0107       | 2.03349084       | 0.00018329 | No      |
|      |       |        |             |          |         | Rcan3  | 34.5526  | 8.93096  | -1.95191         | 34.5536      | 8.93196       | -1.9517873       | 0.00018329 | No      |
|      |       |        |             |          |         | Rcc1   | 15.6365  | 9.15522  | -0.772251        | 15.6375      | 9.15622       | -0.7721859       | 0.0168685  | No      |
|      |       |        |             |          |         | Rcc2   | 113.624  | 56.9969  | -0.995315        | 113.625      | 56.9979       | -0.9952996       | 0.00018329 | No      |
|      |       |        |             |          |         | Rcn2   | 6.04979  | 13.7051  | 1.17976          | 6.05079      | 13.7061       | 1.1796227        | 0.00018329 | No      |
|      |       |        |             |          |         | Rcn3   | 1.93551  | 4.65985  | 1.26757          | 1.93651      | 4.66085       | 1.26713413       | 0.0113722  | No      |
|      |       |        |             |          |         | Rcsd1  | 107.562  | 20.9241  | -2.36193         | 107.563      | 20.9251       | -2.3618755       | 0.00018329 | No      |
|      |       |        |             |          |         | Rdh14  | 8.40542  | 18.0648  | 1.10379          | 8.40642      | 18.0658       | 1.1036977        | 0.00224282 | No      |
|      |       |        |             |          |         | Rdh16  | 1.12514  | 10.5367  | 3.22725          | 1.12614      | 10.5377       | 3.22610192       | 0.00018329 | No      |
|      |       |        |             |          |         | Rdm1   | 11.4998  | 18.9865  | 0.723369         | 11.5008      | 18.9875       | 0.72331575       | 0.0494313  | No      |
|      |       |        |             |          |         | Rdx    | 13.785   | 30.7355  | 1.15681          | 13.786       | 30.7365       | 1.15674897       | 0.0386357  | No      |
|      |       |        |             |          |         | Reck   | 0.522765 | 1.80236  | 1.78565          | 0.523765     | 1.80336       | 1.78369587       | 0.00251301 | No      |
|      |       |        |             |          |         | Recql  | 26.2221  | 14.1876  | -0.886146        | 26.2231      | 14.1886       | -0.886106        | 0.017077   | No      |
|      |       |        |             |          |         | Reep2  | 0.15955  | 0.638781 | 2.00132          | 0.16055      | 0.639781      | 1.99455548       | 0.030294   | No      |
|      |       |        |             |          |         | Reep5  | 46.1377  | 93.2186  | 1.01467          | 46.1387      | 93.2196       | 1.01465597       | 0.00603614 | No      |
|      |       |        |             |          |         | Reep6  | 0.226336 | 9.00154  | 5.31364          | 0.227336     | 9.00254       | 5.30743404       | 0.00018329 | No      |
|      |       |        |             |          |         | Relt   | 15.3733  | 5.54863  | -1.47023         | 15.3743      | 5.54963       | -1.4700572       | 0.00018329 | No      |
|      |       |        |             |          |         | Rem2   | 0.195326 | 1.67985  | 3.10438          | 0.196326     | 1.68085       | 3.09786783       | 0.00197017 | No      |
|      |       |        |             |          |         | Ren    | 0        | 2.35632  | inf              | 0.001        | 2.35732       | 11.2029319       | 0.00018329 | No      |
|      |       |        |             |          |         | Repin1 | 0.77955  | 12.4731  | 4.00004          | 0.78055      | 12.4741       | 3.99830087       | 0.00018329 | No      |
|      |       |        |             |          |         | Reps2  | 0        | 0.636578 | inf              | 0.001        | 0.637578      | 9.31645804       | 0.00035173 | No      |
|      |       |        |             |          |         | Resp18 | 25.6531  | 5.46494  | -2.23085         | 25.6541      | 5.46594       | -2.2306479       | 0.00018329 | No      |
|      |       |        |             |          |         | RET    | 13.6806  | 0.925057 | -3.88645         | 13.6816      | 0.926057      | -3.8849922       | 0.00018329 | No      |
|      |       |        |             |          |         | Rev1   | 44.8668  | 18.1236  | -1.30778         | 44.8678      | 18.1246       | -1.3077313       | 0.030858   | No      |
|      |       |        |             |          |         | Rexo1  | 39.0631  | 22.5479  | -0.792814        | 39.0641      | 22.5489       | -0.7927863       | 0.00937155 | No      |
|      |       |        |             |          |         | Rexo4  | 54.7292  | 23.2922  | -1.23246         | 54.7302      | 23.2932       | -1.2324283       | 0.00018329 | No      |
|      |       |        |             |          |         | Rfc5   | 20.6806  | 11.1288  | -0.893978        | 20.6816      | 11.1298       | -0.8939201       | 0.00419853 | No      |
|      |       |        |             |          |         | Rftn1  | 32.4154  | 5.59912  | -2.53341         | 32.4164      | 5.60012       | -2.5331942       | 0.00018329 | No      |
|      |       |        |             |          |         | Rftn2  | 0        | 0.782962 | inf              | 0.001        | 0.783962      | 9.61463992       | 0.00018329 | No      |
|      |       |        |             |          |         | Rfx1   | 69.3664  | 16.1801  | -2.10002         | 69.3674      | 16.1811       | -2.0999481       | 0.00018329 | No      |
|      |       |        |             |          |         | Rfx2   | 0.143619 | 0.750138 | 2.38491          | 0.144619     | 0.751138      | 2.37682088       | 0.00210945 | No      |
|      |       |        |             |          |         | Rfx4   | 1.48544  | 0.453525 | -1.71163         | 1.48644      | 0.454525      | -1.7094297       | 0.0122333  | No      |
|      |       |        |             |          |         | Rfx7   | 20.6543  | 3.61209  | -2.51554         | 20.6553      | 3.61309       | -2.5152069       | 0.00018329 | No      |

| RRBS |       |        |             |          |         | RNAseq     |          |          |                  |              |               |                  |            |         |
|------|-------|--------|-------------|----------|---------|------------|----------|----------|------------------|--------------|---------------|------------------|------------|---------|
| gene | Blood | Kidney | methyl.diff | pMWU.fdr | Match ? | gene       | blood    | kidney   | log2(fold_ratio) | blood+ 0.001 | kidney+ 0.001 | log2(fold_ratio) | q_value    | Match ? |
|      |       |        |             |          |         | Rfxap      | 43.4813  | 20.7049  | -1.07043         | 43.4823      | 20.7059       | -1.0703863       | 0.00018329 | No      |
|      |       |        |             |          |         | Rgcc       | 170.209  | 38.0523  | -2.16125         | 170.21       | 38.0533       | -2.1612223       | 0.00018329 | No      |
|      |       |        |             |          |         | RGD1302996 | 34.7808  | 101.92   | 1.55107          | 34.7818      | 101.921       | 1.55104684       | 0.00018329 | No      |
|      |       |        |             |          |         | RGD1303003 | 106.738  | 207.68   | 0.960295         | 106.739      | 207.681       | 0.96028183       | 0.00018329 | No      |
|      |       |        |             |          |         | RGD1303130 | 25.3465  | 42.387   | 0.741837         | 25.3475      | 42.388        | 0.74181243       | 0.00650199 | No      |
|      |       |        |             |          |         | RGD1304595 | 11.3072  | 3.50591  | -1.68937         | 11.3082      | 3.50691       | -1.689097        | 0.00018329 | No      |
|      |       |        |             |          |         | RGD1304622 | 0.594298 | 37.2297  | 5.96912          | 0.595298     | 37.2307       | 5.96673688       | 0.00018329 | No      |
|      |       |        |             |          |         | RGD1304694 | 4.77736  | 16.2647  | 1.76746          | 4.77836      | 16.2657       | 1.76724546       | 0.00018329 | No      |
|      |       |        |             |          |         | RGD1304770 | 0.235708 | 11.4907  | 5.60732          | 0.236708     | 11.4917       | 5.60133996       | 0.00018329 | No      |
|      |       |        |             |          |         | RGD1304884 | 0.256762 | 3.48325  | 3.76193          | 0.257762     | 3.48425       | 3.75673664       | 0.00018329 | No      |
|      |       |        |             |          |         | RGD1304982 | 3.35022  | 18.4796  | 2.46361          | 3.35122      | 18.4806       | 2.46325329       | 0.00018329 | No      |
|      |       |        |             |          |         | RGD1305014 | 3.27236  | 1.41699  | -1.20751         | 3.27336      | 1.41799       | -1.2069249       | 0.00732142 | No      |
|      |       |        |             |          |         | RGD1305045 | 45.933   | 72.8188  | 0.664781         | 45.934       | 72.8198       | 0.66476836       | 0.018938   | No      |
|      |       |        |             |          |         | RGD1305110 | 1.6414   | 3.14117  | 0.936373         | 1.6424       | 3.14217       | 0.9359557        | 0.00755425 | No      |
|      |       |        |             |          |         | RGD1305184 | 0.147192 | 0.631323 | 2.10068          | 0.148192     | 0.632323      | 2.09319413       | 0.0409149  | No      |
|      |       |        |             |          |         | RGD1305422 | 5.64245  | 12.2061  | 1.11321          | 5.64345      | 12.2071       | 1.11307121       | 0.00018329 | No      |
|      |       |        |             |          |         | RGD1305508 | 31.3524  | 19.1568  | -0.710717        | 31.3534      | 19.1578       | -0.71069         | 0.0290402  | No      |
|      |       |        |             |          |         | RGD1305743 | 17.0415  | 7.27681  | -1.22767         | 17.0425      | 7.27781       | -1.2275607       | 0.00018329 | No      |
|      |       |        |             |          |         | RGD1305834 | 3.3406   | 0.657644 | -2.34473         | 3.3416       | 0.658644      | -2.3429683       | 0.00018329 | No      |
|      |       |        |             |          |         | RGD1306058 | 28.5329  | 61.0532  | 1.09744          | 28.5339      | 61.0542       | 1.0974136        | 0.00018329 | No      |
|      |       |        |             |          |         | RGD1306151 | 0.615628 | 18.6118  | 4.91802          | 0.616628     | 18.6128       | 4.91575089       | 0.00018329 | No      |
|      |       |        |             |          |         | RGD1306227 | 14.2184  | 5.18227  | -1.4561          | 14.2194      | 5.18327       | -1.4559261       | 0.0439935  | No      |

| RRBS |       |        |             |          |         | RNAseq     |           |         |                  |              |               |                  |            |         |
|------|-------|--------|-------------|----------|---------|------------|-----------|---------|------------------|--------------|---------------|------------------|------------|---------|
| gene | Blood | Kidney | methyl.diff | pMWU.fdr | Match ? | gene       | blood     | kidney  | log2(fold_ratio) | blood+ 0.001 | kidney+ 0.001 | log2(fold_ratio) | q_value    | Match ? |
|      |       |        |             |          |         | RGD1306353 | 22.8133   | 11.1811 | -1.02882         | 22.8143      | 11.1821       | -1.0287472       | 0.00051281 | No      |
|      |       |        |             |          |         | RGD1306556 | 0.0229427 | 5.39513 | 7.87748          | 0.0239427    | 5.39613       | 7.81619544       | 0.00018329 | No      |
|      |       |        |             |          |         | RGD1306739 | 8.4048    | 25.6113 | 1.6075           | 8.4058       | 25.6123       | 1.60737978       | 0.00018329 | No      |
|      |       |        |             |          |         | RGD1306820 | 8.58328   | 3.72325 | -1.20497         | 8.58428      | 3.72425       | -1.2047472       | 0.00018329 | No      |
|      |       |        |             |          |         | RGD1307235 | 37.5832   | 12.008  | -1.64609         | 37.5842      | 12.009        | -1.6460103       | 0.00018329 | No      |
|      |       |        |             |          |         | RGD1307262 | 16.6585   | 52.2987 | 1.65051          | 16.6595      | 52.2997       | 1.65045757       | 0.00018329 | No      |
|      |       |        |             |          |         | RGD1307315 | 0.668036  | 6.04821 | 3.17851          | 0.669036     | 6.04921       | 3.176591         | 0.00018329 | No      |
|      |       |        |             |          |         | RGD1307365 | 5.95681   | 3.52726 | -0.755991        | 5.95781      | 3.52826       | -0.7558252       | 0.0348348  | No      |
|      |       |        |             |          |         | RGD1307461 | 0.481573  | 1.14436 | 1.24871          | 0.482573     | 1.14536       | 1.24698202       | 0.0159271  | No      |
|      |       |        |             |          |         | RGD1307526 | 90.4465   | 47.0744 | -0.942121        | 90.4475      | 47.0754       | -0.9421073       | 0.00603614 | No      |
|      |       |        |             |          |         | RGD1307554 | 7.00605   | 3.7906  | -0.886175        | 7.00705      | 3.7916        | -0.8860004       | 0.0279905  | No      |
|      |       |        |             |          |         | RGD1308005 | 5.58086   | 2.95832 | -0.915708        | 5.58186      | 2.95932       | -0.9154802       | 0.00891798 | No      |
|      |       |        |             |          |         | RGD1308234 | 186.743   | 45.0783 | -2.05055         | 186.744      | 45.0793       | -2.0505249       | 0.00018329 | No      |
|      |       |        |             |          |         | RGD1308297 | 32.5312   | 15.9114 | -1.03176         | 32.5322      | 15.9124       | -1.0317169       | 0.00066911 | No      |
|      |       |        |             |          |         | RGD1308601 | 8.75633   | 5.83623 | -0.585288        | 8.75733      | 5.83723       | -0.5852072       | 0.0444336  | No      |
|      |       |        |             |          |         | RGD1308706 | 13.4546   | 25.7528 | 0.936623         | 13.4556      | 25.7538       | 0.9365786        | 0.00238141 | No      |
|      |       |        |             |          |         | RGD1309079 | 4.63521   | 11.3829 | 1.29616          | 4.63621      | 11.3839       | 1.29597707       | 0.00018329 | No      |
|      |       |        |             |          |         | RGD1309104 | 38.8372   | 6.88461 | -2.49599         | 38.8382      | 6.88561       | -2.49582         | 0.00018329 | No      |
|      |       |        |             |          |         | RGD1309148 | 40.7498   | 22.6501 | -0.847277        | 40.7508      | 22.6511       | -0.8472473       | 0.00744054 | No      |
|      |       |        |             |          |         | RGD1309313 | 6.87515   | 14.4452 | 1.07113          | 6.87615      | 14.4462       | 1.07101713       | 0.00035173 | No      |
|      |       |        |             |          |         | RGD1309534 | 1.35475   | 42.6501 | 4.97645          | 1.35575      | 42.6511       | 4.97541987       | 0.00018329 | No      |

| RRBS |       |        |             |          |         | RNAseq     |           |          |                  |              |               |                  |            |         |
|------|-------|--------|-------------|----------|---------|------------|-----------|----------|------------------|--------------|---------------|------------------|------------|---------|
| gene | Blood | Kidney | methyl.diff | pMWU.fdr | Match ? | gene       | blood     | kidney   | log2(fold_ratio) | blood+ 0.001 | kidney+ 0.001 | log2(fold_ratio) | q_value    | Match ? |
|      |       |        |             |          |         | RGD1309594 | 3.10776   | 15.7795  | 2.34411          | 3.10876      | 15.7805       | 2.34373177       | 0.00018329 | No      |
|      |       |        |             |          |         | RGD1309747 | 17.2895   | 7.17169  | -1.26951         | 17.2905      | 7.17269       | -1.2693934       | 0.0148363  | No      |
|      |       |        |             |          |         | RGD1309808 | 321.095   | 43.2374  | -2.89265         | 321.096      | 43.2384       | -2.8926196       | 0.00154856 | No      |
|      |       |        |             |          |         | RGD1309821 | 0.0782466 | 3.09363  | 5.30513          | 0.0792466    | 3.09463       | 5.28727408       | 0.00018329 | No      |
|      |       |        |             |          |         | RGD1309823 | 32.6121   | 14.9169  | -1.12846         | 32.6131      | 14.9179       | -1.1284071       | 0.010379   | No      |
|      |       |        |             |          |         | RGD1309995 | 47.4328   | 11.1374  | -2.09047         | 47.4338      | 11.1384       | -2.0903734       | 0.00018329 | No      |
|      |       |        |             |          |         | RGD1310081 | 1.49269   | 3.82878  | 1.35897          | 1.49369      | 3.82978       | 1.35838076       | 0.00555427 | No      |
|      |       |        |             |          |         | RGD1310127 | 17.09     | 49.2485  | 1.52693          | 17.091       | 49.2495       | 1.52687227       | 0.00018329 | No      |
|      |       |        |             |          |         | RGD1310262 | 0.202416  | 7.57164  | 5.22521          | 0.203416     | 7.57264       | 5.21829128       | 0.00018329 | No      |
|      |       |        |             |          |         | RGD1310313 | 128.129   | 199.92   | 0.641832         | 128.13       | 199.921       | 0.64182172       | 0.0384488  | No      |
|      |       |        |             |          |         | RGD1310352 | 17.2613   | 44.241   | 1.35785          | 17.2623      | 44.242        | 1.35779191       | 0.00018329 | No      |
|      |       |        |             |          |         | RGD1310371 | 2.57865   | 0.749962 | -1.78172         | 2.57965      | 0.750962      | -1.7803635       | 0.00290302 | No      |
|      |       |        |             |          |         | RGD1310553 | 6.98341   | 3.31213  | -1.07617         | 6.98441      | 3.31313       | -1.0759434       | 0.00051281 | No      |
|      |       |        |             |          |         | RGD1310727 | 26.6829   | 12.725   | -1.06824         | 26.6839      | 12.726        | -1.0681905       | 0.00018329 | No      |
|      |       |        |             |          |         | RGD1310852 | 6.24397   | 3.21737  | -0.95658         | 6.24497      | 3.21837       | -0.9563644       | 0.0284818  | No      |
|      |       |        |             |          |         | RGD1311021 | 0.134908  | 24.7335  | 7.51835          | 0.135908     | 24.7345       | 7.50775055       | 0.00126492 | No      |
|      |       |        |             |          |         | RGD1311084 | 0         | 17.2992  | inf              | 0.001        | 17.3002       | 14.0785011       | 0.00018329 | No      |
|      |       |        |             |          |         | RGD1311251 | 0         | 3.18252  | inf              | 0.001        | 3.18352       | 11.6364071       | 0.00018329 | No      |
|      |       |        |             |          |         | RGD1311344 | 0.252555  | 0.95605  | 1.92049          | 0.253555     | 0.95705       | 1.91629557       | 0.012679   | No      |
|      |       |        |             |          |         | RGD1311345 | 11.5645   | 23.4647  | 1.02079          | 11.5655      | 23.4657       | 1.02072586       | 0.00051281 | No      |
|      |       |        |             |          |         | RGD1311458 | 24.3431   | 7.12326  | -1.7729          | 24.3441      | 7.12426       | -1.7727601       | 0.00018329 | No      |

| RRBS |       |        |             |          |         | RNAseq     |          |         |                  |              |               |                  |            |         |
|------|-------|--------|-------------|----------|---------|------------|----------|---------|------------------|--------------|---------------|------------------|------------|---------|
| gene | Blood | Kidney | methyl.diff | pMWU.fdr | Match ? | gene       | blood    | kidney  | log2(fold_ratio) | blood+ 0.001 | kidney+ 0.001 | log2(fold_ratio) | q_value    | Match ? |
|      |       |        |             |          |         | RGD1311517 | 9.84594  | 3.12722 | -1.65465         | 9.84694      | 3.12822       | -1.6543335       | 0.00018329 | No      |
|      |       |        |             |          |         | RGD1311564 | 0.829921 | 2.11401 | 1.34893          | 0.830921     | 2.11501       | 1.34788126       | 0.0214018  | No      |
|      |       |        |             |          |         | RGD1311756 | 0.13977  | 11.6601 | 6.38237          | 0.14077      | 11.6611       | 6.37222017       | 0.00018329 | No      |
|      |       |        |             |          |         | RGD1311805 | 21.6583  | 10.6967 | -1.01776         | 21.6593      | 10.6977       | -1.017686        | 0.0169745  | No      |
|      |       |        |             |          |         | RGD1311892 | 0        | 5.2746  | inf              | 0.001        | 5.2756        | 12.3651195       | 0.00018329 | No      |
|      |       |        |             |          |         | RGD1312005 | 0        | 1.18961 | inf              | 0.001        | 1.19061       | 10.2174852       | 0.00018329 | No      |
|      |       |        |             |          |         | RGD1312026 | 3.67021  | 2.27212 | -0.691824        | 3.67121      | 2.27312       | -0.6915818       | 0.018938   | No      |
|      |       |        |             |          |         | RGD1359108 | 6.11702  | 3.0686  | -0.995246        | 6.11802      | 3.0696        | -0.9950142       | 0.00380824 | No      |
|      |       |        |             |          |         | RGD1359127 | 13.1827  | 24.8611 | 0.915246         | 13.1837      | 24.8621       | 0.91519284       | 0.00277264 | No      |
|      |       |        |             |          |         | RGD1359158 | 39.8578  | 17.464  | -1.19048         | 39.8588      | 17.465        | -1.1904316       | 0.00018329 | No      |
|      |       |        |             |          |         | RGD1359529 | 400.061  | 153.481 | -1.38216         | 400.062      | 153.482       | -1.3821541       | 0.00035173 | No      |
|      |       |        |             |          |         | RGD1559441 | 6.00561  | 2.88683 | -1.05682         | 6.00661      | 2.88783       | -1.0565652       | 0.0479686  | No      |
|      |       |        |             |          |         | RGD1559442 | 0.444536 | 8.04497 | 4.17771          | 0.445536     | 8.04597       | 4.17465245       | 0.00018329 | No      |
|      |       |        |             |          |         | RGD1559482 | 0.884656 | 18.0426 | 4.35014          | 0.885656     | 18.0436       | 4.34859695       | 0.0193605  | No      |
|      |       |        |             |          |         | RGD1559600 | 0        | 2.92689 | inf              | 0.001        | 2.92789       | 11.5156456       | 0.00018329 | No      |
|      |       |        |             |          |         | RGD1559786 | 9.88368  | 24.7018 | 1.32149          | 9.88468      | 24.7028       | 1.32140841       | 0.00018329 | No      |
|      |       |        |             |          |         | RGD1559891 | 0        | 3.0829  | inf              | 0.001        | 3.0839        | 11.5905403       | 0.00018329 | No      |
|      |       |        |             |          |         | RGD1559896 | 5.84959  | 20.9769 | 1.84239          | 5.85059      | 20.9779       | 1.84221624       | 0.00018329 | No      |
|      |       |        |             |          |         | RGD1559899 | 0        | 9.63509 | inf              | 0.001        | 9.63609       | 13.2342322       | 0.00018329 | No      |
|      |       |        |             |          |         | RGD1559904 | 8.44027  | 4.09875 | -1.0421          | 8.44127      | 4.09975       | -1.0419241       | 0.00018329 | No      |
|      |       |        |             |          |         | RGD1559928 | 6.90568  | 12.5567 | 0.8626           | 6.90668      | 12.5577       | 0.86250796       | 0.0345543  | No      |



| RRBS |       |        |             |          |         | RNAseq     |           |          |                  |              |               |                  |            |         |
|------|-------|--------|-------------|----------|---------|------------|-----------|----------|------------------|--------------|---------------|------------------|------------|---------|
| gene | Blood | Kidney | methyl.diff | pMWU.fdr | Match ? | gene       | blood     | kidney   | log2(fold_ratio) | blood+ 0.001 | kidney+ 0.001 | log2(fold_ratio) | q_value    | Match ? |
|      |       |        |             |          |         | RGD1560289 | 0.924704  | 0.292687 | -1.65963         | 0.925704     | 0.293687      | -1.6562715       | 0.00880015 | No      |
|      |       |        |             |          |         | RGD1560398 | 5.57884   | 15.7305  | 1.49553          | 5.57984      | 15.7315       | 1.49536058       | 0.00018329 | No      |
|      |       |        |             |          |         | RGD1560436 | 2.09418   | 0.995373 | -1.07308         | 2.09518      | 0.996373      | -1.0723164       | 0.0260458  | No      |
|      |       |        |             |          |         | RGD1560470 | 1.99432   | 0.895395 | -1.1553          | 1.99532      | 0.896395      | -1.1544136       | 0.00567465 | No      |
|      |       |        |             |          |         | RGD1560557 | 8.80052   | 4.06914  | -1.11286         | 8.80152      | 4.07014       | -1.1126743       | 0.0336259  | No      |
|      |       |        |             |          |         | RGD1560687 | 3.60536   | 10.8288  | 1.58665          | 3.60636      | 10.8298       | 1.58639128       | 0.00111812 | No      |
|      |       |        |             |          |         | RGD1560718 | 0         | 0.867906 | inf              | 0.001        | 0.868906      | 9.7630563        | 0.00018329 | No      |
|      |       |        |             |          |         | RGD1560849 | 29.9624   | 0.851757 | -5.13657         | 29.9634      | 0.852757      | -5.1349228       | 0.00018329 | No      |
|      |       |        |             |          |         | RGD1560871 | 0.439988  | 2.64446  | 2.58744          | 0.440988     | 2.64546       | 2.5847073        | 0.00018329 | No      |
|      |       |        |             |          |         | RGD1560880 | 0.756272  | 3.8802   | 2.35915          | 0.757272     | 3.8812        | 2.35761929       | 0.00018329 | No      |
|      |       |        |             |          |         | RGD1561113 | 10.8223   | 52.3784  | 2.27496          | 10.8233      | 52.3794       | 2.27485909       | 0.017174   | No      |
|      |       |        |             |          |         | RGD1561145 | 41.8233   | 6.41041  | -2.70582         | 41.8243      | 6.41141       | -2.7056278       | 0.00018329 | No      |
|      |       |        |             |          |         | RGD1561157 | 13.1083   | 5.71646  | -1.19728         | 13.1093      | 5.71746       | -1.1971444       | 0.00018329 | No      |
|      |       |        |             |          |         | RGD1561328 | 31.576    | 65.4446  | 1.05145          | 31.577       | 65.4456       | 1.05142209       | 0.00035173 | No      |
|      |       |        |             |          |         | RGD1561333 | 5.96302   | 1.84716  | -1.69073         | 5.96402      | 1.84816       | -1.6901954       | 0.00432763 | No      |
|      |       |        |             |          |         | RGD1561444 | 0.193293  | 0.712189 | 1.88147          | 0.194293     | 0.713189      | 1.87605053       | 0.0399588  | No      |
|      |       |        |             |          |         | RGD1561530 | 0         | 8.72074  | inf              | 0.001        | 8.72174       | 13.0904003       | 0.00650199 | No      |
|      |       |        |             |          |         | RGD1561648 | 0         | 0.699365 | inf              | 0.001        | 0.700365      | 9.45196318       | 0.00018329 | No      |
|      |       |        |             |          |         | RGD1561662 | 0.0128544 | 7.61433  | 9.21031          | 0.0138544    | 7.61533       | 9.10241851       | 0.00035173 | No      |
|      |       |        |             |          |         | RGD1561694 | 1.7564    | 0.710682 | -1.30535         | 1.7574       | 0.711682      | -1.3041379       | 0.0469027  | No      |
|      |       |        |             |          |         | RGD1561963 | 81.5963   | 19.6756  | -2.0521          | 81.5973      | 19.6766       | -2.0520405       | 0.00018329 | No      |

| RRBS |       |        |             |          |         | RNAseq     |           |          |                  |              |               |                  |            |         |
|------|-------|--------|-------------|----------|---------|------------|-----------|----------|------------------|--------------|---------------|------------------|------------|---------|
| gene | Blood | Kidney | methyl.diff | pMWU.fdr | Match ? | gene       | blood     | kidney   | log2(fold_ratio) | blood+ 0.001 | kidney+ 0.001 | log2(fold_ratio) | q_value    | Match ? |
|      |       |        |             |          |         | RGD1562037 | 2.42347   | 6.37629  | 1.39564          | 2.42447      | 6.37729       | 1.39527409       | 0.00018329 | No      |
|      |       |        |             |          |         | RGD1562084 | 0         | 17.8234  | inf              | 0.001        | 17.8244       | 14.1215659       | 0.00018329 | No      |
|      |       |        |             |          |         | RGD1562107 | 0         | 1.38352  | inf              | 0.001        | 1.38452       | 10.4351702       | 0.00018329 | No      |
|      |       |        |             |          |         | RGD1562161 | 1.88305   | 0.469296 | -2.0045          | 1.88405      | 0.470296      | -2.0021963       | 0.00082046 | No      |
|      |       |        |             |          |         | RGD1562178 | 29.7423   | 50.5667  | 0.765669         | 29.7433      | 50.5677       | 0.76565144       | 0.00777671 | No      |
|      |       |        |             |          |         | RGD1562200 | 9.15407   | 17.0657  | 0.898614         | 9.15507      | 17.0667       | 0.89854131       | 0.0449039  | No      |
|      |       |        |             |          |         | RGD1562378 | 6.58936   | 17.6744  | 1.42345          | 6.59036      | 17.6754       | 1.42331368       | 0.0388119  | No      |
|      |       |        |             |          |         | RGD1562402 | 16.9826   | 4.65545  | -1.86706         | 16.9836      | 4.65645       | -1.8668399       | 0.0169745  | No      |
|      |       |        |             |          |         | RGD1562409 | 6.23328   | 2.11017  | -1.56263         | 6.23428      | 2.11117       | -1.5621802       | 0.00902869 | No      |
|      |       |        |             |          |         | RGD1562469 | 8720.73   | 2474.82  | -1.81713         | 8720.731     | 2474.821      | -1.8171249       | 0.00018329 | No      |
|      |       |        |             |          |         | RGD1562484 | 3.79595   | 14.445   | 1.92803          | 3.79695      | 14.446        | 1.92775717       | 0.00210945 | No      |
|      |       |        |             |          |         | RGD1562618 | 0         | 9.32609  | inf              | 0.001        | 9.32709       | 13.1872113       | 0.00018329 | No      |
|      |       |        |             |          |         | RGD1562667 | 0.0735944 | 2.61092  | 5.14882          | 0.0745944    | 2.61192       | 5.12989957       | 0.00494262 | No      |
|      |       |        |             |          |         | RGD1562673 | 0         | 2.06866  | inf              | 0.001        | 2.06966       | 11.0151781       | 0.00018329 | No      |
|      |       |        |             |          |         | RGD1562987 | 60.6356   | 103.775  | 0.775226         | 60.6366      | 103.776       | 0.77521207       | 0.0031651  | No      |
|      |       |        |             |          |         | RGD1563056 | 0.51884   | 4.05254  | 2.96546          | 0.51984      | 4.05354       | 2.96304283       | 0.00018329 | No      |
|      |       |        |             |          |         | RGD1563084 | 2.02695   | 4.68819  | 1.20972          | 2.02795      | 4.68919       | 1.20931665       | 0.00035173 | No      |
|      |       |        |             |          |         | RGD1563150 | 0         | 0.673678 | inf              | 0.001        | 0.674678      | 9.39805531       | 0.00018329 | No      |
|      |       |        |             |          |         | RGD1563159 | 4.31849   | 1.38548  | -1.64014         | 4.31949      | 1.38648       | -1.6394342       | 0.0128946  | No      |
|      |       |        |             |          |         | RGD1563319 | 0.0932124 | 11.9562  | 7.00302          | 0.0942124    | 11.9572       | 6.98774692       | 0.00035173 | No      |
|      |       |        |             |          |         | RGD1563400 | 0.23127   | 3.49853  | 3.9191           | 0.23227      | 3.49953       | 3.91328644       | 0.00419853 | No      |

| RRBS |       |        |             |          |         | RNAseq     |           |          |                  |              |               |                  |            |         |
|------|-------|--------|-------------|----------|---------|------------|-----------|----------|------------------|--------------|---------------|------------------|------------|---------|
| gene | Blood | Kidney | methyl.diff | pMWU.fdr | Match ? | gene       | blood     | kidney   | log2(fold_ratio) | blood+ 0.001 | kidney+ 0.001 | log2(fold_ratio) | q_value    | Match ? |
|      |       |        |             |          |         | RGD1563451 | 0.0185092 | 0.671234 | 5.1805           | 0.0195092    | 0.672234      | 5.10673699       | 0.00992433 | No      |
|      |       |        |             |          |         | RGD1563547 | 0.253402  | 186.82   | 9.52601          | 0.254402     | 186.821       | 9.52033091       | 0.0201703  | No      |
|      |       |        |             |          |         | RGD1563835 | 4.75077   | 0.585784 | -3.01972         | 4.75177      | 0.586784      | -3.0175636       | 0.0415563  | No      |
|      |       |        |             |          |         | RGD1563941 | 9.95248   | 65.8392  | 2.72582          | 9.95348      | 65.8402       | 2.72569579       | 0.00018329 | No      |
|      |       |        |             |          |         | RGD1564074 | 0         | 0.76647  | inf              | 0.001        | 0.76747       | 9.58396655       | 0.00018329 | No      |
|      |       |        |             |          |         | RGD1564308 | 0         | 0.845833 | inf              | 0.001        | 0.846833      | 9.72593368       | 0.00018329 | No      |
|      |       |        |             |          |         | RGD1564379 | 7.91195   | 25.5897  | 1.69346          | 7.91295      | 25.5907       | 1.69333206       | 0.00018329 | No      |
|      |       |        |             |          |         | RGD1564419 | 0         | 11.0291  | inf              | 0.001        | 11.0301       | 13.4291583       | 0.00018329 | No      |
|      |       |        |             |          |         | RGD1564541 | 15.4951   | 7.44434  | -1.0576          | 15.4961      | 7.44534       | -1.0574955       | 0.0157085  | No      |
|      |       |        |             |          |         | RGD1564865 | 0         | 38.6244  | inf              | 0.001        | 38.6254       | 15.2372623       | 0.00018329 | No      |
|      |       |        |             |          |         | RGD1565059 | 2.11629   | 4.34419  | 1.03755          | 2.11729      | 4.34519       | 1.03720038       | 0.0224259  | No      |
|      |       |        |             |          |         | RGD1565168 | 0         | 86.4407  | inf              | 0.001        | 86.4417       | 16.3994398       | 0.00018329 | No      |
|      |       |        |             |          |         | RGD1565183 | 6767.68   | 2513.98  | -1.42869         | 6767.681     | 2513.981      | -1.4286878       | 0.00018329 | No      |
|      |       |        |             |          |         | RGD1565222 | 3.40268   | 8.38432  | 1.30102          | 3.40368      | 8.38532       | 1.30077043       | 0.00018329 | No      |
|      |       |        |             |          |         | RGD1565252 | 0.7753    | 0        | -inf             | 0.7763       | 0.001         | -9.6004705       | 0.00709238 | No      |
|      |       |        |             |          |         | RGD1565374 | 0.334432  | 2.4238   | 2.85748          | 0.335432     | 2.4248        | 2.85377352       | 0.00354878 | No      |
|      |       |        |             |          |         | RGD1565498 | 4.69894   | 2.18729  | -1.10319         | 4.69994      | 2.18829       | -1.1028384       | 0.00097029 | No      |
|      |       |        |             |          |         | RGD1565616 | 12.4978   | 43.2166  | 1.78992          | 12.4988      | 43.2176       | 1.78982937       | 0.00914594 | No      |
|      |       |        |             |          |         | RGD1565647 | 4.24561   | 1.41338  | -1.58682         | 4.24661      | 1.41438       | -1.5861418       | 0.00051281 | No      |
|      |       |        |             |          |         | RGD1565660 | 0         | 1.1426   | inf              | 0.001        | 1.1436        | 10.1593668       | 0.00018329 | No      |
|      |       |        |             |          |         | RGD1565766 | 2.46313   | 4.92724  | 1.00029          | 2.46413      | 4.92824       | 0.99999415       | 0.0351863  | No      |

| RRBS |       |        |            |          |         | RNAseq     |           |         |                  |              |               |                  |            |         |
|------|-------|--------|------------|----------|---------|------------|-----------|---------|------------------|--------------|---------------|------------------|------------|---------|
| gene | Blood | Kidney | methy.diff | pMWU.fdr | Match ? | gene       | blood     | kidney  | log2(fold_ratio) | blood+ 0.001 | kidney+ 0.001 | log2(fold_ratio) | q_value    | Match ? |
|      |       |        |            |          |         | RGD1565775 | 42.4164   | 20.0778 | -1.07902         | 42.4174      | 20.0788       | -1.0789831       | 0.00018329 | No      |
|      |       |        |            |          |         | RGD1565785 | 0.323066  | 1.2152  | 1.91129          | 0.324066     | 1.2162        | 1.90802092       | 0.00799878 | No      |
|      |       |        |            |          |         | RGD1566099 | 5.95263   | 10.9734 | 0.882405         | 5.95363      | 10.9744       | 0.8823006        | 0.039202   | No      |
|      |       |        |            |          |         | RGD1566243 | 17.6825   | 2.17895 | -3.02062         | 17.6835      | 2.17995       | -3.0200369       | 0.00018329 | No      |
|      |       |        |            |          |         | RGD1566344 | 474.425   | 211.824 | -1.16331         | 474.426      | 211.825       | -1.1633102       | 0.00018329 | No      |
|      |       |        |            |          |         | RGD1566368 | 0.05192   | 8.87132 | 7.41671          | 0.05292      | 8.87232       | 7.38935453       | 0.0220133  | No      |
|      |       |        |            |          |         | RGD1566380 | 3.48817   | 17.9402 | 2.36266          | 3.48917      | 17.9412       | 2.36232059       | 0.0018326  | No      |
|      |       |        |            |          |         | Rgmb       | 0.56499   | 6.9855  | 3.62807          | 0.56599      | 6.9865        | 3.62572143       | 0.00018329 | No      |
|      |       |        |            |          |         | Rgs10      | 264.085   | 36.8546 | -2.84109         | 264.086      | 36.8556       | -2.8410521       | 0.00018329 | No      |
|      |       |        |            |          |         | Rgs11      | 0.0836689 | 3.73623 | 5.48075          | 0.0846689    | 3.73723       | 5.4639934        | 0.00018329 | No      |
|      |       |        |            |          |         | Rgs12      | 0.453273  | 1.86513 | 2.04083          | 0.454273     | 1.86613       | 2.03841803       | 0.00126492 | No      |
|      |       |        |            |          |         | Rgs14      | 40.573    | 8.38123 | -2.27528         | 40.574       | 8.38223       | -2.2751495       | 0.00018329 | No      |
|      |       |        |            |          |         | Rgs18      | 4.41235   | 1.71562 | -1.36282         | 4.41335      | 1.71662       | -1.3623035       | 0.0200787  | No      |
|      |       |        |            |          |         | Rgs19      | 46.8135   | 14.9842 | -1.64348         | 46.8145      | 14.9852       | -1.6434171       | 0.00018329 | No      |
|      |       |        |            |          |         | Rgs2       | 23.6236   | 89.7517 | 1.92571          | 23.6246      | 89.7527       | 1.92566544       | 0.00018329 | No      |
|      |       |        |            |          |         | RGS3       | 18.6161   | 29.3143 | 0.655058         | 18.6171      | 29.3153       | 0.65502546       | 0.04193    | No      |
|      |       |        |            |          |         | Rgs5       | 0.912911  | 3.45438 | 1.91988          | 0.913911     | 3.45538       | 1.9187188        | 0.00880015 | No      |
|      |       |        |            |          |         | RGS6       | 0.123312  | 3.71822 | 4.91423          | 0.124312     | 3.71922       | 4.90296262       | 0.00035173 | No      |
|      |       |        |            |          |         | Rhbdd1     | 1.67363   | 3.5174  | 1.07153          | 1.67463      | 3.5184        | 1.07107713       | 0.00238141 | No      |
|      |       |        |            |          |         | Rhbdd2     | 8.67691   | 15.9554 | 0.878794         | 8.67791      | 15.9564       | 0.87871567       | 0.0228125  | No      |
|      |       |        |            |          |         | Rhbdf1     | 0.0736501 | 25.5916 | 8.44077          | 0.0746501    | 25.5926       | 8.42136681       | 0.00018329 | No      |
|      |       |        |            |          |         | Rhbdf2     | 3.50282   | 10.9643 | 1.64623          | 3.50382      | 10.9653       | 1.64594472       | 0.00018329 | No      |
|      |       |        |            |          |         | Rhbdl2     | 0         | 4.90526 | inf              | 0.001        | 4.90626       | 12.260408        | 0.00018329 | No      |
|      |       |        |            |          |         | Rhbdl3     | 0.207994  | 8.99952 | 5.43524          | 0.208994     | 9.00052       | 5.42847493       | 0.0063852  | No      |
|      |       |        |            |          |         | Rhbg       | 1.49974   | 14.5235 | 3.27561          | 1.50074      | 14.5245       | 3.27474254       | 0.00018329 | No      |
|      |       |        |            |          |         | Rheb       | 65.4076   | 121.649 | 0.895192         | 65.4086      | 121.65        | 0.89518408       | 0.00519348 | No      |
|      |       |        |            |          |         | Rhebl1     | 13.0853   | 4.78849 | -1.45031         | 13.0863      | 4.78949       | -1.4501133       | 0.00082046 | No      |
|      |       |        |            |          |         | Rhoa       | 523.354   | 298.814 | -0.808541        | 523.355      | 298.815       | -0.8085373       | 0.00902869 | No      |
|      |       |        |            |          |         | Rhob       | 42.2387   | 152.198 | 1.84932          | 42.2397      | 152.199       | 1.84928739       | 0.00018329 | No      |
|      |       |        |            |          |         | Rhobtb2    | 1.98283   | 3.87516 | 0.966693         | 1.98383      | 3.87616       | 0.96633972       | 0.0115803  | No      |
|      |       |        |            |          |         | Rhod       | 0         | 34.2603 | inf              | 0.001        | 34.2613       | 15.0642923       | 0.00018329 | No      |
|      |       |        |            |          |         | Rhof       | 98.3235   | 22.6801 | -2.11611         | 98.3245      | 22.6811       | -2.1160603       | 0.00018329 | No      |
|      |       |        |            |          |         | Rhog       | 258.886   | 88.5256 | -1.54815         | 258.887      | 88.5266       | -1.5481396       | 0.00018329 | No      |
|      |       |        |            |          |         | Rhoq       | 5.70812   | 14.9995 | 1.39382          | 5.70912      | 15.0005       | 1.3936703        | 0.00018329 | No      |
|      |       |        |            |          |         | Rhot2      | 27.4319   | 44.3529 | 0.693173         | 27.4329      | 44.3539       | 0.69315382       | 0.00603614 | No      |

| RRBS |       |        |             |          |         | RNAseq   |           |          |                  |              |               |                  |            |         |
|------|-------|--------|-------------|----------|---------|----------|-----------|----------|------------------|--------------|---------------|------------------|------------|---------|
| gene | Blood | Kidney | methyl.diff | pMWU.fdr | Match ? | gene     | blood     | kidney   | log2(fold_ratio) | blood+ 0.001 | kidney+ 0.001 | log2(fold_ratio) | q_value    | Match ? |
|      |       |        |             |          |         | Rhpn1    | 0         | 22.1023  | inf              | 0.001        | 22.1033       | 14.4319742       | 0.00018329 | No      |
|      |       |        |             |          |         | Rhpn2    | 0.0457957 | 5.91164  | 7.0122           | 0.0467957    | 5.91264       | 6.98128266       | 0.0386357  | No      |
|      |       |        |             |          |         | Ribc1    | 1.44248   | 5.13582  | 1.83204          | 1.44348      | 5.13682       | 1.8313244        | 0.00018329 | No      |
|      |       |        |             |          |         | Rictor   | 18.1345   | 3.6187   | -2.32519         | 18.1355      | 3.6197        | -2.3248745       | 0.00018329 | No      |
|      |       |        |             |          |         | Rif1     | 11.8766   | 4.19651  | -1.50086         | 11.8776      | 4.19751       | -1.5006377       | 0.00197017 | No      |
|      |       |        |             |          |         | Rilp     | 0.440943  | 18.1676  | 5.36463          | 0.441943     | 18.1686       | 5.36144314       | 0.00018329 | No      |
|      |       |        |             |          |         | Rilpl2   | 279.471   | 111.667  | -1.32349         | 279.472      | 111.668       | -1.3234879       | 0.00018329 | No      |
|      |       |        |             |          |         | Rimbp2   | 0         | 11.0721  | inf              | 0.001        | 11.0731       | 13.4347716       | 0.00018329 | No      |
|      |       |        |             |          |         | Rimklb   | 0         | 2.0812   | inf              | 0.001        | 2.0822        | 11.0238929       | 0.00018329 | No      |
|      |       |        |             |          |         | Rims2    | 0.068852  | 0.921503 | 3.74242          | 0.069852     | 0.922503      | 3.72318027       | 0.0016929  | No      |
|      |       |        |             |          |         | Rin2     | 0.0544301 | 29.759   | 9.09471          | 0.0554301    | 29.76         | 9.0684892        | 0.0139848  | No      |
|      |       |        |             |          |         | Rin3     | 32.0517   | 15.277   | -1.06904         | 32.0527      | 15.278        | -1.0689902       | 0.00018329 | No      |
|      |       |        |             |          |         | Rinl     | 29.2259   | 6.59968  | -2.14678         | 29.2269      | 6.60068       | -2.1466103       | 0.00018329 | No      |
|      |       |        |             |          |         | Riok1    | 24.3942   | 11.5923  | -1.07337         | 24.3952      | 11.5933       | -1.073306        | 0.00018329 | No      |
|      |       |        |             |          |         | Ripk1    | 19.4473   | 12.0883  | -0.685957        | 19.4483      | 12.0893       | -0.6859133       | 0.0468163  | No      |
|      |       |        |             |          |         | Ripk2    | 14.8063   | 6.20524  | -1.25465         | 14.8073      | 6.20624       | -1.2545172       | 0.00018329 | No      |
|      |       |        |             |          |         | Ripk3    | 28.2338   | 15.4891  | -0.866165        | 28.2348      | 15.4901       | -0.866128        | 0.0297293  | No      |
|      |       |        |             |          |         | Rlf      | 21.3255   | 6.65449  | -1.68018         | 21.3265      | 6.65549       | -1.6800304       | 0.00432763 | No      |
|      |       |        |             |          |         | Rmdn1    | 3.44197   | 26.3572  | 2.93689          | 3.44297      | 26.3582       | 2.93652634       | 0.00018329 | No      |
|      |       |        |             |          |         | Rmdn2    | 0.785559  | 1.98239  | 1.33545          | 0.786559     | 1.98339       | 1.3343415        | 0.033148   | No      |
|      |       |        |             |          |         | Rmdn3    | 7.71357   | 15.3018  | 0.98823          | 7.71457      | 15.3028       | 0.988138         | 0.00111812 | No      |
|      |       |        |             |          |         | Rmnd5a   | 51.0555   | 25.7105  | -0.989708        | 51.0565      | 25.7115       | -0.9896809       | 0.00082046 | No      |
|      |       |        |             |          |         | Rnase6   | 0.927716  | 2.95456  | 1.67119          | 0.928716     | 2.95556       | 1.67012211       | 0.00506686 | No      |
|      |       |        |             |          |         | Rnaseh1  | 21.5215   | 12.6608  | -0.765409        | 21.5225      | 12.6618       | -0.7653632       | 0.0220133  | No      |
|      |       |        |             |          |         | Rnaseh2b | 56.5148   | 22.4864  | -1.32957         | 56.5158      | 22.4874       | -1.3295374       | 0.00251301 | No      |
|      |       |        |             |          |         | Rnasek   | 118.058   | 356.838  | 1.59578          | 118.059      | 356.839       | 1.59576527       | 0.00018329 | No      |
|      |       |        |             |          |         | Rnd1     | 0.724596  | 8.35768  | 3.52785          | 0.725596     | 8.35868       | 3.52603672       | 0.0121287  | No      |
|      |       |        |             |          |         | Rnd3     | 0.0975888 | 14.0487  | 7.16951          | 0.0985888    | 14.0497       | 7.15489985       | 0.00035173 | No      |
|      |       |        |             |          |         | Rnf103   | 7.5717    | 13.5898  | 0.843831         | 7.5727       | 13.5908       | 0.8437507        | 0.00555427 | No      |
|      |       |        |             |          |         | Rnf111   | 27.47     | 10.3782  | -1.40431         | 27.471       | 10.3792       | -1.4042142       | 0.00018329 | No      |
|      |       |        |             |          |         | Rnf113a1 | 8.21033   | 3.83812  | -1.09704         | 8.21133      | 3.83912       | -1.0968403       | 0.0261426  | No      |
|      |       |        |             |          |         | Rnf115   | 55.4456   | 20.5816  | -1.42972         | 55.4466      | 20.5826       | -1.4296738       | 0.00018329 | No      |
|      |       |        |             |          |         | RNF125   | 25.7871   | 1.7081   | -3.91618         | 25.7881      | 1.7091        | -3.9153968       | 0.00018329 | No      |
|      |       |        |             |          |         | Rnf135   | 10.8256   | 4.63806  | -1.22285         | 10.8266      | 4.63906       | -1.2226758       | 0.0135584  | No      |
|      |       |        |             |          |         | Rnf138   | 23.3296   | 7.22736  | -1.69062         | 23.3306      | 7.22836       | -1.6904831       | 0.00018329 | No      |
|      |       |        |             |          |         | Rnf14    | 87.286    | 33.4227  | -1.38492         | 87.287       | 33.4237       | -1.3848954       | 0.00018329 | No      |
|      |       |        |             |          |         | Rnf144a  | 2.89617   | 0.535106 | -2.43625         | 2.89717      | 0.536106      | -2.4340542       | 0.00018329 | No      |
|      |       |        |             |          |         | Rnf144b  | 1.9549    | 3.79751  | 0.957962         | 1.9559       | 3.79851       | 0.95760101       | 0.00555427 | No      |
|      |       |        |             |          |         | Rnf145   | 90.7369   | 22.5459  | -2.00882         | 90.7379      | 22.5469       | -2.0087762       | 0.00018329 | No      |
|      |       |        |             |          |         | Rnf146   | 44.9472   | 18.5194  | -1.27919         | 44.9482      | 18.5204       | -1.2791481       | 0.00035173 | No      |
|      |       |        |             |          |         | Rnf149   | 36.0615   | 19.6124  | -0.878693        | 36.0625      | 19.6134       | -0.8786598       | 0.0114728  | No      |
|      |       |        |             |          |         | Rnf150   | 0.166909  | 5.17084  | 4.95326          | 0.167909     | 5.17184       | 4.94492618       | 0.00066911 | No      |

| RRBS |       |        |            |          |         | RNAseq |           |          |                  |              |               |                  |            |         |
|------|-------|--------|------------|----------|---------|--------|-----------|----------|------------------|--------------|---------------|------------------|------------|---------|
| gene | Blood | Kidney | methy.diff | pMWU.fdr | Match ? | gene   | blood     | kidney   | log2(fold_ratio) | blood+ 0.001 | kidney+ 0.001 | log2(fold_ratio) | q_value    | Match ? |
|      |       |        |            |          |         | Rnf157 | 22.406    | 5.649    | -1.98782         | 22.407       | 5.65          | -1.9876267       | 0.00018329 | No      |
|      |       |        |            |          |         | Rnf167 | 128.584   | 65.9287  | -0.963728        | 128.585      | 65.9297       | -0.9637219       | 0.00051281 | No      |
|      |       |        |            |          |         | Rnf169 | 3.36423   | 0.734457 | -2.19553         | 3.36523      | 0.735457      | -2.1939922       | 0.00051281 | No      |
|      |       |        |            |          |         | Rnf180 | 0         | 0.894659 | inf              | 0.001        | 0.895659      | 9.80680576       | 0.00018329 | No      |
|      |       |        |            |          |         | Rnf183 | 0         | 17.0509  | inf              | 0.001        | 17.0519       | 14.0576449       | 0.00018329 | No      |
|      |       |        |            |          |         | Rnf185 | 5.34812   | 11.8435  | 1.14699          | 5.34912      | 11.8445       | 1.14684382       | 0.00018329 | No      |
|      |       |        |            |          |         | Rnf2   | 31.347    | 10.249   | -1.61285         | 31.348       | 10.25         | -1.6127495       | 0.00018329 | No      |
|      |       |        |            |          |         | Rnf20  | 21.2434   | 10.9132  | -0.960939        | 21.2444      | 10.9142       | -0.9608762       | 0.00035173 | No      |
|      |       |        |            |          |         | Rnf207 | 0.0842499 | 4.36242  | 5.69431          | 0.0852499    | 4.36342       | 5.67761739       | 0.00111812 | No      |
|      |       |        |            |          |         | Rnf213 | 43.0295   | 19.7029  | -1.12692         | 43.0305      | 19.7039       | -1.1268784       | 0.0026435  | No      |
|      |       |        |            |          |         | Rnf215 | 7.56586   | 15.6616  | 1.04966          | 7.56686      | 15.6626       | 1.04955706       | 0.00154856 | No      |
|      |       |        |            |          |         | Rnf217 | 4.28472   | 10.2335  | 1.25602          | 4.28572      | 10.2345       | 1.25583112       | 0.00018329 | No      |
|      |       |        |            |          |         | Rnf219 | 5.16554   | 1.72338  | -1.58367         | 5.16654      | 1.72438       | -1.5831207       | 0.00018329 | No      |
|      |       |        |            |          |         | Rnf220 | 97.5331   | 35.8157  | -1.4453          | 97.5341      | 35.8167       | -1.4452743       | 0.00018329 | No      |
|      |       |        |            |          |         | Rnf32  | 0         | 1.37248  | inf              | 0.001        | 1.37348       | 10.4236202       | 0.018938   | No      |
|      |       |        |            |          |         | Rnf38  | 25.9908   | 9.37667  | -1.47086         | 25.9918      | 9.37767       | -1.4707551       | 0.00018329 | No      |
|      |       |        |            |          |         | Rnf41  | 6.23779   | 10.411   | 0.738997         | 6.23879      | 10.412        | 0.73890906       | 0.0342763  | No      |
|      |       |        |            |          |         | Rnf43  | 1.64587   | 4.7802   | 1.53822          | 1.64687      | 4.7812        | 1.53764608       | 0.00018329 | No      |
|      |       |        |            |          |         | Rnf44  | 73.9651   | 25.7764  | -1.52079         | 73.9661      | 25.7774       | -1.5207575       | 0.00018329 | No      |
|      |       |        |            |          |         | Rnft1  | 18.1523   | 7.53825  | -1.26785         | 18.1533      | 7.53925       | -1.2677389       | 0.0243241  | No      |
|      |       |        |            |          |         | Rngtt  | 11.1945   | 5.4879   | -1.02846         | 11.1955      | 5.4889        | -1.02833         | 0.00051281 | No      |
|      |       |        |            |          |         | RNMT   | 23.5537   | 6.50439  | -1.85647         | 23.5547      | 6.50539       | -1.8563075       | 0.00018329 | No      |
|      |       |        |            |          |         | Rnpc3  | 23.1958   | 12.3956  | -0.904037        | 23.1968      | 12.3966       | -0.9039813       | 0.0353776  | No      |
|      |       |        |            |          |         | Rnpep  | 8.08417   | 48.5261  | 2.58559          | 8.08517      | 48.5271       | 2.58544063       | 0.00018329 | No      |
|      |       |        |            |          |         | Rnps1  | 162.601   | 84.6049  | -0.942519        | 162.602      | 84.6059       | -0.9425148       | 0.00051281 | No      |
|      |       |        |            |          |         | Robo3  | 0         | 4.11043  | inf              | 0.001        | 4.11143       | 12.0054246       | 0.00018329 | No      |
|      |       |        |            |          |         | Rock1  | 34.075    | 9.92749  | -1.77921         | 34.076       | 9.92849       | -1.7791098       | 0.00018329 | No      |
|      |       |        |            |          |         | Romo1  | 141.017   | 281.328  | 0.996386         | 141.018      | 281.329       | 0.99637895       | 0.00097029 | No      |
|      |       |        |            |          |         | Ror1   | 0         | 2.00092  | inf              | 0.001        | 2.00192       | 10.9671686       | 0.00018329 | No      |
|      |       |        |            |          |         | RORC   | 1.48773   | 12.5767  | 3.07957          | 1.48873      | 12.5777       | 3.0787141        | 0.00018329 | No      |
|      |       |        |            |          |         | Rp2    | 7.33904   | 4.06979  | -0.850637        | 7.34004      | 4.07079       | -0.8504791       | 0.0388119  | No      |
|      |       |        |            |          |         | Rpa2   | 55.0836   | 19.1817  | -1.52189         | 55.0846      | 19.1827       | -1.5218432       | 0.00018329 | No      |
|      |       |        |            |          |         | Rpe    | 23.6544   | 12.1237  | -0.964273        | 23.6554      | 12.1247       | -0.9642205       | 0.0216117  | No      |
|      |       |        |            |          |         | Rpf2   | 38.6534   | 23.457   | -0.720577        | 38.6544      | 23.458        | -0.7205526       | 0.0114728  | No      |
|      |       |        |            |          |         | Rpl10  | 3449.02   | 1009.66  | -1.77231         | 3449.021     | 1009.661      | -1.7723159       | 0.00018329 | No      |
|      |       |        |            |          |         | Rpl10a | 2435.95   | 890.545  | -1.45172         | 2435.951     | 890.546       | -1.4517231       | 0.00018329 | No      |
|      |       |        |            |          |         | RPL12  | 4045.91   | 1005.58  | -2.00844         | 4045.911     | 1005.581      | -2.0084353       | 0.00018329 | No      |
|      |       |        |            |          |         | Rpl13  | 5423.06   | 1604.95  | -1.75658         | 5423.061     | 1604.951      | -1.7565781       | 0.00018329 | No      |
|      |       |        |            |          |         | Rpl14  | 3516.43   | 1140.72  | -1.62416         | 3516.431     | 1140.721      | -1.6241659       | 0.00018329 | No      |
|      |       |        |            |          |         | Rpl15  | 3523.31   | 813.058  | -2.1155          | 3523.311     | 813.059       | -2.1154999       | 0.00018329 | No      |
|      |       |        |            |          |         | Rpl17  | 6705.53   | 2077.61  | -1.69043         | 6705.531     | 2077.611      | -1.690426        | 0.00035173 | No      |
|      |       |        |            |          |         | Rpl18  | 3295.42   | 1429.79  | -1.20466         | 3295.421     | 1429.791      | -1.2046585       | 0.00018329 | No      |

| RRBS |       |        |             |          |         | RNAseq    |         |         |                  |              |               |                  |            |         |
|------|-------|--------|-------------|----------|---------|-----------|---------|---------|------------------|--------------|---------------|------------------|------------|---------|
| gene | Blood | Kidney | methyl.diff | pMWU.fdr | Match ? | gene      | blood   | kidney  | log2(fold_ratio) | blood+ 0.001 | kidney+ 0.001 | log2(fold_ratio) | q_value    | Match ? |
|      |       |        |             |          |         | Rpl19     | 7017.14 | 2213.1  | -1.66481         | 7017.141     | 2213.101      | -1.6648141       | 0.00018329 | No      |
|      |       |        |             |          |         | Rpl21     | 916.185 | 257.578 | -1.83063         | 916.186      | 257.579       | -1.8306255       | 0.00018329 | No      |
|      |       |        |             |          |         | Rpl22     | 2011.36 | 637.84  | -1.65691         | 2011.361     | 637.841       | -1.6569033       | 0.00018329 | No      |
|      |       |        |             |          |         | Rpl22l1   | 420.468 | 150.197 | -1.48514         | 420.469      | 150.198       | -1.4851338       | 0.00018329 | No      |
|      |       |        |             |          |         | Rpl23     | 7458.59 | 1851.11 | -2.01051         | 7458.591     | 1851.111      | -2.0105117       | 0.00018329 | No      |
|      |       |        |             |          |         | Rpl23a    | 6215.2  | 1812.02 | -1.7782          | 6215.201     | 1812.021      | -1.7782014       | 0.00018329 | No      |
|      |       |        |             |          |         | Rpl24     | 5961.6  | 1813.4  | -1.717           | 5961.601     | 1813.401      | -1.7170018       | 0.00018329 | No      |
|      |       |        |             |          |         | RPL26     | 10275.3 | 2662.78 | -1.94817         | 10275.301    | 2662.781      | -1.948175        | 0.00018329 | No      |
|      |       |        |             |          |         | Rpl27     | 4352.14 | 1360.77 | -1.67731         | 4352.141     | 1360.771      | -1.677301        | 0.00018329 | No      |
|      |       |        |             |          |         | Rpl27a    | 2959.54 | 846.907 | -1.8051          | 2959.541     | 846.908       | -1.8050963       | 0.00018329 | No      |
|      |       |        |             |          |         | Rpl29     | 4084.82 | 1452.25 | -1.49198         | 4084.821     | 1452.251      | -1.491982        | 0.00018329 | No      |
|      |       |        |             |          |         | Rpl3      | 3179.22 | 992.855 | -1.67902         | 3179.221     | 992.856       | -1.6790169       | 0.00018329 | No      |
|      |       |        |             |          |         | Rpl30     | 8803.95 | 1804.13 | -2.28685         | 8803.951     | 1804.131      | -2.286847        | 0.00018329 | No      |
|      |       |        |             |          |         | Rpl31     | 3221.71 | 744.097 | -2.11426         | 3221.711     | 744.098       | -2.1142625       | 0.00018329 | No      |
|      |       |        |             |          |         | Rpl32     | 8217.32 | 2340.94 | -1.81158         | 8217.321     | 2340.941      | -1.8115796       | 0.00018329 | No      |
|      |       |        |             |          |         | Rpl32-ps1 | 17.3642 | 4.60989 | -1.91331         | 17.3652      | 4.61089       | -1.9130819       | 0.00051281 | No      |
|      |       |        |             |          |         | Rpl34     | 5531.33 | 1840.8  | -1.5873          | 5531.331     | 1840.801      | -1.587293        | 0.00018329 | No      |
|      |       |        |             |          |         | Rpl35     | 11537.8 | 3893.18 | -1.56735         | 11537.801    | 3893.181      | -1.567347        | 0.00126492 | No      |
|      |       |        |             |          |         | Rpl35a    | 2019.22 | 412.105 | -2.29272         | 2019.221     | 412.106       | -2.2927114       | 0.00018329 | No      |
|      |       |        |             |          |         | Rpl36     | 4217.87 | 2032.69 | -1.05312         | 4217.871     | 2032.691      | -1.0531241       | 0.00469886 | No      |
|      |       |        |             |          |         | Rpl36a    | 4137.88 | 1007.97 | -2.03744         | 4137.881     | 1007.971      | -2.037438        | 0.00018329 | No      |
|      |       |        |             |          |         | Rpl36al   | 1402.14 | 865.749 | -0.695612        | 1402.141     | 865.75        | -0.695609        | 0.0193605  | No      |
|      |       |        |             |          |         | Rpl36-ps3 | 53.4169 | 15.2397 | -1.80946         | 53.4179      | 15.2407       | -1.8093941       | 0.00051281 | No      |
|      |       |        |             |          |         | Rpl37     | 5642.38 | 1776.89 | -1.66695         | 5642.381     | 1776.891      | -1.6669489       | 0.00018329 | No      |
|      |       |        |             |          |         | RPL37A    | 7979.94 | 2072.72 | -1.94485         | 7979.941     | 2072.721      | -1.9448521       | 0.00018329 | No      |
|      |       |        |             |          |         | Rpl39     | 7798.63 | 1935.22 | -2.01073         | 7798.631     | 1935.221      | -2.0107226       | 0.00018329 | No      |
|      |       |        |             |          |         | Rpl4      | 3815.92 | 1002.93 | -1.92781         | 3815.921     | 1002.931      | -1.9278089       | 0.00140841 | No      |
|      |       |        |             |          |         | Rpl5      | 5934.18 | 1365.41 | -2.11971         | 5934.181     | 1365.411      | -2.1197137       | 0.00035173 | No      |
|      |       |        |             |          |         | Rpl8      | 487.509 | 144.806 | -1.75131         | 487.51       | 144.807       | -1.7513005       | 0.00018329 | No      |
|      |       |        |             |          |         | Rpl9      | 6494.25 | 1674.51 | -1.95543         | 6494.251     | 1674.511      | -1.9554233       | 0.00018329 | No      |
|      |       |        |             |          |         | Rplp1     | 2539.02 | 720.818 | -1.81657         | 2539.021     | 720.819       | -1.8165634       | 0.00018329 | No      |
|      |       |        |             |          |         | Rpn1      | 72.9689 | 106.547 | 0.546143         | 72.9699      | 106.548       | 0.54613013       | 0.0409941  | No      |
|      |       |        |             |          |         | Rpp40     | 38.3751 | 13.8336 | -1.47199         | 38.3761      | 13.8346       | -1.4719272       | 0.00018329 | No      |
|      |       |        |             |          |         | Rprd2     | 17.1105 | 2.3302  | -2.87636         | 17.1115      | 2.3312        | -2.8758215       | 0.00018329 | No      |
|      |       |        |             |          |         | Rps10l1   | 280.895 | 95.7673 | -1.55243         | 280.896      | 95.7683       | -1.552416        | 0.00018329 | No      |
|      |       |        |             |          |         | Rps11     | 9387.72 | 1813.26 | -2.37219         | 9387.721     | 1813.261      | -2.3721884       | 0.0130082  | No      |
|      |       |        |             |          |         | Rps12     | 8031.29 | 2694.37 | -1.57568         | 8031.291     | 2694.371      | -1.5756834       | 0.00354878 | No      |
|      |       |        |             |          |         | Rps13     | 6138.92 | 1332.86 | -2.20346         | 6138.921     | 1332.861      | -2.2034588       | 0.00018329 | No      |
|      |       |        |             |          |         | Rps14     | 5160.11 | 1264.12 | -2.02927         | 5160.111     | 1264.121      | -2.0292675       | 0.00018329 | No      |
|      |       |        |             |          |         | Rps15     | 7483.35 | 2385.59 | -1.64934         | 7483.351     | 2385.591      | -1.6493377       | 0.00018329 | No      |
|      |       |        |             |          |         | Rps15a    | 6988.37 | 1801.06 | -1.95611         | 6988.371     | 1801.061      | -1.9561092       | 0.00018329 | No      |
|      |       |        |             |          |         | Rps15al4  | 57.955  | 9.54306 | -2.60241         | 57.956       | 9.54406       | -2.602283        | 0.00018329 | No      |

| RRBS |       |        |             |          |         | RNAseq   |           |          |                  |              |               |                  |            |         |
|------|-------|--------|-------------|----------|---------|----------|-----------|----------|------------------|--------------|---------------|------------------|------------|---------|
| gene | Blood | Kidney | methyl.diff | pMWU.fdr | Match ? | gene     | blood     | kidney   | log2(fold_ratio) | blood+ 0.001 | kidney+ 0.001 | log2(fold_ratio) | q_value    | Match ? |
|      |       |        |             |          |         | Rps16    | 6214.09   | 1671.43  | -1.89446         | 6214.091     | 1671.431      | -1.8944596       | 0.00018329 | No      |
|      |       |        |             |          |         | Rps17    | 8982.82   | 2322.84  | -1.95128         | 8982.821     | 2322.841      | -1.9512782       | 0.00018329 | No      |
|      |       |        |             |          |         | Rps18    | 10106.7   | 2341.25  | -2.10996         | 10106.701    | 2341.251      | -2.1099606       | 0.00018329 | No      |
|      |       |        |             |          |         | Rps19    | 3.15764   | 0.791224 | -1.99669         | 3.15864      | 0.792224      | -1.9953232       | 0.0178968  | No      |
|      |       |        |             |          |         | Rps2     | 3497.31   | 1137.62  | -1.62022         | 3497.311     | 1137.621      | -1.6202261       | 0.00018329 | No      |
|      |       |        |             |          |         | Rps20    | 4477.14   | 1524.72  | -1.55404         | 4477.141     | 1524.721      | -1.5540325       | 0.00018329 | No      |
|      |       |        |             |          |         | Rps21    | 5314.46   | 1958.67  | -1.44005         | 5314.461     | 1958.671      | -1.4400483       | 0.00018329 | No      |
|      |       |        |             |          |         | Rps23    | 9078.12   | 2140.61  | -2.08437         | 9078.121     | 2140.611      | -2.0843711       | 0.00018329 | No      |
|      |       |        |             |          |         | Rps24    | 11717.6   | 3241.82  | -1.8538          | 11717.601    | 3241.821      | -1.8538009       | 0.00018329 | No      |
|      |       |        |             |          |         | Rps25    | 4433.19   | 1152.4   | -1.9437          | 4433.191     | 1152.401      | -1.9437027       | 0.00018329 | No      |
|      |       |        |             |          |         | Rps26    | 6160.19   | 1976.35  | -1.64014         | 6160.191     | 1976.351      | -1.6401359       | 0.00018329 | No      |
|      |       |        |             |          |         | Rps27    | 18246.5   | 3400.37  | -2.42385         | 18246.501    | 3400.371      | -2.4238558       | 0.00018329 | No      |
|      |       |        |             |          |         | Rps27a   | 6215.96   | 1616.09  | -1.94347         | 6215.961     | 1616.091      | -1.943469        | 0.00018329 | No      |
|      |       |        |             |          |         | Rps27l   | 102.741   | 173.848  | 0.758819         | 102.742      | 173.849       | 0.75880871       | 0.0132293  | No      |
|      |       |        |             |          |         | Rps27l3  | 241       | 93.8735  | -1.36024         | 241.001      | 93.8745       | -1.3602339       | 0.00018329 | No      |
|      |       |        |             |          |         | Rps28    | 8149.19   | 2556.78  | -1.67233         | 8149.191     | 2556.781      | -1.6723283       | 0.00018329 | No      |
|      |       |        |             |          |         | RPS2-PS6 | 7.10367   | 1.2392   | -2.51915         | 7.10467      | 1.2402        | -2.5181948       | 0.00406781 | No      |
|      |       |        |             |          |         | Rps3     | 5538.52   | 1171.57  | -2.24106         | 5538.521     | 1171.571      | -2.2410564       | 0.00018329 | No      |
|      |       |        |             |          |         | Rps3a    | 6215.69   | 1146.29  | -2.43894         | 6215.691     | 1146.291      | -2.4389414       | 0.00018329 | No      |
|      |       |        |             |          |         | Rps4x    | 450.446   | 108.171  | -2.05804         | 450.447      | 108.172       | -2.0580303       | 0.00018329 | No      |
|      |       |        |             |          |         | RPS5     | 3755.12   | 1082.03  | -1.79512         | 3755.121     | 1082.031      | -1.7951176       | 0.00018329 | No      |
|      |       |        |             |          |         | RPS6     | 925.834   | 223.922  | -2.04776         | 925.835      | 223.923       | -2.0477524       | 0.00018329 | No      |
|      |       |        |             |          |         | Rps6ka1  | 107.688   | 60.2326  | -0.838241        | 107.689      | 60.2336       | -0.8382305       | 0.0121287  | No      |
|      |       |        |             |          |         | Rps6ka4  | 4.65299   | 16.0701  | 1.78815          | 4.65399      | 16.0711       | 1.78792866       | 0.00018329 | No      |
|      |       |        |             |          |         | Rps6kl1  | 0.0354832 | 1.29814  | 5.19317          | 0.0364832    | 1.29914       | 5.15418082       | 0.0118093  | No      |
|      |       |        |             |          |         | Rps7     | 6505.05   | 1419.02  | -2.19666         | 6505.051     | 1419.021      | -2.1966644       | 0.00018329 | No      |
|      |       |        |             |          |         | Rps8     | 4311.54   | 1238.63  | -1.79945         | 4311.541     | 1238.631      | -1.7994571       | 0.00018329 | No      |
|      |       |        |             |          |         | RPS9     | 831.9     | 216.018  | -1.94526         | 831.901      | 216.019       | -1.9452536       | 0.00018329 | No      |
|      |       |        |             |          |         | Rpsa     | 4202.5    | 1569.76  | -1.4207          | 4202.501     | 1569.761      | -1.4207032       | 0.00698138 | No      |
|      |       |        |             |          |         | Rptor    | 2.87128   | 5.24728  | 0.869876         | 2.87228      | 5.24828       | 0.8696483        | 0.00251301 | No      |
|      |       |        |             |          |         | Rqcd1    | 19.827    | 8.43968  | -1.2322          | 19.828       | 8.44068       | -1.232108        | 0.00018329 | No      |
|      |       |        |             |          |         | Rrad     | 0.157388  | 18.1481  | 6.84935          | 0.158388     | 18.1491       | 6.84029116       | 0.00018329 | No      |
|      |       |        |             |          |         | RragB    | 1.376     | 2.81755  | 1.03396          | 1.377        | 2.81855       | 1.0334246        | 0.0258543  | No      |
|      |       |        |             |          |         | Rragd    | 3.22764   | 27.7396  | 3.10339          | 3.22864      | 27.7406       | 3.1030005        | 0.00018329 | No      |
|      |       |        |             |          |         | Rras2    | 82.3175   | 39.54    | -1.05789         | 82.3185      | 39.541        | -1.0578673       | 0.00018329 | No      |
|      |       |        |             |          |         | Rrbp1    | 13.7844   | 42.4776  | 1.62367          | 13.7854      | 42.4786       | 1.62359509       | 0.00018329 | No      |
|      |       |        |             |          |         | Rrm2     | 1.62057   | 4.97063  | 1.61693          | 1.62157      | 4.97163       | 1.61632763       | 0.00018329 | No      |
|      |       |        |             |          |         | Rrn3     | 5.62775   | 2.95579  | -0.929016        | 5.62875      | 2.95679       | -0.9287828       | 0.00937155 | No      |
|      |       |        |             |          |         | Rrp12    | 13.7218   | 6.85194  | -1.00189         | 13.7228      | 6.85294       | -1.0017799       | 0.00082046 | No      |
|      |       |        |             |          |         | Rrp7a    | 33.5077   | 22.2852  | -0.588404        | 33.5087      | 22.2862       | -0.5883851       | 0.0454685  | No      |
|      |       |        |             |          |         | Rrs1     | 19.0539   | 8.65889  | -1.13783         | 19.0549      | 8.65989       | -1.1377414       | 0.00154856 | No      |
|      |       |        |             |          |         | Rsad2    | 0.360904  | 1.16205  | 1.68699          | 0.361904     | 1.16305       | 1.68423416       | 0.0187317  | No      |



| RRBS |       |        |             |          |         | RNAseq   |           |          |                  |              |               |                  |            |         |
|------|-------|--------|-------------|----------|---------|----------|-----------|----------|------------------|--------------|---------------|------------------|------------|---------|
| gene | Blood | Kidney | methyl.diff | pMWU.fdr | Match ? | gene     | blood     | kidney   | log2(fold_ratio) | blood+ 0.001 | kidney+ 0.001 | log2(fold_ratio) | q_value    | Match ? |
|      |       |        |             |          |         | Rsb1     | 19.1338   | 3.24991  | -2.55765         | 19.1348      | 3.25091       | -2.5572833       | 0.00018329 | No      |
|      |       |        |             |          |         | Rsb1l    | 24.6872   | 6.10471  | -2.01577         | 24.6882      | 6.10571       | -2.0155907       | 0.00018329 | No      |
|      |       |        |             |          |         | Rsf1     | 16.7633   | 6.10446  | -1.45737         | 16.7643      | 6.10546       | -1.4572203       | 0.00018329 | No      |
|      |       |        |             |          |         | Rsl24d1  | 51.9747   | 23.8861  | -1.12164         | 51.9757      | 23.8871       | -1.1216056       | 0.00018329 | No      |
|      |       |        |             |          |         | Rsph1    | 0.149709  | 10.7633  | 6.16782          | 0.150709     | 10.7643       | 6.15834512       | 0.0497921  | No      |
|      |       |        |             |          |         | Rsph3    | 1.64369   | 6.46041  | 1.97469          | 1.64469      | 6.46141       | 1.97403334       | 0.00329119 | No      |
|      |       |        |             |          |         | Rspry1   | 11.778    | 6.85754  | -0.780326        | 11.779       | 6.85854       | -0.7802437       | 0.0200787  | No      |
|      |       |        |             |          |         | Rsrc2    | 67.8257   | 41.1718  | -0.720174        | 67.8267      | 41.1728       | -0.7201617       | 0.00811172 | No      |
|      |       |        |             |          |         | RT1-A3   | 191.327   | 57.0945  | -1.74462         | 191.328      | 57.0955       | -1.7445991       | 0.00018329 | No      |
|      |       |        |             |          |         | RT1-Ba   | 15.9604   | 43.7052  | 1.45331          | 15.9614      | 43.7062       | 1.45325075       | 0.00018329 | No      |
|      |       |        |             |          |         | RT1-CE1  | 560.744   | 228.835  | -1.29304         | 560.745      | 228.836       | -1.2930308       | 0.0245258  | No      |
|      |       |        |             |          |         | RT1-Da   | 46.7041   | 254.299  | 2.44491          | 46.7051      | 254.3         | 2.44487946       | 0.00018329 | No      |
|      |       |        |             |          |         | RT1-Db1  | 11.8068   | 78.6139  | 2.73517          | 11.8078      | 78.6149       | 2.73506258       | 0.00018329 | No      |
|      |       |        |             |          |         | RT1-DOb  | 17.0018   | 4.58424  | -1.89093         | 17.0028      | 4.58524       | -1.8907032       | 0.00018329 | No      |
|      |       |        |             |          |         | RT1-M3-1 | 57.7588   | 21.8003  | -1.40569         | 57.7598      | 21.8013       | -1.4056516       | 0.00018329 | No      |
|      |       |        |             |          |         | RT1-N3   | 76.2753   | 26.0429  | -1.55033         | 76.2763      | 26.0439       | -1.5502894       | 0.00458064 | No      |
|      |       |        |             |          |         | RT1-S3   | 101.852   | 21.9574  | -2.2137          | 101.853      | 21.9584       | -2.2136436       | 0.00018329 | No      |
|      |       |        |             |          |         | Rtcd1    | 19.3189   | 31.2911  | 0.69574          | 19.3199      | 31.2921       | 0.69571085       | 0.0191514  | No      |
|      |       |        |             |          |         | Rtf1     | 21.1299   | 11.3042  | -0.902425        | 21.1309      | 11.3052       | -0.9023677       | 0.00519348 | No      |
|      |       |        |             |          |         | RTN1     | 0         | 2.18313  | inf              | 0.001        | 2.18413       | 11.092843        | 0.00018329 | No      |
|      |       |        |             |          |         | Rtn4     | 40.859    | 133.847  | 1.71186          | 40.86        | 133.848       | 1.71183447       | 0.00018329 | No      |
|      |       |        |             |          |         | Rtn4ip1  | 4.21775   | 16.7432  | 1.98903          | 4.21875      | 16.7442       | 1.98877395       | 0.00018329 | No      |
|      |       |        |             |          |         | Rtn4r    | 0         | 3.85014  | inf              | 0.001        | 3.85114       | 11.9110699       | 0.00018329 | No      |
|      |       |        |             |          |         | Rufy3    | 8.275     | 18.0185  | 1.12265          | 8.276        | 18.0195       | 1.12255343       | 0.00018329 | No      |
|      |       |        |             |          |         | Rufy4    | 0         | 0.626131 | inf              | 0.001        | 0.627131      | 9.29262303       | 0.00018329 | No      |
|      |       |        |             |          |         | Rundc3a  | 5.04687   | 2.26216  | -1.15769         | 5.04787      | 2.26316       | -1.1573362       | 0.00393885 | No      |
|      |       |        |             |          |         | Rusc2    | 0.0940084 | 2.35794  | 4.64859          | 0.0950084    | 2.35894       | 4.63393984       | 0.00018329 | No      |
|      |       |        |             |          |         | Rwdd2a   | 0.48286   | 2.17388  | 2.1706           | 0.48386      | 2.17488       | 2.16827422       | 0.0031651  | No      |
|      |       |        |             |          |         | Rxra     | 10.0242   | 17.1886  | 0.777969         | 10.0252      | 17.1896       | 0.77790496       | 0.00354878 | No      |
|      |       |        |             |          |         | Ryk      | 12.3195   | 21.7885  | 0.822624         | 12.3205      | 21.7895       | 0.82257229       | 0.0036827  | No      |
|      |       |        |             |          |         | Ryr1     | 3.17291   | 1.03637  | -1.61426         | 3.17391      | 1.03737       | -1.6133307       | 0.00981659 | No      |
|      |       |        |             |          |         | S100a11  | 41.9785   | 2577.87  | 5.94038          | 41.9795      | 2577.871      | 5.94035128       | 0.00018329 | No      |
|      |       |        |             |          |         | S100a16  | 0         | 90.1835  | inf              | 0.001        | 90.1845       | 16.4605919       | 0.00018329 | No      |
|      |       |        |             |          |         | S100a4   | 125.56    | 394.468  | 1.65153          | 125.561      | 394.469       | 1.6515235        | 0.00018329 | No      |
|      |       |        |             |          |         | S100a6   | 55.4742   | 1223.62  | 4.4632           | 55.4752      | 1223.621      | 4.46317          | 0.00018329 | No      |
|      |       |        |             |          |         | S100pbb  | 21.3932   | 5.98774  | -1.83707         | 21.3942      | 5.98874       | -1.8368953       | 0.00018329 | No      |
|      |       |        |             |          |         | S1pr5    | 0.548614  | 6.71337  | 3.61317          | 0.549614     | 6.71437       | 3.61076138       | 0.00018329 | No      |
|      |       |        |             |          |         | Sacm1l   | 11.1404   | 21.5216  | 0.949985         | 11.1414      | 21.5226       | 0.94992184       | 0.00051281 | No      |
|      |       |        |             |          |         | Sacs     | 5.00575   | 0.693809 | -2.85097         | 5.00675      | 0.694809      | -2.8491861       | 0.00018329 | No      |
|      |       |        |             |          |         | SAMD11   | 0.1506    | 7.93972  | 5.72029          | 0.1516       | 7.94072       | 5.71092817       | 0.00530972 | No      |
|      |       |        |             |          |         | Samd4b   | 6.06841   | 9.17725  | 0.596744         | 6.06941      | 9.17825       | 0.59666282       | 0.0441737  | No      |
|      |       |        |             |          |         | Samd9l   | 48.5908   | 19.0138  | -1.35364         | 48.5918      | 19.0148       | -1.3535901       | 0.00066911 | No      |

| RRBS |       |        |             |          |         | RNAseq |           |          |                  |              |               |                  |            |         |
|------|-------|--------|-------------|----------|---------|--------|-----------|----------|------------------|--------------|---------------|------------------|------------|---------|
| gene | Blood | Kidney | methyl.diff | pMWU.fdr | Match ? | gene   | blood     | kidney   | log2(fold_ratio) | blood+ 0.001 | kidney+ 0.001 | log2(fold_ratio) | q_value    | Match ? |
|      |       |        |             |          |         | Samhd1 | 67.1864   | 16.6031  | -2.01671         | 67.1874      | 16.6041       | -2.0166512       | 0.00018329 | No      |
|      |       |        |             |          |         | Samm50 | 55.9131   | 136.969  | 1.29259          | 55.9141      | 136.97        | 1.2925759        | 0.00018329 | No      |
|      |       |        |             |          |         | Sapcd2 | 0.507722  | 3.0801   | 2.60087          | 0.508722     | 3.0811        | 2.59849612       | 0.00111812 | No      |
|      |       |        |             |          |         | Sar1b  | 27.4879   | 49.9398  | 0.861391         | 27.4889      | 49.9408       | 0.86136976       | 0.0231105  | No      |
|      |       |        |             |          |         | SARG   | 0.0994935 | 26.0909  | 8.03473          | 0.1004935    | 26.0919       | 8.020356         | 0.00018329 | No      |
|      |       |        |             |          |         | Sart3  | 26.6318   | 16.2138  | -0.715933        | 26.6328      | 16.2148       | -0.7158929       | 0.0172708  | No      |
|      |       |        |             |          |         | Sash3  | 193.753   | 25.2095  | -2.94217         | 193.754      | 25.2105       | -2.9421295       | 0.00018329 | No      |
|      |       |        |             |          |         | Sat1   | 94.4752   | 559.98   | 2.56737          | 94.4762      | 559.981       | 2.56735503       | 0.00018329 | No      |
|      |       |        |             |          |         | Satb1  | 335.311   | 18.5803  | -4.17365         | 335.312      | 18.5813       | -4.1735808       | 0.00018329 | No      |
|      |       |        |             |          |         | Sav1   | 3.79048   | 22.8238  | 2.59009          | 3.79148      | 22.8248       | 2.5897692        | 0.00018329 | No      |
|      |       |        |             |          |         | Sbds   | 30.6603   | 71.1394  | 1.21428          | 30.6613      | 71.1404       | 1.21425022       | 0.00018329 | No      |
|      |       |        |             |          |         | Sbk1   | 7.06877   | 4.02172  | -0.813646        | 7.06977      | 4.02272       | -0.813492        | 0.00686277 | No      |
|      |       |        |             |          |         | Sbno1  | 43.9394   | 14.3151  | -1.61798         | 43.9404      | 14.3161       | -1.6179095       | 0.00018329 | No      |
|      |       |        |             |          |         | Sbno2  | 14.538    | 24.7529  | 0.767766         | 14.539       | 24.7539       | 0.7677278        | 0.00948282 | No      |
|      |       |        |             |          |         | Scaf8  | 29.3323   | 15.1206  | -0.955977        | 29.3333      | 15.1216       | -0.9559286       | 0.0016929  | No      |
|      |       |        |             |          |         | SCAI   | 5.74847   | 2.56021  | -1.16692         | 5.74947      | 2.56121       | -1.1666034       | 0.00822601 | No      |
|      |       |        |             |          |         | Scamp1 | 4.2066    | 20.3757  | 2.27612          | 4.2076       | 20.3767       | 2.27585096       | 0.00018329 | No      |
|      |       |        |             |          |         | Scamp2 | 23.7799   | 39.1482  | 0.719206         | 23.7809      | 39.1492       | 0.71917951       | 0.0111567  | No      |
|      |       |        |             |          |         | Scamp5 | 0         | 1.93713  | inf              | 0.001        | 1.93813       | 10.9204496       | 0.00018329 | No      |
|      |       |        |             |          |         | Scarb1 | 4.00766   | 7.43603  | 0.891774         | 4.00866      | 7.43703       | 0.89160653       | 0.0133341  | No      |
|      |       |        |             |          |         | SCCPDH | 1.64245   | 24.5857  | 3.9039           | 1.64345      | 24.5867       | 3.90307864       | 0.00251301 | No      |
|      |       |        |             |          |         | Scd    | 51.9165   | 16.6528  | -1.64043         | 51.9175      | 16.6538       | -1.6403695       | 0.00018329 | No      |
|      |       |        |             |          |         | Scel   | 0.0528805 | 0.794394 | 3.90905          | 0.0538805    | 0.795394      | 3.88383454       | 0.00543198 | No      |
|      |       |        |             |          |         | Scg5   | 0.920994  | 3.15726  | 1.77741          | 0.921994     | 3.15826       | 1.77630068       | 0.00329119 | No      |
|      |       |        |             |          |         | Schip1 | 0.0132631 | 16.7602  | 10.3034          | 0.0142631    | 16.7612       | 10.1986221       | 0.00018329 | No      |
|      |       |        |             |          |         | Scly   | 3.91939   | 53.8386  | 3.77994          | 3.92039      | 53.8396       | 3.77959861       | 0.00018329 | No      |
|      |       |        |             |          |         | Scml4  | 72.8043   | 5.32388  | -3.77347         | 72.8053      | 5.32488       | -3.7732226       | 0.00018329 | No      |
|      |       |        |             |          |         | Scn1b  | 0.0820681 | 31.8324  | 8.59946          | 0.0830681    | 31.8334       | 8.58203098       | 0.00018329 | No      |
|      |       |        |             |          |         | Scnn1g | 0         | 8.44302  | inf              | 0.001        | 8.44402       | 13.0437143       | 0.00018329 | No      |
|      |       |        |             |          |         | Scp2   | 51.4129   | 83.5483  | 0.700479         | 51.4139      | 83.5493       | 0.70046929       | 0.00777671 | No      |
|      |       |        |             |          |         | Scrn2  | 6.76488   | 14.2518  | 1.07501          | 6.76588      | 14.2528       | 1.07489587       | 0.00277264 | No      |
|      |       |        |             |          |         | Scrn3  | 3.2368    | 7.14374  | 1.14211          | 3.2378       | 7.14474       | 1.14186764       | 0.00066911 | No      |
|      |       |        |             |          |         | Sctr   | 0         | 15.0016  | inf              | 0.001        | 15.0026       | 13.8729249       | 0.00018329 | No      |
|      |       |        |             |          |         | Scyl3  | 18.8096   | 7.07458  | -1.41075         | 18.8106      | 7.07558       | -1.4106255       | 0.00018329 | No      |
|      |       |        |             |          |         | Sdad1  | 12.9826   | 5.91988  | -1.13294         | 12.9836      | 5.92088       | -1.1328069       | 0.00066911 | No      |
|      |       |        |             |          |         | Sdc1   | 0.15104   | 18.7042  | 6.95229          | 0.15204      | 18.7052       | 6.94284465       | 0.00018329 | No      |
|      |       |        |             |          |         | Sdc2   | 0         | 95.9473  | inf              | 0.001        | 95.9483       | 16.5499696       | 0.00018329 | No      |
|      |       |        |             |          |         | SDC3   | 0.418395  | 3.92646  | 3.23029          | 0.419395     | 3.92746       | 3.22721502       | 0.00018329 | No      |
|      |       |        |             |          |         | Sde2   | 19.1134   | 9.73577  | -0.973219        | 19.1144      | 9.73677       | -0.9731447       | 0.00035173 | No      |
|      |       |        |             |          |         | Sdha   | 72.3384   | 193.14   | 1.41682          | 72.3394      | 193.141       | 1.41680092       | 0.00018329 | No      |
|      |       |        |             |          |         | Sdhaf2 | 19.1024   | 57.5618  | 1.59136          | 19.1034      | 57.5628       | 1.59130734       | 0.018938   | No      |
|      |       |        |             |          |         | Sdha   | 100.292   | 390.064  | 1.9595           | 100.293      | 390.065       | 1.95949364       | 0.00018329 | No      |

| RRBS |       |        |             |          |         | RNAseq    |           |          |                  |              |               |                  |            |         |
|------|-------|--------|-------------|----------|---------|-----------|-----------|----------|------------------|--------------|---------------|------------------|------------|---------|
| gene | Blood | Kidney | methyl.diff | pMWU.fdr | Match ? | gene      | blood     | kidney   | log2(fold_ratio) | blood+ 0.001 | kidney+ 0.001 | log2(fold_ratio) | q_value    | Match ? |
|      |       |        |             |          |         | Sdhc      | 83.3183   | 285.751  | 1.77805          | 83.3193      | 285.752       | 1.77804097       | 0.00018329 | No      |
|      |       |        |             |          |         | Sdhd      | 82.4645   | 212.818  | 1.36777          | 82.4655      | 212.819       | 1.36776437       | 0.00018329 | No      |
|      |       |        |             |          |         | Sec11c    | 35.6785   | 70.845   | 0.98961          | 35.6795      | 70.846        | 0.989591         | 0.00126492 | No      |
|      |       |        |             |          |         | Sec14l1   | 7.47135   | 22.814   | 1.61048          | 7.47235      | 22.815        | 1.61034872       | 0.00018329 | No      |
|      |       |        |             |          |         | Sec14l2   | 6.02811   | 2.67589  | -1.17169         | 6.02911      | 2.67689       | -1.1713872       | 0.00210945 | No      |
|      |       |        |             |          |         | Sec16b    | 0.12808   | 1.43396  | 3.48489          | 0.12908      | 1.43496       | 3.47467313       | 0.00018329 | No      |
|      |       |        |             |          |         | Sec22a    | 6.9589    | 14.0717  | 1.01586          | 6.9599       | 14.0727       | 1.01576067       | 0.00277264 | No      |
|      |       |        |             |          |         | Sec22c    | 5.33431   | 3.07032  | -0.796913        | 5.33531      | 3.07132       | -0.7967133       | 0.0148363  | No      |
|      |       |        |             |          |         | Sec24b    | 20.5471   | 10.6396  | -0.949486        | 20.5481      | 10.6406       | -0.9494255       | 0.00238141 | No      |
|      |       |        |             |          |         | Sec24d    | 2.11619   | 8.96974  | 2.08359          | 2.11719      | 8.97074       | 2.08307625       | 0.00018329 | No      |
|      |       |        |             |          |         | Sec31b    | 2.36057   | 0.273994 | -3.10692         | 2.36157      | 0.274994      | -3.1022743       | 0.00018329 | No      |
|      |       |        |             |          |         | Sec62     | 48.0311   | 94.5736  | 0.977468         | 48.0321      | 94.5746       | 0.97745388       | 0.00018329 | No      |
|      |       |        |             |          |         | Secisbp2l | 14.0555   | 9.09396  | -0.628159        | 14.0565      | 9.09496       | -0.6280982       | 0.0314274  | No      |
|      |       |        |             |          |         | Sectm1b   | 0.557237  | 18.2604  | 5.03428          | 0.558237     | 18.2614       | 5.03177581       | 0.0108214  | No      |
|      |       |        |             |          |         | Seh1l     | 28.1621   | 17.6175  | -0.676742        | 28.1631      | 17.6185       | -0.676715        | 0.0133341  | No      |
|      |       |        |             |          |         | Sel1l3    | 0         | 2.90967  | inf              | 0.001        | 2.91067       | 11.5071356       | 0.00018329 | No      |
|      |       |        |             |          |         | Selenbp1  | 0         | 23.7412  | inf              | 0.001        | 23.7422       | 14.535166        | 0.00018329 | No      |
|      |       |        |             |          |         | Sell      | 893.059   | 20.2349  | -5.46384         | 893.06       | 20.2359       | -5.4637682       | 0.00018329 | No      |
|      |       |        |             |          |         | Selp      | 2.26467   | 0.527012 | -2.10339         | 2.26567      | 0.528012      | -2.1012951       | 0.00018329 | No      |
|      |       |        |             |          |         | Selplg    | 94.8996   | 11.1674  | -3.08711         | 94.9006      | 11.1684       | -3.0869947       | 0.00018329 | No      |
|      |       |        |             |          |         | Sema3c    | 0         | 18.4258  | inf              | 0.001        | 18.4268       | 14.1695179       | 0.00018329 | No      |
|      |       |        |             |          |         | Sema3f    | 0.237073  | 12.3429  | 5.70221          | 0.238073     | 12.3439       | 5.69625046       | 0.00018329 | No      |
|      |       |        |             |          |         | Sema3g    | 0.262036  | 4.43532  | 4.0812           | 0.263036     | 4.43632       | 4.07603126       | 0.00018329 | No      |
|      |       |        |             |          |         | Sema4c    | 0.0845463 | 1.34358  | 3.99019          | 0.0855463    | 1.34458       | 3.97430633       | 0.00018329 | No      |
|      |       |        |             |          |         | Sema4d    | 53.0742   | 20.2274  | -1.3917          | 53.0752      | 20.2284       | -1.3916557       | 0.00018329 | No      |
|      |       |        |             |          |         | Sema4f    | 0.791806  | 3.72196  | 2.23284          | 0.792806     | 3.72296       | 2.23141033       | 0.00018329 | No      |
|      |       |        |             |          |         | Sema4g    | 0.474578  | 7.03193  | 3.8892           | 0.475578     | 7.03293       | 3.88637197       | 0.00018329 | No      |
|      |       |        |             |          |         | Sema6c    | 0.170863  | 0.832191 | 2.28408          | 0.171863     | 0.833191      | 2.27738827       | 0.00329119 | No      |
|      |       |        |             |          |         | Sema7a    | 1.98707   | 20.8661  | 3.39245          | 1.98807      | 20.8671       | 3.39178966       | 0.00018329 | No      |
|      |       |        |             |          |         | Senp6     | 53.9663   | 26.8272  | -1.00836         | 53.9673      | 26.8282       | -1.0083352       | 0.00018329 | No      |
|      |       |        |             |          |         | Senp7     | 18.4224   | 3.32957  | -2.46805         | 18.4234      | 3.33057       | -2.4676983       | 0.00018329 | No      |
|      |       |        |             |          |         | Senp8     | 1.28274   | 3.48392  | 1.44149          | 1.28374      | 3.48492       | 1.4407725        | 0.0192579  | No      |
|      |       |        |             |          |         | Sepn1     | 0.517658  | 5.88217  | 3.50628          | 0.518658     | 5.88317       | 3.50373827       | 0.00018329 | No      |
|      |       |        |             |          |         | Sepw1     | 107.44    | 33.3903  | -1.68603         | 107.441      | 33.3913       | -1.6860005       | 0.00018329 | No      |
|      |       |        |             |          |         | SERBP1    | 318.255   | 107.21   | -1.56975         | 318.256      | 107.211       | -1.5697348       | 0.00018329 | No      |
|      |       |        |             |          |         | Serf1     | 2.41035   | 13.3336  | 2.46776          | 2.41135      | 13.3346       | 2.46726157       | 0.00530972 | No      |
|      |       |        |             |          |         | Sergef    | 16.1007   | 27.1053  | 0.75145          | 16.1017      | 27.1063       | 0.75141518       | 0.0335274  | No      |
|      |       |        |             |          |         | Serinc1   | 46.5139   | 75.2951  | 0.694892         | 46.5149      | 75.2961       | 0.69488222       | 0.0172708  | No      |
|      |       |        |             |          |         | Serinc2   | 0.16772   | 25.5033  | 7.24848          | 0.16872      | 25.5043       | 7.23996569       | 0.00018329 | No      |
|      |       |        |             |          |         | Serinc5   | 2.11673   | 5.72329  | 1.43501          | 2.11773      | 5.72429       | 1.4345781        | 0.00018329 | No      |
|      |       |        |             |          |         | Serpina3n | 0         | 2.37077  | inf              | 0.001        | 2.37177       | 11.2117484       | 0.00018329 | No      |
|      |       |        |             |          |         | Serpinb1a | 0.669666  | 41.3876  | 5.94961          | 0.670666     | 41.3886       | 5.94749517       | 0.00018329 | No      |

| RRBS |       |        |             |          |         | RNAseq    |           |          |                  |              |               |                  |            |         |
|------|-------|--------|-------------|----------|---------|-----------|-----------|----------|------------------|--------------|---------------|------------------|------------|---------|
| gene | Blood | Kidney | methyl.diff | pMWU.fdr | Match ? | gene      | blood     | kidney   | log2(fold_ratio) | blood+ 0.001 | kidney+ 0.001 | log2(fold_ratio) | q_value    | Match ? |
|      |       |        |             |          |         | Serpinb5  | 0         | 2.74779  | inf              | 0.001        | 2.74879       | 11.424581        | 0.00018329 | No      |
|      |       |        |             |          |         | Serpinb6  | 2.73904   | 61.355   | 4.48544          | 2.74004      | 61.356        | 4.48493557       | 0.0181001  | No      |
|      |       |        |             |          |         | Serpinb6b | 257.891   | 29.4336  | -3.13122         | 257.892      | 29.4346       | -3.1311821       | 0.00018329 | No      |
|      |       |        |             |          |         | Serpinb8  | 0         | 4.51219  | inf              | 0.001        | 4.51319       | 12.1399318       | 0.00018329 | No      |
|      |       |        |             |          |         | Serpinb9  | 80.9317   | 11.5758  | -2.8056          | 80.9327      | 11.5768       | -2.8054862       | 0.00018329 | No      |
|      |       |        |             |          |         | Serpinc1  | 0.184569  | 4.37463  | 4.56693          | 0.185569     | 4.37563       | 4.55946312       | 0.0172708  | No      |
|      |       |        |             |          |         | Serpine2  | 0.145635  | 0.732571 | 2.33061          | 0.146635     | 0.733571      | 2.32270711       | 0.015491   | No      |
|      |       |        |             |          |         | Serpini1  | 6.77244   | 1.10892  | -2.61052         | 6.77344      | 1.10992       | -2.609433        | 0.00018329 | No      |
|      |       |        |             |          |         | Sertad1   | 3.85317   | 23.3278  | 2.59794          | 3.85417      | 23.3288       | 2.59761999       | 0.00018329 | No      |
|      |       |        |             |          |         | Sertad2   | 15.4336   | 6.76871  | -1.18912         | 15.4346      | 6.76971       | -1.1890022       | 0.00018329 | No      |
|      |       |        |             |          |         | Sesn1     | 133.108   | 14.9833  | -3.15117         | 133.109      | 14.9843       | -3.1510845       | 0.00018329 | No      |
|      |       |        |             |          |         | Sesn2     | 6.21159   | 14.8227  | 1.25477          | 6.21259      | 14.8237       | 1.25463884       | 0.00018329 | No      |
|      |       |        |             |          |         | Sesn3     | 48.2382   | 17.461   | -1.46604         | 48.2392      | 17.462        | -1.4659872       | 0.00018329 | No      |
|      |       |        |             |          |         | Sestd1    | 0         | 31.8223  | inf              | 0.001        | 31.8233       | 14.9577958       | 0.00018329 | No      |
|      |       |        |             |          |         | Set       | 230.254   | 91.1115  | -1.33752         | 230.255      | 91.1125       | -1.3375116       | 0.00018329 | No      |
|      |       |        |             |          |         | Setd1b    | 31.0926   | 9.48046  | -1.71354         | 31.0936      | 9.48146       | -1.7134365       | 0.00018329 | No      |
|      |       |        |             |          |         | Setd2     | 40.4599   | 17.9978  | -1.16868         | 40.4609      | 17.9988       | -1.1686277       | 0.0136625  | No      |
|      |       |        |             |          |         | Setd4     | 14.7659   | 25.6322  | 0.795683         | 14.7669      | 25.6332       | 0.7956466        | 0.0246265  | No      |
|      |       |        |             |          |         | Setd5     | 21.8789   | 8.66452  | -1.33634         | 21.8799      | 8.66552       | -1.3362479       | 0.00018329 | No      |
|      |       |        |             |          |         | Setd7     | 22.0233   | 10.8996  | -1.01475         | 22.0243      | 10.9006       | -1.0146886       | 0.00097029 | No      |
|      |       |        |             |          |         | Setdb1    | 19.8327   | 10.6297  | -0.899782        | 19.8337      | 10.6307       | -0.8997172       | 0.0351863  | No      |
|      |       |        |             |          |         | Setx      | 91.7748   | 14.1713  | -2.69513         | 91.7758      | 14.1723       | -2.6950399       | 0.00018329 | No      |
|      |       |        |             |          |         | Sf1       | 172.818   | 87.3488  | -0.984398        | 172.819      | 87.3498       | -0.9843855       | 0.0031651  | No      |
|      |       |        |             |          |         | Sf3a1     | 22.981    | 14.4321  | -0.67116         | 22.982       | 14.4331       | -0.6711232       | 0.012679   | No      |
|      |       |        |             |          |         | Sf3b1     | 171.05    | 59.8871  | -1.5141          | 171.051      | 59.8881       | -1.5140853       | 0.00018329 | No      |
|      |       |        |             |          |         | Sf3b2     | 89.6124   | 54.6992  | -0.712179        | 89.6134      | 54.7002       | -0.7121684       | 0.00845618 | No      |
|      |       |        |             |          |         | Sf3b3     | 56.1855   | 21.0715  | -1.41491         | 56.1865      | 21.0725       | -1.4148621       | 0.00018329 | No      |
|      |       |        |             |          |         | Sf3b6     | 123.515   | 51.7291  | -1.25563         | 123.516      | 51.7301       | -1.2556221       | 0.00018329 | No      |
|      |       |        |             |          |         | Sfn       | 2.1677    | 7.26506  | 1.74481          | 2.1687       | 7.26606       | 1.74434278       | 0.00018329 | No      |
|      |       |        |             |          |         | Sfpq      | 133.619   | 85.2361  | -0.64859         | 133.62       | 85.2371       | -0.6485825       | 0.0424854  | No      |
|      |       |        |             |          |         | SFR1      | 99.8556   | 36.0909  | -1.46821         | 99.8566      | 36.0919       | -1.4681827       | 0.00018329 | No      |
|      |       |        |             |          |         | Sfta2     | 0         | 11.6282  | inf              | 0.001        | 11.6292       | 13.5054642       | 0.00018329 | No      |
|      |       |        |             |          |         | Sfxn2     | 5.92828   | 12.0686  | 1.02557          | 5.92928      | 12.0696       | 1.02544903       | 0.00018329 | No      |
|      |       |        |             |          |         | Sfxn3     | 16.1861   | 23.7962  | 0.555972         | 16.1871      | 23.7972       | 0.55594729       | 0.0484218  | No      |
|      |       |        |             |          |         | Sfxn5     | 0.272182  | 1.58313  | 2.54014          | 0.273182     | 1.58413       | 2.5357564        | 0.00555427 | No      |
|      |       |        |             |          |         | Sgca      | 0         | 3.42974  | inf              | 0.001        | 3.43074       | 11.7443041       | 0.00018329 | No      |
|      |       |        |             |          |         | Sgcb      | 1.29935   | 4.07156  | 1.64779          | 1.30035      | 4.07256       | 1.64703596       | 0.00018329 | No      |
|      |       |        |             |          |         | Sgce      | 0         | 37.526   | inf              | 0.001        | 37.527        | 15.1956413       | 0.00018329 | No      |
|      |       |        |             |          |         | Sgk1      | 11.6467   | 45.8595  | 1.9773           | 11.6477      | 45.8605       | 1.97720698       | 0.00018329 | No      |
|      |       |        |             |          |         | Sgk3      | 6.52053   | 3.9573   | -0.720474        | 6.52153      | 3.9583        | -0.7203295       | 0.0230128  | No      |
|      |       |        |             |          |         | Sgms1     | 5.63863   | 23.0791  | 2.03317          | 5.63963      | 23.0801       | 2.03297706       | 0.00018329 | No      |
|      |       |        |             |          |         | Sgms2     | 0.0455826 | 7.21102  | 7.30558          | 0.0465826    | 7.21202       | 7.27446842       | 0.00591487 | No      |

| RRBS |       |        |             |          |         | RNAseq   |           |         |                  |              |               |                  |            |         |
|------|-------|--------|-------------|----------|---------|----------|-----------|---------|------------------|--------------|---------------|------------------|------------|---------|
| gene | Blood | Kidney | methyl.diff | pMWU.fdr | Match ? | gene     | blood     | kidney  | log2(fold_ratio) | blood+ 0.001 | kidney+ 0.001 | log2(fold_ratio) | q_value    | Match ? |
|      |       |        |             |          |         | Sgsh     | 8.69758   | 3.25431 | -1.41826         | 8.69858      | 3.25531       | -1.417985        | 0.00197017 | No      |
|      |       |        |             |          |         | Sgsm1    | 0.0158186 | 1.67466 | 6.7261           | 0.0168186    | 1.67566       | 6.63852802       | 0.0428533  | No      |
|      |       |        |             |          |         | Sgsm2    | 2.34892   | 6.03783 | 1.36203          | 2.34992      | 6.03883       | 1.36165742       | 0.0018326  | No      |
|      |       |        |             |          |         | Sgsm3    | 0.773969  | 9.7088  | 3.64895          | 0.774969     | 9.7098        | 3.64723107       | 0.00732142 | No      |
|      |       |        |             |          |         | Sgta     | 41.6106   | 77.1902 | 0.891469         | 41.6116      | 77.1912       | 0.89145062       | 0.00051281 | No      |
|      |       |        |             |          |         | Sh2b3    | 10.4273   | 6.66239 | -0.646256        | 10.4283      | 6.66339       | -0.6461758       | 0.0287615  | No      |
|      |       |        |             |          |         | Sh2d1a   | 58.7143   | 5.95626 | -3.30124         | 58.7153      | 5.95726       | -3.3010157       | 0.00018329 | No      |
|      |       |        |             |          |         | Sh2d4a   | 0         | 39.683  | inf              | 0.001        | 39.684        | 15.2762698       | 0.00018329 | No      |
|      |       |        |             |          |         | Sh3bgrl  | 114.518   | 58.4663 | -0.969894        | 114.519      | 58.4673       | -0.9698851       | 0.00018329 | No      |
|      |       |        |             |          |         | Sh3bgrl2 | 0.271328  | 19.0841 | 6.13619          | 0.272328     | 19.0851       | 6.13095761       | 0.00018329 | No      |
|      |       |        |             |          |         | Sh3bgrl3 | 309       | 168.922 | -0.871248        | 309.001      | 168.923       | -0.8712457       | 0.00066911 | No      |
|      |       |        |             |          |         | Sh3bp2   | 2.57506   | 8.45254 | 1.71478          | 2.57606      | 8.45354       | 1.71438941       | 0.00018329 | No      |
|      |       |        |             |          |         | Sh3bp4   | 0.250176  | 12.4584 | 5.63803          | 0.251176     | 12.4594       | 5.63239216       | 0.00018329 | No      |
|      |       |        |             |          |         | Sh3bp5   | 2.57488   | 32.1301 | 3.64135          | 2.57588      | 32.1311       | 3.64083308       | 0.00018329 | No      |
|      |       |        |             |          |         | Sh3bp5l  | 4.23701   | 11.5072 | 1.44142          | 4.23801      | 11.5082       | 1.4412033        | 0.00018329 | No      |
|      |       |        |             |          |         | Sh3gl2   | 0.0283274 | 10.6266 | 8.55127          | 0.0293274    | 10.6276       | 8.50135094       | 0.00432763 | No      |
|      |       |        |             |          |         | Sh3glb2  | 12.9699   | 25.0882 | 0.951846         | 12.9709      | 25.0892       | 0.95178788       | 0.00111812 | No      |
|      |       |        |             |          |         | Sh3kbp1  | 160.629   | 20.0824 | -2.99973         | 160.63       | 20.0834       | -2.9996659       | 0.00018329 | No      |
|      |       |        |             |          |         | Sh3rf1   | 2.81215   | 24.8148 | 3.14146          | 2.81315      | 24.8158       | 3.14100058       | 0.00018329 | No      |
|      |       |        |             |          |         | Sh3tc1   | 2.63144   | 32.5139 | 3.62713          | 2.63244      | 32.5149       | 3.62662843       | 0.00018329 | No      |
|      |       |        |             |          |         | Sh3tc2   | 0         | 15.8167 | inf              | 0.001        | 15.8177       | 13.9492522       | 0.00018329 | No      |
|      |       |        |             |          |         | Sh3yl1   | 0.550853  | 30.0057 | 5.76743          | 0.551853     | 30.0067       | 5.76485684       | 0.00018329 | No      |
|      |       |        |             |          |         | Shb      | 5.57255   | 90.5917 | 4.02297          | 5.57355      | 90.5927       | 4.02272637       | 0.00018329 | No      |
|      |       |        |             |          |         | She      | 4.2389    | 1.94283 | -1.12553         | 4.2399       | 1.94383       | -1.1251282       | 0.00469886 | No      |
|      |       |        |             |          |         | Shf      | 1.14914   | 6.01367 | 2.38769          | 1.15014      | 6.01467       | 2.3866761        | 0.00126492 | No      |
|      |       |        |             |          |         | Shh      | 0         | 1.30458 | inf              | 0.001        | 1.30558       | 10.3504751       | 0.00519348 | No      |
|      |       |        |             |          |         | Shisa4   | 0.0584354 | 5.92935 | 6.66489          | 0.0594354    | 5.93035       | 6.64065098       | 0.00035173 | No      |
|      |       |        |             |          |         | Shisa5   | 469.33    | 118.673 | -1.98361         | 469.331      | 118.674       | -1.9836019       | 0.00018329 | No      |
|      |       |        |             |          |         | Shmt2    | 66.183    | 33.9465 | -0.963198        | 66.184       | 33.9475       | -0.9631772       | 0.00051281 | No      |
|      |       |        |             |          |         | Shoc2    | 14.401    | 6.00997 | -1.26074         | 14.402       | 6.01097       | -1.2605994       | 0.00799878 | No      |
|      |       |        |             |          |         | Shprh    | 5.0823    | 3.104   | -0.711356        | 5.0833       | 3.105         | -0.7111721       | 0.0357237  | No      |
|      |       |        |             |          |         | Shq1     | 3.52129   | 1.42091 | -1.30929         | 3.52229      | 1.42191       | -1.3086835       | 0.0121287  | No      |
|      |       |        |             |          |         | Shroom2  | 0         | 3.32392 | inf              | 0.001        | 3.32492       | 11.6991039       | 0.00018329 | No      |
|      |       |        |             |          |         | Shroom4  | 0         | 7.16791 | inf              | 0.001        | 7.16891       | 12.8075381       | 0.00018329 | No      |
|      |       |        |             |          |         | Siah1a   | 4.04962   | 11.1915 | 1.46654          | 4.05062      | 11.1925       | 1.46631767       | 0.00035173 | No      |
|      |       |        |             |          |         | Siah2    | 3.74227   | 9.22343 | 1.30139          | 3.74327      | 9.22443       | 1.30116065       | 0.00018329 | No      |
|      |       |        |             |          |         | Sidt1    | 8.03504   | 1.88485 | -2.09185         | 8.03604      | 1.88585       | -2.0912698       | 0.00018329 | No      |
|      |       |        |             |          |         | Siglec1  | 0.139798  | 2.76411 | 4.30539          | 0.140798     | 2.76511       | 4.29563813       | 0.00066911 | No      |
|      |       |        |             |          |         | Siglec5  | 0.10122   | 1.45893 | 3.84935          | 0.10222      | 1.45993       | 3.8361498        | 0.00066911 | No      |
|      |       |        |             |          |         | Sik1     | 0.867086  | 4.88059 | 2.49281          | 0.868086     | 4.88159       | 2.49144125       | 0.00018329 | No      |
|      |       |        |             |          |         | Sil1     | 10.9687   | 44.8122 | 2.0305           | 10.9697      | 44.8132       | 2.03039968       | 0.00018329 | No      |
|      |       |        |             |          |         | Sim2     | 0.0223687 | 24.9447 | 10.123           | 0.0233687    | 24.9457       | 10.059998        | 0.0139848  | No      |

| RRBS |       |        |             |          |         | RNAseq   |           |         |                  |              |               |                  |            |         |
|------|-------|--------|-------------|----------|---------|----------|-----------|---------|------------------|--------------|---------------|------------------|------------|---------|
| gene | Blood | Kidney | methyl.diff | pMWU.fdr | Match ? | gene     | blood     | kidney  | log2(fold_ratio) | blood+ 0.001 | kidney+ 0.001 | log2(fold_ratio) | q_value    | Match ? |
|      |       |        |             |          |         | Sipa1l3  | 6.55096   | 17.6873 | 1.43293          | 6.55196      | 17.6883       | 1.43279694       | 0.00066911 | No      |
|      |       |        |             |          |         | Sirpa    | 0.700825  | 13.7026 | 4.28925          | 0.701825     | 13.7036       | 4.2872998        | 0.00018329 | No      |
|      |       |        |             |          |         | Sirt1    | 18.7051   | 7.32403 | -1.35272         | 18.7061      | 7.32503       | -1.3526022       | 0.00380824 | No      |
|      |       |        |             |          |         | Sirt3    | 7.83803   | 20.0332 | 1.35383          | 7.83903      | 20.0342       | 1.35371785       | 0.00018329 | No      |
|      |       |        |             |          |         | Sirt7    | 63.9788   | 30.3226 | -1.0772          | 63.9798      | 30.3236       | -1.0771754       | 0.00018329 | No      |
|      |       |        |             |          |         | Sit1     | 83.0489   | 15.7272 | -2.4007          | 83.0499      | 15.7282       | -2.4006249       | 0.00018329 | No      |
|      |       |        |             |          |         | Six4     | 0.216827  | 1.61405 | 2.89607          | 0.217827     | 1.61505       | 2.89032414       | 0.00018329 | No      |
|      |       |        |             |          |         | Six5     | 0.106511  | 8.34644 | 6.29208          | 0.107511     | 8.34744       | 6.27877764       | 0.00018329 | No      |
|      |       |        |             |          |         | Ska1     | 0.286623  | 1.97557 | 2.78504          | 0.287623     | 1.97657       | 2.7807481        | 0.00126492 | No      |
|      |       |        |             |          |         | Skap1    | 298.797   | 53.1801 | -2.49021         | 298.798      | 53.1811       | -2.490185        | 0.00018329 | No      |
|      |       |        |             |          |         | Skap2    | 12.9677   | 38.6647 | 1.5761           | 12.9687      | 38.6657       | 1.57602046       | 0.00018329 | No      |
|      |       |        |             |          |         | Ski      | 31.6035   | 20.3994 | -0.631561        | 31.6045      | 20.4004       | -0.6315326       | 0.0253382  | No      |
|      |       |        |             |          |         | Skida1   | 0.0913106 | 1.59099 | 4.123            | 0.0923106    | 1.59199       | 4.10819114       | 0.0178968  | No      |
|      |       |        |             |          |         | Sla      | 35.9769   | 4.10648 | -3.1311          | 35.9779      | 4.10748       | -3.1307855       | 0.00018329 | No      |
|      |       |        |             |          |         | Slain1   | 14.5815   | 5.26211 | -1.47043         | 14.5825      | 5.26311       | -1.4702506       | 0.00018329 | No      |
|      |       |        |             |          |         | Slamf1   | 3.74385   | 1.10706 | -1.75779         | 3.74485      | 1.10806       | -1.7568719       | 0.0142025  | No      |
|      |       |        |             |          |         | Slamf6   | 49.445    | 4.87587 | -3.34209         | 49.446       | 4.87687       | -3.3418264       | 0.00018329 | No      |
|      |       |        |             |          |         | Slamf9   | 0.127562  | 12.7329 | 6.64121          | 0.128562     | 12.7339       | 6.63006625       | 0.0076683  | No      |
|      |       |        |             |          |         | Slc11a2  | 13.4529   | 23.504  | 0.804992         | 13.4539      | 23.505        | 0.80494324       | 0.00799878 | No      |
|      |       |        |             |          |         | Slc12a2  | 5.01659   | 10.1567 | 1.01765          | 5.01759      | 10.1577       | 1.01750728       | 0.00126492 | No      |
|      |       |        |             |          |         | Slc12a6  | 22.5185   | 3.76882 | -2.57892         | 22.5195      | 3.76982       | -2.5786073       | 0.00018329 | No      |
|      |       |        |             |          |         | Slc12a7  | 37.0772   | 18.7433 | -0.984156        | 37.0782      | 18.7443       | -0.9841193       | 0.00018329 | No      |
|      |       |        |             |          |         | Slc12a8  | 0.173227  | 7.1936  | 5.37598          | 0.174227     | 7.1946        | 5.36787436       | 0.0202696  | No      |
|      |       |        |             |          |         | Slc12a9  | 25.3592   | 40.3364 | 0.669571         | 25.3602      | 40.3374       | 0.66955197       | 0.0282824  | No      |
|      |       |        |             |          |         | Slc13a1  | 0         | 18.6408 | inf              | 0.001        | 18.6418       | 14.1862535       | 0.00018329 | No      |
|      |       |        |             |          |         | Slc14a1  | 34.0874   | 15.1107 | -1.17367         | 34.0884      | 15.1117       | -1.1736149       | 0.00018329 | No      |
|      |       |        |             |          |         | Slc15a2  | 0         | 5.50116 | inf              | 0.001        | 5.50216       | 12.4257824       | 0.00018329 | No      |
|      |       |        |             |          |         | Slc16a1  | 12.2008   | 6.99961 | -0.801632        | 12.2018      | 7.00061       | -0.8015414       | 0.00799878 | No      |
|      |       |        |             |          |         | Slc16a10 | 5.64558   | 2.80787 | -1.00765         | 5.64658      | 2.80887       | -1.0073875       | 0.00567465 | No      |
|      |       |        |             |          |         | SLC16A11 | 0.0963285 | 14.3897 | 7.22285          | 0.0973285    | 14.3907       | 7.20805873       | 0.00018329 | No      |
|      |       |        |             |          |         | Slc16a13 | 0.908471  | 8.42453 | 3.21309          | 0.909471     | 8.42553       | 3.2116679        | 0.00018329 | No      |
|      |       |        |             |          |         | Slc16a14 | 0.0237556 | 7.19009 | 8.2416           | 0.0247556    | 7.19109       | 8.18231174       | 0.0359108  | No      |
|      |       |        |             |          |         | Slc16a6  | 25.0737   | 13.675  | -0.874632        | 25.0747      | 13.676        | -0.8745861       | 0.0152837  | No      |
|      |       |        |             |          |         | Slc16a7  | 0.0317541 | 74.7464 | 11.2008          | 0.0327541    | 74.7474       | 11.1561322       | 0.00018329 | No      |
|      |       |        |             |          |         | Slc17a1  | 0         | 8.98945 | inf              | 0.001        | 8.99045       | 13.1341776       | 0.00018329 | No      |
|      |       |        |             |          |         | Slc17a2  | 0         | 2.6689  | inf              | 0.001        | 2.6699        | 11.38257         | 0.00018329 | No      |
|      |       |        |             |          |         | Slc17a3  | 0         | 23.4724 | inf              | 0.001        | 23.4734       | 14.5187392       | 0.00018329 | No      |
|      |       |        |             |          |         | Slc17a4  | 0         | 5.76865 | inf              | 0.001        | 5.76965       | 12.4942681       | 0.00018329 | No      |
|      |       |        |             |          |         | Slc18b1  | 0.139285  | 6.0828  | 5.44863          | 0.140285     | 6.0838        | 5.43854006       | 0.00018329 | No      |
|      |       |        |             |          |         | Slc19a1  | 8.76274   | 24.8618 | 1.50448          | 8.76374      | 24.8628       | 1.50437019       | 0.00018329 | No      |
|      |       |        |             |          |         | Slc19a2  | 3.5623    | 6.53018 | 0.874315         | 3.5633       | 6.53118       | 0.87412972       | 0.0063852  | No      |
|      |       |        |             |          |         | Slc1a1   | 0.0351951 | 36.7673 | 10.0288          | 0.0361951    | 36.7683       | 9.98845236       | 0.00082046 | No      |

| RRBS |       |        |             |          |         | RNAseq     |           |          |                  |              |               |                  |            |         |
|------|-------|--------|-------------|----------|---------|------------|-----------|----------|------------------|--------------|---------------|------------------|------------|---------|
| gene | Blood | Kidney | methyl.diff | pMWU.fdr | Match ? | gene       | blood     | kidney   | log2(fold_ratio) | blood+ 0.001 | kidney+ 0.001 | log2(fold_ratio) | q_value    | Match ? |
|      |       |        |             |          |         | Slc1a4     | 0.231265  | 1.04122  | 2.17065          | 0.232265     | 1.04222       | 2.16581617       | 0.00277264 | No      |
|      |       |        |             |          |         | Slc20a1    | 44.3683   | 26.6316  | -0.736388        | 44.3693      | 26.6326       | -0.7363685       | 0.0135584  | No      |
|      |       |        |             |          |         | Slc22a12   | 0         | 71.6525  | inf              | 0.001        | 71.6535       | 16.1287496       | 0.00018329 | No      |
|      |       |        |             |          |         | Slc22a15   | 0.0976171 | 4.97623  | 5.67177          | 0.0986171    | 4.97723       | 5.65736142       | 0.00018329 | No      |
|      |       |        |             |          |         | Slc22a18   | 3.01032   | 23.4601  | 2.96222          | 3.01132      | 23.4611       | 2.96180273       | 0.00018329 | No      |
|      |       |        |             |          |         | Slc22a2    | 0         | 38.3203  | inf              | 0.001        | 38.3213       | 15.2258589       | 0.00018329 | No      |
|      |       |        |             |          |         | Slc22a22   | 0         | 11.4531  | inf              | 0.001        | 11.4541       | 13.4835765       | 0.00018329 | No      |
|      |       |        |             |          |         | Slc22a23   | 0.0217641 | 3.58886  | 7.36543          | 0.0227641    | 3.58986       | 7.30102335       | 0.00018329 | No      |
|      |       |        |             |          |         | Slc22a24   | 0         | 0.978896 | inf              | 0.001        | 0.979896      | 9.93648483       | 0.00018329 | No      |
|      |       |        |             |          |         | Slc22a25   | 0         | 7.34877  | inf              | 0.001        | 7.34977       | 12.8434834       | 0.00018329 | No      |
|      |       |        |             |          |         | Slc22a4    | 0.124088  | 7.66054  | 5.94801          | 0.125088     | 7.66154       | 5.93661911       | 0.00018329 | No      |
|      |       |        |             |          |         | Slc22a5    | 1.68733   | 39.3519  | 4.54362          | 1.68833      | 39.3529       | 4.54280113       | 0.00018329 | No      |
|      |       |        |             |          |         | Slc23a2    | 14.096    | 5.56543  | -1.34072         | 14.097       | 5.56643       | -1.3405639       | 0.00018329 | No      |
|      |       |        |             |          |         | Slc23a3    | 0.341602  | 2.00245  | 2.55138          | 0.342602     | 2.00345       | 2.54788103       | 0.00018329 | No      |
|      |       |        |             |          |         | Slc24a6    | 4.21961   | 32.0101  | 2.92335          | 4.22061      | 32.0111       | 2.92304882       | 0.00018329 | No      |
|      |       |        |             |          |         | Slc25a1    | 14.5026   | 45.738   | 1.65708          | 14.5036      | 45.739        | 1.65701378       | 0.00018329 | No      |
|      |       |        |             |          |         | Slc25a10   | 5.57659   | 83.9059  | 3.91132          | 5.57759      | 83.9069       | 3.91107566       | 0.00018329 | No      |
|      |       |        |             |          |         | Slc25a11   | 41.5887   | 104.695  | 1.33193          | 41.5897      | 104.696       | 1.33190814       | 0.00018329 | No      |
|      |       |        |             |          |         | Slc25a13   | 0.5407    | 16.6731  | 4.94655          | 0.5417       | 16.6741       | 4.94397099       | 0.00066911 | No      |
|      |       |        |             |          |         | Slc25a15   | 4.26478   | 10.6171  | 1.31585          | 4.26578      | 10.6181       | 1.31564417       | 0.00018329 | No      |
|      |       |        |             |          |         | Slc25a20   | 18.0506   | 32.8736  | 0.864885         | 18.0516      | 32.8746       | 0.86484662       | 0.00238141 | No      |
|      |       |        |             |          |         | Slc25a24   | 1.96948   | 9.1546   | 2.21668          | 1.97048      | 9.1556        | 2.21610733       | 0.00018329 | No      |
|      |       |        |             |          |         | Slc25a25   | 3.07194   | 24.2923  | 2.98328          | 3.07294      | 24.2933       | 2.98286698       | 0.00018329 | No      |
|      |       |        |             |          |         | Slc25a28   | 31.7123   | 55.7687  | 0.814414         | 31.7133      | 55.7697       | 0.8143935        | 0.00494262 | No      |
|      |       |        |             |          |         | Slc25a29   | 3.08015   | 17.2984  | 2.48957          | 3.08115      | 17.2994       | 2.48918118       | 0.00018329 | No      |
|      |       |        |             |          |         | Slc25a3    | 287.9     | 574.886  | 0.99771          | 287.901      | 574.887       | 0.99770561       | 0.00035173 | No      |
|      |       |        |             |          |         | Slc25a30   | 16.9108   | 52.1296  | 1.62416          | 16.9118      | 52.1306       | 1.62410024       | 0.00018329 | No      |
|      |       |        |             |          |         | Slc25a33   | 7.19638   | 12.004   | 0.738176         | 7.19738      | 12.005        | 0.73809167       | 0.0352739  | No      |
|      |       |        |             |          |         | Slc25a35   | 1.56304   | 12.6297  | 3.01439          | 1.56404      | 12.6307       | 3.01358528       | 0.0441737  | No      |
|      |       |        |             |          |         | Slc25a36l1 | 75.5267   | 22.7142  | -1.73339         | 75.5277      | 22.7152       | -1.7333478       | 0.00018329 | No      |
|      |       |        |             |          |         | Slc25a38   | 23.3098   | 52.4803  | 1.17084          | 23.3108      | 52.4813       | 1.17080494       | 0.00018329 | No      |
|      |       |        |             |          |         | Slc25a39   | 86.5399   | 155.734  | 0.847642         | 86.5409      | 155.735       | 0.84763918       | 0.00082046 | No      |
|      |       |        |             |          |         | Slc25a4    | 51.996    | 250.919  | 2.27075          | 51.997       | 250.92        | 2.27072717       | 0.00018329 | No      |
|      |       |        |             |          |         | Slc25a44   | 6.16869   | 9.56264  | 0.632445         | 6.16969      | 9.56364       | 0.63236182       | 0.0415563  | No      |
|      |       |        |             |          |         | Slc25a45   | 0.318816  | 14.2148  | 5.47853          | 0.319816     | 14.2158       | 5.47410936       | 0.00018329 | No      |
|      |       |        |             |          |         | Slc25a46   | 29.9171   | 12.6813  | -1.23826         | 29.9181      | 12.6823       | -1.2382021       | 0.00018329 | No      |
|      |       |        |             |          |         | Slc25a48   | 0         | 14.8255  | inf              | 0.001        | 14.8265       | 13.8558904       | 0.00018329 | No      |
|      |       |        |             |          |         | Slc25a5    | 362.733   | 795.318  | 1.13262          | 362.734      | 795.319       | 1.13262166       | 0.00018329 | No      |
|      |       |        |             |          |         | Slc26a2    | 2.63409   | 1.23875  | -1.08843         | 2.63509      | 1.23975       | -1.087803        | 0.0018326  | No      |
|      |       |        |             |          |         | Slc26a4    | 0.0579997 | 2.37019  | 5.35281          | 0.0589997    | 2.37119       | 5.32875984       | 0.00251301 | No      |
|      |       |        |             |          |         | Slc26a7    | 0         | 0.644657 | inf              | 0.001        | 0.645657      | 9.33462414       | 0.00018329 | No      |
|      |       |        |             |          |         | Slc26a8    | 80.0745   | 33.0394  | -1.27715         | 80.0755      | 33.0404       | -1.2771297       | 0.00018329 | No      |

| RRBS |       |        |             |          |         | RNAseq   |           |          |                  |              |               |                  |            |         |
|------|-------|--------|-------------|----------|---------|----------|-----------|----------|------------------|--------------|---------------|------------------|------------|---------|
| gene | Blood | Kidney | methyl.diff | pMWU.fdr | Match ? | gene     | blood     | kidney   | log2(fold_ratio) | blood+ 0.001 | kidney+ 0.001 | log2(fold_ratio) | q_value    | Match ? |
|      |       |        |             |          |         | Slc27a4  | 19.6777   | 28.8973  | 0.554374         | 19.6787      | 28.8983       | 0.55434971       | 0.0470877  | No      |
|      |       |        |             |          |         | Slc28a1  | 0         | 10.3143  | inf              | 0.001        | 10.3153       | 13.3324982       | 0.00018329 | No      |
|      |       |        |             |          |         | Slc28a2  | 97.4875   | 13.4077  | -2.86215         | 97.4885      | 13.4087       | -2.8620627       | 0.00018329 | No      |
|      |       |        |             |          |         | Slc29a3  | 1.87377   | 20.1088  | 3.42382          | 1.87477      | 20.1098       | 3.42311321       | 0.00018329 | No      |
|      |       |        |             |          |         | Slc2a1   | 8.80648   | 51.4582  | 2.54676          | 8.80748      | 51.4592       | 2.54662783       | 0.00018329 | No      |
|      |       |        |             |          |         | Slc2a12  | 0.105769  | 2.21761  | 4.39002          | 0.106769     | 2.21861       | 4.37709135       | 0.00018329 | No      |
|      |       |        |             |          |         | Slc2a2   | 0         | 4.80751  | inf              | 0.001        | 4.80851       | 12.2313742       | 0.00018329 | No      |
|      |       |        |             |          |         | Slc2a5   | 0         | 3.54709  | inf              | 0.001        | 3.54809       | 11.7928269       | 0.00018329 | No      |
|      |       |        |             |          |         | Slc2a6   | 1.80091   | 12.3335  | 2.77579          | 1.80191      | 12.3345       | 2.77510037       | 0.0290402  | No      |
|      |       |        |             |          |         | Slc2a9   | 3.13042   | 1.24917  | -1.32538         | 3.13142      | 1.25017       | -1.3246927       | 0.0026435  | No      |
|      |       |        |             |          |         | Slc30a2  | 0.0734553 | 1.43098  | 4.28399          | 0.0744553    | 1.43198       | 4.26549298       | 0.00035173 | No      |
|      |       |        |             |          |         | Slc30a4  | 1.76868   | 3.89635  | 1.13945          | 1.76968      | 3.89735       | 1.13900499       | 0.00097029 | No      |
|      |       |        |             |          |         | Slc30a7  | 10.008    | 4.40686  | -1.18333         | 10.009       | 4.40786       | -1.1831475       | 0.00140841 | No      |
|      |       |        |             |          |         | Slc31a1  | 5.66311   | 17.2979  | 1.61093          | 5.66411      | 17.2989       | 1.61075911       | 0.00543198 | No      |
|      |       |        |             |          |         | Slc31a2  | 7.23492   | 47.253   | 2.70736          | 7.23592      | 47.254        | 2.70718809       | 0.00097029 | No      |
|      |       |        |             |          |         | Slc35a1  | 10.5165   | 18.3873  | 0.806053         | 10.5175      | 18.3883       | 0.80599629       | 0.00530972 | No      |
|      |       |        |             |          |         | Slc35b1  | 23.9378   | 41.8668  | 0.806516         | 23.9388      | 41.8678       | 0.80649028       | 0.00555427 | No      |
|      |       |        |             |          |         | Slc35b4  | 21.6498   | 12.3936  | -0.804759        | 21.6508      | 12.3946       | -0.8047086       | 0.00744054 | No      |
|      |       |        |             |          |         | Slc35d1  | 1.73837   | 4.39409  | 1.33783          | 1.73937      | 4.39509       | 1.33732785       | 0.00506686 | No      |
|      |       |        |             |          |         | Slc35d2  | 9.96038   | 5.69799  | -0.805749        | 9.96138      | 5.69899       | -0.8056394       | 0.0282824  | No      |
|      |       |        |             |          |         | Slc35e2b | 6.27312   | 3.46596  | -0.855927        | 6.27412      | 3.46696       | -0.8557419       | 0.00277264 | No      |
|      |       |        |             |          |         | Slc35e3  | 2.32734   | 10.0789  | 2.11459          | 2.32834      | 10.0799       | 2.11410768       | 0.00018329 | No      |
|      |       |        |             |          |         | Slc35f5  | 5.07003   | 15.5146  | 1.61356          | 5.07103      | 15.5156       | 1.61336877       | 0.00018329 | No      |
|      |       |        |             |          |         | Slc35f6  | 2.65516   | 5.47843  | 1.04497          | 2.65616      | 5.47943       | 1.04468377       | 0.00615197 | No      |
|      |       |        |             |          |         | Slc35g1  | 0.261968  | 1.9231   | 2.87597          | 0.262968     | 1.9241        | 2.87122462       | 0.00519348 | No      |
|      |       |        |             |          |         | Slc37a1  | 4.32022   | 19.4648  | 2.17169          | 4.32122      | 19.4658       | 2.17143105       | 0.0326623  | No      |
|      |       |        |             |          |         | Slc37a2  | 0.617417  | 2.26705  | 1.8765           | 0.618417     | 2.26805       | 1.87480056       | 0.00111812 | No      |
|      |       |        |             |          |         | Slc37a4  | 20.9385   | 31.8887  | 0.606885         | 20.9395      | 31.8897       | 0.60686353       | 0.0298279  | No      |
|      |       |        |             |          |         | Slc38a1  | 30.8102   | 15.3477  | -1.00538         | 30.8112      | 15.3487       | -1.0053384       | 0.00494262 | No      |
|      |       |        |             |          |         | Slc38a3  | 0         | 10.0043  | inf              | 0.001        | 10.0053       | 13.2884768       | 0.00018329 | No      |
|      |       |        |             |          |         | Slc38a7  | 0.487491  | 1.95786  | 2.00583          | 0.488491     | 1.95886       | 2.0036104        | 0.00591487 | No      |
|      |       |        |             |          |         | Slc38a8  | 1.88534   | 0.349056 | -2.43329         | 1.88634      | 0.350056      | -2.4299321       | 0.0342763  | No      |
|      |       |        |             |          |         | Slc38a9  | 5.81823   | 2.60832  | -1.15746         | 5.81923      | 2.60932       | -1.1571544       | 0.00506686 | No      |
|      |       |        |             |          |         | Slc39a1  | 9.70152   | 33.4685  | 1.78652          | 9.70252      | 33.4695       | 1.78641559       | 0.00018329 | No      |
|      |       |        |             |          |         | Slc39a12 | 0         | 1.45959  | inf              | 0.001        | 1.46059       | 10.5123355       | 0.00018329 | No      |
|      |       |        |             |          |         | Slc39a13 | 2.55069   | 19.0642  | 2.90191          | 2.55169      | 19.0652       | 2.90141669       | 0.00018329 | No      |
|      |       |        |             |          |         | Slc39a6  | 12.3023   | 7.22737  | -0.767387        | 12.3033      | 7.22837       | -0.7673031       | 0.00970533 | No      |
|      |       |        |             |          |         | Slc3a2   | 38.8312   | 97.1874  | 1.32355          | 38.8322      | 97.1884       | 1.32353069       | 0.00018329 | No      |
|      |       |        |             |          |         | Slc40a1  | 0.28993   | 5.83415  | 4.33075          | 0.29093      | 5.83515       | 4.32602577       | 0.00018329 | No      |
|      |       |        |             |          |         | Slc41a3  | 9.8243    | 3.096    | -1.66595         | 9.8253       | 3.097         | -1.6656301       | 0.00018329 | No      |
|      |       |        |             |          |         | Slc43a1  | 13.0093   | 2.6222   | -2.31069         | 13.0103      | 2.6232        | -2.3102545       | 0.00035173 | No      |
|      |       |        |             |          |         | Slc43a3  | 0.0795904 | 1.07057  | 3.74965          | 0.0805904    | 1.07157       | 3.73297429       | 0.00591487 | No      |



| RRBS |       |        |             |          |         | RNAseq   |           |          |                  |              |               |                  |            |         |
|------|-------|--------|-------------|----------|---------|----------|-----------|----------|------------------|--------------|---------------|------------------|------------|---------|
| gene | Blood | Kidney | methyl.diff | pMWU.fdr | Match ? | gene     | blood     | kidney   | log2(fold_ratio) | blood+ 0.001 | kidney+ 0.001 | log2(fold_ratio) | q_value    | Match ? |
|      |       |        |             |          |         | Slc44a1  | 0.0560821 | 24.6235  | 8.77828          | 0.0570821    | 24.6245       | 8.7528403        | 0.00018329 | No      |
|      |       |        |             |          |         | Slc44a3  | 0         | 16.5914  | inf              | 0.001        | 16.5924       | 14.018235        | 0.00018329 | No      |
|      |       |        |             |          |         | Slc45a3  | 0.114491  | 8.60195  | 6.23135          | 0.115491     | 8.60295       | 6.21897912       | 0.00018329 | No      |
|      |       |        |             |          |         | SLC45A4  | 3.06313   | 10.3744  | 1.75994          | 3.06413      | 10.3754       | 1.75961755       | 0.00018329 | No      |
|      |       |        |             |          |         | Slc46a1  | 0.363277  | 1.18769  | 1.70902          | 0.364277     | 1.18869       | 1.70626471       | 0.00406781 | No      |
|      |       |        |             |          |         | Slc47a1  | 0         | 23.5814  | inf              | 0.001        | 23.5824       | 14.5254229       | 0.00018329 | No      |
|      |       |        |             |          |         | Slc4a1   | 0.0305041 | 7.24511  | 7.89186          | 0.0315041    | 7.24611       | 7.8455233        | 0.0110491  | No      |
|      |       |        |             |          |         | Slc4a3   | 0         | 8.06556  | inf              | 0.001        | 8.06656       | 12.9777378       | 0.00018329 | No      |
|      |       |        |             |          |         | Slc4a7   | 20.1218   | 3.69985  | -2.44322         | 20.1228      | 3.70085       | -2.4429025       | 0.00018329 | No      |
|      |       |        |             |          |         | Slc50a1  | 74.9644   | 47.4644  | -0.659361        | 74.9654      | 47.4654       | -0.6593486       | 0.0178047  | No      |
|      |       |        |             |          |         | Slc51b   | 0         | 39.4631  | inf              | 0.001        | 39.4641       | 15.2682532       | 0.00018329 | No      |
|      |       |        |             |          |         | Slc52a3  | 0.408121  | 2.92308  | 2.84042          | 0.409121     | 2.92408       | 2.83738329       | 0.00018329 | No      |
|      |       |        |             |          |         | Slc5a10  | 0.0484467 | 29.8964  | 9.26936          | 0.0494467    | 29.8974       | 9.23993007       | 0.017174   | No      |
|      |       |        |             |          |         | Slc5a11  | 0         | 5.32827  | inf              | 0.001        | 5.32927       | 12.3797222       | 0.00018329 | No      |
|      |       |        |             |          |         | Slc5a2   | 0.0288384 | 7.14634  | 7.95307          | 0.0298384    | 7.14734       | 7.90409243       | 0.00197017 | No      |
|      |       |        |             |          |         | Slc5a6   | 8.1341    | 17.4835  | 1.10394          | 8.1351       | 17.4845       | 1.10384455       | 0.00469886 | No      |
|      |       |        |             |          |         | Slc5a8   | 0         | 4.59799  | inf              | 0.001        | 4.59899       | 12.1671013       | 0.00018329 | No      |
|      |       |        |             |          |         | Slc5a9   | 0         | 2.27569  | inf              | 0.001        | 2.27669       | 11.1527221       | 0.00018329 | No      |
|      |       |        |             |          |         | Slc6a12  | 0.315785  | 31.4387  | 6.63746          | 0.316785     | 31.4397       | 6.63293962       | 0.00018329 | No      |
|      |       |        |             |          |         | Slc6a13  | 0         | 3.13308  | inf              | 0.001        | 3.13408       | 11.6138263       | 0.00018329 | No      |
|      |       |        |             |          |         | Slc6a17  | 0.0163297 | 2.79378  | 7.41858          | 0.0173297    | 2.79478       | 7.33334423       | 0.00744054 | No      |
|      |       |        |             |          |         | Slc6a18  | 0         | 88.7718  | inf              | 0.001        | 88.7728       | 16.4378301       | 0.00018329 | No      |
|      |       |        |             |          |         | Slc6a19  | 0         | 2.6214   | inf              | 0.001        | 2.6224        | 11.356672        | 0.00018329 | No      |
|      |       |        |             |          |         | Slc6a8   | 0.820952  | 58.5841  | 6.15707          | 0.821952     | 58.5851       | 6.15533583       | 0.00018329 | No      |
|      |       |        |             |          |         | Slc7a1   | 5.10411   | 2.48874  | -1.03625         | 5.10511      | 2.48974       | -1.035947        | 0.00082046 | No      |
|      |       |        |             |          |         | Slc7a12  | 0         | 3.74684  | inf              | 0.001        | 3.74784       | 11.8718436       | 0.00018329 | No      |
|      |       |        |             |          |         | Slc7a13  | 0         | 43.4814  | inf              | 0.001        | 43.4824       | 15.408144        | 0.00018329 | No      |
|      |       |        |             |          |         | Slc7a6   | 15.0852   | 7.03482  | -1.10055         | 15.0862      | 7.03582       | -1.100439        | 0.00018329 | No      |
|      |       |        |             |          |         | Slc7a6os | 22.7926   | 12.7067  | -0.842978        | 22.7936      | 12.7077       | -0.8429259       | 0.00530972 | No      |
|      |       |        |             |          |         | Slc7a7   | 0.416621  | 56.038   | 7.07153          | 0.417621     | 56.039        | 7.06809314       | 0.00018329 | No      |
|      |       |        |             |          |         | Slc7a8   | 0.147957  | 5.91876  | 5.32204          | 0.148957     | 5.91976       | 5.31257086       | 0.00018329 | No      |
|      |       |        |             |          |         | Slc7a9   | 0         | 22.496   | inf              | 0.001        | 22.497        | 14.457445        | 0.00018329 | No      |
|      |       |        |             |          |         | Slc9a1   | 47.1533   | 81.8584  | 0.795773         | 47.1543      | 81.8594       | 0.79575876       | 0.00788539 | No      |
|      |       |        |             |          |         | Slc9a2   | 0         | 2.26611  | inf              | 0.001        | 2.26711       | 11.1466387       | 0.00018329 | No      |
|      |       |        |             |          |         | Slc9a3r1 | 147.776   | 99.7009  | -0.567736        | 147.777      | 99.7019       | -0.5677288       | 0.0335274  | No      |
|      |       |        |             |          |         | Slc9a3r2 | 0.0375456 | 23.4617  | 9.28745          | 0.0385456    | 23.4627       | 9.24958714       | 0.00126492 | No      |
|      |       |        |             |          |         | Slc9a4   | 0         | 0.679384 | inf              | 0.001        | 0.680384      | 9.4102054        | 0.00018329 | No      |
|      |       |        |             |          |         | Slc9a7   | 11.1775   | 1.38703  | -3.01053         | 11.1785      | 1.38803       | -3.009616        | 0.00018329 | No      |
|      |       |        |             |          |         | Slc9a9   | 29.8875   | 3.81336  | -2.97041         | 29.8885      | 3.81436       | -2.9700776       | 0.00035173 | No      |
|      |       |        |             |          |         | Slco2a1  | 0         | 17.7249  | inf              | 0.001        | 17.7259       | 14.1135713       | 0.00018329 | No      |
|      |       |        |             |          |         | Slco3a1  | 3.57049   | 12.4727  | 1.80458          | 3.57149      | 12.4737       | 1.80429148       | 0.00018329 | No      |
|      |       |        |             |          |         | Slco4a1  | 0.491263  | 9.69904  | 4.30328          | 0.492263     | 9.70004       | 4.30048949       | 0.00018329 | No      |

| RRBS |       |        |             |          |         | RNAseq   |          |          |                  |              |               |                  |            |         |
|------|-------|--------|-------------|----------|---------|----------|----------|----------|------------------|--------------|---------------|------------------|------------|---------|
| gene | Blood | Kidney | methyl.diff | pMWU.fdr | Match ? | gene     | blood    | kidney   | log2(fold_ratio) | blood+ 0.001 | kidney+ 0.001 | log2(fold_ratio) | q_value    | Match ? |
|      |       |        |             |          |         | Slfn2    | 441.341  | 71.1449  | -2.63306         | 441.342      | 71.1459       | -2.6330445       | 0.00018329 | No      |
|      |       |        |             |          |         | Slfn5    | 149.564  | 27.6723  | -2.43424         | 149.565      | 27.6733       | -2.434206        | 0.00018329 | No      |
|      |       |        |             |          |         | Slit3    | 0        | 0.682772 | inf              | 0.001        | 0.683772      | 9.41737154       | 0.00018329 | No      |
|      |       |        |             |          |         | Slk      | 6.87496  | 15.099   | 1.13503          | 6.87596      | 15.1          | 1.13491549       | 0.00035173 | No      |
|      |       |        |             |          |         | Slpi     | 0.483113 | 11.8966  | 4.62204          | 0.484113     | 11.8976       | 4.61918293       | 0.00959787 | No      |
|      |       |        |             |          |         | Slu7     | 34.2113  | 17.958   | -0.929841        | 34.2123      | 17.959        | -0.9298081       | 0.00051281 | No      |
|      |       |        |             |          |         | Smad1    | 1.74705  | 10.815   | 2.63004          | 1.74805      | 10.816        | 2.6293487        | 0.00018329 | No      |
|      |       |        |             |          |         | Smad2    | 26.3003  | 15.5376  | -0.759315        | 26.3013      | 15.5386       | -0.7592776       | 0.0149499  | No      |
|      |       |        |             |          |         | Smad4    | 90.4417  | 22.8039  | -1.98771         | 90.4427      | 22.8049       | -1.9876602       | 0.00018329 | No      |
|      |       |        |             |          |         | Smad5    | 22.0587  | 9.25112  | -1.25365         | 22.0597      | 9.25212       | -1.2535573       | 0.00018329 | No      |
|      |       |        |             |          |         | SMAGP    | 3.68841  | 167.193  | 5.50237          | 3.68941      | 167.194       | 5.50198914       | 0.00018329 | No      |
|      |       |        |             |          |         | Smap1    | 39.0749  | 25.7598  | -0.60112         | 39.0759      | 25.7608       | -0.6011017       | 0.0275792  | No      |
|      |       |        |             |          |         | Smap2    | 105.392  | 29.2536  | -1.84907         | 105.393      | 29.2546       | -1.8490437       | 0.00197017 | No      |
|      |       |        |             |          |         | Smarca5  | 41.4061  | 19.7434  | -1.06847         | 41.4071      | 19.7444       | -1.0684346       | 0.00018329 | No      |
|      |       |        |             |          |         | Smarcad1 | 15.6241  | 8.85765  | -0.818774        | 15.6251      | 8.85865       | -0.8187067       | 0.0286648  | No      |
|      |       |        |             |          |         | Smarcc2  | 66.8949  | 42.8582  | -0.642325        | 66.8959      | 42.8592       | -0.6423129       | 0.0325782  | No      |
|      |       |        |             |          |         | Smarcd1  | 19.1327  | 9.72782  | -0.975853        | 19.1337      | 9.72882       | -0.9757791       | 0.00111812 | No      |
|      |       |        |             |          |         | Smarcd2  | 45.8777  | 24.7422  | -0.890817        | 45.8787      | 24.7432       | -0.8907924       | 0.0294443  | No      |
|      |       |        |             |          |         | Smarcd3  | 0.179488 | 38.731   | 7.75346          | 0.180488     | 38.732        | 7.74547927       | 0.00018329 | No      |
|      |       |        |             |          |         | Smc1a    | 43.8814  | 18.5067  | -1.24556         | 43.8824      | 18.5077       | -1.2455168       | 0.00018329 | No      |
|      |       |        |             |          |         | Smc2     | 5.45696  | 3.23013  | -0.756505        | 5.45796      | 3.23113       | -0.756323        | 0.0115803  | No      |
|      |       |        |             |          |         | Smc3     | 31.002   | 20.8009  | -0.575713        | 31.003       | 20.8019       | -0.5756925       | 0.030858   | No      |
|      |       |        |             |          |         | Smc4     | 186.809  | 18.9569  | -3.30077         | 186.81       | 18.9579       | -3.3007006       | 0.00018329 | No      |
|      |       |        |             |          |         | Smc5     | 10.4406  | 5.77014  | -0.855522        | 10.4416      | 5.77114       | -0.8554146       | 0.00567465 | No      |
|      |       |        |             |          |         | Smc6     | 30.5608  | 16.8257  | -0.861021        | 30.5618      | 16.8267       | -0.8609772       | 0.0393003  | No      |
|      |       |        |             |          |         | Smchd1   | 65.1221  | 13.0048  | -2.3241          | 65.1231      | 13.0058       | -2.3240142       | 0.00018329 | No      |
|      |       |        |             |          |         | Smtd1    | 91.9777  | 326.026  | 1.82563          | 91.9787      | 326.027       | 1.82561973       | 0.00018329 | No      |
|      |       |        |             |          |         | Smek1    | 57.0629  | 23.0975  | -1.30482         | 57.0639      | 23.0985       | -1.3047792       | 0.00018329 | No      |
|      |       |        |             |          |         | Smek2    | 26.9839  | 9.89327  | -1.44758         | 26.9849      | 9.89427       | -1.4474872       | 0.00018329 | No      |
|      |       |        |             |          |         | Smg1     | 34.9312  | 8.15157  | -2.09937         | 34.9322      | 8.15257       | -2.0992307       | 0.00018329 | No      |
|      |       |        |             |          |         | Smg5     | 26.9554  | 14.4795  | -0.896568        | 26.9564      | 14.4805       | -0.8965164       | 0.00066911 | No      |
|      |       |        |             |          |         | Smg7     | 23.8147  | 9.47782  | -1.32923         | 23.8157      | 9.47882       | -1.3291336       | 0.00018329 | No      |
|      |       |        |             |          |         | Smim1    | 0.471069 | 26.1925  | 5.79707          | 0.472069     | 26.1935       | 5.79406729       | 0.00018329 | No      |
|      |       |        |             |          |         | Smim12   | 42.2209  | 83.0764  | 0.97648          | 42.2219      | 83.0774       | 0.97646456       | 0.0100349  | No      |
|      |       |        |             |          |         | SMIM13   | 5.04248  | 11.8551  | 1.23331          | 5.04348      | 11.8561       | 1.23313808       | 0.00777671 | No      |
|      |       |        |             |          |         | SMIM15   | 45.677   | 15.9291  | -1.5198          | 45.678       | 15.9301       | -1.5197442       | 0.00018329 | No      |
|      |       |        |             |          |         | Smim20   | 36.252   | 94.8476  | 1.38755          | 36.253       | 94.8486       | 1.38752609       | 0.00018329 | No      |
|      |       |        |             |          |         | Smim24   | 7.00593  | 180.892  | 4.6904           | 7.00693      | 180.893       | 4.69021029       | 0.00018329 | No      |
|      |       |        |             |          |         | SMIM5    | 0.159329 | 19.2225  | 6.91464          | 0.160329     | 19.2235       | 6.90569182       | 0.00018329 | No      |
|      |       |        |             |          |         | Smim7    | 28.2763  | 46.933   | 0.731011         | 28.2773      | 46.934        | 0.73098905       | 0.00721079 | No      |
|      |       |        |             |          |         | SMNDC1   | 44.2347  | 27.4447  | -0.688652        | 44.2357      | 27.4457       | -0.688631        | 0.0184137  | No      |
|      |       |        |             |          |         | Smox     | 15.8038  | 8.06416  | -0.970674        | 15.8048      | 8.06516       | -0.9705877       | 0.00567465 | No      |

| RRBS |       |        |             |          |         | RNAseq   |           |         |                  |              |               |                  |            |         |
|------|-------|--------|-------------|----------|---------|----------|-----------|---------|------------------|--------------|---------------|------------------|------------|---------|
| gene | Blood | Kidney | methyl.diff | pMWU.fdr | Match ? | gene     | blood     | kidney  | log2(fold_ratio) | blood+ 0.001 | kidney+ 0.001 | log2(fold_ratio) | q_value    | Match ? |
|      |       |        |             |          |         | Smpd1    | 27.4677   | 48.3975 | 0.817197         | 27.4687      | 48.3985       | 0.8171737        | 0.0016929  | No      |
|      |       |        |             |          |         | Smpd2    | 62.6182   | 30.3726 | -1.04381         | 62.6192      | 30.3736       | -1.0437872       | 0.00018329 | No      |
|      |       |        |             |          |         | Smpd13a  | 29.4454   | 50.7095 | 0.784214         | 29.4464      | 50.7105       | 0.78419323       | 0.0107084  | No      |
|      |       |        |             |          |         | Smpx     | 0         | 24.639  | inf              | 0.001        | 24.64         | 14.5887146       | 0.00018329 | No      |
|      |       |        |             |          |         | Smtn     | 0.0603755 | 28.911  | 8.90344          | 0.0613755    | 28.912        | 8.87978982       | 0.00018329 | No      |
|      |       |        |             |          |         | Smu1     | 47.938    | 29.9005 | -0.681           | 47.939       | 29.9015       | -0.680982        | 0.0108214  | No      |
|      |       |        |             |          |         | Smurf2   | 18.6867   | 8.73655 | -1.09688         | 18.6877      | 8.73755       | -1.0967883       | 0.00018329 | No      |
|      |       |        |             |          |         | Snapc2   | 17.4055   | 37.5934 | 1.11094          | 17.4065      | 37.5944       | 1.11089163       | 0.00035173 | No      |
|      |       |        |             |          |         | Snca     | 0         | 2.52411 | inf              | 0.001        | 2.52511       | 11.3021305       | 0.00018329 | No      |
|      |       |        |             |          |         | Snd1     | 44.2861   | 23.1344 | -0.936815        | 44.2871      | 23.1354       | -0.9367845       | 0.00018329 | No      |
|      |       |        |             |          |         | Sned1    | 0.0291522 | 17.8954 | 9.26177          | 0.0301522    | 17.8964       | 9.21319042       | 0.00018329 | No      |
|      |       |        |             |          |         | Snf8     | 66.3262   | 132.39  | 0.997146         | 66.3272      | 132.391       | 0.99713252       | 0.0238252  | No      |
|      |       |        |             |          |         | Snrk     | 20.7538   | 8.56273 | -1.27724         | 20.7548      | 8.56373       | -1.2771338       | 0.00018329 | No      |
|      |       |        |             |          |         | Snrnp200 | 33.0257   | 16.9176 | -0.96507         | 33.0267      | 16.9186       | -0.9650226       | 0.00018329 | No      |
|      |       |        |             |          |         | Snrnp35  | 17.8877   | 31.8334 | 0.83157          | 17.8887      | 31.8344       | 0.83153802       | 0.010379   | No      |
|      |       |        |             |          |         | Snrnp40  | 38.0696   | 17.0666 | -1.15747         | 38.0706      | 17.0676       | -1.1574171       | 0.00018329 | No      |
|      |       |        |             |          |         | Snrnp48  | 74.8299   | 38.8093 | -0.947211        | 74.8309      | 38.8103       | -0.9471945       | 0.00380824 | No      |
|      |       |        |             |          |         | Snrpa1   | 46.2748   | 29.3706 | -0.655853        | 46.2758      | 29.3716       | -0.6558361       | 0.0482423  | No      |
|      |       |        |             |          |         | Snrpb    | 167.676   | 99.0345 | -0.759671        | 167.677      | 99.0355       | -0.7596671       | 0.00354878 | No      |
|      |       |        |             |          |         | Snrpb2   | 100.109   | 52.237  | -0.938427        | 100.11       | 52.238        | -0.9384145       | 0.00082046 | No      |
|      |       |        |             |          |         | Snrpd2   | 577.041   | 271.213 | -1.08925         | 577.042      | 271.214       | -1.0892447       | 0.00018329 | No      |
|      |       |        |             |          |         | Snrpe1   | 1244.02   | 405.51  | -1.61721         | 1244.021     | 405.511       | -1.6171979       | 0.00018329 | No      |
|      |       |        |             |          |         | Snrpf    | 195.42    | 83.5641 | -1.22562         | 195.421      | 83.5651       | -1.2256131       | 0.00018329 | No      |
|      |       |        |             |          |         | Snrpg    | 576.035   | 314.519 | -0.87301         | 576.036      | 314.52        | -0.8730072       | 0.00111812 | No      |
|      |       |        |             |          |         | Sntb2    | 1.58435   | 3.79304 | 1.25946          | 1.58535      | 3.79404       | 1.25893351       | 0.015491   | No      |
|      |       |        |             |          |         | Snurf    | 0.178277  | 19.0827 | 6.742            | 0.179277     | 19.0837       | 6.73400669       | 0.00018329 | No      |
|      |       |        |             |          |         | Snw1     | 67.3796   | 40.0307 | -0.751205        | 67.3806      | 40.0317       | -0.7511904       | 0.0316127  | No      |
|      |       |        |             |          |         | Snx18    | 4.7267    | 9.656   | 1.03059          | 4.7277       | 9.657         | 1.03043659       | 0.00082046 | No      |
|      |       |        |             |          |         | Snx2     | 35.7614   | 56.8969 | 0.669948         | 35.7624      | 56.8979       | 0.66993185       | 0.00925991 | No      |
|      |       |        |             |          |         | Snx20    | 81.6889   | 25.4329 | -1.68344         | 81.6899      | 25.4339       | -1.683405        | 0.00018329 | No      |
|      |       |        |             |          |         | Snx21    | 0.457047  | 17.3248 | 5.24436          | 0.458047     | 17.3258       | 5.24128252       | 0.00018329 | No      |
|      |       |        |             |          |         | Snx24    | 0         | 17.7874 | inf              | 0.001        | 17.7884       | 14.1186491       | 0.00018329 | No      |
|      |       |        |             |          |         | Snx27    | 11.378    | 6.75573 | -0.752063        | 11.379       | 6.75673       | -0.7519767       | 0.0076683  | No      |
|      |       |        |             |          |         | Snx29    | 6.50509   | 12.9199 | 0.98995          | 6.50609      | 12.9209       | 0.98984388       | 0.00018329 | No      |
|      |       |        |             |          |         | Snx30    | 0.331738  | 5.93781 | 4.16181          | 0.332738     | 5.93881       | 4.15771534       | 0.00018329 | No      |
|      |       |        |             |          |         | Snx32    | 9.82538   | 1.99249 | -2.30194         | 9.82638      | 1.99349       | -2.3013637       | 0.00018329 | No      |
|      |       |        |             |          |         | Snx4     | 27.2849   | 17.3823 | -0.650486        | 27.2859      | 17.3833       | -0.6504536       | 0.0201703  | No      |
|      |       |        |             |          |         | SNX5     | 143.259   | 66.7914 | -1.10089         | 143.26       | 66.7924       | -1.10088         | 0.00097029 | No      |
|      |       |        |             |          |         | Snx7     | 3.54676   | 16.3719 | 2.20665          | 3.54776      | 16.3729       | 2.20632956       | 0.00018329 | No      |
|      |       |        |             |          |         | Snx9     | 1.02276   | 39.868  | 5.2847           | 1.02376      | 39.869        | 5.28331797       | 0.00018329 | No      |
|      |       |        |             |          |         | Soat1    | 1.5528    | 15.1463 | 3.28603          | 1.5538       | 15.1473       | 3.28518793       | 0.00018329 | No      |
|      |       |        |             |          |         | Socs1    | 17.5051   | 7.02143 | -1.31794         | 17.5061      | 7.02243       | -1.3178155       | 0.0153859  | No      |

| RRBS |       |        |             |          |         | RNAseq   |          |          |                  |              |               |                  |            |         |
|------|-------|--------|-------------|----------|---------|----------|----------|----------|------------------|--------------|---------------|------------------|------------|---------|
| gene | Blood | Kidney | methyl.diff | pMWU.fdr | Match ? | gene     | blood    | kidney   | log2(fold_ratio) | blood+ 0.001 | kidney+ 0.001 | log2(fold_ratio) | q_value    | Match ? |
|      |       |        |             |          |         | Socs2    | 30.9824  | 4.19805  | -2.88366         | 30.9834      | 4.19905       | -2.8833606       | 0.00018329 | No      |
|      |       |        |             |          |         | Socs4    | 6.27879  | 3.245    | -0.952269        | 6.27979      | 3.246         | -0.9520533       | 0.0207821  | No      |
|      |       |        |             |          |         | Sod1     | 321.172  | 772.063  | 1.26537          | 321.173      | 772.064       | 1.26536983       | 0.00277264 | No      |
|      |       |        |             |          |         | Sod2     | 26.2877  | 103.169  | 1.97255          | 26.2887      | 103.17        | 1.97250882       | 0.00018329 | No      |
|      |       |        |             |          |         | Sod3     | 0        | 37.3796  | inf              | 0.001        | 37.3806       | 15.1900021       | 0.00018329 | No      |
|      |       |        |             |          |         | Soga1    | 0.15531  | 9.23604  | 5.89405          | 0.15631      | 9.23704       | 5.88494863       | 0.00018329 | No      |
|      |       |        |             |          |         | Soga2    | 0        | 1.49374  | inf              | 0.001        | 1.49474       | 10.5456788       | 0.00018329 | No      |
|      |       |        |             |          |         | Son      | 83.9656  | 46.4098  | -0.855368        | 83.9666      | 46.4108       | -0.855355        | 0.0307576  | No      |
|      |       |        |             |          |         | Sorbs1   | 0.943755 | 11.9432  | 3.66163          | 0.944755     | 11.9442       | 3.66022617       | 0.00018329 | No      |
|      |       |        |             |          |         | Sorbs3   | 0.20566  | 22.6002  | 6.77993          | 0.20666      | 22.6012       | 6.77299639       | 0.00018329 | No      |
|      |       |        |             |          |         | Sord     | 11.0815  | 58.3276  | 2.39602          | 11.0825      | 58.3286       | 2.39592008       | 0.00018329 | No      |
|      |       |        |             |          |         | Sort1    | 1.80424  | 35.3033  | 4.29034          | 1.80524      | 35.3043       | 4.28958136       | 0.00018329 | No      |
|      |       |        |             |          |         | Sos1     | 18.3479  | 7.86195  | -1.22266         | 18.3489      | 7.86295       | -1.222551        | 0.00018329 | No      |
|      |       |        |             |          |         | Sos2     | 4.31867  | 8.0577   | 0.899782         | 4.31967      | 8.0587        | 0.89962602       | 0.00959787 | No      |
|      |       |        |             |          |         | Sowahb   | 0        | 3.52387  | inf              | 0.001        | 3.52487       | 11.7833543       | 0.00018329 | No      |
|      |       |        |             |          |         | Sowahc   | 0.138691 | 5.03564  | 5.18223          | 0.139691     | 5.03664       | 5.17215064       | 0.00018329 | No      |
|      |       |        |             |          |         | Sox17    | 0        | 4.04717  | inf              | 0.001        | 4.04817       | 11.9830542       | 0.00018329 | No      |
|      |       |        |             |          |         | Sox9     | 0        | 6.64328  | inf              | 0.001        | 6.64428       | 12.6978972       | 0.00018329 | No      |
|      |       |        |             |          |         | Sp1      | 22.1609  | 9.36561  | -1.24257         | 22.1619      | 9.36661       | -1.2424827       | 0.00018329 | No      |
|      |       |        |             |          |         | Sp140    | 128.324  | 43.9195  | -1.54686         | 128.325      | 43.9205       | -1.5468359       | 0.00018329 | No      |
|      |       |        |             |          |         | Sp3      | 37.0144  | 10.8397  | -1.77177         | 37.0154      | 10.8407       | -1.7716677       | 0.00018329 | No      |
|      |       |        |             |          |         | Sp4      | 7.46928  | 1.83332  | -2.02651         | 7.47028      | 1.83432       | -2.025917        | 0.00018329 | No      |
|      |       |        |             |          |         | Spa17    | 2.20904  | 34.6186  | 3.97006          | 2.21004      | 34.6196       | 3.96944467       | 0.00380824 | No      |
|      |       |        |             |          |         | Spaca6   | 0.679342 | 15.7136  | 4.53173          | 0.680342     | 15.7146       | 4.52970159       | 0.00018329 | No      |
|      |       |        |             |          |         | Spag1    | 0.338306 | 7.3961   | 4.45036          | 0.339306     | 7.3971        | 4.44630093       | 0.00018329 | No      |
|      |       |        |             |          |         | Spag5    | 0.264957 | 1.04607  | 1.98115          | 0.265957     | 1.04707       | 1.97709298       | 0.00126492 | No      |
|      |       |        |             |          |         | Sparc    | 8.19958  | 118.153  | 3.84896          | 8.20058      | 118.154       | 3.84879871       | 0.00018329 | No      |
|      |       |        |             |          |         | Spast    | 25.6375  | 13.7956  | -0.894041        | 25.6385      | 13.7966       | -0.8939991       | 0.00329119 | No      |
|      |       |        |             |          |         | Spata13  | 59.3094  | 8.75473  | -2.76013         | 59.3104      | 8.75573       | -2.7599857       | 0.00018329 | No      |
|      |       |        |             |          |         | Spata17  | 0        | 1.24922  | inf              | 0.001        | 1.25022       | 10.2879663       | 0.00018329 | No      |
|      |       |        |             |          |         | Spata20  | 0        | 0.673072 | inf              | 0.001        | 0.674072      | 9.39675889       | 0.00018329 | No      |
|      |       |        |             |          |         | Spata24  | 0.746829 | 10.8073  | 3.85508          | 0.747829     | 10.8083       | 3.8532874        | 0.00126492 | No      |
|      |       |        |             |          |         | Spata5   | 9.39238  | 4.09908  | -1.19619         | 9.39338      | 4.10008       | -1.1959923       | 0.00018329 | No      |
|      |       |        |             |          |         | Spata5l1 | 4.89415  | 2.5772   | -0.925254        | 4.89515      | 2.5782        | -0.9249889       | 0.0138771  | No      |
|      |       |        |             |          |         | Spata6   | 20.3921  | 6.69087  | -1.60774         | 20.3931      | 6.69187       | -1.6075998       | 0.00018329 | No      |
|      |       |        |             |          |         | Spata7   | 0.908626 | 10.9435  | 3.59025          | 0.909626     | 10.9445       | 3.58878874       | 0.00018329 | No      |
|      |       |        |             |          |         | Spats2l  | 0.05758  | 9.57005  | 7.37682          | 0.05858      | 9.57105       | 7.3521252        | 0.00018329 | No      |
|      |       |        |             |          |         | Spc24    | 2.63694  | 7.87564  | 1.57853          | 2.63794      | 7.87664       | 1.57816859       | 0.00277264 | No      |
|      |       |        |             |          |         | Spcs1    | 218.383  | 145.755  | -0.583317        | 218.384      | 145.756       | -0.5833119       | 0.030294   | No      |
|      |       |        |             |          |         | Spcs2    | 94.5355  | 30.7405  | -1.62071         | 94.5365      | 30.7415       | -1.6206839       | 0.00018329 | No      |
|      |       |        |             |          |         | Spcs3    | 61.5352  | 18.8318  | -1.70824         | 61.5362      | 18.8328       | -1.7081878       | 0.00018329 | No      |
|      |       |        |             |          |         | Specc1   | 0.528376 | 11.2701  | 4.41479          | 0.529376     | 11.2711       | 4.41219172       | 0.00018329 | No      |

| RRBS |       |        |             |          |         | RNAseq  |           |          |                  |              |               |                  |            |         |
|------|-------|--------|-------------|----------|---------|---------|-----------|----------|------------------|--------------|---------------|------------------|------------|---------|
| gene | Blood | Kidney | methyl.diff | pMWU.fdr | Match ? | gene    | blood     | kidney   | log2(fold_ratio) | blood+ 0.001 | kidney+ 0.001 | log2(fold_ratio) | q_value    | Match ? |
|      |       |        |             |          |         | Sphk1   | 5.4782    | 32.5155  | 2.56935          | 5.4792       | 32.5165       | 2.56913481       | 0.00018329 | No      |
|      |       |        |             |          |         | Sphkap  | 0         | 2.55225  | inf              | 0.001        | 2.55325       | 11.3181191       | 0.00018329 | No      |
|      |       |        |             |          |         | Spi1    | 1.99444   | 31.4353  | 3.97833          | 1.99544      | 31.4363       | 3.97765262       | 0.00018329 | No      |
|      |       |        |             |          |         | Spib    | 1.9867    | 0.800415 | -1.31155         | 1.9877       | 0.801415      | -1.3104786       | 0.00948282 | No      |
|      |       |        |             |          |         | Spin4   | 0         | 0.684441 | inf              | 0.001        | 0.685441      | 9.42088868       | 0.00018329 | No      |
|      |       |        |             |          |         | Spink1  | 0         | 113.555  | inf              | 0.001        | 113.556       | 16.7930444       | 0.00018329 | No      |
|      |       |        |             |          |         | Spint2  | 102.606   | 1258.55  | 3.61658          | 102.607      | 1258.551      | 3.61656262       | 0.00018329 | No      |
|      |       |        |             |          |         | Spire1  | 1.23849   | 14.3113  | 3.53051          | 1.23949      | 14.3123       | 3.529437         | 0.00018329 | No      |
|      |       |        |             |          |         | Spire2  | 0.0152609 | 2.13059  | 7.12527          | 0.0162609    | 2.13159       | 7.03437905       | 0.0243241  | No      |
|      |       |        |             |          |         | Spns1   | 25.8709   | 56.2722  | 1.12109          | 25.8719      | 56.2732       | 1.121062         | 0.00154856 | No      |
|      |       |        |             |          |         | Spns2   | 7.05335   | 22.0153  | 1.64213          | 7.05435      | 22.0163       | 1.64198697       | 0.0272082  | No      |
|      |       |        |             |          |         | Spns3   | 0.116611  | 4.00432  | 5.10179          | 0.117611     | 4.00532       | 5.0898226        | 0.00018329 | No      |
|      |       |        |             |          |         | Spop    | 51.3134   | 29.3049  | -0.808196        | 51.3144      | 29.3059       | -0.8081726       | 0.0026435  | No      |
|      |       |        |             |          |         | Spp1    | 0         | 7579.07  | inf              | 0.001        | 7579.071      | 22.8535896       | 0.00018329 | No      |
|      |       |        |             |          |         | SPPL2A  | 12.2027   | 6.93187  | -0.815883        | 12.2037      | 6.93287       | -0.815794        | 0.0175951  | No      |
|      |       |        |             |          |         | Spr     | 14.7969   | 37.2641  | 1.33249          | 14.7979      | 37.2651       | 1.33243268       | 0.00018329 | No      |
|      |       |        |             |          |         | Sprr1a  | 0         | 71.6623  | inf              | 0.001        | 71.6633       | 16.1289469       | 0.00018329 | No      |
|      |       |        |             |          |         | Sprt    | 8.06354   | 3.93147  | -1.03635         | 8.06454      | 3.93247       | -1.0361565       | 0.00051281 | No      |
|      |       |        |             |          |         | Spry1   | 0.622884  | 16.1227  | 4.69398          | 0.623884     | 16.1237       | 4.69176122       | 0.00018329 | No      |
|      |       |        |             |          |         | Spryd7  | 1.75074   | 31.0641  | 4.14922          | 1.75174      | 31.0651       | 4.14843413       | 0.00018329 | No      |
|      |       |        |             |          |         | Spsb2   | 3.43069   | 8.23274  | 1.26287          | 3.43169      | 8.23374       | 1.26262866       | 0.00140841 | No      |
|      |       |        |             |          |         | Sptbn2  | 0.0285413 | 3.17079  | 6.79565          | 0.0295413    | 3.17179       | 6.74642013       | 0.00051281 | No      |
|      |       |        |             |          |         | Sptssb  | 0         | 8.62359  | inf              | 0.001        | 8.62459       | 13.0742402       | 0.00018329 | No      |
|      |       |        |             |          |         | Sqrdl   | 2.93761   | 16.1013  | 2.45446          | 2.93861      | 16.1023       | 2.45406096       | 0.00018329 | No      |
|      |       |        |             |          |         | Srbd1   | 14.0134   | 7.99258  | -0.810073        | 14.0144      | 7.99358       | -0.8099963       | 0.0240232  | No      |
|      |       |        |             |          |         | Src     | 4.51697   | 17.8157  | 1.97972          | 4.51797      | 17.8167       | 1.97948355       | 0.00018329 | No      |
|      |       |        |             |          |         | Srcin1  | 62.0773   | 13.1907  | -2.23454         | 62.0783      | 13.1917       | -2.2344586       | 0.00018329 | No      |
|      |       |        |             |          |         | Srcrb4d | 1.39859   | 5.79775  | 2.05152          | 1.39959      | 5.79875       | 2.05073768       | 0.00035173 | No      |
|      |       |        |             |          |         | Srd5a1  | 0.606682  | 5.19279  | 3.0975           | 0.607682     | 5.19379       | 3.09539922       | 0.00018329 | No      |
|      |       |        |             |          |         | Srd5a3  | 36.3847   | 14.2858  | -1.34875         | 36.3857      | 14.2868       | -1.3486888       | 0.00018329 | No      |
|      |       |        |             |          |         | Srebf2  | 35.6276   | 23.6955  | -0.588381        | 35.6286      | 23.6965       | -0.5883618       | 0.0315274  | No      |
|      |       |        |             |          |         | Srgap3  | 0.511512  | 3.59729  | 2.81407          | 0.512512     | 3.59829       | 2.81165377       | 0.00018329 | No      |
|      |       |        |             |          |         | Srgn    | 211.793   | 46.6734  | -2.18198         | 211.794      | 46.6744       | -2.1819583       | 0.00018329 | No      |
|      |       |        |             |          |         | Srpx    | 0         | 0.919876 | inf              | 0.001        | 0.920876      | 9.84686309       | 0.00018329 | No      |
|      |       |        |             |          |         | Srrm1   | 101.459   | 50.9995  | -0.992337        | 101.46       | 51.0005       | -0.9923278       | 0.00406781 | No      |
|      |       |        |             |          |         | Srsf1   | 147.215   | 56.7827  | -1.37441         | 147.216      | 56.7837       | -1.3743857       | 0.00018329 | No      |
|      |       |        |             |          |         | Srsf10  | 37.1681   | 16.0829  | -1.20854         | 37.1691      | 16.0839       | -1.2084865       | 0.00018329 | No      |
|      |       |        |             |          |         | Srsf11  | 118.083   | 52.1702  | -1.17851         | 118.084      | 52.1712       | -1.178488        | 0.00018329 | No      |
|      |       |        |             |          |         | Srsf2   | 498.166   | 286.693  | -0.79712         | 498.167      | 286.694       | -0.7971177       | 0.0143185  | No      |
|      |       |        |             |          |         | Srsf3   | 143.355   | 83.0796  | -0.78703         | 143.356      | 83.0806       | -0.7870187       | 0.00419853 | No      |
|      |       |        |             |          |         | Srsf5   | 1132.94   | 235.13   | -2.26854         | 1132.941     | 235.131       | -2.2685361       | 0.00018329 | No      |
|      |       |        |             |          |         | Srsf6   | 146.161   | 46.2415  | -1.6603          | 146.162      | 46.2425       | -1.660277        | 0.00018329 | No      |

| RRBS |       |        |            |          |         | RNAseq     |           |          |                  |              |               |                  |            |         |
|------|-------|--------|------------|----------|---------|------------|-----------|----------|------------------|--------------|---------------|------------------|------------|---------|
| gene | Blood | Kidney | methy.diff | pMWU.fdr | Match ? | gene       | blood     | kidney   | log2(fold_ratio) | blood+ 0.001 | kidney+ 0.001 | log2(fold_ratio) | q_value    | Match ? |
|      |       |        |            |          |         | Srsf7      | 172.733   | 72.1537  | -1.2594          | 172.734      | 72.1547       | -1.2593868       | 0.00018329 | No      |
|      |       |        |            |          |         | SRXN1      | 0.0293315 | 4.2193   | 7.16841          | 0.0303315    | 4.2203        | 7.1203849        | 0.0364805  | No      |
|      |       |        |            |          |         | Ss18       | 68.4836   | 42.5707  | -0.685899        | 68.4846      | 42.5717       | -0.6858849       | 0.00880015 | No      |
|      |       |        |            |          |         | Ssb        | 130.758   | 73.9747  | -0.821799        | 130.759      | 73.9757       | -0.8217869       | 0.00777671 | No      |
|      |       |        |            |          |         | Ssbp2      | 9.87942   | 18.8246  | 0.930123         | 9.88042      | 18.8256       | 0.93005157       | 0.0337151  | No      |
|      |       |        |            |          |         | Ssbp3      | 133.012   | 28.1516  | -2.24027         | 133.013      | 28.1526       | -2.2402272       | 0.00018329 | No      |
|      |       |        |            |          |         | Ssfa2      | 7.67021   | 16.1942  | 1.07814          | 7.67121      | 16.1952       | 1.07804022       | 0.00018329 | No      |
|      |       |        |            |          |         | Ssh1       | 1.27323   | 2.49782  | 0.972171         | 1.27423      | 2.49882       | 0.97162127       | 0.00290302 | No      |
|      |       |        |            |          |         | Ssh2       | 32.7315   | 4.57161  | -2.8399          | 32.7325      | 4.57261       | -2.839634        | 0.00018329 | No      |
|      |       |        |            |          |         | Sspo       | 0.133189  | 1.86979  | 3.81133          | 0.134189     | 1.87079       | 3.8013093        | 0.00066911 | No      |
|      |       |        |            |          |         | Ssr1       | 38.0822   | 24.1912  | -0.654636        | 38.0832      | 24.1922       | -0.6546127       | 0.0182096  | No      |
|      |       |        |            |          |         | Ssr3       | 31.9449   | 21.2812  | -0.586008        | 31.9459      | 21.2822       | -0.5859835       | 0.0296252  | No      |
|      |       |        |            |          |         | Ssr4       | 249.072   | 120.313  | -1.04977         | 249.073      | 120.314       | -1.0497641       | 0.00018329 | No      |
|      |       |        |            |          |         | Ssrp1      | 108.479   | 60.1502  | -0.850778        | 108.48       | 60.1512       | -0.8507637       | 0.00018329 | No      |
|      |       |        |            |          |         | Ssuh2      | 0         | 0.952748 | inf              | 0.001        | 0.953748      | 9.89746432       | 0.00627425 | No      |
|      |       |        |            |          |         | Ssx2ip     | 4.07617   | 8.08847  | 0.988653         | 4.07717      | 8.08947       | 0.98847707       | 0.00238141 | No      |
|      |       |        |            |          |         | St14       | 1.21309   | 80.9251  | 6.05983          | 1.21409      | 80.9261       | 6.05865779       | 0.00018329 | No      |
|      |       |        |            |          |         | St3gal1    | 25.3797   | 4.48239  | -2.50133         | 25.3807      | 4.48339       | -2.50107         | 0.00018329 | No      |
|      |       |        |            |          |         | St3gal2    | 2.416     | 7.78161  | 1.68745          | 2.417        | 7.78261       | 1.68703659       | 0.00018329 | No      |
|      |       |        |            |          |         | St3gal3    | 0.76531   | 7.82575  | 3.35411          | 0.76631      | 7.82675       | 3.35241333       | 0.00018329 | No      |
|      |       |        |            |          |         | St3gal5    | 1.89422   | 33.0376  | 4.12443          | 1.89522      | 33.0386       | 4.12371532       | 0.00018329 | No      |
|      |       |        |            |          |         | St3gal6    | 6.65221   | 55.6144  | 3.06355          | 6.65321      | 55.6154       | 3.06336195       | 0.00018329 | No      |
|      |       |        |            |          |         | St6galnac3 | 0.853608  | 13.4278  | 3.9755           | 0.854608     | 13.4288       | 3.97392376       | 0.00018329 | No      |
|      |       |        |            |          |         | St6galnac5 | 0.786161  | 0.102085 | -2.94505         | 0.787161     | 0.103085      | -2.9328243       | 0.00197017 | No      |
|      |       |        |            |          |         | St6galnac6 | 1.05556   | 2.77825  | 1.39616          | 1.05656      | 2.77925       | 1.39532092       | 0.00251301 | No      |
|      |       |        |            |          |         | ST7        | 3.12666   | 9.5545   | 1.61156          | 3.12766      | 9.5555        | 1.61124768       | 0.00018329 | No      |
|      |       |        |            |          |         | St8sia1    | 64.4645   | 7.05178  | -3.19245         | 64.4655      | 7.05278       | -3.1922633       | 0.00018329 | No      |
|      |       |        |            |          |         | St8sia4    | 16.501    | 2.70335  | -2.60973         | 16.502       | 2.70435       | -2.6092871       | 0.00018329 | No      |
|      |       |        |            |          |         | St8sia6    | 7.43727   | 0.214111 | -5.11834         | 7.43827      | 0.215111      | -5.1118139       | 0.00018329 | No      |
|      |       |        |            |          |         | Stab1      | 0.013209  | 0.576322 | 5.44728          | 0.014209     | 0.577322      | 5.34449927       | 0.0121287  | No      |
|      |       |        |            |          |         | Stag1      | 10.4982   | 5.49661  | -0.933532        | 10.4992      | 5.49761       | -0.9334029       | 0.00238141 | No      |
|      |       |        |            |          |         | Stag2      | 43.1122   | 15.3388  | -1.49091         | 43.1132      | 15.3398       | -1.49085         | 0.00018329 | No      |
|      |       |        |            |          |         | Stam       | 5.09778   | 9.71307  | 0.93006          | 5.09878      | 9.71407       | 0.92992379       | 0.00197017 | No      |
|      |       |        |            |          |         | Stambp     | 6.9845    | 18.0559  | 1.37024          | 6.9855       | 18.0569       | 1.37011494       | 0.00035173 | No      |
|      |       |        |            |          |         | Stambpl1   | 22.419    | 9.22827  | -1.28059         | 22.42        | 9.22927       | -1.2804978       | 0.00018329 | No      |
|      |       |        |            |          |         | Stap2      | 0.140751  | 28.019   | 7.63712          | 0.141751     | 28.02         | 7.62695423       | 0.00018329 | No      |
|      |       |        |            |          |         | Stard13    | 0.425654  | 3.15479  | 2.88979          | 0.426654     | 3.15579       | 2.88686273       | 0.00018329 | No      |
|      |       |        |            |          |         | Stard4     | 7.25163   | 3.39666  | -1.09419         | 7.25263      | 3.39766       | -1.0939628       | 0.00035173 | No      |
|      |       |        |            |          |         | Stard5     | 2.63582   | 23.3155  | 3.14496          | 2.63682      | 23.3165       | 3.14448025       | 0.00506686 | No      |
|      |       |        |            |          |         | Stat1      | 116.789   | 59.2408  | -0.979244        | 116.79       | 59.2418       | -0.9792294       | 0.00419853 | No      |
|      |       |        |            |          |         | Stat3      | 31.8278   | 49.1319  | 0.626374         | 31.8288      | 49.1329       | 0.62635663       | 0.0225266  | No      |
|      |       |        |            |          |         | Stat4      | 62.1964   | 8.98247  | -2.79165         | 62.1974      | 8.98347       | -2.7915096       | 0.00018329 | No      |

| RRBS |       |        |             |          |         | RNAseq  |           |          |                  |              |               |                  |            |         |
|------|-------|--------|-------------|----------|---------|---------|-----------|----------|------------------|--------------|---------------|------------------|------------|---------|
| gene | Blood | Kidney | methyl.diff | pMWU.fdr | Match ? | gene    | blood     | kidney   | log2(fold_ratio) | blood+ 0.001 | kidney+ 0.001 | log2(fold_ratio) | q_value    | Match ? |
|      |       |        |             |          |         | Stat5a  | 28.2843   | 7.11865  | -1.99033         | 28.2853      | 7.11965       | -1.9901742       | 0.00018329 | No      |
|      |       |        |             |          |         | Stat5b  | 59.1711   | 11.1925  | -2.40236         | 59.1721      | 11.1935       | -2.4022559       | 0.00018329 | No      |
|      |       |        |             |          |         | Stat6   | 41.8855   | 11.9168  | -1.81345         | 41.8865      | 11.9178       | -1.8133674       | 0.00799878 | No      |
|      |       |        |             |          |         | Stau2   | 1.02909   | 10.2805  | 3.32047          | 1.03009      | 10.2815       | 3.31920846       | 0.00018329 | No      |
|      |       |        |             |          |         | Steap2  | 0         | 11.634   | inf              | 0.001        | 11.635        | 13.5061836       | 0.00018329 | No      |
|      |       |        |             |          |         | Steap3  | 0.3215    | 2.98151  | 3.21315          | 0.3225       | 2.98251       | 3.20915591       | 0.00018329 | No      |
|      |       |        |             |          |         | Steap4  | 0.0626854 | 0.903314 | 3.84902          | 0.0636854    | 0.904314      | 3.82778922       | 0.00066911 | No      |
|      |       |        |             |          |         | Stim1   | 60.2747   | 7.92604  | -2.92688         | 60.2757      | 7.92704       | -2.9267223       | 0.00018329 | No      |
|      |       |        |             |          |         | Stim2   | 18.6373   | 5.93429  | -1.65105         | 18.6383      | 5.93529       | -1.6508799       | 0.00018329 | No      |
|      |       |        |             |          |         | Stk17b  | 225.039   | 18.1162  | -3.63482         | 225.04       | 18.1172       | -3.6347495       | 0.00018329 | No      |
|      |       |        |             |          |         | Stk24   | 112.186   | 50.6392  | -1.14757         | 112.187      | 50.6402       | -1.1475505       | 0.00709238 | No      |
|      |       |        |             |          |         | Stk3    | 2.31538   | 10.3844  | 2.1651           | 2.31638      | 10.3854       | 2.16461293       | 0.00018329 | No      |
|      |       |        |             |          |         | Stk32a  | 0         | 1.07985  | inf              | 0.001        | 1.08085       | 10.0779506       | 0.00018329 | No      |
|      |       |        |             |          |         | Stk32b  | 0         | 6.11506  | inf              | 0.001        | 6.11606       | 12.5783868       | 0.00018329 | No      |
|      |       |        |             |          |         | Stk36   | 0.161443  | 1.41601  | 3.13274          | 0.162443     | 1.41701       | 3.12484446       | 0.00018329 | No      |
|      |       |        |             |          |         | Stk38   | 265.346   | 52.3788  | -2.34082         | 265.347      | 52.3798       | -2.3407978       | 0.00018329 | No      |
|      |       |        |             |          |         | Stk39   | 17.7452   | 30.7303  | 0.792236         | 17.7462      | 30.7313       | 0.79219866       | 0.0026435  | No      |
|      |       |        |             |          |         | Stk4    | 60.27     | 12.9338  | -2.2203          | 60.271       | 12.9348       | -2.2202063       | 0.00018329 | No      |
|      |       |        |             |          |         | Stom    | 51.1045   | 16.5253  | -1.62878         | 51.1055      | 16.5263       | -1.6287148       | 0.00018329 | No      |
|      |       |        |             |          |         | Stoml1  | 3.87882   | 6.75803  | 0.800983         | 3.87982      | 6.75903       | 0.8008265        | 0.0439935  | No      |
|      |       |        |             |          |         | Stra6   | 0.447589  | 0.996129 | 1.15416          | 0.448589     | 0.997129      | 1.15238592       | 0.0289411  | No      |
|      |       |        |             |          |         | Sts     | 6.29621   | 14.2442  | 1.17782          | 6.29721      | 14.2452       | 1.17769119       | 0.00290302 | No      |
|      |       |        |             |          |         | Stx12   | 10.4356   | 27.7884  | 1.41297          | 10.4366      | 27.7894       | 1.41288289       | 0.00018329 | No      |
|      |       |        |             |          |         | Stx18   | 17.1588   | 40.4002  | 1.23541          | 17.1598      | 40.4012       | 1.23536541       | 0.00035173 | No      |
|      |       |        |             |          |         | Stx1a   | 12.0271   | 6.09209  | -0.981278        | 12.0281      | 6.09309       | -0.9811628       | 0.00755425 | No      |
|      |       |        |             |          |         | Stx5    | 35.264    | 23.964   | -0.557328        | 35.265       | 23.965        | -0.5573081       | 0.0490612  | No      |
|      |       |        |             |          |         | Stx6    | 52.658    | 17.4726  | -1.59156         | 52.659       | 17.4736       | -1.5915033       | 0.00018329 | No      |
|      |       |        |             |          |         | Stx7    | 15.3301   | 71.2467  | 2.21646          | 15.3311      | 71.2477       | 2.21638223       | 0.00018329 | No      |
|      |       |        |             |          |         | Stx8    | 52.1352   | 79.3664  | 0.606272         | 52.1362      | 79.3674       | 0.60626111       | 0.040622   | No      |
|      |       |        |             |          |         | Stxbp1  | 2.44454   | 10.1929  | 2.05992          | 2.44554      | 10.1939       | 2.05948114       | 0.00035173 | No      |
|      |       |        |             |          |         | Stxbp4  | 1.35064   | 9.82725  | 2.86314          | 1.35164      | 9.82825       | 2.8622236        | 0.00018329 | No      |
|      |       |        |             |          |         | Stxbp6  | 0         | 5.18043  | inf              | 0.001        | 5.18143       | 12.3391346       | 0.00018329 | No      |
|      |       |        |             |          |         | Styx    | 24.4506   | 6.98171  | -1.80822         | 24.4516      | 6.98271       | -1.8080699       | 0.00937155 | No      |
|      |       |        |             |          |         | Styx11  | 1.37235   | 3.50066  | 1.35098          | 1.37335      | 3.50166       | 1.35033966       | 0.0125688  | No      |
|      |       |        |             |          |         | SUB1    | 61.12     | 35.1415  | -0.798467        | 61.121       | 35.1425       | -0.7984513       | 0.00210945 | No      |
|      |       |        |             |          |         | Sucla2  | 34.2899   | 69.1801  | 1.01257          | 34.2909      | 69.1811       | 1.01255218       | 0.00018329 | No      |
|      |       |        |             |          |         | Suclg1  | 89.4565   | 226.004  | 1.33709          | 89.4575      | 226.005       | 1.33708034       | 0.00018329 | No      |
|      |       |        |             |          |         | Suclg2  | 63.5089   | 126.509  | 0.994204         | 63.5099      | 126.51        | 0.99419802       | 0.00018329 | No      |
|      |       |        |             |          |         | Sulf2   | 0.101446  | 34.5036  | 8.40989          | 0.102446     | 34.5046       | 8.39578124       | 0.00018329 | No      |
|      |       |        |             |          |         | Sult1a1 | 0.360007  | 14.2672  | 5.30854          | 0.361007     | 14.2682       | 5.30463272       | 0.00567465 | No      |
|      |       |        |             |          |         | Sult1b1 | 0         | 21.5624  | inf              | 0.001        | 21.5634       | 14.3962971       | 0.00018329 | No      |
|      |       |        |             |          |         | Sult1c2 | 0         | 40.2655  | inf              | 0.001        | 40.2665       | 15.2972925       | 0.00018329 | No      |

| RRBS |       |        |             |          |         | RNAseq   |           |          |                  |              |               |                  |            |         |
|------|-------|--------|-------------|----------|---------|----------|-----------|----------|------------------|--------------|---------------|------------------|------------|---------|
| gene | Blood | Kidney | methyl.diff | pMWU.fdr | Match ? | gene     | blood     | kidney   | log2(fold_ratio) | blood+ 0.001 | kidney+ 0.001 | log2(fold_ratio) | q_value    | Match ? |
|      |       |        |             |          |         | Sult1c2  | 0         | 24.4293  | inf              | 0.001        | 24.4303       | 14.576384        | 0.00018329 | No      |
|      |       |        |             |          |         | Sult1c2a | 0         | 99.8953  | inf              | 0.001        | 99.8963       | 16.6081436       | 0.00755425 | No      |
|      |       |        |             |          |         | Sult1c3  | 0         | 1.27449  | inf              | 0.001        | 1.27549       | 10.3168359       | 0.00018329 | No      |
|      |       |        |             |          |         | Sumf2    | 8.76922   | 15.962   | 0.864119         | 8.77022      | 15.963        | 0.86404687       | 0.0111567  | No      |
|      |       |        |             |          |         | Sumo1    | 140.661   | 89.2267  | -0.656672        | 140.662      | 89.2277       | -0.6566691       | 0.00992433 | No      |
|      |       |        |             |          |         | Sumo2l   | 213.68    | 137.951  | -0.631292        | 213.681      | 137.952       | -0.6312923       | 0.0178047  | No      |
|      |       |        |             |          |         | Sumo3    | 51.0742   | 86.2296  | 0.755589         | 51.0752      | 86.2306       | 0.75557697       | 0.00591487 | No      |
|      |       |        |             |          |         | Sun2     | 81.2048   | 36.9535  | -1.13586         | 81.2058      | 36.9545       | -1.1358327       | 0.00018329 | No      |
|      |       |        |             |          |         | Suox     | 0.26408   | 23.9972  | 6.50575          | 0.26508      | 23.9982       | 6.50035456       | 0.00018329 | No      |
|      |       |        |             |          |         | Supt20   | 39.6856   | 24.2354  | -0.711498        | 39.6866      | 24.2364       | -0.7114765       | 0.0240232  | No      |
|      |       |        |             |          |         | Supt4h1  | 134.027   | 66.8272  | -1.00401         | 134.028      | 66.8282       | -1.0040055       | 0.00018329 | No      |
|      |       |        |             |          |         | Supt7l   | 4.03939   | 6.68637  | 0.727084         | 4.04039      | 6.68737       | 0.72694438       | 0.0342763  | No      |
|      |       |        |             |          |         | Suv39h1  | 14.8769   | 5.02681  | -1.56535         | 14.8779      | 5.02781       | -1.5651689       | 0.00018329 | No      |
|      |       |        |             |          |         | Suv39h2  | 1.31005   | 0.438805 | -1.57797         | 1.31105      | 0.439805      | -1.5757868       | 0.00035173 | No      |
|      |       |        |             |          |         | Suv420h1 | 20.5683   | 8.16331  | -1.33319         | 20.5693      | 8.16431       | -1.3330898       | 0.00018329 | No      |
|      |       |        |             |          |         | Suz12    | 32.6496   | 7.94685  | -2.03861         | 32.6506      | 7.94785       | -2.038473        | 0.00018329 | No      |
|      |       |        |             |          |         | Sv2b     | 18.8474   | 0.16428  | -6.84207         | 18.8484      | 0.16528       | -6.8333861       | 0.030565   | No      |
|      |       |        |             |          |         | Svil     | 13.9937   | 4.69544  | -1.57544         | 13.9947      | 4.69644       | -1.5752411       | 0.00018329 | No      |
|      |       |        |             |          |         | Svip     | 2.16999   | 24.916   | 3.52132          | 2.17099      | 24.917        | 3.52070539       | 0.00342383 | No      |
|      |       |        |             |          |         | Swap70   | 2.44619   | 11.8427  | 2.27539          | 2.44719      | 11.8437       | 2.27492183       | 0.00018329 | No      |
|      |       |        |             |          |         | Syap1    | 16.0493   | 24.031   | 0.582384         | 16.0503      | 24.032        | 0.58235645       | 0.0453771  | No      |
|      |       |        |             |          |         | Sybu     | 0.0409416 | 0.733987 | 4.16412          | 0.0419416    | 0.734987      | 4.13126493       | 0.00051281 | No      |
|      |       |        |             |          |         | Syde2    | 0.145223  | 5.57674  | 5.26308          | 0.146223     | 5.57774       | 5.25343852       | 0.00018329 | No      |
|      |       |        |             |          |         | Syf2     | 153.103   | 98.6311  | -0.634392        | 153.104      | 98.6321       | -0.6343828       | 0.0167708  | No      |
|      |       |        |             |          |         | Syncrip  | 107.308   | 44.5747  | -1.26746         | 107.309      | 44.5757       | -1.2674417       | 0.0226206  | No      |
|      |       |        |             |          |         | Syngr1   | 2.04361   | 20.5926  | 3.33294          | 2.04461      | 20.5936       | 3.33229846       | 0.00018329 | No      |
|      |       |        |             |          |         | SYNGR2   | 23.7756   | 98.4026  | 2.04922          | 23.7766      | 98.4036       | 2.04916867       | 0.00018329 | No      |
|      |       |        |             |          |         | Synj1    | 12.8868   | 5.46918  | -1.2365          | 12.8878      | 5.47018       | -1.2363458       | 0.00380824 | No      |
|      |       |        |             |          |         | Synj2    | 0.076242  | 0.901229 | 3.56324          | 0.077242     | 0.902229      | 3.54603623       | 0.00018329 | No      |
|      |       |        |             |          |         | Synj2bp  | 20.1114   | 40.1657  | 0.997949         | 20.1124      | 40.1667       | 0.99791469       | 0.0188386  | No      |
|      |       |        |             |          |         | Syt11    | 5.76565   | 3.36536  | -0.776722        | 5.76665      | 3.36636       | -0.776544        | 0.0356397  | No      |
|      |       |        |             |          |         | Syt3     | 0         | 3.21929  | inf              | 0.001        | 3.22029       | 11.6529749       | 0.00018329 | No      |
|      |       |        |             |          |         | Syt5     | 0.0605306 | 0.941337 | 3.95898          | 0.0615306    | 0.942337      | 3.93686713       | 0.0244274  | No      |
|      |       |        |             |          |         | Syt8     | 0         | 5.22899  | inf              | 0.001        | 5.22999       | 12.3525925       | 0.00018329 | No      |
|      |       |        |             |          |         | Sytl1    | 92.2889   | 28.9911  | -1.67055         | 92.2899      | 28.9921       | -1.6705129       | 0.00018329 | No      |
|      |       |        |             |          |         | T2       | 0.399695  | 1.42485  | 1.83384          | 0.400695     | 1.42585       | 1.83124581       | 0.0295293  | No      |
|      |       |        |             |          |         | Tab1     | 9.82764   | 14.9416  | 0.604422         | 9.82864      | 14.9426       | 0.60436749       | 0.0380641  | No      |
|      |       |        |             |          |         | Tab2     | 88.979    | 21.1824  | -2.0706          | 88.98        | 21.1834       | -2.0705469       | 0.00018329 | No      |
|      |       |        |             |          |         | Tab3     | 4.24919   | 1.8309   | -1.21464         | 4.25019      | 1.8319        | -1.2141866       | 0.00018329 | No      |
|      |       |        |             |          |         | Tacc3    | 50.8703   | 12.0851  | -2.07359         | 50.8713      | 12.0861       | -2.0735032       | 0.0066167  | No      |
|      |       |        |             |          |         | Taco1    | 1.74913   | 3.6998   | 1.0808           | 1.75013      | 3.7008        | 1.08037508       | 0.0377809  | No      |
|      |       |        |             |          |         | Tada2b   | 16.779    | 10.3933  | -0.691           | 16.78        | 10.3943       | -0.6909501       | 0.0118093  | No      |



| RRBS |       |        |             |          |         | RNAseq   |          |         |                  |              |               |                  |            |         |
|------|-------|--------|-------------|----------|---------|----------|----------|---------|------------------|--------------|---------------|------------------|------------|---------|
| gene | Blood | Kidney | methyl.diff | pMWU.fdr | Match ? | gene     | blood    | kidney  | log2(fold_ratio) | blood+ 0.001 | kidney+ 0.001 | log2(fold_ratio) | q_value    | Match ? |
|      |       |        |             |          |         | Taf1     | 16.5652  | 5.30015 | -1.64405         | 16.5662      | 5.30115       | -1.6438654       | 0.00018329 | No      |
|      |       |        |             |          |         | Taf12    | 40.3124  | 22.689  | -0.829231        | 40.3134      | 22.69         | -0.8292029       | 0.00469886 | No      |
|      |       |        |             |          |         | Taf1b    | 9.3543   | 2.63872 | -1.82579         | 9.3553       | 2.63972       | -1.825399        | 0.00018329 | No      |
|      |       |        |             |          |         | Taf1c    | 14.9574  | 8.26544 | -0.855693        | 14.9584      | 8.26644       | -0.8556178       | 0.00506686 | No      |
|      |       |        |             |          |         | Taf2     | 9.59047  | 4.70928 | -1.02609         | 9.59147      | 4.71028       | -1.0259391       | 0.00018329 | No      |
|      |       |        |             |          |         | Taf4a    | 24.1155  | 10.5649 | -1.19069         | 24.1165      | 10.5659       | -1.1906049       | 0.00018329 | No      |
|      |       |        |             |          |         | Taf5l    | 17.9493  | 10.2499 | -0.808311        | 17.9503      | 10.2509       | -0.8082574       | 0.00432763 | No      |
|      |       |        |             |          |         | Taf7     | 20.089   | 8.92566 | -1.17037         | 20.09        | 8.92666       | -1.1702852       | 0.00035173 | No      |
|      |       |        |             |          |         | Taf8     | 18.0004  | 9.64954 | -0.899497        | 18.0014      | 9.65054       | -0.8994275       | 0.00238141 | No      |
|      |       |        |             |          |         | TAF9     | 121.551  | 58.2294 | -1.06174         | 121.552      | 58.2304       | -1.0617292       | 0.00018329 | No      |
|      |       |        |             |          |         | Taf9b    | 11.1398  | 6.99361 | -0.671618        | 11.1408      | 6.99461       | -0.6715373       | 0.0261426  | No      |
|      |       |        |             |          |         | Tagap    | 86.1613  | 19.3023 | -2.15826         | 86.1623      | 19.3033       | -2.1582093       | 0.00018329 | No      |
|      |       |        |             |          |         | Tagln    | 1.20104  | 24.7503 | 4.36509          | 1.20204      | 24.7513       | 4.36394749       | 0.012344   | No      |
|      |       |        |             |          |         | Tagln2   | 436.4    | 230.307 | -0.922094        | 436.401      | 230.308       | -0.9220899       | 0.00018329 | No      |
|      |       |        |             |          |         | Tanc1    | 0.444144 | 30.231  | 6.08886          | 0.445144     | 30.232        | 6.0856605        | 0.00018329 | No      |
|      |       |        |             |          |         | Tango2   | 9.53429  | 24.7246 | 1.37475          | 9.53529      | 24.7256       | 1.37465681       | 0.00018329 | No      |
|      |       |        |             |          |         | Tank     | 46.2266  | 7.38561 | -2.64593         | 46.2276      | 7.38661       | -2.6457702       | 0.00018329 | No      |
|      |       |        |             |          |         | Tapbpl   | 49.4272  | 17.1845 | -1.5242          | 49.4282      | 17.1855       | -1.5241425       | 0.00018329 | No      |
|      |       |        |             |          |         | Tapt1    | 27.7862  | 11.4127 | -1.28373         | 27.7872      | 11.4137       | -1.2836539       | 0.00018329 | No      |
|      |       |        |             |          |         | Tas1r2   | 17.2795  | 34.497  | 0.997406         | 17.2805      | 34.498        | 0.99736776       | 0.00018329 | No      |
|      |       |        |             |          |         | Tas2r139 | 0.579902 | 0       | -inf             | 0.580902     | 0.001         | -9.182151        | 0.00018329 | No      |
|      |       |        |             |          |         | Tax1bp1  | 142.871  | 79.5628 | -0.844548        | 142.872      | 79.5638       | -0.8445391       | 0.0018326  | No      |
|      |       |        |             |          |         | Tax1bp3  | 5.87507  | 49.035  | 3.06113          | 5.87607      | 49.036        | 3.06091781       | 0.00018329 | No      |
|      |       |        |             |          |         | Tbc1d10a | 21.8039  | 36.6944 | 0.750972         | 21.8049      | 36.6954       | 0.75094685       | 0.00732142 | No      |
|      |       |        |             |          |         | Tbc1d15  | 42.3454  | 9.88017 | -2.0996          | 42.3464      | 9.88117       | -2.0994855       | 0.00018329 | No      |
|      |       |        |             |          |         | Tbc1d16  | 10.7101  | 5.75209 | -0.89682         | 10.7111      | 5.75309       | -0.8966977       | 0.00082046 | No      |
|      |       |        |             |          |         | Tbc1d19  | 0.944878 | 9.08281 | 3.26494          | 0.945878     | 9.08381       | 3.26357151       | 0.00018329 | No      |
|      |       |        |             |          |         | Tbc1d2   | 0.738077 | 3.70428 | 2.32735          | 0.739077     | 3.70528       | 2.32578598       | 0.00066911 | No      |
|      |       |        |             |          |         | Tbc1d20  | 97.3944  | 30.9006 | -1.6562          | 97.3954      | 30.9016       | -1.6561721       | 0.00018329 | No      |
|      |       |        |             |          |         | Tbc1d25  | 13.8563  | 6.90349 | -1.00514         | 13.8573      | 6.90449       | -1.0050394       | 0.00755425 | No      |
|      |       |        |             |          |         | Tbc1d2b  | 9.33584  | 4.42858 | -1.07594         | 9.33684      | 4.42958       | -1.0757644       | 0.00018329 | No      |
|      |       |        |             |          |         | Tbc1d30  | 6.23881  | 3.17318 | -0.975344        | 6.23981      | 3.17418       | -0.9751182       | 0.0276821  | No      |
|      |       |        |             |          |         | Tbc1d31  | 3.35611  | 6.13851 | 0.871098         | 3.35711      | 6.13951       | 0.87090371       | 0.00981659 | No      |
|      |       |        |             |          |         | Tbc1d4   | 25.6935  | 11.517  | -1.15765         | 25.6945      | 11.518        | -1.1575694       | 0.00018329 | No      |
|      |       |        |             |          |         | Tbc1d5   | 9.37019  | 4.58362 | -1.03159         | 9.37119      | 4.58462       | -1.0314301       | 0.0216117  | No      |
|      |       |        |             |          |         | Tbk1     | 18.5182  | 10.5059 | -0.817746        | 18.5192      | 10.5069       | -0.8176847       | 0.00530972 | No      |
|      |       |        |             |          |         | Tbl1x    | 17.5097  | 9.88843 | -0.824339        | 17.5107      | 9.88943       | -0.8242775       | 0.00290302 | No      |
|      |       |        |             |          |         | Tbl1xr1  | 20.1342  | 8.05825 | -1.32111         | 20.1352      | 8.05925       | -1.3210023       | 0.00018329 | No      |
|      |       |        |             |          |         | Tbrg1    | 52.1094  | 33.396  | -0.641871        | 52.1104      | 33.397        | -0.6418528       | 0.0172708  | No      |
|      |       |        |             |          |         | Tbx10    | 0.176051 | 4.92441 | 4.80588          | 0.177051     | 4.92541       | 4.79800692       | 0.00018329 | No      |
|      |       |        |             |          |         | Tbx21    | 5.68299  | 17.8927 | 1.65465          | 5.68399      | 17.8937       | 1.65447581       | 0.00018329 | No      |
|      |       |        |             |          |         | Tbxas1   | 0.124233 | 8.44797 | 6.08749          | 0.125233     | 8.44897       | 6.0760888        | 0.00224282 | No      |

| RRBS |       |        |             |          |         | RNAseq  |           |          |                  |              |               |                  |            |         |
|------|-------|--------|-------------|----------|---------|---------|-----------|----------|------------------|--------------|---------------|------------------|------------|---------|
| gene | Blood | Kidney | methyl.diff | pMWU.fdr | Match ? | gene    | blood     | kidney   | log2(fold_ratio) | blood+ 0.001 | kidney+ 0.001 | log2(fold_ratio) | q_value    | Match ? |
|      |       |        |             |          |         | Tc2n    | 0         | 3.50776  | inf              | 0.001        | 3.50876       | 11.7767456       | 0.00018329 | No      |
|      |       |        |             |          |         | Tcaim   | 6.5758    | 21.3938  | 1.70195          | 6.5768       | 21.3948       | 1.70180249       | 0.00018329 | No      |
|      |       |        |             |          |         | Tcea1   | 88.796    | 35.3068  | -1.33055         | 88.797       | 35.3078       | -1.330524        | 0.00018329 | No      |
|      |       |        |             |          |         | Tcea3   | 0         | 24.0322  | inf              | 0.001        | 24.0332       | 14.5527411       | 0.00018329 | No      |
|      |       |        |             |          |         | Tceal1  | 0.155674  | 6.67251  | 5.42163          | 0.156674     | 6.67351       | 5.41260807       | 0.00066911 | No      |
|      |       |        |             |          |         | Tceal8  | 10.4439   | 64.3191  | 2.62258          | 10.4449      | 64.3201       | 2.62247097       | 0.00018329 | No      |
|      |       |        |             |          |         | Tceanc2 | 17.5795   | 8.46421  | -1.05445         | 17.5805      | 8.46521       | -1.0543583       | 0.00051281 | No      |
|      |       |        |             |          |         | Tceb2   | 311.674   | 586.931  | 0.913151         | 311.675      | 586.932       | 0.91315093       | 0.00035173 | No      |
|      |       |        |             |          |         | Tcerg1  | 62.9414   | 20.7245  | -1.60267         | 62.9424      | 20.7255       | -1.6026253       | 0.00018329 | No      |
|      |       |        |             |          |         | Tcf20   | 26.2828   | 7.36855  | -1.83467         | 26.2838      | 7.36955       | -1.8345254       | 0.00018329 | No      |
|      |       |        |             |          |         | Tcf21   | 0         | 1.33572  | inf              | 0.001        | 1.33672       | 10.3844816       | 0.00018329 | No      |
|      |       |        |             |          |         | Tcf3    | 64.3925   | 28.475   | -1.1772          | 64.3935      | 28.476        | -1.1771686       | 0.00018329 | No      |
|      |       |        |             |          |         | Tcf4    | 5.25218   | 2.51069  | -1.06483         | 5.25318      | 2.51169       | -1.0645326       | 0.0121287  | No      |
|      |       |        |             |          |         | TCF7    | 552.201   | 29.7005  | -4.21663         | 552.202      | 29.7015       | -4.2165884       | 0.00018329 | No      |
|      |       |        |             |          |         | Tcf7l2  | 0.126435  | 7.05297  | 5.80177          | 0.127435     | 7.05397       | 5.79060197       | 0.00018329 | No      |
|      |       |        |             |          |         | Tcn2    | 5.92184   | 48.0834  | 3.02142          | 5.92284      | 48.0844       | 3.0212079        | 0.00018329 | No      |
|      |       |        |             |          |         | Tcof1   | 25.911    | 10.7429  | -1.27018         | 25.912       | 10.7439       | -1.2701026       | 0.00018329 | No      |
|      |       |        |             |          |         | Tcp11   | 0.101394  | 1.10971  | 3.45214          | 0.102394     | 1.11071       | 3.4392791        | 0.00380824 | No      |
|      |       |        |             |          |         | Tcp11l1 | 0.053468  | 0.836787 | 3.96811          | 0.054468     | 0.837787      | 3.9431027        | 0.0131216  | No      |
|      |       |        |             |          |         | Tcp11l2 | 113.292   | 18.2811  | -2.63162         | 113.293      | 18.2821       | -2.631555        | 0.00018329 | No      |
|      |       |        |             |          |         | TCRB    | 2864.7    | 425.646  | -2.75066         | 2864.701     | 425.647       | -2.7506552       | 0.00018329 | No      |
|      |       |        |             |          |         | Tcte1   | 0.188037  | 1.66151  | 3.14341          | 0.189037     | 1.66251       | 3.13662247       | 0.0435364  | No      |
|      |       |        |             |          |         | Tctn1   | 0.939045  | 6.3621   | 2.76024          | 0.940045     | 6.3631        | 2.75892807       | 0.00018329 | No      |
|      |       |        |             |          |         | Tdg     | 24.2847   | 16.0715  | -0.595541        | 24.2857      | 16.0725       | -0.5955127       | 0.0318913  | No      |
|      |       |        |             |          |         | Tdp2    | 45.2088   | 19.7769  | -1.19279         | 45.2098      | 19.7779       | -1.1927463       | 0.00018329 | No      |
|      |       |        |             |          |         | Tdrd5   | 1.6878    | 0.618134 | -1.44916         | 1.6888       | 0.619134      | -1.4476749       | 0.00354878 | No      |
|      |       |        |             |          |         | Tdrkh   | 6.55628   | 1.39175  | -2.23598         | 6.55728      | 1.39275       | -2.2351612       | 0.00018329 | No      |
|      |       |        |             |          |         | Tead1   | 0.15461   | 13.1481  | 6.41007          | 0.15561      | 13.1491       | 6.40088547       | 0.00018329 | No      |
|      |       |        |             |          |         | Tecpr1  | 44.2466   | 19.5213  | -1.18052         | 44.2476      | 19.5223       | -1.1804762       | 0.00018329 | No      |
|      |       |        |             |          |         | Tecr    | 119.889   | 187.038  | 0.64163          | 119.89       | 187.039       | 0.64162779       | 0.0150649  | No      |
|      |       |        |             |          |         | Tef     | 3.35939   | 6.87909  | 1.03402          | 3.36039      | 6.88009       | 1.03379876       | 0.00197017 | No      |
|      |       |        |             |          |         | Tefm    | 2.79398   | 8.0329   | 1.5236           | 2.79498      | 8.0339        | 1.52326254       | 0.00018329 | No      |
|      |       |        |             |          |         | Tekt1   | 0         | 7.48973  | inf              | 0.001        | 7.49073       | 12.8708906       | 0.00018329 | No      |
|      |       |        |             |          |         | Tekt5   | 0         | 1.26693  | inf              | 0.001        | 1.26793       | 10.3082594       | 0.00018329 | No      |
|      |       |        |             |          |         | Tenc1   | 0.0444835 | 8.1389   | 7.51542          | 0.0454835    | 8.1399        | 7.48352399       | 0.00290302 | No      |
|      |       |        |             |          |         | Terf2   | 23.9421   | 9.61997  | -1.31545         | 23.9431      | 9.62097       | -1.3153557       | 0.00018329 | No      |
|      |       |        |             |          |         | Tes     | 45.0495   | 20.8021  | -1.11478         | 45.0505      | 20.8031       | -1.1147446       | 0.00018329 | No      |
|      |       |        |             |          |         | Tesk1   | 7.03128   | 13.5336  | 0.944691         | 7.03228      | 13.5346       | 0.94458783       | 0.0026435  | No      |
|      |       |        |             |          |         | Tet2    | 4.23399   | 2.32014  | -0.867808        | 4.23499      | 2.32114       | -0.867525        | 0.0196752  | No      |
|      |       |        |             |          |         | Tet3    | 20.211    | 6.41902  | -1.65472         | 20.212       | 6.42002       | -1.6545624       | 0.00329119 | No      |
|      |       |        |             |          |         | Tex10   | 18.3498   | 6.56483  | -1.48293         | 18.3508      | 6.56583       | -1.4827937       | 0.00018329 | No      |
|      |       |        |             |          |         | Tex14   | 0.463236  | 11.5188  | 4.6361           | 0.464236     | 11.5198       | 4.63311346       | 0.00018329 | No      |

| RRBS |       |        |             |          |         | RNAseq  |           |          |                  |              |               |                  |            |         |
|------|-------|--------|-------------|----------|---------|---------|-----------|----------|------------------|--------------|---------------|------------------|------------|---------|
| gene | Blood | Kidney | methyl.diff | pMWU.fdr | Match ? | gene    | blood     | kidney   | log2(fold_ratio) | blood+ 0.001 | kidney+ 0.001 | log2(fold_ratio) | q_value    | Match ? |
|      |       |        |             |          |         | Tex2    | 23.2      | 11.0324  | -1.07237         | 23.201       | 11.0334       | -1.0723096       | 0.00018329 | No      |
|      |       |        |             |          |         | Tex264  | 43.2418   | 91.7033  | 1.08455          | 43.2428      | 91.7043       | 1.08452944       | 0.00018329 | No      |
|      |       |        |             |          |         | Tex36   | 0         | 5.58227  | inf              | 0.001        | 5.58327       | 12.4468946       | 0.00018329 | No      |
|      |       |        |             |          |         | Tf      | 10.3617   | 36.6278  | 1.82168          | 10.3627      | 36.6288       | 1.82157849       | 0.00018329 | No      |
|      |       |        |             |          |         | Tfap2a  | 0         | 1.84077  | inf              | 0.001        | 1.84177       | 10.8468772       | 0.00018329 | No      |
|      |       |        |             |          |         | Tfap2b  | 0         | 23.1809  | inf              | 0.001        | 23.1819       | 14.5007112       | 0.00018329 | No      |
|      |       |        |             |          |         | Tfdp2   | 2.16252   | 3.78284  | 0.806753         | 2.16352      | 3.78384       | 0.80647063       | 0.017077   | No      |
|      |       |        |             |          |         | Tfe3    | 4.34538   | 10.712   | 1.30168          | 4.34638      | 10.713        | 1.30147632       | 0.00018329 | No      |
|      |       |        |             |          |         | Tff3    | 0         | 241.071  | inf              | 0.001        | 241.072       | 17.8791046       | 0.00018329 | No      |
|      |       |        |             |          |         | Tfpi    | 3.64676   | 6.98004  | 0.936622         | 3.64776      | 6.98104       | 0.93643117       | 0.0393003  | No      |
|      |       |        |             |          |         | Tfrc    | 17.3061   | 8.81747  | -0.972845        | 17.3071      | 8.81847       | -0.9727637       | 0.00035173 | No      |
|      |       |        |             |          |         | Tgfb1   | 116.984   | 62.4036  | -0.906613        | 116.985      | 62.4046       | -0.9065993       | 0.00530972 | No      |
|      |       |        |             |          |         | Tgfb2   | 0.0758917 | 4.50661  | 5.89196          | 0.0768917    | 4.50761       | 5.87339101       | 0.00018329 | No      |
|      |       |        |             |          |         | Tgfrb2  | 27.4258   | 13.6747  | -1.00403         | 27.4268      | 13.6757       | -1.0039716       | 0.00329119 | No      |
|      |       |        |             |          |         | Tgfrb3  | 0.226378  | 9.29653  | 5.35989          | 0.227378     | 9.29753       | 5.35368292       | 0.00018329 | No      |
|      |       |        |             |          |         | Tgm2    | 0.0292137 | 66.025   | 11.1422          | 0.0302137    | 66.026        | 11.0936157       | 0.032482   | No      |
|      |       |        |             |          |         | Tgm3    | 0         | 1.85367  | inf              | 0.001        | 1.85467       | 10.8569468       | 0.00018329 | No      |
|      |       |        |             |          |         | Tgs1    | 7.09222   | 2.46459  | -1.52489         | 7.09322      | 2.46559       | -1.5245078       | 0.00018329 | No      |
|      |       |        |             |          |         | Thap11  | 21.1128   | 12.6103  | -0.743519        | 21.1138      | 12.6113       | -0.7434693       | 0.0157085  | No      |
|      |       |        |             |          |         | Thap4   | 10.9117   | 157.65   | 3.85278          | 10.9127      | 157.651       | 3.85265432       | 0.00018329 | No      |
|      |       |        |             |          |         | Thbs1   | 0.213371  | 113.997  | 9.06142          | 0.214371     | 113.998       | 9.05468305       | 0.00018329 | No      |
|      |       |        |             |          |         | Them4   | 1.77241   | 4.52614  | 1.35257          | 1.77341      | 4.52714       | 1.35207381       | 0.00290302 | No      |
|      |       |        |             |          |         | Them6   | 10.5295   | 41.6527  | 1.98397          | 10.5305      | 41.6537       | 1.98387071       | 0.00018329 | No      |
|      |       |        |             |          |         | Them7   | 0         | 4.02438  | inf              | 0.001        | 4.02538       | 11.9749093       | 0.0158179  | No      |
|      |       |        |             |          |         | Thns12  | 0.823661  | 49.0864  | 5.89713          | 0.824661     | 49.0874       | 5.89540776       | 0.00018329 | No      |
|      |       |        |             |          |         | Thoc2   | 20.4461   | 6.21306  | -1.71845         | 20.4471      | 6.21406       | -1.7182882       | 0.00018329 | No      |
|      |       |        |             |          |         | Thoc3   | 28.3615   | 16.9662  | -0.741274        | 28.3625      | 16.9672       | -0.7412362       | 0.00799878 | No      |
|      |       |        |             |          |         | Thoc7   | 109.02    | 69.9105  | -0.641014        | 109.021      | 69.9115       | -0.6410044       | 0.0349324  | No      |
|      |       |        |             |          |         | Thop1   | 5.08564   | 8.54547  | 0.748731         | 5.08664      | 8.54647       | 0.74861566       | 0.0262294  | No      |
|      |       |        |             |          |         | Thra    | 12.718    | 41.9065  | 1.7203           | 12.719       | 41.9075       | 1.72022321       | 0.00354878 | No      |
|      |       |        |             |          |         | Thrap3  | 61.3166   | 30.2864  | -1.01761         | 61.3176      | 30.2874       | -1.0175835       | 0.00018329 | No      |
|      |       |        |             |          |         | Thrb    | 3.51188   | 8.84757  | 1.33304          | 3.51288      | 8.84857       | 1.33279003       | 0.00018329 | No      |
|      |       |        |             |          |         | Thsd4   | 0.0249979 | 4.47375  | 7.48353          | 0.0259979    | 4.47475       | 7.42726818       | 0.0381595  | No      |
|      |       |        |             |          |         | Tia1    | 25.9493   | 9.12461  | -1.50786         | 25.9503      | 9.12561       | -1.5077583       | 0.00018329 | No      |
|      |       |        |             |          |         | Tial1   | 74.1515   | 30.9715  | -1.25953         | 74.1525      | 30.9725       | -1.2595075       | 0.00018329 | No      |
|      |       |        |             |          |         | Tiam2   | 0.151518  | 0.839451 | 2.46995          | 0.152518     | 0.840451      | 2.46218419       | 0.00018329 | No      |
|      |       |        |             |          |         | Tie1    | 2.09523   | 8.97855  | 2.09937          | 2.09623      | 8.97955       | 2.09884613       | 0.00018329 | No      |
|      |       |        |             |          |         | Tifab   | 0.147651  | 6.35178  | 5.4269           | 0.148651     | 6.35278       | 5.41738699       | 0.016558   | No      |
|      |       |        |             |          |         | Tigd2   | 23.4076   | 4.83412  | -2.27565         | 23.4086      | 4.83512       | -2.2754151       | 0.00018329 | No      |
|      |       |        |             |          |         | Timd2   | 0.512043  | 11.8355  | 4.53071          | 0.513043     | 11.8365       | 4.52801899       | 0.00018329 | No      |
|      |       |        |             |          |         | Timm10  | 21.9073   | 49.9514  | 1.18911          | 21.9083      | 49.9524       | 1.18907645       | 0.00066911 | No      |
|      |       |        |             |          |         | TIMM10B | 11.5061   | 23.7896  | 1.04793          | 11.5071      | 23.7906       | 1.04786736       | 0.00481718 | No      |

| RRBS |       |        |             |          |         | RNAseq   |           |          |                  |              |               |                  |            |         |
|------|-------|--------|-------------|----------|---------|----------|-----------|----------|------------------|--------------|---------------|------------------|------------|---------|
| gene | Blood | Kidney | methyl.diff | pMWU.fdr | Match ? | gene     | blood     | kidney   | log2(fold_ratio) | blood+ 0.001 | kidney+ 0.001 | log2(fold_ratio) | q_value    | Match ? |
|      |       |        |             |          |         | Timm13   | 74.9548   | 177.172  | 1.24106          | 74.9558      | 177.173       | 1.24104674       | 0.00018329 | No      |
|      |       |        |             |          |         | Timm17a  | 35.802    | 83.9829  | 1.23006          | 35.803       | 83.9839       | 1.23003231       | 0.00018329 | No      |
|      |       |        |             |          |         | Timm21   | 13.1931   | 31.1249  | 1.23828          | 13.1941      | 31.1259       | 1.23822261       | 0.00018329 | No      |
|      |       |        |             |          |         | Timm22   | 11.6309   | 31.9526  | 1.45797          | 11.6319      | 31.9536       | 1.45789171       | 0.00018329 | No      |
|      |       |        |             |          |         | Timm44   | 23.1499   | 39.204   | 0.759996         | 23.1509      | 39.205        | 0.75996938       | 0.00650199 | No      |
|      |       |        |             |          |         | Timm8b   | 37.3584   | 265.563  | 2.82955          | 37.3594      | 265.564       | 2.8295164        | 0.00210945 | No      |
|      |       |        |             |          |         | Timp2    | 0.490234  | 42.0813  | 6.42357          | 0.491234     | 42.0823       | 6.42065933       | 0.00018329 | No      |
|      |       |        |             |          |         | Timp3    | 0.015759  | 304.302  | 14.237           | 0.016759     | 304.303       | 14.1482849       | 0.00140841 | No      |
|      |       |        |             |          |         | Timp4    | 0         | 1.2739   | inf              | 0.001        | 1.2749        | 10.3161684       | 0.00018329 | No      |
|      |       |        |             |          |         | Tiparp   | 19.624    | 6.86235  | -1.51584         | 19.625       | 6.86335       | -1.5157078       | 0.00018329 | No      |
|      |       |        |             |          |         | Tjp1     | 0.0299508 | 11.5501  | 8.5911           | 0.0309508    | 11.5511       | 8.54383783       | 0.00018329 | No      |
|      |       |        |             |          |         | Tjp2     | 0.0410349 | 15.1249  | 8.52586          | 0.0420349    | 15.1259       | 8.49121763       | 0.00018329 | No      |
|      |       |        |             |          |         | Tkt      | 84.2036   | 214.627  | 1.34988          | 84.2046      | 214.628       | 1.34986735       | 0.00018329 | No      |
|      |       |        |             |          |         | Tlcd1    | 1.23126   | 41.2877  | 5.0675           | 1.23226      | 41.2887       | 5.0663684        | 0.00018329 | No      |
|      |       |        |             |          |         | Tle2     | 0.0267699 | 187.145  | 12.7713          | 0.0277699    | 187.146       | 12.7183546       | 0.00834357 | No      |
|      |       |        |             |          |         | Tle3     | 55.116    | 19.3096  | -1.51316         | 55.117       | 19.3106       | -1.5131044       | 0.00018329 | No      |
|      |       |        |             |          |         | Tle4     | 30.0549   | 8.74443  | -1.78116         | 30.0559      | 8.74543       | -1.781047        | 0.00018329 | No      |
|      |       |        |             |          |         | Tlk2     | 23.4734   | 12.1717  | -0.947498        | 23.4744      | 12.1727       | -0.9474391       | 0.00891798 | No      |
|      |       |        |             |          |         | Tln1     | 57.6402   | 29.6015  | -0.961403        | 57.6412      | 29.6025       | -0.9613814       | 0.00530972 | No      |
|      |       |        |             |          |         | Tlr12    | 0         | 0.607243 | inf              | 0.001        | 0.608243      | 9.248504         | 0.00018329 | No      |
|      |       |        |             |          |         | Tlr2     | 0.69367   | 2.63159  | 1.92361          | 0.69467      | 2.63259       | 1.92208315       | 0.00018329 | No      |
|      |       |        |             |          |         | Tlr3     | 0.51539   | 10.5749  | 4.35884          | 0.51639      | 10.5759       | 4.35617557       | 0.00018329 | No      |
|      |       |        |             |          |         | Tlr4     | 0.0239433 | 0.802424 | 5.06667          | 0.0249433    | 0.803424      | 5.00943731       | 0.0399588  | No      |
|      |       |        |             |          |         | Tlr7     | 0.235175  | 1.21197  | 2.36555          | 0.236175     | 1.21297       | 2.36061571       | 0.00035173 | No      |
|      |       |        |             |          |         | Tm2d1    | 13.9147   | 37.5159  | 1.4309           | 13.9157      | 37.5169       | 1.43082714       | 0.033435   | No      |
|      |       |        |             |          |         | Tm2d2    | 23.1804   | 43.5078  | 0.908368         | 23.1814      | 43.5088       | 0.90833953       | 0.00154856 | No      |
|      |       |        |             |          |         | Tm7sf2   | 23.0327   | 46.0517  | 0.999568         | 23.0337      | 46.0527       | 0.99953957       | 0.0378663  | No      |
|      |       |        |             |          |         | Tm9sf2   | 13.7932   | 51.019   | 1.88707          | 13.7942      | 51.02         | 1.88700111       | 0.00018329 | No      |
|      |       |        |             |          |         | Tmbim4   | 92.6565   | 61.4757  | -0.591875        | 92.6575      | 61.4767       | -0.591868        | 0.0329503  | No      |
|      |       |        |             |          |         | Tmc4     | 0.102202  | 33.7495  | 8.36729          | 0.103202     | 33.7505       | 8.35329414       | 0.00018329 | No      |
|      |       |        |             |          |         | Tmc6     | 93.5134   | 37.0715  | -1.33486         | 93.5144      | 37.0725       | -1.3348391       | 0.0113722  | No      |
|      |       |        |             |          |         | Tmcc1    | 14.1064   | 5.41375  | -1.38165         | 14.1074      | 5.41475       | -1.3814855       | 0.00018329 | No      |
|      |       |        |             |          |         | Tmcc3    | 1.01071   | 3.33098  | 1.72058          | 1.01171      | 3.33198       | 1.71958393       | 0.00018329 | No      |
|      |       |        |             |          |         | Tmed3    | 9.84067   | 28.3493  | 1.52648          | 9.84167      | 28.3503       | 1.52638895       | 0.00018329 | No      |
|      |       |        |             |          |         | Tmed5    | 14.1622   | 5.86835  | -1.27102         | 14.1632      | 5.86935       | -1.2708746       | 0.00018329 | No      |
|      |       |        |             |          |         | Tmed7    | 12.4344   | 22.6052  | 0.862314         | 12.4354      | 22.6062       | 0.86226559       | 0.0344723  | No      |
|      |       |        |             |          |         | Tmed8    | 7.17967   | 1.74273  | -2.04256         | 7.18067      | 1.74373       | -2.0419418       | 0.00445502 | No      |
|      |       |        |             |          |         | Tmeff1   | 0         | 0.590414 | inf              | 0.001        | 0.591414      | 9.20802459       | 0.00018329 | No      |
|      |       |        |             |          |         | Tmem100  | 0         | 0.689189 | inf              | 0.001        | 0.690189      | 9.43084767       | 0.00018329 | No      |
|      |       |        |             |          |         | Tmem102  | 0         | 7.63073  | inf              | 0.001        | 7.63173       | 12.8977944       | 0.00018329 | No      |
|      |       |        |             |          |         | Tmem104  | 7.34527   | 2.10191  | -1.80512         | 7.34627      | 2.10291       | -1.8046248       | 0.00018329 | No      |
|      |       |        |             |          |         | Tmem106a | 2.10936   | 19.2922  | 3.19314          | 2.11036      | 19.2932       | 3.19253142       | 0.00018329 | No      |

| RRBS |       |        |             |          |         | RNAseq   |           |         |                  |              |               |                  |            |         |
|------|-------|--------|-------------|----------|---------|----------|-----------|---------|------------------|--------------|---------------|------------------|------------|---------|
| gene | Blood | Kidney | methyl.diff | pMWU.fdr | Match ? | gene     | blood     | kidney  | log2(fold_ratio) | blood+ 0.001 | kidney+ 0.001 | log2(fold_ratio) | q_value    | Match ? |
|      |       |        |             |          |         | Tmem106b | 15.3002   | 24.1079 | 0.655951         | 15.3012      | 24.1089       | 0.65592103       | 0.0424854  | No      |
|      |       |        |             |          |         | Tmem106c | 6.32251   | 14.3011 | 1.17755          | 6.32351      | 14.3021       | 1.17742951       | 0.00066911 | No      |
|      |       |        |             |          |         | Tmem107  | 0.489813  | 10.5978 | 4.43539          | 0.490813     | 10.5988       | 4.43258366       | 0.00018329 | No      |
|      |       |        |             |          |         | Tmem108  | 0.052934  | 1.40024 | 4.72534          | 0.053934     | 1.40124       | 4.69936523       | 0.00035173 | No      |
|      |       |        |             |          |         | Tmem109  | 10.9363   | 23.9474 | 1.13075          | 10.9373      | 23.9484       | 1.13067264       | 0.00018329 | No      |
|      |       |        |             |          |         | TMEM11   | 17.8203   | 33.3252 | 0.903093         | 17.8213      | 33.3262       | 0.90305424       | 0.00197017 | No      |
|      |       |        |             |          |         | Tmem115  | 17.7181   | 27.4632 | 0.632279         | 17.7191      | 27.4642       | 0.63224694       | 0.0291393  | No      |
|      |       |        |             |          |         | Tmem116  | 0.0385224 | 9.66622 | 7.97111          | 0.0395224    | 9.66722       | 7.93428671       | 0.00732142 | No      |
|      |       |        |             |          |         | Tmem117  | 0.244721  | 8.35936 | 5.09418          | 0.245721     | 8.36036       | 5.088472         | 0.00018329 | No      |
|      |       |        |             |          |         | Tmem120a | 12.3233   | 25.7911 | 1.06548          | 12.3243      | 25.7921       | 1.06542354       | 0.00018329 | No      |
|      |       |        |             |          |         | Tmem123  | 148.566   | 89.4108 | -0.732582        | 148.567      | 89.4118       | -0.7325766       | 0.00811172 | No      |
|      |       |        |             |          |         | Tmem127  | 17.246    | 26.0223 | 0.593485         | 17.247       | 26.0233       | 0.59345848       | 0.0239196  | No      |
|      |       |        |             |          |         | Tmem132a | 0.828671  | 17.787  | 4.42388          | 0.829671     | 17.788        | 4.42222114       | 0.00018329 | No      |
|      |       |        |             |          |         | Tmem135  | 5.93418   | 12.6251 | 1.08917          | 5.93518      | 12.6261       | 1.08904539       | 0.00018329 | No      |
|      |       |        |             |          |         | Tmem136  | 0.112052  | 8.1608  | 6.18647          | 0.113052     | 8.1618        | 6.17382894       | 0.00018329 | No      |
|      |       |        |             |          |         | Tmem141  | 16.2258   | 28.7849 | 0.82702          | 16.2268      | 28.7859       | 0.8269838        | 0.0221058  | No      |
|      |       |        |             |          |         | Tmem14a  | 11.2168   | 27.1893 | 1.27738          | 11.2178      | 27.1903       | 1.2773023        | 0.00018329 | No      |
|      |       |        |             |          |         | Tmem154  | 52.9013   | 8.1066  | -2.70613         | 52.9023      | 8.1076        | -2.7059836       | 0.00018329 | No      |
|      |       |        |             |          |         | Tmem156  | 53.3237   | 8.10996 | -2.71701         | 53.3247      | 8.11096       | -2.7168594       | 0.00018329 | No      |
|      |       |        |             |          |         | Tmem163  | 9.78317   | 1.05918 | -3.20736         | 9.78417      | 1.06018       | -3.2061402       | 0.0102693  | No      |
|      |       |        |             |          |         | Tmem169  | 0         | 4.28256 | inf              | 0.001        | 4.28356       | 12.0645946       | 0.00481718 | No      |
|      |       |        |             |          |         | Tmem17   | 1.66996   | 9.94573 | 2.57426          | 1.67096      | 9.94673       | 2.57354512       | 0.00018329 | No      |
|      |       |        |             |          |         | Tmem170b | 4.50424   | 1.99628 | -1.17397         | 4.50524      | 1.99728       | -1.1735674       | 0.0016929  | No      |
|      |       |        |             |          |         | Tmem173  | 139.645   | 24.8534 | -2.49025         | 139.646      | 24.8544       | -2.4902011       | 0.00018329 | No      |
|      |       |        |             |          |         | Tmem174  | 0         | 76.2207 | inf              | 0.001        | 76.2217       | 16.2179142       | 0.00018329 | No      |
|      |       |        |             |          |         | Tmem176a | 5.22773   | 97.907  | 4.22716          | 5.22873      | 97.908        | 4.22689427       | 0.00018329 | No      |
|      |       |        |             |          |         | Tmem176b | 4.30416   | 125.841 | 4.86973          | 4.30516      | 125.842       | 4.86940284       | 0.00018329 | No      |
|      |       |        |             |          |         | Tmem184b | 7.25985   | 15.9909 | 1.13924          | 7.26085      | 15.9919       | 1.139131         | 0.00018329 | No      |
|      |       |        |             |          |         | Tmem185b | 6.73666   | 10.9118 | 0.695782         | 6.73766      | 10.9128       | 0.69570178       | 0.0138771  | No      |
|      |       |        |             |          |         | Tmem194  | 3.95476   | 1.56968 | -1.33312         | 3.95576      | 1.57068       | -1.3325656       | 0.0018326  | No      |
|      |       |        |             |          |         | Tmem194b | 20.0314   | 4.28987 | -2.22326         | 20.0324      | 4.29087       | -2.2229932       | 0.00018329 | No      |
|      |       |        |             |          |         | Tmem2    | 0.0971512 | 2.73091 | 4.81301          | 0.0981512    | 2.73191       | 4.79876024       | 0.00018329 | No      |
|      |       |        |             |          |         | Tmem204  | 37.2651   | 5.58893 | -2.73718         | 37.2661      | 5.58993       | -2.7369617       | 0.00210945 | No      |
|      |       |        |             |          |         | Tmem205  | 3.43841   | 35.5183 | 3.36875          | 3.43941      | 35.5193       | 3.36837014       | 0.00018329 | No      |
|      |       |        |             |          |         | Tmem207  | 0         | 66.5226 | inf              | 0.001        | 66.5236       | 16.0215786       | 0.00018329 | No      |
|      |       |        |             |          |         | Tmem213  | 0         | 460.766 | inf              | 0.001        | 460.767       | 18.8136779       | 0.00615197 | No      |
|      |       |        |             |          |         | Tmem216  | 7.1087    | 19.7858 | 1.47681          | 7.1097       | 19.7868       | 1.47667772       | 0.00126492 | No      |
|      |       |        |             |          |         | Tmem218  | 7.47312   | 13.2802 | 0.829493         | 7.47412      | 13.2812       | 0.82940987       | 0.0269158  | No      |
|      |       |        |             |          |         | Tmem229b | 28.4311   | 4.98771 | -2.51102         | 28.4321      | 4.98871       | -2.5107819       | 0.00018329 | No      |
|      |       |        |             |          |         | Tmem237  | 1.64693   | 7.64771 | 2.21525          | 1.64793      | 7.64871       | 2.21456149       | 0.00018329 | No      |
|      |       |        |             |          |         | Tmem238  | 2.90486   | 52.9515 | 4.18813          | 2.90586      | 52.9525       | 4.1876617        | 0.00018329 | No      |
|      |       |        |             |          |         | Tmem243  | 69.9407   | 27.0911 | -1.36832         | 69.9417      | 27.0921       | -1.3682806       | 0.0115803  | No      |

| RRBS |       |        |             |          |         | RNAseq   |           |         |                  |              |               |                  |            |         |
|------|-------|--------|-------------|----------|---------|----------|-----------|---------|------------------|--------------|---------------|------------------|------------|---------|
| gene | Blood | Kidney | methyl.diff | pMWU.fdr | Match ? | gene     | blood     | kidney  | log2(fold_ratio) | blood+ 0.001 | kidney+ 0.001 | log2(fold_ratio) | q_value    | Match ? |
|      |       |        |             |          |         | Tmem245  | 8.77556   | 4.27466 | -1.03768         | 8.77656      | 4.27566       | -1.0375084       | 0.00035173 | No      |
|      |       |        |             |          |         | Tmem246  | 0.125033  | 13.0981 | 6.71091          | 0.126033     | 13.0991       | 6.69952235       | 0.00018329 | No      |
|      |       |        |             |          |         | Tmem25   | 0.383739  | 4.76834 | 3.63529          | 0.384739     | 4.76934       | 3.63183765       | 0.00018329 | No      |
|      |       |        |             |          |         | Tmem252  | 0.0446194 | 17.0931 | 8.58152          | 0.0456194    | 17.0941       | 8.54963528       | 0.0429385  | No      |
|      |       |        |             |          |         | Tmem255b | 0         | 3.14046 | inf              | 0.001        | 3.14146       | 11.6172195       | 0.0276821  | No      |
|      |       |        |             |          |         | Tmem256  | 38.5701   | 111.82  | 1.53562          | 38.5711      | 111.821       | 1.53559896       | 0.00018329 | No      |
|      |       |        |             |          |         | Tmem27   | 0         | 96.5584 | inf              | 0.001        | 96.5594       | 16.5591291       | 0.00018329 | No      |
|      |       |        |             |          |         | Tmem35   | 0.339824  | 2.29723 | 2.75704          | 0.340824     | 2.29823       | 2.75342435       | 0.00018329 | No      |
|      |       |        |             |          |         | Tmem38a  | 0.673892  | 11.953  | 4.14871          | 0.674892     | 11.954        | 4.14669299       | 0.00018329 | No      |
|      |       |        |             |          |         | Tmem38b  | 5.46529   | 14.2818 | 1.38581          | 5.46629      | 14.2828       | 1.38564493       | 0.00018329 | No      |
|      |       |        |             |          |         | Tmem43   | 22.101    | 12.9504 | -0.771116        | 22.102       | 12.9514       | -0.7710689       | 0.00419853 | No      |
|      |       |        |             |          |         | Tmem44   | 0.18458   | 1.05964 | 2.52125          | 0.18558      | 1.06064       | 2.51482192       | 0.0197773  | No      |
|      |       |        |             |          |         | Tmem50a  | 281.276   | 108.38  | -1.37589         | 281.277      | 108.381       | -1.3758797       | 0.00018329 | No      |
|      |       |        |             |          |         | Tmem50b  | 1.5159    | 52.2364 | 5.10681          | 1.5169       | 52.2374       | 5.10588521       | 0.00018329 | No      |
|      |       |        |             |          |         | Tmem51   | 1.12253   | 18.2834 | 4.02571          | 1.12353      | 18.2844       | 4.02450273       | 0.00018329 | No      |
|      |       |        |             |          |         | Tmem52   | 0         | 3.30781 | inf              | 0.001        | 3.30881       | 11.6920967       | 0.0163528  | No      |
|      |       |        |             |          |         | Tmem53   | 3.1937    | 13.0644 | 2.03234          | 3.1947       | 13.0654       | 2.03199893       | 0.00018329 | No      |
|      |       |        |             |          |         | Tmem54   | 0         | 6.86648 | inf              | 0.001        | 6.86748       | 12.7455651       | 0.00018329 | No      |
|      |       |        |             |          |         | Tmem55a  | 0.282775  | 14.9583 | 5.72515          | 0.283775     | 14.9593       | 5.72015136       | 0.00018329 | No      |
|      |       |        |             |          |         | Tmem56   | 0         | 1.10811 | inf              | 0.001        | 1.10911       | 10.1151867       | 0.00018329 | No      |
|      |       |        |             |          |         | Tmem64   | 1.71345   | 4.72466 | 1.46331          | 1.71445      | 4.72566       | 1.46277          | 0.00432763 | No      |
|      |       |        |             |          |         | Tmem66   | 138.41    | 64.7572 | -1.09584         | 138.411      | 64.7582       | -1.0958238       | 0.00018329 | No      |
|      |       |        |             |          |         | Tmem67   | 0.131778  | 3.14774 | 4.57814          | 0.132778     | 3.14874       | 4.5676866        | 0.00018329 | No      |
|      |       |        |             |          |         | Tmem69   | 4.24012   | 8.10461 | 0.934638         | 4.24112      | 8.10561       | 0.93447546       | 0.00555427 | No      |
|      |       |        |             |          |         | Tmem70   | 7.22294   | 23.564  | 1.70593          | 7.22394      | 23.565        | 1.70578787       | 0.00018329 | No      |
|      |       |        |             |          |         | Tmem71   | 63.0368   | 3.4769  | -4.18032         | 63.0378      | 3.4779        | -4.1799288       | 0.00018329 | No      |
|      |       |        |             |          |         | Tmem79   | 0.221188  | 9.5372  | 5.43022          | 0.222188     | 9.5382        | 5.42386423       | 0.00018329 | No      |
|      |       |        |             |          |         | Tmem86a  | 0.665489  | 39.818  | 5.90286          | 0.666489     | 39.819        | 5.90073212       | 0.00018329 | No      |
|      |       |        |             |          |         | Tmem86b  | 6.69517   | 2.8491  | -1.23261         | 6.69617      | 2.8501        | -1.2323236       | 0.0119236  | No      |
|      |       |        |             |          |         | Tmem87a  | 56.1736   | 29.4837 | -0.929973        | 56.1746      | 29.4847       | -0.9299514       | 0.0246265  | No      |
|      |       |        |             |          |         | TMEM9    | 20.4884   | 35.6541 | 0.799264         | 20.4894      | 35.6551       | 0.79923071       | 0.00543198 | No      |
|      |       |        |             |          |         | Tmem97   | 5.09595   | 10.0832 | 0.984535         | 5.09695      | 10.0842       | 0.98439053       | 0.00686277 | No      |
|      |       |        |             |          |         | Tmf1     | 17.6431   | 11.2548 | -0.648564        | 17.6441      | 11.2558       | -0.6485172       | 0.0379652  | No      |
|      |       |        |             |          |         | Tmigd1   | 0.103535  | 5.42629 | 5.71178          | 0.104535     | 5.42729       | 5.69817403       | 0.0031651  | No      |
|      |       |        |             |          |         | Tmlhe    | 8.47871   | 31.5075 | 1.89378          | 8.47971      | 31.5085       | 1.89365424       | 0.00018329 | No      |
|      |       |        |             |          |         | Tmod1    | 1.55214   | 8.11648 | 2.3866           | 1.55314      | 8.11748       | 2.38584404       | 0.00880015 | No      |
|      |       |        |             |          |         | Tmod3    | 55.6898   | 26.3426 | -1.08001         | 55.6908      | 26.3436       | -1.0799865       | 0.00018329 | No      |
|      |       |        |             |          |         | Tmpo     | 51.1364   | 20.9868 | -1.28487         | 51.1374      | 20.9878       | -1.2848279       | 0.00018329 | No      |
|      |       |        |             |          |         | Tmprss13 | 0         | 3.82914 | inf              | 0.001        | 3.83014       | 11.9031814       | 0.00018329 | No      |
|      |       |        |             |          |         | Tmprss9  | 0.0713915 | 6.61491 | 6.53383          | 0.0723915    | 6.61591       | 6.51397549       | 0.00018329 | No      |
|      |       |        |             |          |         | Tmsb10   | 9844.49   | 2241.45 | -2.13488         | 9844.491     | 2241.451      | -2.1348837       | 0.00018329 | No      |
|      |       |        |             |          |         | Tmsbl1   | 98.6024   | 19.2159 | -2.35932         | 98.6034      | 19.2169       | -2.3592618       | 0.00018329 | No      |

| RRBS |       |        |             |          |         | RNAseq    |           |          |                  |              |               |                  |            |         |
|------|-------|--------|-------------|----------|---------|-----------|-----------|----------|------------------|--------------|---------------|------------------|------------|---------|
| gene | Blood | Kidney | methyl.diff | pMWU.fdr | Match ? | gene      | blood     | kidney   | log2(fold_ratio) | blood+ 0.001 | kidney+ 0.001 | log2(fold_ratio) | q_value    | Match ? |
|      |       |        |             |          |         | Tmtc1     | 0         | 5.81927  | inf              | 0.001        | 5.82027       | 12.5068704       | 0.0166578  | No      |
|      |       |        |             |          |         | Tmtc3     | 0.715528  | 2.66712  | 1.8982           | 0.716528     | 2.66812       | 1.89672857       | 0.00018329 | No      |
|      |       |        |             |          |         | Tmtc4     | 1.9003    | 15.475   | 3.02564          | 1.9013       | 15.476        | 3.02497454       | 0.00018329 | No      |
|      |       |        |             |          |         | Tnf       | 0.901544  | 6.53652  | 2.85805          | 0.902544     | 6.53752       | 2.85667428       | 0.0362975  | No      |
|      |       |        |             |          |         | Tnfaip1   | 6.16159   | 25.0636  | 2.02422          | 6.16259      | 25.0646       | 2.02404249       | 0.00018329 | No      |
|      |       |        |             |          |         | Tnfaip2   | 0.0617682 | 20.7033  | 8.38878          | 0.0627682    | 20.7043       | 8.36568087       | 0.00018329 | No      |
|      |       |        |             |          |         | Tnfaip3   | 61.6401   | 31.1274  | -0.985686        | 61.6411      | 31.1284       | -0.9856612       | 0.00277264 | No      |
|      |       |        |             |          |         | Tnfaip8l2 | 96.7707   | 29.1751  | -1.72983         | 96.7717      | 29.1761       | -1.7297982       | 0.0210997  | No      |
|      |       |        |             |          |         | Tnfrsf11b | 0         | 0.745074 | inf              | 0.001        | 0.746074      | 9.54317492       | 0.00018329 | No      |
|      |       |        |             |          |         | Tnfrsf14  | 477.521   | 40.189   | -3.57069         | 477.522      | 40.19         | -3.5706587       | 0.00018329 | No      |
|      |       |        |             |          |         | Tnfrsf1a  | 8.18033   | 37.27    | 2.18778          | 8.18133      | 37.271        | 2.18764623       | 0.00018329 | No      |
|      |       |        |             |          |         | Tnfrsf1b  | 22.3126   | 10.6963  | -1.06075         | 22.3136      | 10.6973       | -1.0606766       | 0.00018329 | No      |
|      |       |        |             |          |         | Tnfrsf21  | 2.37442   | 50.4641  | 4.40961          | 2.37542      | 50.4651       | 4.40903149       | 0.00018329 | No      |
|      |       |        |             |          |         | Tnfrsf26  | 120.653   | 9.19953  | -3.71316         | 120.654      | 9.20053       | -3.713015        | 0.00018329 | No      |
|      |       |        |             |          |         | Tnfsf13   | 0.529564  | 25.787   | 5.6057           | 0.530564     | 25.788        | 5.60302929       | 0.00018329 | No      |
|      |       |        |             |          |         | Tnfsf14   | 2.98969   | 7.78222  | 1.38019          | 2.99069      | 7.78322       | 1.37988876       | 0.00698138 | No      |
|      |       |        |             |          |         | Tnfsf15   | 0         | 0.752508 | inf              | 0.001        | 0.753508      | 9.55747902       | 0.00018329 | No      |
|      |       |        |             |          |         | Tnfsf9    | 0.567768  | 2.58421  | 2.18635          | 0.568768     | 2.58521       | 2.18436927       | 0.00210945 | No      |
|      |       |        |             |          |         | Tnik      | 8.1475    | 0.89627  | -3.18435         | 8.1485       | 0.89727       | -3.1829204       | 0.00018329 | No      |
|      |       |        |             |          |         | Tnip1     | 68.4231   | 35.917   | -0.929816        | 68.4241      | 35.918        | -0.9297975       | 0.00035173 | No      |
|      |       |        |             |          |         | Tnks1bp1  | 2.84206   | 15.8117  | 2.47598          | 2.84306      | 15.8127       | 2.47556728       | 0.00018329 | No      |
|      |       |        |             |          |         | Tnks2     | 15.4076   | 7.84124  | -0.974488        | 15.4086      | 7.84224       | -0.9743981       | 0.00035173 | No      |
|      |       |        |             |          |         | Tnnc1     | 0.495863  | 2.41432  | 2.2836           | 0.496863     | 2.41532       | 2.28129432       | 0.0202696  | No      |
|      |       |        |             |          |         | Tnni1     | 0         | 1.47217  | inf              | 0.001        | 1.47317       | 10.5247082       | 0.00018329 | No      |
|      |       |        |             |          |         | Tnni2     | 0         | 9.03719  | inf              | 0.001        | 9.03819       | 13.1418182       | 0.00018329 | No      |
|      |       |        |             |          |         | Tnni3k    | 0.0790378 | 1.49071  | 4.23732          | 0.0800378    | 1.49171       | 4.22014177       | 0.00140841 | No      |
|      |       |        |             |          |         | Tnnt2     | 0.217318  | 6.25027  | 4.84604          | 0.218318     | 6.25127       | 4.83964633       | 0.0477111  | No      |
|      |       |        |             |          |         | Tnnt3     | 31.8915   | 19.825   | -0.685853        | 31.8925      | 19.826        | -0.6858236       | 0.0460943  | No      |
|      |       |        |             |          |         | Tnpo1     | 22.1494   | 11.7499  | -0.914612        | 22.1504      | 11.7509       | -0.9145615       | 0.0132293  | No      |
|      |       |        |             |          |         | Tnrc6a    | 22.2482   | 12.2793  | -0.857454        | 22.2492      | 12.2803       | -0.8574077       | 0.0018326  | No      |
|      |       |        |             |          |         | Tnrc6b    | 14.5908   | 3.84919  | -1.92243         | 14.5918      | 3.85019       | -1.9221563       | 0.00018329 | No      |
|      |       |        |             |          |         | Tns1      | 0.0840321 | 84.295   | 9.97029          | 0.0850321    | 84.296        | 9.95324089       | 0.00018329 | No      |
|      |       |        |             |          |         | Tns4      | 0         | 4.22687  | inf              | 0.001        | 4.22787       | 12.0457153       | 0.00018329 | No      |
|      |       |        |             |          |         | Tnxb      | 0.0870574 | 2.54396  | 4.86896          | 0.0880574    | 2.54496       | 4.85305492       | 0.0431009  | No      |
|      |       |        |             |          |         | Tob1      | 15.8422   | 54.1606  | 1.77347          | 15.8432      | 54.1616       | 1.7734066        | 0.00018329 | No      |
|      |       |        |             |          |         | Tob2      | 8.59267   | 13.5029  | 0.652086         | 8.59367      | 13.5039       | 0.65202984       | 0.0169745  | No      |
|      |       |        |             |          |         | Toe1      | 22.5705   | 11.7757  | -0.938623        | 22.5715      | 11.7767       | -0.938567        | 0.040622   | No      |
|      |       |        |             |          |         | Tollip    | 9.3692    | 14.9765  | 0.676703         | 9.3702       | 14.9775       | 0.67664509       | 0.0125688  | No      |
|      |       |        |             |          |         | Tom1      | 11.7826   | 25.7871  | 1.12999          | 11.7836      | 25.7881       | 1.12992512       | 0.00018329 | No      |
|      |       |        |             |          |         | Tom1l1    | 1.81495   | 16.0197  | 3.14184          | 1.81595      | 16.0207       | 3.1411408        | 0.00251301 | No      |
|      |       |        |             |          |         | Tom1l2    | 13.0542   | 27.8934  | 1.09541          | 13.0552      | 27.8944       | 1.09535096       | 0.00018329 | No      |
|      |       |        |             |          |         | Tomm34    | 45.1721   | 23.9258  | -0.916863        | 45.1731      | 23.9268       | -0.9168365       | 0.00097029 | No      |

| RRBS |       |        |             |          |         | RNAseq   |           |         |                  |              |               |                  |            |         |
|------|-------|--------|-------------|----------|---------|----------|-----------|---------|------------------|--------------|---------------|------------------|------------|---------|
| gene | Blood | Kidney | methyl.diff | pMWU.fdr | Match ? | gene     | blood     | kidney  | log2(fold_ratio) | blood+ 0.001 | kidney+ 0.001 | log2(fold_ratio) | q_value    | Match ? |
|      |       |        |             |          |         | Tomm40   | 24.5644   | 42.7765 | 0.800247         | 24.5654      | 42.7775       | 0.80022444       | 0.00674218 | No      |
|      |       |        |             |          |         | Tomm40l  | 5.88676   | 11.5921 | 0.977597         | 5.88776      | 11.5931       | 0.97747563       | 0.0249303  | No      |
|      |       |        |             |          |         | Tonsl    | 57.2222   | 95.9111 | 0.745124         | 57.2232      | 95.9121       | 0.74511266       | 0.00959787 | No      |
|      |       |        |             |          |         | Top2a    | 1.0064    | 2.67975 | 1.41289          | 1.0074       | 2.68075       | 1.41200005       | 0.00018329 | No      |
|      |       |        |             |          |         | Top2b    | 15.7934   | 3.42873 | -2.20358         | 15.7944      | 3.42973       | -2.2032462       | 0.00018329 | No      |
|      |       |        |             |          |         | Top3a    | 6.93624   | 2.56002 | -1.438           | 6.93724      | 2.56102       | -1.4376433       | 0.00018329 | No      |
|      |       |        |             |          |         | Topbp1   | 18.3489   | 5.41527 | -1.76059         | 18.3499      | 5.41627       | -1.7604006       | 0.00018329 | No      |
|      |       |        |             |          |         | Tor3a    | 2.0312    | 28.3814 | 3.80454          | 2.0322       | 28.3824       | 3.80388229       | 0.0369285  | No      |
|      |       |        |             |          |         | Tor4a    | 14.2957   | 4.88592 | -1.54888         | 14.2967      | 4.88692       | -1.5486848       | 0.00018329 | No      |
|      |       |        |             |          |         | Tox      | 20.1618   | 2.62029 | -2.94383         | 20.1628      | 2.62129       | -2.9433471       | 0.00018329 | No      |
|      |       |        |             |          |         | Tox4     | 35.2861   | 16.8703 | -1.06462         | 35.2871      | 16.8713       | -1.0645697       | 0.0181001  | No      |
|      |       |        |             |          |         | Tp53     | 221.015   | 90.0235 | -1.29577         | 221.016      | 90.0245       | -1.2957612       | 0.00018329 | No      |
|      |       |        |             |          |         | Tp53bp2  | 6.10652   | 13.4853 | 1.14296          | 6.10752      | 13.4863       | 1.14283601       | 0.00018329 | No      |
|      |       |        |             |          |         | Tp53i13  | 8.00516   | 17.0719 | 1.09262          | 8.00616      | 17.0729       | 1.09252578       | 0.00082046 | No      |
|      |       |        |             |          |         | Tp53inp1 | 28.6998   | 6.79867 | -2.07772         | 28.7008      | 6.79967       | -2.0775543       | 0.00018329 | No      |
|      |       |        |             |          |         | TP53INP2 | 0.519958  | 42.1053 | 6.33946          | 0.520958     | 42.1063       | 6.33672523       | 0.00018329 | No      |
|      |       |        |             |          |         | Tpcn1    | 18.8923   | 70.6586 | 1.90307          | 18.8933      | 70.6596       | 1.90301087       | 0.00018329 | No      |
|      |       |        |             |          |         | Tpd52l1  | 0.0993553 | 12.8998 | 7.02053          | 0.1003553    | 12.9008       | 7.00619991       | 0.0066167  | No      |
|      |       |        |             |          |         | Tpgs1    | 16.4415   | 30.8658 | 0.908665         | 16.4425      | 30.8668       | 0.90862625       | 0.00329119 | No      |
|      |       |        |             |          |         | Tpgs2    | 21.4565   | 13.415  | -0.677565        | 21.4575      | 13.416        | -0.6775274       | 0.019979   | No      |
|      |       |        |             |          |         | Tpk1     | 1.21188   | 4.71287 | 1.95936          | 1.21288      | 4.71387       | 1.95847515       | 0.00018329 | No      |
|      |       |        |             |          |         | TPM1     | 10.6014   | 201.765 | 4.25035          | 10.6024      | 201.766       | 4.2502203        | 0.00018329 | No      |
|      |       |        |             |          |         | Tpm3     | 439.678   | 142.843 | -1.62202         | 439.679      | 142.844       | -1.6220102       | 0.00018329 | No      |
|      |       |        |             |          |         | Tpmt     | 117.173   | 30.7938 | -1.92792         | 117.174      | 30.7948       | -1.9278938       | 0.00018329 | No      |
|      |       |        |             |          |         | Tpp1     | 20.3555   | 30.6706 | 0.591434         | 20.3565      | 30.6716       | 0.59141389       | 0.0426676  | No      |
|      |       |        |             |          |         | Tpp2     | 32.1481   | 14.6499 | -1.13385         | 32.1491      | 14.6509       | -1.1337891       | 0.00035173 | No      |
|      |       |        |             |          |         | Tpr      | 50.6887   | 22.4521 | -1.17481         | 50.6897      | 22.4531       | -1.174778        | 0.00018329 | No      |
|      |       |        |             |          |         | Tpra1    | 23.7121   | 41.6702 | 0.813391         | 23.7131      | 41.6712       | 0.81336637       | 0.00530972 | No      |
|      |       |        |             |          |         | Tpst2    | 78.5319   | 51.7859 | -0.600721        | 78.5329      | 51.7869       | -0.60071         | 0.030294   | No      |
|      |       |        |             |          |         | Tpt1     | 16111.1   | 3626.17 | -2.15154         | 16111.101    | 3626.171      | -2.1515362       | 0.00097029 | No      |
|      |       |        |             |          |         | Tpx2     | 1.12038   | 3.8327  | 1.77438          | 1.12138      | 3.8337        | 1.7734622        | 0.00066911 | No      |
|      |       |        |             |          |         | Tra2a    | 99.9917   | 56.1108 | -0.833531        | 99.9927      | 56.1118       | -0.8335186       | 0.00290302 | No      |
|      |       |        |             |          |         | Tra2b    | 162.939   | 59.6857 | -1.44887         | 162.94       | 59.6867       | -1.4488594       | 0.00018329 | No      |
|      |       |        |             |          |         | Trabd2b  | 0.0576487 | 22.0252 | 8.57765          | 0.0586487    | 22.0262       | 8.55290577       | 0.0110491  | No      |
|      |       |        |             |          |         | Trac     | 1222.15   | 252.118 | -2.27725         | 1222.151     | 252.119       | -2.2772458       | 0.00018329 | No      |
|      |       |        |             |          |         | Traf2    | 36.3221   | 22.2635 | -0.706163        | 36.3231      | 22.2645       | -0.7061421       | 0.016558   | No      |
|      |       |        |             |          |         | Traf3    | 13.0734   | 7.32375 | -0.835978        | 13.0744      | 7.32475       | -0.8358933       | 0.0169745  | No      |
|      |       |        |             |          |         | Traf3ip3 | 203.777   | 28.3479 | -2.84568         | 203.778      | 28.3489       | -2.8456336       | 0.00097029 | No      |
|      |       |        |             |          |         | Traf4    | 13.3675   | 49.3636 | 1.88472          | 13.3685      | 49.3646       | 1.88463924       | 0.00018329 | No      |
|      |       |        |             |          |         | Traf5    | 7.7297    | 12.9864 | 0.748512         | 7.7307       | 12.9874       | 0.74844168       | 0.0350203  | No      |
|      |       |        |             |          |         | Traf6    | 8.64313   | 2.21032 | -1.9673          | 8.64413      | 2.21132       | -1.966813        | 0.00018329 | No      |
|      |       |        |             |          |         | Tram1    | 101.24    | 52.1254 | -0.957724        | 101.241      | 52.1264       | -0.9577075       | 0.00018329 | No      |



| RRBS |       |        |             |          |         | RNAseq   |           |          |                  |              |               |                  |            |         |
|------|-------|--------|-------------|----------|---------|----------|-----------|----------|------------------|--------------|---------------|------------------|------------|---------|
| gene | Blood | Kidney | methyl.diff | pMWU.fdr | Match ? | gene     | blood     | kidney   | log2(fold_ratio) | blood+ 0.001 | kidney+ 0.001 | log2(fold_ratio) | q_value    | Match ? |
|      |       |        |             |          |         | Trap1    | 24.5373   | 40.2417  | 0.713714         | 24.5383      | 40.2427       | 0.7136918        | 0.0101506  | No      |
|      |       |        |             |          |         | Trappc1  | 37.5226   | 86.8987  | 1.21158          | 37.5236      | 86.8997       | 1.21155295       | 0.00018329 | No      |
|      |       |        |             |          |         | Trappc10 | 12.8528   | 8.35167  | -0.621944        | 12.8538      | 8.35267       | -0.6218856       | 0.0271125  | No      |
|      |       |        |             |          |         | TRAPPC2  | 10.3088   | 26.2492  | 1.34841          | 10.3098      | 26.2502       | 1.34831207       | 0.00018329 | No      |
|      |       |        |             |          |         | Trappc2l | 37.1472   | 83.4835  | 1.16824          | 37.1482      | 83.4845       | 1.16821606       | 0.00018329 | No      |
|      |       |        |             |          |         | Trappc8  | 12.2905   | 6.64546  | -0.887106        | 12.2915      | 6.64646       | -0.8870029       | 0.00140841 | No      |
|      |       |        |             |          |         | Trappc9  | 16.192    | 9.08075  | -0.834399        | 16.193       | 9.08175       | -0.8343281       | 0.0160313  | No      |
|      |       |        |             |          |         | Trat1    | 68.0118   | 5.23851  | -3.69856         | 68.0128      | 5.23951       | -3.6983025       | 0.00018329 | No      |
|      |       |        |             |          |         | Trdmt1   | 6.62218   | 3.32394  | -0.994411        | 6.62318      | 3.32494       | -0.9941958       | 0.00277264 | No      |
|      |       |        |             |          |         | Trem1    | 1.63479   | 4.07666  | 1.31828          | 1.63579      | 4.07766       | 1.31775394       | 0.0181001  | No      |
|      |       |        |             |          |         | Trem3    | 0.281592  | 3.48863  | 3.63098          | 0.282592     | 3.48963       | 3.62628155       | 0.00277264 | No      |
|      |       |        |             |          |         | Trem12   | 50.8634   | 3.28289  | -3.95359         | 50.8644      | 3.28389       | -3.9531786       | 0.00018329 | No      |
|      |       |        |             |          |         | Trerf1   | 11.4176   | 5.17712  | -1.14104         | 11.4186      | 5.17812       | -1.1408855       | 0.00066911 | No      |
|      |       |        |             |          |         | Trib1    | 0.76158   | 4.007    | 2.39546          | 0.76258      | 4.008         | 2.39392191       | 0.00018329 | No      |
|      |       |        |             |          |         | Trib2    | 96.0809   | 12.6341  | -2.92692         | 96.0819      | 12.6351       | -2.9268276       | 0.00018329 | No      |
|      |       |        |             |          |         | Trim14   | 29.7922   | 4.0122   | -2.89247         | 29.7932      | 4.0132        | -2.8921581       | 0.00018329 | No      |
|      |       |        |             |          |         | Trim16   | 0.0283137 | 4.39454  | 7.27807          | 0.0293137    | 4.39554       | 7.22832153       | 0.0208908  | No      |
|      |       |        |             |          |         | Trim21   | 28.7159   | 8.94409  | -1.68284         | 28.7169      | 8.94509       | -1.6827321       | 0.00018329 | No      |
|      |       |        |             |          |         | Trim25   | 12.4491   | 4.9912   | -1.31859         | 12.4501      | 4.9922        | -1.3184097       | 0.00445502 | No      |
|      |       |        |             |          |         | TRIM27   | 51.0858   | 29.7408  | -0.78048         | 51.0868      | 29.7418       | -0.7804586       | 0.00834357 | No      |
|      |       |        |             |          |         | Trim3    | 5.61176   | 13.9676  | 1.31556          | 5.61276      | 13.9686       | 1.31540516       | 0.00018329 | No      |
|      |       |        |             |          |         | Trim32   | 4.72707   | 8.5082   | 0.847908         | 4.72807      | 8.5092        | 0.84777211       | 0.00755425 | No      |
|      |       |        |             |          |         | Trim33   | 21.1196   | 5.8884   | -1.84264         | 21.1206      | 5.8894        | -1.8424583       | 0.00018329 | No      |
|      |       |        |             |          |         | Trim34   | 40.5901   | 11.6009  | -1.8069          | 40.5911      | 11.6019       | -1.8068023       | 0.00992433 | No      |
|      |       |        |             |          |         | Trim37   | 18.9576   | 9.34619  | -1.02033         | 18.9586      | 9.34719       | -1.0202478       | 0.0169745  | No      |
|      |       |        |             |          |         | Trim44   | 18.1632   | 35.836   | 0.980391         | 18.1642      | 35.837        | 0.98035204       | 0.00329119 | No      |
|      |       |        |             |          |         | Trim45   | 3.14157   | 7.91996  | 1.33401          | 3.14257      | 7.92096       | 1.33373041       | 0.0143185  | No      |
|      |       |        |             |          |         | Trim5    | 143.398   | 24.3633  | -2.55725         | 143.399      | 24.3643       | -2.5571943       | 0.00018329 | No      |
|      |       |        |             |          |         | Trim50   | 0         | 1.48221  | inf              | 0.001        | 1.48321       | 10.5345072       | 0.00018329 | No      |
|      |       |        |             |          |         | Trim8    | 74.9774   | 51.2948  | -0.547643        | 74.9784      | 51.2958       | -0.5476343       | 0.0425784  | No      |
|      |       |        |             |          |         | Trip10   | 9.56426   | 58.1815  | 2.60484          | 9.56526      | 58.1825       | 2.6047092        | 0.00018329 | No      |
|      |       |        |             |          |         | Trip12   | 35.957    | 20.559   | -0.806504        | 35.958       | 20.56         | -0.8064725       | 0.00925991 | No      |
|      |       |        |             |          |         | Trip13   | 1.28275   | 0.462296 | -1.47235         | 1.28375      | 0.463296      | -1.4703581       | 0.0100349  | No      |
|      |       |        |             |          |         | Triqk    | 0         | 3.11825  | inf              | 0.001        | 3.11925       | 11.6069835       | 0.00018329 | No      |
|      |       |        |             |          |         | Trmt11   | 10.0183   | 4.81366  | -1.05743         | 10.0193      | 4.81466       | -1.0572759       | 0.0114728  | No      |
|      |       |        |             |          |         | Trmt12   | 1.79947   | 4.40104  | 1.29027          | 1.80047      | 4.40204       | 1.28979869       | 0.00481718 | No      |
|      |       |        |             |          |         | Trmt13   | 10.9216   | 3.48566  | -1.64768         | 10.9226      | 3.48666       | -1.6473987       | 0.00393885 | No      |
|      |       |        |             |          |         | Trmt6    | 15.7413   | 5.25076  | -1.58395         | 15.7423      | 5.25176       | -1.5837734       | 0.00018329 | No      |
|      |       |        |             |          |         | Troap    | 0.069053  | 3.16728  | 5.5194           | 0.070053     | 3.16828       | 5.4991092        | 0.00051281 | No      |
|      |       |        |             |          |         | Trove2   | 3.15408   | 8.14931  | 1.36946          | 3.15508      | 8.15031       | 1.36917835       | 0.030375   | No      |
|      |       |        |             |          |         | Trpc1    | 0.265935  | 3.07119  | 3.52965          | 0.266935     | 3.07219       | 3.52470706       | 0.00018329 | No      |
|      |       |        |             |          |         | Trpc3    | 0         | 1.53626  | inf              | 0.001        | 1.53726       | 10.5861455       | 0.00018329 | No      |

| RRBS |       |        |             |          |         | RNAseq  |           |          |                  |              |               |                  |            |         |
|------|-------|--------|-------------|----------|---------|---------|-----------|----------|------------------|--------------|---------------|------------------|------------|---------|
| gene | Blood | Kidney | methyl.diff | pMWU.fdr | Match ? | gene    | blood     | kidney   | log2(fold_ratio) | blood+ 0.001 | kidney+ 0.001 | log2(fold_ratio) | q_value    | Match ? |
|      |       |        |             |          |         | Trpc4ap | 68.5165   | 43.7337  | -0.647705        | 68.5175      | 43.7347       | -0.6476941       | 0.0272985  | No      |
|      |       |        |             |          |         | Trpm4   | 0.0595477 | 4.21169  | 6.14421          | 0.0605477    | 4.21269       | 6.12052579       | 0.00018329 | No      |
|      |       |        |             |          |         | TRPM6   | 26.3143   | 7.31182  | -1.84754         | 26.3153      | 7.31282       | -1.8474021       | 0.00051281 | No      |
|      |       |        |             |          |         | Trpm7   | 39.0473   | 15.5861  | -1.32496         | 39.0483      | 15.5871       | -1.3249072       | 0.00018329 | No      |
|      |       |        |             |          |         | Trpv1   | 0.765882  | 8.5808   | 3.48592          | 0.766882     | 8.5818        | 3.48420377       | 0.00018329 | No      |
|      |       |        |             |          |         | Trpv2   | 12.8597   | 6.38639  | -1.00978         | 12.8607      | 6.38739       | -1.0096707       | 0.00140841 | No      |
|      |       |        |             |          |         | Trpv3   | 3.05193   | 0.273366 | -3.48082         | 3.05293      | 0.274366      | -3.4760209       | 0.03047    | No      |
|      |       |        |             |          |         | Tsc1    | 8.75717   | 5.71146  | -0.616605        | 8.75817      | 5.71246       | -0.6165173       | 0.0354586  | No      |
|      |       |        |             |          |         | Tsc22d1 | 28.6109   | 449.966  | 3.97518          | 28.6119      | 449.967       | 3.97513199       | 0.00018329 | No      |
|      |       |        |             |          |         | Tsc22d3 | 525.37    | 84.2557  | -2.64049         | 525.371      | 84.2567       | -2.6404732       | 0.00018329 | No      |
|      |       |        |             |          |         | Tsen15  | 6.60518   | 30.3742  | 2.20118          | 6.60618      | 30.3752       | 2.20100572       | 0.00018329 | No      |
|      |       |        |             |          |         | Tsg101  | 39.0545   | 65.1366  | 0.737981         | 39.0555      | 65.1376       | 0.73796483       | 0.0163528  | No      |
|      |       |        |             |          |         | TSGA10  | 1.50669   | 3.4896   | 1.21168          | 1.50769      | 3.4906        | 1.21113522       | 0.0417433  | No      |
|      |       |        |             |          |         | Tsn     | 33.4733   | 18.1595  | -0.882289        | 33.4743      | 18.1605       | -0.88225         | 0.00051281 | No      |
|      |       |        |             |          |         | Tsnax   | 48.5867   | 32.9911  | -0.558483        | 48.5877      | 32.9921       | -0.5584705       | 0.0479686  | No      |
|      |       |        |             |          |         | Tspan1  | 0.116271  | 15.6241  | 7.07014          | 0.117271     | 15.6251       | 7.05787532       | 0.0145263  | No      |
|      |       |        |             |          |         | Tspan12 | 0.275399  | 41.6554  | 7.24084          | 0.276399     | 41.6564       | 7.23564196       | 0.00018329 | No      |
|      |       |        |             |          |         | Tspan13 | 102.371   | 39.7827  | -1.3636          | 102.372      | 39.7837       | -1.3635718       | 0.00018329 | No      |
|      |       |        |             |          |         | Tspan14 | 34.9761   | 12.2128  | -1.51797         | 34.9771      | 12.2138       | -1.5178986       | 0.00018329 | No      |
|      |       |        |             |          |         | Tspan15 | 0.0855754 | 3.14823  | 5.2012           | 0.0865754    | 3.14923       | 5.18489817       | 0.021204   | No      |
|      |       |        |             |          |         | Tspan17 | 1.39053   | 3.40918  | 1.29379          | 1.39153      | 3.41018       | 1.29317588       | 0.02934    | No      |
|      |       |        |             |          |         | Tspan18 | 0.0336192 | 7.5321   | 7.80762          | 0.0346192    | 7.5331        | 7.76552748       | 0.00018329 | No      |
|      |       |        |             |          |         | Tspan3  | 14.1107   | 92.9461  | 2.7196           | 14.1117      | 92.9471       | 2.71951806       | 0.00018329 | No      |
|      |       |        |             |          |         | Tspan32 | 127.817   | 5.9859   | -4.41636         | 127.818      | 5.9869        | -4.416138        | 0.00018329 | No      |
|      |       |        |             |          |         | Tspan4  | 0.211074  | 6.02121  | 4.83423          | 0.212074     | 6.02221       | 4.82765335       | 0.00018329 | No      |
|      |       |        |             |          |         | Tspan5  | 1.26056   | 25.1375  | 4.3177           | 1.26156      | 25.1385       | 4.31661784       | 0.00018329 | No      |
|      |       |        |             |          |         | Tspan6  | 0.383891  | 19.8802  | 5.69449          | 0.384891     | 19.8812       | 5.69081109       | 0.00018329 | No      |
|      |       |        |             |          |         | Tspan7  | 0         | 40.685   | inf              | 0.001        | 40.686        | 15.3122448       | 0.00018329 | No      |
|      |       |        |             |          |         | Tspan8  | 0         | 208.435  | inf              | 0.001        | 208.436       | 17.6692449       | 0.00018329 | No      |
|      |       |        |             |          |         | Tspear  | 2.2472    | 0.614712 | -1.87015         | 2.2482       | 0.615712      | -1.8684428       | 0.00210945 | No      |
|      |       |        |             |          |         | Tspyl2  | 23.0471   | 12.334   | -0.901937        | 23.0481      | 12.335        | -0.9018901       | 0.00277264 | No      |
|      |       |        |             |          |         | Tsr2    | 4.84755   | 2.8738   | -0.754295        | 4.84855      | 2.8748        | -0.7540918       | 0.0310472  | No      |
|      |       |        |             |          |         | Tssc1   | 41.7935   | 18.8472  | -1.14893         | 41.7945      | 18.8482       | -1.1488863       | 0.00197017 | No      |
|      |       |        |             |          |         | TSTA3   | 62.6516   | 40.5916  | -0.62617         | 62.6526      | 40.5926       | -0.6261576       | 0.0238252  | No      |
|      |       |        |             |          |         | Ttc13   | 16.5417   | 10.3608  | -0.674972        | 16.5427      | 10.3618       | -0.6749201       | 0.0259489  | No      |
|      |       |        |             |          |         | Ttc14   | 16.5112   | 5.35787  | -1.62371         | 16.5122      | 5.35887       | -1.6235316       | 0.00018329 | No      |
|      |       |        |             |          |         | Ttc18   | 0.709495  | 3.89354  | 2.45622          | 0.710495     | 3.89454       | 2.45455653       | 0.00018329 | No      |
|      |       |        |             |          |         | Ttc23   | 0.132231  | 12.6832  | 6.58372          | 0.133231     | 12.6842       | 6.57295891       | 0.00959787 | No      |
|      |       |        |             |          |         | Ttc26   | 0.0245296 | 2.32918  | 6.56915          | 0.0255296    | 2.33018       | 6.51212666       | 0.0295293  | No      |
|      |       |        |             |          |         | Ttc28   | 11.4003   | 1.49576  | -2.93013         | 11.4013      | 1.49676       | -2.9292835       | 0.00018329 | No      |
|      |       |        |             |          |         | Ttc30a1 | 1.74178   | 3.76068  | 1.11043          | 1.74278      | 3.76168       | 1.10998666       | 0.00992433 | No      |
|      |       |        |             |          |         | Ttc36   | 0         | 68.8476  | inf              | 0.001        | 68.8486       | 16.0711397       | 0.00018329 | No      |

| RRBS |       |        |             |          |         | RNAseq  |           |          |                  |              |               |                  |            |         |
|------|-------|--------|-------------|----------|---------|---------|-----------|----------|------------------|--------------|---------------|------------------|------------|---------|
| gene | Blood | Kidney | methyl.diff | pMWU.fdr | Match ? | gene    | blood     | kidney   | log2(fold_ratio) | blood+ 0.001 | kidney+ 0.001 | log2(fold_ratio) | q_value    | Match ? |
|      |       |        |             |          |         | Ttc37   | 29.9987   | 16.5443  | -0.858569        | 29.9997      | 16.5453       | -0.8585266       | 0.0262294  | No      |
|      |       |        |             |          |         | Ttc7b   | 6.25974   | 18.538   | 1.56631          | 6.26074      | 18.539        | 1.56615833       | 0.00035173 | No      |
|      |       |        |             |          |         | Ttc9    | 0.511164  | 6.40453  | 3.64723          | 0.512164     | 6.40553       | 3.64464019       | 0.00018329 | No      |
|      |       |        |             |          |         | Ttf1    | 14.1405   | 4.34478  | -1.70248         | 14.1415      | 4.34578       | -1.7022481       | 0.00018329 | No      |
|      |       |        |             |          |         | Ttk     | 0.271304  | 1.54744  | 2.51191          | 0.272304     | 1.54844       | 2.5075254        | 0.00097029 | No      |
|      |       |        |             |          |         | Ttll10  | 0.0212673 | 9.82396  | 8.85152          | 0.0222673    | 9.82496       | 8.78538109       | 0.00154856 | No      |
|      |       |        |             |          |         | Ttll3   | 1.237     | 5.81716  | 2.23347          | 1.238        | 5.81816       | 2.23255166       | 0.00051281 | No      |
|      |       |        |             |          |         | Ttll4   | 4.72839   | 1.94788  | -1.27944         | 4.72939      | 1.94888       | -1.2790089       | 0.00018329 | No      |
|      |       |        |             |          |         | Ttll7   | 0.232592  | 1.35197  | 2.53918          | 0.233592     | 1.35297       | 2.53406708       | 0.0107084  | No      |
|      |       |        |             |          |         | Ttpa    | 0         | 0.659893 | inf              | 0.001        | 0.660893      | 9.3682729        | 0.00018329 | No      |
|      |       |        |             |          |         | Ttpal   | 9.28013   | 3.6829   | -1.3333          | 9.28113      | 3.6839        | -1.3330666       | 0.00018329 | No      |
|      |       |        |             |          |         | Ttr     | 0         | 7.48837  | inf              | 0.001        | 7.48937       | 12.8706287       | 0.00018329 | No      |
|      |       |        |             |          |         | Ttyh2   | 0.0225753 | 0.95794  | 5.40712          | 0.0235753    | 0.95894       | 5.34609252       | 0.00721079 | No      |
|      |       |        |             |          |         | Ttyh3   | 84.438    | 23.2676  | -1.85957         | 84.439       | 23.2686       | -1.8595251       | 0.00018329 | No      |
|      |       |        |             |          |         | Tuba8   | 0.2866    | 4.14182  | 3.85316          | 0.2876       | 4.14282       | 3.84847756       | 0.00018329 | No      |
|      |       |        |             |          |         | Tubb2a  | 4.54529   | 56.9626  | 3.64757          | 4.54629      | 56.9636       | 3.64727871       | 0.00018329 | No      |
|      |       |        |             |          |         | Tubb4b  | 41.8656   | 100.314  | 1.26068          | 41.8666      | 100.315       | 1.26066568       | 0.00018329 | No      |
|      |       |        |             |          |         | Tubb5   | 369.829   | 128.555  | -1.52447         | 369.83       | 128.556       | -1.5244653       | 0.00018329 | No      |
|      |       |        |             |          |         | Tube1   | 13.8119   | 3.10696  | -2.15233         | 13.8129      | 3.10796       | -2.1519764       | 0.0016929  | No      |
|      |       |        |             |          |         | Tube1   | 13.8119   | 3.10696  | -2.15233         | 13.8129      | 3.10796       | -2.1519764       | 0.0016929  | No      |
|      |       |        |             |          |         | Tube1   | 13.8119   | 3.10696  | -2.15233         | 13.8129      | 3.10796       | -2.1519764       | 0.0016929  | No      |
|      |       |        |             |          |         | Tubgcp5 | 7.27664   | 4.63597  | -0.6504          | 7.27764      | 4.63697       | -0.6502883       | 0.0431009  | No      |
|      |       |        |             |          |         | Tufm    | 35.7407   | 85.949   | 1.26591          | 35.7417      | 85.95         | 1.26588938       | 0.00018329 | No      |
|      |       |        |             |          |         | Tuft1   | 0.0505348 | 7.45411  | 7.20461          | 0.0515348    | 7.45511       | 7.17653886       | 0.00018329 | No      |
|      |       |        |             |          |         | Tulp3   | 0.416315  | 9.0618   | 4.44405          | 0.417315     | 9.0628        | 4.44074816       | 0.00018329 | No      |
|      |       |        |             |          |         | Tulp4   | 2.99175   | 4.58464  | 0.615817         | 2.99275      | 4.58564       | 0.61565133       | 0.0341877  | No      |
|      |       |        |             |          |         | Tusc2   | 12.306    | 27.8323  | 1.1774           | 12.307       | 27.8333       | 1.17733284       | 0.00018329 | No      |
|      |       |        |             |          |         | Tusc3   | 0.661893  | 30.8068  | 5.54051          | 0.662893     | 30.8078       | 5.53837583       | 0.00018329 | No      |
|      |       |        |             |          |         | Twist1  | 0         | 13.4576  | inf              | 0.001        | 13.4586       | 13.7162407       | 0.00018329 | No      |
|      |       |        |             |          |         | Twistnb | 9.26355   | 3.31035  | -1.48458         | 9.26455      | 3.31135       | -1.4843014       | 0.00018329 | No      |
|      |       |        |             |          |         | Twsg1   | 3.79578   | 17.7397  | 2.22451          | 3.79678      | 17.7407       | 2.22421462       | 0.00018329 | No      |
|      |       |        |             |          |         | Txk     | 88.6284   | 17.3503  | -2.35281         | 88.6294      | 17.3513       | -2.3527416       | 0.00018329 | No      |
|      |       |        |             |          |         | Txlng   | 17.2018   | 4.29398  | -2.00217         | 17.2028      | 4.29498       | -2.0019201       | 0.00709238 | No      |
|      |       |        |             |          |         | Txn1    | 256.751   | 635.451  | 1.30741          | 256.752      | 635.452       | 1.30740764       | 0.00018329 | No      |
|      |       |        |             |          |         | Txn2    | 42.7142   | 113.011  | 1.40368          | 42.7152      | 113.012       | 1.40365453       | 0.00018329 | No      |
|      |       |        |             |          |         | Txndc16 | 19.2615   | 3.83577  | -2.32813         | 19.2625      | 3.83677       | -2.3278308       | 0.00018329 | No      |
|      |       |        |             |          |         | Txndc17 | 22.8373   | 47.2941  | 1.05027          | 22.8383      | 47.2951       | 1.05023546       | 0.00051281 | No      |
|      |       |        |             |          |         | Txndc5  | 18.6632   | 30.1088  | 0.689992         | 18.6642      | 30.1098       | 0.68995945       | 0.019979   | No      |
|      |       |        |             |          |         | Txnip   | 2217.64   | 277.744  | -2.99719         | 2217.641     | 277.745       | -2.997193        | 0.00018329 | No      |
|      |       |        |             |          |         | Txn1    | 39.4916   | 64.572   | 0.709364         | 39.4926      | 64.573        | 0.7093487        | 0.0160313  | No      |
|      |       |        |             |          |         | Txnrd1  | 12.2301   | 40.1345  | 1.71441          | 12.2311      | 40.1355       | 1.71432471       | 0.00018329 | No      |
|      |       |        |             |          |         | Tyms    | 1.21042   | 6.38554  | 2.3993           | 1.21142      | 6.38654       | 2.39833541       | 0.0144181  | No      |
|      |       |        |             |          |         | Tyro3   | 0.108497  | 3.42044  | 4.97845          | 0.109497     | 3.42144       | 4.9656404        | 0.00035173 | No      |
|      |       |        |             |          |         | Tyrobp  | 15.0885   | 185.038  | 3.6163           | 15.0895      | 185.039       | 3.61621247       | 0.00018329 | No      |

| RRBS |       |        |             |          |         | RNAseq |          |         |                  |              |               |                  |            |         |
|------|-------|--------|-------------|----------|---------|--------|----------|---------|------------------|--------------|---------------|------------------|------------|---------|
| gene | Blood | Kidney | methyl.diff | pMWU.fdr | Match ? | gene   | blood    | kidney  | log2(fold_ratio) | blood+ 0.001 | kidney+ 0.001 | log2(fold_ratio) | q_value    | Match ? |
|      |       |        |             |          |         | U2af2  | 159.526  | 64.2774 | -1.31141         | 159.527      | 64.2784       | -1.3113947       | 0.00018329 | No      |
|      |       |        |             |          |         | Uaca   | 0        | 6.99084 | inf              | 0.001        | 6.99184       | 12.7714565       | 0.00018329 | No      |
|      |       |        |             |          |         | Uap1   | 4.5716   | 9.72554 | 1.08908          | 4.5726       | 9.72654       | 1.08891197       | 0.00035173 | No      |
|      |       |        |             |          |         | Uba2   | 53.9809  | 21.4618 | -1.33068         | 53.9819      | 21.4628       | -1.3306375       | 0.00018329 | No      |
|      |       |        |             |          |         | Uba52  | 4180.29  | 1899.94 | -1.13765         | 4180.291     | 1899.941      | -1.1376488       | 0.00066911 | No      |
|      |       |        |             |          |         | Uba6   | 6.76826  | 3.12865 | -1.11324         | 6.76926      | 3.12965       | -1.1129968       | 0.00406781 | No      |
|      |       |        |             |          |         | Ubac1  | 21.9836  | 34.2363 | 0.639099         | 21.9846      | 34.2373       | 0.63907565       | 0.02372737 | No      |
|      |       |        |             |          |         | Ubald2 | 492.906  | 111.284 | -2.14706         | 492.907      | 111.285       | -2.1470563       | 0.00018329 | No      |
|      |       |        |             |          |         | Ubap1  | 12.1365  | 18.1412 | 0.579913         | 12.1375      | 18.1422       | 0.57987812       | 0.0379652  | No      |
|      |       |        |             |          |         | Ubap2l | 39.0202  | 25.3658 | -0.621333        | 39.0212      | 25.3668       | -0.6213166       | 0.0273913  | No      |
|      |       |        |             |          |         | Ubc    | 81.8328  | 185.054 | 1.17719          | 81.8338      | 185.055       | 1.17718537       | 0.00018329 | No      |
|      |       |        |             |          |         | Ubd    | 13.1531  | 33.4639 | 1.3472           | 13.1541      | 33.4649       | 1.34713616       | 0.00035173 | No      |
|      |       |        |             |          |         | Ube2b  | 84.2695  | 51.5805 | -0.708186        | 84.2705      | 51.5815       | -0.708174        | 0.00458064 | No      |
|      |       |        |             |          |         | Ube2d1 | 19.77    | 9.74766 | -1.02018         | 19.771       | 9.74866       | -1.02011         | 0.0146209  | No      |
|      |       |        |             |          |         | Ube2d3 | 265.883  | 116.093 | -1.19552         | 265.884      | 116.094       | -1.1955036       | 0.00018329 | No      |
|      |       |        |             |          |         | Ube2e2 | 3.18292  | 23.59   | 2.88975          | 3.18392      | 23.591        | 2.88936058       | 0.00018329 | No      |
|      |       |        |             |          |         | Ube2f  | 16.7785  | 32.7007 | 0.962705         | 16.7795      | 32.7017       | 0.96266591       | 0.00481718 | No      |
|      |       |        |             |          |         | Ube2g1 | 54.8834  | 24.1388 | -1.18502         | 54.8844      | 24.1398       | -1.1849824       | 0.00018329 | No      |
|      |       |        |             |          |         | Ube2h  | 60.1775  | 20.5596 | -1.54942         | 60.1785      | 20.5606       | -1.5493658       | 0.00018329 | No      |
|      |       |        |             |          |         | Ube2i  | 176.118  | 97.9006 | -0.847152        | 176.119      | 97.9016       | -0.8471462       | 0.00959787 | No      |
|      |       |        |             |          |         | Ube2j1 | 27.5584  | 16.162  | -0.769889        | 27.5594      | 16.163        | -0.7698495       | 0.00303839 | No      |
|      |       |        |             |          |         | Ube2j2 | 107.336  | 55.7652 | -0.944692        | 107.337      | 55.7662       | -0.9446846       | 0.00238141 | No      |
|      |       |        |             |          |         | Ube2l6 | 1.76129  | 8.45466 | 2.26311          | 1.76229      | 8.45566       | 2.26246602       | 0.00018329 | No      |
|      |       |        |             |          |         | Ube2o  | 29.3006  | 12.1217 | -1.27334         | 29.3016      | 12.1227       | -1.2732684       | 0.00018329 | No      |
|      |       |        |             |          |         | Ube2r2 | 165.856  | 111.13  | -0.577689        | 165.857      | 111.131       | -0.5776786       | 0.0399588  | No      |
|      |       |        |             |          |         | Ube2t  | 0.213429 | 1.72834 | 3.01756          | 0.214429     | 1.72934       | 3.0116496        | 0.030375   | No      |
|      |       |        |             |          |         | Ube3b  | 24.7339  | 36.2872 | 0.552975         | 24.7349      | 36.2882       | 0.55295243       | 0.0481525  | No      |
|      |       |        |             |          |         | Ube4a  | 18.9379  | 9.09024 | -1.05888         | 18.9389      | 9.09124       | -1.0588035       | 0.00018329 | No      |
|      |       |        |             |          |         | Ubl4a  | 7.68999  | 14.0425 | 0.868751         | 7.69099      | 14.0435       | 0.86866132       | 0.00303839 | No      |
|      |       |        |             |          |         | Ubn1   | 18.634   | 7.06544 | -1.39908         | 18.635       | 7.06644       | -1.3989593       | 0.00018329 | No      |
|      |       |        |             |          |         | Ubn2   | 8.24344  | 4.16879 | -0.983618        | 8.24444      | 4.16979       | -0.9834468       | 0.00051281 | No      |
|      |       |        |             |          |         | Ubp1   | 69.829   | 29.2683 | -1.25449         | 69.83        | 29.2693       | -1.2544587       | 0.00018329 | No      |
|      |       |        |             |          |         | Ubr1   | 16.6854  | 8.97462 | -0.894661        | 16.6864      | 8.97562       | -0.8945892       | 0.00303839 | No      |
|      |       |        |             |          |         | Ubr2   | 26.4172  | 14.2044 | -0.895143        | 26.4182      | 14.2054       | -0.8950927       | 0.0016929  | No      |
|      |       |        |             |          |         | Ubr4   | 55.9757  | 30.9605 | -0.854372        | 55.9767      | 30.9615       | -0.8543511       | 0.0404374  | No      |
|      |       |        |             |          |         | Ubr7   | 16.9668  | 8.69454 | -0.96453         | 16.9678      | 8.69554       | -0.964452        | 0.00018329 | No      |
|      |       |        |             |          |         | Ubxn11 | 0.262991 | 2.26497 | 3.10641          | 0.263991     | 2.26597       | 3.10156811       | 0.00197017 | No      |
|      |       |        |             |          |         | Ubxn7  | 6.73706  | 2.68912 | -1.32498         | 6.73806      | 2.69012       | -1.3246627       | 0.0340896  | No      |
|      |       |        |             |          |         | Ubxn8  | 4.10108  | 10.0649 | 1.29526          | 4.10208      | 10.0659       | 1.29504864       | 0.00018329 | No      |
|      |       |        |             |          |         | Uchl1  | 8.63003  | 109.537 | 3.66591          | 8.63103      | 109.538       | 3.6657549        | 0.00018329 | No      |
|      |       |        |             |          |         | Uchl5  | 24.7027  | 16.0478 | -0.622286        | 24.7037      | 16.0488       | -0.6222617       | 0.02885    | No      |
|      |       |        |             |          |         | UCMA   | 0        | 6.49368 | inf              | 0.001        | 6.49468       | 12.6650427       | 0.00018329 | No      |

| RRBS |       |        |             |          |         | RNAseq   |          |         |                  |              |               |                  |            |         |
|------|-------|--------|-------------|----------|---------|----------|----------|---------|------------------|--------------|---------------|------------------|------------|---------|
| gene | Blood | Kidney | methyl.diff | pMWU.fdr | Match ? | gene     | blood    | kidney  | log2(fold_ratio) | blood+ 0.001 | kidney+ 0.001 | log2(fold_ratio) | q_value    | Match ? |
|      |       |        |             |          |         | Ucp2     | 636.396  | 141.943 | -2.16462         | 636.397      | 141.944       | -2.1646052       | 0.00018329 | No      |
|      |       |        |             |          |         | Ufsp1    | 2.71762  | 6.17509 | 1.18412          | 2.71862      | 6.17609       | 1.18381927       | 0.022325   | No      |
|      |       |        |             |          |         | Ugcg     | 38.4842  | 18.0273 | -1.09409         | 38.4852      | 18.0283       | -1.0940404       | 0.00018329 | No      |
|      |       |        |             |          |         | Ugdh     | 13.7521  | 28.3352 | 1.04295          | 13.7531      | 28.3362       | 1.04288946       | 0.00035173 | No      |
|      |       |        |             |          |         | Uggt1    | 25.3301  | 9.72704 | -1.38078         | 25.3311      | 9.72804       | -1.3806887       | 0.00018329 | No      |
|      |       |        |             |          |         | Ugp2     | 28.0198  | 41.0928 | 0.552437         | 28.0208      | 41.0938       | 0.5524226        | 0.043182   | No      |
|      |       |        |             |          |         | Ugt1a2   | 1.25627  | 78.1026 | 5.95815          | 1.25727      | 78.1036       | 5.95702264       | 0.00018329 | No      |
|      |       |        |             |          |         | Ugt2b35  | 0        | 13.846  | inf              | 0.001        | 13.847        | 13.7572858       | 0.00018329 | No      |
|      |       |        |             |          |         | Ugt8     | 0        | 23.6459 | inf              | 0.001        | 23.6469       | 14.5293634       | 0.00018329 | No      |
|      |       |        |             |          |         | Uhrf1bp1 | 0.116047 | 5.89327 | 5.66629          | 0.117047     | 5.89427       | 5.65415329       | 0.00018329 | No      |
|      |       |        |             |          |         | Uhrf2    | 115.225  | 38.9111 | -1.56619         | 115.226      | 38.9121       | -1.5661755       | 0.00018329 | No      |
|      |       |        |             |          |         | Ulk1     | 13.2303  | 28.2014 | 1.09191          | 13.2313      | 28.2024       | 1.09186312       | 0.00051281 | No      |
|      |       |        |             |          |         | Ulk2     | 12.7389  | 6.69597 | -0.927874        | 12.7399      | 6.69697       | -0.9277735       | 0.00140841 | No      |
|      |       |        |             |          |         | Unc13b   | 1.09229  | 4.27025 | 1.96696          | 1.09329      | 4.27125       | 1.96598221       | 0.00018329 | No      |
|      |       |        |             |          |         | Unc5b    | 3.55399  | 1.24179 | -1.51702         | 3.55499      | 1.24279       | -1.516263        | 0.00035173 | No      |
|      |       |        |             |          |         | Unc5cl   | 1.824    | 7.59562 | 2.05806          | 1.825        | 7.59662       | 2.05746119       | 0.00018329 | No      |
|      |       |        |             |          |         | Unc93b1  | 2.87583  | 19.6214 | 2.77038          | 2.87683      | 19.6224       | 2.76994963       | 0.00018329 | No      |
|      |       |        |             |          |         | Ung      | 11.4666  | 22.3048 | 0.959915         | 11.4676      | 22.3058       | 0.9598554        | 0.00238141 | No      |
|      |       |        |             |          |         | Unk      | 17.5284  | 9.17644 | -0.933692        | 17.5294      | 9.17744       | -0.9336129       | 0.00686277 | No      |
|      |       |        |             |          |         | Unkl     | 25.9833  | 8.04628 | -1.69119         | 25.9843      | 8.04728       | -1.6910671       | 0.00018329 | No      |
|      |       |        |             |          |         | Upf2     | 45.0877  | 22.528  | -1.00101         | 45.0887      | 22.529        | -1.0009826       | 0.00066911 | No      |
|      |       |        |             |          |         | Upf3b    | 43.5376  | 13.3426 | -1.70623         | 43.5386      | 13.3436       | -1.7061471       | 0.00018329 | No      |
|      |       |        |             |          |         | Upk1a    | 0.470093 | 53.4615 | 6.82941          | 0.471093     | 53.4625       | 6.8263716        | 0.00251301 | No      |
|      |       |        |             |          |         | Upk1b    | 0        | 15.646  | inf              | 0.001        | 15.647        | 13.9335985       | 0.00018329 | No      |
|      |       |        |             |          |         | Upk2     | 0        | 36.647  | inf              | 0.001        | 36.648        | 15.1614468       | 0.00018329 | No      |
|      |       |        |             |          |         | Upk3bl   | 0        | 10.4818 | inf              | 0.001        | 10.4828       | 13.3557365       | 0.00018329 | No      |
|      |       |        |             |          |         | Upp1     | 0.882625 | 19.0294 | 4.43029          | 0.883625     | 19.0304       | 4.42872784       | 0.00018329 | No      |
|      |       |        |             |          |         | UQCRB    | 65.2301  | 234.178 | 1.844            | 65.2311      | 234.179       | 1.84397985       | 0.00018329 | No      |
|      |       |        |             |          |         | Uqcrc1   | 94.0616  | 276.489 | 1.55555          | 94.0626      | 276.49        | 1.55553419       | 0.00018329 | No      |
|      |       |        |             |          |         | Uqcrc2   | 71.9258  | 112.546 | 0.645931         | 71.9268      | 112.547       | 0.64592628       | 0.0455598  | No      |
|      |       |        |             |          |         | Uqcrfs1  | 108.139  | 203.533 | 0.912369         | 108.14       | 203.534       | 0.91236955       | 0.00035173 | No      |
|      |       |        |             |          |         | Uqcrq    | 319.897  | 1501.77 | 2.23098          | 319.898      | 1501.771      | 2.23098096       | 0.00018329 | No      |
|      |       |        |             |          |         | Urad     | 0        | 13.4428 | inf              | 0.001        | 13.4438       | 13.7146534       | 0.00018329 | No      |
|      |       |        |             |          |         | Urb1     | 5.61978  | 1.51729 | -1.88902         | 5.62078      | 1.51829       | -1.888323        | 0.00018329 | No      |
|      |       |        |             |          |         | Urgcp    | 6.49551  | 12.7173 | 0.969276         | 6.49651      | 12.7183       | 0.96916905       | 0.00251301 | No      |
|      |       |        |             |          |         | Uri1     | 49.8338  | 16.471  | -1.5972          | 49.8348      | 16.472        | -1.5971378       | 0.00018329 | No      |
|      |       |        |             |          |         | Urod     | 37.8544  | 76.7689 | 1.02006          | 37.8554      | 76.7699       | 1.02004166       | 0.00035173 | No      |
|      |       |        |             |          |         | Use1     | 156.052  | 229.07  | 0.553768         | 156.053      | 229.071       | 0.55375874       | 0.046635   | No      |
|      |       |        |             |          |         | Usmg5    | 527.928  | 1717    | 1.70148          | 527.929      | 1717.001      | 1.70147506       | 0.00018329 | No      |
|      |       |        |             |          |         | Usp1     | 22.2752  | 9.22517 | -1.27179         | 22.2762      | 9.22617       | -1.2716994       | 0.00018329 | No      |
|      |       |        |             |          |         | Usp14    | 31.1998  | 15.9258 | -0.970172        | 31.2008      | 15.9268       | -0.9701266       | 0.0245258  | No      |
|      |       |        |             |          |         | Usp15    | 23.2386  | 15.0978 | -0.622186        | 23.2396      | 15.0988       | -0.6221513       | 0.0231105  | No      |

| RRBS |       |        |             |          |         | RNAseq |           |          |                  |              |               |                  |            |         |
|------|-------|--------|-------------|----------|---------|--------|-----------|----------|------------------|--------------|---------------|------------------|------------|---------|
| gene | Blood | Kidney | methyl.diff | pMWU.fdr | Match ? | gene   | blood     | kidney   | log2(fold_ratio) | blood+ 0.001 | kidney+ 0.001 | log2(fold_ratio) | q_value    | Match ? |
|      |       |        |             |          |         | Usp2   | 0.137375  | 3.21756  | 4.54978          | 0.138375     | 3.21856       | 4.53976014       | 0.00111812 | No      |
|      |       |        |             |          |         | Usp20  | 7.14765   | 13.7739  | 0.946394         | 7.14865      | 13.7749       | 0.94629912       | 0.00197017 | No      |
|      |       |        |             |          |         | Usp25  | 37.332    | 16.1687  | -1.20721         | 37.333       | 16.1697       | -1.2071585       | 0.00111812 | No      |
|      |       |        |             |          |         | Usp28  | 76.6442   | 9.71474  | -2.97993         | 76.6452      | 9.71574       | -2.9797997       | 0.00018329 | No      |
|      |       |        |             |          |         | Usp31  | 2.00022   | 0.848755 | -1.23674         | 2.00122      | 0.849755      | -1.2357609       | 0.00035173 | No      |
|      |       |        |             |          |         | USP34  | 15.7939   | 4.43741  | -1.83158         | 15.7949      | 4.43841       | -1.831344        | 0.0402454  | No      |
|      |       |        |             |          |         | Usp37  | 7.01839   | 3.38902  | -1.05027         | 7.01939      | 3.39002       | -1.0500519       | 0.00615197 | No      |
|      |       |        |             |          |         | Usp38  | 20.9903   | 5.78081  | -1.86038         | 20.9913      | 5.78181       | -1.8601984       | 0.00018329 | No      |
|      |       |        |             |          |         | USP39  | 23.7797   | 11.0705  | -1.10301         | 23.7807      | 11.0715       | -1.1029405       | 0.00506686 | No      |
|      |       |        |             |          |         | Usp40  | 41.8496   | 11.3067  | -1.88803         | 41.8506      | 11.3077       | -1.8879428       | 0.00018329 | No      |
|      |       |        |             |          |         | Usp43  | 0         | 3.28416  | inf              | 0.001        | 3.28516       | 11.6817479       | 0.00018329 | No      |
|      |       |        |             |          |         | Usp45  | 10.7753   | 2.63654  | -2.03101         | 10.7763      | 2.63754       | -2.030597        | 0.00018329 | No      |
|      |       |        |             |          |         | Usp48  | 67.5905   | 23.6291  | -1.51626         | 67.5915      | 23.6301       | -1.5162161       | 0.00018329 | No      |
|      |       |        |             |          |         | Usp53  | 4.62293   | 9.57724  | 1.0508           | 4.62393      | 9.57824       | 1.05064103       | 0.00197017 | No      |
|      |       |        |             |          |         | Usp6nl | 9.37908   | 4.3017   | -1.12454         | 9.38008      | 4.3027        | -1.124358        | 0.00018329 | No      |
|      |       |        |             |          |         | Usp7   | 74.7399   | 34.0143  | -1.13574         | 74.7409      | 34.0153       | -1.1357141       | 0.00018329 | No      |
|      |       |        |             |          |         | Usp9x  | 18.8846   | 10.1341  | -0.897986        | 18.8856      | 10.1351       | -0.8979263       | 0.00097029 | No      |
|      |       |        |             |          |         | Ust    | 5.35749   | 1.07998  | -2.31056         | 5.35849      | 1.08098       | -2.3094867       | 0.00018329 | No      |
|      |       |        |             |          |         | Utp14a | 17.2051   | 8.03426  | -1.0986          | 17.2061      | 8.03526       | -1.0985035       | 0.00035173 | No      |
|      |       |        |             |          |         | Utp15  | 9.29364   | 4.7277   | -0.975106        | 9.29464      | 4.7287        | -0.9749554       | 0.00154856 | No      |
|      |       |        |             |          |         | Utp18  | 18.1706   | 5.9564   | -1.60909         | 18.1716      | 5.9574        | -1.6089307       | 0.00018329 | No      |
|      |       |        |             |          |         | Utp20  | 5.60875   | 2.51547  | -1.15685         | 5.60975      | 2.51647       | -1.1565351       | 0.00018329 | No      |
|      |       |        |             |          |         | Utp3   | 47.0741   | 29.8688  | -0.656292        | 47.0751      | 29.8698       | -0.6562766       | 0.0190448  | No      |
|      |       |        |             |          |         | Utrn   | 48.4048   | 24.5014  | -0.982286        | 48.4058      | 24.5024       | -0.9822569       | 0.0262294  | No      |
|      |       |        |             |          |         | Vamp1  | 58.8058   | 11.5555  | -2.34738         | 58.8068      | 11.5565       | -2.3472785       | 0.00018329 | No      |
|      |       |        |             |          |         | Vamp4  | 20.1802   | 6.68249  | -1.59449         | 20.1812      | 6.68349       | -1.5943384       | 0.00018329 | No      |
|      |       |        |             |          |         | Vamp8  | 101.212   | 224.703  | 1.15064          | 101.213      | 224.704       | 1.1506312        | 0.00506686 | No      |
|      |       |        |             |          |         | Vangl1 | 0.218466  | 4.27732  | 4.29122          | 0.219466     | 4.27832       | 4.28497504       | 0.00018329 | No      |
|      |       |        |             |          |         | Vapb   | 23.3914   | 38.6285  | 0.723689         | 23.3924      | 38.6295       | 0.72366312       | 0.0168685  | No      |
|      |       |        |             |          |         | Vash1  | 0         | 0.664251 | inf              | 0.001        | 0.665251      | 9.37775496       | 0.00018329 | No      |
|      |       |        |             |          |         | Vash2  | 0.0948197 | 5.21562  | 5.78151          | 0.0958197    | 5.21662       | 5.76664924       | 0.00066911 | No      |
|      |       |        |             |          |         | Vasp   | 99.1938   | 52.1301  | -0.928134        | 99.1948      | 52.1311       | -0.9281202       | 0.00097029 | No      |
|      |       |        |             |          |         | Vav1   | 37.1214   | 7.2575   | -2.35471         | 37.1224      | 7.2585        | -2.3545466       | 0.00018329 | No      |
|      |       |        |             |          |         | Vcam1  | 0.0404593 | 1.60848  | 5.31308          | 0.0414593    | 1.60948       | 5.27875508       | 0.00615197 | No      |
|      |       |        |             |          |         | Vcan   | 0.0928418 | 4.03951  | 5.44326          | 0.0938418    | 4.04051       | 5.42816291       | 0.00018329 | No      |
|      |       |        |             |          |         | Vcl    | 1.44447   | 9.33787  | 2.69256          | 1.44547      | 9.33887       | 2.69170933       | 0.00018329 | No      |
|      |       |        |             |          |         | Vcpip1 | 15.9001   | 5.63568  | -1.49637         | 15.9011      | 5.63668       | -1.496209        | 0.00018329 | No      |
|      |       |        |             |          |         | Vdac1  | 25.4087   | 205.442  | 3.01534          | 25.4097      | 205.443       | 3.01528693       | 0.00018329 | No      |
|      |       |        |             |          |         | Vdac2  | 96.7965   | 149.687  | 0.628918         | 96.7975      | 149.688       | 0.62891688       | 0.0272082  | No      |
|      |       |        |             |          |         | Vdac3  | 93.2794   | 137.999  | 0.56503          | 93.2804      | 138           | 0.56502239       | 0.0335274  | No      |
|      |       |        |             |          |         | Vdr    | 0.219594  | 34.2851  | 7.2866           | 0.220594     | 34.2861       | 7.28008645       | 0.00018329 | No      |
|      |       |        |             |          |         | Vegfa  | 0.170853  | 77.4068  | 8.82356          | 0.171853     | 77.4078       | 8.8151601        | 0.00018329 | No      |

| RRBS |       |        |             |          |         | RNAseq   |           |          |                  |              |               |                  |            |         |
|------|-------|--------|-------------|----------|---------|----------|-----------|----------|------------------|--------------|---------------|------------------|------------|---------|
| gene | Blood | Kidney | methyl.diff | pMWU.fdr | Match ? | gene     | blood     | kidney   | log2(fold_ratio) | blood+ 0.001 | kidney+ 0.001 | log2(fold_ratio) | q_value    | Match ? |
|      |       |        |             |          |         | Vegfb    | 2.62161   | 47.0437  | 4.16547          | 2.62261      | 47.0447       | 4.16495701       | 0.00018329 | No      |
|      |       |        |             |          |         | Vegfc    | 0.159855  | 2.4649   | 3.9467           | 0.160855     | 2.4659        | 3.93828161       | 0.00140841 | No      |
|      |       |        |             |          |         | Veph1    | 0         | 8.4193   | inf              | 0.001        | 8.4203        | 13.0396559       | 0.00018329 | No      |
|      |       |        |             |          |         | VeZF1    | 27.3509   | 16.5251  | -0.726927        | 27.3519      | 16.5261       | -0.7268948       | 0.0121287  | No      |
|      |       |        |             |          |         | VeZt     | 3.57175   | 5.80868  | 0.701579         | 3.57275      | 5.80968       | 0.70142374       | 0.0394791  | No      |
|      |       |        |             |          |         | Vill     | 0         | 50.1591  | inf              | 0.001        | 50.1601       | 15.6142526       | 0.00018329 | No      |
|      |       |        |             |          |         | Vipr1    | 3.22864   | 0.14103  | -4.51685         | 3.22964      | 0.14203       | -4.5071058       | 0.036101   | No      |
|      |       |        |             |          |         | Vipr2    | 4.61048   | 0.839467 | -2.45737         | 4.61148      | 0.840467      | -2.4559668       | 0.00018329 | No      |
|      |       |        |             |          |         | Vkorc1   | 7.34524   | 68.035   | 3.21139          | 7.34624      | 68.036        | 3.21122039       | 0.00018329 | No      |
|      |       |        |             |          |         | Vkorc1l1 | 2.19441   | 4.31546  | 0.97568          | 2.19541      | 4.31646       | 0.97535823       | 0.0313274  | No      |
|      |       |        |             |          |         | Vmac     | 17.0332   | 28.3457  | 0.734776         | 17.0342      | 28.3467       | 0.7347466        | 0.00834357 | No      |
|      |       |        |             |          |         | Vnn1     | 0.745854  | 10.644   | 3.83501          | 0.746854     | 10.645        | 3.8332059        | 0.00018329 | No      |
|      |       |        |             |          |         | Vom2r44  | 0.925902  | 0.425566 | -1.12148         | 0.926902     | 0.426566      | -1.1196478       | 0.0484218  | No      |
|      |       |        |             |          |         | Vopp1    | 69.9476   | 28.2092  | -1.31011         | 69.9486      | 28.2102       | -1.3100783       | 0.00018329 | No      |
|      |       |        |             |          |         | Vprbp    | 20.7477   | 10.6567  | -0.961195        | 20.7487      | 10.6577       | -0.9611248       | 0.0476294  | No      |
|      |       |        |             |          |         | Vps13a   | 26.3776   | 11.0239  | -1.25868         | 26.3786      | 11.0249       | -1.2586024       | 0.00018329 | No      |
|      |       |        |             |          |         | Vps18    | 1.92698   | 4.91044  | 1.34951          | 1.92798      | 4.91144       | 1.34905599       | 0.00018329 | No      |
|      |       |        |             |          |         | Vps25    | 62.6227   | 132.753  | 1.08398          | 62.6237      | 132.754       | 1.08397468       | 0.00251301 | No      |
|      |       |        |             |          |         | Vps29    | 26.3352   | 60.8078  | 1.20726          | 26.3362      | 60.8088       | 1.20723292       | 0.00018329 | No      |
|      |       |        |             |          |         | Vps36    | 54.1329   | 31.628   | -0.775303        | 54.1339      | 31.629        | -0.7752844       | 0.0136625  | No      |
|      |       |        |             |          |         | Vps37b   | 90.3394   | 10.572   | -3.0951          | 90.3404      | 10.573        | -3.0949865       | 0.00018329 | No      |
|      |       |        |             |          |         | Vps45    | 10.3578   | 27.6064  | 1.41429          | 10.3588      | 27.6074       | 1.41419814       | 0.00290302 | No      |
|      |       |        |             |          |         | Vps54    | 41.3059   | 21.6854  | -0.929621        | 41.3069      | 21.6864       | -0.9295922       | 0.0393915  | No      |
|      |       |        |             |          |         | Vps9d1   | 10.7423   | 31.35    | 1.54516          | 10.7433      | 31.351        | 1.54507425       | 0.00018329 | No      |
|      |       |        |             |          |         | Vrk1     | 36.2022   | 17.1949  | -1.0741          | 36.2032      | 17.1959       | -1.0740526       | 0.00051281 | No      |
|      |       |        |             |          |         | Vsig10l  | 0.869964  | 12.1483  | 3.80365          | 0.870964     | 12.1493       | 3.80211629       | 0.00018329 | No      |
|      |       |        |             |          |         | Vsig2    | 0         | 5.1861   | inf              | 0.001        | 5.1871        | 12.3407125       | 0.00018329 | No      |
|      |       |        |             |          |         | Vtcn1    | 0         | 1.67653  | inf              | 0.001        | 1.67753       | 10.7121229       | 0.00018329 | No      |
|      |       |        |             |          |         | Vwa7     | 0.0314075 | 4.03241  | 7.00439          | 0.0324075    | 4.03341       | 6.95952852       | 0.0248275  | No      |
|      |       |        |             |          |         | Vwa8     | 7.88766   | 24.5365  | 1.63726          | 7.88866      | 24.5375       | 1.6371361        | 0.00018329 | No      |
|      |       |        |             |          |         | Vwf      | 16.541    | 3.84043  | -2.1067          | 16.542       | 3.84143       | -2.1064183       | 0.00018329 | No      |
|      |       |        |             |          |         | Wac      | 106.417   | 35.3132  | -1.59145         | 106.418      | 35.3142       | -1.5914219       | 0.00018329 | No      |
|      |       |        |             |          |         | Wapal    | 37.2859   | 12.0137  | -1.63396         | 37.2869      | 12.0147       | -1.6338682       | 0.00018329 | No      |
|      |       |        |             |          |         | Was      | 116.879   | 27.4316  | -2.0911          | 116.88       | 27.4326       | -2.0910648       | 0.00018329 | No      |
|      |       |        |             |          |         | Wasf1    | 0.0620662 | 1.11036  | 4.16108          | 0.0630662    | 1.11136       | 4.1393154        | 0.00251301 | No      |
|      |       |        |             |          |         | Wasf2    | 34.7196   | 12.917   | -1.42648         | 34.7206      | 12.918        | -1.4264092       | 0.00018329 | No      |
|      |       |        |             |          |         | Wasf3    | 0         | 4.24091  | inf              | 0.001        | 4.24191       | 12.0504983       | 0.00018329 | No      |
|      |       |        |             |          |         | Wbp1     | 63.2984   | 98.6018  | 0.639446         | 63.2994      | 98.6028       | 0.63943679       | 0.0207821  | No      |
|      |       |        |             |          |         | Wbp1l    | 70.6241   | 25.0566  | -1.49497         | 70.6251      | 25.0576       | -1.4949328       | 0.00018329 | No      |
|      |       |        |             |          |         | Wbp5     | 12.4043   | 160.701  | 3.69547          | 12.4053      | 160.702       | 3.69535935       | 0.00018329 | No      |
|      |       |        |             |          |         | Wbscr27  | 12.0796   | 23.9458  | 0.987199         | 12.0806      | 23.9468       | 0.98714077       | 0.00380824 | No      |
|      |       |        |             |          |         | Wbscr28  | 0         | 0.678907 | inf              | 0.001        | 0.679907      | 9.40919361       | 0.00018329 | No      |

| RRBS |       |        |             |          |         | RNAseq |           |          |                  |              |               |                  |            |         |
|------|-------|--------|-------------|----------|---------|--------|-----------|----------|------------------|--------------|---------------|------------------|------------|---------|
| gene | Blood | Kidney | methyl.diff | pMWU.fdr | Match ? | gene   | blood     | kidney   | log2(fold_ratio) | blood+ 0.001 | kidney+ 0.001 | log2(fold_ratio) | q_value    | Match ? |
|      |       |        |             |          |         | Wdfy1  | 1.59078   | 10.7187  | 2.75232          | 1.59178      | 10.7197       | 2.75155167       | 0.00018329 | No      |
|      |       |        |             |          |         | Wdfy2  | 7.63407   | 11.638   | 0.60832          | 7.63507      | 11.639        | 0.60825382       | 0.0300303  | No      |
|      |       |        |             |          |         | Wdfy3  | 0.026308  | 9.83279  | 8.54596          | 0.027308     | 9.83379       | 8.49228008       | 0.00018329 | No      |
|      |       |        |             |          |         | Wdhd1  | 4.68421   | 1.20893  | -1.95408         | 4.68521      | 1.20993       | -1.9531901       | 0.00018329 | No      |
|      |       |        |             |          |         | Wdpcp  | 0.642242  | 2.17918  | 1.7626           | 0.643242     | 2.18018       | 1.76101374       | 0.04193    | No      |
|      |       |        |             |          |         | Wdr11  | 6.70421   | 21.2945  | 1.66734          | 6.70521      | 21.2955       | 1.66719418       | 0.00018329 | No      |
|      |       |        |             |          |         | Wdr12  | 22.3896   | 11.2408  | -0.994077        | 22.3906      | 11.2418       | -0.9940201       | 0.02885    | No      |
|      |       |        |             |          |         | Wdr19  | 0.268391  | 1.85897  | 2.7921           | 0.269391     | 1.85997       | 2.78750579       | 0.00018329 | No      |
|      |       |        |             |          |         | Wdr20  | 17.2306   | 9.47936  | -0.862114        | 17.2316      | 9.48036       | -0.8620429       | 0.02885    | No      |
|      |       |        |             |          |         | Wdr25  | 21.9017   | 6.60189  | -1.73009         | 21.9027      | 6.60289       | -1.7299392       | 0.00744054 | No      |
|      |       |        |             |          |         | Wdr26  | 70.9843   | 16.9943  | -2.06245         | 70.9853      | 16.9953       | -2.0623845       | 0.00018329 | No      |
|      |       |        |             |          |         | Wdr3   | 18.5113   | 6.54101  | -1.50082         | 18.5123      | 6.54201       | -1.5006783       | 0.00018329 | No      |
|      |       |        |             |          |         | Wdr35  | 0.677686  | 10.9493  | 4.01408          | 0.678686     | 10.9503       | 4.01208233       | 0.00018329 | No      |
|      |       |        |             |          |         | Wdr37  | 11.2463   | 6.1897   | -0.861514        | 11.2473      | 6.1907        | -0.8614043       | 0.00342383 | No      |
|      |       |        |             |          |         | Wdr41  | 15.8641   | 9.2733   | -0.774613        | 15.8651      | 9.2743        | -0.7745463       | 0.018938   | No      |
|      |       |        |             |          |         | Wdr43  | 32.6523   | 12.2209  | -1.41784         | 32.6533      | 12.2219       | -1.4177602       | 0.00018329 | No      |
|      |       |        |             |          |         | Wdr44  | 6.37246   | 2.3126   | -1.46233         | 6.37346      | 2.3136        | -1.4619373       | 0.00018329 | No      |
|      |       |        |             |          |         | Wdr45  | 54.0201   | 35.5114  | -0.605214        | 54.0211      | 35.5124       | -0.6052002       | 0.0482423  | No      |
|      |       |        |             |          |         | Wdr5   | 27.7989   | 14.8324  | -0.906269        | 27.7999      | 14.8334       | -0.9062304       | 0.00082046 | No      |
|      |       |        |             |          |         | Wdr54  | 0.0966592 | 18.9415  | 7.61443          | 0.0976592    | 18.9425       | 7.59965507       | 0.00111812 | No      |
|      |       |        |             |          |         | WDR55  | 128.145   | 68.2314  | -0.909268        | 128.146      | 68.2324       | -0.9092596       | 0.00082046 | No      |
|      |       |        |             |          |         | Wdr60  | 0.328451  | 3.55338  | 3.43544          | 0.329451     | 3.55438       | 3.43146212       | 0.00018329 | No      |
|      |       |        |             |          |         | Wdr61  | 25.1669   | 40.6457  | 0.691577         | 25.1679      | 40.6467       | 0.69155338       | 0.0287615  | No      |
|      |       |        |             |          |         | Wdr7   | 4.87889   | 2.65467  | -0.878021        | 4.87989      | 2.65567       | -0.8777727       | 0.0036827  | No      |
|      |       |        |             |          |         | Wdr70  | 21.271    | 13.0651  | -0.703177        | 21.272       | 13.0661       | -0.7031271       | 0.0422061  | No      |
|      |       |        |             |          |         | Wdr72  | 0         | 14.6668  | inf              | 0.001        | 14.6678       | 13.8403649       | 0.00018329 | No      |
|      |       |        |             |          |         | Wdr73  | 6.40889   | 13.0231  | 1.02293          | 6.40989      | 13.0241       | 1.02281218       | 0.0218106  | No      |
|      |       |        |             |          |         | Wdr75  | 28.4698   | 14.7086  | -0.952775        | 28.4708      | 14.7096       | -0.952725        | 0.00018329 | No      |
|      |       |        |             |          |         | Wdr76  | 4.71053   | 1.00351  | -2.23083         | 4.71153      | 1.00451       | -2.2297037       | 0.00018329 | No      |
|      |       |        |             |          |         | Wdr91  | 13.5079   | 32.5048  | 1.26685          | 13.5089      | 32.5058       | 1.26678696       | 0.00981659 | No      |
|      |       |        |             |          |         | Wdr92  | 8.50718   | 4.66039  | -0.868231        | 8.50818      | 4.66139       | -0.8680903       | 0.010379   | No      |
|      |       |        |             |          |         | Wdsub1 | 1.87838   | 7.94719  | 2.08096          | 1.87938      | 7.94819       | 2.08036956       | 0.00018329 | No      |
|      |       |        |             |          |         | Wdte1  | 29.2541   | 17.6387  | -0.729896        | 29.2551      | 17.6397       | -0.7298621       | 0.00615197 | No      |
|      |       |        |             |          |         | Wfdc1  | 0         | 9.90711  | inf              | 0.001        | 9.90811       | 13.2743942       | 0.00018329 | No      |
|      |       |        |             |          |         | Wfdc10 | 0         | 3.6374   | inf              | 0.001        | 3.6384        | 11.8290884       | 0.00018329 | No      |
|      |       |        |             |          |         | Wfdc3  | 0         | 2.23542  | inf              | 0.001        | 2.23642       | 11.1269754       | 0.0180048  | No      |
|      |       |        |             |          |         | Wfs1   | 0.579222  | 6.85034  | 3.56399          | 0.580222     | 6.85134       | 3.56170928       | 0.00018329 | No      |
|      |       |        |             |          |         | Whsc1  | 3.98294   | 10.8027  | 1.43949          | 3.98394      | 10.8037       | 1.43925766       | 0.0109365  | No      |
|      |       |        |             |          |         | Wibg   | 124.318   | 38.214   | -1.70187         | 124.319      | 38.215        | -1.7018359       | 0.00018329 | No      |
|      |       |        |             |          |         | WIF1   | 0.157708  | 0.581836 | 1.88336          | 0.158708     | 0.582836      | 1.87671514       | 0.0433593  | No      |
|      |       |        |             |          |         | Wipf3  | 6.76833   | 0.888359 | -2.92959         | 6.76933      | 0.889359      | -2.9281752       | 0.00018329 | No      |
|      |       |        |             |          |         | Wisp3  | 7.43132   | 2.35015  | -1.66086         | 7.43232      | 2.35115       | -1.660446        | 0.0326623  | No      |



| RRBS |       |        |             |          |         | RNAseq   |          |          |                  |              |               |                  |            |         |
|------|-------|--------|-------------|----------|---------|----------|----------|----------|------------------|--------------|---------------|------------------|------------|---------|
| gene | Blood | Kidney | methyl.diff | pMWU.fdr | Match ? | gene     | blood    | kidney   | log2(fold_ratio) | blood+ 0.001 | kidney+ 0.001 | log2(fold_ratio) | q_value    | Match ? |
|      |       |        |             |          |         | Wls      | 5.32765  | 108.795  | 4.35197          | 5.32865      | 108.796       | 4.35171163       | 0.00018329 | No      |
|      |       |        |             |          |         | Wnt4     | 0        | 2.22436  | inf              | 0.001        | 2.22536       | 11.119823        | 0.00018329 | No      |
|      |       |        |             |          |         | Wnt5a    | 0        | 1.64941  | inf              | 0.001        | 1.65041       | 10.6886088       | 0.00018329 | No      |
|      |       |        |             |          |         | Wnt7a    | 0        | 0.618608 | inf              | 0.001        | 0.619608      | 9.27521196       | 0.00018329 | No      |
|      |       |        |             |          |         | Wrap73   | 15.5939  | 7.25139  | -1.10465         | 15.5949      | 7.25239       | -1.1045459       | 0.00354878 | No      |
|      |       |        |             |          |         | Wrb      | 4.21694  | 9.23388  | 1.13074          | 4.21794      | 9.23488       | 1.13055464       | 0.00066911 | No      |
|      |       |        |             |          |         | Wrn      | 10.5014  | 4.17932  | -1.32924         | 10.5024      | 4.18032       | -1.3290338       | 0.00018329 | No      |
|      |       |        |             |          |         | Wsb2     | 8.21819  | 41.2855  | 2.32874          | 8.21919      | 41.2865       | 2.32860199       | 0.00018329 | No      |
|      |       |        |             |          |         | Wscd1    | 0.103888 | 8.3257   | 6.32447          | 0.104888     | 8.3267        | 6.31082331       | 0.00018329 | No      |
|      |       |        |             |          |         | Wt1      | 0        | 3.12219  | inf              | 0.001        | 3.12319       | 11.6088046       | 0.00018329 | No      |
|      |       |        |             |          |         | Wtap     | 63.6457  | 22.213   | -1.51866         | 63.6467      | 22.214        | -1.5186165       | 0.00018329 | No      |
|      |       |        |             |          |         | Wwc1     | 0.102262 | 72.197   | 9.46353          | 0.103262     | 72.198        | 9.44950562       | 0.00018329 | No      |
|      |       |        |             |          |         | Wwc2     | 0.126122 | 21.2616  | 7.39729          | 0.127122     | 21.2626       | 7.38596048       | 0.00018329 | No      |
|      |       |        |             |          |         | Wwc3     | 1.09388  | 4.86969  | 2.15437          | 1.09488      | 4.87069       | 2.15335341       | 0.00018329 | No      |
|      |       |        |             |          |         | Wwox     | 3.58995  | 7.32806  | 1.02947          | 3.59095      | 7.32906       | 1.02926261       | 0.0358173  | No      |
|      |       |        |             |          |         | Wwp1     | 0.834341 | 19.2504  | 4.5281           | 0.835341     | 19.2514       | 4.52645431       | 0.00018329 | No      |
|      |       |        |             |          |         | XAF1     | 20.0634  | 6.10478  | -1.71655         | 20.0644      | 6.10578       | -1.7163905       | 0.00506686 | No      |
|      |       |        |             |          |         | XBP1     | 24.3082  | 63.1528  | 1.3774           | 24.3092      | 63.1538       | 1.37736713       | 0.00018329 | No      |
|      |       |        |             |          |         | Xcl1     | 1.34508  | 59.7225  | 5.47251          | 1.34608      | 59.7235       | 5.47146266       | 0.00018329 | No      |
|      |       |        |             |          |         | Xdh      | 0.659323 | 7.40446  | 3.48934          | 0.660323     | 7.40546       | 3.48734555       | 0.00018329 | No      |
|      |       |        |             |          |         | Xiap     | 19.002   | 9.05149  | -1.06993         | 19.003       | 9.05249       | -1.0698406       | 0.00543198 | No      |
|      |       |        |             |          |         | Xkrx     | 21.9649  | 0.86901  | -4.65968         | 21.9659      | 0.87001       | -4.6580898       | 0.00018329 | No      |
|      |       |        |             |          |         | Xpnpep1  | 17.5353  | 79.7613  | 2.18542          | 17.5363      | 79.7623       | 2.18536263       | 0.00018329 | No      |
|      |       |        |             |          |         | Xpnpep2  | 0.203947 | 7.71155  | 5.24075          | 0.204947     | 7.71255       | 5.23388516       | 0.00018329 | No      |
|      |       |        |             |          |         | Xpo1     | 38.1125  | 18.5392  | -1.03969         | 38.1135      | 18.5402       | -1.0396453       | 0.00018329 | No      |
|      |       |        |             |          |         | Xpo4     | 9.67917  | 3.13275  | -1.62745         | 9.68017      | 3.13375       | -1.6271423       | 0.00018329 | No      |
|      |       |        |             |          |         | Xrcc1    | 27.7477  | 50.0019  | 0.849615         | 27.7487      | 50.0029       | 0.84959158       | 0.0018326  | No      |
|      |       |        |             |          |         | Xrcc6bp1 | 9.46459  | 54.3095  | 2.52059          | 9.46559      | 54.3105       | 2.52046681       | 0.00018329 | No      |
|      |       |        |             |          |         | Xrn2     | 51.797   | 14.0395  | -1.88337         | 51.798       | 14.0405       | -1.8833021       | 0.00018329 | No      |
|      |       |        |             |          |         | Xxylt1   | 5.68364  | 15.0318  | 1.40313          | 5.68464      | 15.0328       | 1.40297286       | 0.00018329 | No      |
|      |       |        |             |          |         | Xylt2    | 26.7277  | 10.7464  | -1.31449         | 26.7287      | 10.7474       | -1.314402        | 0.00018329 | No      |
|      |       |        |             |          |         | Yae1d1   | 4.61419  | 8.71     | 0.916594         | 4.61519      | 8.711         | 0.9164483        | 0.00354878 | No      |
|      |       |        |             |          |         | Ybey     | 1.04736  | 1.92267  | 0.876356         | 1.04836      | 1.92367       | 0.87572712       | 0.0432746  | No      |
|      |       |        |             |          |         | Ybx1     | 151.918  | 323.581  | 1.09083          | 151.919      | 323.582       | 1.09082904       | 0.00018329 | No      |
|      |       |        |             |          |         | Ybx3     | 41.4063  | 92.7554  | 1.16358          | 41.4073      | 92.7564       | 1.16356169       | 0.00018329 | No      |
|      |       |        |             |          |         | Yeats4   | 49.5629  | 25.8914  | -0.936784        | 49.5639      | 25.8924       | -0.936761        | 0.00111812 | No      |
|      |       |        |             |          |         | Yes1     | 0        | 6.7562   | inf              | 0.001        | 6.7572        | 12.7222098       | 0.00018329 | No      |
|      |       |        |             |          |         | Yif1a    | 12.3226  | 30.7378  | 1.31871          | 12.3236      | 30.7388       | 1.31863708       | 0.00018329 | No      |
|      |       |        |             |          |         | Yif1b    | 28.3883  | 51.2276  | 0.851626         | 28.3893      | 51.2286       | 0.85160219       | 0.0281852  | No      |
|      |       |        |             |          |         | YME1L1   | 13.5285  | 6.52682  | -1.05155         | 13.5295      | 6.52782       | -1.0514353       | 0.00066911 | No      |
|      |       |        |             |          |         | Ypel1    | 0.282821 | 3.59409  | 3.66766          | 0.283821     | 3.59509       | 3.66297464       | 0.031236   | No      |
|      |       |        |             |          |         | Ypel3    | 371.714  | 134.31   | -1.46863         | 371.715      | 134.311       | -1.4686194       | 0.00018329 | No      |

| RRBS |       |        |             |          |         | RNAseq  |           |          |                  |              |               |                  |            |         |
|------|-------|--------|-------------|----------|---------|---------|-----------|----------|------------------|--------------|---------------|------------------|------------|---------|
| gene | Blood | Kidney | methyl.diff | pMWU.fdr | Match ? | gene    | blood     | kidney   | log2(fold_ratio) | blood+ 0.001 | kidney+ 0.001 | log2(fold_ratio) | q_value    | Match ? |
|      |       |        |             |          |         | Yrdc    | 39.7581   | 19.6678  | -1.01542         | 39.7591      | 19.6688       | -1.0153762       | 0.0086849  | No      |
|      |       |        |             |          |         | Ythdc1  | 79.849    | 39.3115  | -1.02232         | 79.85        | 39.3125       | -1.0223043       | 0.00018329 | No      |
|      |       |        |             |          |         | Ythdc2  | 9.12847   | 3.28567  | -1.47418         | 9.12947      | 3.28667       | -1.4739045       | 0.00018329 | No      |
|      |       |        |             |          |         | Ythdf1  | 32.1256   | 18.3935  | -0.804529        | 32.1266      | 18.3945       | -0.8044938       | 0.0018326  | No      |
|      |       |        |             |          |         | Ythdf2  | 20.1088   | 10.331   | -0.960854        | 20.1098      | 10.332        | -0.9607792       | 0.0181001  | No      |
|      |       |        |             |          |         | Ythdf3  | 24.051    | 14.8626  | -0.694409        | 24.052       | 14.8636       | -0.6943733       | 0.0237237  | No      |
|      |       |        |             |          |         | Ywhab   | 128.414   | 80.4569  | -0.674515        | 128.415      | 80.4579       | -0.6745077       | 0.0136625  | No      |
|      |       |        |             |          |         | Ywhae   | 125.373   | 279.989  | 1.15914          | 125.374      | 279.99        | 1.15913711       | 0.00018329 | No      |
|      |       |        |             |          |         | Ywhag   | 12.5807   | 45.7244  | 1.86176          | 12.5817      | 45.7254       | 1.86166892       | 0.00018329 | No      |
|      |       |        |             |          |         | Ywhah   | 171.728   | 118.17   | -0.539262        | 171.729      | 118.171       | -0.5392577       | 0.0426676  | No      |
|      |       |        |             |          |         | YWHAZ   | 357.405   | 202.456  | -0.819954        | 357.406      | 202.457       | -0.8199483       | 0.0145263  | No      |
|      |       |        |             |          |         | Yy1     | 50.848    | 26.3456  | -0.948631        | 50.849       | 26.3466       | -0.9486026       | 0.0372165  | No      |
|      |       |        |             |          |         | Zak     | 0.871947  | 7.72199  | 3.14666          | 0.872947     | 7.72299       | 3.14519353       | 0.00018329 | No      |
|      |       |        |             |          |         | Zap70   | 137.039   | 34.6289  | -1.98453         | 137.04       | 34.6299       | -1.9845069       | 0.00018329 | No      |
|      |       |        |             |          |         | Zbed3   | 6.06974   | 16.8627  | 1.47413          | 6.07074      | 16.8637       | 1.47397682       | 0.00018329 | No      |
|      |       |        |             |          |         | Zbed4   | 5.43753   | 2.87391  | -0.919935        | 5.43853      | 2.87491       | -0.9197          | 0.00380824 | No      |
|      |       |        |             |          |         | Zbp1    | 60.3111   | 35.7318  | -0.755214        | 60.3121      | 35.7328       | -0.7551985       | 0.0151736  | No      |
|      |       |        |             |          |         | Zbtb1   | 26.4126   | 7.4075   | -1.83417         | 26.4136      | 7.4085        | -1.8340276       | 0.0290402  | No      |
|      |       |        |             |          |         | Zbtb11  | 12.6634   | 5.06034  | -1.32336         | 12.6644      | 5.06134       | -1.3231874       | 0.0413654  | No      |
|      |       |        |             |          |         | Zbtb32  | 6.72332   | 3.83832  | -0.808699        | 6.72432      | 3.83932       | -0.8085376       | 0.0433593  | No      |
|      |       |        |             |          |         | Zbtb33  | 1.11686   | 0.407178 | -1.45571         | 1.11786      | 0.408178      | -1.4534692       | 0.033435   | No      |
|      |       |        |             |          |         | Zbtb34  | 5.86155   | 1.13871  | -2.36389         | 5.86255      | 1.13971       | -2.3628615       | 0.00018329 | No      |
|      |       |        |             |          |         | Zbtb38  | 2.34656   | 6.16667  | 1.39395          | 2.34756      | 6.16767       | 1.39356354       | 0.00018329 | No      |
|      |       |        |             |          |         | Zbtb4   | 9.63428   | 14.8643  | 0.6256           | 9.63528      | 14.8653       | 0.62555008       | 0.0458374  | No      |
|      |       |        |             |          |         | Zbtb40  | 23.3696   | 8.60734  | -1.44099         | 23.3706      | 8.60834       | -1.4408878       | 0.00018329 | No      |
|      |       |        |             |          |         | Zbtb43  | 6.15297   | 3.98666  | -0.626101        | 6.15397      | 3.98766       | -0.625975        | 0.0369285  | No      |
|      |       |        |             |          |         | Zbtb44  | 22.1766   | 7.33104  | -1.59695         | 22.1776      | 7.33204       | -1.5968167       | 0.00018329 | No      |
|      |       |        |             |          |         | Zbtb6   | 7.34312   | 3.29184  | -1.1575          | 7.34412      | 3.29284       | -1.1572572       | 0.00140841 | No      |
|      |       |        |             |          |         | Zbtb7c  | 0.0319874 | 0.831253 | 4.69971          | 0.0329874    | 0.832253      | 4.65703519       | 0.0162458  | No      |
|      |       |        |             |          |         | Zbtb8a  | 0.343578  | 3.66089  | 3.41348          | 0.344578     | 3.66189       | 3.40968596       | 0.00018329 | No      |
|      |       |        |             |          |         | Zc3h11a | 57.253    | 27.9554  | -1.03422         | 57.254       | 27.9564       | -1.0341979       | 0.00018329 | No      |
|      |       |        |             |          |         | Zc3h12a | 7.2298    | 11.487   | 0.667975         | 7.2308       | 11.488        | 0.66790048       | 0.0354586  | No      |
|      |       |        |             |          |         | Zc3h12d | 37.802    | 7.771    | -2.28229         | 37.803       | 7.772         | -2.2821429       | 0.00018329 | No      |
|      |       |        |             |          |         | Zc3h15  | 81.6894   | 38.3906  | -1.0894          | 81.6904      | 38.3916       | -1.0893759       | 0.00018329 | No      |
|      |       |        |             |          |         | Zc3h4   | 23.3896   | 12.6946  | -0.881646        | 23.3906      | 12.6956       | -0.8816003       | 0.00126492 | No      |
|      |       |        |             |          |         | Zc3h7a  | 91.7961   | 29.9669  | -1.61506         | 91.7971      | 29.9679       | -1.6150306       | 0.00018329 | No      |
|      |       |        |             |          |         | Zc4h2   | 7.19192   | 3.18731  | -1.17404         | 7.19292      | 3.18831       | -1.1737856       | 0.00018329 | No      |
|      |       |        |             |          |         | Zcchc11 | 11.4402   | 4.33788  | -1.39905         | 11.4412      | 4.33888       | -1.3988438       | 0.00018329 | No      |
|      |       |        |             |          |         | Zcchc12 | 0.336767  | 1.53459  | 2.18803          | 0.337767     | 1.53559       | 2.18469278       | 0.0026435  | No      |
|      |       |        |             |          |         | Zcchc18 | 5.4461    | 0.259685 | -4.39039         | 5.4471       | 0.260685      | -4.3851089       | 0.00788539 | No      |
|      |       |        |             |          |         | Zcchc2  | 23.9031   | 6.00158  | -1.99378         | 23.9041      | 6.00258       | -1.9936035       | 0.00018329 | No      |
|      |       |        |             |          |         | Zcchc24 | 0.238709  | 0.814656 | 1.77093          | 0.239709     | 0.815656      | 1.76667675       | 0.00224282 | No      |

| RRBS |       |        |             |          |         | RNAseq  |           |          |                  |              |               |                  |            |         |
|------|-------|--------|-------------|----------|---------|---------|-----------|----------|------------------|--------------|---------------|------------------|------------|---------|
| gene | Blood | Kidney | methyl.diff | pMWU.fdr | Match ? | gene    | blood     | kidney   | log2(fold_ratio) | blood+ 0.001 | kidney+ 0.001 | log2(fold_ratio) | q_value    | Match ? |
|      |       |        |             |          |         | Zcchc7  | 52.2229   | 23.451   | -1.15504         | 52.2239      | 23.452        | -1.1549992       | 0.00937155 | No      |
|      |       |        |             |          |         | Zcchc8  | 28.6761   | 16.464   | -0.800529        | 28.6771      | 16.465        | -0.8004966       | 0.00603614 | No      |
|      |       |        |             |          |         | Zcchc9  | 30.3691   | 16.8928  | -0.846194        | 30.3701      | 16.8938       | -0.8461578       | 0.00543198 | No      |
|      |       |        |             |          |         | Zdhhc1  | 0.49142   | 26.3761  | 5.74613          | 0.49242      | 26.3771       | 5.74325279       | 0.00018329 | No      |
|      |       |        |             |          |         | Zdhhc15 | 0.350338  | 3.62978  | 3.37306          | 0.351338     | 3.63078       | 3.36934799       | 0.0341877  | No      |
|      |       |        |             |          |         | ZDHHC2  | 0.0983927 | 5.19146  | 5.72144          | 0.0993927    | 5.19246       | 5.70713449       | 0.00018329 | No      |
|      |       |        |             |          |         | Zdhhc20 | 9.52482   | 6.02369  | -0.661044        | 9.52582      | 6.02469       | -0.6609563       | 0.0480627  | No      |
|      |       |        |             |          |         | Zdhhc23 | 0.840354  | 6.3556   | 2.91896          | 0.841354     | 6.3566        | 2.91747046       | 0.00018329 | No      |
|      |       |        |             |          |         | Zdhhc9  | 4.35115   | 7.54179  | 0.793508         | 4.35215      | 7.54279       | 0.79336998       | 0.0160313  | No      |
|      |       |        |             |          |         | Zeb1    | 7.66384   | 2.31821  | -1.72506         | 7.66484      | 2.31921       | -1.7246222       | 0.00018329 | No      |
|      |       |        |             |          |         | Zeb2    | 0.214474  | 1.33236  | 2.63511          | 0.215474     | 1.33336       | 2.62948065       | 0.00035173 | No      |
|      |       |        |             |          |         | Zfand3  | 62.8287   | 35.1526  | -0.837794        | 62.8297      | 35.1536       | -0.8377743       | 0.00290302 | No      |
|      |       |        |             |          |         | Zfand4  | 2.41177   | 4.43441  | 0.878651         | 2.41277      | 4.43541       | 0.87837707       | 0.0328513  | No      |
|      |       |        |             |          |         | Zfand5  | 22.852    | 39.0037  | 0.771294         | 22.853       | 39.0047       | 0.77126441       | 0.00591487 | No      |
|      |       |        |             |          |         | Zfand6  | 119.4     | 61.3284  | -0.961179        | 119.401      | 61.3294       | -0.9611642       | 0.00066911 | No      |
|      |       |        |             |          |         | Zfat    | 49.0326   | 3.58766  | -3.77262         | 49.0336      | 3.58866       | -3.7722535       | 0.00018329 | No      |
|      |       |        |             |          |         | Zfc3h1  | 52.8486   | 11.3818  | -2.21513         | 52.8496      | 11.3828       | -2.2150371       | 0.00018329 | No      |
|      |       |        |             |          |         | Zfhx3   | 0.0523793 | 0.730224 | 3.80127          | 0.0533793    | 0.731224      | 3.77596113       | 0.00018329 | No      |
|      |       |        |             |          |         | Zfp101  | 8.24722   | 1.52333  | -2.43668         | 8.24822      | 1.52433       | -2.4359075       | 0.00018329 | No      |
|      |       |        |             |          |         | Zfp110  | 25.1051   | 10.783   | -1.21922         | 25.1061      | 10.784        | -1.2191455       | 0.00018329 | No      |
|      |       |        |             |          |         | Zfp112  | 0.580487  | 1.44991  | 1.32063          | 0.581487     | 1.45091       | 1.31913919       | 0.0119236  | No      |
|      |       |        |             |          |         | Zfp120  | 7.95348   | 2.83959  | -1.4859          | 7.95448      | 2.84059       | -1.485577        | 0.00018329 | No      |
|      |       |        |             |          |         | Zfp128  | 4.54947   | 2.13147  | -1.09385         | 4.55047      | 2.13247       | -1.0934901       | 0.00469886 | No      |
|      |       |        |             |          |         | Zfp13   | 0         | 0.78128  | inf              | 0.001        | 0.78228       | 9.61154127       | 0.00018329 | No      |
|      |       |        |             |          |         | Zfp131  | 27.9384   | 8.39715  | -1.73428         | 27.9394      | 8.39815       | -1.7341576       | 0.00018329 | No      |
|      |       |        |             |          |         | Zfp142  | 16.3037   | 10.1871  | -0.678458        | 16.3047      | 10.1881       | -0.6784029       | 0.0197773  | No      |
|      |       |        |             |          |         | Zfp143  | 9.85262   | 6.02353  | -0.709897        | 9.85362      | 6.02453       | -0.7098051       | 0.0172708  | No      |
|      |       |        |             |          |         | Zfp157  | 6.93398   | 2.96908  | -1.22367         | 6.93498      | 2.97008       | -1.2233899       | 0.00140841 | No      |
|      |       |        |             |          |         | Zfp167  | 0.271216  | 0.816893 | 1.5907           | 0.272216     | 0.817893      | 1.58716025       | 0.0139848  | No      |
|      |       |        |             |          |         | Zfp169  | 2.86082   | 0.972388 | -1.55682         | 2.86182      | 0.973388      | -1.555846        | 0.00018329 | No      |
|      |       |        |             |          |         | Zfp180  | 18.7348   | 12.7677  | -0.553223        | 18.7358      | 12.7687       | -0.5531859       | 0.0429385  | No      |
|      |       |        |             |          |         | Zfp182  | 9.75099   | 5.4737   | -0.833032        | 9.75199      | 5.4747        | -0.8329167       | 0.00530972 | No      |
|      |       |        |             |          |         | Zfp185  | 0.0416001 | 6.47177  | 7.28143          | 0.0426001    | 6.47277       | 7.24738261       | 0.00035173 | No      |
|      |       |        |             |          |         | Zfp187  | 47.4825   | 12.8308  | -1.88778         | 47.4835      | 12.8318       | -1.8877027       | 0.00018329 | No      |
|      |       |        |             |          |         | ZFP212  | 13.3978   | 6.29196  | -1.09041         | 13.3988      | 6.29296       | -1.0902931       | 0.00066911 | No      |
|      |       |        |             |          |         | Zfp236  | 10.8431   | 3.55777  | -1.60774         | 10.8441      | 3.55877       | -1.6074597       | 0.00035173 | No      |
|      |       |        |             |          |         | Zfp238  | 27.3309   | 8.01049  | -1.77057         | 27.3319      | 8.01149       | -1.7704433       | 0.00018329 | No      |
|      |       |        |             |          |         | Zfp239  | 1.812     | 4.34819  | 1.26283          | 1.813        | 4.34919       | 1.26236781       | 0.0374015  | No      |
|      |       |        |             |          |         | Zfp251  | 6.47913   | 3.73874  | -0.793248        | 6.48013      | 3.73974       | -0.7930848       | 0.0198773  | No      |
|      |       |        |             |          |         | Zfp259  | 57.0932   | 27.734   | -1.04166         | 57.0942      | 27.735        | -1.0416365       | 0.00018329 | No      |
|      |       |        |             |          |         | Zfp26   | 7.23563   | 2.41598  | -1.58251         | 7.23663      | 2.41698       | -1.5821125       | 0.00018329 | No      |
|      |       |        |             |          |         | Zfp263  | 7.22365   | 4.26003  | -0.761864        | 7.22465      | 4.26103       | -0.7617255       | 0.0260458  | No      |

| RRBS |       |        |             |          |         | RNAseq  |           |          |                  |              |               |                  |            |         |
|------|-------|--------|-------------|----------|---------|---------|-----------|----------|------------------|--------------|---------------|------------------|------------|---------|
| gene | Blood | Kidney | methyl.diff | pMWU.fdr | Match ? | gene    | blood     | kidney   | log2(fold_ratio) | blood+ 0.001 | kidney+ 0.001 | log2(fold_ratio) | q_value    | Match ? |
|      |       |        |             |          |         | Zfp275  | 5.59524   | 1.61904  | -1.78907         | 5.59624      | 1.62004       | -1.7884284       | 0.00018329 | No      |
|      |       |        |             |          |         | Zfp280c | 3.76193   | 1.41755  | -1.40807         | 3.76293      | 1.41855       | -1.4074394       | 0.00925991 | No      |
|      |       |        |             |          |         | Zfp280d | 20.6217   | 8.943    | -1.20533         | 20.6227      | 8.944         | -1.2052411       | 0.00238141 | No      |
|      |       |        |             |          |         | Zfp281  | 7.47734   | 2.16969  | -1.78504         | 7.47834      | 2.17069       | -1.7845644       | 0.00018329 | No      |
|      |       |        |             |          |         | Zfp282  | 2.64694   | 4.10622  | 0.633484         | 2.64794      | 4.10722       | 0.63329179       | 0.0485114  | No      |
|      |       |        |             |          |         | Zfp287  | 5.7536    | 2.40946  | -1.25575         | 5.7546       | 2.41046       | -1.2554072       | 0.00732142 | No      |
|      |       |        |             |          |         | Zfp292  | 11.1237   | 3.1702   | -1.81099         | 11.1247      | 3.1712        | -1.8106657       | 0.00018329 | No      |
|      |       |        |             |          |         | Zfp3    | 12.6524   | 4.88745  | -1.37226         | 12.6534      | 4.88845       | -1.3720761       | 0.00018329 | No      |
|      |       |        |             |          |         | Zfp316  | 0.892565  | 2.60584  | 1.54572          | 0.893565     | 2.60684       | 1.54465745       | 0.00018329 | No      |
|      |       |        |             |          |         | Zfp317  | 8.8561    | 4.12812  | -1.10119         | 8.8571       | 4.12912       | -1.1010001       | 0.00035173 | No      |
|      |       |        |             |          |         | Zfp346  | 5.47075   | 8.84925  | 0.693817         | 5.47175      | 8.85025       | 0.69371589       | 0.0309526  | No      |
|      |       |        |             |          |         | Zfp354a | 0.656287  | 9.94001  | 3.92085          | 0.657287     | 9.94101       | 3.91879708       | 0.00018329 | No      |
|      |       |        |             |          |         | Zfp354b | 0.11428   | 0.917374 | 3.00493          | 0.11528      | 0.918374      | 2.99393956       | 0.00579773 | No      |
|      |       |        |             |          |         | Zfp354c | 3.79318   | 1.15475  | -1.71582         | 3.79418      | 1.15575       | -1.7149588       | 0.00018329 | No      |
|      |       |        |             |          |         | Zfp3612 | 485.118   | 111.825  | -2.1171          | 485.119      | 111.826       | -2.117083        | 0.00018329 | No      |
|      |       |        |             |          |         | Zfp382  | 2.05865   | 0.668872 | -1.6219          | 2.05965      | 0.669872      | -1.6204418       | 0.00393885 | No      |
|      |       |        |             |          |         | Zfp383  | 5.13707   | 2.71178  | -0.921706        | 5.13807      | 2.71278       | -0.9214545       | 0.0102693  | No      |
|      |       |        |             |          |         | Zfp384  | 30.2402   | 18.175   | -0.734512        | 30.2412      | 18.176        | -0.7344806       | 0.00902869 | No      |
|      |       |        |             |          |         | Zfp385b | 0         | 5.67627  | inf              | 0.001        | 5.67727       | 12.4709816       | 0.00018329 | No      |
|      |       |        |             |          |         | Zfp385c | 13.7965   | 1.97279  | -2.80599         | 13.7975      | 1.97379       | -2.8053665       | 0.0145263  | No      |
|      |       |        |             |          |         | Zfp386  | 53.979    | 21.2054  | -1.34797         | 53.98        | 21.2064       | -1.3479252       | 0.00018329 | No      |
|      |       |        |             |          |         | Zfp394  | 15.4439   | 6.08091  | -1.34468         | 15.4449      | 6.08191       | -1.3445342       | 0.00018329 | No      |
|      |       |        |             |          |         | Zfp398  | 3.11908   | 1.48348  | -1.07213         | 3.12008      | 1.48448       | -1.0716254       | 0.0086849  | No      |
|      |       |        |             |          |         | Zfp40   | 2.46104   | 0.585769 | -2.07087         | 2.46204      | 0.586769      | -2.0689896       | 0.00035173 | No      |
|      |       |        |             |          |         | Zfp407  | 9.15621   | 3.51247  | -1.38226         | 9.15721      | 3.51347       | -1.3820115       | 0.00018329 | No      |
|      |       |        |             |          |         | Zfp418  | 0.305184  | 0.819494 | 1.42505          | 0.306184     | 0.820494      | 1.42209389       | 0.00615197 | No      |
|      |       |        |             |          |         | Zfp449  | 0         | 0.884872 | inf              | 0.001        | 0.885872      | 9.79095445       | 0.00018329 | No      |
|      |       |        |             |          |         | Zfp455  | 37.6697   | 12.8037  | -1.55685         | 37.6707      | 12.8047       | -1.5567694       | 0.00018329 | No      |
|      |       |        |             |          |         | Zfp462  | 0.0576798 | 8.42858  | 7.19108          | 0.0586798    | 8.42958       | 7.16645299       | 0.00018329 | No      |
|      |       |        |             |          |         | Zfp467  | 5.67488   | 13.1902  | 1.21681          | 5.67588      | 13.1912       | 1.21665982       | 0.00018329 | No      |
|      |       |        |             |          |         | Zfp472  | 22.5295   | 4.63858  | -2.28006         | 22.5305      | 4.63958       | -2.2798132       | 0.00018329 | No      |
|      |       |        |             |          |         | Zfp503  | 0.12897   | 23.9543  | 7.53711          | 0.12997      | 23.9553       | 7.52602242       | 0.00018329 | No      |
|      |       |        |             |          |         | Zfp518a | 5.30352   | 2.18818  | -1.27722         | 5.30452      | 2.18918       | -1.2768316       | 0.00018329 | No      |
|      |       |        |             |          |         | Zfp523  | 4.81774   | 19.0439  | 1.9829           | 4.81874      | 19.0449       | 1.98267685       | 0.00018329 | No      |
|      |       |        |             |          |         | Zfp54   | 52.5686   | 18.0436  | -1.54271         | 52.5696      | 18.0446       | -1.5426616       | 0.00018329 | No      |
|      |       |        |             |          |         | Zfp574  | 3.15116   | 13.2988  | 2.07734          | 3.15216      | 13.2998       | 2.07699188       | 0.00018329 | No      |
|      |       |        |             |          |         | Zfp592  | 11.1298   | 6.59882  | -0.754141        | 11.1308      | 6.59982       | -0.7540587       | 0.00494262 | No      |
|      |       |        |             |          |         | Zfp597  | 5.05884   | 1.33725  | -1.91953         | 5.05984      | 1.33825       | -1.9187441       | 0.00018329 | No      |
|      |       |        |             |          |         | Zfp606  | 18.2507   | 8.15653  | -1.16193         | 18.2517      | 8.15753       | -1.1618266       | 0.0150649  | No      |
|      |       |        |             |          |         | Zfp608  | 1.43415   | 4.55949  | 1.66867          | 1.43515      | 4.56049       | 1.66798731       | 0.00290302 | No      |
|      |       |        |             |          |         | Zfp612  | 1.34494   | 4.88972  | 1.86221          | 1.34594      | 4.89072       | 1.86143277       | 0.00018329 | No      |
|      |       |        |             |          |         | Zfp618  | 0         | 1.75978  | inf              | 0.001        | 1.76078       | 10.7819989       | 0.00018329 | No      |

| RRBS |       |        |             |          |         | RNAseq  |          |          |                  |              |               |                  |            |         |
|------|-------|--------|-------------|----------|---------|---------|----------|----------|------------------|--------------|---------------|------------------|------------|---------|
| gene | Blood | Kidney | methyl.diff | pMWU.fdr | Match ? | gene    | blood    | kidney   | log2(fold_ratio) | blood+ 0.001 | kidney+ 0.001 | log2(fold_ratio) | q_value    | Match ? |
|      |       |        |             |          |         | Zfp626  | 2.45997  | 0.862899 | -1.51138         | 2.46097      | 0.863899      | -1.5102925       | 0.00082046 | No      |
|      |       |        |             |          |         | Zfp628  | 7.08279  | 3.16102  | -1.16393         | 7.08379      | 3.16202       | -1.163675        | 0.00066911 | No      |
|      |       |        |             |          |         | Zfp654  | 8.44773  | 2.9592   | -1.51336         | 8.44873      | 2.9602        | -1.5130398       | 0.00018329 | No      |
|      |       |        |             |          |         | Zfp664  | 5.69365  | 18.2424  | 1.67987          | 5.69465      | 18.2434       | 1.67969555       | 0.00051281 | No      |
|      |       |        |             |          |         | Zfp668  | 4.82077  | 2.67315  | -0.850721        | 4.82177      | 2.67415       | -0.8504824       | 0.0338104  | No      |
|      |       |        |             |          |         | Zfp68   | 12.7497  | 6.34214  | -1.00743         | 12.7507      | 6.34314       | -1.0073074       | 0.00018329 | No      |
|      |       |        |             |          |         | Zfp691  | 3.115    | 11.378   | 1.86894          | 3.116        | 11.379        | 1.86860664       | 0.00018329 | No      |
|      |       |        |             |          |         | Zfp709  | 7.0176   | 2.11394  | -1.73104         | 7.0186       | 2.11494       | -1.7305665       | 0.00018329 | No      |
|      |       |        |             |          |         | Zfp715  | 17.9498  | 4.64438  | -1.95041         | 17.9508      | 4.64538       | -1.9501796       | 0.00018329 | No      |
|      |       |        |             |          |         | Zfp740  | 30.5015  | 13.87    | -1.13691         | 30.5025      | 13.871        | -1.1368557       | 0.00251301 | No      |
|      |       |        |             |          |         | Zfp746  | 14.0454  | 8.552    | -0.715767        | 14.0464      | 8.553         | -0.715698        | 0.0217091  | No      |
|      |       |        |             |          |         | Zfp768  | 0.278274 | 9.99631  | 5.16682          | 0.279274     | 9.99731       | 5.16178679       | 0.00018329 | No      |
|      |       |        |             |          |         | Zfp775  | 6.12564  | 14.2615  | 1.21919          | 6.12664      | 14.2625       | 1.2190589        | 0.00035173 | No      |
|      |       |        |             |          |         | Zfp777  | 17.2611  | 9.54323  | -0.854972        | 17.2621      | 9.54423       | -0.8549073       | 0.00567465 | No      |
|      |       |        |             |          |         | Zfp788  | 12.7695  | 5.44058  | -1.23087         | 12.7705      | 5.44158       | -1.2307175       | 0.0076683  | No      |
|      |       |        |             |          |         | Zfp799  | 3.0274   | 1.55641  | -0.959854        | 3.0284       | 1.55741       | -0.959407        | 0.00822601 | No      |
|      |       |        |             |          |         | Zfp800  | 15.6959  | 3.4759   | -2.17493         | 15.6969      | 3.4769        | -2.1746062       | 0.00018329 | No      |
|      |       |        |             |          |         | Zfp821  | 10.6462  | 22.579   | 1.08465          | 10.6472      | 22.58         | 1.08457141       | 0.00154856 | No      |
|      |       |        |             |          |         | Zfp830  | 19.1997  | 11.2336  | -0.773265        | 19.2007      | 11.2346       | -0.7732101       | 0.0146209  | No      |
|      |       |        |             |          |         | Zfp84   | 7.54557  | 4.36194  | -0.790661        | 7.54657      | 4.36294       | -0.7905204       | 0.00543198 | No      |
|      |       |        |             |          |         | Zfp85   | 3.50887  | 0.982772 | -1.83608         | 3.50987      | 0.983772      | -1.8350217       | 0.00224282 | No      |
|      |       |        |             |          |         | Zfp850  | 3.89051  | 1.64265  | -1.24393         | 3.89151      | 1.64365       | -1.2434269       | 0.00469886 | No      |
|      |       |        |             |          |         | Zfp853  | 0.172981 | 1.38258  | 2.99868          | 0.173981     | 1.38358       | 2.9914044        | 0.00303839 | No      |
|      |       |        |             |          |         | Zfp862  | 3.86443  | 0.758767 | -2.34853         | 3.86543      | 0.759767      | -2.347           | 0.00018329 | No      |
|      |       |        |             |          |         | Zfp866  | 5.2634   | 2.217    | -1.24739         | 5.2644       | 2.218         | -1.2470097       | 0.00126492 | No      |
|      |       |        |             |          |         | Zfp867  | 0.192267 | 0.812178 | 2.07869          | 0.193267     | 0.813178      | 2.07297586       | 0.0317095  | No      |
|      |       |        |             |          |         | Zfp868  | 88.0693  | 24.8613  | -1.82474         | 88.0703      | 24.8623       | -1.8246958       | 0.00018329 | No      |
|      |       |        |             |          |         | ZFP87   | 13.8391  | 6.52503  | -1.0847          | 13.8401      | 6.52603       | -1.0845768       | 0.00097029 | No      |
|      |       |        |             |          |         | Zfp870  | 0.274342 | 1.91614  | 2.80416          | 0.275342     | 1.91714       | 2.7996591        | 0.00018329 | No      |
|      |       |        |             |          |         | Zfp871  | 12.3427  | 5.02715  | -1.29584         | 12.3437      | 5.02815       | -1.2956753       | 0.00018329 | No      |
|      |       |        |             |          |         | Zfp873  | 4.15491  | 1.59496  | -1.3813          | 4.15591      | 1.59596       | -1.3807399       | 0.0194611  | No      |
|      |       |        |             |          |         | Zfp882  | 2.65387  | 1.26669  | -1.06703         | 2.65487      | 1.26769       | -1.0664392       | 0.0183081  | No      |
|      |       |        |             |          |         | Zfp94   | 6.43255  | 3.51605  | -0.871436        | 6.43355      | 3.51705       | -0.8712492       | 0.0153859  | No      |
|      |       |        |             |          |         | Zfp943  | 8.70824  | 3.23264  | -1.42967         | 8.70924      | 3.23364       | -1.4293878       | 0.0063852  | No      |
|      |       |        |             |          |         | Zfp956  | 9.22664  | 2.34788  | -1.97444         | 9.22764      | 2.34888       | -1.9739887       | 0.00018329 | No      |
|      |       |        |             |          |         | Zfp961  | 4.2619   | 2.12244  | -1.00577         | 4.2629       | 2.12344       | -1.0054319       | 0.0127876  | No      |
|      |       |        |             |          |         | Zfpm1   | 22.7998  | 10.7978  | -1.07828         | 22.8008      | 10.7988       | -1.0782134       | 0.00018329 | No      |
|      |       |        |             |          |         | Zfx     | 14.1011  | 5.77538  | -1.28782         | 14.1021      | 5.77638       | -1.2876725       | 0.00018329 | No      |
|      |       |        |             |          |         | Zfyve16 | 1.01018  | 4.64341  | 2.20058          | 1.01118      | 4.64441       | 2.1994555        | 0.00018329 | No      |
|      |       |        |             |          |         | Zfyve21 | 3.228    | 38.0038  | 3.55743          | 3.229        | 38.0048       | 3.5570223        | 0.00018329 | No      |
|      |       |        |             |          |         | Zfyve9  | 0.070625 | 4.12259  | 5.86723          | 0.071625     | 4.12359       | 5.84729385       | 0.00018329 | No      |
|      |       |        |             |          |         | Zim1    | 0        | 0.896933 | inf              | 0.001        | 0.897933      | 9.81046399       | 0.00018329 | No      |

| RRBS |       |        |             |          |         | RNAseq  |           |          |                  |              |               |                  |            |         |
|------|-------|--------|-------------|----------|---------|---------|-----------|----------|------------------|--------------|---------------|------------------|------------|---------|
| gene | Blood | Kidney | methyl.diff | pMWU.fdr | Match ? | gene    | blood     | kidney   | log2(fold_ratio) | blood+ 0.001 | kidney+ 0.001 | log2(fold_ratio) | q_value    | Match ? |
|      |       |        |             |          |         | Zkscan4 | 0         | 0.978476 | inf              | 0.001        | 0.979476      | 9.93586633       | 0.00018329 | No      |
|      |       |        |             |          |         | Zmym1   | 17.9164   | 7.26029  | -1.30318         | 17.9174      | 7.26129       | -1.3030635       | 0.00018329 | No      |
|      |       |        |             |          |         | Zmym2   | 28.145    | 11.006   | -1.35459         | 28.146       | 11.007        | -1.3545086       | 0.00018329 | No      |
|      |       |        |             |          |         | Zmynd15 | 0.0660398 | 8.43082  | 6.99619          | 0.0670398    | 8.43182       | 6.97468241       | 0.00822601 | No      |
|      |       |        |             |          |         | Zmynd8  | 46.4291   | 27.3463  | -0.763682        | 46.4301      | 27.3473       | -0.763662        | 0.0121287  | No      |
|      |       |        |             |          |         | Znhit1  | 34.911    | 74.0729  | 1.08526          | 34.912       | 74.0739       | 1.08524229       | 0.0487801  | No      |
|      |       |        |             |          |         | Znrd1   | 117.57    | 62.242   | -0.917554        | 117.571      | 62.243        | -0.9175487       | 0.0036827  | No      |
|      |       |        |             |          |         | Znrf2   | 40.1164   | 13.1212  | -1.61229         | 40.1174      | 13.1222       | -1.6122185       | 0.00018329 | No      |
|      |       |        |             |          |         | Zp4     | 0         | 0.704744 | inf              | 0.001        | 0.705744      | 9.46300115       | 0.00018329 | No      |
|      |       |        |             |          |         | Zrsr2   | 24.6533   | 15.2088  | -0.696875        | 24.6543      | 15.2098       | -0.6968381       | 0.0333394  | No      |
|      |       |        |             |          |         | ZSCAN12 | 3.80934   | 9.80901  | 1.36457          | 3.81034      | 9.81001       | 1.36433487       | 0.00051281 | No      |
|      |       |        |             |          |         | Zscan20 | 1.05382   | 2.7634   | 1.39081          | 1.05482      | 2.7644        | 1.38996955       | 0.00097029 | No      |
|      |       |        |             |          |         | Zscan21 | 4.93766   | 8.71385  | 0.819484         | 4.93866      | 8.71485       | 0.81935618       | 0.0486948  | No      |
|      |       |        |             |          |         | Zscan22 | 5.19626   | 2.82851  | -0.877432        | 5.19726      | 2.82951       | -0.877199        | 0.010379   | No      |
|      |       |        |             |          |         | Zswim6  | 15.2498   | 5.37507  | -1.50443         | 15.2508      | 5.37607       | -1.5042611       | 0.0086849  | No      |
|      |       |        |             |          |         | Zufsp   | 39.2837   | 23.022   | -0.770917        | 39.2847      | 23.023        | -0.7708917       | 0.0460114  | No      |
|      |       |        |             |          |         | Zw10    | 12.5074   | 7.13849  | -0.809089        | 12.5084      | 7.13949       | -0.8090043       | 0.00834357 | No      |
|      |       |        |             |          |         | Zzef1   | 12.3276   | 5.51496  | -1.16048         | 12.3286      | 5.51596       | -1.1603251       | 0.00018329 | No      |
|      |       |        |             |          |         | Zzz3    | 19.5078   | 9.48796  | -1.03988         | 19.5088      | 9.48896       | -1.0398032       | 0.0063852  | No      |

Figure 3C CRLS

| RRBS     |          |           |             |            |         | RNAseq   |           |          |                  |              |               |                  |            |         |
|----------|----------|-----------|-------------|------------|---------|----------|-----------|----------|------------------|--------------|---------------|------------------|------------|---------|
| gene     | Blood    | Kidney    | methyl.diff | pMWU.fdr   | Match ? | gene     | blood     | kidney   | log2(fold_ratio) | blood+ 0.001 | kidney+ 0.001 | log2(fold_ratio) | q_value    | Match ? |
| 42986    | 0.097982 | 0.027279  | -0.070703   | 0.00047568 | Yes     | 42986    | 0.0731072 | 21.4235  | 8.19496          | 0.0741072    | 21.4245       | 8.1754321        | 0.00014629 | Yes     |
| 42987    | 0.7161   | 0.032604  | -0.683496   | 1.63E-09   | Yes     | 42987    | 261.022   | 40.4962  | -2.68831         | 261.023      | 40.4972       | -2.6882829       | 0.00014629 | Yes     |
| Abcc8    | 0.11053  | 0.014335  | -0.096195   | 1.12E-06   | Yes     | Abcc8    | 0         | 3.37213  | inf              | 0.001        | 3.37313       | 11.7198722       | 0.00014629 | Yes     |
| Abhd14a  | 0.14826  | 0.014664  | -0.133596   | 2.65E-11   | Yes     | Abhd14a  | 2.35408   | 87.1499  | 5.21026          | 2.35508      | 87.1509       | 5.20966759       | 0.00014629 | Yes     |
| Abhd8    | 0.30123  | 0.12544   | -0.17579    | 0.0027754  | Yes     | Abhd8    | 5.05203   | 14.8269  | 1.55328          | 5.05303      | 14.8279       | 1.55309364       | 0.00014629 | Yes     |
| Acbd4    | 0.84939  | 0.075115  | -0.774275   | 1.69E-12   | Yes     | Acbd4    | 10.2701   | 96.6158  | 3.23382          | 10.2711      | 96.6168       | 3.23368337       | 0.00014629 | Yes     |
| Acer2    | 0.25743  | 0.10149   | -0.15594    | 0.00076943 | Yes     | Acer2    | 0.058954  | 10.2969  | 7.4484           | 0.059954     | 10.2979       | 7.42427844       | 0.00014629 | Yes     |
| Acot12   | 0.58489  | 0.083502  | -0.501388   | 3.61E-07   | Yes     | Acot12   | 0         | 1.78534  | inf              | 0.001        | 1.78634       | 10.802791        | 0.00014629 | Yes     |
| Acy3     | 0.21095  | 0.017141  | -0.193809   | 5.68E-07   | Yes     | Acy3     | 0.63484   | 238.441  | 8.55302          | 0.63584      | 238.442       | 8.55075889       | 0.00014629 | Yes     |
| Adam15   | 0.68143  | 0.088017  | -0.593413   | 1.61E-12   | Yes     | Adam15   | 0.154797  | 11.777   | 6.24945          | 0.155797     | 11.778        | 6.24028332       | 0.00285806 | Yes     |
| Adam19   | 0.13369  | 0.052908  | -0.080782   | 0.0030913  | Yes     | Adam19   | 72.566    | 0.861559 | -6.3962          | 72.567       | 0.862559      | -6.3945467       | 0.00014629 | Yes     |
| Adamts15 | 0.12772  | 0.013215  | -0.114505   | 9.67E-08   | Yes     | Adamts15 | 0         | 2.2128   | inf              | 0.001        | 2.2138        | 11.1123092       | 0.00014629 | Yes     |
| Adamts5  | 0.13969  | 0.052022  | -0.087668   | 0.00051431 | Yes     | Adamts5  | 0         | 11.2542  | inf              | 0.001        | 11.2552       | 13.4583041       | 0.00014629 | Yes     |
| Adcy3    | 0.10573  | 0.01555   | -0.09018    | 5.90E-08   | Yes     | Adcy3    | 12.2412   | 0.370198 | -5.0473          | 12.2422      | 0.371198      | -5.0435301       | 0.0102511  | Yes     |
| Adora2a  | 0.5196   | 0.094887  | -0.424713   | 4.59E-07   | Yes     | Adora2a  | 9.26299   | 1.46839  | -2.65724         | 9.26399      | 1.46939       | -2.6564163       | 0.00014629 | Yes     |
| Adprhl2  | 0.85179  | 0.6633    | -0.18849    | 0.00130689 | Yes     | Adprhl2  | 23.3116   | 34.8853  | 0.581571         | 23.3126      | 34.8863       | 0.58155068       | 0.0137192  | Yes     |
| Adra2b   | 0.070571 | 0.0067331 | -0.0638379  | 2.70E-09   | Yes     | Adra2b   | 0         | 3.94377  | inf              | 0.001        | 3.94477       | 11.9457255       | 0.00014629 | Yes     |

| RRBS     |           |           |             |            |         | RNAseq   |          |          |                  |              |               |                  |            |         |
|----------|-----------|-----------|-------------|------------|---------|----------|----------|----------|------------------|--------------|---------------|------------------|------------|---------|
| gene     | Blood     | Kidney    | methyl.diff | pMWU.fdr   | Match ? | gene     | blood    | kidney   | log2(fold_ratio) | blood+ 0.001 | kidney+ 0.001 | log2(fold_ratio) | q_value    | Match ? |
| Aes      | 0.0020015 | 0.32484   | 0.3228385   | 3.61E-07   | Yes     | Aes      | 208.753  | 301.896  | 0.532258         | 208.754      | 301.897       | 0.53225258       | 0.00864487 | Yes     |
| Aff3     | 0.95426   | 0.59916   | -0.3551     | 4.32E-09   | Yes     | Aff3     | 13.2707  | 1.44624  | -3.19786         | 13.2717      | 1.44724       | -3.1969771       | 0.00014629 | Yes     |
| Agap2    | 0.86095   | 0.083335  | -0.777615   | 1.61E-12   | Yes     | Agap2    | 20.886   | 2.12857  | -3.29458         | 20.887       | 2.12957       | -3.2939712       | 0.00014629 | Yes     |
| Agmat    | 0.73351   | 0.10767   | -0.62584    | 1.85E-09   | Yes     | Agmat    | 0        | 80.4975  | inf              | 0.001        | 80.4985       | 16.2966743       | 0.00533979 | Yes     |
| Agtr1a   | 0.065697  | 0.0079654 | -0.0577316  | 5.68E-07   | Yes     | Agtr1a   | 0        | 4.07786  | inf              | 0.001        | 4.07886       | 11.9939503       | 0.00014629 | Yes     |
| Akap12   | 0.76573   | 0.27129   | -0.49444    | 5.25E-05   | Yes     | Akap12   | 0.299409 | 29.8386  | 6.63892          | 0.300409     | 29.8396       | 6.63415635       | 0.00014629 | Yes     |
| Akr7a3   | 0.11087   | 0.0083184 | -0.1025516  | 5.23E-07   | Yes     | Akr7a3   | 2.49069  | 396.258  | 7.31375          | 2.49169      | 396.259       | 7.3131753        | 0.016608   | Yes     |
| Aldh1a2  | 0.065071  | 0.0098857 | -0.0551853  | 0.00021752 | Yes     | Aldh1a2  | 0        | 9.82461  | inf              | 0.001        | 9.82561       | 13.2623313       | 0.00014629 | Yes     |
| Aldoa    | 0.62633   | 0.20752   | -0.41881    | 1.05E-06   | Yes     | Aldoa    | 133.66   | 986.908  | 2.88435          | 133.661      | 986.909       | 2.88433849       | 0.00014629 | Yes     |
| Amn      | 0.13304   | 0.018169  | -0.114871   | 2.10E-06   | Yes     | Amn      | 0.133107 | 154.644  | 10.1822          | 0.134107     | 154.645       | 10.1713599       | 0.00533979 | Yes     |
| Amotl2   | 0.14948   | 0.01617   | -0.13331    | 2.08E-10   | Yes     | Amotl2   | 0.187199 | 52.858   | 8.14141          | 0.188199     | 52.859        | 8.13374636       | 0.00028114 | Yes     |
| Ank3     | 0.77247   | 0.1137    | -0.65877    | 1.63E-09   | Yes     | Ank3     | 0.157216 | 45.3559  | 8.17239          | 0.158216     | 45.3569       | 8.16328273       | 0.00014629 | Yes     |
| Ankra2   | 0.13311   | 0.031828  | -0.101282   | 4.32E-09   | Yes     | Ankra2   | 15.8475  | 8.11929  | -0.964829        | 15.8485      | 8.12029       | -0.9647431       | 0.00102864 | Yes     |
| Ankrd33b | 0.067092  | 2.50E-07  | -0.0670918  | 0.00039347 | Yes     | Ankrd33b | 0.320499 | 9.42627  | 4.87829          | 0.321499     | 9.42727       | 4.87395389       | 0.00053701 | Yes     |
| Anxa6    | 0.0047445 | 0.095454  | 0.0907095   | 0.00293459 | Yes     | Anxa6    | 193.476  | 57.3913  | -1.75325         | 193.477      | 57.3923       | -1.753233        | 0.00014629 | Yes     |
| Ap1m2    | 0.56914   | 0.086897  | -0.482243   | 1.61E-12   | Yes     | Ap1m2    | 0.746351 | 35.736   | 5.58138          | 0.747351     | 35.737        | 5.57948874       | 0.00014629 | Yes     |
| Aph1b    | 0.082648  | 0.014933  | -0.067715   | 6.76E-05   | Yes     | Aph1b    | 32.2338  | 13.5457  | -1.25074         | 32.2348      | 13.5467       | -1.2506776       | 0.00014629 | Yes     |
| Apobec3b | 0.057361  | 0.14684   | 0.089479    | 0.00157493 | Yes     | Apobec3b | 12.2841  | 1.61235  | -2.92955         | 12.2851      | 1.61335       | -2.9287782       | 0.00014629 | Yes     |
| Apoe     | 0.070991  | 0.011997  | -0.058994   | 2.63E-05   | Yes     | Apoe     | 11.4593  | 339.118  | 4.88719          | 11.4603      | 339.119       | 4.8870749        | 0.00014629 | Yes     |
| Arf6     | 0.32686   | 0.088683  | -0.238177   | 0.03210797 | Yes     | Arf6     | 194.066  | 54.1065  | -1.84267         | 194.067      | 54.1075       | -1.8426543       | 0.00014629 | Yes     |
| Arfgap1  | 0.39051   | 0.098269  | -0.292241   | 7.90E-07   | Yes     | Arfgap1  | 26.4435  | 40.8476  | 0.627337         | 26.4445      | 40.8486       | 0.62731894       | 0.00374149 | Yes     |
| Arhgap25 | 0         | 0.3236    | 0.3236      | 0.00082506 | Yes     | Arhgap25 | 42.6369  | 5.44337  | -2.96953         | 42.6379      | 5.44437       | -2.9692994       | 0.00014629 | Yes     |
| Arhgef15 | 0.62398   | 0.12644   | -0.49754    | 3.20E-09   | Yes     | Arhgef15 | 0.25028  | 16.3765  | 6.03194          | 0.25128      | 16.3775       | 6.02627549       | 0.00014629 | Yes     |
| Arhgef16 | 0.14541   | 0.060632  | -0.084778   | 0.02954396 | Yes     | Arhgef16 | 0.016813 | 15.2187  | 9.82205          | 0.017813     | 15.2197       | 9.7387937        | 0.0319849  | Yes     |
| Arhgef2  | 0.0016556 | 0.14262   | 0.1409644   | 3.61E-07   | Yes     | Arhgef2  | 24.923   | 13.1657  | -0.920696        | 24.924       | 13.1667       | -0.9206418       | 0.00014629 | Yes     |
| Arhgef25 | 0.11686   | 0.4062    | 0.28934     | 0.0017172  | Yes     | Arhgef25 | 0.318731 | 6.49336  | 4.34856          | 0.319731     | 6.49436       | 4.34425682       | 0.00618538 | Yes     |
| Arhgef3  | 0.0025664 | 0.15313   | 0.1505636   | 4.26E-07   | Yes     | Arhgef3  | 88.7794  | 12.9671  | -2.77537         | 88.7804      | 12.9681       | -2.7752741       | 0.00014629 | Yes     |
| Arhgef40 | 0.082052  | 0.0063493 | -0.0757027  | 0.00226691 | Yes     | Arhgef40 | 0.186477 | 10.7799  | 5.85321          | 0.187477     | 10.7809       | 5.8456202        | 0.00014629 | Yes     |
| Arl4d    | 0.41776   | 0.083136  | -0.334624   | 1.61E-12   | Yes     | Arl4d    | 3.02456  | 49.8593  | 4.04306          | 3.02556      | 49.8603       | 4.04261746       | 0.00014629 | Yes     |
| Arvcf    | 0.13473   | 0.0093865 | -0.1253435  | 1.80E-06   | Yes     | Arvcf    | 1.85105  | 23.4783  | 3.66491          | 1.85205      | 23.4793       | 3.66419444       | 0.00014629 | Yes     |
| Asb2     | 0.80492   | 0.13391   | -0.67101    | 2.62E-08   | Yes     | Asb2     | 1.47453  | 28.5087  | 4.27308          | 1.47553      | 28.5097       | 4.2721477        | 0.00014629 | Yes     |
| Atmin    | 0.3066    | 0.13607   | -0.17053    | 1.61E-12   | Yes     | Atmin    | 8.59836  | 5.5434   | -0.63329         | 8.59936      | 5.5444        | -0.6331979       | 0.00934853 | Yes     |
| Atp11a   | 0.069445  | 0.0086397 | -0.0608053  | 1.15E-05   | Yes     | Atp11a   | 10.2855  | 83.0116  | 3.0127           | 10.2865      | 83.0126       | 3.01257815       | 0.00014629 | Yes     |
| Atp2a3   | 2.00E-07  | 0.051959  | 0.0519588   | 0.00389713 | Yes     | Atp2a3   | 99.1926  | 20.3481  | -2.28534         | 99.1936      | 20.3491       | -2.2852821       | 0.00014629 | Yes     |
| Atp5g1   | 0.28769   | 0.026252  | -0.261438   | 1.11E-08   | Yes     | Atp5g1   | 81.6206  | 835.544  | 3.35571          | 81.6216      | 835.545       | 3.35569463       | 0.00014629 | Yes     |
| Atp5g2   | 0.2815    | 0.068281  | -0.213219   | 6.26E-05   | Yes     | Atp5g2   | 437.432  | 592.875  | 0.43867          | 437.433      | 592.876       | 0.43866834       | 0.0284321  | Yes     |
| Atp6v1c2 | 0.14077   | 0.074831  | -0.065939   | 0.00049782 | Yes     | Atp6v1c2 | 1.78469  | 22.8705  | 3.67974          | 1.78569      | 22.8715       | 3.67899743       | 0.00014629 | Yes     |
| Auh      | 0.8307    | 0.56515   | -0.26555    | 8.78E-05   | Yes     | AUH      | 24.1712  | 82.3013  | 1.76762          | 24.1722      | 82.3023       | 1.76758396       | 0.00014629 | Yes     |
| Axin2    | 0.0072961 | 0.059222  | 0.0519259   | 0.00088718 | Yes     | Axin2    | 26.2459  | 0.811792 | -5.01484         | 26.2469      | 0.812792      | -5.013117        | 0.0100448  | Yes     |
| B3gnt7   | 0.28721   | 0.11681   | -0.1704     | 0.00023951 | Yes     | B3gnt7   | 0.69745  | 4.5918   | 2.7189           | 0.69845      | 4.5928        | 2.71714521       | 0.00014629 | Yes     |
| B9d1     | 0.07272   | 0.0098291 | -0.0628909  | 8.52E-05   | Yes     | B9d1     | 0.911475 | 10.361   | 3.50682          | 0.912475     | 10.362        | 3.50537365       | 0.00161718 | Yes     |
| Bag3     | 0.36748   | 0.037176  | -0.330304   | 1.27E-07   | Yes     | Bag3     | 17.2845  | 30.931   | 0.839573         | 17.2855      | 30.932        | 0.83953778       | 0.00014629 | Yes     |

| RRBS     |            |           |             |            |         | RNAseq   |           |         |                  |              |               |                  |            |         |
|----------|------------|-----------|-------------|------------|---------|----------|-----------|---------|------------------|--------------|---------------|------------------|------------|---------|
| gene     | Blood      | Kidney    | methyl.diff | pMWU.fdr   | Match ? | gene     | blood     | kidney  | log2(fold_ratio) | blood+ 0.001 | kidney+ 0.001 | log2(fold_ratio) | q_value    | Match ? |
| Bcat2    | 0.41274    | 0.12642   | -0.28632    | 0.00259554 | Yes     | Bcat2    | 14.0469   | 55.071  | 1.97104          | 14.0479      | 55.072        | 1.97096452       | 0.00014629 | Yes     |
| Bckdk    | 0.94626    | 0.27799   | -0.66827    | 3.61E-07   | Yes     | Bckdk    | 44.808    | 121.355 | 1.43741          | 44.809       | 121.356       | 1.437385         | 0.00014629 | Yes     |
| Bcor     | 0.013513   | 0.31019   | 0.296677    | 0.00033082 | Yes     | Bcor     | 6.70582   | 3.39245 | -0.983085        | 6.70682      | 3.39345       | -0.9828761       | 0.00014629 | Yes     |
| Begain   | 0.061697   | 0.009281  | -0.052416   | 0.00357821 | Yes     | Begain   | 3.29344   | 1.1442  | -1.52526         | 3.29444      | 1.1452        | -1.5244337       | 0.00296747 | Yes     |
| Bhmt     | 0.77199    | 0.33124   | -0.44075    | 1.72E-11   | Yes     | Bhmt     | 0.452216  | 16.2392 | 5.16633          | 0.453216     | 16.2402       | 5.1632268        | 0.00014629 | Yes     |
| Bmp2     | 0.0824     | 0.021375  | -0.061025   | 1.73E-05   | Yes     | Bmp2     | 0         | 1.28297 | inf              | 0.001        | 1.28397       | 10.3263958       | 0.00730705 | Yes     |
| Bmp7     | 0.062671   | 0.0072487 | -0.0554223  | 2.26E-06   | Yes     | Bmp7     | 2.69627   | 26.9319 | 3.32028          | 2.69727      | 26.9329       | 3.31979773       | 0.00014629 | Yes     |
| Btbd3    | 0.78833    | 0.033239  | -0.755091   | 1.63E-09   | Yes     | Btbd3    | 0.924974  | 4.10522 | 2.14997          | 0.925974     | 4.10622       | 2.14876733       | 0.00014629 | Yes     |
| C1qtnf3  | 0.71978    | 0.12955   | -0.59023    | 7.44E-07   | Yes     | C1qtnf3  | 0         | 5.47247 | inf              | 0.001        | 5.47347       | 12.41824         | 0.00014629 | Yes     |
| C1r      | 0.50809    | 0.22454   | -0.28355    | 0.00803385 | Yes     | C1r      | 0.318656  | 2.53344 | 2.99102          | 0.319656     | 2.53444       | 2.98707493       | 0.00126596 | Yes     |
| Cabp7    | 0.038771   | 0.015753  | -0.023018   | 0.00119585 | Yes     | Cabp7    | 1.3727    | 3.96348 | 1.52975          | 1.3737       | 3.96448       | 1.52906468       | 0.0284321  | Yes     |
| Cactin   | 0.80656    | 0.64676   | -0.1598     | 0.00095974 | Yes     | Cactin   | 30.879    | 14.5115 | -1.08943         | 30.88        | 14.5125       | -1.0893767       | 0.00014629 | Yes     |
| Cadm4    | 0.28853    | 0.49233   | 0.2038      | 0.00021752 | Yes     | Cadm4    | 0         | 2.87478 | inf              | 0.001        | 2.87578       | 11.4897376       | 0.00014629 | Yes     |
| Camk2n1  | 0.3376     | 0.12055   | -0.21705    | 0.00063283 | Yes     | Camk2n1  | 2.41818   | 187.855 | 6.27955          | 2.41918      | 187.856       | 6.27896527       | 0.00028114 | Yes     |
| Car3     | 0.12908    | 0.020073  | -0.109007   | 5.68E-07   | Yes     | Car3     | 0         | 2.99564 | inf              | 0.001        | 2.99664       | 11.5491301       | 0.00014629 | Yes     |
| Car4     | 0.10127    | 0.019981  | -0.081289   | 3.03E-05   | Yes     | Car4     | 0         | 87.0787 | inf              | 0.001        | 87.0797       | 16.4100488       | 0.00014629 | Yes     |
| Card10   | 0.90896    | 0.21481   | -0.69415    | 3.61E-07   | Yes     | Card10   | 0.0416845 | 50.5456 | 10.2439          | 0.0426845    | 50.5466       | 10.2096861       | 0.00066215 | Yes     |
| Casr     | 0.12514    | 0.025532  | -0.099608   | 9.67E-08   | Yes     | Casr     | 0         | 8.62489 | inf              | 0.001        | 8.62589       | 13.0744576       | 0.00014629 | Yes     |
| Cbx2     | 0.0017991  | 0.11125   | 0.1094509   | 0.00063283 | Yes     | Cbx2     | 21.3109   | 1.86216 | -3.51654         | 21.3119      | 1.86316       | -3.5158357       | 0.00014629 | Yes     |
| Ccbl1    | 0.70742    | 0.49264   | -0.21478    | 0.00014495 | Yes     | Ccbl1    | 28.5099   | 252.933 | 3.14922          | 28.5109      | 252.934       | 3.14917549       | 0.00014629 | Yes     |
| Ccdc64b  | 0.13772    | 0.037222  | -0.100498   | 8.95E-06   | Yes     | Ccdc64b  | 0.443773  | 5.45025 | 3.61843          | 0.444773     | 5.45125       | 3.61544597       | 0.00014629 | Yes     |
| Ccl27    | 0.20018    | 0.023902  | -0.176278   | 6.94E-09   | Yes     | Ccl27    | 0.0145023 | 15.6115 | 10.0721          | 0.0155023    | 15.6125       | 9.97600358       | 0.0340023  | Yes     |
| Cd151    | 0.77956    | 0.14532   | -0.63424    | 1.61E-12   | Yes     | Cd151    | 0.633381  | 3.93606 | 2.63561          | 0.634381     | 3.93706       | 2.63369723       | 0.00014629 | Yes     |
| Cd164l2  | 0.58885    | 0.15094   | -0.43791    | 3.61E-07   | Yes     | Cd164l2  | 7.46526   | 2.40571 | -1.63373         | 7.46626      | 2.40671       | -1.6333234       | 0.0360576  | Yes     |
| Cd37     | 0.010505   | 0.58537   | 0.574865    | 3.61E-07   | Yes     | Cd37     | 400.121   | 28.0534 | -3.83419         | 400.122      | 28.0544       | -3.834141        | 0.00014629 | Yes     |
| Cd38     | 0          | 0.086833  | 0.086833    | 2.66E-05   | Yes     | Cd38     | 89.8692   | 2.16689 | -5.37413         | 89.8702      | 2.16789       | -5.3734794       | 0.00944816 | Yes     |
| Cd48     | 0.00028412 | 0.06705   | 0.06676588  | 0.03595682 | Yes     | Cd48     | 180.974   | 32.6723 | -2.46964         | 180.975      | 32.6733       | -2.4696063       | 0.00014629 | Yes     |
| Cd8a     | 0.52218    | 0.67527   | 0.15309     | 0.00655153 | Yes     | Cd8a     | 422.239   | 43.5444 | -3.2775          | 422.24       | 43.5454       | -3.277471        | 0.00014629 | Yes     |
| Cdh3     | 0.51101    | 0.014369  | -0.496641   | 4.05E-07   | Yes     | Cdh3     | 0         | 4.46533 | inf              | 0.001        | 4.46633       | 12.1248741       | 0.00014629 | Yes     |
| Cdkn1c   | 0.12504    | 0.038532  | -0.086508   | 2.56E-07   | Yes     | Cdkn1c   | 0.803272  | 2.55936 | 1.67182          | 0.804272     | 2.56036       | 1.67059128       | 0.027611   | Yes     |
| Cebpa    | 0.080753   | 0.0045455 | -0.0762075  | 0.00357821 | Yes     | Cebpa    | 0.186625  | 7.75077 | 5.37613          | 0.187625     | 7.75177       | 5.36860179       | 0.00576532 | Yes     |
| Cebpb    | 0.26969    | 0.024567  | -0.245123   | 6.26E-05   | Yes     | Cebpb    | 6.4684    | 71.0827 | 3.45802          | 6.4694       | 71.0837       | 3.45781496       | 0.00014629 | Yes     |
| Celsr2   | 0.06849    | 0.010606  | -0.057884   | 0.002433   | Yes     | Celsr2   | 2.10354   | 37.5021 | 4.15608          | 2.10454      | 37.5031       | 4.15543302       | 0.00014629 | Yes     |
| Cep112   | 0.32741    | 0.044987  | -0.282423   | 8.52E-05   | Yes     | Cep112   | 0.206794  | 2.64544 | 3.67724          | 0.207794     | 2.64644       | 3.67082704       | 0.00307875 | Yes     |
| Cers4    | 0.0021101  | 0.12301   | 0.1208999   | 1.63E-09   | Yes     | Cers4    | 5.54016   | 1.72096 | -1.68671         | 5.54116      | 1.72196       | -1.6861364       | 0.00014629 | Yes     |
| Cflar    | 0.81869    | 0.13138   | -0.68731    | 5.76E-10   | Yes     | CFLAR    | 105.457   | 38.3703 | -1.45859         | 105.458      | 38.3713       | -1.458569        | 0.00014629 | Yes     |
| Chmp4bl1 | 0.37367    | 0.051207  | -0.322463   | 1.61E-12   | Yes     | Chmp4bl1 | 179.126   | 93.3501 | -0.940248        | 179.127      | 93.3511       | -0.9402439       | 0.00014629 | Yes     |
| Ciao1    | 0.4158     | 0.25306   | -0.16274    | 0.00092018 | Yes     | Ciao1    | 17.731    | 38.4083 | 1.11515          | 17.732       | 38.4093       | 1.1151004        | 0.00014629 | Yes     |
| Ckap4    | 0.82986    | 0.17429   | -0.65557    | 4.65E-06   | Yes     | Ckap4    | 1.51312   | 11.4488 | 2.91961          | 1.51412      | 11.4498       | 2.91877094       | 0.00014629 | Yes     |
| Ckb      | 0.28005    | 0.13598   | -0.14407    | 0.03705648 | Yes     | Ckb      | 4.43448   | 197.99  | 5.48052          | 4.43548      | 197.991       | 5.4802008        | 0.00014629 | Yes     |
| Cldn1    | 0.098626   | 0.033673  | -0.064953   | 0.00020994 | Yes     | Cldn1    | 0         | 10.3478 | inf              | 0.001        | 10.3488       | 13.3371759       | 0.00014629 | Yes     |
| Cldn7    | 0.017915   | 0.18418   | 0.166265    | 0.0179568  | Yes     | Cldn7    | 0         | 37.4661 | inf              | 0.001        | 37.4671       | 15.1933367       | 0.00014629 | Yes     |



| RRBS    |          |           |             |            |         | RNAseq  |           |         |                  |              |               |                  |            |         |
|---------|----------|-----------|-------------|------------|---------|---------|-----------|---------|------------------|--------------|---------------|------------------|------------|---------|
| gene    | Blood    | Kidney    | methyl.diff | pMWU.fdr   | Match ? | gene    | blood     | kidney  | log2(fold_ratio) | blood+ 0.001 | kidney+ 0.001 | log2(fold_ratio) | q_value    | Match ? |
| Cmb1    | 0.59037  | 0.085969  | -0.504401   | 9.66E-07   | Yes     | Cmb1    | 0.875962  | 176.918 | 7.65799          | 0.876962     | 176.919       | 7.65635895       | 0.00066215 | Yes     |
| Cmtm8   | 0.076764 | 0.014999  | -0.061765   | 0.00389713 | Yes     | Cmtm8   | 0.798742  | 10.6761 | 3.74051          | 0.799742     | 10.6771       | 3.73884138       | 0.0335581  | Yes     |
| Cndp2   | 0.2483   | 0.027119  | -0.221181   | 4.88E-08   | Yes     | Cndp2   | 13.1737   | 250.41  | 4.24856          | 13.1747      | 250.411       | 4.24845592       | 0.00014629 | Yes     |
| Cnnm2   | 0.5819   | 0.090075  | -0.491825   | 4.70E-09   | Yes     | Cnnm2   | 0.64436   | 7.38001 | 3.51768          | 0.64536      | 7.38101       | 3.51564218       | 0.00014629 | Yes     |
| Col16a1 | 0.347    | 0.031672  | -0.315328   | 1.61E-12   | Yes     | Col16a1 | 0         | 2.32057 | inf              | 0.001        | 2.32157       | 11.1808851       | 0.00014629 | Yes     |
| Col18a1 | 0.099644 | 0.02031   | -0.079334   | 0.00039347 | Yes     | Col18a1 | 0.0731062 | 94.9098 | 10.3423          | 0.0741062    | 94.9108       | 10.3227623       | 0.00014629 | Yes     |
| Col27a1 | 0.29926  | 0.038175  | -0.261085   | 2.08E-10   | Yes     | Col27a1 | 0.473398  | 79.4857 | 7.3915           | 0.474398     | 79.4867       | 7.38847175       | 0.00014629 | Yes     |
| Coq2    | 0.13192  | 0.032595  | -0.099325   | 3.66E-07   | Yes     | Coq2    | 7.35172   | 42.629  | 2.53568          | 7.35272      | 42.63         | 2.5355191        | 0.00014629 | Yes     |
| Coro6   | 0.36901  | 0.12959   | -0.23942    | 0.00343039 | Yes     | Coro6   | 0.747051  | 5.32785 | 2.83428          | 0.748051     | 5.32885       | 2.83261569       | 0.00014629 | Yes     |
| Cplx3   | 0.089097 | 0.034335  | -0.054762   | 0.00033082 | Yes     | Cplx3   | 0.087146  | 1.66393 | 4.25502          | 0.088146     | 1.66493       | 4.23942261       | 0.00448672 | Yes     |
| Cpt1b   | 0.78151  | 0.15958   | -0.62193    | 6.57E-07   | Yes     | Cpt1b   | 1.9887    | 5.30176 | 1.41465          | 1.9897       | 5.30276       | 1.41419253       | 0.00041099 | Yes     |
| Crb3    | 0.13559  | 0.020639  | -0.114951   | 0.00039347 | Yes     | Crb3    | 0.332246  | 51.572  | 7.27819          | 0.333246     | 51.573        | 7.2738846        | 0.00014629 | Yes     |
| Crip1   | 0.013321 | 0.47397   | 0.460649    | 4.91E-09   | Yes     | Crip1   | 608.096   | 98.8833 | -2.6205          | 608.097      | 98.8843       | -2.6204881       | 0.00014629 | Yes     |
| Crip2   | 0.17936  | 0.018416  | -0.160944   | 2.53E-08   | Yes     | Crip2   | 0.849929  | 126.627 | 7.21903          | 0.850929     | 126.628       | 7.21734197       | 0.00014629 | Yes     |
| Crlf2   | 0.025238 | 0.18711   | 0.161872    | 5.25E-05   | Yes     | Crlf2   | 18.5989   | 11.7418 | -0.663568        | 18.5999      | 11.7428       | -0.6635184       | 0.0304953  | Yes     |
| Crmp1   | 0.067525 | 0.01153   | -0.055995   | 0.00021752 | Yes     | Crmp1   | 6.09566   | 0.27188 | -4.48674         | 6.09666      | 0.27288       | -4.4816805       | 0.00090728 | Yes     |
| Crnk1   | 0.40595  | 0.16285   | -0.2431     | 1.63E-09   | Yes     | Crnk1   | 15.5637   | 7.34448 | -1.08345         | 15.5647      | 7.34548       | -1.0833491       | 0.00014629 | Yes     |
| Crygs   | 0.79144  | 0.061821  | -0.729619   | 3.61E-07   | Yes     | Crygs   | 0.452254  | 5.19259 | 3.52125          | 0.453254     | 5.19359       | 3.51834047       | 0.00974684 | Yes     |
| Ctgf    | 0.81099  | 0.57848   | -0.23251    | 0.00165151 | Yes     | Ctgf    | 0         | 21.1564 | inf              | 0.001        | 21.1574       | 14.3688747       | 0.00014629 | Yes     |
| Ctsa    | 0.23357  | 0.025845  | -0.207725   | 0.00057442 | Yes     | Ctsa    | 127.239   | 366.719 | 1.52713          | 127.24       | 366.72        | 1.52712667       | 0.00014629 | Yes     |
| Ctnn    | 0.52133  | 0.0065984 | -0.5147316  | 1.63E-09   | Yes     | Ctnn    | 0.0171912 | 1.08782 | 5.98363          | 0.0181912    | 1.08882       | 5.90338095       | 0.0497484  | Yes     |
| Cwc27   | 0.29402  | 0.15218   | -0.14184    | 3.61E-07   | Yes     | Cwc27   | 16.8165   | 113.431 | 2.75387          | 16.8175      | 113.432       | 2.75379253       | 0.00014629 | Yes     |
| Cx3cl1  | 0.76526  | 0.024379  | -0.740881   | 1.63E-09   | Yes     | Cx3cl1  | 0         | 17.2529 | inf              | 0.001        | 17.2539       | 14.0746349       | 0.00014629 | Yes     |
| Cxxc5   | 0.5933   | 0.24631   | -0.34699    | 2.70E-09   | Yes     | CXXC5   | 17.4937   | 76.7534 | 2.1334           | 17.4947      | 76.7544       | 2.13333153       | 0.00014629 | Yes     |
| Cybb    | 0.04262  | 0.69849   | 0.65587     | 3.61E-07   | Yes     | Cybb    | 5.94742   | 4.05429 | -0.552815        | 5.94842      | 4.05529       | -0.5527014       | 0.0425528  | Yes     |
| Cyld    | 0.87279  | 0.75138   | -0.12141    | 0.02065846 | Yes     | Cyld    | 28.9656   | 5.37657 | -2.42958         | 28.9666      | 5.37757       | -2.4293641       | 0.00014629 | Yes     |
| Cyp24a1 | 0.081963 | 0.0309    | -0.051063   | 0.02194182 | Yes     | Cyp24a1 | 0         | 3.25107 | inf              | 0.001        | 3.25207       | 11.6671426       | 0.00014629 | Yes     |
| Cyth2   | 0.95779  | 0.26151   | -0.69628    | 6.20E-11   | Yes     | Cyth2   | 42.8314   | 78.5976 | 0.875816         | 42.8324      | 78.5986       | 0.8758011        | 0.00028114 | Yes     |
| Dab2ip  | 0.72257  | 0.36097   | -0.3616     | 0.00092018 | Yes     | Dab2ip  | 0.15625   | 13.9833 | 6.48371          | 0.15725      | 13.9843       | 6.47460421       | 0.00014629 | Yes     |
| Dact2   | 0.13019  | 0.018111  | -0.112079   | 5.60E-12   | Yes     | Dact2   | 0         | 15.5306 | inf              | 0.001        | 15.5316       | 13.9229188       | 0.00014629 | Yes     |
| Dcxr    | 0.71679  | 0.065341  | -0.651449   | 1.61E-12   | Yes     | Dcxr    | 9.89177   | 411.488 | 5.37848          | 9.89277      | 411.489       | 5.37833552       | 0.00014629 | Yes     |
| Ddah2   | 0.69264  | 0.31891   | -0.37373    | 1.86E-07   | Yes     | Ddah2   | 0.13885   | 86.8375 | 9.28865          | 0.13985      | 86.8385       | 9.27831074       | 0.031283   | Yes     |
| Ddr1    | 0.7146   | 0.071559  | -0.643041   | 5.23E-07   | Yes     | Ddr1    | 0.0245799 | 17.8034 | 9.50046          | 0.0255799    | 17.8044       | 9.44300748       | 0.00014629 | Yes     |
| Ddx54   | 0.95342  | 0.29732   | -0.6561     | 3.41E-06   | Yes     | Ddx54   | 26.8196   | 14.4523 | -0.891983        | 26.8206      | 14.4533       | -0.8919426       | 0.00014629 | Yes     |
| Ddx6    | 0.31063  | 0.036118  | -0.274512   | 1.61E-12   | Yes     | Ddx6    | 88.6571   | 9.5528  | -3.21424         | 88.6581      | 9.5538        | -3.2141059       | 0.00014629 | Yes     |
| Dgat1   | 0.063408 | 0         | -0.063408   | 4.44E-05   | Yes     | Dgat1   | 2.31385   | 15.5823 | 2.75154          | 2.31485      | 15.5833       | 2.75101016       | 0.00014629 | Yes     |
| Dhcr24  | 0.36702  | 0.072444  | -0.294576   | 1.73E-12   | Yes     | Dhcr24  | 11.9136   | 28.7276 | 1.26982          | 11.9146      | 28.7286       | 1.26975717       | 0.00014629 | Yes     |
| Dleu7   | 0.074432 | 0.019213  | -0.055219   | 0.02194182 | Yes     | Dleu7   | 0         | 9.14941 | inf              | 0.001        | 9.15041       | 13.1596207       | 0.00014629 | Yes     |
| Dlgap4  | 0.28875  | 0.14172   | -0.14703    | 0.00500595 | Yes     | Dlgap4  | 15.8806   | 27.5926 | 0.797013         | 15.8816      | 27.5936       | 0.79697743       | 0.00028114 | Yes     |
| Dll4    | 0.036918 | 0.12542   | 0.088502    | 5.25E-05   | Yes     | Dll4    | 0         | 1.4003  | inf              | 0.001        | 1.4013        | 10.4525501       | 0.00014629 | Yes     |
| Dmrt2   | 0.1401   | 0.017984  | -0.122116   | 2.88E-05   | Yes     | Dmrt2   | 0         | 2.79397 | inf              | 0.001        | 2.79497       | 11.4486171       | 0.00014629 | Yes     |
| Dnajb5  | 0.5097   | 0.034515  | -0.475185   | 1.92E-08   | Yes     | Dnajb5  | 4.28585   | 7.76037 | 0.856544         | 4.28685      | 7.76137       | 0.8563934        | 0.00459197 | Yes     |

| RRBS    |           |           |             |            |         | RNAseq  |           |          |                  |              |               |                  |            |         |
|---------|-----------|-----------|-------------|------------|---------|---------|-----------|----------|------------------|--------------|---------------|------------------|------------|---------|
| gene    | Blood     | Kidney    | methyl.diff | pMWU.fdr   | Match ? | gene    | blood     | kidney   | log2(fold_ratio) | blood+ 0.001 | kidney+ 0.001 | log2(fold_ratio) | q_value    | Match ? |
| Dnmt3a  | 0.050918  | 0.23974   | 0.188822    | 0.00057442 | Yes     | Dnmt3a  | 20.7462   | 3.61121  | -2.52229         | 20.7472      | 3.61221       | -2.521963        | 0.00014629 | Yes     |
| Dock1   | 0.15391   | 0.0023998 | -0.1515102  | 3.02E-06   | Yes     | Dock1   | 0.195274  | 26.7011  | 7.09525          | 0.196274     | 26.7021       | 7.08794032       | 0.00028114 | Yes     |
| Dock9   | 0.1212    | 0.018802  | -0.102398   | 0.00033082 | Yes     | Dock9   | 2.18655   | 15.3309  | 2.80971          | 2.18755      | 15.3319       | 2.8091486        | 0.00014629 | Yes     |
| Dohh    | 0.069933  | 0.0091894 | -0.0607436  | 0.00226691 | Yes     | Dohh    | 13.0165   | 33.9817  | 1.38442          | 13.0175      | 33.9827       | 1.38434808       | 0.00014629 | Yes     |
| Dok2    | 0.19113   | 0.67448   | 0.48335     | 9.03E-12   | Yes     | Dok2    | 108.01    | 8.85159  | -3.60909         | 108.011      | 8.85259       | -3.6089348       | 0.00014629 | Yes     |
| Dok3    | 0.69783   | 0.4477    | -0.25013    | 0.0053408  | Yes     | Dok3    | 3.79836   | 12.2928  | 1.69437          | 3.79936      | 12.2938       | 1.6941026        | 0.00014629 | Yes     |
| Dok4    | 0.089017  | 0.01105   | -0.077967   | 6.30E-06   | Yes     | Dok4    | 0.164009  | 9.02537  | 5.78214          | 0.165009     | 9.02637       | 5.7735293        | 0.00618538 | Yes     |
| Dolk    | 0.26737   | 0.082122  | -0.185248   | 0.02194182 | Yes     | Dolk    | 1.29494   | 10.7511  | 3.05352          | 1.29594      | 10.7521       | 3.05254763       | 0.00014629 | Yes     |
| Dpys    | 0.57928   | 0.11727   | -0.46201    | 5.23E-07   | Yes     | Dpys    | 0         | 47.4611  | inf              | 0.001        | 47.4621       | 15.5344883       | 0.00014629 | Yes     |
| Dtx4    | 0.0010417 | 0.069391  | 0.0683493   | 0.0030913  | Yes     | Dtx4    | 0.537395  | 2.62173  | 2.28647          | 0.538395     | 2.62273       | 2.28433238       | 0.0310191  | Yes     |
| Duoxa1  | 0.21755   | 0.05804   | -0.15951    | 0.01079042 | Yes     | Duoxa1  | 0         | 1.05153  | inf              | 0.001        | 1.05253       | 10.0396456       | 0.00014629 | Yes     |
| Dusp14  | 0.19557   | 0.042773  | -0.152797   | 1.77E-11   | Yes     | Dusp14  | 0.456434  | 2.31829  | 2.34458          | 0.457434     | 2.31929       | 2.34204772       | 0.00954394 | Yes     |
| Dusp3   | 0.23387   | 0.056585  | -0.177285   | 0.004217   | Yes     | Dusp3   | 7.59341   | 21.3369  | 1.49053          | 7.59441      | 21.3379       | 1.49040841       | 0.00014629 | Yes     |
| E2f4    | 0.32434   | 0.077373  | -0.246967   | 0.00069112 | Yes     | E2f4    | 41.9578   | 79.9851  | 0.930792         | 41.9588      | 79.9861       | 0.93077589       | 0.00161718 | Yes     |
| Ebpl    | 0.67409   | 0.037171  | -0.636919   | 3.61E-07   | Yes     | Ebpl    | 10.2364   | 4.43415  | -1.20698         | 10.2374      | 4.43515       | -1.2067946       | 0.00405996 | Yes     |
| Eci1    | 0.060718  | 2.50E-07  | -0.0607178  | 4.97E-05   | Yes     | Eci1    | 18.9654   | 151.307  | 2.99604          | 18.9664      | 151.308       | 2.9959705        | 0.00014629 | Yes     |
| Edc4    | 0.061839  | 0.0086963 | -0.0531427  | 0.00037405 | Yes     | Edc4    | 15.4364   | 270.884  | 4.13326          | 15.4374      | 270.885       | 4.13317881       | 0.00014629 | Yes     |
| Eef1g   | 0.88233   | 0.22532   | -0.65701    | 4.05E-07   | Yes     | Eef1g   | 1327.81   | 265.723  | -2.32105         | 1327.811     | 265.724       | -2.3210494       | 0.00014629 | Yes     |
| Eef2    | 0.10012   | 0.011091  | -0.089029   | 1.11E-08   | Yes     | Eef2    | 1658.92   | 381.494  | -2.12051         | 1658.921     | 381.495       | -2.1205091       | 0.00014629 | Yes     |
| Efna1   | 0.58558   | 0.092876  | -0.492704   | 3.05E-07   | Yes     | Efna1   | 0.15368   | 14.6327  | 6.57312          | 0.15468      | 14.6337       | 6.56386411       | 0.00014629 | Yes     |
| Efna5   | 0.37117   | 0.093821  | -0.277349   | 2.69E-06   | Yes     | Efna5   | 0         | 4.21448  | inf              | 0.001        | 4.21548       | 12.0414812       | 0.00014629 | Yes     |
| Efs     | 0.17918   | 0.065554  | -0.113626   | 3.93E-06   | Yes     | Efs     | 0         | 1.52154  | inf              | 0.001        | 1.52254       | 10.5722644       | 0.00014629 | Yes     |
| Egr1    | 0.62847   | 0.059988  | -0.568482   | 9.26E-09   | Yes     | Egr1    | 1.23366   | 44.6092  | 5.17633          | 1.23466      | 44.6102       | 5.1751879        | 0.00014629 | Yes     |
| Eif5    | 0.085727  | 0.01717   | -0.068557   | 2.14E-07   | Yes     | Eif5    | 136.43    | 50.036   | -1.44712         | 136.431      | 50.037        | -1.4471043       | 0.00014629 | Yes     |
| Elac1   | 0.070861  | 0.011364  | -0.059497   | 0.00099362 | Yes     | Elac1   | 0.674398  | 2.28527  | 1.76069          | 0.675398     | 2.28627       | 1.75918598       | 0.00126596 | Yes     |
| Emid1   | 0.92159   | 0.15008   | -0.77151    | 8.00E-12   | Yes     | Emid1   | 29.7443   | 13.7766  | -1.11039         | 29.7453      | 13.7776       | -1.1103371       | 0.00102864 | Yes     |
| Eml2    | 0.10319   | 0.022575  | -0.080615   | 1.37E-06   | Yes     | Eml2    | 2.18248   | 11.9029  | 2.44727          | 2.18348      | 11.9039       | 2.44673309       | 0.00014629 | Yes     |
| Emx2    | 0.098364  | 0.0094566 | -0.0889074  | 7.81E-09   | Yes     | Emx2    | 0         | 13.4644  | inf              | 0.001        | 13.4654       | 13.7169695       | 0.00014629 | Yes     |
| Eng     | 0.16594   | 0.43381   | 0.26787     | 1.22E-05   | Yes     | Eng     | 0.0790009 | 11.1551  | 7.14162          | 0.0800009    | 11.1561       | 7.12360083       | 0.00448672 | Yes     |
| Eno2    | 0.83005   | 0.64431   | -0.18574    | 0.0030913  | Yes     | Eno2    | 1.5763    | 0.687945 | -1.19618         | 1.5773       | 0.688945      | -1.1949964       | 0.0489756  | Yes     |
| Epcam   | 0.80828   | 0.17472   | -0.63356    | 4.59E-07   | Yes     | Epcam   | 0.154013  | 462.132  | 11.551           | 0.155013     | 462.133       | 11.5417032       | 0.0077167  | Yes     |
| Epn2    | 0.15166   | 0.018206  | -0.133454   | 1.48E-08   | Yes     | Epn2    | 0.140171  | 9.25644  | 6.0452           | 0.141171     | 9.25744       | 6.03509763       | 0.00014629 | Yes     |
| Epsti1  | 0.030972  | 0.39743   | 0.366458    | 1.66E-08   | Yes     | Epsti1  | 68.3723   | 2.64708  | -4.69094         | 68.3733      | 2.64808       | -4.6904144       | 0.00014629 | Yes     |
| Esam    | 0.096512  | 0.012916  | -0.083596   | 1.02E-08   | Yes     | Esam    | 0.0437167 | 63.5454  | 10.5054          | 0.0447167    | 63.5464       | 10.472781        | 0.0222999  | Yes     |
| Espn    | 0.53618   | 0.05853   | -0.47765    | 3.61E-07   | Yes     | Espn    | 0.108371  | 100.577  | 9.85811          | 0.109371     | 100.578       | 9.8448688        | 0.0230496  | Yes     |
| Esrrg   | 0.7322    | 0.084439  | -0.647761   | 8.91E-08   | Yes     | Esrrg   | 0         | 135.784  | inf              | 0.001        | 135.785       | 17.0509646       | 0.00014629 | Yes     |
| Esyt1   | 0         | 0.050568  | 0.050568    | 0.01079042 | Yes     | Esyt1   | 132.706   | 14.6797  | -3.17635         | 132.707      | 14.6807       | -3.1762518       | 0.00014629 | Yes     |
| Etaa1   | 0.50829   | 0.45464   | -0.05365    | 0.0053408  | Yes     | Etaa1   | 8.72893   | 0.822529 | -3.40767         | 8.72993      | 0.823529      | -3.4060787       | 0.00014629 | Yes     |
| Ethe1   | 0.96203   | 0.26058   | -0.70145    | 3.61E-07   | Yes     | Ethe1   | 6.2344    | 165.759  | 4.73269          | 6.2354       | 165.76        | 4.73246999       | 0.00014629 | Yes     |
| Etv3    | 0.21887   | 0.70197   | 0.4831      | 3.61E-07   | Yes     | Etv3    | 29.4436   | 3.61404  | -3.02627         | 29.4446      | 3.61504       | -3.0259196       | 0.00014629 | Yes     |
| Etv5    | 0.16574   | 0.046881  | -0.118859   | 0.00053593 | Yes     | Etv5    | 0.659624  | 3.62508  | 2.4583           | 0.660624     | 3.62608       | 2.45650947       | 0.00014629 | Yes     |
| Exoc3l4 | 0.14251   | 0.051517  | -0.090993   | 0.01079042 | Yes     | Exoc3l4 | 0         | 1.26985  | inf              | 0.001        | 1.27085       | 10.311578        | 0.00014629 | Yes     |

| RRBS     |           |          |             |            |         | RNAseq   |            |          |                  |              |               |                  |            |         |
|----------|-----------|----------|-------------|------------|---------|----------|------------|----------|------------------|--------------|---------------|------------------|------------|---------|
| gene     | Blood     | Kidney   | methyl.diff | pMWU.fdr   | Match ? | gene     | blood      | kidney   | log2(fold_ratio) | blood+ 0.001 | kidney+ 0.001 | log2(fold_ratio) | q_value    | Match ? |
| F2rl1    | 0.10025   | 0.021901 | -0.078349   | 2.69E-06   | Yes     | F2rl1    | 0.114635   | 6.33116  | 5.78734          | 0.115635     | 6.33216       | 5.77504767       | 0.00028114 | Yes     |
| Fam101a  | 0.53455   | 0.079927 | -0.454623   | 2.57E-05   | Yes     | Fam101a  | 13.6352    | 0.836394 | -4.02701         | 13.6362      | 0.837394      | -4.0253913       | 0.0192184  | Yes     |
| Fam101b  | 0.19628   | 0.044676 | -0.151604   | 8.00E-12   | Yes     | Fam101b  | 53.7124    | 5.02685  | -3.41753         | 53.7134      | 5.02785       | -3.4172685       | 0.00014629 | Yes     |
| Fam110a  | 0.080935  | 0.27166  | 0.190725    | 0.00015888 | Yes     | Fam110a  | 2.04523    | 5.27312  | 1.36639          | 2.04623      | 5.27412       | 1.36596208       | 0.00173187 | Yes     |
| Fam129b  | 0.26441   | 0.11921  | -0.1452     | 0.02954396 | Yes     | Fam129b  | 1.50082    | 16.5582  | 3.46372          | 1.50182      | 16.5592       | 3.46284916       | 0.00014629 | Yes     |
| Fam189b  | 0.47212   | 0.16506  | -0.30706    | 4.59E-07   | Yes     | Fam189b  | 181.408    | 14.0576  | -3.68982         | 181.409      | 14.0586       | -3.6897212       | 0.00014629 | Yes     |
| Fam19a5  | 0.17538   | 0.026857 | -0.148523   | 1.64E-06   | Yes     | Fam19a5  | 0          | 3.27665  | inf              | 0.001        | 3.27765       | 11.6784461       | 0.00014629 | Yes     |
| Fam213b  | 0.1699    | 0.025119 | -0.144781   | 0.00013121 | Yes     | Fam213b  | 4.15593    | 73.7612  | 4.14962          | 4.15693      | 73.7622       | 4.14929133       | 0.00014629 | Yes     |
| Fam217a  | 0.31223   | 0.059011 | -0.253219   | 9.70E-11   | Yes     | FAM217A  | 0.212123   | 4.15479  | 4.2918           | 0.213123     | 4.15579       | 4.28536455       | 0.00184429 | Yes     |
| Fam43a   | 0.46466   | 0.14299  | -0.32167    | 0.00119585 | Yes     | Fam43a   | 1.54452    | 20.0601  | 3.6991           | 1.54552      | 20.0611       | 3.69823649       | 0.00014629 | Yes     |
| Fam69b   | 0.48103   | 0.23298  | -0.24805    | 0.00041578 | Yes     | Fam69b   | 0.313631   | 3.26986  | 3.38209          | 0.314631     | 3.27086       | 3.37793728       | 0.00459197 | Yes     |
| Fam83f   | 0.32509   | 0.024946 | -0.300144   | 1.51E-10   | Yes     | Fam83f   | 0.040468   | 8.0897   | 7.64316          | 0.041468     | 8.0907        | 7.60812225       | 0.00330073 | Yes     |
| Fam83h   | 0.080816  | 0.014451 | -0.066365   | 1.61E-12   | Yes     | Fam83h   | 0.419452   | 8.75524  | 4.38357          | 0.420452     | 8.75624       | 4.38029849       | 0.00014629 | Yes     |
| Fam84a   | 0.11197   | 0.020122 | -0.091848   | 8.95E-06   | Yes     | Fam84a   | 0          | 8.54844  | inf              | 0.001        | 8.54944       | 13.0616142       | 0.00014629 | Yes     |
| Fancd2os | 0.88698   | 0.13979  | -0.74719    | 1.61E-12   | Yes     | Fancd2os | 0.00917893 | 21.3889  | 11.1862          | 0.01017893   | 21.3899       | 11.0371281       | 0.0320714  | Yes     |
| Fance    | 0.42189   | 0.18478  | -0.23711    | 7.78E-05   | Yes     | Fance    | 27.5252    | 58.5112  | 1.08796          | 27.5262      | 58.5122       | 1.087932         | 0.00597292 | Yes     |
| Fbln5    | 0.08912   | 0.018225 | -0.070895   | 6.03E-11   | Yes     | Fbln5    | 0          | 3.31694  | inf              | 0.001        | 3.31794       | 11.6960721       | 0.00014629 | Yes     |
| Fbp1     | 0.34892   | 0.044182 | -0.304738   | 6.86E-09   | Yes     | Fbp1     | 0.0643415  | 819.662  | 13.637           | 0.0653415    | 819.663       | 13.6147437       | 0.00014629 | Yes     |
| Fbxl15   | 0.056498  | 0.023111 | -0.033387   | 0.00045717 | Yes     | Fbxl15   | 1.05752    | 10.2859  | 3.28192          | 1.05852      | 10.2869       | 3.28068785       | 0.00028114 | Yes     |
| Fbxl17   | 0.32688   | 0.040452 | -0.286428   | 0.0001045  | Yes     | Fbxl17   | 18.1008    | 12.5047  | -0.533576        | 18.1018      | 12.5057       | -0.5335473       | 0.0178218  | Yes     |
| Fbxo46   | 0.66876   | 0.14513  | -0.52363    | 9.54E-11   | Yes     | Fbxo46   | 6.28648    | 2.47789  | -1.34314         | 6.28748      | 2.47889       | -1.3427877       | 0.00014629 | Yes     |
| Fcgr2a   | 0.08097   | 0.021753 | -0.059217   | 0.00683403 | Yes     | FCGR2A   | 1.7273     | 5.54893  | 1.68369          | 1.7283       | 5.54993       | 1.68311591       | 0.0089386  | Yes     |
| Fez1     | 0.35613   | 0.1021   | -0.25403    | 4.95E-06   | Yes     | Fez1     | 1.30649    | 0        | -inf             | 1.30749      | 0.001         | -10.352584       | 0.00014629 | Yes     |
| Fgd3     | 0.007757  | 0.56564  | 0.557883    | 1.80E-12   | Yes     | Fgd3     | 38.9189    | 8.97354  | -2.11672         | 38.9199      | 8.97454       | -2.1165981       | 0.00014629 | Yes     |
| Fhod1    | 0.5538    | 0.10267  | -0.45113    | 7.96E-06   | Yes     | Fhod1    | 26.2873    | 15.9248  | -0.723092        | 26.2883      | 15.9258       | -0.723055        | 0.0108581  | Yes     |
| Fli1     | 0.0036242 | 0.054215 | 0.0505908   | 0.01439246 | Yes     | Fli1     | 67.2849    | 3.80299  | -4.14508         | 67.2859      | 3.80399       | -4.1447189       | 0.0272509  | Yes     |
| Fn3k     | 0.96323   | 0.3781   | -0.58513    | 0.00043492 | Yes     | Fn3k     | 0          | 57.5224  | inf              | 0.001        | 57.5234       | 15.8118613       | 0.00014629 | Yes     |
| Fn3krp   | 0.078392  | 0.013511 | -0.064881   | 0.0001045  | Yes     | Fn3krp   | 3.87509    | 14.8835  | 1.94141          | 3.87609      | 14.8845       | 1.94113678       | 0.00014629 | Yes     |
| Fnbp1l   | 0.94638   | 0.12038  | -0.826      | 2.62E-08   | Yes     | Fnbp1l   | 0.725854   | 20.6406  | 4.82966          | 0.726854     | 20.6416       | 4.82774539       | 0.00014629 | Yes     |
| Foxn4    | 0.12951   | 0.016095 | -0.113415   | 0.00011677 | Yes     | Foxn4    | 0          | 4.67678  | inf              | 0.001        | 4.67778       | 12.1916083       | 0.00014629 | Yes     |
| Foxo3    | 0.031079  | 0.14705  | 0.115971    | 8.83E-12   | Yes     | Foxo3    | 26.3258    | 12.1115  | -1.1201          | 26.3268      | 12.1125       | -1.1200355       | 0.00014629 | Yes     |
| Frg1     | 0.51843   | 0.11598  | -0.40245    | 0.00013121 | Yes     | Frg1     | 73.5918    | 41.6398  | -0.82158         | 73.5928      | 41.6408       | -0.8215668       | 0.00028114 | Yes     |
| Fscn2    | 0.96829   | 0.88361  | -0.08468    | 3.93E-06   | Yes     | Fscn2    | 1.34257    | 6.89435  | 2.36042          | 1.34357      | 6.89535       | 2.3595523        | 0.0380901  | Yes     |
| Ftl1     | 0.6255    | 0.4123   | -0.2132     | 5.68E-07   | Yes     | FTL1     | 228.942    | 3411.65  | 3.89742          | 228.943      | 3411.651      | 3.89740971       | 0.00014629 | Yes     |
| Fundc2   | 0.16842   | 0.051765 | -0.116655   | 1.02E-05   | Yes     | Fundc2   | 11.412     | 35.4778  | 1.63636          | 11.413       | 35.4788       | 1.63627915       | 0.00014629 | Yes     |
| Fxyd2    | 0.7951    | 0.49178  | -0.30332    | 5.48E-05   | Yes     | FXYD2    | 0.466577   | 2441.59  | 12.3534          | 0.467577     | 2441.591      | 12.35033         | 0.00014629 | Yes     |
| Fxyd6    | 0.42419   | 0.20431  | -0.21988    | 0.01439246 | Yes     | Fxyd6    | 0          | 5.06977  | inf              | 0.001        | 5.07077       | 12.3079891       | 0.00014629 | Yes     |
| Gab1     | 0.18912   | 0.048777 | -0.140343   | 0.00157493 | Yes     | Gab1     | 0.100807   | 12.667   | 6.97333          | 0.101807     | 12.668        | 6.9592082        | 0.00028114 | Yes     |
| Gal3st1  | 0.46119   | 0.087532 | -0.373658   | 1.00E-06   | Yes     | Gal3st1  | 0.0728402  | 23.1744  | 8.31358          | 0.0738402    | 23.1754       | 8.29397206       | 0.016989   | Yes     |
| Galnt14  | 0.13565   | 0.018068 | -0.117582   | 0.00023951 | Yes     | Galnt14  | 0          | 46.7267  | inf              | 0.001        | 46.7277       | 15.5119904       | 0.00014629 | Yes     |
| Gamt     | 0.14677   | 0.018307 | -0.128463   | 2.36E-08   | Yes     | Gamt     | 6.6528     | 94.4769  | 3.82793          | 6.6538       | 94.4779       | 3.82772649       | 0.00014629 | Yes     |
| Gapdh    | 0.50305   | 0.019791 | -0.483259   | 3.61E-07   | Yes     | Gapdh    | 348.651    | 1436.51  | 2.04271          | 348.652      | 1436.511      | 2.04270938       | 0.00014629 | Yes     |

| RRBS     |            |           |             |            |         | RNAseq   |           |          |                  |              |               |                  |            |         |
|----------|------------|-----------|-------------|------------|---------|----------|-----------|----------|------------------|--------------|---------------|------------------|------------|---------|
| gene     | Blood      | Kidney    | methyl.diff | pMWU.fdr   | Match ? | gene     | blood     | kidney   | log2(fold_ratio) | blood+ 0.001 | kidney+ 0.001 | log2(fold_ratio) | q_value    | Match ? |
| Gas2l1   | 0.80733    | 0.54018   | -0.26715    | 3.41E-06   | Yes     | Gas2l1   | 0.299861  | 17.4994  | 5.86687          | 0.300861     | 17.5004       | 5.86214698       | 0.00014629 | Yes     |
| Gata3    | 0.0047962  | 0.10958   | 0.1047838   | 1.49E-06   | Yes     | Gata3    | 52.4201   | 12.8181  | -2.03194         | 52.4211      | 12.8191       | -2.0318527       | 0.00014629 | Yes     |
| Gata5    | 0.061171   | 0.0067139 | -0.0544571  | 5.05E-07   | Yes     | Gata5    | 0         | 1.13944  | inf              | 0.001        | 1.14044       | 10.1553748       | 0.00014629 | Yes     |
| Gatsl3   | 0.11889    | 0.020131  | -0.098759   | 4.27E-06   | Yes     | Gatsl3   | 8.97677   | 95.2922  | 3.40809          | 8.97777      | 95.2932       | 3.40794423       | 0.00014629 | Yes     |
| Gcnt2    | 0.026738   | 0.1624    | 0.135662    | 0.00775212 | Yes     | Gcnt2    | 0.0616222 | 10.7043  | 7.44052          | 0.0626222    | 10.7053       | 7.41743532       | 0.00014629 | Yes     |
| Gfer     | 0.38138    | 0.012242  | -0.369138   | 2.62E-08   | Yes     | Gfer     | 13.3608   | 21.8784  | 0.711504         | 13.3618      | 21.8794       | 0.71145881       | 0.00874754 | Yes     |
| Gfra1    | 0.066788   | 0.0021439 | -0.0646441  | 2.28E-05   | Yes     | Gfra1    | 0         | 1.62216  | inf              | 0.001        | 1.62316       | 10.6645895       | 0.00014629 | Yes     |
| Glb1l    | 0.15132    | 0.0131    | -0.13822    | 8.95E-06   | Yes     | Glb1l    | 1.02545   | 11.6868  | 3.51055          | 1.02645      | 11.6878       | 3.50926814       | 0.00700299 | Yes     |
| Glb1l2   | 0.084558   | 0.016146  | -0.068412   | 0.00069112 | Yes     | Glb1l2   | 0         | 7.04646  | inf              | 0.001        | 7.04746       | 12.7828877       | 0.00014629 | Yes     |
| Glis2    | 0.64624    | 0.044801  | -0.601439   | 6.96E-06   | Yes     | Glis2    | 0.123279  | 40.6648  | 8.36571          | 0.124279     | 40.6658       | 8.35408965       | 0.00053701 | Yes     |
| Gna14    | 0.022144   | 0.082543  | 0.060399    | 8.78E-05   | Yes     | Gna14    | 0.187713  | 1.70053  | 3.17938          | 0.188713     | 1.70153       | 3.17256687       | 0.00802631 | Yes     |
| Gna15    | 0.11859    | 0.44072   | 0.32213     | 4.05E-07   | Yes     | Gna15    | 3.8133    | 8.8603   | 1.21631          | 3.8143       | 8.8613        | 1.21610005       | 0.00126596 | Yes     |
| Gnal     | 0.079272   | 0.014998  | -0.064274   | 4.90E-11   | Yes     | Gnal     | 30.0066   | 18.7584  | -0.677747        | 30.0076      | 18.7594       | -0.6777143       | 0.00252712 | Yes     |
| Gpc1     | 0.029021   | 0.0036637 | -0.0253573  | 4.26E-07   | Yes     | Gpc1     | 0.124059  | 1.95365  | 3.97707          | 0.125059     | 1.95465       | 3.96622951       | 0.00330073 | Yes     |
| Gpc3     | 0.085253   | 0.0051852 | -0.0800678  | 3.08E-05   | Yes     | Gpc3     | 0         | 90.0601  | inf              | 0.001        | 90.0611       | 16.4586165       | 0.00014629 | Yes     |
| Gpd1     | 0.36134    | 0.032351  | -0.328989   | 2.70E-09   | Yes     | Gpd1     | 0.244558  | 59.2229  | 7.91983          | 0.245558     | 59.2239       | 7.91397186       | 0.00028114 | Yes     |
| Gpr135   | 0.09057    | 0.039147  | -0.051423   | 0.00043492 | Yes     | Gpr135   | 0         | 1.04786  | inf              | 0.001        | 1.04886       | 10.0346064       | 0.00014629 | Yes     |
| Gpr137   | 0.2054     | 0.021753  | -0.183647   | 3.61E-07   | Yes     | Gpr137   | 2.50748   | 30.3557  | 3.59766          | 2.50848      | 30.3567       | 3.59712963       | 0.00014629 | Yes     |
| Gpr146   | 0.58051    | 0.020045  | -0.560465   | 1.63E-09   | Yes     | Gpr146   | 6.94037   | 2.86695  | -1.2755          | 6.94137      | 2.86795       | -1.2752006       | 0.00114835 | Yes     |
| Gpr150   | 0.23374    | 0.077452  | -0.156288   | 3.91E-05   | Yes     | Gpr150   | 3.22076   | 0        | -inf             | 3.22176      | 0.001         | -11.653633       | 0.00014629 | Yes     |
| Gpr27    | 0.10802    | 0.033416  | -0.074604   | 0.00035126 | Yes     | Gpr27    | 0         | 1.37974  | inf              | 0.001        | 1.38074       | 10.431226        | 0.00014629 | Yes     |
| Gpr4     | 0.8835     | 0.82197   | -0.06153    | 0.02834942 | Yes     | Gpr4     | 0         | 2.0616   | inf              | 0.001        | 2.0626        | 11.0102484       | 0.00014629 | Yes     |
| Gprc5c   | 0.061396   | 0.0061584 | -0.0552376  | 2.28E-05   | Yes     | Gprc5c   | 0         | 71.92    | inf              | 0.001        | 71.921        | 16.1341255       | 0.00014629 | Yes     |
| Gpsm3    | 0.01555    | 0.1457    | 0.13015     | 0.02450594 | Yes     | Gpsm3    | 128.26    | 20.9671  | -2.61288         | 128.261      | 20.9681       | -2.6128145       | 0.0377543  | Yes     |
| Gramd1b  | 0.00014401 | 0.077124  | 0.07697999  | 1.61E-12   | Yes     | Gramd1b  | 6.80767   | 39.6393  | 2.5417           | 6.80867      | 39.6403       | 2.54152296       | 0.00014629 | Yes     |
| Grasp    | 0.020977   | 0.3319    | 0.310923    | 3.61E-07   | Yes     | Grasp    | 1.75721   | 0.343797 | -2.35366         | 1.75821      | 0.344797      | -2.3502883       | 0.00149937 | Yes     |
| Grik2    | 0.095929   | 0.026172  | -0.069757   | 0.00546968 | Yes     | Grik2    | 0         | 2.35408  | inf              | 0.001        | 2.35508       | 11.2015604       | 0.00014629 | Yes     |
| Grik5    | 0.071363   | 0.014375  | -0.056988   | 0.00015508 | Yes     | Grik5    | 0.0265777 | 18.3757  | 9.43337          | 0.0275777    | 18.3767       | 9.38015986       | 0.0299771  | Yes     |
| Grk5     | 0.23476    | 0.011897  | -0.222863   | 6.30E-06   | Yes     | Grk5     | 2.15596   | 4.99024  | 1.21078          | 2.15696      | 4.99124       | 1.21039885       | 0.00241835 | Yes     |
| Grtp1    | 0.056559   | 0.002     | -0.054559   | 0.00157493 | Yes     | Grtp1    | 0.0621628 | 162.213  | 11.3495          | 0.0631628    | 162.214       | 11.3265356       | 0.00014629 | Yes     |
| Gtf2ird1 | 0.042738   | 0.10592   | 0.063182    | 0.00935402 | Yes     | Gtf2ird1 | 5.26251   | 15.1945  | 1.52973          | 5.26351      | 15.1955       | 1.52954705       | 0.00014629 | Yes     |
| Gtpbp3   | 0.10184    | 0.011125  | -0.090715   | 2.28E-05   | Yes     | Gtpbp3   | 2.74393   | 7.02231  | 1.3557           | 2.74493      | 7.02331       | 1.35538176       | 0.00014629 | Yes     |
| H1f0     | 0.091616   | 0.028616  | -0.063      | 0.00047568 | Yes     | H1f0     | 14.3301   | 100.275  | 2.80684          | 14.3311      | 100.276       | 2.8067551        | 0.00014629 | Yes     |
| Habp4    | 0.40871    | 0.041116  | -0.367594   | 6.96E-06   | Yes     | Habp4    | 6.4225    | 15.5995  | 1.28029          | 6.4235       | 15.6005       | 1.28016076       | 0.00014629 | Yes     |
| Hcn2     | 0.074941   | 0.0050865 | -0.0698545  | 1.75E-08   | Yes     | Hcn2     | 0.371867  | 15.5018  | 5.3815           | 0.372867     | 15.5028       | 5.37772388       | 0.00014629 | Yes     |
| Hcst     | 0.06855    | 0.59292   | 0.52437     | 6.57E-07   | Yes     | Hcst     | 264.442   | 31.5853  | -3.06562         | 264.443      | 31.5863       | -3.0655859       | 0.00014629 | Yes     |
| Hid1     | 0.3081     | 0.087392  | -0.220708   | 0.00226691 | Yes     | Hid1     | 0.0866141 | 5.14006  | 5.89104          | 0.0876141    | 5.14106       | 5.87475897       | 0.0373152  | Yes     |
| Hint1    | 0.36276    | 0.23482   | -0.12794    | 0.00130689 | Yes     | Hint1    | 364.359   | 497.455  | 0.449206         | 364.36       | 497.456       | 0.44920434       | 0.0217546  | Yes     |
| Hint2    | 0.32844    | 0.059567  | -0.268873   | 0.02954396 | Yes     | Hint2    | 50.4726   | 368.364  | 2.86756          | 50.4736      | 368.365       | 2.8675351        | 0.00014629 | Yes     |
| Hipk2    | 0.36968    | 0.2338    | -0.13588    | 0.02954396 | Yes     | Hipk2    | 2.43722   | 6.11155  | 1.3263           | 2.43822      | 6.11255       | 1.32594606       | 0.00014629 | Yes     |
| Hlx      | 0.1811     | 0.035308  | -0.145792   | 1.27E-11   | Yes     | Hlx      | 0.133156  | 1.28888  | 3.27493          | 0.134156     | 1.28988       | 3.26525337       | 0.00994441 | Yes     |
| Hmg20b   | 0.72207    | 0.2652    | -0.45687    | 3.08E-05   | Yes     | Hmg20b   | 15.1147   | 64.0647  | 2.08357          | 15.1157      | 64.0657       | 2.08350437       | 0.00014629 | Yes     |

| RRBS    |            |           |             |            |         | RNAseq  |           |           |                  |              |               |                  |            |         |
|---------|------------|-----------|-------------|------------|---------|---------|-----------|-----------|------------------|--------------|---------------|------------------|------------|---------|
| gene    | Blood      | Kidney    | methyl.diff | pMWU.fdr   | Match ? | gene    | blood     | kidney    | log2(fold_ratio) | blood+ 0.001 | kidney+ 0.001 | log2(fold_ratio) | q_value    | Match ? |
| Hnf1a   | 0.82272    | 0.054992  | -0.767728   | 1.61E-12   | Yes     | Hnf1a   | 3.83337   | 16.3405   | 2.09176          | 3.83437      | 16.3415       | 2.09147895       | 0.00014629 | Yes     |
| Hnf1b   | 0.22456    | 0.040504  | -0.184056   | 0.00051431 | Yes     | Hnf1b   | 0         | 205.551   | inf              | 0.001        | 205.552       | 17.6491439       | 0.00014629 | Yes     |
| Hnf4g   | 0.069169   | 0.0092366 | -0.0599324  | 4.59E-07   | Yes     | Hnf4g   | 0         | 2.1945    | inf              | 0.001        | 2.1955        | 11.1003338       | 0.00014629 | Yes     |
| Hnrnpa3 | 0.57243    | 0.32055   | -0.25188    | 0.00043492 | Yes     | Hnrnpa3 | 11.6418   | 1.66172   | -2.80857         | 11.6428      | 1.66272       | -2.8078209       | 0.00014629 | Yes     |
| Hoga1   | 0.77944    | 0.6056    | -0.17384    | 0.03705648 | Yes     | Hoga1   | 0.748181  | 179.388   | 7.90548          | 0.749181     | 179.389       | 7.9035614        | 0.00014629 | Yes     |
| Hoxa2   | 0.13593    | 0.4814    | 0.34547     | 6.37E-09   | Yes     | Hoxa2   | 0         | 2.29515   | inf              | 0.001        | 2.29615       | 11.1650012       | 0.00014629 | Yes     |
| Hoxb3   | 0.73271    | 0.11973   | -0.61298    | 1.61E-12   | Yes     | HOXB3   | 0.164914  | 87.7956   | 9.05629          | 0.165914     | 87.7966       | 9.04758563       | 0.00014629 | Yes     |
| Hoxb5   | 0.605      | 0.3014    | -0.3036     | 4.17E-11   | Yes     | Hoxb5   | 0         | 94.9452   | inf              | 0.001        | 94.9462       | 16.5348226       | 0.00014629 | Yes     |
| Hoxb7   | 0.12542    | 0.027265  | -0.098155   | 0.00014495 | Yes     | Hoxb7   | 0         | 47.6755   | inf              | 0.001        | 47.6765       | 15.5409907       | 0.00014629 | Yes     |
| Hoxb9   | 0.023473   | 0.11347   | 0.089997    | 0.04431681 | Yes     | Hoxb9   | 0         | 15.135    | inf              | 0.001        | 15.136        | 13.8856964       | 0.00014629 | Yes     |
| Hoxc10  | 0.19235    | 0.47544   | 0.28309     | 0.00500595 | Yes     | Hoxc10  | 0         | 6.67425   | inf              | 0.001        | 6.67525       | 12.7046062       | 0.00014629 | Yes     |
| Hoxc5   | 0.052851   | 0.17021   | 0.117359    | 5.48E-05   | Yes     | Hoxc5   | 4.31263   | 23.0582   | 2.41864          | 4.31363      | 23.0592       | 2.41836812       | 0.00014629 | Yes     |
| Hoxd10  | 0.12158    | 0.019525  | -0.102055   | 3.08E-05   | Yes     | Hoxd10  | 0         | 36.818    | inf              | 0.001        | 36.819        | 15.1681628       | 0.00014629 | Yes     |
| Hoxd3   | 0.14285    | 0.51039   | 0.36754     | 6.96E-06   | Yes     | Hoxd3   | 0         | 19.562    | inf              | 0.001        | 19.563        | 14.25584         | 0.00014629 | Yes     |
| Hpn     | 0.66937    | 0.042957  | -0.626413   | 1.61E-12   | Yes     | Hpn     | 0         | 71.4425   | inf              | 0.001        | 71.4435       | 16.1245151       | 0.00014629 | Yes     |
| Hs6st1  | 0.10354    | 0.023481  | -0.080059   | 0.00014495 | Yes     | Hs6st1  | 6.02509   | 25.2028   | 2.06453          | 6.02609      | 25.2038       | 2.06434714       | 0.00014629 | Yes     |
| Hsd17b1 | 0.84931    | 0.21197   | -0.63734    | 1.61E-12   | Yes     | Hsd17b1 | 0.53749   | 7.78698   | 3.85675          | 0.53849      | 7.78798       | 3.85425772       | 0.00184429 | Yes     |
| Hspa12a | 0.20616    | 0.064338  | -0.141822   | 8.52E-05   | Yes     | Hspa12a | 0         | 16.0945   | inf              | 0.001        | 16.0955       | 13.9743698       | 0.00014629 | Yes     |
| Hspa2   | 0.14931    | 0.03135   | -0.11796    | 9.32E-05   | Yes     | Hspa2   | 0.421187  | 22.7909   | 5.75786          | 0.422187     | 22.7919       | 5.75449523       | 0.00994441 | Yes     |
| Id4     | 0.058555   | 0.016432  | -0.042123   | 1.02E-05   | Yes     | Id4     | 0         | 45.2923   | inf              | 0.001        | 45.2933       | 15.46701         | 0.00014629 | Yes     |
| Ifi30   | 0.2992     | 0.51081   | 0.21161     | 0.02194182 | Yes     | Ifi30   | 17.301    | 67.1237   | 1.95597          | 17.302       | 67.1247       | 1.95590492       | 0.00014629 | Yes     |
| Ifitm3  | 0.26654    | 0.10419   | -0.16235    | 0.01658745 | Yes     | Ifitm3  | 0         | 32.8868   | inf              | 0.001        | 32.8878       | 15.0052649       | 0.00014629 | Yes     |
| Igf2r   | 0.39349    | 0.018088  | -0.375402   | 3.61E-07   | Yes     | Igf2r   | 12.3634   | 67.8475   | 2.45623          | 12.3644      | 67.8485       | 2.45612469       | 0.00014629 | Yes     |
| Igfbp3  | 0.054329   | 0.025197  | -0.029132   | 0.00043492 | Yes     | Igfbp3  | 0         | 1.40738   | inf              | 0.001        | 1.40838       | 10.4598209       | 0.00014629 | Yes     |
| Ihh     | 0.104      | 0.016057  | -0.087943   | 0.00069112 | Yes     | Ihh     | 0.561358  | 8.60067   | 3.93746          | 0.562358     | 8.60167       | 3.93505603       | 0.00014629 | Yes     |
| Il27ra  | 0.8084     | 0.32548   | -0.48292    | 1.60E-05   | Yes     | Il27ra  | 31.8586   | 1.12948   | -4.81796         | 31.8596      | 1.13048       | -4.8167208       | 0.00014629 | Yes     |
| Il3ra   | 0.15958    | 0.024283  | -0.135297   | 5.68E-07   | Yes     | Il3ra   | 2.20418   | 137.325   | 5.9612           | 2.20518      | 137.326       | 5.96056457       | 0.00014629 | Yes     |
| Ino80d  | 0.92495    | 0.095065  | -0.829885   | 3.61E-07   | Yes     | Ino80d  | 11.5454   | 1.50601   | -2.93851         | 11.5464      | 1.50701       | -2.9376822       | 0.00014629 | Yes     |
| Inpp1   | 0.31275    | 0.030757  | -0.281993   | 7.44E-07   | Yes     | Inpp1   | 10.4374   | 26.195    | 1.32752          | 10.4384      | 26.196        | 1.32744594       | 0.00014629 | Yes     |
| Insl3   | 0.7195     | 0.11794   | -0.60156    | 2.36E-06   | Yes     | Insl3   | 95.8544   | 24.8247   | -1.94907         | 95.8554      | 24.8257       | -1.9490253       | 0.00014629 | Yes     |
| Irf2bp1 | 0.74617    | 0.037592  | -0.708578   | 1.61E-12   | Yes     | Irf2bp1 | 7.23264   | 11.2307   | 0.634857         | 7.23364      | 11.2317       | 0.6347826        | 0.0149808  | Yes     |
| Irf2bp1 | 0.81443    | 0.035703  | -0.778727   | 1.61E-12   | Yes     | Irf2bp1 | 8.58803   | 17.7069   | 1.04391          | 8.58903      | 17.7079       | 1.04382602       | 0.00014629 | Yes     |
| Irf4    | 0.11134    | 0.013871  | -0.097469   | 0.00057442 | Yes     | Irf4    | 1.94638   | 0.523805  | -1.89369         | 1.94738      | 0.524805      | -1.8916811       | 0.00041099 | Yes     |
| Irx2    | 0.26004    | 0.039419  | -0.220621   | 3.27E-07   | Yes     | Irx2    | 0         | 10.6692   | inf              | 0.001        | 10.6702       | 13.3812996       | 0.00014629 | Yes     |
| Irx3    | 0.10395    | 0.014087  | -0.089863   | 2.49E-07   | Yes     | Irx3    | 0         | 36.9339   | inf              | 0.001        | 36.9349       | 15.1726971       | 0.00014629 | Yes     |
| Isoc2b  | 0.067298   | 0.007956  | -0.059342   | 6.57E-07   | Yes     | Isoc2b  | 14.0628   | 72.9412   | 2.37485          | 14.0638      | 72.9422       | 2.37476725       | 0.00014629 | Yes     |
| Itgal   | 0.073193   | 0.53923   | 0.466037    | 1.64E-06   | Yes     | Itgal   | 73.0225   | 2.72752   | -4.74268         | 73.0235      | 2.72852       | -4.7421703       | 0.00014629 | Yes     |
| Itgb4   | 0.080997   | 0.01935   | -0.061647   | 0.01439246 | Yes     | Itgb4   | 0.0516549 | 9.60133   | 7.53819          | 0.0526549    | 9.60233       | 7.51067291       | 0.0146937  | Yes     |
| Itpkb   | 0.00046729 | 0.065021  | 0.06455371  | 6.26E-05   | Yes     | Itpkb   | 83.9856   | 16.9852   | -2.30587         | 83.9866      | 16.9862       | -2.305796        | 0.00014629 | Yes     |
| Junb    | 0.29348    | 0.0082614 | -0.2852186  | 1.61E-12   | Yes     | Junb    | 48.7687   | 109.986   | 1.1733           | 48.7697      | 109.987       | 1.17327601       | 0.00014629 | Yes     |
| Kazn    | 0.12136    | 0.012893  | -0.108467   | 2.57E-05   | Yes     | KAZN    | 0.0450448 | 33.2115   | 9.5261           | 0.0460448    | 33.2125       | 9.49447237       | 0.0221218  | Yes     |
| Kcna3   | 0.21327    | 0.3798    | 0.16653     | 0.01520153 | Yes     | Kcna3   | 4.0282    | 0.0920338 | -5.45183         | 4.0292       | 0.0930338     | -5.4365947       | 0.0135258  | Yes     |

| RRBS      |           |           |             |            |         | RNAseq    |           |          |                  |              |               |                  |            |         |
|-----------|-----------|-----------|-------------|------------|---------|-----------|-----------|----------|------------------|--------------|---------------|------------------|------------|---------|
| gene      | Blood     | Kidney    | methyl.diff | pMWU.fdr   | Match ? | gene      | blood     | kidney   | log2(fold_ratio) | blood+ 0.001 | kidney+ 0.001 | log2(fold_ratio) | q_value    | Match ? |
| Kcnc3     | 0.076263  | 0.026063  | -0.0502     | 2.10E-06   | Yes     | Kcnc3     | 0         | 4.86756  | inf              | 0.001        | 4.86856       | 12.2492794       | 0.00014629 | Yes     |
| Kcnp4     | 0.098769  | 0.023036  | -0.075733   | 3.95E-10   | Yes     | Kcnp4     | 0         | 2.96149  | inf              | 0.001        | 2.96249       | 11.5325946       | 0.00014629 | Yes     |
| Kcnn4     | 0.033318  | 0.72094   | 0.687622    | 1.09E-10   | Yes     | Kcnn4     | 173.958   | 23.3092  | -2.89977         | 173.959      | 23.3102       | -2.899714        | 0.00014629 | Yes     |
| Kdm2a     | 0.14012   | 0.057546  | -0.082574   | 1.11E-08   | Yes     | Kdm2a     | 60.2117   | 17.271   | -1.80169         | 60.2127      | 17.272        | -1.8016327       | 0.00014629 | Yes     |
| Kdm6b     | 0.91204   | 0.3671    | -0.54494    | 1.92E-07   | Yes     | Kdm6b     | 18.2521   | 8.74084  | -1.06222         | 18.2531      | 8.74184       | -1.0621326       | 0.00014629 | Yes     |
| Kdsr      | 0.50241   | 0.099043  | -0.403367   | 8.18E-10   | Yes     | Kdsr      | 10.9081   | 3.93282  | -1.47176         | 10.9091      | 3.93382       | -1.4715292       | 0.00014629 | Yes     |
| Khk       | 0.84962   | 0.089364  | -0.760256   | 1.61E-12   | Yes     | Khk       | 6.57489   | 595.627  | 6.5013           | 6.57589      | 595.628       | 6.5010816        | 0.00014629 | Yes     |
| Kif12     | 0.84595   | 0.11504   | -0.73091    | 1.61E-12   | Yes     | Kif12     | 0         | 520.547  | inf              | 0.001        | 520.548       | 18.9896717       | 0.00014629 | Yes     |
| Kif26a    | 0.099198  | 0.036686  | -0.062512   | 1.31E-05   | Yes     | Kif26a    | 0         | 1.64301  | inf              | 0.001        | 1.64401       | 10.6830034       | 0.00014629 | Yes     |
| Kif3c     | 0.67486   | 0.29328   | -0.38158    | 1.64E-06   | Yes     | Kif3c     | 3.16345   | 0.649908 | -2.28319         | 3.16445      | 0.650908      | -2.2814292       | 0.00053701 | Yes     |
| Kl        | 0.38597   | 0.08653   | -0.29944    | 7.78E-05   | Yes     | Kl        | 0         | 22.482   | inf              | 0.001        | 22.483        | 14.4565469       | 0.00014629 | Yes     |
| Klc1      | 0.14164   | 0.025854  | -0.115786   | 1.61E-06   | Yes     | Klc1      | 54.6168   | 138.708  | 1.34463          | 54.6178      | 138.709       | 1.34461829       | 0.00041099 | Yes     |
| Klf2      | 0.025564  | 0.3207    | 0.295136    | 2.65E-11   | Yes     | Klf2      | 341.278   | 32.2438  | -3.40386         | 341.279      | 32.2448       | -3.4038132       | 0.00014629 | Yes     |
| Klf5      | 0.093584  | 0.031315  | -0.062269   | 1.61E-12   | Yes     | Klf5      | 0.0695967 | 5.05104  | 6.18142          | 0.0705967    | 5.05204       | 6.1611215        | 0.0194106  | Yes     |
| Klhl29    | 0.084539  | 0.19332   | 0.108781    | 6.52E-08   | Yes     | Klhl29    | 0.0414812 | 1.39971  | 5.07653          | 0.0424812    | 1.40071       | 5.04318996       | 0.00114835 | Yes     |
| Krt19     | 0.12865   | 0.0088651 | -0.1197849  | 1.12E-06   | Yes     | Krt19     | 0         | 85.9965  | inf              | 0.001        | 85.9975       | 16.3920071       | 0.00014629 | Yes     |
| Krtcap3   | 0.85774   | 0.061417  | -0.796323   | 1.61E-12   | Yes     | Krtcap3   | 1.25788   | 13.7446  | 3.4498           | 1.25888      | 13.7456       | 3.44875721       | 0.00014629 | Yes     |
| Lactb2    | 0.11325   | 0.0097412 | -0.1035088  | 1.92E-07   | Yes     | Lactb2    | 16.348    | 183.913  | 3.49183          | 16.349       | 183.914       | 3.49175701       | 0.00014629 | Yes     |
| Lama1     | 0.15966   | 0.014773  | -0.144887   | 0.00069112 | Yes     | Lama1     | 1.04101   | 9.56793  | 3.20022          | 1.04201      | 9.56893       | 3.19898849       | 0.00014629 | Yes     |
| Lamb2     | 0.17383   | 0.0057692 | -0.1680608  | 3.65E-05   | Yes     | Lamb2     | 0.0100164 | 53.2785  | 12.377           | 0.0110164    | 53.2795       | 12.239712        | 0.0133356  | Yes     |
| Lamc1     | 0.064518  | 0.0064117 | -0.0581063  | 3.87E-06   | Yes     | Lamc1     | 1.27062   | 7.4366   | 2.54911          | 1.27162      | 7.4376        | 2.54816955       | 0.00014629 | Yes     |
| Large     | 0.18791   | 0.11024   | -0.07767    | 0.04666269 | Yes     | Large     | 0.478815  | 7.28096  | 3.92659          | 0.479815     | 7.28196       | 3.92377665       | 0.00014629 | Yes     |
| Lat       | 0         | 0.27605   | 0.27605     | 0.00013121 | Yes     | Lat       | 455.416   | 88.3074  | -2.36658         | 455.417      | 88.3084       | -2.3665656       | 0.00014629 | Yes     |
| Lats2     | 0.11426   | 0.29152   | 0.17726     | 0.00019529 | Yes     | Lats2     | 0.100968  | 11.631   | 6.84793          | 0.101968     | 11.632        | 6.83383889       | 0.00384649 | Yes     |
| Lbh       | 0.0018406 | 0.10025   | 0.0984094   | 0.00063283 | Yes     | Lbh       | 132.518   | 9.36804  | -3.8223          | 132.519      | 9.36904       | -3.8221542       | 0.00014629 | Yes     |
| Lgalsl    | 0.77184   | 0.016399  | -0.755441   | 1.63E-09   | Yes     | Lgalsl    | 0.435879  | 17.5386  | 5.33047          | 0.436879     | 17.5396       | 5.32723828       | 0.00014629 | Yes     |
| Loxl1     | 0.50177   | 0.32319   | -0.17858    | 5.76E-05   | Yes     | Loxl1     | 0         | 2.96112  | inf              | 0.001        | 2.96212       | 11.5324144       | 0.00014629 | Yes     |
| Lrrc24    | 0.097182  | 0.023113  | -0.074069   | 0.00157493 | Yes     | Lrrc24    | 9.37316   | 42.9244  | 2.19519          | 9.37416      | 42.9254       | 2.19507025       | 0.00014629 | Yes     |
| Lrrc71    | 0.63085   | 0.06732   | -0.56353    | 2.36E-06   | Yes     | Lrrc71    | 3.10157   | 14.1001  | 2.18464          | 3.10257      | 14.1011       | 2.18427204       | 0.00014629 | Yes     |
| Lrrc8c    | 0.0034483 | 0.065871  | 0.0624227   | 0.00935402 | Yes     | Lrrc8c    | 44.8247   | 2.72082  | -4.04218         | 44.8257      | 2.72182       | -4.0416825       | 0.00014629 | Yes     |
| Lrrfip1   | 0.0061042 | 0.20789   | 0.2017858   | 0.00015888 | Yes     | Lrrfip1   | 61.4164   | 32.2544  | -0.929127        | 61.4174      | 32.2554       | -0.9291067       | 0.00230432 | Yes     |
| Ltbp3     | 0.38448   | 0.22772   | -0.15676    | 0.0017172  | Yes     | Ltbp3     | 0.02699   | 14.4978  | 9.06919          | 0.02799      | 14.4988       | 9.0168063        | 0.00184429 | Yes     |
| Ltbp4     | 0.16073   | 0.029324  | -0.131406   | 4.44E-05   | Yes     | Ltbp4     | 0.357678  | 26.0584  | 6.18694          | 0.358678     | 26.0594       | 6.1829708        | 0.00014629 | Yes     |
| Ltbr      | 0.70273   | 0.076991  | -0.625739   | 4.59E-07   | Yes     | Ltbr      | 0.16655   | 25.4669  | 7.25653          | 0.16755      | 25.4679       | 7.24794451       | 0.00014629 | Yes     |
| Lurap1l   | 0.066137  | 0.0093714 | -0.0567656  | 1.61E-12   | Yes     | Lurap1l   | 0         | 4.80136  | inf              | 0.001        | 4.80236       | 12.2295278       | 0.00014629 | Yes     |
| Lypd6b    | 0.11364   | 0.029871  | -0.083769   | 2.06E-07   | Yes     | Lypd6b    | 0         | 4.23877  | inf              | 0.001        | 4.23977       | 12.0497703       | 0.00014629 | Yes     |
| Lzts3     | 0.68831   | 0.11225   | -0.57606    | 1.61E-12   | Yes     | Lzts3     | 1.34555   | 74.0137  | 5.78152          | 1.34655      | 74.0147       | 5.78047213       | 0.00014629 | Yes     |
| Map4k2    | 0.76826   | 0.19821   | -0.57005    | 1.51E-09   | Yes     | Map4k2    | 54.8368   | 4.65501  | -3.55829         | 54.8378      | 4.65601       | -3.5580046       | 0.00014629 | Yes     |
| Mapk1ip1l | 0.15846   | 0.077514  | -0.080946   | 1.19E-07   | Yes     | Mapk1ip1l | 28.5437   | 10.7903  | -1.40344         | 28.5447      | 10.7913       | -1.4033542       | 0.00014629 | Yes     |
| Mapk4     | 0.92735   | 0.22632   | -0.70103    | 1.95E-09   | Yes     | Mapk4     | 0         | 3.38869  | inf              | 0.001        | 3.38969       | 11.7269376       | 0.00014629 | Yes     |
| Mavs      | 0.082117  | 0.0036303 | -0.0784867  | 8.75E-07   | Yes     | Mavs      | 6.53813   | 31.1865  | 2.25397          | 6.53913      | 31.1875       | 2.2537973        | 0.00014629 | Yes     |
| Mbtps2    | 0.21237   | 0.13235   | -0.08002    | 0.01439246 | Yes     | Mbtps2    | 7.91087   | 1.60307  | -2.30299         | 7.91187      | 1.60407       | -2.3022816       | 0.00014629 | Yes     |

| RRBS     |            |           |             |            |         | RNAseq   |           |          |                  |              |               |                  |            |         |
|----------|------------|-----------|-------------|------------|---------|----------|-----------|----------|------------------|--------------|---------------|------------------|------------|---------|
| gene     | Blood      | Kidney    | methyl.diff | pMWU.fdr   | Match ? | gene     | blood     | kidney   | log2(fold_ratio) | blood+ 0.001 | kidney+ 0.001 | log2(fold_ratio) | q_value    | Match ? |
| Mcm3ap   | 0.83216    | 0.52459   | -0.30757    | 0.00154772 | Yes     | Mcm3ap   | 16.6715   | 10.3117  | -0.6931          | 16.6725      | 10.3127       | -0.6930484       | 0.00066215 | Yes     |
| Mef2d    | 0.16753    | 0.085685  | -0.081845   | 0.03460571 | Yes     | Mef2d    | 46.0966   | 8.43342  | -2.45047         | 46.0976      | 8.43442       | -2.4503309       | 0.00014629 | Yes     |
| Megf8    | 0.3498     | 0.035423  | -0.314377   | 3.61E-07   | Yes     | Megf8    | 0.0197574 | 4.88238  | 7.94904          | 0.0207574    | 4.88338       | 7.87811049       | 0.00459197 | Yes     |
| Mesdc1   | 0.1508     | 0.04631   | -0.10449    | 4.05E-07   | Yes     | Mesdc1   | 7.97735   | 4.01958  | -0.988864        | 7.97835      | 4.02058       | -0.9886868       | 0.0421247  | Yes     |
| Metrn    | 0.47432    | 0.16531   | -0.30901    | 1.20E-08   | Yes     | Metrn    | 0.374384  | 43.2342  | 6.85151          | 0.375384     | 43.2352       | 6.84769539       | 0.00384649 | Yes     |
| Mfhas1   | 0.49353    | 0.18878   | -0.30475    | 0.00051431 | Yes     | Mfhas1   | 0.426776  | 5.40952  | 3.66395          | 0.427776     | 5.41052       | 3.66083981       | 0.00014629 | Yes     |
| Mgarp    | 0.52387    | 0.26635   | -0.25752    | 0.01164415 | Yes     | Mgarp    | 0.202678  | 1.20713  | 2.57432          | 0.203678     | 1.20813       | 2.56841364       | 0.0329554  | Yes     |
| Mlycd    | 0.18939    | 0.045194  | -0.144196   | 0.00082506 | Yes     | Mlycd    | 6.41126   | 30.8746  | 2.26774          | 6.41226      | 30.8756       | 2.26756234       | 0.00014629 | Yes     |
| Mmp11    | 0.44186    | 0.041025  | -0.400835   | 1.00E-06   | Yes     | Mmp11    | 0.670619  | 8.47745  | 3.66007          | 0.671619     | 8.47845       | 3.65808559       | 0.00014629 | Yes     |
| Moap1    | 0.40746    | 0.073979  | -0.333481   | 0.00051431 | Yes     | Moap1    | 8.4288    | 37.3676  | 2.14839          | 8.4298       | 37.3686       | 2.14825621       | 0.00014629 | Yes     |
| Mob3a    | 0.00067568 | 0.20591   | 0.20523432  | 3.61E-07   | Yes     | Mob3a    | 47.4586   | 7.11734  | -2.73726         | 47.4596      | 7.11834       | -2.7370872       | 0.00014629 | Yes     |
| Mpped1   | 0.34626    | 0.25004   | -0.09622    | 0.03210797 | Yes     | Mpped1   | 0         | 5.98843  | inf              | 0.001        | 5.98943       | 12.548203        | 0.00014629 | Yes     |
| Mpst     | 0.92928    | 0.25173   | -0.67755    | 1.27E-10   | Yes     | MPST     | 14.1905   | 214.629  | 3.91884          | 14.1915      | 214.63        | 3.91875275       | 0.00014629 | Yes     |
| Mrap     | 0.69954    | 0.14649   | -0.55305    | 8.75E-07   | Yes     | Mrap     | 0         | 7.26606  | inf              | 0.001        | 7.26706       | 12.8271561       | 0.00014629 | Yes     |
| Mrap2    | 0.49727    | 0.29953   | -0.19774    | 0.00226691 | Yes     | Mrap2    | 4.95458   | 0.228583 | -4.43798         | 4.95558      | 0.229583      | -4.4319662       | 0.0229551  | Yes     |
| Mrpl38   | 0.7695     | 0.072748  | -0.696752   | 3.61E-07   | Yes     | Mrpl38   | 13.3844   | 50.8824  | 1.92662          | 13.3854      | 50.8834       | 1.92653482       | 0.00014629 | Yes     |
| Msrb2    | 0.73387    | 0.13377   | -0.6001     | 5.23E-07   | Yes     | Msrb2    | 13.8957   | 33.139   | 1.2539           | 13.8967      | 33.14         | 1.25383127       | 0.00014629 | Yes     |
| Mxd3     | 0.077707   | 0.0078733 | -0.0698337  | 0.00259554 | Yes     | Mxd3     | 0.170418  | 2.15753  | 3.66223          | 0.171418     | 2.15853       | 3.65445863       | 0.0208247  | Yes     |
| Myh10    | 0.11963    | 0.018655  | -0.100975   | 0.00028703 | Yes     | Myh10    | 0.351081  | 7.23288  | 4.36469          | 0.352081     | 7.23388       | 4.36079039       | 0.00884407 | Yes     |
| Myh11    | 0.91494    | 0.3407    | -0.57424    | 2.88E-05   | Yes     | Myh11    | 1.34364   | 5.65843  | 2.07426          | 1.34464      | 5.65943       | 2.07343678       | 0.00014629 | Yes     |
| Myo1c    | 0.76691    | 0.47977   | -0.28714    | 0.03705648 | Yes     | Myo1c    | 5.24612   | 34.2751  | 2.70784          | 5.24712      | 34.2761       | 2.70760528       | 0.00014629 | Yes     |
| Myo1e    | 0.06275    | 0.01053   | -0.05222    | 0.00546968 | Yes     | Myo1e    | 0.911098  | 15.7347  | 4.1102           | 0.912098     | 15.7357       | 4.10870871       | 0.00014629 | Yes     |
| Myo5b    | 0.20034    | 0.026472  | -0.173868   | 2.26E-06   | Yes     | Myo5b    | 0.0120537 | 28.7774  | 11.2212          | 0.0130537    | 28.7784       | 11.1063119       | 0.023691   | Yes     |
| N4bp3    | 0.91586    | 0.7234    | -0.19246    | 0.01210159 | Yes     | N4bp3    | 0.154502  | 3.23976  | 4.39019          | 0.155502     | 3.24076       | 4.38132714       | 0.00374149 | Yes     |
| Naa25    | 0.37387    | 0.077358  | -0.296512   | 3.61E-07   | Yes     | Naa25    | 10.1236   | 3.17114  | -1.67464         | 10.1246      | 3.17214       | -1.6743366       | 0.00014629 | Yes     |
| Nav2     | 0.20754    | 0.028634  | -0.178906   | 0.00119585 | Yes     | Nav2     | 0.83728   | 16.4792  | 4.29879          | 0.83828      | 16.4802       | 4.29715773       | 0.00014629 | Yes     |
| Nbl1     | 0.18343    | 0.078561  | -0.104869   | 0.01079042 | Yes     | Nbl1     | 0.140501  | 36.6005  | 8.02514          | 0.141501     | 36.6015       | 8.01494672       | 0.00041099 | Yes     |
| Ndrp4    | 0.19546    | 0.10719   | -0.08827    | 0.00022947 | Yes     | Ndrp4    | 0.795515  | 10.9778  | 3.78656          | 0.796515     | 10.9788       | 3.78487503       | 0.00014629 | Yes     |
| Ndufb4   | 0.46327    | 0.20798   | -0.25529    | 6.26E-05   | Yes     | Ndufb4   | 138.744   | 493.378  | 1.83027          | 138.745      | 493.379       | 1.83026053       | 0.00014629 | Yes     |
| Nefm     | 0.06293    | 0.0098781 | -0.0530519  | 1.49E-07   | Yes     | Nefm     | 0         | 1.74893  | inf              | 0.001        | 1.74993       | 10.7730815       | 0.00014629 | Yes     |
| Nelfb    | 0.80427    | 0.38949   | -0.41478    | 2.19E-08   | Yes     | Nelfb    | 23.9074   | 34.1939  | 0.516282         | 23.9084      | 34.1949       | 0.51626359       | 0.0275289  | Yes     |
| Nfix     | 0.10311    | 0.18889   | 0.08578     | 0.02954396 | Yes     | Nfix     | 1.41145   | 7.329    | 2.37643          | 1.41245      | 7.33          | 2.3756134        | 0.00014629 | Yes     |
| Nfkb1    | 0.087607   | 0.0093198 | -0.0782872  | 2.28E-05   | Yes     | Nfkb1    | 55.9095   | 15.6794  | -1.83422         | 55.9105      | 15.6804       | -1.8341569       | 0.00014629 | Yes     |
| Nipsnap1 | 0.095586   | 0.01032   | -0.085266   | 0.0001045  | Yes     | Nipsnap1 | 20.6495   | 81.5044  | 1.98077          | 20.6505      | 81.5054       | 1.98071893       | 0.00014629 | Yes     |
| Nkain4   | 0.11739    | 0.018695  | -0.098695   | 2.69E-06   | Yes     | Nkain4   | 0         | 2.6907   | inf              | 0.001        | 2.6917        | 11.3943019       | 0.00014629 | Yes     |
| Nkx2-1   | 0.083932   | 0.029551  | -0.054381   | 0.00028703 | Yes     | Nkx2-1   | 0.312282  | 142.096  | 8.8298           | 0.313282     | 142.097       | 8.8251985        | 0.00014629 | Yes     |
| Nlk      | 0.14439    | 0.039156  | -0.105234   | 2.62E-08   | Yes     | Nlk      | 21.9354   | 6.32003  | -1.79526         | 21.9364      | 6.32103       | -1.7950952       | 0.00014629 | Yes     |
| Nmrk1    | 0.40242    | 0.13054   | -0.27188    | 8.75E-07   | Yes     | Nmrk1    | 0.664022  | 23.9676  | 5.17371          | 0.665022     | 23.9686       | 5.17159977       | 0.00195831 | Yes     |
| Notch1   | 0.11041    | 0.35195   | 0.24154     | 3.84E-08   | Yes     | Notch1   | 36.5751   | 5.16419  | -2.82425         | 36.5761      | 5.16519       | -2.8240079       | 0.00014629 | Yes     |
| Nox4     | 0.10234    | 0.020486  | -0.081854   | 3.80E-10   | Yes     | Nox4     | 0         | 23.9141  | inf              | 0.001        | 23.9151       | 14.5456342       | 0.00014629 | Yes     |
| Npas2    | 0.061184   | 0.011024  | -0.05016    | 1.82E-05   | Yes     | Npas2    | 0.271967  | 13.9905  | 5.68487          | 0.272967     | 13.9915       | 5.67968028       | 0.00014629 | Yes     |
| Npb      | 0.77799    | 0.12983   | -0.64816    | 1.61E-12   | Yes     | Npb      | 0.910052  | 0        | -inf             | 0.911052     | 0.001         | -9.8313896       | 0.00405996 | Yes     |

| RRBS    |          |           |             |            |         | RNAseq  |           |          |                  |              |               |                  |            |         |
|---------|----------|-----------|-------------|------------|---------|---------|-----------|----------|------------------|--------------|---------------|------------------|------------|---------|
| gene    | Blood    | Kidney    | methyl.diff | pMWU.fdr   | Match ? | gene    | blood     | kidney   | log2(fold_ratio) | blood+ 0.001 | kidney+ 0.001 | log2(fold_ratio) | q_value    | Match ? |
| Npr2    | 0.15735  | 0.065373  | -0.091977   | 0.00057442 | Yes     | Npr2    | 0.949437  | 8.70054  | 3.19596          | 0.950437     | 8.70154       | 3.19460785       | 0.00014629 | Yes     |
| Nr1d1   | 0.068795 | 0.0018755 | -0.0669195  | 2.88E-05   | Yes     | Nr1d1   | 5.90543   | 48.782   | 3.04623          | 5.90643      | 48.783        | 3.04602019       | 0.00014629 | Yes     |
| Nr1h3   | 0.48807  | 0.13181   | -0.35626    | 8.05E-05   | Yes     | Nr1h3   | 0.163515  | 37.6782  | 7.84817          | 0.164515     | 37.6792       | 7.83940539       | 0.00066215 | Yes     |
| Nr2f6   | 0.76255  | 0.035386  | -0.727164   | 1.61E-12   | Yes     | Nr2f6   | 2.91245   | 100.87   | 5.11412          | 2.91345      | 100.871       | 5.1136391        | 0.00014629 | Yes     |
| Nr4a2   | 0.33845  | 0.12895   | -0.2095     | 0.00357821 | Yes     | Nr4a2   | 0.279983  | 1.79136  | 2.67764          | 0.280983     | 1.79236       | 2.67330568       | 0.00307875 | Yes     |
| Nrg1    | 0.12116  | 0.027103  | -0.094057   | 3.08E-05   | Yes     | Nrg1    | 0.0243718 | 3.41014  | 7.12847          | 0.0253718    | 3.41114       | 7.07088428       | 0.00041099 | Yes     |
| Nrp1    | 0.66967  | 0.059784  | -0.609886   | 2.62E-08   | Yes     | Nrp1    | 3.14772   | 10.1102  | 1.68344          | 3.14872      | 10.1112       | 1.68311685       | 0.00014629 | Yes     |
| Nsd1    | 0.16706  | 0.4302    | 0.26314     | 0.00343039 | Yes     | Nsd1    | 20.3323   | 4.43615  | -2.19639         | 20.3333      | 4.43715       | -2.1961391       | 0.004167   | Yes     |
| Nt5dc2  | 0.76954  | 0.033282  | -0.736258   | 8.00E-12   | Yes     | Nt5dc2  | 2.26768   | 7.62388  | 1.74931          | 2.26868      | 7.62488       | 1.7488615        | 0.00028114 | Yes     |
| Ntf3    | 0.12711  | 0.027263  | -0.099847   | 6.26E-05   | Yes     | Ntf3    | 0         | 8.32559  | inf              | 0.001        | 8.32659       | 13.0235101       | 0.00014629 | Yes     |
| Ntn4    | 0.23972  | 0.086487  | -0.153233   | 0.00357821 | Yes     | Ntn4    | 0         | 15.638   | inf              | 0.001        | 15.639        | 13.9328606       | 0.00014629 | Yes     |
| Ntng2   | 0.48434  | 0.1047    | -0.37964    | 1.61E-12   | Yes     | Ntng2   | 60.2241   | 0.904731 | -6.05671         | 60.2251      | 0.905731      | -6.0551384       | 0.00944816 | Yes     |
| Nudt22  | 0.90594  | 0.69978   | -0.20616    | 0.00389713 | Yes     | Nudt22  | 5.26328   | 18.1234  | 1.78382          | 5.26428      | 18.1244       | 1.7836251        | 0.00014629 | Yes     |
| Olfm1   | 0.30507  | 0.076756  | -0.228314   | 0.0017172  | Yes     | Olfm1   | 8.71494   | 2.38113  | -1.87185         | 8.71594      | 2.38213       | -1.8714041       | 0.00014629 | Yes     |
| Olfml2a | 0.93443  | 0.36702   | -0.56741    | 3.61E-07   | Yes     | Olfml2a | 0         | 1.40385  | inf              | 0.001        | 1.40485       | 10.4562004       | 0.00014629 | Yes     |
| Orc2    | 0.90101  | 0.79573   | -0.10528    | 0.00039347 | Yes     | Orc2    | 27.4545   | 12.4747  | -1.13804         | 27.4555      | 12.4757       | -1.1379744       | 0.00014629 | Yes     |
| Pabpc4  | 0.18138  | 0.039883  | -0.141497   | 1.61E-12   | Yes     | Pabpc4  | 47.1984   | 146.682  | 1.63589          | 47.1994      | 146.683       | 1.63586125       | 0.00014629 | Yes     |
| Pacsin3 | 0.65659  | 0.095351  | -0.561239   | 6.57E-07   | Yes     | Pacsin3 | 0.11514   | 23.5406  | 7.67561          | 0.11614      | 23.5416       | 7.66320363       | 0.00041099 | Yes     |
| Palm    | 0.6336   | 0.07147   | -0.56213    | 4.05E-07   | Yes     | Palm    | 2.56108   | 120.636  | 5.55777          | 2.56208      | 120.637       | 5.55721312       | 0.00014629 | Yes     |
| Paqr6   | 0.81372  | 0.06096   | -0.75276    | 3.61E-07   | Yes     | Paqr6   | 0.690529  | 15.5563  | 4.49365          | 0.691529     | 15.5573       | 4.49165814       | 0.00014629 | Yes     |
| Paqr7   | 0.77622  | 0.10418   | -0.67204    | 3.61E-07   | Yes     | Paqr7   | 8.5257    | 20.9471  | 1.29686          | 8.5267       | 20.9481       | 1.29675999       | 0.00014629 | Yes     |
| Pard3   | 0.0785   | 0.0092396 | -0.0692604  | 1.61E-12   | Yes     | Pard3   | 0.0327306 | 17.4109  | 9.05513          | 0.0337306    | 17.4119       | 9.01179994       | 0.00405996 | Yes     |
| Pard6b  | 0.12122  | 0.019968  | -0.101252   | 4.27E-06   | Yes     | Pard6b  | 5.16036   | 40.424   | 2.96967          | 5.16136      | 40.425        | 2.96942461       | 0.00014629 | Yes     |
| Parp3   | 0.65595  | 0.38378   | -0.27217    | 0.00357821 | Yes     | Parp3   | 2.80134   | 11.9341  | 2.0909           | 2.80234      | 11.9351       | 2.09050674       | 0.00014629 | Yes     |
| Pawr    | 0.070024 | 0.010186  | -0.059838   | 0.00035126 | Yes     | Pawr    | 0         | 18.1142  | inf              | 0.001        | 18.1152       | 14.1449131       | 0.00014629 | Yes     |
| Pax2    | 0.12355  | 0.012516  | -0.111034   | 0.00014495 | Yes     | Pax2    | 0         | 24.5909  | inf              | 0.001        | 24.5919       | 14.5858956       | 0.00014629 | Yes     |
| Pced1b  | 0.74204  | 0.49992   | -0.24212    | 0.01931414 | Yes     | Pced1b  | 52.8244   | 5.13518  | -3.36272         | 52.8254      | 5.13618       | -3.3624641       | 0.00014629 | Yes     |
| Pck1    | 0.77672  | 0.088397  | -0.688323   | 1.09E-10   | Yes     | Pck1    | 0         | 324.434  | inf              | 0.001        | 324.435       | 18.3075699       | 0.00014629 | Yes     |
| Pcsk5   | 0.096679 | 0.019317  | -0.077362   | 0.00047568 | Yes     | Pcsk5   | 0         | 2.91521  | inf              | 0.001        | 2.91621       | 11.5098789       | 0.00014629 | Yes     |
| Pde2a   | 0.36984  | 0.12977   | -0.24007    | 0.00043492 | Yes     | Pde2a   | 104.749   | 3.38366  | -4.95221         | 104.75       | 3.38466       | -4.9517955       | 0.00014629 | Yes     |
| Pde4a   | 0.076338 | 0.0074737 | -0.0688643  | 0.00015888 | Yes     | Pde4a   | 0.208095  | 1.70586  | 3.03519          | 0.209095     | 1.70686       | 3.02911426       | 0.00974684 | Yes     |
| Pde4d   | 0.32964  | 0.060496  | -0.269144   | 3.61E-07   | Yes     | Pde4d   | 58.1294   | 4.45161  | -3.70687         | 58.1304      | 4.45261       | -3.7065697       | 0.00014629 | Yes     |
| Pde8a   | 0.063473 | 0.0044961 | -0.0589769  | 0.00014495 | Yes     | Pde8a   | 0.367814  | 16.9854  | 5.52918          | 0.368814     | 16.9864       | 5.5253429        | 0.00014629 | Yes     |
| Pdlim2  | 0.31464  | 0.049973  | -0.264667   | 1.64E-07   | Yes     | Pdlim2  | 50.2984   | 26.4701  | -0.92615         | 50.2994      | 26.4711       | -0.926123        | 0.00014629 | Yes     |
| Pdlim4  | 0.062332 | 0.0085736 | -0.0537584  | 2.10E-06   | Yes     | Pdlim4  | 0         | 9.49132  | inf              | 0.001        | 9.49232       | 13.212545        | 0.00014629 | Yes     |
| Pdzd3   | 0.85983  | 0.29859   | -0.56124    | 1.12E-06   | Yes     | Pdzd3   | 0.167827  | 39.2824  | 7.87077          | 0.168827     | 39.2834       | 7.86223034       | 0.0348116  | Yes     |
| Pdzrn3  | 0.27547  | 0.077796  | -0.197674   | 0.01344183 | Yes     | Pdzrn3  | 0         | 1.69237  | inf              | 0.001        | 1.69337       | 10.7256815       | 0.00014629 | Yes     |
| Peli1   | 0.09525  | 0.042323  | -0.052927   | 3.37E-06   | Yes     | Peli1   | 40.5775   | 4.45731  | -3.18644         | 40.5785      | 4.45831       | -3.1861467       | 0.00014629 | Yes     |
| Pex10   | 0.76473  | 0.60284   | -0.16189    | 0.03347526 | Yes     | Pex10   | 1.85326   | 9.07813  | 2.29233          | 1.85426      | 9.07913       | 2.29171051       | 0.00014629 | Yes     |
| Pfkl    | 0.65013  | 0.20882   | -0.44131    | 3.87E-06   | Yes     | Pfkl    | 18.5567   | 43.9974  | 1.24548          | 18.5577      | 43.9984       | 1.24543314       | 0.00014629 | Yes     |
| Pgm3    | 0.27458  | 0.11616   | -0.15842    | 0.02954396 | Yes     | Pgm3    | 1.07687   | 9.72782  | 3.17527          | 1.07787      | 9.72882       | 3.17408164       | 0.0132409  | Yes     |
| Phpt1   | 0.3285   | 0.10279   | -0.22571    | 0.00119585 | Yes     | Phpt1   | 57.7572   | 200.576  | 1.79608          | 57.7582      | 200.577       | 1.7960585        | 0.00014629 | Yes     |



| RRBS     |            |           |             |            |         | RNAseq   |           |          |                  |              |               |                  |            |         |
|----------|------------|-----------|-------------|------------|---------|----------|-----------|----------|------------------|--------------|---------------|------------------|------------|---------|
| gene     | Blood      | Kidney    | methyl.diff | pMWU.fdr   | Match ? | gene     | blood     | kidney   | log2(fold_ratio) | blood+ 0.001 | kidney+ 0.001 | log2(fold_ratio) | q_value    | Match ? |
| Pik3cd   | 0.87283    | 0.15064   | -0.72219    | 1.61E-12   | Yes     | Pik3cd   | 310.031   | 13.1237  | -4.56217         | 310.032      | 13.1247       | -4.5620608       | 0.00014629 | Yes     |
| Pim3     | 0.94532    | 0.065709  | -0.879611   | 1.63E-09   | Yes     | Pim3     | 8.95299   | 39.1659  | 2.12916          | 8.95399      | 39.1669       | 2.12903233       | 0.00014629 | Yes     |
| Pip5k1c  | 0.065911   | 0.0066316 | -0.0592794  | 0.00063283 | Yes     | PIP5K1C  | 32.1142   | 13.649   | -1.23442         | 32.1152      | 13.65         | -1.2343553       | 0.00014629 | Yes     |
| Pitx2    | 0.13839    | 0.037828  | -0.100562   | 0.00014495 | Yes     | Pitx2    | 0         | 27.0389  | inf              | 0.001        | 27.0399       | 14.7228022       | 0.00014629 | Yes     |
| Piwil1   | 0.63472    | 0.14484   | -0.48988    | 4.97E-05   | Yes     | Piwil1   | 0.217012  | 7.46793  | 5.10486          | 0.218012     | 7.46893       | 5.09842212       | 0.00014629 | Yes     |
| Pklr     | 0.73249    | 0.10811   | -0.62438    | 2.62E-08   | Yes     | Pklr     | 0.120447  | 43.8081  | 8.50666          | 0.121447     | 43.8091       | 8.49475991       | 0.00126596 | Yes     |
| Plac9    | 0.22851    | 0.049937  | -0.178573   | 5.62E-06   | Yes     | Plac9    | 0         | 1.8912   | inf              | 0.001        | 1.8922        | 10.8858489       | 0.00014629 | Yes     |
| Plcb1    | 0.054966   | 2.50E-07  | -0.0549658  | 1.00E-06   | Yes     | Plcb1    | 0.0187386 | 13.8282  | 9.52738          | 0.0197386    | 13.8292       | 9.45248232       | 0.0161245  | Yes     |
| Plce1    | 0.0643     | 0.012138  | -0.052162   | 0.00210055 | Yes     | Plce1    | 0         | 0.875142 | inf              | 0.001        | 0.876142      | 9.7750209        | 0.00014629 | Yes     |
| Pld4     | 0.34643    | 0.76929   | 0.42286     | 2.36E-06   | Yes     | Pld4     | 0.805077  | 7.66448  | 3.25099          | 0.806077     | 7.66548       | 3.24938657       | 0.00014629 | Yes     |
| Plec     | 0.95823    | 0.85316   | -0.10507    | 0.01931414 | Yes     | Plec     | 16.4682   | 7.23473  | -1.18667         | 16.4692      | 7.23573       | -1.18656         | 0.00014629 | Yes     |
| Plekha5  | 0.16177    | 0.03662   | -0.12515    | 2.10E-06   | Yes     | Plekha5  | 1.16769   | 32.622   | 4.80412          | 1.16869      | 32.623        | 4.80292525       | 0.00014629 | Yes     |
| Plekhg2  | 0.00067204 | 0.07497   | 0.07429796  | 1.63E-09   | Yes     | Plekhg2  | 13.3421   | 2.95632  | -2.17411         | 13.3431      | 2.95732       | -2.1737316       | 0.00014629 | Yes     |
| Plekhh1  | 0.56146    | 0.045708  | -0.515752   | 0.00063283 | Yes     | Plekhh1  | 0.0517313 | 6.21851  | 6.90939          | 0.0527313    | 6.21951       | 6.88199755       | 0.00078603 | Yes     |
| Plekhh3  | 0.18467    | 0.010064  | -0.174606   | 3.61E-07   | Yes     | Plekhh3  | 1.21473   | 24.1802  | 4.31512          | 1.21573      | 24.1812       | 4.31399108       | 0.00014629 | Yes     |
| Polg2    | 0.37325    | 0.018503  | -0.354747   | 0.0001045  | Yes     | Polg2    | 23.2105   | 40.5479  | 0.804849         | 23.2115      | 40.5489       | 0.80482302       | 0.00173187 | Yes     |
| Polr2i   | 0.27993    | 0.14892   | -0.13101    | 0.02834942 | Yes     | Polr2i   | 6.1552    | 14.8294  | 1.26858          | 6.1562       | 14.8304       | 1.2684455        | 0.00384649 | Yes     |
| Polr2k   | 0.25483    | 0.07751   | -0.17732    | 1.27E-07   | Yes     | Polr2k   | 31.9918   | 88.0244  | 1.4602           | 31.9928      | 88.0254       | 1.46017262       | 0.00014629 | Yes     |
| Pomc     | 0.36245    | 0.057764  | -0.304686   | 8.75E-07   | Yes     | Pomc     | 0.858757  | 18.0376  | 4.39261          | 0.859757     | 18.0386       | 4.39101461       | 0.00149937 | Yes     |
| Pou2f2   | 0.70429    | 0.42286   | -0.28143    | 0.00470016 | Yes     | POU2F2   | 5.4322    | 0.659846 | -3.04134         | 5.4332       | 0.660846      | -3.0394161       | 0.00014629 | Yes     |
| Pou3f3   | 0.078569   | 0.026202  | -0.052367   | 0.01344183 | Yes     | Pou3f3   | 0         | 38.2469  | inf              | 0.001        | 38.2479       | 15.2230929       | 0.00014629 | Yes     |
| Ppp1cc   | 0.87437    | 0.63636   | -0.23801    | 0.00143157 | Yes     | PPP1CC   | 221.404   | 138.631  | -0.675436        | 221.405      | 138.632       | -0.6754275       | 0.00126596 | Yes     |
| Ppp1r15a | 0.39162    | 0.18596   | -0.20566    | 0.0017172  | Yes     | Ppp1r15a | 17.494    | 79.2504  | 2.17955          | 17.495       | 79.2514       | 2.17949376       | 0.00014629 | Yes     |
| Ppp1r9b  | 0.032165   | 0.14226   | 0.110095    | 0.00035126 | Yes     | Ppp1r9b  | 65.4145   | 10.2696  | -2.67124         | 65.4155      | 10.2706       | -2.6711121       | 0.00014629 | Yes     |
| Ppp2r5b  | 0.74717    | 0.018657  | -0.728513   | 3.61E-07   | Yes     | Ppp2r5b  | 1.78603   | 5.8471   | 1.71096          | 1.78703      | 5.8481        | 1.71040413       | 0.00014629 | Yes     |
| Pramef8  | 0.14353    | 0.03103   | -0.1125     | 0.00033082 | Yes     | Pramef8  | 0.436542  | 3.25978  | 2.90058          | 0.437542     | 3.26078       | 2.89772369       | 0.00014629 | Yes     |
| Prdm1    | 0.31069    | 0.1626    | -0.14809    | 0.00357821 | Yes     | Prdm1    | 2.23667   | 0.220145 | -3.34482         | 2.23767      | 0.221145      | -3.3389328       | 0.00028114 | Yes     |
| Proc     | 0.71499    | 0.12037   | -0.59462    | 2.98E-07   | Yes     | Proc     | 0         | 42.5699  | inf              | 0.001        | 42.5709       | 15.37758         | 0.00014629 | Yes     |
| Prodh    | 0.33432    | 0.10596   | -0.22836    | 0.00092018 | Yes     | Prodh    | 0.141225  | 82.3687  | 9.18796          | 0.142225     | 82.3697       | 9.17779484       | 0.00263402 | Yes     |
| Proz     | 0.74707    | 0.19648   | -0.55059    | 1.57E-07   | Yes     | Proz     | 0.22978   | 4.85214  | 4.4003           | 0.23078      | 4.85314       | 4.39432837       | 0.00041099 | Yes     |
| Prr13    | 0.65049    | 0.45793   | -0.19256    | 0.00997853 | Yes     | Prr13    | 217.76    | 52.2957  | -2.05797         | 217.761      | 52.2967       | -2.0579538       | 0.00014629 | Yes     |
| Prrc2c   | 0.44927    | 0.067848  | -0.381422   | 3.61E-07   | Yes     | Prrc2c   | 38.7933   | 4.57228  | -3.08482         | 38.7943      | 4.57328       | -3.0845435       | 0.00014629 | Yes     |
| Prss23   | 0.10355    | 0.052646  | -0.050904   | 0.02194182 | Yes     | Prss23   | 0         | 49.7334  | inf              | 0.001        | 49.7344       | 15.6019565       | 0.00014629 | Yes     |
| Prss36   | 0.97705    | 0.62965   | -0.3474     | 3.61E-07   | Yes     | Prss36   | 1.07205   | 7.92854  | 2.88668          | 1.07305      | 7.92954       | 2.88551987       | 0.00014629 | Yes     |
| Psd4     | 0.093764   | 0.025741  | -0.068023   | 0.00743291 | Yes     | Psd4     | 44.1419   | 3.71332  | -3.57137         | 44.1429      | 3.71432       | -3.5710114       | 0.00014629 | Yes     |
| Psmb10   | 0.72871    | 0.02414   | -0.70457    | 2.62E-08   | Yes     | Psmb10   | 137.613   | 43.0241  | -1.6774          | 137.614      | 43.0251       | -1.6773768       | 0.00014629 | Yes     |
| Psmb8    | 0.00082573 | 0.053261  | 0.05243527  | 0.00105382 | Yes     | Psmb8    | 165.669   | 34.205   | -2.27602         | 165.67       | 34.206        | -2.2759911       | 0.00014629 | Yes     |
| Psme2    | 0.21123    | 0.037629  | -0.173601   | 0.00069112 | Yes     | Psme2    | 160.258   | 81.6437  | -0.97298         | 160.259      | 81.6447       | -0.9729742       | 0.00689996 | Yes     |
| Ptgds    | 0.87624    | 0.57855   | -0.29769    | 0.00051431 | Yes     | Ptgds    | 0         | 35.7157  | inf              | 0.001        | 35.7167       | 15.1243112       | 0.00014629 | Yes     |
| Ptk7     | 0.0075585  | 0.22602   | 0.2184615   | 2.10E-06   | Yes     | Ptk7     | 0.156831  | 1.99423  | 3.66855          | 0.157831     | 1.99523       | 3.66010256       | 0.00053701 | Yes     |
| Ptma     | 0.43586    | 0.12671   | -0.30915    | 1.09E-10   | Yes     | Ptma     | 947.064   | 672.105  | -0.494775        | 947.065      | 672.106       | -0.4947747       | 0.0252454  | Yes     |
| Ptprs    | 0.78301    | 0.10502   | -0.67799    | 2.70E-09   | Yes     | Ptprs    | 27.5615   | 6.39427  | -2.1078          | 27.5625      | 6.39527       | -2.1076296       | 0.00014629 | Yes     |

| RRBS       |            |           |             |            |         | RNAseq     |           |          |                  |              |               |                  |            |         |
|------------|------------|-----------|-------------|------------|---------|------------|-----------|----------|------------------|--------------|---------------|------------------|------------|---------|
| gene       | Blood      | Kidney    | methyl.diff | pMWU.fdr   | Match ? | gene       | blood     | kidney   | log2(fold_ratio) | blood+ 0.001 | kidney+ 0.001 | log2(fold_ratio) | q_value    | Match ? |
| Ptrf       | 0.068869   | 0.011965  | -0.056904   | 0.00187484 | Yes     | Ptrf       | 0.0626656 | 55.8301  | 9.79915          | 0.0636656    | 55.8311       | 9.7763392        | 0.0266914  | Yes     |
| Purg       | 0.67603    | 0.14391   | -0.53212    | 4.05E-07   | Yes     | Purg       | 0.972231  | 2.55233  | 1.39244          | 0.973231     | 2.55333       | 1.39152583       | 0.0361509  | Yes     |
| Pvrl2      | 0.31248    | 0.19351   | -0.11897    | 0.01008382 | Yes     | Pvrl2      | 0         | 22.0699  | inf              | 0.001        | 22.0709       | 14.4298578       | 0.00014629 | Yes     |
| Pxdc1      | 0.31536    | 0.16154   | -0.15382    | 0.0017172  | Yes     | Pxdc1      | 2.96935   | 7.34924  | 1.30745          | 2.97035      | 7.35024       | 1.30715842       | 0.00195831 | Yes     |
| Rab20      | 0.25387    | 0.0061508 | -0.2477192  | 3.77E-07   | Yes     | Rab20      | 2.95855   | 25.8743  | 3.12855          | 2.95955      | 25.8753       | 3.12812585       | 0.00014629 | Yes     |
| Rab31      | 0.69035    | 0.43275   | -0.2576     | 0.01658745 | Yes     | Rab31      | 1.51476   | 3.07651  | 1.0222           | 1.51576      | 3.07751       | 1.0217222        | 0.00812679 | Yes     |
| Rab34      | 0.58432    | 0.063857  | -0.520463   | 6.65E-08   | Yes     | Rab34      | 0         | 69.1684  | inf              | 0.001        | 69.1694       | 16.0778463       | 0.00014629 | Yes     |
| Rab3a      | 0.75114    | 0.41998   | -0.33116    | 0.0001045  | Yes     | Rab3a      | 1.82997   | 19.3237  | 3.40048          | 1.83097      | 19.3247       | 3.39976596       | 0.00014629 | Yes     |
| Rai1       | 0.62909    | 0.21069   | -0.4184     | 1.44E-06   | Yes     | Rai1       | 24.2839   | 9.95884  | -1.28595         | 24.2849      | 9.95984       | -1.2858651       | 0.0110564  | Yes     |
| Ramp1      | 0.00098039 | 0.23647   | 0.23548961  | 4.95E-06   | Yes     | Ramp1      | 154.388   | 7.84245  | -4.29911         | 154.389      | 7.84345       | -4.2989378       | 0.00014629 | Yes     |
| Ramp3      | 0.0045455  | 0.057089  | 0.0525435   | 0.00861735 | Yes     | Ramp3      | 2.80568   | 6.42711  | 1.19582          | 2.80668      | 6.42811       | 1.19553003       | 0.00659461 | Yes     |
| Rap1gap    | 0.12813    | 0.017589  | -0.110541   | 5.68E-07   | Yes     | RAP1GAP    | 0.0991757 | 40.8289  | 8.68539          | 0.1001757    | 40.8299       | 8.67094963       | 0.00014629 | Yes     |
| Rara       | 0.3588     | 0.086878  | -0.271922   | 0.00033082 | Yes     | Rara       | 32.7305   | 16.7582  | -0.965764        | 32.7315      | 16.7592       | -0.9657264       | 0.00014629 | Yes     |
| Rbpms2     | 0.49659    | 0.1789    | -0.31769    | 2.18E-06   | Yes     | Rbpms2     | 0.063712  | 47.2567  | 9.53474          | 0.064712     | 47.2577       | 9.51230043       | 0.00014629 | Yes     |
| Rcan1      | 0.14057    | 0.002174  | -0.138396   | 2.88E-05   | Yes     | Rcan1      | 6.3815    | 64.6624  | 3.34096          | 6.3825       | 64.6634       | 3.34075583       | 0.00014629 | Yes     |
| Rdh10      | 0.23474    | 0.019568  | -0.215172   | 1.12E-06   | Yes     | Rdh10      | 4.86377   | 8.67558  | 0.834886         | 4.86477      | 8.67658       | 0.8347549        | 0.0421247  | Yes     |
| Ret        | 0.064545   | 0.0099319 | -0.0546131  | 0.00500595 | Yes     | RET        | 11.7312   | 0        | -inf             | 11.7322      | 0.001         | -13.518186       | 0.00014629 | Yes     |
| Rfx3       | 0.23934    | 0.071964  | -0.167376   | 9.50E-05   | Yes     | Rfx3       | 6.51406   | 0.946754 | -2.7825          | 6.51506      | 0.947754      | -2.7811939       | 0.00014629 | Yes     |
| RGD1305347 | 0.18764    | 0.050059  | -0.137581   | 0.00082506 | Yes     | RGD1305347 | 0         | 66.134   | inf              | 0.001        | 66.135        | 16.0131264       | 0.00014629 | Yes     |
| RGD1310587 | 0.74687    | 0.041545  | -0.705325   | 3.61E-07   | Yes     | RGD1310587 | 0         | 32.0979  | inf              | 0.001        | 32.0989       | 14.9702362       | 0.00014629 | Yes     |
| RGD1560394 | 0.073559   | 0.018777  | -0.054782   | 0.00226691 | Yes     | RGD1560394 | 0         | 2.45131  | inf              | 0.001        | 2.45231       | 11.2599256       | 0.00014629 | Yes     |
| RGD1562218 | 0.79871    | 0.42194   | -0.37677    | 0.00069112 | Yes     | RGD1562218 | 16.0892   | 9.82302  | -0.711853        | 16.0902      | 9.82402       | -0.7117969       | 0.00041099 | Yes     |
| RGD1566239 | 0.76696    | 0.37931   | -0.38765    | 2.94E-05   | Yes     | RGD1566239 | 22.6248   | 42.9938  | 0.926228         | 22.6258      | 42.9948       | 0.92619338       | 0.00041099 | Yes     |
| Rgl1       | 0.27629    | 0.026798  | -0.249492   | 3.61E-07   | Yes     | Rgl1       | 0.0578792 | 21.307   | 8.52407          | 0.0588792    | 21.308        | 8.4994214        | 0.00014629 | Yes     |
| Rgl3       | 0.18077    | 0.079441  | -0.101329   | 0.00546968 | Yes     | Rgl3       | 0         | 57.6912  | inf              | 0.001        | 57.6922       | 15.8160887       | 0.00014629 | Yes     |
| Rhcg       | 0.10762    | 0.02495   | -0.08267    | 0.00011677 | Yes     | Rhcg       | 0         | 20.7418  | inf              | 0.001        | 20.7428       | 14.340323        | 0.00014629 | Yes     |
| Rhobtb1    | 0.079233   | 0.0027735 | -0.0764595  | 4.95E-06   | Yes     | Rhobtb1    | 3.75846   | 40.1361  | 3.41669          | 3.75946      | 40.1371       | 3.41633903       | 0.00014629 | Yes     |
| Rilpl1     | 0.16772    | 0.020498  | -0.147222   | 3.61E-07   | Yes     | Rilpl1     | 0.364349  | 18.9742  | 5.70258          | 0.365349     | 18.9752       | 5.69869602       | 0.00028114 | Yes     |
| Rmdn3      | 0.60924    | 0.2267    | -0.38254    | 0.00039347 | Yes     | Rmdn3      | 7.28598   | 15.1309  | 1.0543           | 7.28698      | 15.1319       | 1.05420021       | 0.00014629 | Yes     |
| Rnd2       | 0.33599    | 0.11811   | -0.21788    | 0.00039347 | Yes     | Rnd2       | 0.16398   | 12.6295  | 6.26714          | 0.16498      | 12.6305       | 6.2584768        | 0.0234023  | Yes     |
| Rnf144b    | 0.2936     | 0.16394   | -0.12966    | 0.0179568  | Yes     | Rnf144b    | 2.37468   | 4.31893  | 0.86294          | 2.37568      | 4.31993       | 0.86266741       | 0.00263402 | Yes     |
| Rnf186     | 0.91354    | 0.30255   | -0.61099    | 8.91E-08   | Yes     | Rnf186     | 0.183748  | 6.2778   | 5.09446          | 0.184748     | 6.2788        | 5.08685821       | 0.0368719  | Yes     |
| Rnf26      | 0.61754    | 0.27838   | -0.33916    | 0.00076943 | Yes     | Rnf26      | 11.7295   | 5.646    | -1.05484         | 11.7305      | 5.647         | -1.054708        | 0.00330073 | Yes     |
| Robo2      | 0.29403    | 0.068328  | -0.225702   | 4.95E-06   | Yes     | Robo2      | 0         | 0.972359 | inf              | 0.001        | 0.973359      | 9.9268282        | 0.00014629 | Yes     |
| Rpl13      | 0.38988    | 0.032722  | -0.357158   | 0.00035126 | Yes     | Rpl13      | 4233.35   | 884.686  | -2.25856         | 4233.351     | 884.687       | -2.2585611       | 0.00014629 | Yes     |
| Rpl6       | 0.80487    | 0.48956   | -0.31531    | 2.52E-06   | Yes     | Rpl6       | 2182.51   | 444.334  | -2.29627         | 2182.511     | 444.335       | -2.2962692       | 0.00014629 | Yes     |
| Rplp0      | 0.80835    | 0.46149   | -0.34686    | 9.64E-09   | Yes     | Rplp0      | 3780.23   | 1189.29  | -1.66838         | 3780.231     | 1189.291      | -1.6683726       | 0.00014629 | Yes     |

| RRBS     |          |           |             |            |         | RNAseq   |           |         |                  |              |               |                  |            |         |
|----------|----------|-----------|-------------|------------|---------|----------|-----------|---------|------------------|--------------|---------------|------------------|------------|---------|
| gene     | Blood    | Kidney    | methyl.diff | pMWU.fdr   | Match ? | gene     | blood     | kidney  | log2(fold_ratio) | blood+ 0.001 | kidney+ 0.001 | log2(fold_ratio) | q_value    | Match ? |
| Rps10    | 0.50606  | 0.27025   | -0.23581    | 8.00E-12   | Yes     | Rps10    | 2287.65   | 658.014 | -1.79768         | 2287.651     | 658.015       | -1.7976746       | 0.00014629 | Yes     |
| Rps17    | 0.69209  | 0.33615   | -0.35594    | 1.09E-10   | Yes     | Rps17    | 6928.99   | 1739.39 | -1.99407         | 6928.991     | 1739.391      | -1.994063        | 0.00014629 | Yes     |
| Rps29    | 0.48962  | 0.084866  | -0.404754   | 1.61E-12   | Yes     | RPS29    | 65.3857   | 6.04974 | -3.43403         | 65.3867      | 6.05074       | -3.4338137       | 0.00014629 | Yes     |
| Rps4y2   | 0.82803  | 0.29621   | -0.53182    | 5.50E-09   | Yes     | Rps4y2   | 2.0375    | 18.0157 | 3.14438          | 2.0385       | 18.0167       | 3.14375492       | 0.00014629 | Yes     |
| Rsph9    | 0.35496  | 0.011181  | -0.343779   | 1.61E-12   | Yes     | Rsph9    | 0.125601  | 20.33   | 7.33862          | 0.126601     | 20.331        | 7.32724857       | 0.00448672 | Yes     |
| RT1-Bb   | 0.23325  | 0.040943  | -0.192307   | 5.48E-05   | Yes     | RT1-Bb   | 25.0908   | 36.2717 | 0.531686         | 25.0918      | 36.2727       | 0.53166817       | 0.0287968  | Yes     |
| Rtn1     | 0.059693 | 0.0076381 | -0.0520549  | 2.05E-05   | Yes     | RTN1     | 0         | 2.33176 | inf              | 0.001        | 2.33276       | 11.1878222       | 0.00014629 | Yes     |
| Runx1    | 0.38853  | 0.14262   | -0.24591    | 5.11E-08   | Yes     | Runx1    | 25.2317   | 2.20708 | -3.51502         | 25.2327      | 2.20808       | -3.5144302       | 0.00014629 | Yes     |
| Runx3    | 0.68469  | 0.065701  | -0.618989   | 2.57E-05   | Yes     | Runx3    | 38.8654   | 4.17573 | -3.21838         | 38.8664      | 4.17673       | -3.2180777       | 0.00014629 | Yes     |
| Sall1    | 0.0824   | 0.014767  | -0.067633   | 9.67E-08   | Yes     | Sall1    | 0         | 22.2329 | inf              | 0.001        | 22.2339       | 14.4404734       | 0.00014629 | Yes     |
| Sardh    | 0.13534  | 0.021818  | -0.113522   | 0.00051431 | Yes     | Sardh    | 0.0442622 | 17.1325 | 8.59644          | 0.0452622    | 17.1335       | 8.56429747       | 0.00207488 | Yes     |
| Scin     | 0.67514  | 0.35674   | -0.3184     | 0.00099362 | Yes     | Scin     | 1.61627   | 21.9409 | 3.76288          | 1.61727      | 21.9419       | 3.762056         | 0.00014629 | Yes     |
| Scrn1    | 0.11626  | 0.0494    | -0.06686    | 0.00546968 | Yes     | Scrn1    | 14.2389   | 1.95079 | -2.86771         | 14.2399      | 1.95179       | -2.8670693       | 0.00014629 | Yes     |
| Scx      | 0.62119  | 0.072438  | -0.548752   | 1.61E-12   | Yes     | Scx      | 0.507789  | 21.5333 | 5.4062           | 0.508789     | 21.5343       | 5.40342514       | 0.00751085 | Yes     |
| Sdc4     | 0.077069 | 0.0070465 | -0.0700225  | 2.27E-09   | Yes     | Sdc4     | 0.301529  | 254.425 | 9.72073          | 0.302529     | 254.426       | 9.71595695       | 0.00041099 | Yes     |
| Sdccag3  | 0.44527  | 0.096683  | -0.348587   | 3.61E-07   | Yes     | Sdccag3  | 28.5941   | 62.2855 | 1.12318          | 28.5951      | 62.2865       | 1.12315156       | 0.00014629 | Yes     |
| Sec23ip  | 0.62235  | 0.38351   | -0.23884    | 0.02065846 | Yes     | Sec23ip  | 23.1676   | 11.5195 | -1.00803         | 23.1686      | 11.5205       | -1.0079675       | 0.00014629 | Yes     |
| Sema3b   | 0.75911  | 0.062356  | -0.696754   | 9.47E-12   | Yes     | Sema3b   | 0.0323874 | 23.351  | 9.49384          | 0.0333874    | 23.352        | 9.45002665       | 0.00014629 | Yes     |
| Senp3    | 0.76163  | 0.48196   | -0.27967    | 0.00470016 | Yes     | Senp3    | 27.6424   | 19.7992 | -0.481445        | 27.6434      | 19.8002       | -0.4814201       | 0.0341756  | Yes     |
| Serinc5  | 0.1055   | 0.0031512 | -0.1023488  | 1.15E-05   | Yes     | Serinc5  | 2.53485   | 3.88386 | 0.615591         | 2.53585      | 3.88486       | 0.6153932        | 0.0296199  | Yes     |
| Serpinf2 | 0.82137  | 0.22827   | -0.5931     | 5.62E-06   | Yes     | Serpinf2 | 22.3162   | 144.866 | 2.69856          | 22.3172      | 144.867       | 2.69850106       | 0.00014629 | Yes     |
| Serping1 | 0.35745  | 0.13825   | -0.2192     | 0.00861735 | Yes     | Serping1 | 0         | 6.11266 | inf              | 0.001        | 6.11366       | 12.5778206       | 0.00014629 | Yes     |
| Serpinh1 | 0.68389  | 0.034668  | -0.649222   | 2.05E-11   | Yes     | Serpinh1 | 0         | 57.7257 | inf              | 0.001        | 57.7267       | 15.8169511       | 0.00014629 | Yes     |
| Sertad1  | 0.062175 | 0.010397  | -0.051778   | 0.00593418 | Yes     | Sertad1  | 2.59522   | 31.1349 | 3.5846           | 2.59622      | 31.1359       | 3.58409444       | 0.00014629 | Yes     |
| Sertad4  | 0.39093  | 0.68496   | 0.29403     | 0.00130689 | Yes     | Sertad4  | 0         | 1.07593 | inf              | 0.001        | 1.07693       | 10.0727088       | 0.00014629 | Yes     |
| Sfrp1    | 0.087142 | 0.01069   | -0.076452   | 3.21E-12   | Yes     | Sfrp1    | 0         | 2.06299 | inf              | 0.001        | 2.06399       | 11.0112203       | 0.00014629 | Yes     |
| Shank2   | 0.075722 | 0.29953   | 0.223808    | 8.91E-08   | Yes     | Shank2   | 0         | 13.04   | inf              | 0.001        | 13.041        | 13.6707669       | 0.00014629 | Yes     |
| Sipa1l2  | 0.093001 | 0.027723  | -0.065278   | 0.00389713 | Yes     | Sipa1l2  | 0.0311292 | 2.39998 | 6.26861          | 0.0321292    | 2.40098       | 6.22359452       | 0.0248769  | Yes     |
| Slc12a3  | 0.7886   | 0.57737   | -0.21123    | 0.02954396 | Yes     | Slc12a3  | 6.48119   | 17.5376 | 1.43612          | 6.48219      | 17.5386       | 1.43598038       | 0.0233164  | Yes     |
| Slc13a2  | 0.24207  | 0.074405  | -0.167665   | 3.08E-05   | Yes     | Slc13a2  | 0         | 34.6164 | inf              | 0.001        | 34.6174       | 15.0792098       | 0.00014629 | Yes     |
| Slc13a3  | 0.69516  | 0.2554    | -0.43976    | 0.00099362 | Yes     | Slc13a3  | 0         | 152.583 | inf              | 0.001        | 152.584       | 17.2192442       | 0.00014629 | Yes     |
| Slc21a4  | 0.89371  | 0.37705   | -0.51666    | 3.66E-10   | Yes     | Slc21a4  | 0         | 30.0905 | inf              | 0.001        | 30.0915       | 14.8770684       | 0.00014629 | Yes     |
| Slc22a4  | 0.09929  | 0.0087417 | -0.0905483  | 0.00063283 | Yes     | Slc22a4  | 0.221183  | 7.64641 | 5.11147          | 0.222183     | 7.64741       | 5.10515088       | 0.0177285  | Yes     |
| Slc22a8  | 0.76452  | 0.041624  | -0.722896   | 4.09E-10   | Yes     | Slc22a8  | 0         | 216.556 | inf              | 0.001        | 216.557       | 17.7243873       | 0.00014629 | Yes     |
| Slc25a21 | 0.27258  | 0.067218  | -0.205362   | 1.61E-12   | Yes     | Slc25a21 | 0         | 1.04573 | inf              | 0.001        | 1.04673       | 10.0316736       | 0.0165164  | Yes     |
| Slc25a23 | 0.64865  | 0.078006  | -0.570644   | 3.61E-07   | Yes     | Slc25a23 | 15.8464   | 99.0188 | 2.64355          | 15.8474      | 99.0198       | 2.64347087       | 0.00014629 | Yes     |
| Slc25a4  | 0.53341  | 0.18366   | -0.34975    | 0.00057442 | Yes     | Slc25a4  | 43.2263   | 248.288 | 2.52204          | 43.2273      | 248.289       | 2.52200571       | 0.00014629 | Yes     |
| Slc26a1  | 0.76198  | 0.041468  | -0.720512   | 0.00017692 | Yes     | Slc26a1  | 0.181472  | 21.3351 | 6.87734          | 0.182472     | 21.3361       | 6.86947758       | 0.00102864 | Yes     |
| Slc26a10 | 0.08041  | 0.012806  | -0.067604   | 0.00014495 | Yes     | Slc26a10 | 67.5262   | 31.8455 | -1.08436         | 67.5272      | 31.8465       | -1.0843339       | 0.00041099 | Yes     |
| Slc2a8   | 0.074975 | 0.014944  | -0.060031   | 2.88E-05   | Yes     | Slc2a8   | 2.77681   | 8.39304 | 1.59576          | 2.77781      | 8.39404       | 1.59541741       | 0.00014629 | Yes     |
| Slc30a2  | 0.073742 | 0.018082  | -0.05566    | 7.78E-05   | Yes     | Slc30a2  | 0.101941  | 8.21487 | 6.33243          | 0.102941     | 8.21587       | 6.31852375       | 0.00014629 | Yes     |
| Slc34a2  | 0.079446 | 0.011462  | -0.067984   | 2.51E-10   | Yes     | Slc34a2  | 0         | 27.6229 | inf              | 0.001        | 27.6239       | 14.7536294       | 0.00014629 | Yes     |

| RRBS       |            |            |             |            |         | RNAseq     |           |          |                  |              |               |                  |            |         |
|------------|------------|------------|-------------|------------|---------|------------|-----------|----------|------------------|--------------|---------------|------------------|------------|---------|
| gene       | Blood      | Kidney     | methyl.diff | pMWU.fdr   | Match ? | gene       | blood     | kidney   | log2(fold_ratio) | blood+ 0.001 | kidney+ 0.001 | log2(fold_ratio) | q_value    | Match ? |
| Slc36a4    | 0.00049086 | 0.066974   | 0.06648314  | 1.61E-12   | Yes     | Slc36a4    | 5.96973   | 2.35708  | -1.34066         | 5.97073      | 2.35808       | -1.3402947       | 0.00014629 | Yes     |
| Slc38a3    | 0.068309   | 0.0086869  | -0.0596221  | 0.00014495 | Yes     | Slc38a3    | 0         | 20.4031  | inf              | 0.001        | 20.4041       | 14.3165715       | 0.00014629 | Yes     |
| Slc44a2    | 0.65508    | 0.12126    | -0.53382    | 2.01E-08   | Yes     | Slc44a2    | 215.919   | 21.5627  | -3.32388         | 215.92       | 21.5637       | -3.3238202       | 0.00014629 | Yes     |
| Slc47a1    | 0.062221   | 0          | -0.062221   | 1.46E-05   | Yes     | Slc47a1    | 0         | 67.5603  | inf              | 0.001        | 67.5613       | 16.0439095       | 0.00014629 | Yes     |
| Slc9a3     | 0.087392   | 0.020217   | -0.067175   | 2.57E-05   | Yes     | Slc9a3     | 0         | 18.58    | inf              | 0.001        | 18.581        | 14.1815405       | 0.00014629 | Yes     |
| Smarcc1    | 0.44318    | 0.036773   | -0.406407   | 1.63E-09   | Yes     | Smarcc1    | 24.968    | 6.89171  | -1.85715         | 24.969       | 6.89271       | -1.8569948       | 0.00014629 | Yes     |
| Smim3      | 0.0024607  | 0.36207    | 0.3596093   | 5.48E-05   | Yes     | Smim3      | 2.85858   | 21.3257  | 2.89922          | 2.85958      | 21.3267       | 2.89878557       | 0.00066215 | Yes     |
| Smim5      | 0.33783    | 0.13679    | -0.20104    | 0.0030913  | Yes     | SMIM5      | 0.171086  | 14.1512  | 6.37005          | 0.172086     | 14.1522       | 6.3617528        | 0.00014629 | Yes     |
| Smyd2      | 0.77798    | 0.090983   | -0.686997   | 3.61E-07   | Yes     | Smyd2      | 91.3593   | 50.4395  | -0.856999        | 91.3603      | 50.4405       | -0.8569848       | 0.0175479  | Yes     |
| Snx10      | 0.00041322 | 0.13397    | 0.13355678  | 0.00015888 | Yes     | Snx10      | 8.43812   | 1.94729  | -2.11545         | 8.43912      | 1.94829       | -2.1148841       | 0.00014629 | Yes     |
| Snx33      | 0.35       | 0.017169   | -0.332831   | 1.63E-09   | Yes     | Snx33      | 1.94607   | 12.6028  | 2.69511          | 1.94707      | 12.6038       | 2.69448211       | 0.00014629 | Yes     |
| Socs3      | 0.047699   | 0.40942    | 0.361721    | 2.49E-07   | Yes     | Socs3      | 24.3041   | 72.909   | 1.58489          | 24.3051      | 72.91         | 1.58485763       | 0.00014629 | Yes     |
| Sox11      | 0.08258    | 0.011846   | -0.070734   | 0.0001045  | Yes     | Sox11      | 0         | 2.00063  | inf              | 0.001        | 2.00163       | 10.9669596       | 0.00014629 | Yes     |
| Sox17      | 0.3498     | 0.094459   | -0.255341   | 0.02324623 | Yes     | Sox17      | 0         | 4.50243  | inf              | 0.001        | 4.50343       | 12.1368085       | 0.00014629 | Yes     |
| Sox18      | 0.32511    | 0.054054   | -0.271056   | 1.00E-06   | Yes     | Sox18      | 0         | 3.43878  | inf              | 0.001        | 3.43978       | 11.7481006       | 0.00014629 | Yes     |
| Sp5        | 0.084078   | 0.030715   | -0.053363   | 2.66E-10   | Yes     | Sp5        | 0         | 1.55232  | inf              | 0.001        | 1.55332       | 10.6011394       | 0.00014629 | Yes     |
| Speg       | 0.30059    | 0.18799    | -0.1126     | 0.03460571 | Yes     | Speg       | 2.81445   | 0.626856 | -2.16665         | 2.81545      | 0.627856      | -2.1648599       | 0.0317197  | Yes     |
| Sphk1      | 0.080036   | 0.01322    | -0.066816   | 0.02450594 | Yes     | Sphk1      | 5.16074   | 28.3327  | 2.45682          | 5.16174      | 28.3337       | 2.45658963       | 0.00014629 | Yes     |
| Spint1     | 0.36172    | 0.029278   | -0.332442   | 2.62E-08   | Yes     | Spint1     | 1.53966   | 33.5897  | 4.44734          | 1.54066      | 33.5907       | 4.44644144       | 0.00014629 | Yes     |
| Spock2     | 0.53083    | 0.16956    | -0.36127    | 5.48E-05   | Yes     | Spock2     | 0.732438  | 3.3795   | 2.20603          | 0.733438     | 3.3805        | 2.20448973       | 0.00014629 | Yes     |
| Spry4      | 0.65982    | 0.27309    | -0.38673    | 6.79E-09   | Yes     | Spry4      | 0.140068  | 1.06367  | 2.92485          | 0.141068     | 1.06467       | 2.91594366       | 0.0171742  | Yes     |
| Spryd3     | 0.37249    | 0.12574    | -0.24675    | 5.62E-06   | Yes     | Spryd3     | 9.15533   | 25.3443  | 1.46898          | 9.15633      | 25.3453       | 1.46887688       | 0.00659461 | Yes     |
| Spsb4      | 0.14337    | 0.025151   | -0.118219   | 4.95E-06   | Yes     | Spsb4      | 0         | 18.4925  | inf              | 0.001        | 18.4935       | 14.1747307       | 0.00014629 | Yes     |
| Srsf12     | 0.0069033  | 0.089563   | 0.0826597   | 5.62E-06   | Yes     | Srsf12     | 27.7828   | 4.02513  | -2.78708         | 27.7838      | 4.02613       | -2.7867783       | 0.00014629 | Yes     |
| Ssh3       | 0.19762    | 0.02171    | -0.17591    | 2.36E-08   | Yes     | Ssh3       | 2.14291   | 17.8294  | 3.05662          | 2.14391      | 17.8304       | 3.05602282       | 0.00014629 | Yes     |
| Ssr3       | 0.63955    | 0.52687    | -0.11268    | 0.02592069 | Yes     | Ssr3       | 31.3961   | 17.647   | -0.831165        | 31.3971      | 17.648        | -0.8311266       | 0.00014629 | Yes     |
| St6galnac2 | 0.35208    | 0.16362    | -0.18846    | 0.00210055 | Yes     | St6galnac2 | 0.0953604 | 52.3293  | 9.10001          | 0.0963604    | 52.3303       | 9.08499043       | 0.0115547  | Yes     |
| Stard10    | 0.10259    | 0.023899   | -0.078691   | 0.00639124 | Yes     | Stard10    | 28.7123   | 229.394  | 2.99809          | 28.7133      | 229.395       | 2.99804289       | 0.00014629 | Yes     |
| Steap1     | 0.080845   | 0.021552   | -0.059293   | 0.00187484 | Yes     | Steap1     | 0         | 3.38712  | inf              | 0.001        | 3.38812       | 11.7262693       | 0.00014629 | Yes     |
| Stk3       | 0.35315    | 0.12538    | -0.22777    | 4.59E-07   | Yes     | Stk3       | 2.10732   | 10.2324  | 2.27966          | 2.10832      | 10.2334       | 2.27911979       | 0.00014629 | Yes     |
| Stox2      | 0.030852   | 0.1776     | 0.146748    | 8.18E-10   | Yes     | Stox2      | 2.69889   | 0.500101 | -2.43207         | 2.69989      | 0.501101      | -2.4297273       | 0.00014629 | Yes     |
| Stub1      | 0.088032   | 0.01161    | -0.076422   | 0.01658745 | Yes     | Stub1      | 63.1705   | 119.78   | 0.923062         | 63.1715      | 119.781       | 0.92305335       | 0.00296747 | Yes     |
| Stx16      | 0.16564    | 0.083194   | -0.082446   | 0.00609843 | Yes     | Stx16      | 27.0166   | 14.9337  | -0.855271        | 27.0176      | 14.9347       | -0.8552313       | 0.00014629 | Yes     |
| Stx3       | 0.80513    | 0.33197    | -0.47316    | 4.97E-05   | Yes     | Stx3       | 6.36819   | 15.2611  | 1.2609           | 6.36919      | 15.2621       | 1.26077167       | 0.00014629 | Yes     |
| Sult2b1    | 0.18082    | 0.070836   | -0.109984   | 1.64E-07   | Yes     | Sult2b1    | 7.04219   | 41.7397  | 2.56732          | 7.04319      | 41.7407       | 2.56715389       | 0.00014629 | Yes     |
| Surf6      | 0.37755    | 0.00097656 | -0.3765734  | 1.09E-10   | Yes     | Surf6      | 26.9335   | 15.8709  | -0.763012        | 26.9345      | 15.8719       | -0.7629804       | 0.00090728 | Yes     |
| Susd2      | 0.6173     | 0.11217    | -0.50513    | 2.10E-08   | Yes     | Susd2      | 0.979213  | 39.9772  | 5.35141          | 0.980213     | 39.9782       | 5.34997443       | 0.00014629 | Yes     |
| Syne4      | 0.79242    | 0.041074   | -0.751346   | 1.61E-12   | Yes     | Syne4      | 0.341571  | 6.60168  | 4.27258          | 0.342571     | 6.60268       | 4.2685768        | 0.0151721  | Yes     |
| Syngap1    | 0.017731   | 0.25091    | 0.233179    | 5.08E-11   | Yes     | Syngap1    | 0.571168  | 1.40262  | 1.29613          | 0.572168     | 1.40362       | 1.29464169       | 0.038868   | Yes     |
| Tacc1      | 0.00097471 | 0.076745   | 0.07577029  | 0.00021752 | Yes     | Tacc1      | 24.669    | 6.43589  | -1.93849         | 24.67        | 6.43689       | -1.938322        | 0.00014629 | Yes     |
| Tagln2     | 0.098853   | 0.013676   | -0.085177   | 0.00041578 | Yes     | Tagln2     | 376.909   | 152.791  | -1.30265         | 376.91       | 152.792       | -1.3026511       | 0.00014629 | Yes     |
| Taok3      | 0.0010695  | 0.24762    | 0.2465505   | 0.00063283 | Yes     | Taok3      | 19.2168   | 1.04478  | -4.20109         | 19.2178      | 1.04578       | -4.1997919       | 0.0304953  | Yes     |

| RRBS     |            |           |             |            |         | RNAseq   |           |          |                  |              |               |                  |            |         |
|----------|------------|-----------|-------------|------------|---------|----------|-----------|----------|------------------|--------------|---------------|------------------|------------|---------|
| gene     | Blood      | Kidney    | methyl.diff | pMWU.fdr   | Match ? | gene     | blood     | kidney   | log2(fold_ratio) | blood+ 0.001 | kidney+ 0.001 | log2(fold_ratio) | q_value    | Match ? |
| Tbc1d9   | 0.22043    | 0.069546  | -0.150884   | 0.00092018 | Yes     | Tbc1d9   | 0.0520793 | 6.58421  | 6.98216          | 0.0530793    | 6.58521       | 6.95493629       | 0.0494924  | Yes     |
| Tbkbp1   | 0.29027    | 0.05344   | -0.23683    | 0.00130689 | Yes     | Tbkbp1   | 4.68399   | 0.842541 | -2.47492         | 4.68499      | 0.843541      | -2.4735159       | 0.00014629 | Yes     |
| Tbrg1    | 0.35162    | 0.13113   | -0.22049    | 1.63E-09   | Yes     | Tbrg1    | 43.9343   | 29.1438  | -0.592161        | 43.9353      | 29.1448       | -0.592142        | 0.00649695 | Yes     |
| Tbx3     | 0.090594   | 0.025592  | -0.065002   | 3.92E-09   | Yes     | Tbx3     | 0         | 1.02157  | inf              | 0.001        | 1.02257       | 9.99798389       | 0.00014629 | Yes     |
| Tcf20    | 0.36918    | 0.16629   | -0.20289    | 0.002433   | Yes     | Tcf20    | 33.0539   | 3.91097  | -3.07922         | 33.0549      | 3.91197       | -3.0788969       | 0.00014629 | Yes     |
| Tctex1d2 | 0.13743    | 0.010045  | -0.127385   | 7.58E-05   | Yes     | Tctex1d2 | 0.259677  | 17.4295  | 6.06867          | 0.260677     | 17.4305       | 6.06320685       | 0.00586782 | Yes     |
| Tead1    | 0.10857    | 0.019364  | -0.089206   | 0.00033082 | Yes     | Tead1    | 0.228931  | 11.1158  | 5.60155          | 0.229931     | 11.1168       | 5.59539677       | 0.00014629 | Yes     |
| Tfe3     | 0.063398   | 0.0059874 | -0.0574106  | 0.00293459 | Yes     | Tfe3     | 4.78916   | 8.48773  | 0.825608         | 4.79016      | 8.48873       | 0.82547488       | 0.00352183 | Yes     |
| Tgfb1    | 0.78438    | 0.64748   | -0.1369     | 0.03460571 | Yes     | Tgfb1    | 0.876669  | 5.55396  | 2.66341          | 0.877669     | 5.55496       | 2.66202767       | 0.00014629 | Yes     |
| Thbs2    | 0.36478    | 0.13662   | -0.22816    | 0.00099362 | Yes     | Thbs2    | 0         | 1.82565  | inf              | 0.001        | 1.82665       | 10.8349845       | 0.00014629 | Yes     |
| Thtpa    | 0.095996   | 0.018361  | -0.077635   | 0.00743291 | Yes     | Thtpa    | 10.0229   | 22.6605  | 1.17688          | 10.0239      | 22.6615       | 1.17679943       | 0.0234023  | Yes     |
| Tifa     | 0.021044   | 0.16615   | 0.145106    | 2.69E-06   | Yes     | Tifa     | 1.73215   | 13.8481  | 2.99905          | 1.73315      | 13.8491       | 2.9983238        | 0.00149937 | Yes     |
| Tigd5    | 0.13504    | 0.077918  | -0.057122   | 0.00455939 | Yes     | Tigd5    | 0.118511  | 1.14764  | 3.27557          | 0.119511     | 1.14864       | 3.26471139       | 0.0077167  | Yes     |
| Timm23   | 0.34451    | 0.042611  | -0.301899   | 1.63E-09   | Yes     | Timm23   | 66.4009   | 124.939  | 0.911955         | 66.4019      | 124.94        | 0.91193901       | 0.00014629 | Yes     |
| Tk1      | 0.8054     | 0.42295   | -0.38245    | 0.01439246 | Yes     | Tk1      | 1.26598   | 8.614    | 2.76643          | 1.26698      | 8.615         | 2.76545705       | 0.00014629 | Yes     |
| Tm4sf1   | 0.75085    | 0.20831   | -0.54254    | 1.11E-08   | Yes     | Tm4sf1   | 0         | 11.9374  | inf              | 0.001        | 11.9384       | 13.5433219       | 0.00014629 | Yes     |
| Tmc8     | 0.00064935 | 0.19485   | 0.19420065  | 3.61E-07   | Yes     | Tmc8     | 81.2836   | 9.84248  | -3.04587         | 81.2846      | 9.84348       | -3.0457417       | 0.00014629 | Yes     |
| Tmem104  | 0.12763    | 0.024825  | -0.102805   | 0.00069112 | Yes     | Tmem104  | 10.3571   | 2.68538  | -1.94742         | 10.3581      | 2.68638       | -1.9470241       | 0.00014629 | Yes     |
| Tmem150a | 0.095324   | 0.010392  | -0.084932   | 0.00017692 | Yes     | Tmem150a | 1.10721   | 147.647  | 7.05908          | 1.10821      | 147.648       | 7.05778671       | 0.00114835 | Yes     |
| Tmem163  | 0.22891    | 0.062262  | -0.166648   | 0.002433   | Yes     | Tmem163  | 9.0628    | 0.198593 | -5.51207         | 9.0638       | 0.199593      | -5.504983        | 0.00384649 | Yes     |
| Tmem171  | 0.046135   | 0.0094451 | -0.0366899  | 2.31E-06   | Yes     | Tmem171  | 0         | 71.7637  | inf              | 0.001        | 71.7647       | 16.1309868       | 0.00014629 | Yes     |
| Tmem184a | 0.66197    | 0.39193   | -0.27004    | 0.00500595 | Yes     | Tmem184a | 0         | 11.0855  | inf              | 0.001        | 11.0865       | 13.4365164       | 0.00014629 | Yes     |
| Tmem231  | 0.2522     | 0.084765  | -0.167435   | 7.78E-05   | Yes     | Tmem231  | 0.133483  | 2.5432   | 4.25192          | 0.134483     | 2.5442        | 4.24171637       | 0.0457453  | Yes     |
| Tmem30b  | 0.35996    | 0.1537    | -0.20626    | 2.57E-05   | Yes     | Tmem30b  | 0         | 6.06845  | inf              | 0.001        | 6.06945       | 12.5673501       | 0.00014629 | Yes     |
| Tmem45b  | 0.085103   | 0.022244  | -0.062859   | 0.00039347 | Yes     | Tmem45b  | 0.0627473 | 3.49801  | 5.80084          | 0.0637473    | 3.49901       | 5.77843874       | 0.0182057  | Yes     |
| Tmem47   | 0.069289   | 0.013246  | -0.056043   | 1.25E-06   | Yes     | Tmem47   | 0         | 3.00861  | inf              | 0.001        | 3.00961       | 11.5553608       | 0.00014629 | Yes     |
| Tmem69   | 0.5575     | 0.083097  | -0.474403   | 3.61E-07   | Yes     | Tmem69   | 3.69512   | 9.18386  | 1.31348          | 3.69612      | 9.18486       | 1.31324613       | 0.00014629 | Yes     |
| Tmod1    | 0.091389   | 0.031856  | -0.059533   | 0.01439246 | Yes     | Tmod1    | 1.70375   | 8.95836  | 2.39452          | 1.70475      | 8.95936       | 2.39383549       | 0.00028114 | Yes     |
| Tmod4    | 0.89647    | 0.71135   | -0.18512    | 2.00E-06   | Yes     | Tmod4    | 0.339061  | 7.17103  | 4.40256          | 0.340061     | 7.17203       | 4.39851606       | 0.00459197 | Yes     |
| Tmprss2  | 0.14603    | 0.031455  | -0.114575   | 0.00343039 | Yes     | Tmprss2  | 0.131538  | 39.6216  | 8.23467          | 0.132538     | 39.6226       | 8.22377369       | 0.00014629 | Yes     |
| Tmsb4x   | 0          | 0.17762   | 0.17762     | 6.28E-09   | Yes     | Tmsb4x   | 17182     | 2492.34  | -2.78532         | 17182.001    | 2492.341      | -2.7853247       | 0.00014629 | Yes     |
| Tnfaip8  | 0.26234    | 0.032966  | -0.229374   | 1.61E-12   | Yes     | Tnfaip8  | 82.5433   | 136.832  | 0.729179         | 82.5443      | 136.833       | 0.72917571       | 0.00014629 | Yes     |
| Tnfrsf9  | 0.83925    | 0.34403   | -0.49522    | 6.57E-07   | Yes     | Tnfrsf9  | 3.43126   | 31.9068  | 3.21706          | 3.43226      | 31.9078       | 3.21667839       | 0.00014629 | Yes     |
| Tnfsf12  | 0.12249    | 0.0166    | -0.10589    | 0.00063283 | Yes     | Tnfsf12  | 0.920806  | 20.5009  | 4.47665          | 0.921806     | 20.5019       | 4.47515065       | 0.00014629 | Yes     |
| Tpbp     | 0.13154    | 0.044116  | -0.087424   | 0.00026594 | Yes     | Tpbp     | 0.590071  | 6.07879  | 3.36482          | 0.591071     | 6.07979       | 3.36261815       | 0.00014629 | Yes     |
| Tpm2     | 0.68723    | 0.25768   | -0.42955    | 1.00E-06   | Yes     | Tpm2     | 0.134804  | 4.00893  | 4.89429          | 0.135804     | 4.00993       | 4.88397917       | 0.0128484  | Yes     |
| Tprn     | 0.19824    | 0.049562  | -0.148678   | 0.0030913  | Yes     | Tprn     | 4.04678   | 16.0853  | 1.99089          | 4.04778      | 16.0863       | 1.99062975       | 0.00014629 | Yes     |
| Tpt1     | 0.38976    | 0.21776   | -0.172      | 5.19E-08   | Yes     | Tpt1     | 12335.9   | 2883.56  | -2.09694         | 12335.901    | 2883.561      | -2.0969396       | 0.00014629 | Yes     |
| Trak2    | 0.41336    | 0.12056   | -0.2928     | 8.00E-12   | Yes     | Trak2    | 18.3941   | 26.9421  | 0.55062          | 18.3951      | 26.9431       | 0.55059433       | 0.0330385  | Yes     |
| Trappc6a | 0.77955    | 0.08109   | -0.69846    | 1.61E-12   | Yes     | Trappc6a | 39.9916   | 125.868  | 1.65415          | 39.9926      | 125.869       | 1.65411803       | 0.00014629 | Yes     |
| Trpm4    | 0.12342    | 0.018198  | -0.105222   | 0.0179568  | Yes     | Trpm4    | 0.061637  | 2.62179  | 5.41061          | 0.062637     | 2.62279       | 5.38794337       | 0.00330073 | Yes     |
| Tsen54   | 0.124      | 0.0063575 | -0.1176425  | 7.68E-06   | Yes     | Tsen54   | 9.78547   | 32.7282  | 1.74182          | 9.78647      | 32.7292       | 1.74171786       | 0.00014629 | Yes     |

| RRBS    |           |           |             |            |         | RNAseq  |          |          |                  |              |               |                  |            |         |
|---------|-----------|-----------|-------------|------------|---------|---------|----------|----------|------------------|--------------|---------------|------------------|------------|---------|
| gene    | Blood     | Kidney    | methyl.diff | pMWU.fdr   | Match ? | gene    | blood    | kidney   | log2(fold_ratio) | blood+ 0.001 | kidney+ 0.001 | log2(fold_ratio) | q_value    | Match ? |
| Tspan33 | 0.16384   | 0.0069273 | -0.1569127  | 5.19E-08   | Yes     | Tspan33 | 0.441589 | 33.3759  | 6.23996          | 0.442589     | 33.3769       | 6.23673856       | 0.00014629 | Yes     |
| Tspan9  | 0.0073592 | 0.14054   | 0.1331808   | 0.00500595 | Yes     | Tspan9  | 0.146434 | 7.44203  | 5.66737          | 0.147434     | 7.44303       | 5.65774888       | 0.00014629 | Yes     |
| Ttc22   | 0.34319   | 0.2263    | -0.11689    | 0.02834942 | Yes     | Ttc22   | 0.254439 | 2.34922  | 3.20679          | 0.255439     | 2.35022       | 3.2017451        | 0.00934853 | Yes     |
| Ttc39b  | 0.11598   | 0.005981  | -0.109999   | 4.05E-07   | Yes     | Ttc39b  | 0.252429 | 3.57531  | 3.82412          | 0.253429     | 3.57631       | 3.81881827       | 0.00491494 | Yes     |
| Tuba1c  | 0.46002   | 0.16763   | -0.29239    | 0.00047568 | Yes     | Tuba1c  | 113.483  | 224.518  | 0.984361         | 113.484      | 224.519       | 0.98434863       | 0.00014629 | Yes     |
| Tuba4a  | 0.80982   | 0.21494   | -0.59488    | 3.61E-07   | Yes     | Tuba4a  | 32.2808  | 149.986  | 2.21608          | 32.2818      | 149.987       | 2.21604453       | 0.00014629 | Yes     |
| Tubb2a  | 0.0639    | 0.0062508 | -0.0576492  | 0.00019529 | Yes     | Tubb2a  | 3.69481  | 60.6759  | 4.03755          | 3.69581      | 60.6769       | 4.03718488       | 0.00014629 | Yes     |
| Twf1    | 0.2904    | 0.13425   | -0.15615    | 0.00082506 | Yes     | Twf1    | 28.4636  | 61.2743  | 1.10616          | 28.4646      | 61.2753       | 1.10613682       | 0.00014629 | Yes     |
| Twf2    | 0.35928   | 0.1517    | -0.20758    | 0.00389713 | Yes     | Twf2    | 48.7576  | 7.90031  | -2.62565         | 48.7586      | 7.90131       | -2.6254929       | 0.00014629 | Yes     |
| Twist1  | 0.16078   | 0.014671  | -0.146109   | 0.00011677 | Yes     | Twist1  | 0        | 5.52263  | inf              | 0.001        | 5.52363       | 12.431401        | 0.00014629 | Yes     |
| Tysnd1  | 0.46787   | 0.061289  | -0.406581   | 1.64E-06   | Yes     | Tysnd1  | 5.90745  | 26.0367  | 2.13994          | 5.90845      | 26.0377       | 2.1397504        | 0.00014629 | Yes     |
| Ubash3a | 0.027829  | 0.22017   | 0.192341    | 0.00037405 | Yes     | Ubash3a | 21.8853  | 1.08801  | -4.3302          | 21.8863      | 1.08901       | -4.328939        | 0.00014629 | Yes     |
| Ublcp1  | 0.12094   | 0.0048133 | -0.1161267  | 7.96E-06   | Yes     | Ublcp1  | 14.588   | 21.2452  | 0.54236          | 14.589       | 21.2462       | 0.54232383       | 0.0196905  | Yes     |
| Uchl1   | 0.0034286 | 0.067537  | 0.0641084   | 0.0017172  | Yes     | Uchl1   | 5.7876   | 77.1663  | 3.73693          | 5.7886       | 77.1673       | 3.73670326       | 0.00014629 | Yes     |
| Ugt8    | 0.16622   | 0.024564  | -0.141656   | 6.76E-05   | Yes     | Ugt8    | 0        | 24.4265  | inf              | 0.001        | 24.4275       | 14.5762186       | 0.00014629 | Yes     |
| Uqcr11  | 0.15126   | 0.0333    | -0.11796    | 0.00047568 | Yes     | Uqcr11  | 102.052  | 664.305  | 2.70254          | 102.053      | 664.306       | 2.70252935       | 0.00014629 | Yes     |
| Ush1c   | 0.30856   | 0.030655  | -0.277905   | 2.62E-08   | Yes     | Ush1c   | 0        | 124.269  | inf              | 0.001        | 124.27        | 16.9231185       | 0.00014629 | Yes     |
| Ushbp1  | 0.8022    | 0.43375   | -0.36845    | 0.00051431 | Yes     | Ushbp1  | 0        | 2.34265  | inf              | 0.001        | 2.34365       | 11.1945414       | 0.00014629 | Yes     |
| Usp44   | 0.0066809 | 0.13926   | 0.1325791   | 0.00343039 | Yes     | Usp44   | 27.6854  | 0.994837 | -4.79852         | 27.6864      | 0.995837      | -4.797124        | 0.00014629 | Yes     |
| Vasn    | 0.73109   | 0.11197   | -0.61912    | 1.63E-09   | Yes     | Vasn    | 0.335289 | 9.59409  | 4.83867          | 0.336289     | 9.59509       | 4.83452284       | 0.00782085 | Yes     |
| Vat1    | 0.092361  | 0.0051713 | -0.0871897  | 0.002433   | Yes     | Vat1    | 6.48751  | 41.3814  | 2.67325          | 6.48851      | 41.3824       | 2.67305819       | 0.00014629 | Yes     |
| Vav2    | 0.65857   | 0.10235   | -0.55622    | 1.51E-10   | Yes     | Vav2    | 2.16754  | 9.55337  | 2.13995          | 2.16854      | 9.55437       | 2.13943669       | 0.00014629 | Yes     |
| Vps37d  | 0.90848   | 0.036118  | -0.872362   | 1.61E-12   | Yes     | Vps37d  | 0.321132 | 27.6163  | 6.42621          | 0.322132     | 27.6173       | 6.42177649       | 0.00149937 | Yes     |
| Vstm2b  | 0.073837  | 0.010723  | -0.063114   | 0.00017692 | Yes     | Vstm2b  | 0        | 2.77616  | inf              | 0.001        | 2.77716       | 11.4393946       | 0.00014629 | Yes     |
| Wfdc2   | 0.54769   | 0.32565   | -0.22204    | 0.00095974 | Yes     | Wfdc2   | 1.34916  | 155.749  | 6.85101          | 1.35016      | 155.75        | 6.84995797       | 0.00014629 | Yes     |
| Wipf1   | 0.0019208 | 0.28516   | 0.2832392   | 4.73E-05   | Yes     | Wipf1   | 87.899   | 3.38161  | -4.70007         | 87.9         | 3.38261       | -4.6996544       | 0.00014629 | Yes     |
| Wnt5a   | 0.061065  | 0.0068004 | -0.0542646  | 5.62E-06   | Yes     | Wnt5a   | 0        | 1.51926  | inf              | 0.001        | 1.52026       | 10.5701024       | 0.00014629 | Yes     |
| Wrap73  | 0.064918  | 0.013882  | -0.051036   | 0.01658745 | Yes     | Wrap73  | 13.3836  | 5.03167  | -1.41136         | 13.3846      | 5.03267       | -1.4111781       | 0.00523722 | Yes     |
| Wt1     | 0.1233    | 0.02118   | -0.10212    | 0.00259554 | Yes     | Wt1     | 0        | 2.87086  | inf              | 0.001        | 2.87186       | 11.4877697       | 0.00014629 | Yes     |
| Xkr6    | 0.14834   | 0.01603   | -0.13231    | 1.28E-06   | Yes     | Xkr6    | 0        | 2.44001  | inf              | 0.001        | 2.44101       | 11.2532625       | 0.00618538 | Yes     |
| Yap1    | 0.13543   | 0.015252  | -0.120178   | 2.36E-06   | Yes     | Yap1    | 0        | 26.111   | inf              | 0.001        | 26.112        | 14.6724253       | 0.00014629 | Yes     |
| Ybx2    | 0.47938   | 0.13295   | -0.34643    | 3.11E-08   | Yes     | Ybx2    | 0.687913 | 4.52265  | 2.71687          | 0.688913     | 4.52365       | 2.7150936        | 0.00014629 | Yes     |
| Zbtb10  | 0.17524   | 0.026708  | -0.148532   | 0.00023951 | Yes     | Zbtb10  | 0.66379  | 1.47456  | 1.15149          | 0.66479      | 1.47556       | 1.150292         | 0.0343574  | Yes     |
| Zbtb17  | 0.41341   | 0.1645    | -0.24891    | 0.01439246 | Yes     | Zbtb17  | 15.4209  | 29.5237  | 0.93699          | 15.4219      | 29.5247       | 0.93694188       | 0.00014629 | Yes     |
| Zc2hc1c | 0.36849   | 0.032315  | -0.336175   | 8.75E-07   | Yes     | Zc2hc1c | 0.421191 | 3.3011   | 2.9704           | 0.422191     | 3.3021        | 2.96741608       | 0.0494924  | Yes     |
| Zc3h7b  | 0.6805    | 0.32766   | -0.35284    | 0.00063283 | Yes     | Zc3h7b  | 14.1849  | 22.8208  | 0.685995         | 14.1859      | 22.8218       | 0.6859549        | 0.00207488 | Yes     |
| Zfp110  | 0.11203   | 0.017115  | -0.094915   | 0.0030913  | Yes     | Zfp110  | 27.8523  | 7.34051  | -1.92385         | 27.8533      | 7.34151       | -1.9236995       | 0.00014629 | Yes     |
| Zfp148  | 0.11832   | 0.024077  | -0.094243   | 0.00187484 | Yes     | Zfp148  | 22.6257  | 11.888   | -0.928455        | 22.6267      | 11.889        | -0.9283988       | 0.00126596 | Yes     |
| Zfp219  | 0.8395    | 0.25266   | -0.58684    | 1.85E-09   | Yes     | Zfp219  | 15.1581  | 24.1755  | 0.673458         | 15.1591      | 24.1765       | 0.6734213        | 0.00802631 | Yes     |
| Zfp3    | 0.58366   | 0.18394   | -0.39972    | 0.00051431 | Yes     | Zfp3    | 9.74629  | 4.21155  | -1.2105          | 9.74729      | 4.21255       | -1.2103074       | 0.00028114 | Yes     |
| Zfp358  | 0.52915   | 0.23406   | -0.29509    | 0.00076943 | Yes     | Zfp358  | 6.69115  | 13.9139  | 1.0562           | 6.69215      | 13.9149       | 1.05608885       | 0.00014629 | Yes     |
| Zfp385a | 0.069068  | 0.25313   | 0.184062    | 0.00357821 | Yes     | Zfp385a | 0.366465 | 5.73701  | 3.96855          | 0.367465     | 5.73801       | 3.96487173       | 0.00014629 | Yes     |

| RRBS     |          |          |             |            |         | RNAseq            |           |         |                  |              |               |                  |            |         |
|----------|----------|----------|-------------|------------|---------|-------------------|-----------|---------|------------------|--------------|---------------|------------------|------------|---------|
| gene     | Blood    | Kidney   | methyl.diff | pMWU.fdr   | Match ? | gene              | blood     | kidney  | log2(fold_ratio) | blood+ 0.001 | kidney+ 0.001 | log2(fold_ratio) | q_value    | Match ? |
| Zfp46    | 0.89575  | 0.74741  | -0.14834    | 0.02194182 | Yes     | Zfp46             | 2.03308   | 3.35965 | 0.724644         | 2.03408      | 3.36065       | 0.72436388       | 0.0184724  | Yes     |
| Zfp513   | 0.96346  | 0.11068  | -0.85278    | 3.61E-07   | Yes     | Zfp513            | 31.9723   | 45.1278 | 0.497195         | 31.9733      | 45.1288       | 0.49718076       | 0.0320714  | Yes     |
| Zfp579   | 0.97001  | 0.86721  | -0.1028     | 0.01139461 | Yes     | Zfp579            | 7.62405   | 15.3234 | 1.00711          | 7.62505      | 15.3244       | 1.00701189       | 0.00014629 | Yes     |
| Zfp703   | 0.2451   | 0.098371 | -0.146729   | 0.00119585 | Yes     | Zfp703            | 0.907332  | 5.10786 | 2.49301          | 0.908332     | 5.10886       | 2.49170979       | 0.00014629 | Yes     |
| Zkscan5  | 0.37613  | 0.11471  | -0.26142    | 1.00E-06   | Yes     | Zkscan5           | 4.15056   | 8.46827 | 1.02876          | 4.15156      | 8.46927       | 1.02858407       | 0.00028114 | Yes     |
| Zrsr1    | 0.49257  | 0.070708 | -0.421862   | 2.65E-11   | Yes     | Zrsr1             | 11.8663   | 3.40281 | -1.80207         | 11.8673      | 3.40381       | -1.8017693       | 0.0245032  | Yes     |
| 42795    | 0.35     | 0.031492 | -0.318508   | 6.57E-07   | No      | 42796             | 39.7484   | 98.375  | 1.3074           | 39.7494      | 98.376        | 1.30737331       | 0.00014629 | No      |
| Aaas     | 0.18974  | 0.051024 | -0.138716   | 1.46E-05   | No      | 42796             | 65.18     | 88.6817 | 0.444206         | 65.181       | 88.6827       | 0.44420121       | 0.0492361  | No      |
| Aard     | 0.077853 | 0.010119 | -0.067734   | 5.90E-09   | No      | 42801             | 89.6084   | 17.934  | -2.32093         | 89.6094      | 17.935        | -2.3208723       | 0.00014629 | No      |
| Aatk     | 0.6253   | 0.26249  | -0.36281    | 4.44E-05   | No      | 42802             | 2.20523   | 18.9882 | 3.1061           | 2.20623      | 18.9892       | 3.10552402       | 0.00014629 | No      |
| Abcb9    | 0.60879  | 0.20298  | -0.40581    | 5.48E-05   | No      | 42803             | 7.05119   | 17.5139 | 1.31256          | 7.05219      | 17.5149       | 1.3124395        | 0.00014629 | No      |
| Abcc9    | 0.064891 | 0.012375 | -0.052516   | 1.61E-12   | No      | 42979             | 368.106   | 49.5936 | -2.8919          | 368.107      | 49.5946       | -2.8918702       | 0.00014629 | No      |
| Abcg4    | 0.25387  | 0.063271 | -0.190599   | 0.00157493 | No      | 42982             | 0.114749  | 146.197 | 10.3152          | 0.115749     | 146.198       | 10.3027081       | 0.00184429 | No      |
| Abhd15   | 0.034686 | 0.19407  | 0.159384    | 1.61E-12   | No      | 42984             | 171.977   | 2.38373 | -6.17285         | 171.978      | 2.38473       | -6.1722543       | 0.00014629 | No      |
| Abhd16b  | 0.88417  | 0.67258  | -0.21159    | 0.00226691 | No      | 42985             | 115.082   | 30.0401 | -1.9377          | 115.083      | 30.0411       | -1.9376652       | 0.00014629 | No      |
| Abo      | 0.16123  | 0.019654 | -0.141576   | 0.00043492 | No      | 42988             | 0.0993699 | 3.71424 | 5.22412          | 0.1003699    | 3.71524       | 5.21005682       | 0.0077167  | No      |
| Acot5    | 0.19576  | 0.075417 | -0.120343   | 0.00051431 | No      | 0610030E20<br>Rik | 18.6022   | 7.8339  | -1.24767         | 18.6032      | 7.8349        | -1.247564        | 0.00090728 | No      |
| Acta1    | 0.2083   | 0.084999 | -0.123301   | 9.50E-05   | No      | 1100001G20<br>Rik | 0         | 2.29835 | inf              | 0.001        | 2.29935       | 11.1670104       | 0.00014629 | No      |
| Acta2    | 0.91311  | 0.14043  | -0.77268    | 3.61E-07   | No      | 1110034G24<br>Rik | 17.1015   | 2.5068  | -2.77021         | 17.1025      | 2.5078        | -2.769713        | 0.00014629 | No      |
| Actn3    | 0.24313  | 0.10141  | -0.14172    | 0.00016895 | No      | 1110058L19<br>Rik | 18.3963   | 72.179  | 1.97217          | 18.3973      | 72.18         | 1.97210509       | 0.00014629 | No      |
| Actr3b   | 0.72601  | 0.59318  | -0.13283    | 0.02834942 | No      | 1500011K16<br>Rik | 63.7609   | 118.386 | 0.892754         | 63.7619      | 118.387       | 0.89274414       | 0.00053701 | No      |
| Adamts14 | 0.59811  | 0.3912   | -0.20691    | 0.00851    | No      | 1600014C10<br>Rik | 18.5333   | 10.1954 | -0.862205        | 18.5343      | 10.1964       | -0.8621378       | 0.00014629 | No      |
| Adamts19 | 0.1202   | 0.054725 | -0.065475   | 0.00187484 | No      | 1700019D03<br>Rik | 0.142184  | 14.6852 | 6.69046          | 0.143184     | 14.6862       | 6.68044705       | 0.0166081  | No      |
| Adamts4  | 0.54049  | 0.14512  | -0.39537    | 4.13E-12   | No      | 1700021F05<br>Rik | 8.13722   | 23.2711 | 1.51593          | 8.13822      | 23.2721       | 1.51581621       | 0.00014629 | No      |
| Adamts4  | 0.15431  | 0.021994 | -0.132316   | 0.002433   | No      | 1700112E06<br>Rik | 0.694122  | 49.9986 | 6.17056          | 0.695122     | 49.9996       | 6.16850654       | 0.0257873  | No      |
| Adamts5  | 0.10111  | 0.027737 | -0.073373   | 0.00063283 | No      | 1810009A15<br>Rik | 51.7601   | 27.3924 | -0.918067        | 51.7611      | 27.3934       | -0.9180399       | 0.00041099 | No      |
| Adarb1   | 0.031527 | 0.13438  | 0.102853    | 0.00389713 | No      | 1810037I17<br>Rik | 32.9199   | 96.0088 | 1.54421          | 32.9209      | 96.0098       | 1.5441779        | 0.00014629 | No      |
| Adcy2    | 0.076913 | 0.018314 | -0.058599   | 2.64E-06   | No      | 1810043H04<br>Rik | 45.6593   | 154.768 | 1.76113          | 45.6603      | 154.769       | 1.76110429       | 0.00028114 | No      |
| Adcy5    | 0.038538 | 0.098504 | 0.059966    | 0.01247474 | No      | 2200002D01<br>Rik | 0.703075  | 183.718 | 8.0296           | 0.704075     | 183.719       | 8.027556         | 0.0143044  | No      |

| RRBS    |          |           |            |            |         | RNAseq        |          |         |                  |              |               |                  |            |         |
|---------|----------|-----------|------------|------------|---------|---------------|----------|---------|------------------|--------------|---------------|------------------|------------|---------|
| gene    | Blood    | Kidney    | methy.diff | pMWU.fdr   | Match ? | gene          | blood    | kidney  | log2(fold_ratio) | blood+ 0.001 | kidney+ 0.001 | log2(fold_ratio) | q_value    | Match ? |
| Adgrb2  | 0.73057  | 0.39639   | -0.33418   | 0.02065846 | No      | 2210018M11Rik | 11.5322  | 3.29478 | -1.80741         | 11.5332      | 3.29578       | -1.807101        | 0.00014629 | No      |
| Adgre5  | 0.029176 | 0.41      | 0.380824   | 4.59E-07   | No      | 2310030G06Rik | 0.941749 | 33.7569 | 5.1637           | 0.942749     | 33.7579       | 5.16220763       | 0.00014629 | No      |
| Adgrl4  | 0.17718  | 0.091584  | -0.085596  | 1.17E-06   | No      | 2310067B10Rik | 22.9091  | 12.6314 | -0.858913        | 22.9101      | 12.6324       | -0.858855        | 0.0158416  | No      |
| Ado     | 0.426    | 0.13222   | -0.29378   | 0.00028703 | No      | 2510003E04Rik | 14.0883  | 21.3285 | 0.598285         | 14.0893      | 21.3295       | 0.59825021       | 0.00864487 | No      |
| Adprhl1 | 0.80706  | 0.4922    | -0.31486   | 0.00084567 | No      | 2610008E11Rik | 9.4224   | 2.54091 | -1.89075         | 9.4234       | 2.54191       | -1.8903347       | 0.00014629 | No      |
| Adra1a  | 0.097888 | 0.29155   | 0.193662   | 0.00013873 | No      | 2700089E24Rik | 65.6329  | 49.2248 | -0.415032        | 65.6339      | 49.2258       | -0.4150265       | 0.0465228  | No      |
| Adra1d  | 0.15316  | 0.085299  | -0.067861  | 0.00026594 | No      | 2810408A11Rik | 2.42139  | 36.7496 | 3.92382          | 2.42239      | 36.7506       | 3.92326474       | 0.00014629 | No      |
| Adra2c  | 0.21843  | 0.0396    | -0.17883   | 6.57E-07   | No      | 3110052M02Rik | 14.2069  | 1.54327 | -3.20253         | 14.2079      | 1.54427       | -3.2016964       | 0.00014629 | No      |
| Adrb1   | 0.14329  | 0.03537   | -0.10792   | 2.70E-08   | No      | 3110057O12Rik | 20.8663  | 2.57506 | -3.0185          | 20.8673      | 2.57606       | -3.0180058       | 0.00014629 | No      |
| Afap1l2 | 0.058534 | 0.0083147 | -0.0502193 | 2.88E-05   | No      | 3110082I17Rik | 6.08617  | 14.1746 | 1.2197           | 6.08717      | 14.1756       | 1.21956624       | 0.011151   | No      |
| Agap3   | 0.021691 | 0.13812   | 0.116429   | 6.30E-06   | No      | 4921507P07Rik | 3.21893  | 1.43175 | -1.1688          | 3.21993      | 1.43275       | -1.1682424       | 0.0261464  | No      |
| Agxt    | 0.67299  | 0.3364    | -0.33659   | 0.00357821 | No      | 4930432K21Rik | 1.59289  | 2.92105 | 0.874837         | 1.59389      | 2.92205       | 0.8744288        | 0.0469811  | No      |
| Ahnak   | 0.072469 | 0.0026667 | -0.0698023 | 1.82E-05   | No      | 4930451G09Rik | 0.289337 | 1.57986 | 2.44897          | 0.290337     | 1.58086       | 2.44490927       | 0.0307655  | No      |
| Ajap1   | 0.31894  | 0.49064   | 0.1717     | 0.01344183 | No      | 4930523C07Rik | 22.0276  | 13.5481 | -0.701225        | 22.0286      | 13.5491       | -0.7011808       | 0.00161718 | No      |
| Ajuba   | 0.10746  | 0.017556  | -0.089904  | 1.31E-09   | No      | 4933426M11Rik | 38.7204  | 14.0732 | -1.46014         | 38.7214      | 14.0742       | -1.4600782       | 0.00014629 | No      |
| Alg3    | 0.83824  | 0.58955   | -0.24869   | 0.002433   | No      | 5730508B09Rik | 17.4127  | 6.07569 | -1.51902         | 17.4137      | 6.07669       | -1.5188652       | 0.00263402 | No      |
| Alox12b | 0.19883  | 0.062123  | -0.136707  | 0.00082506 | No      | 5830473C10Rik | 0.295128 | 43.1979 | 7.19347          | 0.296128     | 43.1989       | 7.18862986       | 0.00014629 | No      |
| Alox15b | 0.22793  | 0.10543   | -0.1225    | 0.00039347 | No      | 5S_rRNA       | 46.7696  | 14.7306 | -1.66675         | 46.7706      | 14.7316       | -1.6666878       | 0.00014629 | No      |
| Alox5   | 0.11639  | 0.029013  | -0.087377  | 1.60E-05   | No      | 6430531B16Rik | 0.590716 | 9.97539 | 4.07784          | 0.591716     | 9.97639       | 4.07554105       | 0.00576532 | No      |
| Alpi    | 0.67911  | 0.43142   | -0.24769   | 0.00639124 | No      | 9330171B17Rik | 0.89338  | 4.96228 | 2.47366          | 0.89438      | 4.96328       | 2.47233401       | 0.0136225  | No      |
| Alpk3   | 0.79825  | 0.63337   | -0.16488   | 0.01468717 | No      | 9330182L06Rik | 0        | 4.45714 | inf              | 0.001        | 4.45814       | 12.1222262       | 0.00014629 | No      |
| Alx1    | 0.06049  | 0.0093208 | -0.0511692 | 5.91E-10   | No      | A1cf          | 0        | 1.61526 | inf              | 0.001        | 1.61626       | 10.6584436       | 0.00014629 | No      |



| RRBS     |          |           |             |            |         | RNAseq        |          |         |                  |              |               |                  |            |         |
|----------|----------|-----------|-------------|------------|---------|---------------|----------|---------|------------------|--------------|---------------|------------------|------------|---------|
| gene     | Blood    | Kidney    | methyl.diff | pMWU.fdr   | Match ? | gene          | blood    | kidney  | log2(fold_ratio) | blood+ 0.001 | kidney+ 0.001 | log2(fold_ratio) | q_value    | Match ? |
| Alx4     | 0.24092  | 0.10146   | -0.13946    | 0.04431681 | No      | A330021E22Rik | 0        | 10.1137 | inf              | 0.001        | 10.1147       | 13.3041659       | 0.00014629 | No      |
| Amigo2   | 0.8125   | 0.59722   | -0.21528    | 0.00129612 | No      | A830010M2ORik | 3.48758  | 1.07611 | -1.6964          | 3.48858      | 1.07711       | -1.6954743       | 0.00014629 | No      |
| Amigo3   | 0.88479  | 0.63013   | -0.25466    | 0.00293459 | No      | Aacs          | 17.326   | 4.74584 | -1.86821         | 17.327       | 4.74684       | -1.8679826       | 0.00014629 | No      |
| Amz2     | 0.88355  | 0.70078   | -0.18277    | 3.03E-05   | No      | Aadac         | 0        | 1.61823 | inf              | 0.001        | 1.61923       | 10.6610922       | 0.00014629 | No      |
| Angpt4   | 0.76887  | 0.56824   | -0.20063    | 0.02065846 | No      | Aadat         | 0        | 250.72  | inf              | 0.001        | 250.721       | 17.9357233       | 0.00014629 | No      |
| Ank1     | 0.10857  | 0.024108  | -0.084462   | 6.26E-05   | No      | Aaed1         | 1.45805  | 27.0391 | 4.21294          | 1.45905      | 27.0401       | 4.21199926       | 0.00014629 | No      |
| Ankrd23  | 0.89062  | 0.079875  | -0.810745   | 3.61E-07   | No      | Aagab         | 34.2132  | 20.4691 | -0.741102        | 34.2142      | 20.4701       | -0.7410771       | 0.0183831  | No      |
| Ankrd34a | 0.18492  | 0.063654  | -0.121266   | 0.00092018 | No      | Aamdc         | 6.92282  | 31.912  | 2.20467          | 6.92382      | 31.913        | 2.20450411       | 0.00014629 | No      |
| Ankrd34b | 0.080858 | 0.0055668 | -0.0752912  | 8.95E-06   | No      | AAR2          | 5.50829  | 9.88825 | 0.844113         | 5.50929      | 9.88925       | 0.84399471       | 0.00053701 | No      |
| Anks1b   | 0.16758  | 0.093072  | -0.074508   | 0.00546968 | No      | Aars          | 18.7258  | 103.399 | 2.46512          | 18.7268      | 103.4         | 2.46505988       | 0.00014629 | No      |
| Ano4     | 0.11896  | 0.014847  | -0.104113   | 7.96E-08   | No      | Aarsd1        | 30.4481  | 43.4069 | 0.511573         | 30.4491      | 43.4079       | 0.51155804       | 0.0325224  | No      |
| Ap1s3    | 0.72074  | 0.45443   | -0.26631    | 0.01344183 | No      | Aasdhppt      | 25.6884  | 36.5243 | 0.50774          | 25.6894      | 36.5253       | 0.50772293       | 0.0425528  | No      |
| Ap3b1    | 0.0757   | 0.022468  | -0.053232   | 5.48E-05   | No      | Aass          | 0        | 58.4486 | inf              | 0.001        | 58.4496       | 15.8349055       | 0.00014629 | No      |
| Ap3d1    | 0.35565  | 0.13481   | -0.22084    | 7.96E-08   | No      | Abat          | 0.610551 | 26.8074 | 5.45637          | 0.611551     | 26.8084       | 5.45406849       | 0.00014629 | No      |
| Apc2     | 0.65345  | 0.088363  | -0.565087   | 4.05E-07   | No      | Abca2         | 19.6492  | 54.244  | 1.46499          | 19.6502      | 54.245        | 1.46494617       | 0.00014629 | No      |
| Apob     | 0.83607  | 0.21984   | -0.61623    | 3.61E-07   | No      | ABCA3         | 11.6641  | 31.6899 | 1.44194          | 11.6651      | 31.6909       | 1.44186996       | 0.00014629 | No      |
| Aqp1     | 0.77857  | 0.1825    | -0.59607    | 3.61E-07   | No      | Abcb10        | 4.14868  | 8.6369  | 1.05786          | 4.14968      | 8.6379        | 1.05768053       | 0.00014629 | No      |
| Aqp5     | 0.17605  | 0.057739  | -0.118311   | 5.48E-05   | No      | Abcb6         | 1.29654  | 49.222  | 5.24657          | 1.29754      | 49.223        | 5.24548167       | 0.00014629 | No      |
| Ar       | 0.15365  | 0.066924  | -0.086726   | 0.01344183 | No      | Abcb7         | 11.3765  | 5.27576 | -1.10861         | 11.3775      | 5.27676       | -1.1084593       | 0.00041099 | No      |
| Arfrp1   | 0.46753  | 0.22703   | -0.2405     | 0.01931414 | No      | Abcc1         | 12.3728  | 2.10961 | -2.55212         | 12.3738      | 2.11061       | -2.5515567       | 0.00014629 | No      |
| Arhgap27 | 0.77252  | 0.29279   | -0.47973    | 8.91E-08   | No      | Abcc2         | 0.260665 | 1.12413 | 2.10854          | 0.261665     | 1.12513       | 2.10429883       | 0.00649695 | No      |
| Arhgap8  | 0.37482  | 0.20799   | -0.16683    | 0.01008382 | No      | ABCC4         | 4.93591  | 25.5605 | 2.37253          | 4.93691      | 25.5615       | 2.37229225       | 0.00014629 | No      |
| Arhgef37 | 0.52004  | 0.15241   | -0.36763    | 3.91E-05   | No      | Abcc5         | 42.8427  | 16.5684 | -1.37061         | 42.8437      | 16.5694       | -1.3705617       | 0.0419596  | No      |
| Arid3a   | 0.82568  | 0.60802   | -0.21766    | 2.35E-07   | No      | Abcc6         | 0        | 20.7362 | inf              | 0.001        | 20.7372       | 14.3399335       | 0.00014629 | No      |
| Arntl    | 0.063418 | 0.010854  | -0.052564   | 0.00803385 | No      | Abcd1         | 12.2949  | 4.16084 | -1.56311         | 12.2959      | 4.16184       | -1.5628839       | 0.018934   | No      |
| Art1     | 0.69269  | 0.47076   | -0.22193    | 6.26E-05   | No      | Abcd3         | 14.491   | 32.053  | 1.1453           | 14.492       | 32.054        | 1.14524769       | 0.00014629 | No      |
| Art4     | 0.085862 | 0.27154   | 0.185678    | 0.00683403 | No      | Abcd4         | 6.63617  | 11.5177 | 0.795436         | 6.63717      | 11.5187       | 0.79533777       | 0.00843988 | No      |
| Asb10    | 0.41736  | 0.058746  | -0.358614   | 6.76E-05   | No      | Abce1         | 31.6187  | 14.7476 | -1.1003          | 31.6197      | 14.7486       | -1.1002457       | 0.00014629 | No      |
| Ascl1    | 0.11596  | 0.2214    | 0.10544     | 0.00834984 | No      | Abcf3         | 29.7905  | 46.7082 | 0.648823         | 29.7915      | 46.7092       | 0.64880597       | 0.0221218  | No      |
| Asic1    | 0.064389 | 0.014113  | -0.050276   | 0.00259554 | No      | Abcg1         | 34.4469  | 5.43709 | -2.66347         | 34.4479      | 5.43809       | -2.6632441       | 0.00014629 | No      |
| Asic2    | 0.078896 | 0.022318  | -0.056578   | 0.00130689 | No      | Abcg2         | 0.117935 | 19.7476 | 7.38754          | 0.118935     | 19.7486       | 7.37543324       | 0.00014629 | No      |
| Asic4    | 0.38102  | 0.67649   | 0.29547     | 4.97E-05   | No      | Abhd10        | 13.6123  | 6.33068 | -1.10448         | 13.6133      | 6.33168       | -1.1043566       | 0.00740907 | No      |
| Asmt     | 0.92467  | 0.80269   | -0.12198    | 0.00059604 | No      | Abhd11        | 14.2549  | 34.0875 | 1.25778          | 14.2559      | 34.0885       | 1.257726         | 0.00014629 | No      |
| Asna1    | 0.62174  | 0.41959   | -0.20215    | 0.01079042 | No      | Abhd12        | 11.6816  | 19.3046 | 0.724708         | 11.6826      | 19.3056       | 0.72465801       | 0.00395247 | No      |
| Asphd2   | 0.27328  | 0.058968  | -0.214312   | 3.54E-07   | No      | Abhd13        | 8.49142  | 4.84428 | -0.809724        | 8.49242      | 4.84528       | -0.8095957       | 0.00720409 | No      |
| Astn1    | 0.071988 | 0.014874  | -0.057114   | 1.61E-12   | No      | Abhd14b       | 0.497779 | 162.903 | 8.35429          | 0.498779     | 162.904       | 8.35140559       | 0.00014629 | No      |
| Atf7ip2  | 0.086067 | 0.010425  | -0.075642   | 4.20E-05   | No      | Abhd17a       | 43.2646  | 103.933 | 1.2644           | 43.2656      | 103.934       | 1.26437537       | 0.00014629 | No      |
| Atp12a   | 0.061922 | 0.010001  | -0.051921   | 0.00043492 | No      | Abhd17b       | 16.0806  | 9.37381 | -0.77861         | 16.0816      | 9.37481       | -0.7785496       | 0.00041099 | No      |
| Atp2b2   | 0.078454 | 0.0091742 | -0.0692798  | 1.61E-12   | No      | Abhd17c       | 24.3317  | 166.646 | 2.77588          | 24.3327      | 166.647       | 2.77582703       | 0.00014629 | No      |
| Atp2c2   | 0.1792   | 0.014801  | -0.164399   | 3.20E-09   | No      | Abhd2         | 7.35635  | 3.2444  | -1.18104         | 7.35735      | 3.2454        | -1.1807899       | 0.00126596 | No      |

| RRBS     |          |           |             |            |         | RNAseq |           |         |                  |              |               |                  |            |         |
|----------|----------|-----------|-------------|------------|---------|--------|-----------|---------|------------------|--------------|---------------|------------------|------------|---------|
| gene     | Blood    | Kidney    | methyl.diff | pMWU.fdr   | Match ? | gene   | blood     | kidney  | log2(fold_ratio) | blood+ 0.001 | kidney+ 0.001 | log2(fold_ratio) | q_value    | Match ? |
| Atp6v1g2 | 0.077112 | 0.0046357 | -0.0724763  | 1.42E-11   | No      | Abhd3  | 0.132796  | 4.58743 | 5.11041          | 0.133796     | 4.58843       | 5.09989371       | 0.00352183 | No      |
| Azin2    | 0.30006  | 0.5305    | 0.23044     | 0.00546968 | No      | Abhd4  | 13.7689   | 32.0167 | 1.21741          | 13.7699      | 32.0177       | 1.21735159       | 0.00014629 | No      |
| B3galt4  | 0.14711  | 0.063331  | -0.083779   | 0.00546968 | No      | Abhd5  | 6.03371   | 18.4438 | 1.61202          | 6.03471      | 18.4448       | 1.6118578        | 0.00014629 | No      |
| B3gat2   | 0.10798  | 0.018349  | -0.089631   | 4.97E-05   | No      | Abi1   | 69.8286   | 13.8568 | -2.33322         | 69.8296      | 13.8578       | -2.3331405       | 0.00014629 | No      |
| B3gnt3   | 0.14208  | 0.031956  | -0.110124   | 1.60E-05   | No      | Abi2   | 1.64556   | 3.8589  | 1.22961          | 1.64656      | 3.8599        | 1.22910839       | 0.00066215 | No      |
| B3gnt5   | 0.083884 | 0.025607  | -0.058277   | 0.00099362 | No      | Abi3   | 16.8413   | 41.9161 | 1.3155           | 16.8423      | 41.9171       | 1.31544974       | 0.00078603 | No      |
| B3gnt8   | 0.73192  | 0.47089   | -0.26103    | 0.00226691 | No      | Abl1   | 6.40303   | 8.89362 | 0.474017         | 6.40403      | 8.89462       | 0.47395291       | 0.0448712  | No      |
| B4galt2  | 0.11349  | 0.026243  | -0.087247   | 1.12E-06   | No      | Ablim1 | 177.317   | 47.9359 | -1.88715         | 177.318      | 47.9369       | -1.8871305       | 0.00014629 | No      |
| B4gat1   | 0.33361  | 0.014412  | -0.319198   | 4.05E-07   | No      | Ablim3 | 0         | 35.4432 | inf              | 0.001        | 35.4442       | 15.1132619       | 0.00014629 | No      |
| Bace1    | 0.22401  | 0.051875  | -0.172135   | 0.00293459 | No      | Abr    | 27.25     | 5.92254 | -2.20197         | 27.251       | 5.92354       | -2.2017777       | 0.00014629 | No      |
| Bace2    | 0.12243  | 0.031107  | -0.091323   | 2.05E-05   | No      | Abrac1 | 286.602   | 73.8843 | -1.95571         | 286.603      | 73.8853       | -1.9556944       | 0.00014629 | No      |
| Barhl1   | 0.14645  | 0.061042  | -0.085408   | 0.00039347 | No      | Abt1   | 34.4879   | 15.911  | -1.11607         | 34.4889      | 15.912        | -1.1160169       | 0.00014629 | No      |
| Batf3    | 0.10115  | 0.015047  | -0.086103   | 3.83E-06   | No      | Abtb2  | 15.4447   | 7.19595 | -1.10185         | 15.4457      | 7.19695       | -1.1017477       | 0.00014629 | No      |
| Bbs4     | 0.64304  | 0.34742   | -0.29562    | 4.63E-09   | No      | Acaa1a | 19.4791   | 143.776 | 2.88383          | 19.4801      | 143.777       | 2.88375992       | 0.00014629 | No      |
| Bbs7     | 0.13649  | 0.013489  | -0.123001   | 1.00E-06   | No      | Acaa2  | 32.3879   | 208.994 | 2.68994          | 32.3889      | 208.995       | 2.68989705       | 0.00014629 | No      |
| Bcan     | 0.079289 | 0.019893  | -0.059396   | 1.09E-06   | No      | Acaca  | 4.54207   | 2.22327 | -1.03067         | 4.54307      | 2.22427       | -1.0303356       | 0.00014629 | No      |
| Bcat1    | 0.58632  | 0.18865   | -0.39767    | 2.28E-07   | No      | Acacb  | 0.0816637 | 25.8066 | 8.30383          | 0.0826637    | 25.8076       | 8.28632633       | 0.00014629 | No      |
| Bcl3     | 0.13023  | 0.036049  | -0.094181   | 2.28E-11   | No      | Acad10 | 4.67253   | 19.5617 | 2.06575          | 4.67353      | 19.5627       | 2.06552094       | 0.00014629 | No      |
| Bdh1     | 0.032074 | 0.21771   | 0.185636    | 0.00470016 | No      | Acad11 | 2.92872   | 22.2426 | 2.92498          | 2.92972      | 22.2436       | 2.9245556        | 0.00014629 | No      |
| Bdnf     | 0.11746  | 0.031031  | -0.086429   | 4.44E-05   | No      | Acad9  | 10.2233   | 15.5784 | 0.607692         | 10.2243      | 15.5794       | 0.6076376        | 0.0114542  | No      |
| Bfsp1    | 0.21828  | 0.11755   | -0.10073    | 0.00546968 | No      | Acadl  | 28.4837   | 124.918 | 2.13277          | 28.4847      | 124.919       | 2.13273381       | 0.00014629 | No      |
| Bhlhe23  | 0.070242 | 0.0096828 | -0.0605592  | 2.81E-09   | No      | Acadm  | 45.2924   | 231.886 | 2.35607          | 45.2934      | 231.887       | 2.3560492        | 0.00014629 | No      |
| Bhmt2    | 0.6759   | 0.056997  | -0.618903   | 3.61E-07   | No      | Acads  | 12.8531   | 58.1081 | 2.17662          | 12.8541      | 58.1091       | 2.17653551       | 0.00014629 | No      |
| Bik      | 0.02888  | 0.13346   | 0.10458     | 3.08E-05   | No      | Acadsb | 3.20408   | 11.6561 | 1.8631           | 3.20508      | 11.6571       | 1.86277665       | 0.00014629 | No      |
| Bmi1     | 0.036057 | 0.12072   | 0.084663    | 1.86E-07   | No      | Acadvl | 30.9427   | 95.918  | 1.6322           | 30.9437      | 95.919        | 1.63217091       | 0.00014629 | No      |
| Bmp3     | 0.10529  | 0.01409   | -0.0912     | 4.44E-05   | No      | Acap1  | 418.374   | 267.545 | -0.645009        | 418.375      | 267.546       | -0.6450097       | 0.00689996 | No      |
| Bmp6     | 0.075607 | 0.010015  | -0.065592   | 3.02E-06   | No      | Acap2  | 11.5088   | 3.34906 | -1.78092         | 11.5098      | 3.35006       | -1.7806039       | 0.00014629 | No      |
| Bmp8a    | 0.13625  | 0.044907  | -0.091343   | 3.91E-05   | No      | Acap3  | 7.22378   | 12.4691 | 0.787535         | 7.22478      | 12.4701       | 0.78744747       | 0.00649695 | No      |
| Bmyc     | 0.101    | 0.029587  | -0.071413   | 9.28E-06   | No      | Acat1  | 50.943    | 285.264 | 2.48534          | 50.944       | 285.265       | 2.4853186        | 0.00014629 | No      |
| Bnc1     | 0.12344  | 0.065183  | -0.058257   | 0.03705648 | No      | Acbd3  | 23.4653   | 16.6237 | -0.49729         | 23.4663      | 16.6247       | -0.4972621       | 0.0343574  | No      |
| Boll     | 0.25654  | 0.09255   | -0.16399    | 4.80E-08   | No      | Ace2   | 0         | 1.02927 | inf              | 0.001        | 1.03027       | 10.0088068       | 0.00014629 | No      |
| Borcs6   | 0.18647  | 0.003354  | -0.183116   | 8.95E-06   | No      | Ace3   | 0         | 1.25808 | inf              | 0.001        | 1.25908       | 10.2981542       | 0.00014629 | No      |
| Borcs7   | 0.65081  | 0.3572    | -0.29361    | 0.00343039 | No      | Acly   | 63.2474   | 34.6184 | -0.869465        | 63.2484      | 34.6194       | -0.8694483       | 0.00126596 | No      |
| Bpi      | 0.08006  | 0.015294  | -0.064766   | 0.00593418 | No      | Acmsd  | 0         | 84.5415 | inf              | 0.001        | 84.5425       | 16.3673892       | 0.00014629 | No      |
| Bpifb3   | 0.9333   | 0.66832   | -0.26498    | 1.28E-06   | No      | Acn9   | 5.62881   | 67.4691 | 3.58333          | 5.62981      | 67.4701       | 3.58309016       | 0.00014629 | No      |
| Btbd16   | 0.56758  | 0.2643    | -0.30328    | 3.65E-05   | No      | Aco1   | 6.24815   | 127.898 | 4.35542          | 6.24915      | 127.899       | 4.3552012        | 0.00014629 | No      |
| C1ql1    | 0.098434 | 0.025051  | -0.073383   | 0.0001045  | No      | Aco2   | 43.6906   | 197.162 | 2.17398          | 43.6916      | 197.163       | 2.17396099       | 0.00014629 | No      |
| C1ql2    | 0.11704  | 0.020177  | -0.096863   | 1.83E-06   | No      | Acot1  | 15.7328   | 96.0881 | 2.61059          | 15.7338      | 96.0891       | 2.61050564       | 0.00014629 | No      |
| C1qtnf2  | 0.47023  | 0.099843  | -0.370387   | 4.44E-05   | No      | Acot13 | 5.99772   | 52.7799 | 3.1375           | 5.99872      | 52.7809       | 3.13728935       | 0.00014629 | No      |
| C1qtnf5  | 0.89271  | 0.38405   | -0.50866    | 8.32E-09   | No      | Acot4  | 0         | 10.8043 | inf              | 0.001        | 10.8053       | 13.3994515       | 0.0333784  | No      |
| C2cd4c   | 0.83021  | 0.22041   | -0.6098     | 1.61E-12   | No      | Acot7  | 143.46    | 23.4744 | -2.61149         | 143.461      | 23.4754       | -2.6114369       | 0.00014629 | No      |
| Cacna1e  | 0.40191  | 0.12664   | -0.27527    | 4.05E-07   | No      | Acot8  | 11.5472   | 39.4746 | 1.77339          | 11.5482      | 39.4756       | 1.7732932        | 0.00285806 | No      |

| RRBS     |           |           |             |            |         | RNAseq   |            |         |                  |              |               |                  |            |         |
|----------|-----------|-----------|-------------|------------|---------|----------|------------|---------|------------------|--------------|---------------|------------------|------------|---------|
| gene     | Blood     | Kidney    | methyl.diff | pMWU.fdr   | Match ? | gene     | blood      | kidney  | log2(fold_ratio) | blood+ 0.001 | kidney+ 0.001 | log2(fold_ratio) | q_value    | Match ? |
| Cacna1i  | 0.86519   | 0.1458    | -0.71939    | 1.17E-11   | No      | Acox1    | 12.5341    | 91.2969 | 2.86471          | 12.5351      | 91.2979       | 2.86460817       | 0.00014629 | No      |
| Cacna1s  | 0.095408  | 0.023824  | -0.071584   | 8.72E-09   | No      | Acox3    | 8.89017    | 18.8006 | 1.08049          | 8.89117      | 18.8016       | 1.08041026       | 0.00014629 | No      |
| Cacna2d1 | 0.071647  | 0.01786   | -0.053787   | 4.97E-05   | No      | Acp1     | 40.0307    | 86.9841 | 1.11965          | 40.0317      | 86.9851       | 1.11962541       | 0.00014629 | No      |
| Cacna2d2 | 0.10411   | 0.0059998 | -0.0981102  | 0.00293459 | No      | Acp2     | 4.60183    | 44.6198 | 3.2774           | 4.60283      | 44.6208       | 3.27712332       | 0.00014629 | No      |
| Cadm3    | 0.095697  | 0.007103  | -0.088594   | 0.00039347 | No      | Acp5     | 72.0812    | 46.2284 | -0.640844        | 72.0822      | 46.2294       | -0.6408324       | 0.00219102 | No      |
| Calb1    | 0.063351  | 0.011228  | -0.052123   | 1.55E-05   | No      | Acpl2    | 17.9693    | 5.434   | -1.72545         | 17.9703      | 5.435         | -1.7252626       | 0.00014629 | No      |
| Calb2    | 0.24221   | 0.032278  | -0.209932   | 1.00E-06   | No      | Acpp     | 7.6894     | 2.64412 | -1.54008         | 7.6904       | 2.64512       | -1.5397255       | 0.00014629 | No      |
| Calcr    | 0.2174    | 0.089767  | -0.127633   | 0.0090968  | No      | Acrbp    | 43.3953    | 64.7548 | 0.577446         | 43.3963      | 64.7558       | 0.57743737       | 0.0348116  | No      |
| Calhm1   | 0.7913    | 0.45609   | -0.33521    | 2.34E-05   | No      | Acsf2    | 8.76896    | 12.8375 | 0.549881         | 8.76996      | 12.8385       | 0.54983449       | 0.0455798  | No      |
| Camk2n2  | 0.27751   | 0.086827  | -0.190683   | 4.05E-07   | No      | Acsf3    | 4.50276    | 57.2839 | 3.66925          | 4.50376      | 57.2849       | 3.66895305       | 0.00014629 | No      |
| Cap2     | 0.090068  | 0.019933  | -0.070135   | 1.82E-05   | No      | Acs1     | 3.50764    | 24.617  | 2.81108          | 3.50864      | 24.618        | 2.81072973       | 0.00014629 | No      |
| Capn3    | 0.76883   | 0.57881   | -0.19002    | 0.01079042 | No      | Acs13    | 4.60664    | 9.79886 | 1.0889           | 4.60764      | 9.79986       | 1.08873314       | 0.00028114 | No      |
| Car13    | 0.63071   | 0.15071   | -0.48       | 0.00051431 | No      | Acs14    | 7.54137    | 12.2373 | 0.698382         | 7.54237      | 12.2383       | 0.69831334       | 0.00090728 | No      |
| Car9     | 0.32101   | 0.043102  | -0.277908   | 0.00082506 | No      | Acs15    | 39.3232    | 23.2588 | -0.757605        | 39.3242      | 23.2598       | -0.7575787       | 0.00028114 | No      |
| Cartpt   | 0.27015   | 0.077199  | -0.192951   | 0.00357821 | No      | Acsm1    | 0          | 17.4576 | inf              | 0.001        | 17.4586       | 14.0916503       | 0.00014629 | No      |
| Cass4    | 0.0021086 | 0.097697  | 0.0955884   | 0.00063283 | No      | Acsm2a   | 0          | 199.263 | inf              | 0.001        | 199.264       | 17.6043216       | 0.00014629 | No      |
| Cav3     | 0.87613   | 0.42089   | -0.45524    | 2.36E-06   | No      | Acsm3    | 0.0302228  | 83.6339 | 11.4342          | 0.0312228    | 83.6349       | 11.3872895       | 0.0399122  | No      |
| Cbln1    | 0.12363   | 0.02783   | -0.0958     | 4.94E-10   | No      | ACSM5    | 0          | 13.4078 | inf              | 0.001        | 13.4088       | 13.7108925       | 0.00014629 | No      |
| Cbln4    | 0.06961   | 0.012006  | -0.057604   | 1.61E-12   | No      | Acss1    | 81.8414    | 54.3965 | -0.589317        | 81.8424      | 54.3975       | -0.5893081       | 0.00374149 | No      |
| Ccdc105  | 0.12677   | 0.051338  | -0.075432   | 0.03705648 | No      | Acss2    | 4.36684    | 59.9177 | 3.77832          | 4.36784      | 59.9187       | 3.77801441       | 0.00014629 | No      |
| Ccdc166  | 0.39854   | 0.14118   | -0.25736    | 0.00099362 | No      | Acss3    | 0          | 33.3944 | inf              | 0.001        | 33.3954       | 15.0273618       | 0.00014629 | No      |
| Ccdc184  | 0.07753   | 0.016871  | -0.060659   | 0.00639124 | No      | Actb     | 4001.73    | 1237.56 | -1.69312         | 4001.731     | 1237.561      | -1.6931246       | 0.00014629 | No      |
| Ccdc24   | 0.65661   | 0.18414   | -0.47247    | 1.11E-08   | No      | Actg1    | 446.203    | 877.323 | 0.975406         | 446.204      | 877.324       | 0.97540629       | 0.00014629 | No      |
| Ccdc67   | 0.6091    | 0.037203  | -0.571897   | 2.62E-08   | No      | Actn4    | 69.4088    | 137.714 | 0.988483         | 69.4098      | 137.715       | 0.98847443       | 0.00014629 | No      |
| Ccdc89   | 0.29309   | 0.031634  | -0.261456   | 3.61E-07   | No      | Actr1b   | 14.8995    | 24.2263 | 0.701306         | 14.9005      | 24.2273       | 0.70127289       | 0.00078603 | No      |
| Ccer1    | 0.56743   | 0.67272   | 0.10529     | 0.00147059 | No      | Actr2    | 204.022    | 52.1984 | -1.96664         | 204.023      | 52.1994       | -1.9666267       | 0.00014629 | No      |
| Cd248    | 0.61631   | 0.12249   | -0.49382    | 1.06E-11   | No      | Actr3    | 396.463    | 88.4937 | -2.16354         | 396.464      | 88.4947       | -2.1635269       | 0.00014629 | No      |
| Cd300lb  | 0.77157   | 0.69812   | -0.07345    | 0.004217   | No      | Actr8    | 17.6032    | 36.1792 | 1.03932          | 17.6042      | 36.1802       | 1.03928072       | 0.00984666 | No      |
| Cd52     | 0.68059   | 0.46217   | -0.21842    | 1.00E-06   | No      | Acvr1b   | 6.83945    | 11.3629 | 0.732377         | 6.84045      | 11.3639       | 0.7322949        | 0.0160279  | No      |
| Cd7      | 0.010817  | 0.16777   | 0.156953    | 0.02194182 | No      | Acvr2a   | 10.4452    | 4.33807 | -1.26771         | 10.4462      | 4.33907       | -1.2675205       | 0.0210972  | No      |
| Cdc42ep3 | 0.116     | 0.013636  | -0.102364   | 3.65E-05   | No      | Acy1     | 14.1531    | 611.499 | 5.43316          | 14.1541      | 611.5         | 5.43306058       | 0.00014629 | No      |
| Cdc42ep5 | 0.67359   | 0.13324   | -0.54035    | 1.80E-06   | No      | Acyp2    | 0.262948   | 10.1375 | 5.26878          | 0.263948     | 10.1385       | 5.26344668       | 0.00014629 | No      |
| Cdh13    | 0.48549   | 0.27771   | -0.20778    | 9.32E-05   | No      | Ada      | 21.0652    | 10.7514 | -0.970334        | 21.0662      | 10.7524       | -0.9702714       | 0.00053701 | No      |
| Cdh22    | 0.11089   | 0.0086671 | -0.1022229  | 2.90E-09   | No      | Adal     | 5.73041    | 1.1933  | -2.26369         | 5.73141      | 1.1943        | -2.2627248       | 0.00053701 | No      |
| Cdh8     | 0.13636   | 0.028301  | -0.108059   | 0.00293459 | No      | Adam10   | 69.1067    | 7.47446 | -3.20878         | 69.1077      | 7.47546       | -3.2086122       | 0.00014629 | No      |
| Cdk5r1   | 0.24658   | 0.11331   | -0.13327    | 0.00022947 | No      | Adam17   | 17.9345    | 9.46366 | -0.922269        | 17.9355      | 9.46466       | -0.9221954       | 0.00014629 | No      |
| Cdk5r2   | 0.09488   | 0.0209    | -0.07398    | 2.28E-05   | No      | Adam22   | 0.00368189 | 7.71689 | 11.0334          | 0.00468189   | 7.71789       | 10.6868997       | 0.00014629 | No      |
| Cdx2     | 0.059802  | 0.025048  | -0.034754   | 0.00039347 | No      | Adam23   | 0.0637067  | 3.59188 | 5.81715          | 0.0647067    | 3.59288       | 5.79508184       | 0.00761239 | No      |
| Ceacam4  | 0.82612   | 0.7481    | -0.07802    | 0.01931414 | No      | Adam33   | 0          | 1.9645  | inf              | 0.001        | 1.9655        | 10.9406806       | 0.00533979 | No      |
| Cebpe    | 0.91511   | 0.49261   | -0.4225     | 1.80E-06   | No      | Adam9    | 2.17136    | 7.37744 | 1.76452          | 2.17236      | 7.37844       | 1.76405262       | 0.00014629 | No      |
| Cela1    | 0.0133    | 0.1098    | 0.0965      | 0.00389713 | No      | Adamts1  | 0          | 11.6196 | inf              | 0.001        | 11.6206       | 13.5043969       | 0.00014629 | No      |
| Celf3    | 0.32118   | 0.16024   | -0.16094    | 0.0017172  | No      | Adamts10 | 52.8873    | 23.2184 | -1.18765         | 52.8883      | 23.2194       | -1.1876179       | 0.00513162 | No      |

| RRBS    |          |           |             |            |         | RNAseq   |            |          |                  |              |               |                  |            |         |
|---------|----------|-----------|-------------|------------|---------|----------|------------|----------|------------------|--------------|---------------|------------------|------------|---------|
| gene    | Blood    | Kidney    | methyl.diff | pMWU.fdr   | Match ? | gene     | blood      | kidney   | log2(fold_ratio) | blood+ 0.001 | kidney+ 0.001 | log2(fold_ratio) | q_value    | Match ? |
| Celf4   | 0.060739 | 0.0086462 | -0.0520928  | 0.0001045  | No      | Adamts16 | 0.00456002 | 0.924368 | 7.66328          | 0.00556002   | 0.925368      | 7.37879333       | 0.0145969  | No      |
| Celsr3  | 0.084172 | 0.02416   | -0.060012   | 1.94E-10   | No      | Adamts9  | 0          | 1.15044  | inf              | 0.001        | 1.15144       | 10.1692235       | 0.00014629 | No      |
| Cfb     | 0.52427  | 0.26904   | -0.25523    | 0.02450594 | No      | Adamts1  | 0          | 1.10179  | inf              | 0.001        | 1.10279       | 10.1069424       | 0.00544794 | No      |
| Cfd     | 0.32391  | 0.078984  | -0.244926   | 2.45E-08   | No      | Adap1    | 1.68624    | 10.0366  | 2.57338          | 1.68724      | 10.0376       | 2.57267725       | 0.00014629 | No      |
| Chad    | 0.93621  | 0.80895   | -0.12726    | 0.00546968 | No      | Adar     | 35.8505    | 13.9455  | -1.3622          | 35.8515      | 13.9465       | -1.3621304       | 0.00014629 | No      |
| Chd5    | 0.25831  | 0.045453  | -0.212857   | 1.60E-05   | No      | Adat1    | 2.27328    | 0.793024 | -1.51934         | 2.27428      | 0.794024      | -1.5181554       | 0.0184724  | No      |
| Chmp4c  | 0.083385 | 0.02398   | -0.059405   | 7.96E-06   | No      | Adat2    | 26.6154    | 3.96432  | -2.74712         | 26.6164      | 3.96532       | -2.7468063       | 0.00014629 | No      |
| Chrd    | 0.038494 | 0.18759   | 0.149096    | 0.00186957 | No      | Adc      | 0          | 0.967004 | inf              | 0.001        | 0.968004      | 9.9188692        | 0.00014629 | No      |
| Chrm1   | 0.64198  | 0.35578   | -0.2862     | 0.0017172  | No      | Adck1    | 4.42768    | 13.6173  | 1.62082          | 4.42868      | 13.6183       | 1.62059796       | 0.00014629 | No      |
| Chrm4   | 0.10844  | 0.022671  | -0.085769   | 0.00470016 | No      | Adck3    | 9.84271    | 27.8641  | 1.50128          | 9.84371      | 27.8651       | 1.50118527       | 0.00014629 | No      |
| Chrna3  | 0.087169 | 0.026695  | -0.060474   | 0.00546968 | No      | Adck4    | 12.3909    | 57.3335  | 2.2101           | 12.3919      | 57.3345       | 2.21000611       | 0.00014629 | No      |
| Chrna4  | 0.22647  | 0.14577   | -0.0807     | 0.00071224 | No      | Adck5    | 20.8832    | 58.2785  | 1.48062          | 20.8842      | 58.2795       | 1.48057662       | 0.0181078  | No      |
| Chst5   | 0.092974 | 0.031115  | -0.061859   | 0.00099362 | No      | Adcy4    | 1.31761    | 8.18366  | 2.63482          | 1.31861      | 8.18466       | 2.63390456       | 0.00078603 | No      |
| Chst8   | 0.15165  | 0.024699  | -0.126951   | 9.50E-05   | No      | Adcy7    | 50.5002    | 5.70459  | -3.14609         | 50.5012      | 5.70559       | -3.1458697       | 0.00502315 | No      |
| Ciart   | 0.12868  | 0.036986  | -0.091694   | 0.04893177 | No      | Add1     | 204.493    | 138.794  | -0.559104        | 204.494      | 138.795       | -0.5591029       | 0.0143989  | No      |
| Cilp2   | 0.12704  | 0.0154    | -0.11164    | 0.00011677 | No      | Add3     | 203.964    | 31.5277  | -2.69362         | 203.965      | 31.5287       | -2.693584        | 0.00014629 | No      |
| Ckmt1b  | 0.147    | 0.020622  | -0.126378   | 3.08E-05   | No      | Adh1     | 0          | 71.291   | inf              | 0.001        | 71.292        | 16.1214526       | 0.00014629 | No      |
| Cks1b   | 0.26557  | 0.051817  | -0.213753   | 0.00130689 | No      | Adhfe1   | 0.0877421  | 101.094  | 10.1701          | 0.0887421    | 101.095       | 10.1538053       | 0.00597292 | No      |
| Cldn11  | 0.05724  | 0.0049746 | -0.0522654  | 7.90E-07   | No      | Adi1     | 24.8243    | 106.319  | 2.09858          | 24.8253      | 106.32        | 2.09852995       | 0.00014629 | No      |
| Cldn3   | 0.12108  | 0.042708  | -0.078372   | 0.00935402 | No      | Adipor1  | 40.4839    | 90.5817  | 1.16187          | 40.4849      | 90.5827       | 1.16185163       | 0.00014629 | No      |
| Cldn4   | 0.42149  | 0.090576  | -0.330914   | 1.61E-12   | No      | Adipor2  | 30.3727    | 17.4924  | -0.796044        | 30.3737      | 17.4934       | -0.7960119       | 0.00014629 | No      |
| Cldn5   | 0.1159   | 0.041338  | -0.074562   | 0.00259554 | No      | Adk      | 34.2319    | 87.3959  | 1.35222          | 34.2329      | 87.3969       | 1.35219859       | 0.00014629 | No      |
| Cldn8   | 0.86964  | 0.55211   | -0.31753    | 0.00015888 | No      | Adm2     | 0          | 64.834   | inf              | 0.001        | 64.835        | 15.9844852       | 0.00014629 | No      |
| Clec14a | 0.11169  | 0.029976  | -0.081714   | 2.05E-05   | No      | Adora1   | 0          | 4.26814  | inf              | 0.001        | 4.26914       | 12.0597298       | 0.00014629 | No      |
| Clic6   | 0.10064  | 0.027005  | -0.073635   | 0.00090703 | No      | Adpgk    | 14.353     | 3.71552  | -1.94972         | 14.354       | 3.71652       | -1.9494285       | 0.00014629 | No      |
| Clmp    | 0.1319   | 0.037712  | -0.094188   | 1.02E-05   | No      | Adprh    | 34.0636    | 14.1764  | -1.26474         | 34.0646      | 14.1774       | -1.2646803       | 0.00014629 | No      |
| Clps    | 0.7218   | 0.26667   | -0.45513    | 1.61E-12   | No      | Adprm    | 26.2586    | 17.5352  | -0.582543        | 26.2596      | 17.5362       | -0.5825088       | 0.0228585  | No      |
| Clvs2   | 0.17951  | 0.01834   | -0.16117    | 4.05E-07   | No      | Adrbk1   | 140.835    | 20.4249  | -2.78561         | 140.836      | 20.4259       | -2.7855446       | 0.00014629 | No      |
| Cmss1   | 0.3745   | 0.13032   | -0.24418    | 1.12E-06   | No      | Adrm1    | 47.3392    | 95.2054  | 1.00801          | 47.3402      | 95.2064       | 1.00799276       | 0.00014629 | No      |
| Cnfn    | 0.1272   | 0.041303  | -0.085897   | 0.0030913  | No      | Adsl     | 79.9029    | 120.486  | 0.592548         | 79.9039      | 120.487       | 0.59253967       | 0.00720409 | No      |
| Cnksr1  | 0.28005  | 0.023381  | -0.256669   | 1.61E-12   | No      | Aebp1    | 0.0752093  | 6.33041  | 6.39524          | 0.0762093    | 6.33141       | 6.37641595       | 0.027611   | No      |
| Cnn1    | 0.081411 | 0.020817  | -0.060594   | 0.00011677 | No      | Aebp2    | 16.2631    | 7.95434  | -1.03178         | 16.2641      | 7.95534       | -1.0316955       | 0.00014629 | No      |
| Cnm1    | 0.33103  | 0.10339   | -0.22764    | 6.96E-06   | No      | Afap111  | 0.100217   | 8.89937  | 6.47251          | 0.101217     | 8.90037       | 6.45834179       | 0.0114542  | No      |
| Cntn4   | 0.05678  | 0.0038726 | -0.0529074  | 2.60E-06   | No      | Aff1     | 22.4963    | 12.1773  | -0.885491        | 22.4973      | 12.1783       | -0.8854391       | 0.00014629 | No      |
| Col11a2 | 0.41158  | 0.15798   | -0.2536     | 2.10E-08   | No      | Aff4     | 13.4296    | 5.43481  | -1.30511         | 13.4306      | 5.43581       | -1.3049568       | 0.00014629 | No      |
| Col1a1  | 0.47952  | 0.27045   | -0.20907    | 0.00210055 | No      | Afg3l1   | 10.3167    | 21.7773  | 1.07785          | 10.3177      | 21.7783       | 1.07776994       | 0.00470105 | No      |
| Col23a1 | 0.094117 | 2.50E-07  | -0.0941168  | 3.41E-06   | No      | Afmid    | 1.51322    | 49.9419  | 5.04456          | 1.51422      | 49.9429       | 5.04363286       | 0.00014629 | No      |
| Col26a1 | 0.26353  | 0.056015  | -0.207515   | 2.27E-09   | No      | Agap1    | 5.65461    | 14.1709  | 1.32543          | 5.65561      | 14.1719       | 1.32527865       | 0.00014629 | No      |
| Col5a3  | 0.10169  | 0.021104  | -0.080586   | 0.00015888 | No      | Agbl3    | 9.13853    | 44.0296  | 2.26844          | 9.13953      | 44.0306       | 2.26831462       | 0.00014629 | No      |
| Commd5  | 0.60442  | 0.11811   | -0.48631    | 1.02E-05   | No      | Agfg1    | 25.6358    | 11.5838  | -1.14606         | 25.6368      | 11.5848       | -1.1459831       | 0.00014629 | No      |
| Comp    | 0.10324  | 0.051441  | -0.051799   | 0.00082506 | No      | Agfg2    | 11.3975    | 19.105   | 0.745232         | 11.3985      | 19.106        | 0.74518179       | 0.00066215 | No      |
| Corin   | 0.066434 | 0.0094916 | -0.0569424  | 9.50E-05   | No      | Ago1     | 20.6124    | 6.40821  | -1.68552         | 20.6134      | 6.40921       | -1.685364        | 0.00014629 | No      |

| RRBS    |          |           |             |            |         | RNAseq   |           |          |                  |              |               |                  |            |         |
|---------|----------|-----------|-------------|------------|---------|----------|-----------|----------|------------------|--------------|---------------|------------------|------------|---------|
| gene    | Blood    | Kidney    | methyl.diff | pMWU.fdr   | Match ? | gene     | blood     | kidney   | log2(fold_ratio) | blood+ 0.001 | kidney+ 0.001 | log2(fold_ratio) | q_value    | Match ? |
| Cort    | 0.66829  | 0.40768   | -0.26061    | 0.00861735 | No      | Ago2     | 6.19978   | 1.97769  | -1.6484          | 6.20078      | 1.97869       | -1.6479041       | 0.00014629 | No      |
| Cox6b2  | 0.90722  | 0.63265   | -0.27457    | 0.00041578 | No      | Agpat1   | 27.0815   | 68.9997  | 1.34928          | 27.0825      | 69.0007       | 1.34925008       | 0.0443573  | No      |
| Cpeb1   | 0.091175 | 0.014072  | -0.077103   | 4.27E-06   | No      | Agpat2   | 1.48295   | 15.2866  | 3.36573          | 1.48395      | 15.2876       | 3.36484755       | 0.00014629 | No      |
| Cplx1   | 0.16275  | 0.064359  | -0.098391   | 1.46E-05   | No      | Agpat3   | 25.072    | 56.6505  | 1.17601          | 25.073       | 56.6515       | 1.17597953       | 0.00014629 | No      |
| Cpne6   | 0.71369  | 0.17734   | -0.53635    | 9.66E-07   | No      | Agpat4   | 1.98049   | 7.13831  | 1.84972          | 1.98149      | 7.13931       | 1.84919896       | 0.00014629 | No      |
| Cpne9   | 0.20337  | 0.027038  | -0.176332   | 6.96E-06   | No      | Agpat9   | 0.268897  | 7.2231   | 4.74749          | 0.269897     | 7.2241        | 4.74233702       | 0.00014629 | No      |
| Cpt1c   | 0.10485  | 0.0075379 | -0.0973121  | 0.00043492 | No      | Agrn     | 1.56366   | 34.9667  | 4.48298          | 1.56466      | 34.9677       | 4.48210181       | 0.00014629 | No      |
| Cpxm2   | 0.12363  | 0.038567  | -0.085063   | 0.01079042 | No      | Agtbbp1  | 3.99733   | 46.5382  | 3.54131          | 3.99833      | 46.5392       | 3.54097696       | 0.00014629 | No      |
| Crabp2  | 0.61217  | 0.19704   | -0.41513    | 0.00017692 | No      | Agtrap   | 7.84099   | 30.6492  | 1.96674          | 7.84199      | 30.6502       | 1.96660478       | 0.00014629 | No      |
| Cracr2b | 0.17597  | 0.011452  | -0.164518   | 4.44E-05   | No      | Agxt2    | 0         | 324.691  | inf              | 0.001        | 324.692       | 18.3087123       | 0.00014629 | No      |
| Crb2    | 0.64554  | 0.15763   | -0.48791    | 3.61E-07   | No      | Ahctf1   | 14.1775   | 6.58285  | -1.10682         | 14.1785      | 6.58385       | -1.1067015       | 0.00014629 | No      |
| Creb3l4 | 0.80018  | 0.40078   | -0.3994     | 0.00094018 | No      | Ahcy     | 37.0222   | 50.096   | 0.436305         | 37.0232      | 50.097        | 0.43629462       | 0.0399122  | No      |
| Crhbp   | 0.07191  | 0.016857  | -0.055053   | 5.76E-05   | No      | Ahcyl2   | 8.618     | 41.6303  | 2.27221          | 8.619        | 41.6313       | 2.27207621       | 0.00014629 | No      |
| Crhr1   | 0.094866 | 0.012638  | -0.082228   | 5.68E-07   | No      | Ahdc1    | 6.3608    | 12.8292  | 1.01215          | 6.3618       | 12.8302       | 1.01203674       | 0.0260584  | No      |
| Crnde   | 0.12826  | 0.02392   | -0.10434    | 9.50E-05   | No      | Ahsa1    | 94.8159   | 70.7961  | -0.421459        | 94.8169      | 70.7971       | -0.421454        | 0.0406144  | No      |
| Crtac1  | 0.068268 | 0.013448  | -0.05482    | 1.75E-08   | No      | Ahsa2    | 40.2191   | 21.5645  | -0.899223        | 40.2201      | 21.5655       | -0.8991915       | 0.0156475  | No      |
| Cryba2  | 0.082019 | 0.029372  | -0.052647   | 0.00031034 | No      | Al462493 | 44.9647   | 127.389  | 1.50238          | 44.9657      | 127.39        | 1.5023552        | 0.00014629 | No      |
| Crygn   | 0.52415  | 0.42962   | -0.09453    | 0.04564406 | No      | Al467606 | 68.194    | 18.0098  | -1.92086         | 68.195       | 18.0108       | -1.9208037       | 0.00874754 | No      |
| Csmd1   | 0.12442  | 0.043532  | -0.080888   | 6.76E-05   | No      | Aida     | 26.4073   | 11.7749  | -1.16523         | 26.4083      | 11.7759       | -1.1651541       | 0.00014629 | No      |
| Cspg4   | 0.19871  | 0.096578  | -0.102132   | 5.21E-07   | No      | Aif1     | 1.98688   | 22.3873  | 3.4941           | 1.98788      | 22.3883       | 3.49344241       | 0.0234023  | No      |
| Ctnna2  | 0.099694 | 0.017659  | -0.082035   | 1.27E-05   | No      | Aif1l    | 0.0813081 | 217.863  | 11.3877          | 0.0823081    | 217.864       | 11.3701058       | 0.00307875 | No      |
| Cubn    | 0.79888  | 0.17071   | -0.62817    | 7.50E-08   | No      | Aifm1    | 33.6562   | 61.7295  | 0.875091         | 33.6572      | 61.7305       | 0.87506832       | 0.00014629 | No      |
| Cuedc1  | 0.82166  | 0.56975   | -0.25191    | 4.27E-06   | No      | Aifm2    | 0.517997  | 7.00732  | 3.75785          | 0.518997     | 7.00832       | 3.75527055       | 0.00014629 | No      |
| Cul9    | 0.90598  | 0.83118   | -0.0748     | 0.01093755 | No      | Aig1     | 6.78595   | 3.35661  | -1.01554         | 6.78695      | 3.35761       | -1.0153287       | 0.0492361  | No      |
| Cux2    | 0.21528  | 0.024346  | -0.190934   | 0.00011677 | No      | Aim1     | 2.58399   | 0.400187 | -2.69085         | 2.58499      | 0.401187      | -2.6878119       | 0.00014629 | No      |
| Cxcl1   | 0.52855  | 0.2297    | -0.29885    | 0.00683403 | No      | Aim1l    | 0.409203  | 1.15765  | 1.50031          | 0.410203     | 1.15865       | 1.49803488       | 0.00649695 | No      |
| Cxcl14  | 0.064005 | 0.008908  | -0.055097   | 4.22E-10   | No      | Aim2     | 37.1858   | 3.53551  | -3.39476         | 37.1868      | 3.53651       | -3.3943924       | 0.00014629 | No      |
| Cxcl6   | 0.083562 | 0.014455  | -0.069107   | 0.00047568 | No      | Aimp2    | 21.0665   | 57.6898  | 1.45337          | 21.0675      | 57.6908       | 1.45332214       | 0.00459197 | No      |
| Cyp1b1  | 0.047141 | 0.018551  | -0.02859    | 4.27E-06   | No      | Ak1      | 0         | 9.64009  | inf              | 0.001        | 9.64109       | 13.2349805       | 0.00014629 | No      |
| Cyp2t1  | 0.25088  | 0.023127  | -0.227753   | 2.94E-08   | No      | Ak3      | 63.45     | 233.034  | 1.87685          | 63.451       | 233.035       | 1.87683185       | 0.00014629 | No      |
| Cyp4x1  | 0.10777  | 0.16002   | 0.05225     | 0.01520153 | No      | Akap1    | 4.32261   | 9.53396  | 1.14117          | 4.32361      | 9.53496       | 1.14099049       | 0.00014629 | No      |
| Cysrt1  | 0.24407  | 0.021796  | -0.222274   | 8.75E-07   | No      | Akap10   | 10.5471   | 5.07839  | -1.0544          | 10.5481      | 5.07939       | -1.054256        | 0.00014629 | No      |
| Dagla   | 0.070058 | 0.017995  | -0.052063   | 1.61E-12   | No      | Akap13   | 48.6206   | 8.24473  | -2.56002         | 48.6216      | 8.24573       | -2.5598782       | 0.00014629 | No      |
| Dao     | 0.85206  | 0.07608   | -0.77598    | 1.09E-11   | No      | Akap17b  | 13.1839   | 1.23863  | -3.41196         | 13.1849      | 1.23963       | -3.4109051       | 0.00014629 | No      |
| Dbx1    | 0.18193  | 0.026022  | -0.155908   | 1.26E-10   | No      | Akap2    | 4.80092   | 29.4767  | 2.61819          | 4.80192      | 29.4777       | 2.61794069       | 0.00014629 | No      |
| Dcc     | 0.074913 | 0.020308  | -0.054605   | 3.93E-06   | No      | Akap7    | 1.7063    | 5.80174  | 1.76562          | 1.7073       | 5.80274       | 1.7650177        | 0.00014629 | No      |
| Dcdc2c  | 0.79485  | 0.62299   | -0.17186    | 0.00375402 | No      | Akap8    | 81.2538   | 49.594   | -0.712271        | 81.2548      | 49.595        | -0.7122584       | 0.00014629 | No      |
| Dclk2   | 0.099374 | 0.044103  | -0.055271   | 0.00037405 | No      | Akirin1  | 54.0237   | 15.5002  | -1.8013          | 54.0247      | 15.5012       | -1.8012393       | 0.00014629 | No      |
| Ddx3y   | 0.53803  | 0.74489   | 0.20686     | 7.90E-07   | No      | Akna     | 58.1916   | 3.62165  | -4.00609         | 58.1926      | 3.62265       | -4.0057184       | 0.00014629 | No      |
| Depdc7  | 0.83296  | 0.15173   | -0.68123    | 4.27E-06   | No      | Akr1a1   | 168.743   | 1009.57  | 2.58085          | 168.744      | 1009.571      | 2.58083426       | 0.00014629 | No      |
| Des     | 0.16355  | 0.020789  | -0.142761   | 2.88E-05   | No      | Akr1b1   | 78.9207   | 34.7773  | -1.18226         | 78.9217      | 34.7783       | -1.1822346       | 0.00014629 | No      |
| Dffb    | 0.83329  | 0.70237   | -0.13092    | 0.00834984 | No      | AKR1B10  | 0         | 1.26069  | inf              | 0.001        | 1.26169       | 10.3011418       | 0.00014629 | No      |

| RRBS    |           |           |             |            |         | RNAseq    |          |         |                  |              |               |                  |            |         |
|---------|-----------|-----------|-------------|------------|---------|-----------|----------|---------|------------------|--------------|---------------|------------------|------------|---------|
| gene    | Blood     | Kidney    | methyl.diff | pMWU.fdr   | Match ? | gene      | blood    | kidney  | log2(fold_ratio) | blood+ 0.001 | kidney+ 0.001 | log2(fold_ratio) | q_value    | Match ? |
| Dhh     | 0.094942  | 0.0080923 | -0.0868497  | 6.26E-05   | No      | Akr1c1    | 0        | 207.598 | inf              | 0.001        | 207.599       | 17.66344         | 0.00014629 | No      |
| Dkk3    | 0.23414   | 0.10272   | -0.13142    | 0.00389713 | No      | Akr1c12   | 0        | 2.86202 | inf              | 0.001        | 2.86302       | 11.483322        | 0.00014629 | No      |
| Dkk1    | 0.73046   | 0.45971   | -0.27075    | 0.00259554 | No      | Akr1c12l1 | 0        | 208.145 | inf              | 0.001        | 208.146       | 17.6672363       | 0.00014629 | No      |
| Dlg2    | 0.3291    | 0.0829    | -0.2462     | 4.22E-08   | No      | Akr1e2    | 1.03624  | 48.4305 | 5.54649          | 1.03724      | 48.4315       | 5.54512403       | 0.00014629 | No      |
| Dlgap2  | 0.10802   | 0.026707  | -0.081313   | 0.00051431 | No      | Akr7a2    | 17.7899  | 383.733 | 4.43098          | 17.7909      | 383.734       | 4.4308952        | 0.00014629 | No      |
| Dlk1    | 0.11972   | 0.015895  | -0.103825   | 3.91E-05   | No      | Akt1s1    | 61.742   | 91.8177 | 0.57252          | 61.743       | 91.8187       | 0.57251242       | 0.00566132 | No      |
| Dlk2    | 0.15108   | 0.041367  | -0.109713   | 0.002433   | No      | Akt2      | 52.1911  | 21.0022 | -1.31327         | 52.1921      | 21.0032       | -1.3132223       | 0.00014629 | No      |
| Dll1    | 0.033263  | 0.31517   | 0.281907    | 0.00059604 | No      | Akt3      | 16.1339  | 2.56102 | -2.6553          | 16.1349      | 2.56202       | -2.654831        | 0.00252712 | No      |
| Dll3    | 0.1577    | 0.04059   | -0.11711    | 1.61E-12   | No      | Aktip     | 8.72312  | 99.9194 | 3.51785          | 8.72412      | 99.9204       | 3.51769773       | 0.00014629 | No      |
| Dlx3    | 0.24638   | 0.11695   | -0.12943    | 0.01658745 | No      | Alad      | 5.35418  | 120.071 | 4.48707          | 5.35518      | 120.072       | 4.48682088       | 0.00014629 | No      |
| Dmrt1   | 0.12546   | 0.038926  | -0.086534   | 0.00119585 | No      | Alas1     | 6.17348  | 42.1037 | 2.76979          | 6.17448      | 42.1047       | 2.76959174       | 0.00014629 | No      |
| Dmrta1  | 0.14242   | 0.016751  | -0.125669   | 3.61E-07   | No      | Alas2     | 0.379239 | 6.28055 | 4.04971          | 0.380239     | 6.28155       | 4.04614218       | 0.00219102 | No      |
| Dnai2   | 0.73391   | 0.54999   | -0.18392    | 0.01520153 | No      | Alcam     | 0.582501 | 3.00161 | 2.3654           | 0.583501     | 3.00261       | 2.36341007       | 0.00053701 | No      |
| Dock6   | 0.17924   | 0.095289  | -0.083951   | 0.02324623 | No      | Aldh16a1  | 12.7181  | 62.9521 | 2.30737          | 12.7191      | 62.9531       | 2.30728083       | 0.00014629 | No      |
| Dok5    | 0.088526  | 0.019819  | -0.068707   | 1.57E-06   | No      | Aldh18a1  | 7.62976  | 2.05149 | -1.89496         | 7.63076      | 2.05249       | -1.8944516       | 0.00014629 | No      |
| Dpm1    | 0.40214   | 0.21682   | -0.18532    | 2.93E-07   | No      | Aldh1a1   | 0        | 271.146 | inf              | 0.001        | 271.147       | 18.0487157       | 0.00014629 | No      |
| Dpysl4  | 0.07678   | 0.011572  | -0.065208   | 0.00014495 | No      | Aldh1l1   | 0        | 265.256 | inf              | 0.001        | 265.257       | 18.0170313       | 0.00014629 | No      |
| Dpysl5  | 0.10446   | 0.019483  | -0.084977   | 7.03E-05   | No      | ALDH2     | 74.8817  | 134.952 | 0.84976          | 74.8827      | 134.953       | 0.84975269       | 0.00014629 | No      |
| Drc1    | 0.69213   | 0.065628  | -0.626502   | 2.54E-12   | No      | Aldh5a1   | 1.66632  | 5.22282 | 1.64816          | 1.66732      | 5.22382       | 1.64757417       | 0.0319849  | No      |
| Drd2    | 0.098219  | 0.017661  | -0.080558   | 8.52E-05   | No      | Aldh6a1   | 7.32256  | 143.201 | 4.28955          | 7.32356      | 143.202       | 4.28936272       | 0.00014629 | No      |
| Drd5    | 0.13424   | 0.027751  | -0.106489   | 8.95E-06   | No      | Aldh7a1   | 0.879623 | 174.456 | 7.63176          | 0.880623     | 174.457       | 7.63013125       | 0.00014629 | No      |
| Drgx    | 0.17278   | 0.039618  | -0.133162   | 0.00357821 | No      | Aldh9a1   | 30.6914  | 134.492 | 2.13162          | 30.6924      | 134.493       | 2.13157772       | 0.00014629 | No      |
| Dsc3    | 0.59344   | 0.32717   | -0.26627    | 1.01E-08   | No      | Alg10     | 32.3134  | 6.24626 | -2.37107         | 32.3144      | 6.24726       | -2.3708817       | 0.00014629 | No      |
| Dscam   | 0.064737  | 0.0089098 | -0.0558272  | 7.51E-09   | No      | Alg11     | 9.62612  | 15.0854 | 0.648123         | 9.62712      | 15.0864       | 0.6480724        | 0.029796   | No      |
| Dscam1  | 0.2287    | 0.051589  | -0.177111   | 5.58E-08   | No      | Alg14     | 6.12253  | 15.1665 | 1.30869          | 6.12353      | 15.1675       | 1.30854785       | 0.00014629 | No      |
| Dsn1    | 0.47313   | 0.29543   | -0.1777     | 0.04063154 | No      | Alg9      | 3.17721  | 13.5833 | 2.096            | 3.17821      | 13.5843       | 2.09565387       | 0.00014629 | No      |
| Dynl1   | 0.32294   | 0.03952   | -0.28342    | 4.05E-07   | No      | Alkbh1    | 20.6469  | 6.11004 | -1.75667         | 20.6479      | 6.11104       | -1.7565052       | 0.00028114 | No      |
| Ear11   | 0.64018   | 0.29743   | -0.34275    | 0.01008382 | No      | Alkbh2    | 9.53554  | 30.9238 | 1.69733          | 9.53654      | 30.9248       | 1.69722643       | 0.00014629 | No      |
| Ebf3    | 0.079528  | 0.021764  | -0.057764   | 2.53E-08   | No      | Alkbh3    | 31.449   | 71.9953 | 1.19489          | 31.45        | 71.9963       | 1.19486275       | 0.00014629 | No      |
| Ecel1   | 0.20846   | 0.095944  | -0.112516   | 0.00057442 | No      | Alkbh4    | 17.2489  | 3.84732 | -2.16458         | 17.2499      | 3.84832       | -2.1642873       | 0.00014629 | No      |
| Echdc2  | 0.339     | 0.096707  | -0.242293   | 0.00011677 | No      | Alkbh7    | 26.2524  | 98.0228 | 1.90067          | 26.2534      | 98.0238       | 1.9006278        | 0.00014629 | No      |
| Edn3    | 0.21238   | 0.067868  | -0.144512   | 0.00226691 | No      | Alms1     | 9.48636  | 2.74821 | -1.78736         | 9.48736      | 2.74921       | -1.7869896       | 0.00014629 | No      |
| Eef1d   | 0.83812   | 0.72738   | -0.11074    | 0.02450594 | No      | Alox12    | 0.273703 | 2.07359 | 2.92144          | 0.274703     | 2.07459       | 2.91688167       | 0.00689996 | No      |
| Efnb3   | 0.15979   | 0.035349  | -0.124441   | 7.90E-07   | No      | Aloxe3    | 0        | 1.1192  | inf              | 0.001        | 1.1202        | 10.1295406       | 0.00014629 | No      |
| Egfm1   | 0.148     | 0.01303   | -0.13497    | 3.61E-07   | No      | Alpl      | 0.304409 | 99.5866 | 8.3538           | 0.305409     | 99.5876       | 8.34907973       | 0.00014629 | No      |
| Egflam  | 0.086436  | 0.010097  | -0.076339   | 0.00013121 | No      | Als2      | 1.1704   | 8.09924 | 2.79079          | 1.1714       | 8.10024       | 2.78973085       | 0.00014629 | No      |
| Egr3    | 0.33026   | 0.079077  | -0.251183   | 1.61E-12   | No      | Amacr     | 6.44543  | 150.716 | 4.54741          | 6.44643      | 150.717       | 4.54719792       | 0.00014629 | No      |
| Egr4    | 0.1183    | 0.029674  | -0.088626   | 4.27E-06   | No      | Amd1      | 18.8045  | 54.2493 | 1.52853          | 18.8055      | 54.2503       | 1.52847645       | 0.00014629 | No      |
| Ehbp1l1 | 0.0003629 | 0.051071  | 0.0507081   | 0.00683403 | No      | Amdhd2    | 8.54523  | 90.6482 | 3.40709          | 8.54623      | 90.6492       | 3.40693424       | 0.00014629 | No      |
| Eid3    | 0.88231   | 0.66491   | -0.2174     | 0.00143157 | No      | Amhr2     | 0.601224 | 4.1801  | 2.79756          | 0.602224     | 4.1811        | 2.79551044       | 0.00066215 | No      |
| Elavl3  | 0.09679   | 0.013689  | -0.083101   | 8.75E-07   | No      | Amica1    | 10.3     | 1.34849 | -2.93322         | 10.301       | 1.34949       | -2.9322982       | 0.00014629 | No      |
| Elnf1   | 0.13915   | 0.043087  | -0.096063   | 2.08E-05   | No      | Amigo1    | 10.9207  | 2.80888 | -1.95899         | 10.9217      | 2.80988       | -1.958617        | 0.00014629 | No      |

| RRBS     |          |           |             |            |         | RNAseq   |          |          |                  |              |               |                  |            |         |
|----------|----------|-----------|-------------|------------|---------|----------|----------|----------|------------------|--------------|---------------|------------------|------------|---------|
| gene     | Blood    | Kidney    | methyl.diff | pMWU.fdr   | Match ? | gene     | blood    | kidney   | log2(fold_ratio) | blood+ 0.001 | kidney+ 0.001 | log2(fold_ratio) | q_value    | Match ? |
| Emc10    | 0.43444  | 0.11312   | -0.32132    | 4.27E-06   | No      | Ammecr1  | 4.69581  | 0.619322 | -2.92261         | 4.69681      | 0.620322      | -2.920592        | 0.0125475  | No      |
| Emilin3  | 0.11829  | 0.066591  | -0.051699   | 0.02194182 | No      | Amotl1   | 0.163352 | 3.32271  | 4.3463           | 0.164352     | 3.32371       | 4.33793359       | 0.00053701 | No      |
| En2      | 0.088321 | 0.011887  | -0.076434   | 8.52E-05   | No      | Ampd2    | 15.1722  | 44.7338  | 1.55994          | 15.1732      | 44.7348       | 1.55987219       | 0.00014629 | No      |
| Endou    | 0.73875  | 0.55556   | -0.18319    | 0.00593418 | No      | Ampd3    | 1.00092  | 10.485   | 3.38892          | 1.00192      | 10.486        | 3.38762523       | 0.00014629 | No      |
| Enpep    | 0.5071   | 0.020568  | -0.486532   | 0.0030913  | No      | Amph     | 0        | 5.47949  | inf              | 0.001        | 5.48049       | 12.4200892       | 0.0143044  | No      |
| Enpp3    | 0.17782  | 0.068727  | -0.109093   | 6.96E-06   | No      | Amt      | 14.173   | 57.3138  | 2.01574          | 14.174       | 57.3148       | 2.01566077       | 0.00014629 | No      |
| Epb41l4b | 0.075899 | 0.33176   | 0.255861    | 0.00125588 | No      | Anapc1   | 6.69107  | 3.04408  | -1.13623         | 6.69207      | 3.04508       | -1.1359724       | 0.00014629 | No      |
| Epha10   | 0.21598  | 0.041406  | -0.174574   | 5.48E-05   | No      | Anapc10  | 11.901   | 4.32681  | -1.45971         | 11.902       | 4.32781       | -1.459495        | 0.00014629 | No      |
| Epha5    | 0.056479 | 0.0028698 | -0.0536092  | 5.68E-07   | No      | Anapc13  | 97.4341  | 249.796  | 1.35825          | 97.4351      | 249.797       | 1.35824266       | 0.00014629 | No      |
| Ephb1    | 0.10582  | 0.032387  | -0.073433   | 3.91E-05   | No      | Anapc15  | 37.4555  | 88.086   | 1.23373          | 37.4565      | 88.087        | 1.23371302       | 0.00014629 | No      |
| Ephb3    | 0.35475  | 0.21094   | -0.14381    | 0.00226691 | No      | Anapc2   | 26.6744  | 40.0255  | 0.585462         | 26.6754      | 40.0265       | 0.58544556       | 0.00513162 | No      |
| Epn1     | 0.84738  | 0.051611  | -0.795769   | 1.61E-12   | No      | Anapc4   | 24.2194  | 49.2169  | 1.02299          | 24.2204      | 49.2179       | 1.02296041       | 0.00207488 | No      |
| Epo      | 0.25777  | 0.040061  | -0.217709   | 1.66E-08   | No      | Anapc5   | 63.449   | 121.194  | 0.933654         | 63.45        | 121.195       | 0.93363811       | 0.00014629 | No      |
| Erbp2    | 0.062387 | 0.0056051 | -0.0567819  | 1.46E-05   | No      | Ang      | 1.72691  | 6.0115   | 1.79953          | 1.72791      | 6.0125        | 1.79893691       | 0.00149937 | No      |
| Ereg     | 0.68728  | 0.28588   | -0.4014     | 0.00639124 | No      | Angel2   | 25.958   | 10.2208  | -1.34467         | 25.959       | 10.2218       | -1.3445855       | 0.00014629 | No      |
| Erf      | 0.75106  | 0.61376   | -0.1373     | 0.01658745 | No      | Ank2     | 0.632157 | 2.86234  | 2.17884          | 0.633157     | 2.86334       | 2.1770638        | 0.00014629 | No      |
| Erich6   | 0.44562  | 0.1801    | -0.26552    | 3.61E-07   | No      | Ankh     | 32.7702  | 0.960219 | -5.09288         | 32.7712      | 0.961219      | -5.0914195       | 0.00014629 | No      |
| Esm1     | 0.75876  | 0.36858   | -0.39018    | 1.66E-08   | No      | Ankhd1   | 21.5184  | 88.4818  | 2.03981          | 21.5194      | 88.4828       | 2.03975919       | 0.00014629 | No      |
| Espnl    | 0.78089  | 0.35916   | -0.42173    | 0.00014495 | No      | Ankib1   | 16.5265  | 6.07029  | -1.44495         | 16.5275      | 6.07129       | -1.4447935       | 0.00014629 | No      |
| Esrp2    | 0.15431  | 0.027924  | -0.126386   | 1.12E-06   | No      | Ankle1   | 0.504753 | 3.47874  | 2.78491          | 0.505753     | 3.47974       | 2.78247464       | 0.0477475  | No      |
| Etv4     | 0.14036  | 0.059712  | -0.080648   | 0.01079042 | No      | Ankle2   | 27.2608  | 6.51532  | -2.06492         | 27.2618      | 6.51632       | -2.0647515       | 0.00014629 | No      |
| Eva1b    | 0.74643  | 0.30958   | -0.43685    | 1.61E-12   | No      | Ankrd1   | 0        | 3.2622   | inf              | 0.001        | 3.2632        | 11.6720717       | 0.00014629 | No      |
| Evpl     | 0.61075  | 0.019827  | -0.590923   | 1.63E-09   | No      | ANKRD10  | 46.4175  | 13.6713  | -1.76352         | 46.4185      | 13.6723       | -1.7634439       | 0.00014629 | No      |
| Eya4     | 0.089932 | 0.025992  | -0.06394    | 0.0001045  | No      | Ankrd11  | 102.716  | 22.5811  | -2.18547         | 102.717      | 22.5821       | -2.1854234       | 0.00014629 | No      |
| Fabp3    | 0.23926  | 0.020658  | -0.218602   | 9.66E-07   | No      | Ankrd12  | 16.3193  | 4.10365  | -1.9916          | 16.3203      | 4.10465       | -1.9913365       | 0.00014629 | No      |
| Fabp7    | 0.84901  | 0.34441   | -0.5046     | 1.28E-06   | No      | Ankrd13a | 158.341  | 61.8134  | -1.35705         | 158.342      | 61.8144       | -1.3570291       | 0.00014629 | No      |
| Fam110c  | 0.38197  | 0.072931  | -0.309039   | 1.64E-06   | No      | Ankrd16  | 8.67773  | 14.8141  | 0.771578         | 8.67873      | 14.8151       | 0.77151252       | 0.0419596  | No      |
| Fam131b  | 0.121    | 0.025774  | -0.095226   | 9.28E-06   | No      | Ankrd17  | 22.6981  | 12.4803  | -0.862925        | 22.6991      | 12.4813       | -0.8628669       | 0.00014629 | No      |
| Fam132a  | 0.8939   | 0.25969   | -0.63421    | 8.00E-12   | No      | Ankrd24  | 0.39681  | 2.01997  | 2.34782          | 0.39781      | 2.02097       | 2.34489646       | 0.0143044  | No      |
| Fam150a  | 0.10756  | 0.016024  | -0.091536   | 1.61E-12   | No      | Ankrd26  | 5.22247  | 1.93218  | -1.4345          | 5.22347      | 1.93318       | -1.4340325       | 0.00053701 | No      |
| Fam150b  | 0.080152 | 0.014646  | -0.065506   | 0.00130689 | No      | Ankrd28  | 8.64275  | 5.2796   | -0.711063        | 8.64375      | 5.2806        | -0.7109555       | 0.00149937 | No      |
| Fam163b  | 0.13781  | 0.021284  | -0.116526   | 4.44E-05   | No      | Ankrd29  | 0.220667 | 2.47726  | 3.48881          | 0.221667     | 2.47826       | 3.48286164       | 0.00544794 | No      |
| Fam193b  | 0.43845  | 0.147     | -0.29145    | 4.44E-05   | No      | Ankrd32  | 5.142    | 2.62339  | -0.970898        | 5.143        | 2.62439       | -0.970628        | 0.0168962  | No      |
| Fam196a  | 0.076113 | 0.020996  | -0.055117   | 2.57E-05   | No      | Ankrd37  | 7.09924  | 35.7299  | 2.3314           | 7.10024      | 35.7309       | 2.33123256       | 0.00014629 | No      |
| Fam20a   | 0.12495  | 0.057895  | -0.067055   | 0.00187484 | No      | Ankrd40  | 15.9414  | 21.6129  | 0.439117         | 15.9424      | 21.6139       | 0.43909058       | 0.0482743  | No      |
| Fam221b  | 0.21294  | 0.059865  | -0.153075   | 0.00039347 | No      | Ankrd44  | 50.9711  | 4.97106  | -3.35805         | 50.9721      | 4.97206       | -3.3577922       | 0.00014629 | No      |
| Fam71e2  | 0.90267  | 0.6973    | -0.20537    | 0.00013121 | No      | Ankrd46  | 12.5003  | 33.084   | 1.40417          | 12.5013      | 33.085        | 1.40409915       | 0.00014629 | No      |
| Fam83b   | 0.059044 | 0.0035465 | -0.0554975  | 3.87E-06   | No      | Ankrd50  | 4.09993  | 1.91518  | -1.09812         | 4.10093      | 1.91618       | -1.097718        | 0.00014629 | No      |
| Fam89a   | 0.027206 | 0.3864    | 0.359194    | 8.00E-12   | No      | Ankrd52  | 11.1656  | 3.51033  | -1.66938         | 11.1666      | 3.51133       | -1.6691005       | 0.00014629 | No      |
| Fat1     | 0.088688 | 0.013795  | -0.074893   | 6.17E-07   | No      | Ankrd54  | 11.0702  | 20.873   | 0.914959         | 11.0712      | 20.874        | 0.91489548       | 0.00053701 | No      |
| Fat3     | 0.17316  | 0.041154  | -0.132006   | 8.95E-06   | No      | Ankrd6   | 0.616962 | 1.43846  | 1.22127          | 0.617962     | 1.43946       | 1.21993767       | 0.0296199  | No      |
| Faxc     | 0.16346  | 0.052899  | -0.110561   | 2.57E-05   | No      | Ankrd9   | 1.89585  | 6.51045  | 1.77991          | 1.89685      | 6.51145       | 1.77937325       | 0.0121484  | No      |

| RRBS    |          |           |             |            |         | RNAseq  |           |         |                  |              |               |                  |            |         |
|---------|----------|-----------|-------------|------------|---------|---------|-----------|---------|------------------|--------------|---------------|------------------|------------|---------|
| gene    | Blood    | Kidney    | methyl.diff | pMWU.fdr   | Match ? | gene    | blood     | kidney  | log2(fold_ratio) | blood+ 0.001 | kidney+ 0.001 | log2(fold_ratio) | q_value    | Match ? |
| Fbxw17  | 0.28719  | 0.035492  | -0.251698   | 1.76E-06   | No      | Anks1a  | 10.7441   | 19.4718 | 0.857849         | 10.7451      | 19.4728       | 0.85778144       | 0.00149937 | No      |
| Fendrr  | 0.092363 | 0.034316  | -0.058047   | 0.00500595 | No      | Anks3   | 16.4635   | 34.7759 | 1.07882          | 16.4645      | 34.7769       | 1.07877064       | 0.00014629 | No      |
| Fezf2   | 0.12136  | 0.017934  | -0.103426   | 3.80E-11   | No      | Anks4b  | 0.28485   | 39.2154 | 7.10507          | 0.28585      | 39.2164       | 7.100055         | 0.0267812  | No      |
| Ffar2   | 0.86054  | 0.49826   | -0.36228    | 1.67E-05   | No      | Anks6   | 0.55318   | 49.6351 | 6.48747          | 0.55418      | 49.6361       | 6.48489131       | 0.00014629 | No      |
| Fgf19   | 0.15028  | 0.045656  | -0.104624   | 0.00593418 | No      | Ano8    | 14.3466   | 46.6767 | 1.702            | 14.3476      | 46.6777       | 1.70192405       | 0.00014629 | No      |
| Fgf21   | 0.92914  | 0.72595   | -0.20319    | 0.03820617 | No      | Anp32a  | 180.68    | 110.591 | -0.7082          | 180.681      | 110.592       | -0.7081978       | 0.00028114 | No      |
| Fgf22   | 0.054563 | 0.0042233 | -0.0503397  | 3.71E-09   | No      | Anp32b  | 244.939   | 150.23  | -0.705248        | 244.94       | 150.231       | -0.7052459       | 0.00014629 | No      |
| Fgf4    | 0.1267   | 0.010007  | -0.116693   | 8.75E-07   | No      | Anp32e  | 97.5201   | 30.0741 | -1.69718         | 97.5211      | 30.0751       | -1.6971449       | 0.00014629 | No      |
| Fgf5    | 0.11617  | 0.032466  | -0.083704   | 0.00861735 | No      | Anpep   | 0.133374  | 89.4284 | 9.38911          | 0.134374     | 89.4294       | 9.37835137       | 0.00066215 | No      |
| Fgf6    | 0.74083  | 0.055203  | -0.685627   | 1.61E-12   | No      | Antxr2  | 25.5714   | 3.12511 | -3.03255         | 25.5724      | 3.12611       | -3.0321471       | 0.00014629 | No      |
| Fgf8    | 0.042094 | 0.16524   | 0.123146    | 0.04431681 | No      | Anxa1   | 26.1507   | 85.4229 | 1.70777          | 26.1517      | 85.4239       | 1.70773503       | 0.00014629 | No      |
| Fgfr3   | 0.070114 | 0.0023179 | -0.0677961  | 6.96E-06   | No      | Anxa11  | 74.6122   | 175.247 | 1.23191          | 74.6132      | 175.248       | 1.23189519       | 0.00014629 | No      |
| Fgr     | 0.31031  | 0.043009  | -0.267301   | 6.28E-09   | No      | Anxa4   | 3.65316   | 86.5676 | 4.56661          | 3.65416      | 86.5686       | 4.56623212       | 0.00014629 | No      |
| Fhdc1   | 0.09191  | 0.016378  | -0.075532   | 0.00861735 | No      | Anxa5   | 5.63468   | 305.749 | 5.76187          | 5.63568      | 305.75        | 5.76161899       | 0.00014629 | No      |
| Fitm1   | 0.10967  | 0.025358  | -0.084312   | 0.00015888 | No      | Anxa7   | 24.7335   | 33.93   | 0.456098         | 24.7345      | 33.931        | 0.45607921       | 0.0499148  | No      |
| Fkbp1   | 0.74549  | 0.12917   | -0.61632    | 1.02E-05   | No      | Anxa8   | 0         | 3.92235 | inf              | 0.001        | 3.92335       | 11.9378703       | 0.00014629 | No      |
| Flnc    | 0.11628  | 0.033402  | -0.082878   | 0.00057442 | No      | Anxa9   | 0         | 1.48103 | inf              | 0.001        | 1.48203       | 10.5333589       | 0.00014629 | No      |
| Flrt3   | 0.11565  | 0.045824  | -0.069826   | 0.02324623 | No      | Aoah    | 0.0608577 | 6.88433 | 6.82173          | 0.0618577    | 6.88533       | 6.7984288        | 0.0256967  | No      |
| Foxa3   | 0.13981  | 0.013892  | -0.125918   | 5.23E-07   | No      | Ap1ar   | 15.8258   | 10.1276 | -0.643979        | 15.8268      | 10.1286       | -0.6439348       | 0.00502315 | No      |
| Foxb2   | 0.087687 | 0.023697  | -0.06399    | 0.03460571 | No      | Ap1b1   | 17.0225   | 35.1663 | 1.04675          | 17.0235      | 35.1673       | 1.04670689       | 0.00014629 | No      |
| Foxc2   | 0.10575  | 0.014188  | -0.091562   | 1.64E-06   | No      | Ap1g2   | 44.1149   | 18.1831 | -1.27867         | 44.1159      | 18.1841       | -1.2786212       | 0.00597292 | No      |
| Foxe1   | 0.13395  | 0.037376  | -0.096574   | 5.25E-05   | No      | Ap1s1   | 20.7976   | 65.1196 | 1.64667          | 20.7986      | 65.1206       | 1.64662757       | 0.00014629 | No      |
| Foxe3   | 0.19914  | 0.088504  | -0.110636   | 0.00639124 | No      | Ap1s2   | 9.72031   | 2.05355 | -2.24288         | 9.72131      | 2.05455       | -2.2423283       | 0.00014629 | No      |
| Foxg1   | 0.40255  | 0.083738  | -0.318812   | 3.61E-07   | No      | Ap2a2   | 18.3043   | 49.3614 | 1.4312           | 18.3053      | 49.3624       | 1.43115112       | 0.00014629 | No      |
| Foxj1   | 0.68545  | 0.25047   | -0.43498    | 1.64E-07   | No      | Ap2m1   | 158.626   | 266.725 | 0.749723         | 158.627      | 266.726       | 0.74972011       | 0.00014629 | No      |
| Foxred2 | 0.47685  | 0.093279  | -0.383571   | 1.61E-12   | No      | Ap2s1   | 79.3496   | 188.438 | 1.2478           | 79.3506      | 188.439       | 1.24778454       | 0.00014629 | No      |
| Foxs1   | 0.7735   | 0.59543   | -0.17807    | 0.00156709 | No      | Ap3m1   | 18.737    | 11.0024 | -0.76807         | 18.738       | 11.0034       | -0.7680176       | 0.00028114 | No      |
| Frrmd3  | 0.12904  | 0.0057375 | -0.1233025  | 1.61E-12   | No      | Ap3m2   | 11.9324   | 3.84547 | -1.63365         | 11.9334      | 3.84647       | -1.6333982       | 0.00102864 | No      |
| Fry     | 0.21752  | 0.15543   | -0.06209    | 0.00357821 | No      | Ap3s2   | 8.46175   | 56.7341 | 2.74519          | 8.46275      | 56.7351       | 2.7450431        | 0.00014629 | No      |
| Fsip1   | 0.14888  | 0.0375    | -0.11138    | 0.00028703 | No      | Ap4b1   | 37.3584   | 13.382  | -1.48114         | 37.3594      | 13.383        | -1.4810697       | 0.00014629 | No      |
| Fut4    | 0.24761  | 0.12101   | -0.1266     | 0.00065385 | No      | Ap4e1   | 6.35261   | 2.12571 | -1.5794          | 6.35361      | 2.12671       | -1.5789532       | 0.00014629 | No      |
| Fzd10   | 0.0527   | 0.1895    | 0.1368      | 1.73E-05   | No      | Ap4m1   | 15.0106   | 5.02903 | -1.57763         | 15.0116      | 5.03003       | -1.5774388       | 0.00395247 | No      |
| Fzd5    | 0.87382  | 0.21596   | -0.65786    | 1.61E-12   | No      | Ap4s1   | 15.774    | 33.0346 | 1.06643          | 15.775       | 33.0356       | 1.06638154       | 0.0499959  | No      |
| Gabra1  | 0.074695 | 0.0014227 | -0.0732723  | 1.94E-12   | No      | Ap5b1   | 3.50305   | 8.6887  | 1.31053          | 3.50405      | 8.6897        | 1.31028301       | 0.00014629 | No      |
| Gabra4  | 0.061781 | 0.0043878 | -0.0573932  | 2.10E-08   | No      | Ap5m1   | 10.7649   | 3.70817 | -1.53756         | 10.7659      | 3.70917       | -1.5373006       | 0.00014629 | No      |
| Gabra5  | 0.071473 | 0.0035759 | -0.0678971  | 5.62E-06   | No      | Apaf1   | 21.3245   | 3.06685 | -2.79768         | 21.3255      | 3.06785       | -2.7972797       | 0.00014629 | No      |
| Gabrb3  | 0.076705 | 2.50E-07  | -0.0767048  | 1.12E-06   | No      | Apba3   | 10.9146   | 32.2685 | 1.56386          | 10.9156      | 32.2695       | 1.56377979       | 0.00014629 | No      |
| Gabrg3  | 0.072546 | 0.011094  | -0.061452   | 1.02E-10   | No      | Apbb1   | 3.73261   | 9.06822 | 1.28064          | 3.73361      | 9.06922       | 1.28040724       | 0.00014629 | No      |
| Gabrr1  | 0.89311  | 0.68611   | -0.207      | 0.01079042 | No      | Apbb1ip | 75.5352   | 3.37672 | -4.48345         | 75.5362      | 3.37772       | -4.4830466       | 0.00014629 | No      |
| Gad1    | 0.19322  | 0.025563  | -0.167657   | 8.75E-07   | No      | Apbb2   | 8.66053   | 13.2082 | 0.608907         | 8.66153      | 13.2092       | 0.6088493        | 0.00427532 | No      |
| Gal     | 0.14298  | 0.037447  | -0.105533   | 0.0001045  | No      | Apbb3   | 55.2455   | 112.485 | 1.0258           | 55.2465      | 112.486       | 1.02579048       | 0.0209112  | No      |
| Galnt16 | 0.17522  | 0.026787  | -0.148433   | 3.93E-06   | No      | Apcdd1l | 0.336485  | 4.75895 | 3.82203          | 0.337485     | 4.75995       | 3.81805113       | 0.00014629 | No      |



| RRBS    |          |           |             |            |         | RNAseq  |          |         |                  |              |               |                  |            |         |
|---------|----------|-----------|-------------|------------|---------|---------|----------|---------|------------------|--------------|---------------|------------------|------------|---------|
| gene    | Blood    | Kidney    | methyl.diff | pMWU.fdr   | Match ? | gene    | blood    | kidney  | log2(fold_ratio) | blood+ 0.001 | kidney+ 0.001 | log2(fold_ratio) | q_value    | Match ? |
| Galnt2  | 0.62041  | 0.086466  | -0.533944   | 0.00019529 | No      | Apcs    | 0        | 45.3592 | inf              | 0.001        | 45.3602       | 15.4691394       | 0.00014629 | No      |
| Galnt4  | 0.98306  | 0.89307   | -0.08999    | 0.00076943 | No      | Apeh    | 26.6196  | 40.4248 | 0.602752         | 26.6206      | 40.4258       | 0.60273324       | 0.00330073 | No      |
| Galnt9  | 0.16151  | 0.046995  | -0.114515   | 0.00026594 | No      | Apex2   | 9.38204  | 4.52689 | -1.05138         | 9.38304      | 4.52789       | -1.0512165       | 0.00161718 | No      |
| Galntl6 | 0.060965 | 0.0093192 | -0.0516458  | 3.60E-08   | No      | Api5    | 38.2038  | 25.8078 | -0.56591         | 38.2048      | 25.8088       | -0.5658908       | 0.00395247 | No      |
| Galr1   | 0.12961  | 0.036166  | -0.093444   | 1.39E-08   | No      | Apitd1  | 44.578   | 81.1612 | 0.86446          | 44.579       | 81.1622       | 0.86444372       | 0.00263402 | No      |
| Galr2   | 0.24654  | 0.039452  | -0.207088   | 5.68E-07   | No      | Aplf    | 45.1973  | 30.1856 | -0.582374        | 45.1983      | 30.1866       | -0.5823602       | 0.0314513  | No      |
| Garem2  | 0.23762  | 0.030188  | -0.207432   | 1.12E-06   | No      | Aplnr   | 0.182989 | 2.45443 | 3.74556          | 0.183989     | 2.45543       | 3.73828427       | 0.00384649 | No      |
| Gas2l2  | 0.71904  | 0.33085   | -0.38819    | 4.97E-05   | No      | ALPL1   | 0.322157 | 7.39467 | 4.52065          | 0.323157     | 7.39567       | 4.5163737        | 0.00126596 | No      |
| Gas6    | 0.033638 | 0.22084   | 0.187202    | 4.59E-07   | No      | Aplp2   | 22.628   | 57.079  | 1.33485          | 22.629       | 57.08         | 1.3348125        | 0.00014629 | No      |
| Gata2   | 0.49049  | 0.20858   | -0.28191    | 0.00026594 | No      | Apmap   | 8.32211  | 46.6927 | 2.48818          | 8.32311      | 46.6937       | 2.4880333        | 0.00014629 | No      |
| Gata6   | 0.15055  | 0.065668  | -0.084882   | 0.00076943 | No      | Apoa1   | 0.56869  | 4.27428 | 2.90997          | 0.56969      | 4.27528       | 2.90776992       | 0.0145013  | No      |
| Gba     | 0.97155  | 0.64682   | -0.32473    | 4.59E-07   | No      | APOA1BP | 17.5911  | 41.309  | 1.23161          | 17.5921      | 41.31         | 1.23156335       | 0.00014629 | No      |
| Gbx1    | 0.10957  | 0.02404   | -0.08553    | 0.00226691 | No      | Apobr   | 5.56042  | 1.67976 | -1.72694         | 5.56142      | 1.68076       | -1.7263396       | 0.00014629 | No      |
| Gbx2    | 0.12512  | 0.047174  | -0.077946   | 3.38E-05   | No      | Apoc2   | 0        | 4.2848  | inf              | 0.001        | 4.2858        | 12.0653488       | 0.00014629 | No      |
| Gcgr    | 0.10041  | 0.045079  | -0.055331   | 0.02324623 | No      | Apoc3   | 0        | 19.2581 | inf              | 0.001        | 19.2591       | 14.2332527       | 0.00014629 | No      |
| Gdap1   | 0.072004 | 0.01555   | -0.056454   | 4.27E-06   | No      | Apol9a  | 0.122789 | 5.32587 | 5.43876          | 0.123789     | 5.32687       | 5.42733305       | 0.0274347  | No      |
| Gdap1l1 | 0.096046 | 0.027612  | -0.068434   | 0.00067482 | No      | Apold1  | 0.372773 | 1.82938 | 2.29499          | 0.373773     | 1.83038       | 2.29190893       | 0.00395247 | No      |
| Gdf15   | 0.42392  | 0.097818  | -0.326102   | 1.10E-10   | No      | Apom    | 5.52615  | 194.381 | 5.13647          | 5.52715      | 194.382       | 5.13621505       | 0.00395247 | No      |
| Gdf7    | 0.16223  | 0.073319  | -0.088911   | 0.00210055 | No      | Apoo    | 8.59479  | 57.5988 | 2.7445           | 8.59579      | 57.5998       | 2.74436166       | 0.00014629 | No      |
| Gfod1   | 0.455    | 0.20141   | -0.25359    | 0.004217   | No      | Apool   | 7.08004  | 18.5216 | 1.38738          | 7.08104      | 18.5226       | 1.38725345       | 0.00014629 | No      |
| Gfra4   | 0.12386  | 0.064025  | -0.059835   | 0.00683403 | No      | App     | 55.6208  | 350.61  | 2.65617          | 55.6218      | 350.611       | 2.65614892       | 0.00014629 | No      |
| Ghsr    | 0.38378  | 0.1309    | -0.25288    | 1.05E-06   | No      | Appbp2  | 16.7843  | 8.74043 | -0.941333        | 16.7853      | 8.74143       | -0.9412571       | 0.00014629 | No      |
| Gipc2   | 0.0823   | 0.01007   | -0.07223    | 0.00017692 | No      | Appl2   | 0.620921 | 13.0806 | 4.39688          | 0.621921     | 13.0816       | 4.39466386       | 0.00014629 | No      |
| Gipc3   | 0.72693  | 0.29935   | -0.42758    | 3.61E-07   | No      | Aprt    | 245.834  | 128.762 | -0.932971        | 245.835      | 128.763       | -0.9329722       | 0.00014629 | No      |
| Gja3    | 0.7268   | 0.45432   | -0.27248    | 0.02714861 | No      | Aptx    | 15.9993  | 7.62836 | -1.06856         | 16.0003      | 7.62936       | -1.068465        | 0.00053701 | No      |
| Gldn    | 0.13223  | 0.027692  | -0.104538   | 0.00051431 | No      | Aqp2    | 0        | 186.32  | inf              | 0.001        | 186.321       | 17.5074308       | 0.00014629 | No      |
| Glra1   | 0.10408  | 0.022642  | -0.081438   | 3.91E-05   | No      | Aqp3    | 0        | 40.7075 | inf              | 0.001        | 40.7085       | 15.3130424       | 0.00014629 | No      |
| Gnas    | 0.41291  | 0.17673   | -0.23618    | 1.09E-10   | No      | Aqp4    | 0        | 7.11904 | inf              | 0.001        | 7.12004       | 12.7976696       | 0.00014629 | No      |
| Gnaz    | 0.54117  | 0.24865   | -0.29252    | 0.00076943 | No      | Aqp7    | 0        | 30.5727 | inf              | 0.001        | 30.5737       | 14.9000035       | 0.00014629 | No      |
| Gp1bb   | 0.36821  | 0.26701   | -0.1012     | 0.00580037 | No      | Aqr     | 21.9618  | 12.0167 | -0.869948        | 21.9628      | 12.0177       | -0.8699012       | 0.0286096  | No      |
| Gpr12   | 0.094641 | 0.0029412 | -0.0916998  | 0.00026594 | No      | Arap1   | 41.6326  | 22.3534 | -0.897218        | 41.6336      | 22.3544       | -0.8971895       | 0.00041099 | No      |
| Gpr139  | 0.065809 | 0.010363  | -0.055446   | 0.00026594 | No      | Arap2   | 9.17808  | 2.67666 | -1.77776         | 9.17908      | 2.67766       | -1.7773768       | 0.00014629 | No      |
| Gpr158  | 0.24344  | 0.080934  | -0.162506   | 0.00293459 | No      | Arap3   | 3.86207  | 8.84015 | 1.1947           | 3.86307      | 8.84115       | 1.19448622       | 0.00173187 | No      |
| Gpr26   | 0.30926  | 0.050868  | -0.258392   | 2.28E-11   | No      | Arel1   | 24.065   | 9.58907 | -1.32747         | 24.066       | 9.59007       | -1.3273831       | 0.00014629 | No      |
| Gpr50   | 0.16964  | 0.023038  | -0.146602   | 3.41E-06   | No      | Arf1    | 172.246  | 229.444 | 0.413667         | 172.247      | 229.445       | 0.41366951       | 0.0421247  | No      |
| Gpr6    | 0.19316  | 0.073832  | -0.119328   | 0.00143157 | No      | Arf2    | 4.18528  | 8.92934 | 1.09323          | 4.18628      | 8.93034       | 1.09304629       | 0.00028114 | No      |
| Gpr81   | 0.79906  | 0.15202   | -0.64704    | 4.07E-08   | No      | Arf4    | 67.6348  | 97.3883 | 0.525983         | 67.6358      | 97.3893       | 0.5259762        | 0.00924781 | No      |
| Gpr83   | 0.41112  | 0.15988   | -0.25124    | 0.00026594 | No      | Arf5    | 135.255  | 181.962 | 0.427954         | 135.256      | 181.963       | 0.42795253       | 0.0301422  | No      |
| Gprc5a  | 0.36192  | 0.139     | -0.22292    | 1.46E-05   | No      | Arfgap2 | 30.5611  | 73.7676 | 1.27129          | 30.5621      | 73.7686       | 1.27126318       | 0.00014629 | No      |
| Gpx2    | 0.72612  | 0.22318   | -0.50294    | 1.12E-06   | No      | Arfgap3 | 11.2997  | 18.2332 | 0.690285         | 11.3007      | 18.2342       | 0.69023476       | 0.00307875 | No      |
| Grb10   | 0.68766  | 0.25474   | -0.43292    | 3.61E-07   | No      | Arfgef1 | 33.083   | 19.7383 | -0.745095        | 33.084       | 19.7393       | -0.7450628       | 0.00241835 | No      |
| Grhl2   | 0.1371   | 0.037427  | -0.099673   | 0.00743291 | No      | Arfip2  | 34.4244  | 58.7143 | 0.77028          | 34.4254      | 58.7153       | 0.77026307       | 0.00041099 | No      |

| RRBS      |          |           |             |            |         | RNAseq    |            |         |                  |              |               |                  |            |         |
|-----------|----------|-----------|-------------|------------|---------|-----------|------------|---------|------------------|--------------|---------------|------------------|------------|---------|
| gene      | Blood    | Kidney    | methyl.diff | pMWU.fdr   | Match ? | gene      | blood      | kidney  | log2(fold_ratio) | blood+ 0.001 | kidney+ 0.001 | log2(fold_ratio) | q_value    | Match ? |
| Gria1     | 0.11113  | 0.052875  | -0.058255   | 0.01520153 | No      | Arglu1    | 188.63     | 67.8828 | -1.47444         | 188.631      | 67.8838       | -1.4744276       | 0.00014629 | No      |
| Gria2     | 0.096488 | 0.026894  | -0.069594   | 6.76E-05   | No      | Arhgap1   | 57.3182    | 23.0628 | -1.31343         | 57.3192      | 23.0638       | -1.3133882       | 0.00014629 | No      |
| Gria4     | 0.06167  | 0.0056071 | -0.0560629  | 7.44E-07   | No      | Arhgap10  | 2.58018    | 25.7837 | 3.32092          | 2.58118      | 25.7847       | 3.3204126        | 0.00014629 | No      |
| Grid1     | 0.10798  | 0.024459  | -0.083521   | 5.62E-06   | No      | Arhgap11a | 0.469968   | 1.31485 | 1.48426          | 0.470968     | 1.31585       | 1.48229409       | 0.00629035 | No      |
| Grid2     | 0.050245 | 2.50E-07  | -0.0502448  | 2.88E-05   | No      | Arhgap12  | 15.1425    | 6.70056 | -1.17625         | 15.1435      | 6.70156       | -1.1761298       | 0.00014629 | No      |
| Grik1     | 0.17414  | 0.045594  | -0.128546   | 4.95E-06   | No      | Arhgap15  | 110.78     | 4.38251 | -4.6598          | 110.781      | 4.38351       | -4.6594801       | 0.00014629 | No      |
| Grik3     | 0.14176  | 0.018879  | -0.122881   | 7.96E-06   | No      | Arhgap18  | 3.17436    | 18.7591 | 2.56305          | 3.17536      | 18.7601       | 2.56267545       | 0.00014629 | No      |
| Grin2a    | 0.12634  | 0.016173  | -0.110167   | 6.96E-06   | No      | Arhgap21  | 0.505551   | 5.12115 | 3.34054          | 0.506551     | 5.12215       | 3.33797007       | 0.00014629 | No      |
| Grin2b    | 0.075642 | 0.013707  | -0.061935   | 0.00039347 | No      | Arhgap22  | 0.0405112  | 19.6823 | 8.92436          | 0.0415112    | 19.6833       | 8.88925576       | 0.00066215 | No      |
| Grin2c    | 0.072219 | 0.020094  | -0.052125   | 0.00191236 | No      | Arhgap24  | 0.228299   | 163.031 | 9.48001          | 0.229299     | 163.032       | 9.47370939       | 0.00014629 | No      |
| Grin2d    | 0.48887  | 0.066347  | -0.422523   | 0.00051431 | No      | Arhgap26  | 4.57192    | 1.90419 | -1.26362         | 4.57292      | 1.90519       | -1.2631808       | 0.00090728 | No      |
| Grip2     | 0.090083 | 0.016138  | -0.073945   | 6.76E-05   | No      | Arhgap29  | 0.0205749  | 26.7378 | 10.3438          | 0.0215749    | 26.7388       | 10.2753651       | 0.00014629 | No      |
| Grm1      | 0.21597  | 0.041088  | -0.174882   | 6.96E-06   | No      | Arhgap30  | 106.9      | 184.945 | 0.790831         | 106.901      | 184.946       | 0.79082875       | 0.0141124  | No      |
| Grm7      | 0.15648  | 0.017981  | -0.138499   | 1.63E-09   | No      | Arhgap32  | 0.00419429 | 4.07527 | 9.92425          | 0.00519429   | 4.07627       | 9.61610734       | 0.00448672 | No      |
| Grp       | 0.078228 | 0.010109  | -0.068119   | 2.06E-09   | No      | Arhgap35  | 2.3762     | 9.67526 | 2.02565          | 2.3772       | 9.67626       | 2.02518625       | 0.00014629 | No      |
| Gsc       | 0.12653  | 0.044524  | -0.082006   | 0.00043492 | No      | Arhgap39  | 1.35574    | 3.01129 | 1.1513           | 1.35674      | 3.01229       | 1.15071639       | 0.00114835 | No      |
| Gspt2     | 0.068078 | 0.010804  | -0.057274   | 2.63E-05   | No      | Arhgap4   | 113.259    | 74.6317 | -0.601767        | 113.26       | 74.6327       | -0.6017587       | 0.00307875 | No      |
| Gstt3     | 0.28757  | 0.034367  | -0.253203   | 3.91E-05   | No      | Arhgap44  | 0.0583909  | 3.32249 | 5.83038          | 0.0593909    | 3.32349       | 5.80631331       | 0.00014629 | No      |
| Gsx1      | 0.11088  | 0.02083   | -0.09005    | 8.18E-10   | No      | Arhgap5   | 0.278707   | 16.4947 | 5.88711          | 0.279707     | 16.4957       | 5.88202983       | 0.00014629 | No      |
| Gtpbp6    | 0.069724 | 0.0042186 | -0.0655054  | 1.94E-10   | No      | Arhgap9   | 157.261    | 73.3622 | -1.10006         | 157.262      | 73.3632       | -1.1000416       | 0.00014629 | No      |
| Guca1a    | 0.011364 | 0.31115   | 0.299786    | 3.61E-07   | No      | Arhgdia   | 259.577    | 165.92  | -0.64568         | 259.578      | 165.921       | -0.6456716       | 0.00352183 | No      |
| Gucy1a2   | 0.06352  | 0.012938  | -0.050582   | 2.96E-12   | No      | Arhgdiib  | 1892.78    | 111.495 | -4.08546         | 1892.781     | 111.496       | -4.0854436       | 0.00014629 | No      |
| Gucy2e    | 0.18865  | 0.11769   | -0.07096    | 5.76E-05   | No      | Arhgef1   | 512.483    | 76.3392 | -2.74701         | 512.484      | 76.3402       | -2.7469921       | 0.00014629 | No      |
| H2afx     | 0.059985 | 0.0080728 | -0.0519122  | 1.73E-05   | No      | Arhgef10l | 0.139092   | 32.1436 | 7.85235          | 0.140092     | 32.1446       | 7.84205802       | 0.00014629 | No      |
| H2afy2    | 0.20472  | 0.056828  | -0.147892   | 2.78E-07   | No      | Arhgef11  | 3.00224    | 11.4805 | 1.93508          | 3.00324      | 11.4815       | 1.93471946       | 0.0265991  | No      |
| Haoa      | 0.9257   | 0.28107   | -0.64463    | 1.69E-12   | No      | Arhgef12  | 1.24359    | 8.42314 | 2.75985          | 1.24459      | 8.42414       | 2.75885885       | 0.00014629 | No      |
| Hamp      | 0.80598  | 0.22943   | -0.57655    | 3.61E-07   | No      | Arhgef18  | 56.4584    | 10.31   | -2.45314         | 56.4594      | 10.311        | -2.4530295       | 0.00014629 | No      |
| Hand1     | 0.26953  | 0.09803   | -0.1715     | 0.00043492 | No      | Arhgef6   | 59.1059    | 3.80374 | -3.95781         | 59.1069      | 3.80474       | -3.9574568       | 0.00014629 | No      |
| Hand2     | 0.11381  | 0.045288  | -0.068522   | 4.44E-05   | No      | Arid1a    | 65.0694    | 11.154  | -2.54443         | 65.0704      | 11.155        | -2.5443109       | 0.00014629 | No      |
| Hapln4    | 0.087267 | 0.020818  | -0.066449   | 0.00075499 | No      | Arid3b    | 13.6537    | 2.42045 | -2.49594         | 13.6547      | 2.42145       | -2.4954545       | 0.00014629 | No      |
| Has3      | 0.25615  | 0.063382  | -0.192768   | 0.00051431 | No      | Arid4a    | 29.9981    | 5.20559 | -2.52674         | 29.9991      | 5.20659       | -2.5265085       | 0.00102864 | No      |
| Hcn1      | 0.055575 | 0.0021741 | -0.0534009  | 1.44E-06   | No      | Arid4b    | 12.8753    | 3.09934 | -2.05457         | 12.8763      | 3.10034       | -2.0542198       | 0.00014629 | No      |
| Hdac5     | 0.72472  | 0.51831   | -0.20641    | 0.00683403 | No      | Arid5a    | 13.78      | 2.6281  | -2.39049         | 13.781       | 2.6291        | -2.3900397       | 0.00014629 | No      |
| Hes2      | 0.10509  | 0.050732  | -0.054358   | 0.02834942 | No      | Arid5b    | 19.7243    | 3.93059 | -2.32716         | 19.7253      | 3.93159       | -2.3268625       | 0.00014629 | No      |
| Hes7      | 0.72924  | 0.26893   | -0.46031    | 7.44E-07   | No      | Arih1     | 24.6433    | 11.2202 | -1.1351          | 24.6443      | 11.2212       | -1.135027        | 0.00014629 | No      |
| Hfe2      | 0.040082 | 0.23203   | 0.191948    | 4.97E-05   | No      | Arih2     | 29.3687    | 19.1347 | -0.61809         | 29.3697      | 19.1357       | -0.6180619       | 0.00263402 | No      |
| Hhatl     | 0.81398  | 0.13724   | -0.67674    | 3.61E-07   | No      | Arl1      | 22.8332    | 76.1826 | 1.73833          | 22.8342      | 76.1836       | 1.73828422       | 0.00014629 | No      |
| Hhex      | 0.048622 | 0.25249   | 0.203868    | 1.83E-06   | No      | ARL10     | 2.73932    | 4.79142 | 0.806638         | 2.74032      | 4.79242       | 0.80640998       | 0.0184724  | No      |
| Hic1      | 0.52679  | 0.17331   | -0.35348    | 1.83E-06   | No      | Arl14ep   | 16.0558    | 10.3526 | -0.6331          | 16.0568      | 10.3536       | -0.6330519       | 0.0408729  | No      |
| Hist1h1b  | 0.018874 | 0.20903   | 0.190156    | 5.48E-05   | No      | Arl15     | 8.66418    | 16.3858 | 0.919306         | 8.66518      | 16.3868       | 0.91923253       | 0.0167972  | No      |
| Hist1h2bo | 0.02259  | 0.13062   | 0.10803     | 0.00210055 | No      | Arl2      | 23.7482    | 113.296 | 2.25421          | 23.7492      | 113.297       | 2.25415884       | 0.00014629 | No      |
| Hmx1      | 0.15828  | 0.030663  | -0.127617   | 6.96E-06   | No      | Arl2bp    | 34.222     | 56.9905 | 0.735799         | 34.223       | 56.9915       | 0.73578053       | 0.00014629 | No      |

| RRBS     |           |           |             |            |         | RNAseq  |           |         |                  |              |               |                  |            |         |
|----------|-----------|-----------|-------------|------------|---------|---------|-----------|---------|------------------|--------------|---------------|------------------|------------|---------|
| gene     | Blood     | Kidney    | methyl.diff | pMWU.fdr   | Match ? | gene    | blood     | kidney  | log2(fold_ratio) | blood+ 0.001 | kidney+ 0.001 | log2(fold_ratio) | q_value    | Match ? |
| Hnf4a    | 0.77152   | 0.20476   | -0.56676    | 1.95E-09   | No      | Arl3    | 55.8217   | 139.241 | 1.31869          | 55.8227      | 139.242       | 1.31867063       | 0.00014629 | No      |
| Hoxa11   | 0.0079878 | 0.06152   | 0.0535322   | 2.63E-05   | No      | Arl4a   | 16.3993   | 8.19228 | -1.0013          | 16.4003      | 8.19328       | -1.0012092       | 0.00066215 | No      |
| Hoxa6    | 0.5075    | 0.13396   | -0.37354    | 3.61E-09   | No      | ARL5A   | 21.7603   | 13.9131 | -0.645256        | 21.7613      | 13.9141       | -0.6452171       | 0.00330073 | No      |
| Hoxb13   | 0.088581  | 0.0208    | -0.067781   | 0.00033082 | No      | Arl5b   | 6.10674   | 3.32361 | -0.877652        | 6.10774      | 3.32461       | -0.8774535       | 0.00028114 | No      |
| Hoxb4    | 0.21998   | 0.01545   | -0.20453    | 1.61E-12   | No      | Arl5c   | 92.8638   | 7.37384 | -3.65463         | 92.8648      | 7.37484       | -3.6544482       | 0.00014629 | No      |
| Hoxc11   | 0.13606   | 0.032642  | -0.103418   | 3.08E-05   | No      | ARL6    | 1.5035    | 15.7067 | 3.38499          | 1.5045       | 15.7077       | 3.38411594       | 0.00014629 | No      |
| Hoxc12   | 0.1269    | 0.034391  | -0.092509   | 2.15E-09   | No      | Arl6ip1 | 26.2252   | 44.2451 | 0.754566         | 26.2262      | 44.2461       | 0.75454151       | 0.00014629 | No      |
| Hoxc4    | 0.038371  | 0.12277   | 0.084399    | 0.03460571 | No      | Arl6ip4 | 37.383    | 76.7146 | 1.03712          | 37.384       | 76.7156       | 1.03709904       | 0.00014629 | No      |
| Hoxc9    | 0.06737   | 0.0091475 | -0.0582225  | 2.05E-05   | No      | Arl6ip5 | 146.362   | 32.6591 | -2.16399         | 146.363      | 32.6601       | -2.1639498       | 0.00014629 | No      |
| Hoxd1    | 0.13988   | 0.034253  | -0.105627   | 2.36E-06   | No      | Armc1   | 10.4407   | 18.3831 | 0.816163         | 10.4417      | 18.3841       | 0.81610194       | 0.00274649 | No      |
| Hoxd12   | 0.21122   | 0.68154   | 0.47032     | 3.27E-08   | No      | Armc5   | 19.4538   | 32.1752 | 0.725896         | 19.4548      | 32.1762       | 0.72586781       | 0.00161718 | No      |
| Hoxd9    | 0.21402   | 0.49109   | 0.27707     | 3.41E-06   | No      | Armc9   | 5.30932   | 18.4021 | 1.79327          | 5.31032      | 18.4031       | 1.7930781        | 0.00014629 | No      |
| Hpd1     | 0.30751   | 0.067492  | -0.240018   | 1.27E-05   | No      | Armcx3  | 2.095     | 8.87917 | 2.08347          | 2.096        | 8.88017       | 2.08294858       | 0.00014629 | No      |
| Hpgd     | 0.06884   | 0.0074275 | -0.0614125  | 4.44E-05   | No      | Armcx5  | 21.5131   | 11.5258 | -0.900353        | 21.5141      | 11.5268       | -0.9002904       | 0.00014629 | No      |
| Hrasls   | 0.13516   | 0.032823  | -0.102337   | 1.15E-05   | No      | Arnt2   | 0         | 11.8692 | inf              | 0.001        | 11.8702       | 13.5350566       | 0.00014629 | No      |
| Hrk      | 0.081451  | 0.019746  | -0.061705   | 4.97E-05   | No      | Arpc1a  | 71.7181   | 138.637 | 0.9509           | 71.7191      | 138.638       | 0.95089346       | 0.00014629 | No      |
| Hs3st2   | 0.14637   | 0.01055   | -0.13582    | 4.59E-07   | No      | Arpc1b  | 735.092   | 100.833 | -2.86596         | 735.093      | 100.834       | -2.8659446       | 0.00014629 | No      |
| Hsbp11   | 0.096536  | 0.018458  | -0.078078   | 2.44E-06   | No      | Arpc2   | 918.887   | 339.544 | -1.43629         | 918.888      | 339.545       | -1.4362862       | 0.00014629 | No      |
| Hsd17b14 | 0.74411   | 0.077239  | -0.666871   | 2.05E-05   | No      | Arpc3   | 359.009   | 146.341 | -1.29468         | 359.01       | 146.342       | -1.2946801       | 0.00014629 | No      |
| Hsf4     | 0.64943   | 0.1336    | -0.51583    | 1.61E-12   | No      | Arpc4   | 156.301   | 105.722 | -0.564062        | 156.302      | 105.723       | -0.564047        | 0.00384649 | No      |
| Hspb1    | 0.058331  | 0.0073148 | -0.0510162  | 6.30E-06   | No      | Arpc5   | 243.568   | 71.7811 | -1.76265         | 243.569      | 71.7821       | -1.7626345       | 0.00014629 | No      |
| Htr1a    | 0.099938  | 0.013835  | -0.086103   | 3.41E-09   | No      | Arpp21  | 105.804   | 5.42177 | -4.28649         | 105.805      | 5.42277       | -4.286234        | 0.00014629 | No      |
| Htr6     | 0.071994  | 0.011378  | -0.060616   | 1.46E-05   | No      | Arrib1  | 16.5986   | 8.28161 | -1.00308         | 16.5996      | 8.28261       | -1.0029911       | 0.00028114 | No      |
| Htra3    | 0.066076  | 0.0109    | -0.055176   | 1.77E-11   | No      | Arrib2  | 159.411   | 19.839  | -3.00633         | 159.412      | 19.84         | -3.0062763       | 0.00014629 | No      |
| Ibsp     | 0.69716   | 0.11775   | -0.57941    | 0.00063283 | No      | Arrdc1  | 34.6064   | 47.1556 | 0.44639          | 34.6074      | 47.1566       | 0.44637915       | 0.0378376  | No      |
| Icam4    | 0.40118   | 0.061079  | -0.340101   | 3.61E-07   | No      | Arrdc2  | 34.8119   | 10.6807 | -1.70457         | 34.8129      | 10.6817       | -1.7044807       | 0.00014629 | No      |
| Icmt     | 0.053413  | 0.0027693 | -0.0506437  | 0.00226691 | No      | Arrdc3  | 31.5279   | 63.4357 | 1.00867          | 31.5289      | 63.4367       | 1.00864289       | 0.00014629 | No      |
| Ido1     | 0.71486   | 0.29882   | -0.41604    | 5.25E-05   | No      | Arrdc4  | 0.3696    | 2.93345 | 2.98856          | 0.3706       | 2.93445       | 2.98515534       | 0.00014629 | No      |
| Igf2     | 0.59613   | 0.15397   | -0.44216    | 1.02E-05   | No      | Arsa    | 3.16089   | 30.1662 | 3.25453          | 3.16189      | 30.1672       | 3.25412171       | 0.00014629 | No      |
| Igf2bp1  | 0.063445  | 0.012799  | -0.050646   | 0.00803385 | No      | Arsb    | 4.83679   | 30.7729 | 2.66954          | 4.83779      | 30.7739       | 2.66928724       | 0.00014629 | No      |
| Igf2bp2  | 0.16228   | 0.013831  | -0.148449   | 2.36E-08   | No      | Arse    | 6.15994   | 21.0165 | 1.77053          | 6.16094      | 21.0175       | 1.77036868       | 0.00014629 | No      |
| Igfbp6   | 0.37616   | 0.12768   | -0.24848    | 1.27E-05   | No      | Arsk    | 7.63187   | 3.0555  | -1.32063         | 7.63287      | 3.0565        | -1.3203451       | 0.00053701 | No      |
| Igfbp7   | 0.094885  | 0.010972  | -0.083913   | 1.60E-05   | No      | Art2b   | 207.963   | 3.78685 | -5.77918         | 207.964      | 3.78785       | -5.7788108       | 0.00014629 | No      |
| Igsf21   | 0.20675   | 0.07193   | -0.13482    | 0.00028703 | No      | Artn    | 0         | 1.14897 | inf              | 0.001        | 1.14997       | 10.1673805       | 0.00014629 | No      |
| Il11     | 0.26243   | 0.070274  | -0.192156   | 2.27E-08   | No      | Arv1    | 28.4117   | 51.76   | 0.86535          | 28.4127      | 51.761        | 0.86532956       | 0.00149937 | No      |
| Il17c    | 0.82573   | 0.68447   | -0.14126    | 0.00639124 | No      | As3mt   | 9.08518   | 57.9219 | 2.67252          | 9.08618      | 57.9229       | 2.67238804       | 0.00014629 | No      |
| Il4      | 0.76534   | 0.18648   | -0.57886    | 0.00051431 | No      | Asah1   | 4.85184   | 24.5122 | 2.3369           | 4.85284      | 24.5132       | 2.33665763       | 0.00014629 | No      |
| Ina      | 0.083524  | 0.029065  | -0.054459   | 3.91E-05   | No      | Asah2   | 0         | 1.20999 | inf              | 0.001        | 1.21099       | 10.2419712       | 0.00014629 | No      |
| Inha     | 0.0011905 | 0.076711  | 0.0755205   | 0.0030913  | No      | Asap1   | 29.8169   | 4.20241 | -2.82684         | 29.8179      | 4.20341       | -2.8265466       | 0.00014629 | No      |
| Inhbb    | 0.10449   | 0.028995  | -0.075495   | 1.61E-12   | No      | Asap2   | 0.0964724 | 6.98893 | 6.17881          | 0.0974724    | 6.98993       | 6.16414043       | 0.00014629 | No      |
| Inhbe    | 0.46645   | 0.056041  | -0.410409   | 7.44E-07   | No      | Asap3   | 0.380932  | 3.24452 | 3.0904           | 0.381932     | 3.24552       | 3.08706194       | 0.00028114 | No      |
| Inpp5a   | 0.6797    | 0.38193   | -0.29777    | 0.00033082 | No      | Asb1    | 2.89604   | 1.61958 | -0.838456        | 2.89704      | 1.62058       | -0.8380694       | 0.00730705 | No      |

| RRBS     |            |           |             |            |         | RNAseq  |           |          |                  |              |               |                  |            |         |
|----------|------------|-----------|-------------|------------|---------|---------|-----------|----------|------------------|--------------|---------------|------------------|------------|---------|
| gene     | Blood      | Kidney    | methyl.diff | pMWU.fdr   | Match ? | gene    | blood     | kidney   | log2(fold_ratio) | blood+ 0.001 | kidney+ 0.001 | log2(fold_ratio) | q_value    | Match ? |
| Insig1   | 0.25633    | 0.16005   | -0.09628    | 0.01079042 | No      | Asb13   | 41.3689   | 22.732   | -0.863823        | 41.3699      | 22.733        | -0.8637934       | 0.00014629 | No      |
| Irf5     | 0.090321   | 0.25786   | 0.167539    | 0.03460571 | No      | Asb3    | 10.6467   | 3.89707  | -1.44995         | 10.6477      | 3.89807       | -1.4497099       | 0.00184429 | No      |
| Irf6     | 0.24877    | 0.040923  | -0.207847   | 5.62E-06   | No      | Ascc2   | 12.8731   | 19.966   | 0.633181         | 12.8741      | 19.967        | 0.63314601       | 0.0303176  | No      |
| Irf8     | 0.63818    | 0.32276   | -0.31542    | 1.57E-08   | No      | Ascc3   | 18.7437   | 6.78448  | -1.4661          | 18.7447      | 6.78548       | -1.46596         | 0.00014629 | No      |
| Irgm     | 0.00072674 | 0.11671   | 0.11598326  | 3.65E-05   | No      | Asf1a   | 8.93593   | 4.94602  | -0.853351        | 8.93693      | 4.94702       | -0.8532196       | 0.0158416  | No      |
| Irs1     | 0.062859   | 0.011141  | -0.051718   | 0.00059604 | No      | Asgr1   | 0         | 4.82242  | inf              | 0.001        | 4.82342       | 12.2358407       | 0.00014629 | No      |
| Irx4     | 0.089979   | 0.014897  | -0.075082   | 7.96E-06   | No      | Ash1l   | 11.496    | 2.67082  | -2.10577         | 11.497       | 2.67182       | -2.1053627       | 0.00740907 | No      |
| Irx6     | 0.077017   | 0.016759  | -0.060258   | 5.05E-07   | No      | Asl     | 6.61626   | 227.852  | 5.10594          | 6.61726      | 227.853       | 5.10572559       | 0.00014629 | No      |
| Isg20l2  | 0.27504    | 0.019996  | -0.255044   | 1.95E-09   | No      | Asmtl   | 27.5247   | 97.4886  | 1.82451          | 27.5257      | 97.4896       | 1.82446907       | 0.00014629 | No      |
| Isl1     | 0.067965   | 1.50E-07  | -0.0679649  | 4.05E-07   | No      | Aspa    | 0.233275  | 129.399  | 9.11558          | 0.234275     | 129.4         | 9.10941889       | 0.00090728 | No      |
| Itga8    | 0.82342    | 0.25126   | -0.57216    | 2.69E-06   | No      | Aspdh   | 13.9635   | 187.807  | 3.74952          | 13.9645      | 187.808       | 3.74942269       | 0.00014629 | No      |
| Itgb1    | 0.6627     | 0.3202    | -0.3425     | 1.44E-06   | No      | Aspg    | 0.0399191 | 97.3198  | 11.2514          | 0.0409191    | 97.3208       | 11.2157581       | 0.0393825  | No      |
| Itih1    | 0.77313    | 0.5833    | -0.18983    | 0.00192825 | No      | ASPH    | 0.763717  | 7.4865   | 3.29318          | 0.764717     | 7.4875        | 3.29148625       | 0.00014629 | No      |
| Itpka    | 0.4416     | 0.13981   | -0.30179    | 1.92E-07   | No      | Aspscr1 | 29.545    | 162.029  | 2.45526          | 29.546       | 162.03        | 2.45522622       | 0.00014629 | No      |
| Itpripl2 | 0.70595    | 0.30608   | -0.39987    | 7.27E-08   | No      | Asun    | 27.1225   | 13.1584  | -1.0435          | 27.1235      | 13.1594       | -1.0434496       | 0.00014629 | No      |
| Izumo1   | 0.15176    | 0.019582  | -0.132178   | 4.97E-05   | No      | Asxl1   | 39.6095   | 9.73483  | -2.02462         | 39.6105      | 9.73583       | -2.024507        | 0.00014629 | No      |
| Jmjd6    | 0.094118   | 0.0056178 | -0.0885002  | 1.46E-05   | No      | Asxl2   | 10.7342   | 4.15559  | -1.36909         | 10.7352      | 4.15659       | -1.3688767       | 0.00090728 | No      |
| Jmjd8    | 0.95675    | 0.69118   | -0.26557    | 1.82E-05   | No      | Atad1   | 31.6851   | 23.3686  | -0.439235        | 31.6861      | 23.3696       | -0.4392171       | 0.0416357  | No      |
| Jph3     | 0.079788   | 0.022955  | -0.056833   | 9.28E-06   | No      | Atad2   | 12.1374   | 0.811509 | -3.90271         | 12.1384      | 0.812509      | -3.9010507       | 0.00014629 | No      |
| Jph4     | 0.49907    | 0.28782   | -0.21125    | 0.00389713 | No      | Atad3a  | 16.0279   | 31.9947  | 0.997251         | 16.0289      | 31.9957       | 0.99720261       | 0.00014629 | No      |
| Kat8     | 0.076326   | 0.0077327 | -0.0685933  | 0.01439246 | No      | Atat1   | 12.5157   | 7.43551  | -0.751235        | 12.5167      | 7.43651       | -0.7511566       | 0.0245032  | No      |
| Katnal1  | 0.22779    | 0.027069  | -0.200721   | 2.88E-05   | No      | Ate1    | 11.3249   | 4.12745  | -1.45617         | 11.3259      | 4.12845       | -1.4559536       | 0.0333784  | No      |
| Kbtbd4   | 0.57701    | 0.27889   | -0.29812    | 0.02714861 | No      | Atf1    | 54.7342   | 22.7067  | -1.26933         | 54.7352      | 22.7077       | -1.2692873       | 0.00014629 | No      |
| Kbtbd6   | 0.31381    | 0.11142   | -0.20239    | 1.19E-07   | No      | Atf2    | 27.4755   | 12.2214  | -1.16873         | 27.4765      | 12.2224       | -1.1686706       | 0.00363169 | No      |
| Kbtbd7   | 0.31381    | 0.11142   | -0.20239    | 1.19E-07   | No      | Atf5    | 4.07714   | 14.2103  | 1.80131          | 4.07814      | 14.2113       | 1.80105533       | 0.00639443 | No      |
| Kcna1    | 0.09455    | 0.013489  | -0.081061   | 1.61E-12   | No      | Atf6    | 7.8435    | 4.41701  | -0.828429        | 7.8445       | 4.41801       | -0.8282848       | 0.00014629 | No      |
| Kcna5    | 0.2212     | 0.45855   | 0.23735     | 0.00226691 | No      | Atf7    | 12.7695   | 42.2823  | 1.72735          | 12.7705      | 42.2833       | 1.72727296       | 0.027886   | No      |
| Kcna6    | 0.088336   | 0.021067  | -0.067269   | 0.00069112 | No      | Atf7ip  | 56.6582   | 17.6081  | -1.68604         | 56.6592      | 17.6091       | -1.6859891       | 0.00014629 | No      |
| Kcna7    | 0.061261   | 0.0061979 | -0.0550631  | 4.97E-05   | No      | ATG101  | 26.1216   | 53.6966  | 1.03959          | 26.1226      | 53.6976       | 1.03955911       | 0.00014629 | No      |
| Kcnab1   | 0.06971    | 0.015124  | -0.054586   | 0.00021752 | No      | Atg12   | 43.1206   | 17.6651  | -1.28748         | 43.1216      | 17.6661       | -1.2874271       | 0.00014629 | No      |
| Kcnb1    | 0.48109    | 0.12156   | -0.35953    | 3.20E-09   | No      | Atg13   | 25.1223   | 16.748   | -0.584977        | 25.1233      | 16.749        | -0.584951        | 0.00513162 | No      |
| Kcnc1    | 0.53025    | 0.18149   | -0.34876    | 3.41E-06   | No      | Atg14   | 7.40212   | 5.18992  | -0.512226        | 7.40312      | 5.19092       | -0.5121432       | 0.0454894  | No      |
| Kcnc4    | 0.2947     | 0.14137   | -0.15333    | 0.00210055 | No      | Atg2b   | 12.0274   | 4.89379  | -1.2973          | 12.0284      | 4.89479       | -1.2971259       | 0.00014629 | No      |
| Kcnd2    | 0.059392   | 0.0042511 | -0.0551409  | 0.00035126 | No      | Atg4c   | 5.729     | 9.04005  | 0.658046         | 5.73         | 9.04105       | 0.65795519       | 0.0366018  | No      |
| Kcnd3    | 0.073229   | 0.0028883 | -0.0703407  | 1.82E-05   | No      | Atg4d   | 12.4392   | 52.2004  | 2.06917          | 12.4402      | 52.2014       | 2.06907882       | 0.00014629 | No      |
| Kcne2    | 0.73291    | 0.26556   | -0.46735    | 2.43E-07   | No      | Atg9a   | 33.2756   | 18.5034  | -0.846677        | 33.2766      | 18.5044       | -0.8466397       | 0.00014629 | No      |
| Kcne5    | 0.66682    | 0.39588   | -0.27094    | 0.02954396 | No      | Atic    | 47.7482   | 29.7398  | -0.683052        | 47.7492      | 29.7408       | -0.6830331       | 0.00028114 | No      |
| Kcnf1    | 0.74048    | 0.55758   | -0.1829     | 0.02194182 | No      | Atl1    | 0.281116  | 1.17141  | 2.059            | 0.282116     | 1.17241       | 2.05511678       | 0.027611   | No      |
| Kcng1    | 0.11948    | 0.33394   | 0.21446     | 1.60E-05   | No      | Atl2    | 31.247    | 9.67431  | -1.69149         | 31.248       | 9.67531       | -1.6913841       | 0.00014629 | No      |
| Kcnh3    | 0.1664     | 0.04818   | -0.11822    | 0.00014495 | No      | ATL3    | 12.4431   | 5.26846  | -1.2399          | 12.4441      | 5.26946       | -1.2397349       | 0.00014629 | No      |
| Kcnh5    | 0.079204   | 0.0041241 | -0.0750799  | 1.28E-06   | No      | Atm     | 29.3814   | 2.07766  | -3.82187         | 29.3824      | 2.07866       | -3.8212265       | 0.00014629 | No      |
| Kcnh7    | 0.14908    | 0.027108  | -0.121972   | 7.96E-06   | No      | Atoh8   | 0         | 0.902089 | inf              | 0.001        | 0.903089      | 9.81872436       | 0.00014629 | No      |

| RRBS      |          |           |             |            |         | RNAseq   |           |          |                  |              |               |                  |            |         |
|-----------|----------|-----------|-------------|------------|---------|----------|-----------|----------|------------------|--------------|---------------|------------------|------------|---------|
| gene      | Blood    | Kidney    | methyl.diff | pMWU.fdr   | Match ? | gene     | blood     | kidney   | log2(fold_ratio) | blood+ 0.001 | kidney+ 0.001 | log2(fold_ratio) | q_value    | Match ? |
| Kcnp1     | 0.11322  | 0.015894  | -0.097326   | 7.10E-11   | No      | Atox1    | 58.8411   | 197.571  | 1.74748          | 58.8421      | 197.572       | 1.74745786       | 0.00014629 | No      |
| Kcnj3     | 0.10551  | 0.015908  | -0.089602   | 0.002433   | No      | Atp10a   | 2.67874   | 1.19376  | -1.16604         | 2.67974      | 1.19476       | -1.1653722       | 0.00230432 | No      |
| Kcnj5     | 0.10438  | 0.0069143 | -0.0974657  | 2.10E-06   | No      | ATP11B   | 39.2832   | 6.38201  | -2.62183         | 39.2842      | 6.38301       | -2.6216404       | 0.00014629 | No      |
| Kcnk13    | 0.090674 | 0.40188   | 0.311206    | 3.52E-06   | No      | Atp11c   | 2.56474   | 0.942584 | -1.44412         | 2.56574      | 0.943584      | -1.4431521       | 0.00014629 | No      |
| Kcnk2     | 0.076433 | 0.018517  | -0.057916   | 1.21E-10   | No      | Atp13a1  | 74.015    | 44.6392  | -0.729507        | 74.016       | 44.6402       | -0.7294937       | 0.00053701 | No      |
| Kcnk3     | 0.096121 | 0.012258  | -0.083863   | 9.50E-05   | No      | Atp13a2  | 21.5899   | 36.7584  | 0.76772          | 21.5909      | 36.7594       | 0.76768984       | 0.00102864 | No      |
| Kcnk4     | 0.22386  | 0.067955  | -0.155905   | 0.01344183 | No      | Atp13a3  | 15.7375   | 7.08764  | -1.15083         | 15.7385      | 7.08864       | -1.1507173       | 0.00014629 | No      |
| Kcnk9     | 0.16528  | 0.047732  | -0.117548   | 0.00143157 | No      | Atp1a1   | 82.0805   | 534.218  | 2.70232          | 82.0815      | 534.219       | 2.70230229       | 0.00014629 | No      |
| Kcnma1    | 0.081338 | 0.01188   | -0.069458   | 2.98E-07   | No      | Atp1b1   | 2.73345   | 694.153  | 7.98838          | 2.73445      | 694.154       | 7.98786127       | 0.00014629 | No      |
| Kcnn1     | 0.37052  | 0.067074  | -0.303446   | 1.20E-08   | No      | Atp1b2   | 0.0846228 | 4.75528  | 5.81234          | 0.0856228    | 4.75628       | 5.79569482       | 0.00792329 | No      |
| Kcnn2     | 0.10058  | 0.013044  | -0.087536   | 3.61E-07   | No      | Atp1b3   | 125.525   | 95.8301  | -0.389418        | 125.526      | 95.8311       | -0.3894204       | 0.0494924  | No      |
| Kcns2     | 0.1237   | 0.030387  | -0.093313   | 0.02324623 | No      | Atp2b1   | 15.6138   | 4.4988   | -1.79521         | 15.6148      | 4.4998        | -1.7949813       | 0.00014629 | No      |
| Kctd11    | 0.78783  | 0.29333   | -0.4945     | 6.37E-09   | No      | Atp2b3   | 0         | 1.2516   | inf              | 0.001        | 1.2526        | 10.2907101       | 0.00014629 | No      |
| Kctd15    | 0.075872 | 0.017454  | -0.058418   | 9.50E-05   | No      | Atp2b4   | 9.84736   | 2.12285  | -2.21374         | 9.84836      | 2.12385       | -2.2132016       | 0.00014629 | No      |
| Kctd8     | 0.084684 | 0.0083916 | -0.0762924  | 1.02E-05   | No      | Atp2c1   | 8.13915   | 20.3334  | 1.3209           | 8.14015      | 20.3344       | 1.32079514       | 0.00014629 | No      |
| Kdf1      | 0.6603   | 0.030498  | -0.629802   | 1.61E-12   | No      | Atp5a1   | 241.272   | 971.208  | 2.00912          | 241.273      | 971.209       | 2.00911531       | 0.00014629 | No      |
| Khdrbs2   | 0.12313  | 0.022512  | -0.100618   | 0.00015888 | No      | Atp5b    | 333.707   | 2036.96  | 2.60976          | 333.708      | 2036.961      | 2.60976018       | 0.00014629 | No      |
| Khdrbs3   | 0.14976  | 0.054414  | -0.095346   | 0.01658745 | No      | Atp5c1   | 133.296   | 565.273  | 2.08432          | 133.297      | 565.274       | 2.08430603       | 0.00014629 | No      |
| Kiaa0895l | 0.22499  | 0.015535  | -0.209455   | 2.15E-09   | No      | Atp5d    | 121.658   | 618.366  | 2.34563          | 121.659      | 618.367       | 2.34562028       | 0.00014629 | No      |
| Kif2b     | 0.95859  | 0.49749   | -0.4611     | 4.59E-07   | No      | Atp5e    | 758.876   | 2078.01  | 1.45327          | 758.877      | 2078.011      | 1.45326532       | 0.00014629 | No      |
| Kirrel2   | 0.13602  | 0.028827  | -0.107193   | 0.00092018 | No      | ATP5F1   | 61.4265   | 178.484  | 1.53886          | 61.4275      | 178.485       | 1.53884626       | 0.00014629 | No      |
| Klf14     | 0.29535  | 0.077067  | -0.218283   | 3.84E-08   | No      | ATP5G3   | 208.124   | 1611.52  | 2.95291          | 208.125      | 1611.521      | 2.95290081       | 0.00014629 | No      |
| Klhl1     | 0.062961 | 0.0065067 | -0.0564543  | 0.0030913  | No      | Atp5i    | 439.239   | 3089.41  | 2.81425          | 439.24       | 3089.411      | 2.81425047       | 0.00014629 | No      |
| Krt25     | 0.75784  | 0.55872   | -0.19912    | 0.01164415 | No      | Atp5j    | 295.233   | 1101.16  | 1.8991           | 295.234      | 1101.161      | 1.89909464       | 0.00014629 | No      |
| Krt72     | 0.85528  | 0.52054   | -0.33474    | 3.65E-05   | No      | Atp5j2   | 524.273   | 1862.31  | 1.8287           | 524.274      | 1862.311      | 1.82870111       | 0.00014629 | No      |
| Krt75     | 0.76077  | 0.50836   | -0.25241    | 0.00803385 | No      | Atp5l    | 314.356   | 1238.11  | 1.97766          | 314.357      | 1238.111      | 1.97766487       | 0.00014629 | No      |
| Krt8      | 0.84598  | 0.39946   | -0.44652    | 6.76E-05   | No      | Atp5o    | 125.954   | 926.911  | 2.87953          | 125.955      | 926.912       | 2.87952398       | 0.00014629 | No      |
| Krt81     | 0.60076  | 0.31235   | -0.28841    | 4.94E-10   | No      | Atp6ap1  | 71.062    | 47.3908  | -0.58447         | 71.063       | 47.3918       | -0.5844611       | 0.00252712 | No      |
| Krt83     | 0.79139  | 0.19648   | -0.59491    | 1.61E-12   | No      | Atp6ap2  | 17.2826   | 66.0033  | 1.93322          | 17.2836      | 66.0043       | 1.93315627       | 0.00014629 | No      |
| Krtap16-5 | 0.9561   | 0.75786   | -0.19824    | 0.04063154 | No      | Atp6v0a1 | 2.51442   | 16.2545  | 2.69254          | 2.51542      | 16.2555       | 2.69205672       | 0.00014629 | No      |
| L3hypdh   | 0.64126  | 0.060504  | -0.580756   | 2.28E-11   | No      | Atp6v0a2 | 21.496    | 7.74436  | -1.47285         | 21.497       | 7.74536       | -1.4727311       | 0.00014629 | No      |
| Lamp5     | 0.14684  | 0.024846  | -0.121994   | 2.10E-06   | No      | Atp6v0a4 | 0.0320407 | 50.2036  | 10.6137          | 0.0330407    | 50.2046       | 10.5693596       | 0.00014629 | No      |
| Lancl3    | 0.078586 | 0.0028015 | -0.0757845  | 1.12E-06   | No      | Atp6v0b  | 46.0096   | 209.387  | 2.18617          | 46.0106      | 209.388       | 2.18614059       | 0.00014629 | No      |
| Lbhd1     | 0.065696 | 0.015261  | -0.050435   | 0.002433   | No      | Atp6v0c  | 141.012   | 464.111  | 1.71865          | 141.013      | 464.112       | 1.71864483       | 0.00014629 | No      |
| Lbx1      | 0.11097  | 0.023917  | -0.087053   | 0.00051431 | No      | Atp6v0d1 | 102.754   | 337.88   | 1.71732          | 102.755      | 337.881       | 1.71730663       | 0.00014629 | No      |
| Lbx2      | 0.10204  | 0.033257  | -0.068783   | 7.03E-05   | No      | Atp6v0d2 | 0         | 24.2735  | inf              | 0.001        | 24.2745       | 14.567154        | 0.00014629 | No      |
| Lca5      | 0.80381  | 0.38269   | -0.42112    | 2.15E-09   | No      | Atp6v0e1 | 92.847    | 188.206  | 1.01938          | 92.848       | 188.207       | 1.01937755       | 0.00014629 | No      |
| Lect1     | 0.84643  | 0.76128   | -0.08515    | 0.00803385 | No      | Atp6v0e2 | 15.0308   | 62.0386  | 2.04524          | 15.0318      | 62.0396       | 2.04517161       | 0.00014629 | No      |
| Lefty1    | 0.56139  | 0.33083   | -0.23056    | 0.00935402 | No      | Atp6v1a  | 9.0483    | 54.1929  | 2.58239          | 9.0493       | 54.1939       | 2.58225237       | 0.00014629 | No      |
| Lgals7    | 0.84657  | 0.5385    | -0.30807    | 2.05E-05   | No      | Atp6v1b1 | 0.0342558 | 62.5538  | 10.8345          | 0.0352558    | 62.5548       | 10.7930443       | 0.00090728 | No      |
| Lgi2      | 0.22129  | 0.03715   | -0.18414    | 0.00063283 | No      | Atp6v1b2 | 26.8257   | 128.487  | 2.25993          | 26.8267      | 128.488       | 2.25989212       | 0.00014629 | No      |
| Lhx1      | 0.081347 | 0.010622  | -0.070725   | 0.00057442 | No      | Atp6v1c1 | 31.4989   | 59.513   | 0.917903         | 31.4999      | 59.514        | 0.91788184       | 0.00014629 | No      |

| RRBS         |           |           |             |            |         | RNAseq   |          |          |                  |              |               |                  |            |         |
|--------------|-----------|-----------|-------------|------------|---------|----------|----------|----------|------------------|--------------|---------------|------------------|------------|---------|
| gene         | Blood     | Kidney    | methyl.diff | pMWU.fdr   | Match ? | gene     | blood    | kidney   | log2(fold_ratio) | blood+ 0.001 | kidney+ 0.001 | log2(fold_ratio) | q_value    | Match ? |
| Lhx4         | 0.39661   | 0.16654   | -0.23007    | 0.004217   | No      | Atp6v1d  | 37.1633  | 84.5419  | 1.18579          | 37.1643      | 84.5429       | 1.18576617       | 0.00014629 | No      |
| Lhx5         | 0.12969   | 0.011075  | -0.118615   | 2.36E-06   | No      | Atp6v1e1 | 30.9115  | 170.04   | 2.45966          | 30.9125      | 170.041       | 2.45962041       | 0.00014629 | No      |
| Lif          | 0.33366   | 0.12392   | -0.20974    | 0.00743291 | No      | Atp6v1f  | 85.0348  | 203.184  | 1.25666          | 85.0358      | 203.185       | 1.25665165       | 0.00014629 | No      |
| Lin7a        | 0.093929  | 0.018502  | -0.075427   | 4.73E-05   | No      | Atp6v1h  | 17.0232  | 33.4285  | 0.97358          | 17.0242      | 33.4295       | 0.97353477       | 0.00014629 | No      |
| Lingo3       | 0.16513   | 0.023123  | -0.142007   | 6.96E-06   | No      | Atp8a1   | 16.5411  | 5.75947  | -1.52205         | 16.5421      | 5.76047       | -1.521884        | 0.00014629 | No      |
| Lmx1a        | 0.089382  | 0.027435  | -0.061947   | 0.00067482 | No      | Atp8b1   | 0        | 2.07939  | inf              | 0.001        | 2.08039       | 11.0226383       | 0.00014629 | No      |
| Lmx1b        | 0.087385  | 0.018544  | -0.068841   | 1.61E-12   | No      | Atp8b2   | 10.0178  | 1.76517  | -2.50468         | 10.0188      | 1.76617       | -2.5040136       | 0.00014629 | No      |
| LOC100125362 | 0.19408   | 0.10086   | -0.09322    | 0.00743291 | No      | Atp8b5   | 0.322299 | 4.25883  | 3.72399          | 0.323299     | 4.25983       | 3.71985491       | 0.0256967  | No      |
| LOC100125364 | 0.12125   | 0.031538  | -0.089712   | 0.01931414 | No      | Atp9a    | 0.597241 | 33.2325  | 5.79814          | 0.598241     | 33.2335       | 5.79576764       | 0.00014629 | No      |
| LOC100909539 | 0.14317   | 0.019892  | -0.123278   | 1.24E-09   | No      | Atp9b    | 15.1652  | 29.8814  | 0.978478         | 15.1662      | 29.8824       | 0.97843637       | 0.00252712 | No      |
| LOC100911068 | 0.95493   | 0.71728   | -0.23765    | 0.00013873 | No      | Atpaf1   | 5.78365  | 12.3861  | 1.09867          | 5.78465      | 12.3871       | 1.09853689       | 0.00014629 | No      |
| LOC106182250 | 0.64874   | 0.16971   | -0.47903    | 6.26E-05   | No      | Atpaf2   | 15.6399  | 37.5166  | 1.2623           | 15.6409      | 37.5176       | 1.26224401       | 0.00014629 | No      |
| LOC106736471 | 0.69391   | 0.42725   | -0.26666    | 0.02065846 | No      | Atpif1   | 185.262  | 815.972  | 2.13895          | 185.263      | 815.973       | 2.13894663       | 0.00014629 | No      |
| LOC257642    | 0.37653   | 0.20743   | -0.1691     | 3.61E-07   | No      | Atr      | 3.20278  | 1.04962  | -1.60945         | 3.20378      | 1.05062       | -1.6085341       | 0.00014629 | No      |
| LOC310926    | 0.36026   | 0.084576  | -0.275684   | 1.61E-12   | No      | Atraid   | 9.80319  | 27.3168  | 1.47847          | 9.80419      | 27.3178       | 1.47837095       | 0.00184429 | No      |
| LOC500077    | 0.38085   | 0.14661   | -0.23424    | 3.08E-05   | No      | Atrip    | 13.2122  | 50.7101  | 1.9404           | 13.2132      | 50.7111       | 1.94032167       | 0.00014629 | No      |
| LOC500331    | 0.96194   | 0.16674   | -0.7952     | 1.61E-12   | No      | Atrn     | 4.96229  | 9.75835  | 0.975632         | 4.96329      | 9.75935       | 0.97548831       | 0.00014629 | No      |
| LOC500684    | 0.81196   | 0.6976    | -0.11436    | 0.04666269 | No      | Atrnl1   | 0.509251 | 7.35883  | 3.85303          | 0.510251     | 7.35983       | 3.85039343       | 0.00014629 | No      |
| LOC681383    | 0.4041    | 0.10518   | -0.29892    | 5.62E-06   | No      | Atrx     | 30.2347  | 6.98515  | -2.11384         | 30.2357      | 6.98615       | -2.1136835       | 0.00014629 | No      |
| LOC681766    | 0.47046   | 0.18457   | -0.28589    | 1.95E-09   | No      | Atxn10   | 34.1792  | 47.6243  | 0.478581         | 34.1802      | 47.6253       | 0.47856734       | 0.0251567  | No      |
| LOC682102    | 0.093415  | 0.032404  | -0.061011   | 1.61E-12   | No      | Atxn2    | 14.8853  | 36.8699  | 1.30856          | 14.8863      | 36.8709       | 1.30849742       | 0.00078603 | No      |
| LOC688765    | 0.10211   | 0.038059  | -0.064051   | 0.00013121 | No      | Atxn2l   | 90.958   | 22.4152  | -2.02073         | 90.959       | 22.4162       | -2.0206747       | 0.00014629 | No      |
| LOC690435    | 0.70318   | 0.080659  | -0.622521   | 3.90E-12   | No      | Atxn7    | 18.9834  | 3.40628  | -2.47847         | 18.9844      | 3.40728       | -2.478122        | 0.00014629 | No      |
| LOC690617    | 0.84869   | 0.21115   | -0.63754    | 1.61E-12   | No      | ATXN7L2  | 23.6746  | 9.21585  | -1.36115         | 23.6756      | 9.21685       | -1.3610553       | 0.00014629 | No      |
| LOC691153    | 0.93234   | 0.12963   | -0.80271    | 3.61E-07   | No      | Atxn7l3  | 27.9263  | 12.3006  | -1.18289         | 27.9273      | 12.3016       | -1.1828301       | 0.00014629 | No      |
| Lonrf3       | 0.089143  | 0.0026317 | -0.0865113  | 0.00015888 | No      | Atxn7l4  | 17.3386  | 2.26055  | -2.93924         | 17.3396      | 2.26155       | -2.9386868       | 0.00014629 | No      |
| Loxl4        | 0.16962   | 0.030108  | -0.139512   | 7.96E-06   | No      | AU040320 | 10.3477  | 26.1234  | 1.33603          | 10.3487      | 26.1244       | 1.33594835       | 0.00014629 | No      |
| Lrat         | 0.18845   | 0.055957  | -0.132493   | 0.00017692 | No      | Aup1     | 106.087  | 159.876  | 0.591709         | 106.088      | 159.877       | 0.59170093       | 0.0298866  | No      |
| Lrfn3        | 0.1453    | 0.08179   | -0.06351    | 0.00259554 | No      | Aurkaip1 | 72.0971  | 137.496  | 0.931381         | 72.0981      | 137.497       | 0.931367         | 0.00014629 | No      |
| Lrfn4        | 0.0022851 | 0.59894   | 0.5966549   | 3.61E-07   | No      | Aurkb    | 2.63189  | 0.963211 | -1.45017         | 2.63289      | 0.964211      | -1.4492265       | 0.0175479  | No      |
| Lrfn5        | 0.070023  | 0.010242  | -0.059781   | 0.00026594 | No      | Avpi1    | 7.35203  | 39.5586  | 2.42777          | 7.35303      | 39.5596       | 2.42761706       | 0.00014629 | No      |
| Lrg1         | 0.083998  | 0.0086157 | -0.0753823  | 5.48E-05   | No      | Avpr2    | 4.07819  | 8.15274  | 0.999357         | 4.07919      | 8.15374       | 0.99917925       | 0.0437514  | No      |
| Lrp4         | 0.12528   | 0.026911  | -0.098369   | 1.27E-07   | No      | Axin1    | 32.5944  | 14.0853  | -1.21043         | 32.5954      | 14.0863       | -1.2103757       | 0.00014629 | No      |
| Lrrc23       | 0.026036  | 0.15823   | 0.132194    | 0.00099362 | No      | Azi1     | 4.66125  | 23.8061  | 2.35254          | 4.66225      | 23.8071       | 2.35229362       | 0.00014629 | No      |
| Lrrc26       | 0.18566   | 0.062399  | -0.123261   | 4.24E-09   | No      | Azi2     | 44.8074  | 20.4713  | -1.13014         | 44.8084      | 20.4723       | -1.130096        | 0.00014629 | No      |
| Lrrc38       | 0.10996   | 0.014488  | -0.095472   | 2.10E-06   | No      | Azin1    | 17.0698  | 11.5882  | -0.5588          | 17.0708      | 11.5892       | -0.5587497       | 0.0077167  | No      |

| RRBS      |          |           |             |            |         | RNAseq        |           |         |                  |              |               |                  |            |         |
|-----------|----------|-----------|-------------|------------|---------|---------------|-----------|---------|------------------|--------------|---------------|------------------|------------|---------|
| gene      | Blood    | Kidney    | methyl.diff | pMWU.fdr   | Match ? | gene          | blood     | kidney  | log2(fold_ratio) | blood+ 0.001 | kidney+ 0.001 | log2(fold_ratio) | q_value    | Match ? |
| Lrrc4b    | 0.083412 | 0.019162  | -0.06425    | 1.41E-05   | No      | B230118H07Rik | 5.19988   | 88.1328 | 4.08313          | 5.20088      | 88.1338       | 4.08286775       | 0.00014629 | No      |
| Lrrc55    | 0.082917 | 0.02617   | -0.056747   | 0.00119585 | No      | B2m           | 3090.92   | 349.364 | -3.14523         | 3090.921     | 349.365       | -3.1452298       | 0.00014629 | No      |
| Lrrc8d    | 0.87404  | 0.12961   | -0.74443    | 3.61E-07   | No      | B3galnt1      | 0.0802281 | 4.0725  | 5.66566          | 0.0812281    | 4.0735        | 5.6481462        | 0.00014629 | No      |
| Lrrc8e    | 0.50079  | 0.038915  | -0.461875   | 1.83E-06   | No      | B3galt5       | 1.89139   | 4.54836 | 1.2659           | 1.89239      | 4.54936       | 1.26545416       | 0.00014629 | No      |
| Lrrn4cl   | 0.78561  | 0.70379   | -0.08182    | 0.02834942 | No      | B3gat1        | 0         | 7.69244 | inf              | 0.001        | 7.69344       | 12.9094131       | 0.00014629 | No      |
| LRRTM1    | 0.12671  | 0.029798  | -0.096912   | 0.00023951 | No      | B3gnt2        | 94.2739   | 6.61626 | -3.83277         | 94.2749      | 6.61726       | -3.8325678       | 0.00014629 | No      |
| Ltb4r     | 0.093099 | 0.0013298 | -0.0917692  | 8.03E-08   | No      | B4galnt1      | 54.7036   | 4.20213 | -3.70244         | 54.7046      | 4.20313       | -3.7021262       | 0.00629035 | No      |
| Ltbp2     | 0.2461   | 0.053205  | -0.192895   | 1.46E-05   | No      | B4galnt2      | 0.203853  | 1.15763 | 2.50557          | 0.204853     | 1.15863       | 2.499759         | 0.0266914  | No      |
| Lypd3     | 0.1091   | 0.042573  | -0.066527   | 0.00143157 | No      | B4galnt4      | 0.587443  | 2.11816 | 1.85029          | 0.588443     | 2.11916       | 1.84851794       | 0.0368719  | No      |
| Lymr1     | 0.25705  | 0.073048  | -0.184002   | 1.61E-12   | No      | B4galt1       | 37.2856   | 13.3026 | -1.48691         | 37.2866      | 13.3036       | -1.4868406       | 0.00014629 | No      |
| Mab21l2   | 0.017837 | 0.33256   | 0.314723    | 1.61E-12   | No      | B4galt3       | 17.689    | 39.9973 | 1.17705          | 17.69        | 39.9983       | 1.17700464       | 0.00014629 | No      |
| Mafb      | 0.24564  | 0.066077  | -0.179563   | 2.49E-07   | No      | B4galt4       | 0.317948  | 4.43296 | 3.80141          | 0.318948     | 4.43396       | 3.79720262       | 0.0260584  | No      |
| Map10     | 0.42965  | 0.19089   | -0.23876    | 8.75E-07   | No      | B4galt6       | 0.0976036 | 5.60793 | 5.84439          | 0.0986036    | 5.60893       | 5.82994145       | 0.00555587 | No      |
| Map3k10   | 0.43873  | 0.1453    | -0.29343    | 3.91E-05   | No      | B630005N14Rik | 12.3802   | 4.74166 | -1.38457         | 12.3812      | 4.74266       | -1.3843828       | 0.00014629 | No      |
| Map3k6    | 0.10583  | 0.020347  | -0.085483   | 4.20E-05   | No      | B930041F14Rik | 0         | 1.1331  | inf              | 0.001        | 1.1341        | 10.1473321       | 0.00014629 | No      |
| Map3k9    | 0.10242  | 0.042766  | -0.059654   | 0.02324623 | No      | Baat          | 0.0625264 | 1.73706 | 4.79603          | 0.0635264    | 1.73806       | 4.77397781       | 0.0180197  | No      |
| Map6      | 0.10815  | 0.03298   | -0.07517    | 0.00047568 | No      | Babam1        | 45.8489   | 83.5844 | 0.866347         | 45.8499      | 83.5854       | 0.86633238       | 0.00014629 | No      |
| Mapk12    | 0.1471   | 0.018133  | -0.128967   | 1.83E-06   | No      | Bach1         | 9.89319   | 3.67602 | -1.42829         | 9.89419      | 3.67702       | -1.4280446       | 0.00014629 | No      |
| Mapk9     | 0.10269  | 0.021339  | -0.081351   | 0.00047568 | No      | Bach2         | 30.616    | 2.2299  | -3.77923         | 30.617       | 2.2309        | -3.7786352       | 0.00014629 | No      |
| Marveld2  | 0.21672  | 0.022625  | -0.194095   | 8.75E-07   | No      | Bad           | 21.888    | 49.4475 | 1.17575          | 21.889       | 49.4485       | 1.17572071       | 0.00014629 | No      |
| Marveld3  | 0.10732  | 0.015303  | -0.092017   | 1.61E-12   | No      | Bag2          | 0.686991  | 8.67855 | 3.65909          | 0.687991     | 8.67955       | 3.65715865       | 0.00014629 | No      |
| Matn3     | 0.43847  | 0.1681    | -0.27037    | 0.00639124 | No      | Bag4          | 8.65367   | 5.77961 | -0.58234         | 8.65467      | 5.78061       | -0.5822571       | 0.0120521  | No      |
| Mb21d2    | 0.52405  | 0.15494   | -0.36911    | 7.44E-07   | No      | Bai1          | 0         | 3.40854 | inf              | 0.001        | 3.40954       | 11.7353614       | 0.00014629 | No      |
| Mc3r      | 0.77175  | 0.59202   | -0.17973    | 0.00015888 | No      | Baiap2        | 5.16478   | 40.316  | 2.96457          | 5.16578      | 40.317        | 2.96433018       | 0.00014629 | No      |
| Mcoln2    | 0.15106  | 0.053925  | -0.097135   | 0.00389713 | No      | Baiap2l1      | 1.17459   | 11.2233 | 3.25626          | 1.17559      | 11.2243       | 3.25516858       | 0.00014629 | No      |
| Mdga2     | 0.089387 | 0.032118  | -0.057269   | 8.52E-05   | No      | Baiap2l2      | 1.81701   | 437.991 | 7.91319          | 1.81801      | 437.992       | 7.91240057       | 0.00014629 | No      |
| Mdk       | 0.95813  | 0.10894   | -0.84919    | 3.61E-07   | No      | Baiap3        | 45.278    | 3.08061 | -3.87752         | 45.279       | 3.08161       | -3.8770859       | 0.00014629 | No      |
| Megf6     | 0.09543  | 0.027474  | -0.067956   | 0.00019529 | No      | Bak1          | 30.569    | 13.9166 | -1.13526         | 30.57        | 13.9176       | -1.1352061       | 0.00014629 | No      |
| Meox1     | 0.1317   | 0.0040648 | -0.1276352  | 3.08E-05   | No      | Bambi         | 0.482414  | 27.9522 | 5.85655          | 0.483414     | 27.9532       | 5.85361038       | 0.00041099 | No      |
| Mfap2     | 0.49365  | 0.20457   | -0.28908    | 1.52E-05   | No      | Banp          | 21.5496   | 14.3763 | -0.58397         | 21.5506      | 14.3773       | -0.5839353       | 0.0171742  | No      |
| Mfge8     | 0.025332 | 0.31744   | 0.292108    | 0.0017172  | No      | Barx2         | 0         | 4.96161 | inf              | 0.001        | 4.96261       | 12.2768834       | 0.00014629 | No      |
| Mfsd2a    | 0.1991   | 0.095599  | -0.103501   | 0.0030913  | No      | Batf          | 30.5331   | 2.9102  | -3.39118         | 30.5341      | 2.9112        | -3.3907355       | 0.00066215 | No      |
| Mgat4c    | 0.64354  | 0.19044   | -0.4531     | 0.00099362 | No      | Baz1a         | 21.3701   | 3.29039 | -2.69926         | 21.3711      | 3.29139       | -2.6988923       | 0.00014629 | No      |
| Mgat4d    | 0.50777  | 0.13551   | -0.37226    | 4.96E-07   | No      | Baz1b         | 37.6158   | 17.3583 | -1.11571         | 37.6168      | 17.3593       | -1.1156684       | 0.00014629 | No      |
| MGC114492 | 0.85387  | 0.67097   | -0.1829     | 0.00157493 | No      | Baz2a         | 72.4974   | 9.85562 | -2.87891         | 72.4984      | 9.85662       | -2.8787842       | 0.00014629 | No      |
| MGC94207  | 0.79137  | 0.14572   | -0.64565    | 1.61E-12   | No      | Baz2b         | 36.9637   | 11.4965 | -1.68492         | 36.9647      | 11.4975       | -1.684828        | 0.00014629 | No      |
| MGC95208  | 0.40421  | 0.074249  | -0.329961   | 1.44E-06   | No      | Bbc3          | 26.3191   | 9.80056 | -1.42517         | 26.3201      | 9.80156       | -1.4250817       | 0.00014629 | No      |
| Miat      | 0.10129  | 0.026394  | -0.074896   | 2.94E-08   | No      | Bbs1          | 0.40517   | 9.49117 | 4.54998          | 0.40617      | 9.49217       | 4.54658235       | 0.00014629 | No      |

| RRBS     |           |           |             |            |         | RNAseq   |           |          |                  |              |               |                  |            |         |
|----------|-----------|-----------|-------------|------------|---------|----------|-----------|----------|------------------|--------------|---------------|------------------|------------|---------|
| gene     | Blood     | Kidney    | methyl.diff | pMWU.fdr   | Match ? | gene     | blood     | kidney   | log2(fold_ratio) | blood+ 0.001 | kidney+ 0.001 | log2(fold_ratio) | q_value    | Match ? |
| Mir10b   | 0.029576  | 0.21029   | 0.180714    | 0.00293459 | No      | Bbs10    | 15.097    | 5.54645  | -1.44462         | 15.098       | 5.54745       | -1.4444608       | 0.0118533  | No      |
| Mir1199  | 0.10776   | 0.014616  | -0.093144   | 7.96E-06   | No      | Bbs2     | 8.47563   | 66.8681  | 2.97993          | 8.47663      | 66.8691       | 2.97977698       | 0.00014629 | No      |
| Mir1247  | 0.093826  | 0.013637  | -0.080189   | 1.61E-12   | No      | Bbs5     | 1.20076   | 13.4649  | 3.48719          | 1.20176      | 13.4659       | 3.48608994       | 0.00014629 | No      |
| Mir126   | 0.9668    | 0.89439   | -0.07241    | 0.01931414 | No      | Bbx      | 5.98451   | 3.08182  | -0.957451        | 5.98551      | 3.08282       | -0.9572235       | 0.00014629 | No      |
| Mir129-2 | 0.067511  | 0.012459  | -0.055052   | 6.57E-07   | No      | BC005537 | 109.149   | 63.7066  | -0.776785        | 109.15       | 63.7076       | -0.7767747       | 0.00014629 | No      |
| Mir137   | 0.092379  | 0.03426   | -0.058119   | 0.00803385 | No      | BC005561 | 1.41942   | 0.316918 | -2.16311         | 1.42042      | 0.317918      | -2.159591        | 0.00041099 | No      |
| Mir138-2 | 0.19371   | 0.45856   | 0.26485     | 3.91E-05   | No      | BC021891 | 0         | 9.55048  | inf              | 0.001        | 9.55148       | 13.2215086       | 0.00014629 | No      |
| Mir141   | 0.77394   | 0.60506   | -0.16888    | 0.00055788 | No      | BC049762 | 0.146021  | 10.2887  | 6.13874          | 0.147021     | 10.2897       | 6.12903487       | 0.0103501  | No      |
| Mir146b  | 0.2423    | 0.070685  | -0.171615   | 0.00580037 | No      | BC068281 | 1.19084   | 6.86157  | 2.52656          | 1.19184      | 6.86257       | 2.52555839       | 0.00014629 | No      |
| Mir149   | 0.078919  | 0.29049   | 0.211571    | 0.00057442 | No      | Bcam     | 0         | 128.986  | inf              | 0.001        | 128.987       | 16.9768661       | 0.00014629 | No      |
| Mir196a  | 0.035073  | 0.1654    | 0.130327    | 0.01079042 | No      | Bcap29   | 79.8494   | 6.77038  | -3.55997         | 79.8504      | 6.77138       | -3.5597778       | 0.00014629 | No      |
| Mir196b  | 0.12856   | 0.032857  | -0.095703   | 0.00012705 | No      | Bcap31   | 160.614   | 70.7706  | -1.18237         | 160.615      | 70.7716       | -1.1823642       | 0.00014629 | No      |
| Mir196c  | 0.11319   | 0.39646   | 0.28327     | 3.23E-10   | No      | Bcar1    | 0.0329527 | 52.3715  | 10.6342          | 0.0339527    | 52.3725       | 10.5910675       | 0.00307875 | No      |
| Mir203   | 0.09603   | 0.011306  | -0.084724   | 3.00E-09   | No      | Bcar3    | 0.697948  | 6.45597  | 3.20944          | 0.698948     | 6.45697       | 3.20760029       | 0.00014629 | No      |
| Mir25    | 0.88591   | 0.62936   | -0.25655    | 0.00051431 | No      | Bcas2    | 95.6031   | 39.0896  | -1.29027         | 95.6041      | 39.0906       | -1.2902508       | 0.00014629 | No      |
| Mir295-1 | 0.7963    | 0.59674   | -0.19956    | 0.0179568  | No      | Bckdha   | 27.9811   | 136.284  | 2.2841           | 27.9821      | 136.285       | 2.28405064       | 0.00014629 | No      |
| Mir2964  | 0.81169   | 0.39774   | -0.41395    | 1.61E-12   | No      | Bckdhb   | 22.4962   | 127.672  | 2.50469          | 22.4972      | 127.673       | 2.5046361        | 0.00014629 | No      |
| Mir3065  | 0.78627   | 0.090699  | -0.695571   | 1.61E-12   | No      | Bcl10    | 26.0173   | 18.5101  | -0.491157        | 26.0183      | 18.5111       | -0.4911361       | 0.038868   | No      |
| Mir3072  | 0.27958   | 0.10243   | -0.17715    | 0.04063154 | No      | BCL11B   | 61.0008   | 1.53259  | -5.31479         | 61.0018      | 1.53359       | -5.3138671       | 0.00014629 | No      |
| Mir326   | 0.78588   | 0.25181   | -0.53407    | 0.00014495 | No      | Bcl2     | 27.3651   | 2.636    | -3.37591         | 27.3661      | 2.637         | -3.3754204       | 0.00014629 | No      |
| Mir341   | 0.3854    | 0.15557   | -0.22983    | 1.61E-12   | No      | Bcl2l1   | 4.83115   | 102.876  | 4.4124           | 4.83215      | 102.877       | 4.41211143       | 0.00014629 | No      |
| Mir346   | 0.083183  | 0.024073  | -0.05911    | 0.00157493 | No      | BCL2L11  | 9.65586   | 1.23928  | -2.96191         | 9.65686      | 1.24028       | -2.9608883       | 0.00014629 | No      |
| Mir34a   | 0.84489   | 0.6281    | -0.21679    | 0.02065846 | No      | Bcl2l14  | 0.1654    | 3.28124  | 4.31021          | 0.1664       | 3.28224       | 4.3019534        | 0.0159399  | No      |
| Mir3547  | 0.87044   | 0.56836   | -0.30208    | 0.004217   | No      | Bcl2l2   | 238.166   | 366.993  | 0.623785         | 238.167      | 366.994       | 0.62378295       | 0.0270645  | No      |
| Mir3569  | 0.55186   | 0.040726  | -0.511134   | 2.38E-10   | No      | Bcl7a    | 1.2971    | 8.98168  | 2.7917           | 1.2981       | 8.98268       | 2.79074441       | 0.00014629 | No      |
| Mir3590  | 0.31921   | 0.0304    | -0.28881    | 3.61E-07   | No      | Bcl7c    | 31.7741   | 53.5605  | 0.753315         | 31.7751      | 53.5615       | 0.7532997        | 0.00586782 | No      |
| Mir378   | 0.55051   | 0.046329  | -0.504181   | 3.61E-07   | No      | Bcl9l    | 31.2006   | 8.70749  | -1.84125         | 31.2016      | 8.70849       | -1.8411255       | 0.00014629 | No      |
| Mir380   | 0.96267   | 0.90048   | -0.06219    | 0.00143157 | No      | Bclaf1   | 93.8446   | 35.2268  | -1.4136          | 93.8456      | 35.2278       | -1.4135747       | 0.00041099 | No      |
| Mir455   | 0.78846   | 0.37714   | -0.41132    | 3.38E-05   | No      | Bcs1l    | 2.50289   | 8.32418  | 1.73372          | 2.50389      | 8.32518       | 1.73331028       | 0.00014629 | No      |
| Mir6314  | 0.43147   | 0.2059    | -0.22557    | 0.00157493 | No      | Bdh2     | 2.53529   | 98.1856  | 5.27529          | 2.53629      | 98.1866       | 5.27473453       | 0.00014629 | No      |
| Mir6328  | 0.0056803 | 0.34678   | 0.3410997   | 8.00E-12   | No      | Bdp1     | 12.1852   | 2.63691  | -2.20821         | 12.1862      | 2.63791       | -2.2077811       | 0.00014629 | No      |
| Mir6333  | 0.52305   | 0.084991  | -0.438059   | 7.44E-07   | No      | Becn1    | 59.0215   | 42.1116  | -0.487022        | 59.0225      | 42.1126       | -0.4870131       | 0.016989   | No      |
| Mir9-1   | 0.12866   | 0.01963   | -0.10903    | 1.33E-06   | No      | Bend3    | 1.19723   | 0.208231 | -2.52344         | 1.19823      | 0.209231      | -2.5177363       | 0.0220286  | No      |
| Mir9-3   | 0.2253    | 0.052944  | -0.172356   | 0.00039347 | No      | Bend5    | 3.10667   | 28.4604  | 3.19551          | 3.10767      | 28.4614       | 3.19510141       | 0.00014629 | No      |
| Mir99b   | 0.81799   | 0.32448   | -0.49351    | 1.61E-12   | No      | Bend7    | 0         | 8.14962  | inf              | 0.001        | 8.15062       | 12.9926941       | 0.00014629 | No      |
| Misp     | 0.79754   | 0.067171  | -0.730369   | 1.15E-05   | No      | Bex1     | 9.32465   | 29.9982  | 1.68575          | 9.32565      | 29.9992       | 1.68564784       | 0.00014629 | No      |
| Mlst8    | 0.4806    | 0.32063   | -0.15997    | 0.00593418 | No      | Bex2     | 2.33739   | 12.4056  | 2.40803          | 2.33839      | 12.4066       | 2.40752033       | 0.00014629 | No      |
| Mlxipl   | 0.15876   | 0.019843  | -0.138917   | 4.95E-06   | No      | Bhlhe22  | 2.71618   | 0        | -inf             | 2.71718      | 0.001         | -11.407894       | 0.00014629 | No      |
| Mmd2     | 0.1625    | 0.027242  | -0.135258   | 1.02E-05   | No      | Bhlhe40  | 4.17477   | 38.8994  | 3.21998          | 4.17577      | 38.9004       | 3.21967083       | 0.00014629 | No      |
| Mmp14    | 0.13362   | 0.025455  | -0.108165   | 0.00259554 | No      | Bicc1    | 0.13346   | 24.5637  | 7.52397          | 0.13446      | 24.5647       | 7.51326576       | 0.00014629 | No      |
| Mmp16    | 0.066712  | 0.0091333 | -0.0575787  | 1.61E-12   | No      | Bicd2    | 10.1687   | 32.1974  | 1.66281          | 10.1697      | 32.1984       | 1.66271188       | 0.00274649 | No      |
| Mmp23    | 0.11419   | 0.031509  | -0.082681   | 0.00043492 | No      | Bid      | 40.1331   | 9.13398  | -2.13548         | 40.1341      | 9.13498       | -2.1353551       | 0.00014629 | No      |



| RRBS      |           |           |             |            |         | RNAseq  |           |         |                  |              |               |                  |            |         |
|-----------|-----------|-----------|-------------|------------|---------|---------|-----------|---------|------------------|--------------|---------------|------------------|------------|---------|
| gene      | Blood     | Kidney    | methyl.diff | pMWU.fdr   | Match ? | gene    | blood     | kidney  | log2(fold_ratio) | blood+ 0.001 | kidney+ 0.001 | log2(fold_ratio) | q_value    | Match ? |
| Mmp9      | 0.18496   | 0.1034    | -0.08156    | 0.00389713 | No      | Bin3    | 20.3529   | 29.5628 | 0.538547         | 20.3539      | 29.5638       | 0.53852646       | 0.0221218  | No      |
| Mn1       | 0.88336   | 0.12091   | -0.76245    | 1.61E-12   | No      | Birc2   | 25.413    | 13.413  | -0.921931        | 25.414       | 13.414        | -0.921884        | 0.00014629 | No      |
| Mrc2      | 0.80172   | 0.3498    | -0.45192    | 0.00063283 | No      | Birc6   | 14.912    | 1.63167 | -3.19205         | 14.913       | 1.63267       | -3.1912654       | 0.00053701 | No      |
| Mrgprf    | 0.13601   | 0.051569  | -0.084441   | 0.0013856  | No      | BIVM    | 6.60649   | 13.9967 | 1.08313          | 6.60749      | 13.9977       | 1.08301555       | 0.00041099 | No      |
| Mrpl14    | 0.085316  | 0.011757  | -0.073559   | 0.00019529 | No      | Blcap   | 18.6482   | 42.8154 | 1.19909          | 18.6492      | 42.8164       | 1.19904976       | 0.00014629 | No      |
| Msc       | 0.32935   | 0.082677  | -0.246673   | 8.52E-05   | No      | Blnk    | 2.09184   | 14.7078 | 2.81374          | 2.09284      | 14.7088       | 2.81314563       | 0.00014629 | No      |
| Mst1r     | 0.54439   | 0.15845   | -0.38594    | 6.57E-07   | No      | Bloc1s1 | 63.2135   | 228.652 | 1.85485          | 63.2145      | 228.653       | 1.85483242       | 0.00014629 | No      |
| Mt1       | 0.31472   | 0.066022  | -0.248698   | 1.57E-07   | No      | Bloc1s2 | 59.0769   | 24.9529 | -1.24339         | 59.0779      | 24.9539       | -1.2433532       | 0.00014629 | No      |
| Mtnr1b    | 0.43665   | 0.75934   | 0.32269     | 2.10E-06   | No      | Bloc1s3 | 8.54841   | 16.2112 | 0.923263         | 8.54941      | 16.2122       | 0.92318311       | 0.0411275  | No      |
| Murc      | 0.87886   | 0.69412   | -0.18474    | 0.00935402 | No      | Bloc1s5 | 10.0754   | 24.4148 | 1.27692          | 10.0764      | 24.4158       | 1.27683475       | 0.00014629 | No      |
| Mvp       | 0.83763   | 0.27104   | -0.56659    | 7.44E-07   | No      | Bloc1s6 | 6.52309   | 10.2664 | 0.654307         | 6.52409      | 10.2674       | 0.65422231       | 0.0185598  | No      |
| Myadml2   | 0.87177   | 0.66658   | -0.20519    | 0.00013121 | No      | Blvra   | 15.6019   | 45.141  | 1.53272          | 15.6029      | 45.142        | 1.53265614       | 0.00014629 | No      |
| Mycs      | 0.073413  | 0.0025166 | -0.0708964  | 5.62E-06   | No      | BLVRB   | 6.24294   | 21.4739 | 1.78229          | 6.24394      | 21.4749       | 1.78212283       | 0.00014629 | No      |
| Myh14     | 0.1446    | 0.038319  | -0.106281   | 0.00500595 | No      | Blzf1   | 13.5044   | 5.19827 | -1.37732         | 13.5054      | 5.19927       | -1.3771554       | 0.00014629 | No      |
| Myh6      | 0.52745   | 0.14355   | -0.3839     | 4.27E-06   | No      | Bmf     | 1.27647   | 3.02456 | 1.24456          | 1.27747      | 3.02556       | 1.24391278       | 0.0185598  | No      |
| Myocd     | 0.32235   | 0.073254  | -0.249096   | 3.87E-06   | No      | Bmp1    | 0.621668  | 13.9892 | 4.49202          | 0.622668     | 13.9902       | 4.48980964       | 0.00014629 | No      |
| Myod1     | 0.10925   | 0.029857  | -0.079393   | 0.00035126 | No      | Bmp4    | 0.458379  | 47.3843 | 6.69172          | 0.459379     | 47.3853       | 6.68861085       | 0.00014629 | No      |
| Mypn      | 0.8064    | 0.65593   | -0.15047    | 0.01247474 | No      | Bmpr1a  | 0.0654591 | 7.15305 | 6.77182          | 0.0664591    | 7.15405       | 6.75014964       | 0.0105557  | No      |
| Myt1l     | 0.069946  | 0.015206  | -0.05474    | 2.98E-07   | No      | Bmpr2   | 3.27436   | 5.23046 | 0.675725         | 3.27536      | 5.23146       | 0.67556015       | 0.00700299 | No      |
| Nacad     | 0.13506   | 0.053874  | -0.081186   | 0.00028703 | No      | Bms1    | 30.331    | 16.7487 | -0.856741        | 30.332       | 16.7497       | -0.8567054       | 0.00014629 | No      |
| Nags      | 0.11927   | 0.04384   | -0.07543    | 0.00051431 | No      | Bnip2   | 34.1305   | 12.3912 | -1.46174         | 34.1315      | 12.3922       | -1.4616715       | 0.00014629 | No      |
| Nalcn     | 0.17055   | 0.032518  | -0.138032   | 1.61E-12   | No      | Bnip3   | 1.95965   | 108.079 | 5.78535          | 1.96065      | 108.08        | 5.78462375       | 0.00014629 | No      |
| Nap1l5    | 0.44036   | 0.6691    | 0.22874     | 0.00039347 | No      | Bnip3l  | 59.3431   | 30.9768 | -0.937892        | 59.3441      | 30.9778       | -0.9378699       | 0.00014629 | No      |
| Naprt     | 0.50661   | 0.042238  | -0.464372   | 2.94E-10   | No      | Boc     | 0.282792  | 3.91255 | 3.79029          | 0.283792     | 3.91355       | 3.78557205       | 0.00014629 | No      |
| Nat8f5    | 0.78252   | 0.066778  | -0.715742   | 3.61E-07   | No      | BOD1    | 6.90989   | 28.8135 | 2.06001          | 6.91089      | 28.8145       | 2.05985156       | 0.00014629 | No      |
| Ncan      | 0.089917  | 0.018648  | -0.071269   | 8.66E-06   | No      | Bod1l   | 30.409    | 8.42026 | -1.85256         | 30.41        | 8.42126       | -1.8524378       | 0.00014629 | No      |
| Nccrp1    | 0.01646   | 0.078504  | 0.062044    | 0.00500595 | No      | Bola1   | 18.1934   | 52.6668 | 1.53348          | 18.1944      | 52.6678       | 1.53342672       | 0.00014629 | No      |
| Nck2      | 0.0047342 | 0.093602  | 0.0888678   | 0.00082506 | No      | Bola3   | 24.4567   | 70.0772 | 1.51872          | 24.4577      | 70.0782       | 1.51867698       | 0.00014629 | No      |
| Ndn       | 0.26102   | 0.092119  | -0.168901   | 0.00076943 | No      | Bora    | 7.78149   | 1.21147 | -2.68329         | 7.78249      | 1.21247       | -2.6822828       | 0.00274649 | No      |
| Ndnf2     | 0.080783  | 0.0086732 | -0.0721098  | 6.30E-06   | No      | Bpgm    | 12.2056   | 29.2674 | 1.26175          | 12.2066      | 29.2684       | 1.26168247       | 0.00014629 | No      |
| Ndr3      | 0.06424   | 0.0074932 | -0.0567468  | 0.00210055 | No      | Bphl    | 0.58759   | 73.1406 | 6.95972          | 0.58859      | 73.1416       | 6.95728534       | 0.00014629 | No      |
| Ndufa10l1 | 0.69311   | 0.07015   | -0.62296    | 8.00E-12   | No      | Bpnt1   | 9.91785   | 24.5748 | 1.30908          | 9.91885      | 24.5758       | 1.30899361       | 0.00014629 | No      |
| Ndufs6    | 0.97976   | 0.87168   | -0.10808    | 0.00057442 | No      | Braf    | 3.6093    | 1.63459 | -1.14279         | 3.6103       | 1.63559       | -1.1423076       | 0.00138312 | No      |
| Necab2    | 0.009303  | 0.091158  | 0.081855    | 0.0017172  | No      | Brp     | 22.9079   | 10.9582 | -1.06384         | 22.9089      | 10.9592       | -1.0637657       | 0.0264168  | No      |
| Negr1     | 0.068333  | 0.0010592 | -0.0672738  | 3.61E-07   | No      | Brd1    | 39.8309   | 12.2276 | -1.70374         | 39.8319      | 12.2286       | -1.7036651       | 0.00014629 | No      |
| Neil2     | 0.47017   | 0.056058  | -0.414112   | 1.63E-09   | No      | Brd3    | 12.4204   | 7.98001 | -0.638249        | 12.4214      | 7.98101       | -0.6381846       | 0.00792329 | No      |
| Nell2     | 0.10578   | 0.0099459 | -0.0958341  | 4.59E-07   | No      | Brd4    | 46.8841   | 11.9036 | -1.9777          | 46.8851      | 11.9046       | -1.9776104       | 0.00014629 | No      |
| Neurl1    | 0.18594   | 0.085032  | -0.100908   | 0.02324623 | No      | Bre     | 23.8563   | 39.2932 | 0.719908         | 23.8573      | 39.2942       | 0.7198856        | 0.00448672 | No      |
| Neurod2   | 0.11098   | 0.018606  | -0.092374   | 2.28E-05   | No      | Brf1    | 34.5993   | 114.588 | 1.72764          | 34.6003      | 114.589       | 1.72761211       | 0.00014629 | No      |
| Neurog1   | 0.15364   | 0.011928  | -0.141712   | 4.24E-09   | No      | Brf2    | 10.516    | 6.16389 | -0.770675        | 10.517       | 6.16489       | -0.7705762       | 0.0204477  | No      |
| Neurog3   | 0.17572   | 0.0075456 | -0.1681744  | 1.44E-06   | No      | Bri3    | 55.1294   | 330.348 | 2.58309          | 55.1304      | 330.349       | 2.583071         | 0.00014629 | No      |
| Nfasc     | 0.2048    | 0.047264  | -0.157536   | 2.91E-05   | No      | Bricd5  | 5.64048   | 31.8252 | 2.49628          | 5.64148      | 31.8262       | 2.49606931       | 0.00014629 | No      |

| RRBS      |          |           |             |            |         | RNAseq            |           |          |                  |              |               |                  |            |         |
|-----------|----------|-----------|-------------|------------|---------|-------------------|-----------|----------|------------------|--------------|---------------|------------------|------------|---------|
| gene      | Blood    | Kidney    | methyl.diff | pMWU.fdr   | Match ? | gene              | blood     | kidney   | log2(fold_ratio) | blood+ 0.001 | kidney+ 0.001 | log2(fold_ratio) | q_value    | Match ? |
| Ngb       | 0.2791   | 0.1049    | -0.1742     | 6.76E-05   | No      | Brox              | 25.7394   | 17.7603  | -0.535317        | 25.7404      | 17.7613       | -0.5352973       | 0.0117565  | No      |
| Ngfr      | 0.10898  | 0.0133    | -0.09568    | 0.00099362 | No      | Brpf1             | 16.942    | 8.00603  | -1.08144         | 16.943       | 8.00703       | -1.0813502       | 0.00014629 | No      |
| Nhlh2     | 0.053316 | 0.039949  | -0.013367   | 0.00082506 | No      | Brpf3             | 10.0187   | 4.2378   | -1.2413          | 10.0197      | 4.2388        | -1.2411115       | 0.00014629 | No      |
| Nhlrc1    | 0.42174  | 0.22016   | -0.20158    | 0.00051431 | No      | Brwd1             | 15.8588   | 7.8176   | -1.02048         | 15.8598      | 7.8186        | -1.0203924       | 0.00263402 | No      |
| Nipsnap3a | 0.89324  | 0.71493   | -0.17831    | 2.05E-05   | No      | Brwd3             | 3.34664   | 1.04986  | -1.67251         | 3.34764      | 1.05086       | -1.6715739       | 0.00352183 | No      |
| Nkain3    | 0.077716 | 0.0094153 | -0.0683007  | 1.28E-06   | No      | Bscl2             | 36.0085   | 84.4542  | 1.22983          | 36.0095      | 84.4552       | 1.22980869       | 0.00014629 | No      |
| Nkx1-2    | 0.10496  | 0.022805  | -0.082155   | 0.00935402 | No      | Bsdc1             | 9.01123   | 17.3167  | 0.942366         | 9.01223      | 17.3177       | 0.9422913        | 0.00014629 | No      |
| Nkx2-3    | 0.10331  | 0.043921  | -0.059389   | 0.00143157 | No      | Bsg               | 84.3055   | 562.774  | 2.73886          | 84.3065      | 562.775       | 2.73884247       | 0.00014629 | No      |
| Nkx2-5    | 0.47752  | 0.18214   | -0.29538    | 0.00015888 | No      | Bsnd              | 0         | 12.8415  | inf              | 0.001        | 12.8425       | 13.6486385       | 0.00014629 | No      |
| Nkx2-8    | 0.093689 | 0.02334   | -0.070349   | 3.43E-12   | No      | Bspry             | 3.70598   | 44.3949  | 3.58247          | 3.70698      | 44.3959       | 3.58211021       | 0.00014629 | No      |
| Nkx3-1    | 0.11858  | 0.022464  | -0.096116   | 4.96E-07   | No      | Bst1              | 6.2635    | 78.4781  | 3.64725          | 6.2645       | 78.4791       | 3.64703723       | 0.00014629 | No      |
| Nkx6-2    | 0.084738 | 0.012855  | -0.071883   | 2.01E-08   | No      | Bst2              | 69.6163   | 41.3039  | -0.753147        | 69.6173      | 41.3049       | -0.7531329       | 0.00102864 | No      |
| Nlgn3     | 0.22191  | 0.078333  | -0.143577   | 0.00023889 | No      | Btaf1             | 11.6106   | 4.91803  | -1.23929         | 11.6116      | 4.91903       | -1.239121        | 0.00014629 | No      |
| Nlrp6     | 0.20098  | 0.052134  | -0.148846   | 0.00039347 | No      | Btbd1             | 42.3434   | 20.2344  | -1.06533         | 42.3444      | 20.2354       | -1.0652898       | 0.00014629 | No      |
| Nmnat2    | 0.072344 | 0.016001  | -0.056343   | 5.62E-06   | No      | Btbd2             | 14.2826   | 33.4914  | 1.22953          | 14.2836      | 33.4924       | 1.22947412       | 0.00014629 | No      |
| Nnat      | 0.36957  | 0.13194   | -0.23763    | 1.61E-12   | No      | Btbd6             | 3.41237   | 24.3703  | 2.83628          | 3.41337      | 24.3713       | 2.8359145        | 0.00114835 | No      |
| Nobox     | 0.46343  | 0.33333   | -0.1301     | 0.04893177 | No      | Btbd7             | 5.95244   | 3.78449  | -0.653382        | 5.95344      | 3.78549       | -0.6532435       | 0.00480938 | No      |
| Nodal     | 0.45864  | 0.17323   | -0.28541    | 0.00021752 | No      | Btc               | 0         | 2.72801  | inf              | 0.001        | 2.72901       | 11.414162        | 0.00014629 | No      |
| Nog       | 0.05598  | 2.50E-07  | -0.0559798  | 5.23E-07   | No      | Btd               | 5.1182    | 29.4217  | 2.52317          | 5.1192       | 29.4227       | 2.52293937       | 0.00014629 | No      |
| Nol3      | 0.18276  | 0.36199   | 0.17923     | 0.01194539 | No      | Btf3              | 656.083   | 308.102  | -1.09047         | 656.084      | 308.103       | -1.0904678       | 0.00014629 | No      |
| Nol4      | 0.1263   | 0.022887  | -0.103413   | 6.17E-07   | No      | Btg1              | 1406.67   | 104.448  | -3.75142         | 1406.671     | 104.449       | -3.7514144       | 0.00014629 | No      |
| Nop10     | 0.41667  | 0.12829   | -0.28838    | 3.61E-07   | No      | Btg2              | 327.826   | 45.8794  | -2.83701         | 327.827      | 45.8804       | -2.8369848       | 0.00014629 | No      |
| Npas4     | 0.24137  | 0.067713  | -0.173657   | 5.27E-11   | No      | Btg3              | 2.68678   | 16.0555  | 2.57912          | 2.68778      | 16.0565       | 2.57867049       | 0.00014629 | No      |
| Npffr1    | 0.091197 | 0.040825  | -0.050372   | 0.00210055 | No      | Btla              | 13.2536   | 0.190383 | -6.12134         | 13.2546      | 0.191383      | -6.1138866       | 0.0242332  | No      |
| Npr1      | 0.44452  | 0.2598    | -0.18472    | 0.01931414 | No      | Bzw1              | 74.5542   | 41.721   | -0.837517        | 74.5552      | 41.722        | -0.8375007       | 0.00014629 | No      |
| Nptx2     | 0.14001  | 0.043441  | -0.096569   | 4.27E-06   | No      | Bzw2              | 48.9953   | 15.0675  | -1.7012          | 48.9963      | 15.0685       | -1.701137        | 0.00014629 | No      |
| Npw       | 0.1821   | 0.053705  | -0.128395   | 0.00343039 | No      | C1galt1           | 14.3548   | 4.8619   | -1.56194         | 14.3558      | 4.8629        | -1.5617449       | 0.00014629 | No      |
| Npy5r     | 0.12741  | 0.031722  | -0.095688   | 1.80E-10   | No      | C1galt1c1         | 5.25646   | 14.5529  | 1.46915          | 5.25746      | 14.5539       | 1.46896793       | 0.00014629 | No      |
| Nr2e1     | 0.086669 | 0.033348  | -0.053321   | 1.64E-07   | No      | C1qa              | 0         | 7.47158  | inf              | 0.001        | 7.47258       | 12.8673907       | 0.00014629 | No      |
| Nr2f2     | 0.11717  | 0.013308  | -0.103862   | 4.95E-06   | No      | C1qb              | 0         | 4.76754  | inf              | 0.001        | 4.76854       | 12.2193319       | 0.00014629 | No      |
| Nradd     | 0.93149  | 0.014806  | -0.916684   | 8.00E-12   | No      | C1qc              | 0         | 11.9256  | inf              | 0.001        | 11.9266       | 13.5418952       | 0.00014629 | No      |
| Nrk       | 0.082858 | 0.018069  | -0.064789   | 2.80E-10   | No      | C2                | 0.441654  | 3.22232  | 2.86711          | 0.442654     | 3.22332       | 2.86429606       | 0.00014629 | No      |
| Nrsn2     | 0.84205  | 0.4007    | -0.44135    | 5.68E-07   | No      | C3                | 0.307186  | 2.47803  | 3.01201          | 0.308186     | 2.47903       | 3.0079025        | 0.00014629 | No      |
| Nt5c1a    | 0.39953  | 0.12882   | -0.27071    | 0.00051431 | No      | C330018D20<br>Rik | 14.4057   | 23.5674  | 0.710152         | 14.4067      | 23.5684       | 0.71011391       | 0.00864487 | No      |
| Ntn1      | 0.1107   | 0.041498  | -0.069202   | 0.00017692 | No      | C4b               | 0.677755  | 13.2952  | 4.29399          | 0.678755     | 13.2962       | 4.29197926       | 0.00296747 | No      |
| Ntn3      | 0.14516  | 0.039709  | -0.105451   | 2.57E-05   | No      | C5                | 0.0678092 | 3.21919  | 5.56907          | 0.0688092    | 3.22019       | 5.54840053       | 0.00126596 | No      |
| Ntrk2     | 0.12413  | 0.013228  | -0.110902   | 2.94E-08   | No      | Caap1             | 15.0815   | 7.8018   | -0.9509          | 15.0825      | 7.8028        | -0.9508118       | 0.00078603 | No      |
| Nuak1     | 0.092056 | 0.030681  | -0.061375   | 0.00022224 | No      | Cab39             | 57.6708   | 30.4063  | -0.923471        | 57.6718      | 30.4073       | -0.9234483       | 0.00014629 | No      |
| Numbl     | 0.9689   | 0.75962   | -0.20928    | 0.00743291 | No      | Cabin1            | 12.1888   | 18.7672  | 0.622649         | 12.1898      | 18.7682       | 0.62261584       | 0.0392145  | No      |
| Nvl       | 0.85873  | 0.70407   | -0.15466    | 0.02194182 | No      | Cables1           | 0.10742   | 4.92046  | 5.51746          | 0.10842      | 4.92146       | 5.50438355       | 0.00161718 | No      |
| Nxph3     | 0.11042  | 0.02792   | -0.0825     | 0.01008382 | No      | Cabp1             | 0.645658  | 53.4386  | 6.37097          | 0.646658     | 53.4396       | 6.36876249       | 0.00014629 | No      |

| RRBS     |           |           |             |            |         | RNAseq   |           |          |                  |              |               |                  |            |         |
|----------|-----------|-----------|-------------|------------|---------|----------|-----------|----------|------------------|--------------|---------------|------------------|------------|---------|
| gene     | Blood     | Kidney    | methyl.diff | pMWU.fdr   | Match ? | gene     | blood     | kidney   | log2(fold_ratio) | blood+ 0.001 | kidney+ 0.001 | log2(fold_ratio) | q_value    | Match ? |
| Nyap1    | 0.065007  | 0.012113  | -0.052894   | 0.0179568  | No      | Cacfd1   | 4.86374   | 23.3648  | 2.2642           | 4.86474      | 23.3658       | 2.26396383       | 0.00014629 | No      |
| Odf3b    | 0.089748  | 0.013088  | -0.07666    | 0.00019529 | No      | Cacna1d  | 0.100514  | 1.22502  | 3.60734          | 0.101514     | 1.22602       | 3.5942319        | 0.00014629 | No      |
| Ogfod1   | 0.21136   | 0.048341  | -0.163019   | 3.61E-07   | No      | Cacna1h  | 0.0921492 | 1.21565  | 3.72161          | 0.0931492    | 1.21665       | 3.70722701       | 0.00014629 | No      |
| Olig2    | 0.088043  | 0.024389  | -0.063654   | 0.00063283 | No      | Cacna2d3 | 0         | 0.998428 | inf              | 0.001        | 0.999428      | 9.96495883       | 0.00014629 | No      |
| Olr1462  | 0.61975   | 0.34747   | -0.27228    | 0.00047568 | No      | Cacnb2   | 0.543117  | 1.50758  | 1.4729           | 0.544117     | 1.50858       | 1.4712024        | 0.00533979 | No      |
| Olr857   | 0.632     | 0.27805   | -0.35395    | 0.00165151 | No      | Cacng5   | 0         | 5.37109  | inf              | 0.001        | 5.37209       | 12.3912678       | 0.00014629 | No      |
| Olr877   | 0.96556   | 0.86789   | -0.09767    | 0.00082506 | No      | Cacul1   | 25.5747   | 10.6469  | -1.26428         | 25.5757      | 10.6479       | -1.2642048       | 0.00014629 | No      |
| Opcml    | 0.080205  | 0.020865  | -0.05934    | 9.70E-11   | No      | Cad      | 26.392    | 9.13572  | -1.53051         | 26.393       | 9.13672       | -1.5304071       | 0.00014629 | No      |
| Oprm1    | 0.063356  | 0.012555  | -0.050801   | 0.00024415 | No      | Cadm1    | 0.203617  | 4.40029  | 4.43366          | 0.204617     | 4.40129       | 4.42692852       | 0.00014629 | No      |
| Osbpl8   | 0.27691   | 0.063676  | -0.213234   | 1.12E-06   | No      | Cadps2   | 0.061785  | 7.19528  | 6.86365          | 0.062785     | 7.19628       | 6.84068759       | 0.00014629 | No      |
| Osm      | 0.0049708 | 0.42874   | 0.4237692   | 6.30E-06   | No      | Calcoco1 | 21.6392   | 13.5373  | -0.676714        | 21.6402      | 13.5383       | -0.6766672       | 0.00126596 | No      |
| Otop1    | 0.075302  | 0.0082995 | -0.0670025  | 1.44E-06   | No      | Calcr1   | 7.70883   | 1.40817  | -2.45269         | 7.70983      | 1.40917       | -2.4518534       | 0.0273452  | No      |
| Otop2    | 0.45054   | 0.29917   | -0.15137    | 0.03210797 | No      | Cald1    | 0.0260675 | 60.4542  | 11.1794          | 0.0270675    | 60.4552       | 11.1250891       | 0.0261464  | No      |
| Otop3    | 0.1613    | 0.095189  | -0.066111   | 0.04431681 | No      | Calhm2   | 3.3901    | 1.56498  | -1.11519         | 3.3911       | 1.56598       | -1.1146875       | 0.018934   | No      |
| Otp      | 0.17875   | 0.057166  | -0.121584   | 2.28E-07   | No      | Caln1    | 252.273   | 125.431  | -1.00809         | 252.274      | 125.432       | -1.0080861       | 0.00014629 | No      |
| Otulin   | 0.094038  | 0.0024165 | -0.0916215  | 6.26E-05   | No      | Caln3    | 70.7617   | 170.732  | 1.2707           | 70.7627      | 170.733       | 1.27068093       | 0.00014629 | No      |
| Ovol1    | 0.14018   | 0.022285  | -0.117895   | 0.00069112 | No      | Caln13   | 0         | 1.53161  | inf              | 0.001        | 1.53261       | 10.5817749       | 0.00014629 | No      |
| Oxct2a   | 0.57584   | 0.19636   | -0.37948    | 9.50E-05   | No      | Caln14   | 1.09711   | 232.453  | 7.72709          | 1.09811      | 232.454       | 7.72577886       | 0.00014629 | No      |
| Oxtr     | 0.15528   | 0.046921  | -0.108359   | 0.00099362 | No      | Caln1    | 0         | 4.55803  | inf              | 0.001        | 4.55903       | 12.1545112       | 0.00014629 | No      |
| P2rx2    | 0.73747   | 0.46674   | -0.27073    | 0.02065846 | No      | Calu     | 20.1235   | 14.6421  | -0.458765        | 20.1245      | 14.6431       | -0.4587319       | 0.0335581  | No      |
| P2rx7    | 0.7473    | 0.27413   | -0.47317    | 1.59E-10   | No      | Camk1    | 0.302681  | 34.6488  | 6.83886          | 0.303681     | 34.6498       | 6.83414657       | 0.00053701 | No      |
| P2ry2    | 0.13497   | 0.01254   | -0.12243    | 1.11E-08   | No      | Camk1d   | 4.43757   | 0.172694 | -4.68348         | 4.43857      | 0.173694      | -4.6754751       | 0.00014629 | No      |
| P3h2     | 0.11724   | 0.027619  | -0.089621   | 0.00069112 | No      | Camk2d   | 21.9125   | 7.48405  | -1.54986         | 21.9135      | 7.48505       | -1.5497361       | 0.00014629 | No      |
| P4ha2    | 0.29119   | 0.10735   | -0.18384    | 0.00470016 | No      | Camk2g   | 29.9991   | 9.41558  | -1.6718          | 30.0001      | 9.41658       | -1.6716922       | 0.00014629 | No      |
| Pabpc5   | 0.13943   | 0.023819  | -0.115611   | 4.95E-06   | No      | Camk4    | 52.1784   | 4.82037  | -3.43624         | 52.1794      | 4.82137       | -3.4359653       | 0.00014629 | No      |
| Pak7     | 0.098157  | 0.031539  | -0.066618   | 2.40E-06   | No      | Camkk2   | 4.06576   | 2.03377  | -0.999364        | 4.06676      | 2.03477       | -0.9990141       | 0.0109563  | No      |
| Palm2    | 0.28186   | 0.084989  | -0.196871   | 0.03705648 | No      | Camta1   | 7.99358   | 0.246593 | -5.01864         | 7.99458      | 0.247593      | -5.0129798       | 0.00014629 | No      |
| Palmd    | 0.51266   | 0.13604   | -0.37662    | 6.26E-05   | No      | Cand2    | 0.587076  | 1.53966  | 1.39099          | 0.588076     | 1.54066       | 1.389474         | 0.00470105 | No      |
| Papalb   | 0.40337   | 0.1799    | -0.22347    | 9.66E-07   | No      | Canx     | 115.709   | 76.6787  | -0.593604        | 115.71       | 76.6797       | -0.593597        | 0.00363169 | No      |
| Pappa    | 0.13877   | 0.070175  | -0.068595   | 0.002433   | No      | Cap1     | 189.72    | 51.1706  | -1.89049         | 189.721      | 51.1716       | -1.8904641       | 0.00014629 | No      |
| Paqr4    | 0.36035   | 0.24453   | -0.11582    | 0.00082506 | No      | Capg     | 12.6092   | 33.8621  | 1.42519          | 12.6102      | 33.8631       | 1.42512289       | 0.00014629 | No      |
| Pax1     | 0.067989  | 0.024501  | -0.043488   | 1.22E-05   | No      | Capn13   | 0         | 1.57618  | inf              | 0.001        | 1.57718       | 10.6231316       | 0.00014629 | No      |
| Pax3     | 0.077528  | 0.025744  | -0.051784   | 0.00389713 | No      | Capn2    | 26.09     | 36.1714  | 0.47135          | 26.091       | 36.1724       | 0.47133708       | 0.0183831  | No      |
| Pax7     | 0.11006   | 0.045257  | -0.064803   | 5.68E-07   | No      | Capn6    | 0         | 1.18482  | inf              | 0.001        | 1.18582       | 10.2116693       | 0.00014629 | No      |
| Pcdh20   | 0.3051    | 0.18136   | -0.12374    | 0.04431681 | No      | Caprin1  | 75.3545   | 48.711   | -0.629446        | 75.3555      | 48.712        | -0.6294356       | 0.0105557  | No      |
| Pcdh8    | 0.18786   | 0.056827  | -0.131033   | 7.78E-05   | No      | Caprin2  | 6.12544   | 15.7978  | 1.36684          | 6.12644      | 15.7988       | 1.36669409       | 0.00028114 | No      |
| Pcdh9    | 0.034848  | 0.19726   | 0.162412    | 5.68E-07   | No      | Capza1   | 152.945   | 21.4563  | -2.83354         | 152.946      | 21.4573       | -2.8334819       | 0.00014629 | No      |
| Pcdha8   | 0.47914   | 0.32837   | -0.15077    | 0.04794029 | No      | Capza2   | 94.1076   | 48.6117  | -0.953008        | 94.1086      | 48.6127       | -0.9529933       | 0.00014629 | No      |
| Pcdha9   | 0.34102   | 0.17207   | -0.16895    | 3.93E-06   | No      | Capzb    | 351.957   | 161.919  | -1.12013         | 351.958      | 161.92        | -1.1201221       | 0.00014629 | No      |
| Pcdhac1  | 0.30044   | 0.16166   | -0.13878    | 0.00110448 | No      | Car11    | 1.91835   | 22.9725  | 3.58197          | 1.91935      | 22.9735       | 3.58128095       | 0.00014629 | No      |
| Pcdhac2  | 0.10801   | 0.019817  | -0.088193   | 1.15E-05   | No      | Car12    | 0.350227  | 242.526  | 9.43564          | 0.351227     | 242.527       | 9.4315259        | 0.00014629 | No      |
| Pcdhga10 | 0.4566    | 0.13292   | -0.32368    | 6.57E-07   | No      | Car14    | 2.81137   | 31.9587  | 3.50686          | 2.81237      | 31.9597       | 3.50639555       | 0.0330385  | No      |

| RRBS    |           |           |             |            |         | RNAseq   |           |          |                  |              |               |                  |            |         |
|---------|-----------|-----------|-------------|------------|---------|----------|-----------|----------|------------------|--------------|---------------|------------------|------------|---------|
| gene    | Blood     | Kidney    | methyl.diff | pMWU.fdr   | Match ? | gene     | blood     | kidney   | log2(fold_ratio) | blood+ 0.001 | kidney+ 0.001 | log2(fold_ratio) | q_value    | Match ? |
| Pcdhga2 | 0.50509   | 0.38226   | -0.12283    | 0.00487164 | No      | Car2     | 38.5928   | 355.011  | 3.20146          | 38.5938      | 355.012       | 3.20142679       | 0.00014629 | No      |
| Pcdhga3 | 0.45753   | 0.28265   | -0.17488    | 3.65E-05   | No      | Car5b    | 0.14673   | 38.5831  | 8.03866          | 0.14773      | 38.5841       | 8.02889982       | 0.00014629 | No      |
| Pcdhga8 | 0.47742   | 0.22871   | -0.24871    | 5.48E-05   | No      | Car6     | 5.80166   | 30.0957  | 2.37502          | 5.80266      | 30.0967       | 2.37481901       | 0.00014629 | No      |
| Pcdhgb7 | 0.67331   | 0.45641   | -0.2169     | 0.00226691 | No      | Card11   | 30.904    | 4.1397   | -2.90019         | 30.905       | 4.1407        | -2.8998937       | 0.00014629 | No      |
| Pclo    | 0.1537    | 0.019153  | -0.134547   | 5.62E-06   | No      | Card6    | 28.2667   | 1.10388  | -4.67844         | 28.2677      | 1.10488       | -4.6771929       | 0.00014629 | No      |
| Pcsk1n  | 0.1762    | 0.03849   | -0.13771    | 1.53E-06   | No      | Card9    | 0.150398  | 12.236   | 6.34621          | 0.151398     | 12.237        | 6.33675996       | 0.0175479  | No      |
| Pcsk2   | 0.085077  | 0.019632  | -0.065445   | 6.76E-05   | No      | Carf     | 5.6929    | 1.41506  | -2.0083          | 5.6939       | 1.41606       | -2.0075348       | 0.00184429 | No      |
| Pcsk9   | 0.13346   | 0.04015   | -0.09331    | 0.00226691 | No      | Carkd    | 27.1479   | 43.587   | 0.683058         | 27.1489      | 43.588        | 0.68303726       | 0.0251567  | No      |
| Pde10a  | 0.3215    | 0.19987   | -0.12163    | 0.01247474 | No      | Carm1    | 38.223    | 22.2234  | -0.782361        | 38.224       | 22.2244       | -0.7823343       | 0.00459197 | No      |
| Pde1b   | 0.30426   | 0.080165  | -0.224095   | 0.0013856  | No      | Cars     | 5.33944   | 11.6625  | 1.12711          | 5.34044      | 11.6635       | 1.12697026       | 0.00014629 | No      |
| Pde3a   | 0.11444   | 0.019805  | -0.094635   | 0.00043492 | No      | Casc3    | 24.459    | 6.06381  | -2.01207         | 24.46        | 6.06481       | -2.01189         | 0.00014629 | No      |
| Pdx1    | 0.15534   | 0.045594  | -0.109746   | 0.00187484 | No      | Casd1    | 28.9767   | 2.81171  | -3.36538         | 28.9777      | 2.81271       | -3.3649104       | 0.00014629 | No      |
| Peg12   | 0.16415   | 0.068874  | -0.095276   | 3.68E-06   | No      | Caskin2  | 0.222488  | 11.2278  | 5.6572           | 0.223488     | 11.2288       | 5.65086258       | 0.0151721  | No      |
| Peg3    | 0.44977   | 0.27299   | -0.17678    | 0.00021752 | No      | Casp1    | 72.2712   | 9.19148  | -2.97505         | 72.2722      | 9.19248       | -2.9749148       | 0.00014629 | No      |
| Perp    | 0.13216   | 0.022439  | -0.109721   | 0.00021752 | No      | Casp12   | 0.789918  | 6.23618  | 2.98089          | 0.790918     | 6.23718       | 2.97929386       | 0.0145969  | No      |
| Pex5l   | 0.065843  | 0.010752  | -0.055091   | 1.61E-12   | No      | Casp3    | 16.0864   | 6.53592  | -1.29938         | 16.0874      | 6.53692       | -1.2992482       | 0.00014629 | No      |
| Pgbd5   | 0.13556   | 0.03665   | -0.09891    | 3.65E-05   | No      | Casp7    | 5.81459   | 9.68216  | 0.735652         | 5.81559      | 9.68316       | 0.73555237       | 0.0108581  | No      |
| Pgc     | 0.83418   | 0.75959   | -0.07459    | 0.03705648 | No      | Casp8ap2 | 6.7839    | 1.40472  | -2.27183         | 6.7849       | 1.40572       | -2.2710183       | 0.00014629 | No      |
| Pgf     | 0.0077193 | 0.062551  | 0.0548317   | 0.0030913  | No      | Casp9    | 3.80306   | 8.69828  | 1.19357          | 3.80406      | 8.69928       | 1.193356         | 0.00014629 | No      |
| Pgp     | 0.22331   | 0.03072   | -0.19259    | 1.61E-12   | No      | Cast     | 24.1481   | 12.0731  | -1.00011         | 24.1491      | 12.0741       | -1.0000538       | 0.00710369 | No      |
| Phf1    | 0.76005   | 0.43868   | -0.32137    | 0.00067482 | No      | Casz1    | 0.781638  | 6.21837  | 2.99196          | 0.782638     | 6.21937       | 2.99035138       | 0.00014629 | No      |
| Phldb3  | 0.32343   | 0.022479  | -0.300951   | 3.08E-05   | No      | Cat      | 23.0781   | 308.027  | 3.73846          | 23.0791      | 308.028       | 3.73840263       | 0.00014629 | No      |
| Phlpp1  | 0.65532   | 0.13151   | -0.52381    | 2.62E-08   | No      | Catsper4 | 0         | 2.74159  | inf              | 0.001        | 2.74259       | 11.4213232       | 0.00014629 | No      |
| Phox2a  | 0.26698   | 0.062328  | -0.204652   | 2.36E-06   | No      | Cav1     | 0.102332  | 5.61414  | 5.77773          | 0.103332     | 5.61514       | 5.76396299       | 0.00184429 | No      |
| Pif1    | 0.0059077 | 0.35913   | 0.3532223   | 2.10E-06   | No      | Cav2     | 1.02501   | 8.12197  | 2.98619          | 1.02601      | 8.12297       | 2.98496252       | 0.00014629 | No      |
| Pih1d3  | 0.10468   | 0.011651  | -0.093029   | 7.96E-06   | No      | Cbfa2t3  | 2.2029    | 0.810247 | -1.44297         | 2.2039       | 0.811247      | -1.4418456       | 0.00014629 | No      |
| Pinlyp  | 0.91554   | 0.62837   | -0.28717    | 0.00019529 | No      | Cbfb     | 72.7816   | 10.3768  | -2.81022         | 72.7826      | 10.3778       | -2.810093        | 0.00014629 | No      |
| Pkib    | 0.10415   | 0.030832  | -0.073318   | 0.00017692 | No      | Cbl      | 19.1064   | 1.38592  | -3.78514         | 19.1074      | 1.38692       | -3.784175        | 0.00014629 | No      |
| Pkn1    | 0.17967   | 0.10375   | -0.07592    | 0.03210797 | No      | Cblb     | 30.8258   | 4.74911  | -2.69841         | 30.8268      | 4.75011       | -2.6981523       | 0.00014629 | No      |
| Pkp3    | 0.85596   | 0.013756  | -0.842204   | 1.61E-12   | No      | Cblc     | 0         | 5.60724  | inf              | 0.001        | 5.60824       | 12.4533324       | 0.00014629 | No      |
| Pla2g10 | 0.38855   | 0.060144  | -0.328406   | 0.00157493 | No      | Cbll1    | 18.1534   | 3.45509  | -2.39345         | 18.1544      | 3.45609       | -2.3931066       | 0.00014629 | No      |
| Pla2g3  | 0.47155   | 0.28947   | -0.18208    | 0.01164415 | No      | CBR1     | 8.76642   | 17.1073  | 0.964549         | 8.76742      | 17.1083       | 0.96447214       | 0.00586782 | No      |
| Plagl1  | 0.37429   | 0.10093   | -0.27336    | 1.61E-12   | No      | Cbr4     | 2.10295   | 10.361   | 2.30067          | 2.10395      | 10.362        | 2.30013016       | 0.00884407 | No      |
| Plaur   | 0.10629   | 0.027413  | -0.078877   | 0.00015888 | No      | Cbs      | 0.0211215 | 122.517  | 12.502           | 0.0221215    | 122.518       | 12.4352569       | 0.0102511  | No      |
| Plcg2   | 0.0083135 | 0.11161   | 0.1032965   | 0.00500595 | No      | Cbx1     | 45.8684   | 22.8928  | -1.0026          | 45.8694      | 22.8938       | -1.0025751       | 0.00219102 | No      |
| Plek2   | 0.1053    | 0.012572  | -0.092728   | 1.64E-06   | No      | Cbx3     | 139.67    | 72.3692  | -0.948577        | 139.671      | 72.3702       | -0.9485648       | 0.00014629 | No      |
| Plip    | 0.17293   | 0.031492  | -0.141438   | 0.00076943 | No      | Cbx4     | 34.0517   | 4.47611  | -2.92741         | 34.0527      | 4.47711       | -2.9271295       | 0.00014629 | No      |
| Plod1   | 0.07239   | 0.005974  | -0.066416   | 0.00683403 | No      | Cbx5     | 12.8745   | 21.0296  | 0.707901         | 12.8755      | 21.0306       | 0.70786155       | 0.0160279  | No      |
| Plpp3   | 0.054337  | 0.0031626 | -0.0511744  | 2.98E-07   | No      | Cbx6     | 2.36381   | 26.5183  | 3.4878           | 2.36481      | 26.5193       | 3.48724651       | 0.00014629 | No      |
| Plpp6   | 0.10185   | 0.014898  | -0.086952   | 0.00013121 | No      | Cbx7     | 44.0162   | 15.7463  | -1.48302         | 44.0172      | 15.7473       | -1.4829629       | 0.00014629 | No      |
| Plpp7   | 0.75392   | 0.27208   | -0.48184    | 3.80E-11   | No      | CBY1     | 4.18657   | 20.9572  | 2.32361          | 4.18757      | 20.9582       | 2.3233296        | 0.00014629 | No      |
| Plppr2  | 0.76287   | 0.56516   | -0.19771    | 0.02450594 | No      | Cc2d1a   | 14.7614   | 143.865  | 3.28482          | 14.7624      | 143.866       | 3.28472649       | 0.00014629 | No      |

| RRBS     |          |           |             |            |         | RNAseq  |           |          |                  |              |               |                  |            |         |
|----------|----------|-----------|-------------|------------|---------|---------|-----------|----------|------------------|--------------|---------------|------------------|------------|---------|
| gene     | Blood    | Kidney    | methyl.diff | pMWU.fdr   | Match ? | gene    | blood     | kidney   | log2(fold_ratio) | blood+ 0.001 | kidney+ 0.001 | log2(fold_ratio) | q_value    | Match ? |
| Plppr5   | 0.065023 | 0.010773  | -0.05425    | 1.61E-12   | No      | Cc2d2a  | 0.0677769 | 18.2082  | 8.06958          | 0.0687769    | 18.2092       | 8.04852773       | 0.00014629 | No      |
| Plvap    | 0.33009  | 0.096151  | -0.233939   | 1.33E-06   | No      | Ccar1   | 29.2658   | 17.3879  | -0.751129        | 29.2668      | 17.3889       | -0.7510983       | 0.00014629 | No      |
| Plxdc1   | 0.064116 | 2.50E-07  | -0.0641158  | 4.97E-05   | No      | Ccbl2   | 5.10086   | 16.9889  | 1.73578          | 5.10186      | 16.9899       | 1.73558215       | 0.00053701 | No      |
| Plxna2   | 0.12028  | 0.043367  | -0.076913   | 0.00035126 | No      | CCDC101 | 40.8641   | 23.491   | -0.798724        | 40.8651      | 23.492        | -0.7986997       | 0.00102864 | No      |
| Plxnb2   | 0.075987 | 0.01604   | -0.059947   | 0.00026594 | No      | Ccdc103 | 0         | 1.94356  | inf              | 0.001        | 1.94456       | 10.925228        | 0.00014629 | No      |
| Plxnd1   | 0.24566  | 0.11239   | -0.13327    | 0.00743291 | No      | Ccdc104 | 15.7659   | 49.8089  | 1.65959          | 15.7669      | 49.8099       | 1.65953348       | 0.00014629 | No      |
| Pmaip1   | 0.55135  | 0.16278   | -0.38857    | 1.61E-12   | No      | Ccdc107 | 38.151    | 24.4148  | -0.643967        | 38.152       | 24.4158       | -0.6439436       | 0.0241459  | No      |
| Pnck     | 0.71973  | 0.46525   | -0.25448    | 0.00861735 | No      | Ccdc108 | 0         | 8.84882  | inf              | 0.001        | 8.84982       | 13.1114324       | 0.00513162 | No      |
| Pnkp     | 0.36643  | 0.052608  | -0.313822   | 0.00043492 | No      | Ccdc111 | 2.79246   | 1.21899  | -1.19585         | 2.79346      | 1.21999       | -1.1951838       | 0.027611   | No      |
| Pnmt     | 0.19322  | 0.48187   | 0.28865     | 0.00041578 | No      | Ccdc113 | 0.629839  | 36.5652  | 5.85935          | 0.630839     | 36.5662       | 5.85709504       | 0.00173187 | No      |
| Pnpla1   | 0.53894  | 0.11495   | -0.42399    | 3.61E-07   | No      | CCDC115 | 60.7155   | 25.8814  | -1.23015         | 60.7165      | 25.8824       | -1.2301172       | 0.00014629 | No      |
| Pou3f2   | 0.14123  | 0.019959  | -0.121271   | 1.65E-12   | No      | Ccdc12  | 46.8186   | 79.2676  | 0.759649         | 46.8196      | 79.2686       | 0.75963689       | 0.00102864 | No      |
| Pou4f2   | 0.076297 | 0.013794  | -0.062503   | 1.61E-12   | No      | Ccdc124 | 44.0742   | 117.21   | 1.41109          | 44.0752      | 117.211       | 1.41106895       | 0.00014629 | No      |
| Ppara    | 0.46532  | 0.056693  | -0.408627   | 3.92E-09   | No      | Ccdc126 | 2.06042   | 7.01543  | 1.76759          | 2.06142      | 7.01643       | 1.76709869       | 0.00014629 | No      |
| Ppfia2   | 0.091002 | 0.011161  | -0.079841   | 0.00011929 | No      | Ccdc127 | 2.77855   | 5.93092  | 1.09392          | 2.77955      | 5.93192       | 1.09364781       | 0.0124494  | No      |
| Ppfia3   | 0.12598  | 0.036787  | -0.089193   | 7.44E-07   | No      | Ccdc130 | 12.5245   | 19.9436  | 0.671168         | 12.5255      | 19.9446       | 0.67112999       | 0.0158416  | No      |
| Ppm1n    | 0.072473 | 0.020617  | -0.051856   | 0.00081137 | No      | Ccdc137 | 12.1491   | 6.4153   | -0.921259        | 12.1501      | 6.4163        | -0.9211547       | 0.00184429 | No      |
| Ppp1r14a | 0.76426  | 0.4305    | -0.33376    | 7.05E-07   | No      | Ccdc138 | 0.403796  | 2.31728  | 2.52073          | 0.404796     | 2.31828       | 2.51778789       | 0.0104529  | No      |
| Ppp1r14b | 0.38214  | 0.11015   | -0.27199    | 3.61E-07   | No      | Ccdc15  | 2.86215   | 0.105743 | -4.75847         | 2.86315      | 0.106743      | -4.7453899       | 0.00014629 | No      |
| Ppp1r3b  | 0.081257 | 0.014129  | -0.067128   | 2.28E-05   | No      | Ccdc157 | 0.605253  | 2.633    | 2.12109          | 0.606253     | 2.634         | 2.11926346       | 0.00173187 | No      |
| Ppp1r3d  | 0.37227  | 0.058473  | -0.313797   | 1.61E-12   | No      | Ccdc163 | 2.43899   | 7.67753  | 1.65436          | 2.43999      | 7.67853       | 1.65395491       | 0.00041099 | No      |
| Prim2    | 0.74301  | 0.55778   | -0.18523    | 0.00028703 | No      | Ccdc17  | 19.7624   | 49.0091  | 1.31029          | 19.7634      | 49.0101       | 1.31024793       | 0.00241835 | No      |
| Prkag3   | 0.035604 | 0.10121   | 0.065606    | 0.0027754  | No      | Ccdc181 | 5.42091   | 19.9304  | 1.87836          | 5.42191      | 19.9314       | 1.87816998       | 0.00014629 | No      |
| Prkcdbp  | 0.47179  | 0.24451   | -0.22728    | 2.37E-05   | No      | Ccdc23  | 11.9203   | 20.2871  | 0.767135         | 11.9213      | 20.2881       | 0.76709219       | 0.0416357  | No      |
| Prkce    | 0.35778  | 0.018967  | -0.338813   | 1.65E-10   | No      | Ccdc27  | 0.0203412 | 3.10189  | 7.2526           | 0.0213412    | 3.10289       | 7.18382744       | 0.0138196  | No      |
| Prlhr    | 0.095536 | 0.026152  | -0.069384   | 7.78E-05   | No      | Ccdc28b | 35.9397   | 18.7565  | -0.938186        | 35.9407      | 18.7575       | -0.9381509       | 0.00014629 | No      |
| Prmt8    | 0.082044 | 0.019311  | -0.062733   | 6.00E-09   | No      | Ccdc30  | 0.548403  | 8.2459   | 3.91037          | 0.549403     | 8.2469        | 3.90791522       | 0.00014629 | No      |
| Proca1   | 0.10252  | 0.014052  | -0.088468   | 2.70E-09   | No      | Ccdc37  | 0.778147  | 8.93144  | 3.52078          | 0.779147     | 8.93244       | 3.51908687       | 0.00904412 | No      |
| Prok2    | 0.4325   | 0.1979    | -0.2346     | 0.00546968 | No      | Ccdc41  | 15.8415   | 10.8042  | -0.552125        | 15.8425      | 10.8052       | -0.5520742       | 0.0291608  | No      |
| Prom2    | 0.49018  | 0.12833   | -0.36185    | 1.15E-05   | No      | Ccdc47  | 42.5682   | 27.9662  | -0.606091        | 42.5692      | 27.9672       | -0.6060742       | 0.00138312 | No      |
| Proser3  | 0.10968  | 0.0051426 | -0.1045374  | 2.69E-06   | No      | Ccdc51  | 3.048     | 10.1875  | 1.74087          | 3.049        | 10.1885       | 1.74053361       | 0.00014629 | No      |
| Prpf3    | 0.43296  | 0.22038   | -0.21258    | 0.00357821 | No      | Ccdc53  | 29.7175   | 69.4778  | 1.22524          | 29.7185      | 69.4788       | 1.22521154       | 0.00014629 | No      |
| Prpf31   | 0.51461  | 0.35257   | -0.16204    | 1.13E-05   | No      | Ccdc57  | 1.59081   | 6.53653  | 2.03876          | 1.59181      | 6.53753       | 2.03807752       | 0.0421247  | No      |
| Prph     | 0.077544 | 0.012638  | -0.064906   | 0.00057442 | No      | Ccdc6   | 11.3583   | 99.8985  | 3.13671          | 11.3593      | 99.8995       | 3.13660352       | 0.00014629 | No      |
| Prr18    | 0.12597  | 0.022187  | -0.103783   | 0.00470016 | No      | Ccdc62  | 9.63544   | 21.1326  | 1.13305          | 9.63644      | 21.1336       | 1.13296637       | 0.00066215 | No      |
| Prss34   | 0.70956  | 0.52995   | -0.17961    | 0.04324438 | No      | Ccdc64  | 102.181   | 20.9954  | -2.28298         | 102.182      | 20.9964       | -2.2829272       | 0.00014629 | No      |
| Prss41   | 0.74398  | 0.86842   | 0.12444     | 0.00057442 | No      | Ccdc68  | 0         | 8.38789  | inf              | 0.001        | 8.38889       | 13.0342642       | 0.00014629 | No      |
| Psapl1   | 0.75756  | 0.52745   | -0.23011    | 0.04063154 | No      | Ccdc69  | 57.3476   | 5.69248  | -3.3326          | 57.3486      | 5.69348       | -3.3323756       | 0.00014629 | No      |
| Psd      | 0.63974  | 0.44142   | -0.19832    | 0.03210797 | No      | Ccdc71l | 11.9022   | 2.6263   | -2.18012         | 11.9032      | 2.6273        | -2.1796966       | 0.00720409 | No      |
| Psenen   | 0.58267  | 0.34417   | -0.2385     | 0.00110448 | No      | Ccdc77  | 3.57534   | 1.90897  | -0.905285        | 3.57634      | 1.90997       | -0.9049339       | 0.019026   | No      |
| Ptgr1    | 0.085384 | 0.025308  | -0.060076   | 0.00143157 | No      | Ccdc82  | 34.4965   | 4.4242   | -2.96296         | 34.4975      | 4.4252        | -2.9626772       | 0.00014629 | No      |
| Pth2     | 0.15331  | 0.059086  | -0.094224   | 0.00039347 | No      | Ccdc86  | 12.1517   | 20.865   | 0.779932         | 12.1527      | 20.866        | 0.77987719       | 0.00523722 | No      |

| RRBS       |          |           |             |            |         | RNAseq   |           |          |                  |              |               |                  |            |         |
|------------|----------|-----------|-------------|------------|---------|----------|-----------|----------|------------------|--------------|---------------|------------------|------------|---------|
| gene       | Blood    | Kidney    | methyl.diff | pMWU.fdr   | Match ? | gene     | blood     | kidney   | log2(fold_ratio) | blood+ 0.001 | kidney+ 0.001 | log2(fold_ratio) | q_value    | Match ? |
| Pth2r      | 0.098377 | 0.018322  | -0.080055   | 4.27E-06   | No      | Ccdc88a  | 0.263971  | 1.97086  | 2.90038          | 0.264971     | 1.97186       | 2.89565075       | 0.0329554  | No      |
| Ptpn14     | 0.19734  | 0.037355  | -0.159985   | 3.66E-10   | No      | Ccdc88b  | 43.6919   | 9.3839   | -2.21911         | 43.6929      | 9.3849        | -2.2189856       | 0.00014629 | No      |
| Ptprn      | 0.084924 | 0.02671   | -0.058214   | 0.0179568  | No      | Ccdc88c  | 33.9141   | 12.0232  | -1.49606         | 33.9151      | 12.0242       | -1.4959868       | 0.00014629 | No      |
| Ptx3       | 0.020114 | 0.082463  | 0.062349    | 1.68E-12   | No      | Ccdc91   | 15.8713   | 23.2732  | 0.552253         | 15.8723      | 23.2742       | 0.55222038       | 0.0183831  | No      |
| Pwvp2b     | 0.10636  | 0.28864   | 0.18228     | 0.00082506 | No      | Ccdc92   | 0.63054   | 4.7788   | 2.92199          | 0.63154      | 4.7798        | 2.92000423       | 0.00014629 | No      |
| Rab15      | 0.11471  | 0.030992  | -0.083718   | 0.00023889 | No      | Ccdc94   | 24.2057   | 11.1369  | -1.12            | 24.2067      | 11.1379       | -1.1199292       | 0.00014629 | No      |
| Rab24      | 0.472    | 0.20718   | -0.26482    | 1.59E-05   | No      | Ccdc97   | 113.029   | 55.2403  | -1.03291         | 113.03       | 55.2413       | -1.0328866       | 0.00066215 | No      |
| Rabep2     | 0.12293  | 0.0067231 | -0.1162069  | 2.57E-05   | No      | Cchcr1   | 6.64077   | 30.2615  | 2.18806          | 6.64177      | 30.2625       | 2.1878915        | 0.00014629 | No      |
| Radil      | 0.1767   | 0.050699  | -0.126001   | 0.00293459 | No      | Ccl21    | 0         | 1.16204  | inf              | 0.001        | 1.16304       | 10.183685        | 0.00014629 | No      |
| Rasef      | 0.21183  | 0.053198  | -0.158632   | 2.69E-06   | No      | Ccl3     | 26.8535   | 93.8814  | 1.80573          | 26.8545      | 93.8824       | 1.80569086       | 0.00014629 | No      |
| Rasgef1c   | 0.041766 | 0.52905   | 0.487284    | 3.61E-07   | No      | Ccl4     | 5.679     | 14.8244  | 1.38427          | 5.68         | 14.8254       | 1.3841082        | 0.0351683  | No      |
| Rasgrp4    | 0.9152   | 0.65823   | -0.25697    | 0.00015508 | No      | Ccl5     | 252.154   | 123.535  | -1.02939         | 252.155      | 123.536       | -1.0293793       | 0.00014629 | No      |
| Rasl10b    | 0.021438 | 0.2792    | 0.257762    | 8.75E-07   | No      | Ccl6     | 1.86335   | 5.6151   | 1.59141          | 1.86435      | 5.6161        | 1.5908959        | 0.00502315 | No      |
| Rassf1     | 0.002879 | 0.076473  | 0.073594    | 2.44E-05   | No      | Ccl9     | 2.39424   | 17.0027  | 2.82813          | 2.39524      | 17.0037       | 2.82760659       | 0.00014629 | No      |
| Rassf4     | 0.09966  | 0.0014706 | -0.0981894  | 2.57E-05   | No      | Ccm2     | 70.6203   | 33.8832  | -1.05951         | 70.6213      | 33.8842       | -1.0594907       | 0.00014629 | No      |
| Rax        | 0.16513  | 0.033974  | -0.131156   | 4.97E-05   | No      | Ccnb1ip1 | 3.12585   | 0.444258 | -2.81478         | 3.12685      | 0.445258      | -2.8119966       | 0.019026   | No      |
| Rbfox3     | 0.71367  | 0.10549   | -0.60818    | 1.17E-11   | No      | Ccnb2    | 0.65501   | 3.5556   | 2.4405           | 0.65601      | 3.5566        | 2.43870902       | 0.03862    | No      |
| Rbm20      | 0.12323  | 0.026996  | -0.096234   | 1.02E-08   | No      | Ccnc     | 25.5713   | 9.474    | -1.43248         | 25.5723      | 9.475         | -1.4323841       | 0.00459197 | No      |
| Rbm46      | 0.18202  | 0.055     | -0.12702    | 6.26E-05   | No      | Ccnd1    | 0.0688133 | 47.8645  | 9.44205          | 0.0698133    | 47.8655       | 9.42126856       | 0.00066215 | No      |
| Rbp3       | 0.87385  | 0.7742    | -0.09965    | 0.00861735 | No      | CCND2    | 13.0592   | 1.19408  | -3.45109         | 13.0602      | 1.19508       | -3.4499979       | 0.00014629 | No      |
| Rbpjl      | 0.074493 | 0.29319   | 0.218697    | 1.46E-05   | No      | Ccnd3    | 50.37     | 25.545   | -0.979526        | 50.371       | 25.546        | -0.979496        | 0.00053701 | No      |
| Rcor2      | 0.20963  | 0.070969  | -0.138661   | 2.23E-10   | No      | Ccng2    | 27.5131   | 14.6847  | -0.905808        | 27.5141      | 14.6857       | -0.9057591       | 0.00014629 | No      |
| Reln       | 0.077523 | 0.006933  | -0.07059    | 4.10E-07   | No      | CCNJ     | 6.54396   | 1.93451  | -1.7582          | 6.54496      | 1.93551       | -1.7576706       | 0.00014629 | No      |
| Rem1       | 0.48988  | 0.11147   | -0.37841    | 2.10E-08   | No      | Ccnl1    | 151.659   | 62.0654  | -1.28897         | 151.66       | 62.0664       | -1.2889563       | 0.00014629 | No      |
| Retn       | 0.6915   | 0.32131   | -0.37019    | 5.23E-07   | No      | Ccnt2    | 34.2048   | 6.18149  | -2.46817         | 34.2058      | 6.18249       | -2.4679811       | 0.00014629 | No      |
| RGD1309036 | 0.71513  | 0.41188   | -0.30325    | 6.76E-05   | No      | Ccny     | 44.7311   | 26.5275  | -0.753787        | 44.7321      | 26.5285       | -0.7537674       | 0.00102864 | No      |
| RGD1309049 | 0.95728  | 0.9062    | -0.05108    | 0.00057442 | No      | Ccp110   | 5.95893   | 2.79175  | -1.09389         | 5.95993      | 2.79275       | -1.093609        | 0.00285806 | No      |
| RGD1560108 | 0.90524  | 0.18838   | -0.71686    | 1.61E-12   | No      | Ccpg1    | 88.5201   | 19.4193  | -2.18851         | 88.5211      | 19.4203       | -2.1884559       | 0.00014629 | No      |
| RGD1561149 | 0.71958  | 0.029621  | -0.689959   | 3.27E-08   | No      | Ccpg1os  | 2.70584   | 18.382   | 2.76415          | 2.70684      | 18.383        | 2.76369071       | 0.00014629 | No      |
| RGD1561870 | 0.53553  | 0.20219   | -0.33334    | 0.00069112 | No      | Ccr10    | 1.63544   | 7.09733  | 2.1176           | 1.63644      | 7.09833       | 2.11691894       | 0.0160279  | No      |
| RGD1562114 | 0.90372  | 0.13595   | -0.76777    | 1.61E-12   | No      | Ccr5     | 3.46299   | 1.42997  | -1.27603         | 3.46399      | 1.43097       | -1.2754413       | 0.00126596 | No      |
| RGD1562726 | 0.73442  | 0.20158   | -0.53284    | 1.61E-12   | No      | Ccr6     | 6.92874   | 0.777303 | -3.15605         | 6.92974      | 0.778303      | -3.1543974       | 0.0302247  | No      |
| RGD1563072 | 0.15032  | 0.015533  | -0.134787   | 3.87E-06   | No      | Ccr7     | 323.56    | 1.55432  | -7.70161         | 323.561      | 1.55532       | -7.7006825       | 0.00014629 | No      |

| RRBS       |          |           |             |            |         | RNAseq  |          |          |                  |              |               |                  |            |         |
|------------|----------|-----------|-------------|------------|---------|---------|----------|----------|------------------|--------------|---------------|------------------|------------|---------|
| gene       | Blood    | Kidney    | methyl.diff | pMWU.fdr   | Match ? | gene    | blood    | kidney   | log2(fold_ratio) | blood+ 0.001 | kidney+ 0.001 | log2(fold_ratio) | q_value    | Match ? |
| RGD1563348 | 0.50038  | 0.29953   | -0.20085    | 0.00226691 | No      | Ccr9    | 15.8753  | 0.149492 | -6.73057         | 15.8763      | 0.150492      | -6.7210441       | 0.00149937 | No      |
| RGD1564053 | 0.084821 | 0.013447  | -0.071374   | 4.05E-07   | No      | Ccr12   | 0.625003 | 3.58385  | 2.51958          | 0.626003     | 3.58485       | 2.51767128       | 0.00149937 | No      |
| RGD1564482 | 0.76703  | 0.14897   | -0.61806    | 1.28E-06   | No      | Ccsap   | 11.5468  | 0.646022 | -4.15976         | 11.5478      | 0.647022      | -4.1576594       | 0.0122504  | No      |
| RGD1566401 | 0.47982  | 0.26342   | -0.2164     | 2.43E-07   | No      | Ccser1  | 0.277911 | 1.94122  | 2.80427          | 0.278911     | 1.94222       | 2.79982989       | 0.0196905  | No      |
| Rgma       | 0.10114  | 0.022452  | -0.078688   | 0.0001045  | No      | Ccser2  | 6.66458  | 13.8616  | 1.05651          | 6.66558      | 13.8626       | 1.05639555       | 0.00014629 | No      |
| Rgn        | 0.53608  | 0.053903  | -0.482177   | 1.94E-12   | No      | Cct2    | 139.568  | 74.4356  | -0.906906        | 139.569      | 74.4366       | -0.9068945       | 0.00014629 | No      |
| Rgs20      | 0.11361  | 0.015469  | -0.098141   | 7.96E-06   | No      | Cct4    | 171.615  | 94.7489  | -0.856994        | 171.616      | 94.7499       | -0.8569877       | 0.00014629 | No      |
| Rhbd1      | 0.30232  | 0.059561  | -0.242759   | 1.39E-08   | No      | Cct5    | 224.248  | 127.126  | -0.818841        | 224.249      | 127.127       | -0.8188311       | 0.00263402 | No      |
| Rhoc       | 0.64902  | 0.016006  | -0.633014   | 3.61E-07   | No      | Cct7    | 107.634  | 62.9662  | -0.773491        | 107.635      | 62.9672       | -0.7734749       | 0.00066215 | No      |
| Ric3       | 0.093565 | 0.041699  | -0.051866   | 0.01658745 | No      | Cct8    | 100.212  | 68.9184  | -0.540102        | 100.213      | 68.9194       | -0.5400876       | 0.0211873  | No      |
| Rin1       | 0.50295  | 0.074654  | -0.428296   | 3.61E-07   | No      | Cd14    | 0.387659 | 7.78913  | 4.3286           | 0.388659     | 7.79013       | 4.32507057       | 0.0116551  | No      |
| Ripk4      | 0.12984  | 0.013739  | -0.116101   | 3.02E-06   | No      | Cd160   | 3.49837  | 0.436684 | -3.00202         | 3.49937      | 0.437684      | -2.9991337       | 0.0365085  | No      |
| Rmrp       | 0.39019  | 0.22634   | -0.16385    | 0.00143157 | No      | Cd164   | 128.208  | 81.4196  | -0.655034        | 128.209      | 81.4206       | -0.6550318       | 0.00114835 | No      |
| Rn28s      | 0.22251  | 0.30137   | 0.07886     | 0.04431681 | No      | Cd1d1   | 16.2905  | 2.91248  | -2.48371         | 16.2915      | 2.91348       | -2.4833041       | 0.00014629 | No      |
| Rn45s      | 0.29785  | 0.097628  | -0.200222   | 1.61E-12   | No      | Cd2     | 293.085  | 19.0544  | -3.94313         | 293.086      | 19.0554       | -3.9430523       | 0.00014629 | No      |
| Rn5-8s     | 0.5816   | 0.19454   | -0.38706    | 5.62E-06   | No      | Cd200   | 3.54406  | 5.93176  | 0.74306          | 3.54506      | 5.93276       | 0.74289338       | 0.034633   | No      |
| Rn7sl1     | 0.51751  | 0.087484  | -0.430026   | 1.61E-12   | No      | Cd200r1 | 7.13864  | 0.876579 | -3.02569         | 7.13964      | 0.877579      | -3.0242504       | 0.0402534  | No      |
| Rnase17    | 0.64018  | 0.29743   | -0.34275    | 0.01008382 | No      | Cd226   | 27.3384  | 0.523944 | -5.70537         | 27.3394      | 0.524944      | -5.7026742       | 0.00014629 | No      |
| Rnf113a2   | 0.36701  | 0.076245  | -0.290765   | 1.63E-09   | No      | Cd24    | 2.30659  | 411.948  | 7.48056          | 2.30759      | 411.949       | 7.47993501       | 0.00014629 | No      |
| Rnf151     | 0.77451  | 0.5548    | -0.21971    | 0.02954396 | No      | Cd244   | 7.27475  | 1.45273  | -2.32413         | 7.27575      | 1.45373       | -2.3233366       | 0.0222129  | No      |
| Rnf165     | 0.11836  | 0.03362   | -0.08474    | 0.00143157 | No      | Cd247   | 274.211  | 7.50219  | -5.19183         | 274.212      | 7.50319       | -5.1916438       | 0.00014629 | No      |
| Rnf225     | 0.75081  | 0.43375   | -0.31706    | 0.00187484 | No      | Cd27    | 257.647  | 7.27548  | -5.14621         | 257.648      | 7.27648       | -5.1460169       | 0.00014629 | No      |
| Robo4      | 0.95726  | 0.68413   | -0.27313    | 0.0017172  | No      | Cd274   | 21.4472  | 1.19566  | -4.16491         | 21.4482      | 1.19666       | -4.1637714       | 0.00014629 | No      |
| Rogdi      | 0.65206  | 0.22567   | -0.42639    | 8.52E-05   | No      | Cd28    | 148.207  | 2.05752  | -6.17056         | 148.208      | 2.05852       | -6.169872        | 0.00014629 | No      |
| Rom1       | 0.23274  | 0.019581  | -0.213159   | 8.75E-07   | No      | Cd2ap   | 49.8924  | 34.7435  | -0.522079        | 49.8934      | 34.7445       | -0.5220644       | 0.00823262 | No      |
| Ropn1      | 0.79137  | 0.33136   | -0.46001    | 0.00019529 | No      | Cd302   | 0.847653 | 13.4129  | 3.98401          | 0.848653     | 13.4139       | 3.98241016       | 0.00014629 | No      |
| Ror2       | 0.4207   | 0.18462   | -0.23608    | 3.02E-06   | No      | Cd320   | 75.6784  | 248.884  | 1.71752          | 75.6794      | 248.885       | 1.71750673       | 0.00014629 | No      |
| Rpl39l     | 0.76126  | 0.90881   | 0.14755     | 0.01164415 | No      | Cd36    | 0.197632 | 1.34195  | 2.76344          | 0.198632     | 1.34295       | 2.75723562       | 0.0452219  | No      |
| Rpp25l     | 0.086305 | 0.021773  | -0.064532   | 0.03210797 | No      | Cd3d    | 690.457  | 30.0826  | -4.52055         | 690.458      | 30.0836       | -4.5205045       | 0.00014629 | No      |
| Rprm       | 0.086871 | 0.019811  | -0.06706    | 0.00039347 | No      | Cd3e    | 739.808  | 24.2325  | -4.93214         | 739.809      | 24.2335       | -4.9320782       | 0.00014629 | No      |
| Rsph6a     | 0.77755  | 0.41614   | -0.36141    | 0.00092018 | No      | Cd3eap  | 9.39717  | 38.899   | 2.04944          | 9.39817      | 38.9          | 2.04931839       | 0.00014629 | No      |
| Rspo2      | 0.055867 | 0.0051186 | -0.0507484  | 1.61E-12   | No      | Cd3g    | 1102.07  | 31.6863  | -5.12021         | 1102.071     | 31.6873       | -5.1201686       | 0.00014629 | No      |
| Rspo3      | 0.088374 | 0.027628  | -0.060746   | 0.01164415 | No      | Cd4     | 134.501  | 4.69756  | -4.83957         | 134.502      | 4.69856       | -4.8392651       | 0.00014629 | No      |
| RT1-M5     | 0.081694 | 0.017998  | -0.063696   | 6.17E-07   | No      | Cd40    | 0.934471 | 5.81668  | 2.63797          | 0.935471     | 5.81768       | 2.63667911       | 0.00041099 | No      |
| RT1-M6-2   | 0.79295  | 0.71545   | -0.0775     | 0.03595682 | No      | Cd40lg  | 131.532  | 2.04587  | -6.00655         | 131.533      | 2.04687       | -6.0058615       | 0.0100448  | No      |
| RT1-T18    | 0.45732  | 0.17979   | -0.27753    | 0.00021752 | No      | Cd44    | 139.996  | 11.1734  | -3.64724         | 139.997      | 11.1744       | -3.6471266       | 0.00014629 | No      |
| Rtkn       | 0.4566   | 0.08503   | -0.37157    | 3.61E-07   | No      | Cd47    | 105.54   | 17.6853  | -2.57717         | 105.541      | 17.6863       | -2.5770994       | 0.00014629 | No      |
| Rtn4r      | 0.063976 | 0.011653  | -0.052323   | 7.96E-06   | No      | Cd5     | 14.2659  | 0.307696 | -5.53493         | 14.2669      | 0.308696      | -5.5303413       | 0.00014629 | No      |

| RRBS    |          |           |             |            |         | RNAseq   |           |         |                  |              |               |                  |            |         |
|---------|----------|-----------|-------------|------------|---------|----------|-----------|---------|------------------|--------------|---------------|------------------|------------|---------|
| gene    | Blood    | Kidney    | methyl.diff | pMWU.fdr   | Match ? | gene     | blood     | kidney  | log2(fold_ratio) | blood+ 0.001 | kidney+ 0.001 | log2(fold_ratio) | q_value    | Match ? |
| Rtn4r1  | 0.10887  | 0.027196  | -0.081674   | 0.00014495 | No      | Cd53     | 429.335   | 11.2169 | -5.25835         | 429.336      | 11.2179       | -5.2582326       | 0.00014629 | No      |
| Rxfp3   | 0.66685  | 0.42995   | -0.2369     | 0.00210055 | No      | Cd59     | 1.61933   | 108.665 | 6.06834          | 1.62033      | 108.666       | 6.06746914       | 0.00014629 | No      |
| S100a16 | 0.58987  | 0.090296  | -0.499574   | 0.00861735 | No      | Cd6      | 127.069   | 15.3236 | -3.05179         | 127.07       | 15.3246       | -3.0517021       | 0.00014629 | No      |
| S1pr4   | 0.20637  | 0.59023   | 0.38386     | 6.26E-05   | No      | Cd63     | 5.47032   | 510.318 | 6.54363          | 5.47132      | 510.319       | 6.54336661       | 0.00014629 | No      |
| Sall3   | 0.89257  | 0.57578   | -0.31679    | 4.31E-07   | No      | Cd68     | 1.95362   | 6.44993 | 1.72314          | 1.95462      | 6.45093       | 1.722619         | 0.00066215 | No      |
| Samd14  | 0.23012  | 0.085966  | -0.144154   | 2.47E-05   | No      | Cd69     | 142.877   | 12.5029 | -3.51445         | 142.878      | 12.5039       | -3.5143337       | 0.00014629 | No      |
| Scarf2  | 0.41201  | 0.098276  | -0.313734   | 0.00023951 | No      | Cd74     | 198.93    | 278.397 | 0.484885         | 198.931      | 278.398       | 0.48488073       | 0.0140162  | No      |
| Scn2b   | 0.23761  | 0.092451  | -0.145159   | 0.0017172  | No      | Cd79b    | 25.5473   | 3.33791 | -2.93615         | 25.5483      | 3.33891       | -2.9357782       | 0.00014629 | No      |
| Scn4a   | 0.74478  | 0.27524   | -0.46954    | 3.31E-09   | No      | Cd8b     | 88.0239   | 3.26839 | -4.75124         | 88.0249      | 3.26939       | -4.7508183       | 0.00014629 | No      |
| Scrt1   | 0.16032  | 0.044309  | -0.116011   | 1.60E-05   | No      | Cd9      | 20.5401   | 64.4219 | 1.64911          | 20.5411      | 64.4229       | 1.64906016       | 0.00014629 | No      |
| Scube3  | 0.80814  | 0.453     | -0.35514    | 4.95E-06   | No      | Cd96     | 44.9981   | 2.64641 | -4.08775         | 44.9991      | 2.64741       | -4.0872426       | 0.00014629 | No      |
| Sdr42e1 | 0.28583  | 0.1981    | -0.08773    | 0.00293459 | No      | Cd97     | 175.144   | 21.5876 | -3.02027         | 175.145      | 21.5886       | -3.0202082       | 0.00014629 | No      |
| Sds     | 0.69048  | 0.52918   | -0.1613     | 0.01079042 | No      | Cd99     | 32.392    | 310.811 | 3.26233          | 32.393       | 310.812       | 3.26228821       | 0.00014629 | No      |
| Sec1    | 0.91598  | 0.83313   | -0.08285    | 0.00259554 | No      | Cdc14a   | 8.17876   | 2.93527 | -1.47839         | 8.17976      | 2.93627       | -1.4780739       | 0.00014629 | No      |
| Selv    | 0.073133 | 0.022369  | -0.050764   | 0.00143157 | No      | Cdc14b   | 6.4425    | 14.474  | 1.16777          | 6.4435       | 14.475        | 1.16764689       | 0.00330073 | No      |
| Sema3e  | 0.10297  | 0.013827  | -0.089143   | 1.34E-07   | No      | Cdc20    | 0.999346  | 6.22996 | 2.64017          | 1.000346     | 6.23096       | 2.63895537       | 0.00014629 | No      |
| Sema5b  | 0.070764 | 0.012755  | -0.058009   | 1.15E-05   | No      | Cdc23    | 26.8814   | 13.5125 | -0.99231         | 26.8824      | 13.5135       | -0.9922606       | 0.00014629 | No      |
| Sema6d  | 0.083144 | 0.014713  | -0.068431   | 0.00076943 | No      | Cdc25a   | 3.45462   | 6.28696 | 0.863835         | 3.45562      | 6.28796       | 0.86364746       | 0.00318982 | No      |
| Sez6l   | 0.2555   | 0.080289  | -0.175211   | 4.97E-05   | No      | Cdc25b   | 111.29    | 1.72932 | -6.00798         | 111.291      | 1.73032       | -6.0071542       | 0.00014629 | No      |
| Sfrp5   | 0.083679 | 0.018217  | -0.065462   | 0.00051431 | No      | Cdc25c   | 4.15318   | 1.49999 | -1.46927         | 4.15418      | 1.50099       | -1.4686494       | 0.00014629 | No      |
| Sftpa1  | 0.88809  | 0.41626   | -0.47183    | 2.77E-06   | No      | Cdc26    | 25.5169   | 16.9546 | -0.589778        | 25.5179      | 16.9556       | -0.5897478       | 0.0133356  | No      |
| Sgk2    | 0.6089   | 0.050478  | -0.558422   | 1.61E-12   | No      | Cdc27    | 9.69035   | 4.64892 | -1.05965         | 9.69135      | 4.64992       | -1.0594918       | 0.00014629 | No      |
| Sh2d4a  | 0.099488 | 0.017744  | -0.081744   | 0.00546968 | No      | Cdc42    | 616.808   | 190.224 | -1.69712         | 616.809      | 190.225       | -1.697117        | 0.00014629 | No      |
| Sh3bp2  | 0.10072  | 0.0318    | -0.06892    | 0.00389713 | No      | Cdc42bpa | 0.0851517 | 14.3789 | 7.3997           | 0.0861517    | 14.3799       | 7.38295866       | 0.00041099 | No      |
| Shank1  | 0.080856 | 0.015387  | -0.065469   | 6.26E-05   | No      | Cdc42bpb | 0.0394516 | 19.2069 | 8.92733          | 0.0404516    | 19.2079       | 8.89128732       | 0.00405996 | No      |
| Shc4    | 0.68447  | 0.1475    | -0.53697    | 1.00E-06   | No      | Cdc42bpg | 2.5801    | 12.6595 | 2.29473          | 2.5811       | 12.6605       | 2.29427644       | 0.00014629 | No      |
| Shcbp1l | 0.24031  | 0.089876  | -0.150434   | 0.00259554 | No      | Cdc42ep2 | 0.0918134 | 21.1647 | 7.84874          | 0.0928134    | 21.1657       | 7.83317938       | 0.0195955  | No      |
| Shd     | 0.9133   | 0.27355   | -0.63975    | 1.75E-12   | No      | Cdc42ep4 | 0.320239  | 4.61828 | 3.85014          | 0.321239     | 4.61928       | 3.84594904       | 0.00639443 | No      |
| Shisa6  | 0.088826 | 0.017303  | -0.071523   | 1.60E-05   | No      | Cdc42se1 | 262.953   | 79.541  | -1.72504         | 262.954      | 79.542        | -1.7250217       | 0.00014629 | No      |
| Shisa7  | 0.50426  | 0.098618  | -0.405642   | 1.61E-12   | No      | Cdc42se2 | 165.483   | 22.9759 | -2.84849         | 165.484      | 22.9769       | -2.8484357       | 0.00014629 | No      |
| Shisa8  | 0.017432 | 0.0075514 | -0.0098806  | 0.00343039 | No      | Cdc5l    | 30.5347   | 21.5856 | -0.500379        | 30.5357      | 21.5866       | -0.5003609       | 0.0160279  | No      |
| Sim1    | 0.085069 | 0.0063395 | -0.0787295  | 1.95E-09   | No      | Cdc6     | 0.700566  | 8.35518 | 3.57608          | 0.701566     | 8.35618       | 3.57419283       | 0.00014629 | No      |
| Sim2    | 0.077887 | 0.026248  | -0.051639   | 0.00935402 | No      | Cdca3    | 0.936796  | 4.3632  | 2.21958          | 0.937796     | 4.3642        | 2.21837119       | 0.00138312 | No      |
| Sirt4   | 0.77362  | 0.12292   | -0.6507     | 3.61E-07   | No      | Cdca7    | 4.5565    | 0.23987 | -4.2476          | 4.5575       | 0.24087       | -4.241916        | 0.00126596 | No      |
| Six2    | 0.088848 | 0.012285  | -0.076563   | 2.36E-06   | No      | Cdca7l   | 29.8726   | 3.21408 | -3.21634         | 29.8736      | 3.21508       | -3.2159446       | 0.00014629 | No      |
| Six3    | 0.074042 | 0.0061612 | -0.0678808  | 1.83E-06   | No      | Cdcp1    | 0         | 2.30155 | inf              | 0.001        | 2.30255       | 11.1690168       | 0.00014629 | No      |
| Six6    | 0.15762  | 0.024798  | -0.132822   | 3.91E-05   | No      | Cdh1     | 0.097819  | 21.4822 | 7.77881          | 0.098819     | 21.4832       | 7.76420473       | 0.00679736 | No      |
| Slc10a4 | 0.11234  | 0.02746   | -0.08488    | 0.00039347 | No      | Cdh11    | 0         | 3.47299 | inf              | 0.001        | 3.47399       | 11.7623779       | 0.00014629 | No      |
| Slc12a5 | 0.063973 | 0.026094  | -0.037879   | 6.30E-06   | No      | Cdh5     | 0         | 3.58346 | inf              | 0.001        | 3.58446       | 11.8075401       | 0.00014629 | No      |
| Slc13a5 | 0.14819  | 0.068383  | -0.079807   | 0.02834942 | No      | Cdhr1    | 0.427771  | 2.72486 | 2.67127          | 0.428771     | 2.72586       | 2.66843223       | 0.00014629 | No      |
| Slc15a1 | 0.12725  | 0.05083   | -0.07642    | 1.57E-08   | No      | Cdhr2    | 0.11956   | 5.15562 | 5.43034          | 0.12056      | 5.15662       | 5.41860251       | 0.00078603 | No      |
| Slc16a2 | 0.12681  | 0.047763  | -0.079047   | 0.00935402 | No      | Cdip1    | 10.349    | 27.5512 | 1.41263          | 10.35        | 27.5522       | 1.41253675       | 0.00014629 | No      |



| RRBS     |          |           |             |            |         | RNAseq     |           |         |                  |              |               |                  |            |         |
|----------|----------|-----------|-------------|------------|---------|------------|-----------|---------|------------------|--------------|---------------|------------------|------------|---------|
| gene     | Blood    | Kidney    | methyl.diff | pMWU.fdr   | Match ? | gene       | blood     | kidney  | log2(fold_ratio) | blood+ 0.001 | kidney+ 0.001 | log2(fold_ratio) | q_value    | Match ? |
| Slc16a3  | 0.064854 | 0.0048439 | -0.0600101  | 1.59E-05   | No      | Cdk1       | 1.07798   | 4.71583 | 2.12918          | 1.07898      | 4.71683       | 2.12814948       | 0.00384649 | No      |
| Slc17a6  | 0.08649  | 0.030091  | -0.056399   | 1.39E-08   | No      | CDK12      | 26.2138   | 7.35565 | -1.8334          | 26.2148      | 7.35665       | -1.8332607       | 0.00014629 | No      |
| Slc18a3  | 0.12118  | 0.037059  | -0.084121   | 1.57E-07   | No      | Cdk13      | 50.1365   | 8.01187 | -2.64565         | 50.1375      | 8.01287       | -2.6454991       | 0.00014629 | No      |
| Slc19a3  | 0.096956 | 0.0082693 | -0.0886867  | 1.12E-06   | No      | Cdk17      | 19.9902   | 5.8773  | -1.76607         | 19.9912      | 5.8783        | -1.7658942       | 0.00014629 | No      |
| Slc22a17 | 0.73598  | 0.23742   | -0.49856    | 2.88E-05   | No      | Cdk18      | 0         | 28.5174 | inf              | 0.001        | 28.5184       | 14.7996054       | 0.00014629 | No      |
| Slc22a6  | 0.69184  | 0.097827  | -0.594013   | 3.71E-09   | No      | Cdk19      | 34.5748   | 7.58032 | -2.18939         | 34.5758      | 7.58132       | -2.1892417       | 0.00014629 | No      |
| Slc25a34 | 0.72904  | 0.17473   | -0.55431    | 1.61E-12   | No      | Cdk2       | 26.012    | 5.25861 | -2.30642         | 26.013       | 5.25961       | -2.3062051       | 0.00014629 | No      |
| Slc27a2  | 0.47715  | 0.043529  | -0.433621   | 1.61E-12   | No      | Cdk20      | 7.16598   | 19.6456 | 1.45497          | 7.16698      | 19.6466       | 1.45484243       | 0.00014629 | No      |
| Slc29a1  | 0.096609 | 0.022523  | -0.074086   | 1.35E-09   | No      | Cdk2ap2    | 52.4452   | 130.664 | 1.31698          | 52.4462      | 130.665       | 1.3169626        | 0.00014629 | No      |
| Slc29a2  | 0.16929  | 0.090849  | -0.078441   | 0.04324438 | No      | Cdk4       | 48.742    | 69.8501 | 0.519098         | 48.743       | 69.8511       | 0.51908779       | 0.0267812  | No      |
| Slc30a3  | 0.059925 | 0.21094   | 0.151015    | 3.08E-05   | No      | Cdk5       | 23.485    | 37.8668 | 0.689193         | 23.486       | 37.8678       | 0.68917058       | 0.0248769  | No      |
| Slc35e4  | 0.066784 | 0.0026227 | -0.0641613  | 9.50E-05   | No      | Cdk5rap1   | 12.9128   | 58.4228 | 2.17773          | 12.9138      | 58.4238       | 2.17764261       | 0.00014629 | No      |
| Slc35f1  | 0.073011 | 0.011168  | -0.061843   | 7.44E-07   | No      | Cdk6       | 8.9148    | 4.08119 | -1.12721         | 8.9158       | 4.08219       | -1.1270209       | 0.00659461 | No      |
| Slc35g2  | 0.62995  | 0.06933   | -0.56062    | 3.87E-06   | No      | Cdk7       | 15.7416   | 24.1384 | 0.616752         | 15.7426      | 24.1394       | 0.61671599       | 0.0184724  | No      |
| Slc38a4  | 0.6803   | 0.51807   | -0.16223    | 0.04431681 | No      | Cdk9       | 83.4576   | 62.8399 | -0.409364        | 83.4586      | 62.8409       | -0.4093569       | 0.0435806  | No      |
| Slc3a1   | 0.79978  | 0.11118   | -0.6886     | 3.51E-10   | No      | Cdkl1      | 0.0270907 | 481.754 | 14.1182          | 0.0280907    | 481.755       | 14.0659194       | 0.00014629 | No      |
| Slc44a4  | 0.72684  | 0.32795   | -0.39889    | 0.00051431 | No      | Cdkn1a     | 0.209483  | 5.56548 | 4.7316           | 0.210483     | 5.56648       | 4.7249897        | 0.00014629 | No      |
| Slc45a1  | 0.13678  | 0.054064  | -0.082716   | 0.00259554 | No      | Cdkn1b     | 238.829   | 36.4248 | -2.71298         | 238.83       | 36.4258       | -2.7129515       | 0.00014629 | No      |
| Slc46a2  | 0.091338 | 0.026524  | -0.064814   | 5.62E-06   | No      | Cdkn2aip   | 17.9654   | 5.08588 | -1.82065         | 17.9664      | 5.08688       | -1.8204484       | 0.00014629 | No      |
| Slc47a2  | 0.010987 | 0.077505  | 0.066518    | 0.00015888 | No      | Cdkn2aipnl | 48.6002   | 32.2263 | -0.592724        | 48.6012      | 32.2273       | -0.5927086       | 0.00363169 | No      |
| Slc4a10  | 0.67312  | 0.0098816 | -0.6632384  | 4.44E-05   | No      | Cdo1       | 0.202709  | 15.8968 | 6.29318          | 0.203709     | 15.8978       | 6.2861736        | 0.00014629 | No      |
| Slc4a2   | 0.23204  | 0.0014286 | -0.2306114  | 1.64E-06   | No      | Cdr2       | 1.34899   | 20.9294 | 3.95558          | 1.34999      | 20.9304       | 3.95457926       | 0.00014629 | No      |
| Slc5a5   | 0.16095  | 0.089861  | -0.071089   | 0.04063154 | No      | Cdr2l      | 0.13637   | 1.53486 | 3.4925           | 0.13737      | 1.53586       | 3.48290784       | 0.0183831  | No      |
| Slc5a7   | 0.066615 | 0.013535  | -0.05308    | 1.61E-12   | No      | Cds2       | 24.4732   | 9.49673 | -1.3657          | 24.4742      | 9.49773       | -1.3656071       | 0.00014629 | No      |
| Slc6a15  | 0.11234  | 0.012903  | -0.099437   | 1.42E-07   | No      | Cdv3       | 53.7712   | 19.9441 | -1.43087         | 53.7722      | 19.9451       | -1.4308261       | 0.00014629 | No      |
| Slc6a2   | 0.12624  | 0.026671  | -0.099569   | 2.57E-05   | No      | Cdyl       | 9.57041   | 3.91047 | -1.29124         | 9.57141      | 3.91147       | -1.2910206       | 0.00014629 | No      |
| Slc6a3   | 0.24194  | 0.055731  | -0.186209   | 0.00099362 | No      | Cdyl2      | 8.74929   | 1.31733 | -2.73155         | 8.75029      | 1.31833       | -2.7306193       | 0.00184429 | No      |
| Slc6a5   | 0.096743 | 0.02737   | -0.069373   | 0.01439246 | No      | Ceacam1    | 1.10336   | 3.7525  | 1.76595          | 1.10436      | 3.7535        | 1.76502594       | 0.00014629 | No      |
| Slc6a7   | 0.30374  | 0.039062  | -0.264678   | 0.00057442 | No      | Ceacam18   | 2.32592   | 10.1033 | 2.11895          | 2.32692      | 10.1043       | 2.11847586       | 0.00014629 | No      |
| Slc7a10  | 0.072719 | 0.016506  | -0.056213   | 3.91E-05   | No      | Cebpz      | 36.4049   | 15.27   | -1.25344         | 36.4059      | 15.271        | -1.2533777       | 0.00014629 | No      |
| Slc7a14  | 0.14381  | 0.036184  | -0.107626   | 4.05E-07   | No      | Celf1      | 41.6468   | 21.874  | -0.928986        | 41.6478      | 21.875        | -0.9289573       | 0.004167   | No      |
| Slco2a1  | 0.10362  | 0.011182  | -0.092438   | 6.76E-05   | No      | Celf2      | 60.7892   | 3.85733 | -3.97814         | 60.7902      | 3.85833       | -3.9777903       | 0.00014629 | No      |
| Slit1    | 0.088873 | 0.025061  | -0.063812   | 0.00082506 | No      | Cenpb      | 27.2458   | 42.0877 | 0.627363         | 27.2468      | 42.0887       | 0.62734615       | 0.0265045  | No      |
| Slit2    | 0.098609 | 2.50E-07  | -0.0986088  | 3.61E-07   | No      | Cenpc      | 8.74919   | 2.76076 | -1.66408         | 8.75019      | 2.76176       | -1.6637264       | 0.00014629 | No      |
| Smad3    | 0.60744  | 0.15667   | -0.45077    | 1.83E-06   | No      | Cenpn      | 3.31838   | 12.0179 | 1.85664          | 3.31938      | 12.0189       | 1.85631916       | 0.00041099 | No      |
| Smim17   | 0.12464  | 0.06281   | -0.06183    | 0.04431681 | No      | Cenpo      | 5.79741   | 1.76118 | -1.71887         | 5.79841      | 1.76218       | -1.7182961       | 0.0191214  | No      |
| Smo      | 0.096166 | 0.04245   | -0.053716   | 0.01039117 | No      | Cenpp      | 1.4733    | 51.8677 | 5.13771          | 1.4743       | 51.8687       | 5.13676218       | 0.00014629 | No      |
| Smoc2    | 0.10931  | 0.03341   | -0.0759     | 6.76E-05   | No      | Cenpv      | 6.52677   | 22.212  | 1.7669           | 6.52777      | 22.213        | 1.76674212       | 0.00090728 | No      |
| Smpd3    | 0.098759 | 0.028838  | -0.069921   | 1.85E-05   | No      | Cep104     | 4.99136   | 12.4005 | 1.31289          | 4.99236      | 12.4015       | 1.31272075       | 0.00014629 | No      |
| Smug1    | 0.90723  | 0.41002   | -0.49721    | 3.61E-07   | No      | Cep120     | 18.2979   | 6.6656  | -1.45687         | 18.2989      | 6.6666        | -1.4567339       | 0.00014629 | No      |
| Snai1    | 0.69783  | 0.26428   | -0.43355    | 6.96E-06   | No      | Cep135     | 2.89897   | 0.50839 | -2.51153         | 2.89997      | 0.50939       | -2.5091954       | 0.00014629 | No      |
| Snhg11   | 0.089792 | 0.021578  | -0.068214   | 4.65E-06   | No      | Cep164     | 8.17624   | 4.46339 | -0.873296        | 8.17724      | 4.46439       | -0.8731509       | 0.00041099 | No      |

| RRBS     |          |           |             |            |         | RNAseq  |            |          |                  |              |               |                  |            |         |
|----------|----------|-----------|-------------|------------|---------|---------|------------|----------|------------------|--------------|---------------|------------------|------------|---------|
| gene     | Blood    | Kidney    | methyl.diff | pMWU.fdr   | Match ? | gene    | blood      | kidney   | log2(fold_ratio) | blood+ 0.001 | kidney+ 0.001 | log2(fold_ratio) | q_value    | Match ? |
| Snrpc    | 0.92018  | 0.30594   | -0.61424    | 5.23E-07   | No      | CEP170  | 7.25352    | 1.02881  | -2.81771         | 7.25452      | 1.02981       | -2.816502        | 0.00014629 | No      |
| Snrpn    | 0.397    | 0.31507   | -0.08193    | 0.03460571 | No      | Cep170b | 2.62694    | 17.0903  | 2.70172          | 2.62794      | 17.0913       | 2.70125789       | 0.00014629 | No      |
| Sntg2    | 0.061365 | 0.0061344 | -0.0552306  | 9.22E-07   | No      | Cep19   | 9.31915    | 27.8982  | 1.5819           | 9.32015      | 27.8992       | 1.58179867       | 0.00014629 | No      |
| Snx22    | 0.18058  | 0.060319  | -0.120261   | 0.00134669 | No      | Cep350  | 12.6554    | 3.4901   | -1.85841         | 12.6564      | 3.4911        | -1.8581135       | 0.00014629 | No      |
| Soat2    | 0.78928  | 0.4047    | -0.38458    | 0.00014495 | No      | Cep41   | 9.65532    | 1.09279  | -3.14331         | 9.65632      | 1.09379       | -3.1421377       | 0.00014629 | No      |
| Sorcs3   | 0.095284 | 0.014454  | -0.08083    | 3.66E-10   | No      | Cep44   | 8.95356    | 4.91646  | -0.864843        | 8.95456      | 4.91746       | -0.8647092       | 0.0334697  | No      |
| Sox10    | 0.85235  | 0.64588   | -0.20647    | 0.00051431 | No      | Cep70   | 2.06061    | 13.4468  | 2.70612          | 2.06161      | 13.4478       | 2.70552683       | 0.00028114 | No      |
| Sox14    | 0.078857 | 0.017058  | -0.061799   | 3.29E-06   | No      | Cep78   | 6.20367    | 11.1423  | 0.844848         | 6.20467      | 11.1433       | 0.84475015       | 0.0214664  | No      |
| Sox15    | 0.83627  | 0.19768   | -0.63859    | 3.61E-07   | No      | Cep85   | 16.9868    | 7.78936  | -1.12483         | 16.9878      | 7.79036       | -1.1247371       | 0.00014629 | No      |
| Sox2     | 0.10385  | 0.046303  | -0.057547   | 0.00935402 | No      | Cep85l  | 5.02178    | 0.874626 | -2.52146         | 5.02278      | 0.875626      | -2.5200994       | 0.00014629 | No      |
| Spaca1   | 0.91372  | 0.76347   | -0.15025    | 0.00343039 | No      | Cep89   | 3.53999    | 13.2893  | 1.90845          | 3.54099      | 13.2903       | 1.908149         | 0.00014629 | No      |
| Spag4    | 0.3375   | 0.044825  | -0.292675   | 3.41E-06   | No      | Cep97   | 12.2555    | 2.11548  | -2.53438         | 12.2565      | 2.11648       | -2.5338083       | 0.00014629 | No      |
| Spag8    | 0.68606  | 0.30864   | -0.37742    | 0.00639124 | No      | Cerk    | 41.0541    | 3.17045  | -3.69477         | 41.0551      | 3.17145       | -3.6943469       | 0.00014629 | No      |
| Sparcl1  | 0.51006  | 0.12736   | -0.3827     | 3.91E-05   | No      | Cers2   | 29.03      | 53.8034  | 0.890151         | 29.031       | 53.8044       | 0.89012989       | 0.00405996 | No      |
| Spata1   | 0.20919  | 0.030233  | -0.178957   | 3.61E-07   | No      | Cers5   | 38.5305    | 10.6522  | -1.85485         | 38.5315      | 10.6532       | -1.8547515       | 0.00014629 | No      |
| Spata3   | 0.29003  | 0.16909   | -0.12094    | 0.00470016 | No      | Ces1d   | 0          | 25.5568  | inf              | 0.001        | 25.5578       | 14.641476        | 0.00014629 | No      |
| Spata32  | 0.28678  | 0.063003  | -0.223777   | 1.47E-10   | No      | Ces1e   | 0          | 17.416   | inf              | 0.001        | 17.417        | 14.0882085       | 0.00014629 | No      |
| Spock3   | 0.10075  | 0.01401   | -0.08674    | 2.96E-12   | No      | CES2C   | 0          | 4.894    | inf              | 0.001        | 4.895         | 12.2570931       | 0.0494924  | No      |
| Sppl2c   | 0.78961  | 0.86166   | 0.07205     | 0.02065846 | No      | Ces2g   | 0          | 14.5007  | inf              | 0.001        | 14.5017       | 13.8239344       | 0.00014629 | No      |
| Sprn     | 0.41818  | 0.032119  | -0.386061   | 7.44E-07   | No      | CES2H   | 0          | 16.0315  | inf              | 0.001        | 16.0325       | 13.9687118       | 0.00014629 | No      |
| Spryd4   | 0.16867  | 0.078704  | -0.089966   | 0.00226691 | No      | Ces4a   | 0          | 1.35389  | inf              | 0.001        | 1.35489       | 10.40396         | 0.00014629 | No      |
| Spx      | 0.15577  | 0.044409  | -0.111361   | 1.44E-06   | No      | Cesl1   | 0.00722008 | 168.962  | 14.5143          | 0.00822008   | 168.963       | 14.3271954       | 0.00480938 | No      |
| Srek1ip1 | 0.5082   | 0.28903   | -0.21917    | 3.61E-07   | No      | Cfdp1   | 64.8168    | 116.207  | 0.842251         | 64.8178      | 116.208       | 0.84224743       | 0.0130449  | No      |
| Srgap1   | 0.072609 | 0.012941  | -0.059668   | 0.00210055 | No      | Cfh     | 0.108389   | 2.0281   | 4.22584          | 0.109389     | 2.0291        | 4.21330039       | 0.00173187 | No      |
| Srms     | 0.074909 | 0.023866  | -0.051043   | 0.00226691 | No      | Cfl1    | 1460.22    | 619.133  | -1.23787         | 1460.221     | 619.134       | -1.2378631       | 0.00014629 | No      |
| Srp19    | 0.11767  | 0.05314   | -0.06453    | 0.01247474 | No      | Cfl2    | 3.6494     | 25.0446  | 2.77877          | 3.6504       | 25.0456       | 2.77843071       | 0.00014629 | No      |
| Sstr1    | 0.13541  | 0.059748  | -0.075662   | 3.41E-06   | No      | Cfp     | 4.50962    | 35.2878  | 2.96809          | 4.51062      | 35.2888       | 2.96781272       | 0.00014629 | No      |
| Sstr4    | 0.21848  | 0.087564  | -0.130916   | 0.00803385 | No      | Cggbp1  | 51.746     | 10.8453  | -2.25438         | 51.747       | 10.8463       | -2.2542722       | 0.00014629 | No      |
| Sstr5    | 0.12432  | 0.016352  | -0.107968   | 0.00019529 | No      | Cgn     | 0.0365605  | 11.5458  | 8.30287          | 0.0375605    | 11.5468       | 8.26406111       | 0.00395247 | No      |
| St6gal2  | 0.067342 | 0.010164  | -0.057178   | 3.84E-08   | No      | Cgnl1   | 55.0028    | 134.588  | 1.29098          | 55.0038      | 134.589       | 1.29095731       | 0.00014629 | No      |
| St8sia2  | 0.076088 | 0.013056  | -0.063032   | 8.95E-06   | No      | Cgrrf1  | 13.1014    | 25.5483  | 0.963511         | 13.1024      | 25.5493       | 0.96345267       | 0.00053701 | No      |
| St8sia3  | 0.15912  | 0.024455  | -0.134665   | 5.48E-05   | No      | Chac1   | 0.167764   | 1.95454  | 3.54233          | 0.168764     | 1.95554       | 3.53448795       | 0.00679736 | No      |
| Steap4   | 0.097693 | 0.022991  | -0.074702   | 2.08E-10   | No      | Chadl   | 0.0696179  | 1.35789  | 4.28576          | 0.0706179    | 1.35889       | 4.26625095       | 0.0256152  | No      |
| Stoml3   | 0.73419  | 0.3157    | -0.41849    | 0.00226691 | No      | Chchd1  | 56.4752    | 92.593   | 0.713286         | 56.4762      | 92.594        | 0.71327569       | 0.00318982 | No      |
| Stx2     | 0.067353 | 0.010543  | -0.05681    | 1.02E-05   | No      | Chchd10 | 41.9255    | 1203     | 4.84266          | 41.9265      | 1203.001      | 4.84263163       | 0.00014629 | No      |
| Stxbp5l  | 0.099154 | 0.021271  | -0.077883   | 0.00143157 | No      | Chchd4  | 6.76876    | 20.8567  | 1.62355          | 6.76976      | 20.8577       | 1.62340349       | 0.00014629 | No      |
| Sv2c     | 0.059761 | 0.0041016 | -0.0556594  | 1.17E-06   | No      | Chchd6  | 6.27468    | 13.1681  | 1.06944          | 6.27568      | 13.1691       | 1.06931306       | 0.00448672 | No      |
| Syce2    | 0.49209  | 0.16431   | -0.32778    | 4.87E-12   | No      | Chd1    | 51.4243    | 7.03041  | -2.87077         | 51.4253      | 7.03141       | -2.8705924       | 0.00014629 | No      |
| Sycp1    | 0.84475  | 0.69736   | -0.14739    | 0.00157493 | No      | Chd1l   | 15.3728    | 117.351  | 2.93238          | 15.3738      | 117.352       | 2.93229672       | 0.00014629 | No      |
| Syk      | 0.11679  | 0.61502   | 0.49823     | 2.96E-12   | No      | Chd2    | 241.328    | 46.9371  | -2.3622          | 241.329      | 46.9381       | -2.3621699       | 0.00014629 | No      |
| Sync     | 0.2565   | 0.094332  | -0.162168   | 0.002433   | No      | Chd3    | 193.752    | 22.5986  | -3.0999          | 193.753      | 22.5996       | -3.0998495       | 0.00014629 | No      |
| Synm     | 0.08816  | 0.013206  | -0.074954   | 1.44E-06   | No      | Chd4    | 81.5735    | 45.2419  | -0.850441        | 81.5745      | 45.2429       | -0.8504268       | 0.00014629 | No      |

| RRBS     |          |          |             |            |         | RNAseq  |          |          |                  |              |               |                  |            |         |
|----------|----------|----------|-------------|------------|---------|---------|----------|----------|------------------|--------------|---------------|------------------|------------|---------|
| gene     | Blood    | Kidney   | methyl.diff | pMWU.fdr   | Match ? | gene    | blood    | kidney   | log2(fold_ratio) | blood+ 0.001 | kidney+ 0.001 | log2(fold_ratio) | q_value    | Match ? |
| Syp      | 0.10104  | 0.03028  | -0.07076    | 0.01520153 | No      | Chd6    | 23.149   | 6.93956  | -1.73803         | 23.15        | 6.94056       | -1.7378882       | 0.00014629 | No      |
| Syp12    | 0.11646  | 0.014661 | -0.101799   | 0.00014495 | No      | Chd7    | 7.85923  | 2.24752  | -1.80606         | 7.86023      | 2.24852       | -1.8055958       | 0.00014629 | No      |
| Syt1     | 0.10575  | 0.031163 | -0.074587   | 1.57E-07   | No      | Chd8    | 38.8692  | 13.9662  | -1.47669         | 38.8702      | 13.9672       | -1.4766217       | 0.00014629 | No      |
| Syt6     | 0.11752  | 0.038098 | -0.079422   | 0.03210797 | No      | Chd9    | 2.26845  | 0.581314 | -1.96431         | 2.26945      | 0.582314      | -1.9624735       | 0.00984666 | No      |
| Syt13    | 0.80628  | 0.29972  | -0.50656    | 2.34E-12   | No      | Chek1   | 3.91646  | 0.746206 | -2.3919          | 3.91746      | 0.747206      | -2.3903406       | 0.00173187 | No      |
| T        | 0.14015  | 0.021619 | -0.118531   | 6.57E-07   | No      | Chek2   | 3.88676  | 1.58548  | -1.29365         | 3.88776      | 1.58648       | -1.2931098       | 0.00384649 | No      |
| Tac1     | 0.3679   | 0.23099  | -0.13691    | 0.00470016 | No      | Chfr    | 21.7653  | 5.85921  | -1.89325         | 21.7663      | 5.86021       | -1.8930719       | 0.00114835 | No      |
| Tacr3    | 0.21911  | 0.10848  | -0.11063    | 0.00033082 | No      | Chic2   | 62.2306  | 14.586   | -2.09304         | 62.2316      | 14.587        | -2.0929641       | 0.00014629 | No      |
| Tal1     | 0.22254  | 0.061751 | -0.160789   | 1.82E-05   | No      | Chka    | 7.6036   | 31.0608  | 2.03034          | 7.6046       | 31.0618       | 2.03019717       | 0.00014629 | No      |
| Tapbp    | 0.75885  | 0.10279  | -0.65606    | 1.61E-12   | No      | Chkb    | 42.5988  | 99.7172  | 1.22703          | 42.5998      | 99.7182       | 1.22701018       | 0.00014629 | No      |
| Tbc1d10b | 0.23245  | 0.34864  | 0.11619     | 0.0179568  | No      | Chm     | 17.7805  | 4.29819  | -2.04849         | 17.7815      | 4.29919       | -2.0482403       | 0.00014629 | No      |
| Tbcb     | 0.28392  | 0.14801  | -0.13591    | 0.02194182 | No      | Chmp2a  | 121.175  | 317.494  | 1.38964          | 121.176      | 317.495       | 1.38962988       | 0.00014629 | No      |
| Tbx1     | 0.074462 | 0.2535   | 0.179038    | 0.00035126 | No      | Chmp2b  | 7.98398  | 19.8034  | 1.31057          | 7.98498      | 19.8044       | 1.31046029       | 0.00014629 | No      |
| Tbx18    | 0.11678  | 0.048936 | -0.067844   | 0.00389713 | No      | Chmp3   | 79.7172  | 147.713  | 0.889839         | 79.7182      | 147.714       | 0.88982553       | 0.00014629 | No      |
| Tbx2     | 0.076922 | 0.020928 | -0.055994   | 0.00023889 | No      | Chmp5   | 23.4521  | 71.1842  | 1.60184          | 23.4531      | 71.1852       | 1.6017987        | 0.00014629 | No      |
| Tbx5     | 0.32636  | 0.062143 | -0.264217   | 4.05E-07   | No      | Chmp6   | 12.947   | 19.2799  | 0.574478         | 12.948       | 19.2809       | 0.57444313       | 0.02588    | No      |
| Tbx6     | 0.40586  | 0.082205 | -0.323655   | 5.58E-08   | No      | Chn2    | 5.47587  | 14.757   | 1.43024          | 5.47687      | 14.758        | 1.43007368       | 0.00014629 | No      |
| Tcerg1l  | 0.098916 | 0.018812 | -0.080104   | 2.10E-06   | No      | Chordc1 | 33.1431  | 16.1772  | -1.03475         | 33.1441      | 16.1782       | -1.034701        | 0.00014629 | No      |
| Tcf19    | 0.69908  | 0.43912  | -0.25996    | 0.01093755 | No      | Chp1    | 23.2332  | 56.8107  | 1.28997          | 23.2342      | 56.8117       | 1.2899381        | 0.00014629 | No      |
| Tdh      | 0.083942 | 0.02633  | -0.057612   | 7.03E-05   | No      | Chpt1   | 1.55939  | 55.8749  | 5.16315          | 1.56039      | 55.8759       | 5.1622476        | 0.00014629 | No      |
| Tdrd5    | 0.6013   | 0.090237 | -0.511063   | 4.05E-07   | No      | Chrm3   | 0        | 1.3611   | inf              | 0.001        | 1.3621        | 10.4116169       | 0.00014629 | No      |
| Tdrd6    | 0.52689  | 0.32305  | -0.20384    | 0.004217   | No      | Chrnb1  | 0.186455 | 3.18319  | 4.09357          | 0.187455     | 3.18419       | 4.08631021       | 0.00263402 | No      |
| Tead2    | 0.074214 | 0.017698 | -0.056516   | 0.02194182 | No      | Chst1   | 0.957539 | 1.95107  | 1.02686          | 0.958539     | 1.95207       | 1.02609575       | 0.0399122  | No      |
| Tekt4    | 0.51256  | 0.092753 | -0.419807   | 2.94E-08   | No      | Chst11  | 9.27388  | 4.13161  | -1.16647         | 9.27488      | 4.13261       | -1.1662754       | 0.00586782 | No      |
| Tescl    | 0.55495  | 0.40057  | -0.15438    | 0.00683403 | No      | Chst15  | 5.1576   | 1.16382  | -2.14783         | 5.1586       | 1.16482       | -2.1468726       | 0.00014629 | No      |
| Tfap2c   | 0.15254  | 0.019582 | -0.132958   | 0.00157493 | No      | Chst2   | 3.00901  | 6.70964  | 1.15694          | 3.01001      | 6.71064       | 1.15668208       | 0.00241835 | No      |
| Tfap2e   | 0.11731  | 0.030789 | -0.086521   | 0.00033082 | No      | Chst9   | 0        | 13.7511  | inf              | 0.001        | 13.7521       | 13.7473643       | 0.00014629 | No      |
| Tgfb1i1  | 0.22632  | 0.091122 | -0.135198   | 1.31E-05   | No      | Chsy1   | 9.52642  | 1.32251  | -2.84865         | 9.52742      | 1.32351       | -2.8477165       | 0.00014629 | No      |
| Tgfb3    | 0.65404  | 0.34758  | -0.30646    | 0.01079042 | No      | Chtf8   | 48.7282  | 28.4768  | -0.77497         | 48.7292      | 28.4778       | -0.7749488       | 0.0293375  | No      |
| Thegl    | 0.89159  | 0.45126  | -0.44033    | 0.0001045  | No      | Churc1  | 119.092  | 236.238  | 0.988164         | 119.093      | 236.239       | 0.98815854       | 0.00014629 | No      |
| Thpo     | 0.47832  | 0.19658  | -0.28174    | 0.00039347 | No      | Ciapin1 | 15.2399  | 69.0507  | 2.1798           | 15.2409      | 69.0517       | 2.17972883       | 0.00014629 | No      |
| Tifab    | 0.80956  | 0.67432  | -0.13524    | 0.04063154 | No      | Cib1    | 99.3867  | 193.071  | 0.958007         | 99.3877      | 193.072       | 0.95799973       | 0.00014629 | No      |
| Tle1     | 0.071306 | 0        | -0.071306   | 0.00092018 | No      | Cic     | 38.9153  | 17.8334  | -1.12576         | 38.9163      | 17.8344       | -1.1257119       | 0.0140162  | No      |
| Tlx1     | 0.075557 | 0.031443 | -0.044114   | 0.00517217 | No      | Cideb   | 0.397485 | 22.9138  | 5.84917          | 0.398485     | 22.9148       | 5.84561047       | 0.00448672 | No      |
| Tm6sf2   | 0.74173  | 0.021395 | -0.720335   | 2.62E-08   | No      | Ciita   | 1.09939  | 0.467336 | -1.23417         | 1.10039      | 0.468336      | -1.2323991       | 0.0496631  | No      |
| Tmcc2    | 0.6275   | 0.21468  | -0.41282    | 4.97E-05   | No      | Cir1    | 62.2391  | 19.9542  | -1.64113         | 62.2401      | 19.9552       | -1.6410796       | 0.00014629 | No      |
| Tmem114  | 0.1909   | 0.016625 | -0.174275   | 3.08E-05   | No      | Cirh1a  | 41.4685  | 20.0875  | -1.04572         | 41.4695      | 20.0885       | -1.0456808       | 0.00138312 | No      |
| Tmem119  | 0.86545  | 0.37952  | -0.48593    | 1.27E-05   | No      | Cisd1   | 71.9235  | 502.282  | 2.80396          | 71.9245      | 502.283       | 2.80394526       | 0.00014629 | No      |
| Tmem132d | 0.10515  | 0.02633  | -0.07882    | 0.00546968 | No      | Cisd3   | 24.8768  | 169.548  | 2.76882          | 24.8778      | 169.549       | 2.76877146       | 0.00014629 | No      |
| Tmem132e | 0.080602 | 0.025257 | -0.055345   | 0.00187484 | No      | Cish    | 10.8018  | 32.8862  | 1.60621          | 10.8028      | 32.8872       | 1.60612089       | 0.00014629 | No      |
| Tmem151b | 0.64337  | 0.18907  | -0.4543     | 1.69E-12   | No      | Cited1  | 0        | 5.46714  | inf              | 0.001        | 5.46814       | 12.4168345       | 0.00014629 | No      |
| Tmem178a | 0.34258  | 0.03943  | -0.30315    | 2.66E-10   | No      | Cited2  | 47.3585  | 75.3942  | 0.67083          | 47.3595      | 75.3952       | 0.67081883       | 0.00114835 | No      |

| RRBS      |            |           |             |            |         | RNAseq  |           |          |                  |              |               |                  |            |         |
|-----------|------------|-----------|-------------|------------|---------|---------|-----------|----------|------------------|--------------|---------------|------------------|------------|---------|
| gene      | Blood      | Kidney    | methyl.diff | pMWU.fdr   | Match ? | gene    | blood     | kidney   | log2(fold_ratio) | blood+ 0.001 | kidney+ 0.001 | log2(fold_ratio) | q_value    | Match ? |
| Tmem200a  | 0.088171   | 0.024277  | -0.063894   | 1.71E-07   | No      | Ciz1    | 22.6257   | 58.4951  | 1.37035          | 22.6267      | 58.4961       | 1.37031425       | 0.00184429 | No      |
| Tmem229a  | 0.1954     | 0.058185  | -0.137215   | 0.00063283 | No      | Ckap2   | 2.29667   | 0.90343  | -1.34606         | 2.29767      | 0.90443       | -1.3450909       | 0.0132409  | No      |
| Tmem230   | 0.067793   | 0.017204  | -0.050589   | 0.00683403 | No      | Cklf    | 21.3874   | 4.22329  | -2.34032         | 21.3884      | 4.22429       | -2.3400478       | 0.00263402 | No      |
| Tmem88    | 0.89618    | 0.26465   | -0.63153    | 1.61E-12   | No      | Cks2    | 2.94523   | 15.5214  | 2.39781          | 2.94623      | 15.5224       | 2.39740967       | 0.00066215 | No      |
| Tnf       | 0.74301    | 0.64217   | -0.10084    | 0.02954396 | No      | CLASP1  | 13.5422   | 6.10669  | -1.149           | 13.5432      | 6.10769       | -1.1488699       | 0.00014629 | No      |
| Tnfrsf10b | 0.07626    | 0.026105  | -0.050155   | 7.58E-05   | No      | Clasp2  | 11.3344   | 5.94086  | -0.931968        | 11.3354      | 5.94186       | -0.9318488       | 0.00014629 | No      |
| Tnfrsf12a | 0.15725    | 0.021233  | -0.136017   | 4.97E-05   | No      | Clasrp  | 65.1131   | 99.8817  | 0.617272         | 65.1141      | 99.8827       | 0.61726484       | 0.00296747 | No      |
| Tnfrsf25  | 0.0053553  | 0.15668   | 0.1513247   | 2.05E-05   | No      | Clca2   | 0         | 1.18212  | inf              | 0.001        | 1.18312       | 10.2083807       | 0.00014629 | No      |
| Tnfsf8    | 0.0071308  | 0.33786   | 0.3307292   | 1.46E-05   | No      | Clcn4   | 0.455869  | 3.55634  | 2.9637           | 0.456869     | 3.55734       | 2.96094641       | 0.00014629 | No      |
| Tnnc2     | 0.12711    | 0.011709  | -0.115401   | 8.61E-10   | No      | Clcn6   | 12.779    | 23.6435  | 0.887673         | 12.78        | 23.6445       | 0.8876168        | 0.00014629 | No      |
| Tor1a     | 0.3562     | 0.069832  | -0.286368   | 3.29E-06   | No      | Clcn7   | 21.2397   | 29.3771  | 0.467925         | 21.2407      | 29.3781       | 0.46790978       | 0.0381731  | No      |
| Tppp3     | 0.22599    | 0.072221  | -0.153769   | 8.52E-05   | No      | Clcnka  | 0         | 6.74818  | inf              | 0.001        | 6.74918       | 12.7204965       | 0.00014629 | No      |
| Tradd     | 0.48552    | 0.088179  | -0.397341   | 1.61E-12   | No      | Clcnkb  | 0.174658  | 319.839  | 10.8386          | 0.175658     | 319.84        | 10.8303654       | 0.00014629 | No      |
| Tram1l1   | 0.078858   | 0.016598  | -0.06226    | 0.00081137 | No      | Cldn10  | 2.52577   | 147.204  | 5.86495          | 2.52677      | 147.205       | 5.86438852       | 0.00014629 | No      |
| Trank1    | 0.26957    | 0.040194  | -0.229376   | 0.00017692 | No      | Cldn16  | 0         | 31.883   | inf              | 0.001        | 31.884        | 14.960545        | 0.00014629 | No      |
| Trim15    | 0.093315   | 0.028647  | -0.064668   | 6.26E-05   | No      | Cldn17  | 0         | 19.0621  | inf              | 0.001        | 19.0631       | 14.2184951       | 0.00014629 | No      |
| Trim36    | 0.11932    | 0.031861  | -0.087459   | 2.48E-06   | No      | Cldn19  | 0         | 48.734   | inf              | 0.001        | 48.735        | 15.5726706       | 0.00014629 | No      |
| Trim6     | 0.8595     | 0.21827   | -0.64123    | 2.53E-08   | No      | Cldn2   | 0.0153654 | 143.914  | 13.1932          | 0.0163654    | 143.915       | 13.1022805       | 0.00014629 | No      |
| Trim63    | 0.85184    | 0.21053   | -0.64131    | 1.86E-12   | No      | Cldn6   | 0.233631  | 1.46736  | 2.65091          | 0.234631     | 1.46836       | 2.64574018       | 0.00792329 | No      |
| Trip6     | 0.7033     | 0.04923   | -0.65407    | 1.61E-12   | No      | Cldnd1  | 37.3855   | 16.1867  | -1.20767         | 37.3865      | 16.1877       | -1.2076194       | 0.00014629 | No      |
| Trmt61a   | 0.67152    | 0.44415   | -0.22737    | 0.01658745 | No      | Clec10a | 0.275615  | 1.81364  | 2.71817          | 0.276615     | 1.81464       | 2.71373207       | 0.0176431  | No      |
| Trpm2     | 0.64748    | 0.39167   | -0.25581    | 0.01658745 | No      | Clec16a | 4.64228   | 8.92977  | 0.943788         | 4.64328      | 8.93077       | 0.94364029       | 0.00053701 | No      |
| Tshz3     | 0.058687   | 0.0073458 | -0.0513412  | 0.00110448 | No      | Clec1b  | 2.46368   | 0.723532 | -1.76769         | 2.46468      | 0.724532      | -1.766279        | 0.0139199  | No      |
| Tsku      | 0.31014    | 0.043872  | -0.266268   | 2.98E-07   | No      | Clec2d2 | 33.6474   | 0.670757 | -5.64856         | 33.6484      | 0.671757      | -5.6464546       | 0.00014629 | No      |
| Tspan11   | 0.15639    | 0.032123  | -0.124267   | 0.00226691 | No      | Clec2g  | 82.4849   | 14.9713  | -2.46193         | 82.4859      | 14.9723       | -2.4618517       | 0.00014629 | No      |
| Tspy26    | 0.00091036 | 0.072712  | 0.07180164  | 0.00021752 | No      | Clec4a1 | 0.789354  | 3.40988  | 2.11098          | 0.790354     | 3.41088       | 2.10957311       | 0.00149937 | No      |
| Tssk3     | 0.68825    | 0.13011   | -0.55814    | 1.61E-12   | No      | Clec7a  | 0.372145  | 1.10516  | 1.57031          | 0.373145     | 1.10616       | 1.56775182       | 0.0301422  | No      |
| Tst       | 0.68696    | 0.10083   | -0.58613    | 1.61E-12   | No      | Clic2   | 0.642947  | 12.4752  | 4.27822          | 0.643947     | 12.4762       | 4.27609282       | 0.00066215 | No      |
| Ttc12     | 0.088965   | 0.036811  | -0.052154   | 0.02592069 | No      | Clic4   | 7.01113   | 136.791  | 4.28618          | 7.01213      | 136.792       | 4.28598731       | 0.00014629 | No      |
| Tubb2b    | 0.021521   | 0.0875    | 0.065979    | 0.04063154 | No      | CLIC5   | 1.46962   | 3.67242  | 1.32129          | 1.47062      | 3.67342       | 1.32069935       | 0.00184429 | No      |
| Tubg2     | 0.10588    | 0.019564  | -0.086316   | 1.61E-12   | No      | Clip1   | 12.9897   | 7.48898  | -0.794523        | 12.9907      | 7.48998       | -0.7944454       | 0.00014629 | No      |
| Tug1      | 0.22208    | 0.060643  | -0.161437   | 8.15E-11   | No      | Clip2   | 3.3665    | 7.40735  | 1.13771          | 3.3675       | 7.40835       | 1.13747431       | 0.00014629 | No      |
| Ubb       | 0.12969    | 0.049066  | -0.080624   | 0.02194182 | No      | Clk1    | 177.861   | 119.379  | -0.575201        | 177.862      | 119.38        | -0.5751972       | 0.00544794 | No      |
| Ube2q11   | 0.10599    | 0.02156   | -0.08443    | 0.00593418 | No      | Clk2    | 75.4376   | 48.9033  | -0.625352        | 75.4386      | 48.9043       | -0.6253416       | 0.00330073 | No      |
| Ubfd1     | 0.30937    | 0.044429  | -0.264941   | 1.09E-10   | No      | Clk3    | 65.4695   | 108.827  | 0.733147         | 65.4705      | 108.828       | 0.73313289       | 0.00173187 | No      |
| Ubxn10    | 0.0075458  | 0.55487   | 0.5473242   | 1.30E-08   | No      | Clmn    | 0         | 16.1784  | inf              | 0.001        | 16.1794       | 13.9818705       | 0.00014629 | No      |
| Ucn       | 0.26581    | 0.063673  | -0.202137   | 4.44E-05   | No      | Cln3    | 12.692    | 20.4629  | 0.689085         | 12.693       | 20.4639       | 0.68904803       | 0.0134314  | No      |
| Uhmk1     | 0.34158    | 0.57242   | 0.23084     | 0.00226691 | No      | Cln5    | 0.959922  | 3.59311  | 1.90424          | 0.960922     | 3.59411       | 1.90314333       | 0.004167   | No      |
| Unc5c     | 0.065398   | 0.011055  | -0.054343   | 0.00076943 | No      | Clns1a  | 69.3989   | 39.1273  | -0.826736        | 69.3999      | 39.1283       | -0.8267212       | 0.00014629 | No      |
| Unc5d     | 0.10709    | 0.028219  | -0.078871   | 3.23E-10   | No      | Clp1    | 10.83     | 5.8588   | -0.88635         | 10.831       | 5.8598        | -0.8862431       | 0.0118533  | No      |
| Uncx      | 0.087243   | 0.027522  | -0.059721   | 0.00047568 | No      | Clpb    | 6.93831   | 37.415   | 2.43096          | 6.93931      | 37.416        | 2.43079121       | 0.00014629 | No      |
| Usp46     | 0.66931    | 0.21588   | -0.45343    | 1.27E-05   | No      | Clpp    | 46.9282   | 75.3249  | 0.682672         | 46.9292      | 75.3259       | 0.68266014       | 0.00230432 | No      |

| RRBS    |            |            |             |            |         | RNAseq  |          |         |                  |              |               |                  |            |         |
|---------|------------|------------|-------------|------------|---------|---------|----------|---------|------------------|--------------|---------------|------------------|------------|---------|
| gene    | Blood      | Kidney     | methyl.diff | pMWU.fdr   | Match ? | gene    | blood    | kidney  | log2(fold_ratio) | blood+ 0.001 | kidney+ 0.001 | log2(fold_ratio) | q_value    | Match ? |
| Utf1    | 0.11655    | 0.024776   | -0.091774   | 7.78E-05   | No      | Clpx    | 18.7638  | 60.1816 | 1.68137          | 18.7648      | 60.1826       | 1.68131752       | 0.00014629 | No      |
| Utp15   | 0.12732    | 0.034919   | -0.092401   | 4.90E-11   | No      | Clrn3   | 0        | 5.13778 | inf              | 0.001        | 5.13878       | 12.3272102       | 0.00014629 | No      |
| Vax1    | 0.15719    | 0.049634   | -0.107556   | 0.00035126 | No      | Clstn3  | 1.09991  | 0       | -inf             | 1.10091      | 0.001         | -10.104481       | 0.00014629 | No      |
| Vgf     | 0.096322   | 0.0067982  | -0.0895238  | 0.00023951 | No      | Clta    | 153.139  | 306.959 | 1.0032           | 153.14       | 306.96        | 1.00319951       | 0.00014629 | No      |
| Vipr1   | 0.064566   | 0.0097938  | -0.0547722  | 0.00154772 | No      | Cltb    | 18.6113  | 69.3402 | 1.89751          | 18.6123      | 69.3412       | 1.89745646       | 0.00014629 | No      |
| Vldlr   | 0.071692   | 0.48142    | 0.409728    | 4.27E-06   | No      | Cltc    | 24.6513  | 90.6849 | 1.8792           | 24.6523      | 90.6859       | 1.879156         | 0.00014629 | No      |
| Vom2r26 | 0.87191    | 0.79077    | -0.08114    | 0.00563666 | No      | Clu     | 1.7056   | 164.335 | 6.59022          | 1.7066       | 164.336       | 6.58937979       | 0.00014629 | No      |
| Vom2r65 | 0.8669     | 0.73722    | -0.12968    | 0.03460571 | No      | Cluh    | 12.9901  | 101.286 | 2.96295          | 12.9911      | 101.287       | 2.96285352       | 0.00014629 | No      |
| Vpreb1  | 0.9789     | 0.8435     | -0.1354     | 0.02194182 | No      | Clvs1   | 0.219041 | 1.15668 | 2.40072          | 0.220041     | 1.15768       | 2.39539226       | 0.0227639  | No      |
| Vpreb2  | 0.84192    | 0.73322    | -0.1087     | 0.02065846 | No      | Clybl   | 0.112536 | 51.3086 | 8.83267          | 0.113536     | 51.3096       | 8.81993515       | 0.0146937  | No      |
| Vsir    | 0.00091157 | 0.084076   | 0.08316443  | 0.00759103 | No      | Cmah    | 76.8841  | 7.25342 | -3.40595         | 76.8851      | 7.25442       | -3.4057719       | 0.00014629 | No      |
| Vsx2    | 0.22896    | 0.077752   | -0.151208   | 2.05E-05   | No      | Cmas    | 33.6228  | 22.4106 | -0.585258        | 33.6238      | 22.4116       | -0.5852371       | 0.0126456  | No      |
| Vwc2    | 0.15231    | 0.023367   | -0.128943   | 4.94E-10   | No      | CMC2    | 19.2675  | 76.9042 | 1.99689          | 19.2685      | 76.9052       | 1.99683688       | 0.00014629 | No      |
| Vwc2l   | 0.17963    | 0.050469   | -0.129161   | 5.48E-05   | No      | Cml1    | 0.206461 | 10.7806 | 5.70642          | 0.207461     | 10.7816       | 5.69958733       | 0.00944816 | No      |
| Wbscr17 | 0.25322    | 0.068124   | -0.185096   | 0.00028703 | No      | Cmpk1   | 72.9194  | 99.6108 | 0.45             | 72.9204      | 99.6118       | 0.44999418       | 0.0253385  | No      |
| Wfdc15b | 0.93583    | 0.86586    | -0.06997    | 0.00500595 | No      | Cmpk2   | 5.80775  | 2.64768 | -1.13325         | 5.80875      | 2.64868       | -1.1329542       | 0.00053701 | No      |
| Wnk2    | 0.23526    | 0.056802   | -0.178458   | 1.65E-10   | No      | Cmtm3   | 15.5324  | 2.36104 | -2.71778         | 15.5334      | 2.36204       | -2.7172683       | 0.00014629 | No      |
| Wnt1    | 0.15496    | 0.024386   | -0.130574   | 0.00021752 | No      | Cmtm6   | 44.7377  | 22.1406 | -1.0148          | 44.7387      | 22.1416       | -1.0147639       | 0.00014629 | No      |
| Wnt10a  | 0.3824     | 0.1382     | -0.2442     | 0.00028703 | No      | Cmtm7   | 93.7237  | 27.6399 | -1.76166         | 93.7247      | 27.6409       | -1.7616247       | 0.00014629 | No      |
| Wnt10b  | 0.060258   | 0.010245   | -0.050013   | 1.51E-09   | No      | Cmtr2   | 5.0829   | 1.76115 | -1.52913         | 5.0839       | 1.76215       | -1.5285989       | 0.00014629 | No      |
| Wnt3a   | 0.2403     | 0.16395    | -0.07635    | 0.04666269 | No      | Cnbp    | 415.294  | 194.106 | -1.09728         | 415.295      | 194.107       | -1.0972844       | 0.00014629 | No      |
| Wnt5b   | 0.17092    | 0.083024   | -0.087896   | 1.49E-05   | No      | Cndp1   | 0        | 9.00924 | inf              | 0.001        | 9.01024       | 13.1373498       | 0.00014629 | No      |
| Wnt6    | 0.086486   | 0.0221     | -0.064386   | 4.73E-05   | No      | Cnih1   | 46.5096  | 31.5035 | -0.562019        | 46.5106      | 31.5045       | -0.5620016       | 0.00944816 | No      |
| Wnt8a   | 0.48349    | 0.13622    | -0.34727    | 4.97E-05   | No      | Cnih4   | 41.2412  | 17.2133 | -1.26056         | 41.2422      | 17.2143       | -1.2605138       | 0.00014629 | No      |
| Wnt9b   | 0.079419   | 0.012084   | -0.067335   | 0.00021752 | No      | Cnksr3  | 5.39609  | 11.2767 | 1.06336          | 5.39709      | 11.2777       | 1.06321922       | 0.00053701 | No      |
| Ydjc    | 0.078809   | 0.27864    | 0.199831    | 0.00014495 | No      | Cnn3    | 27.92    | 163.77  | 2.5523           | 27.921       | 163.771       | 2.55225739       | 0.00014629 | No      |
| Zbtb24  | 0.76438    | 0.17125    | -0.59313    | 1.00E-06   | No      | Cnm4    | 5.94611  | 9.37387 | 0.656697         | 5.94711      | 9.37487       | 0.65660992       | 0.0240648  | No      |
| Zbtb7b  | 0.80334    | 0.88113    | 0.07779     | 0.01240395 | No      | Cnot2   | 59.9643  | 32.8414 | -0.868589        | 59.9653      | 32.8424       | -0.8685683       | 0.00014629 | No      |
| Zcrb1   | 0.12284    | 0.030955   | -0.091885   | 0.00047568 | No      | Cnot3   | 30.1781  | 11.6491 | -1.37328         | 30.1791      | 11.6501       | -1.3732074       | 0.00014629 | No      |
| Zdhhc19 | 0.57493    | 0.16264    | -0.41229    | 1.83E-06   | No      | Cnot4   | 17.7002  | 5.49888 | -1.68656         | 17.7012      | 5.49988       | -1.6863751       | 0.00014629 | No      |
| Zfp37   | 0.37406    | 0.040717   | -0.333343   | 4.27E-06   | No      | Cnot6l  | 30.3916  | 5.34787 | -2.50664         | 30.3926      | 5.34887       | -2.5064141       | 0.00014629 | No      |
| Zfp57   | 0.13589    | 0.074797   | -0.061093   | 0.04666269 | No      | Cnot7   | 44.0362  | 20.6757 | -1.09075         | 44.0372      | 20.6767       | -1.0907168       | 0.00014629 | No      |
| Zfp575  | 0.92751    | 0.70618    | -0.22133    | 0.00021752 | No      | Cnot8   | 35.4115  | 22.5502 | -0.651076        | 35.4125      | 22.5512       | -0.6510545       | 0.0121484  | No      |
| Zfp622  | 0.27115    | 0.00049505 | -0.270655   | 3.61E-07   | No      | Cnp     | 119.553  | 8.25699 | -3.85589         | 119.554      | 8.25799       | -3.8557279       | 0.00014629 | No      |
| Zfp641  | 0.058997   | 0.008185   | -0.050812   | 0.00069112 | No      | Cnppd1  | 125.879  | 37.5901 | -1.74361         | 125.88       | 37.5911       | -1.743586        | 0.00014629 | No      |
| Zfp772  | 0.77903    | 0.60577    | -0.17326    | 0.01344183 | No      | Cnpy1   | 0        | 15.5297 | inf              | 0.001        | 15.5307       | 13.9228352       | 0.00014629 | No      |
| Zfp93   | 0.10762    | 0.036328   | -0.071292   | 0.00051431 | No      | Cnpy2   | 82.3624  | 130.656 | 0.665718         | 82.3634      | 130.657       | 0.66570913       | 0.00184429 | No      |
| Zfp949  | 0.079537   | 0.0085019  | -0.0710351  | 0.00043492 | No      | Cnpy4   | 13.7631  | 6.60624 | -1.05891         | 13.7641      | 6.60724       | -1.0587906       | 0.00053701 | No      |
| Zic1    | 0.091028   | 0.032894   | -0.058134   | 0.00019529 | No      | Cnst    | 16.8129  | 8.87412 | -0.921892        | 16.8139      | 8.87512       | -0.9218159       | 0.00629035 | No      |
| Zic3    | 0.065794   | 0.0076131  | -0.0581809  | 2.01E-08   | No      | Cntf    | 38.1489  | 74.4327 | 0.964296         | 38.1499      | 74.4337       | 0.96427668       | 0.00014629 | No      |
| Zic4    | 0.16356    | 0.061616   | -0.101944   | 0.00389713 | No      | Cntnap1 | 1.88573  | 26.8068 | 3.8294           | 1.88673      | 26.8078       | 3.82869294       | 0.00014629 | No      |
| Zic5    | 0.081986   | 0.028373   | -0.053613   | 0.00051431 | No      | Cntnap4 | 0        | 1.1422  | inf              | 0.001        | 1.1432        | 10.1588621       | 0.00014629 | No      |

| RRBS   |         |         |             |          |         | RNAseq   |         |          |                  |              |               |                  |            |         |
|--------|---------|---------|-------------|----------|---------|----------|---------|----------|------------------|--------------|---------------|------------------|------------|---------|
| gene   | Blood   | Kidney  | methyl.diff | pMWU.fdr | Match ? | gene     | blood   | kidney   | log2(fold_ratio) | blood+ 0.001 | kidney+ 0.001 | log2(fold_ratio) | q_value    | Match ? |
| Znrf4  | 0.51037 | 0.22996 | -0.28041    | 5.26E-08 | No      | Cntrl    | 26.7136 | 5.02284  | -2.411           | 26.7146      | 5.02384       | -2.410766        | 0.00014629 | No      |
| Zranb2 | 0.32269 | 0.1248  | -0.19789    | 2.88E-05 | No      | Coa3     | 40.6428 | 133.87   | 1.71977          | 40.6438      | 133.871       | 1.71973627       | 0.00014629 | No      |
|        |         |         |             |          |         | Coa4     | 4.7137  | 26.5997  | 2.49648          | 4.7147       | 26.6007       | 2.49622633       | 0.00014629 | No      |
|        |         |         |             |          |         | Coa5     | 23.893  | 57.1803  | 1.25893          | 23.894       | 57.1813       | 1.25889503       | 0.0419596  | No      |
|        |         |         |             |          |         | Coasy    | 27.7777 | 73.7418  | 1.40855          | 27.7787      | 73.7428       | 1.40852311       | 0.00014629 | No      |
|        |         |         |             |          |         | Cobl     | 0       | 15.7668  | inf              | 0.001        | 15.7678       | 13.9446938       | 0.00014629 | No      |
|        |         |         |             |          |         | Cobl1    | 2.86678 | 33.2533  | 3.53599          | 2.86778      | 33.2543       | 3.53553464       | 0.00014629 | No      |
|        |         |         |             |          |         | Cog1     | 45.9238 | 28.8805  | -0.669146        | 45.9248      | 28.8815       | -0.6691278       | 0.0381731  | No      |
|        |         |         |             |          |         | Cog3     | 14.916  | 6.07069  | -1.29693         | 14.917       | 6.07169       | -1.2967874       | 0.00014629 | No      |
|        |         |         |             |          |         | Cog4     | 15.1578 | 26.8401  | 0.82433          | 15.1588      | 26.8411       | 0.82428825       | 0.00126596 | No      |
|        |         |         |             |          |         | Cog7     | 6.84129 | 19.5679  | 1.51615          | 6.84229      | 19.5689       | 1.51601151       | 0.0483641  | No      |
|        |         |         |             |          |         | Cog8     | 12.5508 | 18.4126  | 0.552916         | 12.5518      | 18.4136       | 0.55287744       | 0.0218441  | No      |
|        |         |         |             |          |         | Col20a1  | 2.19985 | 6.28041  | 1.51346          | 2.20085      | 6.28141       | 1.51302762       | 0.0167972  | No      |
|        |         |         |             |          |         | COL4A3   | 62.4254 | 115.442  | 0.88697          | 62.4264      | 115.443       | 0.88695252       | 0.00014629 | No      |
|        |         |         |             |          |         | Col4a3bp | 27.9917 | 9.83438  | -1.50909         | 27.9927      | 9.83538       | -1.5089979       | 0.00014629 | No      |
|        |         |         |             |          |         | Col4a5   | 0       | 31.8754  | inf              | 0.001        | 31.8764       | 14.9602011       | 0.00014629 | No      |
|        |         |         |             |          |         | Commd1   | 37.2098 | 75.1984  | 1.01502          | 37.2108      | 75.1994       | 1.01499974       | 0.00730705 | No      |
|        |         |         |             |          |         | Commd10  | 19.1083 | 34.0499  | 0.83345          | 19.1093      | 34.0509       | 0.833418         | 0.00066215 | No      |
|        |         |         |             |          |         | Commd2   | 11.4861 | 7.73431  | -0.570549        | 11.4871      | 7.73531       | -0.5704836       | 0.0243269  | No      |
|        |         |         |             |          |         | Commd3   | 30.9746 | 114.883  | 1.891            | 30.9756      | 114.884       | 1.89097375       | 0.00014629 | No      |
|        |         |         |             |          |         | Commd4   | 89.1837 | 190.073  | 1.0917           | 89.1847      | 190.074       | 1.09169306       | 0.00014629 | No      |
|        |         |         |             |          |         | Commd7   | 80.2809 | 27.0721  | -1.56825         | 80.2819      | 27.0731       | -1.5682147       | 0.00014629 | No      |
|        |         |         |             |          |         | Commd8   | 30.1154 | 20.1     | -0.583301        | 30.1164      | 20.101        | -0.5832821       | 0.0128484  | No      |
|        |         |         |             |          |         | Commd9   | 29.4404 | 90.3407  | 1.61758          | 29.4414      | 90.3417       | 1.61754579       | 0.00014629 | No      |
|        |         |         |             |          |         | Comt     | 23.7429 | 211.312  | 3.15381          | 23.7439      | 211.313       | 3.1537527        | 0.00014629 | No      |
|        |         |         |             |          |         | COPE     | 56.265  | 117.14   | 1.05793          | 56.266       | 117.141       | 1.05791081       | 0.00014629 | No      |
|        |         |         |             |          |         | Copg1    | 34.9761 | 53.4407  | 0.611569         | 34.9771      | 53.4417       | 0.61155522       | 0.00195831 | No      |
|        |         |         |             |          |         | Coprs    | 18.5262 | 134.055  | 2.85518          | 18.5272      | 134.056       | 2.85511902       | 0.00014629 | No      |
|        |         |         |             |          |         | Cops4    | 68.5808 | 111.73   | 0.704137         | 68.5818      | 111.731       | 0.70413185       | 0.00053701 | No      |
|        |         |         |             |          |         | Cops6    | 48.9529 | 90.5284  | 0.886975         | 48.9539      | 90.5294       | 0.88696259       | 0.00014629 | No      |
|        |         |         |             |          |         | Cops7a   | 15.957  | 47.7617  | 1.58166          | 15.958       | 47.7627       | 1.58160454       | 0.00014629 | No      |
|        |         |         |             |          |         | Cops7b   | 13.2698 | 8.03819  | -0.723201        | 13.2708      | 8.03919       | -0.7231333       | 0.00448672 | No      |
|        |         |         |             |          |         | Copz1    | 85.3404 | 114.063  | 0.418537         | 85.3414      | 114.064       | 0.41852585       | 0.0376711  | No      |
|        |         |         |             |          |         | Coq10a   | 12.5345 | 18.9832  | 0.598821         | 12.5355      | 18.9842       | 0.59877966       | 0.0478294  | No      |
|        |         |         |             |          |         | Coq10b   | 10.3906 | 19.0698  | 0.876012         | 10.3916      | 19.0708       | 0.87594756       | 0.00138312 | No      |
|        |         |         |             |          |         | Coq3     | 5.89225 | 20.6695  | 1.81061          | 5.89325      | 20.6705       | 1.81043791       | 0.00014629 | No      |
|        |         |         |             |          |         | Coq5     | 11.1863 | 32.872   | 1.55513          | 11.1873      | 32.873        | 1.55504123       | 0.00014629 | No      |
|        |         |         |             |          |         | Coq6     | 17.0404 | 32.0888  | 0.913109         | 17.0414      | 32.0898       | 0.91307094       | 0.0185598  | No      |
|        |         |         |             |          |         | Coq7     | 7.99972 | 39.0938  | 2.28892          | 8.00072      | 39.0948       | 2.28877499       | 0.00014629 | No      |
|        |         |         |             |          |         | Coq9     | 19.8228 | 113.255  | 2.51434          | 19.8238      | 113.256       | 2.51428204       | 0.00014629 | No      |
|        |         |         |             |          |         | Coro1a   | 1050.59 | 84.2085  | -3.64109         | 1050.591     | 84.2095       | -3.6410743       | 0.00014629 | No      |
|        |         |         |             |          |         | Coro2a   | 5.37448 | 0.541857 | -3.31014         | 5.37548      | 0.542857      | -3.3077495       | 0.0219354  | No      |

| RRBS |       |        |             |          |         | RNAseq   |          |          |                  |              |               |                  |            |         |
|------|-------|--------|-------------|----------|---------|----------|----------|----------|------------------|--------------|---------------|------------------|------------|---------|
| gene | Blood | Kidney | methyl.diff | pMWU.fdr | Match ? | gene     | blood    | kidney   | log2(fold_ratio) | blood+ 0.001 | kidney+ 0.001 | log2(fold_ratio) | q_value    | Match ? |
|      |       |        |             |          |         | Coro2b   | 5.50168  | 0.711021 | -2.95191         | 5.50268      | 0.712021      | -2.9501427       | 0.00014629 | No      |
|      |       |        |             |          |         | Coro7    | 59.4838  | 17.087   | -1.7996          | 59.4848      | 17.088        | -1.7995375       | 0.00263402 | No      |
|      |       |        |             |          |         | Cotl1    | 413.004  | 189.831  | -1.12144         | 413.005      | 189.832       | -1.121436        | 0.00014629 | No      |
|      |       |        |             |          |         | Cox15    | 11.9297  | 17.2775  | 0.534336         | 11.9307      | 17.2785       | 0.53429929       | 0.0184724  | No      |
|      |       |        |             |          |         | Cox16    | 35.2896  | 74.602   | 1.07997          | 35.2906      | 74.603        | 1.07994969       | 0.00090728 | No      |
|      |       |        |             |          |         | Cox17    | 157.245  | 432.252  | 1.45886          | 157.246      | 432.253       | 1.45885266       | 0.00014629 | No      |
|      |       |        |             |          |         | Cox18    | 24.8962  | 13.5077  | -0.882141        | 24.8972      | 13.5087       | -0.8820947       | 0.00252712 | No      |
|      |       |        |             |          |         | Cox19    | 18.7051  | 68.8796  | 1.88065          | 18.7061      | 68.8806       | 1.8805889        | 0.00014629 | No      |
|      |       |        |             |          |         | Cox4i1   | 657.334  | 1572.84  | 1.25867          | 657.335      | 1572.841      | 1.25867213       | 0.00014629 | No      |
|      |       |        |             |          |         | Cox5a    | 216.634  | 897.519  | 2.05068          | 216.635      | 897.52        | 2.05067774       | 0.00014629 | No      |
|      |       |        |             |          |         | Cox5b    | 257.767  | 961.524  | 1.89926          | 257.768      | 961.525       | 1.89925119       | 0.00014629 | No      |
|      |       |        |             |          |         | Cox6a1   | 373.191  | 944.119  | 1.33905          | 373.192      | 944.12        | 1.33905218       | 0.00014629 | No      |
|      |       |        |             |          |         | COX6A2   | 0        | 2.1962   | inf              | 0.001        | 2.1972        | 11.1014505       | 0.00014629 | No      |
|      |       |        |             |          |         | Cox6b1   | 302.648  | 950.085  | 1.65042          | 302.649      | 950.086       | 1.65041253       | 0.0112518  | No      |
|      |       |        |             |          |         | Cox6c    | 511.398  | 1549.92  | 1.59967          | 511.399      | 1549.921      | 1.59967344       | 0.00014629 | No      |
|      |       |        |             |          |         | Cox7a2   | 131.51   | 507.542  | 1.94836          | 131.511      | 507.543       | 1.94834658       | 0.00014629 | No      |
|      |       |        |             |          |         | Cox7a2l  | 398.561  | 118.867  | -1.74546         | 398.562      | 118.868       | -1.7454438       | 0.00014629 | No      |
|      |       |        |             |          |         | Cox7a2l2 | 20.6248  | 98.5175  | 2.256            | 20.6258      | 98.5185       | 2.25594458       | 0.00014629 | No      |
|      |       |        |             |          |         | Cox7b    | 361.207  | 1669.94  | 2.2089           | 361.208      | 1669.941      | 2.20889538       | 0.00014629 | No      |
|      |       |        |             |          |         | Cox7c    | 336.862  | 1256.03  | 1.89864          | 336.863      | 1256.031      | 1.89863819       | 0.00014629 | No      |
|      |       |        |             |          |         | Cox8a    | 253.506  | 1627.76  | 2.6828           | 253.507      | 1627.761      | 2.6827914        | 0.00014629 | No      |
|      |       |        |             |          |         | Cox8b    | 0        | 2.38209  | inf              | 0.001        | 2.38309       | 11.2186177       | 0.00014629 | No      |
|      |       |        |             |          |         | Cp       | 0.381026 | 7.64924  | 4.32735          | 0.382026     | 7.65024       | 4.32376227       | 0.00195831 | No      |
|      |       |        |             |          |         | Cpd      | 13.1142  | 7.28144  | -0.848839        | 13.1152      | 7.28244       | -0.848746        | 0.00014629 | No      |
|      |       |        |             |          |         | Cpe      | 1.0739   | 4.00617  | 1.89937          | 1.0749       | 4.00717       | 1.89838127       | 0.00078603 | No      |
|      |       |        |             |          |         | Cpeb2    | 8.58877  | 4.6575   | -0.882895        | 8.58977      | 4.6585        | -0.882754        | 0.00053701 | No      |
|      |       |        |             |          |         | Cpeb3    | 0.736202 | 6.30934  | 3.09932          | 0.737202     | 6.31034       | 3.09758585       | 0.00014629 | No      |
|      |       |        |             |          |         | Cpeb4    | 14.2657  | 23.5079  | 0.72059          | 14.2667      | 23.5089       | 0.72055537       | 0.00114835 | No      |
|      |       |        |             |          |         | Cplx2    | 0        | 2.36503  | inf              | 0.001        | 2.36603       | 11.2082527       | 0.00014629 | No      |
|      |       |        |             |          |         | Cpm      | 0.390105 | 2.7678   | 2.82681          | 0.391105     | 2.7688        | 2.82363296       | 0.00014629 | No      |
|      |       |        |             |          |         | Cpne3    | 8.5577   | 12.9324  | 0.595698         | 8.5587       | 12.9334       | 0.595638         | 0.00427532 | No      |
|      |       |        |             |          |         | Cpne8    | 0.25158  | 1.89124  | 2.91024          | 0.25258      | 1.89224       | 2.90528277       | 0.00078603 | No      |
|      |       |        |             |          |         | Cpped1   | 0.667736 | 31.1282  | 5.5428           | 0.668736     | 31.1292       | 5.54068791       | 0.00014629 | No      |
|      |       |        |             |          |         | Cpq      | 0        | 82.4672  | inf              | 0.001        | 82.4682       | 16.3315503       | 0.00014629 | No      |
|      |       |        |             |          |         | Cpsf2    | 14.9909  | 5.85915  | -1.35533         | 14.9919      | 5.86015       | -1.3551737       | 0.00014629 | No      |
|      |       |        |             |          |         | Cpsf6    | 34.0535  | 5.48704  | -2.6337          | 34.0545      | 5.48804       | -2.6334825       | 0.00014629 | No      |
|      |       |        |             |          |         | Cpsf7    | 57.1538  | 21.2406  | -1.42802         | 57.1548      | 21.2416       | -1.4279822       | 0.00014629 | No      |
|      |       |        |             |          |         | Cpt2     | 1.94171  | 18.9579  | 3.2874           | 1.94271      | 18.9589       | 3.2867328        | 0.00014629 | No      |
|      |       |        |             |          |         | Cr1l     | 79.9317  | 31.1971  | -1.35736         | 79.9327      | 31.1981       | -1.3573277       | 0.00014629 | No      |
|      |       |        |             |          |         | Crabp1   | 0        | 1.12792  | inf              | 0.001        | 1.12892       | 10.1407275       | 0.00014629 | No      |
|      |       |        |             |          |         | Cradd    | 9.73003  | 3.42695  | -1.50552         | 9.73103      | 3.42795       | -1.5052465       | 0.0107557  | No      |
|      |       |        |             |          |         | Cramp1l  | 11.7822  | 2.0204   | -2.5439          | 11.7832      | 2.0214        | -2.5433047       | 0.00014629 | No      |

| RRBS |       |        |             |          |         | RNAseq     |           |          |                  |              |               |                  |            |         |
|------|-------|--------|-------------|----------|---------|------------|-----------|----------|------------------|--------------|---------------|------------------|------------|---------|
| gene | Blood | Kidney | methyl.diff | pMWU.fdr | Match ? | gene       | blood     | kidney   | log2(fold_ratio) | blood+ 0.001 | kidney+ 0.001 | log2(fold_ratio) | q_value    | Match ? |
|      |       |        |             |          |         | Crat       | 2.32466   | 67.3401  | 4.85638          | 2.32566      | 67.3411       | 4.85577518       | 0.00014629 | No      |
|      |       |        |             |          |         | Creb1      | 14.5911   | 2.75643  | -2.40422         | 14.5921      | 2.75743       | -2.4037914       | 0.00014629 | No      |
|      |       |        |             |          |         | Creb3l1    | 0.0756111 | 5.46089  | 6.17439          | 0.0766111    | 5.46189       | 6.15570301       | 0.00384649 | No      |
|      |       |        |             |          |         | Creb3l2    | 1.28106   | 15.0998  | 3.55912          | 1.28206      | 15.1008       | 3.5580893        | 0.00014629 | No      |
|      |       |        |             |          |         | Crebbp     | 81.7874   | 18.6794  | -2.13043         | 81.7884      | 18.6804       | -2.1303709       | 0.00102864 | No      |
|      |       |        |             |          |         | Crebrf     | 38.1349   | 3.78236  | -3.33375         | 38.1359      | 3.78336       | -3.3334098       | 0.00014629 | No      |
|      |       |        |             |          |         | CREBZF     | 52.1784   | 7.94661  | -2.71504         | 52.1794      | 7.94761       | -2.7148874       | 0.00014629 | No      |
|      |       |        |             |          |         | Creg1      | 2.08149   | 12.9564  | 2.63798          | 2.08249      | 12.9574       | 2.63739479       | 0.00014629 | No      |
|      |       |        |             |          |         | Crelid1    | 3.05018   | 15.1358  | 2.31099          | 3.05118      | 15.1368       | 2.31062105       | 0.00014629 | No      |
|      |       |        |             |          |         | Crelid2    | 10.4785   | 30.6413  | 1.54805          | 10.4795      | 30.6423       | 1.54795471       | 0.00014629 | No      |
|      |       |        |             |          |         | Crim1      | 0.823979  | 22.3696  | 4.76279          | 0.824979     | 22.3706       | 4.76110275       | 0.00014629 | No      |
|      |       |        |             |          |         | Cript      | 62.2051   | 30.7283  | -1.01746         | 62.2061      | 30.7293       | -1.0174412       | 0.00014629 | No      |
|      |       |        |             |          |         | Crispld2   | 0.365252  | 3.90614  | 3.41878          | 0.366252     | 3.90714       | 3.41520441       | 0.00014629 | No      |
|      |       |        |             |          |         | Crk        | 14.8905   | 25.6437  | 0.784212         | 14.8915      | 25.6447       | 0.78417161       | 0.00028114 | No      |
|      |       |        |             |          |         | Crkl       | 44.765    | 22.7034  | -0.979463        | 44.766       | 22.7044       | -0.9794315       | 0.00078603 | No      |
|      |       |        |             |          |         | Crif3      | 192.626   | 6.48868  | -4.89174         | 192.627      | 6.48968       | -4.8915188       | 0.00014629 | No      |
|      |       |        |             |          |         | Crls1      | 17.8666   | 54.8484  | 1.61818          | 17.8676      | 54.8494       | 1.61812998       | 0.00014629 | No      |
|      |       |        |             |          |         | Crocc      | 3.60224   | 58.6341  | 4.02477          | 3.60324      | 58.6351       | 4.02439789       | 0.00014629 | No      |
|      |       |        |             |          |         | Crot       | 11.7233   | 25.9557  | 1.14667          | 11.7243      | 25.9567       | 1.14660519       | 0.00090728 | No      |
|      |       |        |             |          |         | Crtam      | 11.6488   | 0.606655 | -4.26316         | 11.6498      | 0.607655      | -4.2609089       | 0.0453124  | No      |
|      |       |        |             |          |         | CRTAP      | 10.4374   | 172.537  | 4.04707          | 10.4384      | 172.538       | 4.04694164       | 0.00014629 | No      |
|      |       |        |             |          |         | Crtc1      | 11.3294   | 4.64512  | -1.28628         | 11.3304      | 4.64612       | -1.2861005       | 0.00014629 | No      |
|      |       |        |             |          |         | Crtc2      | 53.9081   | 33.6378  | -0.68042         | 53.9091      | 33.6388       | -0.6804026       | 0.00700299 | No      |
|      |       |        |             |          |         | Cryaa      | 0         | 3.54696  | inf              | 0.001        | 3.54796       | 11.792774        | 0.00014629 | No      |
|      |       |        |             |          |         | Cryab      | 0.0375773 | 1161.14  | 14.9153          | 0.0385773    | 1161.141      | 14.8774315       | 0.00126596 | No      |
|      |       |        |             |          |         | Cryba4     | 1.69677   | 7.98098  | 2.23377          | 1.69777      | 7.98198       | 2.23310564       | 0.0121484  | No      |
|      |       |        |             |          |         | Cryga      | 0         | 66.2321  | inf              | 0.001        | 66.2331       | 16.0152648       | 0.00014629 | No      |
|      |       |        |             |          |         | Cryl1      | 4.46597   | 206.061  | 5.52796          | 4.46697      | 206.062       | 5.52763811       | 0.00014629 | No      |
|      |       |        |             |          |         | Cryz       | 0.702955  | 207.941  | 8.20852          | 0.703955     | 207.942       | 8.20648226       | 0.00014629 | No      |
|      |       |        |             |          |         | Cryzl1     | 6.30897   | 12.628   | 1.00115          | 6.30997      | 12.629        | 1.00103536       | 0.00090728 | No      |
|      |       |        |             |          |         | Csad       | 5.84166   | 29.3648  | 2.32964          | 5.84266      | 29.3658       | 2.3294397        | 0.00041099 | No      |
|      |       |        |             |          |         | Csdc2      | 1.72448   | 3.28419  | 0.929377         | 1.72548      | 3.28519       | 0.92897906       | 0.0260584  | No      |
|      |       |        |             |          |         | Csde1      | 120.497   | 69.6873  | -0.790032        | 120.498      | 69.6883       | -0.7900208       | 0.00014629 | No      |
|      |       |        |             |          |         | Cse1l      | 24.3802   | 9.1973   | -1.40643         | 24.3812      | 9.1983        | -1.40633         | 0.00014629 | No      |
|      |       |        |             |          |         | Csf1       | 0.449261  | 4.40988  | 3.29511          | 0.450261     | 4.41088       | 3.29223308       | 0.00014629 | No      |
|      |       |        |             |          |         | Csf1r      | 2.63326   | 20.0159  | 2.92622          | 2.63426      | 20.0169       | 2.92574891       | 0.00014629 | No      |
|      |       |        |             |          |         | Csf2ra     | 2.00311   | 5.6568   | 1.49774          | 2.00411      | 5.6578        | 1.49727948       | 0.0137192  | No      |
|      |       |        |             |          |         | Csf2rb     | 0.275112  | 23.0942  | 6.39137          | 0.276112     | 23.0952       | 6.38619564       | 0.00014629 | No      |
|      |       |        |             |          |         | Csgalnact1 | 0.136313  | 0.977245 | 2.84179          | 0.137313     | 0.978245      | 2.83272761       | 0.0121484  | No      |
|      |       |        |             |          |         | Csgalnact2 | 10.0542   | 2.17535  | -2.20847         | 10.0552      | 2.17635       | -2.2079593       | 0.00014629 | No      |
|      |       |        |             |          |         | Csk        | 180.077   | 39.6905  | -2.18175         | 180.078      | 39.6915       | -2.1817199       | 0.00014629 | No      |
|      |       |        |             |          |         | Csnk1a1    | 96.2657   | 45.0564  | -1.09529         | 96.2667      | 45.0574       | -1.0952728       | 0.00014629 | No      |



| RRBS |       |        |             |          |         | RNAseq   |          |         |                  |              |               |                  |            |         |
|------|-------|--------|-------------|----------|---------|----------|----------|---------|------------------|--------------|---------------|------------------|------------|---------|
| gene | Blood | Kidney | methyl.diff | pMWU.fdr | Match ? | gene     | blood    | kidney  | log2(fold_ratio) | blood+ 0.001 | kidney+ 0.001 | log2(fold_ratio) | q_value    | Match ? |
|      |       |        |             |          |         | Csnk1e   | 29.1382  | 8.81539 | -1.72482         | 29.1392      | 8.81639       | -1.7247013       | 0.00014629 | No      |
|      |       |        |             |          |         | Csnk1g1  | 6.53007  | 1.77826 | -1.87663         | 6.53107      | 1.77926       | -1.876042        | 0.00014629 | No      |
|      |       |        |             |          |         | Csnk1g2  | 133.464  | 101.39  | -0.396543        | 133.465      | 101.391       | -0.3965319       | 0.0470633  | No      |
|      |       |        |             |          |         | Csnk1g3  | 46.7043  | 13.5409 | -1.78623         | 46.7053      | 13.5419       | -1.7861561       | 0.00014629 | No      |
|      |       |        |             |          |         | Csnk2a1  | 43.8321  | 16.2181 | -1.43438         | 43.8331      | 16.2191       | -1.4343269       | 0.00014629 | No      |
|      |       |        |             |          |         | Csrnp1   | 19.2551  | 11.4849 | -0.745503        | 19.2561      | 11.4859       | -0.7454516       | 0.00126596 | No      |
|      |       |        |             |          |         | Csrp1    | 29.8449  | 62.0256 | 1.05538          | 29.8459      | 62.0266       | 1.05535429       | 0.00014629 | No      |
|      |       |        |             |          |         | Csrp2    | 0.400007 | 106.687 | 8.05915          | 0.401007     | 106.688       | 8.05555478       | 0.0116551  | No      |
|      |       |        |             |          |         | Cst3     | 69.302   | 280.305 | 2.01603          | 69.303       | 280.306       | 2.01601292       | 0.00014629 | No      |
|      |       |        |             |          |         | Cst7     | 6.78223  | 1.7546  | -1.95062         | 6.78323      | 1.7556        | -1.9500082       | 0.00078603 | No      |
|      |       |        |             |          |         | Cstb     | 73.4555  | 215.149 | 1.55039          | 73.4565      | 215.15        | 1.55038078       | 0.00014629 | No      |
|      |       |        |             |          |         | Cstf2t   | 12.6403  | 8.44316 | -0.58217         | 12.6413      | 8.44416       | -0.582119        | 0.0106553  | No      |
|      |       |        |             |          |         | Ctage5   | 60.5054  | 23.7796 | -1.34734         | 60.5064      | 23.7806       | -1.3473026       | 0.00014629 | No      |
|      |       |        |             |          |         | Ctbp2    | 0.5235   | 24.6762 | 5.55879          | 0.5245       | 24.6772       | 5.55609213       | 0.00014629 | No      |
|      |       |        |             |          |         | Ctbs     | 4.90172  | 20.2226 | 2.04461          | 4.90272      | 20.2236       | 2.04438556       | 0.00014629 | No      |
|      |       |        |             |          |         | Ctc1     | 8.75256  | 43.0245 | 2.29738          | 8.75356      | 43.0255       | 2.29725018       | 0.00014629 | No      |
|      |       |        |             |          |         | Ctcf     | 55.95    | 17.418  | -1.68356         | 55.951       | 17.419        | -1.6835021       | 0.00014629 | No      |
|      |       |        |             |          |         | Ctdnep1  | 79.4496  | 48.1527 | -0.722423        | 79.4506      | 48.1537       | -0.7224115       | 0.00053701 | No      |
|      |       |        |             |          |         | Ctdp1    | 32.4157  | 15.247  | -1.08816         | 32.4167      | 15.248        | -1.0881172       | 0.00014629 | No      |
|      |       |        |             |          |         | Ctdsp2   | 71.1198  | 31.4496 | -1.17721         | 71.1208      | 31.4506       | -1.177184        | 0.00014629 | No      |
|      |       |        |             |          |         | Ctdspl   | 0.149114 | 22.8339 | 7.25861          | 0.150114     | 22.8349       | 7.24903813       | 0.00028114 | No      |
|      |       |        |             |          |         | Ctdspl2  | 15.4477  | 4.03411 | -1.93707         | 15.4487      | 4.03511       | -1.9368055       | 0.00014629 | No      |
|      |       |        |             |          |         | Ctf1     | 0.627254 | 16.4772 | 4.71528          | 0.628254     | 16.4782       | 4.7130669        | 0.00014629 | No      |
|      |       |        |             |          |         | Cth      | 0.634902 | 93.9293 | 7.2089           | 0.635902     | 93.9303       | 7.20664236       | 0.00014629 | No      |
|      |       |        |             |          |         | Ctif     | 0.339624 | 1.93312 | 2.50892          | 0.340624     | 1.93412       | 2.50542531       | 0.0132409  | No      |
|      |       |        |             |          |         | Ctla2a   | 63.0735  | 21.0731 | -1.58163         | 63.0745      | 21.0741       | -1.5815858       | 0.00014629 | No      |
|      |       |        |             |          |         | Ctla4    | 29.8174  | 1.8161  | -4.03724         | 29.8184      | 1.8171        | -4.0364931       | 0.00014629 | No      |
|      |       |        |             |          |         | Ctnna1   | 3.24689  | 79.153  | 4.60752          | 3.24789      | 79.154        | 4.60708758       | 0.00014629 | No      |
|      |       |        |             |          |         | Ctnna3   | 0        | 1.14007 | inf              | 0.001        | 1.14107       | 10.1561716       | 0.00014629 | No      |
|      |       |        |             |          |         | Ctnnal1  | 3.74327  | 22.0067 | 2.55557          | 3.74427      | 22.0077       | 2.555252         | 0.00014629 | No      |
|      |       |        |             |          |         | Ctnnbip1 | 0.144206 | 8.61502 | 5.90065          | 0.145206     | 8.61602       | 5.89084863       | 0.00014629 | No      |
|      |       |        |             |          |         | Ctnnb1   | 45.3836  | 24.3061 | -0.900851        | 45.3846      | 24.3071       | -0.9008251       | 0.00014629 | No      |
|      |       |        |             |          |         | Ctnnd1   | 16.7206  | 28.9909 | 0.793977         | 16.7216      | 28.9919       | 0.79393699       | 0.00014629 | No      |
|      |       |        |             |          |         | Ctps2    | 26.5244  | 16.415  | -0.692303        | 26.5254      | 16.416        | -0.6922719       | 0.0089386  | No      |
|      |       |        |             |          |         | Ctr9     | 30.4265  | 17.0775 | -0.833227        | 30.4275      | 17.0785       | -0.8331945       | 0.00014629 | No      |
|      |       |        |             |          |         | Ctsb     | 69.25    | 448.989 | 2.69679          | 69.251       | 448.99        | 2.6967765        | 0.00014629 | No      |
|      |       |        |             |          |         | Ctsc     | 42.9807  | 28.4582 | -0.594845        | 42.9817      | 28.4592       | -0.5948274       | 0.00285806 | No      |
|      |       |        |             |          |         | Ctsd     | 31.9297  | 130.786 | 2.03424          | 31.9307      | 130.787       | 2.03420306       | 0.00014629 | No      |
|      |       |        |             |          |         | Ctse     | 167.393  | 10.359  | -4.01429         | 167.394      | 10.36         | -4.0141519       | 0.00014629 | No      |
|      |       |        |             |          |         | Ctsh     | 5.72043  | 551.181 | 6.59026          | 5.72143      | 551.182       | 6.59000919       | 0.00014629 | No      |
|      |       |        |             |          |         | Ctsl1    | 22.2195  | 1065.47 | 5.58352          | 22.2205      | 1065.471      | 5.58345624       | 0.00014629 | No      |
|      |       |        |             |          |         | Ctss     | 90.9471  | 14.577  | -2.64133         | 90.9481      | 14.578        | -2.6412507       | 0.00014629 | No      |

| RRBS |       |        |             |          |         | RNAseq  |           |          |                  |              |               |                  |            |         |
|------|-------|--------|-------------|----------|---------|---------|-----------|----------|------------------|--------------|---------------|------------------|------------|---------|
| gene | Blood | Kidney | methyl.diff | pMWU.fdr | Match ? | gene    | blood     | kidney   | log2(fold_ratio) | blood+ 0.001 | kidney+ 0.001 | log2(fold_ratio) | q_value    | Match ? |
|      |       |        |             |          |         | Ctsw    | 239.197   | 48.7072  | -2.29599         | 239.198      | 48.7082       | -2.2959688       | 0.00014629 | No      |
|      |       |        |             |          |         | Cttnbp2 | 0.24047   | 2.72823  | 3.50404          | 0.24147      | 2.72923       | 3.49857811       | 0.00014629 | No      |
|      |       |        |             |          |         | Ctu1    | 4.2783    | 2.22577  | -0.94273         | 4.2793       | 2.22677       | -0.9424223       | 0.0257873  | No      |
|      |       |        |             |          |         | Ctxn1   | 0.230896  | 1.92803  | 3.06181          | 0.231896     | 1.92903       | 3.05632574       | 0.0173652  | No      |
|      |       |        |             |          |         | Cul3    | 74.2092   | 38.4662  | -0.948005        | 74.2102      | 38.4672       | -0.9479887       | 0.00014629 | No      |
|      |       |        |             |          |         | Cul4b   | 24.2432   | 9.01696  | -1.42687         | 24.2442      | 9.01796       | -1.4267666       | 0.00014629 | No      |
|      |       |        |             |          |         | Cul5    | 21.2731   | 7.28418  | -1.54619         | 21.2741      | 7.28518       | -1.5460616       | 0.00014629 | No      |
|      |       |        |             |          |         | Cul7    | 2.14046   | 5.08338  | 1.24786          | 2.14146      | 5.08438       | 1.24747713       | 0.00014629 | No      |
|      |       |        |             |          |         | Cuta    | 70.8019   | 124.255  | 0.811441         | 70.8029      | 124.256       | 0.81143516       | 0.00014629 | No      |
|      |       |        |             |          |         | Cux1    | 26.408    | 57.5715  | 1.12438          | 26.409       | 57.5725       | 1.12435019       | 0.00014629 | No      |
|      |       |        |             |          |         | Cwc15   | 84.7492   | 237.841  | 1.48873          | 84.7502      | 237.842       | 1.48871482       | 0.00014629 | No      |
|      |       |        |             |          |         | Cwc22   | 33.8354   | 18.7948  | -0.848203        | 33.8364      | 18.7958       | -0.8481658       | 0.00114835 | No      |
|      |       |        |             |          |         | Cwf19l2 | 3.5202    | 2.30904  | -0.60836         | 3.5212       | 2.31004       | -0.6081493       | 0.0241459  | No      |
|      |       |        |             |          |         | Cwh43   | 0.131428  | 7.71098  | 5.87457          | 0.132428     | 7.71198       | 5.86382121       | 0.00405996 | No      |
|      |       |        |             |          |         | Cxcl10  | 0.892907  | 11.0077  | 3.62386          | 0.893907     | 11.0087       | 3.62237556       | 0.00014629 | No      |
|      |       |        |             |          |         | Cxcl12  | 0         | 37.2919  | inf              | 0.001        | 37.2929       | 15.1866134       | 0.00014629 | No      |
|      |       |        |             |          |         | Cxcl16  | 0.596081  | 85.0657  | 7.15693          | 0.597081     | 85.0667       | 7.15452402       | 0.00014629 | No      |
|      |       |        |             |          |         | Cxcl17  | 2.8264    | 0        | -inf             | 2.8274       | 0.001         | -11.46526        | 0.00014629 | No      |
|      |       |        |             |          |         | Cxcl2   | 0.428121  | 5.44221  | 3.6681           | 0.429121     | 5.44321       | 3.66500129       | 0.00241835 | No      |
|      |       |        |             |          |         | Cxcr3   | 20.3593   | 4.2541   | -2.25876         | 20.3603      | 4.2551        | -2.2584939       | 0.00014629 | No      |
|      |       |        |             |          |         | Cxcr4   | 424.901   | 36.371   | -3.54627         | 424.902      | 36.372        | -3.54623         | 0.00014629 | No      |
|      |       |        |             |          |         | Cxxc1   | 39.5319   | 22.4918  | -0.813618        | 39.5329      | 22.4928       | -0.8135905       | 0.00014629 | No      |
|      |       |        |             |          |         | Cyb5a   | 45.3278   | 361.569  | 2.9958           | 45.3288      | 361.57        | 2.99577511       | 0.00014629 | No      |
|      |       |        |             |          |         | Cyb5b   | 24.2937   | 131.807  | 2.43977          | 24.2947      | 131.808       | 2.43972441       | 0.00014629 | No      |
|      |       |        |             |          |         | Cyb5r1  | 4.89894   | 19.4055  | 1.98593          | 4.89994      | 19.4065       | 1.98570396       | 0.00014629 | No      |
|      |       |        |             |          |         | Cyb5r2  | 0         | 1.96149  | inf              | 0.001        | 1.96249       | 10.9384696       | 0.00014629 | No      |
|      |       |        |             |          |         | Cyb5r3  | 17.1694   | 64.2405  | 1.90364          | 17.1704      | 64.2415       | 1.90358193       | 0.00014629 | No      |
|      |       |        |             |          |         | Cyba    | 98.1677   | 237.879  | 1.27691          | 98.1687      | 237.88        | 1.27689897       | 0.00014629 | No      |
|      |       |        |             |          |         | Cybrd1  | 3.47469   | 0.318809 | -3.44612         | 3.47569      | 0.319809      | -3.442017        | 0.00014629 | No      |
|      |       |        |             |          |         | CYC1    | 59.7216   | 284.847  | 2.25386          | 59.7226      | 284.848       | 2.2538434        | 0.00014629 | No      |
|      |       |        |             |          |         | Cycs    | 44.3902   | 603.807  | 3.76577          | 44.3912      | 603.808       | 3.76574426       | 0.00014629 | No      |
|      |       |        |             |          |         | Cyfp1   | 2.51977   | 25.6111  | 3.3454           | 2.52077      | 25.6121       | 3.34488915       | 0.00014629 | No      |
|      |       |        |             |          |         | Cyfp2   | 97.301    | 37.0888  | -1.39147         | 97.302       | 37.0898       | -1.391447        | 0.00014629 | No      |
|      |       |        |             |          |         | Cyp20a1 | 6.48335   | 11.0658  | 0.771302         | 6.48435      | 11.0668       | 0.77120425       | 0.013146   | No      |
|      |       |        |             |          |         | Cyp27a1 | 0.0987102 | 12.1051  | 6.9382           | 0.0997102    | 12.1061       | 6.92377736       | 0.00195831 | No      |
|      |       |        |             |          |         | Cyp2c11 | 0         | 1.18821  | inf              | 0.001        | 1.18921       | 10.2157878       | 0.00014629 | No      |
|      |       |        |             |          |         | Cyp2c24 | 0         | 6.89972  | inf              | 0.001        | 6.90072       | 12.7525312       | 0.00014629 | No      |
|      |       |        |             |          |         | Cyp2d2  | 2.14478   | 87.5822  | 5.35173          | 2.14578      | 87.5832       | 5.35108009       | 0.00014629 | No      |
|      |       |        |             |          |         | Cyp2d4  | 0.206467  | 3.17988  | 3.94499          | 0.207467     | 3.18088       | 3.93847216       | 0.00384649 | No      |
|      |       |        |             |          |         | Cyp2j10 | 0         | 1.35112  | inf              | 0.001        | 1.35212       | 10.4010075       | 0.00679736 | No      |
|      |       |        |             |          |         | Cyp2r1  | 1.17612   | 8.37303  | 2.83172          | 1.17712      | 8.37403       | 2.83066068       | 0.00161718 | No      |
|      |       |        |             |          |         | Cyp2s1  | 36.8263   | 8.64048  | -2.09155         | 36.8273      | 8.64148       | -2.0914253       | 0.00014629 | No      |

| RRBS |       |        |             |          |         | RNAseq         |          |         |                  |              |               |                  |            |         |
|------|-------|--------|-------------|----------|---------|----------------|----------|---------|------------------|--------------|---------------|------------------|------------|---------|
| gene | Blood | Kidney | methyl.diff | pMWU.fdr | Match ? | gene           | blood    | kidney  | log2(fold_ratio) | blood+ 0.001 | kidney+ 0.001 | log2(fold_ratio) | q_value    | Match ? |
|      |       |        |             |          |         | Cyp2u1         | 12.4117  | 3.4543  | -1.84524         | 12.4127      | 3.4553        | -1.8449341       | 0.00066215 | No      |
|      |       |        |             |          |         | Cyp39a1        | 0        | 2.16001 | inf              | 0.001        | 2.16101       | 11.07749         | 0.00014629 | No      |
|      |       |        |             |          |         | Cyp4a1         | 0        | 19.4324 | inf              | 0.001        | 19.4334       | 14.2462507       | 0.00014629 | No      |
|      |       |        |             |          |         | Cyp4a2         | 0        | 956.835 | inf              | 0.001        | 956.836       | 19.8679121       | 0.00014629 | No      |
|      |       |        |             |          |         | Cyp4f1         | 0        | 56.5352 | inf              | 0.001        | 56.5362       | 15.7868873       | 0.00014629 | No      |
|      |       |        |             |          |         | Cyp4f17        | 18.095   | 3.02513 | -2.58052         | 18.096       | 3.02613       | -2.580125        | 0.00014629 | No      |
|      |       |        |             |          |         | Cyp4f6         | 5.729    | 47.9306 | 3.06459          | 5.73         | 47.9316       | 3.06437006       | 0.00014629 | No      |
|      |       |        |             |          |         | Cyp4v3         | 20.2772  | 12.1123 | -0.743389        | 20.2782      | 12.1133       | -0.7433376       | 0.00014629 | No      |
|      |       |        |             |          |         | Cystm1         | 0.421501 | 154.128 | 8.51438          | 0.422501     | 154.129       | 8.51096786       | 0.00014629 | No      |
|      |       |        |             |          |         | Cyth1          | 50.7567  | 9.40355 | -2.43232         | 50.7577      | 9.40455       | -2.4321959       | 0.00014629 | No      |
|      |       |        |             |          |         | Cyth3          | 8.49707  | 3.65293 | -1.21791         | 8.49807      | 3.65393       | -1.2176862       | 0.0182057  | No      |
|      |       |        |             |          |         | Cyth4          | 30.8545  | 10.2641 | -1.58788         | 30.8555      | 10.2651       | -1.58778         | 0.00014629 | No      |
|      |       |        |             |          |         | Cytip          | 453.832  | 23.2598 | -4.28624         | 453.833      | 23.2608       | -4.2861889       | 0.00014629 | No      |
|      |       |        |             |          |         | Cytl1          | 0        | 1.99937 | inf              | 0.001        | 2.00037       | 10.9660512       | 0.00014629 | No      |
|      |       |        |             |          |         | D030056L22 Rik | 19.3917  | 7.27121 | -1.41517         | 19.3927      | 7.27221       | -1.4150479       | 0.00014629 | No      |
|      |       |        |             |          |         | D2hgdh         | 3.08505  | 16.9161 | 2.45503          | 3.08605      | 16.9171       | 2.45464894       | 0.00014629 | No      |
|      |       |        |             |          |         | D5Erttd579e    | 18.5369  | 34.2229 | 0.884565         | 18.5379      | 34.2239       | 0.88452635       | 0.00014629 | No      |
|      |       |        |             |          |         | D630039A0 3Rik | 0        | 7.13387 | inf              | 0.001        | 7.13487       | 12.8006714       | 0.00014629 | No      |
|      |       |        |             |          |         | D930015E06 Rik | 66.5389  | 22.7158 | -1.5505          | 66.5399      | 22.7168       | -1.5504601       | 0.00014629 | No      |
|      |       |        |             |          |         | Daam1          | 3.90364  | 6.57864 | 0.752968         | 3.90464      | 6.57964       | 0.75281911       | 0.0164185  | No      |
|      |       |        |             |          |         | Dab2           | 0.328315 | 202.525 | 9.2688           | 0.329315     | 202.526       | 9.26442319       | 0.00014629 | No      |
|      |       |        |             |          |         | Dach1          | 0        | 5.44865 | inf              | 0.001        | 5.44965       | 12.4119479       | 0.00014629 | No      |
|      |       |        |             |          |         | Dad1           | 123.134  | 189.839 | 0.624548         | 123.135      | 189.84        | 0.62454311       | 0.0109563  | No      |
|      |       |        |             |          |         | Dag1           | 11.7962  | 62.2581 | 2.39995          | 11.7972      | 62.2591       | 2.39984024       | 0.00014629 | No      |
|      |       |        |             |          |         | DAGLB          | 1.10924  | 9.77762 | 3.13991          | 1.11024      | 9.77862       | 3.1387593        | 0.00014629 | No      |
|      |       |        |             |          |         | Dak            | 2.60223  | 75.4039 | 4.85682          | 2.60323      | 75.4049       | 4.85628359       | 0.00014629 | No      |
|      |       |        |             |          |         | Dap            | 24.6566  | 108.67  | 2.13991          | 24.6576      | 108.671       | 2.1398627        | 0.00014629 | No      |
|      |       |        |             |          |         | Dapk1          | 2.61007  | 6.20053 | 1.2483           | 2.61107      | 6.20153       | 1.24798306       | 0.00014629 | No      |
|      |       |        |             |          |         | Dapk2          | 16.4567  | 47.0537 | 1.51563          | 16.4577      | 47.0547       | 1.5155761        | 0.00014629 | No      |
|      |       |        |             |          |         | Dapk3          | 45.9046  | 142.146 | 1.63066          | 45.9056      | 142.147       | 1.63064159       | 0.00014629 | No      |
|      |       |        |             |          |         | Dapl1          | 0        | 41.821  | inf              | 0.001        | 41.822        | 15.3519744       | 0.00014629 | No      |
|      |       |        |             |          |         | Dapp1          | 18.5044  | 2.0259  | -3.19123         | 18.5054      | 2.0269        | -3.1905995       | 0.00014629 | No      |
|      |       |        |             |          |         | Dars2          | 7.35761  | 12.349  | 0.747083         | 7.35861      | 12.35         | 0.74700586       | 0.0350837  | No      |
|      |       |        |             |          |         | Dazap2         | 351.288  | 191.385 | -0.87618         | 351.289      | 191.386       | -0.8761731       | 0.00014629 | No      |
|      |       |        |             |          |         | Dbf4           | 2.52035  | 0.41672 | -2.59648         | 2.52135      | 0.41772       | -2.5935883       | 0.0107557  | No      |
|      |       |        |             |          |         | Dbi            | 58.5849  | 854.449 | 3.86639          | 58.5859      | 854.45        | 3.86637068       | 0.00014629 | No      |
|      |       |        |             |          |         | Dbn1           | 0.266446 | 10.0181 | 5.23263          | 0.267446     | 10.0191       | 5.22736148       | 0.00014629 | No      |
|      |       |        |             |          |         | Dbnnd2         | 2.05534  | 43.4661 | 4.40244          | 2.05634      | 43.4671       | 4.40177312       | 0.00014629 | No      |
|      |       |        |             |          |         | Dbt            | 9.6406   | 18.7496 | 0.959665         | 9.6416       | 18.7506       | 0.95959228       | 0.00014629 | No      |

| RRBS |       |        |             |          |         | RNAseq  |          |          |                  |              |               |                  |            |         |
|------|-------|--------|-------------|----------|---------|---------|----------|----------|------------------|--------------|---------------|------------------|------------|---------|
| gene | Blood | Kidney | methyl.diff | pMWU.fdr | Match ? | gene    | blood    | kidney   | log2(fold_ratio) | blood+ 0.001 | kidney+ 0.001 | log2(fold_ratio) | q_value    | Match ? |
|      |       |        |             |          |         | Dcaf10  | 4.80288  | 2.607    | -0.881511        | 4.80388      | 2.608         | -0.8812562       | 0.00307875 | No      |
|      |       |        |             |          |         | Dcaf15  | 35.5897  | 20.4134  | -0.80194         | 35.5907      | 20.4144       | -0.8019131       | 0.00041099 | No      |
|      |       |        |             |          |         | Dcaf17  | 7.74254  | 2.44923  | -1.66048         | 7.74354      | 2.45023       | -1.6600761       | 0.00014629 | No      |
|      |       |        |             |          |         | Dcaf5   | 15.8261  | 6.68379  | -1.24356         | 15.8271      | 6.68479       | -1.2434428       | 0.00014629 | No      |
|      |       |        |             |          |         | Dcaf7   | 15.0582  | 9.73028  | -0.629999        | 15.0592      | 9.73128       | -0.6299436       | 0.00274649 | No      |
|      |       |        |             |          |         | Dcakd   | 3.94252  | 22.279   | 2.49849          | 3.94352      | 22.28         | 2.49819337       | 0.00041099 | No      |
|      |       |        |             |          |         | Dcbld1  | 13.2879  | 7.8868   | -0.7526          | 13.2889      | 7.8878        | -0.7525268       | 0.00533979 | No      |
|      |       |        |             |          |         | Dck     | 22.0407  | 1.67156  | -3.72091         | 22.0417      | 1.67256       | -3.7201056       | 0.00014629 | No      |
|      |       |        |             |          |         | Dclk1   | 0.118385 | 2.09219  | 4.14346          | 0.119385     | 2.09319       | 4.13200978       | 0.00028114 | No      |
|      |       |        |             |          |         | Dclk3   | 0        | 34.4867  | inf              | 0.001        | 34.4877       | 15.0737943       | 0.00014629 | No      |
|      |       |        |             |          |         | Dclre1a | 3.90617  | 21.6695  | 2.47184          | 3.90717      | 21.6705       | 2.47153651       | 0.00014629 | No      |
|      |       |        |             |          |         | Dclre1b | 7.21997  | 1.92782  | -1.90502         | 7.22097      | 1.92882       | -1.9044741       | 0.00195831 | No      |
|      |       |        |             |          |         | Dclre1c | 18.9249  | 6.86747  | -1.46243         | 18.9259      | 6.86847       | -1.4623012       | 0.00014629 | No      |
|      |       |        |             |          |         | Dcn     | 0        | 3.62428  | inf              | 0.001        | 3.62528       | 11.8238767       | 0.00014629 | No      |
|      |       |        |             |          |         | Dcp1b   | 10.4573  | 6.38691  | -0.711319        | 10.4583      | 6.38791       | -0.7112325       | 0.0232282  | No      |
|      |       |        |             |          |         | Dcp2    | 1.55989  | 0.260278 | -2.58332         | 1.56089      | 0.261278      | -2.5787113       | 0.0141124  | No      |
|      |       |        |             |          |         | Dcps    | 40.4471  | 14.9772  | -1.43327         | 40.4481      | 14.9782       | -1.4332077       | 0.00014629 | No      |
|      |       |        |             |          |         | Dctd    | 15.2545  | 6.42784  | -1.24683         | 15.2555      | 6.42884       | -1.2466991       | 0.00014629 | No      |
|      |       |        |             |          |         | Dctn2   | 55.683   | 100.213  | 0.847757         | 55.684       | 100.214       | 0.84774931       | 0.00523722 | No      |
|      |       |        |             |          |         | Dctn3   | 32.3078  | 65.0277  | 1.00917          | 32.3088      | 65.0287       | 1.00914942       | 0.00014629 | No      |
|      |       |        |             |          |         | Dctpp1  | 3.31045  | 9.5289   | 1.52528          | 3.31145      | 9.5299        | 1.524998         | 0.0202551  | No      |
|      |       |        |             |          |         | Dcun1d1 | 12.8995  | 7.38984  | -0.803695        | 12.9005      | 7.39084       | -0.8036167       | 0.0150758  | No      |
|      |       |        |             |          |         | Dcun1d4 | 3.87116  | 10.8575  | 1.48785          | 3.87216      | 10.8585       | 1.48761435       | 0.00014629 | No      |
|      |       |        |             |          |         | Dcun1d5 | 65.8126  | 41.7259  | -0.65742         | 65.8136      | 41.7269       | -0.657408        | 0.00173187 | No      |
|      |       |        |             |          |         | Ddah1   | 0.350506 | 166.091  | 8.88832          | 0.351506     | 166.092       | 8.88421756       | 0.00014629 | No      |
|      |       |        |             |          |         | Ddb2    | 17.4467  | 2.46359  | -2.82412         | 17.4477      | 2.46459       | -2.8236173       | 0.00296747 | No      |
|      |       |        |             |          |         | Ddc     | 0.054505 | 75.1561  | 10.4293          | 0.055505     | 75.1571       | 10.4030759       | 0.00090728 | No      |
|      |       |        |             |          |         | Ddhd1   | 17.9504  | 5.70409  | -1.65394         | 17.9514      | 5.70509       | -1.6537748       | 0.00014629 | No      |
|      |       |        |             |          |         | Ddhd2   | 21.7782  | 7.99985  | -1.44484         | 21.7792      | 8.00085       | -1.4447258       | 0.00014629 | No      |
|      |       |        |             |          |         | Ddi2    | 11.4055  | 21.0593  | 0.884721         | 11.4065      | 21.0603       | 0.88466981       | 0.00219102 | No      |
|      |       |        |             |          |         | DDIT3   | 19.2264  | 116.821  | 2.60313          | 19.2274      | 116.822       | 2.60307639       | 0.00014629 | No      |
|      |       |        |             |          |         | Ddit4   | 39.5688  | 15.7787  | -1.32638         | 39.5698      | 15.7797       | -1.32633         | 0.00014629 | No      |
|      |       |        |             |          |         | Ddit4l  | 0        | 4.38513  | inf              | 0.001        | 4.38613       | 12.0987329       | 0.00014629 | No      |
|      |       |        |             |          |         | Ddrnk1  | 32.8952  | 51.9228  | 0.658493         | 32.8962      | 51.9238       | 0.65847503       | 0.00252712 | No      |
|      |       |        |             |          |         | Ddt     | 63.5969  | 736.936  | 3.53451          | 63.5979      | 736.937       | 3.53449026       | 0.00014629 | No      |
|      |       |        |             |          |         | Ddx1    | 18.3894  | 26.6507  | 0.535295         | 18.3904      | 26.6517       | 0.5352747        | 0.0104529  | No      |
|      |       |        |             |          |         | Ddx10   | 11.659   | 3.65726  | -1.67261         | 11.66        | 3.65826       | -1.6723383       | 0.00014629 | No      |
|      |       |        |             |          |         | Ddx11   | 7.82944  | 2.33286  | -1.74681         | 7.83044      | 2.33386       | -1.7463754       | 0.00028114 | No      |
|      |       |        |             |          |         | Ddx17   | 201.624  | 68.5053  | -1.55738         | 201.625      | 68.5063       | -1.557366        | 0.00014629 | No      |
|      |       |        |             |          |         | Ddx18   | 21.6926  | 11.8344  | -0.874213        | 21.6936      | 11.8354       | -0.874161        | 0.00014629 | No      |
|      |       |        |             |          |         | Ddx19a  | 27.7022  | 97.6181  | 1.81715          | 27.7032      | 97.6191       | 1.81711082       | 0.00014629 | No      |
|      |       |        |             |          |         | Ddx20   | 32.5803  | 7.73204  | -2.07508         | 32.5813      | 7.73304       | -2.0749366       | 0.00014629 | No      |

| RRBS |       |        |             |          |         | RNAseq  |            |         |                  |              |               |                  |            |         |
|------|-------|--------|-------------|----------|---------|---------|------------|---------|------------------|--------------|---------------|------------------|------------|---------|
| gene | Blood | Kidney | methyl.diff | pMWU.fdr | Match ? | gene    | blood      | kidney  | log2(fold_ratio) | blood+ 0.001 | kidney+ 0.001 | log2(fold_ratio) | q_value    | Match ? |
|      |       |        |             |          |         | Ddx21   | 47.4771    | 6.20253 | -2.9363          | 47.4781      | 6.20353       | -2.9361009       | 0.00014629 | No      |
|      |       |        |             |          |         | Ddx24   | 31.1747    | 64.5586 | 1.05023          | 31.1757      | 64.5596       | 1.05020969       | 0.00028114 | No      |
|      |       |        |             |          |         | Ddx26b  | 58.1318    | 12.0083 | -2.27529         | 58.1328      | 12.0093       | -2.2752003       | 0.00014629 | No      |
|      |       |        |             |          |         | Ddx27   | 38.4424    | 16.8515 | -1.18982         | 38.4434      | 16.8525       | -1.1897733       | 0.00014629 | No      |
|      |       |        |             |          |         | DDX39A  | 82.9648    | 51.845  | -0.678295        | 82.9658      | 51.846        | -0.6782841       | 0.00285806 | No      |
|      |       |        |             |          |         | DDX3X   | 97.2824    | 49.4585 | -0.975959        | 97.2834      | 49.4595       | -0.975946        | 0.00014629 | No      |
|      |       |        |             |          |         | Ddx42   | 46.7879    | 12.9686 | -1.85111         | 46.7889      | 12.9696       | -1.8510323       | 0.00014629 | No      |
|      |       |        |             |          |         | Ddx5    | 760.267    | 201.067 | -1.91883         | 760.268      | 201.068       | -1.9188246       | 0.00014629 | No      |
|      |       |        |             |          |         | Ddx50   | 42.2081    | 27.6388 | -0.610823        | 42.2091      | 27.6398       | -0.6108069       | 0.0274347  | No      |
|      |       |        |             |          |         | Ddx52   | 36.9892    | 22.0593 | -0.745714        | 36.9902      | 22.0603       | -0.7456907       | 0.00374149 | No      |
|      |       |        |             |          |         | Deb1    | 39.1778    | 104.074 | 1.4095           | 39.1788      | 104.075       | 1.40947844       | 0.00014629 | No      |
|      |       |        |             |          |         | Decr1   | 26.0255    | 115.544 | 2.15045          | 26.0265      | 115.545       | 2.15040161       | 0.00014629 | No      |
|      |       |        |             |          |         | Decr2   | 1.31564    | 304.49  | 7.85448          | 1.31664      | 304.491       | 7.85339484       | 0.00014629 | No      |
|      |       |        |             |          |         | Dedd2   | 30.6491    | 18.2425 | -0.748542        | 30.6501      | 18.2435       | -0.7485092       | 0.00954394 | No      |
|      |       |        |             |          |         | Def6    | 54.3446    | 9.39673 | -2.5319          | 54.3456      | 9.39773       | -2.531779        | 0.00014629 | No      |
|      |       |        |             |          |         | Def8    | 2.33177    | 32.2607 | 3.79028          | 2.33277      | 32.2617       | 3.78970649       | 0.00014629 | No      |
|      |       |        |             |          |         | Defb1   | 0          | 538.992 | inf              | 0.001        | 538.993       | 19.039907        | 0.00014629 | No      |
|      |       |        |             |          |         | Defb28  | 0          | 13.785  | inf              | 0.001        | 13.786        | 13.7509163       | 0.00014629 | No      |
|      |       |        |             |          |         | Defb29  | 0          | 9.1148  | inf              | 0.001        | 9.1158        | 13.1541536       | 0.00014629 | No      |
|      |       |        |             |          |         | Dek     | 63.8548    | 35.5127 | -0.846462        | 63.8558      | 35.5137       | -0.846442        | 0.00014629 | No      |
|      |       |        |             |          |         | Dennd1a | 4.75377    | 15.2136 | 1.67822          | 4.75477      | 15.2146       | 1.67800894       | 0.00014629 | No      |
|      |       |        |             |          |         | Dennd1b | 10.2853    | 5.51164 | -0.900029        | 10.2863      | 5.51264       | -0.8999088       | 0.0119499  | No      |
|      |       |        |             |          |         | Dennd1c | 417.356    | 66.2124 | -2.65611         | 417.357      | 66.2134       | -2.6560868       | 0.00014629 | No      |
|      |       |        |             |          |         | Dennd2d | 120.916    | 18.2244 | -2.73006         | 120.917      | 18.2254       | -2.7299947       | 0.00802631 | No      |
|      |       |        |             |          |         | Dennd4a | 5.92868    | 1.88292 | -1.65474         | 5.92968      | 1.88392       | -1.6542165       | 0.00014629 | No      |
|      |       |        |             |          |         | Dennd4b | 57.4799    | 12.5968 | -2.19            | 57.4809      | 12.5978       | -2.1899108       | 0.00014629 | No      |
|      |       |        |             |          |         | Dennd4c | 9.13329    | 3.36064 | -1.4424          | 9.13429      | 3.36164       | -1.4421274       | 0.00014629 | No      |
|      |       |        |             |          |         | Dennd5b | 0.309117   | 2.358   | 2.93134          | 0.310117     | 2.359         | 2.9272909        | 0.00330073 | No      |
|      |       |        |             |          |         | Dennd6a | 43.6346    | 13.2906 | -1.71507         | 43.6356      | 13.2916       | -1.7149909       | 0.00014629 | No      |
|      |       |        |             |          |         | Dennd6b | 7.20772    | 19.547  | 1.43933          | 7.20872      | 19.548        | 1.43920599       | 0.00014629 | No      |
|      |       |        |             |          |         | Denr    | 69.0613    | 39.1184 | -0.820031        | 69.0623      | 39.1194       | -0.8200141       | 0.0234023  | No      |
|      |       |        |             |          |         | Depdc5  | 9.16383    | 5.52852 | -0.729057        | 9.16483      | 5.52952       | -0.7289539       | 0.0211873  | No      |
|      |       |        |             |          |         | DEPP    | 0.00763997 | 6.92045 | 9.82308          | 0.00863997   | 6.92145       | 9.64583229       | 0.0162226  | No      |
|      |       |        |             |          |         | Deptor  | 0.227052   | 12.2711 | 5.7561           | 0.228052     | 12.2721       | 5.74987551       | 0.00014629 | No      |
|      |       |        |             |          |         | Dera    | 34.9141    | 65.5797 | 0.909442         | 34.9151      | 65.5807       | 0.9094202        | 0.00014629 | No      |
|      |       |        |             |          |         | Desi1   | 6.8213     | 10.8011 | 0.663061         | 6.8223       | 10.8021       | 0.66298171       | 0.0328695  | No      |
|      |       |        |             |          |         | Desi2   | 13.1828    | 5.71565 | -1.20566         | 13.1838      | 5.71665       | -1.2055244       | 0.00576532 | No      |
|      |       |        |             |          |         | Det1    | 6.82354    | 3.11051 | -1.13337         | 6.82454      | 3.11151       | -1.1331169       | 0.00090728 | No      |
|      |       |        |             |          |         | Dexi    | 22.9993    | 42.7082 | 0.892922         | 23.0003      | 42.7092       | 0.8928942        | 0.00014629 | No      |
|      |       |        |             |          |         | Dfna5   | 0.400633   | 11.586  | 4.85395          | 0.401633     | 11.587        | 4.85048546       | 0.00028114 | No      |
|      |       |        |             |          |         | Dfnb31  | 2.31011    | 7.16998 | 1.63401          | 2.31111      | 7.17098       | 1.63358437       | 0.00014629 | No      |
|      |       |        |             |          |         | Dgat2   | 0.394324   | 9.86443 | 4.64478          | 0.395324     | 9.86543       | 4.64127449       | 0.00014629 | No      |

| RRBS |       |        |             |          |         | RNAseq |          |          |                  |              |               |                  |            |         |
|------|-------|--------|-------------|----------|---------|--------|----------|----------|------------------|--------------|---------------|------------------|------------|---------|
| gene | Blood | Kidney | methyl.diff | pMWU.fdr | Match ? | gene   | blood    | kidney   | log2(fold_ratio) | blood+ 0.001 | kidney+ 0.001 | log2(fold_ratio) | q_value    | Match ? |
|      |       |        |             |          |         | Dgcr6  | 3.58391  | 78.0031  | 4.44392          | 3.58491      | 78.0041       | 4.44354115       | 0.00014629 | No      |
|      |       |        |             |          |         | Dgcr8  | 11.9301  | 5.52292  | -1.1111          | 11.9311      | 5.52392       | -1.1109627       | 0.00014629 | No      |
|      |       |        |             |          |         | Dgka   | 438.343  | 59.5263  | -2.88046         | 438.344      | 59.5273       | -2.8804401       | 0.00014629 | No      |
|      |       |        |             |          |         | Dgkd   | 23.26    | 10.9347  | -1.08893         | 23.261       | 10.9357       | -1.0888675       | 0.00014629 | No      |
|      |       |        |             |          |         | Dgke   | 6.29439  | 1.27284  | -2.30601         | 6.29539      | 1.27384       | -2.3051117       | 0.00014629 | No      |
|      |       |        |             |          |         | Dgkg   | 1.06348  | 7.66894  | 2.85023          | 1.06448      | 7.66994       | 2.84906645       | 0.00014629 | No      |
|      |       |        |             |          |         | Dgkq   | 11.2199  | 22.3604  | 0.994884         | 11.2209      | 22.3614       | 0.99482212       | 0.00102864 | No      |
|      |       |        |             |          |         | Dgkz   | 185.93   | 35.2214  | -2.40023         | 185.931      | 35.2224       | -2.4002022       | 0.00014629 | No      |
|      |       |        |             |          |         | Dguok  | 30.2149  | 51.7255  | 0.775617         | 30.2159      | 51.7265       | 0.77559566       | 0.00161718 | No      |
|      |       |        |             |          |         | Dhcr7  | 3.58911  | 9.44825  | 1.39642          | 3.59011      | 9.44925       | 1.39617178       | 0.00014629 | No      |
|      |       |        |             |          |         | Dhdds  | 4.63232  | 32.2132  | 2.79784          | 4.63332      | 32.2142       | 2.79757854       | 0.00014629 | No      |
|      |       |        |             |          |         | Dhfr   | 4.32386  | 49.5587  | 3.51875          | 4.32486      | 49.5597       | 3.51844212       | 0.00014629 | No      |
|      |       |        |             |          |         | Dhrs1  | 20.2309  | 45.8524  | 1.18044          | 20.2319      | 45.8534       | 1.1803969        | 0.00014629 | No      |
|      |       |        |             |          |         | Dhrs3  | 2.50428  | 70.9355  | 4.82404          | 2.50528      | 70.9365       | 4.82348439       | 0.00014629 | No      |
|      |       |        |             |          |         | Dhrs4  | 12.1207  | 102.275  | 3.0769           | 12.1217      | 102.276       | 3.0768037        | 0.00014629 | No      |
|      |       |        |             |          |         | Dhrs7  | 41.4893  | 86.4605  | 1.0593           | 41.4903      | 86.4615       | 1.05928378       | 0.00014629 | No      |
|      |       |        |             |          |         | DHRSX  | 64.8711  | 106.432  | 0.714284         | 64.8721      | 106.433       | 0.71427549       | 0.00184429 | No      |
|      |       |        |             |          |         | Dhx15  | 93.8465  | 40.1353  | -1.22543         | 93.8475      | 40.1363       | -1.2254107       | 0.00014629 | No      |
|      |       |        |             |          |         | Dhx16  | 38.0247  | 20.6907  | -0.877953        | 38.0257      | 20.6917       | -0.8779226       | 0.00586782 | No      |
|      |       |        |             |          |         | Dhx29  | 11.5422  | 6.54457  | -0.818542        | 11.5432      | 6.54557       | -0.8184525       | 0.00395247 | No      |
|      |       |        |             |          |         | Dhx36  | 25.9169  | 8.09732  | -1.67837         | 25.9179      | 8.09832       | -1.6782543       | 0.00014629 | No      |
|      |       |        |             |          |         | Dhx37  | 8.39683  | 4.82717  | -0.798667        | 8.39783      | 4.82817       | -0.7985401       | 0.00566132 | No      |
|      |       |        |             |          |         | Dhx38  | 17.8762  | 10.5695  | -0.758129        | 17.8772      | 10.5705       | -0.7580772       | 0.00041099 | No      |
|      |       |        |             |          |         | Dhx57  | 7.03742  | 10.8218  | 0.620828         | 7.03842      | 10.8228       | 0.62075028       | 0.0119499  | No      |
|      |       |        |             |          |         | Dhx8   | 14.0688  | 7.46081  | -0.915091        | 14.0698      | 7.46181       | -0.9150043       | 0.00028114 | No      |
|      |       |        |             |          |         | Dhx9   | 47.5016  | 14.0586  | -1.75652         | 47.5026      | 14.0596       | -1.7564509       | 0.00014629 | No      |
|      |       |        |             |          |         | Diablo | 39.075   | 56.2154  | 0.524717         | 39.076       | 56.2164       | 0.52470828       | 0.0228585  | No      |
|      |       |        |             |          |         | Diap1  | 28.7573  | 16.0643  | -0.840067        | 28.7583      | 16.0653       | -0.8400305       | 0.00041099 | No      |
|      |       |        |             |          |         | Dido1  | 17.5924  | 5.16508  | -1.76809         | 17.5934      | 5.16608       | -1.7678924       | 0.00014629 | No      |
|      |       |        |             |          |         | Diexf  | 15.095   | 6.1913   | -1.28575         | 15.096       | 6.1923        | -1.2856191       | 0.00014629 | No      |
|      |       |        |             |          |         | Dip2a  | 1.5441   | 3.66357  | 1.24648          | 1.5451       | 3.66457       | 1.24594371       | 0.00014629 | No      |
|      |       |        |             |          |         | Dip2b  | 18.4806  | 3.24832  | -2.50824         | 18.4816      | 3.24932       | -2.5078799       | 0.00014629 | No      |
|      |       |        |             |          |         | Dip2c  | 0.851181 | 1.53718  | 0.852748         | 0.852181     | 1.53818       | 0.85199255       | 0.0423845  | No      |
|      |       |        |             |          |         | Dis3   | 10.2915  | 2.34703  | -2.13255         | 10.2925      | 2.34803       | -2.1320707       | 0.00014629 | No      |
|      |       |        |             |          |         | Dis3l  | 6.58704  | 55.0503  | 3.06305          | 6.58804      | 55.0513       | 3.06285541       | 0.00014629 | No      |
|      |       |        |             |          |         | Dixdc1 | 0.156513 | 2.44671  | 3.96649          | 0.157513     | 2.44771       | 3.95788983       | 0.00053701 | No      |
|      |       |        |             |          |         | Dkc1   | 90.9528  | 244.952  | 1.42931          | 90.9538      | 244.953       | 1.42929914       | 0.00014629 | No      |
|      |       |        |             |          |         | Dlat   | 7.47075  | 29.6683  | 1.9896           | 7.47175      | 29.6693       | 1.9894528        | 0.00014629 | No      |
|      |       |        |             |          |         | Dld    | 39.1096  | 77.997   | 0.995893         | 39.1106      | 77.998        | 0.99587746       | 0.00014629 | No      |
|      |       |        |             |          |         | Dlg4   | 7.52251  | 0.803124 | -3.22752         | 7.52351      | 0.804124      | -3.225916        | 0.00014629 | No      |
|      |       |        |             |          |         | Dlgap5 | 3.19856  | 1.74868  | -0.871155        | 3.19956      | 1.74968       | -0.8707824       | 0.0254337  | No      |
|      |       |        |             |          |         | Dlst   | 27.1241  | 81.8057  | 1.59263          | 27.1251      | 81.8067       | 1.59259055       | 0.00014629 | No      |

| RRBS |       |        |             |          |         | RNAseq   |           |          |                  |              |               |                  |            |         |
|------|-------|--------|-------------|----------|---------|----------|-----------|----------|------------------|--------------|---------------|------------------|------------|---------|
| gene | Blood | Kidney | methyl.diff | pMWU.fdr | Match ? | gene     | blood     | kidney   | log2(fold_ratio) | blood+ 0.001 | kidney+ 0.001 | log2(fold_ratio) | q_value    | Match ? |
|      |       |        |             |          |         | Dmap1    | 12.7105   | 24.3176  | 0.935985         | 12.7115      | 24.3186       | 0.93592589       | 0.00014629 | No      |
|      |       |        |             |          |         | DMD      | 0.124468  | 1.60924  | 3.69253          | 0.125468     | 1.61024       | 3.68188437       | 0.0150758  | No      |
|      |       |        |             |          |         | Dmgdh    | 0         | 58.6483  | inf              | 0.001        | 58.6493       | 15.8398263       | 0.00014629 | No      |
|      |       |        |             |          |         | Dmpk     | 0.209352  | 25.5653  | 6.93211          | 0.210352     | 25.5663       | 6.92529404       | 0.00014629 | No      |
|      |       |        |             |          |         | Dmrtc1c1 | 0         | 13.1318  | inf              | 0.001        | 13.1328       | 13.6808869       | 0.00014629 | No      |
|      |       |        |             |          |         | Dmrtc2   | 11.4689   | 0.52396  | -4.45213         | 11.4699      | 0.52496       | -4.4495015       | 0.00230432 | No      |
|      |       |        |             |          |         | Dmtf1    | 39.9851   | 8.39868  | -2.25123         | 39.9861      | 8.39968       | -2.2510923       | 0.00014629 | No      |
|      |       |        |             |          |         | Dmtn     | 0.0714115 | 103.777  | 10.505           | 0.0724115    | 103.778       | 10.4849942       | 0.00944816 | No      |
|      |       |        |             |          |         | Dmx1     | 7.72953   | 2.57838  | -1.58392         | 7.73053      | 2.57938       | -1.583543        | 0.00014629 | No      |
|      |       |        |             |          |         | Dna2     | 19.5953   | 12.0809  | -0.69778         | 19.5963      | 12.0819       | -0.6977339       | 0.00090728 | No      |
|      |       |        |             |          |         | DNAH17   | 5.3381    | 0.289372 | -4.20533         | 5.3391       | 0.290372      | -4.2006223       | 0.0107557  | No      |
|      |       |        |             |          |         | Dnaja1   | 111.552   | 173.858  | 0.640199         | 111.553      | 173.859       | 0.64018844       | 0.00184429 | No      |
|      |       |        |             |          |         | Dnaja2   | 80.47     | 59.9992  | -0.423508        | 80.471       | 60.0002       | -0.4235017       | 0.0378376  | No      |
|      |       |        |             |          |         | Dnaja3   | 29.8088   | 81.0881  | 1.44375          | 29.8098      | 81.0891       | 1.4437213        | 0.00090728 | No      |
|      |       |        |             |          |         | Dnaja4   | 17.0579   | 40.2903  | 1.23999          | 17.0589      | 40.2913       | 1.23994373       | 0.00014629 | No      |
|      |       |        |             |          |         | Dnajib1  | 22.191    | 51.6701  | 1.21936          | 22.192       | 51.6711       | 1.2193179        | 0.00014629 | No      |
|      |       |        |             |          |         | Dnajib2  | 27.3853   | 68.5942  | 1.32469          | 27.3863      | 68.5952       | 1.32465326       | 0.00053701 | No      |
|      |       |        |             |          |         | Dnajib4  | 31.8491   | 15.7421  | -1.01663         | 31.8501      | 15.7431       | -1.0165782       | 0.00014629 | No      |
|      |       |        |             |          |         | Dnajib6  | 103.568   | 31.6408  | -1.71072         | 103.569      | 31.6418       | -1.7106887       | 0.00014629 | No      |
|      |       |        |             |          |         | Dnajib9  | 14.6781   | 10.1625  | -0.530411        | 14.6791      | 10.1635       | -0.5303662       | 0.0423845  | No      |
|      |       |        |             |          |         | Dnajc11  | 17.203    | 31.39    | 0.867648         | 17.204       | 31.391        | 0.86760695       | 0.00363169 | No      |
|      |       |        |             |          |         | Dnajc12  | 2.2156    | 25.2759  | 3.51199          | 2.2166       | 25.2769       | 3.51139918       | 0.00014629 | No      |
|      |       |        |             |          |         | Dnajc15  | 14.5552   | 54.0051  | 1.89156          | 14.5562      | 54.0061       | 1.89148859       | 0.00014629 | No      |
|      |       |        |             |          |         | Dnajc17  | 23.4479   | 52.4404  | 1.16122          | 23.4489      | 52.4414       | 1.16118595       | 0.00066215 | No      |
|      |       |        |             |          |         | Dnajc25  | 0.519114  | 1.9372   | 1.89985          | 0.520114     | 1.9382        | 1.89781767       | 0.0216554  | No      |
|      |       |        |             |          |         | Dnajc28  | 0.43295   | 7.28471  | 4.0726           | 0.43395      | 7.28571       | 4.06946884       | 0.00184429 | No      |
|      |       |        |             |          |         | Dnajc3   | 36.1214   | 18.2279  | -0.986704        | 36.1224      | 18.2289       | -0.9866662       | 0.00014629 | No      |
|      |       |        |             |          |         | Dnajc4   | 5.42142   | 33.4144  | 2.62373          | 5.42242      | 33.4154       | 2.62350438       | 0.00014629 | No      |
|      |       |        |             |          |         | Dnajc5   | 42.2481   | 18.0863  | -1.22398         | 42.2491      | 18.0873       | -1.2239435       | 0.00014629 | No      |
|      |       |        |             |          |         | Dnajc5b  | 0         | 1.14691  | inf              | 0.001        | 1.14791       | 10.1647938       | 0.00014629 | No      |
|      |       |        |             |          |         | Dnajc7   | 132.16    | 55.4301  | -1.25354         | 132.161      | 55.4311       | -1.253529        | 0.00014629 | No      |
|      |       |        |             |          |         | Dnajc8   | 124.548   | 71.4138  | -0.802425        | 124.549      | 71.4148       | -0.8024184       | 0.027611   | No      |
|      |       |        |             |          |         | DNAJC9   | 68.5402   | 23.761   | -1.52835         | 68.5412      | 23.762        | -1.5283152       | 0.00014629 | No      |
|      |       |        |             |          |         | Dnal4    | 1.26362   | 11.639   | 3.20333          | 1.26462      | 11.64         | 3.20231521       | 0.00014629 | No      |
|      |       |        |             |          |         | Dnase1   | 0.204709  | 95.0684  | 8.85924          | 0.205709     | 95.0694       | 8.85223233       | 0.00028114 | No      |
|      |       |        |             |          |         | Dnase1l1 | 41.1999   | 14.533   | -1.5033          | 41.2009      | 14.534        | -1.503244        | 0.00014629 | No      |
|      |       |        |             |          |         | Dnase2   | 26.4835   | 16.5014  | -0.682506        | 26.4845      | 16.5024       | -0.6824724       | 0.00669647 | No      |
|      |       |        |             |          |         | DNLZ     | 23.1804   | 115.651  | 2.3188           | 23.1814      | 115.652       | 2.31875061       | 0.00014629 | No      |
|      |       |        |             |          |         | Dnm1     | 0.773392  | 20.9565  | 4.76005          | 0.774392     | 20.9575       | 4.75825877       | 0.00014629 | No      |
|      |       |        |             |          |         | Dnm1l    | 16.1756   | 10.3388  | -0.645742        | 16.1766      | 10.3398       | -0.6457001       | 0.00649695 | No      |
|      |       |        |             |          |         | Dnm3     | 0         | 12.6685  | inf              | 0.001        | 12.6695       | 13.629072        | 0.00014629 | No      |
|      |       |        |             |          |         | Dnmbp    | 1.0398    | 14.0994  | 3.76126          | 1.0408       | 14.1004       | 3.75997132       | 0.00014629 | No      |

| RRBS |       |        |             |          |         | RNAseq  |          |         |                  |              |               |                  |            |         |
|------|-------|--------|-------------|----------|---------|---------|----------|---------|------------------|--------------|---------------|------------------|------------|---------|
| gene | Blood | Kidney | methyl.diff | pMWU.fdr | Match ? | gene    | blood    | kidney  | log2(fold_ratio) | blood+ 0.001 | kidney+ 0.001 | log2(fold_ratio) | q_value    | Match ? |
|      |       |        |             |          |         | Dnmt1   | 23.5593  | 6.16262 | -1.93468         | 23.5603      | 6.16362       | -1.9345081       | 0.00014629 | No      |
|      |       |        |             |          |         | Dnmt3b  | 10.1277  | 1.70075 | -2.57407         | 10.1287      | 1.70175       | -2.573358        | 0.00014629 | No      |
|      |       |        |             |          |         | Dnpep   | 97.4877  | 144.372 | 0.566502         | 97.4887      | 144.373       | 0.56649405       | 0.00438237 | No      |
|      |       |        |             |          |         | Dnph1   | 0.519013 | 11.6625 | 4.48996          | 0.520013     | 11.6635       | 4.48730928       | 0.0387854  | No      |
|      |       |        |             |          |         | Dnttip1 | 21.6469  | 51.5572 | 1.25201          | 21.6479      | 51.5582       | 1.25197482       | 0.00014629 | No      |
|      |       |        |             |          |         | Dnttip2 | 25.5767  | 13.0902 | -0.966343        | 25.5777      | 13.0912       | -0.9662892       | 0.00014629 | No      |
|      |       |        |             |          |         | Doc2g   | 21.0439  | 47.3502 | 1.16997          | 21.0449      | 47.3512       | 1.16993033       | 0.00014629 | No      |
|      |       |        |             |          |         | Dock11  | 46.092   | 3.37821 | -3.77019         | 46.093       | 3.37921       | -3.7697898       | 0.00014629 | No      |
|      |       |        |             |          |         | Dock2   | 93.2815  | 6.44004 | -3.85645         | 93.2825      | 6.44104       | -3.8562409       | 0.00014629 | No      |
|      |       |        |             |          |         | Dock7   | 1.10056  | 8.05731 | 2.87206          | 1.10156      | 8.05831       | 2.87092923       | 0.00014629 | No      |
|      |       |        |             |          |         | Dock8   | 64.0068  | 38.2494 | -0.74279         | 64.0078      | 38.2504       | -0.7427729       | 0.0299771  | No      |
|      |       |        |             |          |         | Dok1    | 5.20123  | 1.457   | -1.83585         | 5.20223      | 1.458         | -1.8351395       | 0.00102864 | No      |
|      |       |        |             |          |         | Dolpp1  | 3.41613  | 6.06355 | 0.827801         | 3.41713      | 6.06455       | 0.82761546       | 0.0175479  | No      |
|      |       |        |             |          |         | Donson  | 14.9246  | 2.07417 | -2.84708         | 14.9256      | 2.07517       | -2.8464875       | 0.0147863  | No      |
|      |       |        |             |          |         | Dopey1  | 24.1875  | 10.7986 | -1.16342         | 24.1885      | 10.7996       | -1.1633434       | 0.00710369 | No      |
|      |       |        |             |          |         | Dpagt1  | 10.3428  | 27.8076 | 1.42685          | 10.3438      | 27.8086       | 1.42676483       | 0.00014629 | No      |
|      |       |        |             |          |         | Dpcd    | 7.65081  | 45.561  | 2.57411          | 7.65181      | 45.562        | 2.57395812       | 0.00014629 | No      |
|      |       |        |             |          |         | Dpep2   | 0.479415 | 1.86557 | 1.96027          | 0.480415     | 1.86657       | 1.95803651       | 0.0222129  | No      |
|      |       |        |             |          |         | Dpf2    | 52.7754  | 29.6439 | -0.832132        | 52.7764      | 29.6449       | -0.832109        | 0.00014629 | No      |
|      |       |        |             |          |         | Dph2    | 6.24093  | 3.93544 | -0.665237        | 6.24193      | 3.93644       | -0.6651007       | 0.0408729  | No      |
|      |       |        |             |          |         | Dph5    | 14.6296  | 5.45787 | -1.42248         | 14.6306      | 5.45887       | -1.4223147       | 0.00014629 | No      |
|      |       |        |             |          |         | Dpm2    | 14.3147  | 31.3723 | 1.13199          | 14.3157      | 31.3733       | 1.13193907       | 0.00014629 | No      |
|      |       |        |             |          |         | Dpp7    | 42.0609  | 178.044 | 2.08168          | 42.0619      | 178.045       | 2.081656         | 0.00014629 | No      |
|      |       |        |             |          |         | Dpp8    | 27.0861  | 13.7753 | -0.975468        | 27.0871      | 13.7763       | -0.9754175       | 0.00014629 | No      |
|      |       |        |             |          |         | Dpp9    | 38.0721  | 26.3171 | -0.53273         | 38.0731      | 26.3181       | -0.5327167       | 0.0171742  | No      |
|      |       |        |             |          |         | Dpy19l3 | 7.36486  | 14.0914 | 0.936087         | 7.36586      | 14.0924       | 0.93599145       | 0.0265045  | No      |
|      |       |        |             |          |         | Dpy30   | 159.408  | 94.3282 | -0.756961        | 159.409      | 94.3292       | -0.7569567       | 0.00028114 | No      |
|      |       |        |             |          |         | Dpyd    | 0        | 1.60041 | inf              | 0.001        | 1.60141       | 10.645127        | 0.00014629 | No      |
|      |       |        |             |          |         | Dpysl2  | 39.7632  | 26.7021 | -0.574481        | 39.7642      | 26.7031       | -0.5744629       | 0.00341151 | No      |
|      |       |        |             |          |         | Dqx1    | 6.85257  | 17.325  | 1.33814          | 6.85357      | 17.326        | 1.33801104       | 0.00014629 | No      |
|      |       |        |             |          |         | Dr1     | 22.8719  | 8.72824 | -1.38981         | 22.8729      | 8.72924       | -1.3897113       | 0.00014629 | No      |
|      |       |        |             |          |         | Dram1   | 1.4031   | 5.22077 | 1.89565          | 1.4041       | 5.22177       | 1.89489323       | 0.00138312 | No      |
|      |       |        |             |          |         | Dram2   | 12.2211  | 36.8354 | 1.59172          | 12.2221      | 36.8364       | 1.59163988       | 0.00566132 | No      |
|      |       |        |             |          |         | Drg1    | 34.0226  | 22.5524 | -0.593211        | 34.0236      | 22.5534       | -0.5931909       | 0.00974684 | No      |
|      |       |        |             |          |         | Drosha  | 22.2251  | 36.4334 | 0.713076         | 22.2261      | 36.4344       | 0.71304641       | 0.0201642  | No      |
|      |       |        |             |          |         | Dse     | 11.7838  | 2.08329 | -2.49986         | 11.7848      | 2.08429       | -2.4992993       | 0.00014629 | No      |
|      |       |        |             |          |         | Dsg2    | 0        | 1.32156 | inf              | 0.001        | 1.32256       | 10.3691175       | 0.00014629 | No      |
|      |       |        |             |          |         | Dst     | 26.5602  | 62.5284 | 1.23525          | 26.5612      | 62.5294       | 1.23521435       | 0.00014629 | No      |
|      |       |        |             |          |         | Dstn    | 96.4818  | 165.771 | 0.780858         | 96.4828      | 165.772       | 0.78085667       | 0.00014629 | No      |
|      |       |        |             |          |         | Dstyk   | 3.26639  | 5.31262 | 0.701728         | 3.26739      | 5.31362       | 0.70155639       | 0.0475835  | No      |
|      |       |        |             |          |         | Dtd1    | 41.3484  | 21.1686 | -0.965906        | 41.3494      | 21.1696       | -0.9658724       | 0.00014629 | No      |
|      |       |        |             |          |         | Dtna    | 0        | 3.08977 | inf              | 0.001        | 3.09077       | 11.5937506       | 0.00014629 | No      |



| RRBS |       |        |            |          |         | RNAseq   |          |          |                  |              |               |                  |            |         |
|------|-------|--------|------------|----------|---------|----------|----------|----------|------------------|--------------|---------------|------------------|------------|---------|
| gene | Blood | Kidney | methy.diff | pMWU.fdr | Match ? | gene     | blood    | kidney   | log2(fold_ratio) | blood+ 0.001 | kidney+ 0.001 | log2(fold_ratio) | q_value    | Match ? |
|      |       |        |            |          |         | Dtnb     | 14.8955  | 52.5471  | 1.81873          | 14.8965      | 52.5481       | 1.8186652        | 0.00014629 | No      |
|      |       |        |            |          |         | Dtnbp1   | 3.57881  | 15.9306  | 2.15425          | 3.57981      | 15.9316       | 2.15393624       | 0.00014629 | No      |
|      |       |        |            |          |         | Dtx1     | 9.14336  | 0.409256 | -4.48165         | 9.14436      | 0.410256      | -4.4782859       | 0.0125475  | No      |
|      |       |        |            |          |         | Dtx3     | 17.7556  | 55.1587  | 1.63531          | 17.7566      | 55.1597       | 1.63525925       | 0.00014629 | No      |
|      |       |        |            |          |         | Dtx3l    | 9.76487  | 1.11818  | -3.12644         | 9.76587      | 1.11918       | -3.1253065       | 0.019873   | No      |
|      |       |        |            |          |         | Dus3l    | 27.3605  | 87.5983  | 1.67881          | 27.3615      | 87.5993       | 1.67877202       | 0.00014629 | No      |
|      |       |        |            |          |         | Dusp1    | 27.2859  | 167.561  | 2.61846          | 27.2869      | 167.562       | 2.6184146        | 0.00014629 | No      |
|      |       |        |            |          |         | Dusp10   | 9.58945  | 1.4829   | -2.69302         | 9.59045      | 1.4839        | -2.6922046       | 0.00014629 | No      |
|      |       |        |            |          |         | Dusp16   | 7.0178   | 3.17395  | -1.14474         | 7.0188       | 3.17495       | -1.1444905       | 0.00014629 | No      |
|      |       |        |            |          |         | Dusp2    | 29.283   | 15.9605  | -0.875558        | 29.284       | 15.9615       | -0.8755164       | 0.00053701 | No      |
|      |       |        |            |          |         | Dusp22   | 8.18807  | 22.7202  | 1.47238          | 8.18907      | 22.7212       | 1.47226751       | 0.00014629 | No      |
|      |       |        |            |          |         | Dusp5    | 5.64429  | 11.1463  | 0.981695         | 5.64529      | 11.1473       | 0.98157472       | 0.00041099 | No      |
|      |       |        |            |          |         | Dusp6    | 6.38018  | 17.6687  | 1.46953          | 6.38118      | 17.6697       | 1.46938241       | 0.00014629 | No      |
|      |       |        |            |          |         | Dusp7    | 20.9152  | 31.0595  | 0.570483         | 20.9162      | 31.0605       | 0.57046028       | 0.0185598  | No      |
|      |       |        |            |          |         | Dusp9    | 0        | 1.14591  | inf              | 0.001        | 1.14691       | 10.1635365       | 0.00014629 | No      |
|      |       |        |            |          |         | Dut      | 29.193   | 90.6219  | 1.63423          | 29.194       | 90.6229       | 1.63420376       | 0.00014629 | No      |
|      |       |        |            |          |         | Dvl1     | 25.6028  | 88.2001  | 1.78448          | 25.6038      | 88.2011       | 1.7844387        | 0.00014629 | No      |
|      |       |        |            |          |         | Dvl3     | 20.0971  | 7.86156  | -1.3541          | 20.0981      | 7.86256       | -1.3539881       | 0.00014629 | No      |
|      |       |        |            |          |         | Dxo      | 8.21356  | 16.7202  | 1.02551          | 8.21456      | 16.7212       | 1.02542318       | 0.0332271  | No      |
|      |       |        |            |          |         | Dync1h1  | 30.0135  | 18.8301  | -0.672566        | 30.0145      | 18.8311       | -0.6725424       | 0.00053701 | No      |
|      |       |        |            |          |         | Dync1i2  | 42.4488  | 27.0635  | -0.649376        | 42.4498      | 27.0645       | -0.649356        | 0.00184429 | No      |
|      |       |        |            |          |         | Dync2li1 | 0.156743 | 12.0293  | 6.262            | 0.157743     | 12.0303       | 6.25295282       | 0.00014629 | No      |
|      |       |        |            |          |         | Dynll2   | 24.5988  | 111.558  | 2.18113          | 24.5998      | 111.559       | 2.18108842       | 0.00014629 | No      |
|      |       |        |            |          |         | Dynlrb1  | 153.374  | 243.219  | 0.665201         | 153.375      | 243.22        | 0.66519852       | 0.00102864 | No      |
|      |       |        |            |          |         | Dynlt1   | 23.5392  | 60.3248  | 1.35769          | 23.5402      | 60.3258       | 1.35764856       | 0.00126596 | No      |
|      |       |        |            |          |         | DYRK1A   | 40.3266  | 10.3204  | -1.96623         | 40.3276      | 10.3214       | -1.9661289       | 0.00014629 | No      |
|      |       |        |            |          |         | Dyrk1b   | 5.59891  | 9.54566  | 0.769698         | 5.59991      | 9.54666       | 0.76959244       | 0.0332271  | No      |
|      |       |        |            |          |         | Dyrk2    | 100.141  | 7.54845  | -3.72971         | 100.142      | 7.54945       | -3.7295318       | 0.00014629 | No      |
|      |       |        |            |          |         | Dysf     | 0        | 14.1704  | inf              | 0.001        | 14.1714       | 13.7906947       | 0.00014629 | No      |
|      |       |        |            |          |         | Dzip1l   | 0        | 9.69437  | inf              | 0.001        | 9.69537       | 13.2430802       | 0.00014629 | No      |
|      |       |        |            |          |         | Dzip3    | 6.88799  | 1.93777  | -1.82969         | 6.88899      | 1.93877       | -1.8291508       | 0.00014629 | No      |
|      |       |        |            |          |         | E2f2     | 15.0262  | 2.71816  | -2.46677         | 15.0272      | 2.71916       | -2.4663433       | 0.00014629 | No      |
|      |       |        |            |          |         | E4f1     | 23.7172  | 66.8129  | 1.4942           | 23.7182      | 66.8139       | 1.49415375       | 0.00014629 | No      |
|      |       |        |            |          |         | Eaf1     | 4.8502   | 11.8097  | 1.28385          | 4.8512       | 11.8107       | 1.28368091       | 0.00014629 | No      |
|      |       |        |            |          |         | Eapp     | 50.4743  | 27.8972  | -0.855432        | 50.4753      | 27.8982       | -0.8554055       | 0.0152626  | No      |
|      |       |        |            |          |         | Ebag9    | 30.3373  | 14.3304  | -1.08201         | 30.3383      | 14.3314       | -1.0819607       | 0.00014629 | No      |
|      |       |        |            |          |         | Ebf4     | 0        | 6.67223  | inf              | 0.001        | 6.67323       | 12.7041695       | 0.00014629 | No      |
|      |       |        |            |          |         | Ech1     | 78.8191  | 174.55   | 1.14703          | 78.8201      | 174.551       | 1.14701314       | 0.00014629 | No      |
|      |       |        |            |          |         | Eci2     | 13.2039  | 65.4745  | 2.30997          | 13.2049      | 65.4755       | 2.3098818        | 0.00014629 | No      |
|      |       |        |            |          |         | Eci3     | 5.07512  | 313.37   | 5.94828          | 5.07612      | 313.371       | 5.94800169       | 0.00014629 | No      |
|      |       |        |            |          |         | Ecm1     | 2.32359  | 5.8444   | 1.3307           | 2.32459      | 5.8454        | 1.33032547       | 0.00066215 | No      |
|      |       |        |            |          |         | Escr     | 0        | 2.54042  | inf              | 0.001        | 2.54142       | 11.3114191       | 0.00014629 | No      |

| RRBS |       |        |             |          |         | RNAseq  |          |          |                  |              |               |                  |            |         |
|------|-------|--------|-------------|----------|---------|---------|----------|----------|------------------|--------------|---------------|------------------|------------|---------|
| gene | Blood | Kidney | methyl.diff | pMWU.fdr | Match ? | gene    | blood    | kidney   | log2(fold_ratio) | blood+ 0.001 | kidney+ 0.001 | log2(fold_ratio) | q_value    | Match ? |
|      |       |        |             |          |         | Ecsit   | 10.8146  | 56.204   | 2.37769          | 10.8156      | 56.205        | 2.37758478       | 0.00014629 | No      |
|      |       |        |             |          |         | Ect2    | 0.182075 | 1.25801  | 2.78854          | 0.183075     | 1.25901       | 2.78178304       | 0.0134314  | No      |
|      |       |        |             |          |         | Edaradd | 0.896564 | 0        | -inf             | 0.897564     | 0.001         | -9.809871        | 0.00028114 | No      |
|      |       |        |             |          |         | Edem1   | 47.3457  | 13.0752  | -1.8564          | 47.3467      | 13.0762       | -1.8563205       | 0.00014629 | No      |
|      |       |        |             |          |         | Edem3   | 8.86858  | 3.98342  | -1.1547          | 8.86958      | 3.98442       | -1.1544961       | 0.00014629 | No      |
|      |       |        |             |          |         | Edn1    | 0        | 1.98908  | inf              | 0.001        | 1.99008       | 10.9586107       | 0.00014629 | No      |
|      |       |        |             |          |         | Ednra   | 0        | 1.78208  | inf              | 0.001        | 1.78308       | 10.8001557       | 0.00014629 | No      |
|      |       |        |             |          |         | Ednrb   | 0        | 2.6179   | inf              | 0.001        | 2.6189        | 11.3547453       | 0.00014629 | No      |
|      |       |        |             |          |         | Eed     | 27.3641  | 17.1646  | -0.672849        | 27.3651      | 17.1656       | -0.6728168       | 0.00330073 | No      |
|      |       |        |             |          |         | Eef1a1  | 8891.14  | 1928.88  | -2.20461         | 8891.141     | 1928.881      | -2.2046044       | 0.00014629 | No      |
|      |       |        |             |          |         | Eef1a2  | 0        | 3.96159  | inf              | 0.001        | 3.96259       | 11.952228        | 0.00014629 | No      |
|      |       |        |             |          |         | Eef1b2  | 1017.39  | 275.493  | -1.88478         | 1017.391     | 275.494       | -1.8847814       | 0.00014629 | No      |
|      |       |        |             |          |         | EEF1B2L | 0        | 1.54628  | inf              | 0.001        | 1.54728       | 10.5955186       | 0.00014629 | No      |
|      |       |        |             |          |         | Eef1e1  | 13.3975  | 31.0769  | 1.21388          | 13.3985      | 31.0779       | 1.21381753       | 0.00307875 | No      |
|      |       |        |             |          |         | Eefsec  | 11.0292  | 23.6236  | 1.0989           | 11.0302      | 23.6246       | 1.09883095       | 0.00066215 | No      |
|      |       |        |             |          |         | Efcab4a | 0.202722 | 13.4272  | 6.04951          | 0.203722     | 13.4282       | 6.04252033       | 0.00720409 | No      |
|      |       |        |             |          |         | Efcab4b | 15.4237  | 0.681902 | -4.49944         | 15.4247      | 0.682902      | -4.4974201       | 0.0202551  | No      |
|      |       |        |             |          |         | Efcab7  | 1.53565  | 3.38556  | 1.14055          | 1.53665      | 3.38656       | 1.14003195       | 0.0136225  | No      |
|      |       |        |             |          |         | Efemp1  | 0        | 30.8884  | inf              | 0.001        | 30.8894       | 14.9148242       | 0.00014629 | No      |
|      |       |        |             |          |         | EFEMP2  | 1.46001  | 11.834   | 3.01889          | 1.46101      | 11.835        | 3.01802175       | 0.00014629 | No      |
|      |       |        |             |          |         | Efhd2   | 61.6892  | 21.757   | -1.50354         | 61.6902      | 21.758        | -1.5034954       | 0.00014629 | No      |
|      |       |        |             |          |         | Efna4   | 0.340287 | 4.50552  | 3.72687          | 0.341287     | 4.50652       | 3.72295643       | 0.0211873  | No      |
|      |       |        |             |          |         | Efnb1   | 0.490776 | 15.1264  | 4.94586          | 0.491776     | 15.1274       | 4.94301891       | 0.00014629 | No      |
|      |       |        |             |          |         | Efnb2   | 0.581586 | 5.37626  | 3.20854          | 0.582586     | 5.37726       | 3.20632829       | 0.00014629 | No      |
|      |       |        |             |          |         | Efr3a   | 26.0227  | 11.913   | -1.12723         | 26.0237      | 11.914        | -1.1271682       | 0.00014629 | No      |
|      |       |        |             |          |         | Eftud2  | 35.0418  | 24.9648  | -0.489185        | 35.0428      | 24.9658       | -0.4891649       | 0.0171742  | No      |
|      |       |        |             |          |         | Egf     | 0.138662 | 13.8746  | 6.64473          | 0.139662     | 13.8756       | 6.63446681       | 0.0143044  | No      |
|      |       |        |             |          |         | Egfl8   | 8.80672  | 49.9478  | 2.50374          | 8.80772      | 49.9488       | 2.50360951       | 0.00149937 | No      |
|      |       |        |             |          |         | Egfr    | 0        | 1.00502  | inf              | 0.001        | 1.00602       | 9.97444327       | 0.00014629 | No      |
|      |       |        |             |          |         | Egln3   | 1.92702  | 4.46631  | 1.21271          | 1.92802      | 4.46731       | 1.21228635       | 0.00138312 | No      |
|      |       |        |             |          |         | Ehbp1   | 0.892007 | 8.34666  | 3.22607          | 0.893007     | 8.34766       | 3.22462845       | 0.00014629 | No      |
|      |       |        |             |          |         | Ehd1    | 8.56981  | 58.5457  | 2.77223          | 8.57081      | 58.5467       | 2.77208439       | 0.00014629 | No      |
|      |       |        |             |          |         | Ehd3    | 75.8587  | 10.2767  | -2.88393         | 75.8597      | 10.2777       | -2.8838162       | 0.00014629 | No      |
|      |       |        |             |          |         | Ehd4    | 4.46604  | 6.76772  | 0.599674         | 4.46704      | 6.76872       | 0.59956387       | 0.0293375  | No      |
|      |       |        |             |          |         | Ehf     | 0        | 14.9227  | inf              | 0.001        | 14.9237       | 13.8653176       | 0.00014629 | No      |
|      |       |        |             |          |         | Ehhadh  | 1.91823  | 26.9075  | 3.81016          | 1.91923      | 26.9085       | 3.80946245       | 0.00014629 | No      |
|      |       |        |             |          |         | Ehmt1   | 12.6042  | 4.48697  | -1.4901          | 12.6052      | 4.48797       | -1.4898841       | 0.00014629 | No      |
|      |       |        |             |          |         | Eid2b   | 7.85539  | 3.00471  | -1.38646         | 7.85639      | 3.00571       | -1.3861607       | 0.00078603 | No      |
|      |       |        |             |          |         | Eif1    | 588.438  | 405.528  | -0.537089        | 588.439      | 405.529       | -0.5370878       | 0.0118533  | No      |
|      |       |        |             |          |         | Eif1ad  | 25.8602  | 13.6737  | -0.919331        | 25.8612      | 13.6747       | -0.91928         | 0.0394714  | No      |
|      |       |        |             |          |         | Eif1b   | 47.8204  | 128.726  | 1.4286           | 47.8214      | 128.727       | 1.42858641       | 0.00014629 | No      |
|      |       |        |             |          |         | Eif2ak2 | 9.42447  | 5.98985  | -0.653893        | 9.42547      | 5.99085       | -0.6538038       | 0.00700299 | No      |

| RRBS |       |        |             |          |         | RNAseq    |          |         |                  |              |               |                  |            |         |
|------|-------|--------|-------------|----------|---------|-----------|----------|---------|------------------|--------------|---------------|------------------|------------|---------|
| gene | Blood | Kidney | methyl.diff | pMWU.fdr | Match ? | gene      | blood    | kidney  | log2(fold_ratio) | blood+ 0.001 | kidney+ 0.001 | log2(fold_ratio) | q_value    | Match ? |
|      |       |        |             |          |         | Eif2ak3   | 20.5544  | 5.5289  | -1.89438         | 20.5554      | 5.5299        | -1.8941921       | 0.00014629 | No      |
|      |       |        |             |          |         | Eif2b1    | 15.8829  | 30.1332 | 0.923882         | 15.8839      | 30.1342       | 0.92383658       | 0.00014629 | No      |
|      |       |        |             |          |         | Eif2b3    | 13.1868  | 7.12095 | -0.888958        | 13.1878      | 7.12195       | -0.8888597       | 0.004167   | No      |
|      |       |        |             |          |         | Eif2b4    | 21.3813  | 41.074  | 0.941878         | 21.3823      | 41.075        | 0.94184353       | 0.00028114 | No      |
|      |       |        |             |          |         | Eif2b5    | 17.5444  | 24.3008 | 0.469996         | 17.5454      | 24.3018       | 0.46997034       | 0.0353465  | No      |
|      |       |        |             |          |         | Eif2s2    | 93.0943  | 59.0246 | -0.657375        | 93.0953      | 59.0256       | -0.6573675       | 0.00090728 | No      |
|      |       |        |             |          |         | Eif2s3    | 109.33   | 26.2232 | -2.05978         | 109.331      | 26.2242       | -2.0597319       | 0.00014629 | No      |
|      |       |        |             |          |         | Eif3a     | 66.8356  | 30.5763 | -1.1282          | 66.8366      | 30.5773       | -1.1281773       | 0.00014629 | No      |
|      |       |        |             |          |         | Eif3c     | 77.6017  | 54.2135 | -0.517435        | 77.6027      | 54.2145       | -0.5174281       | 0.0283457  | No      |
|      |       |        |             |          |         | Eif3d     | 74.4554  | 55.3919 | -0.4267          | 74.4564      | 55.3929       | -0.4266948       | 0.0327779  | No      |
|      |       |        |             |          |         | Eif3e     | 356.145  | 81.002  | -2.13644         | 356.146      | 81.003        | -2.1364215       | 0.00014629 | No      |
|      |       |        |             |          |         | Eif3F     | 282.533  | 118.955 | -1.24801         | 282.534      | 118.956       | -1.2479964       | 0.00014629 | No      |
|      |       |        |             |          |         | Eif3g     | 247.021  | 163.759 | -0.593055        | 247.022      | 163.76        | -0.5930565       | 0.00263402 | No      |
|      |       |        |             |          |         | Eif3h     | 194.234  | 84.2146 | -1.20565         | 194.235      | 84.2156       | -1.2056438       | 0.00014629 | No      |
|      |       |        |             |          |         | Eif3i     | 138.457  | 84.4248 | -0.713699        | 138.458      | 84.4258       | -0.7136926       | 0.00330073 | No      |
|      |       |        |             |          |         | Eif3j     | 42.2687  | 20.6604 | -1.03273         | 42.2697      | 20.6614       | -1.0326859       | 0.00384649 | No      |
|      |       |        |             |          |         | Eif3m     | 256.064  | 115.005 | -1.1548          | 256.065      | 115.006       | -1.1548009       | 0.00014629 | No      |
|      |       |        |             |          |         | Eif4a1    | 206.568  | 152.45  | -0.438287        | 206.569      | 152.451       | -0.4382782       | 0.0241459  | No      |
|      |       |        |             |          |         | Eif4b     | 183.352  | 73.8242 | -1.31245         | 183.353      | 73.8252       | -1.3124386       | 0.00014629 | No      |
|      |       |        |             |          |         | Eif4e     | 41.3233  | 24.5205 | -0.752966        | 41.3243      | 24.5215       | -0.7529431       | 0.00014629 | No      |
|      |       |        |             |          |         | Eif4e2    | 60.7957  | 39.1053 | -0.636603        | 60.7967      | 39.1063       | -0.636592        | 0.00659461 | No      |
|      |       |        |             |          |         | Eif4e3    | 9.27099  | 3.16982 | -1.54832         | 9.27199      | 3.17082       | -1.548023        | 0.00014629 | No      |
|      |       |        |             |          |         | Eif4ebp1  | 36.1058  | 15.4188 | -1.22754         | 36.1068      | 15.4198       | -1.2274865       | 0.00014629 | No      |
|      |       |        |             |          |         | Eif4ebp2  | 45.5948  | 20.242  | -1.17152         | 45.5958      | 20.243        | -1.1714778       | 0.0218441  | No      |
|      |       |        |             |          |         | Eif4enif1 | 22.0421  | 10.8264 | -1.02571         | 22.0431      | 10.8274       | -1.0256403       | 0.00014629 | No      |
|      |       |        |             |          |         | Eif4g1    | 25.7593  | 10.9642 | -1.2323          | 25.7603      | 10.9652       | -1.2322173       | 0.00014629 | No      |
|      |       |        |             |          |         | Eif4g3    | 32.099   | 13.7764 | -1.22033         | 32.1         | 13.7774       | -1.2202696       | 0.00041099 | No      |
|      |       |        |             |          |         | Eif4h     | 157.364  | 97.6446 | -0.688497        | 157.365      | 97.6456       | -0.6884878       | 0.00014629 | No      |
|      |       |        |             |          |         | Eif5a2    | 0.902723 | 0       | -inf             | 0.903723     | 0.001         | -9.8197368       | 0.00138312 | No      |
|      |       |        |             |          |         | Eif5b     | 34.5351  | 70.1767 | 1.02293          | 34.5361      | 70.1777       | 1.02290749       | 0.00028114 | No      |
|      |       |        |             |          |         | Eif6      | 89.2559  | 167.551 | 0.908577         | 89.2569      | 167.552       | 0.9085733        | 0.00014629 | No      |
|      |       |        |             |          |         | Elavl1    | 41.4386  | 21.9491 | -0.916815        | 41.4396      | 21.9501       | -0.9167826       | 0.00014629 | No      |
|      |       |        |             |          |         | Elf1      | 82.6105  | 8.05421 | -3.35851         | 82.6115      | 8.05521       | -3.3583485       | 0.00014629 | No      |
|      |       |        |             |          |         | Elf2      | 51.8774  | 7.66243 | -2.75923         | 51.8784      | 7.66343       | -2.7590718       | 0.00014629 | No      |
|      |       |        |             |          |         | Elf4      | 35.7794  | 1.93283 | -4.21034         | 35.7804      | 1.93383       | -4.2096366       | 0.00014629 | No      |
|      |       |        |             |          |         | Elk1      | 27.9838  | 59.2735 | 1.08279          | 27.9848      | 59.2745       | 1.08276815       | 0.00014629 | No      |
|      |       |        |             |          |         | Elk3      | 34.1942  | 5.76355 | -2.56872         | 34.1952      | 5.76455       | -2.5685139       | 0.00014629 | No      |
|      |       |        |             |          |         | Elk4      | 44.9082  | 3.70649 | -3.59885         | 44.9092      | 3.70749       | -3.5984963       | 0.00014629 | No      |
|      |       |        |             |          |         | Ell3      | 2.91625  | 28.7516 | 3.30145          | 2.91725      | 28.7526       | 3.30101149       | 0.00014629 | No      |
|      |       |        |             |          |         | Elmo1     | 22.295   | 0.78315 | -4.83129         | 22.296       | 0.78415       | -4.8295114       | 0.0103501  | No      |
|      |       |        |             |          |         | Elmod2    | 6.78084  | 3.03108 | -1.16163         | 6.78184      | 3.03208       | -1.1613689       | 0.00014629 | No      |
|      |       |        |             |          |         | Elmod3    | 3.60733  | 7.41701 | 1.03991          | 3.60833      | 7.41801       | 1.03970093       | 0.00274649 | No      |

| RRBS |       |        |             |          |         | RNAseq   |           |         |                  |              |               |                  |            |         |
|------|-------|--------|-------------|----------|---------|----------|-----------|---------|------------------|--------------|---------------|------------------|------------|---------|
| gene | Blood | Kidney | methyl.diff | pMWU.fdr | Match ? | gene     | blood     | kidney  | log2(fold_ratio) | blood+ 0.001 | kidney+ 0.001 | log2(fold_ratio) | q_value    | Match ? |
|      |       |        |             |          |         | Elmsan1  | 22.6875   | 3.90545 | -2.53834         | 22.6885      | 3.90645       | -2.5380312       | 0.00014629 | No      |
|      |       |        |             |          |         | Eln      | 0         | 3.67488 | inf              | 0.001        | 3.67588       | 11.843874        | 0.00014629 | No      |
|      |       |        |             |          |         | Elof1    | 22.8928   | 92.2761 | 2.01106          | 22.8938      | 92.2771       | 2.01101572       | 0.00014629 | No      |
|      |       |        |             |          |         | Elov1    | 65.7656   | 179.737 | 1.45048          | 65.7666      | 179.738       | 1.45046846       | 0.00014629 | No      |
|      |       |        |             |          |         | Elov15   | 164.28    | 15.2778 | -3.42665         | 164.281      | 15.2788       | -3.4265625       | 0.00014629 | No      |
|      |       |        |             |          |         | Elp5     | 17.6693   | 33.3779 | 0.917645         | 17.6703      | 33.3789       | 0.91760988       | 0.00028114 | No      |
|      |       |        |             |          |         | Elp6     | 13.6415   | 37.0614 | 1.44191          | 13.6425      | 37.0624       | 1.44184826       | 0.00014629 | No      |
|      |       |        |             |          |         | Elt1     | 0         | 3.01913 | inf              | 0.001        | 3.02013       | 11.5603949       | 0.00014629 | No      |
|      |       |        |             |          |         | Emb      | 3.16261   | 21.9363 | 2.79413          | 3.16361      | 21.9373       | 2.79374231       | 0.00014629 | No      |
|      |       |        |             |          |         | Emc2     | 28.5805   | 47.9782 | 0.74735          | 28.5815      | 47.9792       | 0.74732747       | 0.00480938 | No      |
|      |       |        |             |          |         | Emcn     | 0         | 21.7403 | inf              | 0.001        | 21.7413       | 14.4081506       | 0.00014629 | No      |
|      |       |        |             |          |         | Emd      | 25.2589   | 10.0734 | -1.32624         | 25.2599      | 10.0744       | -1.326155        | 0.00014629 | No      |
|      |       |        |             |          |         | Emilin1  | 0.348904  | 3.20023 | 3.19727          | 0.349904     | 3.20123       | 3.19359527       | 0.00041099 | No      |
|      |       |        |             |          |         | Eml1     | 0         | 2.35707 | inf              | 0.001        | 2.35807       | 11.2033908       | 0.00014629 | No      |
|      |       |        |             |          |         | Eml4     | 42.2598   | 9.51783 | -2.15058         | 42.2608      | 9.51883       | -2.1504639       | 0.00014629 | No      |
|      |       |        |             |          |         | Emp3     | 200.616   | 33.1379 | -2.59789         | 200.617      | 33.1389       | -2.5978462       | 0.00014629 | No      |
|      |       |        |             |          |         | Emr1     | 0.264542  | 1.20069 | 2.1823           | 0.265542     | 1.20169       | 2.1780528        | 0.00679736 | No      |
|      |       |        |             |          |         | Emx1     | 0         | 23.5006 | inf              | 0.001        | 23.5016       | 14.5204714       | 0.00014629 | No      |
|      |       |        |             |          |         | Enah     | 0.0581745 | 6.53122 | 6.81082          | 0.0591745    | 6.53222       | 6.78645396       | 0.00078603 | No      |
|      |       |        |             |          |         | Enc1     | 0.099393  | 3.16351 | 4.99224          | 0.100393     | 3.16451       | 4.97825154       | 0.00078603 | No      |
|      |       |        |             |          |         | Endod1   | 1.42123   | 10.8224 | 2.92881          | 1.42223      | 10.8234       | 2.92792707       | 0.00014629 | No      |
|      |       |        |             |          |         | Endov    | 5.93025   | 13.7316 | 1.21133          | 5.93125      | 13.7326       | 1.21119671       | 0.00126596 | No      |
|      |       |        |             |          |         | Enkd1    | 0.342627  | 24.131  | 6.13811          | 0.343627     | 24.132        | 6.13396028       | 0.00184429 | No      |
|      |       |        |             |          |         | Eno1     | 214.191   | 1026.54 | 2.26083          | 214.192      | 1026.541      | 2.26081475       | 0.00014629 | No      |
|      |       |        |             |          |         | Enox1    | 0         | 4.75336 | inf              | 0.001        | 4.75436       | 12.2150354       | 0.00014629 | No      |
|      |       |        |             |          |         | Enpp4    | 5.56428   | 3.15431 | -0.818869        | 5.56528      | 3.15531       | -0.8186725       | 0.00173187 | No      |
|      |       |        |             |          |         | Enpp5    | 1.21288   | 23.4072 | 4.27044          | 1.21388      | 23.4082       | 4.26931629       | 0.00014629 | No      |
|      |       |        |             |          |         | Enpp6    | 0         | 29.7836 | inf              | 0.001        | 29.7846       | 14.862279        | 0.00014629 | No      |
|      |       |        |             |          |         | Enthd2   | 15.8258   | 44.4494 | 1.48988          | 15.8268      | 44.4504       | 1.48982681       | 0.00066215 | No      |
|      |       |        |             |          |         | Entpd2   | 4.55038   | 123.975 | 4.76792          | 4.55138      | 123.976       | 4.76761301       | 0.00014629 | No      |
|      |       |        |             |          |         | Entpd6   | 5.16462   | 1.95604 | -1.40072         | 5.16562      | 1.95704       | -1.4002683       | 0.00114835 | No      |
|      |       |        |             |          |         | Eny2     | 23.6652   | 32.7878 | 0.470389         | 23.6662      | 32.7888       | 0.47037503       | 0.0307655  | No      |
|      |       |        |             |          |         | Eomes    | 9.38714   | 1.01099 | -3.21491         | 9.38814      | 1.01199       | -3.2136443       | 0.015456   | No      |
|      |       |        |             |          |         | EP300    | 10.9469   | 1.87084 | -2.54877         | 10.9479      | 1.87184       | -2.5481251       | 0.00014629 | No      |
|      |       |        |             |          |         | Ep400    | 23.6205   | 9.22668 | -1.35616         | 23.6215      | 9.22768       | -1.3560607       | 0.00014629 | No      |
|      |       |        |             |          |         | Epas1    | 0.447369  | 26.0948 | 5.86615          | 0.448369     | 26.0958       | 5.86298729       | 0.00014629 | No      |
|      |       |        |             |          |         | Epb4.1   | 114.682   | 29.2946 | -1.96893         | 114.683      | 29.2956       | -1.9688956       | 0.00014629 | No      |
|      |       |        |             |          |         | Epb4.115 | 1.76415   | 18.6972 | 3.40578          | 1.76515      | 18.6982       | 3.4050367        | 0.00014629 | No      |
|      |       |        |             |          |         | Epb4111  | 0.0679112 | 47.9876 | 9.4648           | 0.0689112    | 47.9886       | 9.44373753       | 0.00914429 | No      |
|      |       |        |             |          |         | Epb4112  | 29.7888   | 6.79089 | -2.13309         | 29.7898      | 6.79189       | -2.1329334       | 0.00014629 | No      |
|      |       |        |             |          |         | EPC1     | 76.0083   | 17.8119 | -2.09331         | 76.0093      | 17.8129       | -2.0932535       | 0.00014629 | No      |
|      |       |        |             |          |         | Epc2     | 34.4232   | 9.63921 | -1.83639         | 34.4242      | 9.64021       | -1.8362866       | 0.00014629 | No      |

| RRBS |       |        |             |          |         | RNAseq   |           |          |                  |              |               |                  |            |         |
|------|-------|--------|-------------|----------|---------|----------|-----------|----------|------------------|--------------|---------------|------------------|------------|---------|
| gene | Blood | Kidney | methyl.diff | pMWU.fdr | Match ? | gene     | blood     | kidney   | log2(fold_ratio) | blood+ 0.001 | kidney+ 0.001 | log2(fold_ratio) | q_value    | Match ? |
|      |       |        |             |          |         | Epg5     | 15.2313   | 2.97791  | -2.35466         | 15.2323      | 2.97891       | -2.3542774       | 0.00014629 | No      |
|      |       |        |             |          |         | Epha1    | 0.25624   | 11.8374  | 5.52972          | 0.25724      | 11.8384       | 5.5242153        | 0.00014629 | No      |
|      |       |        |             |          |         | Epha4    | 0         | 6.34947  | inf              | 0.001        | 6.35047       | 12.6326477       | 0.00014629 | No      |
|      |       |        |             |          |         | Epha7    | 0         | 7.73832  | inf              | 0.001        | 7.73932       | 12.9179911       | 0.00014629 | No      |
|      |       |        |             |          |         | Ephb6    | 16.9389   | 2.12974  | -2.99159         | 16.9399      | 2.13074       | -2.9909989       | 0.00014629 | No      |
|      |       |        |             |          |         | Ephx1    | 4.61476   | 55.3589  | 3.58449          | 4.61576      | 55.3599       | 3.58420122       | 0.00014629 | No      |
|      |       |        |             |          |         | Epm2aip1 | 11.506    | 7.82795  | -0.555683        | 11.507       | 7.82895       | -0.555621        | 0.00639443 | No      |
|      |       |        |             |          |         | Epn3     | 0         | 24.8905  | inf              | 0.001        | 24.8915       | 14.6033656       | 0.00014629 | No      |
|      |       |        |             |          |         | Eprs     | 35.1479   | 25.5323  | -0.461118        | 35.1489      | 25.5333       | -0.4610995       | 0.019504   | No      |
|      |       |        |             |          |         | Eps15    | 35.2686   | 12.2567  | -1.52481         | 35.2696      | 12.2577       | -1.5247369       | 0.00014629 | No      |
|      |       |        |             |          |         | Eps8     | 0.398035  | 23.6679  | 5.89389          | 0.399035     | 23.6689       | 5.89033356       | 0.00014629 | No      |
|      |       |        |             |          |         | Eps8l1   | 0.0501365 | 12.6192  | 7.97555          | 0.0511365    | 12.6202       | 7.94716564       | 0.00028114 | No      |
|      |       |        |             |          |         | Eps8l2   | 0.17103   | 154.847  | 9.82238          | 0.17203      | 154.848       | 9.81397686       | 0.00252712 | No      |
|      |       |        |             |          |         | Ept1     | 10.3286   | 2.29631  | -2.16926         | 10.3296      | 2.29731       | -2.1687669       | 0.00014629 | No      |
|      |       |        |             |          |         | ErbB2ip  | 68.0314   | 25.4323  | -1.41954         | 68.0324      | 25.4333       | -1.4195033       | 0.00014629 | No      |
|      |       |        |             |          |         | ErbB3    | 0.229542  | 4.39496  | 4.25902          | 0.230542     | 4.39596       | 4.25307675       | 0.00014629 | No      |
|      |       |        |             |          |         | ErbB4    | 0         | 1.7552   | inf              | 0.001        | 1.7562        | 10.7782414       | 0.00014629 | No      |
|      |       |        |             |          |         | Erc1     | 2.9438    | 1.89936  | -0.632168        | 2.9448       | 1.90036       | -0.6318969       | 0.0134314  | No      |
|      |       |        |             |          |         | Ercc1    | 6.945     | 25.5532  | 1.87946          | 6.946        | 25.5542       | 1.87930611       | 0.00041099 | No      |
|      |       |        |             |          |         | Ercc6    | 11.8905   | 4.60539  | -1.36841         | 11.8915      | 4.60639       | -1.3682222       | 0.00014629 | No      |
|      |       |        |             |          |         | Ercc6l   | 0.883447  | 0.131932 | -2.74335         | 0.884447     | 0.132932      | -2.7340873       | 0.0130449  | No      |
|      |       |        |             |          |         | Ercc6l2  | 10.9308   | 6.38958  | -0.77461         | 10.9318      | 6.39058       | -0.7745122       | 0.0134314  | No      |
|      |       |        |             |          |         | Erg      | 0         | 1.79036  | inf              | 0.001        | 1.79136       | 10.8068396       | 0.00014629 | No      |
|      |       |        |             |          |         | Ergic3   | 40.3089   | 69.0005  | 0.77551          | 40.3099      | 69.0015       | 0.77549352       | 0.00014629 | No      |
|      |       |        |             |          |         | Erh      | 195.966   | 117.795  | -0.734328        | 195.967      | 117.796       | -0.7343202       | 0.00028114 | No      |
|      |       |        |             |          |         | Eri1     | 17.7628   | 8.90523  | -0.996133        | 17.7638      | 8.90623       | -0.9960535       | 0.00014629 | No      |
|      |       |        |             |          |         | Eri2     | 2.50874   | 40.6578  | 4.0185           | 2.50974      | 40.6588       | 4.01795782       | 0.00014629 | No      |
|      |       |        |             |          |         | Eri3     | 19.3463   | 73.9841  | 1.93515          | 19.3473      | 73.9851       | 1.93510251       | 0.00014629 | No      |
|      |       |        |             |          |         | Erlec1   | 20.4627   | 30.1851  | 0.560838         | 20.4637      | 30.1861       | 0.56081736       | 0.0130449  | No      |
|      |       |        |             |          |         | Erlin1   | 5.5165    | 8.22952  | 0.577054         | 5.5175       | 8.23052       | 0.57696886       | 0.0265045  | No      |
|      |       |        |             |          |         | Erlin2   | 4.26073   | 9.4841   | 1.15441          | 4.26173      | 9.4851        | 1.15422379       | 0.00014629 | No      |
|      |       |        |             |          |         | Ero1l    | 11.5661   | 4.81286  | -1.26494         | 11.5671      | 4.81386       | -1.2647611       | 0.00014629 | No      |
|      |       |        |             |          |         | Erp29    | 23.6996   | 92.9169  | 1.97108          | 23.7006      | 92.9179       | 1.97103297       | 0.00014629 | No      |
|      |       |        |             |          |         | ERRFI1   | 1.93877   | 101.157  | 5.70531          | 1.93977      | 101.158       | 5.70458101       | 0.00014629 | No      |
|      |       |        |             |          |         | Esco1    | 25.1533   | 13.585   | -0.888736        | 25.1543      | 13.586        | -0.8886843       | 0.00608077 | No      |
|      |       |        |             |          |         | Esd      | 22.7805   | 222.859  | 3.29026          | 22.7815      | 222.86        | 3.29020305       | 0.00014629 | No      |
|      |       |        |             |          |         | Esf1     | 13.0205   | 6.62554  | -0.974679        | 13.0215      | 6.62654       | -0.974568        | 0.00014629 | No      |
|      |       |        |             |          |         | Esrp1    | 0         | 2.89465  | inf              | 0.001        | 2.89565       | 11.4996715       | 0.00014629 | No      |
|      |       |        |             |          |         | Esrra    | 6.02394   | 44.8979  | 2.89787          | 6.02494      | 44.8989       | 2.89766132       | 0.00041099 | No      |
|      |       |        |             |          |         | Esrrb    | 0         | 1.69632  | inf              | 0.001        | 1.69732       | 10.7290429       | 0.00149937 | No      |
|      |       |        |             |          |         | Esyt2    | 95.6665   | 10.8356  | -3.14224         | 95.6675      | 10.8366       | -3.1421167       | 0.00014629 | No      |
|      |       |        |             |          |         | Etf1     | 53.6614   | 34.1856  | -0.650493        | 53.6624      | 34.1866       | -0.6504806       | 0.00263402 | No      |

| RRBS |       |        |             |          |         | RNAseq  |           |          |                  |              |               |                  |            |         |
|------|-------|--------|-------------|----------|---------|---------|-----------|----------|------------------|--------------|---------------|------------------|------------|---------|
| gene | Blood | Kidney | methyl.diff | pMWU.fdr | Match ? | gene    | blood     | kidney   | log2(fold_ratio) | blood+ 0.001 | kidney+ 0.001 | log2(fold_ratio) | q_value    | Match ? |
|      |       |        |             |          |         | Etfa    | 35.2728   | 219.616  | 2.63835          | 35.2738      | 219.617       | 2.63832083       | 0.00014629 | No      |
|      |       |        |             |          |         | Etfb    | 25.448    | 402.767  | 3.98432          | 25.449       | 402.768       | 3.98426819       | 0.00014629 | No      |
|      |       |        |             |          |         | Etfdh   | 10.5359   | 41.4062  | 1.97453          | 10.5369      | 41.4072       | 1.97443117       | 0.00014629 | No      |
|      |       |        |             |          |         | Etnk1   | 75.1588   | 31.7618  | -1.24265         | 75.1598      | 31.7628       | -1.2426231       | 0.00014629 | No      |
|      |       |        |             |          |         | Etnk2   | 0         | 6.85886  | inf              | 0.001        | 6.85986       | 12.7439634       | 0.00014629 | No      |
|      |       |        |             |          |         | Etnppl  | 0         | 18.5816  | inf              | 0.001        | 18.5826       | 14.1816648       | 0.00014629 | No      |
|      |       |        |             |          |         | Ets1    | 639.329   | 15.6923  | -5.34843         | 639.33       | 15.6933       | -5.3483401       | 0.00014629 | No      |
|      |       |        |             |          |         | Ets2    | 4.32796   | 20.5534  | 2.24762          | 4.32896      | 20.5544       | 2.24735488       | 0.00014629 | No      |
|      |       |        |             |          |         | Etv6    | 19.6678   | 10.5011  | -0.905296        | 19.6688      | 10.5021       | -0.9052311       | 0.0267812  | No      |
|      |       |        |             |          |         | Evc     | 0         | 40.3177  | inf              | 0.001        | 40.3187       | 15.2991615       | 0.00014629 | No      |
|      |       |        |             |          |         | Evc2    | 0         | 3.87655  | inf              | 0.001        | 3.87755       | 11.9209297       | 0.00014629 | No      |
|      |       |        |             |          |         | Evi2a   | 48.6173   | 2.02096  | -4.58836         | 48.6183      | 2.02196       | -4.5876731       | 0.0166081  | No      |
|      |       |        |             |          |         | Evi2b   | 40.9504   | 2.02243  | -4.33971         | 40.9514      | 2.02343       | -4.3390379       | 0.00384649 | No      |
|      |       |        |             |          |         | Evi5    | 4.71822   | 45.2845  | 3.2627           | 4.71922      | 45.2855       | 3.26242885       | 0.00014629 | No      |
|      |       |        |             |          |         | Evl     | 620.647   | 84.3593  | -2.87915         | 620.648      | 84.3603       | -2.8791391       | 0.00014629 | No      |
|      |       |        |             |          |         | Ewsr1   | 7.36255   | 2.18632  | -1.7517          | 7.36355      | 2.18732       | -1.7512372       | 0.00014629 | No      |
|      |       |        |             |          |         | Exd2    | 7.94339   | 4.07586  | -0.962651        | 7.94439      | 4.07686       | -0.962478        | 0.00207488 | No      |
|      |       |        |             |          |         | Exoc1   | 23.0212   | 50.7981  | 1.14181          | 23.0222      | 50.7991       | 1.14177723       | 0.00014629 | No      |
|      |       |        |             |          |         | Exoc2   | 15.3002   | 10.7464  | -0.509705        | 15.3012      | 10.7474       | -0.5096571       | 0.046797   | No      |
|      |       |        |             |          |         | Exoc3   | 19.9624   | 39.6735  | 0.990889         | 19.9634      | 39.6745       | 0.99085459       | 0.00014629 | No      |
|      |       |        |             |          |         | Exoc3l1 | 1.57249   | 8.049    | 2.35576          | 1.57349      | 8.05          | 2.35502077       | 0.00014629 | No      |
|      |       |        |             |          |         | Exoc3l2 | 0.155017  | 3.78819  | 4.61101          | 0.156017     | 3.78919       | 4.60211434       | 0.015456   | No      |
|      |       |        |             |          |         | Exoc4   | 11.0283   | 6.16472  | -0.839109        | 11.0293      | 6.16572       | -0.839           | 0.00078603 | No      |
|      |       |        |             |          |         | Exoc5   | 18.2779   | 11.9861  | -0.608737        | 18.2789      | 11.9871       | -0.6086966       | 0.00802631 | No      |
|      |       |        |             |          |         | Exoc6   | 7.00484   | 32.6389  | 2.22017          | 7.00584      | 32.6399       | 2.22000669       | 0.00014629 | No      |
|      |       |        |             |          |         | EXOC7   | 3.03082   | 8.87231  | 1.5496           | 3.03182      | 8.87331       | 1.54928827       | 0.0194106  | No      |
|      |       |        |             |          |         | Exog    | 3.38934   | 1.30549  | -1.37641         | 3.39034      | 1.30649       | -1.3757339       | 0.00014629 | No      |
|      |       |        |             |          |         | Exosc1  | 39.6513   | 21.3886  | -0.890528        | 39.6523      | 21.3896       | -0.890495        | 0.00066215 | No      |
|      |       |        |             |          |         | Exosc5  | 35.2418   | 65.0118  | 0.883413         | 35.2428      | 65.0128       | 0.88339524       | 0.0390364  | No      |
|      |       |        |             |          |         | Exosc9  | 30.0198   | 11.2981  | -1.40983         | 30.0208      | 11.2991       | -1.4097546       | 0.00014629 | No      |
|      |       |        |             |          |         | Exph5   | 0.0643508 | 1.56831  | 4.60711          | 0.0653508    | 1.56931       | 4.58578166       | 0.00014629 | No      |
|      |       |        |             |          |         | Extl3   | 9.87842   | 3.49029  | -1.50093         | 9.87942      | 3.49129       | -1.5006661       | 0.0151721  | No      |
|      |       |        |             |          |         | Eya3    | 14.0035   | 5.83627  | -1.26267         | 14.0045      | 5.83727       | -1.2625248       | 0.00014629 | No      |
|      |       |        |             |          |         | Ezr     | 306.849   | 484.784  | 0.659812         | 306.85       | 484.785       | 0.65981148       | 0.00710369 | No      |
|      |       |        |             |          |         | F11r    | 0.7447    | 56.485   | 6.24506          | 0.7457       | 56.486        | 6.24315419       | 0.00184429 | No      |
|      |       |        |             |          |         | F13b    | 0         | 4.12147  | inf              | 0.001        | 4.12247       | 12.0092933       | 0.00014629 | No      |
|      |       |        |             |          |         | F2      | 0.119789  | 3.31197  | 4.78913          | 0.120789     | 3.31297       | 4.77756416       | 0.00395247 | No      |
|      |       |        |             |          |         | F3      | 0         | 23.2646  | inf              | 0.001        | 23.2656       | 14.5059108       | 0.00014629 | No      |
|      |       |        |             |          |         | F5      | 2.52894   | 0.864465 | -1.54865         | 2.52994      | 0.865465      | -1.5475558       | 0.00533979 | No      |
|      |       |        |             |          |         | F8      | 9.06985   | 2.45396  | -1.88597         | 9.07085      | 2.45496       | -1.8855382       | 0.00014629 | No      |
|      |       |        |             |          |         | Fa2h    | 0         | 4.50374  | inf              | 0.001        | 4.50474       | 12.1372281       | 0.00014629 | No      |
|      |       |        |             |          |         | Fabp4   | 0         | 3.26914  | inf              | 0.001        | 3.27014       | 11.6751367       | 0.00014629 | No      |

| RRBS |       |        |             |          |         | RNAseq   |           |          |                  |              |               |                  |            |         |
|------|-------|--------|-------------|----------|---------|----------|-----------|----------|------------------|--------------|---------------|------------------|------------|---------|
| gene | Blood | Kidney | methyl.diff | pMWU.fdr | Match ? | gene     | blood     | kidney   | log2(fold_ratio) | blood+ 0.001 | kidney+ 0.001 | log2(fold_ratio) | q_value    | Match ? |
|      |       |        |             |          |         | Fabp5    | 2.76615   | 29.4984  | 3.41468          | 2.76715      | 29.4994       | 3.41421286       | 0.00053701 | No      |
|      |       |        |             |          |         | Fadd     | 4.39729   | 2.40488  | -0.870649        | 4.39829      | 2.40588       | -0.870378        | 0.00586782 | No      |
|      |       |        |             |          |         | Fads3    | 0.24755   | 30.1616  | 6.92885          | 0.24855      | 30.1626       | 6.92308088       | 0.00374149 | No      |
|      |       |        |             |          |         | Fads6    | 0.150189  | 1.50403  | 3.32398          | 0.151189     | 1.50503       | 3.31536716       | 0.0124494  | No      |
|      |       |        |             |          |         | Faf2     | 17.8223   | 9.11001  | -0.968158        | 17.8233      | 9.11101       | -0.9680816       | 0.00285806 | No      |
|      |       |        |             |          |         | Fah      | 11.4977   | 346.455  | 4.91325          | 11.4987      | 346.456       | 4.91312947       | 0.00014629 | No      |
|      |       |        |             |          |         | Fahd1    | 8.61196   | 120.741  | 3.80943          | 8.61296      | 120.742       | 3.80927466       | 0.00014629 | No      |
|      |       |        |             |          |         | Fahd2a   | 16.5422   | 119.97   | 2.85845          | 16.5432      | 119.971       | 2.85837548       | 0.00014629 | No      |
|      |       |        |             |          |         | Faim3    | 16.9535   | 2.106    | -3.00901         | 16.9545      | 2.107         | -3.008406        | 0.00014629 | No      |
|      |       |        |             |          |         | FALZ     | 38.7412   | 5.82897  | -2.73256         | 38.7422      | 5.82997       | -2.7323455       | 0.00014629 | No      |
|      |       |        |             |          |         | Fam102a  | 62.8541   | 8.62826  | -2.86487         | 62.8551      | 8.62926       | -2.8647211       | 0.00014629 | No      |
|      |       |        |             |          |         | Fam105a  | 130.598   | 4.33676  | -4.91237         | 130.599      | 4.33776       | -4.9120498       | 0.00014629 | No      |
|      |       |        |             |          |         | Fam105b  | 84.9414   | 14.5962  | -2.54088         | 84.9424      | 14.5972       | -2.5407932       | 0.00014629 | No      |
|      |       |        |             |          |         | Fam109a  | 0.635414  | 4.99888  | 2.97583          | 0.636414     | 4.99988       | 2.97385599       | 0.012747   | No      |
|      |       |        |             |          |         | Fam110b  | 0.383395  | 5.89773  | 3.94325          | 0.384395     | 5.89873       | 3.9397429        | 0.00285806 | No      |
|      |       |        |             |          |         | Fam115c  | 12.1524   | 2.35489  | -2.36751         | 12.1534      | 2.35589       | -2.3670159       | 0.00014629 | No      |
|      |       |        |             |          |         | Fam117a  | 130.594   | 12.6766  | -3.36485         | 130.595      | 12.6776       | -3.3647461       | 0.00014629 | No      |
|      |       |        |             |          |         | Fam117b  | 27.8585   | 4.51877  | -2.62412         | 27.8595      | 4.51977       | -2.6238481       | 0.00014629 | No      |
|      |       |        |             |          |         | Fam118a  | 9.45464   | 1.42002  | -2.73511         | 9.45564      | 1.42102       | -2.7342482       | 0.00014629 | No      |
|      |       |        |             |          |         | Fam118b  | 17.0218   | 7.33916  | -1.2137          | 17.0228      | 7.34016       | -1.2135849       | 0.0356993  | No      |
|      |       |        |             |          |         | Fam120a  | 76.4217   | 47.6164  | -0.682522        | 76.4227      | 47.6174       | -0.6825124       | 0.00263402 | No      |
|      |       |        |             |          |         | FAM120C  | 0.706951  | 2.52143  | 1.83456          | 0.707951     | 2.52243       | 1.83309282       | 0.00014629 | No      |
|      |       |        |             |          |         | Fam126a  | 5.15964   | 0.970933 | -2.40983         | 5.16064      | 0.971933      | -2.4086212       | 0.00014629 | No      |
|      |       |        |             |          |         | Fam127b  | 41.9806   | 96.2247  | 1.19669          | 41.9816      | 96.2257       | 1.19666511       | 0.00014629 | No      |
|      |       |        |             |          |         | Fam129a  | 21.5414   | 15.6161  | -0.464076        | 21.5424      | 15.6171       | -0.4640524       | 0.0372317  | No      |
|      |       |        |             |          |         | Fam131c  | 0         | 1.20939  | inf              | 0.001        | 1.21039       | 10.2412563       | 0.00014629 | No      |
|      |       |        |             |          |         | Fam133b  | 29.0731   | 20.0375  | -0.536985        | 29.0741      | 20.0385       | -0.53696         | 0.0181078  | No      |
|      |       |        |             |          |         | Fam134b  | 11.5659   | 25.6722  | 1.15033          | 11.5669      | 25.6732       | 1.15026086       | 0.00014629 | No      |
|      |       |        |             |          |         | Fam134c  | 58.5522   | 11.0609  | -2.40426         | 58.5532      | 11.0619       | -2.4041488       | 0.00014629 | No      |
|      |       |        |             |          |         | Fam135a  | 0.0574483 | 8.01869  | 7.12496          | 0.0584483    | 8.01969       | 7.1002416        | 0.00964777 | No      |
|      |       |        |             |          |         | Fam136a  | 5.29457   | 12.1302  | 1.19602          | 5.29557      | 12.1312       | 1.19586438       | 0.00028114 | No      |
|      |       |        |             |          |         | Fam13a   | 0.0106523 | 7.25453  | 9.41157          | 0.0116523    | 7.25553       | 9.28232244       | 0.0134314  | No      |
|      |       |        |             |          |         | Fam13b   | 42.3367   | 16.1078  | -1.39415         | 42.3377      | 16.1088       | -1.3940939       | 0.00014629 | No      |
|      |       |        |             |          |         | Fam149a  | 0.0538625 | 20.3983  | 8.56495          | 0.0548625    | 20.3993       | 8.53848357       | 0.00028114 | No      |
|      |       |        |             |          |         | Fam151a  | 0.664235  | 75.1242  | 6.82144          | 0.665235     | 75.1252       | 6.81928904       | 0.00014629 | No      |
|      |       |        |             |          |         | Fam160a1 | 0         | 2.35443  | inf              | 0.001        | 2.35543       | 11.2017747       | 0.00014629 | No      |
|      |       |        |             |          |         | Fam162a  | 76.1019   | 139.467  | 0.873923         | 76.1029      | 139.468       | 0.87391081       | 0.00041099 | No      |
|      |       |        |             |          |         | Fam168a  | 8.63971   | 5.36939  | -0.686225        | 8.64071      | 5.37039       | -0.686123        | 0.00274649 | No      |
|      |       |        |             |          |         | Fam168b  | 68.6369   | 18.8235  | -1.86645         | 68.6379      | 18.8245       | -1.8663939       | 0.00014629 | No      |
|      |       |        |             |          |         | Fam169b  | 81.2353   | 3.51497  | -4.53052         | 81.2363      | 3.51597       | -4.5301299       | 0.00014629 | No      |
|      |       |        |             |          |         | Fam171a2 | 1.59093   | 10.6715  | 2.74583          | 1.59193      | 10.6725       | 2.74504936       | 0.00014629 | No      |
|      |       |        |             |          |         | Fam172a  | 19.6169   | 6.32775  | -1.63233         | 19.6179      | 6.32875       | -1.6321781       | 0.00014629 | No      |

| RRBS |       |        |             |          |         | RNAseq  |           |         |                  |              |               |                  |            |         |
|------|-------|--------|-------------|----------|---------|---------|-----------|---------|------------------|--------------|---------------|------------------|------------|---------|
| gene | Blood | Kidney | methyl.diff | pMWU.fdr | Match ? | gene    | blood     | kidney  | log2(fold_ratio) | blood+ 0.001 | kidney+ 0.001 | log2(fold_ratio) | q_value    | Match ? |
|      |       |        |             |          |         | Fam173a | 30.9734   | 44.8929 | 0.535457         | 30.9744      | 44.8939       | 0.53544309       | 0.0401648  | No      |
|      |       |        |             |          |         | Fam173b | 8.99196   | 20.1633 | 1.16502          | 8.99296      | 20.1643       | 1.16493537       | 0.00014629 | No      |
|      |       |        |             |          |         | Fam178a | 12.5108   | 3.73723 | -1.74313         | 12.5118      | 3.73823       | -1.7428621       | 0.00014629 | No      |
|      |       |        |             |          |         | Fam179b | 13.8401   | 6.26677 | -1.14306         | 13.8411      | 6.26777       | -1.1429345       | 0.00014629 | No      |
|      |       |        |             |          |         | Fam184a | 0.141652  | 12.8505 | 6.50334          | 0.142652     | 12.8515       | 6.49329297       | 0.00296747 | No      |
|      |       |        |             |          |         | Fam185a | 34.4987   | 7.91776 | -2.12338         | 34.4997      | 7.91876       | -2.1232374       | 0.00014629 | No      |
|      |       |        |             |          |         | Fam188a | 12.1502   | 23.5669 | 0.955779         | 12.1512      | 23.5679       | 0.95572442       | 0.00014629 | No      |
|      |       |        |             |          |         | Fam188b | 0.400654  | 1.97815 | 2.30373          | 0.401654     | 1.97915       | 2.30085581       | 0.00195831 | No      |
|      |       |        |             |          |         | Fam195a | 0.966804  | 74.3757 | 6.26546          | 0.967804     | 74.3767       | 6.26399203       | 0.00014629 | No      |
|      |       |        |             |          |         | Fam195b | 33.8532   | 92.5334 | 1.45068          | 33.8542      | 92.5344       | 1.45065496       | 0.00014629 | No      |
|      |       |        |             |          |         | Fam198b | 0.0649737 | 1.08152 | 4.05706          | 0.0659737    | 1.08252       | 4.03635885       | 0.00502315 | No      |
|      |       |        |             |          |         | Fam204a | 6.03248   | 2.14337 | -1.49287         | 6.03348      | 2.14437       | -1.4924365       | 0.00014629 | No      |
|      |       |        |             |          |         | Fam208a | 38.8824   | 8.71092 | -2.15822         | 38.8834      | 8.71192       | -2.1580918       | 0.00014629 | No      |
|      |       |        |             |          |         | Fam20c  | 0.138522  | 106.063 | 9.58058          | 0.139522     | 106.064       | 9.57022672       | 0.00014629 | No      |
|      |       |        |             |          |         | Fam211b | 41.3353   | 70.3288 | 0.76674          | 41.3363      | 70.3298       | 0.76672686       | 0.00014629 | No      |
|      |       |        |             |          |         | Fam213a | 1.66349   | 8.6678  | 2.38145          | 1.66449      | 8.6688        | 2.3807521        | 0.00014629 | No      |
|      |       |        |             |          |         | Fam214b | 1.22872   | 16.784  | 3.77187          | 1.22972      | 16.785        | 3.77077077       | 0.00014629 | No      |
|      |       |        |             |          |         | Fam216a | 4.14147   | 18.8229 | 2.18428          | 4.14247      | 18.8239       | 2.18400241       | 0.00014629 | No      |
|      |       |        |             |          |         | Fam217b | 0.961395  | 0       | -inf             | 0.962395     | 0.001         | -9.9104853       | 0.00014629 | No      |
|      |       |        |             |          |         | Fam21c  | 46.3583   | 69.9132 | 0.592738         | 46.3593      | 69.9142       | 0.59272672       | 0.0207324  | No      |
|      |       |        |             |          |         | Fam221a | 0.186858  | 5.71404 | 4.9345           | 0.187858     | 5.71504       | 4.92704914       | 0.00078603 | No      |
|      |       |        |             |          |         | Fam229a | 1.62409   | 5.76499 | 1.82769          | 1.62509      | 5.76599       | 1.82704872       | 0.0244119  | No      |
|      |       |        |             |          |         | Fam26f  | 96.7983   | 5.54708 | -4.12518         | 96.7993      | 5.54808       | -4.1249361       | 0.00014629 | No      |
|      |       |        |             |          |         | Fam46a  | 2.05891   | 1.23164 | -0.741306        | 2.05991      | 1.23264       | -0.7408298       | 0.0261464  | No      |
|      |       |        |             |          |         | Fam46c  | 21.1562   | 4.32198 | -2.29132         | 21.1572      | 4.32298       | -2.2910506       | 0.00014629 | No      |
|      |       |        |             |          |         | FAM49B  | 132.37    | 14.2203 | -3.21855         | 132.371      | 14.2213       | -3.2184618       | 0.00014629 | No      |
|      |       |        |             |          |         | Fam53a  | 38.8177   | 16.4759 | -1.23636         | 38.8187      | 16.4769       | -1.236307        | 0.019873   | No      |
|      |       |        |             |          |         | Fam53b  | 11.6402   | 3.71538 | -1.64754         | 11.6412      | 3.71638       | -1.6472699       | 0.00014629 | No      |
|      |       |        |             |          |         | Fam53c  | 14.3191   | 8.14782 | -0.813452        | 14.3201      | 8.14882       | -0.8133785       | 0.00014629 | No      |
|      |       |        |             |          |         | Fam60a  | 19.9178   | 9.66652 | -1.04299         | 19.9188      | 9.66752       | -1.042913        | 0.00014629 | No      |
|      |       |        |             |          |         | Fam63a  | 9.84043   | 29.4913 | 1.5835           | 9.84143      | 29.4923       | 1.58339847       | 0.00014629 | No      |
|      |       |        |             |          |         | Fam65b  | 140.704   | 2.14875 | -6.03302         | 140.705      | 2.14975       | -6.0323609       | 0.00014629 | No      |
|      |       |        |             |          |         | Fam71a  | 0         | 2.24656 | inf              | 0.001        | 2.24756       | 11.1341439       | 0.00014629 | No      |
|      |       |        |             |          |         | Fam71b  | 2.0547    | 0       | -inf             | 2.0557       | 0.001         | -11.005414       | 0.00014629 | No      |
|      |       |        |             |          |         | Fam73b  | 9.30347   | 29.4099 | 1.66046          | 9.30447      | 29.4109       | 1.66035505       | 0.00014629 | No      |
|      |       |        |             |          |         | Fam76b  | 19.6756   | 5.48861 | -1.84189         | 19.6766      | 5.48961       | -1.8417054       | 0.00014629 | No      |
|      |       |        |             |          |         | Fam78a  | 30.1928   | 0.71884 | -5.39239         | 30.1938      | 0.71984       | -5.3904323       | 0.00014629 | No      |
|      |       |        |             |          |         | Fam81a  | 0.0660792 | 28.3298 | 8.74391          | 0.0670792    | 28.3308       | 8.72229014       | 0.0418048  | No      |
|      |       |        |             |          |         | Fam84b  | 30.4755   | 15.4466 | -0.98036         | 30.4765      | 15.4476       | -0.9803145       | 0.00014629 | No      |
|      |       |        |             |          |         | Fam89b  | 54.158    | 29.1175 | -0.895289        | 54.159       | 29.1185       | -0.8952651       | 0.00014629 | No      |
|      |       |        |             |          |         | Fam8a1  | 21.1398   | 5.71728 | -1.88656         | 21.1408      | 5.71828       | -1.8863768       | 0.00014629 | No      |
|      |       |        |             |          |         | Fam92a1 | 11.2211   | 46.5144 | 2.05147          | 11.2221      | 46.5154       | 2.05136576       | 0.00014629 | No      |



| RRBS |       |        |             |          |         | RNAseq  |          |          |                  |              |               |                  |            |         |
|------|-------|--------|-------------|----------|---------|---------|----------|----------|------------------|--------------|---------------|------------------|------------|---------|
| gene | Blood | Kidney | methyl.diff | pMWU.fdr | Match ? | gene    | blood    | kidney   | log2(fold_ratio) | blood+ 0.001 | kidney+ 0.001 | log2(fold_ratio) | q_value    | Match ? |
|      |       |        |             |          |         | Fam96b  | 25.7814  | 85.5375  | 1.73023          | 25.7824      | 85.5385       | 1.73018734       | 0.00014629 | No      |
|      |       |        |             |          |         | Fanca   | 3.85911  | 15.3107  | 1.9882           | 3.86011      | 15.3117       | 1.9879206        | 0.0157431  | No      |
|      |       |        |             |          |         | Fancb   | 5.09343  | 1.11971  | -2.18551         | 5.09443      | 1.12071       | -2.1845077       | 0.00102864 | No      |
|      |       |        |             |          |         | Fancc   | 1.7259   | 4.31262  | 1.32121          | 1.7269       | 4.31362       | 1.32071455       | 0.00195831 | No      |
|      |       |        |             |          |         | Fancg   | 3.36751  | 0.259355 | -3.69868         | 3.36851      | 0.260355      | -3.6935586       | 0.00138312 | No      |
|      |       |        |             |          |         | Far1    | 15.7118  | 6.39386  | -1.29709         | 15.7128      | 6.39486       | -1.2969556       | 0.00014629 | No      |
|      |       |        |             |          |         | Farp1   | 0.630165 | 26.2286  | 5.37927          | 0.631165     | 26.2296       | 5.37703479       | 0.00102864 | No      |
|      |       |        |             |          |         | Fars2   | 8.47296  | 33.1168  | 1.96662          | 8.47396      | 33.1178       | 1.96649861       | 0.00014629 | No      |
|      |       |        |             |          |         | Fas     | 1.92311  | 0.612685 | -1.65023         | 1.92411      | 0.613685      | -1.6486211       | 0.0211873  | No      |
|      |       |        |             |          |         | Faslg   | 2.59188  | 1.01204  | -1.35673         | 2.59288      | 1.01304       | -1.3558643       | 0.0176431  | No      |
|      |       |        |             |          |         | Fasn    | 8.64977  | 5.59336  | -0.628946        | 8.65077      | 5.59436       | -0.6288555       | 0.00296747 | No      |
|      |       |        |             |          |         | Fastkd1 | 27.967   | 16.1713  | -0.790286        | 27.968       | 16.1723       | -0.7902522       | 0.0155518  | No      |
|      |       |        |             |          |         | Fau     | 3760.69  | 1907.32  | -0.979454        | 3760.691     | 1907.321      | -0.9794501       | 0.00014629 | No      |
|      |       |        |             |          |         | Fbf1    | 11.1217  | 46.7495  | 2.07157          | 11.1227      | 46.7505       | 2.07147475       | 0.00014629 | No      |
|      |       |        |             |          |         | Fbl     | 117.082  | 51.8807  | -1.17425         | 117.083      | 51.8817       | -1.174234        | 0.00014629 | No      |
|      |       |        |             |          |         | Fbp2    | 0.773832 | 4.26437  | 2.46224          | 0.774832     | 4.26537       | 2.46071545       | 0.00230432 | No      |
|      |       |        |             |          |         | Fbrs    | 49.1641  | 8.0566   | -2.60936         | 49.1651      | 8.0576        | -2.6092125       | 0.00014629 | No      |
|      |       |        |             |          |         | Fbxl12  | 59.001   | 11.4818  | -2.36139         | 59.002       | 11.4828       | -2.3612894       | 0.00014629 | No      |
|      |       |        |             |          |         | Fbxl20  | 21.2254  | 3.59196  | -2.56295         | 21.2264      | 3.59296       | -2.5626149       | 0.00014629 | No      |
|      |       |        |             |          |         | Fbxl22  | 77.4574  | 30.7725  | -1.33176         | 77.4584      | 30.7735       | -1.3317332       | 0.00363169 | No      |
|      |       |        |             |          |         | Fbxl3   | 50.335   | 23.5184  | -1.09777         | 50.336       | 23.5194       | -1.0977393       | 0.00659461 | No      |
|      |       |        |             |          |         | Fbxl5   | 25.9421  | 37.0898  | 0.515729         | 25.9431      | 37.0908       | 0.5157105        | 0.0118533  | No      |
|      |       |        |             |          |         | Fbxo11  | 27.4647  | 9.05389  | -1.60097         | 27.4657      | 9.05489       | -1.600862        | 0.00014629 | No      |
|      |       |        |             |          |         | Fbxo16  | 0        | 3.41077  | inf              | 0.001        | 3.41177       | 11.7363047       | 0.00014629 | No      |
|      |       |        |             |          |         | Fbxo21  | 5.73692  | 15.9071  | 1.47132          | 5.73792      | 15.9081       | 1.47116178       | 0.00014629 | No      |
|      |       |        |             |          |         | Fbxo3   | 73.636   | 32.6075  | -1.17521         | 73.637       | 32.6085       | -1.1751828       | 0.00014629 | No      |
|      |       |        |             |          |         | Fbxo33  | 22.8386  | 5.99063  | -1.93069         | 22.8396      | 5.99163       | -1.9305169       | 0.00014629 | No      |
|      |       |        |             |          |         | Fbxo34  | 10.6995  | 4.95179  | -1.11152         | 10.7005      | 4.95279       | -1.1113649       | 0.00014629 | No      |
|      |       |        |             |          |         | Fbxo38  | 20.1121  | 13.2981  | -0.596839        | 20.1131      | 13.2991       | -0.5968068       | 0.0191214  | No      |
|      |       |        |             |          |         | Fbxo39  | 7.31761  | 2.54895  | -1.52147         | 7.31861      | 2.54995       | -1.5211007       | 0.00263402 | No      |
|      |       |        |             |          |         | Fbxo4   | 0.788521 | 11.433   | 3.85792          | 0.789521     | 11.434        | 3.85620875       | 0.00014629 | No      |
|      |       |        |             |          |         | Fbxo44  | 20.348   | 70.5304  | 1.79336          | 20.349       | 70.5314       | 1.79330778       | 0.00014629 | No      |
|      |       |        |             |          |         | Fbxo5   | 3.66091  | 1.11711  | -1.71244         | 3.66191      | 1.11811       | -1.7115342       | 0.00126596 | No      |
|      |       |        |             |          |         | Fbxo9   | 30.699   | 58.1567  | 0.921753         | 30.7         | 58.1577       | 0.92173156       | 0.00014629 | No      |
|      |       |        |             |          |         | Fbxw2   | 40.4406  | 29.3378  | -0.463043        | 40.4416      | 29.3388       | -0.4630302       | 0.0297106  | No      |
|      |       |        |             |          |         | Fbxw4   | 47.3747  | 84.0466  | 0.827072         | 47.3757      | 84.0476       | 0.82705936       | 0.00184429 | No      |
|      |       |        |             |          |         | Fbxw5   | 32.6961  | 83.0947  | 1.34564          | 32.6971      | 83.0957       | 1.34561114       | 0.00014629 | No      |
|      |       |        |             |          |         | Fbxw7   | 12.9157  | 21.3856  | 0.727508         | 12.9167      | 21.3866       | 0.72746961       | 0.00576532 | No      |
|      |       |        |             |          |         | Fbxw8   | 0.43679  | 13.7102  | 4.97217          | 0.43779      | 13.7112       | 4.96897203       | 0.00173187 | No      |
|      |       |        |             |          |         | Fcgr1a  | 0.527788 | 3.82914  | 2.85899          | 0.528788     | 3.83014       | 2.85663578       | 0.0139199  | No      |
|      |       |        |             |          |         | Fcgrt   | 6.61112  | 61.6564  | 3.22128          | 6.61212      | 61.6574       | 3.22108924       | 0.00014629 | No      |
|      |       |        |             |          |         | Fcho1   | 70.5175  | 11.6708  | -2.59508         | 70.5185      | 11.6718       | -2.5949747       | 0.00014629 | No      |

| RRBS |       |        |             |          |         | RNAseq   |           |          |                  |              |               |                  |            |         |
|------|-------|--------|-------------|----------|---------|----------|-----------|----------|------------------|--------------|---------------|------------------|------------|---------|
| gene | Blood | Kidney | methyl.diff | pMWU.fdr | Match ? | gene     | blood     | kidney   | log2(fold_ratio) | blood+ 0.001 | kidney+ 0.001 | log2(fold_ratio) | q_value    | Match ? |
|      |       |        |             |          |         | Fcho2    | 12.4218   | 20.6428  | 0.732758         | 12.4228      | 20.6438       | 0.73271818       | 0.00318982 | No      |
|      |       |        |             |          |         | Fchsd1   | 8.41754   | 12.6306  | 0.585458         | 8.41854      | 12.6316       | 0.58539543       | 0.0159399  | No      |
|      |       |        |             |          |         | Fchsd2   | 25.7093   | 7.19817  | -1.83659         | 25.7103      | 7.19917       | -1.836444        | 0.00014629 | No      |
|      |       |        |             |          |         | Fcrl5    | 3.16564   | 0.339995 | -3.21891         | 3.16664      | 0.340995      | -3.2151304       | 0.0314513  | No      |
|      |       |        |             |          |         | Fcrla    | 8.78891   | 1.09275  | -3.00772         | 8.78991      | 1.09375       | -3.0065654       | 0.0435806  | No      |
|      |       |        |             |          |         | Fdft1    | 7.8229    | 32.5785  | 2.05815          | 7.8239       | 32.5795       | 2.05800463       | 0.00014629 | No      |
|      |       |        |             |          |         | Fdps     | 53.1431   | 77.6704  | 0.547482         | 53.1441      | 77.6714       | 0.54747394       | 0.00864487 | No      |
|      |       |        |             |          |         | Fdx1     | 10.6837   | 75.4724  | 2.82054          | 10.6847      | 75.4734       | 2.82042187       | 0.00014629 | No      |
|      |       |        |             |          |         | Fdx1l    | 30.4842   | 71.3805  | 1.22747          | 30.4852      | 71.3815       | 1.22744121       | 0.00014629 | No      |
|      |       |        |             |          |         | Fdxr     | 9.26563   | 20.9127  | 1.17442          | 9.26663      | 20.9137       | 1.17433165       | 0.031283   | No      |
|      |       |        |             |          |         | Fech     | 4.21932   | 16.8244  | 1.99548          | 4.22032      | 16.8254       | 1.9952165        | 0.00014629 | No      |
|      |       |        |             |          |         | Fem1a    | 11.7339   | 19.5628  | 0.737431         | 11.7349      | 19.5638       | 0.73738107       | 0.00274649 | No      |
|      |       |        |             |          |         | Fem1b    | 20.2318   | 7.0816   | -1.51448         | 20.2328      | 7.0826        | -1.514345        | 0.00014629 | No      |
|      |       |        |             |          |         | Fem1c    | 5.63199   | 3.1304   | -0.847297        | 5.63299      | 3.1314        | -0.8470931       | 0.00014629 | No      |
|      |       |        |             |          |         | Fermt2   | 1.0547    | 34.9204  | 5.04916          | 1.0557       | 34.9214       | 5.04783957       | 0.00014629 | No      |
|      |       |        |             |          |         | Fermt3   | 101.597   | 19.8709  | -2.35413         | 101.598      | 19.8719       | -2.3540703       | 0.00014629 | No      |
|      |       |        |             |          |         | Fert2    | 0.0485319 | 1.12401  | 4.53357          | 0.0495319    | 1.12501       | 4.50543605       | 0.00438237 | No      |
|      |       |        |             |          |         | Fes      | 0.482741  | 10.5616  | 4.45144          | 0.483741     | 10.5626       | 4.44858637       | 0.00014629 | No      |
|      |       |        |             |          |         | Fetub    | 0         | 8.34553  | inf              | 0.001        | 8.34653       | 13.0269608       | 0.00014629 | No      |
|      |       |        |             |          |         | FEZ2     | 5.11871   | 30.8672  | 2.59222          | 5.11971      | 30.8682       | 2.59198736       | 0.00014629 | No      |
|      |       |        |             |          |         | Fgd1     | 0.017544  | 1.16153  | 6.0489           | 0.018544     | 1.16253       | 5.97017166       | 0.0256152  | No      |
|      |       |        |             |          |         | Fgf1     | 0         | 27.5946  | inf              | 0.001        | 27.5956       | 14.7521506       | 0.00014629 | No      |
|      |       |        |             |          |         | Fgf12    | 0         | 5.0275   | inf              | 0.001        | 5.0285        | 12.2959124       | 0.00014629 | No      |
|      |       |        |             |          |         | Fgf13    | 0.403027  | 9.26178  | 4.52234          | 0.404027     | 9.26278       | 4.51892164       | 0.00014629 | No      |
|      |       |        |             |          |         | Fgf9     | 0         | 41.1006  | inf              | 0.001        | 41.1016       | 15.3269069       | 0.00014629 | No      |
|      |       |        |             |          |         | Fgfbp3   | 0.645025  | 2.08787  | 1.6946           | 0.646025     | 2.08887       | 1.69306081       | 0.0244119  | No      |
|      |       |        |             |          |         | Fgfr1    | 0.577132  | 22.1282  | 5.26084          | 0.578132     | 22.1292       | 5.25840856       | 0.00014629 | No      |
|      |       |        |             |          |         | Fgfr1op  | 13.2597   | 5.16975  | -1.35888         | 13.2607      | 5.17075       | -1.3587115       | 0.00053701 | No      |
|      |       |        |             |          |         | Fgfr1op2 | 39.4134   | 15.91    | -1.30875         | 39.4144      | 15.911        | -1.3086983       | 0.00014629 | No      |
|      |       |        |             |          |         | Fgfrl1   | 0.259515  | 10.2866  | 5.30881          | 0.260515     | 10.2876       | 5.3033962        | 0.0089386  | No      |
|      |       |        |             |          |         | Fggy     | 3.89414   | 81.4252  | 4.3861           | 3.89514      | 81.4262       | 4.38574599       | 0.00014629 | No      |
|      |       |        |             |          |         | Fgl2     | 65.7975   | 3.3992   | -4.27477         | 65.7985      | 3.4002        | -4.2743632       | 0.00014629 | No      |
|      |       |        |             |          |         | Fh       | 12.3715   | 128.262  | 3.374            | 12.3725      | 128.263       | 3.37389611       | 0.00014629 | No      |
|      |       |        |             |          |         | Fhit     | 5.68189   | 65.7815  | 3.53324          | 5.68289      | 65.7825       | 3.53300714       | 0.00014629 | No      |
|      |       |        |             |          |         | Fhl1     | 0.200839  | 4.78844  | 4.57545          | 0.201839     | 4.78944       | 4.56858011       | 0.00066215 | No      |
|      |       |        |             |          |         | Fhod3    | 0         | 18.5602  | inf              | 0.001        | 18.5612       | 14.1800024       | 0.00126596 | No      |
|      |       |        |             |          |         | Fip1l1   | 33.6998   | 20.9424  | -0.686314        | 33.7008      | 20.9434       | -0.6862872       | 0.0417203  | No      |
|      |       |        |             |          |         | Fitm2    | 1.00257   | 3.75758  | 1.9061           | 1.00357      | 3.75858       | 1.90504646       | 0.00014629 | No      |
|      |       |        |             |          |         | Fjx1     | 0         | 3.96313  | inf              | 0.001        | 3.96413       | 11.9527886       | 0.00014629 | No      |
|      |       |        |             |          |         | Fkbp10   | 0.459365  | 1.97346  | 2.10301          | 0.460365     | 1.97446       | 2.10060808       | 0.0085437  | No      |
|      |       |        |             |          |         | Fkbp14   | 21.137    | 3.84887  | -2.45726         | 21.138       | 3.84987       | -2.4569572       | 0.00014629 | No      |
|      |       |        |             |          |         | Fkbp2    | 25.6459   | 103.473  | 2.01246          | 25.6469      | 103.474       | 2.01241195       | 0.00014629 | No      |

| RRBS |       |        |             |          |         | RNAseq  |            |         |                  |              |               |                  |            |         |
|------|-------|--------|-------------|----------|---------|---------|------------|---------|------------------|--------------|---------------|------------------|------------|---------|
| gene | Blood | Kidney | methyl.diff | pMWU.fdr | Match ? | gene    | blood      | kidney  | log2(fold_ratio) | blood+ 0.001 | kidney+ 0.001 | log2(fold_ratio) | q_value    | Match ? |
|      |       |        |             |          |         | Fkbp5   | 25.8446    | 8.32661 | -1.63406         | 25.8456      | 8.32761       | -1.6339443       | 0.00014629 | No      |
|      |       |        |             |          |         | Fkrp    | 6.32026    | 2.93732 | -1.10549         | 6.32126      | 2.93832       | -1.1052206       | 0.00114835 | No      |
|      |       |        |             |          |         | Flna    | 150.641    | 16.7916 | -3.16531         | 150.642      | 16.7926       | -3.1652265       | 0.00014629 | No      |
|      |       |        |             |          |         | Flnb    | 0.160124   | 16.255  | 6.66555          | 0.161124     | 16.256        | 6.65665709       | 0.00014629 | No      |
|      |       |        |             |          |         | FLOT2   | 68.1221    | 41.0026 | -0.732406        | 68.1231      | 41.0036       | -0.7323935       | 0.00028114 | No      |
|      |       |        |             |          |         | Flrt1   | 0.00417774 | 2.86525 | 9.42172          | 0.00517774   | 2.86625       | 9.11262621       | 0.0245946  | No      |
|      |       |        |             |          |         | Flt3l   | 25.493     | 12.9202 | -0.980471        | 25.494       | 12.9212       | -0.9804177       | 0.00914429 | No      |
|      |       |        |             |          |         | Flvcr2  | 3.03963    | 16.3248 | 2.4251           | 3.04063      | 16.3258       | 2.42471151       | 0.0341756  | No      |
|      |       |        |             |          |         | Flywch1 | 14.186     | 60.9709 | 2.10365          | 14.187       | 60.9719       | 2.10357496       | 0.00014629 | No      |
|      |       |        |             |          |         | Flywch2 | 0          | 14.5933 | inf              | 0.001        | 14.5943       | 13.8331174       | 0.00014629 | No      |
|      |       |        |             |          |         | Fmn1l   | 239.349    | 50.1315 | -2.25533         | 239.35       | 50.1325       | -2.2553037       | 0.00014629 | No      |
|      |       |        |             |          |         | Fmn12   | 0.82804    | 3.48107 | 2.07176          | 0.82904      | 3.48207       | 2.07043159       | 0.00427532 | No      |
|      |       |        |             |          |         | Fmn13   | 28.3803    | 15.5726 | -0.865883        | 28.3813      | 15.5736       | -0.8658382       | 0.0089386  | No      |
|      |       |        |             |          |         | Fmo1    | 0          | 154.218 | inf              | 0.001        | 154.219       | 17.234621        | 0.00014629 | No      |
|      |       |        |             |          |         | Fmo2    | 0          | 11.6179 | inf              | 0.001        | 11.6189       | 13.5041859       | 0.00014629 | No      |
|      |       |        |             |          |         | Fmo3    | 0          | 75.2178 | inf              | 0.001        | 75.2188       | 16.1988057       | 0.00014629 | No      |
|      |       |        |             |          |         | Fmo4    | 0.42403    | 59.7049 | 7.13754          | 0.42503      | 59.7059       | 7.13416502       | 0.00041099 | No      |
|      |       |        |             |          |         | FMR1    | 39.1519    | 7.41497 | -2.40057         | 39.1529      | 7.41597       | -2.4004119       | 0.00014629 | No      |
|      |       |        |             |          |         | Fnbp1   | 76.3218    | 10.456  | -2.86777         | 76.3228      | 10.457        | -2.8676451       | 0.00014629 | No      |
|      |       |        |             |          |         | Fnbp4   | 126.697    | 24.1755 | -2.38977         | 126.698      | 24.1765       | -2.3897164       | 0.00014629 | No      |
|      |       |        |             |          |         | Fndc3a  | 12.5624    | 8.73377 | -0.52444         | 12.5634      | 8.73477       | -0.5243853       | 0.02588    | No      |
|      |       |        |             |          |         | Fndc3b  | 0.174979   | 8.8394  | 5.65869          | 0.175979     | 8.8404        | 5.65063646       | 0.00014629 | No      |
|      |       |        |             |          |         | Fnip1   | 15.9373    | 2.61646 | -2.60672         | 15.9383      | 2.61746       | -2.6062584       | 0.00014629 | No      |
|      |       |        |             |          |         | Fnip2   | 1.35686    | 17.4618 | 3.68586          | 1.35786      | 17.4628       | 3.68487825       | 0.00014629 | No      |
|      |       |        |             |          |         | Fnta    | 24.273     | 50.6915 | 1.06239          | 24.274       | 50.6925       | 1.06236045       | 0.00014629 | No      |
|      |       |        |             |          |         | Fntb    | 25.0716    | 3.05222 | -3.03812         | 25.0726      | 3.05322       | -3.0377082       | 0.00014629 | No      |
|      |       |        |             |          |         | Folh1   | 0          | 5.81126 | inf              | 0.001        | 5.81226       | 12.5048835       | 0.00014629 | No      |
|      |       |        |             |          |         | FOLR2   | 0.369269   | 423.53  | 10.1636          | 0.370269     | 423.531       | 10.1596781       | 0.00014629 | No      |
|      |       |        |             |          |         | Fos     | 4.70734    | 228.499 | 5.60113          | 4.70834      | 228.5         | 5.60083185       | 0.00014629 | No      |
|      |       |        |             |          |         | Fosb    | 0.832817   | 38.6453 | 5.53615          | 0.833817     | 38.6463       | 5.5344557        | 0.00014629 | No      |
|      |       |        |             |          |         | Fosl2   | 1.29569    | 9.75234 | 2.91203          | 1.29669      | 9.75334       | 2.91106273       | 0.00523722 | No      |
|      |       |        |             |          |         | Foxh1   | 1.01458    | 21.6553 | 4.41577          | 1.01558      | 21.6563       | 4.41441098       | 0.00014629 | No      |
|      |       |        |             |          |         | Foxi1   | 0.167683   | 5.14636 | 4.93974          | 0.168683     | 5.14736       | 4.9314462        | 0.00502315 | No      |
|      |       |        |             |          |         | Foxj2   | 18.5928    | 9.28144 | -1.00233         | 18.5938      | 9.28244       | -1.0022457       | 0.00014629 | No      |
|      |       |        |             |          |         | Foxk1   | 18.0976    | 4.77909 | -1.92099         | 18.0986      | 4.78009       | -1.9207684       | 0.00014629 | No      |
|      |       |        |             |          |         | Foxn2   | 31.7212    | 5.84196 | -2.44092         | 31.7222      | 5.84296       | -2.4407215       | 0.00014629 | No      |
|      |       |        |             |          |         | Foxn3   | 32.4976    | 7.15624 | -2.18306         | 32.4986      | 7.15724       | -2.1829023       | 0.00014629 | No      |
|      |       |        |             |          |         | Foxo1   | 64.8227    | 4.14372 | -3.9675          | 64.8237      | 4.14472       | -3.9671748       | 0.00014629 | No      |
|      |       |        |             |          |         | Foxp1   | 50.9804    | 8.09455 | -2.65492         | 50.9814      | 8.09555       | -2.65477         | 0.00014629 | No      |
|      |       |        |             |          |         | Foxp3   | 13.5198    | 7.15759 | -0.917532        | 13.5208      | 7.15859       | -0.9174332       | 0.0146937  | No      |
|      |       |        |             |          |         | Foxp4   | 18.8334    | 10.5264 | -0.839281        | 18.8344      | 10.5274       | -0.8392209       | 0.00014629 | No      |
|      |       |        |             |          |         | Fpgs    | 4.02295    | 28.2067 | 2.80971          | 4.02395      | 28.2077       | 2.80940475       | 0.00014629 | No      |

| RRBS |       |        |             |          |         | RNAseq   |           |          |                  |              |               |                  |            |         |
|------|-------|--------|-------------|----------|---------|----------|-----------|----------|------------------|--------------|---------------|------------------|------------|---------|
| gene | Blood | Kidney | methyl.diff | pMWU.fdr | Match ? | gene     | blood     | kidney   | log2(fold_ratio) | blood+ 0.001 | kidney+ 0.001 | log2(fold_ratio) | q_value    | Match ? |
|      |       |        |             |          |         | Fra10ac1 | 13.7966   | 21.1553  | 0.616701         | 13.7976      | 21.1563       | 0.61667          | 0.0234023  | No      |
|      |       |        |             |          |         | Fras1    | 0         | 1.90605  | inf              | 0.001        | 1.90705       | 10.897127        | 0.00014629 | No      |
|      |       |        |             |          |         | Frat2    | 43.5118   | 3.65898  | -3.5719          | 43.5128      | 3.65998       | -3.5715322       | 0.00014629 | No      |
|      |       |        |             |          |         | Frem2    | 0         | 0.954931 | inf              | 0.001        | 0.955931      | 9.90076268       | 0.00014629 | No      |
|      |       |        |             |          |         | Frg1l1   | 15.2945   | 4.2886   | -1.83444         | 15.2955      | 4.2896        | -1.8341922       | 0.00014629 | No      |
|      |       |        |             |          |         | Frk      | 0         | 1.92793  | inf              | 0.001        | 1.92893       | 10.9135851       | 0.00014629 | No      |
|      |       |        |             |          |         | Frmd4a   | 0.665447  | 3.74972  | 2.49439          | 0.666447     | 3.75072       | 2.49260551       | 0.0261464  | No      |
|      |       |        |             |          |         | Frmd4b   | 2.43719   | 20.7728  | 3.0914           | 2.43819      | 20.7738       | 3.09088268       | 0.00014629 | No      |
|      |       |        |             |          |         | Frmd6    | 8.79121   | 3.29854  | -1.41424         | 8.79221      | 3.29954       | -1.4139609       | 0.00014629 | No      |
|      |       |        |             |          |         | Frmd8    | 12.9882   | 19.6644  | 0.598382         | 12.9892      | 19.6654       | 0.59834695       | 0.0089386  | No      |
|      |       |        |             |          |         | Frs2     | 6.64145   | 2.73816  | -1.27829         | 6.64245      | 2.73916       | -1.2779819       | 0.00014629 | No      |
|      |       |        |             |          |         | Frs3     | 1.2007    | 8.84295  | 2.88066          | 1.2017       | 8.84395       | 2.87961409       | 0.00014629 | No      |
|      |       |        |             |          |         | Fryl     | 23.04     | 6.35486  | -1.85821         | 23.041       | 6.35586       | -1.8580441       | 0.00014629 | No      |
|      |       |        |             |          |         | Fst      | 0.277258  | 321.479  | 10.1793          | 0.278258     | 321.48        | 10.1740901       | 0.0171742  | No      |
|      |       |        |             |          |         | Ftcd     | 2.09616   | 20.7097  | 3.30449          | 2.09716      | 20.7107       | 3.30386748       | 0.00173187 | No      |
|      |       |        |             |          |         | Fth1     | 613.339   | 5774.84  | 3.23502          | 613.34       | 5774.841      | 3.23502228       | 0.00014629 | No      |
|      |       |        |             |          |         | Ftl      | 22.6847   | 303.493  | 3.74187          | 22.6857      | 303.494       | 3.74181291       | 0.00014629 | No      |
|      |       |        |             |          |         | Ftsj2    | 2.10059   | 5.33676  | 1.34517          | 2.10159      | 5.33776       | 1.3447532        | 0.00263402 | No      |
|      |       |        |             |          |         | Ftsj3    | 36.0795   | 10.2158  | -1.82037         | 36.0805      | 10.2168       | -1.8202759       | 0.00014629 | No      |
|      |       |        |             |          |         | Fubp1    | 41.7236   | 17.7786  | -1.23072         | 41.7246      | 17.7796       | -1.2306754       | 0.00934853 | No      |
|      |       |        |             |          |         | Fubp3    | 22.8097   | 11.0027  | -1.05179         | 22.8107      | 11.0037       | -1.051722        | 0.00173187 | No      |
|      |       |        |             |          |         | Fuca2    | 1.0753    | 14.3144  | 3.73465          | 1.0763       | 14.3154       | 3.73341582       | 0.00014629 | No      |
|      |       |        |             |          |         | Fundc1   | 41.5306   | 12.391   | -1.74488         | 41.5316      | 12.392        | -1.7448004       | 0.00014629 | No      |
|      |       |        |             |          |         | Fuom     | 2.31017   | 21.985   | 3.25045          | 2.31117      | 21.986        | 3.24988987       | 0.00014629 | No      |
|      |       |        |             |          |         | Fut8     | 16.9833   | 10.1363  | -0.744588        | 16.9843      | 10.1373       | -0.7445283       | 0.00241835 | No      |
|      |       |        |             |          |         | Fv1      | 30.3474   | 10.1636  | -1.57815         | 30.3484      | 10.1646       | -1.578067        | 0.00014629 | No      |
|      |       |        |             |          |         | Fxn      | 18.3232   | 45.2522  | 1.30431          | 18.3242      | 45.2532       | 1.3042696        | 0.00014629 | No      |
|      |       |        |             |          |         | Fxr1     | 62.2554   | 36.7095  | -0.762044        | 62.2564      | 36.7105       | -0.7620294       | 0.00864487 | No      |
|      |       |        |             |          |         | Fxyd4    | 0.0902721 | 56.2958  | 9.28453          | 0.0912721    | 56.2968       | 9.26866328       | 0.0381731  | No      |
|      |       |        |             |          |         | Fxyd5    | 587.093   | 50.9848  | -3.52545         | 587.094      | 50.9858       | -3.5254241       | 0.00014629 | No      |
|      |       |        |             |          |         | Fyb      | 160.773   | 2.58632  | -5.95798         | 160.774      | 2.58732       | -5.9574318       | 0.00014629 | No      |
|      |       |        |             |          |         | Fyco1    | 26.7717   | 10.1938  | -1.39302         | 26.7727      | 10.1948       | -1.3929292       | 0.00014629 | No      |
|      |       |        |             |          |         | Fyn      | 114.688   | 8.04407  | -3.83365         | 114.689      | 8.04507       | -3.8334782       | 0.00014629 | No      |
|      |       |        |             |          |         | Fytd1    | 36.5804   | 15.4606  | -1.24248         | 36.5814      | 15.4616       | -1.2424207       | 0.00014629 | No      |
|      |       |        |             |          |         | Fzd1     | 0         | 20.1518  | inf              | 0.001        | 20.1528       | 14.2986927       | 0.00014629 | No      |
|      |       |        |             |          |         | Fzd3     | 0.0833645 | 0.874356 | 3.39072          | 0.0843645    | 0.875356      | 3.37516191       | 0.0119499  | No      |
|      |       |        |             |          |         | Fzd8     | 0.125143  | 1.17135  | 3.22653          | 0.126143     | 1.17235       | 3.21627129       | 0.00994441 | No      |
|      |       |        |             |          |         | G0s2     | 1.14718   | 179.03   | 7.28596          | 1.14818      | 179.031       | 7.28471678       | 0.00014629 | No      |
|      |       |        |             |          |         | G2E3     | 7.85824   | 1.2039   | -2.70649         | 7.85924      | 1.2049        | -2.7054764       | 0.00014629 | No      |
|      |       |        |             |          |         | G3bp2    | 34.5167   | 17.9683  | -0.941845        | 34.5177      | 17.9693       | -0.9418021       | 0.00014629 | No      |
|      |       |        |             |          |         | G6pc3    | 22.3778   | 34.212   | 0.612434         | 22.3788      | 34.213        | 0.61241194       | 0.00730705 | No      |
|      |       |        |             |          |         | G6pd     | 44.4144   | 23.2152  | -0.935956        | 44.4154      | 23.2162       | -0.9359281       | 0.00014629 | No      |

| RRBS |       |        |            |          |         | RNAseq     |          |          |                  |              |               |                  |            |         |
|------|-------|--------|------------|----------|---------|------------|----------|----------|------------------|--------------|---------------|------------------|------------|---------|
| gene | Blood | Kidney | methy.diff | pMWU.fdr | Match ? | gene       | blood    | kidney   | log2(fold_ratio) | blood+ 0.001 | kidney+ 0.001 | log2(fold_ratio) | q_value    | Match ? |
|      |       |        |            |          |         | Gaa        | 2.5089   | 16.1395  | 2.68547          | 2.5099       | 16.1405       | 2.68498348       | 0.00014629 | No      |
|      |       |        |            |          |         | Gabarap    | 243.465  | 468.621  | 0.944709         | 243.466      | 468.622       | 0.94470437       | 0.00014629 | No      |
|      |       |        |            |          |         | Gabarapl1  | 30.6914  | 219.574  | 2.8388           | 30.6924      | 219.575       | 2.83876044       | 0.00014629 | No      |
|      |       |        |            |          |         | Gabarapl2  | 37.0811  | 57.2384  | 0.6263           | 37.0821      | 57.2394       | 0.6262856        | 0.00173187 | No      |
|      |       |        |            |          |         | Gabbr1     | 61.2944  | 10.6886  | -2.51968         | 61.2954      | 10.6896       | -2.5195709       | 0.00014629 | No      |
|      |       |        |            |          |         | Gabpb1     | 20.3887  | 5.85591  | -1.79981         | 20.3897      | 5.85691       | -1.7996289       | 0.00014629 | No      |
|      |       |        |            |          |         | Gabpb1l    | 5.47     | 2.04633  | -1.4185          | 5.471        | 2.04733       | -1.4180609       | 0.00843988 | No      |
|      |       |        |            |          |         | Gabpb2     | 13.5938  | 4.55269  | -1.57816         | 13.5948      | 4.55369       | -1.5779469       | 0.00263402 | No      |
|      |       |        |            |          |         | Gabrp      | 0        | 2.84838  | inf              | 0.001        | 2.84938       | 11.4764323       | 0.00014629 | No      |
|      |       |        |            |          |         | Gadd45a    | 34.4034  | 144.475  | 2.07019          | 34.4044      | 144.476       | 2.07016487       | 0.00014629 | No      |
|      |       |        |            |          |         | Gadd45b    | 2.06324  | 29.9691  | 3.8605           | 2.06424      | 29.9701       | 3.85984128       | 0.00014629 | No      |
|      |       |        |            |          |         | Gadd45g    | 1.69282  | 392.631  | 7.8576           | 1.69382      | 392.632       | 7.85675338       | 0.00014629 | No      |
|      |       |        |            |          |         | Gadd45gip1 | 57.3585  | 111.445  | 0.958253         | 57.3595      | 111.446       | 0.95824048       | 0.00014629 | No      |
|      |       |        |            |          |         | Gak        | 59.2693  | 38.5697  | -0.61982         | 59.2703      | 38.5707       | -0.619804        | 0.0191214  | No      |
|      |       |        |            |          |         | Galc       | 2.94053  | 6.82741  | 1.21526          | 2.94153      | 6.82841       | 1.21498294       | 0.00014629 | No      |
|      |       |        |            |          |         | Galk1      | 11.2128  | 36.317   | 1.6955           | 11.2138      | 36.318        | 1.69540951       | 0.00014629 | No      |
|      |       |        |            |          |         | Galk2      | 20.3604  | 59.6889  | 1.5517           | 20.3614      | 59.6899       | 1.55165008       | 0.00028114 | No      |
|      |       |        |            |          |         | Galm       | 11.9027  | 97.763   | 3.038            | 11.9037      | 97.764        | 3.03789324       | 0.00014629 | No      |
|      |       |        |            |          |         | Galnt1     | 42.3199  | 12.4794  | -1.76178         | 42.3209      | 12.4804       | -1.7617061       | 0.00014629 | No      |
|      |       |        |            |          |         | Galnt10    | 24.8967  | 6.05632  | -2.03944         | 24.8977      | 6.05732       | -2.0392609       | 0.00014629 | No      |
|      |       |        |            |          |         | Galnt11    | 24.9799  | 55.5491  | 1.15299          | 24.9809      | 55.5501       | 1.15296405       | 0.00014629 | No      |
|      |       |        |            |          |         | Galnt12    | 10.4462  | 1.74068  | -2.58526         | 10.4472      | 1.74168       | -2.5845648       | 0.00014629 | No      |
|      |       |        |            |          |         | Galnt13    | 0        | 6.78959  | inf              | 0.001        | 6.79059       | 12.7293212       | 0.00041099 | No      |
|      |       |        |            |          |         | Galnt18    | 0        | 85.3911  | inf              | 0.001        | 85.3921       | 16.381815        | 0.00014629 | No      |
|      |       |        |            |          |         | Galnt3     | 0.126258 | 6.82363  | 5.7561           | 0.127258     | 6.82463       | 5.74492257       | 0.00014629 | No      |
|      |       |        |            |          |         | Galnt6     | 34.6224  | 5.77991  | -2.58259         | 34.6234      | 5.78091       | -2.5823789       | 0.00014629 | No      |
|      |       |        |            |          |         | Galnt7     | 7.48309  | 2.28374  | -1.71224         | 7.48409      | 2.28474       | -1.7117969       | 0.00014629 | No      |
|      |       |        |            |          |         | Galt       | 26.2075  | 112.124  | 2.09704          | 26.2085      | 112.125       | 2.09700129       | 0.00014629 | No      |
|      |       |        |            |          |         | Gan        | 3.08056  | 1.77008  | -0.79938         | 3.08156      | 1.77108       | -0.7990315       | 0.00053701 | No      |
|      |       |        |            |          |         | Ganab      | 69.9574  | 40.3958  | -0.792272        | 69.9584      | 40.3968       | -0.7922563       | 0.00014629 | No      |
|      |       |        |            |          |         | Ganc       | 11.897   | 5.93773  | -1.00262         | 11.898       | 5.93873       | -1.0024927       | 0.0412124  | No      |
|      |       |        |            |          |         | Gapvd1     | 17.6591  | 12.1556  | -0.538788        | 17.6601      | 12.1566       | -0.5387537       | 0.0333042  | No      |
|      |       |        |            |          |         | Garnl3     | 7.3764   | 23.8384  | 1.6923           | 7.3774       | 23.8394       | 1.69216356       | 0.0209112  | No      |
|      |       |        |            |          |         | Gart       | 33.8833  | 9.58535  | -1.82167         | 33.8843      | 9.58635       | -1.8215634       | 0.00014629 | No      |
|      |       |        |            |          |         | Gas1       | 0        | 3.61742  | inf              | 0.001        | 3.61842       | 11.8211442       | 0.00014629 | No      |
|      |       |        |            |          |         | Gas2       | 0.179052 | 8.66575  | 5.59687          | 0.180052     | 8.66675       | 5.58900556       | 0.00014629 | No      |
|      |       |        |            |          |         | Gas7       | 1.26362  | 0.498154 | -1.3429          | 1.26462      | 0.499154      | -1.341147        | 0.00207488 | No      |
|      |       |        |            |          |         | Gas8       | 0.631403 | 6.48682  | 3.36088          | 0.632403     | 6.48782       | 3.35881768       | 0.00363169 | No      |
|      |       |        |            |          |         | Gatad2a    | 30.0856  | 13.9006  | -1.11393         | 30.0866      | 13.9016       | -1.1138701       | 0.00014629 | No      |
|      |       |        |            |          |         | Gatad2b    | 68.5618  | 10.0674  | -2.76772         | 68.5628      | 10.0684       | -2.7675916       | 0.00014629 | No      |
|      |       |        |            |          |         | Gatc       | 7.34877  | 17.0568  | 1.21477          | 7.34977      | 17.0578       | 1.21466058       | 0.00513162 | No      |

| RRBS |       |        |             |          |         | RNAseq |          |          |                  |              |               |                  |            |         |
|------|-------|--------|-------------|----------|---------|--------|----------|----------|------------------|--------------|---------------|------------------|------------|---------|
| gene | Blood | Kidney | methyl.diff | pMWU.fdr | Match ? | gene   | blood    | kidney   | log2(fold_ratio) | blood+ 0.001 | kidney+ 0.001 | log2(fold_ratio) | q_value    | Match ? |
|      |       |        |             |          |         | Gatm   | 0.143314 | 977.487  | 12.7357          | 0.144314     | 977.488       | 12.725652        | 0.00195831 | No      |
|      |       |        |             |          |         | Gatsl2 | 3.26681  | 0.465444 | -2.81121         | 3.26781      | 0.466444      | -2.8085483       | 0.00014629 | No      |
|      |       |        |             |          |         | Gba3   | 0        | 95.9269  | inf              | 0.001        | 95.9279       | 16.5496629       | 0.00014629 | No      |
|      |       |        |             |          |         | Gbas   | 38.4679  | 82.3779  | 1.0986           | 38.4689      | 82.3789       | 1.09858229       | 0.00014629 | No      |
|      |       |        |             |          |         | Gbp2   | 30.1225  | 6.42831  | -2.22833         | 30.1235      | 6.42931       | -2.2281536       | 0.00014629 | No      |
|      |       |        |             |          |         | Gbp4   | 3.83517  | 1.75745  | -1.12581         | 3.83617      | 1.75845       | -1.1253623       | 0.00566132 | No      |
|      |       |        |             |          |         | Gbp5   | 40.0261  | 1.76648  | -4.50199         | 40.0271      | 1.76748       | -4.5012113       | 0.00014629 | No      |
|      |       |        |             |          |         | Gbp7   | 81.8746  | 2.55467  | -5.00221         | 81.8756      | 2.55567       | -5.0016601       | 0.00014629 | No      |
|      |       |        |             |          |         | Gc     | 0        | 2.66033  | inf              | 0.001        | 2.66133       | 11.3779317       | 0.00014629 | No      |
|      |       |        |             |          |         | Gca    | 0.74498  | 15.3921  | 4.36884          | 0.74598      | 15.3931       | 4.36700304       | 0.00014629 | No      |
|      |       |        |             |          |         | Gcat   | 0.541143 | 23.7035  | 5.45294          | 0.542143     | 23.7045       | 5.45034371       | 0.00028114 | No      |
|      |       |        |             |          |         | Gcc2   | 5.59255  | 3.98232  | -0.4899          | 5.59355      | 3.98332       | -0.4897928       | 0.0343574  | No      |
|      |       |        |             |          |         | Gcdh   | 11.6419  | 198.373  | 4.09082          | 11.6429      | 198.374       | 4.0907006        | 0.00014629 | No      |
|      |       |        |             |          |         | Gcfc2  | 7.73722  | 3.70373  | -1.06284         | 7.73822      | 3.70473       | -1.0626333       | 0.00014629 | No      |
|      |       |        |             |          |         | Gclc   | 11.5001  | 250.494  | 4.44506          | 11.5011      | 250.495       | 4.44493805       | 0.00014629 | No      |
|      |       |        |             |          |         | Gclm   | 7.93706  | 138.877  | 4.12905          | 7.93806      | 138.878       | 4.1288878        | 0.00014629 | No      |
|      |       |        |             |          |         | Gcm1   | 0        | 1.49421  | inf              | 0.001        | 1.49521       | 10.5461324       | 0.00014629 | No      |
|      |       |        |             |          |         | Gcsh   | 6.95554  | 224.03   | 5.00939          | 6.95654      | 224.031       | 5.00918464       | 0.00014629 | No      |
|      |       |        |             |          |         | Gda    | 8.35839  | 1.302    | -2.6825          | 8.35939      | 1.303         | -2.6815606       | 0.0301422  | No      |
|      |       |        |             |          |         | Gdap2  | 6.91872  | 3.9908   | -0.793829        | 6.91972      | 3.9918        | -0.7936742       | 0.00618538 | No      |
|      |       |        |             |          |         | Gde1   | 21.3022  | 65.4579  | 1.61956          | 21.3032      | 65.4589       | 1.6195192        | 0.00014629 | No      |
|      |       |        |             |          |         | Gdi1   | 241.225  | 100.235  | -1.267           | 241.226      | 100.236       | -1.2669847       | 0.00014629 | No      |
|      |       |        |             |          |         | Gdpd5  | 0.37551  | 2.59319  | 2.78781          | 0.37651      | 2.59419       | 2.78452406       | 0.00066215 | No      |
|      |       |        |             |          |         | Gemin2 | 23.7334  | 13.4181  | -0.822738        | 23.7344      | 13.4191       | -0.8226917       | 0.00207488 | No      |
|      |       |        |             |          |         | Gemin6 | 6.01532  | 34.2779  | 2.51057          | 6.01632      | 34.2789       | 2.51036761       | 0.00014629 | No      |
|      |       |        |             |          |         | Gemin8 | 7.58307  | 15.9904  | 1.07635          | 7.58407      | 15.9914       | 1.07625206       | 0.00173187 | No      |
|      |       |        |             |          |         | Get4   | 13.147   | 21.2701  | 0.694093         | 13.148       | 21.2711       | 0.69405128       | 0.00230432 | No      |
|      |       |        |             |          |         | Gfm1   | 13.4346  | 33.0644  | 1.29932          | 13.4356      | 33.0654       | 1.2992616        | 0.00014629 | No      |
|      |       |        |             |          |         | Gfra2  | 0.110125 | 1.08877  | 3.30549          | 0.111125     | 1.08977       | 3.29376836       | 0.00761239 | No      |
|      |       |        |             |          |         | Gfra3  | 73.5854  | 32.2078  | -1.19201         | 73.5864      | 32.2088       | -1.1919842       | 0.00014629 | No      |
|      |       |        |             |          |         | Gga1   | 26.2681  | 45.1667  | 0.781951         | 26.2691      | 45.1677       | 0.78192468       | 0.00296747 | No      |
|      |       |        |             |          |         | Gga2   | 21.7106  | 35.0042  | 0.689129         | 21.7116      | 35.0052       | 0.6891032        | 0.00138312 | No      |
|      |       |        |             |          |         | Ggact  | 19.7835  | 56.143   | 1.50481          | 19.7845      | 56.144        | 1.50476125       | 0.00014629 | No      |
|      |       |        |             |          |         | Ggct   | 22.3259  | 409.554  | 4.19726          | 22.3269      | 409.555       | 4.19720235       | 0.00014629 | No      |
|      |       |        |             |          |         | Ggcx   | 4.6626   | 11.1978  | 1.26401          | 4.6636       | 11.1988       | 1.26382819       | 0.00014629 | No      |
|      |       |        |             |          |         | Ggh    | 2.44591  | 45.1659  | 4.20679          | 2.44691      | 45.1669       | 4.20623296       | 0.00014629 | No      |
|      |       |        |             |          |         | GGNBP2 | 60.6504  | 27.113   | -1.16153         | 60.6514      | 27.114        | -1.161503        | 0.00014629 | No      |
|      |       |        |             |          |         | Ggps1  | 14.7441  | 3.60447  | -2.03228         | 14.7451      | 3.60547       | -2.0319764       | 0.00014629 | No      |
|      |       |        |             |          |         | Ggt1   | 2.6323   | 129.918  | 5.62513          | 2.6333       | 129.919       | 5.62459673       | 0.00014629 | No      |
|      |       |        |             |          |         | Ggt6   | 0        | 1.21892  | inf              | 0.001        | 1.21992       | 10.2525708       | 0.00014629 | No      |
|      |       |        |             |          |         | Ggt7   | 2.02048  | 0.290347 | -2.79885         | 2.02148      | 0.291347      | -2.7946016       | 0.0117565  | No      |
|      |       |        |             |          |         | Ghdc   | 1.449    | 5.48353  | 1.92004          | 1.45         | 5.48453       | 1.91931509       | 0.00014629 | No      |

| RRBS |       |        |             |          |         | RNAseq  |           |         |                  |              |               |                  |            |         |
|------|-------|--------|-------------|----------|---------|---------|-----------|---------|------------------|--------------|---------------|------------------|------------|---------|
| gene | Blood | Kidney | methyl.diff | pMWU.fdr | Match ? | gene    | blood     | kidney  | log2(fold_ratio) | blood+ 0.001 | kidney+ 0.001 | log2(fold_ratio) | q_value    | Match ? |
|      |       |        |             |          |         | Ghitm   | 120.392   | 199.056 | 0.725429         | 120.393      | 199.057       | 0.72543009       | 0.00114835 | No      |
|      |       |        |             |          |         | Ghrhr   | 0         | 24.7614 | inf              | 0.001        | 24.7624       | 14.5958635       | 0.00014629 | No      |
|      |       |        |             |          |         | Gimap1  | 77.0562   | 6.79624 | -3.5031          | 77.0572      | 6.79724       | -3.5029088       | 0.00014629 | No      |
|      |       |        |             |          |         | Gimap4  | 194.447   | 7.41394 | -4.71299         | 194.448      | 7.41494       | -4.7128056       | 0.00014629 | No      |
|      |       |        |             |          |         | GIMAP5  | 189.663   | 3.81246 | -5.63657         | 189.664      | 3.81346       | -5.6362015       | 0.00014629 | No      |
|      |       |        |             |          |         | Gimap6  | 154.421   | 4.78241 | -5.01299         | 154.422      | 4.78341       | -5.012695        | 0.00014629 | No      |
|      |       |        |             |          |         | Gimap7  | 487.976   | 13.5221 | -5.17342         | 487.977      | 13.5231       | -5.1733153       | 0.00014629 | No      |
|      |       |        |             |          |         | Gimap8  | 86.8439   | 1.65854 | -5.71044         | 86.8449      | 1.65954       | -5.7095858       | 0.00014629 | No      |
|      |       |        |             |          |         | Gimap9  | 98.2154   | 2.42046 | -5.3426          | 98.2164      | 2.42146       | -5.3420149       | 0.00014629 | No      |
|      |       |        |             |          |         | Ginm1   | 17.3246   | 28.2234 | 0.704066         | 17.3256      | 28.2244       | 0.7040376        | 0.00405996 | No      |
|      |       |        |             |          |         | Giot1   | 10.1462   | 2.40665 | -2.07584         | 10.1472      | 2.40765       | -2.0753841       | 0.00014629 | No      |
|      |       |        |             |          |         | Gipc1   | 21.0959   | 51.3204 | 1.28257          | 21.0969      | 51.3214       | 1.2825295        | 0.00014629 | No      |
|      |       |        |             |          |         | Git1    | 20.4854   | 27.3146 | 0.415078         | 20.4864      | 27.3156       | 0.41505863       | 0.0401648  | No      |
|      |       |        |             |          |         | Git2    | 113.843   | 35.1187 | -1.69673         | 113.844      | 35.1197       | -1.6967058       | 0.00014629 | No      |
|      |       |        |             |          |         | Gja1    | 0.0675297 | 1.91407 | 4.82498          | 0.0685297    | 1.91507       | 4.80452395       | 0.00491494 | No      |
|      |       |        |             |          |         | Gja4    | 0         | 4.81165 | inf              | 0.001        | 4.81265       | 12.2326158       | 0.00014629 | No      |
|      |       |        |             |          |         | Gjb2    | 0.175878  | 12.5269 | 6.15431          | 0.176878     | 12.5279       | 6.14624617       | 0.00138312 | No      |
|      |       |        |             |          |         | Gjb4    | 0         | 2.07694 | inf              | 0.001        | 2.07794       | 11.0209383       | 0.00014629 | No      |
|      |       |        |             |          |         | Gk      | 2.73227   | 30.734  | 3.49166          | 2.73327      | 30.735        | 3.4911826        | 0.00014629 | No      |
|      |       |        |             |          |         | Gkap1   | 8.25261   | 46.2578 | 2.48677          | 8.25361      | 46.2588       | 2.48663067       | 0.00014629 | No      |
|      |       |        |             |          |         | Glb1    | 34.4467   | 328.351 | 3.2528           | 34.4477      | 328.352       | 3.25276368       | 0.00014629 | No      |
|      |       |        |             |          |         | Glcci1  | 32.2819   | 8.39096 | -1.94382         | 32.2829      | 8.39196       | -1.9436905       | 0.00014629 | No      |
|      |       |        |             |          |         | Glce    | 10.9934   | 2.85499 | -1.94509         | 10.9944      | 2.85599       | -1.944706        | 0.00014629 | No      |
|      |       |        |             |          |         | Gldc    | 0.143724  | 15.1299 | 6.71795          | 0.144724     | 15.1309       | 6.7080498        | 0.00114835 | No      |
|      |       |        |             |          |         | Gle1    | 47.6746   | 26.4311 | -0.850984        | 47.6756      | 26.4321       | -0.85096         | 0.00384649 | No      |
|      |       |        |             |          |         | Glg1    | 15.8346   | 4.47299 | -1.82377         | 15.8356      | 4.47399       | -1.8235376       | 0.00014629 | No      |
|      |       |        |             |          |         | Glpr1   | 177.937   | 4.53446 | -5.29429         | 177.938      | 4.53546       | -5.293982        | 0.00014629 | No      |
|      |       |        |             |          |         | Glo1    | 120.365   | 85.6069 | -0.491616        | 120.366      | 85.6079       | -0.4916121       | 0.016989   | No      |
|      |       |        |             |          |         | Glod5   | 12.2656   | 83.3469 | 2.76452          | 12.2666      | 83.3479       | 2.76441043       | 0.00014629 | No      |
|      |       |        |             |          |         | Glrx    | 67.505    | 14.0567 | -2.26374         | 67.506       | 14.0577       | -2.2636552       | 0.00014629 | No      |
|      |       |        |             |          |         | Glrx5   | 31.173    | 162.201 | 2.37942          | 31.174       | 162.202       | 2.37937642       | 0.00014629 | No      |
|      |       |        |             |          |         | Gls2    | 0.328393  | 2.72024 | 3.05023          | 0.329393     | 2.72124       | 3.0463824        | 0.00502315 | No      |
|      |       |        |             |          |         | Glt1d1  | 0         | 1.42255 | inf              | 0.001        | 1.42355       | 10.4752775       | 0.00761239 | No      |
|      |       |        |             |          |         | Glt8d1  | 11.0722   | 21.9996 | 0.990534         | 11.0732      | 22.0006       | 0.99047067       | 0.00352183 | No      |
|      |       |        |             |          |         | GltP    | 53.4669   | 37.4175 | -0.514936        | 53.4679      | 37.4185       | -0.5149213       | 0.0122504  | No      |
|      |       |        |             |          |         | Gltscr1 | 26.2449   | 8.69904 | -1.59311         | 26.2459      | 8.70004       | -1.5929981       | 0.00014629 | No      |
|      |       |        |             |          |         | Gltscr2 | 186.96    | 133.272 | -0.488354        | 186.961      | 133.273       | -0.4883528       | 0.0105557  | No      |
|      |       |        |             |          |         | Glud1   | 94.6631   | 160.874 | 0.765055         | 94.6641      | 160.875       | 0.76505084       | 0.00041099 | No      |
|      |       |        |             |          |         | Glul    | 180.492   | 308.494 | 0.773304         | 180.493      | 308.495       | 0.77330422       | 0.00014629 | No      |
|      |       |        |             |          |         | Glyatl2 | 0         | 41.9757 | inf              | 0.001        | 41.9767       | 15.3573011       | 0.00014629 | No      |
|      |       |        |             |          |         | Glyctk  | 1.66495   | 67.0177 | 5.33099          | 1.66595      | 67.0187       | 5.3301467        | 0.00014629 | No      |
|      |       |        |             |          |         | Glyr1   | 59.8425   | 197.831 | 1.72503          | 59.8435      | 197.832       | 1.72500935       | 0.00014629 | No      |

| RRBS |       |        |             |          |         | RNAseq  |          |          |                  |              |               |                  |            |         |
|------|-------|--------|-------------|----------|---------|---------|----------|----------|------------------|--------------|---------------|------------------|------------|---------|
| gene | Blood | Kidney | methyl.diff | pMWU.fdr | Match ? | gene    | blood    | kidney   | log2(fold_ratio) | blood+ 0.001 | kidney+ 0.001 | log2(fold_ratio) | q_value    | Match ? |
|      |       |        |             |          |         | Gm101   | 0        | 3.83367  | inf              | 0.001        | 3.83467       | 11.9048867       | 0.00014629 | No      |
|      |       |        |             |          |         | Gm11992 | 7.78618  | 33.7585  | 2.11626          | 7.78718      | 33.7595       | 2.11612066       | 0.00014629 | No      |
|      |       |        |             |          |         | Gm14378 | 42.832   | 9.80422  | -2.12721         | 42.833       | 9.80522       | -2.1271008       | 0.00014629 | No      |
|      |       |        |             |          |         | Gm17615 | 2.90988  | 66.5523  | 4.51546          | 2.91088      | 66.5533       | 4.51498293       | 0.00014629 | No      |
|      |       |        |             |          |         | Gm20654 | 0.241438 | 6.91127  | 4.83922          | 0.242438     | 6.91227       | 4.83347182       | 0.0252454  | No      |
|      |       |        |             |          |         | Gm2a    | 76.5822  | 36.8131  | -1.05679         | 76.5832      | 36.8141       | -1.0567695       | 0.00014629 | No      |
|      |       |        |             |          |         | Gm527   | 1.89705  | 0.749958 | -1.33887         | 1.89805      | 0.750958      | -1.3377139       | 0.029796   | No      |
|      |       |        |             |          |         | Gmcl1   | 37.6619  | 21.7548  | -0.79177         | 37.6629      | 21.7558       | -0.791744        | 0.00014629 | No      |
|      |       |        |             |          |         | Gmds    | 7.83217  | 16.7397  | 1.09579          | 7.83317      | 16.7407       | 1.09569168       | 0.00491494 | No      |
|      |       |        |             |          |         | Gmeb2   | 10.3472  | 3.42027  | -1.59706         | 10.3482      | 3.42127       | -1.596776        | 0.00014629 | No      |
|      |       |        |             |          |         | Gmfb    | 42.5997  | 22.637   | -0.912161        | 42.6007      | 22.638        | -0.9121306       | 0.00014629 | No      |
|      |       |        |             |          |         | Gmfg    | 820.799  | 84.4939  | -3.28011         | 820.8        | 84.4949       | -3.2800946       | 0.00014629 | No      |
|      |       |        |             |          |         | Gmppa   | 18.086   | 68.59    | 1.92312          | 18.087       | 68.591        | 1.92306615       | 0.00014629 | No      |
|      |       |        |             |          |         | Gmpr    | 0.351219 | 22.2149  | 5.98301          | 0.352219     | 22.2159       | 5.97897604       | 0.00066215 | No      |
|      |       |        |             |          |         | Gna11   | 5.61175  | 26.1088  | 2.21801          | 5.61275      | 26.1098       | 2.2178117        | 0.037924   | No      |
|      |       |        |             |          |         | Gna12   | 3.37386  | 51.185   | 3.92325          | 3.37486      | 51.186        | 3.92284971       | 0.00014629 | No      |
|      |       |        |             |          |         | Gna13   | 39.569   | 10.625   | -1.89691         | 39.57        | 10.626        | -1.8968084       | 0.00014629 | No      |
|      |       |        |             |          |         | Gnai1   | 0.46161  | 28.9886  | 5.97267          | 0.46261      | 28.9896       | 5.96959516       | 0.00014629 | No      |
|      |       |        |             |          |         | Gnai2   | 366.744  | 92.365   | -1.98935         | 366.745      | 92.366        | -1.9893435       | 0.00014629 | No      |
|      |       |        |             |          |         | Gnai3   | 70.4853  | 31.7873  | -1.14887         | 70.4863      | 31.7883       | -1.148847        | 0.00014629 | No      |
|      |       |        |             |          |         | Gnb1    | 98.0332  | 63.677   | -0.622498        | 98.0342      | 63.678        | -0.6224901       | 0.00597292 | No      |
|      |       |        |             |          |         | Gnb2l1  | 2380.29  | 503.33   | -2.24156         | 2380.291     | 503.331       | -2.2415586       | 0.00014629 | No      |
|      |       |        |             |          |         | Gne     | 41.3859  | 24.943   | -0.730506        | 41.3869      | 24.944        | -0.7304814       | 0.0336436  | No      |
|      |       |        |             |          |         | Gng10   | 23.1088  | 41.7522  | 0.853407         | 23.1098      | 41.7532       | 0.853382         | 0.00014629 | No      |
|      |       |        |             |          |         | Gng12   | 28.6232  | 113.83   | 1.99163          | 28.6242      | 113.831       | 1.99158623       | 0.0125475  | No      |
|      |       |        |             |          |         | Gng2    | 36.4048  | 2.13037  | -4.09496         | 36.4058      | 2.13137       | -4.0943153       | 0.00014629 | No      |
|      |       |        |             |          |         | Gng5    | 38.8881  | 59.9095  | 0.623457         | 38.8891      | 59.9105       | 0.62344303       | 0.0233164  | No      |
|      |       |        |             |          |         | Gng7    | 0        | 7.62147  | inf              | 0.001        | 7.62247       | 12.8960429       | 0.00014629 | No      |
|      |       |        |             |          |         | Gnl3    | 59.2059  | 20.9838  | -1.49646         | 59.2069      | 20.9848       | -1.4964206       | 0.00066215 | No      |
|      |       |        |             |          |         | Gnl3l   | 35.2616  | 14.5827  | -1.27384         | 35.2626      | 14.5837       | -1.2737821       | 0.00014629 | No      |
|      |       |        |             |          |         | Gnpda1  | 14.0448  | 66.8566  | 2.25103          | 14.0458      | 66.8576       | 2.25095277       | 0.00014629 | No      |
|      |       |        |             |          |         | Gnpda2  | 23.5811  | 3.92718  | -2.58607         | 23.5821      | 3.92818       | -2.5857593       | 0.00014629 | No      |
|      |       |        |             |          |         | Gnptab  | 25.7463  | 11.1469  | -1.20772         | 25.7473      | 11.1479       | -1.2076492       | 0.0443573  | No      |
|      |       |        |             |          |         | Gnptg   | 17.7619  | 56.5151  | 1.66985          | 17.7629      | 56.5161       | 1.66979478       | 0.00114835 | No      |
|      |       |        |             |          |         | Golga7  | 73.7806  | 52.1752  | -0.499877        | 73.7816      | 52.1762       | -0.4998692       | 0.0119499  | No      |
|      |       |        |             |          |         | Golgb1  | 8.26013  | 60.9931  | 2.88441          | 8.26113      | 60.9941       | 2.88425866       | 0.00014629 | No      |
|      |       |        |             |          |         | Golm1   | 33.7269  | 20.8017  | -0.6972          | 33.7279      | 20.8027       | -0.6971717       | 0.00041099 | No      |
|      |       |        |             |          |         | Golt1a  | 0        | 23.9258  | inf              | 0.001        | 23.9268       | 14.5463398       | 0.00014629 | No      |
|      |       |        |             |          |         | Golt1b  | 20.2942  | 8.9082   | -1.18786         | 20.2952      | 8.9092        | -1.1877708       | 0.00014629 | No      |
|      |       |        |             |          |         | Gon4l   | 14.5775  | 7.72388  | -0.916344        | 14.5785      | 7.72488       | -0.9162579       | 0.0423845  | No      |
|      |       |        |             |          |         | Gopc    | 15.9656  | 10.9704  | -0.541359        | 15.9666      | 10.9714       | -0.5413095       | 0.00984666 | No      |
|      |       |        |             |          |         | Gorasp1 | 0.542908 | 21.1364  | 5.28288          | 0.543908     | 21.1374       | 5.28029147       | 0.00014629 | No      |



| RRBS |       |        |             |          |         | RNAseq   |            |          |                  |              |               |                  |            |         |
|------|-------|--------|-------------|----------|---------|----------|------------|----------|------------------|--------------|---------------|------------------|------------|---------|
| gene | Blood | Kidney | methyl.diff | pMWU.fdr | Match ? | gene     | blood      | kidney   | log2(fold_ratio) | blood+ 0.001 | kidney+ 0.001 | log2(fold_ratio) | q_value    | Match ? |
|      |       |        |             |          |         | Gosr2    | 38.8039    | 64.871   | 0.741371         | 38.8049      | 64.872        | 0.74135708       | 0.00014629 | No      |
|      |       |        |             |          |         | Got1     | 22.8071    | 98.2968  | 2.10766          | 22.8081      | 98.2978       | 2.10761286       | 0.00014629 | No      |
|      |       |        |             |          |         | Got2     | 53.1143    | 129.069  | 1.28097          | 53.1153      | 129.07        | 1.28095431       | 0.00014629 | No      |
|      |       |        |             |          |         | Gp2      | 0          | 7.64996  | inf              | 0.001        | 7.65096       | 12.9014251       | 0.00014629 | No      |
|      |       |        |             |          |         | Gpam     | 0.898536   | 7.22227  | 3.0068           | 0.899536     | 7.22327       | 3.00539917       | 0.00014629 | No      |
|      |       |        |             |          |         | Gpatch2l | 14.3506    | 6.20474  | -1.20967         | 14.3516      | 6.20574       | -1.2095364       | 0.00078603 | No      |
|      |       |        |             |          |         | Gpatch8  | 18.7187    | 6.05522  | -1.62823         | 18.7197      | 6.05622       | -1.6280678       | 0.00014629 | No      |
|      |       |        |             |          |         | Gbp1     | 63.8495    | 22.7025  | -1.49183         | 63.8505      | 22.7035       | -1.4917832       | 0.00014629 | No      |
|      |       |        |             |          |         | GPBP1L1  | 68.1148    | 20.6863  | -1.71929         | 68.1158      | 20.6873       | -1.7192441       | 0.00014629 | No      |
|      |       |        |             |          |         | Gpc4     | 0          | 55.8171  | inf              | 0.001        | 55.8181       | 15.7684454       | 0.00014629 | No      |
|      |       |        |             |          |         | Gpcpd1   | 42.5697    | 10.8504  | -1.97208         | 42.5707      | 10.8514       | -1.9719796       | 0.00014629 | No      |
|      |       |        |             |          |         | Gpd1l    | 9.32205    | 18.1523  | 0.961434         | 9.32305      | 18.1533       | 0.96135792       | 0.00014629 | No      |
|      |       |        |             |          |         | Gphn     | 1.49342    | 17.3615  | 3.53919          | 1.49442      | 17.3625       | 3.53831712       | 0.00014629 | No      |
|      |       |        |             |          |         | Gpi      | 200.853    | 325.582  | 0.696885         | 200.854      | 325.583       | 0.69687818       | 0.00014629 | No      |
|      |       |        |             |          |         | Gpkow    | 16.5281    | 7.40839  | -1.15769         | 16.5291      | 7.40939       | -1.1575815       | 0.00014629 | No      |
|      |       |        |             |          |         | Gpld1    | 1.23647    | 4.87322  | 1.97865          | 1.23747      | 4.87422       | 1.97777782       | 0.00090728 | No      |
|      |       |        |             |          |         | Gpm6a    | 0          | 11.0682  | inf              | 0.001        | 11.0692       | 13.4342633       | 0.00014629 | No      |
|      |       |        |             |          |         | Gpnmb    | 0.171377   | 3.6692   | 4.42022          | 0.172377     | 3.6702        | 4.41221949       | 0.00195831 | No      |
|      |       |        |             |          |         | Gpr108   | 52.4072    | 109.234  | 1.05959          | 52.4082      | 109.235       | 1.05957072       | 0.00090728 | No      |
|      |       |        |             |          |         | Gpr114   | 7.80336    | 0.911296 | -3.0981          | 7.80436      | 0.912296      | -3.0967064       | 0.0418048  | No      |
|      |       |        |             |          |         | Gpr116   | 0          | 8.13683  | inf              | 0.001        | 8.13783       | 12.9904284       | 0.00014629 | No      |
|      |       |        |             |          |         | Gpr125   | 0.291132   | 28.8616  | 6.63133          | 0.292132     | 28.8626       | 6.62643706       | 0.00014629 | No      |
|      |       |        |             |          |         | Gpr126   | 0.00685739 | 7.09262  | 10.0144          | 0.00785739   | 7.09362       | 9.81825616       | 0.0370518  | No      |
|      |       |        |             |          |         | Gpr132   | 33.4021    | 2.50934  | -3.73456         | 33.4031      | 2.51034       | -3.7340273       | 0.00014629 | No      |
|      |       |        |             |          |         | Gpr133   | 1.59655    | 0.507542 | -1.65335         | 1.59755      | 0.508542      | -1.6514223       | 0.00618538 | No      |
|      |       |        |             |          |         | Gpr137b  | 0.134382   | 13.3932  | 6.63902          | 0.135382     | 13.3942       | 6.62842867       | 0.00014629 | No      |
|      |       |        |             |          |         | Gpr171   | 30.249     | 3.08688  | -3.29266         | 30.25        | 3.08788       | -3.2922465       | 0.00014629 | No      |
|      |       |        |             |          |         | Gpr174   | 16.2073    | 0.275586 | -5.87799         | 16.2083      | 0.276586      | -5.8728608       | 0.00014629 | No      |
|      |       |        |             |          |         | Gpr176   | 0.101489   | 2.78037  | 4.77588          | 0.102489     | 2.78137       | 4.7622547        | 0.00126596 | No      |
|      |       |        |             |          |         | Gpr183   | 34.3548    | 2.15877  | -3.99223         | 34.3558      | 2.15977       | -3.9916041       | 0.00438237 | No      |
|      |       |        |             |          |         | Gpr25    | 1.28984    | 0        | -inf             | 1.29084      | 0.001         | -10.334094       | 0.00014629 | No      |
|      |       |        |             |          |         | Gpr35    | 0.917515   | 0        | -inf             | 0.918515     | 0.001         | -9.8431595       | 0.00014629 | No      |
|      |       |        |             |          |         | Gpr55    | 0.943215   | 0        | -inf             | 0.944215     | 0.001         | -9.8829716       | 0.00014629 | No      |
|      |       |        |             |          |         | Gpr56    | 0.121759   | 110.713  | 9.82857          | 0.122759     | 110.714       | 9.81679315       | 0.00014629 | No      |
|      |       |        |             |          |         | Gpr65    | 10.0949    | 0.65247  | -3.95158         | 10.0959      | 0.65347       | -3.9495047       | 0.00014629 | No      |
|      |       |        |             |          |         | Gpr68    | 21.058     | 0.715159 | -4.87996         | 21.059       | 0.716159      | -4.8780132       | 0.00014629 | No      |
|      |       |        |             |          |         | Gprin3   | 4.53663    | 0.235091 | -4.27033         | 4.53763      | 0.236091      | -4.264524        | 0.00014629 | No      |
|      |       |        |             |          |         | Gps1     | 29.6578    | 55.8277  | 0.912567         | 29.6588      | 55.8287       | 0.91254674       | 0.00014629 | No      |
|      |       |        |             |          |         | Gpsm2    | 0.439405   | 1.91458  | 2.1234           | 0.440405     | 1.91558       | 2.12087852       | 0.00669647 | No      |
|      |       |        |             |          |         | Gpt      | 0.959077   | 21.7787  | 4.50513          | 0.960077     | 21.7797       | 4.50369015       | 0.00014629 | No      |
|      |       |        |             |          |         | Gpx1     | 129.628    | 1169.58  | 3.17354          | 129.629      | 1169.581      | 3.17353137       | 0.00014629 | No      |
|      |       |        |             |          |         | GPX4     | 102.589    | 491.577  | 2.26054          | 102.59       | 491.578       | 2.26053024       | 0.00014629 | No      |

| RRBS |       |        |             |          |         | RNAseq  |            |          |                  |              |               |                  |            |         |
|------|-------|--------|-------------|----------|---------|---------|------------|----------|------------------|--------------|---------------|------------------|------------|---------|
| gene | Blood | Kidney | methyl.diff | pMWU.fdr | Match ? | gene    | blood      | kidney   | log2(fold_ratio) | blood+ 0.001 | kidney+ 0.001 | log2(fold_ratio) | q_value    | Match ? |
|      |       |        |             |          |         | Gpx8    | 0          | 25.5969  | inf              | 0.001        | 25.5979       | 14.6437378       | 0.00014629 | No      |
|      |       |        |             |          |         | Gramd1a | 238.069    | 54.6326  | -2.12354         | 238.07       | 54.6336       | -2.1235254       | 0.00014629 | No      |
|      |       |        |             |          |         | Gramd3  | 0.185005   | 7.02256  | 5.24636          | 0.186005     | 7.02356       | 5.23878916       | 0.00014629 | No      |
|      |       |        |             |          |         | Gramd4  | 49.5334    | 10.5262  | -2.23442         | 49.5344      | 10.5272       | -2.234309        | 0.00014629 | No      |
|      |       |        |             |          |         | Grap    | 135.924    | 8.19615  | -4.05171         | 135.925      | 8.19715       | -4.0515446       | 0.00014629 | No      |
|      |       |        |             |          |         | Grap2   | 99.4777    | 2.12536  | -5.54859         | 99.4787      | 2.12636       | -5.5479299       | 0.00014629 | No      |
|      |       |        |             |          |         | Grb14   | 0.521493   | 2.49174  | 2.25643          | 0.522493     | 2.49274       | 2.2542488        | 0.00395247 | No      |
|      |       |        |             |          |         | Grb2    | 90.7953    | 37.0091  | -1.29474         | 90.7963      | 37.0101       | -1.2947145       | 0.00014629 | No      |
|      |       |        |             |          |         | Grb7    | 0.47475    | 26.3299  | 5.79339          | 0.47575      | 26.3309       | 5.79040937       | 0.00014629 | No      |
|      |       |        |             |          |         | Greb1   | 0.14464    | 0.891423 | 2.62364          | 0.14564      | 0.892423      | 2.61532105       | 0.00149937 | No      |
|      |       |        |             |          |         | GREM1   | 0          | 5.62688  | inf              | 0.001        | 5.62788       | 12.4583759       | 0.00014629 | No      |
|      |       |        |             |          |         | Grhl3   | 0.534553   | 2.08438  | 1.96322          | 0.535553     | 2.08538       | 1.96120904       | 0.00207488 | No      |
|      |       |        |             |          |         | Grhpr   | 6.91318    | 1019.59  | 7.20443          | 6.91418      | 1019.591      | 7.20421667       | 0.00014629 | No      |
|      |       |        |             |          |         | Grina   | 92.726     | 163.795  | 0.820845         | 92.727       | 163.796       | 0.82083874       | 0.00014629 | No      |
|      |       |        |             |          |         | Grip1   | 0.00775651 | 1.43051  | 7.5269           | 0.00875651   | 1.43151       | 7.35296605       | 0.0294333  | No      |
|      |       |        |             |          |         | Gripap1 | 32.5744    | 17.4987  | -0.896488        | 32.5754      | 17.4997       | -0.8964527       | 0.00014629 | No      |
|      |       |        |             |          |         | Grk6    | 266.104    | 25.913   | -3.36025         | 266.105      | 25.914        | -3.360192        | 0.00014629 | No      |
|      |       |        |             |          |         | Grn     | 25.9043    | 96.5686  | 1.89836          | 25.9053      | 96.5696       | 1.89832181       | 0.00014629 | No      |
|      |       |        |             |          |         | Grpel1  | 25.8002    | 89.2339  | 1.79021          | 25.8012      | 89.2349       | 1.7901699        | 0.00014629 | No      |
|      |       |        |             |          |         | Gsdma   | 4.31597    | 24.4034  | 2.49933          | 4.31697      | 24.4044       | 2.49905031       | 0.00014629 | No      |
|      |       |        |             |          |         | Gsdmd   | 20.0771    | 4.38541  | -2.19477         | 20.0781      | 4.38641       | -2.1945102       | 0.00014629 | No      |
|      |       |        |             |          |         | Gsg2    | 29.2313    | 1.53668  | -4.24963         | 29.2323      | 1.53768       | -4.2487361       | 0.0115547  | No      |
|      |       |        |             |          |         | Gsk3a   | 64.2724    | 26.9107  | -1.25602         | 64.2734      | 26.9117       | -1.2559883       | 0.00014629 | No      |
|      |       |        |             |          |         | Gsk3b   | 19.1163    | 10.1675  | -0.910838        | 19.1173      | 10.1685       | -0.9107719       | 0.00078603 | No      |
|      |       |        |             |          |         | Gsn     | 29.5904    | 42.5277  | 0.523273         | 29.5914      | 42.5287       | 0.5232588        | 0.0089386  | No      |
|      |       |        |             |          |         | GSPT1   | 55.9228    | 32.8672  | -0.766786        | 55.9238      | 32.8682       | -0.7667699       | 0.00184429 | No      |
|      |       |        |             |          |         | Gsr     | 20.4402    | 133.941  | 2.71212          | 20.4412      | 133.942       | 2.71205662       | 0.00014629 | No      |
|      |       |        |             |          |         | Gss     | 7.54502    | 153.267  | 4.34437          | 7.54602      | 153.268       | 4.34419678       | 0.00014629 | No      |
|      |       |        |             |          |         | GSTA1   | 0          | 403.109  | inf              | 0.001        | 403.11        | 18.620814        | 0.00363169 | No      |
|      |       |        |             |          |         | Gsta3   | 0          | 53.0091  | inf              | 0.001        | 53.0101       | 15.6939796       | 0.0108581  | No      |
|      |       |        |             |          |         | Gsta4   | 0          | 309.035  | inf              | 0.001        | 309.036       | 18.2374154       | 0.00014629 | No      |
|      |       |        |             |          |         | GSTA6   | 8.1418     | 47.8279  | 2.55443          | 8.1428       | 47.8289       | 2.55428574       | 0.00014629 | No      |
|      |       |        |             |          |         | Gstk1   | 1.76768    | 54.3526  | 4.94242          | 1.76868      | 54.3536       | 4.94163064       | 0.00014629 | No      |
|      |       |        |             |          |         | Gstm4   | 8.52164    | 15.5888  | 0.871308         | 8.52264      | 15.5898       | 0.87123012       | 0.00149937 | No      |
|      |       |        |             |          |         | Gstm7   | 0.776869   | 27.456   | 5.14331          | 0.777869     | 27.457        | 5.14150298       | 0.00014629 | No      |
|      |       |        |             |          |         | Gstp1   | 239.296    | 431.065  | 0.849109         | 239.297      | 431.066       | 0.84910647       | 0.00014629 | No      |
|      |       |        |             |          |         | GSTT2   | 12.2343    | 58.2924  | 2.25238          | 12.2353      | 58.2934       | 2.25228307       | 0.00014629 | No      |
|      |       |        |             |          |         | Gstz1   | 6.50631    | 63.0932  | 3.27757          | 6.50731      | 63.0942       | 3.2773742        | 0.00041099 | No      |
|      |       |        |             |          |         | Gtdc1   | 10.534     | 4.84346  | -1.12095         | 10.535       | 4.84446       | -1.1207825       | 0.00078603 | No      |
|      |       |        |             |          |         | Gtf2e1  | 6.36556    | 3.93361  | -0.694434        | 6.36656      | 3.93461       | -0.6942934       | 0.0182953  | No      |
|      |       |        |             |          |         | Gtf2f1  | 27.7008    | 86.0278  | 1.63487          | 27.7018      | 86.0288       | 1.63483999       | 0.00014629 | No      |
|      |       |        |             |          |         | Gtf2h1  | 23.2747    | 12.6596  | -0.878532        | 23.2757      | 12.6606       | -0.8784788       | 0.00014629 | No      |

| RRBS |       |        |             |          |         | RNAseq   |          |          |                  |              |               |                  |            |         |
|------|-------|--------|-------------|----------|---------|----------|----------|----------|------------------|--------------|---------------|------------------|------------|---------|
| gene | Blood | Kidney | methyl.diff | pMWU.fdr | Match ? | gene     | blood    | kidney   | log2(fold_ratio) | blood+ 0.001 | kidney+ 0.001 | log2(fold_ratio) | q_value    | Match ? |
|      |       |        |             |          |         | Gtf2h4   | 6.08967  | 17.8787  | 1.55381          | 6.09067      | 17.8797       | 1.55364969       | 0.00014629 | No      |
|      |       |        |             |          |         | Gtf2h5   | 17.7024  | 36.7496  | 1.05378          | 17.7034      | 36.7506       | 1.05374134       | 0.00014629 | No      |
|      |       |        |             |          |         | Gtf2i    | 144.695  | 87.8588  | -0.719757        | 144.696      | 87.8598       | -0.7197499       | 0.004167   | No      |
|      |       |        |             |          |         | GTF2IRD2 | 8.66573  | 3.16329  | -1.4539          | 8.66673      | 3.16429       | -1.4536059       | 0.00014629 | No      |
|      |       |        |             |          |         | Gtf3c1   | 27.3569  | 10.9175  | -1.32527         | 27.3579      | 10.9185       | -1.3251828       | 0.00014629 | No      |
|      |       |        |             |          |         | Gtf3c2   | 81.8847  | 40.1398  | -1.02856         | 81.8857      | 40.1408       | -1.0285422       | 0.00219102 | No      |
|      |       |        |             |          |         | Gtf3c4   | 7.69852  | 2.74846  | -1.48596         | 7.69952      | 2.74946       | -1.4856202       | 0.00014629 | No      |
|      |       |        |             |          |         | Gtpbp1   | 16.6831  | 11.9563  | -0.480618        | 16.6841      | 11.9573       | -0.4805822       | 0.0391221  | No      |
|      |       |        |             |          |         | Gtpbp4   | 20.3204  | 11.061   | -0.877447        | 20.3214      | 11.062        | -0.8773875       | 0.00149937 | No      |
|      |       |        |             |          |         | Guca2b   | 0        | 3.98774  | inf              | 0.001        | 3.98874       | 11.9617174       | 0.00014629 | No      |
|      |       |        |             |          |         | GUCD1    | 6.56122  | 27.3205  | 2.05795          | 6.56222      | 27.3215       | 2.05778083       | 0.00014629 | No      |
|      |       |        |             |          |         | Gucy1b2  | 0.032288 | 40.4566  | 10.2912          | 0.033288     | 40.4576       | 10.2471928       | 0.00014629 | No      |
|      |       |        |             |          |         | Guk1     | 56.83    | 125.181  | 1.1393           | 56.831       | 125.182       | 1.13927712       | 0.00014629 | No      |
|      |       |        |             |          |         | Gulp1    | 0        | 7.56272  | inf              | 0.001        | 7.56372       | 12.8848802       | 0.00014629 | No      |
|      |       |        |             |          |         | Gxylt1   | 18.4434  | 5.60678  | -1.71786         | 18.4444      | 5.60778       | -1.7176812       | 0.00014629 | No      |
|      |       |        |             |          |         | Gyg1     | 7.22062  | 14.9749  | 1.05235          | 7.22162      | 14.9759       | 1.05224829       | 0.00126596 | No      |
|      |       |        |             |          |         | Gylt1b   | 1.62196  | 17.1085  | 3.3989           | 1.62296      | 17.1095       | 3.39809825       | 0.00014629 | No      |
|      |       |        |             |          |         | Gypc     | 9.07741  | 2.56433  | -1.8237          | 9.07841      | 2.56533       | -1.8232952       | 0.00014629 | No      |
|      |       |        |             |          |         | Gys1     | 0.650273 | 7.64282  | 3.55499          | 0.651273     | 7.64382       | 3.55295948       | 0.00014629 | No      |
|      |       |        |             |          |         | Gzma     | 7.18957  | 2.36505  | -1.60403         | 7.19057      | 2.36605       | -1.6036256       | 0.0119499  | No      |
|      |       |        |             |          |         | Gzmk     | 25.1843  | 4.33209  | -2.53939         | 25.1853      | 4.33309       | -2.5391138       | 0.00014629 | No      |
|      |       |        |             |          |         | Gzmm     | 103.235  | 21.0377  | -2.29489         | 103.236      | 21.0387       | -2.2948287       | 0.00014629 | No      |
|      |       |        |             |          |         | H1fx     | 22.5734  | 56.7527  | 1.33006          | 22.5744      | 56.7537       | 1.33002681       | 0.00014629 | No      |
|      |       |        |             |          |         | H2afj    | 42.7099  | 182.321  | 2.09384          | 42.7109      | 182.322       | 2.09381245       | 0.00014629 | No      |
|      |       |        |             |          |         | H2afy    | 181.589  | 70.8232  | -1.35838         | 181.59       | 70.8242       | -1.3583705       | 0.0119499  | No      |
|      |       |        |             |          |         | H2afz    | 194.633  | 73.7475  | -1.40009         | 194.634      | 73.7485       | -1.4000781       | 0.00014629 | No      |
|      |       |        |             |          |         | H3f3b    | 720.761  | 502.209  | -0.521232        | 720.762      | 502.21        | -0.5212322       | 0.0209112  | No      |
|      |       |        |             |          |         | H3f3c    | 322.498  | 169.77   | -0.925708        | 322.499      | 169.771       | -0.9257046       | 0.00014629 | No      |
|      |       |        |             |          |         | H6pd     | 0.496811 | 10.1971  | 4.35931          | 0.497811     | 10.1981       | 4.35655847       | 0.00014629 | No      |
|      |       |        |             |          |         | Hacl1    | 2.40606  | 22.3115  | 3.21304          | 2.40706      | 22.3125       | 3.21250816       | 0.00014629 | No      |
|      |       |        |             |          |         | Hadh     | 20.134   | 170.811  | 3.0847           | 20.135       | 170.812       | 3.08463195       | 0.00014629 | No      |
|      |       |        |             |          |         | Hadha    | 66.1764  | 154.477  | 1.223            | 66.1774      | 154.478       | 1.22299087       | 0.00014629 | No      |
|      |       |        |             |          |         | Hadhb    | 44.432   | 106.221  | 1.25739          | 44.433       | 106.222       | 1.25737914       | 0.00014629 | No      |
|      |       |        |             |          |         | Hagh     | 12.0787  | 153.58   | 3.66846          | 12.0797      | 153.581       | 3.66834322       | 0.00014629 | No      |
|      |       |        |             |          |         | Hap1     | 10.664   | 0.529087 | -4.3331          | 10.665       | 0.530087      | -4.330511        | 0.0184724  | No      |
|      |       |        |             |          |         | Haus1    | 6.6922   | 1.54163  | -2.11803         | 6.6932       | 1.54263       | -2.1173041       | 0.00014629 | No      |
|      |       |        |             |          |         | Haus6    | 3.78577  | 0.879401 | -2.10599         | 3.78677      | 0.880401      | -2.1047351       | 0.00014629 | No      |
|      |       |        |             |          |         | HAUS7    | 6.55534  | 23.3271  | 1.83126          | 6.55634      | 23.3281       | 1.83110623       | 0.0132409  | No      |
|      |       |        |             |          |         | Haus8    | 8.90946  | 23.9566  | 1.42702          | 8.91046      | 23.9576       | 1.42691157       | 0.00041099 | No      |
|      |       |        |             |          |         | Havcr1   | 0.151148 | 4.86318  | 5.00787          | 0.152148     | 4.86418       | 4.99864934       | 0.00028114 | No      |
|      |       |        |             |          |         | Hba1     | 42.6238  | 1542.76  | 5.17771          | 42.6248      | 1542.761      | 5.17767771       | 0.00014629 | No      |
|      |       |        |             |          |         | Hba2     | 22.3302  | 877.818  | 5.29686          | 22.3312      | 877.819       | 5.29679081       | 0.00014629 | No      |

| RRBS |       |        |             |          |         | RNAseq   |           |         |                  |              |               |                  |            |         |
|------|-------|--------|-------------|----------|---------|----------|-----------|---------|------------------|--------------|---------------|------------------|------------|---------|
| gene | Blood | Kidney | methyl.diff | pMWU.fdr | Match ? | gene     | blood     | kidney  | log2(fold_ratio) | blood+ 0.001 | kidney+ 0.001 | log2(fold_ratio) | q_value    | Match ? |
|      |       |        |             |          |         | Hbb      | 18.8887   | 362.412 | 4.26203          | 18.8897      | 362.413       | 4.26196301       | 0.00014629 | No      |
|      |       |        |             |          |         | Hbp1     | 35.3236   | 21.7175 | -0.701771        | 35.3246      | 21.7185       | -0.7017488       | 0.00184429 | No      |
|      |       |        |             |          |         | Hck      | 1.72563   | 3.6908  | 1.09681          | 1.72663      | 3.6918        | 1.09636544       | 0.0167011  | No      |
|      |       |        |             |          |         | Hcls1    | 120.335   | 23.499  | -2.35638         | 120.336      | 23.5          | -2.3563356       | 0.00014629 | No      |
|      |       |        |             |          |         | Hdac1    | 88.1833   | 40.4459 | -1.12451         | 88.1843      | 40.4469       | -1.1244927       | 0.00014629 | No      |
|      |       |        |             |          |         | Hdac11   | 0.229504  | 21.8959 | 6.576            | 0.230504     | 21.8969       | 6.56979104       | 0.00014629 | No      |
|      |       |        |             |          |         | Hdac2    | 60.2698   | 37.2153 | -0.69554         | 60.2708      | 37.2163       | -0.6955246       | 0.00053701 | No      |
|      |       |        |             |          |         | Hdac4    | 7.28812   | 1.75495 | -2.05412         | 7.28912      | 1.75595       | -2.0534929       | 0.00014629 | No      |
|      |       |        |             |          |         | Hdac7    | 47.6057   | 10.5606 | -2.17244         | 47.6067      | 10.5616       | -2.1723362       | 0.00014629 | No      |
|      |       |        |             |          |         | Hddc3    | 3.03282   | 36.7536 | 3.59916          | 3.03382      | 36.7546       | 3.59871742       | 0.00014629 | No      |
|      |       |        |             |          |         | Hdgfrp3  | 9.59196   | 2.28295 | -2.07093         | 9.59296      | 2.28395       | -2.070445        | 0.00014629 | No      |
|      |       |        |             |          |         | Hdhd3    | 0.310256  | 15.8565 | 5.67547          | 0.311256     | 15.8575       | 5.67091988       | 0.0223869  | No      |
|      |       |        |             |          |         | Hdlbp    | 33.9815   | 64.3063 | 0.920212         | 33.9825      | 64.3073       | 0.92019053       | 0.00014629 | No      |
|      |       |        |             |          |         | Heatr3   | 8.75967   | 3.49382 | -1.32607         | 8.76067      | 3.49482       | -1.3258231       | 0.00296747 | No      |
|      |       |        |             |          |         | Heatr5b  | 6.56139   | 3.67573 | -0.83597         | 6.56239      | 3.67673       | -0.8357981       | 0.00028114 | No      |
|      |       |        |             |          |         | Heatr6   | 8.10561   | 5.43982 | -0.575362        | 8.10661      | 5.44082       | -0.5752746       | 0.0327779  | No      |
|      |       |        |             |          |         | HEBP1    | 1.25059   | 7.81292 | 2.64325          | 1.25159      | 7.81392       | 2.64228445       | 0.00138312 | No      |
|      |       |        |             |          |         | Hebp2    | 5.62104   | 1.99146 | -1.49701         | 5.62204      | 1.99246       | -1.496543        | 0.00823262 | No      |
|      |       |        |             |          |         | Heca     | 197.634   | 8.05497 | -4.61681         | 197.635      | 8.05597       | -4.6166363       | 0.00014629 | No      |
|      |       |        |             |          |         | Hectd1   | 34.0542   | 14.0351 | -1.27879         | 34.0552      | 14.0361       | -1.278733        | 0.00014629 | No      |
|      |       |        |             |          |         | Helb     | 23.4517   | 4.21808 | -2.47504         | 23.4527      | 4.21908       | -2.4747537       | 0.00014629 | No      |
|      |       |        |             |          |         | Helz     | 17.466    | 5.44117 | -1.68256         | 17.467       | 5.44217       | -1.6823779       | 0.00014629 | No      |
|      |       |        |             |          |         | Helz2    | 26.9544   | 6.90138 | -1.96556         | 26.9554      | 6.90238       | -1.9654085       | 0.00014629 | No      |
|      |       |        |             |          |         | Hemk1    | 7.30321   | 15.2692 | 1.06403          | 7.30421      | 15.2702       | 1.06391881       | 0.00184429 | No      |
|      |       |        |             |          |         | Hepacam2 | 3.07538   | 10.2625 | 1.73854          | 3.07638      | 10.2635       | 1.73821717       | 0.0129486  | No      |
|      |       |        |             |          |         | Herc1    | 50.9293   | 10.2623 | -2.31115         | 50.9303      | 10.2633       | -2.3110295       | 0.00296747 | No      |
|      |       |        |             |          |         | Herc2    | 35.843    | 16.2975 | -1.13704         | 35.844       | 16.2985       | -1.1369924       | 0.00241835 | No      |
|      |       |        |             |          |         | Herc3    | 14.1449   | 6.91088 | -1.03334         | 14.1459      | 6.91188       | -1.0332339       | 0.00041099 | No      |
|      |       |        |             |          |         | Herc4    | 29.4955   | 10.0693 | -1.55054         | 29.4965      | 10.0703       | -1.5504371       | 0.00014629 | No      |
|      |       |        |             |          |         | Herc6    | 20.9614   | 2.19586 | -3.25488         | 20.9624      | 2.19686       | -3.2542891       | 0.00014629 | No      |
|      |       |        |             |          |         | Herpud2  | 40.3695   | 12.2293 | -1.72293         | 40.3705      | 12.2303       | -1.7228417       | 0.00014629 | No      |
|      |       |        |             |          |         | Hes1     | 0.149132  | 55.281  | 8.53405          | 0.150132     | 55.282        | 8.52443449       | 0.00864487 | No      |
|      |       |        |             |          |         | Hes6     | 21.2604   | 89.3916 | 2.07197          | 21.2614      | 89.3926       | 2.07191881       | 0.00014629 | No      |
|      |       |        |             |          |         | Hexa     | 20.9903   | 118.112 | 2.49236          | 20.9913      | 118.113       | 2.49230434       | 0.00014629 | No      |
|      |       |        |             |          |         | Hexb     | 6.38688   | 62.7849 | 3.29723          | 6.38788      | 62.7859       | 3.29703149       | 0.00014629 | No      |
|      |       |        |             |          |         | Hexdc    | 50.1905   | 162.616 | 1.69598          | 50.1915      | 162.617       | 1.69596312       | 0.00014629 | No      |
|      |       |        |             |          |         | Hey1     | 0         | 1.1931  | inf              | 0.001        | 1.1941        | 10.2217079       | 0.00014629 | No      |
|      |       |        |             |          |         | Heyl     | 0         | 4.9266  | inf              | 0.001        | 4.9276        | 12.2666694       | 0.00014629 | No      |
|      |       |        |             |          |         | Hfe      | 0.0591171 | 1.50713 | 4.67209          | 0.0601171    | 1.50813       | 4.64884157       | 0.0380071  | No      |
|      |       |        |             |          |         | Hgd      | 0         | 423.203 | inf              | 0.001        | 423.204       | 18.6909937       | 0.00014629 | No      |
|      |       |        |             |          |         | Hgfac    | 0         | 5.25616 | inf              | 0.001        | 5.25716       | 12.3600679       | 0.00014629 | No      |
|      |       |        |             |          |         | Hgs      | 19.9122   | 74.4443 | 1.90251          | 19.9132      | 74.4453       | 1.90245569       | 0.00014629 | No      |

| RRBS |       |        |             |          |         | RNAseq      |           |         |                  |              |               |                  |            |         |
|------|-------|--------|-------------|----------|---------|-------------|-----------|---------|------------------|--------------|---------------|------------------|------------|---------|
| gene | Blood | Kidney | methyl.diff | pMWU.fdr | Match ? | gene        | blood     | kidney  | log2(fold_ratio) | blood+ 0.001 | kidney+ 0.001 | log2(fold_ratio) | q_value    | Match ? |
|      |       |        |             |          |         | Hgsnat      | 43.3354   | 19.8256 | -1.12818         | 43.3364      | 19.8266       | -1.128142        | 0.00014629 | No      |
|      |       |        |             |          |         | Hhat        | 0.558009  | 12.0546 | 4.43315          | 0.559009     | 12.0556       | 4.43068813       | 0.0431512  | No      |
|      |       |        |             |          |         | Hiat1       | 42.4669   | 16.4006 | -1.37259         | 42.4679      | 16.4016       | -1.3725362       | 0.00014629 | No      |
|      |       |        |             |          |         | Hiat1l      | 15.2098   | 8.94979 | -0.765074        | 15.2108      | 8.95079       | -0.7650091       | 0.00149937 | No      |
|      |       |        |             |          |         | Hibadh      | 39.9078   | 203.562 | 2.35073          | 39.9088      | 203.563       | 2.35069655       | 0.00014629 | No      |
|      |       |        |             |          |         | Hibch       | 8.27232   | 16.7329 | 1.01632          | 8.27332      | 16.7339       | 1.01623543       | 0.00066215 | No      |
|      |       |        |             |          |         | Hif1a       | 51.9426   | 18.8476 | -1.46254         | 51.9436      | 18.8486       | -1.4624886       | 0.00014629 | No      |
|      |       |        |             |          |         | Higd1a      | 20.498    | 53.9417 | 1.39592          | 20.499       | 53.9427       | 1.3958742        | 0.00028114 | No      |
|      |       |        |             |          |         | Higd2a      | 76.3144   | 131.803 | 0.788355         | 76.3154      | 131.804       | 0.78834804       | 0.00028114 | No      |
|      |       |        |             |          |         | Hint3       | 9.65569   | 16.2966 | 0.755117         | 9.65669      | 16.2976       | 0.75505886       | 0.0243269  | No      |
|      |       |        |             |          |         | Hip1        | 0.352399  | 3.29601 | 3.22544          | 0.353399     | 3.29701       | 3.2217884        | 0.00014629 | No      |
|      |       |        |             |          |         | Hip1r       | 32.8646   | 11.3502 | -1.53381         | 32.8656      | 11.3512       | -1.5337335       | 0.00014629 | No      |
|      |       |        |             |          |         | Hipk1       | 70.6734   | 12.2603 | -2.52717         | 70.6744      | 12.2613       | -2.5270758       | 0.00014629 | No      |
|      |       |        |             |          |         | Hipk4       | 0.0677659 | 1.46994 | 4.43906          | 0.0687659    | 1.47094       | 4.41890126       | 0.0287968  | No      |
|      |       |        |             |          |         | Hira        | 12.1667   | 4.6885  | -1.37575         | 12.1677      | 4.6895        | -1.3755505       | 0.00014629 | No      |
|      |       |        |             |          |         | Hist1h2ail1 | 1.01518   | 5.41987 | 2.41652          | 1.01618      | 5.42087       | 2.41536843       | 0.038352   | No      |
|      |       |        |             |          |         | Hist1h2bq   | 49.3657   | 151.381 | 1.6166           | 49.3667      | 151.382       | 1.61658356       | 0.00078603 | No      |
|      |       |        |             |          |         | HIST1H4B    | 1.18449   | 11.3793 | 3.26407          | 1.18549      | 11.3803       | 3.26298319       | 0.0229551  | No      |
|      |       |        |             |          |         | Hist2h2aa3  | 34.9764   | 294.108 | 3.07189          | 34.9774      | 294.109       | 3.07185598       | 0.00014629 | No      |
|      |       |        |             |          |         | HIST2H3C2   | 1.83136   | 9.66286 | 2.39954          | 1.83236      | 9.66386       | 2.39889658       | 0.0281556  | No      |
|      |       |        |             |          |         | Hist3h2a    | 7.70657   | 28.8588 | 1.90485          | 7.70757      | 28.8598       | 1.90471331       | 0.00014629 | No      |
|      |       |        |             |          |         | Hist3h2ba   | 9.45108   | 3.17212 | -1.57503         | 9.45208      | 3.17312       | -1.5747298       | 0.043497   | No      |
|      |       |        |             |          |         | Hivep1      | 5.7558    | 2.50219 | -1.20182         | 5.7568       | 2.50319       | -1.2014993       | 0.00014629 | No      |
|      |       |        |             |          |         | Hivep2      | 10.7154   | 1.66978 | -2.68196         | 10.7164      | 1.67078       | -2.6812267       | 0.00014629 | No      |
|      |       |        |             |          |         | Hk1         | 28.8811   | 44.8458 | 0.634849         | 28.8821      | 44.8468       | 0.6348294        | 0.00207488 | No      |
|      |       |        |             |          |         | Hk2         | 5.61767   | 1.21125 | -2.21348         | 5.61867      | 1.21225       | -2.2125414       | 0.00014629 | No      |
|      |       |        |             |          |         | Hlcs        | 4.65683   | 1.70902 | -1.44618         | 4.65783      | 1.71002       | -1.4456448       | 0.00014629 | No      |
|      |       |        |             |          |         | Hltf        | 30.1207   | 4.98375 | -2.59545         | 30.1217      | 4.98475       | -2.5952101       | 0.00014629 | No      |
|      |       |        |             |          |         | Hm13        | 96.1599   | 219.455 | 1.19042          | 96.1609      | 219.456       | 1.19040941       | 0.00014629 | No      |
|      |       |        |             |          |         | Hmbox1      | 16.0463   | 4.99499 | -1.68369         | 16.0473      | 4.99599       | -1.6834881       | 0.00014629 | No      |
|      |       |        |             |          |         | Hmbs        | 10.167    | 29.7217 | 1.54762          | 10.168       | 29.7227       | 1.54752924       | 0.00014629 | No      |
|      |       |        |             |          |         | Hmces       | 14.0544   | 24.9496 | 0.827992         | 14.0554      | 24.9506       | 0.82795          | 0.00597292 | No      |
|      |       |        |             |          |         | Hmcn2       | 0         | 1.67965 | inf              | 0.001        | 1.68065       | 10.7148036       | 0.00014629 | No      |
|      |       |        |             |          |         | Hmg20a      | 53.8142   | 9.8829  | -2.44498         | 53.8152      | 9.8839        | -2.4448614       | 0.00014629 | No      |
|      |       |        |             |          |         | HMGB1       | 100.006   | 69.0956 | -0.533417        | 100.007      | 69.0966       | -0.5334144       | 0.0251567  | No      |
|      |       |        |             |          |         | Hmgb2       | 470.719   | 39.9272 | -3.55942         | 470.72       | 39.9282       | -3.5593892       | 0.00014629 | No      |
|      |       |        |             |          |         | Hmgcl       | 18.8086   | 86.9685 | 2.2091           | 18.8096      | 86.9695       | 2.20904037       | 0.00014629 | No      |
|      |       |        |             |          |         | Hmgcr       | 15.4825   | 10.895  | -0.506977        | 15.4835      | 10.896        | -0.506933        | 0.029796   | No      |
|      |       |        |             |          |         | Hmgn2       | 167.993   | 109.748 | -0.614212        | 167.994      | 109.749       | -0.6142019       | 0.00078603 | No      |
|      |       |        |             |          |         | Hmgn3       | 24.1369   | 50.0259 | 1.05143          | 24.1379      | 50.0269       | 1.05140389       | 0.00014629 | No      |
|      |       |        |             |          |         | Hmgxb3      | 10.6185   | 17.8904 | 0.752616         | 10.6195      | 17.8914       | 0.75255044       | 0.00149937 | No      |
|      |       |        |             |          |         | Hmha1       | 329.165   | 57.6433 | -2.51358         | 329.166      | 57.6443       | -2.5135655       | 0.0313726  | No      |

| RRBS |       |        |             |          |         | RNAseq    |          |         |                  |              |               |                  |            |         |
|------|-------|--------|-------------|----------|---------|-----------|----------|---------|------------------|--------------|---------------|------------------|------------|---------|
| gene | Blood | Kidney | methyl.diff | pMWU.fdr | Match ? | gene      | blood    | kidney  | log2(fold_ratio) | blood+ 0.001 | kidney+ 0.001 | log2(fold_ratio) | q_value    | Match ? |
|      |       |        |             |          |         | Hmox1     | 0.216679 | 7.76034 | 5.16249          | 0.217679     | 7.76134       | 5.15603162       | 0.00066215 | No      |
|      |       |        |             |          |         | Hmox2     | 19.7631  | 56.6452 | 1.51915          | 19.7641      | 56.6462       | 1.51909692       | 0.00014629 | No      |
|      |       |        |             |          |         | Hn1       | 105.998  | 40.5672 | -1.38566         | 105.999      | 40.5682       | -1.3856295       | 0.00014629 | No      |
|      |       |        |             |          |         | Hnmt      | 0        | 18.7404 | inf              | 0.001        | 18.7414       | 14.1939411       | 0.00014629 | No      |
|      |       |        |             |          |         | Hnrnpa0   | 455.491  | 117.618 | -1.95331         | 455.492      | 117.619       | -1.9533046       | 0.00014629 | No      |
|      |       |        |             |          |         | HNRNPA1   | 879.999  | 114.722 | -2.93936         | 880          | 114.723       | -2.9393489       | 0.00014629 | No      |
|      |       |        |             |          |         | Hnrnpa2b1 | 639.67   | 238.945 | -1.42065         | 639.671      | 238.946       | -1.4206455       | 0.00014629 | No      |
|      |       |        |             |          |         | Hnrnpab   | 136.753  | 92.5853 | -0.562715        | 136.754      | 92.5863       | -0.5627124       | 0.00395247 | No      |
|      |       |        |             |          |         | Hnrnpdl   | 153.577  | 38.2425 | -2.00572         | 153.578      | 38.2435       | -2.0056851       | 0.00014629 | No      |
|      |       |        |             |          |         | Hnrnpf    | 318.468  | 104.571 | -1.60667         | 318.469      | 104.572       | -1.6066563       | 0.00014629 | No      |
|      |       |        |             |          |         | Hnrnp1    | 235.722  | 105.452 | -1.16049         | 235.723      | 105.453       | -1.1604924       | 0.00014629 | No      |
|      |       |        |             |          |         | Hnrnp2    | 46.4451  | 23.2584 | -0.997773        | 46.4461      | 23.2594       | -0.9977436       | 0.00014629 | No      |
|      |       |        |             |          |         | HNRNPH3   | 34.241   | 21.5406 | -0.66867         | 34.242       | 21.5416       | -0.6686416       | 0.00263402 | No      |
|      |       |        |             |          |         | Hnrnpk    | 323.824  | 156.405 | -1.04992         | 323.825      | 156.406       | -1.0499185       | 0.00014629 | No      |
|      |       |        |             |          |         | Hnrnpl    | 346.8    | 211.905 | -0.710686        | 346.801      | 211.906       | -0.7106836       | 0.00014629 | No      |
|      |       |        |             |          |         | Hnrnpm    | 176.12   | 85.7644 | -1.03811         | 176.121      | 85.7654       | -1.0380993       | 0.00014629 | No      |
|      |       |        |             |          |         | Hnrnpr    | 61.7512  | 31.1475 | -0.987352        | 61.7522      | 31.1485       | -0.9873278       | 0.00014629 | No      |
|      |       |        |             |          |         | Hnrnpu    | 250.642  | 74.6828 | -1.74678         | 250.643      | 74.6838       | -1.7467667       | 0.00014629 | No      |
|      |       |        |             |          |         | Hnrnpul2  | 94.3878  | 25.0291 | -1.915           | 94.3888      | 25.0301       | -1.9149516       | 0.00014629 | No      |
|      |       |        |             |          |         | Hnrpd     | 215.786  | 72.5006 | -1.57354         | 215.787      | 72.5016       | -1.5735232       | 0.00014629 | No      |
|      |       |        |             |          |         | Homer1    | 0.183187 | 2.35114 | 3.68198          | 0.184187     | 2.35214       | 3.67473079       | 0.00502315 | No      |
|      |       |        |             |          |         | Homer2    | 0        | 9.26571 | inf              | 0.001        | 9.26671       | 13.1778415       | 0.00014629 | No      |
|      |       |        |             |          |         | Homer3    | 5.90972  | 27.1188 | 2.19813          | 5.91072      | 27.1198       | 2.19794075       | 0.00014629 | No      |
|      |       |        |             |          |         | Hook1     | 0.450686 | 8.31838 | 4.20611          | 0.451686     | 8.31938       | 4.20308391       | 0.00014629 | No      |
|      |       |        |             |          |         | Hook2     | 2.46954  | 83.1768 | 5.07387          | 2.47054      | 83.1778       | 5.07330021       | 0.00014629 | No      |
|      |       |        |             |          |         | Hopx      | 10.5806  | 4.91944 | -1.10486         | 10.5816      | 4.92044       | -1.1046986       | 0.00438237 | No      |
|      |       |        |             |          |         | Hormad2   | 1.64679  | 11.5149 | 2.80577          | 1.64779      | 11.5159       | 2.80502287       | 0.00014629 | No      |
|      |       |        |             |          |         | Hoxa3     | 0        | 2.23519 | inf              | 0.001        | 2.23619       | 11.1268271       | 0.00014629 | No      |
|      |       |        |             |          |         | Hoxb2     | 0        | 36.1562 | inf              | 0.001        | 36.1572       | 15.1419953       | 0.00014629 | No      |
|      |       |        |             |          |         | Hp1bp3    | 89.5138  | 231.328 | 1.36976          | 89.5148      | 231.329       | 1.369748         | 0.0325224  | No      |
|      |       |        |             |          |         | Hpgds     | 1.00902  | 0       | -inf             | 1.01002      | 0.001         | -9.9801681       | 0.00014629 | No      |
|      |       |        |             |          |         | HPS1      | 17.6246  | 26.9467 | 0.612518         | 17.6256      | 26.9477       | 0.61248977       | 0.0355245  | No      |
|      |       |        |             |          |         | Hps3      | 21.424   | 8.64415 | -1.30943         | 21.425       | 8.64515       | -1.3093323       | 0.0393825  | No      |
|      |       |        |             |          |         | Hps4      | 9.52967  | 31.1478 | 1.70863          | 9.53067      | 31.1488       | 1.70852704       | 0.00014629 | No      |
|      |       |        |             |          |         | Hps6      | 3.69503  | 2.07703 | -0.831062        | 3.69603      | 2.07803       | -0.83076         | 0.031196   | No      |
|      |       |        |             |          |         | Hpse      | 19.7468  | 1.57908 | -3.64446         | 19.7478      | 1.58008       | -3.6436224       | 0.00014629 | No      |
|      |       |        |             |          |         | Hr        | 0.170024 | 1.89615 | 3.47927          | 0.171024     | 1.89715       | 3.47156305       | 0.00341151 | No      |
|      |       |        |             |          |         | Hrct1     | 0        | 9.07479 | inf              | 0.001        | 9.07579       | 13.1478075       | 0.00014629 | No      |
|      |       |        |             |          |         | Hrg       | 0        | 3.49745 | inf              | 0.001        | 3.49845       | 11.7725002       | 0.00014629 | No      |
|      |       |        |             |          |         | Hrsp12    | 33.9993  | 2042.46 | 5.90866          | 34.0003      | 2042.461      | 5.90861724       | 0.00014629 | No      |
|      |       |        |             |          |         | Hs1bp3    | 5.6766   | 16.1372 | 1.50729          | 5.6776       | 16.1382       | 1.50712656       | 0.00014629 | No      |
|      |       |        |             |          |         | Hs2st1    | 16.9023  | 6.23201 | -1.43945         | 16.9033      | 6.23301       | -1.439304        | 0.00014629 | No      |

| RRBS |       |        |             |          |         | RNAseq   |           |          |                  |              |               |                  |            |         |
|------|-------|--------|-------------|----------|---------|----------|-----------|----------|------------------|--------------|---------------|------------------|------------|---------|
| gene | Blood | Kidney | methyl.diff | pMWU.fdr | Match ? | gene     | blood     | kidney   | log2(fold_ratio) | blood+ 0.001 | kidney+ 0.001 | log2(fold_ratio) | q_value    | Match ? |
|      |       |        |             |          |         | Hs3st1   | 4.10718   | 0.857804 | -2.25943         | 4.10818      | 0.858804      | -2.2580986       | 0.031283   | No      |
|      |       |        |             |          |         | Hsbp1    | 68.7685   | 276.27   | 2.00626          | 68.7695      | 276.271       | 2.00624337       | 0.00014629 | No      |
|      |       |        |             |          |         | Hscb     | 37.3424   | 20.3152  | -0.878254        | 37.3434      | 20.3162       | -0.8782227       | 0.00114835 | No      |
|      |       |        |             |          |         | Hsd11b1  | 5.86357   | 151.755  | 4.69382          | 5.86457      | 151.756       | 4.69358442       | 0.00014629 | No      |
|      |       |        |             |          |         | Hsd17b10 | 81.024    | 251.898  | 1.63642          | 81.025       | 251.899       | 1.63640637       | 0.00014629 | No      |
|      |       |        |             |          |         | Hsd17b11 | 19.1968   | 36.9401  | 0.944318         | 19.1978      | 36.9411       | 0.94428583       | 0.00014629 | No      |
|      |       |        |             |          |         | Hsd17b2  | 0         | 3.74535  | inf              | 0.001        | 3.74635       | 11.87127         | 0.00014629 | No      |
|      |       |        |             |          |         | Hsd17b4  | 16.5369   | 86.5899  | 2.38851          | 16.5379      | 86.5909       | 2.38843937       | 0.00014629 | No      |
|      |       |        |             |          |         | Hsd17b8  | 71.3095   | 121.957  | 0.774206         | 71.3105      | 121.958       | 0.77419797       | 0.015456   | No      |
|      |       |        |             |          |         | Hsd3b7   | 29.7914   | 16.9968  | -0.809633        | 29.7924      | 16.9978       | -0.8095963       | 0.00041099 | No      |
|      |       |        |             |          |         | Hsdl1    | 20.3689   | 10.0765  | -1.01537         | 20.3699      | 10.0775       | -1.0153011       | 0.00014629 | No      |
|      |       |        |             |          |         | Hsdl2    | 7.15028   | 42.5139  | 2.57186          | 7.15128      | 42.5149       | 2.57169515       | 0.00014629 | No      |
|      |       |        |             |          |         | Hsf2     | 3.82572   | 9.33758  | 1.28732          | 3.82672      | 9.33858       | 1.28709485       | 0.00014629 | No      |
|      |       |        |             |          |         | Hsh2d    | 23.7581   | 3.71684  | -2.67627         | 23.7591      | 3.71784       | -2.6759436       | 0.00014629 | No      |
|      |       |        |             |          |         | Hsp90aa1 | 102.201   | 193.462  | 0.920635         | 102.202      | 193.463       | 0.92063425       | 0.00014629 | No      |
|      |       |        |             |          |         | Hsp90b1  | 96.0101   | 126.85   | 0.401865         | 96.0111      | 126.851       | 0.40186178       | 0.0409578  | No      |
|      |       |        |             |          |         | Hspa5    | 202.352   | 148.532  | -0.446091        | 202.353      | 148.533       | -0.4460907       | 0.024968   | No      |
|      |       |        |             |          |         | Hspa9    | 54.085    | 100.488  | 0.893728         | 54.086       | 100.489       | 0.89371048       | 0.00014629 | No      |
|      |       |        |             |          |         | Hspb6    | 5.16532   | 26.3134  | 2.34887          | 5.16632      | 26.3144       | 2.34864359       | 0.00014629 | No      |
|      |       |        |             |          |         | Hspb8    | 0         | 3.01204  | inf              | 0.001        | 3.01304       | 11.5570041       | 0.00014629 | No      |
|      |       |        |             |          |         | Hspbap1  | 29.7255   | 44.6163  | 0.58587          | 29.7265      | 44.6173       | 0.5858536        | 0.0371418  | No      |
|      |       |        |             |          |         | Hsbbp1   | 15.4944   | 42.8842  | 1.4687           | 15.4954      | 42.8852       | 1.46863985       | 0.00014629 | No      |
|      |       |        |             |          |         | Hspd1    | 64.7021   | 190.754  | 1.55983          | 64.7031      | 190.755       | 1.55981413       | 0.00014629 | No      |
|      |       |        |             |          |         | Hspe1    | 200.31    | 593.166  | 1.5662           | 200.311      | 593.167       | 1.56619669       | 0.00014629 | No      |
|      |       |        |             |          |         | Hspg2    | 0.0131609 | 28.9012  | 11.1007          | 0.0141609    | 28.9022       | 10.9950506       | 0.00014629 | No      |
|      |       |        |             |          |         | Htati2   | 15.8625   | 10.245   | -0.630694        | 15.8635      | 10.246        | -0.6306503       | 0.0360576  | No      |
|      |       |        |             |          |         | Htatsf1  | 43.5132   | 23.1165  | -0.912531        | 43.5142      | 23.1175       | -0.9125009       | 0.00014629 | No      |
|      |       |        |             |          |         | Htra1    | 0         | 37.2557  | inf              | 0.001        | 37.2567       | 15.1852123       | 0.00014629 | No      |
|      |       |        |             |          |         | Htt      | 8.91824   | 3.31844  | -1.42626         | 8.91924      | 3.31944       | -1.4259809       | 0.00014629 | No      |
|      |       |        |             |          |         | Hunk     | 0         | 1.04009  | inf              | 0.001        | 1.04109       | 10.0238791       | 0.00138312 | No      |
|      |       |        |             |          |         | Huwe1    | 122.624   | 25.1295  | -2.28679         | 122.625      | 25.1305       | -2.2867419       | 0.00014629 | No      |
|      |       |        |             |          |         | Hvcn1    | 3.55184   | 0        | -inf             | 3.55284      | 0.001         | -11.794757       | 0.0183831  | No      |
|      |       |        |             |          |         | Hyal1    | 12.268    | 22.3554  | 0.865722         | 12.269       | 22.3564       | 0.86567023       | 0.00090728 | No      |
|      |       |        |             |          |         | Hyal2    | 0.646683  | 14.9662  | 4.53251          | 0.647683     | 14.9672       | 4.53037267       | 0.00014629 | No      |
|      |       |        |             |          |         | Hyi      | 8.08329   | 49.4398  | 2.61266          | 8.08429      | 49.4408       | 2.61250911       | 0.00659461 | No      |
|      |       |        |             |          |         | Hykk     | 0         | 39.7313  | inf              | 0.001        | 39.7323       | 15.2780247       | 0.00014629 | No      |
|      |       |        |             |          |         | Hyou1    | 14.644    | 10.8218  | -0.436363        | 14.645       | 10.8228       | -0.4363344       | 0.0464366  | No      |
|      |       |        |             |          |         | Hypk     | 174.704   | 244.423  | 0.484465         | 174.705      | 244.424       | 0.48446505       | 0.0333784  | No      |
|      |       |        |             |          |         | lah1     | 81.4029   | 308.961  | 1.92427          | 81.4039      | 308.962       | 1.92425959       | 0.00014629 | No      |
|      |       |        |             |          |         | lars     | 17.5474   | 9.5726   | -0.874276        | 17.5484      | 9.5736        | -0.8742061       | 0.00161718 | No      |
|      |       |        |             |          |         | lba57    | 2.78386   | 9.68865  | 1.79921          | 2.78486      | 9.68965       | 1.79883975       | 0.00014629 | No      |
|      |       |        |             |          |         | lbtck    | 18.5647   | 9.9236   | -0.903624        | 18.5657      | 9.9246        | -0.9035588       | 0.00028114 | No      |

| RRBS |       |        |             |          |         | RNAseq   |          |         |                  |              |               |                  |            |         |
|------|-------|--------|-------------|----------|---------|----------|----------|---------|------------------|--------------|---------------|------------------|------------|---------|
| gene | Blood | Kidney | methyl.diff | pMWU.fdr | Match ? | gene     | blood    | kidney  | log2(fold_ratio) | blood+ 0.001 | kidney+ 0.001 | log2(fold_ratio) | q_value    | Match ? |
|      |       |        |             |          |         | lca1     | 0.367115 | 10.1112 | 4.78357          | 0.368115     | 10.1122       | 4.77979655       | 0.00014629 | No      |
|      |       |        |             |          |         | lcam1    | 3.75343  | 12.4917 | 1.73468          | 3.75443      | 12.4927       | 1.73441952       | 0.00014629 | No      |
|      |       |        |             |          |         | lcam2    | 154.405  | 40.9071 | -1.9163          | 154.406      | 40.9081       | -1.9162704       | 0.00014629 | No      |
|      |       |        |             |          |         | lcos     | 42.0106  | 2.26106 | -4.21568         | 42.0116      | 2.26206       | -4.2150786       | 0.00014629 | No      |
|      |       |        |             |          |         | lcoslg   | 3.25919  | 28.0926 | 3.10761          | 3.26019      | 28.0936       | 3.10721356       | 0.00014629 | No      |
|      |       |        |             |          |         | lct1     | 36.9819  | 91.7465 | 1.31083          | 36.9829      | 91.7475       | 1.31081049       | 0.00014629 | No      |
|      |       |        |             |          |         | ld3      | 55.3925  | 104.04  | 0.909379         | 55.3935      | 104.041       | 0.90936357       | 0.00014629 | No      |
|      |       |        |             |          |         | lde      | 18.5889  | 32.721  | 0.815774         | 18.5899      | 32.722        | 0.81574192       | 0.00241835 | No      |
|      |       |        |             |          |         | ldh1     | 6.10627  | 210.965 | 5.11057          | 6.10727      | 210.966       | 5.11033907       | 0.00014629 | No      |
|      |       |        |             |          |         | ldh2     | 13.6484  | 560.971 | 5.36112          | 13.6494      | 560.972       | 5.36101932       | 0.00014629 | No      |
|      |       |        |             |          |         | ldh3a    | 34.0231  | 63.6013 | 0.902542         | 34.0241      | 63.6023       | 0.90252194       | 0.00014629 | No      |
|      |       |        |             |          |         | ldh3B    | 58.9919  | 159.467 | 1.43467          | 58.9929      | 159.468       | 1.43465371       | 0.00014629 | No      |
|      |       |        |             |          |         | ldh3g    | 94.2013  | 293.636 | 1.64021          | 94.2023      | 293.637       | 1.64019958       | 0.00014629 | No      |
|      |       |        |             |          |         | ldi1     | 3.30207  | 9.14992 | 1.47039          | 3.30307      | 9.15092       | 1.47010925       | 0.00078603 | No      |
|      |       |        |             |          |         | lds      | 15.4539  | 9.08817 | -0.765913        | 15.4549      | 9.08917       | -0.7658439       | 0.0257873  | No      |
|      |       |        |             |          |         | ldua     | 40.4732  | 19.3983 | -1.06103         | 40.4742      | 19.3993       | -1.060998        | 0.00014629 | No      |
|      |       |        |             |          |         | ler2     | 30.2398  | 66.5579 | 1.13816          | 30.2408      | 66.5589       | 1.13813529       | 0.00014629 | No      |
|      |       |        |             |          |         | ler3     | 1.46117  | 77.3081 | 5.72542          | 1.46217      | 77.3091       | 5.72445528       | 0.00014629 | No      |
|      |       |        |             |          |         | ler5     | 20.2757  | 9.13784 | -1.14982         | 20.2767      | 9.13884       | -1.1497399       | 0.00263402 | No      |
|      |       |        |             |          |         | lffo1    | 51.5788  | 31.0057 | -0.734245        | 51.5798      | 31.0067       | -0.7342262       | 0.00427532 | No      |
|      |       |        |             |          |         | lfi202b  | 352.79   | 5.90347 | -5.9011          | 352.791      | 5.90447       | -5.9008624       | 0.00014629 | No      |
|      |       |        |             |          |         | lfi27    | 388.133  | 143.721 | -1.43328         | 388.134      | 143.722       | -1.4332739       | 0.00014629 | No      |
|      |       |        |             |          |         | lfi27l2b | 1246.8   | 70.0984 | -4.1527          | 1246.801     | 70.0994       | -4.1526853       | 0.00014629 | No      |
|      |       |        |             |          |         | lfi44    | 81.2149  | 32.096  | -1.33935         | 81.2159      | 32.097        | -1.3393237       | 0.00014629 | No      |
|      |       |        |             |          |         | lfi44l   | 60.7211  | 4.4038  | -3.78538         | 60.7221      | 4.4048        | -3.7850733       | 0.00014629 | No      |
|      |       |        |             |          |         | lfi47    | 51.7713  | 3.8774  | -3.73899         | 51.7723      | 3.8784        | -3.7386469       | 0.00014629 | No      |
|      |       |        |             |          |         | lfih1    | 6.66198  | 1.75594 | -1.92371         | 6.66298      | 1.75694       | -1.9231026       | 0.00014629 | No      |
|      |       |        |             |          |         | lfit1b   | 10.7404  | 27.6897 | 1.3663           | 10.7414      | 27.6907       | 1.36621948       | 0.00014629 | No      |
|      |       |        |             |          |         | lfitm1   | 450.799  | 22.8669 | -4.30115         | 450.8        | 22.8679       | -4.3010917       | 0.00014629 | No      |
|      |       |        |             |          |         | lfitm2   | 161.933  | 239.895 | 0.567007         | 161.934      | 239.896       | 0.56700317       | 0.0426261  | No      |
|      |       |        |             |          |         | lFNAR1   | 55.4321  | 7.75274 | -2.83794         | 55.4331      | 7.75374       | -2.8377834       | 0.00014629 | No      |
|      |       |        |             |          |         | lfnar2   | 12.3754  | 3.65002 | -1.7615          | 12.3764      | 3.65102       | -1.7612203       | 0.00014629 | No      |
|      |       |        |             |          |         | lfngr1   | 57.5058  | 20.2187 | -1.50802         | 57.5068      | 20.2197       | -1.507971        | 0.00014629 | No      |
|      |       |        |             |          |         | lfngr2   | 22.1721  | 9.19586 | -1.26969         | 22.1731      | 9.19686       | -1.2695972       | 0.00014629 | No      |
|      |       |        |             |          |         | lft122   | 0.821527 | 22.642  | 4.78455          | 0.822527     | 22.643        | 4.78285827       | 0.00014629 | No      |
|      |       |        |             |          |         | lft140   | 4.06529  | 15.2868 | 1.91086          | 4.06629      | 15.2878       | 1.9105958        | 0.00014629 | No      |
|      |       |        |             |          |         | lft172   | 2.67776  | 35.4565 | 3.72695          | 2.67876      | 35.4575       | 3.72645358       | 0.00014629 | No      |
|      |       |        |             |          |         | lft20    | 46.8723  | 71.4836 | 0.608876         | 46.8733      | 71.4846       | 0.60886611       | 0.00384649 | No      |
|      |       |        |             |          |         | lft27    | 9.38508  | 15.6277 | 0.735661         | 9.38608      | 15.6287       | 0.73560312       | 0.0213766  | No      |
|      |       |        |             |          |         | lft43    | 0.75274  | 17.3122 | 4.5235           | 0.75374      | 17.3132       | 4.52166164       | 0.00014629 | No      |
|      |       |        |             |          |         | lft46    | 13.3589  | 49.6694 | 1.89455          | 13.3599      | 49.6704       | 1.89447716       | 0.00014629 | No      |
|      |       |        |             |          |         | lft52    | 14.6071  | 27.5681 | 0.916327         | 14.6081      | 27.5691       | 0.91628362       | 0.00028114 | No      |



| RRBS |       |        |             |          |         | RNAseq  |           |          |                  |              |               |                  |            |         |
|------|-------|--------|-------------|----------|---------|---------|-----------|----------|------------------|--------------|---------------|------------------|------------|---------|
| gene | Blood | Kidney | methyl.diff | pMWU.fdr | Match ? | gene    | blood     | kidney   | log2(fold_ratio) | blood+ 0.001 | kidney+ 0.001 | log2(fold_ratio) | q_value    | Match ? |
|      |       |        |             |          |         | lft57   | 0.8235    | 19.4497  | 4.56183          | 0.8245       | 19.4507       | 4.56015877       | 0.00014629 | No      |
|      |       |        |             |          |         | lft74   | 11.7217   | 3.95096  | -1.56891         | 11.7227      | 3.95196       | -1.5686646       | 0.00864487 | No      |
|      |       |        |             |          |         | lft80   | 25.1092   | 5.93806  | -2.08015         | 25.1102      | 5.93906       | -2.079967        | 0.00014629 | No      |
|      |       |        |             |          |         | lft81   | 2.05338   | 11.6743  | 2.50726          | 2.05438      | 11.6753       | 2.50668465       | 0.00014629 | No      |
|      |       |        |             |          |         | lgbp1   | 64.8243   | 37.1505  | -0.803154        | 64.8253      | 37.1515       | -0.8031365       | 0.00102864 | No      |
|      |       |        |             |          |         | lgf1    | 0         | 13.9831  | inf              | 0.001        | 13.9841       | 13.7714998       | 0.00014629 | No      |
|      |       |        |             |          |         | lgf1r   | 13.6871   | 4.54894  | -1.58921         | 13.6881      | 4.54994       | -1.5890028       | 0.00014629 | No      |
|      |       |        |             |          |         | lgfals  | 0.264035  | 4.29443  | 4.02367          | 0.265035     | 4.29543       | 4.01854776       | 0.00274649 | No      |
|      |       |        |             |          |         | lgfbp1  | 0         | 19.4981  | inf              | 0.001        | 19.4991       | 14.2511199       | 0.00014629 | No      |
|      |       |        |             |          |         | lgfbp2  | 0         | 47.8148  | inf              | 0.001        | 47.8158       | 15.5451998       | 0.00014629 | No      |
|      |       |        |             |          |         | lgfbp4  | 1.28494   | 28.5643  | 4.47444          | 1.28594      | 28.5653       | 4.47336845       | 0.00014629 | No      |
|      |       |        |             |          |         | IGG-2A  | 252.382   | 24.8478  | -3.34442         | 252.383      | 24.8488       | -3.3443666       | 0.00014629 | No      |
|      |       |        |             |          |         | IGJ     | 22.1131   | 2.18655  | -3.33818         | 22.1141      | 2.18755       | -3.3375786       | 0.0242332  | No      |
|      |       |        |             |          |         | lgkc    | 140.927   | 6.87068  | -4.35835         | 140.928      | 6.87168       | -4.3581516       | 0.00014629 | No      |
|      |       |        |             |          |         | lglon5  | 0.149914  | 2.01156  | 3.74611          | 0.150914     | 2.01256       | 3.73723324       | 0.0166081  | No      |
|      |       |        |             |          |         | lgsf1   | 0         | 1.83386  | inf              | 0.001        | 1.83486       | 10.8414543       | 0.00669647 | No      |
|      |       |        |             |          |         | lgsf23  | 1.93613   | 5.4168   | 1.48426          | 1.93713      | 5.4178        | 1.48378636       | 0.0177285  | No      |
|      |       |        |             |          |         | lgsf3   | 0.0345367 | 4.78436  | 7.11405          | 0.0355367    | 4.78536       | 7.07317394       | 0.00014629 | No      |
|      |       |        |             |          |         | lgsf9   | 1.3354    | 9.61252  | 2.84765          | 1.3364       | 9.61352       | 2.84671288       | 0.00014629 | No      |
|      |       |        |             |          |         | lgtp    | 38.859    | 23.3209  | -0.736628        | 38.86        | 23.3219       | -0.7366006       | 0.00090728 | No      |
|      |       |        |             |          |         | lkbip   | 4.25887   | 8.97602  | 1.07561          | 4.25987      | 8.97702       | 1.07542721       | 0.0113536  | No      |
|      |       |        |             |          |         | lkbkap  | 8.1464    | 3.86588  | -1.07537         | 8.1474       | 3.86688       | -1.0751697       | 0.0280617  | No      |
|      |       |        |             |          |         | lkbkb   | 55.9435   | 33.9067  | -0.722399        | 55.9445      | 33.9077       | -0.7223834       | 0.00066215 | No      |
|      |       |        |             |          |         | lkbke   | 113.279   | 60.7838  | -0.898119        | 113.28       | 60.7848       | -0.8981107       | 0.00161718 | No      |
|      |       |        |             |          |         | lkbkg   | 13.9057   | 6.02296  | -1.20713         | 13.9067      | 6.02396       | -1.206996        | 0.00352183 | No      |
|      |       |        |             |          |         | lkzf1   | 225.896   | 7.59397  | -4.89466         | 225.897      | 7.59497       | -4.894477        | 0.00014629 | No      |
|      |       |        |             |          |         | lkzf2   | 11.5365   | 0.915951 | -3.6548          | 11.5375      | 0.916951      | -3.6533422       | 0.00014629 | No      |
|      |       |        |             |          |         | lkzf3   | 57.5038   | 1.6404   | -5.13154         | 57.5048      | 1.6414        | -5.1306836       | 0.00014629 | No      |
|      |       |        |             |          |         | lkzf5   | 14.3221   | 3.22506  | -2.15085         | 14.3231      | 3.22606       | -2.1504986       | 0.00014629 | No      |
|      |       |        |             |          |         | ll10rb  | 26.7237   | 12.0434  | -1.14988         | 26.7247      | 12.0444       | -1.1498112       | 0.00014629 | No      |
|      |       |        |             |          |         | ll11ra1 | 0.0556842 | 44.169   | 9.63155          | 0.0566842    | 44.17         | 9.60590446       | 0.0309347  | No      |
|      |       |        |             |          |         | ll12rb1 | 2.61862   | 11.9397  | 2.18889          | 2.61962      | 11.9407       | 2.18845796       | 0.00014629 | No      |
|      |       |        |             |          |         | ll12rb2 | 3.33953   | 1.18835  | -1.49069         | 3.34053      | 1.18935       | -1.4899037       | 0.00252712 | No      |
|      |       |        |             |          |         | ll13ra1 | 0.150426  | 9.274    | 5.94607          | 0.151426     | 9.275         | 5.93666244       | 0.00802631 | No      |
|      |       |        |             |          |         | ll16    | 43.9923   | 3.21903  | -3.77255         | 43.9933      | 3.22003       | -3.7721378       | 0.00014629 | No      |
|      |       |        |             |          |         | ll17ra  | 35.7794   | 25.2664  | -0.501908        | 35.7804      | 25.2674       | -0.5018923       | 0.0153615  | No      |
|      |       |        |             |          |         | ll17re  | 0.151209  | 7.23568  | 5.58051          | 0.152209     | 7.23668       | 5.57120241       | 0.00184429 | No      |
|      |       |        |             |          |         | ll18bp  | 8.24956   | 20.1341  | 1.28725          | 8.25056      | 20.1351       | 1.28714869       | 0.00041099 | No      |
|      |       |        |             |          |         | ll18r1  | 19.2966   | 1.17029  | -4.04341         | 19.2976      | 1.17129       | -4.0422512       | 0.00014629 | No      |
|      |       |        |             |          |         | ll18RAP | 10.1826   | 1.93826  | -2.39326         | 10.1836      | 1.93926       | -2.3926695       | 0.00014629 | No      |
|      |       |        |             |          |         | ll1b    | 2.14395   | 9.16459  | 2.0958           | 2.14495      | 9.16559       | 2.09528373       | 0.00014629 | No      |
|      |       |        |             |          |         | ll1rn   | 0.510103  | 2.22164  | 2.12276          | 0.511103     | 2.22264       | 2.12058833       | 0.00812679 | No      |

| RRBS |       |        |             |          |         | RNAseq  |          |          |                  |              |               |                  |            |         |
|------|-------|--------|-------------|----------|---------|---------|----------|----------|------------------|--------------|---------------|------------------|------------|---------|
| gene | Blood | Kidney | methyl.diff | pMWU.fdr | Match ? | gene    | blood    | kidney   | log2(fold_ratio) | blood+ 0.001 | kidney+ 0.001 | log2(fold_ratio) | q_value    | Match ? |
|      |       |        |             |          |         | Il21r   | 150.871  | 2.80913  | -5.74705         | 150.872      | 2.81013       | -5.7465444       | 0.00014629 | No      |
|      |       |        |             |          |         | Il2ra   | 19.0893  | 5.0514   | -1.91801         | 19.0903      | 5.0524        | -1.917799        | 0.00014629 | No      |
|      |       |        |             |          |         | Il2rb   | 81.9105  | 8.04803  | -3.34734         | 81.9115      | 8.04903       | -3.3471792       | 0.00014629 | No      |
|      |       |        |             |          |         | Il2rg   | 523.462  | 17.9089  | -4.86934         | 523.463      | 17.9099       | -4.8692584       | 0.00014629 | No      |
|      |       |        |             |          |         | Il33    | 0.143291 | 21.357   | 7.21962          | 0.144291     | 21.358        | 7.20965143       | 0.0285184  | No      |
|      |       |        |             |          |         | Il34    | 0.113609 | 25.257   | 7.79647          | 0.114609     | 25.258        | 7.78387626       | 0.00207488 | No      |
|      |       |        |             |          |         | Il4r    | 152.813  | 27.9284  | -2.45196         | 152.814      | 27.9294       | -2.4519202       | 0.00014629 | No      |
|      |       |        |             |          |         | Il6r    | 53.0728  | 1.01911  | -5.7026          | 53.0738      | 1.02011       | -5.7012032       | 0.00014629 | No      |
|      |       |        |             |          |         | Il6st   | 29.035   | 7.14201  | -2.02339         | 29.036       | 7.14301       | -2.0232387       | 0.00014629 | No      |
|      |       |        |             |          |         | Illdr1  | 0.403027 | 16.0852  | 5.31872          | 0.404027     | 16.0862       | 5.31522804       | 0.00053701 | No      |
|      |       |        |             |          |         | Ilf2    | 41.1182  | 65.8898  | 0.680278         | 41.1192      | 65.8908       | 0.68026485       | 0.00078603 | No      |
|      |       |        |             |          |         | Ilf3    | 29.3542  | 18.9347  | -0.632533        | 29.3552      | 18.9357       | -0.6325073       | 0.0380901  | No      |
|      |       |        |             |          |         | Ilvbl   | 5.86542  | 11.6682  | 0.992276         | 5.86642      | 11.6692       | 0.99215339       | 0.00028114 | No      |
|      |       |        |             |          |         | Immmp2l | 7.02281  | 43.5701  | 2.63322          | 7.02381      | 43.5711       | 2.63304581       | 0.00149937 | No      |
|      |       |        |             |          |         | Immt    | 53.2332  | 149.687  | 1.49155          | 53.2342      | 149.688       | 1.49153327       | 0.00014629 | No      |
|      |       |        |             |          |         | Imp3    | 52.2675  | 72.0939  | 0.463964         | 52.2685      | 72.0949       | 0.46395545       | 0.0400829  | No      |
|      |       |        |             |          |         | Impa2   | 15.4252  | 56.0088  | 1.86036          | 15.4262      | 56.0098       | 1.86029656       | 0.00014629 | No      |
|      |       |        |             |          |         | Impact  | 94.8081  | 9.39405  | -3.33519         | 94.8091      | 9.39505       | -3.3350528       | 0.00014629 | No      |
|      |       |        |             |          |         | Impdh1  | 45.8676  | 5.94623  | -2.94743         | 45.8686      | 5.94723       | -2.9472171       | 0.00014629 | No      |
|      |       |        |             |          |         | Impdh2  | 285.654  | 62.179   | -2.19977         | 285.655      | 62.18         | -2.1997513       | 0.00014629 | No      |
|      |       |        |             |          |         | Inadl   | 6.6235   | 32.4825  | 2.294            | 6.6245       | 32.4835       | 2.29382361       | 0.00014629 | No      |
|      |       |        |             |          |         | Ing1    | 86.1111  | 18.2272  | -2.24011         | 86.1121      | 18.2282       | -2.2400439       | 0.00014629 | No      |
|      |       |        |             |          |         | Ing3    | 21.4419  | 3.99879  | -2.4228          | 21.4429      | 3.99979       | -2.4225039       | 0.00014629 | No      |
|      |       |        |             |          |         | Ing5    | 11.1683  | 4.81018  | -1.21524         | 11.1693      | 4.81118       | -1.2150761       | 0.00028114 | No      |
|      |       |        |             |          |         | Inmt    | 0        | 70.9119  | inf              | 0.001        | 70.9129       | 16.1137605       | 0.00014629 | No      |
|      |       |        |             |          |         | Ino80   | 16.3794  | 5.27656  | -1.63421         | 16.3804      | 5.27756       | -1.6340276       | 0.00014629 | No      |
|      |       |        |             |          |         | Ino80b  | 23.9582  | 15.365   | -0.640871        | 23.9592      | 15.366        | -0.6408381       | 0.0218441  | No      |
|      |       |        |             |          |         | Inpp4b  | 31.1967  | 1.23681  | -4.6567          | 31.1977      | 1.23781       | -4.6555779       | 0.00014629 | No      |
|      |       |        |             |          |         | Inpp5d  | 28.8598  | 2.38752  | -3.59547         | 28.8608      | 2.38852       | -3.5949224       | 0.00014629 | No      |
|      |       |        |             |          |         | Inpp5j  | 0        | 15.3491  | inf              | 0.001        | 15.3501       | 13.9059604       | 0.00014629 | No      |
|      |       |        |             |          |         | Inpp5k  | 29.8404  | 12.8858  | -1.21149         | 29.8414      | 12.8868       | -1.2114212       | 0.00014629 | No      |
|      |       |        |             |          |         | Insig2  | 5.40237  | 8.7207   | 0.690851         | 5.40337      | 8.7217        | 0.69074989       | 0.0123523  | No      |
|      |       |        |             |          |         | Ints1   | 22.4003  | 67.022   | 1.58112          | 22.4013      | 67.023        | 1.58107381       | 0.00014629 | No      |
|      |       |        |             |          |         | Ints10  | 22.9469  | 14.5801  | -0.654294        | 22.9479      | 14.5811       | -0.6542626       | 0.0116551  | No      |
|      |       |        |             |          |         | Ints2   | 5.7993   | 1.94885  | -1.57325         | 5.8003       | 1.94985       | -1.5727644       | 0.00138312 | No      |
|      |       |        |             |          |         | INTS6   | 36.8102  | 5.71049  | -2.68842         | 36.8112      | 5.71149       | -2.6882057       | 0.00014629 | No      |
|      |       |        |             |          |         | Ints7   | 7.94647  | 5.40234  | -0.556729        | 7.94747      | 5.40334       | -0.5566442       | 0.0226712  | No      |
|      |       |        |             |          |         | Ip6k1   | 62.678   | 34.8087  | -0.84851         | 62.679       | 34.8097       | -0.8484928       | 0.00014629 | No      |
|      |       |        |             |          |         | Ip6k2   | 50.3408  | 29.8459  | -0.754195        | 50.3418      | 29.8469       | -0.7541757       | 0.00114835 | No      |
|      |       |        |             |          |         | Ipcef1  | 27.0239  | 0.474722 | -5.83101         | 27.0249      | 0.475722      | -5.8280267       | 0.00014629 | No      |
|      |       |        |             |          |         | Ipmk    | 5.24038  | 22.1962  | 2.08257          | 5.24138      | 22.1972       | 2.08235909       | 0.00014629 | No      |
|      |       |        |             |          |         | Ipo5    | 35.4674  | 23.7877  | -0.576277        | 35.4684      | 23.7887       | -0.5762578       | 0.00395247 | No      |

| RRBS |       |        |             |          |         | RNAseq   |           |         |                  |              |               |                  |            |         |
|------|-------|--------|-------------|----------|---------|----------|-----------|---------|------------------|--------------|---------------|------------------|------------|---------|
| gene | Blood | Kidney | methyl.diff | pMWU.fdr | Match ? | gene     | blood     | kidney  | log2(fold_ratio) | blood+ 0.001 | kidney+ 0.001 | log2(fold_ratio) | q_value    | Match ? |
|      |       |        |             |          |         | lpo7     | 26.8167   | 13.8856 | -0.949539        | 26.8177      | 13.8866       | -0.9494921       | 0.00014629 | No      |
|      |       |        |             |          |         | lpo8     | 9.46914   | 5.12444 | -0.885838        | 9.47014      | 5.12544       | -0.8857099       | 0.00363169 | No      |
|      |       |        |             |          |         | lpo9     | 30.1395   | 7.64671 | -1.97874         | 30.1405      | 7.64771       | -1.9786036       | 0.00014629 | No      |
|      |       |        |             |          |         | lpp      | 10.0737   | 27.5522 | 1.45158          | 10.0747      | 27.5532       | 1.451483         | 0.00014629 | No      |
|      |       |        |             |          |         | lqcb1    | 7.4797    | 3.74151 | -0.999361        | 7.4807       | 3.74251       | -0.9991671       | 0.00173187 | No      |
|      |       |        |             |          |         | lqce     | 1.20512   | 7.86152 | 2.70563          | 1.20612      | 7.86252       | 2.70461833       | 0.00014629 | No      |
|      |       |        |             |          |         | lqch     | 11.8039   | 55.4696 | 2.23244          | 11.8049      | 55.4706       | 2.23233751       | 0.00014629 | No      |
|      |       |        |             |          |         | lqgap1   | 57.7906   | 10.7288 | -2.42935         | 57.7916      | 10.7298       | -2.4292366       | 0.00014629 | No      |
|      |       |        |             |          |         | lqgap2   | 46.4239   | 10.6078 | -2.12975         | 46.4249      | 10.6088       | -2.1296373       | 0.00014629 | No      |
|      |       |        |             |          |         | lqsec1   | 3.50927   | 54.9752 | 3.96954          | 3.51027      | 54.9762       | 3.96915328       | 0.00014629 | No      |
|      |       |        |             |          |         | lqsec2   | 1.05771   | 5.4851  | 2.37458          | 1.05871      | 5.4861        | 2.37347346       | 0.00014629 | No      |
|      |       |        |             |          |         | lqub     | 0.659199  | 4.8484  | 2.87872          | 0.660199     | 4.8494        | 2.8768334        | 0.00207488 | No      |
|      |       |        |             |          |         | Irak1    | 44.3295   | 24.3677 | -0.863297        | 44.3305      | 24.3687       | -0.8632703       | 0.00014629 | No      |
|      |       |        |             |          |         | IRAK1BP1 | 0.33533   | 21.0777 | 5.97399          | 0.33633      | 21.0787       | 5.96976461       | 0.00014629 | No      |
|      |       |        |             |          |         | Irak2    | 9.73396   | 15.0007 | 0.62393          | 9.73496      | 15.0017       | 0.62387904       | 0.0175479  | No      |
|      |       |        |             |          |         | Irak3    | 17.302    | 6.12854 | -1.49733         | 17.303       | 6.12954       | -1.4971715       | 0.00014629 | No      |
|      |       |        |             |          |         | Irak4    | 14.077    | 3.84783 | -1.87123         | 14.078       | 3.84883       | -1.8709505       | 0.00014629 | No      |
|      |       |        |             |          |         | lreb2    | 17.5757   | 8.8537  | -0.989228        | 17.5767      | 8.8547        | -0.9891489       | 0.00014629 | No      |
|      |       |        |             |          |         | lrf2     | 95.4762   | 8.08624 | -3.5616          | 95.4772      | 8.08724       | -3.5614369       | 0.00014629 | No      |
|      |       |        |             |          |         | lrf3     | 221.208   | 378.942 | 0.776569         | 221.209      | 378.943       | 0.77657077       | 0.00014629 | No      |
|      |       |        |             |          |         | lrf9     | 54.6207   | 13.8603 | -1.97849         | 54.6217      | 13.8613       | -1.9784116       | 0.00014629 | No      |
|      |       |        |             |          |         | lrgq     | 7.63      | 4.85236 | -0.652996        | 7.631        | 4.85336       | -0.6528883       | 0.00438237 | No      |
|      |       |        |             |          |         | lrx1     | 0         | 40.0085 | inf              | 0.001        | 40.0095       | 15.288055        | 0.00014629 | No      |
|      |       |        |             |          |         | lrx5     | 0         | 17.916  | inf              | 0.001        | 17.917        | 14.1290415       | 0.00014629 | No      |
|      |       |        |             |          |         | lsca1    | 28.9126   | 71.7222 | 1.31072          | 28.9136      | 71.7232       | 1.31069161       | 0.00014629 | No      |
|      |       |        |             |          |         | lsca2    | 32.0924   | 77.4025 | 1.27015          | 32.0934      | 77.4035       | 1.27012217       | 0.00014629 | No      |
|      |       |        |             |          |         | lscu     | 47.893    | 260.262 | 2.44208          | 47.894       | 260.263       | 2.44205339       | 0.00014629 | No      |
|      |       |        |             |          |         | lsg20    | 23.2612   | 14.4313 | -0.688725        | 23.2622      | 14.4323       | -0.6886863       | 0.0428013  | No      |
|      |       |        |             |          |         | lsm1     | 0         | 1.6377  | inf              | 0.001        | 1.6387        | 10.678336        | 0.0204477  | No      |
|      |       |        |             |          |         | lsoc1    | 13.67     | 36.7708 | 1.42754          | 13.671       | 36.7718       | 1.42748102       | 0.00014629 | No      |
|      |       |        |             |          |         | lsoc2a   | 26.0812   | 73.2207 | 1.48924          | 26.0822      | 73.2217       | 1.48920571       | 0.00014629 | No      |
|      |       |        |             |          |         | lsy1     | 84.058    | 34.5535 | -1.28255         | 84.059       | 34.5545       | -1.2825287       | 0.00014629 | No      |
|      |       |        |             |          |         | lsyna1   | 46.191    | 72.308  | 0.646544         | 46.192       | 72.309        | 0.64653221       | 0.00173187 | No      |
|      |       |        |             |          |         | ltch     | 29.143    | 13.0792 | -1.15587         | 29.144       | 13.0802       | -1.1558143       | 0.00014629 | No      |
|      |       |        |             |          |         | ltfg1    | 6.74251   | 22.9784 | 1.76892          | 6.74351      | 22.9794       | 1.76876951       | 0.00014629 | No      |
|      |       |        |             |          |         | ltfg2    | 5.39471   | 11.7802 | 1.12675          | 5.39571      | 11.7812       | 1.12660178       | 0.00014629 | No      |
|      |       |        |             |          |         | ltfg3    | 1.43168   | 35.7939 | 4.64394          | 1.43268      | 35.7949       | 4.64296574       | 0.00014629 | No      |
|      |       |        |             |          |         | ltga1    | 10.595    | 47.8168 | 2.17413          | 10.596       | 47.8178       | 2.17402801       | 0.00014629 | No      |
|      |       |        |             |          |         | ltga2b   | 1.95133   | 7.09177 | 1.86169          | 1.95233      | 7.09277       | 1.86115223       | 0.00014629 | No      |
|      |       |        |             |          |         | ltga3    | 2.26801   | 19.217  | 3.08288          | 2.26901      | 19.218        | 3.08232333       | 0.00014629 | No      |
|      |       |        |             |          |         | ltga4    | 81.2168   | 1.39006 | -5.86856         | 81.2178      | 1.39106       | -5.8675394       | 0.00014629 | No      |
|      |       |        |             |          |         | ltga5    | 0.0985222 | 1.40625 | 3.83527          | 0.0995222    | 1.40725       | 3.82171646       | 0.00252712 | No      |

| RRBS |       |        |             |          |         | RNAseq                 |           |         |                  |              |               |                  |            |         |
|------|-------|--------|-------------|----------|---------|------------------------|-----------|---------|------------------|--------------|---------------|------------------|------------|---------|
| gene | Blood | Kidney | methyl.diff | pMWU.fdr | Match ? | gene                   | blood     | kidney  | log2(fold_ratio) | blood+ 0.001 | kidney+ 0.001 | log2(fold_ratio) | q_value    | Match ? |
|      |       |        |             |          |         | Itga7                  | 0         | 23.8532 | inf              | 0.001        | 23.8542       | 14.5419557       | 0.00014629 | No      |
|      |       |        |             |          |         | Itgav                  | 5.20892   | 16.6098 | 1.67298          | 5.20992      | 16.6108       | 1.67278843       | 0.00014629 | No      |
|      |       |        |             |          |         | Itgb2                  | 111.598   | 5.46203 | -4.35273         | 111.599      | 5.46303       | -4.3524789       | 0.00014629 | No      |
|      |       |        |             |          |         | Itgb3                  | 16.758    | 4.5176  | -1.89122         | 16.759       | 4.5186        | -1.8909883       | 0.00114835 | No      |
|      |       |        |             |          |         | Itgb5                  | 0.659027  | 44.3151 | 6.07132          | 0.660027     | 44.3161       | 6.06916207       | 0.0327779  | No      |
|      |       |        |             |          |         | Itgb7                  | 115.805   | 12.2237 | -3.24395         | 115.806      | 12.2247       | -3.243839        | 0.00014629 | No      |
|      |       |        |             |          |         | Itgb8                  | 0.15385   | 4.53723 | 4.88222          | 0.15485      | 4.53823       | 4.87318644       | 0.00014629 | No      |
|      |       |        |             |          |         | Itih5                  | 0         | 34.5771 | inf              | 0.001        | 34.5781       | 15.077571        | 0.00014629 | No      |
|      |       |        |             |          |         | Itk                    | 121.617   | 3.87252 | -4.97294         | 121.618      | 3.87352       | -4.9725678       | 0.00014629 | No      |
|      |       |        |             |          |         | Itm2a                  | 70.3123   | 2.19449 | -5.00182         | 70.3133      | 2.19549       | -5.0011827       | 0.00792329 | No      |
|      |       |        |             |          |         | Itm2b                  | 413.706   | 565.641 | 0.451281         | 413.707      | 565.642       | 0.45127988       | 0.0387854  | No      |
|      |       |        |             |          |         | Itm2c                  | 48.7581   | 139.293 | 1.51441          | 48.7591      | 139.294       | 1.51438971       | 0.00014629 | No      |
|      |       |        |             |          |         | Itpa                   | 39.1306   | 61.5485 | 0.653426         | 39.1316      | 61.5495       | 0.65341304       | 0.00263402 | No      |
|      |       |        |             |          |         | Itpkc                  | 1.80609   | 4.5368  | 1.3288           | 1.80709      | 4.5378        | 1.32832467       | 0.00014629 | No      |
|      |       |        |             |          |         | Itpr1                  | 11.2539   | 19.7745 | 0.813222         | 11.2549      | 19.7755       | 0.81316093       | 0.0150758  | No      |
|      |       |        |             |          |         | Itpr2                  | 14.0823   | 1.76193 | -2.99866         | 14.0833      | 1.76293       | -2.9979383       | 0.00014629 | No      |
|      |       |        |             |          |         | Itpr3                  | 30.4565   | 9.8704  | -1.62557         | 30.4575      | 9.8714        | -1.6254709       | 0.00014629 | No      |
|      |       |        |             |          |         | Itsn1                  | 16.6216   | 193.202 | 3.53898          | 16.6226      | 193.203       | 3.53889953       | 0.00014629 | No      |
|      |       |        |             |          |         | Itsn2                  | 89.6198   | 50.7209 | -0.821238        | 89.6208      | 50.7219       | -0.8212248       | 0.0424758  | No      |
|      |       |        |             |          |         | Ivd                    | 18.9196   | 74.5915 | 1.97913          | 18.9206      | 74.5925       | 1.97907274       | 0.00014629 | No      |
|      |       |        |             |          |         | IVNS1ABP_P<br>REDICTED | 47.5515   | 145.392 | 1.61238          | 47.5525      | 145.393       | 1.61236472       | 0.00014629 | No      |
|      |       |        |             |          |         | Iws1                   | 12.9213   | 7.24811 | -0.83407         | 12.9223      | 7.24911       | -0.8339871       | 0.0257873  | No      |
|      |       |        |             |          |         | Iyd                    | 0         | 12.4616 | inf              | 0.001        | 12.4626       | 13.6053175       | 0.00014629 | No      |
|      |       |        |             |          |         | Jag1                   | 0.0331487 | 26.2351 | 9.62833          | 0.0341487    | 26.2361       | 9.58550691       | 0.0204477  | No      |
|      |       |        |             |          |         | Jag2                   | 0.252836  | 3.69958 | 3.87109          | 0.253836     | 3.70058       | 3.86578281       | 0.00014629 | No      |
|      |       |        |             |          |         | Jak1                   | 249.658   | 20.9083 | -3.57781         | 249.659      | 20.9093       | -3.5777422       | 0.00014629 | No      |
|      |       |        |             |          |         | Jak2                   | 38.4517   | 4.09965 | -3.22947         | 38.4527      | 4.10065       | -3.2291604       | 0.00014629 | No      |
|      |       |        |             |          |         | Jakmip1                | 51.2365   | 1.74158 | -4.87871         | 51.2375      | 1.74258       | -4.8779033       | 0.00014629 | No      |
|      |       |        |             |          |         | Jarid2                 | 11.8419   | 4.93074 | -1.26403         | 11.8429      | 4.93174       | -1.2638538       | 0.00014629 | No      |
|      |       |        |             |          |         | Jmjd1c                 | 49.9951   | 19.4286 | -1.36361         | 49.9961      | 19.4296       | -1.3635594       | 0.00491494 | No      |
|      |       |        |             |          |         | Jmjd7                  | 9.43729   | 5.53447 | -0.769927        | 9.43829      | 5.53547       | -0.7698197       | 0.0136225  | No      |
|      |       |        |             |          |         | Jun                    | 31.1576   | 245.62  | 2.97877          | 31.1586      | 245.621       | 2.9787316        | 0.00014629 | No      |
|      |       |        |             |          |         | Jund                   | 261.558   | 173.369 | -0.593284        | 261.559      | 173.37        | -0.5932821       | 0.00114835 | No      |
|      |       |        |             |          |         | Jup                    | 25.0796   | 45.8374 | 0.870012         | 25.0806      | 45.8384       | 0.86998483       | 0.00014629 | No      |
|      |       |        |             |          |         | Kank1                  | 0.0951615 | 36.9289 | 8.60015          | 0.0961615    | 36.9299       | 8.58511424       | 0.00014629 | No      |
|      |       |        |             |          |         | Kank2                  | 0.470847  | 9.23563 | 4.29388          | 0.471847     | 9.23663       | 4.29097554       | 0.00014629 | No      |
|      |       |        |             |          |         | Kank3                  | 0.687339  | 6.85547 | 3.31816          | 0.688339     | 6.85647       | 3.31627485       | 0.00041099 | No      |
|      |       |        |             |          |         | Kansl1                 | 97.3723   | 16.8369 | -2.53189         | 97.3733      | 16.8379       | -2.531814        | 0.00014629 | No      |
|      |       |        |             |          |         | Kansl1l                | 3.39014   | 13.0012 | 1.93923          | 3.39114      | 13.0022       | 1.9389135        | 0.00014629 | No      |
|      |       |        |             |          |         | Kap                    | 0         | 2087.69 | inf              | 0.001        | 2087.691      | 20.9934768       | 0.00014629 | No      |
|      |       |        |             |          |         | Kars                   | 73.1884   | 51.8117 | -0.498338        | 73.1894      | 51.8127       | -0.498329        | 0.0116551  | No      |

| RRBS |       |        |             |          |         | RNAseq  |          |          |                  |              |               |                  |            |         |
|------|-------|--------|-------------|----------|---------|---------|----------|----------|------------------|--------------|---------------|------------------|------------|---------|
| gene | Blood | Kidney | methyl.diff | pMWU.fdr | Match ? | gene    | blood    | kidney   | log2(fold_ratio) | blood+ 0.001 | kidney+ 0.001 | log2(fold_ratio) | q_value    | Match ? |
|      |       |        |             |          |         | Kat2a   | 27.8801  | 12.9239  | -1.10919         | 27.8811      | 12.9249       | -1.1091344       | 0.00014629 | No      |
|      |       |        |             |          |         | Kat6a   | 25.3894  | 4.98333  | -2.34905         | 25.3904      | 4.98433       | -2.3488116       | 0.00014629 | No      |
|      |       |        |             |          |         | Kat7    | 33.8472  | 14.36    | -1.23698         | 33.8482      | 14.361        | -1.2369229       | 0.00014629 | No      |
|      |       |        |             |          |         | Katna1  | 22.8053  | 10.4241  | -1.12945         | 22.8063      | 10.4251       | -1.1293712       | 0.00014629 | No      |
|      |       |        |             |          |         | Katnbl1 | 5.45759  | 2.15644  | -1.33962         | 5.45859      | 2.15744       | -1.3392079       | 0.0117565  | No      |
|      |       |        |             |          |         | Kbtbd11 | 40.8037  | 6.27041  | -2.70207         | 40.8047      | 6.27141       | -2.7018736       | 0.00014629 | No      |
|      |       |        |             |          |         | Kbtbd12 | 0        | 1.7053   | inf              | 0.001        | 1.7063        | 10.7366556       | 0.00014629 | No      |
|      |       |        |             |          |         | Kbtbd2  | 41.976   | 8.75703  | -2.26105         | 41.977       | 8.75803       | -2.2609208       | 0.00014629 | No      |
|      |       |        |             |          |         | Kbtbd3  | 5.75716  | 3.51135  | -0.713332        | 5.75816      | 3.51235       | -0.7131713       | 0.0322469  | No      |
|      |       |        |             |          |         | Kbtbd8  | 3.05161  | 0.627611 | -2.28163         | 3.05261      | 0.628611      | -2.2798039       | 0.00014629 | No      |
|      |       |        |             |          |         | Kcnab2  | 60.7707  | 3.09891  | -4.29354         | 60.7717      | 3.09991       | -4.2931014       | 0.00014629 | No      |
|      |       |        |             |          |         | Kcnab3  | 1.22963  | 0.241703 | -2.34692         | 1.23063      | 0.242703      | -2.3421332       | 0.0222129  | No      |
|      |       |        |             |          |         | Kcng4   | 0.782007 | 5.63508  | 2.84918          | 0.783007     | 5.63608       | 2.84759498       | 0.00014629 | No      |
|      |       |        |             |          |         | Kcnj1   | 0.01825  | 48.7007  | 11.3818          | 0.01925      | 48.7017       | 11.304898        | 0.00014629 | No      |
|      |       |        |             |          |         | Kcnj16  | 0        | 226.274  | inf              | 0.001        | 226.275       | 17.7877177       | 0.00014629 | No      |
|      |       |        |             |          |         | Kcnj9   | 1.05056  | 3.70041  | 1.81653          | 1.05156      | 3.70141       | 1.81554378       | 0.004167   | No      |
|      |       |        |             |          |         | Kcnk1   | 0.576225 | 41.1725  | 6.1589           | 0.577225     | 41.1735       | 6.1564385        | 0.00014629 | No      |
|      |       |        |             |          |         | Kcnk5   | 0.56915  | 30.8485  | 5.76025          | 0.57015      | 30.8495       | 5.75776177       | 0.00014629 | No      |
|      |       |        |             |          |         | Kcnk6   | 8.06024  | 1.95311  | -2.04505         | 8.06124      | 1.95411       | -2.0444901       | 0.00014629 | No      |
|      |       |        |             |          |         | Kcnmb4  | 11.2441  | 6.08059  | -0.88689         | 11.2451      | 6.08159       | -0.886776        | 0.0335581  | No      |
|      |       |        |             |          |         | Kcnt1   | 0        | 114.473  | inf              | 0.001        | 114.474       | 16.8046604       | 0.00014629 | No      |
|      |       |        |             |          |         | Kctd1   | 3.98742  | 32.5699  | 3.03001          | 3.98842      | 32.5709       | 3.02969434       | 0.00014629 | No      |
|      |       |        |             |          |         | Kctd17  | 0.86875  | 74.8648  | 6.4292           | 0.86975      | 74.8658       | 6.42756224       | 0.00014629 | No      |
|      |       |        |             |          |         | Kctd18  | 28.9829  | 7.33301  | -1.98272         | 28.9839      | 7.33401       | -1.9825776       | 0.00014629 | No      |
|      |       |        |             |          |         | Kctd2   | 12.3135  | 22.0526  | 0.840709         | 12.3145      | 22.0536       | 0.84065613       | 0.0313726  | No      |
|      |       |        |             |          |         | Kctd20  | 17.3953  | 6.38355  | -1.44627         | 17.3963      | 6.38455       | -1.4461236       | 0.00014629 | No      |
|      |       |        |             |          |         | Kctd3   | 8.46252  | 15.4348  | 0.867025         | 8.46352      | 15.4358       | 0.86695054       | 0.00014629 | No      |
|      |       |        |             |          |         | Kctd5   | 4.36251  | 9.40985  | 1.10901          | 4.36351      | 9.41085       | 1.10883593       | 0.00014629 | No      |
|      |       |        |             |          |         | Kctd6   | 4.7903   | 30.3114  | 2.66167          | 4.7913       | 30.3124       | 2.66141903       | 0.00014629 | No      |
|      |       |        |             |          |         | KDELC1  | 10.3886  | 22.441   | 1.11114          | 10.3896      | 22.442        | 1.11106114       | 0.00090728 | No      |
|      |       |        |             |          |         | Kdelc2  | 2.88105  | 8.65844  | 1.58751          | 2.88205      | 8.65944       | 1.58717837       | 0.00014629 | No      |
|      |       |        |             |          |         | Kdelr1  | 29.1893  | 61.1988  | 1.06806          | 29.1903      | 61.1998       | 1.0680379        | 0.00014629 | No      |
|      |       |        |             |          |         | Kdm1b   | 26.6586  | 7.63275  | -1.80433         | 26.6596      | 7.63375       | -1.8041913       | 0.00014629 | No      |
|      |       |        |             |          |         | KDM2B   | 12.5983  | 5.49192  | -1.19785         | 12.5993      | 5.49292       | -1.1976984       | 0.00014629 | No      |
|      |       |        |             |          |         | Kdm3a   | 60.3983  | 19.1479  | -1.65732         | 60.3993      | 19.1489       | -1.6572703       | 0.00014629 | No      |
|      |       |        |             |          |         | Kdm3b   | 27.4555  | 8.78828  | -1.64344         | 27.4565      | 8.78928       | -1.6433308       | 0.00014629 | No      |
|      |       |        |             |          |         | Kdm4a   | 37.5106  | 10.6191  | -1.82064         | 37.5116      | 10.6201       | -1.8205394       | 0.00014629 | No      |
|      |       |        |             |          |         | Kdm4c   | 11.7339  | 3.95426  | -1.56921         | 11.7349      | 3.95526       | -1.5689611       | 0.00014629 | No      |
|      |       |        |             |          |         | Kdm5a   | 31.5551  | 4.90464  | -2.68565         | 31.5561      | 4.90564       | -2.6854056       | 0.00014629 | No      |
|      |       |        |             |          |         | Kdm5b   | 16.6044  | 6.61703  | -1.32731         | 16.6054      | 6.61803       | -1.3271787       | 0.00014629 | No      |
|      |       |        |             |          |         | Kdm5c   | 12.0749  | 4.56009  | -1.40487         | 12.0759      | 4.56109       | -1.4046802       | 0.00014629 | No      |
|      |       |        |             |          |         | Kdm6a   | 25.5155  | 4.53147  | -2.49332         | 25.5165      | 4.53247       | -2.4930611       | 0.00014629 | No      |

| RRBS |       |        |             |          |         | RNAseq    |           |          |                  |              |               |                  |            |         |
|------|-------|--------|-------------|----------|---------|-----------|-----------|----------|------------------|--------------|---------------|------------------|------------|---------|
| gene | Blood | Kidney | methyl.diff | pMWU.fdr | Match ? | gene      | blood     | kidney   | log2(fold_ratio) | blood+ 0.001 | kidney+ 0.001 | log2(fold_ratio) | q_value    | Match ? |
|      |       |        |             |          |         | Kdm7a     | 16.0181   | 1.72721  | -3.21319         | 16.0191      | 1.72821       | -3.2124427       | 0.00014629 | No      |
|      |       |        |             |          |         | Khdrbs1   | 78.1654   | 29.0037  | -1.43029         | 78.1664      | 29.0047       | -1.4302619       | 0.00014629 | No      |
|      |       |        |             |          |         | Khsrp     | 41.1883   | 20.4395  | -1.01087         | 41.1893      | 20.4405       | -1.0108391       | 0.00041099 | No      |
|      |       |        |             |          |         | Kidins220 | 31.6644   | 8.1162   | -1.96399         | 31.6654      | 8.1172        | -1.9638532       | 0.00014629 | No      |
|      |       |        |             |          |         | Kif11     | 0.902781  | 5.89922  | 2.70808          | 0.903781     | 5.90022       | 2.70672362       | 0.00014629 | No      |
|      |       |        |             |          |         | Kif13a    | 4.03355   | 6.58632  | 0.707423         | 4.03455      | 6.58732       | 0.70728387       | 0.0116551  | No      |
|      |       |        |             |          |         | Kif13b    | 7.01132   | 12.1518  | 0.793414         | 7.01232      | 12.1528       | 0.79332501       | 0.00014629 | No      |
|      |       |        |             |          |         | Kif15     | 3.48442   | 0.743846 | -2.22784         | 3.48542      | 0.744846      | -2.2263184       | 0.00014629 | No      |
|      |       |        |             |          |         | Kif16b    | 2.91939   | 7.47044  | 1.35553          | 2.92039      | 7.47144       | 1.35522528       | 0.00014629 | No      |
|      |       |        |             |          |         | Kif1c     | 11.8044   | 97.0904  | 3.04             | 11.8054      | 97.0914       | 3.03989659       | 0.00014629 | No      |
|      |       |        |             |          |         | Kif21b    | 59.2432   | 2.87769  | -4.36367         | 59.2442      | 2.87869       | -4.3631896       | 0.00014629 | No      |
|      |       |        |             |          |         | Kif22     | 0.358824  | 2.53949  | 2.82319          | 0.359824     | 2.54049       | 2.81974346       | 0.0185598  | No      |
|      |       |        |             |          |         | Kif2a     | 20.9332   | 4.88852  | -2.09832         | 20.9342      | 4.88952       | -2.098097        | 0.00014629 | No      |
|      |       |        |             |          |         | Kif3a     | 2.09094   | 3.63685  | 0.798539         | 2.09194      | 3.63785       | 0.79824458       | 0.0400829  | No      |
|      |       |        |             |          |         | Kif5b     | 21.0853   | 15.0913  | -0.482526        | 21.0863      | 15.0923       | -0.4824933       | 0.0253385  | No      |
|      |       |        |             |          |         | Kifap3    | 4.87749   | 20.1977  | 2.04998          | 4.87849      | 20.1987       | 2.04975587       | 0.00014629 | No      |
|      |       |        |             |          |         | Kifc1     | 3.49398   | 20.8171  | 2.57482          | 3.49498      | 20.8181       | 2.5744823        | 0.00014629 | No      |
|      |       |        |             |          |         | Kifc2     | 4.48721   | 14.7996  | 1.72166          | 4.48821      | 14.8006       | 1.72144358       | 0.00053701 | No      |
|      |       |        |             |          |         | Kifc3     | 0.803871  | 93.5175  | 6.86213          | 0.804871     | 93.5185       | 6.8603504        | 0.00014629 | No      |
|      |       |        |             |          |         | Kirrel    | 0         | 1.12722  | inf              | 0.001        | 1.12822       | 10.1398327       | 0.00014629 | No      |
|      |       |        |             |          |         | Kitlg     | 0.271666  | 6.78716  | 4.6429           | 0.272666     | 6.78816       | 4.63781385       | 0.00014629 | No      |
|      |       |        |             |          |         | Klc2      | 14.8346   | 36.9479  | 1.31652          | 14.8356      | 36.9489       | 1.31646814       | 0.00014629 | No      |
|      |       |        |             |          |         | Klc4      | 12.2722   | 90.6208  | 2.88445          | 12.2732      | 90.6218       | 2.88434669       | 0.00014629 | No      |
|      |       |        |             |          |         | Klf10     | 2.57643   | 5.15274  | 0.999965         | 2.57743      | 5.15374       | 0.99968651       | 0.00149937 | No      |
|      |       |        |             |          |         | Klf11     | 11.0291   | 5.0499   | -1.12699         | 11.0301      | 5.0509        | -1.1268335       | 0.00014629 | No      |
|      |       |        |             |          |         | Klf12     | 9.66365   | 1.84977  | -2.38522         | 9.66465      | 1.85077       | -2.3845919       | 0.00014629 | No      |
|      |       |        |             |          |         | Klf13     | 55.0119   | 4.11871  | -3.73948         | 55.0129      | 4.11971       | -3.7391553       | 0.00014629 | No      |
|      |       |        |             |          |         | Klf3      | 91.8341   | 23.9089  | -1.94148         | 91.8351      | 23.9099       | -1.9414376       | 0.00014629 | No      |
|      |       |        |             |          |         | Klf4      | 1.67808   | 25.6451  | 3.9338           | 1.67908      | 25.6461       | 3.93299658       | 0.00014629 | No      |
|      |       |        |             |          |         | KLF6      | 59.1866   | 32.0516  | -0.884871        | 59.1876      | 32.0526       | -0.8848536       | 0.00014629 | No      |
|      |       |        |             |          |         | KLF7      | 6.4846    | 1.96403  | -1.7232          | 6.4856       | 1.96503       | -1.7226887       | 0.00014629 | No      |
|      |       |        |             |          |         | Klf9      | 45.072    | 25.4866  | -0.82249         | 45.073       | 25.4876       | -0.8224679       | 0.00014629 | No      |
|      |       |        |             |          |         | KLHDC1    | 12.9478   | 1.81997  | -2.83072         | 12.9488      | 1.82097       | -2.8300393       | 0.00014629 | No      |
|      |       |        |             |          |         | Klhdc10   | 7.22314   | 15.1208  | 1.06584          | 7.22414      | 15.1218       | 1.06573212       | 0.00014629 | No      |
|      |       |        |             |          |         | KLHDC2    | 74.9654   | 25.3878  | -1.56209         | 74.9664      | 25.3888       | -1.5620519       | 0.00014629 | No      |
|      |       |        |             |          |         | Klhdc4    | 14.6296   | 35.1651  | 1.26525          | 14.6306      | 35.1661       | 1.26519641       | 0.00014629 | No      |
|      |       |        |             |          |         | Klhdc7a   | 0         | 18.6866  | inf              | 0.001        | 18.6876       | 14.1897937       | 0.00014629 | No      |
|      |       |        |             |          |         | Klhl11    | 6.42145   | 2.37496  | -1.435           | 6.42245      | 2.37596       | -1.4346132       | 0.00041099 | No      |
|      |       |        |             |          |         | Klhl12    | 9.9615    | 39.4031  | 1.98387          | 9.9625       | 39.4041       | 1.98376603       | 0.00576532 | No      |
|      |       |        |             |          |         | Klhl13    | 0.0426999 | 1.98124  | 5.53602          | 0.0436999    | 1.98224       | 5.50335786       | 0.00884407 | No      |
|      |       |        |             |          |         | Klhl14    | 0.146996  | 6.53162  | 5.47359          | 0.147996     | 6.53262       | 5.46403163       | 0.00014629 | No      |
|      |       |        |             |          |         | Klhl15    | 6.21677   | 1.72773  | -1.84729         | 6.21777      | 1.72873       | -1.8466847       | 0.00014629 | No      |

| RRBS |       |        |             |          |         | RNAseq  |           |          |                  |              |               |                  |            |         |
|------|-------|--------|-------------|----------|---------|---------|-----------|----------|------------------|--------------|---------------|------------------|------------|---------|
| gene | Blood | Kidney | methyl.diff | pMWU.fdr | Match ? | gene    | blood     | kidney   | log2(fold_ratio) | blood+ 0.001 | kidney+ 0.001 | log2(fold_ratio) | q_value    | Match ? |
|      |       |        |             |          |         | Klhl2   | 33.502    | 14.0807  | -1.25053         | 33.503       | 14.0817       | -1.2504688       | 0.00014629 | No      |
|      |       |        |             |          |         | Klhl20  | 15.4238   | 2.75471  | -2.48518         | 15.4248      | 2.75571       | -2.4847558       | 0.00014629 | No      |
|      |       |        |             |          |         | Klhl22  | 7.56169   | 15.8003  | 1.06317          | 7.56269      | 15.8013       | 1.06307187       | 0.00014629 | No      |
|      |       |        |             |          |         | Klhl23  | 0.137985  | 1.38145  | 3.3236           | 0.138985     | 1.38245       | 3.31422621       | 0.00659461 | No      |
|      |       |        |             |          |         | Klhl24  | 33.6432   | 15.934   | -1.0782          | 33.6442      | 15.935        | -1.0781588       | 0.00102864 | No      |
|      |       |        |             |          |         | Klhl25  | 3.29236   | 23.0396  | 2.80692          | 3.29336      | 23.0406       | 2.80654616       | 0.00014629 | No      |
|      |       |        |             |          |         | Klhl26  | 0.50213   | 4.17189  | 3.05457          | 0.50313      | 4.17289       | 3.05204377       | 0.00014629 | No      |
|      |       |        |             |          |         | Klhl28  | 4.65619   | 1.03866  | -2.16443         | 4.65719      | 1.03966       | -2.1633479       | 0.00014629 | No      |
|      |       |        |             |          |         | Klhl42  | 21.7288   | 54.2329  | 1.31956          | 21.7298      | 54.2339       | 1.31952002       | 0.00014629 | No      |
|      |       |        |             |          |         | Klhl5   | 13.5331   | 6.75505  | -1.00245         | 13.5341      | 6.75605       | -1.002347        | 0.00639443 | No      |
|      |       |        |             |          |         | Klhl6   | 51.1972   | 1.58979  | -5.00916         | 51.1982      | 1.59079       | -5.0082778       | 0.00014629 | No      |
|      |       |        |             |          |         | Klhl8   | 6.59732   | 11.0457  | 0.743535         | 6.59832      | 11.0467       | 0.7434448        | 0.00252712 | No      |
|      |       |        |             |          |         | Klk1    | 0         | 57.9976  | inf              | 0.001        | 57.9986       | 15.8237305       | 0.00014629 | No      |
|      |       |        |             |          |         | Klk1b3  | 0         | 66.8971  | inf              | 0.001        | 66.8981       | 16.0296776       | 0.00014629 | No      |
|      |       |        |             |          |         | Klk1c10 | 0         | 3.38339  | inf              | 0.001        | 3.38439       | 11.7246801       | 0.00028114 | No      |
|      |       |        |             |          |         | Klra17  | 8.5526    | 23.9959  | 1.48835          | 8.5536       | 23.9969       | 1.4882444        | 0.00014629 | No      |
|      |       |        |             |          |         | Klra22  | 111.772   | 31.0654  | -1.84718         | 111.773      | 31.0664       | -1.8471448       | 0.00014629 | No      |
|      |       |        |             |          |         | Klrb1a  | 30.0174   | 8.03679  | -1.90111         | 30.0184      | 8.03779       | -1.9009763       | 0.00014629 | No      |
|      |       |        |             |          |         | Klrb1c  | 72.9052   | 1.94048  | -5.23153         | 72.9062      | 1.94148       | -5.2308128       | 0.00014629 | No      |
|      |       |        |             |          |         | Klrc1   | 3.9665    | 0.640838 | -2.62984         | 3.9675       | 0.641838      | -2.6279491       | 0.0210052  | No      |
|      |       |        |             |          |         | Klrd1   | 84.7816   | 6.99531  | -3.59929         | 84.7826      | 6.99631       | -3.5991021       | 0.00014629 | No      |
|      |       |        |             |          |         | Klre1   | 20.8116   | 10.5043  | -0.986401        | 20.8126      | 10.5053       | -0.9863398       | 0.0317197  | No      |
|      |       |        |             |          |         | Klrg2   | 0.154052  | 2.96133  | 4.26476          | 0.155052     | 2.96233       | 4.25590832       | 0.00285806 | No      |
|      |       |        |             |          |         | Klrk1   | 188.732   | 6.02597  | -4.96901         | 188.733      | 6.02697       | -4.96877         | 0.00014629 | No      |
|      |       |        |             |          |         | Kmo     | 0.0546693 | 41.8205  | 9.57926          | 0.0556693    | 41.8215       | 9.55314715       | 0.00149937 | No      |
|      |       |        |             |          |         | Kmt2a   | 17.8287   | 3.94078  | -2.17765         | 17.8297      | 3.94178       | -2.1773633       | 0.00014629 | No      |
|      |       |        |             |          |         | Kmt2b   | 24.3607   | 10.7758  | -1.17676         | 24.3617      | 10.7768       | -1.176686        | 0.0106553  | No      |
|      |       |        |             |          |         | Kmt2c   | 45.1724   | 7.32392  | -2.62475         | 45.1734      | 7.32492       | -2.6245886       | 0.00014629 | No      |
|      |       |        |             |          |         | Kmt2e   | 60.3242   | 14.1753  | -2.08935         | 60.3252      | 14.1763       | -2.0892798       | 0.00014629 | No      |
|      |       |        |             |          |         | KNG1L1  | 0         | 36.3069  | inf              | 0.001        | 36.3079       | 15.1479959       | 0.00014629 | No      |
|      |       |        |             |          |         | Kpna1   | 31.8516   | 5.63132  | -2.49982         | 31.8526      | 5.63232       | -2.4996099       | 0.00014629 | No      |
|      |       |        |             |          |         | Kpna2   | 10.4861   | 21.0219  | 1.00342          | 10.4871      | 21.0229       | 1.00334591       | 0.00874754 | No      |
|      |       |        |             |          |         | Kpna3   | 12.4924   | 7.92798  | -0.656026        | 12.4934      | 7.92898       | -0.655959        | 0.0145969  | No      |
|      |       |        |             |          |         | Kpna4   | 29.1845   | 15.6549  | -0.898588        | 29.1855      | 15.6559       | -0.8985453       | 0.00252712 | No      |
|      |       |        |             |          |         | Kpna5   | 17.5203   | 3.12024  | -2.4893          | 17.5213      | 3.12124       | -2.4889186       | 0.00014629 | No      |
|      |       |        |             |          |         | Kpnb1   | 72.1644   | 29.3848  | -1.29622         | 72.1654      | 29.3858       | -1.2961881       | 0.00241835 | No      |
|      |       |        |             |          |         | KPTN    | 11.4713   | 37.2879  | 1.70068          | 11.4723      | 37.2889       | 1.70059158       | 0.00014629 | No      |
|      |       |        |             |          |         | Kras    | 20.1905   | 8.77801  | -1.20171         | 20.1915      | 8.77901       | -1.2016179       | 0.00954394 | No      |
|      |       |        |             |          |         | Kremen1 | 5.59477   | 2.02342  | -1.46728         | 5.59577      | 2.02442       | -1.466828        | 0.00014629 | No      |
|      |       |        |             |          |         | Kri1    | 48.586    | 18.0153  | -1.43132         | 48.587       | 18.0163       | -1.4312676       | 0.00884407 | No      |
|      |       |        |             |          |         | Krit1   | 30.0564   | 7.08208  | -2.08543         | 30.0574      | 7.08308       | -2.0852715       | 0.00014629 | No      |
|      |       |        |             |          |         | Krt10   | 3.75696   | 11.3266  | 1.59208          | 3.75796      | 11.3276       | 1.59182061       | 0.00263402 | No      |

| RRBS |       |        |             |          |         | RNAseq  |           |         |                  |              |               |                  |            |         |
|------|-------|--------|-------------|----------|---------|---------|-----------|---------|------------------|--------------|---------------|------------------|------------|---------|
| gene | Blood | Kidney | methyl.diff | pMWU.fdr | Match ? | gene    | blood     | kidney  | log2(fold_ratio) | blood+ 0.001 | kidney+ 0.001 | log2(fold_ratio) | q_value    | Match ? |
|      |       |        |             |          |         | Krt14   | 0         | 4.83318 | inf              | 0.001        | 4.83418       | 12.2390555       | 0.004167   | No      |
|      |       |        |             |          |         | Krt15   | 0         | 16.4079 | inf              | 0.001        | 16.4089       | 14.0021909       | 0.00014629 | No      |
|      |       |        |             |          |         | Krt18   | 2.60811   | 52.4698 | 4.33041          | 2.60911      | 52.4708       | 4.32988511       | 0.00014629 | No      |
|      |       |        |             |          |         | Krt23   | 0         | 7.55531 | inf              | 0.001        | 7.55631       | 12.8834662       | 0.00014629 | No      |
|      |       |        |             |          |         | Krt5    | 0.0522854 | 2.27882 | 5.44573          | 0.0532854    | 2.27982       | 5.41903582       | 0.0166081  | No      |
|      |       |        |             |          |         | Krt80   | 0         | 5.44768 | inf              | 0.001        | 5.44868       | 12.411691        | 0.00014629 | No      |
|      |       |        |             |          |         | Ktn1    | 35.6531   | 22.84   | -0.642465        | 35.6541      | 22.841        | -0.6424422       | 0.0436642  | No      |
|      |       |        |             |          |         | Kynu    | 0.32668   | 34.8637 | 6.7377           | 0.32768      | 34.8647       | 6.73333564       | 0.0328695  | No      |
|      |       |        |             |          |         | L1cam   | 4.42346   | 19.9105 | 2.17028          | 4.42446      | 19.9115       | 2.17002862       | 0.00014629 | No      |
|      |       |        |             |          |         | L2hgdh  | 1.88367   | 5.41933 | 1.52457          | 1.88467      | 5.42033       | 1.52406875       | 0.00014629 | No      |
|      |       |        |             |          |         | L3mbtl2 | 34.0764   | 18.4954 | -0.881602        | 34.0774      | 18.4964       | -0.8815708       | 0.00014629 | No      |
|      |       |        |             |          |         | L3mbtl3 | 62.3722   | 3.51602 | -4.14889         | 62.3732      | 3.51702       | -4.1485008       | 0.00014629 | No      |
|      |       |        |             |          |         | Lace1   | 4.05998   | 56.7511 | 3.8051           | 4.06098      | 56.7521       | 3.80477395       | 0.00014629 | No      |
|      |       |        |             |          |         | Lactb   | 8.49651   | 44.1235 | 2.37661          | 8.49751      | 44.1245       | 2.37646787       | 0.00014629 | No      |
|      |       |        |             |          |         | Lag3    | 39.7484   | 26.2703 | -0.597465        | 39.7494      | 26.2713       | -0.5974455       | 0.00566132 | No      |
|      |       |        |             |          |         | Lage3   | 36.0718   | 75.8264 | 1.07183          | 36.0728      | 75.8274       | 1.07180785       | 0.00014629 | No      |
|      |       |        |             |          |         | Lama5   | 0.179056  | 27.6999 | 7.27333          | 0.180056     | 27.7009       | 7.26534336       | 0.00014629 | No      |
|      |       |        |             |          |         | Lamb1   | 0.0362536 | 18.1843 | 8.97036          | 0.0372536    | 18.1853       | 8.93117716       | 0.00014629 | No      |
|      |       |        |             |          |         | Lamp1   | 98.4866   | 272.445 | 1.46797          | 98.4876      | 272.446       | 1.46795631       | 0.00014629 | No      |
|      |       |        |             |          |         | Lamp2   | 26.5178   | 51.8845 | 0.96834          | 26.5188      | 51.8855       | 0.96831592       | 0.00014629 | No      |
|      |       |        |             |          |         | Lamtor1 | 51.2799   | 149.974 | 1.54825          | 51.2809      | 149.975       | 1.54822854       | 0.00014629 | No      |
|      |       |        |             |          |         | Lamtor2 | 210.706   | 286.051 | 0.441042         | 210.707      | 286.052       | 0.44103919       | 0.031283   | No      |
|      |       |        |             |          |         | Lamtor3 | 15.9435   | 35.941  | 1.17266          | 15.9445      | 35.942        | 1.17261183       | 0.00014629 | No      |
|      |       |        |             |          |         | Lamtor4 | 47.9564   | 138.855 | 1.53378          | 47.9574      | 138.856       | 1.53376417       | 0.00014629 | No      |
|      |       |        |             |          |         | Lamtor5 | 50.8956   | 134.839 | 1.40562          | 50.8966      | 134.84        | 1.40560734       | 0.00014629 | No      |
|      |       |        |             |          |         | Lap3    | 19.5638   | 71.8638 | 1.87708          | 19.5648      | 71.8648       | 1.87702494       | 0.00014629 | No      |
|      |       |        |             |          |         | Laptm4a | 91.2689   | 195.245 | 1.09709          | 91.2699      | 195.246       | 1.09708194       | 0.00014629 | No      |
|      |       |        |             |          |         | Laptm4b | 1.34279   | 15.4712 | 3.52628          | 1.34379      | 15.4722       | 3.52529874       | 0.0202551  | No      |
|      |       |        |             |          |         | Laptm5  | 607.925   | 39.0675 | -3.95985         | 607.926      | 39.0685       | -3.959818        | 0.00014629 | No      |
|      |       |        |             |          |         | Larp1   | 51.3754   | 21.1181 | -1.2826          | 51.3764      | 21.1191       | -1.2825574       | 0.00014629 | No      |
|      |       |        |             |          |         | Larp1b  | 30.8478   | 13.0012 | -1.24652         | 30.8488      | 13.0022       | -1.2464586       | 0.00014629 | No      |
|      |       |        |             |          |         | Larp4   | 10.8822   | 2.74722 | -1.98593         | 10.8832      | 2.74822       | -1.9855334       | 0.00041099 | No      |
|      |       |        |             |          |         | Lars    | 32.9013   | 17.2131 | -0.934642        | 32.9023      | 17.2141       | -0.9345977       | 0.00014629 | No      |
|      |       |        |             |          |         | LAS2    | 5.23265   | 1.04721 | -2.32099         | 5.23365      | 1.04821       | -2.3198897       | 0.00090728 | No      |
|      |       |        |             |          |         | Lat2    | 14.1714   | 5.99433 | -1.24131         | 14.1724      | 5.99533       | -1.241173        | 0.0156475  | No      |
|      |       |        |             |          |         | Lax1    | 17.8862   | 1.33339 | -3.74567         | 17.8872      | 1.33439       | -3.7446753       | 0.00014629 | No      |
|      |       |        |             |          |         | Lbp     | 0.170564  | 4.07375 | 4.57797          | 0.171564     | 4.07475       | 4.56989278       | 0.00053701 | No      |
|      |       |        |             |          |         | Lbr     | 68.2651   | 5.15422 | -3.72732         | 68.2661      | 5.15522       | -3.7270634       | 0.00014629 | No      |
|      |       |        |             |          |         | Lcat    | 6.36249   | 29.8508 | 2.23011          | 6.36349      | 29.8518       | 2.2299278        | 0.00014629 | No      |
|      |       |        |             |          |         | Lck     | 498.925   | 30.179  | -4.04721         | 498.926      | 30.18         | -4.0471611       | 0.00014629 | No      |
|      |       |        |             |          |         | Lclat1  | 1.85997   | 10.9826 | 2.56187          | 1.86097      | 10.9836       | 2.56122429       | 0.00014629 | No      |
|      |       |        |             |          |         | Lcor    | 12.6931   | 1.82622 | -2.79711         | 12.6941      | 1.82722       | -2.7964359       | 0.00014629 | No      |



| RRBS |       |        |            |          |         | RNAseq   |           |         |                  |              |               |                  |            |         |
|------|-------|--------|------------|----------|---------|----------|-----------|---------|------------------|--------------|---------------|------------------|------------|---------|
| gene | Blood | Kidney | methy.diff | pMWU.fdr | Match ? | gene     | blood     | kidney  | log2(fold_ratio) | blood+ 0.001 | kidney+ 0.001 | log2(fold_ratio) | q_value    | Match ? |
|      |       |        |            |          |         | Lcorl    | 4.73175   | 1.57434 | -1.58763         | 4.73275      | 1.57534       | -1.5870155       | 0.00028114 | No      |
|      |       |        |            |          |         | Lcp1     | 373.655   | 15.4431 | -4.59667         | 373.656      | 15.4441       | -4.596583        | 0.00014629 | No      |
|      |       |        |            |          |         | Lcp2     | 97.9007   | 7.47561 | -3.71106         | 97.9017      | 7.47661       | -3.7108777       | 0.00014629 | No      |
|      |       |        |            |          |         | Ldb1     | 296.729   | 23.4976 | -3.65856         | 296.73       | 23.4986       | -3.6585041       | 0.00014629 | No      |
|      |       |        |            |          |         | Ldha     | 239.71    | 159.627 | -0.586587        | 239.711      | 159.628       | -0.5865824       | 0.00263402 | No      |
|      |       |        |            |          |         | Ldhb     | 9.1354    | 832.46  | 6.50977          | 9.1364       | 832.461       | 6.50961306       | 0.00014629 | No      |
|      |       |        |            |          |         | Ldhd     | 0.95796   | 55.6196 | 5.85949          | 0.95896      | 55.6206       | 5.85800486       | 0.00014629 | No      |
|      |       |        |            |          |         | Ldlr     | 1.64524   | 4.63358 | 1.49383          | 1.64624      | 4.63458       | 1.49326393       | 0.00014629 | No      |
|      |       |        |            |          |         | Ldlrad3  | 0.489633  | 1.82143 | 1.8953           | 0.490633     | 1.82243       | 1.89314722       | 0.0475835  | No      |
|      |       |        |            |          |         | Ldlrap1  | 145.637   | 9.2186  | -3.98168         | 145.638      | 9.2196        | -3.9815389       | 0.00014629 | No      |
|      |       |        |            |          |         | Lef1     | 223.825   | 4.3255  | -5.69336         | 223.826      | 4.3265        | -5.6930334       | 0.00014629 | No      |
|      |       |        |            |          |         | Lemd3    | 11.9776   | 3.85348 | -1.63611         | 11.9786      | 3.85448       | -1.6358512       | 0.00014629 | No      |
|      |       |        |            |          |         | Leng8    | 225.906   | 36.5795 | -2.62662         | 225.907      | 36.5805       | -2.6265823       | 0.00014629 | No      |
|      |       |        |            |          |         | Lepre1   | 4.62982   | 24.3121 | 2.39264          | 4.63082      | 24.3131       | 2.39239427       | 0.00014629 | No      |
|      |       |        |            |          |         | Leprel1  | 0         | 23.1728 | inf              | 0.001        | 23.1738       | 14.500207        | 0.00014629 | No      |
|      |       |        |            |          |         | Leprel2  | 0.0838384 | 51.06   | 9.25037          | 0.0848384    | 51.061        | 9.23328866       | 0.00041099 | No      |
|      |       |        |            |          |         | Leprel4  | 0.202163  | 1.3161  | 2.70268          | 0.203163     | 1.3171        | 2.6966553        | 0.0239709  | No      |
|      |       |        |            |          |         | Leprotl1 | 126.242   | 47.9542 | -1.39646         | 126.243      | 47.9552       | -1.3964442       | 0.00014629 | No      |
|      |       |        |            |          |         | Letm1    | 17.2687   | 46.7294 | 1.43617          | 17.2697      | 46.7304       | 1.43611836       | 0.00184429 | No      |
|      |       |        |            |          |         | Letm2    | 7.16529   | 3.0722  | -1.22175         | 7.16629      | 3.0732        | -1.2214848       | 0.0387027  | No      |
|      |       |        |            |          |         | Lfng     | 41.6993   | 1.83243 | -4.50819         | 41.7003      | 1.83343       | -4.5074407       | 0.00014629 | No      |
|      |       |        |            |          |         | Lgals1   | 421.68    | 121.112 | -1.79981         | 421.681      | 121.113       | -1.7997983       | 0.00014629 | No      |
|      |       |        |            |          |         | Lgals3   | 2.20118   | 34.2134 | 3.95821          | 2.20218      | 34.2144       | 3.95759935       | 0.00014629 | No      |
|      |       |        |            |          |         | Lgals3bp | 38.3813   | 27.4762 | -0.482222        | 38.3823      | 27.4772       | -0.4822062       | 0.0256152  | No      |
|      |       |        |            |          |         | Lgals8   | 14.3982   | 23.6868 | 0.718188         | 14.3992      | 23.6878       | 0.71815556       | 0.00149937 | No      |
|      |       |        |            |          |         | Lgals9   | 174.155   | 23.4132 | -2.89498         | 174.156      | 23.4142       | -2.8949245       | 0.00014629 | No      |
|      |       |        |            |          |         | Lgmn     | 66.672    | 284.64  | 2.09398          | 66.673       | 284.641       | 2.09396894       | 0.00014629 | No      |
|      |       |        |            |          |         | Lgr4     | 0.653304  | 18.4002 | 4.81582          | 0.654304     | 18.4012       | 4.81369495       | 0.00014629 | No      |
|      |       |        |            |          |         | Lhfp     | 0.114276  | 5.99738 | 5.71374          | 0.115276     | 5.99838       | 5.70140883       | 0.00405996 | No      |
|      |       |        |            |          |         | Lhpp     | 2.29165   | 34.0504 | 3.89321          | 2.29265      | 34.0514       | 3.89262608       | 0.00014629 | No      |
|      |       |        |            |          |         | Lias     | 4.59274   | 14.9981 | 1.70735          | 4.59374      | 14.9991       | 1.70713483       | 0.00014629 | No      |
|      |       |        |            |          |         | Lifr     | 0.0737512 | 36.9118 | 8.9672           | 0.0747512    | 36.9128       | 8.94780872       | 0.00195831 | No      |
|      |       |        |            |          |         | Lig1     | 14.5242   | 57.96   | 1.9966           | 14.5252      | 57.961        | 1.99652446       | 0.00102864 | No      |
|      |       |        |            |          |         | Lig3     | 7.72985   | 3.65439 | -1.08081         | 7.73085      | 3.65539       | -1.0806017       | 0.0330385  | No      |
|      |       |        |            |          |         | Lig4     | 49.664    | 10.0858 | -2.29988         | 49.665       | 10.0868       | -2.299761        | 0.00014629 | No      |
|      |       |        |            |          |         | Lilrb4   | 2.21775   | 48.4173 | 4.44835          | 2.21875      | 48.4183       | 4.4477334        | 0.00014629 | No      |
|      |       |        |            |          |         | Lima1    | 0.4707    | 7.45308 | 3.98496          | 0.4717       | 7.45408       | 3.9820888        | 0.00014629 | No      |
|      |       |        |            |          |         | Limch1   | 0         | 9.71083 | inf              | 0.001        | 9.71183       | 13.2455275       | 0.00014629 | No      |
|      |       |        |            |          |         | Limd1    | 12.5757   | 7.87578 | -0.675149        | 12.5767      | 7.87678       | -0.6750755       | 0.00230432 | No      |
|      |       |        |            |          |         | Limd2    | 732.614   | 18.9321 | -5.27414         | 732.615      | 18.9331       | -5.2740727       | 0.00014629 | No      |
|      |       |        |            |          |         | Limk1    | 4.28945   | 1.29969 | -1.72262         | 4.29045      | 1.30069       | -1.7218518       | 0.00014629 | No      |
|      |       |        |            |          |         | Lims1    | 23.4847   | 7.38662 | -1.66874         | 23.4857      | 7.38762       | -1.668601        | 0.00014629 | No      |

| RRBS |       |        |            |          |         | RNAseq |          |          |                  |              |               |                  |            |         |
|------|-------|--------|------------|----------|---------|--------|----------|----------|------------------|--------------|---------------|------------------|------------|---------|
| gene | Blood | Kidney | methy.diff | pMWU.fdr | Match ? | gene   | blood    | kidney   | log2(fold_ratio) | blood+ 0.001 | kidney+ 0.001 | log2(fold_ratio) | q_value    | Match ? |
|      |       |        |            |          |         | Lims2  | 0        | 68.6511  | inf              | 0.001        | 68.6521       | 16.0670162       | 0.00014629 | No      |
|      |       |        |            |          |         | Lin52  | 9.21459  | 28.1298  | 1.61011          | 9.21559      | 28.1308       | 1.61000214       | 0.00318982 | No      |
|      |       |        |            |          |         | Lin54  | 5.01589  | 2.21732  | -1.17769         | 5.01689      | 2.21832       | -1.1773258       | 0.00014629 | No      |
|      |       |        |            |          |         | Lipt1  | 2.66882  | 1.19067  | -1.16442         | 2.66982      | 1.19167       | -1.1637577       | 0.0106553  | No      |
|      |       |        |            |          |         | Litaf  | 37.3945  | 58.1395  | 0.636694         | 37.3955      | 58.1405       | 0.63667881       | 0.00207488 | No      |
|      |       |        |            |          |         | Lix1l  | 2.18091  | 5.34615  | 1.29357          | 2.18191      | 5.34715       | 1.29317855       | 0.00014629 | No      |
|      |       |        |            |          |         | Llgl1  | 14.896   | 7.06898  | -1.07535         | 14.897       | 7.06998       | -1.0752438       | 0.0182057  | No      |
|      |       |        |            |          |         | Llgl2  | 8.60452  | 62.6554  | 2.86427          | 8.60552      | 62.6564       | 2.8641276        | 0.00014629 | No      |
|      |       |        |            |          |         | Llph   | 106.562  | 39.4261  | -1.43447         | 106.563      | 39.4271       | -1.4344471       | 0.00014629 | No      |
|      |       |        |            |          |         | Lman1  | 9.49867  | 16.6697  | 0.811429         | 9.49967      | 16.6707       | 0.81136538       | 0.00639443 | No      |
|      |       |        |            |          |         | Lman2  | 64.8785  | 114.031  | 0.813619         | 64.8795      | 114.032       | 0.81360413       | 0.00014629 | No      |
|      |       |        |            |          |         | Lman2l | 10.9526  | 29.1987  | 1.41464          | 10.9536      | 29.1997       | 1.41454844       | 0.00014629 | No      |
|      |       |        |            |          |         | Lmbr1  | 6.19218  | 3.26958  | -0.921341        | 6.19318      | 3.27058       | -0.9211339       | 0.00363169 | No      |
|      |       |        |            |          |         | Lmbrd2 | 2.26284  | 0.500303 | -2.17726         | 2.26384      | 0.501303      | -2.1750172       | 0.00114835 | No      |
|      |       |        |            |          |         | Lmcd1  | 0        | 16.7066  | inf              | 0.001        | 16.7076       | 14.0282169       | 0.00014629 | No      |
|      |       |        |            |          |         | Lmf1   | 5.85446  | 15.21    | 1.37742          | 5.85546      | 15.211        | 1.37726058       | 0.00014629 | No      |
|      |       |        |            |          |         | Lmna   | 1.14231  | 33.6377  | 4.88005          | 1.14331      | 33.6387       | 4.87883341       | 0.00014629 | No      |
|      |       |        |            |          |         | Lmnb1  | 11.469   | 2.93881  | -1.96444         | 11.47        | 2.93981       | -1.9640706       | 0.00014629 | No      |
|      |       |        |            |          |         | Lmo1   | 0        | 1.47751  | inf              | 0.001        | 1.47851       | 10.5299283       | 0.00014629 | No      |
|      |       |        |            |          |         | Lmo2   | 4.40696  | 8.67699  | 0.977411         | 4.40796      | 8.67799       | 0.97724979       | 0.0126456  | No      |
|      |       |        |            |          |         | Lmo4   | 38.1032  | 60.0564  | 0.656405         | 38.1042      | 60.0574       | 0.65639199       | 0.00102864 | No      |
|      |       |        |            |          |         | Lmo7   | 2.4577   | 27.3715  | 3.4773           | 2.4587       | 27.3725       | 3.47675959       | 0.00014629 | No      |
|      |       |        |            |          |         | Lnp    | 3.11868  | 1.45888  | -1.09607         | 3.11968      | 1.45988       | -1.0955483       | 0.00679736 | No      |
|      |       |        |            |          |         | Lnx2   | 15.3883  | 5.13746  | -1.58271         | 15.3893      | 5.13846       | -1.5825197       | 0.00014629 | No      |
|      |       |        |            |          |         | Lonp1  | 36.9501  | 59.0883  | 0.677294         | 36.9511      | 59.0893       | 0.6772796        | 0.00053701 | No      |
|      |       |        |            |          |         | Lonp2  | 18.0319  | 90.5456  | 2.3281           | 18.0329      | 90.5466       | 2.32802904       | 0.00014629 | No      |
|      |       |        |            |          |         | Lpar2  | 0.86738  | 0        | -inf             | 0.86838      | 0.001         | -9.7621827       | 0.00014629 | No      |
|      |       |        |            |          |         | Lpar3  | 0        | 3.1244   | inf              | 0.001        | 3.1254        | 11.6098251       | 0.00014629 | No      |
|      |       |        |            |          |         | Lpar6  | 49.135   | 8.46927  | -2.53644         | 49.136       | 8.47027       | -2.5363006       | 0.00014629 | No      |
|      |       |        |            |          |         | Lpcat1 | 12.1352  | 5.62859  | -1.10836         | 12.1362      | 5.62959       | -1.108215        | 0.00053701 | No      |
|      |       |        |            |          |         | Lpcat4 | 19.9135  | 5.3273   | -1.90227         | 19.9145      | 5.3283        | -1.902072        | 0.00014629 | No      |
|      |       |        |            |          |         | Lpgat1 | 4.89925  | 13.7673  | 1.49062          | 4.90025      | 13.7683       | 1.49042318       | 0.00014629 | No      |
|      |       |        |            |          |         | Lphn2  | 0.062364 | 4.57507  | 6.19694          | 0.063364     | 4.57607       | 6.1743019        | 0.00014629 | No      |
|      |       |        |            |          |         | Lpin1  | 25.5267  | 5.67842  | -2.16845         | 25.5277      | 5.67942       | -2.168248        | 0.00041099 | No      |
|      |       |        |            |          |         | Lpin2  | 4.50104  | 6.72979  | 0.580303         | 4.50204      | 6.73079       | 0.58019697       | 0.015456   | No      |
|      |       |        |            |          |         | Lpin3  | 14.7966  | 36.3133  | 1.29524          | 14.7976      | 36.3143       | 1.29517456       | 0.00014629 | No      |
|      |       |        |            |          |         | Lpl    | 0        | 12.6429  | inf              | 0.001        | 12.6439       | 13.6261539       | 0.00014629 | No      |
|      |       |        |            |          |         | Lpxn   | 123.776  | 5.54119  | -4.48139         | 123.777      | 5.54219       | -4.4811433       | 0.00014629 | No      |
|      |       |        |            |          |         | Lrch1  | 12.5866  | 2.58961  | -2.28109         | 12.5876      | 2.59061       | -2.2806395       | 0.00014629 | No      |
|      |       |        |            |          |         | Lrch3  | 19.0522  | 4.64309  | -2.0368          | 19.0532      | 4.64409       | -2.0365655       | 0.00014629 | No      |
|      |       |        |            |          |         | Lrch4  | 81.3053  | 19.0206  | -2.09579         | 81.3063      | 19.0216       | -2.0957285       | 0.00014629 | No      |
|      |       |        |            |          |         | Lrif1  | 10.311   | 4.23069  | -1.28522         | 10.312       | 4.23169       | -1.2850183       | 0.00014629 | No      |

| RRBS |       |        |             |          |         | RNAseq  |           |         |                  |              |               |                  |            |         |
|------|-------|--------|-------------|----------|---------|---------|-----------|---------|------------------|--------------|---------------|------------------|------------|---------|
| gene | Blood | Kidney | methyl.diff | pMWU.fdr | Match ? | gene    | blood     | kidney  | log2(fold_ratio) | blood+ 0.001 | kidney+ 0.001 | log2(fold_ratio) | q_value    | Match ? |
|      |       |        |             |          |         | Lrig1   | 57.0414   | 6.51467 | -3.13025         | 57.0424      | 6.51567       | -3.1300492       | 0.00014629 | No      |
|      |       |        |             |          |         | Lrig2   | 10.2133   | 2.51214 | -2.02345         | 10.2143      | 2.51314       | -2.0230274       | 0.00014629 | No      |
|      |       |        |             |          |         | Lrmp    | 39.0271   | 8.26186 | -2.23994         | 39.0281      | 8.26286       | -2.2398001       | 0.00090728 | No      |
|      |       |        |             |          |         | Lrp1    | 0.173195  | 1.08087 | 2.64173          | 0.174195     | 1.08187       | 2.63475203       | 0.00014629 | No      |
|      |       |        |             |          |         | Lrp12   | 0.212759  | 2.44605 | 3.52316          | 0.213759     | 2.44705       | 3.51698651       | 0.00014629 | No      |
|      |       |        |             |          |         | Lrp5    | 1.79967   | 27.8324 | 3.95097          | 1.80067      | 27.8334       | 3.95021144       | 0.00014629 | No      |
|      |       |        |             |          |         | Lrp6    | 8.80285   | 4.21077 | -1.06389         | 8.80385      | 4.21177       | -1.0637079       | 0.00014629 | No      |
|      |       |        |             |          |         | Lrpap1  | 11.2817   | 116.155 | 3.36399          | 11.2827      | 116.156       | 3.36387942       | 0.00014629 | No      |
|      |       |        |             |          |         | Lrrc1   | 10.1907   | 17.737  | 0.799503         | 10.1917      | 17.738        | 0.79944864       | 0.00114835 | No      |
|      |       |        |             |          |         | Lrrc16a | 0.28065   | 14.1925 | 5.66021          | 0.28165      | 14.1935       | 5.65518311       | 0.00014629 | No      |
|      |       |        |             |          |         | Lrrc19  | 0.049196  | 14.5744 | 8.21067          | 0.050196     | 14.5754       | 8.18174736       | 0.019026   | No      |
|      |       |        |             |          |         | Lrrc2   | 0.115914  | 2.38637 | 4.36369          | 0.116914     | 2.38737       | 4.35190257       | 0.00274649 | No      |
|      |       |        |             |          |         | Lrrc25  | 0.176782  | 1.42703 | 3.01298          | 0.177782     | 1.42803       | 3.00584512       | 0.00566132 | No      |
|      |       |        |             |          |         | Lrrc27  | 0         | 2.29629 | inf              | 0.001        | 2.29729       | 11.1657173       | 0.00523722 | No      |
|      |       |        |             |          |         | Lrrc29  | 0.654346  | 3.28878 | 2.32943          | 0.655346     | 3.28978       | 2.3276624        | 0.00161718 | No      |
|      |       |        |             |          |         | Lrrc34  | 24.0075   | 2.76914 | -3.11597         | 24.0085      | 2.77014       | -3.1155145       | 0.0136225  | No      |
|      |       |        |             |          |         | Lrrc39  | 6.11782   | 2.24924 | -1.44358         | 6.11882      | 2.25024       | -1.4431746       | 0.00195831 | No      |
|      |       |        |             |          |         | Lrrc40  | 13.9441   | 6.51292 | -1.09828         | 13.9451      | 6.51392       | -1.0981604       | 0.00053701 | No      |
|      |       |        |             |          |         | Lrrc45  | 29.7821   | 56.4306 | 0.922032         | 29.7831      | 56.4316       | 0.92200933       | 0.00014629 | No      |
|      |       |        |             |          |         | Lrrc46  | 0.519101  | 2.4736  | 2.25253          | 0.520101     | 2.4746        | 2.25033163       | 0.0464366  | No      |
|      |       |        |             |          |         | Lrrc47  | 31.6656   | 70.6531 | 1.15784          | 31.6666      | 70.6541       | 1.15781131       | 0.00014629 | No      |
|      |       |        |             |          |         | Lrrc58  | 0.379955  | 3.58172 | 3.23675          | 0.380955     | 3.58272       | 3.2333628        | 0.00994441 | No      |
|      |       |        |             |          |         | Lrrc59  | 15.4329   | 23.5343 | 0.608761         | 15.4339      | 23.5353       | 0.60872358       | 0.00470105 | No      |
|      |       |        |             |          |         | Lrrc61  | 0.188343  | 1.84966 | 3.29582          | 0.189343     | 1.85066       | 3.28896588       | 0.00944816 | No      |
|      |       |        |             |          |         | Lrrc66  | 0.0756528 | 1.8926  | 4.64483          | 0.0766528    | 1.8936        | 4.62664931       | 0.00914429 | No      |
|      |       |        |             |          |         | Lrrc8a  | 30.0511   | 290.176 | 3.27144          | 30.0521      | 290.177       | 3.27139546       | 0.00014629 | No      |
|      |       |        |             |          |         | Lrrc8b  | 35.9168   | 4.7238  | -2.92664         | 35.9178      | 4.7248        | -2.9263738       | 0.00014629 | No      |
|      |       |        |             |          |         | Lrrfip2 | 12.2573   | 28.1656 | 1.2003           | 12.2583      | 28.1666       | 1.20022651       | 0.00014629 | No      |
|      |       |        |             |          |         | Lrrk1   | 0.554349  | 7.99935 | 3.85102          | 0.555349     | 8.00035       | 3.84859652       | 0.00014629 | No      |
|      |       |        |             |          |         | Lrrk2   | 1.15554   | 7.68061 | 2.73265          | 1.15654      | 7.68161       | 2.73159356       | 0.00014629 | No      |
|      |       |        |             |          |         | Lrsam1  | 2.26223   | 13.6562 | 2.59374          | 2.26323      | 13.6572       | 2.59320662       | 0.00014629 | No      |
|      |       |        |             |          |         | Lrtm2   | 0.18956   | 2.97688 | 3.97308          | 0.19056      | 2.97788       | 3.9659684        | 0.00014629 | No      |
|      |       |        |             |          |         | Lrwd1   | 43.1695   | 15.2231 | -1.50375         | 43.1705      | 15.2241       | -1.5036889       | 0.00184429 | No      |
|      |       |        |             |          |         | Lsg1    | 17.693    | 12.4615 | -0.505702        | 17.694       | 12.4625       | -0.5056667       | 0.0336436  | No      |
|      |       |        |             |          |         | Lsm12   | 60.52     | 36.686  | -0.722181        | 60.521       | 36.687        | -0.7221669       | 0.00014629 | No      |
|      |       |        |             |          |         | Lsm14a  | 71.4559   | 25.7488 | -1.47255         | 71.4569      | 25.7498       | -1.4725121       | 0.00014629 | No      |
|      |       |        |             |          |         | Lsm14b  | 49.7879   | 15.2721 | -1.70489         | 49.7889      | 15.2731       | -1.7048312       | 0.00014629 | No      |
|      |       |        |             |          |         | Lsm3    | 80.4187   | 48.7768 | -0.721337        | 80.4197      | 48.7778       | -0.7213243       | 0.00195831 | No      |
|      |       |        |             |          |         | Lsm4    | 159.502   | 110.67  | -0.527305        | 159.503      | 110.671       | -0.5273063       | 0.0109563  | No      |
|      |       |        |             |          |         | Lsm5    | 157.054   | 68.3313 | -1.20064         | 157.055      | 68.3323       | -1.2006303       | 0.00014629 | No      |
|      |       |        |             |          |         | Lsm6    | 8.29979   | 3.54243 | -1.22834         | 8.30079      | 3.54343       | -1.2281021       | 0.0152626  | No      |
|      |       |        |             |          |         | LSP1    | 223.428   | 22.7717 | -3.2945          | 223.429      | 22.7727       | -3.2944392       | 0.00014629 | No      |

| RRBS |       |        |             |          |         | RNAseq  |           |          |                  |              |               |                  |            |         |
|------|-------|--------|-------------|----------|---------|---------|-----------|----------|------------------|--------------|---------------|------------------|------------|---------|
| gene | Blood | Kidney | methyl.diff | pMWU.fdr | Match ? | gene    | blood     | kidney   | log2(fold_ratio) | blood+ 0.001 | kidney+ 0.001 | log2(fold_ratio) | q_value    | Match ? |
|      |       |        |             |          |         | Lsr     | 2.28131   | 43.3346  | 4.24759          | 2.28231      | 43.3356       | 4.24698601       | 0.00014629 | No      |
|      |       |        |             |          |         | Lta4h   | 14.9057   | 22.7222  | 0.608239         | 14.9067      | 22.7232       | 0.6082051        | 0.00833592 | No      |
|      |       |        |             |          |         | Ltb     | 308.546   | 9.63928  | -5.00042         | 308.547      | 9.64028       | -5.0002714       | 0.00066215 | No      |
|      |       |        |             |          |         | Ltn1    | 18.3875   | 7.79276  | -1.23852         | 18.3885      | 7.79376       | -1.2384124       | 0.00014629 | No      |
|      |       |        |             |          |         | Ltv1    | 22.3823   | 14.3378  | -0.642531        | 22.3833      | 14.3388       | -0.6424985       | 0.0100448  | No      |
|      |       |        |             |          |         | Luc7l3  | 112.278   | 42.7411  | -1.39338         | 112.279      | 42.7421       | -1.3933584       | 0.00014629 | No      |
|      |       |        |             |          |         | LY49S6  | 8.34484   | 0.280052 | -4.89712         | 8.34584      | 0.281052      | -4.8921483       | 0.0417203  | No      |
|      |       |        |             |          |         | Ly6al   | 0.460859  | 12.6751  | 4.78153          | 0.461859     | 12.6761       | 4.77851465       | 0.00014629 | No      |
|      |       |        |             |          |         | Ly6c    | 292.381   | 61.5261  | -2.24858         | 292.382      | 61.5271       | -2.2485606       | 0.00014629 | No      |
|      |       |        |             |          |         | Ly6e    | 573.579   | 94.797   | -2.59708         | 573.58       | 94.798        | -2.5970662       | 0.00014629 | No      |
|      |       |        |             |          |         | Ly6i    | 0.13295   | 63.7043  | 8.90437          | 0.13395      | 63.7053       | 8.89357501       | 0.0106553  | No      |
|      |       |        |             |          |         | Ly75    | 7.95354   | 0.469721 | -4.08172         | 7.95454      | 0.470721      | -4.0788344       | 0.00014629 | No      |
|      |       |        |             |          |         | Ly9     | 84.0582   | 1.61143  | -5.70498         | 84.0592      | 1.61243       | -5.7040973       | 0.00014629 | No      |
|      |       |        |             |          |         | Lyar    | 20.0214   | 7.88723  | -1.34395         | 20.0224      | 7.88823       | -1.3438414       | 0.00014629 | No      |
|      |       |        |             |          |         | Lyl1    | 2.06011   | 10.0976  | 2.29322          | 2.06111      | 10.0986       | 2.29266189       | 0.0077167  | No      |
|      |       |        |             |          |         | Lynx1   | 0.209296  | 7.95015  | 5.24736          | 0.210296     | 7.95115       | 5.24067022       | 0.0213766  | No      |
|      |       |        |             |          |         | Lyplal1 | 0.492325  | 31.1087  | 5.98156          | 0.493325     | 31.1097       | 5.97868227       | 0.00041099 | No      |
|      |       |        |             |          |         | Lyrn2   | 17.5058   | 28.7667  | 0.716565         | 17.5068      | 28.7677       | 0.71653448       | 0.00102864 | No      |
|      |       |        |             |          |         | Lyrn7   | 3.66626   | 9.59353  | 1.38775          | 3.66726      | 9.59453       | 1.38750958       | 0.00014629 | No      |
|      |       |        |             |          |         | Lyrn9   | 4.09346   | 11.3544  | 1.47186          | 4.09446      | 11.3554       | 1.47163343       | 0.00363169 | No      |
|      |       |        |             |          |         | Lysmd2  | 9.40486   | 2.53231  | -1.89295         | 9.40586      | 2.53331       | -1.8925362       | 0.00014629 | No      |
|      |       |        |             |          |         | Lysmd3  | 7.18434   | 2.50603  | -1.51945         | 7.18534      | 2.50703       | -1.5190772       | 0.00014629 | No      |
|      |       |        |             |          |         | Lyve1   | 0.0858528 | 1.32435  | 3.94728          | 0.0868528    | 1.32535       | 3.93165723       | 0.00384649 | No      |
|      |       |        |             |          |         | Lyz2    | 41.3177   | 89.9528  | 1.12241          | 41.3187      | 89.9538       | 1.12238936       | 0.00014629 | No      |
|      |       |        |             |          |         | Lzic    | 16.6276   | 6.21752  | -1.41917         | 16.6286      | 6.21852       | -1.4190235       | 0.00014629 | No      |
|      |       |        |             |          |         | Lztf1   | 2.97229   | 30.5771  | 3.36281          | 2.97329      | 30.5781       | 3.36236668       | 0.00014629 | No      |
|      |       |        |             |          |         | Lzts2   | 3.61025   | 16.6532  | 2.20563          | 3.61125      | 16.6542       | 2.20531585       | 0.00014629 | No      |
|      |       |        |             |          |         | M6pr    | 40.5706   | 28.7321  | -0.497772        | 40.5716      | 28.7331       | -0.4977565       | 0.0151721  | No      |
|      |       |        |             |          |         | MacroD1 | 1.41931   | 100.149  | 6.14081          | 1.42031      | 100.15        | 6.13981276       | 0.00014629 | No      |
|      |       |        |             |          |         | Mad1l1  | 13.9215   | 8.45882  | -0.71879         | 13.9225      | 8.45982       | -0.7187194       | 0.0192184  | No      |
|      |       |        |             |          |         | Mad2l1  | 7.00714   | 2.6159   | -1.42152         | 7.00814      | 2.6169        | -1.4211728       | 0.0126456  | No      |
|      |       |        |             |          |         | Madd    | 38.3111   | 12.7768  | -1.58424         | 38.3121      | 12.7778       | -1.5841606       | 0.00014629 | No      |
|      |       |        |             |          |         | Maea    | 35.922    | 134.622  | 1.90598          | 35.923       | 134.623       | 1.90594517       | 0.00014629 | No      |
|      |       |        |             |          |         | Maf     | 6.9898    | 138.822  | 4.31184          | 6.9908       | 138.823       | 4.31164524       | 0.00014629 | No      |
|      |       |        |             |          |         | Maf1    | 140.74    | 80.6521  | -0.803248        | 140.741      | 80.6531       | -0.8032408       | 0.00114835 | No      |
|      |       |        |             |          |         | Mafg    | 3.13264   | 22.5817  | 2.8497           | 3.13364      | 22.5827       | 2.84930663       | 0.00014629 | No      |
|      |       |        |             |          |         | Maged2  | 3.71914   | 14.2736  | 1.94031          | 3.72014      | 14.2746       | 1.9400215        | 0.00014629 | No      |
|      |       |        |             |          |         | Mageh1  | 1.85051   | 17.4087  | 3.23381          | 1.85151      | 17.4097       | 3.2331171        | 0.00014629 | No      |
|      |       |        |             |          |         | Magi1   | 0.226938  | 12.0472  | 5.73025          | 0.227938     | 12.0482       | 5.72403235       | 0.00014629 | No      |
|      |       |        |             |          |         | Magi3   | 3.8962    | 12.7962  | 1.71558          | 3.8972       | 12.7972       | 1.71531831       | 0.00014629 | No      |
|      |       |        |             |          |         | Magoh   | 100.88    | 60.4303  | -0.739302        | 100.881      | 60.4313       | -0.7392866       | 0.00090728 | No      |
|      |       |        |             |          |         | Magohb  | 26.6773   | 7.72249  | -1.78848         | 26.6783      | 7.72349       | -1.7883419       | 0.00028114 | No      |

| RRBS |       |        |             |          |         | RNAseq   |           |          |                  |              |               |                  |            |         |
|------|-------|--------|-------------|----------|---------|----------|-----------|----------|------------------|--------------|---------------|------------------|------------|---------|
| gene | Blood | Kidney | methyl.diff | pMWU.fdr | Match ? | gene     | blood     | kidney   | log2(fold_ratio) | blood+ 0.001 | kidney+ 0.001 | log2(fold_ratio) | q_value    | Match ? |
|      |       |        |             |          |         | Magt1    | 22.118    | 15.4163  | -0.520769        | 22.119       | 15.4173       | -0.520736        | 0.0270645  | No      |
|      |       |        |             |          |         | Mak16    | 16.5666   | 9.53067  | -0.797625        | 16.5676      | 9.53167       | -0.7975637       | 0.0172634  | No      |
|      |       |        |             |          |         | Mal      | 0.737938  | 88.8031  | 6.91097          | 0.738938     | 88.8041       | 6.90902915       | 0.00014629 | No      |
|      |       |        |             |          |         | Mal2     | 0         | 16.093   | inf              | 0.001        | 16.094        | 13.9742353       | 0.00014629 | No      |
|      |       |        |             |          |         | Malsu1   | 9.98989   | 35.8109  | 1.84186          | 9.99089      | 35.8119       | 1.84175396       | 0.00014629 | No      |
|      |       |        |             |          |         | Malt1    | 25.8877   | 3.22933  | -3.00296         | 25.8887      | 3.23033       | -3.0025691       | 0.00014629 | No      |
|      |       |        |             |          |         | Mamdc4   | 0.964669  | 3.30587  | 1.77692          | 0.965669     | 3.30687       | 1.77586566       | 0.0298866  | No      |
|      |       |        |             |          |         | Maml1    | 10.0303   | 2.60812  | -1.94329         | 10.0313      | 2.60912       | -1.9428734       | 0.0242332  | No      |
|      |       |        |             |          |         | Maml2    | 10.8742   | 1.31489  | -3.04789         | 10.8752      | 1.31589       | -3.0469311       | 0.00014629 | No      |
|      |       |        |             |          |         | Man1a1   | 63.6594   | 2.87786  | -4.46731         | 63.6604      | 2.87886       | -4.4668267       | 0.00014629 | No      |
|      |       |        |             |          |         | Man1a2   | 15.0722   | 7.08327  | -1.0894          | 15.0732      | 7.08427       | -1.0892946       | 0.00459197 | No      |
|      |       |        |             |          |         | Man1c1   | 24.2481   | 14.2419  | -0.767731        | 24.2491      | 14.2429       | -0.7676883       | 0.00230432 | No      |
|      |       |        |             |          |         | Man2a1   | 37.5794   | 7.88561  | -2.25265         | 37.5804      | 7.88661       | -2.2525032       | 0.00014629 | No      |
|      |       |        |             |          |         | Man2b1   | 103.739   | 150.193  | 0.53385          | 103.74       | 150.194       | 0.53385491       | 0.031633   | No      |
|      |       |        |             |          |         | Man2c1   | 38.7248   | 78.8467  | 1.02579          | 38.7258      | 78.8477       | 1.02577363       | 0.00833592 | No      |
|      |       |        |             |          |         | Manba    | 11.1532   | 25.8642  | 1.2135           | 11.1542      | 25.8652       | 1.2134253        | 0.00014629 | No      |
|      |       |        |             |          |         | Manbal   | 24.5861   | 49.9561  | 1.02282          | 24.5871      | 49.9571       | 1.02278815       | 0.00014629 | No      |
|      |       |        |             |          |         | Mansc1   | 0.0898733 | 8.03375  | 6.48204          | 0.0908733    | 8.03475       | 6.46625285       | 0.015456   | No      |
|      |       |        |             |          |         | Maoa     | 0.148642  | 9.6164   | 6.01559          | 0.149642     | 9.6174        | 6.00605987       | 0.00374149 | No      |
|      |       |        |             |          |         | Map1lc3a | 12.622    | 115.919  | 3.19911          | 12.623       | 115.92        | 3.19900277       | 0.00014629 | No      |
|      |       |        |             |          |         | Map1lc3b | 105.814   | 183.898  | 0.79738          | 105.815      | 183.899       | 0.79736948       | 0.00195831 | No      |
|      |       |        |             |          |         | Map2     | 0         | 0.951435 | inf              | 0.001        | 0.952435      | 9.89547683       | 0.00533979 | No      |
|      |       |        |             |          |         | Map2k2   | 55.291    | 284.516  | 2.36339          | 55.292       | 284.517       | 2.36337219       | 0.00014629 | No      |
|      |       |        |             |          |         | Map2k3   | 3.45659   | 13.9951  | 2.01749          | 3.45759      | 13.9961       | 2.01718617       | 0.00014629 | No      |
|      |       |        |             |          |         | Map2k4   | 18.1741   | 9.9412   | -0.870392        | 18.1751      | 9.9422        | -0.8703263       | 0.00555587 | No      |
|      |       |        |             |          |         | Map2k5   | 13.1756   | 52.0714  | 1.98262          | 13.1766      | 52.0724       | 1.98254075       | 0.00014629 | No      |
|      |       |        |             |          |         | Map2k6   | 20.6205   | 10.4533  | -0.980114        | 20.6215      | 10.4543       | -0.9800528       | 0.00053701 | No      |
|      |       |        |             |          |         | Map3k1   | 35.9548   | 16.5341  | -1.12074         | 35.9558      | 16.5351       | -1.1206927       | 0.00014629 | No      |
|      |       |        |             |          |         | Map3k11  | 11.4013   | 27.1146  | 1.24987          | 11.4023      | 27.1156       | 1.24979823       | 0.00014629 | No      |
|      |       |        |             |          |         | Map3k14  | 19.5923   | 4.4708   | -2.13169         | 19.5933      | 4.4718        | -2.1314328       | 0.00014629 | No      |
|      |       |        |             |          |         | Map3k2   | 11.9824   | 3.71596  | -1.68911         | 11.9834      | 3.71696       | -1.6888422       | 0.00014629 | No      |
|      |       |        |             |          |         | Map3k3   | 26.2472   | 8.13934  | -1.68918         | 26.2482      | 8.14034       | -1.6890575       | 0.0178218  | No      |
|      |       |        |             |          |         | Map3k5   | 14.8007   | 29.2015  | 0.980381         | 14.8017      | 29.2025       | 0.980329         | 0.00014629 | No      |
|      |       |        |             |          |         | Map3k7cl | 0         | 19.5404  | inf              | 0.001        | 19.5414       | 14.2542462       | 0.0499148  | No      |
|      |       |        |             |          |         | Map3k8   | 9.43587   | 2.38549  | -1.98387         | 9.43687      | 2.38649       | -1.9834181       | 0.00014629 | No      |
|      |       |        |             |          |         | MAP4     | 26.7128   | 16.8543  | -0.664416        | 26.7138      | 16.8553       | -0.6643829       | 0.00066215 | No      |
|      |       |        |             |          |         | Map4k1   | 64.2758   | 14.0604  | -2.19264         | 64.2768      | 14.0614       | -2.1925579       | 0.00014629 | No      |
|      |       |        |             |          |         | Map4k3   | 7.21417   | 38.7076  | 2.42371          | 7.21517      | 38.7086       | 2.42354884       | 0.00014629 | No      |
|      |       |        |             |          |         | Map4k4   | 53.8112   | 7.84409  | -2.77823         | 53.8122      | 7.84509       | -2.7780714       | 0.00014629 | No      |
|      |       |        |             |          |         | Map4k5   | 1.14368   | 5.8819   | 2.3626           | 1.14468      | 5.8829        | 2.36158317       | 0.00014629 | No      |
|      |       |        |             |          |         | Map7     | 0.424694  | 42.7452  | 6.65319          | 0.425694     | 42.7462       | 6.64983561       | 0.00014629 | No      |
|      |       |        |             |          |         | Map7d1   | 33.9063   | 21.7941  | -0.637614        | 33.9073      | 21.7951       | -0.6375921       | 0.00161718 | No      |

| RRBS |       |        |             |          |         | RNAseq   |           |          |                  |              |               |                  |            |         |
|------|-------|--------|-------------|----------|---------|----------|-----------|----------|------------------|--------------|---------------|------------------|------------|---------|
| gene | Blood | Kidney | methyl.diff | pMWU.fdr | Match ? | gene     | blood     | kidney   | log2(fold_ratio) | blood+ 0.001 | kidney+ 0.001 | log2(fold_ratio) | q_value    | Match ? |
|      |       |        |             |          |         | Mapk1    | 33.1967   | 19.7222  | -0.751219        | 33.1977      | 19.7232       | -0.7511897       | 0.00184429 | No      |
|      |       |        |             |          |         | Mapk3    | 20.181    | 50.7359  | 1.33001          | 20.182       | 50.7369       | 1.32996622       | 0.00014629 | No      |
|      |       |        |             |          |         | Mapk6    | 23.5912   | 14.1537  | -0.737068        | 23.5922      | 14.1547       | -0.7370288       | 0.0113536  | No      |
|      |       |        |             |          |         | Mapk7    | 0.996552  | 2.91824  | 1.55008          | 0.997552     | 2.91924       | 1.54912887       | 0.00149937 | No      |
|      |       |        |             |          |         | Mapk8    | 12.7574   | 4.53385  | -1.49253         | 12.7584      | 4.53485       | -1.4923207       | 0.00014629 | No      |
|      |       |        |             |          |         | Mapk8ip1 | 0.203186  | 49.3092  | 7.92292          | 0.204186     | 49.3102       | 7.91585834       | 0.00014629 | No      |
|      |       |        |             |          |         | Mapk8ip3 | 29.8632   | 15.091   | -0.984682        | 29.8642      | 15.092        | -0.9846331       | 0.00014629 | No      |
|      |       |        |             |          |         | Mapkbp1  | 7.89487   | 1.99396  | -1.98528         | 7.89587      | 1.99496       | -1.9847384       | 0.00014629 | No      |
|      |       |        |             |          |         | Mapre1   | 61.3142   | 27.5518  | -1.15407         | 61.3152      | 27.5528       | -1.1540458       | 0.00014629 | No      |
|      |       |        |             |          |         | Mapre2   | 58.7132   | 18.1751  | -1.69173         | 58.7142      | 18.1761       | -1.6916668       | 0.00014629 | No      |
|      |       |        |             |          |         | Mapre3   | 2.68539   | 28.374   | 3.40136          | 2.68639      | 28.375        | 3.40087972       | 0.00014629 | No      |
|      |       |        |             |          |         | Mapt     | 0.117802  | 22.2002  | 7.55806          | 0.118802     | 22.2012       | 7.54593472       | 0.00014629 | No      |
|      |       |        |             |          |         | Marcks   | 1.26198   | 5.11503  | 2.01906          | 1.26298      | 5.11603       | 2.01819293       | 0.0167011  | No      |
|      |       |        |             |          |         | Marcksl1 | 3.69077   | 10.4632  | 1.50332          | 3.69177      | 10.4642       | 1.50307744       | 0.00041099 | No      |
|      |       |        |             |          |         | Marf1    | 18.4897   | 9.1463   | -1.01546         | 18.4907      | 9.1473        | -1.015382        | 0.00041099 | No      |
|      |       |        |             |          |         | Mark2    | 48.5265   | 32.8182  | -0.564279        | 48.5275      | 32.8192       | -0.5642625       | 0.0135258  | No      |
|      |       |        |             |          |         | Mars     | 26.2795   | 77.0959  | 1.55272          | 26.2805      | 77.0969       | 1.55268013       | 0.00341151 | No      |
|      |       |        |             |          |         | Marveld1 | 0.500406  | 3.91985  | 2.96963          | 0.501406     | 3.92085       | 2.96711528       | 0.0146937  | No      |
|      |       |        |             |          |         | Mast2    | 6.40826   | 22.6946  | 1.82435          | 6.40926      | 22.6956       | 1.82418293       | 0.00014629 | No      |
|      |       |        |             |          |         | Mast3    | 32.6429   | 21.7723  | -0.584276        | 32.6439      | 21.7733       | -0.5842533       | 0.00730705 | No      |
|      |       |        |             |          |         | Mast4    | 0         | 6.93686  | inf              | 0.001        | 6.93786       | 12.760275        | 0.00014629 | No      |
|      |       |        |             |          |         | Matk     | 0.58144   | 2.79015  | 2.26264          | 0.58244      | 2.79115       | 2.26067832       | 0.00740907 | No      |
|      |       |        |             |          |         | Matr3    | 106.95    | 35.5661  | -1.58836         | 106.951      | 35.5671       | -1.5883347       | 0.00014629 | No      |
|      |       |        |             |          |         | Max      | 175.202   | 35.8747  | -2.28798         | 175.203      | 35.8757       | -2.2879486       | 0.00014629 | No      |
|      |       |        |             |          |         | Maz      | 92.996    | 40.2498  | -1.20819         | 92.997       | 40.2508       | -1.2081667       | 0.00014629 | No      |
|      |       |        |             |          |         | MBD3     | 67.313    | 98.1745  | 0.544463         | 67.314       | 98.1755       | 0.54445645       | 0.00679736 | No      |
|      |       |        |             |          |         | Mbd4     | 5.69968   | 1.81398  | -1.65172         | 5.70068      | 1.81498       | -1.6511804       | 0.00639443 | No      |
|      |       |        |             |          |         | Mbd5     | 5.06912   | 1.17574  | -2.10816         | 5.07012      | 1.17674       | -2.1072243       | 0.00014629 | No      |
|      |       |        |             |          |         | Mbd6     | 21.6268   | 70.4125  | 1.70301          | 21.6278      | 70.4135       | 1.70296514       | 0.0107557  | No      |
|      |       |        |             |          |         | Mbip     | 9.86485   | 5.52174  | -0.837175        | 9.86585      | 5.52274       | -0.8370591       | 0.00629035 | No      |
|      |       |        |             |          |         | Mbl1     | 0         | 3.4502   | inf              | 0.001        | 3.4512        | 11.7528824       | 0.00014629 | No      |
|      |       |        |             |          |         | Mbnl1    | 399.125   | 40.6865  | -3.29422         | 399.126      | 40.6875       | -3.2941867       | 0.00014629 | No      |
|      |       |        |             |          |         | Mbnl3    | 3.66382   | 0.747928 | -2.29238         | 3.66482      | 0.748928      | -2.2908434       | 0.00014629 | No      |
|      |       |        |             |          |         | Mboat1   | 1.72909   | 8.98715  | 2.37785          | 1.73009      | 8.98815       | 2.37717711       | 0.00014629 | No      |
|      |       |        |             |          |         | Mboat2   | 0.0474785 | 9.84808  | 7.69642          | 0.0484785    | 9.84908       | 7.6665001        | 0.00126596 | No      |
|      |       |        |             |          |         | MBP      | 66.8227   | 6.89295  | -3.27714         | 66.8237      | 6.89395       | -3.2769571       | 0.00014629 | No      |
|      |       |        |             |          |         | Mbtd1    | 22.0503   | 7.98971  | -1.46458         | 22.0513      | 7.99071       | -1.4644681       | 0.00014629 | No      |
|      |       |        |             |          |         | Mbtps1   | 154       | 63.2977  | -1.28271         | 154.001      | 63.2987       | -1.2826919       | 0.00014629 | No      |
|      |       |        |             |          |         | Mcam     | 0.544785  | 1.79437  | 1.71972          | 0.545785     | 1.79537       | 1.71787654       | 0.00812679 | No      |
|      |       |        |             |          |         | Mcart1   | 6.75963   | 32.3602  | 2.25921          | 6.76063      | 32.3612       | 2.25903551       | 0.00014629 | No      |
|      |       |        |             |          |         | Mcart1l  | 45.5192   | 0.502385 | -6.50154         | 45.5202      | 0.503385      | -6.4987009       | 0.00014629 | No      |
|      |       |        |             |          |         | Mcat     | 9.57862   | 14.9054  | 0.637946         | 9.57962      | 14.9064       | 0.63789154       | 0.0150758  | No      |

| RRBS |       |        |             |          |         | RNAseq |          |         |                  |              |               |                  |            |         |
|------|-------|--------|-------------|----------|---------|--------|----------|---------|------------------|--------------|---------------|------------------|------------|---------|
| gene | Blood | Kidney | methyl.diff | pMWU.fdr | Match ? | gene   | blood    | kidney  | log2(fold_ratio) | blood+ 0.001 | kidney+ 0.001 | log2(fold_ratio) | q_value    | Match ? |
|      |       |        |             |          |         | Mccc1  | 27.6338  | 109.065 | 1.98069          | 27.6348      | 109.066       | 1.98064335       | 0.00014629 | No      |
|      |       |        |             |          |         | Mccc2  | 4.08658  | 49.7404 | 3.60545          | 4.08758      | 49.7414       | 3.60512824       | 0.00014629 | No      |
|      |       |        |             |          |         | Mcee   | 6.3318   | 88.3232 | 3.8021           | 6.3328       | 88.3242       | 3.80189335       | 0.00014629 | No      |
|      |       |        |             |          |         | Mcf2l  | 1.1992   | 14.0089 | 3.54619          | 1.2002       | 14.0099       | 3.54509992       | 0.00014629 | No      |
|      |       |        |             |          |         | Mcm2   | 14.6006  | 6.40114 | -1.18962         | 14.6016      | 6.40214       | -1.1895003       | 0.00014629 | No      |
|      |       |        |             |          |         | Mcm3   | 32.861   | 3.60274 | -3.18921         | 32.862       | 3.60374       | -3.1888535       | 0.00014629 | No      |
|      |       |        |             |          |         | Mcm4   | 12.7063  | 3.23189 | -1.97509         | 12.7073      | 3.23289       | -1.9747612       | 0.00014629 | No      |
|      |       |        |             |          |         | Mcm5   | 10.9083  | 5.25848 | -1.05271         | 10.9093      | 5.25948       | -1.0525665       | 0.00448672 | No      |
|      |       |        |             |          |         | Mcm6   | 17.8081  | 3.81671 | -2.22213         | 17.8091      | 3.81771       | -2.2218352       | 0.00014629 | No      |
|      |       |        |             |          |         | Mcm7   | 38.2965  | 14.8421 | -1.36752         | 38.2975      | 14.8431       | -1.3674578       | 0.00014629 | No      |
|      |       |        |             |          |         | Mcoln1 | 9.01864  | 37.7466 | 2.06536          | 9.01964      | 37.7476       | 2.06524316       | 0.00014629 | No      |
|      |       |        |             |          |         | Mcoln3 | 0        | 1.89341 | inf              | 0.001        | 1.89441       | 10.8875329       | 0.00014629 | No      |
|      |       |        |             |          |         | Mcrs1  | 26.0677  | 49.2345 | 0.917409         | 26.0687      | 49.2355       | 0.91738027       | 0.0117565  | No      |
|      |       |        |             |          |         | Mcts1  | 43.9885  | 30.1794 | -0.543561        | 43.9895      | 30.1804       | -0.5435473       | 0.0287057  | No      |
|      |       |        |             |          |         | Mcur1  | 9.91837  | 14.0344 | 0.500788         | 9.91937      | 14.0354       | 0.50074978       | 0.046797   | No      |
|      |       |        |             |          |         | Mdc1   | 4.17054  | 1.90722 | -1.12877         | 4.17154      | 1.90822       | -1.1283526       | 0.00014629 | No      |
|      |       |        |             |          |         | Mdfic  | 1.25988  | 6.6021  | 2.38963          | 1.26088      | 6.6031        | 2.38871252       | 0.00014629 | No      |
|      |       |        |             |          |         | Mdh1   | 83.1781  | 910.199 | 3.45191          | 83.1791      | 910.2         | 3.45189061       | 0.00014629 | No      |
|      |       |        |             |          |         | Mdh2   | 106.616  | 318.616 | 1.5794           | 106.617      | 318.617       | 1.57938575       | 0.00014629 | No      |
|      |       |        |             |          |         | Mdm2   | 28.6707  | 17.1548 | -0.740963        | 28.6717      | 17.1558       | -0.740931        | 0.00090728 | No      |
|      |       |        |             |          |         | Mdm4   | 99.2264  | 8.80187 | -3.49484         | 99.2274      | 8.80287       | -3.4946927       | 0.00014629 | No      |
|      |       |        |             |          |         | Mdp1   | 17.8247  | 8.23929 | -1.11329         | 17.8257      | 8.24029       | -1.1131917       | 0.00438237 | No      |
|      |       |        |             |          |         | Me1    | 0.153243 | 39.6989 | 8.01713          | 0.154243     | 39.6999       | 8.00778655       | 0.00041099 | No      |
|      |       |        |             |          |         | Me2    | 12.2432  | 5.92729 | -1.04654         | 12.2442      | 5.92829       | -1.0464106       | 0.00014629 | No      |
|      |       |        |             |          |         | Me3    | 0        | 9.65077 | inf              | 0.001        | 9.65177       | 13.2365778       | 0.00014629 | No      |
|      |       |        |             |          |         | Meaf6  | 27.9554  | 43.1267 | 0.625457         | 27.9564      | 43.1277       | 0.62543619       | 0.0279702  | No      |
|      |       |        |             |          |         | Mecom  | 0        | 33.1105 | inf              | 0.001        | 33.1115       | 15.0150447       | 0.00014629 | No      |
|      |       |        |             |          |         | Mecr   | 4.0195   | 21.5954 | 2.42564          | 4.0205       | 21.5964       | 2.42534401       | 0.00014629 | No      |
|      |       |        |             |          |         | Med1   | 26.7759  | 8.26492 | -1.69586         | 26.7769      | 8.26592       | -1.6957416       | 0.00014629 | No      |
|      |       |        |             |          |         | Med12  | 56.9458  | 36.2112 | -0.653153        | 56.9468      | 36.2122       | -0.6531389       | 0.0266914  | No      |
|      |       |        |             |          |         | Med13  | 15.5548  | 3.57578 | -2.12103         | 15.5558      | 3.57678       | -2.1207193       | 0.00014629 | No      |
|      |       |        |             |          |         | Med13l | 12.877   | 3.12277 | -2.04389         | 12.878       | 3.12377       | -2.0435484       | 0.00014629 | No      |
|      |       |        |             |          |         | Med14  | 29.7949  | 15.5171 | -0.941204        | 29.7959      | 15.5181       | -0.9411619       | 0.00427532 | No      |
|      |       |        |             |          |         | Med15  | 70.403   | 36.3951 | -0.95189         | 70.404       | 36.3961       | -0.9518735       | 0.00014629 | No      |
|      |       |        |             |          |         | Med18  | 43.7943  | 14.6176 | -1.58304         | 43.7953      | 14.6186       | -1.5829709       | 0.00014629 | No      |
|      |       |        |             |          |         | MED20  | 6.33257  | 17.1348 | 1.43607          | 6.33357      | 17.1358       | 1.43592272       | 0.00014629 | No      |
|      |       |        |             |          |         | Med22  | 4.55445  | 14.9587 | 1.71564          | 4.55545      | 14.9597       | 1.71541576       | 0.00014629 | No      |
|      |       |        |             |          |         | Med23  | 19.683   | 11.0085 | -0.83833         | 19.684       | 11.0095       | -0.8382745       | 0.0109563  | No      |
|      |       |        |             |          |         | Med25  | 51.4533  | 129.965 | 1.33679          | 51.4543      | 129.966       | 1.3367707        | 0.00014629 | No      |
|      |       |        |             |          |         | Med29  | 54.4785  | 147.714 | 1.43905          | 54.4795      | 147.715       | 1.43903097       | 0.00014629 | No      |
|      |       |        |             |          |         | Med31  | 19.3374  | 72.8741 | 1.91401          | 19.3384      | 72.8751       | 1.91395752       | 0.00014629 | No      |
|      |       |        |             |          |         | Med9   | 2.91443  | 9.00623 | 1.62771          | 2.91543      | 9.00723       | 1.62737482       | 0.00014629 | No      |

| RRBS |       |        |            |          |         | RNAseq    |           |          |                  |              |               |                  |            |         |
|------|-------|--------|------------|----------|---------|-----------|-----------|----------|------------------|--------------|---------------|------------------|------------|---------|
| gene | Blood | Kidney | methy.diff | pMWU.fdr | Match ? | gene      | blood     | kidney   | log2(fold_ratio) | blood+ 0.001 | kidney+ 0.001 | log2(fold_ratio) | q_value    | Match ? |
|      |       |        |            |          |         | Medag     | 0         | 3.90549  | inf              | 0.001        | 3.90649       | 11.9316572       | 0.00014629 | No      |
|      |       |        |            |          |         | Mef2a     | 21.5791   | 8.0245   | -1.42715         | 21.5801      | 8.0255        | -1.4270384       | 0.00014629 | No      |
|      |       |        |            |          |         | Megf9     | 0.72434   | 2.31167  | 1.67419          | 0.72534      | 2.31267       | 1.6728301        | 0.00090728 | No      |
|      |       |        |            |          |         | Meis3     | 17.8109   | 10.024   | -0.829302        | 17.8119      | 10.025        | -0.8292392       | 0.00274649 | No      |
|      |       |        |            |          |         | Melk      | 0.376087  | 7.77077  | 4.36892          | 0.377087     | 7.77177       | 4.36527389       | 0.00252712 | No      |
|      |       |        |            |          |         | Memo1     | 73.3415   | 40.0552  | -0.87264         | 73.3425      | 40.0562       | -0.8726239       | 0.00053701 | No      |
|      |       |        |            |          |         | Mep1a     | 0         | 99.8444  | inf              | 0.001        | 99.8454       | 16.6074083       | 0.00014629 | No      |
|      |       |        |            |          |         | Mep1b     | 0         | 19.6531  | inf              | 0.001        | 19.6541       | 14.2625427       | 0.00014629 | No      |
|      |       |        |            |          |         | Mesdc2    | 20.1592   | 33.4095  | 0.728817         | 20.1602      | 33.4105       | 0.72879162       | 0.00041099 | No      |
|      |       |        |            |          |         | Mest      | 0.278013  | 3.42581  | 3.62322          | 0.279013     | 3.42681       | 3.61846196       | 0.0145969  | No      |
|      |       |        |            |          |         | Met       | 0         | 22.3559  | inf              | 0.001        | 22.3569       | 14.4484325       | 0.00014629 | No      |
|      |       |        |            |          |         | Metap1    | 29.2508   | 20.3532  | -0.523226        | 29.2518      | 20.3542       | -0.5231989       | 0.0126456  | No      |
|      |       |        |            |          |         | Metrnl    | 1.64658   | 16.3213  | 3.30921          | 1.64758      | 16.3223       | 3.30842394       | 0.00014629 | No      |
|      |       |        |            |          |         | Mettl13   | 10.9577   | 6.36203  | -0.784391        | 10.9587      | 6.36303       | -0.7842908       | 0.00263402 | No      |
|      |       |        |            |          |         | Mettl14   | 26.9826   | 14.3517  | -0.910804        | 26.9836      | 14.3527       | -0.9107607       | 0.00014629 | No      |
|      |       |        |            |          |         | Mettl16   | 11.2012   | 6.91531  | -0.695789        | 11.2022      | 6.91631       | -0.6957077       | 0.0114542  | No      |
|      |       |        |            |          |         | Mettl20   | 25.5381   | 11.2338  | -1.18481         | 25.5391      | 11.2348       | -1.1847332       | 0.00014629 | No      |
|      |       |        |            |          |         | Mettl23   | 49.1647   | 23.6326  | -1.05684         | 49.1657      | 23.6336       | -1.0568128       | 0.00014629 | No      |
|      |       |        |            |          |         | Mettl7a   | 14.0549   | 21.8701  | 0.637883         | 14.0559      | 21.8711       | 0.63784995       | 0.0124494  | No      |
|      |       |        |            |          |         | Mettl7b   | 0         | 25.9086  | inf              | 0.001        | 25.9096       | 14.6611991       | 0.00014629 | No      |
|      |       |        |            |          |         | Mettl8    | 46.8457   | 25.1256  | -0.898761        | 46.8467      | 25.1266       | -0.898732        | 0.00649695 | No      |
|      |       |        |            |          |         | Mettl9    | 18.4482   | 60.2383  | 1.7072           | 18.4492      | 60.2393       | 1.70714675       | 0.00014629 | No      |
|      |       |        |            |          |         | Mex3b     | 6.93682   | 0.468646 | -3.88771         | 6.93782      | 0.469646      | -3.8848368       | 0.00014629 | No      |
|      |       |        |            |          |         | Mfap3l    | 0.0570195 | 15.8096  | 8.11513          | 0.0580195    | 15.8106       | 8.09013854       | 0.0256152  | No      |
|      |       |        |            |          |         | Mfng      | 44.0191   | 5.1425   | -3.09759         | 44.0201      | 5.1435        | -3.0973401       | 0.00014629 | No      |
|      |       |        |            |          |         | Mfrp      | 0         | 2.07515  | inf              | 0.001        | 2.07615       | 11.019695        | 0.00014629 | No      |
|      |       |        |            |          |         | Mfsd1     | 14.0954   | 25.6418  | 0.863268         | 14.0964      | 25.6428       | 0.86322703       | 0.00014629 | No      |
|      |       |        |            |          |         | Mfsd10    | 15.1516   | 4.60645  | -1.71775         | 15.1526      | 4.60745       | -1.7175249       | 0.00014629 | No      |
|      |       |        |            |          |         | Mfsd3     | 19.3302   | 39.7673  | 1.04073          | 19.3312      | 39.7683       | 1.04068769       | 0.00053701 | No      |
|      |       |        |            |          |         | Mfsd4     | 64.8308   | 9.9232   | -2.7078          | 64.8318      | 9.9242        | -2.7076789       | 0.00014629 | No      |
|      |       |        |            |          |         | Mfsd6     | 16.5363   | 7.40138  | -1.15977         | 16.5373      | 7.40238       | -1.1596626       | 0.00041099 | No      |
|      |       |        |            |          |         | Mfsd7     | 0.257009  | 1.78334  | 2.79469          | 0.258009     | 1.78434       | 2.78989725       | 0.0218441  | No      |
|      |       |        |            |          |         | Mfsd8     | 14.2307   | 5.25515  | -1.4372          | 14.2317      | 5.25615       | -1.4370297       | 0.00028114 | No      |
|      |       |        |            |          |         | Mfsd9     | 2.70817   | 1.15281  | -1.23216         | 2.70917      | 1.15381       | -1.2314453       | 0.00241835 | No      |
|      |       |        |            |          |         | Mga       | 17.2511   | 4.93083  | -1.80679         | 17.2521      | 4.93183       | -1.806577        | 0.00014629 | No      |
|      |       |        |            |          |         | Mgam      | 0.0542016 | 50.2524  | 9.85664          | 0.0552016    | 50.2534       | 9.83029541       | 0.00014629 | No      |
|      |       |        |            |          |         | Mgat1     | 40.8684   | 25.6282  | -0.673255        | 40.8694      | 25.6292       | -0.6732326       | 0.00126596 | No      |
|      |       |        |            |          |         | Mgat2     | 20.1014   | 8.69443  | -1.20913         | 20.1024      | 8.69543       | -1.2090385       | 0.00014629 | No      |
|      |       |        |            |          |         | Mgat4b    | 5.20908   | 65.3021  | 3.64803          | 5.21008      | 65.3031       | 3.64777405       | 0.00014629 | No      |
|      |       |        |            |          |         | MGC105649 | 19.8474   | 4.16151  | -2.25377         | 19.8484      | 4.16251       | -2.2534971       | 0.00014629 | No      |



| RRBS |       |        |             |          |         | RNAseq    |           |         |                  |              |               |                  |            |         |
|------|-------|--------|-------------|----------|---------|-----------|-----------|---------|------------------|--------------|---------------|------------------|------------|---------|
| gene | Blood | Kidney | methyl.diff | pMWU.fdr | Match ? | gene      | blood     | kidney  | log2(fold_ratio) | blood+ 0.001 | kidney+ 0.001 | log2(fold_ratio) | q_value    | Match ? |
|      |       |        |             |          |         | MGC108823 | 57.5077   | 6.12279 | -3.2315          | 57.5087      | 6.12379       | -3.2312835       | 0.00014629 | No      |
|      |       |        |             |          |         | MGC112715 | 126.424   | 9.17059 | -3.78511         | 126.425      | 9.17159       | -3.7849661       | 0.00014629 | No      |
|      |       |        |             |          |         | MGC112830 | 24.1411   | 16.5362 | -0.545862        | 24.1421      | 16.5372       | -0.5458362       | 0.0119499  | No      |
|      |       |        |             |          |         | MGC116121 | 8.53655   | 16.0061 | 0.9069           | 8.53755      | 16.0071       | 0.90681793       | 0.00374149 | No      |
|      |       |        |             |          |         | MGC125239 | 12.944    | 22.2945 | 0.784408         | 12.945       | 22.2955       | 0.78435759       | 0.00252712 | No      |
|      |       |        |             |          |         | MGC94199  | 1.27766   | 9.90712 | 2.95497          | 1.27866      | 9.90812       | 2.95397864       | 0.00014629 | No      |
|      |       |        |             |          |         | MGC94335  | 15.2979   | 24.7971 | 0.696845         | 15.2989      | 24.7981       | 0.69680166       | 0.0389571  | No      |
|      |       |        |             |          |         | Mgea5     | 68.7019   | 36.0399 | -0.930754        | 68.7029      | 36.0409       | -0.930736        | 0.0426261  | No      |
|      |       |        |             |          |         | Mgll      | 0.118547  | 166.022 | 10.4517          | 0.119547     | 166.023       | 10.4395895       | 0.00649695 | No      |
|      |       |        |             |          |         | Mgmt      | 16.7021   | 38.7695 | 1.21489          | 16.7031      | 38.7705       | 1.21484346       | 0.00014629 | No      |
|      |       |        |             |          |         | Mgrn1     | 20.3942   | 45.079  | 1.1443           | 20.3952      | 45.08         | 1.14425786       | 0.00014629 | No      |
|      |       |        |             |          |         | Mgst1     | 3.63344   | 71.894  | 4.30646          | 3.63444      | 71.895        | 4.30608645       | 0.00014629 | No      |
|      |       |        |             |          |         | Mgst3     | 8.19161   | 464.762 | 5.8262           | 8.19261      | 464.763       | 5.82602827       | 0.00028114 | No      |
|      |       |        |             |          |         | Mia3      | 32.796    | 17.3544 | -0.918216        | 32.797       | 17.3554       | -0.9181792       | 0.00014629 | No      |
|      |       |        |             |          |         | Mib2      | 9.60666   | 28.8267 | 1.5853           | 9.60766      | 28.8277       | 1.58519873       | 0.00014629 | No      |
|      |       |        |             |          |         | Mical1    | 90.9194   | 32.4649 | -1.48571         | 90.9204      | 32.4659       | -1.4856788       | 0.00252712 | No      |
|      |       |        |             |          |         | Mical3    | 3.41868   | 9.57388 | 1.48567          | 3.41968      | 9.57488       | 1.48539308       | 0.00014629 | No      |
|      |       |        |             |          |         | Micu1     | 7.14344   | 13.7395 | 0.943637         | 7.14444      | 13.7405       | 0.94354166       | 0.00053701 | No      |
|      |       |        |             |          |         | Mid1      | 0.145944  | 2.64381 | 4.17913          | 0.146944     | 2.64481       | 4.16982573       | 0.00014629 | No      |
|      |       |        |             |          |         | Mid1ip1   | 14.9576   | 39.4763 | 1.40011          | 14.9586      | 39.4773       | 1.40004816       | 0.00014629 | No      |
|      |       |        |             |          |         | Mien1     | 24.7436   | 63.3439 | 1.35615          | 24.7446      | 63.3449       | 1.35611475       | 0.00014629 | No      |
|      |       |        |             |          |         | Mier1     | 60.9541   | 13.0463 | -2.22408         | 60.9551      | 13.0473       | -2.2239956       | 0.00014629 | No      |
|      |       |        |             |          |         | Mif       | 281.826   | 731.203 | 1.37547          | 281.827      | 731.204       | 1.37546413       | 0.00014629 | No      |
|      |       |        |             |          |         | Mif4gd    | 25.8041   | 38.808  | 0.588753         | 25.8051      | 38.809        | 0.58873504       | 0.0167972  | No      |
|      |       |        |             |          |         | MiIP      | 23.273    | 84.6599 | 1.86302          | 23.274       | 84.6609       | 1.86297664       | 0.00041099 | No      |
|      |       |        |             |          |         | Milr1     | 22.0601   | 1.81549 | -3.60301         | 22.0611      | 1.81649       | -3.6022794       | 0.00014629 | No      |
|      |       |        |             |          |         | Mink1     | 42.0652   | 31.5309 | -0.415863        | 42.0662      | 31.5319       | -0.4158494       | 0.0369619  | No      |
|      |       |        |             |          |         | Minos1    | 150.614   | 492.459 | 1.70915          | 150.615      | 492.46        | 1.70914109       | 0.00014629 | No      |
|      |       |        |             |          |         | Minpp1    | 4.11646   | 18.8314 | 2.19366          | 4.11746      | 18.8324       | 2.19339033       | 0.00014629 | No      |
|      |       |        |             |          |         | Miox      | 0.0340819 | 3434.7  | 16.6208          | 0.0350819    | 3434.701      | 16.5790981       | 0.00944816 | No      |
|      |       |        |             |          |         | Mipep     | 2.72139   | 26.5075 | 3.28399          | 2.72239      | 26.5085       | 3.28350937       | 0.00014629 | No      |
|      |       |        |             |          |         | Mipol1    | 1.15373   | 2.92602 | 1.34264          | 1.15473      | 2.92702       | 1.34187704       | 0.0114542  | No      |
|      |       |        |             |          |         | Mir186    | 77.9206   | 21.1299 | -1.88272         | 77.9216      | 21.1309       | -1.8826691       | 0.00014629 | No      |
|      |       |        |             |          |         | Mir21     | 43.9619   | 23.7356 | -0.8892          | 43.9629      | 23.7366       | -0.8891733       | 0.00090728 | No      |
|      |       |        |             |          |         | Mir22     | 1.62124   | 11.5729 | 2.83558          | 1.62224      | 11.5739       | 2.83481591       | 0.00014629 | No      |
|      |       |        |             |          |         | Mir221    | 0.546107  | 3.74014 | 2.77584          | 0.547107     | 3.74114       | 2.77358304       | 0.0333042  | No      |
|      |       |        |             |          |         | Mir349    | 0.751977  | 46.4367 | 5.94843          | 0.752977     | 46.4377       | 5.94654691       | 0.00014629 | No      |

| RRBS |       |        |             |          |         | RNAseq   |           |          |                  |              |               |                  |            |         |
|------|-------|--------|-------------|----------|---------|----------|-----------|----------|------------------|--------------|---------------|------------------|------------|---------|
| gene | Blood | Kidney | methyl.diff | pMWU.fdr | Match ? | gene     | blood     | kidney   | log2(fold_ratio) | blood+ 0.001 | kidney+ 0.001 | log2(fold_ratio) | q_value    | Match ? |
|      |       |        |             |          |         | Mir632   | 119.246   | 71.3003  | -0.741955        | 119.247      | 71.3013       | -0.7419527       | 0.00078603 | No      |
|      |       |        |             |          |         | Mir678   | 70.4144   | 38.908   | -0.855804        | 70.4154      | 38.909        | -0.8557871       | 0.0269701  | No      |
|      |       |        |             |          |         | Mir702   | 18.5005   | 43.1275  | 1.22105          | 18.5015      | 43.1285       | 1.2209993        | 0.0161245  | No      |
|      |       |        |             |          |         | Mir761   | 79.2285   | 320.756  | 2.01739          | 79.2295      | 320.757       | 2.01737115       | 0.00014629 | No      |
|      |       |        |             |          |         | Mis18bp1 | 8.62861   | 0.264377 | -5.02846         | 8.62961      | 0.265377      | -5.0231801       | 0.00014629 | No      |
|      |       |        |             |          |         | Mitd1    | 17.2908   | 9.0683   | -0.931102        | 17.2918      | 9.0693        | -0.9310249       | 0.0161245  | No      |
|      |       |        |             |          |         | Mitf     | 0.0643096 | 9.21872  | 7.16339          | 0.0653096    | 9.21972       | 7.14128405       | 0.00014629 | No      |
|      |       |        |             |          |         | Mkl1     | 38.262    | 5.40346  | -2.82396         | 38.263       | 5.40446       | -2.8237276       | 0.00014629 | No      |
|      |       |        |             |          |         | Mkln1    | 20.0189   | 77.0482  | 1.9444           | 20.0199      | 77.0492       | 1.94434521       | 0.00014629 | No      |
|      |       |        |             |          |         | Mknk1    | 26.4319   | 11.345   | -1.22023         | 26.4329      | 11.346        | -1.2201509       | 0.00014629 | No      |
|      |       |        |             |          |         | Mknk2    | 116.271   | 38.391   | -1.59865         | 116.272      | 38.392        | -1.5986261       | 0.00014629 | No      |
|      |       |        |             |          |         | Mkrn1    | 37.6402   | 26.5371  | -0.504264        | 37.6412      | 26.5381       | -0.5042475       | 0.0227639  | No      |
|      |       |        |             |          |         | Mks1     | 3.51107   | 6.808    | 0.955319         | 3.51207      | 6.809         | 0.95512133       | 0.00263402 | No      |
|      |       |        |             |          |         | Mlana    | 0         | 7.27784  | inf              | 0.001        | 7.27884       | 12.8294928       | 0.00014629 | No      |
|      |       |        |             |          |         | Mlec     | 16.8755   | 31.2359  | 0.888275         | 16.8765      | 31.2369       | 0.88823555       | 0.00028114 | No      |
|      |       |        |             |          |         | Mlf2     | 72.644    | 189.644  | 1.38437          | 72.645       | 189.645       | 1.38436593       | 0.00014629 | No      |
|      |       |        |             |          |         | Mllt10   | 35.502    | 10.4385  | -1.76598         | 35.503       | 10.4395       | -1.7658883       | 0.00014629 | No      |
|      |       |        |             |          |         | Mllt3    | 17.8671   | 4.60287  | -1.9567          | 17.8681      | 4.60387       | -1.9564672       | 0.00014629 | No      |
|      |       |        |             |          |         | Mllt4    | 0.149605  | 34.9378  | 7.86749          | 0.150605     | 34.9388       | 7.85791658       | 0.00014629 | No      |
|      |       |        |             |          |         | Mllt6    | 40.7845   | 15.0424  | -1.43899         | 40.7855      | 15.0434       | -1.4389257       | 0.00014629 | No      |
|      |       |        |             |          |         | Mlph     | 0         | 18.2788  | inf              | 0.001        | 18.2798       | 14.1579627       | 0.00014629 | No      |
|      |       |        |             |          |         | Mlxip    | 6.92628   | 1.01736  | -2.76725         | 6.92728      | 1.01836       | -2.7660413       | 0.00014629 | No      |
|      |       |        |             |          |         | Mmachc   | 2.86141   | 8.33468  | 1.5424           | 2.86241      | 8.33568       | 1.54206956       | 0.00014629 | No      |
|      |       |        |             |          |         | Mmadhc   | 14.6786   | 54.7437  | 1.89898          | 14.6796      | 54.7447       | 1.89890664       | 0.00014629 | No      |
|      |       |        |             |          |         | Mmp12    | 0         | 1.72455  | inf              | 0.001        | 1.72555       | 10.7528406       | 0.00014629 | No      |
|      |       |        |             |          |         | Mmp15    | 0         | 9.35453  | inf              | 0.001        | 9.35553       | 13.1916037       | 0.00014629 | No      |
|      |       |        |             |          |         | Mmp24    | 0.66779   | 10.6412  | 3.99412          | 0.66879      | 10.6422       | 3.99209934       | 0.00014629 | No      |
|      |       |        |             |          |         | Mmrn2    | 0.350754  | 2.41957  | 2.78622          | 0.351754     | 2.42057       | 2.78270808       | 0.00014629 | No      |
|      |       |        |             |          |         | Mms22l   | 1.05673   | 0.34466  | -1.61636         | 1.05773      | 0.34566       | -1.6135458       | 0.0106553  | No      |
|      |       |        |             |          |         | Mnat1    | 32.3715   | 16.7079  | -0.95419         | 32.3725      | 16.7089       | -0.954152        | 0.00263402 | No      |
|      |       |        |             |          |         | Mnf1     | 33.7311   | 125.879  | 1.89989          | 33.7321      | 125.88        | 1.89985504       | 0.00014629 | No      |
|      |       |        |             |          |         | Mnt      | 11.2089   | 3.54539  | -1.66063         | 11.2099      | 3.54639       | -1.6603503       | 0.00014629 | No      |
|      |       |        |             |          |         | Mob1a    | 43.7168   | 11.1952  | -1.9653          | 43.7178      | 11.1962       | -1.9652116       | 0.00014629 | No      |
|      |       |        |             |          |         | Mob1b    | 12.0619   | 6.20738  | -0.958407        | 12.0629      | 6.20838       | -0.958288        | 0.00014629 | No      |
|      |       |        |             |          |         | Mob2     | 52.9465   | 29.2168  | -0.857736        | 52.9475      | 29.2178       | -0.857715        | 0.00014629 | No      |
|      |       |        |             |          |         | Mob3b    | 1.03367   | 6.69757  | 2.69586          | 1.03467      | 6.69857       | 2.69468244       | 0.00014629 | No      |
|      |       |        |             |          |         | Mob4     | 20.7786   | 12.3495  | -0.750648        | 20.7796      | 12.3505       | -0.7505984       | 0.00078603 | No      |
|      |       |        |             |          |         | Mocos    | 0.186086  | 2.81444  | 3.91881          | 0.187086     | 2.81544       | 3.9115869        | 0.00330073 | No      |
|      |       |        |             |          |         | Mocs1    | 6.59902   | 15.0738  | 1.19172          | 6.60002      | 15.0748       | 1.19159656       | 0.00014629 | No      |
|      |       |        |             |          |         | Mocs2    | 28.9205   | 47.8843  | 0.727459         | 28.9215      | 47.8853       | 0.72744046       | 0.00090728 | No      |
|      |       |        |             |          |         | Mok      | 0.142691  | 15.3666  | 6.75076          | 0.143691     | 15.3676       | 6.74077836       | 0.00014629 | No      |
|      |       |        |             |          |         | MON1A    | 29.1057   | 129.902  | 2.15805          | 29.1067      | 129.903       | 2.15801156       | 0.00014629 | No      |

| RRBS |       |        |             |          |         | RNAseq    |           |          |                  |              |               |                  |            |         |
|------|-------|--------|-------------|----------|---------|-----------|-----------|----------|------------------|--------------|---------------|------------------|------------|---------|
| gene | Blood | Kidney | methyl.diff | pMWU.fdr | Match ? | gene      | blood     | kidney   | log2(fold_ratio) | blood+ 0.001 | kidney+ 0.001 | log2(fold_ratio) | q_value    | Match ? |
|      |       |        |             |          |         | Mon1b     | 14.0278   | 8.60607  | -0.704867        | 14.0288      | 8.60707       | -0.7047975       | 0.0147863  | No      |
|      |       |        |             |          |         | Mon2      | 50.4289   | 15.582   | -1.69437         | 50.4299      | 15.583        | -1.6943064       | 0.00014629 | No      |
|      |       |        |             |          |         | Morc3     | 65.2752   | 6.898    | -3.24228         | 65.2762      | 6.899         | -3.2420979       | 0.00014629 | No      |
|      |       |        |             |          |         | MORF4L1   | 219.578   | 138.229  | -0.667673        | 219.579      | 138.23        | -0.6676693       | 0.00028114 | No      |
|      |       |        |             |          |         | Morf4l2   | 45.2505   | 73.8296  | 0.706266         | 45.2515      | 73.8306       | 0.70625327       | 0.00014629 | No      |
|      |       |        |             |          |         | Morn1     | 0.421376  | 5.25763  | 3.64123          | 0.422376     | 5.25863       | 3.63808723       | 0.0337348  | No      |
|      |       |        |             |          |         | Mospd1    | 1.37428   | 4.0957   | 1.57543          | 1.37528      | 4.0967        | 1.57473687       | 0.00195831 | No      |
|      |       |        |             |          |         | Mov10     | 99.1961   | 17.2791  | -2.52126         | 99.1971      | 17.2801       | -2.5211864       | 0.00014629 | No      |
|      |       |        |             |          |         | MP68      | 74.515    | 342.248  | 2.19944          | 74.516       | 342.249       | 2.19942419       | 0.00014629 | No      |
|      |       |        |             |          |         | Mpa2l     | 228.26    | 8.79008  | -4.69866         | 228.261      | 8.79108       | -4.6985002       | 0.00014629 | No      |
|      |       |        |             |          |         | Mpc1      | 47.9287   | 591.302  | 3.62493          | 47.9297      | 591.303       | 3.62490578       | 0.00014629 | No      |
|      |       |        |             |          |         | Mpc2      | 40.601    | 335.753  | 3.04782          | 40.602       | 335.754       | 3.04778189       | 0.00014629 | No      |
|      |       |        |             |          |         | Mpdu1     | 23.8193   | 45.0495  | 0.919382         | 23.8203      | 45.0505       | 0.91935154       | 0.00014629 | No      |
|      |       |        |             |          |         | Mpdz      | 0         | 5.92571  | inf              | 0.001        | 5.92671       | 12.5330158       | 0.00014629 | No      |
|      |       |        |             |          |         | Mphosph10 | 25.3134   | 12.6836  | -0.996934        | 25.3144      | 12.6846       | -0.9968803       | 0.00014629 | No      |
|      |       |        |             |          |         | Mphosph6  | 25.3097   | 15.4011  | -0.716661        | 25.3107      | 15.4021       | -0.7166203       | 0.00974684 | No      |
|      |       |        |             |          |         | Mphosph8  | 57.0788   | 34.4395  | -0.728893        | 57.0798      | 34.4405       | -0.7288742       | 0.0135258  | No      |
|      |       |        |             |          |         | Mphosph9  | 9.06684   | 2.18087  | -2.0557          | 9.06784      | 2.18187       | -2.0551938       | 0.00555587 | No      |
|      |       |        |             |          |         | Mpi       | 14.6119   | 39.7562  | 1.44403          | 14.6129      | 39.7572       | 1.44397364       | 0.00014629 | No      |
|      |       |        |             |          |         | Mpnd      | 96.2035   | 223.011  | 1.21295          | 96.2045      | 223.012       | 1.21294506       | 0.00014629 | No      |
|      |       |        |             |          |         | Mpp5      | 4.48007   | 15.8604  | 1.82384          | 4.48107      | 15.8614       | 1.82360495       | 0.00014629 | No      |
|      |       |        |             |          |         | Mpp6      | 8.04672   | 26.6944  | 1.73006          | 8.04772      | 26.6954       | 1.72993915       | 0.00014629 | No      |
|      |       |        |             |          |         | Mpped2    | 0.241626  | 2.52181  | 3.38361          | 0.242626     | 2.52281       | 3.37822549       | 0.00219102 | No      |
|      |       |        |             |          |         | Mprip     | 24.0261   | 97.8258  | 2.02561          | 24.0271      | 97.8268       | 2.02556722       | 0.00014629 | No      |
|      |       |        |             |          |         | Mpv17l    | 0.0837912 | 25.2213  | 8.23363          | 0.0847912    | 25.2223       | 8.21656958       | 0.0167011  | No      |
|      |       |        |             |          |         | Mpv17l2   | 19.7683   | 54.7423  | 1.46947          | 19.7693      | 54.7433       | 1.46942062       | 0.00014629 | No      |
|      |       |        |             |          |         | Mpzl1     | 4.26056   | 10.3208  | 1.27644          | 4.26156      | 10.3218       | 1.27624103       | 0.00014629 | No      |
|      |       |        |             |          |         | Mpzl2     | 0.531389  | 8.6569   | 4.02601          | 0.532389     | 8.6579        | 4.02346447       | 0.00078603 | No      |
|      |       |        |             |          |         | Mr1       | 12.9414   | 0.959138 | -3.75411         | 12.9424      | 0.960138      | -3.7527196       | 0.00014629 | No      |
|      |       |        |             |          |         | Mras      | 0.846038  | 17.5319  | 4.37311          | 0.847038     | 17.5329       | 4.37149414       | 0.00014629 | No      |
|      |       |        |             |          |         | Mre11a    | 7.66161   | 4.85212  | -0.659034        | 7.66261      | 4.85312       | -0.6589233       | 0.00740907 | No      |
|      |       |        |             |          |         | Mri1      | 13.6765   | 30.6068  | 1.16215          | 13.6775      | 30.6078       | 1.1620948        | 0.00014629 | No      |
|      |       |        |             |          |         | Mro       | 0         | 100.057  | inf              | 0.001        | 100.058       | 16.610477        | 0.00014629 | No      |
|      |       |        |             |          |         | Mroh1     | 27.1538   | 114.116  | 2.07128          | 27.1548      | 114.117       | 2.07123458       | 0.00014629 | No      |
|      |       |        |             |          |         | Mroh2a    | 0.0483572 | 7.22551  | 7.22322          | 0.0493572    | 7.22651       | 7.19389471       | 0.0478294  | No      |
|      |       |        |             |          |         | Mroh6     | 1.37018   | 8.21739  | 2.58432          | 1.37118      | 8.21839       | 2.58343782       | 0.00014629 | No      |
|      |       |        |             |          |         | Mrp63     | 62.9412   | 88.1719  | 0.486314         | 62.9422      | 88.1729       | 0.48630771       | 0.0333042  | No      |
|      |       |        |             |          |         | Mrpl10    | 18.7266   | 33.622   | 0.844322         | 18.7276      | 33.623        | 0.84428243       | 0.00014629 | No      |
|      |       |        |             |          |         | mrpl11    | 27.9395   | 72.9865  | 1.38533          | 27.9405      | 72.9875       | 1.38529157       | 0.00014629 | No      |
|      |       |        |             |          |         | Mrpl12    | 33.9938   | 199.451  | 2.55269          | 33.9948      | 199.452       | 2.5526556        | 0.00014629 | No      |
|      |       |        |             |          |         | Mrpl13    | 38.8395   | 85.935   | 1.14572          | 38.8405      | 85.936        | 1.14570085       | 0.00053701 | No      |

| RRBS |       |        |             |          |         | RNAseq  |         |         |                  |              |               |                  |            |         |
|------|-------|--------|-------------|----------|---------|---------|---------|---------|------------------|--------------|---------------|------------------|------------|---------|
| gene | Blood | Kidney | methyl.diff | pMWU.fdr | Match ? | gene    | blood   | kidney  | log2(fold_ratio) | blood+ 0.001 | kidney+ 0.001 | log2(fold_ratio) | q_value    | Match ? |
|      |       |        |             |          |         | Mrpl15  | 27.1196 | 175.031 | 2.6902           | 27.1206      | 175.032       | 2.6901577        | 0.00014629 | No      |
|      |       |        |             |          |         | Mrpl16  | 10.5528 | 48.0601 | 2.18722          | 10.5538      | 48.0611       | 2.18710712       | 0.00014629 | No      |
|      |       |        |             |          |         | Mrpl17  | 52.6372 | 128.242 | 1.28471          | 52.6382      | 128.243       | 1.28469802       | 0.00014629 | No      |
|      |       |        |             |          |         | Mrpl19  | 10.4128 | 15.7832 | 0.600032         | 10.4138      | 15.7842       | 0.59998454       | 0.0428888  | No      |
|      |       |        |             |          |         | Mrpl2   | 21.8628 | 65.3126 | 1.57888          | 21.8638      | 65.3136       | 1.57883926       | 0.00014629 | No      |
|      |       |        |             |          |         | Mrpl21  | 23.7758 | 40.2739 | 0.760349         | 23.7768      | 40.2749       | 0.76032644       | 0.0188385  | No      |
|      |       |        |             |          |         | Mrpl22  | 24.057  | 66.8074 | 1.47355          | 24.058       | 66.8084       | 1.4735128        | 0.00014629 | No      |
|      |       |        |             |          |         | Mrpl27  | 35.6865 | 128.751 | 1.85113          | 35.6875      | 128.752       | 1.8511041        | 0.00014629 | No      |
|      |       |        |             |          |         | Mrpl28  | 27.4844 | 94.8575 | 1.78715          | 27.4854      | 94.8585       | 1.78711158       | 0.00014629 | No      |
|      |       |        |             |          |         | Mrpl3   | 19.235  | 36.6835 | 0.931394         | 19.236       | 36.6845       | 0.93136179       | 0.00014629 | No      |
|      |       |        |             |          |         | MRPL30  | 11.1239 | 34.5825 | 1.63638          | 11.1249      | 34.5835       | 1.63629152       | 0.00014629 | No      |
|      |       |        |             |          |         | Mrpl33  | 114.781 | 160.701 | 0.485488         | 114.782      | 160.702       | 0.48549147       | 0.0377543  | No      |
|      |       |        |             |          |         | Mrpl34  | 60.2823 | 122.297 | 1.02058          | 60.2833      | 122.298       | 1.02057051       | 0.00014629 | No      |
|      |       |        |             |          |         | Mrpl35  | 23.157  | 41.3391 | 0.836061         | 23.158       | 41.3401       | 0.83603122       | 0.00207488 | No      |
|      |       |        |             |          |         | Mrpl36  | 37.247  | 57.2564 | 0.620313         | 37.248       | 57.2574       | 0.6202992        | 0.00710369 | No      |
|      |       |        |             |          |         | Mrpl39  | 13.923  | 22.5777 | 0.697428         | 13.924       | 22.5787       | 0.6973887        | 0.0152626  | No      |
|      |       |        |             |          |         | Mrpl4   | 24.7126 | 46.6121 | 0.915458         | 24.7136      | 46.6131       | 0.91543028       | 0.00014629 | No      |
|      |       |        |             |          |         | Mrpl40  | 6.09445 | 15.7885 | 1.3733           | 6.09545      | 15.7895       | 1.37316085       | 0.00014629 | No      |
|      |       |        |             |          |         | Mrpl41  | 31.599  | 71.2496 | 1.173            | 31.6         | 71.2506       | 1.1729776        | 0.00014629 | No      |
|      |       |        |             |          |         | Mrpl42  | 49.8082 | 102.381 | 1.0395           | 49.8092      | 102.382       | 1.03947795       | 0.00014629 | No      |
|      |       |        |             |          |         | Mrpl44  | 18.6237 | 27.0513 | 0.538558         | 18.6247      | 27.0523       | 0.53853407       | 0.0327003  | No      |
|      |       |        |             |          |         | Mrpl45  | 15.5664 | 22.7446 | 0.547088         | 15.5674      | 22.7456       | 0.54705948       | 0.0285184  | No      |
|      |       |        |             |          |         | Mrpl47  | 11.1465 | 25.752  | 1.2081           | 11.1475      | 25.753        | 1.2080203        | 0.0255267  | No      |
|      |       |        |             |          |         | MRPL48  | 23.2444 | 64.7391 | 1.47775          | 23.2454      | 64.7401       | 1.47771434       | 0.00014629 | No      |
|      |       |        |             |          |         | Mrpl49  | 10.6768 | 33.9804 | 1.67023          | 10.6778      | 33.9814       | 1.67013086       | 0.00014629 | No      |
|      |       |        |             |          |         | Mrpl50  | 7.84281 | 30.6725 | 1.9675           | 7.84381      | 30.6735       | 1.9673663        | 0.00014629 | No      |
|      |       |        |             |          |         | Mrpl51  | 5.77881 | 12.9733 | 1.1667           | 5.77981      | 12.9743       | 1.16656273       | 0.00195831 | No      |
|      |       |        |             |          |         | Mrpl52  | 47.122  | 101.461 | 1.10645          | 47.123       | 101.462       | 1.10643621       | 0.00014629 | No      |
|      |       |        |             |          |         | Mrpl54  | 50.2702 | 174.366 | 1.79434          | 50.2712      | 174.367       | 1.79432299       | 0.00014629 | No      |
|      |       |        |             |          |         | Mrpl55  | 26.016  | 79.6773 | 1.61477          | 26.017       | 79.6783       | 1.61473225       | 0.00014629 | No      |
|      |       |        |             |          |         | Mrps11  | 16.8026 | 48.2952 | 1.52319          | 16.8036      | 48.2962       | 1.52313933       | 0.00014629 | No      |
|      |       |        |             |          |         | Mrps12  | 22.2332 | 38.0574 | 0.775462         | 22.2342      | 38.0584       | 0.77543441       | 0.0380071  | No      |
|      |       |        |             |          |         | Mrps14  | 15.0396 | 32.6071 | 1.11642          | 15.0406      | 32.6081       | 1.11636826       | 0.00014629 | No      |
|      |       |        |             |          |         | Mrps15  | 69.5179 | 32.1423 | -1.11291         | 69.5189      | 32.1433       | -1.1128872       | 0.00014629 | No      |
|      |       |        |             |          |         | Mrps16  | 36.5363 | 150.912 | 2.0463           | 36.5373      | 150.913       | 2.04627516       | 0.00014629 | No      |
|      |       |        |             |          |         | Mrps17  | 27.2416 | 56.0194 | 1.04011          | 27.2426      | 56.0204       | 1.04008789       | 0.00014629 | No      |
|      |       |        |             |          |         | Mrps18a | 32.1379 | 95.5488 | 1.57196          | 32.1389      | 95.5498       | 1.5719323        | 0.00014629 | No      |
|      |       |        |             |          |         | Mrps18b | 34.3335 | 91.7963 | 1.41882          | 34.3345      | 91.7973       | 1.41879277       | 0.00014629 | No      |
|      |       |        |             |          |         | Mrps18c | 30.8213 | 57.3377 | 0.895558         | 30.8223      | 57.3387       | 0.89553467       | 0.00078603 | No      |
|      |       |        |             |          |         | MRPS21  | 141.757 | 265.855 | 0.907221         | 141.758      | 265.856       | 0.90721487       | 0.00014629 | No      |
|      |       |        |             |          |         | MRPS23  | 57.866  | 94.6681 | 0.710163         | 57.867       | 94.6691       | 0.71015275       | 0.00363169 | No      |
|      |       |        |             |          |         | Mrps24  | 56.0524 | 81.2129 | 0.534932         | 56.0534      | 81.2139       | 0.53492479       | 0.0188385  | No      |

| RRBS |       |        |             |          |         | RNAseq  |          |          |                  |              |               |                  |            |         |
|------|-------|--------|-------------|----------|---------|---------|----------|----------|------------------|--------------|---------------|------------------|------------|---------|
| gene | Blood | Kidney | methyl.diff | pMWU.fdr | Match ? | gene    | blood    | kidney   | log2(fold_ratio) | blood+ 0.001 | kidney+ 0.001 | log2(fold_ratio) | q_value    | Match ? |
|      |       |        |             |          |         | Mrps25  | 51.9337  | 163.784  | 1.65705          | 51.9347      | 163.785       | 1.65703254       | 0.00014629 | No      |
|      |       |        |             |          |         | Mrps28  | 44.2572  | 102.791  | 1.21574          | 44.2582      | 102.792       | 1.21571131       | 0.00014629 | No      |
|      |       |        |             |          |         | Mrps31  | 19.3205  | 34.0806  | 0.818819         | 19.3215      | 34.0816       | 0.81878597       | 0.00028114 | No      |
|      |       |        |             |          |         | Mrps34  | 55.2497  | 186.539  | 1.75544          | 55.2507      | 186.54        | 1.75542037       | 0.00014629 | No      |
|      |       |        |             |          |         | Mrps36  | 30.9187  | 91.9266  | 1.572            | 30.9197      | 91.9276       | 1.57197175       | 0.00014629 | No      |
|      |       |        |             |          |         | Mrps7   | 17.5798  | 70.9578  | 2.01304          | 17.5808      | 70.9588       | 2.01298089       | 0.00053701 | No      |
|      |       |        |             |          |         | Mrvi1   | 0.105535 | 8.56826  | 6.34321          | 0.106535     | 8.56926       | 6.32977124       | 0.00014629 | No      |
|      |       |        |             |          |         | Ms4a4c  | 218.415  | 2.01018  | -6.7636          | 218.416      | 2.01118       | -6.7628925       | 0.00014629 | No      |
|      |       |        |             |          |         | Ms4a6b  | 291.295  | 9.07287  | -5.00478         | 291.296      | 9.07387       | -5.0046241       | 0.00014629 | No      |
|      |       |        |             |          |         | Msantd2 | 26.685   | 12.1624  | -1.13361         | 26.686       | 12.1634       | -1.1335365       | 0.00014629 | No      |
|      |       |        |             |          |         | Msantd3 | 0        | 2.5968   | inf              | 0.001        | 2.5978        | 11.3430746       | 0.00014629 | No      |
|      |       |        |             |          |         | Msantd4 | 5.86785  | 11.8079  | 1.00885          | 5.86885      | 11.8089       | 1.00872484       | 0.00028114 | No      |
|      |       |        |             |          |         | Msh2    | 27.465   | 8.51009  | -1.69035         | 27.466       | 8.51109       | -1.690231        | 0.00014629 | No      |
|      |       |        |             |          |         | Msi2    | 48.6854  | 24.5974  | -0.984981        | 48.6864      | 24.5984       | -0.9849543       | 0.0126456  | No      |
|      |       |        |             |          |         | Msl1    | 57.4967  | 16.3618  | -1.81315         | 57.4977      | 16.3628       | -1.8130846       | 0.00014629 | No      |
|      |       |        |             |          |         | Msl2    | 34.8184  | 9.28889  | -1.90627         | 34.8194      | 9.28989       | -1.9061579       | 0.00014629 | No      |
|      |       |        |             |          |         | Msln    | 0        | 4.24374  | inf              | 0.001        | 4.24474       | 12.0514605       | 0.00014629 | No      |
|      |       |        |             |          |         | Mslnl   | 3.49659  | 1.23     | -1.50729         | 3.49759      | 1.231         | -1.5065304       | 0.0118533  | No      |
|      |       |        |             |          |         | Msmo1   | 6.88211  | 22.1764  | 1.6881           | 6.88311      | 22.1774       | 1.68795777       | 0.00014629 | No      |
|      |       |        |             |          |         | Msn     | 340.22   | 120.393  | -1.49872         | 340.221      | 120.394       | -1.4987087       | 0.00014629 | No      |
|      |       |        |             |          |         | Msra    | 3.55642  | 182.8    | 5.6837           | 3.55742      | 182.801       | 5.68329884       | 0.00014629 | No      |
|      |       |        |             |          |         | Mst4    | 72.5384  | 2.27344  | -4.9958          | 72.5394      | 2.27444       | -4.9951815       | 0.00014629 | No      |
|      |       |        |             |          |         | Mt1a    | 66.8068  | 1655.75  | 4.63135          | 66.8078      | 1655.751      | 4.63132537       | 0.00014629 | No      |
|      |       |        |             |          |         | Mt2A    | 1.69006  | 2122.23  | 10.2943          | 1.69106      | 2122.231      | 10.2934381       | 0.00102864 | No      |
|      |       |        |             |          |         | Mta3    | 44.3271  | 18.4376  | -1.26554         | 44.3281      | 18.4386       | -1.2654924       | 0.00014629 | No      |
|      |       |        |             |          |         | Mtap    | 15.4634  | 4.55236  | -1.76417         | 15.4644      | 4.55336       | -1.7639474       | 0.00014629 | No      |
|      |       |        |             |          |         | Mtch1   | 82.884   | 140.083  | 0.757112         | 82.885       | 140.084       | 0.75710924       | 0.00014629 | No      |
|      |       |        |             |          |         | Mtch2   | 28.8732  | 83.6214  | 1.53414          | 28.8742      | 83.6224       | 1.53410847       | 0.00014629 | No      |
|      |       |        |             |          |         | Mtcp1   | 43.3916  | 74.3131  | 0.776199         | 43.3926      | 74.3141       | 0.77618693       | 0.0457453  | No      |
|      |       |        |             |          |         | Mtdh    | 26.0921  | 5.05423  | -2.36805         | 26.0931      | 5.05523       | -2.3678197       | 0.00014629 | No      |
|      |       |        |             |          |         | Mterfd2 | 13.3262  | 20.3298  | 0.609332         | 13.3272      | 20.3308       | 0.60929328       | 0.0321606  | No      |
|      |       |        |             |          |         | Mterfd3 | 5.98011  | 3.35692  | -0.833035        | 5.98111      | 3.35792       | -0.8328454       | 0.0454894  | No      |
|      |       |        |             |          |         | Mtf2    | 15.3089  | 4.36921  | -1.80892         | 15.3099      | 4.37021       | -1.8086903       | 0.00014629 | No      |
|      |       |        |             |          |         | Mtfmt   | 8.39909  | 43.4087  | 2.36968          | 8.40009      | 43.4097       | 2.36954076       | 0.00014629 | No      |
|      |       |        |             |          |         | Mtfp1   | 1.09203  | 13.7442  | 3.65373          | 1.09303      | 13.7452       | 3.652523         | 0.00014629 | No      |
|      |       |        |             |          |         | Mtfr1   | 4.69337  | 11.4896  | 1.29163          | 4.69437      | 11.4906       | 1.29145067       | 0.0448712  | No      |
|      |       |        |             |          |         | Mtfr1l  | 30.9716  | 44.4631  | 0.521662         | 30.9726      | 44.4641       | 0.52164849       | 0.0133356  | No      |
|      |       |        |             |          |         | Mthfd1  | 24.9904  | 34.4656  | 0.463785         | 24.9914      | 34.4666       | 0.46376727       | 0.0243269  | No      |
|      |       |        |             |          |         | Mthfd1l | 11.2192  | 0.577464 | -4.2801          | 11.2202      | 0.578464      | -4.2777274       | 0.00014629 | No      |
|      |       |        |             |          |         | Mthfd2  | 52.7761  | 8.64048  | -2.6107          | 52.7771      | 8.64148       | -2.6105618       | 0.00014629 | No      |
|      |       |        |             |          |         | Mthfr   | 0.72192  | 9.67354  | 3.74413          | 0.72292      | 9.67454       | 3.74228516       | 0.00014629 | No      |
|      |       |        |             |          |         | Mthfsd  | 2.31976  | 4.41933  | 0.929854         | 2.32076      | 4.42033       | 0.92955674       | 0.0242332  | No      |

| RRBS |       |        |             |          |         | RNAseq  |           |          |                  |              |               |                  |            |         |
|------|-------|--------|-------------|----------|---------|---------|-----------|----------|------------------|--------------|---------------|------------------|------------|---------|
| gene | Blood | Kidney | methyl.diff | pMWU.fdr | Match ? | gene    | blood     | kidney   | log2(fold_ratio) | blood+ 0.001 | kidney+ 0.001 | log2(fold_ratio) | q_value    | Match ? |
|      |       |        |             |          |         | Mtif3   | 5.63267   | 13.9139  | 1.30463          | 5.63367      | 13.9149       | 1.30448358       | 0.00792329 | No      |
|      |       |        |             |          |         | Mtm1    | 7.01464   | 19.1756  | 1.45083          | 7.01564      | 19.1766       | 1.45070033       | 0.00014629 | No      |
|      |       |        |             |          |         | Mtmr10  | 0.841342  | 13.8289  | 4.03885          | 0.842342     | 13.8299       | 4.03724081       | 0.00014629 | No      |
|      |       |        |             |          |         | Mtmr11  | 0.341591  | 50.9259  | 7.21999          | 0.342591     | 50.9269       | 7.21579684       | 0.00014629 | No      |
|      |       |        |             |          |         | MTMR12  | 19.0698   | 5.62496  | -1.76138         | 19.0708      | 5.62596       | -1.7611942       | 0.00014629 | No      |
|      |       |        |             |          |         | Mtmr14  | 19.2894   | 43.4162  | 1.17043          | 19.2904      | 43.4172       | 1.17038363       | 0.0213766  | No      |
|      |       |        |             |          |         | Mtmr3   | 25.3567   | 16.6478  | -0.607034        | 25.3577      | 16.6488       | -0.6070057       | 0.0232282  | No      |
|      |       |        |             |          |         | Mtmr9   | 6.43405   | 4.03887  | -0.671777        | 6.43505      | 4.03987       | -0.6716425       | 0.0225745  | No      |
|      |       |        |             |          |         | Mtor    | 9.66107   | 20.6166  | 1.09355          | 9.66207      | 20.6176       | 1.09347219       | 0.00395247 | No      |
|      |       |        |             |          |         | Mtpap   | 19.6356   | 6.8625   | -1.51666         | 19.6366      | 6.8635        | -1.5165288       | 0.00014629 | No      |
|      |       |        |             |          |         | Mtr     | 7.64337   | 5.4259   | -0.494346        | 7.64437      | 5.4269        | -0.4942693       | 0.0428888  | No      |
|      |       |        |             |          |         | Mtrf1   | 1.47857   | 6.53426  | 2.14382          | 1.47957      | 6.53526       | 2.14306668       | 0.00053701 | No      |
|      |       |        |             |          |         | Mtrr    | 12.0516   | 6.85795  | -0.81338         | 12.0526      | 6.85895       | -0.8132848       | 0.0136225  | No      |
|      |       |        |             |          |         | Mtus1   | 0.962087  | 15.1667  | 3.97859          | 0.963087     | 15.1677       | 3.9771924        | 0.00014629 | No      |
|      |       |        |             |          |         | Mtx3    | 12.8276   | 34.554   | 1.4296           | 12.8286      | 34.555        | 1.42953074       | 0.0126456  | No      |
|      |       |        |             |          |         | Muc1    | 0.618209  | 35.9917  | 5.86343          | 0.619209     | 35.9927       | 5.86113408       | 0.00014629 | No      |
|      |       |        |             |          |         | Muc6    | 7.82051   | 1.04363  | -2.90565         | 7.82151      | 1.04463       | -2.9044551       | 0.0241459  | No      |
|      |       |        |             |          |         | Mum1    | 31.6505   | 16.8015  | -0.913637        | 31.6515      | 16.8025       | -0.913598        | 0.00014629 | No      |
|      |       |        |             |          |         | Mustn1  | 14.8725   | 8.71879  | -0.770449        | 14.8735      | 8.71979       | -0.7703789       | 0.0242332  | No      |
|      |       |        |             |          |         | Mut     | 6.18442   | 18.3605  | 1.56989          | 6.18542      | 18.3615       | 1.56974046       | 0.00014629 | No      |
|      |       |        |             |          |         | Mutyh   | 27.6439   | 4.09417  | -2.75532         | 27.6449      | 4.09517       | -2.7550181       | 0.00014629 | No      |
|      |       |        |             |          |         | Mvb12a  | 19.9311   | 78.725   | 1.9818           | 19.9321      | 78.726        | 1.98174646       | 0.00014629 | No      |
|      |       |        |             |          |         | Mvb12b  | 9.98518   | 6.48562  | -0.622544        | 9.98618      | 6.48662       | -0.622466        | 0.0103501  | No      |
|      |       |        |             |          |         | Mvd     | 6.34037   | 19.4435  | 1.61665          | 6.34137      | 19.4445       | 1.61649568       | 0.0377543  | No      |
|      |       |        |             |          |         | Mx1     | 156.397   | 4.67298  | -5.06472         | 156.398      | 4.67398       | -5.0644267       | 0.00014629 | No      |
|      |       |        |             |          |         | Mx2     | 24.5519   | 7.94851  | -1.62708         | 24.5529      | 7.94951       | -1.6269556       | 0.0138196  | No      |
|      |       |        |             |          |         | Mxi1    | 20.463    | 52.581   | 1.36152          | 20.464       | 52.582        | 1.36148085       | 0.00014629 | No      |
|      |       |        |             |          |         | Mxra7   | 1.10878   | 13.3571  | 3.59056          | 1.10978      | 13.3581       | 3.58936921       | 0.00296747 | No      |
|      |       |        |             |          |         | Mxra8   | 0.283975  | 6.69662  | 4.55959          | 0.284975     | 6.69762       | 4.55474126       | 0.00014629 | No      |
|      |       |        |             |          |         | Myadm   | 29.1855   | 14.8251  | -0.977203        | 29.1865      | 14.8261       | -0.9771621       | 0.00014629 | No      |
|      |       |        |             |          |         | Myb     | 19.5938   | 0.958339 | -4.35372         | 19.5948      | 0.959339      | -4.3522863       | 0.00014629 | No      |
|      |       |        |             |          |         | Mybbp1a | 27.4584   | 11.0632  | -1.31149         | 27.4594      | 11.0642       | -1.311401        | 0.00219102 | No      |
|      |       |        |             |          |         | Myc     | 64.0118   | 19.9945  | -1.67874         | 64.0128      | 19.9955       | -1.6786851       | 0.00014629 | No      |
|      |       |        |             |          |         | Mycbp   | 12.237    | 57.6905  | 2.23708          | 12.238       | 57.6915       | 2.23699097       | 0.00090728 | No      |
|      |       |        |             |          |         | Mycbp2  | 57.368    | 6.64181  | -3.1106          | 57.369       | 6.64281       | -3.1104058       | 0.00014629 | No      |
|      |       |        |             |          |         | Mycbpap | 0.0799111 | 4.76328  | 5.89742          | 0.0809111    | 4.76428       | 5.87977676       | 0.0237851  | No      |
|      |       |        |             |          |         | Myd88   | 26.1988   | 15.592   | -0.748693        | 26.1998      | 15.593        | -0.7486573       | 0.00114835 | No      |
|      |       |        |             |          |         | Myef2   | 34.6552   | 22.0981  | -0.649146        | 34.6562      | 22.0991       | -0.6491259       | 0.00330073 | No      |
|      |       |        |             |          |         | Myeov2  | 100.668   | 244.226  | 1.27861          | 100.669      | 244.227       | 1.27860321       | 0.00014629 | No      |
|      |       |        |             |          |         | Myg1    | 29.567    | 53.2876  | 0.849811         | 29.568       | 53.2886       | 0.84979027       | 0.00014629 | No      |
|      |       |        |             |          |         | Myh7b   | 0.0795472 | 66.8802  | 9.71555          | 0.0805472    | 66.8812       | 9.69755058       | 0.00252712 | No      |
|      |       |        |             |          |         | MYH9    | 11.6144   | 3.05637  | -1.92602         | 11.6154      | 3.05737       | -1.9256758       | 0.0125475  | No      |

| RRBS |       |        |             |          |         | RNAseq  |           |         |                  |              |               |                  |            |         |
|------|-------|--------|-------------|----------|---------|---------|-----------|---------|------------------|--------------|---------------|------------------|------------|---------|
| gene | Blood | Kidney | methyl.diff | pMWU.fdr | Match ? | gene    | blood     | kidney  | log2(fold_ratio) | blood+ 0.001 | kidney+ 0.001 | log2(fold_ratio) | q_value    | Match ? |
|      |       |        |             |          |         | Myl12a  | 136.114   | 284.53  | 1.06377          | 136.115      | 284.531       | 1.06375978       | 0.00014629 | No      |
|      |       |        |             |          |         | Myl12b  | 522.383   | 263.03  | -0.989881        | 522.384      | 263.031       | -0.9898779       | 0.00014629 | No      |
|      |       |        |             |          |         | Myl9    | 2.08192   | 8.21575 | 1.98047          | 2.08292      | 8.21675       | 1.97996044       | 0.00053701 | No      |
|      |       |        |             |          |         | Mylip   | 65.5335   | 10.8975 | -2.58824         | 65.5345      | 10.8985       | -2.588125        | 0.00014629 | No      |
|      |       |        |             |          |         | Mylk    | 0.309749  | 6.85398 | 4.46777          | 0.310749     | 6.85498       | 4.4633308        | 0.00014629 | No      |
|      |       |        |             |          |         | Mynn    | 9.74959   | 2.05785 | -2.2442          | 9.75059      | 2.05885       | -2.2436508       | 0.00014629 | No      |
|      |       |        |             |          |         | Myo10   | 1.53622   | 12.4041 | 3.01336          | 1.53722      | 12.4051       | 3.01253781       | 0.00014629 | No      |
|      |       |        |             |          |         | MYO18A  | 6.31731   | 25.9003 | 2.03559          | 6.31831      | 25.9013       | 2.03541388       | 0.00014629 | No      |
|      |       |        |             |          |         | Myo1d   | 0.478834  | 24.65   | 5.68592          | 0.479834     | 24.651        | 5.68296697       | 0.00014629 | No      |
|      |       |        |             |          |         | Myo1g   | 71.9889   | 18.6181 | -1.95107         | 71.9899      | 18.6191       | -1.9510112       | 0.00014629 | No      |
|      |       |        |             |          |         | Myo5c   | 3.73784   | 14.1883 | 1.92442          | 3.73884      | 14.1893       | 1.92414078       | 0.00014629 | No      |
|      |       |        |             |          |         | Myo6    | 0.0770567 | 41.9041 | 9.08695          | 0.0780567    | 41.9051       | 9.06838765       | 0.00014629 | No      |
|      |       |        |             |          |         | Myo7b   | 0         | 4.85034 | inf              | 0.001        | 4.85134       | 12.2441676       | 0.00014629 | No      |
|      |       |        |             |          |         | Myo9a   | 2.67467   | 4.46744 | 0.740091         | 2.67567      | 4.46844       | 0.73987106       | 0.00102864 | No      |
|      |       |        |             |          |         | Myo9b   | 87.9844   | 33.7223 | -1.38354         | 87.9854      | 33.7233       | -1.3835184       | 0.00014629 | No      |
|      |       |        |             |          |         | Myof    | 0.311468  | 24.2249 | 6.28126          | 0.312468     | 24.2259       | 6.276698         | 0.00014629 | No      |
|      |       |        |             |          |         | Myrf    | 0.264036  | 12.5848 | 5.57481          | 0.265036     | 12.5858       | 5.56946478       | 0.00014629 | No      |
|      |       |        |             |          |         | Mysm1   | 18.468    | 4.84695 | -1.92988         | 18.469       | 4.84795       | -1.929659        | 0.00014629 | No      |
|      |       |        |             |          |         | Mzf1    | 0.648479  | 1.76565 | 1.44506          | 0.649479     | 1.76665       | 1.44366146       | 0.00954394 | No      |
|      |       |        |             |          |         | Mzt2b   | 21.6929   | 11.5889 | -0.904472        | 21.6939      | 11.5899       | -0.9044213       | 0.004167   | No      |
|      |       |        |             |          |         | N4bp1   | 16.5802   | 7.55813 | -1.13336         | 16.5812      | 7.55913       | -1.1332563       | 0.00014629 | No      |
|      |       |        |             |          |         | N4bp2   | 207.261   | 16.3193 | -3.6668          | 207.262      | 16.3203       | -3.6667162       | 0.00014629 | No      |
|      |       |        |             |          |         | N4bp2l1 | 22.3928   | 3.63124 | -2.6245          | 22.3938      | 3.63224       | -2.6241679       | 0.00014629 | No      |
|      |       |        |             |          |         | N4bp2l2 | 55.8389   | 22.8007 | -1.29219         | 55.8399      | 22.8017       | -1.292155        | 0.00014629 | No      |
|      |       |        |             |          |         | N6amt1  | 9.04647   | 27.2124 | 1.58884          | 9.04747      | 27.2134       | 1.58873089       | 0.00014629 | No      |
|      |       |        |             |          |         | Naa10   | 58.4756   | 93.734  | 0.680736         | 58.4766      | 93.735        | 0.68072841       | 0.00230432 | No      |
|      |       |        |             |          |         | Naa15   | 15.8592   | 5.31946 | -1.57597         | 15.8602      | 5.32046       | -1.5757881       | 0.00014629 | No      |
|      |       |        |             |          |         | Naa16   | 27.0787   | 9.52933 | -1.50671         | 27.0797      | 9.53033       | -1.5066137       | 0.00014629 | No      |
|      |       |        |             |          |         | Naa20   | 25.8796   | 64.1449 | 1.30952          | 25.8806      | 64.1459       | 1.30948599       | 0.00014629 | No      |
|      |       |        |             |          |         | Naa38   | 53.6697   | 23.8261 | -1.17156         | 53.6707      | 23.8271       | -1.1715313       | 0.00014629 | No      |
|      |       |        |             |          |         | Naa40   | 3.18812   | 7.2091  | 1.17711          | 3.18912      | 7.2101        | 1.17686088       | 0.00028114 | No      |
|      |       |        |             |          |         | Naaa    | 4.13777   | 1.65837 | -1.31909         | 4.13877      | 1.65937       | -1.3185665       | 0.00629035 | No      |
|      |       |        |             |          |         | Nab1    | 11.0433   | 6.00733 | -0.87837         | 11.0443      | 6.00833       | -0.878266        | 0.00014629 | No      |
|      |       |        |             |          |         | Nab2    | 38.9311   | 19.1485 | -1.02369         | 38.9321      | 19.1495       | -1.0236534       | 0.00700299 | No      |
|      |       |        |             |          |         | Nabp1   | 19.198    | 55.067  | 1.52023          | 19.199       | 55.068        | 1.52018304       | 0.00014629 | No      |
|      |       |        |             |          |         | Nabp2   | 47.9486   | 66.5247 | 0.472401         | 47.9496      | 66.5257       | 0.47239301       | 0.0413818  | No      |
|      |       |        |             |          |         | Naca    | 1488.88   | 648.933 | -1.19809         | 1488.881     | 648.934       | -1.1980848       | 0.00014629 | No      |
|      |       |        |             |          |         | Nacc1   | 24.9448   | 9.98824 | -1.32044         | 24.9458      | 9.98924       | -1.3203501       | 0.00014629 | No      |
|      |       |        |             |          |         | Nacc2   | 0.0518511 | 14.5452 | 8.13195          | 0.0528511    | 14.5462       | 8.1044931        | 0.00566132 | No      |
|      |       |        |             |          |         | Nadk2   | 21.0834   | 7.96609 | -1.40416         | 21.0844      | 7.96709       | -1.4040512       | 0.00014629 | No      |
|      |       |        |             |          |         | Nadsyn1 | 5.54832   | 11.034  | 0.991829         | 5.54932      | 11.035        | 0.99170373       | 0.00078603 | No      |
|      |       |        |             |          |         | Naga    | 5.51431   | 39.261  | 2.83184          | 5.51531      | 39.262        | 2.83161978       | 0.00014629 | No      |

| RRBS |       |        |             |          |         | RNAseq  |           |          |                  |              |               |                  |            |         |
|------|-------|--------|-------------|----------|---------|---------|-----------|----------|------------------|--------------|---------------|------------------|------------|---------|
| gene | Blood | Kidney | methyl.diff | pMWU.fdr | Match ? | gene    | blood     | kidney   | log2(fold_ratio) | blood+ 0.001 | kidney+ 0.001 | log2(fold_ratio) | q_value    | Match ? |
|      |       |        |             |          |         | Nagk    | 5.78882   | 47.0015  | 3.02137          | 5.78982      | 47.0025       | 3.02114709       | 0.00014629 | No      |
|      |       |        |             |          |         | Naglu   | 3.06708   | 12.0955  | 1.97953          | 3.06808      | 12.0965       | 1.97918167       | 0.00014629 | No      |
|      |       |        |             |          |         | Nampt   | 9.51215   | 20.331   | 1.09584          | 9.51315      | 20.332        | 1.0957571        | 0.00014629 | No      |
|      |       |        |             |          |         | Nanos1  | 1.04891   | 0        | -inf             | 1.04991      | 0.001         | -10.03605        | 0.00041099 | No      |
|      |       |        |             |          |         | Nanp    | 9.16068   | 5.49631  | -0.736992        | 9.16168      | 5.49731       | -0.7368863       | 0.0356993  | No      |
|      |       |        |             |          |         | Nans    | 18.4499   | 37.9008  | 1.03861          | 18.4509      | 37.9018       | 1.03857518       | 0.00014629 | No      |
|      |       |        |             |          |         | Nap1l1  | 388.475   | 47.3604  | -3.03607         | 388.476      | 47.3614       | -3.0360418       | 0.00014629 | No      |
|      |       |        |             |          |         | Nap1l3  | 0         | 3.16584  | inf              | 0.001        | 3.16684       | 11.6288283       | 0.00014629 | No      |
|      |       |        |             |          |         | Nap1l4  | 74.9103   | 34.0561  | -1.13725         | 74.9113      | 34.0571       | -1.1372278       | 0.00014629 | No      |
|      |       |        |             |          |         | Napa    | 49.9955   | 113.435  | 1.182            | 49.9965      | 113.436       | 1.18197956       | 0.00014629 | No      |
|      |       |        |             |          |         | Napepld | 0.630191  | 3.10987  | 2.303            | 0.631191     | 3.11087       | 2.30116957       | 0.0420475  | No      |
|      |       |        |             |          |         | Naprt1  | 0.485784  | 256.667  | 9.04537          | 0.486784     | 256.668       | 9.04240598       | 0.00090728 | No      |
|      |       |        |             |          |         | Napsa   | 3.8955    | 258.288  | 6.05103          | 3.8965       | 258.289       | 6.05066358       | 0.00014629 | No      |
|      |       |        |             |          |         | Narf    | 19.2791   | 13.395   | -0.525335        | 19.2801      | 13.396        | -0.5253103       | 0.0330385  | No      |
|      |       |        |             |          |         | Narfl   | 11.7809   | 29.4563  | 1.32213          | 11.7819      | 29.4573       | 1.32205299       | 0.00014629 | No      |
|      |       |        |             |          |         | Nars    | 43.9492   | 29.4697  | -0.576606        | 43.9502      | 29.4707       | -0.5765884       | 0.00405996 | No      |
|      |       |        |             |          |         | Nasp    | 32.5219   | 14.8704  | -1.12896         | 32.5229      | 14.8714       | -1.1289154       | 0.00330073 | No      |
|      |       |        |             |          |         | Nat14   | 0.309345  | 2.41813  | 2.9666           | 0.310345     | 2.41913       | 2.96254349       | 0.00659461 | No      |
|      |       |        |             |          |         | NAT2    | 4.83832   | 7.92543  | 0.711984         | 4.83932      | 7.92643       | 0.71186689       | 0.0418893  | No      |
|      |       |        |             |          |         | Nat8b   | 14.5563   | 111.054  | 2.93155          | 14.5573      | 111.055       | 2.93145965       | 0.00014629 | No      |
|      |       |        |             |          |         | Nbas    | 7.16126   | 15.178   | 1.0837           | 7.16226      | 15.179        | 1.08358995       | 0.0233164  | No      |
|      |       |        |             |          |         | Nbea    | 0.0111919 | 3.37177  | 8.23491          | 0.0121919    | 3.37277       | 8.11186715       | 0.00195831 | No      |
|      |       |        |             |          |         | Nbeal2  | 55.0856   | 29.7666  | -0.887983        | 55.0866      | 29.7676       | -0.8879585       | 0.0478294  | No      |
|      |       |        |             |          |         | Nbn     | 8.17376   | 12.1221  | 0.568572         | 8.17476      | 12.1231       | 0.56851038       | 0.0231421  | No      |
|      |       |        |             |          |         | Nbr1    | 37.0259   | 52.4138  | 0.501413         | 37.0269      | 52.4148       | 0.50140047       | 0.0102511  | No      |
|      |       |        |             |          |         | Ncald   | 3.85066   | 6.64337  | 0.78681          | 3.85166      | 6.64437       | 0.78665206       | 0.00566132 | No      |
|      |       |        |             |          |         | Ncam1   | 0         | 7.04758  | inf              | 0.001        | 7.04858       | 12.7831169       | 0.00014629 | No      |
|      |       |        |             |          |         | Ncapd3  | 3.86963   | 1.77842  | -1.1216          | 3.87063      | 1.77942       | -1.1211613       | 0.00041099 | No      |
|      |       |        |             |          |         | Ncapg2  | 1.63005   | 0.822154 | -0.987431        | 1.63105      | 0.823154      | -0.9865667       | 0.0381731  | No      |
|      |       |        |             |          |         | Ncaph2  | 28.7727   | 15.1746  | -0.923045        | 28.7737      | 15.1756       | -0.9229972       | 0.00053701 | No      |
|      |       |        |             |          |         | Ncbp1   | 38.6568   | 102.275  | 1.40366          | 38.6578      | 102.276       | 1.4036362        | 0.00014629 | No      |
|      |       |        |             |          |         | Ncbp2   | 32.6971   | 19.5206  | -0.744165        | 32.6981      | 19.5216       | -0.7441355       | 0.00114835 | No      |
|      |       |        |             |          |         | Ncdn    | 9.47361   | 6.40197  | -0.565398        | 9.47461      | 6.40297       | -0.5653253       | 0.0222999  | No      |
|      |       |        |             |          |         | Ncf4    | 1.20252   | 4.56638  | 1.92499          | 1.20352      | 4.56738       | 1.92410671       | 0.00341151 | No      |
|      |       |        |             |          |         | Nck1    | 27.9495   | 16.3231  | -0.775909        | 27.9505      | 16.3241       | -0.7758706       | 0.00184429 | No      |
|      |       |        |             |          |         | Nckap1  | 0.856684  | 58.388   | 6.09076          | 0.857684     | 58.389        | 6.08910659       | 0.00014629 | No      |
|      |       |        |             |          |         | Nckap1l | 45.9217   | 2.53323  | -4.18012         | 45.9227      | 2.53423       | -4.1795881       | 0.00014629 | No      |
|      |       |        |             |          |         | Nckap5  | 0         | 0.927439 | inf              | 0.001        | 0.928439      | 9.85866332       | 0.00014629 | No      |
|      |       |        |             |          |         | Nckap5l | 6.87435   | 1.18728  | -2.53356         | 6.87535      | 1.18828       | -2.5325583       | 0.00014629 | No      |
|      |       |        |             |          |         | Ncl     | 256.269   | 107.164  | -1.25784         | 256.27       | 107.165       | -1.2578308       | 0.00014629 | No      |
|      |       |        |             |          |         | Ncln    | 108.328   | 73.5421  | -0.558764        | 108.329      | 73.5431       | -0.5587576       | 0.00751085 | No      |
|      |       |        |             |          |         | Ncoa1   | 23.615    | 12.6267  | -0.903223        | 23.616       | 12.6277       | -0.9031727       | 0.00014629 | No      |



| RRBS |       |        |             |          |         | RNAseq  |          |         |                  |              |               |                  |            |         |
|------|-------|--------|-------------|----------|---------|---------|----------|---------|------------------|--------------|---------------|------------------|------------|---------|
| gene | Blood | Kidney | methyl.diff | pMWU.fdr | Match ? | gene    | blood    | kidney  | log2(fold_ratio) | blood+ 0.001 | kidney+ 0.001 | log2(fold_ratio) | q_value    | Match ? |
|      |       |        |             |          |         | Ncoa2   | 17.7465  | 3.90628 | -2.18367         | 17.7475      | 3.90728       | -2.1833793       | 0.00014629 | No      |
|      |       |        |             |          |         | Ncoa3   | 48.9892  | 4.89923 | -3.32184         | 48.9902      | 4.90023       | -3.3215718       | 0.00014629 | No      |
|      |       |        |             |          |         | Ncoa4   | 25.4294  | 43.7464 | 0.782668         | 25.4304      | 43.7474       | 0.78264312       | 0.00014629 | No      |
|      |       |        |             |          |         | Ncoa6   | 13.325   | 5.30223 | -1.32947         | 13.326       | 5.30323       | -1.3293006       | 0.00014629 | No      |
|      |       |        |             |          |         | NCOA7   | 17.5404  | 30.8416 | 0.814198         | 17.5414      | 30.8426       | 0.81416049       | 0.00114835 | No      |
|      |       |        |             |          |         | Ndc1    | 5.43518  | 2.45443 | -1.14694         | 5.43618      | 2.45543       | -1.1466175       | 0.00014629 | No      |
|      |       |        |             |          |         | Ndel1   | 37.152   | 57.3216 | 0.625637         | 37.153       | 57.3226       | 0.62562534       | 0.023691   | No      |
|      |       |        |             |          |         | Ndr1    | 10.9236  | 785.517 | 6.16812          | 10.9246      | 785.518       | 6.16799197       | 0.00014629 | No      |
|      |       |        |             |          |         | Ndr2    | 3.17573  | 51.2787 | 4.0132           | 3.17673      | 51.2797       | 4.01277344       | 0.00014629 | No      |
|      |       |        |             |          |         | Ndst1   | 0.112935 | 19.3585 | 7.42133          | 0.113935     | 19.3595       | 7.40868688       | 0.00014629 | No      |
|      |       |        |             |          |         | Ndst2   | 14.6026  | 6.07842 | -1.26445         | 14.6036      | 6.07942       | -1.2643185       | 0.0182953  | No      |
|      |       |        |             |          |         | Ndufa1  | 291.305  | 676.82  | 1.21624          | 291.306      | 676.821       | 1.21623892       | 0.00014629 | No      |
|      |       |        |             |          |         | Ndufa10 | 37.6826  | 109.269 | 1.53592          | 37.6836      | 109.27        | 1.53588866       | 0.00014629 | No      |
|      |       |        |             |          |         | Ndufa11 | 80.9185  | 599.988 | 2.89039          | 80.9195      | 599.989       | 2.89037674       | 0.00014629 | No      |
|      |       |        |             |          |         | Ndufa12 | 66.9565  | 331.658 | 2.3084           | 66.9575      | 331.659       | 2.30838311       | 0.00014629 | No      |
|      |       |        |             |          |         | Ndufa13 | 135.381  | 413.957 | 1.61245          | 135.382      | 413.958       | 1.61244846       | 0.00014629 | No      |
|      |       |        |             |          |         | Ndufa2  | 59.2899  | 277.219 | 2.22517          | 59.2909      | 277.22        | 2.22514874       | 0.00014629 | No      |
|      |       |        |             |          |         | Ndufa3  | 125.395  | 434.515 | 1.79293          | 125.396      | 434.516       | 1.79291797       | 0.00014629 | No      |
|      |       |        |             |          |         | Ndufa4  | 187.909  | 873.153 | 2.2162           | 187.91       | 873.154       | 2.21619428       | 0.00014629 | No      |
|      |       |        |             |          |         | Ndufa5  | 55.7517  | 309.64  | 2.47351          | 55.7527      | 309.641       | 2.47348293       | 0.00014629 | No      |
|      |       |        |             |          |         | Ndufa6  | 157.291  | 538.543 | 1.77562          | 157.292      | 538.544       | 1.77561892       | 0.00014629 | No      |
|      |       |        |             |          |         | Ndufa8  | 49.579   | 164.489 | 1.73019          | 49.58        | 164.49        | 1.7301697        | 0.00014629 | No      |
|      |       |        |             |          |         | Ndufa9  | 50.6585  | 164.9   | 1.70271          | 50.6595      | 164.901       | 1.7026954        | 0.00014629 | No      |
|      |       |        |             |          |         | Ndufab1 | 63.3919  | 328.275 | 2.37254          | 63.3929      | 328.276       | 2.37251611       | 0.00014629 | No      |
|      |       |        |             |          |         | Ndufaf1 | 2.51442  | 7.07126 | 1.49174          | 2.51542      | 7.07226       | 1.49137201       | 0.00041099 | No      |
|      |       |        |             |          |         | Ndufaf4 | 28.993   | 12.7057 | -1.19023         | 28.994       | 12.7067       | -1.190165        | 0.00014629 | No      |
|      |       |        |             |          |         | Ndufaf5 | 10.456   | 24.5217 | 1.22972          | 10.457       | 24.5227       | 1.22964881       | 0.00028114 | No      |
|      |       |        |             |          |         | Ndufaf6 | 5.12039  | 13.6739 | 1.4171           | 5.12139      | 13.6749       | 1.41692295       | 0.00041099 | No      |
|      |       |        |             |          |         | Ndufb10 | 127.099  | 396.905 | 1.64285          | 127.1        | 396.906       | 1.64283334       | 0.00014629 | No      |
|      |       |        |             |          |         | Ndufb11 | 170.963  | 392.92  | 1.20055          | 170.964      | 392.921       | 1.20054671       | 0.00014629 | No      |
|      |       |        |             |          |         | Ndufb2  | 130.683  | 522.948 | 2.00059          | 130.684      | 522.949       | 2.00058774       | 0.00014629 | No      |
|      |       |        |             |          |         | Ndufb3  | 69.3127  | 285.618 | 2.04289          | 69.3137      | 285.619       | 2.04287952       | 0.00014629 | No      |
|      |       |        |             |          |         | Ndufb5  | 53.1353  | 234.38  | 2.14111          | 53.1363      | 234.381       | 2.14108594       | 0.00014629 | No      |
|      |       |        |             |          |         | Ndufb6  | 72.5795  | 335.363 | 2.20809          | 72.5805      | 335.364       | 2.20807393       | 0.00014629 | No      |
|      |       |        |             |          |         | Ndufb7  | 54.4814  | 471.152 | 3.11236          | 54.4824      | 471.153       | 3.11233347       | 0.00014629 | No      |
|      |       |        |             |          |         | Ndufb8  | 131.297  | 459.661 | 1.80773          | 131.298      | 459.662       | 1.80772846       | 0.00014629 | No      |
|      |       |        |             |          |         | Ndufb9  | 99.4061  | 462.145 | 2.21694          | 99.4071      | 462.146       | 2.21692789       | 0.00014629 | No      |
|      |       |        |             |          |         | Ndufc1  | 41.5899  | 425.09  | 3.35346          | 41.5909      | 425.091       | 3.35343191       | 0.00014629 | No      |
|      |       |        |             |          |         | Ndufc2  | 94.5533  | 191.347 | 1.01699          | 94.5543      | 191.348       | 1.01698385       | 0.00014629 | No      |
|      |       |        |             |          |         | Ndufs1  | 19.3091  | 107.547 | 2.47761          | 19.3101      | 107.548       | 2.47755316       | 0.00014629 | No      |
|      |       |        |             |          |         | Ndufs2  | 56.4433  | 206.266 | 1.86963          | 56.4443      | 206.267       | 1.86961322       | 0.00014629 | No      |
|      |       |        |             |          |         | Ndufs3  | 47.2196  | 289.675 | 2.61697          | 47.2206      | 289.676       | 2.61695188       | 0.00014629 | No      |

| RRBS |       |        |             |          |         | RNAseq   |          |         |                  |              |               |                  |            |         |
|------|-------|--------|-------------|----------|---------|----------|----------|---------|------------------|--------------|---------------|------------------|------------|---------|
| gene | Blood | Kidney | methyl.diff | pMWU.fdr | Match ? | gene     | blood    | kidney  | log2(fold_ratio) | blood+ 0.001 | kidney+ 0.001 | log2(fold_ratio) | q_value    | Match ? |
|      |       |        |             |          |         | Ndufs4   | 19.3261  | 61.2634 | 1.66447          | 19.3271      | 61.2644       | 1.66442381       | 0.00014629 | No      |
|      |       |        |             |          |         | Ndufs5   | 82.5923  | 307.964 | 1.89868          | 82.5933      | 307.965       | 1.89866974       | 0.00014629 | No      |
|      |       |        |             |          |         | Ndufs7   | 99.5204  | 640.825 | 2.68687          | 99.5214      | 640.826       | 2.686854         | 0.00014629 | No      |
|      |       |        |             |          |         | Ndufs8   | 49.372   | 295.047 | 2.57918          | 49.373       | 295.048       | 2.57915547       | 0.00014629 | No      |
|      |       |        |             |          |         | Ndufv1   | 68.1477  | 250.688 | 1.87916          | 68.1487      | 250.689       | 1.87914065       | 0.00014629 | No      |
|      |       |        |             |          |         | Ndufv2   | 80.0384  | 334.892 | 2.06493          | 80.0394      | 334.893       | 2.06491796       | 0.00014629 | No      |
|      |       |        |             |          |         | Ndufv3   | 45.4472  | 107.033 | 1.2358           | 45.4482      | 107.034       | 1.23577409       | 0.00014629 | No      |
|      |       |        |             |          |         | Necap2   | 47.8008  | 25.7509 | -0.892411        | 47.8018      | 25.7519       | -0.8923861       | 0.00014629 | No      |
|      |       |        |             |          |         | Nedd4l   | 1.53467  | 31.0488 | 4.33854          | 1.53567      | 31.0498       | 4.33764384       | 0.00014629 | No      |
|      |       |        |             |          |         | Neil1    | 41.6516  | 12.8484 | -1.69678         | 41.6526      | 12.8494       | -1.6967056       | 0.00014629 | No      |
|      |       |        |             |          |         | Nek1     | 2.62868  | 1.45079 | -0.857497        | 2.62968      | 1.45179       | -0.8570545       | 0.00812679 | No      |
|      |       |        |             |          |         | Nek3     | 4.87757  | 19.1644 | 1.97419          | 4.87857      | 19.1654       | 1.97397387       | 0.00078603 | No      |
|      |       |        |             |          |         | Nek4     | 1.22242  | 3.91328 | 1.67864          | 1.22342      | 3.91428       | 1.67782719       | 0.00014629 | No      |
|      |       |        |             |          |         | NEK6     | 3.10838  | 8.18674 | 1.39713          | 3.10938      | 8.18774       | 1.39683835       | 0.00078603 | No      |
|      |       |        |             |          |         | Nek7     | 63.6385  | 21.7337 | -1.54997         | 63.6395      | 21.7347       | -1.5499223       | 0.00014629 | No      |
|      |       |        |             |          |         | Nek8     | 4.59799  | 10.5378 | 1.1965           | 4.59899      | 10.5388       | 1.19632164       | 0.00014629 | No      |
|      |       |        |             |          |         | Nelfa    | 26.2423  | 15.1218 | -0.79527         | 26.2433      | 15.1228       | -0.7952239       | 0.00053701 | No      |
|      |       |        |             |          |         | Nelfe    | 13.7236  | 32.5627 | 1.24656          | 13.7246      | 32.5637       | 1.24650053       | 0.00014629 | No      |
|      |       |        |             |          |         | Nemf     | 34.2759  | 11.8012 | -1.53826         | 34.2769      | 11.8022       | -1.5381808       | 0.00014629 | No      |
|      |       |        |             |          |         | Nenf     | 6.20008  | 65.0291 | 3.39073          | 6.20108      | 65.0301       | 3.39051624       | 0.00014629 | No      |
|      |       |        |             |          |         | Neo1     | 0.549173 | 11.5395 | 4.39317          | 0.550173     | 11.5405       | 4.39067658       | 0.00014629 | No      |
|      |       |        |             |          |         | Net1     | 5.42863  | 55.0661 | 3.34251          | 5.42963      | 55.0671       | 3.34226484       | 0.00014629 | No      |
|      |       |        |             |          |         | Neto2    | 0.939885 | 4.28755 | 2.1896           | 0.940885     | 4.28855       | 2.18839964       | 0.00014629 | No      |
|      |       |        |             |          |         | Nfam1    | 0.609411 | 1.54294 | 1.34019          | 0.610411     | 1.54394       | 1.33876382       | 0.0415477  | No      |
|      |       |        |             |          |         | Nfat5    | 17.9446  | 36.0643 | 1.00702          | 17.9456      | 36.0653       | 1.00698126       | 0.00014629 | No      |
|      |       |        |             |          |         | Nfatc1   | 54.403   | 5.4457  | -3.3205          | 54.404       | 5.4467        | -3.3202584       | 0.00014629 | No      |
|      |       |        |             |          |         | Nfatc2   | 11.0431  | 1.9396  | -2.50931         | 11.0441      | 1.9406        | -2.5087012       | 0.00014629 | No      |
|      |       |        |             |          |         | Nfatc2ip | 5.63787  | 2.39819 | -1.2332          | 5.63887      | 2.39919       | -1.2328587       | 0.0143044  | No      |
|      |       |        |             |          |         | Nfatc3   | 60.0081  | 4.49114 | -3.74            | 60.0091      | 4.49214       | -3.7397065       | 0.00014629 | No      |
|      |       |        |             |          |         | NFE2L1   | 10.6984  | 30.2889 | 1.50139          | 10.6994      | 30.2899       | 1.50130692       | 0.00014629 | No      |
|      |       |        |             |          |         | Nfe2l2   | 8.21172  | 45.6321 | 2.47429          | 8.21272      | 45.6331       | 2.47414865       | 0.0109563  | No      |
|      |       |        |             |          |         | Nfia     | 1.8367   | 5.26547 | 1.51945          | 1.8377       | 5.26647       | 1.51893501       | 0.0244119  | No      |
|      |       |        |             |          |         | Nfib     | 0        | 2.07229 | inf              | 0.001        | 2.07329       | 11.0177062       | 0.00014629 | No      |
|      |       |        |             |          |         | Nfic     | 4.49222  | 12.0436 | 1.42277          | 4.49322      | 12.0446       | 1.42256488       | 0.00014629 | No      |
|      |       |        |             |          |         | Nfil3    | 2.58348  | 13.264  | 2.36013          | 2.58448      | 13.265        | 2.35967873       | 0.00014629 | No      |
|      |       |        |             |          |         | Nfkb2    | 9.96686  | 21.1895 | 1.08814          | 9.96786      | 21.1905       | 1.08806192       | 0.00014629 | No      |
|      |       |        |             |          |         | Nfkbia   | 144.201  | 65.4703 | -1.13917         | 144.202      | 65.4713       | -1.1391566       | 0.00014629 | No      |
|      |       |        |             |          |         | Nfkbiz   | 20.1821  | 14.1387 | -0.513424        | 20.1831      | 14.1397       | -0.5133963       | 0.0311089  | No      |
|      |       |        |             |          |         | Nfrkb    | 58.6774  | 6.41745 | -3.19273         | 58.6784      | 6.41845       | -3.1925327       | 0.00014629 | No      |
|      |       |        |             |          |         | Nfs1     | 12.6958  | 169.78  | 3.74124          | 12.6968      | 169.781       | 3.74113817       | 0.00014629 | No      |
|      |       |        |             |          |         | Nfx1     | 17.693   | 7.40818 | -1.25599         | 17.694       | 7.40918       | -1.2558744       | 0.00014629 | No      |
|      |       |        |             |          |         | Nfxl1    | 13.0854  | 2.41449 | -2.43817         | 13.0864      | 2.41549       | -2.4376805       | 0.00014629 | No      |

| RRBS |       |        |             |          |         | RNAseq  |           |         |                  |              |               |                  |            |         |
|------|-------|--------|-------------|----------|---------|---------|-----------|---------|------------------|--------------|---------------|------------------|------------|---------|
| gene | Blood | Kidney | methyl.diff | pMWU.fdr | Match ? | gene    | blood     | kidney  | log2(fold_ratio) | blood+ 0.001 | kidney+ 0.001 | log2(fold_ratio) | q_value    | Match ? |
|      |       |        |             |          |         | Nfya    | 13.5014   | 7.53877 | -0.840707        | 13.5024      | 7.53977       | -0.8406234       | 0.0209112  | No      |
|      |       |        |             |          |         | Nfyb    | 20.612    | 6.44861 | -1.67643         | 20.613       | 6.44961       | -1.6762707       | 0.00102864 | No      |
|      |       |        |             |          |         | Ngdn    | 65.7783   | 43.026  | -0.612403        | 65.7793      | 43.027        | -0.6123914       | 0.00924781 | No      |
|      |       |        |             |          |         | Ngfrap1 | 51.9969   | 153.464 | 1.56141          | 51.9979      | 153.465       | 1.5613844        | 0.00014629 | No      |
|      |       |        |             |          |         | Ngly1   | 36.6171   | 23.7293 | -0.625847        | 36.6181      | 23.7303       | -0.6258266       | 0.00307875 | No      |
|      |       |        |             |          |         | NGRN    | 39.4577   | 28.4681 | -0.470961        | 39.4587      | 28.4691       | -0.4709465       | 0.0475015  | No      |
|      |       |        |             |          |         | Nhej1   | 9.09347   | 3.70417 | -1.29568         | 9.09447      | 3.70517       | -1.2954498       | 0.00138312 | No      |
|      |       |        |             |          |         | Nhlrc2  | 10.2073   | 30.0941 | 1.55988          | 10.2083      | 30.0951       | 1.55978598       | 0.0415477  | No      |
|      |       |        |             |          |         | Nhlrc3  | 22.4033   | 4.7287  | -2.24419         | 22.4043      | 4.7297        | -2.2439551       | 0.00014629 | No      |
|      |       |        |             |          |         | Nhp2l1  | 108.609   | 63.1053 | -0.783313        | 108.61       | 63.1063       | -0.783301        | 0.00078603 | No      |
|      |       |        |             |          |         | Nhs     | 0         | 1.48654 | inf              | 0.001        | 1.48754       | 10.5387127       | 0.00014629 | No      |
|      |       |        |             |          |         | Nhsl1   | 0.429436  | 2.06632 | 2.26655          | 0.430436     | 2.06732       | 2.26389107       | 0.00041099 | No      |
|      |       |        |             |          |         | Nid1    | 0         | 4.91456 | inf              | 0.001        | 4.91556       | 12.2631401       | 0.00014629 | No      |
|      |       |        |             |          |         | Nid2    | 0.0936297 | 74.2111 | 9.63045          | 0.0946297    | 74.2121       | 9.61514566       | 0.00014629 | No      |
|      |       |        |             |          |         | Nin     | 5.09691   | 2.56539 | -0.990447        | 5.09791      | 2.56639       | -0.9901655       | 0.00618538 | No      |
|      |       |        |             |          |         | Ninj1   | 4.35768   | 176.837 | 5.34272          | 4.35868      | 176.838       | 5.34239322       | 0.00014629 | No      |
|      |       |        |             |          |         | Ninl    | 0.0277182 | 40.8861 | 10.5266          | 0.0287182    | 40.8871       | 10.4754647       | 0.0103501  | No      |
|      |       |        |             |          |         | Nip30   | 43.718    | 137.396 | 1.65204          | 43.719       | 137.397       | 1.6520182        | 0.00014629 | No      |
|      |       |        |             |          |         | Nip7    | 24.7181   | 13.404  | -0.882904        | 24.7191      | 13.405        | -0.882855        | 0.00138312 | No      |
|      |       |        |             |          |         | Nipa1   | 0         | 2.38902 | inf              | 0.001        | 2.39002       | 11.222807        | 0.00014629 | No      |
|      |       |        |             |          |         | Nipal1  | 29.3396   | 2.15949 | -3.76409         | 29.3406      | 2.16049       | -3.7634679       | 0.00014629 | No      |
|      |       |        |             |          |         | Nipal2  | 7.08081   | 23.5538 | 1.73397          | 7.08181      | 23.5548       | 1.73383104       | 0.00014629 | No      |
|      |       |        |             |          |         | Nipal3  | 12.947    | 3.49171 | -1.89061         | 12.948       | 3.49271       | -1.8903105       | 0.00014629 | No      |
|      |       |        |             |          |         | Nipbl   | 36.7801   | 8.33911 | -2.14096         | 36.7811      | 8.34011       | -2.1408263       | 0.00014629 | No      |
|      |       |        |             |          |         | Nit1    | 40.9367   | 263.987 | 2.689            | 40.9377      | 263.988       | 2.6889704        | 0.00014629 | No      |
|      |       |        |             |          |         | Nit2    | 45.0998   | 214.5   | 2.24978          | 45.1008      | 214.501       | 2.24975944       | 0.00014629 | No      |
|      |       |        |             |          |         | Nkap    | 27.7938   | 6.09063 | -2.1901          | 27.7948      | 6.09163       | -2.1899148       | 0.00014629 | No      |
|      |       |        |             |          |         | Nkd2    | 0.979367  | 6.34229 | 2.69508          | 0.980367     | 6.34329       | 2.69383747       | 0.00014629 | No      |
|      |       |        |             |          |         | Nkg7    | 54.8047   | 19.0679 | -1.52316         | 54.8057      | 19.0689       | -1.5231043       | 0.00014629 | No      |
|      |       |        |             |          |         | Nktr    | 30.7621   | 7.50688 | -2.03487         | 30.7631      | 7.50788       | -2.0347234       | 0.00014629 | No      |
|      |       |        |             |          |         | Nle1    | 15.9839   | 6.30938 | -1.34105         | 15.9849      | 6.31038       | -1.3409109       | 0.00014629 | No      |
|      |       |        |             |          |         | Nlrc3   | 29.6576   | 3.67995 | -3.01064         | 29.6586      | 3.68095       | -3.0103004       | 0.0407029  | No      |
|      |       |        |             |          |         | Nlrc5   | 94.3638   | 11.1072 | -3.08674         | 94.3648      | 11.1082       | -3.0866237       | 0.00014629 | No      |
|      |       |        |             |          |         | Nlrp1a  | 24.1537   | 1.12038 | -4.43018         | 24.1547      | 1.12138       | -4.4289568       | 0.00014629 | No      |
|      |       |        |             |          |         | Nlrx1   | 0.548117  | 9.32788 | 4.08899          | 0.549117     | 9.32888       | 4.0865184        | 0.00014629 | No      |
|      |       |        |             |          |         | Nmd3    | 30.9512   | 22.2663 | -0.475134        | 30.9522      | 22.2673       | -0.4751153       | 0.0407879  | No      |
|      |       |        |             |          |         | Nme1    | 67.0398   | 109.797 | 0.711742         | 67.0408      | 109.798       | 0.71174051       | 0.00114835 | No      |
|      |       |        |             |          |         | Nme2    | 302.407   | 720.01  | 1.25152          | 302.408      | 720.011       | 1.25152264       | 0.00014629 | No      |
|      |       |        |             |          |         | NME4    | 5.15211   | 134.93  | 4.7109           | 5.15311      | 134.931       | 4.71063464       | 0.00014629 | No      |
|      |       |        |             |          |         | Nme5    | 0         | 1.60989 | inf              | 0.001        | 1.61089       | 10.6536423       | 0.00028114 | No      |
|      |       |        |             |          |         | Nme6    | 2.99507   | 21.2469 | 2.82659          | 2.99607      | 21.2479       | 2.82617703       | 0.00014629 | No      |
|      |       |        |             |          |         | Nmi     | 94.3928   | 20.9698 | -2.17037         | 94.3938      | 20.9708       | -2.1703102       | 0.00014629 | No      |

| RRBS |       |        |             |          |         | RNAseq |           |         |                  |              |               |                  |            |         |
|------|-------|--------|-------------|----------|---------|--------|-----------|---------|------------------|--------------|---------------|------------------|------------|---------|
| gene | Blood | Kidney | methyl.diff | pMWU.fdr | Match ? | gene   | blood     | kidney  | log2(fold_ratio) | blood+ 0.001 | kidney+ 0.001 | log2(fold_ratio) | q_value    | Match ? |
|      |       |        |             |          |         | Nmnat1 | 6.05988   | 18.9572 | 1.64539          | 6.06088      | 18.9582       | 1.64522281       | 0.00014629 | No      |
|      |       |        |             |          |         | Nmnat3 | 0.19351   | 14.7709 | 6.2542           | 0.19451      | 14.7719       | 6.24686726       | 0.00028114 | No      |
|      |       |        |             |          |         | Nmral1 | 4.16187   | 21.1331 | 2.3442           | 4.16287      | 21.1341       | 2.34392227       | 0.00014629 | No      |
|      |       |        |             |          |         | Nmt2   | 2.88645   | 7.24297 | 1.32729          | 2.88745      | 7.24397       | 1.32698461       | 0.00014629 | No      |
|      |       |        |             |          |         | Nnmt   | 0         | 2.39452 | inf              | 0.001        | 2.39552       | 11.2261231       | 0.00014629 | No      |
|      |       |        |             |          |         | Nnt    | 9.23847   | 39.2312 | 2.08628          | 9.23947      | 39.2322       | 2.08615624       | 0.00014629 | No      |
|      |       |        |             |          |         | Noa1   | 11.4006   | 6.29928 | -0.85585         | 11.4016      | 6.30028       | -0.8557484       | 0.00184429 | No      |
|      |       |        |             |          |         | Nob1   | 61.5983   | 102.046 | 0.728256         | 61.5993      | 102.047       | 0.72824791       | 0.0113536  | No      |
|      |       |        |             |          |         | Noc2l  | 39.5283   | 25.4152 | -0.637197        | 39.5293      | 25.4162       | -0.6371741       | 0.0418893  | No      |
|      |       |        |             |          |         | Noc3l  | 16.1909   | 6.84111 | -1.24288         | 16.1919      | 6.84211       | -1.2427591       | 0.00014629 | No      |
|      |       |        |             |          |         | Noc4l  | 12.5912   | 20.7598 | 0.72138          | 12.5922      | 20.7608       | 0.72133168       | 0.0459971  | No      |
|      |       |        |             |          |         | Nod1   | 3.59041   | 6.98392 | 0.95989          | 3.59141      | 6.98492       | 0.95969323       | 0.00041099 | No      |
|      |       |        |             |          |         | Nol10  | 11.4473   | 3.99538 | -1.5186          | 11.4483      | 3.99638       | -1.5183677       | 0.00014629 | No      |
|      |       |        |             |          |         | Nol12  | 14.3253   | 24.1878 | 0.755715         | 14.3263      | 24.1888       | 0.75567314       | 0.0137192  | No      |
|      |       |        |             |          |         | NOL6   | 19.0607   | 11.1691 | -0.771085        | 19.0617      | 11.1701       | -0.7710347       | 0.0304953  | No      |
|      |       |        |             |          |         | Nol7   | 121.496   | 67.0617 | -0.857343        | 121.497      | 67.0627       | -0.8573382       | 0.00014629 | No      |
|      |       |        |             |          |         | Nolc1  | 30.7826   | 17.1575 | -0.84327         | 30.7836      | 17.1585       | -0.8432385       | 0.00014629 | No      |
|      |       |        |             |          |         | Nom1   | 11.8011   | 5.09737 | -1.21109         | 11.8021      | 5.09837       | -1.2109356       | 0.00028114 | No      |
|      |       |        |             |          |         | Nomo1  | 19.8851   | 34.9781 | 0.814763         | 19.8861      | 34.9791       | 0.8147328        | 0.00395247 | No      |
|      |       |        |             |          |         | Nono   | 194.084   | 76.7093 | -1.3392          | 194.085      | 76.7103       | -1.3391964       | 0.00014629 | No      |
|      |       |        |             |          |         | Nop2   | 25.0812   | 15.5092 | -0.69348         | 25.0822      | 15.5102       | -0.6934466       | 0.00173187 | No      |
|      |       |        |             |          |         | Nop58  | 63.1941   | 27.6807 | -1.19091         | 63.1951      | 27.6817       | -1.1908802       | 0.00014629 | No      |
|      |       |        |             |          |         | Nos1   | 0         | 1.0968  | inf              | 0.001        | 1.0978        | 10.1003995       | 0.00954394 | No      |
|      |       |        |             |          |         | Nos1ap | 0.135404  | 7.06921 | 5.70621          | 0.136404     | 7.07021       | 5.69579521       | 0.00014629 | No      |
|      |       |        |             |          |         | Nos3   | 0.0678673 | 3.0837  | 5.5058           | 0.0688673    | 3.0847        | 5.48516726       | 0.00263402 | No      |
|      |       |        |             |          |         | NOSIP  | 51.0103   | 147.749 | 1.53429          | 51.0113      | 147.75        | 1.53426936       | 0.00014629 | No      |
|      |       |        |             |          |         | Notch2 | 17.9639   | 6.49757 | -1.46713         | 17.9649      | 6.49857       | -1.4669867       | 0.00934853 | No      |
|      |       |        |             |          |         | Npap60 | 18.7348   | 12.5248 | -0.580928        | 18.7358      | 12.5258       | -0.5808948       | 0.00974684 | No      |
|      |       |        |             |          |         | Npat   | 7.31537   | 2.39798 | -1.60911         | 7.31637      | 2.39898       | -1.6087069       | 0.00014629 | No      |
|      |       |        |             |          |         | Npc2   | 54.8629   | 79.4462 | 0.534148         | 54.8639      | 79.4472       | 0.5341392        | 0.0440092  | No      |
|      |       |        |             |          |         | Npepl1 | 25.6058   | 43.2635 | 0.756682         | 25.6068      | 43.2645       | 0.75665675       | 0.00014629 | No      |
|      |       |        |             |          |         | Npepo  | 3.67185   | 53.1648 | 3.85589          | 3.67285      | 53.1658       | 3.85552662       | 0.00014629 | No      |
|      |       |        |             |          |         | Nphp1  | 0.149494  | 15.6804 | 6.71274          | 0.150494     | 15.6814       | 6.70320459       | 0.00014629 | No      |
|      |       |        |             |          |         | Nphp4  | 0.329182  | 6.22815 | 4.24185          | 0.330182     | 6.22915       | 4.23770193       | 0.0232282  | No      |
|      |       |        |             |          |         | Npl    | 0.199418  | 7.33357 | 5.20065          | 0.200418     | 7.33457       | 5.1936284        | 0.00114835 | No      |
|      |       |        |             |          |         | Nploc4 | 20.482    | 13.4758 | -0.60399         | 20.483       | 13.4768       | -0.6039491       | 0.00352183 | No      |
|      |       |        |             |          |         | Npm1   | 1034.94   | 199.035 | -2.37845         | 1034.941     | 199.036       | -2.3784472       | 0.00014629 | No      |
|      |       |        |             |          |         | Npnt   | 0.298996  | 38.8346 | 7.02107          | 0.299996     | 38.8356       | 7.01629268       | 0.00014629 | No      |
|      |       |        |             |          |         | Npr3   | 0         | 3.324   | inf              | 0.001        | 3.325         | 11.6991386       | 0.00014629 | No      |
|      |       |        |             |          |         | Nprl3  | 7.71913   | 21.3495 | 1.46769          | 7.72013      | 21.3505       | 1.46757281       | 0.00014629 | No      |
|      |       |        |             |          |         | Nqo1   | 0.225854  | 3.53178 | 3.96694          | 0.226854     | 3.53278       | 3.96096791       | 0.00502315 | No      |
|      |       |        |             |          |         | Nr0b2  | 0         | 4.47467 | inf              | 0.001        | 4.47567       | 12.127888        | 0.00014629 | No      |

| RRBS |       |        |             |          |         | RNAseq  |          |          |                  |              |               |                  |            |         |
|------|-------|--------|-------------|----------|---------|---------|----------|----------|------------------|--------------|---------------|------------------|------------|---------|
| gene | Blood | Kidney | methyl.diff | pMWU.fdr | Match ? | gene    | blood    | kidney   | log2(fold_ratio) | blood+ 0.001 | kidney+ 0.001 | log2(fold_ratio) | q_value    | Match ? |
|      |       |        |             |          |         | NR1D2   | 20.2721  | 10.5698  | -0.939549        | 20.2731      | 10.5708       | -0.9394821       | 0.00090728 | No      |
|      |       |        |             |          |         | Nr1h2   | 45.0082  | 81.0795  | 0.849149         | 45.0092      | 81.0805       | 0.84913506       | 0.00014629 | No      |
|      |       |        |             |          |         | Nr1h4   | 0.442301 | 43.6931  | 6.62623          | 0.443301     | 43.6941       | 6.62300806       | 0.00014629 | No      |
|      |       |        |             |          |         | Nr2c1   | 6.44498  | 3.02446  | -1.0915          | 6.44598      | 3.02546       | -1.0912452       | 0.00219102 | No      |
|      |       |        |             |          |         | Nr2c2   | 15.9782  | 5.62925  | -1.5051          | 15.9792      | 5.63025       | -1.5049243       | 0.00014629 | No      |
|      |       |        |             |          |         | Nr2c2ap | 27.1117  | 51.1333  | 0.915348         | 27.1127      | 51.1343       | 0.91532256       | 0.00053701 | No      |
|      |       |        |             |          |         | Nr3c1   | 24.0907  | 9.85437  | -1.28964         | 24.0917      | 9.85537       | -1.2895543       | 0.00014629 | No      |
|      |       |        |             |          |         | Nr4a1   | 3.38375  | 16.405   | 2.27744          | 3.38475      | 16.406        | 2.27710235       | 0.00014629 | No      |
|      |       |        |             |          |         | Nras    | 37.8595  | 16.1015  | -1.23346         | 37.8605      | 16.1025       | -1.2334088       | 0.00014629 | No      |
|      |       |        |             |          |         | Nrbf2   | 16.777   | 9.05169  | -0.890228        | 16.778       | 9.05269       | -0.8901523       | 0.00114835 | No      |
|      |       |        |             |          |         | Nrbp1   | 42.7596  | 27.5242  | -0.635545        | 42.7606      | 27.5252       | -0.635529        | 0.00241835 | No      |
|      |       |        |             |          |         | Nrbp2   | 4.21587  | 15.1395  | 1.84441          | 4.21687      | 15.1405       | 1.8441684        | 0.00014629 | No      |
|      |       |        |             |          |         | Nrf1    | 24.7069  | 9.441    | -1.3879          | 24.7079      | 9.442         | -1.387808        | 0.00014629 | No      |
|      |       |        |             |          |         | Nrn1    | 0        | 1.287    | inf              | 0.001        | 1.288         | 10.3309169       | 0.00014629 | No      |
|      |       |        |             |          |         | Nrros   | 46.8502  | 8.73545  | -2.4231          | 46.8512      | 8.73645       | -2.4229669       | 0.00014629 | No      |
|      |       |        |             |          |         | Nsa2    | 135.503  | 55.1155  | -1.2978          | 135.504      | 55.1165       | -1.2977793       | 0.00014629 | No      |
|      |       |        |             |          |         | Nsfl1c  | 47.8593  | 119.539  | 1.32061          | 47.8603      | 119.54        | 1.3205921        | 0.00014629 | No      |
|      |       |        |             |          |         | Nsg2    | 23.8083  | 0.715805 | -5.05575         | 23.8093      | 0.716805      | -5.0538007       | 0.00014629 | No      |
|      |       |        |             |          |         | Nsmce2  | 12.1274  | 51.9376  | 2.09851          | 12.1284      | 51.9386       | 2.09841789       | 0.00014629 | No      |
|      |       |        |             |          |         | NSMF    | 0.886296 | 4.45171  | 2.3285           | 0.887296     | 4.45271       | 2.32719628       | 0.00014629 | No      |
|      |       |        |             |          |         | Nsrp1   | 24.9869  | 11.6284  | -1.10353         | 24.9879      | 11.6294       | -1.103453        | 0.00014629 | No      |
|      |       |        |             |          |         | Nsun2   | 38.2989  | 15.5033  | -1.30473         | 38.2999      | 15.5043       | -1.3046722       | 0.00014629 | No      |
|      |       |        |             |          |         | Nt5c    | 87.3221  | 17.4643  | -2.32194         | 87.3231      | 17.4653       | -2.3218719       | 0.00184429 | No      |
|      |       |        |             |          |         | Nt5c2   | 12.3617  | 35.578   | 1.52511          | 12.3627      | 35.579        | 1.5250321        | 0.00014629 | No      |
|      |       |        |             |          |         | Nt5c3a  | 26.5415  | 8.71199  | -1.60718         | 26.5425      | 8.71299       | -1.6070645       | 0.00014629 | No      |
|      |       |        |             |          |         | Nt5c3b  | 29.3483  | 18.0342  | -0.70254         | 29.3493      | 18.0352       | -0.7025107       | 0.00438237 | No      |
|      |       |        |             |          |         | Nt5dc1  | 31.747   | 11.2612  | -1.49526         | 31.748       | 11.2622       | -1.495177        | 0.00014629 | No      |
|      |       |        |             |          |         | Nt5dc3  | 2.74351  | 1.68617  | -0.702276        | 2.74451      | 1.68717       | -0.7019432       | 0.0425528  | No      |
|      |       |        |             |          |         | Nt5m    | 0.91065  | 11.0697  | 3.60358          | 0.91165      | 11.0707       | 3.60212258       | 0.00102864 | No      |
|      |       |        |             |          |         | Ntan1   | 203.747  | 77.6702  | -1.39135         | 203.748      | 77.6712       | -1.3913342       | 0.00014629 | No      |
|      |       |        |             |          |         | Ntmt1   | 8.34112  | 25.2513  | 1.59805          | 8.34212      | 25.2523       | 1.59792883       | 0.00028114 | No      |
|      |       |        |             |          |         | Ntpcr   | 8.08852  | 37.1487  | 2.19936          | 8.08952      | 37.1497       | 2.19922455       | 0.00014629 | No      |
|      |       |        |             |          |         | Nuak2   | 0.444067 | 93.1098  | 7.71201          | 0.445067     | 93.1108       | 7.70878217       | 0.00014629 | No      |
|      |       |        |             |          |         | Nub1    | 54.3013  | 23.5923  | -1.20267         | 54.3023      | 23.5933       | -1.2026361       | 0.00014629 | No      |
|      |       |        |             |          |         | Nubp1   | 102.329  | 56.7857  | -0.849617        | 102.33       | 56.7867       | -0.8496042       | 0.00014629 | No      |
|      |       |        |             |          |         | Nubp2   | 30.3386  | 48.5568  | 0.678518         | 30.3396      | 48.5578       | 0.67850099       | 0.00126596 | No      |
|      |       |        |             |          |         | Nubpl   | 2.91774  | 11.6093  | 1.99236          | 2.91874      | 11.6103       | 1.99198764       | 0.00014629 | No      |
|      |       |        |             |          |         | Nucb2   | 6.58959  | 21.5892  | 1.71205          | 6.59059      | 21.5902       | 1.71189708       | 0.00014629 | No      |
|      |       |        |             |          |         | Nucks1  | 35.3315  | 18.6839  | -0.91916         | 35.3325      | 18.6849       | -0.919123        | 0.00173187 | No      |
|      |       |        |             |          |         | Nudcd3  | 21.1012  | 5.29953  | -1.99339         | 21.1022      | 5.30053       | -1.9931849       | 0.00597292 | No      |
|      |       |        |             |          |         | Nudt1   | 21.1688  | 11.2743  | -0.908906        | 21.1698      | 11.2753       | -0.9088418       | 0.020542   | No      |
|      |       |        |             |          |         | Nudt12  | 2.85569  | 8.0155   | 1.48895          | 2.85669      | 8.0165        | 1.48862801       | 0.00014629 | No      |

| RRBS |       |        |             |          |         | RNAseq   |          |          |                  |              |               |                  |            |         |
|------|-------|--------|-------------|----------|---------|----------|----------|----------|------------------|--------------|---------------|------------------|------------|---------|
| gene | Blood | Kidney | methyl.diff | pMWU.fdr | Match ? | gene     | blood    | kidney   | log2(fold_ratio) | blood+ 0.001 | kidney+ 0.001 | log2(fold_ratio) | q_value    | Match ? |
|      |       |        |             |          |         | Nudt16   | 4.31017  | 9.11439  | 1.0804           | 4.31117      | 9.11539       | 1.08022493       | 0.00195831 | No      |
|      |       |        |             |          |         | Nudt16l1 | 23.6066  | 53.1153  | 1.16994          | 23.6076      | 53.1163       | 1.16990327       | 0.00014629 | No      |
|      |       |        |             |          |         | Nudt19   | 8.87573  | 53.6788  | 2.59641          | 8.87673      | 53.6798       | 2.59627908       | 0.00014629 | No      |
|      |       |        |             |          |         | Nudt2    | 20.6227  | 82.2333  | 1.99549          | 20.6237      | 82.2343       | 1.99543709       | 0.00014629 | No      |
|      |       |        |             |          |         | NUDT21   | 72.2526  | 20.2619  | -1.83428         | 72.2536      | 20.2629       | -1.8342288       | 0.00014629 | No      |
|      |       |        |             |          |         | Nudt4    | 32.9256  | 86.1106  | 1.38698          | 32.9266      | 86.1116       | 1.38695405       | 0.00014629 | No      |
|      |       |        |             |          |         | Nudt7    | 9.51083  | 31.8767  | 1.74486          | 9.51183      | 31.8777       | 1.74475271       | 0.00014629 | No      |
|      |       |        |             |          |         | Nudt9    | 21.5377  | 54.6114  | 1.34234          | 21.5387      | 54.6124       | 1.34229738       | 0.00014629 | No      |
|      |       |        |             |          |         | Numa1    | 72.8056  | 20.4477  | -1.83211         | 72.8066      | 20.4487       | -1.8320601       | 0.00014629 | No      |
|      |       |        |             |          |         | Numb     | 12.2561  | 25.5621  | 1.06051          | 12.2571      | 25.5631       | 1.06044512       | 0.00041099 | No      |
|      |       |        |             |          |         | Nup107   | 8.02314  | 2.40701  | -1.73692         | 8.02414      | 2.40801       | -1.7365054       | 0.00014629 | No      |
|      |       |        |             |          |         | Nup153   | 45.8876  | 6.22172  | -2.88272         | 45.8886      | 6.22272       | -2.8825186       | 0.00014629 | No      |
|      |       |        |             |          |         | Nup155   | 3.64121  | 1.47653  | -1.30221         | 3.64221      | 1.47753       | -1.3016267       | 0.00014629 | No      |
|      |       |        |             |          |         | Nup188   | 12.433   | 6.10876  | -1.02523         | 12.434       | 6.10976       | -1.0251029       | 0.00014629 | No      |
|      |       |        |             |          |         | Nup210   | 29.0098  | 4.03527  | -2.8458          | 29.0108      | 4.03627       | -2.8454955       | 0.00014629 | No      |
|      |       |        |             |          |         | Nup37    | 7.44195  | 15.0109  | 1.01226          | 7.44295      | 15.0119       | 1.01216014       | 0.00149937 | No      |
|      |       |        |             |          |         | Nup54    | 59.4065  | 28.914   | -1.03885         | 59.4075      | 28.915        | -1.038827        | 0.00014629 | No      |
|      |       |        |             |          |         | Nup62    | 20.7617  | 8.99592  | -1.20658         | 20.7627      | 8.99692       | -1.206491        | 0.00149937 | No      |
|      |       |        |             |          |         | Nup88    | 25.9468  | 14.4805  | -0.841444        | 25.9478      | 14.4815       | -0.8414012       | 0.0152626  | No      |
|      |       |        |             |          |         | Nup93    | 17.3071  | 6.32084  | -1.45317         | 17.3081      | 6.32184       | -1.4530309       | 0.00014629 | No      |
|      |       |        |             |          |         | Nup98    | 19.3312  | 9.70813  | -0.993663        | 19.3322      | 9.70913       | -0.9935919       | 0.00014629 | No      |
|      |       |        |             |          |         | Nupl1    | 14.9787  | 7.13234  | -1.07046         | 14.9797      | 7.13334       | -1.0703591       | 0.00014629 | No      |
|      |       |        |             |          |         | NUPR1    | 0        | 61.5142  | inf              | 0.001        | 61.5152       | 15.9086553       | 0.00014629 | No      |
|      |       |        |             |          |         | Nus1     | 16.1855  | 8.83637  | -0.873176        | 16.1865      | 8.83737       | -0.8731021       | 0.00014629 | No      |
|      |       |        |             |          |         | Nxn      | 4.12146  | 7.46129  | 0.856271         | 4.12246      | 7.46229       | 0.85611293       | 0.0380071  | No      |
|      |       |        |             |          |         | Nxt1     | 27.0621  | 13.431   | -1.01071         | 27.0631      | 13.432        | -1.010653        | 0.00066215 | No      |
|      |       |        |             |          |         | Nxt2     | 6.06061  | 1.96825  | -1.62255         | 6.06161      | 1.96925       | -1.6220548       | 0.00014629 | No      |
|      |       |        |             |          |         | Oaf      | 7.02276  | 66.2342  | 3.23746          | 7.02376      | 66.2352       | 3.23728267       | 0.00014629 | No      |
|      |       |        |             |          |         | Oas1a    | 12.5374  | 5.12178  | -1.29152         | 12.5384      | 5.12278       | -1.2913544       | 0.00555587 | No      |
|      |       |        |             |          |         | Oas1b    | 8.70338  | 1.59145  | -2.45124         | 8.70438      | 1.59245       | -2.4504935       | 0.00014629 | No      |
|      |       |        |             |          |         | Oas1i    | 2.44926  | 0.725034 | -1.75622         | 2.45026      | 0.726034      | -1.7548258       | 0.0193137  | No      |
|      |       |        |             |          |         | Oasl2    | 17.8893  | 4.50851  | -1.98837         | 17.8903      | 4.50951       | -1.988135        | 0.00014629 | No      |
|      |       |        |             |          |         | Oat      | 12.4802  | 157.773  | 3.66013          | 12.4812      | 157.774       | 3.66003093       | 0.00014629 | No      |
|      |       |        |             |          |         | Oaz2     | 32.6844  | 60.0378  | 0.877267         | 32.6854      | 60.0388       | 0.87724879       | 0.00014629 | No      |
|      |       |        |             |          |         | Obp1f    | 0        | 1.2855   | inf              | 0.001        | 1.2865        | 10.3292357       | 0.00014629 | No      |
|      |       |        |             |          |         | Obsl1    | 1.28735  | 9.21618  | 2.83976          | 1.28835      | 9.21718       | 2.83880085       | 0.00014629 | No      |
|      |       |        |             |          |         | Ocln     | 6.01768  | 12.1473  | 1.01336          | 6.01868      | 12.1483       | 1.01323542       | 0.00028114 | No      |
|      |       |        |             |          |         | Odc1     | 39.099   | 76.2049  | 0.962752         | 39.1         | 76.2059       | 0.96273409       | 0.00014629 | No      |
|      |       |        |             |          |         | Ofd1     | 17.1736  | 7.6731   | -1.16231         | 17.1746      | 7.6741        | -1.162207        | 0.011151   | No      |
|      |       |        |             |          |         | Ogdh     | 38.4564  | 110.547  | 1.52336          | 38.4574      | 110.548       | 1.52333979       | 0.00014629 | No      |
|      |       |        |             |          |         | Ogdhl    | 0.354465 | 23.2798  | 6.03729          | 0.355465     | 23.2808       | 6.03328931       | 0.00014629 | No      |
|      |       |        |             |          |         | Ogfod3   | 6.65488  | 36.1129  | 2.44003          | 6.65588      | 36.1139       | 2.4398529        | 0.0259772  | No      |

| RRBS |       |        |             |          |         | RNAseq  |           |          |                  |              |               |                  |            |         |
|------|-------|--------|-------------|----------|---------|---------|-----------|----------|------------------|--------------|---------------|------------------|------------|---------|
| gene | Blood | Kidney | methyl.diff | pMWU.fdr | Match ? | gene    | blood     | kidney   | log2(fold_ratio) | blood+ 0.001 | kidney+ 0.001 | log2(fold_ratio) | q_value    | Match ? |
|      |       |        |             |          |         | Ogfr    | 51.7509   | 30.5819  | -0.758905        | 51.7519      | 30.5829       | -0.7588866       | 0.00028114 | No      |
|      |       |        |             |          |         | Ogfr1   | 0.788776  | 14.632   | 4.21337          | 0.789776     | 14.633        | 4.21163824       | 0.00014629 | No      |
|      |       |        |             |          |         | Ogn     | 0.0273368 | 4.99377  | 7.51314          | 0.0283368    | 4.99477       | 7.46159759       | 0.00812679 | No      |
|      |       |        |             |          |         | Ogt     | 181.896   | 24.2815  | -2.90518         | 181.897      | 24.2825       | -2.9051329       | 0.00014629 | No      |
|      |       |        |             |          |         | Ola1    | 55.0054   | 27.2739  | -1.01205         | 55.0064      | 27.2749       | -1.0120256       | 0.00014629 | No      |
|      |       |        |             |          |         | Olfm4   | 0         | 2.31926  | inf              | 0.001        | 2.32026       | 11.1800708       | 0.00014629 | No      |
|      |       |        |             |          |         | Olfml1  | 0         | 17.6856  | inf              | 0.001        | 17.6866       | 14.1103691       | 0.00014629 | No      |
|      |       |        |             |          |         | Olr1    | 0.0961194 | 0.893867 | 3.21716          | 0.0971194    | 0.894867      | 3.20384186       | 0.00533979 | No      |
|      |       |        |             |          |         | Olr1326 | 0         | 0.947014 | inf              | 0.001        | 0.948014      | 9.88876455       | 0.0142084  | No      |
|      |       |        |             |          |         | Olr1387 | 0.882368  | 0        | -inf             | 0.883368     | 0.001         | -9.7868708       | 0.00014629 | No      |
|      |       |        |             |          |         | Olr1668 | 0         | 2.51625  | inf              | 0.001        | 2.51725       | 11.2976328       | 0.00014629 | No      |
|      |       |        |             |          |         | Oma1    | 4.2049    | 16.6297  | 1.98362          | 4.2059       | 16.6307       | 1.98336244       | 0.00014629 | No      |
|      |       |        |             |          |         | OPA3    | 5.98594   | 16.122   | 1.42938          | 5.98694      | 16.123        | 1.42922949       | 0.00014629 | No      |
|      |       |        |             |          |         | Oplah   | 0.990286  | 169.452  | 7.41882          | 0.991286     | 169.453       | 7.41736811       | 0.00014629 | No      |
|      |       |        |             |          |         | Optc    | 8.72441   | 3.63502  | -1.26309         | 8.72541      | 3.63602       | -1.2628628       | 0.0364215  | No      |
|      |       |        |             |          |         | Orai2   | 44.2322   | 2.67972  | -4.04495         | 44.2332      | 2.68072       | -4.0444372       | 0.00014629 | No      |
|      |       |        |             |          |         | Orai3   | 4.65879   | 10.8266  | 1.21655          | 4.65979      | 10.8276       | 1.21637665       | 0.00014629 | No      |
|      |       |        |             |          |         | Orc3    | 11.5598   | 5.62522  | -1.03913         | 11.5608      | 5.62622       | -1.0390034       | 0.0231421  | No      |
|      |       |        |             |          |         | Orc4    | 16.7406   | 7.03064  | -1.25162         | 16.7416      | 7.03164       | -1.2515043       | 0.00114835 | No      |
|      |       |        |             |          |         | Orc5    | 13.8232   | 25.153   | 0.863634         | 13.8242      | 25.154        | 0.86359184       | 0.0140162  | No      |
|      |       |        |             |          |         | Ormdl1  | 10.4932   | 1.54684  | -2.76206         | 10.4942      | 1.54784       | -2.7612639       | 0.00730705 | No      |
|      |       |        |             |          |         | Ormdl3  | 23.4611   | 35.0817  | 0.58045          | 23.4621      | 35.0827       | 0.58042763       | 0.00720409 | No      |
|      |       |        |             |          |         | Os9     | 60.9841   | 29.5597  | -1.0448          | 60.9851      | 29.5607       | -1.0447764       | 0.00014629 | No      |
|      |       |        |             |          |         | Osbpl11 | 12.8707   | 5.31302  | -1.27648         | 12.8717      | 5.31402       | -1.276327        | 0.00014629 | No      |
|      |       |        |             |          |         | Osbpl3  | 3.31344   | 47.1312  | 3.83028          | 3.31444      | 47.1322       | 3.82987598       | 0.00014629 | No      |
|      |       |        |             |          |         | Osbpl7  | 12.9443   | 8.87987  | -0.543707        | 12.9453      | 8.88087       | -0.5436555       | 0.0212829  | No      |
|      |       |        |             |          |         | Oscar   | 0.216918  | 3.20519  | 3.88519          | 0.217918     | 3.20619       | 3.87900265       | 0.00195831 | No      |
|      |       |        |             |          |         | Osgin1  | 0.443992  | 86.1114  | 7.59953          | 0.444992     | 86.1124       | 7.59629779       | 0.00014629 | No      |
|      |       |        |             |          |         | Osgin2  | 6.83791   | 3.5148   | -0.960114        | 6.83891      | 3.5158        | -0.9599134       | 0.00448672 | No      |
|      |       |        |             |          |         | Osmr    | 0         | 9.63672  | inf              | 0.001        | 9.63772       | 13.2344762       | 0.00014629 | No      |
|      |       |        |             |          |         | OST4    | 223.917   | 360.507  | 0.687065         | 223.918      | 360.508       | 0.68706077       | 0.00102864 | No      |
|      |       |        |             |          |         | Otub1   | 31.079    | 45.9152  | 0.563033         | 31.08        | 45.9162       | 0.56301675       | 0.0135258  | No      |
|      |       |        |             |          |         | Otud1   | 22.0843   | 9.11047  | -1.27742         | 22.0853      | 9.11147       | -1.2773307       | 0.00014629 | No      |
|      |       |        |             |          |         | Otud3   | 8.45745   | 4.61022  | -0.875388        | 8.45845      | 4.61122       | -0.8752448       | 0.0256967  | No      |
|      |       |        |             |          |         | Otud4   | 28.4945   | 5.74956  | -2.30916         | 28.4955      | 5.75056       | -2.3089597       | 0.00014629 | No      |
|      |       |        |             |          |         | Otud5   | 169.099   | 100.644  | -0.748605        | 169.1        | 100.645       | -0.7486012       | 0.00161718 | No      |
|      |       |        |             |          |         | Oxa1l   | 60.2675   | 113.589  | 0.914372         | 60.2685      | 113.59        | 0.91435977       | 0.00014629 | No      |
|      |       |        |             |          |         | Oxct1   | 29.0539   | 219.278  | 2.91596          | 29.0549      | 219.279       | 2.91591426       | 0.00014629 | No      |
|      |       |        |             |          |         | Oxgr1   | 0         | 1.10782  | inf              | 0.001        | 1.10882       | 10.1148095       | 0.00014629 | No      |
|      |       |        |             |          |         | Oxld1   | 7.48864   | 18.9313  | 1.338            | 7.48964      | 18.9323       | 1.33788141       | 0.0241459  | No      |
|      |       |        |             |          |         | Oxnad1  | 9.14627   | 25.485   | 1.4784           | 9.14727      | 25.486        | 1.47829182       | 0.00014629 | No      |
|      |       |        |             |          |         | Oxr1    | 37.9961   | 20.201   | -0.911425        | 37.9971      | 20.202        | -0.9113912       | 0.00014629 | No      |

| RRBS |       |        |             |          |         | RNAseq   |           |          |                  |              |               |                  |            |         |
|------|-------|--------|-------------|----------|---------|----------|-----------|----------|------------------|--------------|---------------|------------------|------------|---------|
| gene | Blood | Kidney | methyl.diff | pMWU.fdr | Match ? | gene     | blood     | kidney   | log2(fold_ratio) | blood+ 0.001 | kidney+ 0.001 | log2(fold_ratio) | q_value    | Match ? |
|      |       |        |             |          |         | Oxsm     | 3.08332   | 5.90419  | 0.937256         | 3.08432      | 5.90519       | 0.93703103       | 0.00689996 | No      |
|      |       |        |             |          |         | Oxsr1    | 25.5243   | 13.2041  | -0.950883        | 25.5253      | 13.2051       | -0.9508327       | 0.00014629 | No      |
|      |       |        |             |          |         | P2ry10   | 63.9658   | 1.66311  | -5.26534         | 63.9668      | 1.66411       | -5.2645006       | 0.00014629 | No      |
|      |       |        |             |          |         | P2ry4    | 15.4286   | 35.7551  | 1.21254          | 15.4296      | 35.7561       | 1.21248873       | 0.00041099 | No      |
|      |       |        |             |          |         | P33MONOX | 13.5382   | 180.846  | 3.73965          | 13.5392      | 180.847       | 3.73955526       | 0.00014629 | No      |
|      |       |        |             |          |         | P4ha1    | 8.03633   | 43.3414  | 2.43114          | 8.03733      | 43.3424       | 2.43099082       | 0.00014629 | No      |
|      |       |        |             |          |         | P4hb     | 66.5      | 92.3148  | 0.473209         | 66.501       | 92.3158       | 0.47320155       | 0.0167011  | No      |
|      |       |        |             |          |         | Pa2g4    | 78.7893   | 55.0359  | -0.517626        | 78.7903      | 55.0369       | -0.5176188       | 0.0123523  | No      |
|      |       |        |             |          |         | Pabpc1   | 1320.66   | 126.465  | -3.38445         | 1320.661     | 126.466       | -3.3844387       | 0.00014629 | No      |
|      |       |        |             |          |         | Pacs1    | 49.5264   | 10.244   | -2.27342         | 49.5274      | 10.245        | -2.2733069       | 0.00014629 | No      |
|      |       |        |             |          |         | Paccin1  | 22.1468   | 3.83843  | -2.52851         | 22.1478      | 3.83943       | -2.5281993       | 0.00014629 | No      |
|      |       |        |             |          |         | Paccin2  | 20.135    | 67.7694  | 1.75093          | 20.136       | 67.7704       | 1.75087817       | 0.00014629 | No      |
|      |       |        |             |          |         | Paf1     | 38.4999   | 70.039   | 0.863303         | 38.5009      | 70.04         | 0.86328691       | 0.00014629 | No      |
|      |       |        |             |          |         | Pafah1b1 | 64.5906   | 30.194   | -1.09706         | 64.5916      | 30.195        | -1.0970369       | 0.00014629 | No      |
|      |       |        |             |          |         | Pafah1b2 | 18.6445   | 27.9617  | 0.5847           | 18.6455      | 27.9627       | 0.58467618       | 0.0216554  | No      |
|      |       |        |             |          |         | Pafah1b3 | 37.0806   | 19.6727  | -0.914472        | 37.0816      | 19.6737       | -0.9144352       | 0.00138312 | No      |
|      |       |        |             |          |         | Pag1     | 13.9086   | 5.20579  | -1.41779         | 13.9096      | 5.20679       | -1.4176148       | 0.00014629 | No      |
|      |       |        |             |          |         | Pah      | 0         | 412.071  | inf              | 0.001        | 412.072       | 18.6525369       | 0.00014629 | No      |
|      |       |        |             |          |         | Paip2    | 175.825   | 110.163  | -0.674498        | 175.826      | 110.164       | -0.6744956       | 0.00102864 | No      |
|      |       |        |             |          |         | Pak1     | 0.227007  | 13.0461  | 5.84474          | 0.228007     | 13.0471       | 5.83850725       | 0.00014629 | No      |
|      |       |        |             |          |         | Pak1ip1  | 19.0582   | 5.10182  | -1.90133         | 19.0592      | 5.10282       | -1.9011209       | 0.00014629 | No      |
|      |       |        |             |          |         | Pak2     | 4.69683   | 0.739237 | -2.66758         | 4.69783      | 0.740237      | -2.6659354       | 0.00028114 | No      |
|      |       |        |             |          |         | Pak4     | 1.75182   | 18.3128  | 3.38592          | 1.75282      | 18.3138       | 3.38518142       | 0.00014629 | No      |
|      |       |        |             |          |         | Palld    | 0.770438  | 5.72212  | 2.8928           | 0.771438     | 5.72312       | 2.89117974       | 0.00014629 | No      |
|      |       |        |             |          |         | Palm3    | 0.557051  | 17.3285  | 4.95919          | 0.558051     | 17.3295       | 4.95668924       | 0.00014629 | No      |
|      |       |        |             |          |         | Pam      | 0.0799148 | 17.2976  | 7.75789          | 0.0809148    | 17.2986       | 7.74003596       | 0.00041099 | No      |
|      |       |        |             |          |         | Pamr1    | 0         | 22.1342  | inf              | 0.001        | 22.1352       | 14.4340548       | 0.00014629 | No      |
|      |       |        |             |          |         | Pan3     | 96.2318   | 15.071   | -2.67474         | 96.2328      | 15.072        | -2.6746578       | 0.00014629 | No      |
|      |       |        |             |          |         | Pank1    | 1.41491   | 33.8365  | 4.57979          | 1.41591      | 33.8375       | 4.57882151       | 0.00014629 | No      |
|      |       |        |             |          |         | Pank3    | 6.93117   | 2.32394  | -1.57652         | 6.93217      | 2.32494       | -1.5761135       | 0.00014629 | No      |
|      |       |        |             |          |         | Papd4    | 23.628    | 8.27362  | -1.51391         | 23.629       | 8.27462       | -1.5137936       | 0.00014629 | No      |
|      |       |        |             |          |         | Papd5    | 34.4684   | 7.05197  | -2.28918         | 34.4694      | 7.05297       | -2.2890134       | 0.00014629 | No      |
|      |       |        |             |          |         | Papola   | 60.9255   | 27.2133  | -1.16273         | 60.9265      | 27.2143       | -1.1627049       | 0.00014629 | No      |
|      |       |        |             |          |         | Papolg   | 20.4345   | 1.86533  | -3.4535          | 20.4355      | 1.86633       | -3.4528015       | 0.00014629 | No      |
|      |       |        |             |          |         | Papss1   | 13.253    | 61.8965  | 2.22353          | 13.254       | 61.8975       | 2.22345332       | 0.00014629 | No      |
|      |       |        |             |          |         | Papss2   | 0.294352  | 38.2175  | 7.02054          | 0.295352     | 38.2185       | 7.01569196       | 0.00014629 | No      |
|      |       |        |             |          |         | Paqr3    | 0.291601  | 1.40238  | 2.26581          | 0.292601     | 1.40338       | 2.2618991        | 0.043497   | No      |
|      |       |        |             |          |         | Paqr5    | 17.7714   | 26.5016  | 0.576522         | 17.7724      | 26.5026       | 0.57649538       | 0.00405996 | No      |
|      |       |        |             |          |         | Paqr8    | 5.89704   | 3.59957  | -0.712167        | 5.89804      | 3.60057       | -0.7120103       | 0.0105557  | No      |
|      |       |        |             |          |         | Paqr9    | 0         | 5.10558  | inf              | 0.001        | 5.10658       | 12.3181417       | 0.00014629 | No      |
|      |       |        |             |          |         | Parm1    | 0.0926872 | 53.896   | 9.18359          | 0.0936872    | 53.897        | 9.1681373        | 0.00149937 | No      |



| RRBS |       |        |             |          |         | RNAseq |           |          |                  |              |               |                  |            |         |
|------|-------|--------|-------------|----------|---------|--------|-----------|----------|------------------|--------------|---------------|------------------|------------|---------|
| gene | Blood | Kidney | methyl.diff | pMWU.fdr | Match ? | gene   | blood     | kidney   | log2(fold_ratio) | blood+ 0.001 | kidney+ 0.001 | log2(fold_ratio) | q_value    | Match ? |
|      |       |        |             |          |         | Parn   | 29.3662   | 10.901   | -1.4297          | 29.3672      | 10.902        | -1.4296129       | 0.0170801  | No      |
|      |       |        |             |          |         | Parp1  | 47.8553   | 24.8804  | -0.943668        | 47.8563      | 24.8814       | -0.9436412       | 0.00014629 | No      |
|      |       |        |             |          |         | Parp10 | 24.2675   | 11.9599  | -1.02083         | 24.2685      | 11.9609       | -1.020759        | 0.00138312 | No      |
|      |       |        |             |          |         | Parp11 | 17.7757   | 2.25921  | -2.97601         | 17.7767      | 2.26021       | -2.9754588       | 0.00014629 | No      |
|      |       |        |             |          |         | Parp12 | 9.44804   | 5.66999  | -0.736669        | 9.44904      | 5.67099       | -0.7365672       | 0.0143989  | No      |
|      |       |        |             |          |         | Parp14 | 39.9502   | 8.34238  | -2.25967         | 39.9512      | 8.34338       | -2.259535        | 0.00014629 | No      |
|      |       |        |             |          |         | Parp16 | 0.960564  | 24.7646  | 4.68825          | 0.961564     | 24.7656       | 4.68681088       | 0.00014629 | No      |
|      |       |        |             |          |         | Parp2  | 9.89265   | 17.9245  | 0.857507         | 9.89365      | 17.9255       | 0.85743859       | 0.0209112  | No      |
|      |       |        |             |          |         | Parp8  | 46.5522   | 10.0206  | -2.21588         | 46.5532      | 10.0216       | -2.2157675       | 0.00014629 | No      |
|      |       |        |             |          |         | Parp9  | 44.2966   | 9.3817   | -2.23928         | 44.2976      | 9.3827        | -2.2391535       | 0.00014629 | No      |
|      |       |        |             |          |         | Parva  | 0         | 41.4904  | inf              | 0.001        | 41.4914       | 15.3405247       | 0.00014629 | No      |
|      |       |        |             |          |         | Parvb  | 0.225435  | 2.00601  | 3.15354          | 0.226435     | 2.00701       | 3.14787893       | 0.00984666 | No      |
|      |       |        |             |          |         | Parvg  | 35.505    | 4.17988  | -3.08649         | 35.506       | 4.18088       | -3.0861843       | 0.00014629 | No      |
|      |       |        |             |          |         | Patl1  | 22.5008   | 8.25359  | -1.44688         | 22.5018      | 8.25459       | -1.4467719       | 0.00014629 | No      |
|      |       |        |             |          |         | Pax5   | 13.8742   | 28.1077  | 1.01856          | 13.8752      | 28.1087       | 1.01850817       | 0.00904412 | No      |
|      |       |        |             |          |         | Pax8   | 0.0855663 | 101.468  | 10.2117          | 0.0865663    | 101.469       | 10.1949459       | 0.0137192  | No      |
|      |       |        |             |          |         | Paxbp1 | 34.7399   | 19.7588  | -0.814097        | 34.7409      | 19.7598       | -0.8140668       | 0.00138312 | No      |
|      |       |        |             |          |         | Paxip1 | 16.4753   | 4.87093  | -1.75803         | 16.4763      | 4.87193       | -1.757827        | 0.00014629 | No      |
|      |       |        |             |          |         | Pbdc1  | 16.5059   | 7.21377  | -1.19415         | 16.5069      | 7.21477       | -1.1940439       | 0.00014629 | No      |
|      |       |        |             |          |         | Pbk    | 0.230551  | 1.42357  | 2.62635          | 0.231551     | 1.42457       | 2.62112462       | 0.0255267  | No      |
|      |       |        |             |          |         | Pbld1  | 0.0634891 | 183.905  | 11.5002          | 0.0644891    | 183.906       | 11.4776256       | 0.00195831 | No      |
|      |       |        |             |          |         | Pbrm1  | 21.293    | 6.85863  | -1.63439         | 21.294       | 6.85963       | -1.6342443       | 0.00014629 | No      |
|      |       |        |             |          |         | Pbx1   | 1.32343   | 13.5826  | 3.3594           | 1.32443      | 13.5836       | 3.35842238       | 0.00014629 | No      |
|      |       |        |             |          |         | Pbx3   | 1.75353   | 7.74354  | 2.14273          | 1.75453      | 7.74454       | 2.14209493       | 0.00014629 | No      |
|      |       |        |             |          |         | Pbx4   | 0.43173   | 3.90015  | 3.17533          | 0.43273      | 3.90115       | 3.17236042       | 0.00285806 | No      |
|      |       |        |             |          |         | Pbxip1 | 158.845   | 56.6112  | -1.48846         | 158.846      | 56.6122       | -1.4884439       | 0.00014629 | No      |
|      |       |        |             |          |         | Pc     | 0.594387  | 96.1976  | 7.33845          | 0.595387     | 96.1986       | 7.33604437       | 0.00014629 | No      |
|      |       |        |             |          |         | Pcbd1  | 0.338993  | 323.032  | 9.8962           | 0.339993     | 323.033       | 9.89196079       | 0.004167   | No      |
|      |       |        |             |          |         | Pcbd2  | 58.4404   | 120.892  | 1.04868          | 58.4414      | 120.893       | 1.04866807       | 0.00028114 | No      |
|      |       |        |             |          |         | PCBP2  | 210.714   | 100.233  | -1.07193         | 210.715      | 100.234       | -1.0719211       | 0.00014629 | No      |
|      |       |        |             |          |         | Pcbp3  | 3.76902   | 6.38032  | 0.75944          | 3.77002      | 6.38132       | 0.7592827        | 0.019026   | No      |
|      |       |        |             |          |         | Pcbp4  | 8.14327   | 36.0688  | 2.14707          | 8.14427      | 36.0698       | 2.14693413       | 0.00014629 | No      |
|      |       |        |             |          |         | Pcca   | 10.9499   | 69.5171  | 2.66645          | 10.9509      | 69.5181       | 2.66633921       | 0.00014629 | No      |
|      |       |        |             |          |         | Pccb   | 9.84273   | 174.165  | 4.14525          | 9.84373      | 174.166       | 4.14511412       | 0.00014629 | No      |
|      |       |        |             |          |         | Pcdh1  | 0         | 2.64944  | inf              | 0.001        | 2.65044       | 11.3720162       | 0.00014629 | No      |
|      |       |        |             |          |         | Pcdh12 | 1.01319   | 0.191246 | -2.40541         | 1.01419      | 0.192246      | -2.3993025       | 0.0345421  | No      |
|      |       |        |             |          |         | Pcdh17 | 0         | 1.20903  | inf              | 0.001        | 1.21003       | 10.2408271       | 0.00014629 | No      |
|      |       |        |             |          |         | Pcf11  | 37.4379   | 5.70249  | -2.71484         | 37.4389      | 5.70349       | -2.7146212       | 0.00014629 | No      |
|      |       |        |             |          |         | Pcgf2  | 2.60472   | 18.261   | 2.80956          | 2.60572      | 18.262        | 2.8090908        | 0.00014629 | No      |
|      |       |        |             |          |         | Pcgf6  | 15.6652   | 4.84998  | -1.69152         | 15.6662      | 4.85098       | -1.6913071       | 0.00014629 | No      |
|      |       |        |             |          |         | Pck2   | 1.92171   | 20.526   | 3.41699          | 1.92271      | 20.527        | 3.41630971       | 0.00014629 | No      |
|      |       |        |             |          |         | Pcmt1  | 125.915   | 24.866   | -2.3402          | 125.916      | 24.867        | -2.3401572       | 0.00014629 | No      |

| RRBS |       |        |             |          |         | RNAseq   |           |          |                  |              |               |                  |            |         |
|------|-------|--------|-------------|----------|---------|----------|-----------|----------|------------------|--------------|---------------|------------------|------------|---------|
| gene | Blood | Kidney | methyl.diff | pMWU.fdr | Match ? | gene     | blood     | kidney   | log2(fold_ratio) | blood+ 0.001 | kidney+ 0.001 | log2(fold_ratio) | q_value    | Match ? |
|      |       |        |             |          |         | Pcmt2    | 58.953    | 16.0161  | -1.88004         | 58.954       | 16.0171       | -1.8799767       | 0.00014629 | No      |
|      |       |        |             |          |         | Pcna     | 58.5888   | 39.885   | -0.554777        | 58.5898      | 39.886        | -0.5547671       | 0.0112518  | No      |
|      |       |        |             |          |         | PCOLCE2  | 0         | 17.4946  | inf              | 0.001        | 17.4956       | 14.0947045       | 0.00014629 | No      |
|      |       |        |             |          |         | Pcsk6    | 0         | 9.05094  | inf              | 0.001        | 9.05194       | 13.1440113       | 0.00014629 | No      |
|      |       |        |             |          |         | Pcyt1a   | 3.71008   | 12.4025  | 1.74111          | 3.71108      | 12.4035       | 1.74083627       | 0.00014629 | No      |
|      |       |        |             |          |         | Pcyt2    | 25.996    | 135.516  | 2.38211          | 25.997       | 135.517       | 2.38205679       | 0.00014629 | No      |
|      |       |        |             |          |         | Pdcd10   | 82.1494   | 35.2541  | -1.22046         | 82.1504      | 35.2551       | -1.2204356       | 0.00014629 | No      |
|      |       |        |             |          |         | Pdcd11   | 19.7104   | 12.3033  | -0.679909        | 19.7114      | 12.3043       | -0.6798677       | 0.00241835 | No      |
|      |       |        |             |          |         | Pdcd1lg2 | 3.90421   | 0.352479 | -3.46942         | 3.90521      | 0.353479      | -3.4657037       | 0.00230432 | No      |
|      |       |        |             |          |         | Pdcd2    | 31.2598   | 20.9316  | -0.57863         | 31.2608      | 20.9326       | -0.5786032       | 0.0224797  | No      |
|      |       |        |             |          |         | Pdcd4    | 548.523   | 61.6829  | -3.15261         | 548.524      | 61.6839       | -3.1525889       | 0.00014629 | No      |
|      |       |        |             |          |         | Pdcd7    | 14.2168   | 43.0925  | 1.59984          | 14.2178      | 43.0935       | 1.59977203       | 0.00014629 | No      |
|      |       |        |             |          |         | Pde12    | 11.8486   | 7.7259   | -0.61694         | 11.8496      | 7.7269        | -0.6168767       | 0.034996   | No      |
|      |       |        |             |          |         | Pde1a    | 0         | 11.502   | inf              | 0.001        | 11.503        | 13.4897225       | 0.00014629 | No      |
|      |       |        |             |          |         | Pde1c    | 0.0183321 | 4.38365  | 7.90162          | 0.0193321    | 4.38465       | 7.82531951       | 0.0314513  | No      |
|      |       |        |             |          |         | Pde3b    | 44.8638   | 1.90425  | -4.55825         | 44.8648      | 1.90525       | -4.5575318       | 0.00014629 | No      |
|      |       |        |             |          |         | Pde4b    | 79.8109   | 2.39391  | -5.05915         | 79.8119      | 2.39491       | -5.0585605       | 0.00014629 | No      |
|      |       |        |             |          |         | Pde4c    | 4.19885   | 22.5201  | 2.42315          | 4.19985      | 22.5211       | 2.42286759       | 0.00014629 | No      |
|      |       |        |             |          |         | Pde4dip  | 22.2542   | 15.7616  | -0.497665        | 22.2552      | 15.7626       | -0.4976369       | 0.0363282  | No      |
|      |       |        |             |          |         | Pde7a    | 11.2486   | 5.29182  | -1.08791         | 11.2496      | 5.29282       | -1.0877652       | 0.00792329 | No      |
|      |       |        |             |          |         | Pde7b    | 0.318925  | 20.5439  | 6.00935          | 0.319925     | 20.5449       | 6.00490276       | 0.00014629 | No      |
|      |       |        |             |          |         | Pde9a    | 0.188575  | 14.0456  | 6.21884          | 0.189575     | 14.0466       | 6.21130843       | 0.00014629 | No      |
|      |       |        |             |          |         | Pdgfb    | 1.14485   | 12.5486  | 3.4543           | 1.14585      | 12.5496       | 3.45315128       | 0.00014629 | No      |
|      |       |        |             |          |         | Pdgfra   | 0         | 2.48504  | inf              | 0.001        | 2.48604       | 11.2796338       | 0.00014629 | No      |
|      |       |        |             |          |         | Pdha1    | 81.5619   | 164.83   | 1.01501          | 81.5629      | 164.831       | 1.01500262       | 0.00028114 | No      |
|      |       |        |             |          |         | Pdhb     | 31.5294   | 136.495  | 2.11408          | 31.5304      | 136.496       | 2.1140433        | 0.00014629 | No      |
|      |       |        |             |          |         | Pdhx     | 5.25356   | 15.559   | 1.56638          | 5.25456      | 15.56         | 1.56620019       | 0.00014629 | No      |
|      |       |        |             |          |         | Pdia3    | 157.067   | 92.5151  | -0.763619        | 157.068      | 92.5161       | -0.7636129       | 0.00014629 | No      |
|      |       |        |             |          |         | Pdia5    | 0.535354  | 10.2273  | 4.25579          | 0.536354     | 10.2283       | 4.25323706       | 0.0170801  | No      |
|      |       |        |             |          |         | Pdk1     | 20.5889   | 8.78681  | -1.22845         | 20.5899      | 8.78781       | -1.2283612       | 0.00102864 | No      |
|      |       |        |             |          |         | Pdk2     | 11.0273   | 226.016  | 4.35728          | 11.0283      | 226.017       | 4.35714897       | 0.00014629 | No      |
|      |       |        |             |          |         | Pdk4     | 0         | 7.11947  | inf              | 0.001        | 7.12047       | 12.7977568       | 0.00014629 | No      |
|      |       |        |             |          |         | Pdlim1   | 52.6266   | 11.1809  | -2.23476         | 52.6276      | 11.1819       | -2.2346543       | 0.00014629 | No      |
|      |       |        |             |          |         | Pdlim7   | 24.8681   | 16.7711  | -0.568319        | 24.8691      | 16.7721       | -0.568291        | 0.026232   | No      |
|      |       |        |             |          |         | Pdp1     | 9.83839   | 2.86401  | -1.78039         | 9.83939      | 2.86501       | -1.7800287       | 0.00014629 | No      |
|      |       |        |             |          |         | Pdp2     | 1.75039   | 12.766   | 2.86656          | 1.75139      | 12.767        | 2.86584727       | 0.00014629 | No      |
|      |       |        |             |          |         | Pdpk1    | 23.2703   | 9.03413  | -1.36503         | 23.2713      | 9.03513       | -1.3649345       | 0.00014629 | No      |
|      |       |        |             |          |         | Pdpn     | 0         | 12.714   | inf              | 0.001        | 12.715        | 13.6342438       | 0.00014629 | No      |
|      |       |        |             |          |         | Pds5a    | 39.6669   | 11.7556  | -1.75459         | 39.6679      | 11.7566       | -1.7545011       | 0.00014629 | No      |
|      |       |        |             |          |         | Pds5b    | 19.715    | 3.83205  | -2.36311         | 19.716       | 3.83305       | -2.3628022       | 0.00014629 | No      |
|      |       |        |             |          |         | Pdss2    | 6.26421   | 9.89545  | 0.659632         | 6.26521      | 9.89645       | 0.65954824       | 0.0426261  | No      |
|      |       |        |             |          |         | PDXDC1   | 10.5578   | 1.38852  | -2.92669         | 10.5588      | 1.38952       | -2.9257874       | 0.00318982 | No      |

| RRBS |       |        |             |          |         | RNAseq  |           |          |                  |              |               |                  |            |         |
|------|-------|--------|-------------|----------|---------|---------|-----------|----------|------------------|--------------|---------------|------------------|------------|---------|
| gene | Blood | Kidney | methyl.diff | pMWU.fdr | Match ? | gene    | blood     | kidney   | log2(fold_ratio) | blood+ 0.001 | kidney+ 0.001 | log2(fold_ratio) | q_value    | Match ? |
|      |       |        |             |          |         | Pdxk    | 3.64085   | 37.533   | 3.36581          | 3.64185      | 37.534        | 3.36545464       | 0.00014629 | No      |
|      |       |        |             |          |         | Pdzd9   | 11.9229   | 39.2585  | 1.71927          | 11.9239      | 39.2595       | 1.71918562       | 0.00028114 | No      |
|      |       |        |             |          |         | Pdzk1   | 0.788614  | 432.536  | 9.09928          | 0.789614     | 432.537       | 9.09746026       | 0.00014629 | No      |
|      |       |        |             |          |         | Pea15   | 15.0048   | 32.4056  | 1.11082          | 15.0058      | 32.4066       | 1.11076743       | 0.0327779  | No      |
|      |       |        |             |          |         | Pebp1   | 91.1104   | 462.94   | 2.34514          | 91.1114      | 462.941       | 2.34512486       | 0.00014629 | No      |
|      |       |        |             |          |         | Pecam1  | 32.165    | 13.6367  | -1.238           | 32.166       | 13.6377       | -1.2379362       | 0.00014629 | No      |
|      |       |        |             |          |         | Pecr    | 12.1334   | 218.169  | 4.16838          | 12.1344      | 218.17        | 4.16827805       | 0.00014629 | No      |
|      |       |        |             |          |         | Pef1    | 26.7403   | 42.3473  | 0.663257         | 26.7413      | 42.3483       | 0.66323445       | 0.00195831 | No      |
|      |       |        |             |          |         | Peo1    | 4.51589   | 13.35    | 1.56376          | 4.51689      | 13.351        | 1.56354612       | 0.00014629 | No      |
|      |       |        |             |          |         | Pepd    | 10.475    | 365.798  | 5.12603          | 10.476       | 365.799       | 5.12589126       | 0.00014629 | No      |
|      |       |        |             |          |         | Per1    | 85.4319   | 50.5126  | -0.758131        | 85.4329      | 50.5136       | -0.7581199       | 0.00014629 | No      |
|      |       |        |             |          |         | Per2    | 1.33844   | 7.56973  | 2.49969          | 1.33944      | 7.57073       | 2.49880246       | 0.00014629 | No      |
|      |       |        |             |          |         | Per3    | 3.8134    | 2.31609  | -0.719386        | 3.8144       | 2.31709       | -0.7191421       | 0.0322469  | No      |
|      |       |        |             |          |         | Perld1  | 3.64883   | 7.11348  | 0.963119         | 3.64983      | 7.11448       | 0.96292905       | 0.00184429 | No      |
|      |       |        |             |          |         | Pes1    | 63.1773   | 40.4079  | -0.644769        | 63.1783      | 40.4089       | -0.644756        | 0.00078603 | No      |
|      |       |        |             |          |         | Pet100  | 15.7739   | 52.4591  | 1.73366          | 15.7749      | 52.4601       | 1.7335897        | 0.00014629 | No      |
|      |       |        |             |          |         | Pet112l | 9.86816   | 18.8943  | 0.937096         | 9.86916      | 18.8953       | 0.93702822       | 0.00014629 | No      |
|      |       |        |             |          |         | Pex1    | 6.11612   | 22.9391  | 1.90712          | 6.11712      | 22.9401       | 1.9069472        | 0.00014629 | No      |
|      |       |        |             |          |         | Pex11a  | 0.0881448 | 16.4342  | 7.54261          | 0.0891448    | 16.4352       | 7.52642265       | 0.00533979 | No      |
|      |       |        |             |          |         | Pex11b  | 42.8339   | 192.309  | 2.1666           | 42.8349      | 192.31        | 2.16657516       | 0.00014629 | No      |
|      |       |        |             |          |         | Pex11g  | 0.529524  | 7.82044  | 3.88448          | 0.530524     | 7.82144       | 3.88194432       | 0.00341151 | No      |
|      |       |        |             |          |         | Pex12   | 1.20918   | 2.72012  | 1.16964          | 1.21018      | 2.72112       | 1.16897893       | 0.0167011  | No      |
|      |       |        |             |          |         | Pex13   | 9.59177   | 24.1164  | 1.33015          | 9.59277      | 24.1174       | 1.33005501       | 0.00014629 | No      |
|      |       |        |             |          |         | Pex14   | 7.66625   | 14.1777  | 0.887033         | 7.66725      | 14.1787       | 0.88694414       | 0.00138312 | No      |
|      |       |        |             |          |         | Pex16   | 17.283    | 31.3277  | 0.858087         | 17.284       | 31.3287       | 0.85804777       | 0.0216554  | No      |
|      |       |        |             |          |         | Pex2    | 5.12029   | 15.2562  | 1.5751           | 5.12129      | 15.2572       | 1.57491106       | 0.00014629 | No      |
|      |       |        |             |          |         | Pex3    | 11.0676   | 6.72497  | -0.718739        | 11.0686      | 6.72597       | -0.7186585       | 0.0167011  | No      |
|      |       |        |             |          |         | Pex7    | 0.976921  | 10.5876  | 3.43799          | 0.977921     | 10.5886       | 3.43665012       | 0.00014629 | No      |
|      |       |        |             |          |         | Pfdn5   | 195.684   | 379.215  | 0.954494         | 195.685      | 379.216       | 0.95448666       | 0.00014629 | No      |
|      |       |        |             |          |         | Pfkfb2  | 11.2661   | 6.74331  | -0.740462        | 11.2671      | 6.74431       | -0.7403735       | 0.00904412 | No      |
|      |       |        |             |          |         | Pfkfb4  | 0.266158  | 2.21754  | 3.05861          | 0.267158     | 2.21854       | 3.05384544       | 0.00533979 | No      |
|      |       |        |             |          |         | Pfkm    | 10.2188   | 30.1603  | 1.56143          | 10.2198      | 30.1613       | 1.56133165       | 0.00014629 | No      |
|      |       |        |             |          |         | Pfn1    | 2367.26   | 638.218  | -1.8911          | 2367.261     | 638.219       | -1.8910953       | 0.00014629 | No      |
|      |       |        |             |          |         | Pfn2    | 1.2345    | 17.4042  | 3.81744          | 1.2355       | 17.4052       | 3.81635148       | 0.0214664  | No      |
|      |       |        |             |          |         | Pfn3    | 0         | 113.633  | inf              | 0.001        | 113.634       | 16.794035        | 0.00014629 | No      |
|      |       |        |             |          |         | Pgam1   | 76.0704   | 228.481  | 1.58667          | 76.0714      | 228.482       | 1.58665445       | 0.00014629 | No      |
|      |       |        |             |          |         | Pggt1b  | 9.28522   | 4.73698  | -0.970969        | 9.28622      | 4.73798       | -0.9708194       | 0.00823262 | No      |
|      |       |        |             |          |         | Pgk1    | 151.895   | 318.69   | 1.06908          | 151.896      | 318.691       | 1.0690744        | 0.00014629 | No      |
|      |       |        |             |          |         | Pgls    | 26.1637   | 52.0385  | 0.992011         | 26.1647      | 52.0395       | 0.99198538       | 0.00053701 | No      |
|      |       |        |             |          |         | Pgm1    | 4.50013   | 26.9695  | 2.58329          | 4.50113      | 26.9705       | 2.58302313       | 0.00014629 | No      |
|      |       |        |             |          |         | PGM2    | 5.59853   | 11.7842  | 1.07374          | 5.59953      | 11.7852       | 1.0735986        | 0.00014629 | No      |
|      |       |        |             |          |         | Pgm2l1  | 9.30113   | 0.506348 | -4.1992          | 9.30213      | 0.507348      | -4.1965135       | 0.00014629 | No      |

| RRBS |       |        |             |          |         | RNAseq   |           |          |                  |              |               |                  |            |         |
|------|-------|--------|-------------|----------|---------|----------|-----------|----------|------------------|--------------|---------------|------------------|------------|---------|
| gene | Blood | Kidney | methyl.diff | pMWU.fdr | Match ? | gene     | blood     | kidney   | log2(fold_ratio) | blood+ 0.001 | kidney+ 0.001 | log2(fold_ratio) | q_value    | Match ? |
|      |       |        |             |          |         | Pgm5     | 0         | 1.75359  | inf              | 0.001        | 1.75459       | 10.7769182       | 0.00014629 | No      |
|      |       |        |             |          |         | Pgpep1   | 3.1213    | 93.7056  | 4.90791          | 3.1223       | 93.7066       | 4.9074696        | 0.00014629 | No      |
|      |       |        |             |          |         | Pgrmc1   | 114.784   | 78.1655  | -0.554325        | 114.785      | 78.1665       | -0.5543118       | 0.00252712 | No      |
|      |       |        |             |          |         | Pgrmc2   | 35.6737   | 23.9629  | -0.574056        | 35.6747      | 23.9639       | -0.5740386       | 0.00843988 | No      |
|      |       |        |             |          |         | Pgs1     | 22.3979   | 12.8923  | -0.796857        | 22.3989      | 12.8933       | -0.7968063       | 0.0105557  | No      |
|      |       |        |             |          |         | Phactr4  | 7.60994   | 16.5647  | 1.12216          | 7.61094      | 16.5657       | 1.12205262       | 0.00014629 | No      |
|      |       |        |             |          |         | Phb      | 34.3591   | 117.172  | 1.76986          | 34.3601      | 117.173       | 1.76983403       | 0.00014629 | No      |
|      |       |        |             |          |         | Phc3     | 20.9812   | 3.62791  | -2.53189         | 20.9822      | 3.62891       | -2.5315578       | 0.00014629 | No      |
|      |       |        |             |          |         | Phf11b   | 843.081   | 143.056  | -2.55909         | 843.082      | 143.057       | -2.5590829       | 0.00014629 | No      |
|      |       |        |             |          |         | Phf12    | 38.9557   | 14.1844  | -1.45753         | 38.9567      | 14.1854       | -1.4574646       | 0.00014629 | No      |
|      |       |        |             |          |         | Phf13    | 1.77667   | 3.13141  | 0.817636         | 1.77767      | 3.13241       | 0.81728553       | 0.0267812  | No      |
|      |       |        |             |          |         | Phf15    | 24.1318   | 8.43205  | -1.51698         | 24.1328      | 8.43305       | -1.5168689       | 0.00014629 | No      |
|      |       |        |             |          |         | Phf17    | 5.87597   | 8.39906  | 0.515399         | 5.87697      | 8.40006       | 0.5153271        | 0.0291608  | No      |
|      |       |        |             |          |         | Phf2     | 30.1425   | 12.8201  | -1.23339         | 30.1435      | 12.8211       | -1.2333269       | 0.0152626  | No      |
|      |       |        |             |          |         | Phf20    | 11.1373   | 5.70364  | -0.965451        | 11.1383      | 5.70464       | -0.9653213       | 0.00014629 | No      |
|      |       |        |             |          |         | PHF20L1  | 26.9226   | 8.97275  | -1.5852          | 26.9236      | 8.97375       | -1.5850884       | 0.00014629 | No      |
|      |       |        |             |          |         | Phf21a   | 34.4243   | 16.0744  | -1.09866         | 34.4253      | 16.0754       | -1.0986146       | 0.00014629 | No      |
|      |       |        |             |          |         | Phf3     | 23.131    | 8.74917  | -1.40261         | 23.132       | 8.75017       | -1.4025071       | 0.00014629 | No      |
|      |       |        |             |          |         | Phf8     | 27.8064   | 4.53701  | -2.6156          | 27.8074      | 4.53801       | -2.6153372       | 0.00014629 | No      |
|      |       |        |             |          |         | Phgdh    | 19.8591   | 68.9982  | 1.79676          | 19.8601      | 68.9992       | 1.79670675       | 0.00014629 | No      |
|      |       |        |             |          |         | Phip     | 25.8487   | 3.33858  | -2.95278         | 25.8497      | 3.33958       | -2.952409        | 0.00014629 | No      |
|      |       |        |             |          |         | Phkb     | 6.78325   | 15.0706  | 1.15169          | 6.78425      | 15.0716       | 1.15157134       | 0.0446219  | No      |
|      |       |        |             |          |         | PHKG2    | 4.69576   | 0.388968 | -3.59364         | 4.69676      | 0.389968      | -3.5902382       | 0.0085437  | No      |
|      |       |        |             |          |         | PHLDA2   | 0.476115  | 14.6041  | 4.93892          | 0.477115     | 14.6051       | 4.93599138       | 0.00629035 | No      |
|      |       |        |             |          |         | Phldb1   | 0.0506047 | 36.3873  | 9.48995          | 0.0516047    | 36.3883       | 9.46175647       | 0.00014629 | No      |
|      |       |        |             |          |         | Phldb2   | 0.0136168 | 48.6111  | 11.8017          | 0.0146168    | 48.6121       | 11.6994722       | 0.00014629 | No      |
|      |       |        |             |          |         | Phospho2 | 11.3017   | 7.05091  | -0.680654        | 11.3027      | 7.05191       | -0.6805815       | 0.00954394 | No      |
|      |       |        |             |          |         | Phtf2    | 11.8245   | 3.10023  | -1.93133         | 11.8255      | 3.10123       | -1.9309888       | 0.00014629 | No      |
|      |       |        |             |          |         | Phyh     | 33.2857   | 350.064  | 3.39464          | 33.2867      | 350.065       | 3.39460507       | 0.00014629 | No      |
|      |       |        |             |          |         | Phyhipl  | 0         | 30.9671  | inf              | 0.001        | 30.9681       | 14.9184953       | 0.00014629 | No      |
|      |       |        |             |          |         | Pias1    | 25.7804   | 13.9729  | -0.883648        | 25.7814      | 13.9739       | -0.8835959       | 0.019026   | No      |
|      |       |        |             |          |         | Pias3    | 3.35288   | 7.27572  | 1.11769          | 3.35388      | 7.27672       | 1.11745723       | 0.00028114 | No      |
|      |       |        |             |          |         | Pias4    | 9.11577   | 15.5387  | 0.769433         | 9.11677      | 15.5397       | 0.76936397       | 0.00184429 | No      |
|      |       |        |             |          |         | Pibf1    | 6.30131   | 3.19283  | -0.980816        | 6.30231      | 3.19383       | -0.9805932       | 0.0089386  | No      |
|      |       |        |             |          |         | Picalm   | 34.5179   | 136.859  | 1.98728          | 34.5189      | 136.86        | 1.98724246       | 0.00014629 | No      |
|      |       |        |             |          |         | Pick1    | 6.77664   | 30.2687  | 2.15918          | 6.77764      | 30.2697       | 2.15901946       | 0.00014629 | No      |
|      |       |        |             |          |         | Pidd     | 0.193146  | 2.82689  | 3.87146          | 0.194146     | 2.82789       | 3.86451211       | 0.00405996 | No      |
|      |       |        |             |          |         | Piezo1   | 13.3774   | 24.0492  | 0.846185         | 13.3784      | 24.0502       | 0.84614331       | 0.00285806 | No      |
|      |       |        |             |          |         | Pigh     | 2.3096    | 11.3324  | 2.29474          | 2.3106       | 11.3334       | 2.2942413        | 0.00014629 | No      |
|      |       |        |             |          |         | Pigk     | 17.4108   | 29.1023  | 0.741152         | 17.4118      | 29.1033       | 0.74111739       | 0.00296747 | No      |
|      |       |        |             |          |         | Pigm     | 6.88127   | 2.01993  | -1.76837         | 6.88227      | 2.02093       | -1.7678651       | 0.00014629 | No      |
|      |       |        |             |          |         | Pign     | 3.92215   | 7.55709  | 0.946187         | 3.92315      | 7.55809       | 0.9460092        | 0.0133356  | No      |

| RRBS |       |        |             |          |         | RNAseq   |          |         |                  |              |               |                  |            |         |
|------|-------|--------|-------------|----------|---------|----------|----------|---------|------------------|--------------|---------------|------------------|------------|---------|
| gene | Blood | Kidney | methyl.diff | pMWU.fdr | Match ? | gene     | blood    | kidney  | log2(fold_ratio) | blood+ 0.001 | kidney+ 0.001 | log2(fold_ratio) | q_value    | Match ? |
|      |       |        |             |          |         | Pigo     | 5.74326  | 3.27998 | -0.808182        | 5.74426      | 3.28098       | -0.8079943       | 0.00659461 | No      |
|      |       |        |             |          |         | PIGP     | 18.4787  | 114.826 | 2.63551          | 18.4797      | 114.827       | 2.63544867       | 0.0208247  | No      |
|      |       |        |             |          |         | Pigr     | 0.190498 | 43.9913 | 7.8513           | 0.191498     | 43.9923       | 7.8437779        | 0.00028114 | No      |
|      |       |        |             |          |         | Pigt     | 41.3056  | 28.513  | -0.534718        | 41.3066      | 28.514        | -0.5347019       | 0.00964777 | No      |
|      |       |        |             |          |         | Pigv     | 5.80878  | 11.48   | 0.982821         | 5.80978      | 11.481        | 0.98269287       | 0.0233164  | No      |
|      |       |        |             |          |         | Pigx     | 28.3556  | 13.7425 | -1.04499         | 28.3566      | 13.7435       | -1.0449351       | 0.00053701 | No      |
|      |       |        |             |          |         | Pigy     | 16.6078  | 47.9839 | 1.53069          | 16.6088      | 47.9849       | 1.53063265       | 0.00014629 | No      |
|      |       |        |             |          |         | Pih1d1   | 7.13629  | 23.3766 | 1.71182          | 7.13729      | 23.3776       | 1.71167853       | 0.00230432 | No      |
|      |       |        |             |          |         | Pik3c2a  | 8.49867  | 4.47966 | -0.923846        | 8.49967      | 4.48066       | -0.9236956       | 0.00014629 | No      |
|      |       |        |             |          |         | Pik3c2b  | 10.1287  | 1.31744 | -2.94263         | 10.1297      | 1.31844       | -2.9416876       | 0.00014629 | No      |
|      |       |        |             |          |         | PIK3CA   | 27.4709  | 10.6756 | -1.36359         | 27.4719      | 10.6766       | -1.3635044       | 0.00014629 | No      |
|      |       |        |             |          |         | Pik3cb   | 2.31381  | 5.24832 | 1.18158          | 2.31481      | 5.24932       | 1.18123677       | 0.00028114 | No      |
|      |       |        |             |          |         | Pik3cg   | 12.9486  | 0.81626 | -3.98762         | 12.9496      | 0.81726       | -3.9859686       | 0.00014629 | No      |
|      |       |        |             |          |         | Pik3ip1  | 207.379  | 5.38886 | -5.26615         | 207.38       | 5.38986       | -5.2658852       | 0.00014629 | No      |
|      |       |        |             |          |         | Pik3r1   | 82.6947  | 24.5307 | -1.75321         | 82.6957      | 24.5317       | -1.7531651       | 0.00014629 | No      |
|      |       |        |             |          |         | Pik3r2   | 8.7635   | 24.894  | 1.50622          | 8.7645       | 24.895        | 1.50611232       | 0.00014629 | No      |
|      |       |        |             |          |         | Pik3r5   | 44.5564  | 3.69466 | -3.59212         | 44.5574      | 3.69566       | -3.5917611       | 0.00014629 | No      |
|      |       |        |             |          |         | Pikfyve  | 10.6391  | 5.42851 | -0.970741        | 10.6401      | 5.42951       | -0.9706178       | 0.00014629 | No      |
|      |       |        |             |          |         | Pim1     | 128.205  | 13.6157 | -3.2351          | 128.206      | 13.6167       | -3.2350148       | 0.00014629 | No      |
|      |       |        |             |          |         | Pim2     | 39.5062  | 12.9256 | -1.61185         | 39.5072      | 12.9266       | -1.6117727       | 0.00014629 | No      |
|      |       |        |             |          |         | Pin1     | 28.0377  | 64.9302 | 1.21152          | 28.0387      | 64.9312       | 1.21149241       | 0.00014629 | No      |
|      |       |        |             |          |         | Pin4     | 94.0453  | 140.071 | 0.574729         | 94.0463      | 140.072       | 0.5747255        | 0.016989   | No      |
|      |       |        |             |          |         | Pink1    | 19.4448  | 69.3396 | 1.8343           | 19.4458      | 69.3406       | 1.83424173       | 0.00014629 | No      |
|      |       |        |             |          |         | Pip4k2a  | 86.0725  | 8.81954 | -3.28678         | 86.0735      | 8.82054       | -3.2866302       | 0.00014629 | No      |
|      |       |        |             |          |         | Pip4k2b  | 20.0861  | 5.60353 | -1.84179         | 20.0871      | 5.60453       | -1.841604        | 0.00028114 | No      |
|      |       |        |             |          |         | Pip4k2c  | 12.7675  | 27.1427 | 1.08809          | 12.7685      | 27.1437       | 1.08802834       | 0.00014629 | No      |
|      |       |        |             |          |         | Pip5k1a  | 20.8284  | 9.12821 | -1.19015         | 20.8294      | 9.12921       | -1.1900594       | 0.00014629 | No      |
|      |       |        |             |          |         | Pitpna   | 186.662  | 57.7537 | -1.69245         | 186.663      | 57.7547       | -1.6924257       | 0.00014629 | No      |
|      |       |        |             |          |         | Pitpnm2  | 60.7437  | 7.34972 | -3.04697         | 60.7447      | 7.35072       | -3.0468011       | 0.00014629 | No      |
|      |       |        |             |          |         | Pitpnm3  | 0        | 3.73374 | inf              | 0.001        | 3.73474       | 11.8667921       | 0.00014629 | No      |
|      |       |        |             |          |         | Pja1     | 11.6425  | 46.4225 | 1.99542          | 11.6435      | 46.4235       | 1.9953305        | 0.00014629 | No      |
|      |       |        |             |          |         | Pkd2     | 0.148746 | 12.448  | 6.38692          | 0.149746     | 12.449        | 6.37736858       | 0.00014629 | No      |
|      |       |        |             |          |         | Pkdcc    | 3.08474  | 9.90867 | 1.68354          | 3.08574      | 9.90967       | 1.68322051       | 0.00014629 | No      |
|      |       |        |             |          |         | Pkhd1    | 0        | 24.984  | inf              | 0.001        | 24.985        | 14.6087746       | 0.00014629 | No      |
|      |       |        |             |          |         | Pkia     | 0.527443 | 6.99052 | 3.72831          | 0.528443     | 6.99152       | 3.72578637       | 0.00014629 | No      |
|      |       |        |             |          |         | Pkig     | 0.257706 | 74.8319 | 8.18178          | 0.258706     | 74.8329       | 8.17621536       | 0.00014629 | No      |
|      |       |        |             |          |         | Pkn3     | 83.8914  | 30.1602 | -1.47588         | 83.8924      | 30.1612       | -1.4758463       | 0.00014629 | No      |
|      |       |        |             |          |         | Pknox1   | 10.5106  | 5.84168 | -0.847391        | 10.5116      | 5.84268       | -0.8472801       | 0.0207324  | No      |
|      |       |        |             |          |         | PKP2     | 0        | 14.7746 | inf              | 0.001        | 14.7756       | 13.8509291       | 0.00014629 | No      |
|      |       |        |             |          |         | Pkp4     | 8.5292   | 49.4885 | 2.53661          | 8.5302       | 49.4895       | 2.53647099       | 0.00014629 | No      |
|      |       |        |             |          |         | Pla2g12a | 4.58422  | 22.3522 | 2.28567          | 4.58522      | 22.3532       | 2.28541852       | 0.00014629 | No      |
|      |       |        |             |          |         | Pla2g15  | 2.47211  | 22.9786 | 3.21647          | 2.47311      | 22.9796       | 3.21595537       | 0.00090728 | No      |

| RRBS |       |        |             |          |         | RNAseq  |           |         |                  |              |               |                  |            |         |
|------|-------|--------|-------------|----------|---------|---------|-----------|---------|------------------|--------------|---------------|------------------|------------|---------|
| gene | Blood | Kidney | methyl.diff | pMWU.fdr | Match ? | gene    | blood     | kidney  | log2(fold_ratio) | blood+ 0.001 | kidney+ 0.001 | log2(fold_ratio) | q_value    | Match ? |
|      |       |        |             |          |         | Pla2g16 | 329.892   | 124.009 | -1.41154         | 329.893      | 124.01        | -1.4115417       | 0.00014629 | No      |
|      |       |        |             |          |         | Pla2g4a | 0.122015  | 2.2117  | 4.18003          | 0.123015     | 2.2127        | 4.16890171       | 0.00285806 | No      |
|      |       |        |             |          |         | Pla2g6  | 6.78491   | 31.9035 | 2.23331          | 6.78591      | 31.9045       | 2.23314572       | 0.00014629 | No      |
|      |       |        |             |          |         | Pla2g7  | 0.552623  | 1.80464 | 1.70734          | 0.553623     | 1.80564       | 1.7055345        | 0.0170801  | No      |
|      |       |        |             |          |         | Plaa    | 12.7145   | 6.91941 | -0.877754        | 12.7155      | 6.92041       | -0.8776588       | 0.00014629 | No      |
|      |       |        |             |          |         | Plac8   | 1950.26   | 213.314 | -3.19262         | 1950.261     | 213.315       | -3.1926099       | 0.00014629 | No      |
|      |       |        |             |          |         | Plagl2  | 9.98286   | 2.93421 | -1.76648         | 9.98386      | 2.93521       | -1.766134        | 0.00014629 | No      |
|      |       |        |             |          |         | Plat    | 1.67248   | 56.6745 | 5.08264          | 1.67348      | 56.6755       | 5.081802         | 0.00014629 | No      |
|      |       |        |             |          |         | Plau    | 0         | 202.154 | inf              | 0.001        | 202.155       | 17.6251024       | 0.00014629 | No      |
|      |       |        |             |          |         | Plbd1   | 1.18622   | 4.41895 | 1.89733          | 1.18722      | 4.41995       | 1.89644275       | 0.00149937 | No      |
|      |       |        |             |          |         | Plbd2   | 16.5291   | 40.7294 | 1.30106          | 16.5301      | 40.7304       | 1.30101053       | 0.00014629 | No      |
|      |       |        |             |          |         | Plcb3   | 0.763731  | 4.98055 | 2.70517          | 0.764731     | 4.98155       | 2.70357044       | 0.00014629 | No      |
|      |       |        |             |          |         | Plcb4   | 0.868359  | 2.06456 | 1.24947          | 0.869359     | 2.06556       | 1.248509         | 0.00533979 | No      |
|      |       |        |             |          |         | Plcd3   | 0.0886586 | 6.69599 | 6.23889          | 0.0896586    | 6.69699       | 6.22292703       | 0.00014629 | No      |
|      |       |        |             |          |         | Plcg1   | 192.067   | 36.2926 | -2.40386         | 192.068      | 36.2936       | -2.4038301       | 0.00014629 | No      |
|      |       |        |             |          |         | Plch2   | 0.651812  | 2.82449 | 2.11546          | 0.652812     | 2.82549       | 2.1137616        | 0.00544794 | No      |
|      |       |        |             |          |         | Plcl1   | 0.703834  | 4.63814 | 2.72024          | 0.704834     | 4.63914       | 2.71850196       | 0.00014629 | No      |
|      |       |        |             |          |         | Plcl2   | 54.5366   | 7.83905 | -2.79847         | 54.5376      | 7.84005       | -2.7983165       | 0.00014629 | No      |
|      |       |        |             |          |         | Plcx2   | 1.34502   | 2.22662 | 0.727222         | 1.34602      | 2.22762       | 0.7268033        | 0.0162226  | No      |
|      |       |        |             |          |         | Pld1    | 0.0412773 | 3.16283 | 6.25972          | 0.0422773    | 3.16383       | 6.22564503       | 0.00014629 | No      |
|      |       |        |             |          |         | Pld3    | 8.99932   | 19.7448 | 1.13359          | 9.00032      | 19.7458       | 1.13349762       | 0.00014629 | No      |
|      |       |        |             |          |         | Plekha2 | 35.9369   | 10.569  | -1.76563         | 35.9379      | 10.57         | -1.7655307       | 0.00014629 | No      |
|      |       |        |             |          |         | Plekha3 | 30.44     | 22.0773 | -0.463403        | 30.441       | 22.0783       | -0.4633867       | 0.0439257  | No      |
|      |       |        |             |          |         | Plekha6 | 0.517879  | 32.9494 | 5.99149          | 0.518879     | 32.9504       | 5.98875402       | 0.00014629 | No      |
|      |       |        |             |          |         | Plekha7 | 5.67871   | 17.4416 | 1.61889          | 5.67971      | 17.4426       | 1.61872593       | 0.00014629 | No      |
|      |       |        |             |          |         | Plekha8 | 5.49024   | 3.52062 | -0.641038        | 5.49124      | 3.52162       | -0.6408927       | 0.00480938 | No      |
|      |       |        |             |          |         | Plekhb1 | 0.256276  | 8.96055 | 5.12782          | 0.257276     | 8.96155       | 5.1223595        | 0.0295292  | No      |
|      |       |        |             |          |         | Plekhb2 | 3.91694   | 96.0116 | 4.61541          | 3.91794      | 96.0126       | 4.61505654       | 0.00014629 | No      |
|      |       |        |             |          |         | Plekhf2 | 19.1034   | 47.318  | 1.30856          | 19.1044      | 47.319        | 1.30851464       | 0.00014629 | No      |
|      |       |        |             |          |         | Plekhg3 | 1.03066   | 34.4885 | 5.06448          | 1.03166      | 34.4895       | 5.06311772       | 0.00014629 | No      |
|      |       |        |             |          |         | Plekhg5 | 40.7705   | 10.1161 | -2.01087         | 40.7715      | 10.1171       | -2.0107652       | 0.00014629 | No      |
|      |       |        |             |          |         | Plekhh2 | 0         | 1.30146 | inf              | 0.001        | 1.30246       | 10.3470234       | 0.00014629 | No      |
|      |       |        |             |          |         | Plekhn1 | 16.4529   | 7.31622 | -1.16918         | 16.4539      | 7.31722       | -1.169062        | 0.00014629 | No      |
|      |       |        |             |          |         | Plekhn2 | 23.1157   | 9.4996  | -1.28294         | 23.1167      | 9.5006        | -1.2828449       | 0.00014629 | No      |
|      |       |        |             |          |         | Plekho1 | 2.91786   | 8.74261 | 1.58315          | 2.91886      | 8.74361       | 1.58282404       | 0.00028114 | No      |
|      |       |        |             |          |         | Plekho2 | 7.56652   | 3.79744 | -0.994602        | 7.56752      | 3.79844       | -0.9944136       | 0.00014629 | No      |
|      |       |        |             |          |         | Plgrkt  | 2.46712   | 12.9818 | 2.39559          | 2.46812      | 12.9828       | 2.39511712       | 0.00014629 | No      |
|      |       |        |             |          |         | Plin2   | 1.69272   | 48.3313 | 4.83555          | 1.69372      | 48.3323       | 4.83472035       | 0.00014629 | No      |
|      |       |        |             |          |         | Plin3   | 31.0804   | 21.5342 | -0.529376        | 31.0814      | 21.5352       | -0.5293548       | 0.0145969  | No      |
|      |       |        |             |          |         | Plk2    | 0.929825  | 5.09131 | 2.45301          | 0.930825     | 5.09231       | 2.45173838       | 0.00014629 | No      |
|      |       |        |             |          |         | Plk3    | 0.535693  | 14.454  | 4.75392          | 0.536693     | 14.455        | 4.75132773       | 0.00014629 | No      |
|      |       |        |             |          |         | Plk5    | 0.377148  | 1.67437 | 2.15041          | 0.378148     | 1.67537       | 2.14745685       | 0.0373152  | No      |

| RRBS |       |        |             |          |         | RNAseq  |           |          |                  |              |               |                  |            |         |
|------|-------|--------|-------------|----------|---------|---------|-----------|----------|------------------|--------------|---------------|------------------|------------|---------|
| gene | Blood | Kidney | methyl.diff | pMWU.fdr | Match ? | gene    | blood     | kidney   | log2(fold_ratio) | blood+ 0.001 | kidney+ 0.001 | log2(fold_ratio) | q_value    | Match ? |
|      |       |        |             |          |         | Plod2   | 0.0531976 | 16.168   | 8.24757          | 0.0541976    | 16.169        | 8.22078577       | 0.00864487 | No      |
|      |       |        |             |          |         | Pls1    | 0.476029  | 18.8077  | 5.30413          | 0.477029     | 18.8087       | 5.30117935       | 0.00014629 | No      |
|      |       |        |             |          |         | Pls3    | 0         | 23.1774  | inf              | 0.001        | 23.1784       | 14.5004934       | 0.00014629 | No      |
|      |       |        |             |          |         | Plscr1  | 0.251024  | 18.2191  | 6.18148          | 0.252024     | 18.2201       | 6.17582594       | 0.00114835 | No      |
|      |       |        |             |          |         | Plscr2  | 67.987    | 133.982  | 0.978713         | 67.988       | 133.983       | 0.97869792       | 0.00041099 | No      |
|      |       |        |             |          |         | Plscr4  | 6.30557   | 1.76098  | -1.84025         | 6.30657      | 1.76198       | -1.839658        | 0.00053701 | No      |
|      |       |        |             |          |         | Pltp    | 5.16698   | 97.792   | 4.24232          | 5.16798      | 97.793        | 4.24205881       | 0.00014629 | No      |
|      |       |        |             |          |         | Plxdc2  | 3.32422   | 33.9427  | 3.35201          | 3.32522      | 33.9437       | 3.35162213       | 0.00014629 | No      |
|      |       |        |             |          |         | Plxnb1  | 0.232421  | 2.14502  | 3.20618          | 0.233421     | 2.14602       | 3.20065726       | 0.00014629 | No      |
|      |       |        |             |          |         | Pm20d1  | 0.122602  | 45.1299  | 8.52396          | 0.123602     | 45.1309       | 8.51226965       | 0.00679736 | No      |
|      |       |        |             |          |         | Pm20d2  | 0.312799  | 3.99155  | 3.67364          | 0.313799     | 3.99255       | 3.66939782       | 0.00608077 | No      |
|      |       |        |             |          |         | Pmepa1  | 5.45027   | 60.3468  | 3.46888          | 5.45127      | 60.3478       | 3.46863689       | 0.00014629 | No      |
|      |       |        |             |          |         | Pmm1    | 13.1768   | 66.0572  | 2.32571          | 13.1778      | 66.0582       | 2.32562812       | 0.00014629 | No      |
|      |       |        |             |          |         | Pmm2    | 22.2088   | 45.5821  | 1.03733          | 22.2098      | 45.5831       | 1.03730264       | 0.00014629 | No      |
|      |       |        |             |          |         | Pmpcb   | 50.5868   | 88.1398  | 0.801034         | 50.5878      | 88.1408       | 0.80102049       | 0.00014629 | No      |
|      |       |        |             |          |         | Pms1    | 4.93044   | 3.14302  | -0.649563        | 4.93144      | 3.14402       | -0.6493986       | 0.0340933  | No      |
|      |       |        |             |          |         | Pnir    | 224.295   | 32.4297  | -2.79001         | 224.296      | 32.4307       | -2.7899718       | 0.00014629 | No      |
|      |       |        |             |          |         | Pnkd    | 37.1988   | 207.13   | 2.47721          | 37.1998      | 207.131       | 2.47717672       | 0.00618538 | No      |
|      |       |        |             |          |         | Pnlcd1  | 1.79192   | 8.36271  | 2.22247          | 1.79292      | 8.36371       | 2.22183192       | 0.00014629 | No      |
|      |       |        |             |          |         | Pnn     | 199.149   | 27.8689  | -2.83713         | 199.15       | 27.8699       | -2.8370757       | 0.00014629 | No      |
|      |       |        |             |          |         | Pno1    | 14.821    | 10.1562  | -0.545273        | 14.822       | 10.1572       | -0.5452374       | 0.0496631  | No      |
|      |       |        |             |          |         | Pnpla2  | 17.9512   | 33.766   | 0.911488         | 17.9522      | 33.767        | 0.91145336       | 0.00014629 | No      |
|      |       |        |             |          |         | Pnpla6  | 6.18724   | 24.9362  | 2.01087          | 6.18824      | 24.9372       | 2.01069843       | 0.00014629 | No      |
|      |       |        |             |          |         | Pnpo    | 16.3121   | 23.2143  | 0.50907          | 16.3131      | 23.2153       | 0.50904496       | 0.023877   | No      |
|      |       |        |             |          |         | Pnpt1   | 14.0999   | 7.21872  | -0.965867        | 14.1009      | 7.21972       | -0.9657725       | 0.00014629 | No      |
|      |       |        |             |          |         | Pnrc1   | 160.977   | 82.3395  | -0.967198        | 160.978      | 82.3405       | -0.9671894       | 0.00014629 | No      |
|      |       |        |             |          |         | Pnrc2   | 81.4887   | 34.9589  | -1.22094         | 81.4897      | 34.9599       | -1.2209167       | 0.00014629 | No      |
|      |       |        |             |          |         | Poc1a   | 1.74476   | 16.9216  | 3.27777          | 1.74576      | 16.9226       | 3.2770241        | 0.00028114 | No      |
|      |       |        |             |          |         | Poc1b   | 5.16075   | 8.05578  | 0.642442         | 5.16175      | 8.05678       | 0.64234309       | 0.0163221  | No      |
|      |       |        |             |          |         | Podn    | 0.0329714 | 2.46146  | 6.22215          | 0.0339714    | 2.46246       | 6.1796358        | 0.019873   | No      |
|      |       |        |             |          |         | Podnl1  | 1.50097   | 0.362882 | -2.04832         | 1.50197      | 0.363882      | -2.0453134       | 0.0476655  | No      |
|      |       |        |             |          |         | Pofut1  | 12.737    | 3.41932  | -1.89724         | 12.738       | 3.42032       | -1.8969356       | 0.00041099 | No      |
|      |       |        |             |          |         | Pofut2  | 9.12005   | 38.2596  | 2.06871          | 9.12105      | 38.2606       | 2.06858768       | 0.00014629 | No      |
|      |       |        |             |          |         | Poglut1 | 28.77     | 40.5562  | 0.495354         | 28.771       | 40.5572       | 0.49534269       | 0.0320714  | No      |
|      |       |        |             |          |         | Pogz    | 21.7871   | 5.00505  | -2.12202         | 21.7881      | 5.00605       | -2.1217958       | 0.00014629 | No      |
|      |       |        |             |          |         | Pola1   | 3.66062   | 1.80694  | -1.01854         | 3.66162      | 1.80794       | -1.0181353       | 0.00126596 | No      |
|      |       |        |             |          |         | Pola2   | 7.22858   | 21.9535  | 1.60267          | 7.22958      | 21.9545       | 1.60253294       | 0.00014629 | No      |
|      |       |        |             |          |         | Pold1   | 10.4785   | 5.43519  | -0.947036        | 10.4795      | 5.43619       | -0.9469021       | 0.00126596 | No      |
|      |       |        |             |          |         | Pold2   | 19.4047   | 10.7076  | -0.857777        | 19.4057      | 10.7086       | -0.8577106       | 0.00138312 | No      |
|      |       |        |             |          |         | Poldip2 | 20.2361   | 70.8976  | 1.80881          | 20.2371      | 70.8986       | 1.80875457       | 0.00014629 | No      |
|      |       |        |             |          |         | Poldip3 | 24.5893   | 14.542   | -0.757801        | 24.5903      | 14.543        | -0.7577644       | 0.00066215 | No      |
|      |       |        |             |          |         | Pole2   | 10.0904   | 1.52182  | -2.72911         | 10.0914      | 1.52282       | -2.728309        | 0.00014629 | No      |

| RRBS |       |        |             |          |         | RNAseq  |           |         |                  |              |               |                  |            |         |
|------|-------|--------|-------------|----------|---------|---------|-----------|---------|------------------|--------------|---------------|------------------|------------|---------|
| gene | Blood | Kidney | methyl.diff | pMWU.fdr | Match ? | gene    | blood     | kidney  | log2(fold_ratio) | blood+ 0.001 | kidney+ 0.001 | log2(fold_ratio) | q_value    | Match ? |
|      |       |        |             |          |         | Pole3   | 13.7671   | 24.0657 | 0.805751         | 13.7681      | 24.0667       | 0.80570885       | 0.00028114 | No      |
|      |       |        |             |          |         | Poli    | 3.6595    | 1.40008 | -1.38613         | 3.6605       | 1.40108       | -1.3855014       | 0.00502315 | No      |
|      |       |        |             |          |         | Polk    | 3.41324   | 1.90257 | -0.843196        | 3.41424      | 1.90357       | -0.8428569       | 0.0314513  | No      |
|      |       |        |             |          |         | Poll    | 7.56901   | 14.5324 | 0.941099         | 7.57001      | 14.5334       | 0.94100514       | 0.00053701 | No      |
|      |       |        |             |          |         | Polm    | 16.9931   | 5.94138 | -1.51608         | 16.9941      | 5.94238       | -1.5159212       | 0.00014629 | No      |
|      |       |        |             |          |         | Polr1b  | 18.3537   | 2.57444 | -2.83374         | 18.3547      | 2.57544       | -2.8332587       | 0.00014629 | No      |
|      |       |        |             |          |         | Polr1c  | 18.0355   | 34.7796 | 0.947403         | 18.0365      | 34.7806       | 0.94736341       | 0.0161245  | No      |
|      |       |        |             |          |         | Polr1e  | 20.0295   | 6.79712 | -1.55913         | 20.0305      | 6.79812       | -1.5589907       | 0.00014629 | No      |
|      |       |        |             |          |         | Polr2a  | 69.0418   | 28.1438 | -1.29465         | 69.0428      | 28.1448       | -1.2946226       | 0.00014629 | No      |
|      |       |        |             |          |         | Polr2c  | 30.368    | 65.8299 | 1.11619          | 30.369       | 65.8309       | 1.11616552       | 0.00014629 | No      |
|      |       |        |             |          |         | Polr2d  | 52.3307   | 35.9771 | -0.54058         | 52.3317      | 35.9781       | -0.5405661       | 0.0187462  | No      |
|      |       |        |             |          |         | Polr2f  | 17.8143   | 31.7815 | 0.835155         | 17.8153      | 31.7825       | 0.83511583       | 0.00090728 | No      |
|      |       |        |             |          |         | Polr2l  | 22.5081   | 112.586 | 2.32252          | 22.5091      | 112.587       | 2.32245998       | 0.0263268  | No      |
|      |       |        |             |          |         | Polr2m  | 5.35464   | 8.80309 | 0.71722          | 5.35564      | 8.80409       | 0.71711491       | 0.0123523  | No      |
|      |       |        |             |          |         | Polr3a  | 4.45852   | 6.57599 | 0.560643         | 4.45952      | 6.57699       | 0.56053904       | 0.0256967  | No      |
|      |       |        |             |          |         | Polr3b  | 10.053    | 5.47627 | -0.876365        | 10.054       | 5.47727       | -0.8762407       | 0.00014629 | No      |
|      |       |        |             |          |         | Polr3c  | 21.2094   | 11.5516 | -0.876612        | 21.2104      | 11.5526       | -0.8765543       | 0.00053701 | No      |
|      |       |        |             |          |         | Polr3e  | 24.5771   | 11.1115 | -1.14526         | 24.5781      | 11.1125       | -1.14519         | 0.00014629 | No      |
|      |       |        |             |          |         | Polr3f  | 8.16382   | 2.20965 | -1.88543         | 8.16482      | 2.21065       | -1.8849505       | 0.00014629 | No      |
|      |       |        |             |          |         | Polr3h  | 31.8427   | 12.5677 | -1.34125         | 31.8437      | 12.5687       | -1.3411725       | 0.00014629 | No      |
|      |       |        |             |          |         | Polr3k  | 30.8999   | 76.5749 | 1.30927          | 30.9009      | 76.5759       | 1.30924156       | 0.00014629 | No      |
|      |       |        |             |          |         | Pom121  | 15.7455   | 4.27433 | -1.88117         | 15.7465      | 4.27533       | -1.8809235       | 0.00014629 | No      |
|      |       |        |             |          |         | Pomgnt1 | 10.0024   | 25.4702 | 1.34847          | 10.0034      | 25.4712       | 1.3483765        | 0.00014629 | No      |
|      |       |        |             |          |         | Pomk    | 21.8116   | 14.1047 | -0.628919        | 21.8126      | 14.1057       | -0.6288835       | 0.004167   | No      |
|      |       |        |             |          |         | Pomt2   | 35.848    | 16.7728 | -1.09577         | 35.849       | 16.7738       | -1.0957233       | 0.0241459  | No      |
|      |       |        |             |          |         | Pon2    | 90.9113   | 22.0342 | -2.04471         | 90.9123      | 22.0352       | -2.0446655       | 0.00014629 | No      |
|      |       |        |             |          |         | Pon3    | 0.0692518 | 4.09299 | 5.88516          | 0.0702518    | 4.09399       | 5.86482858       | 0.0459971  | No      |
|      |       |        |             |          |         | Pop1    | 2.25574   | 9.525   | 2.07812          | 2.25674      | 9.526         | 2.07763033       | 0.00014629 | No      |
|      |       |        |             |          |         | Pop4    | 19.295    | 12.8085 | -0.591132        | 19.296       | 12.8095       | -0.5910876       | 0.0404305  | No      |
|      |       |        |             |          |         | Por     | 16.6529   | 38.8309 | 1.22143          | 16.6539      | 38.8319       | 1.22138223       | 0.00014629 | No      |
|      |       |        |             |          |         | Porcn   | 0.147024  | 3.90648 | 4.73174          | 0.148024     | 3.90748       | 4.72233548       | 0.00028114 | No      |
|      |       |        |             |          |         | Pot1    | 19.0894   | 5.12685 | -1.89663         | 19.0904      | 5.12785       | -1.8964214       | 0.00014629 | No      |
|      |       |        |             |          |         | Pot1b   | 16.5679   | 5.7959  | -1.51528         | 16.5689      | 5.7969        | -1.5151243       | 0.00014629 | No      |
|      |       |        |             |          |         | Pou2af1 | 10.2482   | 3.03631 | -1.75498         | 10.2492      | 3.03731       | -1.7546452       | 0.00014629 | No      |
|      |       |        |             |          |         | Pou2f1  | 6.69344   | 1.85814 | -1.84889         | 6.69444      | 1.85914       | -1.848328        | 0.00014629 | No      |
|      |       |        |             |          |         | Pp3111  | 29.8993   | 64.4215 | 1.10743          | 29.9003      | 64.4225       | 1.10740469       | 0.00014629 | No      |
|      |       |        |             |          |         | Ppa2    | 20.1363   | 121.981 | 2.59878          | 20.1373      | 121.982       | 2.59872611       | 0.00014629 | No      |
|      |       |        |             |          |         | Ppap2a  | 1.69863   | 47.5802 | 4.80792          | 1.69963      | 47.5812       | 4.80709904       | 0.00014629 | No      |
|      |       |        |             |          |         | Ppap2b  | 0.149822  | 29.2439 | 7.60874          | 0.150822     | 29.2449       | 7.59919436       | 0.00041099 | No      |
|      |       |        |             |          |         | Ppap2c  | 2.8744    | 27.9365 | 3.28082          | 2.8754       | 27.9375       | 3.28036836       | 0.00014629 | No      |
|      |       |        |             |          |         | Ppapdc2 | 12.7857   | 8.01543 | -0.673677        | 12.7867      | 8.01643       | -0.6736122       | 0.00843988 | No      |
|      |       |        |             |          |         | Ppard   | 4.66086   | 18.9605 | 2.02433          | 4.66186      | 18.9615       | 2.02409551       | 0.00014629 | No      |



| RRBS |       |        |             |          |         | RNAseq   |           |         |                  |              |               |                  |            |         |
|------|-------|--------|-------------|----------|---------|----------|-----------|---------|------------------|--------------|---------------|------------------|------------|---------|
| gene | Blood | Kidney | methyl.diff | pMWU.fdr | Match ? | gene     | blood     | kidney  | log2(fold_ratio) | blood+ 0.001 | kidney+ 0.001 | log2(fold_ratio) | q_value    | Match ? |
|      |       |        |             |          |         | Pparg    | 0.0685047 | 3.86251 | 5.81719          | 0.0695047    | 3.86351       | 5.79665778       | 0.0401648  | No      |
|      |       |        |             |          |         | Ppcdc    | 4.33238   | 13.9672 | 1.68881          | 4.33338      | 13.9682       | 1.68858146       | 0.00014629 | No      |
|      |       |        |             |          |         | Ppcs     | 11.2073   | 38.214  | 1.76966          | 11.2083      | 38.215        | 1.76957155       | 0.00014629 | No      |
|      |       |        |             |          |         | Ppdpf    | 69.6875   | 144.88  | 1.05588          | 69.6885      | 144.881       | 1.0558759        | 0.00014629 | No      |
|      |       |        |             |          |         | Ppfia1   | 16.8494   | 9.10623 | -0.887771        | 16.8504      | 9.10723       | -0.8876986       | 0.00014629 | No      |
|      |       |        |             |          |         | Ppfia4   | 2.31021   | 6.14074 | 1.41039          | 2.31121      | 6.14174       | 1.40999909       | 0.0193137  | No      |
|      |       |        |             |          |         | Ppfibp1  | 9.68891   | 41.0739 | 2.08382          | 9.68991      | 41.0749       | 2.08370189       | 0.00014629 | No      |
|      |       |        |             |          |         | Ppfibp2  | 0.204082  | 22.7138 | 6.79827          | 0.205082     | 22.7148       | 6.79128792       | 0.00263402 | No      |
|      |       |        |             |          |         | Pphln1   | 16.2385   | 5.33687 | -1.60535         | 16.2395      | 5.33787       | -1.6051711       | 0.00014629 | No      |
|      |       |        |             |          |         | Ppib     | 225.398   | 161.151 | -0.484062        | 225.399      | 161.152       | -0.484059        | 0.0174574  | No      |
|      |       |        |             |          |         | Ppic     | 0         | 55.3397 | inf              | 0.001        | 55.3407       | 15.7560533       | 0.00014629 | No      |
|      |       |        |             |          |         | Ppid     | 45.3659   | 28.7557 | -0.657759        | 45.3669      | 28.7567       | -0.657742        | 0.00318982 | No      |
|      |       |        |             |          |         | Ppif     | 14.5457   | 24.5072 | 0.752618         | 14.5467      | 24.5082       | 0.75257262       | 0.00161718 | No      |
|      |       |        |             |          |         | Ppig     | 39.5549   | 12.6954 | -1.63955         | 39.5559      | 12.6964       | -1.6394734       | 0.00014629 | No      |
|      |       |        |             |          |         | Ppil1    | 100.036   | 32.607  | -1.61726         | 100.037      | 32.608        | -1.6172358       | 0.00470105 | No      |
|      |       |        |             |          |         | Ppil4    | 21.3351   | 5.00653 | -2.09134         | 21.3361      | 5.00753       | -2.0911254       | 0.00014629 | No      |
|      |       |        |             |          |         | Ppil6    | 4.5393    | 10.5589 | 1.21791          | 4.5403       | 10.5599       | 1.21773664       | 0.00586782 | No      |
|      |       |        |             |          |         | Ppip5k1  | 3.86864   | 11.1207 | 1.52335          | 3.86964      | 11.1217       | 1.52310607       | 0.00014629 | No      |
|      |       |        |             |          |         | Ppl      | 1.80077   | 10.8847 | 2.59561          | 1.80177      | 10.8857       | 2.59494742       | 0.00014629 | No      |
|      |       |        |             |          |         | Ppm1b    | 76.2163   | 29.3599 | -1.37625         | 76.2173      | 29.3609       | -1.3762223       | 0.00014629 | No      |
|      |       |        |             |          |         | Ppm1d    | 20.2473   | 6.26225 | -1.69298         | 20.2483      | 6.26325       | -1.6928174       | 0.00014629 | No      |
|      |       |        |             |          |         | Ppm1f    | 10.3632   | 3.59536 | -1.52726         | 10.3642      | 3.59636       | -1.5269994       | 0.00014629 | No      |
|      |       |        |             |          |         | Ppm1g    | 70.1631   | 41.1601 | -0.769466        | 70.1641      | 41.1611       | -0.7694515       | 0.00014629 | No      |
|      |       |        |             |          |         | Ppm1j    | 0.83931   | 32.2427 | 5.26362          | 0.84031      | 32.2437       | 5.26195184       | 0.00014629 | No      |
|      |       |        |             |          |         | Ppox     | 6.97688   | 48.2873 | 2.79099          | 6.97788      | 48.2883       | 2.79081298       | 0.00014629 | No      |
|      |       |        |             |          |         | PPP1ca   | 293.168   | 168.242 | -0.801191        | 293.169      | 168.243       | -0.8011861       | 0.00078603 | No      |
|      |       |        |             |          |         | PPP1cb   | 101.431   | 73.2254 | -0.470082        | 101.432      | 73.2264       | -0.4700771       | 0.0265991  | No      |
|      |       |        |             |          |         | PPP1r10  | 19.8955   | 9.5434  | -1.05987         | 19.8965      | 9.5444        | -1.0597883       | 0.00014629 | No      |
|      |       |        |             |          |         | PPP1r12a | 50.5541   | 6.39101 | -2.98371         | 50.5551      | 6.39201       | -2.9835151       | 0.00014629 | No      |
|      |       |        |             |          |         | PPP1r12b | 11.6903   | 3.07683 | -1.92579         | 11.6913      | 3.07783       | -1.9254499       | 0.00014629 | No      |
|      |       |        |             |          |         | PPP1r12c | 68.9914   | 42.5151 | -0.69844         | 68.9924      | 42.5161       | -0.6984282       | 0.0296199  | No      |
|      |       |        |             |          |         | PPP1r13b | 2.43226   | 7.62207 | 1.64789          | 2.43326      | 7.62307       | 1.64748164       | 0.00014629 | No      |
|      |       |        |             |          |         | PPP1r13l | 0.313992  | 3.00952 | 3.26073          | 0.314992     | 3.01052       | 3.25662561       | 0.00014629 | No      |
|      |       |        |             |          |         | PPP1r15b | 23.9212   | 11.6255 | -1.041           | 23.9222      | 11.6265       | -1.0409332       | 0.00014629 | No      |
|      |       |        |             |          |         | PPP1r16a | 1.55421   | 42.181  | 4.76234          | 1.55521      | 42.182        | 4.76144619       | 0.00014629 | No      |
|      |       |        |             |          |         | PPP1r16b | 39.7411   | 9.85784 | -2.01129         | 39.7421      | 9.85884       | -2.0111783       | 0.00014629 | No      |
|      |       |        |             |          |         | PPP1r18  | 50.5985   | 9.78159 | -2.37095         | 50.5995      | 9.78259       | -2.3708347       | 0.00014629 | No      |
|      |       |        |             |          |         | PPP1r26  | 0.310696  | 2.55277 | 3.03849          | 0.311696     | 2.55377       | 3.03441705       | 0.00090728 | No      |
|      |       |        |             |          |         | PPP1r36  | 0.706649  | 29.6757 | 5.39214          | 0.707649     | 29.6767       | 5.39015292       | 0.00161718 | No      |
|      |       |        |             |          |         | PPP1r37  | 17.8006   | 30.8473 | 0.793222         | 17.8016      | 30.8483       | 0.79318407       | 0.00014629 | No      |
|      |       |        |             |          |         | PPP1r8   | 20.8606   | 12.1804 | -0.776217        | 20.8616      | 12.1814       | -0.7761699       | 0.00954394 | No      |
|      |       |        |             |          |         | PPP1r9a  | 0         | 3.09382 | inf              | 0.001        | 3.09482       | 11.5956398       | 0.00014629 | No      |

| RRBS |       |        |             |          |         | RNAseq   |          |          |                  |              |               |                  |            |         |
|------|-------|--------|-------------|----------|---------|----------|----------|----------|------------------|--------------|---------------|------------------|------------|---------|
| gene | Blood | Kidney | methyl.diff | pMWU.fdr | Match ? | gene     | blood    | kidney   | log2(fold_ratio) | blood+ 0.001 | kidney+ 0.001 | log2(fold_ratio) | q_value    | Match ? |
|      |       |        |             |          |         | Ppp2cb   | 32.1512  | 79.1409  | 1.29955          | 32.1522      | 79.1419       | 1.29952424       | 0.00014629 | No      |
|      |       |        |             |          |         | Ppp2r1a  | 54.4531  | 84.2299  | 0.629318         | 54.4541      | 84.2309       | 0.6293089        | 0.00427532 | No      |
|      |       |        |             |          |         | Ppp2r1b  | 7.74476  | 47.1754  | 2.60674          | 7.74576      | 47.1764       | 2.60658663       | 0.00014629 | No      |
|      |       |        |             |          |         | Ppp2r2a  | 60.3567  | 32.1897  | -0.906915        | 60.3577      | 32.1907       | -0.9068939       | 0.00014629 | No      |
|      |       |        |             |          |         | Ppp2r2b  | 0        | 7.37967  | inf              | 0.001        | 7.38067       | 12.8495361       | 0.00014629 | No      |
|      |       |        |             |          |         | Ppp2r3a  | 0.164001 | 4.52905  | 4.78743          | 0.165001     | 4.53005       | 4.7789803        | 0.00053701 | No      |
|      |       |        |             |          |         | Ppp2r5a  | 114.36   | 70.4481  | -0.698946        | 114.361      | 70.4491       | -0.698942        | 0.00066215 | No      |
|      |       |        |             |          |         | Ppp2r5c  | 151.155  | 29.0578  | -2.37904         | 151.156      | 29.0588       | -2.3789912       | 0.00014629 | No      |
|      |       |        |             |          |         | PPP3CA   | 17.3551  | 9.70166  | -0.839057        | 17.3561      | 9.70266       | -0.8389906       | 0.00053701 | No      |
|      |       |        |             |          |         | Ppp3r1   | 55.7877  | 34.0227  | -0.713452        | 55.7887      | 34.0237       | -0.7134329       | 0.00028114 | No      |
|      |       |        |             |          |         | Ppp4c    | 66.2194  | 40.802   | -0.698615        | 66.2204      | 40.803        | -0.6986005       | 0.00126596 | No      |
|      |       |        |             |          |         | Ppp4r1   | 24.4152  | 17.1791  | -0.507127        | 24.4162      | 17.1801       | -0.5071003       | 0.0196905  | No      |
|      |       |        |             |          |         | Ppp4r2   | 42.51    | 19.2661  | -1.14174         | 42.511       | 19.2671       | -1.1416968       | 0.00014629 | No      |
|      |       |        |             |          |         | Ppp5c    | 31.9495  | 50.1196  | 0.649583         | 31.9505      | 50.1206       | 0.64956518       | 0.00173187 | No      |
|      |       |        |             |          |         | Ppp6r1   | 142.858  | 68.4786  | -1.06085         | 142.859      | 68.4796       | -1.0608457       | 0.00014629 | No      |
|      |       |        |             |          |         | Ppp6r2   | 39.5507  | 17.7946  | -1.15226         | 39.5517      | 17.7956       | -1.1522191       | 0.004167   | No      |
|      |       |        |             |          |         | Pprc1    | 9.27867  | 3.45408  | -1.42562         | 9.27967      | 3.45508       | -1.4253544       | 0.00014629 | No      |
|      |       |        |             |          |         | Ppt1     | 34.8776  | 21.551   | -0.694541        | 34.8786      | 21.552        | -0.6945204       | 0.00274649 | No      |
|      |       |        |             |          |         | Pptc7    | 17.3258  | 8.22551  | -1.07474         | 17.3268      | 8.22651       | -1.0746528       | 0.00014629 | No      |
|      |       |        |             |          |         | Pqbp1    | 56.8006  | 32.7638  | -0.793803        | 56.8016      | 32.7648       | -0.7937848       | 0.00438237 | No      |
|      |       |        |             |          |         | PQLC1    | 3.19758  | 90.0889  | 4.8163           | 3.19858      | 90.0899       | 4.8158619        | 0.00014629 | No      |
|      |       |        |             |          |         | Pqlc2    | 2.02265  | 6.29137  | 1.63713          | 2.02365      | 6.29237       | 1.63664372       | 0.00053701 | No      |
|      |       |        |             |          |         | Pradc1   | 9.24527  | 40.7492  | 2.13999          | 9.24627      | 40.7502       | 2.13986374       | 0.00470105 | No      |
|      |       |        |             |          |         | Pragmin  | 0.883494 | 3.52953  | 1.99818          | 0.884494     | 3.53053       | 1.99696051       | 0.00014629 | No      |
|      |       |        |             |          |         | Pram1    | 0.557353 | 2.46661  | 2.14587          | 0.558353     | 2.46761       | 2.14386499       | 0.00307875 | No      |
|      |       |        |             |          |         | Prc1     | 0.912428 | 2.02099  | 1.14728          | 0.913428     | 2.02199       | 1.14641294       | 0.0246902  | No      |
|      |       |        |             |          |         | Prcp     | 7.01681  | 2.53184  | -1.47063         | 7.01781      | 2.53284       | -1.4702649       | 0.00014629 | No      |
|      |       |        |             |          |         | Prdm10   | 3.21531  | 0.492831 | -2.70579         | 3.21631      | 0.493831      | -2.7033172       | 0.00014629 | No      |
|      |       |        |             |          |         | Prdm11   | 2.60698  | 0.677051 | -1.94504         | 2.60798      | 0.678051      | -1.9434671       | 0.00395247 | No      |
|      |       |        |             |          |         | Prdm15   | 8.84652  | 2.25919  | -1.9693          | 8.84752      | 2.26019       | -1.9688291       | 0.00014629 | No      |
|      |       |        |             |          |         | Prdm2    | 25.4298  | 14.8026  | -0.78067         | 25.4308      | 14.8036       | -0.7806288       | 0.00330073 | No      |
|      |       |        |             |          |         | Prdm9    | 0.556875 | 2.1546   | 1.952            | 0.557875     | 2.1556        | 1.95007569       | 0.00230432 | No      |
|      |       |        |             |          |         | Prdx1    | 121.606  | 376.982  | 1.63228          | 121.607      | 376.983       | 1.63227319       | 0.00014629 | No      |
|      |       |        |             |          |         | Prdx2    | 119.105  | 289.753  | 1.28259          | 119.106      | 289.754       | 1.28258249       | 0.00014629 | No      |
|      |       |        |             |          |         | Prdx3    | 18.7332  | 94.4369  | 2.33376          | 18.7342      | 94.4379       | 2.33369159       | 0.00014629 | No      |
|      |       |        |             |          |         | Prdx5    | 74.1819  | 646.567  | 3.12366          | 74.1829      | 646.568       | 3.12364353       | 0.00014629 | No      |
|      |       |        |             |          |         | Prdx6    | 62.0128  | 199.63   | 1.68669          | 62.0138      | 199.631       | 1.68667457       | 0.00014629 | No      |
|      |       |        |             |          |         | Preb     | 12.3296  | 55.0531  | 2.1587           | 12.3306      | 55.0541       | 2.15860701       | 0.00014629 | No      |
|      |       |        |             |          |         | Prex1    | 112.709  | 7.72262  | -3.86736         | 112.71       | 7.72362       | -3.8671945       | 0.00014629 | No      |
|      |       |        |             |          |         | Prf1     | 40.9486  | 1.22049  | -5.06828         | 40.9496      | 1.22149       | -5.0671354       | 0.00014629 | No      |
|      |       |        |             |          |         | Prickle1 | 0.126882 | 3.05617  | 4.59017          | 0.127882     | 3.05717       | 4.57931166       | 0.00014629 | No      |
|      |       |        |             |          |         | Prickle2 | 0        | 0.931549 | inf              | 0.001        | 0.932549      | 9.86503572       | 0.00014629 | No      |

| RRBS |       |        |             |          |         | RNAseq   |           |         |                  |              |               |                  |            |         |
|------|-------|--------|-------------|----------|---------|----------|-----------|---------|------------------|--------------|---------------|------------------|------------|---------|
| gene | Blood | Kidney | methyl.diff | pMWU.fdr | Match ? | gene     | blood     | kidney  | log2(fold_ratio) | blood+ 0.001 | kidney+ 0.001 | log2(fold_ratio) | q_value    | Match ? |
|      |       |        |             |          |         | Prickle3 | 33.492    | 22.1111 | -0.599043        | 33.493       | 22.1121       | -0.5990236       | 0.0143989  | No      |
|      |       |        |             |          |         | Prkaa1   | 29.875    | 8.15112 | -1.87387         | 29.876       | 8.15212       | -1.8737398       | 0.00014629 | No      |
|      |       |        |             |          |         | Prkaa2   | 0.0297536 | 12.2741 | 8.68834          | 0.0307536    | 12.2751       | 8.64076376       | 0.00954394 | No      |
|      |       |        |             |          |         | Prkab1   | 43.874    | 86.8099 | 0.984495         | 43.875       | 86.8109       | 0.98447707       | 0.00014629 | No      |
|      |       |        |             |          |         | Prkacb   | 50.4894   | 10.8814 | -2.21412         | 50.4904      | 10.8824       | -2.2140123       | 0.00014629 | No      |
|      |       |        |             |          |         | Prkag2   | 20.8621   | 9.86035 | -1.08117         | 20.8631      | 9.86135       | -1.0810965       | 0.00090728 | No      |
|      |       |        |             |          |         | Prkar1b  | 0         | 9.19449 | inf              | 0.001        | 9.19549       | 13.1667107       | 0.00014629 | No      |
|      |       |        |             |          |         | Prkar2b  | 32.268    | 4.09766 | -2.97723         | 32.269       | 4.09866       | -2.9769246       | 0.00014629 | No      |
|      |       |        |             |          |         | Prkca    | 21.0354   | 4.36105 | -2.27007         | 21.0364      | 4.36205       | -2.2698096       | 0.00014629 | No      |
|      |       |        |             |          |         | Prkcd    | 11.5531   | 30.8951 | 1.41909          | 11.5541      | 30.8961       | 1.41901985       | 0.00014629 | No      |
|      |       |        |             |          |         | Prkch    | 124.6     | 6.98786 | -4.15631         | 124.601      | 6.98886       | -4.1561147       | 0.00014629 | No      |
|      |       |        |             |          |         | Prkci    | 6.66269   | 18.0728 | 1.43964          | 6.66369      | 18.0738       | 1.43950667       | 0.00014629 | No      |
|      |       |        |             |          |         | Prkccq   | 150.421   | 24.3276 | -2.62834         | 150.422      | 24.3286       | -2.6282904       | 0.00014629 | No      |
|      |       |        |             |          |         | Prkcz    | 4.50428   | 32.8737 | 2.86756          | 4.50528      | 32.8747       | 2.86728905       | 0.00014629 | No      |
|      |       |        |             |          |         | Prkd2    | 84.9529   | 17.5055 | -2.27886         | 84.9539      | 17.5065       | -2.2787895       | 0.00014629 | No      |
|      |       |        |             |          |         | Prkd3    | 21.9963   | 7.28645 | -1.59398         | 21.9973      | 7.28745       | -1.5938405       | 0.00014629 | No      |
|      |       |        |             |          |         | Prkdc    | 11.7402   | 2.11242 | -2.47449         | 11.7412      | 2.11342       | -2.4739285       | 0.00014629 | No      |
|      |       |        |             |          |         | Prkra    | 8.7635    | 76.931  | 3.13399          | 8.7645       | 76.932        | 3.13384012       | 0.00014629 | No      |
|      |       |        |             |          |         | Prkrir   | 28.4599   | 9.81846 | -1.53536         | 28.4609      | 9.81946       | -1.5352657       | 0.00014629 | No      |
|      |       |        |             |          |         | Prkx     | 12.3038   | 4.31462 | -1.5118          | 12.3048      | 4.31562       | -1.5115815       | 0.00014629 | No      |
|      |       |        |             |          |         | Prlr     | 0.0740371 | 15.3694 | 7.69759          | 0.0750371    | 15.3704       | 7.67833492       | 0.00014629 | No      |
|      |       |        |             |          |         | Prmt3    | 17.0795   | 8.14535 | -1.06822         | 17.0805      | 8.14635       | -1.0681245       | 0.00028114 | No      |
|      |       |        |             |          |         | Prmt5    | 15.6562   | 21.7136 | 0.471862         | 15.6572      | 21.7146       | 0.47183914       | 0.0336436  | No      |
|      |       |        |             |          |         | Prmt6    | 4.92102   | 1.58802 | -1.63173         | 4.92202      | 1.58902       | -1.6311132       | 0.00014629 | No      |
|      |       |        |             |          |         | Prmt7    | 13.9768   | 8.27329 | -0.756497        | 13.9778      | 8.27429       | -0.7564299       | 0.00984666 | No      |
|      |       |        |             |          |         | Prodh2   | 0         | 286.983 | inf              | 0.001        | 286.984       | 18.1306108       | 0.00014629 | No      |
|      |       |        |             |          |         | Prom1    | 1.08443   | 23.6297 | 4.44559          | 1.08543      | 23.6307       | 4.44432377       | 0.00014629 | No      |
|      |       |        |             |          |         | Pros1    | 1.13994   | 2.58108 | 1.17902          | 1.14094      | 2.58208       | 1.17831078       | 0.00533979 | No      |
|      |       |        |             |          |         | Prosc    | 22.2577   | 86.6895 | 1.96155          | 22.2587      | 86.6905       | 1.96150457       | 0.00014629 | No      |
|      |       |        |             |          |         | Proser1  | 13.6606   | 4.48379 | -1.60723         | 13.6616      | 4.48479       | -1.6070141       | 0.00014629 | No      |
|      |       |        |             |          |         | Prpf18   | 28.3693   | 13.6688 | -1.05344         | 28.3703      | 13.6698       | -1.0533893       | 0.00230432 | No      |
|      |       |        |             |          |         | Prpf38a  | 28.9819   | 18.1207 | -0.677511        | 28.9829      | 18.1217       | -0.6774837       | 0.00405996 | No      |
|      |       |        |             |          |         | Prpf38b  | 77.6651   | 22.1063 | -1.81281         | 77.6661      | 22.1073       | -1.8127622       | 0.00014629 | No      |
|      |       |        |             |          |         | Prpf39   | 63.826    | 25.6836 | -1.3133          | 63.827       | 25.6846       | -1.3132632       | 0.00014629 | No      |
|      |       |        |             |          |         | Prpf4    | 18.4396   | 9.19961 | -1.00317         | 18.4406      | 9.20061       | -1.0030842       | 0.00014629 | No      |
|      |       |        |             |          |         | Prpf40a  | 32.7197   | 10.4647 | -1.64462         | 32.7207      | 10.4657       | -1.6445348       | 0.00014629 | No      |
|      |       |        |             |          |         | Prpf40b  | 7.67855   | 22.8763 | 1.57495          | 7.67955      | 22.8773       | 1.57482311       | 0.029796   | No      |
|      |       |        |             |          |         | Prpf8    | 52.1619   | 15.5839 | -1.74294         | 52.1629      | 15.5849       | -1.7428752       | 0.00014629 | No      |
|      |       |        |             |          |         | PRPS1    | 34.644    | 8.03447 | -2.10833         | 34.645       | 8.03547       | -2.1081928       | 0.00014629 | No      |
|      |       |        |             |          |         | Prps2    | 64.7357   | 20.3396 | -1.67027         | 64.7367      | 20.3406       | -1.6702216       | 0.00014629 | No      |
|      |       |        |             |          |         | Prpsap1  | 47.0321   | 133.064 | 1.5004           | 47.0331      | 133.065       | 1.50038282       | 0.00014629 | No      |
|      |       |        |             |          |         | Prr12    | 12.4411   | 6.58802 | -0.917203        | 12.4421      | 6.58902       | -0.9170942       | 0.00014629 | No      |

| RRBS |       |        |             |          |         | RNAseq  |           |          |                  |              |               |                  |            |         |
|------|-------|--------|-------------|----------|---------|---------|-----------|----------|------------------|--------------|---------------|------------------|------------|---------|
| gene | Blood | Kidney | methyl.diff | pMWU.fdr | Match ? | gene    | blood     | kidney   | log2(fold_ratio) | blood+ 0.001 | kidney+ 0.001 | log2(fold_ratio) | q_value    | Match ? |
|      |       |        |             |          |         | Prr14   | 35.7653   | 10.0903  | -1.82558         | 35.7663      | 10.0913       | -1.8254888       | 0.00014629 | No      |
|      |       |        |             |          |         | Prr14l  | 11.4436   | 3.65593  | -1.64623         | 11.4446      | 3.65693       | -1.6459621       | 0.00014629 | No      |
|      |       |        |             |          |         | Prr16   | 0         | 1.3857   | inf              | 0.001        | 1.3867        | 10.43744         | 0.00014629 | No      |
|      |       |        |             |          |         | Prr22   | 1.65501   | 7.53175  | 2.18615          | 1.65601      | 7.53275       | 2.18546526       | 0.00014629 | No      |
|      |       |        |             |          |         | Prr5    | 1.60816   | 32.334   | 4.32957          | 1.60916      | 32.335        | 4.32871692       | 0.00014629 | No      |
|      |       |        |             |          |         | Prr7    | 19.8217   | 1.87444  | -3.40255         | 19.8227      | 1.87544       | -3.4018525       | 0.00041099 | No      |
|      |       |        |             |          |         | Prcc2b  | 48.0242   | 12.6585  | -1.92366         | 48.0252      | 12.6595       | -1.9235712       | 0.00014629 | No      |
|      |       |        |             |          |         | Prrg2   | 0.505998  | 14.096   | 4.80001          | 0.506998     | 14.097        | 4.79726431       | 0.00438237 | No      |
|      |       |        |             |          |         | Prss12  | 0         | 6.12251  | inf              | 0.001        | 6.12351       | 12.5801431       | 0.00014629 | No      |
|      |       |        |             |          |         | Prss30  | 0.479451  | 6.25991  | 3.70669          | 0.480451     | 6.26091       | 3.70391116       | 0.0390364  | No      |
|      |       |        |             |          |         | Prss39  | 13.3852   | 6.38461  | -1.06797         | 13.3862      | 6.38561       | -1.0678501       | 0.00173187 | No      |
|      |       |        |             |          |         | Prss53  | 1.09162   | 16.7926  | 3.94328          | 1.09262      | 16.7936       | 3.94204789       | 0.00014629 | No      |
|      |       |        |             |          |         | Prss8   | 1.36632   | 92.9699  | 6.0884           | 1.36732      | 92.9709       | 6.08735639       | 0.00782085 | No      |
|      |       |        |             |          |         | Prtfdc1 | 1.13452   | 4.01774  | 1.8243           | 1.13552      | 4.01874       | 1.82339013       | 0.024968   | No      |
|      |       |        |             |          |         | Prune   | 6.46975   | 18.6901  | 1.53049          | 6.47075      | 18.6911       | 1.53034663       | 0.00014629 | No      |
|      |       |        |             |          |         | Prx     | 0.0609875 | 0.925501 | 3.92365          | 0.0619875    | 0.926501      | 3.90174331       | 0.00740907 | No      |
|      |       |        |             |          |         | Psap    | 131.858   | 207.377  | 0.65327          | 131.859      | 207.378       | 0.65326681       | 0.00053701 | No      |
|      |       |        |             |          |         | Psat1   | 6.61527   | 131.439  | 4.31244          | 6.61627      | 131.44        | 4.31224247       | 0.00014629 | No      |
|      |       |        |             |          |         | Psca    | 0.0283284 | 71.3532  | 11.2985          | 0.0293284    | 71.3542       | 11.2484843       | 0.019873   | No      |
|      |       |        |             |          |         | Psen2   | 12.5654   | 6.90606  | -0.863518        | 12.5664      | 6.90706       | -0.8634277       | 0.00184429 | No      |
|      |       |        |             |          |         | Psip1   | 74.5191   | 8.70373  | -3.0979          | 74.5201      | 8.70473       | -3.0977582       | 0.00014629 | No      |
|      |       |        |             |          |         | Pskh1   | 7.60375   | 14.3185  | 0.9131           | 7.60475      | 14.3195       | 0.91300839       | 0.00138312 | No      |
|      |       |        |             |          |         | Psma3l  | 2.67807   | 0.963202 | -1.47528         | 2.67907      | 0.964202      | -1.4743249       | 0.0487067  | No      |
|      |       |        |             |          |         | Psemb1  | 248.445   | 186.577  | -0.413156        | 248.446      | 186.578       | -0.4131534       | 0.0400829  | No      |
|      |       |        |             |          |         | Psemb11 | 0.355889  | 6.28875  | 4.14328          | 0.356889     | 6.28975       | 4.13945533       | 0.00161718 | No      |
|      |       |        |             |          |         | Psemb5  | 100.994   | 183.185  | 0.859031         | 100.995      | 183.186       | 0.85902538       | 0.00014629 | No      |
|      |       |        |             |          |         | Psemb6  | 68.0441   | 139.69   | 1.03769          | 68.0451      | 139.691       | 1.03767589       | 0.00014629 | No      |
|      |       |        |             |          |         | Psemb7  | 90.2358   | 133.322  | 0.56314          | 90.2368      | 133.323       | 0.56313787       | 0.00448672 | No      |
|      |       |        |             |          |         | Psemb9  | 138.684   | 34.9193  | -1.98971         | 138.685      | 34.9203       | -1.9896739       | 0.00014629 | No      |
|      |       |        |             |          |         | Psmc2   | 52.7323   | 80.105   | 0.603205         | 52.7333      | 80.106        | 0.60319602       | 0.00352183 | No      |
|      |       |        |             |          |         | Psmc3   | 82.9846   | 125.156  | 0.592808         | 82.9856      | 125.157       | 0.59280606       | 0.00230432 | No      |
|      |       |        |             |          |         | Psmc4   | 82.9975   | 112.695  | 0.441284         | 82.9985      | 112.696       | 0.44127914       | 0.0285184  | No      |
|      |       |        |             |          |         | Psmc5   | 66.1757   | 100.973  | 0.609598         | 66.1767      | 100.974       | 0.6095886        | 0.0448712  | No      |
|      |       |        |             |          |         | Psmd10  | 14.5504   | 29.5891  | 1.02401          | 14.5514      | 29.5901       | 1.02395661       | 0.0185598  | No      |
|      |       |        |             |          |         | Psmd13  | 67.6924   | 50.8411  | -0.412997        | 67.6934      | 50.8421       | -0.4129916       | 0.0480948  | No      |
|      |       |        |             |          |         | Psmd14  | 54.2054   | 34.7608  | -0.640974        | 54.2064      | 34.7618       | -0.6409604       | 0.00307875 | No      |
|      |       |        |             |          |         | Psmd2   | 50.3637   | 75.0447  | 0.575365         | 50.3647      | 75.0457       | 0.57535649       | 0.00285806 | No      |
|      |       |        |             |          |         | Psmd3   | 43.2901   | 63.4097  | 0.550667         | 43.2911      | 63.4107       | 0.55065584       | 0.00566132 | No      |
|      |       |        |             |          |         | Psmd4   | 72.0729   | 98.0933  | 0.444697         | 72.0739      | 98.0943       | 0.44469239       | 0.0330385  | No      |
|      |       |        |             |          |         | Psmd5   | 14.5109   | 27.0044  | 0.896059         | 14.5119      | 27.0054       | 0.8960115        | 0.00053701 | No      |
|      |       |        |             |          |         | Psmd6   | 49.773    | 79.2509  | 0.671064         | 49.774       | 79.2519       | 0.67105319       | 0.00102864 | No      |
|      |       |        |             |          |         | Psmd8   | 30.7066   | 67.0951  | 1.12766          | 30.7076      | 67.0961       | 1.12763315       | 0.00014629 | No      |

| RRBS |       |        |             |          |         | RNAseq   |           |          |                  |              |               |                  |            |         |
|------|-------|--------|-------------|----------|---------|----------|-----------|----------|------------------|--------------|---------------|------------------|------------|---------|
| gene | Blood | Kidney | methyl.diff | pMWU.fdr | Match ? | gene     | blood     | kidney   | log2(fold_ratio) | blood+ 0.001 | kidney+ 0.001 | log2(fold_ratio) | q_value    | Match ? |
|      |       |        |             |          |         | Psmc1    | 708.239   | 339.723  | -1.05988         | 708.24       | 339.724       | -1.0598752       | 0.00014629 | No      |
|      |       |        |             |          |         | Psmc3    | 154.203   | 245.676  | 0.671926         | 154.204      | 245.677       | 0.67192261       | 0.00341151 | No      |
|      |       |        |             |          |         | Psmg1    | 27.223    | 40.4466  | 0.571193         | 27.224       | 40.4476       | 0.57117504       | 0.0207324  | No      |
|      |       |        |             |          |         | PSMG3    | 13.226    | 30.0733  | 1.18511          | 13.227       | 30.0743       | 1.18504528       | 0.00041099 | No      |
|      |       |        |             |          |         | Psph     | 10.9638   | 78.6889  | 2.84342          | 10.9648      | 78.6899       | 2.84329898       | 0.00014629 | No      |
|      |       |        |             |          |         | Pstpip1  | 119.63    | 45.0655  | -1.40848         | 119.631      | 45.0665       | -1.408464        | 0.00014629 | No      |
|      |       |        |             |          |         | Ptbp2    | 21.7687   | 4.55234  | -2.25757         | 21.7697      | 4.55334       | -2.2573244       | 0.00014629 | No      |
|      |       |        |             |          |         | Ptbp3    | 67.2388   | 11.8818  | -2.50054         | 67.2398      | 11.8828       | -2.5004406       | 0.00014629 | No      |
|      |       |        |             |          |         | Ptcd2    | 10.1015   | 14.6626  | 0.537577         | 10.1025      | 14.6636       | 0.53752699       | 0.0499959  | No      |
|      |       |        |             |          |         | Ptchd3   | 0         | 0.882105 | inf              | 0.001        | 0.883105      | 9.78644117       | 0.00014629 | No      |
|      |       |        |             |          |         | Ptdss1   | 29.249    | 9.7532   | -1.58444         | 29.25        | 9.7542        | -1.5843412       | 0.00384649 | No      |
|      |       |        |             |          |         | Pten     | 58.1482   | 18.7045  | -1.63635         | 58.1492      | 18.7055       | -1.6362968       | 0.00014629 | No      |
|      |       |        |             |          |         | Pter     | 1.34812   | 121.174  | 6.48999          | 1.34912      | 121.175       | 6.4889296        | 0.00014629 | No      |
|      |       |        |             |          |         | Ptger2   | 10.927    | 5.04436  | -1.11516         | 10.928       | 5.04536       | -1.1150003       | 0.00597292 | No      |
|      |       |        |             |          |         | Ptger3   | 1.24465   | 18.6772  | 3.90746          | 1.24565      | 18.6782       | 3.90638477       | 0.00014629 | No      |
|      |       |        |             |          |         | Ptger4   | 19.6263   | 3.81457  | -2.3632          | 19.6273      | 3.81557       | -2.3628912       | 0.00014629 | No      |
|      |       |        |             |          |         | Ptges    | 0         | 6.1068   | inf              | 0.001        | 6.1078        | 12.5764371       | 0.00014629 | No      |
|      |       |        |             |          |         | Ptges2   | 8.6803    | 37.1047  | 2.09579          | 8.6813       | 37.1057       | 2.09565782       | 0.00014629 | No      |
|      |       |        |             |          |         | Ptges3   | 123.929   | 90.3846  | -0.455363        | 123.93       | 90.3856       | -0.4553606       | 0.0252454  | No      |
|      |       |        |             |          |         | Ptges3l1 | 13.6965   | 2.32895  | -2.55605         | 13.6975      | 2.32995       | -2.5555417       | 0.00014629 | No      |
|      |       |        |             |          |         | Ptgrn    | 0.447749  | 13.7393  | 4.93948          | 0.448749     | 13.7403       | 4.93636097       | 0.00014629 | No      |
|      |       |        |             |          |         | Ptgr2    | 10.73     | 31.8598  | 1.57008          | 10.731       | 31.8608       | 1.56999797       | 0.00014629 | No      |
|      |       |        |             |          |         | Ptgs1    | 0.225176  | 8.64463  | 5.26268          | 0.226176     | 8.64563       | 5.25645334       | 0.00066215 | No      |
|      |       |        |             |          |         | Pth1r    | 0         | 299.708  | inf              | 0.001        | 299.709       | 18.1932029       | 0.00014629 | No      |
|      |       |        |             |          |         | Ptk2     | 3.27412   | 27.6687  | 3.07908          | 3.27512      | 27.6697       | 3.07868733       | 0.00014629 | No      |
|      |       |        |             |          |         | Ptk2b    | 76.1742   | 14.7767  | -2.36598         | 76.1752      | 14.7777       | -2.3658996       | 0.00014629 | No      |
|      |       |        |             |          |         | Ptms     | 178.085   | 813.738  | 2.192            | 178.086      | 813.739       | 2.19199203       | 0.00014629 | No      |
|      |       |        |             |          |         | Ptn      | 0         | 18.7114  | inf              | 0.001        | 18.7124       | 14.191707        | 0.00014629 | No      |
|      |       |        |             |          |         | Ptp4a1   | 38.9244   | 25.6281  | -0.602947        | 38.9254      | 25.6291       | -0.602929        | 0.00649695 | No      |
|      |       |        |             |          |         | PTP4A2   | 340.57    | 139.559  | -1.28707         | 340.571      | 139.56        | -1.2870701       | 0.00014629 | No      |
|      |       |        |             |          |         | Ptp4a3   | 78.71     | 10.3613  | -2.92534         | 78.711       | 10.3623       | -2.925221        | 0.00014629 | No      |
|      |       |        |             |          |         | Ptpdc1   | 3.065     | 13.8107  | 2.17183          | 3.066        | 13.8117       | 2.1714613        | 0.00014629 | No      |
|      |       |        |             |          |         | Ptpla    | 1.02754   | 9.24826  | 3.16999          | 1.02854      | 9.24926       | 3.16874004       | 0.0222999  | No      |
|      |       |        |             |          |         | Ptplad1  | 7.36432   | 12.1443  | 0.72166          | 7.36532      | 12.1453       | 0.72157801       | 0.00384649 | No      |
|      |       |        |             |          |         | Ptplad2  | 0.676265  | 13.1396  | 4.28019          | 0.677265     | 13.1406       | 4.2781669        | 0.0147863  | No      |
|      |       |        |             |          |         | Ptpmt1   | 5.68074   | 25.096   | 2.14331          | 5.68174      | 25.097        | 2.1431102        | 0.00874754 | No      |
|      |       |        |             |          |         | Ptpn1    | 32.6771   | 9.03742  | -1.8543          | 32.6781      | 9.03842       | -1.8541816       | 0.00014629 | No      |
|      |       |        |             |          |         | Ptpn13   | 0.514727  | 90.3206  | 7.4551           | 0.515727     | 90.3216       | 7.45231966       | 0.00014629 | No      |
|      |       |        |             |          |         | Ptpn18   | 179.915   | 50.6158  | -1.82966         | 179.916      | 50.6168       | -1.8296353       | 0.00014629 | No      |
|      |       |        |             |          |         | PTPN2    | 53.6134   | 22.0085  | -1.28453         | 53.6144      | 22.0095       | -1.2844942       | 0.00014629 | No      |
|      |       |        |             |          |         | Ptpn21   | 0.0743421 | 8.36389  | 6.81385          | 0.0753421    | 8.36489       | 6.79474651       | 0.00028114 | No      |
|      |       |        |             |          |         | Ptpn22   | 173.311   | 10.8571  | -3.99665         | 173.312      | 10.8581       | -3.996528        | 0.00014629 | No      |

| RRBS |       |        |             |          |         | RNAseq  |          |         |                  |              |               |                  |            |         |
|------|-------|--------|-------------|----------|---------|---------|----------|---------|------------------|--------------|---------------|------------------|------------|---------|
| gene | Blood | Kidney | methyl.diff | pMWU.fdr | Match ? | gene    | blood    | kidney  | log2(fold_ratio) | blood+ 0.001 | kidney+ 0.001 | log2(fold_ratio) | q_value    | Match ? |
|      |       |        |             |          |         | Ptpn23  | 6.33787  | 18.1562 | 1.51839          | 6.33887      | 18.1572       | 1.51824416       | 0.00014629 | No      |
|      |       |        |             |          |         | Ptpn4   | 1.46535  | 0.84098 | -0.801104        | 1.46635      | 0.84198       | -0.8003716       | 0.0321606  | No      |
|      |       |        |             |          |         | Ptpn7   | 14.3046  | 3.05544 | -2.22702         | 14.3056      | 3.05644       | -2.2266559       | 0.00014629 | No      |
|      |       |        |             |          |         | Ptprb   | 0        | 2.01586 | inf              | 0.001        | 2.01686       | 10.9778952       | 0.00014629 | No      |
|      |       |        |             |          |         | Ptprc   | 751.434  | 11.6146 | -6.01564         | 751.435      | 11.6156       | -6.0155127       | 0.00014629 | No      |
|      |       |        |             |          |         | Ptprcap | 500.293  | 25.266  | -4.30751         | 500.294      | 25.267        | -4.3074499       | 0.00014629 | No      |
|      |       |        |             |          |         | Ptprd   | 0        | 5.98339 | inf              | 0.001        | 5.98439       | 12.5469885       | 0.00014629 | No      |
|      |       |        |             |          |         | Ptpre   | 10.3473  | 1.34603 | -2.94247         | 10.3483      | 1.34703       | -2.9415399       | 0.00078603 | No      |
|      |       |        |             |          |         | Ptprf   | 14.6815  | 24.7154 | 0.751411         | 14.6825      | 24.7164       | 0.75137099       | 0.00090728 | No      |
|      |       |        |             |          |         | PTPRG   | 0.227247 | 2.61029 | 3.52188          | 0.228247     | 2.61129       | 3.51609488       | 0.00014629 | No      |
|      |       |        |             |          |         | Ptprj   | 1.90855  | 6.71392 | 1.81468          | 1.90955      | 6.71492       | 1.81413752       | 0.0188385  | No      |
|      |       |        |             |          |         | Ptprk   | 1.87532  | 18.5727 | 3.30797          | 1.87632      | 18.5737       | 3.30728344       | 0.00014629 | No      |
|      |       |        |             |          |         | Ptprm   | 0.577372 | 3.601   | 2.64083          | 0.578372     | 3.602         | 2.63872857       | 0.00014629 | No      |
|      |       |        |             |          |         | Ptpro   | 0.96353  | 4.16981 | 2.11358          | 0.96453      | 4.17081       | 2.11242958       | 0.00994441 | No      |
|      |       |        |             |          |         | Ptprr   | 0        | 6.56718 | inf              | 0.001        | 6.56818       | 12.6812779       | 0.00014629 | No      |
|      |       |        |             |          |         | Pttg1ip | 39.9804  | 239.789 | 2.5844           | 39.9814      | 239.79        | 2.5843706        | 0.00014629 | No      |
|      |       |        |             |          |         | Pum1    | 58.6694  | 13.8368 | -2.08409         | 58.6704      | 13.8378       | -2.0840182       | 0.00014629 | No      |
|      |       |        |             |          |         | Pum2    | 96.1356  | 20.4823 | -2.23069         | 96.1366      | 20.4833       | -2.2306376       | 0.00014629 | No      |
|      |       |        |             |          |         | Purb    | 26.8469  | 13.8657 | -0.953239        | 26.8479      | 13.8667       | -0.9531848       | 0.00964777 | No      |
|      |       |        |             |          |         | Pus10   | 8.03331  | 1.39607 | -2.52462         | 8.03431      | 1.39707       | -2.5237698       | 0.00014629 | No      |
|      |       |        |             |          |         | Pus3    | 18.3771  | 7.6316  | -1.26785         | 18.3781      | 7.6326        | -1.2677411       | 0.00014629 | No      |
|      |       |        |             |          |         | Pus7    | 4.4408   | 1.44912 | -1.61564         | 4.4418       | 1.45012       | -1.6149721       | 0.00066215 | No      |
|      |       |        |             |          |         | Pus7l   | 6.88741  | 1.16257 | -2.56664         | 6.88841      | 1.16357       | -2.565613        | 0.0158416  | No      |
|      |       |        |             |          |         | Pvrl3   | 0.101739 | 8.92398 | 6.45474          | 0.102739     | 8.92498       | 6.44079309       | 0.0277051  | No      |
|      |       |        |             |          |         | Pwp1    | 8.68582  | 20.1528 | 1.21425          | 8.68682      | 20.1538       | 1.21415184       | 0.00459197 | No      |
|      |       |        |             |          |         | Pwp2    | 13.7075  | 6.84786 | -1.00124         | 13.7085      | 6.84886       | -1.0011349       | 0.00014629 | No      |
|      |       |        |             |          |         | Pwwp2a  | 33.3926  | 6.45373 | -2.37132         | 33.3936      | 6.45473       | -2.371143        | 0.00014629 | No      |
|      |       |        |             |          |         | Pxmp2   | 1.35441  | 36.451  | 4.75022          | 1.35541      | 36.452        | 4.74919675       | 0.00014629 | No      |
|      |       |        |             |          |         | Pxmp4   | 9.68879  | 40.0543 | 2.04757          | 9.68979      | 40.0553       | 2.04745584       | 0.00173187 | No      |
|      |       |        |             |          |         | Pycard  | 93.955   | 15.7582 | -2.57587         | 93.956       | 15.7592       | -2.575791        | 0.00014629 | No      |
|      |       |        |             |          |         | Pygb    | 5.57944  | 10.7293 | 0.943362         | 5.58044      | 10.7303       | 0.94323963       | 0.00014629 | No      |
|      |       |        |             |          |         | Pygo2   | 31.8812  | 19.773  | -0.689171        | 31.8822      | 19.774        | -0.6891464       | 0.00138312 | No      |
|      |       |        |             |          |         | Pyroxd1 | 8.95712  | 24.7932 | 1.46884          | 8.95812      | 24.7942       | 1.46873478       | 0.00230432 | No      |
|      |       |        |             |          |         | Pyroxd2 | 3.40686  | 405.589 | 6.89543          | 3.40786      | 405.59        | 6.8950122        | 0.00014629 | No      |
|      |       |        |             |          |         | Qars    | 79.2556  | 47.0193 | -0.753259        | 79.2566      | 47.0203       | -0.7532473       | 0.00014629 | No      |
|      |       |        |             |          |         | Qdpr    | 30.8637  | 197.827 | 2.68025          | 30.8647      | 197.828       | 2.68021696       | 0.00014629 | No      |
|      |       |        |             |          |         | QK      | 26.5656  | 12.5951 | -1.07669         | 26.5666      | 12.5961       | -1.0766365       | 0.00014629 | No      |
|      |       |        |             |          |         | Qprt    | 61.1958  | 96.3259 | 0.65449          | 61.1968      | 96.3269       | 0.65448252       | 0.0148843  | No      |
|      |       |        |             |          |         | Qrs1    | 5.72615  | 11.2132 | 0.969565         | 5.72715      | 11.2142       | 0.96943741       | 0.00114835 | No      |
|      |       |        |             |          |         | Qsox1   | 2.2228   | 9.23414 | 2.0546           | 2.2238       | 9.23514       | 2.05410679       | 0.00014629 | No      |
|      |       |        |             |          |         | Qsox2   | 4.0863   | 2.17553 | -0.90943         | 4.0873       | 2.17653       | -0.9091182       | 0.0444443  | No      |
|      |       |        |             |          |         | Qtrt1   | 3.05144  | 5.77358 | 0.919977         | 3.05244      | 5.77458       | 0.91975308       | 0.0356089  | No      |

| RRBS |       |        |             |          |         | RNAseq    |          |         |                  |              |               |                  |            |         |
|------|-------|--------|-------------|----------|---------|-----------|----------|---------|------------------|--------------|---------------|------------------|------------|---------|
| gene | Blood | Kidney | methyl.diff | pMWU.fdr | Match ? | gene      | blood    | kidney  | log2(fold_ratio) | blood+ 0.001 | kidney+ 0.001 | log2(fold_ratio) | q_value    | Match ? |
|      |       |        |             |          |         | Qtrtd1    | 4.02369  | 1.03588 | -1.95766         | 4.02469      | 1.03688       | -1.9566287       | 0.00014629 | No      |
|      |       |        |             |          |         | R3hdm1    | 25.2233  | 5.8096  | -2.11825         | 25.2243      | 5.8106        | -2.1180552       | 0.00014629 | No      |
|      |       |        |             |          |         | Rab1      | 24.1362  | 70.6442 | 1.54937          | 24.1372      | 70.6452       | 1.54933321       | 0.00014629 | No      |
|      |       |        |             |          |         | Rab10     | 50.2729  | 31.6946 | -0.665546        | 50.2739      | 31.6956       | -0.665527        | 0.00263402 | No      |
|      |       |        |             |          |         | Rab11a    | 31.7368  | 95.466  | 1.58883          | 31.7378      | 95.467        | 1.5888           | 0.00014629 | No      |
|      |       |        |             |          |         | Rab11b    | 88.6046  | 137.657 | 0.635629         | 88.6056      | 137.658       | 0.63561867       | 0.00102864 | No      |
|      |       |        |             |          |         | Rab11fip1 | 2.52977  | 12.6009 | 2.31645          | 2.53077      | 12.6019       | 2.31599296       | 0.00014629 | No      |
|      |       |        |             |          |         | Rab11fip4 | 72.34    | 8.66204 | -3.06202         | 72.341       | 8.66304       | -3.0618683       | 0.00014629 | No      |
|      |       |        |             |          |         | Rab11fip5 | 0.410447 | 40.0911 | 6.60994          | 0.411447     | 40.0921       | 6.60646757       | 0.00014629 | No      |
|      |       |        |             |          |         | Rab17     | 0        | 122.977 | inf              | 0.001        | 122.978       | 16.9080407       | 0.00014629 | No      |
|      |       |        |             |          |         | Rab18     | 14.3386  | 34.3319 | 1.25965          | 14.3396      | 34.3329       | 1.25958694       | 0.00014629 | No      |
|      |       |        |             |          |         | Rab19     | 11.9823  | 3.21388 | -1.89852         | 11.9833      | 3.21488       | -1.8981885       | 0.00041099 | No      |
|      |       |        |             |          |         | Rab23     | 6.22317  | 14.5577 | 1.22606          | 6.22417      | 14.5587       | 1.22592817       | 0.00014629 | No      |
|      |       |        |             |          |         | Rab25     | 8.52928  | 27.7283 | 1.70086          | 8.53028      | 27.7293       | 1.70074619       | 0.00014629 | No      |
|      |       |        |             |          |         | Rab27a    | 91.4485  | 5.25326 | -4.12167         | 91.4495      | 5.25426       | -4.1214158       | 0.00014629 | No      |
|      |       |        |             |          |         | Rab32     | 0.224873 | 6.16926 | 4.77792          | 0.225873     | 6.17026       | 4.77174755       | 0.00041099 | No      |
|      |       |        |             |          |         | Rab33a    | 10.8026  | 5.3206  | -1.02171         | 10.8036      | 5.3216        | -1.0215802       | 0.0433332  | No      |
|      |       |        |             |          |         | Rab33b    | 7.69595  | 2.84921 | -1.43354         | 7.69695      | 2.85021       | -1.4332187       | 0.00014629 | No      |
|      |       |        |             |          |         | Rab35     | 75.0521  | 24.7377 | -1.60118         | 75.0531      | 24.7387       | -1.601142        | 0.00014629 | No      |
|      |       |        |             |          |         | RAB37     | 35.7751  | 1.41961 | -4.65539         | 35.7761      | 1.42061       | -4.6544137       | 0.00014629 | No      |
|      |       |        |             |          |         | Rab3d     | 12.362   | 5.20029 | -1.24925         | 12.363       | 5.20129       | -1.2490875       | 0.00053701 | No      |
|      |       |        |             |          |         | Rab3ip    | 439.245  | 95.5712 | -2.20038         | 439.246      | 95.5722       | -2.2003662       | 0.00014629 | No      |
|      |       |        |             |          |         | Rab4a     | 10.9565  | 31.0039 | 1.50066          | 10.9575      | 31.0049       | 1.50057756       | 0.00041099 | No      |
|      |       |        |             |          |         | Rab6b     | 0.266549 | 1.16718 | 2.13055          | 0.267549     | 1.16818       | 2.12638755       | 0.0118533  | No      |
|      |       |        |             |          |         | Rab7a     | 92.2184  | 206.935 | 1.16605          | 92.2194      | 206.936       | 1.16604246       | 0.00014629 | No      |
|      |       |        |             |          |         | Rab8a     | 170.638  | 65.946  | -1.37158         | 170.639      | 65.947        | -1.3715685       | 0.00014629 | No      |
|      |       |        |             |          |         | Rab9a     | 19.6994  | 40.34   | 1.03406          | 19.7004      | 40.341        | 1.03402192       | 0.00014629 | No      |
|      |       |        |             |          |         | Rabac1    | 254.171  | 130.974 | -0.956521        | 254.172      | 130.975       | -0.9565136       | 0.00014629 | No      |
|      |       |        |             |          |         | Rabepk    | 6.5435   | 11.0511 | 0.75605          | 6.5445       | 11.0521       | 0.75596564       | 0.0119499  | No      |
|      |       |        |             |          |         | Rabgap1l  | 13.0642  | 5.6719  | -1.20372         | 13.0652      | 5.6729        | -1.2035709       | 0.00954394 | No      |
|      |       |        |             |          |         | Rabl2a    | 0.234729 | 15.0486 | 6.00249          | 0.235729     | 15.0496       | 5.99645208       | 0.00014629 | No      |
|      |       |        |             |          |         | Rabl5     | 0.600688 | 10.9873 | 4.19307          | 0.601688     | 10.9883       | 4.19080881       | 0.00053701 | No      |
|      |       |        |             |          |         | Rac2      | 995.538  | 71.434  | -3.80079         | 995.539      | 71.435        | -3.8007748       | 0.00014629 | No      |
|      |       |        |             |          |         | Rad1      | 12.7152  | 4.98872 | -1.34982         | 12.7162      | 4.98972       | -1.3496368       | 0.00041099 | No      |
|      |       |        |             |          |         | Rad17     | 16.0968  | 7.59105 | -1.0844          | 16.0978      | 7.59205       | -1.0843021       | 0.00014629 | No      |
|      |       |        |             |          |         | Rad21     | 65.5454  | 36.0281 | -0.863373        | 65.5464      | 36.0291       | -0.8633539       | 0.00014629 | No      |
|      |       |        |             |          |         | Rad50     | 11.6973  | 4.55241 | -1.36147         | 11.6983      | 4.55341       | -1.3612796       | 0.00014629 | No      |
|      |       |        |             |          |         | Raf1      | 51.2862  | 31.481  | -0.704091        | 51.2872      | 31.482        | -0.7040716       | 0.00285806 | No      |
|      |       |        |             |          |         | Ralb      | 5.13499  | 24.1279 | 2.23227          | 5.13599      | 24.1289       | 2.23204785       | 0.00014629 | No      |
|      |       |        |             |          |         | Ralbp1    | 36.7492  | 21.1828 | -0.794823        | 36.7502      | 21.1838       | -0.7947907       | 0.00014629 | No      |
|      |       |        |             |          |         | Ralgapa1  | 14.8601  | 9.12403 | -0.703703        | 14.8611      | 9.12503       | -0.7036397       | 0.00491494 | No      |
|      |       |        |             |          |         | Ralgapb   | 13.9798  | 5.84737 | -1.25748         | 13.9808      | 5.84837       | -1.2573404       | 0.00014629 | No      |

| RRBS |       |        |             |          |         | RNAseq   |           |         |                  |              |               |                  |            |         |
|------|-------|--------|-------------|----------|---------|----------|-----------|---------|------------------|--------------|---------------|------------------|------------|---------|
| gene | Blood | Kidney | methyl.diff | pMWU.fdr | Match ? | gene     | blood     | kidney  | log2(fold_ratio) | blood+ 0.001 | kidney+ 0.001 | log2(fold_ratio) | q_value    | Match ? |
|      |       |        |             |          |         | Ralgds   | 6.09747   | 3.58927 | -0.764523        | 6.09847      | 3.59027       | -0.764355        | 0.00700299 | No      |
|      |       |        |             |          |         | Ralgps2  | 15.9328   | 2.36237 | -2.75369         | 15.9338      | 2.36337       | -2.753173        | 0.00014629 | No      |
|      |       |        |             |          |         | Raly     | 271.323   | 100.908 | -1.42697         | 271.324      | 100.909       | -1.4269618       | 0.00014629 | No      |
|      |       |        |             |          |         | Ramp2    | 0.684541  | 16.3707 | 4.57984          | 0.685541     | 16.3717       | 4.57781737       | 0.00195831 | No      |
|      |       |        |             |          |         | Ranbp1   | 69.771    | 48.2085 | -0.53334         | 69.772       | 48.2095       | -0.5333307       | 0.011151   | No      |
|      |       |        |             |          |         | Ranbp10  | 27.4415   | 8.69656 | -1.65784         | 27.4425      | 8.69756       | -1.6577293       | 0.00014629 | No      |
|      |       |        |             |          |         | Ranbp2   | 30.447    | 20.6561 | -0.55973         | 30.448       | 20.6571       | -0.5597097       | 0.0240648  | No      |
|      |       |        |             |          |         | Ranbp6   | 6.79271   | 2.82051 | -1.26803         | 6.79371      | 2.82151       | -1.2677322       | 0.00014629 | No      |
|      |       |        |             |          |         | Ranbp9   | 52.7788   | 15.8852 | -1.73228         | 52.7798      | 15.8862       | -1.7322118       | 0.00014629 | No      |
|      |       |        |             |          |         | Rangap1  | 45.4066   | 31.0941 | -0.546258        | 45.4076      | 31.0951       | -0.5462465       | 0.00720409 | No      |
|      |       |        |             |          |         | Rap1a    | 149.218   | 44.3373 | -1.75083         | 149.219      | 44.3383       | -1.7508059       | 0.00014629 | No      |
|      |       |        |             |          |         | Rap1b    | 236.347   | 56.3747 | -2.06779         | 236.348      | 56.3757       | -2.0677673       | 0.00014629 | No      |
|      |       |        |             |          |         | Rap1gap2 | 4.75989   | 14.8421 | 1.64069          | 4.76089      | 14.8431       | 1.64048923       | 0.00014629 | No      |
|      |       |        |             |          |         | Rap1gds1 | 34.549    | 11.5308 | -1.58315         | 34.55        | 11.5318       | -1.583068        | 0.00014629 | No      |
|      |       |        |             |          |         | Rap2a    | 5.42427   | 1.72822 | -1.65014         | 5.42527      | 1.72922       | -1.6495735       | 0.00161718 | No      |
|      |       |        |             |          |         | Rap2c    | 27.9354   | 4.74813 | -2.55666         | 27.9364      | 4.74913       | -2.556411        | 0.00014629 | No      |
|      |       |        |             |          |         | Rapgef1  | 24.2692   | 8.39843 | -1.53094         | 24.2702      | 8.39943       | -1.5308227       | 0.00014629 | No      |
|      |       |        |             |          |         | Rapgef2  | 11.3951   | 5.73461 | -0.990644        | 11.3961      | 5.73561       | -0.9905214       | 0.00341151 | No      |
|      |       |        |             |          |         | Rapgef3  | 0.0847054 | 25.1073 | 8.21144          | 0.0857054    | 25.1083       | 8.19456253       | 0.00053701 | No      |
|      |       |        |             |          |         | Rapgef5  | 0.162558  | 1.088   | 2.74265          | 0.163558     | 1.089         | 2.73512972       | 0.00028114 | No      |
|      |       |        |             |          |         | Rapgef6  | 51.0873   | 1.68156 | -4.92509         | 51.0883      | 1.68256       | -4.9242631       | 0.00014629 | No      |
|      |       |        |             |          |         | RAPGEFL1 | 0.206197  | 3.70441 | 4.16715          | 0.207197     | 3.70541       | 4.16055816       | 0.00014629 | No      |
|      |       |        |             |          |         | Rapsn    | 0.746328  | 11.7763 | 3.97993          | 0.747328     | 11.7773       | 3.97812345       | 0.00014629 | No      |
|      |       |        |             |          |         | Rarres2  | 0         | 11.0176 | inf              | 0.001        | 11.0186       | 13.4276533       | 0.00639443 | No      |
|      |       |        |             |          |         | Rars2    | 5.52212   | 16.2874 | 1.56046          | 5.52312      | 16.2884       | 1.56028952       | 0.00053701 | No      |
|      |       |        |             |          |         | Rasa1    | 28.4281   | 7.66516 | -1.89093         | 28.4291      | 7.66616       | -1.8907924       | 0.00014629 | No      |
|      |       |        |             |          |         | Rasa2    | 9.09317   | 3.49864 | -1.37799         | 9.09417      | 3.49964       | -1.3777355       | 0.00014629 | No      |
|      |       |        |             |          |         | Rasa3    | 83.8652   | 2.7944  | -4.90746         | 83.8662      | 2.7954        | -4.9069628       | 0.00014629 | No      |
|      |       |        |             |          |         | RASA4    | 25.7138   | 7.56648 | -1.76485         | 25.7148      | 7.56748       | -1.7647141       | 0.00014629 | No      |
|      |       |        |             |          |         | Rasal3   | 86.8415   | 7.05378 | -3.62192         | 86.8425      | 7.05478       | -3.6217283       | 0.00014629 | No      |
|      |       |        |             |          |         | Rasd1    | 0.898871  | 10.0908 | 3.48879          | 0.899871     | 10.0918       | 3.48732151       | 0.00014629 | No      |
|      |       |        |             |          |         | Rasgef1b | 21.3965   | 5.24393 | -2.02865         | 21.3975      | 5.24493       | -2.0284468       | 0.00014629 | No      |
|      |       |        |             |          |         | Rasgrp1  | 93.0417   | 4.10083 | -4.50389         | 93.0427      | 4.10183       | -4.5035534       | 0.00014629 | No      |
|      |       |        |             |          |         | Rasgrp2  | 131.197   | 11.5633 | -3.50411         | 131.198      | 11.5643       | -3.5039959       | 0.00014629 | No      |
|      |       |        |             |          |         | Rasgrp3  | 0.590578  | 4.0299  | 2.77055          | 0.591578     | 4.0309        | 2.76846169       | 0.0137192  | No      |
|      |       |        |             |          |         | Rasip1   | 0.690721  | 4.36119 | 2.65855          | 0.691721     | 4.36219       | 2.65679045       | 0.00014629 | No      |
|      |       |        |             |          |         | Rasl10a  | 0.0782238 | 4.02306 | 5.68454          | 0.0792238    | 4.02406       | 5.6665741        | 0.0224797  | No      |
|      |       |        |             |          |         | Rasl11a  | 0.661397  | 10.0228 | 3.92163          | 0.662397     | 10.0238       | 3.91958959       | 0.00384649 | No      |
|      |       |        |             |          |         | Rasl11b  | 1.44708   | 24.9859 | 4.1099           | 1.44808      | 24.9869       | 4.10895871       | 0.00014629 | No      |
|      |       |        |             |          |         | Rassf2   | 23.8581   | 5.37287 | -2.15071         | 23.8591      | 5.37387       | -2.1505063       | 0.00014629 | No      |
|      |       |        |             |          |         | Rassf3   | 28.6229   | 16.7905 | -0.769525        | 28.6239      | 16.7915       | -0.7694891       | 0.00014629 | No      |
|      |       |        |             |          |         | Rassf5   | 61.1776   | 7.56604 | -3.01539         | 61.1786      | 7.56704       | -3.0152261       | 0.00014629 | No      |



| RRBS |       |        |             |          |         | RNAseq   |           |          |                  |              |               |                  |            |         |
|------|-------|--------|-------------|----------|---------|----------|-----------|----------|------------------|--------------|---------------|------------------|------------|---------|
| gene | Blood | Kidney | methyl.diff | pMWU.fdr | Match ? | gene     | blood     | kidney   | log2(fold_ratio) | blood+ 0.001 | kidney+ 0.001 | log2(fold_ratio) | q_value    | Match ? |
|      |       |        |             |          |         | Rassf6   | 0.0957328 | 19.3684  | 7.66047          | 0.0967328    | 19.3694       | 7.64555839       | 0.00014629 | No      |
|      |       |        |             |          |         | Rassf8   | 0.148051  | 19.9423  | 7.07359          | 0.149051     | 19.9433       | 7.06395429       | 0.00014629 | No      |
|      |       |        |             |          |         | Rassf9   | 0         | 5.60605  | inf              | 0.001        | 5.60705       | 12.4530262       | 0.00014629 | No      |
|      |       |        |             |          |         | RatNP-3b | 0         | 6.3595   | inf              | 0.001        | 6.3605        | 12.6349245       | 0.00014629 | No      |
|      |       |        |             |          |         | Raver1   | 46.1155   | 17.8148  | -1.37218         | 46.1165      | 17.8158       | -1.3721258       | 0.00014629 | No      |
|      |       |        |             |          |         | Rb1cc1   | 20.3536   | 11.3242  | -0.845876        | 20.3546      | 11.3252       | -0.8458183       | 0.00566132 | No      |
|      |       |        |             |          |         | Rbak     | 4.16635   | 2.5564   | -0.704671        | 4.16735      | 2.5574        | -0.7044524       | 0.0413818  | No      |
|      |       |        |             |          |         | Rbbp5    | 19.0582   | 9.07415  | -1.07058         | 19.0592      | 9.07515       | -1.0704942       | 0.00014629 | No      |
|      |       |        |             |          |         | Rbbp8nl  | 0.0548614 | 6.23472  | 6.82839          | 0.0558614    | 6.23572       | 6.80256061       | 0.0315381  | No      |
|      |       |        |             |          |         | Rbck1    | 117.172   | 50.4794  | -1.21486         | 117.173      | 50.4804       | -1.2148449       | 0.00014629 | No      |
|      |       |        |             |          |         | Rbfa     | 16.2478   | 23.1081  | 0.508154         | 16.2488      | 23.1091       | 0.5081279        | 0.0491588  | No      |
|      |       |        |             |          |         | Rbl1     | 2.01867   | 0.924539 | -1.1266          | 2.01967      | 0.925539      | -1.1257539       | 0.0156475  | No      |
|      |       |        |             |          |         | Rbl2     | 38.207    | 15.2782  | -1.32237         | 38.208       | 15.2792       | -1.3223057       | 0.00639443 | No      |
|      |       |        |             |          |         | Rbm12b   | 9.16316   | 4.21345  | -1.12084         | 9.16416      | 4.21445       | -1.1206583       | 0.00041099 | No      |
|      |       |        |             |          |         | Rbm19    | 3.9228    | 2.17026  | -0.854019        | 3.9238       | 2.17126       | -0.853719        | 0.0141124  | No      |
|      |       |        |             |          |         | Rbm22    | 39.385    | 17.4171  | -1.17714         | 39.386       | 17.4181       | -1.1770956       | 0.00014629 | No      |
|      |       |        |             |          |         | Rbm25    | 75.2741   | 27.8381  | -1.43509         | 75.2751      | 27.8391       | -1.4350601       | 0.00014629 | No      |
|      |       |        |             |          |         | Rbm27    | 20.5782   | 5.26567  | -1.96643         | 20.5792      | 5.26667       | -1.9662239       | 0.00014629 | No      |
|      |       |        |             |          |         | Rbm3     | 273.325   | 58.9276  | -2.2136          | 273.326      | 58.9286       | -2.2135828       | 0.00014629 | No      |
|      |       |        |             |          |         | Rbm33    | 51.4579   | 7.51613  | -2.77533         | 51.4589      | 7.51713       | -2.7751668       | 0.00014629 | No      |
|      |       |        |             |          |         | Rbm34    | 12.3287   | 4.88352  | -1.33603         | 12.3297      | 4.88452       | -1.335849        | 0.00014629 | No      |
|      |       |        |             |          |         | Rbm38    | 46.5163   | 10.6797  | -2.12286         | 46.5173      | 10.6807       | -2.1227612       | 0.00014629 | No      |
|      |       |        |             |          |         | RBM39    | 0.869201  | 2.96964  | 1.77253          | 0.870201     | 2.97064       | 1.7713532        | 0.00014629 | No      |
|      |       |        |             |          |         | Rbm41    | 10.2993   | 0.969918 | -3.40854         | 10.3003      | 0.970918      | -3.4071931       | 0.0142084  | No      |
|      |       |        |             |          |         | Rbm47    | 0.0358403 | 30.9251  | 9.75298          | 0.0368403    | 30.9261       | 9.71332439       | 0.0155518  | No      |
|      |       |        |             |          |         | Rbm48    | 9.94299   | 3.74842  | -1.4074          | 9.94399      | 3.74942       | -1.4071574       | 0.00090728 | No      |
|      |       |        |             |          |         | RBM4B    | 17.7656   | 57.7234  | 1.70007          | 17.7666      | 57.7244       | 1.70001365       | 0.00014629 | No      |
|      |       |        |             |          |         | Rbm5     | 76.6211   | 47.302   | -0.695842        | 76.6221      | 47.303        | -0.6958289       | 0.00041099 | No      |
|      |       |        |             |          |         | Rbm6     | 34.6614   | 18.2043  | -0.929049        | 34.6624      | 18.2053       | -0.929013        | 0.00053701 | No      |
|      |       |        |             |          |         | Rbm7     | 51.2631   | 21.2935  | -1.26751         | 51.2641      | 21.2945       | -1.267468        | 0.00014629 | No      |
|      |       |        |             |          |         | Rbms1    | 19.0037   | 11.4001  | -0.737225        | 19.0047      | 11.4011       | -0.7371832       | 0.00195831 | No      |
|      |       |        |             |          |         | Rbms2    | 74.1304   | 28.9434  | -1.35683         | 74.1314      | 28.9444       | -1.3568005       | 0.00161718 | No      |
|      |       |        |             |          |         | Rbms3    | 0         | 3.06662  | inf              | 0.001        | 3.06762       | 11.5829041       | 0.00014629 | No      |
|      |       |        |             |          |         | Rbmx     | 43.5131   | 14.8325  | -1.55269         | 43.5141      | 14.8335       | -1.5526239       | 0.00014629 | No      |
|      |       |        |             |          |         | Rbmx2    | 10.3837   | 4.97169  | -1.06252         | 10.3847      | 4.97269       | -1.0623611       | 0.00195831 | No      |
|      |       |        |             |          |         | Rbp1     | 0         | 214.85   | inf              | 0.001        | 214.851       | 17.712977        | 0.00014629 | No      |
|      |       |        |             |          |         | Rbpj     | 6.66678   | 4.80049  | -0.473808        | 6.66778      | 4.80149       | -0.4737243       | 0.0418048  | No      |
|      |       |        |             |          |         | Rbpms    | 3.46043   | 156.169  | 5.49601          | 3.46143      | 156.17        | 5.49560536       | 0.00014629 | No      |
|      |       |        |             |          |         | Rc3h1    | 20.9818   | 2.90661  | -2.85173         | 20.9828      | 2.90761       | -2.8513015       | 0.00014629 | No      |
|      |       |        |             |          |         | Rc3h2    | 22.4084   | 6.46375  | -1.7936          | 22.4094      | 6.46475       | -1.7934375       | 0.00014629 | No      |
|      |       |        |             |          |         | Rcan3    | 36.2502   | 8.80707  | -2.04126         | 36.2512      | 8.80807       | -2.0411309       | 0.00014629 | No      |
|      |       |        |             |          |         | Rcbtb2   | 16.1821   | 36.2269  | 1.16266          | 16.1831      | 36.2279       | 1.16261319       | 0.0232282  | No      |

| RRBS |       |        |             |          |         | RNAseq |          |          |                  |              |               |                  |            |         |
|------|-------|--------|-------------|----------|---------|--------|----------|----------|------------------|--------------|---------------|------------------|------------|---------|
| gene | Blood | Kidney | methyl.diff | pMWU.fdr | Match ? | gene   | blood    | kidney   | log2(fold_ratio) | blood+ 0.001 | kidney+ 0.001 | log2(fold_ratio) | q_value    | Match ? |
|      |       |        |             |          |         | Rcc1   | 12.4539  | 5.84901  | -1.09033         | 12.4549      | 5.85001       | -1.0902024       | 0.00090728 | No      |
|      |       |        |             |          |         | Rcc2   | 107.396  | 28.0256  | -1.93812         | 107.397      | 28.0266       | -1.9380851       | 0.00014629 | No      |
|      |       |        |             |          |         | Rchy1  | 18.8111  | 33.5177  | 0.833341         | 18.8121      | 33.5187       | 0.83330529       | 0.00028114 | No      |
|      |       |        |             |          |         | Rcn1   | 17.4647  | 8.16024  | -1.09776         | 17.4657      | 8.16124       | -1.0976642       | 0.00014629 | No      |
|      |       |        |             |          |         | Rcn2   | 5.06041  | 10.9924  | 1.11918          | 5.06141      | 10.9934       | 1.1190264        | 0.00041099 | No      |
|      |       |        |             |          |         | Rcn3   | 1.39139  | 4.28929  | 1.62421          | 1.39239      | 4.29029       | 1.62351181       | 0.00954394 | No      |
|      |       |        |             |          |         | Rcor3  | 5.04703  | 2.05379  | -1.29715         | 5.04803      | 2.05479       | -1.2967295       | 0.00427532 | No      |
|      |       |        |             |          |         | Rcsd1  | 113.568  | 8.23211  | -3.78615         | 113.569      | 8.23311       | -3.7859878       | 0.00014629 | No      |
|      |       |        |             |          |         | Rdh14  | 6.53482  | 11.5933  | 0.827078         | 6.53582      | 11.5943       | 0.82697556       | 0.013146   | No      |
|      |       |        |             |          |         | Rdh16  | 1.78615  | 17.4087  | 3.28488          | 1.78715      | 17.4097       | 3.28415871       | 0.00014629 | No      |
|      |       |        |             |          |         | Rdm1   | 8.7714   | 28.6368  | 1.70699          | 8.7724       | 28.6378       | 1.70687716       | 0.00014629 | No      |
|      |       |        |             |          |         | Rdx    | 13.0484  | 37.9607  | 1.54063          | 13.0494      | 37.9617       | 1.54056113       | 0.00274649 | No      |
|      |       |        |             |          |         | Reck   | 0.489848 | 1.34883  | 1.4613           | 0.490848     | 1.34983       | 1.45942948       | 0.0495818  | No      |
|      |       |        |             |          |         | Recql  | 25.7952  | 11.7422  | -1.1354          | 25.7962      | 11.7432       | -1.135333        | 0.0117565  | No      |
|      |       |        |             |          |         | Recql5 | 9.16243  | 29.1661  | 1.67049          | 9.16343      | 29.1671       | 1.67038232       | 0.00090728 | No      |
|      |       |        |             |          |         | Reep2  | 0.203242 | 1.2537   | 2.62492          | 0.204242     | 1.2547        | 2.61899098       | 0.0245946  | No      |
|      |       |        |             |          |         | Reep4  | 29.6991  | 16.4125  | -0.855626        | 29.7001      | 16.4135       | -0.8555849       | 0.00263402 | No      |
|      |       |        |             |          |         | Reep6  | 0.365347 | 4.88322  | 3.7405           | 0.366347     | 4.88422       | 3.73684548       | 0.00014629 | No      |
|      |       |        |             |          |         | Rel    | 7.77813  | 0.910001 | -3.09548         | 7.77913      | 0.911001      | -3.0940843       | 0.00014629 | No      |
|      |       |        |             |          |         | Rela   | 40.9659  | 28.5843  | -0.519199        | 40.9669      | 28.5853       | -0.5191853       | 0.00924781 | No      |
|      |       |        |             |          |         | Relt   | 15.2475  | 2.56513  | -2.57146         | 15.2485      | 2.56613       | -2.5710012       | 0.00014629 | No      |
|      |       |        |             |          |         | Rem2   | 0.203869 | 2.01786  | 3.30711          | 0.204869     | 2.01886       | 3.30076727       | 0.0085437  | No      |
|      |       |        |             |          |         | Repin1 | 0.701761 | 15.0468  | 4.42233          | 0.702761     | 15.0478       | 4.42037464       | 0.00014629 | No      |
|      |       |        |             |          |         | Reps2  | 0        | 1.24251  | inf              | 0.001        | 1.24351       | 10.2802024       | 0.00173187 | No      |
|      |       |        |             |          |         | Rest   | 17.1012  | 9.2003   | -0.894346        | 17.1022      | 9.2013        | -0.8942723       | 0.0342694  | No      |
|      |       |        |             |          |         | Rev1   | 47.3964  | 18.1183  | -1.38733         | 47.3974      | 18.1193       | -1.3872807       | 0.0327779  | No      |
|      |       |        |             |          |         | Rev3l  | 17.1854  | 6.11154  | -1.49157         | 17.1864      | 6.11254       | -1.4914235       | 0.00090728 | No      |
|      |       |        |             |          |         | Rexo1  | 44.4492  | 23.2523  | -0.934785        | 44.4502      | 23.2533       | -0.9347544       | 0.00014629 | No      |
|      |       |        |             |          |         | Rexo4  | 47.5934  | 25.3461  | -0.908996        | 47.5944      | 25.3471       | -0.9089711       | 0.00014629 | No      |
|      |       |        |             |          |         | Rfc1   | 15.1978  | 10.1299  | -0.585242        | 15.1988      | 10.1309       | -0.5851951       | 0.0223869  | No      |
|      |       |        |             |          |         | Rfc5   | 19.381   | 11.4661  | -0.757276        | 19.382       | 11.4671       | -0.7572169       | 0.00274649 | No      |
|      |       |        |             |          |         | Rfesd  | 15.5251  | 36.5286  | 1.23442          | 15.5261      | 36.5296       | 1.23437047       | 0.00014629 | No      |
|      |       |        |             |          |         | RFFL   | 28.2098  | 15.9544  | -0.822242        | 28.2108      | 15.9554       | -0.8222028       | 0.00318982 | No      |
|      |       |        |             |          |         | Rfk    | 11.0449  | 75.2595  | 2.7685           | 11.0459      | 75.2605       | 2.7683819        | 0.00014629 | No      |
|      |       |        |             |          |         | Rfng   | 11.3955  | 22.3355  | 0.970874         | 11.3965      | 22.3365       | 0.97081232       | 0.00014629 | No      |
|      |       |        |             |          |         | Rftn1  | 27.5334  | 2.59005  | -3.41013         | 27.5344      | 2.59105       | -3.4096264       | 0.00014629 | No      |
|      |       |        |             |          |         | Rfx1   | 73.6407  | 17.6674  | -2.05941         | 73.6417      | 17.6684       | -2.0593515       | 0.00014629 | No      |
|      |       |        |             |          |         | Rfx7   | 27.1046  | 3.06751  | -3.1434          | 27.1056      | 3.06851       | -3.1429808       | 0.00014629 | No      |
|      |       |        |             |          |         | Rfx8   | 0        | 1.88763  | inf              | 0.001        | 1.88863       | 10.8831244       | 0.00014629 | No      |
|      |       |        |             |          |         | Rfxank | 11.9802  | 23.7493  | 0.98723          | 11.9812      | 23.7503       | 0.98717333       | 0.015456   | No      |
|      |       |        |             |          |         | Rfxap  | 36.1151  | 13.546   | -1.41473         | 36.1161      | 13.547        | -1.4146687       | 0.00014629 | No      |
|      |       |        |             |          |         | Rgcc   | 97.6664  | 9.70135  | -3.3316          | 97.6674      | 9.70235       | -3.331471        | 0.00014629 | No      |

| RRBS |       |        |             |          |         | RNAseq     |          |         |                  |              |               |                  |            |         |
|------|-------|--------|-------------|----------|---------|------------|----------|---------|------------------|--------------|---------------|------------------|------------|---------|
| gene | Blood | Kidney | methyl.diff | pMWU.fdr | Match ? | gene       | blood    | kidney  | log2(fold_ratio) | blood+ 0.001 | kidney+ 0.001 | log2(fold_ratio) | q_value    | Match ? |
|      |       |        |             |          |         | RGD1302996 | 30.1699  | 96.5636 | 1.67837          | 30.1709      | 96.5646       | 1.67833667       | 0.00014629 | No      |
|      |       |        |             |          |         | RGD1303003 | 81.443   | 212.45  | 1.38326          | 81.444       | 212.451       | 1.38324981       | 0.00014629 | No      |
|      |       |        |             |          |         | RGD1303130 | 23.5295  | 59.5142 | 1.33876          | 23.5305      | 59.5152       | 1.3387262        | 0.00014629 | No      |
|      |       |        |             |          |         | RGD1303271 | 0        | 6.18605 | inf              | 0.001        | 6.18705       | 12.595036        | 0.0487067  | No      |
|      |       |        |             |          |         | RGD1304567 | 17.3984  | 45.1011 | 1.37421          | 17.3994      | 45.1021       | 1.37415705       | 0.00014629 | No      |
|      |       |        |             |          |         | RGD1304595 | 14.1009  | 3.74502 | -1.91274         | 14.1019      | 3.74602       | -1.912459        | 0.00014629 | No      |
|      |       |        |             |          |         | RGD1304622 | 0.79569  | 36.3745 | 5.51457          | 0.79669      | 36.3755       | 5.5128048        | 0.00014629 | No      |
|      |       |        |             |          |         | RGD1304624 | 1.89048  | 7.91001 | 2.06492          | 1.89148      | 7.91101       | 2.06434637       | 0.0175479  | No      |
|      |       |        |             |          |         | RGD1304694 | 4.80548  | 26.568  | 2.46694          | 4.80648      | 26.569        | 2.46669129       | 0.00014629 | No      |
|      |       |        |             |          |         | RGD1304704 | 121.507  | 234.597 | 0.949144         | 121.508      | 234.598       | 0.94913941       | 0.00014629 | No      |
|      |       |        |             |          |         | RGD1304770 | 0.239706 | 25.3265 | 6.72324          | 0.240706     | 25.3275       | 6.71728877       | 0.00014629 | No      |
|      |       |        |             |          |         | RGD1304884 | 0.455128 | 2.44842 | 2.42751          | 0.456128     | 2.44942       | 2.42492953       | 0.00028114 | No      |
|      |       |        |             |          |         | RGD1304982 | 3.68287  | 50.3203 | 3.77224          | 3.68387      | 50.3213       | 3.77187514       | 0.00014629 | No      |
|      |       |        |             |          |         | RGD1305045 | 36.4113  | 52.8975 | 0.538812         | 36.4123      | 52.8985       | 0.53880094       | 0.0393001  | No      |
|      |       |        |             |          |         | RGD1305235 | 7.23104  | 3.99413 | -0.856322        | 7.23204      | 3.99513       | -0.8561602       | 0.00533979 | No      |
|      |       |        |             |          |         | RGD1305350 | 22.5451  | 16.4104 | -0.458201        | 22.5461      | 16.4114       | -0.4581796       | 0.0394714  | No      |
|      |       |        |             |          |         | RGD1305422 | 5.99601  | 15.4977 | 1.36998          | 5.99701      | 15.4987       | 1.36983193       | 0.00014629 | No      |
|      |       |        |             |          |         | RGD1305464 | 2.74397  | 1.12989 | -1.28008         | 2.74497      | 1.13089       | -1.2793318       | 0.00252712 | No      |
|      |       |        |             |          |         | RGD1305508 | 24.1142  | 10.0492 | -1.2628          | 24.1152      | 10.0502       | -1.2627186       | 0.00028114 | No      |
|      |       |        |             |          |         | RGD1305587 | 23.4966  | 45.0247 | 0.938262         | 23.4976      | 45.0257       | 0.9382353        | 0.00014629 | No      |
|      |       |        |             |          |         | RGD1305645 | 0        | 32.5957 | inf              | 0.001        | 32.5967       | 14.9924383       | 0.00014629 | No      |

| RRBS |       |        |             |          |         | RNAseq     |           |          |                  |              |               |                  |            |         |
|------|-------|--------|-------------|----------|---------|------------|-----------|----------|------------------|--------------|---------------|------------------|------------|---------|
| gene | Blood | Kidney | methyl.diff | pMWU.fdr | Match ? | gene       | blood     | kidney   | log2(fold_ratio) | blood+ 0.001 | kidney+ 0.001 | log2(fold_ratio) | q_value    | Match ? |
|      |       |        |             |          |         | RGD1305743 | 21.5949   | 7.18937  | -1.58675         | 21.5959      | 7.19037       | -1.5866195       | 0.00014629 | No      |
|      |       |        |             |          |         | RGD1305834 | 4.41368   | 0.438872 | -3.33011         | 4.41468      | 0.439872      | -3.3271532       | 0.00014629 | No      |
|      |       |        |             |          |         | RGD1306058 | 25.8094   | 52.4826  | 1.02394          | 25.8104      | 52.4836       | 1.02391418       | 0.00014629 | No      |
|      |       |        |             |          |         | RGD1306151 | 0.582442  | 6.0668   | 3.38075          | 0.583442     | 6.0678        | 3.37851238       | 0.00014629 | No      |
|      |       |        |             |          |         | RGD1306215 | 22.3871   | 43.7298  | 0.965946         | 22.3881      | 43.7308       | 0.96591764       | 0.00028114 | No      |
|      |       |        |             |          |         | RGD1306271 | 0.0536479 | 1.20249  | 4.48636          | 0.0546479    | 1.20349       | 4.46091429       | 0.00843988 | No      |
|      |       |        |             |          |         | RGD1306353 | 27.9631   | 8.80744  | -1.66673         | 27.9641      | 8.80844       | -1.6666175       | 0.00014629 | No      |
|      |       |        |             |          |         | RGD1306556 | 0.136785  | 5.73704  | 5.39032          | 0.137785     | 5.73804       | 5.38006728       | 0.00014629 | No      |
|      |       |        |             |          |         | RGD1306739 | 8.34386   | 28.2579  | 1.75987          | 8.34486      | 28.2589       | 1.75974556       | 0.00041099 | No      |
|      |       |        |             |          |         | RGD1306772 | 3.23648   | 7.9848   | 1.30283          | 3.23748      | 7.9858        | 1.30256566       | 0.00173187 | No      |
|      |       |        |             |          |         | RGD1306820 | 9.74487   | 4.19545  | -1.21582         | 9.74587      | 4.19645       | -1.2156216       | 0.00014629 | No      |
|      |       |        |             |          |         | RGD1306941 | 1.68608   | 2.86233  | 0.763517         | 1.68708      | 2.86333       | 0.76316556       | 0.0461776  | No      |
|      |       |        |             |          |         | RGD1306954 | 25.7927   | 57.125   | 1.14716          | 25.7937      | 57.126        | 1.14712878       | 0.00014629 | No      |
|      |       |        |             |          |         | RGD1307100 | 56.7421   | 25.4778  | -1.15518         | 56.7431      | 25.4788       | -1.1551476       | 0.00263402 | No      |
|      |       |        |             |          |         | RGD1307235 | 43.2574   | 11.7915  | -1.8752          | 43.2584      | 11.7925       | -1.8751107       | 0.00014629 | No      |
|      |       |        |             |          |         | RGD1307262 | 14.7679   | 56.6859  | 1.94053          | 14.7689      | 56.6869       | 1.940453         | 0.00014629 | No      |
|      |       |        |             |          |         | RGD1307315 | 0.506698  | 10.9903  | 4.43896          | 0.507698     | 10.9913       | 4.43624764       | 0.00014629 | No      |
|      |       |        |             |          |         | RGD1307325 | 6.19585   | 3.74772  | -0.72529         | 6.19685      | 3.74872       | -0.725137        | 0.00751085 | No      |
|      |       |        |             |          |         | RGD1307365 | 7.35525   | 3.41587  | -1.10652         | 7.35625      | 3.41687       | -1.1062952       | 0.00090728 | No      |
|      |       |        |             |          |         | RGD1307461 | 0.486956  | 2.12295  | 2.12421          | 0.487956     | 2.12395       | 2.12192684       | 0.00066215 | No      |
|      |       |        |             |          |         | RGD1307526 | 82.463    | 51.8207  | -0.670219        | 82.464       | 51.8217       | -0.6702081       | 0.00679736 | No      |

| RRBS |       |        |             |          |         | RNAseq     |           |         |                  |              |               |                  |            |         |
|------|-------|--------|-------------|----------|---------|------------|-----------|---------|------------------|--------------|---------------|------------------|------------|---------|
| gene | Blood | Kidney | methyl.diff | pMWU.fdr | Match ? | gene       | blood     | kidney  | log2(fold_ratio) | blood+ 0.001 | kidney+ 0.001 | log2(fold_ratio) | q_value    | Match ? |
|      |       |        |             |          |         | RGD1307554 | 7.32447   | 3.08907 | -1.24555         | 7.32547      | 3.09007       | -1.2452818       | 0.00126596 | No      |
|      |       |        |             |          |         | RGD1307752 | 95.5906   | 145.381 | 0.604895         | 95.5916      | 145.382       | 0.6048929        | 0.0225745  | No      |
|      |       |        |             |          |         | RGD1307929 | 30.8049   | 20.5374 | -0.584907        | 30.8059      | 20.5384       | -0.5848829       | 0.00833592 | No      |
|      |       |        |             |          |         | RGD1307947 | 7.43089   | 3.25555 | -1.19063         | 7.43189      | 3.25655       | -1.1903848       | 0.0291608  | No      |
|      |       |        |             |          |         | RGD1308005 | 5.59032   | 2.07913 | -1.42695         | 5.59132      | 2.08013       | -1.4265152       | 0.00014629 | No      |
|      |       |        |             |          |         | RGD1308106 | 13.437    | 6.20565 | -1.11455         | 13.438       | 6.20665       | -1.1144317       | 0.00812679 | No      |
|      |       |        |             |          |         | RGD1308114 | 0.0586921 | 52.3516 | 9.80085          | 0.0596921    | 52.3526       | 9.77650546       | 0.0233164  | No      |
|      |       |        |             |          |         | RGD1308234 | 166.396   | 43.9897 | -1.91938         | 166.397      | 43.9907       | -1.919359        | 0.00014629 | No      |
|      |       |        |             |          |         | RGD1308297 | 35.5745   | 16.4054 | -1.11667         | 35.5755      | 16.4064       | -1.1166253       | 0.00014629 | No      |
|      |       |        |             |          |         | RGD1308428 | 6.89964   | 3.44981 | -1               | 6.90064      | 3.45081       | -0.9997951       | 0.00028114 | No      |
|      |       |        |             |          |         | RGD1308601 | 10.5632   | 5.07769 | -1.0568          | 10.5642      | 5.07869       | -1.0566552       | 0.00014629 | No      |
|      |       |        |             |          |         | RGD1308706 | 12.9831   | 23.7919 | 0.873832         | 12.9841      | 23.7929       | 0.87378511       | 0.00053701 | No      |
|      |       |        |             |          |         | RGD1308923 | 15.0927   | 40.2901 | 1.41658          | 15.0937      | 40.2911       | 1.41651469       | 0.00138312 | No      |
|      |       |        |             |          |         | RGD1309079 | 4.79392   | 8.18284 | 0.771394         | 4.79492      | 8.18384       | 0.77127119       | 0.00241835 | No      |
|      |       |        |             |          |         | RGD1309104 | 36.981    | 3.40668 | -3.44035         | 36.982       | 3.40768       | -3.4399615       | 0.00014629 | No      |
|      |       |        |             |          |         | RGD1309313 | 7.94938   | 13.3506 | 0.747989         | 7.95038      | 13.3516       | 0.74791692       | 0.00618538 | No      |
|      |       |        |             |          |         | RGD1309374 | 18.3322   | 51.35   | 1.48599          | 18.3332      | 51.351        | 1.48593375       | 0.0129486  | No      |
|      |       |        |             |          |         | RGD1309534 | 1.42557   | 145.611 | 6.67444          | 1.42657      | 145.612       | 6.6734349        | 0.00014629 | No      |
|      |       |        |             |          |         | RGD1309594 | 2.65148   | 19.9814 | 2.91379          | 2.65248      | 19.9824       | 2.91331609       | 0.00014629 | No      |
|      |       |        |             |          |         | RGD1309621 | 37.146    | 12.5502 | -1.5655          | 37.147       | 12.5512       | -1.5654204       | 0.00126596 | No      |
|      |       |        |             |          |         | RGD1309747 | 18.6645   | 4.99535 | -1.90164         | 18.6655      | 4.99635       | -1.9014277       | 0.00014629 | No      |

| RRBS |       |        |             |          |         | RNAseq     |           |         |                  |              |               |                  |            |         |
|------|-------|--------|-------------|----------|---------|------------|-----------|---------|------------------|--------------|---------------|------------------|------------|---------|
| gene | Blood | Kidney | methyl.diff | pMWU.fdr | Match ? | gene       | blood     | kidney  | log2(fold_ratio) | blood+ 0.001 | kidney+ 0.001 | log2(fold_ratio) | q_value    | Match ? |
|      |       |        |             |          |         | RGD1309762 | 11.3236   | 4.80227 | -1.23754         | 11.3246      | 4.80327       | -1.2373713       | 0.0156475  | No      |
|      |       |        |             |          |         | RGD1309808 | 331.591   | 9.19953 | -5.1717          | 331.592      | 9.20053       | -5.1715484       | 0.00014629 | No      |
|      |       |        |             |          |         | RGD1309821 | 0.0604529 | 2.87464 | 5.57143          | 0.0614529    | 2.87564       | 5.54825817       | 0.00014629 | No      |
|      |       |        |             |          |         | RGD1309903 | 0         | 1.17046 | inf              | 0.001        | 1.17146       | 10.194092        | 0.00014629 | No      |
|      |       |        |             |          |         | RGD1309995 | 53.5303   | 13.8096 | -1.95468         | 53.5313      | 13.8106       | -1.9546067       | 0.00014629 | No      |
|      |       |        |             |          |         | RGD1310016 | 5.11674   | 2.54203 | -1.00924         | 5.11774      | 2.54303       | -1.0089584       | 0.0417203  | No      |
|      |       |        |             |          |         | RGD1310081 | 1.17673   | 5.27021 | 2.16308          | 1.17773      | 5.27121       | 2.16212534       | 0.00014629 | No      |
|      |       |        |             |          |         | RGD1310127 | 18.8393   | 291.295 | 3.95066          | 18.8403      | 291.296       | 3.95059205       | 0.00014629 | No      |
|      |       |        |             |          |         | RGD1310352 | 15.8083   | 37.918  | 1.2622           | 15.8093      | 37.919        | 1.26214743       | 0.00014629 | No      |
|      |       |        |             |          |         | RGD1310429 | 4.15833   | 2.593   | -0.681383        | 4.15933      | 2.594         | -0.6811727       | 0.0363282  | No      |
|      |       |        |             |          |         | RGD1310553 | 7.87912   | 3.76925 | -1.06376         | 7.88012      | 3.77025       | -1.0635574       | 0.00014629 | No      |
|      |       |        |             |          |         | RGD1310592 | 24.6835   | 13.5411 | -0.866197        | 24.6845      | 13.5421       | -0.8661539       | 0.00438237 | No      |
|      |       |        |             |          |         | RGD1310727 | 26.4858   | 13.4421 | -0.97846         | 26.4868      | 13.4431       | -0.9784077       | 0.00014629 | No      |
|      |       |        |             |          |         | RGD1310852 | 6.09348   | 2.59041 | -1.23409         | 6.09448      | 2.59141       | -1.2337658       | 0.0106553  | No      |
|      |       |        |             |          |         | RGD1311084 | 0         | 15.2742 | inf              | 0.001        | 15.2752       | 13.8989036       | 0.00014629 | No      |
|      |       |        |             |          |         | RGD1311345 | 11.4185   | 70.4179 | 2.62457          | 11.4195      | 70.4189       | 2.62446321       | 0.00014629 | No      |
|      |       |        |             |          |         | RGD1311458 | 22.9056   | 7.12664 | -1.68441         | 22.9066      | 7.12764       | -1.684267        | 0.00014629 | No      |
|      |       |        |             |          |         | RGD1311517 | 8.77348   | 2.08607 | -2.07236         | 8.77448      | 2.08707       | -2.0718346       | 0.00014629 | No      |
|      |       |        |             |          |         | RGD1311564 | 1.48359   | 4.17021 | 1.49102          | 1.48459      | 4.17121       | 1.49040139       | 0.00126596 | No      |
|      |       |        |             |          |         | RGD1311648 | 14.7337   | 22.9727 | 0.640796         | 14.7347      | 22.9737       | 0.64076554       | 0.00544794 | No      |
|      |       |        |             |          |         | RGD1311703 | 71.6585   | 48.4783 | -0.563798        | 71.6595      | 48.4793       | -0.5637891       | 0.00374149 | No      |

| RRBS |       |        |             |          |         | RNAseq     |          |         |                  |              |               |                  |            |         |
|------|-------|--------|-------------|----------|---------|------------|----------|---------|------------------|--------------|---------------|------------------|------------|---------|
| gene | Blood | Kidney | methyl.diff | pMWU.fdr | Match ? | gene       | blood    | kidney  | log2(fold_ratio) | blood+ 0.001 | kidney+ 0.001 | log2(fold_ratio) | q_value    | Match ? |
|      |       |        |             |          |         | RGD1311756 | 0.220167 | 18.2909 | 6.37638          | 0.221167     | 18.2919       | 6.36992499       | 0.00014629 | No      |
|      |       |        |             |          |         | RGD1311805 | 23.9994  | 10.6619 | -1.17053         | 24.0004      | 10.6629       | -1.1704586       | 0.00014629 | No      |
|      |       |        |             |          |         | RGD1311847 | 11.1159  | 25.5382 | 1.20003          | 11.1169      | 25.5392       | 1.19995879       | 0.0178218  | No      |
|      |       |        |             |          |         | RGD1311899 | 47.0034  | 87.8982 | 0.903067         | 47.0044      | 87.8992       | 0.90305422       | 0.00014629 | No      |
|      |       |        |             |          |         | RGD1312026 | 4.29877  | 1.29628 | -1.72955         | 4.29977      | 1.29728       | -1.7287696       | 0.00014629 | No      |
|      |       |        |             |          |         | RGD1359108 | 7.03544  | 3.08356 | -1.19004         | 7.03644      | 3.08456       | -1.189781        | 0.00014629 | No      |
|      |       |        |             |          |         | RGD1359127 | 10.9912  | 25.3848 | 1.20761          | 10.9922      | 25.3858       | 1.20754157       | 0.00014629 | No      |
|      |       |        |             |          |         | RGD1359158 | 37.3008  | 15.8206 | -1.2374          | 37.3018      | 15.8216       | -1.2373497       | 0.00014629 | No      |
|      |       |        |             |          |         | RGD1359529 | 455.784  | 243.577 | -0.903971        | 455.785      | 243.578       | -0.9039696       | 0.00053701 | No      |
|      |       |        |             |          |         | RGD1359634 | 2.39898  | 11.8417 | 2.30339          | 2.39998      | 11.8427       | 2.30290375       | 0.0077167  | No      |
|      |       |        |             |          |         | RGD1559441 | 7.30179  | 2.26561 | -1.68835         | 7.30279      | 2.26661       | -1.6879116       | 0.00649695 | No      |
|      |       |        |             |          |         | RGD1559442 | 0.458704 | 7.01098 | 3.93398          | 0.459704     | 7.01198       | 3.93104476       | 0.00014629 | No      |
|      |       |        |             |          |         | RGD1559600 | 0        | 4.73076 | inf              | 0.001        | 4.73176       | 12.2081612       | 0.00014629 | No      |
|      |       |        |             |          |         | RGD1559672 | 0.536466 | 2.67006 | 2.31531          | 0.537466     | 2.67106       | 2.31316699       | 0.0399122  | No      |
|      |       |        |             |          |         | RGD1559786 | 8.53914  | 30.1703 | 1.82097          | 8.54014      | 30.1713       | 1.82084523       | 0.00014629 | No      |
|      |       |        |             |          |         | RGD1559841 | 2.62953  | 10.1704 | 1.9515           | 2.63053      | 10.1714       | 1.95109286       | 0.00014629 | No      |
|      |       |        |             |          |         | RGD1559891 | 0        | 3.91704 | inf              | 0.001        | 3.91804       | 11.9359164       | 0.00014629 | No      |
|      |       |        |             |          |         | RGD1559896 | 5.52147  | 27.6181 | 2.32249          | 5.52247      | 27.6191       | 2.32228073       | 0.00014629 | No      |
|      |       |        |             |          |         | RGD1559899 | 0        | 10.987  | inf              | 0.001        | 10.988        | 13.4236412       | 0.00014629 | No      |
|      |       |        |             |          |         | RGD1559904 | 9.94294  | 3.78248 | -1.39434         | 9.94394      | 3.78348       | -1.3941038       | 0.00014629 | No      |
|      |       |        |             |          |         | RGD1559909 | 15.3476  | 41.678  | 1.44127          | 15.3486      | 41.679        | 1.4412136        | 0.0085437  | No      |

| RRBS |       |        |             |          |         | RNAseq     |          |          |                  |              |               |                  |            |         |
|------|-------|--------|-------------|----------|---------|------------|----------|----------|------------------|--------------|---------------|------------------|------------|---------|
| gene | Blood | Kidney | methyl.diff | pMWU.fdr | Match ? | gene       | blood    | kidney   | log2(fold_ratio) | blood+ 0.001 | kidney+ 0.001 | log2(fold_ratio) | q_value    | Match ? |
|      |       |        |             |          |         | RGD1559971 | 1.72274  | 0.729047 | -1.24062         | 1.72374      | 0.730047      | -1.2394809       | 0.00740907 | No      |
|      |       |        |             |          |         | RGD1560010 | 2.93404  | 1.18687  | -1.30573         | 2.93504      | 1.18787       | -1.3050032       | 0.0177285  | No      |
|      |       |        |             |          |         | RGD1560175 | 4.45435  | 1.58935  | -1.48678         | 4.45535      | 1.59035       | -1.4861945       | 0.00014629 | No      |
|      |       |        |             |          |         | RGD1560220 | 50.7983  | 113.744  | 1.16293          | 50.7993      | 113.745       | 1.16292261       | 0.00782085 | No      |
|      |       |        |             |          |         | RGD1560289 | 1.479    | 0        | -inf             | 1.48         | 0.001         | -10.531381       | 0.00014629 | No      |
|      |       |        |             |          |         | RGD1560398 | 6.03251  | 11.5859  | 0.941533         | 6.03351      | 11.5869       | 0.94142519       | 0.0459183  | No      |
|      |       |        |             |          |         | RGD1560648 | 184.173  | 497.875  | 1.43472          | 184.174      | 497.876       | 1.43471706       | 0.00014629 | No      |
|      |       |        |             |          |         | RGD1560687 | 2.5407   | 21.1523  | 3.05751          | 2.5417       | 21.1533       | 3.05701708       | 0.00014629 | No      |
|      |       |        |             |          |         | RGD1560718 | 0        | 0.913813 | inf              | 0.001        | 0.914813      | 9.83733306       | 0.00014629 | No      |
|      |       |        |             |          |         | RGD1560813 | 86.2596  | 55.2094  | -0.643771        | 86.2606      | 55.2104       | -0.6437617       | 0.0174574  | No      |
|      |       |        |             |          |         | RGD1560833 | 2.18127  | 0.520237 | -2.06793         | 2.18227      | 0.521237      | -2.0658182       | 0.00761239 | No      |
|      |       |        |             |          |         | RGD1560849 | 34.6902  | 0.607812 | -5.83476         | 34.6912      | 0.608812      | -5.8324291       | 0.011151   | No      |
|      |       |        |             |          |         | RGD1560880 | 0.280631 | 9.01141  | 5.00501          | 0.281631     | 9.01241       | 5.0000349        | 0.00720409 | No      |
|      |       |        |             |          |         | RGD1560888 | 18.103   | 10.1739  | -0.831357        | 18.104       | 10.1749       | -0.8312939       | 0.00053701 | No      |
|      |       |        |             |          |         | RGD1561113 | 9.96929  | 56.4557  | 2.50156          | 9.97029      | 56.4567       | 2.50143743       | 0.00944816 | No      |
|      |       |        |             |          |         | RGD1561145 | 39.3302  | 2.67641  | -3.87726         | 39.3312      | 2.67741       | -3.8767642       | 0.00014629 | No      |
|      |       |        |             |          |         | RGD1561157 | 12.7313  | 4.71849  | -1.43198         | 12.7323      | 4.71949       | -1.4317902       | 0.00014629 | No      |
|      |       |        |             |          |         | RGD1561328 | 29.4055  | 58.5097  | 0.992587         | 29.4065      | 58.5107       | 0.9925654        | 0.00014629 | No      |
|      |       |        |             |          |         | RGD1561333 | 13.5848  | 4.11907  | -1.72161         | 13.5858      | 4.12007       | -1.7213588       | 0.00252712 | No      |
|      |       |        |             |          |         | RGD1561444 | 0.192876 | 1.61172  | 3.06286          | 0.193876     | 1.61272       | 3.05628985       | 0.0437514  | No      |
|      |       |        |             |          |         | RGD1561589 | 29.1229  | 52.9294  | 0.861916         | 29.1239      | 52.9304       | 0.861893         | 0.00028114 | No      |



| RRBS |       |        |             |          |         | RNAseq     |           |          |                  |              |               |                  |            |         |
|------|-------|--------|-------------|----------|---------|------------|-----------|----------|------------------|--------------|---------------|------------------|------------|---------|
| gene | Blood | Kidney | methyl.diff | pMWU.fdr | Match ? | gene       | blood     | kidney   | log2(fold_ratio) | blood+ 0.001 | kidney+ 0.001 | log2(fold_ratio) | q_value    | Match ? |
|      |       |        |             |          |         | RGD1561662 | 0.0207215 | 6.46545  | 8.28548          | 0.0217215    | 6.46645       | 8.21770636       | 0.00740907 | No      |
|      |       |        |             |          |         | RGD1561796 | 0.49196   | 7.41109  | 3.91307          | 0.49296      | 7.41209       | 3.91033791       | 0.00618538 | No      |
|      |       |        |             |          |         | RGD1561909 | 0.580107  | 2.65794  | 2.19592          | 0.581107     | 2.65894       | 2.19397548       | 0.00053701 | No      |
|      |       |        |             |          |         | RGD1561963 | 87.9686   | 8.173    | -3.42805         | 87.9696      | 8.174         | -3.4278909       | 0.00014629 | No      |
|      |       |        |             |          |         | RGD1562037 | 2.8093    | 7.35283  | 1.38809          | 2.8103       | 7.35383       | 1.38777168       | 0.00014629 | No      |
|      |       |        |             |          |         | RGD1562084 | 0         | 27.2491  | inf              | 0.001        | 27.2501       | 14.7339739       | 0.00014629 | No      |
|      |       |        |             |          |         | RGD1562107 | 0         | 1.72378  | inf              | 0.001        | 1.72478       | 10.7521966       | 0.00014629 | No      |
|      |       |        |             |          |         | RGD1562136 | 13.1283   | 20.7119  | 0.657775         | 13.1293      | 20.7129       | 0.65773956       | 0.00307875 | No      |
|      |       |        |             |          |         | RGD1562161 | 2.47548   | 0.687931 | -1.84737         | 2.47648      | 0.688931      | -1.8458596       | 0.00274649 | No      |
|      |       |        |             |          |         | RGD1562178 | 25.8944   | 113.286  | 2.12926          | 25.8954      | 113.287       | 2.12921457       | 0.00014629 | No      |
|      |       |        |             |          |         | RGD1562200 | 6.85009   | 20.126   | 1.55486          | 6.85109      | 20.127        | 1.55472671       | 0.00014629 | No      |
|      |       |        |             |          |         | RGD1562259 | 0.935834  | 0        | -inf             | 0.936834     | 0.001         | -9.8716496       | 0.00384649 | No      |
|      |       |        |             |          |         | RGD1562378 | 3.75741   | 26.6998  | 2.82902          | 3.75841      | 26.7008       | 2.82868861       | 0.0147863  | No      |
|      |       |        |             |          |         | RGD1562390 | 159.067   | 60.2032  | -1.40173         | 159.068      | 60.2042       | -1.4017076       | 0.0220286  | No      |
|      |       |        |             |          |         | RGD1562409 | 4.09295   | 1.41857  | -1.5287          | 4.09395      | 1.41957       | -1.5280395       | 0.0365085  | No      |
|      |       |        |             |          |         | RGD1562469 | 6410.45   | 1533.39  | -2.0637          | 6410.451     | 1533.391      | -2.0637002       | 0.00014629 | No      |
|      |       |        |             |          |         | RGD1562484 | 4.37462   | 10.4691  | 1.2589           | 4.37562      | 10.4701       | 1.25871586       | 0.0421247  | No      |
|      |       |        |             |          |         | RGD1562618 | 0         | 18.15    | inf              | 0.001        | 18.151        | 14.1477614       | 0.00014629 | No      |
|      |       |        |             |          |         | RGD1562987 | 50.441    | 98.3274  | 0.962996         | 50.442       | 98.3284       | 0.96298269       | 0.00014629 | No      |
|      |       |        |             |          |         | RGD1563056 | 0.651719  | 5.56025  | 3.09283          | 0.652719     | 5.56125       | 3.09087525       | 0.0208247  | No      |
|      |       |        |             |          |         | RGD1563084 | 2.25759   | 9.82806  | 2.12213          | 2.25859      | 9.82906       | 2.12163105       | 0.00864487 | No      |

| RRBS |       |        |             |          |         | RNAseq     |          |          |                  |              |               |                  |            |         |
|------|-------|--------|-------------|----------|---------|------------|----------|----------|------------------|--------------|---------------|------------------|------------|---------|
| gene | Blood | Kidney | methyl.diff | pMWU.fdr | Match ? | gene       | blood    | kidney   | log2(fold_ratio) | blood+ 0.001 | kidney+ 0.001 | log2(fold_ratio) | q_value    | Match ? |
|      |       |        |             |          |         | RGD1563150 | 0        | 0.866001 | inf              | 0.001        | 0.867001      | 9.75988985       | 0.00014629 | No      |
|      |       |        |             |          |         | RGD1563231 | 2.57712  | 0        | -inf             | 2.57812      | 0.001         | -11.332104       | 0.00014629 | No      |
|      |       |        |             |          |         | RGD1563319 | 0.124843 | 3.99731  | 5.00084          | 0.125843     | 3.99831       | 4.98969346       | 0.00555587 | No      |
|      |       |        |             |          |         | RGD1563325 | 8.7547   | 2.68602  | -1.70459         | 8.7557       | 2.68702       | -1.7042155       | 0.0089386  | No      |
|      |       |        |             |          |         | RGD1563441 | 0.553215 | 1.70704  | 1.62559          | 0.554215     | 1.70804       | 1.6238241        | 0.0301422  | No      |
|      |       |        |             |          |         | RGD1563547 | 0.175194 | 235.069  | 10.3899          | 0.176194     | 235.07        | 10.3817099       | 0.0214664  | No      |
|      |       |        |             |          |         | RGD1563888 | 57.831   | 2.72917  | -4.40531         | 57.832       | 2.73017       | -4.4048053       | 0.00014629 | No      |
|      |       |        |             |          |         | RGD1563941 | 6.79607  | 97.7979  | 3.84703          | 6.79707      | 97.7989       | 3.84683335       | 0.00014629 | No      |
|      |       |        |             |          |         | RGD1564074 | 0        | 2.1058   | inf              | 0.001        | 2.1068        | 11.0408376       | 0.00014629 | No      |
|      |       |        |             |          |         | RGD1564093 | 242.832  | 169.059  | -0.522437        | 242.833      | 169.06        | -0.5224291       | 0.0160279  | No      |
|      |       |        |             |          |         | RGD1564171 | 40.4194  | 77.4985  | 0.93912          | 40.4204      | 77.4995       | 0.9391034        | 0.00028114 | No      |
|      |       |        |             |          |         | RGD1564184 | 2.84148  | 0        | -inf             | 2.84248      | 0.001         | -11.472934       | 0.00041099 | No      |
|      |       |        |             |          |         | RGD1564212 | 2.77249  | 0        | -inf             | 2.77349      | 0.001         | -11.437487       | 0.00028114 | No      |
|      |       |        |             |          |         | RGD1564300 | 33.0194  | 47.7216  | 0.53133          | 33.0204      | 47.7226       | 0.53131505       | 0.0263268  | No      |
|      |       |        |             |          |         | RGD1564379 | 8.02023  | 31.0176  | 1.95137          | 8.02123      | 31.0186       | 1.95123819       | 0.00014629 | No      |
|      |       |        |             |          |         | RGD1564420 | 10.4619  | 34.4232  | 1.71823          | 10.4629      | 34.4242       | 1.71814035       | 0.00114835 | No      |
|      |       |        |             |          |         | RGD1564548 | 9.43072  | 3.45851  | -1.44722         | 9.43172      | 3.45951       | -1.4469532       | 0.00041099 | No      |
|      |       |        |             |          |         | RGD1564804 | 4.7828   | 13.8844  | 1.53754          | 4.7838       | 13.8854       | 1.53733976       | 0.00014629 | No      |
|      |       |        |             |          |         | RGD1564865 | 0        | 202.027  | inf              | 0.001        | 202.028       | 17.6241957       | 0.00014629 | No      |
|      |       |        |             |          |         | RGD1565059 | 1.92065  | 4.4396   | 1.20883          | 1.92165      | 4.4406        | 1.20840903       | 0.0118533  | No      |
|      |       |        |             |          |         | RGD1565168 | 0        | 57.9195  | inf              | 0.001        | 57.9205       | 15.8217864       | 0.00014629 | No      |

| RRBS |       |        |             |          |         | RNAseq     |           |         |                  |              |               |                  |            |         |
|------|-------|--------|-------------|----------|---------|------------|-----------|---------|------------------|--------------|---------------|------------------|------------|---------|
| gene | Blood | Kidney | methyl.diff | pMWU.fdr | Match ? | gene       | blood     | kidney  | log2(fold_ratio) | blood+ 0.001 | kidney+ 0.001 | log2(fold_ratio) | q_value    | Match ? |
|      |       |        |             |          |         | RGD1565183 | 5162.13   | 1882.73 | -1.45514         | 5162.131     | 1882.731      | -1.4551399       | 0.00014629 | No      |
|      |       |        |             |          |         | RGD1565252 | 2.68555   | 0       | -inf             | 2.68655      | 0.001         | -11.391539       | 0.00014629 | No      |
|      |       |        |             |          |         | RGD1565363 | 285.151   | 575.171 | 1.01226          | 285.152      | 575.172       | 1.01226229       | 0.00014629 | No      |
|      |       |        |             |          |         | RGD1565498 | 4.98369   | 2.11239 | -1.23834         | 4.98469      | 2.11339       | -1.2379448       | 0.00028114 | No      |
|      |       |        |             |          |         | RGD1565616 | 18.2716   | 62.9068 | 1.78361          | 18.2726      | 62.9078       | 1.78355698       | 0.00126596 | No      |
|      |       |        |             |          |         | RGD1565647 | 4.32693   | 1.13059 | -1.93627         | 4.32793      | 1.13159       | -1.9353258       | 0.00014629 | No      |
|      |       |        |             |          |         | RGD1565660 | 0         | 3.59465 | inf              | 0.001        | 3.59565       | 11.8120369       | 0.00014629 | No      |
|      |       |        |             |          |         | RGD1565775 | 46.9496   | 17.4671 | -1.42648         | 46.9506      | 17.4681       | -1.4264209       | 0.00014629 | No      |
|      |       |        |             |          |         | RGD1566099 | 5.54504   | 11.2664 | 1.02276          | 5.54604      | 11.2674       | 1.02262472       | 0.020066   | No      |
|      |       |        |             |          |         | RGD1566243 | 20.6063   | 1.82091 | -3.50035         | 20.6073      | 1.82191       | -3.4996319       | 0.00014629 | No      |
|      |       |        |             |          |         | RGD1566265 | 7.65242   | 2.85649 | -1.42167         | 7.65342      | 2.85749       | -1.4213561       | 0.00041099 | No      |
|      |       |        |             |          |         | RGD1566314 | 3.14716   | 7.83116 | 1.31517          | 3.14816      | 7.83216       | 1.31490137       | 0.00318982 | No      |
|      |       |        |             |          |         | RGD1566320 | 19.6357   | 35.4516 | 0.852371         | 19.6367      | 35.4526       | 0.85233893       | 0.00597292 | No      |
|      |       |        |             |          |         | RGD1566344 | 586.879   | 167.719 | -1.80702         | 586.88       | 167.72        | -1.8070108       | 0.00014629 | No      |
|      |       |        |             |          |         | RGD1566368 | 0.083685  | 35.9268 | 8.74588          | 0.084685     | 35.9278       | 8.72877843       | 0.00028114 | No      |
|      |       |        |             |          |         | RGD621098  | 14.7112   | 30.6014 | 1.05668          | 14.7122      | 30.6024       | 1.0566318        | 0.00028114 | No      |
|      |       |        |             |          |         | Rgl2       | 97.8856   | 62.6654 | -0.643428        | 97.8866      | 62.6664       | -0.6434193       | 0.0178218  | No      |
|      |       |        |             |          |         | Rgmb       | 0.391228  | 5.39317 | 3.78505          | 0.392228     | 5.39417       | 3.78163656       | 0.00219102 | No      |
|      |       |        |             |          |         | Rgs1       | 61.8007   | 16.8537 | -1.87456         | 61.8017      | 16.8547       | -1.8744956       | 0.00014629 | No      |
|      |       |        |             |          |         | Rgs10      | 224.697   | 10.8819 | -4.36798         | 224.698      | 10.8829       | -4.3678523       | 0.00014629 | No      |
|      |       |        |             |          |         | Rgs11      | 0.0919311 | 7.43464 | 6.33757          | 0.0929311    | 7.43564       | 6.32215163       | 0.00014629 | No      |
|      |       |        |             |          |         | Rgs14      | 41.7361   | 4.9218  | -3.08404         | 41.7371      | 4.9228        | -3.0837793       | 0.00014629 | No      |
|      |       |        |             |          |         | Rgs19      | 40.8503   | 6.5005  | -2.65172         | 40.8513      | 6.5015        | -2.6515375       | 0.00014629 | No      |
|      |       |        |             |          |         | RGS6       | 0.0519716 | 2.86934 | 5.78685          | 0.0529716    | 2.87034       | 5.75985874       | 0.0380901  | No      |
|      |       |        |             |          |         | Rgs7       | 0         | 1.43411 | inf              | 0.001        | 1.43511       | 10.4869456       | 0.00014629 | No      |
|      |       |        |             |          |         | Rgs9       | 1.05897   | 3.22841 | 1.60816          | 1.05997      | 3.22941       | 1.60724718       | 0.00884407 | No      |
|      |       |        |             |          |         | Rhbdd2     | 7.68907   | 17.4279 | 1.18052          | 7.69007      | 17.4289       | 1.18041288       | 0.00014629 | No      |

| RRBS |       |        |             |          |         | RNAseq   |           |          |                  |              |               |                  |            |         |
|------|-------|--------|-------------|----------|---------|----------|-----------|----------|------------------|--------------|---------------|------------------|------------|---------|
| gene | Blood | Kidney | methyl.diff | pMWU.fdr | Match ? | gene     | blood     | kidney   | log2(fold_ratio) | blood+ 0.001 | kidney+ 0.001 | log2(fold_ratio) | q_value    | Match ? |
|      |       |        |             |          |         | RHBDD3   | 7.9264    | 15.3503  | 0.953526         | 7.9274       | 15.3513       | 0.95344115       | 0.00395247 | No      |
|      |       |        |             |          |         | Rhbdf1   | 0.117302  | 28.5376  | 7.9265           | 0.118302     | 28.5386       | 7.91429629       | 0.00014629 | No      |
|      |       |        |             |          |         | Rhbdl2   | 0         | 3.06555  | inf              | 0.001        | 3.06655       | 11.5824008       | 0.00014629 | No      |
|      |       |        |             |          |         | Rhbdl3   | 0.0190662 | 7.89323  | 8.69345          | 0.0200662    | 7.89423       | 8.61988731       | 0.0440926  | No      |
|      |       |        |             |          |         | Rhbg     | 1.3648    | 15.1984  | 3.47716          | 1.3658       | 15.1994       | 3.47619623       | 0.00014629 | No      |
|      |       |        |             |          |         | Rheb     | 61.4124   | 130.579  | 1.08832          | 61.4134      | 130.58        | 1.08830856       | 0.00078603 | No      |
|      |       |        |             |          |         | Rhebl1   | 11.1908   | 2.91812  | -1.93921         | 11.1918      | 2.91912       | -1.9388367       | 0.00014629 | No      |
|      |       |        |             |          |         | Rhoa     | 451.676   | 270.134  | -0.741611        | 451.677      | 270.135       | -0.7416109       | 0.00090728 | No      |
|      |       |        |             |          |         | Rhob     | 44.6663   | 144.784  | 1.69665          | 44.6673      | 144.785       | 1.69662119       | 0.00014629 | No      |
|      |       |        |             |          |         | Rhod     | 0         | 32.9439  | inf              | 0.001        | 32.9449       | 15.0077675       | 0.00014629 | No      |
|      |       |        |             |          |         | Rhof     | 103.559   | 30.3365  | -1.77133         | 103.56       | 30.3375       | -1.7712928       | 0.00014629 | No      |
|      |       |        |             |          |         | Rhog     | 220.923   | 51.0433  | -2.11375         | 220.924      | 51.0443       | -2.1137284       | 0.00014629 | No      |
|      |       |        |             |          |         | Rhoj     | 0         | 0.922276 | inf              | 0.001        | 0.923276      | 9.85061817       | 0.00014629 | No      |
|      |       |        |             |          |         | Rhoq     | 6.62576   | 15.1833  | 1.19632          | 6.62676      | 15.1843       | 1.19620483       | 0.00014629 | No      |
|      |       |        |             |          |         | Rhot2    | 26.2305   | 66.5295  | 1.34275          | 26.2315      | 66.5305       | 1.34271557       | 0.00014629 | No      |
|      |       |        |             |          |         | Rhov     | 0.216155  | 1.99567  | 3.20674          | 0.217155     | 1.99667       | 3.20079883       | 0.00812679 | No      |
|      |       |        |             |          |         | Rhpn1    | 0.0368842 | 107.785  | 11.5129          | 0.0378842    | 107.786       | 11.4742859       | 0.0181078  | No      |
|      |       |        |             |          |         | Rhpn2    | 0.0689532 | 4.16342  | 5.91601          | 0.0699532    | 4.16442       | 5.89558171       | 0.0440926  | No      |
|      |       |        |             |          |         | Ribc1    | 1.17731   | 8.60144  | 2.86908          | 1.17831      | 8.60244       | 2.86802678       | 0.00014629 | No      |
|      |       |        |             |          |         | Rictor   | 24.4711   | 2.24766  | -3.44458         | 24.4721      | 2.24866       | -3.4440005       | 0.00014629 | No      |
|      |       |        |             |          |         | Rilp     | 0.292745  | 15.1713  | 5.69556          | 0.293745     | 15.1723       | 5.6907317        | 0.00014629 | No      |
|      |       |        |             |          |         | Rilpl2   | 208.505   | 92.0978  | -1.17884         | 208.506      | 92.0988       | -1.1788346       | 0.00014629 | No      |
|      |       |        |             |          |         | Rimbp2   | 0         | 57.5585  | inf              | 0.001        | 57.5595       | 15.8127664       | 0.00014629 | No      |
|      |       |        |             |          |         | Rims2    | 0.0413005 | 0.986343 | 4.57786          | 0.0423005    | 0.987343      | 4.54480474       | 0.026232   | No      |
|      |       |        |             |          |         | Rin2     | 0.113199  | 34.5239  | 8.25259          | 0.114199     | 34.5249       | 8.23994341       | 0.00014629 | No      |
|      |       |        |             |          |         | Rin3     | 29.0571   | 12.587   | -1.20695         | 29.0581      | 12.588        | -1.2068913       | 0.00014629 | No      |
|      |       |        |             |          |         | Ring1    | 31.7938   | 56.7972  | 0.837074         | 31.7948      | 56.7982       | 0.83705438       | 0.00041099 | No      |
|      |       |        |             |          |         | Rinl     | 27.9992   | 4.7237   | -2.5674          | 28.0002      | 4.7247        | -2.5671425       | 0.00014629 | No      |
|      |       |        |             |          |         | Rint1    | 9.37355   | 5.82095  | -0.68734         | 9.37455      | 5.82195       | -0.687247        | 0.0182953  | No      |
|      |       |        |             |          |         | Riok1    | 26.7808   | 11.099   | -1.27076         | 26.7818      | 11.1          | -1.2706933       | 0.00014629 | No      |
|      |       |        |             |          |         | Ripk1    | 19.8345   | 11.0674  | -0.841699        | 19.8355      | 11.0684       | -0.8416381       | 0.00041099 | No      |
|      |       |        |             |          |         | Ripk2    | 14.7399   | 5.45432  | -1.43426         | 14.7409      | 5.45532       | -1.4340889       | 0.00014629 | No      |
|      |       |        |             |          |         | Ripk3    | 30.5035   | 9.96343  | -1.61426         | 30.5045      | 9.96443       | -1.6141629       | 0.00448672 | No      |
|      |       |        |             |          |         | Rlf      | 27.3489   | 6.81814  | -2.00403         | 27.3499      | 6.81914       | -2.0038738       | 0.0307655  | No      |
|      |       |        |             |          |         | Rmdn1    | 3.53461   | 42.7027  | 3.5947           | 3.53561      | 42.7037       | 3.59433003       | 0.00014629 | No      |
|      |       |        |             |          |         | Rmdn2    | 0.568208  | 3.21595  | 2.50075          | 0.569208     | 3.21695       | 2.49866567       | 0.00669647 | No      |
|      |       |        |             |          |         | Rmi1     | 26.4454   | 44.9483  | 0.765249         | 26.4464      | 44.9493       | 0.7652273        | 0.0089386  | No      |
|      |       |        |             |          |         | Rmnd5a   | 56.3546   | 17.959   | -1.64983         | 56.3556      | 17.96         | -1.6497716       | 0.00014629 | No      |
|      |       |        |             |          |         | Rnase6   | 1.98014   | 0.315983 | -2.64768         | 1.98114      | 0.316983      | -2.6438535       | 0.0172634  | No      |
|      |       |        |             |          |         | Rnaseh1  | 20.2178   | 11.7162  | -0.787126        | 20.2188      | 11.7172       | -0.7870695       | 0.00710369 | No      |
|      |       |        |             |          |         | Rnaseh2a | 22.2212   | 44.7005  | 1.00836          | 22.2222      | 44.7015       | 1.00832159       | 0.0373152  | No      |
|      |       |        |             |          |         | Rnasek   | 86.7155   | 255.477  | 1.55883          | 86.7165      | 255.478       | 1.55882063       | 0.00014629 | No      |

| RRBS |       |        |             |          |         | RNAseq   |          |          |                  |              |               |                  |            |         |
|------|-------|--------|-------------|----------|---------|----------|----------|----------|------------------|--------------|---------------|------------------|------------|---------|
| gene | Blood | Kidney | methyl.diff | pMWU.fdr | Match ? | gene     | blood    | kidney   | log2(fold_ratio) | blood+ 0.001 | kidney+ 0.001 | log2(fold_ratio) | q_value    | Match ? |
|      |       |        |             |          |         | Rnf103   | 7.01867  | 12.1591  | 0.79276          | 7.01967      | 12.1601       | 0.79267998       | 0.00161718 | No      |
|      |       |        |             |          |         | Rnf111   | 31.0785  | 8.3155   | -1.90204         | 31.0795      | 8.3165        | -1.9019149       | 0.00014629 | No      |
|      |       |        |             |          |         | Rnf113a1 | 7.11969  | 2.47385  | -1.52505         | 7.12069      | 2.47485       | -1.524676        | 0.0235969  | No      |
|      |       |        |             |          |         | Rnf114   | 29.7923  | 21.3872  | -0.47819         | 29.7933      | 21.3882       | -0.4781729       | 0.0293375  | No      |
|      |       |        |             |          |         | Rnf115   | 54.6833  | 22.115   | -1.30607         | 54.6843      | 22.116        | -1.3060362       | 0.00014629 | No      |
|      |       |        |             |          |         | Rnf111   | 1.62249  | 4.60477  | 1.50492          | 1.62349      | 4.60577       | 1.50434387       | 0.0212829  | No      |
|      |       |        |             |          |         | Rnf121   | 14.1391  | 5.81758  | -1.2812          | 14.1401      | 5.81858       | -1.2810533       | 0.00138312 | No      |
|      |       |        |             |          |         | RNF125   | 28.717   | 1.69647  | -4.0813          | 28.718       | 1.69747       | -4.0804973       | 0.00014629 | No      |
|      |       |        |             |          |         | Rnf13    | 50.0656  | 23.9286  | -1.06508         | 50.0666      | 23.9296       | -1.0650522       | 0.00014629 | No      |
|      |       |        |             |          |         | Rnf135   | 9.99722  | 4.18485  | -1.25635         | 9.99822      | 4.18585       | -1.2561507       | 0.0219354  | No      |
|      |       |        |             |          |         | Rnf138   | 23.3776  | 5.14235  | -2.18463         | 23.3786      | 5.14335       | -2.1844083       | 0.00014629 | No      |
|      |       |        |             |          |         | Rnf14    | 91.1824  | 33.8054  | -1.4315          | 91.1834      | 33.8064       | -1.4314748       | 0.00014629 | No      |
|      |       |        |             |          |         | Rnf144a  | 3.24734  | 0.729789 | -2.15371         | 3.24834      | 0.730789      | -2.1521758       | 0.00720409 | No      |
|      |       |        |             |          |         | Rnf145   | 98.9001  | 12.475   | -2.98694         | 98.9011      | 12.476        | -2.9868311       | 0.00014629 | No      |
|      |       |        |             |          |         | Rnf146   | 49.406   | 16.812   | -1.5552          | 49.407       | 16.813        | -1.5551383       | 0.00014629 | No      |
|      |       |        |             |          |         | Rnf149   | 41.8336  | 14.2085  | -1.55791         | 41.8346      | 14.2095       | -1.5578409       | 0.00014629 | No      |
|      |       |        |             |          |         | Rnf150   | 0.161263 | 1.81936  | 3.49594          | 0.162263     | 1.82036       | 3.48781782       | 0.00884407 | No      |
|      |       |        |             |          |         | Rnf157   | 28.9711  | 2.78546  | -3.37863         | 28.9721      | 2.78646       | -3.3781589       | 0.00014629 | No      |
|      |       |        |             |          |         | Rnf167   | 109.222  | 67.6784  | -0.690491        | 109.223      | 67.6794       | -0.690488        | 0.00126596 | No      |
|      |       |        |             |          |         | Rnf168   | 10.3874  | 6.7823   | -0.614986        | 10.3884      | 6.7833        | -0.6149143       | 0.0178218  | No      |
|      |       |        |             |          |         | Rnf169   | 5.06494  | 0.658573 | -2.94313         | 5.06594      | 0.659573      | -2.9412257       | 0.00053701 | No      |
|      |       |        |             |          |         | Rnf180   | 0        | 1.54494  | inf              | 0.001        | 1.54594       | 10.5942686       | 0.00014629 | No      |
|      |       |        |             |          |         | Rnf183   | 0        | 102.267  | inf              | 0.001        | 102.268       | 16.6419953       | 0.00014629 | No      |
|      |       |        |             |          |         | Rnf185   | 5.07272  | 21.1076  | 2.05693          | 5.07372      | 21.1086       | 2.05671509       | 0.00014629 | No      |
|      |       |        |             |          |         | Rnf187   | 65.6213  | 102.565  | 0.644302         | 65.6223      | 102.566       | 0.6442945        | 0.00028114 | No      |
|      |       |        |             |          |         | Rnf19a   | 11.5355  | 21.0193  | 0.865636         | 11.5365      | 21.0203       | 0.86557766       | 0.00608077 | No      |
|      |       |        |             |          |         | Rnf19b   | 37.9328  | 15.4709  | -1.29389         | 37.9338      | 15.4719       | -1.2938335       | 0.00014629 | No      |
|      |       |        |             |          |         | Rnf2     | 31.9613  | 8.10418  | -1.97959         | 31.9623      | 8.10518       | -1.9794551       | 0.00014629 | No      |
|      |       |        |             |          |         | Rnf20    | 23.0655  | 8.82397  | -1.38624         | 23.0665      | 8.82497       | -1.3861358       | 0.00014629 | No      |
|      |       |        |             |          |         | Rnf208   | 1.39915  | 39.8108  | 4.83054          | 1.40015      | 39.8118       | 4.8295428        | 0.00014629 | No      |
|      |       |        |             |          |         | Rnf213   | 52.1625  | 9.71874  | -2.42417         | 52.1635      | 9.71974       | -2.424051        | 0.00014629 | No      |
|      |       |        |             |          |         | Rnf215   | 6.80984  | 23.1656  | 1.76629          | 6.81084      | 23.1666       | 1.76614168       | 0.00014629 | No      |
|      |       |        |             |          |         | Rnf217   | 4.11949  | 12.7899  | 1.63447          | 4.12049      | 12.7909       | 1.63422996       | 0.00014629 | No      |
|      |       |        |             |          |         | Rnf219   | 5.66758  | 0.834536 | -2.76369         | 5.66858      | 0.835536      | -2.7622135       | 0.00014629 | No      |
|      |       |        |             |          |         | Rnf220   | 99.6228  | 29.9796  | -1.7325          | 99.6238      | 29.9806       | -1.7324612       | 0.00014629 | No      |
|      |       |        |             |          |         | Rnf25    | 16.1648  | 34.254   | 1.08342          | 16.1658      | 34.255        | 1.08336968       | 0.00014629 | No      |
|      |       |        |             |          |         | Rnf38    | 30.1968  | 6.28075  | -2.26539         | 30.1978      | 6.28175       | -2.265205        | 0.00014629 | No      |
|      |       |        |             |          |         | Rnf4     | 47.5318  | 26.7192  | -0.831016        | 47.5328      | 26.7202       | -0.8309926       | 0.0279702  | No      |
|      |       |        |             |          |         | Rnf41    | 6.70936  | 10.8953  | 0.699462         | 6.71036      | 10.8963       | 0.69937626       | 0.0431512  | No      |
|      |       |        |             |          |         | Rnf43    | 2.21249  | 4.32513  | 0.967075         | 2.21349      | 4.32613       | 0.96675416       | 0.00555587 | No      |
|      |       |        |             |          |         | Rnf44    | 89.7403  | 19.9383  | -2.17021         | 89.7413      | 19.9393       | -2.1701573       | 0.00014629 | No      |
|      |       |        |             |          |         | Rnf5     | 29.6645  | 141.797  | 2.25701          | 29.6655      | 141.798       | 2.25697918       | 0.00448672 | No      |

| RRBS |       |        |             |          |         | RNAseq  |         |         |                  |              |               |                  |            |         |
|------|-------|--------|-------------|----------|---------|---------|---------|---------|------------------|--------------|---------------|------------------|------------|---------|
| gene | Blood | Kidney | methyl.diff | pMWU.fdr | Match ? | gene    | blood   | kidney  | log2(fold_ratio) | blood+ 0.001 | kidney+ 0.001 | log2(fold_ratio) | q_value    | Match ? |
|      |       |        |             |          |         | Rnft1   | 22.0404 | 5.80265 | -1.92536         | 22.0414      | 5.80365       | -1.9251834       | 0.0174574  | No      |
|      |       |        |             |          |         | Rngtt   | 11.0364 | 5.40588 | -1.02966         | 11.0374      | 5.40688       | -1.0295321       | 0.00014629 | No      |
|      |       |        |             |          |         | Rnls    | 4.47811 | 8.02097 | 0.840886         | 4.47911      | 8.02197       | 0.84074447       | 0.0311089  | No      |
|      |       |        |             |          |         | RNMT    | 24.4475 | 6.05646 | -2.01314         | 24.4485      | 6.05746       | -2.0129611       | 0.00014629 | No      |
|      |       |        |             |          |         | Rnmtl1  | 3.52494 | 6.37883 | 0.855693         | 3.52594      | 6.37983       | 0.85551006       | 0.0292517  | No      |
|      |       |        |             |          |         | Rnpc3   | 26.2027 | 8.56472 | -1.61324         | 26.2037      | 8.56572       | -1.6131241       | 0.00053701 | No      |
|      |       |        |             |          |         | Rnpep   | 7.6096  | 41.5788 | 2.44996          | 7.6106       | 41.5798       | 2.44980072       | 0.00014629 | No      |
|      |       |        |             |          |         | Rnps1   | 139.185 | 63.8532 | -1.12418         | 139.186      | 63.8542       | -1.1241607       | 0.00014629 | No      |
|      |       |        |             |          |         | Robo3   | 0       | 9.2687  | inf              | 0.001        | 9.2697        | 13.1783069       | 0.00014629 | No      |
|      |       |        |             |          |         | Rock1   | 37.2916 | 6.48185 | -2.52437         | 37.2926      | 6.48285       | -2.5241893       | 0.00014629 | No      |
|      |       |        |             |          |         | Rock2   | 8.96899 | 5.13862 | -0.803564        | 8.96999      | 5.13962       | -0.8034447       | 0.00014629 | No      |
|      |       |        |             |          |         | Romo1   | 134.397 | 351.629 | 1.38755          | 134.398      | 351.63        | 1.38754649       | 0.00014629 | No      |
|      |       |        |             |          |         | Ror1    | 0       | 1.97289 | inf              | 0.001        | 1.97389       | 10.9468259       | 0.00014629 | No      |
|      |       |        |             |          |         | Rora    | 2.26889 | 4.89159 | 1.10832          | 2.26989      | 4.89259       | 1.107976         | 0.00374149 | No      |
|      |       |        |             |          |         | RORC    | 2.01226 | 24.7493 | 3.6205           | 2.01326      | 24.7503       | 3.61984061       | 0.00014629 | No      |
|      |       |        |             |          |         | Rp2     | 7.54823 | 2.70123 | -1.48252         | 7.54923      | 2.70223       | -1.482179        | 0.00014629 | No      |
|      |       |        |             |          |         | Rpa1    | 109.124 | 48.4345 | -1.17185         | 109.125      | 48.4355       | -1.1718449       | 0.0422161  | No      |
|      |       |        |             |          |         | Rpa2    | 47.8208 | 14.4902 | -1.72256         | 47.8218      | 14.4912       | -1.7224914       | 0.00014629 | No      |
|      |       |        |             |          |         | Rpe     | 21.5488 | 8.86743 | -1.28102         | 21.5498      | 8.86843       | -1.2809239       | 0.00263402 | No      |
|      |       |        |             |          |         | Rpf2    | 31.3315 | 16.1987 | -0.951732        | 31.3325      | 16.1997       | -0.9516928       | 0.00028114 | No      |
|      |       |        |             |          |         | Rpl10   | 2766.16 | 690.63  | -2.0019          | 2766.161     | 690.631       | -2.0018981       | 0.00014629 | No      |
|      |       |        |             |          |         | Rpl10a  | 1881.85 | 526.867 | -1.83664         | 1881.851     | 526.868       | -1.8366389       | 0.00014629 | No      |
|      |       |        |             |          |         | Rpl11   | 4121.89 | 886.966 | -2.21636         | 4121.891     | 886.967       | -2.216354        | 0.00014629 | No      |
|      |       |        |             |          |         | RPL12   | 3094.31 | 549.972 | -2.49219         | 3094.311     | 549.973       | -2.4921855       | 0.00014629 | No      |
|      |       |        |             |          |         | Rpl13a  | 5584.61 | 1981.65 | -1.49476         | 5584.611     | 1981.651      | -1.4947539       | 0.00491494 | No      |
|      |       |        |             |          |         | Rpl14   | 2984.57 | 972.986 | -1.61703         | 2984.571     | 972.987       | -1.6170311       | 0.00014629 | No      |
|      |       |        |             |          |         | Rpl15   | 2905.69 | 461.94  | -2.6531          | 2905.691     | 461.941       | -2.6531008       | 0.00014629 | No      |
|      |       |        |             |          |         | Rpl17   | 5098.1  | 1114.4  | -2.19369         | 5098.101     | 1114.401      | -2.1936915       | 0.00014629 | No      |
|      |       |        |             |          |         | Rpl18   | 2362.64 | 944.656 | -1.32254         | 2362.641     | 944.657       | -1.3225379       | 0.00014629 | No      |
|      |       |        |             |          |         | Rpl18a  | 5936.14 | 1390.78 | -2.09363         | 5936.141     | 1390.781      | -2.0936301       | 0.00014629 | No      |
|      |       |        |             |          |         | Rpl19   | 5483.04 | 1648.51 | -1.73381         | 5483.041     | 1648.511      | -1.7338127       | 0.00014629 | No      |
|      |       |        |             |          |         | Rpl21   | 799.479 | 156.459 | -2.35328         | 799.48       | 156.46        | -2.3532681       | 0.00014629 | No      |
|      |       |        |             |          |         | Rpl22   | 1529.55 | 394.786 | -1.95397         | 1529.551     | 394.787       | -1.9539618       | 0.00014629 | No      |
|      |       |        |             |          |         | Rpl22l1 | 389.596 | 170.113 | -1.19548         | 389.597      | 170.114       | -1.1954807       | 0.00014629 | No      |
|      |       |        |             |          |         | Rpl23   | 6217.66 | 996.055 | -2.64208         | 6217.661     | 996.056       | -2.6420732       | 0.00014629 | No      |
|      |       |        |             |          |         | Rpl23a  | 4903.34 | 1004.46 | -2.28735         | 4903.341     | 1004.461      | -2.2873435       | 0.00014629 | No      |
|      |       |        |             |          |         | Rpl24   | 4609.47 | 1015.75 | -2.18206         | 4609.471     | 1015.751      | -2.1820544       | 0.00014629 | No      |
|      |       |        |             |          |         | RPL26   | 7598.27 | 1671    | -2.18496         | 7598.271     | 1671.001      | -2.1849586       | 0.00014629 | No      |
|      |       |        |             |          |         | Rpl27   | 3518.8  | 1137.27 | -1.6295          | 3518.801     | 1137.271      | -1.6295079       | 0.00014629 | No      |
|      |       |        |             |          |         | Rpl27a  | 2627.18 | 569.001 | -2.20701         | 2627.181     | 569.002       | -2.20701         | 0.00014629 | No      |
|      |       |        |             |          |         | Rpl29   | 2943.67 | 1071.4  | -1.45812         | 2943.671     | 1071.401      | -1.4581179       | 0.00014629 | No      |
|      |       |        |             |          |         | Rpl3    | 2451.69 | 644.213 | -1.92817         | 2451.691     | 644.214       | -1.9281652       | 0.00014629 | No      |

| RRBS |       |        |             |          |         | RNAseq    |         |         |                  |              |               |                  |            |         |
|------|-------|--------|-------------|----------|---------|-----------|---------|---------|------------------|--------------|---------------|------------------|------------|---------|
| gene | Blood | Kidney | methyl.diff | pMWU.fdr | Match ? | gene      | blood   | kidney  | log2(fold_ratio) | blood+ 0.001 | kidney+ 0.001 | log2(fold_ratio) | q_value    | Match ? |
|      |       |        |             |          |         | Rpl30     | 6452.23 | 1112.29 | -2.53626         | 6452.231     | 1112.291      | -2.5362638       | 0.00014629 | No      |
|      |       |        |             |          |         | Rpl31     | 3015.57 | 401.982 | -2.90723         | 3015.571     | 401.983       | -2.9072248       | 0.00014629 | No      |
|      |       |        |             |          |         | Rpl32     | 6759.78 | 1574.4  | -2.10218         | 6759.781     | 1574.401      | -2.1021735       | 0.00014629 | No      |
|      |       |        |             |          |         | Rpl32-ps1 | 15.3367 | 3.50962 | -2.1276          | 15.3377      | 3.51062       | -2.1272844       | 0.00710369 | No      |
|      |       |        |             |          |         | Rpl34     | 4336.73 | 1194.12 | -1.86066         | 4336.731     | 1194.121      | -1.8606589       | 0.00014629 | No      |
|      |       |        |             |          |         | Rpl35     | 9489.87 | 3111.61 | -1.60873         | 9489.871     | 3111.611      | -1.6087268       | 0.00014629 | No      |
|      |       |        |             |          |         | Rpl35a    | 1528.41 | 179.963 | -3.08626         | 1528.411     | 179.964       | -3.0862523       | 0.00014629 | No      |
|      |       |        |             |          |         | Rpl36     | 3365.26 | 1395.37 | -1.27007         | 3365.261     | 1395.371      | -1.2700696       | 0.00014629 | No      |
|      |       |        |             |          |         | Rpl36a    | 2771.33 | 383.502 | -2.85327         | 2771.331     | 383.503       | -2.8532693       | 0.00014629 | No      |
|      |       |        |             |          |         | Rpl36al   | 1011.28 | 598.547 | -0.756639        | 1011.281     | 598.548       | -0.7566451       | 0.00028114 | No      |
|      |       |        |             |          |         | Rpl36-ps3 | 45.6233 | 5.81075 | -2.97298         | 45.6243      | 5.81175       | -2.9727579       | 0.00066215 | No      |
|      |       |        |             |          |         | Rpl37     | 4538.32 | 1163.72 | -1.96342         | 4538.321     | 1163.721      | -1.9634134       | 0.00014629 | No      |
|      |       |        |             |          |         | RPL37A    | 5705.52 | 1156.07 | -2.30313         | 5705.521     | 1156.071      | -2.3031286       | 0.00014629 | No      |
|      |       |        |             |          |         | Rpl38     | 5522.86 | 2928.66 | -0.915174        | 5522.861     | 2928.661      | -0.9151746       | 0.00014629 | No      |
|      |       |        |             |          |         | Rpl39     | 6734.57 | 1385.9  | -2.28077         | 6734.571     | 1385.901      | -2.2807618       | 0.00014629 | No      |
|      |       |        |             |          |         | Rpl4      | 2923.01 | 603.859 | -2.27517         | 2923.011     | 603.86        | -2.2751692       | 0.00014629 | No      |
|      |       |        |             |          |         | Rpl41     | 15490.6 | 7322.15 | -1.08106         | 15490.601    | 7322.151      | -1.0810537       | 0.00028114 | No      |
|      |       |        |             |          |         | Rpl5      | 4689.67 | 829.298 | -2.49952         | 4689.671     | 829.299       | -2.4995225       | 0.00014629 | No      |
|      |       |        |             |          |         | Rpl7      | 4526.44 | 993.113 | -2.18835         | 4526.441     | 993.114       | -2.1883459       | 0.00014629 | No      |
|      |       |        |             |          |         | Rpl7l1    | 65.3094 | 29.7187 | -1.13592         | 65.3104      | 29.7197       | -1.1358932       | 0.00730705 | No      |
|      |       |        |             |          |         | Rpl8      | 375.229 | 102.628 | -1.87035         | 375.23       | 102.629       | -1.8703367       | 0.00014629 | No      |
|      |       |        |             |          |         | Rpl9      | 4453.53 | 1012.65 | -2.13682         | 4453.531     | 1012.651      | -2.1368126       | 0.00014629 | No      |
|      |       |        |             |          |         | Rplp1     | 2152.09 | 644.059 | -1.74048         | 2152.091     | 644.06        | -1.7404721       | 0.00014629 | No      |
|      |       |        |             |          |         | Rpp21     | 120.857 | 52.8609 | -1.19303         | 120.858      | 52.8619       | -1.1930128       | 0.00659461 | No      |
|      |       |        |             |          |         | Rpp38     | 2.06042 | 8.39522 | 2.02663          | 2.06142      | 8.39622       | 2.0261015        | 0.00102864 | No      |
|      |       |        |             |          |         | Rpp40     | 33.2851 | 11.4434 | -1.54036         | 33.2861      | 11.4444       | -1.540278        | 0.00014629 | No      |
|      |       |        |             |          |         | Rprd1a    | 13.9289 | 4.96748 | -1.4875          | 13.9299      | 4.96848       | -1.4873084       | 0.00102864 | No      |
|      |       |        |             |          |         | Rprd1b    | 5.60247 | 9.81789 | 0.809349         | 5.60347      | 9.81889       | 0.80923943       | 0.00184429 | No      |
|      |       |        |             |          |         | Rprd2     | 21.8765 | 2.36985 | -3.20651         | 21.8775      | 2.37085       | -3.2059716       | 0.00014629 | No      |
|      |       |        |             |          |         | Rps10l1   | 341.958 | 72.5007 | -2.23775         | 341.959      | 72.5017       | -2.2377366       | 0.00014629 | No      |
|      |       |        |             |          |         | Rps11     | 7815.3  | 1074.47 | -2.86267         | 7815.301     | 1074.471      | -2.8626749       | 0.00014629 | No      |
|      |       |        |             |          |         | Rps12     | 5594.77 | 1432.71 | -1.96533         | 5594.771     | 1432.711      | -1.9653315       | 0.00014629 | No      |
|      |       |        |             |          |         | Rps13     | 4937.42 | 807.492 | -2.61224         | 4937.421     | 807.493       | -2.612236        | 0.00014629 | No      |
|      |       |        |             |          |         | Rps14     | 3377.67 | 727.017 | -2.21597         | 3377.671     | 727.018       | -2.2159658       | 0.00014629 | No      |
|      |       |        |             |          |         | Rps15     | 5258.04 | 1334    | -1.97877         | 5258.041     | 1334.001      | -1.9787656       | 0.00014629 | No      |
|      |       |        |             |          |         | Rps15a    | 4934.7  | 951.682 | -2.37441         | 4934.701     | 951.683       | -2.3744097       | 0.00014629 | No      |
|      |       |        |             |          |         | Rps15al4  | 56.3048 | 8.73407 | -2.68853         | 56.3058      | 8.73507       | -2.6883924       | 0.00014629 | No      |
|      |       |        |             |          |         | Rps16     | 4476.27 | 944.071 | -2.24533         | 4476.271     | 944.072       | -2.2453286       | 0.00014629 | No      |
|      |       |        |             |          |         | Rps18     | 7673.89 | 1835.41 | -2.06385         | 7673.891     | 1835.411      | -2.0638551       | 0.00014629 | No      |
|      |       |        |             |          |         | Rps19bp1  | 59.8135 | 135.72  | 1.18209          | 59.8145      | 135.721       | 1.1820768        | 0.00014629 | No      |
|      |       |        |             |          |         | Rps2      | 2766.87 | 851.003 | -1.70102         | 2766.871     | 851.004       | -1.7010176       | 0.00014629 | No      |
|      |       |        |             |          |         | Rps20     | 3312.56 | 1121.35 | -1.56271         | 3312.561     | 1121.351      | -1.5627091       | 0.00014629 | No      |

| RRBS |       |        |             |          |         | RNAseq  |           |          |                  |              |               |                  |            |         |
|------|-------|--------|-------------|----------|---------|---------|-----------|----------|------------------|--------------|---------------|------------------|------------|---------|
| gene | Blood | Kidney | methyl.diff | pMWU.fdr | Match ? | gene    | blood     | kidney   | log2(fold_ratio) | blood+ 0.001 | kidney+ 0.001 | log2(fold_ratio) | q_value    | Match ? |
|      |       |        |             |          |         | Rps21   | 4672.88   | 1142.78  | -2.03176         | 4672.881     | 1142.781      | -2.0317633       | 0.00014629 | No      |
|      |       |        |             |          |         | Rps23   | 6251.19   | 1067.16  | -2.55036         | 6251.191     | 1067.161      | -2.5503532       | 0.00014629 | No      |
|      |       |        |             |          |         | Rps24   | 8480.55   | 1625.31  | -2.38344         | 8480.551     | 1625.311      | -2.3834422       | 0.00014629 | No      |
|      |       |        |             |          |         | Rps25   | 3827.42   | 728.815  | -2.39275         | 3827.421     | 728.816       | -2.3927461       | 0.00014629 | No      |
|      |       |        |             |          |         | Rps26   | 5000.64   | 1223.62  | -2.03096         | 5000.641     | 1223.621      | -2.0309563       | 0.00014629 | No      |
|      |       |        |             |          |         | Rps27   | 14806.9   | 2345.34  | -2.6584          | 14806.901    | 2345.341      | -2.6584001       | 0.00014629 | No      |
|      |       |        |             |          |         | Rps27a  | 4590.78   | 909.075  | -2.33627         | 4590.781     | 909.076       | -2.3362668       | 0.00014629 | No      |
|      |       |        |             |          |         | Rps27l  | 90.5162   | 208.217  | 1.20184          | 90.5172      | 208.218       | 1.20183093       | 0.00014629 | No      |
|      |       |        |             |          |         | Rps27l3 | 181.137   | 36.1465  | -2.32515         | 181.138      | 36.1475       | -2.3251215       | 0.00014629 | No      |
|      |       |        |             |          |         | Rps28   | 7339.53   | 2092.68  | -1.81034         | 7339.531     | 2092.681      | -1.8103355       | 0.00014629 | No      |
|      |       |        |             |          |         | Rps3    | 4069.91   | 662.206  | -2.61965         | 4069.911     | 662.207       | -2.6196431       | 0.00014629 | No      |
|      |       |        |             |          |         | Rps3a   | 4552.16   | 689.599  | -2.72272         | 4552.161     | 689.6         | -2.7227199       | 0.00014629 | No      |
|      |       |        |             |          |         | Rps4x   | 579.095   | 128.508  | -2.17194         | 579.096      | 128.509       | -2.1719331       | 0.00014629 | No      |
|      |       |        |             |          |         | RPS5    | 2894.67   | 762.041  | -1.92546         | 2894.671     | 762.042       | -1.925457        | 0.00014629 | No      |
|      |       |        |             |          |         | RPS6    | 652.36    | 128.31   | -2.34604         | 652.361      | 128.311       | -2.3460257       | 0.00014629 | No      |
|      |       |        |             |          |         | Rps6ka1 | 87.3711   | 51.606   | -0.759617        | 87.3721      | 51.607        | -0.7596059       | 0.00066215 | No      |
|      |       |        |             |          |         | Rps6ka4 | 4.49967   | 14.0817  | 1.64593          | 4.50067      | 14.0827       | 1.64571227       | 0.00014629 | No      |
|      |       |        |             |          |         | Rps6ka5 | 2.19015   | 0.572104 | -1.93668         | 2.19115      | 0.573104      | -1.9348194       | 0.00014629 | No      |
|      |       |        |             |          |         | Rps6kb1 | 24.8932   | 12.6348  | -0.978353        | 24.8942      | 12.6358       | -0.9782926       | 0.0302247  | No      |
|      |       |        |             |          |         | Rps6kl1 | 0.0478859 | 7.42595  | 7.27683          | 0.0488859    | 7.42695       | 7.24720764       | 0.00219102 | No      |
|      |       |        |             |          |         | RPS7    | 568.599   | 115.154  | -2.30384         | 568.6        | 115.155       | -2.303837        | 0.00014629 | No      |
|      |       |        |             |          |         | Rps8    | 3624.48   | 747.414  | -2.27779         | 3624.481     | 747.415       | -2.277793        | 0.00014629 | No      |
|      |       |        |             |          |         | RPS9    | 626.107   | 213.516  | -1.55207         | 626.108      | 213.517       | -1.5520606       | 0.00014629 | No      |
|      |       |        |             |          |         | Rpsa    | 3162.16   | 1538.98  | -1.03893         | 3162.161     | 1538.981      | -1.0389354       | 0.00028114 | No      |
|      |       |        |             |          |         | Rptor   | 3.11485   | 5.0346   | 0.692717         | 3.11585      | 5.0356        | 0.69253791       | 0.00341151 | No      |
|      |       |        |             |          |         | Rpusd3  | 7.30854   | 21.4158  | 1.55102          | 7.30954      | 21.4168       | 1.55089041       | 0.00028114 | No      |
|      |       |        |             |          |         | Rqcd1   | 21.7156   | 7.89957  | -1.45888         | 21.7166      | 7.90057       | -1.4587696       | 0.00014629 | No      |
|      |       |        |             |          |         | Rragc   | 23.1476   | 41.5407  | 0.843665         | 23.1486      | 41.5417       | 0.84363531       | 0.00014629 | No      |
|      |       |        |             |          |         | Rragd   | 2.98346   | 18.8212  | 2.6573           | 2.98446      | 18.8222       | 2.65689344       | 0.00014629 | No      |
|      |       |        |             |          |         | Rras2   | 76.03     | 34.0666  | -1.15821         | 76.031       | 34.0676       | -1.1581875       | 0.00014629 | No      |
|      |       |        |             |          |         | Rrbp1   | 14.8777   | 41.0197  | 1.46317          | 14.8787      | 41.0207       | 1.46310363       | 0.00014629 | No      |
|      |       |        |             |          |         | Rrn3    | 6.50159   | 2.49326  | -1.38276         | 6.50259      | 2.49426       | -1.3824026       | 0.00014629 | No      |
|      |       |        |             |          |         | Rrp12   | 13.0497   | 4.16983  | -1.64596         | 13.0507      | 4.17083       | -1.6457208       | 0.00014629 | No      |
|      |       |        |             |          |         | Rrp1b   | 9.01656   | 4.65122  | -0.954969        | 9.01756      | 4.65222       | -0.9548178       | 0.00014629 | No      |
|      |       |        |             |          |         | Rrp8    | 4.11079   | 1.47408  | -1.4796          | 4.11179      | 1.47508       | -1.4789734       | 0.00374149 | No      |
|      |       |        |             |          |         | Rrs1    | 15.0923   | 8.43117  | -0.840008        | 15.0933      | 8.43217       | -0.8399324       | 0.0142084  | No      |
|      |       |        |             |          |         | Rsb1    | 22.549    | 2.7002   | -3.06193         | 22.55        | 2.7012        | -3.0614551       | 0.00014629 | No      |
|      |       |        |             |          |         | Rsb1l   | 29.3522   | 4.7144   | -2.63832         | 29.3532      | 4.7154        | -2.6380657       | 0.00014629 | No      |
|      |       |        |             |          |         | Rsf1    | 17.8101   | 5.17069  | -1.78427         | 17.8111      | 5.17169       | -1.7840689       | 0.00014629 | No      |
|      |       |        |             |          |         | Rsl24d1 | 43.3624   | 24.6887  | -0.812596        | 43.3634      | 24.6897       | -0.8125686       | 0.00078603 | No      |
|      |       |        |             |          |         | Rsph1   | 0.16635   | 7.01571  | 5.3983           | 0.16735      | 7.01671       | 5.38985428       | 0.0279702  | No      |
|      |       |        |             |          |         | Rsph3   | 1.40593   | 4.10622  | 1.54629          | 1.40693      | 4.10722       | 1.54561168       | 0.0244119  | No      |



| RRBS |       |        |             |          |         | RNAseq   |          |          |                  |              |               |                  |            |         |
|------|-------|--------|-------------|----------|---------|----------|----------|----------|------------------|--------------|---------------|------------------|------------|---------|
| gene | Blood | Kidney | methyl.diff | pMWU.fdr | Match ? | gene     | blood    | kidney   | log2(fold_ratio) | blood+ 0.001 | kidney+ 0.001 | log2(fold_ratio) | q_value    | Match ? |
|      |       |        |             |          |         | Rspry1   | 13.644   | 8.60718  | -0.664654        | 13.645       | 8.60818       | -0.6645922       | 0.0223869  | No      |
|      |       |        |             |          |         | Rsrc1    | 15.2269  | 6.59945  | -1.2062          | 15.2279      | 6.60045       | -1.2060807       | 0.00041099 | No      |
|      |       |        |             |          |         | Rsrc2    | 65.2284  | 34.638   | -0.913145        | 65.2294      | 34.639        | -0.9131251       | 0.00014629 | No      |
|      |       |        |             |          |         | Rsu1     | 35.9446  | 20.6396  | -0.800358        | 35.9456      | 20.6406       | -0.8003303       | 0.0319849  | No      |
|      |       |        |             |          |         | RT1-A3   | 168.634  | 31.781   | -2.40766         | 168.635      | 31.782        | -2.4076222       | 0.00014629 | No      |
|      |       |        |             |          |         | RT1-CE1  | 540.749  | 119.331  | -2.17999         | 540.75       | 119.332       | -2.1799808       | 0.00374149 | No      |
|      |       |        |             |          |         | RT1-CE10 | 145.625  | 58.0169  | -1.32771         | 145.626      | 58.0179       | -1.327698        | 0.0186489  | No      |
|      |       |        |             |          |         | RT1-DOb  | 20.9696  | 1.37395  | -3.9319          | 20.9706      | 1.37495       | -3.9309171       | 0.0160279  | No      |
|      |       |        |             |          |         | RT1-M3-1 | 64.5126  | 12.1237  | -2.41175         | 64.5136      | 12.1247       | -2.4116543       | 0.00014629 | No      |
|      |       |        |             |          |         | RT1-N3   | 78.9409  | 13.9449  | -2.50103         | 78.9419      | 13.9459       | -2.5009502       | 0.00014629 | No      |
|      |       |        |             |          |         | RT1-S3   | 101.773  | 10.9328  | -3.21862         | 101.774      | 10.9338       | -3.2185022       | 0.00014629 | No      |
|      |       |        |             |          |         | Rtcd1    | 15.9218  | 35.1573  | 1.14282          | 15.9228      | 35.1583       | 1.14277126       | 0.00014629 | No      |
|      |       |        |             |          |         | Rtn4     | 37.9445  | 97.5089  | 1.36164          | 37.9455      | 97.5099       | 1.3616199        | 0.00014629 | No      |
|      |       |        |             |          |         | Rtn4ip1  | 3.94868  | 16.1243  | 2.02979          | 3.94968      | 16.1253       | 2.02951832       | 0.00014629 | No      |
|      |       |        |             |          |         | Rtp4     | 15.5387  | 6.57294  | -1.24126         | 15.5397      | 6.57394       | -1.2411285       | 0.00078603 | No      |
|      |       |        |             |          |         | Rttn     | 3.72869  | 1.82319  | -1.0322          | 3.72969      | 1.82419       | -1.0317997       | 0.00720409 | No      |
|      |       |        |             |          |         | Rufy1    | 19.861   | 38.3364  | 0.948777         | 19.862       | 38.3374       | 0.9487416        | 0.00014629 | No      |
|      |       |        |             |          |         | Rufy3    | 9.26041  | 29.7226  | 1.68241          | 9.26141      | 29.7236       | 1.6823051        | 0.00014629 | No      |
|      |       |        |             |          |         | Rundc3a  | 5.43124  | 1.8312   | -1.56849         | 5.43224      | 1.8322        | -1.5679702       | 0.00053701 | No      |
|      |       |        |             |          |         | Runx2    | 3.04518  | 0.320176 | -3.24959         | 3.04618      | 0.321176      | -3.2455652       | 0.0192184  | No      |
|      |       |        |             |          |         | Rusc2    | 0.137419 | 1.66369  | 3.59773          | 0.138419     | 1.66469       | 3.58813965       | 0.00659461 | No      |
|      |       |        |             |          |         | Rwdd2a   | 0.626022 | 7.33175  | 3.54987          | 0.627022     | 7.33275       | 3.54776639       | 0.00014629 | No      |
|      |       |        |             |          |         | Rwdd2b   | 3.3202   | 12.8225  | 1.94933          | 3.3212       | 12.8235       | 1.94901357       | 0.00014629 | No      |
|      |       |        |             |          |         | Rwdd3    | 4.90984  | 9.57544  | 0.963663         | 4.91084      | 9.57644       | 0.96351962       | 0.0193137  | No      |
|      |       |        |             |          |         | Rxra     | 10.3062  | 24.696   | 1.26076          | 10.3072      | 24.697        | 1.26068333       | 0.00014629 | No      |
|      |       |        |             |          |         | Rxrg     | 0.161685 | 12.6675  | 6.29181          | 0.162685     | 12.6685       | 6.28302067       | 0.00555587 | No      |
|      |       |        |             |          |         | RYBP     | 34.5625  | 8.86828  | -1.96248         | 34.5635      | 8.86928       | -1.9623604       | 0.00014629 | No      |
|      |       |        |             |          |         | Ryk      | 11.8116  | 17.1449  | 0.537571         | 11.8126      | 17.1459       | 0.53753709       | 0.0275289  | No      |
|      |       |        |             |          |         | S100a1   | 0.753006 | 509.548  | 9.40234          | 0.754006     | 509.549       | 9.40042917       | 0.0286096  | No      |
|      |       |        |             |          |         | S100a10  | 576.933  | 362.981  | -0.668509        | 576.934      | 362.982       | -0.6685083       | 0.00014629 | No      |
|      |       |        |             |          |         | S100a11  | 36.7094  | 1391.4   | 5.24424          | 36.7104      | 1391.401      | 5.24420562       | 0.00014629 | No      |
|      |       |        |             |          |         | S100a13  | 34.0957  | 195.336  | 2.5183           | 34.0967      | 195.337       | 2.51826122       | 0.00014629 | No      |
|      |       |        |             |          |         | S100a6   | 41.2261  | 831.865  | 4.33472          | 41.2271      | 831.866       | 4.33468626       | 0.00014629 | No      |
|      |       |        |             |          |         | S100pbp  | 24.8539  | 4.687    | -2.40674         | 24.8549      | 4.688         | -2.4064858       | 0.00014629 | No      |
|      |       |        |             |          |         | S1pr1    | 415.809  | 6.04898  | -6.10309         | 415.81       | 6.04998       | -6.1028503       | 0.00014629 | No      |
|      |       |        |             |          |         | S1pr5    | 1.40699  | 3.3849   | 1.2665           | 1.40799      | 3.3859        | 1.26590228       | 0.0085437  | No      |
|      |       |        |             |          |         | SAAL1    | 15.8921  | 42.9125  | 1.43308          | 15.8931      | 42.9135       | 1.43303102       | 0.037924   | No      |
|      |       |        |             |          |         | Sacs     | 6.39773  | 0.386728 | -4.04817         | 6.39873      | 0.387728      | -4.0446688       | 0.00014629 | No      |
|      |       |        |             |          |         | Safb     | 77.0569  | 49.1578  | -0.648505        | 77.0579      | 49.1588       | -0.6484932       | 0.00230432 | No      |
|      |       |        |             |          |         | Safb2    | 93.8381  | 155.335  | 0.727139         | 93.8391      | 155.336       | 0.72713114       | 0.029796   | No      |
|      |       |        |             |          |         | SAMD11   | 0.123925 | 6.91388  | 5.80196          | 0.124925     | 6.91488       | 5.79057009       | 0.00161718 | No      |
|      |       |        |             |          |         | Samd5    | 0        | 0.990417 | inf              | 0.001        | 0.991417      | 9.95334819       | 0.00014629 | No      |

| RRBS |       |        |             |          |         | RNAseq |           |         |                  |              |               |                  |            |         |
|------|-------|--------|-------------|----------|---------|--------|-----------|---------|------------------|--------------|---------------|------------------|------------|---------|
| gene | Blood | Kidney | methyl.diff | pMWU.fdr | Match ? | gene   | blood     | kidney  | log2(fold_ratio) | blood+ 0.001 | kidney+ 0.001 | log2(fold_ratio) | q_value    | Match ? |
|      |       |        |             |          |         | Samd9l | 52.9393   | 7.9372  | -2.73764         | 52.9403      | 7.9382        | -2.7374826       | 0.00014629 | No      |
|      |       |        |             |          |         | Samhd1 | 72.5563   | 4.95028 | -3.87352         | 72.5573      | 4.95128       | -3.8732473       | 0.00014629 | No      |
|      |       |        |             |          |         | Samm50 | 44.3113   | 175.764 | 1.98789          | 44.3123      | 175.765       | 1.9878687        | 0.00014629 | No      |
|      |       |        |             |          |         | Samsn1 | 6.25752   | 2.45681 | -1.3488          | 6.25852      | 2.45781       | -1.3484481       | 0.0132409  | No      |
|      |       |        |             |          |         | Sap130 | 14.597    | 7.68166 | -0.926178        | 14.598       | 7.68266       | -0.9260929       | 0.0353465  | No      |
|      |       |        |             |          |         | Sap30  | 14.9239   | 8.44978 | -0.820634        | 14.9249      | 8.45078       | -0.8205649       | 0.0230496  | No      |
|      |       |        |             |          |         | Sar1b  | 22.6703   | 48.9876 | 1.11161          | 22.6713      | 48.9886       | 1.11157894       | 0.00014629 | No      |
|      |       |        |             |          |         | SARG   | 0.146154  | 18.6643 | 6.99665          | 0.147154     | 18.6653       | 6.98688813       | 0.00014629 | No      |
|      |       |        |             |          |         | Sart3  | 25.9289   | 15.6093 | -0.732153        | 25.9299      | 15.6103       | -0.7321184       | 0.00761239 | No      |
|      |       |        |             |          |         | Sash3  | 178.047   | 7.46221 | -4.57651         | 178.048      | 7.46321       | -4.5763261       | 0.00014629 | No      |
|      |       |        |             |          |         | Sat1   | 84.2913   | 380.534 | 2.17457          | 84.2923      | 380.535       | 2.1745564        | 0.00014629 | No      |
|      |       |        |             |          |         | Sat2   | 0.0664778 | 167.468 | 11.2987          | 0.0674778    | 167.469       | 11.2771935       | 0.00934853 | No      |
|      |       |        |             |          |         | Satb1  | 366.662   | 5.80623 | -5.9807          | 366.663      | 5.80723       | -5.9804607       | 0.00014629 | No      |
|      |       |        |             |          |         | Satb2  | 0         | 5.46148 | inf              | 0.001        | 5.46248       | 12.4153404       | 0.00014629 | No      |
|      |       |        |             |          |         | Sav1   | 3.37435   | 20.486  | 2.60196          | 3.37535      | 20.487        | 2.60159973       | 0.00014629 | No      |
|      |       |        |             |          |         | Saysd1 | 5.58892   | 19.6916 | 1.81694          | 5.58992      | 19.6926       | 1.81675406       | 0.00066215 | No      |
|      |       |        |             |          |         | Sbds   | 30.5415   | 71.2983 | 1.2231           | 30.5425      | 71.2993       | 1.22306976       | 0.00014629 | No      |
|      |       |        |             |          |         | Sbk1   | 6.84986   | 1.93002 | -1.82746         | 6.85086      | 1.93102       | -1.826922        | 0.00014629 | No      |
|      |       |        |             |          |         | Sbno1  | 44.1358   | 13.136  | -1.74842         | 44.1368      | 13.137        | -1.7483462       | 0.00014629 | No      |
|      |       |        |             |          |         | Scaf1  | 24.0536   | 37.0906 | 0.624799         | 24.0546      | 37.0916       | 0.62477969       | 0.00195831 | No      |
|      |       |        |             |          |         | Scaf11 | 33.3475   | 13.5672 | -1.29746         | 33.3485      | 13.5682       | -1.2973925       | 0.00014629 | No      |
|      |       |        |             |          |         | Scaf8  | 32.8705   | 10.7939 | -1.60658         | 32.8715      | 10.7949       | -1.6064874       | 0.00014629 | No      |
|      |       |        |             |          |         | SCAI   | 7.52153   | 1.08253 | -2.79661         | 7.52253      | 1.08353       | -2.7954789       | 0.00014629 | No      |
|      |       |        |             |          |         | Scamp1 | 4.11891   | 14.3214 | 1.79784          | 4.11991      | 14.3224       | 1.79758854       | 0.00014629 | No      |
|      |       |        |             |          |         | Scamp2 | 22.235    | 34.8373 | 0.647803         | 22.236       | 34.8383       | 0.64777694       | 0.00307875 | No      |
|      |       |        |             |          |         | Scamp3 | 96.8742   | 68.7233 | -0.495313        | 96.8752      | 68.7243       | -0.4953071       | 0.0129486  | No      |
|      |       |        |             |          |         | Scamp5 | 0         | 8.5189  | inf              | 0.001        | 8.5199        | 13.0566208       | 0.00014629 | No      |
|      |       |        |             |          |         | Scand1 | 58.412    | 304.909 | 2.38404          | 58.413       | 304.91        | 2.38402208       | 0.00014629 | No      |
|      |       |        |             |          |         | Scaper | 5.36754   | 3.42309 | -0.648963        | 5.36854      | 3.42409       | -0.6488092       | 0.011151   | No      |
|      |       |        |             |          |         | SCCPDH | 1.27952   | 20.1443 | 3.97669          | 1.28052      | 20.1453       | 3.9756416        | 0.00954394 | No      |
|      |       |        |             |          |         | Scd    | 66.3596   | 10.9196 | -2.60339         | 66.3606      | 10.9206       | -2.6032748       | 0.00014629 | No      |
|      |       |        |             |          |         | Schip1 | 0         | 14.3043 | inf              | 0.001        | 14.3053       | 13.8042621       | 0.00014629 | No      |
|      |       |        |             |          |         | Scly   | 3.73339   | 223.587 | 5.90421          | 3.73439      | 223.588       | 5.90382635       | 0.00014629 | No      |
|      |       |        |             |          |         | Scml4  | 74.892    | 2.62559 | -4.8341          | 74.893       | 2.62659       | -4.833568        | 0.00014629 | No      |
|      |       |        |             |          |         | Scnm1  | 12.9764   | 128.731 | 3.3104           | 12.9774      | 128.732       | 3.31029745       | 0.00014629 | No      |
|      |       |        |             |          |         | Scnn1a | 0.0405133 | 7.14612 | 7.46262          | 0.0415133    | 7.14712       | 7.42764458       | 0.0182953  | No      |
|      |       |        |             |          |         | Scnn1b | 0.0816831 | 8.51958 | 6.7046           | 0.0826831    | 8.52058       | 6.68721535       | 0.0351683  | No      |
|      |       |        |             |          |         | Scnn1g | 0         | 7.24203 | inf              | 0.001        | 7.24303       | 12.8223776       | 0.00014629 | No      |
|      |       |        |             |          |         | Scoc   | 16.8578   | 31.078  | 0.882476         | 16.8588      | 31.079        | 0.88243823       | 0.00014629 | No      |
|      |       |        |             |          |         | Scp2   | 43.6836   | 89.8056 | 1.03971          | 43.6846      | 89.8066       | 1.03969669       | 0.00014629 | No      |
|      |       |        |             |          |         | Scpep1 | 47.6699   | 170.367 | 1.8375           | 47.6709      | 170.368       | 1.83747361       | 0.00014629 | No      |
|      |       |        |             |          |         | Scrn2  | 6.35486   | 31.1474 | 2.29318          | 6.35586      | 31.1484       | 2.29299881       | 0.00014629 | No      |

| RRBS |       |        |             |          |         | RNAseq    |           |          |                  |              |               |                  |            |         |
|------|-------|--------|-------------|----------|---------|-----------|-----------|----------|------------------|--------------|---------------|------------------|------------|---------|
| gene | Blood | Kidney | methyl.diff | pMWU.fdr | Match ? | gene      | blood     | kidney   | log2(fold_ratio) | blood+ 0.001 | kidney+ 0.001 | log2(fold_ratio) | q_value    | Match ? |
|      |       |        |             |          |         | Scrn3     | 3.62315   | 10.0983  | 1.47879          | 3.62415      | 10.0993       | 1.47854073       | 0.00014629 | No      |
|      |       |        |             |          |         | Scyl1     | 21.5595   | 38.1604  | 0.823752         | 21.5605      | 38.1614       | 0.82372346       | 0.00126596 | No      |
|      |       |        |             |          |         | Scyl3     | 22.0134   | 7.07641  | -1.63729         | 22.0144      | 7.07741       | -1.6371541       | 0.00014629 | No      |
|      |       |        |             |          |         | Sdad1     | 13.7747   | 7.81986  | -0.816806        | 13.7757      | 7.82086       | -0.8167265       | 0.038868   | No      |
|      |       |        |             |          |         | Sdc1      | 0.187967  | 6.22009  | 5.04839          | 0.188967     | 6.22109       | 5.04096116       | 0.00066215 | No      |
|      |       |        |             |          |         | Sdc2      | 0         | 115.809  | inf              | 0.001        | 115.81        | 16.8214003       | 0.00014629 | No      |
|      |       |        |             |          |         | SDC3      | 0.533615  | 2.00655  | 1.91084          | 0.534615     | 2.00755       | 1.9088637        | 0.00384649 | No      |
|      |       |        |             |          |         | Sdcbp     | 74.9529   | 103.748  | 0.469033         | 74.9539      | 103.749       | 0.46902198       | 0.0176431  | No      |
|      |       |        |             |          |         | Sdccag8   | 3.23888   | 8.885    | 1.45588          | 3.23988      | 8.886         | 1.45559376       | 0.0313726  | No      |
|      |       |        |             |          |         | Sde2      | 21.1931   | 7.52534  | -1.49377         | 21.1941      | 7.52634       | -1.4936423       | 0.00014629 | No      |
|      |       |        |             |          |         | Sdha      | 66.2446   | 235.434  | 1.82945          | 66.2456      | 235.435       | 1.82943227       | 0.00014629 | No      |
|      |       |        |             |          |         | Sdhaf2    | 16.1448   | 78.461   | 2.28091          | 16.1458      | 78.462        | 2.28083518       | 0.00014629 | No      |
|      |       |        |             |          |         | Sdhb      | 85.0547   | 461.703  | 2.4405           | 85.0557      | 461.704       | 2.4404884        | 0.00014629 | No      |
|      |       |        |             |          |         | Sdhc      | 69.4022   | 499.05   | 2.84613          | 69.4032      | 499.051       | 2.84611317       | 0.00014629 | No      |
|      |       |        |             |          |         | Sdhd      | 70.1997   | 258.883  | 1.88276          | 70.2007      | 258.884       | 1.88274848       | 0.00014629 | No      |
|      |       |        |             |          |         | Sdpr      | 0         | 9.24491  | inf              | 0.001        | 9.24591       | 13.1745996       | 0.00014629 | No      |
|      |       |        |             |          |         | Sdr39u1   | 35.528    | 17.717   | -1.00382         | 35.529       | 17.718        | -1.0037813       | 0.0384413  | No      |
|      |       |        |             |          |         | Sec14l1   | 8.44852   | 18.0079  | 1.09186          | 8.44952      | 18.0089       | 1.09176877       | 0.00014629 | No      |
|      |       |        |             |          |         | Sec14l2   | 6.49031   | 2.34204  | -1.47052         | 6.49131      | 2.34304       | -1.4701281       | 0.00352183 | No      |
|      |       |        |             |          |         | Sec16b    | 0.180983  | 5.48653  | 4.92197          | 0.181983     | 5.48753       | 4.91428133       | 0.00014629 | No      |
|      |       |        |             |          |         | Sec22a    | 6.37813   | 13.8547  | 1.11917          | 6.37913      | 13.8557       | 1.11904801       | 0.00090728 | No      |
|      |       |        |             |          |         | Sec22c    | 7.0983    | 4.0707   | -0.802199        | 7.0993       | 4.0717        | -0.8020455       | 0.029075   | No      |
|      |       |        |             |          |         | Sec24b    | 23.4416   | 8.35686  | -1.48804         | 23.4426      | 8.35786       | -1.4879271       | 0.00014629 | No      |
|      |       |        |             |          |         | Sec24d    | 2.85498   | 8.46668  | 1.56832          | 2.85598      | 8.46768       | 1.56798087       | 0.00014629 | No      |
|      |       |        |             |          |         | Sec61b    | 102.196   | 150.39   | 0.557375         | 102.197      | 150.391       | 0.55736539       | 0.0104529  | No      |
|      |       |        |             |          |         | Sec61g    | 155.42    | 214.005  | 0.461474         | 155.421      | 214.006       | 0.4614698        | 0.0426261  | No      |
|      |       |        |             |          |         | Sec62     | 41.6916   | 105.652  | 1.3415           | 41.6926      | 105.653       | 1.34147048       | 0.00014629 | No      |
|      |       |        |             |          |         | Sec63     | 26.2599   | 12.694   | -1.04872         | 26.2609      | 12.695        | -1.048656        | 0.00014629 | No      |
|      |       |        |             |          |         | Secisbp2l | 17.4704   | 7.44982  | -1.22963         | 17.4714      | 7.45082       | -1.2295241       | 0.00014629 | No      |
|      |       |        |             |          |         | Sectm1b   | 0.699639  | 18.0062  | 4.68574          | 0.700639     | 18.0072       | 4.68375876       | 0.00066215 | No      |
|      |       |        |             |          |         | Seh1l     | 28.8009   | 18.9445  | -0.60433         | 28.8019      | 18.9455       | -0.6043088       | 0.00285806 | No      |
|      |       |        |             |          |         | Sel1l     | 15.8528   | 8.52854  | -0.894368        | 15.8538      | 8.52954       | -0.8942888       | 0.00014629 | No      |
|      |       |        |             |          |         | Sel1l3    | 0         | 0.931685 | inf              | 0.001        | 0.932685      | 9.86524611       | 0.00014629 | No      |
|      |       |        |             |          |         | Selenbp1  | 0         | 37.6209  | inf              | 0.001        | 37.6219       | 15.1992851       | 0.00014629 | No      |
|      |       |        |             |          |         | Sell      | 868.287   | 7.06815  | -6.94069         | 868.288      | 7.06915       | -6.9404931       | 0.00014629 | No      |
|      |       |        |             |          |         | Selp      | 2.31991   | 0.166596 | -3.79965         | 2.32091      | 0.167596      | -3.791631        | 0.00219102 | No      |
|      |       |        |             |          |         | Selplg    | 93.121    | 3.95784  | -4.55632         | 93.122       | 3.95884       | -4.5559724       | 0.00014629 | No      |
|      |       |        |             |          |         | Selrc1    | 1.88551   | 4.22828  | 1.16511          | 1.88651      | 4.22928       | 1.16469233       | 0.00427532 | No      |
|      |       |        |             |          |         | Sema3c    | 0         | 14.0815  | inf              | 0.001        | 14.0825       | 13.7816159       | 0.00014629 | No      |
|      |       |        |             |          |         | Sema3f    | 0.382479  | 6.8621   | 4.1652           | 0.383479     | 6.8631        | 4.1616409        | 0.00014629 | No      |
|      |       |        |             |          |         | Sema3g    | 0.269508  | 4.21396  | 3.96678          | 0.270508     | 4.21496       | 3.96177577       | 0.00014629 | No      |
|      |       |        |             |          |         | Sema4c    | 0.0876252 | 0.965733 | 3.46221          | 0.0886252    | 0.966733      | 3.44732861       | 0.00761239 | No      |

| RRBS |       |        |             |          |         | RNAseq    |          |          |                  |              |               |                  |            |         |
|------|-------|--------|-------------|----------|---------|-----------|----------|----------|------------------|--------------|---------------|------------------|------------|---------|
| gene | Blood | Kidney | methyl.diff | pMWU.fdr | Match ? | gene      | blood    | kidney   | log2(fold_ratio) | blood+ 0.001 | kidney+ 0.001 | log2(fold_ratio) | q_value    | Match ? |
|      |       |        |             |          |         | Sema4d    | 56.7437  | 10.5148  | -2.43204         | 56.7447      | 10.5158       | -2.431927        | 0.00014629 | No      |
|      |       |        |             |          |         | Sema4g    | 0.58739  | 5.66082  | 3.26862          | 0.58839      | 5.66182       | 3.26642125       | 0.00014629 | No      |
|      |       |        |             |          |         | Sema7a    | 2.08786  | 20.1998  | 3.27424          | 2.08886      | 20.2008       | 3.27362472       | 0.00014629 | No      |
|      |       |        |             |          |         | Senp1     | 9.08659  | 3.99368  | -1.18602         | 9.08759      | 3.99468       | -1.1858178       | 0.00014629 | No      |
|      |       |        |             |          |         | Senp6     | 56.5472  | 20.7023  | -1.44966         | 56.5482      | 20.7033       | -1.4496204       | 0.00014629 | No      |
|      |       |        |             |          |         | Senp7     | 21.4052  | 3.05817  | -2.80722         | 21.4062      | 3.05917       | -2.8068165       | 0.00014629 | No      |
|      |       |        |             |          |         | Senp8     | 0.911054 | 4.55454  | 2.3217           | 0.912054     | 4.55554       | 2.32043093       | 0.00014629 | No      |
|      |       |        |             |          |         | Sephs1    | 16.6629  | 30.8653  | 0.889344         | 16.6639      | 30.8663       | 0.88930647       | 0.00014629 | No      |
|      |       |        |             |          |         | Sephs2    | 20.4912  | 59.9369  | 1.54844          | 20.4922      | 59.9379       | 1.54839366       | 0.00014629 | No      |
|      |       |        |             |          |         | Sepn1     | 0.547881 | 4.03583  | 2.88093          | 0.548881     | 4.03683       | 2.87865753       | 0.019504   | No      |
|      |       |        |             |          |         | Sepw1     | 74.8333  | 39.9138  | -0.906794        | 74.8343      | 39.9148       | -0.9067759       | 0.0322469  | No      |
|      |       |        |             |          |         | SERBP1    | 291.006  | 76.798   | -1.92191         | 291.007      | 76.799        | -1.9218944       | 0.00014629 | No      |
|      |       |        |             |          |         | Sergef    | 11.5872  | 55.773   | 2.26703          | 11.5882      | 55.774        | 2.26693625       | 0.00014629 | No      |
|      |       |        |             |          |         | Serhl2    | 2.07779  | 13.7229  | 2.72347          | 2.07879      | 13.7239       | 2.72287459       | 0.0254337  | No      |
|      |       |        |             |          |         | Serinc2   | 0.179826 | 26.8647  | 7.22296          | 0.180826     | 26.8657       | 7.21501949       | 0.00041099 | No      |
|      |       |        |             |          |         | Serpinb1a | 0.655333 | 26.7848  | 5.35304          | 0.656333     | 26.7858       | 5.3508966        | 0.00014629 | No      |
|      |       |        |             |          |         | Serpinb5  | 0        | 0.964927 | inf              | 0.001        | 0.965927      | 9.91577035       | 0.00014629 | No      |
|      |       |        |             |          |         | Serpinb6  | 1.90218  | 44.0059  | 4.53197          | 1.90318      | 44.0069       | 4.53124583       | 0.00230432 | No      |
|      |       |        |             |          |         | Serpinb6b | 238.411  | 11.6668  | -4.35297         | 238.412      | 11.6678       | -4.3528524       | 0.00014629 | No      |
|      |       |        |             |          |         | Serpinb9  | 78.7447  | 7.54263  | -3.38404         | 78.7457      | 7.54363       | -3.3838703       | 0.00014629 | No      |
|      |       |        |             |          |         | Serpinc1  | 0.209362 | 10.0291  | 5.58205          | 0.210362     | 10.0301       | 5.57531806       | 0.00352183 | No      |
|      |       |        |             |          |         | Serpini1  | 6.69319  | 0.703892 | -3.24927         | 6.69419      | 0.704892      | -3.2474354       | 0.00014629 | No      |
|      |       |        |             |          |         | Sertad2   | 18.6393  | 7.29011  | -1.35433         | 18.6403      | 7.29111       | -1.3542147       | 0.00014629 | No      |
|      |       |        |             |          |         | Sesn1     | 126.965  | 18.5768  | -2.77285         | 126.966      | 18.5778       | -2.7727906       | 0.00014629 | No      |
|      |       |        |             |          |         | Sesn2     | 5.77699  | 24.3806  | 2.07734          | 5.77799      | 24.3816       | 2.07715319       | 0.00014629 | No      |
|      |       |        |             |          |         | Sesn3     | 63.8908  | 15.1789  | -2.07354         | 63.8918      | 15.1799       | -2.0734685       | 0.00014629 | No      |
|      |       |        |             |          |         | Set       | 199.079  | 61.9277  | -1.68469         | 199.08       | 61.9287       | -1.6846682       | 0.00014629 | No      |
|      |       |        |             |          |         | Setd1b    | 38.2123  | 7.94505  | -2.26591         | 38.2133      | 7.94605       | -2.2657651       | 0.00014629 | No      |
|      |       |        |             |          |         | Setd2     | 46.4767  | 15.2826  | -1.60462         | 46.4777      | 15.2836       | -1.6045543       | 0.00014629 | No      |
|      |       |        |             |          |         | Setd3     | 31.0975  | 52.1979  | 0.747192         | 31.0985      | 52.1989       | 0.74717441       | 0.00028114 | No      |
|      |       |        |             |          |         | Setd4     | 11.29    | 38.9226  | 1.78556          | 11.291       | 38.9236       | 1.78547188       | 0.00014629 | No      |
|      |       |        |             |          |         | Setd5     | 26.6983  | 5.11655  | -2.3835          | 26.6993      | 5.11755       | -2.3832767       | 0.00014629 | No      |
|      |       |        |             |          |         | Setd7     | 25.9744  | 4.14899  | -2.64626         | 25.9754      | 4.14999       | -2.6459662       | 0.00014629 | No      |
|      |       |        |             |          |         | Setd8     | 53.7194  | 23.0395  | -1.22133         | 53.7204      | 23.0405       | -1.221298        | 0.00014629 | No      |
|      |       |        |             |          |         | Setdb1    | 24.3269  | 6.53074  | -1.89724         | 24.3279      | 6.53174       | -1.8970725       | 0.00114835 | No      |
|      |       |        |             |          |         | Setx      | 102.867  | 7.8878   | -3.70502         | 102.868      | 7.8888        | -3.7048446       | 0.00014629 | No      |
|      |       |        |             |          |         | Sf1       | 186.353  | 65.9225  | -1.49919         | 186.354      | 65.9235       | -1.499181        | 0.00014629 | No      |
|      |       |        |             |          |         | Sf3a1     | 25.3081  | 12.8005  | -0.983401        | 25.3091      | 12.8015       | -0.9833433       | 0.00014629 | No      |
|      |       |        |             |          |         | Sf3a3     | 56.5575  | 32.1794  | -0.813583        | 56.5585      | 32.1804       | -0.8135616       | 0.046358   | No      |
|      |       |        |             |          |         | Sf3b1     | 197.016  | 45.4202  | -2.11691         | 197.017      | 45.4212       | -2.1168824       | 0.00014629 | No      |
|      |       |        |             |          |         | Sf3b2     | 80.9811  | 46.6823  | -0.794708        | 80.9821      | 46.6833       | -0.7946965       | 0.00014629 | No      |
|      |       |        |             |          |         | Sf3b3     | 54.4108  | 17.6344  | -1.6255          | 54.4118      | 17.6354       | -1.6254453       | 0.00014629 | No      |

| RRBS |       |        |             |          |         | RNAseq   |          |          |                  |              |               |                  |            |         |
|------|-------|--------|-------------|----------|---------|----------|----------|----------|------------------|--------------|---------------|------------------|------------|---------|
| gene | Blood | Kidney | methyl.diff | pMWU.fdr | Match ? | gene     | blood    | kidney   | log2(fold_ratio) | blood+ 0.001 | kidney+ 0.001 | log2(fold_ratio) | q_value    | Match ? |
|      |       |        |             |          |         | Sf3b4    | 37.9603  | 25.5403  | -0.571714        | 37.9613      | 25.5413       | -0.5716974       | 0.0497484  | No      |
|      |       |        |             |          |         | Sf3b5    | 89.0955  | 158.61   | 0.832055         | 89.0965      | 158.611       | 0.83205216       | 0.00014629 | No      |
|      |       |        |             |          |         | Sf3b6    | 108.524  | 55.8056  | -0.959528        | 108.525      | 55.8066       | -0.9595198       | 0.00014629 | No      |
|      |       |        |             |          |         | Sfi1     | 14.7321  | 208.636  | 3.82395          | 14.7331      | 208.637       | 3.8238621        | 0.00014629 | No      |
|      |       |        |             |          |         | SFN      | 73.2969  | 30.1309  | -1.28251         | 73.2979      | 30.1319       | -1.2824802       | 0.00014629 | No      |
|      |       |        |             |          |         | SFR1     | 88.2281  | 23.1593  | -1.92965         | 88.2291      | 23.1603       | -1.9296006       | 0.00014629 | No      |
|      |       |        |             |          |         | SFSWAP   | 26.1369  | 78.7643  | 1.59145          | 26.1379      | 78.7653       | 1.59141696       | 0.00014629 | No      |
|      |       |        |             |          |         | Sft2d1   | 96.6223  | 61.2899  | -0.656706        | 96.6233      | 61.2909       | -0.6566982       | 0.00782085 | No      |
|      |       |        |             |          |         | Sfta2    | 0        | 6.87089  | inf              | 0.001        | 6.87189       | 12.7464912       | 0.00740907 | No      |
|      |       |        |             |          |         | Sfxn1    | 16.675   | 59.0445  | 1.82411          | 16.676       | 59.0455       | 1.82405384       | 0.00014629 | No      |
|      |       |        |             |          |         | Sfxn2    | 6.44308  | 30.0604  | 2.22204          | 6.44408      | 30.0614       | 2.22186589       | 0.00014629 | No      |
|      |       |        |             |          |         | Sfxn4    | 7.23387  | 20.2194  | 1.4829           | 7.23487      | 20.2204       | 1.48277254       | 0.00014629 | No      |
|      |       |        |             |          |         | Sfxn5    | 0.351279 | 3.40275  | 3.27601          | 0.352279     | 3.40375       | 3.2723347        | 0.00296747 | No      |
|      |       |        |             |          |         | Sgcb     | 1.38436  | 2.44161  | 0.818611         | 1.38536      | 2.44261       | 0.81816261       | 0.036695   | No      |
|      |       |        |             |          |         | Sgce     | 0        | 28.1346  | inf              | 0.001        | 28.1356       | 14.7801091       | 0.00014629 | No      |
|      |       |        |             |          |         | Sgk1     | 10.8585  | 136.992  | 3.65719          | 10.8595      | 136.993       | 3.65707259       | 0.00014629 | No      |
|      |       |        |             |          |         | Sgk3     | 6.43917  | 4.25248  | -0.59857         | 6.44017      | 4.25348       | -0.5984551       | 0.0333042  | No      |
|      |       |        |             |          |         | Sgms1    | 5.70946  | 31.8417  | 2.47949          | 5.71046      | 31.8427       | 2.4792838        | 0.00014629 | No      |
|      |       |        |             |          |         | Sgpl1    | 11.4004  | 2.69917  | -2.07849         | 11.4014      | 2.70017       | -2.0780888       | 0.00014629 | No      |
|      |       |        |             |          |         | Sgsh     | 9.96633  | 2.20978  | -2.17316         | 9.96733      | 2.21078       | -2.1726516       | 0.00014629 | No      |
|      |       |        |             |          |         | Sgsm2    | 2.57309  | 6.25025  | 1.28041          | 2.57409      | 6.25125       | 1.2800822        | 0.00090728 | No      |
|      |       |        |             |          |         | Sgsm3    | 0.77102  | 9.86757  | 3.67786          | 0.77202      | 9.86857       | 3.67613092       | 0.00102864 | No      |
|      |       |        |             |          |         | Sgta     | 38.3249  | 150.755  | 1.97585          | 38.3259      | 150.756       | 1.97582385       | 0.00014629 | No      |
|      |       |        |             |          |         | Sh2b2    | 1.09679  | 0.192592 | -2.50966         | 1.09779      | 0.193592      | -2.5035109       | 0.0160279  | No      |
|      |       |        |             |          |         | Sh2b3    | 13.0364  | 4.8981   | -1.41225         | 13.0374      | 4.8991        | -1.4120675       | 0.00014629 | No      |
|      |       |        |             |          |         | Sh2d1a   | 51.2616  | 1.49652  | -5.09819         | 51.2626      | 1.49752       | -5.0972595       | 0.00014629 | No      |
|      |       |        |             |          |         | Sh2d3c   | 66.0382  | 36.6716  | -0.848638        | 66.0392      | 36.6726       | -0.8486201       | 0.00028114 | No      |
|      |       |        |             |          |         | Sh3bgrl  | 112.038  | 38.2122  | -1.55188         | 112.039      | 38.2132       | -1.551858        | 0.00014629 | No      |
|      |       |        |             |          |         | Sh3bgrl2 | 0.254193 | 19.7743  | 6.28156          | 0.255193     | 19.7753       | 6.27596701       | 0.00014629 | No      |
|      |       |        |             |          |         | Sh3bgrl3 | 241.211  | 90.9698  | -1.40683         | 241.212      | 90.9708       | -1.4068262       | 0.00014629 | No      |
|      |       |        |             |          |         | Sh3bp1   | 26.2164  | 10.5778  | -1.30944         | 26.2174      | 10.5788       | -1.3093486       | 0.00649695 | No      |
|      |       |        |             |          |         | Sh3bp4   | 0.330778 | 6.37391  | 4.26824          | 0.331778     | 6.37491       | 4.26411484       | 0.00014629 | No      |
|      |       |        |             |          |         | Sh3bp5   | 3.95525  | 37.0543  | 3.2278           | 3.95625      | 37.0553       | 3.22747441       | 0.00014629 | No      |
|      |       |        |             |          |         | Sh3bp5l  | 3.70917  | 12.0873  | 1.70432          | 3.71017      | 12.0883       | 1.70405417       | 0.00014629 | No      |
|      |       |        |             |          |         | Sh3glb1  | 52.9681  | 32.1077  | -0.722203        | 52.9691      | 32.1087       | -0.7221867       | 0.011151   | No      |
|      |       |        |             |          |         | Sh3glb2  | 11.4721  | 32.6191  | 1.50759          | 11.4731      | 32.6201       | 1.50750595       | 0.00014629 | No      |
|      |       |        |             |          |         | Sh3kbp1  | 140.879  | 6.52577  | -4.43217         | 140.88       | 6.52677       | -4.4319538       | 0.00014629 | No      |
|      |       |        |             |          |         | Sh3pxd2a | 2.20619  | 0.976369 | -1.17606         | 2.20719      | 0.977369      | -1.1752356       | 0.0319849  | No      |
|      |       |        |             |          |         | Sh3rf1   | 1.75544  | 36.8126  | 4.39029          | 1.75644      | 36.8136       | 4.38951264       | 0.00014629 | No      |
|      |       |        |             |          |         | Sh3tc1   | 2.4426   | 50.3264  | 4.36483          | 2.4436       | 50.3274       | 4.36426402       | 0.00014629 | No      |
|      |       |        |             |          |         | Sh3tc2   | 0        | 74.7323  | inf              | 0.001        | 74.7333       | 16.1894636       | 0.00014629 | No      |
|      |       |        |             |          |         | Sh3yl1   | 0.413345 | 27.0194  | 6.0305           | 0.414345     | 27.0204       | 6.02707271       | 0.00028114 | No      |

| RRBS |       |        |             |          |         | RNAseq  |          |          |                  |              |               |                  |            |         |
|------|-------|--------|-------------|----------|---------|---------|----------|----------|------------------|--------------|---------------|------------------|------------|---------|
| gene | Blood | Kidney | methyl.diff | pMWU.fdr | Match ? | gene    | blood    | kidney   | log2(fold_ratio) | blood+ 0.001 | kidney+ 0.001 | log2(fold_ratio) | q_value    | Match ? |
|      |       |        |             |          |         | Shb     | 5.29614  | 111.238  | 4.39256          | 5.29714      | 111.239       | 4.39230523       | 0.00014629 | No      |
|      |       |        |             |          |         | Shbg    | 0.376089 | 3.01724  | 3.00408          | 0.377089     | 3.01824       | 3.00073056       | 0.034633   | No      |
|      |       |        |             |          |         | She     | 5.06448  | 1.03817  | -2.28638         | 5.06548      | 1.03917       | -2.2852673       | 0.00041099 | No      |
|      |       |        |             |          |         | Shf     | 1.16137  | 10.3068  | 3.14969          | 1.16237      | 10.3078       | 3.14859517       | 0.004167   | No      |
|      |       |        |             |          |         | Shh     | 0        | 5.44401  | inf              | 0.001        | 5.44501       | 12.410719        | 0.00014629 | No      |
|      |       |        |             |          |         | Shisa5  | 449.63   | 57.0223  | -2.97914         | 449.631      | 57.0233       | -2.9791181       | 0.00014629 | No      |
|      |       |        |             |          |         | Shmt1   | 21.6202  | 32.4621  | 0.586376         | 21.6212      | 32.4631       | 0.58635418       | 0.0323416  | No      |
|      |       |        |             |          |         | Shoc2   | 16.1762  | 5.50602  | -1.55479         | 16.1772      | 5.50702       | -1.5546182       | 0.00014629 | No      |
|      |       |        |             |          |         | Shpk    | 3.46763  | 8.90428  | 1.36055          | 3.46863      | 8.90528       | 1.36029502       | 0.00014629 | No      |
|      |       |        |             |          |         | Shprh   | 5.37998  | 2.95723  | -0.863357        | 5.38098      | 2.95823       | -0.8631347       | 0.00184429 | No      |
|      |       |        |             |          |         | Shq1    | 2.69114  | 1.11047  | -1.27705         | 2.69214      | 1.11147       | -1.2762844       | 0.0479113  | No      |
|      |       |        |             |          |         | Shroom2 | 0        | 4.36709  | inf              | 0.001        | 4.36809       | 12.0927869       | 0.00014629 | No      |
|      |       |        |             |          |         | Shroom3 | 0        | 5.21202  | inf              | 0.001        | 5.21302       | 12.3479037       | 0.00014629 | No      |
|      |       |        |             |          |         | Siah1a  | 4.08714  | 10.035   | 1.29587          | 4.08814      | 10.036        | 1.29566787       | 0.00014629 | No      |
|      |       |        |             |          |         | Siah2   | 3.51647  | 8.34335  | 1.2465           | 3.51747      | 8.34435       | 1.24626155       | 0.00066215 | No      |
|      |       |        |             |          |         | Sidt1   | 9.7068   | 0.570353 | -4.08907         | 9.7078       | 0.571353      | -4.0866901       | 0.00014629 | No      |
|      |       |        |             |          |         | Sidt2   | 49.1583  | 33.7021  | -0.544597        | 49.1593      | 33.7031       | -0.5445831       | 0.0100448  | No      |
|      |       |        |             |          |         | Sil1    | 7.98279  | 52.2488  | 2.71043          | 7.98379      | 52.2498       | 2.71027984       | 0.00014629 | No      |
|      |       |        |             |          |         | Sipa1   | 94.4632  | 21.2322  | -2.1535          | 94.4642      | 21.2332       | -2.1534459       | 0.00014629 | No      |
|      |       |        |             |          |         | Sipa1l3 | 7.15916  | 17.7861  | 1.31289          | 7.16016      | 17.7871       | 1.31276758       | 0.00014629 | No      |
|      |       |        |             |          |         | Sirpa   | 0.903238 | 5.21229  | 2.52874          | 0.904238     | 5.21329       | 2.52741966       | 0.00014629 | No      |
|      |       |        |             |          |         | Sirt1   | 20.2606  | 8.74448  | -1.21223         | 20.2616      | 8.74548       | -1.2121386       | 0.00352183 | No      |
|      |       |        |             |          |         | Sirt2   | 56.264   | 82.797   | 0.557365         | 56.265       | 82.798        | 0.55735816       | 0.0137192  | No      |
|      |       |        |             |          |         | Sirt3   | 7.84778  | 43.1034  | 2.45744          | 7.84878      | 43.1044       | 2.45729482       | 0.00014629 | No      |
|      |       |        |             |          |         | Sirt5   | 20.9326  | 33.0836  | 0.660366         | 20.9336      | 33.0846       | 0.6603394        | 0.00710369 | No      |
|      |       |        |             |          |         | Sirt6   | 13.5722  | 21.3826  | 0.655781         | 13.5732      | 21.3836       | 0.65574387       | 0.00884407 | No      |
|      |       |        |             |          |         | Sirt7   | 58.9622  | 42.6119  | -0.468534        | 58.9632      | 42.6129       | -0.4685246       | 0.0250635  | No      |
|      |       |        |             |          |         | Sit1    | 67.3517  | 3.65523  | -4.20368         | 67.3527      | 3.65623       | -4.203307        | 0.00014629 | No      |
|      |       |        |             |          |         | Six5    | 0.139725 | 8.40932  | 5.91133          | 0.140725     | 8.41032       | 5.90121014       | 0.0224797  | No      |
|      |       |        |             |          |         | Ska2    | 4.76699  | 15.7995  | 1.72873          | 4.76799      | 15.8005       | 1.7285171        | 0.0139199  | No      |
|      |       |        |             |          |         | Skap1   | 239.372  | 24.2262  | -3.30461         | 239.373      | 24.2272       | -3.3045608       | 0.00014629 | No      |
|      |       |        |             |          |         | Skap2   | 11.9683  | 26.3615  | 1.13922          | 11.9693      | 26.3625       | 1.13914841       | 0.00014629 | No      |
|      |       |        |             |          |         | Ski     | 38.2107  | 17.9037  | -1.09372         | 38.2117      | 17.9047       | -1.0936761       | 0.00014629 | No      |
|      |       |        |             |          |         | Skida1  | 0.149227 | 1.73831  | 3.5421           | 0.150227     | 1.73931       | 3.53329906       | 0.00884407 | No      |
|      |       |        |             |          |         | Skil    | 16.2729  | 10.3496  | -0.652906        | 16.2739      | 10.3506       | -0.6528456       | 0.00066215 | No      |
|      |       |        |             |          |         | Skiv2l2 | 22.7703  | 12.2129  | -0.898749        | 22.7713      | 12.2139       | -0.8986927       | 0.00924781 | No      |
|      |       |        |             |          |         | Skp1    | 188.406  | 340.331  | 0.853092         | 188.407      | 340.332       | 0.85309024       | 0.00014629 | No      |
|      |       |        |             |          |         | Skp2    | 4.54483  | 0.492365 | -3.20643         | 4.54583      | 0.493365      | -3.2038165       | 0.00014629 | No      |
|      |       |        |             |          |         | Sla     | 39.2149  | 0.929943 | -5.39812         | 39.2159      | 0.930943      | -5.3966021       | 0.00014629 | No      |
|      |       |        |             |          |         | Slain1  | 14.9856  | 1.92334  | -2.96188         | 14.9866      | 1.92434       | -2.9612375       | 0.00014629 | No      |
|      |       |        |             |          |         | Slain2  | 16.9689  | 11.2343  | -0.594975        | 16.9699      | 11.2353       | -0.5949394       | 0.00914429 | No      |
|      |       |        |             |          |         | Slamf6  | 63.8045  | 0.829589 | -6.26512         | 63.8055      | 0.830589      | -6.2634022       | 0.00014629 | No      |

| RRBS |       |        |             |          |         | RNAseq   |           |         |                  |              |               |                  |            |         |
|------|-------|--------|-------------|----------|---------|----------|-----------|---------|------------------|--------------|---------------|------------------|------------|---------|
| gene | Blood | Kidney | methyl.diff | pMWU.fdr | Match ? | gene     | blood     | kidney  | log2(fold_ratio) | blood+ 0.001 | kidney+ 0.001 | log2(fold_ratio) | q_value    | Match ? |
|      |       |        |             |          |         | Slamf9   | 0.26472   | 2.31429 | 3.12803          | 0.26572      | 2.31529       | 3.12321418       | 0.0247814  | No      |
|      |       |        |             |          |         | Slc10a5  | 0.661914  | 2.77744 | 2.06904          | 0.662914     | 2.77844       | 2.06738146       | 0.00700299 | No      |
|      |       |        |             |          |         | Slc11a2  | 13.0237   | 57.1081 | 2.13256          | 13.0247      | 57.1091       | 2.13247051       | 0.00014629 | No      |
|      |       |        |             |          |         | SLC12A1  | 0         | 114.722 | inf              | 0.001        | 114.723       | 16.8077951       | 0.00014629 | No      |
|      |       |        |             |          |         | Slc12a2  | 4.39678   | 8.18501 | 0.896539         | 4.39778      | 8.18601       | 0.89638499       | 0.00053701 | No      |
|      |       |        |             |          |         | Slc12a6  | 29.9794   | 5.70142 | -2.39458         | 29.9804      | 5.70242       | -2.3943734       | 0.00014629 | No      |
|      |       |        |             |          |         | Slc12a7  | 44.154    | 16.6898 | -1.40358         | 44.155       | 16.6908       | -1.4035237       | 0.00014629 | No      |
|      |       |        |             |          |         | Slc12a8  | 0.163176  | 38.8595 | 7.8957           | 0.164176     | 38.8605       | 7.88691741       | 0.00014629 | No      |
|      |       |        |             |          |         | Slc12a9  | 25.4322   | 37.1103 | 0.545164         | 25.4332      | 37.1113       | 0.54514555       | 0.0301422  | No      |
|      |       |        |             |          |         | Slc13a1  | 0         | 106.683 | inf              | 0.001        | 106.684       | 16.7029843       | 0.00014629 | No      |
|      |       |        |             |          |         | Slc14a1  | 40.2654   | 8.7252  | -2.20628         | 40.2664      | 8.7262        | -2.206151        | 0.00014629 | No      |
|      |       |        |             |          |         | Slc14a2  | 0         | 23.4779 | inf              | 0.001        | 23.4789       | 14.5190772       | 0.00014629 | No      |
|      |       |        |             |          |         | Slc16a10 | 6.06897   | 3.09027 | -0.973719        | 6.06997      | 3.09127       | -0.9734897       | 0.00491494 | No      |
|      |       |        |             |          |         | SLC16A11 | 0.136374  | 37.0377 | 8.08528          | 0.137374     | 37.0387       | 8.07478067       | 0.00014629 | No      |
|      |       |        |             |          |         | Slc16a12 | 0         | 47.158  | inf              | 0.001        | 47.159        | 15.5252455       | 0.00014629 | No      |
|      |       |        |             |          |         | Slc16a13 | 0.948145  | 23.5294 | 4.63321          | 0.949145     | 23.5304       | 4.63175353       | 0.00014629 | No      |
|      |       |        |             |          |         | Slc16a14 | 0.0105329 | 21.0749 | 10.9664          | 0.0115329    | 21.0759       | 10.8356232       | 0.00138312 | No      |
|      |       |        |             |          |         | Slc16a7  | 0.0768491 | 25.1994 | 8.35714          | 0.0778491    | 25.2004       | 8.33855056       | 0.00014629 | No      |
|      |       |        |             |          |         | Slc17a1  | 0         | 33.4554 | inf              | 0.001        | 33.4564       | 15.0299946       | 0.00014629 | No      |
|      |       |        |             |          |         | Slc17a2  | 0         | 12.4931 | inf              | 0.001        | 12.4941       | 13.6089594       | 0.00014629 | No      |
|      |       |        |             |          |         | Slc17a3  | 0         | 154.963 | inf              | 0.001        | 154.964       | 17.2415736       | 0.00014629 | No      |
|      |       |        |             |          |         | Slc17a4  | 0         | 5.75653 | inf              | 0.001        | 5.75753       | 12.4912343       | 0.00014629 | No      |
|      |       |        |             |          |         | Slc17a5  | 4.63363   | 8.94747 | 0.949338         | 4.63463      | 8.94847       | 0.94918687       | 0.00066215 | No      |
|      |       |        |             |          |         | Slc18b1  | 0.165869  | 8.18538 | 5.62493          | 0.166869     | 8.18638       | 5.61643777       | 0.00014629 | No      |
|      |       |        |             |          |         | Slc19a1  | 8.38885   | 79.5162 | 3.2447           | 8.38985      | 79.5172       | 3.24455003       | 0.00014629 | No      |
|      |       |        |             |          |         | Slc1a1   | 0.0288015 | 45.4133 | 10.6228          | 0.0298015    | 45.4143       | 10.573546        | 0.0122504  | No      |
|      |       |        |             |          |         | Slc1a5   | 15.5235   | 5.49077 | -1.49937         | 15.5245      | 5.49177       | -1.4992037       | 0.00014629 | No      |
|      |       |        |             |          |         | Slc20a1  | 48.283    | 13.773  | -1.80967         | 48.284       | 13.774        | -1.8095976       | 0.00014629 | No      |
|      |       |        |             |          |         | Slc20a2  | 34.3722   | 18.5505 | -0.889786        | 34.3732      | 18.5515       | -0.8897483       | 0.00014629 | No      |
|      |       |        |             |          |         | Slc22a1  | 0         | 154.449 | inf              | 0.001        | 154.45        | 17.2367803       | 0.00014629 | No      |
|      |       |        |             |          |         | Slc22a15 | 0.0590107 | 11.7189 | 7.63364          | 0.0600107    | 11.7199       | 7.60952479       | 0.0240648  | No      |
|      |       |        |             |          |         | Slc22a18 | 2.79127   | 92.1958 | 5.04571          | 2.79227      | 92.1968       | 5.04520632       | 0.00014629 | No      |
|      |       |        |             |          |         | Slc22a2  | 0         | 57.1429 | inf              | 0.001        | 57.1439       | 15.8023119       | 0.00014629 | No      |
|      |       |        |             |          |         | Slc22a22 | 0         | 22.8381 | inf              | 0.001        | 22.8391       | 14.4792182       | 0.00014629 | No      |
|      |       |        |             |          |         | Slc22a23 | 0.0139484 | 8.63308 | 9.27363          | 0.0149484    | 8.63408       | 9.17390758       | 0.023877   | No      |
|      |       |        |             |          |         | Slc22a24 | 0         | 2.55007 | inf              | 0.001        | 2.55107       | 11.3168868       | 0.00014629 | No      |
|      |       |        |             |          |         | Slc22a25 | 0         | 25.0211 | inf              | 0.001        | 25.0221       | 14.6109153       | 0.00014629 | No      |
|      |       |        |             |          |         | Slc22a5  | 1.60815   | 113.783 | 6.14475          | 1.60915      | 113.784       | 6.14385508       | 0.00014629 | No      |
|      |       |        |             |          |         | Slc22a7  | 0         | 2.02917 | inf              | 0.001        | 2.03017       | 10.9873848       | 0.00014629 | No      |
|      |       |        |             |          |         | Slc23a2  | 18.5437   | 3.48403 | -2.4121          | 18.5447      | 3.48503       | -2.4117639       | 0.00014629 | No      |
|      |       |        |             |          |         | Slc23a3  | 0.42933   | 2.36606 | 2.46233          | 0.43033      | 2.36706       | 2.45958095       | 0.00173187 | No      |
|      |       |        |             |          |         | Slc24a6  | 4.58051   | 30.0033 | 2.71154          | 4.58151      | 30.0043       | 2.7112742        | 0.00014629 | No      |

| RRBS |       |        |             |          |         | RNAseq     |           |         |                  |              |               |                  |            |         |
|------|-------|--------|-------------|----------|---------|------------|-----------|---------|------------------|--------------|---------------|------------------|------------|---------|
| gene | Blood | Kidney | methyl.diff | pMWU.fdr | Match ? | gene       | blood     | kidney  | log2(fold_ratio) | blood+ 0.001 | kidney+ 0.001 | log2(fold_ratio) | q_value    | Match ? |
|      |       |        |             |          |         | Slc25a1    | 11.3092   | 68.5616 | 2.5999           | 11.3102      | 68.5626       | 2.59979738       | 0.00014629 | No      |
|      |       |        |             |          |         | Slc25a10   | 5.88578   | 159     | 4.75565          | 5.88678      | 159.001       | 4.75541332       | 0.00014629 | No      |
|      |       |        |             |          |         | Slc25a11   | 36.3172   | 155.156 | 2.09499          | 36.3182      | 155.157       | 2.09496418       | 0.00014629 | No      |
|      |       |        |             |          |         | Slc25a13   | 0.434699  | 37.6067 | 6.43483          | 0.435699     | 37.6077       | 6.43155246       | 0.00219102 | No      |
|      |       |        |             |          |         | Slc25a15   | 3.96347   | 25.3691 | 2.67824          | 3.96447      | 25.3701       | 2.67792929       | 0.00014629 | No      |
|      |       |        |             |          |         | Slc25a20   | 14.9759   | 34.4731 | 1.20283          | 14.9769      | 34.4741       | 1.20277385       | 0.00014629 | No      |
|      |       |        |             |          |         | Slc25a24   | 2.10169   | 5.87845 | 1.48389          | 2.10269      | 5.87945       | 1.48344503       | 0.00014629 | No      |
|      |       |        |             |          |         | Slc25a25   | 2.93354   | 18.4626 | 2.65389          | 2.93454      | 18.4636       | 2.6534776        | 0.00014629 | No      |
|      |       |        |             |          |         | Slc25a28   | 32.4196   | 85.3397 | 1.39635          | 32.4206      | 85.3407       | 1.39632315       | 0.00014629 | No      |
|      |       |        |             |          |         | Slc25a29   | 2.47474   | 23.9025 | 3.27181          | 2.47574      | 23.9035       | 3.27129016       | 0.00014629 | No      |
|      |       |        |             |          |         | Slc25a3    | 237.718   | 621.914 | 1.38747          | 237.719      | 621.915       | 1.3874602        | 0.00014629 | No      |
|      |       |        |             |          |         | Slc25a30   | 17.6016   | 70.7996 | 2.00804          | 17.6026      | 70.8006       | 2.00797305       | 0.00014629 | No      |
|      |       |        |             |          |         | Slc25a32   | 4.87757   | 2.94171 | -0.729508        | 4.87857      | 2.94271       | -0.729313        | 0.0315381  | No      |
|      |       |        |             |          |         | Slc25a33   | 6.87994   | 12.3378 | 0.842623         | 6.88094      | 12.3388       | 0.84252452       | 0.00597292 | No      |
|      |       |        |             |          |         | Slc25a35   | 2.04864   | 7.50058 | 1.87234          | 2.04964      | 7.50158       | 1.87182396       | 0.00384649 | No      |
|      |       |        |             |          |         | Slc25a36l1 | 100.225   | 20.9984 | -2.25489         | 100.226      | 20.9994       | -2.2548368       | 0.00014629 | No      |
|      |       |        |             |          |         | Slc25a38   | 20.8161   | 117.368 | 2.49527          | 20.8171      | 117.369       | 2.4952104        | 0.00014629 | No      |
|      |       |        |             |          |         | Slc25a39   | 66.697    | 247.562 | 1.89209          | 66.698       | 247.563       | 1.8920803        | 0.00014629 | No      |
|      |       |        |             |          |         | Slc25a42   | 5.21831   | 17.7447 | 1.76573          | 5.21931      | 17.7457       | 1.76553849       | 0.00014629 | No      |
|      |       |        |             |          |         | Slc25a45   | 0.294047  | 77.0345 | 8.03332          | 0.295047     | 77.0355       | 8.02843483       | 0.00014629 | No      |
|      |       |        |             |          |         | Slc25a46   | 29.0217   | 14.1424 | -1.03711         | 29.0227      | 14.1434       | -1.0370528       | 0.00195831 | No      |
|      |       |        |             |          |         | Slc25a48   | 0         | 20.2077 | inf              | 0.001        | 20.2087       | 14.3026889       | 0.00014629 | No      |
|      |       |        |             |          |         | Slc25a5    | 300.377   | 856.28  | 1.51131          | 300.378      | 856.281       | 1.51130516       | 0.00014629 | No      |
|      |       |        |             |          |         | Slc26a2    | 3.01313   | 1.01883 | -1.56435         | 3.01413      | 1.01983       | -1.563413        | 0.00014629 | No      |
|      |       |        |             |          |         | Slc26a6    | 20.7981   | 40.1473 | 0.948851         | 20.7991      | 40.1483       | 0.9488178        | 0.00252712 | No      |
|      |       |        |             |          |         | Slc26a8    | 87.9308   | 30.3881 | -1.53286         | 87.9318      | 30.3891       | -1.5328311       | 0.00014629 | No      |
|      |       |        |             |          |         | Slc27a1    | 12.3403   | 33.4964 | 1.44063          | 12.3413      | 33.4974       | 1.44055475       | 0.00374149 | No      |
|      |       |        |             |          |         | Slc28a2    | 90.3936   | 11.6202 | -2.95958         | 90.3946      | 11.6212       | -2.9594775       | 0.00014629 | No      |
|      |       |        |             |          |         | Slc29a3    | 2.08746   | 39.9334 | 4.25778          | 2.08846      | 39.9344       | 4.25712062       | 0.00014629 | No      |
|      |       |        |             |          |         | Slc2a1     | 9.33674   | 26.6998 | 1.51584          | 9.33774      | 26.7008       | 1.51573764       | 0.00014629 | No      |
|      |       |        |             |          |         | Slc2a12    | 0.0927231 | 1.8721  | 4.33558          | 0.0937231    | 1.8731        | 4.32087944       | 0.00263402 | No      |
|      |       |        |             |          |         | Slc2a2     | 0         | 9.44784 | inf              | 0.001        | 9.44884       | 13.2059215       | 0.00014629 | No      |
|      |       |        |             |          |         | Slc2a9     | 3.82389   | 1.20459 | -1.6665          | 3.82489      | 1.20559       | -1.6656789       | 0.0102511  | No      |
|      |       |        |             |          |         | Slc30a4    | 1.67262   | 5.43071 | 1.69903          | 1.67362      | 5.43171       | 1.69843446       | 0.00014629 | No      |
|      |       |        |             |          |         | Slc30a7    | 11.698    | 2.77004 | -2.07828         | 11.699       | 2.77104       | -2.0778858       | 0.00014629 | No      |
|      |       |        |             |          |         | Slc31a1    | 6.53814   | 24.3898 | 1.89932          | 6.53914      | 24.3908       | 1.89916426       | 0.00066215 | No      |
|      |       |        |             |          |         | Slc31a2    | 6.61974   | 30.0424 | 2.18216          | 6.62074      | 30.0434       | 2.18198371       | 0.00028114 | No      |
|      |       |        |             |          |         | Slc34a1    | 0.0320587 | 2989.12 | 16.5086          | 0.0330587    | 2989.121      | 16.4643318       | 0.0109563  | No      |
|      |       |        |             |          |         | Slc34a3    | 0         | 102.375 | inf              | 0.001        | 102.376       | 16.643518        | 0.00014629 | No      |
|      |       |        |             |          |         | Slc35a1    | 9.19805   | 20.627  | 1.16513          | 9.19905      | 20.628        | 1.16504717       | 0.00014629 | No      |
|      |       |        |             |          |         | Slc35a3    | 9.54022   | 4.82026 | -0.984913        | 9.54122      | 4.82126       | -0.9847635       | 0.00014629 | No      |
|      |       |        |             |          |         | Slc35a5    | 6.97818   | 3.30364 | -1.07879         | 6.97918      | 3.30464       | -1.0785644       | 0.00138312 | No      |



| RRBS |       |        |             |          |         | RNAseq   |           |          |                  |              |               |                  |            |         |
|------|-------|--------|-------------|----------|---------|----------|-----------|----------|------------------|--------------|---------------|------------------|------------|---------|
| gene | Blood | Kidney | methyl.diff | pMWU.fdr | Match ? | gene     | blood     | kidney   | log2(fold_ratio) | blood+ 0.001 | kidney+ 0.001 | log2(fold_ratio) | q_value    | Match ? |
|      |       |        |             |          |         | Slc35b1  | 21.2804   | 37.1795  | 0.804981         | 21.2814      | 37.1805       | 0.80495311       | 0.00028114 | No      |
|      |       |        |             |          |         | Slc35b4  | 24.339    | 12.8746  | -0.918741        | 24.34        | 12.8756       | -0.9186895       | 0.00014629 | No      |
|      |       |        |             |          |         | Slc35d2  | 10.6565   | 2.31196  | -2.20454         | 10.6575      | 2.31296       | -2.2040568       | 0.00014629 | No      |
|      |       |        |             |          |         | Slc35e1  | 10.9599   | 6.15432  | -0.83256         | 10.9609      | 6.15532       | -0.8324605       | 0.00078603 | No      |
|      |       |        |             |          |         | Slc35e2b | 7.91561   | 3.5456   | -1.15867         | 7.91661      | 3.5466        | -1.1584462       | 0.00014629 | No      |
|      |       |        |             |          |         | Slc35e3  | 2.41906   | 6.91033  | 1.51431          | 2.42006      | 6.91133       | 1.51392055       | 0.00028114 | No      |
|      |       |        |             |          |         | Slc35f5  | 5.07231   | 8.61398  | 0.764038         | 5.07331      | 8.61498       | 0.76392013       | 0.00669647 | No      |
|      |       |        |             |          |         | Slc35f6  | 2.47341   | 4.99594  | 1.01426          | 2.47441      | 4.99694       | 1.01396033       | 0.012747   | No      |
|      |       |        |             |          |         | Slc35g1  | 0.383837  | 2.10065  | 2.45227          | 0.384837     | 2.10165       | 2.44920301       | 0.0289815  | No      |
|      |       |        |             |          |         | Slc36a1  | 2.8815    | 1.21009  | -1.25171         | 2.8825       | 1.21109       | -1.2510145       | 0.0396558  | No      |
|      |       |        |             |          |         | Slc37a4  | 19.1172   | 114.942  | 2.58796          | 19.1182      | 114.943       | 2.58790001       | 0.00014629 | No      |
|      |       |        |             |          |         | Slc38a1  | 36.1798   | 10.785   | -1.74615         | 36.1808      | 10.786        | -1.7460644       | 0.00014629 | No      |
|      |       |        |             |          |         | Slc38a10 | 18.3504   | 11.922   | -0.622183        | 18.3514      | 11.923        | -0.6221428       | 0.0164185  | No      |
|      |       |        |             |          |         | Slc38a2  | 52.9962   | 38.9084  | -0.445808        | 52.9972      | 38.9094       | -0.4457974       | 0.0209112  | No      |
|      |       |        |             |          |         | Slc38a7  | 0.749579  | 2.61403  | 1.80212          | 0.750579     | 2.61503       | 1.80075167       | 0.0269701  | No      |
|      |       |        |             |          |         | Slc38a9  | 7.45292   | 2.15797  | -1.78813         | 7.45392      | 2.15897       | -1.7876561       | 0.00053701 | No      |
|      |       |        |             |          |         | Slc39a1  | 8.27141   | 17.1103  | 1.04866          | 8.27241      | 17.1113       | 1.04856977       | 0.00014629 | No      |
|      |       |        |             |          |         | Slc39a10 | 3.77879   | 1.54717  | -1.28829         | 3.77979      | 1.54817       | -1.2877422       | 0.0104529  | No      |
|      |       |        |             |          |         | Slc39a12 | 0         | 5.20643  | inf              | 0.001        | 5.20743       | 12.3463558       | 0.00014629 | No      |
|      |       |        |             |          |         | Slc39a13 | 2.77712   | 13.1307  | 2.24129          | 2.77812      | 13.1317       | 2.24087287       | 0.00014629 | No      |
|      |       |        |             |          |         | Slc39a14 | 5.19907   | 1.15062  | -2.17584         | 5.20007      | 1.15162       | -2.1748663       | 0.00014629 | No      |
|      |       |        |             |          |         | Slc39a6  | 12.1307   | 3.43191  | -1.82158         | 12.1317      | 3.43291       | -1.8212778       | 0.00014629 | No      |
|      |       |        |             |          |         | Slc39a9  | 12.5429   | 6.12847  | -1.03327         | 12.5439      | 6.12947       | -1.0331517       | 0.00014629 | No      |
|      |       |        |             |          |         | Slc3a2   | 31.3999   | 80.6763  | 1.36138          | 31.4009      | 80.6773       | 1.36135689       | 0.00014629 | No      |
|      |       |        |             |          |         | Slc40a1  | 0.245672  | 9.90575  | 5.33346          | 0.246672     | 9.90675       | 5.32774598       | 0.00014629 | No      |
|      |       |        |             |          |         | Slc41a1  | 8.86178   | 3.93958  | -1.16955         | 8.86278      | 3.94058       | -1.1693513       | 0.00014629 | No      |
|      |       |        |             |          |         | Slc41a3  | 8.16511   | 1.8581   | -2.13564         | 8.16611      | 1.8591        | -2.1350446       | 0.00014629 | No      |
|      |       |        |             |          |         | Slc43a1  | 16.8358   | 3.20121  | -2.39485         | 16.8368      | 3.20221       | -2.3944781       | 0.00014629 | No      |
|      |       |        |             |          |         | Slc44a1  | 0.095638  | 16.6112  | 7.44036          | 0.096638     | 16.6122       | 7.42543683       | 0.00014629 | No      |
|      |       |        |             |          |         | Slc44a3  | 0         | 9.96009  | inf              | 0.001        | 9.96109       | 13.2820879       | 0.00014629 | No      |
|      |       |        |             |          |         | Slc45a3  | 0.241657  | 10.4924  | 5.44025          | 0.242657     | 10.4934       | 5.43441992       | 0.00014629 | No      |
|      |       |        |             |          |         | SLC45A4  | 3.40444   | 9.78598  | 1.5233           | 3.40544      | 9.78698       | 1.52302254       | 0.00014629 | No      |
|      |       |        |             |          |         | Slc46a1  | 0.307335  | 1.25326  | 2.0278           | 0.308335     | 1.25426       | 2.02426587       | 0.0103501  | No      |
|      |       |        |             |          |         | Slc46a3  | 3.09201   | 0.854943 | -1.85464         | 3.09301      | 0.855943      | -1.8534249       | 0.00114835 | No      |
|      |       |        |             |          |         | Slc4a11  | 31.4208   | 185.757  | 2.56362          | 31.4218      | 185.758       | 2.56358661       | 0.00014629 | No      |
|      |       |        |             |          |         | Slc4a4   | 7.27943   | 19.738   | 1.43908          | 7.28043      | 19.739        | 1.43895334       | 0.00014629 | No      |
|      |       |        |             |          |         | Slc4a7   | 27.1211   | 1.03595  | -4.71039         | 27.1221      | 1.03695       | -4.7090507       | 0.00014629 | No      |
|      |       |        |             |          |         | Slc50a1  | 66.557    | 34.3841  | -0.952846        | 66.558       | 34.3851       | -0.9528285       | 0.00014629 | No      |
|      |       |        |             |          |         | Slc51b   | 0         | 72.258   | inf              | 0.001        | 72.259        | 16.1408897       | 0.00014629 | No      |
|      |       |        |             |          |         | SLC52A2  | 2.55234   | 7.61573  | 1.57716          | 2.55334      | 7.61673       | 1.5767861        | 0.00014629 | No      |
|      |       |        |             |          |         | Slc52a3  | 0.544499  | 5.13405  | 3.23709          | 0.545499     | 5.13505       | 3.23472987       | 0.00014629 | No      |
|      |       |        |             |          |         | Slc5a10  | 0.0652775 | 64.6949  | 9.95285          | 0.0662775    | 64.6959       | 9.93093939       | 0.00149937 | No      |

| RRBS |       |        |            |          |         | RNAseq   |           |          |                  |              |               |                  |            |         |
|------|-------|--------|------------|----------|---------|----------|-----------|----------|------------------|--------------|---------------|------------------|------------|---------|
| gene | Blood | Kidney | methy.diff | pMWU.fdr | Match ? | gene     | blood     | kidney   | log2(fold_ratio) | blood+ 0.001 | kidney+ 0.001 | log2(fold_ratio) | q_value    | Match ? |
|      |       |        |            |          |         | Slc5a11  | 0         | 26.6246  | inf              | 0.001        | 26.6256       | 14.7005264       | 0.00014629 | No      |
|      |       |        |            |          |         | Slc5a12  | 0         | 15.7828  | inf              | 0.001        | 15.7838       | 13.946157        | 0.00014629 | No      |
|      |       |        |            |          |         | Slc5a2   | 0.0982933 | 58.0182  | 9.2052           | 0.0992933    | 58.0192       | 9.19061832       | 0.00149937 | No      |
|      |       |        |            |          |         | Slc5a6   | 8.40629   | 20.0278  | 1.25246          | 8.40729      | 20.0288       | 1.25236324       | 0.00014629 | No      |
|      |       |        |            |          |         | Slc5a8   | 0         | 12.5131  | inf              | 0.001        | 12.5141       | 13.6112669       | 0.00014629 | No      |
|      |       |        |            |          |         | Slc5a9   | 0         | 6.04372  | inf              | 0.001        | 6.04472       | 12.5614598       | 0.00014629 | No      |
|      |       |        |            |          |         | Slc6a12  | 0.82212   | 16.8668  | 4.35869          | 0.82312      | 16.8678       | 4.35702524       | 0.00014629 | No      |
|      |       |        |            |          |         | Slc6a13  | 0         | 17.1067  | inf              | 0.001        | 17.1077       | 14.0623582       | 0.00014629 | No      |
|      |       |        |            |          |         | Slc6a18  | 0         | 373.978  | inf              | 0.001        | 373.979       | 18.5125977       | 0.00014629 | No      |
|      |       |        |            |          |         | Slc6a19  | 0         | 37.275   | inf              | 0.001        | 37.276        | 15.1859594       | 0.00014629 | No      |
|      |       |        |            |          |         | Slc6a6   | 18.4863   | 45.3311  | 1.29404          | 18.4873      | 45.3321       | 1.29399846       | 0.00014629 | No      |
|      |       |        |            |          |         | Slc6a8   | 0.790023  | 86.2128  | 6.76986          | 0.791023     | 86.2138       | 6.76805536       | 0.00014629 | No      |
|      |       |        |            |          |         | Slc7a1   | 5.85462   | 1.13291  | -2.36955         | 5.85562      | 1.13391       | -2.3685158       | 0.00014629 | No      |
|      |       |        |            |          |         | Slc7a12  | 0         | 9.44344  | inf              | 0.001        | 9.44444       | 13.2052495       | 0.00014629 | No      |
|      |       |        |            |          |         | Slc7a13  | 0         | 59.0298  | inf              | 0.001        | 59.0308       | 15.8491803       | 0.00014629 | No      |
|      |       |        |            |          |         | Slc7a15  | 0         | 1.29829  | inf              | 0.001        | 1.29929       | 10.3435078       | 0.00014629 | No      |
|      |       |        |            |          |         | Slc7a4   | 0.0829107 | 1.83477  | 4.4679           | 0.0839107    | 1.83577       | 4.45138672       | 0.00014629 | No      |
|      |       |        |            |          |         | Slc7a5   | 7.22268   | 0.887422 | -3.02484         | 7.22368      | 0.888422      | -3.023417        | 0.00014629 | No      |
|      |       |        |            |          |         | Slc7a6   | 15.1384   | 3.16633  | -2.25733         | 15.1394      | 3.16733       | -2.2569689       | 0.00014629 | No      |
|      |       |        |            |          |         | Slc7a6os | 21.1891   | 11.1852  | -0.921733        | 21.1901      | 11.1862       | -0.9216704       | 0.00041099 | No      |
|      |       |        |            |          |         | Slc7a7   | 0.318398  | 138.677  | 8.76668          | 0.319398     | 138.678       | 8.76216794       | 0.00014629 | No      |
|      |       |        |            |          |         | Slc7a8   | 0.173476  | 16.8624  | 6.60294          | 0.174476     | 16.8634       | 6.59472303       | 0.00014629 | No      |
|      |       |        |            |          |         | Slc7a9   | 0         | 155.057  | inf              | 0.001        | 155.058       | 17.2424484       | 0.00014629 | No      |
|      |       |        |            |          |         | Slc9a1   | 49.4753   | 10.635   | -2.21788         | 49.4763      | 10.636        | -2.2177819       | 0.00014629 | No      |
|      |       |        |            |          |         | Slc9a3r1 | 129.064   | 185.823  | 0.525843         | 129.065      | 185.824       | 0.52583902       | 0.00597292 | No      |
|      |       |        |            |          |         | Slc9a6   | 6.47068   | 2.96049  | -1.12808         | 6.47168      | 2.96149       | -1.1278171       | 0.00924781 | No      |
|      |       |        |            |          |         | Slc9a7   | 13.4785   | 0.357117 | -5.23812         | 13.4795      | 0.358117      | -5.2341922       | 0.00014629 | No      |
|      |       |        |            |          |         | Slc9a9   | 31.5906   | 1.48118  | -4.41468         | 31.5916      | 1.48218       | -4.4137484       | 0.00014629 | No      |
|      |       |        |            |          |         | Slco1a6  | 0         | 66.1029  | inf              | 0.001        | 66.1039       | 16.0124478       | 0.00014629 | No      |
|      |       |        |            |          |         | Slco4a1  | 0.607423  | 7.01227  | 3.52911          | 0.608423     | 7.01327       | 3.52694067       | 0.00014629 | No      |
|      |       |        |            |          |         | Sfn13    | 71.5121   | 10.4182  | -2.77908         | 71.5131      | 10.4192       | -2.778963        | 0.00014629 | No      |
|      |       |        |            |          |         | Sfn2     | 368.793   | 20.3614  | -4.1789          | 368.794      | 20.3624       | -4.1788357       | 0.00014629 | No      |
|      |       |        |            |          |         | Sfn3     | 31.8153   | 14.9163  | -1.09284         | 31.8163      | 14.9173       | -1.0927796       | 0.00114835 | No      |
|      |       |        |            |          |         | Sfn5     | 190.137   | 12.1745  | -3.96511         | 190.138      | 12.1755       | -3.964994        | 0.00014629 | No      |
|      |       |        |            |          |         | Slu7     | 34.7738   | 14.7346  | -1.23879         | 34.7748      | 14.7356       | -1.2387364       | 0.00014629 | No      |
|      |       |        |            |          |         | Slx1b    | 12.3061   | 24.4737  | 0.991851         | 12.3071      | 24.4747       | 0.99180033       | 0.00161718 | No      |
|      |       |        |            |          |         | Smad1    | 2.08641   | 9.28092  | 2.15324          | 2.08741      | 9.28192       | 2.15270927       | 0.00014629 | No      |
|      |       |        |            |          |         | Smad2    | 25.8911   | 12.6604  | -1.03213         | 25.8921      | 12.6614       | -1.032075        | 0.00014629 | No      |
|      |       |        |            |          |         | Smad4    | 101.012   | 20.1665  | -2.32449         | 101.013      | 20.1675       | -2.3244368       | 0.00014629 | No      |
|      |       |        |            |          |         | Smad5    | 24.9406   | 7.07291  | -1.81812         | 24.9416      | 7.07391       | -1.8179742       | 0.00014629 | No      |
|      |       |        |            |          |         | SMAGP    | 3.75349   | 171.731  | 5.51578          | 3.75449      | 171.732       | 5.51539813       | 0.00014629 | No      |
|      |       |        |            |          |         | Smap1    | 36.259    | 19.937   | -0.862887        | 36.26        | 19.938        | -0.8628582       | 0.00014629 | No      |

| RRBS |       |        |             |          |         | RNAseq   |          |         |                  |              |               |                  |            |         |
|------|-------|--------|-------------|----------|---------|----------|----------|---------|------------------|--------------|---------------|------------------|------------|---------|
| gene | Blood | Kidney | methyl.diff | pMWU.fdr | Match ? | gene     | blood    | kidney  | log2(fold_ratio) | blood+ 0.001 | kidney+ 0.001 | log2(fold_ratio) | q_value    | Match ? |
|      |       |        |             |          |         | Smcp2    | 111.172  | 16.0832 | -2.78917         | 111.173      | 16.0842       | -2.7890904       | 0.00014629 | No      |
|      |       |        |             |          |         | Smarca2  | 75.9435  | 32.7549 | -1.21322         | 75.9445      | 32.7559       | -1.2131907       | 0.00014629 | No      |
|      |       |        |             |          |         | Smarca5  | 41.0232  | 13.7942 | -1.57238         | 41.0242      | 13.7952       | -1.5723088       | 0.00014629 | No      |
|      |       |        |             |          |         | Smarcad1 | 18.0834  | 7.46283 | -1.27687         | 18.0844      | 7.46383       | -1.2767577       | 0.00014629 | No      |
|      |       |        |             |          |         | Smarcb1  | 33.3321  | 49.3618 | 0.566483         | 33.3331      | 49.3628       | 0.56646874       | 0.015456   | No      |
|      |       |        |             |          |         | Smarcc2  | 74.2232  | 32.9247 | -1.1727          | 74.2242      | 32.9257       | -1.1726755       | 0.00014629 | No      |
|      |       |        |             |          |         | Smarcd1  | 19.1373  | 7.27426 | -1.39552         | 19.1383      | 7.27526       | -1.395392        | 0.00014629 | No      |
|      |       |        |             |          |         | Smarcd2  | 45.1631  | 14.4968 | -1.63941         | 45.1641      | 14.4978       | -1.6393425       | 0.00184429 | No      |
|      |       |        |             |          |         | Smarcd3  | 0.112094 | 25.3438 | 7.82078          | 0.113094     | 25.3448       | 7.80802358       | 0.00014629 | No      |
|      |       |        |             |          |         | Smarce1  | 91.8623  | 61.8682 | -0.570277        | 91.8633      | 61.8692       | -0.5702672       | 0.0156475  | No      |
|      |       |        |             |          |         | Smc1a    | 44.2133  | 17.1818 | -1.3636          | 44.2143      | 17.1828       | -1.3635479       | 0.00014629 | No      |
|      |       |        |             |          |         | Smc2     | 5.85675  | 2.55356 | -1.19759         | 5.85775      | 2.55456       | -1.1972718       | 0.00014629 | No      |
|      |       |        |             |          |         | Smc3     | 30.6555  | 14.7654 | -1.05393         | 30.6565      | 14.7664       | -1.0538749       | 0.00014629 | No      |
|      |       |        |             |          |         | Smc4     | 202.079  | 9.21037 | -4.45552         | 202.08       | 9.21137       | -4.455367        | 0.00014629 | No      |
|      |       |        |             |          |         | Smc5     | 12.2621  | 6.83528 | -0.843134        | 12.2631      | 6.83628       | -0.8430403       | 0.00014629 | No      |
|      |       |        |             |          |         | Smc6     | 28.4898  | 16.9995 | -0.744959        | 28.4908      | 17.0005       | -0.744919        | 0.00914429 | No      |
|      |       |        |             |          |         | Smchd1   | 64.9039  | 6.53486 | -3.31208         | 64.9049      | 6.53586       | -3.3118784       | 0.00014629 | No      |
|      |       |        |             |          |         | Smdt1    | 73.3547  | 468.224 | 2.67424          | 73.3557      | 468.225       | 2.67422099       | 0.00014629 | No      |
|      |       |        |             |          |         | Smek1    | 60.6265  | 21.4463 | -1.49922         | 60.6275      | 21.4473       | -1.4991763       | 0.00014629 | No      |
|      |       |        |             |          |         | Smek2    | 31.0458  | 7.22517 | -2.10329         | 31.0468      | 7.22617       | -2.1031415       | 0.00014629 | No      |
|      |       |        |             |          |         | Smg1     | 43.554   | 5.73972 | -2.92375         | 43.555       | 5.74072       | -2.9235348       | 0.00014629 | No      |
|      |       |        |             |          |         | Smg5     | 31.0556  | 21.4315 | -0.535119        | 31.0566      | 21.4325       | -0.5350998       | 0.0107557  | No      |
|      |       |        |             |          |         | Smg7     | 30.8519  | 6.82413 | -2.17664         | 30.8529      | 6.82513       | -2.1764777       | 0.00014629 | No      |
|      |       |        |             |          |         | Smg9     | 27.9981  | 41.7451 | 0.576277         | 27.9991      | 41.7461       | 0.57626097       | 0.041463   | No      |
|      |       |        |             |          |         | Smim1    | 0.464521 | 82.0733 | 7.46502          | 0.465521     | 82.0743       | 7.46194048       | 0.00014629 | No      |
|      |       |        |             |          |         | Smim11   | 37.007   | 20.2647 | -0.86883         | 37.008       | 20.2657       | -0.8687972       | 0.00679736 | No      |
|      |       |        |             |          |         | Smim12   | 35.8021  | 67.8475 | 0.922251         | 35.8031      | 67.8485       | 0.92223241       | 0.0282519  | No      |
|      |       |        |             |          |         | SMIM15   | 44.3303  | 17.4823 | -1.3424          | 44.3313      | 17.4833       | -1.3423481       | 0.00014629 | No      |
|      |       |        |             |          |         | Smim19   | 23.2952  | 45.311  | 0.959829         | 23.2962      | 45.312        | 0.95979852       | 0.00014629 | No      |
|      |       |        |             |          |         | Smim20   | 28.8694  | 75.4557 | 1.38609          | 28.8704      | 75.4567       | 1.38605791       | 0.00014629 | No      |
|      |       |        |             |          |         | Smim24   | 4.58888  | 280.31  | 5.93274          | 4.58988      | 280.311       | 5.93242811       | 0.00014629 | No      |
|      |       |        |             |          |         | Smim4    | 12.3633  | 56.8814 | 2.20189          | 12.3643      | 56.8824       | 2.20180177       | 0.00586782 | No      |
|      |       |        |             |          |         | Smim7    | 23.8237  | 46.7104 | 0.971345         | 23.8247      | 46.7114       | 0.97131664       | 0.00014629 | No      |
|      |       |        |             |          |         | SMIM8    | 23.615   | 45.4434 | 0.944366         | 23.616       | 45.4444       | 0.9443379        | 0.00207488 | No      |
|      |       |        |             |          |         | Smox     | 14.0696  | 2.85823 | -2.29938         | 14.0706      | 2.85923       | -2.2989853       | 0.00014629 | No      |
|      |       |        |             |          |         | Smpd1    | 24.1543  | 36.2352 | 0.585112         | 24.1553      | 36.2362       | 0.5850919        | 0.00523722 | No      |
|      |       |        |             |          |         | Smpd4    | 4.67177  | 6.85572 | 0.553339         | 4.67277      | 6.85672       | 0.55324058       | 0.0419596  | No      |
|      |       |        |             |          |         | Smpx     | 0        | 16.382  | inf              | 0.001        | 16.383        | 13.9999119       | 0.00014629 | No      |
|      |       |        |             |          |         | Smtn     | 0.125557 | 20.4205 | 7.34554          | 0.126557     | 20.4215       | 7.33415772       | 0.00078603 | No      |
|      |       |        |             |          |         | Smurf1   | 16.2001  | 5.77808 | -1.48734         | 16.2011      | 5.77908       | -1.48718         | 0.00014629 | No      |
|      |       |        |             |          |         | Smurf2   | 21.8325  | 6.00928 | -1.86122         | 21.8335      | 6.01028       | -1.8610393       | 0.00014629 | No      |
|      |       |        |             |          |         | Smyd5    | 4.99891  | 2.34848 | -1.08989         | 4.99991      | 2.34948       | -1.0895606       | 0.00792329 | No      |

| RRBS |       |        |             |          |         | RNAseq   |           |          |                  |              |               |                  |            |         |
|------|-------|--------|-------------|----------|---------|----------|-----------|----------|------------------|--------------|---------------|------------------|------------|---------|
| gene | Blood | Kidney | methyl.diff | pMWU.fdr | Match ? | gene     | blood     | kidney   | log2(fold_ratio) | blood+ 0.001 | kidney+ 0.001 | log2(fold_ratio) | q_value    | Match ? |
|      |       |        |             |          |         | Snap47   | 3.93779   | 11.2089  | 1.50918          | 3.93879      | 11.2099       | 1.508949         | 0.00028114 | No      |
|      |       |        |             |          |         | Snap91   | 0         | 6.6972   | inf              | 0.001        | 6.6982        | 12.7095577       | 0.0277968  | No      |
|      |       |        |             |          |         | Snapc2   | 16.2664   | 28.5096  | 0.80955          | 16.2674      | 28.5106       | 0.80951472       | 0.00066215 | No      |
|      |       |        |             |          |         | Snapc4   | 2.92826   | 6.50577  | 1.15168          | 2.92926      | 6.50677       | 1.15140531       | 0.00014629 | No      |
|      |       |        |             |          |         | Snd1     | 42.6176   | 14.0503  | -1.60085         | 42.6186      | 14.0513       | -1.6007796       | 0.00014629 | No      |
|      |       |        |             |          |         | Sned1    | 0.0260955 | 17.0906  | 9.35518          | 0.0270955    | 17.0916       | 9.30101847       | 0.00833592 | No      |
|      |       |        |             |          |         | Snf8     | 54.4455   | 146.207  | 1.42513          | 54.4465      | 146.208       | 1.42511104       | 0.00014629 | No      |
|      |       |        |             |          |         | Snn      | 25.4678   | 56.0872  | 1.139            | 25.4688      | 56.0882       | 1.1389663        | 0.0304078  | No      |
|      |       |        |             |          |         | Snrk     | 24.9156   | 9.2842   | -1.4242          | 24.9166      | 9.2852        | -1.4241023       | 0.00014629 | No      |
|      |       |        |             |          |         | Snrnp200 | 36.0995   | 12.9038  | -1.48419         | 36.1005      | 12.9048       | -1.484111        | 0.00014629 | No      |
|      |       |        |             |          |         | Snrnp35  | 15.0274   | 24.2596  | 0.690953         | 15.0284      | 24.2606       | 0.69092381       | 0.0168962  | No      |
|      |       |        |             |          |         | Snrnp40  | 33.4686   | 15.7785  | -1.08485         | 33.4696      | 15.7795       | -1.0847998       | 0.00014629 | No      |
|      |       |        |             |          |         | Snrnp48  | 74.8086   | 25.5884  | -1.54771         | 74.8096      | 25.5894       | -1.5476771       | 0.00014629 | No      |
|      |       |        |             |          |         | Snrpb2   | 87.9412   | 38.6171  | -1.1873          | 87.9422      | 38.6181       | -1.1872784       | 0.00014629 | No      |
|      |       |        |             |          |         | Snrpd2   | 430.937   | 221.882  | -0.957683        | 430.938      | 221.883       | -0.9576812       | 0.00014629 | No      |
|      |       |        |             |          |         | Snrpe1   | 920.184   | 243.914  | -1.91555         | 920.185      | 243.915       | -1.9155455       | 0.00014629 | No      |
|      |       |        |             |          |         | Snrpf    | 174.15    | 42.7663  | -2.02579         | 174.151      | 42.7673       | -2.0257587       | 0.00014629 | No      |
|      |       |        |             |          |         | Snrpg    | 471.378   | 222.052  | -1.08599         | 471.379      | 222.053       | -1.0859834       | 0.00014629 | No      |
|      |       |        |             |          |         | Sntb1    | 7.30801   | 2.28961  | -1.67438         | 7.30901      | 2.29061       | -1.6739442       | 0.00330073 | No      |
|      |       |        |             |          |         | Sntb2    | 2.28054   | 3.9409   | 0.789151         | 2.28154      | 3.9419        | 0.78888323       | 0.0219354  | No      |
|      |       |        |             |          |         | Snurf    | 0.181015  | 27.1436  | 7.22836          | 0.182015     | 27.1446       | 7.22046407       | 0.00710369 | No      |
|      |       |        |             |          |         | Snw1     | 55.8277   | 26.6503  | -1.06683         | 55.8287      | 26.6513       | -1.0668011       | 0.00014629 | No      |
|      |       |        |             |          |         | Snx1     | 30.4616   | 52.5733  | 0.787338         | 30.4626      | 52.5743       | 0.78731865       | 0.00090728 | No      |
|      |       |        |             |          |         | Snx11    | 8.06463   | 12.8943  | 0.677052         | 8.06563      | 12.8953       | 0.67698621       | 0.00659461 | No      |
|      |       |        |             |          |         | Snx14    | 21.0469   | 7.88967  | -1.41557         | 21.0479      | 7.89067       | -1.4154566       | 0.00014629 | No      |
|      |       |        |             |          |         | Snx18    | 4.71705   | 7.9027   | 0.74446          | 4.71805      | 7.9037        | 0.74433748       | 0.00230432 | No      |
|      |       |        |             |          |         | Snx2     | 36.1573   | 61.7128  | 0.771282         | 36.1583      | 61.7138       | 0.77126628       | 0.00014629 | No      |
|      |       |        |             |          |         | Snx20    | 57.7563   | 8.79071  | -2.71593         | 57.7573      | 8.79171       | -2.7157876       | 0.00014629 | No      |
|      |       |        |             |          |         | Snx21    | 0.337294  | 24.1728  | 6.16323          | 0.338294     | 24.1738       | 6.15902288       | 0.00014629 | No      |
|      |       |        |             |          |         | Snx24    | 0         | 34.9242  | inf              | 0.001        | 34.9252       | 15.0919808       | 0.00014629 | No      |
|      |       |        |             |          |         | Snx27    | 13.1648   | 7.92928  | -0.731427        | 13.1658      | 7.93028       | -0.7313515       | 0.00066215 | No      |
|      |       |        |             |          |         | Snx29    | 7.42521   | 62.9383  | 3.08343          | 7.42621      | 62.9393       | 3.08326312       | 0.00014629 | No      |
|      |       |        |             |          |         | Snx30    | 0.507775  | 13.619   | 4.74529          | 0.508775     | 13.62         | 4.74255511       | 0.00014629 | No      |
|      |       |        |             |          |         | Snx32    | 10.6528   | 1.58203  | -2.75138         | 10.6538      | 1.58303       | -2.7506076       | 0.00014629 | No      |
|      |       |        |             |          |         | Snx4     | 26.7572   | 16.1225  | -0.730851        | 26.7582      | 16.1235       | -0.7308161       | 0.00090728 | No      |
|      |       |        |             |          |         | SNX5     | 133.535   | 87.8479  | -0.604139        | 133.536      | 87.8489       | -0.6041326       | 0.0152626  | No      |
|      |       |        |             |          |         | Snx6     | 25.0266   | 46.8362  | 0.904163         | 25.0276      | 46.8372       | 0.90413488       | 0.00014629 | No      |
|      |       |        |             |          |         | Snx7     | 3.05379   | 27.2675  | 3.15851          | 3.05479      | 27.2685       | 3.15809023       | 0.00014629 | No      |
|      |       |        |             |          |         | Snx8     | 12.2759   | 23.9249  | 0.962688         | 12.2769      | 23.9259       | 0.96262688       | 0.00014629 | No      |
|      |       |        |             |          |         | Snx9     | 1.65049   | 46.01    | 4.80098          | 1.65149      | 46.011        | 4.80013867       | 0.00014629 | No      |
|      |       |        |             |          |         | Soat1    | 1.91436   | 11.0478  | 2.52882          | 1.91536      | 11.0488       | 2.5282022        | 0.00014629 | No      |
|      |       |        |             |          |         | Socs1    | 8.41836   | 0.900402 | -3.2249          | 8.41936      | 0.901402      | -3.223468        | 0.00659461 | No      |

| RRBS |       |        |             |          |         | RNAseq  |           |         |                  |              |               |                  |            |         |
|------|-------|--------|-------------|----------|---------|---------|-----------|---------|------------------|--------------|---------------|------------------|------------|---------|
| gene | Blood | Kidney | methyl.diff | pMWU.fdr | Match ? | gene    | blood     | kidney  | log2(fold_ratio) | blood+ 0.001 | kidney+ 0.001 | log2(fold_ratio) | q_value    | Match ? |
|      |       |        |             |          |         | Socs2   | 34.1943   | 1.59089 | -4.42585         | 34.1953      | 1.59189       | -4.4249855       | 0.00014629 | No      |
|      |       |        |             |          |         | Socs4   | 8.25074   | 2.28939 | -1.84956         | 8.25174      | 2.29039       | -1.8491051       | 0.00014629 | No      |
|      |       |        |             |          |         | Socs5   | 18.9092   | 8.01139 | -1.23897         | 18.9102      | 8.01239       | -1.2388601       | 0.00014629 | No      |
|      |       |        |             |          |         | Sod1    | 266.956   | 1791.08 | 2.74615          | 266.957      | 1791.081      | 2.7461513        | 0.00014629 | No      |
|      |       |        |             |          |         | Sod2    | 23.834    | 109.569 | 2.20075          | 23.835       | 109.57        | 2.20069932       | 0.00014629 | No      |
|      |       |        |             |          |         | Sod3    | 0         | 80.1067 | inf              | 0.001        | 80.1077       | 16.2896533       | 0.00014629 | No      |
|      |       |        |             |          |         | Soga1   | 0.170442  | 7.45838 | 5.45151          | 0.171442     | 7.45938       | 5.44326323       | 0.00028114 | No      |
|      |       |        |             |          |         | Soga2   | 0         | 1.94828 | inf              | 0.001        | 1.94928       | 10.9287256       | 0.00014629 | No      |
|      |       |        |             |          |         | Sorbs1  | 1.10292   | 11.9888 | 3.44229          | 1.10392      | 11.9898       | 3.44110006       | 0.00014629 | No      |
|      |       |        |             |          |         | Sorbs2  | 0         | 8.29747 | inf              | 0.001        | 8.29847       | 13.0186297       | 0.00014629 | No      |
|      |       |        |             |          |         | Sorbs3  | 0.217527  | 29.803  | 7.09812          | 0.218527     | 29.804        | 7.09155062       | 0.00014629 | No      |
|      |       |        |             |          |         | Sord    | 9.52235   | 260.729 | 4.77509          | 9.52335      | 260.73        | 4.77494363       | 0.00014629 | No      |
|      |       |        |             |          |         | Sorl1   | 27.564    | 15.4767 | -0.832683        | 27.565       | 15.4777       | -0.8326465       | 0.00014629 | No      |
|      |       |        |             |          |         | Sort1   | 2.30132   | 20.8136 | 3.17699          | 2.30232      | 20.8146       | 3.17643556       | 0.00014629 | No      |
|      |       |        |             |          |         | Sos1    | 24.2693   | 6.23929 | -1.95968         | 24.2703      | 6.24029       | -1.959507        | 0.00014629 | No      |
|      |       |        |             |          |         | Sos2    | 4.9814    | 7.37336 | 0.565772         | 4.9824       | 7.37436       | 0.565677         | 0.0477475  | No      |
|      |       |        |             |          |         | Sostdc1 | 0         | 64.1299 | inf              | 0.001        | 64.1309       | 15.968732        | 0.00014629 | No      |
|      |       |        |             |          |         | Sowahb  | 0         | 5.89582 | inf              | 0.001        | 5.89682       | 12.5257214       | 0.00014629 | No      |
|      |       |        |             |          |         | Sowahc  | 0.18995   | 2.45737 | 3.69342          | 0.19095      | 2.45837       | 3.68643524       | 0.00014629 | No      |
|      |       |        |             |          |         | Sox13   | 0.126216  | 12.4195 | 6.62057          | 0.127216     | 12.4205       | 6.60929931       | 0.00053701 | No      |
|      |       |        |             |          |         | Sox9    | 0         | 5.87769 | inf              | 0.001        | 5.87869       | 12.521279        | 0.00014629 | No      |
|      |       |        |             |          |         | Sp1     | 27.4905   | 5.63789 | -2.28571         | 27.4915      | 5.63889       | -2.2855025       | 0.00014629 | No      |
|      |       |        |             |          |         | Sp110   | 155.66    | 68.0219 | -1.19432         | 155.661      | 68.0229       | -1.1943151       | 0.00491494 | No      |
|      |       |        |             |          |         | Sp140   | 130.562   | 16.8993 | -2.9497          | 130.563      | 16.9003       | -2.9496254       | 0.00014629 | No      |
|      |       |        |             |          |         | Sp2     | 15.5895   | 9.51557 | -0.712217        | 15.5905      | 9.51657       | -0.7121536       | 0.0309347  | No      |
|      |       |        |             |          |         | Sp3     | 41.4453   | 10.5574 | -1.97296         | 41.4463      | 10.5584       | -1.9728521       | 0.00014629 | No      |
|      |       |        |             |          |         | Sp4     | 9.46916   | 1.78782 | -2.40504         | 9.47016      | 1.78882       | -2.4043806       | 0.00014629 | No      |
|      |       |        |             |          |         | Spa17   | 1.43831   | 46.9338 | 5.02818          | 1.43931      | 46.9348       | 5.02720875       | 0.00241835 | No      |
|      |       |        |             |          |         | Spaca6  | 0.864164  | 12.4793 | 3.85209          | 0.865164     | 12.4803       | 3.85053517       | 0.00014629 | No      |
|      |       |        |             |          |         | Spag1   | 0.362019  | 6.09101 | 4.07254          | 0.363019     | 6.09201       | 4.06880135       | 0.00041099 | No      |
|      |       |        |             |          |         | Sparc   | 8.27999   | 80.9152 | 3.28871          | 8.28099      | 80.9162       | 3.28855341       | 0.00014629 | No      |
|      |       |        |             |          |         | Spast   | 23.3452   | 10.6456 | -1.13287         | 23.3462      | 10.6466       | -1.132795        | 0.00138312 | No      |
|      |       |        |             |          |         | Spata13 | 68.6187   | 5.81275 | -3.56131         | 68.6197      | 5.81375       | -3.5610819       | 0.00014629 | No      |
|      |       |        |             |          |         | Spata17 | 0         | 2.90557 | inf              | 0.001        | 2.90657       | 11.5051019       | 0.00014629 | No      |
|      |       |        |             |          |         | Spata22 | 0.42439   | 2.63616 | 2.63497          | 0.42539      | 2.63716       | 2.63212708       | 0.0222999  | No      |
|      |       |        |             |          |         | Spata24 | 0.818113  | 16.3046 | 4.31684          | 0.819113     | 16.3056       | 4.31516123       | 0.0288879  | No      |
|      |       |        |             |          |         | Spata5  | 9.26495   | 3.59652 | -1.36518         | 9.26595      | 3.59752       | -1.3649362       | 0.00014629 | No      |
|      |       |        |             |          |         | Spata6  | 21.4646   | 6.62082 | -1.69688         | 21.4656      | 6.62182       | -1.6967268       | 0.00014629 | No      |
|      |       |        |             |          |         | Spata7  | 0.878969  | 17.5171 | 4.31681          | 0.879969     | 17.5181       | 4.3152498        | 0.00014629 | No      |
|      |       |        |             |          |         | Spats2  | 12.1772   | 19.3447 | 0.667763         | 12.1782      | 19.3457       | 0.66771202       | 0.00405996 | No      |
|      |       |        |             |          |         | Spats2l | 0.0580412 | 11.0774 | 7.57632          | 0.0590412    | 11.0784       | 7.55181178       | 0.00028114 | No      |
|      |       |        |             |          |         | Spcs1   | 178.68    | 111.629 | -0.678671        | 178.681      | 111.63        | -0.6786614       | 0.00078603 | No      |

| RRBS |       |        |             |          |         | RNAseq    |           |          |                  |              |               |                  |            |         |
|------|-------|--------|-------------|----------|---------|-----------|-----------|----------|------------------|--------------|---------------|------------------|------------|---------|
| gene | Blood | Kidney | methyl.diff | pMWU.fdr | Match ? | gene      | blood     | kidney   | log2(fold_ratio) | blood+ 0.001 | kidney+ 0.001 | log2(fold_ratio) | q_value    | Match ? |
|      |       |        |             |          |         | Spcs2     | 82.6165   | 16.3328  | -2.33865         | 82.6175      | 16.3338       | -2.3385869       | 0.00014629 | No      |
|      |       |        |             |          |         | Spcs3     | 62.1126   | 14.6517  | -2.08382         | 62.1136      | 14.6527       | -2.0837427       | 0.00014629 | No      |
|      |       |        |             |          |         | Specc1    | 0.773834  | 5.7878   | 2.90292          | 0.774834     | 5.7888        | 2.90130515       | 0.00014629 | No      |
|      |       |        |             |          |         | Specc1l   | 11.703    | 8.20434  | -0.512423        | 11.704       | 8.20534       | -0.5123667       | 0.0204477  | No      |
|      |       |        |             |          |         | Spetex-2F | 0         | 1.19894  | inf              | 0.001        | 1.19994       | 10.2287466       | 0.00014629 | No      |
|      |       |        |             |          |         | Sphk2     | 23.9308   | 42.0752  | 0.814101         | 23.9318      | 42.0762       | 0.81407551       | 0.00102864 | No      |
|      |       |        |             |          |         | Sphkap    | 0         | 1.21591  | inf              | 0.001        | 1.21691       | 10.2490068       | 0.00014629 | No      |
|      |       |        |             |          |         | Spi1      | 2.37862   | 7.99073  | 1.7482           | 2.37962      | 7.99173       | 1.74777663       | 0.00066215 | No      |
|      |       |        |             |          |         | Spib      | 3.78165   | 0.541302 | -2.80451         | 3.78265      | 0.542302      | -2.8022289       | 0.0358739  | No      |
|      |       |        |             |          |         | Spink1    | 0         | 768.62   | inf              | 0.001        | 768.621       | 19.5519129       | 0.00014629 | No      |
|      |       |        |             |          |         | Spink8    | 0         | 1.23386  | inf              | 0.001        | 1.23486       | 10.2701318       | 0.00014629 | No      |
|      |       |        |             |          |         | Spint2    | 76.3499   | 611.091  | 3.00069          | 76.3509      | 611.092       | 3.00067253       | 0.00014629 | No      |
|      |       |        |             |          |         | Spire1    | 1.35956   | 9.66386  | 2.82946          | 1.36056      | 9.66486       | 2.82854825       | 0.00014629 | No      |
|      |       |        |             |          |         | Spns1     | 24.4472   | 120.495  | 2.30123          | 24.4482      | 120.496       | 2.3011851        | 0.00014629 | No      |
|      |       |        |             |          |         | Spns2     | 5.6874    | 42.9747  | 2.91765          | 5.6884       | 42.9757       | 2.91742632       | 0.00014629 | No      |
|      |       |        |             |          |         | Spns3     | 0.123763  | 6.39313  | 5.69087          | 0.124763     | 6.39413       | 5.67948602       | 0.00126596 | No      |
|      |       |        |             |          |         | Spon1     | 0.333831  | 43.4366  | 7.02365          | 0.334831     | 43.4376       | 7.01936748       | 0.00014629 | No      |
|      |       |        |             |          |         | Spop      | 47.5741   | 26.1083  | -0.865668        | 47.5751      | 26.1093       | -0.8656429       | 0.00014629 | No      |
|      |       |        |             |          |         | Spp2      | 0         | 381.959  | inf              | 0.001        | 381.96        | 18.543062        | 0.00014629 | No      |
|      |       |        |             |          |         | SPPL2A    | 12.2546   | 3.83016  | -1.67784         | 12.2556      | 3.83116       | -1.6775879       | 0.00014629 | No      |
|      |       |        |             |          |         | Spr       | 9.90821   | 62.4547  | 2.65611          | 9.90921      | 62.4557       | 2.65599129       | 0.00014629 | No      |
|      |       |        |             |          |         | Sprr1a    | 0         | 37.0004  | inf              | 0.001        | 37.0014       | 15.1752922       | 0.00014629 | No      |
|      |       |        |             |          |         | Sprtn     | 8.76199   | 3.69378  | -1.24616         | 8.76299      | 3.69478       | -1.2459347       | 0.00014629 | No      |
|      |       |        |             |          |         | Spry1     | 0.684863  | 11.984   | 4.12915          | 0.685863     | 11.985        | 4.12716567       | 0.00014629 | No      |
|      |       |        |             |          |         | Spryd7    | 1.81318   | 30.5926  | 4.07659          | 1.81418      | 30.5936       | 4.07584037       | 0.00014629 | No      |
|      |       |        |             |          |         | Spsb2     | 2.78621   | 8.90165  | 1.67577          | 2.78721      | 8.90265       | 1.67541313       | 0.00102864 | No      |
|      |       |        |             |          |         | Spsb3     | 38.1047   | 90.5825  | 1.24926          | 38.1057      | 90.5835       | 1.24924147       | 0.00161718 | No      |
|      |       |        |             |          |         | Sptbn2    | 0.0515943 | 2.96086  | 5.84266          | 0.0525943    | 2.96186       | 5.81545319       | 0.00078603 | No      |
|      |       |        |             |          |         | Sptssb    | 0         | 4.53626  | inf              | 0.001        | 4.53726       | 12.1476056       | 0.00014629 | No      |
|      |       |        |             |          |         | Sqrdl     | 2.42344   | 14.0615  | 2.53662          | 2.42444      | 14.0625       | 2.53612964       | 0.00014629 | No      |
|      |       |        |             |          |         | SQSTM1    | 128.616   | 223.507  | 0.797257         | 128.617      | 223.508       | 0.79724513       | 0.00014629 | No      |
|      |       |        |             |          |         | Srbd1     | 11.8328   | 6.0826   | -0.960037        | 11.8338      | 6.0836        | -0.9599162       | 0.00207488 | No      |
|      |       |        |             |          |         | Src       | 5.34024   | 22.299   | 2.062            | 5.34124      | 22.3          | 2.06179709       | 0.00014629 | No      |
|      |       |        |             |          |         | Srcin1    | 67.2588   | 26.3265  | -1.35321         | 67.2598      | 26.3275       | -1.353174        | 0.00014629 | No      |
|      |       |        |             |          |         | Srcrb4d   | 1.35023   | 5.64503  | 2.06377          | 1.35123      | 5.64603       | 2.06296353       | 0.00352183 | No      |
|      |       |        |             |          |         | Srd5a1    | 0.579984  | 3.9078   | 2.75227          | 0.580984     | 3.9088        | 2.75015543       | 0.00014629 | No      |
|      |       |        |             |          |         | Srd5a3    | 32.3041   | 6.29258  | -2.35999         | 32.3051      | 6.29358       | -2.3598091       | 0.00014629 | No      |
|      |       |        |             |          |         | Sreb2     | 38.8069   | 11.6647  | -1.73417         | 38.8079      | 11.6657       | -1.7340775       | 0.00014629 | No      |
|      |       |        |             |          |         | Srgap2    | 17.4566   | 8.49194  | -1.03961         | 17.4576      | 8.49294       | -1.0395193       | 0.00459197 | No      |
|      |       |        |             |          |         | Srgap3    | 0.889683  | 2.96385  | 1.73611          | 0.890683     | 2.96485       | 1.73497515       | 0.00014629 | No      |
|      |       |        |             |          |         | Srgn      | 196.549   | 19.5778  | -3.3276          | 196.55       | 19.5788       | -3.3275321       | 0.00014629 | No      |
|      |       |        |             |          |         | Sri       | 118.925   | 71.2861  | -0.738364        | 118.926      | 71.2871       | -0.7383512       | 0.004167   | No      |

| RRBS |       |        |             |          |         | RNAseq     |           |         |                  |              |               |                  |            |         |
|------|-------|--------|-------------|----------|---------|------------|-----------|---------|------------------|--------------|---------------|------------------|------------|---------|
| gene | Blood | Kidney | methyl.diff | pMWU.fdr | Match ? | gene       | blood     | kidney  | log2(fold_ratio) | blood+ 0.001 | kidney+ 0.001 | log2(fold_ratio) | q_value    | Match ? |
|      |       |        |             |          |         | Srp68      | 48.6645   | 78.1117 | 0.68267          | 48.6655      | 78.1127       | 0.68265775       | 0.0378376  | No      |
|      |       |        |             |          |         | Srp72      | 80.5935   | 33.2492 | -1.27734         | 80.5945      | 33.2502       | -1.2773184       | 0.00014629 | No      |
|      |       |        |             |          |         | Srp9       | 40.0247   | 56.4852 | 0.496983         | 40.0257      | 56.4862       | 0.49697182       | 0.0227639  | No      |
|      |       |        |             |          |         | Srpk2      | 24.5674   | 7.78629 | -1.65774         | 24.5684      | 7.78729       | -1.6576106       | 0.016989   | No      |
|      |       |        |             |          |         | Srpr       | 41.1216   | 23.937  | -0.780658        | 41.1226      | 23.938        | -0.7806289       | 0.00138312 | No      |
|      |       |        |             |          |         | Srrm1      | 103.753   | 39.3486 | -1.39878         | 103.754      | 39.3496       | -1.3987461       | 0.00014629 | No      |
|      |       |        |             |          |         | Srrt       | 108.903   | 147.359 | 0.436297         | 108.904      | 147.36        | 0.43628802       | 0.0430673  | No      |
|      |       |        |             |          |         | Srsf1      | 169.792   | 51.7277 | -1.71476         | 169.793      | 51.7287       | -1.7147401       | 0.00014629 | No      |
|      |       |        |             |          |         | Srsf10     | 42.6751   | 14.9461 | -1.51362         | 42.6761      | 14.9471       | -1.5135627       | 0.00014629 | No      |
|      |       |        |             |          |         | Srsf11     | 130.174   | 43.1398 | -1.59335         | 130.175      | 43.1408       | -1.5933276       | 0.00014629 | No      |
|      |       |        |             |          |         | Srsf2      | 473.448   | 324.03  | -0.547077        | 473.449      | 324.031       | -0.5470772       | 0.0326142  | No      |
|      |       |        |             |          |         | Srsf3      | 134.713   | 68.2517 | -0.980955        | 134.714      | 68.2527       | -0.9809418       | 0.00014629 | No      |
|      |       |        |             |          |         | Srsf4      | 64.3106   | 46.084  | -0.480791        | 64.3116      | 46.085        | -0.4807817       | 0.020066   | No      |
|      |       |        |             |          |         | Srsf5      | 982.011   | 200.139 | -2.29474         | 982.012      | 200.14        | -2.2947311       | 0.00014629 | No      |
|      |       |        |             |          |         | Srsf6      | 144.231   | 35.6749 | -2.0154          | 144.232      | 35.6759       | -2.0153696       | 0.00014629 | No      |
|      |       |        |             |          |         | Srsf7      | 192.29    | 67.6471 | -1.50718         | 192.291      | 67.6481       | -1.5071699       | 0.00014629 | No      |
|      |       |        |             |          |         | Ss18       | 68.8453   | 34.4675 | -0.998123        | 68.8463      | 34.4685       | -0.9981006       | 0.00014629 | No      |
|      |       |        |             |          |         | Ssb        | 129.876   | 49.9997 | -1.37714         | 129.877      | 50.0007       | -1.3771258       | 0.00014629 | No      |
|      |       |        |             |          |         | Ssbp2      | 8.12304   | 23.0773 | 1.50638          | 8.12404      | 23.0783       | 1.50626771       | 0.00014629 | No      |
|      |       |        |             |          |         | Ssbp3      | 128.137   | 24.4207 | -2.39151         | 128.138      | 24.4217       | -2.3914628       | 0.00014629 | No      |
|      |       |        |             |          |         | Ssbp4      | 37.821    | 17.5365 | -1.10883         | 37.822       | 17.5375       | -1.1087826       | 0.00173187 | No      |
|      |       |        |             |          |         | Ssh1       | 1.77145   | 2.64257 | 0.577007         | 1.77245      | 2.64357       | 0.5767426        | 0.0333042  | No      |
|      |       |        |             |          |         | Ssh2       | 40.5162   | 3.67011 | -3.4646          | 40.5172      | 3.67111       | -3.4642462       | 0.00014629 | No      |
|      |       |        |             |          |         | Ssna1      | 29.939    | 96.561  | 1.68942          | 29.94        | 96.562        | 1.68938134       | 0.00014629 | No      |
|      |       |        |             |          |         | Sspo       | 0.0699916 | 6.69943 | 6.58071          | 0.0709916    | 6.70043       | 6.56046154       | 0.00014629 | No      |
|      |       |        |             |          |         | Ssr1       | 37.8189   | 16.0097 | -1.24016         | 37.8199      | 16.0107       | -1.2401092       | 0.00014629 | No      |
|      |       |        |             |          |         | Ssr4       | 218.984   | 73.5947 | -1.57315         | 218.985      | 73.5957       | -1.5731387       | 0.00014629 | No      |
|      |       |        |             |          |         | Ssrp1      | 100.843   | 48.6056 | -1.05291         | 100.844      | 48.6066       | -1.0529011       | 0.00014629 | No      |
|      |       |        |             |          |         | Sssca1     | 16.6147   | 27.8742 | 0.74647          | 16.6157      | 27.8752       | 0.74643508       | 0.00751085 | No      |
|      |       |        |             |          |         | Sstr3      | 16.0716   | 2.56369 | -2.64822         | 16.0726      | 2.56469       | -2.647747        | 0.00014629 | No      |
|      |       |        |             |          |         | Ssuh2      | 0         | 1.72956 | inf              | 0.001        | 1.73056       | 10.7570232       | 0.00629035 | No      |
|      |       |        |             |          |         | Ssx2ip     | 3.92071   | 7.03874 | 0.844203         | 3.92171      | 7.03974       | 0.84403929       | 0.00252712 | No      |
|      |       |        |             |          |         | St13       | 44.8641   | 137.213 | 1.61278          | 44.8651      | 137.214       | 1.61276216       | 0.00014629 | No      |
|      |       |        |             |          |         | St14       | 1.245     | 41.3586 | 5.05397          | 1.246        | 41.3596       | 5.05284626       | 0.00014629 | No      |
|      |       |        |             |          |         | St3gal1    | 33.0018   | 2.7249  | -3.59827         | 33.0028      | 2.7259        | -3.5977839       | 0.00014629 | No      |
|      |       |        |             |          |         | St3gal2    | 2.48157   | 10.5158 | 2.08323          | 2.48257      | 10.5168       | 2.08278949       | 0.00014629 | No      |
|      |       |        |             |          |         | St3gal3    | 0.694204  | 11.1057 | 3.99979          | 0.695204     | 11.1067       | 3.99785004       | 0.00014629 | No      |
|      |       |        |             |          |         | St3gal5    | 2.50499   | 43.2863 | 4.11103          | 2.50599      | 43.2873       | 4.11049125       | 0.00014629 | No      |
|      |       |        |             |          |         | St3gal6    | 7.66593   | 53.972  | 2.81568          | 7.66693      | 53.973        | 2.81551697       | 0.00014629 | No      |
|      |       |        |             |          |         | St5        | 0.167176  | 10.7161 | 6.00227          | 0.168176     | 10.7171       | 5.99379892       | 0.00041099 | No      |
|      |       |        |             |          |         | St6gal1    | 38.504    | 25.4945 | -0.59482         | 38.505       | 25.4955       | -0.5948032       | 0.00448672 | No      |
|      |       |        |             |          |         | St6galnac3 | 0.882455  | 31.1714 | 5.14256          | 0.883455     | 31.1724       | 5.14096877       | 0.00014629 | No      |

| RRBS |       |        |             |          |         | RNAseq     |           |          |                  |              |               |                  |            |         |
|------|-------|--------|-------------|----------|---------|------------|-----------|----------|------------------|--------------|---------------|------------------|------------|---------|
| gene | Blood | Kidney | methyl.diff | pMWU.fdr | Match ? | gene       | blood     | kidney   | log2(fold_ratio) | blood+ 0.001 | kidney+ 0.001 | log2(fold_ratio) | q_value    | Match ? |
|      |       |        |             |          |         | St6galnac4 | 11.8327   | 8.20822  | -0.527642        | 11.8337      | 8.20922       | -0.5275842       | 0.0499148  | No      |
|      |       |        |             |          |         | St6galnac5 | 0.886706  | 0        | -inf             | 0.887706     | 0.001         | -9.7939381       | 0.00041099 | No      |
|      |       |        |             |          |         | ST7        | 2.57315   | 12.5709  | 2.28848          | 2.57415      | 12.5719       | 2.28803467       | 0.00014629 | No      |
|      |       |        |             |          |         | St8sia1    | 63.5012   | 1.49693  | -5.4067          | 63.5022      | 1.49793       | -5.4057645       | 0.00014629 | No      |
|      |       |        |             |          |         | St8sia4    | 22.4731   | 0.473111 | -5.56988         | 22.4741      | 0.474111      | -5.5668947       | 0.00014629 | No      |
|      |       |        |             |          |         | St8sia6    | 9.48062   | 0.146911 | -6.01197         | 9.48162      | 0.147911      | -6.0023323       | 0.0123523  | No      |
|      |       |        |             |          |         | Stag1      | 11.2054   | 4.6981   | -1.25404         | 11.2064      | 4.6991        | -1.2538665       | 0.00014629 | No      |
|      |       |        |             |          |         | Stag2      | 45.1875   | 13.0571  | -1.79109         | 45.1885      | 13.0581       | -1.7910107       | 0.00014629 | No      |
|      |       |        |             |          |         | Stam       | 6.0278    | 16.7065  | 1.47071          | 6.0288       | 16.7075       | 1.4705531        | 0.00014629 | No      |
|      |       |        |             |          |         | Stampb     | 6.68841   | 24.4229  | 1.8685           | 6.68941      | 24.4239       | 1.86834271       | 0.00014629 | No      |
|      |       |        |             |          |         | Stamppl1   | 22.1992   | 3.12844  | -2.82699         | 22.2002      | 3.12944       | -2.8265963       | 0.00014629 | No      |
|      |       |        |             |          |         | Stap1      | 16.2782   | 1.294    | -3.65304         | 16.2792      | 1.295         | -3.6520058       | 0.00090728 | No      |
|      |       |        |             |          |         | Stap2      | 0.086619  | 38.086   | 8.78036          | 0.087619     | 38.087        | 8.76383919       | 0.00014629 | No      |
|      |       |        |             |          |         | Stard13    | 0.501807  | 2.68276  | 2.41851          | 0.502807     | 2.68376       | 2.41617902       | 0.00014629 | No      |
|      |       |        |             |          |         | Stard4     | 8.50651   | 2.75496  | -1.62653         | 8.50751      | 2.75596       | -1.626182        | 0.00014629 | No      |
|      |       |        |             |          |         | Stard8     | 0.0111176 | 17.613   | 10.6296          | 0.0121176    | 17.614        | 10.5054029       | 0.00566132 | No      |
|      |       |        |             |          |         | Stat1      | 108.787   | 52.052   | -1.06348         | 108.788      | 52.053        | -1.0634662       | 0.027886   | No      |
|      |       |        |             |          |         | Stat2      | 23.5656   | 13.0451  | -0.853178        | 23.5666      | 13.0461       | -0.853125        | 0.00014629 | No      |
|      |       |        |             |          |         | Stat4      | 64.6042   | 3.86596  | -4.06273         | 64.6052      | 3.86696       | -4.0623785       | 0.00014629 | No      |
|      |       |        |             |          |         | Stat5a     | 27.677    | 7.29955  | -1.92281         | 27.678       | 7.30055       | -1.9226626       | 0.00014629 | No      |
|      |       |        |             |          |         | Stat5b     | 64.8108   | 7.05601  | -3.19931         | 64.8118      | 7.05701       | -3.1991275       | 0.00014629 | No      |
|      |       |        |             |          |         | Stat6      | 46.7836   | 8.03612  | -2.54143         | 46.7846      | 8.03712       | -2.5412832       | 0.00014629 | No      |
|      |       |        |             |          |         | Stau2      | 1.52806   | 12.9479  | 3.08295          | 1.52906      | 12.9489       | 3.08211262       | 0.00014629 | No      |
|      |       |        |             |          |         | Steap2     | 0         | 19.1252  | inf              | 0.001        | 19.1262       | 14.2232626       | 0.00014629 | No      |
|      |       |        |             |          |         | Steap3     | 0.36467   | 1.32342  | 1.8596           | 0.36567      | 1.32442       | 1.85674653       | 0.0142084  | No      |
|      |       |        |             |          |         | Stfa2      | 2.22272   | 0        | -inf             | 2.22372      | 0.001         | -11.118759       | 0.00014629 | No      |
|      |       |        |             |          |         | Stim1      | 65.7978   | 5.28615  | -3.63775         | 65.7988      | 5.28715       | -3.6374991       | 0.00014629 | No      |
|      |       |        |             |          |         | Stim2      | 20.8766   | 3.94178  | -2.40497         | 20.8776      | 3.94278       | -2.4046708       | 0.00014629 | No      |
|      |       |        |             |          |         | Stip1      | 87.4791   | 60.7623  | -0.525763        | 87.4801      | 60.7633       | -0.5257546       | 0.00639443 | No      |
|      |       |        |             |          |         | Stk10      | 95.2441   | 4.5117   | -4.39989         | 95.2451      | 4.5127        | -4.3995821       | 0.00014629 | No      |
|      |       |        |             |          |         | Stk11ip    | 5.77077   | 10.3308  | 0.840112         | 5.77177      | 10.3318       | 0.84000591       | 0.00395247 | No      |
|      |       |        |             |          |         | Stk16      | 19.8571   | 43.4478  | 1.12963          | 19.8581      | 43.4488       | 1.12958874       | 0.00014629 | No      |
|      |       |        |             |          |         | Stk17b     | 251.896   | 8.8561   | -4.83002         | 251.897      | 8.8571        | -4.8298557       | 0.00014629 | No      |
|      |       |        |             |          |         | Stk24      | 113.753   | 54.2296  | -1.06875         | 113.754      | 54.2306       | -1.0687382       | 0.00374149 | No      |
|      |       |        |             |          |         | Stk32a     | 0         | 1.39005  | inf              | 0.001        | 1.39105       | 10.4419586       | 0.00014629 | No      |
|      |       |        |             |          |         | Stk32b     | 0         | 4.06079  | inf              | 0.001        | 4.06179       | 11.9878999       | 0.00014629 | No      |
|      |       |        |             |          |         | Stk36      | 0.161602  | 1.33792  | 3.04947          | 0.162602     | 1.33892       | 3.04165285       | 0.00028114 | No      |
|      |       |        |             |          |         | Stk38      | 273.515   | 36.4121  | -2.90913         | 273.516      | 36.4131       | -2.9090958       | 0.00014629 | No      |
|      |       |        |             |          |         | Stk4       | 64.1846   | 7.204    | -3.15536         | 64.1856      | 7.205         | -3.1551793       | 0.00014629 | No      |
|      |       |        |             |          |         | Stmn1      | 94.3806   | 165.172  | 0.807405         | 94.3816      | 165.173       | 0.80740034       | 0.00014629 | No      |
|      |       |        |             |          |         | Stom       | 45.975    | 10.0142  | -2.1988          | 45.976       | 10.0152       | -2.1986897       | 0.00014629 | No      |
|      |       |        |             |          |         | Stoml2     | 53.9342   | 128.617  | 1.2538           | 53.9352      | 128.618       | 1.25379352       | 0.00066215 | No      |



| RRBS |       |        |             |          |         | RNAseq   |            |         |                  |              |               |                  |            |         |
|------|-------|--------|-------------|----------|---------|----------|------------|---------|------------------|--------------|---------------|------------------|------------|---------|
| gene | Blood | Kidney | methyl.diff | pMWU.fdr | Match ? | gene     | blood      | kidney  | log2(fold_ratio) | blood+ 0.001 | kidney+ 0.001 | log2(fold_ratio) | q_value    | Match ? |
|      |       |        |             |          |         | Stra6    | 0.539897   | 4.60428 | 3.09222          | 0.540897     | 4.60528       | 3.08986307       | 0.00014629 | No      |
|      |       |        |             |          |         | Stradb   | 7.11818    | 36.6361 | 2.36369          | 7.11918      | 36.6371       | 2.36352233       | 0.00184429 | No      |
|      |       |        |             |          |         | Strn     | 18.5523    | 6.49667 | -1.51382         | 18.5533      | 6.49767       | -1.5136814       | 0.00014629 | No      |
|      |       |        |             |          |         | Strn3    | 25.7149    | 12.856  | -1.00015         | 25.7159      | 12.857        | -1.0001066       | 0.00102864 | No      |
|      |       |        |             |          |         | Sts      | 5.70667    | 23.7994 | 2.0602           | 5.70767      | 23.8004       | 2.06001199       | 0.00014629 | No      |
|      |       |        |             |          |         | Stt3a    | 17.595     | 11.855  | -0.56967         | 17.596       | 11.856        | -0.5696302       | 0.0172634  | No      |
|      |       |        |             |          |         | Stt3b    | 33.5435    | 15.3941 | -1.12366         | 33.5445      | 15.3951       | -1.123605        | 0.00014629 | No      |
|      |       |        |             |          |         | Stx12    | 10.5262    | 24.4647 | 1.21672          | 10.5272      | 24.4657       | 1.2166388        | 0.00014629 | No      |
|      |       |        |             |          |         | Stx18    | 14.9105    | 40.1855 | 1.43035          | 14.9115      | 40.1865       | 1.43028554       | 0.00014629 | No      |
|      |       |        |             |          |         | Stx1a    | 11.7175    | 5.30829 | -1.14235         | 11.7185      | 5.30929       | -1.1421971       | 0.00014629 | No      |
|      |       |        |             |          |         | Stx6     | 51.5351    | 14.513  | -1.82821         | 51.5361      | 14.514        | -1.8281382       | 0.00014629 | No      |
|      |       |        |             |          |         | Stx7     | 15.6408    | 68.568  | 2.13222          | 15.6418      | 68.569        | 2.13214994       | 0.00014629 | No      |
|      |       |        |             |          |         | Stx8     | 35.0322    | 75.283  | 1.10364          | 35.0332      | 75.284        | 1.10362051       | 0.00014629 | No      |
|      |       |        |             |          |         | Stxbp1   | 2.36941    | 5.95231 | 1.32892          | 2.37041      | 5.95331       | 1.3285554        | 0.00555587 | No      |
|      |       |        |             |          |         | Stxbp4   | 1.52038    | 22.4175 | 3.88212          | 1.52138      | 22.4185       | 3.8812373        | 0.00014629 | No      |
|      |       |        |             |          |         | Stxbp5   | 14.0799    | 26.7044 | 0.923434         | 14.0809      | 26.7054       | 0.92339194       | 0.00014629 | No      |
|      |       |        |             |          |         | Stxbp6   | 0          | 3.49286 | inf              | 0.001        | 3.49386       | 11.7706061       | 0.00014629 | No      |
|      |       |        |             |          |         | Styx     | 29.1546    | 5.82437 | -2.32355         | 29.1556      | 5.82537       | -2.3233514       | 0.00066215 | No      |
|      |       |        |             |          |         | Styx11   | 1.53585    | 4.33882 | 1.49826          | 1.53685      | 4.33982       | 1.49765884       | 0.0159399  | No      |
|      |       |        |             |          |         | SUB1     | 57.9877    | 32.0273 | -0.856443        | 57.9887      | 32.0283       | -0.8564246       | 0.00014629 | No      |
|      |       |        |             |          |         | Sucla2   | 32.5311    | 76.4055 | 1.23186          | 32.5321      | 76.4065       | 1.23183142       | 0.00014629 | No      |
|      |       |        |             |          |         | Suclg1   | 77.4771    | 329.715 | 2.08937          | 77.4781      | 329.716       | 2.08936342       | 0.00014629 | No      |
|      |       |        |             |          |         | Suclg2   | 61.651     | 186.558 | 1.59743          | 61.652       | 186.559       | 1.59741236       | 0.00014629 | No      |
|      |       |        |             |          |         | Suco     | 20.6134    | 12.8163 | -0.685608        | 20.6144      | 12.8173       | -0.6855601       | 0.00689996 | No      |
|      |       |        |             |          |         | Suds3    | 39.0693    | 58.5917 | 0.584658         | 39.0703      | 58.5927       | 0.5846486        | 0.00274649 | No      |
|      |       |        |             |          |         | Sufu     | 8.04723    | 13.2862 | 0.723359         | 8.04823      | 13.2872       | 0.72329368       | 0.0114542  | No      |
|      |       |        |             |          |         | Sugt1    | 23.7938    | 38.5766 | 0.697142         | 23.7948      | 38.5776       | 0.69711706       | 0.00263402 | No      |
|      |       |        |             |          |         | Sulf2    | 0.111664   | 15.6947 | 7.13497          | 0.112664     | 15.6957       | 7.12219896       | 0.00014629 | No      |
|      |       |        |             |          |         | Sult1a1  | 0.470697   | 21.8514 | 5.53678          | 0.471697     | 21.8524       | 5.5337875        | 0.0089386  | No      |
|      |       |        |             |          |         | Sult1b1  | 0          | 46.4781 | inf              | 0.001        | 46.4791       | 15.5042945       | 0.00014629 | No      |
|      |       |        |             |          |         | Sult1c2  | 0          | 192.469 | inf              | 0.001        | 192.47        | 17.5542741       | 0.00014629 | No      |
|      |       |        |             |          |         | Sult1c2  | 0          | 189.757 | inf              | 0.001        | 189.758       | 17.5338012       | 0.00014629 | No      |
|      |       |        |             |          |         | Sult1c2a | 0.00474758 | 371.732 | 16.2567          | 0.00574758   | 371.733       | 15.9809526       | 0.00934853 | No      |
|      |       |        |             |          |         | Sumf2    | 7.72211    | 17.0167 | 1.13988          | 7.72311      | 17.0177       | 1.13978224       | 0.00041099 | No      |
|      |       |        |             |          |         | Sumo1    | 119.022    | 88.2607 | -0.431381        | 119.023      | 88.2617       | -0.4313809       | 0.0309347  | No      |
|      |       |        |             |          |         | Sumo2l   | 177.617    | 86.0815 | -1.04499         | 177.618      | 86.0825       | -1.0449859       | 0.00014629 | No      |
|      |       |        |             |          |         | Sumo3    | 48.6371    | 86.4648 | 0.830057         | 48.6381      | 86.4658       | 0.83004274       | 0.00014629 | No      |
|      |       |        |             |          |         | Sun2     | 87.4204    | 21.1448 | -2.04767         | 87.4214      | 21.1458       | -2.0476153       | 0.00014629 | No      |
|      |       |        |             |          |         | Sun3     | 0.296331   | 1.90211 | 2.68232          | 0.297331     | 1.90311       | 2.67821716       | 0.0264168  | No      |
|      |       |        |             |          |         | Suox     | 0.185898   | 37.6422 | 7.66169          | 0.186898     | 37.6432       | 7.65399433       | 0.00014629 | No      |
|      |       |        |             |          |         | Supt16h  | 46.7791    | 29.7714 | -0.651935        | 46.7801      | 29.7724       | -0.6519194       | 0.0132409  | No      |
|      |       |        |             |          |         | Supt20   | 47.3894    | 32.7832 | -0.53161         | 47.3904      | 32.7842       | -0.5315941       | 0.0337348  | No      |

| RRBS |       |        |             |          |         | RNAseq   |          |          |                  |              |               |                  |            |         |
|------|-------|--------|-------------|----------|---------|----------|----------|----------|------------------|--------------|---------------|------------------|------------|---------|
| gene | Blood | Kidney | methyl.diff | pMWU.fdr | Match ? | gene     | blood    | kidney   | log2(fold_ratio) | blood+ 0.001 | kidney+ 0.001 | log2(fold_ratio) | q_value    | Match ? |
|      |       |        |             |          |         | Supt3h   | 6.9029   | 16.9604  | 1.29689          | 6.9039       | 16.9614       | 1.29677178       | 0.00618538 | No      |
|      |       |        |             |          |         | Supt4h1  | 120.822  | 65.1983  | -0.889972        | 120.823      | 65.1993       | -0.8899667       | 0.00014629 | No      |
|      |       |        |             |          |         | Supt6h   | 27.2479  | 17.8462  | -0.61053         | 27.2489      | 17.8472       | -0.6105002       | 0.0125475  | No      |
|      |       |        |             |          |         | Supt7l   | 4.00325  | 7.98816  | 0.996693         | 4.00425      | 7.98916       | 0.99651177       | 0.00161718 | No      |
|      |       |        |             |          |         | Supv3l1  | 54.2294  | 98.0368  | 0.854248         | 54.2304      | 98.0378       | 0.8542363        | 0.00438237 | No      |
|      |       |        |             |          |         | Surf1    | 3.05758  | 5.75421  | 0.912228         | 3.05858      | 5.75521       | 0.91200656       | 0.0183831  | No      |
|      |       |        |             |          |         | Surf2    | 28.9482  | 68.5521  | 1.24373          | 28.9492      | 68.5531       | 1.24369843       | 0.00014629 | No      |
|      |       |        |             |          |         | Suv39h1  | 15.571   | 3.00029  | -2.37569         | 15.572       | 3.00129       | -2.3752996       | 0.00014629 | No      |
|      |       |        |             |          |         | Suv39h2  | 1.43275  | 0.229196 | -2.64413         | 1.43375      | 0.230196      | -2.6388588       | 0.00138312 | No      |
|      |       |        |             |          |         | Suv420h1 | 24.249   | 6.02503  | -2.00888         | 24.25        | 6.02603       | -2.008705        | 0.00014629 | No      |
|      |       |        |             |          |         | Suz12    | 32.7097  | 6.85012  | -2.25552         | 32.7107      | 6.85112       | -2.2553509       | 0.00014629 | No      |
|      |       |        |             |          |         | Sv2a     | 6.03576  | 3.60444  | -0.743759        | 6.03676      | 3.60544       | -0.7435991       | 0.024968   | No      |
|      |       |        |             |          |         | Sv2b     | 21.2647  | 0.150267 | -7.14478         | 21.2657      | 0.151267      | -7.1352872       | 0.0245946  | No      |
|      |       |        |             |          |         | Svil     | 16.5502  | 3.50926  | -2.23761         | 16.5512      | 3.51026       | -2.237286        | 0.00014629 | No      |
|      |       |        |             |          |         | Svip     | 1.85372  | 19.1178  | 3.36642          | 1.85472      | 19.1188       | 3.36571866       | 0.00659461 | No      |
|      |       |        |             |          |         | Swap70   | 3.33361  | 19.2351  | 2.52859          | 3.33461      | 19.2361       | 2.52822639       | 0.00014629 | No      |
|      |       |        |             |          |         | Swsap1   | 3.92824  | 6.33852  | 0.690263         | 3.92924      | 6.33952       | 0.69012332       | 0.0484417  | No      |
|      |       |        |             |          |         | Swt1     | 11.2657  | 7.2222   | -0.641431        | 11.2667      | 7.2232        | -0.641355        | 0.0143989  | No      |
|      |       |        |             |          |         | Syap1    | 18.0994  | 31.159   | 0.78371          | 18.1004      | 31.16         | 0.78367365       | 0.0390364  | No      |
|      |       |        |             |          |         | Syde2    | 0.126273 | 6.94564  | 5.78149          | 0.127273     | 6.94664       | 5.77031703       | 0.00014629 | No      |
|      |       |        |             |          |         | Syf2     | 138.499  | 105.483  | -0.392861        | 138.5        | 105.484       | -0.3928618       | 0.0479113  | No      |
|      |       |        |             |          |         | Syncrip  | 118.632  | 41.4017  | -1.51873         | 118.633      | 41.4027       | -1.5187086       | 0.00544794 | No      |
|      |       |        |             |          |         | Syng1    | 1.48367  | 15.7802  | 3.41088          | 1.48467      | 15.7812       | 3.40999271       | 0.00014629 | No      |
|      |       |        |             |          |         | SYNGR2   | 21.9559  | 54.0685  | 1.30018          | 21.9569      | 54.0695       | 1.30014063       | 0.00014629 | No      |
|      |       |        |             |          |         | Synj1    | 16.4166  | 5.6374   | -1.54205         | 16.4176      | 5.6384        | -1.5418855       | 0.00014629 | No      |
|      |       |        |             |          |         | Synj2bp  | 17.8046  | 66.4823  | 1.90072          | 17.8056      | 66.4833       | 1.90066094       | 0.00014629 | No      |
|      |       |        |             |          |         | Syt11    | 6.10415  | 0.96113  | -2.66699         | 6.10515      | 0.96213       | -2.665723        | 0.00014629 | No      |
|      |       |        |             |          |         | Syt8     | 0        | 1.86267  | inf              | 0.001        | 1.86367       | 10.8639307       | 0.00014629 | No      |
|      |       |        |             |          |         | Sytl1    | 81.0389  | 25.8093  | -1.65072         | 81.0399      | 25.8103       | -1.6506855       | 0.00014629 | No      |
|      |       |        |             |          |         | Tab1     | 10.0644  | 19.0344  | 0.919342         | 10.0654      | 19.0354       | 0.91928038       | 0.00014629 | No      |
|      |       |        |             |          |         | Tab2     | 103.763  | 13.5276  | -2.93932         | 103.764      | 13.5286       | -2.9392215       | 0.00014629 | No      |
|      |       |        |             |          |         | Tab3     | 5.216    | 1.50183  | -1.79622         | 5.217        | 1.50283       | -1.7955386       | 0.00014629 | No      |
|      |       |        |             |          |         | Tacc2    | 9.436    | 64.4797  | 2.7726           | 9.437        | 64.4807       | 2.7724672        | 0.00014629 | No      |
|      |       |        |             |          |         | Tacc3    | 49.6184  | 7.65335  | -2.69671         | 49.6194      | 7.65435       | -2.6965525       | 0.00090728 | No      |
|      |       |        |             |          |         | Taco1    | 1.76497  | 4.59072  | 1.37908          | 1.76597      | 4.59172       | 1.37857384       | 0.0218441  | No      |
|      |       |        |             |          |         | Tacstd2  | 0        | 31.83    | inf              | 0.001        | 31.831        | 14.9581449       | 0.00014629 | No      |
|      |       |        |             |          |         | Tada2b   | 20.1307  | 9.91246  | -1.02208         | 20.1317      | 9.91346       | -1.0220084       | 0.00014629 | No      |
|      |       |        |             |          |         | Tada3    | 28.9198  | 51.878   | 0.843062         | 28.9208      | 51.879        | 0.84304321       | 0.00138312 | No      |
|      |       |        |             |          |         | Taf1     | 18.9792  | 3.55394  | -2.41693         | 18.9802      | 3.55494       | -2.4165981       | 0.00014629 | No      |
|      |       |        |             |          |         | Taf11    | 12.9815  | 25.1529  | 0.954268         | 12.9825      | 25.1539       | 0.95421388       | 0.00066215 | No      |
|      |       |        |             |          |         | Taf12    | 34.1042  | 17.7658  | -0.940845        | 34.1052      | 17.7668       | -0.9408079       | 0.00053701 | No      |
|      |       |        |             |          |         | Taf1a    | 3.68765  | 1.53222  | -1.26707         | 3.68865      | 1.53322       | -1.2665282       | 0.00994441 | No      |

| RRBS |       |        |             |          |         | RNAseq   |          |         |                  |              |               |                  |            |         |
|------|-------|--------|-------------|----------|---------|----------|----------|---------|------------------|--------------|---------------|------------------|------------|---------|
| gene | Blood | Kidney | methyl.diff | pMWU.fdr | Match ? | gene     | blood    | kidney  | log2(fold_ratio) | blood+ 0.001 | kidney+ 0.001 | log2(fold_ratio) | q_value    | Match ? |
|      |       |        |             |          |         | Taf1b    | 8.41619  | 2.76588 | -1.60543         | 8.41719      | 2.76688       | -1.6050786       | 0.00014629 | No      |
|      |       |        |             |          |         | Taf2     | 10.4368  | 4.06077 | -1.36185         | 10.4378      | 4.06177       | -1.3616372       | 0.00014629 | No      |
|      |       |        |             |          |         | Taf4a    | 25.3736  | 8.61315 | -1.55872         | 25.3746      | 8.61415       | -1.5586047       | 0.00014629 | No      |
|      |       |        |             |          |         | Taf4b    | 4.39549  | 8.39475 | 0.933463         | 4.39649      | 8.39575       | 0.93330702       | 0.00173187 | No      |
|      |       |        |             |          |         | Taf5l    | 17.803   | 6.19247 | -1.52353         | 17.804       | 6.19347       | -1.5233816       | 0.00014629 | No      |
|      |       |        |             |          |         | TAF6     | 20.2074  | 8.93693 | -1.17703         | 20.2084      | 8.93793       | -1.1769424       | 0.00659461 | No      |
|      |       |        |             |          |         | Taf7     | 17.7022  | 6.11258 | -1.53408         | 17.7032      | 6.11358       | -1.5339208       | 0.00014629 | No      |
|      |       |        |             |          |         | Taf8     | 17.8193  | 8.21035 | -1.11793         | 17.8203      | 8.21135       | -1.1178303       | 0.00014629 | No      |
|      |       |        |             |          |         | TAF9     | 113.605  | 61.4542 | -0.886446        | 113.606      | 61.4552       | -0.886432        | 0.00014629 | No      |
|      |       |        |             |          |         | Tagap    | 89.4048  | 6.32773 | -3.82059         | 89.4058      | 6.32873       | -3.8203805       | 0.00014629 | No      |
|      |       |        |             |          |         | Taldo1   | 80.7733  | 231.943 | 1.52182          | 80.7743      | 231.944       | 1.52180828       | 0.00914429 | No      |
|      |       |        |             |          |         | Tanc1    | 0.76355  | 17.7646 | 4.54014          | 0.76455      | 17.7656       | 4.53833175       | 0.00014629 | No      |
|      |       |        |             |          |         | Tanc2    | 14.0829  | 38.0402 | 1.43358          | 14.0839      | 38.0412       | 1.43351587       | 0.00491494 | No      |
|      |       |        |             |          |         | Tango2   | 9.73039  | 47.195  | 2.27807          | 9.73139      | 47.196        | 2.2779468        | 0.00014629 | No      |
|      |       |        |             |          |         | Tank     | 47.2659  | 4.06624 | -3.53903         | 47.2669      | 4.06724       | -3.5387082       | 0.00014629 | No      |
|      |       |        |             |          |         | Taok1    | 28.0819  | 8.39384 | -1.74224         | 28.0829      | 8.39484       | -1.7421172       | 0.00014629 | No      |
|      |       |        |             |          |         | Tap1     | 52.3308  | 13.5524 | -1.94911         | 52.3318      | 13.5534       | -1.9490331       | 0.00014629 | No      |
|      |       |        |             |          |         | Tapbpl   | 49.2231  | 4.53983 | -3.43862         | 49.2241      | 4.54083       | -3.4383369       | 0.00014629 | No      |
|      |       |        |             |          |         | Tapt1    | 29.5275  | 10.1176 | -1.5452          | 29.5285      | 10.1186       | -1.5450984       | 0.00014629 | No      |
|      |       |        |             |          |         | Tardbp   | 110.464  | 51.473  | -1.10169         | 110.465      | 51.474        | -1.1016735       | 0.00014629 | No      |
|      |       |        |             |          |         | Tars2    | 21.7621  | 34.4166 | 0.661282         | 21.7631      | 34.4176       | 0.66126243       | 0.011151   | No      |
|      |       |        |             |          |         | Tarsl2   | 3.88897  | 2.07652 | -0.905219        | 3.88997      | 2.07752       | -0.9048967       | 0.0434133  | No      |
|      |       |        |             |          |         | Tas1r1   | 1.36796  | 15.8197 | 3.53162          | 1.36896      | 15.8207       | 3.53066124       | 0.00014629 | No      |
|      |       |        |             |          |         | Tas1r2   | 17.9089  | 69.4423 | 1.95514          | 17.9099      | 69.4433       | 1.95507823       | 0.00014629 | No      |
|      |       |        |             |          |         | Tax1bp1  | 134.164  | 72.8519 | -0.880961        | 134.165      | 72.8529       | -0.8809501       | 0.00014629 | No      |
|      |       |        |             |          |         | Tax1bp3  | 4.76419  | 47.8935 | 3.32953          | 4.76519      | 47.8945       | 3.32925435       | 0.00014629 | No      |
|      |       |        |             |          |         | Tbc1d10a | 18.1075  | 57.7882 | 1.67419          | 18.1085      | 57.7892       | 1.67413285       | 0.00014629 | No      |
|      |       |        |             |          |         | Tbc1d13  | 8.32996  | 36.1634 | 2.11815          | 8.33096      | 36.1644       | 2.11801556       | 0.00014629 | No      |
|      |       |        |             |          |         | Tbc1d15  | 44.2651  | 10.1467 | -2.12515         | 44.2661      | 10.1477       | -2.1250495       | 0.00014629 | No      |
|      |       |        |             |          |         | Tbc1d16  | 11.1057  | 6.97541 | -0.670955        | 11.1067      | 6.97641       | -0.6708735       | 0.00149937 | No      |
|      |       |        |             |          |         | Tbc1d17  | 39.4992  | 163.605 | 2.05032          | 39.5002      | 163.606       | 2.05029379       | 0.00014629 | No      |
|      |       |        |             |          |         | Tbc1d19  | 0.948557 | 11.6095 | 3.61342          | 0.949557     | 11.6105       | 3.61203169       | 0.00014629 | No      |
|      |       |        |             |          |         | Tbc1d2   | 0.887701 | 4.82707 | 2.443            | 0.888701     | 4.82807       | 2.44167658       | 0.00014629 | No      |
|      |       |        |             |          |         | Tbc1d20  | 103.427  | 23.8039 | -2.11934         | 103.428      | 23.8049       | -2.1192963       | 0.00014629 | No      |
|      |       |        |             |          |         | Tbc1d23  | 14.4156  | 7.63293 | -0.917323        | 14.4166      | 7.63393       | -0.9172331       | 0.00014629 | No      |
|      |       |        |             |          |         | Tbc1d24  | 1.85448  | 0.64585 | -1.52174         | 1.85548      | 0.64685       | -1.5202893       | 0.00184429 | No      |
|      |       |        |             |          |         | Tbc1d25  | 13.9264  | 5.69472 | -1.29013         | 13.9274      | 5.69572       | -1.2899758       | 0.00014629 | No      |
|      |       |        |             |          |         | Tbc1d2b  | 11.8699  | 1.70927 | -2.79586         | 11.8709      | 1.71027       | -2.7951333       | 0.00014629 | No      |
|      |       |        |             |          |         | Tbc1d30  | 5.8581   | 2.36817 | -1.30666         | 5.8591       | 2.36917       | -1.3062974       | 0.00576532 | No      |
|      |       |        |             |          |         | Tbc1d4   | 27.5783  | 7.31596 | -1.91442         | 27.5793      | 7.31696       | -1.9142696       | 0.00014629 | No      |
|      |       |        |             |          |         | Tbc1d5   | 10.8447  | 3.69205 | -1.5545          | 10.8457      | 3.69305       | -1.5542385       | 0.00014629 | No      |
|      |       |        |             |          |         | Tbc1d8   | 0.595072 | 4.59453 | 2.94878          | 0.596072     | 4.59553       | 2.94667275       | 0.0187462  | No      |

| RRBS |       |        |             |          |         | RNAseq  |           |           |                  |              |               |                  |            |         |
|------|-------|--------|-------------|----------|---------|---------|-----------|-----------|------------------|--------------|---------------|------------------|------------|---------|
| gene | Blood | Kidney | methyl.diff | pMWU.fdr | Match ? | gene    | blood     | kidney    | log2(fold_ratio) | blood+ 0.001 | kidney+ 0.001 | log2(fold_ratio) | q_value    | Match ? |
|      |       |        |             |          |         | Tbca    | 239.401   | 330.698   | 0.466087         | 239.402      | 330.699       | 0.46608348       | 0.027886   | No      |
|      |       |        |             |          |         | Tbcd    | 18.2038   | 41.2249   | 1.17927          | 18.2048      | 41.2259       | 1.1792321        | 0.0378376  | No      |
|      |       |        |             |          |         | Tbk1    | 19.4455   | 10.0229   | -0.956136        | 19.4465      | 10.0239       | -0.9560666       | 0.00014629 | No      |
|      |       |        |             |          |         | Tbl1x   | 21.9648   | 8.23262   | -1.41577         | 21.9658      | 8.23362       | -1.4156603       | 0.00014629 | No      |
|      |       |        |             |          |         | Tbl1xr1 | 24.2888   | 6.85224   | -1.82564         | 24.2898      | 6.85324       | -1.8254925       | 0.00014629 | No      |
|      |       |        |             |          |         | Tbrg4   | 21.9324   | 34.7489   | 0.6639           | 21.9334      | 34.7499       | 0.66387936       | 0.00974684 | No      |
|      |       |        |             |          |         | Tbx19   | 3.03881   | 1.50703   | -1.0118          | 3.03981      | 1.50803       | -1.011316        | 0.0321606  | No      |
|      |       |        |             |          |         | Tbxas1  | 0.195818  | 4.98889   | 4.67114          | 0.196818     | 4.98989       | 4.66407394       | 0.0185598  | No      |
|      |       |        |             |          |         | Tc2n    | 0         | 2.32316   | inf              | 0.001        | 2.32416       | 11.1824937       | 0.00014629 | No      |
|      |       |        |             |          |         | Tcaim   | 7.37048   | 28.4007   | 1.9461           | 7.37148      | 28.4017       | 1.94595108       | 0.00014629 | No      |
|      |       |        |             |          |         | Tcea1   | 82.55     | 40.4094   | -1.03058         | 82.551       | 40.4104       | -1.0305591       | 0.00014629 | No      |
|      |       |        |             |          |         | Tcea3   | 0         | 81.4563   | inf              | 0.001        | 81.4573       | 16.3137564       | 0.00014629 | No      |
|      |       |        |             |          |         | Tceal8  | 9.61731   | 64.2276   | 2.73949          | 9.61831      | 64.2286       | 2.73936052       | 0.00014629 | No      |
|      |       |        |             |          |         | Tceb2   | 234.118   | 627.155   | 1.42158          | 234.119      | 627.156       | 1.42158232       | 0.00014629 | No      |
|      |       |        |             |          |         | Tcerg1  | 70.3248   | 12.5968   | -2.48098         | 70.3258      | 12.5978       | -2.4808822       | 0.00014629 | No      |
|      |       |        |             |          |         | Tcf21   | 0         | 3.2754    | inf              | 0.001        | 3.2764        | 11.6778958       | 0.00014629 | No      |
|      |       |        |             |          |         | Tcf25   | 73.7855   | 178.581   | 1.27517          | 73.7865      | 178.582       | 1.27515788       | 0.00014629 | No      |
|      |       |        |             |          |         | Tcf3    | 60.991    | 26.7114   | -1.19114         | 60.992       | 26.7124       | -1.1911104       | 0.00014629 | No      |
|      |       |        |             |          |         | Tcf4    | 6.19928   | 2.21897   | -1.48221         | 6.20028      | 2.21997       | -1.4817932       | 0.00884407 | No      |
|      |       |        |             |          |         | TCF7    | 646.372   | 8.29452   | -6.28406         | 646.373      | 8.29552       | -6.2838907       | 0.00014629 | No      |
|      |       |        |             |          |         | Tcf7l2  | 0.203517  | 5.41272   | 4.73313          | 0.204517     | 5.41372       | 4.7263276        | 0.00014629 | No      |
|      |       |        |             |          |         | Tcn2    | 5.38327   | 55.3498   | 3.36202          | 5.38427      | 55.3508       | 3.36178151       | 0.00014629 | No      |
|      |       |        |             |          |         | Tcof1   | 28.0593   | 10.2948   | -1.44655         | 28.0603      | 10.2958       | -1.4464745       | 0.00014629 | No      |
|      |       |        |             |          |         | Tcp11l2 | 106.068   | 17.3344   | -2.61329         | 106.069      | 17.3354       | -2.61321         | 0.00014629 | No      |
|      |       |        |             |          |         | TCRB    | 2130.78   | 118.586   | -4.16738         | 2130.781     | 118.587       | -4.1673646       | 0.00014629 | No      |
|      |       |        |             |          |         | Tctn1   | 1.44573   | 8.8092    | 2.60722          | 1.44673      | 8.8102        | 2.60637907       | 0.00014629 | No      |
|      |       |        |             |          |         | Tdg     | 22.2624   | 12.3287   | -0.852592        | 22.2634      | 12.3297       | -0.8525362       | 0.00014629 | No      |
|      |       |        |             |          |         | Tdp1    | 4.74834   | 1.78438   | -1.412           | 4.74934      | 1.78538       | -1.4114959       | 0.00102864 | No      |
|      |       |        |             |          |         | Tdp2    | 53.8447   | 22.4061   | -1.26492         | 53.8457      | 22.4071       | -1.2648752       | 0.00014629 | No      |
|      |       |        |             |          |         | TDRD3   | 8.88319   | 16.8766   | 0.925878         | 8.88419      | 16.8776       | 0.92579761       | 0.00041099 | No      |
|      |       |        |             |          |         | Tecpr1  | 46.6942   | 17.0174   | -1.45623         | 46.6952      | 17.0184       | -1.4561788       | 0.00014629 | No      |
|      |       |        |             |          |         | Tef     | 3.15607   | 13.9286   | 2.14185          | 3.15707      | 13.9296       | 2.14149568       | 0.00014629 | No      |
|      |       |        |             |          |         | Tefm    | 2.62573   | 9.84541   | 1.90673          | 2.62673      | 9.84641       | 1.9063299        | 0.00014629 | No      |
|      |       |        |             |          |         | Tekt1   | 0         | 3.70654   | inf              | 0.001        | 3.70754       | 11.8562465       | 0.00014629 | No      |
|      |       |        |             |          |         | Tenc1   | 0.0490927 | 6.71021   | 7.0947           | 0.0500927    | 6.71121       | 7.06582872       | 0.00448672 | No      |
|      |       |        |             |          |         | Tenm3   | 0         | 1.73726   | inf              | 0.001        | 1.73826       | 10.7634282       | 0.00014629 | No      |
|      |       |        |             |          |         | Terf1   | 18.479    | 10.2533   | -0.849796        | 18.48        | 10.2543       | -0.8497357       | 0.00126596 | No      |
|      |       |        |             |          |         | Terf2   | 22.1354   | 11.6857   | -0.921609        | 22.1364      | 11.6867       | -0.921553        | 0.00102864 | No      |
|      |       |        |             |          |         | Tert    | 2.12371   | 0.89868   | -1.24071         | 2.12471      | 0.89968       | -1.2397821       | 0.0260584  | No      |
|      |       |        |             |          |         | Tes     | 41.5812   | 8.29405   | -2.32578         | 41.5822      | 8.29505       | -2.3256435       | 0.00014629 | No      |
|      |       |        |             |          |         | Tesk1   | 5.98021   | 13.0907   | 1.13028          | 5.98121      | 13.0917       | 1.13014317       | 0.00014629 | No      |
|      |       |        |             |          |         | Tet1    | 1.03252   | 0.0669987 | -3.94589         | 1.03352      | 0.0679987     | -3.9259153       | 0.0448712  | No      |

| RRBS |       |        |             |          |         | RNAseq |          |         |                  |              |               |                  |            |         |
|------|-------|--------|-------------|----------|---------|--------|----------|---------|------------------|--------------|---------------|------------------|------------|---------|
| gene | Blood | Kidney | methyl.diff | pMWU.fdr | Match ? | gene   | blood    | kidney  | log2(fold_ratio) | blood+ 0.001 | kidney+ 0.001 | log2(fold_ratio) | q_value    | Match ? |
|      |       |        |             |          |         | Tet2   | 5.73062  | 2.0874  | -1.45698         | 5.73162      | 2.0884        | -1.4565449       | 0.00307875 | No      |
|      |       |        |             |          |         | Tet3   | 26.688   | 5.59947 | -2.25283         | 26.689       | 5.60047       | -2.2526254       | 0.00014629 | No      |
|      |       |        |             |          |         | Tex10  | 18.1235  | 4.4888  | -2.01346         | 18.1245      | 4.4898        | -2.0132181       | 0.00014629 | No      |
|      |       |        |             |          |         | Tex14  | 0.40095  | 19.5256 | 5.6058           | 0.40195      | 19.5266       | 5.60228091       | 0.00014629 | No      |
|      |       |        |             |          |         | Tex2   | 28.8034  | 10.4444 | -1.46351         | 28.8044      | 10.4454       | -1.4634215       | 0.00014629 | No      |
|      |       |        |             |          |         | Tex26  | 0        | 7.43738 | inf              | 0.001        | 7.43838       | 12.8607727       | 0.00014629 | No      |
|      |       |        |             |          |         | Tex264 | 33.9997  | 120.784 | 1.82884          | 34.0007      | 120.785       | 1.82880495       | 0.00014629 | No      |
|      |       |        |             |          |         | Tex36  | 0        | 21.8714 | inf              | 0.001        | 21.8724       | 14.4168239       | 0.00014629 | No      |
|      |       |        |             |          |         | Tex9   | 15.9403  | 31.3228 | 0.97453          | 15.9413      | 31.3238       | 0.97448996       | 0.0403386  | No      |
|      |       |        |             |          |         | Tf     | 9.02554  | 13.8445 | 0.61723          | 9.02654      | 13.8455       | 0.61717216       | 0.0110564  | No      |
|      |       |        |             |          |         | Tfam   | 47.9723  | 30.4713 | -0.654751        | 47.9733      | 30.4723       | -0.6547333       | 0.00173187 | No      |
|      |       |        |             |          |         | Tfap2b | 0        | 9.60602 | inf              | 0.001        | 9.60702       | 13.2298733       | 0.00014629 | No      |
|      |       |        |             |          |         | Tfdp2  | 2.61616  | 6.52233 | 1.31794          | 2.61716      | 6.52333       | 1.31760649       | 0.00014629 | No      |
|      |       |        |             |          |         | Tfeb   | 22.6197  | 37.2814 | 0.720877         | 22.6207      | 37.2824       | 0.72085116       | 0.00053701 | No      |
|      |       |        |             |          |         | Tff3   | 0        | 249.413 | inf              | 0.001        | 249.414       | 17.9281829       | 0.00014629 | No      |
|      |       |        |             |          |         | Tfg    | 15.886   | 23.7254 | 0.578681         | 15.887       | 23.7264       | 0.5786465        | 0.0140162  | No      |
|      |       |        |             |          |         | Tfip11 | 15.4491  | 21.7768 | 0.495266         | 15.4501      | 21.7778       | 0.49524204       | 0.0356089  | No      |
|      |       |        |             |          |         | Tfpi   | 2.78572  | 12.0963 | 2.11844          | 2.78672      | 12.0973       | 2.11804513       | 0.00318982 | No      |
|      |       |        |             |          |         | Tfrc   | 19.2081  | 4.22401 | -2.18503         | 19.2091      | 4.22501       | -2.1847633       | 0.00014629 | No      |
|      |       |        |             |          |         | Tgfb1  | 96.1717  | 14.6327 | -2.71642         | 96.1727      | 14.6337       | -2.7163328       | 0.00014629 | No      |
|      |       |        |             |          |         | Tgfr1  | 8.34194  | 3.64577 | -1.19416         | 8.34294      | 3.64677       | -1.1939367       | 0.00014629 | No      |
|      |       |        |             |          |         | Tgfr2  | 35.8703  | 9.33527 | -1.94203         | 35.8713      | 9.33627       | -1.9419118       | 0.00014629 | No      |
|      |       |        |             |          |         | Tgfr3  | 0.261204 | 6.58301 | 4.6555           | 0.262204     | 6.58401       | 4.65020493       | 0.00014629 | No      |
|      |       |        |             |          |         | Tgif1  | 33.2868  | 18.6204 | -0.838068        | 33.2878      | 18.6214       | -0.838032        | 0.00014629 | No      |
|      |       |        |             |          |         | Tgm3   | 0        | 2.49377 | inf              | 0.001        | 2.49477       | 11.2846911       | 0.00014629 | No      |
|      |       |        |             |          |         | Tgs1   | 6.96553  | 2.36361 | -1.55924         | 6.96653      | 2.36461       | -1.558838        | 0.00014629 | No      |
|      |       |        |             |          |         | Tha1   | 2.7457   | 9.93791 | 1.85577          | 2.7467       | 9.93891       | 1.8553883        | 0.00014629 | No      |
|      |       |        |             |          |         | Thada  | 7.63602  | 14.6688 | 0.941857         | 7.63702      | 14.6698       | 0.9417675        | 0.0239709  | No      |
|      |       |        |             |          |         | Thap3  | 11.9951  | 34.4736 | 1.52305          | 11.9961      | 34.4746       | 1.52296836       | 0.00090728 | No      |
|      |       |        |             |          |         | Thap4  | 10.5448  | 155.898 | 3.886            | 10.5458      | 155.899       | 3.88587123       | 0.00014629 | No      |
|      |       |        |             |          |         | Thap7  | 8.78604  | 20.3561 | 1.21217          | 8.78704      | 20.3571       | 1.21208289       | 0.00014629 | No      |
|      |       |        |             |          |         | Thbs1  | 0.188999 | 74.0222 | 8.61344          | 0.189999     | 74.0232       | 8.60584187       | 0.00014629 | No      |
|      |       |        |             |          |         | Thbs4  | 0        | 1.06712 | inf              | 0.001        | 1.06812       | 10.060858        | 0.00014629 | No      |
|      |       |        |             |          |         | Them6  | 8.69495  | 21.8376 | 1.32857          | 8.69595      | 21.8386       | 1.32846482       | 0.00053701 | No      |
|      |       |        |             |          |         | Them7  | 0        | 4.91442 | inf              | 0.001        | 4.91542       | 12.263099        | 0.0152626  | No      |
|      |       |        |             |          |         | Thns12 | 0.744223 | 185.282 | 7.95977          | 0.745223     | 185.283       | 7.9578426        | 0.00014629 | No      |
|      |       |        |             |          |         | Thoc2  | 23.8457  | 5.31965 | -2.16432         | 23.8467      | 5.32065       | -2.1641152       | 0.00014629 | No      |
|      |       |        |             |          |         | Thoc3  | 24.1213  | 12.6765 | -0.928145        | 24.1223      | 12.6775       | -0.9280972       | 0.00014629 | No      |
|      |       |        |             |          |         | Thop1  | 4.07241  | 8.99862 | 1.14382          | 4.07341      | 8.99962       | 1.14362705       | 0.00014629 | No      |
|      |       |        |             |          |         | Thra   | 12.7212  | 38.8578 | 1.61097          | 12.7222      | 38.8588       | 1.61089318       | 0.00138312 | No      |
|      |       |        |             |          |         | Thrap3 | 70.3261  | 21.88   | -1.68444         | 70.3271      | 21.881        | -1.6844021       | 0.00014629 | No      |
|      |       |        |             |          |         | Thrb   | 3.9771   | 8.123   | 1.0303           | 3.9781       | 8.124         | 1.0301107        | 0.00014629 | No      |

| RRBS |       |        |             |          |         | RNAseq  |           |         |                  |              |               |                  |            |         |
|------|-------|--------|-------------|----------|---------|---------|-----------|---------|------------------|--------------|---------------|------------------|------------|---------|
| gene | Blood | Kidney | methyl.diff | pMWU.fdr | Match ? | gene    | blood     | kidney  | log2(fold_ratio) | blood+ 0.001 | kidney+ 0.001 | log2(fold_ratio) | q_value    | Match ? |
|      |       |        |             |          |         | Thumpd3 | 12.6797   | 8.10875 | -0.644969        | 12.6807      | 8.10975       | -0.644905        | 0.0220286  | No      |
|      |       |        |             |          |         | Tia1    | 31.3851   | 7.49884 | -2.06534         | 31.3861      | 7.49984       | -2.065194        | 0.00014629 | No      |
|      |       |        |             |          |         | Tial1   | 72.9093   | 20.2853 | -1.84567         | 72.9103      | 20.2863       | -1.8456169       | 0.00014629 | No      |
|      |       |        |             |          |         | Tie1    | 1.91577   | 11.6794 | 2.60797          | 1.91677      | 11.6804       | 2.60734054       | 0.00014629 | No      |
|      |       |        |             |          |         | Tigd2   | 23.8664   | 5.02396 | -2.24809         | 23.8674      | 5.02496       | -2.2478574       | 0.00014629 | No      |
|      |       |        |             |          |         | Tigd3   | 0.560058  | 1.89415 | 1.7579           | 0.561058     | 1.89515       | 1.75609022       | 0.0210052  | No      |
|      |       |        |             |          |         | Timd2   | 0.738022  | 17.7402 | 4.58721          | 0.739022     | 17.7412       | 4.58534247       | 0.00014629 | No      |
|      |       |        |             |          |         | Timm10  | 14.7519   | 48.3047 | 1.71126          | 14.7529      | 48.3057       | 1.71119486       | 0.00014629 | No      |
|      |       |        |             |          |         | TIMM10B | 11.4083   | 33.5509 | 1.55626          | 11.4093      | 33.5519       | 1.55618419       | 0.00014629 | No      |
|      |       |        |             |          |         | Timm13  | 57.7533   | 221.679 | 1.9405           | 57.7543      | 221.68        | 1.94047835       | 0.00014629 | No      |
|      |       |        |             |          |         | Timm17a | 32.1527   | 104.927 | 1.70637          | 32.1537      | 104.928       | 1.70634305       | 0.00014629 | No      |
|      |       |        |             |          |         | Timm21  | 11.3648   | 31.0513 | 1.45009          | 11.3658      | 31.0523       | 1.4500009        | 0.00014629 | No      |
|      |       |        |             |          |         | Timm22  | 9.43765   | 28.0738 | 1.57273          | 9.43865      | 28.0748       | 1.57262331       | 0.00014629 | No      |
|      |       |        |             |          |         | Timm44  | 20.5298   | 41.163  | 1.00363          | 20.5308      | 41.164        | 1.00359333       | 0.00014629 | No      |
|      |       |        |             |          |         | Timm8b  | 26.2009   | 321.399 | 3.61667          | 26.2019      | 321.4         | 3.61662659       | 0.00014629 | No      |
|      |       |        |             |          |         | Timp2   | 0.550103  | 28.0033 | 5.66975          | 0.551103     | 28.0043       | 5.66718258       | 0.00014629 | No      |
|      |       |        |             |          |         | Timp3   | 0.0218934 | 296.924 | 13.7273          | 0.0228934    | 296.925       | 13.6628792       | 0.00523722 | No      |
|      |       |        |             |          |         | Timp4   | 0         | 2.84284 | inf              | 0.001        | 2.84384       | 11.4736246       | 0.00014629 | No      |
|      |       |        |             |          |         | Tiparp  | 21.1837   | 8.97395 | -1.23914         | 21.1847      | 8.97495       | -1.2390469       | 0.00014629 | No      |
|      |       |        |             |          |         | Tjp1    | 0.0913463 | 7.53282 | 6.3657           | 0.0923463    | 7.53382       | 6.3501836        | 0.00014629 | No      |
|      |       |        |             |          |         | Tjp2    | 0.0476781 | 18.2903 | 8.58354          | 0.0486781    | 18.2913       | 8.55366904       | 0.00173187 | No      |
|      |       |        |             |          |         | Tjp3    | 0.878978  | 19.3021 | 4.45679          | 0.879978     | 19.3031       | 4.45522129       | 0.00014629 | No      |
|      |       |        |             |          |         | Tkt     | 71.4022   | 166.373 | 1.22038          | 71.4032      | 166.374       | 1.22036936       | 0.00014629 | No      |
|      |       |        |             |          |         | Tlcd1   | 0.97083   | 31.0003 | 4.99692          | 0.97183      | 31.0013       | 4.99548094       | 0.00014629 | No      |
|      |       |        |             |          |         | Tle3    | 58.2429   | 14.0629 | -2.05018         | 58.2439      | 14.0639       | -2.0501102       | 0.00014629 | No      |
|      |       |        |             |          |         | Tle4    | 30.7265   | 6.24782 | -2.29806         | 30.7275      | 6.24882       | -2.2978747       | 0.00014629 | No      |
|      |       |        |             |          |         | Tlk2    | 22.7415   | 14.1635 | -0.683152        | 22.7425      | 14.1645       | -0.6831112       | 0.0423845  | No      |
|      |       |        |             |          |         | Tln1    | 63.2068   | 19.5683 | -1.69156         | 63.2078      | 19.5693       | -1.6915105       | 0.00014629 | No      |
|      |       |        |             |          |         | Tln2    | 0.0155395 | 18.0661 | 10.1831          | 0.0165395    | 18.0671       | 10.0932336       | 0.0148843  | No      |
|      |       |        |             |          |         | Tlr12   | 0         | 2.53401 | inf              | 0.001        | 2.53501       | 11.3077757       | 0.00014629 | No      |
|      |       |        |             |          |         | Tlr3    | 0.715381  | 6.29203 | 3.13674          | 0.716381     | 6.29303       | 3.13495584       | 0.00014629 | No      |
|      |       |        |             |          |         | Tm2d1   | 13.4598   | 32.859  | 1.28763          | 13.4608      | 32.86         | 1.28756833       | 0.00833592 | No      |
|      |       |        |             |          |         | Tm2d2   | 18.5071   | 35.0383 | 0.920856         | 18.5081      | 35.0393       | 0.92081715       | 0.00014629 | No      |
|      |       |        |             |          |         | Tm2d3   | 8.34338   | 37.5791 | 2.17123          | 8.34438      | 37.5801       | 2.17109214       | 0.00984666 | No      |
|      |       |        |             |          |         | Tm7sf2  | 19.4822   | 50.242  | 1.36673          | 19.4832      | 50.243        | 1.36669196       | 0.00438237 | No      |
|      |       |        |             |          |         | Tm9sf2  | 15.3236   | 38.4067 | 1.32561          | 15.3246      | 38.4077       | 1.32554615       | 0.00014629 | No      |
|      |       |        |             |          |         | Tm9sf3  | 59.3993   | 32.8395 | -0.855013        | 59.4003      | 32.8405       | -0.8549941       | 0.00014629 | No      |
|      |       |        |             |          |         | Tmbim1  | 1.71148   | 22.9252 | 3.74362          | 1.71248      | 22.9262       | 3.74283821       | 0.0277051  | No      |
|      |       |        |             |          |         | Tmbim4  | 78.3595   | 52.1059 | -0.58866         | 78.3605      | 52.1069       | -0.5886522       | 0.00629035 | No      |
|      |       |        |             |          |         | Tmc3    | 0         | 16.1996 | inf              | 0.001        | 16.2006       | 13.9837596       | 0.00014629 | No      |
|      |       |        |             |          |         | Tmc6    | 103.628   | 37.7233 | -1.45789         | 103.629      | 37.7243       | -1.4578618       | 0.00138312 | No      |
|      |       |        |             |          |         | Tmcc1   | 16.651    | 4.26693 | -1.96434         | 16.652       | 4.26793       | -1.964087        | 0.00014629 | No      |

| RRBS |       |        |             |          |         | RNAseq   |           |          |                  |              |               |                  |            |         |
|------|-------|--------|-------------|----------|---------|----------|-----------|----------|------------------|--------------|---------------|------------------|------------|---------|
| gene | Blood | Kidney | methyl.diff | pMWU.fdr | Match ? | gene     | blood     | kidney   | log2(fold_ratio) | blood+ 0.001 | kidney+ 0.001 | log2(fold_ratio) | q_value    | Match ? |
|      |       |        |             |          |         | Tmcc3    | 1.19001   | 3.58437  | 1.59074          | 1.19101      | 3.58537       | 1.58993648       | 0.00014629 | No      |
|      |       |        |             |          |         | Tmed10   | 75.7569   | 35.8622  | -1.07891         | 75.7579      | 35.8632       | -1.0788921       | 0.00014629 | No      |
|      |       |        |             |          |         | Tmed2    | 119.782   | 66.961   | -0.839014        | 119.783      | 66.962        | -0.8390086       | 0.00014629 | No      |
|      |       |        |             |          |         | Tmed5    | 16.2152   | 2.79311  | -2.5374          | 16.2162      | 2.79411       | -2.5369751       | 0.00014629 | No      |
|      |       |        |             |          |         | Tmed6    | 0.147644  | 37.3261  | 7.98192          | 0.148644     | 37.3271       | 7.97221839       | 0.0425528  | No      |
|      |       |        |             |          |         | Tmed8    | 12.4595   | 1.67801  | -2.89242         | 12.4605      | 1.67901       | -2.8916792       | 0.0307655  | No      |
|      |       |        |             |          |         | Tmem106a | 1.99316   | 125.008  | 5.97082          | 1.99416      | 125.009       | 5.97010699       | 0.00014629 | No      |
|      |       |        |             |          |         | Tmem106c | 4.77067   | 18.0258  | 1.9178           | 4.77167      | 18.0268       | 1.91757714       | 0.00014629 | No      |
|      |       |        |             |          |         | Tmem107  | 0.42774   | 11.8486  | 4.79184          | 0.42874      | 11.8496       | 4.78859153       | 0.00053701 | No      |
|      |       |        |             |          |         | Tmem108  | 0.06237   | 1.36688  | 4.45389          | 0.06337      | 1.36788       | 4.43199785       | 0.0107557  | No      |
|      |       |        |             |          |         | TMEM11   | 14.1309   | 36.9287  | 1.38589          | 14.1319      | 36.9297       | 1.3858261        | 0.00014629 | No      |
|      |       |        |             |          |         | Tmem116  | 0.0732239 | 6.7066   | 6.51712          | 0.0742239    | 6.7076        | 6.49776904       | 0.00274649 | No      |
|      |       |        |             |          |         | Tmem117  | 0.148356  | 6.6536   | 5.487            | 0.149356     | 6.6546        | 5.47752485       | 0.00053701 | No      |
|      |       |        |             |          |         | Tmem120a | 11.6276   | 34.9861  | 1.58922          | 11.6286      | 34.9871       | 1.58914567       | 0.00014629 | No      |
|      |       |        |             |          |         | Tmem123  | 140.455   | 63.3512  | -1.14867         | 140.456      | 63.3522       | -1.1486516       | 0.00014629 | No      |
|      |       |        |             |          |         | Tmem125  | 0         | 16.5709  | inf              | 0.001        | 16.5719       | 14.0164514       | 0.00014629 | No      |
|      |       |        |             |          |         | Tmem126b | 11.9894   | 20.2018  | 0.75273          | 11.9904      | 20.2028       | 0.75267547       | 0.0327003  | No      |
|      |       |        |             |          |         | Tmem128  | 31.4047   | 21.2801  | -0.561476        | 31.4057      | 21.2811       | -0.5614537       | 0.0413006  | No      |
|      |       |        |             |          |         | Tmem132a | 0.508957  | 9.32248  | 4.1951           | 0.509957     | 9.32348       | 4.19242103       | 0.00014629 | No      |
|      |       |        |             |          |         | Tmem135  | 6.2047    | 16.3828  | 1.40075          | 6.2057       | 16.3838       | 1.40060415       | 0.00014629 | No      |
|      |       |        |             |          |         | Tmem138  | 1.45916   | 7.00198  | 2.26263          | 1.46016      | 7.00298       | 2.2618425        | 0.0210052  | No      |
|      |       |        |             |          |         | Tmem141  | 12.5829   | 32.7557  | 1.38028          | 12.5839      | 32.7567       | 1.38021091       | 0.00014629 | No      |
|      |       |        |             |          |         | TMEM144  | 2.32846   | 9.42549  | 2.01719          | 2.32946      | 9.42649       | 2.01672512       | 0.00014629 | No      |
|      |       |        |             |          |         | Tmem145  | 0         | 3.28473  | inf              | 0.001        | 3.28573       | 11.6819982       | 0.00639443 | No      |
|      |       |        |             |          |         | Tmem14a  | 9.73569   | 18.641   | 0.937127         | 9.73669      | 18.642        | 0.93705333       | 0.00318982 | No      |
|      |       |        |             |          |         | Tmem154  | 60.5151   | 3.50523  | -4.10971         | 60.5161      | 3.50623       | -4.1093265       | 0.00014629 | No      |
|      |       |        |             |          |         | Tmem156  | 54.5923   | 4.31341  | -3.6618          | 54.5933      | 4.31441       | -3.6614887       | 0.0138196  | No      |
|      |       |        |             |          |         | Tmem160  | 40.896    | 61.9177  | 0.59839          | 40.897       | 61.9187       | 0.59838016       | 0.0247814  | No      |
|      |       |        |             |          |         | Tmem161b | 14.7085   | 8.99149  | -0.710015        | 14.7095      | 8.99249       | -0.7099557       | 0.0244119  | No      |
|      |       |        |             |          |         | Tmem164  | 12.7264   | 3.49273  | -1.86539         | 12.7274      | 3.49373       | -1.8650977       | 0.00014629 | No      |
|      |       |        |             |          |         | Tmem167a | 35.6277   | 19.4088  | -0.876292        | 35.6287      | 19.4098       | -0.8762546       | 0.00028114 | No      |
|      |       |        |             |          |         | Tmem169  | 0         | 3.89158  | inf              | 0.001        | 3.89258       | 11.926511        | 0.00438237 | No      |
|      |       |        |             |          |         | Tmem17   | 1.14554   | 6.8632   | 2.58286          | 1.14654      | 6.8642        | 2.5818049        | 0.00161718 | No      |
|      |       |        |             |          |         | Tmem170a | 3.97393   | 5.90296  | 0.570872         | 3.97493      | 5.90396       | 0.57075349       | 0.0406144  | No      |
|      |       |        |             |          |         | Tmem170b | 6.34929   | 2.11577  | -1.58541         | 6.35029      | 2.11677       | -1.584958        | 0.0135258  | No      |
|      |       |        |             |          |         | Tmem173  | 143.436   | 18.2003  | -2.97838         | 143.437      | 18.2013       | -2.9783038       | 0.00014629 | No      |
|      |       |        |             |          |         | Tmem176a | 4.33614   | 41.1023  | 3.24474          | 4.33714      | 41.1033       | 3.24443831       | 0.00014629 | No      |
|      |       |        |             |          |         | Tmem176b | 4.07308   | 75.1327  | 4.20525          | 4.07408      | 75.1337       | 4.20491394       | 0.00014629 | No      |
|      |       |        |             |          |         | Tmem183a | 35.3853   | 80.4335  | 1.18465          | 35.3863      | 80.4345       | 1.18462351       | 0.00014629 | No      |
|      |       |        |             |          |         | Tmem185b | 5.32214   | 9.95654  | 0.903639         | 5.32314      | 9.95754       | 0.90351186       | 0.00102864 | No      |
|      |       |        |             |          |         | Tmem19   | 13.0917   | 8.35192  | -0.648472        | 13.0927      | 8.35292       | -0.6484101       | 0.0208247  | No      |
|      |       |        |             |          |         | Tmem194  | 4.51187   | 0.608452 | -2.89051         | 4.51287      | 0.609452      | -2.8884607       | 0.00014629 | No      |

| RRBS |       |        |             |          |         | RNAseq   |          |         |                  |              |               |                  |            |         |
|------|-------|--------|-------------|----------|---------|----------|----------|---------|------------------|--------------|---------------|------------------|------------|---------|
| gene | Blood | Kidney | methyl.diff | pMWU.fdr | Match ? | gene     | blood    | kidney  | log2(fold_ratio) | blood+ 0.001 | kidney+ 0.001 | log2(fold_ratio) | q_value    | Match ? |
|      |       |        |             |          |         | Tmem194b | 21.1025  | 2.0478  | -3.36527         | 21.1035      | 2.0488        | -3.3646312       | 0.00014629 | No      |
|      |       |        |             |          |         | Tmem2    | 0.135357 | 2.99668 | 4.46852          | 0.136357     | 2.99768       | 4.45838572       | 0.00014629 | No      |
|      |       |        |             |          |         | Tmem201  | 4.14707  | 1.55483 | -1.41533         | 4.14807      | 1.55583       | -1.4147558       | 0.0185598  | No      |
|      |       |        |             |          |         | Tmem204  | 30.6147  | 2.67132 | -3.5186          | 30.6157      | 2.67232       | -3.518107        | 0.0135258  | No      |
|      |       |        |             |          |         | Tmem205  | 3.12443  | 59.037  | 4.23995          | 3.12543      | 59.038        | 4.23951725       | 0.00014629 | No      |
|      |       |        |             |          |         | Tmem206  | 7.50249  | 18.1659 | 1.27579          | 7.50349      | 18.1669       | 1.27567858       | 0.00014629 | No      |
|      |       |        |             |          |         | Tmem207  | 0        | 43.6453 | inf              | 0.001        | 43.6463       | 15.4135717       | 0.00014629 | No      |
|      |       |        |             |          |         | Tmem209  | 23.4554  | 14.4824 | -0.695616        | 23.4564      | 14.4834       | -0.6955813       | 0.00689996 | No      |
|      |       |        |             |          |         | Tmem213  | 0        | 190.615 | inf              | 0.001        | 190.616       | 17.5403097       | 0.00014629 | No      |
|      |       |        |             |          |         | Tmem216  | 6.34094  | 17.6009 | 1.47288          | 6.34194      | 17.6019       | 1.47273503       | 0.00041099 | No      |
|      |       |        |             |          |         | Tmem218  | 6.08581  | 12.6167 | 1.05182          | 6.08681      | 12.6177       | 1.05169072       | 0.00318982 | No      |
|      |       |        |             |          |         | Tmem221  | 0        | 1.92072 | inf              | 0.001        | 1.92172       | 10.9081824       | 0.00014629 | No      |
|      |       |        |             |          |         | Tmem229b | 27.5493  | 1.40517 | -4.2932          | 27.5503      | 1.40617       | -4.2922251       | 0.00014629 | No      |
|      |       |        |             |          |         | Tmem237  | 1.57453  | 9.59317 | 2.60709          | 1.57553      | 9.59417       | 2.60632078       | 0.00014629 | No      |
|      |       |        |             |          |         | Tmem238  | 2.02086  | 35.5097 | 4.13518          | 2.02186      | 35.5107       | 4.13449879       | 0.00014629 | No      |
|      |       |        |             |          |         | Tmem240  | 1.16744  | 0       | -inf             | 1.16844      | 0.001         | -10.190368       | 0.00014629 | No      |
|      |       |        |             |          |         | Tmem243  | 67.3657  | 32.4649 | -1.05314         | 67.3667      | 32.4659       | -1.0531104       | 0.00296747 | No      |
|      |       |        |             |          |         | Tmem245  | 11.485   | 3.11141 | -1.88411         | 11.486       | 3.11241       | -1.8837724       | 0.00014629 | No      |
|      |       |        |             |          |         | Tmem25   | 0.509563 | 15.2282 | 4.90134          | 0.510563     | 15.2292       | 4.89860736       | 0.00014629 | No      |
|      |       |        |             |          |         | Tmem254  | 43.2471  | 18.475  | -1.22703         | 43.2481      | 18.476        | -1.2269843       | 0.00014629 | No      |
|      |       |        |             |          |         | Tmem256  | 30.933   | 176.877 | 2.51552          | 30.934       | 176.878       | 2.51548932       | 0.00014629 | No      |
|      |       |        |             |          |         | Tmem27   | 0        | 274.165 | inf              | 0.001        | 274.166       | 18.0646901       | 0.00014629 | No      |
|      |       |        |             |          |         | Tmem30a  | 40.0952  | 21.4719 | -0.900981        | 40.0962      | 21.4729       | -0.9009485       | 0.00014629 | No      |
|      |       |        |             |          |         | Tmem37   | 0.253445 | 61.4279 | 7.92108          | 0.254445     | 61.4289       | 7.9154199        | 0.0166081  | No      |
|      |       |        |             |          |         | Tmem38a  | 0.911445 | 7.2923  | 3.00015          | 0.912445     | 7.2933        | 2.99876223       | 0.00014629 | No      |
|      |       |        |             |          |         | Tmem38b  | 5.02436  | 11.907  | 1.24479          | 5.02536      | 11.908        | 1.24463227       | 0.00014629 | No      |
|      |       |        |             |          |         | Tmem41a  | 7.18696  | 21.4579 | 1.57806          | 7.18796      | 21.4589       | 1.57792184       | 0.00014629 | No      |
|      |       |        |             |          |         | Tmem42   | 13.6844  | 31.6616 | 1.2102           | 13.6854      | 31.6626       | 1.21014213       | 0.00014629 | No      |
|      |       |        |             |          |         | Tmem43   | 19.9215  | 6.19697 | -1.68469         | 19.9225      | 6.19797       | -1.684531        | 0.00014629 | No      |
|      |       |        |             |          |         | Tmem44   | 0.124157 | 1.17798 | 3.24608          | 0.125157     | 1.17898       | 3.23572836       | 0.0327003  | No      |
|      |       |        |             |          |         | Tmem50a  | 229.369  | 72.0633 | -1.67033         | 229.37       | 72.0643       | -1.6703201       | 0.00014629 | No      |
|      |       |        |             |          |         | Tmem50b  | 2.00359  | 41.4237 | 4.3698           | 2.00459      | 41.4247       | 4.36911215       | 0.00014629 | No      |
|      |       |        |             |          |         | Tmem51   | 0.900412 | 25.8077 | 4.84107          | 0.901412     | 25.8087       | 4.83952701       | 0.00014629 | No      |
|      |       |        |             |          |         | Tmem52   | 0        | 3.88877 | inf              | 0.001        | 3.88977       | 11.9254691       | 0.00823262 | No      |
|      |       |        |             |          |         | Tmem52b  | 0        | 39.8506 | inf              | 0.001        | 39.8516       | 15.28235         | 0.00014629 | No      |
|      |       |        |             |          |         | Tmem53   | 2.4857   | 14.9036 | 2.58393          | 2.4867       | 14.9046       | 2.58345328       | 0.00014629 | No      |
|      |       |        |             |          |         | Tmem54   | 0        | 3.66029 | inf              | 0.001        | 3.66129       | 11.8381363       | 0.00014629 | No      |
|      |       |        |             |          |         | Tmem55a  | 0.275457 | 14.7036 | 5.7382           | 0.276457     | 14.7046       | 5.73306863       | 0.00028114 | No      |
|      |       |        |             |          |         | Tmem57   | 14.3199  | 7.13986 | -1.00405         | 14.3209      | 7.14086       | -1.0039524       | 0.00028114 | No      |
|      |       |        |             |          |         | Tmem60   | 5.02345  | 10.1977 | 1.0215           | 5.02445      | 10.1987       | 1.02134768       | 0.00252712 | No      |
|      |       |        |             |          |         | Tmem62   | 11.4129  | 7.54438 | -0.597192        | 11.4139      | 7.54538       | -0.5971264       | 0.0180197  | No      |
|      |       |        |             |          |         | Tmem64   | 1.86923  | 9.74538 | 2.38227          | 1.87023      | 9.74638       | 2.38165077       | 0.00066215 | No      |



| RRBS |       |        |             |          |         | RNAseq    |            |          |                  |              |               |                  |            |         |
|------|-------|--------|-------------|----------|---------|-----------|------------|----------|------------------|--------------|---------------|------------------|------------|---------|
| gene | Blood | Kidney | methyl.diff | pMWU.fdr | Match ? | gene      | blood      | kidney   | log2(fold_ratio) | blood+ 0.001 | kidney+ 0.001 | log2(fold_ratio) | q_value    | Match ? |
|      |       |        |             |          |         | Tmem65    | 9.32557    | 6.07142  | -0.619159        | 9.32657      | 6.07242       | -0.619075        | 0.0223869  | No      |
|      |       |        |             |          |         | Tmem66    | 112.023    | 34.5451  | -1.69724         | 112.024      | 34.5461       | -1.6972131       | 0.00014629 | No      |
|      |       |        |             |          |         | Tmem67    | 0.224299   | 2.16056  | 3.26791          | 0.225299     | 2.16156       | 3.26216007       | 0.00028114 | No      |
|      |       |        |             |          |         | Tmem68    | 7.87935    | 4.27196  | -0.883181        | 7.88035      | 4.27296       | -0.8830239       | 0.00576532 | No      |
|      |       |        |             |          |         | Tmem70    | 6.24222    | 30.5514  | 2.29111          | 6.24322      | 30.5524       | 2.2909235        | 0.00014629 | No      |
|      |       |        |             |          |         | Tmem71    | 77.2382    | 1.6886   | -5.51541         | 77.2392      | 1.6896        | -5.5145796       | 0.00014629 | No      |
|      |       |        |             |          |         | Tmem72    | 0          | 32.9927  | inf              | 0.001        | 32.9937       | 15.009903        | 0.00014629 | No      |
|      |       |        |             |          |         | Tmem79    | 0.185563   | 15.2585  | 6.36156          | 0.186563     | 15.2595       | 6.35390099       | 0.00014629 | No      |
|      |       |        |             |          |         | Tmem86a   | 0.375211   | 34.6399  | 6.52859          | 0.376211     | 34.6409       | 6.52479057       | 0.00028114 | No      |
|      |       |        |             |          |         | Tmem86b   | 7.87304    | 2.04144  | -1.94734         | 7.87404      | 2.04244       | -1.9468103       | 0.0172634  | No      |
|      |       |        |             |          |         | Tmem87a   | 58.6588    | 17.9215  | -1.71066         | 58.6598      | 17.9225       | -1.7106003       | 0.00014629 | No      |
|      |       |        |             |          |         | Tmem87b   | 17.2169    | 10.3193  | -0.738487        | 17.2179      | 10.3203       | -0.7384243       | 0.00014629 | No      |
|      |       |        |             |          |         | TMEM9     | 17.3122    | 24.6661  | 0.510744         | 17.3132      | 24.6671       | 0.51071571       | 0.0403386  | No      |
|      |       |        |             |          |         | Tmem97    | 4.1347     | 7.51262  | 0.861532         | 4.1357       | 7.51362       | 0.86137662       | 0.0287968  | No      |
|      |       |        |             |          |         | Tmf1      | 21.3695    | 9.1008   | -1.23148         | 21.3705      | 9.1018        | -1.2313969       | 0.00014629 | No      |
|      |       |        |             |          |         | Tmlhe     | 8.88883    | 81.1656  | 3.1908           | 8.88983      | 81.1666       | 3.19065845       | 0.00014629 | No      |
|      |       |        |             |          |         | Tmod3     | 56.0844    | 15.4071  | -1.864           | 56.0854      | 15.4081       | -1.8639363       | 0.00014629 | No      |
|      |       |        |             |          |         | Tmpo      | 49.1479    | 19.428   | -1.33899         | 49.1489      | 19.429        | -1.3389475       | 0.00014629 | No      |
|      |       |        |             |          |         | Tmprss13  | 0          | 14.0424  | inf              | 0.001        | 14.0434       | 13.7776046       | 0.00014629 | No      |
|      |       |        |             |          |         | Tmsb10    | 9057.32    | 768.165  | -3.5596          | 9057.321     | 768.166       | -3.5595944       | 0.00014629 | No      |
|      |       |        |             |          |         | Tmsbl1    | 75.128     | 1.82011  | -5.36725         | 75.129       | 1.82111       | -5.3664799       | 0.00014629 | No      |
|      |       |        |             |          |         | Tmtc1     | 0.00135444 | 5.62538  | 12.02            | 0.00235444   | 5.62638       | 11.2226073       | 0.02588    | No      |
|      |       |        |             |          |         | Tmtc4     | 1.92944    | 6.232    | 1.69151          | 1.93044      | 6.233         | 1.690997         | 0.00014629 | No      |
|      |       |        |             |          |         | Tmx1      | 27.053     | 13.0635  | -1.05024         | 27.054       | 13.0645       | -1.05019         | 0.00014629 | No      |
|      |       |        |             |          |         | Tmx3      | 11.838     | 5.39736  | -1.1331          | 11.839       | 5.39836       | -1.1329541       | 0.00014629 | No      |
|      |       |        |             |          |         | Tnfaip1   | 6.45614    | 28.8015  | 2.1574           | 6.45714      | 28.8025       | 2.15722683       | 0.00014629 | No      |
|      |       |        |             |          |         | Tnfaip2   | 0.0825208  | 16.2972  | 7.62565          | 0.0835208    | 16.2982       | 7.60836139       | 0.00014629 | No      |
|      |       |        |             |          |         | Tnfaip3   | 71.0038    | 9.34737  | -2.92526         | 71.0048      | 9.34837       | -2.9251298       | 0.00014629 | No      |
|      |       |        |             |          |         | Tnfaip8l1 | 17.6005    | 1.78639  | -3.3005          | 17.6015      | 1.78739       | -3.299772        | 0.0247814  | No      |
|      |       |        |             |          |         | Tnfaip8l2 | 75.7236    | 11.0842  | -2.77224         | 75.7246      | 11.0852       | -2.7721273       | 0.00053701 | No      |
|      |       |        |             |          |         | Tnfrsf14  | 533.049    | 51.3592  | -3.37557         | 533.05       | 51.3602       | -3.3755481       | 0.00014629 | No      |
|      |       |        |             |          |         | TNFRSF18  | 34.0544    | 3.00439  | -3.50269         | 34.0554      | 3.00539       | -3.5022595       | 0.00263402 | No      |
|      |       |        |             |          |         | Tnfrsf1a  | 6.97353    | 18.5824  | 1.41397          | 6.97453      | 18.5834       | 1.41384657       | 0.00014629 | No      |
|      |       |        |             |          |         | Tnfrsf1b  | 22.7294    | 2.26997  | -3.32382         | 22.7304      | 2.27097       | -3.3232425       | 0.00014629 | No      |
|      |       |        |             |          |         | Tnfrsf21  | 2.32255    | 48.3021  | 4.3783           | 2.32355      | 48.3031       | 4.37771319       | 0.00014629 | No      |
|      |       |        |             |          |         | Tnfrsf26  | 124.524    | 4.73494  | -4.71694         | 124.525      | 4.73594       | -4.7166408       | 0.00014629 | No      |
|      |       |        |             |          |         | Tnfsf13   | 0.679814   | 43.4306  | 5.99743          | 0.680814     | 43.4316       | 5.99534059       | 0.00014629 | No      |
|      |       |        |             |          |         | Tnik      | 9.44808    | 0.736926 | -3.68043         | 9.44908      | 0.737926      | -3.6786258       | 0.00014629 | No      |
|      |       |        |             |          |         | Tnip1     | 68.8341    | 30.7474  | -1.16266         | 68.8351      | 30.7484       | -1.1626331       | 0.00014629 | No      |
|      |       |        |             |          |         | Tnks      | 11.1674    | 6.36955  | -0.810036        | 11.1684      | 6.37055       | -0.8099327       | 0.00014629 | No      |
|      |       |        |             |          |         | Tnks1bp1  | 2.91799    | 7.87608  | 1.4325           | 2.91899      | 7.87708       | 1.43219166       | 0.00014629 | No      |
|      |       |        |             |          |         | Tnks2     | 14.0907    | 5.28653  | -1.41435         | 14.0917      | 5.28753       | -1.4141798       | 0.00014629 | No      |

| RRBS |       |        |             |          |         | RNAseq   |           |         |                  |              |               |                  |            |         |
|------|-------|--------|-------------|----------|---------|----------|-----------|---------|------------------|--------------|---------------|------------------|------------|---------|
| gene | Blood | Kidney | methyl.diff | pMWU.fdr | Match ? | gene     | blood     | kidney  | log2(fold_ratio) | blood+ 0.001 | kidney+ 0.001 | log2(fold_ratio) | q_value    | Match ? |
|      |       |        |             |          |         | Tnni3k   | 0.0598775 | 2.43183 | 5.34389          | 0.0608775    | 2.43283       | 5.32058259       | 0.0100448  | No      |
|      |       |        |             |          |         | Tnnt2    | 0.12769   | 9.05394 | 6.14783          | 0.12869      | 9.05494       | 6.13673322       | 0.00904412 | No      |
|      |       |        |             |          |         | Tnnt3    | 35.3419   | 20.7202 | -0.770339        | 35.3429      | 20.7212       | -0.7703129       | 0.00934853 | No      |
|      |       |        |             |          |         | Tnpo1    | 27.0228   | 8.21198 | -1.71838         | 27.0238      | 8.21298       | -1.7182529       | 0.00014629 | No      |
|      |       |        |             |          |         | Tnpo3    | 12.5966   | 17.1706 | 0.446907         | 12.5976      | 17.1716       | 0.44687556       | 0.0393825  | No      |
|      |       |        |             |          |         | Tnrc6a   | 27.7811   | 10.1791 | -1.44849         | 27.7821      | 10.1801       | -1.4484039       | 0.00014629 | No      |
|      |       |        |             |          |         | Tnrc6b   | 18.9938   | 2.79635 | -2.76391         | 18.9948      | 2.79735       | -2.7634718       | 0.00014629 | No      |
|      |       |        |             |          |         | Tnrc6c   | 25.0361   | 11.0147 | -1.18458         | 25.0371      | 11.0157       | -1.1845063       | 0.00028114 | No      |
|      |       |        |             |          |         | Tns1     | 0.111427  | 103.079 | 9.85343          | 0.112427     | 103.08        | 9.84056018       | 0.00014629 | No      |
|      |       |        |             |          |         | Tns3     | 0.110351  | 31.0704 | 8.1373           | 0.111351     | 31.0714       | 8.12432892       | 0.00014629 | No      |
|      |       |        |             |          |         | Tns4     | 0         | 1.73849 | inf              | 0.001        | 1.73949       | 10.7644487       | 0.00014629 | No      |
|      |       |        |             |          |         | Tob1     | 16.4709   | 43.8371 | 1.41223          | 16.4719      | 43.8381       | 1.41217829       | 0.00014629 | No      |
|      |       |        |             |          |         | Toe1     | 20.9332   | 9.59486 | -1.12546         | 20.9342      | 9.59586       | -1.1253778       | 0.00184429 | No      |
|      |       |        |             |          |         | Tollip   | 9.40725   | 20.2668 | 1.10727          | 9.40825      | 20.2678       | 1.1071912        | 0.00014629 | No      |
|      |       |        |             |          |         | Tom1     | 10.3465   | 54.9346 | 2.40858          | 10.3475      | 54.9356       | 2.40845912       | 0.00014629 | No      |
|      |       |        |             |          |         | Tom1l1   | 2.58276   | 12.0419 | 2.22108          | 2.58376      | 12.0429       | 2.22063887       | 0.00090728 | No      |
|      |       |        |             |          |         | Tom1l2   | 14.8933   | 30.9244 | 1.05408          | 14.8943      | 30.9254       | 1.05403193       | 0.00014629 | No      |
|      |       |        |             |          |         | Tomm34   | 43.5254   | 18.7021 | -1.21866         | 43.5264      | 18.7031       | -1.2186133       | 0.00014629 | No      |
|      |       |        |             |          |         | Tomm40   | 21.9881   | 37.886  | 0.78494          | 21.9891      | 37.887        | 0.78491435       | 0.00078603 | No      |
|      |       |        |             |          |         | Tomm40l  | 5.68629   | 12.1135 | 1.09106          | 5.68729      | 12.1145       | 1.09092159       | 0.00405996 | No      |
|      |       |        |             |          |         | Tomm6    | 122.698   | 420.74  | 1.77781          | 122.699      | 420.741       | 1.77780892       | 0.00173187 | No      |
|      |       |        |             |          |         | Tonsl    | 48.1488   | 121.638 | 1.33703          | 48.1498      | 121.639       | 1.33700415       | 0.00014629 | No      |
|      |       |        |             |          |         | Top2b    | 18.7712   | 2.38836 | -2.97443         | 18.7722      | 2.38936       | -2.9739016       | 0.00014629 | No      |
|      |       |        |             |          |         | Top3a    | 8.77398   | 2.23089 | -1.97561         | 8.77498      | 2.23189       | -1.9751299       | 0.00014629 | No      |
|      |       |        |             |          |         | Topaz1   | 0         | 50.2722 | inf              | 0.001        | 50.2732       | 15.6175019       | 0.00014629 | No      |
|      |       |        |             |          |         | Topbp1   | 17.7356   | 2.61832 | -2.75994         | 17.7366      | 2.61932       | -2.7594653       | 0.00014629 | No      |
|      |       |        |             |          |         | Topors   | 16.6777   | 11.4116 | -0.547413        | 16.6787      | 11.4126       | -0.5473793       | 0.0387854  | No      |
|      |       |        |             |          |         | Tor1aip2 | 29.492    | 18.4616 | -0.675797        | 29.493       | 18.4626       | -0.6757668       | 0.0170801  | No      |
|      |       |        |             |          |         | Tor3a    | 1.84255   | 26.0118 | 3.81939          | 1.84355      | 26.0128       | 3.81866325       | 0.00114835 | No      |
|      |       |        |             |          |         | Tor4a    | 15.1391   | 2.39395 | -2.66082         | 15.1401      | 2.39495       | -2.6603073       | 0.00014629 | No      |
|      |       |        |             |          |         | Tox      | 20.7711   | 3.11152 | -2.73889         | 20.7721      | 3.11252       | -2.7384921       | 0.00014629 | No      |
|      |       |        |             |          |         | Tox4     | 36.9092   | 12.9622 | -1.50967         | 36.9102      | 12.9632       | -1.5095977       | 0.00341151 | No      |
|      |       |        |             |          |         | Tp53     | 172.711   | 63.5594 | -1.44218         | 172.712      | 63.5604       | -1.4421682       | 0.00014629 | No      |
|      |       |        |             |          |         | Tp53bp2  | 6.76146   | 13.7417 | 1.02315          | 6.76246      | 13.7427       | 1.02304541       | 0.00014629 | No      |
|      |       |        |             |          |         | Tp53i13  | 6.92209   | 14.8132 | 1.09761          | 6.92309      | 14.8142       | 1.09749271       | 0.00066215 | No      |
|      |       |        |             |          |         | Tp53inp1 | 34.7437   | 7.64897 | -2.18341         | 34.7447      | 7.64997       | -2.1832669       | 0.00014629 | No      |
|      |       |        |             |          |         | TP53INP2 | 0.639763  | 43.4536 | 6.08579          | 0.640763     | 43.4546       | 6.08357425       | 0.00014629 | No      |
|      |       |        |             |          |         | Tpcn1    | 17.7969   | 128.375 | 2.85067          | 17.7979      | 128.376       | 2.85059658       | 0.00014629 | No      |
|      |       |        |             |          |         | Tpd52    | 0.489732  | 49.9808 | 6.67324          | 0.490732     | 49.9818       | 6.6703237        | 0.00014629 | No      |
|      |       |        |             |          |         | Tpd52l1  | 0.0889839 | 9.07437 | 6.67211          | 0.0899839    | 9.07537       | 6.65614576       | 0.00230432 | No      |
|      |       |        |             |          |         | Tpgs1    | 10.1509   | 30.2739 | 1.57647          | 10.1519      | 30.2749       | 1.57637243       | 0.00014629 | No      |
|      |       |        |             |          |         | Tpgs2    | 20.287    | 9.88535 | -1.03719         | 20.288       | 9.88635       | -1.0371168       | 0.00014629 | No      |

| RRBS |       |        |             |          |         | RNAseq   |          |          |                  |              |               |                  |            |         |
|------|-------|--------|-------------|----------|---------|----------|----------|----------|------------------|--------------|---------------|------------------|------------|---------|
| gene | Blood | Kidney | methyl.diff | pMWU.fdr | Match ? | gene     | blood    | kidney   | log2(fold_ratio) | blood+ 0.001 | kidney+ 0.001 | log2(fold_ratio) | q_value    | Match ? |
|      |       |        |             |          |         | Tpi1     | 13.9045  | 247.409  | 4.15327          | 13.9055      | 247.41        | 4.15317629       | 0.00014629 | No      |
|      |       |        |             |          |         | Tpk1     | 1.34238  | 7.5372   | 2.48923          | 1.34338      | 7.5382        | 2.48835262       | 0.00014629 | No      |
|      |       |        |             |          |         | TPM1     | 10.3785  | 167.819  | 4.01524          | 10.3795      | 167.82        | 4.01510581       | 0.00014629 | No      |
|      |       |        |             |          |         | Tpm3     | 379.945  | 105.072  | -1.85441         | 379.946      | 105.073       | -1.8544024       | 0.00014629 | No      |
|      |       |        |             |          |         | Tpm4     | 129.656  | 86.9783  | -0.575966        | 129.657      | 86.9793       | -0.5759561       | 0.00761239 | No      |
|      |       |        |             |          |         | Tpmt     | 114.27   | 56.1656  | -1.02468         | 114.271      | 56.1666       | -1.0246749       | 0.00014629 | No      |
|      |       |        |             |          |         | Tpp1     | 20.0129  | 31.2962  | 0.645058         | 20.0139      | 31.2972       | 0.64503127       | 0.00513162 | No      |
|      |       |        |             |          |         | Tpp2     | 36.0012  | 17.0061  | -1.082           | 36.0022      | 17.0071       | -1.0819479       | 0.00014629 | No      |
|      |       |        |             |          |         | Tpr      | 54.4407  | 11.933   | -2.18973         | 54.4417      | 11.934        | -2.1896344       | 0.00014629 | No      |
|      |       |        |             |          |         | Tpra1    | 23.0857  | 61.0315  | 1.40255          | 23.0867      | 61.0325       | 1.40251572       | 0.00014629 | No      |
|      |       |        |             |          |         | TPRG1L   | 120.437  | 77.5739  | -0.634633        | 120.438      | 77.5749       | -0.6346288       | 0.00090728 | No      |
|      |       |        |             |          |         | Tpst2    | 65.699   | 35.5627  | -0.885508        | 65.7         | 35.5637       | -0.8854879       | 0.00014629 | No      |
|      |       |        |             |          |         | Tra2a    | 99.2551  | 40.4625  | -1.29455         | 99.2561      | 40.4635       | -1.2945347       | 0.00014629 | No      |
|      |       |        |             |          |         | Tra2b    | 186.492  | 48.3193  | -1.94845         | 186.493      | 48.3203       | -1.9484202       | 0.00014629 | No      |
|      |       |        |             |          |         | Trabd    | 22.8812  | 40.1172  | 0.810057         | 22.8822      | 40.1182       | 0.81003111       | 0.0376711  | No      |
|      |       |        |             |          |         | Trac     | 936.888  | 74.2517  | -3.65738         | 936.889      | 74.2527       | -3.6573627       | 0.00014629 | No      |
|      |       |        |             |          |         | Traf1    | 4.92094  | 2.33068  | -1.07818         | 4.92194      | 2.33168       | -1.0778573       | 0.0182953  | No      |
|      |       |        |             |          |         | Traf2    | 32.6934  | 23.7117  | -0.463398        | 32.6944      | 23.7127       | -0.4633836       | 0.0472473  | No      |
|      |       |        |             |          |         | Traf3    | 15.4383  | 8.22214  | -0.90893         | 15.4393      | 8.22314       | -0.908846        | 0.00230432 | No      |
|      |       |        |             |          |         | Traf3ip2 | 31.3485  | 75.1079  | 1.26057          | 31.3495      | 75.1089       | 1.26054144       | 0.0133356  | No      |
|      |       |        |             |          |         | Traf3ip3 | 204.295  | 22.6663  | -3.17204         | 204.296      | 22.6673       | -3.1719765       | 0.00053701 | No      |
|      |       |        |             |          |         | Traf4    | 12.4976  | 58.1314  | 2.21767          | 12.4986      | 58.1324       | 2.21757597       | 0.00014629 | No      |
|      |       |        |             |          |         | Traf6    | 11.7238  | 1.98374  | -2.56315         | 11.7248      | 1.98474       | -2.5625414       | 0.00014629 | No      |
|      |       |        |             |          |         | Traf7    | 32.7489  | 23.6398  | -0.470227        | 32.7499      | 23.6408       | -0.4702116       | 0.0310191  | No      |
|      |       |        |             |          |         | Trak1    | 8.09411  | 29.3613  | 1.85897          | 8.09511      | 29.3623       | 1.85884239       | 0.00014629 | No      |
|      |       |        |             |          |         | Tram1    | 100.101  | 34.2093  | -1.54899         | 100.102      | 34.2103       | -1.5489681       | 0.00014629 | No      |
|      |       |        |             |          |         | Trap1    | 25.279   | 41.6287  | 0.719641         | 25.28        | 41.6297       | 0.7196167        | 0.00090728 | No      |
|      |       |        |             |          |         | Trappc1  | 30.3557  | 119.177  | 1.97307          | 30.3567      | 119.178       | 1.97303107       | 0.00014629 | No      |
|      |       |        |             |          |         | Trappc10 | 14.5374  | 7.05245  | -1.04357         | 14.5384      | 7.05345       | -1.0434675       | 0.00014629 | No      |
|      |       |        |             |          |         | TRAPPC2  | 6.97467  | 37.512   | 2.42716          | 6.97567      | 37.513        | 2.42698695       | 0.00014629 | No      |
|      |       |        |             |          |         | Trappc2l | 28.7172  | 95.4271  | 1.73248          | 28.7182      | 95.4281       | 1.73244882       | 0.00014629 | No      |
|      |       |        |             |          |         | Trappc3  | 25.8186  | 39.8985  | 0.627922         | 25.8196      | 39.8995       | 0.62790402       | 0.00629035 | No      |
|      |       |        |             |          |         | Trappc6b | 23.1221  | 35.1898  | 0.605886         | 23.1231      | 35.1908       | 0.60586349       | 0.0470633  | No      |
|      |       |        |             |          |         | Trappc8  | 13.4975  | 7.63015  | -0.822911        | 13.4985      | 7.63115       | -0.8228267       | 0.00028114 | No      |
|      |       |        |             |          |         | Trappc9  | 16.606   | 7.79294  | -1.09147         | 16.607       | 7.79394       | -1.0913667       | 0.00014629 | No      |
|      |       |        |             |          |         | Trat1    | 61.5191  | 0.962476 | -5.99814         | 61.5201      | 0.963476      | -5.9966653       | 0.00014629 | No      |
|      |       |        |             |          |         | Trav4-2  | 4.54423  | 0        | -inf             | 4.54523      | 0.001         | -12.150138       | 0.00014629 | No      |
|      |       |        |             |          |         | Trav5-4  | 2.67536  | 0        | -inf             | 2.67636      | 0.001         | -11.386056       | 0.00459197 | No      |
|      |       |        |             |          |         | Trav7-2  | 4.61799  | 0        | -inf             | 4.61899      | 0.001         | -12.173362       | 0.00014629 | No      |
|      |       |        |             |          |         | Trdmt1   | 8.00609  | 3.70251  | -1.1126          | 8.00709      | 3.70351       | -1.1123848       | 0.00114835 | No      |
|      |       |        |             |          |         | Trem3    | 0.166282 | 1.99613  | 3.5855           | 0.167282     | 1.99713       | 3.57757412       | 0.0357927  | No      |
|      |       |        |             |          |         | Trem12   | 63.9086  | 0.849728 | -6.23286         | 63.9096      | 0.850728      | -6.2311909       | 0.00014629 | No      |

| RRBS |       |        |             |          |         | RNAseq   |          |         |                  |              |               |                  |            |         |
|------|-------|--------|-------------|----------|---------|----------|----------|---------|------------------|--------------|---------------|------------------|------------|---------|
| gene | Blood | Kidney | methyl.diff | pMWU.fdr | Match ? | gene     | blood    | kidney  | log2(fold_ratio) | blood+ 0.001 | kidney+ 0.001 | log2(fold_ratio) | q_value    | Match ? |
|      |       |        |             |          |         | Trerf1   | 11.7856  | 3.03185 | -1.95876         | 11.7866      | 3.03285       | -1.9584016       | 0.00014629 | No      |
|      |       |        |             |          |         | Triap1   | 17.8763  | 40.1355 | 1.16683          | 17.8773      | 40.1365       | 1.16678595       | 0.00014629 | No      |
|      |       |        |             |          |         | Trib1    | 0.623417 | 7.16799 | 3.5233           | 0.624417     | 7.16899       | 3.52118816       | 0.00014629 | No      |
|      |       |        |             |          |         | Trib2    | 94.5456  | 12.9844 | -2.86423         | 94.5466      | 12.9854       | -2.8641351       | 0.00014629 | No      |
|      |       |        |             |          |         | Tril     | 0        | 13.7053 | inf              | 0.001        | 13.7063       | 13.7425515       | 0.00014629 | No      |
|      |       |        |             |          |         | Trim11   | 11.2213  | 23.8411 | 1.08721          | 11.2223      | 23.8421       | 1.08714293       | 0.00014629 | No      |
|      |       |        |             |          |         | Trim14   | 28.8579  | 3.31328 | -3.12264         | 28.8589      | 3.31428       | -3.1222489       | 0.00014629 | No      |
|      |       |        |             |          |         | Trim21   | 34.3987  | 7.65814 | -2.16729         | 34.3997      | 7.65914       | -2.1671417       | 0.00014629 | No      |
|      |       |        |             |          |         | Trim24   | 18.3939  | 10.9356 | -0.750191        | 18.3949      | 10.9366       | -0.7501415       | 0.0101499  | No      |
|      |       |        |             |          |         | Trim25   | 16.76    | 6.48678 | -1.36945         | 16.761       | 6.48778       | -1.3693114       | 0.00161718 | No      |
|      |       |        |             |          |         | Trim26   | 12.0262  | 8.1929  | -0.553739        | 12.0272      | 8.1939        | -0.5536786       | 0.0232282  | No      |
|      |       |        |             |          |         | TRIM27   | 41.217   | 29.8672 | -0.464676        | 41.218       | 29.8682       | -0.4646642       | 0.0446219  | No      |
|      |       |        |             |          |         | Trim28   | 85.4015  | 60.3016 | -0.502066        | 85.4025      | 60.3026       | -0.5020581       | 0.00934853 | No      |
|      |       |        |             |          |         | Trim29   | 0        | 7.68129 | inf              | 0.001        | 7.68229       | 12.9073207       | 0.00014629 | No      |
|      |       |        |             |          |         | Trim3    | 6.19661  | 21.6623 | 1.80564          | 6.19761      | 21.6633       | 1.80546915       | 0.00014629 | No      |
|      |       |        |             |          |         | Trim32   | 4.20232  | 9.21276 | 1.13245          | 4.20332      | 9.21376       | 1.13226073       | 0.00014629 | No      |
|      |       |        |             |          |         | Trim33   | 26.0682  | 3.8059  | -2.77598         | 26.0692      | 3.8069        | -2.7756577       | 0.00014629 | No      |
|      |       |        |             |          |         | Trim34   | 43.2858  | 6.59886 | -2.7136          | 43.2868      | 6.59986       | -2.7134198       | 0.00014629 | No      |
|      |       |        |             |          |         | Trim35   | 35.974   | 64.9444 | 0.85225          | 35.975       | 64.9454       | 0.85223266       | 0.00014629 | No      |
|      |       |        |             |          |         | Trim37   | 16.976   | 8.66053 | -0.970971        | 16.977       | 8.66153       | -0.9708877       | 0.00792329 | No      |
|      |       |        |             |          |         | Trim44   | 21.1535  | 37.5232 | 0.826887         | 21.1545      | 37.5242       | 0.82685673       | 0.0103501  | No      |
|      |       |        |             |          |         | Trim45   | 3.05109  | 9.2368  | 1.59807          | 3.05209      | 9.2378        | 1.59775181       | 0.00874754 | No      |
|      |       |        |             |          |         | Trim46   | 1.37431  | 5.33313 | 1.95627          | 1.37531      | 5.33413       | 1.95549614       | 0.00014629 | No      |
|      |       |        |             |          |         | Trim5    | 171.329  | 16.8339 | -3.34733         | 171.33       | 16.8349       | -3.3472507       | 0.00014629 | No      |
|      |       |        |             |          |         | Trim59   | 23.5883  | 4.07239 | -2.53413         | 23.5893      | 4.07339       | -2.5338308       | 0.0141124  | No      |
|      |       |        |             |          |         | Trip10   | 10.3051  | 88.7095 | 3.10573          | 10.3061      | 88.7105       | 3.10560638       | 0.00014629 | No      |
|      |       |        |             |          |         | Trip12   | 38.4698  | 23.5095 | -0.710481        | 38.4708      | 23.5105       | -0.7104586       | 0.00078603 | No      |
|      |       |        |             |          |         | Triqk    | 0        | 3.51155 | inf              | 0.001        | 3.51255       | 11.778303        | 0.00014629 | No      |
|      |       |        |             |          |         | Trit1    | 23.2856  | 36.2208 | 0.637379         | 23.2866      | 36.2218       | 0.63735823       | 0.031196   | No      |
|      |       |        |             |          |         | Trmt1    | 42.0461  | 59.6353 | 0.504194         | 42.0471      | 59.6363       | 0.50418445       | 0.0288879  | No      |
|      |       |        |             |          |         | Trmt11   | 9.15755  | 3.87036 | -1.24249         | 9.15855      | 3.87136       | -1.2422787       | 0.00041099 | No      |
|      |       |        |             |          |         | Trmt12   | 1.52536  | 3.99128 | 1.3877           | 1.52636      | 3.99228       | 1.38711764       | 0.0147863  | No      |
|      |       |        |             |          |         | Trmt13   | 15.9103  | 2.99076 | -2.41138         | 15.9113      | 2.99176       | -2.4109854       | 0.00028114 | No      |
|      |       |        |             |          |         | Trmt2a   | 25.754   | 40.0541 | 0.637153         | 25.755       | 40.0551       | 0.6371334        | 0.0077167  | No      |
|      |       |        |             |          |         | Trmt5    | 11.6855  | 5.10686 | -1.19422         | 11.6865      | 5.10786       | -1.194052        | 0.0161245  | No      |
|      |       |        |             |          |         | Trmt6    | 15.2955  | 6.19288 | -1.30442         | 15.2965      | 6.19388       | -1.3042862       | 0.00014629 | No      |
|      |       |        |             |          |         | Trmu     | 11.5364  | 21.8066 | 0.918575         | 11.5374      | 21.8076       | 0.91851286       | 0.00252712 | No      |
|      |       |        |             |          |         | Trnau1ap | 48.7864  | 77.5721 | 0.66906          | 48.7874      | 77.5731       | 0.66904786       | 0.00586782 | No      |
|      |       |        |             |          |         | Troap    | 0.161235 | 2.23371 | 3.79221          | 0.162235     | 2.23471       | 3.78393062       | 0.0163221  | No      |
|      |       |        |             |          |         | Trpc1    | 0.220215 | 3.38139 | 3.94063          | 0.221215     | 3.38239       | 3.9345219        | 0.00014629 | No      |
|      |       |        |             |          |         | Trpm1    | 0        | 4.31062 | inf              | 0.001        | 4.31162       | 12.0740143       | 0.00014629 | No      |
|      |       |        |             |          |         | TRPM6    | 26.0517  | 10.0053 | -1.38062         | 26.0527      | 10.0063       | -1.3805243       | 0.020066   | No      |

| RRBS |       |        |             |          |         | RNAseq  |           |          |                  |              |               |                  |            |         |
|------|-------|--------|-------------|----------|---------|---------|-----------|----------|------------------|--------------|---------------|------------------|------------|---------|
| gene | Blood | Kidney | methyl.diff | pMWU.fdr | Match ? | gene    | blood     | kidney   | log2(fold_ratio) | blood+ 0.001 | kidney+ 0.001 | log2(fold_ratio) | q_value    | Match ? |
|      |       |        |             |          |         | Trpm7   | 42.8641   | 12.2851  | -1.80286         | 42.8651      | 12.2861       | -1.8027765       | 0.00014629 | No      |
|      |       |        |             |          |         | Trpv1   | 1.00813   | 54.7308  | 5.7626           | 1.00913      | 54.7318       | 5.76119536       | 0.00014629 | No      |
|      |       |        |             |          |         | Trpv2   | 11.1523   | 1.20009  | -3.21614         | 11.1533      | 1.20109       | -3.2150545       | 0.00014629 | No      |
|      |       |        |             |          |         | Trpv3   | 3.96602   | 0.316387 | -3.64793         | 3.96702      | 0.317387      | -3.6437407       | 0.0326142  | No      |
|      |       |        |             |          |         | Trpv4   | 0         | 53.4698  | inf              | 0.001        | 53.4708       | 15.7064636       | 0.00014629 | No      |
|      |       |        |             |          |         | Trpv6   | 1.72626   | 0.162861 | -3.40594         | 1.72726      | 0.163861      | -3.3979408       | 0.0247814  | No      |
|      |       |        |             |          |         | Trrap   | 46.7709   | 22.6894  | -1.04359         | 46.7719      | 22.6904       | -1.04356         | 0.0148843  | No      |
|      |       |        |             |          |         | Tsc1    | 11.3513   | 5.9824   | -0.924069        | 11.3523      | 5.9834        | -0.9239472       | 0.00014629 | No      |
|      |       |        |             |          |         | Tsc2    | 15.0182   | 36.6385  | 1.28665          | 15.0192      | 36.6395       | 1.28659185       | 0.00102864 | No      |
|      |       |        |             |          |         | Tsc22d1 | 28.9804   | 415.836  | 3.84287          | 28.9814      | 415.837       | 3.84281894       | 0.00014629 | No      |
|      |       |        |             |          |         | Tsc22d2 | 6.3146    | 3.32018  | -0.927429        | 6.3156       | 3.32118       | -0.9272239       | 0.00114835 | No      |
|      |       |        |             |          |         | Tsc22d3 | 430.452   | 77.6547  | -2.47071         | 430.453      | 77.6557       | -2.470692        | 0.00014629 | No      |
|      |       |        |             |          |         | TSC22D4 | 57.842    | 28.7188  | -1.01012         | 57.843       | 28.7198       | -1.0100967       | 0.00533979 | No      |
|      |       |        |             |          |         | Tsen15  | 5.98819   | 34.6196  | 2.5314           | 5.98919      | 34.6206       | 2.53119792       | 0.00014629 | No      |
|      |       |        |             |          |         | Tsfm    | 12.6051   | 25.6921  | 1.02731          | 12.6061      | 25.6931       | 1.02725896       | 0.0134314  | No      |
|      |       |        |             |          |         | Tsg101  | 32.0768   | 72.3708  | 1.17388          | 32.0778      | 72.3718       | 1.17385245       | 0.00014629 | No      |
|      |       |        |             |          |         | Tsn     | 33.323    | 15.392   | -1.11433         | 33.324       | 15.393        | -1.1142872       | 0.00014629 | No      |
|      |       |        |             |          |         | Tspan12 | 0.260768  | 24.0334  | 6.52613          | 0.261768     | 24.0344       | 6.52066823       | 0.00014629 | No      |
|      |       |        |             |          |         | Tspan13 | 94.6898   | 27.948   | -1.76047         | 94.6908      | 27.949        | -1.7604276       | 0.00014629 | No      |
|      |       |        |             |          |         | Tspan14 | 33.9828   | 6.87264  | -2.30587         | 33.9838      | 6.87364       | -2.305701        | 0.00014629 | No      |
|      |       |        |             |          |         | Tspan18 | 0.0464706 | 8.53711  | 7.52129          | 0.0474706    | 8.53811       | 7.49073865       | 0.00014629 | No      |
|      |       |        |             |          |         | Tspan3  | 13.0875   | 63.0916  | 2.26926          | 13.0885      | 63.0926       | 2.26917104       | 0.00014629 | No      |
|      |       |        |             |          |         | Tspan31 | 2.12244   | 26.2116  | 3.62641          | 2.12344      | 26.2126       | 3.62578521       | 0.00028114 | No      |
|      |       |        |             |          |         | Tspan32 | 133.811   | 2.57817  | -5.69771         | 133.812      | 2.57917       | -5.6971568       | 0.00014629 | No      |
|      |       |        |             |          |         | Tspan4  | 0.268042  | 6.90132  | 4.68634          | 0.269042     | 6.90232       | 4.68117805       | 0.00090728 | No      |
|      |       |        |             |          |         | Tspan5  | 1.42411   | 35.9981  | 4.65979          | 1.42511      | 35.9991       | 4.65881565       | 0.00014629 | No      |
|      |       |        |             |          |         | Tspan6  | 0.400322  | 16.2558  | 5.34365          | 0.401322     | 16.2568       | 5.34013925       | 0.00028114 | No      |
|      |       |        |             |          |         | Tspan7  | 0         | 33.4489  | inf              | 0.001        | 33.4499       | 15.0297143       | 0.00014629 | No      |
|      |       |        |             |          |         | Tspyl1  | 25.7543   | 18.3535  | -0.488762        | 25.7553      | 18.3545       | -0.4887355       | 0.026232   | No      |
|      |       |        |             |          |         | Tspyl2  | 25.9554   | 9.95484  | -1.38257         | 25.9564      | 9.95584       | -1.3824754       | 0.00014629 | No      |
|      |       |        |             |          |         | Tsr2    | 5.22794   | 3.02807  | -0.787843        | 5.22894      | 3.02907       | -0.7876436       | 0.00994441 | No      |
|      |       |        |             |          |         | Tssc1   | 31.2058   | 16.7466  | -0.897945        | 31.2068      | 16.7476       | -0.8979061       | 0.00459197 | No      |
|      |       |        |             |          |         | Tsx     | 1.37378   | 12.4214  | 3.1766           | 1.37478      | 12.4224       | 3.17567125       | 0.00053701 | No      |
|      |       |        |             |          |         | Ttbk2   | 1.89748   | 1.13003  | -0.747727        | 1.89848      | 1.13103       | -0.7472076       | 0.0333784  | No      |
|      |       |        |             |          |         | Ttc13   | 18.4923   | 9.75924  | -0.922085        | 18.4933      | 9.76024       | -0.9220142       | 0.00014629 | No      |
|      |       |        |             |          |         | Ttc14   | 20.574    | 5.40064  | -1.92962         | 20.575       | 5.40164       | -1.929423        | 0.00014629 | No      |
|      |       |        |             |          |         | Ttc17   | 18.7838   | 11.8368  | -0.666204        | 18.7848      | 11.8378       | -0.6661648       | 0.0149808  | No      |
|      |       |        |             |          |         | Ttc18   | 0.665397  | 3.60115  | 2.43617          | 0.666397     | 3.60215       | 2.43440445       | 0.00241835 | No      |
|      |       |        |             |          |         | Ttc21b  | 0         | 19.7617  | inf              | 0.001        | 19.7627       | 14.2704924       | 0.00014629 | No      |
|      |       |        |             |          |         | Ttc28   | 14.0444   | 0.766735 | -4.19513         | 14.0454      | 0.767735      | -4.1933455       | 0.00014629 | No      |
|      |       |        |             |          |         | Ttc30a1 | 1.83547   | 5.65122  | 1.62242          | 1.83647      | 5.65222       | 1.62188229       | 0.00041099 | No      |
|      |       |        |             |          |         | Ttc37   | 27.9337   | 13.3672  | -1.06331         | 27.9347      | 13.3682       | -1.0632531       | 0.00066215 | No      |

| RRBS |       |        |             |          |         | RNAseq  |           |         |                  |              |               |                  |            |         |
|------|-------|--------|-------------|----------|---------|---------|-----------|---------|------------------|--------------|---------------|------------------|------------|---------|
| gene | Blood | Kidney | methyl.diff | pMWU.fdr | Match ? | gene    | blood     | kidney  | log2(fold_ratio) | blood+ 0.001 | kidney+ 0.001 | log2(fold_ratio) | q_value    | Match ? |
|      |       |        |             |          |         | Ttc38   | 8.68325   | 5.38637 | -0.688923        | 8.68425      | 5.38737       | -0.6888201       | 0.00491494 | No      |
|      |       |        |             |          |         | Ttc7b   | 6.35689   | 25.236  | 1.98909          | 6.35789      | 25.237        | 1.98892046       | 0.00014629 | No      |
|      |       |        |             |          |         | Ttc9    | 0.348019  | 3.92747 | 3.49636          | 0.349019     | 3.92847       | 3.49259006       | 0.00649695 | No      |
|      |       |        |             |          |         | Ttc9c   | 22.277    | 10.229  | -1.12289         | 22.278       | 10.23         | -1.1228136       | 0.0319849  | No      |
|      |       |        |             |          |         | Ttf1    | 16.2445   | 3.60114 | -2.17343         | 16.2455      | 3.60214       | -2.173114        | 0.00014629 | No      |
|      |       |        |             |          |         | Ttf2    | 6.50855   | 1.63407 | -1.99386         | 6.50955      | 1.63507       | -1.9932054       | 0.00014629 | No      |
|      |       |        |             |          |         | Ttll10  | 0.0254529 | 14.4968 | 9.15369          | 0.0264529    | 14.4978       | 9.09819238       | 0.00028114 | No      |
|      |       |        |             |          |         | Ttll12  | 10.218    | 4.44022 | -1.20241         | 10.219       | 4.44122       | -1.2022261       | 0.00014629 | No      |
|      |       |        |             |          |         | Ttll3   | 1.40716   | 14.8884 | 3.40333          | 1.40816      | 14.8894       | 3.40240245       | 0.00014629 | No      |
|      |       |        |             |          |         | Ttll4   | 5.94451   | 2.07071 | -1.52143         | 5.94551      | 2.07171       | -1.5209785       | 0.00014629 | No      |
|      |       |        |             |          |         | Ttll7   | 0.39381   | 4.11502 | 3.38533          | 0.39481      | 4.11602       | 3.38201956       | 0.00041099 | No      |
|      |       |        |             |          |         | Ttpa    | 0         | 1.32944 | inf              | 0.001        | 1.33044       | 10.3776877       | 0.00014629 | No      |
|      |       |        |             |          |         | Ttpal   | 9.4587    | 2.82105 | -1.74541         | 9.4597       | 2.82205       | -1.7450509       | 0.00014629 | No      |
|      |       |        |             |          |         | Ttyh3   | 99.6751   | 14.9866 | -2.73356         | 99.6761      | 14.9876       | -2.7334782       | 0.00014629 | No      |
|      |       |        |             |          |         | Tuba1a  | 184.805   | 122.917 | -0.588318        | 184.806      | 122.918       | -0.5883154       | 0.0309347  | No      |
|      |       |        |             |          |         | Tuba8   | 0.232204  | 2.19327 | 3.23962          | 0.233204     | 2.19427       | 3.23407662       | 0.00102864 | No      |
|      |       |        |             |          |         | Tubb4b  | 35.4435   | 129.787 | 1.87255          | 35.4445      | 129.788       | 1.87252332       | 0.00014629 | No      |
|      |       |        |             |          |         | Tubb5   | 322.728   | 51.9672 | -2.63465         | 322.729      | 51.9682       | -2.6346222       | 0.00014629 | No      |
|      |       |        |             |          |         | Tubd1   | 7.03611   | 2.00809 | -1.80895         | 7.03711      | 2.00909       | -1.8084409       | 0.0299771  | No      |
|      |       |        |             |          |         | Tube1   | 15.904    | 2.48768 | -2.67652         | 15.905       | 2.48868       | -2.6760277       | 0.00014629 | No      |
|      |       |        |             |          |         | Tubg1   | 26.6585   | 38.847  | 0.543207         | 26.6595      | 38.848        | 0.5431906        | 0.0153615  | No      |
|      |       |        |             |          |         | Tubgcp3 | 17.764    | 9.4004  | -0.918162        | 17.765       | 9.4014        | -0.9180902       | 0.00184429 | No      |
|      |       |        |             |          |         | Tubgcp5 | 7.34035   | 3.85019 | -0.93092         | 7.34135      | 3.85119       | -0.9307411       | 0.00041099 | No      |
|      |       |        |             |          |         | Tufm    | 27.8529   | 98.8438 | 1.82732          | 27.8539      | 98.8448       | 1.82728573       | 0.00014629 | No      |
|      |       |        |             |          |         | Tulp3   | 0.403985  | 13.9181 | 5.10652          | 0.404985     | 13.9191       | 5.10305365       | 0.00014629 | No      |
|      |       |        |             |          |         | Tusc2   | 9.52629   | 33.5767 | 1.81747          | 9.52729      | 33.5777       | 1.8173656        | 0.00014629 | No      |
|      |       |        |             |          |         | Tusc3   | 0.697975  | 24.7229 | 5.14653          | 0.698975     | 24.7239       | 5.14452167       | 0.00014629 | No      |
|      |       |        |             |          |         | TVP23A  | 10.0108   | 1.9431  | -2.36513         | 10.0118      | 1.9441        | -2.364527        | 0.0140162  | No      |
|      |       |        |             |          |         | Twistnb | 9.85589   | 2.53208 | -1.96066         | 9.85689      | 2.53308       | -1.9602399       | 0.00014629 | No      |
|      |       |        |             |          |         | Twsg1   | 3.58343   | 12.3679 | 1.78719          | 3.58443      | 12.3689       | 1.78690158       | 0.00014629 | No      |
|      |       |        |             |          |         | Txk     | 83.1664   | 6.60585 | -3.65418         | 83.1674      | 6.60685       | -3.6539836       | 0.00014629 | No      |
|      |       |        |             |          |         | Txlng   | 20.3556   | 3.12046 | -2.7056          | 20.3566      | 3.12146       | -2.7052037       | 0.00041099 | No      |
|      |       |        |             |          |         | Txn1    | 208.637   | 821.283 | 1.97688          | 208.638      | 821.284       | 1.97687925       | 0.00014629 | No      |
|      |       |        |             |          |         | Txn2    | 33.708    | 136.673 | 2.01957          | 33.709       | 136.674       | 2.01953309       | 0.00014629 | No      |
|      |       |        |             |          |         | Txndc11 | 12.3501   | 20.7357 | 0.747598         | 12.3511      | 20.7367       | 0.74754679       | 0.0179216  | No      |
|      |       |        |             |          |         | Txndc16 | 21.8258   | 3.45663 | -2.6586          | 21.8268      | 3.45763       | -2.6582452       | 0.00014629 | No      |
|      |       |        |             |          |         | Txndc17 | 19.9135   | 93.4519 | 2.23048          | 19.9145      | 93.4529       | 2.23042018       | 0.00014629 | No      |
|      |       |        |             |          |         | Txndc9  | 28.8456   | 54.354  | 0.914035         | 28.8466      | 54.355        | 0.91401147       | 0.00041099 | No      |
|      |       |        |             |          |         | Txnip   | 1986.89   | 112.943 | -4.13684         | 1986.891     | 112.944       | -4.1368332       | 0.00014629 | No      |
|      |       |        |             |          |         | Txnl1   | 34.6167   | 72.7774 | 1.07202          | 34.6177      | 72.7784       | 1.07200046       | 0.00014629 | No      |
|      |       |        |             |          |         | Txnrd1  | 11.2923   | 73.4141 | 2.70071          | 11.2933      | 73.4151       | 2.70060971       | 0.00014629 | No      |
|      |       |        |             |          |         | Tyk2    | 21.9657   | 15.8084 | -0.474565        | 21.9667      | 15.8094       | -0.4745355       | 0.0464366  | No      |

| RRBS |       |        |             |          |         | RNAseq  |           |         |                  |              |               |                  |            |         |
|------|-------|--------|-------------|----------|---------|---------|-----------|---------|------------------|--------------|---------------|------------------|------------|---------|
| gene | Blood | Kidney | methyl.diff | pMWU.fdr | Match ? | gene    | blood     | kidney  | log2(fold_ratio) | blood+ 0.001 | kidney+ 0.001 | log2(fold_ratio) | q_value    | Match ? |
|      |       |        |             |          |         | Tyms    | 0.941958  | 4.77636 | 2.34218          | 0.942958     | 4.77736       | 2.34094818       | 0.0338201  | No      |
|      |       |        |             |          |         | Tyro3   | 0.0901613 | 2.79131 | 4.95229          | 0.0911613    | 2.79231       | 4.93689381       | 0.00090728 | No      |
|      |       |        |             |          |         | Tyrobp  | 27.5098   | 43.7919 | 0.670722         | 27.5108      | 43.7929       | 0.6706989        | 0.029075   | No      |
|      |       |        |             |          |         | Tyw3    | 4.17529   | 16.9904 | 2.02478          | 4.17629      | 16.9914       | 2.02451093       | 0.00014629 | No      |
|      |       |        |             |          |         | U2af2   | 158.222   | 55.8222 | -1.50304         | 158.223      | 55.8232       | -1.5030226       | 0.00014629 | No      |
|      |       |        |             |          |         | Uaca    | 0         | 12.0566 | inf              | 0.001        | 12.0576       | 13.5576552       | 0.00014629 | No      |
|      |       |        |             |          |         | Uap1    | 3.79484   | 10.926  | 1.52566          | 3.79584      | 10.927        | 1.52540628       | 0.00014629 | No      |
|      |       |        |             |          |         | Uap1l1  | 5.33546   | 80.2699 | 3.91118          | 5.33646      | 80.2709       | 3.91092214       | 0.00014629 | No      |
|      |       |        |             |          |         | Uba1    | 75.5474   | 51.9959 | -0.538983        | 75.5484      | 51.9969       | -0.5389756       | 0.00427532 | No      |
|      |       |        |             |          |         | Uba2    | 52.2956   | 18.1648 | -1.52555         | 52.2966      | 18.1658       | -1.5254923       | 0.00014629 | No      |
|      |       |        |             |          |         | Uba3    | 28.1904   | 16.5253 | -0.770533        | 28.1914      | 16.5263       | -0.7704914       | 0.00053701 | No      |
|      |       |        |             |          |         | Uba5    | 42.2543   | 58.026  | 0.457601         | 42.2553      | 58.027        | 0.45759204       | 0.0419596  | No      |
|      |       |        |             |          |         | Uba52   | 3135.55   | 1543.45 | -1.02256         | 3135.551     | 1543.451      | -1.0225593       | 0.00014629 | No      |
|      |       |        |             |          |         | Uba6    | 7.64445   | 2.57453 | -1.57011         | 7.64545      | 2.57553       | -1.5697321       | 0.00014629 | No      |
|      |       |        |             |          |         | Uba7    | 13.1929   | 6.45843 | -1.03051         | 13.1939      | 6.45943       | -1.0303923       | 0.00078603 | No      |
|      |       |        |             |          |         | Ubac1   | 16.3467   | 40.2013 | 1.29824          | 16.3477      | 40.2023       | 1.29819037       | 0.00014629 | No      |
|      |       |        |             |          |         | Ubac2   | 50.204    | 29.1405 | -0.784774        | 50.205       | 29.1415       | -0.7847559       | 0.00710369 | No      |
|      |       |        |             |          |         | Ubald2  | 397.846   | 128.167 | -1.63419         | 397.847      | 128.168       | -1.6341776       | 0.00014629 | No      |
|      |       |        |             |          |         | Ubp1    | 11.5419   | 21.2463 | 0.880324         | 11.5429      | 21.2473       | 0.8802738        | 0.00014629 | No      |
|      |       |        |             |          |         | Ubp2l   | 44.633    | 22.4038 | -0.994371        | 44.634       | 22.4048       | -0.9943353       | 0.00014629 | No      |
|      |       |        |             |          |         | Ubash3b | 14.1962   | 7.45394 | -0.929427        | 14.1972      | 7.45494       | -0.9293378       | 0.00448672 | No      |
|      |       |        |             |          |         | Ubc     | 65.3153   | 384.653 | 2.55806          | 65.3163      | 384.654       | 2.55804634       | 0.00014629 | No      |
|      |       |        |             |          |         | Ubd     | 9.5214    | 55.1463 | 2.53402          | 9.5224       | 55.1473       | 2.53389312       | 0.00014629 | No      |
|      |       |        |             |          |         | Ube2b   | 84.3211   | 52.5988 | -0.680864        | 84.3221      | 52.5998       | -0.6808535       | 0.00041099 | No      |
|      |       |        |             |          |         | Ube2d1  | 17.0508   | 5.17679 | -1.71971         | 17.0518      | 5.17779       | -1.7195157       | 0.00014629 | No      |
|      |       |        |             |          |         | Ube2d3  | 257.474   | 120.531 | -1.09502         | 257.475      | 120.532       | -1.0950161       | 0.00014629 | No      |
|      |       |        |             |          |         | Ube2e1  | 63.6779   | 44.3624 | -0.521455        | 63.6789      | 44.3634       | -0.5214455       | 0.0132409  | No      |
|      |       |        |             |          |         | Ube2e2  | 3.27956   | 22.2926 | 2.76499          | 3.28056      | 22.2936       | 2.76461559       | 0.00028114 | No      |
|      |       |        |             |          |         | Ube2f   | 15.5123   | 44.1447 | 1.50883          | 15.5133      | 44.1457       | 1.50876731       | 0.00014629 | No      |
|      |       |        |             |          |         | Ube2g1  | 54.8268   | 21.4014 | -1.35718         | 54.8278      | 21.4024       | -1.357135        | 0.00014629 | No      |
|      |       |        |             |          |         | Ube2h   | 64.265    | 18.7525 | -1.77695         | 64.266       | 18.7535       | -1.7768958       | 0.00014629 | No      |
|      |       |        |             |          |         | Ube2i   | 167.198   | 75.5311 | -1.14642         | 167.199      | 75.5321       | -1.1464044       | 0.00014629 | No      |
|      |       |        |             |          |         | Ube2j1  | 27.8724   | 16.2386 | -0.779413        | 27.8734      | 16.2396       | -0.7793729       | 0.00014629 | No      |
|      |       |        |             |          |         | Ube2j2  | 95.7325   | 51.4211 | -0.896648        | 95.7335      | 51.4221       | -0.8966353       | 0.00014629 | No      |
|      |       |        |             |          |         | Ube2l6  | 1.48324   | 4.20577 | 1.50362          | 1.48424      | 4.20677       | 1.50298855       | 0.00586782 | No      |
|      |       |        |             |          |         | Ube2o   | 30.0263   | 7.04308 | -2.09195         | 30.0273      | 7.04408       | -2.0917916       | 0.00014629 | No      |
|      |       |        |             |          |         | Ube2r2  | 148.319   | 93.8681 | -0.66            | 148.32       | 93.8691       | -0.6599909       | 0.00341151 | No      |
|      |       |        |             |          |         | Ube2v1  | 113.59    | 83.4487 | -0.444868        | 113.591      | 83.4497       | -0.4448698       | 0.0241459  | No      |
|      |       |        |             |          |         | Ube3b   | 24.2184   | 50.5743 | 1.0623           | 24.2194      | 50.5753       | 1.06226985       | 0.00014629 | No      |
|      |       |        |             |          |         | Ube3c   | 15.3807   | 8.84875 | -0.797581        | 15.3817      | 8.84975       | -0.7975064       | 0.00014629 | No      |
|      |       |        |             |          |         | Ube3d   | 1.73802   | 6.5151  | 1.90635          | 1.73902      | 6.5161        | 1.90573422       | 0.00041099 | No      |
|      |       |        |             |          |         | Ube4a   | 21.1669   | 8.13732 | -1.37919         | 21.1679      | 8.13832       | -1.3790752       | 0.00014629 | No      |

| RRBS |       |        |             |          |         | RNAseq    |          |         |                  |              |               |                  |            |         |
|------|-------|--------|-------------|----------|---------|-----------|----------|---------|------------------|--------------|---------------|------------------|------------|---------|
| gene | Blood | Kidney | methyl.diff | pMWU.fdr | Match ? | gene      | blood    | kidney  | log2(fold_ratio) | blood+ 0.001 | kidney+ 0.001 | log2(fold_ratio) | q_value    | Match ? |
|      |       |        |             |          |         | Ubl4a     | 6.62798  | 16.619  | 1.32619          | 6.62898      | 16.62         | 1.32606158       | 0.00014629 | No      |
|      |       |        |             |          |         | Ubl5      | 204.798  | 299.379 | 0.54777          | 204.799      | 299.38        | 0.54776917       | 0.0317197  | No      |
|      |       |        |             |          |         | Ubn1      | 20.6604  | 6.76672 | -1.61034         | 20.6614      | 6.76772       | -1.6101962       | 0.00014629 | No      |
|      |       |        |             |          |         | Ubn2      | 9.9686   | 2.65368 | -1.9094          | 9.9696       | 2.65468       | -1.9089977       | 0.00014629 | No      |
|      |       |        |             |          |         | Ubp1      | 82.6447  | 23.5765 | -1.80958         | 82.6457      | 23.5775       | -1.809529        | 0.00014629 | No      |
|      |       |        |             |          |         | Ubqln1    | 48.6483  | 34.7849 | -0.483928        | 48.6493      | 34.7859       | -0.4839164       | 0.0167972  | No      |
|      |       |        |             |          |         | Ubqln4    | 32.2354  | 44.5811 | 0.467784         | 32.2364      | 44.5821       | 0.46777394       | 0.0309347  | No      |
|      |       |        |             |          |         | Ubr1      | 20.7654  | 7.2461  | -1.51891         | 20.7664      | 7.2471        | -1.5187754       | 0.00014629 | No      |
|      |       |        |             |          |         | Ubr2      | 34.214   | 11.6104 | -1.55917         | 34.215       | 11.6114       | -1.559087        | 0.00014629 | No      |
|      |       |        |             |          |         | Ubr3      | 16.4468  | 8.41877 | -0.966128        | 16.4478      | 8.41977       | -0.9660419       | 0.00090728 | No      |
|      |       |        |             |          |         | Ubr4      | 61.4342  | 26.3404 | -1.22177         | 61.4352      | 26.3414       | -1.2217335       | 0.00014629 | No      |
|      |       |        |             |          |         | Ubr7      | 17.5832  | 10.3451 | -0.765254        | 17.5842      | 10.3461       | -0.7651927       | 0.00028114 | No      |
|      |       |        |             |          |         | Ubxn1     | 128.205  | 185.166 | 0.530363         | 128.206      | 185.167       | 0.53036323       | 0.00751085 | No      |
|      |       |        |             |          |         | Ubxn7     | 7.76551  | 1.62151 | -2.25974         | 7.76651      | 1.62251       | -2.2590391       | 0.0280617  | No      |
|      |       |        |             |          |         | Ubxn8     | 4.14718  | 7.32738 | 0.821166         | 4.14818      | 7.32838       | 0.82101582       | 0.00576532 | No      |
|      |       |        |             |          |         | Uchl5     | 23.6894  | 14.2061 | -0.737724        | 23.6904      | 14.2071       | -0.7376905       | 0.00173187 | No      |
|      |       |        |             |          |         | UCMA      | 0        | 2.06161 | inf              | 0.001        | 2.06261       | 11.0102553       | 0.00014629 | No      |
|      |       |        |             |          |         | Ucp2      | 583.101  | 57.7928 | -3.33478         | 583.102      | 57.7938       | -3.3347616       | 0.00014629 | No      |
|      |       |        |             |          |         | Ufl1      | 13.15    | 6.35755 | -1.04853         | 13.151       | 6.35855       | -1.0484028       | 0.00014629 | No      |
|      |       |        |             |          |         | Ufsp1     | 1.75535  | 10.6709 | 2.60385          | 1.75635      | 10.6719       | 2.60316478       | 0.00138312 | No      |
|      |       |        |             |          |         | Ufsp2     | 20.9074  | 64.1028 | 1.61637          | 20.9084      | 64.1038       | 1.61632722       | 0.00014629 | No      |
|      |       |        |             |          |         | Ugcg      | 43.3923  | 9.4016  | -2.20646         | 43.3933      | 9.4026        | -2.2063407       | 0.00014629 | No      |
|      |       |        |             |          |         | Ugdh      | 14.0855  | 57.2249 | 2.02244          | 14.0865      | 57.2259       | 2.02235505       | 0.00014629 | No      |
|      |       |        |             |          |         | Uggt1     | 31.1907  | 7.76306 | -2.00642         | 31.1917      | 7.76406       | -2.006279        | 0.00014629 | No      |
|      |       |        |             |          |         | Ugp2      | 26.5613  | 43.5433 | 0.713126         | 26.5623      | 43.5443       | 0.71310381       | 0.00041099 | No      |
|      |       |        |             |          |         | Ugt1a2    | 1.03396  | 91.9517 | 6.47462          | 1.03496      | 91.9527       | 6.47324502       | 0.00014629 | No      |
|      |       |        |             |          |         | Ugt2b35   | 0        | 87.0428 | inf              | 0.001        | 87.0438       | 16.4094539       | 0.00014629 | No      |
|      |       |        |             |          |         | Uhrf1bp1  | 0.152408 | 7.23428 | 5.56884          | 0.153408     | 7.23528       | 5.55960322       | 0.00014629 | No      |
|      |       |        |             |          |         | Uhrf1bp1l | 25.2653  | 9.11529 | -1.4708          | 25.2663      | 9.11629       | -1.4706957       | 0.00014629 | No      |
|      |       |        |             |          |         | Uhrf2     | 120.751  | 37.166  | -1.69998         | 120.752      | 37.167        | -1.6999529       | 0.00014629 | No      |
|      |       |        |             |          |         | Ulk1      | 13.6738  | 21.8231 | 0.674437         | 13.6748      | 21.8241       | 0.67440243       | 0.00363169 | No      |
|      |       |        |             |          |         | Ulk2      | 13.0828  | 6.29831 | -1.05463         | 13.0838      | 6.29931       | -1.0545159       | 0.00014629 | No      |
|      |       |        |             |          |         | Umod      | 0        | 952.963 | inf              | 0.001        | 952.964       | 19.8620622       | 0.00014629 | No      |
|      |       |        |             |          |         | Umps      | 19.6802  | 39.9548 | 1.02163          | 19.6812      | 39.9558       | 1.02158675       | 0.00053701 | No      |
|      |       |        |             |          |         | Unc119    | 29.8891  | 17.2097 | -0.796395        | 29.8901      | 17.2107       | -0.7963619       | 0.00207488 | No      |
|      |       |        |             |          |         | Unc13b    | 1.32534  | 3.28585 | 1.3099           | 1.32634      | 3.28685       | 1.30925497       | 0.00014629 | No      |
|      |       |        |             |          |         | Unc5b     | 4.70491  | 1.0047  | -2.2274          | 4.70591      | 1.0057        | -2.2262737       | 0.00014629 | No      |
|      |       |        |             |          |         | Unc5cl    | 1.93184  | 29.5805 | 3.9366           | 1.93284      | 29.5815       | 3.93590109       | 0.00014629 | No      |
|      |       |        |             |          |         | Ung       | 9.15256  | 28.8132 | 1.65448          | 9.15356      | 28.8142       | 1.65437511       | 0.00014629 | No      |
|      |       |        |             |          |         | Unk       | 19.0154  | 12.2241 | -0.637438        | 19.0164      | 12.2251       | -0.6373979       | 0.0126456  | No      |
|      |       |        |             |          |         | Unkl      | 27.996   | 8.99731 | -1.63766         | 27.997       | 8.99831       | -1.6375463       | 0.00341151 | No      |
|      |       |        |             |          |         | Upb1      | 0.157234 | 140.007 | 9.79837          | 0.158234     | 140.008       | 9.78923392       | 0.0399122  | No      |



| RRBS |       |        |             |          |         | RNAseq  |          |          |                  |              |               |                  |            |         |
|------|-------|--------|-------------|----------|---------|---------|----------|----------|------------------|--------------|---------------|------------------|------------|---------|
| gene | Blood | Kidney | methyl.diff | pMWU.fdr | Match ? | gene    | blood    | kidney   | log2(fold_ratio) | blood+ 0.001 | kidney+ 0.001 | log2(fold_ratio) | q_value    | Match ? |
|      |       |        |             |          |         | Upf2    | 45.6528  | 22.2655  | -1.03589         | 45.6538      | 22.2665       | -1.0358601       | 0.00014629 | No      |
|      |       |        |             |          |         | Upf3a   | 20.457   | 31.4618  | 0.621007         | 20.458       | 31.4628       | 0.62098196       | 0.0121484  | No      |
|      |       |        |             |          |         | Upf3b   | 45.1633  | 9.27439  | -2.28383         | 45.1643      | 9.27539       | -2.283703        | 0.00014629 | No      |
|      |       |        |             |          |         | Upk1a   | 0.549567 | 34.478   | 5.97124          | 0.550567     | 34.479        | 5.96865598       | 0.00078603 | No      |
|      |       |        |             |          |         | Upk1b   | 0        | 6.33621  | inf              | 0.001        | 6.33721       | 12.6296321       | 0.00014629 | No      |
|      |       |        |             |          |         | Upk2    | 0        | 20.0782  | inf              | 0.001        | 20.0792       | 14.2934142       | 0.00014629 | No      |
|      |       |        |             |          |         | Upk3a   | 0        | 22.2045  | inf              | 0.001        | 22.2055       | 14.4386294       | 0.00014629 | No      |
|      |       |        |             |          |         | Upk3bl  | 0        | 10.506   | inf              | 0.001        | 10.507        | 13.3590632       | 0.00014629 | No      |
|      |       |        |             |          |         | Upp1    | 0.683574 | 7.49302  | 3.45438          | 0.684574     | 7.49402       | 3.45246142       | 0.00041099 | No      |
|      |       |        |             |          |         | Uqcc    | 17.1095  | 28.0298  | 0.712163         | 17.1105      | 28.0308       | 0.712131         | 0.00395247 | No      |
|      |       |        |             |          |         | UQCRB   | 51.8031  | 293.864  | 2.50404          | 51.8041      | 293.865       | 2.50401535       | 0.00014629 | No      |
|      |       |        |             |          |         | Uqcrc1  | 73.9601  | 296.346  | 2.00246          | 73.9611      | 296.347       | 2.00244887       | 0.00014629 | No      |
|      |       |        |             |          |         | Uqcrc2  | 63.779   | 130.486  | 1.03274          | 63.78        | 130.487       | 1.03273008       | 0.00014629 | No      |
|      |       |        |             |          |         | Uqcrfs1 | 87.6483  | 277.868  | 1.6646           | 87.6493      | 277.869       | 1.66459042       | 0.00014629 | No      |
|      |       |        |             |          |         | Uqcrh   | 549.9    | 834.046  | 0.600958         | 549.901      | 834.047       | 0.60095677       | 0.00173187 | No      |
|      |       |        |             |          |         | Uqcrq   | 218.826  | 1708.91  | 2.96522          | 218.827      | 1708.911      | 2.9652146        | 0.00014629 | No      |
|      |       |        |             |          |         | Urad    | 0        | 8.37305  | inf              | 0.001        | 8.37405       | 13.0317098       | 0.00014629 | No      |
|      |       |        |             |          |         | Urb1    | 7.85588  | 1.27089  | -2.62794         | 7.85688      | 1.27189       | -2.6269826       | 0.00014629 | No      |
|      |       |        |             |          |         | Urb2    | 4.53278  | 1.36615  | -1.73028         | 4.53378      | 1.36715       | -1.7295428       | 0.00491494 | No      |
|      |       |        |             |          |         | Urgcp   | 6.66882  | 20.8273  | 1.64297          | 6.66982      | 20.8283       | 1.64282536       | 0.00014629 | No      |
|      |       |        |             |          |         | Uri1    | 48.0706  | 11.057   | -2.1202          | 48.0716      | 11.058        | -2.1200943       | 0.00014629 | No      |
|      |       |        |             |          |         | Urod    | 30.9439  | 86.2012  | 1.47805          | 30.9449      | 86.2022       | 1.47802303       | 0.00014629 | No      |
|      |       |        |             |          |         | Uros    | 1.84772  | 5.94753  | 1.68655          | 1.84872      | 5.94853       | 1.68600646       | 0.00102864 | No      |
|      |       |        |             |          |         | Use1    | 121.897  | 328.29   | 1.42931          | 121.898      | 328.291       | 1.42930074       | 0.00014629 | No      |
|      |       |        |             |          |         | Usmg5   | 360.41   | 1494.96  | 2.0524           | 360.411      | 1494.961      | 2.0523929        | 0.00014629 | No      |
|      |       |        |             |          |         | Uso1    | 26.2276  | 35.023   | 0.417219         | 26.2286      | 35.024        | 0.41720306       | 0.044705   | No      |
|      |       |        |             |          |         | Usp1    | 21.9652  | 5.76554  | -1.92969         | 21.9662      | 5.76654       | -1.9295075       | 0.00014629 | No      |
|      |       |        |             |          |         | Usp10   | 16.9849  | 26.5391  | 0.643864         | 16.9859      | 26.5401       | 0.64383615       | 0.00114835 | No      |
|      |       |        |             |          |         | Usp14   | 29.1243  | 15.6273  | -0.898154        | 29.1253      | 15.6283       | -0.8981121       | 0.0167972  | No      |
|      |       |        |             |          |         | Usp15   | 24.8892  | 17.4142  | -0.515259        | 24.8902      | 17.4152       | -0.5152308       | 0.0130449  | No      |
|      |       |        |             |          |         | Usp16   | 34.6696  | 16.5928  | -1.06311         | 34.6706      | 16.5938       | -1.0630685       | 0.018934   | No      |
|      |       |        |             |          |         | Usp18   | 13.0986  | 5.53159  | -1.24364         | 13.0996      | 5.53259       | -1.2434958       | 0.0423845  | No      |
|      |       |        |             |          |         | Usp20   | 6.8713   | 42.0785  | 2.61443          | 6.8723       | 42.0795       | 2.61425264       | 0.00014629 | No      |
|      |       |        |             |          |         | Usp22   | 28.54    | 16.2602  | -0.811639        | 28.541       | 16.2612       | -0.8116022       | 0.00041099 | No      |
|      |       |        |             |          |         | Usp24   | 40.9764  | 19.5297  | -1.06913         | 40.9774      | 19.5307       | -1.0690848       | 0.00014629 | No      |
|      |       |        |             |          |         | Usp25   | 37.2722  | 13.7669  | -1.4369          | 37.2732      | 13.7679       | -1.4368302       | 0.00014629 | No      |
|      |       |        |             |          |         | Usp28   | 96.9746  | 5.81723  | -4.0592          | 96.9756      | 5.81823       | -4.0589696       | 0.00014629 | No      |
|      |       |        |             |          |         | Usp31   | 2.78956  | 0.596996 | -2.22425         | 2.79056      | 0.597996      | -2.2223469       | 0.00014629 | No      |
|      |       |        |             |          |         | Usp33   | 25.5418  | 16.3604  | -0.642656        | 25.5428      | 16.3614       | -0.6426205       | 0.00252712 | No      |
|      |       |        |             |          |         | USP34   | 19.7108  | 3.1746   | -2.63434         | 19.7118      | 3.1756        | -2.6339584       | 0.00053701 | No      |
|      |       |        |             |          |         | Usp37   | 8.04945  | 2.72799  | -1.56105         | 8.05045      | 2.72899       | -1.5607023       | 0.00195831 | No      |
|      |       |        |             |          |         | Usp38   | 22.5674  | 3.92216  | -2.52452         | 22.5684      | 3.92316       | -2.5242161       | 0.00014629 | No      |

| RRBS |       |        |             |          |         | RNAseq |           |         |                  |              |               |                  |            |         |
|------|-------|--------|-------------|----------|---------|--------|-----------|---------|------------------|--------------|---------------|------------------|------------|---------|
| gene | Blood | Kidney | methyl.diff | pMWU.fdr | Match ? | gene   | blood     | kidney  | log2(fold_ratio) | blood+ 0.001 | kidney+ 0.001 | log2(fold_ratio) | q_value    | Match ? |
|      |       |        |             |          |         | USP39  | 22.3417   | 9.76314 | -1.19432         | 22.3427      | 9.76414       | -1.1942387       | 0.00028114 | No      |
|      |       |        |             |          |         | Usp40  | 44.8183   | 10.33   | -2.11725         | 44.8193      | 10.331        | -2.1171402       | 0.00014629 | No      |
|      |       |        |             |          |         | Usp42  | 8.14676   | 2.94897 | -1.46602         | 8.14776      | 2.94997       | -1.4657032       | 0.00014629 | No      |
|      |       |        |             |          |         | Usp45  | 12.4585   | 1.90052 | -2.71267         | 12.4595      | 1.90152       | -2.7120212       | 0.00014629 | No      |
|      |       |        |             |          |         | Usp48  | 66.566    | 16.3699 | -2.02374         | 66.567       | 16.3709       | -2.0236735       | 0.00014629 | No      |
|      |       |        |             |          |         | Usp53  | 5.44277   | 7.88856 | 0.53542          | 5.44377      | 7.88956       | 0.53533873       | 0.03544    | No      |
|      |       |        |             |          |         | Usp6nl | 11.499    | 3.7353  | -1.62222         | 11.5         | 3.7363        | -1.6219517       | 0.00014629 | No      |
|      |       |        |             |          |         | Usp7   | 77.1287   | 32.4963 | -1.24699         | 77.1297      | 32.4973       | -1.2469666       | 0.00014629 | No      |
|      |       |        |             |          |         | Usp8   | 15.8131   | 28.6217 | 0.855988         | 15.8141      | 28.6227       | 0.85594832       | 0.00014629 | No      |
|      |       |        |             |          |         | Usp9x  | 21.5006   | 7.94587 | -1.4361          | 21.5016      | 7.94687       | -1.4359854       | 0.00014629 | No      |
|      |       |        |             |          |         | Utp14a | 17.0454   | 7.44882 | -1.1943          | 17.0464      | 7.44982       | -1.1941896       | 0.0109563  | No      |
|      |       |        |             |          |         | Utp18  | 17.0029   | 10.2114 | -0.735607        | 17.0039      | 10.2124       | -0.7355437       | 0.00126596 | No      |
|      |       |        |             |          |         | Utp20  | 5.87174   | 2.02711 | -1.53436         | 5.87274      | 2.02811       | -1.5338979       | 0.00014629 | No      |
|      |       |        |             |          |         | Utp3   | 38.4769   | 24.8856 | -0.628683        | 38.4779      | 24.8866       | -0.6286609       | 0.00576532 | No      |
|      |       |        |             |          |         | Utp6   | 13.4447   | 7.34733 | -0.871747        | 13.4457      | 7.34833       | -0.8716565       | 0.00014629 | No      |
|      |       |        |             |          |         | Utrn   | 54.0224   | 17.3158 | -1.64147         | 54.0234      | 17.3168       | -1.6414121       | 0.00014629 | No      |
|      |       |        |             |          |         | Vamp1  | 61.5262   | 7.89463 | -2.96226         | 61.5272      | 7.89563       | -2.962098        | 0.00014629 | No      |
|      |       |        |             |          |         | Vamp4  | 21.8147   | 6.14589 | -1.82761         | 21.8157      | 6.14689       | -1.8274382       | 0.00014629 | No      |
|      |       |        |             |          |         | Vamp8  | 71.1331   | 208.107 | 1.54873          | 71.1341      | 208.108       | 1.5487192        | 0.00014629 | No      |
|      |       |        |             |          |         | Vangl1 | 0.192734  | 9.89091 | 5.68142          | 0.193734     | 9.89191       | 5.67410004       | 0.00014629 | No      |
|      |       |        |             |          |         | Vapb   | 22.4177   | 36.0475 | 0.685262         | 22.4187      | 36.0485       | 0.68523661       | 0.00230432 | No      |
|      |       |        |             |          |         | Vash2  | 0.0601827 | 6.30426 | 6.71083          | 0.0611827    | 6.30526       | 6.68728828       | 0.00041099 | No      |
|      |       |        |             |          |         | Vasp   | 85.7804   | 23.8974 | -1.8438          | 85.7814      | 23.8984       | -1.8437508       | 0.00014629 | No      |
|      |       |        |             |          |         | Vav1   | 39.1437   | 1.35812 | -4.8491          | 39.1447      | 1.35912       | -4.8480722       | 0.00014629 | No      |
|      |       |        |             |          |         | Vav3   | 9.79842   | 7.1425  | -0.456119        | 9.79942      | 7.1435        | -0.4560653       | 0.0454028  | No      |
|      |       |        |             |          |         | Vcan   | 0.112065  | 1.07155 | 3.25729          | 0.113065     | 1.07255       | 3.2458206        | 0.00659461 | No      |
|      |       |        |             |          |         | Vcl    | 1.60642   | 8.30069 | 2.36938          | 1.60742      | 8.30169       | 2.36865812       | 0.00014629 | No      |
|      |       |        |             |          |         | Vcpip1 | 17.3785   | 4.24395 | -2.03383         | 17.3795      | 4.24495       | -2.0335671       | 0.00014629 | No      |
|      |       |        |             |          |         | Vdac1  | 23.795    | 284.589 | 3.58015          | 23.796       | 284.59        | 3.58009398       | 0.00014629 | No      |
|      |       |        |             |          |         | Vdac2  | 86.2379   | 165.353 | 0.939151         | 86.2389      | 165.354       | 0.93914726       | 0.00014629 | No      |
|      |       |        |             |          |         | Vdac3  | 77.3858   | 141.903 | 0.874767         | 77.3868      | 141.904       | 0.87475585       | 0.00014629 | No      |
|      |       |        |             |          |         | Vdr    | 0.25727   | 41.3901 | 7.32986          | 0.25827      | 41.3911       | 7.32429671       | 0.00014629 | No      |
|      |       |        |             |          |         | Vegfa  | 0.169081  | 65.059  | 8.58789          | 0.170081     | 65.06         | 8.57940503       | 0.00014629 | No      |
|      |       |        |             |          |         | Vegfb  | 2.95151   | 46.7716 | 3.98611          | 2.95251      | 46.7726       | 3.98564978       | 0.00014629 | No      |
|      |       |        |             |          |         | Vegfc  | 0.149502  | 1.05487 | 2.81884          | 0.150502     | 1.05587       | 2.81057766       | 0.0172634  | No      |
|      |       |        |             |          |         | Veph1  | 0         | 7.32629 | inf              | 0.001        | 7.32729       | 12.839064        | 0.00014629 | No      |
|      |       |        |             |          |         | VeZF1  | 32.0587   | 14.6681 | -1.12804         | 32.0597      | 14.6691       | -1.1279806       | 0.00014629 | No      |
|      |       |        |             |          |         | Vil1   | 0.0562286 | 28.2791 | 8.97422          | 0.0572286    | 28.2801       | 8.94883519       | 0.0413818  | No      |
|      |       |        |             |          |         | Vill   | 0         | 180.752 | inf              | 0.001        | 180.753       | 17.4636601       | 0.00014629 | No      |
|      |       |        |             |          |         | Vim    | 356.036   | 181.298 | -0.973656        | 356.037      | 181.299       | -0.9736562       | 0.00014629 | No      |
|      |       |        |             |          |         | Vipr2  | 5.39553   | 0.67333 | -3.00238         | 5.39653      | 0.67433       | -3.0005054       | 0.00014629 | No      |
|      |       |        |             |          |         | Vkorc1 | 6.44715   | 67.7076 | 3.39259          | 6.44815      | 67.7086       | 3.39238188       | 0.00014629 | No      |

| RRBS |       |        |             |          |         | RNAseq  |           |          |                  |              |               |                  |            |         |
|------|-------|--------|-------------|----------|---------|---------|-----------|----------|------------------|--------------|---------------|------------------|------------|---------|
| gene | Blood | Kidney | methyl.diff | pMWU.fdr | Match ? | gene    | blood     | kidney   | log2(fold_ratio) | blood+ 0.001 | kidney+ 0.001 | log2(fold_ratio) | q_value    | Match ? |
|      |       |        |             |          |         | Vma21   | 5.35905   | 9.18022  | 0.776553         | 5.36005      | 9.18122       | 0.77643941       | 0.00459197 | No      |
|      |       |        |             |          |         | Vmac    | 15.7165   | 31.5164  | 1.00382          | 15.7175      | 31.5174       | 1.00377676       | 0.00014629 | No      |
|      |       |        |             |          |         | Vnn1    | 0.585813  | 14.0244  | 4.58136          | 0.586813     | 14.0254       | 4.57899727       | 0.00014629 | No      |
|      |       |        |             |          |         | Vopp1   | 65.9676   | 16.5846  | -1.99192         | 65.9686      | 16.5856       | -1.9918483       | 0.00014629 | No      |
|      |       |        |             |          |         | Vprbp   | 21.9832   | 9.67628  | -1.18388         | 21.9842      | 9.67728       | -1.1837935       | 0.0085437  | No      |
|      |       |        |             |          |         | Vps13a  | 30.9964   | 7.7527   | -1.99933         | 30.9974      | 7.7537        | -1.9991904       | 0.00014629 | No      |
|      |       |        |             |          |         | Vps13b  | 22.3201   | 7.84716  | -1.5081          | 22.3211      | 7.84816       | -1.5079818       | 0.00014629 | No      |
|      |       |        |             |          |         | Vps13c  | 16.927    | 8.32792  | -1.0233          | 16.928       | 8.32892       | -1.0232102       | 0.00138312 | No      |
|      |       |        |             |          |         | Vps18   | 1.97709   | 4.78903  | 1.27636          | 1.97809      | 4.79003       | 1.27592662       | 0.00028114 | No      |
|      |       |        |             |          |         | Vps25   | 54.216    | 148.06   | 1.44939          | 54.217       | 148.061       | 1.44937449       | 0.00014629 | No      |
|      |       |        |             |          |         | Vps29   | 23.3911   | 99.4658  | 2.08824          | 23.3921      | 99.4668       | 2.08819368       | 0.00014629 | No      |
|      |       |        |             |          |         | Vps33b  | 12.0603   | 8.18003  | -0.560083        | 12.0613      | 8.18103       | -0.560031        | 0.0440092  | No      |
|      |       |        |             |          |         | Vps36   | 51.7117   | 22.0265  | -1.23125         | 51.7127      | 22.0275       | -1.2312129       | 0.00014629 | No      |
|      |       |        |             |          |         | Vps37b  | 85.8447   | 10.2548  | -3.06543         | 85.8457      | 10.2558       | -3.0653058       | 0.00014629 | No      |
|      |       |        |             |          |         | Vps39   | 14.3245   | 8.60761  | -0.734799        | 14.3255      | 8.60861       | -0.7347333       | 0.00114835 | No      |
|      |       |        |             |          |         | Vps45   | 8.17833   | 41.7854  | 2.35312          | 8.17933      | 41.7864       | 2.3529789        | 0.00014629 | No      |
|      |       |        |             |          |         | Vps9d1  | 9.84668   | 67.2593  | 2.77202          | 9.84768      | 67.2603       | 2.77189943       | 0.00014629 | No      |
|      |       |        |             |          |         | Vrk1    | 31.1801   | 9.7297   | -1.68016         | 31.1811      | 9.7307        | -1.6800563       | 0.00014629 | No      |
|      |       |        |             |          |         | Vsig10  | 0.116862  | 6.07187  | 5.69926          | 0.117862     | 6.07287       | 5.68720793       | 0.00028114 | No      |
|      |       |        |             |          |         | Vsig10l | 1.13907   | 7.55319  | 2.72923          | 1.14007      | 7.55419       | 2.72815466       | 0.00014629 | No      |
|      |       |        |             |          |         | Vta1    | 30.4706   | 52.646   | 0.788907         | 30.4716      | 52.647        | 0.78888607       | 0.00014629 | No      |
|      |       |        |             |          |         | Vti1b   | 42.4858   | 78.3173  | 0.882352         | 42.4868      | 78.3183       | 0.88233476       | 0.00014629 | No      |
|      |       |        |             |          |         | Vwa7    | 0.0468397 | 3.8898   | 6.37582          | 0.0478397    | 3.8908        | 6.34571467       | 0.0400829  | No      |
|      |       |        |             |          |         | Vwa8    | 7.91157   | 50.2295  | 2.6665           | 7.91257      | 50.2305       | 2.66634537       | 0.00014629 | No      |
|      |       |        |             |          |         | Vwf     | 16.9391   | 8.3861   | -1.01428         | 16.9401      | 8.3871        | -1.0141984       | 0.00014629 | No      |
|      |       |        |             |          |         | Wac     | 122.984   | 34.7711  | -1.82251         | 122.985      | 34.7721       | -1.8224803       | 0.00014629 | No      |
|      |       |        |             |          |         | Wapal   | 42.1106   | 11.3607  | -1.89014         | 42.1116      | 11.3617       | -1.890039        | 0.00014629 | No      |
|      |       |        |             |          |         | Was     | 106.622   | 7.43844  | -3.84136         | 106.623      | 7.43944       | -3.8411808       | 0.00014629 | No      |
|      |       |        |             |          |         | Wasf1   | 0.0682096 | 2.01526  | 4.88485          | 0.0692096    | 2.01626       | 4.86456571       | 0.0110564  | No      |
|      |       |        |             |          |         | Wasf2   | 44.8843   | 8.8139   | -2.34836         | 44.8853      | 8.8149        | -2.3482269       | 0.00014629 | No      |
|      |       |        |             |          |         | Wasf3   | 0         | 2.31683  | inf              | 0.001        | 2.31783       | 11.178559        | 0.00014629 | No      |
|      |       |        |             |          |         | Wash    | 50.3558   | 153.436  | 1.60741          | 50.3568      | 153.437       | 1.60738791       | 0.00014629 | No      |
|      |       |        |             |          |         | Wbp1    | 54.4353   | 101.519  | 0.899132         | 54.4363      | 101.52        | 0.89912306       | 0.00014629 | No      |
|      |       |        |             |          |         | Wbp1l   | 67.2207   | 21.0391  | -1.67583         | 67.2217      | 21.0401       | -1.6757855       | 0.00014629 | No      |
|      |       |        |             |          |         | Wbp5    | 9.37491   | 134.463  | 3.84226          | 9.37591      | 134.464       | 3.84211744       | 0.00014629 | No      |
|      |       |        |             |          |         | Wbscr16 | 8.34204   | 15.78    | 0.919627         | 8.34304      | 15.781        | 0.91954356       | 0.00028114 | No      |
|      |       |        |             |          |         | Wbscr27 | 10.6732   | 17.4516  | 0.709361         | 10.6742      | 17.4526       | 0.70931403       | 0.0245946  | No      |
|      |       |        |             |          |         | Wdfy1   | 1.72937   | 14.9714  | 3.11389          | 1.73037      | 14.9724       | 3.11315303       | 0.00014629 | No      |
|      |       |        |             |          |         | Wdfy3   | 0.04397   | 11.0068  | 7.96766          | 0.04497      | 11.0078       | 7.93534756       | 0.00014629 | No      |
|      |       |        |             |          |         | Wdhd1   | 5.88148   | 0.594933 | -3.30538         | 5.88248      | 0.595933      | -3.3032025       | 0.0314513  | No      |
|      |       |        |             |          |         | Wdpcp   | 0.602557  | 4.58522  | 2.92782          | 0.603557     | 4.58622       | 2.92574363       | 0.00395247 | No      |
|      |       |        |             |          |         | Wdr11   | 6.13962   | 18.8404  | 1.61761          | 6.14062      | 18.8414       | 1.61744993       | 0.00014629 | No      |

| RRBS |       |        |             |          |         | RNAseq |           |          |                  |              |               |                  |            |         |
|------|-------|--------|-------------|----------|---------|--------|-----------|----------|------------------|--------------|---------------|------------------|------------|---------|
| gene | Blood | Kidney | methyl.diff | pMWU.fdr | Match ? | gene   | blood     | kidney   | log2(fold_ratio) | blood+ 0.001 | kidney+ 0.001 | log2(fold_ratio) | q_value    | Match ? |
|      |       |        |             |          |         | Wdr19  | 0.359479  | 1.68412  | 2.22801          | 0.360479     | 1.68512       | 2.22486421       | 0.00102864 | No      |
|      |       |        |             |          |         | Wdr20  | 18.2819   | 8.85785  | -1.04539         | 18.2829      | 8.85885       | -1.0453036       | 0.00028114 | No      |
|      |       |        |             |          |         | Wdr25  | 18.9491   | 8.24824  | -1.19997         | 18.9501      | 8.24924       | -1.1998723       | 0.00114835 | No      |
|      |       |        |             |          |         | Wdr26  | 80.8526   | 14.7115  | -2.45835         | 80.8536      | 14.7125       | -2.4582696       | 0.00014629 | No      |
|      |       |        |             |          |         | Wdr3   | 18.7114   | 6.58896  | -1.5058          | 18.7124      | 6.58996       | -1.505653        | 0.00014629 | No      |
|      |       |        |             |          |         | Wdr33  | 15.5966   | 24.615   | 0.65831          | 15.5976      | 24.616        | 0.65827229       | 0.00395247 | No      |
|      |       |        |             |          |         | Wdr34  | 2.62291   | 33.8631  | 3.69048          | 2.62391      | 33.8641       | 3.68996651       | 0.0475835  | No      |
|      |       |        |             |          |         | Wdr35  | 0.745458  | 10.38    | 3.79954          | 0.746458     | 10.381        | 3.79774053       | 0.00014629 | No      |
|      |       |        |             |          |         | Wdr36  | 26.3487   | 13.4678  | -0.968222        | 26.3497      | 13.4688       | -0.9681652       | 0.00053701 | No      |
|      |       |        |             |          |         | Wdr37  | 11.7575   | 4.36635  | -1.42908         | 11.7585      | 4.36735       | -1.428874        | 0.00014629 | No      |
|      |       |        |             |          |         | Wdr41  | 15.213    | 9.97817  | -0.608459        | 15.214       | 9.97917       | -0.6084078       | 0.0195955  | No      |
|      |       |        |             |          |         | Wdr43  | 31.4151   | 7.72723  | -2.02343         | 31.4161      | 7.72823       | -2.0232942       | 0.00014629 | No      |
|      |       |        |             |          |         | Wdr44  | 7.51802   | 1.61254  | -2.22102         | 7.51902      | 1.61354       | -2.2203153       | 0.00014629 | No      |
|      |       |        |             |          |         | Wdr5   | 28.3382   | 14.5079  | -0.965912        | 28.3392      | 14.5089       | -0.9658609       | 0.00014629 | No      |
|      |       |        |             |          |         | Wdr54  | 0.0406723 | 24.8117  | 9.25276          | 0.0416723    | 24.8127       | 9.21777429       | 0.0494152  | No      |
|      |       |        |             |          |         | WDR55  | 122.656   | 67.3823  | -0.864175        | 122.657      | 67.3833       | -0.8641666       | 0.00014629 | No      |
|      |       |        |             |          |         | Wdr6   | 10.0738   | 22.7647  | 1.17618          | 10.0748      | 22.7657       | 1.17611062       | 0.00014629 | No      |
|      |       |        |             |          |         | Wdr60  | 0.311304  | 4.97436  | 3.99812          | 0.312304     | 4.97536       | 3.99377797       | 0.00014629 | No      |
|      |       |        |             |          |         | Wdr61  | 20.6355   | 35.0802  | 0.765529         | 20.6365      | 35.0812       | 0.76549979       | 0.00149937 | No      |
|      |       |        |             |          |         | Wdr7   | 4.82938   | 2.52164  | -0.937475        | 4.83038      | 2.52264       | -0.9372024       | 0.00014629 | No      |
|      |       |        |             |          |         | Wdr70  | 19.8593   | 11.5638  | -0.780208        | 19.8603      | 11.5648       | -0.7801471       | 0.00689996 | No      |
|      |       |        |             |          |         | Wdr72  | 0         | 19.4649  | inf              | 0.001        | 19.4659       | 14.2486614       | 0.00014629 | No      |
|      |       |        |             |          |         | Wdr73  | 5.59565   | 25.6388  | 2.19595          | 5.59665      | 25.6398       | 2.19574958       | 0.00014629 | No      |
|      |       |        |             |          |         | Wdr74  | 20.9398   | 34.4726  | 0.719204         | 20.9408      | 34.4736       | 0.71917541       | 0.00438237 | No      |
|      |       |        |             |          |         | Wdr75  | 27.4099   | 13.4923  | -1.02256         | 27.4109      | 13.4933       | -1.0225065       | 0.00014629 | No      |
|      |       |        |             |          |         | Wdr76  | 5.61976   | 0.632412 | -3.15157         | 5.62076      | 0.633412      | -3.1495491       | 0.00014629 | No      |
|      |       |        |             |          |         | Wdr91  | 13.3772   | 75.0062  | 2.48723          | 13.3782      | 75.0072       | 2.48714507       | 0.00014629 | No      |
|      |       |        |             |          |         | Wdsub1 | 1.75134   | 10.0984  | 2.52759          | 1.75234      | 10.0994       | 2.52691496       | 0.00014629 | No      |
|      |       |        |             |          |         | Wfdc1  | 0         | 2.18151  | inf              | 0.001        | 2.18251       | 11.0917725       | 0.00014629 | No      |
|      |       |        |             |          |         | Wfdc10 | 0         | 4.12846  | inf              | 0.001        | 4.12946       | 12.0117374       | 0.00014629 | No      |
|      |       |        |             |          |         | Wfdc3  | 0         | 7.11471  | inf              | 0.001        | 7.11571       | 12.796792        | 0.011151   | No      |
|      |       |        |             |          |         | Wfs1   | 0.516846  | 3.80052  | 2.87839          | 0.517846     | 3.80152       | 2.87598135       | 0.00014629 | No      |
|      |       |        |             |          |         | Whsc1  | 4.14787   | 16.577   | 1.99874          | 4.14887      | 16.578        | 1.99847961       | 0.00014629 | No      |
|      |       |        |             |          |         | Wibg   | 102.447   | 31.5157  | -1.70073         | 102.448      | 31.5167       | -1.7007034       | 0.00014629 | No      |
|      |       |        |             |          |         | Wipf3  | 7.83064   | 0.456975 | -4.09894         | 7.83164      | 0.457975      | -4.0959737       | 0.00138312 | No      |
|      |       |        |             |          |         | Wipi1  | 0.112789  | 15.8711  | 7.13664          | 0.113789     | 15.8721       | 7.12398811       | 0.00053701 | No      |
|      |       |        |             |          |         | Wisp3  | 7.06798   | 1.73393  | -2.02725         | 7.06898      | 1.73493       | -2.0266246       | 0.00523722 | No      |
|      |       |        |             |          |         | Wls    | 4.85192   | 93.7     | 4.27142          | 4.85292      | 93.701        | 4.27113946       | 0.00014629 | No      |
|      |       |        |             |          |         | Wnk1   | 35.6172   | 24.6806  | -0.529196        | 35.6182      | 24.6816       | -0.5291787       | 0.0224797  | No      |
|      |       |        |             |          |         | Wnt7b  | 0         | 17.1394  | inf              | 0.001        | 17.1404       | 14.0651132       | 0.00014629 | No      |
|      |       |        |             |          |         | Wrb    | 3.9597    | 12.6515  | 1.67584          | 3.9607       | 12.6525       | 1.67559514       | 0.00014629 | No      |
|      |       |        |             |          |         | Wrn    | 12.4506   | 3.79311  | -1.71476         | 12.4516      | 3.79411       | -1.7144977       | 0.00014629 | No      |

| RRBS |       |        |             |          |         | RNAseq   |          |         |                  |              |               |                  |            |         |
|------|-------|--------|-------------|----------|---------|----------|----------|---------|------------------|--------------|---------------|------------------|------------|---------|
| gene | Blood | Kidney | methyl.diff | pMWU.fdr | Match ? | gene     | blood    | kidney  | log2(fold_ratio) | blood+ 0.001 | kidney+ 0.001 | log2(fold_ratio) | q_value    | Match ? |
|      |       |        |             |          |         | Wsb2     | 8.57128  | 47.7879 | 2.47906          | 8.57228      | 47.7889       | 2.47892468       | 0.00014629 | No      |
|      |       |        |             |          |         | Wscd1    | 0.139486 | 1.9587  | 3.8117           | 0.140486     | 1.9597        | 3.80213454       | 0.00014629 | No      |
|      |       |        |             |          |         | Wtap     | 65.7692  | 17.8507 | -1.88143         | 65.7702      | 17.8517       | -1.8813726       | 0.00014629 | No      |
|      |       |        |             |          |         | Wwc1     | 0.118723 | 92.654  | 9.60811          | 0.119723     | 92.655        | 9.59602469       | 0.00114835 | No      |
|      |       |        |             |          |         | Wwc2     | 0.173502 | 26.9079 | 7.27693          | 0.174502     | 26.9089       | 7.26869603       | 0.00352183 | No      |
|      |       |        |             |          |         | Wwc3     | 1.38052  | 4.26786 | 1.6283           | 1.38152      | 4.26886       | 1.6275944        | 0.00014629 | No      |
|      |       |        |             |          |         | Wwox     | 4.20027  | 18.1926 | 2.1148           | 4.20127      | 18.1936       | 2.11453363       | 0.00014629 | No      |
|      |       |        |             |          |         | Wwp1     | 0.847404 | 29.6188 | 5.12732          | 0.848404     | 29.6198       | 5.12566667       | 0.00014629 | No      |
|      |       |        |             |          |         | XAF1     | 21.4344  | 3.22454 | -2.73276         | 21.4354      | 3.22554       | -2.7323827       | 0.00014629 | No      |
|      |       |        |             |          |         | XBP1     | 20.7093  | 51.2674 | 1.30776          | 20.7103      | 51.2684       | 1.30772142       | 0.00014629 | No      |
|      |       |        |             |          |         | Xcl1     | 1.57321  | 14.838  | 3.23751          | 1.57421      | 14.839        | 3.23669396       | 0.00384649 | No      |
|      |       |        |             |          |         | Xdh      | 0.784965 | 12.0413 | 3.93922          | 0.785965     | 12.0423       | 3.93750208       | 0.00014629 | No      |
|      |       |        |             |          |         | Xiap     | 22.0734  | 7.60421 | -1.53744         | 22.0744      | 7.60521       | -1.5373142       | 0.00014629 | No      |
|      |       |        |             |          |         | Xkrx     | 19.5513  | 1.19785 | -4.02874         | 19.5523      | 1.19885       | -4.0276153       | 0.0300623  | No      |
|      |       |        |             |          |         | Xpnpep1  | 16.5245  | 274.737 | 4.05538          | 16.5255      | 274.738       | 4.05529064       | 0.00014629 | No      |
|      |       |        |             |          |         | Xpnpep2  | 0.208081 | 19.7433 | 6.56807          | 0.209081     | 19.7443       | 6.56123045       | 0.00014629 | No      |
|      |       |        |             |          |         | Xpo1     | 39.9743  | 15.7988 | -1.33926         | 39.9753      | 15.7998       | -1.3392026       | 0.00014629 | No      |
|      |       |        |             |          |         | Xpo4     | 9.71127  | 2.61354 | -1.89366         | 9.71227      | 2.61454       | -1.8932514       | 0.00014629 | No      |
|      |       |        |             |          |         | Xpot     | 7.26412  | 14.7079 | 1.01773          | 7.26512      | 14.7089       | 1.01763083       | 0.00014629 | No      |
|      |       |        |             |          |         | Xpr1     | 9.71171  | 6.49434 | -0.580543        | 9.71271      | 6.49534       | -0.5804688       | 0.0358739  | No      |
|      |       |        |             |          |         | Xrcc1    | 27.0408  | 52.5825 | 0.959446         | 27.0418      | 52.5835       | 0.95941899       | 0.00014629 | No      |
|      |       |        |             |          |         | Xrcc6bp1 | 6.84141  | 43.9145 | 2.68233          | 6.84241      | 43.9155       | 2.68215377       | 0.00014629 | No      |
|      |       |        |             |          |         | Xrn2     | 59.0889  | 12.8469 | -2.20147         | 59.0899      | 12.8479       | -2.201379        | 0.00014629 | No      |
|      |       |        |             |          |         | Xxylt1   | 5.25826  | 10.7318 | 1.02924          | 5.25926      | 10.7328       | 1.02909477       | 0.00230432 | No      |
|      |       |        |             |          |         | Xylb     | 5.72036  | 291.128 | 5.6694           | 5.72136      | 291.129       | 5.66915662       | 0.00014629 | No      |
|      |       |        |             |          |         | Xylt2    | 28.3421  | 10.2121 | -1.47267         | 28.3431      | 10.2131       | -1.4725767       | 0.00014629 | No      |
|      |       |        |             |          |         | Yae1d1   | 4.45217  | 7.62336 | 0.775919         | 4.45317      | 7.62436       | 0.77578355       | 0.00384649 | No      |
|      |       |        |             |          |         | Ybx1     | 127.256  | 250.079 | 0.974649         | 127.257      | 250.08        | 0.97464467       | 0.00014629 | No      |
|      |       |        |             |          |         | Yeats4   | 40.9954  | 25.4477 | -0.687926        | 40.9964      | 25.4487       | -0.6879053       | 0.00384649 | No      |
|      |       |        |             |          |         | Yes1     | 0        | 5.90991 | inf              | 0.001        | 5.91091       | 12.5291645       | 0.00014629 | No      |
|      |       |        |             |          |         | Yif1a    | 10.2194  | 29.6317 | 1.53582          | 10.2204      | 29.6327       | 1.53573842       | 0.00014629 | No      |
|      |       |        |             |          |         | Yif1b    | 20.4615  | 34.3954 | 0.749305         | 20.4625      | 34.3964       | 0.74927516       | 0.0418893  | No      |
|      |       |        |             |          |         | YME1L1   | 13.9976  | 5.18422 | -1.43298         | 13.9986      | 5.18522       | -1.4328054       | 0.00014629 | No      |
|      |       |        |             |          |         | Ypel3    | 317.544  | 122.793 | -1.37072         | 317.545      | 122.794       | -1.370721        | 0.00014629 | No      |
|      |       |        |             |          |         | Yrdc     | 36.0893  | 17.3673 | -1.0552          | 36.0903      | 17.3683       | -1.0551546       | 0.00812679 | No      |
|      |       |        |             |          |         | Ythdc1   | 78.2468  | 30.8555 | -1.3425          | 78.2478      | 30.8565       | -1.3424758       | 0.00014629 | No      |
|      |       |        |             |          |         | Ythdc2   | 10.1434  | 2.011   | -2.33456         | 10.1444      | 2.012         | -2.3339813       | 0.00014629 | No      |
|      |       |        |             |          |         | Ythdf1   | 30.9804  | 16.491  | -0.909676        | 30.9814      | 16.492        | -0.909636        | 0.00014629 | No      |
|      |       |        |             |          |         | Ythdf2   | 20.3568  | 9.63324 | -1.07942         | 20.3578      | 9.63424       | -1.0793389       | 0.00138312 | No      |
|      |       |        |             |          |         | Ythdf3   | 32.2332  | 15.9904 | -1.01134         | 32.2342      | 15.9914       | -1.0112959       | 0.00014629 | No      |
|      |       |        |             |          |         | Ywhab    | 113.08   | 66.2867 | -0.770553        | 113.081      | 66.2877       | -0.7705434       | 0.00014629 | No      |
|      |       |        |             |          |         | Ywhae    | 114.653  | 259.795 | 1.1801           | 114.654      | 259.796       | 1.18009253       | 0.00014629 | No      |

| RRBS |       |        |             |          |         | RNAseq  |           |          |                  |              |               |                  |            |         |
|------|-------|--------|-------------|----------|---------|---------|-----------|----------|------------------|--------------|---------------|------------------|------------|---------|
| gene | Blood | Kidney | methyl.diff | pMWU.fdr | Match ? | gene    | blood     | kidney   | log2(fold_ratio) | blood+ 0.001 | kidney+ 0.001 | log2(fold_ratio) | q_value    | Match ? |
|      |       |        |             |          |         | Ywhag   | 11.4007   | 32.6861  | 1.51955          | 11.4017      | 32.6871       | 1.51947244       | 0.00014629 | No      |
|      |       |        |             |          |         | Ywhah   | 143.624   | 95.5519  | -0.587936        | 143.625      | 95.5529       | -0.5879353       | 0.00307875 | No      |
|      |       |        |             |          |         | Ywhaq   | 134.953   | 89.6754  | -0.589667        | 134.954      | 89.6764       | -0.5896675       | 0.00219102 | No      |
|      |       |        |             |          |         | YWHAZ   | 326.629   | 187.742  | -0.798905        | 326.63       | 187.743       | -0.7988982       | 0.00041099 | No      |
|      |       |        |             |          |         | Yy1     | 50.0045   | 28.168   | -0.828004        | 50.0055      | 28.169        | -0.8279784       | 0.0107557  | No      |
|      |       |        |             |          |         | Zadh2   | 7.93546   | 14.5209  | 0.871748         | 7.93646      | 14.5219       | 0.87166267       | 0.00014629 | No      |
|      |       |        |             |          |         | Zak     | 1.10607   | 7.11297  | 2.68501          | 1.10707      | 7.11397       | 2.68390844       | 0.00014629 | No      |
|      |       |        |             |          |         | Zap70   | 127.525   | 20.1093  | -2.66484         | 127.526      | 20.1103       | -2.6647849       | 0.00014629 | No      |
|      |       |        |             |          |         | Zbed3   | 5.69853   | 14.5097  | 1.34835          | 5.69953      | 14.5107       | 1.34820226       | 0.00014629 | No      |
|      |       |        |             |          |         | Zbed4   | 6.49004   | 2.86041  | -1.182           | 6.49104      | 2.86141       | -1.1817234       | 0.00014629 | No      |
|      |       |        |             |          |         | Zbp1    | 64.4608   | 23.6227  | -1.44825         | 64.4618      | 23.6237       | -1.4482095       | 0.00014629 | No      |
|      |       |        |             |          |         | Zbtb1   | 27.4817   | 4.58677  | -2.58292         | 27.4827      | 4.58777       | -2.5826588       | 0.00014629 | No      |
|      |       |        |             |          |         | Zbtb11  | 14.7667   | 5.19749  | -1.50646         | 14.7677      | 5.19849       | -1.5062806       | 0.0336436  | No      |
|      |       |        |             |          |         | Zbtb25  | 10.0521   | 1.05372  | -3.25393         | 10.0531      | 1.05472       | -3.2527085       | 0.00053701 | No      |
|      |       |        |             |          |         | Zbtb32  | 5.66289   | 2.57602  | -1.1364          | 5.66389      | 2.57702       | -1.1360895       | 0.0112518  | No      |
|      |       |        |             |          |         | Zbtb34  | 9.53689   | 0.946507 | -3.33283         | 9.53789      | 0.947507      | -3.3314616       | 0.00014629 | No      |
|      |       |        |             |          |         | Zbtb37  | 2.94866   | 0.533393 | -2.46679         | 2.94966      | 0.534393      | -2.4645757       | 0.00014629 | No      |
|      |       |        |             |          |         | Zbtb38  | 2.53368   | 4.19528  | 0.727532         | 2.53468      | 4.19628       | 0.72730733       | 0.00994441 | No      |
|      |       |        |             |          |         | Zbtb41  | 4.27454   | 2.18297  | -0.969475        | 4.27554      | 2.18397       | -0.9691536       | 0.00053701 | No      |
|      |       |        |             |          |         | Zbtb42  | 1.62833   | 3.37195  | 1.05018          | 1.62933      | 3.37295       | 1.0497321        | 0.00720409 | No      |
|      |       |        |             |          |         | Zbtb43  | 7.30628   | 3.4586   | -1.07895         | 7.30728      | 3.4596        | -1.0787292       | 0.00014629 | No      |
|      |       |        |             |          |         | Zbtb44  | 24.5695   | 5.44508  | -2.17385         | 24.5705      | 5.44608       | -2.1736371       | 0.00014629 | No      |
|      |       |        |             |          |         | Zbtb48  | 5.31132   | 16.4431  | 1.63034          | 5.31232      | 16.4441       | 1.63015609       | 0.00014629 | No      |
|      |       |        |             |          |         | Zbtb6   | 9.21363   | 2.66471  | -1.78979         | 9.21463      | 2.66571       | -1.7894064       | 0.00014629 | No      |
|      |       |        |             |          |         | Zbtb7c  | 0.0514585 | 1.59111  | 4.95048          | 0.0524585    | 1.59211       | 4.92361965       | 0.00513162 | No      |
|      |       |        |             |          |         | Zbtb8a  | 0.35321   | 3.03141  | 3.10139          | 0.35421      | 3.03241       | 3.09778798       | 0.0102511  | No      |
|      |       |        |             |          |         | Zbtb8os | 41.5535   | 84.7786  | 1.02873          | 41.5545      | 84.7796       | 1.02871244       | 0.00102864 | No      |
|      |       |        |             |          |         | Zc3h11a | 67.0318   | 17.9855  | -1.89801         | 67.0328      | 17.9865       | -1.8979527       | 0.00014629 | No      |
|      |       |        |             |          |         | Zc3h12a | 8.27588   | 5.52425  | -0.583134        | 8.27688      | 5.52525       | -0.5830473       | 0.0476655  | No      |
|      |       |        |             |          |         | Zc3h12d | 46.4292   | 2.46529  | -4.2352          | 46.4302      | 2.46629       | -4.2346491       | 0.00014629 | No      |
|      |       |        |             |          |         | Zc3h13  | 18.4389   | 11.0344  | -0.740743        | 18.4399      | 11.0354       | -0.7406919       | 0.00090728 | No      |
|      |       |        |             |          |         | Zc3h15  | 69.8835   | 39.2709  | -0.83149         | 69.8845      | 39.2719       | -0.8314751       | 0.00014629 | No      |
|      |       |        |             |          |         | Zc3h4   | 25.75     | 9.6765   | -1.41202         | 25.751       | 9.6775        | -1.4119222       | 0.00014629 | No      |
|      |       |        |             |          |         | Zc3h7a  | 100.681   | 15.6686  | -2.68385         | 100.682      | 15.6696       | -2.6837655       | 0.00014629 | No      |
|      |       |        |             |          |         | Zc3hav1 | 85.3065   | 4.89605  | -4.12296         | 85.3075      | 4.89705       | -4.1226878       | 0.00014629 | No      |
|      |       |        |             |          |         | Zc4h2   | 6.67964   | 2.71726  | -1.29762         | 6.68064      | 2.71826       | -1.2973029       | 0.00078603 | No      |
|      |       |        |             |          |         | Zcchc11 | 13.3376   | 2.642    | -2.33579         | 13.3386      | 2.643         | -2.3353589       | 0.00014629 | No      |
|      |       |        |             |          |         | Zcchc18 | 3.84722   | 0        | -inf             | 3.84822      | 0.001         | -11.909976       | 0.00014629 | No      |
|      |       |        |             |          |         | Zcchc2  | 31.1686   | 3.6726   | -3.08522         | 31.1696      | 3.6736        | -3.0848732       | 0.00014629 | No      |
|      |       |        |             |          |         | Zcchc6  | 29.2429   | 8.91625  | -1.71358         | 29.2439      | 8.91725       | -1.713465        | 0.00014629 | No      |
|      |       |        |             |          |         | Zcchc7  | 58.4187   | 19.9485  | -1.55015         | 58.4197      | 19.9495       | -1.5501024       | 0.00014629 | No      |
|      |       |        |             |          |         | Zcchc8  | 33.1546   | 13.8249  | -1.26194         | 33.1556      | 13.8259       | -1.2618792       | 0.00014629 | No      |

| RRBS |       |        |             |          |         | RNAseq  |           |         |                  |              |               |                  |            |         |
|------|-------|--------|-------------|----------|---------|---------|-----------|---------|------------------|--------------|---------------|------------------|------------|---------|
| gene | Blood | Kidney | methyl.diff | pMWU.fdr | Match ? | gene    | blood     | kidney  | log2(fold_ratio) | blood+ 0.001 | kidney+ 0.001 | log2(fold_ratio) | q_value    | Match ? |
|      |       |        |             |          |         | Zcchc9  | 27.0972   | 16.5224 | -0.713718        | 27.0982      | 16.5234       | -0.7136864       | 0.00173187 | No      |
|      |       |        |             |          |         | Zdhhc1  | 0.329063  | 27.4171 | 6.38057          | 0.330063     | 27.4181       | 6.37624337       | 0.00014629 | No      |
|      |       |        |             |          |         | Zdhhc14 | 9.02401   | 3.96016 | -1.18821         | 9.02501      | 3.96116       | -1.1880056       | 0.020542   | No      |
|      |       |        |             |          |         | Zdhhc15 | 0.112488  | 6.34054 | 5.81676          | 0.113488     | 6.34154       | 5.80422157       | 0.0128484  | No      |
|      |       |        |             |          |         | Zdhhc17 | 21.479    | 3.72728 | -2.52673         | 21.48        | 3.72828       | -2.5264119       | 0.00014629 | No      |
|      |       |        |             |          |         | ZDHC2   | 0.0871497 | 5.52436 | 5.98617          | 0.0881497    | 5.52536       | 5.969969         | 0.00028114 | No      |
|      |       |        |             |          |         | Zdhhc20 | 12.046    | 4.43978 | -1.43999         | 12.047       | 4.44078       | -1.4397889       | 0.00014629 | No      |
|      |       |        |             |          |         | Zdhhc23 | 1.09769   | 6.31091 | 2.52338          | 1.09869      | 6.31191       | 2.52229225       | 0.00014629 | No      |
|      |       |        |             |          |         | Zdhhc24 | 3.48335   | 1.94743 | -0.838906        | 3.48435      | 1.94843       | -0.8385774       | 0.0484417  | No      |
|      |       |        |             |          |         | Zdhhc4  | 17.2227   | 32.9882 | 0.937638         | 17.2237      | 32.9892       | 0.9375987        | 0.00014629 | No      |
|      |       |        |             |          |         | Zdhhc8  | 10.1767   | 6.39017 | -0.67135         | 10.1777      | 6.39117       | -0.6712596       | 0.0170801  | No      |
|      |       |        |             |          |         | Zdhhc9  | 4.45741   | 10.4993 | 1.23602          | 4.45841      | 10.5003       | 1.23582935       | 0.00014629 | No      |
|      |       |        |             |          |         | Zeb1    | 9.31192   | 2.14719 | -2.11663         | 9.31292      | 2.14819       | -2.116112        | 0.00014629 | No      |
|      |       |        |             |          |         | Zfand3  | 59.963    | 39.5069 | -0.601968        | 59.964       | 39.5079       | -0.6019555       | 0.0182953  | No      |
|      |       |        |             |          |         | Zfand5  | 23.4421   | 34.021  | 0.537323         | 23.4431      | 34.022        | 0.5373046        | 0.00843988 | No      |
|      |       |        |             |          |         | Zfand6  | 111.454   | 53.3298 | -1.06344         | 111.455      | 53.3308       | -1.0634205       | 0.00014629 | No      |
|      |       |        |             |          |         | Zfat    | 43.5901   | 3.46468 | -3.65321         | 43.5911      | 3.46568       | -3.6528233       | 0.00014629 | No      |
|      |       |        |             |          |         | Zfc3h1  | 66.8497   | 9.44272 | -2.82365         | 66.8507      | 9.44372       | -2.8235155       | 0.00014629 | No      |
|      |       |        |             |          |         | Zfp101  | 8.64326   | 1.25611 | -2.78261         | 8.64426      | 1.25711       | -2.7816316       | 0.00014629 | No      |
|      |       |        |             |          |         | Zfp105  | 4.17279   | 7.04325 | 0.755228         | 4.17379      | 7.04425       | 0.7550881        | 0.023877   | No      |
|      |       |        |             |          |         | Zfp112  | 0.580025  | 1.38198 | 1.25255          | 0.581025     | 1.38298       | 1.25110815       | 0.0194106  | No      |
|      |       |        |             |          |         | Zfp120  | 9.57805   | 1.63338 | -2.55187         | 9.57905      | 1.63438       | -2.5511391       | 0.00014629 | No      |
|      |       |        |             |          |         | Zfp128  | 4.90237   | 2.1903  | -1.16235         | 4.90337      | 2.1913        | -1.1619866       | 0.00090728 | No      |
|      |       |        |             |          |         | Zfp131  | 31.2708   | 5.41221 | -2.53053         | 31.2718      | 5.41321       | -2.530306        | 0.00014629 | No      |
|      |       |        |             |          |         | Zfp142  | 22.0471   | 10.82   | -1.02688         | 22.0481      | 10.821        | -1.0268205       | 0.00028114 | No      |
|      |       |        |             |          |         | Zfp143  | 10.0298   | 6.45944 | -0.634813        | 10.0308      | 6.46044       | -0.6347323       | 0.0103501  | No      |
|      |       |        |             |          |         | Zfp146  | 23.0192   | 7.11716 | -1.69347         | 23.0202      | 7.11816       | -1.6933241       | 0.00669647 | No      |
|      |       |        |             |          |         | Zfp157  | 6.9714    | 3.67248 | -0.924695        | 6.9724       | 3.67348       | -0.9245079       | 0.00730705 | No      |
|      |       |        |             |          |         | Zfp161  | 12.3466   | 5.66167 | -1.12481         | 12.3476      | 5.66267       | -1.1246763       | 0.00480938 | No      |
|      |       |        |             |          |         | Zfp167  | 0.268426  | 1.18349 | 2.14045          | 0.269426     | 1.18449       | 2.13630503       | 0.00491494 | No      |
|      |       |        |             |          |         | Zfp169  | 4.10479   | 0.7194  | -2.51244         | 4.10579      | 0.7204        | -2.5107898       | 0.00014629 | No      |
|      |       |        |             |          |         | Zfp18   | 16.6035   | 10.2486 | -0.696067        | 16.6045      | 10.2496       | -0.6960067       | 0.00659461 | No      |
|      |       |        |             |          |         | Zfp180  | 17.8346   | 10.7526 | -0.729994        | 17.8356      | 10.7536       | -0.72994         | 0.00041099 | No      |
|      |       |        |             |          |         | Zfp182  | 10.9521   | 2.30429 | -2.24881         | 10.9531      | 2.30529       | -2.2483191       | 0.00014629 | No      |
|      |       |        |             |          |         | Zfp185  | 0.0322027 | 7.16881 | 7.79841          | 0.0332027    | 7.16981       | 7.75449051       | 0.0256152  | No      |
|      |       |        |             |          |         | Zfp187  | 60.7655   | 9.67601 | -2.65077         | 60.7665      | 9.67701       | -2.6506429       | 0.00014629 | No      |
|      |       |        |             |          |         | Zfp189  | 1.92374   | 3.33056 | 0.791852         | 1.92474      | 3.33156       | 0.7915343        | 0.0434133  | No      |
|      |       |        |             |          |         | Zfp192  | 2.45018   | 1.18815 | -1.04417         | 2.45118      | 1.18915       | -1.0435457       | 0.00184429 | No      |
|      |       |        |             |          |         | ZFP212  | 14.1014   | 4.48525 | -1.65258         | 14.1024      | 4.48625       | -1.6523588       | 0.00014629 | No      |
|      |       |        |             |          |         | Zfp213  | 6.88085   | 12.3621 | 0.845268         | 6.88185      | 12.3631       | 0.84517219       | 0.00523722 | No      |
|      |       |        |             |          |         | Zfp217  | 19.137    | 4.81046 | -1.99212         | 19.138       | 4.81146       | -1.9918934       | 0.00014629 | No      |
|      |       |        |             |          |         | Zfp236  | 14.1988   | 2.40955 | -2.55893         | 14.1998      | 2.41055       | -2.5584364       | 0.00014629 | No      |

| RRBS |       |        |             |          |         | RNAseq  |          |          |                  |              |               |                  |            |         |
|------|-------|--------|-------------|----------|---------|---------|----------|----------|------------------|--------------|---------------|------------------|------------|---------|
| gene | Blood | Kidney | methyl.diff | pMWU.fdr | Match ? | gene    | blood    | kidney   | log2(fold_ratio) | blood+ 0.001 | kidney+ 0.001 | log2(fold_ratio) | q_value    | Match ? |
|      |       |        |             |          |         | Zfp238  | 34.663   | 8.33906  | -2.05544         | 34.664       | 8.34006       | -2.0553085       | 0.00014629 | No      |
|      |       |        |             |          |         | Zfp251  | 6.49615  | 3.73572  | -0.798199        | 6.49715      | 3.73672       | -0.7980345       | 0.00914429 | No      |
|      |       |        |             |          |         | Zfp259  | 56.5262  | 32.0239  | -0.819769        | 56.5272      | 32.0249       | -0.8197512       | 0.00014629 | No      |
|      |       |        |             |          |         | Zfp26   | 9.21558  | 2.30219  | -2.00107         | 9.21658      | 2.30319       | -2.0005981       | 0.00014629 | No      |
|      |       |        |             |          |         | Zfp263  | 7.43263  | 3.08209  | -1.26996         | 7.43363      | 3.08309       | -1.2696899       | 0.00014629 | No      |
|      |       |        |             |          |         | Zfp275  | 6.80812  | 1.17178  | -2.53856         | 6.80912      | 1.17278       | -2.537536        | 0.00014629 | No      |
|      |       |        |             |          |         | Zfp277  | 21.2986  | 40.578   | 0.92994          | 21.2996      | 40.579        | 0.92990698       | 0.00014629 | No      |
|      |       |        |             |          |         | Zfp280b | 1.43202  | 0.666849 | -1.10262         | 1.43302      | 0.667849      | -1.1014649       | 0.0104529  | No      |
|      |       |        |             |          |         | Zfp280c | 4.93501  | 1.40169  | -1.81588         | 4.93601      | 1.40269       | -1.8151491       | 0.00014629 | No      |
|      |       |        |             |          |         | Zfp280d | 22.3489  | 7.5961   | -1.55687         | 22.3499      | 7.5971        | -1.5567477       | 0.00014629 | No      |
|      |       |        |             |          |         | Zfp281  | 10.1794  | 2.16884  | -2.23066         | 10.1804      | 2.16984       | -2.2301337       | 0.00014629 | No      |
|      |       |        |             |          |         | Zfp282  | 2.74711  | 4.11699  | 0.583678         | 2.74811      | 4.11799       | 0.58350057       | 0.0426261  | No      |
|      |       |        |             |          |         | Zfp287  | 6.80266  | 3.44943  | -0.979742        | 6.80366      | 3.45043       | -0.9795349       | 0.00427532 | No      |
|      |       |        |             |          |         | Zfp292  | 14.0823  | 2.1211   | -2.73099         | 14.0833      | 2.1221        | -2.7304209       | 0.00014629 | No      |
|      |       |        |             |          |         | Zfp316  | 1.0857   | 2.58179  | 1.24975          | 1.0867       | 2.58279       | 1.24897663       | 0.00252712 | No      |
|      |       |        |             |          |         | Zfp317  | 11.196   | 3.13429  | -1.83677         | 11.197       | 3.13529       | -1.8364414       | 0.00014629 | No      |
|      |       |        |             |          |         | Zfp319  | 3.94732  | 1.01552  | -1.95866         | 3.94832      | 1.01652       | -1.9576003       | 0.00028114 | No      |
|      |       |        |             |          |         | ZFP324  | 3.70218  | 1.47117  | -1.33141         | 3.70318      | 1.47217       | -1.3308204       | 0.00014629 | No      |
|      |       |        |             |          |         | Zfp329  | 2.09504  | 0.833269 | -1.33012         | 2.09604      | 0.834269      | -1.3290817       | 0.00014629 | No      |
|      |       |        |             |          |         | Zfp330  | 28.8225  | 17.4248  | -0.726053        | 28.8235      | 17.4258       | -0.7260206       | 0.00184429 | No      |
|      |       |        |             |          |         | Zfp346  | 5.31652  | 13.9036  | 1.3869           | 5.31752      | 13.9046       | 1.38673678       | 0.00014629 | No      |
|      |       |        |             |          |         | Zfp347  | 11.3958  | 2.57985  | -2.14315         | 11.3968      | 2.58085       | -2.1427106       | 0.011151   | No      |
|      |       |        |             |          |         | Zfp354a | 0.531222 | 28.2061  | 5.73055          | 0.532222     | 28.2071       | 5.72788639       | 0.00014629 | No      |
|      |       |        |             |          |         | Zfp354c | 4.94516  | 0.366647 | -3.75355         | 4.94616      | 0.367647      | -3.7499158       | 0.00014629 | No      |
|      |       |        |             |          |         | Zfp3612 | 456.216  | 37.0959  | -3.62039         | 456.217      | 37.0969       | -3.6203497       | 0.00014629 | No      |
|      |       |        |             |          |         | Zfp382  | 2.73232  | 0.710803 | -1.9426          | 2.73332      | 0.711803      | -1.9411045       | 0.00252712 | No      |
|      |       |        |             |          |         | Zfp383  | 5.54416  | 2.16603  | -1.35592         | 5.54516      | 2.16703       | -1.35551         | 0.00014629 | No      |
|      |       |        |             |          |         | Zfp384  | 34.9015  | 25.4342  | -0.456521        | 34.9025      | 25.4352       | -0.4565039       | 0.0352589  | No      |
|      |       |        |             |          |         | Zfp385b | 0        | 6.35763  | inf              | 0.001        | 6.35863       | 12.6345002       | 0.00014629 | No      |
|      |       |        |             |          |         | Zfp385c | 14.7888  | 1.67903  | -3.1388          | 14.7898      | 1.68003       | -3.1380436       | 0.00751085 | No      |
|      |       |        |             |          |         | Zfp386  | 56.191   | 13.6837  | -2.03788         | 56.192       | 13.6847       | -2.0378009       | 0.00014629 | No      |
|      |       |        |             |          |         | Zfp394  | 16.0286  | 4.88762  | -1.71345         | 16.0296      | 4.88862       | -1.7132393       | 0.00014629 | No      |
|      |       |        |             |          |         | Zfp398  | 4.51454  | 1.43603  | -1.65249         | 4.51554      | 1.43703       | -1.6518083       | 0.00014629 | No      |
|      |       |        |             |          |         | Zfp40   | 2.95101  | 0.389205 | -2.92261         | 2.95201      | 0.390205      | -2.9193934       | 0.00014629 | No      |
|      |       |        |             |          |         | Zfp407  | 11.5927  | 4.81637  | -1.26719         | 11.5937      | 4.81737       | -1.2670234       | 0.0141124  | No      |
|      |       |        |             |          |         | Zfp41   | 2.95151  | 1.04401  | -1.49931         | 2.95251      | 1.04501       | -1.4984252       | 0.00028114 | No      |
|      |       |        |             |          |         | Zfp414  | 21.678   | 34.9081  | 0.687335         | 21.679       | 34.9091       | 0.68730495       | 0.00330073 | No      |
|      |       |        |             |          |         | Zfp418  | 0.285243 | 1.28983  | 2.17692          | 0.286243     | 1.29083       | 2.17298669       | 0.00090728 | No      |
|      |       |        |             |          |         | Zfp422  | 15.681   | 11.1114  | -0.496977        | 15.682       | 11.1124       | -0.4969391       | 0.0413818  | No      |
|      |       |        |             |          |         | Zfp428  | 2.73805  | 6.75218  | 1.30221          | 2.73905      | 6.75318       | 1.30189141       | 0.0373986  | No      |
|      |       |        |             |          |         | Zfp444  | 10.6933  | 23.6244  | 1.14357          | 10.6943      | 23.6254       | 1.1434967        | 0.00053701 | No      |
|      |       |        |             |          |         | Zfp445  | 10.6764  | 5.90097  | -0.855396        | 10.6774      | 5.90197       | -0.8552919       | 0.00014629 | No      |



| RRBS |       |        |             |          |         | RNAseq  |           |          |                  |              |               |                  |            |         |
|------|-------|--------|-------------|----------|---------|---------|-----------|----------|------------------|--------------|---------------|------------------|------------|---------|
| gene | Blood | Kidney | methyl.diff | pMWU.fdr | Match ? | gene    | blood     | kidney   | log2(fold_ratio) | blood+ 0.001 | kidney+ 0.001 | log2(fold_ratio) | q_value    | Match ? |
|      |       |        |             |          |         | Zfp455  | 42.1379   | 12.1753  | -1.79116         | 42.1389      | 12.1763       | -1.7910768       | 0.00014629 | No      |
|      |       |        |             |          |         | Zfp462  | 0.0909462 | 7.62683  | 6.38993          | 0.0919462    | 7.62783       | 6.37433893       | 0.00669647 | No      |
|      |       |        |             |          |         | Zfp467  | 5.92242   | 14.055   | 1.24682          | 5.92342      | 14.056        | 1.24668381       | 0.00014629 | No      |
|      |       |        |             |          |         | Zfp472  | 22.5503   | 3.38142  | -2.73744         | 22.5513      | 3.38242       | -2.7370829       | 0.00014629 | No      |
|      |       |        |             |          |         | Zfp496  | 13.2661   | 7.27972  | -0.865785        | 13.2671      | 7.28072       | -0.8657          | 0.00028114 | No      |
|      |       |        |             |          |         | Zfp498  | 10.8119   | 4.93052  | -1.13281         | 10.8129      | 4.93152       | -1.1326492       | 0.0077167  | No      |
|      |       |        |             |          |         | Zfp503  | 0.111502  | 22.4719  | 7.65491          | 0.112502     | 22.4729       | 7.64209185       | 0.00149937 | No      |
|      |       |        |             |          |         | Zfp507  | 9.9065    | 2.15715  | -2.19925         | 9.9075       | 2.15815       | -2.1987259       | 0.00014629 | No      |
|      |       |        |             |          |         | Zfp512b | 13.137    | 8.52398  | -0.624031        | 13.138       | 8.52498       | -0.6239773       | 0.00384649 | No      |
|      |       |        |             |          |         | Zfp518a | 6.01096   | 1.45732  | -2.04428         | 6.01196      | 1.45832       | -2.0435281       | 0.00014629 | No      |
|      |       |        |             |          |         | Zfp52   | 25.2098   | 7.55606  | -1.73828         | 25.2108      | 7.55706       | -1.7381449       | 0.00014629 | No      |
|      |       |        |             |          |         | Zfp523  | 4.79248   | 22.9274  | 2.25823          | 4.79348      | 22.9284       | 2.25799037       | 0.00014629 | No      |
|      |       |        |             |          |         | Zfp54   | 60.9735   | 11.3064  | -2.43105         | 60.9745      | 11.3074       | -2.4309388       | 0.00014629 | No      |
|      |       |        |             |          |         | Zfp553  | 6.93445   | 4.29502  | -0.691115        | 6.93545      | 4.29602       | -0.6909888       | 0.0185598  | No      |
|      |       |        |             |          |         | Zfp574  | 3.01106   | 10.798   | 1.84242          | 3.01206      | 10.799        | 1.84207531       | 0.00014629 | No      |
|      |       |        |             |          |         | Zfp592  | 13.5677   | 7.82188  | -0.794586        | 13.5687      | 7.82288       | -0.7945108       | 0.00014629 | No      |
|      |       |        |             |          |         | Zfp597  | 5.72842   | 2.00083  | -1.51754         | 5.72942      | 2.00183       | -1.5170696       | 0.00066215 | No      |
|      |       |        |             |          |         | Zfp61   | 23.2526   | 37.7054  | 0.697381         | 23.2536      | 37.7064       | 0.69735533       | 0.00689996 | No      |
|      |       |        |             |          |         | Zfp612  | 1.65299   | 4.12992  | 1.32104          | 1.65399      | 4.13092       | 1.32051261       | 0.00014629 | No      |
|      |       |        |             |          |         | Zfp626  | 3.27903   | 0.652422 | -2.32939         | 3.28003      | 0.653422      | -2.3276221       | 0.00195831 | No      |
|      |       |        |             |          |         | Zfp628  | 8.96046   | 2.78697  | -1.68488         | 8.96146      | 2.78797       | -1.6845188       | 0.00014629 | No      |
|      |       |        |             |          |         | Zfp652  | 27.9412   | 8.27559  | -1.75546         | 27.9422      | 8.27659       | -1.7553372       | 0.00014629 | No      |
|      |       |        |             |          |         | Zfp654  | 11.3847   | 2.59503  | -2.13328         | 11.3857      | 2.59603       | -2.132844        | 0.00014629 | No      |
|      |       |        |             |          |         | Zfp68   | 13.4751   | 6.91696  | -0.96208         | 13.4761      | 6.91796       | -0.9619845       | 0.00014629 | No      |
|      |       |        |             |          |         | Zfp691  | 2.59293   | 9.90012  | 1.93286          | 2.59393      | 9.90112       | 1.93245218       | 0.00014629 | No      |
|      |       |        |             |          |         | Zfp709  | 7.22424   | 2.46696  | -1.55011         | 7.22524      | 2.46796       | -1.5497265       | 0.00014629 | No      |
|      |       |        |             |          |         | Zfp746  | 14.5807   | 6.66944  | -1.12842         | 14.5817      | 6.67044       | -1.1283051       | 0.00041099 | No      |
|      |       |        |             |          |         | Zfp768  | 0.211861  | 10.9083  | 5.68617          | 0.212861     | 10.9093       | 5.67950308       | 0.00014629 | No      |
|      |       |        |             |          |         | Zfp770  | 2.38523   | 0.705169 | -1.75809         | 2.38623      | 0.706169      | -1.7566477       | 0.00149937 | No      |
|      |       |        |             |          |         | Zfp771  | 20.3537   | 63.0799  | 1.63189          | 20.3547      | 63.0809       | 1.63184129       | 0.00014629 | No      |
|      |       |        |             |          |         | Zfp775  | 5.90612   | 25.9727  | 2.13671          | 5.90712      | 25.9737       | 2.13652472       | 0.00014629 | No      |
|      |       |        |             |          |         | Zfp777  | 18.744    | 10.6521  | -0.815297        | 18.745       | 10.6531       | -0.8152325       | 0.00078603 | No      |
|      |       |        |             |          |         | Zfp787  | 9.27637   | 18.9851  | 1.03324          | 9.27737      | 18.9861       | 1.0331558        | 0.00028114 | No      |
|      |       |        |             |          |         | Zfp788  | 13.9932   | 4.45449  | -1.65139         | 13.9942      | 4.45549       | -1.651173        | 0.00014629 | No      |
|      |       |        |             |          |         | Zfp799  | 3.37931   | 1.24866  | -1.43634         | 3.38031      | 1.24966       | -1.4356199       | 0.00014629 | No      |
|      |       |        |             |          |         | Zfp800  | 19.7221   | 3.19802  | -2.62456         | 19.7231      | 3.19902       | -2.6241844       | 0.00014629 | No      |
|      |       |        |             |          |         | Zfp81   | 3.11571   | 0.202613 | -3.94276         | 3.11671      | 0.203613      | -3.9361223       | 0.0234023  | No      |
|      |       |        |             |          |         | Zfp821  | 10.2596   | 19.2008  | 0.904194         | 10.2606      | 19.2018       | 0.90412646       | 0.00184429 | No      |
|      |       |        |             |          |         | Zfp830  | 17.384    | 9.44305  | -0.880437        | 17.385       | 9.44405       | -0.8803655       | 0.00296747 | No      |
|      |       |        |             |          |         | Zfp84   | 9.05721   | 3.34599  | -1.43663         | 9.05821      | 3.34699       | -1.4363617       | 0.00014629 | No      |
|      |       |        |             |          |         | Zfp85   | 3.29855   | 1.193    | -1.46724         | 3.29955      | 1.194         | -1.4664664       | 0.0112518  | No      |
|      |       |        |             |          |         | Zfp850  | 4.79778   | 1.78259  | -1.42839         | 4.79878      | 1.78359       | -1.4278837       | 0.0172634  | No      |

| RRBS |       |        |             |          |         | RNAseq  |           |          |                  |              |               |                  |            |         |
|------|-------|--------|-------------|----------|---------|---------|-----------|----------|------------------|--------------|---------------|------------------|------------|---------|
| gene | Blood | Kidney | methyl.diff | pMWU.fdr | Match ? | gene    | blood     | kidney   | log2(fold_ratio) | blood+ 0.001 | kidney+ 0.001 | log2(fold_ratio) | q_value    | Match ? |
|      |       |        |             |          |         | Zfp862  | 4.21423   | 0.416386 | -3.33928         | 4.21523      | 0.417386      | -3.3361572       | 0.00014629 | No      |
|      |       |        |             |          |         | Zfp866  | 6.10811   | 2.63118  | -1.21502         | 6.10911      | 2.63218       | -1.2147041       | 0.00173187 | No      |
|      |       |        |             |          |         | Zfp868  | 100.383   | 25.0827  | -2.00075         | 100.384      | 25.0837       | -2.0007073       | 0.00014629 | No      |
|      |       |        |             |          |         | ZFP87   | 13.587    | 6.83212  | -0.991827        | 13.588       | 6.83312       | -0.9917168       | 0.00014629 | No      |
|      |       |        |             |          |         | Zfp870  | 0.221234  | 1.41253  | 2.67464          | 0.222234     | 1.41353       | 2.66915104       | 0.00576532 | No      |
|      |       |        |             |          |         | Zfp871  | 15.4376   | 6.00848  | -1.36138         | 15.4386      | 6.00948       | -1.3612299       | 0.00014629 | No      |
|      |       |        |             |          |         | Zfp882  | 3.38967   | 1.02568  | -1.72457         | 3.39067      | 1.02668       | -1.7235838       | 0.016989   | No      |
|      |       |        |             |          |         | Zfp943  | 10.0338   | 3.35654  | -1.57982         | 10.0348      | 3.35754       | -1.5795354       | 0.00114835 | No      |
|      |       |        |             |          |         | Zfp954  | 5.67581   | 8.81308  | 0.63482          | 5.67681      | 8.81408       | 0.63472953       | 0.0487963  | No      |
|      |       |        |             |          |         | Zfp955a | 3.0029    | 5.05002  | 0.749932         | 3.0039       | 5.05102       | 0.74973797       | 0.0233164  | No      |
|      |       |        |             |          |         | Zfp956  | 10.2185   | 2.3704   | -2.10797         | 10.2195      | 2.3714        | -2.1075137       | 0.00014629 | No      |
|      |       |        |             |          |         | Zfp958  | 52.7029   | 33.8859  | -0.637195        | 52.7039      | 33.8869       | -0.6371821       | 0.0477475  | No      |
|      |       |        |             |          |         | Zfp961  | 4.86235   | 1.5194   | -1.67815         | 4.86335      | 1.5204        | -1.6774995       | 0.00102864 | No      |
|      |       |        |             |          |         | Zfpm1   | 23.702    | 5.9962   | -1.98289         | 23.703       | 5.9972        | -1.9827087       | 0.00014629 | No      |
|      |       |        |             |          |         | ZFR     | 22.4067   | 13.6743  | -0.712462        | 22.4077      | 13.6753       | -0.7124221       | 0.00053701 | No      |
|      |       |        |             |          |         | Zfx     | 16.3095   | 3.90068  | -2.06391         | 16.3105      | 3.90168       | -2.0636336       | 0.00014629 | No      |
|      |       |        |             |          |         | Zfyve16 | 1.26958   | 7.5719   | 2.5763           | 1.27058      | 7.5729        | 2.57535866       | 0.00014629 | No      |
|      |       |        |             |          |         | Zfyve19 | 17.6408   | 40.7807  | 1.20897          | 17.6418      | 40.7817       | 1.20892415       | 0.00014629 | No      |
|      |       |        |             |          |         | Zfyve20 | 10.1805   | 4.34686  | -1.22776         | 10.1815      | 4.34786       | -1.2275727       | 0.026232   | No      |
|      |       |        |             |          |         | Zfyve21 | 2.71267   | 61.5532  | 4.50405          | 2.71367      | 61.5542       | 4.5035401        | 0.00014629 | No      |
|      |       |        |             |          |         | Zfyve27 | 13.2196   | 8.09214  | -0.708087        | 13.2206      | 8.09314       | -0.7080162       | 0.00448672 | No      |
|      |       |        |             |          |         | Zfyve9  | 0.0797443 | 4.59685  | 5.84912          | 0.0807443    | 4.59785       | 5.83145517       | 0.00041099 | No      |
|      |       |        |             |          |         | Zhx3    | 7.25158   | 22.6542  | 1.64341          | 7.25258      | 22.6552       | 1.64327602       | 0.0176431  | No      |
|      |       |        |             |          |         | Zmat3   | 3.71357   | 1.54431  | -1.26585         | 3.71457      | 1.54531       | -1.2652989       | 0.00014629 | No      |
|      |       |        |             |          |         | Zmiz1   | 37.4828   | 20.609   | -0.862956        | 37.4838      | 20.61         | -0.8629227       | 0.00014629 | No      |
|      |       |        |             |          |         | Zmym1   | 19.7573   | 6.7436   | -1.5508          | 19.7583      | 6.7446        | -1.550654        | 0.00014629 | No      |
|      |       |        |             |          |         | Zmym2   | 30.6608   | 12.4799  | -1.29678         | 30.6618      | 12.4809       | -1.2967204       | 0.00014629 | No      |
|      |       |        |             |          |         | Zmym4   | 6.53075   | 3.2055   | -1.0267          | 6.53175      | 3.2065        | -1.0264702       | 0.00014629 | No      |
|      |       |        |             |          |         | Zmynd11 | 47.3041   | 23.5784  | -1.0045          | 47.3051      | 23.5794       | -1.0044687       | 0.00014629 | No      |
|      |       |        |             |          |         | Zmynd15 | 0.063266  | 19.2513  | 8.24931          | 0.064266     | 19.2523       | 8.22675941       | 0.0149808  | No      |
|      |       |        |             |          |         | Zmynd8  | 58.1502   | 17.8911  | -1.70054         | 58.1512      | 17.8921       | -1.7004862       | 0.00014629 | No      |
|      |       |        |             |          |         | Znhit1  | 22.8714   | 76.8479  | 1.74846          | 22.8724      | 76.8489       | 1.74841685       | 0.00014629 | No      |
|      |       |        |             |          |         | Znhit2  | 8.18335   | 18.9635  | 1.21246          | 8.18435      | 18.9645       | 1.21236159       | 0.0255267  | No      |
|      |       |        |             |          |         | Znhit6  | 15.9471   | 32.2102  | 1.01423          | 15.9481      | 32.2112       | 1.01417785       | 0.0369619  | No      |
|      |       |        |             |          |         | Znrd1   | 94.8119   | 49.2682  | -0.94441         | 94.8129      | 49.2692       | -0.9443973       | 0.00014629 | No      |
|      |       |        |             |          |         | Znrf2   | 42.6267   | 10.0592  | -2.08324         | 42.6277      | 10.0602       | -2.0831322       | 0.00014629 | No      |
|      |       |        |             |          |         | Znrf3   | 4.71808   | 1.83289  | -1.36408         | 4.71908      | 1.83389       | -1.3635985       | 0.00078603 | No      |
|      |       |        |             |          |         | Zpbp2   | 24.5746   | 12.6943  | -0.952984        | 24.5756      | 12.6953       | -0.9529322       | 0.0308581  | No      |
|      |       |        |             |          |         | Zranb1  | 11.5275   | 4.73202  | -1.28456         | 11.5285      | 4.73302       | -1.2843719       | 0.0283457  | No      |
|      |       |        |             |          |         | Zranb3  | 2.87286   | 1.27202  | -1.17536         | 2.87386      | 1.27302       | -1.1747347       | 0.00352183 | No      |
|      |       |        |             |          |         | ZSCAN12 | 4.12233   | 9.78208  | 1.24668          | 4.12333      | 9.78308       | 1.24647881       | 0.00285806 | No      |
|      |       |        |             |          |         | Zscan20 | 1.43634   | 5.04029  | 1.81111          | 1.43734      | 5.04129       | 1.81039158       | 0.00014629 | No      |

| RRBS |       |        |             |          |         | RNAseq  |         |         |                  |              |               |                  |            |         |
|------|-------|--------|-------------|----------|---------|---------|---------|---------|------------------|--------------|---------------|------------------|------------|---------|
| gene | Blood | Kidney | methyl.diff | pMWU.fdr | Match ? | gene    | blood   | kidney  | log2(fold_ratio) | blood+ 0.001 | kidney+ 0.001 | log2(fold_ratio) | q_value    | Match ? |
|      |       |        |             |          |         | Zscan21 | 5.26381 | 8.83692 | 0.747437         | 5.26481      | 8.83792       | 0.7473254        | 0.0177285  | No      |
|      |       |        |             |          |         | Zscan22 | 5.22438 | 3.2336  | -0.692117        | 5.22538      | 3.2346        | -0.6919486       | 0.0228585  | No      |
|      |       |        |             |          |         | Zswim5  | 4.47646 | 2.25556 | -0.988875        | 4.47746      | 2.25656       | -0.9885554       | 0.00459197 | No      |
|      |       |        |             |          |         | Zswim6  | 17.7839 | 3.43874 | -2.37062         | 17.7849      | 3.43974       | -2.3702814       | 0.00014629 | No      |
|      |       |        |             |          |         | Zswim8  | 24.251  | 51.541  | 1.08768          | 24.252       | 51.542        | 1.08764479       | 0.00307875 | No      |
|      |       |        |             |          |         | Zufsp   | 39.2841 | 20.1833 | -0.960787        | 39.2851      | 20.1843       | -0.9607487       | 0.00363169 | No      |
|      |       |        |             |          |         | Zw10    | 11.9587 | 7.10354 | -0.751448        | 11.9597      | 7.10454       | -0.7513681       | 0.00395247 | No      |
|      |       |        |             |          |         | Zyg11b  | 5.50754 | 2.77455 | -0.989154        | 5.50854      | 2.77555       | -0.9888963       | 0.00014629 | No      |
|      |       |        |             |          |         | Zzef1   | 15.7393 | 3.24443 | -2.27833         | 15.7403      | 3.24543       | -2.2779815       | 0.00014629 | No      |
|      |       |        |             |          |         | Zzz3    | 21.2957 | 9.70666 | -1.13352         | 21.2967      | 9.70766       | -1.1334344       | 0.00014629 | No      |

Figure 3C CRLHS

| RRBS     |          |          |             |            |         | RNAseq   |           |          |                  |              |               |                  |            |         |
|----------|----------|----------|-------------|------------|---------|----------|-----------|----------|------------------|--------------|---------------|------------------|------------|---------|
| gene     | Blood    | Kidney   | methyl.diff | pMWU.fdr   | Match ? | gene     | blood     | kidney   | log2(fold_ratio) | blood+ 0.001 | kidney+ 0.001 | log2(fold_ratio) | q_value    | Match ? |
| 42986    | 0.069279 | 0.018516 | -0.050763   | 0.00020718 | Yes     | 42986    | 0.0978393 | 24.5921  | 7.97356          | 0.0988393    | 24.5931       | 7.95895309       | 0.00014386 | Yes     |
| 42987    | 0.72378  | 0.084102 | -0.639678   | 2.85E-09   | Yes     | 42987    | 288.774   | 42.3612  | -2.76913         | 288.775      | 42.3622       | -2.7690964       | 0.00014386 | Yes     |
| Aard     | 0.18531  | 0.044705 | -0.140605   | 0.00031293 | Yes     | Aard     | 0         | 2.42335  | inf              | 0.001        | 2.42435       | 11.2433823       | 0.00014386 | Yes     |
| Abcb9    | 0.60601  | 0.22116  | -0.38485    | 0.00014055 | Yes     | Abcb9    | 0.0958012 | 3.09845  | 5.01536          | 0.0968012    | 3.09945       | 5.00084349       | 0.00649235 | Yes     |
| Abhd14a  | 0.1417   | 0.030245 | -0.111455   | 6.17E-07   | Yes     | Abhd14a  | 2.60346   | 35.1861  | 3.7565           | 2.60446      | 35.1871       | 3.75599043       | 0.00014386 | Yes     |
| Abhd8    | 0.48077  | 0.16988  | -0.31089    | 2.80E-05   | Yes     | Abhd8    | 6.69735   | 17.8431  | 1.4137           | 6.69835      | 17.8441       | 1.41356947       | 0.00014386 | Yes     |
| Abo      | 0.19747  | 0.036022 | -0.161448   | 0.0038486  | Yes     | Abo      | 0         | 6.88002  | inf              | 0.001        | 6.88102       | 12.7484067       | 0.00014386 | Yes     |
| Acbd4    | 0.93029  | 0.21395  | -0.71634    | 4.71E-07   | Yes     | Acbd4    | 12.5247   | 53.0203  | 2.08178          | 12.5257      | 53.0213       | 2.08168081       | 0.00014386 | Yes     |
| Acer2    | 0.2552   | 0.044266 | -0.210934   | 4.44E-05   | Yes     | Acer2    | 0.0608792 | 13.6149  | 7.80502          | 0.0618792    | 13.6159       | 7.78162209       | 0.00014386 | Yes     |
| Acot12   | 0.56708  | 0.241    | -0.32608    | 1.43E-06   | Yes     | Acot12   | 0         | 1.95194  | inf              | 0.001        | 1.95294       | 10.9314319       | 0.00014386 | Yes     |
| Adam15   | 0.6273   | 0.17938  | -0.44792    | 4.84E-12   | Yes     | Adam15   | 0.18506   | 22.2937  | 6.9125           | 0.18606      | 22.2947       | 6.90478904       | 0.00014386 | Yes     |
| Adam19   | 0.15855  | 0.10678  | -0.05177    | 0.01832913 | Yes     | Adam19   | 66.9321   | 0.742659 | -6.49386         | 66.9331      | 0.743659      | -6.4919348       | 0.00014386 | Yes     |
| Adamts15 | 0.10367  | 0.024033 | -0.079637   | 0.00072449 | Yes     | Adamts15 | 0         | 1.92488  | inf              | 0.001        | 1.92588       | 10.9113021       | 0.00014386 | Yes     |
| Adcy3    | 0.10355  | 0.029997 | -0.073553   | 7.01E-05   | Yes     | Adcy3    | 13.6521   | 0.457947 | -4.8978          | 13.6531      | 0.458947      | -4.8947572       | 0.00014386 | Yes     |
| Adm2     | 0.95948  | 0.11591  | -0.84357    | 1.06E-11   | Yes     | Adm2     | 0         | 19.3969  | inf              | 0.001        | 19.3979       | 14.2436129       | 0.00014386 | Yes     |
| Adora2a  | 0.5113   | 0.17332  | -0.33798    | 1.80E-05   | Yes     | Adora2a  | 11.925    | 1.31892  | -3.17657         | 11.926       | 1.31992       | -3.1755878       | 0.00014386 | Yes     |
| Adprhl2  | 0.88245  | 0.70658  | -0.17587    | 0.00058998 | Yes     | Adprhl2  | 25.8155   | 40.6143  | 0.653752         | 25.8165      | 40.6153       | 0.65372988       | 0.00104136 | Yes     |
| Aes      | 0.012224 | 0.14218  | 0.129956    | 3.96E-09   | Yes     | Aes      | 228.899   | 409.483  | 0.839094         | 228.9        | 409.484       | 0.83908962       | 0.00014386 | Yes     |
| Aff3     | 0.83703  | 0.65189  | -0.18514    | 1.55E-05   | Yes     | Aff3     | 11.4194   | 2.43668  | -2.2285          | 11.4204      | 2.43768       | -2.2280325       | 0.00014386 | Yes     |
| Agap2    | 0.87045  | 0.15999  | -0.71046    | 2.15E-12   | Yes     | Agap2    | 22.227    | 1.11238  | -4.3206          | 22.228       | 1.11338       | -4.3193602       | 0.00014386 | Yes     |
| Agmat    | 0.86696  | 0.20249  | -0.66447    | 4.71E-07   | Yes     | Agmat    | 0.010489  | 51.8514  | 12.2713          | 0.011489     | 51.8524       | 12.1399418       | 0.00540069 | Yes     |
| Agpat2   | 0.085141 | 0.021436 | -0.063705   | 0.00519776 | Yes     | Agpat2   | 1.69894   | 25.8768  | 3.92895          | 1.69994      | 25.8778       | 3.92815924       | 0.00014386 | Yes     |
| Agpat3   | 0.23041  | 0.48745  | 0.25704     | 6.75E-07   | Yes     | Agpat3   | 29.1007   | 45.2767  | 0.637719         | 29.1017      | 45.2777       | 0.63769724       | 0.0450268  | Yes     |
| Ahnak    | 0.24781  | 0.046826 | -0.200984   | 5.41E-06   | Yes     | AHNAK    | 10.6224   | 17.3406  | 0.707046         | 10.6234      | 17.3416       | 0.70699144       | 0.00627855 | Yes     |
| Akap12   | 0.65104  | 0.16842  | -0.48262    | 1.08E-08   | Yes     | Akap12   | 0.22258   | 41.6846  | 7.54904          | 0.22358      | 41.6856       | 7.54261415       | 0.00014386 | Yes     |
| Aldoa    | 0.61784  | 0.23865  | -0.37919    | 9.62E-06   | Yes     | Aldoa    | 171.307   | 1183.13  | 2.78795          | 171.308      | 1183.131      | 2.78794539       | 0.00014386 | Yes     |

| RRBS     |           |           |             |            |         | RNAseq   |           |          |                  |              |               |                  |            |         |
|----------|-----------|-----------|-------------|------------|---------|----------|-----------|----------|------------------|--------------|---------------|------------------|------------|---------|
| gene     | Blood     | Kidney    | methyl.diff | pMWU.fdr   | Match ? | gene     | blood     | kidney   | log2(fold_ratio) | blood+ 0.001 | kidney+ 0.001 | log2(fold_ratio) | q_value    | Match ? |
| Amn      | 0.17204   | 0.043878  | -0.128162   | 0.00028308 | Yes     | Amn      | 0.0433878 | 33.5658  | 9.59549          | 0.0443878    | 33.5668       | 9.56265609       | 0.00670865 | Yes     |
| Amotl2   | 0.1502    | 0.036758  | -0.113442   | 1.69E-06   | Yes     | Amotl2   | 0.201437  | 91.8411  | 8.83267          | 0.202437     | 91.8421       | 8.82553882       | 0.00014386 | Yes     |
| Ank3     | 0.75846   | 0.20514   | -0.55332    | 6.19E-09   | Yes     | Ank3     | 0.0231356 | 36.4954  | 10.6234          | 0.0241356    | 36.4964       | 10.5623758       | 0.00014386 | Yes     |
| Ankra2   | 0.12636   | 0.065987  | -0.060373   | 3.76E-06   | Yes     | Ankra2   | 13.3807   | 8.27378  | -0.693535        | 13.3817      | 8.27478       | -0.6934685       | 0.010437   | Yes     |
| Ankrd10  | 0.15852   | 0.029814  | -0.128706   | 0.02850905 | Yes     | ANKRD10  | 48.222    | 15.985   | -1.59297         | 48.223       | 15.986        | -1.5929124       | 0.00014386 | Yes     |
| Anxa6    | 0.004207  | 0.24214   | 0.237933    | 9.98E-06   | Yes     | Anxa6    | 240.899   | 68.4896  | -1.81447         | 240.9        | 68.4906       | -1.8144565       | 0.00014386 | Yes     |
| Ap1m1    | 0.21873   | 0.030427  | -0.188303   | 0.00031293 | Yes     | Ap1m1    | 65.493    | 38.2979  | -0.774075        | 65.494       | 38.2989       | -0.7740598       | 0.00014386 | Yes     |
| Ap1m2    | 0.53687   | 0.12797   | -0.4089     | 2.20E-12   | Yes     | Ap1m2    | 0.676683  | 59.3451  | 6.4545           | 0.677683     | 59.3461       | 6.45239883       | 0.00014386 | Yes     |
| Ap1s3    | 0.90149   | 0.54744   | -0.35405    | 2.77E-10   | Yes     | Ap1s3    | 11.3267   | 18.9008  | 0.73872          | 11.3277      | 18.9018       | 0.73866866       | 0.00014386 | Yes     |
| Aplf     | 0.054569  | 0.0015625 | -0.0530065  | 7.31E-07   | Yes     | Aplf     | 43.9022   | 12.6646  | -1.79349         | 43.9032      | 12.6656       | -1.7934107       | 0.00014386 | Yes     |
| Aplnr    | 0.91944   | 0.83936   | -0.08008    | 0.00842241 | Yes     | Aplnr    | 0.177548  | 2.0593   | 3.53587          | 0.178548     | 2.0603        | 3.52847054       | 0.00281576 | Yes     |
| Aqp1     | 0.78503   | 0.3238    | -0.46123    | 1.98E-05   | Yes     | Aqp1     | 0.161789  | 2279.24  | 13.7822          | 0.162789     | 2279.241      | 13.7732626       | 0.00014386 | Yes     |
| Arhgap20 | 0.075915  | 0.018296  | -0.057619   | 0.02850905 | Yes     | Arhgap20 | 0         | 1.18086  | inf              | 0.001        | 1.18186       | 10.2068434       | 0.00014386 | Yes     |
| Arhgap25 | 0         | 0.37488   | 0.37488     | 5.42E-05   | Yes     | Arhgap25 | 46.219    | 2.45987  | -4.23184         | 46.22        | 2.46087       | -4.2312769       | 0.00014386 | Yes     |
| Arhgap27 | 0.7095    | 0.28025   | -0.42925    | 1.02E-10   | Yes     | Arhgap27 | 52.922    | 32.5781  | -0.699966        | 52.923       | 32.5791       | -0.6999481       | 0.00164556 | Yes     |
| Arhgef15 | 0.63922   | 0.14834   | -0.49088    | 8.33E-09   | Yes     | Arhgef15 | 0.239021  | 8.77847  | 5.19876          | 0.240021     | 8.77947       | 5.19290131       | 0.00014386 | Yes     |
| Arhgef2  | 0.0048762 | 0.2185    | 0.2136238   | 1.83E-06   | Yes     | Arhgef2  | 26.1717   | 15.0261  | -0.800538        | 26.1727      | 15.0271       | -0.8004961       | 0.00091827 | Yes     |
| Arhgef25 | 0.096087  | 0.20477   | 0.108683    | 4.76E-05   | Yes     | Arhgef25 | 0.395539  | 2.70265  | 2.77248          | 0.396539     | 2.70365       | 2.76937373       | 0.033819   | Yes     |
| Arhgef3  | 0.0041454 | 0.097665  | 0.0935196   | 0.00087121 | Yes     | Arhgef3  | 91.445    | 15.1234  | -2.59612         | 91.446       | 15.1244       | -2.5960422       | 0.00014386 | Yes     |
| Arhgef37 | 0.66156   | 0.39308   | -0.26848    | 0.00369602 | Yes     | Arhgef37 | 0         | 4.14788  | inf              | 0.001        | 4.14888       | 12.0185062       | 0.00014386 | Yes     |
| Arhgef40 | 0.055103  | 0.1375    | 0.082397    | 0.0024744  | Yes     | Arhgef40 | 0.0685703 | 14.9053  | 7.76402          | 0.0695703    | 14.9063       | 7.74323494       | 0.00014386 | Yes     |
| Arl10    | 0.075192  | 0.022636  | -0.052556   | 0.00918133 | Yes     | ARL10    | 2.89529   | 5.53817  | 0.935701         | 2.89629      | 5.53917       | 0.93546375       | 0.00014386 | Yes     |
| Arl4d    | 0.42147   | 0.12851   | -0.29296    | 2.15E-12   | Yes     | Arl4d    | 3.28713   | 73.0247  | 4.47348          | 3.28813      | 73.0257       | 4.47306504       | 0.00014386 | Yes     |
| Arvcf    | 0.12041   | 0.013308  | -0.107102   | 4.47E-06   | Yes     | Arvcf    | 2.14637   | 14.1861  | 2.72451          | 2.14737      | 14.1871       | 2.72393702       | 0.00014386 | Yes     |
| Asb13    | 0.12147   | 0.062811  | -0.058659   | 0.01699421 | Yes     | Asb13    | 38.957    | 19.5025  | -0.998222        | 38.958       | 19.5035       | -0.9981866       | 0.00014386 | Yes     |
| Asb2     | 0.88959   | 0.22992   | -0.65967    | 4.71E-07   | Yes     | Asb2     | 1.43522   | 15.2941  | 3.41363          | 1.43622      | 15.2951       | 3.41272088       | 0.00014386 | Yes     |
| Atg4d    | 0.12105   | 0.011146  | -0.109904   | 0.04412687 | Yes     | Atg4d    | 13.5346   | 47.7186  | 1.8179           | 13.5356      | 47.7196       | 1.81782311       | 0.00014386 | Yes     |
| Atmin    | 0.33813   | 0.18217   | -0.15596    | 2.15E-12   | Yes     | Atmin    | 8.04068   | 3.88932  | -1.0478          | 8.04168      | 3.89032       | -1.0476081       | 0.00014386 | Yes     |
| Atp2a3   | 0         | 0.13147   | 0.13147     | 5.41E-06   | Yes     | Atp2a3   | 114.124   | 18.2217  | -2.64687         | 114.125      | 18.2227       | -2.6468062       | 0.00014386 | Yes     |
| Atp5g1   | 0.2791    | 0.042483  | -0.236617   | 5.95E-09   | Yes     | Atp5g1   | 98.7248   | 906.282  | 3.19847          | 98.7258      | 906.283       | 3.19846256       | 0.00014386 | Yes     |
| Atp5g2   | 0.25346   | 0.079195  | -0.174265   | 0.00038568 | Yes     | Atp5g2   | 503.15    | 666.397  | 0.405395         | 503.151      | 666.398       | 0.40539264       | 0.00014386 | Yes     |
| Auh      | 0.83352   | 0.68104   | -0.15248    | 0.00026646 | Yes     | AUH      | 25.3097   | 76.5005  | 1.59578          | 25.3107      | 76.5015       | 1.59574063       | 0.00014386 | Yes     |
| Axin2    | 0.0059651 | 0.067561  | 0.0615959   | 0.00108023 | Yes     | Axin2    | 22.4846   | 0.976966 | -4.52449         | 22.4856      | 0.977966      | -4.5230733       | 0.00014386 | Yes     |
| B3galnt1 | 0.88526   | 0.79958   | -0.08568    | 0.01482889 | Yes     | B3galnt1 | 0.0943836 | 5.79808  | 5.9409           | 0.0953836    | 5.79908       | 5.925939         | 0.00014386 | Yes     |
| B3gnt2   | 0.0017857 | 0.058187  | 0.0564013   | 0.00334552 | Yes     | B3gnt2   | 99.6521   | 10.3181  | -3.27173         | 99.6531      | 10.3191       | -3.2715975       | 0.00014386 | Yes     |
| B3gnt7   | 0.34057   | 0.18473   | -0.15584    | 0.00072449 | Yes     | B3gnt7   | 0.975879  | 5.9064   | 2.59751          | 0.976879     | 5.9074        | 2.59627152       | 0.00014386 | Yes     |
| Bai1     | 0.8543    | 0.79938   | -0.05492    | 0.01289082 | Yes     | Bai1     | 0         | 7.40975  | inf              | 0.001        | 7.41075       | 12.8554038       | 0.00014386 | Yes     |
| Batf     | 0.0011175 | 0.05174   | 0.0506225   | 1.24E-06   | Yes     | Batf     | 41.1501   | 1.91806  | -4.42318         | 41.1511      | 1.91906       | -4.4224593       | 0.00014386 | Yes     |
| Bcat2    | 0.3834    | 0.20256   | -0.18084    | 0.01961146 | Yes     | Bcat2    | 18.242    | 66.4498  | 1.865            | 18.243       | 66.4508       | 1.86494357       | 0.00014386 | Yes     |
| Bckdk    | 0.72665   | 0.27361   | -0.45304    | 1.69E-06   | Yes     | Bckdk    | 51.5432   | 96.4475  | 0.903961         | 51.5442      | 96.4485       | 0.9039487        | 0.00014386 | Yes     |
| Bcl2l11  | 0.10484   | 0.0085778 | -0.0962622  | 3.76E-05   | Yes     | BCL2L11  | 9.55953   | 2.65963  | -1.84571         | 9.56053      | 2.66063       | -1.8453227       | 0.00014386 | Yes     |
| Bcor     | 0.0059295 | 0.15139   | 0.1454605   | 2.80E-05   | Yes     | Bcor     | 7.47932   | 3.96301  | -0.91631         | 7.48032      | 3.96401       | -0.9161394       | 0.00014386 | Yes     |

| RRBS     |           |           |             |            |         | RNAseq   |           |          |                  |              |               |                  |            |         |
|----------|-----------|-----------|-------------|------------|---------|----------|-----------|----------|------------------|--------------|---------------|------------------|------------|---------|
| gene     | Blood     | Kidney    | methyl.diff | pMWU.fdr   | Match ? | gene     | blood     | kidney   | log2(fold_ratio) | blood+ 0.001 | kidney+ 0.001 | log2(fold_ratio) | q_value    | Match ? |
| Bdh1     | 0.04471   | 0.17491   | 0.1302      | 0.00132879 | Yes     | Bdh1     | 19.3052   | 30.7022  | 0.66935          | 19.3062      | 30.7032       | 0.6693248        | 0.00014386 | Yes     |
| Bhmt     | 0.97018   | 0.45519   | -0.51499    | 4.71E-07   | Yes     | Bhmt     | 0.288024  | 32.2268  | 6.80593          | 0.289024     | 32.2278       | 6.8009726        | 0.00014386 | Yes     |
| Bmp2     | 0.084801  | 0.018412  | -0.066389   | 0.00054762 | Yes     | Bmp2     | 0         | 1.97031  | inf              | 0.001        | 1.97131       | 10.944939        | 0.00014386 | Yes     |
| Bmp4     | 0.12343   | 0.027601  | -0.095829   | 0.00158432 | Yes     | Bmp4     | 0.520138  | 43.7736  | 6.39502          | 0.521138     | 43.7746       | 6.39228473       | 0.00014386 | Yes     |
| Bmp7     | 0.086412  | 0.011817  | -0.074595   | 0.00018974 | Yes     | Bmp7     | 3.33446   | 23.8119  | 2.83616          | 3.33546      | 23.8129       | 2.83578568       | 0.00014386 | Yes     |
| Brpf3    | 0.93764   | 0.88284   | -0.0548     | 9.20E-05   | Yes     | Brpf3    | 9.99813   | 3.81564  | -1.38973         | 9.99913      | 3.81664       | -1.3894995       | 0.00014386 | Yes     |
| Btbd3    | 0.71064   | 0.050154  | -0.660486   | 3.48E-08   | Yes     | Btbd3    | 0.898888  | 6.28552  | 2.80582          | 0.899888     | 6.28652       | 2.80444425       | 0.00014386 | Yes     |
| C1qtnf2  | 0.49174   | 0.17053   | -0.32121    | 0.00144827 | Yes     | C1qtnf2  | 0         | 1.21078  | inf              | 0.001        | 1.21178       | 10.2429121       | 0.00014386 | Yes     |
| C1qtnf3  | 0.71043   | 0.092961  | -0.617469   | 5.41E-06   | Yes     | C1qtnf3  | 0         | 4.29119  | inf              | 0.001        | 4.29219       | 12.0674982       | 0.00014386 | Yes     |
| C1r      | 0.51339   | 0.26032   | -0.25307    | 0.02220995 | Yes     | C1r      | 0.307565  | 3.41246  | 3.47185          | 0.308565     | 3.41346       | 3.46758851       | 0.00014386 | Yes     |
| Cactin   | 0.83876   | 0.64925   | -0.18951    | 0.00111391 | Yes     | Cactin   | 38.878    | 14.4008  | -1.4328          | 38.879       | 14.4018       | -1.432742        | 0.00014386 | Yes     |
| Camk2g   | 0.90984   | 0.77834   | -0.1315     | 0.00229548 | Yes     | Camk2g   | 29.7735   | 6.9209   | -2.105           | 29.7745      | 6.9219        | -2.1048373       | 0.00014386 | Yes     |
| Camk2n1  | 0.32695   | 0.17326   | -0.15369    | 0.03216266 | Yes     | Camk2n1  | 2.73371   | 160.068  | 5.87168          | 2.73471      | 160.069       | 5.87116227       | 0.00014386 | Yes     |
| Capn2    | 0.11892   | 0.02283   | -0.09609    | 0.00021135 | Yes     | Capn2    | 30.9019   | 54.2911  | 0.813019         | 30.9029      | 54.2921       | 0.81300006       | 0.00014386 | Yes     |
| Car15    | 0.92748   | 0.8346    | -0.09288    | 0.03700939 | Yes     | Car15    | 0.0743232 | 73.7235  | 9.9541           | 0.0753232    | 73.7245       | 9.93483413       | 0.00014386 | Yes     |
| Card10   | 0.87489   | 0.40513   | -0.46976    | 6.29E-06   | Yes     | Card10   | 0.0353787 | 27.4931  | 9.60197          | 0.0363787    | 27.4941       | 9.56181236       | 0.00014386 | Yes     |
| Casr     | 0.21515   | 0.033224  | -0.181926   | 4.51E-09   | Yes     | Casr     | 0.0138547 | 10.716   | 9.59517          | 0.0148547    | 10.717        | 9.49476593       | 0.00014386 | Yes     |
| Cblc     | 0.16715   | 0.26722   | 0.10007     | 0.02346238 | Yes     | Cblc     | 0         | 6.48172  | inf              | 0.001        | 6.48272       | 12.6623835       | 0.00014386 | Yes     |
| Cbx2     | 0         | 0.13558   | 0.13558     | 5.41E-06   | Yes     | Cbx2     | 20.77     | 1.12699  | -4.20396         | 20.771       | 1.12799       | -4.2027445       | 0.00014386 | Yes     |
| Ccbl1    | 0.77714   | 0.597     | -0.18014    | 7.15E-06   | Yes     | Ccbl1    | 30.9092   | 142.829  | 2.20818          | 30.9102      | 142.83        | 2.20814414       | 0.00014386 | Yes     |
| Ccdc64b  | 0.13605   | 0.045965  | -0.090085   | 0.00057292 | Yes     | Ccdc64b  | 0.416067  | 5.31275  | 3.67457          | 0.417067     | 5.31375       | 3.67137928       | 0.00014386 | Yes     |
| Cd151    | 0.83452   | 0.19777   | -0.63675    | 2.15E-12   | Yes     | Cd151    | 0.661982  | 4.0835   | 2.62494          | 0.662982     | 4.0845        | 2.62311788       | 0.00014386 | Yes     |
| Cd24     | 0.11799   | 0.041161  | -0.076829   | 0.00122444 | Yes     | Cd24     | 2.77456   | 801.727  | 8.17471          | 2.77556      | 801.728       | 8.17419017       | 0.00014386 | Yes     |
| Cd244    | 0.95107   | 0.87693   | -0.07414    | 0.03700939 | Yes     | Cd244    | 7.1944    | 0.646565 | -3.47601         | 7.1954       | 0.647565      | -3.473978        | 0.00014386 | Yes     |
| Cd37     | 0.0064872 | 0.61787   | 0.6113828   | 4.71E-07   | Yes     | Cd37     | 457.172   | 21.3526  | -4.42025         | 457.173      | 21.3536       | -4.420189        | 0.00014386 | Yes     |
| Cd38     | 0         | 0.099321  | 0.099321    | 0.00054762 | Yes     | Cd38     | 83.8531   | 1.89474  | -5.46779         | 83.8541      | 1.89574       | -5.4670483       | 0.00014386 | Yes     |
| Cd7      | 0.0075797 | 0.17854   | 0.1709603   | 0.00065829 | Yes     | Cd7      | 100.845   | 5.25352  | -4.26271         | 100.846      | 5.25452       | -4.2624511       | 0.00014386 | Yes     |
| Cd8a     | 0.57707   | 0.6734    | 0.09633     | 0.03461603 | Yes     | Cd8a     | 467.771   | 36.3613  | -3.68533         | 467.772      | 36.3623       | -3.6852901       | 0.00014386 | Yes     |
| Cdc20    | 0.0076561 | 0.059547  | 0.0518909   | 8.22E-05   | Yes     | Cdc20    | 1.37106   | 6.23421  | 2.18492          | 1.37206      | 6.23521       | 2.18409458       | 0.00014386 | Yes     |
| Cdc42bpb | 0.075302  | 0.020903  | -0.054399   | 0.00010321 | Yes     | Cdc42bpb | 0.0406906 | 18.4003  | 8.82082          | 0.0416906    | 18.4013       | 8.78586984       | 0.00014386 | Yes     |
| Cdc42ep2 | 0.10684   | 0.044674  | -0.062166   | 0.04859041 | Yes     | Cdc42ep2 | 0.0654144 | 40.1231  | 9.26061          | 0.0664144    | 40.1241       | 9.23875724       | 0.00014386 | Yes     |
| Cdc42ep5 | 0.72484   | 0.14608   | -0.57876    | 3.22E-07   | Yes     | Cdc42ep5 | 0.978095  | 13.8343  | 3.82214          | 0.979095     | 13.8353       | 3.82076127       | 0.00014386 | Yes     |
| Cdcp1    | 0.59703   | 0.4269    | -0.17013    | 0.04638126 | Yes     | Cdcp1    | 0         | 4.49545  | inf              | 0.001        | 4.49645       | 12.1345707       | 0.00014386 | Yes     |
| Cdh11    | 0.17808   | 0.044707  | -0.133373   | 0.00842241 | Yes     | Cdh11    | 0         | 6.84681  | inf              | 0.001        | 6.84781       | 12.741427        | 0.00014386 | Yes     |
| Cdk5r1   | 0.20229   | 0.11037   | -0.09192    | 0.00992265 | Yes     | Cdk5r1   | 1.22128   | 0        | -inf             | 1.22228      | 0.001         | -10.255359       | 0.00014386 | Yes     |
| Cdk6     | 0.10523   | 0.018131  | -0.087099   | 0.00902244 | Yes     | Cdk6     | 7.75543   | 3.50814  | -1.1445          | 7.75643      | 3.50914       | -1.1442753       | 0.00014386 | Yes     |
| Cdkn1c   | 0.14426   | 0.046264  | -0.097996   | 4.71E-07   | Yes     | Cdkn1c   | 0.838781  | 4.33636  | 2.37012          | 0.839781     | 4.33736       | 2.36873214       | 0.00014386 | Yes     |
| Cebpb    | 0.24606   | 0.030444  | -0.215616   | 0.0007877  | Yes     | Cebpb    | 7.76177   | 50.6158  | 2.70513          | 7.76277      | 50.6168       | 2.70497285       | 0.00014386 | Yes     |
| Celsr2   | 0.11668   | 0.0071435 | -0.1095365  | 1.80E-05   | Yes     | Celsr2   | 2.69067   | 38.0121  | 3.82042          | 2.69167      | 38.0131       | 3.81992323       | 0.00014386 | Yes     |
| Cep112   | 0.08714   | 0.022512  | -0.064628   | 3.76E-05   | Yes     | Cep112   | 0.366672  | 1.48599  | 2.01886          | 0.367672     | 1.48699       | 2.01590373       | 0.00014386 | Yes     |
| Cers4    | 0.0041022 | 0.082209  | 0.0781068   | 1.46E-08   | Yes     | Cers4    | 4.7078    | 2.60806  | -0.852077        | 4.7088       | 2.60906       | -0.8518293       | 0.00014386 | Yes     |
| Chmp4bl1 | 0.37969   | 0.15974   | -0.21995    | 4.35E-11   | Yes     | Chmp4bl1 | 198.503   | 103.65   | -0.937434        | 198.504      | 103.651       | -0.937434        | 0.00014386 | Yes     |

| RRBS    |          |          |             |            |         | RNAseq  |           |          |                  |              |               |                  |            |         |
|---------|----------|----------|-------------|------------|---------|---------|-----------|----------|------------------|--------------|---------------|------------------|------------|---------|
| gene    | Blood    | Kidney   | methyl.diff | pMWU.fdr   | Match ? | gene    | blood     | kidney   | log2(fold_ratio) | blood+ 0.001 | kidney+ 0.001 | log2(fold_ratio) | q_value    | Match ? |
| Ciao1   | 0.42479  | 0.22224  | -0.20255    | 0.0003366  | Yes     | Ciao1   | 21.2032   | 36.5598  | 0.785976         | 21.2042      | 36.5608       | 0.78594759       | 0.00014386 | Yes     |
| Ckb     | 0.47809  | 0.30407  | -0.17402    | 0.00533667 | Yes     | Ckb     | 5.04522   | 287.434  | 5.83217          | 5.04622      | 287.435       | 5.83188883       | 0.00014386 | Yes     |
| Ckmt1b  | 0.10478  | 0.025199 | -0.079581   | 0.00045631 | Yes     | Ckmt1b  | 0.0765519 | 110.123  | 10.4904          | 0.0775519    | 110.124       | 10.4716792       | 0.00014386 | Yes     |
| Cldn1   | 0.10971  | 0.018293 | -0.091417   | 0.00028308 | Yes     | Cldn1   | 0         | 11.4406  | inf              | 0.001        | 11.4416       | 13.4820012       | 0.00014386 | Yes     |
| Cldn19  | 0.67426  | 0.37104  | -0.30322    | 0.00031293 | Yes     | Cldn19  | 0.0373921 | 82.9001  | 11.1144          | 0.0383921    | 82.9011       | 11.0763661       | 0.00014386 | Yes     |
| Cldnd1  | 0.88423  | 0.76123  | -0.123      | 0.01049788 | Yes     | Cldnd1  | 38.5813   | 24.4157  | -0.660091        | 38.5823      | 24.4167       | -0.6600709       | 0.00014386 | Yes     |
| Clec14a | 0.15395  | 0.035501 | -0.118449   | 9.44E-05   | Yes     | Clec14a | 0         | 1.27413  | inf              | 0.001        | 1.27513       | 10.3164286       | 0.00014386 | Yes     |
| Clk2    | 0.89175  | 0.81877  | -0.07298    | 0.0024744  | Yes     | Clk2    | 77.1738   | 36.7917  | -1.06873         | 77.1748      | 36.7927       | -1.0687103       | 0.00014386 | Yes     |
| Cndp2   | 0.26768  | 0.071421 | -0.196259   | 5.89E-06   | Yes     | Cndp2   | 16.2407   | 204.703  | 3.65585          | 16.2417      | 204.704       | 3.65576474       | 0.00014386 | Yes     |
| Cnm2    | 0.71513  | 0.23876  | -0.47637    | 5.28E-07   | Yes     | Cnm2    | 0.511996  | 6.44191  | 3.65328          | 0.512996     | 6.44291       | 3.65069296       | 0.00014386 | Yes     |
| Col18a1 | 0.094112 | 0.029817 | -0.064295   | 0.02967027 | Yes     | Col18a1 | 0.101029  | 150.094  | 10.5369          | 0.102029     | 150.095       | 10.5226809       | 0.00014386 | Yes     |
| Col27a1 | 0.26511  | 0.058026 | -0.207084   | 0.00028819 | Yes     | Col27a1 | 0.608561  | 42.1956  | 6.11555          | 0.609561     | 42.1966       | 6.11321235       | 0.00014386 | Yes     |
| Coq2    | 0.18363  | 0.054578 | -0.129052   | 2.31E-05   | Yes     | Coq2    | 8.82921   | 41.7474  | 2.24133          | 8.83021      | 41.7484       | 2.24120125       | 0.00014386 | Yes     |
| Coro6   | 0.2144   | 0.084771 | -0.129629   | 0.00281863 | Yes     | Coro6   | 0.480254  | 5.59086  | 3.5412           | 0.481254     | 5.59186       | 3.5384578        | 0.00014386 | Yes     |
| Cox6b2  | 0.93983  | 0.53198  | -0.40785    | 1.58E-11   | Yes     | Cox6b2  | 2.99493   | 0        | -inf             | 2.99593      | 0.001         | -11.548788       | 0.00014386 | Yes     |
| Cpt1b   | 0.82125  | 0.29517  | -0.52608    | 3.15E-05   | Yes     | Cpt1b   | 1.92442   | 6.40203  | 1.73411          | 1.92542      | 6.40303       | 1.73358159       | 0.00014386 | Yes     |
| Crabp2  | 0.62079  | 0.2614   | -0.35939    | 0.00014055 | Yes     | Crabp2  | 30.2293   | 13.3701  | -1.17694         | 30.2303      | 13.3711       | -1.1768771       | 0.00014386 | Yes     |
| Crb3    | 0.10406  | 0.022009 | -0.082051   | 0.00173557 | Yes     | Crb3    | 0.294742  | 52.9763  | 7.48975          | 0.295742     | 52.9773       | 7.48489136       | 0.00014386 | Yes     |
| Crip1   | 0        | 0.42829  | 0.42829     | 3.07E-11   | Yes     | Crip1   | 637.857   | 119.601  | -2.415           | 637.858      | 119.602       | -2.4149938       | 0.00014386 | Yes     |
| Crip2   | 0.17742  | 0.042044 | -0.135376   | 5.19E-07   | Yes     | Crip2   | 1.24094   | 235.787  | 7.56991          | 1.24194      | 235.788       | 7.56875101       | 0.00014386 | Yes     |
| Crlf2   | 0.043222 | 0.19804  | 0.154818    | 0.00093244 | Yes     | Crlf2   | 23.1434   | 11.2367  | -1.04238         | 23.1444      | 11.2377       | -1.0423164       | 0.00014386 | Yes     |
| Crnk1l  | 0.43107  | 0.33023  | -0.10084    | 0.00188523 | Yes     | Crnk1l  | 17.2654   | 9.03592  | -0.934141        | 17.2664      | 9.03692       | -0.9340643       | 0.00014386 | Yes     |
| Csad    | 0.87435  | 0.80857  | -0.06578    | 0.02220995 | Yes     | Csad    | 6.50814   | 28.7121  | 2.14134          | 6.50914      | 28.7131       | 2.14117025       | 0.00014386 | Yes     |
| Cttn    | 0.62779  | 0.094726 | -0.533064   | 4.71E-07   | Yes     | Cttn    | 0.0292177 | 1.5509   | 5.73012          | 0.0302177    | 1.5519        | 5.68249793       | 0.00014386 | Yes     |
| Cubn    | 0.7833   | 0.21982  | -0.56348    | 6.72E-08   | Yes     | Cubn    | 0.011602  | 37.8672  | 11.6724          | 0.012602     | 37.8682       | 11.5531184       | 0.00014386 | Yes     |
| Cwc27   | 0.11436  | 0.047588 | -0.066772   | 0.02850905 | Yes     | Cwc27   | 17.4962   | 45.2385  | 1.37051          | 17.4972      | 45.2395       | 1.37045891       | 0.00014386 | Yes     |
| Cxxc5   | 0.62606  | 0.31782  | -0.30824    | 5.68E-09   | Yes     | CXXC5   | 22.3453   | 97.4404  | 2.12455          | 22.3463      | 97.4414       | 2.12449889       | 0.00014386 | Yes     |
| Cyld    | 0.77538  | 0.66969  | -0.10569    | 0.03808344 | Yes     | Cyld    | 26.8207   | 5.99775  | -2.16086         | 26.8217      | 5.99875       | -2.1606669       | 0.00014386 | Yes     |
| Dab2ip  | 0.70303  | 0.39955  | -0.30348    | 0.00072449 | Yes     | Dab2ip  | 0.148979  | 16.9823  | 6.83278          | 0.149979     | 16.9833       | 6.82321249       | 0.00014386 | Yes     |
| Dapk1   | 0.77447  | 0.55133  | -0.22314    | 0.00842241 | Yes     | Dapk1   | 2.74988   | 8.92277  | 1.69813          | 2.75088      | 8.92377       | 1.69776012       | 0.00014386 | Yes     |
| Dapp1   | 0.054396 | 0.54904  | 0.494644    | 4.92E-06   | Yes     | Dapp1   | 16.926    | 2.85488  | -2.56774         | 16.927       | 2.85588       | -2.567319        | 0.00014386 | Yes     |
| Dcxr    | 0.73519  | 0.12683  | -0.60836    | 6.74E-09   | Yes     | Dcxr    | 12.7158   | 233.754  | 4.2003           | 12.7168      | 233.755       | 4.20018964       | 0.00014386 | Yes     |
| Ddah2   | 0.69411  | 0.19114  | -0.50297    | 2.15E-12   | Yes     | Ddah2   | 0.324442  | 109.165  | 8.39433          | 0.325442     | 109.166       | 8.38990743       | 0.00014386 | Yes     |
| Ddr1    | 0.60812  | 0.16338  | -0.44474    | 0.00014055 | Yes     | Ddr1    | 0.0314438 | 29.1966  | 9.85881          | 0.0324438    | 29.1976       | 9.81369127       | 0.00014386 | Yes     |
| Ddx21   | 0.080197 | 0.01725  | -0.062947   | 0.00087121 | Yes     | Ddx21   | 44.7048   | 6.72419  | -2.733           | 44.7058      | 6.72519       | -2.7328151       | 0.00014386 | Yes     |
| Ddx54   | 0.92879  | 0.2781   | -0.65069    | 4.71E-07   | Yes     | Ddx54   | 31.2591   | 19.5633  | -0.676127        | 31.2601      | 19.5643       | -0.6760989       | 0.00014386 | Yes     |
| Ddx6    | 0.30008  | 0.12493  | -0.17515    | 2.71E-12   | Yes     | Ddx6    | 73.2663   | 12.1356  | -2.5939          | 73.2673      | 12.1366       | -2.5938051       | 0.00014386 | Yes     |
| Depdc5  | 0.86208  | 0.57556  | -0.28652    | 0.00011494 | Yes     | Depdc5  | 10.1344   | 3.90473  | -1.37597         | 10.1354      | 3.90573       | -1.3757389       | 0.00014386 | Yes     |
| Dffb    | 0.87325  | 0.7624   | -0.11085    | 0.00317797 | Yes     | Dffb    | 12.9163   | 6.72242  | -0.942141        | 12.9173      | 6.72342       | -0.9420374       | 0.00014386 | Yes     |
| Dgat1   | 0.072444 | 0.018479 | -0.053965   | 0.00054762 | Yes     | Dgat1   | 2.58416   | 12.4829  | 2.27219          | 2.58516      | 12.4839       | 2.27174323       | 0.00014386 | Yes     |
| Dhcr24  | 0.87646  | 0.233    | -0.64346    | 8.46E-07   | Yes     | Dhcr24  | 11.328    | 27.935   | 1.30218          | 11.329       | 27.936        | 1.30210494       | 0.00014386 | Yes     |
| Dkk3    | 0.25014  | 0.1358   | -0.11434    | 0.04051274 | Yes     | Dkk3    | 0         | 0.846353 | inf              | 0.001        | 0.847353      | 9.7268193        | 0.00014386 | Yes     |

| RRBS     |          |           |             |            |         | RNAseq   |           |          |                  |              |               |                  |            |         |
|----------|----------|-----------|-------------|------------|---------|----------|-----------|----------|------------------|--------------|---------------|------------------|------------|---------|
| gene     | Blood    | Kidney    | methyl.diff | pMWU.fdr   | Match ? | gene     | blood     | kidney   | log2(fold_ratio) | blood+ 0.001 | kidney+ 0.001 | log2(fold_ratio) | q_value    | Match ? |
| Dlg3     | 0.31357  | 0.13496   | -0.17861    | 6.06E-05   | Yes     | Dlg3     | 6.56218   | 14.1574  | 1.10931          | 6.56318      | 14.1584       | 1.10919133       | 0.00014386 | Yes     |
| Dlgap4   | 0.28986  | 0.11437   | -0.17549    | 0.00144827 | Yes     | Dlgap4   | 17.5474   | 25.936   | 0.563704         | 17.5484      | 25.937        | 0.56367212       | 0.00014386 | Yes     |
| Dll1     | 0.027107 | 0.20251   | 0.175403    | 2.06E-05   | Yes     | Dll1     | 0.063299  | 1.43917  | 4.50691          | 0.064299     | 1.44017       | 4.48529901       | 0.00014386 | Yes     |
| Dmrt2    | 0.10454  | 0.041199  | -0.063341   | 0.00123297 | Yes     | Dmrt2    | 0         | 1.71108  | inf              | 0.001        | 1.71208       | 10.7415344       | 0.00014386 | Yes     |
| Dnaja2   | 0.14179  | 0.025973  | -0.115817   | 0.00040757 | Yes     | Dnaja2   | 84.5708   | 64.7122  | -0.386122        | 84.5718      | 64.7132       | -0.3861167       | 0.00014386 | Yes     |
| Dnajc10  | 0.30783  | 0.087696  | -0.220134   | 0.01120909 | Yes     | Dnajc10  | 9.73025   | 16.938   | 0.799716         | 9.73125      | 16.939        | 0.79965167       | 0.00014386 | Yes     |
| Dnmt3a   | 0.051889 | 0.31449   | 0.262601    | 4.12E-07   | Yes     | Dnmt3a   | 16.7201   | 3.72456  | -2.16644         | 16.7211      | 3.72556       | -2.1661406       | 0.00014386 | Yes     |
| Dock1    | 0.13304  | 0.020529  | -0.112511   | 0.00050175 | Yes     | Dock1    | 0.236216  | 47.0088  | 7.63668          | 0.237216     | 47.0098       | 7.63061641       | 0.00014386 | Yes     |
| Dock6    | 0.20786  | 0.087448  | -0.120412   | 0.00533667 | Yes     | Dock6    | 0.0442261 | 14.828   | 8.38921          | 0.0452261    | 14.829        | 8.35705          | 0.00014386 | Yes     |
| Dock9    | 0.13663  | 0.015384  | -0.121246   | 4.76E-05   | Yes     | Dock9    | 2.15748   | 21.9437  | 3.34639          | 2.15848      | 21.9447       | 3.34578492       | 0.00014386 | Yes     |
| Dok2     | 0.19961  | 0.68111   | 0.4815      | 2.48E-12   | Yes     | Dok2     | 110.817   | 4.98418  | -4.47468         | 110.818      | 4.98518       | -4.4744028       | 0.00014386 | Yes     |
| Dok4     | 0.091476 | 0.017415  | -0.074061   | 6.29E-06   | Yes     | Dok4     | 0.196181  | 8.70375  | 5.47138          | 0.197181     | 8.70475       | 5.46421042       | 0.00014386 | Yes     |
| Dolk     | 0.18404  | 0.066031  | -0.118009   | 8.22E-05   | Yes     | Dolk     | 2.00974   | 11.7251  | 2.54451          | 2.01074      | 11.7261       | 2.54392481       | 0.00014386 | Yes     |
| Dtnb     | 0.15803  | 0.022608  | -0.135422   | 6.78E-10   | Yes     | Dtnb     | 17.2938   | 66.8873  | 1.95148          | 17.2948      | 66.8883       | 1.95141555       | 0.00014386 | Yes     |
| Duoxa1   | 0.2081   | 0.057387  | -0.150713   | 0.00103522 | Yes     | Duoxa1   | 0         | 4.50051  | inf              | 0.001        | 4.50151       | 12.1361933       | 0.00014386 | Yes     |
| Dusp14   | 0.18636  | 0.06355   | -0.12281    | 1.75E-09   | Yes     | Dusp14   | 0.274541  | 4.94076  | 4.16964          | 0.275541     | 4.94176       | 4.16468604       | 0.00014386 | Yes     |
| Dusp3    | 0.35335  | 0.14959   | -0.20376    | 0.0024744  | Yes     | Dusp3    | 7.76372   | 23.5734  | 1.60234          | 7.76472      | 23.5744       | 1.60221525       | 0.00014386 | Yes     |
| Dyrk2    | 0.084086 | 0.35264   | 0.268554    | 8.56E-08   | Yes     | Dyrk2    | 88.5922   | 6.25796  | -3.82342         | 88.5932      | 6.25896       | -3.8232011       | 0.00014386 | Yes     |
| Ebpl     | 0.57953  | 0.12963   | -0.4499     | 4.71E-07   | Yes     | Ebpl     | 13.3336   | 4.21804  | -1.66042         | 13.3346      | 4.21904       | -1.6601879       | 0.00014386 | Yes     |
| Eef1d    | 0.83296  | 0.77736   | -0.0556     | 0.03216266 | Yes     | Eef1d    | 362.71    | 209.975  | -0.788601        | 362.711      | 209.976       | -0.7885961       | 0.00014386 | Yes     |
| Eef1g    | 0.79236  | 0.23789   | -0.55447    | 1.58E-08   | Yes     | Eef1g    | 1482.62   | 321.012  | -2.20745         | 1482.621     | 321.013       | -2.2074462       | 0.00014386 | Yes     |
| Eef2     | 0.090371 | 0.01658   | -0.073791   | 1.55E-06   | Yes     | Eef2     | 1847.75   | 450.588  | -2.03588         | 1847.751     | 450.589       | -2.0358864       | 0.00014386 | Yes     |
| Efna1    | 0.60982  | 0.075069  | -0.534751   | 3.48E-08   | Yes     | Efna1    | 0.136725  | 24.2292  | 7.46933          | 0.137725     | 24.2302       | 7.45887204       | 0.00014386 | Yes     |
| Efnb3    | 0.19294  | 0.063263  | -0.129677   | 0.00019259 | Yes     | Efnb3    | 0.0675817 | 0.733315 | 3.43973          | 0.0685817    | 0.734315      | 3.4205035        | 0.00014386 | Yes     |
| Egfl8    | 0.7003   | 0.14912   | -0.55118    | 1.02E-06   | Yes     | Egfl8    | 10.1442   | 55.4883  | 2.45153          | 10.1452      | 55.4893       | 2.4514123        | 0.00014386 | Yes     |
| Elac1    | 0.059386 | 0.005879  | -0.053507   | 0.00065829 | Yes     | Elac1    | 0.549084  | 3.52203  | 2.68131          | 0.550084     | 3.52303       | 2.67909291       | 0.00014386 | Yes     |
| Emb      | 0.4257   | 0.1187    | -0.307      | 0.00023201 | Yes     | Emb      | 3.51235   | 32.3575  | 3.20359          | 3.51335      | 32.3585       | 3.20322552       | 0.00014386 | Yes     |
| Emid1    | 0.91797  | 0.26399   | -0.65398    | 1.06E-11   | Yes     | Emid1    | 34.8304   | 7.70336  | -2.17679         | 34.8314      | 7.70436       | -2.1766414       | 0.00014386 | Yes     |
| Emx2     | 0.078289 | 0.0074075 | -0.0708815  | 6.06E-05   | Yes     | Emx2     | 0         | 14.5399  | inf              | 0.001        | 14.5409       | 13.8278289       | 0.00014386 | Yes     |
| Eng      | 0.14033  | 0.39465   | 0.25432     | 8.74E-06   | Yes     | Eng      | 0.122461  | 22.0736  | 7.49386          | 0.123461     | 22.0746       | 7.4821881        | 0.00014386 | Yes     |
| Epb41l4b | 0.064088 | 0.2175    | 0.153412    | 0.00533667 | Yes     | Epb41l4b | 0         | 10.8852  | inf              | 0.001        | 10.8862       | 13.4102128       | 0.00014386 | Yes     |
| Epcam    | 0.81317  | 0.23898   | -0.57419    | 2.12E-07   | Yes     | Epcam    | 0.30413   | 749.607  | 11.2672          | 0.30513      | 749.608       | 11.2624966       | 0.00014386 | Yes     |
| Epn2     | 0.12951  | 0.042773  | -0.086737   | 8.22E-05   | Yes     | Epn2     | 0.151185  | 13.186   | 6.44655          | 0.152185     | 13.187        | 6.43714642       | 0.00014386 | Yes     |
| Epsti1   | 0.062817 | 0.49275   | 0.429933    | 2.16E-09   | Yes     | Epsti1   | 71.852    | 2.72991  | -4.7181          | 71.853       | 2.73091       | -4.7175947       | 0.00014386 | Yes     |
| Esam     | 0.13559  | 0.013092  | -0.122498   | 2.99E-06   | Yes     | Esam     | 0.0803556 | 111.928  | 10.4439          | 0.0813556    | 111.929       | 10.4260546       | 0.00014386 | Yes     |
| Esm1     | 0.75292  | 0.41706   | -0.33586    | 7.28E-09   | Yes     | Esm1     | 0         | 6.8172   | inf              | 0.001        | 6.8182        | 12.7351752       | 0.00014386 | Yes     |
| Espn     | 0.51783  | 0.089357  | -0.428473   | 1.28E-06   | Yes     | Espn     | 0.114248  | 41.7611  | 8.51384          | 0.115248     | 41.7621       | 8.50130873       | 0.00014386 | Yes     |
| Esyt1    | 0        | 0.053955  | 0.053955    | 0.00122444 | Yes     | Esyt1    | 147.18    | 18.0665  | -3.02619         | 147.181      | 18.0675       | -3.0261226       | 0.00014386 | Yes     |
| Etaa1    | 0.52294  | 0.3532    | -0.16974    | 2.57E-11   | Yes     | Etaa1    | 6.53372   | 1.6341   | -1.99941         | 6.53472      | 1.6351        | -1.9987465       | 0.00014386 | Yes     |
| Ethe1    | 0.98231  | 0.22256   | -0.75975    | 4.71E-07   | Yes     | Ethe1    | 7.52863   | 142.084  | 4.23821          | 7.52963      | 142.085       | 4.23803147       | 0.00014386 | Yes     |
| Etv3     | 0.19885  | 0.77152   | 0.57267     | 4.71E-07   | Yes     | Etv3     | 26.2338   | 3.42168  | -2.93865         | 26.2348      | 3.42268       | -2.9382835       | 0.00014386 | Yes     |
| Etv5     | 0.13315  | 0.05539   | -0.07776    | 0.00052742 | Yes     | Etv5     | 0.561548  | 4.15077  | 2.8859           | 0.562548     | 4.15177       | 2.88367842       | 0.00014386 | Yes     |

| RRBS     |           |           |             |            |         | RNAseq   |            |         |                  |              |               |                  |            |         |
|----------|-----------|-----------|-------------|------------|---------|----------|------------|---------|------------------|--------------|---------------|------------------|------------|---------|
| gene     | Blood     | Kidney    | methyl.diff | pMWU.fdr   | Match ? | gene     | blood      | kidney  | log2(fold_ratio) | blood+ 0.001 | kidney+ 0.001 | log2(fold_ratio) | q_value    | Match ? |
| Evpl     | 0.58196   | 0.1254    | -0.45656    | 1.10E-08   | Yes     | Evpl     | 0.0287192  | 8.62573 | 8.23049          | 0.0297192    | 8.62673       | 8.18127471       | 0.00014386 | Yes     |
| Extl3    | 0.97591   | 0.87796   | -0.09795    | 0.00054762 | Yes     | Extl3    | 8.49767    | 4.12898 | -1.04128         | 8.49867      | 4.12998       | -1.0411023       | 0.00014386 | Yes     |
| F2r      | 0.89705   | 0.80961   | -0.08744    | 0.00469886 | Yes     | F2r      | 4.6179     | 10.2492 | 1.15019          | 4.6189       | 10.2502       | 1.15003084       | 0.00014386 | Yes     |
| F2rl1    | 0.12172   | 0.014301  | -0.107419   | 1.12E-06   | Yes     | F2rl1    | 0.164584   | 14.9505 | 6.50522          | 0.165584     | 14.9515       | 6.49658314       | 0.00014386 | Yes     |
| Fam101b  | 0.24036   | 0.11896   | -0.1214     | 2.15E-12   | Yes     | Fam101b  | 49.697     | 6.62788 | -2.90654         | 49.698       | 6.62888       | -2.9063508       | 0.00014386 | Yes     |
| Fam110a  | 0.73752   | 0.49229   | -0.24523    | 0.00902244 | Yes     | Fam110a  | 3.34119    | 5.64652 | 0.757            | 3.34219      | 5.64752       | 0.75682372       | 0.00014386 | Yes     |
| Fam110c  | 0.39363   | 0.088837  | -0.304793   | 4.92E-06   | Yes     | Fam110c  | 0          | 1.47556 | inf              | 0.001        | 1.47656       | 10.5280243       | 0.00014386 | Yes     |
| Fam129b  | 0.33337   | 0.10567   | -0.2277     | 0.00087121 | Yes     | Fam129b  | 1.66532    | 31.3308 | 4.23371          | 1.66632      | 31.3318       | 4.23289027       | 0.00014386 | Yes     |
| Fam189b  | 0.40361   | 0.1515    | -0.25211    | 3.41E-06   | Yes     | Fam189b  | 190.181    | 10.2371 | -4.21549         | 190.182      | 10.2381       | -4.2153608       | 0.00014386 | Yes     |
| Fam19a5  | 0.10106   | 0.018088  | -0.082972   | 2.15E-12   | Yes     | Fam19a5  | 0          | 4.17383 | inf              | 0.001        | 4.17483       | 12.0275017       | 0.00014386 | Yes     |
| Fam20c   | 0.059741  | 0.0083942 | -0.0513468  | 3.52E-05   | Yes     | Fam20c   | 0.214533   | 90.5433 | 8.72127          | 0.215533     | 90.5443       | 8.71457124       | 0.00014386 | Yes     |
| Fam213b  | 0.14039   | 0.058065  | -0.082325   | 0.00533667 | Yes     | Fam213b  | 4.94329    | 46.3195 | 3.22807          | 4.94429      | 46.3205       | 3.22781556       | 0.00014386 | Yes     |
| Fam43a   | 0.4305    | 0.22775   | -0.20275    | 0.01289082 | Yes     | Fam43a   | 1.46926    | 34.13   | 4.53788          | 1.47026      | 34.131        | 4.53693948       | 0.00014386 | Yes     |
| Fam69b   | 0.49945   | 0.30926   | -0.19019    | 0.02733646 | Yes     | Fam69b   | 0.35332    | 7.32998 | 4.37476          | 0.35432      | 7.33098       | 4.37088126       | 0.00014386 | Yes     |
| Fam83h   | 0.28166   | 0.045635  | -0.236025   | 7.96E-06   | Yes     | Fam83h   | 0.365064   | 7.28294 | 4.3183           | 0.366064     | 7.28394       | 4.31455123       | 0.00014386 | Yes     |
| Fam84a   | 0.12201   | 0.028528  | -0.093482   | 1.83E-06   | Yes     | Fam84a   | 0          | 13.7324 | inf              | 0.001        | 13.7334       | 13.7454012       | 0.00014386 | Yes     |
| Fam89a   | 0.018654  | 0.36113   | 0.342476    | 1.09E-11   | Yes     | Fam89a   | 1.23392    | 0       | -inf             | 1.23492      | 0.001         | -10.270202       | 0.00014386 | Yes     |
| Fam96b   | 0.076773  | 0.0074604 | -0.0693126  | 0.00072449 | Yes     | Fam96b   | 34.6985    | 88.5452 | 1.35154          | 34.6995      | 88.5462       | 1.35151552       | 0.00014386 | Yes     |
| Fancd2os | 0.82084   | 0.19731   | -0.62353    | 2.15E-12   | Yes     | Fancd2os | 0.00755497 | 12.1333 | 10.6493          | 0.00855497   | 12.1343       | 10.4700405       | 0.00014386 | Yes     |
| Fbp1     | 0.4443    | 0.15278   | -0.29152    | 2.38E-06   | Yes     | Fbp1     | 0.0811705  | 506.071 | 12.6061          | 0.0821705    | 506.072       | 12.5884345       | 0.00014386 | Yes     |
| Fbxl15   | 0.086931  | 0.022705  | -0.064226   | 2.73E-09   | Yes     | Fbxl15   | 2.39335    | 8.34941 | 1.80264          | 2.39435      | 8.35041       | 1.80221298       | 0.00014386 | Yes     |
| Fbxl17   | 0.23746   | 0.086007  | -0.151453   | 0.0247155  | Yes     | Fbxl17   | 16.99      | 12.2443 | -0.472574        | 16.991       | 12.2453       | -0.4725426       | 0.00014386 | Yes     |
| Fbxo46   | 0.72082   | 0.20845   | -0.51237    | 1.19E-10   | Yes     | Fbxo46   | 8.28642    | 2.54902 | -1.7008          | 8.28742      | 2.55002       | -1.7004145       | 0.00014386 | Yes     |
| Fcgr2a   | 0.23982   | 0.14588   | -0.09394    | 0.01120909 | Yes     | FCGR2A   | 1.58078    | 5.72745 | 1.85725          | 1.58178      | 5.72845       | 1.85659587       | 0.00014386 | Yes     |
| Fes      | 0.71093   | 0.44749   | -0.26344    | 0.00317797 | Yes     | Fes      | 0.606919   | 7.17352 | 3.5631           | 0.607919     | 7.17452       | 3.5609313        | 0.00014386 | Yes     |
| Fez1     | 0.23691   | 0.082399  | -0.154511   | 0.00018974 | Yes     | Fez1     | 1.0981     | 0       | -inf             | 1.0991       | 0.001         | -10.102107       | 0.00014386 | Yes     |
| Fgd3     | 0.0091725 | 0.54241   | 0.5332375   | 2.15E-12   | Yes     | Fgd3     | 35.5545    | 9.72214 | -1.87069         | 35.5555      | 9.72314       | -1.8705785       | 0.00014386 | Yes     |
| Fhod1    | 0.56454   | 0.089722  | -0.474818   | 4.71E-07   | Yes     | Fhod1    | 28.898     | 13.1286 | -1.13825         | 28.899       | 13.1296       | -1.1381966       | 0.00014386 | Yes     |
| Fhod3    | 0.10322   | 0.021844  | -0.081376   | 1.64E-06   | Yes     | Fhod3    | 0.0124182  | 21.1607 | 10.7347          | 0.0134182    | 21.1617       | 10.6230487       | 0.00014386 | Yes     |
| Flnb     | 0.19337   | 0.36516   | 0.17179     | 0.03808344 | Yes     | Flnb     | 0.130999   | 20.4084 | 7.28346          | 0.131999     | 20.4094       | 7.27256296       | 0.00014386 | Yes     |
| Fn3krp   | 0.10416   | 0.022717  | -0.081443   | 0.00045631 | Yes     | Fn3krp   | 4.55927    | 16.6262 | 1.86659          | 4.56027      | 16.6272       | 1.86635409       | 0.00014386 | Yes     |
| Fnbp1l   | 0.9389    | 0.21988   | -0.71902    | 3.48E-08   | Yes     | Fnbp1l   | 0.723225   | 24.706  | 5.09428          | 0.724225     | 24.707        | 5.09233806       | 0.00014386 | Yes     |
| Fndc3b   | 0.902     | 0.85095   | -0.05105    | 0.01049788 | Yes     | Fndc3b   | 0.159602   | 13.3934 | 6.39089          | 0.160602     | 13.3944       | 6.38199629       | 0.00014386 | Yes     |
| Foxo3    | 0.04404   | 0.1688    | 0.12476     | 4.21E-12   | Yes     | Foxo3    | 26.2622    | 15.4556 | -0.764857        | 26.2632      | 15.4566       | -0.7648197       | 0.00014386 | Yes     |
| Foxp4    | 0.0054483 | 0.082925  | 0.0774767   | 0.00023201 | Yes     | Foxp4    | 18.0141    | 9.55793 | -0.914354        | 18.0151      | 9.55893       | -0.9142856       | 0.00014386 | Yes     |
| Frg1     | 0.52801   | 0.13603   | -0.39198    | 0.00065829 | Yes     | Frg1     | 93.774     | 40.7939 | -1.20084         | 93.775       | 40.7949       | -1.2008146       | 0.00014386 | Yes     |
| Fry      | 0.64234   | 0.34185   | -0.30049    | 7.78E-09   | Yes     | Fry      | 0.794487   | 3.30207 | 2.05527          | 0.795487     | 3.30307       | 2.05389729       | 0.00014386 | Yes     |
| Fscn2    | 0.86951   | 0.80055   | -0.06896    | 0.00173557 | Yes     | Fscn2    | 2.02864    | 15.0933 | 2.89532          | 2.02964      | 15.0943       | 2.89470809       | 0.00014386 | Yes     |
| Ftl1     | 0.57055   | 0.44427   | -0.12628    | 0.0017319  | Yes     | FTL1     | 298.489    | 2087.67 | 2.80614          | 298.49       | 2087.671      | 2.80613987       | 0.00014386 | Yes     |
| Fundc2   | 0.063629  | 0.066222  | 0.002593    | 0.00040757 | Yes     | Fundc2   | 14.6503    | 32.0544 | 1.1296           | 14.6513      | 32.0554       | 1.12953873       | 0.00014386 | Yes     |
| Fut7     | 0.81003   | 0.75324   | -0.05679    | 0.00418734 | Yes     | Fut7     | 1.23487    | 0       | -inf             | 1.23587      | 0.001         | -10.271311       | 0.00014386 | Yes     |
| Fxyd2    | 0.84958   | 0.52986   | -0.31972    | 0.00023201 | Yes     | FXYD2    | 1.46396    | 2808.89 | 10.9059          | 1.46496      | 2808.891      | 10.9049237       | 0.00014386 | Yes     |



| RRBS    |           |          |             |            |         | RNAseq  |           |          |                  |              |               |                  |            |         |
|---------|-----------|----------|-------------|------------|---------|---------|-----------|----------|------------------|--------------|---------------|------------------|------------|---------|
| gene    | Blood     | Kidney   | methyl.diff | pMWU.fdr   | Match ? | gene    | blood     | kidney   | log2(fold_ratio) | blood+ 0.001 | kidney+ 0.001 | log2(fold_ratio) | q_value    | Match ? |
| Fxyd6   | 0.421     | 0.16269  | -0.25831    | 0.02094681 | Yes     | Fxyd6   | 0         | 6.55482  | inf              | 0.001        | 6.55582       | 12.6785605       | 0.00014386 | Yes     |
| Gab1    | 0.23189   | 0.046771 | -0.185119   | 0.00028308 | Yes     | Gab1    | 0.0746555 | 9.92651  | 7.05489          | 0.0756555    | 9.92751       | 7.03584313       | 0.00014386 | Yes     |
| Gabbr1  | 0.025428  | 0.092964 | 0.067536    | 0.01040885 | Yes     | Gabbr1  | 57.7266   | 9.04279  | -2.6744          | 57.7276      | 9.04379       | -2.6742618       | 0.00014386 | Yes     |
| Galnt14 | 0.17276   | 0.056794 | -0.115966   | 0.00038568 | Yes     | Galnt14 | 0         | 15.722   | inf              | 0.001        | 15.723        | 13.9405889       | 0.00014386 | Yes     |
| Gamt    | 0.14661   | 0.038556 | -0.108054   | 0.00072449 | Yes     | Gamt    | 8.39375   | 73.9291  | 3.13875          | 8.39475      | 73.9301       | 3.1386026        | 0.00014386 | Yes     |
| Gapdh   | 0.47415   | 0.070836 | -0.403314   | 2.65E-06   | Yes     | Gapdh   | 393.59    | 1635.31  | 2.0548           | 393.591      | 1635.311      | 2.05479589       | 0.00014386 | Yes     |
| Gas2l1  | 0.81826   | 0.57873  | -0.23953    | 9.96E-11   | Yes     | Gas2l1  | 0.370284  | 15.5408  | 5.39129          | 0.371284     | 15.5418       | 5.38748665       | 0.00014386 | Yes     |
| Gata3   | 0.012592  | 0.17264  | 0.160048    | 0.00065829 | Yes     | Gata3   | 58.764    | 14.3324  | -2.03566         | 58.765       | 14.3334       | -2.0355763       | 0.00014386 | Yes     |
| Gata5   | 0.071345  | 0.014753 | -0.056592   | 2.49E-07   | Yes     | Gata5   | 0         | 0.830288 | inf              | 0.001        | 0.831288      | 9.69920458       | 0.00014386 | Yes     |
| Gatsl2  | 0.19657   | 0.012456 | -0.184114   | 5.41E-06   | Yes     | Gatsl2  | 2.46936   | 0.656172 | -1.91199         | 2.47036      | 0.657172      | -1.9103784       | 0.00014386 | Yes     |
| Gba     | 0.96241   | 0.66815  | -0.29426    | 5.96E-07   | Yes     | Gba     | 25.4334   | 16.3607  | -0.636489        | 25.4344      | 16.3617       | -0.6364584       | 0.00014386 | Yes     |
| Gcgr    | 0.1479    | 0.062076 | -0.085824   | 0.04051274 | Yes     | Gcgr    | 0.0309413 | 70.5625  | 11.1552          | 0.0319413    | 70.5635       | 11.1092834       | 0.00014386 | Yes     |
| Gcnt2   | 0.025038  | 0.12629  | 0.101252    | 1.57E-07   | Yes     | Gcnt2   | 0.0624635 | 15.863   | 7.98844          | 0.0634635    | 15.864        | 7.96561378       | 0.00014386 | Yes     |
| Gfer    | 0.8564    | 0.79971  | -0.05669    | 0.01699421 | Yes     | Gfer    | 15.4153   | 22.1857  | 0.52527          | 15.4163      | 22.1867       | 0.52523855       | 0.00014386 | Yes     |
| Gldc    | 0.048556  | 0.15481  | 0.106254    | 0.00093244 | Yes     | Gldc    | 0.136736  | 27.3674  | 7.64492          | 0.137736     | 27.3684       | 7.6344616        | 0.00014386 | Yes     |
| Glis2   | 0.63002   | 0.061653 | -0.568367   | 1.43E-06   | Yes     | Glis2   | 0.131429  | 47.3375  | 8.49256          | 0.132429     | 47.3385       | 8.4816511        | 0.00014386 | Yes     |
| Gna14   | 0.096009  | 0.019139 | -0.07687    | 0.00058998 | Yes     | Gna14   | 0.210588  | 1.60131  | 2.92676          | 0.211588     | 1.60231       | 2.92082358       | 0.00014386 | Yes     |
| Gpd1    | 0.34546   | 0.076357 | -0.269103   | 1.37E-07   | Yes     | Gpd1    | 0.232642  | 54.8843  | 7.88214          | 0.233642     | 54.8853       | 7.87597635       | 0.00014386 | Yes     |
| Gpr137  | 0.15941   | 0.032534 | -0.126876   | 9.98E-06   | Yes     | Gpr137  | 2.5766    | 23.0076  | 3.15857          | 2.5776       | 23.0086       | 3.1580729        | 0.00014386 | Yes     |
| Gpr146  | 0.59158   | 0.064081 | -0.527499   | 6.87E-09   | Yes     | Gpr146  | 8.32471   | 3.23559  | -1.36337         | 8.32571      | 3.23659       | -1.3630987       | 0.00014386 | Yes     |
| Gpr176  | 0.19828   | 0.056173 | -0.142107   | 0.00028308 | Yes     | Gpr176  | 0.0682916 | 5.69249  | 6.38121          | 0.0692916    | 5.69349       | 6.36048899       | 0.00014386 | Yes     |
| Gpr65   | 0.81236   | 0.69573  | -0.11663    | 0.00451501 | Yes     | Gpr65   | 10.1681   | 0.369941 | -4.78061         | 10.1691      | 0.370941      | -4.7768585       | 0.00014386 | Yes     |
| Gprc5c  | 0.081568  | 0.0025   | -0.079068   | 0.00065829 | Yes     | Gprc5c  | 0.0175376 | 109.8    | 12.6121          | 0.0185376    | 109.801       | 12.5321491       | 0.00014386 | Yes     |
| Gramd1b | 0.0028256 | 0.087078 | 0.0842524   | 2.15E-12   | Yes     | Gramd1b | 5.68397   | 22.2907  | 1.97147          | 5.68497      | 22.2917       | 1.971282         | 0.00014386 | Yes     |
| Grap2   | 0         | 0.69901  | 0.69901     | 1.06E-11   | Yes     | Grap2   | 95.9927   | 2.20858  | -5.44174         | 95.9937      | 2.20958       | -5.4410957       | 0.00014386 | Yes     |
| Grb7    | 0.22612   | 0.043786 | -0.182334   | 0.00501738 | Yes     | Grb7    | 0.45454   | 32.5911  | 6.16393          | 0.45554      | 32.5921       | 6.16080076       | 0.00014386 | Yes     |
| Grhl2   | 0.17329   | 0.080912 | -0.092378   | 0.01387459 | Yes     | Grhl2   | 0.0424155 | 9.85741  | 7.86048          | 0.0434155    | 9.85841       | 7.82700097       | 0.00014386 | Yes     |
| Grk5    | 0.21933   | 0.061657 | -0.157673   | 0.00451501 | Yes     | Grk5    | 2.06311   | 6.45065  | 1.64462          | 2.06411      | 6.45165       | 1.64414832       | 0.00014386 | Yes     |
| Gsn     | 0.025711  | 0.093294 | 0.067583    | 8.73E-09   | Yes     | Gsn     | 34.9666   | 75.0584  | 1.10204          | 34.9676      | 75.0594       | 1.10201398       | 0.00014386 | Yes     |
| Gtdc1   | 0.13848   | 0.044542 | -0.093938   | 0.01961146 | Yes     | Gtdc1   | 10.3518   | 6.68953  | -0.629903        | 10.3528      | 6.69053       | -0.6298286       | 0.00014386 | Yes     |
| Gtpbp3  | 0.096418  | 0.01491  | -0.081508   | 0.00012642 | Yes     | Gtpbp3  | 2.701     | 6.33488  | 1.22982          | 2.702        | 6.33588       | 1.22951734       | 0.00014386 | Yes     |
| H1f0    | 0.085949  | 0.011687 | -0.074262   | 1.69E-06   | Yes     | H1f0    | 13.0734   | 148.868  | 3.50933          | 13.0744      | 148.869       | 3.50922672       | 0.00014386 | Yes     |
| H2afx   | 0.075819  | 0.013312 | -0.062507   | 3.02E-05   | Yes     | H2afx   | 29.8533   | 21.4297  | -0.47828         | 29.8543      | 21.4307       | -0.4782598       | 0.00014386 | Yes     |
| Habp4   | 0.50023   | 0.15076  | -0.34947    | 3.70E-05   | Yes     | Habp4   | 7.39262   | 13.9711  | 0.918294         | 7.39362      | 13.9721       | 0.91819607       | 0.00014386 | Yes     |
| Hcn2    | 0.10486   | 0.034638 | -0.070222   | 0.00028819 | Yes     | Hcn2    | 0.331886  | 22.8186  | 6.10338          | 0.332886     | 22.8196       | 6.0991015        | 0.00014386 | Yes     |
| Hexa    | 0.5278    | 0.062642 | -0.465158   | 4.71E-07   | Yes     | Hexa    | 25.4166   | 85.1719  | 1.74461          | 25.4176      | 85.1729       | 1.74456666       | 0.00014386 | Yes     |
| Hid1    | 0.29599   | 0.13963  | -0.15636    | 0.00210898 | Yes     | Hid1    | 0.0910033 | 7.48994  | 6.36289          | 0.0920033    | 7.49094       | 6.34731735       | 0.00014386 | Yes     |
| Hk1     | 0.042901  | 0.20036  | 0.157459    | 5.42E-05   | Yes     | Hk1     | 34.6916   | 76.1928  | 1.13507          | 34.6926      | 76.1938       | 1.13504564       | 0.00014386 | Yes     |
| Hmg20b  | 0.64028   | 0.31438  | -0.3259     | 0.00017371 | Yes     | Hmg20b  | 16.0316   | 51.5051  | 1.6838           | 16.0326      | 51.5061       | 1.6837349        | 0.00014386 | Yes     |
| Hnf1a   | 0.77203   | 0.080525 | -0.691505   | 2.15E-12   | Yes     | Hnf1a   | 3.21811   | 8.18203  | 1.34624          | 3.21911      | 8.18303       | 1.34597327       | 0.00014386 | Yes     |
| Hnf1b   | 0.11751   | 0.021741 | -0.095769   | 8.74E-06   | Yes     | Hnf1b   | 0.0509715 | 230.553  | 12.1431          | 0.0519715    | 230.554       | 12.1150964       | 0.00014386 | Yes     |
| Hnrnpa3 | 0.63728   | 0.3821   | -0.25518    | 0.00054762 | Yes     | Hnrnpa3 | 7.70123   | 2.80541  | -1.45688         | 7.70223      | 2.80641       | -1.4565504       | 0.00014386 | Yes     |

| RRBS     |            |           |             |            |         | RNAseq   |           |          |                  |              |               |                  |            |         |
|----------|------------|-----------|-------------|------------|---------|----------|-----------|----------|------------------|--------------|---------------|------------------|------------|---------|
| gene     | Blood      | Kidney    | methyl.diff | pMWU.fdr   | Match ? | gene     | blood     | kidney   | log2(fold_ratio) | blood+ 0.001 | kidney+ 0.001 | log2(fold_ratio) | q_value    | Match ? |
| Hoga1    | 0.22141    | 0.025136  | -0.196274   | 2.00E-06   | Yes     | Hoga1    | 0.578739  | 140.697  | 7.92546          | 0.579739     | 140.698       | 7.92298256       | 0.00014386 | Yes     |
| Hoxa2    | 0.16772    | 0.51074   | 0.34302     | 2.88E-08   | Yes     | Hoxa2    | 0         | 3.95689  | inf              | 0.001        | 3.95789       | 11.9505158       | 0.00014386 | Yes     |
| Hoxa6    | 0.49358    | 0.092813  | -0.400767   | 1.06E-11   | Yes     | HOXA6    | 0         | 5.08026  | inf              | 0.001        | 5.08126       | 12.3109706       | 0.00014386 | Yes     |
| Hoxb3    | 0.74785    | 0.22032   | -0.52753    | 6.09E-11   | Yes     | HOXB3    | 0.206256  | 78.0707  | 8.56421          | 0.207256     | 78.0717       | 8.55724201       | 0.00014386 | Yes     |
| Hoxc5    | 0.052263   | 0.17839   | 0.126127    | 2.80E-05   | Yes     | Hoxc5    | 4.87614   | 39.3311  | 3.01186          | 4.87714      | 39.3321       | 3.01159992       | 0.00014386 | Yes     |
| Hsd17b1  | 0.83204    | 0.26985   | -0.56219    | 2.15E-12   | Yes     | Hsd17b1  | 0.530116  | 5.96916  | 3.49315          | 0.531116     | 5.97016       | 3.4906707        | 0.00014386 | Yes     |
| Hsd17b11 | 0.054573   | 0.0044143 | -0.0501587  | 0.00158432 | Yes     | Hsd17b11 | 22.0233   | 42.2833  | 0.94106          | 22.0243      | 42.2843       | 0.94102593       | 0.00014386 | Yes     |
| Ifi30    | 0.27679    | 0.42123   | 0.14444     | 0.03700939 | Yes     | Ifi30    | 18.8734   | 67.4013  | 1.83642          | 18.8744      | 67.4023       | 1.83636704       | 0.00014386 | Yes     |
| Igf2     | 0.48943    | 0.28439   | -0.20504    | 0.00675344 | Yes     | Igf2     | 0.0231872 | 0.870129 | 5.22983          | 0.0241872    | 0.871129      | 5.1705707        | 0.00014386 | Yes     |
| Igf2r    | 0.40128    | 0.1791    | -0.22218    | 2.15E-12   | Yes     | Igf2r    | 11.7898   | 34.4164  | 1.54556          | 11.7908      | 34.4174       | 1.54547651       | 0.00014386 | Yes     |
| Igfbp5   | 0.064183   | 0.014006  | -0.050177   | 4.33E-06   | Yes     | Igfbp5   | 0.0455753 | 65.65    | 10.4923          | 0.0465753    | 65.651        | 10.4610362       | 0.00014386 | Yes     |
| Igfbp7   | 0.10074    | 0.020989  | -0.079751   | 0.00087121 | Yes     | Igfbp7   | 0.253961  | 1524.2   | 12.5512          | 0.254961     | 1524.201      | 12.545489        | 0.00014386 | Yes     |
| Ihh      | 0.056684   | 0.0033333 | -0.0533507  | 0.00015722 | Yes     | Ihh      | 0.894062  | 7.90146  | 3.14367          | 0.895062     | 7.90246       | 3.1422423        | 0.00014386 | Yes     |
| Il27ra   | 0.44453    | 0.28195   | -0.16258    | 0.04638126 | Yes     | Il27ra   | 32.6376   | 0.518701 | -5.97549         | 32.6386      | 0.519701      | -5.9727535       | 0.00014386 | Yes     |
| Il3ra    | 0.10115    | 0.023873  | -0.077277   | 7.94E-07   | Yes     | Il3ra    | 2.63735   | 105.19   | 5.31776          | 2.63835      | 105.191       | 5.3172315        | 0.00014386 | Yes     |
| Ino80d   | 0.88436    | 0.25702   | -0.62734    | 5.28E-07   | Yes     | Ino80d   | 8.69532   | 1.84394  | -2.23745         | 8.69632      | 1.84494       | -2.2368311       | 0.00014386 | Yes     |
| Inpp5a   | 0.64726    | 0.39461   | -0.25265    | 0.00229548 | Yes     | Inpp5a   | 12.8767   | 17.4807  | 0.441004         | 12.8777      | 17.4817       | 0.44097054       | 0.00014386 | Yes     |
| Inpp5f   | 0.10951    | 0.019728  | -0.089782   | 0.00265064 | Yes     | Inpp5f   | 18.4355   | 11.242   | -0.71359         | 18.4365      | 11.243        | -0.7135378       | 0.00014386 | Yes     |
| Inpp1    | 0.27596    | 0.055772  | -0.220188   | 0.00040757 | Yes     | Inpp1    | 9.99047   | 26.1144  | 1.38622          | 9.99147      | 26.1154       | 1.38613195       | 0.00014386 | Yes     |
| Irf2bpl  | 0.79447    | 0.085347  | -0.709123   | 2.15E-12   | Yes     | Irf2bpl  | 10.0496   | 24.2838  | 1.27286          | 10.0506      | 24.2848       | 1.27277198       | 0.00014386 | Yes     |
| Irf4     | 0.11512    | 0.042519  | -0.072601   | 0.00108023 | Yes     | Irf4     | 2.28813   | 0.636876 | -1.84509         | 2.28913      | 0.637876      | -1.8434515       | 0.00014386 | Yes     |
| Irgm     | 0.00054945 | 0.17452   | 0.17397055  | 1.98E-05   | Yes     | Irgm     | 6.4048    | 4.12094  | -0.636179        | 6.4058       | 4.12194       | -0.6360553       | 0.00014386 | Yes     |
| Irx3     | 0.038724   | 0.02323   | -0.015494   | 0.00018568 | Yes     | Irx3     | 0         | 54.9858  | inf              | 0.001        | 54.9868       | 15.7467977       | 0.00014386 | Yes     |
| Ism1     | 0.053311   | 1.00E-07  | -0.0533109  | 7.15E-06   | Yes     | Ism1     | 0         | 1.72105  | inf              | 0.001        | 1.72205       | 10.7499113       | 0.00014386 | Yes     |
| Itgal    | 0.054092   | 0.49088   | 0.436788    | 2.08E-06   | Yes     | Itgal    | 74.7373   | 1.83617  | -5.34706         | 74.7383      | 1.83717       | -5.3462907       | 0.00014386 | Yes     |
| Itgb4    | 0.10216    | 0.024028  | -0.078132   | 0.00418734 | Yes     | Itgb4    | 0.0732795 | 18.4411  | 7.9753           | 0.0742795    | 18.4421       | 7.95582313       | 0.00014386 | Yes     |
| Itgb5    | 0.54599    | 0.12222   | -0.42377    | 1.57E-07   | Yes     | Itgb5    | 1.55548   | 54.1267  | 5.12091          | 1.55648      | 54.1277       | 5.12000814       | 0.00014386 | Yes     |
| Itih1    | 0.83558    | 0.64109   | -0.19449    | 0.00012128 | Yes     | Itih1    | 0         | 0.940843 | inf              | 0.001        | 0.941843      | 9.87934278       | 0.00014386 | Yes     |
| Itpkb    | 0.003634   | 0.076351  | 0.072717    | 4.33E-06   | Yes     | Itpkb    | 80.7951   | 28.7232  | -1.49205         | 80.7961      | 28.7242       | -1.4920189       | 0.00014386 | Yes     |
| Itpripl2 | 0.72711    | 0.31782   | -0.40929    | 2.77E-10   | Yes     | Itpripl2 | 0.277221  | 1.17269  | 2.08071          | 0.278221     | 1.17369       | 2.07674818       | 0.00014386 | Yes     |
| Jag1     | 0.077127   | 0.007177  | -0.06995    | 0.01120909 | Yes     | Jag1     | 0.0571242 | 44.1158  | 9.59298          | 0.0581242    | 44.1168       | 9.56797348       | 0.00014386 | Yes     |
| Junb     | 0.40242    | 0.024448  | -0.377972   | 4.71E-07   | Yes     | Junb     | 48.1937   | 183.459  | 1.92854          | 48.1947      | 183.46        | 1.92851914       | 0.00014386 | Yes     |
| Kazn     | 0.10252    | 0.023639  | -0.078881   | 6.44E-07   | Yes     | KAZN     | 0.0510032 | 42.6971  | 9.70934          | 0.0520032    | 42.6981       | 9.68135576       | 0.00014386 | Yes     |
| Kcnip4   | 0.084703   | 0.023406  | -0.061297   | 2.98E-08   | Yes     | Kcnip4   | 0         | 3.2473   | inf              | 0.001        | 3.2483        | 11.6654692       | 0.00014386 | Yes     |
| Kcnk6    | 0.015841   | 0.073288  | 0.057447    | 0.00842241 | Yes     | Kcnk6    | 11.0459   | 1.22893  | -3.16804         | 11.0469      | 1.22993       | -3.1669935       | 0.00014386 | Yes     |
| Kcnn2    | 0.094529   | 0.017434  | -0.077095   | 0.00015722 | Yes     | Kcnn2    | 0         | 1.28647  | inf              | 0.001        | 1.28747       | 10.3303231       | 0.00014386 | Yes     |
| Kdm2a    | 0.14597    | 0.053026  | -0.092944   | 1.64E-09   | Yes     | Kdm2a    | 51.927    | 13.3646  | -1.95807         | 51.928       | 13.3656       | -1.9579881       | 0.00014386 | Yes     |
| Kdm6b    | 0.89563    | 0.47275   | -0.42288    | 2.12E-07   | Yes     | Kdm6b    | 17.8875   | 9.51135  | -0.911227        | 17.8885      | 9.51235       | -0.9111587       | 0.00014386 | Yes     |
| Kdsr     | 0.52169    | 0.14835   | -0.37334    | 3.12E-09   | Yes     | Kdsr     | 11.0584   | 6.28572  | -0.814995        | 11.0594      | 6.28672       | -0.8148937       | 0.00014386 | Yes     |
| Khk      | 0.88103    | 0.12512   | -0.75591    | 2.15E-12   | Yes     | Khk      | 8.04499   | 287.339  | 5.15852          | 8.04599      | 287.34        | 5.15834509       | 0.00014386 | Yes     |
| Kif12    | 0.84813    | 0.17101   | -0.67712    | 2.15E-12   | Yes     | Kif12    | 0.049709  | 285.117  | 12.4858          | 0.050709     | 285.118       | 12.4570297       | 0.00014386 | Yes     |
| Kif26a   | 0.10356    | 0.039063  | -0.064497   | 0.0003366  | Yes     | Kif26a   | 0         | 2.30281  | inf              | 0.001        | 2.30381       | 11.169806        | 0.00014386 | Yes     |

| RRBS     |           |           |             |            |         | RNAseq   |           |          |                  |              |               |                  |            |         |
|----------|-----------|-----------|-------------|------------|---------|----------|-----------|----------|------------------|--------------|---------------|------------------|------------|---------|
| gene     | Blood     | Kidney    | methyl.diff | pMWU.fdr   | Match ? | gene     | blood     | kidney   | log2(fold_ratio) | blood+ 0.001 | kidney+ 0.001 | log2(fold_ratio) | q_value    | Match ? |
| Kif3c    | 0.68482   | 0.28519   | -0.39963    | 8.74E-06   | Yes     | Kif3c    | 2.84091   | 0.537736 | -2.40139         | 2.84191      | 0.538736      | -2.3992105       | 0.00014386 | Yes     |
| Kl       | 0.33787   | 0.06385   | -0.27402    | 5.06E-11   | Yes     | Kl       | 0.0207321 | 17.069   | 9.6853           | 0.0217321    | 17.07         | 9.61741975       | 0.00014386 | Yes     |
| Klf2     | 0.03039   | 0.44893   | 0.41854     | 2.15E-12   | Yes     | Klf2     | 436.542   | 34.0422  | -3.68072         | 436.543      | 34.0432       | -3.6806852       | 0.00014386 | Yes     |
| Klhl29   | 0.076685  | 0.23419   | 0.157505    | 2.28E-12   | Yes     | Klhl29   | 0.0466846 | 1.29233  | 4.79089          | 0.0476846    | 1.29333       | 4.76142321       | 0.00014386 | Yes     |
| Krtcap3  | 0.90687   | 0.12522   | -0.78165    | 2.15E-12   | Yes     | Krtcap3  | 1.16043   | 12.0034  | 3.3707           | 1.16143      | 12.0044       | 3.36958919       | 0.00014386 | Yes     |
| L2hgdh   | 0.22127   | 0.044151  | -0.177119   | 0.00451501 | Yes     | L2hgdh   | 2.0201    | 4.73173  | 1.22794          | 2.0211       | 4.73273       | 1.22753191       | 0.00014386 | Yes     |
| Lactb2   | 0.13807   | 0.013905  | -0.124165   | 7.51E-09   | Yes     | Lactb2   | 15.3045   | 115.986  | 2.92192          | 15.3055      | 115.987       | 2.92184103       | 0.00014386 | Yes     |
| Lag3     | 0.22643   | 0.3822    | 0.15577     | 0.00265064 | Yes     | Lag3     | 49.35     | 19.6428  | -1.32905         | 49.351       | 19.6438       | -1.3290053       | 0.00014386 | Yes     |
| Lama1    | 0.081123  | 0.012666  | -0.068457   | 4.77E-09   | Yes     | Lama1    | 0.869857  | 3.76778  | 2.11486          | 0.870857     | 3.76878       | 2.11358984       | 0.00014386 | Yes     |
| Lama5    | 0.06265   | 0.006421  | -0.056229   | 6.67E-05   | Yes     | Lama5    | 0.179186  | 23.9319  | 7.06133          | 0.180186     | 23.9329       | 7.05336449       | 0.00014386 | Yes     |
| Lamc1    | 0.078338  | 0.017265  | -0.061073   | 0.00205129 | Yes     | Lamc1    | 1.12559   | 10.5932  | 3.2344           | 1.12659      | 10.5942       | 3.23324017       | 0.00014386 | Yes     |
| Lat      | 0.001882  | 0.3072    | 0.305318    | 2.16E-09   | Yes     | Lat      | 567.295   | 51.517   | -3.46098         | 567.296      | 51.518        | -3.4609532       | 0.00014386 | Yes     |
| Lats2    | 0.086618  | 0.28163   | 0.195012    | 4.44E-05   | Yes     | Lats2    | 0.103105  | 15.17    | 7.20097          | 0.104105     | 15.171        | 7.18713301       | 0.00014386 | Yes     |
| Lax1     | 0.07595   | 0.42966   | 0.35371     | 2.32E-06   | Yes     | Lax1     | 18.1992   | 0.386493 | -5.55729         | 18.2002      | 0.387493      | -5.5536402       | 0.00014386 | Yes     |
| Lbh      | 0.0029412 | 0.15332   | 0.1503788   | 2.52E-05   | Yes     | Lbh      | 152.743   | 19.8893  | -2.94104         | 152.744      | 19.8903       | -2.9409788       | 0.00014386 | Yes     |
| Lgalsl   | 0.73673   | 0.10392   | -0.63281    | 2.85E-09   | Yes     | Lgalsl   | 0.503772  | 17.2445  | 5.09722          | 0.504772     | 17.2455       | 5.09444426       | 0.00014386 | Yes     |
| Limd1    | 0.15802   | 0.021984  | -0.136036   | 1.12E-05   | Yes     | Limd1    | 13.1998   | 8.4473   | -0.643949        | 13.2008      | 8.4483        | -0.6438924       | 0.00014386 | Yes     |
| Lmna     | 0.080619  | 0.01266   | -0.067959   | 0.03461603 | Yes     | Lmna     | 1.82267   | 31.0866  | 4.09217          | 1.82367      | 31.0876       | 4.09142265       | 0.00014386 | Yes     |
| Loxl1    | 0.6022    | 0.36206   | -0.24014    | 1.60E-06   | Yes     | Loxl1    | 0         | 1.89237  | inf              | 0.001        | 1.89337       | 10.8867407       | 0.00014386 | Yes     |
| Lrfn4    | 0.0047727 | 0.1564    | 0.1516273   | 1.83E-06   | Yes     | Lrfn4    | 0.629281  | 3.75183  | 2.57582          | 0.630281     | 3.75283       | 2.57391186       | 0.00014386 | Yes     |
| Lrrc16a  | 0.42315   | 0.092342  | -0.330808   | 5.28E-07   | Yes     | Lrrc16a  | 0.348115  | 18.0544  | 5.69664          | 0.349115     | 18.0554       | 5.69258423       | 0.00014386 | Yes     |
| Lrrc23   | 0.036578  | 0.12463   | 0.088052    | 1.92E-05   | Yes     | Lrrc23   | 69.0472   | 27.1766  | -1.34522         | 69.0482      | 27.1776       | -1.3451857       | 0.00014386 | Yes     |
| Lrrc24   | 0.13327   | 0.046181  | -0.087089   | 0.00050175 | Yes     | Lrrc24   | 11.0183   | 42.0519  | 1.93227          | 11.0193      | 42.0529       | 1.93217271       | 0.00014386 | Yes     |
| Lrrc71   | 0.63915   | 0.17032   | -0.46883    | 4.44E-05   | Yes     | Lrrc71   | 3.81614   | 14.2544  | 1.90122          | 3.81714      | 14.2554       | 1.90094452       | 0.00014386 | Yes     |
| Lrrc8c   | 0.80592   | 0.72952   | -0.0764     | 0.00192641 | Yes     | Lrrc8c   | 42.022    | 2.98816  | -3.81382         | 42.023       | 2.98916       | -3.8133671       | 0.00014386 | Yes     |
| Lrrfip1  | 0.0072886 | 0.20118   | 0.1938914   | 1.28E-06   | Yes     | Lrrfip1  | 57.8979   | 27.9356  | -1.05141         | 57.8989      | 27.9366       | -1.0513795       | 0.00014386 | Yes     |
| Lsr      | 0.061262  | 0.0040689 | -0.0571931  | 0.00038568 | Yes     | Lsr      | 1.9591    | 52.2959  | 4.73844          | 1.9601       | 52.2969       | 4.73772627       | 0.00014386 | Yes     |
| Ltbp3    | 0.5906    | 0.18847   | -0.40213    | 4.71E-07   | Yes     | Ltbp3    | 0.0147988 | 19.2549  | 10.3455          | 0.0157988    | 19.2559       | 10.2512699       | 0.00014386 | Yes     |
| Ltbr     | 0.71452   | 0.13243   | -0.58209    | 4.71E-07   | Yes     | Ltbr     | 0.287303  | 35.2517  | 6.93898          | 0.288303     | 35.2527       | 6.9340041        | 0.00014386 | Yes     |
| Lurap1l  | 0.31194   | 0.15963   | -0.15231    | 0.01482889 | Yes     | Lurap1l  | 0         | 6.57165  | inf              | 0.001        | 6.57265       | 12.6822594       | 0.00014386 | Yes     |
| Lypd6b   | 0.043673  | 0.017767  | -0.025906   | 1.57E-05   | Yes     | Lypd6b   | 0         | 6.4393   | inf              | 0.001        | 6.4403        | 12.6529122       | 0.00014386 | Yes     |
| Lzts3    | 0.64353   | 0.18466   | -0.45887    | 2.15E-12   | Yes     | Lzts3    | 1.34092   | 82.8796  | 5.94972          | 1.34192      | 82.8806       | 5.94866388       | 0.00014386 | Yes     |
| Mafk     | 0.87961   | 0.56842   | -0.31119    | 2.48E-06   | Yes     | Mafk     | 11.7474   | 20.4049  | 0.796576         | 11.7484      | 20.4059       | 0.79652205       | 0.00014386 | Yes     |
| Map4k2   | 0.76234   | 0.27299   | -0.48935    | 7.28E-09   | Yes     | Map4k2   | 50.8708   | 5.34075  | -3.25172         | 50.8718      | 5.34175       | -3.2514818       | 0.00014386 | Yes     |
| Mapk4    | 0.97092   | 0.47281   | -0.49811    | 4.71E-07   | Yes     | Mapk4    | 0         | 1.53934  | inf              | 0.001        | 1.54034       | 10.5890331       | 0.00014386 | Yes     |
| Marveld2 | 0.16997   | 0.024748  | -0.145222   | 1.05E-07   | Yes     | Marveld2 | 0.0572662 | 6.41495  | 6.80761          | 0.0582662    | 6.41595       | 6.78285986       | 0.00014386 | Yes     |
| Mavs     | 0.40954   | 0.049335  | -0.360205   | 6.06E-05   | Yes     | Mavs     | 7.15611   | 38.071   | 2.41144          | 7.15711      | 38.072        | 2.4112813        | 0.00014386 | Yes     |
| Mcm3ap   | 0.81647   | 0.54943   | -0.26704    | 0.00132879 | Yes     | Mcm3ap   | 15.6159   | 7.70961  | -1.01829         | 15.6169      | 7.71061       | -1.0181912       | 0.00014386 | Yes     |
| Mdk      | 0.92108   | 0.10212   | -0.81896    | 4.71E-07   | Yes     | Mdk      | 19.1509   | 4.7425   | -2.01369         | 19.1519      | 4.7435        | -2.0134637       | 0.00014386 | Yes     |
| Megf8    | 0.231     | 0.033982  | -0.197018   | 2.15E-12   | Yes     | Megf8    | 0.0256498 | 5.91628  | 7.8496           | 0.0266498    | 5.91728       | 7.79466565       | 0.00014386 | Yes     |
| Metrn    | 0.49956   | 0.16711   | -0.33245    | 7.28E-09   | Yes     | Metrn    | 0.336654  | 24.6726  | 6.1955           | 0.337654     | 24.6736       | 6.19127877       | 0.00014386 | Yes     |
| Mex3b    | 0.17488   | 0.042246  | -0.132634   | 0.00040757 | Yes     | Mex3b    | 8.07246   | 0.501134 | -4.00974         | 8.07346      | 0.502134      | -4.0070428       | 0.00014386 | Yes     |

| RRBS     |           |           |             |            |         | RNAseq   |           |          |                  |              |               |                  |            |         |
|----------|-----------|-----------|-------------|------------|---------|----------|-----------|----------|------------------|--------------|---------------|------------------|------------|---------|
| gene     | Blood     | Kidney    | methyl.diff | pMWU.fdr   | Match ? | gene     | blood     | kidney   | log2(fold_ratio) | blood+ 0.001 | kidney+ 0.001 | log2(fold_ratio) | q_value    | Match ? |
| Mfhas1   | 0.30504   | 0.15134   | -0.1537     | 0.02967027 | Yes     | Mfhas1   | 0.446665  | 7.85803  | 4.1369           | 0.447665     | 7.85903       | 4.13385983       | 0.00014386 | Yes     |
| Mki67    | 0.07209   | 0.014501  | -0.057589   | 0.00123297 | Yes     | Mki67    | 1.76112   | 0.810662 | -1.11932         | 1.76212      | 0.811662      | -1.1183612       | 0.00014386 | Yes     |
| Mlf2     | 0.86446   | 0.59164   | -0.27282    | 0.00628692 | Yes     | Mlf2     | 90.8784   | 171.816  | 0.918854         | 90.8794      | 171.817       | 0.91884757       | 0.00014386 | Yes     |
| Mlycd    | 0.20216   | 0.057024  | -0.145136   | 0.00205129 | Yes     | Mlycd    | 7.57677   | 22.6386  | 1.57913          | 7.57777      | 22.6396       | 1.57900321       | 0.00014386 | Yes     |
| Mmp11    | 0.35166   | 0.14016   | -0.2115     | 0.01049788 | Yes     | Mmp11    | 0.59394   | 5.93747  | 3.32146          | 0.59494      | 5.93847       | 3.3192752        | 0.00014386 | Yes     |
| Mn1      | 0.90124   | 0.26986   | -0.63138    | 2.27E-12   | Yes     | Mn1      | 1.55114   | 0.404678 | -1.93849         | 1.55214      | 0.405678      | -1.9358517       | 0.00014386 | Yes     |
| Moap1    | 0.34959   | 0.14219   | -0.2074     | 0.00103522 | Yes     | Moap1    | 10.4548   | 40.1512  | 1.94127          | 10.4558      | 40.1522       | 1.94117559       | 0.00014386 | Yes     |
| Mob3a    | 0.001419  | 0.19538   | 0.193961    | 4.91E-07   | Yes     | Mob3a    | 55.2159   | 5.62827  | -3.29432         | 55.2169      | 5.62927       | -3.2940901       | 0.00014386 | Yes     |
| Mpp6     | 0.64394   | 0.35086   | -0.29308    | 0.00040757 | Yes     | Mpp6     | 8.15941   | 20.3493  | 1.31844          | 8.16041      | 20.3503       | 1.31833652       | 0.00014386 | Yes     |
| Mpst     | 0.9484    | 0.44918   | -0.49922    | 2.60E-10   | Yes     | MPST     | 18.1242   | 145.346  | 3.0035           | 18.1252      | 145.347       | 3.00343247       | 0.00014386 | Yes     |
| Mrap2    | 0.47147   | 0.363     | -0.10847    | 0.00045631 | Yes     | Mrap2    | 5.57625   | 0.365698 | -3.93057         | 5.57725      | 0.366698      | -3.9268896       | 0.00014386 | Yes     |
| Mri1     | 0.89288   | 0.8073    | -0.08558    | 0.01482889 | Yes     | Mri1     | 17.3967   | 29.2333  | 0.748801         | 17.3977      | 29.2343       | 0.74876545       | 0.00014386 | Yes     |
| Mrpl38   | 0.76744   | 0.2533    | -0.51414    | 5.41E-06   | Yes     | Mrpl38   | 16.3565   | 36.7688  | 1.16861          | 16.3575      | 36.7698       | 1.16856906       | 0.00014386 | Yes     |
| Msrb2    | 0.71703   | 0.20271   | -0.51432    | 9.98E-06   | Yes     | Msrb2    | 15.9543   | 32.0719  | 1.00737          | 15.9553      | 32.0729       | 1.00731907       | 0.00014386 | Yes     |
| Mvp      | 0.84242   | 0.38409   | -0.45833    | 5.41E-06   | Yes     | Mvp      | 137.116   | 90.0947  | -0.605881        | 137.117      | 90.0957       | -0.6058773       | 0.00014386 | Yes     |
| Myh10    | 0.12056   | 0.024901  | -0.095659   | 0.00018974 | Yes     | Myh10    | 0.301868  | 9.6315   | 4.99577          | 0.302868     | 9.6325        | 4.99114922       | 0.00014386 | Yes     |
| Myh11    | 0.92733   | 0.37877   | -0.54856    | 4.71E-07   | Yes     | Myh11    | 1.59742   | 5.71067  | 1.83792          | 1.59842      | 5.71167       | 1.83726609       | 0.00014386 | Yes     |
| Myh14    | 0.083303  | 0.02903   | -0.054273   | 0.00317797 | Yes     | Myh14    | 0.0396232 | 14.0597  | 8.47101          | 0.0406232    | 14.0607       | 8.43514882       | 0.00014386 | Yes     |
| Myo1c    | 0.69905   | 0.35419   | -0.34486    | 1.16E-05   | Yes     | Myo1c    | 5.145     | 47.2294  | 3.19844          | 5.146        | 47.2304       | 3.19819239       | 0.00014386 | Yes     |
| Myo5b    | 0.25325   | 0.067689  | -0.185561   | 0.00093244 | Yes     | Myo5b    | 0.0218797 | 32.9658  | 10.5572          | 0.0228797    | 32.9668       | 10.49273         | 0.00014386 | Yes     |
| N4bp3    | 0.69097   | 0.37621   | -0.31476    | 0.00369602 | Yes     | N4bp3    | 0.2919    | 3.57907  | 3.61604          | 0.2929       | 3.58007       | 3.6115077        | 0.00014386 | Yes     |
| Naa25    | 0.28047   | 0.2254    | -0.05507    | 0.04638126 | Yes     | Naa25    | 8.86995   | 2.67795  | -1.7278          | 8.87095      | 2.67895       | -1.727421        | 0.00014386 | Yes     |
| Nab2     | 0.15524   | 0.41786   | 0.26262     | 0.00719792 | Yes     | Nab2     | 47.6939   | 15.4676  | -1.62455         | 47.6949      | 15.4686       | -1.6244924       | 0.00014386 | Yes     |
| Nagpa    | 0.81312   | 0.72551   | -0.08761    | 0.01237082 | Yes     | Nagpa    | 10.111    | 5.46397  | -0.887911        | 10.112       | 5.46497       | -0.8877829       | 0.00014386 | Yes     |
| Nav2     | 0.23508   | 0.081392  | -0.153688   | 2.65E-06   | Yes     | Nav2     | 0.883689  | 13.1467  | 3.89501          | 0.884689     | 13.1477       | 3.89349625       | 0.00014386 | Yes     |
| Ncf4     | 0.87886   | 0.79071   | -0.08815    | 0.02733646 | Yes     | Ncf4     | 1.38334   | 3.92934  | 1.50613          | 1.38434      | 3.93034       | 1.5054558        | 0.00014386 | Yes     |
| Nckap1l  | 0.0073307 | 0.49873   | 0.4913993   | 4.71E-07   | Yes     | Nckap1l  | 45.825    | 2.46185  | -4.21832         | 45.826       | 2.46285       | -4.2177657       | 0.00014386 | Yes     |
| Ncl      | 0.30005   | 0.17054   | -0.12951    | 0.01120909 | Yes     | Ncl      | 282.42    | 135.057  | -1.06428         | 282.421      | 135.058       | -1.0642683       | 0.00014386 | Yes     |
| Ndufs5   | 0.24852   | 0.14729   | -0.10123    | 0.00025822 | Yes     | NDUFS5   | 13.0298   | 61.1184  | 2.22979          | 13.0308      | 61.1194       | 2.22970472       | 0.00014386 | Yes     |
| Nfix     | 0.11415   | 0.24994   | 0.13579     | 0.00451501 | Yes     | Nfix     | 1.3118    | 12.5073  | 3.25315          | 1.3128       | 12.5083       | 3.25216668       | 0.00014386 | Yes     |
| Nfkb1    | 0.12224   | 0.031766  | -0.090474   | 3.82E-06   | Yes     | Nfkb1    | 61.0659   | 19.6213  | -1.63794         | 61.0669      | 19.6223       | -1.6378965       | 0.00014386 | Yes     |
| Nfkbia   | 0.29782   | 0.07401   | -0.22381    | 0.00103522 | Yes     | Nfkbia   | 97.7298   | 73.1883  | -0.417185        | 97.7308      | 73.1893       | -0.4171806       | 0.00014386 | Yes     |
| Nid2     | 0.10866   | 0.046857  | -0.061803   | 0.03700939 | Yes     | Nid2     | 0.10027   | 128.41   | 10.3227          | 0.10127      | 128.411       | 10.3083462       | 0.00014386 | Yes     |
| Nipsnap1 | 0.083668  | 0.023127  | -0.060541   | 0.00052742 | Yes     | Nipsnap1 | 20.0818   | 61.4097  | 1.61258          | 20.0828      | 61.4107       | 1.61252962       | 0.00014386 | Yes     |
| Nkain4   | 0.068571  | 0.0081378 | -0.0604332  | 1.80E-05   | Yes     | Nkain4   | 0         | 13.2983  | inf              | 0.001        | 13.2993       | 13.6990627       | 0.00014386 | Yes     |
| Nkx2-1   | 0.095456  | 0.021009  | -0.074447   | 3.76E-05   | Yes     | Nkx2-1   | 0.415895  | 117.965  | 8.14793          | 0.416895     | 117.966       | 8.14447132       | 0.00014386 | Yes     |
| Nmrk1    | 0.37523   | 0.27913   | -0.0961     | 0.03216266 | Yes     | Nmrk1    | 0.816777  | 27.589   | 5.07801          | 0.817777     | 27.59         | 5.07629416       | 0.00014386 | Yes     |
| Notch1   | 0.099251  | 0.22232   | 0.123069    | 4.44E-05   | Yes     | Notch1   | 35.0548   | 6.41861  | -2.44928         | 35.0558      | 6.41961       | -2.4490956       | 0.00014386 | Yes     |
| Nox4     | 0.24815   | 2.50E-07  | -0.2481498  | 4.71E-07   | Yes     | Nox4     | 0         | 11.2772  | inf              | 0.001        | 11.2782       | 13.4612492       | 0.00014386 | Yes     |
| Npb      | 0.81059   | 0.22953   | -0.58106    | 2.15E-12   | Yes     | Npb      | 1.06929   | 0        | -inf             | 1.07029      | 0.001         | -10.063786       | 0.00014386 | Yes     |
| Npr2     | 0.2322    | 0.0585    | -0.1737     | 1.40E-05   | Yes     | Npr2     | 1.17455   | 6.56584  | 2.48286          | 1.17555      | 6.56684       | 2.4818634        | 0.00014386 | Yes     |
| Npy      | 0.071873  | 0.016241  | -0.055632   | 0.01559789 | Yes     | Npy      | 11.2971   | 4.44756  | -1.34486         | 11.2981      | 4.44856       | -1.3446699       | 0.00014386 | Yes     |

| RRBS    |          |           |             |            |         | RNAseq  |           |          |                  |              |               |                  |            |         |
|---------|----------|-----------|-------------|------------|---------|---------|-----------|----------|------------------|--------------|---------------|------------------|------------|---------|
| gene    | Blood    | Kidney    | methyl.diff | pMWU.fdr   | Match ? | gene    | blood     | kidney   | log2(fold_ratio) | blood+ 0.001 | kidney+ 0.001 | log2(fold_ratio) | q_value    | Match ? |
| Nr1h3   | 0.41152  | 0.052739  | -0.358781   | 2.68E-07   | Yes     | Nr1h3   | 0.210707  | 18.0864  | 6.42353          | 0.211707     | 18.0874       | 6.41677226       | 0.00014386 | Yes     |
| Nr2f6   | 0.54129  | 0.079396  | -0.461894   | 2.15E-12   | Yes     | Nr2f6   | 3.82643   | 94.1686  | 4.62117          | 3.82743      | 94.1696       | 4.6208135        | 0.00014386 | Yes     |
| Nr4a2   | 0.13894  | 0.28418   | 0.14524     | 2.49E-07   | Yes     | Nr4a2   | 0.244681  | 2.06466  | 3.07693          | 0.245681     | 2.06566       | 3.07174462       | 0.00014386 | Yes     |
| Nrg1    | 0.13269  | 0.045032  | -0.087658   | 0.00229548 | Yes     | Nrg1    | 0.0173027 | 3.01731  | 7.44612          | 0.0183027    | 3.01831       | 7.36554069       | 0.00014386 | Yes     |
| Nrp1    | 0.67624  | 0.10568   | -0.57056    | 5.37E-08   | Yes     | Nrp1    | 3.46752   | 14.0724  | 2.02089          | 3.46852      | 14.0734       | 2.0205788        | 0.00014386 | Yes     |
| Nrxn2   | 0.10296  | 0.01314   | -0.08982    | 4.76E-05   | Yes     | Nrxn2   | 0         | 1.99002  | inf              | 0.001        | 1.99102       | 10.959292        | 0.00014386 | Yes     |
| Nsd1    | 0.11648  | 0.19406   | 0.07758     | 0.00017247 | Yes     | Nsd1    | 17.0793   | 4.7804   | -1.83705         | 17.0803      | 4.7814        | -1.8368283       | 0.00014386 | Yes     |
| Nt5dc2  | 0.76704  | 0.054198  | -0.712842   | 1.06E-11   | Yes     | Nt5dc2  | 2.65388   | 7.99661  | 1.59129          | 2.65488      | 7.99761       | 1.59092228       | 0.00014386 | Yes     |
| Ntf3    | 0.1476   | 0.04168   | -0.10592    | 0.00025822 | Yes     | Ntf3    | 0         | 2.54787  | inf              | 0.001        | 2.54887       | 11.3156421       | 0.00014386 | Yes     |
| Ntn4    | 0.080184 | 0.017672  | -0.062512   | 0.00014055 | Yes     | Ntn4    | 0         | 25.3721  | inf              | 0.001        | 25.3731       | 14.6310122       | 0.00014386 | Yes     |
| Ntng2   | 0.53753  | 0.12005   | -0.41748    | 2.15E-12   | Yes     | Ntng2   | 55.9767   | 0.643373 | -6.44303         | 55.9777      | 0.644373      | -6.4408124       | 0.00014386 | Yes     |
| Nuak1   | 0.079832 | 0.0218    | -0.058032   | 0.00229548 | Yes     | Nuak1   | 0.776154  | 6.06392  | 2.96584          | 0.777154     | 6.06492       | 2.9642162        | 0.00014386 | Yes     |
| Nudt22  | 0.82074  | 0.48118   | -0.33956    | 1.98E-05   | Yes     | Nudt22  | 6.47288   | 16.2235  | 1.3256           | 6.47388      | 16.2245       | 1.32547149       | 0.00014386 | Yes     |
| Olfm1   | 0.050038 | 0.14168   | 0.091642    | 0.00691976 | Yes     | Olfm1   | 9.99264   | 2.52122  | -1.98674         | 9.99364      | 2.52222       | -1.9863161       | 0.00014386 | Yes     |
| Olfml2a | 0.96264  | 0.40508   | -0.55756    | 4.71E-07   | Yes     | Olfml2a | 0         | 1.30548  | inf              | 0.001        | 1.30648       | 10.3514693       | 0.00014386 | Yes     |
| Orc2    | 0.91287  | 0.75012   | -0.16275    | 0.00012642 | Yes     | Orc2    | 26.9421   | 9.96318  | -1.43518         | 26.9431      | 9.96418       | -1.4350929       | 0.00014386 | Yes     |
| Ovol1   | 0.17148  | 0.066619  | -0.104861   | 0.04638126 | Yes     | Ovol1   | 0.184441  | 3.73831  | 4.34116          | 0.185441     | 3.73931       | 4.33373992       | 0.00014386 | Yes     |
| Pabpc4  | 0.15096  | 0.013111  | -0.137849   | 2.16E-09   | Yes     | Pabpc4  | 48.2822   | 86.6728  | 0.844088         | 48.2832      | 86.6738       | 0.84407466       | 0.00014386 | Yes     |
| Pacsin3 | 0.6418   | 0.13809   | -0.50371    | 1.43E-06   | Yes     | Pacsin3 | 0.142708  | 31.0635  | 7.76601          | 0.143708     | 31.0645       | 7.75598265       | 0.00014386 | Yes     |
| Palm    | 0.71631  | 0.16832   | -0.54799    | 2.23E-05   | Yes     | Palm    | 3.07789   | 107.284  | 5.12335          | 3.07889      | 107.285       | 5.12289425       | 0.00014386 | Yes     |
| Paqr6   | 0.83137  | 0.097981  | -0.733389   | 4.71E-07   | Yes     | Paqr6   | 0.687817  | 13.874   | 4.33422          | 0.688817     | 13.875        | 4.33222321       | 0.00014386 | Yes     |
| Parp16  | 0.60108  | 0.1182    | -0.48288    | 4.22E-09   | Yes     | Parp16  | 1.16568   | 13.2527  | 3.50705          | 1.16668      | 13.2537       | 3.50591435       | 0.00014386 | Yes     |
| Parp3   | 0.68725  | 0.49671   | -0.19054    | 0.01289082 | Yes     | Parp3   | 3.15483   | 15.2957  | 2.27749          | 3.15583      | 15.2967       | 2.27712905       | 0.00014386 | Yes     |
| Pcdhga1 | 0.34238  | 0.24232   | -0.10006    | 0.02611884 | Yes     | Pcdhga1 | 0.857725  | 0.197067 | -2.12182         | 0.858725     | 0.198067      | -2.1162077       | 0.00014386 | Yes     |
| Pced1b  | 0.76602  | 0.51304   | -0.25298    | 0.00123297 | Yes     | Pced1b  | 55.9867   | 3.45991  | -4.01628         | 55.9877      | 3.46091       | -4.0158866       | 0.00014386 | Yes     |
| Pcna    | 0.6383   | 0.41767   | -0.22063    | 0.00418734 | Yes     | Pcna    | 65.9845   | 47.3383  | -0.479121        | 65.9855      | 47.3393       | -0.4791107       | 0.00014386 | Yes     |
| Pcsk5   | 0.099836 | 0.020031  | -0.079805   | 0.00011494 | Yes     | Pcsk5   | 0         | 3.70631  | inf              | 0.001        | 3.70731       | 11.856157        | 0.00014386 | Yes     |
| Pde2a   | 0.44068  | 0.22759   | -0.21309    | 0.00024929 | Yes     | Pde2a   | 96.0288   | 3.34291  | -4.84429         | 96.0298      | 3.34391       | -4.8438742       | 0.00014386 | Yes     |
| Pde4a   | 0.073453 | 0.012173  | -0.06128    | 0.00025822 | Yes     | Pde4a   | 0.144344  | 2.53525  | 4.13455          | 0.145344     | 2.53625       | 4.12515354       | 0.00014386 | Yes     |
| Pde4d   | 0.32484  | 0.063154  | -0.261686   | 4.71E-07   | Yes     | Pde4d   | 42.4937   | 3.13369  | -3.76131         | 42.4947      | 3.13469       | -3.7608882       | 0.00014386 | Yes     |
| Pde8a   | 0.056734 | 0.0047619 | -0.0519721  | 0.04412687 | Yes     | Pde8a   | 0.421618  | 15.6506  | 5.21414          | 0.422618     | 15.6516       | 5.21081212       | 0.00014386 | Yes     |
| Pdgfra  | 0.069462 | 0.013923  | -0.055539   | 0.00023156 | Yes     | Pdgfra  | 0         | 1.34424  | inf              | 0.001        | 1.34524       | 10.3936479       | 0.00014386 | Yes     |
| Pdlim2  | 0.27575  | 0.084244  | -0.191506   | 3.22E-05   | Yes     | Pdlim2  | 55.7633   | 25.8189  | -1.11089         | 55.7643      | 25.8199       | -1.1108584       | 0.00014386 | Yes     |
| Pdlim4  | 0.086375 | 0.024844  | -0.061531   | 0.01832913 | Yes     | Pdlim4  | 0         | 7.21807  | inf              | 0.001        | 7.21907       | 12.8175973       | 0.00014386 | Yes     |
| Pdzd3   | 0.85448  | 0.49386   | -0.36062    | 3.52E-05   | Yes     | Pdzd3   | 0.165991  | 12.3039  | 6.21187          | 0.166991     | 12.3049       | 6.20331877       | 0.00014386 | Yes     |
| Pdzrn3  | 0.073757 | 0.022878  | -0.050879   | 0.00451501 | Yes     | Pdzrn3  | 0         | 1.29295  | inf              | 0.001        | 1.29395       | 10.3375662       | 0.00014386 | Yes     |
| Pea15   | 0.14206  | 0.035644  | -0.106416   | 0.0024744  | Yes     | Pea15   | 16.3638   | 47.3028  | 1.53142          | 16.3648      | 47.3038       | 1.53136011       | 0.00014386 | Yes     |
| Pebp1   | 0.75283  | 0.58663   | -0.1662     | 0.04051274 | Yes     | Pebp1   | 101.467   | 572.695  | 2.49676          | 101.468      | 572.696       | 2.49674471       | 0.00014386 | Yes     |
| Peli1   | 0.14005  | 0.071254  | -0.068796   | 7.01E-05   | Yes     | Peli1   | 35.4079   | 4.51528  | -2.97118         | 35.4089      | 4.51628       | -2.9709052       | 0.00014386 | Yes     |
| Peli2   | 0.45657  | 0.040937  | -0.415633   | 4.71E-07   | Yes     | Peli2   | 0.0656408 | 5.05475  | 6.26691          | 0.0666408    | 5.05575       | 6.2453756        | 0.00014386 | Yes     |
| Pex10   | 0.77028  | 0.57486   | -0.19542    | 0.00501738 | Yes     | Pex10   | 2.08192   | 8.05669  | 1.95227          | 2.08292      | 8.05769       | 1.95175887       | 0.00014386 | Yes     |
| Pex2    | 0.061067 | 0.0038067 | -0.0572603  | 2.23E-05   | Yes     | Pex2    | 6.01091   | 15.4554  | 1.36245          | 6.01191      | 15.4564       | 1.36230902       | 0.00014386 | Yes     |

| RRBS     |            |           |             |            |         | RNAseq   |           |          |                  |              |               |                  |            |         |
|----------|------------|-----------|-------------|------------|---------|----------|-----------|----------|------------------|--------------|---------------|------------------|------------|---------|
| gene     | Blood      | Kidney    | methyl.diff | pMWU.fdr   | Match ? | gene     | blood     | kidney   | log2(fold_ratio) | blood+ 0.001 | kidney+ 0.001 | log2(fold_ratio) | q_value    | Match ? |
| Pfkfb3   | 0.77415    | 0.60363   | -0.17052    | 0.00616443 | Yes     | Pfkfb3   | 11.7523   | 22.9913  | 0.968145         | 11.7533      | 22.9923       | 0.96808491       | 0.00014386 | Yes     |
| Pfkl     | 0.60664    | 0.34285   | -0.26379    | 0.00111391 | Yes     | Pfkl     | 23.6765   | 54.2513  | 1.1962           | 23.6775      | 54.2523       | 1.19616754       | 0.00014386 | Yes     |
| Phf1     | 0.72806    | 0.52807   | -0.19999    | 0.00040757 | Yes     | Phf1     | 44.5994   | 28.6706  | -0.637451        | 44.6004      | 28.6716       | -0.6374342       | 0.00014386 | Yes     |
| Phlda2   | 0.14006    | 0.047208  | -0.092852   | 0.00675344 | Yes     | PHLDA2   | 0.614276  | 16.2552  | 4.72587          | 0.615276     | 16.2562       | 4.72361253       | 0.00014386 | Yes     |
| Phlpp1   | 0.50049    | 0.12928   | -0.37121    | 7.13E-10   | Yes     | Phlpp1   | 1.79212   | 2.65133  | 0.56505          | 1.79312      | 2.65233       | 0.56478825       | 0.00014386 | Yes     |
| Phpt1    | 0.3014     | 0.060692  | -0.240708   | 9.44E-05   | Yes     | Phpt1    | 65.2485   | 188.696  | 1.53204          | 65.2495      | 188.697       | 1.53203273       | 0.00014386 | Yes     |
| Pik3cd   | 0.88447    | 0.20895   | -0.67552    | 2.15E-12   | Yes     | Pik3cd   | 305.282   | 7.83898  | -5.28333         | 305.283      | 7.83998       | -5.2831535       | 0.00014386 | Yes     |
| Pim3     | 0.93063    | 0.15522   | -0.77541    | 2.16E-09   | Yes     | Pim3     | 8.46408   | 51.1335  | 2.59484          | 8.46508      | 51.1345       | 2.59470139       | 0.00014386 | Yes     |
| Pirt     | 0.7831     | 0.58748   | -0.19562    | 0.00045631 | Yes     | Pirt     | 0         | 1.3086   | inf              | 0.001        | 1.3096        | 10.3549105       | 0.00014386 | Yes     |
| Pitx2    | 0.14014    | 0.025712  | -0.114428   | 0.00065829 | Yes     | Pitx2    | 0         | 41.6769  | inf              | 0.001        | 41.6779       | 15.346995        | 0.00014386 | Yes     |
| Piwil1   | 0.62837    | 0.26788   | -0.36049    | 0.00031293 | Yes     | Piwil1   | 0.063008  | 7.84185  | 6.95952          | 0.064008     | 7.84285       | 6.93698197       | 0.00014386 | Yes     |
| Pklr     | 0.80297    | 0.30968   | -0.49329    | 5.41E-06   | Yes     | Pklr     | 0.0516074 | 34.3669  | 9.37922          | 0.0526074    | 34.3679       | 9.35158024       | 0.00014386 | Yes     |
| Plac9    | 0.25439    | 0.11781   | -0.13658    | 2.15E-12   | Yes     | Plac9    | 0         | 1.61915  | inf              | 0.001        | 1.62015       | 10.6619117       | 0.00014386 | Yes     |
| Plce1    | 0.067749   | 0.015498  | -0.052251   | 0.0003366  | Yes     | Plce1    | 0         | 0.881136 | inf              | 0.001        | 0.882136      | 9.78485728       | 0.00014386 | Yes     |
| Plcg2    | 0.01139    | 0.089818  | 0.078428    | 0.00198839 | Yes     | Plcg2    | 10.3431   | 4.63078  | -1.15934         | 10.3441      | 4.63178       | -1.1591695       | 0.00014386 | Yes     |
| Plec     | 0.97571    | 0.8774    | -0.09831    | 0.00144827 | Yes     | Plec     | 18.0701   | 8.91058  | -1.02002         | 18.0711      | 8.91158       | -1.0199312       | 0.00014386 | Yes     |
| Plekha5  | 0.17634    | 0.042216  | -0.134124   | 3.15E-05   | Yes     | Plekha5  | 1.02506   | 20.954   | 4.35345          | 1.02606      | 20.955        | 4.35210752       | 0.00014386 | Yes     |
| Plekhd1  | 0.068604   | 0.01166   | -0.056944   | 4.31E-08   | Yes     | Plekhd1  | 0.298287  | 1.59755  | 2.42109          | 0.299287     | 1.59855       | 2.41716235       | 0.00014386 | Yes     |
| Plekhg2  | 0.00095238 | 0.067509  | 0.06655662  | 0.00018974 | Yes     | Plekhg2  | 11.5612   | 1.83595  | -2.6547          | 11.5622      | 1.83695       | -2.6540317       | 0.00014386 | Yes     |
| Plekhh1  | 0.54029    | 0.10615   | -0.43414    | 0.00265064 | Yes     | Plekhh1  | 0.044523  | 5.76087  | 7.01559          | 0.045523     | 5.76187       | 6.98379766       | 0.00014386 | Yes     |
| Plekhh3  | 0.08684    | 0.014268  | -0.072572   | 1.64E-09   | Yes     | Plekhh3  | 1.44537   | 15.1369  | 3.38856          | 1.44637      | 15.1379       | 3.38765652       | 0.00014386 | Yes     |
| Plod1    | 0.16336    | 0.065046  | -0.098314   | 0.01120909 | Yes     | Plod1    | 16.3554   | 9.04732  | -0.854207        | 16.3564      | 9.04832       | -0.8541334       | 0.00014386 | Yes     |
| Plvap    | 0.36997    | 0.14444   | -0.22553    | 0.0003366  | Yes     | Plvap    | 0.127307  | 9.56079  | 6.23075          | 0.128307     | 9.56179       | 6.21960893       | 0.00014386 | Yes     |
| Polr2i   | 0.96281    | 0.66566   | -0.29715    | 1.08E-05   | Yes     | Polr2i   | 5.81621   | 15.5307  | 1.41697          | 5.81721      | 15.5317       | 1.41681646       | 0.00014386 | Yes     |
| Polr2k   | 0.23285    | 0.10057   | -0.13228    | 2.13E-06   | Yes     | Polr2k   | 42.4141   | 118.898  | 1.48711          | 42.4151      | 118.899       | 1.48708671       | 0.00014386 | Yes     |
| Polr3h   | 0.41747    | 0.68758   | 0.27011     | 8.46E-07   | Yes     | Polr3h   | 39.6861   | 12.4649  | -1.67076         | 39.6871      | 12.4659       | -1.6706831       | 0.00014386 | Yes     |
| Pomc     | 0.37703    | 0.11738   | -0.25965    | 0.00023201 | Yes     | Pomc     | 1.08281   | 7.83153  | 2.85451          | 1.08381      | 7.83253       | 2.85336653       | 0.00014386 | Yes     |
| Pomgnt2  | 0.79982    | 0.70486   | -0.09496    | 0.00967483 | Yes     | Pomgnt2  | 0         | 2.71007  | inf              | 0.001        | 2.71107       | 11.4046466       | 0.00014386 | Yes     |
| Pou2f2   | 0.70687    | 0.42236   | -0.28451    | 0.00087121 | Yes     | POU2F2   | 5.3363    | 0.775769 | -2.78214         | 5.3373       | 0.776769      | -2.7805526       | 0.00014386 | Yes     |
| Pou6f1   | 0.75238    | 0.43013   | -0.32225    | 0.00087121 | Yes     | Pou6f1   | 10.1543   | 5.95334  | -0.770323        | 10.1553      | 5.95434       | -0.7702194       | 0.00014386 | Yes     |
| Ppl      | 0.10903    | 0.31747   | 0.20844     | 0.0007877  | Yes     | Ppl      | 1.71917   | 19.1839  | 3.48011          | 1.72017      | 19.1849       | 3.47934819       | 0.00014386 | Yes     |
| Ppp1cc   | 0.82465    | 0.4524    | -0.37225    | 8.74E-06   | Yes     | PPP1CC   | 237.765   | 124.777  | -0.930189        | 237.766      | 124.778       | -0.9301788       | 0.00014386 | Yes     |
| Ppp1r15a | 0.40888    | 0.13379   | -0.27509    | 0.00038568 | Yes     | Ppp1r15a | 15.3938   | 75.1265  | 2.28697          | 15.3948      | 75.1275       | 2.28689797       | 0.00014386 | Yes     |
| Ppp1r3b  | 0.069463   | 0.017939  | -0.051524   | 0.00043393 | Yes     | Ppp1r3b  | 0.382512  | 1.42748  | 1.8999           | 0.383512     | 1.42848       | 1.89713721       | 0.00014386 | Yes     |
| Ppp1r9b  | 0.045433   | 0.11159   | 0.066157    | 0.0247155  | Yes     | Ppp1r9b  | 73.6776   | 15.2913  | -2.26852         | 73.6786      | 15.2923       | -2.2684402       | 0.00014386 | Yes     |
| Ppp2r5b  | 0.75326    | 0.13826   | -0.615      | 1.64E-06   | Yes     | Ppp2r5b  | 2.16417   | 5.52978  | 1.3534           | 2.16517      | 5.53078       | 1.35300265       | 0.00014386 | Yes     |
| Pramef8  | 0.14668    | 0.0078386 | -0.1388414  | 1.98E-05   | Yes     | Pramef8  | 0.625683  | 3.18741  | 2.34888          | 0.626683     | 3.18841       | 2.3470294        | 0.00014386 | Yes     |
| Prdm1    | 0.25784    | 0.13222   | -0.12562    | 0.00205129 | Yes     | Prdm1    | 2.00718   | 0.342572 | -2.55069         | 2.00818      | 0.343572      | -2.5472042       | 0.00014386 | Yes     |
| Prkag2   | 0.015773   | 0.080618  | 0.064845    | 0.00025822 | Yes     | Prkag2   | 22.5948   | 12.4813  | -0.856221        | 22.5958      | 12.4823       | -0.8561708       | 0.00014386 | Yes     |
| Proc     | 0.72365    | 0.155     | -0.56865    | 3.91E-08   | Yes     | Proc     | 0         | 16.827   | inf              | 0.001        | 16.828        | 14.0385761       | 0.00014386 | Yes     |
| Prodh    | 0.61236    | 0.13605   | -0.47631    | 5.17E-09   | Yes     | Prodh    | 0.377715  | 24.884   | 6.04178          | 0.378715     | 24.885        | 6.03802001       | 0.00014386 | Yes     |
| Prom2    | 0.35263    | 0.18052   | -0.17211    | 0.01699421 | Yes     | Prom2    | 0.0157752 | 15.7053  | 9.95938          | 0.0167752    | 15.7063       | 9.87079768       | 0.00014386 | Yes     |

| RRBS       |           |           |             |            |         | RNAseq     |           |          |                  |              |               |                  |            |         |
|------------|-----------|-----------|-------------|------------|---------|------------|-----------|----------|------------------|--------------|---------------|------------------|------------|---------|
| gene       | Blood     | Kidney    | methyl.diff | pMWU.fdr   | Match ? | gene       | blood     | kidney   | log2(fold_ratio) | blood+ 0.001 | kidney+ 0.001 | log2(fold_ratio) | q_value    | Match ? |
| Proz       | 0.79851   | 0.309     | -0.48951    | 3.76E-05   | Yes     | Proz       | 0.227785  | 2.46234  | 3.43429          | 0.228785     | 2.46334       | 3.4285514        | 0.00014386 | Yes     |
| Prpf3      | 0.38424   | 0.13959   | -0.24465    | 0.00054762 | Yes     | Prpf3      | 31.0386   | 21.7624  | -0.512228        | 31.0396      | 21.7634       | -0.512206        | 0.00014386 | Yes     |
| Prr15      | 0.79597   | 0.58959   | -0.20638    | 2.43E-06   | Yes     | Prr15      | 0.105904  | 78.1547  | 9.52743          | 0.106904     | 78.1557       | 9.51389145       | 0.00014386 | Yes     |
| Prrc2c     | 0.49549   | 0.27595   | -0.21954    | 5.96E-07   | Yes     | Prrc2c     | 27.9277   | 5.5171   | -2.33971         | 27.9287      | 5.5181        | -2.3395049       | 0.00014386 | Yes     |
| Prss36     | 0.97802   | 0.67215   | -0.30587    | 4.71E-07   | Yes     | Prss36     | 1.09972   | 3.49773  | 1.66928          | 1.10072      | 3.49873       | 1.66838381       | 0.00014386 | Yes     |
| Psemb10    | 0.74174   | 0.076588  | -0.665152   | 3.48E-08   | Yes     | Psemb10    | 180.972   | 40.7625  | -2.15045         | 180.973      | 40.7635       | -2.1504246       | 0.00014386 | Yes     |
| Psemb8     | 0.3865    | 0.55287   | 0.16637     | 0.04412687 | Yes     | Psemb8     | 212.063   | 32.5718  | -2.7028          | 212.064      | 32.5728       | -2.7027601       | 0.00014386 | Yes     |
| Psme2      | 0.20391   | 0.04413   | -0.15978    | 0.00021135 | Yes     | Psme2      | 175.293   | 90.7826  | -0.949285        | 175.294      | 90.7836       | -0.949273        | 0.00014386 | Yes     |
| Ptk7       | 0.0075715 | 0.14608   | 0.1385085   | 4.71E-07   | Yes     | Ptk7       | 0.121154  | 3.85829  | 4.99304          | 0.122154     | 3.85929       | 4.98156245       | 0.00014386 | Yes     |
| Ptms       | 0.5519    | 0.21361   | -0.33829    | 0.01206268 | Yes     | Ptms       | 251.621   | 810.229  | 1.68708          | 251.622      | 810.23        | 1.68707344       | 0.00014386 | Yes     |
| Ptpns      | 0.77042   | 0.18934   | -0.58108    | 4.22E-09   | Yes     | Ptpns      | 26.1795   | 4.90957  | -2.41477         | 26.1805      | 4.91057       | -2.4145302       | 0.00014386 | Yes     |
| Ptrf       | 0.16048   | 0.042481  | -0.117999   | 0.00038568 | Yes     | Ptrf       | 0.069402  | 89.6626  | 10.3353          | 0.070402     | 89.6636       | 10.3146903       | 0.00014386 | Yes     |
| Pwp2       | 0.34906   | 0.1393    | -0.20976    | 0.00501738 | Yes     | Pwp2       | 17.0137   | 6.32852  | -1.42676         | 17.0147      | 6.32952       | -1.4266137       | 0.00014386 | Yes     |
| Pxdc1      | 0.28353   | 0.1284    | -0.15513    | 0.0247155  | Yes     | Pxdc1      | 3.19362   | 8.6978   | 1.44546          | 3.19462      | 8.6988        | 1.44517206       | 0.00014386 | Yes     |
| Rab20      | 0.22414   | 0.07255   | -0.15159    | 0.03461603 | Yes     | Rab20      | 4.12408   | 20.9645  | 2.3458           | 4.12508      | 20.9655       | 2.34552323       | 0.00014386 | Yes     |
| Rab24      | 0.65775   | 0.29064   | -0.36711    | 4.17E-06   | Yes     | Rab24      | 186.273   | 72.914   | -1.35315         | 186.274      | 72.915        | -1.3531388       | 0.00014386 | Yes     |
| Rab26      | 0.87863   | 0.79268   | -0.08595    | 0.03808344 | Yes     | Rab26      | 0.282432  | 3.57009  | 3.65998          | 0.283432     | 3.57109       | 3.65528994       | 0.00014386 | Yes     |
| Rab31      | 0.66089   | 0.48467   | -0.17622    | 0.04638126 | Yes     | Rab31      | 1.37356   | 2.725    | 0.988332         | 1.37456      | 2.726         | 0.98781568       | 0.00014386 | Yes     |
| Rab3a      | 0.5876    | 0.36892   | -0.21868    | 0.00102403 | Yes     | Rab3a      | 1.87799   | 24.6495  | 3.7143           | 1.87899      | 24.6505       | 3.71358762       | 0.00014386 | Yes     |
| Ramp1      | 0.002     | 0.19117   | 0.18917     | 1.98E-05   | Yes     | Ramp1      | 188.194   | 2.87212  | -6.03396         | 188.195      | 2.87312       | -6.0334662       | 0.00014386 | Yes     |
| Rap1gap    | 0.12554   | 0.034603  | -0.090937   | 0.00122444 | Yes     | RAP1GAP    | 0.100602  | 53.2237  | 9.04726          | 0.101602     | 53.2247       | 9.0330233        | 0.00014386 | Yes     |
| Rapgef3    | 0.14006   | 0.0059821 | -0.1340779  | 0.00010321 | Yes     | Rapgef3    | 0.0758363 | 19.5396  | 8.00929          | 0.0768363    | 19.5406       | 7.990471         | 0.00014386 | Yes     |
| Rara       | 0.407     | 0.11318   | -0.29382    | 0.00451501 | Yes     | Rara       | 33.2321   | 17.5871  | -0.91806         | 33.2331      | 17.5881       | -0.9180212       | 0.00014386 | Yes     |
| Rarb       | 0.08399   | 0.011756  | -0.072234   | 1.83E-06   | Yes     | Rarb       | 0         | 5.33479  | inf              | 0.001        | 5.33579       | 12.3814862       | 0.00014386 | Yes     |
| Rasgrp2    | 0.001     | 0.092521  | 0.091521    | 1.98E-05   | Yes     | Rasgrp2    | 153.202   | 4.76444  | -5.00698         | 153.203      | 4.76544       | -5.0066913       | 0.00014386 | Yes     |
| Rassf1     | 0.0022398 | 0.071199  | 0.0689592   | 7.32E-11   | Yes     | Rassf1     | 31.8346   | 22.8707  | -0.477096        | 31.8356      | 22.8717       | -0.4770774       | 0.00014386 | Yes     |
| Rbck1      | 0.0071201 | 0.21335   | 0.2062299   | 3.41E-06   | Yes     | Rbck1      | 124.336   | 44.4279  | -1.4847          | 124.337      | 44.4289       | -1.4846853       | 0.00014386 | Yes     |
| Rbm20      | 0.14404   | 0.030196  | -0.113844   | 1.18E-07   | Yes     | Rbm20      | 0.213516  | 1.7104   | 3.00192          | 0.214516     | 1.7114        | 2.99601983       | 0.00014386 | Yes     |
| Rbpjl      | 0.091985  | 0.38072   | 0.288735    | 3.41E-06   | Yes     | Rbpjl      | 0.861939  | 3.52989  | 2.03396          | 0.862939     | 3.53089       | 2.03270139       | 0.00014386 | Yes     |
| Rbpms2     | 0.46025   | 0.10218   | -0.35807    | 5.95E-09   | Yes     | Rbpms2     | 0.0388844 | 34.5032  | 9.79332          | 0.0398844    | 34.5042       | 9.75673169       | 0.00014386 | Yes     |
| Rcan1      | 0.13948   | 0.012818  | -0.126662   | 0.00065829 | Yes     | Rcan1      | 7.02961   | 42.2307  | 2.58678          | 7.03061      | 42.2317       | 2.58660455       | 0.00014386 | Yes     |
| Ret        | 0.066578  | 0.014298  | -0.05228    | 0.0024744  | Yes     | RET        | 12.4561   | 0.713993 | -4.12479         | 12.4571      | 0.714993      | -4.1228953       | 0.00014386 | Yes     |
| Rfc3       | 0.8768    | 0.75972   | -0.11708    | 0.00902244 | Yes     | Rfc3       | 16.7195   | 10.8058  | -0.629724        | 16.7205      | 10.8068       | -0.6296786       | 0.00014386 | Yes     |
| Rfk        | 0.45548   | 0.2673    | -0.18818    | 4.44E-05   | Yes     | Rfk        | 11.4696   | 88.7643  | 2.95216          | 11.4706      | 88.7653       | 2.95205495       | 0.00014386 | Yes     |
| Rfx3       | 0.23443   | 0.074131  | -0.160299   | 0.00451501 | Yes     | Rfx3       | 4.80205   | 1.23573  | -1.95828         | 4.80305      | 1.23673       | -1.9574203       | 0.00014386 | Yes     |
| RGD1305347 | 0.19933   | 0.04952   | -0.14981    | 0.00023201 | Yes     | RGD1305347 | 0         | 67.8525  | inf              | 0.001        | 67.8535       | 16.0501356       | 0.00014386 | Yes     |
| RGD1560608 | 0.19954   | 0.12765   | -0.07189    | 0.03216266 | Yes     | RGD1560608 | 0         | 1.35805  | inf              | 0.001        | 1.35905       | 10.4083828       | 0.00014386 | Yes     |
| RGD1562218 | 0.79197   | 0.51697   | -0.275      | 0.00265064 | Yes     | RGD1562218 | 15.5776   | 9.97158  | -0.643574        | 15.5786      | 9.97258       | -0.6435269       | 0.00014386 | Yes     |
| Rgl1       | 0.23443   | 0.085848  | -0.148582   | 4.71E-07   | Yes     | Rgl1       | 0.100994  | 11.2321  | 6.79721          | 0.101994     | 11.2331       | 6.78312803       | 0.00014386 | Yes     |

| RRBS     |          |          |             |            |         | RNAseq   |            |         |                  |              |               |                  |            |         |
|----------|----------|----------|-------------|------------|---------|----------|------------|---------|------------------|--------------|---------------|------------------|------------|---------|
| gene     | Blood    | Kidney   | methyl.diff | pMWU.fdr   | Match ? | gene     | blood      | kidney  | log2(fold_ratio) | blood+ 0.001 | kidney+ 0.001 | log2(fold_ratio) | q_value    | Match ? |
| Rgl3     | 0.15367  | 0.053957 | -0.099713   | 1.98E-05   | Yes     | Rgl3     | 0.0142977  | 68.4759 | 12.2256          | 0.0152977    | 68.4769       | 12.1280869       | 0.00014386 | Yes     |
| Rgma     | 0.096165 | 0.024606 | -0.071559   | 0.01120909 | Yes     | Rgma     | 0          | 1.55705 | inf              | 0.001        | 1.55805       | 10.6055258       | 0.00014386 | Yes     |
| Rhcg     | 0.12496  | 0.030917 | -0.094043   | 7.62E-05   | Yes     | Rhcg     | 0          | 22.7419 | inf              | 0.001        | 22.7429       | 14.4731286       | 0.00014386 | Yes     |
| Rhobtb1  | 0.062978 | 0.011929 | -0.051049   | 0.00976507 | Yes     | Rhobtb1  | 3.64732    | 20.6455 | 2.50092          | 3.64832      | 20.6465       | 2.50059306       | 0.00014386 | Yes     |
| Rhpn2    | 0.48481  | 0.34422  | -0.14059    | 0.00451501 | Yes     | Rhpn2    | 0.0750115  | 5.52794 | 6.20349          | 0.0760115    | 5.52894       | 6.1846414        | 0.00014386 | Yes     |
| Rilpl1   | 0.16625  | 0.04956  | -0.11669    | 5.41E-06   | Yes     | Rilpl1   | 0.290674   | 20.1524 | 6.11541          | 0.291674     | 20.1534       | 6.11052265       | 0.00014386 | Yes     |
| Rnd2     | 0.32467  | 0.13892  | -0.18575    | 0.00976507 | Yes     | Rnd2     | 0.104016   | 11.216  | 6.75261          | 0.105016     | 11.217        | 6.73893392       | 0.00014386 | Yes     |
| Rnf26    | 0.53678  | 0.33157  | -0.20521    | 0.01832913 | Yes     | Rnf26    | 12.3311    | 5.4573  | -1.17604         | 12.3321      | 5.4583        | -1.1758949       | 0.00014386 | Yes     |
| Rngtt    | 0.042686 | 0.18944  | 0.146754    | 0.01402866 | Yes     | Rngtt    | 11.0141    | 5.98742 | -0.87935         | 11.0151      | 5.98842       | -0.8792353       | 0.00014386 | Yes     |
| Rpl10a   | 0.20861  | 0.065445 | -0.143165   | 0.01289082 | Yes     | Rpl10a   | 2247.21    | 539.182 | -2.05929         | 2247.211     | 539.183       | -2.0592887       | 0.00014386 | Yes     |
| Rpl11    | 0.76381  | 0.67303  | -0.09078    | 0.01482889 | Yes     | Rpl11    | 4555.66    | 990.701 | -2.20114         | 4555.661     | 990.702       | -2.2011373       | 0.00014386 | Yes     |
| Rpl13    | 0.34457  | 0.10093  | -0.24364    | 0.00317797 | Yes     | Rpl13    | 4629.48    | 813.071 | -2.5094          | 4629.481     | 813.072       | -2.5093954       | 0.00014386 | Yes     |
| Rpl18a   | 0.8889   | 0.65168  | -0.23722    | 4.71E-07   | Yes     | Rpl18a   | 6818.59    | 1313.85 | -2.37567         | 6818.591     | 1313.851      | -2.375672        | 0.00014386 | Yes     |
| Rpl38    | 0.47687  | 0.34137  | -0.1355     | 0.01832913 | Yes     | Rpl38    | 6288.99    | 2553.6  | -1.3003          | 6288.991     | 2553.601      | -1.3002954       | 0.00014386 | Yes     |
| Rpl6     | 0.83936  | 0.56677  | -0.27259    | 3.31E-07   | Yes     | Rpl6     | 2594.39    | 482.693 | -2.42622         | 2594.391     | 482.694       | -2.4262151       | 0.00014386 | Yes     |
| Rplp0    | 0.74042  | 0.51497  | -0.22545    | 2.59E-06   | Yes     | Rplp0    | 4657.28    | 1228.75 | -1.9223          | 4657.281     | 1228.751      | -1.9222953       | 0.00014386 | Yes     |
| Rps17    | 0.71532  | 0.46314  | -0.25218    | 1.47E-10   | Yes     | Rps17    | 7813.77    | 1691.73 | -2.20752         | 7813.771     | 1691.731      | -2.2075188       | 0.00014386 | Yes     |
| Rps29    | 0.48664  | 0.21185  | -0.27479    | 2.15E-12   | Yes     | RPS29    | 26.1087    | 5.89345 | -2.14735         | 26.1097      | 5.89445       | -2.1471568       | 0.00014386 | Yes     |
| Rps4y2   | 0.81585  | 0.5223   | -0.29355    | 3.35E-06   | Yes     | Rps4y2   | 6.20221    | 21.6853 | 1.80586          | 6.20321      | 21.6863       | 1.80569706       | 0.00014386 | Yes     |
| Rps8     | 0.09098  | 0.024847 | -0.066133   | 0.02967027 | Yes     | Rps8     | 3987.59    | 761.363 | -2.38886         | 3987.591     | 761.364       | -2.3888592       | 0.00014386 | Yes     |
| Rsph9    | 0.1755   | 0.027339 | -0.148161   | 9.62E-06   | Yes     | Rsph9    | 0.212618   | 12.606  | 5.8897           | 0.213618     | 12.607        | 5.88304798       | 0.00014386 | Yes     |
| RT1-Bb   | 0.27435  | 0.062168 | -0.212182   | 2.65E-06   | Yes     | RT1-Bb   | 25.6614    | 35.0503 | 0.449828         | 25.6624      | 35.0513       | 0.44981185       | 0.00014386 | Yes     |
| RT1-T18  | 0.47138  | 0.1504   | -0.32098    | 3.76E-05   | Yes     | RT1-T18  | 20.7296    | 1.94707 | -3.41231         | 20.7306      | 1.94807       | -3.4116444       | 0.00014386 | Yes     |
| Rtkn     | 0.49531  | 0.053171 | -0.442139   | 5.28E-07   | Yes     | Rtkn     | 0.00820733 | 7.46628 | 9.82926          | 0.00920733   | 7.46728       | 9.66358426       | 0.00014386 | Yes     |
| Runx1    | 0.40367  | 0.082754 | -0.320916   | 4.58E-11   | Yes     | Runx1    | 23.4524    | 2.01428 | -3.5414          | 23.4534      | 2.01528       | -3.5407449       | 0.00014386 | Yes     |
| Runx3    | 0.68187  | 0.1402   | -0.54167    | 9.44E-05   | Yes     | Runx3    | 43.408     | 2.65563 | -4.03084         | 43.409       | 2.65663       | -4.030325        | 0.00014386 | Yes     |
| Ruvbl2   | 0.78081  | 0.60461  | -0.1762     | 0.01832913 | Yes     | Ruvbl2   | 38.5616    | 27.0897 | -0.509417        | 38.5626      | 27.0907       | -0.5094047       | 0.00014386 | Yes     |
| S100a1   | 0.13209  | 0.030438 | -0.101652   | 3.22E-05   | Yes     | S100a1   | 0.684975   | 819.708 | 10.2248          | 0.685975     | 819.709       | 10.2227401       | 0.00014386 | Yes     |
| S100a16  | 0.59826  | 0.13404  | -0.46422    | 0.01289082 | Yes     | S100a16  | 0          | 140.607 | inf              | 0.001        | 140.608       | 17.1013192       | 0.00014386 | Yes     |
| S1pr1    | 0.012255 | 0.078664 | 0.066409    | 0.00012128 | Yes     | S1pr1    | 411.42     | 8.98065 | -5.51765         | 411.421      | 8.98165       | -5.5174911       | 0.00014386 | Yes     |
| Sardh    | 0.12946  | 0.011806 | -0.117654   | 0.0024744  | Yes     | Sardh    | 0.0553478  | 10.727  | 7.59851          | 0.0563478    | 10.728        | 7.57280614       | 0.00014386 | Yes     |
| Satb2    | 0.093749 | 0.035459 | -0.05829    | 0.00132029 | Yes     | Satb2    | 0          | 8.36899 | inf              | 0.001        | 8.36999       | 13.0310102       | 0.00014386 | Yes     |
| Scnn1a   | 0.63175  | 0.22894  | -0.40281    | 2.15E-12   | Yes     | Scnn1a   | 0.0907264  | 10.5201 | 6.85742          | 0.0917264    | 10.5211       | 6.84173281       | 0.00014386 | Yes     |
| Scrn1    | 0.12984  | 0.055609 | -0.074231   | 0.00265064 | Yes     | Scrn1    | 13.8718    | 1.84014 | -2.91426         | 13.8728      | 1.84114       | -2.9135878       | 0.00014386 | Yes     |
| Scx      | 0.62827  | 0.10342  | -0.52485    | 2.15E-12   | Yes     | Scx      | 0.530946   | 40.2885 | 6.24566          | 0.531946     | 40.2895       | 6.24298029       | 0.00014386 | Yes     |
| Sdc4     | 0.089117 | 0.018466 | -0.070651   | 1.57E-07   | Yes     | Sdc4     | 0.339038   | 306.947 | 9.82233          | 0.340038     | 306.948       | 9.81808257       | 0.00014386 | Yes     |
| Sdccag3  | 0.192    | 0.078133 | -0.113867   | 2.15E-12   | Yes     | Sdccag3  | 36.2985    | 51.1598 | 0.4951           | 36.2995      | 51.1608       | 0.49508915       | 0.00014386 | Yes     |
| Sec23ip  | 0.61226  | 0.33859  | -0.27367    | 0.00533667 | Yes     | Sec23ip  | 21.8358    | 12.091  | -0.85276         | 21.8368      | 12.092        | -0.8527086       | 0.00014386 | Yes     |
| Sema3b   | 0.77734  | 0.10911  | -0.66823    | 1.47E-10   | Yes     | Sema3b   | 0.0189669  | 19.8019 | 10.0279          | 0.0199669    | 19.8029       | 9.95388564       | 0.00014386 | Yes     |
| Serpinf2 | 0.93502  | 0.27191  | -0.66311    | 4.71E-07   | Yes     | Serpinf2 | 15.5977    | 50.9996 | 1.70915          | 15.5987      | 51.0006       | 1.70908842       | 0.00014386 | Yes     |
| Serping1 | 0.3776   | 0.12479  | -0.25281    | 0.00976507 | Yes     | Serping1 | 0          | 7.41013 | inf              | 0.001        | 7.41113       | 12.8554778       | 0.00014386 | Yes     |
| Sertad1  | 0.081695 | 0.01746  | -0.064235   | 0.00334552 | Yes     | Sertad1  | 4.8847     | 29.3075 | 2.58493          | 4.8857       | 29.3085       | 2.58468195       | 0.00014386 | Yes     |



| RRBS     |           |           |             |            |         | RNAseq   |           |          |                  |              |               |                  |            |         |
|----------|-----------|-----------|-------------|------------|---------|----------|-----------|----------|------------------|--------------|---------------|------------------|------------|---------|
| gene     | Blood     | Kidney    | methyl.diff | pMWU.fdr   | Match ? | gene     | blood     | kidney   | log2(fold_ratio) | blood+ 0.001 | kidney+ 0.001 | log2(fold_ratio) | q_value    | Match ? |
| Sgk2     | 0.58672   | 0.088432  | -0.498288   | 2.15E-12   | Yes     | Sgk2     | 0         | 15.8185  | inf              | 0.001        | 15.8195       | 13.9494164       | 0.00014386 | Yes     |
| Sgms1    | 0.075496  | 0.0082285 | -0.0672675  | 0.00064003 | Yes     | Sgms1    | 5.94236   | 33.6313  | 2.5007           | 5.94336      | 33.6323       | 2.50049677       | 0.00014386 | Yes     |
| Sh3rf1   | 0.16255   | 0.024183  | -0.138367   | 1.98E-05   | Yes     | Sh3rf1   | 2.00804   | 31.5776  | 3.97504          | 2.00904      | 31.5786       | 3.97436902       | 0.00014386 | Yes     |
| Shank2   | 0.06978   | 0.25742   | 0.18764     | 2.15E-12   | Yes     | Shank2   | 0.0140473 | 9.67506  | 9.42783          | 0.0150473    | 9.67606       | 9.32877126       | 0.00014386 | Yes     |
| Shank3   | 0.45694   | 0.12525   | -0.33169    | 3.52E-05   | Yes     | Shank3   | 0.0291115 | 5.13187  | 7.46175          | 0.0301115    | 5.13287       | 7.41330733       | 0.00014386 | Yes     |
| Shisa7   | 0.75264   | 0.31695   | -0.43569    | 4.71E-07   | Yes     | Shisa7   | 2.27987   | 0.41218  | -2.4676          | 2.28087      | 0.41318       | -2.4647419       | 0.00014386 | Yes     |
| Sigirr   | 0.5784    | 0.12159   | -0.45681    | 4.71E-07   | Yes     | Sigirr   | 53.5078   | 36.4097  | -0.555428        | 53.5088      | 36.4107       | -0.5554137       | 0.00014386 | Yes     |
| Sim1     | 0.081285  | 0.022264  | -0.059021   | 2.15E-12   | Yes     | Sim1     | 0         | 9.82583  | inf              | 0.001        | 9.82683       | 13.2625104       | 0.00014386 | Yes     |
| Skp2     | 0.26227   | 0.097539  | -0.164731   | 0.00334552 | Yes     | Skp2     | 3.88531   | 0.325923 | -3.57542         | 3.88631      | 0.326923      | -3.5713782       | 0.00014386 | Yes     |
| Slc12a3  | 0.82444   | 0.6726    | -0.15184    | 0.00551211 | Yes     | Slc12a3  | 5.36664   | 24.484   | 2.18975          | 5.36764      | 24.485        | 2.18953838       | 0.00014386 | Yes     |
| Slc21a4  | 0.94267   | 0.45614   | -0.48653    | 1.47E-10   | Yes     | Slc21a4  | 0.0211526 | 16.8643  | 9.63892          | 0.0221526    | 16.8653       | 9.57236623       | 0.00014386 | Yes     |
| Slc22a4  | 0.18623   | 0.035082  | -0.151148   | 2.80E-05   | Yes     | Slc22a4  | 0.213444  | 9.82292  | 5.52422          | 0.214444     | 9.82392       | 5.51762596       | 0.00014386 | Yes     |
| Slc22a6  | 0.88246   | 0.25259   | -0.62987    | 8.46E-07   | Yes     | Slc22a6  | 0.0271872 | 148.987  | 12.42            | 0.0281872    | 148.988       | 12.3678683       | 0.00014386 | Yes     |
| Slc22a8  | 0.84677   | 0.1295    | -0.71727    | 3.12E-09   | Yes     | Slc22a8  | 0.0228174 | 93.6558  | 12.003           | 0.0238174    | 93.6568       | 11.9411521       | 0.00014386 | Yes     |
| Slc25a23 | 0.6376    | 0.13975   | -0.49785    | 9.57E-07   | Yes     | Slc25a23 | 14.5985   | 81.292   | 2.4773           | 14.5995      | 81.293        | 2.47721217       | 0.00014386 | Yes     |
| Slc25a25 | 0.18814   | 0.035501  | -0.152639   | 0.0024744  | Yes     | Slc25a25 | 3.17093   | 30.5721  | 3.26924          | 3.17193      | 30.5731       | 3.26883001       | 0.00014386 | Yes     |
| Slc26a1  | 0.76223   | 0.11826   | -0.64397    | 0.00040757 | Yes     | Slc26a1  | 0.161145  | 14.1081  | 6.45202          | 0.162145     | 14.1091       | 6.44319762       | 0.00014386 | Yes     |
| Slc36a4  | 0.0026316 | 0.056573  | 0.0539414   | 4.44E-05   | Yes     | Slc36a4  | 5.81071   | 3.68292  | -0.657864        | 5.81171      | 3.68392       | -0.657721        | 0.00014386 | Yes     |
| Slc38a3  | 0.068506  | 0.014303  | -0.054203   | 0.01699421 | Yes     | Slc38a3  | 0         | 12.8747  | inf              | 0.001        | 12.8757       | 13.6523632       | 0.00014386 | Yes     |
| Slc44a2  | 0.5901    | 0.10943   | -0.48067    | 2.58E-09   | Yes     | Slc44a2  | 210.31    | 21.4251  | -3.29514         | 210.311      | 21.4261       | -3.2950831       | 0.00014386 | Yes     |
| Slc6a6   | 0.69772   | 0.2182    | -0.47952    | 6.67E-05   | Yes     | Slc6a6   | 17.227    | 73.0522  | 2.08426          | 17.228       | 73.0532       | 2.08419224       | 0.00014386 | Yes     |
| Slc7a15  | 0.86125   | 0.32655   | -0.5347     | 7.31E-07   | Yes     | Slc7a15  | 0         | 1.82125  | inf              | 0.001        | 1.82225       | 10.8315052       | 0.00014386 | Yes     |
| Slc7a5   | 0.75614   | 0.5503    | -0.20584    | 0.00369602 | Yes     | Slc7a5   | 8.00261   | 1.47267  | -2.44203         | 8.00361      | 1.47367       | -2.4412374       | 0.00014386 | Yes     |
| Slc9a3   | 0.10019   | 0.021678  | -0.078512   | 7.62E-05   | Yes     | Slc9a3   | 0.0176695 | 16.9556  | 9.90629          | 0.0186695    | 16.9566       | 9.82694792       | 0.00014386 | Yes     |
| Slco2a1  | 0.081848  | 0.022394  | -0.059454   | 0.00038568 | Yes     | Slco2a1  | 0         | 22.5705  | inf              | 0.001        | 22.5715       | 14.4622147       | 0.00014386 | Yes     |
| Smarcc1  | 0.49403   | 0.16638   | -0.32765    | 4.71E-07   | Yes     | Smarcc1  | 22.5828   | 7.73225  | -1.54626         | 22.5838      | 7.73325       | -1.5461415       | 0.00014386 | Yes     |
| Smim3    | 0.0019231 | 0.32266   | 0.3207369   | 6.67E-05   | Yes     | Smim3    | 3.46076   | 49.5476  | 3.83965          | 3.46176      | 49.5486       | 3.83926668       | 0.00014386 | Yes     |
| Smyd2    | 0.77838   | 0.20999   | -0.56839    | 8.74E-06   | Yes     | Smyd2    | 106.519   | 39.9069  | -1.4164          | 106.52       | 39.9079       | -1.4163781       | 0.00014386 | Yes     |
| Snx10    | 0.006301  | 0.13829   | 0.131989    | 2.27E-12   | Yes     | Snx10    | 7.89781   | 1.66583  | -2.24521         | 7.89881      | 1.66683       | -2.2445283       | 0.00014386 | Yes     |
| Snx33    | 0.23929   | 0.040899  | -0.198391   | 2.15E-12   | Yes     | Snx33    | 1.80544   | 17.7411  | 3.29668          | 1.80644      | 17.7421       | 3.29595554       | 0.00014386 | Yes     |
| Socs3    | 0.05176   | 0.44743   | 0.39567     | 4.33E-06   | Yes     | Socs3    | 23.0274   | 118.918  | 2.36854          | 23.0284      | 118.919       | 2.36849315       | 0.00014386 | Yes     |
| Sox11    | 0.096132  | 0.023468  | -0.072664   | 3.15E-05   | Yes     | Sox11    | 0         | 4.73805  | inf              | 0.001        | 4.73905       | 12.2103822       | 0.00014386 | Yes     |
| Sox13    | 0.083419  | 0.019955  | -0.063464   | 0.00265064 | Yes     | Sox13    | 0.0891647 | 12.0397  | 7.07711          | 0.0901647    | 12.0407       | 7.06114083       | 0.00014386 | Yes     |
| Sox18    | 0.31555   | 0.066836  | -0.248714   | 4.33E-06   | Yes     | Sox18    | 0         | 7.42595  | inf              | 0.001        | 7.42695       | 12.8585542       | 0.00014386 | Yes     |
| Sp5      | 0.13845   | 0.034517  | -0.103933   | 0.00281863 | Yes     | Sp5      | 0         | 2.35384  | inf              | 0.001        | 2.35484       | 11.2014133       | 0.00014386 | Yes     |
| Spag1    | 0.05349   | 0.0032284 | -0.0502616  | 0.00014055 | Yes     | Spag1    | 0.432872  | 4.25719  | 3.29789          | 0.433872     | 4.25819       | 3.29489893       | 0.00014386 | Yes     |
| Sparcl1  | 0.56441   | 0.29386   | -0.27055    | 5.11E-05   | Yes     | Sparcl1  | 0         | 1.30563  | inf              | 0.001        | 1.30663       | 10.351635        | 0.00014386 | Yes     |
| Spata7   | 0.41963   | 0.20214   | -0.21749    | 0.00072449 | Yes     | Spata7   | 0.91842   | 17.2092  | 4.22788          | 0.91942      | 17.2102       | 4.226396         | 0.00014386 | Yes     |
| Spint1   | 0.35493   | 0.062675  | -0.292255   | 4.71E-07   | Yes     | Spint1   | 1.93589   | 43.277   | 4.48253          | 1.93689      | 43.278        | 4.4818199        | 0.00014386 | Yes     |
| Spock2   | 0.53106   | 0.1507    | -0.38036    | 5.28E-07   | Yes     | Spock2   | 0.588418  | 6.42135  | 3.44796          | 0.589418     | 6.42235       | 3.44573827       | 0.00014386 | Yes     |
| Spon1    | 0.57486   | 0.39642   | -0.17844    | 0.04638126 | Yes     | Spon1    | 0.417243  | 77.8436  | 7.54355          | 0.418243     | 77.8446       | 7.54011176       | 0.00014386 | Yes     |
| Spry4    | 0.60518   | 0.15897   | -0.44621    | 8.44E-10   | Yes     | Spry4    | 0.126212  | 1.2184   | 3.27107          | 0.127212     | 1.2194        | 3.26086478       | 0.00014386 | Yes     |

| RRBS       |            |           |             |            |         | RNAseq     |           |          |                  |              |               |                  |            |         |
|------------|------------|-----------|-------------|------------|---------|------------|-----------|----------|------------------|--------------|---------------|------------------|------------|---------|
| gene       | Blood      | Kidney    | methyl.diff | pMWU.fdr   | Match ? | gene       | blood     | kidney   | log2(fold_ratio) | blood+ 0.001 | kidney+ 0.001 | log2(fold_ratio) | q_value    | Match ? |
| Spryd4     | 0.15353    | 0.071502  | -0.082028   | 8.22E-05   | Yes     | Spryd4     | 4.53558   | 7.46452  | 0.718764         | 4.53658      | 7.46552       | 0.71863765       | 0.00014386 | Yes     |
| Spsb4      | 0.15953    | 0.021638  | -0.137892   | 2.08E-06   | Yes     | Spsb4      | 0         | 22.631   | inf              | 0.001        | 22.632        | 14.4660765       | 0.00014386 | Yes     |
| Sptbn2     | 0.073453   | 0.015508  | -0.057945   | 0.0007877  | Yes     | Sptbn2     | 0.0194598 | 4.79912  | 7.94613          | 0.0204598    | 4.80012       | 7.87413462       | 0.00014386 | Yes     |
| Srsf12     | 0.0025448  | 0.12257   | 0.1200252   | 0.00093244 | Yes     | Srsf12     | 25.2998   | 1.43802  | -4.13698         | 25.3008      | 1.43902       | -4.1360245       | 0.00014386 | Yes     |
| Ssh3       | 0.21122    | 0.047831  | -0.163389   | 3.25E-06   | Yes     | Ssh3       | 1.79141   | 17.7884  | 3.31177          | 1.79241      | 17.7894       | 3.31104527       | 0.00014386 | Yes     |
| Ssna1      | 0.74242    | 0.51005   | -0.23237    | 0.01206268 | Yes     | Ssna1      | 34.2453   | 64.1718  | 0.906033         | 34.2463      | 64.1728       | 0.90601381       | 0.00014386 | Yes     |
| St3gal2    | 0.8174     | 0.73108   | -0.08632    | 0.02850905 | Yes     | St3gal2    | 2.67474   | 9.65885  | 1.85245          | 2.67574      | 9.65985       | 1.85206285       | 0.00014386 | Yes     |
| St6galnac2 | 0.19467    | 0.070378  | -0.124292   | 0.00158432 | Yes     | St6galnac2 | 0.128862  | 78.0916  | 9.24319          | 0.129862     | 78.0926       | 9.2320627        | 0.00014386 | Yes     |
| Stard10    | 0.55605    | 0.069444  | -0.486606   | 2.97E-10   | Yes     | Stard10    | 34.9754   | 177.821  | 2.34601          | 34.9764      | 177.822       | 2.34598011       | 0.00014386 | Yes     |
| Stk3       | 0.42354    | 0.32294   | -0.1006     | 0.01961146 | Yes     | Stk3       | 2.54595   | 10.1825  | 1.99981          | 2.54695      | 10.1835       | 1.99939095       | 0.00014386 | Yes     |
| Stox2      | 0.035823   | 0.16502   | 0.129197    | 5.41E-06   | Yes     | Stox2      | 2.18892   | 0.71118  | -1.62193         | 2.18992      | 0.71218       | -1.6205643       | 0.00014386 | Yes     |
| Stx16      | 0.40106    | 0.18246   | -0.2186     | 8.54E-05   | Yes     | Stx16      | 26.2655   | 12.9273  | -1.02274         | 26.2665      | 12.9283       | -1.0226914       | 0.00014386 | Yes     |
| Stx3       | 0.74891    | 0.33877   | -0.41014    | 4.44E-05   | Yes     | Stx3       | 6.39072   | 13.0079  | 1.02533          | 6.39172      | 13.0089       | 1.02522286       | 0.00014386 | Yes     |
| Sult2b1    | 0.19347    | 0.094131  | -0.099339   | 2.03E-07   | Yes     | Sult2b1    | 8.10217   | 44.1291  | 2.44535          | 8.10317      | 44.1301       | 2.4452047        | 0.00014386 | Yes     |
| Surf6      | 0.38699    | 0.13381   | -0.25318    | 3.95E-10   | Yes     | Surf6      | 29.7054   | 16.326   | -0.863555        | 29.7064      | 16.327        | -0.8635141       | 0.00014386 | Yes     |
| Susd2      | 0.56259    | 0.12104   | -0.44155    | 3.37E-10   | Yes     | Susd2      | 1.43115   | 12.8926  | 3.1713           | 1.43215      | 12.8936       | 3.17040062       | 0.00014386 | Yes     |
| Syne4      | 0.79072    | 0.14977   | -0.64095    | 2.15E-12   | Yes     | Syne4      | 0.21523   | 5.38167  | 4.6441           | 0.21623      | 5.38267       | 4.63768338       | 0.00014386 | Yes     |
| Syngap1    | 0.84472    | 0.47779   | -0.36693    | 2.23E-05   | Yes     | Syngap1    | 0.539638  | 2.24112  | 2.05416          | 0.540638     | 2.24212       | 2.05212867       | 0.00014386 | Yes     |
| Sytl3      | 0.82436    | 0.46843   | -0.35593    | 9.49E-11   | Yes     | Sytl3      | 6.54636   | 2.99571  | -1.1278          | 6.54736      | 2.99671       | -1.1275338       | 0.00014386 | Yes     |
| Tacc1      | 0.00070802 | 0.060001  | 0.05929298  | 4.42E-08   | Yes     | Tacc1      | 23.0516   | 8.48061  | -1.44263         | 23.0526      | 8.48161       | -1.4425194       | 0.00014386 | Yes     |
| Taok3      | 0.00078621 | 0.33761   | 0.33682379  | 3.48E-08   | Yes     | Taok3      | 16.5592   | 1.34819  | -3.61853         | 16.5602      | 1.34919       | -3.6175547       | 0.00014386 | Yes     |
| Tbc1d9     | 0.20408    | 0.078019  | -0.126061   | 0.00010321 | Yes     | Tbc1d9     | 0.0508118 | 10.5597  | 7.69919          | 0.0518118    | 10.5607       | 7.67120904       | 0.00014386 | Yes     |
| Tbrg1      | 0.33303    | 0.20732   | -0.12571    | 7.31E-07   | Yes     | Tbrg1      | 52.1858   | 38.035   | -0.45633         | 52.1868      | 38.036        | -0.4563194       | 0.00014386 | Yes     |
| Tbx6       | 0.37559    | 0.083406  | -0.292184   | 1.94E-07   | Yes     | Tbx6       | 2.7502    | 0.357788 | -2.94236         | 2.7512       | 0.358788      | -2.9388575       | 0.00014386 | Yes     |
| Tctex1d2   | 0.22164    | 0.048648  | -0.172992   | 0.00017371 | Yes     | Tctex1d2   | 0.381094  | 14.93    | 5.29193          | 0.382094     | 14.931        | 5.28823938       | 0.00014386 | Yes     |
| Tead1      | 0.05928    | 0.0066816 | -0.0525984  | 0.00205129 | Yes     | Tead1      | 0.190603  | 14.4148  | 6.24083          | 0.191603     | 14.4158       | 6.23338694       | 0.00014386 | Yes     |
| Tfam       | 0.034142   | 0.43788   | 0.403738    | 7.96E-06   | Yes     | Tfam       | 53.2965   | 35.7336  | -0.576758        | 53.2975      | 35.7346       | -0.5767462       | 0.00014386 | Yes     |
| Tfe3       | 0.10387    | 0.0065126 | -0.0973574  | 0.01559789 | Yes     | Tfe3       | 5.09447   | 10.0847  | 0.985162         | 5.09547      | 10.0857       | 0.98502409       | 0.00014386 | Yes     |
| Thtpa      | 0.1294     | 0.021884  | -0.107516   | 0.00132879 | Yes     | Thtpa      | 10.9727   | 23.2402  | 1.0827           | 10.9737      | 23.2412       | 1.08263452       | 0.00014386 | Yes     |
| Tifa       | 0.029863   | 0.16711   | 0.137247    | 8.22E-05   | Yes     | Tifa       | 1.17141   | 7.25996  | 2.63172          | 1.17241      | 7.26096       | 2.63068313       | 0.00014386 | Yes     |
| Timm23     | 0.31027    | 0.053767  | -0.256503   | 2.16E-09   | Yes     | Timm23     | 79.4371   | 130.386  | 0.714905         | 79.4381      | 130.387       | 0.71489701       | 0.00014386 | Yes     |
| Tk1        | 0.80288    | 0.49237   | -0.31051    | 0.00646281 | Yes     | Tk1        | 1.65254   | 9.7614   | 2.5624           | 1.65354      | 9.7624        | 2.56167792       | 0.00014386 | Yes     |
| Tle1       | 0.070718   | 0.014545  | -0.056173   | 0.00054762 | Yes     | Tle1       | 0.032485  | 3.53748  | 6.7668           | 0.033485     | 3.53848       | 6.72347099       | 0.00014386 | Yes     |
| Tmc8       | 0.0029741  | 0.23047   | 0.2274959   | 7.15E-06   | Yes     | Tmc8       | 81.1334   | 5.3936   | -3.91098         | 81.1344      | 5.3946        | -3.9107258       | 0.00014386 | Yes     |
| Tmem104    | 0.11909    | 0.043152  | -0.075938   | 0.02967027 | Yes     | Tmem104    | 8.40012   | 2.05775  | -2.02934         | 8.40112      | 2.05875       | -2.028813        | 0.00014386 | Yes     |
| Tmem150a   | 0.10727    | 0.022711  | -0.084559   | 0.00054762 | Yes     | Tmem150a   | 1.33129   | 65.6908  | 5.62479          | 1.33229      | 65.6918       | 5.62373324       | 0.00014386 | Yes     |
| Tmem171    | 0.62805    | 0.23007   | -0.39798    | 3.82E-06   | Yes     | Tmem171    | 0         | 90.0323  | inf              | 0.001        | 90.0333       | 16.4581711       | 0.00014386 | Yes     |
| Tmem184a   | 0.68605    | 0.34228   | -0.34377    | 0.00031293 | Yes     | Tmem184a   | 0         | 14.4095  | inf              | 0.001        | 14.4105       | 13.8148328       | 0.00014386 | Yes     |
| Tmem229a   | 0.15992    | 0.076235  | -0.083685   | 0.00736774 | Yes     | Tmem229a   | 0         | 0.847784 | inf              | 0.001        | 0.848784      | 9.72925365       | 0.00014386 | Yes     |
| Tmem231    | 0.41964    | 0.065154  | -0.354486   | 0.00011494 | Yes     | Tmem231    | 0.0844828 | 5.17692  | 5.93729          | 0.0854828    | 5.17792       | 5.9205947        | 0.00014386 | Yes     |
| Tmem30b    | 0.32538    | 0.16464   | -0.16074    | 0.00017371 | Yes     | Tmem30b    | 0         | 9.07691  | inf              | 0.001        | 9.07791       | 13.1481445       | 0.00014386 | Yes     |
| Tmem37     | 0.75783    | 0.12287   | -0.63496    | 4.71E-07   | Yes     | Tmem37     | 0.658238  | 68.4188  | 6.69964          | 0.659238     | 68.4198       | 6.69747067       | 0.00014386 | Yes     |

| RRBS     |           |          |             |            |         | RNAseq   |           |          |                  |              |               |                  |            |         |
|----------|-----------|----------|-------------|------------|---------|----------|-----------|----------|------------------|--------------|---------------|------------------|------------|---------|
| gene     | Blood     | Kidney   | methyl.diff | pMWU.fdr   | Match ? | gene     | blood     | kidney   | log2(fold_ratio) | blood+ 0.001 | kidney+ 0.001 | log2(fold_ratio) | q_value    | Match ? |
| Tmem69   | 0.42218   | 0.15969  | -0.26249    | 0.00111391 | Yes     | Tmem69   | 4.0656    | 9.97612  | 1.29501          | 4.0666       | 9.97712       | 1.29480034       | 0.00014386 | Yes     |
| Tmem79   | 0.90852   | 0.12718  | -0.78134    | 2.21E-10   | Yes     | Tmem79   | 0.323133  | 12.4804  | 5.27139          | 0.324133     | 12.4814       | 5.26705005       | 0.00014386 | Yes     |
| Tmod4    | 0.88718   | 0.73998  | -0.1472     | 1.94E-07   | Yes     | Tmod4    | 0.145175  | 7.61075  | 5.71217          | 0.146175     | 7.61175       | 5.70245968       | 0.00014386 | Yes     |
| Tmprss2  | 0.15222   | 0.036924 | -0.115296   | 0.00501738 | Yes     | Tmprss2  | 0.189193  | 55.7211  | 8.20222          | 0.190193     | 55.7221       | 8.19464167       | 0.00014386 | Yes     |
| Tmsb4x   | 0.0029647 | 0.091064 | 0.0880993   | 1.47E-05   | Yes     | Tmsb4x   | 21046     | 2718.31  | -2.95276         | 21046.001    | 2718.311      | -2.9527637       | 0.00014386 | Yes     |
| Tnfaip2  | 0.10794   | 0.049855 | -0.058085   | 6.40E-05   | Yes     | Tnfaip2  | 0.0884402 | 27.7655  | 8.29437          | 0.0894402    | 27.7665       | 8.27820621       | 0.00014386 | Yes     |
| Tnfrsf9  | 0.83242   | 0.35381  | -0.47861    | 1.05E-07   | Yes     | Tnfrsf9  | 3.15691   | 21.5442  | 2.77071          | 3.15791      | 21.5452       | 2.77032453       | 0.00014386 | Yes     |
| Tnfsf12  | 0.3314    | 0.043269 | -0.288131   | 2.32E-06   | Yes     | Tnfsf12  | 1.10137   | 26.2867  | 4.57695          | 1.10237      | 26.2877       | 4.57570748       | 0.00014386 | Yes     |
| Tonsl    | 0.34136   | 0.15723  | -0.18413    | 0.01049788 | Yes     | Tonsl    | 55.5386   | 111.291  | 1.00278          | 55.5396      | 111.292       | 1.0027612        | 0.00014386 | Yes     |
| Tor1a    | 0.31362   | 0.085086 | -0.228534   | 4.74E-08   | Yes     | Tor1a    | 25.7331   | 17.9363  | -0.520742        | 25.7341      | 17.9373       | -0.5207186       | 0.00014386 | Yes     |
| Tpbg     | 0.11351   | 0.057317 | -0.056193   | 0.01832913 | Yes     | Tpbg     | 0.682719  | 7.82272  | 3.51831          | 0.683719     | 7.82372       | 3.51637932       | 0.00014386 | Yes     |
| Tpd52    | 0.61956   | 0.17797  | -0.44159    | 3.52E-05   | Yes     | Tpd52    | 0.497583  | 65.6668  | 7.04408          | 0.498583     | 65.6678       | 7.04120862       | 0.00014386 | Yes     |
| Tpd52l1  | 0.079072  | 0.021051 | -0.058021   | 0.00025822 | Yes     | Tpd52l1  | 0.0823824 | 20.8525  | 7.98367          | 0.0833824    | 20.8535       | 7.96633093       | 0.00014386 | Yes     |
| Tpi1     | 0.70335   | 0.090171 | -0.613179   | 0.00058998 | Yes     | Tpi1     | 18.2028   | 245.758  | 3.75501          | 18.2038      | 245.759       | 3.7549327        | 0.00014386 | Yes     |
| Tpm2     | 0.66767   | 0.28183  | -0.38584    | 1.80E-05   | Yes     | Tpm2     | 0.120527  | 6.87828  | 5.83462          | 0.121527     | 6.87928       | 5.8229088        | 0.00014386 | Yes     |
| Tpt1     | 0.41619   | 0.30574  | -0.11045    | 0.00036321 | Yes     | Tpt1     | 15011.1   | 2990.91  | -2.32737         | 15011.101    | 2990.911      | -2.3273729       | 0.00014386 | Yes     |
| Trak2    | 0.46043   | 0.19214  | -0.26829    | 1.04E-11   | Yes     | Trak2    | 15.8293   | 35.475   | 1.1642           | 15.8303      | 35.476        | 1.16415476       | 0.00014386 | Yes     |
| Trappc6a | 0.82183   | 0.19691  | -0.62492    | 2.15E-12   | Yes     | Trappc6a | 47.0355   | 116.748  | 1.31157          | 47.0365      | 116.749       | 1.31155757       | 0.00014386 | Yes     |
| Tspan33  | 0.16237   | 0.051375 | -0.110995   | 0.00188523 | Yes     | Tspan33  | 0.336751  | 38.7481  | 6.8463           | 0.337751     | 38.7491       | 6.84205895       | 0.00014386 | Yes     |
| Tspan9   | 0.11224   | 0.048725 | -0.063515   | 7.96E-05   | Yes     | Tspan9   | 0.0996575 | 12.3559  | 6.95401          | 0.1006575    | 12.3569       | 6.93971838       | 0.00014386 | Yes     |
| Tst      | 0.67866   | 0.15601  | -0.52265    | 2.15E-12   | Yes     | Tst      | 0.290146  | 177.964  | 9.26059          | 0.291146     | 177.965       | 9.25563502       | 0.00014386 | Yes     |
| Ttc22    | 0.26043   | 0.37109  | 0.11066     | 0.00129883 | Yes     | Ttc22    | 0.485509  | 2.66311  | 2.45554          | 0.486509     | 2.66411       | 2.45311525       | 0.00014386 | Yes     |
| Ttc30a1  | 0.25885   | 0.20698  | -0.05187    | 0.01961146 | Yes     | Ttc30a1  | 1.90685   | 4.63831  | 1.2824           | 1.90785      | 4.63931       | 1.2819625        | 0.00014386 | Yes     |
| Ttc39b   | 0.1009    | 0.013321 | -0.087579   | 1.80E-05   | Yes     | Ttc39b   | 0.265592  | 2.81076  | 3.40368          | 0.266592     | 2.81176       | 3.39876806       | 0.00014386 | Yes     |
| Ttf2     | 0.15138   | 0.031921 | -0.119459   | 0.0007877  | Yes     | Ttf2     | 6.41482   | 2.03935  | -1.6533          | 6.41582      | 2.04035       | -1.652817        | 0.00014386 | Yes     |
| Ttpa     | 0.06095   | 0.010751 | -0.050199   | 1.27E-05   | Yes     | Ttpa     | 0         | 1.50686  | inf              | 0.001        | 1.50786       | 10.5582868       | 0.00014386 | Yes     |
| Tuba1c   | 0.51489   | 0.20942  | -0.30547    | 2.80E-05   | Yes     | Tuba1c   | 138.507   | 265.038  | 0.936246         | 138.508      | 265.039       | 0.93623536       | 0.00014386 | Yes     |
| Tuba4a   | 0.63468   | 0.21215  | -0.42253    | 1.37E-07   | Yes     | Tuba4a   | 51.6044   | 161.495  | 1.64592          | 51.6054      | 161.496       | 1.64590449       | 0.00014386 | Yes     |
| Tuba8    | 0.012142  | 0.068919 | 0.056777    | 0.04051274 | Yes     | Tuba8    | 0.287799  | 5.21432  | 4.17935          | 0.288799     | 5.21532       | 4.17461812       | 0.00014386 | Yes     |
| Tysnd1   | 0.45592   | 0.11456  | -0.34136    | 7.96E-06   | Yes     | Tysnd1   | 7.50641   | 15.0325  | 1.00189          | 7.50741      | 15.0335       | 1.00179375       | 0.00014386 | Yes     |
| Ubash3a  | 0.005102  | 0.27109  | 0.265988    | 9.97E-09   | Yes     | Ubash3a  | 23.4509   | 1.27611  | -4.19982         | 23.4519      | 1.27711       | -4.1987501       | 0.00014386 | Yes     |
| Ublcp1   | 0.11966   | 0.028849 | -0.090811   | 4.44E-05   | Yes     | Ublcp1   | 14.1384   | 22.481   | 0.669089         | 14.1394      | 22.482        | 0.66904948       | 0.00014386 | Yes     |
| Uncx     | 0.090728  | 0.031427 | -0.059301   | 0.00842241 | Yes     | Uncx     | 0         | 0.908832 | inf              | 0.001        | 0.909832      | 9.82945637       | 0.00014386 | Yes     |
| Uqcr11   | 0.078207  | 0.026218 | -0.051989   | 0.0038486  | Yes     | Uqcr11   | 117.943   | 760.71   | 2.68926          | 117.944      | 760.711       | 2.68924644       | 0.00014386 | Yes     |
| Ushbp1   | 0.84972   | 0.46241  | -0.38731    | 0.00014055 | Yes     | Ushbp1   | 0         | 3.78484  | inf              | 0.001        | 3.78584       | 11.8863977       | 0.00014386 | Yes     |
| Usp19    | 0.84037   | 0.73419  | -0.10618    | 0.01120909 | Yes     | Usp19    | 37.5307   | 26.576   | -0.497944        | 37.5317      | 26.577        | -0.4979314       | 0.00014386 | Yes     |
| Usp44    | 0.0075923 | 0.13749  | 0.1298977   | 2.65E-06   | Yes     | Usp44    | 24.0577   | 0.417651 | -5.84806         | 24.0587      | 0.418651      | -5.8446668       | 0.00014386 | Yes     |
| Usp46    | 0.81154   | 0.3839   | -0.42764    | 6.59E-10   | Yes     | Usp46    | 6.37737   | 9.26502  | 0.538833         | 6.37837      | 9.26602       | 0.53876201       | 0.00014386 | Yes     |
| Ust      | 0.0074176 | 0.060449 | 0.0530314   | 0.00111391 | Yes     | Ust      | 4.8715    | 0.819495 | -2.57156         | 4.8725       | 0.820495      | -2.5700957       | 0.00014386 | Yes     |
| Utp15    | 0.14599   | 0.073452 | -0.072538   | 2.29E-06   | Yes     | Utp15    | 9.22414   | 4.40857  | -1.0651          | 9.22514      | 4.40957       | -1.0649328       | 0.00014386 | Yes     |
| Vasn     | 0.75948   | 0.18213  | -0.57735    | 2.85E-09   | Yes     | Vasn     | 0.309598  | 13.6786  | 5.46538          | 0.310598     | 13.6796       | 5.4608337        | 0.00014386 | Yes     |
| Vat1     | 0.064594  | 0.004738 | -0.059856   | 0.00144827 | Yes     | Vat1     | 6.63759   | 52.1951  | 2.97518          | 6.63859      | 52.1961       | 2.97499326       | 0.00014386 | Yes     |

| RRBS    |           |          |             |            |         | RNAseq         |            |          |                  |              |               |                  |            |         |
|---------|-----------|----------|-------------|------------|---------|----------------|------------|----------|------------------|--------------|---------------|------------------|------------|---------|
| gene    | Blood     | Kidney   | methyl.diff | pMWU.fdr   | Match ? | gene           | blood      | kidney   | log2(fold_ratio) | blood+ 0.001 | kidney+ 0.001 | log2(fold_ratio) | q_value    | Match ? |
| Vav2    | 0.66741   | 0.11369  | -0.55372    | 1.01E-09   | Yes     | Vav2           | 1.73267    | 11.0387  | 2.6715           | 1.73367      | 11.0397       | 2.67079975       | 0.00014386 | Yes     |
| Vps37d  | 0.88813   | 0.0354   | -0.85273    | 2.15E-12   | Yes     | Vps37d         | 0.462954   | 21.6636  | 5.54826          | 0.463954     | 21.6646       | 5.54521402       | 0.00014386 | Yes     |
| Vstm2b  | 0.12585   | 0.031732 | -0.094118   | 2.15E-12   | Yes     | Vstm2b         | 0          | 5.92653  | inf              | 0.001        | 5.92753       | 12.5332153       | 0.00014386 | Yes     |
| Wfdc2   | 0.59001   | 0.24041  | -0.3496     | 3.59E-08   | Yes     | Wfdc2          | 1.515      | 245.692  | 7.34139          | 1.516        | 245.693       | 7.34044319       | 0.00014386 | Yes     |
| Wnt9b   | 0.076262  | 0.016711 | -0.059551   | 0.00144827 | Yes     | Wnt9b          | 0          | 0.739942 | inf              | 0.001        | 0.740942      | 9.5332168        | 0.00014386 | Yes     |
| Wt1     | 0.070679  | 0.019852 | -0.050827   | 0.03216266 | Yes     | Wt1            | 0          | 2.53423  | inf              | 0.001        | 2.53523       | 11.3079009       | 0.00014386 | Yes     |
| Wwc2    | 0.064107  | 0.011244 | -0.052863   | 6.47E-09   | Yes     | Wwc2           | 0.134214   | 35.9259  | 8.06435          | 0.135214     | 35.9269       | 8.05367611       | 0.00014386 | Yes     |
| Yap1    | 0.11571   | 0.027434 | -0.088276   | 0.00012642 | Yes     | Yap1           | 0.00949235 | 34.8666  | 11.8428          | 0.01049235   | 34.8676       | 11.6983335       | 0.00014386 | Yes     |
| Ybx2    | 0.53158   | 0.17334  | -0.35824    | 9.06E-09   | Yes     | Ybx2           | 0.790483   | 6.63731  | 3.06979          | 0.791483     | 6.63831       | 3.06818573       | 0.00014386 | Yes     |
| Zbed5   | 0.69664   | 0.45577  | -0.24087    | 0.00418734 | Yes     | Zbed5          | 7.11154    | 19.2083  | 1.4335           | 7.11254      | 19.2093       | 1.43336818       | 0.00014386 | Yes     |
| Zbtb10  | 0.17759   | 0.039488 | -0.138102   | 0.00123297 | Yes     | Zbtb10         | 0.520538   | 1.63415  | 1.65047          | 0.521538     | 1.63515       | 1.64857871       | 0.00014386 | Yes     |
| Zbtb17  | 0.38968   | 0.14927  | -0.24041    | 0.00842241 | Yes     | Zbtb17         | 16.7704    | 23.054   | 0.459097         | 16.7714      | 23.055        | 0.45907654       | 0.00014386 | Yes     |
| Zbtb7b  | 0.81674   | 0.89254  | 0.0758      | 0.02733646 | Yes     | Zbtb7b         | 16.3437    | 10.6274  | -0.620951        | 16.3447      | 10.6284       | -0.6208985       | 0.00014386 | Yes     |
| Zc3h7b  | 0.66564   | 0.38186  | -0.28378    | 0.00229548 | Yes     | Zc3h7b         | 14.2373    | 26.7319  | 0.908884         | 14.2383      | 26.7329       | 0.90883945       | 0.00014386 | Yes     |
| Zdhhc2  | 0.11183   | 0.009293 | -0.102537   | 1.04E-05   | Yes     | ZDHHC2         | 0.0846114  | 5.8404   | 6.10907          | 0.0856114    | 5.8414        | 6.09236745       | 0.00014386 | Yes     |
| Zfand2b | 0.86471   | 0.46506  | -0.39965    | 4.76E-05   | Yes     | Zfand2b        | 41.8076    | 29.9875  | -0.479405        | 41.8086      | 29.9885       | -0.4793904       | 0.00014386 | Yes     |
| Zfp148  | 0.12667   | 0.039816 | -0.086854   | 0.00437164 | Yes     | Zfp148         | 18.8768    | 10.0239  | -0.913165        | 18.8778      | 10.0249       | -0.9131028       | 0.00014386 | Yes     |
| Zfp219  | 0.82129   | 0.35241  | -0.46888    | 9.06E-09   | Yes     | Zfp219         | 15.3695    | 29.158   | 0.923821         | 15.3705      | 29.159        | 0.92377715       | 0.00014386 | Yes     |
| Zfp287  | 0.0022727 | 0.053948 | 0.0516753   | 8.22E-05   | Yes     | Zfp287         | 5.93071    | 2.33577  | -1.34431         | 5.93171      | 2.33677       | -1.3439323       | 0.00014386 | Yes     |
| Zfp358  | 0.54081   | 0.30044  | -0.24037    | 0.00719792 | Yes     | Zfp358         | 7.97695    | 18.3154  | 1.19915          | 7.97795      | 18.3164       | 1.19904599       | 0.00014386 | Yes     |
| Zfp385a | 0.07972   | 0.2613   | 0.18158     | 0.00072449 | Yes     | Zfp385a        | 0.418917   | 6.69565  | 3.99849          | 0.419917     | 6.69665       | 3.99526347       | 0.00014386 | Yes     |
| Zfp503  | 0.20502   | 0.057986 | -0.147034   | 0.0007877  | Yes     | Zfp503         | 0.100943   | 21.0874  | 7.70669          | 0.101943     | 21.0884       | 7.69254312       | 0.00014386 | Yes     |
| Zfp513  | 0.92754   | 0.13812  | -0.78942    | 4.71E-07   | Yes     | Zfp513         | 33.123     | 23.3695  | -0.50321         | 33.124       | 23.3705       | -0.5031883       | 0.00014386 | Yes     |
| Zfp652  | 0.068953  | 0.4879   | 0.418947    | 2.08E-06   | Yes     | Zfp652         | 25.1547    | 11.539   | -1.12431         | 25.1557      | 11.54         | -1.1242421       | 0.00014386 | Yes     |
| Zfp703  | 0.26977   | 0.098192 | -0.171578   | 0.00087121 | Yes     | Zfp703         | 1.15944    | 5.03409  | 2.11831          | 1.16044      | 5.03509       | 2.11734564       | 0.00014386 | Yes     |
| Zkscan5 | 0.53526   | 0.32869  | -0.20657    | 0.0017319  | Yes     | Zkscan5        | 4.41756    | 6.64015  | 0.587967         | 4.41856      | 6.64115       | 0.58785681       | 0.00014386 | Yes     |
| Zrsr1   | 0.52296   | 0.33066  | -0.1923     | 8.22E-05   | Yes     | Zrsr1          | 10.572     | 1.8769   | -2.49383         | 10.573       | 1.8779        | -2.4931926       | 0.00014386 | Yes     |
| Zscan21 | 0.52029   | 0.30549  | -0.2148     | 0.03216266 | Yes     | Zscan21        | 5.60661    | 9.03836  | 0.688933         | 5.60761      | 9.03936       | 0.68883462       | 0.00014386 | Yes     |
| 42795   | 0.33406   | 0.082277 | -0.251783   | 1.42E-05   | No      | 42797          | 13.0545    | 6.05186  | -1.1091          | 13.0555      | 6.05286       | -1.1089688       | 0.00014386 | No      |
| 42983   | 0.22166   | 0.36418  | 0.14252     | 0.00719792 | No      | 42799          | 30.2477    | 47.5873  | 0.653752         | 30.2487      | 47.5883       | 0.65373378       | 0.00014386 | No      |
| Aaas    | 0.22443   | 0.072397 | -0.152033   | 6.06E-05   | No      | 42801          | 80.5957    | 14.8521  | -2.44003         | 80.5967      | 14.8531       | -2.4399567       | 0.00014386 | No      |
| Aanat   | 0.40002   | 0.12178  | -0.27824    | 0.01482889 | No      | 42802          | 2.35931    | 25.2575  | 3.42027          | 2.36031      | 25.2585       | 3.41972071       | 0.00014386 | No      |
| Aatk    | 0.56125   | 0.26419  | -0.29706    | 2.41E-07   | No      | 42803          | 10.021     | 16.0372  | 0.678392         | 10.022       | 16.0382       | 0.67834179       | 0.00014386 | No      |
| Abca13  | 0.80225   | 0.53604  | -0.26621    | 0.00111391 | No      | 42979          | 437.273    | 25.7686  | -4.08485         | 437.274      | 25.7696       | -4.0847955       | 0.00014386 | No      |
| Abcc9   | 0.096611  | 0.02436  | -0.072251   | 8.74E-06   | No      | 42982          | 0.188856   | 256.834  | 10.4093          | 0.189856     | 256.835       | 10.4017205       | 0.00014386 | No      |
| Abcg4   | 0.29298   | 0.090758 | -0.202222   | 0.00111391 | No      | 42984          | 170.119    | 2.17763  | -6.28764         | 170.12       | 2.17863       | -6.2869877       | 0.00014386 | No      |
| Abhd15  | 0.076455  | 0.30579  | 0.229335    | 2.41E-08   | No      | 42985          | 109.84     | 34.5261  | -1.66965         | 109.841      | 34.5271       | -1.6696156       | 0.00014386 | No      |
| Abhd16b | 0.98171   | 0.65746  | -0.32425    | 1.58E-08   | No      | 42988          | 0.137887   | 6.09894  | 5.467            | 0.138887     | 6.09994       | 5.45681158       | 0.00014386 | No      |
| Acot5   | 0.21104   | 0.10388  | -0.10716    | 0.00171073 | No      | 0610030E20 Rik | 18.4238    | 6.62179  | -1.47628         | 18.4248      | 6.62279       | -1.4761379       | 0.00014386 | No      |
| Acta1   | 0.21249   | 0.10777  | -0.10472    | 0.00533667 | No      | 1110034G24 Rik | 16.0963    | 2.61547  | -2.62159         | 16.0973      | 2.61647       | -2.6211251       | 0.00014386 | No      |

| RRBS     |           |          |             |            |         | RNAseq         |          |          |                  |              |               |                  |            |         |
|----------|-----------|----------|-------------|------------|---------|----------------|----------|----------|------------------|--------------|---------------|------------------|------------|---------|
| gene     | Blood     | Kidney   | methyl.diff | pMWU.fdr   | Match ? | gene           | blood    | kidney   | log2(fold_ratio) | blood+ 0.001 | kidney+ 0.001 | log2(fold_ratio) | q_value    | Match ? |
| Acta2    | 0.8593    | 0.31169  | -0.54761    | 5.96E-07   | No      | 1110058L19 Rik | 20.4636  | 88.8988  | 2.11911          | 20.4646      | 88.8998       | 2.11904971       | 0.00014386 | No      |
| Actn3    | 0.55326   | 0.21929  | -0.33397    | 0.00028308 | No      | 1190007I07 Rik | 23.2276  | 42.8209  | 0.882474         | 23.2286      | 42.8219       | 0.8824466        | 0.00014386 | No      |
| Actr3b   | 0.73337   | 0.47646  | -0.25691    | 0.00087121 | No      | 1500011K16 Rik | 70.003   | 99.6477  | 0.50942          | 70.004       | 99.6487       | 0.50941362       | 0.00014386 | No      |
| Adamts14 | 0.60117   | 0.34736  | -0.25381    | 0.00050175 | No      | 1600014C10 Rik | 16.9703  | 9.31626  | -0.865188        | 16.9713      | 9.31726       | -0.8651194       | 0.00014386 | No      |
| Adamts19 | 0.099176  | 0.028368 | -0.070808   | 6.67E-05   | No      | 1700003E16 Rik | 0        | 0.808907 | inf              | 0.001        | 0.809907      | 9.66161245       | 0.00014386 | No      |
| Adamts4  | 0.57779   | 0.18023  | -0.39756    | 2.93E-12   | No      | 1700021F05 Rik | 10.7033  | 24.4621  | 1.19249          | 10.7043      | 24.4631       | 1.19241678       | 0.00014386 | No      |
| Adarb1   | 0.037836  | 0.19127  | 0.153434    | 0.02850905 | No      | 1700056E22 Rik | 0.997464 | 0        | -inf             | 0.998464     | 0.001         | -9.9635666       | 0.00014386 | No      |
| Adcy5    | 0.062461  | 0.010705 | -0.051756   | 0.00087121 | No      | 1810009A15 Rik | 61.5718  | 29.5401  | -1.0596          | 61.5728      | 29.5411       | -1.0595696       | 0.00014386 | No      |
| Adgrb3   | 0.07318   | 0.0109   | -0.06228    | 0.00012642 | No      | 1810037I17 Rik | 34.5939  | 114.91   | 1.73192          | 34.5949      | 114.911       | 1.73188563       | 0.00014386 | No      |
| Adgre5   | 0.055194  | 0.3456   | 0.290406    | 7.31E-07   | No      | 1810043H04 Rik | 49.8478  | 148.682  | 1.57663          | 49.8488      | 148.683       | 1.57660902       | 0.00014386 | No      |
| Adgrl4   | 0.18745   | 0.075596 | -0.111854   | 3.52E-05   | No      | 2200002D01 Rik | 0.802185 | 185.67   | 7.85459          | 0.803185     | 185.671       | 7.85280046       | 0.00014386 | No      |
| Ado      | 0.35748   | 0.17778  | -0.1797     | 0.0038486  | No      | 2210018M11 Rik | 10.4103  | 2.49989  | -2.05807         | 10.4113      | 2.50089       | -2.0576367       | 0.00014386 | No      |
| Adprhl1  | 0.8692    | 0.65081  | -0.21839    | 0.00065829 | No      | 2310030G06 Rik | 1.04707  | 38.4606  | 5.19896          | 1.04807      | 38.4616       | 5.1976118        | 0.00014386 | No      |
| Adra1a   | 0.072175  | 0.25611  | 0.183935    | 9.98E-06   | No      | 2310067B10 Rik | 24.3384  | 13.0809  | -0.895778        | 24.3394      | 13.0819       | -0.8957215       | 0.00014386 | No      |
| Adra1d   | 0.087148  | 0.021646 | -0.065502   | 6.06E-05   | No      | 2410004P03 Rik | 0        | 7.26908  | inf              | 0.001        | 7.27008       | 12.8277555       | 0.00014386 | No      |
| Adra2b   | 0.089261  | 0.014647 | -0.074614   | 1.43E-06   | No      | 2510049J12 Rik | 0        | 40.3571  | inf              | 0.001        | 40.3581       | 15.3005706       | 0.00014386 | No      |
| Adra2c   | 0.29817   | 0.06764  | -0.23053    | 8.74E-06   | No      | 2610008E11 Rik | 8.00681  | 3.81542  | -1.06939         | 8.00781      | 3.81642       | -1.0691878       | 0.00014386 | No      |
| Adrb1    | 0.13023   | 0.024805 | -0.105425   | 1.21E-08   | No      | 2810408A11 Rik | 3.33553  | 12.8571  | 1.94657          | 3.33653      | 12.8581       | 1.9462571        | 0.00014386 | No      |
| Afap1l2  | 0.056474  | 0.12498  | 0.068506    | 0.0007877  | No      | 3110052M02 Rik | 9.47144  | 1.266    | -2.90331         | 9.47244      | 1.267         | -2.9023196       | 0.00014386 | No      |
| Agap3    | 0.0018706 | 0.075337 | 0.0734664   | 4.71E-07   | No      | 3110057O12 Rik | 16.9917  | 2.102    | -3.01499         | 16.9927      | 2.103         | -3.0143943       | 0.00014386 | No      |
| Agxt     | 0.8356    | 0.50541  | -0.33019    | 4.44E-05   | No      | 4921507P07 Rik | 3.13213  | 1.47724  | -1.08425         | 3.13313      | 1.47824       | -1.0837241       | 0.00014386 | No      |

| RRBS     |          |           |             |            |         | RNAseq        |           |          |                  |              |               |                  |            |         |
|----------|----------|-----------|-------------|------------|---------|---------------|-----------|----------|------------------|--------------|---------------|------------------|------------|---------|
| gene     | Blood    | Kidney    | methyl.diff | pMWU.fdr   | Match ? | gene          | blood     | kidney   | log2(fold_ratio) | blood+ 0.001 | kidney+ 0.001 | log2(fold_ratio) | q_value    | Match ? |
| Ajuba    | 0.17153  | 0.017591  | -0.153939   | 5.41E-06   | No      | 4933426M11Rik | 32.4273   | 15.7925  | -1.03797         | 32.4283      | 15.7935       | -1.0379225       | 0.00014386 | No      |
| Akap17a  | 0.92656  | 0.62935   | -0.29721    | 1.28E-06   | No      | 5730508B09Rik | 20.9775   | 6.78904  | -1.62756         | 20.9785      | 6.79004       | -1.6274195       | 0.00014386 | No      |
| Akr7a3   | 0.10552  | 0.018413  | -0.087107   | 0.00229548 | No      | 5830473C10Rik | 0.374503  | 15.5973  | 5.38017          | 0.375503     | 15.5983       | 5.37642056       | 0.00014386 | No      |
| Aldh1b1  | 0.054129 | 0.1129    | 0.058771    | 0.00281863 | No      | 5S_rRNA       | 48.5426   | 20.1065  | -1.27159         | 48.5436      | 20.1075       | -1.2715474       | 0.00014386 | No      |
| Alg3     | 0.83635  | 0.5367    | -0.29965    | 4.44E-05   | No      | 6430531B16Rik | 0.597915  | 6.1464   | 3.36173          | 0.598915     | 6.1474        | 3.35955319       | 0.00014386 | No      |
| Alox12b  | 0.16905  | 0.065924  | -0.103126   | 0.00171073 | No      | 6720489N17Rik | 9.58656   | 2.43286  | -1.97836         | 9.58756      | 2.43386       | -1.9779175       | 0.00014386 | No      |
| Alox15b  | 0.2242   | 0.14988   | -0.07432    | 0.01961146 | No      | 9230110C19Rik | 0         | 3.22388  | inf              | 0.001        | 3.22488       | 11.6550298       | 0.00014386 | No      |
| Alox5    | 0.11705  | 0.036646  | -0.080404   | 0.00015722 | No      | A1cf          | 0         | 0.790215 | inf              | 0.001        | 0.791215      | 9.62792597       | 0.00014386 | No      |
| Alpi     | 0.69131  | 0.42877   | -0.26254    | 0.0058184  | No      | A4galt        | 0         | 7.85556  | inf              | 0.001        | 7.85656       | 12.9396821       | 0.00014386 | No      |
| Alpk3    | 0.78731  | 0.53866   | -0.24865    | 0.00017969 | No      | A4gnt         | 1.68729   | 0        | -inf             | 1.68829      | 0.001         | -10.721347       | 0.00014386 | No      |
| Als2cr11 | 0.975    | 0.8952    | -0.0798     | 0.00194697 | No      | A630007B06Rik | 13.1284   | 20.2103  | 0.622407         | 13.1294      | 20.2113       | 0.62236113       | 0.00014386 | No      |
| Alx1     | 0.090763 | 0.032799  | -0.057964   | 0.00123297 | No      | A830010M2ORik | 2.72047   | 1.04904  | -1.37479         | 2.72147      | 1.05004       | -1.3739418       | 0.00014386 | No      |
| Amh      | 0.8853   | 0.81512   | -0.07018    | 5.00E-06   | No      | Aacs          | 17.9618   | 5.73568  | -1.64689         | 17.9628      | 5.73668       | -1.6467243       | 0.00014386 | No      |
| Amhr2    | 0.74602  | 0.50953   | -0.23649    | 0.00281863 | No      | Aadac         | 0         | 1.0594   | inf              | 0.001        | 1.0604        | 10.0503929       | 0.00014386 | No      |
| Amigo2   | 0.80946  | 0.61939   | -0.19007    | 0.00031293 | No      | Aadat         | 0.0605041 | 251.784  | 12.0229          | 0.0615041    | 251.785       | 11.9992221       | 0.00014386 | No      |
| Amigo3   | 0.90532  | 0.72937   | -0.17595    | 0.00111391 | No      | Aaed1         | 1.45953   | 39.8339  | 4.77042          | 1.46053      | 39.8349       | 4.76946906       | 0.00014386 | No      |
| Angpt4   | 0.77851  | 0.55256   | -0.22595    | 0.01206268 | No      | Aamdc         | 8.53233   | 35.2564  | 2.04687          | 8.53333      | 35.2574       | 2.04674534       | 0.00014386 | No      |
| Angptl4  | 0.023958 | 0.1316    | 0.107642    | 0.00087121 | No      | AAR2          | 6.67339   | 10.3053  | 0.626887         | 6.67439      | 10.3063       | 0.6268186        | 0.00014386 | No      |
| Ankrd13d | 0.10776  | 0.028151  | -0.079609   | 0.0007877  | No      | Aars          | 23.1638   | 64.0708  | 1.46779          | 23.1648      | 64.0718       | 1.46775529       | 0.00014386 | No      |
| Ankrd34a | 0.12223  | 0.060856  | -0.061374   | 0.00093244 | No      | Abat          | 0.735714  | 12.6798  | 4.10724          | 0.736714     | 12.6808       | 4.1053973        | 0.00014386 | No      |
| Ankrd55  | 0.88654  | 0.83368   | -0.05286    | 0.01040885 | No      | Abca2         | 20.1558   | 43.4354  | 1.10767          | 20.1568      | 43.4364       | 1.10763792       | 0.00014386 | No      |
| Ankrd65  | 0.85975  | 0.16455   | -0.6952     | 2.27E-12   | No      | ABCA3         | 12.9724   | 25.1274  | 0.953818         | 12.9734      | 25.1284       | 0.95376219       | 0.00014386 | No      |
| Anks1b   | 0.1792   | 0.076555  | -0.102645   | 0.02733646 | No      | Abcb10        | 4.18642   | 10.2914  | 1.29765          | 4.18742      | 10.2924       | 1.2974459        | 0.00014386 | No      |
| Ano4     | 0.084969 | 0.010206  | -0.074763   | 1.08E-05   | No      | Abcb6         | 2.19881   | 25.9757  | 3.56237          | 2.19981      | 25.9767       | 3.56176734       | 0.00014386 | No      |
| Ap1g1    | 0.78052  | 0.58926   | -0.19126    | 0.02346238 | No      | Abcb7         | 10.9761   | 7.77655  | -0.497169        | 10.9771      | 7.77755       | -0.4971093       | 0.00014386 | No      |
| Ap3d1    | 0.34498  | 0.14825   | -0.19673    | 2.46E-09   | No      | Abcc1         | 10.0113   | 2.18456  | -2.19621         | 10.0123      | 2.18556       | -2.1956985       | 0.00014386 | No      |
| Apba1    | 0.24005  | 0.092254  | -0.147796   | 1.98E-05   | No      | ABCC4         | 4.22554   | 23.8645  | 2.49766          | 4.22654      | 23.8655       | 2.49737755       | 0.00014386 | No      |
| Apc2     | 0.67215  | 0.16529   | -0.50686    | 4.71E-07   | No      | Abcc5         | 38.6953   | 21.0085  | -0.881185        | 38.6963      | 21.0095       | -0.8811538       | 0.00014386 | No      |
| Apob     | 0.83545  | 0.36865   | -0.4668     | 7.31E-07   | No      | Abcc6         | 0         | 3.87212  | inf              | 0.001        | 3.87312       | 11.9192805       | 0.00014386 | No      |
| Apod     | 0.72612  | 0.41775   | -0.30837    | 0.00087121 | No      | Abcc8         | 0         | 2.47947  | inf              | 0.001        | 2.48047       | 11.2763978       | 0.00014386 | No      |
| Aqp5     | 0.15028  | 0.074117  | -0.076163   | 9.62E-06   | No      | Abcd1         | 12.4955   | 3.94388  | -1.66372         | 12.4965      | 3.94488       | -1.6634708       | 0.00014386 | No      |
| Aqp7     | 0.62431  | 0.42559   | -0.19872    | 0.01120909 | No      | Abcd3         | 12.5752   | 25.7774  | 1.03553          | 12.5762      | 25.7784       | 1.03546666       | 0.00014386 | No      |
| Arfgap1  | 0.36701  | 0.080474  | -0.286536   | 2.12E-07   | No      | Abce1         | 29.6337   | 13.4711  | -1.13737         | 29.6347      | 13.4721       | -1.1373127       | 0.00014386 | No      |
| Arg2     | 0.079479 | 0.0066667 | -0.0728123  | 0.00173557 | No      | Abcg1         | 32.5129   | 7.0118   | -2.21315         | 32.5139      | 7.0128        | -2.2129941       | 0.00014386 | No      |

| RRBS     |           |           |             |            |         | RNAseq  |           |         |                  |              |               |                  |            |         |
|----------|-----------|-----------|-------------|------------|---------|---------|-----------|---------|------------------|--------------|---------------|------------------|------------|---------|
| gene     | Blood     | Kidney    | methyl.diff | pMWU.fdr   | Match ? | gene    | blood     | kidney  | log2(fold_ratio) | blood+ 0.001 | kidney+ 0.001 | log2(fold_ratio) | q_value    | Match ? |
| Arhgap30 | 0.014019  | 0.41398   | 0.399961    | 4.71E-07   | No      | Abcg2   | 0.0476417 | 12.5317 | 8.03914          | 0.0486417    | 12.5327       | 8.00928789       | 0.00014386 | No      |
| Arhgap8  | 0.39357   | 0.21058   | -0.18299    | 0.01961146 | No      | Abcg3l3 | 10.0994   | 3.84005 | -1.39508         | 10.1004      | 3.84105       | -1.3948398       | 0.00014386 | No      |
| Arhgef16 | 0.11278   | 0.059358  | -0.053422   | 0.01289082 | No      | Abhd10  | 12.2205   | 7.26031 | -0.751206        | 12.2215      | 7.26131       | -0.7511196       | 0.00014386 | No      |
| Arhgef7  | 0.77444   | 0.68904   | -0.0854     | 0.03216266 | No      | Abhd11  | 16.8564   | 30.7778 | 0.868594         | 16.8574      | 30.7788       | 0.86855495       | 0.00014386 | No      |
| Arid3a   | 0.84931   | 0.65099   | -0.19832    | 7.51E-10   | No      | Abhd12  | 11.7873   | 26.322  | 1.15903          | 11.7883      | 26.323        | 1.15896824       | 0.00014386 | No      |
| Arl9     | 0.896     | 0.84028   | -0.05572    | 0.01268638 | No      | Abhd13  | 9.03183   | 4.68064 | -0.948311        | 9.03283      | 4.68164       | -0.9481641       | 0.00014386 | No      |
| Arpin    | 0.77785   | 0.099354  | -0.678496   | 0.00017371 | No      | Abhd14b | 0.831161  | 134.905 | 7.3426           | 0.832161     | 134.906       | 7.34087612       | 0.00014386 | No      |
| Arsi     | 0.084506  | 0.015539  | -0.068967   | 3.76E-05   | No      | Abhd17a | 52.0795   | 75.2516 | 0.531007         | 52.0805      | 75.2526       | 0.53099813       | 0.00014386 | No      |
| Art1     | 0.83961   | 0.66003   | -0.17958    | 5.77E-05   | No      | Abhd17b | 19.067    | 7.8211  | -1.28563         | 19.068       | 7.8221        | -1.2855256       | 0.00014386 | No      |
| Art4     | 0.04452   | 0.38564   | 0.34112     | 5.96E-07   | No      | Abhd17c | 24.3907   | 86.7753 | 1.83095          | 24.3917      | 86.7763       | 1.83091076       | 0.00014386 | No      |
| Asb10    | 0.43305   | 0.11738   | -0.31567    | 0.00103522 | No      | Abhd2   | 6.49529   | 3.7064  | -0.809376        | 6.49629      | 3.7074        | -0.8092083       | 0.00014386 | No      |
| Ascl1    | 0.12218   | 0.030044  | -0.092136   | 0.00054762 | No      | Abhd3   | 0.219952  | 5.79286 | 4.71902          | 0.220952     | 5.79386       | 4.71271993       | 0.00014386 | No      |
| Asic2    | 0.80336   | 0.73509   | -0.06827    | 0.04412687 | No      | Abhd4   | 14.4829   | 40.2973 | 1.47633          | 14.4839      | 40.2983       | 1.47626886       | 0.00014386 | No      |
| Asic4    | 0.40508   | 0.60802   | 0.20294     | 0.00054762 | No      | Abhd5   | 7.08492   | 25.2837 | 1.83539          | 7.08592      | 25.2847       | 1.83523758       | 0.00014386 | No      |
| Asmt     | 0.97273   | 0.9078    | -0.06493    | 0.00229548 | No      | Abi1    | 64.8606   | 16.2956 | -1.99286         | 64.8616      | 16.2966       | -1.9927936       | 0.00014386 | No      |
| Asna1    | 0.53617   | 0.3823    | -0.15387    | 7.31E-07   | No      | Abi2    | 1.50328   | 4.67655 | 1.63733          | 1.50428      | 4.67755       | 1.63667995       | 0.00014386 | No      |
| Astn2    | 0.12077   | 0.0091462 | -0.1116238  | 1.57E-05   | No      | Abi3bp  | 0         | 1.51468 | inf              | 0.001        | 1.51568       | 10.5657495       | 0.00014386 | No      |
| Atf7ip2  | 0.093187  | 0.011026  | -0.082161   | 0.00050175 | No      | Abl1    | 6.74843   | 10.2272 | 0.599786         | 6.74943      | 10.2282       | 0.5997147        | 0.00014386 | No      |
| Atp2b2   | 0.09212   | 0.0092354 | -0.0828846  | 6.06E-05   | No      | Ablim1  | 167.746   | 45.7002 | -1.87601         | 167.747      | 45.7012       | -1.875983        | 0.00014386 | No      |
| Atp2c2   | 0.1556    | 0.04379   | -0.11181    | 1.61E-10   | No      | Abr     | 24.7233   | 8.85077 | -1.48199         | 24.7243      | 8.85177       | -1.4818918       | 0.00014386 | No      |
| Atp6v1g2 | 0.10364   | 0.018804  | -0.084836   | 9.57E-07   | No      | Abracl  | 346.177   | 64.5728 | -2.42251         | 346.178      | 64.5738       | -2.4224932       | 0.00014386 | No      |
| Azin2    | 0.31923   | 0.57398   | 0.25475     | 0.00188523 | No      | Abt1    | 32.0628   | 14.1906 | -1.17596         | 32.0638      | 14.1916       | -1.1759082       | 0.00014386 | No      |
| B3gat2   | 0.073138  | 0.015054  | -0.058084   | 0.00054762 | No      | Abtb2   | 13.531    | 3.7166  | -1.86421         | 13.532       | 3.7176        | -1.8639316       | 0.00014386 | No      |
| B3gnt3   | 0.51283   | 0.19543   | -0.3174     | 0.00123297 | No      | Acaa1a  | 25.0743   | 80.3301 | 1.67973          | 25.0753      | 80.3311       | 1.67969167       | 0.00014386 | No      |
| B3gnt8   | 0.7531    | 0.48413   | -0.26897    | 0.00281863 | No      | Acaa2   | 38.0534   | 143.686 | 1.91682          | 38.0544      | 143.687       | 1.91679436       | 0.00014386 | No      |
| B4galt2  | 0.2011    | 0.049361  | -0.151739   | 5.41E-06   | No      | Acaca   | 4.04946   | 1.8278  | -1.14762         | 4.05046      | 1.8288        | -1.1471885       | 0.00014386 | No      |
| B4gat1   | 0.36278   | 0.049678  | -0.313102   | 2.32E-06   | No      | Acacb   | 0.111487  | 38.1768 | 8.41968          | 0.112487     | 38.1778       | 8.40683188       | 0.00014386 | No      |
| Bace1    | 0.13251   | 0.049377  | -0.083133   | 0.00144827 | No      | Acad10  | 4.88481   | 16.1779 | 1.72765          | 4.88581      | 16.1789       | 1.72744386       | 0.00014386 | No      |
| Bace2    | 0.12079   | 0.042262  | -0.078528   | 0.00010321 | No      | Acad11  | 2.88859   | 23.8861 | 3.04773          | 2.88959      | 23.8871       | 3.047295         | 0.00014386 | No      |
| Bag3     | 0.32294   | 0.044153  | -0.278787   | 6.75E-07   | No      | Acad9   | 12.4011   | 18.8161 | 0.601499         | 12.4021      | 18.8171       | 0.60145988       | 0.00014386 | No      |
| Barhl1   | 0.13516   | 0.045655  | -0.089505   | 6.06E-05   | No      | Acadl   | 34.6488   | 106.803 | 1.62408          | 34.6498      | 106.804       | 1.62404675       | 0.00014386 | No      |
| Batf3    | 0.12478   | 0.014823  | -0.109957   | 0.00173557 | No      | Acadm   | 48.6801   | 206.847 | 2.08716          | 48.6811      | 206.848       | 2.08713734       | 0.00014386 | No      |
| Bbs4     | 0.74629   | 0.53836   | -0.20793    | 3.81E-09   | No      | Acads   | 15.9194   | 46.1583 | 1.5358           | 15.9204      | 46.1593       | 1.53574476       | 0.00014386 | No      |
| Bbs7     | 0.14417   | 0.029638  | -0.114532   | 3.76E-05   | No      | Acadsb  | 2.05365   | 12.0463 | 2.55233          | 2.05465      | 12.0473       | 2.55174529       | 0.00014386 | No      |
| Bcan     | 0.10557   | 0.026024  | -0.079546   | 0.00045631 | No      | Acadvl  | 35.4288   | 81.8201 | 1.20753          | 35.4298      | 81.8211       | 1.20750961       | 0.00014386 | No      |
| Bcat1    | 0.48166   | 0.22278   | -0.25888    | 0.00015722 | No      | Acap1   | 507.284   | 205.83  | -1.30134         | 507.285      | 205.831       | -1.3013362       | 0.00014386 | No      |
| Bcdin3d  | 0.0035714 | 0.20733   | 0.2037586   | 1.83E-06   | No      | Acap2   | 8.60443   | 3.0489  | -1.49679         | 8.60543      | 3.0499        | -1.4964853       | 0.00014386 | No      |
| Bcl3     | 0.12581   | 0.053089  | -0.072721   | 3.13E-07   | No      | Acat1   | 59.033    | 314.762 | 2.41467          | 59.034       | 314.763       | 2.41464796       | 0.00014386 | No      |
| Bcl6b    | 0.77932   | 0.5397    | -0.23962    | 0.00301385 | No      | Acbd6   | 20.2875   | 29.6108 | 0.545533         | 20.2885      | 29.6118       | 0.54550998       | 0.00014386 | No      |
| Bdnf     | 0.12761   | 0.064371  | -0.063239   | 0.01049788 | No      | Acd     | 55.5848   | 25.9961 | -1.09639         | 55.5858      | 25.9971       | -1.0963657       | 0.00014386 | No      |
| Begain   | 0.081075  | 0.023724  | -0.057351   | 0.00132879 | No      | Ace2    | 0         | 1.23896 | inf              | 0.001        | 1.23996       | 10.2760779       | 0.00014386 | No      |
| Bfsp1    | 0.34783   | 0.22698   | -0.12085    | 0.01482889 | No      | Ace3    | 0         | 1.52029 | inf              | 0.001        | 1.52129       | 10.5710795       | 0.00014386 | No      |

| RRBS     |           |           |             |            |         | RNAseq |           |         |                  |              |               |                  |            |         |
|----------|-----------|-----------|-------------|------------|---------|--------|-----------|---------|------------------|--------------|---------------|------------------|------------|---------|
| gene     | Blood     | Kidney    | methyl.diff | pMWU.fdr   | Match ? | gene   | blood     | kidney  | log2(fold_ratio) | blood+ 0.001 | kidney+ 0.001 | log2(fold_ratio) | q_value    | Match ? |
| Bhmt2    | 0.55579   | 0.2063    | -0.34949    | 1.94E-07   | No      | Acin1  | 138.511   | 69.5746 | -0.993363        | 138.512      | 69.5756       | -0.9933576       | 0.00014386 | No      |
| Bik      | 0.033271  | 0.14187   | 0.108599    | 4.76E-05   | No      | Acly   | 64.99     | 37.7495 | -0.783759        | 64.991       | 37.7505       | -0.7837442       | 0.00014386 | No      |
| Bmi1     | 0.039871  | 0.098356  | 0.058485    | 0.00017969 | No      | Acmsd  | 0         | 54.0214 | inf              | 0.001        | 54.0224       | 15.7212701       | 0.00014386 | No      |
| Bmp3     | 0.1389    | 0.023621  | -0.115279   | 4.76E-05   | No      | Acn9   | 10.3639   | 62.3952 | 2.58987          | 10.3649      | 62.3962       | 2.58975197       | 0.00014386 | No      |
| Bmp8a    | 0.14422   | 0.080759  | -0.063461   | 0.00770116 | No      | Aco1   | 6.89998   | 111.012 | 4.00797          | 6.90098      | 111.013       | 4.00778357       | 0.00014386 | No      |
| Boll     | 0.26722   | 0.13399   | -0.13323    | 0.00369602 | No      | Aco2   | 43.1379   | 193.255 | 2.16348          | 43.1389      | 193.256       | 2.16345191       | 0.00014386 | No      |
| Borcs6   | 0.65568   | 0.32783   | -0.32785    | 0.0058184  | No      | Acot1  | 15.0892   | 76.8786 | 2.34906          | 15.0902      | 76.8796       | 2.3489889        | 0.00014386 | No      |
| Borcs7   | 0.65111   | 0.31319   | -0.33792    | 3.58E-07   | No      | Acot13 | 7.92382   | 57.9004 | 2.86931          | 7.92482      | 57.9014       | 2.86914816       | 0.00014386 | No      |
| Bpi      | 0.105     | 0.029002  | -0.075998   | 0.00144827 | No      | Acot4  | 0.0176455 | 6.32085 | 8.48467          | 0.0186455    | 6.32185       | 8.40537551       | 0.00014386 | No      |
| Bpifb3   | 0.93998   | 0.70385   | -0.23613    | 2.08E-06   | No      | Acot7  | 167.974   | 21.9372 | -2.93679         | 167.975      | 21.9382       | -2.9367295       | 0.00014386 | No      |
| Btbd16   | 0.81193   | 0.57725   | -0.23468    | 0.00173557 | No      | Acot8  | 12.2215   | 31.6522 | 1.37289          | 12.2225      | 31.6532       | 1.37281195       | 0.00014386 | No      |
| Btn1a1   | 0.094456  | 0.04119   | -0.053266   | 0.03700939 | No      | Acox1  | 11.6892   | 64.8183 | 2.47122          | 11.6902      | 64.8193       | 2.47112383       | 0.00014386 | No      |
| C1q1     | 0.053979  | 0.026269  | -0.02771    | 1.73E-05   | No      | Acox3  | 8.62257   | 14.7533 | 0.774846         | 8.62357      | 14.7543       | 0.77477833       | 0.00014386 | No      |
| C1q12    | 0.057842  | 0.011547  | -0.046295   | 2.15E-12   | No      | Acp1   | 42.0577   | 71.0369 | 0.756201         | 42.0587      | 71.0379       | 0.75618468       | 0.00014386 | No      |
| C1qtnf5  | 0.92529   | 0.60644   | -0.31885    | 6.83E-08   | No      | Acp2   | 5.00808   | 25.2502 | 2.33396          | 5.00908      | 25.2512       | 2.33373439       | 0.00014386 | No      |
| C2cd4c   | 0.84384   | 0.25281   | -0.59103    | 2.15E-12   | No      | Acp5   | 91.9573   | 61.6359 | -0.577193        | 91.9583      | 61.6369       | -0.5771855       | 0.00014386 | No      |
| Cacna1e  | 0.33664   | 0.15173   | -0.18491    | 3.41E-06   | No      | Acpl2  | 19.8965   | 6.37302 | -1.64246         | 19.8975      | 6.37402       | -1.6423117       | 0.00014386 | No      |
| Cacna1i  | 0.96152   | 0.29223   | -0.66929    | 2.16E-09   | No      | Acpp   | 6.75685   | 2.38086 | -1.50487         | 6.75785      | 2.38186       | -1.5044757       | 0.00014386 | No      |
| Cacna1s  | 0.12734   | 0.051934  | -0.075406   | 4.31E-08   | No      | Acsf3  | 5.19667   | 41.9701 | 3.0137           | 5.19767      | 41.9711       | 3.01345933       | 0.00014386 | No      |
| Cacna2d1 | 0.16966   | 0.037291  | -0.132369   | 0.00103522 | No      | Acs1   | 3.4751    | 25.2864 | 2.86323          | 3.4761       | 25.2874       | 2.86287722       | 0.00014386 | No      |
| Cacna2d2 | 0.13383   | 0.035073  | -0.098757   | 0.00451501 | No      | Acs13  | 4.44638   | 7.57563 | 0.768735         | 4.44738      | 7.57663       | 0.76860062       | 0.00014386 | No      |
| Cacng2   | 0.057126  | 0.0055728 | -0.0515532  | 0.00050175 | No      | Acs14  | 6.61586   | 14.1485 | 1.09664          | 6.61686      | 14.1495       | 1.09653241       | 0.00014386 | No      |
| Cadm4    | 0.21607   | 0.45981   | 0.24374     | 0.00015279 | No      | Acsm1  | 0         | 7.79493 | inf              | 0.001        | 7.79593       | 12.9285054       | 0.00014386 | No      |
| Calb2    | 0.25963   | 0.077034  | -0.182596   | 2.23E-05   | No      | Acsm2a | 0.025992  | 107.657 | 12.0161          | 0.026992     | 107.658       | 11.961636        | 0.00014386 | No      |
| Calcr    | 0.15726   | 0.076754  | -0.080506   | 0.04638126 | No      | Acsm3  | 0.0244874 | 76.894  | 11.6166          | 0.0254874    | 76.895        | 11.5588899       | 0.00014386 | No      |
| Calhm1   | 0.84609   | 0.41227   | -0.43382    | 3.18E-10   | No      | Acss1  | 73.7743   | 41.4912 | -0.830314        | 73.7753      | 41.4922       | -0.8302977       | 0.00014386 | No      |
| Calhm3   | 0.76691   | 0.64393   | -0.12298    | 0.0247155  | No      | Acss2  | 4.33639   | 56.2749 | 3.69792          | 4.33739      | 56.2759       | 3.69761815       | 0.00014386 | No      |
| Caly     | 0.11367   | 0.03975   | -0.07392    | 0.00281863 | No      | Acss3  | 0         | 22.7746 | inf              | 0.001        | 22.7756       | 14.4752014       | 0.00014386 | No      |
| Camk2n2  | 0.29567   | 0.075114  | -0.220556   | 7.31E-07   | No      | Actb   | 4629.95   | 1198.77 | -1.94945         | 4629.951     | 1198.771      | -1.9494408       | 0.00014386 | No      |
| Capn12   | 0.85512   | 0.68952   | -0.1656     | 9.44E-05   | No      | Actg1  | 633.993   | 1005.15 | 0.664869         | 633.994      | 1005.151      | 0.66487116       | 0.00014386 | No      |
| Car13    | 0.62425   | 0.27961   | -0.34464    | 0.00111391 | No      | Actn4  | 70.6762   | 130.308 | 0.882633         | 70.6772      | 130.309       | 0.88261994       | 0.00014386 | No      |
| Car3     | 0.12087   | 0.025696  | -0.095174   | 1.73E-05   | No      | Actr1b | 16.5518   | 26.6946 | 0.689566         | 16.5528      | 26.6956       | 0.6895267        | 0.00014386 | No      |
| Car4     | 0.092361  | 0.013207  | -0.079154   | 6.67E-05   | No      | Actr2  | 193.977   | 50.2019 | -1.95007         | 193.978      | 50.2029       | -1.9500504       | 0.00014386 | No      |
| Car9     | 0.77761   | 0.58194   | -0.19567    | 0.00334552 | No      | Actr3  | 429.39    | 94.9635 | -2.17684         | 429.391      | 94.9645       | -2.1768317       | 0.00014386 | No      |
| Carkd    | 0.76201   | 0.3124    | -0.44961    | 9.98E-06   | No      | Acvr1  | 0.104915  | 14.1582 | 7.07627          | 0.105915     | 14.1592       | 7.06268902       | 0.00014386 | No      |
| Cartpt   | 0.30562   | 0.15058   | -0.15504    | 0.01832913 | No      | Acvr1b | 6.0515    | 12.9734 | 1.10019          | 6.0525       | 12.9744       | 1.10006474       | 0.00014386 | No      |
| Cass4    | 0.0016581 | 0.11979   | 0.1181319   | 1.66E-07   | No      | Acy1   | 18.2238   | 340.432 | 4.22348          | 18.2248      | 340.433       | 4.223396         | 0.00014386 | No      |
| Cav3     | 0.8947    | 0.38578   | -0.50892    | 8.46E-07   | No      | Acy3   | 0.947667  | 181.371 | 7.58034          | 0.948667     | 181.372       | 7.57883427       | 0.00014386 | No      |
| Cbln1    | 0.14549   | 0.056998  | -0.088492   | 5.89E-06   | No      | Acyp2  | 0.270719  | 8.93336 | 5.04433          | 0.271719     | 8.93436       | 5.03917703       | 0.00014386 | No      |
| Cbln4    | 0.10555   | 0.024024  | -0.081526   | 2.80E-05   | No      | Ada    | 26.1183   | 10.6789 | -1.2903          | 26.1193      | 10.6799       | -1.2902181       | 0.00014386 | No      |
| Cbx8     | 0.79016   | 0.66759   | -0.12257    | 0.02850905 | No      | Adam10 | 59.9888   | 10.5762 | -2.50387         | 59.9898      | 10.5772       | -2.5037595       | 0.00014386 | No      |
| Ccdc105  | 0.14707   | 0.034111  | -0.112959   | 0.00054762 | No      | Adam17 | 18.3064   | 9.70078 | -0.916177        | 18.3074      | 9.70178       | -0.9161055       | 0.00014386 | No      |



| RRBS     |          |           |             |            |         | RNAseq   |           |          |                  |              |               |                  |            |         |
|----------|----------|-----------|-------------|------------|---------|----------|-----------|----------|------------------|--------------|---------------|------------------|------------|---------|
| gene     | Blood    | Kidney    | methyl.diff | pMWU.fdr   | Match ? | gene     | blood     | kidney   | log2(fold_ratio) | blood+ 0.001 | kidney+ 0.001 | log2(fold_ratio) | q_value    | Match ? |
| Ccdc166  | 0.49197  | 0.32583   | -0.16614    | 0.00057292 | No      | Adam22   | 0.0157642 | 1.52849  | 6.59931          | 0.0167642    | 1.52949       | 6.51152323       | 0.00014386 | No      |
| Ccdc184  | 0.10637  | 0.035403  | -0.070967   | 7.60E-06   | No      | Adam8    | 6.29438   | 0.935049 | -2.75095         | 6.29538      | 0.936049      | -2.7496375       | 0.00014386 | No      |
| Ccdc24   | 0.63237  | 0.18562   | -0.44675    | 1.70E-08   | No      | Adam9    | 1.98119   | 8.13136  | 2.03713          | 1.98219      | 8.13236       | 2.03657882       | 0.00014386 | No      |
| Ccdc7    | 0.85449  | 0.77416   | -0.08033    | 0.0247155  | No      | Adamts1  | 0         | 8.22001  | inf              | 0.001        | 8.22101       | 13.0050999       | 0.00014386 | No      |
| Ccdc89   | 0.34213  | 0.069777  | -0.272353   | 1.12E-06   | No      | Adamts10 | 57.1778   | 19.6232  | -1.54289         | 57.1788      | 19.6242       | -1.5428465       | 0.00014386 | No      |
| Ccer1    | 0.68159  | 0.8195    | 0.13791     | 0.00077259 | No      | Adamts16 | 0         | 0.974265 | inf              | 0.001        | 0.975265      | 9.92965047       | 0.00014386 | No      |
| Ccl27    | 0.25174  | 0.058085  | -0.193655   | 2.73E-09   | No      | Adamts17 | 0         | 1.00756  | inf              | 0.001        | 1.00856       | 9.9780812        | 0.00014386 | No      |
| Ccl28    | 0.69069  | 0.48247   | -0.20822    | 0.02220995 | No      | Adamts14 | 0.630577  | 2.2362   | 1.82631          | 0.631577     | 2.2372        | 1.8246637        | 0.00014386 | No      |
| Ccna1    | 0.066595 | 0.015269  | -0.051326   | 0.00050175 | No      | Adap1    | 1.39846   | 13.5133  | 3.27247          | 1.39946      | 13.5143       | 3.27154463       | 0.00014386 | No      |
| Cct6b    | 0.076929 | 0.016402  | -0.060527   | 0.00173557 | No      | Adar     | 34.0671   | 12.3637  | -1.46227         | 34.0681      | 12.3647       | -1.4621943       | 0.00014386 | No      |
| Cct8l1   | 0.83505  | 0.68394   | -0.15111    | 0.02346238 | No      | Adat1    | 3.12106   | 0.766115 | -2.0264          | 3.12206      | 0.767115      | -2.0249835       | 0.00014386 | No      |
| Cd164l2  | 0.44369  | 0.12185   | -0.32184    | 1.32E-08   | No      | Adat2    | 25.6752   | 3.70252  | -2.79379         | 25.6762      | 3.70352       | -2.7934627       | 0.00014386 | No      |
| Cd248    | 0.48893  | 0.1379    | -0.35103    | 4.54E-12   | No      | Adc      | 0         | 3.4772   | inf              | 0.001        | 3.4782        | 11.7641252       | 0.00014386 | No      |
| Cd52     | 0.67783  | 0.59302   | -0.08481    | 0.00123297 | No      | Adck1    | 4.39093   | 17.9686  | 2.03288          | 4.39193      | 17.9696       | 2.03263133       | 0.00014386 | No      |
| Cd72     | 0.11473  | 0.31079   | 0.19606     | 0.00173557 | No      | Adck3    | 9.48856   | 18.3141  | 0.94869          | 9.48956      | 18.3151       | 0.94862048       | 0.00014386 | No      |
| Cdc42ep3 | 0.08631  | 0.0069444 | -0.0793656  | 0.0003366  | No      | Adck4    | 14.8443   | 44.4171  | 1.58121          | 14.8453      | 44.4181       | 1.58114143       | 0.00014386 | No      |
| Cdh13    | 0.6062   | 0.27328   | -0.33292    | 1.28E-06   | No      | Adcy4    | 1.10794   | 11.6248  | 3.39125          | 1.10894      | 11.6258       | 3.39007678       | 0.00014386 | No      |
| Cdh3     | 0.52758  | 0.075311  | -0.452269   | 1.58E-08   | No      | Adcy7    | 44.3792   | 6.44503  | -2.78363         | 44.3802      | 6.44603       | -2.7834334       | 0.00014386 | No      |
| Cdh8     | 0.18234  | 0.010891  | -0.171449   | 3.85E-07   | No      | Add1     | 204.583   | 121.781  | -0.748392        | 204.584      | 121.782       | -0.7483924       | 0.00014386 | No      |
| Cdk5r2   | 0.1027   | 0.027024  | -0.075676   | 2.27E-05   | No      | Add3     | 195.613   | 24.9265  | -2.97225         | 195.614      | 24.9275       | -2.9721995       | 0.00014386 | No      |
| Cdon     | 0.95428  | 0.66112   | -0.29316    | 9.98E-06   | No      | Adhfe1   | 0.081751  | 59.4225  | 9.50556          | 0.082751     | 59.4235       | 9.48804112       | 0.00014386 | No      |
| Ceacam4  | 0.82165  | 0.74214   | -0.07951    | 0.00281863 | No      | Adi1     | 26.8397   | 119.492  | 2.15447          | 26.8407      | 119.493       | 2.1544319        | 0.00014386 | No      |
| Cebpe    | 0.84564  | 0.55028   | -0.29536    | 2.06E-11   | No      | Adipor1  | 47.1301   | 99.2584  | 1.07454          | 47.1311      | 99.2594       | 1.07452438       | 0.00014386 | No      |
| Cela1    | 0.010303 | 0.11986   | 0.109557    | 4.82E-11   | No      | Adipor2  | 30.7803   | 22.805   | -0.432657        | 30.7813      | 22.806        | -0.4326407       | 0.00014386 | No      |
| Celf3    | 0.21726  | 0.12256   | -0.0947     | 0.04051274 | No      | Adk      | 35.1665   | 82.8468  | 1.23624          | 35.1675      | 82.8478       | 1.23622061       | 0.00014386 | No      |
| Celf4    | 0.079826 | 0.015307  | -0.064519   | 0.00025822 | No      | Adora1   | 0         | 7.37814  | inf              | 0.001        | 7.37914       | 12.849237        | 0.00014386 | No      |
| Celsr3   | 0.13151  | 0.024701  | -0.106809   | 7.62E-05   | No      | Adpgk    | 16.021    | 4.83661  | -1.7279          | 16.022       | 4.83761       | -1.7276879       | 0.00014386 | No      |
| Cfb      | 0.7314   | 0.36094   | -0.37046    | 2.08E-06   | No      | Adprh    | 46.2768   | 19.8738  | -1.21942         | 46.2778      | 19.8748       | -1.2193799       | 0.00014386 | No      |
| Cfd      | 0.28872  | 0.074224  | -0.214496   | 1.52E-09   | No      | Adprm    | 32.6994   | 13.9548  | -1.2285          | 32.7004      | 13.9558       | -1.2284435       | 0.00014386 | No      |
| Chad     | 0.89316  | 0.76899   | -0.12417    | 2.53E-06   | No      | Adrbk1   | 149.1     | 21.4201  | -2.79924         | 149.101      | 21.4211       | -2.7991855       | 0.00014386 | No      |
| Chchd2   | 0.67371  | 0.43025   | -0.24346    | 0.01120909 | No      | Adrm1    | 62.5867   | 91.5441  | 0.54861          | 62.5877      | 91.5451       | 0.54860351       | 0.00014386 | No      |
| Chchd5   | 0.11682  | 0.06142   | -0.0554     | 0.02733646 | No      | Aebp1    | 0.0890609 | 5.0526   | 5.82609          | 0.0900609    | 5.0536        | 5.81026677       | 0.00014386 | No      |
| Chd5     | 0.081432 | 0.016698  | -0.064734   | 3.20E-06   | No      | Aebp2    | 16.1293   | 9.75636  | -0.72527         | 16.1303      | 9.75736       | -0.7252105       | 0.00014386 | No      |
| Chmp4c   | 0.10959  | 0.0095489 | -0.1000411  | 1.04E-10   | No      | Afap1l1  | 0.0750501 | 15.2337  | 7.6652           | 0.0760501    | 15.2347       | 7.64619523       | 0.00014386 | No      |
| Chrd     | 0.050822 | 0.27223   | 0.221408    | 1.70E-08   | No      | Aff4     | 9.86818   | 5.60526  | -0.816003        | 9.86918      | 5.60626       | -0.8158916       | 0.00014386 | No      |
| Chrdl2   | 0.18829  | 0.042069  | -0.146221   | 0.00054762 | No      | Afg3l1   | 13.1111   | 27.2413  | 1.05501          | 13.1121      | 27.2423       | 1.05494975       | 0.00014386 | No      |
| Chrm1    | 0.6416   | 0.36183   | -0.27977    | 0.0024744  | No      | Afm      | 0         | 28.9143  | inf              | 0.001        | 28.9153       | 14.8195454       | 0.00014386 | No      |
| Chrm4    | 0.11619  | 0.029141  | -0.087049   | 0.00628692 | No      | Afmid    | 1.68256   | 28.7329  | 4.09397          | 1.68356      | 28.7339       | 4.09316678       | 0.00014386 | No      |
| Chrna10  | 0.85647  | 0.71443   | -0.14204    | 3.76E-05   | No      | Aftph    | 49.248    | 34.5629  | -0.51084         | 49.249       | 34.5639       | -0.5108284       | 0.00014386 | No      |
| Chrna3   | 0.11038  | 0.047279  | -0.063101   | 0.00281863 | No      | Agap1    | 5.58663   | 16.8293  | 1.59092          | 5.58763      | 16.8303       | 1.5907525        | 0.00014386 | No      |
| Chrna7   | 0.085013 | 0.014846  | -0.070167   | 0.00014055 | No      | Agbl3    | 11.0279   | 42.7331  | 1.9542           | 11.0289      | 42.7341       | 1.95409883       | 0.00014386 | No      |
| Chst3    | 0.74968  | 0.8526    | 0.10292     | 0.00334552 | No      | Agfg1    | 24.9241   | 15.6931  | -0.667412        | 24.9251      | 15.6941       | -0.667377        | 0.00014386 | No      |

| RRBS    |          |           |             |            |         | RNAseq   |           |          |                  |              |               |                  |            |         |
|---------|----------|-----------|-------------|------------|---------|----------|-----------|----------|------------------|--------------|---------------|------------------|------------|---------|
| gene    | Blood    | Kidney    | methyl.diff | pMWU.fdr   | Match ? | gene     | blood     | kidney   | log2(fold_ratio) | blood+ 0.001 | kidney+ 0.001 | log2(fold_ratio) | q_value    | Match ? |
| Chst8   | 0.087802 | 0.031954  | -0.055848   | 0.00842241 | No      | Agfg2    | 12.779    | 21.3914  | 0.743252         | 12.78        | 21.3924       | 0.74321051       | 0.00014386 | No      |
| Cilp2   | 0.13486  | 0.033536  | -0.101324   | 0.00628692 | No      | Agl      | 4.19401   | 6.5096   | 0.634236         | 4.19501      | 6.5106        | 0.63411625       | 0.00014386 | No      |
| Cistr   | 0.025048 | 0.12567   | 0.100622    | 2.80E-05   | No      | Ago1     | 19.129    | 7.05474  | -1.43909         | 19.13        | 7.05574       | -1.4389676       | 0.00014386 | No      |
| Clca5   | 0.64651  | 0.46003   | -0.18648    | 0.02850905 | No      | Ago2     | 4.61232   | 1.01334  | -2.18638         | 4.61332      | 1.01434       | -2.1852641       | 0.00014386 | No      |
| Cldn3   | 0.11539  | 0.038856  | -0.076534   | 0.01961146 | No      | Agpat4   | 2.96061   | 8.25268  | 1.47897          | 2.96161      | 8.25368       | 1.47865583       | 0.00014386 | No      |
| Cldn4   | 0.47071  | 0.11117   | -0.35954    | 2.15E-12   | No      | Agpat5   | 7.80111   | 11.7768  | 0.59419          | 7.80211      | 11.7778       | 0.59413384       | 0.00014386 | No      |
| Cldn7   | 0.15561  | 0.045441  | -0.110169   | 0.0003366  | No      | Agpat9   | 0.145731  | 5.55977  | 5.25365          | 0.146731     | 5.56077       | 5.24403906       | 0.00014386 | No      |
| Cldn8   | 0.88713  | 0.69759   | -0.18954    | 0.00065829 | No      | Agrn     | 1.34432   | 52.8491  | 5.29693          | 1.34532      | 52.8501       | 5.29588492       | 0.00014386 | No      |
| Clic6   | 0.095502 | 0.026544  | -0.068958   | 5.77E-05   | No      | Agt      | 0.168312  | 4.25435  | 4.65973          | 0.169312     | 4.25535       | 4.65152166       | 0.00014386 | No      |
| Clps    | 0.72619  | 0.3351    | -0.39109    | 2.15E-12   | No      | Agtpbp1  | 3.84951   | 29.0282  | 2.91471          | 3.85051      | 29.0292       | 2.91438337       | 0.00014386 | No      |
| Clstn1  | 0.058929 | 0.0058824 | -0.0530466  | 0.00369602 | No      | Agtr1a   | 0         | 2.81202  | inf              | 0.001        | 2.81302       | 11.4579041       | 0.00014386 | No      |
| Cmss1   | 0.39519  | 0.25204   | -0.14315    | 0.00334552 | No      | Agtrap   | 9.3254    | 34.2866  | 1.87841          | 9.3264       | 34.2876       | 1.87829471       | 0.00014386 | No      |
| Cnfn    | 0.12984  | 0.04078   | -0.08906    | 0.00418734 | No      | Ahctf1   | 12.7746   | 6.57258  | -0.95875         | 12.7756      | 6.57358       | -0.9586399       | 0.00014386 | No      |
| Cnksr1  | 0.29368  | 0.060482  | -0.233198   | 2.15E-12   | No      | Ahcyl1   | 29.405    | 39.5414  | 0.427302         | 29.406       | 39.5424       | 0.42728988       | 0.00014386 | No      |
| Cnn1    | 0.1041   | 0.022045  | -0.082055   | 2.52E-05   | No      | Ahcyl2   | 8.56987   | 35.3013  | 2.04238          | 8.57087      | 35.3023       | 2.04224862       | 0.00014386 | No      |
| Cnnm1   | 0.16349  | 0.080209  | -0.083281   | 0.00093244 | No      | Ahsa1    | 109.057   | 75.235   | -0.535614        | 109.058      | 75.236        | -0.5356005       | 0.00014386 | No      |
| Cntnap4 | 0.26989  | 0.088941  | -0.180949   | 2.65E-06   | No      | Ahsa2    | 45.9036   | 18.7402  | -1.29247         | 45.9046      | 18.7412       | -1.2924254       | 0.00014386 | No      |
| Col11a2 | 0.37     | 0.18921   | -0.18079    | 2.29E-06   | No      | Al462493 | 56.553    | 112.827  | 0.996434         | 56.554       | 112.828       | 0.99642417       | 0.00014386 | No      |
| Col16a1 | 0.24319  | 0.038432  | -0.204758   | 2.15E-12   | No      | Al467606 | 76.815    | 8.13567  | -3.23906         | 76.816       | 8.13667       | -3.2388965       | 0.00014386 | No      |
| Col26a1 | 0.24095  | 0.085593  | -0.155357   | 5.27E-08   | No      | Aida     | 24.8212   | 13.0333  | -0.929371        | 24.8222      | 13.0343       | -0.9293179       | 0.00014386 | No      |
| Col5a3  | 0.1717   | 0.052462  | -0.119238   | 7.31E-07   | No      | Aif1l    | 0.135178  | 353.383  | 11.3522          | 0.136178     | 353.384       | 11.3415274       | 0.00014386 | No      |
| Col9a2  | 0.10621  | 0.022502  | -0.083708   | 0.00369602 | No      | Aifm1    | 39.0127   | 68.4614  | 0.811346         | 39.0137      | 68.4624       | 0.81133104       | 0.00014386 | No      |
| Commd4  | 0.97911  | 0.9193    | -0.05981    | 0.01120909 | No      | Aifm2    | 0.516438  | 5.68575  | 3.46068          | 0.517438     | 5.68675       | 3.45814647       | 0.00014386 | No      |
| Commd5  | 0.55802  | 0.25598   | -0.30204    | 0.00038568 | No      | Aim1     | 3.00169   | 0.618779 | -2.27828         | 3.00269      | 0.619779      | -2.2764298       | 0.00014386 | No      |
| Comp    | 0.082255 | 0.02881   | -0.053445   | 0.0058184  | No      | Aim2     | 36.4455   | 1.88238  | -4.27511         | 36.4465      | 1.88338       | -4.2743843       | 0.00014386 | No      |
| Copz2   | 0.29705  | 0.19002   | -0.10703    | 0.03808344 | No      | Aimp1    | 66.2455   | 46.6679  | -0.505393        | 66.2465      | 46.6689       | -0.5053828       | 0.00014386 | No      |
| Corin   | 0.10146  | 0.032684  | -0.068776   | 0.00317797 | No      | Aimp2    | 26.3667   | 71.3988  | 1.43718          | 26.3677      | 71.3998       | 1.4371483        | 0.00014386 | No      |
| Cort    | 0.67319  | 0.4402    | -0.23299    | 0.00902244 | No      | Ak1      | 0         | 11.9211  | inf              | 0.001        | 11.9221       | 13.5413508       | 0.00014386 | No      |
| Cpeb1   | 0.092414 | 0.030472  | -0.061942   | 1.07E-07   | No      | Ak3      | 73.8269   | 215.148  | 1.54311          | 73.8279      | 215.149       | 1.54309811       | 0.00014386 | No      |
| Cplx1   | 0.13103  | 0.05675   | -0.07428    | 3.76E-07   | No      | Ak4      | 0.0713619 | 68.2454  | 9.90136          | 0.0723619    | 68.2464       | 9.88130694       | 0.00014386 | No      |
| Cpne6   | 0.68175  | 0.17652   | -0.50523    | 2.59E-07   | No      | Akap1    | 4.40301   | 9.55705  | 1.11807          | 4.40401      | 9.55805       | 1.11789857       | 0.00014386 | No      |
| Cpne9   | 0.18167  | 0.040802  | -0.140868   | 2.29E-08   | No      | Akap10   | 10.5845   | 5.69213  | -0.894917        | 10.5855      | 5.69313       | -0.8947955       | 0.00014386 | No      |
| Cpt1c   | 0.1115   | 0.014115  | -0.097385   | 0.00976507 | No      | Akap13   | 44.8038   | 8.94295  | -2.3248          | 44.8048      | 8.94395       | -2.3246693       | 0.00014386 | No      |
| Cpxm2   | 0.153    | 0.045408  | -0.107592   | 0.00205129 | No      | Akap17b  | 11.9062   | 1.03012  | -3.53083         | 11.9072      | 1.03112       | -3.5295501       | 0.00014386 | No      |
| Cracr2b | 0.16756  | 0.029802  | -0.137758   | 0.03216266 | No      | Akap2    | 4.16289   | 38.7948  | 3.22021          | 4.16389      | 38.7958       | 3.21989661       | 0.00014386 | No      |
| Crb2    | 0.50758  | 0.17378   | -0.3338     | 3.15E-05   | No      | Akap7    | 2.04674   | 7.42698  | 1.85945          | 2.04774      | 7.42798       | 1.85893738       | 0.00014386 | No      |
| Creb3l4 | 0.91662  | 0.34848   | -0.56814    | 4.71E-07   | No      | Akap8    | 87.3721   | 33.7181  | -1.37365         | 87.3731      | 33.7191       | -1.3736231       | 0.00014386 | No      |
| Crhr1   | 0.09986  | 0.022481  | -0.077379   | 2.19E-10   | No      | Akirin1  | 59.4481   | 20.8238  | -1.5134          | 59.4491      | 20.8248       | -1.5133523       | 0.00014386 | No      |
| Crif1   | 0.14032  | 0.057087  | -0.083233   | 0.00976507 | No      | Akirin2  | 57.8631   | 38.3886  | -0.591964        | 57.8641      | 38.3896       | -0.591953        | 0.00014386 | No      |
| Crnde   | 0.094941 | 0.033824  | -0.061117   | 2.59E-07   | No      | Akna     | 54.7592   | 1.92419  | -4.83078         | 54.7602      | 1.92519       | -4.830055        | 0.00014386 | No      |
| Crtac1  | 0.096877 | 0.023235  | -0.073642   | 4.44E-05   | No      | Akr1a1   | 196.285   | 649.849  | 1.72716          | 196.286      | 649.85        | 1.72714947       | 0.00014386 | No      |
| Cryba2  | 0.093752 | 0.032568  | -0.061184   | 0.00036321 | No      | Akr1b1   | 95.6908   | 68.7445  | -0.477137        | 95.6918      | 68.7455       | -0.47713         | 0.00014386 | No      |

| RRBS    |          |           |             |            |         | RNAseq   |           |          |                  |              |               |                  |            |         |
|---------|----------|-----------|-------------|------------|---------|----------|-----------|----------|------------------|--------------|---------------|------------------|------------|---------|
| gene    | Blood    | Kidney    | methyl.diff | pMWU.fdr   | Match ? | gene     | blood     | kidney   | log2(fold_ratio) | blood+ 0.001 | kidney+ 0.001 | log2(fold_ratio) | q_value    | Match ? |
| Crygn   | 0.7685   | 0.57954   | -0.18896    | 0.00054762 | No      | Akr1b10  | 0         | 1.806    | inf              | 0.001        | 1.807         | 10.8193808       | 0.00014386 | No      |
| Crygs   | 0.77397  | 0.18118   | -0.59279    | 4.71E-07   | No      | Akr1c1   | 0         | 35.2897  | inf              | 0.001        | 35.2907       | 15.1070004       | 0.00014386 | No      |
| Csmd1   | 0.11474  | 0.031847  | -0.082893   | 0.00054762 | No      | Akr1c12  | 0         | 3.03583  | inf              | 0.001        | 3.03683       | 11.5683504       | 0.00014386 | No      |
| Cspg4   | 0.28987  | 0.18869   | -0.10118    | 0.01832913 | No      | Akr1e2   | 1.0629    | 39.0961  | 5.20096          | 1.0639       | 39.0971       | 5.19962714       | 0.00014386 | No      |
| Ctgf    | 0.44259  | 0.12289   | -0.3197     | 3.52E-05   | No      | Akr7a2   | 24.3251   | 256.013  | 3.3957           | 24.3261      | 256.014       | 3.39564576       | 0.00014386 | No      |
| Ctnna2  | 0.069559 | 0.0066964 | -0.0628626  | 3.76E-05   | No      | Akt2     | 52.3687   | 25.8403  | -1.01908         | 52.3697      | 25.8413       | -1.0190537       | 0.00014386 | No      |
| Ctsz    | 0.016184 | 0.077499  | 0.061315    | 0.00317797 | No      | Akt3     | 14.4379   | 5.06809  | -1.51035         | 14.4389      | 5.06909       | -1.5101622       | 0.00014386 | No      |
| Cuedc1  | 0.86744  | 0.68342   | -0.18402    | 7.65E-08   | No      | Aktip    | 9.13862   | 126.657  | 3.7928           | 9.13962      | 126.658       | 3.79266021       | 0.00014386 | No      |
| Cux2    | 0.28123  | 0.10186   | -0.17937    | 0.00026362 | No      | Alad     | 6.54114   | 83.147   | 3.66805          | 6.54214      | 83.148        | 3.66784702       | 0.00014386 | No      |
| Cx3cl1  | 0.76059  | 0.12476   | -0.63583    | 2.16E-09   | No      | Alas1    | 8.67809   | 40.6643  | 2.22831          | 8.67909      | 40.6653       | 2.22818257       | 0.00014386 | No      |
| Cxcl1   | 0.4979   | 0.2178    | -0.2801     | 0.00781609 | No      | Alcam    | 0.56621   | 4.80358  | 3.0847           | 0.56721      | 4.80458       | 3.08245545       | 0.00014386 | No      |
| Cxcl6   | 0.090253 | 0.037508  | -0.052745   | 0.00519776 | No      | Aldh16a1 | 13.8242   | 43.1142  | 1.64096          | 13.8252      | 43.1152       | 1.64089622       | 0.00014386 | No      |
| Cxcr2   | 0.059717 | 0.28612   | 0.226403    | 0.00158432 | No      | Aldh18a1 | 8.50946   | 1.62993  | -2.38426         | 8.51046      | 1.63093       | -2.3835423       | 0.00014386 | No      |
| Cybb    | 0.021625 | 0.58981   | 0.568185    | 4.71E-07   | No      | Aldh1l1  | 0         | 128.873  | inf              | 0.001        | 128.874       | 16.9756017       | 0.00014386 | No      |
| Cyp1b1  | 0.077316 | 0.015107  | -0.062209   | 0.01289082 | No      | Aldh5a1  | 2.57863   | 13.5831  | 2.39714          | 2.57963      | 13.5841       | 2.39668293       | 0.00014386 | No      |
| Cyp26a1 | 0.11862  | 0.038201  | -0.080419   | 0.0003366  | No      | Aldh6a1  | 6.65716   | 110.498  | 4.05296          | 6.65816      | 110.499       | 4.05276596       | 0.00014386 | No      |
| Cyp27b1 | 0.087786 | 0.020035  | -0.067751   | 0.00023201 | No      | Aldh7a1  | 1.08068   | 151.422  | 7.13049          | 1.08168      | 151.423       | 7.12916679       | 0.00014386 | No      |
| Cyp2t1  | 0.24755  | 0.046815  | -0.200735   | 5.28E-07   | No      | Aldh9a1  | 34.8129   | 113.845  | 1.70938          | 34.8139      | 113.846       | 1.70934826       | 0.00014386 | No      |
| Cyp4x1  | 0.09331  | 0.18825   | 0.09494     | 0.02967027 | No      | Aldob    | 0.173474  | 1950.75  | 13.457           | 0.174474     | 1950.751      | 13.44873         | 0.00014386 | No      |
| Cysrt1  | 0.2828   | 0.03254   | -0.25026    | 4.63E-08   | No      | Alg1     | 13.6156   | 7.02822  | -0.954029        | 13.6166      | 7.02922       | -0.95393         | 0.00014386 | No      |
| Cyth2   | 0.95116  | 0.42022   | -0.53094    | 1.11E-11   | No      | Alg10    | 22.7423   | 6.44435  | -1.81927         | 22.7433      | 6.44535       | -1.819111        | 0.00014386 | No      |
| Dact2   | 0.56647  | 0.14179   | -0.42468    | 5.96E-07   | No      | Alg12    | 14.3209   | 9.61351  | -0.574984        | 14.3219      | 9.61451       | -0.5749377       | 0.00014386 | No      |
| Dagla   | 0.070781 | 0.0092282 | -0.0615528  | 1.59E-10   | No      | Alg14    | 7.66358   | 20.1593  | 1.39536          | 7.66458      | 20.1603       | 1.39523846       | 0.00014386 | No      |
| Dao     | 0.97379  | 0.24946   | -0.72433    | 2.16E-09   | No      | Alg8     | 7.91589   | 4.46836  | -0.825007        | 7.91689      | 4.46936       | -0.8248655       | 0.00014386 | No      |
| Dbx1    | 0.22297  | 0.057228  | -0.165742   | 0.00021135 | No      | Alg9     | 3.62171   | 11.7187  | 1.69407          | 3.62271      | 11.7197       | 1.69379441       | 0.00014386 | No      |
| Dcaf12  | 0.096808 | 0.028824  | -0.067984   | 3.70E-08   | No      | Alkbh1   | 16.5124   | 7.11052  | -1.21552         | 16.5134      | 7.11152       | -1.2154073       | 0.00014386 | No      |
| Dcc     | 0.10114  | 0.037652  | -0.063488   | 0.00040757 | No      | Alkbh2   | 10.3682   | 20.361   | 0.973641         | 10.3692      | 20.362        | 0.97357468       | 0.00014386 | No      |
| Dcdc2c  | 0.8226   | 0.63657   | -0.18603    | 0.00123297 | No      | Alkbh4   | 19.0249   | 4.31827  | -2.13936         | 19.0259      | 4.31927       | -2.1391053       | 0.00014386 | No      |
| Ddx3y   | 0.40945  | 0.61138   | 0.20193     | 6.76E-06   | No      | Alkbh7   | 30.1779   | 72.1036  | 1.25658          | 30.1789      | 72.1046       | 1.25655108       | 0.00014386 | No      |
| Degs1   | 0.051595 | 0         | -0.051595   | 1.64E-06   | No      | Alms1    | 9.02631   | 3.40792  | -1.40524         | 9.02731      | 3.40892       | -1.4049814       | 0.00014386 | No      |
| Depdc7  | 0.81665  | 0.14598   | -0.67067    | 4.71E-07   | No      | Alox12   | 0.520985  | 1.69343  | 1.70063          | 0.521985     | 1.69443       | 1.69871978       | 0.00014386 | No      |
| Des     | 0.098359 | 0.032696  | -0.065663   | 4.51E-09   | No      | Alpl     | 0.231218  | 26.2809  | 6.82862          | 0.232218     | 26.2819       | 6.82244596       | 0.00014386 | No      |
| Dkk1    | 0.72619  | 0.39574   | -0.33045    | 0.00093244 | No      | Als2     | 1.19392   | 3.47507  | 1.54134          | 1.19492      | 3.47607       | 1.5405431        | 0.00014386 | No      |
| Dlg2    | 0.42813  | 0.13876   | -0.28937    | 2.65E-06   | No      | Amacr    | 8.10281   | 72.5277  | 3.16204          | 8.10381      | 72.5287       | 3.16187974       | 0.00014386 | No      |
| Dlgap2  | 0.29197  | 0.077853  | -0.214117   | 2.08E-06   | No      | Ambp     | 0.0363927 | 28.6835  | 9.62235          | 0.0373927    | 28.6845       | 9.58329901       | 0.00014386 | No      |
| Dlk1    | 0.12995  | 0.017494  | -0.112456   | 8.22E-05   | No      | Amd1     | 20.2753   | 58.2146  | 1.52166          | 20.2763      | 58.2156       | 1.52161139       | 0.00014386 | No      |
| Dlk2    | 0.18122  | 0.042094  | -0.139126   | 0.00058998 | No      | Amdhd2   | 10.1294   | 32.3134  | 1.67359          | 10.1304      | 32.3144       | 1.67348606       | 0.00014386 | No      |
| Dlil3   | 0.17414  | 0.059086  | -0.115054   | 9.18E-06   | No      | Amfr     | 22.2116   | 29.8707  | 0.427418         | 22.2126      | 29.8717       | 0.42740107       | 0.00014386 | No      |
| Dmrt1   | 0.15601  | 0.044526  | -0.111484   | 4.25E-08   | No      | Amica1   | 11.0177   | 0.942863 | -3.54663         | 11.0187      | 0.943863      | -3.5452327       | 0.00014386 | No      |
| Dmrt3   | 0.019055 | 0.09034   | 0.071285    | 0.01206268 | No      | Amigo1   | 11.404    | 4.13493  | -1.46361         | 11.405       | 4.13593       | -1.4633828       | 0.00014386 | No      |
| Dmrta1  | 0.13707  | 0.045746  | -0.091324   | 7.15E-06   | No      | Ammecr1  | 2.87904   | 0.776057 | -1.89135         | 2.88004      | 0.777057      | -1.8899965       | 0.00014386 | No      |
| Dnai2   | 0.71407  | 0.5714    | -0.14267    | 0.04051274 | No      | Amotl1   | 0.274857  | 2.39821  | 3.1252           | 0.275857     | 2.39921       | 3.12056695       | 0.00014386 | No      |

| RRBS     |          |           |             |            |         | RNAseq   |           |         |                  |              |               |                  |            |         |
|----------|----------|-----------|-------------|------------|---------|----------|-----------|---------|------------------|--------------|---------------|------------------|------------|---------|
| gene     | Blood    | Kidney    | methyl.diff | pMWU.fdr   | Match ? | gene     | blood     | kidney  | log2(fold_ratio) | blood+ 0.001 | kidney+ 0.001 | log2(fold_ratio) | q_value    | Match ? |
| Dnajb5   | 0.48833  | 0.069919  | -0.418411   | 2.76E-08   | No      | Ampd3    | 1.10056   | 17.2207 | 3.96784          | 1.10156      | 17.2217       | 3.96660758       | 0.00014386 | No      |
| Dnase2b  | 0.90415  | 0.77328   | -0.13087    | 0.00842241 | No      | Amph     | 0.0245052 | 9.0921  | 8.53538          | 0.0255052    | 9.0931        | 8.47783699       | 0.00014386 | No      |
| Doc2b    | 0.076702 | 0.02563   | -0.051072   | 0.00132879 | No      | Amt      | 15.5804   | 52.1657 | 1.74337          | 15.5814      | 52.1667       | 1.74330431       | 0.00014386 | No      |
| Dok3     | 0.70743  | 0.4408    | -0.26663    | 0.00194697 | No      | Amz2     | 11.9153   | 20.0015 | 0.74729          | 11.9163      | 20.0025       | 0.74724398       | 0.00014386 | No      |
| Dpm1     | 0.45436  | 0.25683   | -0.19753    | 1.16E-05   | No      | Anapc1   | 5.99638   | 3.34952 | -0.840136        | 5.99738      | 3.35052       | -0.8399474       | 0.00014386 | No      |
| Dpp6     | 0.11732  | 0.046839  | -0.070481   | 0.00087121 | No      | Anapc10  | 13.6006   | 6.37154 | -1.09395         | 13.6016      | 6.37254       | -1.0938359       | 0.00014386 | No      |
| Dpys     | 0.41379  | 0.14609   | -0.2677     | 4.76E-05   | No      | Anapc13  | 107.523   | 240.988 | 1.16432          | 107.524      | 240.989       | 1.16430858       | 0.00014386 | No      |
| Dpysl4   | 0.084398 | 0.016083  | -0.068315   | 0.00072449 | No      | Anapc15  | 42.2661   | 72.0785 | 0.770066         | 42.2671      | 72.0795       | 0.77005387       | 0.00014386 | No      |
| Drc1     | 0.73291  | 0.097026  | -0.635884   | 4.54E-12   | No      | Anapc2   | 30.3115   | 42.6228 | 0.49176          | 30.3125      | 42.6238       | 0.49174638       | 0.00014386 | No      |
| Drd2     | 0.085491 | 0.023126  | -0.062365   | 0.00022001 | No      | Anapc5   | 68.819    | 136.527 | 0.988306         | 68.82        | 136.528       | 0.98829706       | 0.00014386 | No      |
| Drd5     | 0.93228  | 0.79802   | -0.13426    | 0.00123297 | No      | Anapc7   | 24.4715   | 11.1116 | -1.13903         | 24.4725      | 11.1126       | -1.1389651       | 0.00014386 | No      |
| Drgx     | 0.17833  | 0.038369  | -0.139961   | 5.68E-09   | No      | Ang      | 1.97105   | 4.88915 | 1.31062          | 1.97205      | 4.89015       | 1.31018259       | 0.00014386 | No      |
| Dsc3     | 0.5535   | 0.43709   | -0.11641    | 0.0024744  | No      | Angel2   | 23.5236   | 8.74963 | -1.42682         | 23.5246      | 8.75063       | -1.4267114       | 0.00014386 | No      |
| Dscam1   | 0.1632   | 0.043777  | -0.119423   | 0.00065829 | No      | Ank2     | 0.674156  | 6.02069 | 3.15877          | 0.675156     | 6.02169       | 3.15687565       | 0.00014386 | No      |
| Dspp     | 0.77636  | 0.66145   | -0.11491    | 0.01049788 | No      | Ankfy1   | 10.4182   | 15.7509 | 0.596326         | 10.4192      | 15.7519       | 0.59628135       | 0.00014386 | No      |
| Dynll1   | 0.2974   | 0.088658  | -0.208742   | 3.76E-05   | No      | Ankh     | 31.0247   | 2.2644  | -3.77622         | 31.0257      | 2.2654        | -3.775626        | 0.00014386 | No      |
| E2f4     | 0.33288  | 0.11604   | -0.21684    | 0.00334552 | No      | Ankib1   | 13.8806   | 4.81722 | -1.5268          | 13.8816      | 4.81822       | -1.5266017       | 0.00014386 | No      |
| Ear11    | 0.66159  | 0.3364    | -0.32519    | 0.0024744  | No      | Ankle1   | 0.424296  | 2.87642 | 2.76113          | 0.425296     | 2.87742       | 2.75823663       | 0.00014386 | No      |
| Ecel1    | 0.093148 | 0.036699  | -0.056449   | 0.00691976 | No      | Ankle2   | 23.3512   | 6.66237 | -1.80939         | 23.3522      | 6.66337       | -1.8092346       | 0.00014386 | No      |
| Echdc2   | 0.28325  | 0.1217    | -0.16155    | 0.00719792 | No      | Ankmy2   | 24.483    | 36.0798 | 0.559408         | 24.484       | 36.0808       | 0.55939205       | 0.00014386 | No      |
| Eda      | 0.084227 | 0.0087037 | -0.0755233  | 0.00040757 | No      | Ankrd1   | 0         | 5.76176 | inf              | 0.001        | 5.76276       | 12.4925442       | 0.00014386 | No      |
| Efhb     | 0.059962 | 0.0046584 | -0.0553036  | 1.08E-05   | No      | Ankrd11  | 95.6624   | 18.7859 | -2.3483          | 95.6634      | 18.7869       | -2.34824         | 0.00014386 | No      |
| Efna5    | 0.40582  | 0.18172   | -0.2241     | 7.96E-06   | No      | Ankrd12  | 14.8026   | 2.54434 | -2.54049         | 14.8036      | 2.54534       | -2.5400178       | 0.00014386 | No      |
| Efs      | 0.23305  | 0.097633  | -0.135417   | 2.63E-05   | No      | Ankrd13a | 165.815   | 71.5975 | -1.21159         | 165.816      | 71.5985       | -1.211582        | 0.00014386 | No      |
| Egfem1   | 0.15521  | 0.050303  | -0.104907   | 3.41E-06   | No      | Ankrd13c | 34.0583   | 45.0031 | 0.402017         | 34.0593      | 45.0041       | 0.40200766       | 0.00014386 | No      |
| Egflam   | 0.19226  | 0.038387  | -0.153873   | 4.71E-07   | No      | Ankrd17  | 19.8757   | 11.7649 | -0.756515        | 19.8767      | 11.7659       | -0.7564666       | 0.00014386 | No      |
| Egr3     | 0.37848  | 0.12938   | -0.2491     | 4.92E-06   | No      | Ankrd24  | 0.605874  | 2.14041 | 1.8208           | 0.606874     | 2.14141       | 1.81909213       | 0.00014386 | No      |
| Egr4     | 0.11521  | 0.033473  | -0.081737   | 0.00040757 | No      | Ankrd26  | 4.47729   | 1.46366 | -1.61304         | 4.47829      | 1.46466       | -1.6123822       | 0.00014386 | No      |
| Ehf      | 0.70134  | 0.47366   | -0.22768    | 0.00369602 | No      | Ankrd29  | 0.213814  | 5.00198 | 4.54807          | 0.214814     | 5.00298       | 4.54162776       | 0.00014386 | No      |
| Eid3     | 0.90006  | 0.79081   | -0.10925    | 0.01961146 | No      | Ankrd32  | 5.0394    | 2.72566 | -0.886647        | 5.0404       | 2.72666       | -0.8864034       | 0.00014386 | No      |
| Eif4ebp3 | 0.88213  | 0.38635   | -0.49578    | 8.99E-11   | No      | Ankrd33b | 0.283258  | 6.1136  | 4.43183          | 0.284258     | 6.1146        | 4.42698527       | 0.00014386 | No      |
| Eif5a2   | 0.31904  | 0.17307   | -0.14597    | 0.0247155  | No      | Ankrd40  | 16.9291   | 25.5316 | 0.592778         | 16.9301      | 25.5326       | 0.59274996       | 0.00014386 | No      |
| Elavl2   | 0.090401 | 0.032682  | -0.057719   | 0.0247155  | No      | Ankrd44  | 53.4921   | 4.73152 | -3.49895         | 53.4931      | 4.73252       | -3.4986723       | 0.00014386 | No      |
| Elavl3   | 0.10967  | 0.024485  | -0.085185   | 0.00011494 | No      | Ankrd45  | 8.39864   | 2.73933 | -1.61633         | 8.39964      | 2.74033       | -1.6159779       | 0.00014386 | No      |
| Elfn1    | 0.14871  | 0.046671  | -0.102039   | 1.16E-05   | No      | Ankrd46  | 13.3512   | 29.5739 | 1.14736          | 13.3522      | 29.5749       | 1.14729582       | 0.00014386 | No      |
| Elmod1   | 0.0855   | 0.024101  | -0.061399   | 0.00014055 | No      | Ankrd50  | 3.46885   | 1.96074 | -0.823058        | 3.46985      | 1.96174       | -0.8227395       | 0.00014386 | No      |
| Elovl6   | 0.11404  | 0.05755   | -0.05649    | 0.04412687 | No      | Ankrd52  | 9.62003   | 3.5383  | -1.44299         | 9.62103      | 3.5393        | -1.4427273       | 0.00014386 | No      |
| Emc10    | 0.44821  | 0.15622   | -0.29199    | 5.77E-05   | No      | Ankrd54  | 12.0152   | 23.7225 | 0.9814           | 12.0162      | 23.7235       | 0.98133614       | 0.00014386 | No      |
| Emilin3  | 0.11081  | 0.053559  | -0.057251   | 0.01559789 | No      | Ankrd6   | 0.827782  | 2.6688  | 1.68887          | 0.828782     | 2.6698        | 1.6876671        | 0.00014386 | No      |
| En2      | 0.075484 | 0.0071895 | -0.0682945  | 0.00028308 | No      | Ankrd9   | 2.05239   | 9.33743 | 2.18572          | 2.05339      | 9.33843       | 2.18517236       | 0.00014386 | No      |
| Endou    | 0.76315  | 0.5408    | -0.22235    | 0.00229548 | No      | Anks1a   | 11.9897   | 19.6762 | 0.714656         | 11.9907      | 19.6772       | 0.71460906       | 0.00014386 | No      |
| Eno2     | 0.7662   | 0.59234   | -0.17386    | 0.00551211 | No      | Anks3    | 17.2644   | 26.193  | 0.601376         | 17.2654      | 26.194        | 0.60135263       | 0.00014386 | No      |

| RRBS    |          |          |             |            |         | RNAseq  |          |          |                  |              |               |                  |            |         |
|---------|----------|----------|-------------|------------|---------|---------|----------|----------|------------------|--------------|---------------|------------------|------------|---------|
| gene    | Blood    | Kidney   | methyl.diff | pMWU.fdr   | Match ? | gene    | blood    | kidney   | log2(fold_ratio) | blood+ 0.001 | kidney+ 0.001 | log2(fold_ratio) | q_value    | Match ? |
| Enpep   | 0.88231  | 0.12241  | -0.7599     | 4.71E-07   | No      | Anks4b  | 0.306127 | 22.2996  | 6.18674          | 0.307127     | 22.3006       | 6.18210337       | 0.00014386 | No      |
| Enpp3   | 0.12259  | 0.047918 | -0.074672   | 0.00031293 | No      | Anks6   | 0.661151 | 18.1106  | 4.77571          | 0.662151     | 18.1116       | 4.77360994       | 0.00014386 | No      |
| Epha10  | 0.10298  | 0.027673 | -0.075307   | 7.53E-11   | No      | Ano8    | 18.1296  | 32.9306  | 0.861079         | 18.1306      | 32.9316       | 0.86104594       | 0.00014386 | No      |
| Epha4   | 0.092651 | 0.023282 | -0.069369   | 4.02E-08   | No      | Ano9    | 4.2185   | 1.13662  | -1.89197         | 4.2195       | 1.13762       | -1.8910533       | 0.00014386 | No      |
| Ephb1   | 0.20897  | 0.06293  | -0.14604    | 0.00012642 | No      | Anp32a  | 236.356  | 115.59   | -1.03194         | 236.357      | 115.591       | -1.0319385       | 0.00014386 | No      |
| Ephb3   | 0.36211  | 0.11482  | -0.24729    | 2.80E-05   | No      | Anp32b  | 301.278  | 178.137  | -0.758105        | 301.279      | 178.138       | -0.7581048       | 0.00014386 | No      |
| Epn1    | 0.84724  | 0.16269  | -0.68455    | 2.15E-12   | No      | Anp32e  | 98.0384  | 36.1731  | -1.43843         | 98.0394      | 36.1741       | -1.4384045       | 0.00014386 | No      |
| Epo     | 0.2738   | 0.0452   | -0.2286     | 8.74E-06   | No      | Anpep   | 0.200734 | 65.4521  | 8.34901          | 0.201734     | 65.4531       | 8.34186346       | 0.00014386 | No      |
| Erf     | 0.81931  | 0.63732  | -0.18199    | 0.00719792 | No      | Antxr2  | 27.9196  | 2.29195  | -3.60663         | 27.9206      | 2.29295       | -3.6060531       | 0.00014386 | No      |
| Erich6  | 0.42552  | 0.19802  | -0.2275     | 5.41E-06   | No      | Anxa1   | 35.1031  | 119.873  | 1.77184          | 35.1041      | 119.874       | 1.77180733       | 0.00014386 | No      |
| Espnl   | 0.82498  | 0.33616  | -0.48882    | 7.15E-06   | No      | Anxa11  | 89.0051  | 232.655  | 1.38623          | 89.0061      | 232.656       | 1.38622227       | 0.00014386 | No      |
| Esrp2   | 0.14521  | 0.05714  | -0.08807    | 0.00132879 | No      | Anxa13  | 0        | 0.928517 | inf              | 0.001        | 0.929517      | 9.86033744       | 0.00014386 | No      |
| Esrrg   | 0.7391   | 0.21048  | -0.52862    | 3.13E-07   | No      | Anxa4   | 4.40416  | 116.211  | 4.72174          | 4.40516      | 116.212       | 4.72142082       | 0.00014386 | No      |
| Eva1b   | 0.72551  | 0.29189  | -0.43362    | 2.15E-12   | No      | Anxa5   | 7.65782  | 523.811  | 6.09597          | 7.65882      | 523.812       | 6.09578317       | 0.00014386 | No      |
| Evx1    | 0.26335  | 0.13035  | -0.133      | 0.01482889 | No      | Anxa7   | 26.7563  | 49.0579  | 0.874607         | 26.7573      | 49.0589       | 0.87458234       | 0.00014386 | No      |
| Exoc3l4 | 0.21165  | 0.083765 | -0.127885   | 0.00058998 | No      | Anxa8   | 0        | 4.96637  | inf              | 0.001        | 4.96737       | 12.2782665       | 0.00014386 | No      |
| Exoc8   | 0.78313  | 0.12184  | -0.66129    | 4.71E-07   | No      | Anxa9   | 0        | 2.86402  | inf              | 0.001        | 2.86502       | 11.4843295       | 0.00014386 | No      |
| F10     | 0.85723  | 0.64772  | -0.20951    | 9.44E-05   | No      | Ap1ar   | 15.839   | 11.3875  | -0.476036        | 15.84        | 11.3885       | -0.4759946       | 0.00014386 | No      |
| F2rl3   | 0.20262  | 0.37478  | 0.17216     | 0.03808344 | No      | Ap1b1   | 19.0966  | 28.6681  | 0.586132         | 19.0976      | 28.6691       | 0.58610527       | 0.00014386 | No      |
| Fabp3   | 0.23528  | 0.064134 | -0.171146   | 0.0024744  | No      | Ap1g2   | 43.89    | 15.2861  | -1.52167         | 43.891       | 15.2871       | -1.5216104       | 0.00014386 | No      |
| Fabp7   | 0.8567   | 0.42328  | -0.43342    | 3.41E-06   | No      | Ap1s1   | 24.2665  | 63.0798  | 1.37821          | 24.2675      | 63.0808       | 1.37817546       | 0.00014386 | No      |
| Fam101a | 0.60196  | 0.14385  | -0.45811    | 3.82E-06   | No      | Ap1s2   | 10.5999  | 3.63534  | -1.54389         | 10.6009      | 3.63634       | -1.5436277       | 0.00014386 | No      |
| Fam129c | 0.23862  | 0.059586 | -0.179034   | 0.0007877  | No      | Ap2a1   | 20.9256  | 14.1398  | -0.565506        | 20.9266      | 14.1408       | -0.5654742       | 0.00014386 | No      |
| Fam132a | 0.84499  | 0.21842  | -0.62657    | 1.06E-11   | No      | Ap2a2   | 19.1492  | 46.3611  | 1.27563          | 19.1502      | 46.3621       | 1.27558646       | 0.00014386 | No      |
| Fam150a | 0.14297  | 0.029358 | -0.113612   | 2.49E-07   | No      | Ap2m1   | 194.325  | 254.814  | 0.390972         | 194.326      | 254.815       | 0.39097127       | 0.00014386 | No      |
| Fam150b | 0.096426 | 0.034463 | -0.061963   | 0.00103522 | No      | Ap2s1   | 104.066  | 145.456  | 0.483089         | 104.067      | 145.457       | 0.48308007       | 0.00014386 | No      |
| Fam163b | 0.13292  | 0.024543 | -0.108377   | 9.44E-05   | No      | Ap3b1   | 15.9185  | 11.8507  | -0.425734        | 15.9195      | 11.8517       | -0.425701        | 0.00014386 | No      |
| FAM187A | 0.84778  | 0.74294  | -0.10484    | 0.00122444 | No      | Ap3m1   | 18.9745  | 12.3936  | -0.614465        | 18.9755      | 12.3946       | -0.6144262       | 0.00014386 | No      |
| Fam193b | 0.42879  | 0.13592  | -0.29287    | 3.48E-05   | No      | Ap3m2   | 10.6391  | 6.11819  | -0.798195        | 10.6401      | 6.11919       | -0.7980991       | 0.00014386 | No      |
| Fam196a | 0.12329  | 0.048261 | -0.075029   | 0.00058998 | No      | Ap3s2   | 10.7694  | 53.3455  | 2.30842          | 10.7704      | 53.3465       | 2.30832179       | 0.00014386 | No      |
| Fam217a | 0.2666   | 0.081864 | -0.184736   | 2.15E-12   | No      | Ap4b1   | 38.7445  | 11.2551  | -1.78341         | 38.7455      | 11.2561       | -1.7833217       | 0.00014386 | No      |
| Fam221b | 0.22541  | 0.064264 | -0.161146   | 0.00011494 | No      | Ap4e1   | 5.52724  | 2.36465  | -1.22493         | 5.52824      | 2.36565       | -1.2245836       | 0.00014386 | No      |
| Fam55b  | 0.94952  | 0.26672  | -0.6828     | 4.71E-07   | No      | Ap4m1   | 14.1297  | 4.91812  | -1.52255         | 14.1307      | 4.91912       | -1.5223608       | 0.00014386 | No      |
| Fam71e2 | 0.86781  | 0.62114  | -0.24667    | 0.00038568 | No      | Ap5m1   | 9.32207  | 4.42916  | -1.07362         | 9.32307      | 4.43016       | -1.0734463       | 0.00014386 | No      |
| Fam83f  | 0.38783  | 0.03838  | -0.34945    | 2.16E-09   | No      | Apaf1   | 19.2727  | 2.29096  | -3.07254         | 19.2737      | 2.29196       | -3.0719798       | 0.00014386 | No      |
| Fance   | 0.3363   | 0.26074  | -0.07556    | 0.03461603 | No      | Apba3   | 11.5721  | 27.3077  | 1.23866          | 11.5731      | 27.3087       | 1.23858528       | 0.00014386 | No      |
| Fat1    | 0.13554  | 0.011735 | -0.123805   | 3.52E-05   | No      | Apbb1   | 4.28375  | 11.9642  | 1.48178          | 4.28475      | 11.9652       | 1.48156158       | 0.00014386 | No      |
| Fat3    | 0.14289  | 0.025648 | -0.117242   | 1.12E-06   | No      | Apbb1ip | 80.7232  | 3.54479  | -4.50921         | 80.7242      | 3.54579       | -4.5088222       | 0.00014386 | No      |
| Faxc    | 0.16491  | 0.068008 | -0.096902   | 0.00058998 | No      | Apbb2   | 9.2789   | 12.6262  | 0.444398         | 9.2799       | 12.6272       | 0.4443536        | 0.00014386 | No      |
| Fbxo24  | 0.83325  | 0.69162  | -0.14163    | 7.60E-06   | No      | Apccd1l | 0.308666 | 9.87464  | 4.99961          | 0.309666     | 9.87564       | 4.99508935       | 0.00014386 | No      |
| Fbxw17  | 0.28623  | 0.04114  | -0.24509    | 1.49E-06   | No      | Apex1   | 60.0765  | 36.8053  | -0.706887        | 60.0775      | 36.8063       | -0.7068721       | 0.00014386 | No      |
| Fdps    | 0.10247  | 0.013126 | -0.089344   | 0.00229548 | No      | Apex2   | 9.73463  | 4.08106  | -1.25418         | 9.73563      | 4.08206       | -1.253977        | 0.00014386 | No      |

| RRBS    |          |          |             |            |         | RNAseq    |          |         |                  |              |               |                  |            |         |
|---------|----------|----------|-------------|------------|---------|-----------|----------|---------|------------------|--------------|---------------|------------------|------------|---------|
| gene    | Blood    | Kidney   | methyl.diff | pMWU.fdr   | Match ? | gene      | blood    | kidney  | log2(fold_ratio) | blood+ 0.001 | kidney+ 0.001 | log2(fold_ratio) | q_value    | Match ? |
| Fev     | 0.069629 | 0.010728 | -0.058901   | 0.00675344 | No      | Aph1a     | 36.1522  | 52.862  | 0.548147         | 36.1532      | 52.863        | 0.54813495       | 0.00014386 | No      |
| Fezf1   | 0.073291 | 0.014634 | -0.058657   | 0.00209233 | No      | Aph1b     | 31.2423  | 13.3333 | -1.22846         | 31.2433      | 13.3343       | -1.2284048       | 0.00014386 | No      |
| Fezf2   | 0.14475  | 0.025363 | -0.119387   | 0.00010321 | No      | Api5      | 35.1386  | 25.0995 | -0.4854          | 35.1396      | 25.1005       | -0.4853817       | 0.00014386 | No      |
| Ffar1   | 0.82731  | 0.71421  | -0.1131     | 0.00418734 | No      | Apitd1    | 52.0145  | 87.9329 | 0.757491         | 52.0155      | 87.9339       | 0.75747786       | 0.00014386 | No      |
| Ffar2   | 0.87711  | 0.79865  | -0.07846    | 0.00533667 | No      | APLP1     | 0.298257 | 9.36597 | 4.9728           | 0.299257     | 9.36697       | 4.96812555       | 0.00014386 | No      |
| Ffar3   | 0.80601  | 0.67075  | -0.13526    | 0.01237082 | No      | Aplp2     | 23.5371  | 95.0743 | 2.01412          | 23.5381      | 95.0753       | 2.01407272       | 0.00014386 | No      |
| Fgf11   | 0.07743  | 0.024674 | -0.052756   | 0.00040757 | No      | Apmap     | 7.96244  | 33.4835 | 2.07217          | 7.96344      | 33.4845       | 2.07202975       | 0.00014386 | No      |
| Fgf16   | 0.093074 | 0.016414 | -0.07666    | 0.00501738 | No      | APOA1BP   | 22.3791  | 53.6678 | 1.26191          | 22.3801      | 53.6688       | 1.26186715       | 0.00014386 | No      |
| Fgf19   | 0.10994  | 0.039725 | -0.070215   | 0.04859041 | No      | Apobec3b  | 17.0713  | 1.7447  | -3.29053         | 17.0723      | 1.7457        | -3.2897799       | 0.00014386 | No      |
| Fgf20   | 0.098513 | 0.030322 | -0.068191   | 0.00028308 | No      | Apobr     | 6.34646  | 1.24657 | -2.34799         | 6.34746      | 1.24757       | -2.3470586       | 0.00014386 | No      |
| Fgf21   | 0.90058  | 0.69911  | -0.20147    | 0.0003366  | No      | Apoc2     | 0        | 5.45746 | inf              | 0.001        | 5.45846       | 12.4142783       | 0.00014386 | No      |
| Fgf3    | 0.12796  | 0.028059 | -0.099901   | 0.0058184  | No      | Apoc3     | 0        | 6.58617 | inf              | 0.001        | 6.58717       | 12.6854431       | 0.00014386 | No      |
| Fgf4    | 0.10379  | 0.01452  | -0.08927    | 1.37E-07   | No      | Apoe      | 11.955   | 190.892 | 3.99708          | 11.956       | 190.893       | 3.99695749       | 0.00014386 | No      |
| Fgf6    | 0.72107  | 0.11453  | -0.60654    | 2.15E-12   | No      | Apold1    | 0.422884 | 4.10628 | 3.2795           | 0.423884     | 4.10728       | 3.27644189       | 0.00014386 | No      |
| Fgf8    | 0.034801 | 0.11412  | 0.079319    | 0.00265064 | No      | Apoo      | 8.93345  | 63.869  | 2.83783          | 8.93445      | 63.87         | 2.83768762       | 0.00014386 | No      |
| Fgr     | 0.30768  | 0.056149 | -0.251531   | 9.46E-08   | No      | Apool     | 7.20759  | 19.8672 | 1.4628           | 7.20859      | 19.8682       | 1.46267217       | 0.00014386 | No      |
| Fhdcd1  | 0.1437   | 0.04032  | -0.10338    | 1.18E-07   | No      | Apopt1    | 70.031   | 112.127 | 0.679071         | 70.032       | 112.128       | 0.67906039       | 0.00014386 | No      |
| Fibcd1  | 0.011657 | 0.075482 | 0.063825    | 1.73E-05   | No      | App       | 56.7677  | 570.19  | 3.3283           | 56.7687      | 570.191       | 3.32827766       | 0.00014386 | No      |
| Fkbp9   | 0.072801 | 0.011028 | -0.061773   | 2.86E-07   | No      | Appbp2    | 15.6846  | 9.42224 | -0.735208        | 15.6856      | 9.42324       | -0.7351456       | 0.00014386 | No      |
| Fkbpl   | 0.69988  | 0.10701  | -0.59287    | 0.0003366  | No      | Appl2     | 0.688364 | 13.8846 | 4.33417          | 0.689364     | 13.8856       | 4.33217975       | 0.00014386 | No      |
| Fli1    | 0.083198 | 0.021471 | -0.061727   | 0.0058184  | No      | Aprt      | 289.216  | 150.108 | -0.946145        | 289.217      | 150.109       | -0.9461419       | 0.00014386 | No      |
| Flnc    | 0.10589  | 0.032498 | -0.073392   | 0.00317797 | No      | Aptx      | 14.8556  | 5.89852 | -1.33259         | 14.8566      | 5.89952       | -1.3324345       | 0.00014386 | No      |
| Flrt3   | 0.1042   | 0.036248 | -0.067952   | 0.01335255 | No      | Aqp4      | 0        | 5.8675  | inf              | 0.001        | 5.8685        | 12.5187761       | 0.00014386 | No      |
| Fn3k    | 0.96866  | 0.25633  | -0.71233    | 4.71E-07   | No      | Aqr       | 22.9546  | 10.182  | -1.17276         | 22.9556      | 10.183        | -1.1726835       | 0.00014386 | No      |
| Foxa3   | 0.13987  | 0.038344 | -0.101526   | 0.00031293 | No      | Arap1     | 44.0556  | 19.843  | -1.15069         | 44.0566      | 19.844        | -1.1506553       | 0.00014386 | No      |
| Foxc2   | 0.094689 | 0.19351  | 0.098821    | 0.02346238 | No      | Arap2     | 8.43323  | 3.04055 | -1.47175         | 8.43423      | 3.04155       | -1.4714496       | 0.00014386 | No      |
| Foxe1   | 0.14097  | 0.063999 | -0.076971   | 0.00025822 | No      | Arap3     | 4.67852  | 7.8341  | 0.743715         | 4.67952      | 7.8351        | 0.74359113       | 0.00014386 | No      |
| Foxe3   | 0.15294  | 0.033091 | -0.119849   | 1.64E-06   | No      | Are1      | 22.2312  | 11.3911 | -0.964681        | 22.2322      | 11.3921       | -0.964617        | 0.00014386 | No      |
| Foxg1   | 0.41968  | 0.13443  | -0.28525    | 1.06E-11   | No      | Arf1      | 179.923  | 259.863 | 0.530367         | 179.924      | 259.864       | 0.53036915       | 0.00014386 | No      |
| Foxj1   | 0.77947  | 0.26409  | -0.51538    | 1.46E-08   | No      | Arf2      | 4.43661  | 9.52533 | 1.10231          | 4.43761      | 9.52633       | 1.10213764       | 0.00014386 | No      |
| Foxn4   | 0.13154  | 0.032996 | -0.098544   | 0.00675344 | No      | Arf4      | 69.4549  | 110.811 | 0.673956         | 69.4559      | 110.812       | 0.67394497       | 0.00014386 | No      |
| Foxred2 | 0.48806  | 0.089193 | -0.398867   | 2.15E-12   | No      | Arf6      | 197.464  | 76.5563 | -1.367           | 197.465      | 76.5573       | -1.3669851       | 0.00014386 | No      |
| Foxs1   | 0.71605  | 0.57536  | -0.14069    | 0.00469886 | No      | Arfgap2   | 35.8591  | 51.0411 | 0.509322         | 35.8601      | 51.0421       | 0.50930818       | 0.00014386 | No      |
| Frmrd3  | 0.1202   | 0.023903 | -0.096297   | 2.15E-12   | No      | Arfgef1   | 32.5546  | 18.8579 | -0.787695        | 32.5556      | 18.8589       | -0.7876602       | 0.00014386 | No      |
| Fsip1   | 0.12306  | 0.055984 | -0.067076   | 0.01289082 | No      | Arglu1    | 168.302  | 61.4367 | -1.45388         | 168.303      | 61.4377       | -1.4538648       | 0.00014386 | No      |
| Fut1    | 0.98381  | 0.87212  | -0.11169    | 0.0003366  | No      | Arhgap1   | 51.1137  | 20.2204 | -1.3379          | 51.1147      | 20.2214       | -1.3378554       | 0.00014386 | No      |
| Fut2    | 0.81962  | 0.69249  | -0.12713    | 0.00501738 | No      | Arhgap10  | 2.86497  | 14.745  | 2.36363          | 2.86597      | 14.746        | 2.36322825       | 0.00014386 | No      |
| Fut9    | 0.077541 | 0.019756 | -0.057785   | 2.16E-09   | No      | Arhgap11a | 0.690948 | 1.93748 | 1.48753          | 0.691948     | 1.93848       | 1.48619032       | 0.00014386 | No      |
| Fzd10   | 0.063835 | 0.2769   | 0.213065    | 5.41E-06   | No      | Arhgap12  | 13.5128  | 8.74268 | -0.628179        | 13.5138      | 8.74368       | -0.6281209       | 0.00014386 | No      |
| Fzd2    | 0.12714  | 0.056734 | -0.070406   | 0.01559789 | No      | Arhgap15  | 115.872  | 3.55647 | -5.02594         | 115.873      | 3.55747       | -5.025549        | 0.00014386 | No      |
| Fzd5    | 0.90495  | 0.37023  | -0.53472    | 2.15E-12   | No      | Arhgap17  | 65.7022  | 27.3133 | -1.26634         | 65.7032      | 27.3143       | -1.2663072       | 0.00014386 | No      |
| G4      | 0.12553  | 0.022697 | -0.102833   | 0.04051274 | No      | Arhgap18  | 3.54292  | 20.3199 | 2.51988          | 3.54392      | 20.3209       | 2.51954636       | 0.00014386 | No      |

| RRBS    |          |          |             |            |         | RNAseq    |           |         |                  |              |               |                  |            |         |
|---------|----------|----------|-------------|------------|---------|-----------|-----------|---------|------------------|--------------|---------------|------------------|------------|---------|
| gene    | Blood    | Kidney   | methyl.diff | pMWU.fdr   | Match ? | gene      | blood     | kidney  | log2(fold_ratio) | blood+ 0.001 | kidney+ 0.001 | log2(fold_ratio) | q_value    | Match ? |
| Gabbr2  | 0.15775  | 0.048634 | -0.109116   | 0.0024744  | No      | Arhgap21  | 0.397216  | 5.63893 | 3.82743          | 0.398216     | 5.63993       | 3.82405416       | 0.00014386 | No      |
| Gabra1  | 0.13303  | 0.02227  | -0.11076    | 0.0003366  | No      | Arhgap22  | 0.0478494 | 17.6821 | 8.52957          | 0.0488494    | 17.6831       | 8.49981466       | 0.00014386 | No      |
| Gabra5  | 0.14126  | 0.014068 | -0.127192   | 7.62E-05   | No      | Arhgap23  | 0.192427  | 1.00516 | 2.38504          | 0.193427     | 1.00616       | 2.37899865       | 0.00014386 | No      |
| Gabrb3  | 0.10304  | 0.028391 | -0.074649   | 1.42E-05   | No      | Arhgap24  | 0.259748  | 177.074 | 9.41303          | 0.260748     | 177.075       | 9.40748864       | 0.00014386 | No      |
| Gabrg3  | 0.094031 | 0.025559 | -0.068472   | 0.03700939 | No      | Arhgap29  | 0.0109347 | 38.5509 | 11.7836          | 0.0119347    | 38.5519       | 11.6574239       | 0.00014386 | No      |
| Gabbr1  | 0.79469  | 0.69539  | -0.0993     | 0.00719792 | No      | Arhgap32  | 0         | 5.73256 | inf              | 0.001        | 5.73356       | 12.4852155       | 0.00014386 | No      |
| Gad1    | 0.17613  | 0.041047 | -0.135083   | 4.44E-05   | No      | Arhgap35  | 1.98388   | 10.4566 | 2.39802          | 1.98488      | 10.4576       | 2.3974281        | 0.00014386 | No      |
| Gal3st1 | 0.50166  | 0.1351   | -0.36656    | 2.08E-06   | No      | Arhgap39  | 1.30582   | 2.90348 | 1.15283          | 1.30682      | 2.90448       | 1.15221946       | 0.00014386 | No      |
| Gal3st3 | 0.067422 | 0.1619   | 0.094478    | 0.00317797 | No      | Arhgap4   | 132.645   | 60.4307 | -1.13421         | 132.646      | 60.4317       | -1.1342037       | 0.00014386 | No      |
| Galnt16 | 0.2165   | 0.042232 | -0.174268   | 2.08E-06   | No      | Arhgap44  | 0.123767  | 2.94815 | 4.57411          | 0.124767     | 2.94915       | 4.5629909        | 0.00014386 | No      |
| Galnt2  | 0.85592  | 0.37296  | -0.48296    | 1.57E-05   | No      | Arhgap5   | 0.193509  | 7.18078 | 5.21367          | 0.194509     | 7.18178       | 5.20643264       | 0.00014386 | No      |
| Galnt9  | 0.15318  | 0.036419 | -0.116761   | 0.00087121 | No      | Arhgap6   | 0.781318  | 4.80671 | 2.62107          | 0.782318     | 4.80771       | 2.61952281       | 0.00014386 | No      |
| Galr1   | 0.12153  | 0.047161 | -0.074369   | 1.28E-08   | No      | Arhgap9   | 207.009   | 52.0212 | -1.99253         | 207.01       | 52.0222       | -1.9925011       | 0.00014386 | No      |
| Galr2   | 0.15981  | 0.042721 | -0.117089   | 2.98E-08   | No      | Arhgdia   | 277.384   | 204.199 | -0.441908        | 277.385      | 204.2         | -0.4419069       | 0.00014386 | No      |
| Garem2  | 0.23134  | 0.062513 | -0.168827   | 2.23E-05   | No      | Arhg dib  | 2195.22   | 137.725 | -3.99451         | 2195.221     | 137.726       | -3.9944933       | 0.00014386 | No      |
| Gas2l2  | 0.71564  | 0.40994  | -0.3057     | 0.00023201 | No      | Arhgef1   | 533.778   | 43.2691 | -3.62483         | 533.779      | 43.2701       | -3.6248002       | 0.00014386 | No      |
| Gas6    | 0.046869 | 0.21389  | 0.167021    | 9.98E-06   | No      | Arhgef10l | 0.121602  | 35.3955 | 8.18526          | 0.122602     | 35.3965       | 8.17348039       | 0.00014386 | No      |
| Gata2   | 0.56804  | 0.14719  | -0.42085    | 5.96E-07   | No      | Arhgef11  | 2.84601   | 15.217  | 2.41867          | 2.84701      | 15.218        | 2.4182593        | 0.00014386 | No      |
| Gata6   | 0.13091  | 0.077466 | -0.053444   | 0.00418734 | No      | Arhgef12  | 0.959921  | 9.38206 | 3.28892          | 0.960921     | 9.38306       | 3.28756876       | 0.00014386 | No      |
| Gbx2    | 0.30507  | 0.089359 | -0.215711   | 0.00040757 | No      | Arhgef18  | 54.2412   | 11.7929 | -2.20147         | 54.2422      | 11.7939       | -2.2013748       | 0.00014386 | No      |
| Gck     | 0.93809  | 0.79355  | -0.14454    | 9.44E-05   | No      | Arhgef19  | 0         | 4.29204 | inf              | 0.001        | 4.29304       | 12.0677839       | 0.00014386 | No      |
| Gdap1   | 0.094738 | 0.033375 | -0.061363   | 0.00188523 | No      | Arhgef5   | 0         | 9.06688 | inf              | 0.001        | 9.06788       | 13.1465496       | 0.00014386 | No      |
| Gdap1l1 | 0.12684  | 0.045618 | -0.081222   | 0.01699421 | No      | Arhgef6   | 56.1221   | 4.51226 | -3.63665         | 56.1231      | 4.51326       | -3.6363529       | 0.00014386 | No      |
| Gdf10   | 0.19974  | 0.10354  | -0.0962     | 0.00050175 | No      | Arhgef9   | 1.17002   | 5.38765 | 2.20312          | 1.17102      | 5.38865       | 2.20215817       | 0.00014386 | No      |
| Gdf15   | 0.46823  | 0.12836  | -0.33987    | 6.45E-12   | No      | Arid1a    | 59.3633   | 11.0052 | -2.43138         | 59.3643      | 11.0062       | -2.4312791       | 0.00014386 | No      |
| Gdf7    | 0.11004  | 0.05093  | -0.05911    | 0.01049788 | No      | Arid3b    | 11.1431   | 1.56865 | -2.82856         | 11.1441      | 1.56965       | -2.8277653       | 0.00014386 | No      |
| Gfod1   | 0.45688  | 0.15607  | -0.30081    | 0.00451501 | No      | Arid4a    | 28.1202   | 6.31569 | -2.15459         | 28.1212      | 6.31669       | -2.1544175       | 0.00014386 | No      |
| Gfpt2   | 0.60915  | 0.13328  | -0.47587    | 2.80E-05   | No      | Arid4b    | 11.43     | 2.30052 | -2.3128          | 11.431       | 2.30152       | -2.3122927       | 0.00014386 | No      |
| Ggn     | 0.7853   | 0.64286  | -0.14244    | 0.02850905 | No      | Arid5a    | 16.9568   | 3.18497 | -2.41251         | 16.9578      | 3.18597       | -2.4121444       | 0.00014386 | No      |
| Ghsr    | 0.34081  | 0.18244  | -0.15837    | 0.00281863 | No      | Arid5b    | 15.1534   | 3.5171  | -2.10718         | 15.1544      | 3.5181        | -2.1068683       | 0.00014386 | No      |
| Gipc3   | 0.80284  | 0.36099  | -0.44185    | 3.81E-08   | No      | Arih1     | 21.7395   | 12.4702 | -0.801833        | 21.7405      | 12.4712       | -0.8017848       | 0.00014386 | No      |
| Gja8    | 0.14741  | 0.58243  | 0.43502     | 1.12E-05   | No      | Arih2     | 28.1066   | 14.3261 | -0.972263        | 28.1076      | 14.3271       | -0.9722137       | 0.00014386 | No      |
| Gjc1    | 0.085032 | 0.033324 | -0.051708   | 0.00675344 | No      | Arl1      | 23.6508   | 119.581 | 2.33802          | 23.6518      | 119.582       | 2.33797836       | 0.00014386 | No      |
| Gjd2    | 0.073335 | 0.016615 | -0.05672    | 3.76E-05   | No      | Arl11     | 0.254005  | 1.39942 | 2.4619           | 0.255005     | 1.40042       | 2.45726213       | 0.00014386 | No      |
| Gldn    | 0.10766  | 0.032944 | -0.074716   | 0.00158432 | No      | Arl15     | 5.82977   | 19.5898 | 1.74859          | 5.83077      | 19.5908       | 1.74841799       | 0.00014386 | No      |
| Glra1   | 0.10499  | 0.029175 | -0.075815   | 0.00265064 | No      | Arl2      | 32.8919   | 87.7539 | 1.41573          | 32.8929      | 87.7549       | 1.41570348       | 0.00014386 | No      |
| Gna15   | 0.11717  | 0.37809  | 0.26092     | 3.70E-08   | No      | Arl2bp    | 34.7857   | 55.2843 | 0.668375         | 34.7867      | 55.2853       | 0.6683601        | 0.00014386 | No      |
| Gnal    | 0.11404  | 0.038958 | -0.075082   | 0.00111391 | No      | Arl3      | 62.096    | 136.059 | 1.13167          | 62.097       | 136.06        | 1.13164752       | 0.00014386 | No      |
| Gnas    | 0.075062 | 0.2596   | 0.184538    | 3.82E-06   | No      | Arl4a     | 18.1016   | 8.61175 | -1.07174         | 18.1026      | 8.61275       | -1.0716511       | 0.00014386 | No      |
| Gnaz    | 0.82034  | 0.26732  | -0.55302    | 2.27E-12   | No      | Arl5c     | 94.5744   | 2.77587 | -5.09044         | 94.5754      | 2.77687       | -5.0899334       | 0.00014386 | No      |
| Gng11   | 0.015309 | 0.080586 | 0.065277    | 1.39E-06   | No      | ARL6      | 1.76994   | 20.1433 | 3.50853          | 1.77094      | 20.1443       | 3.50778443       | 0.00014386 | No      |
| Gng7    | 0.58798  | 0.070356 | -0.517624   | 9.57E-07   | No      | Arl6ip1   | 32.2625   | 42.0367 | 0.38179          | 32.2635      | 42.0377       | 0.38178078       | 0.00014386 | No      |

| RRBS   |          |          |             |            |         | RNAseq  |           |          |                  |              |               |                  |            |         |
|--------|----------|----------|-------------|------------|---------|---------|-----------|----------|------------------|--------------|---------------|------------------|------------|---------|
| gene   | Blood    | Kidney   | methyl.diff | pMWU.fdr   | Match ? | gene    | blood     | kidney   | log2(fold_ratio) | blood+ 0.001 | kidney+ 0.001 | log2(fold_ratio) | q_value    | Match ? |
| Gnrhr  | 0.77433  | 0.62848  | -0.14585    | 0.03808344 | No      | Arl6ip4 | 46.1563   | 63.9719  | 0.47091          | 46.1573      | 63.9729       | 0.47090205       | 0.00014386 | No      |
| Gp1bb  | 0.050868 | 0.12027  | 0.069402    | 0.00111391 | No      | Arl6ip5 | 163.751   | 44.7211  | -1.87248         | 163.752      | 44.7221       | -1.8724527       | 0.00014386 | No      |
| Gpaa1  | 0.92033  | 0.79586  | -0.12447    | 0.01559789 | No      | Armc9   | 5.77412   | 15.1561  | 1.39222          | 5.77512      | 15.1571       | 1.39207092       | 0.00014386 | No      |
| Gpc4   | 0.066239 | 0.012787 | -0.053452   | 0.00057292 | No      | Armcx1  | 0         | 2.18726  | inf              | 0.001        | 2.18826       | 11.0955684       | 0.00014386 | No      |
| Gpr139 | 0.11804  | 0.02206  | -0.09598    | 3.52E-05   | No      | Armcx3  | 2.1278    | 10.9613  | 2.36499          | 2.1288       | 10.9623       | 2.3644382        | 0.00014386 | No      |
| Gpr150 | 0.20539  | 0.078082 | -0.127308   | 0.0007877  | No      | Arnt2   | 0.0118578 | 15.3795  | 10.341           | 0.0128578    | 15.3805       | 10.2242429       | 0.00014386 | No      |
| Gpr158 | 0.55483  | 0.3651   | -0.18973    | 0.00451501 | No      | Arpc1a  | 81.2336   | 128.627  | 0.663041         | 81.2346      | 128.628       | 0.66303848       | 0.00014386 | No      |
| Gpr17  | 0.72023  | 0.85135  | 0.13112     | 0.0048809  | No      | Arpc1b  | 853.906   | 133.983  | -2.67202         | 853.907      | 133.984       | -2.6720182       | 0.00014386 | No      |
| Gpr26  | 0.23505  | 0.069044 | -0.166006   | 2.15E-12   | No      | Arpc2   | 924.245   | 354.679  | -1.38176         | 924.246      | 354.68        | -1.3817589       | 0.00014386 | No      |
| Gpr50  | 0.17988  | 0.062427 | -0.117453   | 1.42E-05   | No      | Arpc3   | 397.705   | 149.876  | -1.40793         | 397.706      | 149.877       | -1.4079233       | 0.00014386 | No      |
| Gpr6   | 0.16224  | 0.055933 | -0.106307   | 0.0003366  | No      | Arpc4   | 204.687   | 102.806  | -0.993493        | 204.688      | 102.807       | -0.993488        | 0.00014386 | No      |
| Gpr81  | 0.83575  | 0.16757  | -0.66818    | 1.06E-11   | No      | Arpc5   | 266.84    | 76.2402  | -1.80735         | 266.841      | 76.2412       | -1.8073376       | 0.00014386 | No      |
| Gpr83  | 0.32387  | 0.10929  | -0.21458    | 0.0038486  | No      | Arpp21  | 109.808   | 7.58264  | -3.85613         | 109.809      | 7.58364       | -3.855962        | 0.00014386 | No      |
| Gprc5a | 0.35866  | 0.13633  | -0.22233    | 3.76E-05   | No      | Arrib2  | 174.878   | 15.0932  | -3.53438         | 174.879      | 15.0942       | -3.5342909       | 0.00014386 | No      |
| Gpsm3  | 0.014991 | 0.20322  | 0.188229    | 0.00025822 | No      | Arrdc1  | 38.0389   | 50.6645  | 0.413501         | 38.0399      | 50.6655       | 0.41349024       | 0.00014386 | No      |
| Gpx2   | 0.56497  | 0.19978  | -0.36519    | 2.46E-09   | No      | Arrdc2  | 35.1074   | 7.70959  | -2.18705         | 35.1084      | 7.71059       | -2.1869031       | 0.00014386 | No      |
| Gpx7   | 0.36859  | 0.2222   | -0.14639    | 0.02967027 | No      | Arrdc3  | 18.5416   | 98.9607  | 2.41609          | 18.5426      | 98.9617       | 2.41602673       | 0.00014386 | No      |
| Grasp  | 0.016177 | 0.30504  | 0.288863    | 1.66E-07   | No      | Arrdc4  | 0.352331  | 3.34804  | 3.24832          | 0.353331     | 3.34904       | 3.24465537       | 0.00014386 | No      |
| Grb10  | 0.5997   | 0.37661  | -0.22309    | 9.20E-09   | No      | Arsa    | 3.13226   | 27.1611  | 3.11626          | 3.13326      | 27.1621       | 3.11585863       | 0.00014386 | No      |
| Gria4  | 0.090927 | 0.020993 | -0.069934   | 0.00132879 | No      | Arsb    | 4.98972   | 35.8137  | 2.84348          | 4.99072      | 35.8147       | 2.84323199       | 0.00014386 | No      |
| Grid1  | 0.091515 | 0.011863 | -0.079652   | 6.06E-05   | No      | Arse    | 7.32379   | 17.9333  | 1.29198          | 7.32479      | 17.9343       | 1.29186213       | 0.00014386 | No      |
| Grid2  | 0.084567 | 0.013261 | -0.071306   | 4.82E-11   | No      | Arsk    | 7.22638   | 3.56001  | -1.02139         | 7.22738      | 3.56101       | -1.0211863       | 0.00014386 | No      |
| Grik1  | 0.18794  | 0.038543 | -0.149397   | 0.00017371 | No      | Art2b   | 228.656   | 1.4792   | -7.27222         | 228.657      | 1.4802        | -7.2712492       | 0.00014386 | No      |
| Grik3  | 0.093801 | 0.019727 | -0.074074   | 0.02733646 | No      | As3mt   | 10.2945   | 39.8187  | 1.95157          | 10.2955      | 39.8197       | 1.95146846       | 0.00014386 | No      |
| Grin2a | 0.11229  | 0.037724 | -0.074566   | 0.00533667 | No      | Asah1   | 5.30981   | 36.345   | 2.77502          | 5.31081      | 36.346        | 2.77479278       | 0.00014386 | No      |
| Grin2d | 0.4214   | 0.26565  | -0.15575    | 0.00085839 | No      | Asap1   | 26.7476   | 3.1721   | -3.0759          | 26.7486      | 3.1731        | -3.0754985       | 0.00014386 | No      |
| Grin3b | 0.98592  | 0.91515  | -0.07077    | 0.02094681 | No      | Asap2   | 0.0517145 | 8.20952  | 7.31058          | 0.0527145    | 8.21052       | 7.28312993       | 0.00014386 | No      |
| Grip2  | 0.17062  | 0.054548 | -0.116072   | 0.00842241 | No      | Asap3   | 0.370394  | 4.03235  | 3.44449          | 0.371394     | 4.03335       | 3.44095619       | 0.00014386 | No      |
| Grm1   | 0.18108  | 0.052778 | -0.128302   | 6.93E-08   | No      | Asb1    | 2.83093   | 1.25492  | -1.17368         | 2.83193      | 1.25592       | -1.173041        | 0.00014386 | No      |
| Grm7   | 0.15669  | 0.038834 | -0.117856   | 7.31E-07   | No      | Asb3    | 10.0595   | 6.5614   | -0.616489        | 10.0605      | 6.5624        | -0.6164066       | 0.00014386 | No      |
| Grwd1  | 0.18956  | 0.060907 | -0.128653   | 0.0007877  | No      | Ascc3   | 19.7138   | 9.37491  | -1.07233         | 19.7148      | 9.37591       | -1.0722484       | 0.00014386 | No      |
| Gsc    | 0.11097  | 0.021715 | -0.089255   | 0.00036321 | No      | Ascl4   | 1.18471   | 0        | inf              | 1.18571      | 0.001         | -10.211535       | 0.00014386 | No      |
| Gsc2   | 0.10131  | 0.044688 | -0.056622   | 0.01320709 | No      | Asf1b   | 2.04238   | 0.337247 | -2.59837         | 2.04338      | 0.338247      | -2.5948085       | 0.00014386 | No      |
| Gstt3  | 0.2497   | 0.04789  | -0.20181    | 8.74E-06   | No      | Asgr1   | 0         | 2.71843  | inf              | 0.001        | 2.71943       | 11.4090886       | 0.00014386 | No      |
| Gsx1   | 0.15588  | 0.053641 | -0.102239   | 0.00028819 | No      | Ash1l   | 8.0426    | 2.83336  | -1.50515         | 8.0436       | 2.83436       | -1.5048183       | 0.00014386 | No      |
| Guca1a | 0.013095 | 0.30336  | 0.290265    | 4.71E-07   | No      | Ash2l   | 28.3331   | 17.9781  | -0.656251        | 28.3341      | 17.9791       | -0.6562186       | 0.00014386 | No      |
| Gucy2e | 0.24331  | 0.33476  | 0.09145     | 0.00015279 | No      | Asl     | 8.5402    | 98.4261  | 3.5267           | 8.5412       | 98.4271       | 3.52654491       | 0.00014386 | No      |
| H2afb3 | 0.85094  | 0.76193  | -0.08901    | 0.02094681 | No      | Asmtl   | 34.5738   | 91.1501  | 1.39857          | 34.5748      | 91.1511       | 1.39853916       | 0.00014386 | No      |
| H2afy2 | 0.15696  | 0.05911  | -0.09785    | 0.00317797 | No      | Aspa    | 0.266907  | 64.5874  | 7.91877          | 0.267907     | 64.5884       | 7.91339899       | 0.00014386 | No      |
| Hao    | 0.92814  | 0.35121  | -0.57693    | 2.15E-12   | No      | Aspdh   | 16.9848   | 82.8343  | 2.28599          | 16.9858      | 82.8353       | 2.28591653       | 0.00014386 | No      |
| Hamp   | 0.7583   | 0.38667  | -0.37163    | 7.96E-06   | No      | Aspg    | 0.0463031 | 40.0555  | 9.75668          | 0.0473031    | 40.0565       | 9.72588592       | 0.00014386 | No      |
| Hand1  | 0.31591  | 0.12992  | -0.18599    | 0.00173557 | No      | ASPH    | 0.670445  | 6.78087  | 3.33828          | 0.671445     | 6.78187       | 3.336342         | 0.00014386 | No      |



| RRBS      |          |           |             |            |         | RNAseq  |          |          |                  |              |               |                  |            |         |
|-----------|----------|-----------|-------------|------------|---------|---------|----------|----------|------------------|--------------|---------------|------------------|------------|---------|
| gene      | Blood    | Kidney    | methyl.diff | pMWU.fdr   | Match ? | gene    | blood    | kidney   | log2(fold_ratio) | blood+ 0.001 | kidney+ 0.001 | log2(fold_ratio) | q_value    | Match ? |
| Hand2     | 0.16953  | 0.085996  | -0.083534   | 0.01512325 | No      | Aspscr1 | 34.9564  | 88.2972  | 1.33681          | 34.9574      | 88.2982       | 1.33678614       | 0.00014386 | No      |
| Hapln4    | 0.095407 | 0.042886  | -0.052521   | 0.00065829 | No      | Asun    | 27.4061  | 14.5809  | -0.910418        | 27.4071      | 14.5819       | -0.910371        | 0.00014386 | No      |
| Has3      | 0.31284  | 0.13431   | -0.17853    | 1.60E-06   | No      | Asxl1   | 32.4332  | 9.17957  | -1.82097         | 32.4342      | 9.18057       | -1.8208602       | 0.00014386 | No      |
| Hcn4      | 0.13128  | 0.29038   | 0.1591      | 0.00628692 | No      | Asxl2   | 10.1013  | 2.94414  | -1.77862         | 10.1023      | 2.94514       | -1.7782757       | 0.00014386 | No      |
| Hdac5     | 0.72116  | 0.46434   | -0.25682    | 0.00093244 | No      | Atad2   | 10.0998  | 0.998678 | -3.33816         | 10.1008      | 0.999678      | -3.3368623       | 0.00014386 | No      |
| Hecw1     | 0.071721 | 0.0043478 | -0.0673732  | 0.00369602 | No      | Atad2b  | 9.42397  | 3.68274  | -1.35555         | 9.42497      | 3.68374       | -1.3553168       | 0.00014386 | No      |
| Hes7      | 0.70937  | 0.40757   | -0.3018     | 3.76E-05   | No      | Ate1    | 10.5895  | 5.27267  | -1.00603         | 10.5905      | 5.27367       | -1.0058915       | 0.00014386 | No      |
| Hfe2      | 0.059772 | 0.12711   | 0.067338    | 0.01558694 | No      | Atf1    | 56.3386  | 21.4944  | -1.39016         | 56.3396      | 21.4954       | -1.3901214       | 0.00014386 | No      |
| Hhatl     | 0.7729   | 0.19788   | -0.57502    | 7.31E-07   | No      | Atf2    | 24.0277  | 11.6454  | -1.04494         | 24.0287      | 11.6464       | -1.0448745       | 0.00014386 | No      |
| Hhex      | 0.027034 | 0.2573    | 0.230266    | 8.74E-08   | No      | Atf3    | 0.138972 | 75.6321  | 9.08807          | 0.139972     | 75.6331       | 9.07773568       | 0.00014386 | No      |
| Hic1      | 0.45034  | 0.15698   | -0.29336    | 2.15E-12   | No      | Atf5    | 3.79306  | 19.4279  | 2.3567           | 3.79406      | 19.4289       | 2.35638982       | 0.00014386 | No      |
| Hint1     | 0.37377  | 0.18295   | -0.19082    | 0.00085839 | No      | Atf6    | 6.67432  | 4.8426   | -0.46284         | 6.67532      | 4.8436        | -0.4627573       | 0.00014386 | No      |
| Hist1h1b  | 0.018805 | 0.17028   | 0.151475    | 1.12E-06   | No      | Atf7ip  | 49.0722  | 12.1826  | -2.01008         | 49.0732      | 12.1836       | -2.0099949       | 0.00014386 | No      |
| Hist1h2bo | 0.011196 | 0.087449  | 0.076253    | 6.67E-05   | No      | Atg12   | 39.1089  | 15.9591  | -1.29312         | 39.1099      | 15.9601       | -1.2930642       | 0.00014386 | No      |
| Hlx       | 0.17158  | 0.067907  | -0.103673   | 5.41E-06   | No      | Atg13   | 23.2179  | 15.8419  | -0.551493        | 23.2189      | 15.8429       | -0.5514632       | 0.00014386 | No      |
| Hmces     | 0.7546   | 0.61274   | -0.14186    | 0.03808344 | No      | Atg14   | 6.70292  | 3.64653  | -0.878266        | 6.70392      | 3.64753       | -0.8780851       | 0.00014386 | No      |
| Hmx1      | 0.17884  | 0.05091   | -0.12793    | 0.02094681 | No      | Atg16l1 | 44.6299  | 20.2403  | -1.14078         | 44.6309      | 20.2413       | -1.1407409       | 0.00014386 | No      |
| Hnf4a     | 0.76341  | 0.34213   | -0.42128    | 1.43E-06   | No      | Atg2b   | 11.2809  | 4.24857  | -1.40883         | 11.2819      | 4.24957       | -1.4086213       | 0.00014386 | No      |
| Hoxa11    | 0.13106  | 0.20731   | 0.07625     | 0.0007072  | No      | Atg4c   | 5.96339  | 9.37528  | 0.652729         | 5.96439      | 9.37628       | 0.65264106       | 0.00014386 | No      |
| Hoxb13    | 0.095705 | 0.0231    | -0.072605   | 0.00229548 | No      | Atg9a   | 34.0527  | 15.6294  | -1.1235          | 34.0537      | 15.6304       | -1.1234569       | 0.00014386 | No      |
| Hoxb4     | 0.18547  | 0.023109  | -0.162361   | 2.15E-12   | No      | Atic    | 55.5874  | 31.1073  | -0.837503        | 55.5884      | 31.1083       | -0.8374843       | 0.00014386 | No      |
| Hoxb5     | 0.72447  | 0.27492   | -0.44955    | 2.15E-12   | No      | Atl2    | 28.1914  | 11.6624  | -1.2734          | 28.1924      | 11.6634       | -1.2733179       | 0.00014386 | No      |
| Hoxb7     | 0.11944  | 0.031988  | -0.087452   | 0.00045631 | No      | ATL3    | 11.4462  | 7.98372  | -0.519739        | 11.4472      | 7.98472       | -0.519681        | 0.00014386 | No      |
| Hoxc11    | 0.13329  | 0.041408  | -0.091882   | 1.80E-05   | No      | Atm     | 25.2702  | 2.49999  | -3.33744         | 25.2712      | 2.50099       | -3.336923        | 0.00014386 | No      |
| Hoxc12    | 0.14477  | 0.062411  | -0.082359   | 0.00025822 | No      | Atoh8   | 0        | 1.53626  | inf              | 0.001        | 1.53726       | 10.5861455       | 0.00014386 | No      |
| Hoxc4     | 0.045233 | 0.16308   | 0.117847    | 2.15E-12   | No      | Atox1   | 73.0222  | 187.988  | 1.36423          | 73.0232      | 187.989       | 1.36422145       | 0.00014386 | No      |
| Hoxc9     | 0.056305 | 0.0033784 | -0.0529266  | 6.06E-05   | No      | Atp10a  | 2.47086  | 1.54413  | -0.678218        | 2.47186      | 1.54513       | -0.6778688       | 0.00014386 | No      |
| Hoxd1     | 0.20163  | 0.067715  | -0.133915   | 1.42E-05   | No      | Atp11a  | 10.4443  | 74.6553  | 2.83753          | 10.4453      | 74.6563       | 2.83741008       | 0.00014386 | No      |
| Hoxd12    | 0.16454  | 0.68374   | 0.5192      | 5.28E-07   | No      | ATP11B  | 37.0512  | 8.06497  | -2.19978         | 37.0522      | 8.06597       | -2.1996393       | 0.00014386 | No      |
| Hoxd3     | 0.116    | 0.47304   | 0.35704     | 9.44E-05   | No      | Atp11c  | 2.48534  | 1.51868  | -0.710625        | 2.48634      | 1.51968       | -0.710256        | 0.00014386 | No      |
| Hoxd9     | 0.25447  | 0.50353   | 0.24906     | 3.82E-06   | No      | Atp13a1 | 77.5508  | 28.0556  | -1.46686         | 77.5518      | 28.0566       | -1.4668201       | 0.00014386 | No      |
| Hpd1      | 0.78698  | 0.58159   | -0.20539    | 0.01206268 | No      | Atp13a3 | 14.1245  | 6.58744  | -1.10041         | 14.1255      | 6.58844       | -1.1002931       | 0.00014386 | No      |
| Hpgd      | 0.080774 | 0.015819  | -0.064955   | 0.00038568 | No      | Atp1a1  | 88.6263  | 710.367  | 3.00276          | 88.6273      | 710.368       | 3.00274353       | 0.00014386 | No      |
| Hpn       | 0.71627  | 0.17175   | -0.54452    | 8.74E-06   | No      | Atp1b1  | 3.49538  | 1023.93  | 8.19445          | 3.49638      | 1023.931      | 8.19404079       | 0.00014386 | No      |
| Hr        | 0.30418  | 0.15887   | -0.14531    | 0.04859041 | No      | Atp1b2  | 0.106161 | 9.33156  | 6.45779          | 0.107161     | 9.33256       | 6.44442102       | 0.00014386 | No      |
| Hras      | 0.77692  | 0.65467   | -0.12225    | 0.00976507 | No      | Atp2b1  | 13.3617  | 4.62082  | -1.53188         | 13.3627      | 4.62182       | -1.5316786       | 0.00014386 | No      |
| Hrasls    | 0.14838  | 0.021204  | -0.127176   | 1.98E-05   | No      | Atp2b4  | 9.6107   | 2.66365  | -1.85124         | 9.6117       | 2.66465       | -1.8508456       | 0.00014386 | No      |
| Hrk       | 0.098047 | 0.031923  | -0.066124   | 0.01832913 | No      | Atp2c1  | 8.18768  | 28.0069  | 1.77425          | 8.18868      | 28.0079       | 1.774131         | 0.00014386 | No      |
| Hs3st2    | 0.1718   | 0.017663  | -0.154137   | 9.44E-05   | No      | Atp5a1  | 288.398  | 1018.92  | 1.82091          | 288.399      | 1018.921      | 1.82090413       | 0.00014386 | No      |
| Hs6st2    | 0.21499  | 0.019885  | -0.195105   | 0.00010321 | No      | Atp5b   | 395.885  | 2281.26  | 2.52668          | 395.886      | 2281.261      | 2.52667456       | 0.00014386 | No      |
| Hsbp11    | 0.099885 | 0.021959  | -0.077926   | 1.61E-05   | No      | Atp5c1  | 159.579  | 575.973  | 1.85173          | 159.58       | 575.974       | 1.85172384       | 0.00014386 | No      |
| Hsd17b14  | 0.74435  | 0.21654   | -0.52781    | 0.00011494 | No      | Atp5d   | 152.681  | 627.968  | 2.04017          | 152.682      | 627.969       | 2.04016335       | 0.00014386 | No      |

| RRBS     |          |           |             |            |         | RNAseq   |           |         |                  |              |               |                  |            |         |
|----------|----------|-----------|-------------|------------|---------|----------|-----------|---------|------------------|--------------|---------------|------------------|------------|---------|
| gene     | Blood    | Kidney    | methyl.diff | pMWU.fdr   | Match ? | gene     | blood     | kidney  | log2(fold_ratio) | blood+ 0.001 | kidney+ 0.001 | log2(fold_ratio) | q_value    | Match ? |
| Hsf4     | 0.63531  | 0.22093   | -0.41438    | 2.20E-12   | No      | Atp5e    | 901.794   | 2097.6  | 1.21787          | 901.795      | 2097.601      | 1.21786886       | 0.00014386 | No      |
| Hspa12a  | 0.30085  | 0.084173  | -0.216677   | 2.65E-06   | No      | ATP5F1   | 66.8552   | 179.513 | 1.42498          | 66.8562      | 179.514       | 1.4249631        | 0.00014386 | No      |
| Hspa2    | 0.029066 | 0.13991   | 0.110844    | 0.00111391 | No      | ATP5G3   | 245.377   | 1721.71 | 2.81077          | 245.378      | 1721.711      | 2.81076519       | 0.00014386 | No      |
| Hspb7    | 0.74363  | 0.56529   | -0.17834    | 0.02850905 | No      | Atp5i    | 479.93    | 2810.42 | 2.54989          | 479.931      | 2810.421      | 2.54988735       | 0.00014386 | No      |
| Htr1a    | 0.084342 | 0.023097  | -0.061245   | 8.46E-07   | No      | Atp5j    | 314.498   | 1291.25 | 2.03765          | 314.499      | 1291.251      | 2.03764213       | 0.00014386 | No      |
| Htr6     | 0.089759 | 0.023021  | -0.066738   | 0.00021135 | No      | Atp5j2   | 624.76    | 1783.64 | 1.51345          | 624.761      | 1783.641      | 1.51344897       | 0.00014386 | No      |
| Htra3    | 0.1233   | 0.015486  | -0.107814   | 0.00050175 | No      | Atp5l    | 365.376   | 1320.54 | 1.85368          | 365.377      | 1320.541      | 1.85367137       | 0.00014386 | No      |
| lbsp     | 0.71207  | 0.20124   | -0.51083    | 0.00040757 | No      | Atp5o    | 159.503   | 909.2   | 2.51101          | 159.504      | 909.201       | 2.51100667       | 0.00014386 | No      |
| lcam4    | 0.38062  | 0.083298  | -0.297322   | 2.65E-06   | No      | Atp5s    | 0.562918  | 20.1876 | 5.1644           | 0.563918     | 20.1886       | 5.16191166       | 0.00014386 | No      |
| ld4      | 0.06888  | 0.015941  | -0.052939   | 0.0058184  | No      | Atp6ap2  | 18.9594   | 103.736 | 2.45193          | 18.9604      | 103.737       | 2.45186925       | 0.00014386 | No      |
| ldo1     | 0.69404  | 0.42341   | -0.27063    | 0.00031293 | No      | Atp6v0a1 | 2.47934   | 19.248  | 2.95668          | 2.48034      | 19.249        | 2.9561737        | 0.00014386 | No      |
| lfitm3   | 0.28613  | 0.14772   | -0.13841    | 0.02733646 | No      | Atp6v0a2 | 20.2881   | 11.3979 | -0.831875        | 20.2891      | 11.3989       | -0.8318103       | 0.00014386 | No      |
| lgf2bp2  | 0.12285  | 0.037732  | -0.085118   | 0.00132879 | No      | Atp6v0a4 | 0.045756  | 36.1209 | 9.62466          | 0.046756     | 36.1219       | 9.59350655       | 0.00014386 | No      |
| lgfbp6   | 0.38682  | 0.19059   | -0.19623    | 0.00050175 | No      | Atp6v0b  | 55.6225   | 169.887 | 1.61084          | 55.6235      | 169.888       | 1.61081752       | 0.00014386 | No      |
| lgsf21   | 0.20782  | 0.068164  | -0.139656   | 0.00093244 | No      | Atp6v0c  | 167.588   | 407.551 | 1.28207          | 167.589      | 407.552       | 1.28205669       | 0.00014386 | No      |
| ll11     | 0.22837  | 0.081323  | -0.147047   | 5.41E-06   | No      | Atp6v0d1 | 123.547   | 275.55  | 1.15726          | 123.548      | 275.551       | 1.15724771       | 0.00014386 | No      |
| ll17c    | 0.82612  | 0.66195   | -0.16417    | 0.00719792 | No      | Atp6v0e1 | 119.923   | 234.203 | 0.965649         | 119.924      | 234.204       | 0.96564531       | 0.00014386 | No      |
| ll18bp   | 0.058873 | 0.0087623 | -0.0501107  | 0.0058184  | No      | Atp6v0e2 | 16.5742   | 62.2323 | 1.90872          | 16.5752      | 62.2333       | 1.90866047       | 0.00014386 | No      |
| ll1r2    | 0.84563  | 0.18935   | -0.65628    | 6.75E-07   | No      | Atp6v1a  | 9.42195   | 62.1946 | 2.72269          | 9.42295      | 62.1956       | 2.72256183       | 0.00014386 | No      |
| ll1rapl2 | 0.13964  | 0.052471  | -0.087169   | 0.0048809  | No      | Atp6v1b1 | 0.0290986 | 66.1081 | 11.1497          | 0.0300986    | 66.1091       | 11.1009368       | 0.00014386 | No      |
| ll4      | 0.76129  | 0.19539   | -0.5659     | 0.00123297 | No      | Atp6v1b2 | 30.5654   | 97.6918 | 1.67634          | 30.5664      | 97.6928       | 1.67630559       | 0.00014386 | No      |
| lna      | 0.12344  | 0.024008  | -0.099432   | 2.80E-05   | No      | Atp6v1c1 | 36.1074   | 57.8497 | 0.680014         | 36.1084      | 57.8507       | 0.67999992       | 0.00014386 | No      |
| lnca1    | 0.063324 | 0.0091355 | -0.0541885  | 0.0007877  | No      | Atp6v1c2 | 1.93381   | 12.3353 | 2.67327          | 1.93481      | 12.3363       | 2.67264595       | 0.00014386 | No      |
| lnhbb    | 0.14759  | 0.034236  | -0.113354   | 2.40E-10   | No      | Atp6v1d  | 39.9944   | 91.0435 | 1.18676          | 39.9954      | 91.0445       | 1.18673779       | 0.00014386 | No      |
| lnhbe    | 0.51663  | 0.16774   | -0.34889    | 9.09E-07   | No      | Atp6v1e1 | 29.4759   | 183.517 | 2.6383           | 29.4769      | 183.518       | 2.63826486       | 0.00014386 | No      |
| linsig1  | 0.22305  | 0.15955   | -0.0635     | 0.00188523 | No      | Atp6v1f  | 92.4821   | 239.284 | 1.37148          | 92.4831      | 239.285       | 1.3714683        | 0.00014386 | No      |
| lrf2bp1  | 0.70627  | 0.115     | -0.59127    | 2.15E-12   | No      | Atp6v1g1 | 163.183   | 248.41  | 0.606233         | 163.184      | 248.411       | 0.60622945       | 0.00014386 | No      |
| lrf5     | 0.031372 | 0.10816   | 0.076788    | 0.00781609 | No      | Atp6v1g3 | 0.594025  | 19.8353 | 5.0614           | 0.595025     | 19.8363       | 5.05904885       | 0.00014386 | No      |
| lrf6     | 0.15961  | 0.033021  | -0.126589   | 3.76E-05   | No      | Atp6v1h  | 18.9574   | 41.5241 | 1.13119          | 18.9584      | 41.5251       | 1.13114643       | 0.00014386 | No      |
| lrf8     | 0.62179  | 0.38866   | -0.23313    | 3.13E-07   | No      | Atp8a1   | 14.6461   | 6.43807 | -1.18582         | 14.6471      | 6.43907       | -1.1856908       | 0.00014386 | No      |
| lrx2     | 0.17457  | 0.060657  | -0.113913   | 0.00173557 | No      | Atp8b2   | 9.50296   | 1.80153 | -2.39916         | 9.50396      | 1.80253       | -2.3985055       | 0.00014386 | No      |
| lrx4     | 0.10492  | 0.020109  | -0.084811   | 5.42E-05   | No      | Atp9a    | 0.550791  | 46.2658 | 6.3923           | 0.551791     | 46.2668       | 6.38971158       | 0.00014386 | No      |
| lrx6     | 0.066466 | 0.0097656 | -0.0567004  | 5.11E-05   | No      | Atpaf1   | 5.64292   | 10.9222 | 0.952751         | 5.64392      | 10.9232       | 0.95262612       | 0.00014386 | No      |
| lsg2012  | 0.21435  | 0.04502   | -0.16933    | 4.77E-07   | No      | Atpaf2   | 16.547    | 24.8256 | 0.585258         | 16.548       | 24.8266       | 0.58522984       | 0.00014386 | No      |
| ltga8    | 0.80294  | 0.31742   | -0.48552    | 8.74E-06   | No      | Atpif1   | 238.589   | 868.211 | 1.86352          | 238.59       | 868.212       | 1.86351379       | 0.00014386 | No      |
| ltgbl1   | 0.69712  | 0.39214   | -0.30498    | 2.99E-06   | No      | Atr      | 2.95254   | 1.21889 | -1.27639         | 2.95354      | 1.21989       | -1.2756941       | 0.00014386 | No      |
| ltpka    | 0.48423  | 0.21635   | -0.26788    | 3.70E-05   | No      | Atraid   | 10.4612   | 35.7827 | 1.77421          | 10.4622      | 35.7837       | 1.77411631       | 0.00014386 | No      |
| lzumo1   | 0.13069  | 0.052776  | -0.077914   | 0.00108023 | No      | Atrip    | 16.1501   | 35.8776 | 1.15154          | 16.1511      | 35.8786       | 1.15149117       | 0.00014386 | No      |
| jph3     | 0.11518  | 0.019645  | -0.095535   | 5.06E-08   | No      | Atrn     | 4.48023   | 11.3126 | 1.33628          | 4.48123      | 11.3136       | 1.33609139       | 0.00014386 | No      |
| jph4     | 0.50311  | 0.40104   | -0.10207    | 0.00842241 | No      | Atrnl1   | 0.491178  | 6.89343 | 3.8109           | 0.492178     | 6.89443       | 3.8081792        | 0.00014386 | No      |
| kb23     | 0.71666  | 0.46919   | -0.24747    | 6.79E-07   | No      | Atrx     | 28.2517   | 9.47199 | -1.5766          | 28.2527      | 9.47299       | -1.576497        | 0.00014386 | No      |
| kbtbd4   | 0.59369  | 0.35948   | -0.23421    | 0.04051274 | No      | Atxn10   | 41.372    | 63.5269 | 0.618712         | 41.373       | 63.5279       | 0.61870076       | 0.00014386 | No      |

| RRBS      |          |           |             |            |         | RNAseq        |           |          |                  |              |               |                  |            |         |
|-----------|----------|-----------|-------------|------------|---------|---------------|-----------|----------|------------------|--------------|---------------|------------------|------------|---------|
| gene      | Blood    | Kidney    | methyl.diff | pMWU.fdr   | Match ? | gene          | blood     | kidney   | log2(fold_ratio) | blood+ 0.001 | kidney+ 0.001 | log2(fold_ratio) | q_value    | Match ? |
| Kbtbd6    | 0.27554  | 0.14769   | -0.12785    | 4.87E-06   | No      | Atxn1l        | 3.85209   | 6.33817  | 0.718426         | 3.85309      | 6.33917       | 0.71827807       | 0.00014386 | No      |
| Kbtbd7    | 0.27554  | 0.14769   | -0.12785    | 4.87E-06   | No      | Atxn2         | 16.9749   | 40.1661  | 1.24258          | 16.9759      | 40.1671       | 1.24252624       | 0.00014386 | No      |
| Kcna1     | 0.14267  | 0.047169  | -0.095501   | 4.21E-12   | No      | Atxn2l        | 76.0914   | 20.8248  | -1.86943         | 76.0924      | 20.8258       | -1.8693805       | 0.00014386 | No      |
| Kcna3     | 0.16046  | 0.32061   | 0.16015     | 0.00158432 | No      | Atxn7         | 15.6618   | 3.3583   | -2.22145         | 15.6628      | 3.3593        | -2.2211096       | 0.00014386 | No      |
| Kcna5     | 0.2023   | 0.40407   | 0.20177     | 1.98E-05   | No      | ATXN7L2       | 26.4875   | 8.11328  | -1.70695         | 26.4885      | 8.11428       | -1.7068312       | 0.00014386 | No      |
| Kcna6     | 0.069722 | 0.015073  | -0.054649   | 1.02E-06   | No      | Atxn7l3       | 26.374    | 10.1976  | -1.37089         | 26.375       | 10.1986       | -1.3708          | 0.00014386 | No      |
| Kcnb1     | 0.4034   | 0.2188    | -0.1846     | 2.76E-08   | No      | Atxn7l4       | 14.0592   | 1.95507  | -2.84622         | 14.0602      | 1.95607       | -2.8455872       | 0.00014386 | No      |
| Kcnc1     | 0.27727  | 0.087714  | -0.189556   | 2.15E-12   | No      | AU040320      | 11.6599   | 25.203   | 1.11203          | 11.6609      | 25.204        | 1.11197357       | 0.00014386 | No      |
| Kcnc3     | 0.13628  | 0.023285  | -0.112995   | 2.08E-06   | No      | Aurkaip1      | 89.7317   | 120.56   | 0.426058         | 89.7327      | 120.561       | 0.42605756       | 0.00014386 | No      |
| Kcnd3     | 0.086028 | 0.015497  | -0.070531   | 1.85E-07   | No      | Aurkb         | 2.97616   | 1.41801  | -1.06959         | 2.97716      | 1.41901       | -1.069052        | 0.00014386 | No      |
| Kcne2     | 0.8058   | 0.30363   | -0.50217    | 5.56E-07   | No      | Aven          | 25.2873   | 12.1523  | -1.05719         | 25.2883      | 12.1533       | -1.057122        | 0.00014386 | No      |
| Kcnf1     | 0.75009  | 0.60104   | -0.14905    | 0.02346238 | No      | Avl9          | 8.67762   | 3.93135  | -1.14227         | 8.67862      | 3.93235       | -1.1420739       | 0.00014386 | No      |
| Kcng1     | 0.13044  | 0.33049   | 0.20005     | 0.00015722 | No      | Avpi1         | 10.0276   | 40.7987  | 2.02455          | 10.0286      | 40.7997       | 2.02443833       | 0.00014386 | No      |
| Kcnh3     | 0.13863  | 0.032362  | -0.106268   | 0.00031293 | No      | Avpr1a        | 0         | 1.22369  | inf              | 0.001        | 1.22469       | 10.2582009       | 0.00014386 | No      |
| Kcnh5     | 0.64972  | 0.41689   | -0.23283    | 0.00628692 | No      | Avpr2         | 2.66426   | 12.2867  | 2.20529          | 2.66526      | 12.2877       | 2.20486672       | 0.00014386 | No      |
| Kcnh7     | 0.090164 | 0.027864  | -0.0623     | 8.48E-08   | No      | Axin1         | 32.7814   | 15.7663  | -1.05603         | 32.7824      | 15.7673       | -1.0559858       | 0.00014386 | No      |
| Kcnh8     | 0.064687 | 0.013942  | -0.050745   | 0.00028819 | No      | Azi1          | 5.4818    | 18.2588  | 1.73587          | 5.4828       | 18.2598       | 1.73568621       | 0.00014386 | No      |
| Kcnip1    | 0.12587  | 0.031599  | -0.094271   | 2.18E-08   | No      | Azi2          | 48.92     | 19.5774  | -1.32124         | 48.921       | 19.5784       | -1.321191        | 0.00014386 | No      |
| Kcnj14    | 0.58413  | 0.18497   | -0.39916    | 4.76E-05   | No      | B230118H07Rik | 4.634     | 84.067   | 4.18121          | 4.635        | 84.068        | 4.18091551       | 0.00014386 | No      |
| Kcnj3     | 0.1105   | 0.023148  | -0.087352   | 5.49E-12   | No      | B2m           | 3092.34   | 475.873  | -2.70005         | 3092.341     | 475.874       | -2.7000479       | 0.00014386 | No      |
| Kcnj5     | 0.073287 | 0.013723  | -0.059564   | 0.00100136 | No      | B3galnt2      | 23.6443   | 10.0782  | -1.23026         | 23.6453      | 10.0792       | -1.2301723       | 0.00014386 | No      |
| Kcnk2     | 0.12336  | 0.041951  | -0.081409   | 0.00628692 | No      | B3galt5       | 1.62544   | 3.16947  | 0.963409         | 1.62644      | 3.17047       | 0.96297912       | 0.00014386 | No      |
| Kcnk3     | 0.09324  | 0.023599  | -0.069641   | 0.00842241 | No      | B3gat1        | 0         | 1.52111  | inf              | 0.001        | 1.52211       | 10.5718569       | 0.00014386 | No      |
| Kcnk4     | 0.16619  | 0.038322  | -0.127868   | 5.41E-06   | No      | B3gnt5        | 1.29123   | 0.120317 | -3.42384         | 1.29223      | 0.121317      | -3.4130092       | 0.00014386 | No      |
| Kcnk9     | 0.13269  | 0.029438  | -0.103252   | 0.00015722 | No      | B4galnt1      | 60.1135   | 6.06643  | -3.30877         | 60.1145      | 6.06743       | -3.3085556       | 0.00014386 | No      |
| Kcnn1     | 0.40258  | 0.10545   | -0.29713    | 6.67E-05   | No      | B4galt1       | 38.6626   | 14.1942  | -1.44564         | 38.6636      | 14.1952       | -1.4455728       | 0.00014386 | No      |
| Kcnq3     | 0.061611 | 0.0072864 | -0.0543246  | 4.10E-09   | No      | B4galt3       | 19.1135   | 36.9157  | 0.94964          | 19.1145      | 36.9167       | 0.94960613       | 0.00014386 | No      |
| Kcns2     | 0.10525  | 0.026671  | -0.078579   | 0.00281863 | No      | B4galt4       | 0.313201  | 5.99175  | 4.25782          | 0.314201     | 5.99275       | 4.25345851       | 0.00014386 | No      |
| Kctd11    | 0.77096  | 0.37121   | -0.39975    | 2.49E-07   | No      | B4galt6       | 0.0625277 | 5.39503  | 6.43099          | 0.0635277    | 5.39603       | 6.40836877       | 0.00014386 | No      |
| Kctd15    | 0.076132 | 0.012571  | -0.063561   | 1.28E-06   | No      | B630005N14Rik | 9.29085   | 4.42167  | -1.07122         | 9.29185      | 4.42267       | -1.0710483       | 0.00014386 | No      |
| Kctd8     | 0.10145  | 0.019812  | -0.081638   | 0.00045631 | No      | B930041F14Rik | 0         | 1.04177  | inf              | 0.001        | 1.04277       | 10.0262053       | 0.00014386 | No      |
| Kdf1      | 0.65984  | 0.097327  | -0.562513   | 1.47E-10   | No      | B9d1          | 2.033     | 10.6486  | 2.38898          | 2.034        | 10.6496       | 2.38840766       | 0.00014386 | No      |
| Khdrbs2   | 0.12557  | 0.03021   | -0.09536    | 0.00023201 | No      | Baalc         | 0         | 0.868441 | inf              | 0.001        | 0.869441      | 9.76394432       | 0.00014386 | No      |
| Kiaa0895l | 0.23203  | 0.053636  | -0.178394   | 2.80E-05   | No      | Bach1         | 8.28762   | 4.20999  | -0.977141        | 8.28862      | 4.21099       | -0.9769725       | 0.00014386 | No      |
| Kif2b     | 0.9373   | 0.62534   | -0.31196    | 9.57E-07   | No      | Bach2         | 27.6033   | 1.03039  | -4.74358         | 27.6043      | 1.03139       | -4.7422311       | 0.00014386 | No      |
| Klc1      | 0.22223  | 0.037114  | -0.185116   | 3.87E-06   | No      | Bad           | 24.7095   | 51.1558  | 1.04983          | 24.7105      | 51.1568       | 1.04980182       | 0.00014386 | No      |
| Klf14     | 0.27431  | 0.12064   | -0.15367    | 9.16E-10   | No      | Bag1          | 60.4846   | 83.868   | 0.471551         | 60.4856      | 83.869        | 0.47154594       | 0.00014386 | No      |
| Klf5      | 0.093149 | 0.040935  | -0.052214   | 2.15E-12   | No      | Bag2          | 0.89463   | 16.0479  | 4.16495          | 0.89563      | 16.0489       | 4.16342775       | 0.00014386 | No      |
| Klhl1     | 0.078372 | 0.021538  | -0.056834   | 1.16E-05   | No      | Baiap2        | 5.83138   | 23.913   | 2.03589          | 5.83238      | 23.914        | 2.03569884       | 0.00014386 | No      |

| RRBS         |          |           |             |            |         | RNAseq   |           |         |                  |              |               |                  |            |         |
|--------------|----------|-----------|-------------|------------|---------|----------|-----------|---------|------------------|--------------|---------------|------------------|------------|---------|
| gene         | Blood    | Kidney    | methyl.diff | pMWU.fdr   | Match ? | gene     | blood     | kidney  | log2(fold_ratio) | blood+ 0.001 | kidney+ 0.001 | log2(fold_ratio) | q_value    | Match ? |
| Klh138       | 0.88092  | 0.76502   | -0.1159     | 0.00451501 | No      | Baiap2l1 | 1.1869    | 12.9218 | 3.44454          | 1.1879       | 12.9228       | 3.4434334        | 0.00014386 | No      |
| Klh141       | 0.86943  | 0.52382   | -0.34561    | 0.00015722 | No      | Baiap2l2 | 2.33098   | 112.138 | 5.58819          | 2.33198      | 112.139       | 5.58758888       | 0.00014386 | No      |
| Krt19        | 0.10027  | 0.018236  | -0.082034   | 3.15E-05   | No      | Baiap3   | 43.5288   | 1.98126 | -4.45748         | 43.5298      | 1.98226       | -4.4567853       | 0.00014386 | No      |
| Krt25        | 0.75701  | 0.61399   | -0.14302    | 0.02220995 | No      | Bak1     | 33.0066   | 21.8256 | -0.596729        | 33.0076      | 21.8266       | -0.5967108       | 0.00014386 | No      |
| Krt72        | 0.91091  | 0.65295   | -0.25796    | 1.43E-06   | No      | Bambi    | 0.393936  | 21.4139 | 5.76444          | 0.394936     | 21.4149       | 5.76085225       | 0.00014386 | No      |
| Krt75        | 0.76596  | 0.51562   | -0.25034    | 0.00842241 | No      | Bap1     | 34.1487   | 22.5916 | -0.596046        | 34.1497      | 22.5926       | -0.5960226       | 0.00014386 | No      |
| Krt8         | 0.7231   | 0.37204   | -0.35106    | 0.00334552 | No      | Barx2    | 0         | 1.46389 | inf              | 0.001        | 1.46489       | 10.5165766       | 0.00014386 | No      |
| Krt80        | 0.66132  | 0.20537   | -0.45595    | 2.23E-05   | No      | Bax      | 85.4563   | 45.8269 | -0.898994        | 85.4573      | 45.8279       | -0.8989776       | 0.00014386 | No      |
| Krt81        | 0.62889  | 0.41666   | -0.21223    | 0.00014055 | No      | Baz1a    | 20.4932   | 3.26658 | -2.64929         | 20.4942      | 3.26758       | -2.6489212       | 0.00014386 | No      |
| Krt83        | 0.77901  | 0.24558   | -0.53343    | 2.15E-12   | No      | Baz1b    | 37.2997   | 15.0637 | -1.30809         | 37.3007      | 15.0647       | -1.3080308       | 0.00014386 | No      |
| Ky           | 0.065519 | 0.012903  | -0.052616   | 0.00675344 | No      | Baz2a    | 63.1069   | 10.7454 | -2.55408         | 63.1079      | 10.7464       | -2.5539672       | 0.00014386 | No      |
| L3hypadh     | 0.77277  | 0.15147   | -0.6213     | 4.71E-07   | No      | Baz2b    | 32.8053   | 8.99686 | -1.86643         | 32.8063      | 8.99786       | -1.8663191       | 0.00014386 | No      |
| Lamp5        | 0.068074 | 0.033931  | -0.034143   | 0.00014347 | No      | Bbc3     | 22.5048   | 9.89897 | -1.18488         | 22.5058      | 9.89997       | -1.1848008       | 0.00014386 | No      |
| Lanc13       | 0.058571 | 0.005     | -0.053571   | 0.03808344 | No      | Bbs1     | 0.333568  | 9.45258 | 4.82465          | 0.334568     | 9.45358       | 4.8204894        | 0.00014386 | No      |
| Lbhd1        | 0.095937 | 0.022973  | -0.072964   | 0.01049788 | No      | Bbs2     | 8.6889    | 38.3708 | 2.14276          | 8.6899       | 38.3718       | 2.14263496       | 0.00014386 | No      |
| Lbx2         | 0.35512  | 0.19836   | -0.15676    | 0.01832913 | No      | Bbs5     | 1.57951   | 10.0712 | 2.67268          | 1.58051      | 10.0722       | 2.67191677       | 0.00014386 | No      |
| Lca5l        | 0.86108  | 0.71158   | -0.1495     | 0.00317797 | No      | Bbx      | 5.34334   | 3.36    | -0.669279        | 5.34434      | 3.361         | -0.6691213       | 0.00014386 | No      |
| Lcmt2        | 0.062157 | 0.0071236 | -0.0550334  | 6.06E-05   | No      | BC005537 | 118.361   | 74.779  | -0.662491        | 118.362      | 74.78         | -0.6624816       | 0.00014386 | No      |
| Lefty1       | 0.25078  | 0.027305  | -0.223475   | 4.22E-09   | No      | BC005561 | 1.08457   | 0.43291 | -1.32498         | 1.08557      | 0.43391       | -1.322985        | 0.00014386 | No      |
| Lefty2       | 0.42117  | 0.2368    | -0.18437    | 0.00132879 | No      | BC017643 | 27.1918   | 13.2256 | -1.03984         | 27.1928      | 13.2266       | -1.0397825       | 0.00014386 | No      |
| Lgals7       | 0.76339  | 0.55582   | -0.20757    | 0.00023201 | No      | BC021891 | 0         | 10.4648 | inf              | 0.001        | 10.4658       | 13.353395        | 0.00014386 | No      |
| Lhx1         | 0.064757 | 0.0091667 | -0.0555903  | 0.00050175 | No      | BC030307 | 0.166501  | 1.50054 | 3.17188          | 0.167501     | 1.50154       | 3.16420129       | 0.00014386 | No      |
| Lhx5         | 0.092428 | 0.022853  | -0.069575   | 9.44E-05   | No      | BC049762 | 0.121767  | 4.67223 | 5.26192          | 0.122767     | 4.67323       | 5.25042532       | 0.00014386 | No      |
| Lif          | 0.26898  | 0.084743  | -0.184237   | 0.00353419 | No      | BC068281 | 1.48043   | 4.25458 | 1.523            | 1.48143      | 4.25558       | 1.52236531       | 0.00014386 | No      |
| Lin7a        | 0.067177 | 0.0091966 | -0.0579804  | 1.98E-05   | No      | Bcam     | 0.0445279 | 230.197 | 12.3359          | 0.0455279    | 230.198       | 12.3038368       | 0.00014386 | No      |
| Lingo3       | 0.93298  | 0.57059   | -0.36239    | 4.71E-07   | No      | Bcap29   | 76.0989   | 8.99976 | -3.07992         | 76.0999      | 9.00076       | -3.0797758       | 0.00014386 | No      |
| Lmx1a        | 0.19663  | 0.081541  | -0.115089   | 0.00628692 | No      | Bcap31   | 165.62    | 92.9959 | -0.832638        | 165.621      | 92.9969       | -0.8326311       | 0.00014386 | No      |
| Lmx1b        | 0.11878  | 0.026099  | -0.092681   | 0.00021135 | No      | Bcar1    | 0.0621827 | 41.5558 | 9.38432          | 0.0631827    | 41.5568       | 9.36133926       | 0.00014386 | No      |
| LOC100362783 | 0.94312  | 0.1384    | -0.80472    | 4.21E-12   | No      | Bcar3    | 0.764008  | 9.11287 | 3.57625          | 0.765008     | 9.11387       | 3.57451705       | 0.00014386 | No      |
| LOC100909539 | 0.12773  | 0.0058869 | -0.1218431  | 1.80E-05   | No      | Bcas2    | 102.182   | 51.4308 | -0.990431        | 102.183      | 51.4318       | -0.9904226       | 0.00014386 | No      |
| LOC106182250 | 0.6433   | 0.24416   | -0.39914    | 0.00038568 | No      | Bcas3    | 16.6283   | 9.3179  | -0.835569        | 16.6293      | 9.3189        | -0.8354959       | 0.00014386 | No      |
| LOC106736471 | 0.67009  | 0.35814   | -0.31195    | 0.00113573 | No      | Bckdha   | 30.4      | 128.544 | 2.08012          | 30.401       | 128.545       | 2.08008281       | 0.00014386 | No      |
| LOC257642    | 0.38153  | 0.22096   | -0.16057    | 7.31E-07   | No      | Bckdhb   | 25.3208   | 123.286 | 2.28362          | 25.3218      | 123.287       | 2.28356882       | 0.00014386 | No      |
| LOC310926    | 0.37244  | 0.16317   | -0.20927    | 0.0038486  | No      | Bcl10    | 27.7602   | 17.3665 | -0.676713        | 27.7612      | 17.3675       | -0.6766798       | 0.00014386 | No      |
| LOC497938    | 0.81489  | 0.62933   | -0.18556    | 0.01120909 | No      | BCL11B   | 54.2775   | 1.43211 | -5.24414         | 54.2785      | 1.43311       | -5.2431596       | 0.00014386 | No      |
| LOC498368    | 0.091464 | 0.013061  | -0.078403   | 1.42E-05   | No      | Bcl2     | 24.4732   | 2.91182 | -3.07121         | 24.4742      | 2.91282       | -3.0707732       | 0.00014386 | No      |
| LOC500077    | 0.35912  | 0.22912   | -0.13       | 0.00050175 | No      | Bcl2l1   | 6.31285   | 111.086 | 4.13724          | 6.31385      | 111.087       | 4.1370262        | 0.00014386 | No      |
| LOC500331    | 0.91888  | 0.4085    | -0.51038    | 2.15E-12   | No      | Bcl2l14  | 0.22903   | 3.10225 | 3.75971          | 0.23003      | 3.10325       | 3.75388599       | 0.00014386 | No      |

| RRBS      |           |          |             |            |         | RNAseq  |          |         |                  |              |               |                  |            |         |
|-----------|-----------|----------|-------------|------------|---------|---------|----------|---------|------------------|--------------|---------------|------------------|------------|---------|
| gene      | Blood     | Kidney   | methyl.diff | pMWU.fdr   | Match ? | gene    | blood    | kidney  | log2(fold_ratio) | blood+ 0.001 | kidney+ 0.001 | log2(fold_ratio) | q_value    | Match ? |
| LOC681383 | 0.388     | 0.18441  | -0.20359    | 0.00065829 | No      | Bcl6    | 5.43031  | 9.03719 | 0.73484          | 5.43131      | 9.03819       | 0.73473368       | 0.00014386 | No      |
| LOC681766 | 0.44081   | 0.23348  | -0.20733    | 2.29E-08   | No      | Bcl7a   | 1.19159  | 7.72503 | 2.69665          | 1.19259      | 7.72603       | 2.69562913       | 0.00014386 | No      |
| LOC682102 | 0.23173   | 0.044567 | -0.187163   | 9.57E-07   | No      | Bcl9l   | 30.1598  | 6.98905 | -2.10946         | 30.1608      | 6.99005       | -2.1093          | 0.00014386 | No      |
| LOC687707 | 0.83925   | 0.71164  | -0.12761    | 0.01961146 | No      | Bclaf1  | 79.2033  | 22.8418 | -1.79388         | 79.2043      | 22.8428       | -1.7938393       | 0.00014386 | No      |
| LOC688924 | 0.71667   | 0.55334  | -0.16333    | 0.03461603 | No      | Bcs1l   | 3.01832  | 6.44903 | 1.09534          | 3.01932      | 6.45003       | 1.0950822        | 0.00014386 | No      |
| LOC690435 | 0.71132   | 0.17665  | -0.53467    | 2.40E-10   | No      | Bdh2    | 2.97703  | 71.072  | 4.57734          | 2.97803      | 71.073        | 4.5768714        | 0.00014386 | No      |
| LOC690617 | 0.83859   | 0.28992  | -0.54867    | 2.15E-12   | No      | Bdp1    | 10.4406  | 4.31667 | -1.27421         | 10.4416      | 4.31767       | -1.2740179       | 0.00014386 | No      |
| LOC691153 | 0.878     | 0.13562  | -0.74238    | 4.71E-07   | No      | Bend5   | 3.10319  | 20.7112 | 2.73858          | 3.10419      | 20.7122       | 2.73819203       | 0.00014386 | No      |
| Loxl4     | 0.10305   | 0.031274 | -0.071776   | 0.00334552 | No      | Bet1    | 17.0946  | 23.6896 | 0.470714         | 17.0956      | 23.6906       | 0.47068968       | 0.00014386 | No      |
| Lrat      | 0.097691  | 0.027196 | -0.070495   | 1.18E-07   | No      | Bex1    | 12.8742  | 53.989  | 2.06819          | 12.8752      | 53.99         | 2.06809737       | 0.00014386 | No      |
| Lrcol1    | 0.072393  | 0.018676 | -0.053717   | 0.00036321 | No      | Bex2    | 2.05855  | 11.6922 | 2.50585          | 2.05955      | 11.6932       | 2.50526874       | 0.00014386 | No      |
| Lrfn1     | 0.82707   | 0.73733  | -0.08974    | 0.01283808 | No      | Bhlhe23 | 0        | 1.12624 | inf              | 0.001        | 1.12724       | 10.138579        | 0.00014386 | No      |
| Lrfn5     | 0.086944  | 0.014828 | -0.072116   | 0.00976507 | No      | Bhlhe40 | 4.00888  | 30.4105 | 2.9233           | 4.00988      | 30.4115       | 2.92298601       | 0.00014386 | No      |
| Lrg1      | 0.32133   | 0.17038  | -0.15095    | 0.01961146 | No      | Bicc1   | 0.15306  | 35.4466 | 7.8554           | 0.15406      | 35.4476       | 7.84605181       | 0.00014386 | No      |
| Lrp4      | 0.13277   | 0.039605 | -0.093165   | 1.57E-05   | No      | Bicd2   | 10.6144  | 25.0716 | 1.24003          | 10.6154      | 25.0726       | 1.23995288       | 0.00014386 | No      |
| Lrrc14b   | 0.95905   | 0.84896  | -0.11009    | 3.52E-05   | No      | Bid     | 45.8187  | 7.54222 | -2.60288         | 45.8197      | 7.54322       | -2.6027156       | 0.00014386 | No      |
| Lrrc20    | 0.0054896 | 0.075091 | 0.0696014   | 0.00015722 | No      | Bin1    | 188.424  | 76.7148 | -1.29641         | 188.425      | 76.7158       | -1.2963947       | 0.00014386 | No      |
| Lrrc26    | 0.22394   | 0.061056 | -0.162884   | 1.57E-07   | No      | Bin2    | 176.476  | 112.283 | -0.652335        | 176.477      | 112.284       | -0.6523278       | 0.00014386 | No      |
| Lrrc38    | 0.10604   | 0.018651 | -0.087389   | 0.00038568 | No      | Birc2   | 28.5303  | 16.2272 | -0.814078        | 28.5313      | 16.2282       | -0.8140425       | 0.00014386 | No      |
| Lrrc4b    | 0.10263   | 0.028657 | -0.073973   | 0.00021135 | No      | Birc3   | 16.5801  | 7.93961 | -1.06231         | 16.5811      | 7.94061       | -1.062218        | 0.00014386 | No      |
| Lrrc8d    | 0.87104   | 0.21907  | -0.65197    | 4.71E-07   | No      | Birc6   | 11.2943  | 1.66643 | -2.76076         | 11.2953      | 1.66743       | -2.7600245       | 0.00014386 | No      |
| Lrrc8e    | 0.54351   | 0.085793 | -0.457717   | 7.62E-05   | No      | BIVM    | 6.64194  | 12.2209 | 0.879672         | 6.64294      | 12.2219       | 0.87957479       | 0.00014386 | No      |
| Lrrn4cl   | 0.88907   | 0.76516  | -0.12391    | 0.00418734 | No      | Bicap   | 21.8434  | 42.2533 | 0.951866         | 21.8444      | 42.2543       | 0.95183468       | 0.00014386 | No      |
| LRRTM1    | 0.084082  | 0.025914 | -0.058168   | 3.46E-06   | No      | Blm     | 5.99116  | 1.06189 | -2.4962          | 5.99216      | 1.06289       | -2.4950838       | 0.00014386 | No      |
| Ltb4r     | 0.11714   | 0.022479 | -0.094661   | 5.96E-07   | No      | Blnk    | 2.55737  | 21.5082 | 3.07215          | 2.55837      | 21.5092       | 3.07165704       | 0.00014386 | No      |
| Ltbp2     | 0.10742   | 0.02693  | -0.08049    | 2.15E-12   | No      | Bloc1s1 | 72.6619  | 188.166 | 1.37274          | 72.6629      | 188.167       | 1.37272279       | 0.00014386 | No      |
| Ltk       | 0.020768  | 0.082865 | 0.062097    | 0.00281863 | No      | Bloc1s2 | 61.8348  | 25.5005 | -1.2779          | 61.8358      | 25.5015       | -1.2778602       | 0.00014386 | No      |
| Lypd3     | 0.13418   | 0.069257 | -0.064923   | 0.02094681 | No      | Bloc1s5 | 11.5611  | 25.854  | 1.16111          | 11.5621      | 25.855        | 1.16103985       | 0.00014386 | No      |
| Lymr1     | 0.29402   | 0.20786  | -0.08616    | 0.00017371 | No      | Bloc1s6 | 6.32149  | 11.5108 | 0.864653         | 6.32249      | 11.5118       | 0.86454868       | 0.00014386 | No      |
| Mab2111   | 0.06106   | 0.17268  | 0.11162     | 9.09E-07   | No      | Blvra   | 17.8011  | 41.4103 | 1.21803          | 17.8021      | 41.4113       | 1.21797706       | 0.00014386 | No      |
| Mab2112   | 0.065261  | 0.49089  | 0.425629    | 2.97E-10   | No      | BLVRB   | 8.11742  | 29.6212 | 1.86754          | 8.11842      | 29.6222       | 1.86740791       | 0.00014386 | No      |
| Mael      | 0.81113   | 0.69034  | -0.12079    | 0.01387459 | No      | Blzf1   | 11.6676  | 6.05624 | -0.94601         | 11.6686      | 6.05724       | -0.945899        | 0.00014386 | No      |
| Mafb      | 0.30443   | 0.095301 | -0.209129   | 0.00038568 | No      | Bmf     | 1.10827  | 2.57309 | 1.21519          | 1.10927      | 2.57409       | 1.21445193       | 0.00014386 | No      |
| Mageb18   | 0.9599    | 0.89092  | -0.06898    | 0.01832913 | No      | Bmp1    | 0.826197 | 12.8698 | 3.96136          | 0.827197     | 12.8708       | 3.95972697       | 0.00014386 | No      |
| Map10     | 0.30211   | 0.22152  | -0.08059    | 0.02733646 | No      | Bmpr1a  | 0.070155 | 7.62365 | 6.76379          | 0.071155     | 7.62465       | 6.74356217       | 0.00014386 | No      |
| Map3k10   | 0.53804   | 0.20866  | -0.32938    | 0.00038568 | No      | Bmpr2   | 2.83454  | 5.48819 | 0.953218         | 2.83554      | 5.48919       | 0.95296977       | 0.00014386 | No      |
| Map3k6    | 0.14163   | 0.024164 | -0.117466   | 7.62E-05   | No      | Bms1    | 29.7675  | 12.8569 | -1.2112          | 29.7685      | 12.8579       | -1.2111315       | 0.00014386 | No      |
| Map3k9    | 0.12566   | 0.019958 | -0.105702   | 0.0003366  | No      | Bnip2   | 32.7175  | 16.8832 | -0.954474        | 32.7185      | 16.8842       | -0.9544328       | 0.00014386 | No      |
| Mapk12    | 0.09822   | 0.030153 | -0.068067   | 1.61E-05   | No      | Bnip3   | 2.06056  | 120.828 | 5.87377          | 2.06156      | 120.829       | 5.87308649       | 0.00014386 | No      |
| Mapk13    | 0.7048    | 0.58677  | -0.11803    | 0.01387459 | No      | Bnip3l  | 58.0102  | 34.8884 | -0.733558        | 58.0112      | 34.8894       | -0.7335427       | 0.00014386 | No      |
| Marveld3  | 0.13711   | 0.029235 | -0.107875   | 1.70E-08   | No      | Boc     | 0.30375  | 5.60849 | 4.20666          | 0.30475      | 5.60949       | 4.20217148       | 0.00014386 | No      |
| Matn1     | 0.76309   | 0.67452  | -0.08857    | 0.04412687 | No      | BOD1    | 8.93562  | 22.4187 | 1.32706          | 8.93662      | 22.4197       | 1.32696579       | 0.00014386 | No      |

| RRBS     |          |          |             |            |         | RNAseq |          |         |                  |              |               |                  |            |         |
|----------|----------|----------|-------------|------------|---------|--------|----------|---------|------------------|--------------|---------------|------------------|------------|---------|
| gene     | Blood    | Kidney   | methyl.diff | pMWU.fdr   | Match ? | gene   | blood    | kidney  | log2(fold_ratio) | blood+ 0.001 | kidney+ 0.001 | log2(fold_ratio) | q_value    | Match ? |
| Mb21d2   | 0.48409  | 0.28665  | -0.19744    | 0.00087121 | No      | Bod1l  | 27.2042  | 10.3389 | -1.39575         | 27.2052      | 10.3399       | -1.3956602       | 0.00014386 | No      |
| Mboat4   | 0.81062  | 0.6121   | -0.19852    | 0.00038568 | No      | Bola1  | 24.0342  | 54.1963 | 1.17311          | 24.0352      | 54.1973       | 1.17307217       | 0.00014386 | No      |
| Mc3r     | 0.66621  | 0.56121  | -0.105      | 0.01387459 | No      | Bola3  | 24.227   | 56.7779 | 1.22871          | 24.228       | 56.7789       | 1.22867958       | 0.00014386 | No      |
| Mdga2    | 0.10635  | 0.02246  | -0.08389    | 0.01832913 | No      | Bop1   | 32.715   | 18.6789 | -0.808545        | 32.716       | 18.6799       | -0.8085096       | 0.00014386 | No      |
| Megf6    | 0.093988 | 0.038333 | -0.055655   | 0.01253195 | No      | Bora   | 6.49416  | 1.46686 | -2.14641         | 6.49516      | 1.46786       | -2.1456507       | 0.00014386 | No      |
| Meox1    | 0.10338  | 0.035369 | -0.068011   | 0.04859041 | No      | Bpgm   | 14.0344  | 31.5839 | 1.17022          | 14.0354      | 31.5849       | 1.17016482       | 0.00014386 | No      |
| Mesdc1   | 0.21031  | 0.050898 | -0.159412   | 2.95E-07   | No      | Bphl   | 0.458267 | 58.0264 | 6.98438          | 0.459267     | 58.0274       | 6.98125735       | 0.00014386 | No      |
| Mesp1    | 0.077183 | 0.025333 | -0.05185    | 1.55E-06   | No      | Bpnt1  | 10.7699  | 32.3071 | 1.58485          | 10.7709      | 32.3081       | 1.58475711       | 0.00014386 | No      |
| Mest     | 0.3526   | 0.45656  | 0.10396     | 0.00451501 | No      | Braf   | 2.99295  | 1.55615 | -0.943582        | 2.99395      | 1.55715       | -0.9431422       | 0.00014386 | No      |
| Mfap2    | 0.75696  | 0.33124  | -0.42572    | 1.98E-05   | No      | Brap   | 23.1641  | 12.3714 | -0.904891        | 23.1651      | 12.3724       | -0.9048275       | 0.00014386 | No      |
| Mfge8    | 0.023761 | 0.34451  | 0.320749    | 8.46E-07   | No      | Brat1  | 16.7256  | 10.5459 | -0.665377        | 16.7266      | 10.5469       | -0.6653252       | 0.00014386 | No      |
| Mgat4c   | 0.6258   | 0.17625  | -0.44955    | 0.00058998 | No      | Brcc3  | 13.3618  | 20.3259 | 0.605208         | 13.3628      | 20.3269       | 0.60516787       | 0.00014386 | No      |
| Mgat4d   | 0.5234   | 0.15537  | -0.36803    | 6.79E-07   | No      | Brd1   | 37.321   | 13.7994 | -1.43538         | 37.322       | 13.8004       | -1.4353162       | 0.00014386 | No      |
| MGC94207 | 0.78731  | 0.25172  | -0.53559    | 2.15E-12   | No      | Brd3   | 13.076   | 9.354   | -0.483265        | 13.077       | 9.355         | -0.4832221       | 0.00014386 | No      |
| MGC95208 | 0.41937  | 0.24287  | -0.1765     | 0.00628692 | No      | Brd4   | 41.7649  | 14.883  | -1.48863         | 41.7659      | 14.884        | -1.4885632       | 0.00014386 | No      |
| Miat     | 0.12651  | 0.024669 | -0.101841   | 0.00719792 | No      | Brd8   | 43.5658  | 26.2899 | -0.728686        | 43.5668      | 26.2909       | -0.7286656       | 0.00014386 | No      |
| Mir124-1 | 0.069701 | 0.012605 | -0.057096   | 6.06E-05   | No      | Bre    | 28.775   | 48.853  | 0.763631         | 28.776       | 48.854        | 0.76361063       | 0.00014386 | No      |
| Mir1247  | 0.20687  | 0.033142 | -0.173728   | 4.33E-06   | No      | Brf1   | 40.7379  | 69.2644 | 0.765742         | 40.7389      | 69.2654       | 0.76572784       | 0.00014386 | No      |
| Mir126   | 0.98005  | 0.90204  | -0.07801    | 0.00023201 | No      | Bri3   | 71.8513  | 323.985 | 2.17284          | 71.8523      | 323.986       | 2.17282523       | 0.00014386 | No      |
| Mir137   | 0.085187 | 0.017505 | -0.067682   | 1.80E-05   | No      | Bri3bp | 13.989   | 8.26384 | -0.759414        | 13.99        | 8.26484       | -0.7593372       | 0.00014386 | No      |
| Mir138-2 | 0.22036  | 0.46229  | 0.24193     | 2.86E-06   | No      | Bricd5 | 7.27587  | 21.8259 | 1.58485          | 7.27687      | 21.8269       | 1.5847173        | 0.00014386 | No      |
| Mir141   | 0.95279  | 0.68537  | -0.26742    | 3.91E-08   | No      | Brix1  | 28.5866  | 14.638  | -0.96562         | 28.5876      | 14.639        | -0.9655725       | 0.00014386 | No      |
| Mir149   | 0.065258 | 0.25175  | 0.186492    | 0.00028308 | No      | Brk1   | 103.759  | 75.9289 | -0.450511        | 103.76       | 75.9299       | -0.4505104       | 0.00014386 | No      |
| Mir196a  | 0.062707 | 0.17909  | 0.116383    | 4.58E-11   | No      | Brpf1  | 15.867   | 6.04512 | -1.39219         | 15.868       | 6.04612       | -1.3920388       | 0.00014386 | No      |
| Mir196c  | 0.13483  | 0.46176  | 0.32693     | 2.15E-12   | No      | Brsk1  | 0.929682 | 2.81448 | 1.59806          | 0.930682     | 2.81548       | 1.59702069       | 0.00014386 | No      |
| Mir203   | 0.11559  | 0.016197 | -0.099393   | 1.76E-07   | No      | Brwd1  | 14.9722  | 8.45868 | -0.823785        | 14.9732      | 8.45968       | -0.8237076       | 0.00014386 | No      |
| Mir25    | 0.88184  | 0.67237  | -0.20947    | 0.00132879 | No      | Bscl2  | 38.1257  | 63.2722 | 0.730808         | 38.1267      | 63.2732       | 0.73079289       | 0.00014386 | No      |
| Mir295-1 | 0.73571  | 0.50267  | -0.23304    | 0.00020424 | No      | Bsdc1  | 8.4669   | 17.2794 | 1.02915          | 8.4679       | 17.2804       | 1.02906048       | 0.00014386 | No      |
| Mir2964  | 0.83459  | 0.45197  | -0.38262    | 2.15E-12   | No      | Bsg    | 105.862  | 815.798 | 2.94603          | 105.863      | 815.799       | 2.9460153        | 0.00014386 | No      |
| Mir3065  | 0.77649  | 0.14552  | -0.63097    | 2.15E-12   | No      | Bspry  | 4.10949  | 49.0894 | 3.57838          | 4.11049      | 49.0904       | 3.57805863       | 0.00014386 | No      |
| Mir326   | 0.8006   | 0.43909  | -0.36151    | 0.00054762 | No      | Bst1   | 6.19733  | 171.708 | 4.79216          | 6.19833      | 171.709       | 4.79194228       | 0.00014386 | No      |
| Mir331   | 0.86398  | 0.7169   | -0.14708    | 0.02346238 | No      | Bst2   | 94.2511  | 65.064  | -0.53465         | 94.2521      | 65.065        | -0.5346431       | 0.00014386 | No      |
| Mir341   | 0.31306  | 0.18039  | -0.13267    | 2.20E-12   | No      | Btaf1  | 10.5604  | 4.85786 | -1.12027         | 10.5614      | 4.85886       | -1.1201113       | 0.00014386 | No      |
| Mir346   | 0.10578  | 0.02261  | -0.08317    | 6.40E-05   | No      | Btbd1  | 40.4039  | 25.3356 | -0.67333         | 40.4049      | 25.3366       | -0.6733073       | 0.00014386 | No      |
| Mir34a   | 0.85128  | 0.57363  | -0.27765    | 0.00058998 | No      | Btbd19 | 4.30356  | 1.15017 | -1.90369         | 4.30456      | 1.15117       | -1.9027649       | 0.00014386 | No      |
| Mir3547  | 0.84369  | 0.67155  | -0.17214    | 4.44E-05   | No      | Btbd2  | 15.2812  | 35.0694 | 1.19845          | 15.2822      | 35.0704       | 1.19840164       | 0.00014386 | No      |
| Mir3569  | 0.56542  | 0.085272 | -0.480148   | 9.85E-08   | No      | Btbd6  | 3.46269  | 21.1326 | 2.60951          | 3.46369      | 21.1336       | 2.60915682       | 0.00014386 | No      |
| Mir3590  | 0.39959  | 0.030585 | -0.369005   | 4.71E-07   | No      | Btc    | 0        | 2.42347 | inf              | 0.001        | 2.42447       | 11.2434537       | 0.00014386 | No      |
| Mir378   | 0.53262  | 0.090255 | -0.442365   | 4.33E-06   | No      | Btd    | 6.5279   | 15.8452 | 1.27935          | 6.5289       | 15.8462       | 1.27922507       | 0.00014386 | No      |
| Mir455   | 0.75339  | 0.37254  | -0.38085    | 6.76E-06   | No      | Btf3   | 811.771  | 316.616 | -1.35834         | 811.772      | 316.617       | -1.3583359       | 0.00014386 | No      |
| Mir6314  | 0.43372  | 0.16418  | -0.26954    | 0.00010321 | No      | Btg1   | 1746.92  | 152.897 | -3.51419         | 1746.921     | 152.898       | -3.5141729       | 0.00014386 | No      |
| Mir6326  | 0.18799  | 0.017637 | -0.170353   | 0.00050175 | No      | Btg2   | 316.745  | 65.864  | -2.26576         | 316.746      | 65.865        | -2.2657425       | 0.00014386 | No      |

| RRBS    |          |          |             |            |         | RNAseq         |           |          |                  |              |               |                  |            |         |
|---------|----------|----------|-------------|------------|---------|----------------|-----------|----------|------------------|--------------|---------------|------------------|------------|---------|
| gene    | Blood    | Kidney   | methyl.diff | pMWU.fdr   | Match ? | gene           | blood     | kidney   | log2(fold_ratio) | blood+ 0.001 | kidney+ 0.001 | log2(fold_ratio) | q_value    | Match ? |
| Mir6328 | 0.011358 | 0.25482  | 0.243462    | 4.82E-11   | No      | Btg3           | 3.00109   | 20.0567  | 2.74052          | 3.00209      | 20.0577       | 2.74011705       | 0.00014386 | No      |
| Mir6333 | 0.45567  | 0.12759  | -0.32808    | 4.92E-06   | No      | Btn2a2         | 0.170781  | 1.56843  | 3.1991           | 0.171781     | 1.56943       | 3.1915983        | 0.00014386 | No      |
| Mir671  | 0.75059  | 0.63105  | -0.11954    | 0.02850905 | No      | Bves           | 0         | 0.756212 | inf              | 0.001        | 0.757212      | 9.56455346       | 0.00014386 | No      |
| Mir711  | 0.85061  | 0.76236  | -0.08825    | 0.00281863 | No      | Bysl           | 20.9207   | 13.6724  | -0.61366         | 20.9217      | 13.6734       | -0.6136281       | 0.00014386 | No      |
| Mir9-1  | 0.15254  | 0.020591 | -0.131949   | 0.00158432 | No      | Bzw1           | 71.7126   | 41.5833  | -0.786224        | 71.7136      | 41.5843       | -0.7862078       | 0.00014386 | No      |
| Mir9-3  | 0.098361 | 0.027655 | -0.070706   | 0.00010965 | No      | Bzw2           | 60.9052   | 17.416   | -1.80615         | 60.9062      | 17.417        | -1.8060929       | 0.00014386 | No      |
| Mir99b  | 0.83075  | 0.30233  | -0.52842    | 2.15E-12   | No      | C030039L03 Rik | 1.50867   | 0.794691 | -0.924809        | 1.50967      | 0.795691      | -0.923953        | 0.00014386 | No      |
| Misp    | 0.93347  | 0.19656  | -0.73691    | 2.16E-09   | No      | C1galt1        | 12.1815   | 5.25892  | -1.21185         | 12.1825      | 5.25992       | -1.2116975       | 0.00014386 | No      |
| Mk1     | 0.87645  | 0.64996  | -0.22649    | 0.00123297 | No      | C1galt1c1      | 7.27066   | 21.6667  | 1.57532          | 7.27166      | 21.6677       | 1.57518937       | 0.00014386 | No      |
| Mlh3    | 0.39703  | 0.46838  | 0.07135     | 0.03216266 | No      | C1qa           | 0         | 9.5948   | inf              | 0.001        | 9.5958        | 13.2281874       | 0.00014386 | No      |
| Mlxipl  | 0.15493  | 0.03808  | -0.11685    | 0.00031293 | No      | C1qb           | 0         | 6.19441  | inf              | 0.001        | 6.19541       | 12.596984        | 0.00014386 | No      |
| Mmd2    | 0.16054  | 0.043801 | -0.116739   | 0.00014055 | No      | C1qc           | 0         | 10.5371  | inf              | 0.001        | 10.5381       | 13.3633272       | 0.00014386 | No      |
| Mmel1   | 0.69087  | 0.52535  | -0.16552    | 0.01559789 | No      | C1qtnf6        | 4.03812   | 0.547469 | -2.88283         | 4.03912      | 0.548469      | -2.880559        | 0.00014386 | No      |
| Mmp14   | 0.16331  | 0.038572 | -0.124738   | 0.00072449 | No      | C2             | 0.480622  | 3.38953  | 2.81811          | 0.481622     | 3.39053       | 2.81553761       | 0.00014386 | No      |
| Mmp16   | 0.065674 | 0.014061 | -0.051613   | 2.52E-12   | No      | C2cd2          | 2.38061   | 5.93882  | 1.31885          | 2.38161      | 5.93982       | 1.31848203       | 0.00014386 | No      |
| Mmp2    | 0.095192 | 0.040366 | -0.054826   | 3.74E-05   | No      | C2cd3          | 15.6419   | 6.58549  | -1.24806         | 15.6429      | 6.58649       | -1.2479262       | 0.00014386 | No      |
| Mmp23   | 0.60688  | 0.4733   | -0.13358    | 0.02346238 | No      | C2cd5          | 16.5986   | 10.9103  | -0.605367        | 16.5996      | 10.9113       | -0.6053255       | 0.00014386 | No      |
| Mmp9    | 0.23896  | 0.1633   | -0.07566    | 0.00011494 | No      | C3             | 0.270568  | 1.43951  | 2.41151          | 0.271568     | 1.44051       | 2.40719428       | 0.00014386 | No      |
| Mos     | 0.38551  | 0.08525  | -0.30026    | 2.31E-07   | No      | C330018D20 Rik | 15.03     | 23.031   | 0.615738         | 15.031       | 23.032        | 0.6156987        | 0.00014386 | No      |
| Mrap    | 0.70484  | 0.21238  | -0.49246    | 2.08E-06   | No      | C5             | 0.0488337 | 3.01812  | 5.94963          | 0.0498337    | 3.01912       | 5.9208626        | 0.00014386 | No      |
| Mrc2    | 0.071778 | 0.011455 | -0.060323   | 0.00317797 | No      | Caap1          | 15.0572   | 5.96278  | -1.3364          | 15.0582      | 5.96378       | -1.3362504       | 0.00014386 | No      |
| Mrgprf  | 0.14051  | 0.06313  | -0.07738    | 0.01120909 | No      | Cab39          | 57.1805   | 39.3717  | -0.538363        | 57.1815      | 39.3727       | -0.5383528       | 0.00014386 | No      |
| Mrpl14  | 0.47586  | 0.12291  | -0.35295    | 0.00017371 | No      | Cables1        | 0.0722703 | 5.57571  | 6.26961          | 0.0732703    | 5.57671       | 6.25004192       | 0.00014386 | No      |
| Mrpl53  | 0.94438  | 0.86802  | -0.07636    | 0.02220995 | No      | Cabp1          | 0.415889  | 85.3745  | 7.68146          | 0.416889     | 85.3755       | 7.67801501       | 0.00014386 | No      |
| Mrps2   | 0.30278  | 0.46723  | 0.16445     | 0.02220995 | No      | Cacfd1         | 5.62039   | 21.1288  | 1.91047          | 5.62139      | 21.1298       | 1.9102803        | 0.00014386 | No      |
| Msc     | 0.35634  | 0.094217 | -0.262123   | 2.52E-05   | No      | Cacna1d        | 0.0620418 | 1.13587  | 4.19442          | 0.0630418    | 1.13687       | 4.17261475       | 0.00014386 | No      |
| Mt1     | 0.31634  | 0.17137  | -0.14497    | 0.00010637 | No      | Cacna2d3       | 0         | 1.43779  | inf              | 0.001        | 1.43879       | 10.4906403       | 0.00014386 | No      |
| Mtnr1b  | 0.19973  | 0.36512  | 0.16539     | 1.43E-06   | No      | Cacnb2         | 0.41285   | 1.55745  | 1.91549          | 0.41385      | 1.55845       | 1.91293201       | 0.00014386 | No      |
| Mycs    | 0.078605 | 0.021163 | -0.057442   | 0.00103522 | No      | Cacul1         | 21.899    | 12.2281  | -0.840665        | 21.9         | 12.2291       | -0.8406126       | 0.00014386 | No      |
| Myh6    | 0.50538  | 0.19132  | -0.31406    | 3.15E-05   | No      | Cacybp         | 65.2366   | 49.631   | -0.394438        | 65.2376      | 49.632        | -0.3944331       | 0.00014386 | No      |
| Myocd   | 0.27398  | 0.090229 | -0.183751   | 0.00040757 | No      | Cad            | 27.6368   | 9.67821  | -1.51378         | 27.6378      | 9.67921       | -1.5136816       | 0.00014386 | No      |
| Myod1   | 0.14124  | 0.061328 | -0.079912   | 9.36E-08   | No      | Cadm1          | 0.275584  | 7.52036  | 4.77024          | 0.276584     | 7.52136       | 4.76520395       | 0.00014386 | No      |
| Mypn    | 0.8209   | 0.66843  | -0.15247    | 0.00719792 | No      | Cadps2         | 0.120426  | 8.19519  | 6.08856          | 0.121426     | 8.19619       | 6.07680416       | 0.00014386 | No      |
| Myt1l   | 0.090777 | 0.031832 | -0.058945   | 0.00021135 | No      | Calcoco1       | 22.4974   | 16.46    | -0.450792        | 22.4984      | 16.461        | -0.4507704       | 0.00014386 | No      |
| Nalcn   | 0.16469  | 0.050129 | -0.114561   | 0.00132879 | No      | Calcl1         | 6.52061   | 2.14964  | -1.60092         | 6.52161      | 2.15064       | -1.6004621       | 0.00014386 | No      |
| Nap1l5  | 0.40297  | 0.56953  | 0.16656     | 1.80E-05   | No      | Cald1          | 0.0246778 | 101.866  | 12.0112          | 0.0256778    | 101.867       | 11.9538775       | 0.00014386 | No      |
| Naprt   | 0.52777  | 0.081327 | -0.446443   | 3.81E-09   | No      | Calm1          | 262.506   | 143.411  | -0.872196        | 262.507      | 143.412       | -0.8721901       | 0.00014386 | No      |
| Nat8    | 0.70397  | 0.17397  | -0.53       | 6.75E-07   | No      | Calm2          | 178.484   | 231.621  | 0.375972         | 178.485      | 231.622       | 0.37596946       | 0.00014386 | No      |
| Nat8f5  | 0.7812   | 0.13393  | -0.64727    | 6.75E-07   | No      | Calm3          | 86.9894   | 153.021  | 0.814816         | 86.9904      | 153.022       | 0.81481098       | 0.00014386 | No      |
| Ncan    | 0.13611  | 0.023389 | -0.112721   | 6.06E-05   | No      | Calml3         | 0         | 1.76184  | inf              | 0.001        | 1.76284       | 10.7836858       | 0.00014386 | No      |

| RRBS      |          |           |             |            |         | RNAseq   |           |          |                  |              |               |                  |            |         |
|-----------|----------|-----------|-------------|------------|---------|----------|-----------|----------|------------------|--------------|---------------|------------------|------------|---------|
| gene      | Blood    | Kidney    | methyl.diff | pMWU.fdr   | Match ? | gene     | blood     | kidney   | log2(fold_ratio) | blood+ 0.001 | kidney+ 0.001 | log2(fold_ratio) | q_value    | Match ? |
| Nccrp1    | 0.084654 | 0.032042  | -0.052612   | 0.00139382 | No      | Calml4   | 0.930281  | 130.924  | 7.13685          | 0.931281     | 130.925       | 7.13530834       | 0.00014386 | No      |
| Ndn       | 0.27144  | 0.096129  | -0.175311   | 0.00205129 | No      | Caln1    | 0         | 10.6861  | inf              | 0.001        | 10.6871       | 13.3835828       | 0.00014386 | No      |
| Ndr3      | 0.0628   | 0.0016667 | -0.0611333  | 0.00144827 | No      | Camk1    | 0.396321  | 37.7     | 6.57175          | 0.397321     | 37.701        | 6.56815393       | 0.00014386 | No      |
| Ndufa10l1 | 0.6204   | 0.30822   | -0.31218    | 1.37E-07   | No      | Camk1d   | 3.83429   | 0.399632 | -3.26221         | 3.83529      | 0.400632      | -3.2589861       | 0.00014386 | No      |
| Ndufs6    | 0.8885   | 0.75375   | -0.13475    | 0.00045631 | No      | Camk2d   | 20.867    | 8.74149  | -1.25527         | 20.868       | 8.74249       | -1.2551762       | 0.00014386 | No      |
| Necab2    | 0.79743  | 0.67456   | -0.12287    | 0.00192641 | No      | Camk4    | 56.8368   | 1.60407  | -5.14702         | 56.8378      | 1.60507       | -5.1461426       | 0.00014386 | No      |
| Nefm      | 0.1133   | 0.024242  | -0.089058   | 1.30E-09   | No      | Camkk2   | 4.1702    | 1.69051  | -1.30266         | 4.1712       | 1.69151       | -1.3021508       | 0.00014386 | No      |
| Neil2     | 0.34227  | 0.07048   | -0.27179    | 2.15E-12   | No      | Camsap3  | 0.0589445 | 24.7062  | 8.7113           | 0.0599445    | 24.7072       | 8.68708842       | 0.00014386 | No      |
| Nelfb     | 0.76789  | 0.45501   | -0.31288    | 1.02E-06   | No      | Camta1   | 6.61843   | 0.518022 | -3.67541         | 6.61943      | 0.519022      | -3.6728394       | 0.00014386 | No      |
| Nell2     | 0.08485  | 0.023372  | -0.061478   | 2.80E-05   | No      | Cand2    | 0.742757  | 2.297    | 1.62879          | 0.743757     | 2.298         | 1.62747555       | 0.00014386 | No      |
| Neur1     | 0.17072  | 0.069101  | -0.101619   | 0.00016628 | No      | Cap1     | 209.14    | 60.324   | -1.79366         | 209.141      | 60.325        | -1.793648        | 0.00014386 | No      |
| Neurod2   | 0.11828  | 0.041349  | -0.076931   | 0.00902244 | No      | Capg     | 21.4323   | 54.3873  | 1.34348          | 21.4333      | 54.3883       | 1.34344234       | 0.00014386 | No      |
| Neurog1   | 0.11726  | 0.054626  | -0.062634   | 0.00158432 | No      | Capn1    | 48.8909   | 76.0079  | 0.636583         | 48.8919      | 76.0089       | 0.63657288       | 0.00014386 | No      |
| Neurog3   | 0.19209  | 0.044799  | -0.147291   | 0.00031293 | No      | Capn10   | 26.51     | 13.1747  | -1.00877         | 26.511       | 13.1757       | -1.0087115       | 0.00014386 | No      |
| Nfasc     | 0.42893  | 0.10695   | -0.32198    | 1.49E-06   | No      | Capn13   | 0         | 0.986629 | inf              | 0.001        | 0.987629      | 9.94782539       | 0.00014386 | No      |
| Nfatc4    | 0.66614  | 0.77298   | 0.10684     | 0.00501738 | No      | Capn5    | 16.4198   | 26.1093  | 0.669122         | 16.4208      | 26.1103       | 0.66909462       | 0.00014386 | No      |
| Ngb       | 0.24418  | 0.094177  | -0.150003   | 0.00132879 | No      | Caprin2  | 6.40549   | 10.8893  | 0.765531         | 6.40649      | 10.8903       | 0.76543765       | 0.00014386 | No      |
| Ngfr      | 0.073443 | 0.016547  | -0.056896   | 0.01049788 | No      | Capza1   | 147.82    | 23.6848  | -2.64181         | 147.821      | 23.6858       | -2.6417569       | 0.00014386 | No      |
| Nhlh2     | 0.078601 | 0.026223  | -0.052378   | 0.00023201 | No      | Capza2   | 90.5776   | 53.6361  | -0.755951        | 90.5786      | 53.6371       | -0.755939        | 0.00014386 | No      |
| Nhlrc1    | 0.31617  | 0.15787   | -0.1583     | 5.77E-05   | No      | Capzb    | 409.686   | 170.469  | -1.265           | 409.687      | 170.47        | -1.2650042       | 0.00014386 | No      |
| Nkx1-2    | 0.10409  | 0.049324  | -0.054766   | 0.03700939 | No      | Car11    | 2.35637   | 31.0518  | 3.72004          | 2.35737      | 31.0528       | 3.71947324       | 0.00014386 | No      |
| Nkx2-5    | 0.46939  | 0.31275   | -0.15664    | 0.00675344 | No      | Car12    | 0.246798  | 122.023  | 8.94961          | 0.247798     | 122.024       | 8.94378467       | 0.00014386 | No      |
| Nkx2-8    | 0.091315 | 0.038313  | -0.053002   | 1.32E-08   | No      | Car14    | 3.51272   | 24.2014  | 2.78443          | 3.51372      | 24.2024       | 2.78407898       | 0.00014386 | No      |
| Nkx3-1    | 0.11089  | 0.040525  | -0.070365   | 0.00173557 | No      | Car2     | 43.7226   | 465.994  | 3.41386          | 43.7236      | 465.995       | 3.41383038       | 0.00014386 | No      |
| Nkx6-2    | 0.13178  | 0.059416  | -0.072364   | 0.04859041 | No      | Car5b    | 0.219467  | 41.4409  | 7.56091          | 0.220467     | 41.4419       | 7.55438361       | 0.00014386 | No      |
| Nlgn3     | 0.13319  | 0.031769  | -0.101421   | 7.01E-09   | No      | Car6     | 6.06954   | 10.4638  | 0.78575          | 6.07054      | 10.4648       | 0.78564798       | 0.00014386 | No      |
| Nln       | 0.31433  | 0.08106   | -0.23327    | 2.77E-07   | No      | Card11   | 32.6094   | 2.54043  | -3.68215         | 32.6104      | 2.54143       | -3.6816197       | 0.00014386 | No      |
| Nlrp6     | 0.1915   | 0.081381  | -0.110119   | 0.00675344 | No      | Card6    | 24.1887   | 1.67891  | -3.84874         | 24.1897      | 1.67991       | -3.847937        | 0.00014386 | No      |
| Nmnat2    | 0.12378  | 0.035135  | -0.088645   | 2.16E-09   | No      | Card9    | 0.420082  | 6.00608  | 3.83768          | 0.421082     | 6.00708       | 3.83449077       | 0.00014386 | No      |
| Nmur2     | 0.084713 | 0.019662  | -0.065051   | 4.76E-05   | No      | Carf     | 4.326     | 1.42843  | -1.5986          | 4.327        | 1.42943       | -1.5979271       | 0.00014386 | No      |
| Nnat      | 0.38766  | 0.25586   | -0.1318     | 4.31E-08   | No      | Carm1    | 40.9606   | 24.0323  | -0.769259        | 40.9616      | 24.0333       | -0.7692373       | 0.00014386 | No      |
| Nodal     | 0.43056  | 0.12753   | -0.30303    | 4.33E-06   | No      | Casc3    | 22.2731   | 7.80359  | -1.51309         | 22.2741      | 7.80459       | -1.5129724       | 0.00014386 | No      |
| Nol3      | 0.81518  | 0.68045   | -0.13473    | 0.03216266 | No      | Casc4    | 6.80004   | 12.171   | 0.839832         | 6.80104      | 12.172        | 0.83973896       | 0.00014386 | No      |
| Nol4      | 0.20693  | 0.038297  | -0.168633   | 0.00010321 | No      | Casd1    | 26.5709   | 3.69617  | -2.84575         | 26.5719      | 3.69717       | -2.8454081       | 0.00014386 | No      |
| Nop10     | 0.32829  | 0.17333   | -0.15496    | 0.00017371 | No      | Cask     | 0.91369   | 3.90109  | 2.0941           | 0.91469      | 3.90209       | 2.09289227       | 0.00014386 | No      |
| Notch3    | 0.2218   | 0.11627   | -0.10553    | 0.01206268 | No      | Casp1    | 82.147    | 6.37709  | -3.68724         | 82.148       | 6.37809       | -3.6870291       | 0.00014386 | No      |
| Notch4    | 0.64203  | 0.38473   | -0.2573     | 0.00173557 | No      | Casp12   | 0.565387  | 5.70284  | 3.33437          | 0.566387     | 5.70384       | 3.33207346       | 0.00014386 | No      |
| Notum     | 0.14257  | 0.018092  | -0.124478   | 2.27E-05   | No      | Casp3    | 17.4923   | 7.73532  | -1.17719         | 17.4933      | 7.73632       | -1.1770831       | 0.00014386 | No      |
| Npas4     | 0.26414  | 0.094496  | -0.169644   | 1.64E-06   | No      | Casp8ap2 | 5.53957   | 1.41613  | -1.96782         | 5.54057      | 1.41713       | -1.9670623       | 0.00014386 | No      |
| Npbwr1    | 0.091853 | 0.027896  | -0.063957   | 2.52E-05   | No      | Casz1    | 0.761035  | 11.2443  | 3.88509          | 0.762035     | 11.2453       | 3.88332108       | 0.00014386 | No      |
| Npc11l    | 0.80724  | 0.53416   | -0.27308    | 0.00418734 | No      | Cat      | 23.0217   | 216.791  | 3.23524          | 23.0227      | 216.792       | 3.23518258       | 0.00014386 | No      |
| Npffr1    | 0.11225  | 0.015519  | -0.096731   | 0.00045631 | No      | Catsper4 | 0         | 3.98182  | inf              | 0.001        | 3.98282       | 11.9595746       | 0.00014386 | No      |



| RRBS    |          |          |             |            |         | RNAseq  |            |          |                  |              |               |                  |            |         |
|---------|----------|----------|-------------|------------|---------|---------|------------|----------|------------------|--------------|---------------|------------------|------------|---------|
| gene    | Blood    | Kidney   | methyl.diff | pMWU.fdr   | Match ? | gene    | blood      | kidney   | log2(fold_ratio) | blood+ 0.001 | kidney+ 0.001 | log2(fold_ratio) | q_value    | Match ? |
| Nphs2   | 0.095504 | 0.221    | 0.125496    | 0.01832913 | No      | Cav1    | 0.129445   | 8.91068  | 6.10512          | 0.130445     | 8.91168       | 6.09418388       | 0.00014386 | No      |
| Npr1    | 0.10732  | 0.030969 | -0.076351   | 4.77E-09   | No      | Cav2    | 0.861251   | 11.4455  | 3.7322           | 0.862251     | 11.4465       | 3.73065483       | 0.00014386 | No      |
| Nptx2   | 0.13745  | 0.022583 | -0.114867   | 2.23E-05   | No      | Cbfa2t3 | 2.16639    | 0.940458 | -1.20386         | 2.16739      | 0.941458      | -1.2029901       | 0.00014386 | No      |
| Npy5r   | 0.11303  | 0.027371 | -0.085659   | 2.15E-12   | No      | Cbfb    | 71.2416    | 12.5398  | -2.50621         | 71.2426      | 12.5408       | -2.5061108       | 0.00014386 | No      |
| Nr2e1   | 0.080431 | 0.029792 | -0.050639   | 0.00018974 | No      | Cbl     | 15.8686    | 1.66464  | -3.25289         | 15.8696      | 1.66564       | -3.2521172       | 0.00014386 | No      |
| Nr2f2   | 0.13664  | 0.022455 | -0.114185   | 1.83E-06   | No      | Cblb    | 25.1432    | 3.50106  | -2.8443          | 25.1442      | 3.50206       | -2.8439499       | 0.00014386 | No      |
| Nradd   | 0.83537  | 0.055565 | -0.779805   | 1.06E-11   | No      | Cbll1   | 14.508     | 4.21829  | -1.78212         | 14.509       | 4.21929       | -1.7818759       | 0.00014386 | No      |
| Nrip3   | 0.081421 | 0.023668 | -0.057753   | 0.00171073 | No      | CBR1    | 8.47206    | 22.5689  | 1.41355          | 8.47306      | 22.5699       | 1.41344504       | 0.00014386 | No      |
| Nrk     | 0.080261 | 0.013953 | -0.066308   | 2.17E-05   | No      | Cbr4    | 2.28978    | 11.9081  | 2.37866          | 2.29078      | 11.9091       | 2.37815357       | 0.00014386 | No      |
| Nrsn2   | 0.85845  | 0.38307  | -0.47538    | 4.71E-07   | No      | Cbs     | 0.0319445  | 64.787   | 10.9859          | 0.0329445    | 64.788        | 10.9414733       | 0.00014386 | No      |
| Nrtn    | 0.74423  | 0.63712  | -0.10711    | 0.02220995 | No      | Cbx3    | 142.555    | 93.7153  | -0.605159        | 142.556      | 93.7163       | -0.6051569       | 0.00014386 | No      |
| Nt5c1a  | 0.41804  | 0.12405  | -0.29399    | 2.23E-05   | No      | Cbx4    | 34.7049    | 5.61868  | -2.62684         | 34.7059      | 5.61968       | -2.6266211       | 0.00014386 | No      |
| Ntm     | 0.044347 | 0.013006 | -0.031341   | 0.0007877  | No      | Cbx5    | 12.118     | 27.8827  | 1.20221          | 12.119       | 27.8837       | 1.20215135       | 0.00014386 | No      |
| Ntn3    | 0.19827  | 0.025804 | -0.172466   | 1.28E-06   | No      | Cbx6    | 2.40318    | 22.5073  | 3.22738          | 2.40418      | 22.5083       | 3.22684028       | 0.00014386 | No      |
| Ntrk2   | 0.096948 | 0.01861  | -0.078338   | 0.00025822 | No      | Cbx7    | 41.4573    | 17.2887  | -1.2618          | 41.4583      | 17.2897       | -1.2617481       | 0.00014386 | No      |
| Ntsr1   | 0.11918  | 0.045973 | -0.073207   | 0.0038486  | No      | CBY1    | 4.2851     | 19.5708  | 2.1913           | 4.2861       | 19.5718       | 2.19103903       | 0.00014386 | No      |
| Numbl   | 0.85792  | 0.71081  | -0.14711    | 0.00210898 | No      | Cc2d1a  | 18.3681    | 81.0017  | 2.14075          | 18.3691      | 81.0027       | 2.14068905       | 0.00014386 | No      |
| Nvl     | 0.85287  | 0.77487  | -0.078      | 0.02967027 | No      | Cc2d1b  | 47.2451    | 28.4109  | -0.733719        | 47.2461      | 28.4119       | -0.7336999       | 0.00014386 | No      |
| Nyap1   | 0.051468 | 1.50E-07 | -0.0514679  | 5.41E-06   | No      | Cc2d2a  | 0.104035   | 7.30443  | 6.13363          | 0.105035     | 7.30543       | 6.12002714       | 0.00014386 | No      |
| Oaz1    | 0.55248  | 0.098932 | -0.453548   | 4.92E-06   | No      | Ccar1   | 27.9318    | 13.2595  | -1.07489         | 27.9328      | 13.2605       | -1.074825        | 0.00014386 | No      |
| Ogfod1  | 0.17819  | 0.10046  | -0.07773    | 1.57E-05   | No      | Ccbl2   | 4.72171    | 15.3081  | 1.69692          | 4.72271      | 15.3091       | 1.69670262       | 0.00014386 | No      |
| Olig2   | 0.10054  | 0.039893 | -0.060647   | 0.02967027 | No      | CCDC101 | 44.2506    | 15.0243  | -1.5584          | 44.2516      | 15.0253       | -1.5583358       | 0.00014386 | No      |
| Olr1462 | 0.53911  | 0.39398  | -0.14513    | 0.00403477 | No      | Ccdc104 | 18.3599    | 47.1576  | 1.36094          | 18.3609      | 47.1586       | 1.36088411       | 0.00014386 | No      |
| Olr857  | 0.62408  | 0.31198  | -0.3121     | 0.00205129 | No      | Ccdc111 | 1.87832    | 0.609817 | -1.62299         | 1.87932      | 0.610817      | -1.6213986       | 0.00014386 | No      |
| Onecut1 | 0.093853 | 0.041977 | -0.051876   | 7.62E-05   | No      | Ccdc113 | 0.656765   | 29.4125  | 5.48491          | 0.657765     | 29.4135       | 5.48276241       | 0.00014386 | No      |
| Oprm1   | 0.077814 | 0.024832 | -0.052982   | 7.62E-05   | No      | CCDC115 | 64.0971    | 29.318   | -1.12847         | 64.0981      | 29.319        | -1.1284457       | 0.00014386 | No      |
| Osbp18  | 0.30904  | 0.084833 | -0.224207   | 5.28E-07   | No      | Ccdc124 | 60.5741    | 105.397  | 0.799059         | 60.5751      | 105.398       | 0.7990507        | 0.00014386 | No      |
| Osm     | 0        | 0.54179  | 0.54179     | 3.48E-08   | No      | Ccdc126 | 2.55318    | 12.2071  | 2.25735          | 2.55418      | 12.2081       | 2.25690658       | 0.00014386 | No      |
| Otop2   | 0.32063  | 0.19122  | -0.12941    | 0.00198839 | No      | Ccdc127 | 2.66161    | 10.272   | 1.94835          | 2.66261      | 10.273        | 1.94794452       | 0.00014386 | No      |
| Otp     | 0.2366   | 0.063593 | -0.173007   | 0.0007877  | No      | Ccdc137 | 13.0719    | 5.71969  | -1.19246         | 13.0729      | 5.72069       | -1.1923181       | 0.00014386 | No      |
| Ovol3   | 0.7963   | 0.56344  | -0.23286    | 0.00353419 | No      | Ccdc138 | 0.241014   | 2.53717  | 3.39603          | 0.242014     | 2.53817       | 3.39062629       | 0.00014386 | No      |
| Oxct2a  | 0.56604  | 0.34276  | -0.22328    | 0.00418734 | No      | Ccdc148 | 0          | 3.82123  | inf              | 0.001        | 3.82223       | 11.9001989       | 0.00014386 | No      |
| Oxt     | 0.11598  | 0.05515  | -0.06083    | 0.0024744  | No      | Ccdc15  | 1.94562    | 0.409406 | -2.24863         | 1.94662      | 0.410406      | -2.2458476       | 0.00014386 | No      |
| Oxtr    | 0.14224  | 0.077643 | -0.064597   | 0.00229548 | No      | Ccdc157 | 0.616521   | 2.86587  | 2.21675          | 0.617521     | 2.86687       | 2.21491638       | 0.00014386 | No      |
| P22k15  | 0.89183  | 0.78959  | -0.10224    | 0.00770116 | No      | Ccdc160 | 0          | 5.10294  | inf              | 0.001        | 5.10394       | 12.3173957       | 0.00014386 | No      |
| P2rx1   | 0.24579  | 0.42395  | 0.17816     | 0.00875465 | No      | Ccdc163 | 2.47113    | 5.71837  | 1.21043          | 2.47213      | 5.71937       | 1.21010163       | 0.00014386 | No      |
| P2rx2   | 0.71947  | 0.47479  | -0.24468    | 0.01387459 | No      | Ccdc181 | 5.0736     | 18.934   | 1.8999           | 5.0746       | 18.935        | 1.89968941       | 0.00014386 | No      |
| P2rx7   | 0.7978   | 0.19609  | -0.60171    | 3.81E-09   | No      | Ccdc22  | 24.7607    | 13.1257  | -0.915661        | 24.7617      | 13.1267       | -0.9156061       | 0.00014386 | No      |
| P2ry2   | 0.11326  | 0.024573 | -0.088687   | 1.37E-07   | No      | Ccdc23  | 14.5663    | 29.1129  | 0.999018         | 14.5673      | 29.1139       | 0.99897461       | 0.00014386 | No      |
| P3h3    | 0.81513  | 0.70016  | -0.11497    | 0.02733646 | No      | Ccdc27  | 0.00629729 | 6.40189  | 9.98955          | 0.00729729   | 6.40289       | 9.77714672       | 0.00014386 | No      |
| P4ha2   | 0.22482  | 0.080056 | -0.144764   | 0.01961146 | No      | Ccdc28a | 25.7183    | 14.9433  | -0.783297        | 25.7193      | 14.9443       | -0.7832561       | 0.00014386 | No      |
| Pabpc5  | 0.10731  | 0.037806 | -0.069504   | 0.00229548 | No      | Ccdc28b | 36.3469    | 19.505   | -0.897988        | 36.3479      | 19.506        | -0.8979541       | 0.00014386 | No      |

| RRBS     |          |           |             |            |         | RNAseq  |           |          |                  |              |               |                  |            |         |
|----------|----------|-----------|-------------|------------|---------|---------|-----------|----------|------------------|--------------|---------------|------------------|------------|---------|
| gene     | Blood    | Kidney    | methyl.diff | pMWU.fdr   | Match ? | gene    | blood     | kidney   | log2(fold_ratio) | blood+ 0.001 | kidney+ 0.001 | log2(fold_ratio) | q_value    | Match ? |
| Padi2    | 0.12069  | 0.054329  | -0.066361   | 0.0310266  | No      | Ccdc30  | 0.602481  | 5.92115  | 3.29689          | 0.603481     | 5.92215       | 3.29474078       | 0.00014386 | No      |
| Pak7     | 0.17102  | 0.046675  | -0.124345   | 1.17E-09   | No      | Ccdc32  | 8.3795    | 5.29497  | -0.662241        | 8.3805       | 5.29597       | -0.6621414       | 0.00014386 | No      |
| Palmd    | 0.52119  | 0.17833   | -0.34286    | 0.00111391 | No      | Ccdc34  | 2.84638   | 5.65599  | 0.990651         | 2.84738      | 5.65699       | 0.99039958       | 0.00014386 | No      |
| Papolb   | 0.37519  | 0.25395   | -0.12124    | 8.54E-05   | No      | Ccdc37  | 0.709065  | 10.3865  | 3.87265          | 0.710065     | 10.3875       | 3.87075357       | 0.00014386 | No      |
| Pappa    | 0.15552  | 0.034301  | -0.121219   | 8.22E-05   | No      | Ccdc50  | 13.4179   | 9.55347  | -0.490061        | 13.4189      | 9.55447       | -0.4900187       | 0.00014386 | No      |
| Paqr4    | 0.62096  | 0.31394   | -0.30702    | 2.52E-05   | No      | Ccdc51  | 2.91684   | 7.41823  | 1.34667          | 2.91784      | 7.41923       | 1.34636869       | 0.00014386 | No      |
| Paqr7    | 0.76424  | 0.22072   | -0.54352    | 4.71E-07   | No      | Ccdc53  | 31.0835   | 70.9028  | 1.18969          | 31.0845      | 70.9038       | 1.18966758       | 0.00014386 | No      |
| Pard3    | 0.091506 | 0.018187  | -0.073319   | 6.06E-05   | No      | Ccdc6   | 10.3009   | 52.8957  | 2.36037          | 10.3019      | 52.8967       | 2.36026728       | 0.00014386 | No      |
| Pawr     | 0.077066 | 0.015739  | -0.061327   | 0.00317797 | No      | Ccdc64  | 100.657   | 27.3335  | -1.88071         | 100.658      | 27.3345       | -1.8806669       | 0.00014386 | No      |
| Pax1     | 0.10452  | 0.034885  | -0.069635   | 0.00103522 | No      | Ccdc68  | 0         | 7.6574   | inf              | 0.001        | 7.6584        | 12.9028273       | 0.00014386 | No      |
| Pax2     | 0.11637  | 0.01907   | -0.0973     | 2.38E-06   | No      | Ccdc69  | 60.6607   | 2.47224  | -4.61687         | 60.6617      | 2.47324       | -4.6163118       | 0.00014386 | No      |
| Pax3     | 0.076008 | 0.024152  | -0.051856   | 0.00111391 | No      | Ccdc71l | 11.196    | 3.12888  | -1.83927         | 11.197       | 3.12988       | -1.838933        | 0.00014386 | No      |
| Pax7     | 0.09975  | 0.019625  | -0.080125   | 0.00095533 | No      | Ccdc77  | 3.57106   | 1.5366   | -1.21661         | 3.57206      | 1.5376        | -1.2160761       | 0.00014386 | No      |
| Pbp2     | 0.88923  | 0.81279   | -0.07644    | 0.01961146 | No      | Ccdc80  | 0         | 4.73144  | inf              | 0.001        | 4.73244       | 12.2083685       | 0.00014386 | No      |
| Pcdh19   | 0.09097  | 0.012671  | -0.078299   | 4.44E-05   | No      | Ccdc82  | 32.0301   | 5.91524  | -2.43692         | 32.0311      | 5.91624       | -2.4367209       | 0.00014386 | No      |
| Pcdh7    | 0.25842  | 0.15554   | -0.10288    | 0.01320709 | No      | Ccdc88b | 50.5628   | 4.68157  | -3.43301         | 50.5638      | 4.68257       | -3.4327324       | 0.00014386 | No      |
| Pcdh8    | 0.12375  | 0.043639  | -0.080111   | 2.26E-12   | No      | Ccdc88c | 32.1696   | 8.03128  | -2.002           | 32.1706      | 8.03228       | -2.0018614       | 0.00014386 | No      |
| Pcdh9    | 0.040154 | 0.19347   | 0.153316    | 3.52E-05   | No      | Ccdc90b | 10.7084   | 24.4148  | 1.18902          | 10.7094      | 24.4158       | 1.1889374        | 0.00014386 | No      |
| Pcdha9   | 0.39991  | 0.22944   | -0.17047    | 3.41E-06   | No      | Ccdc91  | 16.6409   | 27.0738  | 0.70216          | 16.6419      | 27.0748       | 0.70213053       | 0.00014386 | No      |
| Pcdhac1  | 0.35009  | 0.18709   | -0.163      | 0.00902244 | No      | Ccdc92  | 0.779336  | 7.27052  | 3.22174          | 0.780336     | 7.27152       | 3.22008961       | 0.00014386 | No      |
| Pcdhac2  | 0.15773  | 0.051633  | -0.106097   | 0.00014055 | No      | Ccdc94  | 25.5937   | 12.7987  | -0.999793        | 25.5947      | 12.7997       | -0.9997351       | 0.00014386 | No      |
| Pcdhga10 | 0.55435  | 0.35094   | -0.20341    | 0.00014055 | No      | Ccdc97  | 111.472   | 53.2487  | -1.06587         | 111.473      | 53.2497       | -1.065849        | 0.00014386 | No      |
| Pcdhga12 | 0.555    | 0.32543   | -0.22957    | 0.00011494 | No      | Cchr1   | 7.7766    | 26.2234  | 1.75365          | 7.7776       | 26.2244       | 1.75351282       | 0.00014386 | No      |
| Pcdhga2  | 0.4625   | 0.37132   | -0.09118    | 0.02094681 | No      | Ccl3    | 23.2476   | 52.4534  | 1.17396          | 23.2486      | 52.4544       | 1.17391995       | 0.00014386 | No      |
| Pcdhga3  | 0.56619  | 0.36309   | -0.2031     | 0.00017371 | No      | Ccl4    | 5.59384   | 12.8301  | 1.19762          | 5.59484      | 12.8311       | 1.19747608       | 0.00014386 | No      |
| Pcdhga8  | 0.62033  | 0.34204   | -0.27829    | 1.51E-05   | No      | Ccl5    | 259.601   | 92.1391  | -1.49441         | 259.602      | 92.1401       | -1.4944004       | 0.00014386 | No      |
| Pcdhgb7  | 0.53288  | 0.3956    | -0.13728    | 0.00770116 | No      | Ccl6    | 1.1656    | 4.48644  | 1.9445           | 1.1666       | 4.48744       | 1.94358267       | 0.00014386 | No      |
| Pclo     | 0.13644  | 0.028361  | -0.108079   | 6.06E-05   | No      | Ccl9    | 0.725559  | 18.4954  | 4.67193          | 0.726559     | 18.4964       | 4.67002074       | 0.00014386 | No      |
| Pcsk1n   | 0.094627 | 0.016871  | -0.077756   | 0.0003366  | No      | Ccm2    | 76.5457   | 26.0587  | -1.55456         | 76.5467      | 26.0597       | -1.5545197       | 0.00014386 | No      |
| Pcsk2    | 0.091528 | 0.026345  | -0.065183   | 0.00087121 | No      | Ccnc    | 20.789    | 9.35169  | -1.15252         | 20.79        | 9.35269       | -1.1524365       | 0.00014386 | No      |
| Pcsk9    | 0.3302   | 0.086698  | -0.243502   | 2.08E-06   | No      | Ccnd1   | 0.0885675 | 83.4851  | 9.88053          | 0.0895675    | 83.4861       | 9.86434496       | 0.00014386 | No      |
| Pdcl     | 0.74428  | 0.63695   | -0.10733    | 0.02346238 | No      | CCND2   | 13.4329   | 1.59572  | -3.07349         | 13.4339      | 1.59672       | -3.0726949       | 0.00014386 | No      |
| Pde10a   | 0.18905  | 0.10153   | -0.08752    | 0.00113573 | No      | Ccnd3   | 56.4753   | 29.5995  | -0.932048        | 56.4763      | 29.6005       | -0.932024        | 0.00014386 | No      |
| Pde11a   | 0.79554  | 0.49326   | -0.30228    | 2.23E-05   | No      | Ccng2   | 32.3454   | 14.0953  | -1.19835         | 32.3464      | 14.0963       | -1.1982886       | 0.00014386 | No      |
| Pde1b    | 0.30813  | 0.081156  | -0.226974   | 0.00334552 | No      | CCNJ    | 6.27615   | 2.00008  | -1.64982         | 6.27715      | 2.00108       | -1.6493308       | 0.00014386 | No      |
| Pde3a    | 0.12805  | 0.03475   | -0.0933     | 0.00501738 | No      | Ccnjl   | 3.24942   | 0.540482 | -2.58786         | 3.25042      | 0.541482      | -2.5856409       | 0.00014386 | No      |
| Pde6c    | 0.69754  | 0.81301   | 0.11547     | 0.00533667 | No      | Ccnk    | 23.2959   | 14.6872  | -0.665523        | 23.2969      | 14.6882       | -0.6654804       | 0.00014386 | No      |
| Pdia5    | 0.10901  | 0.049445  | -0.059565   | 0.01387459 | No      | Ccnl1   | 149.43    | 45.1045  | -1.72812         | 149.431      | 45.1055       | -1.7281042       | 0.00014386 | No      |
| Pdx1     | 0.18849  | 0.028376  | -0.160114   | 0.00025822 | No      | CCNL2   | 163.994   | 69.482   | -1.23893         | 163.995      | 69.483        | -1.2389199       | 0.00014386 | No      |
| Peg12    | 0.16407  | 0.082388  | -0.081682   | 0.00065829 | No      | Ccnt2   | 30.4986   | 6.75018  | -2.17574         | 30.4996      | 6.75118       | -2.1755787       | 0.00014386 | No      |
| Pelo     | 0.080707 | 0.0079365 | -0.0727705  | 0.00038568 | No      | Ccp110  | 5.73132   | 2.46591  | -1.21675         | 5.73232      | 2.46691       | -1.2164141       | 0.00014386 | No      |
| Perp     | 0.37709  | 0.101     | -0.27609    | 0.00018974 | No      | Ccp1    | 86.9206   | 25.1892  | -1.78689         | 86.9216      | 25.1902       | -1.7868522       | 0.00014386 | No      |

| RRBS   |           |           |             |            |         | RNAseq  |          |           |                  |              |               |                  |            |         |
|--------|-----------|-----------|-------------|------------|---------|---------|----------|-----------|------------------|--------------|---------------|------------------|------------|---------|
| gene   | Blood     | Kidney    | methyl.diff | pMWU.fdr   | Match ? | gene    | blood    | kidney    | log2(fold_ratio) | blood+ 0.001 | kidney+ 0.001 | log2(fold_ratio) | q_value    | Match ? |
| Pex5l  | 0.07371   | 0.021115  | -0.052595   | 2.98E-08   | No      | Ccpg1os | 3.67884  | 22.0058   | 2.58056          | 3.67984      | 22.0068       | 2.58023443       | 0.00014386 | No      |
| Pgc    | 0.78386   | 0.69395   | -0.08991    | 0.04412687 | No      | Ccr5    | 3.3286   | 1.2055    | -1.46529         | 3.3296       | 1.2065        | -1.464521        | 0.00014386 | No      |
| Pgp    | 0.24044   | 0.044362  | -0.196078   | 2.28E-12   | No      | Ccr6    | 7.5248   | 1.0565    | -2.83236         | 7.5258       | 1.0575        | -2.8311873       | 0.00014386 | No      |
| Phf13  | 0.19994   | 0.058334  | -0.141606   | 0.01120909 | No      | Ccr7    | 388.133  | 1.38328   | -8.13231         | 388.134      | 1.38428       | -8.1312752       | 0.00014386 | No      |
| Phldb3 | 0.29426   | 0.12972   | -0.16454    | 0.02346238 | No      | Ccr9    | 21.2573  | 0.0712638 | -8.22058         | 21.2583      | 0.0722638     | -8.2005374       | 0.00014386 | No      |
| Phox2a | 0.23331   | 0.064595  | -0.168715   | 1.27E-05   | No      | Ccrl2   | 0.258121 | 2.74511   | 3.41075          | 0.259121     | 2.74611       | 3.40569157       | 0.00014386 | No      |
| Pif1   | 0.0081861 | 0.11441   | 0.1062239   | 2.15E-12   | No      | Ccsap   | 11.6667  | 0.885511  | -3.71974         | 11.6677      | 0.886511      | -3.7182379       | 0.00014386 | No      |
| Pih1d3 | 0.14562   | 0.039586  | -0.106034   | 0.00024364 | No      | Ccser1  | 0.240935 | 2.09365   | 3.1193           | 0.241935     | 2.09465       | 3.1140178        | 0.00014386 | No      |
| Pinlyp | 0.91052   | 0.6451    | -0.26542    | 0.0007877  | No      | Ccser2  | 5.25763  | 10.6869   | 1.02336          | 5.25863      | 10.6879       | 1.02321952       | 0.00014386 | No      |
| Pkp1   | 0.07547   | 0.019571  | -0.055899   | 2.31E-05   | No      | Cct2    | 141.905  | 82.4035   | -0.784153        | 141.906      | 82.4045       | -0.7841406       | 0.00014386 | No      |
| Pkp3   | 0.85709   | 0.11153   | -0.74556    | 1.47E-10   | No      | Cct3    | 162.746  | 111.488   | -0.545731        | 162.747      | 111.489       | -0.5457296       | 0.00014386 | No      |
| Pla1a  | 0.14199   | 0.35729   | 0.2153      | 0.01832913 | No      | Cct4    | 195.846  | 96.7954   | -1.01671         | 195.847      | 96.7964       | -1.0167017       | 0.00014386 | No      |
| Pla2g3 | 0.74942   | 0.61405   | -0.13537    | 0.01559789 | No      | Cct5    | 276.715  | 139.637   | -0.98672         | 276.716      | 139.638       | -0.9867145       | 0.00014386 | No      |
| Pla2r1 | 0.44719   | 0.24882   | -0.19837    | 0.01387459 | No      | Cct6a   | 69.7561  | 53.1132   | -0.393248        | 69.7571      | 53.1142       | -0.3932424       | 0.00014386 | No      |
| Plagl1 | 0.32035   | 0.15736   | -0.16299    | 2.15E-12   | No      | Cct7    | 128.263  | 73.0764   | -0.811629        | 128.264      | 73.0774       | -0.8116191       | 0.00014386 | No      |
| Plaur  | 0.089206  | 0.029324  | -0.059882   | 0.01559789 | No      | Cct8    | 114.768  | 66.9034   | -0.778563        | 114.769      | 66.9044       | -0.77856         | 0.00014386 | No      |
| Plcd3  | 0.084488  | 0.0131    | -0.071388   | 0.00103522 | No      | Ccz1    | 37.086   | 24.4514   | -0.600959        | 37.087       | 24.4524       | -0.6009375       | 0.00014386 | No      |
| Plek2  | 0.33958   | 0.077819  | -0.261761   | 0.00123297 | No      | Cd14    | 0.474947 | 9.09577   | 4.25936          | 0.475947     | 9.09677       | 4.25648154       | 0.00014386 | No      |
| Plk1   | 0.0025208 | 0.082983  | 0.0804622   | 2.23E-05   | No      | Cd163l1 | 0.794198 | 0         | -inf             | 0.795198     | 0.001         | -9.6351703       | 0.00014386 | No      |
| Plip   | 0.14364   | 0.046588  | -0.097052   | 0.00781609 | No      | Cd1d1   | 17.5668  | 3.38874   | -2.37403         | 17.5678      | 3.38974       | -2.373687        | 0.00014386 | No      |
| Plpp4  | 0.065119  | 0.009047  | -0.056072   | 0.01289082 | No      | Cd2     | 325.838  | 16.3189   | -4.31954         | 325.839      | 16.3199       | -4.3194552       | 0.00014386 | No      |
| Plpp6  | 0.084295  | 0.005155  | -0.07914    | 2.99E-06   | No      | Cd200   | 3.80164  | 10.6036   | 1.47986          | 3.80264      | 10.6046       | 1.47961694       | 0.00014386 | No      |
| Plpp7  | 0.69672   | 0.28092   | -0.4158     | 1.33E-06   | No      | Cd200r1 | 7.41336  | 0.660778  | -3.48789         | 7.41436      | 0.661778      | -3.4859029       | 0.00014386 | No      |
| Plppr5 | 0.075672  | 0.015379  | -0.060293   | 2.15E-12   | No      | Cd22    | 5.99891  | 0.486074  | -3.62545         | 5.99991      | 0.487074      | -3.622728        | 0.00014386 | No      |
| Plscr3 | 0.9054    | 0.59787   | -0.30753    | 4.33E-06   | No      | Cd226   | 21.6404  | 0.458466  | -5.56077         | 21.6414      | 0.459466      | -5.5576919       | 0.00014386 | No      |
| Plxna2 | 0.12054   | 0.047283  | -0.073257   | 0.00281863 | No      | Cd247   | 302.614  | 8.03917   | -5.23429         | 302.615      | 8.04017       | -5.2341137       | 0.00014386 | No      |
| Plxb2  | 0.14091   | 0.0026205 | -0.1382895  | 6.50E-07   | No      | Cd27    | 246.992  | 5.01743   | -5.62137         | 246.993      | 5.01843       | -5.6210903       | 0.00014386 | No      |
| Pmaip1 | 0.52289   | 0.23463   | -0.28826    | 3.92E-12   | No      | Cd274   | 17.583   | 1.2201    | -3.84911         | 17.584       | 1.2211        | -3.84801         | 0.00014386 | No      |
| Pnck   | 0.71945   | 0.5777    | -0.14175    | 0.04412687 | No      | Cd28    | 115.974  | 2.47919   | -5.54779         | 115.975      | 2.48019       | -5.5472194       | 0.00014386 | No      |
| Pnkp   | 0.3061    | 0.084885  | -0.221215   | 0.00533667 | No      | Cd300a  | 1.04804  | 5.61215   | 2.42086          | 1.04904      | 5.61315       | 2.41974092       | 0.00014386 | No      |
| Pnma1  | 0.92118   | 0.74615   | -0.17503    | 0.00031293 | No      | Cd302   | 0.982061 | 7.78122   | 2.98611          | 0.983061     | 7.78222       | 2.98482892       | 0.00014386 | No      |
| Pnmt   | 0.18942   | 0.46648   | 0.27706     | 1.73E-05   | No      | Cd320   | 77.7178  | 285.693   | 1.87815          | 77.7188      | 285.694       | 1.87813521       | 0.00014386 | No      |
| Pnpla1 | 0.50098   | 0.13635   | -0.36463    | 1.27E-05   | No      | Cd36    | 0.181367 | 1.56122   | 3.10569          | 0.182367     | 1.56222       | 3.09868104       | 0.00014386 | No      |
| Polg   | 0.87893   | 0.77573   | -0.1032     | 0.02220995 | No      | Cd3d    | 779.757  | 22.6908   | -5.10285         | 779.758      | 22.6918       | -5.1027835       | 0.00014386 | No      |
| Polg2  | 0.37899   | 0.03428   | -0.34471    | 0.00087121 | No      | Cd3e    | 821.701  | 20.4936   | -5.32537         | 821.702      | 20.4946       | -5.3252995       | 0.00014386 | No      |
| Pou2f3 | 0.072104  | 0.014286  | -0.057818   | 0.00173557 | No      | Cd3eap  | 11.2011  | 40.4561   | 1.85271          | 11.2021      | 40.4571       | 1.8526237        | 0.00014386 | No      |
| Pou3f2 | 0.18518   | 0.020274  | -0.164906   | 1.98E-05   | No      | Cd3g    | 1339.4   | 36.1745   | -5.21047         | 1339.401     | 36.1755       | -5.2104312       | 0.00014386 | No      |
| Pou4f2 | 0.064893  | 0.011869  | -0.053024   | 3.15E-05   | No      | Cd4     | 132.994  | 4.22624   | -4.97584         | 132.995      | 4.22724       | -4.9755122       | 0.00014386 | No      |
| Ppara  | 0.23386   | 0.082373  | -0.151487   | 0.00010321 | No      | Cd40    | 0.919108 | 10.899    | 3.56781          | 0.920108     | 10.9          | 3.56638111       | 0.00014386 | No      |
| Ppfia2 | 0.14641   | 0.034047  | -0.112363   | 3.76E-05   | No      | Cd40lg  | 129.152  | 0.7312    | -7.46459         | 129.153      | 0.7322        | -7.4626277       | 0.00014386 | No      |
| Ppfia3 | 0.10821   | 0.023272  | -0.084938   | 0.00025822 | No      | Cd44    | 119.282  | 15.3979   | -2.95357         | 119.283      | 15.3989       | -2.9534892       | 0.00014386 | No      |
| Ppm1n  | 0.078119  | 0.017659  | -0.06046    | 0.00031293 | No      | Cd47    | 99.2204  | 18.8037   | -2.39962         | 99.2214      | 18.8047       | -2.399558        | 0.00014386 | No      |

| RRBS     |           |           |             |            |         | RNAseq   |           |          |                  |              |               |                  |            |         |
|----------|-----------|-----------|-------------|------------|---------|----------|-----------|----------|------------------|--------------|---------------|------------------|------------|---------|
| gene     | Blood     | Kidney    | methyl.diff | pMWU.fdr   | Match ? | gene     | blood     | kidney   | log2(fold_ratio) | blood+ 0.001 | kidney+ 0.001 | log2(fold_ratio) | q_value    | Match ? |
| Ppp1r14a | 0.72385   | 0.34923   | -0.37462    | 1.70E-08   | No      | Cd48     | 189.371   | 43.3046  | -2.12862         | 189.372      | 43.3056       | -2.1285975       | 0.00014386 | No      |
| Ppp1r14b | 0.3438    | 0.18817   | -0.15563    | 1.18E-06   | No      | Cd5      | 13.7294   | 0.37396  | -5.19824         | 13.7304      | 0.37496       | -5.1944931       | 0.00014386 | No      |
| Ppp1r3d  | 0.3583    | 0.074085  | -0.284215   | 2.15E-12   | No      | Cd53     | 411.139   | 9.58036  | -5.4234          | 411.14       | 9.58136       | -5.4232555       | 0.00014386 | No      |
| Prim2    | 0.77956   | 0.62933   | -0.15023    | 0.00103522 | No      | Cd55     | 0.946723  | 2.64303  | 1.48118          | 0.947723     | 2.64403       | 1.48020119       | 0.00014386 | No      |
| Prkcdbp  | 0.58256   | 0.36852   | -0.21404    | 0.00010637 | No      | Cd59     | 1.61297   | 155.065  | 6.58701          | 1.61397      | 155.066       | 6.58612482       | 0.00014386 | No      |
| Prkce    | 0.2173    | 0.020354  | -0.196946   | 2.15E-12   | No      | Cd6      | 134.293   | 13.4929  | -3.31511         | 134.294      | 13.4939       | -3.3150156       | 0.00014386 | No      |
| Prkd1    | 0.13155   | 0.035396  | -0.096154   | 0.00188523 | No      | Cd63     | 5.71558   | 597.053  | 6.70681          | 5.71658      | 597.054       | 6.70656531       | 0.00014386 | No      |
| Prmt8    | 0.1296    | 0.028607  | -0.100993   | 4.71E-07   | No      | Cd68     | 2.03985   | 7.18129  | 1.81578          | 2.04085      | 7.18229       | 1.81527376       | 0.00014386 | No      |
| Proca1   | 0.081541  | 0.021623  | -0.059918   | 3.41E-06   | No      | Cd69     | 131.367   | 9.01328  | -3.8654          | 131.368      | 9.01428       | -3.8652578       | 0.00014386 | No      |
| Prpf31   | 0.46697   | 0.27354   | -0.19343    | 4.12E-07   | No      | Cd74     | 223.853   | 310.598  | 0.472496         | 223.854      | 310.599       | 0.47249509       | 0.00014386 | No      |
| Prss32   | 0.562     | 0.28059   | -0.28141    | 0.00265064 | No      | Cd79b    | 30.1274   | 2.09458  | -3.84634         | 30.1284      | 2.09558       | -3.8457026       | 0.00014386 | No      |
| Prss33   | 0.7793    | 0.61851   | -0.16079    | 0.02967027 | No      | Cd81     | 112.724   | 168.552  | 0.580404         | 112.725      | 168.553       | 0.5803948        | 0.00014386 | No      |
| Prss34   | 0.74706   | 0.54337   | -0.20369    | 0.01387459 | No      | Cd84     | 14.4731   | 1.83929  | -2.97615         | 14.4741      | 1.84029       | -2.9754686       | 0.00014386 | No      |
| Prss41   | 0.81483   | 0.66334   | -0.15149    | 0.00418734 | No      | Cd8b     | 98.5075   | 3.42425  | -4.84638         | 98.5085      | 3.42525       | -4.845967        | 0.00014386 | No      |
| Prtfdc1  | 0.092188  | 0.026217  | -0.065971   | 0.00188523 | No      | Cd9      | 21.8433   | 121.124  | 2.47121          | 21.8443      | 121.125       | 2.47116789       | 0.00014386 | No      |
| Psapl1   | 0.74094   | 0.56098   | -0.17996    | 0.0247155  | No      | Cd93     | 0.0644626 | 2.20456  | 5.09589          | 0.0654626    | 2.20556       | 5.07433029       | 0.00014386 | No      |
| Psd      | 0.64842   | 0.46318   | -0.18524    | 0.00229548 | No      | Cd96     | 47.0854   | 2.81203  | -4.06559         | 47.0864      | 2.81303       | -4.0651136       | 0.00014386 | No      |
| Psmas8   | 0.87268   | 0.71613   | -0.15655    | 1.04E-05   | No      | Cd97     | 168.927   | 13.8334  | -3.61017         | 168.928      | 13.8344       | -3.6100765       | 0.00014386 | No      |
| Ptchd1   | 0.062579  | 0         | -0.062579   | 0.01120909 | No      | Cd99     | 36.8543   | 363.937  | 3.30379          | 36.8553      | 363.938       | 3.30374869       | 0.00014386 | No      |
| Ptf1a    | 0.10182   | 0.025047  | -0.076773   | 2.18E-08   | No      | CDADC1   | 18.6042   | 25.1098  | 0.432624         | 18.6052      | 25.1108       | 0.43260209       | 0.00014386 | No      |
| Ptgdr    | 0.13637   | 0.054609  | -0.081761   | 0.00050175 | No      | Cdc14a   | 7.1028    | 4.22304  | -0.750107        | 7.1038       | 4.22404       | -0.7499675       | 0.00014386 | No      |
| Ptgds    | 0.90873   | 0.64251   | -0.26622    | 0.00011494 | No      | Cdc14b   | 5.97635   | 18.554   | 1.63439          | 5.97735      | 18.555        | 1.63423007       | 0.00014386 | No      |
| Ptgr1    | 0.084577  | 0.022116  | -0.062461   | 0.00095533 | No      | Cdc23    | 25.0548   | 12.2881  | -1.02782         | 25.0558      | 12.2891       | -1.0277653       | 0.00014386 | No      |
| Pth2     | 0.19157   | 0.035504  | -0.156066   | 3.09E-06   | No      | Cdc25a   | 3.22242   | 5.0387   | 0.644907         | 3.22342      | 5.0397        | 0.64474568       | 0.00014386 | No      |
| Pth2r    | 0.069894  | 0.014736  | -0.055158   | 2.18E-08   | No      | Cdc25b   | 108.126   | 2.82979  | -5.25588         | 108.127      | 2.83079       | -5.2553783       | 0.00014386 | No      |
| Ptma     | 0.42373   | 0.32953   | -0.0942     | 0.00038568 | No      | Cdc25c   | 3.97369   | 1.0413   | -1.93209         | 3.97469      | 1.0423        | -1.9310718       | 0.00014386 | No      |
| Ptpn14   | 0.19032   | 0.034294  | -0.156026   | 6.17E-07   | No      | Cdc26    | 28.6632   | 15.914   | -0.848907        | 28.6642      | 15.915        | -0.8488629       | 0.00014386 | No      |
| Ptprn    | 0.082485  | 0.018173  | -0.064312   | 0.00123297 | No      | Cdc27    | 8.19812   | 5.34669  | -0.616648        | 8.19912      | 5.34769       | -0.6165532       | 0.00014386 | No      |
| Ptx3     | 0.01148   | 0.081835  | 0.070355    | 0.00179845 | No      | Cdc40    | 16.7984   | 10.8604  | -0.629243        | 16.7994      | 10.8614       | -0.6291996       | 0.00014386 | No      |
| Purg     | 0.34138   | 0.047001  | -0.294379   | 3.70E-08   | No      | Cdc42    | 623.268   | 225.294  | -1.46805         | 623.269      | 225.295       | -1.4680397       | 0.00014386 | No      |
| Pvrl2    | 0.33974   | 0.16782   | -0.17192    | 0.00281863 | No      | Cdc42bpa | 0.0938667 | 6.10117  | 6.02233          | 0.0948667    | 6.10217       | 6.0072768        | 0.00014386 | No      |
| Pwwp2b   | 0.1025    | 0.20252   | 0.10002     | 0.00118    | No      | Cdc42bpg | 2.93346   | 15.4349  | 2.39552          | 2.93446      | 15.4359       | 2.39512265       | 0.00014386 | No      |
| Rab34    | 0.56199   | 0.077451  | -0.484539   | 1.47E-07   | No      | Cdc42ep4 | 0.272515  | 7.76718  | 4.83298          | 0.273515     | 7.76818       | 4.82788477       | 0.00014386 | No      |
| Rab36    | 0.8614    | 0.59134   | -0.27006    | 8.22E-05   | No      | Cdc42se1 | 228.862   | 107.274  | -1.09318         | 228.863      | 107.275       | -1.0931703       | 0.00014386 | No      |
| Rad23b   | 0.068427  | 0.010317  | -0.05811    | 0.00501738 | No      | Cdc42se2 | 163.83    | 27.3698  | -2.58154         | 163.831      | 27.3708       | -2.5814989       | 0.00014386 | No      |
| Radil    | 0.058178  | 0.0028096 | -0.0553684  | 1.16E-05   | No      | Cdc5l    | 36.0407   | 22.0289  | -0.710232        | 36.0417      | 22.0299       | -0.7102041       | 0.00014386 | No      |
| Rai1     | 0.56741   | 0.19975   | -0.36766    | 2.00E-06   | No      | Cdc6     | 0.552829  | 12.696   | 4.52139          | 0.553829     | 12.697        | 4.51890325       | 0.00014386 | No      |
| Rasef    | 0.16614   | 0.041108  | -0.125032   | 2.15E-12   | No      | Cdca3    | 1.26215   | 5.16038  | 2.0316           | 1.26315      | 5.16138       | 2.03073088       | 0.00014386 | No      |
| Rasgef1c | 0.039925  | 0.44391   | 0.403985    | 6.75E-07   | No      | Cdca4    | 7.18163   | 2.01168  | -1.83591         | 7.18263      | 2.01268       | -1.8353944       | 0.00014386 | No      |
| Rasgrp4  | 0.77659   | 0.55492   | -0.22167    | 0.01025068 | No      | Cdca7    | 5.94363   | 0.627558 | -3.24352         | 5.94463      | 0.628558      | -3.2414692       | 0.00014386 | No      |
| Rasl10b  | 0.0094969 | 0.32511   | 0.3156131   | 2.32E-06   | No      | Cdca7l   | 29.1693   | 3.56181  | -3.03377         | 29.1703      | 3.56281       | -3.0334128       | 0.00014386 | No      |
| Rassf4   | 0.088932  | 0.0083565 | -0.0805755  | 0.00065829 | No      | Cdh1     | 0.0990399 | 29.1409  | 8.20082          | 0.1000399    | 29.1419       | 8.18637561       | 0.00014386 | No      |

| RRBS       |          |          |             |            |         | RNAseq     |           |         |                  |              |               |                  |            |         |
|------------|----------|----------|-------------|------------|---------|------------|-----------|---------|------------------|--------------|---------------|------------------|------------|---------|
| gene       | Blood    | Kidney   | methyl.diff | pMWU.fdr   | Match ? | gene       | blood     | kidney  | log2(fold_ratio) | blood+ 0.001 | kidney+ 0.001 | log2(fold_ratio) | q_value    | Match ? |
| Rax        | 0.14496  | 0.047998 | -0.096962   | 0.0038486  | No      | Cdh16      | 0.116169  | 374.713 | 11.6553          | 0.117169     | 374.714       | 11.6429832       | 0.00014386 | No      |
| Rbfox3     | 0.7643   | 0.19521  | -0.56909    | 2.16E-09   | No      | Cdhr1      | 0.41826   | 2.57616 | 2.62275          | 0.41926      | 2.57716       | 2.61986501       | 0.00014386 | No      |
| Rbm24      | 0.73463  | 0.63107  | -0.10356    | 0.00976507 | No      | Cdhr2      | 0.133683  | 2.3234  | 4.11935          | 0.134683     | 2.3244        | 4.10921869       | 0.00014386 | No      |
| Rbm46      | 0.21077  | 0.021528 | -0.189242   | 1.98E-05   | No      | Cdip1      | 10.2011   | 27.2916 | 1.41973          | 10.2021      | 27.2926       | 1.41964369       | 0.00014386 | No      |
| Rcor2      | 0.23643  | 0.11673  | -0.1197     | 3.31E-07   | No      | Cdk1       | 1.44341   | 6.38809 | 2.14591          | 1.44441      | 6.38909       | 2.14513015       | 0.00014386 | No      |
| Rdh10      | 0.23331  | 0.021877 | -0.211433   | 5.41E-06   | No      | Cdk11b     | 94.2331   | 59.5281 | -0.662662        | 94.2341      | 59.5291       | -0.6626541       | 0.00014386 | No      |
| Reln       | 0.080492 | 0.026541 | -0.053951   | 1.73E-05   | No      | CDK12      | 24.481    | 6.88506 | -1.83012         | 24.482       | 6.88606       | -1.8299708       | 0.00014386 | No      |
| Rem1       | 0.47624  | 0.14371  | -0.33253    | 8.74E-08   | No      | Cdk13      | 40.3128   | 8.78955 | -2.19738         | 40.3138      | 8.79055       | -2.1972484       | 0.00014386 | No      |
| Retn       | 0.66813  | 0.35788  | -0.31025    | 6.06E-05   | No      | Cdk17      | 16.8355   | 5.51122 | -1.61106         | 16.8365      | 5.51222       | -1.6108869       | 0.00014386 | No      |
| RGD1309036 | 0.69587  | 0.50444  | -0.19143    | 0.00418734 | No      | Cdk18      | 0         | 17.8694 | inf              | 0.001        | 17.8704       | 14.1252843       | 0.00014386 | No      |
| RGD1309049 | 0.98283  | 0.90935  | -0.07348    | 0.00014347 | No      | Cdk19      | 29.5602   | 8.73287 | -1.75913         | 29.5612      | 8.73387       | -1.7590119       | 0.00014386 | No      |
| RGD1309362 | 0.95588  | 0.74942  | -0.20646    | 5.28E-07   | No      | Cdk2       | 28.0802   | 5.49836 | -2.35248         | 28.0812      | 5.49936       | -2.352269        | 0.00014386 | No      |
| RGD1310587 | 0.74484  | 0.17006  | -0.57478    | 4.71E-07   | No      | Cdk20      | 7.76414   | 12.5042 | 0.687515         | 7.76514      | 12.5052       | 0.68744429       | 0.00014386 | No      |
| RGD1311946 | 0.089194 | 0.017985 | -0.071209   | 0.00040757 | No      | Cdk2ap2    | 70.2152   | 134.957 | 0.942641         | 70.2162      | 134.958       | 0.94263467       | 0.00014386 | No      |
| RGD1359334 | 0.8133   | 0.76038  | -0.05292    | 0.00892199 | No      | Cdk5rap1   | 17.4795   | 35.2075 | 1.01022          | 17.4805      | 35.2085       | 1.01017731       | 0.00014386 | No      |
| RGD1560108 | 0.90855  | 0.28496  | -0.62359    | 2.15E-12   | No      | Cdk9       | 97.0528   | 49.4719 | -0.972161        | 97.0538      | 49.4729       | -0.9721462       | 0.00014386 | No      |
| RGD1560394 | 0.66737  | 0.47964  | -0.18773    | 0.01268638 | No      | Cdkl1      | 0.0897891 | 548.488 | 12.5766          | 0.0907891    | 548.489       | 12.560656        | 0.00014386 | No      |
| RGD1561149 | 0.75902  | 0.070422 | -0.688598   | 9.55E-08   | No      | Cdkl2      | 0.0756145 | 1.04151 | 3.78387          | 0.0766145    | 1.04251       | 3.76629995       | 0.00014386 | No      |
| RGD1561870 | 0.52357  | 0.27657  | -0.247      | 0.00976507 | No      | Cdkn1a     | 0.120898  | 8.44607 | 6.12641          | 0.121898     | 8.44707       | 6.11470465       | 0.00014386 | No      |
| RGD1562114 | 0.89312  | 0.11057  | -0.78255    | 2.15E-12   | No      | Cdkn1b     | 226.4     | 40.1418 | -2.49569         | 226.401      | 40.1428       | -2.4956672       | 0.00014386 | No      |
| RGD1562726 | 0.5806   | 0.095349 | -0.485251   | 3.12E-09   | No      | Cdkn2aip   | 16.8453   | 8.46599 | -0.992592        | 16.8463      | 8.46699       | -0.9925107       | 0.00014386 | No      |
| RGD1563072 | 0.09898  | 0.026763 | -0.072217   | 4.21E-12   | No      | Cdkn2aipnl | 52.9328   | 35.3383 | -0.582931        | 52.9338      | 35.3393       | -0.5829158       | 0.00014386 | No      |
| RGD1563348 | 0.47147  | 0.36111  | -0.11036    | 0.00045631 | No      | Cdo1       | 0.174316  | 19.5093 | 6.80631          | 0.175316     | 19.5103       | 6.79813448       | 0.00014386 | No      |
| RGD1564053 | 0.11019  | 0.027026 | -0.083164   | 0.00018974 | No      | Cdr2       | 1.7238    | 24.2296 | 3.8131           | 1.7248       | 24.2306       | 3.81232914       | 0.00014386 | No      |
| RGD1564345 | 0.90777  | 0.8336   | -0.07417    | 0.01206268 | No      | Cds2       | 21.8648   | 11.3956 | -0.940136        | 21.8658      | 11.3966       | -0.9400727       | 0.00014386 | No      |

| RRBS       |          |          |             |            |         | RNAseq  |          |          |                  |              |               |                  |            |         |
|------------|----------|----------|-------------|------------|---------|---------|----------|----------|------------------|--------------|---------------|------------------|------------|---------|
| gene       | Blood    | Kidney   | methyl.diff | pMWU.fdr   | Match ? | gene    | blood    | kidney   | log2(fold_ratio) | blood+ 0.001 | kidney+ 0.001 | log2(fold_ratio) | q_value    | Match ? |
| RGD1564482 | 0.75032  | 0.2832   | -0.46712    | 9.44E-05   | No      | Cdt1    | 2.58818  | 1.12413  | -1.20313         | 2.58918      | 1.12513       | -1.2024036       | 0.00014386 | No      |
| RGD1565611 | 0.23621  | 0.091868 | -0.144342   | 0.00093244 | No      | Cdv3    | 48.247   | 20.8066  | -1.21339         | 48.248       | 20.8076       | -1.2133586       | 0.00014386 | No      |
| RGD1566239 | 0.88302  | 0.35849  | -0.52453    | 4.71E-07   | No      | Cdyl    | 7.94033  | 4.65384  | -0.770778        | 7.94133      | 4.65484       | -0.7706491       | 0.00014386 | No      |
| RGD1566401 | 0.52746  | 0.32242  | -0.20504    | 1.40E-05   | No      | Cdyl2   | 7.13835  | 0.882105 | -3.01657         | 7.13935      | 0.883105      | -3.0151358       | 0.00014386 | No      |
| Rgn        | 0.53334  | 0.065503 | -0.467837   | 7.53E-11   | No      | Ceacam1 | 0.838159 | 4.94332  | 2.56018          | 0.839159     | 4.94432       | 2.55875602       | 0.00014386 | No      |
| Rgs20      | 0.11808  | 0.040414 | -0.077666   | 0.00781609 | No      | Cebpa   | 0.339786 | 5.80654  | 4.09498          | 0.340786     | 5.80754       | 4.09098921       | 0.00014386 | No      |
| Rhbd1      | 0.29907  | 0.072839 | -0.226231   | 1.85E-07   | No      | Cebpz   | 37.1082  | 13.5971  | -1.44844         | 37.1092      | 13.5981       | -1.4483718       | 0.00014386 | No      |
| Rhoc       | 0.64786  | 0.056842 | -0.591018   | 5.96E-07   | No      | Cecr5   | 15.5287  | 9.91861  | -0.646727        | 15.5297      | 9.91961       | -0.6466747       | 0.00014386 | No      |
| Rhoh       | 0.063468 | 0.41469  | 0.351222    | 1.28E-06   | No      | Celf1   | 39.3491  | 22.5581  | -0.802684        | 39.3501      | 22.5591       | -0.8026578       | 0.00014386 | No      |
| Ric3       | 0.083946 | 0.033023 | -0.050923   | 0.00113573 | No      | Celf2   | 54.5088  | 4.26323  | -3.67647         | 54.5098      | 4.26423       | -3.6761585       | 0.00014386 | No      |
| Rin1       | 0.51304  | 0.14712  | -0.36592    | 1.18E-07   | No      | Cenpb   | 30.5405  | 46.9076  | 0.619097         | 30.5415      | 46.9086       | 0.61908152       | 0.00014386 | No      |
| Ripk4      | 0.13681  | 0.026087 | -0.110723   | 9.98E-06   | No      | Cenpc   | 7.55409  | 3.44388  | -1.13322         | 7.55509      | 3.44488       | -1.1329952       | 0.00014386 | No      |
| Rmrp       | 0.30855  | 0.22927  | -0.07928    | 0.01120909 | No      | Cenpf   | 0.266255 | 0.767799 | 1.52792          | 0.267255     | 0.768799      | 1.52438952       | 0.00014386 | No      |
| Rn45s      | 0.30063  | 0.13022  | -0.17041    | 4.71E-07   | No      | Cenpj   | 27.2654  | 13.4753  | -1.01675         | 27.2664      | 13.4763       | -1.0166998       | 0.00014386 | No      |
| Rn5-8s     | 0.46478  | 0.18446  | -0.28032    | 8.46E-07   | No      | Cenpn   | 3.0456   | 7.86937  | 1.36952          | 3.0466       | 7.87037       | 1.36923137       | 0.00014386 | No      |
| Rn7sl1     | 0.47919  | 0.19776  | -0.28143    | 2.15E-12   | No      | Cenpo   | 6.05067  | 1.37104  | -2.14183         | 6.05167      | 1.37204       | -2.1410108       | 0.00014386 | No      |
| Rnase17    | 0.66159  | 0.3364   | -0.32519    | 0.0024744  | No      | Cenpp   | 1.41991  | 21.2918  | 3.90643          | 1.42091      | 21.2928       | 3.90547859       | 0.00014386 | No      |
| Rnaset2    | 0.27424  | 0.035022 | -0.239218   | 7.96E-06   | No      | Cenpv   | 7.21491  | 29.6843  | 2.04065          | 7.21591      | 29.6853       | 2.04049544       | 0.00014386 | No      |
| Rnf113a2   | 0.2816   | 0.11451  | -0.16709    | 8.74E-06   | No      | Cep104  | 5.095    | 15.237   | 1.58043          | 5.096        | 15.238        | 1.58023638       | 0.00014386 | No      |
| Rnf126     | 0.25841  | 0.095517 | -0.162893   | 0.00093244 | No      | Cep120  | 18.1813  | 6.37801  | -1.51127         | 18.1823      | 6.37901       | -1.5111303       | 0.00014386 | No      |
| Rnf151     | 0.86112  | 0.66394  | -0.19718    | 0.0007877  | No      | Cep135  | 2.62704  | 0.620854 | -2.08111         | 2.62804      | 0.621854      | -2.0793394       | 0.00014386 | No      |
| Rnf186     | 0.90869  | 0.32383  | -0.58486    | 2.60E-10   | No      | Cep152  | 3.24223  | 0.858634 | -1.91687         | 3.24323      | 0.859634      | -1.9156369       | 0.00014386 | No      |
| Rnf225     | 0.23835  | 0.10118  | -0.13717    | 1.94E-07   | No      | CEP170  | 6.37187  | 0.876094 | -2.86256         | 6.37287      | 0.877094      | -2.8611399       | 0.00014386 | No      |
| Rnf39      | 0.076538 | 0.025167 | -0.051371   | 0.04638126 | No      | Cep170b | 2.28378  | 16.01    | 2.80948          | 2.28478      | 16.011        | 2.80893626       | 0.00014386 | No      |
| Rnf8       | 0.87379  | 0.58996  | -0.28383    | 2.46E-09   | No      | Cep19   | 12.7368  | 29.3145  | 1.20261          | 12.7378      | 29.3155       | 1.20254754       | 0.00014386 | No      |
| Robo2      | 0.26336  | 0.058637 | -0.204723   | 3.41E-06   | No      | Cep250  | 14.2186  | 7.15693  | -0.990365        | 14.2196      | 7.15793       | -0.9902665       | 0.00014386 | No      |
| Robo4      | 0.76571  | 0.64446  | -0.12125    | 0.01289082 | No      | Cep350  | 10.4553  | 2.87652  | -1.86184         | 10.4563      | 2.87752       | -1.8614746       | 0.00014386 | No      |
| Rogdi      | 0.70364  | 0.061881 | -0.641759   | 5.28E-07   | No      | Cep41   | 7.53329  | 1.07041  | -2.81511         | 7.53429      | 1.07141       | -2.8139609       | 0.00014386 | No      |
| Rom1       | 0.22165  | 0.022212 | -0.199438   | 4.71E-07   | No      | Cep57l1 | 13.093   | 7.76432  | -0.75386         | 13.094       | 7.76532       | -0.7537886       | 0.00014386 | No      |
| Ropn1      | 0.68838  | 0.25524  | -0.43314    | 1.28E-06   | No      | Cep70   | 2.36409  | 11.3847  | 2.26775          | 2.36509      | 11.3857       | 2.267256         | 0.00014386 | No      |
| Ror2       | 0.42618  | 0.16096  | -0.26522    | 2.99E-06   | No      | Cep85   | 14.3846  | 5.773    | -1.31713         | 14.3856      | 5.774         | -1.3169824       | 0.00014386 | No      |
| Rsph6a     | 0.93954  | 0.63948  | -0.30006    | 6.72E-08   | No      | Cep85l  | 3.87902  | 0.474101 | -3.03242         | 3.88002      | 0.475101      | -3.0297579       | 0.00014386 | No      |
| Rspo2      | 0.07136  | 0.013811 | -0.057549   | 2.23E-05   | No      | Cep89   | 4.36419  | 14.3265  | 1.7149           | 4.36519      | 14.3275       | 1.71467054       | 0.00014386 | No      |
| RT1-Db2    | 0.13518  | 0.37395  | 0.23877     | 0.00065829 | No      | Cep95   | 60.7589  | 16.7956  | -1.85501         | 60.7599      | 16.7966       | -1.8549503       | 0.00014386 | No      |
| RT1-M5     | 0.089783 | 0.036687 | -0.053096   | 0.00050175 | No      | Cep97   | 11.2557  | 2.55052  | -2.14178         | 11.2567      | 2.55152       | -2.1413551       | 0.00014386 | No      |
| Rtn4r1     | 0.11084  | 0.012759 | -0.098081   | 1.42E-05   | No      | Cerk    | 39.3397  | 3.24402  | -3.60013         | 39.3407      | 3.24502       | -3.5997234       | 0.00014386 | No      |
| Rxfp3      | 0.53872  | 0.38858  | -0.15014    | 0.00139382 | No      | Cers2   | 29.4667  | 66.6716  | 1.17799          | 29.4677      | 66.6726       | 1.17795953       | 0.00014386 | No      |
| S1pr4      | 0.19622  | 0.59145  | 0.39523     | 1.41E-11   | No      | Cers5   | 42.4075  | 14.6161  | -1.53677         | 42.4085      | 14.6171       | -1.5366963       | 0.00014386 | No      |

| RRBS     |          |          |             |            |         | RNAseq  |            |         |                  |              |               |                  |            |         |
|----------|----------|----------|-------------|------------|---------|---------|------------|---------|------------------|--------------|---------------|------------------|------------|---------|
| gene     | Blood    | Kidney   | methyl.diff | pMWU.fdr   | Match ? | gene    | blood      | kidney  | log2(fold_ratio) | blood+ 0.001 | kidney+ 0.001 | log2(fold_ratio) | q_value    | Match ? |
| Sall1    | 0.083872 | 0.017717 | -0.066155   | 1.98E-05   | No      | Ces1d   | 0          | 8.59534 | inf              | 0.001        | 8.59634       | 13.0695068       | 0.00014386 | No      |
| Sall3    | 0.8021   | 0.5502   | -0.2519     | 0.00022001 | No      | Ces1e   | 0          | 10.4149 | inf              | 0.001        | 10.4159       | 13.3464999       | 0.00014386 | No      |
| Samd14   | 0.2918   | 0.097031 | -0.194769   | 5.00E-06   | No      | CES2C   | 0.00622797 | 9.02653 | 10.5012          | 0.00722797   | 9.02753       | 10.2865251       | 0.00014386 | No      |
| Scarf2   | 0.38929  | 0.11582  | -0.27347    | 0.0024744  | No      | Ces2g   | 0          | 6.39332 | inf              | 0.001        | 6.39432       | 12.6425752       | 0.00014386 | No      |
| Scn2b    | 0.27274  | 0.13369  | -0.13905    | 0.00160533 | No      | CES2H   | 0          | 4.43075 | inf              | 0.001        | 4.43175       | 12.1136608       | 0.00014386 | No      |
| Scn4a    | 0.58925  | 0.2035   | -0.38575    | 7.60E-06   | No      | Cesl1   | 0.00671913 | 65.6917 | 13.2551          | 0.00771913   | 65.6927       | 13.0550072       | 0.00014386 | No      |
| Scn5a    | 0.097266 | 0.02725  | -0.070016   | 0.00132879 | No      | Cetn2   | 57.2275    | 96.4805 | 0.753528         | 57.2285      | 96.4815       | 0.75351854       | 0.00014386 | No      |
| Scrt1    | 0.13976  | 0.043172 | -0.096588   | 0.00020718 | No      | Cetn4   | 0.325419   | 4.46521 | 3.77836          | 0.326419     | 4.46621       | 3.77425415       | 0.00014386 | No      |
| Scube1   | 0.069    | 0.0107   | -0.0583     | 0.03461603 | No      | Cfh     | 0.15643    | 2.56109 | 4.03317          | 0.15743      | 2.56209       | 4.02453876       | 0.00014386 | No      |
| Scube3   | 0.80937  | 0.55344  | -0.25593    | 8.54E-05   | No      | Cfi     | 0          | 1.71495 | inf              | 0.001        | 1.71595       | 10.7447918       | 0.00014386 | No      |
| Sdr42e1  | 0.41102  | 0.29362  | -0.1174     | 0.0083162  | No      | Cfl1    | 1652.34    | 580.635 | -1.50881         | 1652.341     | 580.636       | -1.5088055       | 0.00014386 | No      |
| Selv     | 0.026792 | 0.090667 | 0.063875    | 0.00334552 | No      | Cfl2    | 3.45526    | 26.4341 | 2.93553          | 3.45626      | 26.4351       | 2.93517113       | 0.00014386 | No      |
| Sema3e   | 0.1194   | 0.022418 | -0.096982   | 2.65E-06   | No      | CFLAR   | 110.521    | 24.3531 | -2.18214         | 110.522      | 24.3541       | -2.182097        | 0.00014386 | No      |
| Senp3    | 0.76338  | 0.49642  | -0.26696    | 0.00501738 | No      | Cfp     | 5.2808     | 17.5156 | 1.72981          | 5.2818       | 17.5166       | 1.72962119       | 0.00014386 | No      |
| Serpinh1 | 0.54792  | 0.084054 | -0.463866   | 2.32E-06   | No      | Cggbp1  | 46.6944    | 12.8261 | -1.86417         | 46.6954      | 12.8271       | -1.8640854       | 0.00014386 | No      |
| Sertad4  | 0.42295  | 0.64611  | 0.22316     | 0.00501738 | No      | Cgnl1   | 46.1289    | 186.423 | 2.01484          | 46.1299      | 186.424       | 2.01481353       | 0.00014386 | No      |
| Sez6     | 0.079611 | 0.02616  | -0.053451   | 0.00103522 | No      | Cgrrf1  | 15.4111    | 25.6223 | 0.733427         | 15.4121      | 25.6233       | 0.73339284       | 0.00014386 | No      |
| Sez6l    | 0.2509   | 0.059152 | -0.191748   | 1.70E-08   | No      | Ch25h   | 0.204477   | 2.33184 | 3.51145          | 0.205477     | 2.33284       | 3.50503854       | 0.00014386 | No      |
| Sfrp1    | 0.070911 | 0.016297 | -0.054614   | 2.15E-12   | No      | Chadl   | 0.0399781  | 2.26576 | 5.82464          | 0.0409781    | 2.26676       | 5.78963475       | 0.00014386 | No      |
| Sfrp5    | 0.084516 | 0.020396 | -0.06412    | 0.00031293 | No      | Chaf1b  | 1.47089    | 8.23314 | 2.48475          | 1.47189      | 8.23414       | 2.48394812       | 0.00014386 | No      |
| Sftpa1   | 0.97962  | 0.51711  | -0.46251    | 4.71E-07   | No      | Chchd10 | 46.9906    | 1194.34 | 4.6677           | 46.9916      | 1194.341      | 4.6676681        | 0.00014386 | No      |
| Sgcd     | 0.76777  | 0.64059  | -0.12718    | 0.04412687 | No      | Chchd4  | 7.77633    | 21.7269 | 1.48232          | 7.77733      | 21.7279       | 1.48220188       | 0.00014386 | No      |
| Sh2b2    | 0.21401  | 0.040101 | -0.173909   | 1.24E-06   | No      | Chchd6  | 7.90979    | 19.8852 | 1.32998          | 7.91079      | 19.8862       | 1.32987394       | 0.00014386 | No      |
| Sh2d4a   | 0.080163 | 0.020735 | -0.059428   | 0.00205129 | No      | Chd1    | 44.2716    | 6.74867 | -2.71371         | 44.2726      | 6.74967       | -2.7135252       | 0.00014386 | No      |
| Sh3bp2   | 0.08059  | 0.024175 | -0.056415   | 0.00770116 | No      | Chd1l   | 14.4633    | 44.7841 | 1.63058          | 14.4643      | 44.7851       | 1.63052232       | 0.00014386 | No      |
| Shc1     | 0.28995  | 0.14006  | -0.14989    | 0.04638126 | No      | Chd2    | 242.267    | 41.4266 | -2.54797         | 242.268      | 41.4276       | -2.5479397       | 0.00014386 | No      |
| Shcbp1l  | 0.33779  | 0.1828   | -0.15499    | 0.01049788 | No      | Chd3    | 175.278    | 19.965  | -3.1341          | 175.279      | 19.966        | -3.1340359       | 0.00014386 | No      |
| Shd      | 0.91696  | 0.43556  | -0.4814     | 3.33E-11   | No      | Chd4    | 91.2345    | 41.9696 | -1.12024         | 91.2355      | 41.9706       | -1.1202162       | 0.00014386 | No      |
| Shisa6   | 0.079538 | 0.012643 | -0.066895   | 0.00205129 | No      | Chd6    | 21.0044    | 6.6664  | -1.65571         | 21.0054      | 6.6674        | -1.6555641       | 0.00014386 | No      |
| Sim2     | 0.14849  | 0.024053 | -0.124437   | 4.76E-05   | No      | Chd7    | 7.60679    | 2.26292 | -1.7491          | 7.60779      | 2.26392       | -1.7486544       | 0.00014386 | No      |
| Sipa1l2  | 0.13558  | 0.046952 | -0.088628   | 9.44E-05   | No      | Chd8    | 36.5394    | 12.429  | -1.55574         | 36.5404      | 12.43         | -1.5556661       | 0.00014386 | No      |
| Sirt4    | 0.77797  | 0.2458   | -0.53217    | 1.12E-06   | No      | Chek1   | 3.85713    | 1.4001  | -1.462           | 3.85813      | 1.4011        | -1.4613418       | 0.00014386 | No      |
| Six1     | 0.09095  | 0.021282 | -0.069668   | 0.00533667 | No      | Chek2   | 4.17439    | 2.00818 | -1.05568         | 4.17539      | 2.00918       | -1.0553041       | 0.00014386 | No      |
| Six2     | 0.087066 | 0.015419 | -0.071647   | 1.57E-05   | No      | Cherp   | 38.4334    | 23.5661 | -0.70565         | 38.4344      | 23.5671       | -0.7056239       | 0.00014386 | No      |
| Six6     | 0.16312  | 0.059737 | -0.103383   | 0.00533667 | No      | Chfr    | 22.7078    | 7.08238 | -1.68088         | 22.7088      | 7.08338       | -1.6807416       | 0.00014386 | No      |
| Slc10a4  | 0.12275  | 0.036409 | -0.086341   | 8.87E-05   | No      | Chic2   | 68.0723    | 13.6659 | -2.31648         | 68.0733      | 13.6669       | -2.316403        | 0.00014386 | No      |
| Slc10a6  | 0.81564  | 0.57534  | -0.2403     | 0.00058998 | No      | Chit1   | 0          | 1.17073 | inf              | 0.001        | 1.17173       | 10.1944245       | 0.00014386 | No      |
| Slc12a4  | 0.31227  | 0.1009   | -0.21137    | 0.00902244 | No      | Chka    | 8.47898    | 19.4568 | 1.19831          | 8.47998      | 19.4578       | 1.19821583       | 0.00014386 | No      |
| Slc12a5  | 0.087286 | 0.00621  | -0.081076   | 4.76E-05   | No      | Chm     | 14.4375    | 3.82721 | -1.91545         | 14.4385      | 3.82821       | -1.915179        | 0.00014386 | No      |
| Slc13a2  | 0.092343 | 0.01206  | -0.080283   | 1.12E-05   | No      | Chmp2a  | 153.238    | 286.712 | 0.903825         | 153.239      | 286.713       | 0.9038238        | 0.00014386 | No      |
| Slc13a3  | 0.82986  | 0.41145  | -0.41841    | 1.28E-06   | No      | Chmp2b  | 9.43332    | 21.8323 | 1.21063          | 9.43432      | 21.8333       | 1.21053976       | 0.00014386 | No      |
| Slc13a5  | 0.32387  | 0.18735  | -0.13652    | 0.00301385 | No      | Chmp3   | 93.3839    | 164.912 | 0.820449         | 93.3849      | 164.913       | 0.82044393       | 0.00014386 | No      |

| RRBS     |          |           |             |            |         | RNAseq  |           |          |                  |              |               |                  |            |         |
|----------|----------|-----------|-------------|------------|---------|---------|-----------|----------|------------------|--------------|---------------|------------------|------------|---------|
| gene     | Blood    | Kidney    | methyl.diff | pMWU.fdr   | Match ? | gene    | blood     | kidney   | log2(fold_ratio) | blood+ 0.001 | kidney+ 0.001 | log2(fold_ratio) | q_value    | Match ? |
| Slc15a1  | 0.14404  | 0.071227  | -0.072813   | 2.99E-06   | No      | Chmp5   | 28.4721   | 96.3363  | 1.75853          | 28.4731      | 96.3373       | 1.75849492       | 0.00014386 | No      |
| Slc16a2  | 0.098986 | 0.022441  | -0.076545   | 0.01120909 | No      | Chmp6   | 15.6201   | 26.5886  | 0.767406         | 15.6211      | 26.5896       | 0.76736603       | 0.00014386 | No      |
| Slc18a3  | 0.098698 | 0.046716  | -0.051982   | 7.36E-05   | No      | Chn2    | 5.96264   | 24.5959  | 2.04439          | 5.96364      | 24.5969       | 2.04421143       | 0.00014386 | No      |
| Slc19a3  | 0.14217  | 0.028518  | -0.113652   | 1.61E-05   | No      | Chordc1 | 35.6269   | 17.3021  | -1.04202         | 35.6279      | 17.3031       | -1.0419769       | 0.00014386 | No      |
| Slc1a6   | 0.075641 | 0.017976  | -0.057665   | 0.00058998 | No      | Chp1    | 26.9163   | 58.4524  | 1.11878          | 26.9173      | 58.4534       | 1.11875324       | 0.00014386 | No      |
| Slc22a17 | 0.71855  | 0.40651   | -0.31204    | 0.00087121 | No      | Chpf2   | 10.3948   | 5.02657  | -1.04822         | 10.3958      | 5.02757       | -1.0480676       | 0.00014386 | No      |
| Slc25a21 | 0.2334   | 0.057597  | -0.175803   | 2.15E-12   | No      | Chpt1   | 1.29695   | 35.6056  | 4.77891          | 1.29795      | 35.6066       | 4.77783797       | 0.00014386 | No      |
| Slc25a34 | 0.77663  | 0.22762   | -0.54901    | 2.15E-12   | No      | Chrbn1  | 0.243934  | 2.70784  | 3.47258          | 0.244934     | 2.70884       | 3.46721022       | 0.00014386 | No      |
| Slc27a2  | 0.51091  | 0.077594  | -0.433316   | 2.15E-12   | No      | Chrne   | 24.6643   | 7.39051  | -1.73868         | 24.6653      | 7.39151       | -1.7385418       | 0.00014386 | No      |
| Slc29a1  | 0.064709 | 0.0074198 | -0.0572892  | 2.15E-12   | No      | Chst1   | 0.868601  | 2.022    | 1.21902          | 0.869601     | 2.023         | 1.21807082       | 0.00014386 | No      |
| Slc30a3  | 0.073914 | 0.25297   | 0.179056    | 3.10E-08   | No      | Chst11  | 8.73218   | 3.95249  | -1.14358         | 8.73318      | 3.95349       | -1.1433803       | 0.00014386 | No      |
| Slc34a2  | 0.092228 | 0.020193  | -0.072035   | 4.35E-11   | No      | Chst14  | 2.13583   | 5.23034  | 1.29211          | 2.13683      | 5.23134       | 1.2917084        | 0.00014386 | No      |
| Slc35f1  | 0.076086 | 0.020106  | -0.05598    | 1.43E-06   | No      | Chst15  | 6.43136   | 1.40809  | -2.19139         | 6.43236      | 1.40909       | -2.1905844       | 0.00014386 | No      |
| Slc35g2  | 0.21816  | 0.13725   | -0.08091    | 0.04051274 | No      | Chst2   | 3.67395   | 7.19325  | 0.969313         | 3.67495      | 7.19425       | 0.96911967       | 0.00014386 | No      |
| Slc3a1   | 0.98059  | 0.31638   | -0.66421    | 4.71E-07   | No      | Chsy1   | 10.1335   | 2.25841  | -2.16575         | 10.1345      | 2.25941       | -2.1652569       | 0.00014386 | No      |
| Slc44a4  | 0.6392   | 0.21707   | -0.42213    | 0.0024744  | No      | Chuk    | 18.1148   | 13.3363  | -0.441812        | 18.1158      | 13.3373       | -0.4417819       | 0.00014386 | No      |
| Slc46a2  | 0.10608  | 0.014721  | -0.091359   | 3.87E-06   | No      | Churc1  | 145.333   | 212.554  | 0.548468         | 145.334      | 212.555       | 0.54846394       | 0.00014386 | No      |
| Slc47a1  | 0.061969 | 0.010506  | -0.051463   | 0.0007877  | No      | Ciapin1 | 18.3233   | 46.5079  | 1.3438           | 18.3243      | 46.5089       | 1.34374873       | 0.00014386 | No      |
| Slc4a10  | 0.71389  | 0.053579  | -0.660311   | 2.80E-05   | No      | Cib1    | 115.873   | 199.551  | 0.784205         | 115.874      | 199.552       | 0.78420785       | 0.00014386 | No      |
| Slc4a2   | 0.20337  | 0.057402  | -0.145968   | 0.00451501 | No      | Cic     | 36.7045   | 14.7802  | -1.31229         | 36.7055      | 14.7812       | -1.3122329       | 0.00014386 | No      |
| Slc5a4   | 0.47389  | 0.11291   | -0.36098    | 0.00205129 | No      | Cidea   | 0         | 2.59986  | inf              | 0.001        | 2.60086       | 11.344773        | 0.00014386 | No      |
| Slc6a15  | 0.08993  | 0.021768  | -0.068162   | 0.0003366  | No      | Cideb   | 0.123743  | 15.2018  | 6.94076          | 0.124743     | 15.2028       | 6.92923439       | 0.00014386 | No      |
| Slc6a2   | 0.10574  | 0.032136  | -0.073604   | 0.00781609 | No      | Cidec   | 0.114621  | 4.87841  | 5.41147          | 0.115621     | 4.87941       | 5.39923135       | 0.00014386 | No      |
| Slc6a3   | 0.22261  | 0.08658   | -0.13603    | 0.00093244 | No      | Cir1    | 67.2072   | 21.6597  | -1.6336          | 67.2082      | 21.6607       | -1.6335574       | 0.00014386 | No      |
| Slc6a7   | 0.29703  | 0.067568  | -0.229462   | 0.01961146 | No      | Cirh1a  | 39.2597   | 13.2286  | -1.56939         | 39.2607      | 13.2296       | -1.5693165       | 0.00014386 | No      |
| Slc7a10  | 0.083563 | 0.14812   | 0.064557    | 0.00040757 | No      | Cisd1   | 85.8731   | 435.191  | 2.34137          | 85.8741      | 435.192       | 2.34135706       | 0.00014386 | No      |
| Slc7a14  | 0.20926  | 0.065927  | -0.143333   | 0.00533667 | No      | Cisd2   | 12.4636   | 19.6785  | 0.658895         | 12.4646      | 19.6795       | 0.65885698       | 0.00014386 | No      |
| Slc9a3r1 | 0.26731  | 0.10079   | -0.16652    | 0.01120909 | No      | Cisd3   | 30.8207   | 71.6261  | 1.21659          | 30.8217      | 71.6271       | 1.2165909        | 0.00014386 | No      |
| Slit1    | 0.092644 | 0.021885  | -0.070759   | 8.80E-10   | No      | Cit     | 0.147706  | 1.52756  | 3.37042          | 0.148706     | 1.52856       | 3.36163842       | 0.00014386 | No      |
| Slit2    | 0.10232  | 0.0079608 | -0.0943592  | 0.00038568 | No      | Cited1  | 0         | 7.69516  | inf              | 0.001        | 7.69616       | 12.9099231       | 0.00014386 | No      |
| Slitrk1  | 0.074085 | 0.02655   | -0.047535   | 7.01E-05   | No      | Cited2  | 53.5053   | 108.946  | 1.02586          | 53.5063      | 108.947       | 1.0258458        | 0.00014386 | No      |
| Smad3    | 0.64981  | 0.17575   | -0.47406    | 6.75E-07   | No      | Ckap2l  | 0.111152  | 0.693589 | 2.64154          | 0.112152     | 0.694589      | 2.63070422       | 0.00014386 | No      |
| Smoc2    | 0.076376 | 0.033341  | -0.043035   | 0.00038568 | No      | Ckap4   | 1.66311   | 14.7548  | 3.14923          | 1.66411      | 14.7558       | 3.14845943       | 0.00014386 | No      |
| Smpd3    | 0.17364  | 0.044979  | -0.128661   | 0.01559789 | No      | Ckap5   | 6.51491   | 4.81813  | -0.435271        | 6.51591      | 4.81913       | -0.435194        | 0.00014386 | No      |
| Smtnl2   | 0.30072  | 0.083636  | -0.217084   | 3.15E-05   | No      | CKlf    | 25.1471   | 2.15282  | -3.54609         | 25.1481      | 2.15382       | -3.5454798       | 0.00014386 | No      |
| Smug1    | 0.82567  | 0.58291   | -0.24276    | 5.05E-07   | No      | Cks2    | 4.01196   | 15.7624  | 1.97411          | 4.01296      | 15.7634       | 1.97384006       | 0.00014386 | No      |
| Snai1    | 0.72691  | 0.42765   | -0.29926    | 7.62E-05   | No      | CLASP1  | 12.6092   | 7.17527  | -0.813372        | 12.6102      | 7.17627       | -0.8132851       | 0.00014386 | No      |
| Snrpc    | 0.90733  | 0.48142   | -0.42591    | 6.29E-06   | No      | Clasp2  | 11.1437   | 7.06729  | -0.656996        | 11.1447      | 7.06829       | -0.6569246       | 0.00014386 | No      |
| Snrpn    | 0.42433  | 0.27794   | -0.14639    | 0.00281863 | No      | Clcn2   | 0.0359704 | 2.46034  | 6.0959           | 0.0369704    | 2.46134       | 6.0569295        | 0.00014386 | No      |
| Snx19    | 0.077215 | 0.015109  | -0.062106   | 0.00205129 | No      | Clcn3   | 7.96785   | 11.818   | 0.568728         | 7.96885      | 11.819        | 0.56866453       | 0.00014386 | No      |
| Snx22    | 0.22209  | 0.085604  | -0.136486   | 0.00087121 | No      | Clcn4   | 0.416758  | 3.19562  | 2.93881          | 0.417758     | 3.19662       | 2.93580789       | 0.00014386 | No      |
| Soat2    | 0.60821  | 0.37931   | -0.2289     | 0.01049788 | No      | Clcn6   | 11.119    | 8.25747  | -0.429258        | 11.12        | 8.25847       | -0.4292104       | 0.00014386 | No      |



| RRBS    |           |           |             |            |         | RNAseq  |           |         |                  |              |               |                  |            |         |
|---------|-----------|-----------|-------------|------------|---------|---------|-----------|---------|------------------|--------------|---------------|------------------|------------|---------|
| gene    | Blood     | Kidney    | methyl.diff | pMWU.fdr   | Match ? | gene    | blood     | kidney  | log2(fold_ratio) | blood+ 0.001 | kidney+ 0.001 | log2(fold_ratio) | q_value    | Match ? |
| Sorcs1  | 0.088178  | 0.025502  | -0.062676   | 0.0058184  | No      | Clcn7   | 22.0667   | 14.8672 | -0.569741        | 22.0677      | 14.8682       | -0.5697063       | 0.00014386 | No      |
| Sorcs2  | 0.107     | 0.014203  | -0.092797   | 0.00025822 | No      | Clcnkb  | 0.278436  | 399.828 | 10.4878          | 0.279436     | 399.829       | 10.4826495       | 0.00014386 | No      |
| Sorcs3  | 0.091801  | 0.017262  | -0.074539   | 5.17E-08   | No      | Cldn10  | 2.70789   | 156.174 | 5.84984          | 2.70889      | 156.175       | 5.84931791       | 0.00014386 | No      |
| Sox10   | 0.85695   | 0.70976   | -0.14719    | 0.00103522 | No      | Cldn2   | 0.0362802 | 190.761 | 12.3603          | 0.0372802    | 190.762       | 12.3210766       | 0.00014386 | No      |
| Sox14   | 0.21399   | 0.057728  | -0.156262   | 1.64E-06   | No      | Cldn6   | 0.261617  | 3.04201 | 3.5395           | 0.262617     | 3.04301       | 3.53446686       | 0.00014386 | No      |
| Sox15   | 0.75983   | 0.26135   | -0.49848    | 1.28E-06   | No      | Cldn9   | 0         | 1.12579 | inf              | 0.001        | 1.12679       | 10.1380029       | 0.00014386 | No      |
| Sox7    | 0.38664   | 0.25226   | -0.13438    | 0.04638126 | No      | Clec16a | 5.0352    | 18.1916 | 1.85315          | 5.0362       | 18.1926       | 1.85294426       | 0.00014386 | No      |
| Spaca1  | 0.90443   | 0.77502   | -0.12941    | 7.43E-12   | No      | Clec2d2 | 22.5062   | 2.08888 | -3.42952         | 22.5072      | 2.08988       | -3.4288946       | 0.00014386 | No      |
| Spag4   | 0.45008   | 0.15281   | -0.29727    | 0.00058998 | No      | Clec2g  | 88.7144   | 17.0026 | -2.38341         | 88.7154      | 17.0036       | -2.3833443       | 0.00014386 | No      |
| Spagl   | 0.099042  | 0.041508  | -0.057534   | 0.0024744  | No      | Clec4a1 | 1.40047   | 4.96662 | 1.82635          | 1.40147      | 4.96762       | 1.82561396       | 0.00014386 | No      |
| Spag8   | 0.71046   | 0.35892   | -0.35154    | 0.00533667 | No      | Clec4a3 | 1.38817   | 4.93489 | 1.82984          | 1.38917      | 4.93589       | 1.82908708       | 0.00014386 | No      |
| Spata1  | 0.20596   | 0.062142  | -0.143818   | 4.71E-07   | No      | Clec7a  | 0.359538  | 1.46866 | 2.03028          | 0.360538     | 1.46966       | 2.0272592        | 0.00014386 | No      |
| Spata3  | 0.32293   | 0.21767   | -0.10526    | 0.03700939 | No      | Clic2   | 0.889584  | 12.9982 | 3.86904          | 0.890584     | 12.9992       | 3.86752734       | 0.00014386 | No      |
| Spata32 | 0.21667   | 0.057797  | -0.158873   | 0.00111391 | No      | Clic4   | 7.6418    | 175.447 | 4.52098          | 7.6428       | 175.448       | 4.52079841       | 0.00014386 | No      |
| Speg    | 0.18762   | 0.13049   | -0.05713    | 0.00709364 | No      | CLIC5   | 1.43046   | 5.44856 | 1.92939          | 1.43146      | 5.44956       | 1.92865239       | 0.00014386 | No      |
| Spg7    | 0.57384   | 0.32231   | -0.25153    | 0.00054762 | No      | Clip1   | 11.3796   | 8.56131 | -0.410545        | 11.3806      | 8.56231       | -0.4105046       | 0.00014386 | No      |
| Spock3  | 0.15392   | 0.047396  | -0.106524   | 0.00123297 | No      | Clip2   | 3.79267   | 11.9744 | 1.65867          | 3.79367      | 11.9754       | 1.65840775       | 0.00014386 | No      |
| Spred3  | 0.47271   | 0.069841  | -0.402869   | 8.46E-07   | No      | Clk1    | 200.398   | 90.869  | -1.14101         | 200.399      | 90.87         | -1.1409993       | 0.00014386 | No      |
| Sprn    | 0.41029   | 0.066713  | -0.343577   | 2.65E-06   | No      | Clk4    | 52.6211   | 25.9048 | -1.02242         | 52.6221      | 25.9058       | -1.0223937       | 0.00014386 | No      |
| Spryd3  | 0.36967   | 0.1135    | -0.25617    | 8.46E-07   | No      | Cln5    | 1.31217   | 3.65409 | 1.47756          | 1.31317      | 3.65509       | 1.47685323       | 0.00014386 | No      |
| Spx     | 0.19481   | 0.05498   | -0.13983    | 1.43E-06   | No      | Clns1a  | 77.3093   | 42.7834 | -0.853591        | 77.3103      | 42.7844       | -0.8535758       | 0.00014386 | No      |
| Srgap1  | 0.079626  | 0.026212  | -0.053414   | 0.01699421 | No      | Clpb    | 7.51923   | 31.2422 | 2.05484          | 7.52023      | 31.2432       | 2.05469353       | 0.00014386 | No      |
| Srms    | 0.10393   | 0.022304  | -0.081626   | 0.00188523 | No      | Clpx    | 19.4953   | 48.9048 | 1.32684          | 19.4963      | 48.9058       | 1.32680522       | 0.00014386 | No      |
| Srsf9   | 0.0056592 | 0.06348   | 0.0578208   | 0.00087121 | No      | Clrn3   | 0         | 2.90347 | inf              | 0.001        | 2.90447       | 11.5040592       | 0.00014386 | No      |
| Sstr1   | 0.13943   | 0.041813  | -0.097617   | 1.85E-07   | No      | Clta    | 208.395   | 358.981 | 0.784589         | 208.396      | 358.982       | 0.78458392       | 0.00014386 | No      |
| Sstr2   | 0.070745  | 0.016324  | -0.054421   | 0.00087121 | No      | Cltb    | 22.2748   | 83.8396 | 1.91222          | 22.2758      | 83.8406       | 1.9121718        | 0.00014386 | No      |
| Sstr5   | 0.20698   | 0.051147  | -0.155833   | 0.00334552 | No      | Cltc    | 23.6651   | 78.4167 | 1.7284           | 23.6661      | 78.4177       | 1.72835735       | 0.00014386 | No      |
| St6gal2 | 0.060111  | 0.0090575 | -0.0510535  | 2.73E-09   | No      | Clu     | 2.96252   | 239.693 | 6.33822          | 2.96352      | 239.694       | 6.33773819       | 0.00014386 | No      |
| St8sia2 | 0.089122  | 0.026126  | -0.062996   | 2.18E-08   | No      | Cluh    | 14.2263   | 65.5392 | 2.2038           | 14.2273      | 65.5402       | 2.20371818       | 0.00014386 | No      |
| St8sia3 | 0.094668  | 0.027382  | -0.067286   | 7.33E-10   | No      | Clvs1   | 0.188775  | 1.2477  | 2.72454          | 0.189775     | 1.2487        | 2.71806505       | 0.00014386 | No      |
| St8sia5 | 0.086263  | 0.024153  | -0.06211    | 0.01482889 | No      | Cmah    | 60.0976   | 8.94996 | -2.74735         | 60.0986      | 8.95096       | -2.7472171       | 0.00014386 | No      |
| Steap4  | 0.11275   | 0.019008  | -0.093742   | 3.58E-12   | No      | Cmas    | 39.6721   | 23.656  | -0.745917        | 39.6731      | 23.657        | -0.745894        | 0.00014386 | No      |
| Stx2    | 0.20046   | 0.0089962 | -0.1914638  | 9.44E-05   | No      | Cmb1    | 1.12304   | 98.9799 | 6.46166          | 1.12404      | 98.9809       | 6.46038488       | 0.00014386 | No      |
| Stx5    | 0.09463   | 0.031775  | -0.062855   | 0.00675344 | No      | CMC2    | 24.0786   | 82.8611 | 1.78294          | 24.0796      | 82.8621       | 1.78290096       | 0.00014386 | No      |
| Stxbp5l | 0.041589  | 0.015646  | -0.025943   | 0.00334552 | No      | Cmip    | 93.313    | 41.8119 | -1.15816         | 93.314       | 41.8129       | -1.1581454       | 0.00014386 | No      |
| Sv2a    | 0.97956   | 0.87967   | -0.09989    | 0.00132879 | No      | Cml1    | 0.365116  | 8.96421 | 4.61775          | 0.366116     | 8.96521       | 4.61396465       | 0.00014386 | No      |
| Syce2   | 0.49071   | 0.19996   | -0.29075    | 1.30E-10   | No      | Cml3    | 0         | 19.5858 | inf              | 0.001        | 19.5868       | 14.2575941       | 0.00014386 | No      |
| Sycp1   | 0.84695   | 0.71668   | -0.13027    | 0.00281863 | No      | Cmpk2   | 5.7676    | 4.02428 | -0.519241        | 5.7686       | 4.02528       | -0.5191321       | 0.00014386 | No      |
| Syk     | 0.13629   | 0.67793   | 0.54164     | 2.15E-12   | No      | Cmtm3   | 17.1769   | 2.47644 | -2.79413         | 17.1779      | 2.47744       | -2.7936317       | 0.00014386 | No      |
| Sync    | 0.23868   | 0.11624   | -0.12244    | 0.00902244 | No      | Cmtm6   | 48.2004   | 30.5038 | -0.660056        | 48.2014      | 30.5048       | -0.6600388       | 0.00014386 | No      |
| Synm    | 0.077235  | 0.010034  | -0.067201   | 7.94E-07   | No      | Cmtm7   | 107.41    | 25.4654 | -2.07652         | 107.411      | 25.4664       | -2.0764748       | 0.00014386 | No      |
| Sypl2   | 0.1958    | 0.032906  | -0.162894   | 1.57E-05   | No      | Cmtm8   | 0.979278  | 17.8206 | 4.18568          | 0.980278     | 17.8216       | 4.18429211       | 0.00014386 | No      |

| RRBS     |          |           |             |            |         | RNAseq   |            |         |                  |              |               |                  |            |         |
|----------|----------|-----------|-------------|------------|---------|----------|------------|---------|------------------|--------------|---------------|------------------|------------|---------|
| gene     | Blood    | Kidney    | methyl.diff | pMWU.fdr   | Match ? | gene     | blood      | kidney  | log2(fold_ratio) | blood+ 0.001 | kidney+ 0.001 | log2(fold_ratio) | q_value    | Match ? |
| Syt1     | 0.11097  | 0.036425  | -0.074545   | 3.48E-08   | No      | Cnbp     | 472.535    | 196.523 | -1.26572         | 472.536      | 196.524       | -1.2657187       | 0.00014386 | No      |
| Syt10    | 0.096268 | 0.034141  | -0.062127   | 0.01136336 | No      | Cnep1r1  | 16.5969    | 9.86911 | -0.749925        | 16.5979      | 9.87011       | -0.7498627       | 0.00014386 | No      |
| Syt6     | 0.19094  | 0.06135   | -0.12959    | 0.00025822 | No      | Cnih4    | 41.7792    | 21.7447 | -0.942121        | 41.7802      | 21.7457       | -0.9420892       | 0.00014386 | No      |
| Syt7     | 0.25622  | 0.040978  | -0.215242   | 6.67E-05   | No      | Cnksr3   | 5.49446    | 13.4628 | 1.29292          | 5.49546      | 13.4638       | 1.2927735        | 0.00014386 | No      |
| T        | 0.19373  | 0.063456  | -0.130274   | 0.00281863 | No      | Cnn3     | 32.6788    | 172.079 | 2.39664          | 32.6798      | 172.08        | 2.39660837       | 0.00014386 | No      |
| Tac3     | 0.77533  | 0.63841   | -0.13692    | 0.01512325 | No      | Cnm4     | 5.70914    | 10.2237 | 0.840579         | 5.71014      | 10.2247       | 0.84046049       | 0.00014386 | No      |
| Tacr3    | 0.23094  | 0.083396  | -0.147544   | 3.82E-06   | No      | Cnot1    | 127.422    | 61.8958 | -1.0417          | 127.423      | 61.8968       | -1.041689        | 0.00014386 | No      |
| Tal1     | 0.24752  | 0.053822  | -0.193698   | 0.0003366  | No      | Cnot10   | 38.733     | 23.4745 | -0.72247         | 38.734       | 23.4755       | -0.7224446       | 0.00014386 | No      |
| Tapbp    | 0.74991  | 0.22001   | -0.5299     | 2.15E-12   | No      | Cnot2    | 52.8374    | 26.3711 | -1.0026          | 52.8384      | 26.3721       | -1.0025743       | 0.00014386 | No      |
| Tbc1d10b | 0.20521  | 0.30344   | 0.09823     | 0.01699421 | No      | Cnot3    | 30.3122    | 12.0411 | -1.33194         | 30.3132      | 12.0421       | -1.3318592       | 0.00014386 | No      |
| Tbccd1   | 0.8813   | 0.69208   | -0.18922    | 0.00058998 | No      | Cnot4    | 15.6809    | 7.28929 | -1.10516         | 15.6819      | 7.29029       | -1.1050523       | 0.00014386 | No      |
| Tbx1     | 0.099004 | 0.17027   | 0.071266    | 0.00976507 | No      | Cnot6l   | 23.7706    | 7.97165 | -1.57623         | 23.7716      | 7.97265       | -1.5761078       | 0.00014386 | No      |
| Tbx18    | 0.15692  | 0.068952  | -0.087968   | 0.00038568 | No      | Cnot7    | 44.6918    | 22.869  | -0.966618        | 44.6928      | 22.87         | -0.9665861       | 0.00014386 | No      |
| Tbx2     | 0.07828  | 0.32512   | 0.24684     | 5.42E-05   | No      | Cnot8    | 39.4579    | 24.2443 | -0.702666        | 39.4589      | 24.2453       | -0.7026456       | 0.00014386 | No      |
| Tbx3     | 0.10583  | 0.050605  | -0.055225   | 0.00028584 | No      | Cnp      | 125.872    | 8.87619 | -3.82588         | 125.873      | 8.87719       | -3.825722        | 0.00014386 | No      |
| Tbx4     | 0.24009  | 0.41784   | 0.17775     | 0.00501738 | No      | Cnppd1   | 136.542    | 32.8494 | -2.05541         | 136.543      | 32.8504       | -2.0553725       | 0.00014386 | No      |
| Tbx5     | 0.31827  | 0.12686   | -0.19141    | 7.15E-06   | No      | Cnpy1    | 0          | 8.17829 | inf              | 0.001        | 8.17929       | 12.9977599       | 0.00014386 | No      |
| Tcf19    | 0.71217  | 0.55428   | -0.15789    | 0.04859041 | No      | Cnpy2    | 93.8167    | 128.565 | 0.454584         | 93.8177      | 128.566       | 0.45457713       | 0.00014386 | No      |
| Tcirg1   | 0.73825  | 0.11096   | -0.62729    | 0.00072449 | No      | Cnpy4    | 14.7188    | 8.21303 | -0.841677        | 14.7198      | 8.21403       | -0.8415959       | 0.00014386 | No      |
| Tdh      | 0.092038 | 0.018172  | -0.073866   | 0.00050175 | No      | Cnst     | 16.202     | 9.52006 | -0.767125        | 16.203       | 9.52106       | -0.7670668       | 0.00014386 | No      |
| Tdrd5    | 0.63551  | 0.13705   | -0.49846    | 5.28E-07   | No      | Cntf     | 31.5421    | 134.293 | 2.09004          | 31.5431      | 134.294       | 2.08999849       | 0.00014386 | No      |
| Tdrd6    | 0.61592  | 0.38496   | -0.23096    | 0.00770116 | No      | Cntln    | 0.0658976  | 1.72589 | 4.71097          | 0.0668976    | 1.72689       | 4.69007792       | 0.00014386 | No      |
| Tekt2    | 0.11629  | 0.021858  | -0.094432   | 0.00451501 | No      | Cntnap1  | 2.03425    | 8.70814 | 2.09787          | 2.03525      | 8.70914       | 2.09732425       | 0.00014386 | No      |
| Tekt4    | 0.50177  | 0.10313   | -0.39864    | 6.08E-08   | No      | Cntrl    | 25.4818    | 4.58273 | -2.47519         | 25.4828      | 4.58373       | -2.4749298       | 0.00014386 | No      |
| Tescl    | 0.60847  | 0.52564   | -0.08283    | 0.04638126 | No      | Coa3     | 56.6344    | 137.86  | 1.28346          | 56.6354      | 137.861       | 1.28343839       | 0.00014386 | No      |
| Tfap2c   | 0.093796 | 0.024651  | -0.069145   | 0.00205129 | No      | Coa4     | 7.18031    | 15.6532 | 1.12434          | 7.18131      | 15.6542       | 1.12423084       | 0.00014386 | No      |
| Tfap2e   | 0.15822  | 0.044495  | -0.113725   | 0.01289082 | No      | Coa5     | 18.0834    | 56.6211 | 1.64667          | 18.0844      | 56.6221       | 1.64661952       | 0.00014386 | No      |
| Tfip11   | 0.80792  | 0.74485   | -0.06307    | 0.01152422 | No      | Coasy    | 34.2525    | 59.2973 | 0.791757         | 34.2535      | 59.2983       | 0.79173934       | 0.00014386 | No      |
| Tgfa     | 0.27566  | 0.10058   | -0.17508    | 0.00181901 | No      | Cobll1   | 2.55309    | 41.0442 | 4.00686          | 2.55409      | 41.0452       | 4.00633225       | 0.00014386 | No      |
| Tgfb1i1  | 0.35525  | 0.18096   | -0.17429    | 0.00144827 | No      | Cog1     | 47.2681    | 23.1707 | -1.02856         | 47.2691      | 23.1717       | -1.0285335       | 0.00014386 | No      |
| Tgfb3    | 0.62851  | 0.32856   | -0.29995    | 0.00675344 | No      | Cog3     | 13.4161    | 5.98602 | -1.16429         | 13.4171      | 5.98702       | -1.1641629       | 0.00014386 | No      |
| Theg     | 0.92654  | 0.8087    | -0.11784    | 0.0024744  | No      | Cog4     | 15.032     | 23.5553 | 0.648012         | 15.033       | 23.5563       | 0.64798001       | 0.00014386 | No      |
| Thegl    | 0.87924  | 0.31702   | -0.56222    | 4.22E-09   | No      | Col11a1  | 2.11559    | 4.117   | 0.960536         | 2.11659      | 4.118         | 0.96020199       | 0.00014386 | No      |
| Thpo     | 0.47826  | 0.30552   | -0.17274    | 0.03216266 | No      | COL15A1  | 0.0564422  | 1.65339 | 4.87251          | 0.0574422    | 1.65439       | 4.84804456       | 0.00014386 | No      |
| Tifab    | 0.94446  | 0.87989   | -0.06457    | 0.04859041 | No      | Col4a1   | 0.00743584 | 64.2701 | 13.0774          | 0.00843584   | 64.2711       | 12.8953508       | 0.00014386 | No      |
| Tjap1    | 0.65447  | 0.32823   | -0.32624    | 0.00451501 | No      | COL4A3   | 69.1841    | 120.45  | 0.799924         | 69.1851      | 120.451       | 0.7999131        | 0.00014386 | No      |
| Tll1     | 0.06997  | 0.0017241 | -0.0682459  | 7.62E-05   | No      | Col4a3bp | 22.2652    | 10.5099 | -1.08304         | 22.2662      | 10.5109       | -1.0829692       | 0.00014386 | No      |
| Tm4sf1   | 0.95303  | 0.3943    | -0.55873    | 4.71E-07   | No      | Col4a4   | 0.162967   | 32.2255 | 7.62748          | 0.163967     | 32.2265       | 7.61869821       | 0.00014386 | No      |
| Tm6sf2   | 0.73615  | 0.071331  | -0.664819   | 3.48E-08   | No      | Col4a5   | 0          | 47.8183 | inf              | 0.001        | 47.8193       | 15.5453054       | 0.00014386 | No      |
| Tmcc2    | 0.62356  | 0.31553   | -0.30803    | 0.00040757 | No      | Col5a2   | 0          | 2.58752 | inf              | 0.001        | 2.58852       | 11.3379117       | 0.00014386 | No      |
| Tmem114  | 0.073263 | 0.019439  | -0.053824   | 0.00188523 | No      | Comm1    | 46.6914    | 112.388 | 1.26726          | 46.6924      | 112.389       | 1.26724119       | 0.00014386 | No      |
| Tmem119  | 0.70897  | 0.37955   | -0.32942    | 0.00018974 | No      | Comm10   | 21.177     | 42.7241 | 1.01255          | 21.178       | 42.7251       | 1.01251752       | 0.00014386 | No      |

| RRBS      |           |           |             |            |         | RNAseq   |         |          |                  |              |               |                  |            |         |
|-----------|-----------|-----------|-------------|------------|---------|----------|---------|----------|------------------|--------------|---------------|------------------|------------|---------|
| gene      | Blood     | Kidney    | methyl.diff | pMWU.fdr   | Match ? | gene     | blood   | kidney   | log2(fold_ratio) | blood+ 0.001 | kidney+ 0.001 | log2(fold_ratio) | q_value    | Match ? |
| Tmem125   | 0.87989   | 0.76242   | -0.11747    | 0.01832913 | No      | Commd3   | 30.4064 | 105.24   | 1.79124          | 30.4074      | 105.241       | 1.79120249       | 0.00014386 | No      |
| Tmem132d  | 0.2056    | 0.043242  | -0.162358   | 7.31E-07   | No      | Commd7   | 86.119  | 32.2484  | -1.4171          | 86.12        | 32.2494       | -1.417076        | 0.00014386 | No      |
| Tmem151b  | 0.66725   | 0.2879    | -0.37935    | 2.27E-12   | No      | Commd8   | 32.956  | 22.8446  | -0.528688        | 32.957       | 22.8456       | -0.5286686       | 0.00014386 | No      |
| Tmem160   | 0.94921   | 0.8626    | -0.08661    | 0.00675344 | No      | Commd9   | 30.8743 | 73.6243  | 1.25378          | 30.8753      | 73.6253       | 1.25374845       | 0.00014386 | No      |
| Tmem178a  | 0.18276   | 0.07489   | -0.10787    | 0.00072449 | No      | Comt     | 26.2515 | 145.905  | 2.47455          | 26.2525      | 145.906       | 2.47451249       | 0.00014386 | No      |
| Tmem200c  | 0.056894  | 0.0061871 | -0.0507069  | 0.00173557 | No      | Copb2    | 38.8535 | 27.2309  | -0.512796        | 38.8545      | 27.2319       | -0.5127841       | 0.00014386 | No      |
| Tmem47    | 0.087298  | 0.022473  | -0.064825   | 4.71E-07   | No      | COPE     | 75.3764 | 123.56   | 0.713023         | 75.3774      | 123.561       | 0.71301951       | 0.00014386 | No      |
| Tmem88    | 0.82895   | 0.13066   | -0.69829    | 5.28E-07   | No      | Copg1    | 38.4173 | 61.3644  | 0.675646         | 38.4183      | 61.3654       | 0.67563176       | 0.00014386 | No      |
| Tnfaip8   | 0.38084   | 0.029358  | -0.351482   | 2.15E-12   | No      | Coprs    | 22.678  | 108.013  | 2.25184          | 22.679       | 108.014       | 2.25178938       | 0.00014386 | No      |
| Tnfrsf12a | 0.16653   | 0.032668  | -0.133862   | 1.57E-05   | No      | Cops6    | 59.0967 | 94.0797  | 0.670804         | 59.0977      | 94.0807       | 0.67079681       | 0.00014386 | No      |
| Tnfrsf25  | 0.0035827 | 0.14422   | 0.1406373   | 3.54E-09   | No      | Cops7a   | 17.7576 | 51.9162  | 1.54775          | 17.7586      | 51.9172       | 1.54769473       | 0.00014386 | No      |
| Tnfsf13b  | 0.26816   | 0.069062  | -0.199098   | 1.18E-08   | No      | Cops7b   | 14.3668 | 5.76617  | -1.31705         | 14.3678      | 5.76717       | -1.3169037       | 0.00014386 | No      |
| Tnfsf8    | 0.011168  | 0.29472   | 0.283552    | 6.75E-07   | No      | Coq10b   | 10.2673 | 23.2646  | 1.18009          | 10.2683      | 23.2656       | 1.18000104       | 0.00014386 | No      |
| Tnk2      | 0.80324   | 0.3025    | -0.50074    | 3.56E-05   | No      | Coq3     | 7.19177 | 20.8453  | 1.5353           | 7.19277      | 20.8463       | 1.53517197       | 0.00014386 | No      |
| Tnnc2     | 0.26525   | 0.37514   | 0.10989     | 0.02220995 | No      | Coq4     | 2.91259 | 11.924   | 2.0335           | 2.91359      | 11.925        | 2.03311949       | 0.00014386 | No      |
| Tnxa-ps1  | 0.0693    | 0.23287   | 0.16357     | 1.80E-05   | No      | Coq5     | 13.1846 | 22.349   | 0.761351         | 13.1856      | 22.35         | 0.76131161       | 0.00014386 | No      |
| Tox3      | 0.80048   | 0.73972   | -0.06076    | 0.0247155  | No      | Coq7     | 9.92276 | 50.5376  | 2.34854          | 9.92376      | 50.5386       | 2.34842695       | 0.00014386 | No      |
| Tp53i11   | 0.0026334 | 0.070296  | 0.0676626   | 2.80E-05   | No      | Coq9     | 22.1307 | 88.2734  | 1.99593          | 22.1317      | 88.2744       | 1.99588084       | 0.00014386 | No      |
| Tppp3     | 0.26418   | 0.066523  | -0.197657   | 4.92E-06   | No      | Coro1a   | 1345.44 | 68.9027  | -4.28737         | 1345.441     | 68.9037       | -4.2873539       | 0.00014386 | No      |
| Tradd     | 0.70776   | 0.14383   | -0.56393    | 1.64E-06   | No      | Coro1c   | 23.7032 | 17.0813  | -0.472669        | 23.7042      | 17.0823       | -0.4726405       | 0.00014386 | No      |
| Tram11    | 0.14856   | 0.049209  | -0.099351   | 0.01206268 | No      | Coro2a   | 4.72841 | 0.503426 | -3.2315          | 4.72941      | 0.504426      | -3.2289457       | 0.00014386 | No      |
| Trank1    | 0.17472   | 0.088024  | -0.086696   | 0.00065829 | No      | Coro2b   | 5.52563 | 0.685606 | -3.01069         | 5.52663      | 0.686606      | -3.0088457       | 0.00014386 | No      |
| Trhr2     | 0.93141   | 0.75564   | -0.17577    | 1.80E-05   | No      | Coro7    | 61.6679 | 8.77011  | -2.81385         | 61.6689      | 8.77111       | -2.8137118       | 0.00014386 | No      |
| Trim15    | 0.1073    | 0.051857  | -0.055443   | 0.00038568 | No      | Cotl1    | 509.677 | 117.397  | -2.11819         | 509.678      | 117.398       | -2.1181783       | 0.00014386 | No      |
| Trim26    | 0.92576   | 0.80722   | -0.11854    | 0.00017371 | No      | Cox15    | 12.0721 | 18.0903  | 0.583537         | 12.0731      | 18.0913       | 0.58349992       | 0.00014386 | No      |
| Trim36    | 0.086157  | 0.030151  | -0.056006   | 0.00017677 | No      | Cox17    | 202.669 | 511.344  | 1.33517          | 202.67       | 511.345       | 1.33516444       | 0.00014386 | No      |
| Trim6     | 0.85747   | 0.3733    | -0.48417    | 1.37E-07   | No      | Cox18    | 27.2255 | 10.1219  | -1.42748         | 27.2265      | 10.1229       | -1.4273889       | 0.00014386 | No      |
| Trim63    | 0.80815   | 0.29325   | -0.5149     | 2.43E-12   | No      | Cox19    | 20.8809 | 51.578   | 1.30457          | 20.8819      | 51.579        | 1.30453082       | 0.00014386 | No      |
| Trim9     | 0.058234  | 0.0040911 | -0.0541429  | 6.06E-05   | No      | Cox4i1   | 878.784 | 1626.35  | 0.888059         | 878.785      | 1626.351      | 0.8880565        | 0.00014386 | No      |
| Trip6     | 0.71764   | 0.11748   | -0.60016    | 2.15E-12   | No      | Cox4i2   | 0       | 2.6091   | inf              | 0.001        | 2.6101        | 11.3498894       | 0.00014386 | No      |
| Trmt61a   | 0.5892    | 0.30535   | -0.28385    | 7.60E-06   | No      | Cox5a    | 281.032 | 988.328  | 1.81426          | 281.033      | 988.329       | 1.81425183       | 0.00014386 | No      |
| Trpm2     | 0.6983    | 0.40038   | -0.29792    | 0.0024744  | No      | Cox5b    | 269.11  | 1044.54  | 1.9566           | 269.111      | 1044.541      | 1.95659585       | 0.00014386 | No      |
| Tsks      | 0.83138   | 0.762     | -0.06938    | 0.0247155  | No      | Cox6a1   | 443.229 | 1058.36  | 1.25571          | 443.23       | 1058.361      | 1.25570437       | 0.00014386 | No      |
| Tspan11   | 0.091837  | 0.030267  | -0.06157    | 2.86E-06   | No      | COX6A2   | 0       | 1.77485  | inf              | 0.001        | 1.77585       | 10.794294        | 0.00014386 | No      |
| Tssk3     | 0.67842   | 0.18674   | -0.49168    | 2.19E-12   | No      | Cox6b1   | 379.172 | 1168.73  | 1.62401          | 379.173      | 1168.731      | 1.62401477       | 0.00014386 | No      |
| Ttc30b    | 0.25846   | 0.2063    | -0.05216    | 0.02094681 | No      | Cox6c    | 613.609 | 1680.96  | 1.45389          | 613.61       | 1680.961      | 1.45389235       | 0.00014386 | No      |
| Ttc8      | 0.36008   | 0.1085    | -0.25158    | 0.00265064 | No      | Cox7a2   | 159.814 | 625.7    | 1.96907          | 159.815      | 625.701       | 1.96907059       | 0.00014386 | No      |
| Tuba3b    | 0.9863    | 0.93192   | -0.05438    | 0.00188523 | No      | Cox7a2l  | 423.341 | 128.368  | -1.72154         | 423.342      | 128.369       | -1.7215268       | 0.00014386 | No      |
| Tubg2     | 0.11967   | 0.011893  | -0.107777   | 2.15E-12   | No      | Cox7a2l2 | 10.558  | 92.7979  | 3.13576          | 10.559       | 92.7989       | 3.13563449       | 0.00014386 | No      |
| Tug1      | 0.93411   | 0.8042    | -0.12991    | 2.49E-07   | No      | Cox7b    | 382.45  | 1924.76  | 2.33133          | 382.451      | 1924.761      | 2.33133249       | 0.00014386 | No      |
| Ubb       | 0.39947   | 0.20259   | -0.19688    | 0.00026094 | No      | Cox7c    | 323.697 | 1379.02  | 2.09093          | 323.698      | 1379.021      | 2.09092407       | 0.00014386 | No      |
| Ube2ql1   | 0.13718   | 0.038321  | -0.098859   | 2.31E-05   | No      | Cox8a    | 283.995 | 1838.94  | 2.69494          | 283.996      | 1838.941      | 2.69493268       | 0.00014386 | No      |

| RRBS    |           |           |             |            |         | RNAseq   |           |          |                  |              |               |                  |            |         |
|---------|-----------|-----------|-------------|------------|---------|----------|-----------|----------|------------------|--------------|---------------|------------------|------------|---------|
| gene    | Blood     | Kidney    | methyl.diff | pMWU.fdr   | Match ? | gene     | blood     | kidney   | log2(fold_ratio) | blood+ 0.001 | kidney+ 0.001 | log2(fold_ratio) | q_value    | Match ? |
| Ubfd1   | 0.34647   | 0.10618   | -0.24029    | 2.16E-09   | No      | Cp       | 0.32077   | 7.16266  | 4.48088          | 0.32177      | 7.16366       | 4.47659514       | 0.00014386 | No      |
| Ubxn10  | 0.0085574 | 0.56638   | 0.5578226   | 1.11E-11   | No      | Cpe      | 1.06704   | 4.02882  | 1.91674          | 1.06804      | 4.02982       | 1.91574972       | 0.00014386 | No      |
| Ucn     | 0.2522    | 0.035352  | -0.216848   | 0.00011494 | No      | Cpeb3    | 0.612755  | 6.44846  | 3.39557          | 0.613755     | 6.44946       | 3.39344359       | 0.00014386 | No      |
| Ugt8    | 0.1928    | 0.02792   | -0.16488    | 7.62E-05   | No      | Cpeb4    | 11.3821   | 16.8644  | 0.567216         | 11.3831      | 16.8654       | 0.56717303       | 0.00014386 | No      |
| Uhmk1   | 0.25934   | 0.12148   | -0.13786    | 2.15E-12   | No      | Cplx2    | 0         | 2.89538  | inf              | 0.001        | 2.89638       | 11.5000352       | 0.00014386 | No      |
| Unc5c   | 0.077777  | 0.0038462 | -0.0739308  | 0.00087121 | No      | Cpm      | 0.409425  | 2.98807  | 2.86754          | 0.410425     | 2.98907       | 2.86450617       | 0.00014386 | No      |
| Unc5d   | 0.16111   | 0.028571  | -0.132539   | 0.00093244 | No      | Cpne3    | 8.01171   | 18.9672  | 1.24332          | 8.01271      | 18.9682       | 1.24322061       | 0.00014386 | No      |
| Uqcc2   | 0.28347   | 0.14874   | -0.13473    | 0.00123297 | No      | Cpne7    | 30.7967   | 18.621   | -0.725844        | 30.7977      | 18.622        | -0.7258146       | 0.00014386 | No      |
| Ush1c   | 0.31258   | 0.061856  | -0.250724   | 4.84E-08   | No      | Cpne8    | 0.249394  | 3.66929  | 3.87901          | 0.250394     | 3.67029       | 3.87362216       | 0.00014386 | No      |
| Usp13   | 0.10936   | 0.028964  | -0.080396   | 9.44E-05   | No      | Cpped1   | 0.671615  | 30.1089  | 5.48641          | 0.672615     | 30.1099       | 5.48431315       | 0.00014386 | No      |
| Utf1    | 0.091442  | 0.020741  | -0.070701   | 2.80E-05   | No      | Cpq      | 0.0483716 | 105.406  | 11.0895          | 0.0493716    | 105.407       | 11.0600017       | 0.00014386 | No      |
| Vax1    | 0.10778   | 0.031752  | -0.076028   | 6.08E-08   | No      | Cpsf2    | 15.5333   | 6.14518  | -1.33784         | 15.5343      | 6.14618       | -1.3376953       | 0.00014386 | No      |
| Vldlr   | 0.10282   | 0.56533   | 0.46251     | 6.75E-07   | No      | Cpsf4    | 26.8917   | 17.3162  | -0.63504         | 26.8927      | 17.3172       | -0.6350089       | 0.00014386 | No      |
| Vom1r70 | 0.7455    | 0.52429   | -0.22121    | 0.00139382 | No      | Cpsf6    | 28.232    | 7.62646  | -1.88824         | 28.233       | 7.62746       | -1.8881078       | 0.00014386 | No      |
| Vom2r55 | 0.8191    | 0.70815   | -0.11095    | 0.00115826 | No      | Cpsf7    | 52.7128   | 20.0939  | -1.39139         | 52.7138      | 20.0949       | -1.3913513       | 0.00014386 | No      |
| Vom2r65 | 0.87824   | 0.77563   | -0.10261    | 0.01699421 | No      | Cpt2     | 2.67097   | 16.973   | 2.66781          | 2.67197      | 16.974        | 2.66735087       | 0.00014386 | No      |
| Vpreb1  | 0.89435   | 0.82886   | -0.06549    | 0.00127757 | No      | Cr1l     | 82.9081   | 38.5465  | -1.10491         | 82.9091      | 38.5475       | -1.1048932       | 0.00014386 | No      |
| Vpreb2  | 0.90031   | 0.81476   | -0.08555    | 6.75E-07   | No      | Cr2      | 1.04643   | 0        | -inf             | 1.04743      | 0.001         | -10.032638       | 0.00014386 | No      |
| Vsx1    | 0.079822  | 0.023745  | -0.056077   | 0.00123297 | No      | Crabp1   | 0         | 1.03445  | inf              | 0.001        | 1.03545       | 10.0160422       | 0.00014386 | No      |
| Vsx2    | 0.17408   | 0.077615  | -0.096465   | 0.00902244 | No      | Cradd    | 10.3724   | 3.44163  | -1.59159         | 10.3734      | 3.44263       | -1.5913058       | 0.00014386 | No      |
| Vwc2    | 0.090789  | 0.0278    | -0.062989   | 4.21E-12   | No      | Cramp1l  | 10.1468   | 2.90587  | -1.80399         | 10.1478      | 2.90687       | -1.8036285       | 0.00014386 | No      |
| Vwc2l   | 0.12882   | 0.03987   | -0.08895    | 0.00028308 | No      | Crat     | 2.43813   | 53.8466  | 4.46501          | 2.43913      | 53.8476       | 4.46444349       | 0.00014386 | No      |
| Vwce    | 0.17177   | 0.080024  | -0.091746   | 0.00036321 | No      | Creb1    | 11.1984   | 3.45985  | -1.69451         | 11.1994      | 3.46085       | -1.6942231       | 0.00014386 | No      |
| Wars    | 0.33328   | 0.45037   | 0.11709     | 0.02346238 | No      | Creb3l2  | 1.3345    | 21.7866  | 4.02907          | 1.3355       | 21.7876       | 4.0280554        | 0.00014386 | No      |
| Wbscr17 | 0.23525   | 0.10002   | -0.13523    | 0.0038486  | No      | Crebbp   | 69.1452   | 12.131   | -2.51093         | 69.1462      | 12.132        | -2.5108326       | 0.00014386 | No      |
| Wfdc11  | 0.35526   | 0.22172   | -0.13354    | 0.00675344 | No      | Crebrf   | 25.1482   | 4.5625   | -2.46256         | 25.1492      | 4.5635        | -2.4622999       | 0.00014386 | No      |
| Wfdc15b | 0.83482   | 0.74797   | -0.08685    | 0.01049788 | No      | CREBZF   | 45.6859   | 9.47281  | -2.26989         | 45.6869      | 9.47381       | -2.2697639       | 0.00014386 | No      |
| Wfdc6a  | 0.72277   | 0.59843   | -0.12434    | 0.04412687 | No      | Creg1    | 1.91697   | 16.2246  | 3.08129          | 1.91797      | 16.2256       | 3.08061977       | 0.00014386 | No      |
| Wnk2    | 0.20009   | 0.05433   | -0.14576    | 0.00017371 | No      | Creld1   | 3.92569   | 18.1915  | 2.21225          | 3.92669      | 18.1925       | 2.2119582        | 0.00014386 | No      |
| Wnt10a  | 0.47052   | 0.24701   | -0.22351    | 0.01049788 | No      | Crim1    | 0.813758  | 35.2293  | 5.43603          | 0.814758     | 35.2303       | 5.43430134       | 0.00014386 | No      |
| Wnt10b  | 0.080785  | 0.027455  | -0.05333    | 0.00028819 | No      | Cript    | 67.3835   | 42.5042  | -0.664791        | 67.3845      | 42.5052       | -0.6647774       | 0.00014386 | No      |
| Wnt3    | 0.072103  | 0.016344  | -0.055759   | 7.01E-05   | No      | Crispld2 | 0.388985  | 6.58192  | 4.08072          | 0.389985     | 6.58292       | 4.07723713       | 0.00014386 | No      |
| Wnt7a   | 0.060714  | 0.010483  | -0.050231   | 0.00087121 | No      | Crk      | 15.6633   | 28.4978  | 0.863461         | 15.6643      | 28.4988       | 0.86342087       | 0.00014386 | No      |
| Wnt8a   | 0.5168    | 0.25039   | -0.26641    | 0.00281863 | No      | Crkl     | 45.8983   | 24.5052  | -0.905354        | 45.8993      | 24.5062       | -0.9053254       | 0.00014386 | No      |
| Xkr6    | 0.12877   | 0.041516  | -0.087254   | 0.00081111 | No      | Crlf3    | 194.145   | 6.93031  | -4.80807         | 194.146      | 6.93131       | -4.8078701       | 0.00014386 | No      |
| Ydjc    | 0.06019   | 0.16708   | 0.10689     | 5.27E-08   | No      | Crls1    | 21.0494   | 34.9777  | 0.732651         | 21.0504      | 34.9787       | 0.73262902       | 0.00014386 | No      |
| Zbtb24  | 0.75241   | 0.32035   | -0.43206    | 0.00017371 | No      | Crmp1    | 7.11196   | 0.433962 | -4.03461         | 7.11296      | 0.434962      | -4.0314888       | 0.00014386 | No      |
| Zc2hc1c | 0.75813   | 0.45321   | -0.30492    | 0.00123297 | No      | Crocc    | 3.50962   | 29.6202  | 3.07719          | 3.51062      | 29.6212       | 3.07683234       | 0.00014386 | No      |
| Zdhhc19 | 0.58708   | 0.23538   | -0.3517     | 8.74E-06   | No      | Crot     | 10.9893   | 23.959   | 1.12447          | 10.9903      | 23.96         | 1.12439714       | 0.00014386 | No      |
| Zdhhc22 | 0.05719   | 0.011341  | -0.045849   | 0.01832913 | No      | CRTAP    | 11.555    | 92.2495  | 2.99702          | 11.556       | 92.2505       | 2.99691462       | 0.00014386 | No      |
| Zfp37   | 0.36995   | 0.055662  | -0.314288   | 3.15E-05   | No      | Crtc1    | 9.49663   | 5.0039   | -0.924363        | 9.49763      | 5.0049        | -0.9242263       | 0.00014386 | No      |
| Zfp385d | 0.086813  | 0.022957  | -0.063856   | 2.12E-07   | No      | Crtc2    | 52.464    | 25.3619  | -1.04867         | 52.465       | 25.3629       | -1.0486356       | 0.00014386 | No      |

| RRBS    |          |          |             |            |         | RNAseq     |          |          |                  |              |               |                  |            |         |
|---------|----------|----------|-------------|------------|---------|------------|----------|----------|------------------|--------------|---------------|------------------|------------|---------|
| gene    | Blood    | Kidney   | methyl.diff | pMWU.fdr   | Match ? | gene       | blood    | kidney   | log2(fold_ratio) | blood+ 0.001 | kidney+ 0.001 | log2(fold_ratio) | q_value    | Match ? |
| Zfp46   | 0.91373  | 0.76388  | -0.14985    | 0.00054762 | No      | Crtc3      | 3.62172  | 0.508045 | -2.83365         | 3.62272      | 0.509045      | -2.8312082       | 0.00014386 | No      |
| Zfp575  | 0.012467 | 0.18961  | 0.177143    | 3.82E-06   | No      | Cry1       | 16.8488  | 3.01658  | -2.48166         | 16.8498      | 3.01758       | -2.4812675       | 0.00014386 | No      |
| Zfp580  | 0.17333  | 0.072402 | -0.100928   | 0.00842241 | No      | Cryab      | 0.191918 | 2207.58  | 13.4897          | 0.192918     | 2207.581      | 13.482191        | 0.00014386 | No      |
| Zfp61   | 0.86215  | 0.7459   | -0.11625    | 0.00317797 | No      | Cryba4     | 1.95442  | 6.21438  | 1.66887          | 1.95542      | 6.21538       | 1.66836408       | 0.00014386 | No      |
| Zfp622  | 0.2571   | 0.091995 | -0.165105   | 0.00015722 | No      | Cryl1      | 5.75419  | 118.558  | 4.36484          | 5.75519      | 118.559       | 4.36459782       | 0.00014386 | No      |
| Zfp641  | 0.084532 | 0.013386 | -0.071146   | 1.27E-05   | No      | Cryz       | 0.644982 | 144.395  | 7.80655          | 0.645982     | 144.396       | 7.8043211        | 0.00014386 | No      |
| Zfp710  | 0.87878  | 0.79501  | -0.08377    | 0.01482889 | No      | Cryzl1     | 6.78982  | 17.3112  | 1.35026          | 6.79082      | 17.3122       | 1.35013137       | 0.00014386 | No      |
| Zfp772  | 0.90962  | 0.75969  | -0.14993    | 1.61E-05   | No      | Csdc2      | 1.5649   | 3.24964  | 1.05421          | 1.5659       | 3.25064       | 1.05373171       | 0.00014386 | No      |
| Zfp93   | 0.13675  | 0.042636 | -0.094114   | 0.00011267 | No      | Csde1      | 118.873  | 75.7333  | -0.650424        | 118.874      | 75.7343       | -0.6504145       | 0.00014386 | No      |
| Zic1    | 0.088433 | 0.036838 | -0.051595   | 0.00045631 | No      | Cse1l      | 26.2735  | 11.5344  | -1.18766         | 26.2745      | 11.5354       | -1.1875953       | 0.00014386 | No      |
| Zic2    | 0.081948 | 0.027016 | -0.054932   | 0.0003366  | No      | Csf1       | 0.528608 | 5.15096  | 3.28457          | 0.529608     | 5.15196       | 3.28212457       | 0.00014386 | No      |
| Zic3    | 0.10745  | 0.032235 | -0.075215   | 4.44E-05   | No      | Csf1r      | 3.53864  | 11.2536  | 1.66911          | 3.53964      | 11.2546       | 1.66884024       | 0.00014386 | No      |
| Zic5    | 0.12485  | 0.048789 | -0.076061   | 0.01559789 | No      | Csf2rb     | 0.517646 | 16.2018  | 4.96804          | 0.518646     | 16.2028       | 4.96534917       | 0.00014386 | No      |
| Zmynd10 | 0.76003  | 0.64995  | -0.11008    | 0.02220995 | No      | Csgalnact1 | 0.110066 | 2.38559  | 4.43791          | 0.111066     | 2.38659       | 4.4254616        | 0.00014386 | No      |
| Znrf4   | 0.35812  | 0.18193  | -0.17619    | 0.0002806  | No      | Csgalnact2 | 8.86078  | 4.49632  | -0.978689        | 8.86178      | 4.49732       | -0.978531        | 0.00014386 | No      |
| Zranb2  | 0.31638  | 0.13872  | -0.17766    | 0.0003366  | No      | Csk        | 200.643  | 34.1505  | -2.55465         | 200.644      | 34.1515       | -2.5546172       | 0.00014386 | No      |
|         |          |          |             |            |         | Csnk1a1    | 98.4489  | 49.0497  | -1.00513         | 98.4499      | 49.0507       | -1.005116        | 0.00014386 | No      |
|         |          |          |             |            |         | Csnk1e     | 28.0316  | 14.0677  | -0.994665        | 28.0326      | 14.0687       | -0.9946165       | 0.00014386 | No      |
|         |          |          |             |            |         | Csnk1g2    | 140.691  | 86.5665  | -0.700654        | 140.692      | 86.5675       | -0.7006429       | 0.00014386 | No      |
|         |          |          |             |            |         | Csnk1g3    | 39.481   | 13.0399  | -1.59822         | 39.482       | 13.0409       | -1.5981516       | 0.00014386 | No      |
|         |          |          |             |            |         | Csnk2a1    | 40.8723  | 21.6861  | -0.91435         | 40.8733      | 21.6871       | -0.9143216       | 0.00014386 | No      |
|         |          |          |             |            |         | Csrnp1     | 18.1663  | 13.2637  | -0.453783        | 18.1673      | 13.2647       | -0.453752        | 0.00014386 | No      |
|         |          |          |             |            |         | Csrp1      | 32.668   | 95.9493  | 1.5544           | 32.669       | 95.9503       | 1.55436502       | 0.00014386 | No      |
|         |          |          |             |            |         | Csrp2      | 0.328256 | 119.251  | 8.50496          | 0.329256     | 119.252       | 8.50058802       | 0.00014386 | No      |
|         |          |          |             |            |         | Cst3       | 78.9581  | 449.734  | 2.50991          | 78.9591      | 449.735       | 2.50989771       | 0.00014386 | No      |
|         |          |          |             |            |         | Cst7       | 7.50833  | 2.60001  | -1.52997         | 7.50933      | 2.60101       | -1.5296122       | 0.00014386 | No      |
|         |          |          |             |            |         | Cstb       | 83.5156  | 230.315  | 1.46349          | 83.5166      | 230.316       | 1.46347975       | 0.00014386 | No      |
|         |          |          |             |            |         | Cstf1      | 12.8966  | 7.8792   | -0.710868        | 12.8976      | 7.8802        | -0.7107985       | 0.00014386 | No      |
|         |          |          |             |            |         | Ctage5     | 56.5178  | 26.3429  | -1.10129         | 56.5188      | 26.3439       | -1.1012619       | 0.00014386 | No      |
|         |          |          |             |            |         | Ctbp2      | 0.514287 | 39.5869  | 6.2663           | 0.515287     | 39.5879       | 6.26353953       | 0.00014386 | No      |
|         |          |          |             |            |         | Ctbs       | 4.89307  | 14.6721  | 1.58426          | 4.89407      | 14.6731       | 1.58406706       | 0.00014386 | No      |
|         |          |          |             |            |         | Ctc1       | 11.2266  | 36.1665  | 1.68773          | 11.2276      | 36.1675       | 1.68764431       | 0.00014386 | No      |
|         |          |          |             |            |         | Ctcf       | 57.2743  | 21.9961  | -1.38064         | 57.2753      | 21.9971       | -1.3805998       | 0.00014386 | No      |
|         |          |          |             |            |         | Ctdnep1    | 85.3649  | 49.469   | -0.787119        | 85.3659      | 49.47         | -0.787106        | 0.00014386 | No      |
|         |          |          |             |            |         | Ctdp1      | 31.7759  | 11.0478  | -1.52417         | 31.7769      | 11.0488       | -1.5240887       | 0.00014386 | No      |
|         |          |          |             |            |         | Ctdsp2     | 68.1759  | 31.1728  | -1.12897         | 68.1769      | 31.1738       | -1.128949        | 0.00014386 | No      |
|         |          |          |             |            |         | Ctdspl     | 0.168567 | 33.634   | 7.64045          | 0.169567     | 33.635        | 7.63196402       | 0.00014386 | No      |
|         |          |          |             |            |         | Ctdspl2    | 12.3377  | 4.01423  | -1.61987         | 12.3387      | 4.01523       | -1.6196359       | 0.00014386 | No      |
|         |          |          |             |            |         | Ctf1       | 0.527662 | 20.5514  | 5.28348          | 0.528662     | 20.5524       | 5.28081743       | 0.00014386 | No      |
|         |          |          |             |            |         | Cth        | 0.987726 | 81.1889  | 6.36103          | 0.988726     | 81.1899       | 6.35958569       | 0.00014386 | No      |
|         |          |          |             |            |         | Ctif       | 0.247342 | 2.93053  | 3.56659          | 0.248342     | 2.93153       | 3.56125364       | 0.00014386 | No      |
|         |          |          |             |            |         | Ctla2a     | 67.774   | 29.8646  | -1.1823          | 67.775       | 29.8656       | -1.1822685       | 0.00014386 | No      |

| RRBS |       |        |             |          |         | RNAseq   |           |         |                  |              |               |                  |            |         |
|------|-------|--------|-------------|----------|---------|----------|-----------|---------|------------------|--------------|---------------|------------------|------------|---------|
| gene | Blood | Kidney | methyl.diff | pMWU.fdr | Match ? | gene     | blood     | kidney  | log2(fold_ratio) | blood+ 0.001 | kidney+ 0.001 | log2(fold_ratio) | q_value    | Match ? |
|      |       |        |             |          |         | Ctla4    | 26.7563   | 2.51317 | -3.4123          | 26.7573      | 2.51417       | -3.4117784       | 0.00014386 | No      |
|      |       |        |             |          |         | Ctnna1   | 3.69836   | 113     | 4.9333           | 3.69936      | 113.001       | 4.93291603       | 0.00014386 | No      |
|      |       |        |             |          |         | Ctnnal1  | 3.17741   | 29.7557 | 3.22724          | 3.17841      | 29.7567       | 3.2268374        | 0.00014386 | No      |
|      |       |        |             |          |         | Ctnnb1   | 105.425   | 171.477 | 0.701795         | 105.426      | 171.478       | 0.70179279       | 0.00014386 | No      |
|      |       |        |             |          |         | Ctnnbip1 | 0.130225  | 10.9782 | 6.39749          | 0.131225     | 10.9792       | 6.38658653       | 0.00014386 | No      |
|      |       |        |             |          |         | Ctnnb1   | 49.7164   | 20.5493 | -1.27464         | 49.7174      | 20.5503       | -1.2745914       | 0.00014386 | No      |
|      |       |        |             |          |         | Ctnnd1   | 15.0202   | 33.8403 | 1.17184          | 15.0212      | 33.8413       | 1.17178492       | 0.00014386 | No      |
|      |       |        |             |          |         | Ctps1    | 19.3169   | 11.4414 | -0.755605        | 19.3179      | 11.4424       | -0.7555486       | 0.00014386 | No      |
|      |       |        |             |          |         | Ctps2    | 26.4632   | 17.601  | -0.588334        | 26.4642      | 17.602        | -0.5883027       | 0.00014386 | No      |
|      |       |        |             |          |         | Ctr9     | 34.0485   | 17.4002 | -0.968489        | 34.0495      | 17.4012       | -0.9684468       | 0.00014386 | No      |
|      |       |        |             |          |         | Ctsb     | 81.5333   | 409.782 | 2.3294           | 81.5343      | 409.783       | 2.32938113       | 0.00014386 | No      |
|      |       |        |             |          |         | Ctsc     | 43.188    | 29.4559 | -0.552072        | 43.189       | 29.4569       | -0.5520583       | 0.00014386 | No      |
|      |       |        |             |          |         | Ctsd     | 35.1192   | 153.456 | 2.12749          | 35.1202      | 153.457       | 2.12746149       | 0.00014386 | No      |
|      |       |        |             |          |         | Ctse     | 181.729   | 5.50177 | -5.04575         | 181.73       | 5.50277       | -5.0454948       | 0.00014386 | No      |
|      |       |        |             |          |         | Ctsh     | 6.86462   | 355.264 | 5.69357          | 6.86562      | 355.265       | 5.69336175       | 0.00014386 | No      |
|      |       |        |             |          |         | Ctsl1    | 22.6947   | 1345.11 | 5.88923          | 22.6957      | 1345.111      | 5.88916243       | 0.00014386 | No      |
|      |       |        |             |          |         | Ctss     | 107.747   | 10.1729 | -3.40485         | 107.748      | 10.1739       | -3.4047164       | 0.00014386 | No      |
|      |       |        |             |          |         | Ctsw     | 288.864   | 38.3776 | -2.91205         | 288.865      | 38.3786       | -2.9120214       | 0.00014386 | No      |
|      |       |        |             |          |         | Cttnbp2  | 0.225483  | 1.49433 | 2.72841          | 0.226483     | 1.49533       | 2.72298923       | 0.00014386 | No      |
|      |       |        |             |          |         | Ctu1     | 6.6677    | 2.17585 | -1.61561         | 6.6687       | 2.17685       | -1.6151635       | 0.00014386 | No      |
|      |       |        |             |          |         | Ctxn1    | 0.239842  | 1.69926 | 2.82475          | 0.240842     | 1.70026       | 2.81959647       | 0.00014386 | No      |
|      |       |        |             |          |         | Cul1     | 40.8573   | 31.1545 | -0.391153        | 40.8583      | 31.1555       | -0.3911423       | 0.00014386 | No      |
|      |       |        |             |          |         | Cul3     | 71.1705   | 35.7214 | -0.994491        | 71.1715      | 35.7224       | -0.9944706       | 0.00014386 | No      |
|      |       |        |             |          |         | Cul4b    | 22.2917   | 8.13026 | -1.45513         | 22.2927      | 8.13126       | -1.4550205       | 0.00014386 | No      |
|      |       |        |             |          |         | Cul5     | 18.8039   | 8.60268 | -1.12817         | 18.8049      | 8.60368       | -1.1280829       | 0.00014386 | No      |
|      |       |        |             |          |         | Cul7     | 2.05496   | 5.94111 | 1.53162          | 2.05596      | 5.94211       | 1.53116312       | 0.00014386 | No      |
|      |       |        |             |          |         | Cuta     | 89.3429   | 123.754 | 0.470054         | 89.3439      | 123.755       | 0.47004568       | 0.00014386 | No      |
|      |       |        |             |          |         | Cux1     | 25.9269   | 52.136  | 1.00783          | 25.9279      | 52.137        | 1.00780221       | 0.00014386 | No      |
|      |       |        |             |          |         | Cwc15    | 70.3394   | 146.391 | 1.05742          | 70.3404      | 146.392       | 1.05741127       | 0.00014386 | No      |
|      |       |        |             |          |         | Cwc22    | 33.134    | 11.9093 | -1.47622         | 33.135       | 11.9103       | -1.4761462       | 0.00014386 | No      |
|      |       |        |             |          |         | Cwh43    | 0.135346  | 8.50911 | 5.97429          | 0.136346     | 8.51011       | 5.9638335        | 0.00014386 | No      |
|      |       |        |             |          |         | Cxcl10   | 0.99277   | 13.9988 | 3.8177           | 0.99377      | 13.9998       | 3.81635042       | 0.00014386 | No      |
|      |       |        |             |          |         | Cxcl12   | 0.0202489 | 55.8389 | 11.4292          | 0.0212489    | 55.8399       | 11.3596925       | 0.00014386 | No      |
|      |       |        |             |          |         | Cxcl13   | 0         | 1.06437 | inf              | 0.001        | 1.06537       | 10.0571388       | 0.00014386 | No      |
|      |       |        |             |          |         | Cxcl16   | 0.703262  | 85.2991 | 6.92232          | 0.704262     | 85.3001       | 6.92029138       | 0.00014386 | No      |
|      |       |        |             |          |         | Cxcr3    | 28.3845   | 3.58799 | -2.98386         | 28.3855      | 3.58899       | -2.9835043       | 0.00014386 | No      |
|      |       |        |             |          |         | Cxcr4    | 397.64    | 26.7026 | -3.89641         | 397.641      | 26.7036       | -3.8963604       | 0.00014386 | No      |
|      |       |        |             |          |         | Cxxc1    | 46.1712   | 25.1585 | -0.875948        | 46.1722      | 25.1595       | -0.8759212       | 0.00014386 | No      |
|      |       |        |             |          |         | Cyb5a    | 53.406    | 322.552 | 2.59446          | 53.407       | 322.553       | 2.59443548       | 0.00014386 | No      |
|      |       |        |             |          |         | Cyb5b    | 24.9436   | 122.531 | 2.29641          | 24.9446      | 122.532       | 2.29635913       | 0.00014386 | No      |
|      |       |        |             |          |         | Cyb5r1   | 5.2045    | 27.7189 | 2.41304          | 5.2055       | 27.7199       | 2.4128134        | 0.00014386 | No      |
|      |       |        |             |          |         | Cyb5r2   | 0         | 2.086   | inf              | 0.001        | 2.087         | 11.0272149       | 0.00014386 | No      |

| RRBS |       |        |             |          |         | RNAseq         |           |          |                  |              |               |                  |            |         |
|------|-------|--------|-------------|----------|---------|----------------|-----------|----------|------------------|--------------|---------------|------------------|------------|---------|
| gene | Blood | Kidney | methyl.diff | pMWU.fdr | Match ? | gene           | blood     | kidney   | log2(fold_ratio) | blood+ 0.001 | kidney+ 0.001 | log2(fold_ratio) | q_value    | Match ? |
|      |       |        |             |          |         | Cyb5r3         | 17.1632   | 68.0532  | 1.98735          | 17.1642      | 68.0542       | 1.98728158       | 0.00014386 | No      |
|      |       |        |             |          |         | Cybrd1         | 3.27182   | 0.41387  | -2.98284         | 3.27282      | 0.41487       | -2.979803        | 0.00014386 | No      |
|      |       |        |             |          |         | CYC1           | 63.7263   | 302.766  | 2.24824          | 63.7273      | 302.767       | 2.24822452       | 0.00014386 | No      |
|      |       |        |             |          |         | Cycs           | 46.4502   | 517.604  | 3.47809          | 46.4512      | 517.605       | 3.47806378       | 0.00014386 | No      |
|      |       |        |             |          |         | Cyfp1          | 3.19744   | 27.044   | 3.08032          | 3.19844      | 27.045        | 3.07992157       | 0.00014386 | No      |
|      |       |        |             |          |         | Cyfp2          | 88.1643   | 48.2868  | -0.868566        | 88.1653      | 48.2878       | -0.8685522       | 0.00014386 | No      |
|      |       |        |             |          |         | Cyp20a1        | 6.80821   | 14.831   | 1.12327          | 6.80921      | 14.832        | 1.12315382       | 0.00014386 | No      |
|      |       |        |             |          |         | Cyp27a1        | 0.0962763 | 17.3987  | 7.49758          | 0.0972763    | 17.3997       | 7.48275836       | 0.00014386 | No      |
|      |       |        |             |          |         | Cyp2c11        | 0         | 1.74793  | inf              | 0.001        | 1.74893       | 10.7722568       | 0.00014386 | No      |
|      |       |        |             |          |         | Cyp2d1         | 0         | 23.2285  | inf              | 0.001        | 23.2295       | 14.5036705       | 0.00014386 | No      |
|      |       |        |             |          |         | Cyp2d2         | 1.26363   | 37.7524  | 4.90092          | 1.26463      | 37.7534       | 4.89981932       | 0.00014386 | No      |
|      |       |        |             |          |         | Cyp2d4         | 0.205333  | 2.46874  | 3.58774          | 0.206333     | 2.46974       | 3.58131269       | 0.00014386 | No      |
|      |       |        |             |          |         | Cyp2j10        | 0         | 0.822778 | inf              | 0.001        | 0.823778      | 9.68611179       | 0.00014386 | No      |
|      |       |        |             |          |         | Cyp2j4         | 0         | 1.62057  | inf              | 0.001        | 1.62157       | 10.6631756       | 0.00014386 | No      |
|      |       |        |             |          |         | Cyp2s1         | 34.9046   | 11.3151  | -1.62517         | 34.9056      | 11.3161       | -1.6250817       | 0.00014386 | No      |
|      |       |        |             |          |         | Cyp2u1         | 12.8147   | 2.89114  | -2.1481          | 12.8157      | 2.89214       | -2.147703        | 0.00014386 | No      |
|      |       |        |             |          |         | Cyp39a1        | 0         | 1.82168  | inf              | 0.001        | 1.82268       | 10.8318456       | 0.00014386 | No      |
|      |       |        |             |          |         | Cyp46a1        | 0         | 2.21748  | inf              | 0.001        | 2.21848       | 11.1153558       | 0.00014386 | No      |
|      |       |        |             |          |         | Cyp4a1         | 0         | 8.25468  | inf              | 0.001        | 8.25568       | 13.0111713       | 0.00014386 | No      |
|      |       |        |             |          |         | Cyp4a2         | 0.0732658 | 442.964  | 12.5618          | 0.0742658    | 442.965       | 12.5422071       | 0.00014386 | No      |
|      |       |        |             |          |         | Cyp4f17        | 19.5849   | 3.19456  | -2.61606         | 19.5859      | 3.19556       | -2.6156747       | 0.00014386 | No      |
|      |       |        |             |          |         | Cyp4f6         | 6.49755   | 30.1248  | 2.21298          | 6.49855      | 30.1258       | 2.2128098        | 0.00014386 | No      |
|      |       |        |             |          |         | Cystm1         | 0.472802  | 153.332  | 8.3412           | 0.473802     | 153.333       | 8.33816822       | 0.00014386 | No      |
|      |       |        |             |          |         | Cyth1          | 50.3981   | 9.06114  | -2.4756          | 50.3991      | 9.06214       | -2.4754743       | 0.00014386 | No      |
|      |       |        |             |          |         | Cyth3          | 9.15494   | 5.7902   | -0.660936        | 9.15594      | 5.7912        | -0.6608457       | 0.00014386 | No      |
|      |       |        |             |          |         | Cyth4          | 36.5706   | 7.74986  | -2.23844         | 36.5716      | 7.75086       | -2.2382954       | 0.00014386 | No      |
|      |       |        |             |          |         | Cytip          | 433.697   | 19.7625  | -4.45585         | 433.698      | 19.7635       | -4.4557804       | 0.00014386 | No      |
|      |       |        |             |          |         | D030056L22 Rik | 20.1124   | 11.7148  | -0.779748        | 20.1134      | 11.7158       | -0.7797015       | 0.00014386 | No      |
|      |       |        |             |          |         | D17Wsu104 e    | 19.3524   | 32.7706  | 0.759888         | 19.3534      | 32.7716       | 0.75985907       | 0.00014386 | No      |
|      |       |        |             |          |         | D2hgdh         | 3.56437   | 19.2895  | 2.4361           | 3.56537      | 19.2905       | 2.43576683       | 0.00014386 | No      |
|      |       |        |             |          |         | D5Erttd579e    | 17.4286   | 37.6766  | 1.11221          | 17.4296      | 37.6776       | 1.11216761       | 0.00014386 | No      |
|      |       |        |             |          |         | D630039A0 3Rik | 0         | 12.6479  | inf              | 0.001        | 12.6489       | 13.6267243       | 0.00014386 | No      |
|      |       |        |             |          |         | D930015E06 Rik | 67.332    | 15.2481  | -2.14266         | 67.333       | 15.2491       | -2.1425896       | 0.00014386 | No      |
|      |       |        |             |          |         | Daam1          | 3.8618    | 6.60562  | 0.774418         | 3.8628       | 6.60662       | 0.77426538       | 0.00014386 | No      |
|      |       |        |             |          |         | Dab2           | 0.218293  | 110.115  | 8.97852          | 0.219293     | 110.116       | 8.97194863       | 0.00014386 | No      |
|      |       |        |             |          |         | Dach2          | 0.906574  | 0        | -inf             | 0.907574     | 0.001         | -9.8258715       | 0.00014386 | No      |
|      |       |        |             |          |         | Dad1           | 139.085   | 196.665  | 0.499767         | 139.086      | 196.666       | 0.49977035       | 0.00014386 | No      |
|      |       |        |             |          |         | Dag1           | 11.6402   | 95.4981  | 3.03635          | 11.6412      | 95.4991       | 3.03624735       | 0.00014386 | No      |

| RRBS |       |        |             |          |         | RNAseq  |           |         |                  |              |               |                  |            |         |
|------|-------|--------|-------------|----------|---------|---------|-----------|---------|------------------|--------------|---------------|------------------|------------|---------|
| gene | Blood | Kidney | methyl.diff | pMWU.fdr | Match ? | gene    | blood     | kidney  | log2(fold_ratio) | blood+ 0.001 | kidney+ 0.001 | log2(fold_ratio) | q_value    | Match ? |
|      |       |        |             |          |         | DAGLB   | 1.01732   | 14.8695 | 3.86951          | 1.01832      | 14.8705       | 3.86819026       | 0.00014386 | No      |
|      |       |        |             |          |         | Dak     | 3.03486   | 68.773  | 4.50214          | 3.03586      | 68.774        | 4.50168609       | 0.00014386 | No      |
|      |       |        |             |          |         | Dap     | 26.794    | 119.319 | 2.15484          | 26.795       | 119.32        | 2.15480016       | 0.00014386 | No      |
|      |       |        |             |          |         | Dapk3   | 68.079    | 105.668 | 0.634252         | 68.08        | 105.669       | 0.63424925       | 0.00014386 | No      |
|      |       |        |             |          |         | Dapl1   | 0         | 56.4088 | inf              | 0.001        | 56.4098       | 15.7836582       | 0.00014386 | No      |
|      |       |        |             |          |         | Daxx    | 39.123    | 23.0009 | -0.766328        | 39.124       | 23.0019       | -0.7663008       | 0.00014386 | No      |
|      |       |        |             |          |         | Dazap2  | 327.263   | 202.281 | -0.69409         | 327.264      | 202.282       | -0.694087        | 0.00014386 | No      |
|      |       |        |             |          |         | Dbi     | 68.549    | 955.249 | 3.80067          | 68.55        | 955.25        | 3.80064978       | 0.00014386 | No      |
|      |       |        |             |          |         | Dbn1    | 0.414205  | 16.3579 | 5.3035           | 0.415205     | 16.3589       | 5.30010811       | 0.00014386 | No      |
|      |       |        |             |          |         | Dbnnd2  | 1.89187   | 56.6362 | 4.90384          | 1.89287      | 56.6372       | 4.90310271       | 0.00014386 | No      |
|      |       |        |             |          |         | Dbp     | 30.3986   | 61.3739 | 1.01362          | 30.3996      | 61.3749       | 1.01359643       | 0.00014386 | No      |
|      |       |        |             |          |         | Dbr1    | 17.2974   | 12.1131 | -0.513983        | 17.2984      | 12.1141       | -0.5139514       | 0.00014386 | No      |
|      |       |        |             |          |         | Dbt     | 8.88394   | 22.192  | 1.32077          | 8.88494      | 22.193        | 1.32067076       | 0.00014386 | No      |
|      |       |        |             |          |         | Dcaf10  | 4.61294   | 1.98312 | -1.21791         | 4.61394      | 1.98412       | -1.2175          | 0.00014386 | No      |
|      |       |        |             |          |         | Dcaf15  | 38.8002   | 13.9851 | -1.47217         | 38.8012      | 13.9861       | -1.4721075       | 0.00014386 | No      |
|      |       |        |             |          |         | Dcaf17  | 6.51919   | 2.55915 | -1.34903         | 6.52019      | 2.56015       | -1.3486857       | 0.00014386 | No      |
|      |       |        |             |          |         | Dcaf5   | 14.7983   | 7.27629 | -1.02416         | 14.7993      | 7.27729       | -1.0240557       | 0.00014386 | No      |
|      |       |        |             |          |         | Dcaf7   | 16.4958   | 11.3514 | -0.539235        | 16.4968      | 11.3524       | -0.5391889       | 0.00014386 | No      |
|      |       |        |             |          |         | Dcakd   | 4.38917   | 28.6341 | 2.70572          | 4.39017      | 28.6351       | 2.70543593       | 0.00014386 | No      |
|      |       |        |             |          |         | Dcbld1  | 11.9482   | 8.14371 | -0.553032        | 11.9492      | 8.14471       | -0.5529788       | 0.00014386 | No      |
|      |       |        |             |          |         | Dck     | 21.0402   | 2.60679 | -3.0128          | 21.0412      | 2.60779       | -3.0123174       | 0.00014386 | No      |
|      |       |        |             |          |         | Dclk1   | 0.0887236 | 3.55229 | 5.32329          | 0.0897236    | 3.55329       | 5.30752412       | 0.00014386 | No      |
|      |       |        |             |          |         | Dclk2   | 0.19808   | 1.71795 | 3.11653          | 0.19908      | 1.71895       | 3.11010738       | 0.00014386 | No      |
|      |       |        |             |          |         | Dclre1a | 3.87      | 9.84678 | 1.34732          | 3.871        | 9.84778       | 1.34709222       | 0.00014386 | No      |
|      |       |        |             |          |         | Dclre1b | 6.77482   | 3.11436 | -1.12125         | 6.77582      | 3.11536       | -1.1209967       | 0.00014386 | No      |
|      |       |        |             |          |         | Dclre1c | 18.1296   | 4.43724 | -2.03061         | 18.1306      | 4.43824       | -2.0303671       | 0.00014386 | No      |
|      |       |        |             |          |         | Dcn     | 0         | 4.29934 | inf              | 0.001        | 4.30034       | 12.070235        | 0.00014386 | No      |
|      |       |        |             |          |         | Dcp1a   | 7.96676   | 4.46793 | -0.834385        | 7.96776      | 4.46893       | -0.8342447       | 0.00014386 | No      |
|      |       |        |             |          |         | Dcp1b   | 11.514    | 6.72625 | -0.775515        | 11.515       | 6.72725       | -0.7754256       | 0.00014386 | No      |
|      |       |        |             |          |         | Dcps    | 38.6377   | 13.5008 | -1.51697         | 38.6387      | 13.5018       | -1.5168948       | 0.00014386 | No      |
|      |       |        |             |          |         | Dcstamp | 0         | 1.15407 | inf              | 0.001        | 1.15507       | 10.1737646       | 0.00014386 | No      |
|      |       |        |             |          |         | Dctd    | 16.6818   | 10.2089 | -0.70845         | 16.6828      | 10.2099       | -0.7083927       | 0.00014386 | No      |
|      |       |        |             |          |         | Dctn2   | 63.6904   | 92.8087 | 0.543183         | 63.6914      | 92.8097       | 0.54317701       | 0.00014386 | No      |
|      |       |        |             |          |         | Dctn3   | 35.5837   | 72.2264 | 1.02131          | 35.5847      | 72.2274       | 1.02128916       | 0.00014386 | No      |
|      |       |        |             |          |         | Dctpp1  | 3.83736   | 9.54862 | 1.31518          | 3.83836      | 9.54962       | 1.3149533        | 0.00014386 | No      |
|      |       |        |             |          |         | Dcun1d1 | 13.2884   | 8.32556 | -0.674551        | 13.2894      | 8.32656       | -0.6744835       | 0.00014386 | No      |
|      |       |        |             |          |         | Dcun1d4 | 3.76712   | 8.6161  | 1.19357          | 3.76812      | 8.6171        | 1.19335752       | 0.00014386 | No      |
|      |       |        |             |          |         | Dcun1d5 | 75.7051   | 41.4506 | -0.868997        | 75.7061      | 41.4516       | -0.8689818       | 0.00014386 | No      |
|      |       |        |             |          |         | Ddah1   | 0.302447  | 110.201 | 8.50925          | 0.303447     | 110.202       | 8.50449013       | 0.00014386 | No      |
|      |       |        |             |          |         | Ddb2    | 17.3166   | 2.938   | -2.55926         | 17.3176      | 2.939         | -2.5588417       | 0.00014386 | No      |
|      |       |        |             |          |         | Ddc     | 0.155957  | 39.1037 | 7.97002          | 0.156957     | 39.1047       | 7.96082883       | 0.00014386 | No      |
|      |       |        |             |          |         | Ddhd1   | 18.3531   | 4.32121 | -2.08652         | 18.3541      | 4.32221       | -2.0862613       | 0.00014386 | No      |



| RRBS |       |        |             |          |         | RNAseq  |         |         |                  |              |               |                  |            |         |
|------|-------|--------|-------------|----------|---------|---------|---------|---------|------------------|--------------|---------------|------------------|------------|---------|
| gene | Blood | Kidney | methyl.diff | pMWU.fdr | Match ? | gene    | blood   | kidney  | log2(fold_ratio) | blood+ 0.001 | kidney+ 0.001 | log2(fold_ratio) | q_value    | Match ? |
|      |       |        |             |          |         | Ddhd2   | 18.9629 | 6.76039 | -1.488           | 18.9639      | 6.76139       | -1.4878639       | 0.00014386 | No      |
|      |       |        |             |          |         | DDIT3   | 22.8867 | 94.2894 | 2.04258          | 22.8877      | 94.2904       | 2.0425384        | 0.00014386 | No      |
|      |       |        |             |          |         | Ddit4   | 32.0747 | 20.252  | -0.663367        | 32.0757      | 20.253        | -0.6633451       | 0.00014386 | No      |
|      |       |        |             |          |         | Ddit4l  | 0       | 8.28557 | inf              | 0.001        | 8.28657       | 13.0165593       | 0.00014386 | No      |
|      |       |        |             |          |         | Ddo     | 0       | 4.52033 | inf              | 0.001        | 4.52133       | 12.1425315       | 0.00014386 | No      |
|      |       |        |             |          |         | Ddrnk1  | 38.8717 | 66.4275 | 0.773059         | 38.8727      | 66.4285       | 0.77304502       | 0.00014386 | No      |
|      |       |        |             |          |         | Ddt     | 84.7502 | 490.685 | 2.53351          | 84.7512      | 490.686       | 2.53349441       | 0.00014386 | No      |
|      |       |        |             |          |         | Ddx1    | 20.0525 | 27.8435 | 0.473563         | 20.0535      | 27.8445       | 0.47353833       | 0.00014386 | No      |
|      |       |        |             |          |         | Ddx10   | 12.3842 | 4.42274 | -1.48549         | 12.3852      | 4.42374       | -1.4852787       | 0.00014386 | No      |
|      |       |        |             |          |         | Ddx11   | 8.59857 | 1.28055 | -2.74734         | 8.59957      | 1.28155       | -2.7463748       | 0.00014386 | No      |
|      |       |        |             |          |         | Ddx17   | 176.688 | 73.477  | -1.26583         | 176.689      | 73.478        | -1.265828        | 0.00014386 | No      |
|      |       |        |             |          |         | Ddx18   | 25.9308 | 9.33797 | -1.47349         | 25.9318      | 9.33897       | -1.473387        | 0.00014386 | No      |
|      |       |        |             |          |         | Ddx19a  | 29.5005 | 66.4323 | 1.17114          | 29.5015      | 66.4333       | 1.17111827       | 0.00014386 | No      |
|      |       |        |             |          |         | Ddx20   | 27.595  | 5.64885 | -2.28838         | 27.596       | 5.64985       | -2.2881747       | 0.00014386 | No      |
|      |       |        |             |          |         | Ddx26b  | 55.3434 | 8.93935 | -2.63017         | 55.3444      | 8.94035       | -2.6300341       | 0.00014386 | No      |
|      |       |        |             |          |         | Ddx27   | 43.2133 | 15.5791 | -1.47187         | 43.2143      | 15.5801       | -1.4718043       | 0.00014386 | No      |
|      |       |        |             |          |         | DDX39A  | 100.858 | 31.9967 | -1.65633         | 100.859      | 31.9977       | -1.6562997       | 0.00014386 | No      |
|      |       |        |             |          |         | DDX3X   | 82.7737 | 49.5153 | -0.741299        | 82.7747      | 49.5163       | -0.7412864       | 0.00014386 | No      |
|      |       |        |             |          |         | Ddx42   | 41.4794 | 13.1016 | -1.66265         | 41.4804      | 13.1026       | -1.6625767       | 0.00014386 | No      |
|      |       |        |             |          |         | Ddx46   | 111.007 | 34.6522 | -1.67964         | 111.008      | 34.6532       | -1.6796032       | 0.00014386 | No      |
|      |       |        |             |          |         | Ddx49   | 43.101  | 25.0344 | -0.783807        | 43.102       | 25.0354       | -0.7837853       | 0.00014386 | No      |
|      |       |        |             |          |         | Ddx5    | 700.46  | 213.436 | -1.7145          | 700.461      | 213.437       | -1.7144944       | 0.00014386 | No      |
|      |       |        |             |          |         | Ddx50   | 46.7274 | 26.1265 | -0.838756        | 46.7284      | 26.1275       | -0.8387306       | 0.00014386 | No      |
|      |       |        |             |          |         | Ddx51   | 14.656  | 7.51311 | -0.964012        | 14.657       | 7.51411       | -0.9639157       | 0.00014386 | No      |
|      |       |        |             |          |         | Ddx52   | 36.5211 | 24.9363 | -0.550481        | 36.5221      | 24.9373       | -0.5504645       | 0.00014386 | No      |
|      |       |        |             |          |         | Ddx55   | 16.5111 | 11.2281 | -0.556325        | 16.5121      | 11.2291       | -0.5562813       | 0.00014386 | No      |
|      |       |        |             |          |         | Ddx56   | 15.6473 | 8.9838  | -0.800517        | 15.6483      | 8.9848        | -0.8004476       | 0.00014386 | No      |
|      |       |        |             |          |         | Ddx59   | 11.3408 | 7.23327 | -0.648807        | 11.3418      | 7.23427       | -0.6487303       | 0.00014386 | No      |
|      |       |        |             |          |         | Deb1    | 44.0041 | 100.115 | 1.18596          | 44.0051      | 100.116       | 1.18592992       | 0.00014386 | No      |
|      |       |        |             |          |         | Decr1   | 30.8324 | 95.4601 | 1.63045          | 30.8334      | 95.4611       | 1.63041898       | 0.00014386 | No      |
|      |       |        |             |          |         | Decr2   | 1.67619 | 123.674 | 6.20521          | 1.67719      | 123.675       | 6.20436396       | 0.00014386 | No      |
|      |       |        |             |          |         | Dedd2   | 33.0705 | 15.2585 | -1.11594         | 33.0715      | 15.2595       | -1.1158808       | 0.00014386 | No      |
|      |       |        |             |          |         | Def6    | 64.1112 | 5.2834  | -3.60104         | 64.1122      | 5.2844        | -3.6007873       | 0.00014386 | No      |
|      |       |        |             |          |         | Def8    | 2.16781 | 18.0909 | 3.06096          | 2.16881      | 18.0919       | 3.06036835       | 0.00014386 | No      |
|      |       |        |             |          |         | Defb29  | 0       | 9.10851 | inf              | 0.001        | 9.10951       | 13.1531577       | 0.00014386 | No      |
|      |       |        |             |          |         | Dek     | 66.4559 | 40.5808 | -0.711599        | 66.4569      | 40.5818       | -0.7115861       | 0.00014386 | No      |
|      |       |        |             |          |         | Dennd1a | 4.41177 | 9.81302 | 1.15334          | 4.41277      | 9.81402       | 1.15315966       | 0.00014386 | No      |
|      |       |        |             |          |         | Dennd1b | 9.13767 | 4.48832 | -1.02565         | 9.13867      | 4.48932       | -1.0254873       | 0.00014386 | No      |
|      |       |        |             |          |         | Dennd1c | 409.866 | 44.0011 | -3.21954         | 409.867      | 44.0021       | -3.2195116       | 0.00014386 | No      |
|      |       |        |             |          |         | Dennd2d | 115.244 | 20.6015 | -2.48387         | 115.245      | 20.6025       | -2.4838128       | 0.00014386 | No      |
|      |       |        |             |          |         | Dennd3  | 17.135  | 7.13738 | -1.26348         | 17.136       | 7.13838       | -1.2633618       | 0.00014386 | No      |
|      |       |        |             |          |         | Dennd4a | 4.72407 | 1.95785 | -1.27076         | 4.72507      | 1.95885       | -1.2703288       | 0.00014386 | No      |

| RRBS |       |        |             |          |         | RNAseq  |          |         |                  |              |               |                  |            |         |
|------|-------|--------|-------------|----------|---------|---------|----------|---------|------------------|--------------|---------------|------------------|------------|---------|
| gene | Blood | Kidney | methyl.diff | pMWU.fdr | Match ? | gene    | blood    | kidney  | log2(fold_ratio) | blood+ 0.001 | kidney+ 0.001 | log2(fold_ratio) | q_value    | Match ? |
|      |       |        |             |          |         | Dennd4b | 57.1155  | 10.581  | -2.43241         | 57.1165      | 10.582        | -2.4322953       | 0.00014386 | No      |
|      |       |        |             |          |         | Dennd4c | 6.36027  | 4.22923 | -0.588694        | 6.36127      | 4.23023       | -0.5885787       | 0.00014386 | No      |
|      |       |        |             |          |         | Dennd5b | 0.261621 | 1.5788  | 2.59328          | 0.262621     | 1.5798        | 2.58868774       | 0.00014386 | No      |
|      |       |        |             |          |         | Dennd6a | 37.6584  | 14.4914 | -1.37777         | 37.6594      | 14.4924       | -1.3777135       | 0.00014386 | No      |
|      |       |        |             |          |         | Denr    | 87.1092  | 48.1799 | -0.854393        | 87.1102      | 48.1809       | -0.8543803       | 0.00014386 | No      |
|      |       |        |             |          |         | DEPP    | 0        | 9.87695 | inf              | 0.001        | 9.87795       | 13.269996        | 0.00014386 | No      |
|      |       |        |             |          |         | Deptor  | 0.242566 | 11.707  | 5.59285          | 0.243566     | 11.708        | 5.58703808       | 0.00014386 | No      |
|      |       |        |             |          |         | Dera    | 38.6946  | 71.6395 | 0.888623         | 38.6956      | 71.6405       | 0.88860588       | 0.00014386 | No      |
|      |       |        |             |          |         | Desi1   | 7.66515  | 11.9165 | 0.636575         | 7.66615      | 11.9175       | 0.63650749       | 0.00014386 | No      |
|      |       |        |             |          |         | Desi2   | 12.8885  | 5.32248 | -1.27591         | 12.8895      | 5.32348       | -1.2757547       | 0.00014386 | No      |
|      |       |        |             |          |         | Det1    | 7.85739  | 5.0392  | -0.640855        | 7.85839      | 5.0402        | -0.6407528       | 0.00014386 | No      |
|      |       |        |             |          |         | Dexi    | 27.8215  | 50.8817 | 0.870946         | 27.8225      | 50.8827       | 0.87092317       | 0.00014386 | No      |
|      |       |        |             |          |         | Dfna5   | 0.530164 | 3.29111 | 2.63407          | 0.531164     | 3.29211       | 2.63178327       | 0.00014386 | No      |
|      |       |        |             |          |         | Dfnb31  | 2.03736  | 10.5057 | 2.3664           | 2.03836      | 10.5067       | 2.36582883       | 0.00014386 | No      |
|      |       |        |             |          |         | Dgat2   | 0.386175 | 11.514  | 4.89799          | 0.387175     | 11.515        | 4.8943848        | 0.00014386 | No      |
|      |       |        |             |          |         | Dgcr6   | 5.23092  | 65.5727 | 3.64796          | 5.23192      | 65.5737       | 3.64770492       | 0.00014386 | No      |
|      |       |        |             |          |         | Dgcr8   | 12.4397  | 5.12036 | -1.28063         | 12.4407      | 5.12136       | -1.2804688       | 0.00014386 | No      |
|      |       |        |             |          |         | Dgka    | 452.301  | 27.1351 | -4.05905         | 452.302      | 27.1361       | -4.0590011       | 0.00014386 | No      |
|      |       |        |             |          |         | Dgkd    | 23.8244  | 8.46256 | -1.49328         | 23.8254      | 8.46356       | -1.4931639       | 0.00014386 | No      |
|      |       |        |             |          |         | Dgkg    | 0.822764 | 3.23801 | 1.97656          | 0.823764     | 3.23901       | 1.97524994       | 0.00014386 | No      |
|      |       |        |             |          |         | Dgkz    | 181.184  | 32.4151 | -2.48272         | 181.185      | 32.4161       | -2.4826811       | 0.00014386 | No      |
|      |       |        |             |          |         | Dhcr7   | 4.09409  | 7.52369 | 0.8779           | 4.09509      | 7.52469       | 0.87773699       | 0.00014386 | No      |
|      |       |        |             |          |         | Dhdds   | 5.81963  | 29.2974 | 2.33177          | 5.82063      | 29.2984       | 2.33157466       | 0.00014386 | No      |
|      |       |        |             |          |         | Dhfr    | 4.16216  | 31.4656 | 2.91837          | 4.16316      | 31.4666       | 2.91807039       | 0.00014386 | No      |
|      |       |        |             |          |         | Dhh     | 68.8238  | 18.1313 | -1.92442         | 68.8248      | 18.1323       | -1.9243666       | 0.00014386 | No      |
|      |       |        |             |          |         | Dhodh   | 14.9271  | 7.88292 | -0.921132        | 14.9281      | 7.88392       | -0.9210455       | 0.00014386 | No      |
|      |       |        |             |          |         | Dhrs11  | 27.9821  | 39.0378 | 0.480365         | 27.9831      | 39.0388       | 0.48035291       | 0.00014386 | No      |
|      |       |        |             |          |         | Dhrs3   | 3.23339  | 68.5588 | 4.40622          | 3.23439      | 68.5598       | 4.40579735       | 0.00014386 | No      |
|      |       |        |             |          |         | Dhrs4   | 13.9972  | 81.6624 | 2.54453          | 13.9982      | 81.6634       | 2.54444831       | 0.00014386 | No      |
|      |       |        |             |          |         | Dhx15   | 88.7435  | 40.1916 | -1.14275         | 88.7445      | 40.1926       | -1.1427278       | 0.00014386 | No      |
|      |       |        |             |          |         | Dhx16   | 39.1981  | 16.982  | -1.20678         | 39.1991      | 16.983        | -1.2067292       | 0.00014386 | No      |
|      |       |        |             |          |         | Dhx29   | 12.4685  | 7.10856 | -0.810654        | 12.4695      | 7.10956       | -0.8105714       | 0.00014386 | No      |
|      |       |        |             |          |         | Dhx30   | 33.5007  | 21.7063 | -0.626077        | 33.5017      | 21.7073       | -0.626054        | 0.00014386 | No      |
|      |       |        |             |          |         | Dhx33   | 5.54418  | 2.63354 | -1.07397         | 5.54518      | 2.63454       | -1.0736832       | 0.00014386 | No      |
|      |       |        |             |          |         | Dhx35   | 16.3634  | 5.89565 | -1.47275         | 16.3644      | 5.89665       | -1.4725932       | 0.00014386 | No      |
|      |       |        |             |          |         | Dhx36   | 22.7757  | 6.66192 | -1.77348         | 22.7767      | 6.66292       | -1.7733323       | 0.00014386 | No      |
|      |       |        |             |          |         | Dhx37   | 8.74682  | 3.1962  | -1.4524          | 8.74782      | 3.1972        | -1.4521145       | 0.00014386 | No      |
|      |       |        |             |          |         | Dhx38   | 18.0198  | 9.64504 | -0.901724        | 18.0208      | 9.64604       | -0.9016544       | 0.00014386 | No      |
|      |       |        |             |          |         | Dhx40   | 12.6097  | 22.001  | 0.803036         | 12.6107      | 22.002        | 0.80298631       | 0.00014386 | No      |
|      |       |        |             |          |         | Dhx8    | 14.5008  | 6.94752 | -1.06156         | 14.5018      | 6.94852       | -1.0614544       | 0.00014386 | No      |
|      |       |        |             |          |         | Dhx9    | 42.2687  | 17.5996 | -1.26405         | 42.2697      | 17.6006       | -1.2639993       | 0.00014386 | No      |
|      |       |        |             |          |         | Diablo  | 41.9749  | 63.5937 | 0.599356         | 41.9759      | 63.5947       | 0.59934528       | 0.00014386 | No      |

| RRBS |       |        |             |          |         | RNAseq |          |          |                  |              |               |                  |            |         |
|------|-------|--------|-------------|----------|---------|--------|----------|----------|------------------|--------------|---------------|------------------|------------|---------|
| gene | Blood | Kidney | methyl.diff | pMWU.fdr | Match ? | gene   | blood    | kidney   | log2(fold_ratio) | blood+ 0.001 | kidney+ 0.001 | log2(fold_ratio) | q_value    | Match ? |
|      |       |        |             |          |         | Diap1  | 30.3535  | 16.4976  | -0.879605        | 30.3545      | 16.4986       | -0.8795668       | 0.00014386 | No      |
|      |       |        |             |          |         | Diap2  | 0.465425 | 7.73175  | 4.05417          | 0.466425     | 7.73275       | 4.05126455       | 0.00014386 | No      |
|      |       |        |             |          |         | Dido1  | 13.7457  | 5.74121  | -1.25955         | 13.7467      | 5.74221       | -1.2594073       | 0.00014386 | No      |
|      |       |        |             |          |         | Diexf  | 16.3206  | 7.07105  | -1.2067          | 16.3216      | 7.07205       | -1.2065821       | 0.00014386 | No      |
|      |       |        |             |          |         | Dimt1  | 10.4616  | 3.34959  | -1.64304         | 10.4626      | 3.35059       | -1.6427543       | 0.00014386 | No      |
|      |       |        |             |          |         | Dip2a  | 1.43509  | 5.23649  | 1.86746          | 1.43609      | 5.23749       | 1.86672942       | 0.00014386 | No      |
|      |       |        |             |          |         | Dip2b  | 14.9247  | 2.09231  | -2.83453         | 14.9257      | 2.09331       | -2.8339407       | 0.00014386 | No      |
|      |       |        |             |          |         | Dip2c  | 0.623796 | 1.39299  | 1.15904          | 0.624796     | 1.39399       | 1.15776309       | 0.00014386 | No      |
|      |       |        |             |          |         | Dirc2  | 29.4616  | 17.9754  | -0.712813        | 29.4626      | 17.9764       | -0.7127806       | 0.00014386 | No      |
|      |       |        |             |          |         | Dis3   | 8.96268  | 3.09143  | -1.53566         | 8.96368      | 3.09243       | -1.5353502       | 0.00014386 | No      |
|      |       |        |             |          |         | Dis3l  | 9.35703  | 46.4541  | 2.31168          | 9.35803      | 46.4551       | 2.31156023       | 0.00014386 | No      |
|      |       |        |             |          |         | Disc1  | 2.48991  | 0.469168 | -2.40792         | 2.49091      | 0.470168      | -2.4054246       | 0.00014386 | No      |
|      |       |        |             |          |         | Dixdc1 | 0.107316 | 2.24429  | 4.38632          | 0.108316     | 2.24529       | 4.37358352       | 0.00014386 | No      |
|      |       |        |             |          |         | Dkc1   | 111.733  | 148.281  | 0.408285         | 111.734      | 148.282       | 0.40827522       | 0.00014386 | No      |
|      |       |        |             |          |         | Dkk1   | 0        | 3.56085  | inf              | 0.001        | 3.56185       | 11.798411        | 0.00014386 | No      |
|      |       |        |             |          |         | Dkk2   | 0        | 2.04704  | inf              | 0.001        | 2.04804       | 11.0000282       | 0.00014386 | No      |
|      |       |        |             |          |         | Dlat   | 7.60611  | 30.1208  | 1.98553          | 7.60711      | 30.1218       | 1.98538761       | 0.00014386 | No      |
|      |       |        |             |          |         | Dlc1   | 0.172596 | 0.894799 | 2.37416          | 0.173596     | 0.895799      | 2.36744135       | 0.00014386 | No      |
|      |       |        |             |          |         | Dld    | 39.3994  | 94.5639  | 1.26311          | 39.4004      | 94.5649       | 1.26309452       | 0.00014386 | No      |
|      |       |        |             |          |         | Dlg1   | 14.0153  | 19.5721  | 0.481801         | 14.0163      | 19.5731       | 0.48176671       | 0.00014386 | No      |
|      |       |        |             |          |         | Dlg4   | 7.58808  | 1.31209  | -2.53187         | 7.58908      | 1.31309       | -2.5309592       | 0.00014386 | No      |
|      |       |        |             |          |         | Dlgap5 | 3.36252  | 1.82925  | -0.87829         | 3.36352      | 1.83025       | -0.8779311       | 0.00014386 | No      |
|      |       |        |             |          |         | Dll4   | 0        | 1.66512  | inf              | 0.001        | 1.66612       | 10.7022766       | 0.00014386 | No      |
|      |       |        |             |          |         | Dlst   | 28.1765  | 80.5275  | 1.51499          | 28.1775      | 80.5285       | 1.51495584       | 0.00014386 | No      |
|      |       |        |             |          |         | Dmap1  | 14.998   | 21.567   | 0.524059         | 14.999       | 21.568        | 0.52402608       | 0.00014386 | No      |
|      |       |        |             |          |         | DMD    | 0.135236 | 2.57341  | 4.25013          | 0.136236     | 2.57441       | 4.24006195       | 0.00014386 | No      |
|      |       |        |             |          |         | Dmp1   | 0        | 0.821914 | inf              | 0.001        | 0.822914      | 9.68459786       | 0.00014386 | No      |
|      |       |        |             |          |         | Dmpk   | 0.312689 | 35.25    | 6.81675          | 0.313689     | 35.251        | 6.81218543       | 0.00014386 | No      |
|      |       |        |             |          |         | Dmrta2 | 0.11418  | 1.35321  | 3.567            | 0.11518      | 1.35421       | 3.55548935       | 0.00014386 | No      |
|      |       |        |             |          |         | Dmrta2 | 0        | 6.10202  | inf              | 0.001        | 6.10302       | 12.5753076       | 0.00014386 | No      |
|      |       |        |             |          |         | Dmrta2 | 13.6985  | 0.194066 | -6.14132         | 13.6995      | 0.195066      | -6.1340171       | 0.00014386 | No      |
|      |       |        |             |          |         | Dmtf1  | 34.5963  | 9.701    | -1.83441         | 34.5973      | 9.702         | -1.8343054       | 0.00014386 | No      |
|      |       |        |             |          |         | Dmtn   | 0.165233 | 104.508  | 9.3049           | 0.166233     | 104.509       | 9.29620466       | 0.00014386 | No      |
|      |       |        |             |          |         | Dmwd   | 0.407355 | 9.60414  | 4.5593           | 0.408355     | 9.60514       | 4.55591084       | 0.00014386 | No      |
|      |       |        |             |          |         | Dmxl1  | 6.27088  | 2.24539  | -1.4817          | 6.27188      | 2.24639       | -1.4812895       | 0.00014386 | No      |
|      |       |        |             |          |         | DNAH17 | 5.92011  | 0.398771 | -3.89199         | 5.92111      | 0.399771      | -3.8886219       | 0.00014386 | No      |
|      |       |        |             |          |         | Dnaja3 | 31.2238  | 65.6482  | 1.07211          | 31.2248      | 65.6492       | 1.0720851        | 0.00014386 | No      |
|      |       |        |             |          |         | Dnaja4 | 17.8711  | 35.6694  | 0.997063         | 17.8721      | 35.6704       | 0.99701823       | 0.00014386 | No      |
|      |       |        |             |          |         | Dnaja4 | 29.1575  | 63.4495  | 1.12174          | 29.1585      | 63.4505       | 1.12171503       | 0.00014386 | No      |
|      |       |        |             |          |         | Dnaja4 | 32.5712  | 42.7288  | 0.391613         | 32.5722      | 42.7298       | 0.3916014        | 0.00014386 | No      |
|      |       |        |             |          |         | Dnaja4 | 30.0588  | 68.2061  | 1.18211          | 30.0598      | 68.2071       | 1.18208651       | 0.00014386 | No      |
|      |       |        |             |          |         | Dnaja4 | 28.7965  | 19.4576  | -0.565559        | 28.7975      | 19.4586       | -0.5655357       | 0.00014386 | No      |

| RRBS |       |        |             |          |         | RNAseq   |           |          |                  |              |               |                  |            |         |
|------|-------|--------|-------------|----------|---------|----------|-----------|----------|------------------|--------------|---------------|------------------|------------|---------|
| gene | Blood | Kidney | methyl.diff | pMWU.fdr | Match ? | gene     | blood     | kidney   | log2(fold_ratio) | blood+ 0.001 | kidney+ 0.001 | log2(fold_ratio) | q_value    | Match ? |
|      |       |        |             |          |         | Dnajb6   | 93.9319   | 30.5958  | -1.61828         | 93.9329      | 30.5968       | -1.6182498       | 0.00014386 | No      |
|      |       |        |             |          |         | Dnajc1   | 59.3817   | 28.3882  | -1.06473         | 59.3827      | 28.3892       | -1.0647005       | 0.00014386 | No      |
|      |       |        |             |          |         | Dnajc12  | 2.15655   | 16.998   | 2.97857          | 2.15755      | 16.999        | 2.97798398       | 0.00014386 | No      |
|      |       |        |             |          |         | Dnajc15  | 16.4088   | 67.2686  | 2.03546          | 16.4098      | 67.2696       | 2.03539702       | 0.00014386 | No      |
|      |       |        |             |          |         | Dnajc22  | 0.0626135 | 18.3091  | 8.19187          | 0.0636135    | 18.3101       | 8.16909099       | 0.00014386 | No      |
|      |       |        |             |          |         | Dnajc25  | 0.486573  | 3.28775  | 2.75637          | 0.487573     | 3.28875       | 2.7538492        | 0.00014386 | No      |
|      |       |        |             |          |         | Dnajc28  | 0.538427  | 4.53836  | 3.07535          | 0.539427     | 4.53936       | 3.07298927       | 0.00014386 | No      |
|      |       |        |             |          |         | Dnajc3   | 36.9357   | 20.96    | -0.817377        | 36.9367      | 20.961        | -0.8173474       | 0.00014386 | No      |
|      |       |        |             |          |         | Dnajc30  | 13.5494   | 25.9991  | 0.940231         | 13.5504      | 26.0001       | 0.94018173       | 0.00014386 | No      |
|      |       |        |             |          |         | Dnajc4   | 5.43143   | 25.8137  | 2.24873          | 5.43243      | 25.8147       | 2.24852325       | 0.00014386 | No      |
|      |       |        |             |          |         | Dnajc5   | 41.0536   | 17.9382  | -1.19448         | 41.0546      | 17.9392       | -1.1944283       | 0.00014386 | No      |
|      |       |        |             |          |         | Dnajc7   | 137.929   | 51.8463  | -1.41161         | 137.93       | 51.8473       | -1.4115955       | 0.00014386 | No      |
|      |       |        |             |          |         | Dnajc8   | 130.254   | 80.1616  | -0.700344        | 130.255      | 80.1626       | -0.7003375       | 0.00014386 | No      |
|      |       |        |             |          |         | DNAJC9   | 80.4415   | 27.7884  | -1.53346         | 80.4425      | 27.7894       | -1.5334232       | 0.00014386 | No      |
|      |       |        |             |          |         | Dnal1    | 0.396389  | 2.07501  | 2.38813          | 0.397389     | 2.07601       | 2.38518955       | 0.00014386 | No      |
|      |       |        |             |          |         | Dnal4    | 1.25961   | 17.6209  | 3.80624          | 1.26061      | 17.6219       | 3.80517557       | 0.00014386 | No      |
|      |       |        |             |          |         | Dnase1   | 0.283543  | 130.49   | 8.84616          | 0.284543     | 130.491       | 8.8410879        | 0.00014386 | No      |
|      |       |        |             |          |         | Dnase1l1 | 42.9245   | 12.4553  | -1.78504         | 42.9255      | 12.4563       | -1.7849593       | 0.00014386 | No      |
|      |       |        |             |          |         | Dnase2   | 30.6234   | 15.4533  | -0.986723        | 30.6244      | 15.4543       | -0.9866733       | 0.00014386 | No      |
|      |       |        |             |          |         | DNLZ     | 28.9102   | 95.1165  | 1.71812          | 28.9112      | 95.1175       | 1.71808231       | 0.00014386 | No      |
|      |       |        |             |          |         | Dnm1     | 0.812312  | 28.3881  | 5.12711          | 0.813312     | 28.3891       | 5.1253844        | 0.00014386 | No      |
|      |       |        |             |          |         | Dnm2     | 86.4495   | 45.2117  | -0.93516         | 86.4505      | 45.2127       | -0.9351462       | 0.00014386 | No      |
|      |       |        |             |          |         | Dnmbp    | 0.890198  | 13.3081  | 3.90203          | 0.891198     | 13.3091       | 3.90052321       | 0.00014386 | No      |
|      |       |        |             |          |         | Dnmt1    | 24.2399   | 5.4025   | -2.16568         | 24.2409      | 5.4035        | -2.1654772       | 0.00014386 | No      |
|      |       |        |             |          |         | Dnmt3b   | 12.5084   | 0.637218 | -4.29497         | 12.5094      | 0.638218      | -4.2928195       | 0.00014386 | No      |
|      |       |        |             |          |         | Dnph1    | 1.33963   | 6.53627  | 2.28663          | 1.34063      | 6.53727       | 2.28577716       | 0.00014386 | No      |
|      |       |        |             |          |         | Dnttip1  | 25.9377   | 39.3252  | 0.600401         | 25.9387      | 39.3262       | 0.60038461       | 0.00014386 | No      |
|      |       |        |             |          |         | Dnttip2  | 25.4375   | 18.2859  | -0.476223        | 25.4385      | 18.2869       | -0.4762031       | 0.00014386 | No      |
|      |       |        |             |          |         | Doc2g    | 25.7624   | 54.4943  | 1.08084          | 25.7634      | 54.4953       | 1.08080881       | 0.00014386 | No      |
|      |       |        |             |          |         | Dock11   | 46.7023   | 4.1051   | -3.508           | 46.7033      | 4.1061        | -3.5076838       | 0.00014386 | No      |
|      |       |        |             |          |         | Dock2    | 94.8538   | 3.06745  | -4.95059         | 94.8548      | 3.06845       | -4.9501388       | 0.00014386 | No      |
|      |       |        |             |          |         | Dock5    | 0.221523  | 0.8696   | 1.97289          | 0.222523     | 0.8706        | 1.96805556       | 0.00014386 | No      |
|      |       |        |             |          |         | Dock7    | 1.28372   | 11.2695  | 3.13402          | 1.28472      | 11.2705       | 3.13302565       | 0.00014386 | No      |
|      |       |        |             |          |         | Dohh     | 17.4327   | 32.6638  | 0.905894         | 17.4337      | 32.6648       | 0.90585802       | 0.00014386 | No      |
|      |       |        |             |          |         | Dok1     | 6.17555   | 1.59949  | -1.94896         | 6.17655      | 1.60049       | -1.9482876       | 0.00014386 | No      |
|      |       |        |             |          |         | Donson   | 14.8165   | 2.20436  | -2.74878         | 14.8175      | 2.20536       | -2.748216        | 0.00014386 | No      |
|      |       |        |             |          |         | Dopey1   | 25.7312   | 9.02856  | -1.51095         | 25.7322      | 9.02956       | -1.5108472       | 0.00014386 | No      |
|      |       |        |             |          |         | Dpagt1   | 11.3526   | 21.279   | 0.90641          | 11.3536      | 21.28         | 0.90634833       | 0.00014386 | No      |
|      |       |        |             |          |         | Dpcd     | 7.91076   | 49.1835  | 2.63629          | 7.91176      | 49.1845       | 2.63613317       | 0.00014386 | No      |
|      |       |        |             |          |         | Dpep2    | 0.701563  | 4.15999  | 2.56793          | 0.702563     | 4.16099       | 2.56622732       | 0.00014386 | No      |
|      |       |        |             |          |         | Dpf2     | 55.7928   | 34.7359  | -0.683651        | 55.7938      | 34.7369       | -0.6836358       | 0.00014386 | No      |
|      |       |        |             |          |         | Dph2     | 6.93105   | 3.40019  | -1.02746         | 6.93205      | 3.40119       | -1.0272425       | 0.00014386 | No      |

| RRBS |       |        |             |          |         | RNAseq  |           |          |                  |              |               |                  |            |         |
|------|-------|--------|-------------|----------|---------|---------|-----------|----------|------------------|--------------|---------------|------------------|------------|---------|
| gene | Blood | Kidney | methyl.diff | pMWU.fdr | Match ? | gene    | blood     | kidney   | log2(fold_ratio) | blood+ 0.001 | kidney+ 0.001 | log2(fold_ratio) | q_value    | Match ? |
|      |       |        |             |          |         | Dph5    | 16.4323   | 5.98356  | -1.45746         | 16.4333      | 5.98456       | -1.4573051       | 0.00014386 | No      |
|      |       |        |             |          |         | Dph7    | 18.4571   | 10.5027  | -0.813417        | 18.4581      | 10.5037       | -0.8133564       | 0.00014386 | No      |
|      |       |        |             |          |         | Dpm2    | 15.1033   | 26.2333  | 0.796537         | 15.1043      | 26.2343       | 0.79649497       | 0.00014386 | No      |
|      |       |        |             |          |         | Dpm3    | 83.0243   | 126.656  | 0.609309         | 83.0253      | 126.657       | 0.60930388       | 0.00014386 | No      |
|      |       |        |             |          |         | Dpp3    | 38.8743   | 26.0967  | -0.574947        | 38.8753      | 26.0977       | -0.5749311       | 0.00014386 | No      |
|      |       |        |             |          |         | Dpp4    | 39.3821   | 62.4818  | 0.665897         | 39.3831      | 62.4828       | 0.66588243       | 0.00014386 | No      |
|      |       |        |             |          |         | Dpp7    | 46.5405   | 74.9541  | 0.687522         | 46.5415      | 74.9551       | 0.68750893       | 0.00014386 | No      |
|      |       |        |             |          |         | Dpp8    | 24.2984   | 15.7506  | -0.62545         | 24.2994      | 15.7516       | -0.6254223       | 0.00014386 | No      |
|      |       |        |             |          |         | Dpp9    | 39.4119   | 25.8619  | -0.607804        | 39.4129      | 25.8629       | -0.6077839       | 0.00014386 | No      |
|      |       |        |             |          |         | Dpy1911 | 7.98561   | 14.6079  | 0.871269         | 7.98661      | 14.6089       | 0.87119238       | 0.00014386 | No      |
|      |       |        |             |          |         | Dpy1913 | 8.17045   | 22.4208  | 1.45635          | 8.17145      | 22.4218       | 1.45623809       | 0.00014386 | No      |
|      |       |        |             |          |         | Dpy30   | 159.602   | 100.015  | -0.674271        | 159.603      | 100.016       | -0.674257        | 0.00014386 | No      |
|      |       |        |             |          |         | Dpyd    | 0         | 3.00829  | inf              | 0.001        | 3.00929       | 11.5552074       | 0.00014386 | No      |
|      |       |        |             |          |         | Dpysl3  | 0         | 0.886062 | inf              | 0.001        | 0.887062      | 9.79289113       | 0.00014386 | No      |
|      |       |        |             |          |         | Dr1     | 21.1261   | 12.7203  | -0.731893        | 21.1271      | 12.7213       | -0.7318486       | 0.00014386 | No      |
|      |       |        |             |          |         | Dram1   | 1.56481   | 4.8028   | 1.61789          | 1.56581      | 4.8038        | 1.61726693       | 0.00014386 | No      |
|      |       |        |             |          |         | Drg1    | 37.3552   | 27.4976  | -0.442003        | 37.3562      | 27.4986       | -0.4419895       | 0.00014386 | No      |
|      |       |        |             |          |         | Dse     | 12.0556   | 3.00306  | -2.00519         | 12.0566      | 3.00406       | -2.0048376       | 0.00014386 | No      |
|      |       |        |             |          |         | Dsg2    | 0         | 1.39887  | inf              | 0.001        | 1.39987       | 10.4510771       | 0.00014386 | No      |
|      |       |        |             |          |         | Dsn1    | 8.53984   | 2.11583  | -2.01299         | 8.54084      | 2.11683       | -2.0124726       | 0.00014386 | No      |
|      |       |        |             |          |         | Dsp     | 0.0191912 | 15.7603  | 9.68163          | 0.0201912    | 15.7613       | 9.60844416       | 0.00014386 | No      |
|      |       |        |             |          |         | Dst     | 28.8318   | 62.6328  | 1.11926          | 28.8328      | 62.6338       | 1.11923046       | 0.00014386 | No      |
|      |       |        |             |          |         | Dstn    | 107.627   | 223.389  | 1.05352          | 107.628      | 223.39        | 1.05351115       | 0.00014386 | No      |
|      |       |        |             |          |         | Dstyk   | 2.71946   | 6.10703  | 1.16715          | 2.72046      | 6.10803       | 1.16685653       | 0.00014386 | No      |
|      |       |        |             |          |         | Dtd1    | 40.0433   | 26.1783  | -0.61319         | 40.0443      | 26.1793       | -0.6131704       | 0.00014386 | No      |
|      |       |        |             |          |         | Dtd2    | 8.60689   | 13.5394  | 0.653605         | 8.60789      | 13.5404       | 0.65353881       | 0.00014386 | No      |
|      |       |        |             |          |         | Dtna    | 0         | 1.89989  | inf              | 0.001        | 1.90089       | 10.8924593       | 0.00014386 | No      |
|      |       |        |             |          |         | Dtnbp1  | 4.6596    | 14.478   | 1.63559          | 4.6606       | 14.479        | 1.63537436       | 0.00014386 | No      |
|      |       |        |             |          |         | Dtwd2   | 2.18902   | 4.50303  | 1.04061          | 2.19002      | 4.50403       | 1.04027239       | 0.00014386 | No      |
|      |       |        |             |          |         | Dtx1    | 9.62678   | 0.535163 | -4.169           | 9.62778      | 0.536163      | -4.1664596       | 0.00014386 | No      |
|      |       |        |             |          |         | Dtx3    | 17.9471   | 50.6904  | 1.49796          | 17.9481      | 50.6914       | 1.49790988       | 0.00014386 | No      |
|      |       |        |             |          |         | Dtx3l   | 8.12222   | 0.738305 | -3.45959         | 8.12322      | 0.739305      | -3.4578101       | 0.00014386 | No      |
|      |       |        |             |          |         | Dus3l   | 30.4132   | 62.6572  | 1.04278          | 30.4142      | 62.6582       | 1.04275827       | 0.00014386 | No      |
|      |       |        |             |          |         | Dusp1   | 23.3153   | 191.772  | 3.04005          | 23.3163      | 191.773       | 3.03998884       | 0.00014386 | No      |
|      |       |        |             |          |         | Dusp10  | 7.42364   | 0.971572 | -2.93373         | 7.42464      | 0.972572      | -2.9324441       | 0.00014386 | No      |
|      |       |        |             |          |         | Dusp12  | 13.2456   | 4.75808  | -1.47706         | 13.2466      | 4.75908       | -1.4768675       | 0.00014386 | No      |
|      |       |        |             |          |         | Dusp16  | 5.907     | 3.91739  | -0.592533        | 5.908        | 3.91839       | -0.5924088       | 0.00014386 | No      |
|      |       |        |             |          |         | Dusp18  | 6.24393   | 4.31759  | -0.532229        | 6.24493      | 4.31859       | -0.532125        | 0.00014386 | No      |
|      |       |        |             |          |         | Dusp2   | 28.3152   | 11.1158  | -1.34897         | 28.3162      | 11.1168       | -1.3488861       | 0.00014386 | No      |
|      |       |        |             |          |         | Dusp22  | 9.1551    | 33.0628  | 1.85256          | 9.1561       | 33.0638       | 1.85244742       | 0.00014386 | No      |
|      |       |        |             |          |         | Dusp5   | 4.18892   | 8.74493  | 1.06187          | 4.18992      | 8.74593       | 1.0616891        | 0.00014386 | No      |
|      |       |        |             |          |         | Dusp6   | 8.75809   | 19.8924  | 1.18353          | 8.75909      | 19.8934       | 1.18343697       | 0.00014386 | No      |

| RRBS |       |        |             |          |         | RNAseq         |          |          |                  |              |               |                  |            |         |
|------|-------|--------|-------------|----------|---------|----------------|----------|----------|------------------|--------------|---------------|------------------|------------|---------|
| gene | Blood | Kidney | methyl.diff | pMWU.fdr | Match ? | gene           | blood    | kidney   | log2(fold_ratio) | blood+ 0.001 | kidney+ 0.001 | log2(fold_ratio) | q_value    | Match ? |
|      |       |        |             |          |         | Dusp7          | 26.3746  | 16.0385  | -0.717604        | 26.3756      | 16.0395       | -0.7175747       | 0.00014386 | No      |
|      |       |        |             |          |         | Dut            | 32.2956  | 63.9673  | 0.985995         | 32.2966      | 63.9683       | 0.98597485       | 0.00014386 | No      |
|      |       |        |             |          |         | Dvl1           | 24.9261  | 57.2683  | 1.20008          | 24.9271      | 57.2693       | 1.20004692       | 0.00014386 | No      |
|      |       |        |             |          |         | Dvl2           | 7.81066  | 4.63307  | -0.753478        | 7.81166      | 4.63407       | -0.7533493       | 0.00014386 | No      |
|      |       |        |             |          |         | Dvl3           | 14.9676  | 6.84133  | -1.1295          | 14.9686      | 6.84233       | -1.1293797       | 0.00014386 | No      |
|      |       |        |             |          |         | Dync1h1        | 30.0091  | 16.9026  | -0.828157        | 30.0101      | 16.9036       | -0.8281176       | 0.00014386 | No      |
|      |       |        |             |          |         | Dync1i2        | 40.7622  | 29.6499  | -0.459204        | 40.7632      | 29.6509       | -0.4591914       | 0.00014386 | No      |
|      |       |        |             |          |         | Dync1li2       | 11.594   | 16.2038  | 0.482952         | 11.595       | 16.2048       | 0.4829184        | 0.00014386 | No      |
|      |       |        |             |          |         | Dync2li1       | 0.160773 | 19.3322  | 6.90984          | 0.161773     | 19.3332       | 6.9009658        | 0.00014386 | No      |
|      |       |        |             |          |         | Dynll2         | 30.2307  | 115.413  | 1.93272          | 30.2317      | 115.414       | 1.93268422       | 0.00014386 | No      |
|      |       |        |             |          |         | Dynlrb1        | 175.549  | 275.225  | 0.648735         | 175.55       | 275.226       | 0.64873477       | 0.00014386 | No      |
|      |       |        |             |          |         | Dynlt1         | 26.3063  | 73.3199  | 1.4788           | 26.3073      | 73.3209       | 1.47876131       | 0.00014386 | No      |
|      |       |        |             |          |         | Dynlt3         | 23.6298  | 40.3679  | 0.772602         | 23.6308      | 40.3689       | 0.7725758        | 0.00014386 | No      |
|      |       |        |             |          |         | DYRK1A         | 35.9456  | 9.83345  | -1.87005         | 35.9466      | 9.83445       | -1.869939        | 0.00014386 | No      |
|      |       |        |             |          |         | Dyrk1b         | 6.18894  | 13.0033  | 1.07112          | 6.18994      | 13.0043       | 1.07099141       | 0.00014386 | No      |
|      |       |        |             |          |         | Dysf           | 0        | 17.9224  | inf              | 0.001        | 17.9234       | 14.1295567       | 0.00014386 | No      |
|      |       |        |             |          |         | Dzip1l         | 0        | 10.5013  | inf              | 0.001        | 10.5023       | 13.3584177       | 0.00014386 | No      |
|      |       |        |             |          |         | Dzip3          | 5.91836  | 1.77625  | -1.73637         | 5.91936      | 1.77725       | -1.7357946       | 0.00014386 | No      |
|      |       |        |             |          |         | E130012A19 Rik | 4.74477  | 0.526329 | -3.1723          | 4.74577      | 0.527329      | -3.1698669       | 0.00014386 | No      |
|      |       |        |             |          |         | E2f2           | 15.5348  | 1.92338  | -3.01379         | 15.5358      | 1.92438       | -3.0131309       | 0.00014386 | No      |
|      |       |        |             |          |         | E2f5           | 9.31855  | 19.0108  | 1.02865          | 9.31955      | 19.0118       | 1.02856293       | 0.00014386 | No      |
|      |       |        |             |          |         | E2f6           | 26.0823  | 17.1826  | -0.602125        | 26.0833      | 17.1836       | -0.6020941       | 0.00014386 | No      |
|      |       |        |             |          |         | Eaf1           | 4.89766  | 20.618   | 2.07374          | 4.89866      | 20.619        | 2.0735153        | 0.00014386 | No      |
|      |       |        |             |          |         | Eapp           | 52.1357  | 35.5653  | -0.5518          | 52.1367      | 35.5663       | -0.5517884       | 0.00014386 | No      |
|      |       |        |             |          |         | Ebag9          | 30.5574  | 18.3628  | -0.734734        | 30.5584      | 18.3638       | -0.7347044       | 0.00014386 | No      |
|      |       |        |             |          |         | Ece1           | 10.2151  | 19.6073  | 0.940691         | 10.2161      | 19.6083       | 0.94061991       | 0.00014386 | No      |
|      |       |        |             |          |         | Ech1           | 90.914   | 201.517  | 1.14833          | 90.915       | 201.518       | 1.14831846       | 0.00014386 | No      |
|      |       |        |             |          |         | Eci1           | 24.2696  | 132.181  | 2.44529          | 24.2706      | 132.182       | 2.44524405       | 0.00014386 | No      |
|      |       |        |             |          |         | Eci2           | 14.5983  | 58.2546  | 1.99657          | 14.5993      | 58.2556       | 1.99649754       | 0.00014386 | No      |
|      |       |        |             |          |         | Eci3           | 6.60837  | 223.357  | 5.07892          | 6.60937      | 223.358       | 5.07870136       | 0.00014386 | No      |
|      |       |        |             |          |         | Ecm1           | 2.82708  | 8.52161  | 1.59181          | 2.82808      | 8.52261       | 1.59147238       | 0.00014386 | No      |
|      |       |        |             |          |         | Escr           | 0        | 5.28344  | inf              | 0.001        | 5.28444       | 12.3675349       | 0.00014386 | No      |
|      |       |        |             |          |         | Ecsit          | 14.9112  | 48.6748  | 1.70678          | 14.9122      | 48.6758       | 1.70671158       | 0.00014386 | No      |
|      |       |        |             |          |         | Ect2           | 0.183362 | 1.01356  | 2.46666          | 0.184362     | 1.01456       | 2.46024096       | 0.00014386 | No      |
|      |       |        |             |          |         | Edc4           | 16.1357  | 352.786  | 4.45047          | 16.1367      | 352.787       | 4.45037992       | 0.00014386 | No      |
|      |       |        |             |          |         | Edem1          | 45.7758  | 16.3142  | -1.48846         | 45.7768      | 16.3152       | -1.4883999       | 0.00014386 | No      |
|      |       |        |             |          |         | Edem2          | 19.8893  | 12.1355  | -0.712766        | 19.8903      | 12.1365       | -0.7127126       | 0.00014386 | No      |
|      |       |        |             |          |         | Edem3          | 7.37539  | 4.68686  | -0.654098        | 7.37639      | 4.68786       | -0.6539854       | 0.00014386 | No      |
|      |       |        |             |          |         | Edn3           | 0        | 1.25639  | inf              | 0.001        | 1.25739       | 10.2962165       | 0.00014386 | No      |
|      |       |        |             |          |         | Ednra          | 0        | 3.21916  | inf              | 0.001        | 3.22016       | 11.6529167       | 0.00014386 | No      |
|      |       |        |             |          |         | Eea1           | 3.29453  | 6.8055   | 1.04663          | 3.29553      | 6.8065        | 1.04640263       | 0.00014386 | No      |

| RRBS |       |        |             |          |         | RNAseq  |           |         |                  |              |               |                  |            |         |
|------|-------|--------|-------------|----------|---------|---------|-----------|---------|------------------|--------------|---------------|------------------|------------|---------|
| gene | Blood | Kidney | methyl.diff | pMWU.fdr | Match ? | gene    | blood     | kidney  | log2(fold_ratio) | blood+ 0.001 | kidney+ 0.001 | log2(fold_ratio) | q_value    | Match ? |
|      |       |        |             |          |         | Eed     | 29.4938   | 13.8054 | -1.09518         | 29.4948      | 13.8064       | -1.0951234       | 0.00014386 | No      |
|      |       |        |             |          |         | Eef1a1  | 10339     | 2360.87 | -2.1307          | 10339.001    | 2360.871      | -2.1307057       | 0.00014386 | No      |
|      |       |        |             |          |         | Eef1b2  | 1349.62   | 304.212 | -2.1494          | 1349.621     | 304.213       | -2.1494006       | 0.00014386 | No      |
|      |       |        |             |          |         | Eef1e1  | 13.6974   | 31.9875 | 1.22361          | 13.6984      | 31.9885       | 1.22354595       | 0.00014386 | No      |
|      |       |        |             |          |         | Eepd1   | 0.133989  | 4.8888  | 5.1893           | 0.134989     | 4.8898        | 5.1788617        | 0.00014386 | No      |
|      |       |        |             |          |         | Efcab2  | 2.1538    | 12.0612 | 2.48542          | 2.1548       | 12.0622       | 2.48486719       | 0.00014386 | No      |
|      |       |        |             |          |         | Efcab4a | 0.190564  | 9.27057 | 5.60431          | 0.191564     | 9.27157       | 5.59691529       | 0.00014386 | No      |
|      |       |        |             |          |         | Efcab7  | 1.52029   | 3.88748 | 1.35449          | 1.52129      | 3.88848       | 1.35391112       | 0.00014386 | No      |
|      |       |        |             |          |         | EFEMP2  | 1.46066   | 9.9133  | 2.76275          | 1.46166      | 9.9143        | 2.76190315       | 0.00014386 | No      |
|      |       |        |             |          |         | Efhd2   | 71.8961   | 27.5586 | -1.38341         | 71.8971      | 27.5596       | -1.3833786       | 0.00014386 | No      |
|      |       |        |             |          |         | Efna4   | 0.555246  | 7.01695 | 3.65965          | 0.556246     | 7.01795       | 3.65725471       | 0.00014386 | No      |
|      |       |        |             |          |         | Efnb1   | 0.524343  | 18.495  | 5.14048          | 0.525343     | 18.496        | 5.13780982       | 0.00014386 | No      |
|      |       |        |             |          |         | Efnb2   | 0.256417  | 5.16329 | 4.33173          | 0.257417     | 5.16429       | 4.32639078       | 0.00014386 | No      |
|      |       |        |             |          |         | Efr3a   | 21.4247   | 13.5247 | -0.663677        | 21.4257      | 13.5257       | -0.6636391       | 0.00014386 | No      |
|      |       |        |             |          |         | Eftud2  | 39.7386   | 21.9714 | -0.854914        | 39.7396      | 21.9724       | -0.8548849       | 0.00014386 | No      |
|      |       |        |             |          |         | Egf     | 0.0871698 | 15.54   | 7.47794          | 0.0881698    | 15.541        | 7.46157904       | 0.00014386 | No      |
|      |       |        |             |          |         | EGFL7   | 0.107237  | 11.8246 | 6.78485          | 0.108237     | 11.8256       | 6.77157582       | 0.00014386 | No      |
|      |       |        |             |          |         | Egln3   | 2.4096    | 5.59491 | 1.21532          | 2.4106       | 5.59591       | 1.21498048       | 0.00014386 | No      |
|      |       |        |             |          |         | Egr1    | 1.08195   | 69.43   | 6.00386          | 1.08295      | 69.431        | 6.00254141       | 0.00014386 | No      |
|      |       |        |             |          |         | Ehbp1   | 1.2974    | 10.5701 | 3.0263           | 1.2984       | 10.5711       | 3.0253187        | 0.00014386 | No      |
|      |       |        |             |          |         | EHBP1L1 | 33.938    | 23.0276 | -0.559537        | 33.939       | 23.0286       | -0.5595174       | 0.00014386 | No      |
|      |       |        |             |          |         | Ehd1    | 9.58431   | 42.7732 | 2.15796          | 9.58531      | 42.7742       | 2.15784388       | 0.00014386 | No      |
|      |       |        |             |          |         | Ehd3    | 81.1047   | 11.4967 | -2.81856         | 81.1057      | 11.4977       | -2.818458        | 0.00014386 | No      |
|      |       |        |             |          |         | Ehd4    | 5.04173   | 13.3908 | 1.40925          | 5.04273      | 13.3918       | 1.409073         | 0.00014386 | No      |
|      |       |        |             |          |         | Ehhadh  | 1.76364   | 15.144  | 3.10212          | 1.76464      | 15.145        | 3.10139578       | 0.00014386 | No      |
|      |       |        |             |          |         | Ehmt1   | 12.3234   | 5.28867 | -1.22043         | 12.3244      | 5.28967       | -1.2202678       | 0.00014386 | No      |
|      |       |        |             |          |         | Ehmt2   | 55.4225   | 40.7326 | -0.444287        | 55.4235      | 40.7336       | -0.4442785       | 0.00014386 | No      |
|      |       |        |             |          |         | Eid2b   | 7.98748   | 2.95103 | -1.43652         | 7.98848      | 2.95203       | -1.4362136       | 0.00014386 | No      |
|      |       |        |             |          |         | Eif1b   | 61.3565   | 114.65  | 0.901948         | 61.3575      | 114.651       | 0.90193733       | 0.00014386 | No      |
|      |       |        |             |          |         | Eif2ak3 | 16.167    | 5.64354 | -1.51838         | 16.168       | 5.64454       | -1.5182133       | 0.00014386 | No      |
|      |       |        |             |          |         | Eif2b1  | 17.446    | 26.8382 | 0.621394         | 17.447       | 26.8392       | 0.62136268       | 0.00014386 | No      |
|      |       |        |             |          |         | Eif2b3  | 14.785    | 9.34617 | -0.661692        | 14.786       | 9.34717       | -0.6616303       | 0.00014386 | No      |
|      |       |        |             |          |         | Eif2b4  | 25.4471   | 35.2842 | 0.471523         | 25.4481      | 35.2852       | 0.47150524       | 0.00014386 | No      |
|      |       |        |             |          |         | Eif2s2  | 98.662    | 58.1959 | -0.761577        | 98.663       | 58.1969       | -0.7615668       | 0.00014386 | No      |
|      |       |        |             |          |         | Eif2s3  | 102.696   | 24.7903 | -2.05053         | 102.697      | 24.7913       | -2.0504882       | 0.00014386 | No      |
|      |       |        |             |          |         | Eif3a   | 63.6629   | 34.147  | -0.898694        | 63.6639      | 34.148        | -0.8986745       | 0.00014386 | No      |
|      |       |        |             |          |         | Eif3b   | 75.0985   | 54.4204 | -0.464637        | 75.0995      | 54.4214       | -0.4646292       | 0.00014386 | No      |
|      |       |        |             |          |         | Eif3c   | 85.1124   | 48.0007 | -0.826316        | 85.1134      | 48.0017       | -0.8263008       | 0.00014386 | No      |
|      |       |        |             |          |         | Eif3d   | 90.4302   | 60.3229 | -0.584099        | 90.4312      | 60.3239       | -0.5840909       | 0.00014386 | No      |
|      |       |        |             |          |         | Eif3e   | 369.841   | 93.21   | -1.98835         | 369.842      | 93.211        | -1.9883369       | 0.00014386 | No      |
|      |       |        |             |          |         | EIF3F   | 373.283   | 132.924 | -1.48967         | 373.284      | 132.925       | -1.4896612       | 0.00014386 | No      |
|      |       |        |             |          |         | Eif3g   | 301.033   | 145.44  | -1.0495          | 301.034      | 145.441       | -1.0494924       | 0.00014386 | No      |

| RRBS |       |        |             |          |         | RNAseq    |           |         |                  |              |               |                  |            |         |
|------|-------|--------|-------------|----------|---------|-----------|-----------|---------|------------------|--------------|---------------|------------------|------------|---------|
| gene | Blood | Kidney | methyl.diff | pMWU.fdr | Match ? | gene      | blood     | kidney  | log2(fold_ratio) | blood+ 0.001 | kidney+ 0.001 | log2(fold_ratio) | q_value    | Match ? |
|      |       |        |             |          |         | Eif3h     | 216.053   | 85.8519 | -1.33146         | 216.054      | 85.8529       | -1.3314532       | 0.00014386 | No      |
|      |       |        |             |          |         | Eif3i     | 158.091   | 94.123  | -0.748136        | 158.092      | 94.124        | -0.7481298       | 0.00014386 | No      |
|      |       |        |             |          |         | Eif3j     | 43.685    | 26.5469 | -0.718595        | 43.686       | 26.5479       | -0.7185733       | 0.00014386 | No      |
|      |       |        |             |          |         | Eif3m     | 285.359   | 126.423 | -1.17452         | 285.36       | 126.424       | -1.1745128       | 0.00014386 | No      |
|      |       |        |             |          |         | Eif4a1    | 233.865   | 155.895 | -0.585107        | 233.866      | 155.896       | -0.5850982       | 0.00014386 | No      |
|      |       |        |             |          |         | Eif4a3    | 107.847   | 78.3131 | -0.461661        | 107.848      | 78.3141       | -0.4616554       | 0.00014386 | No      |
|      |       |        |             |          |         | Eif4b     | 183.021   | 74.5701 | -1.29534         | 183.022      | 74.5711       | -1.2953285       | 0.00014386 | No      |
|      |       |        |             |          |         | Eif4e     | 43.1835   | 29.5729 | -0.546204        | 43.1845      | 29.5739       | -0.5461891       | 0.00014386 | No      |
|      |       |        |             |          |         | Eif4e2    | 63.9515   | 36.1548 | -0.822791        | 63.9525      | 36.1558       | -0.8227737       | 0.00014386 | No      |
|      |       |        |             |          |         | Eif4e3    | 8.63721   | 3.60322 | -1.26128         | 8.63821      | 3.60422       | -1.2610453       | 0.00014386 | No      |
|      |       |        |             |          |         | Eif4ebp1  | 39.4383   | 21.65   | -0.865228        | 39.4393      | 21.651        | -0.8652003       | 0.00014386 | No      |
|      |       |        |             |          |         | Eif4ebp2  | 41.308    | 16.4224 | -1.33075         | 41.309       | 16.4234       | -1.3307033       | 0.00014386 | No      |
|      |       |        |             |          |         | Eif4enif1 | 20.6413   | 12.9347 | -0.674285        | 20.6423      | 12.9357       | -0.6742456       | 0.00014386 | No      |
|      |       |        |             |          |         | Eif4g1    | 26.0103   | 15.7739 | -0.721536        | 26.0113      | 15.7749       | -0.7215076       | 0.00014386 | No      |
|      |       |        |             |          |         | Eif4g3    | 28.5374   | 11.7822 | -1.27624         | 28.5384      | 11.7832       | -1.2761731       | 0.00014386 | No      |
|      |       |        |             |          |         | Eif5      | 124.427   | 49.4389 | -1.33158         | 124.428      | 49.4399       | -1.3315634       | 0.00014386 | No      |
|      |       |        |             |          |         | Elac2     | 15.7347   | 10.6558 | -0.562308        | 15.7357      | 10.6568       | -0.5622671       | 0.00014386 | No      |
|      |       |        |             |          |         | Elavl1    | 42.6987   | 22.5576 | -0.920577        | 42.6997      | 22.5586       | -0.9205484       | 0.00014386 | No      |
|      |       |        |             |          |         | Elf1      | 68.2387   | 10.1292 | -2.75207         | 68.2397      | 10.1302       | -2.7519486       | 0.00014386 | No      |
|      |       |        |             |          |         | Elf2      | 42.9945   | 11.6797 | -1.88015         | 42.9955      | 11.6807       | -1.8800589       | 0.00014386 | No      |
|      |       |        |             |          |         | Elf4      | 31.8755   | 2.10345 | -3.92162         | 31.8765      | 2.10445       | -3.9209781       | 0.00014386 | No      |
|      |       |        |             |          |         | Elf5      | 0         | 1.0579  | inf              | 0.001        | 1.0589        | 10.0483506       | 0.00014386 | No      |
|      |       |        |             |          |         | Elk1      | 32.4197   | 71.0505 | 1.13197          | 32.4207      | 71.0515       | 1.13194987       | 0.00014386 | No      |
|      |       |        |             |          |         | Elk3      | 31.7754   | 6.58248 | -2.27121         | 31.7764      | 6.58348       | -2.2710334       | 0.00014386 | No      |
|      |       |        |             |          |         | Elk4      | 41.2188   | 4.6488  | -3.14837         | 41.2198      | 4.6498        | -3.1480969       | 0.00014386 | No      |
|      |       |        |             |          |         | Ell3      | 3.06499   | 11.2843 | 1.88036          | 3.06599      | 11.2853       | 1.88001987       | 0.00014386 | No      |
|      |       |        |             |          |         | Elmo1     | 21.4347   | 1.50912 | -3.82817         | 21.4357      | 1.51012       | -3.8272804       | 0.00014386 | No      |
|      |       |        |             |          |         | Elmo2     | 23.0981   | 12.9453 | -0.835349        | 23.0991      | 12.9463       | -0.8352968       | 0.00014386 | No      |
|      |       |        |             |          |         | Elmod2    | 6.1123    | 4.38424 | -0.479389        | 6.1133       | 4.38524       | -0.4792956       | 0.00014386 | No      |
|      |       |        |             |          |         | Elmod3    | 3.80111   | 6.68436 | 0.814368         | 3.80211      | 6.68536       | 0.81420498       | 0.00014386 | No      |
|      |       |        |             |          |         | Elmsan1   | 20.1492   | 3.8397  | -2.39166         | 20.1502      | 3.8407        | -2.391353        | 0.00014386 | No      |
|      |       |        |             |          |         | Eln       | 0.0222738 | 7.55314 | 8.40558          | 0.0232738    | 7.55414       | 8.34241693       | 0.00014386 | No      |
|      |       |        |             |          |         | Elof1     | 30.6054   | 98.4068 | 1.68497          | 30.6064      | 98.4078       | 1.68493931       | 0.00014386 | No      |
|      |       |        |             |          |         | Elov1     | 76.368    | 109.885 | 0.524956         | 76.369       | 109.886       | 0.52494855       | 0.00014386 | No      |
|      |       |        |             |          |         | Elov15    | 149.623   | 17.8949 | -3.06371         | 149.624      | 17.8959       | -3.0636406       | 0.00014386 | No      |
|      |       |        |             |          |         | ELP2      | 31.6714   | 18.9772 | -0.738916        | 31.6724      | 18.9782       | -0.738883        | 0.00014386 | No      |
|      |       |        |             |          |         | Elp6      | 17.2648   | 27.8115 | 0.687852         | 17.2658      | 27.8125       | 0.68781625       | 0.00014386 | No      |
|      |       |        |             |          |         | Elt1      | 0         | 6.00525 | inf              | 0.001        | 6.00625       | 12.5522488       | 0.00014386 | No      |
|      |       |        |             |          |         | Emc2      | 31.9213   | 53.3804 | 0.741791         | 31.9223      | 53.3814       | 0.74177254       | 0.00014386 | No      |
|      |       |        |             |          |         | Emcn      | 0         | 38.9437 | inf              | 0.001        | 38.9447       | 15.2491394       | 0.00014386 | No      |
|      |       |        |             |          |         | Emd       | 29.3201   | 14.7917 | -0.987107        | 29.3211      | 14.7927       | -0.9870538       | 0.00014386 | No      |
|      |       |        |             |          |         | Emilin1   | 0.301303  | 3.59251 | 3.57571          | 0.302303     | 3.59351       | 3.5713265        | 0.00014386 | No      |



| RRBS |       |        |             |          |         | RNAseq    |           |          |                  |              |               |                  |            |         |
|------|-------|--------|-------------|----------|---------|-----------|-----------|----------|------------------|--------------|---------------|------------------|------------|---------|
| gene | Blood | Kidney | methyl.diff | pMWU.fdr | Match ? | gene      | blood     | kidney   | log2(fold_ratio) | blood+ 0.001 | kidney+ 0.001 | log2(fold_ratio) | q_value    | Match ? |
|      |       |        |             |          |         | Eml2      | 2.95671   | 16.7689  | 2.50372          | 2.95771      | 16.7699       | 2.50332158       | 0.00014386 | No      |
|      |       |        |             |          |         | Eml4      | 40.4481   | 7.81349  | -2.37203         | 40.4491      | 7.81449       | -2.371884        | 0.00014386 | No      |
|      |       |        |             |          |         | Emp1      | 4.03505   | 7.43136  | 0.881042         | 4.03605      | 7.43236       | 0.88087634       | 0.00014386 | No      |
|      |       |        |             |          |         | Emp3      | 273.389   | 26.5152  | -3.36606         | 273.39       | 26.5162       | -3.3660145       | 0.00014386 | No      |
|      |       |        |             |          |         | Emr1      | 0.182147  | 0.931011 | 2.3537           | 0.183147     | 0.932011      | 2.34734491       | 0.00014386 | No      |
|      |       |        |             |          |         | Emx1      | 0         | 19.0847  | inf              | 0.001        | 19.0857       | 14.2202045       | 0.00014386 | No      |
|      |       |        |             |          |         | Enah      | 0.096333  | 7.35339  | 6.25424          | 0.097333     | 7.35439       | 6.23953285       | 0.00014386 | No      |
|      |       |        |             |          |         | Enc1      | 0.0941073 | 4.91452  | 5.7066           | 0.0951073    | 4.91552       | 5.69164415       | 0.00014386 | No      |
|      |       |        |             |          |         | Endod1    | 1.53344   | 13.3501  | 3.12201          | 1.53444      | 13.3511       | 3.12117447       | 0.00014386 | No      |
|      |       |        |             |          |         | Endov     | 6.39046   | 12.6826  | 0.988865         | 6.39146      | 12.6836       | 0.98874686       | 0.00014386 | No      |
|      |       |        |             |          |         | Engase    | 6.34471   | 4.13765  | -0.616743        | 6.34571      | 4.13865       | -0.6166213       | 0.00014386 | No      |
|      |       |        |             |          |         | Enkd1     | 0.284071  | 13.3075  | 5.54985          | 0.285071     | 13.3085       | 5.54488288       | 0.00014386 | No      |
|      |       |        |             |          |         | Eno1      | 258.662   | 974.779  | 1.91401          | 258.663      | 974.78        | 1.91400295       | 0.00014386 | No      |
|      |       |        |             |          |         | Enpp4     | 4.39803   | 6.13043  | 0.47913          | 4.39903      | 6.13143       | 0.47903815       | 0.00014386 | No      |
|      |       |        |             |          |         | Enpp5     | 0.861661  | 22.9591  | 4.7358           | 0.862661     | 22.9601       | 4.73419138       | 0.00014386 | No      |
|      |       |        |             |          |         | Enpp6     | 0         | 15.9135  | inf              | 0.001        | 15.9145       | 13.9580542       | 0.00014386 | No      |
|      |       |        |             |          |         | Enthd1    | 2.42245   | 0        | -inf             | 2.42345      | 0.001         | -11.242847       | 0.00014386 | No      |
|      |       |        |             |          |         | Enthd2    | 17.6271   | 30.083   | 0.771154         | 17.6281      | 30.084        | 0.77111942       | 0.00014386 | No      |
|      |       |        |             |          |         | Entpd2    | 5.47344   | 122.907  | 4.48897          | 5.47444      | 122.908       | 4.48872362       | 0.00014386 | No      |
|      |       |        |             |          |         | Entpd4    | 23.2027   | 37.4318  | 0.689971         | 23.2037      | 37.4328       | 0.68994809       | 0.00014386 | No      |
|      |       |        |             |          |         | Entpd6    | 6.1285    | 1.62493  | -1.91515         | 6.1295       | 1.62593       | -1.9145042       | 0.00014386 | No      |
|      |       |        |             |          |         | Eny2      | 21.9069   | 32.6302  | 0.574821         | 21.9079      | 32.6312       | 0.57480084       | 0.00014386 | No      |
|      |       |        |             |          |         | Eomes     | 10.9724   | 1.50551  | -2.86555         | 10.9734      | 1.50651       | -2.8647284       | 0.00014386 | No      |
|      |       |        |             |          |         | EP300     | 5.77179   | 1.43739  | -2.00557         | 5.77279      | 1.43839       | -2.0048138       | 0.00014386 | No      |
|      |       |        |             |          |         | Ep400     | 24.1431   | 9.13419  | -1.40226         | 24.1441      | 9.13519       | -1.402164        | 0.00014386 | No      |
|      |       |        |             |          |         | Epas1     | 0.414809  | 29.3343  | 6.144            | 0.415809     | 29.3353       | 6.14057295       | 0.00014386 | No      |
|      |       |        |             |          |         | Epb4.1    | 99.0174   | 18.3296  | -2.4335          | 99.0184      | 18.3306       | -2.4334426       | 0.00014386 | No      |
|      |       |        |             |          |         | Epb4.1l5  | 1.70493   | 21.3834  | 3.64871          | 1.70593      | 21.3844       | 3.64792837       | 0.00014386 | No      |
|      |       |        |             |          |         | Epb4l1l   | 0.0339286 | 47.4105  | 10.4485          | 0.0349286    | 47.4115       | 10.4066125       | 0.00014386 | No      |
|      |       |        |             |          |         | Epb4l1l2  | 28.3906   | 5.56439  | -2.35112         | 28.3916      | 5.56539       | -2.3509095       | 0.00014386 | No      |
|      |       |        |             |          |         | Epb4l1l3  | 0         | 38.042   | inf              | 0.001        | 38.043        | 15.2153434       | 0.00014386 | No      |
|      |       |        |             |          |         | Epb4l1l4a | 0         | 25.4476  | inf              | 0.001        | 25.4486       | 14.6352987       | 0.00014386 | No      |
|      |       |        |             |          |         | EPC1      | 68.7817   | 17.3593  | -1.98632         | 68.7827      | 17.3603       | -1.9862539       | 0.00014386 | No      |
|      |       |        |             |          |         | Epc2      | 28.8772   | 8.39043  | -1.78311         | 28.8782      | 8.39143       | -1.7829922       | 0.00014386 | No      |
|      |       |        |             |          |         | Epg5      | 13.0461   | 2.25813  | -2.53042         | 13.0471      | 2.25913       | -2.52989         | 0.00014386 | No      |
|      |       |        |             |          |         | Epha1     | 0.241793  | 14.5105  | 5.90718          | 0.242793     | 14.5115       | 5.90132602       | 0.00014386 | No      |
|      |       |        |             |          |         | Ephb6     | 19.1633   | 1.93884  | -3.30508         | 19.1643      | 1.93984       | -3.3044117       | 0.00014386 | No      |
|      |       |        |             |          |         | Ephx1     | 4.81684   | 52.6751  | 3.45096          | 4.81784      | 52.6761       | 3.45069015       | 0.00014386 | No      |
|      |       |        |             |          |         | Eprs      | 36.7432   | 25.9413  | -0.502223        | 36.7442      | 25.9423       | -0.5022101       | 0.00014386 | No      |
|      |       |        |             |          |         | Eps15     | 32.1606   | 11.8132  | -1.4449          | 32.1616      | 11.8142       | -1.4448172       | 0.00014386 | No      |
|      |       |        |             |          |         | Eps15l1   | 44.5015   | 22.7093  | -0.970571        | 44.5025      | 22.7103       | -0.9705396       | 0.00014386 | No      |
|      |       |        |             |          |         | Eps8      | 0.346112  | 18.6886  | 5.75478          | 0.347112     | 18.6896       | 5.75069064       | 0.00014386 | No      |

| RRBS |       |        |             |          |         | RNAseq  |           |          |                  |              |               |                  |            |         |
|------|-------|--------|-------------|----------|---------|---------|-----------|----------|------------------|--------------|---------------|------------------|------------|---------|
| gene | Blood | Kidney | methyl.diff | pMWU.fdr | Match ? | gene    | blood     | kidney   | log2(fold_ratio) | blood+ 0.001 | kidney+ 0.001 | log2(fold_ratio) | q_value    | Match ? |
|      |       |        |             |          |         | Eps8l1  | 0.0976871 | 20.1264  | 7.68671          | 0.0986871    | 20.1274       | 7.67208359       | 0.00014386 | No      |
|      |       |        |             |          |         | Eps8l2  | 0.222437  | 194.823  | 9.77456          | 0.223437     | 194.824       | 9.76808759       | 0.00014386 | No      |
|      |       |        |             |          |         | Ept1    | 10.0771   | 2.98998  | -1.75288         | 10.0781      | 2.99098       | -1.7525335       | 0.00014386 | No      |
|      |       |        |             |          |         | Erb2ip  | 56.0141   | 29.2667  | -0.93653         | 56.0151      | 29.2677       | -0.9365064       | 0.00014386 | No      |
|      |       |        |             |          |         | Erb3    | 0.250865  | 3.34125  | 3.7354           | 0.251865     | 3.34225       | 3.73009709       | 0.00014386 | No      |
|      |       |        |             |          |         | Erb4    | 0         | 1.87629  | inf              | 0.001        | 1.87729       | 10.8744358       | 0.00014386 | No      |
|      |       |        |             |          |         | Ercc1   | 10.2682   | 25.4214  | 1.30786          | 10.2692      | 25.4224       | 1.30777644       | 0.00014386 | No      |
|      |       |        |             |          |         | Ercc2   | 14.9066   | 10.1644  | -0.552423        | 14.9076      | 10.1654       | -0.552381        | 0.00014386 | No      |
|      |       |        |             |          |         | Ercc3   | 35.8286   | 19.8187  | -0.854247        | 35.8296      | 19.8197       | -0.8542168       | 0.00014386 | No      |
|      |       |        |             |          |         | Ercc6   | 10.0802   | 4.83766  | -1.05915         | 10.0812      | 4.83866       | -1.0589879       | 0.00014386 | No      |
|      |       |        |             |          |         | Ercc6l  | 0.923961  | 0.114491 | -3.0126          | 0.924961     | 0.115491      | -3.0016121       | 0.00014386 | No      |
|      |       |        |             |          |         | Ercc6l2 | 10.7652   | 7.39112  | -0.542505        | 10.7662      | 7.39212       | -0.542449        | 0.00014386 | No      |
|      |       |        |             |          |         | Erg     | 0         | 2.3551   | inf              | 0.001        | 2.3561        | 11.2021851       | 0.00014386 | No      |
|      |       |        |             |          |         | Ergic3  | 49.325    | 75.6334  | 0.616704         | 49.326       | 75.6344       | 0.61669425       | 0.00014386 | No      |
|      |       |        |             |          |         | Erh     | 241.567   | 141.148  | -0.775215        | 241.568      | 141.149       | -0.7752104       | 0.00014386 | No      |
|      |       |        |             |          |         | Eri1    | 19.0007   | 8.65863  | -1.13384         | 19.0017      | 8.65963       | -1.1337512       | 0.00014386 | No      |
|      |       |        |             |          |         | Eri2    | 2.48821   | 31.5571  | 3.66478          | 2.48921      | 31.5581       | 3.6642505        | 0.00014386 | No      |
|      |       |        |             |          |         | Eri3    | 22.1467   | 51.9058  | 1.2288           | 22.1477      | 51.9068       | 1.22876666       | 0.00014386 | No      |
|      |       |        |             |          |         | Erich1  | 5.60877   | 9.5576   | 0.768964         | 5.60977      | 9.5586        | 0.76885771       | 0.00014386 | No      |
|      |       |        |             |          |         | Erich2  | 0         | 8.41858  | inf              | 0.001        | 8.41958       | 13.0395326       | 0.00014386 | No      |
|      |       |        |             |          |         | Erlec1  | 20.4166   | 35.384   | 0.793357         | 20.4176      | 35.385        | 0.79332463       | 0.00014386 | No      |
|      |       |        |             |          |         | Erlin1  | 5.64818   | 9.00676  | 0.673222         | 5.64918      | 9.00776       | 0.67312692       | 0.00014386 | No      |
|      |       |        |             |          |         | Erlin2  | 3.84703   | 10.8438  | 1.49505          | 3.84803      | 10.8448       | 1.4948115        | 0.00014386 | No      |
|      |       |        |             |          |         | Ero1l   | 11.6411   | 7.72568  | -0.591493        | 11.6421      | 7.72668       | -0.5914308       | 0.00014386 | No      |
|      |       |        |             |          |         | Ero1b   | 11.0415   | 3.24632  | -1.76605         | 11.0425      | 3.24732       | -1.7657454       | 0.00014386 | No      |
|      |       |        |             |          |         | Erp27   | 9.70787   | 3.46102  | -1.48796         | 9.70887      | 3.46202       | -1.4876893       | 0.00014386 | No      |
|      |       |        |             |          |         | Erp29   | 28.8749   | 77.4853  | 1.42411          | 28.8759      | 77.4863       | 1.42407534       | 0.00014386 | No      |
|      |       |        |             |          |         | ERRF1   | 2.46244   | 51.4565  | 4.38519          | 2.46344      | 51.4575       | 4.38463513       | 0.00014386 | No      |
|      |       |        |             |          |         | Esco1   | 26.4762   | 13.7434  | -0.945953        | 26.4772      | 13.7444       | -0.9459066       | 0.00014386 | No      |
|      |       |        |             |          |         | Esd     | 24.7614   | 218.708  | 3.14284          | 24.7624      | 218.709       | 3.14278954       | 0.00014386 | No      |
|      |       |        |             |          |         | Esf1    | 13.0085   | 7.82052  | -0.734122        | 13.0095      | 7.82152       | -0.7340446       | 0.00014386 | No      |
|      |       |        |             |          |         | Esrra   | 6.43014   | 46.702   | 2.86056          | 6.43114      | 46.703        | 2.86036882       | 0.00014386 | No      |
|      |       |        |             |          |         | Esrrb   | 0         | 5.10674  | inf              | 0.001        | 5.10774       | 12.3184694       | 0.00014386 | No      |
|      |       |        |             |          |         | Esyt2   | 77.6394   | 13.0962  | -2.56764         | 77.6404      | 13.0972       | -2.5675491       | 0.00014386 | No      |
|      |       |        |             |          |         | Etf1    | 55.9627   | 37.4423  | -0.579797        | 55.9637      | 37.4433       | -0.5797838       | 0.00014386 | No      |
|      |       |        |             |          |         | Etf2    | 36.7376   | 194.336  | 2.40322          | 36.7386      | 194.337       | 2.40319205       | 0.00014386 | No      |
|      |       |        |             |          |         | Etf3    | 31.5542   | 404.163  | 3.67904          | 31.5552      | 404.164       | 3.67899115       | 0.00014386 | No      |
|      |       |        |             |          |         | Etf4    | 10.8075   | 39.1325  | 1.85633          | 10.8085      | 39.1335       | 1.85623783       | 0.00014386 | No      |
|      |       |        |             |          |         | Etnk1   | 69.8101   | 35.4234  | -0.978733        | 69.8111      | 35.4244       | -0.978713        | 0.00014386 | No      |
|      |       |        |             |          |         | Etnppl  | 0         | 10.4886  | inf              | 0.001        | 10.4896       | 13.356672        | 0.00014386 | No      |
|      |       |        |             |          |         | Ets1    | 570.328   | 20.7294  | -4.78204         | 570.329      | 20.7304       | -4.7819745       | 0.00014386 | No      |
|      |       |        |             |          |         | Ets2    | 4.87423   | 26.7029  | 2.45375          | 4.87523      | 26.7039       | 2.45350827       | 0.00014386 | No      |

| RRBS |       |        |             |          |         | RNAseq  |           |          |                  |              |               |                  |            |         |
|------|-------|--------|-------------|----------|---------|---------|-----------|----------|------------------|--------------|---------------|------------------|------------|---------|
| gene | Blood | Kidney | methyl.diff | pMWU.fdr | Match ? | gene    | blood     | kidney   | log2(fold_ratio) | blood+ 0.001 | kidney+ 0.001 | log2(fold_ratio) | q_value    | Match ? |
|      |       |        |             |          |         | Etv6    | 21.9105   | 9.05832  | -1.27431         | 21.9115      | 9.05932       | -1.2742136       | 0.00014386 | No      |
|      |       |        |             |          |         | Evc2    | 0         | 3.40544  | inf              | 0.001        | 3.40644       | 11.7340491       | 0.00014386 | No      |
|      |       |        |             |          |         | Evi2a   | 53.8949   | 1.38332  | -5.28394         | 53.8959      | 1.38432       | -5.2829261       | 0.00014386 | No      |
|      |       |        |             |          |         | Evi2b   | 46.0552   | 1.8118   | -4.66787         | 46.0562      | 1.8128        | -4.6671037       | 0.00014386 | No      |
|      |       |        |             |          |         | Evi5    | 5.83366   | 30.4588  | 2.38439          | 5.83466      | 30.4598       | 2.38418597       | 0.00014386 | No      |
|      |       |        |             |          |         | Evl     | 665.546   | 60.7863  | -3.45272         | 665.547      | 60.7873       | -3.4526987       | 0.00014386 | No      |
|      |       |        |             |          |         | Ewsr1   | 6.04963   | 3.25233  | -0.895374        | 6.05063      | 3.25333       | -0.8951682       | 0.00014386 | No      |
|      |       |        |             |          |         | Exd2    | 8.45119   | 5.74485  | -0.556885        | 8.45219      | 5.74585       | -0.5568049       | 0.00014386 | No      |
|      |       |        |             |          |         | Exoc2   | 13.8983   | 10.1624  | -0.451672        | 13.8993      | 10.1634       | -0.4516291       | 0.00014386 | No      |
|      |       |        |             |          |         | Exoc3l1 | 2.03793   | 11.0179  | 2.43468          | 2.03893      | 11.0189       | 2.43409606       | 0.00014386 | No      |
|      |       |        |             |          |         | Exoc3l2 | 0.134352  | 3.95516  | 4.87965          | 0.135352     | 3.95616       | 4.86931266       | 0.00014386 | No      |
|      |       |        |             |          |         | Exoc4   | 10.8782   | 5.99223  | -0.860271        | 10.8792      | 5.99323       | -0.8601668       | 0.00014386 | No      |
|      |       |        |             |          |         | Exoc5   | 17.266    | 11.5591  | -0.57891         | 17.267       | 11.5601       | -0.5788636       | 0.00014386 | No      |
|      |       |        |             |          |         | Exoc6   | 7.21961   | 30.8606  | 2.09577          | 7.22061      | 30.8616       | 2.09562023       | 0.00014386 | No      |
|      |       |        |             |          |         | EXOC7   | 2.97604   | 7.39484  | 1.31313          | 2.97704      | 7.39584       | 1.31283541       | 0.00014386 | No      |
|      |       |        |             |          |         | Exog    | 4.05802   | 2.4201   | -0.745707        | 4.05902      | 2.4211        | -0.7454688       | 0.00014386 | No      |
|      |       |        |             |          |         | Exosc1  | 44.72     | 15.6253  | -1.51703         | 44.721       | 15.6263       | -1.5169762       | 0.00014386 | No      |
|      |       |        |             |          |         | Exosc2  | 19.312    | 11.1551  | -0.791788        | 19.313       | 11.1561       | -0.7917395       | 0.00014386 | No      |
|      |       |        |             |          |         | Exosc9  | 29.5843   | 11.1245  | -1.41109         | 29.5853      | 11.1255       | -1.4110103       | 0.00014386 | No      |
|      |       |        |             |          |         | Exph5   | 0.0763115 | 2.73327  | 5.16258          | 0.0773115    | 2.73427       | 5.14432887       | 0.00014386 | No      |
|      |       |        |             |          |         | Ext1    | 9.4836    | 13.2059  | 0.477673         | 9.4846       | 13.2069       | 0.47763303       | 0.00014386 | No      |
|      |       |        |             |          |         | Ext2    | 15.2059   | 21.7496  | 0.516359         | 15.2069      | 21.7506       | 0.51632912       | 0.00014386 | No      |
|      |       |        |             |          |         | Eya2    | 3.76552   | 10.7608  | 1.51487          | 3.76652      | 10.7618       | 1.51461531       | 0.00014386 | No      |
|      |       |        |             |          |         | Eya3    | 12.1171   | 5.67106  | -1.09536         | 12.1181      | 5.67206       | -1.0952188       | 0.00014386 | No      |
|      |       |        |             |          |         | Ezr     | 286.204   | 417.488  | 0.544691         | 286.205      | 417.489       | 0.54468931       | 0.00014386 | No      |
|      |       |        |             |          |         | F11r    | 0.816615  | 74.2466  | 6.50653          | 0.817615     | 74.2476       | 6.50477892       | 0.00014386 | No      |
|      |       |        |             |          |         | F13b    | 0         | 0.922781 | inf              | 0.001        | 0.923781      | 9.85140706       | 0.00014386 | No      |
|      |       |        |             |          |         | F3      | 0         | 11.9503  | inf              | 0.001        | 11.9513       | 13.5448799       | 0.00014386 | No      |
|      |       |        |             |          |         | F8      | 8.04599   | 2.17448  | -1.8876          | 8.04699      | 2.17548       | -1.8871155       | 0.00014386 | No      |
|      |       |        |             |          |         | F8a1    | 29.9877   | 19.4947  | -0.621284        | 29.9887      | 19.4957       | -0.621263        | 0.00014386 | No      |
|      |       |        |             |          |         | Fabp4   | 0         | 8.70636  | inf              | 0.001        | 8.70736       | 13.0880197       | 0.00014386 | No      |
|      |       |        |             |          |         | Fabp5   | 3.34397   | 23.8397  | 2.83373          | 3.34497      | 23.8407       | 2.83336142       | 0.00014386 | No      |
|      |       |        |             |          |         | Fads3   | 0.214394  | 34.2582  | 7.32004          | 0.215394     | 34.2592       | 7.31336959       | 0.00014386 | No      |
|      |       |        |             |          |         | Fads6   | 0.222241  | 1.96975  | 3.14782          | 0.223241     | 1.97075       | 3.14207086       | 0.00014386 | No      |
|      |       |        |             |          |         | Faf2    | 16.863    | 8.51219  | -0.986262        | 16.864       | 8.51319       | -0.986175        | 0.00014386 | No      |
|      |       |        |             |          |         | Fah     | 12.9227   | 180.128  | 3.80105          | 12.9237      | 180.129       | 3.8009394        | 0.00014386 | No      |
|      |       |        |             |          |         | Fahd1   | 9.78662   | 95.2418  | 3.28271          | 9.78762      | 95.2428       | 3.28258004       | 0.00014386 | No      |
|      |       |        |             |          |         | Fahd2a  | 20.2256   | 120.229  | 2.57153          | 20.2266      | 120.23        | 2.57147119       | 0.00014386 | No      |
|      |       |        |             |          |         | Faim2   | 0         | 0.957496 | inf              | 0.001        | 0.958496      | 9.9046286        | 0.00014386 | No      |
|      |       |        |             |          |         | Faim3   | 20.1136   | 2.23535  | -3.1696          | 20.1146      | 2.23635       | -3.1690251       | 0.00014386 | No      |
|      |       |        |             |          |         | FALZ    | 35.0734   | 8.66258  | -2.01751         | 35.0744      | 8.66358       | -2.0173832       | 0.00014386 | No      |
|      |       |        |             |          |         | Fam102a | 49.7885   | 9.29578  | -2.42116         | 49.7895      | 9.29678       | -2.4210385       | 0.00014386 | No      |

| RRBS |       |        |             |          |         | RNAseq   |            |          |                  |              |               |                  |            |         |
|------|-------|--------|-------------|----------|---------|----------|------------|----------|------------------|--------------|---------------|------------------|------------|---------|
| gene | Blood | Kidney | methyl.diff | pMWU.fdr | Match ? | gene     | blood      | kidney   | log2(fold_ratio) | blood+ 0.001 | kidney+ 0.001 | log2(fold_ratio) | q_value    | Match ? |
|      |       |        |             |          |         | Fam105a  | 127.885    | 6.51598  | -4.29471         | 127.886      | 6.51698       | -4.294511        | 0.00014386 | No      |
|      |       |        |             |          |         | Fam105b  | 94.0472    | 16.1073  | -2.54567         | 94.0482      | 16.1083       | -2.5455961       | 0.00014386 | No      |
|      |       |        |             |          |         | Fam107b  | 85.3068    | 47.011   | -0.859661        | 85.3078      | 47.012        | -0.8596486       | 0.00014386 | No      |
|      |       |        |             |          |         | Fam109a  | 0.715239   | 3.25183  | 2.18475          | 0.716239     | 3.25283       | 2.18318244       | 0.00014386 | No      |
|      |       |        |             |          |         | Fam110b  | 0.436088   | 8.4847   | 4.28217          | 0.437088     | 8.4857        | 4.279038         | 0.00014386 | No      |
|      |       |        |             |          |         | Fam111a  | 0.340973   | 1.34086  | 1.97543          | 0.341973     | 1.34186       | 1.97227983       | 0.00014386 | No      |
|      |       |        |             |          |         | Fam114a1 | 0.0525464  | 5.34144  | 6.66749          | 0.0535464    | 5.34244       | 6.64056541       | 0.00014386 | No      |
|      |       |        |             |          |         | Fam115a  | 0.0860302  | 6.11425  | 6.15119          | 0.0870302    | 6.11525       | 6.13475156       | 0.00014386 | No      |
|      |       |        |             |          |         | Fam115c  | 9.95674    | 3.84047  | -1.37439         | 9.95774      | 3.84147       | -1.3741599       | 0.00014386 | No      |
|      |       |        |             |          |         | Fam117a  | 141.039    | 10.8809  | -3.69622         | 141.04       | 10.8819       | -3.696102        | 0.00014386 | No      |
|      |       |        |             |          |         | Fam117b  | 24.2765    | 5.25886  | -2.20674         | 24.2775      | 5.25986       | -2.2065236       | 0.00014386 | No      |
|      |       |        |             |          |         | Fam118a  | 9.272      | 1.6237   | -2.51359         | 9.273        | 1.6247        | -2.5128628       | 0.00014386 | No      |
|      |       |        |             |          |         | Fam118b  | 19.2582    | 6.40983  | -1.58711         | 19.2592      | 6.41083       | -1.5869647       | 0.00014386 | No      |
|      |       |        |             |          |         | Fam120a  | 76.3186    | 51.2697  | -0.573928        | 76.3196      | 51.2707       | -0.573919        | 0.00014386 | No      |
|      |       |        |             |          |         | FAM120C  | 0.476258   | 3.90948  | 3.03716          | 0.477258     | 3.91048       | 3.03450442       | 0.00014386 | No      |
|      |       |        |             |          |         | Fam122b  | 2.53925    | 0.371996 | -2.77105         | 2.54025      | 0.372996      | -2.7677384       | 0.00014386 | No      |
|      |       |        |             |          |         | Fam126a  | 4.20498    | 0.959746 | -2.13137         | 4.20598      | 0.960746      | -2.130215        | 0.00014386 | No      |
|      |       |        |             |          |         | Fam127b  | 48.1868    | 116.996  | 1.27976          | 48.1878      | 116.997       | 1.2797317        | 0.00014386 | No      |
|      |       |        |             |          |         | Fam133b  | 29.2897    | 14.8781  | -0.977205        | 29.2907      | 14.8791       | -0.9771554       | 0.00014386 | No      |
|      |       |        |             |          |         | Fam134b  | 10.6124    | 19.557   | 0.881934         | 10.6134      | 19.558        | 0.88187195       | 0.00014386 | No      |
|      |       |        |             |          |         | Fam134c  | 64.1282    | 13.2922  | -2.27037         | 64.1292      | 13.2932       | -2.270293        | 0.00014386 | No      |
|      |       |        |             |          |         | Fam135a  | 0.0640627  | 4.28117  | 6.06238          | 0.0650627    | 4.28217       | 6.04036757       | 0.00014386 | No      |
|      |       |        |             |          |         | Fam136a  | 6.06492    | 13.6751  | 1.17299          | 6.06592      | 13.6761       | 1.1728585        | 0.00014386 | No      |
|      |       |        |             |          |         | Fam13a   | 0.00904489 | 7.80041  | 9.75223          | 0.01004489   | 7.80141       | 9.60112932       | 0.00014386 | No      |
|      |       |        |             |          |         | Fam13b   | 37.325     | 16.4086  | -1.18569         | 37.326       | 16.4096       | -1.1856408       | 0.00014386 | No      |
|      |       |        |             |          |         | Fam149a  | 0.0677205  | 23.8098  | 8.45775          | 0.0687205    | 23.8108       | 8.43665984       | 0.00014386 | No      |
|      |       |        |             |          |         | Fam151a  | 0.604672   | 22.0081  | 5.18574          | 0.605672     | 22.0091       | 5.18341962       | 0.00014386 | No      |
|      |       |        |             |          |         | Fam160a1 | 0          | 4.23213  | inf              | 0.001        | 4.23313       | 12.0475091       | 0.00014386 | No      |
|      |       |        |             |          |         | Fam160a2 | 11.442     | 7.36136  | -0.636299        | 11.443       | 7.36236       | -0.6362251       | 0.00014386 | No      |
|      |       |        |             |          |         | Fam160b2 | 16.7217    | 11.2046  | -0.577628        | 16.7227      | 11.2056       | -0.5775879       | 0.00014386 | No      |
|      |       |        |             |          |         | Fam162a  | 87.1628    | 160.039  | 0.876641         | 87.1638      | 160.04        | 0.87663154       | 0.00014386 | No      |
|      |       |        |             |          |         | Fam168a  | 8.247      | 5.96371  | -0.467659        | 8.248        | 5.96471       | -0.4675923       | 0.00014386 | No      |
|      |       |        |             |          |         | Fam168b  | 64.0235    | 28.2302  | -1.18136         | 64.0245      | 28.2312       | -1.1813336       | 0.00014386 | No      |
|      |       |        |             |          |         | Fam169b  | 82.7869    | 1.42141  | -5.864           | 82.7879      | 1.42241       | -5.8630106       | 0.00014386 | No      |
|      |       |        |             |          |         | Fam171a2 | 1.54909    | 19.9636  | 3.68788          | 1.55009      | 19.9646       | 3.68702028       | 0.00014386 | No      |
|      |       |        |             |          |         | Fam175a  | 9.51576    | 3.35816  | -1.50265         | 9.51676      | 3.35916       | -1.50237         | 0.00014386 | No      |
|      |       |        |             |          |         | Fam175b  | 16.3345    | 11.5782  | -0.496518        | 16.3355      | 11.5792       | -0.496475        | 0.00014386 | No      |
|      |       |        |             |          |         | Fam178a  | 11.2924    | 4.41517  | -1.35481         | 11.2934      | 4.41617       | -1.3546123       | 0.00014386 | No      |
|      |       |        |             |          |         | Fam179b  | 11.9752    | 5.57559  | -1.10285         | 11.9762      | 5.57659       | -1.1027151       | 0.00014386 | No      |
|      |       |        |             |          |         | Fam184a  | 0.341193   | 13.0902  | 5.26176          | 0.342193     | 13.0912       | 5.25764329       | 0.00014386 | No      |
|      |       |        |             |          |         | Fam185a  | 33.3563    | 9.2155   | -1.85583         | 33.3573      | 9.2165        | -1.8557116       | 0.00014386 | No      |
|      |       |        |             |          |         | Fam188a  | 12.0313    | 19.4748  | 0.694812         | 12.0323      | 19.4758       | 0.69477015       | 0.00014386 | No      |

| RRBS |       |        |             |          |         | RNAseq   |           |          |                  |              |               |                  |            |         |
|------|-------|--------|-------------|----------|---------|----------|-----------|----------|------------------|--------------|---------------|------------------|------------|---------|
| gene | Blood | Kidney | methyl.diff | pMWU.fdr | Match ? | gene     | blood     | kidney   | log2(fold_ratio) | blood+ 0.001 | kidney+ 0.001 | log2(fold_ratio) | q_value    | Match ? |
|      |       |        |             |          |         | Fam188b  | 0.392914  | 2.74933  | 2.80679          | 0.393914     | 2.75033       | 2.80365213       | 0.00014386 | No      |
|      |       |        |             |          |         | Fam189a2 | 0         | 1.97377  | inf              | 0.001        | 1.97477       | 10.9474689       | 0.00014386 | No      |
|      |       |        |             |          |         | Fam195a  | 1.33267   | 58.0079  | 5.44385          | 1.33367      | 58.0089       | 5.44280062       | 0.00014386 | No      |
|      |       |        |             |          |         | Fam195b  | 43.439    | 102.088  | 1.23275          | 43.44        | 102.089       | 1.23273142       | 0.00014386 | No      |
|      |       |        |             |          |         | Fam19a3  | 41.2683   | 3.89054  | -3.40699         | 41.2693      | 3.89154       | -3.4066559       | 0.00014386 | No      |
|      |       |        |             |          |         | Fam203a  | 21.377    | 8.71329  | -1.29477         | 21.378       | 8.71429       | -1.2946719       | 0.00014386 | No      |
|      |       |        |             |          |         | Fam208a  | 35.5955   | 9.48981  | -1.90725         | 35.5965      | 9.49081       | -1.9071323       | 0.00014386 | No      |
|      |       |        |             |          |         | Fam20b   | 8.62695   | 17.5967  | 1.02838          | 8.62795      | 17.5977       | 1.02829716       | 0.00014386 | No      |
|      |       |        |             |          |         | Fam213a  | 1.70095   | 7.96331  | 2.22702          | 1.70195      | 7.96431       | 2.22636072       | 0.00014386 | No      |
|      |       |        |             |          |         | Fam214a  | 17.5796   | 9.6095   | -0.871373        | 17.5806      | 9.6105        | -0.8713009       | 0.00014386 | No      |
|      |       |        |             |          |         | Fam214b  | 1.2956    | 13.0919  | 3.33698          | 1.2966       | 13.0929       | 3.3359793        | 0.00014386 | No      |
|      |       |        |             |          |         | Fam216a  | 5.13506   | 24.7358  | 2.26815          | 5.13606      | 24.7368       | 2.26792492       | 0.00014386 | No      |
|      |       |        |             |          |         | Fam229a  | 1.38548   | 5.03445  | 1.86145          | 1.38648      | 5.03545       | 1.86069391       | 0.00014386 | No      |
|      |       |        |             |          |         | Fam26f   | 107.447   | 3.02685  | -5.14966         | 107.448      | 3.02785       | -5.1492011       | 0.00014386 | No      |
|      |       |        |             |          |         | Fam3c    | 17.928    | 29.5416  | 0.720534         | 17.929       | 29.5426       | 0.72050178       | 0.00014386 | No      |
|      |       |        |             |          |         | Fam45a   | 14.3553   | 10.0508  | -0.514274        | 14.3563      | 10.0518       | -0.5142301       | 0.00014386 | No      |
|      |       |        |             |          |         | Fam46a   | 1.66205   | 0.702197 | -1.24302         | 1.66305      | 0.703197      | -1.2418307       | 0.00014386 | No      |
|      |       |        |             |          |         | Fam46c   | 18.2289   | 3.57434  | -2.35048         | 18.2299      | 3.57534       | -2.3501543       | 0.00014386 | No      |
|      |       |        |             |          |         | FAM49B   | 132.17    | 17.1965  | -2.94221         | 132.171      | 17.1975       | -2.9421349       | 0.00014386 | No      |
|      |       |        |             |          |         | Fam53a   | 42.8716   | 11.8591  | -1.85403         | 42.8726      | 11.8601       | -1.8539397       | 0.00014386 | No      |
|      |       |        |             |          |         | Fam53b   | 9.92109   | 6.14855  | -0.690252        | 9.92209      | 6.14955       | -0.6901632       | 0.00014386 | No      |
|      |       |        |             |          |         | Fam53c   | 14.1505   | 7.34413  | -0.946186        | 14.1515      | 7.34513       | -0.9460951       | 0.00014386 | No      |
|      |       |        |             |          |         | Fam60a   | 19.0106   | 13.2975  | -0.515646        | 19.0116      | 13.2985       | -0.5156164       | 0.00014386 | No      |
|      |       |        |             |          |         | Fam63a   | 10.2585   | 41.2518  | 2.00763          | 10.2595      | 41.2528       | 2.00753162       | 0.00014386 | No      |
|      |       |        |             |          |         | Fam64a   | 0         | 1.10397  | inf              | 0.001        | 1.10497       | 10.1097915       | 0.00014386 | No      |
|      |       |        |             |          |         | Fam65b   | 121.919   | 2.02938  | -5.90874         | 121.92       | 2.03038       | -5.9080412       | 0.00014386 | No      |
|      |       |        |             |          |         | Fam71a   | 0         | 2.98385  | inf              | 0.001        | 2.98485       | 11.5434427       | 0.00014386 | No      |
|      |       |        |             |          |         | Fam71b   | 2.33198   | 0        | -inf             | 2.33298      | 0.001         | -11.187958       | 0.00014386 | No      |
|      |       |        |             |          |         | Fam73b   | 9.74247   | 20.0795  | 1.04337          | 9.74347      | 20.0805       | 1.04328763       | 0.00014386 | No      |
|      |       |        |             |          |         | Fam76b   | 17.9498   | 5.34735  | -1.74707         | 17.9508      | 5.34835       | -1.7468824       | 0.00014386 | No      |
|      |       |        |             |          |         | Fam78a   | 30.3148   | 0.751953 | -5.33324         | 30.3158      | 0.752953      | -5.3313663       | 0.00014386 | No      |
|      |       |        |             |          |         | Fam81a   | 0.0435632 | 30.3898  | 9.44626          | 0.0445632    | 30.3908       | 9.4135661        | 0.00014386 | No      |
|      |       |        |             |          |         | Fam83b   | 0         | 0.788073 | inf              | 0.001        | 0.789073      | 9.62401497       | 0.00014386 | No      |
|      |       |        |             |          |         | Fam84b   | 30.1576   | 13.7942  | -1.12846         | 30.1586      | 13.7952       | -1.1284031       | 0.00014386 | No      |
|      |       |        |             |          |         | Fam89b   | 72.8601   | 49.934   | -0.545106        | 72.8611      | 49.935        | -0.5450974       | 0.00014386 | No      |
|      |       |        |             |          |         | Fam8a1   | 17.7372   | 7.05499  | -1.33006         | 17.7382      | 7.05599       | -1.3299392       | 0.00014386 | No      |
|      |       |        |             |          |         | Fam91a1  | 13.3421   | 21.9252  | 0.716607         | 13.3431      | 21.9262       | 0.71656192       | 0.00014386 | No      |
|      |       |        |             |          |         | Fam92a1  | 12.9135   | 78.8336  | 2.60993          | 12.9145      | 78.8346       | 2.60983717       | 0.00014386 | No      |
|      |       |        |             |          |         | Fam92b   | 0         | 1.05693  | inf              | 0.001        | 1.05793       | 10.0470285       | 0.00014386 | No      |
|      |       |        |             |          |         | FAM98C   | 98.2052   | 71.3284  | -0.461321        | 98.2062      | 71.3294       | -0.4613173       | 0.00014386 | No      |
|      |       |        |             |          |         | Fan1     | 1.60415   | 3.29821  | 1.03988          | 1.60515      | 3.29921       | 1.03941249       | 0.00014386 | No      |
|      |       |        |             |          |         | Fancb    | 4.55637   | 1.65885  | -1.4577          | 4.55737      | 1.65985       | -1.4571486       | 0.00014386 | No      |

| RRBS |       |        |             |          |         | RNAseq  |          |         |                  |              |               |                  |            |         |
|------|-------|--------|-------------|----------|---------|---------|----------|---------|------------------|--------------|---------------|------------------|------------|---------|
| gene | Blood | Kidney | methyl.diff | pMWU.fdr | Match ? | gene    | blood    | kidney  | log2(fold_ratio) | blood+ 0.001 | kidney+ 0.001 | log2(fold_ratio) | q_value    | Match ? |
|      |       |        |             |          |         | Fancc   | 1.74677  | 3.52459 | 1.01277          | 1.74777      | 3.52559       | 1.01234937       | 0.00014386 | No      |
|      |       |        |             |          |         | Fancg   | 3.89417  | 1.21918 | -1.6754          | 3.89517      | 1.22018       | -1.6745923       | 0.00014386 | No      |
|      |       |        |             |          |         | Fancl   | 23.8991  | 15.2303 | -0.650016        | 23.9001      | 15.2313       | -0.6499776       | 0.00014386 | No      |
|      |       |        |             |          |         | Far1    | 12.8749  | 6.73985 | -0.933773        | 12.8759      | 6.74085       | -0.9336709       | 0.00014386 | No      |
|      |       |        |             |          |         | Farp1   | 0.709874 | 25.069  | 5.1422           | 0.710874     | 25.07         | 5.14022432       | 0.00014386 | No      |
|      |       |        |             |          |         | Fars2   | 12.2403  | 22.7186 | 0.892234         | 12.2413      | 22.7196       | 0.89218066       | 0.00014386 | No      |
|      |       |        |             |          |         | Fasn    | 9.38002  | 6.57029 | -0.513634        | 9.38102      | 6.57129       | -0.5135682       | 0.00014386 | No      |
|      |       |        |             |          |         | Fastkd1 | 27.4608  | 10.1965 | -1.4293          | 27.4618      | 10.1975       | -1.4292107       | 0.00014386 | No      |
|      |       |        |             |          |         | Fau     | 4619.61  | 1775.55 | -1.3795          | 4619.611     | 1775.551      | -1.3795046       | 0.00014386 | No      |
|      |       |        |             |          |         | Fbf1    | 13.8676  | 28.9464 | 1.06167          | 13.8686      | 28.9474       | 1.06161162       | 0.00014386 | No      |
|      |       |        |             |          |         | Fbl     | 155.038  | 68.5835 | -1.17669         | 155.039      | 68.5845       | -1.1766767       | 0.00014386 | No      |
|      |       |        |             |          |         | Fbln5   | 0        | 4.12825 | inf              | 0.001        | 4.12925       | 12.0116641       | 0.00014386 | No      |
|      |       |        |             |          |         | Fbrs    | 41.2527  | 9.7391  | -2.08263         | 41.2537      | 9.7401        | -2.082515        | 0.00014386 | No      |
|      |       |        |             |          |         | Fbxl12  | 49.1601  | 14.0363 | -1.80833         | 49.1611      | 14.0373       | -1.8082517       | 0.00014386 | No      |
|      |       |        |             |          |         | Fbxl20  | 19.5104  | 4.76572 | -2.03348         | 19.5114      | 4.76672       | -2.0332485       | 0.00014386 | No      |
|      |       |        |             |          |         | Fbxl22  | 77.4374  | 28.1173 | -1.46157         | 77.4384      | 28.1183       | -1.4615398       | 0.00014386 | No      |
|      |       |        |             |          |         | Fbxl3   | 46.1954  | 20.0027 | -1.20755         | 46.1964      | 20.0037       | -1.2075136       | 0.00014386 | No      |
|      |       |        |             |          |         | Fbxl5   | 25.6963  | 48.0609 | 0.903303         | 25.6973      | 48.0619       | 0.9032769        | 0.00014386 | No      |
|      |       |        |             |          |         | Fbxl6   | 25.666   | 14.7509 | -0.799058        | 25.667       | 14.7519       | -0.7990139       | 0.00014386 | No      |
|      |       |        |             |          |         | Fbxo11  | 23.9992  | 9.53636 | -1.33147         | 24.0002      | 9.53736       | -1.3313845       | 0.00014386 | No      |
|      |       |        |             |          |         | Fbxo16  | 0        | 6.56615 | inf              | 0.001        | 6.56715       | 12.6810517       | 0.00014386 | No      |
|      |       |        |             |          |         | Fbxo21  | 5.45427  | 17.6965 | 1.698            | 5.45527      | 17.6975       | 1.69782307       | 0.00014386 | No      |
|      |       |        |             |          |         | Fbxo25  | 13.1721  | 8.12156 | -0.697654        | 13.1731      | 8.12256       | -0.6975885       | 0.00014386 | No      |
|      |       |        |             |          |         | Fbxo3   | 59.0239  | 26.8868 | -1.1344          | 59.0249      | 26.8878       | -1.134372        | 0.00014386 | No      |
|      |       |        |             |          |         | Fbxo31  | 41.7989  | 29.3896 | -0.508161        | 41.7999      | 29.3906       | -0.5081447       | 0.00014386 | No      |
|      |       |        |             |          |         | Fbxo32  | 4.85763  | 2.0401  | -1.25161         | 4.85863      | 2.0411        | -1.2512027       | 0.00014386 | No      |
|      |       |        |             |          |         | Fbxo33  | 20.4724  | 6.32944 | -1.69353         | 20.4734      | 6.33044       | -1.693373        | 0.00014386 | No      |
|      |       |        |             |          |         | Fbxo34  | 10.1165  | 5.17907 | -0.965951        | 10.1175      | 5.18007       | -0.9658094       | 0.00014386 | No      |
|      |       |        |             |          |         | Fbxo38  | 18.1841  | 12.2251 | -0.572833        | 18.1851      | 12.2261       | -0.5727926       | 0.00014386 | No      |
|      |       |        |             |          |         | Fbxo39  | 8.08469  | 3.53619 | -1.193           | 8.08569      | 3.53719       | -1.1927672       | 0.00014386 | No      |
|      |       |        |             |          |         | Fbxo4   | 0.899946 | 10.7068 | 3.57255          | 0.900946     | 10.7078       | 3.57107765       | 0.00014386 | No      |
|      |       |        |             |          |         | Fbxo44  | 24.37    | 81.994  | 1.75041          | 24.371       | 81.995        | 1.75037049       | 0.00014386 | No      |
|      |       |        |             |          |         | Fbxo5   | 3.70647  | 1.01899 | -1.8629          | 3.70747      | 1.01999       | -1.86188         | 0.00014386 | No      |
|      |       |        |             |          |         | Fbxo8   | 9.82659  | 15.099  | 0.619689         | 9.82759      | 15.1          | 0.61963897       | 0.00014386 | No      |
|      |       |        |             |          |         | Fbxw2   | 43.3627  | 25.8095 | -0.748553        | 43.3637      | 25.8105       | -0.7485298       | 0.00014386 | No      |
|      |       |        |             |          |         | Fbxw5   | 37.4323  | 65.9992 | 0.818164         | 37.4333      | 66.0002       | 0.81814816       | 0.00014386 | No      |
|      |       |        |             |          |         | Fbxw8   | 0.4619   | 11.6051 | 4.65103          | 0.4629       | 11.6061       | 4.64803889       | 0.00014386 | No      |
|      |       |        |             |          |         | Fcf1    | 143.736  | 103.654 | -0.471644        | 143.737      | 103.655       | -0.4716418       | 0.00014386 | No      |
|      |       |        |             |          |         | Fcgr1a  | 0.575256 | 3.50143 | 2.60567          | 0.576256     | 3.50243       | 2.60357444       | 0.00014386 | No      |
|      |       |        |             |          |         | Fcgrt   | 8.14966  | 55.4314 | 2.76589          | 8.15066      | 55.4324       | 2.76574068       | 0.00014386 | No      |
|      |       |        |             |          |         | Fcho1   | 70.4042  | 7.03317 | -3.32342         | 70.4052      | 7.03417       | -3.3232299       | 0.00014386 | No      |
|      |       |        |             |          |         | Fcho2   | 10.3971  | 33.6123 | 1.69281          | 10.3981      | 33.6133       | 1.69271225       | 0.00014386 | No      |

| RRBS |       |        |             |          |         | RNAseq   |            |         |                  |              |               |                  |            |         |
|------|-------|--------|-------------|----------|---------|----------|------------|---------|------------------|--------------|---------------|------------------|------------|---------|
| gene | Blood | Kidney | methyl.diff | pMWU.fdr | Match ? | gene     | blood      | kidney  | log2(fold_ratio) | blood+ 0.001 | kidney+ 0.001 | log2(fold_ratio) | q_value    | Match ? |
|      |       |        |             |          |         | Fchsd2   | 22.7791    | 5.39696 | -2.07749         | 22.7801      | 5.39796       | -2.0772879       | 0.00014386 | No      |
|      |       |        |             |          |         | Fcnb     | 8.34972    | 1.19192 | -2.80844         | 8.35072      | 1.19292       | -2.8074033       | 0.00014386 | No      |
|      |       |        |             |          |         | Fcrl1    | 3.02226    | 0       | -inf             | 3.02326      | 0.001         | -11.561889       | 0.00014386 | No      |
|      |       |        |             |          |         | Fdft1    | 8.14719    | 29.1126 | 1.83727          | 8.14819      | 29.1136       | 1.83714172       | 0.00014386 | No      |
|      |       |        |             |          |         | Fdx1     | 13.4568    | 67.3391 | 2.32311          | 13.4578      | 67.3401       | 2.32302328       | 0.00014386 | No      |
|      |       |        |             |          |         | Fdx1l    | 37.2502    | 57.8587 | 0.635284         | 37.2512      | 57.8597       | 0.63527194       | 0.00014386 | No      |
|      |       |        |             |          |         | Fdxr     | 11.744     | 26.1203 | 1.15325          | 11.745       | 26.1213       | 1.15317999       | 0.00014386 | No      |
|      |       |        |             |          |         | Fech     | 4.88801    | 18.9175 | 1.9524           | 4.88901      | 18.9185       | 1.95218344       | 0.00014386 | No      |
|      |       |        |             |          |         | Fem1a    | 14.8567    | 22.219  | 0.580687         | 14.8577      | 22.22         | 0.58064802       | 0.00014386 | No      |
|      |       |        |             |          |         | Fem1b    | 18.3472    | 5.98613 | -1.61587         | 18.3482      | 5.98713       | -1.615702        | 0.00014386 | No      |
|      |       |        |             |          |         | Fem1c    | 6.07769    | 3.82582 | -0.667752        | 6.07869      | 3.82682       | -0.6676144       | 0.00014386 | No      |
|      |       |        |             |          |         | Fermt2   | 1.06417    | 36.5494 | 5.10205          | 1.06517      | 36.5504       | 5.10073159       | 0.00014386 | No      |
|      |       |        |             |          |         | Fermt3   | 127.97     | 12.4579 | -3.36067         | 127.971      | 12.4589       | -3.3605683       | 0.00014386 | No      |
|      |       |        |             |          |         | Fert2    | 0.0457738  | 1.25929 | 4.78195          | 0.0467738    | 1.26029       | 4.75191129       | 0.00014386 | No      |
|      |       |        |             |          |         | FEZ2     | 6.15347    | 35.308  | 2.52052          | 6.15447      | 35.309        | 2.52032943       | 0.00014386 | No      |
|      |       |        |             |          |         | Fgd1     | 0.0356951  | 1.08053 | 4.91987          | 0.0366951    | 1.08153       | 4.88134244       | 0.00014386 | No      |
|      |       |        |             |          |         | Fgf1     | 0.0198727  | 39.6265 | 10.9615          | 0.0208727    | 39.6275       | 10.890669        | 0.00014386 | No      |
|      |       |        |             |          |         | Fgf12    | 0          | 5.29526 | inf              | 0.001        | 5.29626       | 12.3707582       | 0.00014386 | No      |
|      |       |        |             |          |         | Fgf13    | 0.555031   | 4.83499 | 3.12287          | 0.556031     | 4.83599       | 3.12057404       | 0.00014386 | No      |
|      |       |        |             |          |         | Fgf9     | 0.0198019  | 39.365  | 10.9571          | 0.0208019    | 39.366        | 10.8860191       | 0.00014386 | No      |
|      |       |        |             |          |         | Fgfbp3   | 0.530752   | 4.54705 | 3.09882          | 0.531752     | 4.54805       | 3.09642266       | 0.00014386 | No      |
|      |       |        |             |          |         | Fgfr1    | 0.438898   | 19.0846 | 5.44238          | 0.439898     | 19.0856       | 5.43917169       | 0.00014386 | No      |
|      |       |        |             |          |         | Fgfr1op  | 10.8153    | 4.78247 | -1.17725         | 10.8163      | 4.78347       | -1.1770776       | 0.00014386 | No      |
|      |       |        |             |          |         | Fgfr1op2 | 45.0737    | 19.6765 | -1.19581         | 45.0747      | 19.6775       | -1.1957709       | 0.00014386 | No      |
|      |       |        |             |          |         | Fgfr2    | 0          | 4.65773 | inf              | 0.001        | 4.65873       | 12.185721        | 0.00014386 | No      |
|      |       |        |             |          |         | Fggy     | 5.16864    | 75.2925 | 3.86465          | 5.16964      | 75.2935       | 3.8643896        | 0.00014386 | No      |
|      |       |        |             |          |         | Fgl2     | 67.1518    | 2.48401 | -4.75669         | 67.1528      | 2.48501       | -4.756124        | 0.00014386 | No      |
|      |       |        |             |          |         | Fh       | 14.038     | 131.746 | 3.23036          | 14.039       | 131.747       | 3.23025803       | 0.00014386 | No      |
|      |       |        |             |          |         | Fhit     | 5.35797    | 26.6331 | 2.31346          | 5.35897      | 26.6341       | 2.31324689       | 0.00014386 | No      |
|      |       |        |             |          |         | Fhl1     | 0.243575   | 5.3675  | 4.46181          | 0.244575     | 5.3685        | 4.4561702        | 0.00014386 | No      |
|      |       |        |             |          |         | Fitm2    | 1.07024    | 4.69884 | 2.13437          | 1.07124      | 4.69984       | 2.13332991       | 0.00014386 | No      |
|      |       |        |             |          |         | Fkbp14   | 17.5253    | 5.93806 | -1.56137         | 17.5263      | 5.93906       | -1.5612149       | 0.00014386 | No      |
|      |       |        |             |          |         | Fkbp1a   | 98.2217    | 68.4494 | -0.521003        | 98.2227      | 68.4504       | -0.5209975       | 0.00014386 | No      |
|      |       |        |             |          |         | Fkbp2    | 30.5116    | 96.5452 | 1.66185          | 30.5126      | 96.5462       | 1.66181436       | 0.00014386 | No      |
|      |       |        |             |          |         | Fkbp5    | 30.3802    | 7.75542 | -1.96985         | 30.3812      | 7.75642       | -1.969716        | 0.00014386 | No      |
|      |       |        |             |          |         | Flcn     | 25.2917    | 16.1642 | -0.645862        | 25.2927      | 16.1652       | -0.6458297       | 0.00014386 | No      |
|      |       |        |             |          |         | Flii     | 34.8363    | 23.7214 | -0.554406        | 34.8373      | 23.7224       | -0.5543828       | 0.00014386 | No      |
|      |       |        |             |          |         | Flna     | 147.728    | 16.0932 | -3.19842         | 147.729      | 16.0942       | -3.1983403       | 0.00014386 | No      |
|      |       |        |             |          |         | FLOT2    | 71.4408    | 44.3126 | -0.689032        | 71.4418      | 44.3136       | -0.6890189       | 0.00014386 | No      |
|      |       |        |             |          |         | Flrt1    | 0.00360126 | 3.61966 | 9.97314          | 0.00460126   | 3.62066       | 9.62000801       | 0.00014386 | No      |
|      |       |        |             |          |         | Flt3l    | 29.3716    | 8.52857 | -1.78405         | 29.3726      | 8.52957       | -1.7839261       | 0.00014386 | No      |
|      |       |        |             |          |         | Flvcr2   | 3.3872     | 23.4255 | 2.78991          | 3.3882       | 23.4265       | 2.78955048       | 0.00014386 | No      |

| RRBS |       |        |             |          |         | RNAseq   |          |         |                  |              |               |                  |            |         |
|------|-------|--------|-------------|----------|---------|----------|----------|---------|------------------|--------------|---------------|------------------|------------|---------|
| gene | Blood | Kidney | methyl.diff | pMWU.fdr | Match ? | gene     | blood    | kidney  | log2(fold_ratio) | blood+ 0.001 | kidney+ 0.001 | log2(fold_ratio) | q_value    | Match ? |
|      |       |        |             |          |         | Flywch1  | 16.3183  | 51.0884 | 1.6465           | 16.3193      | 51.0894       | 1.64644482       | 0.00014386 | No      |
|      |       |        |             |          |         | Flywch2  | 0        | 14.2224 | inf              | 0.001        | 14.2234       | 13.7959788       | 0.00014386 | No      |
|      |       |        |             |          |         | Fmc1     | 70.1151  | 108.107 | 0.624658         | 70.1161      | 108.108       | 0.62465563       | 0.00014386 | No      |
|      |       |        |             |          |         | Fmn1     | 254.051  | 21.9471 | -3.53302         | 254.052      | 21.9481       | -3.5329559       | 0.00014386 | No      |
|      |       |        |             |          |         | Fmn2     | 0.684905 | 2.57927 | 1.91299          | 0.685905     | 2.58027       | 1.91144136       | 0.00014386 | No      |
|      |       |        |             |          |         | Fmn3     | 32.006   | 17.1659 | -0.898794        | 32.007       | 17.1669       | -0.8987579       | 0.00014386 | No      |
|      |       |        |             |          |         | Fmo2     | 0        | 7.73503 | inf              | 0.001        | 7.73603       | 12.9173777       | 0.00014386 | No      |
|      |       |        |             |          |         | Fmo3     | 0        | 62.2132 | inf              | 0.001        | 62.2142       | 15.9249563       | 0.00014386 | No      |
|      |       |        |             |          |         | Fmo4     | 0.388784 | 30.3712 | 6.28759          | 0.389784     | 30.3722       | 6.28393273       | 0.00014386 | No      |
|      |       |        |             |          |         | Fmo5     | 2.46374  | 9.02527 | 1.87312          | 2.46474      | 9.02627       | 1.87269447       | 0.00014386 | No      |
|      |       |        |             |          |         | FMR1     | 32.6127  | 12.0006 | -1.44233         | 32.6137      | 12.0016       | -1.4422514       | 0.00014386 | No      |
|      |       |        |             |          |         | FN1      | 3.3397   | 5.45743 | 0.708502         | 3.3407       | 5.45843       | 0.70833562       | 0.00014386 | No      |
|      |       |        |             |          |         | Fnbp1    | 81.4794  | 7.1645  | -3.5075          | 81.4804      | 7.1655        | -3.5073138       | 0.00014386 | No      |
|      |       |        |             |          |         | Fnbp4    | 115.705  | 18.264  | -2.66337         | 115.706      | 18.265        | -2.66331         | 0.00014386 | No      |
|      |       |        |             |          |         | Fnip1    | 11.7474  | 3.04721 | -1.94679         | 11.7484      | 3.04821       | -1.9464301       | 0.00014386 | No      |
|      |       |        |             |          |         | Fnip2    | 1.20061  | 10.007  | 3.05917          | 1.20161      | 10.008        | 3.05811307       | 0.00014386 | No      |
|      |       |        |             |          |         | Fnta     | 28.8841  | 51.9814 | 0.847719         | 28.8851      | 51.9824       | 0.84769775       | 0.00014386 | No      |
|      |       |        |             |          |         | Fntb     | 21.4412  | 2.87404 | -2.89923         | 21.4422      | 2.87504       | -2.898799        | 0.00014386 | No      |
|      |       |        |             |          |         | Folh1    | 0        | 4.87785 | inf              | 0.001        | 4.87885       | 12.2523254       | 0.00014386 | No      |
|      |       |        |             |          |         | FOLR2    | 0.447466 | 403.398 | 9.81621          | 0.448466     | 403.399       | 9.81299318       | 0.00014386 | No      |
|      |       |        |             |          |         | Folr4    | 1.01518  | 0       | -inf             | 1.01618      | 0.001         | -9.9889403       | 0.00014386 | No      |
|      |       |        |             |          |         | Fos      | 5.2622   | 320.008 | 5.9263           | 5.2632       | 320.009       | 5.92602845       | 0.00014386 | No      |
|      |       |        |             |          |         | Fosb     | 0.887635 | 56.2484 | 5.9857           | 0.888635     | 56.2494       | 5.98410293       | 0.00014386 | No      |
|      |       |        |             |          |         | Fosl2    | 1.46292  | 9.84902 | 2.75113          | 1.46392      | 9.85002       | 2.75028994       | 0.00014386 | No      |
|      |       |        |             |          |         | Foxh1    | 1.0695   | 11.3818 | 3.41172          | 1.0705       | 11.3828       | 3.41049878       | 0.00014386 | No      |
|      |       |        |             |          |         | Foxj2    | 21.5116  | 8.13016 | -1.40376         | 21.5126      | 8.13116       | -1.4036488       | 0.00014386 | No      |
|      |       |        |             |          |         | Foxk1    | 16.3765  | 3.56411 | -2.20001         | 16.3775      | 3.56511       | -2.1996967       | 0.00014386 | No      |
|      |       |        |             |          |         | Foxn2    | 27.1209  | 4.90162 | -2.46807         | 27.1219      | 4.90262       | -2.4678334       | 0.00014386 | No      |
|      |       |        |             |          |         | Foxn3    | 29.2238  | 5.28423 | -2.46738         | 29.2248      | 5.28523       | -2.467155        | 0.00014386 | No      |
|      |       |        |             |          |         | Foxo1    | 50.6439  | 3.8618  | -3.71304         | 50.6449      | 3.8628        | -3.7126981       | 0.00014386 | No      |
|      |       |        |             |          |         | Foxp1    | 41.2893  | 8.08078 | -2.3532          | 41.2903      | 8.08178       | -2.3530579       | 0.00014386 | No      |
|      |       |        |             |          |         | Foxp3    | 14.6974  | 4.61406 | -1.67145         | 14.6984      | 4.61506       | -1.6712378       | 0.00014386 | No      |
|      |       |        |             |          |         | Fpgs     | 4.91438  | 25.3136 | 2.36483          | 4.91538      | 25.3146       | 2.36459483       | 0.00014386 | No      |
|      |       |        |             |          |         | Fra10ac1 | 15.5443  | 22.4785 | 0.532154         | 15.5453      | 22.4795       | 0.53213149       | 0.00014386 | No      |
|      |       |        |             |          |         | Fras1    | 0        | 4.35609 | inf              | 0.001        | 4.35709       | 12.0891492       | 0.00014386 | No      |
|      |       |        |             |          |         | Frat2    | 52.9065  | 5.29157 | -3.32168         | 52.9075      | 5.29257       | -3.3214319       | 0.00014386 | No      |
|      |       |        |             |          |         | Frg1l1   | 16.2335  | 5.98438 | -1.4397          | 16.2345      | 5.98538       | -1.4395482       | 0.00014386 | No      |
|      |       |        |             |          |         | Frmd4a   | 0.58131  | 3.91229 | 2.75063          | 0.58231      | 3.91329       | 2.74852273       | 0.00014386 | No      |
|      |       |        |             |          |         | Frmd4b   | 2.21873  | 35.9339 | 4.01754          | 2.21973      | 35.9349       | 4.01692956       | 0.00014386 | No      |
|      |       |        |             |          |         | Frmd6    | 7.94925  | 4.4995  | -0.821054        | 7.95025      | 4.5005        | -0.8209149       | 0.00014386 | No      |
|      |       |        |             |          |         | Frs2     | 5.31169  | 3.64592 | -0.542889        | 5.31269      | 3.64692       | -0.542764        | 0.00014386 | No      |
|      |       |        |             |          |         | Frs3     | 1.13362  | 9.5894  | 3.0805           | 1.13462      | 9.5904        | 3.07938179       | 0.00014386 | No      |



| RRBS |       |        |             |          |         | RNAseq    |           |          |                  |              |               |                  |            |         |
|------|-------|--------|-------------|----------|---------|-----------|-----------|----------|------------------|--------------|---------------|------------------|------------|---------|
| gene | Blood | Kidney | methyl.diff | pMWU.fdr | Match ? | gene      | blood     | kidney   | log2(fold_ratio) | blood+ 0.001 | kidney+ 0.001 | log2(fold_ratio) | q_value    | Match ? |
|      |       |        |             |          |         | Fryl      | 22.9445   | 8.21668  | -1.48152         | 22.9455      | 8.21768       | -1.4814082       | 0.00014386 | No      |
|      |       |        |             |          |         | Frzb      | 0         | 1.61585  | inf              | 0.001        | 1.61685       | 10.6589701       | 0.00014386 | No      |
|      |       |        |             |          |         | Fst       | 0.287233  | 515.053  | 10.8083          | 0.288233     | 515.054       | 10.8032725       | 0.00014386 | No      |
|      |       |        |             |          |         | Fstl1     | 0.0285176 | 119.396  | 12.0316          | 0.0295176    | 119.397       | 11.9819035       | 0.00014386 | No      |
|      |       |        |             |          |         | Fstl3     | 0         | 2.563    | inf              | 0.001        | 2.564         | 11.3241805       | 0.00014386 | No      |
|      |       |        |             |          |         | Ftcd      | 1.87235   | 9.38226  | 2.32508          | 1.87335      | 9.38326       | 2.32446878       | 0.00014386 | No      |
|      |       |        |             |          |         | Fth1      | 825.925   | 5521.58  | 2.741            | 825.926      | 5521.581      | 2.74099698       | 0.00014386 | No      |
|      |       |        |             |          |         | Ftl       | 22.8795   | 157.316  | 2.78153          | 22.8805      | 157.317       | 2.7814841        | 0.00014386 | No      |
|      |       |        |             |          |         | Ftsj3     | 40.4042   | 9.94843  | -2.02197         | 40.4052      | 9.94943       | -2.0218552       | 0.00014386 | No      |
|      |       |        |             |          |         | Fubp1     | 40.9495   | 21.5024  | -0.929346        | 40.9505      | 21.5034       | -0.9293163       | 0.00014386 | No      |
|      |       |        |             |          |         | Fubp3     | 18.9858   | 12.8319  | -0.565187        | 18.9868      | 12.8329       | -0.5651495       | 0.00014386 | No      |
|      |       |        |             |          |         | Fuca2     | 1.25179   | 17.8271  | 3.83201          | 1.25279      | 17.8281       | 3.83093645       | 0.00014386 | No      |
|      |       |        |             |          |         | Fundc1    | 42.0356   | 15.4195  | -1.44685         | 42.0366      | 15.4205       | -1.4467964       | 0.00014386 | No      |
|      |       |        |             |          |         | Fuom      | 2.53753   | 18.9871  | 2.90352          | 2.53853      | 18.9881       | 2.90303034       | 0.00014386 | No      |
|      |       |        |             |          |         | Fus       | 202.718   | 149.887  | -0.4356          | 202.719      | 149.888       | -0.4355964       | 0.00014386 | No      |
|      |       |        |             |          |         | Fut10     | 0         | 0.891067 | inf              | 0.001        | 0.892067      | 9.80100826       | 0.00014386 | No      |
|      |       |        |             |          |         | Fut11     | 35.2798   | 26.7364  | -0.400038        | 35.2808      | 26.7374       | -0.4000241       | 0.00014386 | No      |
|      |       |        |             |          |         | Fut8      | 17.3136   | 11.7561  | -0.558495        | 17.3146      | 11.7571       | -0.5584568       | 0.00014386 | No      |
|      |       |        |             |          |         | Fuz       | 1.50924   | 12.1001  | 3.00312          | 1.51024      | 12.1011       | 3.00228846       | 0.00014386 | No      |
|      |       |        |             |          |         | Fv1       | 26.8465   | 9.53108  | -1.49402         | 26.8475      | 9.53208       | -1.4939248       | 0.00014386 | No      |
|      |       |        |             |          |         | Fxn       | 21.7259   | 34.1142  | 0.650957         | 21.7269      | 34.1152       | 0.65093233       | 0.00014386 | No      |
|      |       |        |             |          |         | Fxyd1     | 0         | 12.8592  | inf              | 0.001        | 12.8602       | 13.6506255       | 0.00014386 | No      |
|      |       |        |             |          |         | Fxyd5     | 660.237   | 53.1422  | -3.63505         | 660.238      | 53.1432       | -3.6350292       | 0.00014386 | No      |
|      |       |        |             |          |         | Fyb       | 150.905   | 2.76534  | -5.77004         | 150.906      | 2.76634       | -5.7695279       | 0.00014386 | No      |
|      |       |        |             |          |         | Fyco1     | 25.15     | 10.001   | -1.33041         | 25.151       | 10.002        | -1.3303273       | 0.00014386 | No      |
|      |       |        |             |          |         | Fyn       | 112.529   | 5.68071  | -4.30808         | 112.53       | 5.68171       | -4.3078407       | 0.00014386 | No      |
|      |       |        |             |          |         | Fytd1     | 32.4511   | 14.1605  | -1.19639         | 32.4521      | 14.1615       | -1.1963378       | 0.00014386 | No      |
|      |       |        |             |          |         | Fzd3      | 0.0680019 | 1.20286  | 4.14475          | 0.0690019    | 1.20386       | 4.12488773       | 0.00014386 | No      |
|      |       |        |             |          |         | Fzd8      | 0.174625  | 2.35498  | 3.75338          | 0.175625     | 2.35598       | 3.74575716       | 0.00014386 | No      |
|      |       |        |             |          |         | G0s2      | 0.717615  | 80.3045  | 6.80613          | 0.718615     | 80.3055       | 6.80413594       | 0.00014386 | No      |
|      |       |        |             |          |         | G2E3      | 6.41371   | 1.41202  | -2.1834          | 6.41471      | 1.41302       | -2.1826022       | 0.00014386 | No      |
|      |       |        |             |          |         | G3bp1     | 82.5752   | 47.7449  | -0.79036         | 82.5762      | 47.7459       | -0.7903492       | 0.00014386 | No      |
|      |       |        |             |          |         | G3bp2     | 31.3073   | 20.611   | -0.603084        | 31.3083      | 20.612        | -0.6030607       | 0.00014386 | No      |
|      |       |        |             |          |         | G6pc3     | 23.8644   | 34.5184  | 0.532504         | 23.8654      | 34.5194       | 0.53248687       | 0.00014386 | No      |
|      |       |        |             |          |         | G6pd      | 42.679    | 24.2219  | -0.817212        | 42.68        | 24.2229       | -0.8171886       | 0.00014386 | No      |
|      |       |        |             |          |         | Gaa       | 2.82872   | 14.2541  | 2.33315          | 2.82972      | 14.2551       | 2.33274695       | 0.00014386 | No      |
|      |       |        |             |          |         | Gabarap   | 331.176   | 478.29   | 0.530285         | 331.177      | 478.291       | 0.53028616       | 0.00014386 | No      |
|      |       |        |             |          |         | Gabarapl1 | 29.2704   | 234.557  | 3.00242          | 29.2714      | 234.558       | 3.00238105       | 0.00014386 | No      |
|      |       |        |             |          |         | Gabarapl2 | 39.9651   | 77.6086  | 0.957477         | 39.9661      | 77.6096       | 0.95745832       | 0.00014386 | No      |
|      |       |        |             |          |         | Gabpb1    | 22.6618   | 7.31751  | -1.63084         | 22.6628      | 7.31851       | -1.6307043       | 0.00014386 | No      |
|      |       |        |             |          |         | Gabpb1l   | 5.20248   | 1.72615  | -1.59164         | 5.20348      | 1.72715       | -1.5910834       | 0.00014386 | No      |
|      |       |        |             |          |         | Gabpb2    | 11.4458   | 4.36318  | -1.39137         | 11.4468      | 4.36418       | -1.3911618       | 0.00014386 | No      |

| RRBS |       |        |             |          |         | RNAseq  |           |         |                  |              |               |                  |            |         |
|------|-------|--------|-------------|----------|---------|---------|-----------|---------|------------------|--------------|---------------|------------------|------------|---------|
| gene | Blood | Kidney | methyl.diff | pMWU.fdr | Match ? | gene    | blood     | kidney  | log2(fold_ratio) | blood+ 0.001 | kidney+ 0.001 | log2(fold_ratio) | q_value    | Match ? |
|      |       |        |             |          |         | Gabrp   | 0         | 6.39499 | inf              | 0.001        | 6.39599       | 12.642952        | 0.00014386 | No      |
|      |       |        |             |          |         | Gadd45a | 30.3441   | 167.356 | 2.46343          | 30.3451      | 167.357       | 2.46339342       | 0.00014386 | No      |
|      |       |        |             |          |         | Gadd45b | 2.23082   | 54.4997 | 4.6106           | 2.23182      | 54.5007       | 4.60998218       | 0.00014386 | No      |
|      |       |        |             |          |         | Gadd45g | 2.10655   | 369.299 | 7.45376          | 2.10755      | 369.3         | 7.45308259       | 0.00014386 | No      |
|      |       |        |             |          |         | Gak     | 67.0139   | 41.9963 | -0.6742          | 67.0149      | 41.9973       | -0.6741853       | 0.00014386 | No      |
|      |       |        |             |          |         | Galc    | 3.14296   | 7.06751 | 1.16908          | 3.14396      | 7.06851       | 1.16882327       | 0.00014386 | No      |
|      |       |        |             |          |         | Gale    | 27.644    | 7.39022 | -1.90328         | 27.645       | 7.39122       | -1.9031342       | 0.00014386 | No      |
|      |       |        |             |          |         | Galk1   | 15.1834   | 42.7038 | 1.49187          | 15.1844      | 42.7048       | 1.49180833       | 0.00014386 | No      |
|      |       |        |             |          |         | Galk2   | 24.7448   | 44.6752 | 0.852348         | 24.7458      | 44.6762       | 0.8523228        | 0.00014386 | No      |
|      |       |        |             |          |         | Galm    | 12.1795   | 115.361 | 3.24362          | 12.1805      | 115.362       | 3.24352282       | 0.00014386 | No      |
|      |       |        |             |          |         | Galnt1  | 40.7577   | 13.5237 | -1.59159         | 40.7587      | 13.5247       | -1.5915114       | 0.00014386 | No      |
|      |       |        |             |          |         | Galnt10 | 23.0199   | 11.3343 | -1.02219         | 23.0209      | 11.3353       | -1.0221217       | 0.00014386 | No      |
|      |       |        |             |          |         | Galnt11 | 25.4224   | 37.575  | 0.563675         | 25.4234      | 37.576        | 0.56365452       | 0.00014386 | No      |
|      |       |        |             |          |         | Galnt12 | 10.835    | 2.53078 | -2.09804         | 10.836       | 2.53178       | -2.0976083       | 0.00014386 | No      |
|      |       |        |             |          |         | Galnt13 | 0         | 16.6775 | inf              | 0.001        | 16.6785       | 14.0257019       | 0.00014386 | No      |
|      |       |        |             |          |         | Galnt3  | 0.123572  | 5.90133 | 5.57761          | 0.124572     | 5.90233       | 5.56623285       | 0.00014386 | No      |
|      |       |        |             |          |         | Galnt6  | 37.2491   | 3.03883 | -3.61562         | 37.2501      | 3.03983       | -3.6151817       | 0.00014386 | No      |
|      |       |        |             |          |         | Galnt7  | 7.09269   | 3.61649 | -0.971741        | 7.09369      | 3.61749       | -0.9715473       | 0.00014386 | No      |
|      |       |        |             |          |         | Galt    | 26.8616   | 102.554 | 1.93277          | 26.8626      | 102.555       | 1.93272698       | 0.00014386 | No      |
|      |       |        |             |          |         | Gan     | 2.86262   | 1.14188 | -1.32592         | 2.86362      | 1.14288       | -1.3251661       | 0.00014386 | No      |
|      |       |        |             |          |         | Ganab   | 69.8367   | 43.2696 | -0.690631        | 69.8377      | 43.2706       | -0.6906189       | 0.00014386 | No      |
|      |       |        |             |          |         | Ganc    | 9.60114   | 4.51981 | -1.08694         | 9.60214      | 4.52081       | -1.0867747       | 0.00014386 | No      |
|      |       |        |             |          |         | Gapvd1  | 16.4415   | 11.0531 | -0.572888        | 16.4425      | 11.0541       | -0.5728481       | 0.00014386 | No      |
|      |       |        |             |          |         | Gar1    | 19.8115   | 11.0353 | -0.844216        | 19.8125      | 11.0363       | -0.8441544       | 0.00014386 | No      |
|      |       |        |             |          |         | Gart    | 34.5444   | 11.2722 | -1.61568         | 34.5454      | 11.2732       | -1.6155965       | 0.00014386 | No      |
|      |       |        |             |          |         | Gas1    | 0         | 5.11726 | inf              | 0.001        | 5.11826       | 12.3214377       | 0.00014386 | No      |
|      |       |        |             |          |         | Gas2    | 0.0829158 | 5.5721  | 6.07043          | 0.0839158    | 5.5731        | 6.05339376       | 0.00014386 | No      |
|      |       |        |             |          |         | Gas8    | 0.699743  | 6.11582 | 3.12765          | 0.700743     | 6.11682       | 3.12582449       | 0.00014386 | No      |
|      |       |        |             |          |         | Gatad2a | 28.4863   | 12.9653 | -1.13561         | 28.4873      | 12.9663       | -1.135552        | 0.00014386 | No      |
|      |       |        |             |          |         | Gatad2b | 62.4465   | 13.6791 | -2.19064         | 62.4475      | 13.6801       | -2.190565        | 0.00014386 | No      |
|      |       |        |             |          |         | Gatc    | 8.61457   | 18.5579 | 1.10718          | 8.61557      | 18.5589       | 1.10709305       | 0.00014386 | No      |
|      |       |        |             |          |         | Gatm    | 0.260528  | 980.822 | 11.8783          | 0.261528     | 980.823       | 11.8728117       | 0.00014386 | No      |
|      |       |        |             |          |         | Gatsl3  | 10.436    | 44.9801 | 2.10771          | 10.437       | 44.9811       | 2.10761186       | 0.00014386 | No      |
|      |       |        |             |          |         | Gbas    | 42.3199   | 116.934 | 1.46629          | 42.3209      | 116.935       | 1.4662646        | 0.00014386 | No      |
|      |       |        |             |          |         | Gbp2    | 30.4685   | 9.67415 | -1.65511         | 30.4695      | 9.67515       | -1.6550099       | 0.00014386 | No      |
|      |       |        |             |          |         | Gbp5    | 37.9362   | 3.33598 | -3.5074          | 37.9372      | 3.33698       | -3.5069983       | 0.00014386 | No      |
|      |       |        |             |          |         | Gbp7    | 75.8512   | 3.85208 | -4.29946         | 75.8522      | 3.85308       | -4.299107        | 0.00014386 | No      |
|      |       |        |             |          |         | Gc      | 0         | 4.44064 | inf              | 0.001        | 4.44164       | 12.1168768       | 0.00014386 | No      |
|      |       |        |             |          |         | Gca     | 0.73327   | 27.996  | 5.25473          | 0.73427      | 27.997        | 5.25281778       | 0.00014386 | No      |
|      |       |        |             |          |         | Gcat    | 0.618775  | 22.4066 | 5.17837          | 0.619775     | 22.4076       | 5.17609976       | 0.00014386 | No      |
|      |       |        |             |          |         | Gcdh    | 13.9995   | 128.405 | 3.19725          | 14.0005      | 128.406       | 3.19716236       | 0.00014386 | No      |
|      |       |        |             |          |         | Gcfc2   | 7.42902   | 3.17613 | -1.2259          | 7.43002      | 3.17713       | -1.225642        | 0.00014386 | No      |

| RRBS |       |        |             |          |         | RNAseq |          |          |                  |              |               |                  |            |         |
|------|-------|--------|-------------|----------|---------|--------|----------|----------|------------------|--------------|---------------|------------------|------------|---------|
| gene | Blood | Kidney | methyl.diff | pMWU.fdr | Match ? | gene   | blood    | kidney   | log2(fold_ratio) | blood+ 0.001 | kidney+ 0.001 | log2(fold_ratio) | q_value    | Match ? |
|      |       |        |             |          |         | Gchfr  | 0.585338 | 52.2755  | 6.48072          | 0.586338     | 52.2765       | 6.47828618       | 0.00014386 | No      |
|      |       |        |             |          |         | Gclc   | 11.5116  | 200.07   | 4.11934          | 11.5126      | 200.071       | 4.11922647       | 0.00014386 | No      |
|      |       |        |             |          |         | Gclm   | 10.426   | 142.574  | 3.77345          | 10.427       | 142.575       | 3.77332499       | 0.00014386 | No      |
|      |       |        |             |          |         | Gcm1   | 0        | 2.94532  | inf              | 0.001        | 2.94632       | 11.5246984       | 0.00014386 | No      |
|      |       |        |             |          |         | Gcn1l1 | 25.1594  | 14.4164  | -0.803393        | 25.1604      | 14.4174       | -0.8033438       | 0.00014386 | No      |
|      |       |        |             |          |         | Gcsh   | 7.96038  | 175.187  | 4.45992          | 7.96138      | 175.188       | 4.45974162       | 0.00014386 | No      |
|      |       |        |             |          |         | Gde1   | 23.8362  | 78.0905  | 1.71199          | 23.8372      | 78.0915       | 1.71195074       | 0.00014386 | No      |
|      |       |        |             |          |         | Gdi1   | 246.002  | 106.044  | -1.214           | 246.003      | 106.045       | -1.2139993       | 0.00014386 | No      |
|      |       |        |             |          |         | Gdpd1  | 3.18113  | 8.7034   | 1.45204          | 3.18213      | 8.7044        | 1.45175208       | 0.00014386 | No      |
|      |       |        |             |          |         | Gdpd5  | 0.295652 | 2.96256  | 3.32487          | 0.296652     | 2.96356       | 3.32048785       | 0.00014386 | No      |
|      |       |        |             |          |         | Gemin2 | 24.2263  | 10.735   | -1.17426         | 24.2273      | 10.736        | -1.1741771       | 0.00014386 | No      |
|      |       |        |             |          |         | Gemin4 | 10.9049  | 4.29146  | -1.34544         | 10.9059      | 4.29246       | -1.3452322       | 0.00014386 | No      |
|      |       |        |             |          |         | Gemin6 | 7.50465  | 28.8217  | 1.9413           | 7.50565      | 28.8227       | 1.94115657       | 0.00014386 | No      |
|      |       |        |             |          |         | Get4   | 14.1013  | 24.6069  | 0.803238         | 14.1023      | 24.6079       | 0.80319107       | 0.00014386 | No      |
|      |       |        |             |          |         | Gfm1   | 13.8019  | 33.8221  | 1.2931           | 13.8029      | 33.8231       | 1.29303748       | 0.00014386 | No      |
|      |       |        |             |          |         | Gfod2  | 0.888265 | 3.13164  | 1.81786          | 0.889265     | 3.13264       | 1.81669368       | 0.00014386 | No      |
|      |       |        |             |          |         | Gfra3  | 80.8153  | 36.5872  | -1.14329         | 80.8163      | 36.5882       | -1.1432679       | 0.00014386 | No      |
|      |       |        |             |          |         | Gfra4  | 0        | 3.14162  | inf              | 0.001        | 3.14262       | 11.6177521       | 0.00014386 | No      |
|      |       |        |             |          |         | Gga2   | 22.2498  | 40.3872  | 0.860108         | 22.2508      | 40.3882       | 0.86007664       | 0.00014386 | No      |
|      |       |        |             |          |         | Gga3   | 23.0567  | 8.76573  | -1.39524         | 23.0577      | 8.76673       | -1.3951379       | 0.00014386 | No      |
|      |       |        |             |          |         | Ggact  | 20.9705  | 72.2021  | 1.78368          | 20.9715      | 72.2031       | 1.78363072       | 0.00014386 | No      |
|      |       |        |             |          |         | Ggct   | 26.5473  | 270.129  | 3.34701          | 26.5483      | 270.13        | 3.34696248       | 0.00014386 | No      |
|      |       |        |             |          |         | Ggcx   | 4.42248  | 12.704   | 1.52236          | 4.42348      | 12.705        | 1.52214267       | 0.00014386 | No      |
|      |       |        |             |          |         | Ggh    | 3.21441  | 31.6384  | 3.29905          | 3.21541      | 31.6394       | 3.29864763       | 0.00014386 | No      |
|      |       |        |             |          |         | GGNBP2 | 58.8774  | 25.2116  | -1.22362         | 58.8784      | 25.2126       | -1.2235936       | 0.00014386 | No      |
|      |       |        |             |          |         | Ggps1  | 14.4248  | 5.72562  | -1.33305         | 14.4258      | 5.72662       | -1.3328955       | 0.00014386 | No      |
|      |       |        |             |          |         | Ggt1   | 2.73045  | 120.294  | 5.46129          | 2.73145      | 120.295       | 5.46076585       | 0.00014386 | No      |
|      |       |        |             |          |         | Ggt7   | 2.20143  | 0.353675 | -2.63794         | 2.20243      | 0.354675      | -2.6345266       | 0.00014386 | No      |
|      |       |        |             |          |         | Ghdc   | 1.64554  | 3.37202  | 1.03505          | 1.64654      | 3.37302       | 1.03460331       | 0.00014386 | No      |
|      |       |        |             |          |         | Ghitm  | 124.55   | 199.69   | 0.681038         | 124.551      | 199.691       | 0.68103271       | 0.00014386 | No      |
|      |       |        |             |          |         | Ghrhr  | 0        | 33.4892  | inf              | 0.001        | 33.4902       | 15.0314514       | 0.00014386 | No      |
|      |       |        |             |          |         | Gigyf1 | 19.5022  | 8.39684  | -1.21572         | 19.5032      | 8.39784       | -1.2156206       | 0.00014386 | No      |
|      |       |        |             |          |         | Gigyf2 | 11.6645  | 18.5359  | 0.668201         | 11.6655      | 18.5369       | 0.66815185       | 0.00014386 | No      |
|      |       |        |             |          |         | Gimap1 | 101.025  | 4.61194  | -4.4532          | 101.026      | 4.61294       | -4.4528963       | 0.00014386 | No      |
|      |       |        |             |          |         | Gimap4 | 246.707  | 8.42709  | -4.87162         | 246.708      | 8.42809       | -4.871455        | 0.00014386 | No      |
|      |       |        |             |          |         | GIMAP5 | 195.538  | 4.97662  | -5.29614         | 195.539      | 4.97762       | -5.2958565       | 0.00014386 | No      |
|      |       |        |             |          |         | Gimap6 | 167.461  | 2.43151  | -6.10583         | 167.462      | 2.43251       | -6.1052442       | 0.00014386 | No      |
|      |       |        |             |          |         | Gimap7 | 633.733  | 12.3233  | -5.68441         | 633.734      | 12.3243       | -5.6842998       | 0.00014386 | No      |
|      |       |        |             |          |         | Gimap8 | 87.4201  | 1.81891  | -5.58682         | 87.4211      | 1.81991       | -5.5860425       | 0.00014386 | No      |
|      |       |        |             |          |         | Gimap9 | 110.042  | 2.58515  | -5.41166         | 110.043      | 2.58615       | -5.4111176       | 0.00014386 | No      |
|      |       |        |             |          |         | Ginm1  | 18.9466  | 37.5102  | 0.985343         | 18.9476      | 37.5112       | 0.9853063        | 0.00014386 | No      |
|      |       |        |             |          |         | Giot1  | 8.54597  | 4.19034  | -1.02818         | 8.54697      | 4.19134       | -1.0280015       | 0.00014386 | No      |

| RRBS |       |        |             |          |         | RNAseq  |           |          |                  |              |               |                  |            |         |
|------|-------|--------|-------------|----------|---------|---------|-----------|----------|------------------|--------------|---------------|------------------|------------|---------|
| gene | Blood | Kidney | methyl.diff | pMWU.fdr | Match ? | gene    | blood     | kidney   | log2(fold_ratio) | blood+ 0.001 | kidney+ 0.001 | log2(fold_ratio) | q_value    | Match ? |
|      |       |        |             |          |         | Gipc1   | 23.5637   | 59.2368  | 1.32993          | 23.5647      | 59.2378       | 1.32989075       | 0.00014386 | No      |
|      |       |        |             |          |         | Gipr    | 0.764593  | 0.203388 | -1.91046         | 0.765593     | 0.204388      | -1.9052671       | 0.00014386 | No      |
|      |       |        |             |          |         | Git1    | 21.9625   | 28.4975  | 0.375791         | 21.9635      | 28.4985       | 0.37577801       | 0.00014386 | No      |
|      |       |        |             |          |         | Git2    | 113.949   | 26.8715  | -2.08423         | 113.95       | 26.8725       | -2.0841985       | 0.00014386 | No      |
|      |       |        |             |          |         | Gja1    | 0.110833  | 2.29807  | 4.37396          | 0.111833     | 2.29907       | 4.36163252       | 0.00014386 | No      |
|      |       |        |             |          |         | Gja4    | 0         | 9.9358   | inf              | 0.001        | 9.9368        | 13.2785656       | 0.00014386 | No      |
|      |       |        |             |          |         | Gjb2    | 0.197845  | 8.06121  | 5.34855          | 0.198845     | 8.06221       | 5.34145917       | 0.00014386 | No      |
|      |       |        |             |          |         | Gjb4    | 0         | 1.04925  | inf              | 0.001        | 1.05025       | 10.0365171       | 0.00014386 | No      |
|      |       |        |             |          |         | Gjb5    | 0         | 2.75453  | inf              | 0.001        | 2.75553       | 11.4281141       | 0.00014386 | No      |
|      |       |        |             |          |         | Gk      | 2.23293   | 18.3549  | 3.03915          | 2.23393      | 18.3559       | 3.03858797       | 0.00014386 | No      |
|      |       |        |             |          |         | Gkap1   | 7.45949   | 41.5008  | 2.47599          | 7.46049      | 41.5018       | 2.47583162       | 0.00014386 | No      |
|      |       |        |             |          |         | Glb1    | 38.2223   | 97.1044  | 1.34512          | 38.2233      | 97.1054       | 1.34509919       | 0.00014386 | No      |
|      |       |        |             |          |         | Glb1l   | 0.863774  | 8.06218  | 3.22244          | 0.864774     | 8.06318       | 3.22095388       | 0.00014386 | No      |
|      |       |        |             |          |         | Glb1l2  | 0         | 6.85223  | inf              | 0.001        | 6.85323       | 12.7425684       | 0.00014386 | No      |
|      |       |        |             |          |         | Glcci1  | 28.8398   | 8.42421  | -1.77545         | 28.8408      | 8.42521       | -1.7753266       | 0.00014386 | No      |
|      |       |        |             |          |         | Glce    | 12.3683   | 2.99463  | -2.0462          | 12.3693      | 2.99563       | -2.0458325       | 0.00014386 | No      |
|      |       |        |             |          |         | Gle1    | 45.8758   | 16.478   | -1.47719         | 45.8768      | 16.479        | -1.4771361       | 0.00014386 | No      |
|      |       |        |             |          |         | Glg1    | 13.4433   | 5.46021  | -1.29986         | 13.4443      | 5.46121       | -1.2997021       | 0.00014386 | No      |
|      |       |        |             |          |         | Glpr1   | 185.97    | 7.96259  | -4.54569         | 185.971      | 7.96359       | -4.5455149       | 0.00014386 | No      |
|      |       |        |             |          |         | Glis3   | 0         | 8.00414  | inf              | 0.001        | 8.00514       | 12.9667109       | 0.00014386 | No      |
|      |       |        |             |          |         | Glo1    | 130.404   | 88.8478  | -0.553582        | 130.405      | 88.8488       | -0.553575        | 0.00014386 | No      |
|      |       |        |             |          |         | Glod5   | 15.3511   | 49.9076  | 1.70092          | 15.3521      | 49.9086       | 1.70085242       | 0.00014386 | No      |
|      |       |        |             |          |         | Glrx    | 71.1867   | 17.2464  | -2.04532         | 71.1877      | 17.2474       | -2.0452491       | 0.00014386 | No      |
|      |       |        |             |          |         | Glrx5   | 37.2055   | 133.816  | 1.84667          | 37.2065      | 133.817       | 1.84663482       | 0.00014386 | No      |
|      |       |        |             |          |         | Gls     | 36.084    | 76.1621  | 1.07771          | 36.085       | 76.1631       | 1.07769295       | 0.00014386 | No      |
|      |       |        |             |          |         | Git1d1  | 0         | 0.931008 | inf              | 0.001        | 0.932008      | 9.86419853       | 0.00014386 | No      |
|      |       |        |             |          |         | Gltpd1  | 2.31063   | 9.66216  | 2.06406          | 2.31163      | 9.66316       | 2.06358455       | 0.00014386 | No      |
|      |       |        |             |          |         | Gltscr1 | 24.1317   | 5.92422  | -2.02623         | 24.1327      | 5.92522       | -2.0260487       | 0.00014386 | No      |
|      |       |        |             |          |         | Gltscr2 | 250.806   | 132.218  | -0.923657        | 250.807      | 132.219       | -0.9236481       | 0.00014386 | No      |
|      |       |        |             |          |         | Glud1   | 97.8302   | 193.36   | 0.982934         | 97.8312      | 193.361       | 0.9829303        | 0.00014386 | No      |
|      |       |        |             |          |         | Glul    | 187.435   | 270.464  | 0.529049         | 187.436      | 270.465       | 0.52904384       | 0.00014386 | No      |
|      |       |        |             |          |         | Glyat   | 0.0221433 | 277.256  | 13.6121          | 0.0231433    | 277.257       | 13.5483417       | 0.00014386 | No      |
|      |       |        |             |          |         | Glyctk  | 1.40988   | 37.9201  | 4.74932          | 1.41088      | 37.9211       | 4.74833362       | 0.00014386 | No      |
|      |       |        |             |          |         | Glyr1   | 66.3741   | 175.809  | 1.40532          | 66.3751      | 175.81        | 1.4053031        | 0.00014386 | No      |
|      |       |        |             |          |         | Gm1043  | 2.00487   | 0        | -inf             | 2.00587      | 0.001         | -10.970012       | 0.00014386 | No      |
|      |       |        |             |          |         | Gm11992 | 7.64178   | 25.0244  | 1.71136          | 7.64278      | 25.0254       | 1.71122372       | 0.00014386 | No      |
|      |       |        |             |          |         | Gm14378 | 39.8033   | 11.1016  | -1.84212         | 39.8043      | 11.1026       | -1.8420267       | 0.00014386 | No      |
|      |       |        |             |          |         | Gm17615 | 2.27809   | 59.7285  | 4.71252          | 2.27909      | 59.7295       | 4.71191384       | 0.00014386 | No      |
|      |       |        |             |          |         | Gm20654 | 0.227031  | 4.45148  | 4.29333          | 0.228031     | 4.45248       | 4.28730726       | 0.00014386 | No      |
|      |       |        |             |          |         | Gm2a    | 68.5208   | 49.5729  | -0.466991        | 68.5218      | 49.5739       | -0.4669823       | 0.00014386 | No      |
|      |       |        |             |          |         | Gm3336  | 0.0690711 | 15.0688  | 7.76926          | 0.0700711    | 15.0698       | 7.74862501       | 0.00014386 | No      |
|      |       |        |             |          |         | Gmcl1   | 37.3127   | 25.4063  | -0.55448         | 37.3137      | 25.4073       | -0.5544624       | 0.00014386 | No      |

| RRBS |       |        |             |          |         | RNAseq   |          |         |                  |              |               |                  |            |         |
|------|-------|--------|-------------|----------|---------|----------|----------|---------|------------------|--------------|---------------|------------------|------------|---------|
| gene | Blood | Kidney | methyl.diff | pMWU.fdr | Match ? | gene     | blood    | kidney  | log2(fold_ratio) | blood+ 0.001 | kidney+ 0.001 | log2(fold_ratio) | q_value    | Match ? |
|      |       |        |             |          |         | Gmds     | 8.2187   | 22.7177 | 1.46683          | 8.2197       | 22.7187       | 1.46672264       | 0.00014386 | No      |
|      |       |        |             |          |         | Gmeb1    | 10.2137  | 5.85579 | -0.80257         | 10.2147      | 5.85679       | -0.8024648       | 0.00014386 | No      |
|      |       |        |             |          |         | Gmeb2    | 8.58816  | 3.54494 | -1.27659         | 8.58916      | 3.54594       | -1.2763489       | 0.00014386 | No      |
|      |       |        |             |          |         | Gmfb     | 36.2985  | 27.1495 | -0.418983        | 36.2995      | 27.1505       | -0.4189709       | 0.00014386 | No      |
|      |       |        |             |          |         | Gmfg     | 946.504  | 71.296  | -3.73071         | 946.505      | 71.297        | -3.7306968       | 0.00014386 | No      |
|      |       |        |             |          |         | Gmppa    | 20.5698  | 44.0749 | 1.09943          | 20.5708      | 44.0759       | 1.09939213       | 0.00014386 | No      |
|      |       |        |             |          |         | Gmpr     | 0.480388 | 35.2116 | 6.1957           | 0.481388     | 35.2126       | 6.19274777       | 0.00014386 | No      |
|      |       |        |             |          |         | Gna11    | 6.11456  | 24.6689 | 2.01237          | 6.11556      | 24.6699       | 2.01219535       | 0.00014386 | No      |
|      |       |        |             |          |         | Gna12    | 3.61669  | 41.5352 | 3.52159          | 3.61769      | 41.5362       | 3.52122854       | 0.00014386 | No      |
|      |       |        |             |          |         | Gna13    | 37.4808  | 11.6715 | -1.68316         | 37.4818      | 11.6725       | -1.6830766       | 0.00014386 | No      |
|      |       |        |             |          |         | Gnai1    | 0.566623 | 27.7473 | 5.61381          | 0.567623     | 27.7483       | 5.61132253       | 0.00014386 | No      |
|      |       |        |             |          |         | Gnai2    | 425.291  | 120.369 | -1.82099         | 425.292      | 120.37        | -1.8209778       | 0.00014386 | No      |
|      |       |        |             |          |         | Gnai3    | 68.1208  | 33.6827 | -1.01609         | 68.1218      | 33.6837       | -1.0160659       | 0.00014386 | No      |
|      |       |        |             |          |         | Gnat3    | 0        | 1.56023 | inf              | 0.001        | 1.56123       | 10.6084674       | 0.00014386 | No      |
|      |       |        |             |          |         | Gnb1l    | 2.76968  | 7.4055  | 1.41888          | 2.77068      | 7.4065        | 1.41855185       | 0.00014386 | No      |
|      |       |        |             |          |         | Gnb2l1   | 2869.39  | 548.548 | -2.38705         | 2869.391     | 548.549       | -2.3870522       | 0.00014386 | No      |
|      |       |        |             |          |         | Gnb5     | 3.08922  | 13.6346 | 2.14195          | 3.09022      | 13.6356       | 2.14159673       | 0.00014386 | No      |
|      |       |        |             |          |         | Gne      | 48.9847  | 22.912  | -1.09623         | 48.9857      | 22.913        | -1.0961943       | 0.00014386 | No      |
|      |       |        |             |          |         | Gng10    | 27.2234  | 56.691  | 1.05827          | 27.2244      | 56.692        | 1.05824491       | 0.00014386 | No      |
|      |       |        |             |          |         | Gng12    | 28.9161  | 146.052 | 2.33654          | 28.9171      | 146.053       | 2.33649721       | 0.00014386 | No      |
|      |       |        |             |          |         | Gng2     | 34.0209  | 1.45665 | -4.5457          | 34.0219      | 1.45765       | -4.5447475       | 0.00014386 | No      |
|      |       |        |             |          |         | Gng5     | 40.4493  | 71.904  | 0.829958         | 40.4503      | 71.905        | 0.82994169       | 0.00014386 | No      |
|      |       |        |             |          |         | Gnl2     | 45.7387  | 24.3287 | -0.910755        | 45.7397      | 24.3297       | -0.9107284       | 0.00014386 | No      |
|      |       |        |             |          |         | Gnl3     | 53.1052  | 13.9274 | -1.93093         | 53.1062      | 13.9284       | -1.9308508       | 0.00014386 | No      |
|      |       |        |             |          |         | Gnl3l    | 33.8192  | 19.6692 | -0.781901        | 33.8202      | 19.6702       | -0.7818736       | 0.00014386 | No      |
|      |       |        |             |          |         | Gnpda1   | 15.1563  | 39.1702 | 1.36984          | 15.1573      | 39.1712       | 1.36978054       | 0.00014386 | No      |
|      |       |        |             |          |         | Gnpda2   | 24.0673  | 3.59476 | -2.74311         | 24.0683      | 3.59576       | -2.7427656       | 0.00014386 | No      |
|      |       |        |             |          |         | Gnpnat1  | 17.0303  | 28.9998 | 0.767935         | 17.0313      | 29.0008       | 0.76790414       | 0.00014386 | No      |
|      |       |        |             |          |         | GnpTAB   | 24.0947  | 8.74794 | -1.4617          | 24.0957      | 8.74894       | -1.4615956       | 0.00014386 | No      |
|      |       |        |             |          |         | Golga2   | 12.2221  | 16.3429 | 0.419171         | 12.2231      | 16.3439       | 0.41914206       | 0.00014386 | No      |
|      |       |        |             |          |         | Golgb1   | 9.9496   | 53.2951 | 2.42129          | 9.9506       | 53.2961       | 2.42117454       | 0.00014386 | No      |
|      |       |        |             |          |         | Golim4   | 8.86992  | 12.4479 | 0.488914         | 8.87092      | 12.4489       | 0.48886263       | 0.00014386 | No      |
|      |       |        |             |          |         | Golph3   | 39.5571  | 60.9688 | 0.624137         | 39.5581      | 60.9698       | 0.62412168       | 0.00014386 | No      |
|      |       |        |             |          |         | Golt1b   | 21.478   | 14.0902 | -0.608166        | 21.479       | 14.0912       | -0.6081324       | 0.00014386 | No      |
|      |       |        |             |          |         | Gon4l    | 15.1037  | 6.76114 | -1.15956         | 15.1047      | 6.76214       | -1.1594457       | 0.00014386 | No      |
|      |       |        |             |          |         | Gopc     | 16.5152  | 11.5153 | -0.52025         | 16.5162      | 11.5163       | -0.5202045       | 0.00014386 | No      |
|      |       |        |             |          |         | Gorasp1  | 0.670074 | 18.0893 | 4.75467          | 0.671074     | 18.0903       | 4.75260066       | 0.00014386 | No      |
|      |       |        |             |          |         | Got1     | 26.937   | 94.0508 | 1.80385          | 26.938       | 94.0518       | 1.80381281       | 0.00014386 | No      |
|      |       |        |             |          |         | Got2     | 60.744   | 148.53  | 1.28994          | 60.745       | 148.531       | 1.2899265        | 0.00014386 | No      |
|      |       |        |             |          |         | Gpam     | 0.807812 | 8.25945 | 3.35395          | 0.808812     | 8.26045       | 3.35234407       | 0.00014386 | No      |
|      |       |        |             |          |         | Gpatch1  | 7.4003   | 4.6899  | -0.658028        | 7.4013       | 4.6909        | -0.6579139       | 0.00014386 | No      |
|      |       |        |             |          |         | Gpatch2l | 15.8093  | 7.20657 | -1.13339         | 15.8103      | 7.20757       | -1.1332799       | 0.00014386 | No      |

| RRBS |       |        |             |          |         | RNAseq  |            |          |                  |              |               |                  |            |         |
|------|-------|--------|-------------|----------|---------|---------|------------|----------|------------------|--------------|---------------|------------------|------------|---------|
| gene | Blood | Kidney | methyl.diff | pMWU.fdr | Match ? | gene    | blood      | kidney   | log2(fold_ratio) | blood+ 0.001 | kidney+ 0.001 | log2(fold_ratio) | q_value    | Match ? |
|      |       |        |             |          |         | Gpatch4 | 13.1762    | 4.63104  | -1.50852         | 13.1772      | 4.63204       | -1.5083242       | 0.00014386 | No      |
|      |       |        |             |          |         | Gpatch8 | 14.7564    | 4.89622  | -1.5916          | 14.7574      | 4.89722       | -1.5914037       | 0.00014386 | No      |
|      |       |        |             |          |         | Gbp1    | 67.2076    | 26.4905  | -1.34315         | 67.2086      | 26.4915       | -1.3431163       | 0.00014386 | No      |
|      |       |        |             |          |         | GPBP1L1 | 63.6882    | 26.5538  | -1.26211         | 63.6892      | 26.5548       | -1.2620761       | 0.00014386 | No      |
|      |       |        |             |          |         | Gpc1    | 0.119085   | 2.60093  | 4.44897          | 0.120085     | 2.60193       | 4.43745429       | 0.00014386 | No      |
|      |       |        |             |          |         | Gpcpd1  | 39.3535    | 8.0535   | -2.2888          | 39.3545      | 8.0545        | -2.2886617       | 0.00014386 | No      |
|      |       |        |             |          |         | Gpd1l   | 9.25535    | 25.1119  | 1.44001          | 9.25635      | 25.1129       | 1.43991332       | 0.00014386 | No      |
|      |       |        |             |          |         | Gphn    | 1.36027    | 12.453   | 3.19453          | 1.36127      | 12.454        | 3.19358403       | 0.00014386 | No      |
|      |       |        |             |          |         | Gpi     | 249.218    | 327.259  | 0.393021         | 249.219      | 327.26        | 0.39302322       | 0.00014386 | No      |
|      |       |        |             |          |         | Gpkow   | 15.6648    | 7.45965  | -1.07035         | 15.6658      | 7.46065       | -1.0702452       | 0.00014386 | No      |
|      |       |        |             |          |         | Gpld1   | 1.09517    | 5.05119  | 2.20547          | 1.09617      | 5.05219       | 2.20443734       | 0.00014386 | No      |
|      |       |        |             |          |         | Gpm6a   | 0          | 13.5839  | inf              | 0.001        | 13.5849       | 13.7297163       | 0.00014386 | No      |
|      |       |        |             |          |         | Gpn1    | 20.3281    | 14.1326  | -0.52445         | 20.3291      | 14.1336       | -0.5244174       | 0.00014386 | No      |
|      |       |        |             |          |         | Gpnmb   | 0.186209   | 4.56136  | 4.61447          | 0.187209     | 4.56236       | 4.60705859       | 0.00014386 | No      |
|      |       |        |             |          |         | Gpr108  | 60.2679    | 108.873  | 0.853189         | 60.2689      | 108.874       | 0.85317383       | 0.00014386 | No      |
|      |       |        |             |          |         | Gpr125  | 0.305685   | 29.7234  | 6.60341          | 0.306685     | 29.7244       | 6.59874627       | 0.00014386 | No      |
|      |       |        |             |          |         | Gpr126  | 0.00794936 | 26.5125  | 11.7035          | 0.00894936   | 26.5135       | 11.532655        | 0.00014386 | No      |
|      |       |        |             |          |         | Gpr132  | 33.0924    | 1.56309  | -4.40403         | 33.0934      | 1.56409       | -4.4031481       | 0.00014386 | No      |
|      |       |        |             |          |         | Gpr133  | 1.51877    | 0.590283 | -1.36343         | 1.51977      | 0.591283      | -1.3619323       | 0.00014386 | No      |
|      |       |        |             |          |         | Gpr137b | 0.221866   | 12.2246  | 5.78396          | 0.222866     | 12.2256       | 5.77758492       | 0.00014386 | No      |
|      |       |        |             |          |         | Gpr155  | 7.90715    | 0.227129 | -5.12158         | 7.90815      | 0.228129      | -5.1154185       | 0.00014386 | No      |
|      |       |        |             |          |         | Gpr171  | 41.6825    | 2.21818  | -4.23199         | 41.6835      | 2.21918       | -4.2313778       | 0.00014386 | No      |
|      |       |        |             |          |         | Gpr174  | 14.7116    | 0.307593 | -5.57979         | 14.7126      | 0.308593      | -5.5752031       | 0.00014386 | No      |
|      |       |        |             |          |         | Gpr18   | 17.4353    | 0.569014 | -4.93741         | 17.4363      | 0.570014      | -4.9349528       | 0.00014386 | No      |
|      |       |        |             |          |         | Gpr183  | 32.1331    | 2.54061  | -3.66081         | 32.1341      | 2.54161       | -3.6602905       | 0.00014386 | No      |
|      |       |        |             |          |         | Gpr25   | 1.49893    | 0        | -inf             | 1.49993      | 0.001         | -10.550679       | 0.00014386 | No      |
|      |       |        |             |          |         | Gpr27   | 0          | 2.09028  | inf              | 0.001        | 2.09128       | 11.0301705       | 0.00014386 | No      |
|      |       |        |             |          |         | Gpr35   | 1.01399    | 0        | -inf             | 1.01499      | 0.001         | -9.9872498       | 0.00014386 | No      |
|      |       |        |             |          |         | Gpr56   | 0.108465   | 136.703  | 10.2996          | 0.109465     | 136.704       | 10.2863701       | 0.00014386 | No      |
|      |       |        |             |          |         | Gpr68   | 27.4136    | 1.72933  | -3.9866          | 27.4146      | 1.73033       | -3.9858253       | 0.00014386 | No      |
|      |       |        |             |          |         | Gprin3  | 3.63628    | 0.330631 | -3.45917         | 3.63728      | 0.331631      | -3.4552092       | 0.00014386 | No      |
|      |       |        |             |          |         | Gps1    | 32.1648    | 51.9455  | 0.691516         | 32.1658      | 51.9465       | 0.69149898       | 0.00014386 | No      |
|      |       |        |             |          |         | Gpsm1   | 7.64072    | 4.99107  | -0.614361        | 7.64172      | 4.99207       | -0.6142592       | 0.00014386 | No      |
|      |       |        |             |          |         | Gpt     | 1.27783    | 10.4178  | 3.02729          | 1.27883      | 10.4188       | 3.02629272       | 0.00014386 | No      |
|      |       |        |             |          |         | Gpt2    | 0.474386   | 1.92233  | 2.01873          | 0.475386     | 1.92333       | 2.016435         | 0.00014386 | No      |
|      |       |        |             |          |         | Gpx1    | 168.691    | 1127.89  | 2.74117          | 168.692      | 1127.891      | 2.74116419       | 0.00014386 | No      |
|      |       |        |             |          |         | GPX4    | 129.075    | 368.797  | 1.51462          | 129.076      | 368.798       | 1.51461006       | 0.00014386 | No      |
|      |       |        |             |          |         | Gramd1a | 247.915    | 43.678   | -2.50487         | 247.916      | 43.679        | -2.5048397       | 0.00014386 | No      |
|      |       |        |             |          |         | Gramd1c | 0.175174   | 0.828345 | 2.24144          | 0.176174     | 0.829345      | 2.23497135       | 0.00014386 | No      |
|      |       |        |             |          |         | Gramd3  | 0.195331   | 9.31863  | 5.57612          | 0.196331     | 9.31963       | 5.56891279       | 0.00014386 | No      |
|      |       |        |             |          |         | Gramd4  | 46.1759    | 7.11182  | -2.69885         | 46.1769      | 7.11282       | -2.6986778       | 0.00014386 | No      |
|      |       |        |             |          |         | Grap    | 157.794    | 7.32072  | -4.42991         | 157.795      | 7.32172       | -4.4297251       | 0.00014386 | No      |

| RRBS |       |        |             |          |         | RNAseq  |           |         |                  |              |               |                  |            |         |
|------|-------|--------|-------------|----------|---------|---------|-----------|---------|------------------|--------------|---------------|------------------|------------|---------|
| gene | Blood | Kidney | methyl.diff | pMWU.fdr | Match ? | gene    | blood     | kidney  | log2(fold_ratio) | blood+ 0.001 | kidney+ 0.001 | log2(fold_ratio) | q_value    | Match ? |
|      |       |        |             |          |         | Grb14   | 0.51035   | 2.16039 | 2.08173          | 0.51135      | 2.16139       | 2.07957641       | 0.00014386 | No      |
|      |       |        |             |          |         | Grb2    | 94.7498   | 46.716  | -1.02021         | 94.7508      | 46.717        | -1.0201905       | 0.00014386 | No      |
|      |       |        |             |          |         | GREM1   | 0         | 8.3931  | inf              | 0.001        | 8.3941        | 13.0351599       | 0.00014386 | No      |
|      |       |        |             |          |         | Grhl3   | 0.735436  | 1.88631 | 1.35889          | 0.736436     | 1.88731       | 1.35769935       | 0.00014386 | No      |
|      |       |        |             |          |         | Grhpr   | 9.14459   | 362.049 | 5.30712          | 9.14559      | 362.05        | 5.3069689        | 0.00014386 | No      |
|      |       |        |             |          |         | Grik2   | 0         | 8.24402 | inf              | 0.001        | 8.24502       | 13.0093073       | 0.00014386 | No      |
|      |       |        |             |          |         | Grik5   | 0.045414  | 15.9688 | 8.4579           | 0.046414     | 15.9698       | 8.42657049       | 0.00014386 | No      |
|      |       |        |             |          |         | Grina   | 97.8197   | 157.949 | 0.691262         | 97.8207      | 157.95        | 0.69125624       | 0.00014386 | No      |
|      |       |        |             |          |         | Grip1   | 0.0050858 | 1.51801 | 8.22149          | 0.0060858    | 1.51901       | 7.96346873       | 0.00014386 | No      |
|      |       |        |             |          |         | Gripap1 | 59.2171   | 13.8011 | -2.10123         | 59.2181      | 13.8021       | -2.1011504       | 0.00014386 | No      |
|      |       |        |             |          |         | Grk4    | 3.52829   | 6.86562 | 0.960422         | 3.52929      | 6.86662       | 0.96022215       | 0.00014386 | No      |
|      |       |        |             |          |         | Grk6    | 274.105   | 23.5626 | -3.54015         | 274.106      | 23.5636       | -3.540102        | 0.00014386 | No      |
|      |       |        |             |          |         | Grn     | 30.5298   | 118.624 | 1.95811          | 30.5308      | 118.625       | 1.95807079       | 0.00014386 | No      |
|      |       |        |             |          |         | Grpel1  | 29.374    | 81.3299 | 1.46924          | 29.375       | 81.3309       | 1.46921473       | 0.00014386 | No      |
|      |       |        |             |          |         | Gsdma   | 2.94711   | 14.9874 | 2.34638          | 2.94811      | 14.9884       | 2.34598412       | 0.00014386 | No      |
|      |       |        |             |          |         | Gsdmd   | 25.2953   | 4.73155 | -2.41848         | 25.2963      | 4.73255       | -2.4182367       | 0.00014386 | No      |
|      |       |        |             |          |         | Gsg1l   | 0.761261  | 0       | -inf             | 0.762261     | 0.001         | -9.5741413       | 0.00014386 | No      |
|      |       |        |             |          |         | Gsg2    | 28.3892   | 1.09339 | -4.69846         | 28.3902      | 1.09439       | -4.6971942       | 0.00014386 | No      |
|      |       |        |             |          |         | Gsk3a   | 65.5738   | 36.0676 | -0.862418        | 65.5748      | 36.0686       | -0.8623981       | 0.00014386 | No      |
|      |       |        |             |          |         | Gsk3b   | 16.0828   | 9.85234 | -0.706983        | 16.0838      | 9.85334       | -0.7069236       | 0.00014386 | No      |
|      |       |        |             |          |         | GSPT1   | 65.7974   | 37.4396 | -0.813466        | 65.7984      | 37.4406       | -0.8134489       | 0.00014386 | No      |
|      |       |        |             |          |         | Gsr     | 22.46     | 140.817 | 2.64839          | 22.461       | 140.818       | 2.64833769       | 0.00014386 | No      |
|      |       |        |             |          |         | Gss     | 8.75161   | 110.832 | 3.66268          | 8.75261      | 110.833       | 3.6625304        | 0.00014386 | No      |
|      |       |        |             |          |         | GSTA1   | 0.0528778 | 183.091 | 11.7576          | 0.0538778    | 183.092       | 11.7305902       | 0.00014386 | No      |
|      |       |        |             |          |         | Gsta3   | 0.0106391 | 71.225  | 12.7088          | 0.0116391    | 71.226        | 12.5792088       | 0.00014386 | No      |
|      |       |        |             |          |         | Gsta4   | 0.169205  | 316.212 | 10.8679          | 0.170205     | 316.213       | 10.8594075       | 0.00014386 | No      |
|      |       |        |             |          |         | GSTA6   | 8.34218   | 30.5197 | 1.87125          | 8.34318      | 30.5207       | 1.87111877       | 0.00014386 | No      |
|      |       |        |             |          |         | Gstk1   | 2.55172   | 47.9851 | 4.23305          | 2.55272      | 47.9861       | 4.23250936       | 0.00014386 | No      |
|      |       |        |             |          |         | Gstm4   | 8.32795   | 12.3959 | 0.573824         | 8.32895      | 12.3969       | 0.57377286       | 0.00014386 | No      |
|      |       |        |             |          |         | Gstm7   | 0.667215  | 29.3145 | 5.45732          | 0.668215     | 29.3155       | 5.45520748       | 0.00014386 | No      |
|      |       |        |             |          |         | Gsto1   | 170.232   | 112.406 | -0.59878         | 170.233      | 112.407       | -0.5987789       | 0.00014386 | No      |
|      |       |        |             |          |         | Gsto2   | 0.815929  | 3.87493 | 2.24766          | 0.816929     | 3.87593       | 2.24625991       | 0.00014386 | No      |
|      |       |        |             |          |         | Gstp1   | 322.847   | 441.16  | 0.450452         | 322.848      | 441.161       | 0.45045017       | 0.00014386 | No      |
|      |       |        |             |          |         | GSTT2   | 14.6504   | 41.5078 | 1.50244          | 14.6514      | 41.5088       | 1.5023787        | 0.00014386 | No      |
|      |       |        |             |          |         | Gstz1   | 6.91533   | 34.6321 | 2.32424          | 6.91633      | 34.6331       | 2.32407292       | 0.00014386 | No      |
|      |       |        |             |          |         | Gtf2a2  | 54.645    | 75.563  | 0.467591         | 54.646       | 75.564        | 0.46758318       | 0.00014386 | No      |
|      |       |        |             |          |         | Gtf2e1  | 7.69203   | 4.92646 | -0.642812        | 7.69303      | 4.92746       | -0.6427078       | 0.00014386 | No      |
|      |       |        |             |          |         | Gtf2f1  | 33.5161   | 62.9347 | 0.909            | 33.5171      | 62.9357       | 0.90898128       | 0.00014386 | No      |
|      |       |        |             |          |         | Gtf2f2  | 16.081    | 10.323  | -0.639485        | 16.082       | 10.324        | -0.6394448       | 0.00014386 | No      |
|      |       |        |             |          |         | Gtf2h1  | 23.2896   | 11.3909 | -1.0318          | 23.2906      | 11.3919       | -1.0317394       | 0.00014386 | No      |
|      |       |        |             |          |         | Gtf2h3  | 17.3383   | 7.44658 | -1.21931         | 17.3393      | 7.44758       | -1.219202        | 0.00014386 | No      |
|      |       |        |             |          |         | Gtf2h5  | 17.8485   | 47.6913 | 1.41792          | 17.8495      | 47.6923       | 1.4178727        | 0.00014386 | No      |

| RRBS |       |        |             |          |         | RNAseq   |           |          |                  |              |               |                  |            |         |
|------|-------|--------|-------------|----------|---------|----------|-----------|----------|------------------|--------------|---------------|------------------|------------|---------|
| gene | Blood | Kidney | methyl.diff | pMWU.fdr | Match ? | gene     | blood     | kidney   | log2(fold_ratio) | blood+ 0.001 | kidney+ 0.001 | log2(fold_ratio) | q_value    | Match ? |
|      |       |        |             |          |         | Gtf2i    | 148.068   | 87.0058  | -0.767074        | 148.069      | 87.0068       | -0.7670696       | 0.00014386 | No      |
|      |       |        |             |          |         | Gtf2ird1 | 4.75096   | 14.2352  | 1.58317          | 4.75196      | 14.2362       | 1.58296951       | 0.00014386 | No      |
|      |       |        |             |          |         | GTF2IRD2 | 9.63892   | 3.60365  | -1.41941         | 9.63992      | 3.60465       | -1.419162        | 0.00014386 | No      |
|      |       |        |             |          |         | Gtf3a    | 43.5533   | 30.6088  | -0.508833        | 43.5543      | 30.6098       | -0.5088215       | 0.00014386 | No      |
|      |       |        |             |          |         | Gtf3c1   | 26.8977   | 11.9651  | -1.16865         | 26.8987      | 11.9661       | -1.1685834       | 0.00014386 | No      |
|      |       |        |             |          |         | Gtf3c2   | 76.4488   | 34.7019  | -1.13948         | 76.4498      | 34.7029       | -1.1394565       | 0.00014386 | No      |
|      |       |        |             |          |         | Gtf3c4   | 7.10998   | 2.65525  | -1.421           | 7.11098      | 2.65625       | -1.4206575       | 0.00014386 | No      |
|      |       |        |             |          |         | Gtl3     | 15.9493   | 26.7142  | 0.744119         | 15.9503      | 26.7152       | 0.74407726       | 0.00014386 | No      |
|      |       |        |             |          |         | Gtpbp4   | 23.9563   | 10.2476  | -1.22512         | 23.9573      | 10.2486       | -1.2250385       | 0.00014386 | No      |
|      |       |        |             |          |         | Gtpbp5   | 76.1801   | 40.849   | -0.899112        | 76.1811      | 40.85         | -0.899097        | 0.00014386 | No      |
|      |       |        |             |          |         | Guca2b   | 0         | 4.3437   | inf              | 0.001        | 4.3447        | 12.0850408       | 0.00014386 | No      |
|      |       |        |             |          |         | GUCD1    | 7.63516   | 22.4033  | 1.55298          | 7.63616      | 22.4043       | 1.55285641       | 0.00014386 | No      |
|      |       |        |             |          |         | Gucy1b2  | 0.0833235 | 15.3335  | 7.52374          | 0.0843235    | 15.3345       | 7.50663066       | 0.00014386 | No      |
|      |       |        |             |          |         | Gucy2g   | 0         | 1.7582   | inf              | 0.001        | 1.7592        | 10.7807038       | 0.00014386 | No      |
|      |       |        |             |          |         | Guk1     | 70.7299   | 125.731  | 0.829949         | 70.7309      | 125.732       | 0.82993935       | 0.00014386 | No      |
|      |       |        |             |          |         | Gxylt1   | 17.769    | 7.92952  | -1.16406         | 17.77        | 7.93052       | -1.1639563       | 0.00014386 | No      |
|      |       |        |             |          |         | Gyg1     | 8.58744   | 19.5527  | 1.18707          | 8.58844      | 19.5537       | 1.18697361       | 0.00014386 | No      |
|      |       |        |             |          |         | Gylt1b   | 1.47174   | 16.2729  | 3.46688          | 1.47274      | 16.2739       | 3.46598537       | 0.00014386 | No      |
|      |       |        |             |          |         | Gypc     | 10.3395   | 2.03236  | -2.34694         | 10.3405      | 2.03336       | -2.3463684       | 0.00014386 | No      |
|      |       |        |             |          |         | Gys1     | 0.775587  | 9.09511  | 3.55173          | 0.776587     | 9.09611       | 3.55003024       | 0.00014386 | No      |
|      |       |        |             |          |         | Gzf1     | 3.92227   | 6.03225  | 0.62101          | 3.92327      | 6.03325       | 0.62087874       | 0.00014386 | No      |
|      |       |        |             |          |         | Gzma     | 7.66515   | 0.764741 | -3.32527         | 7.66615      | 0.765741      | -3.3235738       | 0.00014386 | No      |
|      |       |        |             |          |         | Gzmk     | 28.0672   | 2.85383  | -3.29791         | 28.0682      | 2.85483       | -3.2974598       | 0.00014386 | No      |
|      |       |        |             |          |         | Gzmm     | 126.675   | 18.6527  | -2.76368         | 126.676      | 18.6537       | -2.7636095       | 0.00014386 | No      |
|      |       |        |             |          |         | H1fx     | 28.8346   | 75.1346  | 1.38168          | 28.8356      | 75.1356       | 1.38164559       | 0.00014386 | No      |
|      |       |        |             |          |         | H2afj    | 51.3612   | 106.02   | 1.04559          | 51.3622      | 106.021       | 1.04557115       | 0.00014386 | No      |
|      |       |        |             |          |         | H2afy    | 188.212   | 81.1002  | -1.21458         | 188.213      | 81.1012       | -1.2145711       | 0.00014386 | No      |
|      |       |        |             |          |         | H2afz    | 206.308   | 106.97   | -0.947592        | 206.309      | 106.971       | -0.947587        | 0.00014386 | No      |
|      |       |        |             |          |         | H6pd     | 0.522671  | 5.55331  | 3.40937          | 0.523671     | 5.55431       | 3.40687508       | 0.00014386 | No      |
|      |       |        |             |          |         | Hace1    | 6.02219   | 2.78775  | -1.11119         | 6.02319      | 2.78875       | -1.1109092       | 0.00014386 | No      |
|      |       |        |             |          |         | Hacl1    | 2.21648   | 18.4732  | 3.05909          | 2.21748      | 18.4742       | 3.05851889       | 0.00014386 | No      |
|      |       |        |             |          |         | Hadh     | 24.0243   | 171.962  | 2.83953          | 24.0253      | 171.963       | 2.83947183       | 0.00014386 | No      |
|      |       |        |             |          |         | Hadha    | 71.101    | 158.835  | 1.15959          | 71.102       | 158.836       | 1.15957589       | 0.00014386 | No      |
|      |       |        |             |          |         | Hadhb    | 46.2588   | 107.939  | 1.22241          | 46.2598      | 107.94        | 1.22239866       | 0.00014386 | No      |
|      |       |        |             |          |         | Hagh     | 13.5273   | 109.529  | 3.01736          | 13.5283      | 109.53        | 3.01727361       | 0.00014386 | No      |
|      |       |        |             |          |         | Hao2     | 0.116326  | 1283.64  | 13.4298          | 0.117326     | 1283.641      | 13.4174314       | 0.00014386 | No      |
|      |       |        |             |          |         | Hap1     | 12.0976   | 0.619636 | -4.28716         | 12.0986      | 0.620636      | -4.2849489       | 0.00014386 | No      |
|      |       |        |             |          |         | Hars2    | 65.5371   | 46.5525  | -0.493454        | 65.5381      | 46.5535       | -0.4934442       | 0.00014386 | No      |
|      |       |        |             |          |         | Hat1     | 45.3393   | 29.7024  | -0.610182        | 45.3403      | 29.7034       | -0.6101659       | 0.00014386 | No      |
|      |       |        |             |          |         | Haus1    | 6.79437   | 2.50033  | -1.44222         | 6.79537      | 2.50133       | -1.4418567       | 0.00014386 | No      |
|      |       |        |             |          |         | Haus4    | 4.95305   | 13.1295  | 1.40642          | 4.95405      | 13.1305       | 1.40624152       | 0.00014386 | No      |
|      |       |        |             |          |         | Haus6    | 3.46713   | 0.599128 | -2.53281         | 3.46813      | 0.600128      | -2.5308158       | 0.00014386 | No      |



| RRBS |       |        |             |          |         | RNAseq  |          |         |                  |              |               |                  |            |         |
|------|-------|--------|-------------|----------|---------|---------|----------|---------|------------------|--------------|---------------|------------------|------------|---------|
| gene | Blood | Kidney | methyl.diff | pMWU.fdr | Match ? | gene    | blood    | kidney  | log2(fold_ratio) | blood+ 0.001 | kidney+ 0.001 | log2(fold_ratio) | q_value    | Match ? |
|      |       |        |             |          |         | Havcr1  | 0.122229 | 6.1052  | 5.64238          | 0.123229     | 6.1062        | 5.63086113       | 0.00014386 | No      |
|      |       |        |             |          |         | Hba1    | 83.0538  | 322.842 | 1.95871          | 83.0548      | 322.843       | 1.95869729       | 0.00014386 | No      |
|      |       |        |             |          |         | Hba2    | 37.6665  | 197.202 | 2.38832          | 37.6675      | 197.203       | 2.38828931       | 0.00014386 | No      |
|      |       |        |             |          |         | Hbb     | 34.7721  | 97.1205 | 1.48185          | 34.7731      | 97.1215       | 1.48181902       | 0.00014386 | No      |
|      |       |        |             |          |         | Hbp1    | 32.4847  | 21.4248 | -0.600478        | 32.4857      | 21.4258       | -0.6004557       | 0.00014386 | No      |
|      |       |        |             |          |         | Hcfc1r1 | 140.971  | 231.613 | 0.716324         | 140.972      | 231.614       | 0.71631382       | 0.00014386 | No      |
|      |       |        |             |          |         | Hcfc2   | 24.0201  | 7.87907 | -1.60815         | 24.0211      | 7.88007       | -1.6080219       | 0.00014386 | No      |
|      |       |        |             |          |         | Hcls1   | 148.795  | 16.266  | -3.1934          | 148.796      | 16.267        | -3.1933156       | 0.00014386 | No      |
|      |       |        |             |          |         | Hcst    | 289.638  | 36.2786 | -2.99706         | 289.639      | 36.2796       | -2.9970254       | 0.00014386 | No      |
|      |       |        |             |          |         | Hdac1   | 106.54   | 49.6931 | -1.10027         | 106.541      | 49.6941       | -1.1002622       | 0.00014386 | No      |
|      |       |        |             |          |         | Hdac11  | 0.24091  | 26.9346 | 6.80483          | 0.24191      | 26.9356       | 6.79889998       | 0.00014386 | No      |
|      |       |        |             |          |         | Hdac2   | 69.2402  | 40.644  | -0.768565        | 69.2412      | 40.645        | -0.7685528       | 0.00014386 | No      |
|      |       |        |             |          |         | Hdac4   | 6.5895   | 1.708   | -1.94786         | 6.5905       | 1.709         | -1.9472355       | 0.00014386 | No      |
|      |       |        |             |          |         | Hdac7   | 49.5091  | 17.143  | -1.53008         | 49.5101      | 17.144        | -1.5300191       | 0.00014386 | No      |
|      |       |        |             |          |         | Hddc3   | 3.37733  | 52.3612 | 3.95454          | 3.37833      | 52.3622       | 3.95414355       | 0.00014386 | No      |
|      |       |        |             |          |         | Hdgrfp3 | 8.80709  | 3.58993 | -1.29471         | 8.80809      | 3.59093       | -1.2944717       | 0.00014386 | No      |
|      |       |        |             |          |         | Hdlbp   | 34.1001  | 59.9431 | 0.813815         | 34.1011      | 59.9441       | 0.81379949       | 0.00014386 | No      |
|      |       |        |             |          |         | Heatr3  | 10.1713  | 3.735   | -1.44532         | 10.1723      | 3.736         | -1.4450796       | 0.00014386 | No      |
|      |       |        |             |          |         | Heatr5b | 6.05666  | 4.23018 | -0.517805        | 6.05766      | 4.23118       | -0.5177005       | 0.00014386 | No      |
|      |       |        |             |          |         | Heatr6  | 7.09522  | 4.9745  | -0.512297        | 7.09622      | 4.9755        | -0.5122092       | 0.00014386 | No      |
|      |       |        |             |          |         | HEBP1   | 1.39148  | 7.74874 | 2.47734          | 1.39248      | 7.74974       | 2.4764913        | 0.00014386 | No      |
|      |       |        |             |          |         | Hebp2   | 5.11474  | 2.60736 | -0.97207         | 5.11574      | 2.60836       | -0.9717999       | 0.00014386 | No      |
|      |       |        |             |          |         | Heca    | 190.552  | 9.50975 | -4.32463         | 190.553      | 9.51075       | -4.3244894       | 0.00014386 | No      |
|      |       |        |             |          |         | Hectd1  | 30.1095  | 13.3428 | -1.17416         | 30.1105      | 13.3438       | -1.1740971       | 0.00014386 | No      |
|      |       |        |             |          |         | Heg1    | 4.89937  | 11.1959 | 1.1923           | 4.90037      | 11.1969       | 1.19213677       | 0.00014386 | No      |
|      |       |        |             |          |         | Helb    | 23.3399  | 4.63295 | -2.3328          | 23.3409      | 4.63395       | -2.3325458       | 0.00014386 | No      |
|      |       |        |             |          |         | Helz    | 14.1364  | 3.49732 | -2.0151          | 14.1374      | 3.49832       | -2.0147827       | 0.00014386 | No      |
|      |       |        |             |          |         | Helz2   | 27.1258  | 6.78323 | -1.99962         | 27.1268      | 6.78423       | -1.9994619       | 0.00014386 | No      |
|      |       |        |             |          |         | Herc1   | 57.6562  | 15.9709 | -1.85203         | 57.6572      | 15.9719       | -1.8519648       | 0.00014386 | No      |
|      |       |        |             |          |         | Herc2   | 36.3989  | 20.1606 | -0.852356        | 36.3999      | 20.1616       | -0.8523244       | 0.00014386 | No      |
|      |       |        |             |          |         | Herc3   | 13.7537  | 5.94862 | -1.2092          | 13.7547      | 5.94962       | -1.2090552       | 0.00014386 | No      |
|      |       |        |             |          |         | Herc4   | 29.71    | 8.07717 | -1.87903         | 29.711       | 8.07817       | -1.8788968       | 0.00014386 | No      |
|      |       |        |             |          |         | Herc6   | 17.2321  | 4.49795 | -1.93776         | 17.2331      | 4.49895       | -1.937522        | 0.00014386 | No      |
|      |       |        |             |          |         | Herpud1 | 61.982   | 90.8933 | 0.552325         | 61.983       | 90.8943       | 0.55231724       | 0.00014386 | No      |
|      |       |        |             |          |         | Herpud2 | 41.261   | 15.1088 | -1.44939         | 41.262       | 15.1098       | -1.4493292       | 0.00014386 | No      |
|      |       |        |             |          |         | Hes1    | 0.318317 | 83.5215 | 8.03554          | 0.319317     | 83.5225       | 8.03103172       | 0.00014386 | No      |
|      |       |        |             |          |         | Hes6    | 25.0586  | 71.298  | 1.50856          | 25.0596      | 71.299        | 1.50851846       | 0.00014386 | No      |
|      |       |        |             |          |         | Hexb    | 7.01215  | 90.5759 | 3.6912           | 7.01315      | 90.5769       | 3.69100867       | 0.00014386 | No      |
|      |       |        |             |          |         | Hexdc   | 53.5823  | 88.3884 | 0.7221           | 53.5833      | 88.3894       | 0.72208993       | 0.00014386 | No      |
|      |       |        |             |          |         | Hexim1  | 82.7322  | 54.7796 | -0.59481         | 82.7332      | 54.7806       | -0.5948013       | 0.00014386 | No      |
|      |       |        |             |          |         | Heyl    | 0        | 4.28631 | inf              | 0.001        | 4.28731       | 12.065857        | 0.00014386 | No      |
|      |       |        |             |          |         | Hgs     | 21.3261  | 52.6882 | 1.30486          | 21.3271      | 52.6892       | 1.30481947       | 0.00014386 | No      |

| RRBS |       |        |             |          |         | RNAseq     |          |         |                  |              |               |                  |            |         |
|------|-------|--------|-------------|----------|---------|------------|----------|---------|------------------|--------------|---------------|------------------|------------|---------|
| gene | Blood | Kidney | methyl.diff | pMWU.fdr | Match ? | gene       | blood    | kidney  | log2(fold_ratio) | blood+ 0.001 | kidney+ 0.001 | log2(fold_ratio) | q_value    | Match ? |
|      |       |        |             |          |         | Hgsnat     | 48.7853  | 21.6286 | -1.17351         | 48.7863      | 21.6296       | -1.1734691       | 0.00014386 | No      |
|      |       |        |             |          |         | Hiat1      | 43.5472  | 17.6415 | -1.30361         | 43.5482      | 17.6425       | -1.3035581       | 0.00014386 | No      |
|      |       |        |             |          |         | Hibadh     | 44.4177  | 203.096 | 2.19296          | 44.4187      | 203.097       | 2.19292985       | 0.00014386 | No      |
|      |       |        |             |          |         | Hibch      | 8.43047  | 21.6113 | 1.3581           | 8.43147      | 21.6123       | 1.35799653       | 0.00014386 | No      |
|      |       |        |             |          |         | Hic2       | 0.335366 | 1.18494 | 1.82101          | 0.336366     | 1.18594       | 1.81792723       | 0.00014386 | No      |
|      |       |        |             |          |         | Hif1a      | 42.037   | 25.5585 | -0.717856        | 42.038       | 25.5595       | -0.7178344       | 0.00014386 | No      |
|      |       |        |             |          |         | Higd1a     | 23.0637  | 70.0891 | 1.60356          | 23.0647      | 70.0901       | 1.60352416       | 0.00014386 | No      |
|      |       |        |             |          |         | Higd2a     | 84.4985  | 152.051 | 0.84756          | 84.4995      | 152.052       | 0.84755008       | 0.00014386 | No      |
|      |       |        |             |          |         | Hint2      | 57.3636  | 249.809 | 2.12261          | 57.3646      | 249.81        | 2.12259861       | 0.00014386 | No      |
|      |       |        |             |          |         | Hint3      | 10.2835  | 26.1905 | 1.34872          | 10.2845      | 26.1915       | 1.34862703       | 0.00014386 | No      |
|      |       |        |             |          |         | Hip1       | 0.320753 | 6.21876 | 4.27709          | 0.321753     | 6.21976       | 4.27283341       | 0.00014386 | No      |
|      |       |        |             |          |         | Hip1r      | 32.3938  | 9.8235  | -1.72141         | 32.3948      | 9.8245        | -1.7213064       | 0.00014386 | No      |
|      |       |        |             |          |         | Hipk1      | 58.7903  | 16.5607 | -1.82781         | 58.7913      | 16.5617       | -1.8277519       | 0.00014386 | No      |
|      |       |        |             |          |         | Hipk2      | 1.95723  | 6.14775 | 1.65124          | 1.95823      | 6.14875       | 1.65074293       | 0.00014386 | No      |
|      |       |        |             |          |         | Hira       | 13.9792  | 4.68678 | -1.57662         | 13.9802      | 4.68778       | -1.5764082       | 0.00014386 | No      |
|      |       |        |             |          |         | Hist1h1d   | 161.229  | 293.368 | 0.863603         | 161.23       | 293.369       | 0.86359622       | 0.00014386 | No      |
|      |       |        |             |          |         | Hist1h2bq  | 65.0053  | 185.521 | 1.51295          | 65.0063      | 185.522       | 1.51293883       | 0.00014386 | No      |
|      |       |        |             |          |         | Hist2h2aa3 | 49.7268  | 288.785 | 2.5379           | 49.7278      | 288.786       | 2.53787629       | 0.00014386 | No      |
|      |       |        |             |          |         | Hist3h2a   | 9.71242  | 48.4843 | 2.31961          | 9.71342      | 48.4853       | 2.31949616       | 0.00014386 | No      |
|      |       |        |             |          |         | Hist3h2ba  | 11.4944  | 5.55598 | -1.04882         | 11.4954      | 5.55698       | -1.0486837       | 0.00014386 | No      |
|      |       |        |             |          |         | Hivep1     | 4.73242  | 2.85295 | -0.730127        | 4.73342      | 2.85395       | -0.7299229       | 0.00014386 | No      |
|      |       |        |             |          |         | Hivep2     | 8.28906  | 2.41465 | -1.77939         | 8.29006      | 2.41565       | -1.7789711       | 0.00014386 | No      |
|      |       |        |             |          |         | Hk2        | 6.05652  | 1.58243 | -1.93635         | 6.05752      | 1.58343       | -1.9356742       | 0.00014386 | No      |
|      |       |        |             |          |         | Hkdc1      | 0        | 1.71778 | inf              | 0.001        | 1.71878       | 10.7471692       | 0.00014386 | No      |
|      |       |        |             |          |         | Hlcs       | 4.88014  | 2.32791 | -1.06789         | 4.88114      | 2.32891       | -1.0675632       | 0.00014386 | No      |
|      |       |        |             |          |         | Hltf       | 30.1785  | 7.65352 | -1.97932         | 30.1795      | 7.65452       | -1.9791851       | 0.00014386 | No      |
|      |       |        |             |          |         | Hm13       | 104.955  | 277.613 | 1.4033           | 104.956      | 277.614       | 1.40329568       | 0.00014386 | No      |
|      |       |        |             |          |         | Hmbox1     | 14.2897  | 5.78274 | -1.30515         | 14.2907      | 5.78374       | -1.305002        | 0.00014386 | No      |
|      |       |        |             |          |         | Hmbs       | 12.3575  | 28.101  | 1.18523          | 12.3585      | 28.102        | 1.18516916       | 0.00014386 | No      |
|      |       |        |             |          |         | Hmg20a     | 49.0671  | 9.32672 | -2.39531         | 49.0681      | 9.32772       | -2.395189        | 0.00014386 | No      |
|      |       |        |             |          |         | Hmga1      | 39.1352  | 20.9099 | -0.904281        | 39.1362      | 20.9109       | -0.9042485       | 0.00014386 | No      |
|      |       |        |             |          |         | Hmgb2      | 478.376  | 43.4167 | -3.46182         | 478.377      | 43.4177       | -3.4617928       | 0.00014386 | No      |
|      |       |        |             |          |         | Hmgcl      | 23.347   | 67.6917 | 1.53574          | 23.348       | 67.6927       | 1.53570129       | 0.00014386 | No      |
|      |       |        |             |          |         | Hmgcs1     | 10.217   | 17.3062 | 0.760317         | 10.218       | 17.3072       | 0.7602595        | 0.00014386 | No      |
|      |       |        |             |          |         | Hmgcs2     | 0.197275 | 14.6202 | 6.21161          | 0.198275     | 14.6212       | 6.20441513       | 0.00014386 | No      |
|      |       |        |             |          |         | Hmgn2      | 185.39   | 111.103 | -0.738668        | 185.391      | 111.104       | -0.7386605       | 0.00014386 | No      |
|      |       |        |             |          |         | Hmgn3      | 27.4205  | 69.4223 | 1.34014          | 27.4215      | 69.4233       | 1.34011245       | 0.00014386 | No      |
|      |       |        |             |          |         | Hmgn5b     | 5.23948  | 10.6466 | 1.02289          | 5.24048      | 10.6476       | 1.02275741       | 0.00014386 | No      |
|      |       |        |             |          |         | Hmgxb4     | 6.12736  | 4.20837 | -0.542005        | 6.12836      | 4.20937       | -0.5418967       | 0.00014386 | No      |
|      |       |        |             |          |         | Hmha1      | 378.868  | 33.9544 | -3.48002         | 378.869      | 33.9554       | -3.4799862       | 0.00014386 | No      |
|      |       |        |             |          |         | Hmox1      | 0.29768  | 7.2292  | 4.602            | 0.29868      | 7.2302        | 4.59736301       | 0.00014386 | No      |
|      |       |        |             |          |         | Hmox2      | 23.1694  | 43.1409 | 0.896835         | 23.1704      | 43.1419       | 0.89680676       | 0.00014386 | No      |

| RRBS |       |        |             |          |         | RNAseq    |          |         |                  |              |               |                  |            |         |
|------|-------|--------|-------------|----------|---------|-----------|----------|---------|------------------|--------------|---------------|------------------|------------|---------|
| gene | Blood | Kidney | methyl.diff | pMWU.fdr | Match ? | gene      | blood    | kidney  | log2(fold_ratio) | blood+ 0.001 | kidney+ 0.001 | log2(fold_ratio) | q_value    | Match ? |
|      |       |        |             |          |         | Hmx2      | 0        | 1.1406  | inf              | 0.001        | 1.1416        | 10.1568415       | 0.00014386 | No      |
|      |       |        |             |          |         | Hn1       | 125.696  | 52.0227 | -1.27273         | 125.697      | 52.0237       | -1.2727093       | 0.00014386 | No      |
|      |       |        |             |          |         | Hnf4g     | 0        | 3.41565 | inf              | 0.001        | 3.41665       | 11.7383668       | 0.00014386 | No      |
|      |       |        |             |          |         | Hnmt      | 0        | 15.7982 | inf              | 0.001        | 15.7992       | 13.9475639       | 0.00014386 | No      |
|      |       |        |             |          |         | Hnrnpa0   | 505.349  | 119.136 | -2.08466         | 505.35       | 119.137       | -2.0846614       | 0.00014386 | No      |
|      |       |        |             |          |         | HNRNPA1   | 840.398  | 126.988 | -2.72638         | 840.399      | 126.989       | -2.7263709       | 0.00014386 | No      |
|      |       |        |             |          |         | Hnrnpa2b1 | 629.289  | 264.545 | -1.25021         | 629.29       | 264.546       | -1.2502064       | 0.00014386 | No      |
|      |       |        |             |          |         | Hnrnpab   | 182.078  | 104.596 | -0.799728        | 182.079      | 104.597       | -0.7997231       | 0.00014386 | No      |
|      |       |        |             |          |         | Hnrnpdl   | 131.482  | 44.8465 | -1.5518          | 131.483      | 44.8475       | -1.5517768       | 0.00014386 | No      |
|      |       |        |             |          |         | Hnrnpf    | 329.469  | 119.476 | -1.46342         | 329.47       | 119.477       | -1.4634142       | 0.00014386 | No      |
|      |       |        |             |          |         | Hnrnp1    | 223.042  | 120.505 | -0.888225        | 223.043      | 120.506       | -0.8882169       | 0.00014386 | No      |
|      |       |        |             |          |         | Hnrnp2    | 42.2836  | 31.0563 | -0.445212        | 42.2846      | 31.0573       | -0.4451999       | 0.00014386 | No      |
|      |       |        |             |          |         | Hnrnpk    | 331.416  | 175.482 | -0.917318        | 331.417      | 175.483       | -0.9173163       | 0.00014386 | No      |
|      |       |        |             |          |         | Hnrnpl    | 384.484  | 233.585 | -0.718976        | 384.485      | 233.586       | -0.7189735       | 0.00014386 | No      |
|      |       |        |             |          |         | Hnrnpm    | 208.174  | 105.021 | -0.987115        | 208.175      | 105.022       | -0.9871052       | 0.00014386 | No      |
|      |       |        |             |          |         | Hnrnpr    | 67.8029  | 32.0259 | -1.08211         | 67.8039      | 32.0269       | -1.0820841       | 0.00014386 | No      |
|      |       |        |             |          |         | Hnrnpu    | 247.09   | 95.715  | -1.36822         | 247.091      | 95.716        | -1.3682105       | 0.00014386 | No      |
|      |       |        |             |          |         | Hnrnpul2  | 91.4609  | 31.6343 | -1.53167         | 91.4619      | 31.6353       | -1.5316356       | 0.00014386 | No      |
|      |       |        |             |          |         | Hnrpd     | 214.805  | 73.8712 | -1.53994         | 214.806      | 73.8722       | -1.5399308       | 0.00014386 | No      |
|      |       |        |             |          |         | Homer1    | 0.224106 | 1.78237 | 2.99154          | 0.225106     | 1.78337       | 2.98592964       | 0.00014386 | No      |
|      |       |        |             |          |         | Homer3    | 6.68467  | 20.588  | 1.62288          | 6.68567      | 20.589        | 1.62272971       | 0.00014386 | No      |
|      |       |        |             |          |         | Hook1     | 0.401314 | 8.4259  | 4.39203          | 0.402314     | 8.4269        | 4.38860816       | 0.00014386 | No      |
|      |       |        |             |          |         | Hook2     | 2.46358  | 42.8692 | 4.12111          | 2.46458      | 42.8702       | 4.12056143       | 0.00014386 | No      |
|      |       |        |             |          |         | HOOK3     | 17.2058  | 11.3052 | -0.605914        | 17.2068      | 11.3062       | -0.6058647       | 0.00014386 | No      |
|      |       |        |             |          |         | Hopx      | 14.1348  | 3.90405 | -1.85621         | 14.1358      | 3.90505       | -1.8559406       | 0.00014386 | No      |
|      |       |        |             |          |         | Hormad2   | 1.80031  | 5.70108 | 1.66299          | 1.80131      | 5.70208       | 1.66244179       | 0.00014386 | No      |
|      |       |        |             |          |         | Hoxa3     | 0        | 3.13501 | inf              | 0.001        | 3.13601       | 11.6147144       | 0.00014386 | No      |
|      |       |        |             |          |         | Hoxa9     | 0        | 2.39615 | inf              | 0.001        | 2.39715       | 11.2271045       | 0.00014386 | No      |
|      |       |        |             |          |         | Hoxc10    | 0        | 6.94357 | inf              | 0.001        | 6.94457       | 12.7616697       | 0.00014386 | No      |
|      |       |        |             |          |         | Hpcal1    | 134.923  | 88.5054 | -0.608297        | 134.924      | 88.5064       | -0.6082933       | 0.00014386 | No      |
|      |       |        |             |          |         | Hpgds     | 1.07347  | 0       | -inf             | 1.07447      | 0.001         | -10.069409       | 0.00014386 | No      |
|      |       |        |             |          |         | Hps3      | 21.2184  | 9.8082  | -1.11326         | 21.2194      | 9.8092        | -1.1131765       | 0.00014386 | No      |
|      |       |        |             |          |         | Hps4      | 9.99227  | 17.7837 | 0.831673         | 9.99327      | 17.7847       | 0.8316079        | 0.00014386 | No      |
|      |       |        |             |          |         | Hps5      | 14.2322  | 5.81974 | -1.29013         | 14.2332      | 5.82074       | -1.2899856       | 0.00014386 | No      |
|      |       |        |             |          |         | Hpse      | 19.8192  | 1.3849  | -3.83904         | 19.8202      | 1.3859        | -3.8380765       | 0.00014386 | No      |
|      |       |        |             |          |         | Hpx       | 0.288967 | 2.88041 | 3.3173           | 0.289967     | 2.88141       | 3.31281433       | 0.00014386 | No      |
|      |       |        |             |          |         | Hrct1     | 0        | 17.2009 | inf              | 0.001        | 17.2019       | 14.0702803       | 0.00014386 | No      |
|      |       |        |             |          |         | Hrg       | 0        | 1.21125 | inf              | 0.001        | 1.21225       | 10.2434715       | 0.00014386 | No      |
|      |       |        |             |          |         | Hrsp12    | 33.8472  | 1314.26 | 5.27907          | 33.8482      | 1314.261      | 5.27902888       | 0.00014386 | No      |
|      |       |        |             |          |         | Hs1bp3    | 6.4297   | 11.9553 | 0.894821         | 6.4307       | 11.9563       | 0.89472331       | 0.00014386 | No      |
|      |       |        |             |          |         | Hs2st1    | 18.3439  | 8.93936 | -1.03705         | 18.3449      | 8.94036       | -1.0369742       | 0.00014386 | No      |
|      |       |        |             |          |         | Hs6st1    | 6.03606  | 23.0838 | 1.9352           | 6.03706      | 23.0848       | 1.93502519       | 0.00014386 | No      |

| RRBS |       |        |             |          |         | RNAseq   |           |           |                  |              |               |                  |            |         |
|------|-------|--------|-------------|----------|---------|----------|-----------|-----------|------------------|--------------|---------------|------------------|------------|---------|
| gene | Blood | Kidney | methyl.diff | pMWU.fdr | Match ? | gene     | blood     | kidney    | log2(fold_ratio) | blood+ 0.001 | kidney+ 0.001 | log2(fold_ratio) | q_value    | Match ? |
|      |       |        |             |          |         | Hsbp1    | 79.7344   | 302.198   | 1.92222          | 79.7354      | 302.199       | 1.9222066        | 0.00014386 | No      |
|      |       |        |             |          |         | Hscb     | 40.4148   | 23.3483   | -0.791567        | 40.4158      | 23.3493       | -0.7915401       | 0.00014386 | No      |
|      |       |        |             |          |         | Hsd11b1  | 4.80882   | 87.0293   | 4.17775          | 4.80982      | 87.0303       | 4.17746296       | 0.00014386 | No      |
|      |       |        |             |          |         | Hsd11b2  | 0.040577  | 104.176   | 11.3261          | 0.041577     | 104.177       | 11.2909635       | 0.00014386 | No      |
|      |       |        |             |          |         | Hsd17b10 | 87.4982   | 266.656   | 1.60766          | 87.4992      | 266.657       | 1.60764347       | 0.00014386 | No      |
|      |       |        |             |          |         | Hsd17b2  | 0         | 3.45304   | inf              | 0.001        | 3.45404       | 11.7540691       | 0.00014386 | No      |
|      |       |        |             |          |         | Hsd17b4  | 17.9354   | 78.6447   | 2.13254          | 17.9364      | 78.6457       | 2.13247753       | 0.00014386 | No      |
|      |       |        |             |          |         | Hsd3b7   | 27.8881   | 17.4841   | -0.673607        | 27.8891      | 17.4851       | -0.6735753       | 0.00014386 | No      |
|      |       |        |             |          |         | Hsdl1    | 20.7596   | 10.2308   | -1.02086         | 20.7606      | 10.2318       | -1.0207882       | 0.00014386 | No      |
|      |       |        |             |          |         | Hsdl2    | 8.30592   | 43.0365   | 2.37335          | 8.30692      | 43.0375       | 2.37320871       | 0.00014386 | No      |
|      |       |        |             |          |         | Hsf1     | 40.8537   | 18.4322   | -1.14824         | 40.8547      | 18.4332       | -1.1481955       | 0.00014386 | No      |
|      |       |        |             |          |         | Hsf2     | 3.52504   | 9.06991   | 1.36345          | 3.52604      | 9.07091       | 1.36319845       | 0.00014386 | No      |
|      |       |        |             |          |         | Hsh2d    | 23.6733   | 1.56432   | -3.91965         | 23.6743      | 1.56532       | -3.9187922       | 0.00014386 | No      |
|      |       |        |             |          |         | Hsp90aa1 | 117.699   | 214.754   | 0.867584         | 117.7        | 214.755       | 0.8675774        | 0.00014386 | No      |
|      |       |        |             |          |         | Hsp90ab1 | 930.17    | 594.471   | -0.645888        | 930.171      | 594.472       | -0.6458871       | 0.00014386 | No      |
|      |       |        |             |          |         | Hspa12b  | 1.08957   | 5.03669   | 2.20871          | 1.09057      | 5.03769       | 2.20767997       | 0.00014386 | No      |
|      |       |        |             |          |         | Hspa4l   | 0.976032  | 3.23295   | 1.72785          | 0.977032     | 3.23395       | 1.72681965       | 0.00014386 | No      |
|      |       |        |             |          |         | Hspa5    | 198.576   | 152.894   | -0.377161        | 198.577      | 152.895       | -0.3771573       | 0.00014386 | No      |
|      |       |        |             |          |         | Hspa9    | 55.2549   | 105.517   | 0.933307         | 55.2559      | 105.518       | 0.9332887        | 0.00014386 | No      |
|      |       |        |             |          |         | Hspb6    | 5.93095   | 33.876    | 2.51393          | 5.93195      | 33.877        | 2.51372778       | 0.00014386 | No      |
|      |       |        |             |          |         | Hspb8    | 0         | 3.12615   | inf              | 0.001        | 3.12715       | 11.6106327       | 0.00014386 | No      |
|      |       |        |             |          |         | Hsbbp1   | 20.5313   | 42.4617   | 1.04834          | 20.5323      | 42.4627       | 1.04830086       | 0.00014386 | No      |
|      |       |        |             |          |         | Hspd1    | 77.2046   | 181.5     | 1.23321          | 77.2056      | 181.501       | 1.2332001        | 0.00014386 | No      |
|      |       |        |             |          |         | Hspe1    | 247.145   | 484.828   | 0.972115         | 247.146      | 484.829       | 0.97211244       | 0.00014386 | No      |
|      |       |        |             |          |         | Hspg2    | 0.0246798 | 52.2168   | 11.047           | 0.0256798    | 52.2178       | 10.989692        | 0.00014386 | No      |
|      |       |        |             |          |         | Htati2   | 20.0572   | 9.41413   | -1.09122         | 20.0582      | 9.41513       | -1.0911392       | 0.00014386 | No      |
|      |       |        |             |          |         | Htatsf1  | 45.7471   | 27.2859   | -0.745524        | 45.7481      | 27.2869       | -0.7455033       | 0.00014386 | No      |
|      |       |        |             |          |         | Htt      | 8.35774   | 3.02731   | -1.46508         | 8.35874      | 3.02831       | -1.4647726       | 0.00014386 | No      |
|      |       |        |             |          |         | Huwe1    | 107.54    | 23.7707   | -2.17761         | 107.541      | 23.7717       | -2.1775698       | 0.00014386 | No      |
|      |       |        |             |          |         | Hvcn1    | 3.0368    | 0.0489805 | -5.9542          | 3.0378       | 0.0499805     | -5.9255177       | 0.00014386 | No      |
|      |       |        |             |          |         | Hyal1    | 14.03     | 21.2383   | 0.598153         | 14.031       | 21.2393       | 0.59811838       | 0.00014386 | No      |
|      |       |        |             |          |         | Hyal2    | 1.31174   | 21.1056   | 4.00808          | 1.31274      | 21.1066       | 4.00704109       | 0.00014386 | No      |
|      |       |        |             |          |         | Hyi      | 11.0697   | 32.0988   | 1.5359           | 11.0707      | 32.0998       | 1.53581786       | 0.00014386 | No      |
|      |       |        |             |          |         | Hykk     | 0         | 24.4943   | inf              | 0.001        | 24.4953       | 14.5802173       | 0.00014386 | No      |
|      |       |        |             |          |         | Iah1     | 92.2132   | 199.103   | 1.11047          | 92.2142      | 199.104       | 1.11046137       | 0.00014386 | No      |
|      |       |        |             |          |         | Iars     | 17.7141   | 11.5704   | -0.61446         | 17.7151      | 11.5714       | -0.6144162       | 0.00014386 | No      |
|      |       |        |             |          |         | Iars2    | 8.94614   | 5.68762   | -0.65344         | 8.94714      | 5.68862       | -0.6533479       | 0.00014386 | No      |
|      |       |        |             |          |         | Iba57    | 2.93377   | 5.49217   | 0.904622         | 2.93477      | 5.49317       | 0.9043915        | 0.00014386 | No      |
|      |       |        |             |          |         | Ibtk     | 16.4702   | 10.5668   | -0.640327        | 16.4712      | 10.5678       | -0.6402706       | 0.00014386 | No      |
|      |       |        |             |          |         | Ica1     | 0.231998  | 16.9194   | 6.18842          | 0.232998     | 16.9204       | 6.18230229       | 0.00014386 | No      |
|      |       |        |             |          |         | Icam1    | 3.96443   | 10.8455   | 1.45191          | 3.96543      | 10.8465       | 1.45168036       | 0.00014386 | No      |
|      |       |        |             |          |         | Icam2    | 166.907   | 37.1161   | -2.16893         | 166.908      | 37.1171       | -2.1688972       | 0.00014386 | No      |



| RRBS |       |        |             |          |         | RNAseq  |           |          |                  |              |               |                  |            |         |
|------|-------|--------|-------------|----------|---------|---------|-----------|----------|------------------|--------------|---------------|------------------|------------|---------|
| gene | Blood | Kidney | methyl.diff | pMWU.fdr | Match ? | gene    | blood     | kidney   | log2(fold_ratio) | blood+ 0.001 | kidney+ 0.001 | log2(fold_ratio) | q_value    | Match ? |
|      |       |        |             |          |         | lgbp1   | 75.2569   | 47.5568  | -0.66217         | 75.2579      | 47.5578       | -0.6621611       | 0.00014386 | No      |
|      |       |        |             |          |         | lgf1r   | 11.3075   | 5.98183  | -0.918619        | 11.3085      | 5.98283       | -0.9185076       | 0.00014386 | No      |
|      |       |        |             |          |         | lgfals  | 0.168686  | 2.18716  | 3.69665          | 0.169686     | 2.18816       | 3.68877879       | 0.00014386 | No      |
|      |       |        |             |          |         | lgfbp4  | 1.32198   | 19.952   | 3.91576          | 1.32298      | 19.953        | 3.91474252       | 0.00014386 | No      |
|      |       |        |             |          |         | IGG-2A  | 294.817   | 11.1987  | -4.71842         | 294.818      | 11.1997       | -4.7182926       | 0.00014386 | No      |
|      |       |        |             |          |         | IGJ     | 25.8671   | 0.641974 | -5.33246         | 25.8681      | 0.642974      | -5.3302699       | 0.00014386 | No      |
|      |       |        |             |          |         | lgkc    | 167.557   | 6.86441  | -4.60937         | 167.558      | 6.86541       | -4.6091709       | 0.00014386 | No      |
|      |       |        |             |          |         | lglon5  | 0.187389  | 3.57051  | 4.25202          | 0.188389     | 3.57151       | 4.24474753       | 0.00014386 | No      |
|      |       |        |             |          |         | lgsf1   | 0         | 1.17217  | inf              | 0.001        | 1.17317       | 10.1961964       | 0.00014386 | No      |
|      |       |        |             |          |         | lgsf3   | 0.0266081 | 7.37265  | 8.11417          | 0.0276081    | 7.37365       | 8.06114352       | 0.00014386 | No      |
|      |       |        |             |          |         | lgsf8   | 6.51488   | 3.29282  | -0.984413        | 6.51588      | 3.29382       | -0.9841983       | 0.00014386 | No      |
|      |       |        |             |          |         | lgsf9   | 1.49978   | 5.19907  | 1.7935           | 1.50078      | 5.20007       | 1.79281854       | 0.00014386 | No      |
|      |       |        |             |          |         | lgtp    | 44.6022   | 25.8672  | -0.785992        | 44.6032      | 25.8682       | -0.7859675       | 0.00014386 | No      |
|      |       |        |             |          |         | lkbip   | 5.42463   | 12.3868  | 1.19121          | 5.42563      | 12.3878       | 1.19105742       | 0.00014386 | No      |
|      |       |        |             |          |         | lkbkap  | 8.33664   | 4.46484  | -0.900858        | 8.33764      | 4.46584       | -0.9007075       | 0.00014386 | No      |
|      |       |        |             |          |         | lkbkb   | 59.5152   | 28.869   | -1.04374         | 59.5162      | 28.87         | -1.0437113       | 0.00014386 | No      |
|      |       |        |             |          |         | lkbke   | 118.314   | 35.5595  | -1.73432         | 118.315      | 35.5605       | -1.7342855       | 0.00014386 | No      |
|      |       |        |             |          |         | lkbkg   | 12.686    | 4.65398  | -1.4467          | 12.687       | 4.65498       | -1.4465041       | 0.00014386 | No      |
|      |       |        |             |          |         | lkzf1   | 195.713   | 7.15579  | -4.77348         | 195.714      | 7.15679       | -4.7732905       | 0.00014386 | No      |
|      |       |        |             |          |         | lkzf2   | 9.82113   | 0.850061 | -3.53025         | 9.82213      | 0.851061      | -3.5287015       | 0.00014386 | No      |
|      |       |        |             |          |         | lkzf3   | 51.3839   | 1.31081  | -5.29279         | 51.3849      | 1.31181       | -5.2917138       | 0.00014386 | No      |
|      |       |        |             |          |         | lkzf5   | 10.7057   | 3.5648   | -1.58649         | 10.7067      | 3.5658        | -1.5862162       | 0.00014386 | No      |
|      |       |        |             |          |         | ll10rb  | 30.0146   | 12.9564  | -1.212           | 30.0156      | 12.9574       | -1.2119362       | 0.00014386 | No      |
|      |       |        |             |          |         | ll12rb1 | 3.24328   | 6.37533  | 0.975046         | 3.24428      | 6.37633       | 0.97482796       | 0.00014386 | No      |
|      |       |        |             |          |         | ll13ra1 | 0.206137  | 11.7121  | 5.82826          | 0.207137     | 11.7131       | 5.82139386       | 0.00014386 | No      |
|      |       |        |             |          |         | ll16    | 47.7346   | 2.13511  | -4.48265         | 47.7356      | 2.13611       | -4.4820077       | 0.00014386 | No      |
|      |       |        |             |          |         | ll17ra  | 40.4447   | 14.5501  | -1.47492         | 40.4457      | 14.5511       | -1.4748581       | 0.00014386 | No      |
|      |       |        |             |          |         | ll17rb  | 0.0535355 | 1.05829  | 4.30509          | 0.0545355    | 1.05929       | 4.27975814       | 0.00014386 | No      |
|      |       |        |             |          |         | ll17rc  | 0.0532187 | 23.7642  | 8.80264          | 0.0542187    | 23.7652       | 8.77584431       | 0.00014386 | No      |
|      |       |        |             |          |         | ll17re  | 0.395157  | 13.7206  | 5.11777          | 0.396157     | 13.7216       | 5.11423261       | 0.00014386 | No      |
|      |       |        |             |          |         | ll18r1  | 20.7342   | 0.805524 | -4.68594         | 20.7352      | 0.806524      | -4.6842207       | 0.00014386 | No      |
|      |       |        |             |          |         | ll18RAP | 9.93512   | 1.46996  | -2.75676         | 9.93612      | 1.47096       | -2.7559246       | 0.00014386 | No      |
|      |       |        |             |          |         | ll1b    | 0.873695  | 6.63101  | 2.92403          | 0.874695     | 6.63201       | 2.92259423       | 0.00014386 | No      |
|      |       |        |             |          |         | ll1r1   | 0.184627  | 1.68624  | 3.19112          | 0.185627     | 1.68724       | 3.18418673       | 0.00014386 | No      |
|      |       |        |             |          |         | ll1rn   | 0.574645  | 2.11616  | 1.8807           | 0.575645     | 2.11716       | 1.87887902       | 0.00014386 | No      |
|      |       |        |             |          |         | ll21r   | 163.464   | 1.448    | -6.81877         | 163.465      | 1.449         | -6.8177804       | 0.00014386 | No      |
|      |       |        |             |          |         | ll2ra   | 21.0976   | 5.87993  | -1.84321         | 21.0986      | 5.88093       | -1.843031        | 0.00014386 | No      |
|      |       |        |             |          |         | ll2rb   | 96.5173   | 5.82656  | -4.05007         | 96.5183      | 5.82756       | -4.0498386       | 0.00014386 | No      |
|      |       |        |             |          |         | ll2rg   | 527.086   | 15.6082  | -5.07766         | 527.087      | 15.6092       | -5.0775726       | 0.00014386 | No      |
|      |       |        |             |          |         | ll34    | 0.182718  | 13.3148  | 6.18727          | 0.183718     | 13.3158       | 6.17950231       | 0.00014386 | No      |
|      |       |        |             |          |         | ll4r    | 139.566   | 16.0885  | -3.11685         | 139.567      | 16.0895       | -3.1167665       | 0.00014386 | No      |
|      |       |        |             |          |         | ll6r    | 49.7781   | 1.01498  | -5.61599         | 49.7791      | 1.01598       | -5.6145962       | 0.00014386 | No      |



| RRBS |       |        |             |          |         | RNAseq   |          |          |                  |              |               |                  |            |         |
|------|-------|--------|-------------|----------|---------|----------|----------|----------|------------------|--------------|---------------|------------------|------------|---------|
| gene | Blood | Kidney | methyl.diff | pMWU.fdr | Match ? | gene     | blood    | kidney   | log2(fold_ratio) | blood+ 0.001 | kidney+ 0.001 | log2(fold_ratio) | q_value    | Match ? |
|      |       |        |             |          |         | lpp      | 11.2613  | 21.1012  | 0.905946         | 11.2623      | 21.1022       | 0.90589193       | 0.00014386 | No      |
|      |       |        |             |          |         | lqce     | 1.13252  | 7.32917  | 2.69412          | 1.13352      | 7.33017       | 2.69303681       | 0.00014386 | No      |
|      |       |        |             |          |         | lqch     | 14.0641  | 46.1681  | 1.71488          | 14.0651      | 46.1691       | 1.7148078        | 0.00014386 | No      |
|      |       |        |             |          |         | lqgap1   | 52.079   | 13.5986  | -1.93725         | 52.08        | 13.5996       | -1.9371652       | 0.00014386 | No      |
|      |       |        |             |          |         | lqgap2   | 44.898   | 8.2578   | -2.44282         | 44.899       | 8.2588        | -2.4426792       | 0.00014386 | No      |
|      |       |        |             |          |         | lqgap3   | 0.124653 | 0.972581 | 2.9639           | 0.125653     | 0.973581      | 2.9538559        | 0.00014386 | No      |
|      |       |        |             |          |         | lqsec1   | 3.43631  | 41.1413  | 3.58166          | 3.43731      | 41.1423       | 3.58127057       | 0.00014386 | No      |
|      |       |        |             |          |         | lqsec2   | 0.824867 | 7.68081  | 3.21902          | 0.825867     | 7.68181       | 3.21746491       | 0.00014386 | No      |
|      |       |        |             |          |         | lqub     | 0.596752 | 1.63751  | 1.4563           | 0.597752     | 1.63851       | 1.45476552       | 0.00014386 | No      |
|      |       |        |             |          |         | lrak1    | 43.4148  | 27.1195  | -0.678859        | 43.4158      | 27.1205       | -0.6788364       | 0.00014386 | No      |
|      |       |        |             |          |         | IRAK1BP1 | 0.338998 | 17.9662  | 5.72786          | 0.339998     | 17.9672       | 5.72369553       | 0.00014386 | No      |
|      |       |        |             |          |         | lrak3    | 18.2886  | 4.33728  | -2.07608         | 18.2896      | 4.33828       | -2.0758284       | 0.00014386 | No      |
|      |       |        |             |          |         | lrak4    | 15.018   | 6.63778  | -1.17792         | 15.019       | 6.63878       | -1.1777987       | 0.00014386 | No      |
|      |       |        |             |          |         | lireb2   | 15.3275  | 8.96909  | -0.773086        | 15.3285      | 8.97009       | -0.7730222       | 0.00014386 | No      |
|      |       |        |             |          |         | lrf1     | 86.1117  | 42.2683  | -1.02663         | 86.1127      | 42.2693       | -1.0266158       | 0.00014386 | No      |
|      |       |        |             |          |         | lrf2     | 92.2675  | 12.8178  | -2.84768         | 92.2685      | 12.8188       | -2.847577        | 0.00014386 | No      |
|      |       |        |             |          |         | lrf2bp2  | 56.1268  | 30.6032  | -0.875007        | 56.1278      | 30.6042       | -0.8749859       | 0.00014386 | No      |
|      |       |        |             |          |         | lrf9     | 53.6564  | 15.5196  | -1.78966         | 53.6574      | 15.5206       | -1.7895928       | 0.00014386 | No      |
|      |       |        |             |          |         | lrgq     | 8.10322  | 5.72952  | -0.500079        | 8.10422      | 5.73052       | -0.5000073       | 0.00014386 | No      |
|      |       |        |             |          |         | lrs2     | 7.00661  | 4.32376  | -0.696431        | 7.00761      | 4.32476       | -0.6963024       | 0.00014386 | No      |
|      |       |        |             |          |         | lsca1    | 33.3701  | 81.6065  | 1.29013          | 33.3711      | 81.6075       | 1.2901025        | 0.00014386 | No      |
|      |       |        |             |          |         | lsca2    | 32.1152  | 77.4606  | 1.27021          | 32.1162      | 77.4616       | 1.2701801        | 0.00014386 | No      |
|      |       |        |             |          |         | lscu     | 59.0294  | 246.227  | 2.06048          | 59.0304      | 246.228       | 2.06046481       | 0.00014386 | No      |
|      |       |        |             |          |         | lsg20    | 25.8815  | 9.20638  | -1.49122         | 25.8825      | 9.20738       | -1.4911144       | 0.00014386 | No      |
|      |       |        |             |          |         | lsoc1    | 13.5322  | 45.9768  | 1.76451          | 13.5332      | 45.9778       | 1.76443442       | 0.00014386 | No      |
|      |       |        |             |          |         | lsoc2a   | 33.0439  | 62.8398  | 0.927294         | 33.0449      | 62.8408       | 0.92727392       | 0.00014386 | No      |
|      |       |        |             |          |         | lsoc2b   | 18.2762  | 83.1115  | 2.18508          | 18.2772      | 83.1125       | 2.1850204        | 0.00014386 | No      |
|      |       |        |             |          |         | lsy1     | 92.3562  | 35.3508  | -1.38546         | 92.3572      | 35.3518       | -1.3854408       | 0.00014386 | No      |
|      |       |        |             |          |         | lsyna1   | 56.4733  | 96.795   | 0.777364         | 56.4743      | 96.796        | 0.77735295       | 0.00014386 | No      |
|      |       |        |             |          |         | ltch     | 24.9027  | 12.5677  | -0.986587        | 24.9037      | 12.5687       | -0.9865247       | 0.00014386 | No      |
|      |       |        |             |          |         | ltfg1    | 6.62457  | 33.0961  | 2.32076          | 6.62557      | 33.0971       | 2.32058833       | 0.00014386 | No      |
|      |       |        |             |          |         | ltfg3    | 1.90044  | 52.2287  | 4.78044          | 1.90144      | 52.2297       | 4.7797061        | 0.00014386 | No      |
|      |       |        |             |          |         | ltga1    | 14.207   | 37.6301  | 1.40528          | 14.208       | 37.6311       | 1.40522197       | 0.00014386 | No      |
|      |       |        |             |          |         | ltga2    | 2.96946  | 0.182462 | -4.02454         | 2.97046      | 0.183462      | -4.0171332       | 0.00014386 | No      |
|      |       |        |             |          |         | ltga2b   | 2.65456  | 4.35174  | 0.713119         | 2.65556      | 4.35274       | 0.71290772       | 0.00014386 | No      |
|      |       |        |             |          |         | ltga3    | 2.26037  | 32.5228  | 3.84682          | 2.26137      | 32.5238       | 3.84622686       | 0.00014386 | No      |
|      |       |        |             |          |         | ltga4    | 58.4341  | 1.00688  | -5.85884         | 58.4351      | 1.00788       | -5.8574394       | 0.00014386 | No      |
|      |       |        |             |          |         | ltga5    | 0.103776 | 2.05759  | 4.30941          | 0.104776     | 2.05859       | 4.29627633       | 0.00014386 | No      |
|      |       |        |             |          |         | ltga6    | 14.3155  | 9.08637  | -0.655806        | 14.3165      | 9.08737       | -0.6557441       | 0.00014386 | No      |
|      |       |        |             |          |         | ltgav    | 4.19216  | 21.4093  | 2.35247          | 4.19316      | 21.4103       | 2.35219523       | 0.00014386 | No      |
|      |       |        |             |          |         | ltgb2    | 123.179  | 5.22363  | -4.55956         | 123.18       | 5.22463       | -4.5592954       | 0.00014386 | No      |
|      |       |        |             |          |         | ltgb3    | 19.1427  | 3.9117   | -2.29093         | 19.1437      | 3.9127        | -2.2906333       | 0.00014386 | No      |



| RRBS |       |        |             |          |         | RNAseq                 |          |         |                  |              |               |                  |            |         |
|------|-------|--------|-------------|----------|---------|------------------------|----------|---------|------------------|--------------|---------------|------------------|------------|---------|
| gene | Blood | Kidney | methyl.diff | pMWU.fdr | Match ? | gene                   | blood    | kidney  | log2(fold_ratio) | blood+ 0.001 | kidney+ 0.001 | log2(fold_ratio) | q_value    | Match ? |
|      |       |        |             |          |         | ltgb7                  | 145.522  | 8.07614 | -4.17142         | 145.523      | 8.07714       | -4.1712588       | 0.00014386 | No      |
|      |       |        |             |          |         | ltgb8                  | 0.110508 | 4.12959 | 5.22377          | 0.111508     | 4.13059       | 5.21112874       | 0.00014386 | No      |
|      |       |        |             |          |         | ltih5                  | 0        | 20.202  | inf              | 0.001        | 20.203        | 14.3022819       | 0.00014386 | No      |
|      |       |        |             |          |         | ltk                    | 105.706  | 2.55362 | -5.37137         | 105.707      | 2.55462       | -5.3708184       | 0.00014386 | No      |
|      |       |        |             |          |         | ltm2a                  | 73.3447  | 1.98463 | -5.20775         | 73.3457      | 1.98563       | -5.2070437       | 0.00014386 | No      |
|      |       |        |             |          |         | ltm2b                  | 445.416  | 773.829 | 0.796862         | 445.417      | 773.83        | 0.79686004       | 0.00014386 | No      |
|      |       |        |             |          |         | ltm2c                  | 57.3202  | 200.009 | 1.80295          | 57.3212      | 200.01        | 1.80293142       | 0.00014386 | No      |
|      |       |        |             |          |         | ltpa                   | 45.4173  | 63.6202 | 0.486243         | 45.4183      | 63.6212       | 0.48623388       | 0.00014386 | No      |
|      |       |        |             |          |         | ltpkc                  | 2.29511  | 5.60984 | 1.2894           | 2.29611      | 5.61084       | 1.28902501       | 0.00014386 | No      |
|      |       |        |             |          |         | ltpr1                  | 11.4267  | 24.2076 | 1.08306          | 11.4277      | 24.2086       | 1.08298458       | 0.00014386 | No      |
|      |       |        |             |          |         | ltpr2                  | 12.528   | 1.40141 | -3.1602          | 12.529       | 1.40241       | -3.1592912       | 0.00014386 | No      |
|      |       |        |             |          |         | ltpr3                  | 32.4765  | 12.5133 | -1.37594         | 32.4775      | 12.5143       | -1.375863        | 0.00014386 | No      |
|      |       |        |             |          |         | ltsn1                  | 19.7698  | 349.776 | 4.14506          | 19.7708      | 349.777       | 4.14499227       | 0.00014386 | No      |
|      |       |        |             |          |         | ltsn2                  | 87.9345  | 38.4227 | -1.19447         | 87.9355      | 38.4237       | -1.1944493       | 0.00014386 | No      |
|      |       |        |             |          |         | lvd                    | 22.9043  | 71.9913 | 1.65221          | 22.9053      | 71.9923       | 1.65216115       | 0.00014386 | No      |
|      |       |        |             |          |         | IVNS1ABP_P<br>REDICTED | 47.3051  | 167.177 | 1.82131          | 47.3061      | 167.178       | 1.82128687       | 0.00014386 | No      |
|      |       |        |             |          |         | lws1                   | 13.0903  | 6.65831 | -0.975268        | 13.0913      | 6.65931       | -0.9751638       | 0.00014386 | No      |
|      |       |        |             |          |         | lyd                    | 0        | 10.8464 | inf              | 0.001        | 10.8474       | 13.4050617       | 0.00014386 | No      |
|      |       |        |             |          |         | lzumo4                 | 17.1214  | 2.61729 | -2.70965         | 17.1224      | 2.61829       | -2.7091881       | 0.00014386 | No      |
|      |       |        |             |          |         | Jag2                   | 0.222251 | 6.9334  | 4.9633           | 0.223251     | 6.9344        | 4.95703252       | 0.00014386 | No      |
|      |       |        |             |          |         | Jak1                   | 227.702  | 25.2901 | -3.1705          | 227.703      | 25.2911       | -3.1704516       | 0.00014386 | No      |
|      |       |        |             |          |         | Jak2                   | 34.9335  | 5.39638 | -2.69455         | 34.9345      | 5.39738       | -2.6943213       | 0.00014386 | No      |
|      |       |        |             |          |         | Jakmip1                | 65.2382  | 1.56    | -5.3861          | 65.2392      | 1.561         | -5.3851966       | 0.00014386 | No      |
|      |       |        |             |          |         | Jarid2                 | 10.9122  | 6.16585 | -0.823576        | 10.9132      | 6.16685       | -0.8234685       | 0.00014386 | No      |
|      |       |        |             |          |         | Jkamp                  | 14.6427  | 21.5433 | 0.557058         | 14.6437      | 21.5443       | 0.5570261        | 0.00014386 | No      |
|      |       |        |             |          |         | Jmjd1c                 | 46.7729  | 15.8804 | -1.55842         | 46.7739      | 15.8814       | -1.5583656       | 0.00014386 | No      |
|      |       |        |             |          |         | Jmjd4                  | 2.63368  | 1.258   | -1.06595         | 2.63468      | 1.259         | -1.0653495       | 0.00014386 | No      |
|      |       |        |             |          |         | Jmjd7                  | 8.70729  | 4.02591 | -1.11291         | 8.70829      | 4.02691       | -1.1127162       | 0.00014386 | No      |
|      |       |        |             |          |         | Jmy                    | 24.834   | 4.45029 | -2.48035         | 24.835       | 4.45129       | -2.4800793       | 0.00014386 | No      |
|      |       |        |             |          |         | Jrkl                   | 2.62053  | 5.36839 | 1.03463          | 2.62153      | 5.36939       | 1.03434914       | 0.00014386 | No      |
|      |       |        |             |          |         | Jun                    | 23.1024  | 282.613 | 3.61271          | 23.1034      | 282.614       | 3.61265585       | 0.00014386 | No      |
|      |       |        |             |          |         | Jund                   | 288.325  | 163.869 | -0.815154        | 288.326      | 163.87        | -0.8151492       | 0.00014386 | No      |
|      |       |        |             |          |         | Jup                    | 26.5387  | 54.1988 | 1.03016          | 26.5397      | 54.1998       | 1.03013547       | 0.00014386 | No      |
|      |       |        |             |          |         | Kank1                  | 0.101745 | 41.6672 | 8.67781          | 0.102745     | 41.6682       | 8.66373478       | 0.00014386 | No      |
|      |       |        |             |          |         | Kank2                  | 0.509296 | 14.7113 | 4.85228          | 0.510296     | 14.7123       | 4.84954466       | 0.00014386 | No      |
|      |       |        |             |          |         | Kank3                  | 0.99545  | 12.6781 | 3.67085          | 0.99645      | 12.6791       | 3.66951112       | 0.00014386 | No      |
|      |       |        |             |          |         | Kansl1                 | 82.1616  | 20.1858 | -2.02512         | 82.1626      | 20.1868       | -2.0250696       | 0.00014386 | No      |
|      |       |        |             |          |         | Kansl1l                | 2.75196  | 11.3201 | 2.04036          | 2.75296      | 11.3211       | 2.03995859       | 0.00014386 | No      |
|      |       |        |             |          |         | Kansl2                 | 68.9299  | 44.5384 | -0.630082        | 68.9309      | 44.5394       | -0.6300687       | 0.00014386 | No      |
|      |       |        |             |          |         | Kap                    | 0.182109 | 1304.94 | 12.8069          | 0.183109     | 1304.941      | 12.7989943       | 0.00014386 | No      |
|      |       |        |             |          |         | Kars                   | 77.1223  | 51.4874 | -0.582928        | 77.1233      | 51.4884       | -0.5829193       | 0.00014386 | No      |

| RRBS |       |        |             |          |         | RNAseq  |            |          |                  |              |               |                  |            |         |
|------|-------|--------|-------------|----------|---------|---------|------------|----------|------------------|--------------|---------------|------------------|------------|---------|
| gene | Blood | Kidney | methyl.diff | pMWU.fdr | Match ? | gene    | blood      | kidney   | log2(fold_ratio) | blood+ 0.001 | kidney+ 0.001 | log2(fold_ratio) | q_value    | Match ? |
|      |       |        |             |          |         | Kat2a   | 31.7024    | 13.0432  | -1.28129         | 31.7034      | 13.0442       | -1.2812291       | 0.00014386 | No      |
|      |       |        |             |          |         | Kat6a   | 20.233     | 4.65343  | -2.12035         | 20.234       | 4.65443       | -2.1201051       | 0.00014386 | No      |
|      |       |        |             |          |         | Kat7    | 31.3622    | 16.9403  | -0.888571        | 31.3632      | 16.9413       | -0.8885282       | 0.00014386 | No      |
|      |       |        |             |          |         | Katna1  | 27.3715    | 9.61279  | -1.50965         | 27.3725      | 9.61379       | -1.50955         | 0.00014386 | No      |
|      |       |        |             |          |         | Kbtbd11 | 35.7673    | 4.95462  | -2.8518          | 35.7683      | 4.95562       | -2.8515441       | 0.00014386 | No      |
|      |       |        |             |          |         | Kbtbd2  | 36.7574    | 9.60595  | -1.93603         | 36.7584      | 9.60695       | -1.9359236       | 0.00014386 | No      |
|      |       |        |             |          |         | Kbtbd3  | 5.60409    | 3.36524  | -0.735768        | 5.60509      | 3.36624       | -0.7355995       | 0.00014386 | No      |
|      |       |        |             |          |         | Kbtbd8  | 2.89138    | 0.696087 | -2.05442         | 2.89238      | 0.697087      | -2.0528465       | 0.00014386 | No      |
|      |       |        |             |          |         | Kcnab2  | 64.7586    | 3.3379   | -4.27806         | 64.7596      | 3.3389        | -4.2776493       | 0.00014386 | No      |
|      |       |        |             |          |         | Kcnab3  | 1.40398    | 0        | -inf             | 1.40498      | 0.001         | -10.456334       | 0.00014386 | No      |
|      |       |        |             |          |         | Kcne1   | 0          | 5.62774  | inf              | 0.001        | 5.62874       | 12.4585963       | 0.00014386 | No      |
|      |       |        |             |          |         | Kcng4   | 0.630751   | 2.13878  | 1.76164          | 0.631751     | 2.13978       | 1.76003453       | 0.00014386 | No      |
|      |       |        |             |          |         | Kcnip3  | 0          | 3.38171  | inf              | 0.001        | 3.38271       | 11.7239638       | 0.00014386 | No      |
|      |       |        |             |          |         | Kcnj1   | 0.114615   | 88.4899  | 9.59258          | 0.115615     | 88.4909       | 9.58005671       | 0.00014386 | No      |
|      |       |        |             |          |         | Kcnj12  | 0.105899   | 3.46757  | 5.03316          | 0.106899     | 3.46857       | 5.02002074       | 0.00014386 | No      |
|      |       |        |             |          |         | Kcnj15  | 0.00654984 | 20.0605  | 11.5806          | 0.00754984   | 20.0615       | 11.3756958       | 0.00014386 | No      |
|      |       |        |             |          |         | Kcnj16  | 0.0776825  | 249.762  | 11.6507          | 0.0786825    | 249.763       | 11.6322294       | 0.00014386 | No      |
|      |       |        |             |          |         | Kcnk1   | 0.575255   | 59.1017  | 6.68285          | 0.576255     | 59.1027       | 6.68037287       | 0.00014386 | No      |
|      |       |        |             |          |         | Kcnk5   | 0.873731   | 12.6775  | 3.85894          | 0.874731     | 12.6785       | 3.85740084       | 0.00014386 | No      |
|      |       |        |             |          |         | Kcnk7   | 1.01216    | 0        | -inf             | 1.01316      | 0.001         | -9.9846463       | 0.00014386 | No      |
|      |       |        |             |          |         | Kcnn4   | 192.091    | 19.4047  | -3.30732         | 192.092      | 19.4057       | -3.3072451       | 0.00014386 | No      |
|      |       |        |             |          |         | Kcnt1   | 0.0228124  | 184.573  | 12.9821          | 0.0238124    | 184.574       | 12.9201987       | 0.00014386 | No      |
|      |       |        |             |          |         | Kctd1   | 4.51032    | 45.2752  | 3.32742          | 4.51132      | 45.2762       | 3.32713135       | 0.00014386 | No      |
|      |       |        |             |          |         | Kctd13  | 3.51264    | 5.95096  | 0.760568         | 3.51364      | 5.95196       | 0.76039845       | 0.00014386 | No      |
|      |       |        |             |          |         | Kctd17  | 0.789734   | 23.6176  | 4.90235          | 0.790734     | 23.6186       | 4.90058718       | 0.00014386 | No      |
|      |       |        |             |          |         | Kctd18  | 24.8725    | 8.33736  | -1.57689         | 24.8735      | 8.33836       | -1.576774        | 0.00014386 | No      |
|      |       |        |             |          |         | Kctd20  | 17.7894    | 5.24237  | -1.76272         | 17.7904      | 5.24337       | -1.7625327       | 0.00014386 | No      |
|      |       |        |             |          |         | Kctd3   | 7.80702    | 14.1459  | 0.857542         | 7.80802      | 14.1469       | 0.8574573        | 0.00014386 | No      |
|      |       |        |             |          |         | Kctd5   | 4.60458    | 7.96184  | 0.790033         | 4.60558      | 7.96284       | 0.78990022       | 0.00014386 | No      |
|      |       |        |             |          |         | Kctd6   | 5.45327    | 28.1196  | 2.36638          | 5.45427      | 28.1206       | 2.36616935       | 0.00014386 | No      |
|      |       |        |             |          |         | Kdelc2  | 2.85963    | 15.5345  | 2.44158          | 2.86063      | 15.5355       | 2.44116386       | 0.00014386 | No      |
|      |       |        |             |          |         | Kdelr1  | 37.6924    | 77.9424  | 1.04814          | 37.6934      | 77.9434       | 1.04811493       | 0.00014386 | No      |
|      |       |        |             |          |         | Kdelr2  | 17.019     | 26.9923  | 0.665401         | 17.02        | 26.9933       | 0.66537032       | 0.00014386 | No      |
|      |       |        |             |          |         | Kdm1b   | 25.5229    | 10.0645  | -1.34251         | 25.5239      | 10.0655       | -1.3424299       | 0.00014386 | No      |
|      |       |        |             |          |         | KDM2B   | 12.279     | 6.86263  | -0.839364        | 12.28        | 6.86363       | -0.8392669       | 0.00014386 | No      |
|      |       |        |             |          |         | Kdm3a   | 54.9718    | 12.5833  | -2.12719         | 54.9728      | 12.5843       | -2.127093        | 0.00014386 | No      |
|      |       |        |             |          |         | Kdm3b   | 24.843     | 8.28393  | -1.58445         | 24.844       | 8.28493       | -1.5843361       | 0.00014386 | No      |
|      |       |        |             |          |         | Kdm4a   | 35.9536    | 12.8271  | -1.48695         | 35.9546      | 12.8281       | -1.4868689       | 0.00014386 | No      |
|      |       |        |             |          |         | Kdm4b   | 23.6526    | 13.0381  | -0.859263        | 23.6536      | 13.0391       | -0.8592155       | 0.00014386 | No      |
|      |       |        |             |          |         | Kdm4c   | 11.5149    | 7.241    | -0.669236        | 11.5159      | 7.242         | -0.6691671       | 0.00014386 | No      |
|      |       |        |             |          |         | Kdm5a   | 24.1602    | 6.05076  | -1.99744         | 24.1612      | 6.05176       | -1.9972654       | 0.00014386 | No      |
|      |       |        |             |          |         | Kdm5b   | 14.2798    | 7.79843  | -0.872722        | 14.2808      | 7.79943       | -0.8726362       | 0.00014386 | No      |

| RRBS |       |        |             |          |         | RNAseq    |           |          |                  |              |               |                  |            |         |
|------|-------|--------|-------------|----------|---------|-----------|-----------|----------|------------------|--------------|---------------|------------------|------------|---------|
| gene | Blood | Kidney | methyl.diff | pMWU.fdr | Match ? | gene      | blood     | kidney   | log2(fold_ratio) | blood+ 0.001 | kidney+ 0.001 | log2(fold_ratio) | q_value    | Match ? |
|      |       |        |             |          |         | Kdm5c     | 11.6271   | 5.37815  | -1.11231         | 11.6281      | 5.37915       | -1.1121653       | 0.00014386 | No      |
|      |       |        |             |          |         | Kdm6a     | 19.2804   | 4.94219  | -1.96392         | 19.2814      | 4.94319       | -1.9636955       | 0.00014386 | No      |
|      |       |        |             |          |         | Kdm7a     | 11.0596   | 1.65834  | -2.73749         | 11.0606      | 1.65934       | -2.7367482       | 0.00014386 | No      |
|      |       |        |             |          |         | Kdm8      | 18.6979   | 9.7358   | -0.941504        | 18.6989      | 9.7368        | -0.9414338       | 0.00014386 | No      |
|      |       |        |             |          |         | Kdr       | 0.0398332 | 2.79525  | 6.13286          | 0.0408332    | 2.79625       | 6.09760691       | 0.00014386 | No      |
|      |       |        |             |          |         | Khdrbs1   | 77.4335   | 35.5958  | -1.12125         | 77.4345      | 35.5968       | -1.1212289       | 0.00014386 | No      |
|      |       |        |             |          |         | Khynyn    | 82.8986   | 35.8615  | -1.20891         | 82.8996      | 35.8625       | -1.2088891       | 0.00014386 | No      |
|      |       |        |             |          |         | Khsrp     | 43.8832   | 22.1953  | -0.983417        | 43.8842      | 22.1963       | -0.9833824       | 0.00014386 | No      |
|      |       |        |             |          |         | Kidins220 | 28.178    | 10.8744  | -1.37363         | 28.179       | 10.8754       | -1.373552        | 0.00014386 | No      |
|      |       |        |             |          |         | Kif11     | 0.988566  | 4.54305  | 2.20025          | 0.989566     | 4.54405       | 2.19911087       | 0.00014386 | No      |
|      |       |        |             |          |         | Kif13a    | 3.8079    | 6.33678  | 0.734755         | 3.8089       | 6.33778       | 0.73460317       | 0.00014386 | No      |
|      |       |        |             |          |         | Kif13b    | 7.3801    | 13.8686  | 0.910114         | 7.3811       | 13.8696       | 0.91001844       | 0.00014386 | No      |
|      |       |        |             |          |         | Kif15     | 3.35414   | 0.316412 | -3.40606         | 3.35514      | 0.317412      | -3.4019444       | 0.00014386 | No      |
|      |       |        |             |          |         | Kif16b    | 2.72901   | 8.94613  | 1.71289          | 2.73001      | 8.94713       | 1.71251874       | 0.00014386 | No      |
|      |       |        |             |          |         | Kif1c     | 11.6318   | 129.141  | 3.47281          | 11.6328      | 129.142       | 3.47268798       | 0.00014386 | No      |
|      |       |        |             |          |         | Kif21a    | 0.0302481 | 9.93055  | 8.35888          | 0.0312481    | 9.93155       | 8.31210661       | 0.00014386 | No      |
|      |       |        |             |          |         | Kif21b    | 57.6431   | 1.45898  | -5.30411         | 57.6441      | 1.45998       | -5.3031524       | 0.00014386 | No      |
|      |       |        |             |          |         | Kif22     | 0.522659  | 1.60699  | 1.62042          | 0.523659     | 1.60799       | 1.61855888       | 0.00014386 | No      |
|      |       |        |             |          |         | Kif23     | 1.42709   | 3.62903  | 1.34651          | 1.42809      | 3.63003       | 1.34589457       | 0.00014386 | No      |
|      |       |        |             |          |         | Kif2a     | 19.1769   | 6.29406  | -1.60731         | 19.1779      | 6.29506       | -1.6071527       | 0.00014386 | No      |
|      |       |        |             |          |         | Kif3a     | 2.08484   | 5.05226  | 1.27699          | 2.08584      | 5.05326       | 1.27658592       | 0.00014386 | No      |
|      |       |        |             |          |         | Kif3b     | 9.20958   | 6.28802  | -0.550529        | 9.21058      | 6.28902       | -0.5504568       | 0.00014386 | No      |
|      |       |        |             |          |         | Kif7      | 2.97341   | 0.853832 | -1.8001          | 2.97441      | 0.854832      | -1.7988907       | 0.00014386 | No      |
|      |       |        |             |          |         | Kifap3    | 4.7182    | 20.8264  | 2.1421           | 4.7192       | 20.8274       | 2.14186853       | 0.00014386 | No      |
|      |       |        |             |          |         | Kifc1     | 4.2472    | 6.91698  | 0.703629         | 4.2482       | 6.91798       | 0.70349915       | 0.00014386 | No      |
|      |       |        |             |          |         | Kifc2     | 3.87145   | 11.3665  | 1.55384          | 3.87245      | 11.3675       | 1.55359649       | 0.00014386 | No      |
|      |       |        |             |          |         | Kifc3     | 0.582205  | 110.056  | 7.56249          | 0.583205     | 110.057       | 7.5600321        | 0.00014386 | No      |
|      |       |        |             |          |         | Kirrel    | 0         | 1.6774   | inf              | 0.001        | 1.6784        | 10.7128709       | 0.00014386 | No      |
|      |       |        |             |          |         | Kirrel3   | 0.0231241 | 1.31679  | 5.83148          | 0.0241241    | 1.31779       | 5.77150155       | 0.00014386 | No      |
|      |       |        |             |          |         | Kitlg     | 0.317588  | 10.4562  | 5.04106          | 0.318588     | 10.4572       | 5.03666087       | 0.00014386 | No      |
|      |       |        |             |          |         | Klc2      | 15.7253   | 31.6611  | 1.00962          | 15.7263      | 31.6621       | 1.00957766       | 0.00014386 | No      |
|      |       |        |             |          |         | Klc4      | 12.9691   | 56.78    | 2.1303           | 12.9701      | 56.781        | 2.13021865       | 0.00014386 | No      |
|      |       |        |             |          |         | Klf10     | 2.64802   | 8.00714  | 1.59637          | 2.64902      | 8.00814       | 1.59600846       | 0.00014386 | No      |
|      |       |        |             |          |         | Klf12     | 7.84964   | 1.54133  | -2.34845         | 7.85064      | 1.54233       | -2.3476988       | 0.00014386 | No      |
|      |       |        |             |          |         | Klf13     | 52.4392   | 5.8363   | -3.16752         | 52.4402      | 5.8373        | -3.1673001       | 0.00014386 | No      |
|      |       |        |             |          |         | Klf3      | 87.6461   | 25.1254  | -1.80254         | 87.6471      | 25.1264       | -1.8025024       | 0.00014386 | No      |
|      |       |        |             |          |         | Klf4      | 1.713     | 30.0678  | 4.13362          | 1.714        | 30.0688       | 4.13282828       | 0.00014386 | No      |
|      |       |        |             |          |         | KLF7      | 5.4395    | 3.02677  | -0.845697        | 5.4405       | 3.02777       | -0.8454836       | 0.00014386 | No      |
|      |       |        |             |          |         | Klf9      | 30.0755   | 17.795   | -0.757123        | 30.0765      | 17.796        | -0.7570837       | 0.00014386 | No      |
|      |       |        |             |          |         | KLHDC1    | 12.295    | 1.33094  | -3.20755         | 12.296       | 1.33194       | -3.2065881       | 0.00014386 | No      |
|      |       |        |             |          |         | Klhdc10   | 6.21084   | 18.6252  | 1.5844           | 6.21184      | 18.6262       | 1.5842408        | 0.00014386 | No      |
|      |       |        |             |          |         | KLHDC2    | 70.6035   | 26.4029  | -1.41904         | 70.6045      | 26.4039       | -1.4190091       | 0.00014386 | No      |

| RRBS |       |        |             |          |         | RNAseq  |           |          |                  |              |               |                  |            |         |
|------|-------|--------|-------------|----------|---------|---------|-----------|----------|------------------|--------------|---------------|------------------|------------|---------|
| gene | Blood | Kidney | methyl.diff | pMWU.fdr | Match ? | gene    | blood     | kidney   | log2(fold_ratio) | blood+ 0.001 | kidney+ 0.001 | log2(fold_ratio) | q_value    | Match ? |
|      |       |        |             |          |         | Klhdc3  | 83.2756   | 49.398   | -0.753442        | 83.2766      | 49.399        | -0.7534293       | 0.00014386 | No      |
|      |       |        |             |          |         | Klhdc4  | 18.2566   | 25.2906  | 0.470181         | 18.2576      | 25.2916       | 0.47016118       | 0.00014386 | No      |
|      |       |        |             |          |         | Klhdc8a | 0.0365039 | 113.392  | 11.601           | 0.0375039    | 113.393       | 11.5620033       | 0.00014386 | No      |
|      |       |        |             |          |         | Klhl11  | 3.42696   | 1.28252  | -1.41795         | 3.42796      | 1.28352       | -1.4172445       | 0.00014386 | No      |
|      |       |        |             |          |         | Klhl12  | 10.3075   | 30.729   | 1.57591          | 10.3085      | 30.73         | 1.57581335       | 0.00014386 | No      |
|      |       |        |             |          |         | Klhl13  | 0.0440665 | 2.05415  | 5.54271          | 0.0450665    | 2.05515       | 5.51104448       | 0.00014386 | No      |
|      |       |        |             |          |         | Klhl14  | 0.167004  | 9.59857  | 5.84486          | 0.168004     | 9.59957       | 5.8364023        | 0.00014386 | No      |
|      |       |        |             |          |         | Klhl15  | 5.82477   | 1.08132  | -2.4294          | 5.82577      | 1.08232       | -2.4283216       | 0.00014386 | No      |
|      |       |        |             |          |         | Klhl17  | 40.3481   | 22.683   | -0.830888        | 40.3491      | 22.684        | -0.8308614       | 0.00014386 | No      |
|      |       |        |             |          |         | Klhl2   | 33.1224   | 18.7428  | -0.821472        | 33.1234      | 18.7438       | -0.8214373       | 0.00014386 | No      |
|      |       |        |             |          |         | Klhl20  | 13.422    | 2.92442  | -2.19838         | 13.423       | 2.92542       | -2.1979915       | 0.00014386 | No      |
|      |       |        |             |          |         | Klhl22  | 8.69778   | 13.2131  | 0.603252         | 8.69878      | 13.2141       | 0.60319318       | 0.00014386 | No      |
|      |       |        |             |          |         | Klhl23  | 0.0771821 | 1.23805  | 4.00366          | 0.0781821    | 1.23905       | 3.98625226       | 0.00014386 | No      |
|      |       |        |             |          |         | Klhl24  | 27.9191   | 15.5767  | -0.841864        | 27.9201      | 15.5777       | -0.8418219       | 0.00014386 | No      |
|      |       |        |             |          |         | Klhl25  | 3.80627   | 12.2735  | 1.6891           | 3.80727      | 12.2745       | 1.68883547       | 0.00014386 | No      |
|      |       |        |             |          |         | Klhl26  | 0.678245  | 3.06839  | 2.17761          | 0.679245     | 3.06939       | 2.17594802       | 0.00014386 | No      |
|      |       |        |             |          |         | Klhl28  | 3.41026   | 1.57477  | -1.11474         | 3.41126      | 1.57577       | -1.1142477       | 0.00014386 | No      |
|      |       |        |             |          |         | Klhl36  | 10.7152   | 6.29735  | -0.766849        | 10.7162      | 6.29835       | -0.7667476       | 0.00014386 | No      |
|      |       |        |             |          |         | Klhl42  | 25.547    | 49.892   | 0.965656         | 25.548       | 49.893        | 0.96562706       | 0.00014386 | No      |
|      |       |        |             |          |         | Klhl6   | 50.0206   | 0.762865 | -6.03495         | 50.0216      | 0.763865      | -6.0330897       | 0.00014386 | No      |
|      |       |        |             |          |         | Klhl9   | 12.0811   | 16.9305  | 0.48687          | 12.0821      | 16.9315       | 0.48683856       | 0.00014386 | No      |
|      |       |        |             |          |         | Klra17  | 10.0674   | 20.0003  | 0.990336         | 10.0684      | 20.0013       | 0.99025933       | 0.00014386 | No      |
|      |       |        |             |          |         | Klra22  | 136.843   | 25.8129  | -2.40635         | 136.844      | 25.8139       | -2.4063122       | 0.00014386 | No      |
|      |       |        |             |          |         | Klrb1a  | 34.3469   | 8.42579  | -2.0273          | 34.3479      | 8.42679       | -2.0271668       | 0.00014386 | No      |
|      |       |        |             |          |         | Klrb1c  | 61.0787   | 0.893318 | -6.09535         | 61.0797      | 0.894318      | -6.0937613       | 0.00014386 | No      |
|      |       |        |             |          |         | Klrd1   | 82.7256   | 4.53592  | -4.18887         | 82.7266      | 4.53692       | -4.1885662       | 0.00014386 | No      |
|      |       |        |             |          |         | Klre1   | 24.6009   | 6.33695  | -1.95685         | 24.6019      | 6.33795       | -1.9566816       | 0.00014386 | No      |
|      |       |        |             |          |         | Klrk1   | 198.343   | 3.711    | -5.74005         | 198.344      | 3.712         | -5.7396642       | 0.00014386 | No      |
|      |       |        |             |          |         | Kmo     | 0.133626  | 26.2518  | 7.61807          | 0.134626     | 26.2528       | 7.60737043       | 0.00014386 | No      |
|      |       |        |             |          |         | Kmt2a   | 16.4984   | 3.60584  | -2.19392         | 16.4994      | 3.60684       | -2.1936062       | 0.00014386 | No      |
|      |       |        |             |          |         | Kmt2b   | 23.9176   | 7.95411  | -1.5883          | 23.9186      | 7.95511       | -1.5881792       | 0.00014386 | No      |
|      |       |        |             |          |         | Kmt2c   | 44.2445   | 7.27139  | -2.6052          | 44.2455      | 7.27239       | -2.6050293       | 0.00014386 | No      |
|      |       |        |             |          |         | Kmt2e   | 49.8581   | 12.9589  | -1.94388         | 49.8591      | 12.9599       | -1.9438023       | 0.00014386 | No      |
|      |       |        |             |          |         | Kpna1   | 26.9149   | 6.15886  | -2.12767         | 26.9159      | 6.15986       | -2.1274892       | 0.00014386 | No      |
|      |       |        |             |          |         | Kpna3   | 11.5464   | 5.737    | -1.00908         | 11.5474      | 5.738         | -1.0089482       | 0.00014386 | No      |
|      |       |        |             |          |         | Kpna4   | 28.1458   | 18.1906  | -0.629731        | 28.1468      | 18.1916       | -0.6296985       | 0.00014386 | No      |
|      |       |        |             |          |         | Kpna5   | 15.5033   | 3.51114  | -2.14256         | 15.5043      | 3.51214       | -2.1422461       | 0.00014386 | No      |
|      |       |        |             |          |         | Kpnb1   | 71.1702   | 28.165   | -1.33737         | 71.1712      | 28.166        | -1.3373389       | 0.00014386 | No      |
|      |       |        |             |          |         | KPTN    | 13.2834   | 26.1524  | 0.977316         | 13.2844      | 26.1534       | 0.97726544       | 0.00014386 | No      |
|      |       |        |             |          |         | Kras    | 18.314    | 11.0261  | -0.732025        | 18.315       | 11.0271       | -0.7319723       | 0.00014386 | No      |
|      |       |        |             |          |         | Krcc1   | 42.5969   | 63.2638  | 0.570633         | 42.5979      | 63.2648       | 0.57062071       | 0.00014386 | No      |
|      |       |        |             |          |         | Kremen1 | 5.7607    | 3.92691  | -0.552852        | 5.7617       | 3.92791       | -0.5527327       | 0.00014386 | No      |

| RRBS |       |        |             |          |         | RNAseq  |            |          |                  |              |               |                  |            |         |
|------|-------|--------|-------------|----------|---------|---------|------------|----------|------------------|--------------|---------------|------------------|------------|---------|
| gene | Blood | Kidney | methyl.diff | pMWU.fdr | Match ? | gene    | blood      | kidney   | log2(fold_ratio) | blood+ 0.001 | kidney+ 0.001 | log2(fold_ratio) | q_value    | Match ? |
|      |       |        |             |          |         | Kri1    | 55.1328    | 17.5333  | -1.65282         | 55.1338      | 17.5343       | -1.6527572       | 0.00014386 | No      |
|      |       |        |             |          |         | Krit1   | 27.8865    | 9.39901  | -1.56898         | 27.8875      | 9.40001       | -1.5688844       | 0.00014386 | No      |
|      |       |        |             |          |         | Krr1    | 26.0148    | 12.5257  | -1.05444         | 26.0158      | 12.5267       | -1.0543817       | 0.00014386 | No      |
|      |       |        |             |          |         | Krt10   | 3.87887    | 8.2333   | 1.08583          | 3.87987      | 8.2343        | 1.0856377        | 0.00014386 | No      |
|      |       |        |             |          |         | Krt14   | 0          | 12.1628  | inf              | 0.001        | 12.1638       | 13.5703064       | 0.00014386 | No      |
|      |       |        |             |          |         | Krt17   | 0          | 0.8381   | inf              | 0.001        | 0.8391        | 9.71269894       | 0.00014386 | No      |
|      |       |        |             |          |         | Krt18   | 2.68819    | 70.681   | 4.71661          | 2.68919      | 70.682        | 4.71609927       | 0.00014386 | No      |
|      |       |        |             |          |         | Krt23   | 0          | 15.4705  | inf              | 0.001        | 15.4715       | 13.9173255       | 0.00014386 | No      |
|      |       |        |             |          |         | Krt5    | 0.00804904 | 4.63761  | 9.17035          | 0.00904904   | 4.63861       | 9.00171209       | 0.00014386 | No      |
|      |       |        |             |          |         | Krt7    | 0.22243    | 693.599  | 11.6065          | 0.22343      | 693.6         | 11.6000653       | 0.00014386 | No      |
|      |       |        |             |          |         | Kynu    | 0.318567   | 14.5692  | 5.51518          | 0.319567     | 14.5702       | 5.51075843       | 0.00014386 | No      |
|      |       |        |             |          |         | L1cam   | 3.85317    | 34.4786  | 3.16158          | 3.85417      | 34.4796       | 3.16125093       | 0.00014386 | No      |
|      |       |        |             |          |         | L3mbtl2 | 34.2386    | 14.817   | -1.20837         | 34.2396      | 14.818        | -1.2083151       | 0.00014386 | No      |
|      |       |        |             |          |         | L3mbtl3 | 57.9059    | 3.24494  | -4.15744         | 57.9069      | 3.24594       | -4.157027        | 0.00014386 | No      |
|      |       |        |             |          |         | I7Rn6   | 46.6467    | 34.45    | -0.43727         | 46.6477      | 34.451        | -0.4372601       | 0.00014386 | No      |
|      |       |        |             |          |         | Lace1   | 5.04293    | 33.9988  | 2.75315          | 5.04393      | 33.9998       | 2.7529061        | 0.00014386 | No      |
|      |       |        |             |          |         | Lactb   | 11.1157    | 36.379   | 1.71051          | 11.1167      | 36.38         | 1.71041696       | 0.00014386 | No      |
|      |       |        |             |          |         | Lage3   | 39.5643    | 75.9778  | 0.94138          | 39.5653      | 75.9788       | 0.94136123       | 0.00014386 | No      |
|      |       |        |             |          |         | Lamb1   | 0.0514401  | 28.4348  | 9.11055          | 0.0524401    | 28.4358       | 9.08282224       | 0.00014386 | No      |
|      |       |        |             |          |         | Lamb2   | 0.0221269  | 71.8044  | 11.6641          | 0.0231269    | 71.8054       | 11.6003047       | 0.00014386 | No      |
|      |       |        |             |          |         | Lamp1   | 105.359    | 241.093  | 1.19428          | 105.36       | 241.094       | 1.1942685        | 0.00014386 | No      |
|      |       |        |             |          |         | Lamp2   | 26.7288    | 60.9327  | 1.18882          | 26.7298      | 60.9337       | 1.1887913        | 0.00014386 | No      |
|      |       |        |             |          |         | Lamtor1 | 58.016     | 141.788  | 1.28922          | 58.017       | 141.789       | 1.28919801       | 0.00014386 | No      |
|      |       |        |             |          |         | Lamtor3 | 17.5803    | 34.7479  | 0.982967         | 17.5813      | 34.7489       | 0.98292556       | 0.00014386 | No      |
|      |       |        |             |          |         | Lamtor4 | 55.7882    | 127.918  | 1.19719          | 55.7892      | 127.919       | 1.1971728        | 0.00014386 | No      |
|      |       |        |             |          |         | Lamtor5 | 54.2635    | 112.776  | 1.0554           | 54.2645      | 112.777       | 1.05539227       | 0.00014386 | No      |
|      |       |        |             |          |         | Lap3    | 20.3764    | 57.8636  | 1.50576          | 20.3774      | 57.8646       | 1.50571103       | 0.00014386 | No      |
|      |       |        |             |          |         | Laptm4a | 94.0648    | 252.341  | 1.42365          | 94.0658      | 252.342       | 1.42363815       | 0.00014386 | No      |
|      |       |        |             |          |         | Laptm4b | 1.74296    | 20.6449  | 3.56617          | 1.74396      | 20.6459       | 3.56541645       | 0.00014386 | No      |
|      |       |        |             |          |         | Laptm5  | 668.55     | 35.6313  | -4.22982         | 668.551      | 35.6323       | -4.2297801       | 0.00014386 | No      |
|      |       |        |             |          |         | Large   | 0.609239   | 10.3669  | 4.08883          | 0.610239     | 10.3679       | 4.08660551       | 0.00014386 | No      |
|      |       |        |             |          |         | Larp1   | 52.2276    | 19.9094  | -1.39137         | 52.2286      | 19.9104       | -1.3913178       | 0.00014386 | No      |
|      |       |        |             |          |         | Larp1b  | 31.4997    | 12.5498  | -1.32768         | 31.5007      | 12.5508       | -1.3276046       | 0.00014386 | No      |
|      |       |        |             |          |         | Lars    | 33.7285    | 15.2794  | -1.14238         | 33.7295      | 15.2804       | -1.1423286       | 0.00014386 | No      |
|      |       |        |             |          |         | LAS2    | 4.62788    | 0.938954 | -2.30122         | 4.62888      | 0.939954      | -2.3000011       | 0.00014386 | No      |
|      |       |        |             |          |         | Lat2    | 13.8473    | 2.77004  | -2.32163         | 13.8483      | 2.77104       | -2.3212094       | 0.00014386 | No      |
|      |       |        |             |          |         | Lbp     | 0.128376   | 3.7892   | 4.88344          | 0.129376     | 3.7902        | 4.87263206       | 0.00014386 | No      |
|      |       |        |             |          |         | Lbr     | 67.1226    | 5.45682  | -3.62067         | 67.1236      | 5.45782       | -3.6204234       | 0.00014386 | No      |
|      |       |        |             |          |         | Lcat    | 6.63305    | 32.4742  | 2.29155          | 6.63405      | 32.4752       | 2.29137662       | 0.00014386 | No      |
|      |       |        |             |          |         | Lck     | 540.51     | 19.9155  | -4.76236         | 540.511      | 19.9165       | -4.7622879       | 0.00014386 | No      |
|      |       |        |             |          |         | Lclat1  | 1.94475    | 9.63974  | 2.30941          | 1.94575      | 9.64074       | 2.30881753       | 0.00014386 | No      |
|      |       |        |             |          |         | Lcor    | 7.94601    | 1.80614  | -2.13732         | 7.94701      | 1.80714       | -2.1367039       | 0.00014386 | No      |

| RRBS |       |        |             |          |         | RNAseq   |           |         |                  |              |               |                  |            |         |
|------|-------|--------|-------------|----------|---------|----------|-----------|---------|------------------|--------------|---------------|------------------|------------|---------|
| gene | Blood | Kidney | methyl.diff | pMWU.fdr | Match ? | gene     | blood     | kidney  | log2(fold_ratio) | blood+ 0.001 | kidney+ 0.001 | log2(fold_ratio) | q_value    | Match ? |
|      |       |        |             |          |         | Lcp1     | 404.937   | 16.7805 | -4.59284         | 404.938      | 16.7815       | -4.5927575       | 0.00014386 | No      |
|      |       |        |             |          |         | Lcp2     | 104.521   | 5.06066 | -4.36833         | 104.522      | 5.06166       | -4.3680522       | 0.00014386 | No      |
|      |       |        |             |          |         | Ldb1     | 282.568   | 23.9362 | -3.56133         | 282.569      | 23.9372       | -3.5612769       | 0.00014386 | No      |
|      |       |        |             |          |         | Ldb2     | 0         | 2.28625 | inf              | 0.001        | 2.28725       | 11.1593983       | 0.00014386 | No      |
|      |       |        |             |          |         | Ldha     | 296.447   | 205.605 | -0.527899        | 296.448      | 205.606       | -0.5278967       | 0.00014386 | No      |
|      |       |        |             |          |         | Ldhb     | 11.1144   | 973.23  | 6.45228          | 11.1154      | 973.231       | 6.4521505        | 0.00014386 | No      |
|      |       |        |             |          |         | Ldhd     | 0.984361  | 40.002  | 5.34474          | 0.985361     | 40.003        | 5.34331202       | 0.00014386 | No      |
|      |       |        |             |          |         | Ldlr     | 1.48103   | 6.4575  | 2.12437          | 1.48203      | 6.4585        | 2.12362448       | 0.00014386 | No      |
|      |       |        |             |          |         | Ldlrad1  | 6.00639   | 1.87141 | -1.68238         | 6.00739      | 1.87241       | -1.681842        | 0.00014386 | No      |
|      |       |        |             |          |         | Ldlrap1  | 142.917   | 7.92397 | -4.17281         | 142.918      | 7.92497       | -4.1726383       | 0.00014386 | No      |
|      |       |        |             |          |         | Lef1     | 207.375   | 2.80877 | -6.20616         | 207.376      | 2.80977       | -6.2056531       | 0.00014386 | No      |
|      |       |        |             |          |         | Lemd2    | 49.4181   | 29.9461 | -0.722672        | 49.4191      | 29.9471       | -0.7226524       | 0.00014386 | No      |
|      |       |        |             |          |         | Lemd3    | 11.6148   | 4.53525 | -1.3567          | 11.6158      | 4.53625       | -1.3565165       | 0.00014386 | No      |
|      |       |        |             |          |         | Leng8    | 208.204   | 33.7412 | -2.62542         | 208.205      | 33.7422       | -2.6253788       | 0.00014386 | No      |
|      |       |        |             |          |         | Lepre1   | 5.36841   | 23.2472 | 2.11449          | 5.36941      | 23.2482       | 2.11428354       | 0.00014386 | No      |
|      |       |        |             |          |         | Leprel2  | 0.173183  | 58.7252 | 8.40554          | 0.174183     | 58.7262       | 8.39725665       | 0.00014386 | No      |
|      |       |        |             |          |         | Leprel4  | 0.282942  | 2.96195 | 3.38797          | 0.283942     | 2.96295       | 3.38336611       | 0.00014386 | No      |
|      |       |        |             |          |         | Leprot   | 20.2753   | 27.2566 | 0.426882         | 20.2763      | 27.2576       | 0.42686413       | 0.00014386 | No      |
|      |       |        |             |          |         | Leprotl1 | 139.874   | 56.8339 | -1.29931         | 139.875      | 56.8349       | -1.2992891       | 0.00014386 | No      |
|      |       |        |             |          |         | Letm1    | 18.7227   | 36.0439 | 0.944968         | 18.7237      | 36.0449       | 0.94492959       | 0.00014386 | No      |
|      |       |        |             |          |         | Letm2    | 8.46299   | 4.0275  | -1.07128         | 8.46399      | 4.0285        | -1.0710952       | 0.00014386 | No      |
|      |       |        |             |          |         | Lfng     | 53.7473   | 2.71048 | -4.30957         | 53.7483      | 2.71148       | -4.3090667       | 0.00014386 | No      |
|      |       |        |             |          |         | Lgals1   | 563.389   | 165.958 | -1.76331         | 563.39       | 165.959       | -1.7633071       | 0.00014386 | No      |
|      |       |        |             |          |         | Lgals3   | 3.27483   | 37.0711 | 3.5008           | 3.27583      | 37.0721       | 3.50040145       | 0.00014386 | No      |
|      |       |        |             |          |         | Lgals3bp | 39.6034   | 27.6699 | -0.517307        | 39.6044      | 27.6709       | -0.5172912       | 0.00014386 | No      |
|      |       |        |             |          |         | Lgals8   | 13.7561   | 23.413  | 0.767232         | 13.7571      | 23.414        | 0.76719504       | 0.00014386 | No      |
|      |       |        |             |          |         | Lgals9   | 214.455   | 20.8042 | -3.36573         | 214.456      | 20.8052       | -3.3656656       | 0.00014386 | No      |
|      |       |        |             |          |         | Lgmn     | 76.3512   | 167.256 | 1.13133          | 76.3522      | 167.257       | 1.13132496       | 0.00014386 | No      |
|      |       |        |             |          |         | Lgr4     | 0.449884  | 24.2564 | 5.75267          | 0.450884     | 24.2574       | 5.7495248        | 0.00014386 | No      |
|      |       |        |             |          |         | Lhpp     | 2.7513    | 28.9174 | 3.39375          | 2.7523       | 28.9184       | 3.3932781        | 0.00014386 | No      |
|      |       |        |             |          |         | Lias     | 4.10117   | 20.1321 | 2.29539          | 4.10217      | 20.1331       | 2.29511014       | 0.00014386 | No      |
|      |       |        |             |          |         | Lifr     | 0.0724435 | 43.7411 | 9.23792          | 0.0734435    | 43.7421       | 9.21817196       | 0.00014386 | No      |
|      |       |        |             |          |         | Lig1     | 17.8772   | 44.5897 | 1.31859          | 17.8782      | 44.5907       | 1.31854136       | 0.00014386 | No      |
|      |       |        |             |          |         | Lig4     | 41.5728   | 8.72639 | -2.25218         | 41.5738      | 8.72739       | -2.2520524       | 0.00014386 | No      |
|      |       |        |             |          |         | Lilrb4   | 2.48265   | 22.0713 | 3.15222          | 2.48365      | 22.0723       | 3.15170318       | 0.00014386 | No      |
|      |       |        |             |          |         | Lima1    | 0.545496  | 10.5372 | 4.27179          | 0.546496     | 10.5382       | 4.26927372       | 0.00014386 | No      |
|      |       |        |             |          |         | Limd2    | 792.505   | 29.7365 | -4.73611         | 792.506      | 29.7375       | -4.7360666       | 0.00014386 | No      |
|      |       |        |             |          |         | Lime1    | 80.9182   | 32.95   | -1.29619         | 80.9192      | 32.951        | -1.2961598       | 0.00014386 | No      |
|      |       |        |             |          |         | Limk1    | 4.52077   | 1.83503 | -1.30077         | 4.52177      | 1.83603       | -1.300298        | 0.00014386 | No      |
|      |       |        |             |          |         | Lims1    | 21.4049   | 9.92214 | -1.10922         | 21.4059      | 9.92314       | -1.1091399       | 0.00014386 | No      |
|      |       |        |             |          |         | Lin52    | 7.91994   | 38.7579 | 2.29093          | 7.92094      | 38.7589       | 2.29078407       | 0.00014386 | No      |
|      |       |        |             |          |         | Lin54    | 4.61382   | 2.01097 | -1.19807         | 4.61482      | 2.01197       | -1.1976656       | 0.00014386 | No      |

| RRBS |       |        |             |          |         | RNAseq |           |          |                  |              |               |                  |            |         |
|------|-------|--------|-------------|----------|---------|--------|-----------|----------|------------------|--------------|---------------|------------------|------------|---------|
| gene | Blood | Kidney | methyl.diff | pMWU.fdr | Match ? | gene   | blood     | kidney   | log2(fold_ratio) | blood+ 0.001 | kidney+ 0.001 | log2(fold_ratio) | q_value    | Match ? |
|      |       |        |             |          |         | Lin7c  | 12.8143   | 22.1805  | 0.791535         | 12.8153      | 22.1815       | 0.79148968       | 0.00014386 | No      |
|      |       |        |             |          |         | Lipt1  | 2.39606   | 1.35     | -0.827697        | 2.39706      | 1.351         | -0.8272383       | 0.00014386 | No      |
|      |       |        |             |          |         | Litaf  | 41.7929   | 54.9529  | 0.394937         | 41.7939      | 54.9539       | 0.39492948       | 0.00014386 | No      |
|      |       |        |             |          |         | Lix1l  | 2.2408    | 6.09555  | 1.44375          | 2.2418       | 6.09655       | 1.44333549       | 0.00014386 | No      |
|      |       |        |             |          |         | Llgl1  | 14.4643   | 7.23645  | -0.999138        | 14.4653      | 7.23745       | -0.9990429       | 0.00014386 | No      |
|      |       |        |             |          |         | Llgl2  | 9.58334   | 50.5931  | 2.40034          | 9.58434      | 50.5941       | 2.40021816       | 0.00014386 | No      |
|      |       |        |             |          |         | Llph   | 126.29    | 71.9361  | -0.811957        | 126.291      | 71.9371       | -0.8119439       | 0.00014386 | No      |
|      |       |        |             |          |         | Lman1  | 8.60059   | 23.4388  | 1.44639          | 8.60159      | 23.4398       | 1.44628499       | 0.00014386 | No      |
|      |       |        |             |          |         | Lman2l | 10.7621   | 23.083   | 1.10087          | 10.7631      | 23.084        | 1.10079957       | 0.00014386 | No      |
|      |       |        |             |          |         | Lmbr1  | 6.12646   | 3.90111  | -0.651169        | 6.12746      | 3.90211       | -0.6510347       | 0.00014386 | No      |
|      |       |        |             |          |         | Lmbrd1 | 23.5588   | 30.876   | 0.390218         | 23.5598      | 30.877        | 0.3902053        | 0.00014386 | No      |
|      |       |        |             |          |         | Lmnb1  | 13.554    | 3.78254  | -1.84129         | 13.555       | 3.78354       | -1.8410165       | 0.00014386 | No      |
|      |       |        |             |          |         | Lmnb2  | 10.9039   | 5.49104  | -0.989689        | 10.9049      | 5.49204       | -0.9895625       | 0.00014386 | No      |
|      |       |        |             |          |         | Lmo1   | 0         | 2.05743  | inf              | 0.001        | 2.05843       | 11.0073287       | 0.00014386 | No      |
|      |       |        |             |          |         | Lmo2   | 4.77664   | 10.8564  | 1.18448          | 4.77764      | 10.8574       | 1.18430861       | 0.00014386 | No      |
|      |       |        |             |          |         | Lmo7   | 2.51475   | 42.5877  | 4.08195          | 2.51575      | 42.5887       | 4.08141022       | 0.00014386 | No      |
|      |       |        |             |          |         | Lmtk2  | 3.04401   | 4.3146   | 0.503251         | 3.04501      | 4.3156        | 0.50311419       | 0.00014386 | No      |
|      |       |        |             |          |         | Lnp    | 2.7845    | 1.47478  | -0.91692         | 2.7855       | 1.47578       | -0.9164586       | 0.00014386 | No      |
|      |       |        |             |          |         | Lnx1   | 1.46381   | 10.1367  | 2.7918           | 1.46481      | 10.1377       | 2.79094493       | 0.00014386 | No      |
|      |       |        |             |          |         | Lnx2   | 15.1048   | 6.12761  | -1.30161         | 15.1058      | 6.12861       | -1.3014708       | 0.00014386 | No      |
|      |       |        |             |          |         | Lonp1  | 42.6194   | 59.5158  | 0.481761         | 42.6204      | 59.5168       | 0.48175283       | 0.00014386 | No      |
|      |       |        |             |          |         | Lonp2  | 21.7233   | 84.7653  | 1.96423          | 21.7243      | 84.7663       | 1.96418112       | 0.00014386 | No      |
|      |       |        |             |          |         | Lpar3  | 0         | 1.88102  | inf              | 0.001        | 1.88202       | 10.8780662       | 0.00014386 | No      |
|      |       |        |             |          |         | Lpar6  | 48.8454   | 10.5225  | -2.21475         | 48.8464      | 10.5235       | -2.2146376       | 0.00014386 | No      |
|      |       |        |             |          |         | Lpcat1 | 13.2563   | 5.97952  | -1.14858         | 13.2573      | 5.98052       | -1.1484441       | 0.00014386 | No      |
|      |       |        |             |          |         | Lpcat3 | 23.5968   | 13.8304  | -0.77075         | 23.5978      | 13.8314       | -0.7707052       | 0.00014386 | No      |
|      |       |        |             |          |         | Lpcat4 | 18.95     | 4.94917  | -1.93694         | 18.951       | 4.95017       | -1.936724        | 0.00014386 | No      |
|      |       |        |             |          |         | Lpgat1 | 4.779     | 9.58322  | 1.0038           | 4.78         | 9.58422       | 1.00365041       | 0.00014386 | No      |
|      |       |        |             |          |         | Lphn1  | 10.9414   | 5.37805  | -1.02464         | 10.9424      | 5.37905       | -1.0245059       | 0.00014386 | No      |
|      |       |        |             |          |         | Lphn2  | 0.0793352 | 5.58036  | 6.13625          | 0.0803352    | 5.58136       | 6.11844063       | 0.00014386 | No      |
|      |       |        |             |          |         | Lpin2  | 3.73112   | 7.22779  | 0.953946         | 3.73212      | 7.22879       | 0.95375881       | 0.00014386 | No      |
|      |       |        |             |          |         | Lpin3  | 14.5174   | 27.9403  | 0.944565         | 14.5184      | 27.9413       | 0.94451668       | 0.00014386 | No      |
|      |       |        |             |          |         | Lpo    | 0         | 0.905676 | inf              | 0.001        | 0.906676      | 9.82444329       | 0.00014386 | No      |
|      |       |        |             |          |         | Lpxn   | 129.161   | 5.52226  | -4.54777         | 129.162      | 5.52326       | -4.5475178       | 0.00014386 | No      |
|      |       |        |             |          |         | Lrch1  | 9.75942   | 4.25795  | -1.19664         | 9.76042      | 4.25895       | -1.1964454       | 0.00014386 | No      |
|      |       |        |             |          |         | Lrch3  | 15.732    | 5.81036  | -1.43701         | 15.733       | 5.81136       | -1.4368461       | 0.00014386 | No      |
|      |       |        |             |          |         | Lrch4  | 78.9548   | 19.0822  | -2.0488          | 78.9558      | 19.0832       | -2.0487421       | 0.00014386 | No      |
|      |       |        |             |          |         | Lrif1  | 9.52084   | 4.33875  | -1.13381         | 9.52184      | 4.33975       | -1.1336285       | 0.00014386 | No      |
|      |       |        |             |          |         | Lrig1  | 49.2253   | 6.48382  | -2.92448         | 49.2263      | 6.48482       | -2.9242909       | 0.00014386 | No      |
|      |       |        |             |          |         | Lrig2  | 9.19226   | 2.75124  | -1.74034         | 9.19326      | 2.75224       | -1.7399703       | 0.00014386 | No      |
|      |       |        |             |          |         | LRIG3  | 0.148028  | 8.54427  | 5.85102          | 0.149028     | 8.54527       | 5.84147076       | 0.00014386 | No      |
|      |       |        |             |          |         | Lrmp   | 40.2462   | 5.48013  | -2.87657         | 40.2472      | 5.48113       | -2.8763432       | 0.00014386 | No      |

| RRBS |       |        |             |          |         | RNAseq  |           |         |                  |              |               |                  |            |         |
|------|-------|--------|-------------|----------|---------|---------|-----------|---------|------------------|--------------|---------------|------------------|------------|---------|
| gene | Blood | Kidney | methyl.diff | pMWU.fdr | Match ? | gene    | blood     | kidney  | log2(fold_ratio) | blood+ 0.001 | kidney+ 0.001 | log2(fold_ratio) | q_value    | Match ? |
|      |       |        |             |          |         | Lrp1    | 0.166175  | 1.03924 | 2.64474          | 0.167175     | 1.04024       | 2.6374854        | 0.00014386 | No      |
|      |       |        |             |          |         | Lrp12   | 0.165178  | 3.62706 | 4.45671          | 0.166178     | 3.62806       | 4.44839701       | 0.00014386 | No      |
|      |       |        |             |          |         | Lrp5    | 2.06536   | 35.3437 | 4.09699          | 2.06636      | 35.3447       | 4.09633037       | 0.00014386 | No      |
|      |       |        |             |          |         | Lrppap1 | 12.8314   | 97.6132 | 2.92739          | 12.8324      | 97.6142       | 2.92730001       | 0.00014386 | No      |
|      |       |        |             |          |         | Lrrc1   | 11.7076   | 21.1615 | 0.85399          | 11.7086      | 21.1625       | 0.85394149       | 0.00014386 | No      |
|      |       |        |             |          |         | Lrrc19  | 0.0540969 | 8.41399 | 7.2811           | 0.0550969    | 8.41499       | 7.2548466        | 0.00014386 | No      |
|      |       |        |             |          |         | Lrrc25  | 0.240414  | 1.05983 | 2.14024          | 0.241414     | 1.06083       | 2.13561223       | 0.00014386 | No      |
|      |       |        |             |          |         | Lrrc27  | 0         | 1.0637  | inf              | 0.001        | 1.0647        | 10.0562313       | 0.00014386 | No      |
|      |       |        |             |          |         | Lrrc34  | 22.9769   | 2.6615  | -3.10987         | 22.9779      | 2.6625        | -3.1093935       | 0.00014386 | No      |
|      |       |        |             |          |         | Lrrc39  | 6.22793   | 1.69923 | -1.87387         | 6.22893      | 1.70023       | -1.8732544       | 0.00014386 | No      |
|      |       |        |             |          |         | Lrrc40  | 13.1776   | 7.21521 | -0.868971        | 13.1786      | 7.21621       | -0.8688839       | 0.00014386 | No      |
|      |       |        |             |          |         | Lrrc46  | 0.540175  | 2.28557 | 2.08106          | 0.541175     | 2.28657       | 2.07901799       | 0.00014386 | No      |
|      |       |        |             |          |         | Lrrc47  | 34.9282   | 48.1104 | 0.461954         | 34.9292      | 48.1114       | 0.46194518       | 0.00014386 | No      |
|      |       |        |             |          |         | Lrrc51  | 0.201718  | 1.55165 | 2.94339          | 0.202718     | 1.55265       | 2.93718655       | 0.00014386 | No      |
|      |       |        |             |          |         | Lrrc59  | 17.6289   | 24.8898 | 0.497613         | 17.6299      | 24.8908       | 0.49758831       | 0.00014386 | No      |
|      |       |        |             |          |         | Lrrc61  | 0.128354  | 1.81423 | 3.82116          | 0.129354     | 1.81523       | 3.81075579       | 0.00014386 | No      |
|      |       |        |             |          |         | Lrrc66  | 0.0963974 | 2.94763 | 4.93442          | 0.0973974    | 2.94863       | 4.92001773       | 0.00014386 | No      |
|      |       |        |             |          |         | Lrrc8a  | 30.7939   | 136.652 | 2.14979          | 30.7949      | 136.653       | 2.14975378       | 0.00014386 | No      |
|      |       |        |             |          |         | Lrrc8b  | 27.7964   | 2.97096 | -3.2259          | 27.7974      | 2.97196       | -3.2254633       | 0.00014386 | No      |
|      |       |        |             |          |         | Lrrfip2 | 12.6494   | 30.962  | 1.29143          | 12.6504      | 30.963        | 1.29136226       | 0.00014386 | No      |
|      |       |        |             |          |         | Lrrk1   | 0.566948  | 11.6447 | 4.36031          | 0.567948     | 11.6457       | 4.3578947        | 0.00014386 | No      |
|      |       |        |             |          |         | Lrrk2   | 0.97632   | 11.6495 | 3.57677          | 0.97732      | 11.6505       | 3.57541705       | 0.00014386 | No      |
|      |       |        |             |          |         | Lrsam1  | 2.2779    | 22.2434 | 3.2876           | 2.2789       | 22.2444       | 3.28703266       | 0.00014386 | No      |
|      |       |        |             |          |         | Lrtm2   | 0.0654622 | 3.63795 | 5.79632          | 0.0664622    | 3.63895       | 5.77484437       | 0.00014386 | No      |
|      |       |        |             |          |         | Lrwd1   | 48.5843   | 9.21018 | -2.39919         | 48.5853      | 9.21118       | -2.399062        | 0.00014386 | No      |
|      |       |        |             |          |         | Lsg1    | 19.6381   | 12.4018 | -0.66311         | 19.6391      | 12.4028       | -0.663063        | 0.00014386 | No      |
|      |       |        |             |          |         | Lsm12   | 74.2209   | 40.5514 | -0.872073        | 74.2219      | 40.5524       | -0.8720576       | 0.00014386 | No      |
|      |       |        |             |          |         | Lsm14a  | 69.581    | 29.9945 | -1.214           | 69.582       | 29.9955       | -1.2139681       | 0.00014386 | No      |
|      |       |        |             |          |         | Lsm14b  | 51.4933   | 20.6015 | -1.32164         | 51.4943      | 20.6025       | -1.3215933       | 0.00014386 | No      |
|      |       |        |             |          |         | Lsm4    | 209.293   | 101.409 | -1.04534         | 209.294      | 101.41        | -1.045331        | 0.00014386 | No      |
|      |       |        |             |          |         | Lsm5    | 152.479   | 84.001  | -0.860135        | 152.48       | 84.002        | -0.8601244       | 0.00014386 | No      |
|      |       |        |             |          |         | LSP1    | 238.496   | 17.6443 | -3.75669         | 238.497      | 17.6453       | -3.7566153       | 0.00014386 | No      |
|      |       |        |             |          |         | Lta4h   | 15.9887   | 24.5146 | 0.616588         | 15.9897      | 24.5156       | 0.6165572        | 0.00014386 | No      |
|      |       |        |             |          |         | Ltb     | 389.231   | 9.59884 | -5.34162         | 389.232      | 9.59984       | -5.3414762       | 0.00014386 | No      |
|      |       |        |             |          |         | Ltbp1   | 0.116545  | 10.0507 | 6.43026          | 0.117545     | 10.0517       | 6.41808254       | 0.00014386 | No      |
|      |       |        |             |          |         | Ltbp4   | 0.382332  | 19.5187 | 5.67388          | 0.383332     | 19.5197       | 5.67019263       | 0.00014386 | No      |
|      |       |        |             |          |         | Ltn1    | 18.8023   | 7.79885 | -1.26957         | 18.8033      | 7.79985       | -1.2694676       | 0.00014386 | No      |
|      |       |        |             |          |         | Ltv1    | 24.2641   | 15.2265 | -0.672235        | 24.2651      | 15.2275       | -0.6722037       | 0.00014386 | No      |
|      |       |        |             |          |         | Luc7l   | 40.3939   | 21.7537 | -0.892876        | 40.3949      | 21.7547       | -0.892846        | 0.00014386 | No      |
|      |       |        |             |          |         | Luc7l3  | 94.9878   | 51.6822 | -0.878074        | 94.9888      | 51.6832       | -0.878062        | 0.00014386 | No      |
|      |       |        |             |          |         | Lurap1  | 0         | 1.1656  | inf              | 0.001        | 1.1666        | 10.1880943       | 0.00014386 | No      |
|      |       |        |             |          |         | Luzp1   | 2.81607   | 5.31478 | 0.916326         | 2.81707      | 5.31578       | 0.91608599       | 0.00014386 | No      |



| RRBS |       |        |             |          |         | RNAseq  |          |          |                  |              |               |                  |            |         |
|------|-------|--------|-------------|----------|---------|---------|----------|----------|------------------|--------------|---------------|------------------|------------|---------|
| gene | Blood | Kidney | methyl.diff | pMWU.fdr | Match ? | gene    | blood    | kidney   | log2(fold_ratio) | blood+ 0.001 | kidney+ 0.001 | log2(fold_ratio) | q_value    | Match ? |
|      |       |        |             |          |         | Ly49i5  | 5.22312  | 0.547421 | -3.25419         | 5.22412      | 0.548421      | -3.2518323       | 0.00014386 | No      |
|      |       |        |             |          |         | Ly6al   | 0.609636 | 16.8958  | 4.79257          | 0.610636     | 16.8968       | 4.79029359       | 0.00014386 | No      |
|      |       |        |             |          |         | Ly6c    | 328.734  | 62.8     | -2.38809         | 328.735      | 62.801        | -2.3880656       | 0.00014386 | No      |
|      |       |        |             |          |         | Ly6e    | 717.888  | 174.821  | -2.03788         | 717.889      | 174.822       | -2.037874        | 0.00014386 | No      |
|      |       |        |             |          |         | Ly6i    | 0.142052 | 65.8866  | 8.85742          | 0.143052     | 65.8876       | 8.8473235        | 0.00014386 | No      |
|      |       |        |             |          |         | Ly75    | 7.1691   | 0.450534 | -3.99208         | 7.1701       | 0.451534      | -3.9890867       | 0.00014386 | No      |
|      |       |        |             |          |         | Ly9     | 78.4012  | 0.923175 | -6.40813         | 78.4022      | 0.924175      | -6.4065843       | 0.00014386 | No      |
|      |       |        |             |          |         | Lyar    | 22.8253  | 11.1925  | -1.0281          | 22.8263      | 11.1935       | -1.0280358       | 0.00014386 | No      |
|      |       |        |             |          |         | Lyn     | 4.70597  | 10.0317  | 1.09199          | 4.70697      | 10.0327       | 1.09183935       | 0.00014386 | No      |
|      |       |        |             |          |         | Lynx1   | 0.585006 | 13.4015  | 4.5178           | 0.586006     | 13.4025       | 4.51544289       | 0.00014386 | No      |
|      |       |        |             |          |         | Lypla2  | 57.6282  | 42.1029  | -0.452855        | 57.6292      | 42.1039       | -0.4528461       | 0.00014386 | No      |
|      |       |        |             |          |         | Lypla1  | 0.775953 | 25.9983  | 5.0663           | 0.776953     | 25.9993       | 5.06450164       | 0.00014386 | No      |
|      |       |        |             |          |         | Lyrn2   | 18.1445  | 27.0355  | 0.57532          | 18.1455      | 27.0365       | 0.57529659       | 0.00014386 | No      |
|      |       |        |             |          |         | Lyrn7   | 4.07351  | 14.1691  | 1.7984           | 4.07451      | 14.1701       | 1.79815146       | 0.00014386 | No      |
|      |       |        |             |          |         | Lyrn9   | 4.53599  | 14.3252  | 1.65907          | 4.53699      | 14.3262       | 1.6588486        | 0.00014386 | No      |
|      |       |        |             |          |         | Lysmd2  | 10.3743  | 1.72194  | -2.59091         | 10.3753      | 1.72294       | -2.5902087       | 0.00014386 | No      |
|      |       |        |             |          |         | Lysmd3  | 4.61834  | 2.58753  | -0.835799        | 4.61934      | 2.58853       | -0.8355537       | 0.00014386 | No      |
|      |       |        |             |          |         | Lyst    | 9.35478  | 1.39472  | -2.74573         | 9.35578      | 1.39572       | -2.7448484       | 0.00014386 | No      |
|      |       |        |             |          |         | Lyve1   | 0.117919 | 1.80273  | 3.93432          | 0.118919     | 1.80373       | 3.92293226       | 0.00014386 | No      |
|      |       |        |             |          |         | Lyz2    | 58.1267  | 99.2271  | 0.771532         | 58.1277      | 99.2281       | 0.7715229        | 0.00014386 | No      |
|      |       |        |             |          |         | Lzic    | 15.5257  | 6.88729  | -1.17265         | 15.5267      | 6.88829       | -1.1725334       | 0.00014386 | No      |
|      |       |        |             |          |         | Lztf1   | 2.9855   | 20.9647  | 2.81192          | 2.9865       | 20.9657       | 2.81150337       | 0.00014386 | No      |
|      |       |        |             |          |         | Lzts2   | 4.09781  | 19.2069  | 2.2287           | 4.09881      | 19.2079       | 2.22842278       | 0.00014386 | No      |
|      |       |        |             |          |         | MacroD1 | 0.94939  | 70.2417  | 6.20918          | 0.95039      | 70.2427       | 6.20768483       | 0.00014386 | No      |
|      |       |        |             |          |         | Mad1l1  | 16.354   | 9.44241  | -0.792421        | 16.355       | 9.44341       | -0.7923519       | 0.00014386 | No      |
|      |       |        |             |          |         | Mad2l1  | 6.96791  | 2.4754   | -1.49307         | 6.96891      | 2.4764        | -1.4926887       | 0.00014386 | No      |
|      |       |        |             |          |         | Madd    | 40.1579  | 10.8992  | -1.88147         | 40.1589      | 10.9002       | -1.8813651       | 0.00014386 | No      |
|      |       |        |             |          |         | Maea    | 42.0715  | 182.068  | 2.11356          | 42.0725      | 182.069       | 2.11353585       | 0.00014386 | No      |
|      |       |        |             |          |         | Maf     | 7.02068  | 54.9452  | 2.96831          | 7.02168      | 54.9462       | 2.96813156       | 0.00014386 | No      |
|      |       |        |             |          |         | Maf1    | 149.351  | 76.637   | -0.962595        | 149.352      | 76.638        | -0.9625847       | 0.00014386 | No      |
|      |       |        |             |          |         | Mafg    | 2.9546   | 12.3546  | 2.06402          | 2.9556       | 12.3556       | 2.06364213       | 0.00014386 | No      |
|      |       |        |             |          |         | Maged2  | 3.98052  | 21.6358  | 2.44239          | 3.98152      | 21.6368       | 2.44209594       | 0.00014386 | No      |
|      |       |        |             |          |         | Mageh1  | 2.11218  | 28.6318  | 3.76082          | 2.11318      | 28.6328       | 3.76018119       | 0.00014386 | No      |
|      |       |        |             |          |         | Magi1   | 0.163824 | 10.7847  | 6.0407           | 0.164824     | 10.7857       | 6.03204967       | 0.00014386 | No      |
|      |       |        |             |          |         | Magi3   | 3.93869  | 19.2251  | 2.2872           | 3.93969      | 19.2261       | 2.28691212       | 0.00014386 | No      |
|      |       |        |             |          |         | Magoh   | 120.092  | 72.0408  | -0.737252        | 120.093      | 72.0418       | -0.7372459       | 0.00014386 | No      |
|      |       |        |             |          |         | Magohb  | 29.1385  | 7.60745  | -1.93744         | 29.1395      | 7.60845       | -1.9373016       | 0.00014386 | No      |
|      |       |        |             |          |         | Mak16   | 21.405   | 9.31536  | -1.20026         | 21.406       | 9.31636       | -1.2001769       | 0.00014386 | No      |
|      |       |        |             |          |         | Mal     | 0.747786 | 163.021  | 7.76822          | 0.748786     | 163.022       | 7.76629749       | 0.00014386 | No      |
|      |       |        |             |          |         | Mall    | 0        | 1.56018  | inf              | 0.001        | 1.56118       | 10.6084212       | 0.00014386 | No      |
|      |       |        |             |          |         | Malsu1  | 14.4241  | 31.6627  | 1.1343           | 14.4251      | 31.6637       | 1.13424853       | 0.00014386 | No      |
|      |       |        |             |          |         | Malt1   | 20.9201  | 2.46317  | -3.0863          | 20.9211      | 2.46417       | -3.085785        | 0.00014386 | No      |

| RRBS |       |        |            |          |         | RNAseq    |           |         |                  |              |               |                  |            |         |
|------|-------|--------|------------|----------|---------|-----------|-----------|---------|------------------|--------------|---------------|------------------|------------|---------|
| gene | Blood | Kidney | methy.diff | pMWU.fdr | Match ? | gene      | blood     | kidney  | log2(fold_ratio) | blood+ 0.001 | kidney+ 0.001 | log2(fold_ratio) | q_value    | Match ? |
|      |       |        |            |          |         | MAMDC2    | 0         | 5.84098 | inf              | 0.001        | 5.84198       | 12.5122417       | 0.00014386 | No      |
|      |       |        |            |          |         | Maml2     | 9.56375   | 1.20137 | -2.9929          | 9.56475      | 1.20237       | -2.9918463       | 0.00014386 | No      |
|      |       |        |            |          |         | Man1a1    | 56.0587   | 2.3843  | -4.5553          | 56.0597      | 2.3853        | -4.5547214       | 0.00014386 | No      |
|      |       |        |            |          |         | Man1a2    | 12.7243   | 5.93583 | -1.10007         | 12.7253      | 5.93683       | -1.099935        | 0.00014386 | No      |
|      |       |        |            |          |         | Man1b1    | 32.7807   | 20.9368 | -0.646808        | 32.7817      | 20.9378       | -0.6467808       | 0.00014386 | No      |
|      |       |        |            |          |         | Man2a1    | 33.1884   | 10.4236 | -1.67082         | 33.1894      | 10.4246       | -1.6707305       | 0.00014386 | No      |
|      |       |        |            |          |         | Man2c1    | 37.9041   | 59.0521 | 0.639637         | 37.9051      | 59.0531       | 0.63962082       | 0.00014386 | No      |
|      |       |        |            |          |         | Manba     | 11.5531   | 27.8521 | 1.26951          | 11.5541      | 27.8531       | 1.26943302       | 0.00014386 | No      |
|      |       |        |            |          |         | Manbal    | 29.2398   | 65.2977 | 1.1591           | 29.2408      | 65.2987       | 1.15907149       | 0.00014386 | No      |
|      |       |        |            |          |         | Manea     | 1.08746   | 2.55325 | 1.23138          | 1.08846      | 2.55425       | 1.23061135       | 0.00014386 | No      |
|      |       |        |            |          |         | Mansc1    | 0.0768439 | 12.6568 | 7.36376          | 0.0778439    | 12.6578       | 7.34522697       | 0.00014386 | No      |
|      |       |        |            |          |         | Maoa      | 0.197811  | 9.38532 | 5.56821          | 0.198811     | 9.38632       | 5.56109016       | 0.00014386 | No      |
|      |       |        |            |          |         | Map1lc3a  | 15.7479   | 118.357 | 2.90991          | 15.7489      | 118.358       | 2.90983425       | 0.00014386 | No      |
|      |       |        |            |          |         | Map1lc3b  | 106.802   | 164.631 | 0.624298         | 106.803      | 164.632       | 0.62429261       | 0.00014386 | No      |
|      |       |        |            |          |         | Map2      | 0         | 1.03945 | inf              | 0.001        | 1.04045       | 10.0229919       | 0.00014386 | No      |
|      |       |        |            |          |         | Map2k1    | 44.0914   | 26.1096 | -0.755917        | 44.0924      | 26.1106       | -0.7558944       | 0.00014386 | No      |
|      |       |        |            |          |         | Map2k2    | 72.024    | 175.307 | 1.28334          | 72.025       | 175.308       | 1.28332217       | 0.00014386 | No      |
|      |       |        |            |          |         | Map2k3    | 4.64655   | 13.8106 | 1.57154          | 4.64755      | 13.8116       | 1.57133817       | 0.00014386 | No      |
|      |       |        |            |          |         | Map2k4    | 17.31     | 11.9156 | -0.53875         | 17.311       | 11.9166       | -0.5387164       | 0.00014386 | No      |
|      |       |        |            |          |         | Map2k5    | 13.94     | 34.8451 | 1.32173          | 13.941       | 34.8461       | 1.32166315       | 0.00014386 | No      |
|      |       |        |            |          |         | Map2k6    | 22.373    | 7.02078 | -1.67205         | 22.374       | 7.02178       | -1.6719145       | 0.00014386 | No      |
|      |       |        |            |          |         | Map3k1    | 34.387    | 25.026  | -0.458438        | 34.388       | 25.027        | -0.4584198       | 0.00014386 | No      |
|      |       |        |            |          |         | Map3k11   | 14.4184   | 23.2773 | 0.691018         | 14.4194      | 23.2783       | 0.69097457       | 0.00014386 | No      |
|      |       |        |            |          |         | Map3k13   | 11.1805   | 7.00428 | -0.67467         | 11.1815      | 7.00528       | -0.6745991       | 0.00014386 | No      |
|      |       |        |            |          |         | Map3k14   | 19.4063   | 3.6589  | -2.40705         | 19.4073      | 3.6599        | -2.4067233       | 0.00014386 | No      |
|      |       |        |            |          |         | Map3k2    | 10.9194   | 3.63714 | -1.58601         | 10.9204      | 3.63814       | -1.5857527       | 0.00014386 | No      |
|      |       |        |            |          |         | Map3k3    | 23.7084   | 8.76473 | -1.43562         | 23.7094      | 8.76573       | -1.435513        | 0.00014386 | No      |
|      |       |        |            |          |         | Map3k5    | 14.8791   | 24.7009 | 0.731277         | 14.8801      | 24.7019       | 0.73123779       | 0.00014386 | No      |
|      |       |        |            |          |         | Map3k8    | 8.84999   | 2.93515 | -1.59224         | 8.85099      | 2.93615       | -1.5919132       | 0.00014386 | No      |
|      |       |        |            |          |         | Map4k1    | 72.5162   | 10.5784 | -2.77718         | 72.5172      | 10.5794       | -2.7770654       | 0.00014386 | No      |
|      |       |        |            |          |         | Map4k3    | 6.97344   | 43.1002 | 2.62775          | 6.97444      | 43.1012       | 2.62757875       | 0.00014386 | No      |
|      |       |        |            |          |         | Map4k4    | 47.8876   | 11.5724 | -2.04897         | 47.8886      | 11.5734       | -2.0488695       | 0.00014386 | No      |
|      |       |        |            |          |         | Map4k5    | 0.998699  | 8.31363 | 3.05736          | 0.999699     | 8.31463       | 3.05608638       | 0.00014386 | No      |
|      |       |        |            |          |         | Map7      | 0.388104  | 27.9639 | 6.17098          | 0.389104     | 27.9649       | 6.16731755       | 0.00014386 | No      |
|      |       |        |            |          |         | Map7d1    | 42.8487   | 29.6098 | -0.533178        | 42.8497      | 29.6108       | -0.5331616       | 0.00014386 | No      |
|      |       |        |            |          |         | Map9      | 1.21263   | 1.93589 | 0.674852         | 1.21363      | 1.93689       | 0.67441337       | 0.00014386 | No      |
|      |       |        |            |          |         | Mapk1     | 33.9239   | 24.7437 | -0.45524         | 33.9249      | 24.7447       | -0.455225        | 0.00014386 | No      |
|      |       |        |            |          |         | Mapk1ip1l | 28.3111   | 12.91   | -1.13288         | 28.3121      | 12.911        | -1.132818        | 0.00014386 | No      |
|      |       |        |            |          |         | Mapk3     | 23.0019   | 61.9202 | 1.42866          | 23.0029      | 61.9212       | 1.42861768       | 0.00014386 | No      |
|      |       |        |            |          |         | Mapk7     | 0.940089  | 3.60782 | 1.94026          | 0.941089     | 3.60882       | 1.93912411       | 0.00014386 | No      |
|      |       |        |            |          |         | Mapk8     | 9.03828   | 4.46177 | -1.01843         | 9.03928      | 4.46277       | -1.0182684       | 0.00014386 | No      |
|      |       |        |            |          |         | Mapk8ip1  | 0.177894  | 42.6987 | 7.90703          | 0.178894     | 42.6997       | 7.89897712       | 0.00014386 | No      |

| RRBS |       |        |             |          |         | RNAseq   |           |          |                  |              |               |                  |            |         |
|------|-------|--------|-------------|----------|---------|----------|-----------|----------|------------------|--------------|---------------|------------------|------------|---------|
| gene | Blood | Kidney | methyl.diff | pMWU.fdr | Match ? | gene     | blood     | kidney   | log2(fold_ratio) | blood+ 0.001 | kidney+ 0.001 | log2(fold_ratio) | q_value    | Match ? |
|      |       |        |             |          |         | Mapk8ip3 | 26.8692   | 11.7169  | -1.19736         | 26.8702      | 11.7179       | -1.197293        | 0.00014386 | No      |
|      |       |        |             |          |         | Mapkap1  | 21.9088   | 29.9899  | 0.452968         | 21.9098      | 29.9909       | 0.4529485        | 0.00014386 | No      |
|      |       |        |             |          |         | Mapkbp1  | 6.65858   | 1.8162   | -1.87429         | 6.65958      | 1.8172        | -1.873714        | 0.00014386 | No      |
|      |       |        |             |          |         | Mapre1   | 69.6094   | 30.4122  | -1.19463         | 69.6104      | 30.4132       | -1.1946052       | 0.00014386 | No      |
|      |       |        |             |          |         | Mapre2   | 58.6209   | 24.4069  | -1.26413         | 58.6219      | 24.4079       | -1.2640916       | 0.00014386 | No      |
|      |       |        |             |          |         | Mapre3   | 3.114     | 27.7922  | 3.15784          | 3.115        | 27.7932       | 3.15742788       | 0.00014386 | No      |
|      |       |        |             |          |         | Mapt     | 0.0975216 | 12.3715  | 6.98708          | 0.0985216    | 12.3725       | 6.97248127       | 0.00014386 | No      |
|      |       |        |             |          |         | Marcks   | 0.933214  | 3.54876  | 1.92704          | 0.934214     | 3.54976       | 1.92589652       | 0.00014386 | No      |
|      |       |        |             |          |         | Marcksl1 | 5.09683   | 19.3348  | 1.92353          | 5.09783      | 19.3358       | 1.92331929       | 0.00014386 | No      |
|      |       |        |             |          |         | Marf1    | 21.3535   | 8.33866  | -1.35658         | 21.3545      | 8.33966       | -1.3564796       | 0.00014386 | No      |
|      |       |        |             |          |         | Mark2    | 49.5264   | 28.3789  | -0.803379        | 49.5274      | 28.3799       | -0.8033574       | 0.00014386 | No      |
|      |       |        |             |          |         | Mark4    | 9.99239   | 5.40618  | -0.886221        | 9.99339      | 5.40718       | -0.8860978       | 0.00014386 | No      |
|      |       |        |             |          |         | Marveld1 | 0.664476  | 6.7539   | 3.34543          | 0.665476     | 6.7549        | 3.34347587       | 0.00014386 | No      |
|      |       |        |             |          |         | Mast2    | 6.28319   | 16.3597  | 1.38058          | 6.28419      | 16.3607       | 1.38043577       | 0.00014386 | No      |
|      |       |        |             |          |         | Mast3    | 35.2456   | 13.8728  | -1.34519         | 35.2466      | 13.8738       | -1.3451211       | 0.00014386 | No      |
|      |       |        |             |          |         | Matr3    | 102.802   | 43.7154  | -1.23366         | 102.803      | 43.7164       | -1.2336359       | 0.00014386 | No      |
|      |       |        |             |          |         | MAU2     | 51.4428   | 23.0198  | -1.16009         | 51.4438      | 23.0208       | -1.1600592       | 0.00014386 | No      |
|      |       |        |             |          |         | Max      | 177.149   | 43.4958  | -2.02602         | 177.15       | 43.4968       | -2.0259903       | 0.00014386 | No      |
|      |       |        |             |          |         | Maz      | 102.691   | 34.3285  | -1.58083         | 102.692      | 34.3295       | -1.580803        | 0.00014386 | No      |
|      |       |        |             |          |         | Mbd5     | 4.33874   | 1.58629  | -1.45162         | 4.33974      | 1.58729       | -1.4510429       | 0.00014386 | No      |
|      |       |        |             |          |         | Mbip     | 9.65084   | 4.62141  | -1.06232         | 9.65184      | 4.62241       | -1.0621588       | 0.00014386 | No      |
|      |       |        |             |          |         | Mbl1     | 0         | 3.20603  | inf              | 0.001        | 3.20703       | 11.6470221       | 0.00014386 | No      |
|      |       |        |             |          |         | Mblac1   | 4.30701   | 7.89473  | 0.874201         | 4.30801      | 7.89573       | 0.87405106       | 0.00014386 | No      |
|      |       |        |             |          |         | Mbnl1    | 356.936   | 31.7306  | -3.49172         | 356.937      | 31.7316       | -3.4916773       | 0.00014386 | No      |
|      |       |        |             |          |         | Mbnl2    | 12.6718   | 19.8439  | 0.647068         | 12.6728      | 19.8449       | 0.64703298       | 0.00014386 | No      |
|      |       |        |             |          |         | Mbnl3    | 3.29577   | 0.922412 | -1.83713         | 3.29677      | 0.923412      | -1.8360069       | 0.00014386 | No      |
|      |       |        |             |          |         | Mboat1   | 2.03466   | 12.0741  | 2.56905          | 2.03566      | 12.0751       | 2.56846661       | 0.00014386 | No      |
|      |       |        |             |          |         | Mboat2   | 0.0602278 | 17.9998  | 8.22334          | 0.0612278    | 18.0008       | 8.19965846       | 0.00014386 | No      |
|      |       |        |             |          |         | Mboat7   | 7.89252   | 14.1514  | 0.84239          | 7.89352      | 14.1524       | 0.84230603       | 0.00014386 | No      |
|      |       |        |             |          |         | MBP      | 71.3542   | 10.9827  | -2.69976         | 71.3552      | 10.9837       | -2.6996544       | 0.00014386 | No      |
|      |       |        |             |          |         | Mbtd1    | 18.5706   | 4.73105  | -1.97279         | 18.5716      | 4.73205       | -1.9725609       | 0.00014386 | No      |
|      |       |        |             |          |         | Mbtps1   | 155.182   | 60.1239  | -1.36795         | 155.183      | 60.1249       | -1.367936        | 0.00014386 | No      |
|      |       |        |             |          |         | Mbtps2   | 7.49314   | 2.5015   | -1.58278         | 7.49414      | 2.5025        | -1.5823929       | 0.00014386 | No      |
|      |       |        |             |          |         | Mcam     | 0.592628  | 3.55158  | 2.58326          | 0.593628     | 3.55258       | 2.58123609       | 0.00014386 | No      |
|      |       |        |             |          |         | Mcart1   | 5.38085   | 20.3566  | 1.91959          | 5.38185      | 20.3576       | 1.9193934        | 0.00014386 | No      |
|      |       |        |             |          |         | Mcart1l  | 42.834    | 0.228784 | -7.54862         | 42.835       | 0.229784      | -7.5423679       | 0.00014386 | No      |
|      |       |        |             |          |         | Mccc1    | 28.6173   | 78.9211  | 1.46352          | 28.6183      | 78.9221       | 1.46349137       | 0.00014386 | No      |
|      |       |        |             |          |         | Mccc2    | 3.94091   | 48.5636  | 3.62327          | 3.94191      | 48.5646       | 3.62293834       | 0.00014386 | No      |
|      |       |        |             |          |         | Mcee     | 6.16711   | 91.8398  | 3.89645          | 6.16811      | 91.8408       | 3.89623481       | 0.00014386 | No      |
|      |       |        |             |          |         | Mcf2l    | 0.671498  | 10.518   | 3.96933          | 0.672498     | 10.519        | 3.96732377       | 0.00014386 | No      |
|      |       |        |             |          |         | Mcm2     | 16.4491   | 7.70863  | -1.09346         | 16.4501      | 7.70963       | -1.0933628       | 0.00014386 | No      |
|      |       |        |             |          |         | Mcm3     | 37.9196   | 3.15223  | -3.5885          | 37.9206      | 3.15323       | -3.5880795       | 0.00014386 | No      |

| RRBS |       |        |             |          |         | RNAseq |           |         |                  |              |               |                  |            |         |
|------|-------|--------|-------------|----------|---------|--------|-----------|---------|------------------|--------------|---------------|------------------|------------|---------|
| gene | Blood | Kidney | methyl.diff | pMWU.fdr | Match ? | gene   | blood     | kidney  | log2(fold_ratio) | blood+ 0.001 | kidney+ 0.001 | log2(fold_ratio) | q_value    | Match ? |
|      |       |        |             |          |         | Mcm4   | 12.2      | 3.28429 | -1.89322         | 12.201       | 3.28529       | -1.8929068       | 0.00014386 | No      |
|      |       |        |             |          |         | Mcm5   | 12.9236   | 4.28472 | -1.59273         | 12.9246      | 4.28572       | -1.5925101       | 0.00014386 | No      |
|      |       |        |             |          |         | Mcm6   | 20.9542   | 4.27483 | -2.2933          | 20.9552      | 4.27583       | -2.2930319       | 0.00014386 | No      |
|      |       |        |             |          |         | Mcm7   | 43.6889   | 14.9382 | -1.54826         | 43.6899      | 14.9392       | -1.5481969       | 0.00014386 | No      |
|      |       |        |             |          |         | Mcoln1 | 10.2874   | 20.9605 | 1.02679          | 10.2884      | 20.9615       | 1.02672332       | 0.00014386 | No      |
|      |       |        |             |          |         | Mcts1  | 47.4873   | 33.2614 | -0.513693        | 47.4883      | 33.2624       | -0.5136798       | 0.00014386 | No      |
|      |       |        |             |          |         | Mcur1  | 10.3077   | 14.0788 | 0.449799         | 10.3087      | 14.0798       | 0.44976443       | 0.00014386 | No      |
|      |       |        |             |          |         | Mdc1   | 3.65328   | 2.13365 | -0.775868        | 3.65428      | 2.13465       | -0.7755876       | 0.00014386 | No      |
|      |       |        |             |          |         | Mdfic  | 1.25575   | 11.8303 | 3.23586          | 1.25675      | 11.8313       | 3.23483901       | 0.00014386 | No      |
|      |       |        |             |          |         | Mdh1   | 102.073   | 833.367 | 3.02936          | 102.074      | 833.368       | 3.02933827       | 0.00014386 | No      |
|      |       |        |             |          |         | Mdh2   | 126.257   | 365.35  | 1.53291          | 126.258      | 365.351       | 1.53290835       | 0.00014386 | No      |
|      |       |        |             |          |         | Mdm2   | 27.9915   | 13.058  | -1.10006         | 27.9925      | 13.059        | -1.0999959       | 0.00014386 | No      |
|      |       |        |             |          |         | Mdm4   | 76.6372   | 7.73655 | -3.30828         | 76.6382      | 7.73755       | -3.3081149       | 0.00014386 | No      |
|      |       |        |             |          |         | Mdp1   | 20.4595   | 11.4032 | -0.843329        | 20.4605      | 11.4042       | -0.8432762       | 0.00014386 | No      |
|      |       |        |             |          |         | Me1    | 0.242259  | 32.0599 | 7.04808          | 0.243259     | 32.0609       | 7.04217793       | 0.00014386 | No      |
|      |       |        |             |          |         | Me2    | 12.2492   | 8.18685 | -0.581308        | 12.2502      | 8.18785       | -0.5812487       | 0.00014386 | No      |
|      |       |        |             |          |         | Me3    | 0         | 16.6573 | inf              | 0.001        | 16.6583       | 14.0239536       | 0.00014386 | No      |
|      |       |        |             |          |         | Mecom  | 0.0915119 | 40.5863 | 8.79282          | 0.0925119    | 40.5873       | 8.7771737        | 0.00014386 | No      |
|      |       |        |             |          |         | Mecp2  | 7.85115   | 3.60211 | -1.12406         | 7.85215      | 3.60311       | -1.123845        | 0.00014386 | No      |
|      |       |        |             |          |         | Mecr   | 4.65149   | 14.5889 | 1.64911          | 4.65249      | 14.5899       | 1.64889504       | 0.00014386 | No      |
|      |       |        |             |          |         | Med1   | 24.9391   | 9.98871 | -1.32004         | 24.9401      | 9.98971       | -1.3199525       | 0.00014386 | No      |
|      |       |        |             |          |         | Med12  | 50.4307   | 19.2844 | -1.38687         | 50.4317      | 19.2854       | -1.3868218       | 0.00014386 | No      |
|      |       |        |             |          |         | Med13  | 11.6156   | 4.02452 | -1.52918         | 11.6166      | 4.02552       | -1.5289408       | 0.00014386 | No      |
|      |       |        |             |          |         | Med13l | 10.0133   | 3.52546 | -1.50604         | 10.0143      | 3.52646       | -1.505769        | 0.00014386 | No      |
|      |       |        |             |          |         | Med14  | 31.3818   | 18.3254 | -0.776084        | 31.3828      | 18.3264       | -0.7760507       | 0.00014386 | No      |
|      |       |        |             |          |         | Med15  | 68.5375   | 24.4721 | -1.48575         | 68.5385      | 24.4731       | -1.4857178       | 0.00014386 | No      |
|      |       |        |             |          |         | Med18  | 50.0878   | 15.5914 | -1.6837          | 50.0888      | 15.5924       | -1.683645        | 0.00014386 | No      |
|      |       |        |             |          |         | MED20  | 8.22301   | 18.3904 | 1.16121          | 8.22401      | 18.3914       | 1.16111738       | 0.00014386 | No      |
|      |       |        |             |          |         | Med22  | 4.88698   | 12.3516 | 1.33768          | 4.88798      | 12.3526       | 1.33750445       | 0.00014386 | No      |
|      |       |        |             |          |         | Med23  | 19.2327   | 9.53808 | -1.01179         | 19.2337      | 9.53908       | -1.0117143       | 0.00014386 | No      |
|      |       |        |             |          |         | Med25  | 59.7826   | 127.445 | 1.09208          | 59.7836      | 127.446       | 1.09206441       | 0.00014386 | No      |
|      |       |        |             |          |         | Med26  | 5.7495    | 2.91822 | -0.978349        | 5.7505       | 2.91922       | -0.9781045       | 0.00014386 | No      |
|      |       |        |             |          |         | Med29  | 47.6882   | 208.725 | 2.1299           | 47.6892      | 208.726       | 2.12987583       | 0.00014386 | No      |
|      |       |        |             |          |         | Med31  | 25.1861   | 62.3354 | 1.30742          | 25.1871      | 62.3364       | 1.30738982       | 0.00014386 | No      |
|      |       |        |             |          |         | Med6   | 17.2987   | 27.9995 | 0.694738         | 17.2997      | 28.0005       | 0.69470557       | 0.00014386 | No      |
|      |       |        |             |          |         | Med9   | 3.30602   | 9.86517 | 1.57725          | 3.30702      | 9.86617       | 1.57695838       | 0.00014386 | No      |
|      |       |        |             |          |         | Medag  | 0         | 5.93119 | inf              | 0.001        | 5.93219       | 12.5343491       | 0.00014386 | No      |
|      |       |        |             |          |         | Mef2a  | 17.4647   | 9.47376 | -0.882437        | 17.4657      | 9.47476       | -0.8823632       | 0.00014386 | No      |
|      |       |        |             |          |         | Mef2b  | 31.7354   | 46.0052 | 0.535705         | 31.7364      | 46.0062       | 0.53568981       | 0.00014386 | No      |
|      |       |        |             |          |         | Mef2d  | 40.3984   | 10.6331 | -1.92574         | 40.3994      | 10.6341       | -1.9256359       | 0.00014386 | No      |
|      |       |        |             |          |         | Megf11 | 0.0134016 | 10.9987 | 9.6807           | 0.0144016    | 10.9997       | 9.57701936       | 0.00014386 | No      |
|      |       |        |             |          |         | Megf9  | 0.590072  | 1.88034 | 1.67203          | 0.591072     | 1.88134       | 1.67035481       | 0.00014386 | No      |

| RRBS |       |        |             |          |         | RNAseq    |           |         |                  |              |               |                  |            |         |
|------|-------|--------|-------------|----------|---------|-----------|-----------|---------|------------------|--------------|---------------|------------------|------------|---------|
| gene | Blood | Kidney | methyl.diff | pMWU.fdr | Match ? | gene      | blood     | kidney  | log2(fold_ratio) | blood+ 0.001 | kidney+ 0.001 | log2(fold_ratio) | q_value    | Match ? |
|      |       |        |             |          |         | Meis2     | 0         | 5.92129 | inf              | 0.001        | 5.92229       | 12.5319394       | 0.00014386 | No      |
|      |       |        |             |          |         | Meis3     | 18.5474   | 7.6247  | -1.28247         | 18.5484      | 7.6257        | -1.2823531       | 0.00014386 | No      |
|      |       |        |             |          |         | Memo1     | 76.4283   | 34.5018 | -1.14743         | 76.4293      | 34.5028       | -1.1474124       | 0.00014386 | No      |
|      |       |        |             |          |         | Men1      | 24.2896   | 16.6291 | -0.546625        | 24.2906      | 16.6301       | -0.5466013       | 0.00014386 | No      |
|      |       |        |             |          |         | Mep1a     | 0         | 46.5102 | inf              | 0.001        | 46.5112       | 15.5052905       | 0.00014386 | No      |
|      |       |        |             |          |         | Mep1b     | 0         | 10.9853 | inf              | 0.001        | 10.9863       | 13.423418        | 0.00014386 | No      |
|      |       |        |             |          |         | Mesdc2    | 22.7973   | 38.8844 | 0.770329         | 22.7983      | 38.8854       | 0.77030233       | 0.00014386 | No      |
|      |       |        |             |          |         | Met       | 0.0144913 | 32.0891 | 11.1127          | 0.0154913    | 32.0901       | 11.0164544       | 0.00014386 | No      |
|      |       |        |             |          |         | Metap1    | 30.7115   | 22.1028 | -0.474547        | 30.7125      | 22.1038       | -0.4745315       | 0.00014386 | No      |
|      |       |        |             |          |         | Metrn1    | 1.57045   | 22.2032 | 3.82152          | 1.57145      | 22.2042       | 3.82066432       | 0.00014386 | No      |
|      |       |        |             |          |         | Mettl13   | 11.7874   | 5.78605 | -1.02659         | 11.7884      | 5.78705       | -1.0264679       | 0.00014386 | No      |
|      |       |        |             |          |         | Mettl14   | 23.2848   | 14.4013 | -0.693191        | 23.2858      | 14.4023       | -0.6931512       | 0.00014386 | No      |
|      |       |        |             |          |         | Mettl17   | 24.3513   | 12.2788 | -0.987823        | 24.3523      | 12.2798       | -0.987771        | 0.00014386 | No      |
|      |       |        |             |          |         | Mettl18   | 8.09041   | 4.4661  | -0.857199        | 8.09141      | 4.4671        | -0.8570526       | 0.00014386 | No      |
|      |       |        |             |          |         | Mettl20   | 22.7665   | 11.9609 | -0.928594        | 22.7675      | 11.9619       | -0.9285293       | 0.00014386 | No      |
|      |       |        |             |          |         | Mettl21a  | 9.05271   | 3.59458 | -1.33253         | 9.05371      | 3.59558       | -1.3322846       | 0.00014386 | No      |
|      |       |        |             |          |         | Mettl22   | 49.9423   | 18.9972 | -1.39447         | 49.9433      | 18.9982       | -1.3944284       | 0.00014386 | No      |
|      |       |        |             |          |         | Mettl23   | 62.2534   | 18.4171 | -1.7571          | 62.2544      | 18.4181       | -1.7570516       | 0.00014386 | No      |
|      |       |        |             |          |         | Mettl24   | 6.93725   | 0       | -inf             | 6.93825      | 0.001         | -12.760356       | 0.00014386 | No      |
|      |       |        |             |          |         | Mettl2b   | 11.0901   | 5.73358 | -0.951764        | 11.0911      | 5.73458       | -0.9516427       | 0.00014386 | No      |
|      |       |        |             |          |         | Mettl7a   | 15.7139   | 33.215  | 1.07979          | 15.7149      | 33.216        | 1.07974526       | 0.00014386 | No      |
|      |       |        |             |          |         | Mettl8    | 44.174    | 25.8693 | -0.771959        | 44.175       | 25.8703       | -0.7719334       | 0.00014386 | No      |
|      |       |        |             |          |         | Mettl9    | 20.0012   | 65.5234 | 1.71193          | 20.0022      | 65.5244       | 1.71187355       | 0.00014386 | No      |
|      |       |        |             |          |         | Mex3d     | 1.15821   | 2.96996 | 1.35855          | 1.15921      | 2.97096       | 1.35778724       | 0.00014386 | No      |
|      |       |        |             |          |         | Mfap1a    | 24.7289   | 16.8127 | -0.556644        | 24.7299      | 16.8137       | -0.5566192       | 0.00014386 | No      |
|      |       |        |             |          |         | Mfap3l    | 0.0427924 | 18.5468 | 8.7596           | 0.0437924    | 18.5478       | 8.72635184       | 0.00014386 | No      |
|      |       |        |             |          |         | Mfng      | 51.1321   | 4.79623 | -3.41426         | 51.1331      | 4.79723       | -3.413984        | 0.00014386 | No      |
|      |       |        |             |          |         | Mfsd1     | 15.6497   | 25.7536 | 0.718638         | 15.6507      | 25.7546       | 0.71860295       | 0.00014386 | No      |
|      |       |        |             |          |         | Mfsd10    | 15.2579   | 4.88676 | -1.6426          | 15.2589      | 4.88776       | -1.6424056       | 0.00014386 | No      |
|      |       |        |             |          |         | Mfsd4     | 57.8725   | 14.8839 | -1.95913         | 57.8735      | 14.8849       | -1.9590534       | 0.00014386 | No      |
|      |       |        |             |          |         | Mfsd8     | 13.0856   | 3.69264 | -1.82526         | 13.0866      | 3.69364       | -1.8249752       | 0.00014386 | No      |
|      |       |        |             |          |         | Mga       | 15.0128   | 4.9978  | -1.58682         | 15.0138      | 4.9988        | -1.5866355       | 0.00014386 | No      |
|      |       |        |             |          |         | Mgam      | 0.0767469 | 33.3073 | 8.76152          | 0.0777469    | 33.3083       | 8.74288086       | 0.00014386 | No      |
|      |       |        |             |          |         | Mgat1     | 46.3237   | 28.5791 | -0.696792        | 46.3247      | 28.5801       | -0.6967707       | 0.00014386 | No      |
|      |       |        |             |          |         | Mgat2     | 20.2494   | 9.02884 | -1.16527         | 20.2504      | 9.02984       | -1.1651781       | 0.00014386 | No      |
|      |       |        |             |          |         | Mgat3     | 0.0214729 | 5.46922 | 7.99268          | 0.0224729    | 5.47022       | 7.92726874       | 0.00014386 | No      |
|      |       |        |             |          |         | Mgat4b    | 5.76097   | 54.6693 | 3.24635          | 5.76197      | 54.6703       | 3.24612324       | 0.00014386 | No      |
|      |       |        |             |          |         | MGC105567 | 6.85591   | 3.85017 | -0.832424        | 6.85691      | 3.85117       | -0.8322618       | 0.00014386 | No      |
|      |       |        |             |          |         | MGC105649 | 24.6046   | 4.63566 | -2.40808         | 24.6056      | 4.63666       | -2.4078289       | 0.00014386 | No      |

| RRBS |       |        |             |          |         | RNAseq    |          |          |                  |              |               |                  |            |         |
|------|-------|--------|-------------|----------|---------|-----------|----------|----------|------------------|--------------|---------------|------------------|------------|---------|
| gene | Blood | Kidney | methyl.diff | pMWU.fdr | Match ? | gene      | blood    | kidney   | log2(fold_ratio) | blood+ 0.001 | kidney+ 0.001 | log2(fold_ratio) | q_value    | Match ? |
|      |       |        |             |          |         | MGC108823 | 57.9432  | 6.4458   | -3.16821         | 57.9442      | 6.4468        | -3.1680091       | 0.00014386 | No      |
|      |       |        |             |          |         | MGC112715 | 140.58   | 6.82348  | -4.36474         | 140.581      | 6.82448       | -4.3645387       | 0.00014386 | No      |
|      |       |        |             |          |         | MGC112830 | 27.3431  | 15.1528  | -0.851587        | 27.3441      | 15.1538       | -0.85155         | 0.00014386 | No      |
|      |       |        |             |          |         | MGC94199  | 1.39695  | 8.43818  | 2.59465          | 1.39795      | 8.43918       | 2.59379006       | 0.00014386 | No      |
|      |       |        |             |          |         | MGC95152  | 14.0055  | 28.9245  | 1.0463           | 14.0065      | 28.9255       | 1.0462454        | 0.00014386 | No      |
|      |       |        |             |          |         | Mgea5     | 64.1038  | 31.0935  | -1.0438          | 64.1048      | 31.0945       | -1.043773        | 0.00014386 | No      |
|      |       |        |             |          |         | Mgll      | 0.120372 | 170.419  | 10.4674          | 0.121372     | 170.42        | 10.4554433       | 0.00014386 | No      |
|      |       |        |             |          |         | Mgp       | 0        | 59.0622  | inf              | 0.001        | 59.0632       | 15.8499719       | 0.00014386 | No      |
|      |       |        |             |          |         | Mgrn1     | 20.9976  | 54.102   | 1.36545          | 20.9986      | 54.103        | 1.36541545       | 0.00014386 | No      |
|      |       |        |             |          |         | Mgst1     | 3.9303   | 69.8511  | 4.15157          | 3.9313       | 69.8521       | 4.15122512       | 0.00014386 | No      |
|      |       |        |             |          |         | Mgst3     | 7.95048  | 365.668  | 5.52335          | 7.95148      | 365.669       | 5.5231711        | 0.00014386 | No      |
|      |       |        |             |          |         | Mia       | 33.0219  | 14.5536  | -1.18205         | 33.0229      | 14.5546       | -1.1819916       | 0.00014386 | No      |
|      |       |        |             |          |         | Mia3      | 33.5478  | 15.6045  | -1.10426         | 33.5488      | 15.6055       | -1.1042066       | 0.00014386 | No      |
|      |       |        |             |          |         | Mib2      | 12.1933  | 21.647   | 0.828083         | 12.1943      | 21.648        | 0.8280268        | 0.00014386 | No      |
|      |       |        |             |          |         | Mical1    | 110.4    | 20.3814  | -2.43741         | 110.401      | 20.3824       | -2.4373574       | 0.00014386 | No      |
|      |       |        |             |          |         | Mical3    | 2.93398  | 8.63362  | 1.55711          | 2.93498      | 8.63462       | 1.55678202       | 0.00014386 | No      |
|      |       |        |             |          |         | Micu1     | 7.50131  | 15.8222  | 1.07673          | 7.50231      | 15.8232       | 1.07663461       | 0.00014386 | No      |
|      |       |        |             |          |         | Mid1      | 0.133717 | 2.52752  | 4.24046          | 0.134717     | 2.52852       | 4.23028937       | 0.00014386 | No      |
|      |       |        |             |          |         | Mid1ip1   | 17.5318  | 53.25    | 1.60281          | 17.5328      | 53.251        | 1.6027522        | 0.00014386 | No      |
|      |       |        |             |          |         | Midn      | 23.7358  | 34.2549  | 0.529242         | 23.7368      | 34.2559       | 0.52922703       | 0.00014386 | No      |
|      |       |        |             |          |         | Mien1     | 30.2429  | 59.6557  | 0.980063         | 30.2439      | 59.6567       | 0.98003999       | 0.00014386 | No      |
|      |       |        |             |          |         | Mier1     | 52.2648  | 15.8091  | -1.72509         | 52.2658      | 15.8101       | -1.7250207       | 0.00014386 | No      |
|      |       |        |             |          |         | Mif       | 349.605  | 689.796  | 0.980444         | 349.606      | 689.797       | 0.98044191       | 0.00014386 | No      |
|      |       |        |             |          |         | Mif4gd    | 33.8022  | 48.0968  | 0.508821         | 33.8032      | 48.0978       | 0.50881108       | 0.00014386 | No      |
|      |       |        |             |          |         | Milr1     | 22.4272  | 0.958196 | -4.54879         | 22.4282      | 0.959196      | -4.5473444       | 0.00014386 | No      |
|      |       |        |             |          |         | Mink1     | 38.8811  | 28.247   | -0.460968        | 38.8821      | 28.248        | -0.4609574       | 0.00014386 | No      |
|      |       |        |             |          |         | Minos1    | 199.121  | 530.337  | 1.41326          | 199.122      | 530.338       | 1.4132595        | 0.00014386 | No      |
|      |       |        |             |          |         | Minpp1    | 4.46723  | 23.9714  | 2.42386          | 4.46823      | 23.9724       | 2.423599         | 0.00014386 | No      |
|      |       |        |             |          |         | Mios      | 5.46996  | 3.76831  | -0.537615        | 5.47096      | 3.76931       | -0.5374936       | 0.00014386 | No      |
|      |       |        |             |          |         | Miox      | 0.146634 | 1405.68  | 13.2268          | 0.147634     | 1405.681      | 13.2169566       | 0.00014386 | No      |
|      |       |        |             |          |         | Mipep     | 2.84338  | 21.1306  | 2.89365          | 2.84438      | 21.1316       | 2.89321588       | 0.00014386 | No      |
|      |       |        |             |          |         | Mipol1    | 1.17847  | 3.56599  | 1.59739          | 1.17947      | 3.56699       | 1.59656845       | 0.00014386 | No      |
|      |       |        |             |          |         | Mir101a   | 1.72813  | 0.423616 | -2.02838         | 1.72913      | 0.424616      | -2.0258157       | 0.00014386 | No      |
|      |       |        |             |          |         | Mir101b   | 22.8486  | 11.5306  | -0.986634        | 22.8496      | 11.5316       | -0.9865762       | 0.00014386 | No      |
|      |       |        |             |          |         | Mir186    | 70.7709  | 19.8123  | -1.83676         | 70.7719      | 19.8133       | -1.8367075       | 0.00014386 | No      |
|      |       |        |             |          |         | Mir21     | 37.5044  | 26.5792  | -0.496767        | 37.5054      | 26.5802       | -0.4967464       | 0.00014386 | No      |
|      |       |        |             |          |         | Mir22     | 2.10406  | 11.2659  | 2.42071          | 2.10506      | 11.2669       | 2.42015736       | 0.00014386 | No      |
|      |       |        |             |          |         | Mir221    | 0.63468  | 4.32717  | 2.76932          | 0.63568      | 4.32817       | 2.76738456       | 0.00014386 | No      |
|      |       |        |             |          |         | Mir349    | 0.788029 | 56.0439  | 6.15217          | 0.789029     | 56.0449       | 6.15036096       | 0.00014386 | No      |

| RRBS |       |        |             |          |         | RNAseq   |           |          |                  |              |               |                  |            |         |
|------|-------|--------|-------------|----------|---------|----------|-----------|----------|------------------|--------------|---------------|------------------|------------|---------|
| gene | Blood | Kidney | methyl.diff | pMWU.fdr | Match ? | gene     | blood     | kidney   | log2(fold_ratio) | blood+ 0.001 | kidney+ 0.001 | log2(fold_ratio) | q_value    | Match ? |
|      |       |        |             |          |         | Mir632   | 116.068   | 72.9042  | -0.670894        | 116.069      | 72.9052       | -0.6708891       | 0.00014386 | No      |
|      |       |        |             |          |         | Mir678   | 80.024    | 46.2366  | -0.791397        | 80.025       | 46.2376       | -0.7913843       | 0.00014386 | No      |
|      |       |        |             |          |         | Mir702   | 21.7427   | 38.9841  | 0.842355         | 21.7437      | 38.9851       | 0.84232538       | 0.00014386 | No      |
|      |       |        |             |          |         | Mir761   | 90.987    | 155.629  | 0.774375         | 90.988       | 155.63        | 0.774372         | 0.00014386 | No      |
|      |       |        |             |          |         | Mis18bp1 | 7.50283   | 0.400749 | -4.22667         | 7.50383      | 0.401749      | -4.2232608       | 0.00014386 | No      |
|      |       |        |             |          |         | Mitd1    | 18.8984   | 7.88083  | -1.26184         | 18.8994      | 7.88183       | -1.2617379       | 0.00014386 | No      |
|      |       |        |             |          |         | Mitf     | 0.0846519 | 11.6674  | 7.10673          | 0.0856519    | 11.6684       | 7.08990578       | 0.00014386 | No      |
|      |       |        |             |          |         | Mkl1     | 39.3224   | 4.40308  | -3.15876         | 39.3234      | 4.40408       | -3.1584755       | 0.00014386 | No      |
|      |       |        |             |          |         | Mkln1    | 21.6253   | 57.4843  | 1.41045          | 21.6263      | 57.4853       | 1.41040622       | 0.00014386 | No      |
|      |       |        |             |          |         | Mknk1    | 26.0653   | 12.6291  | -1.04538         | 26.0663      | 12.6301       | -1.0453198       | 0.00014386 | No      |
|      |       |        |             |          |         | Mknk2    | 112.138   | 44.4529  | -1.33493         | 112.139      | 44.4539       | -1.3349062       | 0.00014386 | No      |
|      |       |        |             |          |         | Mks1     | 3.79033   | 7.31855  | 0.949234         | 3.79133      | 7.31955       | 0.94905092       | 0.00014386 | No      |
|      |       |        |             |          |         | Mlana    | 0         | 3.6382   | inf              | 0.001        | 3.6392        | 11.8294056       | 0.00014386 | No      |
|      |       |        |             |          |         | Mlec     | 17.3418   | 32.3782  | 0.900764         | 17.3428      | 32.3792       | 0.9007305        | 0.00014386 | No      |
|      |       |        |             |          |         | Mlh1     | 21.6942   | 13.2195  | -0.714636        | 21.6952      | 13.2205       | -0.7145991       | 0.00014386 | No      |
|      |       |        |             |          |         | Mllt10   | 33.5296   | 10.6521  | -1.6543          | 33.5306      | 10.6531       | -1.654205        | 0.00014386 | No      |
|      |       |        |             |          |         | Mllt3    | 16.9043   | 3.74264  | -2.17526         | 16.9053      | 3.74364       | -2.174962        | 0.00014386 | No      |
|      |       |        |             |          |         | Mllt4    | 0.112495  | 35.2608  | 8.29207          | 0.113495     | 35.2618       | 8.27933357       | 0.00014386 | No      |
|      |       |        |             |          |         | Mllt6    | 41.0453   | 17.0959  | -1.26357         | 41.0463      | 17.0969       | -1.2635174       | 0.00014386 | No      |
|      |       |        |             |          |         | Mlxip    | 5.12389   | 1.80829  | -1.50262         | 5.12489      | 1.80929       | -1.5020974       | 0.00014386 | No      |
|      |       |        |             |          |         | Mmachc   | 3.3165    | 9.3964   | 1.50244          | 3.3175       | 9.3974        | 1.50216519       | 0.00014386 | No      |
|      |       |        |             |          |         | Mmadhc   | 17.734    | 52.9181  | 1.57724          | 17.735       | 52.9191       | 1.5771892        | 0.00014386 | No      |
|      |       |        |             |          |         | Mme      | 0.0196824 | 26.6018  | 10.4004          | 0.0206824    | 26.6028       | 10.3289588       | 0.00014386 | No      |
|      |       |        |             |          |         | Mmgt1    | 1.63455   | 7.67931  | 2.23208          | 1.63555      | 7.68031       | 2.23138868       | 0.00014386 | No      |
|      |       |        |             |          |         | Mmp12    | 0         | 1.53634  | inf              | 0.001        | 1.53734       | 10.5862206       | 0.00014386 | No      |
|      |       |        |             |          |         | Mmp24    | 0.772437  | 11.1604  | 3.85283          | 0.773437     | 11.1614       | 3.85109041       | 0.00014386 | No      |
|      |       |        |             |          |         | Mmrn2    | 0.484473  | 6.47529  | 3.74046          | 0.485473     | 6.47629       | 3.73770462       | 0.00014386 | No      |
|      |       |        |             |          |         | Mms19l   | 47.1768   | 25.9338  | -0.863242        | 47.1778      | 25.9348       | -0.8632189       | 0.00014386 | No      |
|      |       |        |             |          |         | Mnat1    | 35.2402   | 21.0213  | -0.74537         | 35.2412      | 21.0223       | -0.7453425       | 0.00014386 | No      |
|      |       |        |             |          |         | Mnf1     | 38.4919   | 114.031  | 1.5668           | 38.4929      | 114.032       | 1.56677446       | 0.00014386 | No      |
|      |       |        |             |          |         | Mnt      | 10.4741   | 3.61982  | -1.53283         | 10.4751      | 3.62082       | -1.5325757       | 0.00014386 | No      |
|      |       |        |             |          |         | Mob1a    | 42.5588   | 12.9978  | -1.71119         | 42.5598      | 12.9988       | -1.7111129       | 0.00014386 | No      |
|      |       |        |             |          |         | Mob2     | 56.1427   | 28.4256  | -0.981907        | 56.1437      | 28.4266       | -0.9818826       | 0.00014386 | No      |
|      |       |        |             |          |         | Mob3b    | 0.826006  | 7.34994  | 3.15351          | 0.827006     | 7.35094       | 3.15195904       | 0.00014386 | No      |
|      |       |        |             |          |         | Mob4     | 22.3045   | 14.3684  | -0.634439        | 22.3055      | 14.3694       | -0.6343997       | 0.00014386 | No      |
|      |       |        |             |          |         | Mocos    | 0.203638  | 2.05976  | 3.33839          | 0.204638     | 2.06076       | 3.33203052       | 0.00014386 | No      |
|      |       |        |             |          |         | Mocs1    | 7.59403   | 13.3263  | 0.81134          | 7.59503      | 13.3273       | 0.81125696       | 0.00014386 | No      |
|      |       |        |             |          |         | Mok      | 0.259275  | 14.7624  | 5.8313           | 0.260275     | 14.7634       | 5.82584446       | 0.00014386 | No      |
|      |       |        |             |          |         | MON1A    | 28.4114   | 81.1571  | 1.51425          | 28.4124      | 81.1581       | 1.51421439       | 0.00014386 | No      |
|      |       |        |             |          |         | Mon1b    | 15.3514   | 8.70133  | -0.819061        | 15.3524      | 8.70233       | -0.8189906       | 0.00014386 | No      |
|      |       |        |             |          |         | Mon2     | 43.6447   | 12.5751  | -1.79523         | 43.6457      | 12.5761       | -1.7951549       | 0.00014386 | No      |
|      |       |        |             |          |         | Morc1    | 1.85496   | 0        | -inf             | 1.85596      | 0.001         | -10.85795        | 0.00014386 | No      |

| RRBS |       |        |             |          |         | RNAseq    |           |          |                  |              |               |                  |            |         |
|------|-------|--------|-------------|----------|---------|-----------|-----------|----------|------------------|--------------|---------------|------------------|------------|---------|
| gene | Blood | Kidney | methyl.diff | pMWU.fdr | Match ? | gene      | blood     | kidney   | log2(fold_ratio) | blood+ 0.001 | kidney+ 0.001 | log2(fold_ratio) | q_value    | Match ? |
|      |       |        |             |          |         | Morc2     | 8.75471   | 5.35617  | -0.708857        | 8.75571      | 5.35717       | -0.7087531       | 0.00014386 | No      |
|      |       |        |             |          |         | Morc3     | 56.3833   | 7.65664  | -2.88048         | 56.3843      | 7.65764       | -2.8803218       | 0.00014386 | No      |
|      |       |        |             |          |         | MORF4L1   | 224.478   | 171.506  | -0.388315        | 224.479      | 171.507       | -0.388313        | 0.00014386 | No      |
|      |       |        |             |          |         | Morf4l2   | 47.8362   | 85.4164  | 0.836412         | 47.8372      | 85.4174       | 0.83639704       | 0.00014386 | No      |
|      |       |        |             |          |         | Morn1     | 0.262121  | 17.3705  | 6.05026          | 0.263121     | 17.3715       | 6.04485213       | 0.00014386 | No      |
|      |       |        |             |          |         | MOSPD1    | 0.0667723 | 0.851255 | 3.67227          | 0.0677723    | 0.852255      | 3.65251752       | 0.00014386 | No      |
|      |       |        |             |          |         | Mov10     | 100.021   | 8.96861  | -3.47928         | 100.022      | 8.96961       | -3.4791283       | 0.00014386 | No      |
|      |       |        |             |          |         | MP68      | 77.6508   | 319.553  | 2.04098          | 77.6518      | 319.554       | 2.04096847       | 0.00014386 | No      |
|      |       |        |             |          |         | Mpa2l     | 238.981   | 6.64017  | -5.16953         | 238.982      | 6.64117       | -5.1693207       | 0.00014386 | No      |
|      |       |        |             |          |         | Mpc1      | 54.4618   | 711.146  | 3.70683          | 54.4628      | 711.147       | 3.70680475       | 0.00014386 | No      |
|      |       |        |             |          |         | Mpc2      | 45.5108   | 358.385  | 2.97723          | 45.5118      | 358.386       | 2.97720173       | 0.00014386 | No      |
|      |       |        |             |          |         | Mpdu1     | 26.5491   | 52.3175  | 0.978629         | 26.5501      | 52.3185       | 0.97860388       | 0.00014386 | No      |
|      |       |        |             |          |         | Mpdz      | 0         | 4.97295  | inf              | 0.001        | 4.97395       | 12.2801763       | 0.00014386 | No      |
|      |       |        |             |          |         | Mphosph10 | 26.5509   | 8.472    | -1.64798         | 26.5519      | 8.473         | -1.6478703       | 0.00014386 | No      |
|      |       |        |             |          |         | Mphosph6  | 26.7123   | 16.4939  | -0.695568        | 26.7133      | 16.4949       | -0.6955382       | 0.00014386 | No      |
|      |       |        |             |          |         | Mphosph8  | 58.8629   | 33.1851  | -0.826823        | 58.8639      | 33.1861       | -0.826804        | 0.00014386 | No      |
|      |       |        |             |          |         | Mphosph9  | 7.85367   | 0.92307  | -3.08885         | 7.85467      | 0.92407       | -3.0874766       | 0.00014386 | No      |
|      |       |        |             |          |         | Mpi       | 17.0038   | 29.1987  | 0.780045         | 17.0048      | 29.1997       | 0.78001151       | 0.00014386 | No      |
|      |       |        |             |          |         | Mpnd      | 113.034   | 181.631  | 0.684261         | 113.035      | 181.632       | 0.68424884       | 0.00014386 | No      |
|      |       |        |             |          |         | Mpp4      | 4.84636   | 0        | -inf             | 4.84736      | 0.001         | -12.242984       | 0.00014386 | No      |
|      |       |        |             |          |         | Mpp5      | 3.43326   | 14.1101  | 2.03908          | 3.43426      | 14.1111       | 2.03875928       | 0.00014386 | No      |
|      |       |        |             |          |         | Mpp7      | 0.868676  | 3.42509  | 1.97925          | 0.869676     | 3.42609       | 1.97801312       | 0.00014386 | No      |
|      |       |        |             |          |         | Mppe1     | 18.6315   | 10.6924  | -0.801159        | 18.6325      | 10.6934       | -0.8011006       | 0.00014386 | No      |
|      |       |        |             |          |         | Mpped1    | 0         | 1.34476  | inf              | 0.001        | 1.34576       | 10.3942054       | 0.00014386 | No      |
|      |       |        |             |          |         | Mpped2    | 0.331389  | 4.41946  | 3.73727          | 0.332389     | 4.42046       | 3.73325196       | 0.00014386 | No      |
|      |       |        |             |          |         | Mprip     | 25.197    | 107.361  | 2.09114          | 25.198       | 107.362       | 2.09110232       | 0.00014386 | No      |
|      |       |        |             |          |         | Mpv17l    | 0.101992  | 17.4106  | 7.41536          | 0.102992     | 17.4116       | 7.40137269       | 0.00014386 | No      |
|      |       |        |             |          |         | Mpv17l2   | 24.4569   | 50.6866  | 1.05136          | 24.4579      | 50.6876       | 1.05133232       | 0.00014386 | No      |
|      |       |        |             |          |         | Mpzl1     | 3.66135   | 15.5543  | 2.08687          | 3.66235      | 15.5553       | 2.08656464       | 0.00014386 | No      |
|      |       |        |             |          |         | Mpzl2     | 0.340944  | 10.5281  | 4.94857          | 0.341944     | 10.5291       | 4.94447824       | 0.00014386 | No      |
|      |       |        |             |          |         | Mr1       | 11.5029   | 0.33808  | -5.08849         | 11.5039      | 0.33908       | -5.0843535       | 0.00014386 | No      |
|      |       |        |             |          |         | Mras      | 0.662434  | 26.2377  | 5.30772          | 0.663434     | 26.2387       | 5.30559948       | 0.00014386 | No      |
|      |       |        |             |          |         | Mre11a    | 7.54344   | 4.09116  | -0.882713        | 7.54444      | 4.09216       | -0.8825513       | 0.00014386 | No      |
|      |       |        |             |          |         | MRI       | 13.1257   | 5.47394  | -1.26175         | 13.1267      | 5.47494       | -1.2615892       | 0.00014386 | No      |
|      |       |        |             |          |         | Mro       | 0         | 45.9938  | inf              | 0.001        | 45.9948       | 15.4891831       | 0.00014386 | No      |
|      |       |        |             |          |         | Mroh1     | 28.9631   | 68.5123  | 1.24215          | 28.9641      | 68.5133       | 1.24211824       | 0.00014386 | No      |
|      |       |        |             |          |         | Mroh6     | 1.20704   | 3.96556  | 1.71605          | 1.20804      | 3.96656       | 1.71522015       | 0.00014386 | No      |
|      |       |        |             |          |         | Mrpl10    | 21.4052   | 33.0208  | 0.625414         | 21.4062      | 33.0218       | 0.62539005       | 0.00014386 | No      |
|      |       |        |             |          |         | mrpl11    | 28.2454   | 63.4267  | 1.16708          | 28.2464      | 63.4277       | 1.16704602       | 0.00014386 | No      |
|      |       |        |             |          |         | Mrpl12    | 48.986    | 204.449  | 2.0613           | 48.987       | 204.45        | 2.06127722       | 0.00014386 | No      |
|      |       |        |             |          |         | Mrpl13    | 43.8712   | 93.8062  | 1.09641          | 43.8722      | 93.8072       | 1.09639161       | 0.00014386 | No      |



| RRBS |       |        |             |          |         | RNAseq  |          |         |                  |              |               |                  |            |         |
|------|-------|--------|-------------|----------|---------|---------|----------|---------|------------------|--------------|---------------|------------------|------------|---------|
| gene | Blood | Kidney | methyl.diff | pMWU.fdr | Match ? | gene    | blood    | kidney  | log2(fold_ratio) | blood+ 0.001 | kidney+ 0.001 | log2(fold_ratio) | q_value    | Match ? |
|      |       |        |             |          |         | Mrpl15  | 30.4306  | 151.392 | 2.3147           | 30.4316      | 151.393       | 2.31465641       | 0.00014386 | No      |
|      |       |        |             |          |         | Mrpl16  | 13.9067  | 46.3267 | 1.73606          | 13.9077      | 46.3277       | 1.73599121       | 0.00014386 | No      |
|      |       |        |             |          |         | Mrpl17  | 73.5798  | 129.362 | 0.814035         | 73.5808      | 129.363       | 0.81402377       | 0.00014386 | No      |
|      |       |        |             |          |         | Mrpl2   | 26.0469  | 58.159  | 1.15889          | 26.0479      | 58.16         | 1.1588602        | 0.00014386 | No      |
|      |       |        |             |          |         | Mrpl22  | 27.7232  | 74.3066 | 1.42239          | 27.7242      | 74.3076       | 1.42236394       | 0.00014386 | No      |
|      |       |        |             |          |         | Mrpl27  | 48.6662  | 120.65  | 1.30983          | 48.6672      | 120.651       | 1.30981819       | 0.00014386 | No      |
|      |       |        |             |          |         | Mrpl28  | 33.7355  | 79.2534 | 1.2322           | 33.7365      | 79.2544       | 1.23218072       | 0.00014386 | No      |
|      |       |        |             |          |         | Mrpl3   | 21.5169  | 47.4724 | 1.14162          | 21.5179      | 47.4734       | 1.14158209       | 0.00014386 | No      |
|      |       |        |             |          |         | MRPL30  | 9.24823  | 26.3047 | 1.50807          | 9.24923      | 26.3057       | 1.50797027       | 0.00014386 | No      |
|      |       |        |             |          |         | Mrpl32  | 70.325   | 46.8939 | -0.584638        | 70.326       | 46.8949       | -0.5846271       | 0.00014386 | No      |
|      |       |        |             |          |         | Mrpl34  | 72.251   | 118.909 | 0.718766         | 72.252       | 118.91        | 0.71876062       | 0.00014386 | No      |
|      |       |        |             |          |         | Mrpl35  | 26.4181  | 38.8329 | 0.555753         | 26.4191      | 38.8339       | 0.55573528       | 0.00014386 | No      |
|      |       |        |             |          |         | Mrpl36  | 39.6261  | 67.706  | 0.772833         | 39.6271      | 67.707        | 0.77281761       | 0.00014386 | No      |
|      |       |        |             |          |         | Mrpl4   | 25.5957  | 46.1653 | 0.850906         | 25.5967      | 46.1663       | 0.85088229       | 0.00014386 | No      |
|      |       |        |             |          |         | Mrpl40  | 6.38663  | 14.6855 | 1.20127          | 6.38763      | 14.6865       | 1.20113797       | 0.00014386 | No      |
|      |       |        |             |          |         | Mrpl41  | 38.6163  | 77.9922 | 1.01412          | 38.6173      | 77.9932       | 1.01410105       | 0.00014386 | No      |
|      |       |        |             |          |         | Mrpl42  | 51.9189  | 101.142 | 0.962055         | 51.9199      | 101.143       | 0.96203697       | 0.00014386 | No      |
|      |       |        |             |          |         | Mrpl44  | 18.288   | 28.1722 | 0.623374         | 18.289       | 28.1732       | 0.62334724       | 0.00014386 | No      |
|      |       |        |             |          |         | MRPL48  | 26.7143  | 83.5014 | 1.64419          | 26.7153      | 83.5024       | 1.64415145       | 0.00014386 | No      |
|      |       |        |             |          |         | Mrpl49  | 13.2565  | 32.0115 | 1.27188          | 13.2575      | 32.0125       | 1.2718266        | 0.00014386 | No      |
|      |       |        |             |          |         | Mrpl50  | 10.0486  | 40.8517 | 2.0234           | 10.0496      | 40.8527       | 2.02329335       | 0.00014386 | No      |
|      |       |        |             |          |         | Mrpl51  | 5.95281  | 14.1997 | 1.25422          | 5.95381      | 14.2007       | 1.25407696       | 0.00014386 | No      |
|      |       |        |             |          |         | Mrpl52  | 51.3631  | 109.183 | 1.08795          | 51.3641      | 109.184       | 1.08792919       | 0.00014386 | No      |
|      |       |        |             |          |         | Mrpl54  | 57.41    | 167.591 | 1.54557          | 57.411       | 167.592       | 1.54555419       | 0.00014386 | No      |
|      |       |        |             |          |         | Mrpl55  | 30.6851  | 57.5406 | 0.90704          | 30.6861      | 57.5416       | 0.90702004       | 0.00014386 | No      |
|      |       |        |             |          |         | mrpl9   | 67.6559  | 46.9356 | -0.527532        | 67.6569      | 46.9366       | -0.5275237       | 0.00014386 | No      |
|      |       |        |             |          |         | Mrps11  | 21.5145  | 50.8949 | 1.24221          | 21.5155      | 50.8959       | 1.24217307       | 0.00014386 | No      |
|      |       |        |             |          |         | Mrps14  | 18.6697  | 31.8183 | 0.769153         | 18.6707      | 31.8193       | 0.76912608       | 0.00014386 | No      |
|      |       |        |             |          |         | Mrps15  | 72.4211  | 33.0089 | -1.13355         | 72.4221      | 33.0099       | -1.1335312       | 0.00014386 | No      |
|      |       |        |             |          |         | Mrps16  | 41.3239  | 142.555 | 1.78647          | 41.3249      | 142.556       | 1.78644553       | 0.00014386 | No      |
|      |       |        |             |          |         | Mrps17  | 32.1453  | 60.6794 | 0.9166           | 32.1463      | 60.6804       | 0.9165779        | 0.00014386 | No      |
|      |       |        |             |          |         | Mrps18a | 43.2029  | 94.6548 | 1.13155          | 43.2039      | 94.6558       | 1.13152936       | 0.00014386 | No      |
|      |       |        |             |          |         | Mrps18b | 41.1805  | 60.5172 | 0.555386         | 41.1815      | 60.5182       | 0.5553727        | 0.00014386 | No      |
|      |       |        |             |          |         | Mrps18c | 33.5541  | 54.4674 | 0.698906         | 33.5551      | 54.4684       | 0.69888743       | 0.00014386 | No      |
|      |       |        |             |          |         | MRPS21  | 167.637  | 233.201 | 0.476235         | 167.638      | 233.202       | 0.47623095       | 0.00014386 | No      |
|      |       |        |             |          |         | Mrps24  | 69.0386  | 91.3359 | 0.403779         | 69.0396      | 91.3369       | 0.40377372       | 0.00014386 | No      |
|      |       |        |             |          |         | Mrps25  | 62.8618  | 142.58  | 1.18152          | 62.8628      | 142.581       | 1.18150331       | 0.00014386 | No      |
|      |       |        |             |          |         | Mrps28  | 47.9478  | 108.643 | 1.18006          | 47.9488      | 108.644       | 1.18004189       | 0.00014386 | No      |
|      |       |        |             |          |         | Mrps34  | 79.3645  | 149.195 | 0.910637         | 79.3655      | 149.196       | 0.91062494       | 0.00014386 | No      |
|      |       |        |             |          |         | Mrps36  | 32.4038  | 101.584 | 1.64844          | 32.4048      | 101.585       | 1.64840796       | 0.00014386 | No      |
|      |       |        |             |          |         | Mrps7   | 22.1007  | 56.5164 | 1.35458          | 22.1017      | 56.5174       | 1.35453776       | 0.00014386 | No      |
|      |       |        |             |          |         | Mrvi1   | 0.168614 | 5.25902 | 4.963            | 0.169614     | 5.26002       | 4.95474112       | 0.00014386 | No      |

| RRBS |       |        |             |          |         | RNAseq  |          |          |                  |              |               |                  |            |         |
|------|-------|--------|-------------|----------|---------|---------|----------|----------|------------------|--------------|---------------|------------------|------------|---------|
| gene | Blood | Kidney | methyl.diff | pMWU.fdr | Match ? | gene    | blood    | kidney   | log2(fold_ratio) | blood+ 0.001 | kidney+ 0.001 | log2(fold_ratio) | q_value    | Match ? |
|      |       |        |             |          |         | Ms4a1   | 6.56357  | 0.129123 | -5.66766         | 6.56457      | 0.130123      | -5.6567526       | 0.00014386 | No      |
|      |       |        |             |          |         | Ms4a4c  | 206.516  | 2.26022  | -6.51365         | 206.517      | 2.26122       | -6.5130154       | 0.00014386 | No      |
|      |       |        |             |          |         | Ms4a6b  | 290.805  | 5.90108  | -5.62293         | 290.806      | 5.90208       | -5.6226897       | 0.00014386 | No      |
|      |       |        |             |          |         | Msantd2 | 29.1656  | 15.0416  | -0.955316        | 29.1666      | 15.0426       | -0.9552633       | 0.00014386 | No      |
|      |       |        |             |          |         | Msantd3 | 0        | 4.57227  | inf              | 0.001        | 4.57327       | 12.1590104       | 0.00014386 | No      |
|      |       |        |             |          |         | Msantd4 | 5.11986  | 13.222   | 1.36876          | 5.12086      | 13.223        | 1.36859151       | 0.00014386 | No      |
|      |       |        |             |          |         | Msh2    | 29.4696  | 11.6422  | -1.33986         | 29.4706      | 11.6432       | -1.3397888       | 0.00014386 | No      |
|      |       |        |             |          |         | Msl1    | 61.7366  | 15.7453  | -1.97121         | 61.7376      | 15.7463       | -1.9711365       | 0.00014386 | No      |
|      |       |        |             |          |         | Msl2    | 34.2457  | 9.9378   | -1.78492         | 34.2467      | 9.9388        | -1.7848214       | 0.00014386 | No      |
|      |       |        |             |          |         | Msmo1   | 9.17978  | 28.1332  | 1.61574          | 9.18078      | 28.1342       | 1.61563631       | 0.00014386 | No      |
|      |       |        |             |          |         | Msn     | 287.333  | 116.349  | -1.30427         | 287.334      | 116.35        | -1.3042575       | 0.00014386 | No      |
|      |       |        |             |          |         | Msra    | 5.0539   | 132.77   | 4.71538          | 5.0549       | 132.771       | 4.7151137        | 0.00014386 | No      |
|      |       |        |             |          |         | Mss51   | 48.4313  | 26.7075  | -0.858692        | 48.4323      | 26.7085       | -0.8586706       | 0.00014386 | No      |
|      |       |        |             |          |         | Mst4    | 67.1992  | 4.75447  | -3.82109         | 67.2002      | 4.75547       | -3.8208057       | 0.00014386 | No      |
|      |       |        |             |          |         | Msx2    | 0        | 1.16565  | inf              | 0.001        | 1.16665       | 10.1881561       | 0.00014386 | No      |
|      |       |        |             |          |         | Mt1a    | 83.1368  | 1931.5   | 4.53809          | 83.1378      | 1931.501      | 4.53807404       | 0.00014386 | No      |
|      |       |        |             |          |         | Mt2A    | 2.7855   | 2567.88  | 9.84842          | 2.7865       | 2567.881      | 9.84790848       | 0.00014386 | No      |
|      |       |        |             |          |         | Mta3    | 48.7384  | 24.1246  | -1.01455         | 48.7394      | 24.1256       | -1.0145237       | 0.00014386 | No      |
|      |       |        |             |          |         | Mtap    | 15.2151  | 4.64111  | -1.71296         | 15.2161      | 4.64211       | -1.712746        | 0.00014386 | No      |
|      |       |        |             |          |         | Mtch1   | 95.5842  | 143.955  | 0.590776         | 95.5852      | 143.956       | 0.59076876       | 0.00014386 | No      |
|      |       |        |             |          |         | Mtch2   | 31.8324  | 75.7983  | 1.25167          | 31.8334      | 75.7993       | 1.25164327       | 0.00014386 | No      |
|      |       |        |             |          |         | Mtdh    | 24.1425  | 6.52277  | -1.88802         | 24.1435      | 6.52377       | -1.887857        | 0.00014386 | No      |
|      |       |        |             |          |         | Mterf   | 19.8488  | 13.9353  | -0.510311        | 19.8498      | 13.9363       | -0.5102769       | 0.00014386 | No      |
|      |       |        |             |          |         | Mtf2    | 13.9614  | 4.25124  | -1.71549         | 13.9624      | 4.25224       | -1.715252        | 0.00014386 | No      |
|      |       |        |             |          |         | Mtfmt   | 7.62712  | 18.844   | 1.30489          | 7.62812      | 18.845        | 1.30478235       | 0.00014386 | No      |
|      |       |        |             |          |         | Mtfp1   | 1.94436  | 14.5417  | 2.90283          | 1.94536      | 14.5427       | 2.90218608       | 0.00014386 | No      |
|      |       |        |             |          |         | Mtfr1   | 4.10044  | 9.64648  | 1.23422          | 4.10144      | 9.64748       | 1.23402162       | 0.00014386 | No      |
|      |       |        |             |          |         | Mtfr1l  | 33.6107  | 46.1221  | 0.456536         | 33.6117      | 46.1231       | 0.45652597       | 0.00014386 | No      |
|      |       |        |             |          |         | Mthfd1l | 13.539   | 0.871563 | -3.95737         | 13.54        | 0.872563      | -3.9558246       | 0.00014386 | No      |
|      |       |        |             |          |         | Mthfd2  | 58.3892  | 9.95154  | -2.55271         | 58.3902      | 9.95254       | -2.5525896       | 0.00014386 | No      |
|      |       |        |             |          |         | Mthfr   | 0.581923 | 3.62557  | 2.63931          | 0.582923     | 3.62657       | 2.63722846       | 0.00014386 | No      |
|      |       |        |             |          |         | Mtm1    | 7.19745  | 20.7534  | 1.52779          | 7.19845      | 20.7544       | 1.52765903       | 0.00014386 | No      |
|      |       |        |             |          |         | Mtmr1   | 45.8367  | 26.7869  | -0.774977        | 45.8377      | 26.7879       | -0.7749532       | 0.00014386 | No      |
|      |       |        |             |          |         | Mtmr10  | 0.757976 | 13.574   | 4.16255          | 0.758976     | 13.575        | 4.16075412       | 0.00014386 | No      |
|      |       |        |             |          |         | Mtmr11  | 0.363725 | 34.552   | 6.56977          | 0.364725     | 34.553        | 6.56585807       | 0.00014386 | No      |
|      |       |        |             |          |         | MTMR12  | 17.3295  | 4.91369  | -1.81835         | 17.3305      | 4.91469       | -1.818141        | 0.00014386 | No      |
|      |       |        |             |          |         | Mtmr3   | 23.4815  | 15.5665  | -0.59308         | 23.4825      | 15.5675       | -0.5930487       | 0.00014386 | No      |
|      |       |        |             |          |         | Mtor    | 10.8883  | 19.7601  | 0.859811         | 10.8893      | 19.7611       | 0.85975204       | 0.00014386 | No      |
|      |       |        |             |          |         | Mtpap   | 17.7143  | 8.61918  | -1.03929         | 17.7153      | 8.62018       | -1.039206        | 0.00014386 | No      |
|      |       |        |             |          |         | Mtr     | 6.43776  | 4.77729  | -0.430365        | 6.43876      | 4.77829       | -0.4302885       | 0.00014386 | No      |
|      |       |        |             |          |         | Mtrf1   | 1.36192  | 10.0836  | 2.8883           | 1.36292      | 10.0846       | 2.88738107       | 0.00014386 | No      |
|      |       |        |             |          |         | Mtrr    | 11.5587  | 7.07885  | -0.707386        | 11.5597      | 7.07985       | -0.7073133       | 0.00014386 | No      |

| RRBS |       |        |             |          |         | RNAseq  |           |          |                  |              |               |                  |            |         |
|------|-------|--------|-------------|----------|---------|---------|-----------|----------|------------------|--------------|---------------|------------------|------------|---------|
| gene | Blood | Kidney | methyl.diff | pMWU.fdr | Match ? | gene    | blood     | kidney   | log2(fold_ratio) | blood+ 0.001 | kidney+ 0.001 | log2(fold_ratio) | q_value    | Match ? |
|      |       |        |             |          |         | Mtus1   | 0.995441  | 12.9849  | 3.70536          | 0.996441     | 12.9859       | 3.70401781       | 0.00014386 | No      |
|      |       |        |             |          |         | Muc1    | 1.08816   | 48.7522  | 5.4855           | 1.08916      | 48.7532       | 5.48420911       | 0.00014386 | No      |
|      |       |        |             |          |         | Muc20   | 0.241847  | 10.7296  | 5.47136          | 0.242847     | 10.7306       | 5.46553927       | 0.00014386 | No      |
|      |       |        |             |          |         | Muc6    | 9.05983   | 0.530898 | -4.09298         | 9.06083      | 0.531898      | -4.0904217       | 0.00014386 | No      |
|      |       |        |             |          |         | Mum1    | 35.1261   | 14.4538  | -1.28109         | 35.1271      | 14.4548       | -1.2810358       | 0.00014386 | No      |
|      |       |        |             |          |         | Mus81   | 12.3877   | 5.38108  | -1.20294         | 12.3887      | 5.38208       | -1.2027891       | 0.00014386 | No      |
|      |       |        |             |          |         | Mustn1  | 17.3828   | 8.29484  | -1.06737         | 17.3838      | 8.29584       | -1.0672835       | 0.00014386 | No      |
|      |       |        |             |          |         | Mut     | 6.59321   | 23.4919  | 1.83311          | 6.59421      | 23.4929       | 1.83295308       | 0.00014386 | No      |
|      |       |        |             |          |         | Mutyh   | 28.4705   | 2.6726   | -3.41315         | 28.4715      | 2.6736        | -3.412663        | 0.00014386 | No      |
|      |       |        |             |          |         | Mvb12a  | 25.2898   | 94.4131  | 1.90043          | 25.2908      | 94.4141       | 1.90038966       | 0.00014386 | No      |
|      |       |        |             |          |         | Mx1     | 139.068   | 4.74708  | -4.8726          | 139.069      | 4.74808       | -4.8723128       | 0.00014386 | No      |
|      |       |        |             |          |         | Mxd3    | 0.366562  | 2.2747   | 2.63354          | 0.367562     | 2.2757        | 2.63025086       | 0.00014386 | No      |
|      |       |        |             |          |         | Mxi1    | 18.5392   | 64.1715  | 1.79136          | 18.5402      | 64.1725       | 1.79129838       | 0.00014386 | No      |
|      |       |        |             |          |         | Mxra7   | 0.917818  | 9.09788  | 3.30925          | 0.918818     | 9.09888       | 3.30783795       | 0.00014386 | No      |
|      |       |        |             |          |         | Mxra8   | 0.325847  | 4.05747  | 3.63831          | 0.326847     | 4.05847       | 3.63424859       | 0.00014386 | No      |
|      |       |        |             |          |         | Myadm   | 32.5037   | 19.638   | -0.726959        | 32.5047      | 19.639        | -0.7269269       | 0.00014386 | No      |
|      |       |        |             |          |         | Myb     | 17.5629   | 0.851209 | -4.36687         | 17.5639      | 0.852209      | -4.3652621       | 0.00014386 | No      |
|      |       |        |             |          |         | Mybbp1a | 29.5488   | 11.2725  | -1.39029         | 29.5498      | 11.2735       | -1.3902129       | 0.00014386 | No      |
|      |       |        |             |          |         | Myc     | 79.969    | 22.7199  | -1.81548         | 79.97        | 22.7209       | -1.8154389       | 0.00014386 | No      |
|      |       |        |             |          |         | Mycbp   | 14.7356   | 45.9573  | 1.64099          | 14.7366      | 45.9583       | 1.64092173       | 0.00014386 | No      |
|      |       |        |             |          |         | Mycbp2  | 54.1153   | 6.615    | -3.03222         | 54.1163      | 6.616         | -3.0320321       | 0.00014386 | No      |
|      |       |        |             |          |         | Myd88   | 31.9791   | 16.7338  | -0.934369        | 31.9801      | 16.7348       | -0.9343231       | 0.00014386 | No      |
|      |       |        |             |          |         | Myeov2  | 126.586   | 297.461  | 1.23258          | 126.587      | 297.462       | 1.23257613       | 0.00014386 | No      |
|      |       |        |             |          |         | Myh1    | 0         | 5.8356   | inf              | 0.001        | 5.8366        | 12.5109125       | 0.00014386 | No      |
|      |       |        |             |          |         | Myh7b   | 0.0882982 | 24.6325  | 8.12396          | 0.0892982    | 24.6335       | 8.10777481       | 0.00014386 | No      |
|      |       |        |             |          |         | Myl12a  | 175.03    | 405.508  | 1.21213          | 175.031      | 405.509       | 1.21212347       | 0.00014386 | No      |
|      |       |        |             |          |         | Myl12b  | 574.17    | 313.682  | -0.872176        | 574.171      | 313.683       | -0.8721731       | 0.00014386 | No      |
|      |       |        |             |          |         | Myl9    | 4.13275   | 9.13321  | 1.14402          | 4.13375      | 9.13421       | 1.14382882       | 0.00014386 | No      |
|      |       |        |             |          |         | Mylip   | 63.6103   | 12.4373  | -2.35459         | 63.6113      | 12.4383       | -2.3544938       | 0.00014386 | No      |
|      |       |        |             |          |         | Mylk    | 0.295808  | 7.24852  | 4.61495          | 0.296808     | 7.24952       | 4.61028359       | 0.00014386 | No      |
|      |       |        |             |          |         | Mynn    | 8.32589   | 2.40733  | -1.79017         | 8.32689      | 2.40833       | -1.7897447       | 0.00014386 | No      |
|      |       |        |             |          |         | Myo10   | 1.49332   | 13.688   | 3.19632          | 1.49432      | 13.689        | 3.19545603       | 0.00014386 | No      |
|      |       |        |             |          |         | MYO18A  | 6.51164   | 26.3569  | 2.01709          | 6.51264      | 26.3579       | 2.01692105       | 0.00014386 | No      |
|      |       |        |             |          |         | Myo1d   | 0.554317  | 34.3342  | 5.95279          | 0.555317     | 34.3352       | 5.95023299       | 0.00014386 | No      |
|      |       |        |             |          |         | Myo1e   | 0.826016  | 20.257   | 4.6161           | 0.827016     | 20.258        | 4.6144327        | 0.00014386 | No      |
|      |       |        |             |          |         | Myo1f   | 24.6601   | 10.9034  | -1.17741         | 24.6611      | 10.9044       | -1.1773268       | 0.00014386 | No      |
|      |       |        |             |          |         | Myo1g   | 78.7761   | 10.0093  | -2.97641         | 78.7771      | 10.0103       | -2.9762911       | 0.00014386 | No      |
|      |       |        |             |          |         | Myo3b   | 0         | 0.796966 | inf              | 0.001        | 0.797966      | 9.64018347       | 0.00014386 | No      |
|      |       |        |             |          |         | Myo5c   | 3.55001   | 22.4822  | 2.66288          | 3.55101      | 22.4832       | 2.66254606       | 0.00014386 | No      |
|      |       |        |             |          |         | Myo6    | 0.0832305 | 44.3476  | 9.05753          | 0.0842305    | 44.3486       | 9.04033012       | 0.00014386 | No      |
|      |       |        |             |          |         | Myo9a   | 2.21076   | 4.78232  | 1.11317          | 2.21176      | 4.78332       | 1.11281746       | 0.00014386 | No      |
|      |       |        |             |          |         | Myo9b   | 86.0049   | 27.2692  | -1.65715         | 86.0059      | 27.2702       | -1.6571104       | 0.00014386 | No      |

| RRBS |       |        |             |          |         | RNAseq  |           |          |                  |              |               |                  |            |         |
|------|-------|--------|-------------|----------|---------|---------|-----------|----------|------------------|--------------|---------------|------------------|------------|---------|
| gene | Blood | Kidney | methyl.diff | pMWU.fdr | Match ? | gene    | blood     | kidney   | log2(fold_ratio) | blood+ 0.001 | kidney+ 0.001 | log2(fold_ratio) | q_value    | Match ? |
|      |       |        |             |          |         | Myof    | 0.30762   | 33.8818  | 6.78321          | 0.30862      | 33.8828       | 6.77857773       | 0.00014386 | No      |
|      |       |        |             |          |         | Myrf    | 0.222009  | 3.47718  | 3.96923          | 0.223009     | 3.47818       | 3.96315876       | 0.00014386 | No      |
|      |       |        |             |          |         | Mysm1   | 15.7391   | 5.28309  | -1.5749          | 15.7401      | 5.28409       | -1.5747178       | 0.00014386 | No      |
|      |       |        |             |          |         | Mzb1    | 3.09961   | 0.586026 | -2.40305         | 3.10061      | 0.587026      | -2.4010558       | 0.00014386 | No      |
|      |       |        |             |          |         | Mzf1    | 0.719931  | 2.41706  | 1.74732          | 0.720931     | 2.41806       | 1.74591695       | 0.00014386 | No      |
|      |       |        |             |          |         | Mzt2b   | 21.0928   | 12.0938  | -0.802476        | 21.0938      | 12.0948       | -0.8024321       | 0.00014386 | No      |
|      |       |        |             |          |         | N4bp1   | 15.1972   | 8.66629  | -0.810317        | 15.1982      | 8.66729       | -0.8102476       | 0.00014386 | No      |
|      |       |        |             |          |         | N4bp2   | 208.907   | 13.6466  | -3.93624         | 208.908      | 13.6476       | -3.9361486       | 0.00014386 | No      |
|      |       |        |             |          |         | N4bp2l1 | 20.1919   | 2.8413   | -2.82916         | 20.1929      | 2.8423        | -2.8287174       | 0.00014386 | No      |
|      |       |        |             |          |         | N4bp2l2 | 56.1376   | 25.1883  | -1.15622         | 56.1386      | 25.1893       | -1.1561821       | 0.00014386 | No      |
|      |       |        |             |          |         | N6amt1  | 9.51206   | 27.3005  | 1.5211           | 9.51306      | 27.3015       | 1.52099884       | 0.00014386 | No      |
|      |       |        |             |          |         | Naa15   | 14.6793   | 6.76554  | -1.1175          | 14.6803      | 6.76654       | -1.1173912       | 0.00014386 | No      |
|      |       |        |             |          |         | Naa16   | 26.8356   | 7.09774  | -1.91872         | 26.8366      | 7.09874       | -1.918567        | 0.00014386 | No      |
|      |       |        |             |          |         | Naa20   | 27.2465   | 67.9235  | 1.31784          | 27.2475      | 67.9245       | 1.31780817       | 0.00014386 | No      |
|      |       |        |             |          |         | Naa38   | 65.9711   | 27.5539  | -1.25958         | 65.9721      | 27.5549       | -1.2595471       | 0.00014386 | No      |
|      |       |        |             |          |         | Nab1    | 11.5268   | 7.84282  | -0.555547        | 11.5278      | 7.84382       | -0.5554889       | 0.00014386 | No      |
|      |       |        |             |          |         | Naca    | 1847.86   | 654.872  | -1.49657         | 1847.861     | 654.873       | -1.4965692       | 0.00014386 | No      |
|      |       |        |             |          |         | Nacc1   | 21.5446   | 11.4105  | -0.916959        | 21.5456      | 11.4115       | -0.9169048       | 0.00014386 | No      |
|      |       |        |             |          |         | Nacc2   | 0.0696027 | 10.4986  | 7.23684          | 0.0706027    | 10.4996       | 7.2163953        | 0.00014386 | No      |
|      |       |        |             |          |         | Nadk2   | 19.6997   | 8.61541  | -1.19318         | 19.7007      | 8.61641       | -1.1930881       | 0.00014386 | No      |
|      |       |        |             |          |         | Naf1    | 6.34453   | 2.33424  | -1.44256         | 6.34553      | 2.33524       | -1.4421698       | 0.00014386 | No      |
|      |       |        |             |          |         | Naga    | 7.30689   | 33.5711  | 2.19989          | 7.30789      | 33.5721       | 2.19973596       | 0.00014386 | No      |
|      |       |        |             |          |         | Nagk    | 6.26507   | 33.0804  | 2.40057          | 6.26607      | 33.0814       | 2.4003875        | 0.00014386 | No      |
|      |       |        |             |          |         | Naglu   | 3.29328   | 6.8658   | 1.0599           | 3.29428      | 6.8668        | 1.05967476       | 0.00014386 | No      |
|      |       |        |             |          |         | Nampt   | 8.5895    | 29.097   | 1.76022          | 8.5905       | 29.098        | 1.76010599       | 0.00014386 | No      |
|      |       |        |             |          |         | Nanos3  | 0         | 11.9765  | inf              | 0.001        | 11.9775       | 13.5480392       | 0.00014386 | No      |
|      |       |        |             |          |         | Nanp    | 8.21932   | 4.57973  | -0.843755        | 8.22032      | 4.58073       | -0.843617        | 0.00014386 | No      |
|      |       |        |             |          |         | Nans    | 21.6103   | 49.27    | 1.18899          | 21.6113      | 49.271        | 1.18895289       | 0.00014386 | No      |
|      |       |        |             |          |         | Nap1l1  | 428.361   | 60.1831  | -2.83139         | 428.362      | 60.1841       | -2.8313762       | 0.00014386 | No      |
|      |       |        |             |          |         | Nap1l3  | 0         | 3.73805  | inf              | 0.001        | 3.73905       | 11.868456        | 0.00014386 | No      |
|      |       |        |             |          |         | Nap1l4  | 77.8816   | 38.1599  | -1.02923         | 77.8826      | 38.1609       | -1.0292059       | 0.00014386 | No      |
|      |       |        |             |          |         | Napa    | 56.8787   | 79.5361  | 0.483721         | 56.8797      | 79.5371       | 0.48371411       | 0.00014386 | No      |
|      |       |        |             |          |         | Naprt1  | 0.413765  | 114.49   | 8.1122           | 0.414765     | 114.491       | 8.10872432       | 0.00014386 | No      |
|      |       |        |             |          |         | Napsa   | 4.20126   | 132.736  | 4.9816           | 4.20226      | 132.737       | 4.98126134       | 0.00014386 | No      |
|      |       |        |             |          |         | Narfl   | 12.7289   | 23.134   | 0.861909         | 12.7299      | 23.135        | 0.86185601       | 0.00014386 | No      |
|      |       |        |             |          |         | Nars    | 47.3267   | 29.4052  | -0.686584        | 47.3277      | 29.4062       | -0.6865644       | 0.00014386 | No      |
|      |       |        |             |          |         | Nasp    | 37.0334   | 11.4782  | -1.68993         | 37.0344      | 11.4792       | -1.6898439       | 0.00014386 | No      |
|      |       |        |             |          |         | NAT2    | 4.58293   | 8.5934   | 0.906959         | 4.58393      | 8.5944        | 0.90681191       | 0.00014386 | No      |
|      |       |        |             |          |         | Nat8b   | 16.0099   | 63.6863  | 1.99202          | 16.0109      | 63.6873       | 1.9919513        | 0.00014386 | No      |
|      |       |        |             |          |         | Nat9    | 54.3573   | 36.934   | -0.557523        | 54.3583      | 36.935        | -0.5575118       | 0.00014386 | No      |
|      |       |        |             |          |         | Nbea    | 0.0201469 | 4.48637  | 7.79885          | 0.0211469    | 4.48737       | 7.72928015       | 0.00014386 | No      |
|      |       |        |             |          |         | Nbeal1  | 1.16619   | 1.85414  | 0.668947         | 1.16719      | 1.85514       | 0.66848864       | 0.00014386 | No      |

| RRBS |       |        |             |          |         | RNAseq  |          |          |                  |              |               |                  |            |         |
|------|-------|--------|-------------|----------|---------|---------|----------|----------|------------------|--------------|---------------|------------------|------------|---------|
| gene | Blood | Kidney | methyl.diff | pMWU.fdr | Match ? | gene    | blood    | kidney   | log2(fold_ratio) | blood+ 0.001 | kidney+ 0.001 | log2(fold_ratio) | q_value    | Match ? |
|      |       |        |             |          |         | Nbeal2  | 61.2218  | 25.7711  | -1.24829         | 61.2228      | 25.7721       | -1.2482589       | 0.00014386 | No      |
|      |       |        |             |          |         | Nbl1    | 0.199483 | 51.7505  | 8.01916          | 0.200483     | 51.7515       | 8.01197696       | 0.00014386 | No      |
|      |       |        |             |          |         | Nbr1    | 35.6301  | 46.5378  | 0.385306         | 35.6311      | 46.5388       | 0.38529699       | 0.00014386 | No      |
|      |       |        |             |          |         | Ncald   | 3.54714  | 7.37832  | 1.05664          | 3.54814      | 7.37932       | 1.05642494       | 0.00014386 | No      |
|      |       |        |             |          |         | Ncapd2  | 5.69068  | 2.64048  | -1.1078          | 5.69168      | 2.64148       | -1.1075081       | 0.00014386 | No      |
|      |       |        |             |          |         | Ncapd3  | 3.67355  | 2.09213  | -0.8122          | 3.67455      | 2.09313       | -0.8119057       | 0.00014386 | No      |
|      |       |        |             |          |         | Ncapg2  | 1.49322  | 0.390834 | -1.9338          | 1.49422      | 0.391834      | -1.9310781       | 0.00014386 | No      |
|      |       |        |             |          |         | Ncaph2  | 27.3203  | 16.0793  | -0.764774        | 27.3213      | 16.0803       | -0.7647318       | 0.00014386 | No      |
|      |       |        |             |          |         | Ncdn    | 9.37741  | 6.03215  | -0.636516        | 9.37841      | 6.03315       | -0.6364319       | 0.00014386 | No      |
|      |       |        |             |          |         | Nck1    | 34.0638  | 16.3327  | -1.06048         | 34.0648      | 16.3337       | -1.0604301       | 0.00014386 | No      |
|      |       |        |             |          |         | Nck2    | 15.7059  | 22.999   | 0.550261         | 15.7069      | 23            | 0.55023539       | 0.00014386 | No      |
|      |       |        |             |          |         | Nckap1  | 0.839755 | 63.4702  | 6.23997          | 0.840755     | 63.4712       | 6.23827286       | 0.00014386 | No      |
|      |       |        |             |          |         | Nckap5  | 0        | 3.54256  | inf              | 0.001        | 3.54356       | 11.7909838       | 0.00014386 | No      |
|      |       |        |             |          |         | Nckap5l | 6.95409  | 2.08442  | -1.73821         | 6.95509      | 2.08542       | -1.7377312       | 0.00014386 | No      |
|      |       |        |             |          |         | Ncln    | 125.274  | 51.6047  | -1.27951         | 125.275      | 51.6057       | -1.2794962       | 0.00014386 | No      |
|      |       |        |             |          |         | Ncoa1   | 22.9395  | 12.8383  | -0.837384        | 22.9405      | 12.8393       | -0.8373303       | 0.00014386 | No      |
|      |       |        |             |          |         | Ncoa2   | 15.5915  | 4.14403  | -1.91165         | 15.5925      | 4.14503       | -1.9113978       | 0.00014386 | No      |
|      |       |        |             |          |         | Ncoa3   | 42.1081  | 5.20434  | -3.01631         | 42.1091      | 5.20534       | -3.0160677       | 0.00014386 | No      |
|      |       |        |             |          |         | Ncoa4   | 24.8039  | 58.327   | 1.2336           | 24.8049      | 58.328        | 1.23356347       | 0.00014386 | No      |
|      |       |        |             |          |         | Ncoa6   | 11.4185  | 5.34774  | -1.09438         | 11.4195      | 5.34874       | -1.0942285       | 0.00014386 | No      |
|      |       |        |             |          |         | NCOA7   | 14.3029  | 27.8721  | 0.962519         | 14.3039      | 27.8731       | 0.96246491       | 0.00014386 | No      |
|      |       |        |             |          |         | Ndc1    | 4.92488  | 2.44363  | -1.01106         | 4.92588      | 2.44463       | -1.0107654       | 0.00014386 | No      |
|      |       |        |             |          |         | Ndrg1   | 11.6194  | 427.379  | 5.20091          | 11.6204      | 427.38        | 5.20078776       | 0.00014386 | No      |
|      |       |        |             |          |         | Ndrg2   | 3.67211  | 83.6191  | 4.50915          | 3.67311      | 83.6201       | 4.50877576       | 0.00014386 | No      |
|      |       |        |             |          |         | Ndrg4   | 1.03885  | 19.2377  | 4.21088          | 1.03985      | 19.2387       | 4.20956398       | 0.00014386 | No      |
|      |       |        |             |          |         | Ndst1   | 0.133475 | 32.6702  | 7.93526          | 0.134475     | 32.6712       | 7.92453765       | 0.00014386 | No      |
|      |       |        |             |          |         | Ndst2   | 12.8473  | 6.59299  | -0.962455        | 12.8483      | 6.59399       | -0.9623539       | 0.00014386 | No      |
|      |       |        |             |          |         | Ndufa1  | 295.909  | 788.33   | 1.41365          | 295.91       | 788.331       | 1.41364306       | 0.00014386 | No      |
|      |       |        |             |          |         | Ndufa10 | 43.9342  | 108.094  | 1.29887          | 43.9352      | 108.095       | 1.29885063       | 0.00014386 | No      |
|      |       |        |             |          |         | Ndufa11 | 91.1671  | 555.906  | 2.60826          | 91.1681      | 555.907       | 2.60824253       | 0.00014386 | No      |
|      |       |        |             |          |         | Ndufa12 | 86.0624  | 378.419  | 2.13653          | 86.0634      | 378.42        | 2.1365166        | 0.00014386 | No      |
|      |       |        |             |          |         | Ndufa13 | 160.782  | 442.446  | 1.4604           | 160.783      | 442.447       | 1.46038977       | 0.00014386 | No      |
|      |       |        |             |          |         | Ndufa2  | 67.0295  | 282.19   | 2.0738           | 67.0305      | 282.191       | 2.07378238       | 0.00014386 | No      |
|      |       |        |             |          |         | Ndufa3  | 116.657  | 489.844  | 2.07006          | 116.658      | 489.845       | 2.07004007       | 0.00014386 | No      |
|      |       |        |             |          |         | Ndufa4  | 216.503  | 958.713  | 2.14671          | 216.504      | 958.714       | 2.14670682       | 0.00014386 | No      |
|      |       |        |             |          |         | Ndufa5  | 61.7028  | 339.691  | 2.46082          | 61.7038      | 339.692       | 2.460796         | 0.00014386 | No      |
|      |       |        |             |          |         | Ndufa6  | 177.985  | 460.116  | 1.37024          | 177.986      | 460.117       | 1.37023699       | 0.00014386 | No      |
|      |       |        |             |          |         | Ndufa8  | 62.6866  | 157.909  | 1.33286          | 62.6876      | 157.91        | 1.33285053       | 0.00014386 | No      |
|      |       |        |             |          |         | Ndufa9  | 61.3104  | 185.524  | 1.59741          | 61.3114      | 185.525       | 1.59738635       | 0.00014386 | No      |
|      |       |        |             |          |         | Ndufab1 | 80.3448  | 356.159  | 2.14824          | 80.3458      | 356.16        | 2.14823098       | 0.00014386 | No      |
|      |       |        |             |          |         | Ndufaf1 | 2.61115  | 7.56736  | 1.53511          | 2.61215      | 7.56836       | 1.53474297       | 0.00014386 | No      |
|      |       |        |             |          |         | Ndufaf4 | 29.996   | 12.2215  | -1.29534         | 29.997       | 12.2225       | -1.2952788       | 0.00014386 | No      |

| RRBS |       |        |             |          |         | RNAseq  |         |         |                  |              |               |                  |            |         |
|------|-------|--------|-------------|----------|---------|---------|---------|---------|------------------|--------------|---------------|------------------|------------|---------|
| gene | Blood | Kidney | methyl.diff | pMWU.fdr | Match ? | gene    | blood   | kidney  | log2(fold_ratio) | blood+ 0.001 | kidney+ 0.001 | log2(fold_ratio) | q_value    | Match ? |
|      |       |        |             |          |         | Ndufaf5 | 13.0419 | 32.733  | 1.3276           | 13.0429      | 32.734        | 1.32752523       | 0.00014386 | No      |
|      |       |        |             |          |         | Ndufaf6 | 4.31503 | 11.488  | 1.41268          | 4.31603      | 11.489        | 1.41247643       | 0.00014386 | No      |
|      |       |        |             |          |         | Ndufb10 | 158.872 | 448.789 | 1.49817          | 158.873      | 448.79        | 1.49816657       | 0.00014386 | No      |
|      |       |        |             |          |         | Ndufb11 | 200.956 | 411.557 | 1.03421          | 200.957      | 411.558       | 1.03420893       | 0.00014386 | No      |
|      |       |        |             |          |         | Ndufb2  | 152.473 | 522.338 | 1.77643          | 152.474      | 522.339       | 1.77642317       | 0.00014386 | No      |
|      |       |        |             |          |         | Ndufb3  | 71.5521 | 311.321 | 2.12134          | 71.5531      | 311.322       | 2.12132135       | 0.00014386 | No      |
|      |       |        |             |          |         | Ndufb4  | 156.292 | 586.476 | 1.90783          | 156.293      | 586.477       | 1.90782137       | 0.00014386 | No      |
|      |       |        |             |          |         | Ndufb5  | 61.3839 | 259.759 | 2.08124          | 61.3849      | 259.76        | 2.08122357       | 0.00014386 | No      |
|      |       |        |             |          |         | Ndufb6  | 74.9558 | 380.412 | 2.34345          | 74.9568      | 380.413       | 2.34343528       | 0.00014386 | No      |
|      |       |        |             |          |         | Ndufb7  | 71.9609 | 407.533 | 2.50163          | 71.9619      | 407.534       | 2.50161524       | 0.00014386 | No      |
|      |       |        |             |          |         | Ndufb8  | 157.138 | 483.505 | 1.6215           | 157.139      | 483.506       | 1.62149251       | 0.00014386 | No      |
|      |       |        |             |          |         | Ndufb9  | 114.109 | 520.551 | 2.18963          | 114.11       | 520.552       | 2.18961706       | 0.00014386 | No      |
|      |       |        |             |          |         | Ndufc1  | 45.0414 | 382.263 | 3.08524          | 45.0424      | 382.264       | 3.08521373       | 0.00014386 | No      |
|      |       |        |             |          |         | Ndufc2  | 106.454 | 239.986 | 1.17272          | 106.455      | 239.987       | 1.17271255       | 0.00014386 | No      |
|      |       |        |             |          |         | Ndufs1  | 21.6905 | 101.652 | 2.2285           | 21.6915      | 101.653       | 2.22845107       | 0.00014386 | No      |
|      |       |        |             |          |         | Ndufs2  | 66.6521 | 237.07  | 1.83059          | 66.6531      | 237.071       | 1.83057531       | 0.00014386 | No      |
|      |       |        |             |          |         | Ndufs3  | 60.7115 | 276.411 | 2.18678          | 60.7125      | 276.412       | 2.18675476       | 0.00014386 | No      |
|      |       |        |             |          |         | Ndufs4  | 19.5886 | 68.4195 | 1.80439          | 19.5896      | 68.4205       | 1.80434071       | 0.00014386 | No      |
|      |       |        |             |          |         | Ndufs7  | 128.138 | 558.649 | 2.12424          | 128.139      | 558.65        | 2.12423507       | 0.00014386 | No      |
|      |       |        |             |          |         | Ndufs8  | 64.3627 | 306.677 | 2.25242          | 64.3637      | 306.678       | 2.25240551       | 0.00014386 | No      |
|      |       |        |             |          |         | Ndufv1  | 80.9808 | 264.398 | 1.70706          | 80.9818      | 264.399       | 1.7070471        | 0.00014386 | No      |
|      |       |        |             |          |         | Ndufv2  | 95.1183 | 402.6   | 2.08155          | 95.1193      | 402.601       | 2.08154075       | 0.00014386 | No      |
|      |       |        |             |          |         | NDUFV3  | 13.831  | 191.085 | 3.78823          | 13.832       | 191.086       | 3.7881404        | 0.00014386 | No      |
|      |       |        |             |          |         | NEBL    | 43.4848 | 11.5116 | -1.91743         | 43.4858      | 11.5126       | -1.9173307       | 0.00014386 | No      |
|      |       |        |             |          |         | Necap1  | 14.6105 | 25.0618 | 0.778488         | 14.6115      | 25.0628       | 0.77844331       | 0.00014386 | No      |
|      |       |        |             |          |         | Necap2  | 54.5385 | 30.9183 | -0.818813        | 54.5395      | 30.9193       | -0.8187938       | 0.00014386 | No      |
|      |       |        |             |          |         | Nedd1   | 4.45923 | 2.07152 | -1.1061          | 4.46023      | 2.07252       | -1.1057321       | 0.00014386 | No      |
|      |       |        |             |          |         | Nedd4   | 37.8667 | 60.6185 | 0.678829         | 37.8677      | 60.6195       | 0.67881415       | 0.00014386 | No      |
|      |       |        |             |          |         | Nedd4l  | 1.53695 | 29.2625 | 4.25091          | 1.53795      | 29.2635       | 4.25002182       | 0.00014386 | No      |
|      |       |        |             |          |         | Nedd9   | 10.5777 | 14.4533 | 0.450367         | 10.5787      | 14.4543       | 0.4503364        | 0.00014386 | No      |
|      |       |        |             |          |         | Neil1   | 40.785  | 9.65505 | -2.07868         | 40.786       | 9.65605       | -2.078569        | 0.00014386 | No      |
|      |       |        |             |          |         | Nek1    | 2.12781 | 1.05709 | -1.00928         | 2.12881      | 1.05809       | -1.0085848       | 0.00014386 | No      |
|      |       |        |             |          |         | Nek3    | 5.16783 | 17.1492 | 1.73051          | 5.16883      | 17.1502       | 1.73031574       | 0.00014386 | No      |
|      |       |        |             |          |         | Nek4    | 1.16583 | 3.9872  | 1.77402          | 1.16683      | 3.9882        | 1.77314338       | 0.00014386 | No      |
|      |       |        |             |          |         | Nek5    | 0       | 10.9389 | inf              | 0.001        | 10.9399       | 13.4173119       | 0.00014386 | No      |
|      |       |        |             |          |         | NEK6    | 3.67885 | 11.1606 | 1.60109          | 3.67985      | 11.1616       | 1.60082499       | 0.00014386 | No      |
|      |       |        |             |          |         | Nek7    | 57.5033 | 30.5576 | -0.912114        | 57.5043      | 30.5586       | -0.9120914       | 0.00014386 | No      |
|      |       |        |             |          |         | Nek8    | 4.61305 | 11.7629 | 1.35045          | 4.61405      | 11.7639       | 1.35026088       | 0.00014386 | No      |
|      |       |        |             |          |         | Nelfa   | 24.338  | 15.2942 | -0.670229        | 24.339       | 15.2952       | -0.6701909       | 0.00014386 | No      |
|      |       |        |             |          |         | Nelfcd  | 73.456  | 36.6996 | -1.00111         | 73.457       | 36.7006       | -1.0010963       | 0.00014386 | No      |
|      |       |        |             |          |         | Nelfe   | 17.2689 | 31.3361 | 0.859651         | 17.2699      | 31.3371       | 0.85961195       | 0.00014386 | No      |
|      |       |        |             |          |         | Nemf    | 32.9609 | 10.2036 | -1.69169         | 32.9619      | 10.2046       | -1.6915798       | 0.00014386 | No      |

| RRBS |       |        |             |          |         | RNAseq   |           |         |                  |              |               |                  |            |         |
|------|-------|--------|-------------|----------|---------|----------|-----------|---------|------------------|--------------|---------------|------------------|------------|---------|
| gene | Blood | Kidney | methyl.diff | pMWU.fdr | Match ? | gene     | blood     | kidney  | log2(fold_ratio) | blood+ 0.001 | kidney+ 0.001 | log2(fold_ratio) | q_value    | Match ? |
|      |       |        |             |          |         | Nenf     | 6.82899   | 49.4811 | 2.85713          | 6.82999      | 49.4821       | 2.85695136       | 0.00014386 | No      |
|      |       |        |             |          |         | Neo1     | 0.342242  | 16.9764 | 5.63237          | 0.343242     | 16.9774       | 5.62824563       | 0.00014386 | No      |
|      |       |        |             |          |         | Net1     | 5.15202   | 60.592  | 3.55592          | 5.15302      | 60.593        | 3.55566104       | 0.00014386 | No      |
|      |       |        |             |          |         | Neto2    | 0.878073  | 3.12615 | 1.83197          | 0.879073     | 3.12715       | 1.83079354       | 0.00014386 | No      |
|      |       |        |             |          |         | Neurl3   | 58.7689   | 29.2843 | -1.00493         | 58.7699      | 29.2853       | -1.0049008       | 0.00014386 | No      |
|      |       |        |             |          |         | Nfam1    | 0.628951  | 1.66639 | 1.4057           | 0.629951     | 1.66739       | 1.40428007       | 0.00014386 | No      |
|      |       |        |             |          |         | Nfat5    | 13.85     | 49.6836 | 1.84288          | 13.851       | 49.6846       | 1.84280861       | 0.00014386 | No      |
|      |       |        |             |          |         | Nfatc1   | 51.0092   | 4.10717 | -3.63454         | 51.0102      | 4.10817       | -3.634218        | 0.00014386 | No      |
|      |       |        |             |          |         | Nfatc2   | 9.84985   | 2.15575 | -2.19191         | 9.85085      | 2.15675       | -2.1913893       | 0.00014386 | No      |
|      |       |        |             |          |         | Nfatc2ip | 5.50003   | 2.44101 | -1.17196         | 5.50103      | 2.44201       | -1.1716327       | 0.00014386 | No      |
|      |       |        |             |          |         | Nfatc3   | 52.058    | 5.8102  | -3.16346         | 52.059       | 5.8112        | -3.1632396       | 0.00014386 | No      |
|      |       |        |             |          |         | NFE2L1   | 12.1585   | 46.2338 | 1.92699          | 12.1595      | 46.2348       | 1.92689524       | 0.00014386 | No      |
|      |       |        |             |          |         | Nfe2l2   | 9.29421   | 48.6064 | 2.38674          | 9.29521      | 48.6074       | 2.3866166        | 0.00014386 | No      |
|      |       |        |             |          |         | Nfia     | 1.51562   | 5.8154  | 1.93997          | 1.51662      | 5.8164        | 1.93926684       | 0.00014386 | No      |
|      |       |        |             |          |         | Nfib     | 0         | 2.59913 | inf              | 0.001        | 2.60013       | 11.344368        | 0.00014386 | No      |
|      |       |        |             |          |         | Nfic     | 4.87858   | 13.1222 | 1.42747          | 4.87958      | 13.1232       | 1.42729067       | 0.00014386 | No      |
|      |       |        |             |          |         | Nfil3    | 2.86806   | 10.0901 | 1.81479          | 2.86906      | 10.0911       | 1.8144334        | 0.00014386 | No      |
|      |       |        |             |          |         | Nfrkb    | 52.6108   | 7.33124 | -2.84323         | 52.6118      | 7.33224       | -2.8430605       | 0.00014386 | No      |
|      |       |        |             |          |         | Nfs1     | 16.3589   | 85.6731 | 2.38877          | 16.3599      | 85.6741       | 2.3886952        | 0.00014386 | No      |
|      |       |        |             |          |         | Nfx1     | 18.3651   | 9.29205 | -0.982899        | 18.3661      | 9.29305       | -0.9828212       | 0.00014386 | No      |
|      |       |        |             |          |         | Nfxl1    | 13.7117   | 4.32554 | -1.66446         | 13.7127      | 4.32654       | -1.664227        | 0.00014386 | No      |
|      |       |        |             |          |         | Nfya     | 13.7793   | 7.2075  | -0.934935        | 13.7803      | 7.2085        | -0.9348363       | 0.00014386 | No      |
|      |       |        |             |          |         | Nfyb     | 19.8828   | 10.5997 | -0.907498        | 19.8838      | 10.6007       | -0.907434        | 0.00014386 | No      |
|      |       |        |             |          |         | Ngdn     | 75.7815   | 38.2596 | -0.986025        | 75.7825      | 38.2606       | -0.9860052       | 0.00014386 | No      |
|      |       |        |             |          |         | Ngfrap1  | 62.6548   | 197.171 | 1.65395          | 62.6558      | 197.172       | 1.65393472       | 0.00014386 | No      |
|      |       |        |             |          |         | Ngly1    | 40.3532   | 26.6025 | -0.601122        | 40.3542      | 26.6035       | -0.6011028       | 0.00014386 | No      |
|      |       |        |             |          |         | NGRN     | 42.0901   | 29.7223 | -0.501936        | 42.0911      | 29.7233       | -0.5019209       | 0.00014386 | No      |
|      |       |        |             |          |         | Nhlrc3   | 21.4008   | 6.46662 | -1.72658         | 21.4018      | 6.46762       | -1.7264253       | 0.00014386 | No      |
|      |       |        |             |          |         | Nhp2l1   | 114.543   | 70.1684 | -0.706992        | 114.544      | 70.1694       | -0.706988        | 0.00014386 | No      |
|      |       |        |             |          |         | Nhsl1    | 0.416294  | 2.58871 | 2.63656          | 0.417294     | 2.58971       | 2.63365447       | 0.00014386 | No      |
|      |       |        |             |          |         | Nid1     | 0         | 4.4374  | inf              | 0.001        | 4.4384        | 12.115824        | 0.00014386 | No      |
|      |       |        |             |          |         | Ninj1    | 6.29923   | 167.902 | 4.7363           | 6.30023      | 167.903       | 4.7360797        | 0.00014386 | No      |
|      |       |        |             |          |         | Ninl     | 0.0732603 | 54.0925 | 9.52818          | 0.0742603    | 54.0935       | 9.50864839       | 0.00014386 | No      |
|      |       |        |             |          |         | Nip30    | 51.117    | 75.6534 | 0.565601         | 51.118       | 75.6544       | 0.5655926        | 0.00014386 | No      |
|      |       |        |             |          |         | Nip7     | 27.0686   | 14.0807 | -0.942899        | 27.0696      | 14.0817       | -0.9428521       | 0.00014386 | No      |
|      |       |        |             |          |         | Nipal1   | 25.861    | 2.16099 | -3.58101         | 25.862       | 2.16199       | -3.5804021       | 0.00014386 | No      |
|      |       |        |             |          |         | Nipal2   | 9.07082   | 36.9756 | 2.02727          | 9.07182      | 36.9766       | 2.02714865       | 0.00014386 | No      |
|      |       |        |             |          |         | Nipal3   | 10.1461   | 3.82018 | -1.40922         | 10.1471      | 3.82118       | -1.4089773       | 0.00014386 | No      |
|      |       |        |             |          |         | Nipbl    | 34.3902   | 8.73746 | -1.97671         | 34.3912      | 8.73846       | -1.9765885       | 0.00014386 | No      |
|      |       |        |             |          |         | Nit1     | 46.3802   | 179.791 | 1.95474          | 46.3812      | 179.792       | 1.95471678       | 0.00014386 | No      |
|      |       |        |             |          |         | Nit2     | 45.5522   | 187.306 | 2.0398           | 45.5532      | 187.307       | 2.03978051       | 0.00014386 | No      |
|      |       |        |             |          |         | Nkain1   | 10.6867   | 2.23678 | -2.25633         | 10.6877      | 2.23778       | -2.2558113       | 0.00014386 | No      |

| RRBS |       |        |             |          |         | RNAseq |          |         |                  |              |               |                  |            |         |
|------|-------|--------|-------------|----------|---------|--------|----------|---------|------------------|--------------|---------------|------------------|------------|---------|
| gene | Blood | Kidney | methyl.diff | pMWU.fdr | Match ? | gene   | blood    | kidney  | log2(fold_ratio) | blood+ 0.001 | kidney+ 0.001 | log2(fold_ratio) | q_value    | Match ? |
|      |       |        |             |          |         | Nkap   | 25.9393  | 8.2516  | -1.6524          | 25.9403      | 8.2526        | -1.6522745       | 0.00014386 | No      |
|      |       |        |             |          |         | Nkd2   | 0.955825 | 9.38434 | 3.29544          | 0.956825     | 9.38534       | 3.29408202       | 0.00014386 | No      |
|      |       |        |             |          |         | Nkg7   | 69.1     | 18.9794 | -1.86425         | 69.101       | 18.9804       | -1.8641962       | 0.00014386 | No      |
|      |       |        |             |          |         | Nktr   | 24.1454  | 6.44578 | -1.90532         | 24.1464      | 6.44678       | -1.9051575       | 0.00014386 | No      |
|      |       |        |             |          |         | Nle1   | 19.4958  | 5.21177 | -1.90332         | 19.4968      | 5.21277       | -1.9031152       | 0.00014386 | No      |
|      |       |        |             |          |         | Nlgn2  | 0.167728 | 1.19421 | 2.83186          | 0.168728     | 1.19521       | 2.82449281       | 0.00014386 | No      |
|      |       |        |             |          |         | Nlk    | 21.4847  | 5.541   | -1.95509         | 21.4857      | 5.542         | -1.9548982       | 0.00014386 | No      |
|      |       |        |             |          |         | Nlrc3  | 32.5591  | 1.85527 | -4.13336         | 32.5601      | 1.85627       | -4.1326267       | 0.00014386 | No      |
|      |       |        |             |          |         | Nlrc5  | 92.7569  | 9.87667 | -3.23136         | 92.7579      | 9.87767       | -3.2312275       | 0.00014386 | No      |
|      |       |        |             |          |         | Nlrp1a | 21.1111  | 1.50463 | -3.81052         | 21.1121      | 1.50563       | -3.8096309       | 0.00014386 | No      |
|      |       |        |             |          |         | Nlrx1  | 0.906636 | 7.42158 | 3.03313          | 0.907636     | 7.42258       | 3.031735         | 0.00014386 | No      |
|      |       |        |             |          |         | Nmd3   | 34.4289  | 16.3743 | -1.07218         | 34.4299      | 16.3753       | -1.0721407       | 0.00014386 | No      |
|      |       |        |             |          |         | Nme2   | 387.576  | 645.201 | 0.735269         | 387.577      | 645.202       | 0.73526795       | 0.00014386 | No      |
|      |       |        |             |          |         | NME4   | 4.86356  | 57.7247 | 3.5691           | 4.86456      | 57.7257       | 3.56883254       | 0.00014386 | No      |
|      |       |        |             |          |         | Nme6   | 3.47443  | 20.6224 | 2.56936          | 3.47543      | 20.6234       | 2.5690188        | 0.00014386 | No      |
|      |       |        |             |          |         | Nmi    | 118.633  | 27.8204 | -2.09229         | 118.634      | 27.8214       | -2.0922506       | 0.00014386 | No      |
|      |       |        |             |          |         | Nmnat1 | 6.6429   | 12.7376 | 0.93921          | 6.6439       | 12.7386       | 0.93910447       | 0.00014386 | No      |
|      |       |        |             |          |         | Nmnat3 | 0.30553  | 9.06538 | 4.89098          | 0.30653      | 9.06638       | 4.88642645       | 0.00014386 | No      |
|      |       |        |             |          |         | Nmral1 | 5.04262  | 16.6496 | 1.72324          | 5.04362      | 16.6506       | 1.72304268       | 0.00014386 | No      |
|      |       |        |             |          |         | Nmt2   | 2.85704  | 8.13663 | 1.50991          | 2.85804      | 8.13763       | 1.50958258       | 0.00014386 | No      |
|      |       |        |             |          |         | Nmu    | 0        | 1.90624 | inf              | 0.001        | 1.90724       | 10.8972707       | 0.00014386 | No      |
|      |       |        |             |          |         | Nnmt   | 0        | 3.47192 | inf              | 0.001        | 3.47292       | 11.7619335       | 0.00014386 | No      |
|      |       |        |             |          |         | Nnt    | 9.74063  | 49.6722 | 2.35035          | 9.74163      | 49.6732       | 2.3502326        | 0.00014386 | No      |
|      |       |        |             |          |         | Noa1   | 10.7203  | 5.73918 | -0.901423        | 10.7213      | 5.74018       | -0.901312        | 0.00014386 | No      |
|      |       |        |             |          |         | Noc2l  | 43.4734  | 18.5891 | -1.22568         | 43.4744      | 18.5901       | -1.2256316       | 0.00014386 | No      |
|      |       |        |             |          |         | Noc3l  | 14.9437  | 7.09012 | -1.07566         | 14.9447      | 7.09112       | -1.0755485       | 0.00014386 | No      |
|      |       |        |             |          |         | Nol10  | 11.8129  | 4.79756 | -1.29999         | 11.8139      | 4.79856       | -1.2998119       | 0.00014386 | No      |
|      |       |        |             |          |         | Nol11  | 11.7064  | 7.85497 | -0.575617        | 11.7074      | 7.85597       | -0.5755594       | 0.00014386 | No      |
|      |       |        |             |          |         | NOL6   | 18.9304  | 11.9617 | -0.662285        | 18.9314      | 11.9627       | -0.6622381       | 0.00014386 | No      |
|      |       |        |             |          |         | Nol7   | 134.178  | 64.5095 | -1.05656         | 134.179      | 64.5105       | -1.056553        | 0.00014386 | No      |
|      |       |        |             |          |         | Nolc1  | 33.5582  | 15.8552 | -1.08171         | 33.5592      | 15.8562       | -1.0816613       | 0.00014386 | No      |
|      |       |        |             |          |         | Nom1   | 12.0987  | 7.72303 | -0.647616        | 12.0997      | 7.72403       | -0.6475456       | 0.00014386 | No      |
|      |       |        |             |          |         | Nono   | 191.615  | 90.7747 | -1.07785         | 191.616      | 90.7757       | -1.07784         | 0.00014386 | No      |
|      |       |        |             |          |         | Nop14  | 18.0967  | 11.4541 | -0.659867        | 18.0977      | 11.4551       | -0.6598163       | 0.00014386 | No      |
|      |       |        |             |          |         | Nop16  | 55.9155  | 40.1812 | -0.476727        | 55.9165      | 40.1822       | -0.4767175       | 0.00014386 | No      |
|      |       |        |             |          |         | Nop2   | 31.8014  | 11.9464 | -1.41252         | 31.8024      | 11.9474       | -1.412439        | 0.00014386 | No      |
|      |       |        |             |          |         | Nop56  | 107.245  | 49.3557 | -1.11962         | 107.246      | 49.3567       | -1.119606        | 0.00014386 | No      |
|      |       |        |             |          |         | Nop58  | 63.599   | 25.0715 | -1.34295         | 63.6         | 25.0725       | -1.3429209       | 0.00014386 | No      |
|      |       |        |             |          |         | Nos1   | 0        | 1.54795 | inf              | 0.001        | 1.54895       | 10.5970749       | 0.00014386 | No      |
|      |       |        |             |          |         | Nos1ap | 0.131579 | 7.21069 | 5.77613          | 0.132579     | 7.21169       | 5.7654132        | 0.00014386 | No      |
|      |       |        |             |          |         | NOSIP  | 66.3823  | 94.9832 | 0.516874         | 66.3833      | 94.9842       | 0.5168672        | 0.00014386 | No      |
|      |       |        |             |          |         | Notch2 | 17.3638  | 8.42393 | -1.04352         | 17.3648      | 8.42493       | -1.0434292       | 0.00014386 | No      |



| RRBS |       |        |             |          |         | RNAseq  |          |          |                  |              |               |                  |            |         |
|------|-------|--------|-------------|----------|---------|---------|----------|----------|------------------|--------------|---------------|------------------|------------|---------|
| gene | Blood | Kidney | methyl.diff | pMWU.fdr | Match ? | gene    | blood    | kidney   | log2(fold_ratio) | blood+ 0.001 | kidney+ 0.001 | log2(fold_ratio) | q_value    | Match ? |
|      |       |        |             |          |         | Npap60  | 21.1818  | 10.9509  | -0.951778        | 21.1828      | 10.9519       | -0.9517121       | 0.00014386 | No      |
|      |       |        |             |          |         | Npas2   | 0.369591 | 11.021   | 4.89819          | 0.370591     | 11.022        | 4.89441438       | 0.00014386 | No      |
|      |       |        |             |          |         | Npat    | 6.04885  | 2.39787  | -1.33491         | 6.04985      | 2.39887       | -1.3345444       | 0.00014386 | No      |
|      |       |        |             |          |         | Npc2    | 59.3763  | 93.6089  | 0.65676          | 59.3773      | 93.6099       | 0.65674962       | 0.00014386 | No      |
|      |       |        |             |          |         | Npepl1  | 29.0022  | 38.4246  | 0.40587          | 29.0032      | 38.4256       | 0.4058557        | 0.00014386 | No      |
|      |       |        |             |          |         | Npepo   | 4.39767  | 52.0825  | 3.56599          | 4.39867      | 52.0835       | 3.56568712       | 0.00014386 | No      |
|      |       |        |             |          |         | Nphp1   | 0.265504 | 19.5136  | 6.1996           | 0.266504     | 19.5146       | 6.19425289       | 0.00014386 | No      |
|      |       |        |             |          |         | Npl     | 0.133451 | 4.68294  | 5.13303          | 0.134451     | 4.68394       | 5.1225702        | 0.00014386 | No      |
|      |       |        |             |          |         | Nploc4  | 21.7725  | 15.1288  | -0.525214        | 21.7735      | 15.1298       | -0.5251804       | 0.00014386 | No      |
|      |       |        |             |          |         | Npm1    | 1057.33  | 233.34   | -2.17993         | 1057.331     | 233.341       | -2.1799154       | 0.00014386 | No      |
|      |       |        |             |          |         | Npnt    | 0.220811 | 54.5745  | 7.94927          | 0.221811     | 54.5755       | 7.94277872       | 0.00014386 | No      |
|      |       |        |             |          |         | Npr3    | 0        | 3.28051  | inf              | 0.001        | 3.28151       | 11.6801441       | 0.00014386 | No      |
|      |       |        |             |          |         | Nqo1    | 0.622345 | 10.8303  | 4.12122          | 0.623345     | 10.8313       | 4.11903173       | 0.00014386 | No      |
|      |       |        |             |          |         | Nr1d1   | 6.38165  | 73.3283  | 3.52237          | 6.38265      | 73.3293       | 3.52216232       | 0.00014386 | No      |
|      |       |        |             |          |         | Nr1h2   | 55.4887  | 75.7766  | 0.449558         | 55.4897      | 75.7776       | 0.44955144       | 0.00014386 | No      |
|      |       |        |             |          |         | Nr1h4   | 0.526992 | 32.0175  | 5.92493          | 0.527992     | 32.0185       | 5.92224584       | 0.00014386 | No      |
|      |       |        |             |          |         | Nr2c1   | 6.03979  | 3.16203  | -0.933645        | 6.04079      | 3.16303       | -0.93343         | 0.00014386 | No      |
|      |       |        |             |          |         | Nr2c2   | 13.1258  | 6.55904  | -1.00085         | 13.1268      | 6.56004       | -1.0007387       | 0.00014386 | No      |
|      |       |        |             |          |         | Nr2c2ap | 32.8421  | 49.2607  | 0.584893         | 32.8431      | 49.2617       | 0.58487611       | 0.00014386 | No      |
|      |       |        |             |          |         | Nr3c1   | 20.327   | 10.7636  | -0.917237        | 20.328       | 10.7646       | -0.9171736       | 0.00014386 | No      |
|      |       |        |             |          |         | Nr4a1   | 2.64311  | 11.9198  | 2.17306          | 2.64411      | 11.9208       | 2.17262696       | 0.00014386 | No      |
|      |       |        |             |          |         | Nrarp   | 0.909215 | 2.661    | 1.54928          | 0.910215     | 2.662         | 1.5482313        | 0.00014386 | No      |
|      |       |        |             |          |         | Nras    | 35.2011  | 13.4763  | -1.38519         | 35.2021      | 13.4773       | -1.38513         | 0.00014386 | No      |
|      |       |        |             |          |         | Nrbf2   | 17.418   | 8.82149  | -0.981483        | 17.419       | 8.82249       | -0.981404        | 0.00014386 | No      |
|      |       |        |             |          |         | Nrbp1   | 46.1288  | 26.034   | -0.825273        | 46.1298      | 26.035        | -0.8252466       | 0.00014386 | No      |
|      |       |        |             |          |         | Nrbp2   | 3.87991  | 16.5534  | 2.09303          | 3.88091      | 16.5544       | 2.09274784       | 0.00014386 | No      |
|      |       |        |             |          |         | Nrde2   | 12.2294  | 4.30682  | -1.50566         | 12.2304      | 4.30782       | -1.5054417       | 0.00014386 | No      |
|      |       |        |             |          |         | Nrf1    | 25.6696  | 9.0138   | -1.50985         | 25.6706      | 9.0148        | -1.5097496       | 0.00014386 | No      |
|      |       |        |             |          |         | Nrn1    | 0        | 0.983778 | inf              | 0.001        | 0.984778      | 9.94365472       | 0.00014386 | No      |
|      |       |        |             |          |         | Nrros   | 53.1375  | 5.09619  | -3.38224         | 53.1385      | 5.09719       | -3.3819835       | 0.00014386 | No      |
|      |       |        |             |          |         | Nsa2    | 143.823  | 58.1722  | -1.30589         | 143.824      | 58.1732       | -1.3058779       | 0.00014386 | No      |
|      |       |        |             |          |         | Nsfl1c  | 51.9581  | 90.6525  | 0.802997         | 51.9591      | 90.6535       | 0.80298628       | 0.00014386 | No      |
|      |       |        |             |          |         | Nsg2    | 25.3475  | 0.845859 | -4.90529         | 25.3485      | 0.846859      | -4.9036348       | 0.00014386 | No      |
|      |       |        |             |          |         | Nsmaf   | 20.9708  | 12.5133  | -0.744927        | 20.9718      | 12.5143       | -0.7448731       | 0.00014386 | No      |
|      |       |        |             |          |         | Nsmce1  | 57.6466  | 35.3754  | -0.704491        | 57.6476      | 35.3764       | -0.7044733       | 0.00014386 | No      |
|      |       |        |             |          |         | Nsmce2  | 11.4323  | 46.4773  | 2.02341          | 11.4333      | 46.4783       | 2.02331543       | 0.00014386 | No      |
|      |       |        |             |          |         | NSMF    | 0.965865 | 4.40142  | 2.18808          | 0.966865     | 4.40242       | 2.18691042       | 0.00014386 | No      |
|      |       |        |             |          |         | Nsrp1   | 20.211   | 11.3824  | -0.828334        | 20.212       | 11.3834       | -0.8282806       | 0.00014386 | No      |
|      |       |        |             |          |         | Nsun2   | 41.2539  | 16.6206  | -1.31155         | 41.2549      | 16.6216       | -1.3115062       | 0.00014386 | No      |
|      |       |        |             |          |         | Nsun6   | 4.99063  | 1.17803  | -2.08284         | 4.99163      | 1.17903       | -2.0819106       | 0.00014386 | No      |
|      |       |        |             |          |         | Nt5c    | 115.764  | 16.7751  | -2.78679         | 115.765      | 16.7761       | -2.7867199       | 0.00014386 | No      |
|      |       |        |             |          |         | Nt5c2   | 12.4317  | 35.315   | 1.50625          | 12.4327      | 35.316        | 1.50618231       | 0.00014386 | No      |

| RRBS |       |        |             |          |         | RNAseq   |          |         |                  |              |               |                  |            |         |
|------|-------|--------|-------------|----------|---------|----------|----------|---------|------------------|--------------|---------------|------------------|------------|---------|
| gene | Blood | Kidney | methyl.diff | pMWU.fdr | Match ? | gene     | blood    | kidney  | log2(fold_ratio) | blood+ 0.001 | kidney+ 0.001 | log2(fold_ratio) | q_value    | Match ? |
|      |       |        |             |          |         | Nt5c3a   | 26.3344  | 10.6402 | -1.30743         | 26.3354      | 10.6412       | -1.3073425       | 0.00014386 | No      |
|      |       |        |             |          |         | Nt5c3b   | 32.974   | 19.5987 | -0.750575        | 32.975       | 19.5997       | -0.7505411       | 0.00014386 | No      |
|      |       |        |             |          |         | Nt5dc1   | 30.4344  | 13.2668 | -1.19788         | 30.4354      | 13.2678       | -1.1978212       | 0.00014386 | No      |
|      |       |        |             |          |         | Nt5m     | 0.869775 | 7.80901 | 3.16643          | 0.870775     | 7.81001       | 3.1649525        | 0.00014386 | No      |
|      |       |        |             |          |         | Ntan1    | 234.269  | 73.3784 | -1.67474         | 234.27       | 73.3794       | -1.6747252       | 0.00014386 | No      |
|      |       |        |             |          |         | Ntmt1    | 11.6747  | 23.3969 | 1.00293          | 11.6757      | 23.3979       | 1.00287          | 0.00014386 | No      |
|      |       |        |             |          |         | Ntpcr    | 8.55305  | 38.3043 | 2.163            | 8.55405      | 38.3053       | 2.16286448       | 0.00014386 | No      |
|      |       |        |             |          |         | Nuak2    | 0.433162 | 85.6154 | 7.62682          | 0.434162     | 85.6164       | 7.6235099        | 0.00014386 | No      |
|      |       |        |             |          |         | Nub1     | 57.6286  | 29.6508 | -0.958714        | 57.6296      | 29.6518       | -0.9586903       | 0.00014386 | No      |
|      |       |        |             |          |         | Nubp1    | 109.041  | 60.7852 | -0.843081        | 109.042      | 60.7862       | -0.8430682       | 0.00014386 | No      |
|      |       |        |             |          |         | Nubpl    | 3.25129  | 9.30461 | 1.51694          | 3.25229      | 9.30561       | 1.51664482       | 0.00014386 | No      |
|      |       |        |             |          |         | Nucb1    | 74.964   | 97.4578 | 0.378579         | 74.965       | 97.4588       | 0.37857528       | 0.00014386 | No      |
|      |       |        |             |          |         | Nucb2    | 6.81076  | 33.0904 | 2.28053          | 6.81176      | 33.0914       | 2.28035682       | 0.00014386 | No      |
|      |       |        |             |          |         | Nucks1   | 34.3891  | 21.4383 | -0.68176         | 34.3901      | 21.4393       | -0.6817355       | 0.00014386 | No      |
|      |       |        |             |          |         | Nudt1    | 25.1     | 8.8486  | -1.50417         | 25.101       | 8.8496        | -1.5040607       | 0.00014386 | No      |
|      |       |        |             |          |         | Nudt12   | 2.55384  | 6.0531  | 1.24501          | 2.55484      | 6.0541        | 1.24467956       | 0.00014386 | No      |
|      |       |        |             |          |         | Nudt16   | 4.85141  | 12.8175 | 1.40164          | 4.85241      | 12.8185       | 1.40145409       | 0.00014386 | No      |
|      |       |        |             |          |         | Nudt16l1 | 29.87    | 41.8118 | 0.485213         | 29.871       | 41.8128       | 0.48519912       | 0.00014386 | No      |
|      |       |        |             |          |         | Nudt19   | 10.178   | 33.2788 | 1.70915          | 10.179       | 33.2798       | 1.70905093       | 0.00014386 | No      |
|      |       |        |             |          |         | Nudt2    | 21.4824  | 92.0464 | 2.0992           | 21.4834      | 92.0474       | 2.09915464       | 0.00014386 | No      |
|      |       |        |             |          |         | NUDT21   | 73.1173  | 21.3882 | -1.7734          | 73.1183      | 21.3892       | -1.77335         | 0.00014386 | No      |
|      |       |        |             |          |         | Nudt4    | 33.248   | 134.989 | 2.02151          | 33.249       | 134.99        | 2.02146968       | 0.00014386 | No      |
|      |       |        |             |          |         | Nudt6    | 11.1197  | 6.47991 | -0.779075        | 11.1207      | 6.48091       | -0.7789793       | 0.00014386 | No      |
|      |       |        |             |          |         | Nudt7    | 10.398   | 38.9745 | 1.90623          | 10.399       | 38.9755       | 1.90612273       | 0.00014386 | No      |
|      |       |        |             |          |         | Nufip1   | 35.2681  | 22.6837 | -0.636711        | 35.2691      | 22.6847       | -0.6366852       | 0.00014386 | No      |
|      |       |        |             |          |         | Numa1    | 73.6974  | 23.6172 | -1.64178         | 73.6984      | 23.6182       | -1.6417343       | 0.00014386 | No      |
|      |       |        |             |          |         | Numb     | 11.5429  | 27.7625 | 1.26614          | 11.5439      | 27.7635       | 1.26605874       | 0.00014386 | No      |
|      |       |        |             |          |         | Nup107   | 8.16938  | 3.72072 | -1.13464         | 8.17038      | 3.72172       | -1.1344337       | 0.00014386 | No      |
|      |       |        |             |          |         | Nup133   | 10.0998  | 5.99381 | -0.752784        | 10.1008      | 5.99481       | -0.7526836       | 0.00014386 | No      |
|      |       |        |             |          |         | Nup153   | 35.1101  | 6.70559 | -2.38845         | 35.1111      | 6.70659       | -2.3882759       | 0.00014386 | No      |
|      |       |        |             |          |         | Nup155   | 3.19774  | 2.0118  | -0.668567        | 3.19874      | 2.0128        | -0.6682999       | 0.00014386 | No      |
|      |       |        |             |          |         | Nup160   | 8.78208  | 2.8463  | -1.62548         | 8.78308      | 2.8473        | -1.6251324       | 0.00014386 | No      |
|      |       |        |             |          |         | Nup188   | 11.8468  | 5.30785 | -1.1583          | 11.8478      | 5.30885       | -1.1581479       | 0.00014386 | No      |
|      |       |        |             |          |         | Nup205   | 26.0427  | 9.7625  | -1.41556         | 26.0437      | 9.7635        | -1.4154641       | 0.00014386 | No      |
|      |       |        |             |          |         | Nup210   | 29.9762  | 3.3328  | -3.16901         | 29.9772      | 3.3338        | -3.1686262       | 0.00014386 | No      |
|      |       |        |             |          |         | Nup54    | 58.4324  | 32.0803 | -0.865078        | 58.4334      | 32.0813       | -0.8650606       | 0.00014386 | No      |
|      |       |        |             |          |         | Nup62    | 23.2361  | 11.081  | -1.06829         | 23.2371      | 11.082        | -1.0682118       | 0.00014386 | No      |
|      |       |        |             |          |         | Nup85    | 16.1351  | 10.6556 | -0.598594        | 16.1361      | 10.6566       | -0.5985447       | 0.00014386 | No      |
|      |       |        |             |          |         | Nup88    | 30.0873  | 13.6083 | -1.14467         | 30.0883      | 13.6093       | -1.1446097       | 0.00014386 | No      |
|      |       |        |             |          |         | Nup93    | 17.1291  | 8.23766 | -1.05615         | 17.1301      | 8.23866       | -1.056052        | 0.00014386 | No      |
|      |       |        |             |          |         | Nup98    | 17.2798  | 9.13352 | -0.919845        | 17.2808      | 9.13452       | -0.9197692       | 0.00014386 | No      |
|      |       |        |             |          |         | Nupl1    | 13.211   | 8.06617 | -0.711785        | 13.212       | 8.06717       | -0.7117143       | 0.00014386 | No      |

| RRBS |       |        |             |          |         | RNAseq |            |         |                  |              |               |                  |            |         |
|------|-------|--------|-------------|----------|---------|--------|------------|---------|------------------|--------------|---------------|------------------|------------|---------|
| gene | Blood | Kidney | methyl.diff | pMWU.fdr | Match ? | gene   | blood      | kidney  | log2(fold_ratio) | blood+ 0.001 | kidney+ 0.001 | log2(fold_ratio) | q_value    | Match ? |
|      |       |        |             |          |         | Nupl2  | 9.71125    | 5.86164 | -0.728352        | 9.71225      | 5.86264       | -0.7282551       | 0.00014386 | No      |
|      |       |        |             |          |         | NUPR1  | 0          | 125.291 | inf              | 0.001        | 125.292       | 16.9349348       | 0.00014386 | No      |
|      |       |        |             |          |         | Nus1   | 16.2403    | 11.818  | -0.458588        | 16.2413      | 11.819        | -0.4585591       | 0.00014386 | No      |
|      |       |        |             |          |         | Nxf1   | 208.312    | 111.793 | -0.897912        | 208.313      | 111.794       | -0.8979101       | 0.00014386 | No      |
|      |       |        |             |          |         | Nxn    | 4.54589    | 16.4252 | 1.85328          | 4.54689      | 16.4262       | 1.85304676       | 0.00014386 | No      |
|      |       |        |             |          |         | Nxt1   | 31.0853    | 21.1498 | -0.555584        | 31.0863      | 21.1508       | -0.5555667       | 0.00014386 | No      |
|      |       |        |             |          |         | Nxt2   | 5.7561     | 2.86227 | -1.00793         | 5.7571       | 2.86327       | -1.0076786       | 0.00014386 | No      |
|      |       |        |             |          |         | Nynrin | 2.18771    | 4.90073 | 1.16357          | 2.18871      | 4.90173       | 1.16321021       | 0.00014386 | No      |
|      |       |        |             |          |         | Oaf    | 9.6324     | 70.4702 | 2.87105          | 9.6334       | 70.4712       | 2.8709168        | 0.00014386 | No      |
|      |       |        |             |          |         | Oas1a  | 14.2413    | 6.24539 | -1.18922         | 14.2423      | 6.24639       | -1.1890876       | 0.00014386 | No      |
|      |       |        |             |          |         | Oas1b  | 9.2837     | 2.02382 | -2.19762         | 9.2847       | 2.02482       | -2.1970616       | 0.00014386 | No      |
|      |       |        |             |          |         | Oas1i  | 3.26331    | 1.20866 | -1.43293         | 3.26431      | 1.20966       | -1.4321765       | 0.00014386 | No      |
|      |       |        |             |          |         | Oasl2  | 16.8213    | 4.59924 | -1.87082         | 16.8223      | 4.60024       | -1.8705939       | 0.00014386 | No      |
|      |       |        |             |          |         | Oat    | 14.6212    | 121.653 | 3.05664          | 14.6222      | 121.654       | 3.05655146       | 0.00014386 | No      |
|      |       |        |             |          |         | Oaz2   | 34.6639    | 73.1341 | 1.07711          | 34.6649      | 73.1351       | 1.07708837       | 0.00014386 | No      |
|      |       |        |             |          |         | Obp1f  | 0          | 1.10184 | inf              | 0.001        | 1.10284       | 10.1070078       | 0.00014386 | No      |
|      |       |        |             |          |         | Obsl1  | 1.61466    | 11.7672 | 2.86547          | 1.61566      | 11.7682       | 2.86469814       | 0.00014386 | No      |
|      |       |        |             |          |         | Ociad1 | 108.968    | 75.9948 | -0.519928        | 108.969      | 75.9958       | -0.5199262       | 0.00014386 | No      |
|      |       |        |             |          |         | Ocln   | 5.69568    | 14.9267 | 1.38996          | 5.69668      | 14.9277       | 1.38979862       | 0.00014386 | No      |
|      |       |        |             |          |         | Odc1   | 38.4769    | 76.6049 | 0.993443         | 38.4779      | 76.6059       | 0.99342545       | 0.00014386 | No      |
|      |       |        |             |          |         | Ofd1   | 16.9268    | 6.86465 | -1.30205         | 16.9278      | 6.86565       | -1.3019263       | 0.00014386 | No      |
|      |       |        |             |          |         | Ogdh   | 39.7548    | 107.389 | 1.43365          | 39.7558      | 107.39        | 1.4336224        | 0.00014386 | No      |
|      |       |        |             |          |         | Ogdhl  | 0.300754   | 8.60967 | 4.8393           | 0.301754     | 8.61067       | 4.8346807        | 0.00014386 | No      |
|      |       |        |             |          |         | Ogfod3 | 7.22086    | 29.3009 | 2.0207           | 7.22186      | 29.3019       | 2.02055186       | 0.00014386 | No      |
|      |       |        |             |          |         | Ogfr   | 56.084     | 30.0528 | -0.900091        | 56.085       | 30.0538       | -0.9000676       | 0.00014386 | No      |
|      |       |        |             |          |         | Ogfrl1 | 0.795362   | 13.7124 | 4.10773          | 0.796362     | 13.7134       | 4.10601811       | 0.00014386 | No      |
|      |       |        |             |          |         | Ogn    | 0.00997204 | 5.98007 | 9.22806          | 0.01097204   | 5.98107       | 9.09042801       | 0.00014386 | No      |
|      |       |        |             |          |         | Ogt    | 167.277    | 23.4929 | -2.83195         | 167.278      | 23.4939       | -2.8318896       | 0.00014386 | No      |
|      |       |        |             |          |         | Ola1   | 55.4624    | 33.6318 | -0.721686        | 55.4634      | 33.6328       | -0.7216672       | 0.00014386 | No      |
|      |       |        |             |          |         | Olah   | 2.21009    | 0       | -inf             | 2.21109      | 0.001         | -11.110542       | 0.00014386 | No      |
|      |       |        |             |          |         | Olr155 | 0          | 1.11396 | inf              | 0.001        | 1.11496       | 10.1227762       | 0.00014386 | No      |
|      |       |        |             |          |         | Oma1   | 5.65415    | 12.9409 | 1.19456          | 5.65515      | 12.9419       | 1.19441224       | 0.00014386 | No      |
|      |       |        |             |          |         | Oosp1  | 0.340939   | 17.3677 | 5.67074          | 0.341939     | 17.3687       | 5.66660699       | 0.00014386 | No      |
|      |       |        |             |          |         | Opa1   | 14.8236    | 19.7514 | 0.41406          | 14.8246      | 19.7524       | 0.41403478       | 0.00014386 | No      |
|      |       |        |             |          |         | OPA3   | 7.06328    | 15.7122 | 1.15347          | 7.06428      | 15.7132       | 1.15336258       | 0.00014386 | No      |
|      |       |        |             |          |         | Oplah  | 1.17098    | 90.1875 | 6.26714          | 1.17198      | 90.1885       | 6.26592363       | 0.00014386 | No      |
|      |       |        |             |          |         | Opn3   | 0.701951   | 3.21716 | 2.19634          | 0.702951     | 3.21816       | 2.19474002       | 0.00014386 | No      |
|      |       |        |             |          |         | Optc   | 7.58273    | 1.93384 | -1.97125         | 7.58373      | 1.93484       | -1.9706933       | 0.00014386 | No      |
|      |       |        |             |          |         | Orai1  | 51.0404    | 23.2276 | -1.1358          | 51.0414      | 23.2286       | -1.1357657       | 0.00014386 | No      |
|      |       |        |             |          |         | Orai2  | 44.0527    | 2.34327 | -4.23264         | 44.0537      | 2.34427       | -4.2320525       | 0.00014386 | No      |
|      |       |        |             |          |         | Orai3  | 5.54327    | 15.7999 | 1.5111           | 5.54427      | 15.8009       | 1.51093731       | 0.00014386 | No      |
|      |       |        |             |          |         | Orc3   | 11.2991    | 4.77845 | -1.24159         | 11.3001      | 4.77945       | -1.241419        | 0.00014386 | No      |

| RRBS |       |        |             |          |         | RNAseq   |           |          |                  |              |               |                  |            |         |
|------|-------|--------|-------------|----------|---------|----------|-----------|----------|------------------|--------------|---------------|------------------|------------|---------|
| gene | Blood | Kidney | methyl.diff | pMWU.fdr | Match ? | gene     | blood     | kidney   | log2(fold_ratio) | blood+ 0.001 | kidney+ 0.001 | log2(fold_ratio) | q_value    | Match ? |
|      |       |        |             |          |         | Orc4     | 13.9767   | 7.12276  | -0.972511        | 13.9777      | 7.12376       | -0.9724162       | 0.00014386 | No      |
|      |       |        |             |          |         | Ormdl1   | 8.74425   | 2.10344  | -2.05558         | 8.74525      | 2.10444       | -2.0550632       | 0.00014386 | No      |
|      |       |        |             |          |         | Ormdl3   | 29.5426   | 45.9152  | 0.636178         | 29.5436      | 45.9162       | 0.63615762       | 0.00014386 | No      |
|      |       |        |             |          |         | Os9      | 64.7286   | 35.7238  | -0.857518        | 64.7296      | 35.7248       | -0.8574997       | 0.00014386 | No      |
|      |       |        |             |          |         | Osbpl11  | 12.4837   | 4.59244  | -1.44271         | 12.4847      | 4.59344       | -1.4425143       | 0.00014386 | No      |
|      |       |        |             |          |         | Osbpl3   | 3.37353   | 30.3941  | 3.17146          | 3.37453      | 30.3951       | 3.17108028       | 0.00014386 | No      |
|      |       |        |             |          |         | Osbpl7   | 14.638    | 5.82693  | -1.32891         | 14.639       | 5.82793       | -1.3287616       | 0.00014386 | No      |
|      |       |        |             |          |         | Oscar    | 0.182206  | 1.06821  | 2.55155          | 0.183206     | 1.06921       | 2.54500658       | 0.00014386 | No      |
|      |       |        |             |          |         | Osgin1   | 0.388595  | 32.8441  | 6.40122          | 0.389595     | 32.8451       | 6.39755919       | 0.00014386 | No      |
|      |       |        |             |          |         | Osgin2   | 7.1894    | 3.73136  | -0.946171        | 7.1904       | 3.73236       | -0.9459839       | 0.00014386 | No      |
|      |       |        |             |          |         | Osmr     | 0         | 12.1782  | inf              | 0.001        | 12.1792       | 13.5721318       | 0.00014386 | No      |
|      |       |        |             |          |         | Osr2     | 0         | 18.6809  | inf              | 0.001        | 18.6819       | 14.1893536       | 0.00014386 | No      |
|      |       |        |             |          |         | OST4     | 284.562   | 411.611  | 0.532538         | 284.563      | 411.612       | 0.53253695       | 0.00014386 | No      |
|      |       |        |             |          |         | Otud1    | 17.0596   | 10.9845  | -0.63511         | 17.0606      | 10.9855       | -0.6350679       | 0.00014386 | No      |
|      |       |        |             |          |         | Otud3    | 7.65607   | 3.46655  | -1.1431          | 7.65707      | 3.46755       | -1.1428758       | 0.00014386 | No      |
|      |       |        |             |          |         | Otud4    | 23.0926   | 6.85173  | -1.75289         | 23.0936      | 6.85273       | -1.7527423       | 0.00014386 | No      |
|      |       |        |             |          |         | Otud5    | 179.716   | 67.8545  | -1.4052          | 179.717      | 67.8555       | -1.4051892       | 0.00014386 | No      |
|      |       |        |             |          |         | Ovol2    | 0         | 5.75709  | inf              | 0.001        | 5.75809       | 12.4913746       | 0.00014386 | No      |
|      |       |        |             |          |         | Oxa1l    | 70.102    | 93.6121  | 0.41724          | 70.103       | 93.6131       | 0.41723425       | 0.00014386 | No      |
|      |       |        |             |          |         | Oxct1    | 28.2358   | 215.694  | 2.93339          | 28.2368      | 215.695       | 2.93334423       | 0.00014386 | No      |
|      |       |        |             |          |         | Oxnad1   | 10.2185   | 20.7131  | 1.01936          | 10.2195      | 20.7141       | 1.01928853       | 0.00014386 | No      |
|      |       |        |             |          |         | Oxsm     | 3.25191   | 5.86169  | 0.85003          | 3.25291      | 5.86269       | 0.84983187       | 0.00014386 | No      |
|      |       |        |             |          |         | Oxsr1    | 25.2681   | 16.4639  | -0.618007        | 25.2691      | 16.4649       | -0.6179805       | 0.00014386 | No      |
|      |       |        |             |          |         | P2RX3    | 0.0957679 | 0.748334 | 2.96607          | 0.0967679    | 0.749334      | 2.95300845       | 0.00014386 | No      |
|      |       |        |             |          |         | P2ry10   | 53.6473   | 1.18607  | -5.49924         | 53.6483      | 1.18707       | -5.4980555       | 0.00014386 | No      |
|      |       |        |             |          |         | P2ry4    | 14.6692   | 37.7995  | 1.36558          | 14.6702      | 37.8005       | 1.36551678       | 0.00014386 | No      |
|      |       |        |             |          |         | P33MONOX | 14.2487   | 148.598  | 3.38251          | 14.2497      | 148.599       | 3.38242096       | 0.00014386 | No      |
|      |       |        |             |          |         | P4ha1    | 9.05738   | 31.5056  | 1.79844          | 9.05838      | 31.5066       | 1.79832911       | 0.00014386 | No      |
|      |       |        |             |          |         | P4hb     | 74.4773   | 130.841  | 0.812946         | 74.4783      | 130.842       | 0.81293367       | 0.00014386 | No      |
|      |       |        |             |          |         | Pa2g4    | 88.4225   | 53.9803  | -0.711981        | 88.4235      | 53.9813       | -0.7119701       | 0.00014386 | No      |
|      |       |        |             |          |         | Pabpc1   | 1390.2    | 144.341  | -3.26774         | 1390.201     | 144.342       | -3.2677304       | 0.00014386 | No      |
|      |       |        |             |          |         | Pacs1    | 49.4765   | 11.4907  | -2.10628         | 49.4775      | 11.4917       | -2.1061804       | 0.00014386 | No      |
|      |       |        |             |          |         | Pacsin1  | 19.1577   | 2.11635  | -3.17827         | 19.1587      | 2.11735       | -3.177668        | 0.00014386 | No      |
|      |       |        |             |          |         | Pacsin2  | 20.308    | 86.9846  | 2.09871          | 20.309       | 86.9856       | 2.09865739       | 0.00014386 | No      |
|      |       |        |             |          |         | Paf1     | 47.5185   | 76.1566  | 0.680482         | 47.5195      | 76.1576       | 0.68046836       | 0.00014386 | No      |
|      |       |        |             |          |         | Pafah1b1 | 59.9296   | 35.4374  | -0.757996        | 59.9306      | 35.4384       | -0.7579793       | 0.00014386 | No      |
|      |       |        |             |          |         | Pafah1b2 | 18.3635   | 28.2301  | 0.620395         | 18.3645      | 28.2311       | 0.62036573       | 0.00014386 | No      |
|      |       |        |             |          |         | Pafah1b3 | 42.5618   | 20.6615  | -1.04261         | 42.5628      | 20.6625       | -1.0425782       | 0.00014386 | No      |
|      |       |        |             |          |         | Pag1     | 12.762    | 4.82571  | -1.40304         | 12.763       | 4.82671       | -1.4028554       | 0.00014386 | No      |
|      |       |        |             |          |         | Paip2    | 187.661   | 124.65   | -0.590243        | 187.662      | 124.651       | -0.5902421       | 0.00014386 | No      |
|      |       |        |             |          |         | Paip2b   | 5.13868   | 9.25211  | 0.848385         | 5.13968      | 9.25311       | 0.8482598        | 0.00014386 | No      |

| RRBS |       |        |             |          |         | RNAseq  |           |         |                  |              |               |                  |            |         |
|------|-------|--------|-------------|----------|---------|---------|-----------|---------|------------------|--------------|---------------|------------------|------------|---------|
| gene | Blood | Kidney | methyl.diff | pMWU.fdr | Match ? | gene    | blood     | kidney  | log2(fold_ratio) | blood+ 0.001 | kidney+ 0.001 | log2(fold_ratio) | q_value    | Match ? |
|      |       |        |             |          |         | Pak1    | 0.257316  | 9.20893 | 5.16142          | 0.258316     | 9.20993       | 5.15598128       | 0.00014386 | No      |
|      |       |        |             |          |         | Pak1ip1 | 22.3467   | 3.98552 | -2.48722         | 22.3477      | 3.98652       | -2.4869245       | 0.00014386 | No      |
|      |       |        |             |          |         | Pak2    | 3.6378    | 1.12335 | -1.69526         | 3.6388       | 1.12435       | -1.6943716       | 0.00014386 | No      |
|      |       |        |             |          |         | Pak4    | 2.04105   | 17.2798 | 3.0817           | 2.04205      | 17.2808       | 3.08107991       | 0.00014386 | No      |
|      |       |        |             |          |         | Pak6    | 4.79828   | 7.17534 | 0.58053          | 4.79928      | 7.17634       | 0.58043026       | 0.00014386 | No      |
|      |       |        |             |          |         | Palld   | 0.790171  | 5.58561 | 2.82148          | 0.791171     | 5.58661       | 2.81991166       | 0.00014386 | No      |
|      |       |        |             |          |         | Palm3   | 0.463626  | 7.41201 | 3.99883          | 0.464626     | 7.41301       | 3.99591766       | 0.00014386 | No      |
|      |       |        |             |          |         | Pam     | 0.0326268 | 22.5135 | 9.43052          | 0.0336268    | 22.5145       | 9.38702723       | 0.00014386 | No      |
|      |       |        |             |          |         | Pan2    | 28.1447   | 16.1122 | -0.804712        | 28.1457      | 16.1132       | -0.8046715       | 0.00014386 | No      |
|      |       |        |             |          |         | Pan3    | 87.436    | 14.0342 | -2.63928         | 87.437       | 14.0352       | -2.6391943       | 0.00014386 | No      |
|      |       |        |             |          |         | Pank1   | 1.33751   | 34.5047 | 4.68917          | 1.33851      | 34.5057       | 4.68813488       | 0.00014386 | No      |
|      |       |        |             |          |         | Pank2   | 31.0624   | 16.5953 | -0.904391        | 31.0634      | 16.5963       | -0.9043541       | 0.00014386 | No      |
|      |       |        |             |          |         | Pank3   | 4.48573   | 2.30629 | -0.959769        | 4.48673      | 2.30729       | -0.959465        | 0.00014386 | No      |
|      |       |        |             |          |         | Paox    | 20.0204   | 14.3009 | -0.485365        | 20.0214      | 14.3019       | -0.485336        | 0.00014386 | No      |
|      |       |        |             |          |         | Papd4   | 20.6628   | 7.99949 | -1.36905         | 20.6638      | 8.00049       | -1.3689453       | 0.00014386 | No      |
|      |       |        |             |          |         | Papd5   | 29.6043   | 7.54568 | -1.97209         | 29.6053      | 7.54668       | -1.9719415       | 0.00014386 | No      |
|      |       |        |             |          |         | Papola  | 56.6564   | 28.2246 | -1.00528         | 56.6574      | 28.2256       | -1.0052601       | 0.00014386 | No      |
|      |       |        |             |          |         | Papolg  | 14.9067   | 2.01018 | -2.89056         | 14.9077      | 2.01118       | -2.8899436       | 0.00014386 | No      |
|      |       |        |             |          |         | Papss1  | 14.0761   | 73.0857 | 2.37634          | 14.0771      | 73.0867       | 2.37625874       | 0.00014386 | No      |
|      |       |        |             |          |         | Papss2  | 0.259661  | 55.3468 | 7.73573          | 0.260661     | 55.3478       | 7.73020742       | 0.00014386 | No      |
|      |       |        |             |          |         | Paqr5   | 19.431    | 26.8916 | 0.468794         | 19.432       | 26.8926       | 0.46877485       | 0.00014386 | No      |
|      |       |        |             |          |         | Paqr9   | 0         | 2.76276 | inf              | 0.001        | 2.76376       | 11.4324166       | 0.00014386 | No      |
|      |       |        |             |          |         | Pard6b  | 6.35461   | 38.4701 | 2.59786          | 6.35561      | 38.4711       | 2.59767258       | 0.00014386 | No      |
|      |       |        |             |          |         | Parm1   | 0.113243  | 96.4297 | 9.73391          | 0.114243     | 96.4307       | 9.72124294       | 0.00014386 | No      |
|      |       |        |             |          |         | Parp1   | 51.8356   | 28.2696 | -0.874691        | 51.8366      | 28.2706       | -0.8746686       | 0.00014386 | No      |
|      |       |        |             |          |         | Parp10  | 26.2488   | 9.37557 | -1.48527         | 26.2498      | 9.37657       | -1.4851743       | 0.00014386 | No      |
|      |       |        |             |          |         | Parp11  | 16.6247   | 4.71496 | -1.81801         | 16.6257      | 4.71596       | -1.8177917       | 0.00014386 | No      |
|      |       |        |             |          |         | Parp14  | 36.8195   | 7.24212 | -2.34599         | 36.8205      | 7.24312       | -2.345826        | 0.00014386 | No      |
|      |       |        |             |          |         | Parp6   | 30.0325   | 20.5145 | -0.549879        | 30.0335      | 20.5155       | -0.5498583       | 0.00014386 | No      |
|      |       |        |             |          |         | Parp8   | 47.5727   | 15.8643 | -1.58435         | 47.5737      | 15.8653       | -1.5842894       | 0.00014386 | No      |
|      |       |        |             |          |         | Parp9   | 42.2729   | 10.4563 | -2.01536         | 42.2739      | 10.4573       | -2.0152568       | 0.00014386 | No      |
|      |       |        |             |          |         | Parvb   | 0.300262  | 5.6398  | 4.23135          | 0.301262     | 5.6408        | 4.22680917       | 0.00014386 | No      |
|      |       |        |             |          |         | Parvg   | 36.7264   | 2.40342 | -3.93365         | 36.7274      | 2.40442       | -3.9330959       | 0.00014386 | No      |
|      |       |        |             |          |         | Patl1   | 19.4517   | 8.08644 | -1.26632         | 19.4527      | 8.08744       | -1.2662154       | 0.00014386 | No      |
|      |       |        |             |          |         | Patl2   | 5.55956   | 0       | -inf             | 5.56056      | 0.001         | -12.441014       | 0.00014386 | No      |
|      |       |        |             |          |         | PATZ1   | 16.5458   | 41.2679 | 1.31856          | 16.5468      | 41.2689       | 1.31850274       | 0.00014386 | No      |
|      |       |        |             |          |         | Pax8    | 0.124654  | 102.307 | 9.68076          | 0.125654     | 102.308       | 9.66924665       | 0.00014386 | No      |
|      |       |        |             |          |         | Paxbp1  | 31.3525   | 9.87274 | -1.66706         | 31.3535      | 9.87374       | -1.6669579       | 0.00014386 | No      |
|      |       |        |             |          |         | Paxip1  | 14.3681   | 5.0764  | -1.501           | 14.3691      | 5.0774        | -1.5008079       | 0.00014386 | No      |
|      |       |        |             |          |         | Pbdc1   | 18.4613   | 9.5556  | -0.950083        | 18.4623      | 9.5566        | -0.950013        | 0.00014386 | No      |
|      |       |        |             |          |         | Pbld1   | 0.0822689 | 174.953 | 11.0543          | 0.0832689    | 174.954       | 11.0369103       | 0.00014386 | No      |
|      |       |        |             |          |         | Pbrm1   | 19.4603   | 7.1914  | -1.43619         | 19.4613      | 7.1924        | -1.4360629       | 0.00014386 | No      |

| RRBS |       |        |             |          |         | RNAseq   |          |          |                  |              |               |                  |            |         |
|------|-------|--------|-------------|----------|---------|----------|----------|----------|------------------|--------------|---------------|------------------|------------|---------|
| gene | Blood | Kidney | methyl.diff | pMWU.fdr | Match ? | gene     | blood    | kidney   | log2(fold_ratio) | blood+ 0.001 | kidney+ 0.001 | log2(fold_ratio) | q_value    | Match ? |
|      |       |        |             |          |         | Pbx1     | 1.27103  | 16.1698  | 3.66923          | 1.27203      | 16.1708       | 3.66818645       | 0.00014386 | No      |
|      |       |        |             |          |         | Pbx3     | 1.59692  | 9.53339  | 2.5777           | 1.59792      | 9.53439       | 2.57694546       | 0.00014386 | No      |
|      |       |        |             |          |         | Pbx4     | 0.565651 | 3.51323  | 2.63481          | 0.566651     | 3.51423       | 2.63267626       | 0.00014386 | No      |
|      |       |        |             |          |         | Pbxip1   | 163.362  | 66.4209  | -1.29836         | 163.363      | 66.4219       | -1.2983504       | 0.00014386 | No      |
|      |       |        |             |          |         | Pc       | 0.588956 | 51.5495  | 6.45165          | 0.589956     | 51.5505       | 6.44923525       | 0.00014386 | No      |
|      |       |        |             |          |         | Pcbd1    | 0.502325 | 291.67   | 9.1815           | 0.503325     | 291.671       | 9.17863598       | 0.00014386 | No      |
|      |       |        |             |          |         | Pcbd2    | 71.6759  | 137.281  | 0.937572         | 71.6769      | 137.282       | 0.93756233       | 0.00014386 | No      |
|      |       |        |             |          |         | PCBP2    | 230.433  | 119.151  | -0.951558        | 230.434      | 119.152       | -0.9515504       | 0.00014386 | No      |
|      |       |        |             |          |         | Pcbp4    | 8.76281  | 26.0444  | 1.57151          | 8.76381      | 26.0454       | 1.57139848       | 0.00014386 | No      |
|      |       |        |             |          |         | Pcca     | 10.3171  | 76.5781  | 2.8919           | 10.3181      | 76.5791       | 2.89177337       | 0.00014386 | No      |
|      |       |        |             |          |         | Pccb     | 11.5208  | 172.285  | 3.90248          | 11.5218      | 172.286       | 3.90236745       | 0.00014386 | No      |
|      |       |        |             |          |         | Pcdh1    | 0        | 3.37241  | inf              | 0.001        | 3.37341       | 11.719992        | 0.00014386 | No      |
|      |       |        |             |          |         | Pcdh17   | 0        | 1.46812  | inf              | 0.001        | 1.46912       | 10.5207365       | 0.00014386 | No      |
|      |       |        |             |          |         | Pced1a   | 63.3991  | 27.1235  | -1.22492         | 63.4001      | 27.1245       | -1.2248886       | 0.00014386 | No      |
|      |       |        |             |          |         | Pcf11    | 30.4203  | 5.31944  | -2.51568         | 30.4213      | 5.32044       | -2.5154643       | 0.00014386 | No      |
|      |       |        |             |          |         | Pcgf2    | 2.4737   | 17.9248  | 2.85721          | 2.4747       | 17.9258       | 2.85671196       | 0.00014386 | No      |
|      |       |        |             |          |         | Pcgf6    | 15.476   | 3.75825  | -2.0419          | 15.477       | 3.75925       | -2.0416091       | 0.00014386 | No      |
|      |       |        |             |          |         | Pck1     | 0.108373 | 969.432  | 13.1269          | 0.109373     | 969.433       | 13.1136688       | 0.00014386 | No      |
|      |       |        |             |          |         | Pck2     | 2.47786  | 20.644   | 3.05855          | 2.47886      | 20.645        | 3.05804372       | 0.00014386 | No      |
|      |       |        |             |          |         | Pcm1     | 32.8935  | 17.1443  | -0.940075        | 32.8945      | 17.1453       | -0.9400332       | 0.00014386 | No      |
|      |       |        |             |          |         | Pcmtd1   | 112.687  | 29.2866  | -1.94401         | 112.688      | 29.2876       | -1.943972        | 0.00014386 | No      |
|      |       |        |             |          |         | Pcmtd2   | 49.1479  | 14.6283  | -1.74836         | 49.1489      | 14.6293       | -1.7482984       | 0.00014386 | No      |
|      |       |        |             |          |         | Pcnx     | 12.4759  | 18.4686  | 0.565926         | 12.4769      | 18.4696       | 0.56589309       | 0.00014386 | No      |
|      |       |        |             |          |         | PCOLCE2  | 0        | 26.3622  | inf              | 0.001        | 26.3632       | 14.6862379       | 0.00014386 | No      |
|      |       |        |             |          |         | Pctp     | 12.4691  | 7.80403  | -0.676065        | 12.4701      | 7.80503       | -0.675997        | 0.00014386 | No      |
|      |       |        |             |          |         | Pcyox1   | 9.56836  | 13.2548  | 0.470169         | 9.56936      | 13.2558       | 0.4701294        | 0.00014386 | No      |
|      |       |        |             |          |         | Pcyt1a   | 3.78187  | 11.8119  | 1.64307          | 3.78287      | 11.8129       | 1.64281008       | 0.00014386 | No      |
|      |       |        |             |          |         | Pcyt1b   | 0.237685 | 1.21908  | 2.35866          | 0.238685     | 1.22008       | 2.35379594       | 0.00014386 | No      |
|      |       |        |             |          |         | Pcyt2    | 29.1977  | 71.5462  | 1.29302          | 29.1987      | 71.5472       | 1.29299117       | 0.00014386 | No      |
|      |       |        |             |          |         | Pdcd10   | 85.134   | 38.6161  | -1.14053         | 85.135       | 38.6171       | -1.1405125       | 0.00014386 | No      |
|      |       |        |             |          |         | Pdcd11   | 21.5607  | 9.73301  | -1.14745         | 21.5617      | 9.73401       | -1.1473648       | 0.00014386 | No      |
|      |       |        |             |          |         | Pdcd1lg2 | 4.50938  | 0.339655 | -3.73079         | 4.51038      | 0.340655      | -3.7268657       | 0.00014386 | No      |
|      |       |        |             |          |         | Pdcd2    | 33.3547  | 20.606   | -0.694828        | 33.3557      | 20.607        | -0.6947988       | 0.00014386 | No      |
|      |       |        |             |          |         | Pdcd4    | 530.263  | 85.031   | -2.64065         | 530.264      | 85.032        | -2.640633        | 0.00014386 | No      |
|      |       |        |             |          |         | Pdcd6    | 44.2098  | 63.9139  | 0.531763         | 44.2108      | 63.9149       | 0.53175345       | 0.00014386 | No      |
|      |       |        |             |          |         | Pdcd6ip  | 28.3883  | 42.5289  | 0.583145         | 28.3893      | 42.5299       | 0.58313019       | 0.00014386 | No      |
|      |       |        |             |          |         | Pde3b    | 40.3505  | 3.32118  | -3.60282         | 40.3515      | 3.32218       | -3.6024202       | 0.00014386 | No      |
|      |       |        |             |          |         | Pde4b    | 69.0578  | 2.76618  | -4.64184         | 69.0588      | 2.76718       | -4.6413369       | 0.00014386 | No      |
|      |       |        |             |          |         | Pde4c    | 4.46164  | 16.1717  | 1.85782          | 4.46264      | 16.1727       | 1.85759122       | 0.00014386 | No      |
|      |       |        |             |          |         | Pde4dip  | 23.4681  | 17.1519  | -0.452336        | 23.4691      | 17.1529       | -0.45231         | 0.00014386 | No      |
|      |       |        |             |          |         | Pde7a    | 9.46576  | 4.80046  | -0.979547        | 9.46676      | 4.80146       | -0.9793976       | 0.00014386 | No      |
|      |       |        |             |          |         | Pde7b    | 0.537709 | 16.7721  | 4.96309          | 0.538709     | 16.7731       | 4.96049937       | 0.00014386 | No      |

| RRBS |       |        |             |          |         | RNAseq    |          |          |                  |              |               |                  |            |         |
|------|-------|--------|-------------|----------|---------|-----------|----------|----------|------------------|--------------|---------------|------------------|------------|---------|
| gene | Blood | Kidney | methyl.diff | pMWU.fdr | Match ? | gene      | blood    | kidney   | log2(fold_ratio) | blood+ 0.001 | kidney+ 0.001 | log2(fold_ratio) | q_value    | Match ? |
|      |       |        |             |          |         | Pde9a     | 0.233834 | 10.9655  | 5.55134          | 0.234834     | 10.9665       | 5.54531805       | 0.00014386 | No      |
|      |       |        |             |          |         | Pdgfb     | 1.01379  | 14.6587  | 3.85393          | 1.01479      | 14.6597       | 3.85260247       | 0.00014386 | No      |
|      |       |        |             |          |         | Pdgfd     | 0        | 1.27646  | inf              | 0.001        | 1.27746       | 10.3190624       | 0.00014386 | No      |
|      |       |        |             |          |         | Pdha1     | 76.1102  | 184.117  | 1.27446          | 76.1112      | 184.118       | 1.27445          | 0.00014386 | No      |
|      |       |        |             |          |         | Pdhb      | 35.1422  | 150.153  | 2.09516          | 35.1432      | 150.154       | 2.09512544       | 0.00014386 | No      |
|      |       |        |             |          |         | Pdhx      | 5.48414  | 16.1631  | 1.55937          | 5.48514      | 16.1641       | 1.55919283       | 0.00014386 | No      |
|      |       |        |             |          |         | Pdia3     | 177.439  | 126.821  | -0.484526        | 177.44       | 126.822       | -0.4845262       | 0.00014386 | No      |
|      |       |        |             |          |         | Pdk2      | 10.5515  | 154.601  | 3.87303          | 10.5525      | 154.602       | 3.87290225       | 0.00014386 | No      |
|      |       |        |             |          |         | Pdlim1    | 63.3134  | 13.5004  | -2.22951         | 63.3144      | 13.5014       | -2.2294246       | 0.00014386 | No      |
|      |       |        |             |          |         | Pdp1      | 8.80857  | 6.11115  | -0.527464        | 8.80957      | 6.11215       | -0.5273917       | 0.00014386 | No      |
|      |       |        |             |          |         | Pdp2      | 2.05085  | 9.7069   | 2.24279          | 2.05185      | 9.7079        | 2.24223398       | 0.00014386 | No      |
|      |       |        |             |          |         | Pdpk1     | 20.2992  | 8.92103  | -1.18614         | 20.3002      | 8.92203       | -1.18605         | 0.00014386 | No      |
|      |       |        |             |          |         | Pdpn      | 0        | 14.0532  | inf              | 0.001        | 14.0542       | 13.7787137       | 0.00014386 | No      |
|      |       |        |             |          |         | Pds5a     | 36.4296  | 11.7133  | -1.63697         | 36.4306      | 11.7143       | -1.63688         | 0.00014386 | No      |
|      |       |        |             |          |         | Pds5b     | 17.1631  | 4.10974  | -2.06219         | 17.1641      | 4.11074       | -2.0619242       | 0.00014386 | No      |
|      |       |        |             |          |         | PDXDC1    | 10.5857  | 2.59133  | -2.03035         | 10.5867      | 2.59233       | -2.0299317       | 0.00014386 | No      |
|      |       |        |             |          |         | Pdxk      | 4.70876  | 20.9986  | 2.15688          | 4.70976      | 20.9996       | 2.1566364        | 0.00014386 | No      |
|      |       |        |             |          |         | Pd xp     | 5.21237  | 2.33523  | -1.15837         | 5.21337      | 2.33623       | -1.1580339       | 0.00014386 | No      |
|      |       |        |             |          |         | Pd zd4    | 5.5051   | 0.275936 | -4.31836         | 5.5061       | 0.276936      | -4.3134063       | 0.00014386 | No      |
|      |       |        |             |          |         | Pd zd8    | 3.25924  | 6.12324  | 0.909761         | 3.26024      | 6.12424       | 0.90955265       | 0.00014386 | No      |
|      |       |        |             |          |         | Pd zd9    | 11.6647  | 33.4728  | 1.52083          | 11.6657      | 33.4738       | 1.52075946       | 0.00014386 | No      |
|      |       |        |             |          |         | Pd zk1    | 1.05484  | 221.139  | 7.71179          | 1.05584      | 221.14        | 7.71042497       | 0.00014386 | No      |
|      |       |        |             |          |         | Pd zk1ip1 | 0.222917 | 431.473  | 10.9185          | 0.223917     | 431.474       | 10.9120938       | 0.00014386 | No      |
|      |       |        |             |          |         | Pecam1    | 31.6405  | 21.5789  | -0.55215         | 31.6415      | 21.5799       | -0.5521298       | 0.00014386 | No      |
|      |       |        |             |          |         | Pecr      | 15.1925  | 248.369  | 4.03106          | 15.1935      | 248.37        | 4.03096477       | 0.00014386 | No      |
|      |       |        |             |          |         | Pef1      | 31.0108  | 49.5453  | 0.675975         | 31.0118      | 49.5463       | 0.67596006       | 0.00014386 | No      |
|      |       |        |             |          |         | Peli3     | 4.27304  | 1.95761  | -1.12617         | 4.27404      | 1.95861       | -1.1257703       | 0.00014386 | No      |
|      |       |        |             |          |         | Peo1      | 5.35748  | 12.9384  | 1.27203          | 5.35848      | 12.9394       | 1.271875         | 0.00014386 | No      |
|      |       |        |             |          |         | Pepd      | 11.9112  | 228.855  | 4.26404          | 11.9122      | 228.856       | 4.26392833       | 0.00014386 | No      |
|      |       |        |             |          |         | Per2      | 1.46944  | 4.01604  | 1.45051          | 1.47044      | 4.01704       | 1.44988491       | 0.00014386 | No      |
|      |       |        |             |          |         | Pes1      | 71.7116  | 36.0619  | -0.99173         | 71.7126      | 36.0629       | -0.9917112       | 0.00014386 | No      |
|      |       |        |             |          |         | Pet100    | 19.4431  | 37.9013  | 0.96299          | 19.4441      | 37.9023       | 0.96295294       | 0.00014386 | No      |
|      |       |        |             |          |         | Pet112l   | 10.3932  | 16.5169  | 0.668305         | 10.3942      | 16.5179       | 0.66825156       | 0.00014386 | No      |
|      |       |        |             |          |         | Pex1      | 6.88328  | 15.1915  | 1.14209          | 6.88428      | 15.1925       | 1.14198161       | 0.00014386 | No      |
|      |       |        |             |          |         | Pex11a    | 0.144545 | 14.7925  | 6.67721          | 0.145545     | 14.7935       | 6.66735433       | 0.00014386 | No      |
|      |       |        |             |          |         | Pex11b    | 31.0578  | 79.9245  | 1.36368          | 31.0588      | 79.9255       | 1.36365377       | 0.00014386 | No      |
|      |       |        |             |          |         | Pex11g    | 0.584968 | 5.02474  | 3.10262          | 0.585968     | 5.02574       | 3.10044225       | 0.00014386 | No      |
|      |       |        |             |          |         | Pex12     | 1.20833  | 4.05096  | 1.74524          | 1.20933      | 4.05196       | 1.74441195       | 0.00014386 | No      |
|      |       |        |             |          |         | Pex13     | 12.0668  | 22.5378  | 0.901299         | 12.0678      | 22.5388       | 0.90124801       | 0.00014386 | No      |
|      |       |        |             |          |         | Pex14     | 7.96594  | 12.3733  | 0.635312         | 7.96694      | 12.3743       | 0.6352493        | 0.00014386 | No      |
|      |       |        |             |          |         | Pex3      | 11.2973  | 7.85758  | -0.523827        | 11.2983      | 7.85858       | -0.5237652       | 0.00014386 | No      |
|      |       |        |             |          |         | Pex7      | 1.25029  | 11.3737  | 3.18537          | 1.25129      | 11.3747       | 3.1843404        | 0.00014386 | No      |

| RRBS |       |        |             |          |         | RNAseq  |           |          |                  |              |               |                  |            |         |
|------|-------|--------|-------------|----------|---------|---------|-----------|----------|------------------|--------------|---------------|------------------|------------|---------|
| gene | Blood | Kidney | methyl.diff | pMWU.fdr | Match ? | gene    | blood     | kidney   | log2(fold_ratio) | blood+ 0.001 | kidney+ 0.001 | log2(fold_ratio) | q_value    | Match ? |
|      |       |        |             |          |         | Pf4     | 49.061    | 20.7854  | -1.23901         | 49.062       | 20.7864       | -1.2389661       | 0.00014386 | No      |
|      |       |        |             |          |         | Pfdn5   | 223.949   | 305.602  | 0.448487         | 223.95       | 305.603       | 0.44848204       | 0.00014386 | No      |
|      |       |        |             |          |         | Pfkfb2  | 9.7201    | 4.39733  | -1.14434         | 9.7211       | 4.39833       | -1.1441637       | 0.00014386 | No      |
|      |       |        |             |          |         | Pfkm    | 12.2469   | 39.5451  | 1.69108          | 12.2479      | 39.5461       | 1.69100102       | 0.00014386 | No      |
|      |       |        |             |          |         | Pfn1    | 2996.9    | 626.904  | -2.25715         | 2996.901     | 626.905       | -2.2571527       | 0.00014386 | No      |
|      |       |        |             |          |         | Pfn2    | 1.21823   | 22.8802  | 4.23124          | 1.21923      | 22.8812       | 4.2301205        | 0.00014386 | No      |
|      |       |        |             |          |         | Pfn3    | 0         | 21.5861  | inf              | 0.001        | 21.5871       | 14.3978818       | 0.00014386 | No      |
|      |       |        |             |          |         | Pgam1   | 92.1555   | 266.454  | 1.53174          | 92.1565      | 266.455       | 1.53173407       | 0.00014386 | No      |
|      |       |        |             |          |         | Pgam5   | 27.5027   | 16.3961  | -0.746216        | 27.5037      | 16.3971       | -0.746185        | 0.00014386 | No      |
|      |       |        |             |          |         | Pgk1    | 178.411   | 346.825  | 0.959009         | 178.412      | 346.826       | 0.9589994        | 0.00014386 | No      |
|      |       |        |             |          |         | Pglyrp2 | 5.65732   | 0        | -inf             | 5.65832      | 0.001         | -12.466158       | 0.00014386 | No      |
|      |       |        |             |          |         | Pgm1    | 5.2613    | 20.3653  | 1.95262          | 5.2623       | 20.3663       | 1.9524185        | 0.00014386 | No      |
|      |       |        |             |          |         | PGM2    | 6.46874   | 12.8976  | 0.99555          | 6.46974      | 12.8986       | 0.99543484       | 0.00014386 | No      |
|      |       |        |             |          |         | Pgm2l1  | 8.98956   | 0.729134 | -3.62399         | 8.99056      | 0.730134      | -3.6221778       | 0.00014386 | No      |
|      |       |        |             |          |         | Pgm3    | 1.14441   | 7.39504  | 2.69196          | 1.14541      | 7.39604       | 2.69088892       | 0.00014386 | No      |
|      |       |        |             |          |         | Pgpep1  | 2.69889   | 64.6821  | 4.58293          | 2.69989      | 64.6831       | 4.58241629       | 0.00014386 | No      |
|      |       |        |             |          |         | Pgrmc1  | 124.044   | 75.5758  | -0.714852        | 124.045      | 75.5768       | -0.7148482       | 0.00014386 | No      |
|      |       |        |             |          |         | Pgrmc2  | 40.0406   | 30.5466  | -0.390451        | 40.0416      | 30.5476       | -0.3904406       | 0.00014386 | No      |
|      |       |        |             |          |         | Pgs1    | 25.7287   | 12.047   | -1.09471         | 25.7297      | 12.048        | -1.094641        | 0.00014386 | No      |
|      |       |        |             |          |         | Phactr4 | 7.44258   | 13.5689  | 0.866431         | 7.44358      | 13.5699       | 0.86634153       | 0.00014386 | No      |
|      |       |        |             |          |         | Phb     | 42.1692   | 122.061  | 1.53334          | 42.1702      | 122.062       | 1.53331837       | 0.00014386 | No      |
|      |       |        |             |          |         | Phc1    | 14.0193   | 9.54774  | -0.554182        | 14.0203      | 9.54874       | -0.5541349       | 0.00014386 | No      |
|      |       |        |             |          |         | Phc2    | 33.5224   | 23.9061  | -0.487746        | 33.5234      | 23.9071       | -0.4877293       | 0.00014386 | No      |
|      |       |        |             |          |         | Phc3    | 16.9403   | 3.99767  | -2.08323         | 16.9413      | 3.99867       | -2.0829525       | 0.00014386 | No      |
|      |       |        |             |          |         | Phf10   | 43.2999   | 24.4926  | -0.822014        | 43.3009      | 24.4936       | -0.8219922       | 0.00014386 | No      |
|      |       |        |             |          |         | Phf11b  | 878.884   | 66.9221  | -3.71512         | 878.885      | 66.9231       | -3.7150982       | 0.00014386 | No      |
|      |       |        |             |          |         | Phf12   | 36.3005   | 11.0759  | -1.71256         | 36.3015      | 11.0769       | -1.712475        | 0.00014386 | No      |
|      |       |        |             |          |         | Phf15   | 26.0217   | 9.03609  | -1.52594         | 26.0227      | 9.03709       | -1.5258405       | 0.00014386 | No      |
|      |       |        |             |          |         | Phf17   | 5.45268   | 10.6015  | 0.95923          | 5.45368      | 10.6025       | 0.95910253       | 0.00014386 | No      |
|      |       |        |             |          |         | Phf2    | 30.3526   | 13.3756  | -1.18222         | 30.3536      | 13.3766       | -1.1821562       | 0.00014386 | No      |
|      |       |        |             |          |         | Phf20   | 9.88934   | 6.31985  | -0.645985        | 9.89034      | 6.32085       | -0.6459015       | 0.00014386 | No      |
|      |       |        |             |          |         | PHF20L1 | 22.9089   | 6.68974  | -1.77589         | 22.9099      | 6.69074       | -1.7757335       | 0.00014386 | No      |
|      |       |        |             |          |         | Phf21a  | 34.699    | 12.6413  | -1.45675         | 34.7         | 12.6423       | -1.4566767       | 0.00014386 | No      |
|      |       |        |             |          |         | Phf23   | 40.7642   | 20.2937  | -1.00627         | 40.7652      | 20.2947       | -1.0062351       | 0.00014386 | No      |
|      |       |        |             |          |         | Phf3    | 20.1999   | 8.63002  | -1.22691         | 20.2009      | 8.63102       | -1.2268166       | 0.00014386 | No      |
|      |       |        |             |          |         | Phf8    | 24.2904   | 3.6968   | -2.71604         | 24.2914      | 3.6978        | -2.7157065       | 0.00014386 | No      |
|      |       |        |             |          |         | Phgdh   | 23.9688   | 65.539   | 1.4512           | 23.9698      | 65.54         | 1.4511578        | 0.00014386 | No      |
|      |       |        |             |          |         | Phip    | 18.8201   | 3.93572  | -2.25757         | 18.8211      | 3.93672       | -2.2572849       | 0.00014386 | No      |
|      |       |        |             |          |         | PHKG2   | 4.12927   | 1.13712  | -1.8605          | 4.13027      | 1.13812       | -1.8595834       | 0.00014386 | No      |
|      |       |        |             |          |         | Phlda3  | 0.203141  | 9.27648  | 5.51303          | 0.204141     | 9.27748       | 5.50609512       | 0.00014386 | No      |
|      |       |        |             |          |         | Phldb1  | 0.0392244 | 30.3772  | 9.59702          | 0.0402244    | 30.3782       | 9.56074977       | 0.00014386 | No      |
|      |       |        |             |          |         | Phldb2  | 0.0392124 | 70.8002  | 10.8182          | 0.0402124    | 70.8012       | 10.7819177       | 0.00014386 | No      |



| RRBS |       |        |             |          |         | RNAseq   |          |          |                  |              |               |                  |            |         |
|------|-------|--------|-------------|----------|---------|----------|----------|----------|------------------|--------------|---------------|------------------|------------|---------|
| gene | Blood | Kidney | methyl.diff | pMWU.fdr | Match ? | gene     | blood    | kidney   | log2(fold_ratio) | blood+ 0.001 | kidney+ 0.001 | log2(fold_ratio) | q_value    | Match ? |
|      |       |        |             |          |         | Phospho2 | 11.8061  | 7.03167  | -0.747589        | 11.8071      | 7.03267       | -0.7475102       | 0.00014386 | No      |
|      |       |        |             |          |         | Phtf2    | 10.8274  | 3.27368  | -1.7257          | 10.8284      | 3.27468       | -1.7253942       | 0.00014386 | No      |
|      |       |        |             |          |         | Phyh     | 36.647   | 379.839  | 3.37362          | 36.648       | 379.84        | 3.37358547       | 0.00014386 | No      |
|      |       |        |             |          |         | Pi4ka    | 35.2206  | 20.422   | -0.786295        | 35.2216      | 20.423        | -0.7862656       | 0.00014386 | No      |
|      |       |        |             |          |         | Pias1    | 23.146   | 13.1798  | -0.812433        | 23.147       | 13.1808       | -0.8123873       | 0.00014386 | No      |
|      |       |        |             |          |         | Pias3    | 3.6249   | 7.77918  | 1.10168          | 3.6259       | 7.78018       | 1.1014644        | 0.00014386 | No      |
|      |       |        |             |          |         | Picalm   | 32.7231  | 142.854  | 2.12616          | 32.7241      | 142.855       | 2.12612611       | 0.00014386 | No      |
|      |       |        |             |          |         | Pick1    | 7.97401  | 24.5494  | 1.62231          | 7.97501      | 24.5504       | 1.6221883        | 0.00014386 | No      |
|      |       |        |             |          |         | Pidd     | 0.270031 | 1.68029  | 2.63752          | 0.271031     | 1.68129       | 2.63303881       | 0.00014386 | No      |
|      |       |        |             |          |         | Piezo1   | 14.8605  | 28.2011  | 0.924268         | 14.8615      | 28.2021       | 0.92422286       | 0.00014386 | No      |
|      |       |        |             |          |         | Pigh     | 2.56591  | 14.4231  | 2.49084          | 2.56691      | 14.4241       | 2.49037669       | 0.00014386 | No      |
|      |       |        |             |          |         | Pigk     | 20.1841  | 32.728   | 0.69731          | 20.1851      | 32.729        | 0.69727879       | 0.00014386 | No      |
|      |       |        |             |          |         | Pigm     | 4.36759  | 1.2884   | -1.76126         | 4.36859      | 1.2894        | -1.7604678       | 0.00014386 | No      |
|      |       |        |             |          |         | Pign     | 3.30732  | 7.37407  | 1.1568           | 3.30832      | 7.37507       | 1.15655796       | 0.00014386 | No      |
|      |       |        |             |          |         | Pigo     | 6.07683  | 3.56489  | -0.769463        | 6.07783      | 3.56589       | -0.7692941       | 0.00014386 | No      |
|      |       |        |             |          |         | Pigq     | 24.2114  | 34.7677  | 0.522063         | 24.2124      | 34.7687       | 0.52204304       | 0.00014386 | No      |
|      |       |        |             |          |         | Pigr     | 0.230855 | 54.5815  | 7.88528          | 0.231855     | 54.5825       | 7.87907183       | 0.00014386 | No      |
|      |       |        |             |          |         | Pigx     | 31.0216  | 13.0313  | -1.25129         | 31.0226      | 13.0323       | -1.2512279       | 0.00014386 | No      |
|      |       |        |             |          |         | Pigy     | 18.0471  | 49.2116  | 1.44724          | 18.0481      | 49.2126       | 1.44718077       | 0.00014386 | No      |
|      |       |        |             |          |         | Pik3c2a  | 6.50379  | 4.05898  | -0.680162        | 6.50479      | 4.05998       | -0.6800299       | 0.00014386 | No      |
|      |       |        |             |          |         | Pik3c3   | 26.1944  | 16.476   | -0.668897        | 26.1954      | 16.477        | -0.6688599       | 0.00014386 | No      |
|      |       |        |             |          |         | PIK3CA   | 23.057   | 9.10719  | -1.34013         | 23.058       | 9.10819       | -1.3400311       | 0.00014386 | No      |
|      |       |        |             |          |         | Pik3cb   | 1.68935  | 6.86946  | 2.02373          | 1.69035      | 6.87046       | 2.0230847        | 0.00014386 | No      |
|      |       |        |             |          |         | Pik3cg   | 12.6322  | 0.602894 | -4.38906         | 12.6332      | 0.603894      | -4.386781        | 0.00014386 | No      |
|      |       |        |             |          |         | Pik3ip1  | 190.287  | 6.78816  | -4.80901         | 190.288      | 6.78916       | -4.8088077       | 0.00014386 | No      |
|      |       |        |             |          |         | Pik3r1   | 67.9137  | 21.2476  | -1.67641         | 67.9147      | 21.2486       | -1.6763561       | 0.00014386 | No      |
|      |       |        |             |          |         | Pik3r2   | 10.3147  | 20.6715  | 1.00294          | 10.3157      | 20.6725       | 1.00287115       | 0.00014386 | No      |
|      |       |        |             |          |         | Pik3r3   | 1.22925  | 3.76751  | 1.61583          | 1.23025      | 3.76851       | 1.6150427        | 0.00014386 | No      |
|      |       |        |             |          |         | Pik3r5   | 37.9599  | 1.76608  | -4.42585         | 37.9609      | 1.76708       | -4.4250749       | 0.00014386 | No      |
|      |       |        |             |          |         | Pikfyve  | 9.20387  | 4.94964  | -0.894916        | 9.20487      | 4.95064       | -0.8947823       | 0.00014386 | No      |
|      |       |        |             |          |         | Pim1     | 112.258  | 10.9215  | -3.36158         | 112.259      | 10.9225       | -3.3614561       | 0.00014386 | No      |
|      |       |        |             |          |         | Pim2     | 52.0084  | 12.7962  | -2.02303         | 52.0094      | 12.7972       | -2.0229442       | 0.00014386 | No      |
|      |       |        |             |          |         | Pin1     | 31.5419  | 50.2161  | 0.670879         | 31.5429      | 50.2171       | 0.67086341       | 0.00014386 | No      |
|      |       |        |             |          |         | Pin4     | 97.6656  | 155.519  | 0.671165         | 97.6666      | 155.52        | 0.67116294       | 0.00014386 | No      |
|      |       |        |             |          |         | Pink1    | 20.628   | 68.4889  | 1.73127          | 20.629       | 68.4899       | 1.73121737       | 0.00014386 | No      |
|      |       |        |             |          |         | Pinx1    | 12.5198  | 5.05751  | -1.30771         | 12.5208      | 5.05851       | -1.3075423       | 0.00014386 | No      |
|      |       |        |             |          |         | Pip4k2a  | 85.1388  | 7.71366  | -3.46433         | 85.1398      | 7.71466       | -3.4641592       | 0.00014386 | No      |
|      |       |        |             |          |         | Pip4k2b  | 18.8735  | 4.94221  | -1.93314         | 18.8745      | 4.94321       | -1.9329183       | 0.00014386 | No      |
|      |       |        |             |          |         | Pip4k2c  | 14.369   | 30.2601  | 1.07446          | 14.37        | 30.2611       | 1.07440437       | 0.00014386 | No      |
|      |       |        |             |          |         | Pip5k1a  | 19.0653  | 9.3135   | -1.03356         | 19.0663      | 9.3145        | -1.0334747       | 0.00014386 | No      |
|      |       |        |             |          |         | PIP5K1C  | 29.6305  | 12.4242  | -1.25392         | 29.6315      | 12.4252       | -1.2538626       | 0.00014386 | No      |
|      |       |        |             |          |         | Pitpna   | 216.389  | 67.5734  | -1.6791          | 216.39       | 67.5744       | -1.6790851       | 0.00014386 | No      |

| RRBS |       |        |             |          |         | RNAseq   |           |         |                  |              |               |                  |            |         |
|------|-------|--------|-------------|----------|---------|----------|-----------|---------|------------------|--------------|---------------|------------------|------------|---------|
| gene | Blood | Kidney | methyl.diff | pMWU.fdr | Match ? | gene     | blood     | kidney  | log2(fold_ratio) | blood+ 0.001 | kidney+ 0.001 | log2(fold_ratio) | q_value    | Match ? |
|      |       |        |             |          |         | Pitpnc1  | 25.345    | 9.21577 | -1.45952         | 25.346       | 9.21677       | -1.4594249       | 0.00014386 | No      |
|      |       |        |             |          |         | Pitpnm2  | 56.5303   | 6.41384 | -3.13976         | 56.5313      | 6.41484       | -3.1395647       | 0.00014386 | No      |
|      |       |        |             |          |         | Pitpnm3  | 0         | 8.15864 | inf              | 0.001        | 8.15964       | 12.9942898       | 0.00014386 | No      |
|      |       |        |             |          |         | Pja1     | 11.5694   | 53.4672 | 2.20834          | 11.5704      | 53.4682       | 2.20824237       | 0.00014386 | No      |
|      |       |        |             |          |         | Pkd2     | 0.116446  | 17.6732 | 7.24576          | 0.117446     | 17.6742       | 7.23350353       | 0.00014386 | No      |
|      |       |        |             |          |         | Pkd2l2   | 5.58566   | 0.91157 | -2.6153          | 5.58666      | 0.91257       | -2.6139789       | 0.00014386 | No      |
|      |       |        |             |          |         | Pkdcc    | 4.55493   | 12.0399 | 1.40232          | 4.55593      | 12.0409       | 1.40212574       | 0.00014386 | No      |
|      |       |        |             |          |         | Pkia     | 0.621748  | 9.60276 | 3.94905          | 0.622748     | 9.60376       | 3.94687896       | 0.00014386 | No      |
|      |       |        |             |          |         | Pkig     | 0.171065  | 78.2863 | 8.83807          | 0.172065     | 78.2873       | 8.82968081       | 0.00014386 | No      |
|      |       |        |             |          |         | Pkm      | 228.686   | 317.049 | 0.471337         | 228.687      | 317.05        | 0.47133602       | 0.00014386 | No      |
|      |       |        |             |          |         | Pkmyt1   | 8.97374   | 3.23757 | -1.4708          | 8.97474      | 3.23857       | -1.4705132       | 0.00014386 | No      |
|      |       |        |             |          |         | Pkn3     | 91.5079   | 37.6525 | -1.28115         | 91.5089      | 37.6535       | -1.2811281       | 0.00014386 | No      |
|      |       |        |             |          |         | Pknx1    | 10.1071   | 5.65141 | -0.83869         | 10.1081      | 5.65241       | -0.8385738       | 0.00014386 | No      |
|      |       |        |             |          |         | PKP2     | 0         | 18.5482 | inf              | 0.001        | 18.5492       | 14.1790693       | 0.00014386 | No      |
|      |       |        |             |          |         | Pkp4     | 9.42205   | 65.9402 | 2.80705          | 9.42305      | 65.9412       | 2.80691414       | 0.00014386 | No      |
|      |       |        |             |          |         | Pla2g12a | 4.29595   | 21.4612 | 2.32068          | 4.29695      | 21.4622       | 2.32041307       | 0.00014386 | No      |
|      |       |        |             |          |         | Pla2g15  | 3.33613   | 23.6611 | 2.82627          | 3.33713      | 23.6621       | 2.82589832       | 0.00014386 | No      |
|      |       |        |             |          |         | Pla2g16  | 384.14    | 125.422 | -1.61484         | 384.141      | 125.423       | -1.614834        | 0.00014386 | No      |
|      |       |        |             |          |         | Pla2g2e  | 0         | 1.01534 | inf              | 0.001        | 1.01634       | 9.9891674        | 0.00014386 | No      |
|      |       |        |             |          |         | Pla2g4a  | 0.121246  | 3.22063 | 4.73133          | 0.122246     | 3.22163       | 4.71993165       | 0.00014386 | No      |
|      |       |        |             |          |         | Pla2g6   | 6.47316   | 17.5092 | 1.43557          | 6.47416      | 17.5102       | 1.43543064       | 0.00014386 | No      |
|      |       |        |             |          |         | Pla2g7   | 0.605124  | 3.20557 | 2.40528          | 0.606124     | 3.20657       | 2.40334603       | 0.00014386 | No      |
|      |       |        |             |          |         | Plaa     | 13.0177   | 7.48097 | -0.799179        | 13.0187      | 7.48197       | -0.7990953       | 0.00014386 | No      |
|      |       |        |             |          |         | Plac8    | 2322.46   | 140     | -4.05216         | 2322.461     | 140.001       | -4.0521453       | 0.00014386 | No      |
|      |       |        |             |          |         | Plagl2   | 9.84574   | 3.12916 | -1.65373         | 9.84674      | 3.13016       | -1.6534098       | 0.00014386 | No      |
|      |       |        |             |          |         | Plat     | 1.46576   | 110.491 | 6.23613          | 1.46676      | 110.492       | 6.23516528       | 0.00014386 | No      |
|      |       |        |             |          |         | Plbd2    | 18.428    | 39.9716 | 1.11707          | 18.429       | 39.9726       | 1.11703363       | 0.00014386 | No      |
|      |       |        |             |          |         | Plcb1    | 0.0120957 | 4.87767 | 8.65556          | 0.0130957    | 4.87867       | 8.54125091       | 0.00014386 | No      |
|      |       |        |             |          |         | Plcb3    | 0.739027  | 5.07463 | 2.7796           | 0.740027     | 5.07563       | 2.77793709       | 0.00014386 | No      |
|      |       |        |             |          |         | Plcb4    | 0.848343  | 1.75446 | 1.04831          | 0.849343     | 1.75546       | 1.04742993       | 0.00014386 | No      |
|      |       |        |             |          |         | Plcd1    | 2.80087   | 4.99098 | 0.833447         | 2.80187      | 4.99198       | 0.83322213       | 0.00014386 | No      |
|      |       |        |             |          |         | Plcg1    | 197.703   | 33.8817 | -2.54476         | 197.704      | 33.8827       | -2.5447213       | 0.00014386 | No      |
|      |       |        |             |          |         | Plch2    | 0.600834  | 2.68139 | 2.15794          | 0.601834     | 2.68239       | 2.15608149       | 0.00014386 | No      |
|      |       |        |             |          |         | Plcl1    | 0.573702  | 5.31216 | 3.21093          | 0.574702     | 5.31316       | 3.20868418       | 0.00014386 | No      |
|      |       |        |             |          |         | Plcl2    | 62.8159   | 6.23098 | -3.3336          | 62.8169      | 6.23198       | -3.3333902       | 0.00014386 | No      |
|      |       |        |             |          |         | Pld1     | 0.022436  | 2.9423  | 7.03499          | 0.023436     | 2.9433        | 6.97256443       | 0.00014386 | No      |
|      |       |        |             |          |         | PLD2     | 4.67594   | 8.10713 | 0.793935         | 4.67694      | 8.10813       | 0.7938043        | 0.00014386 | No      |
|      |       |        |             |          |         | Pld3     | 10.1417   | 17.1637 | 0.759067         | 10.1427      | 17.1647       | 0.75900289       | 0.00014386 | No      |
|      |       |        |             |          |         | Pld4     | 1.18423   | 5.15408 | 2.12177          | 1.18523      | 5.15508       | 2.12082777       | 0.00014386 | No      |
|      |       |        |             |          |         | Plek     | 13.9557   | 7.55619 | -0.885122        | 13.9567      | 7.55719       | -0.8850361       | 0.00014386 | No      |
|      |       |        |             |          |         | Plekha2  | 36.0381   | 12.1758 | -1.56551         | 36.0391      | 12.1768       | -1.5654279       | 0.00014386 | No      |
|      |       |        |             |          |         | Plekha6  | 0.468285  | 23.8379 | 5.66973          | 0.469285     | 23.8389       | 5.66670951       | 0.00014386 | No      |

| RRBS |       |        |             |          |         | RNAseq   |           |          |                  |              |               |                  |            |         |
|------|-------|--------|-------------|----------|---------|----------|-----------|----------|------------------|--------------|---------------|------------------|------------|---------|
| gene | Blood | Kidney | methyl.diff | pMWU.fdr | Match ? | gene     | blood     | kidney   | log2(fold_ratio) | blood+ 0.001 | kidney+ 0.001 | log2(fold_ratio) | q_value    | Match ? |
|      |       |        |             |          |         | Plekha7  | 5.55873   | 18.3945  | 1.72645          | 5.55973      | 18.3955       | 1.72626616       | 0.00014386 | No      |
|      |       |        |             |          |         | Plekha8  | 4.80476   | 3.47019  | -0.46945         | 4.80576      | 3.47119       | -0.4693343       | 0.00014386 | No      |
|      |       |        |             |          |         | Plekha1  | 0.270872  | 10.2759  | 5.24551          | 0.271872     | 10.2769       | 5.24033376       | 0.00014386 | No      |
|      |       |        |             |          |         | Plekha2  | 3.52089   | 85.5634  | 4.60298          | 3.52189      | 85.5644       | 4.60258892       | 0.00014386 | No      |
|      |       |        |             |          |         | Plekha3  | 19.0155   | 46.2262  | 1.28154          | 19.0165      | 46.2272       | 1.28149024       | 0.00014386 | No      |
|      |       |        |             |          |         | Plekha4  | 1.15108   | 42.6102  | 5.21014          | 1.15208      | 42.6112       | 5.20891988       | 0.00014386 | No      |
|      |       |        |             |          |         | Plekha5  | 46.8338   | 7.31203  | -2.67921         | 46.8348      | 7.31303       | -2.6790397       | 0.00014386 | No      |
|      |       |        |             |          |         | Plekha6  | 0.872882  | 2.66293  | 1.60915          | 0.873882     | 2.66393       | 1.60804578       | 0.00014386 | No      |
|      |       |        |             |          |         | Plekha7  | 0         | 7.02936  | inf              | 0.001        | 7.03036       | 12.7793829       | 0.00014386 | No      |
|      |       |        |             |          |         | Plekha8  | 17.1089   | 8.7832   | -0.961929        | 17.1099      | 8.7842        | -0.9618485       | 0.00014386 | No      |
|      |       |        |             |          |         | Plekha9  | 21.013    | 11.7203  | -0.842273        | 21.014       | 11.7213       | -0.8422182       | 0.00014386 | No      |
|      |       |        |             |          |         | Plekha10 | 3.40241   | 9.01284  | 1.40542          | 3.40341      | 9.01384       | 1.40516088       | 0.00014386 | No      |
|      |       |        |             |          |         | Plekha11 | 8.75344   | 2.20569  | -1.98862         | 8.75444      | 2.20669       | -1.9881309       | 0.00014386 | No      |
|      |       |        |             |          |         | Plekha12 | 3.21687   | 12.7187  | 1.98322          | 3.21787      | 12.7197       | 1.9828867        | 0.00014386 | No      |
|      |       |        |             |          |         | Plekha13 | 2.16956   | 38.9464  | 4.16601          | 2.17056      | 38.9474       | 4.16538781       | 0.00014386 | No      |
|      |       |        |             |          |         | Plekha14 | 0.787351  | 7.90398  | 3.3275           | 0.788351     | 7.90498       | 3.3258518        | 0.00014386 | No      |
|      |       |        |             |          |         | Plekha15 | 0.690214  | 6.73064  | 3.28563          | 0.691214     | 6.73164       | 3.28375368       | 0.00014386 | No      |
|      |       |        |             |          |         | Plekha16 | 0.358816  | 3.20722  | 3.16             | 0.359816     | 3.20822       | 3.15644183       | 0.00014386 | No      |
|      |       |        |             |          |         | Plekha17 | 0.118079  | 30.7287  | 8.02369          | 0.119079     | 30.7297       | 8.01157086       | 0.00014386 | No      |
|      |       |        |             |          |         | Plekha18 | 2.53017   | 1.1401   | -1.15007         | 2.53117      | 1.1411        | -1.1493792       | 0.00014386 | No      |
|      |       |        |             |          |         | Plekha19 | 0.570562  | 22.225   | 5.28366          | 0.571562     | 22.226        | 5.28119452       | 0.00014386 | No      |
|      |       |        |             |          |         | Plekha20 | 0.39422   | 23.1686  | 5.87702          | 0.39522      | 23.1696       | 5.87343337       | 0.00014386 | No      |
|      |       |        |             |          |         | Plekha21 | 69.072    | 119.994  | 0.796786         | 69.073       | 119.995       | 0.7967805        | 0.00014386 | No      |
|      |       |        |             |          |         | Plekha22 | 3.85309   | 53.8625  | 3.80519          | 3.85409      | 53.8635       | 3.80484581       | 0.00014386 | No      |
|      |       |        |             |          |         | Plekha23 | 0.0369669 | 0.82609  | 4.48199          | 0.0379669    | 0.82709       | 4.44523021       | 0.00014386 | No      |
|      |       |        |             |          |         | Plekha24 | 0.193223  | 3.40558  | 4.13956          | 0.194223     | 3.40658       | 4.13253813       | 0.00014386 | No      |
|      |       |        |             |          |         | Plekha25 | 1.83026   | 0.168699 | -3.43952         | 1.83126      | 0.169699      | -3.4317867       | 0.00014386 | No      |
|      |       |        |             |          |         | Plekha26 | 0.0990374 | 15.2649  | 7.26802          | 0.1000374    | 15.2659       | 7.25362937       | 0.00014386 | No      |
|      |       |        |             |          |         | Plekha27 | 6.47273   | 92.7273  | 3.84055          | 6.47373      | 92.7283       | 3.8403406        | 0.00014386 | No      |
|      |       |        |             |          |         | Plekha28 | 15.4272   | 94.6191  | 2.61665          | 15.4282      | 94.6201       | 2.61657693       | 0.00014386 | No      |
|      |       |        |             |          |         | Plekha29 | 24.666    | 36.4063  | 0.561664         | 24.667       | 36.4073       | 0.56164549       | 0.00014386 | No      |
|      |       |        |             |          |         | Plekha30 | 60.5601   | 100.833  | 0.735525         | 60.5611      | 100.834       | 0.73551887       | 0.00014386 | No      |
|      |       |        |             |          |         | Plekha31 | 4.82695   | 2.63332  | -0.87423         | 4.82795      | 2.63432       | -0.8739801       | 0.00014386 | No      |
|      |       |        |             |          |         | Plekha32 | 200.314   | 30.245   | -2.7275          | 200.315      | 30.246        | -2.7274542       | 0.00014386 | No      |
|      |       |        |             |          |         | Plekha33 | 46.4899   | 195.569  | 2.07269          | 46.4909      | 195.57        | 2.07266482       | 0.00014386 | No      |
|      |       |        |             |          |         | Plekha34 | 1.69251   | 3.86831  | 1.19254          | 1.69351      | 3.86931       | 1.19205981       | 0.00014386 | No      |
|      |       |        |             |          |         | Plekha35 | 163.814   | 28.4167  | -2.52725         | 163.815      | 28.4177       | -2.5272058       | 0.00014386 | No      |
|      |       |        |             |          |         | Plekha36 | 17.4939   | 12.2943  | -0.508862        | 17.4949      | 12.2953       | -0.5088275       | 0.00014386 | No      |
|      |       |        |             |          |         | Plekha37 | 63.1323   | 90.1752  | 0.514352         | 63.1333      | 90.1762       | 0.51434555       | 0.00014386 | No      |
|      |       |        |             |          |         | Plekha38 | 17.4161   | 28.4543  | 0.708229         | 17.4171      | 28.4553       | 0.70819296       | 0.00014386 | No      |
|      |       |        |             |          |         | Plekha39 | 7.4849    | 15.8219  | 1.07987          | 7.4859       | 15.8229       | 1.07976636       | 0.00014386 | No      |
|      |       |        |             |          |         | Plekha40 | 81.728    | 42.0979  | -0.957083        | 81.729       | 42.0989       | -0.9570655       | 0.00014386 | No      |

| RRBS |       |        |             |          |         | RNAseq  |           |         |                  |              |               |                  |            |         |
|------|-------|--------|-------------|----------|---------|---------|-----------|---------|------------------|--------------|---------------|------------------|------------|---------|
| gene | Blood | Kidney | methyl.diff | pMWU.fdr | Match ? | gene    | blood     | kidney  | log2(fold_ratio) | blood+ 0.001 | kidney+ 0.001 | log2(fold_ratio) | q_value    | Match ? |
|      |       |        |             |          |         | Pnpo    | 17.322    | 23.9369 | 0.466633         | 17.323       | 23.9379       | 0.4666078        | 0.00014386 | No      |
|      |       |        |             |          |         | Pnpt1   | 13.5837   | 8.18722 | -0.730429        | 13.5847      | 8.18822       | -0.7303609       | 0.00014386 | No      |
|      |       |        |             |          |         | Pnrc1   | 183.075   | 70.536  | -1.37601         | 183.076      | 70.537        | -1.3759906       | 0.00014386 | No      |
|      |       |        |             |          |         | Pnrc2   | 83.5515   | 44.891  | -0.896241        | 83.5525      | 44.892        | -0.8962246       | 0.00014386 | No      |
|      |       |        |             |          |         | Podnl1  | 1.87177   | 0.24215 | -2.95043         | 1.87277      | 0.24315       | -2.9452552       | 0.00014386 | No      |
|      |       |        |             |          |         | Pofut1  | 10.1731   | 3.27611 | -1.6347          | 10.1741      | 3.27711       | -1.6344052       | 0.00014386 | No      |
|      |       |        |             |          |         | Pofut2  | 10.6874   | 33.6464 | 1.65454          | 10.6884      | 33.6474       | 1.65444912       | 0.00014386 | No      |
|      |       |        |             |          |         | Poglut1 | 33.8534   | 56.6516 | 0.742818         | 33.8544      | 56.6526       | 0.74279882       | 0.00014386 | No      |
|      |       |        |             |          |         | Pogz    | 18.9297   | 6.08958 | -1.63624         | 18.9307      | 6.09058       | -1.6360762       | 0.00014386 | No      |
|      |       |        |             |          |         | Pola1   | 3.50201   | 2.25265 | -0.636562        | 3.50301      | 2.25365       | -0.6363316       | 0.00014386 | No      |
|      |       |        |             |          |         | Pola2   | 8.14381   | 27.0843 | 1.73368          | 8.14481      | 27.0853       | 1.73355712       | 0.00014386 | No      |
|      |       |        |             |          |         | Pold1   | 11.6618   | 6.30149 | -0.888019        | 11.6628      | 6.30249       | -0.8879204       | 0.00014386 | No      |
|      |       |        |             |          |         | Pold2   | 19.1103   | 9.10594 | -1.06947         | 19.1113      | 9.10694       | -1.0693876       | 0.00014386 | No      |
|      |       |        |             |          |         | Poldip2 | 21.9681   | 71.7549 | 1.70767          | 21.9691      | 71.7559       | 1.70762169       | 0.00014386 | No      |
|      |       |        |             |          |         | Poldip3 | 24.8775   | 15.3789 | -0.693889        | 24.8785      | 15.3799       | -0.6938534       | 0.00014386 | No      |
|      |       |        |             |          |         | Pole3   | 14.6144   | 24.5838 | 0.750316         | 14.6154      | 24.5848       | 0.7502773        | 0.00014386 | No      |
|      |       |        |             |          |         | Polh    | 5.7192    | 2.5221  | -1.18119         | 5.7202       | 2.5231        | -1.1808682       | 0.00014386 | No      |
|      |       |        |             |          |         | Poli    | 3.24657   | 1.49486 | -1.11891         | 3.24757      | 1.49586       | -1.1183855       | 0.00014386 | No      |
|      |       |        |             |          |         | Polk    | 2.77638   | 1.71857 | -0.691996        | 2.77738      | 1.71957       | -0.6916767       | 0.00014386 | No      |
|      |       |        |             |          |         | Poll    | 7.90652   | 14.4981 | 0.874747         | 7.90752      | 14.4991       | 0.87466615       | 0.00014386 | No      |
|      |       |        |             |          |         | Polm    | 18.5563   | 4.46057 | -2.05661         | 18.5573      | 4.46157       | -2.0563634       | 0.00014386 | No      |
|      |       |        |             |          |         | Polr1b  | 18.4119   | 2.91824 | -2.65747         | 18.4129      | 2.91924       | -2.6570521       | 0.00014386 | No      |
|      |       |        |             |          |         | Polr1e  | 23.4832   | 4.16641 | -2.49475         | 23.4842      | 4.16741       | -2.4944675       | 0.00014386 | No      |
|      |       |        |             |          |         | Polr2a  | 68.6652   | 27.4173 | -1.32449         | 68.6662      | 27.4183       | -1.324461        | 0.00014386 | No      |
|      |       |        |             |          |         | Polr2c  | 33.7042   | 48.5384 | 0.526199         | 33.7052      | 48.5394       | 0.52618509       | 0.00014386 | No      |
|      |       |        |             |          |         | Polr2d  | 57.5667   | 38.0302 | -0.598091        | 57.5677      | 38.0312       | -0.5980761       | 0.00014386 | No      |
|      |       |        |             |          |         | Polr2f  | 20.8312   | 41.8908 | 1.00789          | 20.8322      | 41.8918       | 1.00785267       | 0.00014386 | No      |
|      |       |        |             |          |         | Polr2j  | 44.2876   | 81.9921 | 0.888582         | 44.2886      | 81.9931       | 0.88856711       | 0.00014386 | No      |
|      |       |        |             |          |         | Polr2m  | 5.57257   | 8.39592 | 0.591345         | 5.57357      | 8.39692       | 0.59125854       | 0.00014386 | No      |
|      |       |        |             |          |         | Polr3e  | 23.4597   | 8.93133 | -1.39324         | 23.4607      | 8.93233       | -1.3931376       | 0.00014386 | No      |
|      |       |        |             |          |         | Polr3f  | 7.83176   | 3.21255 | -1.28562         | 7.83276      | 3.21355       | -1.2853528       | 0.00014386 | No      |
|      |       |        |             |          |         | Polr3gl | 31.8227   | 20.1051 | -0.662493        | 31.8237      | 20.1061       | -0.6624683       | 0.00014386 | No      |
|      |       |        |             |          |         | Polr3k  | 41.1234   | 78.9266 | 0.940551         | 41.1244      | 78.9276       | 0.94053525       | 0.00014386 | No      |
|      |       |        |             |          |         | Polrmt  | 11.6494   | 6.02335 | -0.951617        | 11.6504      | 6.02435       | -0.951502        | 0.00014386 | No      |
|      |       |        |             |          |         | Pom121  | 14.618    | 4.08798 | -1.83829         | 14.619       | 4.08898       | -1.8380317       | 0.00014386 | No      |
|      |       |        |             |          |         | Pomgnt1 | 10.7975   | 24.9417 | 1.20786          | 10.7985      | 24.9427       | 1.20778672       | 0.00014386 | No      |
|      |       |        |             |          |         | Pomk    | 23.9295   | 15.3876 | -0.637026        | 23.9305      | 15.3886       | -0.6369886       | 0.00014386 | No      |
|      |       |        |             |          |         | Pomt2   | 31.6908   | 13.4769 | -1.23358         | 31.6918      | 13.4779       | -1.2335139       | 0.00014386 | No      |
|      |       |        |             |          |         | Pon2    | 94.3882   | 25.2463 | -1.90254         | 94.3892      | 25.2473       | -1.9024927       | 0.00014386 | No      |
|      |       |        |             |          |         | Pon3    | 0.0454144 | 10.7362 | 7.88512          | 0.0464144    | 10.7372       | 7.85382964       | 0.00014386 | No      |
|      |       |        |             |          |         | Pop1    | 2.89189   | 6.16853 | 1.09291          | 2.89289      | 6.16953       | 1.09264912       | 0.00014386 | No      |
|      |       |        |             |          |         | Por     | 20.0386   | 41.9176 | 1.06477          | 20.0396      | 41.9186       | 1.06473682       | 0.00014386 | No      |

| RRBS |       |        |             |          |         | RNAseq   |           |         |                  |              |               |                  |            |         |
|------|-------|--------|-------------|----------|---------|----------|-----------|---------|------------------|--------------|---------------|------------------|------------|---------|
| gene | Blood | Kidney | methyl.diff | pMWU.fdr | Match ? | gene     | blood     | kidney  | log2(fold_ratio) | blood+ 0.001 | kidney+ 0.001 | log2(fold_ratio) | q_value    | Match ? |
|      |       |        |             |          |         | Porcn    | 0.146406  | 6.45728 | 5.46288          | 0.147406     | 6.45828       | 5.45328284       | 0.00014386 | No      |
|      |       |        |             |          |         | Pot1     | 15.8926   | 4.67039 | -1.76674         | 15.8936      | 4.67139       | -1.7665221       | 0.00014386 | No      |
|      |       |        |             |          |         | Pot1b    | 14.4012   | 5.31176 | -1.43893         | 14.4022      | 5.31276       | -1.4387558       | 0.00014386 | No      |
|      |       |        |             |          |         | Pou2af1  | 11.1787   | 2.72772 | -2.03499         | 11.1797      | 2.72872       | -2.0345852       | 0.00014386 | No      |
|      |       |        |             |          |         | Pou2f1   | 5.60003   | 2.27404 | -1.30018         | 5.60103      | 2.27504       | -1.2998002       | 0.00014386 | No      |
|      |       |        |             |          |         | Pou3f3   | 0.0161696 | 49.1598 | 11.57            | 0.0171696    | 49.1608       | 11.4834362       | 0.00014386 | No      |
|      |       |        |             |          |         | Ppa2     | 24.9903   | 76.9092 | 1.62179          | 24.9913      | 76.9102       | 1.62174899       | 0.00014386 | No      |
|      |       |        |             |          |         | Ppan     | 50.1076   | 28.5398 | -0.812054        | 50.1086      | 28.5408       | -0.8120325       | 0.00014386 | No      |
|      |       |        |             |          |         | Ppap2a   | 2.01581   | 84.7169 | 5.39322          | 2.01681      | 84.7179       | 5.39251975       | 0.00014386 | No      |
|      |       |        |             |          |         | Ppap2b   | 0.176451  | 51.5295 | 8.18999          | 0.177451     | 51.5305       | 8.18186208       | 0.00014386 | No      |
|      |       |        |             |          |         | Ppap2c   | 3.51405   | 37.0663 | 3.3989           | 3.51505      | 37.0673       | 3.39852992       | 0.00014386 | No      |
|      |       |        |             |          |         | Ppapdc2  | 13.7545   | 7.73205 | -0.830976        | 13.7555      | 7.73305       | -0.8308991       | 0.00014386 | No      |
|      |       |        |             |          |         | Ppard    | 4.60281   | 13.8171 | 1.58586          | 4.60381      | 13.8181       | 1.58565906       | 0.00014386 | No      |
|      |       |        |             |          |         | Pparg    | 0.116816  | 3.81412 | 5.02904          | 0.117816     | 3.81512       | 5.01712105       | 0.00014386 | No      |
|      |       |        |             |          |         | Ppat     | 16.7421   | 7.75313 | -1.11063         | 16.7431      | 7.75413       | -1.1105298       | 0.00014386 | No      |
|      |       |        |             |          |         | Ppcdc    | 4.47101   | 9.44077 | 1.0783           | 4.47201      | 9.44177       | 1.07813393       | 0.00014386 | No      |
|      |       |        |             |          |         | Ppcs     | 16.702    | 25.5226 | 0.611752         | 16.703       | 25.5236       | 0.61172458       | 0.00014386 | No      |
|      |       |        |             |          |         | Ppdf     | 76.16     | 158.759 | 1.05973          | 76.161       | 158.76        | 1.05972314       | 0.00014386 | No      |
|      |       |        |             |          |         | Ppfia1   | 15.7288   | 10.8333 | -0.537944        | 15.7298      | 10.8343       | -0.5378944       | 0.00014386 | No      |
|      |       |        |             |          |         | Ppfibp1  | 9.50249   | 45.9092 | 2.27241          | 9.50349      | 45.9102       | 2.2722854        | 0.00014386 | No      |
|      |       |        |             |          |         | Ppfibp2  | 0.112008  | 11.1541 | 6.63783          | 0.113008     | 11.1551       | 6.62513473       | 0.00014386 | No      |
|      |       |        |             |          |         | Pphln1   | 15.369    | 5.93878 | -1.37179         | 15.37        | 5.93978       | -1.3716358       | 0.00014386 | No      |
|      |       |        |             |          |         | Ppib     | 277.216   | 201.39  | -0.46102         | 277.217      | 201.391       | -0.4610165       | 0.00014386 | No      |
|      |       |        |             |          |         | Ppid     | 47.8591   | 26.828  | -0.835055        | 47.8601      | 26.829        | -0.8350301       | 0.00014386 | No      |
|      |       |        |             |          |         | Ppie     | 43.0549   | 27.5303 | -0.645159        | 43.0559      | 27.5313       | -0.6451382       | 0.00014386 | No      |
|      |       |        |             |          |         | Ppif     | 15.1239   | 24.3386 | 0.686415         | 15.1249      | 24.3396       | 0.68637985       | 0.00014386 | No      |
|      |       |        |             |          |         | Ppig     | 38.0933   | 11.8985 | -1.67876         | 38.0943      | 11.8995       | -1.6786742       | 0.00014386 | No      |
|      |       |        |             |          |         | Ppil1    | 118.695   | 28.9127 | -2.03748         | 118.696      | 28.9137       | -2.0374462       | 0.00014386 | No      |
|      |       |        |             |          |         | Ppil4    | 21.4883   | 5.85705 | -1.8753          | 21.4893      | 5.85805       | -1.8751261       | 0.00014386 | No      |
|      |       |        |             |          |         | Ppip5k1  | 4.12933   | 16.0745 | 1.96079          | 4.13033      | 16.0755       | 1.96053465       | 0.00014386 | No      |
|      |       |        |             |          |         | Ppip5k2  | 7.18202   | 2.34931 | -1.61215         | 7.18302      | 2.35031       | -1.6117395       | 0.00014386 | No      |
|      |       |        |             |          |         | Ppm1a    | 56.5748   | 34.4096 | -0.717351        | 56.5758      | 34.4106       | -0.717332        | 0.00014386 | No      |
|      |       |        |             |          |         | Ppm1b    | 71.4447   | 31.2174 | -1.19448         | 71.4457      | 31.2184       | -1.1944506       | 0.00014386 | No      |
|      |       |        |             |          |         | Ppm1d    | 20.5289   | 8.19686 | -1.32451         | 20.5299      | 8.19786       | -1.3244073       | 0.00014386 | No      |
|      |       |        |             |          |         | Ppm1f    | 9.49878   | 4.01237 | -1.24329         | 9.49978      | 4.01337       | -1.2430799       | 0.00014386 | No      |
|      |       |        |             |          |         | Ppm1g    | 89.0312   | 44.7326 | -0.992985        | 89.0322      | 44.7336       | -0.9929683       | 0.00014386 | No      |
|      |       |        |             |          |         | Ppm1j    | 0.877649  | 7.12588 | 3.02135          | 0.878649     | 7.12688       | 3.01991177       | 0.00014386 | No      |
|      |       |        |             |          |         | Ppox     | 8.43076   | 27.6134 | 1.71164          | 8.43176      | 27.6144       | 1.71151507       | 0.00014386 | No      |
|      |       |        |             |          |         | Ppp1ca   | 331.356   | 197.327 | -0.747796        | 331.357      | 197.328       | -0.7477907       | 0.00014386 | No      |
|      |       |        |             |          |         | Ppp1r10  | 19.6584   | 11.1652 | -0.816135        | 19.6594      | 11.1662       | -0.816081        | 0.00014386 | No      |
|      |       |        |             |          |         | Ppp1r11  | 32.9214   | 46.895  | 0.510409         | 32.9224      | 46.896        | 0.51039536       | 0.00014386 | No      |
|      |       |        |             |          |         | Ppp1r12a | 45.2588   | 6.75614 | -2.74393         | 45.2598      | 6.75714       | -2.7437456       | 0.00014386 | No      |

| RRBS |       |        |             |          |         | RNAseq   |          |          |                  |              |               |                  |            |         |
|------|-------|--------|-------------|----------|---------|----------|----------|----------|------------------|--------------|---------------|------------------|------------|---------|
| gene | Blood | Kidney | methyl.diff | pMWU.fdr | Match ? | gene     | blood    | kidney   | log2(fold_ratio) | blood+ 0.001 | kidney+ 0.001 | log2(fold_ratio) | q_value    | Match ? |
|      |       |        |             |          |         | Ppp1r12b | 9.83952  | 3.33555  | -1.56066         | 9.84052      | 3.33655       | -1.5603774       | 0.00014386 | No      |
|      |       |        |             |          |         | Ppp1r12c | 75.654   | 47.7776  | -0.66308         | 75.655       | 47.7786       | -0.6630709       | 0.00014386 | No      |
|      |       |        |             |          |         | Ppp1r13b | 2.40608  | 7.29399  | 1.60003          | 2.40708      | 7.29499       | 1.59962191       | 0.00014386 | No      |
|      |       |        |             |          |         | Ppp1r13l | 0.307715 | 4.22407  | 3.77897          | 0.308715     | 4.22507       | 3.77462776       | 0.00014386 | No      |
|      |       |        |             |          |         | Ppp1r15b | 20.7159  | 10.4602  | -0.985831        | 20.7169      | 10.4612       | -0.9857598       | 0.00014386 | No      |
|      |       |        |             |          |         | Ppp1r16a | 1.61765  | 35.5326  | 4.45717          | 1.61865      | 35.5336       | 4.45632089       | 0.00014386 | No      |
|      |       |        |             |          |         | Ppp1r16b | 35.8336  | 7.72033  | -2.21458         | 35.8346      | 7.72133       | -2.214432        | 0.00014386 | No      |
|      |       |        |             |          |         | Ppp1r18  | 69.9376  | 8.02453  | -3.12358         | 69.9386      | 8.02553       | -3.1234203       | 0.00014386 | No      |
|      |       |        |             |          |         | Ppp1r1a  | 0.230396 | 725      | 11.6197          | 0.231396     | 725.001       | 11.6134033       | 0.00014386 | No      |
|      |       |        |             |          |         | Ppp1r26  | 0.35947  | 2.39555  | 2.73641          | 0.36047      | 2.39655       | 2.73300794       | 0.00014386 | No      |
|      |       |        |             |          |         | Ppp1r36  | 0.649435 | 33.1889  | 5.67537          | 0.650435     | 33.1899       | 5.67319558       | 0.00014386 | No      |
|      |       |        |             |          |         | Ppp1r37  | 18.8269  | 31.8864  | 0.760146         | 18.8279      | 31.8874       | 0.76011437       | 0.00014386 | No      |
|      |       |        |             |          |         | Ppp1r3c  | 0        | 1.44437  | inf              | 0.001        | 1.44537       | 10.4972231       | 0.00014386 | No      |
|      |       |        |             |          |         | Ppp1r7   | 26.5815  | 17.6934  | -0.587209        | 26.5825      | 17.6944       | -0.5871839       | 0.00014386 | No      |
|      |       |        |             |          |         | Ppp1r8   | 25.5389  | 16.6611  | -0.616217        | 25.5399      | 16.6621       | -0.6161826       | 0.00014386 | No      |
|      |       |        |             |          |         | Ppp1r9a  | 0        | 3.71347  | inf              | 0.001        | 3.71447       | 11.8589407       | 0.00014386 | No      |
|      |       |        |             |          |         | Ppp2cb   | 38.4911  | 104.284  | 1.43792          | 38.4921      | 104.285       | 1.43789737       | 0.00014386 | No      |
|      |       |        |             |          |         | Ppp2r1a  | 68.7935  | 107.369  | 0.642231         | 68.7945      | 107.37        | 0.64222582       | 0.00014386 | No      |
|      |       |        |             |          |         | Ppp2r1b  | 9.03066  | 23.9849  | 1.40923          | 9.03166      | 23.9859       | 1.40912349       | 0.00014386 | No      |
|      |       |        |             |          |         | Ppp2r2a  | 62.6798  | 25.1094  | -1.31977         | 62.6808      | 25.1104       | -1.3197386       | 0.00014386 | No      |
|      |       |        |             |          |         | Ppp2r2b  | 0        | 12.175   | inf              | 0.001        | 12.176        | 13.5717526       | 0.00014386 | No      |
|      |       |        |             |          |         | Ppp2r3a  | 0.113236 | 4.79625  | 5.40451          | 0.114236     | 4.79725       | 5.39211835       | 0.00014386 | No      |
|      |       |        |             |          |         | Ppp2r5a  | 116.862  | 79.6931  | -0.552281        | 116.863      | 79.6941       | -0.5522734       | 0.00014386 | No      |
|      |       |        |             |          |         | Ppp2r5c  | 142.486  | 39.5232  | -1.85005         | 142.487      | 39.5242       | -1.8500221       | 0.00014386 | No      |
|      |       |        |             |          |         | PPP3CA   | 18.2554  | 11.411   | -0.677905        | 18.2564      | 11.412        | -0.6778507       | 0.00014386 | No      |
|      |       |        |             |          |         | Ppp3r1   | 60.7532  | 35.478   | -0.776034        | 60.7542      | 35.479        | -0.7760188       | 0.00014386 | No      |
|      |       |        |             |          |         | Ppp4c    | 87.0068  | 37.4865  | -1.21476         | 87.0078      | 37.4875       | -1.2147351       | 0.00014386 | No      |
|      |       |        |             |          |         | Ppp4r2   | 42.7936  | 20.9821  | -1.02823         | 42.7946      | 20.9831       | -1.0282009       | 0.00014386 | No      |
|      |       |        |             |          |         | Ppp4r4   | 2.73074  | 0.627667 | -2.12122         | 2.73174      | 0.628667      | -2.1194522       | 0.00014386 | No      |
|      |       |        |             |          |         | Ppp6r1   | 144.438  | 55.236   | -1.38677         | 144.439      | 55.237        | -1.3867535       | 0.00014386 | No      |
|      |       |        |             |          |         | Ppp6r2   | 38.0768  | 14.9613  | -1.34768         | 38.0778      | 14.9623       | -1.3476182       | 0.00014386 | No      |
|      |       |        |             |          |         | Pprc1    | 9.72142  | 2.08289  | -2.22258         | 9.72242      | 2.08389       | -2.2220363       | 0.00014386 | No      |
|      |       |        |             |          |         | Ppt1     | 38.5607  | 26.7495  | -0.527616        | 38.5617      | 26.7505       | -0.5276028       | 0.00014386 | No      |
|      |       |        |             |          |         | Pptc7    | 15.8463  | 9.586    | -0.725141        | 15.8473      | 9.587         | -0.7250857       | 0.00014386 | No      |
|      |       |        |             |          |         | Pqbp1    | 68.6255  | 38.7497  | -0.824561        | 68.6265      | 38.7507       | -0.8245434       | 0.00014386 | No      |
|      |       |        |             |          |         | PQLC1    | 4.51742  | 57.4762  | 3.66939          | 4.51842      | 57.4772       | 3.6690995        | 0.00014386 | No      |
|      |       |        |             |          |         | Pqlc2    | 1.9166   | 4.72579  | 1.302            | 1.9176       | 4.72679       | 1.30155896       | 0.00014386 | No      |
|      |       |        |             |          |         | Pragmin  | 1.1458   | 6.12003  | 2.41719          | 1.1468       | 6.12103       | 2.41616063       | 0.00014386 | No      |
|      |       |        |             |          |         | Pram1    | 0.582359 | 2.85978  | 2.29592          | 0.583359     | 2.86078       | 2.29395266       | 0.00014386 | No      |
|      |       |        |             |          |         | Prc1     | 1.0952   | 4.11069  | 1.90819          | 1.0962       | 4.11169       | 1.90722046       | 0.00014386 | No      |
|      |       |        |             |          |         | Prcc     | 50.3072  | 28.1184  | -0.839249        | 50.3082      | 28.1194       | -0.8392278       | 0.00014386 | No      |
|      |       |        |             |          |         | Prpc     | 7.49138  | 3.88396  | -0.947705        | 7.49238      | 3.88496       | -0.9475243       | 0.00014386 | No      |

| RRBS |       |        |             |          |         | RNAseq   |           |          |                  |              |               |                  |            |         |
|------|-------|--------|-------------|----------|---------|----------|-----------|----------|------------------|--------------|---------------|------------------|------------|---------|
| gene | Blood | Kidney | methyl.diff | pMWU.fdr | Match ? | gene     | blood     | kidney   | log2(fold_ratio) | blood+ 0.001 | kidney+ 0.001 | log2(fold_ratio) | q_value    | Match ? |
|      |       |        |             |          |         | Prdm10   | 2.69173   | 0.515582 | -2.38426         | 2.69273      | 0.516582      | -2.3820003       | 0.00014386 | No      |
|      |       |        |             |          |         | Prdm15   | 6.96126   | 1.62028  | -2.1031          | 6.96226      | 1.62128       | -2.1024224       | 0.00014386 | No      |
|      |       |        |             |          |         | Prdm2    | 26.957    | 12.1869  | -1.14533         | 26.958       | 12.1879       | -1.1452639       | 0.00014386 | No      |
|      |       |        |             |          |         | Prdm9    | 0.487544  | 1.48799  | 1.60976          | 0.488544     | 1.48899       | 1.60777366       | 0.00014386 | No      |
|      |       |        |             |          |         | Prdx1    | 141.841   | 328.612  | 1.21211          | 141.842      | 328.613       | 1.21210477       | 0.00014386 | No      |
|      |       |        |             |          |         | Prdx2    | 150.47    | 360.32   | 1.2598           | 150.471      | 360.321       | 1.25979727       | 0.00014386 | No      |
|      |       |        |             |          |         | Prdx3    | 20.7642   | 101.129  | 2.28403          | 20.7652      | 101.13        | 2.28397136       | 0.00014386 | No      |
|      |       |        |             |          |         | Prdx5    | 92.6692   | 914.043  | 3.3021           | 92.6702      | 914.044       | 3.30208622       | 0.00014386 | No      |
|      |       |        |             |          |         | Prdx6    | 66.4681   | 201.059  | 1.59688          | 66.4691      | 201.06        | 1.59687037       | 0.00014386 | No      |
|      |       |        |             |          |         | Preb     | 15.4494   | 35.5137  | 1.20083          | 15.4504      | 35.5147       | 1.20077211       | 0.00014386 | No      |
|      |       |        |             |          |         | Prex1    | 103.328   | 5.47723  | -4.23764         | 103.329      | 5.47823       | -4.2373916       | 0.00014386 | No      |
|      |       |        |             |          |         | Prf1     | 50.7504   | 1.11037  | -5.51431         | 50.7514      | 1.11137       | -5.5130365       | 0.00014386 | No      |
|      |       |        |             |          |         | Prickle1 | 0.109844  | 2.76642  | 4.65449          | 0.110844     | 2.76742       | 4.64193903       | 0.00014386 | No      |
|      |       |        |             |          |         | Prickle2 | 0         | 0.838226 | inf              | 0.001        | 0.839226      | 9.71291556       | 0.00014386 | No      |
|      |       |        |             |          |         | Prickle3 | 35.3745   | 20.3715  | -0.796158        | 35.3755      | 20.3725       | -0.7961275       | 0.00014386 | No      |
|      |       |        |             |          |         | Prim1    | 18.5273   | 8.83432  | -1.06846         | 18.5283      | 8.83532       | -1.0683762       | 0.00014386 | No      |
|      |       |        |             |          |         | Prkaa1   | 23.8417   | 8.22159  | -1.536           | 23.8427      | 8.22259       | -1.5358828       | 0.00014386 | No      |
|      |       |        |             |          |         | Prkab1   | 49.0274   | 79.1091  | 0.690256         | 49.0284      | 79.1101       | 0.69024421       | 0.00014386 | No      |
|      |       |        |             |          |         | Prkacb   | 48.8586   | 12.2677  | -1.99374         | 48.8596      | 12.2687       | -1.9936597       | 0.00014386 | No      |
|      |       |        |             |          |         | Prkar2b  | 31.358    | 3.06402  | -3.35534         | 31.359       | 3.06502       | -3.3549112       | 0.00014386 | No      |
|      |       |        |             |          |         | Prkca    | 19.0924   | 4.28455  | -2.15579         | 19.0934      | 4.28555       | -2.1555218       | 0.00014386 | No      |
|      |       |        |             |          |         | Prkcb    | 68.3876   | 2.71451  | -4.65497         | 68.3886      | 2.71551       | -4.6544608       | 0.00014386 | No      |
|      |       |        |             |          |         | Prkcd    | 13.4119   | 23.803   | 0.827631         | 13.4129      | 23.804        | 0.82758283       | 0.00014386 | No      |
|      |       |        |             |          |         | Prkch    | 128.392   | 6.82343  | -4.23391         | 128.393      | 6.82443       | -4.2337142       | 0.00014386 | No      |
|      |       |        |             |          |         | Prkci    | 6.31342   | 23.4259  | 1.89161          | 6.31442      | 23.4269       | 1.89144393       | 0.00014386 | No      |
|      |       |        |             |          |         | Prkccq   | 172.909   | 41.3747  | -2.06319         | 172.91       | 41.3757       | -2.0631657       | 0.00014386 | No      |
|      |       |        |             |          |         | Prkcz    | 4.79504   | 36.5387  | 2.92981          | 4.79604      | 36.5397       | 2.92954919       | 0.00014386 | No      |
|      |       |        |             |          |         | Prkd2    | 94.1774   | 19.6102  | -2.26377         | 94.1784      | 19.6112       | -2.2637184       | 0.00014386 | No      |
|      |       |        |             |          |         | Prkd3    | 20.4341   | 6.26866  | -1.70475         | 20.4351      | 6.26966       | -1.7045902       | 0.00014386 | No      |
|      |       |        |             |          |         | Prkdc    | 10.3687   | 2.09345  | -2.30828         | 10.3697      | 2.09445       | -2.3077308       | 0.00014386 | No      |
|      |       |        |             |          |         | Prkra    | 9.70843   | 58.7524  | 2.59734          | 9.70943      | 58.7534       | 2.59721383       | 0.00014386 | No      |
|      |       |        |             |          |         | Prkrir   | 27.8385   | 12.0959  | -1.20257         | 27.8395      | 12.0969       | -1.2024959       | 0.00014386 | No      |
|      |       |        |             |          |         | Prkx     | 12.0064   | 6.8558   | -0.808411        | 12.0074      | 6.8568        | -0.8083164       | 0.00014386 | No      |
|      |       |        |             |          |         | Prlr     | 0.0288956 | 11.6193  | 8.65145          | 0.0298956    | 11.6203       | 8.60249843       | 0.00014386 | No      |
|      |       |        |             |          |         | Prmt1    | 62.2947   | 46.2385  | -0.430015        | 62.2957      | 46.2395       | -0.4300068       | 0.00014386 | No      |
|      |       |        |             |          |         | Prmt3    | 18.0803   | 6.18255  | -1.54815         | 18.0813      | 6.18355       | -1.5479912       | 0.00014386 | No      |
|      |       |        |             |          |         | Prmt6    | 4.49011   | 1.71378  | -1.38957         | 4.49111      | 1.71478       | -1.3890486       | 0.00014386 | No      |
|      |       |        |             |          |         | Prmt7    | 16.0983   | 7.06891  | -1.18734         | 16.0993      | 7.06991       | -1.1872342       | 0.00014386 | No      |
|      |       |        |             |          |         | Prnp     | 14.6559   | 24.6418  | 0.749625         | 14.6569      | 24.6428       | 0.74958619       | 0.00014386 | No      |
|      |       |        |             |          |         | Prom1    | 0.660506  | 16.995   | 4.68539          | 0.661506     | 16.996        | 4.6832972        | 0.00014386 | No      |
|      |       |        |             |          |         | Pros1    | 1.07583   | 2.19013  | 1.02557          | 1.07683      | 2.19113       | 1.02488457       | 0.00014386 | No      |
|      |       |        |             |          |         | Prosc    | 23.9474   | 62.5528  | 1.3852           | 23.9484      | 62.5538       | 1.38516826       | 0.00014386 | No      |

| RRBS |       |        |             |          |         | RNAseq  |          |          |                  |              |               |                  |            |         |
|------|-------|--------|-------------|----------|---------|---------|----------|----------|------------------|--------------|---------------|------------------|------------|---------|
| gene | Blood | Kidney | methyl.diff | pMWU.fdr | Match ? | gene    | blood    | kidney   | log2(fold_ratio) | blood+ 0.001 | kidney+ 0.001 | log2(fold_ratio) | q_value    | Match ? |
|      |       |        |             |          |         | Proser1 | 11.3287  | 3.26862  | -1.79322         | 11.3297      | 3.26962       | -1.7929148       | 0.00014386 | No      |
|      |       |        |             |          |         | Prpf18  | 29.8335  | 15.7648  | -0.920229        | 29.8345      | 15.7658       | -0.9201832       | 0.00014386 | No      |
|      |       |        |             |          |         | Prpf19  | 70.4608  | 53.2337  | -0.404482        | 70.4618      | 53.2347       | -0.4044744       | 0.00014386 | No      |
|      |       |        |             |          |         | Prpf38a | 32.6385  | 18.5806  | -0.812775        | 32.6395      | 18.5816       | -0.8127442       | 0.00014386 | No      |
|      |       |        |             |          |         | Prpf38b | 71.6372  | 22.0071  | -1.70274         | 71.6382      | 22.0081       | -1.7026945       | 0.00014386 | No      |
|      |       |        |             |          |         | Prpf39  | 61.9457  | 20.3287  | -1.60749         | 61.9467      | 20.3297       | -1.6074385       | 0.00014386 | No      |
|      |       |        |             |          |         | Prpf4   | 18.6462  | 8.5173   | -1.13041         | 18.6472      | 8.5183        | -1.1303216       | 0.00014386 | No      |
|      |       |        |             |          |         | Prpf40a | 27.6714  | 10.819   | -1.35483         | 27.6724      | 10.82         | -1.3547473       | 0.00014386 | No      |
|      |       |        |             |          |         | Prpf8   | 47.0309  | 18.8258  | -1.3209          | 47.0319      | 18.8268       | -1.3208518       | 0.00014386 | No      |
|      |       |        |             |          |         | PRPS1   | 33.0157  | 9.42417  | -1.80871         | 33.0167      | 9.42517       | -1.8086054       | 0.00014386 | No      |
|      |       |        |             |          |         | Prps2   | 60.7617  | 27.6571  | -1.13551         | 60.7627      | 27.6581       | -1.1354839       | 0.00014386 | No      |
|      |       |        |             |          |         | Prpsap1 | 54.8779  | 80.9698  | 0.561159         | 54.8789      | 80.9708       | 0.56115017       | 0.00014386 | No      |
|      |       |        |             |          |         | Prr12   | 13.2544  | 6.56084  | -1.01452         | 13.2554      | 6.56184       | -1.0144079       | 0.00014386 | No      |
|      |       |        |             |          |         | Prr13   | 230.844  | 61.8923  | -1.89909         | 230.845      | 61.8933       | -1.8990693       | 0.00014386 | No      |
|      |       |        |             |          |         | Prr14   | 36.1348  | 15.1719  | -1.25199         | 36.1358      | 15.1729       | -1.251932        | 0.00014386 | No      |
|      |       |        |             |          |         | Prr14l  | 10.028   | 3.70604  | -1.43608         | 10.029       | 3.70704       | -1.4358382       | 0.00014386 | No      |
|      |       |        |             |          |         | Prr15l  | 0        | 83.1431  | inf              | 0.001        | 83.1441       | 16.3433263       | 0.00014386 | No      |
|      |       |        |             |          |         | Prr16   | 0        | 2.05376  | inf              | 0.001        | 2.05476       | 11.0047542       | 0.00014386 | No      |
|      |       |        |             |          |         | Prr22   | 1.5785   | 5.28654  | 1.74377          | 1.5795       | 5.28754       | 1.74312874       | 0.00014386 | No      |
|      |       |        |             |          |         | Prr3    | 32.1295  | 22.3607  | -0.522933        | 32.1305      | 22.3617       | -0.5229136       | 0.00014386 | No      |
|      |       |        |             |          |         | Prr5    | 1.55142  | 10.964   | 2.82112          | 1.55242      | 10.965        | 2.82031498       | 0.00014386 | No      |
|      |       |        |             |          |         | Prr7    | 21.3907  | 3.08992  | -2.79134         | 21.3917      | 3.09092       | -2.7909429       | 0.00014386 | No      |
|      |       |        |             |          |         | Prrc2b  | 42.9988  | 14.1093  | -1.60765         | 42.9998      | 14.1103       | -1.6075813       | 0.00014386 | No      |
|      |       |        |             |          |         | Prrg2   | 0.550912 | 16.3569  | 4.89194          | 0.551912     | 16.3579       | 4.88940549       | 0.00014386 | No      |
|      |       |        |             |          |         | Prss12  | 0        | 4.65858  | inf              | 0.001        | 4.65958       | 12.1859842       | 0.00014386 | No      |
|      |       |        |             |          |         | Prss22  | 0        | 4.64027  | inf              | 0.001        | 4.64127       | 12.1803039       | 0.00014386 | No      |
|      |       |        |             |          |         | Prss39  | 15.8027  | 2.22805  | -2.82632         | 15.8037      | 2.22905       | -2.8257615       | 0.00014386 | No      |
|      |       |        |             |          |         | Prss53  | 1.34807  | 10.2881  | 2.93202          | 1.34907      | 10.2891       | 2.93107968       | 0.00014386 | No      |
|      |       |        |             |          |         | Prss8   | 1.26686  | 82.0416  | 6.01702          | 1.26786      | 82.0426       | 6.01590586       | 0.00014386 | No      |
|      |       |        |             |          |         | Prune   | 6.78145  | 26.771   | 1.98101          | 6.78245      | 26.772        | 1.98084651       | 0.00014386 | No      |
|      |       |        |             |          |         | Prx     | 0.126574 | 0.840056 | 2.73051          | 0.127574     | 0.841056      | 2.72086753       | 0.00014386 | No      |
|      |       |        |             |          |         | Psap    | 150.415  | 249.452  | 0.729808         | 150.416      | 249.453       | 0.72980998       | 0.00014386 | No      |
|      |       |        |             |          |         | Psat1   | 6.88511  | 74.4749  | 3.4352           | 6.88611      | 74.4759       | 3.43501252       | 0.00014386 | No      |
|      |       |        |             |          |         | Psca    | 0.202858 | 129.979  | 9.32359          | 0.203858     | 129.98        | 9.31650936       | 0.00014386 | No      |
|      |       |        |             |          |         | Psd4    | 43.313   | 3.95407  | -3.45339         | 43.314       | 3.95507       | -3.4530583       | 0.00014386 | No      |
|      |       |        |             |          |         | Psen2   | 13.1343  | 8.56563  | -0.616707        | 13.1353      | 8.56663       | -0.6166495       | 0.00014386 | No      |
|      |       |        |             |          |         | Psip1   | 69.16    | 10.3015  | -2.74708         | 69.161       | 10.3025       | -2.7469643       | 0.00014386 | No      |
|      |       |        |             |          |         | Pskh1   | 7.76292  | 18.0424  | 1.21672          | 7.76392      | 18.0434       | 1.21661406       | 0.00014386 | No      |
|      |       |        |             |          |         | Psma4   | 161.427  | 118.846  | -0.441793        | 161.428      | 118.847       | -0.4417854       | 0.00014386 | No      |
|      |       |        |             |          |         | Psmb1   | 283.01   | 204.274  | -0.47035         | 283.011      | 204.275       | -0.4703455       | 0.00014386 | No      |
|      |       |        |             |          |         | Psmb5   | 124.756  | 189.435  | 0.602592         | 124.757      | 189.436       | 0.60258976       | 0.00014386 | No      |
|      |       |        |             |          |         | Psmb6   | 81.4055  | 116.113  | 0.512336         | 81.4065      | 116.114       | 0.51232603       | 0.00014386 | No      |



| RRBS |       |        |             |          |         | RNAseq   |          |         |                  |              |               |                  |            |         |
|------|-------|--------|-------------|----------|---------|----------|----------|---------|------------------|--------------|---------------|------------------|------------|---------|
| gene | Blood | Kidney | methyl.diff | pMWU.fdr | Match ? | gene     | blood    | kidney  | log2(fold_ratio) | blood+ 0.001 | kidney+ 0.001 | log2(fold_ratio) | q_value    | Match ? |
|      |       |        |             |          |         | Psmb7    | 108.161  | 166.544 | 0.622713         | 108.162      | 166.545       | 0.62271831       | 0.00014386 | No      |
|      |       |        |             |          |         | Psmb9    | 159.653  | 36.642  | -2.12337         | 159.654      | 36.643        | -2.1233392       | 0.00014386 | No      |
|      |       |        |             |          |         | Psmc2    | 59.2041  | 90.5107 | 0.612392         | 59.2051      | 90.5117       | 0.61238284       | 0.00014386 | No      |
|      |       |        |             |          |         | Psmd13   | 83.2966  | 55.6204 | -0.582642        | 83.2976      | 55.6214       | -0.5826349       | 0.00014386 | No      |
|      |       |        |             |          |         | Psmd14   | 62.8611  | 41.4098 | -0.602195        | 62.8621      | 41.4108       | -0.6021834       | 0.00014386 | No      |
|      |       |        |             |          |         | Psmd6    | 55.2767  | 74.1976 | 0.424702         | 55.2777      | 74.1986       | 0.42469438       | 0.00014386 | No      |
|      |       |        |             |          |         | Psmd8    | 36.4316  | 73.3411 | 1.00943          | 36.4326      | 73.3421       | 1.00941162       | 0.00014386 | No      |
|      |       |        |             |          |         | Psme1    | 904.663  | 411.03  | -1.13814         | 904.664      | 411.031       | -1.1381349       | 0.00014386 | No      |
|      |       |        |             |          |         | Psmg1    | 31.8375  | 61.1871 | 0.942501         | 31.8385      | 61.1881       | 0.94247873       | 0.00014386 | No      |
|      |       |        |             |          |         | PSMG3    | 15.9382  | 34.1572 | 1.0997           | 15.9392      | 34.1582       | 1.09965273       | 0.00014386 | No      |
|      |       |        |             |          |         | Pspc1    | 33.1291  | 15.9455 | -1.05495         | 33.1301      | 15.9465       | -1.0549027       | 0.00014386 | No      |
|      |       |        |             |          |         | Psph     | 14.2576  | 49.1611 | 1.78578          | 14.2586      | 49.1621       | 1.78571421       | 0.00014386 | No      |
|      |       |        |             |          |         | Pstpip1  | 132.831  | 34.3966 | -1.94925         | 132.832      | 34.3976       | -1.9492229       | 0.00014386 | No      |
|      |       |        |             |          |         | Ptbp2    | 17.0002  | 4.26975 | -1.99333         | 17.0012      | 4.27075       | -1.9930752       | 0.00014386 | No      |
|      |       |        |             |          |         | Ptbp3    | 54.7205  | 15.8467 | -1.7879          | 54.7215      | 15.8477       | -1.7878343       | 0.00014386 | No      |
|      |       |        |             |          |         | Ptch1    | 3.46826  | 6.73366 | 0.957178         | 3.46926      | 6.73466       | 0.95697715       | 0.00014386 | No      |
|      |       |        |             |          |         | Ptchd3   | 0        | 1.47083 | inf              | 0.001        | 1.47183       | 10.5233953       | 0.00014386 | No      |
|      |       |        |             |          |         | Ptdss1   | 30.0663  | 14.9357 | -1.00939         | 30.0673      | 14.9367       | -1.0093339       | 0.00014386 | No      |
|      |       |        |             |          |         | Pten     | 54.8396  | 19.6106 | -1.48359         | 54.8406      | 19.6116       | -1.4835371       | 0.00014386 | No      |
|      |       |        |             |          |         | Pter     | 1.769    | 92.1477 | 5.70294          | 1.77         | 92.1487       | 5.70214255       | 0.00014386 | No      |
|      |       |        |             |          |         | PTGER1   | 27.3473  | 7.41717 | -1.88246         | 27.3483      | 7.41817       | -1.8823159       | 0.00014386 | No      |
|      |       |        |             |          |         | Ptger2   | 11.8039  | 4.88701 | -1.27225         | 11.8049      | 4.88801       | -1.2720667       | 0.00014386 | No      |
|      |       |        |             |          |         | Ptger3   | 1.35399  | 30.4697 | 4.49209          | 1.35499      | 30.4707       | 4.49106853       | 0.00014386 | No      |
|      |       |        |             |          |         | Ptger4   | 19.0034  | 5.61333 | -1.75933         | 19.0044      | 5.61433       | -1.7591477       | 0.00014386 | No      |
|      |       |        |             |          |         | Ptges2   | 10.7711  | 39.3802 | 1.87031          | 10.7721      | 39.3812       | 1.87020754       | 0.00014386 | No      |
|      |       |        |             |          |         | Ptges3   | 137.608  | 103.935 | -0.40489         | 137.609      | 103.936       | -0.4048794       | 0.00014386 | No      |
|      |       |        |             |          |         | Ptges3l1 | 11.9915  | 2.14454 | -2.48328         | 11.9925      | 2.14554       | -2.4827197       | 0.00014386 | No      |
|      |       |        |             |          |         | Ptgfr    | 0        | 1.08056 | inf              | 0.001        | 1.08156       | 10.078898        | 0.00014386 | No      |
|      |       |        |             |          |         | Ptgfrn   | 0.548104 | 26.036  | 5.56991          | 0.549104     | 26.037        | 5.56734          | 0.00014386 | No      |
|      |       |        |             |          |         | Ptgr2    | 10.8246  | 42.015  | 1.95659          | 10.8256      | 42.016        | 1.95649183       | 0.00014386 | No      |
|      |       |        |             |          |         | Ptgs1    | 0.381284 | 20.6123 | 5.7565           | 0.382284     | 20.6133       | 5.75278686       | 0.00014386 | No      |
|      |       |        |             |          |         | Ptk2     | 2.67841  | 26.2472 | 3.29272          | 2.67941      | 26.2482       | 3.29223123       | 0.00014386 | No      |
|      |       |        |             |          |         | Ptk2b    | 71.8302  | 11.8171 | -2.60371         | 71.8312      | 11.8181       | -2.6036125       | 0.00014386 | No      |
|      |       |        |             |          |         | PTP4A2   | 370.821  | 145.448 | -1.35022         | 370.822      | 145.449       | -1.3502135       | 0.00014386 | No      |
|      |       |        |             |          |         | Ptp4a3   | 99.7026  | 11.9815 | -3.05682         | 99.7036      | 11.9825       | -3.0567167       | 0.00014386 | No      |
|      |       |        |             |          |         | Ptpdc1   | 2.89873  | 10.5936 | 1.86969          | 2.89973      | 10.5946       | 1.86933864       | 0.00014386 | No      |
|      |       |        |             |          |         | Ptpla    | 1.24931  | 10.7914 | 3.11067          | 1.25031      | 10.7924       | 3.10965798       | 0.00014386 | No      |
|      |       |        |             |          |         | Ptplad1  | 8.72466  | 17.4672 | 1.00148          | 8.72566      | 17.4682       | 1.00139479       | 0.00014386 | No      |
|      |       |        |             |          |         | Ptplad2  | 0.604554 | 23.77   | 5.29712          | 0.605554     | 23.771        | 5.29480317       | 0.00014386 | No      |
|      |       |        |             |          |         | Ptpmt1   | 7.1812   | 31.4198 | 2.12938          | 7.1822       | 31.4208       | 2.12922218       | 0.00014386 | No      |
|      |       |        |             |          |         | Ptpn1    | 34.6899  | 8.04967 | -2.10751         | 34.6909      | 8.05067       | -2.1073765       | 0.00014386 | No      |
|      |       |        |             |          |         | Ptpn12   | 12.2769  | 20.491  | 0.739041         | 12.2779      | 20.492        | 0.73899697       | 0.00014386 | No      |

| RRBS |       |        |             |          |         | RNAseq  |            |          |                  |              |               |                  |            |         |
|------|-------|--------|-------------|----------|---------|---------|------------|----------|------------------|--------------|---------------|------------------|------------|---------|
| gene | Blood | Kidney | methyl.diff | pMWU.fdr | Match ? | gene    | blood      | kidney   | log2(fold_ratio) | blood+ 0.001 | kidney+ 0.001 | log2(fold_ratio) | q_value    | Match ? |
|      |       |        |             |          |         | Ptpn13  | 0.737063   | 93.9005  | 6.9932           | 0.738063     | 93.9015       | 6.99126043       | 0.00014386 | No      |
|      |       |        |             |          |         | Ptpn18  | 193.604    | 61.9472  | -1.644           | 193.605      | 61.9482       | -1.6439819       | 0.00014386 | No      |
|      |       |        |             |          |         | PTPN2   | 58.224     | 19.8407  | -1.55315         | 58.225       | 19.8417       | -1.5531031       | 0.00014386 | No      |
|      |       |        |             |          |         | Ptpn21  | 0.0599887  | 9.20971  | 7.26232          | 0.0609887    | 9.21071       | 7.23862659       | 0.00014386 | No      |
|      |       |        |             |          |         | Ptpn22  | 171.062    | 5.50397  | -4.9579          | 171.063      | 5.50497       | -4.9576492       | 0.00014386 | No      |
|      |       |        |             |          |         | Ptpn23  | 6.55793    | 13.178   | 1.00682          | 6.55893      | 13.179        | 1.00670852       | 0.00014386 | No      |
|      |       |        |             |          |         | Ptpn7   | 17.1056    | 2.05532  | -3.05704         | 17.1066      | 2.05632       | -3.0564164       | 0.00014386 | No      |
|      |       |        |             |          |         | Ptprc   | 699.665    | 7.85281  | -6.47731         | 699.666      | 7.85381       | -6.4771299       | 0.00014386 | No      |
|      |       |        |             |          |         | Ptprcap | 629.338    | 16.5168  | -5.25183         | 629.339      | 16.5178       | -5.2517439       | 0.00014386 | No      |
|      |       |        |             |          |         | Ptprd   | 0.00369885 | 5.14732  | 10.4425          | 0.00469885   | 5.14832       | 10.0975783       | 0.00014386 | No      |
|      |       |        |             |          |         | Ptpre   | 9.71648    | 0.897597 | -3.4363          | 9.71748      | 0.898597      | -3.4348361       | 0.00014386 | No      |
|      |       |        |             |          |         | Ptprf   | 14.5894    | 34.6257  | 1.24693          | 14.5904      | 34.6267       | 1.24686547       | 0.00014386 | No      |
|      |       |        |             |          |         | PTPRG   | 0.209859   | 2.89756  | 3.78735          | 0.210859     | 2.89856       | 3.78098584       | 0.00014386 | No      |
|      |       |        |             |          |         | Ptprj   | 1.48833    | 7.34402  | 2.30288          | 1.48933      | 7.34502       | 2.30210296       | 0.00014386 | No      |
|      |       |        |             |          |         | Ptprk   | 1.96884    | 18.4497  | 3.22818          | 1.96984      | 18.4507       | 3.22752519       | 0.00014386 | No      |
|      |       |        |             |          |         | Ptprm   | 0.751424   | 5.0294   | 2.74269          | 0.752424     | 5.0304        | 2.74105535       | 0.00014386 | No      |
|      |       |        |             |          |         | Ptpro   | 1.03175    | 5.22006  | 2.33897          | 1.03275      | 5.22106       | 2.33785168       | 0.00014386 | No      |
|      |       |        |             |          |         | Ptprr   | 0          | 9.81461  | inf              | 0.001        | 9.81561       | 13.2608622       | 0.00014386 | No      |
|      |       |        |             |          |         | Ptpru   | 0          | 0.812003 | inf              | 0.001        | 0.813003      | 9.66711687       | 0.00014386 | No      |
|      |       |        |             |          |         | Ptrh2   | 3.46545    | 5.77802  | 0.737531         | 3.46645      | 5.77902       | 0.73736591       | 0.00014386 | No      |
|      |       |        |             |          |         | Pts     | 22.535     | 33.9115  | 0.589607         | 22.536       | 33.9125       | 0.58958567       | 0.00014386 | No      |
|      |       |        |             |          |         | Pttg1ip | 43.6295    | 366.151  | 3.06906          | 43.6305      | 366.152       | 3.06903376       | 0.00014386 | No      |
|      |       |        |             |          |         | Pum1    | 52.6264    | 14.2884  | -1.88094         | 52.6274      | 14.2894       | -1.8808688       | 0.00014386 | No      |
|      |       |        |             |          |         | Pum2    | 88.4695    | 21.9051  | -2.01392         | 88.4705      | 21.9061       | -2.0138638       | 0.00014386 | No      |
|      |       |        |             |          |         | Pus1    | 39.5639    | 19.2629  | -1.03836         | 39.5649      | 19.2639       | -1.0383213       | 0.00014386 | No      |
|      |       |        |             |          |         | Pus3    | 19.8947    | 6.39803  | -1.63669         | 19.8957      | 6.39903       | -1.6365315       | 0.00014386 | No      |
|      |       |        |             |          |         | Pus7    | 4.34981    | 1.4035   | -1.63193         | 4.35081      | 1.4045        | -1.6312274       | 0.00014386 | No      |
|      |       |        |             |          |         | Pus7l   | 7.29842    | 0.385214 | -4.24385         | 7.29942      | 0.386214      | -4.2403095       | 0.00014386 | No      |
|      |       |        |             |          |         | PVR     | 1.67346    | 4.50219  | 1.42779          | 1.67446      | 4.50319       | 1.42725144       | 0.00014386 | No      |
|      |       |        |             |          |         | Pvrl1   | 0          | 1.26921  | inf              | 0.001        | 1.27021       | 10.3108513       | 0.00014386 | No      |
|      |       |        |             |          |         | Pvrl3   | 0.0547401  | 4.0701   | 6.21632          | 0.0557401    | 4.0711        | 6.19055926       | 0.00014386 | No      |
|      |       |        |             |          |         | Pwwp2a  | 31.3777    | 5.75364  | -2.44719         | 31.3787      | 5.75464       | -2.446988        | 0.00014386 | No      |
|      |       |        |             |          |         | Pxk     | 21.2385    | 36.7865  | 0.792495         | 21.2395      | 36.7875       | 0.79246583       | 0.00014386 | No      |
|      |       |        |             |          |         | Pxmp2   | 2.03164    | 43.4174  | 4.41755          | 2.03264      | 43.4184       | 4.41687993       | 0.00014386 | No      |
|      |       |        |             |          |         | Pxmp4   | 11.7464    | 31.3813  | 1.41768          | 11.7474      | 31.3823       | 1.4176096        | 0.00014386 | No      |
|      |       |        |             |          |         | Pycard  | 122.06     | 17.076   | -2.83755         | 122.061      | 17.077        | -2.8374759       | 0.00014386 | No      |
|      |       |        |             |          |         | Pygb    | 5.94172    | 15.2427  | 1.35916          | 5.94272      | 15.2437       | 1.35901781       | 0.00014386 | No      |
|      |       |        |             |          |         | Pygl    | 26.2187    | 12.9211  | -1.02087         | 26.2197      | 12.9221       | -1.0208106       | 0.00014386 | No      |
|      |       |        |             |          |         | Pygo2   | 33.7478    | 20.0675  | -0.749936        | 33.7488      | 20.0685       | -0.7499034       | 0.00014386 | No      |
|      |       |        |             |          |         | Pyroxd1 | 8.55889    | 21.2423  | 1.31145          | 8.55989      | 21.2433       | 1.31134373       | 0.00014386 | No      |
|      |       |        |             |          |         | Pyroxd2 | 3.61369    | 192.096  | 5.73221          | 3.61469      | 192.097       | 5.73181925       | 0.00014386 | No      |
|      |       |        |             |          |         | Qars    | 84.5355    | 43.5763  | -0.956016        | 84.5365      | 43.5773       | -0.9559976       | 0.00014386 | No      |

| RRBS |       |        |             |          |         | RNAseq    |          |         |                  |              |               |                  |            |         |
|------|-------|--------|-------------|----------|---------|-----------|----------|---------|------------------|--------------|---------------|------------------|------------|---------|
| gene | Blood | Kidney | methyl.diff | pMWU.fdr | Match ? | gene      | blood    | kidney  | log2(fold_ratio) | blood+ 0.001 | kidney+ 0.001 | log2(fold_ratio) | q_value    | Match ? |
|      |       |        |             |          |         | Qdpr      | 35.3253  | 139.315 | 1.97958          | 35.3263      | 139.316       | 1.9795464        | 0.00014386 | No      |
|      |       |        |             |          |         | QK        | 23.8646  | 13.0097 | -0.875288        | 23.8656      | 13.0107       | -0.875234        | 0.00014386 | No      |
|      |       |        |             |          |         | Qrsl1     | 5.94858  | 10.9544 | 0.880889         | 5.94958      | 10.9554       | 0.88078243       | 0.00014386 | No      |
|      |       |        |             |          |         | Qser1     | 0.705175 | 1.50702 | 1.09565          | 0.706175     | 1.50802       | 1.09455791       | 0.00014386 | No      |
|      |       |        |             |          |         | Qsox1     | 2.61067  | 15.3934 | 2.55982          | 2.61167      | 15.3944       | 2.55936112       | 0.00014386 | No      |
|      |       |        |             |          |         | Qtrtd1    | 3.9883   | 1.21026 | -1.72046         | 3.9893       | 1.21126       | -1.719627        | 0.00014386 | No      |
|      |       |        |             |          |         | R3hdm1    | 22.2652  | 5.83826 | -1.93118         | 22.2662      | 5.83926       | -1.9309979       | 0.00014386 | No      |
|      |       |        |             |          |         | Rab1      | 24.9266  | 82.6331 | 1.72903          | 24.9276      | 82.6341       | 1.72899326       | 0.00014386 | No      |
|      |       |        |             |          |         | Rab11a    | 37.3064  | 97.4741 | 1.3856           | 37.3074      | 97.4751       | 1.38557191       | 0.00014386 | No      |
|      |       |        |             |          |         | Rab11b    | 107.142  | 150.96  | 0.494644         | 107.143      | 150.961       | 0.49463829       | 0.00014386 | No      |
|      |       |        |             |          |         | Rab11fip1 | 2.91469  | 21.0126 | 2.84984          | 2.91569      | 21.0136       | 2.8494141        | 0.00014386 | No      |
|      |       |        |             |          |         | Rab11fip4 | 62.0113  | 14.1086 | -2.13595         | 62.0123      | 14.1096       | -2.1358773       | 0.00014386 | No      |
|      |       |        |             |          |         | Rab11fip5 | 0.435443 | 25.8775 | 5.89307          | 0.436443     | 25.8785       | 5.88981694       | 0.00014386 | No      |
|      |       |        |             |          |         | Rab12     | 12.8249  | 28.6683 | 1.16051          | 12.8259      | 28.6693       | 1.16044662       | 0.00014386 | No      |
|      |       |        |             |          |         | Rab13     | 0.202747 | 24.6165 | 6.9238           | 0.203747     | 24.6175       | 6.91676163       | 0.00014386 | No      |
|      |       |        |             |          |         | Rab18     | 14.441   | 42.77   | 1.56643          | 14.442       | 42.771        | 1.56636239       | 0.00014386 | No      |
|      |       |        |             |          |         | Rab19     | 13.4264  | 3.34744 | -2.00394         | 13.4274      | 3.34844       | -2.003619        | 0.00014386 | No      |
|      |       |        |             |          |         | Rab23     | 5.97154  | 14.0687 | 1.23632          | 5.97254      | 14.0697       | 1.23617505       | 0.00014386 | No      |
|      |       |        |             |          |         | Rab25     | 9.69459  | 44.9566 | 2.21328          | 9.69559      | 44.9576       | 2.21316442       | 0.00014386 | No      |
|      |       |        |             |          |         | Rab27a    | 95.1883  | 6.52578 | -3.86656         | 95.1893      | 6.52678       | -3.8663561       | 0.00014386 | No      |
|      |       |        |             |          |         | Rab32     | 0.281709 | 5.72496 | 4.34499          | 0.282709     | 5.72596       | 4.34012788       | 0.00014386 | No      |
|      |       |        |             |          |         | Rab33b    | 6.72432  | 4.51131 | -0.57584         | 6.72532      | 4.51231       | -0.5757367       | 0.00014386 | No      |
|      |       |        |             |          |         | Rab35     | 82.2566  | 30.8213 | -1.4162          | 82.2576      | 30.8223       | -1.4161745       | 0.00014386 | No      |
|      |       |        |             |          |         | RAB37     | 38.3266  | 1.73382 | -4.46632         | 38.3276      | 1.73482       | -4.4655258       | 0.00014386 | No      |
|      |       |        |             |          |         | Rab3d     | 13.2501  | 6.591   | -1.00743         | 13.2511      | 6.592         | -1.007324        | 0.00014386 | No      |
|      |       |        |             |          |         | Rab3ip    | 449.295  | 91.3844 | -2.29764         | 449.296      | 91.3854       | -2.2976306       | 0.00014386 | No      |
|      |       |        |             |          |         | Rab40b    | 0.106555 | 2.53909 | 4.57464          | 0.107555     | 2.54009       | 4.56173312       | 0.00014386 | No      |
|      |       |        |             |          |         | Rab4a     | 12.1223  | 28.0514 | 1.21041          | 12.1233      | 28.0524       | 1.21034175       | 0.00014386 | No      |
|      |       |        |             |          |         | Rab5a     | 30.997   | 48.5326 | 0.646825         | 30.998       | 48.5336       | 0.64680874       | 0.00014386 | No      |
|      |       |        |             |          |         | Rab5b     | 34.9113  | 46.6881 | 0.419359         | 34.9123      | 46.6891       | 0.41935037       | 0.00014386 | No      |
|      |       |        |             |          |         | Rab6b     | 0.201675 | 2.10971 | 3.38694          | 0.202675     | 2.11071       | 3.38048833       | 0.00014386 | No      |
|      |       |        |             |          |         | Rab7a     | 101.286  | 220.197 | 1.12036          | 101.287      | 220.198       | 1.12035235       | 0.00014386 | No      |
|      |       |        |             |          |         | Rab7l1    | 124.97   | 65.4381 | -0.933375        | 124.971      | 65.4391       | -0.9333685       | 0.00014386 | No      |
|      |       |        |             |          |         | Rab8a     | 181.256  | 64.2263 | -1.49679         | 181.257      | 64.2273       | -1.4967782       | 0.00014386 | No      |
|      |       |        |             |          |         | Rab9a     | 22.8855  | 54.3057 | 1.24667          | 22.8865      | 54.3067       | 1.24663335       | 0.00014386 | No      |
|      |       |        |             |          |         | Rabac1    | 287.074  | 190.411 | -0.592306        | 287.075      | 190.412       | -0.5923033       | 0.00014386 | No      |
|      |       |        |             |          |         | Rabep2    | 32.6965  | 22.9056 | -0.513434        | 32.6975      | 22.9066       | -0.513417        | 0.00014386 | No      |
|      |       |        |             |          |         | Rabepk    | 7.06667  | 13.6353 | 0.948248         | 7.06767      | 13.6363       | 0.94814566       | 0.00014386 | No      |
|      |       |        |             |          |         | Rabgap1   | 6.30416  | 9.24545 | 0.55244          | 6.30516      | 9.24645       | 0.5523666        | 0.00014386 | No      |
|      |       |        |             |          |         | Rabgap1l  | 14.1005  | 7.73475 | -0.866314        | 14.1015      | 7.73575       | -0.8662356       | 0.00014386 | No      |
|      |       |        |             |          |         | Rabl2a    | 0.231223 | 15.294  | 6.04754          | 0.232223     | 15.295        | 6.04140543       | 0.00014386 | No      |
|      |       |        |             |          |         | Rabl5     | 0.734698 | 14.6935 | 4.32188          | 0.735698     | 14.6945       | 4.32001879       | 0.00014386 | No      |

| RRBS |       |        |             |          |         | RNAseq   |           |         |                  |              |               |                  |            |         |
|------|-------|--------|-------------|----------|---------|----------|-----------|---------|------------------|--------------|---------------|------------------|------------|---------|
| gene | Blood | Kidney | methyl.diff | pMWU.fdr | Match ? | gene     | blood     | kidney  | log2(fold_ratio) | blood+ 0.001 | kidney+ 0.001 | log2(fold_ratio) | q_value    | Match ? |
|      |       |        |             |          |         | Rac2     | 1198.55   | 59.4306 | -4.33394         | 1198.551     | 59.4316       | -4.3339173       | 0.00014386 | No      |
|      |       |        |             |          |         | Rad1     | 16.0951   | 6.19556 | -1.37731         | 16.0961      | 6.19656       | -1.3771717       | 0.00014386 | No      |
|      |       |        |             |          |         | Rad17    | 15.1264   | 9.91348 | -0.609602        | 15.1274      | 9.91448       | -0.609555        | 0.00014386 | No      |
|      |       |        |             |          |         | Rad21    | 61.129    | 47.6373 | -0.359765        | 61.13        | 47.6383       | -0.3597586       | 0.00014386 | No      |
|      |       |        |             |          |         | Rad50    | 11.5267   | 5.91307 | -0.962999        | 11.5277      | 5.91407       | -0.9628815       | 0.00014386 | No      |
|      |       |        |             |          |         | Rae1     | 48.0361   | 26.7671 | -0.843662        | 48.0371      | 26.7681       | -0.8436343       | 0.00014386 | No      |
|      |       |        |             |          |         | Raf1     | 48.8986   | 30.4692 | -0.682443        | 48.8996      | 30.4702       | -0.6824237       | 0.00014386 | No      |
|      |       |        |             |          |         | Rai14    | 0.0134141 | 10.4735 | 9.60877          | 0.0144141    | 10.4745       | 9.5051849        | 0.00014386 | No      |
|      |       |        |             |          |         | Rai2     | 0         | 5.02906 | inf              | 0.001        | 5.03006       | 12.2963599       | 0.00014386 | No      |
|      |       |        |             |          |         | Ralb     | 6.25266   | 24.0385 | 1.9428           | 6.25366      | 24.0395       | 1.9426342        | 0.00014386 | No      |
|      |       |        |             |          |         | Ralbp1   | 35.2503   | 24.7445 | -0.510529        | 35.2513      | 24.7455       | -0.5105103       | 0.00014386 | No      |
|      |       |        |             |          |         | Ralgapa1 | 13.1809   | 9.11617 | -0.531947        | 13.1819      | 9.11717       | -0.5319003       | 0.00014386 | No      |
|      |       |        |             |          |         | Ralgapa2 | 6.40669   | 3.51975 | -0.864106        | 6.40769      | 3.52075       | -0.8639216       | 0.00014386 | No      |
|      |       |        |             |          |         | Ralgapb  | 12.1667   | 7.07792 | -0.781541        | 12.1677      | 7.07892       | -0.7814553       | 0.00014386 | No      |
|      |       |        |             |          |         | Ralgps2  | 13.402    | 1.67234 | -3.00251         | 13.403       | 1.67334       | -3.0017534       | 0.00014386 | No      |
|      |       |        |             |          |         | Raly     | 302.02    | 128.011 | -1.23838         | 302.021      | 128.012       | -1.2383698       | 0.00014386 | No      |
|      |       |        |             |          |         | Ramp2    | 1.11731   | 31.0439 | 4.79621          | 1.11831      | 31.0449       | 4.79496422       | 0.00014386 | No      |
|      |       |        |             |          |         | Ramp3    | 3.83873   | 8.95432 | 1.22195          | 3.83973      | 8.95532       | 1.22174012       | 0.00014386 | No      |
|      |       |        |             |          |         | Ranbp1   | 83.5162   | 61.0013 | -0.453216        | 83.5172      | 61.0023       | -0.4532097       | 0.00014386 | No      |
|      |       |        |             |          |         | Ranbp10  | 23.7476   | 8.19071 | -1.53572         | 23.7486      | 8.19171       | -1.5356059       | 0.00014386 | No      |
|      |       |        |             |          |         | Ranbp6   | 5.10864   | 2.28062 | -1.16351         | 5.10964      | 2.28162       | -1.1631631       | 0.00014386 | No      |
|      |       |        |             |          |         | Ranbp9   | 49.6023   | 15.8538 | -1.64558         | 49.6033      | 15.8548       | -1.6455164       | 0.00014386 | No      |
|      |       |        |             |          |         | Rangap1  | 54.7726   | 26.317  | -1.05746         | 54.7736      | 26.318        | -1.0574308       | 0.00014386 | No      |
|      |       |        |             |          |         | Rap1a    | 155.062   | 39.1832 | -1.98454         | 155.063      | 39.1842       | -1.9845105       | 0.00014386 | No      |
|      |       |        |             |          |         | Rap1b    | 236.549   | 63.4099 | -1.89936         | 236.55       | 63.4109       | -1.8993424       | 0.00014386 | No      |
|      |       |        |             |          |         | Rap1gap2 | 4.78312   | 16.9694 | 1.82691          | 4.78412      | 16.9704       | 1.82669509       | 0.00014386 | No      |
|      |       |        |             |          |         | Rap1gds1 | 30.332    | 10.5321 | -1.52605         | 30.333       | 10.5331       | -1.5259581       | 0.00014386 | No      |
|      |       |        |             |          |         | Rap2b    | 10.6835   | 1.40712 | -2.92457         | 10.6845      | 1.40812       | -2.9236772       | 0.00014386 | No      |
|      |       |        |             |          |         | Rap2c    | 26.9545   | 5.51959 | -2.28789         | 26.9555      | 5.52059       | -2.2876853       | 0.00014386 | No      |
|      |       |        |             |          |         | Rapgef1  | 23.4443   | 11.1756 | -1.06889         | 23.4453      | 11.1766       | -1.0688174       | 0.00014386 | No      |
|      |       |        |             |          |         | Rapgef5  | 0.164678  | 1.28598 | 2.96514          | 0.165678     | 1.28698       | 2.95753569       | 0.00014386 | No      |
|      |       |        |             |          |         | Rapgef6  | 41.4263   | 1.93983 | -4.41654         | 41.4273      | 1.94083       | -4.4158361       | 0.00014386 | No      |
|      |       |        |             |          |         | RAPGEFL1 | 0.134991  | 5.11469 | 5.24371          | 0.135991     | 5.11569       | 5.23334576       | 0.00014386 | No      |
|      |       |        |             |          |         | Rapsn    | 0.86096   | 14.8346 | 4.10688          | 0.86196      | 14.8356       | 4.10529854       | 0.00014386 | No      |
|      |       |        |             |          |         | Rarres2  | 0.0192011 | 11.5821 | 9.23649          | 0.0202011    | 11.5831       | 9.16337185       | 0.00014386 | No      |
|      |       |        |             |          |         | Rars2    | 5.2568    | 12.302  | 1.22664          | 5.2578       | 12.303        | 1.22647898       | 0.00014386 | No      |
|      |       |        |             |          |         | Rasa1    | 25.3923   | 8.83021 | -1.52387         | 25.3933      | 8.83121       | -1.5237649       | 0.00014386 | No      |
|      |       |        |             |          |         | Rasa3    | 74.9684   | 1.76088 | -5.41191         | 74.9694      | 1.76188       | -5.4111143       | 0.00014386 | No      |
|      |       |        |             |          |         | RASA4    | 27.4139   | 4.16248 | -2.71939         | 27.4149      | 4.16348       | -2.7190984       | 0.00014386 | No      |
|      |       |        |             |          |         | Rasal3   | 99.6274   | 3.75636 | -4.72913         | 99.6284      | 3.75736       | -4.7287658       | 0.00014386 | No      |
|      |       |        |             |          |         | Rasd1    | 0.61272   | 12.7265 | 4.37646          | 0.61372      | 12.7275       | 4.37422466       | 0.00014386 | No      |
|      |       |        |             |          |         | Rasgef1b | 21.7242   | 4.18004 | -2.37771         | 21.7252      | 4.18104       | -2.3774357       | 0.00014386 | No      |

| RRBS |       |        |             |          |         | RNAseq   |           |          |                  |              |               |                  |            |         |
|------|-------|--------|-------------|----------|---------|----------|-----------|----------|------------------|--------------|---------------|------------------|------------|---------|
| gene | Blood | Kidney | methyl.diff | pMWU.fdr | Match ? | gene     | blood     | kidney   | log2(fold_ratio) | blood+ 0.001 | kidney+ 0.001 | log2(fold_ratio) | q_value    | Match ? |
|      |       |        |             |          |         | Rasgrp1  | 79.7479   | 4.30665  | -4.21081         | 79.7489      | 4.30765       | -4.2104917       | 0.00014386 | No      |
|      |       |        |             |          |         | Rasgrp3  | 0.547598  | 6.91352  | 3.65823          | 0.548598     | 6.91452       | 3.65580784       | 0.00014386 | No      |
|      |       |        |             |          |         | Rasip1   | 0.693226  | 7.04462  | 3.34512          | 0.694226     | 7.04562       | 3.34324936       | 0.00014386 | No      |
|      |       |        |             |          |         | Rasl10a  | 0.105673  | 9.78774  | 6.53329          | 0.106673     | 9.78874       | 6.5198562        | 0.00014386 | No      |
|      |       |        |             |          |         | Rasl11a  | 0.437089  | 10.3535  | 4.56605          | 0.438089     | 10.3545       | 4.56289009       | 0.00014386 | No      |
|      |       |        |             |          |         | Rasl11b  | 1.46736   | 37.7355  | 4.68462          | 1.46836      | 37.7365       | 4.683683         | 0.00014386 | No      |
|      |       |        |             |          |         | Rasl12   | 0         | 4.77985  | inf              | 0.001        | 4.78085       | 12.2230514       | 0.00014386 | No      |
|      |       |        |             |          |         | Rassf2   | 23.8375   | 2.907    | -3.03563         | 23.8385      | 2.908         | -3.0351943       | 0.00014386 | No      |
|      |       |        |             |          |         | Rassf5   | 65.1349   | 10.2011  | -2.6747          | 65.1359      | 10.2021       | -2.6745868       | 0.00014386 | No      |
|      |       |        |             |          |         | Rassf6   | 0.0420154 | 27.0195  | 9.32887          | 0.0430154    | 27.0205       | 9.2949854        | 0.00014386 | No      |
|      |       |        |             |          |         | Rassf8   | 0.108079  | 26.045   | 7.91278          | 0.109079     | 26.046        | 7.89954464       | 0.00014386 | No      |
|      |       |        |             |          |         | Rassf9   | 0         | 7.05597  | inf              | 0.001        | 7.05697       | 12.7848332       | 0.00014386 | No      |
|      |       |        |             |          |         | RatNP-3b | 0         | 6.01121  | inf              | 0.001        | 6.01221       | 12.5536797       | 0.00014386 | No      |
|      |       |        |             |          |         | Raver1   | 46.2211   | 21.4766  | -1.10579         | 46.2221      | 21.4776       | -1.10575         | 0.00014386 | No      |
|      |       |        |             |          |         | Rb1cc1   | 17.7797   | 8.30941  | -1.09741         | 17.7807      | 8.31041       | -1.0973206       | 0.00014386 | No      |
|      |       |        |             |          |         | Rbak     | 4.86405   | 2.8158   | -0.78861         | 4.86505      | 2.8168        | -0.7883975       | 0.00014386 | No      |
|      |       |        |             |          |         | Rbbp5    | 23.4752   | 7.59057  | -1.62886         | 23.4762      | 7.59157       | -1.6287287       | 0.00014386 | No      |
|      |       |        |             |          |         | Rbbp8    | 10.682    | 27.9492  | 1.38762          | 10.683       | 27.9502       | 1.38754176       | 0.00014386 | No      |
|      |       |        |             |          |         | Rbl1     | 1.68507   | 0.704185 | -1.25878         | 1.68607      | 0.705185      | -1.2575907       | 0.00014386 | No      |
|      |       |        |             |          |         | Rbl2     | 38.76     | 15.9739  | -1.27885         | 38.761       | 15.9749       | -1.2787989       | 0.00014386 | No      |
|      |       |        |             |          |         | Rbm10    | 43.4289   | 26.6943  | -0.702122        | 43.4299      | 26.6953       | -0.7021029       | 0.00014386 | No      |
|      |       |        |             |          |         | Rbm12b   | 8.67751   | 4.75519  | -0.867777        | 8.67851      | 4.75619       | -0.867641        | 0.00014386 | No      |
|      |       |        |             |          |         | Rbm15    | 6.60721   | 2.9929   | -1.1425          | 6.60821      | 2.9939        | -1.1422335       | 0.00014386 | No      |
|      |       |        |             |          |         | Rbm17    | 125.056   | 69.7477  | -0.842353        | 125.057      | 69.7487       | -0.8423476       | 0.00014386 | No      |
|      |       |        |             |          |         | Rbm19    | 4.15066   | 1.81574  | -1.19278         | 4.15166      | 1.81674       | -1.1923363       | 0.00014386 | No      |
|      |       |        |             |          |         | Rbm22    | 35.8887   | 15.8246  | -1.18136         | 35.8897      | 15.8256       | -1.1813097       | 0.00014386 | No      |
|      |       |        |             |          |         | Rbm25    | 64.4106   | 20.7899  | -1.63141         | 64.4116      | 20.7909       | -1.6313683       | 0.00014386 | No      |
|      |       |        |             |          |         | Rbm27    | 20.7408   | 6.39152  | -1.69824         | 20.7418      | 6.39252       | -1.6980844       | 0.00014386 | No      |
|      |       |        |             |          |         | Rbm3     | 252.545   | 58.059   | -2.12095         | 252.546      | 58.06         | -2.1209297       | 0.00014386 | No      |
|      |       |        |             |          |         | Rbm33    | 44.0065   | 6.24817  | -2.81621         | 44.0075      | 6.24917       | -2.8160129       | 0.00014386 | No      |
|      |       |        |             |          |         | Rbm34    | 12.9037   | 4.80666  | -1.42468         | 12.9047      | 4.80766       | -1.4244898       | 0.00014386 | No      |
|      |       |        |             |          |         | Rbm38    | 52.683    | 8.99042  | -2.55088         | 52.684       | 8.99142       | -2.550744        | 0.00014386 | No      |
|      |       |        |             |          |         | Rbm39    | 77.8249   | 30.2834  | -1.3617          | 77.8259      | 30.2844       | -1.3616755       | 0.00014386 | No      |
|      |       |        |             |          |         | Rbm41    | 6.86798   | 1.21992  | -2.4931          | 6.86898      | 1.22092       | -2.4921272       | 0.00014386 | No      |
|      |       |        |             |          |         | Rbm48    | 10.1874   | 3.70722  | -1.45838         | 10.1884      | 3.70822       | -1.4581288       | 0.00014386 | No      |
|      |       |        |             |          |         | Rbm5     | 86.9828   | 42.7229  | -1.02572         | 86.9838      | 42.7239       | -1.0257034       | 0.00014386 | No      |
|      |       |        |             |          |         | Rbm6     | 35.0224   | 15.1473  | -1.20921         | 35.0234      | 15.1483       | -1.2091632       | 0.00014386 | No      |
|      |       |        |             |          |         | Rbm7     | 40.8187   | 23.8509  | -0.775187        | 40.8197      | 23.8519       | -0.7751614       | 0.00014386 | No      |
|      |       |        |             |          |         | Rbms2    | 76.8703   | 41.284   | -0.896845        | 76.8713      | 41.285        | -0.8968274       | 0.00014386 | No      |
|      |       |        |             |          |         | Rbms3    | 0         | 4.6725   | inf              | 0.001        | 4.6735        | 12.1902877       | 0.00014386 | No      |
|      |       |        |             |          |         | Rbmx     | 40.2997   | 18.8182  | -1.09864         | 40.3007      | 18.8192       | -1.0985996       | 0.00014386 | No      |
|      |       |        |             |          |         | Rbmxrtl  | 13.9527   | 8.87897  | -0.652077        | 13.9537      | 8.87997       | -0.652021        | 0.00014386 | No      |

| RRBS |       |        |             |          |         | RNAseq |           |          |                  |              |               |                  |            |         |
|------|-------|--------|-------------|----------|---------|--------|-----------|----------|------------------|--------------|---------------|------------------|------------|---------|
| gene | Blood | Kidney | methyl.diff | pMWU.fdr | Match ? | gene   | blood     | kidney   | log2(fold_ratio) | blood+ 0.001 | kidney+ 0.001 | log2(fold_ratio) | q_value    | Match ? |
|      |       |        |             |          |         | Rbp1   | 0         | 113.031  | inf              | 0.001        | 113.032       | 16.7863717       | 0.00014386 | No      |
|      |       |        |             |          |         | Rbpms  | 3.6067    | 168.461  | 5.54559          | 3.6077       | 168.462       | 5.54520001       | 0.00014386 | No      |
|      |       |        |             |          |         | Rc3h1  | 12.9482   | 3.91172  | -1.72688         | 12.9492      | 3.91272       | -1.7266192       | 0.00014386 | No      |
|      |       |        |             |          |         | Rc3h2  | 17.2051   | 9.34713  | -0.880242        | 17.2061      | 9.34813       | -0.8801704       | 0.00014386 | No      |
|      |       |        |             |          |         | Rcan2  | 0.0176224 | 19.073   | 10.0799          | 0.0186224    | 19.074        | 10.0003527       | 0.00014386 | No      |
|      |       |        |             |          |         | Rcan3  | 37.1681   | 6.61562  | -2.49012         | 37.1691      | 6.61662       | -2.4899374       | 0.00014386 | No      |
|      |       |        |             |          |         | Rcc1   | 16.6095   | 7.58086  | -1.13158         | 16.6105      | 7.58186       | -1.1314718       | 0.00014386 | No      |
|      |       |        |             |          |         | Rcc2   | 111.663   | 31.29    | -1.83537         | 111.664      | 31.291        | -1.8353445       | 0.00014386 | No      |
|      |       |        |             |          |         | Rchy1  | 21.6793   | 39.5382  | 0.866927         | 21.6803      | 39.5392       | 0.86689896       | 0.00014386 | No      |
|      |       |        |             |          |         | Rcn1   | 17.7269   | 11.3704  | -0.640659        | 17.7279      | 11.3714       | -0.6406118       | 0.00014386 | No      |
|      |       |        |             |          |         | Rcn2   | 6.28527   | 16.1329  | 1.35996          | 6.28627      | 16.1339       | 1.35981908       | 0.00014386 | No      |
|      |       |        |             |          |         | Rcsd1  | 117.3     | 5.92545  | -4.30713         | 117.301      | 5.92645       | -4.3069033       | 0.00014386 | No      |
|      |       |        |             |          |         | Rdh14  | 9.22103   | 16.132   | 0.806923         | 9.22203      | 16.133        | 0.80685847       | 0.00014386 | No      |
|      |       |        |             |          |         | Rdh16  | 1.41723   | 12.224   | 3.10857          | 1.41823      | 12.225        | 3.10767104       | 0.00014386 | No      |
|      |       |        |             |          |         | Rdm1   | 11.0911   | 19.4805  | 0.81263          | 11.0921      | 19.4815       | 0.81257224       | 0.00014386 | No      |
|      |       |        |             |          |         | Rdx    | 14.359    | 33.2984  | 1.2135           | 14.36        | 33.2994       | 1.21344043       | 0.00014386 | No      |
|      |       |        |             |          |         | Reck   | 0.440003  | 3.82883  | 3.12132          | 0.441003     | 3.82983       | 3.11841998       | 0.00014386 | No      |
|      |       |        |             |          |         | Recql  | 26.0551   | 12.6162  | -1.04628         | 26.0561      | 12.6172       | -1.0462294       | 0.00014386 | No      |
|      |       |        |             |          |         | Reep4  | 33.8992   | 11.1108  | -1.60929         | 33.9002      | 11.1118       | -1.6092012       | 0.00014386 | No      |
|      |       |        |             |          |         | Reep6  | 0.314093  | 5.87952  | 4.22644          | 0.315093     | 5.88052       | 4.22209413       | 0.00014386 | No      |
|      |       |        |             |          |         | Rel    | 6.6097    | 1.09625  | -2.59201         | 6.6107       | 1.09725       | -2.5909108       | 0.00014386 | No      |
|      |       |        |             |          |         | Rela   | 45.8095   | 29.9762  | -0.611831        | 45.8105      | 29.9772       | -0.6118127       | 0.00014386 | No      |
|      |       |        |             |          |         | Relb   | 8.97584   | 6.08873  | -0.559905        | 8.97684      | 6.08973       | -0.5598294       | 0.00014386 | No      |
|      |       |        |             |          |         | Rell1  | 7.17933   | 12.5238  | 0.80275          | 7.18033      | 12.5248       | 0.80266551       | 0.00014386 | No      |
|      |       |        |             |          |         | Relt   | 16.4215   | 2.34576  | -2.80746         | 16.4225      | 2.34676       | -2.8069316       | 0.00014386 | No      |
|      |       |        |             |          |         | Rem2   | 0.232317  | 1.34303  | 2.53133          | 0.233317     | 1.34403       | 2.52620201       | 0.00014386 | No      |
|      |       |        |             |          |         | Repin1 | 0.782306  | 13.6093  | 4.12072          | 0.783306     | 13.6103       | 4.11897905       | 0.00014386 | No      |
|      |       |        |             |          |         | Reps2  | 0         | 0.951569 | inf              | 0.001        | 0.952569      | 9.89567979       | 0.00014386 | No      |
|      |       |        |             |          |         | Rere   | 80.3822   | 40.8418  | -0.976831        | 80.3832      | 40.8428       | -0.9768122       | 0.00014386 | No      |
|      |       |        |             |          |         | Resp18 | 26.7957   | 9.94433  | -1.43005         | 26.7967      | 9.94533       | -1.4299642       | 0.00014386 | No      |
|      |       |        |             |          |         | Rest   | 17.463    | 10.407   | -0.746751        | 17.464       | 10.408        | -0.7466912       | 0.00014386 | No      |
|      |       |        |             |          |         | Rev1   | 47.8408   | 15.0468  | -1.66879         | 47.8418      | 15.0478       | -1.6687191       | 0.00014386 | No      |
|      |       |        |             |          |         | Rev3l  | 16.7677   | 6.78205  | -1.30589         | 16.7687      | 6.78305       | -1.3057648       | 0.00014386 | No      |
|      |       |        |             |          |         | Rexo1  | 42.1496   | 17.2898  | -1.2856          | 42.1506      | 17.2908       | -1.2855485       | 0.00014386 | No      |
|      |       |        |             |          |         | Rexo4  | 54.7964   | 24.684   | -1.1505          | 54.7974      | 24.685        | -1.1504728       | 0.00014386 | No      |
|      |       |        |             |          |         | Rfc1   | 16.017    | 8.40105  | -0.930967        | 16.018       | 8.40205       | -0.9308807       | 0.00014386 | No      |
|      |       |        |             |          |         | Rfc2   | 25.3951   | 14.0578  | -0.853175        | 25.3961      | 14.0588       | -0.8531335       | 0.00014386 | No      |
|      |       |        |             |          |         | Rfc5   | 20.9824   | 10.137   | -1.04956         | 20.9834      | 10.138        | -1.0494754       | 0.00014386 | No      |
|      |       |        |             |          |         | RFFL   | 28.2114   | 18.3113  | -0.623546        | 28.2124      | 18.3123       | -0.6235164       | 0.00014386 | No      |
|      |       |        |             |          |         | Rftn1  | 33.4298   | 2.2603   | -3.88655         | 33.4308      | 2.2613        | -3.8859536       | 0.00014386 | No      |
|      |       |        |             |          |         | Rfx1   | 68.2199   | 11.6811  | -2.54602         | 68.2209      | 11.6821       | -2.5459141       | 0.00014386 | No      |
|      |       |        |             |          |         | Rfx5   | 25.5247   | 18.2471  | -0.484221        | 25.5257      | 18.2481       | -0.4842043       | 0.00014386 | No      |

| RRBS |       |        |             |          |         | RNAseq     |           |          |                  |              |               |                  |            |         |
|------|-------|--------|-------------|----------|---------|------------|-----------|----------|------------------|--------------|---------------|------------------|------------|---------|
| gene | Blood | Kidney | methyl.diff | pMWU.fdr | Match ? | gene       | blood     | kidney   | log2(fold_ratio) | blood+ 0.001 | kidney+ 0.001 | log2(fold_ratio) | q_value    | Match ? |
|      |       |        |             |          |         | Rfx7       | 20.4682   | 2.30344  | -3.15152         | 20.4692      | 2.30444       | -3.1509666       | 0.00014386 | No      |
|      |       |        |             |          |         | Rfx8       | 0         | 0.802783 | inf              | 0.001        | 0.803783      | 9.65066225       | 0.00014386 | No      |
|      |       |        |             |          |         | Rfxap      | 43.2962   | 19.4437  | -1.15493         | 43.2972      | 19.4447       | -1.1548968       | 0.00014386 | No      |
|      |       |        |             |          |         | Rgcc       | 156.983   | 7.4735   | -4.39268         | 156.984      | 7.4745        | -4.3924966       | 0.00014386 | No      |
|      |       |        |             |          |         | RGD1302996 | 33.2788   | 98.579   | 1.56668          | 33.2798      | 98.58         | 1.56664822       | 0.00014386 | No      |
|      |       |        |             |          |         | RGD1303003 | 106.682   | 223.011  | 1.0638           | 106.683      | 223.012       | 1.06379104       | 0.00014386 | No      |
|      |       |        |             |          |         | RGD1303130 | 27.8738   | 43.337   | 0.63669          | 27.8748      | 43.338        | 0.63667112       | 0.00014386 | No      |
|      |       |        |             |          |         | RGD1304567 | 22.2049   | 41.5021  | 0.902304         | 22.2059      | 41.5031       | 0.90227606       | 0.00014386 | No      |
|      |       |        |             |          |         | RGD1304595 | 12.2766   | 1.97925  | -2.63288         | 12.2776      | 1.98025       | -2.6322741       | 0.00014386 | No      |
|      |       |        |             |          |         | RGD1304622 | 0.973393  | 44.3066  | 5.50835          | 0.974393     | 44.3076       | 5.5069066        | 0.00014386 | No      |
|      |       |        |             |          |         | RGD1304694 | 4.94395   | 18.531   | 1.9062           | 4.94495      | 18.532        | 1.90599075       | 0.00014386 | No      |
|      |       |        |             |          |         | RGD1304704 | 128.074   | 194.997  | 0.606474         | 128.075      | 194.998       | 0.60647044       | 0.00014386 | No      |
|      |       |        |             |          |         | RGD1304770 | 0.0728901 | 16.4148  | 7.81505          | 0.0738901    | 16.4158       | 7.79548826       | 0.00014386 | No      |
|      |       |        |             |          |         | RGD1304884 | 0.37299   | 3.85876  | 3.37093          | 0.37399      | 3.85976       | 3.36743954       | 0.00014386 | No      |
|      |       |        |             |          |         | RGD1304978 | 1.35255   | 2.70114  | 0.997894         | 1.35355      | 2.70214       | 0.99735424       | 0.00014386 | No      |
|      |       |        |             |          |         | RGD1304982 | 3.41339   | 37.1422  | 3.44378          | 3.41439      | 37.1432       | 3.44339835       | 0.00014386 | No      |
|      |       |        |             |          |         | RGD1305045 | 41.9199   | 57.461   | 0.454949         | 41.9209      | 57.462        | 0.45493852       | 0.00014386 | No      |
|      |       |        |             |          |         | RGD1305110 | 1.59209   | 3.04732  | 0.936623         | 1.59309      | 3.04832       | 0.93618659       | 0.00014386 | No      |
|      |       |        |             |          |         | RGD1305350 | 25.1955   | 16.5422  | -0.607017        | 25.1965      | 16.5432       | -0.606985        | 0.00014386 | No      |
|      |       |        |             |          |         | RGD1305422 | 5.96217   | 14.0238  | 1.23397          | 5.96317      | 14.0248       | 1.23382883       | 0.00014386 | No      |
|      |       |        |             |          |         | RGD1305455 | 14.5609   | 6.37597  | -1.19138         | 14.5619      | 6.37697       | -1.1912556       | 0.00014386 | No      |
|      |       |        |             |          |         | RGD1305464 | 3.43307   | 1.41622  | -1.27746         | 3.43407      | 1.41722       | -1.2768557       | 0.00014386 | No      |
|      |       |        |             |          |         | RGD1305508 | 30.6446   | 16.8202  | -0.865435        | 30.6456      | 16.8212       | -0.8653993       | 0.00014386 | No      |

| RRBS |       |        |             |          |         | RNAseq     |          |          |                  |              |               |                  |            |         |
|------|-------|--------|-------------|----------|---------|------------|----------|----------|------------------|--------------|---------------|------------------|------------|---------|
| gene | Blood | Kidney | methyl.diff | pMWU.fdr | Match ? | gene       | blood    | kidney   | log2(fold_ratio) | blood+ 0.001 | kidney+ 0.001 | log2(fold_ratio) | q_value    | Match ? |
|      |       |        |             |          |         | RGD1305587 | 22.6482  | 51.4884  | 1.18485          | 22.6492      | 51.4894       | 1.18481537       | 0.00014386 | No      |
|      |       |        |             |          |         | RGD1305645 | 0        | 39.4164  | inf              | 0.001        | 39.4174       | 15.266545        | 0.00014386 | No      |
|      |       |        |             |          |         | RGD1305743 | 19.0668  | 7.43603  | -1.35846         | 19.0678      | 7.43703       | -1.3583399       | 0.00014386 | No      |
|      |       |        |             |          |         | RGD1305834 | 3.43281  | 0.392059 | -3.13024         | 3.43381      | 0.393059      | -3.1269924       | 0.00014386 | No      |
|      |       |        |             |          |         | RGD1306058 | 28.6395  | 59.7645  | 1.06128          | 28.6405      | 59.7655       | 1.06125624       | 0.00014386 | No      |
|      |       |        |             |          |         | RGD1306063 | 42.9817  | 73.1419  | 0.766974         | 42.9827      | 73.1429       | 0.76696172       | 0.00014386 | No      |
|      |       |        |             |          |         | RGD1306151 | 0.672839 | 10.9564  | 4.02537          | 0.673839     | 10.9574       | 4.02335777       | 0.00014386 | No      |
|      |       |        |             |          |         | RGD1306215 | 27.4846  | 43.597   | 0.665604         | 27.4856      | 43.598        | 0.66558598       | 0.00014386 | No      |
|      |       |        |             |          |         | RGD1306353 | 23.8762  | 8.18234  | -1.54499         | 23.8772      | 8.18334       | -1.544872        | 0.00014386 | No      |
|      |       |        |             |          |         | RGD1306556 | 0.148843 | 5.7945   | 5.28282          | 0.149843     | 5.7955        | 5.27340954       | 0.00014386 | No      |
|      |       |        |             |          |         | RGD1306730 | 23.4874  | 12.9895  | -0.854538        | 23.4884      | 12.9905       | -0.8544915       | 0.00014386 | No      |
|      |       |        |             |          |         | RGD1306739 | 8.44682  | 34.6321  | 2.03563          | 8.44782      | 34.6331       | 2.03550053       | 0.00014386 | No      |
|      |       |        |             |          |         | RGD1306772 | 3.98888  | 10.9556  | 1.4576           | 3.98988      | 10.9566       | 1.45738292       | 0.00014386 | No      |
|      |       |        |             |          |         | RGD1306820 | 9.28971  | 3.22595  | -1.52591         | 9.29071      | 3.22695       | -1.5256176       | 0.00014386 | No      |
|      |       |        |             |          |         | RGD1306941 | 1.62834  | 3.024    | 0.893056         | 1.62934      | 3.025         | 0.89264745       | 0.00014386 | No      |
|      |       |        |             |          |         | RGD1306954 | 29.2564  | 57.5001  | 0.974813         | 29.2574      | 57.5011       | 0.97478799       | 0.00014386 | No      |
|      |       |        |             |          |         | RGD1307100 | 59.0947  | 29.6549  | -0.994755        | 59.0957      | 29.6559       | -0.994734        | 0.00014386 | No      |
|      |       |        |             |          |         | RGD1307235 | 38.7227  | 11.5043  | -1.75101         | 38.7237      | 11.5053       | -1.7509182       | 0.00014386 | No      |
|      |       |        |             |          |         | RGD1307254 | 25.4177  | 17.6194  | -0.528667        | 25.4187      | 17.6204       | -0.5286436       | 0.00014386 | No      |
|      |       |        |             |          |         | RGD1307262 | 15.361   | 64.7483  | 2.07557          | 15.362       | 64.7493       | 2.07549854       | 0.00014386 | No      |
|      |       |        |             |          |         | RGD1307315 | 0.521781 | 9.61016  | 4.20304          | 0.522781     | 9.61116       | 4.20043195       | 0.00014386 | No      |



| RRBS |       |        |             |          |         | RNAseq     |         |         |                  |              |               |                  |            |         |
|------|-------|--------|-------------|----------|---------|------------|---------|---------|------------------|--------------|---------------|------------------|------------|---------|
| gene | Blood | Kidney | methyl.diff | pMWU.fdr | Match ? | gene       | blood   | kidney  | log2(fold_ratio) | blood+ 0.001 | kidney+ 0.001 | log2(fold_ratio) | q_value    | Match ? |
|      |       |        |             |          |         | RGD1307365 | 6.18531 | 2.53078 | -1.28926         | 6.18631      | 2.53178       | -1.2889271       | 0.00014386 | No      |
|      |       |        |             |          |         | RGD1307526 | 91.2802 | 33.799  | -1.43332         | 91.2812      | 33.8          | -1.4332945       | 0.00014386 | No      |
|      |       |        |             |          |         | RGD1307554 | 7.62048 | 4.13247 | -0.882877        | 7.62148      | 4.13347       | -0.8827178       | 0.00014386 | No      |
|      |       |        |             |          |         | RGD1307929 | 28.6087 | 20.7017 | -0.466704        | 28.6097      | 20.7027       | -0.4666854       | 0.00014386 | No      |
|      |       |        |             |          |         | RGD1308005 | 5.81313 | 1.55514 | -1.90227         | 5.81413      | 1.55614       | -1.9015915       | 0.00014386 | No      |
|      |       |        |             |          |         | RGD1308134 | 84.8326 | 49.833  | -0.767517        | 84.8336      | 49.834        | -0.7675054       | 0.00014386 | No      |
|      |       |        |             |          |         | RGD1308234 | 185.551 | 35.6562 | -2.37959         | 185.552      | 35.6572       | -2.3795582       | 0.00014386 | No      |
|      |       |        |             |          |         | RGD1308297 | 32.9907 | 12.4741 | -1.40312         | 32.9917      | 12.4751       | -1.4030517       | 0.00014386 | No      |
|      |       |        |             |          |         | RGD1308601 | 8.28325 | 6.11186 | -0.438587        | 8.28425      | 6.11286       | -0.4385236       | 0.00014386 | No      |
|      |       |        |             |          |         | RGD1308706 | 13.7824 | 30.4683 | 1.14448          | 13.7834      | 30.4693       | 1.14442455       | 0.00014386 | No      |
|      |       |        |             |          |         | RGD1309079 | 4.79262 | 7.95147 | 0.730407         | 4.79362      | 7.95247       | 0.73028748       | 0.00014386 | No      |
|      |       |        |             |          |         | RGD1309104 | 40.5455 | 3.89082 | -3.3814          | 40.5465      | 3.89182       | -3.3810605       | 0.00014386 | No      |
|      |       |        |             |          |         | RGD1309148 | 39.4391 | 20.3833 | -0.952237        | 39.4401      | 20.3843       | -0.9522048       | 0.00014386 | No      |
|      |       |        |             |          |         | RGD1309313 | 7.44523 | 13.1016 | 0.815354         | 7.44623      | 13.1026       | 0.81527104       | 0.00014386 | No      |
|      |       |        |             |          |         | RGD1309350 | 0.73959 | 0       | -inf             | 0.74059      | 0.001         | -9.5325313       | 0.00014386 | No      |
|      |       |        |             |          |         | RGD1309492 | 9.91764 | 7.21933 | -0.458132        | 9.91864      | 7.22033       | -0.4580775       | 0.00014386 | No      |
|      |       |        |             |          |         | RGD1309534 | 1.4021  | 91.0311 | 6.02069          | 1.4031       | 91.0321       | 6.01968562       | 0.00014386 | No      |
|      |       |        |             |          |         | RGD1309540 | 9.2749  | 15.6198 | 0.751973         | 9.2759       | 15.6208       | 0.75190917       | 0.00014386 | No      |
|      |       |        |             |          |         | RGD1309594 | 2.8843  | 20.8986 | 2.85712          | 2.8853       | 20.8996       | 2.85668209       | 0.00014386 | No      |
|      |       |        |             |          |         | RGD1309621 | 40.7601 | 10.4686 | -1.96109         | 40.7611      | 10.4696       | -1.9609867       | 0.00014386 | No      |
|      |       |        |             |          |         | RGD1309747 | 16.6713 | 5.61842 | -1.56913         | 16.6723      | 5.61942       | -1.56896         | 0.00014386 | No      |

| RRBS |       |        |             |          |         | RNAseq     |          |         |                  |              |               |                  |            |         |
|------|-------|--------|-------------|----------|---------|------------|----------|---------|------------------|--------------|---------------|------------------|------------|---------|
| gene | Blood | Kidney | methyl.diff | pMWU.fdr | Match ? | gene       | blood    | kidney  | log2(fold_ratio) | blood+ 0.001 | kidney+ 0.001 | log2(fold_ratio) | q_value    | Match ? |
|      |       |        |             |          |         | RGD1309762 | 11.9927  | 4.60355 | -1.38134         | 11.9937      | 4.60455       | -1.3811447       | 0.00014386 | No      |
|      |       |        |             |          |         | RGD1309808 | 327.546  | 5.82715 | -5.81277         | 327.547      | 5.82815       | -5.8125201       | 0.00014386 | No      |
|      |       |        |             |          |         | RGD1309823 | 33.0393  | 17.5309 | -0.914286        | 33.0403      | 17.5319       | -0.9142444       | 0.00014386 | No      |
|      |       |        |             |          |         | RGD1309995 | 45.2858  | 10.0904 | -2.16607         | 45.2868      | 10.0914       | -2.1659643       | 0.00014386 | No      |
|      |       |        |             |          |         | RGD1310016 | 4.24163  | 2.0469  | -1.05118         | 4.24263      | 2.0479        | -1.0508136       | 0.00014386 | No      |
|      |       |        |             |          |         | RGD1310127 | 19.0244  | 73.3322 | 1.9466           | 19.0254      | 73.3332       | 1.94653971       | 0.00014386 | No      |
|      |       |        |             |          |         | RGD1310262 | 0.161768 | 14.3181 | 6.46777          | 0.162768     | 14.3191       | 6.45897991       | 0.00014386 | No      |
|      |       |        |             |          |         | RGD1310313 | 130.585  | 224.05  | 0.778835         | 130.586      | 224.051       | 0.77882693       | 0.00014386 | No      |
|      |       |        |             |          |         | RGD1310352 | 16.9341  | 52.6362 | 1.63613          | 16.9351      | 52.6372       | 1.63606624       | 0.00014386 | No      |
|      |       |        |             |          |         | RGD1310553 | 6.7487   | 3.90384 | -0.789716        | 6.7497       | 3.90484       | -0.7895599       | 0.00014386 | No      |
|      |       |        |             |          |         | RGD1310592 | 26.5513  | 11.0434 | -1.2656          | 26.5523      | 11.0444       | -1.2655218       | 0.00014386 | No      |
|      |       |        |             |          |         | RGD1310727 | 26.6139  | 12.8986 | -1.04497         | 26.6149      | 12.8996       | -1.0449078       | 0.00014386 | No      |
|      |       |        |             |          |         | RGD1310819 | 0        | 1.19684 | inf              | 0.001        | 1.19784       | 10.2262195       | 0.00014386 | No      |
|      |       |        |             |          |         | RGD1310852 | 6.43737  | 3.27793 | -0.973685        | 6.43837      | 3.27893       | -0.9734704       | 0.00014386 | No      |
|      |       |        |             |          |         | RGD1311345 | 13.6518  | 36.3218 | 1.41175          | 13.6528      | 36.3228       | 1.41167856       | 0.00014386 | No      |
|      |       |        |             |          |         | RGD1311458 | 23.9425  | 4.60186 | -2.37928         | 23.9435      | 4.60286       | -2.3790316       | 0.00014386 | No      |
|      |       |        |             |          |         | RGD1311517 | 9.60313  | 1.39193 | -2.78642         | 9.60413      | 1.39293       | -2.7855322       | 0.00014386 | No      |
|      |       |        |             |          |         | RGD1311564 | 1.19053  | 3.09292 | 1.37737          | 1.19153      | 3.09392       | 1.37662062       | 0.00014386 | No      |
|      |       |        |             |          |         | RGD1311595 | 6.57679  | 2.65894 | -1.30653         | 6.57779      | 2.65994       | -1.3062092       | 0.00014386 | No      |
|      |       |        |             |          |         | RGD1311703 | 71.2929  | 53.0529 | -0.426326        | 71.2939      | 53.0539       | -0.4263198       | 0.00014386 | No      |
|      |       |        |             |          |         | RGD1311756 | 0.202578 | 14.7071 | 6.18189          | 0.203578     | 14.7081       | 6.17488542       | 0.00014386 | No      |

| RRBS |       |        |             |          |         | RNAseq     |           |          |                  |              |               |                  |            |         |
|------|-------|--------|-------------|----------|---------|------------|-----------|----------|------------------|--------------|---------------|------------------|------------|---------|
| gene | Blood | Kidney | methyl.diff | pMWU.fdr | Match ? | gene       | blood     | kidney   | log2(fold_ratio) | blood+ 0.001 | kidney+ 0.001 | log2(fold_ratio) | q_value    | Match ? |
|      |       |        |             |          |         | RGD1311805 | 23.526    | 8.35148  | -1.49415         | 23.527       | 8.35248       | -1.4940408       | 0.00014386 | No      |
|      |       |        |             |          |         | RGD1311863 | 7.4564    | 4.62553  | -0.688862        | 7.4574       | 4.62653       | -0.6887422       | 0.00014386 | No      |
|      |       |        |             |          |         | RGD1311892 | 0.0235943 | 2.85757  | 6.92021          | 0.0245943    | 2.85857       | 6.86082582       | 0.00014386 | No      |
|      |       |        |             |          |         | RGD1312026 | 3.70794   | 1.95168  | -0.925903        | 3.70894      | 1.95268       | -0.9255514       | 0.00014386 | No      |
|      |       |        |             |          |         | RGD1359108 | 6.46196   | 2.9976   | -1.10816         | 6.46296      | 2.9986        | -1.107906        | 0.00014386 | No      |
|      |       |        |             |          |         | RGD1359127 | 13.3148   | 29.582   | 1.15169          | 13.3158      | 29.583        | 1.15162926       | 0.00014386 | No      |
|      |       |        |             |          |         | RGD1359158 | 39.8027   | 18.9544  | -1.07033         | 39.8037      | 18.9554       | -1.0702936       | 0.00014386 | No      |
|      |       |        |             |          |         | RGD1359529 | 431.042   | 155.413  | -1.47172         | 431.043      | 155.414       | -1.4717153       | 0.00014386 | No      |
|      |       |        |             |          |         | RGD1359634 | 2.14364   | 16.5103  | 2.94523          | 2.14464      | 16.5113       | 2.94464631       | 0.00014386 | No      |
|      |       |        |             |          |         | RGD1559442 | 0.403573  | 8.13571  | 4.33336          | 0.404573     | 8.13671       | 4.32997363       | 0.00014386 | No      |
|      |       |        |             |          |         | RGD1559600 | 0         | 2.55489  | inf              | 0.001        | 2.55589       | 11.31961         | 0.00014386 | No      |
|      |       |        |             |          |         | RGD1559786 | 10.498    | 28.7628  | 1.45409          | 10.499       | 28.7638       | 1.45400236       | 0.00014386 | No      |
|      |       |        |             |          |         | RGD1559891 | 0         | 2.81292  | inf              | 0.001        | 2.81392       | 11.4583656       | 0.00014386 | No      |
|      |       |        |             |          |         | RGD1559896 | 6.45212   | 28.7806  | 2.15725          | 6.45312      | 28.7816       | 2.15707804       | 0.00014386 | No      |
|      |       |        |             |          |         | RGD1559904 | 9.12319   | 3.76735  | -1.27599         | 9.12419      | 3.76835       | -1.2757635       | 0.00014386 | No      |
|      |       |        |             |          |         | RGD1559971 | 1.9807    | 0.814772 | -1.28154         | 1.9817       | 0.815772      | -1.2805007       | 0.00014386 | No      |
|      |       |        |             |          |         | RGD1560175 | 3.59128   | 1.5866   | -1.17856         | 3.59228      | 1.5876        | -1.1780523       | 0.00014386 | No      |
|      |       |        |             |          |         | RGD1560220 | 51.7079   | 102.532  | 0.987619         | 51.7089      | 102.533       | 0.98760379       | 0.00014386 | No      |
|      |       |        |             |          |         | RGD1560289 | 1.20141   | 0.194072 | -2.63006         | 1.20241      | 0.195072      | -2.6238503       | 0.00014386 | No      |
|      |       |        |             |          |         | RGD1560398 | 5.15608   | 21.2389  | 2.04236          | 5.15708      | 21.2399       | 2.04215064       | 0.00014386 | No      |
|      |       |        |             |          |         | RGD1560470 | 1.9472    | 0.563542 | -1.7888          | 1.9482       | 0.564542      | -1.786989        | 0.00014386 | No      |

| RRBS |       |        |             |          |         | RNAseq     |          |          |                  |              |               |                  |            |         |
|------|-------|--------|-------------|----------|---------|------------|----------|----------|------------------|--------------|---------------|------------------|------------|---------|
| gene | Blood | Kidney | methyl.diff | pMWU.fdr | Match ? | gene       | blood    | kidney   | log2(fold_ratio) | blood+ 0.001 | kidney+ 0.001 | log2(fold_ratio) | q_value    | Match ? |
|      |       |        |             |          |         | RGD1560557 | 8.80924  | 2.25918  | -1.96322         | 8.81024      | 2.26018       | -1.9627436       | 0.00014386 | No      |
|      |       |        |             |          |         | RGD1560648 | 228.04   | 424.406  | 0.896155         | 228.041      | 424.407       | 0.89615522       | 0.00014386 | No      |
|      |       |        |             |          |         | RGD1560687 | 3.58582  | 13.9481  | 1.9597           | 3.58682      | 13.9491       | 1.95939479       | 0.00014386 | No      |
|      |       |        |             |          |         | RGD1560718 | 0        | 0.856556 | inf              | 0.001        | 0.857556      | 9.74408707       | 0.00014386 | No      |
|      |       |        |             |          |         | RGD1560813 | 96.0172  | 64.8764  | -0.565599        | 96.0182      | 64.8774       | -0.5655919       | 0.00014386 | No      |
|      |       |        |             |          |         | RGD1560849 | 29.0481  | 0.158284 | -7.51978         | 29.0491      | 0.159284      | -7.5107483       | 0.00014386 | No      |
|      |       |        |             |          |         | RGD1560871 | 0.555183 | 1.94614  | 1.80958          | 0.556183     | 1.94714       | 1.80772506       | 0.00014386 | No      |
|      |       |        |             |          |         | RGD1560880 | 0.423096 | 4.71082  | 3.47692          | 0.424096     | 4.71182       | 3.47382165       | 0.00014386 | No      |
|      |       |        |             |          |         | RGD1560888 | 16.7951  | 9.46528  | -0.827327        | 16.7961      | 9.46628       | -0.8272568       | 0.00014386 | No      |
|      |       |        |             |          |         | RGD1561113 | 9.57138  | 57.2649  | 2.58085          | 9.57238      | 57.2659       | 2.58072674       | 0.00014386 | No      |
|      |       |        |             |          |         | RGD1561145 | 44.672   | 1.72959  | -4.69087         | 44.673       | 1.73059       | -4.6900673       | 0.00014386 | No      |
|      |       |        |             |          |         | RGD1561157 | 13.8542  | 5.08028  | -1.44734         | 13.8552      | 5.08128       | -1.4471637       | 0.00014386 | No      |
|      |       |        |             |          |         | RGD1561328 | 33.2786  | 65.8108  | 0.983729         | 33.2796      | 65.8118       | 0.98370819       | 0.00014386 | No      |
|      |       |        |             |          |         | RGD1561507 | 0.396082 | 9.5986   | 4.59895          | 0.397082     | 9.5996        | 4.59546542       | 0.00014386 | No      |
|      |       |        |             |          |         | RGD1561530 | 0        | 26.935   | inf              | 0.001        | 26.936        | 14.717248        | 0.00014386 | No      |
|      |       |        |             |          |         | RGD1561589 | 33.1536  | 46.978   | 0.50282          | 33.1546      | 46.979        | 0.50280695       | 0.00014386 | No      |
|      |       |        |             |          |         | RGD1561676 | 5.34536  | 0        | -inf             | 5.34636      | 0.001         | -12.384341       | 0.00014386 | No      |
|      |       |        |             |          |         | RGD1561796 | 0.505332 | 6.9482   | 3.78134          | 0.506332     | 6.9492        | 3.77869133       | 0.00014386 | No      |
|      |       |        |             |          |         | RGD1561909 | 0.506531 | 1.57996  | 1.64116          | 0.507531     | 1.58096       | 1.63923302       | 0.00014386 | No      |
|      |       |        |             |          |         | RGD1561963 | 84.8401  | 9.60319  | -3.14316         | 84.8411      | 9.60419       | -3.1430275       | 0.00014386 | No      |
|      |       |        |             |          |         | RGD1562037 | 2.29057  | 11.6121  | 2.34185          | 2.29157      | 11.6131       | 2.34134488       | 0.00014386 | No      |

| RRBS |       |        |             |          |         | RNAseq     |          |         |                  |              |               |                  |            |         |
|------|-------|--------|-------------|----------|---------|------------|----------|---------|------------------|--------------|---------------|------------------|------------|---------|
| gene | Blood | Kidney | methyl.diff | pMWU.fdr | Match ? | gene       | blood    | kidney  | log2(fold_ratio) | blood+ 0.001 | kidney+ 0.001 | log2(fold_ratio) | q_value    | Match ? |
|      |       |        |             |          |         | RGD1562084 | 0        | 18.2988 | inf              | 0.001        | 18.2998       | 14.1595403       | 0.00014386 | No      |
|      |       |        |             |          |         | RGD1562136 | 16.2448  | 30.244  | 0.89667          | 16.2458      | 30.245        | 0.89662987       | 0.00014386 | No      |
|      |       |        |             |          |         | RGD1562161 | 1.6772   | 0.46705 | -1.84441         | 1.6782       | 0.46805       | -1.8421801       | 0.00014386 | No      |
|      |       |        |             |          |         | RGD1562178 | 31.7442  | 75.5614 | 1.25116          | 31.7452      | 75.5624       | 1.25113006       | 0.00014386 | No      |
|      |       |        |             |          |         | RGD1562259 | 2.2351   | 0       | -inf             | 2.2361       | 0.001         | -11.126769       | 0.00014386 | No      |
|      |       |        |             |          |         | RGD1562390 | 168.719  | 42.7135 | -1.98186         | 168.72       | 42.7145       | -1.9818332       | 0.00014386 | No      |
|      |       |        |             |          |         | RGD1562409 | 6.14797  | 1.20324 | -2.35318         | 6.14897      | 1.20424       | -2.3522218       | 0.00014386 | No      |
|      |       |        |             |          |         | RGD1562469 | 7565.79  | 1458.37 | -2.37514         | 7565.791     | 1458.371      | -2.3751331       | 0.00014386 | No      |
|      |       |        |             |          |         | RGD1562618 | 0        | 18.8633 | inf              | 0.001        | 18.8643       | 14.2033709       | 0.00014386 | No      |
|      |       |        |             |          |         | RGD1562673 | 0        | 1.09786 | inf              | 0.001        | 1.09886       | 10.1017919       | 0.00014386 | No      |
|      |       |        |             |          |         | RGD1562987 | 56.1484  | 119.261 | 1.08681          | 56.1494      | 119.262       | 1.08679192       | 0.00014386 | No      |
|      |       |        |             |          |         | RGD1563084 | 1.94554  | 5.93944 | 1.61016          | 1.94654      | 5.94044       | 1.6096578        | 0.00014386 | No      |
|      |       |        |             |          |         | RGD1563150 | 0        | 1.10474 | inf              | 0.001        | 1.10574       | 10.1107965       | 0.00014386 | No      |
|      |       |        |             |          |         | RGD1563231 | 2.3692   | 0       | -inf             | 2.3702       | 0.001         | -11.210793       | 0.00014386 | No      |
|      |       |        |             |          |         | RGD1563319 | 0.101033 | 7.77054 | 6.26512          | 0.102033     | 7.77154       | 6.25109277       | 0.00014386 | No      |
|      |       |        |             |          |         | RGD1563547 | 0        | 218.413 | inf              | 0.001        | 218.414       | 17.7367058       | 0.00014386 | No      |
|      |       |        |             |          |         | RGD1563888 | 51.7475  | 2.93104 | -4.142           | 51.7485      | 2.93204       | -4.1415404       | 0.00014386 | No      |
|      |       |        |             |          |         | RGD1563941 | 9.45379  | 85.6202 | 3.17899          | 9.45479      | 85.6212       | 3.17885074       | 0.00014386 | No      |
|      |       |        |             |          |         | RGD1564074 | 0        | 1.47256 | inf              | 0.001        | 1.47356       | 10.5250901       | 0.00014386 | No      |
|      |       |        |             |          |         | RGD1564093 | 293.6    | 176.589 | -0.733453        | 293.601      | 176.59        | -0.7334532       | 0.00014386 | No      |
|      |       |        |             |          |         | RGD1564184 | 3.36821  | 0       | -inf             | 3.36921      | 0.001         | -11.718195       | 0.00014386 | No      |

| RRBS |       |        |             |          |         | RNAseq     |          |          |                  |              |               |                  |            |         |
|------|-------|--------|-------------|----------|---------|------------|----------|----------|------------------|--------------|---------------|------------------|------------|---------|
| gene | Blood | Kidney | methyl.diff | pMWU.fdr | Match ? | gene       | blood    | kidney   | log2(fold_ratio) | blood+ 0.001 | kidney+ 0.001 | log2(fold_ratio) | q_value    | Match ? |
|      |       |        |             |          |         | RGD1564212 | 2.01386  | 0        | -inf             | 2.01486      | 0.001         | -10.976464       | 0.00014386 | No      |
|      |       |        |             |          |         | RGD1564379 | 7.40641  | 26.9482  | 1.86334          | 7.40741      | 26.9492       | 1.86320135       | 0.00014386 | No      |
|      |       |        |             |          |         | RGD1564405 | 7.47364  | 0        | -inf             | 7.47464      | 0.001         | -12.867788       | 0.00014386 | No      |
|      |       |        |             |          |         | RGD1564419 | 0        | 9.69448  | inf              | 0.001        | 9.69548       | 13.2430966       | 0.00014386 | No      |
|      |       |        |             |          |         | RGD1564541 | 14.5415  | 7.8238   | -0.894236        | 14.5425      | 7.8248        | -0.8941495       | 0.00014386 | No      |
|      |       |        |             |          |         | RGD1564597 | 1.86393  | 0        | -inf             | 1.86493      | 0.001         | -10.864906       | 0.00014386 | No      |
|      |       |        |             |          |         | RGD1564804 | 6.99322  | 12.2929  | 0.813794         | 6.99422      | 12.2939       | 0.81370757       | 0.00014386 | No      |
|      |       |        |             |          |         | RGD1565183 | 6070.09  | 1593.13  | -1.92985         | 6070.091     | 1593.131      | -1.9298532       | 0.00014386 | No      |
|      |       |        |             |          |         | RGD1565222 | 3.42006  | 7.51381  | 1.13552          | 3.42106      | 7.51481       | 1.13529322       | 0.00014386 | No      |
|      |       |        |             |          |         | RGD1565252 | 2.91129  | 0        | -inf             | 2.91229      | 0.001         | -11.507938       | 0.00014386 | No      |
|      |       |        |             |          |         | RGD1565498 | 4.69618  | 2.12276  | -1.14554         | 4.69718      | 2.12376       | -1.1451741       | 0.00014386 | No      |
|      |       |        |             |          |         | RGD1565616 | 16.036   | 78.8739  | 2.29823          | 16.037       | 78.8749       | 2.29816199       | 0.00014386 | No      |
|      |       |        |             |          |         | RGD1565647 | 4.0242   | 0.801512 | -2.32791         | 4.0252       | 0.802512      | -2.3264656       | 0.00014386 | No      |
|      |       |        |             |          |         | RGD1565660 | 0        | 4.38289  | inf              | 0.001        | 4.38389       | 12.0979959       | 0.00014386 | No      |
|      |       |        |             |          |         | RGD1565766 | 2.00906  | 4.56465  | 1.18399          | 2.01006      | 4.56565       | 1.1835817        | 0.00014386 | No      |
|      |       |        |             |          |         | RGD1565775 | 45.7522  | 16.1867  | -1.49903         | 45.7532      | 16.1877       | -1.4989746       | 0.00014386 | No      |
|      |       |        |             |          |         | RGD1565785 | 0.714499 | 0        | -inf             | 0.715499     | 0.001         | -9.4828059       | 0.00014386 | No      |
|      |       |        |             |          |         | RGD1566099 | 5.67222  | 16.6733  | 1.55555          | 5.67322      | 16.6743       | 1.55538648       | 0.00014386 | No      |
|      |       |        |             |          |         | RGD1566243 | 18.5188  | 1.21272  | -3.93268         | 18.5198      | 1.21372       | -3.931561        | 0.00014386 | No      |
|      |       |        |             |          |         | RGD1566320 | 22.9089  | 37.5608  | 0.713319         | 22.9099      | 37.5618       | 0.71329504       | 0.00014386 | No      |
|      |       |        |             |          |         | RGD1566344 | 480.716  | 144.57   | -1.73342         | 480.717      | 144.571       | -1.7334096       | 0.00014386 | No      |

| RRBS |       |        |             |          |         | RNAseq     |           |          |                  |              |               |                  |            |         |
|------|-------|--------|-------------|----------|---------|------------|-----------|----------|------------------|--------------|---------------|------------------|------------|---------|
| gene | Blood | Kidney | methyl.diff | pMWU.fdr | Match ? | gene       | blood     | kidney   | log2(fold_ratio) | blood+ 0.001 | kidney+ 0.001 | log2(fold_ratio) | q_value    | Match ? |
|      |       |        |             |          |         | RGD1566368 | 0.106439  | 12.9013  | 6.92134          | 0.107439     | 12.9023       | 6.90796668       | 0.00014386 | No      |
|      |       |        |             |          |         | RGD1566386 | 1.91073   | 3.58232  | 0.906772         | 1.91173      | 3.58332       | 0.9064181        | 0.00014386 | No      |
|      |       |        |             |          |         | Rgl2       | 114.343   | 55.5297  | -1.04203         | 114.344      | 55.5307       | -1.0420232       | 0.00014386 | No      |
|      |       |        |             |          |         | Rgmb       | 0.528197  | 7.51415  | 3.83046          | 0.529197     | 7.51515       | 3.82792511       | 0.00014386 | No      |
|      |       |        |             |          |         | Rgs1       | 56.9806   | 14.8848  | -1.93663         | 56.9816      | 14.8858       | -1.9365594       | 0.00014386 | No      |
|      |       |        |             |          |         | Rgs10      | 233.387   | 11.2282  | -4.37752         | 233.388      | 11.2292       | -4.3774033       | 0.00014386 | No      |
|      |       |        |             |          |         | Rgs11      | 0.111195  | 4.35163  | 5.2904           | 0.112195     | 4.35263       | 5.2778071        | 0.00014386 | No      |
|      |       |        |             |          |         | Rgs14      | 44.168    | 3.72084  | -3.5693          | 44.169       | 3.72184       | -3.5689462       | 0.00014386 | No      |
|      |       |        |             |          |         | Rgs19      | 47.7217   | 5.2759   | -3.17715         | 47.7227      | 5.2769        | -3.1769131       | 0.00014386 | No      |
|      |       |        |             |          |         | RGS6       | 0.153971  | 3.57553  | 4.53743          | 0.154971     | 3.57653       | 4.52849037       | 0.00014386 | No      |
|      |       |        |             |          |         | Rgs9       | 1.12333   | 3.86424  | 1.7824           | 1.12433      | 3.86524       | 1.78149246       | 0.00014386 | No      |
|      |       |        |             |          |         | Rhbdd2     | 8.0031    | 18.9078  | 1.24035          | 8.0041       | 18.9088       | 1.24024671       | 0.00014386 | No      |
|      |       |        |             |          |         | Rhbdf1     | 0.0727427 | 29.5224  | 8.66479          | 0.0737427    | 29.5234       | 8.64514292       | 0.00014386 | No      |
|      |       |        |             |          |         | Rhbdl2     | 0         | 5.80862  | inf              | 0.001        | 5.80962       | 12.5042281       | 0.00014386 | No      |
|      |       |        |             |          |         | Rhbdl3     | 0.248601  | 11.8285  | 5.57229          | 0.249601     | 11.8295       | 5.56662157       | 0.00014386 | No      |
|      |       |        |             |          |         | Rhbg       | 1.46883   | 13.1437  | 3.16163          | 1.46983      | 13.1447       | 3.16076001       | 0.00014386 | No      |
|      |       |        |             |          |         | Rheb       | 80.8192   | 154.948  | 0.939018         | 80.8202      | 154.949       | 0.93900562       | 0.00014386 | No      |
|      |       |        |             |          |         | Rhebl1     | 11.9972   | 2.29269  | -2.38759         | 11.9982      | 2.29369       | -2.3870757       | 0.00014386 | No      |
|      |       |        |             |          |         | Rhoa       | 492.87    | 316.884  | -0.637255        | 492.871      | 316.885       | -0.6372507       | 0.00014386 | No      |
|      |       |        |             |          |         | Rhob       | 37.2572   | 230.34   | 2.62817          | 37.2582      | 230.341       | 2.62814135       | 0.00014386 | No      |
|      |       |        |             |          |         | Rhobtb2    | 2.16449   | 4.31035  | 0.993778         | 2.16549      | 4.31135       | 0.99344618       | 0.00014386 | No      |
|      |       |        |             |          |         | Rhod       | 0         | 44.8558  | inf              | 0.001        | 44.8568       | 15.4530391       | 0.00014386 | No      |
|      |       |        |             |          |         | Rhof       | 113.486   | 21.7236  | -2.38518         | 113.487      | 21.7246       | -2.3851255       | 0.00014386 | No      |
|      |       |        |             |          |         | Rhog       | 264.838   | 51.2003  | -2.37089         | 264.839      | 51.2013       | -2.3708632       | 0.00014386 | No      |
|      |       |        |             |          |         | Rhoq       | 5.93691   | 17.4114  | 1.55225          | 5.93791      | 17.4124       | 1.55208794       | 0.00014386 | No      |
|      |       |        |             |          |         | Rhot2      | 29.0802   | 47.6843  | 0.713476         | 29.0812      | 47.6853       | 0.71345779       | 0.00014386 | No      |
|      |       |        |             |          |         | Rhov       | 0.340637  | 1.46867  | 2.1082           | 0.341637     | 1.46967       | 2.10495611       | 0.00014386 | No      |
|      |       |        |             |          |         | Ribc1      | 1.43151   | 6.17005  | 2.10775          | 1.43251      | 6.17105       | 2.10697077       | 0.00014386 | No      |
|      |       |        |             |          |         | Ric8b      | 13.6242   | 8.77913  | -0.634017        | 13.6252      | 8.78013       | -0.6339632       | 0.00014386 | No      |
|      |       |        |             |          |         | Rictor     | 17.75     | 2.32866  | -2.93025         | 17.751       | 2.32966       | -2.929709        | 0.00014386 | No      |
|      |       |        |             |          |         | Rif1       | 10.0693   | 4.20881  | -1.25848         | 10.0703      | 4.20981       | -1.2582796       | 0.00014386 | No      |
|      |       |        |             |          |         | Rilp       | 0.498221  | 18.7148  | 5.23125          | 0.499221     | 18.7158       | 5.22843428       | 0.00014386 | No      |
|      |       |        |             |          |         | Rilpl2     | 272.269   | 84.8376  | -1.68226         | 272.27       | 84.8386       | -1.6822453       | 0.00014386 | No      |
|      |       |        |             |          |         | Rims2      | 0.0198682 | 0.928727 | 5.54672          | 0.0208682    | 0.929727      | 5.47742908       | 0.00014386 | No      |
|      |       |        |             |          |         | Rin2       | 0.0942829 | 35.8477  | 8.57067          | 0.0952829    | 35.8487       | 8.55548776       | 0.00014386 | No      |
|      |       |        |             |          |         | Rin3       | 39.5638   | 11.1653  | -1.82515         | 39.5648      | 11.1663       | -1.8250662       | 0.00014386 | No      |
|      |       |        |             |          |         | Ring1      | 35.439    | 50.9173  | 0.522816         | 35.44        | 50.9183       | 0.52280565       | 0.00014386 | No      |
|      |       |        |             |          |         | Rinl       | 31.7494   | 4.65086  | -2.77116         | 31.7504      | 4.65186       | -2.7708952       | 0.00014386 | No      |
|      |       |        |             |          |         | Riok1      | 25.7734   | 12.189   | -1.0803          | 25.7744      | 12.19         | -1.0802407       | 0.00014386 | No      |
|      |       |        |             |          |         | Riok2      | 16.733    | 10.1206  | -0.725399        | 16.734       | 10.1216       | -0.725345        | 0.00014386 | No      |

| RRBS |       |        |             |          |         | RNAseq   |           |          |                  |              |               |                  |            |         |
|------|-------|--------|-------------|----------|---------|----------|-----------|----------|------------------|--------------|---------------|------------------|------------|---------|
| gene | Blood | Kidney | methyl.diff | pMWU.fdr | Match ? | gene     | blood     | kidney   | log2(fold_ratio) | blood+ 0.001 | kidney+ 0.001 | log2(fold_ratio) | q_value    | Match ? |
|      |       |        |             |          |         | Riok3    | 43.1994   | 27.6588  | -0.643274        | 43.2004      | 27.6598       | -0.6432539       | 0.00014386 | No      |
|      |       |        |             |          |         | Ripk1    | 20.2232   | 10.5593  | -0.937495        | 20.2242      | 10.5603       | -0.9374318       | 0.00014386 | No      |
|      |       |        |             |          |         | Ripk2    | 15.3194   | 3.67563  | -2.0593          | 15.3204      | 3.67663       | -2.0589981       | 0.00014386 | No      |
|      |       |        |             |          |         | Ripk3    | 32.9572   | 10.519   | -1.6476          | 32.9582      | 10.52         | -1.6475027       | 0.00014386 | No      |
|      |       |        |             |          |         | Rlf      | 20.8722   | 4.04374  | -2.36782         | 20.8732      | 4.04474       | -2.3675329       | 0.00014386 | No      |
|      |       |        |             |          |         | Rmdn1    | 3.16388   | 34.9547  | 3.46572          | 3.16488      | 34.9557       | 3.46530502       | 0.00014386 | No      |
|      |       |        |             |          |         | Rmdn2    | 0.922901  | 2.80696  | 1.60476          | 0.923901     | 2.80796       | 1.60371221       | 0.00014386 | No      |
|      |       |        |             |          |         | Rmdn3    | 8.0347    | 15.7885  | 0.974554         | 8.0357       | 15.7895       | 0.97446988       | 0.00014386 | No      |
|      |       |        |             |          |         | Rmnd1    | 30.6623   | 18.3889  | -0.737632        | 30.6633      | 18.3899       | -0.7375993       | 0.00014386 | No      |
|      |       |        |             |          |         | Rmnd5a   | 52.8163   | 26.4511  | -0.997653        | 52.8173      | 26.4521       | -0.9976283       | 0.00014386 | No      |
|      |       |        |             |          |         | Rnaseh1  | 22.2148   | 9.68668  | -1.19745         | 22.2158      | 9.68768       | -1.197363        | 0.00014386 | No      |
|      |       |        |             |          |         | Rnaseh2b | 55.1737   | 25.7706  | -1.09826         | 55.1747      | 25.7716       | -1.0982248       | 0.00014386 | No      |
|      |       |        |             |          |         | Rnasek   | 115.81    | 345.406  | 1.57654          | 115.811      | 345.407       | 1.57652503       | 0.00014386 | No      |
|      |       |        |             |          |         | Rnd1     | 0.565283  | 6.19313  | 3.45363          | 0.566283     | 6.19413       | 3.45130654       | 0.00014386 | No      |
|      |       |        |             |          |         | Rnd3     | 0.1275    | 19.7471  | 7.275            | 0.1285       | 19.7481       | 7.26380169       | 0.00014386 | No      |
|      |       |        |             |          |         | Rnf103   | 7.34017   | 13.9196  | 0.923237         | 7.34117      | 13.9206       | 0.92313948       | 0.00014386 | No      |
|      |       |        |             |          |         | Rnf111   | 28.2274   | 9.42734  | -1.58217         | 28.2284      | 9.42834       | -1.5820717       | 0.00014386 | No      |
|      |       |        |             |          |         | Rnf113a1 | 7.65456   | 3.65499  | -1.06645         | 7.65556      | 3.65599       | -1.0662458       | 0.00014386 | No      |
|      |       |        |             |          |         | Rnf115   | 52.4761   | 20.1391  | -1.38166         | 52.4771      | 20.1401       | -1.3816171       | 0.00014386 | No      |
|      |       |        |             |          |         | Rnf11l   | 1.78448   | 5.67862  | 1.67003          | 1.78548      | 5.67962       | 1.66948243       | 0.00014386 | No      |
|      |       |        |             |          |         | RNF125   | 24.9963   | 0.992108 | -4.65507         | 24.9973      | 0.993108      | -4.6536778       | 0.00014386 | No      |
|      |       |        |             |          |         | Rnf128   | 0.0594778 | 35.6653  | 9.22796          | 0.0604778    | 35.6663       | 9.20394018       | 0.00014386 | No      |
|      |       |        |             |          |         | Rnf13    | 45.9463   | 29.7471  | -0.627197        | 45.9473      | 29.7481       | -0.6271826       | 0.00014386 | No      |
|      |       |        |             |          |         | Rnf135   | 12.245    | 4.18023  | -1.55054         | 12.246       | 4.18123       | -1.5503113       | 0.00014386 | No      |
|      |       |        |             |          |         | Rnf138   | 21.5994   | 5.72297  | -1.91616         | 21.6004      | 5.72397       | -1.91597         | 0.00014386 | No      |
|      |       |        |             |          |         | Rnf14    | 90.4921   | 29.5093  | -1.61662         | 90.4931      | 29.5103       | -1.6165892       | 0.00014386 | No      |
|      |       |        |             |          |         | rnf141   | 4.00034   | 11.4959  | 1.52292          | 4.00134      | 11.4969       | 1.52268978       | 0.00014386 | No      |
|      |       |        |             |          |         | Rnf144a  | 2.79008   | 0.841035 | -1.73007         | 2.79108      | 0.842035      | -1.7288714       | 0.00014386 | No      |
|      |       |        |             |          |         | Rnf144b  | 2.24331   | 3.92716  | 0.807859         | 2.24431      | 3.92816       | 0.80758173       | 0.00014386 | No      |
|      |       |        |             |          |         | Rnf145   | 90.7489   | 14.3405  | -2.66179         | 90.7499      | 14.3415       | -2.6617001       | 0.00014386 | No      |
|      |       |        |             |          |         | Rnf146   | 41.4752   | 16.7441  | -1.3086          | 41.4762      | 16.7451       | -1.3085447       | 0.00014386 | No      |
|      |       |        |             |          |         | Rnf149   | 37.5933   | 18.663   | -1.0103          | 37.5943      | 18.664        | -1.0102557       | 0.00014386 | No      |
|      |       |        |             |          |         | Rnf157   | 26.7463   | 1.83448  | -3.86589         | 26.7473      | 1.83548       | -3.865164        | 0.00014386 | No      |
|      |       |        |             |          |         | Rnf167   | 124.864   | 53.8246  | -1.21402         | 124.865      | 53.8256       | -1.2140047       | 0.00014386 | No      |
|      |       |        |             |          |         | Rnf168   | 10.6369   | 5.64028  | -0.915243        | 10.6379      | 5.64128       | -0.9151189       | 0.00014386 | No      |
|      |       |        |             |          |         | Rnf169   | 3.60756   | 0.568246 | -2.66643         | 3.60856      | 0.569246      | -2.6642991       | 0.00014386 | No      |
|      |       |        |             |          |         | Rnf180   | 0         | 1.34864  | inf              | 0.001        | 1.34964       | 10.3983589       | 0.00014386 | No      |
|      |       |        |             |          |         | Rnf181   | 41.9176   | 67.7832  | 0.693372         | 41.9186      | 67.7842       | 0.6933585        | 0.00014386 | No      |
|      |       |        |             |          |         | Rnf183   | 0         | 32.2273  | inf              | 0.001        | 32.2283       | 14.9760405       | 0.00014386 | No      |
|      |       |        |             |          |         | Rnf185   | 5.67484   | 16.9024  | 1.57458          | 5.67584      | 16.9034       | 1.57440764       | 0.00014386 | No      |
|      |       |        |             |          |         | Rnf187   | 77.1239   | 109.013  | 0.499244         | 77.1249      | 109.014       | 0.4992448        | 0.00014386 | No      |
|      |       |        |             |          |         | Rnf19a   | 11.4114   | 16.8421  | 0.561599         | 11.4124      | 16.8431       | 0.56155547       | 0.00014386 | No      |



| RRBS |       |        |             |          |         | RNAseq |         |         |                  |              |               |                  |            |         |
|------|-------|--------|-------------|----------|---------|--------|---------|---------|------------------|--------------|---------------|------------------|------------|---------|
| gene | Blood | Kidney | methyl.diff | pMWU.fdr | Match ? | gene   | blood   | kidney  | log2(fold_ratio) | blood+ 0.001 | kidney+ 0.001 | log2(fold_ratio) | q_value    | Match ? |
|      |       |        |             |          |         | Rnf19b | 38.845  | 12.665  | -1.61688         | 38.846       | 12.666        | -1.6168051       | 0.00014386 | No      |
|      |       |        |             |          |         | Rnf2   | 29.007  | 9.4125  | -1.62375         | 29.008       | 9.4135        | -1.6236477       | 0.00014386 | No      |
|      |       |        |             |          |         | Rnf20  | 22.0945 | 9.12035 | -1.27653         | 22.0955      | 9.12135       | -1.2764333       | 0.00014386 | No      |
|      |       |        |             |          |         | Rnf208 | 2.00282 | 25.4182 | 3.66575          | 2.00382      | 25.4192       | 3.6650938        | 0.00014386 | No      |
|      |       |        |             |          |         | Rnf213 | 48.8096 | 10.0069 | -2.28617         | 48.8106      | 10.0079       | -2.2860552       | 0.00014386 | No      |
|      |       |        |             |          |         | Rnf214 | 10.1848 | 15.5641 | 0.611803         | 10.1858      | 15.5651       | 0.61175555       | 0.00014386 | No      |
|      |       |        |             |          |         | Rnf215 | 7.99997 | 16.0542 | 1.00488          | 8.00097      | 16.0552       | 1.00479382       | 0.00014386 | No      |
|      |       |        |             |          |         | Rnf217 | 4.32586 | 12.011  | 1.4733           | 4.32686      | 12.012        | 1.47308403       | 0.00014386 | No      |
|      |       |        |             |          |         | Rnf219 | 5.01549 | 1.32429 | -1.92117         | 5.01649      | 1.32529       | -1.9203702       | 0.00014386 | No      |
|      |       |        |             |          |         | Rnf220 | 94.8029 | 36.13   | -1.39174         | 94.8039      | 36.131        | -1.3917092       | 0.00014386 | No      |
|      |       |        |             |          |         | Rnf38  | 26.1461 | 7.40986 | -1.81908         | 26.1471      | 7.41086       | -1.8189381       | 0.00014386 | No      |
|      |       |        |             |          |         | Rnf41  | 6.50926 | 10.7701 | 0.726467         | 6.51026      | 10.7711       | 0.72637853       | 0.00014386 | No      |
|      |       |        |             |          |         | Rnf43  | 2.13332 | 4.52234 | 1.08397          | 2.13432      | 4.52334       | 1.08361194       | 0.00014386 | No      |
|      |       |        |             |          |         | Rnf44  | 80.8038 | 21.0807 | -1.9385          | 80.8048      | 21.0817       | -1.9384498       | 0.00014386 | No      |
|      |       |        |             |          |         | Rnf5   | 38.0137 | 123.539 | 1.70037          | 38.0147      | 123.54        | 1.70034892       | 0.00014386 | No      |
|      |       |        |             |          |         | Rnf7   | 23.9933 | 38.7763 | 0.692546         | 23.9943      | 38.7773       | 0.69252063       | 0.00014386 | No      |
|      |       |        |             |          |         | Rnft1  | 18.9961 | 5.57717 | -1.76809         | 18.9971      | 5.57817       | -1.7679154       | 0.00014386 | No      |
|      |       |        |             |          |         | Rnls   | 4.80939 | 10.7423 | 1.15938          | 4.81039      | 10.7433       | 1.15921144       | 0.00014386 | No      |
|      |       |        |             |          |         | RNMT   | 23.7266 | 5.20042 | -2.18981         | 23.7276      | 5.20142       | -2.1895887       | 0.00014386 | No      |
|      |       |        |             |          |         | Rnpep  | 8.9262  | 55.5547 | 2.63779          | 8.9272       | 55.5557       | 2.63765529       | 0.00014386 | No      |
|      |       |        |             |          |         | Rnps1  | 153.356 | 73.091  | -1.06912         | 153.357      | 73.092        | -1.0691086       | 0.00014386 | No      |
|      |       |        |             |          |         | Robo3  | 0       | 5.01791 | inf              | 0.001        | 5.01891       | 12.2931584       | 0.00014386 | No      |
|      |       |        |             |          |         | Rock1  | 31.0288 | 8.01479 | -1.95287         | 31.0298      | 8.01579       | -1.9527378       | 0.00014386 | No      |
|      |       |        |             |          |         | Romo1  | 137.73  | 376.293 | 1.45002          | 137.731      | 376.294       | 1.45000697       | 0.00014386 | No      |
|      |       |        |             |          |         | Ror1   | 0       | 1.97868 | inf              | 0.001        | 1.97968       | 10.9510515       | 0.00014386 | No      |
|      |       |        |             |          |         | RORC   | 1.82772 | 15.3613 | 3.07119          | 1.82872      | 15.3623       | 3.07048813       | 0.00014386 | No      |
|      |       |        |             |          |         | Rp2    | 7.34014 | 4.11984 | -0.833217        | 7.34114      | 4.12084       | -0.8330657       | 0.00014386 | No      |
|      |       |        |             |          |         | Rpa2   | 54.4533 | 11.8438 | -2.20089         | 54.4543      | 11.8448       | -2.2007921       | 0.00014386 | No      |
|      |       |        |             |          |         | Rpap1  | 10.6698 | 4.01149 | -1.41133         | 10.6708      | 4.01249       | -1.4110986       | 0.00014386 | No      |
|      |       |        |             |          |         | Rpap2  | 24.7834 | 10.5978 | -1.22561         | 24.7844      | 10.5988       | -1.2255314       | 0.00014386 | No      |
|      |       |        |             |          |         | Rpap3  | 33.4889 | 17.2611 | -0.956155        | 33.4899      | 17.2621       | -0.9561181       | 0.00014386 | No      |
|      |       |        |             |          |         | Rpe    | 21.8245 | 14.0874 | -0.631542        | 21.8255      | 14.0884       | -0.6315069       | 0.00014386 | No      |
|      |       |        |             |          |         | Rpf2   | 34.906  | 11.7802 | -1.56711         | 34.907       | 11.7812       | -1.5670299       | 0.00014386 | No      |
|      |       |        |             |          |         | RPGR   | 2.90955 | 5.33356 | 0.874302         | 2.91055      | 5.33456       | 0.87407748       | 0.00014386 | No      |
|      |       |        |             |          |         | Rpia   | 19.6018 | 11.9954 | -0.708509        | 19.6028      | 11.9964       | -0.7084582       | 0.00014386 | No      |
|      |       |        |             |          |         | Rpl10  | 3175.04 | 759.781 | -2.06312         | 3175.041     | 759.782       | -2.0631178       | 0.00014386 | No      |
|      |       |        |             |          |         | RPL12  | 3640.41 | 641.428 | -2.50474         | 3640.411     | 641.429       | -2.5047399       | 0.00014386 | No      |
|      |       |        |             |          |         | Rpl13a | 6685.27 | 1834.35 | -1.86572         | 6685.271     | 1834.351      | -1.8657163       | 0.00014386 | No      |
|      |       |        |             |          |         | Rpl14  | 3345.63 | 905.842 | -1.88495         | 3345.631     | 905.843       | -1.8849454       | 0.00014386 | No      |
|      |       |        |             |          |         | Rpl15  | 3137.77 | 510.163 | -2.62071         | 3137.771     | 510.164       | -2.6207071       | 0.00014386 | No      |
|      |       |        |             |          |         | Rpl17  | 6040.16 | 1084.62 | -2.4774          | 6040.161     | 1084.621      | -2.477396        | 0.00014386 | No      |
|      |       |        |             |          |         | Rpl18  | 2869.54 | 1023.66 | -1.48708         | 2869.541     | 1023.661      | -1.487082        | 0.00014386 | No      |

| RRBS |       |        |             |          |         | RNAseq    |         |         |                  |              |               |                  |            |         |
|------|-------|--------|-------------|----------|---------|-----------|---------|---------|------------------|--------------|---------------|------------------|------------|---------|
| gene | Blood | Kidney | methyl.diff | pMWU.fdr | Match ? | gene      | blood   | kidney  | log2(fold_ratio) | blood+ 0.001 | kidney+ 0.001 | log2(fold_ratio) | q_value    | Match ? |
|      |       |        |             |          |         | Rpl19     | 6223.71 | 1552.79 | -2.00291         | 6223.711     | 1552.791      | -2.0029114       | 0.00014386 | No      |
|      |       |        |             |          |         | Rpl21     | 845.521 | 185.072 | -2.19176         | 845.522      | 185.073       | -2.1917479       | 0.00014386 | No      |
|      |       |        |             |          |         | Rpl22     | 1846.23 | 431.562 | -2.09694         | 1846.231     | 431.563       | -2.09694         | 0.00014386 | No      |
|      |       |        |             |          |         | Rpl22l1   | 383.606 | 159.63  | -1.26489         | 383.607      | 159.631       | -1.2648882       | 0.00014386 | No      |
|      |       |        |             |          |         | Rpl23     | 6865.42 | 1140.69 | -2.58944         | 6865.421     | 1140.691      | -2.5894402       | 0.00014386 | No      |
|      |       |        |             |          |         | Rpl23a    | 5669.33 | 1141.4  | -2.31237         | 5669.331     | 1141.401      | -2.3123728       | 0.00014386 | No      |
|      |       |        |             |          |         | Rpl24     | 4988.88 | 1121.26 | -2.15359         | 4988.881     | 1121.261      | -2.1535941       | 0.00014386 | No      |
|      |       |        |             |          |         | RPL26     | 8826.14 | 1742.62 | -2.34052         | 8826.141     | 1742.621      | -2.340524        | 0.00014386 | No      |
|      |       |        |             |          |         | Rpl27     | 3991.74 | 1160.55 | -1.78221         | 3991.741     | 1160.551      | -1.7822082       | 0.00014386 | No      |
|      |       |        |             |          |         | Rpl27a    | 2604.22 | 660.595 | -1.97901         | 2604.221     | 660.596       | -1.9790117       | 0.00014386 | No      |
|      |       |        |             |          |         | Rpl29     | 3684.09 | 1082.68 | -1.7667          | 3684.091     | 1082.681      | -1.7667005       | 0.00014386 | No      |
|      |       |        |             |          |         | Rpl3      | 2939.37 | 673.22  | -2.12636         | 2939.371     | 673.221       | -2.1263554       | 0.00014386 | No      |
|      |       |        |             |          |         | Rpl30     | 7794.99 | 1326.3  | -2.55514         | 7794.991     | 1326.301      | -2.5551391       | 0.00014386 | No      |
|      |       |        |             |          |         | Rpl31     | 3056.95 | 474.712 | -2.68697         | 3056.951     | 474.713       | -2.686966        | 0.00014386 | No      |
|      |       |        |             |          |         | Rpl32     | 7585.2  | 1539.05 | -2.30114         | 7585.201     | 1539.051      | -2.3011464       | 0.00014386 | No      |
|      |       |        |             |          |         | Rpl32-ps1 | 20.2541 | 5.78696 | -1.80734         | 20.2551      | 5.78796       | -1.8071584       | 0.00014386 | No      |
|      |       |        |             |          |         | Rpl34     | 4907.47 | 1213.02 | -2.01638         | 4907.471     | 1213.021      | -2.0163752       | 0.00014386 | No      |
|      |       |        |             |          |         | Rpl35     | 10040   | 2323    | -2.11169         | 10040.001    | 2323.001      | -2.1116977       | 0.00014386 | No      |
|      |       |        |             |          |         | Rpl35a    | 1683.08 | 235.326 | -2.83837         | 1683.081     | 235.327       | -2.8383658       | 0.00014386 | No      |
|      |       |        |             |          |         | Rpl36     | 3636.77 | 1486.97 | -1.29028         | 3636.771     | 1486.971      | -1.2902816       | 0.00014386 | No      |
|      |       |        |             |          |         | Rpl36a    | 3534.38 | 434.856 | -3.02285         | 3534.381     | 434.857       | -3.0228446       | 0.00014386 | No      |
|      |       |        |             |          |         | Rpl36al   | 1228.69 | 669.179 | -0.876663        | 1228.691     | 669.18        | -0.8766559       | 0.00014386 | No      |
|      |       |        |             |          |         | Rpl36-ps3 | 59.7516 | 7.75314 | -2.94612         | 59.7526      | 7.75414       | -2.9459628       | 0.00014386 | No      |
|      |       |        |             |          |         | Rpl37     | 4690.96 | 1152.43 | -2.0252          | 4690.961     | 1152.431      | -2.0252031       | 0.00014386 | No      |
|      |       |        |             |          |         | RPL37A    | 7139.98 | 1239.54 | -2.52611         | 7139.981     | 1239.541      | -2.5261142       | 0.00014386 | No      |
|      |       |        |             |          |         | Rpl39     | 6871.79 | 1483.5  | -2.21168         | 6871.791     | 1483.501      | -2.2116803       | 0.00014386 | No      |
|      |       |        |             |          |         | Rpl4      | 3560.42 | 576.699 | -2.62616         | 3560.421     | 576.7         | -2.6261549       | 0.00014386 | No      |
|      |       |        |             |          |         | Rpl41     | 17353.6 | 6805.36 | -1.3505          | 17353.601    | 6805.361      | -1.3504915       | 0.00014386 | No      |
|      |       |        |             |          |         | Rpl5      | 5440.45 | 875.489 | -2.63556         | 5440.451     | 875.49        | -2.6355636       | 0.00014386 | No      |
|      |       |        |             |          |         | Rpl7      | 5086.51 | 1046.42 | -2.28121         | 5086.511     | 1046.421      | -2.281213        | 0.00014386 | No      |
|      |       |        |             |          |         | Rpl7l1    | 68.8979 | 37.9347 | -0.86094         | 68.8989      | 37.9357       | -0.8609248       | 0.00014386 | No      |
|      |       |        |             |          |         | Rpl8      | 420.321 | 96.4621 | -2.12346         | 420.322      | 96.4631       | -2.1234459       | 0.00014386 | No      |
|      |       |        |             |          |         | Rpl9      | 5903.85 | 1155.23 | -2.35348         | 5903.851     | 1155.231      | -2.3534749       | 0.00014386 | No      |
|      |       |        |             |          |         | Rplp1     | 2202.51 | 544.706 | -2.0156          | 2202.511     | 544.707       | -2.0155969       | 0.00014386 | No      |
|      |       |        |             |          |         | RPLP2     | 134.723 | 768.168 | 2.51142          | 134.724      | 768.169       | 2.51141687       | 0.00014386 | No      |
|      |       |        |             |          |         | Rpp21     | 135.974 | 50.6253 | -1.42541         | 135.975      | 50.6263       | -1.4253825       | 0.00014386 | No      |
|      |       |        |             |          |         | Rpp30     | 15.1864 | 9.32783 | -0.70317         | 15.1874      | 9.32883       | -0.7031069       | 0.00014386 | No      |
|      |       |        |             |          |         | Rpp40     | 37.1799 | 13.6878 | -1.44163         | 37.1809      | 13.6888       | -1.4415657       | 0.00014386 | No      |
|      |       |        |             |          |         | Rprd1b    | 6.54765 | 9.57748 | 0.54867          | 6.54865      | 9.57848       | 0.54859921       | 0.00014386 | No      |
|      |       |        |             |          |         | Rprd2     | 15.1552 | 2.2765  | -2.73493         | 15.1562      | 2.2775        | -2.7343851       | 0.00014386 | No      |
|      |       |        |             |          |         | Rps10     | 2814    | 662.161 | -2.08737         | 2814.001     | 662.162       | -2.0873667       | 0.00014386 | No      |
|      |       |        |             |          |         | Rps10l1   | 247.556 | 64.4168 | -1.94225         | 247.557      | 64.4178       | -1.9422294       | 0.00014386 | No      |

| RRBS |       |        |             |          |         | RNAseq   |          |         |                  |              |               |                  |            |         |
|------|-------|--------|-------------|----------|---------|----------|----------|---------|------------------|--------------|---------------|------------------|------------|---------|
| gene | Blood | Kidney | methyl.diff | pMWU.fdr | Match ? | gene     | blood    | kidney  | log2(fold_ratio) | blood+ 0.001 | kidney+ 0.001 | log2(fold_ratio) | q_value    | Match ? |
|      |       |        |             |          |         | Rps11    | 8925.3   | 1151.17 | -2.9548          | 8925.301     | 1151.171      | -2.9547987       | 0.00014386 | No      |
|      |       |        |             |          |         | Rps12    | 6855.25  | 1523.9  | -2.16944         | 6855.251     | 1523.901      | -2.1694403       | 0.00014386 | No      |
|      |       |        |             |          |         | RPS13    | 31.1057  | 3.43613 | -3.17833         | 31.1067      | 3.43713       | -3.177949        | 0.00014386 | No      |
|      |       |        |             |          |         | Rps14    | 4244.16  | 917.548 | -2.20962         | 4244.161     | 917.549       | -2.2096223       | 0.00014386 | No      |
|      |       |        |             |          |         | Rps15    | 6462.97  | 1403.65 | -2.20301         | 6462.971     | 1403.651      | -2.2030132       | 0.00014386 | No      |
|      |       |        |             |          |         | Rps15a   | 6462.37  | 959.628 | -2.75152         | 6462.371     | 959.629       | -2.7515149       | 0.00014386 | No      |
|      |       |        |             |          |         | Rps15a4  | 45.1664  | 11.6606 | -1.95361         | 45.1674      | 11.6616       | -1.9535161       | 0.00014386 | No      |
|      |       |        |             |          |         | Rps16    | 6502.89  | 1155.33 | -2.49277         | 6502.891     | 1155.331      | -2.492775        | 0.00014386 | No      |
|      |       |        |             |          |         | Rps18    | 9022.13  | 1696.06 | -2.41128         | 9022.131     | 1696.061      | -2.4112802       | 0.00014386 | No      |
|      |       |        |             |          |         | Rps19bp1 | 70.8201  | 102.149 | 0.528443         | 70.8211      | 102.15        | 0.52843805       | 0.00014386 | No      |
|      |       |        |             |          |         | Rps2     | 3142.34  | 837.45  | -1.90776         | 3142.341     | 837.451       | -1.9077631       | 0.00014386 | No      |
|      |       |        |             |          |         | Rps20    | 3785.61  | 1091.53 | -1.79418         | 3785.611     | 1091.531      | -1.7941731       | 0.00014386 | No      |
|      |       |        |             |          |         | Rps21    | 4569.89  | 1196.25 | -1.93364         | 4569.891     | 1196.251      | -1.9336396       | 0.00014386 | No      |
|      |       |        |             |          |         | Rps23    | 8293.25  | 1246.33 | -2.73425         | 8293.251     | 1246.331      | -2.7342505       | 0.00014386 | No      |
|      |       |        |             |          |         | Rps24    | 10203.2  | 1749.04 | -2.54439         | 10203.201    | 1749.041      | -2.5443858       | 0.00014386 | No      |
|      |       |        |             |          |         | Rps25    | 3918.94  | 805.619 | -2.2823          | 3918.941     | 805.62        | -2.2822924       | 0.00014386 | No      |
|      |       |        |             |          |         | Rps26    | 5407.51  | 1275.25 | -2.08419         | 5407.511     | 1275.251      | -2.0841835       | 0.00014386 | No      |
|      |       |        |             |          |         | Rps27    | 16816.3  | 2722.77 | -2.62672         | 16816.301    | 2722.771      | -2.6267128       | 0.00014386 | No      |
|      |       |        |             |          |         | Rps27a   | 5563.64  | 987.681 | -2.49391         | 5563.641     | 987.682       | -2.4939108       | 0.00014386 | No      |
|      |       |        |             |          |         | Rps27l   | 105.52   | 245.439 | 1.21785          | 105.521      | 245.44        | 1.21784025       | 0.00014386 | No      |
|      |       |        |             |          |         | Rps27l3  | 200.785  | 36.7334 | -2.45049         | 200.786      | 36.7344       | -2.4504551       | 0.00014386 | No      |
|      |       |        |             |          |         | Rps28    | 7037.28  | 1936.01 | -1.86193         | 7037.281     | 1936.011      | -1.861931        | 0.00014386 | No      |
|      |       |        |             |          |         | RPS2-PS6 | 5.24202  | 1.7089  | -1.61706         | 5.24302      | 1.7099        | -1.6164861       | 0.00014386 | No      |
|      |       |        |             |          |         | Rps3     | 4968.11  | 835.014 | -2.57282         | 4968.111     | 835.015       | -2.5728234       | 0.00014386 | No      |
|      |       |        |             |          |         | Rps3a    | 5646.6   | 785.754 | -2.84523         | 5646.601     | 785.755       | -2.8452312       | 0.00014386 | No      |
|      |       |        |             |          |         | Rps4x    | 399.014  | 118.666 | -1.74953         | 399.015      | 118.667       | -1.7495242       | 0.00014386 | No      |
|      |       |        |             |          |         | RPS5     | 3299.67  | 778.155 | -2.08419         | 3299.671     | 778.156       | -2.0841909       | 0.00014386 | No      |
|      |       |        |             |          |         | RPS6     | 909.2    | 134.639 | -2.7555          | 909.201      | 134.64        | -2.7554922       | 0.00014386 | No      |
|      |       |        |             |          |         | Rps6ka1  | 110.197  | 42.6422 | -1.36973         | 110.198      | 42.6432       | -1.3697104       | 0.00014386 | No      |
|      |       |        |             |          |         | Rps6ka4  | 5.61267  | 16.1356 | 1.52348          | 5.61367      | 16.1366       | 1.52332047       | 0.00014386 | No      |
|      |       |        |             |          |         | Rps6ka5  | 2.02097  | 1.2     | -0.752015        | 2.02197      | 1.201         | -0.7515254       | 0.00014386 | No      |
|      |       |        |             |          |         | Rps6kb1  | 24.6211  | 8.51526 | -1.53177         | 24.6221      | 8.51626       | -1.5316619       | 0.00014386 | No      |
|      |       |        |             |          |         | Rps6kl1  | 0.174294 | 2.54395 | 3.86747          | 0.175294     | 2.54495       | 3.85978879       | 0.00014386 | No      |
|      |       |        |             |          |         | RPS7     | 282.007  | 98.1451 | -1.52274         | 282.008      | 98.1461       | -1.5227332       | 0.00014386 | No      |
|      |       |        |             |          |         | RPS9     | 487.597  | 237.324 | -1.03883         | 487.598      | 237.325       | -1.0388281       | 0.00014386 | No      |
|      |       |        |             |          |         | Rpsa     | 3968.53  | 1285.55 | -1.62621         | 3968.531     | 1285.551      | -1.6262182       | 0.00014386 | No      |
|      |       |        |             |          |         | Rptor    | 3.1911   | 4.58797 | 0.523801         | 3.1921       | 4.58897       | 0.52366453       | 0.00014386 | No      |
|      |       |        |             |          |         | Rqcd1    | 20.8326  | 7.50164 | -1.47356         | 20.8336      | 7.50264       | -1.4734419       | 0.00014386 | No      |
|      |       |        |             |          |         | RragB    | 1.29501  | 3.30945 | 1.35363          | 1.29601      | 3.31045       | 1.35295049       | 0.00014386 | No      |
|      |       |        |             |          |         | Rragc    | 26.0404  | 38.1746 | 0.551861         | 26.0414      | 38.1756       | 0.55184382       | 0.00014386 | No      |
|      |       |        |             |          |         | Rragd    | 2.87867  | 27.3198 | 3.24647          | 2.87967      | 27.3208       | 3.24602433       | 0.00014386 | No      |
|      |       |        |             |          |         | Rras2    | 76.5507  | 39.4659 | -0.95581         | 76.5517      | 39.4669       | -0.9557912       | 0.00014386 | No      |

| RRBS |       |        |             |          |         | RNAseq   |          |          |                  |              |               |                  |            |         |
|------|-------|--------|-------------|----------|---------|----------|----------|----------|------------------|--------------|---------------|------------------|------------|---------|
| gene | Blood | Kidney | methyl.diff | pMWU.fdr | Match ? | gene     | blood    | kidney   | log2(fold_ratio) | blood+ 0.001 | kidney+ 0.001 | log2(fold_ratio) | q_value    | Match ? |
|      |       |        |             |          |         | Rrbp1    | 15.426   | 32.6713  | 1.08266          | 15.427       | 32.6723       | 1.08261048       | 0.00014386 | No      |
|      |       |        |             |          |         | Rrn3     | 6.15902  | 3.37993  | -0.865709        | 6.16002      | 3.38093       | -0.8655149       | 0.00014386 | No      |
|      |       |        |             |          |         | Rrnad1   | 13.4733  | 5.07535  | -1.40852         | 13.4743      | 5.07635       | -1.4083469       | 0.00014386 | No      |
|      |       |        |             |          |         | Rrp12    | 14.3846  | 3.48822  | -2.04396         | 14.3856      | 3.48922       | -2.0436489       | 0.00014386 | No      |
|      |       |        |             |          |         | Rrp15    | 45.3538  | 68.3942  | 0.592653         | 45.3548      | 68.3952       | 0.59263984       | 0.00014386 | No      |
|      |       |        |             |          |         | Rrp1b    | 8.40458  | 3.82918  | -1.13414         | 8.40558      | 3.83018       | -1.1339352       | 0.00014386 | No      |
|      |       |        |             |          |         | Rrp7a    | 33.6313  | 21.2798  | -0.660322        | 33.6323      | 21.2808       | -0.6602951       | 0.00014386 | No      |
|      |       |        |             |          |         | Rrp8     | 4.58305  | 2.34862  | -0.964492        | 4.58405      | 2.34962       | -0.9641953       | 0.00014386 | No      |
|      |       |        |             |          |         | Rrp9     | 24.7362  | 12.6685  | -0.965376        | 24.7372      | 12.6695       | -0.9653226       | 0.00014386 | No      |
|      |       |        |             |          |         | Rrs1     | 15.1565  | 7.36691  | -1.0408          | 15.1575      | 7.36791       | -1.0407045       | 0.00014386 | No      |
|      |       |        |             |          |         | Rsad2    | 0.338634 | 1.76517  | 2.38201          | 0.339634     | 1.76617       | 2.37857142       | 0.00014386 | No      |
|      |       |        |             |          |         | Rsb1     | 18.6092  | 2.67896  | -2.79627         | 18.6102      | 2.67996       | -2.7958102       | 0.00014386 | No      |
|      |       |        |             |          |         | Rsb1l    | 24.4231  | 4.36734  | -2.48342         | 24.4241      | 4.36834       | -2.4831483       | 0.00014386 | No      |
|      |       |        |             |          |         | Rsf1     | 16.9845  | 4.36314  | -1.96079         | 16.9855      | 4.36414       | -1.9605344       | 0.00014386 | No      |
|      |       |        |             |          |         | Rsl24d1  | 45.4308  | 28.3085  | -0.682438        | 45.4318      | 28.3095       | -0.6824162       | 0.00014386 | No      |
|      |       |        |             |          |         | Rsph1    | 0.153207 | 11.1647  | 6.18732          | 0.154207     | 11.1657       | 6.17806163       | 0.00014386 | No      |
|      |       |        |             |          |         | Rsph3    | 1.5603   | 6.20705  | 1.99208          | 1.5613       | 6.20805       | 1.9913924        | 0.00014386 | No      |
|      |       |        |             |          |         | Rspry1   | 11.9529  | 6.772    | -0.819712        | 11.9539      | 6.773         | -0.8196145       | 0.00014386 | No      |
|      |       |        |             |          |         | Rsrc1    | 14.1118  | 7.67054  | -0.879499        | 14.1128      | 7.67154       | -0.8794161       | 0.00014386 | No      |
|      |       |        |             |          |         | Rsrc2    | 69.2519  | 36.2699  | -0.933082        | 69.2529      | 36.2709       | -0.9330619       | 0.00014386 | No      |
|      |       |        |             |          |         | Rsu1     | 33.3025  | 18.6867  | -0.833622        | 33.3035      | 18.6877       | -0.8335848       | 0.00014386 | No      |
|      |       |        |             |          |         | RT1-A3   | 207.084  | 59.7682  | -1.79276         | 207.085      | 59.7692       | -1.7927489       | 0.00014386 | No      |
|      |       |        |             |          |         | RT1-CE1  | 591.534  | 138.031  | -2.09947         | 591.535      | 138.032       | -2.0994608       | 0.00014386 | No      |
|      |       |        |             |          |         | RT1-CE10 | 189.43   | 71.8224  | -1.39916         | 189.431      | 71.8234       | -1.3991466       | 0.00014386 | No      |
|      |       |        |             |          |         | RT1-DOa  | 5.49228  | 2.70233  | -1.0232          | 5.49328      | 2.70333       | -1.0229302       | 0.00014386 | No      |
|      |       |        |             |          |         | RT1-DOb  | 19.1361  | 0.700816 | -4.77111         | 19.1371      | 0.701816      | -4.7691356       | 0.00014386 | No      |
|      |       |        |             |          |         | RT1-M3-1 | 59.6458  | 12.8892  | -2.21026         | 59.6468      | 12.8902       | -2.2101701       | 0.00014386 | No      |
|      |       |        |             |          |         | RT1-N3   | 90.0129  | 14.4867  | -2.6354          | 90.0139      | 14.4877       | -2.6353192       | 0.00014386 | No      |
|      |       |        |             |          |         | RT1-S3   | 106.392  | 15.9408  | -2.73859         | 106.393      | 15.9418       | -2.7385168       | 0.00014386 | No      |
|      |       |        |             |          |         | Rtcd1    | 18.0757  | 33.2487  | 0.87925          | 18.0767      | 33.2497       | 0.87920999       | 0.00014386 | No      |
|      |       |        |             |          |         | Rtf1     | 21.5962  | 14.1905  | -0.605853        | 21.5972      | 14.1915       | -0.6058172       | 0.00014386 | No      |
|      |       |        |             |          |         | RTN1     | 0        | 2.71794  | inf              | 0.001        | 2.71894       | 11.4088286       | 0.00014386 | No      |
|      |       |        |             |          |         | Rtn4     | 40.6454  | 182.553  | 2.16715          | 40.6464      | 182.554       | 2.1671238        | 0.00014386 | No      |
|      |       |        |             |          |         | Rtn4ip1  | 3.98669  | 15.9743  | 2.00249          | 3.98769      | 15.9753       | 2.00221786       | 0.00014386 | No      |
|      |       |        |             |          |         | Rtp4     | 16.4774  | 8.81834  | -0.901911        | 16.4784      | 8.81934       | -0.9018336       | 0.00014386 | No      |
|      |       |        |             |          |         | Rttn     | 3.80876  | 1.43167  | -1.41162         | 3.80976      | 1.43267       | -1.4109938       | 0.00014386 | No      |
|      |       |        |             |          |         | Rufy1    | 23.7314  | 33.373   | 0.491886         | 23.7324      | 33.374        | 0.49186661       | 0.00014386 | No      |
|      |       |        |             |          |         | Rufy3    | 11.1205  | 18.7923  | 0.756918         | 11.1215      | 18.7933       | 0.75686704       | 0.00014386 | No      |
|      |       |        |             |          |         | Rundc3a  | 5.69373  | 1.88082  | -1.59801         | 5.69473      | 1.88182       | -1.5974988       | 0.00014386 | No      |
|      |       |        |             |          |         | Runx2    | 2.9916   | 0.291051 | -3.36157         | 2.9926       | 0.292051      | -3.3571072       | 0.00014386 | No      |
|      |       |        |             |          |         | Rusc2    | 0.136895 | 2.63748  | 4.26802          | 0.137895     | 2.63848       | 4.258065         | 0.00014386 | No      |
|      |       |        |             |          |         | Rwdd1    | 54.7441  | 37.5069  | -0.545549        | 54.7451      | 37.5079       | -0.5455353       | 0.00014386 | No      |

| RRBS |       |        |             |          |         | RNAseq  |           |          |                  |              |               |                  |            |         |
|------|-------|--------|-------------|----------|---------|---------|-----------|----------|------------------|--------------|---------------|------------------|------------|---------|
| gene | Blood | Kidney | methyl.diff | pMWU.fdr | Match ? | gene    | blood     | kidney   | log2(fold_ratio) | blood+ 0.001 | kidney+ 0.001 | log2(fold_ratio) | q_value    | Match ? |
|      |       |        |             |          |         | Rwdd2a  | 0.423722  | 10.9124  | 4.68671          | 0.424722     | 10.9134       | 4.68343798       | 0.00014386 | No      |
|      |       |        |             |          |         | Rwdd2b  | 4.23624   | 6.92556  | 0.709144         | 4.23724      | 6.92656       | 0.70901419       | 0.00014386 | No      |
|      |       |        |             |          |         | Rxra    | 10.7311   | 18.4762  | 0.783873         | 10.7321      | 18.4772       | 0.78381375       | 0.00014386 | No      |
|      |       |        |             |          |         | Rxrg    | 0.189583  | 6.60976  | 5.1237           | 0.190583     | 6.61076       | 5.1163248        | 0.00014386 | No      |
|      |       |        |             |          |         | RYBP    | 32.7732   | 12.8873  | -1.34657         | 32.7742      | 12.8883       | -1.3464986       | 0.00014386 | No      |
|      |       |        |             |          |         | Ryk     | 11.4874   | 24.309   | 1.08144          | 11.4884      | 24.31         | 1.08137201       | 0.00014386 | No      |
|      |       |        |             |          |         | S100a10 | 673.712   | 514.812  | -0.388087        | 673.713      | 514.813       | -0.3880857       | 0.00014386 | No      |
|      |       |        |             |          |         | S100a11 | 51.8799   | 2435.35  | 5.55281          | 51.8809      | 2435.351      | 5.5527824        | 0.00014386 | No      |
|      |       |        |             |          |         | S100a6  | 58.1936   | 1466.07  | 4.65494          | 58.1946      | 1466.071      | 4.65492587       | 0.00014386 | No      |
|      |       |        |             |          |         | S100pbp | 23.4594   | 5.77909  | -2.02125         | 23.4604      | 5.78009       | -2.0210637       | 0.00014386 | No      |
|      |       |        |             |          |         | SAAL1   | 18.7932   | 43.6664  | 1.21631          | 18.7942      | 43.6674       | 1.21626913       | 0.00014386 | No      |
|      |       |        |             |          |         | Sacm1l  | 11.2777   | 24.2064  | 1.10192          | 11.2787      | 24.2074       | 1.10184734       | 0.00014386 | No      |
|      |       |        |             |          |         | Sacs    | 5.20898   | 0.408973 | -3.67092         | 5.20998      | 0.409973      | -3.667677        | 0.00014386 | No      |
|      |       |        |             |          |         | Safb    | 89.742    | 44.0022  | -1.02821         | 89.743       | 44.0032       | -1.028191        | 0.00014386 | No      |
|      |       |        |             |          |         | SAMD11  | 0.194677  | 7.09546  | 5.18774          | 0.195677     | 7.09646       | 5.18055343       | 0.00014386 | No      |
|      |       |        |             |          |         | Samd3   | 7.43994   | 2.87446  | -1.372           | 7.44094      | 2.87546       | -1.3716921       | 0.00014386 | No      |
|      |       |        |             |          |         | Samd4a  | 0         | 3.48866  | inf              | 0.001        | 3.48966       | 11.7688708       | 0.00014386 | No      |
|      |       |        |             |          |         | Samd4b  | 6.38685   | 11.8332  | 0.889669         | 6.38785      | 11.8342       | 0.88955984       | 0.00014386 | No      |
|      |       |        |             |          |         | Samd5   | 0         | 1.37459  | inf              | 0.001        | 1.37559       | 10.4258348       | 0.00014386 | No      |
|      |       |        |             |          |         | Samd9l  | 48.1231   | 15.3112  | -1.65215         | 48.1241      | 15.3122       | -1.652078        | 0.00014386 | No      |
|      |       |        |             |          |         | Samhd1  | 73.2792   | 3.9278   | -4.22161         | 73.2802      | 3.9288        | -4.2212628       | 0.00014386 | No      |
|      |       |        |             |          |         | Samm50  | 55.7208   | 175.649  | 1.6564           | 55.7218      | 175.65        | 1.65638981       | 0.00014386 | No      |
|      |       |        |             |          |         | Samsn1  | 6.70829   | 2.28126  | -1.55611         | 6.70929      | 2.28226       | -1.5556969       | 0.00014386 | No      |
|      |       |        |             |          |         | Sap130  | 13.3231   | 6.39538  | -1.05882         | 13.3241      | 6.39638       | -1.0587105       | 0.00014386 | No      |
|      |       |        |             |          |         | Sap30   | 23.9948   | 8.61014  | -1.47861         | 23.9958      | 8.61114       | -1.4785058       | 0.00014386 | No      |
|      |       |        |             |          |         | Sar1b   | 28.7814   | 47.9266  | 0.735689         | 28.7824      | 47.9276       | 0.7356698        | 0.00014386 | No      |
|      |       |        |             |          |         | SARG    | 0.121874  | 37.0974  | 8.24978          | 0.122874     | 37.0984       | 8.23803348       | 0.00014386 | No      |
|      |       |        |             |          |         | Sart1   | 60.8576   | 44.7157  | -0.444656        | 60.8586      | 44.7167       | -0.4446474       | 0.00014386 | No      |
|      |       |        |             |          |         | Sart3   | 28.9883   | 12.9528  | -1.1622          | 28.9893      | 12.9538       | -1.1621451       | 0.00014386 | No      |
|      |       |        |             |          |         | Sash3   | 201.441   | 4.36604  | -5.52789         | 201.442      | 4.36704       | -5.527565        | 0.00014386 | No      |
|      |       |        |             |          |         | Sat1    | 84.4089   | 498.038  | 2.56079          | 84.4099      | 498.039       | 2.5607746        | 0.00014386 | No      |
|      |       |        |             |          |         | Sat2    | 0.0203758 | 115.269  | 12.4659          | 0.0213758    | 115.27        | 12.3967511       | 0.00014386 | No      |
|      |       |        |             |          |         | Satb1   | 333.67    | 3.89104  | -6.42212         | 333.671      | 3.89204       | -6.421756        | 0.00014386 | No      |
|      |       |        |             |          |         | Sav1    | 4.09662   | 28.348   | 2.79074          | 4.09762      | 28.349        | 2.79043974       | 0.00014386 | No      |
|      |       |        |             |          |         | Saysd1  | 10.0159   | 20.7415  | 1.05023          | 10.0169      | 20.7425       | 1.05015369       | 0.00014386 | No      |
|      |       |        |             |          |         | Sbds    | 31.7253   | 78.5851  | 1.30862          | 31.7263      | 78.5861       | 1.30859488       | 0.00014386 | No      |
|      |       |        |             |          |         | Sbf1    | 57.9475   | 25.2534  | -1.19827         | 57.9485      | 25.2544       | -1.1982366       | 0.00014386 | No      |
|      |       |        |             |          |         | Sbk1    | 7.86421   | 2.91318  | -1.43271         | 7.86521      | 2.91418       | -1.4323953       | 0.00014386 | No      |
|      |       |        |             |          |         | Sbno1   | 43.8222   | 13.0956  | -1.74258         | 43.8232      | 13.0966       | -1.7425025       | 0.00014386 | No      |
|      |       |        |             |          |         | Scaf11  | 30.7284   | 12.083   | -1.3466          | 30.7294      | 12.084        | -1.3465215       | 0.00014386 | No      |
|      |       |        |             |          |         | Scaf8   | 28.9883   | 12.0517  | -1.26624         | 28.9893      | 12.0527       | -1.2661641       | 0.00014386 | No      |
|      |       |        |             |          |         | SCAI    | 5.60861   | 1.73489  | -1.6928          | 5.60961      | 1.73589       | -1.6922249       | 0.00014386 | No      |

| RRBS |       |        |             |          |         | RNAseq  |           |          |                  |              |               |                  |            |         |
|------|-------|--------|-------------|----------|---------|---------|-----------|----------|------------------|--------------|---------------|------------------|------------|---------|
| gene | Blood | Kidney | methyl.diff | pMWU.fdr | Match ? | gene    | blood     | kidney   | log2(fold_ratio) | blood+ 0.001 | kidney+ 0.001 | log2(fold_ratio) | q_value    | Match ? |
|      |       |        |             |          |         | Scamp1  | 3.89142   | 21.3278  | 2.45437          | 3.89242      | 21.3288       | 2.45406351       | 0.00014386 | No      |
|      |       |        |             |          |         | Scamp3  | 108.381   | 59.9283  | -0.854799        | 108.382      | 59.9293       | -0.8547917       | 0.00014386 | No      |
|      |       |        |             |          |         | Scand1  | 59.4211   | 222.917  | 1.90746          | 59.4221      | 222.918       | 1.90744162       | 0.00014386 | No      |
|      |       |        |             |          |         | Scap    | 20.1231   | 15.1674  | -0.407877        | 20.1241      | 15.1684       | -0.4078553       | 0.00014386 | No      |
|      |       |        |             |          |         | SCCPDH  | 1.07208   | 41.0322  | 5.25827          | 1.07308      | 41.0332       | 5.25696213       | 0.00014386 | No      |
|      |       |        |             |          |         | Scd     | 59.5051   | 13.9716  | -2.09051         | 59.5061      | 13.9726       | -2.0904371       | 0.00014386 | No      |
|      |       |        |             |          |         | Schip1  | 0.0575726 | 24.8171  | 8.75174          | 0.0585726    | 24.8181       | 8.72695102       | 0.00014386 | No      |
|      |       |        |             |          |         | Scin    | 1.86993   | 49.9164  | 4.73846          | 1.87093      | 49.9174       | 4.7377153        | 0.00014386 | No      |
|      |       |        |             |          |         | Scly    | 4.87169   | 100.057  | 4.36026          | 4.87269      | 100.058       | 4.35997427       | 0.00014386 | No      |
|      |       |        |             |          |         | Scml4   | 76.0287   | 3.64899  | -4.38097         | 76.0297      | 3.64999       | -4.3805987       | 0.00014386 | No      |
|      |       |        |             |          |         | Scn1b   | 0.0878395 | 22.9121  | 8.02702          | 0.0888395    | 22.9131       | 8.01075567       | 0.00014386 | No      |
|      |       |        |             |          |         | Scnm1   | 14.2403   | 62.8343  | 2.14157          | 14.2413      | 62.8353       | 2.14149443       | 0.00014386 | No      |
|      |       |        |             |          |         | Scnn1g  | 0         | 10.4499  | inf              | 0.001        | 10.4509       | 13.3513396       | 0.00014386 | No      |
|      |       |        |             |          |         | Scoc    | 18.8109   | 30.8003  | 0.711373         | 18.8119      | 30.8013       | 0.71134567       | 0.00014386 | No      |
|      |       |        |             |          |         | Scp2    | 45.1489   | 102.813  | 1.18725          | 45.1499      | 102.814       | 1.18724203       | 0.00014386 | No      |
|      |       |        |             |          |         | Scrn2   | 7.48732   | 17.0009  | 1.18309          | 7.48832      | 17.0019       | 1.18298199       | 0.00014386 | No      |
|      |       |        |             |          |         | Scrn3   | 3.44485   | 7.00171  | 1.02326          | 3.44585      | 7.00271       | 1.02305344       | 0.00014386 | No      |
|      |       |        |             |          |         | Scyl1   | 23.3081   | 39.2051  | 0.750208         | 23.3091      | 39.2061       | 0.75018484       | 0.00014386 | No      |
|      |       |        |             |          |         | Scyl3   | 19.7109   | 7.099    | -1.47331         | 19.7119      | 7.1           | -1.4731759       | 0.00014386 | No      |
|      |       |        |             |          |         | Sdad1   | 13.4731   | 4.45591  | -1.59629         | 13.4741      | 4.45691       | -1.5960732       | 0.00014386 | No      |
|      |       |        |             |          |         | Sdc1    | 0.244026  | 9.90856  | 5.34357          | 0.245026     | 9.90956       | 5.33781425       | 0.00014386 | No      |
|      |       |        |             |          |         | SDC3    | 0.558968  | 3.43635  | 2.62004          | 0.559968     | 3.43735       | 2.61788047       | 0.00014386 | No      |
|      |       |        |             |          |         | Sdcbp   | 76.6319   | 130.51   | 0.76814          | 76.6329      | 130.511       | 0.7681356        | 0.00014386 | No      |
|      |       |        |             |          |         | Sde2    | 19.618    | 7.85373  | -1.32073         | 19.619       | 7.85473       | -1.3206179       | 0.00014386 | No      |
|      |       |        |             |          |         | Sdf2l1  | 29.1259   | 15.7245  | -0.889286        | 29.1269      | 15.7255       | -0.8892463       | 0.00014386 | No      |
|      |       |        |             |          |         | Sdha    | 72.9655   | 236.396  | 1.69592          | 72.9665      | 236.397       | 1.69590557       | 0.00014386 | No      |
|      |       |        |             |          |         | Sdhaf2  | 20.5931   | 56.9152  | 1.46665          | 20.5941      | 56.9162       | 1.46660826       | 0.00014386 | No      |
|      |       |        |             |          |         | Sdhb    | 96.453    | 440.954  | 2.19273          | 96.454       | 440.955       | 2.19271846       | 0.00014386 | No      |
|      |       |        |             |          |         | Sdhc    | 76.2468   | 480.642  | 2.65621          | 76.2478      | 480.643       | 2.65619811       | 0.00014386 | No      |
|      |       |        |             |          |         | Sdhd    | 76.3657   | 272.265  | 1.83401          | 76.3667      | 272.266       | 1.83400125       | 0.00014386 | No      |
|      |       |        |             |          |         | Sec11a  | 92.12     | 63.1335  | -0.545108        | 92.121       | 63.1345       | -0.5451015       | 0.00014386 | No      |
|      |       |        |             |          |         | Sec11c  | 34.2954   | 59.9169  | 0.804948         | 34.2964      | 59.9179       | 0.80492991       | 0.00014386 | No      |
|      |       |        |             |          |         | Sec14l1 | 8.80191   | 23.3428  | 1.40709          | 8.80291      | 23.3438       | 1.406987         | 0.00014386 | No      |
|      |       |        |             |          |         | Sec14l2 | 6.66329   | 3.12462  | -1.09255         | 6.66429      | 3.12562       | -1.0923088       | 0.00014386 | No      |
|      |       |        |             |          |         | Sec16b  | 0.101594  | 2.02464  | 4.31678          | 0.102594     | 2.02564       | 4.30335953       | 0.00014386 | No      |
|      |       |        |             |          |         | Sec22a  | 6.84261   | 15.8375  | 1.21073          | 6.84361      | 15.8385       | 1.21060626       | 0.00014386 | No      |
|      |       |        |             |          |         | Sec24b  | 21.676    | 9.62131  | -1.1718          | 21.677       | 9.62231       | -1.1717099       | 0.00014386 | No      |
|      |       |        |             |          |         | Sec24d  | 2.42925   | 10.2401  | 2.07564          | 2.43025      | 10.2411       | 2.07519405       | 0.00014386 | No      |
|      |       |        |             |          |         | Sec31b  | 2.64957   | 0.293526 | -3.1742          | 2.65057      | 0.294526      | -3.1698357       | 0.00014386 | No      |
|      |       |        |             |          |         | Sec61b  | 123.099   | 183.827  | 0.578529         | 123.1        | 183.828       | 0.57852577       | 0.00014386 | No      |
|      |       |        |             |          |         | Sec62   | 49.4814   | 95.5886  | 0.949951         | 49.4824      | 95.5896       | 0.94993819       | 0.00014386 | No      |
|      |       |        |             |          |         | Sec63   | 23.5809   | 17.5619  | -0.425168        | 23.5819      | 17.5629       | -0.4251489       | 0.00014386 | No      |

| RRBS |       |        |             |          |         | RNAseq    |           |          |                  |              |               |                  |            |         |
|------|-------|--------|-------------|----------|---------|-----------|-----------|----------|------------------|--------------|---------------|------------------|------------|---------|
| gene | Blood | Kidney | methyl.diff | pMWU.fdr | Match ? | gene      | blood     | kidney   | log2(fold_ratio) | blood+ 0.001 | kidney+ 0.001 | log2(fold_ratio) | q_value    | Match ? |
|      |       |        |             |          |         | Secisbp2  | 46.6331   | 21.4202  | -1.12238         | 46.6341      | 21.4212       | -1.122346        | 0.00014386 | No      |
|      |       |        |             |          |         | Secisbp2l | 14.9571   | 7.26566  | -1.04166         | 14.9581      | 7.26666       | -1.0415626       | 0.00014386 | No      |
|      |       |        |             |          |         | Sectm1b   | 0.617013  | 20.7541  | 5.07195          | 0.618013     | 20.7551       | 5.06968489       | 0.00014386 | No      |
|      |       |        |             |          |         | Seh1l     | 28.2479   | 21.3651  | -0.402887        | 28.2489      | 21.3661       | -0.4028711       | 0.00014386 | No      |
|      |       |        |             |          |         | Sel1l     | 14.2991   | 8.51037  | -0.748627        | 14.3001      | 8.51137       | -0.748562        | 0.00014386 | No      |
|      |       |        |             |          |         | Sel1l3    | 0         | 1.67991  | inf              | 0.001        | 1.68091       | 10.7150268       | 0.00014386 | No      |
|      |       |        |             |          |         | Selk      | 90.3089   | 120.392  | 0.4148           | 90.3099      | 120.393       | 0.41479546       | 0.00014386 | No      |
|      |       |        |             |          |         | Sell      | 810.999   | 3.84308  | -7.72129         | 811          | 3.84408       | -7.7209197       | 0.00014386 | No      |
|      |       |        |             |          |         | Selplg    | 109.79    | 4.09278  | -4.74551         | 109.791      | 4.09378       | -4.7451824       | 0.00014386 | No      |
|      |       |        |             |          |         | Selrc1    | 1.81595   | 3.2346   | 0.832866         | 1.81695      | 3.2356        | 0.83251455       | 0.00014386 | No      |
|      |       |        |             |          |         | Sema3f    | 0.371928  | 7.20892  | 4.27669          | 0.372928     | 7.20992       | 4.27301423       | 0.00014386 | No      |
|      |       |        |             |          |         | Sema3g    | 0.377823  | 6.93072  | 4.19722          | 0.378823     | 6.93172       | 4.19361755       | 0.00014386 | No      |
|      |       |        |             |          |         | Sema4a    | 47.0633   | 24.8184  | -0.92319         | 47.0643      | 24.8194       | -0.9231649       | 0.00014386 | No      |
|      |       |        |             |          |         | Sema4c    | 0.108302  | 1.13258  | 3.38647          | 0.109302     | 1.13358       | 3.37449451       | 0.00014386 | No      |
|      |       |        |             |          |         | Sema4d    | 54.6727   | 9.26665  | -2.5607          | 54.6737      | 9.26765       | -2.5605715       | 0.00014386 | No      |
|      |       |        |             |          |         | Sema4f    | 1.00376   | 3.07484  | 1.61509          | 1.00476      | 3.07584       | 1.61412952       | 0.00014386 | No      |
|      |       |        |             |          |         | Sema4g    | 0.497682  | 3.91513  | 2.97576          | 0.498682     | 3.91613       | 2.97323662       | 0.00014386 | No      |
|      |       |        |             |          |         | Sema6a    | 0.783061  | 1.76786  | 1.1748           | 0.784061     | 1.76886       | 1.17378206       | 0.00014386 | No      |
|      |       |        |             |          |         | Sema6c    | 0.149009  | 0.928156 | 2.63897          | 0.150009     | 0.929156      | 2.63087178       | 0.00014386 | No      |
|      |       |        |             |          |         | Sema6d    | 0.0241989 | 2.77439  | 6.84109          | 0.0251989    | 2.77539       | 6.78318595       | 0.00014386 | No      |
|      |       |        |             |          |         | Sema7a    | 2.13777   | 25.6861  | 3.58681          | 2.13877      | 25.6871       | 3.58619077       | 0.00014386 | No      |
|      |       |        |             |          |         | Senp1     | 8.36114   | 5.50263  | -0.603578        | 8.36214      | 5.50363       | -0.6034887       | 0.00014386 | No      |
|      |       |        |             |          |         | Senp6     | 51.5366   | 21.9383  | -1.23215         | 51.5376      | 21.9393       | -1.2321079       | 0.00014386 | No      |
|      |       |        |             |          |         | Senp7     | 17.1248   | 3.29184  | -2.37912         | 17.1258      | 3.29284       | -2.3787671       | 0.00014386 | No      |
|      |       |        |             |          |         | Senp8     | 1.23986   | 5.14185  | 2.05212          | 1.24086      | 5.14285       | 2.05122772       | 0.00014386 | No      |
|      |       |        |             |          |         | Sephs2    | 24.9396   | 46.8359  | 0.909179         | 24.9406      | 46.8369       | 0.90914942       | 0.00014386 | No      |
|      |       |        |             |          |         | Sepn1     | 0.535251  | 5.79128  | 3.4356           | 0.536251     | 5.79228       | 3.43315101       | 0.00014386 | No      |
|      |       |        |             |          |         | Sepw1     | 112.52    | 20.3992  | -2.46359         | 112.521      | 20.4002       | -2.4635391       | 0.00014386 | No      |
|      |       |        |             |          |         | SERBP1    | 284.75    | 92.7982  | -1.61753         | 284.751      | 92.7992       | -1.6175166       | 0.00014386 | No      |
|      |       |        |             |          |         | Sergef    | 15.0144   | 35.6427  | 1.24726          | 15.0154      | 35.6437       | 1.2472042        | 0.00014386 | No      |
|      |       |        |             |          |         | Serinc1   | 48.2621   | 78.8857  | 0.708874         | 48.2631      | 78.8867       | 0.7088615        | 0.00014386 | No      |
|      |       |        |             |          |         | Serinc2   | 0.209708  | 43.7124  | 7.70352          | 0.210708     | 43.7134       | 7.69668669       | 0.00014386 | No      |
|      |       |        |             |          |         | Serinc5   | 2.29919   | 5.12465  | 1.15633          | 2.30019      | 5.12565       | 1.15598193       | 0.00014386 | No      |
|      |       |        |             |          |         | Serpinb1a | 0.953843  | 22.4926  | 4.55956          | 0.954843     | 22.4936       | 4.55810723       | 0.00014386 | No      |
|      |       |        |             |          |         | Serpinb5  | 0         | 1.77607  | inf              | 0.001        | 1.77707       | 10.7952848       | 0.00014386 | No      |
|      |       |        |             |          |         | Serpinb6  | 2.79324   | 70.2778  | 4.65306          | 2.79424      | 70.2788       | 4.65256171       | 0.00014386 | No      |
|      |       |        |             |          |         | Serpinb6b | 255.893   | 9.48708  | -4.75343         | 255.894      | 9.48808       | -4.7532863       | 0.00014386 | No      |
|      |       |        |             |          |         | Serpinb9  | 82.8999   | 6.42593  | -3.68939         | 82.9009      | 6.42693       | -3.6891861       | 0.00014386 | No      |
|      |       |        |             |          |         | Serpinc1  | 0.238288  | 6.89816  | 4.85544          | 0.239288     | 6.89916       | 4.84960076       | 0.00014386 | No      |
|      |       |        |             |          |         | Serpini1  | 6.79613   | 0.585591 | -3.53675         | 6.79713      | 0.586591      | -3.5344989       | 0.00014386 | No      |
|      |       |        |             |          |         | Sertad2   | 17.0786   | 6.92992  | -1.30128         | 17.0796      | 6.93092       | -1.3011554       | 0.00014386 | No      |
|      |       |        |             |          |         | Sesn1     | 131.906   | 16.9988  | -2.95601         | 131.907      | 16.9998       | -2.9559314       | 0.00014386 | No      |

| RRBS |       |        |             |          |         | RNAseq |           |         |                  |              |               |                  |            |         |
|------|-------|--------|-------------|----------|---------|--------|-----------|---------|------------------|--------------|---------------|------------------|------------|---------|
| gene | Blood | Kidney | methyl.diff | pMWU.fdr | Match ? | gene   | blood     | kidney  | log2(fold_ratio) | blood+ 0.001 | kidney+ 0.001 | log2(fold_ratio) | q_value    | Match ? |
|      |       |        |             |          |         | Sesn2  | 7.38815   | 17.8303 | 1.27105          | 7.38915      | 17.8313       | 1.27093157       | 0.00014386 | No      |
|      |       |        |             |          |         | Sesn3  | 54.6306   | 14.5878 | -1.90495         | 54.6316      | 14.5888       | -1.9048745       | 0.00014386 | No      |
|      |       |        |             |          |         | Set    | 225.673   | 77.8004 | -1.53639         | 225.674      | 77.8014       | -1.5363722       | 0.00014386 | No      |
|      |       |        |             |          |         | Setd1b | 34.9563   | 8.43865 | -2.05047         | 34.9573      | 8.43965       | -2.0503387       | 0.00014386 | No      |
|      |       |        |             |          |         | Setd2  | 41.9841   | 16.0385 | -1.38831         | 41.9851      | 16.0395       | -1.3882483       | 0.00014386 | No      |
|      |       |        |             |          |         | Setd3  | 33.6015   | 53.692  | 0.676184         | 33.6025      | 53.693        | 0.67616544       | 0.00014386 | No      |
|      |       |        |             |          |         | Setd4  | 15.3303   | 24.1796 | 0.657407         | 15.3313      | 24.1806       | 0.65737001       | 0.00014386 | No      |
|      |       |        |             |          |         | Setd5  | 23.1221   | 6.75828 | -1.77455         | 23.1231      | 6.75928       | -1.7743933       | 0.00014386 | No      |
|      |       |        |             |          |         | Setd7  | 23.8013   | 6.96956 | -1.7719          | 23.8023      | 6.97056       | -1.7717545       | 0.00014386 | No      |
|      |       |        |             |          |         | Setd8  | 47.8709   | 25.8313 | -0.890028        | 47.8719      | 25.8323       | -0.890003        | 0.00014386 | No      |
|      |       |        |             |          |         | Setdb1 | 22.2879   | 8.80183 | -1.34038         | 22.2889      | 8.80283       | -1.3402861       | 0.00014386 | No      |
|      |       |        |             |          |         | Setx   | 95.2412   | 8.33084 | -3.51505         | 95.2422      | 8.33184       | -3.5148939       | 0.00014386 | No      |
|      |       |        |             |          |         | Sf1    | 181.569   | 58.7847 | -1.62701         | 181.57       | 58.7857       | -1.6269887       | 0.00014386 | No      |
|      |       |        |             |          |         | Sf3a1  | 25.0242   | 16.6786 | -0.585324        | 25.0252      | 16.6796       | -0.5852969       | 0.00014386 | No      |
|      |       |        |             |          |         | Sf3a3  | 63.5642   | 27.8491 | -1.19058         | 63.5652      | 27.8501       | -1.1905546       | 0.00014386 | No      |
|      |       |        |             |          |         | Sf3b1  | 165.925   | 44.7052 | -1.89202         | 165.926      | 44.7062       | -1.8919931       | 0.00014386 | No      |
|      |       |        |             |          |         | Sf3b2  | 89.9234   | 52.8101 | -0.767884        | 89.9244      | 52.8111       | -0.7678714       | 0.00014386 | No      |
|      |       |        |             |          |         | Sf3b3  | 56.8018   | 17.3315 | -1.71254         | 56.8028      | 17.3325       | -1.7124823       | 0.00014386 | No      |
|      |       |        |             |          |         | Sf3b5  | 113.871   | 168.221 | 0.562952         | 113.872      | 168.222       | 0.56295335       | 0.00014386 | No      |
|      |       |        |             |          |         | Sf3b6  | 102.863   | 55.5077 | -0.889964        | 102.864      | 55.5087       | -0.8899523       | 0.00014386 | No      |
|      |       |        |             |          |         | Sfi1   | 18.1912   | 114.099 | 2.64898          | 18.1922      | 114.1         | 2.64890687       | 0.00014386 | No      |
|      |       |        |             |          |         | Sfn    | 1.90618   | 5.58818 | 1.5517           | 1.90718      | 5.58918       | 1.55119563       | 0.00014386 | No      |
|      |       |        |             |          |         | Sfpq   | 143.38    | 76.948  | -0.897885        | 143.381      | 76.949        | -0.8978794       | 0.00014386 | No      |
|      |       |        |             |          |         | SFR1   | 94.8773   | 31.2539 | -1.60203         | 94.8783      | 31.2549       | -1.6019958       | 0.00014386 | No      |
|      |       |        |             |          |         | Sft2d1 | 111.476   | 59.5481 | -0.904603        | 111.477      | 59.5491       | -0.9045945       | 0.00014386 | No      |
|      |       |        |             |          |         | Sfta2  | 0         | 6.87353 | inf              | 0.001        | 6.87453       | 12.7470454       | 0.00014386 | No      |
|      |       |        |             |          |         | Sfxn1  | 18.2609   | 38.4448 | 1.07403          | 18.2619      | 38.4458       | 1.07398913       | 0.00014386 | No      |
|      |       |        |             |          |         | Sfxn2  | 6.75808   | 17.9491 | 1.40923          | 6.75908      | 17.9501       | 1.40909309       | 0.00014386 | No      |
|      |       |        |             |          |         | Sfxn4  | 8.06198   | 15.7231 | 0.963682         | 8.06298      | 15.7241       | 0.9635924        | 0.00014386 | No      |
|      |       |        |             |          |         | Sgcb   | 1.24663   | 3.12981 | 1.32805          | 1.24763      | 3.13081       | 1.32734581       | 0.00014386 | No      |
|      |       |        |             |          |         | Sgce   | 0         | 50.3131 | inf              | 0.001        | 50.3141       | 15.6186751       | 0.00014386 | No      |
|      |       |        |             |          |         | Sgk1   | 8.89097   | 65.0447 | 2.87102          | 8.89197      | 65.0457       | 2.8708787        | 0.00014386 | No      |
|      |       |        |             |          |         | Sgms2  | 0.0792225 | 5.56286 | 6.13377          | 0.0802225    | 5.56386       | 6.11593538       | 0.00014386 | No      |
|      |       |        |             |          |         | Sgpl1  | 9.44174   | 3.22984 | -1.54759         | 9.44274      | 3.23084       | -1.5472962       | 0.00014386 | No      |
|      |       |        |             |          |         | Sgsh   | 9.65343   | 2.95596 | -1.70742         | 9.65443      | 2.95696       | -1.7070764       | 0.00014386 | No      |
|      |       |        |             |          |         | Sgsm2  | 2.29226   | 5.78745 | 1.33615          | 2.29326      | 5.78845       | 1.33577715       | 0.00014386 | No      |
|      |       |        |             |          |         | Sgsm3  | 0.853971  | 9.00403 | 3.39831          | 0.854971     | 9.00503       | 3.39678369       | 0.00014386 | No      |
|      |       |        |             |          |         | Sgta   | 42.5239   | 103.916 | 1.28908          | 42.5249      | 103.917       | 1.28905194       | 0.00014386 | No      |
|      |       |        |             |          |         | Sh2b1  | 38.7433   | 25.5637 | -0.599852        | 38.7443      | 25.5647       | -0.599831        | 0.00014386 | No      |
|      |       |        |             |          |         | Sh2b3  | 12.1556   | 5.67011 | -1.10017         | 12.1566      | 5.67111       | -1.1000367       | 0.00014386 | No      |
|      |       |        |             |          |         | Sh2d1a | 55.8735   | 1.06502 | -5.71321         | 55.8745      | 1.06602       | -5.7118836       | 0.00014386 | No      |
|      |       |        |             |          |         | Sh2d3c | 77.4767   | 34.8032 | -1.15454         | 77.4777      | 34.8042       | -1.1545197       | 0.00014386 | No      |



| RRBS |       |        |             |          |         | RNAseq   |          |          |                  |              |               |                  |            |         |
|------|-------|--------|-------------|----------|---------|----------|----------|----------|------------------|--------------|---------------|------------------|------------|---------|
| gene | Blood | Kidney | methyl.diff | pMWU.fdr | Match ? | gene     | blood    | kidney   | log2(fold_ratio) | blood+ 0.001 | kidney+ 0.001 | log2(fold_ratio) | q_value    | Match ? |
|      |       |        |             |          |         | Sh3bgr1  | 104.14   | 60.046   | -0.794379        | 104.141      | 60.047        | -0.7943741       | 0.00014386 | No      |
|      |       |        |             |          |         | Sh3bgr2  | 0.21567  | 21.0205  | 6.60683          | 0.21667      | 21.0215       | 6.60022239       | 0.00014386 | No      |
|      |       |        |             |          |         | Sh3bgr3  | 290.784  | 98.1006  | -1.56761         | 290.785      | 98.1016       | -1.5676043       | 0.00014386 | No      |
|      |       |        |             |          |         | Sh3bp1   | 28.2367  | 7.91979  | -1.83404         | 28.2377      | 7.92079       | -1.8339064       | 0.00014386 | No      |
|      |       |        |             |          |         | Sh3bp4   | 0.220308 | 10.1867  | 5.53102          | 0.221308     | 10.1877       | 5.52462897       | 0.00014386 | No      |
|      |       |        |             |          |         | Sh3bp5   | 3.77444  | 50.4507  | 3.74054          | 3.77544      | 50.4517       | 3.74018619       | 0.00014386 | No      |
|      |       |        |             |          |         | Sh3bp5l  | 5.23944  | 12.1576  | 1.21437          | 5.24044      | 12.1586       | 1.21421727       | 0.00014386 | No      |
|      |       |        |             |          |         | Sh3gl1   | 48.6748  | 23.196   | -1.0693          | 48.6758      | 23.197        | -1.0692665       | 0.00014386 | No      |
|      |       |        |             |          |         | Sh3gl3   | 0.25643  | 4.60293  | 4.16592          | 0.25743      | 4.60393       | 4.1606138        | 0.00014386 | No      |
|      |       |        |             |          |         | Sh3glb1  | 57.2043  | 36.4067  | -0.651919        | 57.2053      | 36.4077       | -0.6519052       | 0.00014386 | No      |
|      |       |        |             |          |         | Sh3glb2  | 14.1302  | 29.468   | 1.06037          | 14.1312      | 29.469        | 1.06031412       | 0.00014386 | No      |
|      |       |        |             |          |         | Sh3kbp1  | 159.683  | 6.23714  | -4.67818         | 159.684      | 6.23814       | -4.67796         | 0.00014386 | No      |
|      |       |        |             |          |         | Sh3rf2   | 0        | 4.84037  | inf              | 0.001        | 4.84137       | 12.2411996       | 0.00014386 | No      |
|      |       |        |             |          |         | Sh3tc1   | 3.39462  | 54.7738  | 4.01216          | 3.39562      | 54.7748       | 4.01176539       | 0.00014386 | No      |
|      |       |        |             |          |         | Sh3tc2   | 0        | 35.0312  | inf              | 0.001        | 35.0322       | 15.096394        | 0.00014386 | No      |
|      |       |        |             |          |         | Sh3yl1   | 0.525829 | 35.0361  | 6.0581           | 0.526829     | 35.0371       | 6.0554048        | 0.00014386 | No      |
|      |       |        |             |          |         | Shb      | 5.50431  | 150.338  | 4.7715           | 5.50531      | 150.339       | 4.7712517        | 0.00014386 | No      |
|      |       |        |             |          |         | She      | 4.64096  | 2.1651   | -1.09999         | 4.64196      | 2.1661        | -1.0996342       | 0.00014386 | No      |
|      |       |        |             |          |         | Shf      | 1.40167  | 7.57132  | 2.4334           | 1.40267      | 7.57232       | 2.43255975       | 0.00014386 | No      |
|      |       |        |             |          |         | Shfm1    | 157.304  | 215.756  | 0.455844         | 157.305      | 215.757       | 0.45584284       | 0.00014386 | No      |
|      |       |        |             |          |         | Shh      | 0        | 8.39967  | inf              | 0.001        | 8.40067       | 13.0362887       | 0.00014386 | No      |
|      |       |        |             |          |         | Shisa5   | 462.011  | 78.2207  | -2.56231         | 462.012      | 78.2217       | -2.5622895       | 0.00014386 | No      |
|      |       |        |             |          |         | Shkbp1   | 23.9432  | 13.5281  | -0.823658        | 23.9442      | 13.5291       | -0.8236104       | 0.00014386 | No      |
|      |       |        |             |          |         | Shmt2    | 65.9675  | 42.1683  | -0.645596        | 65.9685      | 42.1693       | -0.6455842       | 0.00014386 | No      |
|      |       |        |             |          |         | Shoc2    | 14.0316  | 7.56737  | -0.890818        | 14.0326      | 7.56837       | -0.8907278       | 0.00014386 | No      |
|      |       |        |             |          |         | Shpk     | 4.44554  | 7.08115  | 0.671628         | 4.44654      | 7.08215       | 0.67150424       | 0.00014386 | No      |
|      |       |        |             |          |         | Shprh    | 5.02629  | 3.13968  | -0.678874        | 5.02729      | 3.14068       | -0.678704        | 0.00014386 | No      |
|      |       |        |             |          |         | Shq1     | 3.30466  | 0.758378 | -2.12351         | 3.30566      | 0.759378      | -2.1220482       | 0.00014386 | No      |
|      |       |        |             |          |         | Shroom1  | 0        | 0.744643 | inf              | 0.001        | 0.745643      | 9.54234125       | 0.00014386 | No      |
|      |       |        |             |          |         | Shroom2  | 0        | 4.30049  | inf              | 0.001        | 4.30149       | 12.0706208       | 0.00014386 | No      |
|      |       |        |             |          |         | Siae     | 4.34423  | 6.61969  | 0.607665         | 4.34523      | 6.62069       | 0.60754904       | 0.00014386 | No      |
|      |       |        |             |          |         | Siah1a   | 3.65928  | 10.5742  | 1.53092          | 3.66028      | 10.5752       | 1.53065903       | 0.00014386 | No      |
|      |       |        |             |          |         | Siah2    | 3.88652  | 6.47016  | 0.735323         | 3.88752      | 6.47116       | 0.73517425       | 0.00014386 | No      |
|      |       |        |             |          |         | Sidt1    | 9.79451  | 0.346438 | -4.8213          | 9.79551      | 0.347438      | -4.8172931       | 0.00014386 | No      |
|      |       |        |             |          |         | Sidt2    | 45.6308  | 26.6542  | -0.775648        | 45.6318      | 26.6552       | -0.7756226       | 0.00014386 | No      |
|      |       |        |             |          |         | Siglec10 | 1.63007  | 0.258407 | -2.65722         | 1.63107      | 0.259407      | -2.6525294       | 0.00014386 | No      |
|      |       |        |             |          |         | Sil1     | 10.096   | 30.0188  | 1.57208          | 10.097       | 30.0198       | 1.57198766       | 0.00014386 | No      |
|      |       |        |             |          |         | Sipa1    | 118.617  | 18.8328  | -2.65499         | 118.618      | 18.8338       | -2.6549269       | 0.00014386 | No      |
|      |       |        |             |          |         | Sipa1l3  | 7.44901  | 18.5195  | 1.31392          | 7.45001      | 18.5205       | 1.31380878       | 0.00014386 | No      |
|      |       |        |             |          |         | Sirpa    | 0.968944 | 3.21834  | 1.73183          | 0.969944     | 3.21934       | 1.73079159       | 0.00014386 | No      |
|      |       |        |             |          |         | Sirt1    | 19.6436  | 6.83284  | -1.52351         | 19.6446      | 6.83384       | -1.5233644       | 0.00014386 | No      |
|      |       |        |             |          |         | Sirt2    | 55.1447  | 88.5143  | 0.682688         | 55.1457      | 88.5153       | 0.68267845       | 0.00014386 | No      |

| RRBS |       |        |             |          |         | RNAseq   |           |          |                  |              |               |                  |            |         |
|------|-------|--------|-------------|----------|---------|----------|-----------|----------|------------------|--------------|---------------|------------------|------------|---------|
| gene | Blood | Kidney | methyl.diff | pMWU.fdr | Match ? | gene     | blood     | kidney   | log2(fold_ratio) | blood+ 0.001 | kidney+ 0.001 | log2(fold_ratio) | q_value    | Match ? |
|      |       |        |             |          |         | Sirt3    | 8.27368   | 24.5627  | 1.56987          | 8.27468      | 24.5637       | 1.56975246       | 0.00014386 | No      |
|      |       |        |             |          |         | Sirt5    | 28.5583   | 39.9278  | 0.483485         | 28.5593      | 39.9288       | 0.4834691        | 0.00014386 | No      |
|      |       |        |             |          |         | Sirt6    | 13.3002   | 23.4134  | 0.815881         | 13.3012      | 23.4144       | 0.81583966       | 0.00014386 | No      |
|      |       |        |             |          |         | Sirt7    | 64.4705   | 24.1002  | -1.4196          | 64.4715      | 24.1012       | -1.4195566       | 0.00014386 | No      |
|      |       |        |             |          |         | Sit1     | 90.0387   | 4.62275  | -4.28372         | 90.0397      | 4.62375       | -4.2834259       | 0.00014386 | No      |
|      |       |        |             |          |         | Six5     | 0.182497  | 9.71291  | 5.73396          | 0.183497     | 9.71391       | 5.72622374       | 0.00014386 | No      |
|      |       |        |             |          |         | Ska2     | 5.68539   | 17.5294  | 1.62444          | 5.68639      | 17.5304       | 1.62427396       | 0.00014386 | No      |
|      |       |        |             |          |         | Skap1    | 294.525   | 21.6379  | -3.76676         | 294.526      | 21.6389       | -3.7666959       | 0.00014386 | No      |
|      |       |        |             |          |         | Skap2    | 13.0478   | 30.1791  | 1.20974          | 13.0488      | 30.1801       | 1.20968045       | 0.00014386 | No      |
|      |       |        |             |          |         | Ski      | 34.1377   | 19.3999  | -0.815314        | 34.1387      | 19.4009       | -0.8152845       | 0.00014386 | No      |
|      |       |        |             |          |         | Skida1   | 0.0941206 | 1.58501  | 4.07384          | 0.0951206    | 1.58601       | 4.05950024       | 0.00014386 | No      |
|      |       |        |             |          |         | Skil     | 14.2003   | 9.66993  | -0.55434         | 14.2013      | 9.67093       | -0.5542965       | 0.00014386 | No      |
|      |       |        |             |          |         | Skp1     | 206.777   | 353.46   | 0.773474         | 206.778      | 353.461       | 0.77346834       | 0.00014386 | No      |
|      |       |        |             |          |         | Sla      | 37.642    | 1.43862  | -4.70959         | 37.643       | 1.43962       | -4.7086217       | 0.00014386 | No      |
|      |       |        |             |          |         | Slain1   | 15.0854   | 3.42747  | -2.13794         | 15.0864      | 3.42847       | -2.1376118       | 0.00014386 | No      |
|      |       |        |             |          |         | Slamf6   | 56.1122   | 0.873953 | -6.00461         | 56.1132      | 0.874953      | -6.0029909       | 0.00014386 | No      |
|      |       |        |             |          |         | Slamf9   | 0.154122  | 3.43768  | 4.47929          | 0.155122     | 3.43868       | 4.47037965       | 0.00014386 | No      |
|      |       |        |             |          |         | Slc11a2  | 14.5684   | 24.2171  | 0.733185         | 14.5694      | 24.2181       | 0.73314422       | 0.00014386 | No      |
|      |       |        |             |          |         | SLC12A1  | 0.158302  | 149.416  | 9.88244          | 0.159302     | 149.417       | 9.87336421       | 0.00014386 | No      |
|      |       |        |             |          |         | Slc12a2  | 4.63412   | 12.5724  | 1.43989          | 4.63512      | 12.5734       | 1.43969623       | 0.00014386 | No      |
|      |       |        |             |          |         | Slc12a6  | 24.1468   | 3.67575  | -2.71572         | 24.1478      | 3.67675       | -2.7153888       | 0.00014386 | No      |
|      |       |        |             |          |         | Slc12a7  | 41.3504   | 19.5176  | -1.08313         | 41.3514      | 19.5186       | -1.0830866       | 0.00014386 | No      |
|      |       |        |             |          |         | Slc12a8  | 0.116612  | 10.6477  | 6.51268          | 0.117612     | 10.6487       | 6.50049824       | 0.00014386 | No      |
|      |       |        |             |          |         | Slc12a9  | 27.0217   | 38.3116  | 0.503662         | 27.0227      | 38.3126       | 0.5036471        | 0.00014386 | No      |
|      |       |        |             |          |         | Slc13a1  | 0.0188762 | 26.0659  | 10.4314          | 0.0198762    | 26.0669       | 10.3569613       | 0.00014386 | No      |
|      |       |        |             |          |         | Slc14a1  | 37.3704   | 15.5969  | -1.26063         | 37.3714      | 15.5979       | -1.2605828       | 0.00014386 | No      |
|      |       |        |             |          |         | Slc14a2  | 0         | 68.2329  | inf              | 0.001        | 68.2339       | 16.0582011       | 0.00014386 | No      |
|      |       |        |             |          |         | Slc16a1  | 12.504    | 6.56375  | -0.929801        | 12.505       | 6.56475       | -0.9296931       | 0.00014386 | No      |
|      |       |        |             |          |         | Slc16a10 | 6.47041   | 2.77068  | -1.22362         | 6.47141      | 2.77168       | -1.2233194       | 0.00014386 | No      |
|      |       |        |             |          |         | SLC16A11 | 0.128103  | 23.5685  | 7.5234           | 0.129103     | 23.5695       | 7.51225482       | 0.00014386 | No      |
|      |       |        |             |          |         | Slc16a12 | 0.024883  | 33.2895  | 10.3857          | 0.025883     | 33.2905       | 10.32889         | 0.00014386 | No      |
|      |       |        |             |          |         | Slc16a13 | 0.970799  | 13.4507  | 3.79236          | 0.971799     | 13.4517       | 3.79098675       | 0.00014386 | No      |
|      |       |        |             |          |         | Slc16a14 | 0.0433086 | 9.60827  | 7.79348          | 0.0443086    | 9.60927       | 7.76069628       | 0.00014386 | No      |
|      |       |        |             |          |         | Slc16a6  | 27.9682   | 8.65924  | -1.69148         | 27.9692      | 8.66024       | -1.6913601       | 0.00014386 | No      |
|      |       |        |             |          |         | Slc16a7  | 0.136934  | 31.9962  | 7.86828          | 0.137934     | 31.9972       | 7.85782374       | 0.00014386 | No      |
|      |       |        |             |          |         | Slc17a1  | 0         | 12.0866  | inf              | 0.001        | 12.0876       | 13.5612402       | 0.00014386 | No      |
|      |       |        |             |          |         | Slc17a2  | 0         | 3.78996  | inf              | 0.001        | 3.79096       | 11.8883475       | 0.00014386 | No      |
|      |       |        |             |          |         | Slc18b1  | 0.193626  | 7.24999  | 5.22663          | 0.194626     | 7.25099       | 5.21940163       | 0.00014386 | No      |
|      |       |        |             |          |         | Slc19a1  | 9.313     | 34.3649  | 1.88362          | 9.314        | 34.3659       | 1.88350495       | 0.00014386 | No      |
|      |       |        |             |          |         | Slc19a2  | 3.64213   | 5.90869  | 0.698056         | 3.64313      | 5.90969       | 0.69790398       | 0.00014386 | No      |
|      |       |        |             |          |         | Slc1a4   | 0.346034  | 1.2292   | 1.82873          | 0.347034     | 1.2302        | 1.82574396       | 0.00014386 | No      |
|      |       |        |             |          |         | Slc1a5   | 18.8552   | 10.677   | -0.820456        | 18.8562      | 10.678        | -0.8203975       | 0.00014386 | No      |

| RRBS |       |        |             |          |         | RNAseq     |           |         |                  |              |               |                  |            |         |
|------|-------|--------|-------------|----------|---------|------------|-----------|---------|------------------|--------------|---------------|------------------|------------|---------|
| gene | Blood | Kidney | methyl.diff | pMWU.fdr | Match ? | gene       | blood     | kidney  | log2(fold_ratio) | blood+ 0.001 | kidney+ 0.001 | log2(fold_ratio) | q_value    | Match ? |
|      |       |        |             |          |         | Slc20a1    | 48.2292   | 12.3129 | -1.96974         | 48.2302      | 12.3139       | -1.969649        | 0.00014386 | No      |
|      |       |        |             |          |         | Slc20a2    | 31.5751   | 19.2749 | -0.712069        | 31.5761      | 19.2759       | -0.7120348       | 0.00014386 | No      |
|      |       |        |             |          |         | Slc22a1    | 0         | 25.0239 | inf              | 0.001        | 25.0249       | 14.6110767       | 0.00014386 | No      |
|      |       |        |             |          |         | Slc22a12   | 0.0624958 | 92.2855 | 10.5281          | 0.0634958    | 92.2865       | 10.5052427       | 0.00014386 | No      |
|      |       |        |             |          |         | Slc22a15   | 0.113963  | 7.50894 | 6.04197          | 0.114963     | 7.50994       | 6.02955986       | 0.00014386 | No      |
|      |       |        |             |          |         | Slc22a18   | 2.79399   | 38.6649 | 3.79063          | 2.79499      | 38.6659       | 3.79014677       | 0.00014386 | No      |
|      |       |        |             |          |         | Slc22a25   | 0         | 12.3576 | inf              | 0.001        | 12.3586       | 13.5932277       | 0.00014386 | No      |
|      |       |        |             |          |         | Slc22a5    | 1.96622   | 47.1739 | 4.5845           | 1.96722      | 47.1749       | 4.58378925       | 0.00014386 | No      |
|      |       |        |             |          |         | Slc22a7    | 0         | 1.03645 | inf              | 0.001        | 1.03745       | 10.0188261       | 0.00014386 | No      |
|      |       |        |             |          |         | Slc23a2    | 15.3211   | 5.43707 | -1.49462         | 15.3221      | 5.43807       | -1.4944474       | 0.00014386 | No      |
|      |       |        |             |          |         | Slc23a3    | 0.402179  | 2.9295  | 2.86475          | 0.403179     | 2.9305        | 2.86165444       | 0.00014386 | No      |
|      |       |        |             |          |         | Slc24a6    | 5.36543   | 30.1411 | 2.48996          | 5.36643      | 30.1421       | 2.48974537       | 0.00014386 | No      |
|      |       |        |             |          |         | Slc25a1    | 14.1949   | 62.5919 | 2.1406           | 14.1959      | 62.5929       | 2.1405247        | 0.00014386 | No      |
|      |       |        |             |          |         | Slc25a10   | 5.57337   | 122.362 | 4.45646          | 5.57437      | 122.363       | 4.45621481       | 0.00014386 | No      |
|      |       |        |             |          |         | Slc25a11   | 39.9074   | 146.114 | 1.87237          | 39.9084      | 146.115       | 1.87233995       | 0.00014386 | No      |
|      |       |        |             |          |         | Slc25a13   | 0.503696  | 25.2453 | 5.64732          | 0.504696     | 25.2463       | 5.6445135        | 0.00014386 | No      |
|      |       |        |             |          |         | Slc25a15   | 4.20165   | 17.7138 | 2.07585          | 4.20265      | 17.7148       | 2.07558396       | 0.00014386 | No      |
|      |       |        |             |          |         | Slc25a17   | 27.2435   | 51.1018 | 0.90746          | 27.2445      | 51.1028       | 0.90743733       | 0.00014386 | No      |
|      |       |        |             |          |         | Slc25a20   | 17.5367   | 35.1575 | 1.00345          | 17.5377      | 35.1585       | 1.00341396       | 0.00014386 | No      |
|      |       |        |             |          |         | Slc25a24   | 2.13475   | 8.21772 | 1.94467          | 2.13575      | 8.21872       | 1.94417094       | 0.00014386 | No      |
|      |       |        |             |          |         | Slc25a28   | 33.8406   | 61.885  | 0.870834         | 33.8416      | 61.886        | 0.8708153        | 0.00014386 | No      |
|      |       |        |             |          |         | Slc25a29   | 3.72397   | 27.5388 | 2.88655          | 3.72497      | 27.5398       | 2.88621737       | 0.00014386 | No      |
|      |       |        |             |          |         | Slc25a3    | 284.976   | 684.685 | 1.2646           | 284.977      | 684.686       | 1.26459703       | 0.00014386 | No      |
|      |       |        |             |          |         | Slc25a30   | 16.561    | 79.9165 | 2.2707           | 16.562       | 79.9175       | 2.27063455       | 0.00014386 | No      |
|      |       |        |             |          |         | Slc25a35   | 1.73935   | 9.9548  | 2.51684          | 1.74035      | 9.9558        | 2.51615977       | 0.00014386 | No      |
|      |       |        |             |          |         | Slc25a36l1 | 70.401    | 22.3806 | -1.65335         | 70.402       | 22.3816       | -1.6533032       | 0.00014386 | No      |
|      |       |        |             |          |         | Slc25a38   | 23.3424   | 57.6768 | 1.30504          | 23.3434      | 57.6778       | 1.30500143       | 0.00014386 | No      |
|      |       |        |             |          |         | Slc25a39   | 79.3996   | 179.311 | 1.17526          | 79.4006      | 179.312       | 1.17525023       | 0.00014386 | No      |
|      |       |        |             |          |         | Slc25a4    | 49.9044   | 307.536 | 2.62352          | 49.9054      | 307.537       | 2.62349216       | 0.00014386 | No      |
|      |       |        |             |          |         | Slc25a45   | 0.511953  | 20.5684 | 5.32828          | 0.512953     | 20.5694       | 5.32552926       | 0.00014386 | No      |
|      |       |        |             |          |         | Slc25a46   | 30.3022   | 14.2131 | -1.0922          | 30.3032      | 14.2141       | -1.0921474       | 0.00014386 | No      |
|      |       |        |             |          |         | Slc25a5    | 338.378   | 956.958 | 1.49982          | 338.379      | 956.959       | 1.49981708       | 0.00014386 | No      |
|      |       |        |             |          |         | Slc26a10   | 78.8044   | 34.6174 | -1.18678         | 78.8054      | 34.6184       | -1.1867554       | 0.00014386 | No      |
|      |       |        |             |          |         | Slc26a11   | 7.16183   | 3.91348 | -0.871878        | 7.16283      | 3.91448       | -0.871709        | 0.00014386 | No      |
|      |       |        |             |          |         | Slc26a2    | 2.77179   | 1.00977 | -1.4568          | 2.77279      | 1.01077       | -1.4558836       | 0.00014386 | No      |
|      |       |        |             |          |         | Slc26a8    | 86.1966   | 30.7391 | -1.48756         | 86.1976      | 30.7401       | -1.4875258       | 0.00014386 | No      |
|      |       |        |             |          |         | Slc27a1    | 15.3314   | 32.3116 | 1.07556          | 15.3324      | 32.3126       | 1.0755133        | 0.00014386 | No      |
|      |       |        |             |          |         | Slc28a2    | 102.862   | 7.10716 | -3.8553          | 102.863      | 7.10816       | -3.8551042       | 0.00014386 | No      |
|      |       |        |             |          |         | Slc29a3    | 2.2705    | 27.0039 | 3.57208          | 2.2715       | 27.0049       | 3.571504         | 0.00014386 | No      |
|      |       |        |             |          |         | Slc2a1     | 9.50624   | 46.0728 | 2.27697          | 9.50724      | 46.0738       | 2.27684811       | 0.00014386 | No      |
|      |       |        |             |          |         | Slc2a12    | 0.126161  | 1.54405 | 3.61339          | 0.127161     | 1.54505       | 3.60292535       | 0.00014386 | No      |
|      |       |        |             |          |         | Slc2a8     | 2.87879   | 8.09706 | 1.49193          | 2.87979      | 8.09806       | 1.49161272       | 0.00014386 | No      |

| RRBS |       |        |             |          |         | RNAseq   |           |         |                  |              |               |                  |            |         |
|------|-------|--------|-------------|----------|---------|----------|-----------|---------|------------------|--------------|---------------|------------------|------------|---------|
| gene | Blood | Kidney | methyl.diff | pMWU.fdr | Match ? | gene     | blood     | kidney  | log2(fold_ratio) | blood+ 0.001 | kidney+ 0.001 | log2(fold_ratio) | q_value    | Match ? |
|      |       |        |             |          |         | Slc2a9   | 3.40515   | 1.15219 | -1.56334         | 3.40615      | 1.15319       | -1.5625117       | 0.00014386 | No      |
|      |       |        |             |          |         | Slc30a2  | 0.0776653 | 8.63691 | 6.7971           | 0.0786653    | 8.63791       | 6.77881108       | 0.00014386 | No      |
|      |       |        |             |          |         | Slc30a4  | 1.39917   | 3.72914 | 1.41427          | 1.40017      | 3.73014       | 1.41362778       | 0.00014386 | No      |
|      |       |        |             |          |         | Slc30a5  | 15.2192   | 10.1436 | -0.585325        | 15.2202      | 10.1446       | -0.5852753       | 0.00014386 | No      |
|      |       |        |             |          |         | Slc30a7  | 10.1255   | 2.78178 | -1.86391         | 10.1265      | 2.78278       | -1.8635369       | 0.00014386 | No      |
|      |       |        |             |          |         | Slc31a1  | 6.24532   | 21.7091 | 1.79745          | 6.24632      | 21.7101       | 1.79728799       | 0.00014386 | No      |
|      |       |        |             |          |         | Slc31a2  | 7.32384   | 62.138  | 3.0848           | 7.32484      | 62.139        | 3.08462987       | 0.00014386 | No      |
|      |       |        |             |          |         | Slc33a1  | 12.6044   | 17.2901 | 0.456021         | 12.6054      | 17.2911       | 0.45598775       | 0.00014386 | No      |
|      |       |        |             |          |         | Slc34a1  | 0.209093  | 702.049 | 11.7132          | 0.210093     | 702.05        | 11.70633         | 0.00014386 | No      |
|      |       |        |             |          |         | Slc34a3  | 0         | 15.6    | inf              | 0.001        | 15.601        | 13.9293509       | 0.00014386 | No      |
|      |       |        |             |          |         | Slc35a1  | 10.4033   | 19.9372 | 0.938423         | 10.4043      | 19.9382       | 0.93835527       | 0.00014386 | No      |
|      |       |        |             |          |         | Slc35a3  | 8.22923   | 5.96502 | -0.46423         | 8.23023      | 5.96602       | -0.4641639       | 0.00014386 | No      |
|      |       |        |             |          |         | Slc35a5  | 5.70952   | 3.49059 | -0.709898        | 5.71052      | 3.49159       | -0.709738        | 0.00014386 | No      |
|      |       |        |             |          |         | Slc35b1  | 24.7294   | 34.6727 | 0.48757          | 24.7304      | 34.6737       | 0.48755622       | 0.00014386 | No      |
|      |       |        |             |          |         | Slc35b3  | 51.7445   | 21.5402 | -1.26438         | 51.7455      | 21.5412       | -1.2643348       | 0.00014386 | No      |
|      |       |        |             |          |         | Slc35b4  | 22.6587   | 8.90888 | -1.34675         | 22.6597      | 8.90988       | -1.3466509       | 0.00014386 | No      |
|      |       |        |             |          |         | Slc35c1  | 16.284    | 9.42948 | -0.788201        | 16.285       | 9.43048       | -0.7881406       | 0.00014386 | No      |
|      |       |        |             |          |         | Slc35d1  | 2.33547   | 5.44082 | 1.22011          | 2.33647      | 5.44182       | 1.21975872       | 0.00014386 | No      |
|      |       |        |             |          |         | Slc35d2  | 10.7515   | 3.63991 | -1.56257         | 10.7525      | 3.64091       | -1.5623011       | 0.00014386 | No      |
|      |       |        |             |          |         | Slc35e1  | 10.7478   | 7.80583 | -0.46142         | 10.7488      | 7.80683       | -0.4613668       | 0.00014386 | No      |
|      |       |        |             |          |         | Slc35e2b | 7.28754   | 3.65627 | -0.99506         | 7.28854      | 3.65727       | -0.9948627       | 0.00014386 | No      |
|      |       |        |             |          |         | Slc35e3  | 2.53928   | 8.07477 | 1.669            | 2.54028      | 8.07577       | 1.6686123        | 0.00014386 | No      |
|      |       |        |             |          |         | Slc35f5  | 4.39948   | 9.22917 | 1.06887          | 4.40048      | 9.23017       | 1.06869632       | 0.00014386 | No      |
|      |       |        |             |          |         | Slc37a4  | 20.0028   | 46.5387 | 1.21823          | 20.0038      | 46.5397       | 1.21818782       | 0.00014386 | No      |
|      |       |        |             |          |         | Slc38a1  | 32.1172   | 15.5835 | -1.04333         | 32.1182      | 15.5845       | -1.0432792       | 0.00014386 | No      |
|      |       |        |             |          |         | Slc38a10 | 20.3487   | 12.8438 | -0.663863        | 20.3497      | 12.8448       | -0.6638231       | 0.00014386 | No      |
|      |       |        |             |          |         | Slc38a9  | 5.77903   | 1.50264 | -1.94332         | 5.78003      | 1.50364       | -1.9426178       | 0.00014386 | No      |
|      |       |        |             |          |         | Slc39a1  | 9.92315   | 28.5543 | 1.52484          | 9.92415      | 28.5553       | 1.5247431        | 0.00014386 | No      |
|      |       |        |             |          |         | Slc39a10 | 3.07638   | 1.02748 | -1.58213         | 3.07738      | 1.02848       | -1.5811889       | 0.00014386 | No      |
|      |       |        |             |          |         | Slc39a12 | 0         | 6.13975 | inf              | 0.001        | 6.14075       | 12.5841992       | 0.00014386 | No      |
|      |       |        |             |          |         | Slc39a13 | 2.67068   | 18.667  | 2.80521          | 2.67168      | 18.668        | 2.80474825       | 0.00014386 | No      |
|      |       |        |             |          |         | Slc39a14 | 4.56038   | 1.30105 | -1.80948         | 4.56138      | 1.30205       | -1.8086855       | 0.00014386 | No      |
|      |       |        |             |          |         | Slc39a3  | 4.71175   | 6.69068 | 0.505892         | 4.71275      | 6.69168       | 0.5057993        | 0.00014386 | No      |
|      |       |        |             |          |         | Slc39a6  | 14.0281   | 4.59918 | -1.60887         | 14.0291      | 4.60018       | -1.6086602       | 0.00014386 | No      |
|      |       |        |             |          |         | Slc3a2   | 39.4974   | 85.2348 | 1.10968          | 39.4984      | 85.2358       | 1.10966529       | 0.00014386 | No      |
|      |       |        |             |          |         | Slc40a1  | 0.304446  | 7.78793 | 4.67698          | 0.305446     | 7.78893       | 4.6724359        | 0.00014386 | No      |
|      |       |        |             |          |         | Slc41a1  | 8.92265   | 3.6361  | -1.29508         | 8.92365      | 3.6371        | -1.2948453       | 0.00014386 | No      |
|      |       |        |             |          |         | Slc41a3  | 9.83251   | 1.83584 | -2.42112         | 9.83351      | 1.83684       | -2.4204805       | 0.00014386 | No      |
|      |       |        |             |          |         | Slc43a1  | 17.2708   | 1.38344 | -3.642           | 17.2718      | 1.38444       | -3.641044        | 0.00014386 | No      |
|      |       |        |             |          |         | Slc43a2  | 23.5258   | 11.9507 | -0.977142        | 23.5268      | 11.9517       | -0.9770893       | 0.00014386 | No      |
|      |       |        |             |          |         | Slc44a1  | 0.0978781 | 25.9836 | 8.0524           | 0.0988781    | 25.9846       | 8.03779011       | 0.00014386 | No      |
|      |       |        |             |          |         | Slc45a3  | 0.28337   | 8.82308 | 4.96053          | 0.28437      | 8.82408       | 4.95560469       | 0.00014386 | No      |

| RRBS |       |        |             |          |         | RNAseq   |           |          |                  |              |               |                  |            |         |
|------|-------|--------|-------------|----------|---------|----------|-----------|----------|------------------|--------------|---------------|------------------|------------|---------|
| gene | Blood | Kidney | methyl.diff | pMWU.fdr | Match ? | gene     | blood     | kidney   | log2(fold_ratio) | blood+ 0.001 | kidney+ 0.001 | log2(fold_ratio) | q_value    | Match ? |
|      |       |        |             |          |         | SLC45A4  | 3.02012   | 11.3869  | 1.9147           | 3.02112      | 11.3879       | 1.91434633       | 0.00014386 | No      |
|      |       |        |             |          |         | Slc46a3  | 3.90877   | 1.54655  | -1.33766         | 3.90977      | 1.54755       | -1.3370977       | 0.00014386 | No      |
|      |       |        |             |          |         | Slc48a1  | 7.31889   | 36.1365  | 2.30376          | 7.31989      | 36.1375       | 2.30360283       | 0.00014386 | No      |
|      |       |        |             |          |         | Slc4a1   | 0.0502391 | 5.2758   | 6.71444          | 0.0512391    | 5.2768        | 6.68627436       | 0.00014386 | No      |
|      |       |        |             |          |         | Slc4a11  | 34.8618   | 283.659  | 3.02444          | 34.8628      | 283.66        | 3.02440238       | 0.00014386 | No      |
|      |       |        |             |          |         | Slc4a4   | 6.31368   | 11.7014  | 0.89013          | 6.31468      | 11.7024       | 0.89002291       | 0.00014386 | No      |
|      |       |        |             |          |         | Slc4a7   | 20.5907   | 1.17209  | -4.13483         | 20.5917      | 1.17309       | -4.1336773       | 0.00014386 | No      |
|      |       |        |             |          |         | Slc4a9   | 0.0343312 | 14.7674  | 8.74868          | 0.0353312    | 14.7684       | 8.70735507       | 0.00014386 | No      |
|      |       |        |             |          |         | Slc50a1  | 74.1813   | 34.2651  | -1.11432         | 74.1823      | 34.2661       | -1.114293        | 0.00014386 | No      |
|      |       |        |             |          |         | Slc51b   | 0         | 42.9133  | inf              | 0.001        | 42.9143       | 15.3891708       | 0.00014386 | No      |
|      |       |        |             |          |         | Slc52a3  | 0.519229  | 2.67221  | 2.36359          | 0.520229     | 2.67321       | 2.36135445       | 0.00014386 | No      |
|      |       |        |             |          |         | Slc5a10  | 0.0542674 | 48.2682  | 9.79677          | 0.0552674    | 48.2692       | 9.77045846       | 0.00014386 | No      |
|      |       |        |             |          |         | Slc5a12  | 0         | 6.76558  | inf              | 0.001        | 6.76658       | 12.7242111       | 0.00014386 | No      |
|      |       |        |             |          |         | Slc5a2   | 0.0920795 | 13.0464  | 7.14655          | 0.0930795    | 13.0474       | 7.13108317       | 0.00014386 | No      |
|      |       |        |             |          |         | Slc5a6   | 9.56782   | 27.3544  | 1.51551          | 9.56882      | 27.3554       | 1.51541272       | 0.00014386 | No      |
|      |       |        |             |          |         | Slc5a8   | 0         | 8.03046  | inf              | 0.001        | 8.03146       | 12.9714466       | 0.00014386 | No      |
|      |       |        |             |          |         | Slc5a9   | 0         | 3.17345  | inf              | 0.001        | 3.17445       | 11.6322909       | 0.00014386 | No      |
|      |       |        |             |          |         | Slc6a12  | 0.519241  | 31.4956  | 5.9226           | 0.520241     | 31.4966       | 5.91987219       | 0.00014386 | No      |
|      |       |        |             |          |         | Slc6a13  | 0         | 4.33865  | inf              | 0.001        | 4.33965       | 12.083363        | 0.00014386 | No      |
|      |       |        |             |          |         | Slc6a18  | 0.0219047 | 219.721  | 13.2921          | 0.0229047    | 219.722       | 13.227748        | 0.00014386 | No      |
|      |       |        |             |          |         | Slc6a8   | 0.886718  | 47.2955  | 5.73708          | 0.887718     | 47.2965       | 5.73548817       | 0.00014386 | No      |
|      |       |        |             |          |         | Slc7a1   | 5.23358   | 1.90171  | -1.4605          | 5.23458      | 1.90271       | -1.4600181       | 0.00014386 | No      |
|      |       |        |             |          |         | Slc7a12  | 0         | 5.82142  | inf              | 0.001        | 5.82242       | 12.5074032       | 0.00014386 | No      |
|      |       |        |             |          |         | Slc7a13  | 0         | 58.1027  | inf              | 0.001        | 58.1037       | 15.8263424       | 0.00014386 | No      |
|      |       |        |             |          |         | Slc7a4   | 0.01993   | 3.01917  | 7.24307          | 0.02093      | 3.02017       | 7.17291364       | 0.00014386 | No      |
|      |       |        |             |          |         | Slc7a6   | 15.4134   | 2.87347  | -2.42332         | 15.4144      | 2.87447       | -2.4229109       | 0.00014386 | No      |
|      |       |        |             |          |         | Slc7a6os | 20.8914   | 12.8893  | -0.696733        | 20.8924      | 12.8903       | -0.6966924       | 0.00014386 | No      |
|      |       |        |             |          |         | Slc7a7   | 0.546305  | 79.6901  | 7.18855          | 0.547305     | 79.6911       | 7.18592976       | 0.00014386 | No      |
|      |       |        |             |          |         | Slc7a8   | 0.199612  | 7.55121  | 5.24144          | 0.200612     | 7.55221       | 5.23441907       | 0.00014386 | No      |
|      |       |        |             |          |         | Slc9a1   | 52.8077   | 10.9755  | -2.26647         | 52.8087      | 10.9765       | -2.2663575       | 0.00014386 | No      |
|      |       |        |             |          |         | Slc9a3r2 | 0.0604983 | 58.9042  | 9.92726          | 0.0614983    | 58.9052       | 9.90363275       | 0.00014386 | No      |
|      |       |        |             |          |         | Slc9a4   | 0         | 0.804147 | inf              | 0.001        | 0.805147      | 9.6531084        | 0.00014386 | No      |
|      |       |        |             |          |         | Slc9a7   | 12.0863   | 0.487308 | -4.63239         | 12.0873      | 0.488308      | -4.6295568       | 0.00014386 | No      |
|      |       |        |             |          |         | Slc9a9   | 30.0839   | 0.840009 | -5.16244         | 30.0849      | 0.841009      | -5.1607745       | 0.00014386 | No      |
|      |       |        |             |          |         | Slco3a1  | 4.09132   | 6.12425  | 0.581969         | 4.09232      | 6.12525       | 0.58184977       | 0.00014386 | No      |
|      |       |        |             |          |         | Slco4a1  | 0.666813  | 10.1558  | 3.92888          | 0.667813     | 10.1568       | 3.92685795       | 0.00014386 | No      |
|      |       |        |             |          |         | Slfn13   | 67.7252   | 5.13017  | -3.72262         | 67.7262      | 5.13117       | -3.7223543       | 0.00014386 | No      |
|      |       |        |             |          |         | Slfn2    | 456.932   | 23.6333  | -4.27309         | 456.933      | 23.6343       | -4.2730286       | 0.00014386 | No      |
|      |       |        |             |          |         | Slfn3    | 21.3036   | 8.25367  | -1.36799         | 21.3046      | 8.25467       | -1.3678825       | 0.00014386 | No      |
|      |       |        |             |          |         | Slfn5    | 158.493   | 15.8472  | -3.32212         | 158.494      | 15.8482       | -3.3220373       | 0.00014386 | No      |
|      |       |        |             |          |         | Slk      | 7.55075   | 14.8764  | 0.978337         | 7.55175      | 14.8774       | 0.97823951       | 0.00014386 | No      |
|      |       |        |             |          |         | Slu7     | 33.3722   | 21.0915  | -0.661984        | 33.3732      | 21.0925       | -0.6619599       | 0.00014386 | No      |

| RRBS |       |        |             |          |         | RNAseq   |          |          |                  |              |               |                  |            |         |
|------|-------|--------|-------------|----------|---------|----------|----------|----------|------------------|--------------|---------------|------------------|------------|---------|
| gene | Blood | Kidney | methyl.diff | pMWU.fdr | Match ? | gene     | blood    | kidney   | log2(fold_ratio) | blood+ 0.001 | kidney+ 0.001 | log2(fold_ratio) | q_value    | Match ? |
|      |       |        |             |          |         | Slx4     | 15.729   | 6.88157  | -1.19262         | 15.73        | 6.88257       | -1.1924994       | 0.00014386 | No      |
|      |       |        |             |          |         | Slx4ip   | 1.77804  | 0.935264 | -0.926841        | 1.77904      | 0.936264      | -0.9261117       | 0.00014386 | No      |
|      |       |        |             |          |         | Smad1    | 1.9169   | 11.1712  | 2.54294          | 1.9179       | 11.1722       | 2.5423139        | 0.00014386 | No      |
|      |       |        |             |          |         | Smad2    | 26.956   | 14.3812  | -0.906422        | 26.957       | 14.3822       | -0.9063756       | 0.00014386 | No      |
|      |       |        |             |          |         | Smad4    | 88.2335  | 19.5102  | -2.1771          | 88.2345      | 19.5112       | -2.1770404       | 0.00014386 | No      |
|      |       |        |             |          |         | Smad5    | 22.7823  | 7.9839   | -1.51275         | 22.7833      | 7.9849        | -1.5126305       | 0.00014386 | No      |
|      |       |        |             |          |         | SMAGP    | 4.23456  | 212.598  | 5.64977          | 4.23556      | 212.599       | 5.64943827       | 0.00014386 | No      |
|      |       |        |             |          |         | Smadp1   | 38.5269  | 24.6302  | -0.645439        | 38.5279      | 24.6312       | -0.6454166       | 0.00014386 | No      |
|      |       |        |             |          |         | Smadp2   | 111.55   | 16.3312  | -2.77199         | 111.551      | 16.3322       | -2.7719124       | 0.00014386 | No      |
|      |       |        |             |          |         | Smarca2  | 73.9237  | 41.5288  | -0.831926        | 73.9247      | 41.5298       | -0.8319096       | 0.00014386 | No      |
|      |       |        |             |          |         | Smarca5  | 39.3861  | 15.8597  | -1.31232         | 39.3871      | 15.8607       | -1.3122668       | 0.00014386 | No      |
|      |       |        |             |          |         | Smarcad1 | 15.7698  | 9.35428  | -0.753463        | 15.7708      | 9.35528       | -0.7534031       | 0.00014386 | No      |
|      |       |        |             |          |         | Smarca11 | 16.7473  | 6.88736  | -1.2819          | 16.7483      | 6.88836       | -1.2817822       | 0.00014386 | No      |
|      |       |        |             |          |         | Smarcc2  | 73.6963  | 38.0819  | -0.952486        | 73.6973      | 38.0829       | -0.9524684       | 0.00014386 | No      |
|      |       |        |             |          |         | Smarcd1  | 20.2601  | 8.47676  | -1.25706         | 20.2611      | 8.47776       | -1.2569575       | 0.00014386 | No      |
|      |       |        |             |          |         | Smarcd2  | 47.8199  | 15.5834  | -1.6176          | 47.8209      | 15.5844       | -1.6175387       | 0.00014386 | No      |
|      |       |        |             |          |         | Smarcd3  | 0.132404 | 36.3618  | 8.10133          | 0.133404     | 36.3628       | 8.09051756       | 0.00014386 | No      |
|      |       |        |             |          |         | Smarce1  | 91.092   | 60.9581  | -0.579505        | 91.093       | 60.9591       | -0.5794986       | 0.00014386 | No      |
|      |       |        |             |          |         | Smc1a    | 46.8646  | 18.9008  | -1.31005         | 46.8656      | 18.9018       | -1.3100057       | 0.00014386 | No      |
|      |       |        |             |          |         | Smc2     | 5.35672  | 2.46461  | -1.11999         | 5.35772      | 2.46561       | -1.1196746       | 0.00014386 | No      |
|      |       |        |             |          |         | Smc3     | 30.8394  | 17.2806  | -0.835625        | 30.8404      | 17.2816       | -0.8355847       | 0.00014386 | No      |
|      |       |        |             |          |         | Smc4     | 183.034  | 7.53057  | -4.60321         | 183.035      | 7.53157       | -4.6030251       | 0.00014386 | No      |
|      |       |        |             |          |         | Smc5     | 10.4413  | 5.78751  | -0.851283        | 10.4423      | 5.78851       | -0.8511756       | 0.00014386 | No      |
|      |       |        |             |          |         | Smc6     | 29.068   | 14.5417  | -0.99924         | 29.069       | 14.5427       | -0.9991863       | 0.00014386 | No      |
|      |       |        |             |          |         | Smchd1   | 64.6604  | 8.22588  | -2.97464         | 64.6614      | 8.22688       | -2.9744874       | 0.00014386 | No      |
|      |       |        |             |          |         | Smco4    | 64.4427  | 41.8097  | -0.624181        | 64.4437      | 41.8107       | -0.6241671       | 0.00014386 | No      |
|      |       |        |             |          |         | Smdt1    | 87.5468  | 432.519  | 2.30464          | 87.5478      | 432.52        | 2.30462401       | 0.00014386 | No      |
|      |       |        |             |          |         | Smek1    | 60.0899  | 19.0616  | -1.65645         | 60.0909      | 19.0626       | -1.6564016       | 0.00014386 | No      |
|      |       |        |             |          |         | Smek2    | 26.2958  | 8.5454   | -1.62161         | 26.2968      | 8.5464        | -1.6214985       | 0.00014386 | No      |
|      |       |        |             |          |         | Smg1     | 35.7375  | 5.54465  | -2.68827         | 35.7385      | 5.54565       | -2.6880506       | 0.00014386 | No      |
|      |       |        |             |          |         | Smg5     | 29.7547  | 17.7486  | -0.745416        | 29.7557      | 17.7496       | -0.7453795       | 0.00014386 | No      |
|      |       |        |             |          |         | Smg7     | 24.6871  | 6.93034  | -1.83276         | 24.6881      | 6.93134       | -1.8326096       | 0.00014386 | No      |
|      |       |        |             |          |         | Smg8     | 4.004    | 2.24844  | -0.832513        | 4.005        | 2.24944       | -0.8322364       | 0.00014386 | No      |
|      |       |        |             |          |         | Smim1    | 0.408305 | 61.479   | 7.2343           | 0.409305     | 61.48         | 7.23079706       | 0.00014386 | No      |
|      |       |        |             |          |         | Smim11   | 46.1281  | 25.8391  | -0.836089        | 46.1291      | 25.8401       | -0.8360655       | 0.00014386 | No      |
|      |       |        |             |          |         | Smim12   | 44.862   | 102.78   | 1.19599          | 44.863       | 102.781       | 1.19597559       | 0.00014386 | No      |
|      |       |        |             |          |         | Smim14   | 49.0085  | 73.654   | 0.587732         | 49.0095      | 73.655        | 0.58772204       | 0.00014386 | No      |
|      |       |        |             |          |         | SMIM15   | 38.9511  | 17.9393  | -1.11854         | 38.9521      | 17.9403       | -1.1184971       | 0.00014386 | No      |
|      |       |        |             |          |         | Smim19   | 29.8858  | 60.7324  | 1.023            | 29.8868      | 60.7334       | 1.0229817        | 0.00014386 | No      |
|      |       |        |             |          |         | Smim20   | 34.2018  | 116.323  | 1.766            | 34.2028      | 116.324       | 1.76596244       | 0.00014386 | No      |
|      |       |        |             |          |         | Smim24   | 7.09718  | 237.395  | 5.0639           | 7.09818      | 237.396       | 5.06370266       | 0.00014386 | No      |
|      |       |        |             |          |         | SMIM5    | 0.210477 | 23.4046  | 6.79698          | 0.211477     | 23.4056       | 6.79020917       | 0.00014386 | No      |

| RRBS |       |        |             |          |         | RNAseq   |           |         |                  |              |               |                  |            |         |
|------|-------|--------|-------------|----------|---------|----------|-----------|---------|------------------|--------------|---------------|------------------|------------|---------|
| gene | Blood | Kidney | methyl.diff | pMWU.fdr | Match ? | gene     | blood     | kidney  | log2(fold_ratio) | blood+ 0.001 | kidney+ 0.001 | log2(fold_ratio) | q_value    | Match ? |
|      |       |        |             |          |         | Smim7    | 27.4208   | 59.9568 | 1.12865          | 27.4218      | 59.9578       | 1.12862417       | 0.00014386 | No      |
|      |       |        |             |          |         | Smn1     | 29.4936   | 17.2791 | -0.771379        | 29.4946      | 17.2801       | -0.7713393       | 0.00014386 | No      |
|      |       |        |             |          |         | SMNDC1   | 41.6201   | 26.597  | -0.646019        | 41.6211      | 26.598        | -0.6459973       | 0.00014386 | No      |
|      |       |        |             |          |         | Smox     | 15.3714   | 2.69827 | -2.51014         | 15.3724      | 2.69927       | -2.5097012       | 0.00014386 | No      |
|      |       |        |             |          |         | Smpd1    | 26.101    | 49.6824 | 0.928633         | 26.102       | 49.6834       | 0.92860355       | 0.00014386 | No      |
|      |       |        |             |          |         | Smpd2    | 62.7212   | 32.7998 | -0.935265        | 62.7222      | 32.8008       | -0.9352452       | 0.00014386 | No      |
|      |       |        |             |          |         | Smpd13a  | 31.2458   | 47.7515 | 0.611881         | 31.2468      | 47.7525       | 0.61186781       | 0.00014386 | No      |
|      |       |        |             |          |         | Smpd13b  | 3.31931   | 1.21484 | -1.45012         | 3.32031      | 1.21584       | -1.4493646       | 0.00014386 | No      |
|      |       |        |             |          |         | Smtn     | 0.138784  | 31.3124 | 7.81775          | 0.139784     | 31.3134       | 7.80743712       | 0.00014386 | No      |
|      |       |        |             |          |         | Smurf1   | 13.1081   | 7.9625  | -0.719164        | 13.1091      | 7.9635        | -0.7190941       | 0.00014386 | No      |
|      |       |        |             |          |         | Smurf2   | 19.0533   | 8.41708 | -1.17865         | 19.0543      | 8.41808       | -1.1785535       | 0.00014386 | No      |
|      |       |        |             |          |         | Snap47   | 4.70951   | 8.52391 | 0.855937         | 4.71051      | 8.52491       | 0.85580134       | 0.00014386 | No      |
|      |       |        |             |          |         | Snapc2   | 16.0036   | 33.8583 | 1.08111          | 16.0046      | 33.8593       | 1.08106553       | 0.00014386 | No      |
|      |       |        |             |          |         | Snapc4   | 2.77622   | 4.22751 | 0.606687         | 2.77722      | 4.22851       | 0.60650792       | 0.00014386 | No      |
|      |       |        |             |          |         | Snd1     | 44.063    | 18.0206 | -1.28993         | 44.064       | 18.0216       | -1.2898734       | 0.00014386 | No      |
|      |       |        |             |          |         | Sned1    | 0.0265799 | 22.5763 | 9.73025          | 0.0275799    | 22.5773       | 9.67704002       | 0.00014386 | No      |
|      |       |        |             |          |         | Snf8     | 67.2926   | 125.905 | 0.903818         | 67.2936      | 125.906       | 0.90380583       | 0.00014386 | No      |
|      |       |        |             |          |         | Snn      | 16.9245   | 73.8633 | 2.12574          | 16.9255      | 73.8643       | 2.1256788        | 0.00014386 | No      |
|      |       |        |             |          |         | Snrk     | 21.9041   | 8.79049 | -1.31719         | 21.9051      | 8.79149       | -1.3170872       | 0.00014386 | No      |
|      |       |        |             |          |         | Snrnp200 | 36.277    | 16.2595 | -1.15777         | 36.278       | 16.2605       | -1.1577233       | 0.00014386 | No      |
|      |       |        |             |          |         | Snrnp25  | 66.1288   | 37.3231 | -0.825212        | 66.1298      | 37.3241       | -0.8251931       | 0.00014386 | No      |
|      |       |        |             |          |         | Snrnp40  | 36.973    | 14.0681 | -1.39404         | 36.974       | 14.0691       | -1.3939811       | 0.00014386 | No      |
|      |       |        |             |          |         | Snrnp48  | 80.0019   | 20.1045 | -1.99251         | 80.0029      | 20.1055       | -1.9924621       | 0.00014386 | No      |
|      |       |        |             |          |         | Snrnp70  | 555.291   | 261.723 | -1.0852          | 555.292      | 261.724       | -1.0852004       | 0.00014386 | No      |
|      |       |        |             |          |         | Snrpa1   | 41.5541   | 26.3455 | -0.657435        | 41.5551      | 26.3465       | -0.6574142       | 0.00014386 | No      |
|      |       |        |             |          |         | Snrpb    | 153.426   | 115.658 | -0.407677        | 153.427      | 115.659       | -0.4076749       | 0.00014386 | No      |
|      |       |        |             |          |         | Snrpb2   | 86.4478   | 42.0934 | -1.03823         | 86.4488      | 42.0944       | -1.0382176       | 0.00014386 | No      |
|      |       |        |             |          |         | Snrpd1   | 74.6148   | 52.6815 | -0.502166        | 74.6158      | 52.6825       | -0.5021573       | 0.00014386 | No      |
|      |       |        |             |          |         | Snrpd2   | 498.5     | 233.079 | -1.09677         | 498.501      | 233.08        | -1.0967712       | 0.00014386 | No      |
|      |       |        |             |          |         | Snrpe11  | 1188.43   | 314.001 | -1.92021         | 1188.431     | 314.002       | -1.9202125       | 0.00014386 | No      |
|      |       |        |             |          |         | Snrpf    | 164.853   | 44.6146 | -1.88559         | 164.854      | 44.6156       | -1.8855687       | 0.00014386 | No      |
|      |       |        |             |          |         | Snrpg    | 521.524   | 234.296 | -1.1544          | 521.525      | 234.297       | -1.1543979       | 0.00014386 | No      |
|      |       |        |             |          |         | Snta1    | 0.195404  | 44.7869 | 7.84048          | 0.196404     | 44.7879       | 7.8331409        | 0.00014386 | No      |
|      |       |        |             |          |         | Sntb2    | 1.93252   | 4.4507  | 1.20355          | 1.93352      | 4.4517        | 1.20312669       | 0.00014386 | No      |
|      |       |        |             |          |         | Snurf    | 0.24513   | 25.2192 | 6.68483          | 0.24613      | 25.2202       | 6.67901539       | 0.00014386 | No      |
|      |       |        |             |          |         | Snw1     | 61.404    | 33.3333 | -0.881369        | 61.405       | 33.3343       | -0.8813487       | 0.00014386 | No      |
|      |       |        |             |          |         | Snx1     | 37.6504   | 53.2999 | 0.501468         | 37.6514      | 53.3009       | 0.50145638       | 0.00014386 | No      |
|      |       |        |             |          |         | Snx11    | 8.69151   | 12.0558 | 0.472052         | 8.69251      | 12.0568       | 0.47200233       | 0.00014386 | No      |
|      |       |        |             |          |         | Snx14    | 20.2675   | 11.5519 | -0.81104         | 20.2685      | 11.5529       | -0.8109843       | 0.00014386 | No      |
|      |       |        |             |          |         | Snx15    | 26.3065   | 14.7991 | -0.829911        | 26.3075      | 14.8001       | -0.8298672       | 0.00014386 | No      |
|      |       |        |             |          |         | Snx18    | 5.09709   | 8.28334 | 0.70054          | 5.09809      | 8.28434       | 0.70042992       | 0.00014386 | No      |
|      |       |        |             |          |         | Snx2     | 35.4547   | 67.0586 | 0.919447         | 35.4557      | 67.0596       | 0.9194263        | 0.00014386 | No      |

| RRBS |       |        |             |          |         | RNAseq  |          |         |                  |              |               |                  |            |         |
|------|-------|--------|-------------|----------|---------|---------|----------|---------|------------------|--------------|---------------|------------------|------------|---------|
| gene | Blood | Kidney | methyl.diff | pMWU.fdr | Match ? | gene    | blood    | kidney  | log2(fold_ratio) | blood+ 0.001 | kidney+ 0.001 | log2(fold_ratio) | q_value    | Match ? |
|      |       |        |             |          |         | Snx20   | 78.4451  | 3.77023 | -4.37896         | 78.4461      | 3.77123       | -4.3785947       | 0.00014386 | No      |
|      |       |        |             |          |         | Snx21   | 0.49583  | 16.3207 | 5.04071          | 0.49683      | 16.3217       | 5.03789523       | 0.00014386 | No      |
|      |       |        |             |          |         | Snx27   | 11.7738  | 6.45129 | -0.867921        | 11.7748      | 6.45229       | -0.8678194       | 0.00014386 | No      |
|      |       |        |             |          |         | Snx29   | 7.09937  | 23.5616 | 1.73067          | 7.10037      | 23.5626       | 1.73053263       | 0.00014386 | No      |
|      |       |        |             |          |         | Snx30   | 0.463858 | 5.61467 | 3.59744          | 0.464858     | 5.61567       | 3.59459617       | 0.00014386 | No      |
|      |       |        |             |          |         | Snx32   | 11.3186  | 2.81707 | -2.00643         | 11.3196      | 2.81807       | -2.0060436       | 0.00014386 | No      |
|      |       |        |             |          |         | Snx4    | 26.2446  | 16.8148 | -0.642292        | 26.2456      | 16.8158       | -0.6422582       | 0.00014386 | No      |
|      |       |        |             |          |         | SNX5    | 143.62   | 65.1755 | -1.13986         | 143.621      | 65.1765       | -1.1398429       | 0.00014386 | No      |
|      |       |        |             |          |         | Snx7    | 3.67546  | 26.0883 | 2.8274           | 3.67646      | 26.0893       | 2.82706904       | 0.00014386 | No      |
|      |       |        |             |          |         | Snx9    | 1.55713  | 49.823  | 4.99985          | 1.55813      | 49.824        | 4.99895334       | 0.00014386 | No      |
|      |       |        |             |          |         | Soat1   | 2.04536  | 13.3797 | 2.70962          | 2.04636      | 13.3807       | 2.70902172       | 0.00014386 | No      |
|      |       |        |             |          |         | Socs1   | 10.6568  | 2.12082 | -2.32908         | 10.6578      | 2.12182       | -2.3285355       | 0.00014386 | No      |
|      |       |        |             |          |         | Socs2   | 36.3873  | 2.99914 | -3.60081         | 36.3883      | 3.00014       | -3.6003729       | 0.00014386 | No      |
|      |       |        |             |          |         | Socs4   | 5.64013  | 2.12364 | -1.40919         | 5.64113      | 2.12464       | -1.4087658       | 0.00014386 | No      |
|      |       |        |             |          |         | Socs5   | 19.4503  | 11.033  | -0.817963        | 19.4513      | 11.034        | -0.8179107       | 0.00014386 | No      |
|      |       |        |             |          |         | Sod1    | 310.608  | 1301.2  | 2.06668          | 310.609      | 1301.201      | 2.0666723        | 0.00014386 | No      |
|      |       |        |             |          |         | Sod2    | 25.3544  | 125.898 | 2.31195          | 25.3554      | 125.899       | 2.31190188       | 0.00014386 | No      |
|      |       |        |             |          |         | Sod3    | 0        | 54.3273 | inf              | 0.001        | 54.3283       | 15.7294163       | 0.00014386 | No      |
|      |       |        |             |          |         | Soga1   | 0.241571 | 10.2583 | 5.4082           | 0.242571     | 10.2593       | 5.40238141       | 0.00014386 | No      |
|      |       |        |             |          |         | Soga2   | 0        | 1.91437 | inf              | 0.001        | 1.91537       | 10.9034074       | 0.00014386 | No      |
|      |       |        |             |          |         | Sorbs1  | 0.969226 | 8.8681  | 3.19372          | 0.970226     | 8.8691        | 3.19239497       | 0.00014386 | No      |
|      |       |        |             |          |         | Sorbs3  | 0.286939 | 34.1241 | 6.8939           | 0.287939     | 34.1251       | 6.88892626       | 0.00014386 | No      |
|      |       |        |             |          |         | Sord    | 10.9686  | 126.713 | 3.53011          | 10.9696      | 126.714       | 3.5299931        | 0.00014386 | No      |
|      |       |        |             |          |         | Sorl1   | 26.7094  | 18.3034 | -0.545233        | 26.7104      | 18.3044       | -0.5452111       | 0.00014386 | No      |
|      |       |        |             |          |         | Sort1   | 2.08912  | 36.3102 | 4.1194           | 2.09012      | 36.3112       | 4.11875693       | 0.00014386 | No      |
|      |       |        |             |          |         | Sos1    | 19.7041  | 5.43725 | -1.85755         | 19.7051      | 5.43825       | -1.8573547       | 0.00014386 | No      |
|      |       |        |             |          |         | Sos2    | 4.7281   | 7.58657 | 0.682186         | 4.7291       | 7.58757       | 0.68207227       | 0.00014386 | No      |
|      |       |        |             |          |         | Sowahc  | 0.155822 | 3.75416 | 4.59052          | 0.156822     | 3.75516       | 4.58167451       | 0.00014386 | No      |
|      |       |        |             |          |         | Sox17   | 0        | 10.2616 | inf              | 0.001        | 10.2626       | 13.3251087       | 0.00014386 | No      |
|      |       |        |             |          |         | Sox9    | 0        | 3.76683 | inf              | 0.001        | 3.76783       | 11.8795182       | 0.00014386 | No      |
|      |       |        |             |          |         | Sp1     | 22.8519  | 7.23009 | -1.66023         | 22.8529      | 7.23109       | -1.6600922       | 0.00014386 | No      |
|      |       |        |             |          |         | Sp110   | 172.925  | 50.6688 | -1.77097         | 172.926      | 50.6698       | -1.7709568       | 0.00014386 | No      |
|      |       |        |             |          |         | Sp140   | 133.179  | 31.3415 | -2.08722         | 133.18       | 31.3425       | -2.0871853       | 0.00014386 | No      |
|      |       |        |             |          |         | Sp2     | 15.4966  | 8.92799 | -0.795544        | 15.4976      | 8.92899       | -0.7954759       | 0.00014386 | No      |
|      |       |        |             |          |         | Sp3     | 34.532   | 11.5208 | -1.58369         | 34.533       | 11.5218       | -1.5836096       | 0.00014386 | No      |
|      |       |        |             |          |         | Sp4     | 7.80625  | 1.6891  | -2.20837         | 7.80725      | 1.6901        | -2.2077059       | 0.00014386 | No      |
|      |       |        |             |          |         | Spa17   | 1.92915  | 43.822  | 4.50562          | 1.93015      | 43.823        | 4.50490338       | 0.00014386 | No      |
|      |       |        |             |          |         | Spaca6  | 0.728011 | 18.7549 | 4.68716          | 0.729011     | 18.7559       | 4.6852601        | 0.00014386 | No      |
|      |       |        |             |          |         | Sparc   | 8.30971  | 129.16  | 3.95821          | 8.31071      | 129.161       | 3.95805497       | 0.00014386 | No      |
|      |       |        |             |          |         | Spast   | 24.0904  | 13.6475 | -0.819816        | 24.0914      | 13.6485       | -0.8197758       | 0.00014386 | No      |
|      |       |        |             |          |         | Spata13 | 61.8944  | 5.47324 | -3.49934         | 61.8954      | 5.47424       | -3.4991016       | 0.00014386 | No      |
|      |       |        |             |          |         | Spata17 | 0        | 1.37018 | inf              | 0.001        | 1.37118       | 10.4212023       | 0.00014386 | No      |



| RRBS |       |        |             |          |         | RNAseq   |           |          |                  |              |               |                  |            |         |
|------|-------|--------|-------------|----------|---------|----------|-----------|----------|------------------|--------------|---------------|------------------|------------|---------|
| gene | Blood | Kidney | methyl.diff | pMWU.fdr | Match ? | gene     | blood     | kidney   | log2(fold_ratio) | blood+ 0.001 | kidney+ 0.001 | log2(fold_ratio) | q_value    | Match ? |
|      |       |        |             |          |         | Spata24  | 0.687888  | 16.726   | 4.60378          | 0.688888     | 16.727        | 4.60176546       | 0.00014386 | No      |
|      |       |        |             |          |         | Spata5   | 8.51481   | 2.81381  | -1.59745         | 8.51581      | 2.81481       | -1.5971062       | 0.00014386 | No      |
|      |       |        |             |          |         | Spata5l1 | 5.3687    | 1.77477  | -1.59694         | 5.3697       | 1.77577       | -1.5963968       | 0.00014386 | No      |
|      |       |        |             |          |         | Spata6   | 19.4066   | 6.4076   | -1.59869         | 19.4076      | 6.4086        | -1.5985406       | 0.00014386 | No      |
|      |       |        |             |          |         | Spats2l  | 0.0630698 | 12.2329  | 7.59961          | 0.0640698    | 12.2339       | 7.57702419       | 0.00014386 | No      |
|      |       |        |             |          |         | Spcs1    | 191.62    | 131.452  | -0.543713        | 191.621      | 131.453       | -0.5437086       | 0.00014386 | No      |
|      |       |        |             |          |         | Spcs2    | 92.5115   | 23.3033  | -1.9891          | 92.5125      | 23.3043       | -1.9890521       | 0.00014386 | No      |
|      |       |        |             |          |         | Spcs3    | 57.5271   | 17.2733  | -1.7357          | 57.5281      | 17.2743       | -1.7356396       | 0.00014386 | No      |
|      |       |        |             |          |         | Specc1   | 0.823242  | 8.61482  | 3.38743          | 0.824242     | 8.61582       | 3.38584823       | 0.00014386 | No      |
|      |       |        |             |          |         | Specc1l  | 10.4738   | 7.5797   | -0.466576        | 10.4748      | 7.5807        | -0.4665197       | 0.00014386 | No      |
|      |       |        |             |          |         | Spg20    | 8.88112   | 15.4832  | 0.801889         | 8.88212      | 15.4842       | 0.80182088       | 0.00014386 | No      |
|      |       |        |             |          |         | Sphk1    | 5.32556   | 43.653   | 3.03507          | 5.32656      | 43.654        | 3.03483784       | 0.00014386 | No      |
|      |       |        |             |          |         | Spib     | 3.10138   | 0.371861 | -3.06008         | 3.10238      | 0.372861      | -3.0566656       | 0.00014386 | No      |
|      |       |        |             |          |         | Spin1    | 11.2768   | 18.5773  | 0.720181         | 11.2778      | 18.5783       | 0.72013283       | 0.00014386 | No      |
|      |       |        |             |          |         | Spink8   | 0         | 0.861359 | inf              | 0.001        | 0.862359      | 9.75214478       | 0.00014386 | No      |
|      |       |        |             |          |         | Spint2   | 95.7482   | 907.548  | 3.24466          | 95.7492      | 907.549       | 3.2446432        | 0.00014386 | No      |
|      |       |        |             |          |         | Spire1   | 1.24154   | 15.4582  | 3.63817          | 1.24254      | 15.4592       | 3.63710146       | 0.00014386 | No      |
|      |       |        |             |          |         | Spns1    | 26.1829   | 60.4845  | 1.20794          | 26.1839      | 60.4855       | 1.20790933       | 0.00014386 | No      |
|      |       |        |             |          |         | Spns2    | 8.04642   | 27.05    | 1.74921          | 8.04742      | 27.051        | 1.74908369       | 0.00014386 | No      |
|      |       |        |             |          |         | Spns3    | 0.380848  | 8.23995  | 4.43535          | 0.381848     | 8.24095       | 4.43174029       | 0.00014386 | No      |
|      |       |        |             |          |         | Spop     | 51.0415   | 31.4351  | -0.699296        | 51.0425      | 31.4361       | -0.6992767       | 0.00014386 | No      |
|      |       |        |             |          |         | Spopl    | 4.53974   | 6.64361  | 0.549357         | 4.54074      | 6.64461       | 0.54925709       | 0.00014386 | No      |
|      |       |        |             |          |         | Spp1     | 1.09316   | 10275.3  | 13.1984          | 1.09416      | 10275.301     | 13.1970693       | 0.00014386 | No      |
|      |       |        |             |          |         | Spp2     | 0         | 158.525  | inf              | 0.001        | 158.526       | 17.27436         | 0.00014386 | No      |
|      |       |        |             |          |         | SPPL2A   | 11.6828   | 5.83978  | -1.0004          | 11.6838      | 5.84078       | -1.0002766       | 0.00014386 | No      |
|      |       |        |             |          |         | Spr      | 15.2604   | 43.3445  | 1.50606          | 15.2614      | 43.3455       | 1.50599491       | 0.00014386 | No      |
|      |       |        |             |          |         | Sprtn    | 8.68013   | 3.73025  | -1.21844         | 8.68113      | 3.73125       | -1.2182238       | 0.00014386 | No      |
|      |       |        |             |          |         | Spry1    | 0.651456  | 16.4161  | 4.6553           | 0.652456     | 16.4171       | 4.65317488       | 0.00014386 | No      |
|      |       |        |             |          |         | Spryd7   | 1.94432   | 34.87    | 4.16465          | 1.94532      | 34.871        | 4.16394834       | 0.00014386 | No      |
|      |       |        |             |          |         | Spsb2    | 4.34128   | 11.4953  | 1.40485          | 4.34228      | 11.4963       | 1.40464495       | 0.00014386 | No      |
|      |       |        |             |          |         | Sqle     | 4.37624   | 12.0387  | 1.45992          | 4.37724      | 12.0397       | 1.45970605       | 0.00014386 | No      |
|      |       |        |             |          |         | Sqrdl    | 2.62141   | 19.1037  | 2.86544          | 2.62241      | 19.1047       | 2.86496244       | 0.00014386 | No      |
|      |       |        |             |          |         | SQSTM1   | 146.432   | 227.02   | 0.632592         | 146.433      | 227.021       | 0.63258504       | 0.00014386 | No      |
|      |       |        |             |          |         | Srbd1    | 13.8716   | 8.90907  | -0.638789        | 13.8726      | 8.91007       | -0.6387295       | 0.00014386 | No      |
|      |       |        |             |          |         | Src      | 5.71701   | 19.628   | 1.77958          | 5.71801      | 19.629        | 1.77940163       | 0.00014386 | No      |
|      |       |        |             |          |         | Srcap    | 64.1058   | 37.4896  | -0.773966        | 64.1068      | 37.4906       | -0.7739485       | 0.00014386 | No      |
|      |       |        |             |          |         | Srcin1   | 66.0408   | 11.383   | -2.53647         | 66.0418      | 11.384        | -2.5363719       | 0.00014386 | No      |
|      |       |        |             |          |         | Srcrb4d  | 1.43796   | 6.44224  | 2.16354          | 1.43896      | 6.44324       | 2.16275984       | 0.00014386 | No      |
|      |       |        |             |          |         | Srd5a1   | 0.542089  | 5.75548  | 3.40833          | 0.543089     | 5.75648       | 3.40592635       | 0.00014386 | No      |
|      |       |        |             |          |         | Srd5a3   | 37.8184   | 10.4032  | -1.86207         | 37.8194      | 10.4042       | -1.8619604       | 0.00014386 | No      |
|      |       |        |             |          |         | Srebf2   | 39.871    | 16.903   | -1.23807         | 39.872       | 16.904        | -1.2380113       | 0.00014386 | No      |
|      |       |        |             |          |         | Srek1    | 43.2062   | 24.9214  | -0.793857        | 43.2072      | 24.9224       | -0.7938287       | 0.00014386 | No      |

| RRBS |       |        |             |          |         | RNAseq  |           |         |                  |              |               |                  |            |         |
|------|-------|--------|-------------|----------|---------|---------|-----------|---------|------------------|--------------|---------------|------------------|------------|---------|
| gene | Blood | Kidney | methyl.diff | pMWU.fdr | Match ? | gene    | blood     | kidney  | log2(fold_ratio) | blood+ 0.001 | kidney+ 0.001 | log2(fold_ratio) | q_value    | Match ? |
|      |       |        |             |          |         | Srfbp1  | 19.7968   | 11.5112 | -0.782234        | 19.7978      | 11.5122       | -0.7821766       | 0.00014386 | No      |
|      |       |        |             |          |         | Srgap2  | 16.7854   | 7.79326 | -1.10691         | 16.7864      | 7.79426       | -1.1068089       | 0.00014386 | No      |
|      |       |        |             |          |         | Srgap3  | 0.86611   | 4.85718 | 2.4875           | 0.86711      | 4.85818       | 2.48612902       | 0.00014386 | No      |
|      |       |        |             |          |         | Srgn    | 196.507   | 24.5406 | -3.00134         | 196.508      | 24.5416       | -3.0012868       | 0.00014386 | No      |
|      |       |        |             |          |         | Sri     | 124.857   | 91.3844 | -0.450259        | 124.858      | 91.3854       | -0.4502527       | 0.00014386 | No      |
|      |       |        |             |          |         | Srp72   | 74.037    | 35.3723 | -1.06563         | 74.038       | 35.3733       | -1.0656051       | 0.00014386 | No      |
|      |       |        |             |          |         | Srp9    | 48.6551   | 64.3103 | 0.402457         | 48.6561      | 64.3113       | 0.40245157       | 0.00014386 | No      |
|      |       |        |             |          |         | Srpk2   | 23.858    | 10.1014 | -1.23992         | 23.859       | 10.1024       | -1.2398355       | 0.00014386 | No      |
|      |       |        |             |          |         | Srpr    | 42.9687   | 29.9339 | -0.521505        | 42.9697      | 29.9349       | -0.5214913       | 0.00014386 | No      |
|      |       |        |             |          |         | Srpx    | 0         | 1.6134  | inf              | 0.001        | 1.6144        | 10.6567824       | 0.00014386 | No      |
|      |       |        |             |          |         | Srrm1   | 106.351   | 37.3742 | -1.50872         | 106.352      | 37.3752       | -1.508694        | 0.00014386 | No      |
|      |       |        |             |          |         | Srrm2   | 319.23    | 132.89  | -1.26436         | 319.231      | 132.891       | -1.2643574       | 0.00014386 | No      |
|      |       |        |             |          |         | Srrt    | 117.707   | 82.2437 | -0.517228        | 117.708      | 82.2447       | -0.5172178       | 0.00014386 | No      |
|      |       |        |             |          |         | Srsf1   | 159.558   | 50.3101 | -1.66516         | 159.559      | 50.3111       | -1.6651413       | 0.00014386 | No      |
|      |       |        |             |          |         | Srsf10  | 37.8012   | 21.6246 | -0.805758        | 37.8022      | 21.6256       | -0.80573         | 0.00014386 | No      |
|      |       |        |             |          |         | Srsf11  | 124.945   | 41.8398 | -1.57834         | 124.946      | 41.8408       | -1.5783224       | 0.00014386 | No      |
|      |       |        |             |          |         | Srsf2   | 506.598   | 214.356 | -1.24083         | 506.599      | 214.357       | -1.2408287       | 0.00014386 | No      |
|      |       |        |             |          |         | Srsf3   | 138.458   | 76.6064 | -0.853913        | 138.459      | 76.6074       | -0.8539032       | 0.00014386 | No      |
|      |       |        |             |          |         | Srsf4   | 71.643    | 39.9353 | -0.84316         | 71.644       | 39.9363       | -0.8431452       | 0.00014386 | No      |
|      |       |        |             |          |         | Srsf5   | 1013.64   | 163.876 | -2.62887         | 1013.641     | 163.877       | -2.6288615       | 0.00014386 | No      |
|      |       |        |             |          |         | Srsf6   | 148.71    | 35.6631 | -2.05999         | 148.711      | 35.6641       | -2.0599669       | 0.00014386 | No      |
|      |       |        |             |          |         | Srsf7   | 179.432   | 58.3812 | -1.61986         | 179.433      | 58.3822       | -1.6198448       | 0.00014386 | No      |
|      |       |        |             |          |         | Ss18    | 69.681    | 40.1894 | -0.79395         | 69.682       | 40.1904       | -0.7939351       | 0.00014386 | No      |
|      |       |        |             |          |         | Ssb     | 126.368   | 58.7614 | -1.10469         | 126.369      | 58.7624       | -1.1046774       | 0.00014386 | No      |
|      |       |        |             |          |         | Ssbp2   | 8.52281   | 21.6938 | 1.34788          | 8.52381      | 21.6948       | 1.34777895       | 0.00014386 | No      |
|      |       |        |             |          |         | Ssbp3   | 132.551   | 25.1807 | -2.39615         | 132.552      | 25.1817       | -2.3961109       | 0.00014386 | No      |
|      |       |        |             |          |         | Ssbp4   | 39.7534   | 25.9626 | -0.614642        | 39.7544      | 25.9636       | -0.6146241       | 0.00014386 | No      |
|      |       |        |             |          |         | Ssfa2   | 7.8072    | 13.5998 | 0.800704         | 7.8082       | 13.6008       | 0.8006296        | 0.00014386 | No      |
|      |       |        |             |          |         | Ssh2    | 31.835    | 2.94999 | -3.43183         | 31.836       | 2.95099       | -3.4313881       | 0.00014386 | No      |
|      |       |        |             |          |         | Sspo    | 0.0499622 | 2.20114 | 5.46127          | 0.0509622    | 2.20214       | 5.43333482       | 0.00014386 | No      |
|      |       |        |             |          |         | Ssr1    | 37.0053   | 24.3948 | -0.601156        | 37.0063      | 24.3958       | -0.6011381       | 0.00014386 | No      |
|      |       |        |             |          |         | Ssr3    | 31.0307   | 17.5014 | -0.826227        | 31.0317      | 17.5024       | -0.82619         | 0.00014386 | No      |
|      |       |        |             |          |         | Ssr4    | 234.968   | 81.6938 | -1.52416         | 234.969      | 81.6948       | -1.5241543       | 0.00014386 | No      |
|      |       |        |             |          |         | Ssrp1   | 112.85    | 55.3747 | -1.02711         | 112.851      | 55.3757       | -1.0270943       | 0.00014386 | No      |
|      |       |        |             |          |         | Sssca1  | 18.1139   | 27.9538 | 0.625944         | 18.1149      | 27.9548       | 0.62591918       | 0.00014386 | No      |
|      |       |        |             |          |         | Sstr3   | 14.5659   | 1.199   | -3.60269         | 14.5669      | 1.2           | -3.6015876       | 0.00014386 | No      |
|      |       |        |             |          |         | Ssuh2   | 0         | 2.1602  | inf              | 0.001        | 2.1612        | 11.0776169       | 0.00014386 | No      |
|      |       |        |             |          |         | Ssx2ip  | 4.22945   | 7.62032 | 0.849383         | 4.23045      | 7.62132       | 0.84922976       | 0.00014386 | No      |
|      |       |        |             |          |         | St13    | 52.0747   | 134.243 | 1.36619          | 52.0757      | 134.244       | 1.36617538       | 0.00014386 | No      |
|      |       |        |             |          |         | St14    | 1.49874   | 67.0445 | 5.4833           | 1.49974      | 67.0455       | 5.48235619       | 0.00014386 | No      |
|      |       |        |             |          |         | St3gal1 | 28.0896   | 2.9361  | -3.25806         | 28.0906      | 2.9371        | -3.2576231       | 0.00014386 | No      |
|      |       |        |             |          |         | St3gal3 | 0.644171  | 12.767  | 4.30883          | 0.645171     | 12.768        | 4.30670715       | 0.00014386 | No      |

| RRBS |       |        |             |          |         | RNAseq     |           |          |                  |              |               |                  |            |         |
|------|-------|--------|-------------|----------|---------|------------|-----------|----------|------------------|--------------|---------------|------------------|------------|---------|
| gene | Blood | Kidney | methyl.diff | pMWU.fdr | Match ? | gene       | blood     | kidney   | log2(fold_ratio) | blood+ 0.001 | kidney+ 0.001 | log2(fold_ratio) | q_value    | Match ? |
|      |       |        |             |          |         | St3gal5    | 2.61323   | 49.3317  | 4.23861          | 2.61423      | 49.3327       | 4.23808627       | 0.00014386 | No      |
|      |       |        |             |          |         | St3gal6    | 7.21822   | 59.0002  | 3.031            | 7.21922      | 59.0012       | 3.03082942       | 0.00014386 | No      |
|      |       |        |             |          |         | St5        | 0.129645  | 18.3018  | 7.14128          | 0.130645     | 18.3028       | 7.13026865       | 0.00014386 | No      |
|      |       |        |             |          |         | St6galnac3 | 1.22072   | 19.516   | 3.99885          | 1.22172      | 19.517        | 3.99774573       | 0.00014386 | No      |
|      |       |        |             |          |         | St6galnac4 | 12.9646   | 8.31499  | -0.640794        | 12.9656      | 8.31599       | -0.640729        | 0.00014386 | No      |
|      |       |        |             |          |         | St6galnac6 | 1.09652   | 3.23804  | 1.56218          | 1.09752      | 3.23904       | 1.56131905       | 0.00014386 | No      |
|      |       |        |             |          |         | ST7        | 3.48708   | 9.49668  | 1.4454           | 3.48808      | 9.49768       | 1.44514202       | 0.00014386 | No      |
|      |       |        |             |          |         | St8sia1    | 64.2017   | 3.83862  | -4.06395         | 64.2027      | 3.83962       | -4.0635985       | 0.00014386 | No      |
|      |       |        |             |          |         | St8sia4    | 16.6097   | 0.891615 | -4.21946         | 16.6107      | 0.892615      | -4.217931        | 0.00014386 | No      |
|      |       |        |             |          |         | St8sia6    | 7.07224   | 0.280088 | -4.65821         | 7.07324      | 0.281088      | -4.6532774       | 0.00014386 | No      |
|      |       |        |             |          |         | Stag2      | 39.3313   | 13.8847  | -1.50219         | 39.3323      | 13.8857       | -1.5021146       | 0.00014386 | No      |
|      |       |        |             |          |         | Stam       | 5.16444   | 14.0249  | 1.4413           | 5.16544      | 14.0259       | 1.4411302        | 0.00014386 | No      |
|      |       |        |             |          |         | Stamp      | 7.40937   | 19.7534  | 1.41468          | 7.41037      | 19.7544       | 1.41455654       | 0.00014386 | No      |
|      |       |        |             |          |         | Stamp1     | 24.9385   | 2.54113  | -3.29484         | 24.9395      | 2.54213       | -3.2943228       | 0.00014386 | No      |
|      |       |        |             |          |         | Stap1      | 18.3589   | 1.3256   | -3.79176         | 18.3599      | 1.3266        | -3.7907529       | 0.00014386 | No      |
|      |       |        |             |          |         | Stap2      | 0.147435  | 53.8668  | 8.51317          | 0.148435     | 53.8678       | 8.50344803       | 0.00014386 | No      |
|      |       |        |             |          |         | Stard13    | 0.412906  | 3.31171  | 3.00369          | 0.413906     | 3.31271       | 3.00063685       | 0.00014386 | No      |
|      |       |        |             |          |         | Stard4     | 7.25279   | 2.43923  | -1.57211         | 7.25379      | 2.44023       | -1.5717178       | 0.00014386 | No      |
|      |       |        |             |          |         | Stard5     | 2.69083   | 25.5714  | 3.24841          | 2.69183      | 25.5724       | 3.24792836       | 0.00014386 | No      |
|      |       |        |             |          |         | Stard8     | 0.0255546 | 26.3697  | 10.0111          | 0.0265546    | 26.3707       | 9.95575835       | 0.00014386 | No      |
|      |       |        |             |          |         | Stat1      | 115.202   | 65.9699  | -0.804285        | 115.203      | 65.9709       | -0.8042766       | 0.00014386 | No      |
|      |       |        |             |          |         | Stat2      | 23.3719   | 14.2715  | -0.711641        | 23.3729      | 14.2725       | -0.7115987       | 0.00014386 | No      |
|      |       |        |             |          |         | Stat4      | 63.5396   | 2.04808  | -4.95531         | 63.5406      | 2.04908       | -4.9546305       | 0.00014386 | No      |
|      |       |        |             |          |         | Stat5a     | 29.3212   | 3.22391  | -3.18506         | 29.3222      | 3.22491       | -3.1846625       | 0.00014386 | No      |
|      |       |        |             |          |         | Stat5b     | 61.3904   | 6.62312  | -3.21243         | 61.3914      | 6.62412       | -3.2122359       | 0.00014386 | No      |
|      |       |        |             |          |         | Stat6      | 46.5141   | 8.31518  | -2.48385         | 46.5151      | 8.31618       | -2.4837062       | 0.00014386 | No      |
|      |       |        |             |          |         | Stau2      | 1.34105   | 10.2693  | 2.9369           | 1.34205      | 10.2703       | 2.935968         | 0.00014386 | No      |
|      |       |        |             |          |         | Steap1     | 0         | 3.08859  | inf              | 0.001        | 3.08959       | 11.5931997       | 0.00014386 | No      |
|      |       |        |             |          |         | Steap3     | 0.362548  | 1.768    | 2.28588          | 0.363548     | 1.769         | 2.28271628       | 0.00014386 | No      |
|      |       |        |             |          |         | Stim1      | 63.2109   | 5.66581  | -3.47982         | 63.2119      | 5.66681       | -3.4795874       | 0.00014386 | No      |
|      |       |        |             |          |         | Stim2      | 19.2262   | 5.47907  | -1.81107         | 19.2272      | 5.48007       | -1.8108825       | 0.00014386 | No      |
|      |       |        |             |          |         | Stip1      | 90.1409   | 64.5677  | -0.48137         | 90.1419      | 64.5687       | -0.4813629       | 0.00014386 | No      |
|      |       |        |             |          |         | Stk10      | 91.9376   | 4.27028  | -4.42825         | 91.9386      | 4.27128       | -4.4279303       | 0.00014386 | No      |
|      |       |        |             |          |         | Stk11      | 46.8638   | 28.3369  | -0.725791        | 46.8648      | 28.3379       | -0.7257719       | 0.00014386 | No      |
|      |       |        |             |          |         | Stk16      | 22.8512   | 46.7713  | 1.03335          | 22.8522      | 46.7723       | 1.03332131       | 0.00014386 | No      |
|      |       |        |             |          |         | Stk17b     | 209.85    | 8.44455  | -4.6352          | 209.851      | 8.44555       | -4.6350301       | 0.00014386 | No      |
|      |       |        |             |          |         | Stk24      | 106.375   | 44.8356  | -1.24644         | 106.376      | 44.8366       | -1.2464239       | 0.00014386 | No      |
|      |       |        |             |          |         | Stk32a     | 0         | 1.42508  | inf              | 0.001        | 1.42608       | 10.4778392       | 0.00014386 | No      |
|      |       |        |             |          |         | Stk36      | 0.127881  | 1.17937  | 3.20514          | 0.128881     | 1.18037       | 3.19512766       | 0.00014386 | No      |
|      |       |        |             |          |         | Stk38      | 285.061   | 24.4862  | -3.54123         | 285.062      | 24.4872       | -3.541176        | 0.00014386 | No      |
|      |       |        |             |          |         | Stk39      | 19.3648   | 30.7919  | 0.669111         | 19.3658      | 30.7929       | 0.66908664       | 0.00014386 | No      |
|      |       |        |             |          |         | Stk4       | 63.6697   | 8.44526  | -2.91439         | 63.6707      | 8.44626       | -2.9142451       | 0.00014386 | No      |

| RRBS |       |        |             |          |         | RNAseq   |           |          |                  |              |               |                  |            |         |
|------|-------|--------|-------------|----------|---------|----------|-----------|----------|------------------|--------------|---------------|------------------|------------|---------|
| gene | Blood | Kidney | methyl.diff | pMWU.fdr | Match ? | gene     | blood     | kidney   | log2(fold_ratio) | blood+ 0.001 | kidney+ 0.001 | log2(fold_ratio) | q_value    | Match ? |
|      |       |        |             |          |         | Stmn1    | 112.881   | 156.001  | 0.466755         | 112.882      | 156.002       | 0.46674907       | 0.00014386 | No      |
|      |       |        |             |          |         | Stom     | 51.4468   | 9.31162  | -2.46598         | 51.4478      | 9.31262       | -2.4658504       | 0.00014386 | No      |
|      |       |        |             |          |         | Stra6    | 0.358893  | 1.73823  | 2.27599          | 0.359893     | 1.73923       | 2.27280878       | 0.00014386 | No      |
|      |       |        |             |          |         | Stradb   | 6.78586   | 27.6688  | 2.02766          | 6.78686      | 27.6698       | 2.02749606       | 0.00014386 | No      |
|      |       |        |             |          |         | Strbp    | 15.2731   | 20.9805  | 0.45805          | 15.2741      | 20.9815       | 0.45803045       | 0.00014386 | No      |
|      |       |        |             |          |         | Strip1   | 27.3364   | 13.7624  | -0.990091        | 27.3374      | 13.7634       | -0.9900391       | 0.00014386 | No      |
|      |       |        |             |          |         | Strn     | 15.0318   | 7.51068  | -1.001           | 15.0328      | 7.51168       | -1.0009062       | 0.00014386 | No      |
|      |       |        |             |          |         | Strn3    | 21.9631   | 14.2452  | -0.624602        | 21.9641      | 14.2462       | -0.6245702       | 0.00014386 | No      |
|      |       |        |             |          |         | Sts      | 7.34482   | 11.8623  | 0.691588         | 7.34582      | 11.8633       | 0.69150993       | 0.00014386 | No      |
|      |       |        |             |          |         | Stt3b    | 30.117    | 21.1072  | -0.512839        | 30.118       | 21.1082       | -0.5128224       | 0.00014386 | No      |
|      |       |        |             |          |         | Stub1    | 314.16    | 107.569  | -1.54624         | 314.161      | 107.57        | -1.5462283       | 0.00014386 | No      |
|      |       |        |             |          |         | Stx12    | 11.1495   | 32.1905  | 1.52965          | 11.1505      | 32.1915       | 1.5295714        | 0.00014386 | No      |
|      |       |        |             |          |         | Stx18    | 17.1802   | 45.7712  | 1.41369          | 17.1812      | 45.7722       | 1.41364083       | 0.00014386 | No      |
|      |       |        |             |          |         | Stx1a    | 13.1873   | 3.44508  | -1.93654         | 13.1883      | 3.44608       | -1.9362305       | 0.00014386 | No      |
|      |       |        |             |          |         | Stx4     | 86.7331   | 65.4474  | -0.406246        | 86.7341      | 65.4484       | -0.4062414       | 0.00014386 | No      |
|      |       |        |             |          |         | Stx6     | 54.7059   | 16.8347  | -1.70026         | 54.7069      | 16.8357       | -1.7001991       | 0.00014386 | No      |
|      |       |        |             |          |         | Stx7     | 15.7914   | 76.0283  | 2.2674           | 15.7924      | 76.0293       | 2.26732507       | 0.00014386 | No      |
|      |       |        |             |          |         | Stx8     | 52.4395   | 72.2726  | 0.462796         | 52.4405      | 72.2736       | 0.46278732       | 0.00014386 | No      |
|      |       |        |             |          |         | Stxbp1   | 2.48082   | 7.61626  | 1.61826          | 2.48182      | 7.61726       | 1.61787366       | 0.00014386 | No      |
|      |       |        |             |          |         | Stxbp4   | 1.26597   | 8.47513  | 2.74299          | 1.26697      | 8.47613       | 2.74202335       | 0.00014386 | No      |
|      |       |        |             |          |         | Stxbp6   | 0         | 4.0002   | inf              | 0.001        | 4.0012        | 11.966217        | 0.00014386 | No      |
|      |       |        |             |          |         | Styk1    | 5.88313   | 0.764417 | -2.94415         | 5.88413      | 0.765417      | -2.9425113       | 0.00014386 | No      |
|      |       |        |             |          |         | Styx     | 23.5474   | 3.87136  | -2.60466         | 23.5484      | 3.87236       | -2.6043441       | 0.00014386 | No      |
|      |       |        |             |          |         | Styx11   | 1.35714   | 3.37108  | 1.31264          | 1.35814      | 3.37208       | 1.31200656       | 0.00014386 | No      |
|      |       |        |             |          |         | SUB1     | 58.7658   | 40.0671  | -0.552559        | 58.7668      | 40.0681       | -0.5525472       | 0.00014386 | No      |
|      |       |        |             |          |         | Sucla2   | 31.4893   | 84.6002  | 1.4258           | 31.4903      | 84.6012       | 1.42577063       | 0.00014386 | No      |
|      |       |        |             |          |         | Suclg1   | 88.244    | 308.83   | 1.80724          | 88.245       | 308.831       | 1.80723113       | 0.00014386 | No      |
|      |       |        |             |          |         | Suclg2   | 59.2662   | 159.457  | 1.42789          | 59.2672      | 159.458       | 1.42787067       | 0.00014386 | No      |
|      |       |        |             |          |         | Sufu     | 8.98373   | 15.551   | 0.791625         | 8.98473      | 15.552        | 0.79155307       | 0.00014386 | No      |
|      |       |        |             |          |         | Sugt1    | 25.3349   | 39.3277  | 0.634421         | 25.3359      | 39.3287       | 0.63439942       | 0.00014386 | No      |
|      |       |        |             |          |         | Sulf2    | 0.166493  | 16.821   | 6.65866          | 0.167493     | 16.822        | 6.65010463       | 0.00014386 | No      |
|      |       |        |             |          |         | Sult1a1  | 0.293526  | 30.2851  | 6.68898          | 0.294526     | 30.2861       | 6.684117         | 0.00014386 | No      |
|      |       |        |             |          |         | Sult1c2  | 0         | 101.623  | inf              | 0.001        | 101.624       | 16.6328816       | 0.00014386 | No      |
|      |       |        |             |          |         | Sult1c2  | 0.0310571 | 72.4924  | 11.1887          | 0.0320571    | 72.4934       | 11.14299         | 0.00014386 | No      |
|      |       |        |             |          |         | Sult1c2a | 0.0125807 | 224.158  | 14.121           | 0.0135807    | 224.159       | 14.010677        | 0.00014386 | No      |
|      |       |        |             |          |         | Sult1c3  | 0         | 1.72244  | inf              | 0.001        | 1.72344       | 10.7510754       | 0.00014386 | No      |
|      |       |        |             |          |         | Sumf2    | 8.52606   | 13.1097  | 0.62068          | 8.52706      | 13.1107       | 0.6206244        | 0.00014386 | No      |
|      |       |        |             |          |         | Sumo1    | 127.246   | 95.2173  | -0.418319        | 127.247      | 95.2183       | -0.4183209       | 0.00014386 | No      |
|      |       |        |             |          |         | Sumo2l   | 199.193   | 121.681  | -0.711064        | 199.194      | 121.682       | -0.7110584       | 0.00014386 | No      |
|      |       |        |             |          |         | Sumo3    | 48.17     | 104.495  | 1.11722          | 48.171       | 104.496       | 1.11721094       | 0.00014386 | No      |
|      |       |        |             |          |         | Sun1     | 12.8616   | 17.8931  | 0.476331         | 12.8626      | 17.8941       | 0.47630169       | 0.00014386 | No      |
|      |       |        |             |          |         | Sun2     | 85.4137   | 27.5949  | -1.63007         | 85.4147      | 27.5959       | -1.6300304       | 0.00014386 | No      |

| RRBS |       |        |             |          |         | RNAseq   |           |          |                  |              |               |                  |            |         |
|------|-------|--------|-------------|----------|---------|----------|-----------|----------|------------------|--------------|---------------|------------------|------------|---------|
| gene | Blood | Kidney | methyl.diff | pMWU.fdr | Match ? | gene     | blood     | kidney   | log2(fold_ratio) | blood+ 0.001 | kidney+ 0.001 | log2(fold_ratio) | q_value    | Match ? |
|      |       |        |             |          |         | Suox     | 0.313306  | 33.8025  | 6.75341          | 0.314306     | 33.8035       | 6.74885901       | 0.00014386 | No      |
|      |       |        |             |          |         | Supt16h  | 56.206    | 34.4707  | -0.705351        | 56.207       | 34.4717       | -0.7053374       | 0.00014386 | No      |
|      |       |        |             |          |         | Supt20   | 43.5742   | 19.6966  | -1.14553         | 43.5752      | 19.6976       | -1.1454874       | 0.00014386 | No      |
|      |       |        |             |          |         | Supt3h   | 8.85351   | 25.271   | 1.51316          | 8.85451      | 25.272        | 1.51305547       | 0.00014386 | No      |
|      |       |        |             |          |         | Supt4h1  | 125.789   | 75.012   | -0.745815        | 125.79       | 75.013        | -0.7458047       | 0.00014386 | No      |
|      |       |        |             |          |         | Supt5    | 75.9901   | 50.211   | -0.597809        | 75.9911      | 50.212        | -0.5977983       | 0.00014386 | No      |
|      |       |        |             |          |         | Supt6h   | 28.1282   | 14.8373  | -0.922785        | 28.1292      | 14.8383       | -0.9227427       | 0.00014386 | No      |
|      |       |        |             |          |         | Supt7l   | 4.07902   | 6.67953  | 0.711522         | 4.08002      | 6.68053       | 0.71138634       | 0.00014386 | No      |
|      |       |        |             |          |         | Supv3l1  | 53.8474   | 76.3853  | 0.50442          | 53.8484      | 76.3863       | 0.50441043       | 0.00014386 | No      |
|      |       |        |             |          |         | Suv39h1  | 14.7738   | 3.63183  | -2.02427         | 14.7748      | 3.63283       | -2.0239728       | 0.00014386 | No      |
|      |       |        |             |          |         | Suv39h2  | 1.26698   | 0.149523 | -3.08295         | 1.26798      | 0.150523      | -3.0744761       | 0.00014386 | No      |
|      |       |        |             |          |         | Suv420h1 | 22.1337   | 6.84354  | -1.69343         | 22.1347      | 6.84454       | -1.6932843       | 0.00014386 | No      |
|      |       |        |             |          |         | Suv420h2 | 31.278    | 19.1203  | -0.710041        | 31.279       | 19.1213       | -0.7100138       | 0.00014386 | No      |
|      |       |        |             |          |         | Suz12    | 30.5152   | 7.45311  | -2.03361         | 30.5162      | 7.45411       | -2.0334673       | 0.00014386 | No      |
|      |       |        |             |          |         | Svil     | 15.795    | 3.23364  | -2.28824         | 15.796       | 3.23464       | -2.2878822       | 0.00014386 | No      |
|      |       |        |             |          |         | Svip     | 1.96755   | 27.9339  | 3.82755          | 1.96855      | 27.9349       | 3.82686339       | 0.00014386 | No      |
|      |       |        |             |          |         | Swap70   | 3.48145   | 11.8581  | 1.76812          | 3.48245      | 11.8591       | 1.76781998       | 0.00014386 | No      |
|      |       |        |             |          |         | Swsap1   | 3.78201   | 7.13283  | 0.91532          | 3.78301      | 7.13383       | 0.91514225       | 0.00014386 | No      |
|      |       |        |             |          |         | Swt1     | 10.3658   | 4.58749  | -1.17605         | 10.3668      | 4.58849       | -1.1758793       | 0.00014386 | No      |
|      |       |        |             |          |         | Syap1    | 15.7096   | 30.0878  | 0.937534         | 15.7106      | 30.0888       | 0.93748829       | 0.00014386 | No      |
|      |       |        |             |          |         | Sybu     | 0.0310618 | 2.42063  | 6.2841           | 0.0320618    | 2.42163       | 6.23897922       | 0.00014386 | No      |
|      |       |        |             |          |         | Syde2    | 0.165002  | 7.43983  | 5.49471          | 0.166002     | 7.44083       | 5.48619103       | 0.00014386 | No      |
|      |       |        |             |          |         | Syncrip  | 104.079   | 40.7617  | -1.3524          | 104.08       | 40.7627       | -1.3523713       | 0.00014386 | No      |
|      |       |        |             |          |         | Syne3    | 4.65342   | 1.70261  | -1.45055         | 4.65442      | 1.70361       | -1.4500063       | 0.00014386 | No      |
|      |       |        |             |          |         | Syngr1   | 1.96848   | 17.9339  | 3.18754          | 1.96948      | 17.9349       | 3.18688303       | 0.00014386 | No      |
|      |       |        |             |          |         | SYNGR2   | 26.441    | 72.5672  | 1.45654          | 26.442       | 72.5682       | 1.45650618       | 0.00014386 | No      |
|      |       |        |             |          |         | Syngr4   | 0.0487518 | 2.0452   | 5.39064          | 0.0497518    | 2.0462        | 5.36205463       | 0.00014386 | No      |
|      |       |        |             |          |         | Synj1    | 13.6012   | 3.64168  | -1.90106         | 13.6022      | 3.64268       | -1.9007678       | 0.00014386 | No      |
|      |       |        |             |          |         | Synj2    | 0.0742287 | 0.837631 | 3.49627          | 0.0752287    | 0.838631      | 3.4786811        | 0.00014386 | No      |
|      |       |        |             |          |         | Synj2bp  | 20.3615   | 59.8308  | 1.55505          | 20.3625      | 59.8318       | 1.55499777       | 0.00014386 | No      |
|      |       |        |             |          |         | Synpo    | 0.646175  | 2.23504  | 1.7903           | 0.647175     | 2.23604       | 1.78871821       | 0.00014386 | No      |
|      |       |        |             |          |         | Synpo2   | 0         | 0.748158 | inf              | 0.001        | 0.749158      | 9.54912621       | 0.00014386 | No      |
|      |       |        |             |          |         | Synpr    | 0         | 0.796958 | inf              | 0.001        | 0.797958      | 9.640169         | 0.00014386 | No      |
|      |       |        |             |          |         | Syt11    | 6.5684    | 1.9039   | -1.78659         | 6.5694       | 1.9049        | -1.7860463       | 0.00014386 | No      |
|      |       |        |             |          |         | Syt9     | 0         | 1.45907  | inf              | 0.001        | 1.46007       | 10.5118218       | 0.00014386 | No      |
|      |       |        |             |          |         | Sytl1    | 93.0668   | 26.613   | -1.80614         | 93.0678      | 26.614        | -1.8060967       | 0.00014386 | No      |
|      |       |        |             |          |         | Syvn1    | 28.0041   | 18.6822  | -0.583972        | 28.0051      | 18.6832       | -0.583948        | 0.00014386 | No      |
|      |       |        |             |          |         | Szt2     | 14.9121   | 7.54171  | -0.983521        | 14.9131      | 7.54271       | -0.9834253       | 0.00014386 | No      |
|      |       |        |             |          |         | Tab1     | 10.3707   | 17.6153  | 0.764314         | 10.3717      | 17.6163       | 0.76425856       | 0.00014386 | No      |
|      |       |        |             |          |         | Tab2     | 92.8488   | 14.9456  | -2.63516         | 92.8498      | 14.9466       | -2.6350815       | 0.00014386 | No      |
|      |       |        |             |          |         | Tab3     | 3.97524   | 1.83886  | -1.11223         | 3.97624      | 1.83986       | -1.1118088       | 0.00014386 | No      |
|      |       |        |             |          |         | Tacc2    | 13.1796   | 45.7271  | 1.79475          | 13.1806      | 45.7281       | 1.79466493       | 0.00014386 | No      |

| RRBS |       |        |             |          |         | RNAseq   |          |          |                  |              |               |                  |            |         |
|------|-------|--------|-------------|----------|---------|----------|----------|----------|------------------|--------------|---------------|------------------|------------|---------|
| gene | Blood | Kidney | methyl.diff | pMWU.fdr | Match ? | gene     | blood    | kidney   | log2(fold_ratio) | blood+ 0.001 | kidney+ 0.001 | log2(fold_ratio) | q_value    | Match ? |
|      |       |        |             |          |         | Tacc3    | 54.8857  | 7.50918  | -2.8697          | 54.8867      | 7.51018       | -2.8695372       | 0.00014386 | No      |
|      |       |        |             |          |         | Taco1    | 1.90949  | 5.0953   | 1.41598          | 1.91049      | 5.0963        | 1.4155075        | 0.00014386 | No      |
|      |       |        |             |          |         | Tada2b   | 18.7395  | 12.3436  | -0.602323        | 18.7405      | 12.3446       | -0.6022794       | 0.00014386 | No      |
|      |       |        |             |          |         | Taf1     | 16.8177  | 3.91619  | -2.10246         | 16.8187      | 3.91719       | -2.1021752       | 0.00014386 | No      |
|      |       |        |             |          |         | Taf12    | 36.3852  | 20.2267  | -0.847095        | 36.3862      | 20.2277       | -0.8470591       | 0.00014386 | No      |
|      |       |        |             |          |         | Taf15    | 21.9535  | 13.1973  | -0.734209        | 21.9545      | 13.1983       | -0.7341646       | 0.00014386 | No      |
|      |       |        |             |          |         | Taf1b    | 9.01269  | 2.57741  | -1.80604         | 9.01369      | 2.57841       | -1.8056361       | 0.00014386 | No      |
|      |       |        |             |          |         | Taf1c    | 15.7729  | 5.62488  | -1.48755         | 15.7739      | 5.62588       | -1.4873887       | 0.00014386 | No      |
|      |       |        |             |          |         | Taf1d    | 32.125   | 7.8636   | -2.03044         | 32.126       | 7.8646        | -2.0302961       | 0.00014386 | No      |
|      |       |        |             |          |         | Taf2     | 9.3644   | 3.93544  | -1.25066         | 9.3654       | 3.93644       | -1.2504491       | 0.00014386 | No      |
|      |       |        |             |          |         | Taf4a    | 24.6515  | 8.37556  | -1.55742         | 24.6525      | 8.37656       | -1.5573042       | 0.00014386 | No      |
|      |       |        |             |          |         | Taf5l    | 16.6809  | 8.5829   | -0.958659        | 16.6819      | 8.5839        | -0.9585784       | 0.00014386 | No      |
|      |       |        |             |          |         | Taf7     | 18.7564  | 8.18903  | -1.19562         | 18.7574      | 8.19003       | -1.1955192       | 0.00014386 | No      |
|      |       |        |             |          |         | Taf8     | 18.5279  | 7.02451  | -1.39923         | 18.5289      | 7.02551       | -1.3991024       | 0.00014386 | No      |
|      |       |        |             |          |         | TAF9     | 109.595  | 63.9492  | -0.777177        | 109.596      | 63.9502       | -0.7771744       | 0.00014386 | No      |
|      |       |        |             |          |         | Taf9b    | 11.2779  | 8.08599  | -0.479999        | 11.2789      | 8.08699       | -0.4799516       | 0.00014386 | No      |
|      |       |        |             |          |         | Tagap    | 81.4876  | 3.94514  | -4.36843         | 81.4886      | 3.94614       | -4.3680842       | 0.00014386 | No      |
|      |       |        |             |          |         | Tagln2   | 409.63   | 196.502  | -1.05978         | 409.631      | 196.503       | -1.0597736       | 0.00014386 | No      |
|      |       |        |             |          |         | Taldo1   | 100.412  | 260.997  | 1.37811          | 100.413      | 260.998       | 1.37809269       | 0.00014386 | No      |
|      |       |        |             |          |         | Tanc1    | 0.646403 | 22.4009  | 5.11498          | 0.647403     | 22.4019       | 5.11281324       | 0.00014386 | No      |
|      |       |        |             |          |         | Tanc2    | 11.407   | 21.9842  | 0.946545         | 11.408       | 21.9852       | 0.94648677       | 0.00014386 | No      |
|      |       |        |             |          |         | Tango2   | 10.4905  | 33.3737  | 1.66963          | 10.4915      | 33.3747       | 1.66953391       | 0.00014386 | No      |
|      |       |        |             |          |         | Tank     | 46.0028  | 5.79553  | -2.98871         | 46.0038      | 5.79653       | -2.9884916       | 0.00014386 | No      |
|      |       |        |             |          |         | Taok1    | 20.4684  | 10.9817  | -0.898297        | 20.4694      | 10.9827       | -0.898236        | 0.00014386 | No      |
|      |       |        |             |          |         | Tap1     | 59.2278  | 11.8285  | -2.32401         | 59.2288      | 11.8295       | -2.3239098       | 0.00014386 | No      |
|      |       |        |             |          |         | Tapbpl   | 52.4706  | 9.75105  | -2.42788         | 52.4716      | 9.75205       | -2.4277594       | 0.00014386 | No      |
|      |       |        |             |          |         | Tapt1    | 26.9309  | 10.0858  | -1.41694         | 26.9319      | 10.0868       | -1.4168475       | 0.00014386 | No      |
|      |       |        |             |          |         | Tardbp   | 106.804  | 50.9787  | -1.067           | 106.805      | 50.9797       | -1.0669844       | 0.00014386 | No      |
|      |       |        |             |          |         | Tas1r1   | 1.402    | 19.9546  | 3.83117          | 1.403        | 19.9556       | 3.83020674       | 0.00014386 | No      |
|      |       |        |             |          |         | Tas1r2   | 18.7597  | 54.6838  | 1.54348          | 18.7607      | 54.6848       | 1.54342622       | 0.00014386 | No      |
|      |       |        |             |          |         | Tax1bp1  | 130.935  | 91.9378  | -0.510124        | 130.936      | 91.9388       | -0.5101161       | 0.00014386 | No      |
|      |       |        |             |          |         | Tax1bp3  | 5.86095  | 70.3433  | 3.58521          | 5.86195      | 70.3443       | 3.58498096       | 0.00014386 | No      |
|      |       |        |             |          |         | Tbc1d10a | 22.9941  | 41.1276  | 0.83884          | 22.9951      | 41.1286       | 0.83881549       | 0.00014386 | No      |
|      |       |        |             |          |         | Tbc1d13  | 8.28376  | 22.5131  | 1.44241          | 8.28476      | 22.5141       | 1.442297         | 0.00014386 | No      |
|      |       |        |             |          |         | Tbc1d15  | 39.108   | 10.1117  | -1.95143         | 39.109       | 10.1127       | -1.9513324       | 0.00014386 | No      |
|      |       |        |             |          |         | Tbc1d16  | 12.3764  | 6.53917  | -0.920415        | 12.3774      | 6.54017       | -0.9203083       | 0.00014386 | No      |
|      |       |        |             |          |         | Tbc1d17  | 47.8123  | 81.0202  | 0.760898         | 47.8133      | 81.0212       | 0.76088747       | 0.00014386 | No      |
|      |       |        |             |          |         | Tbc1d19  | 0.669397 | 11.7434  | 4.13284          | 0.670397     | 11.7444       | 4.13081351       | 0.00014386 | No      |
|      |       |        |             |          |         | Tbc1d2   | 0.823954 | 3.76651  | 2.19259          | 0.824954     | 3.76751       | 2.19122576       | 0.00014386 | No      |
|      |       |        |             |          |         | Tbc1d20  | 101.047  | 21.3985  | -2.23944         | 101.048      | 21.3995       | -2.2393918       | 0.00014386 | No      |
|      |       |        |             |          |         | Tbc1d22b | 34.197   | 16.8114  | -1.02443         | 34.198       | 16.8124       | -1.0243863       | 0.00014386 | No      |
|      |       |        |             |          |         | Tbc1d24  | 1.69775  | 0.815904 | -1.05716         | 1.69875      | 0.816904      | -1.0562351       | 0.00014386 | No      |

| RRBS |       |        |             |          |         | RNAseq  |           |         |                  |              |               |                  |            |         |
|------|-------|--------|-------------|----------|---------|---------|-----------|---------|------------------|--------------|---------------|------------------|------------|---------|
| gene | Blood | Kidney | methyl.diff | pMWU.fdr | Match ? | gene    | blood     | kidney  | log2(fold_ratio) | blood+ 0.001 | kidney+ 0.001 | log2(fold_ratio) | q_value    | Match ? |
|      |       |        |             |          |         | Tbc1d25 | 14.7009   | 6.62424 | -1.15008         | 14.7019      | 6.62524       | -1.149958        | 0.00014386 | No      |
|      |       |        |             |          |         | Tbc1d2b | 10.6841   | 3.78239 | -1.49809         | 10.6851      | 3.78339       | -1.497849        | 0.00014386 | No      |
|      |       |        |             |          |         | Tbc1d32 | 0.272118  | 2.33175 | 3.09911          | 0.273118     | 2.33275       | 3.0944354        | 0.00014386 | No      |
|      |       |        |             |          |         | Tbc1d4  | 25.3727   | 9.85068 | -1.36498         | 25.3737      | 9.85168       | -1.3648922       | 0.00014386 | No      |
|      |       |        |             |          |         | Tbc1d5  | 10.3785   | 4.67639 | -1.15013         | 10.3795      | 4.67739       | -1.1499613       | 0.00014386 | No      |
|      |       |        |             |          |         | Tbca    | 253.258   | 392.817 | 0.633252         | 253.259      | 392.818       | 0.6332475        | 0.00014386 | No      |
|      |       |        |             |          |         | Tbce    | 54.7857   | 21.8407 | -1.32678         | 54.7867      | 21.8417       | -1.3267406       | 0.00014386 | No      |
|      |       |        |             |          |         | Tbcel   | 11.7853   | 7.31436 | -0.688183        | 11.7863      | 7.31536       | -0.6881101       | 0.00014386 | No      |
|      |       |        |             |          |         | Tbk1    | 20.0231   | 8.85257 | -1.1775          | 20.0241      | 8.85357       | -1.1774062       | 0.00014386 | No      |
|      |       |        |             |          |         | Tbkbp1  | 4.91067   | 1.80132 | -1.44687         | 4.91167      | 1.80232       | -1.4463585       | 0.00014386 | No      |
|      |       |        |             |          |         | Tbl1x   | 19.229    | 9.35854 | -1.03893         | 19.23        | 9.35954       | -1.0388492       | 0.00014386 | No      |
|      |       |        |             |          |         | Tbl1xr1 | 20.238    | 8.59603 | -1.23533         | 20.239       | 8.59703       | -1.2352278       | 0.00014386 | No      |
|      |       |        |             |          |         | Tbp     | 6.7594    | 4.20221 | -0.685746        | 6.7604       | 4.20321       | -0.6856171       | 0.00014386 | No      |
|      |       |        |             |          |         | Tbpl1   | 45.0691   | 23.3694 | -0.947516        | 45.0701      | 23.3704       | -0.9474882       | 0.00014386 | No      |
|      |       |        |             |          |         | Tbx10   | 0.163733  | 7.42199 | 5.50239          | 0.164733     | 7.42299       | 5.49379893       | 0.00014386 | No      |
|      |       |        |             |          |         | Tbx21   | 8.64749   | 3.3457  | -1.36997         | 8.64849      | 3.3467        | -1.369709        | 0.00014386 | No      |
|      |       |        |             |          |         | Tc2n    | 0         | 3.627   | inf              | 0.001        | 3.628         | 11.8249587       | 0.00014386 | No      |
|      |       |        |             |          |         | Tcaim   | 6.72069   | 29.5893 | 2.13839          | 6.72169      | 29.5903       | 2.13822841       | 0.00014386 | No      |
|      |       |        |             |          |         | Tcea1   | 77.7635   | 40.0115 | -0.958679        | 77.7645      | 40.0125       | -0.9586609       | 0.00014386 | No      |
|      |       |        |             |          |         | Tcea3   | 0         | 39.3945 | inf              | 0.001        | 39.3955       | 15.2657432       | 0.00014386 | No      |
|      |       |        |             |          |         | Tceal8  | 10.1475   | 74.482  | 2.87577          | 10.1485      | 74.483        | 2.87564468       | 0.00014386 | No      |
|      |       |        |             |          |         | Tceanc2 | 16.1482   | 9.27833 | -0.799432        | 16.1492      | 9.27933       | -0.7993702       | 0.00014386 | No      |
|      |       |        |             |          |         | Tceb2   | 291.836   | 541.63  | 0.892149         | 291.837      | 541.631       | 0.89214751       | 0.00014386 | No      |
|      |       |        |             |          |         | Tceb3   | 23.0416   | 16.3932 | -0.491146        | 23.0426      | 16.3942       | -0.491118        | 0.00014386 | No      |
|      |       |        |             |          |         | Tcerg1  | 63.3142   | 14.3086 | -2.14565         | 63.3152      | 14.3096       | -2.1455685       | 0.00014386 | No      |
|      |       |        |             |          |         | Tcf20   | 28.013    | 5.71105 | -2.29427         | 28.014       | 5.71205       | -2.2940675       | 0.00014386 | No      |
|      |       |        |             |          |         | Tcf21   | 0         | 2.08324 | inf              | 0.001        | 2.08424       | 11.0253057       | 0.00014386 | No      |
|      |       |        |             |          |         | Tcf25   | 74.4901   | 109.48  | 0.555544         | 74.4911      | 109.481       | 0.55554055       | 0.00014386 | No      |
|      |       |        |             |          |         | Tcf3    | 68.2451   | 23.2157 | -1.55563         | 68.2461      | 23.2167       | -1.5555837       | 0.00014386 | No      |
|      |       |        |             |          |         | Tcf4    | 4.9621    | 2.05939 | -1.26873         | 4.9631       | 2.06039       | -1.2683241       | 0.00014386 | No      |
|      |       |        |             |          |         | TCF7    | 571.227   | 6.78148 | -6.39632         | 571.228      | 6.78248       | -6.39611         | 0.00014386 | No      |
|      |       |        |             |          |         | Tcf7l1  | 1.91528   | 3.6809  | 0.942499         | 1.91628      | 3.6819        | 0.94214207       | 0.00014386 | No      |
|      |       |        |             |          |         | Tcf7l2  | 0.133937  | 7.19639 | 5.74764          | 0.134937     | 7.19739       | 5.73711594       | 0.00014386 | No      |
|      |       |        |             |          |         | Tcn2    | 6.31774   | 48.3302 | 2.93544          | 6.31874      | 48.3312       | 2.93524601       | 0.00014386 | No      |
|      |       |        |             |          |         | Tcof1   | 28.5676   | 11.0351 | -1.37228         | 28.5686      | 11.0361       | -1.3721999       | 0.00014386 | No      |
|      |       |        |             |          |         | Tcp11l1 | 0.0583901 | 7.53529 | 7.0118           | 0.0593901    | 7.53629       | 6.98748821       | 0.00014386 | No      |
|      |       |        |             |          |         | Tcp11l2 | 111.302   | 14.79   | -2.91178         | 111.303      | 14.791        | -2.911701        | 0.00014386 | No      |
|      |       |        |             |          |         | TCRB    | 2570.37   | 93.2191 | -4.78521         | 2570.371     | 93.2201       | -4.7851917       | 0.00014386 | No      |
|      |       |        |             |          |         | Tctn1   | 1.4018    | 9.28243 | 2.72722          | 1.4028       | 9.28343       | 2.72634861       | 0.00014386 | No      |
|      |       |        |             |          |         | Tdg     | 23.6384   | 17.7821 | -0.410709        | 23.6394      | 17.7831       | -0.4106866       | 0.00014386 | No      |
|      |       |        |             |          |         | Tdp1    | 5.19398   | 1.89786 | -1.45246         | 5.19498      | 1.89886       | -1.4519847       | 0.00014386 | No      |
|      |       |        |             |          |         | Tdp2    | 47.0562   | 19.56   | -1.26648         | 47.0572      | 19.561        | -1.2664354       | 0.00014386 | No      |

| RRBS |       |        |             |          |         | RNAseq |           |          |                  |              |               |                  |            |         |
|------|-------|--------|-------------|----------|---------|--------|-----------|----------|------------------|--------------|---------------|------------------|------------|---------|
| gene | Blood | Kidney | methyl.diff | pMWU.fdr | Match ? | gene   | blood     | kidney   | log2(fold_ratio) | blood+ 0.001 | kidney+ 0.001 | log2(fold_ratio) | q_value    | Match ? |
|      |       |        |             |          |         | TDRD3  | 9.18514   | 18.1366  | 0.98153          | 9.18614      | 18.1376       | 0.98145289       | 0.00014386 | No      |
|      |       |        |             |          |         | Tead4  | 0         | 0.941214 | inf              | 0.001        | 0.942214      | 9.87991096       | 0.00014386 | No      |
|      |       |        |             |          |         | Tecpr1 | 49.3702   | 13.5566  | -1.86464         | 49.3712      | 13.5576       | -1.8645679       | 0.00014386 | No      |
|      |       |        |             |          |         | Tecr   | 118.072   | 157.602  | 0.41662          | 118.073      | 157.603       | 0.4166159        | 0.00014386 | No      |
|      |       |        |             |          |         | Tef    | 3.92687   | 15.7094  | 2.00018          | 3.92787      | 15.7104       | 1.99990083       | 0.00014386 | No      |
|      |       |        |             |          |         | Tefm   | 3.19461   | 10.477   | 1.71352          | 3.19561      | 10.478        | 1.71320011       | 0.00014386 | No      |
|      |       |        |             |          |         | Tekt1  | 0         | 2.30437  | inf              | 0.001        | 2.30537       | 11.1707826       | 0.00014386 | No      |
|      |       |        |             |          |         | Tekt5  | 0         | 1.38119  | inf              | 0.001        | 1.38219       | 10.4327402       | 0.00014386 | No      |
|      |       |        |             |          |         | Tenc1  | 0.0361077 | 15.0482  | 8.70307          | 0.0371077    | 15.0492       | 8.6637525        | 0.00014386 | No      |
|      |       |        |             |          |         | Terf1  | 19.8105   | 11.568   | -0.776126        | 19.8115      | 11.569        | -0.7760739       | 0.00014386 | No      |
|      |       |        |             |          |         | Terf2  | 24.4263   | 8.76315  | -1.47892         | 24.4273      | 8.76415       | -1.4788083       | 0.00014386 | No      |
|      |       |        |             |          |         | Tes    | 42.9603   | 14.464   | -1.57054         | 42.9613      | 14.465        | -1.5704713       | 0.00014386 | No      |
|      |       |        |             |          |         | Tesk1  | 7.44409   | 13.3727  | 0.845125         | 7.44509      | 13.3737       | 0.84503747       | 0.00014386 | No      |
|      |       |        |             |          |         | Tet2   | 4.07632   | 1.46519  | -1.47618         | 4.07732      | 1.46619       | -1.4755491       | 0.00014386 | No      |
|      |       |        |             |          |         | Tex10  | 17.5101   | 4.18849  | -2.06369         | 17.5111      | 4.18949       | -2.0634232       | 0.00014386 | No      |
|      |       |        |             |          |         | Tex14  | 0.499347  | 11.9958  | 4.58634          | 0.500347     | 11.9968       | 4.58357685       | 0.00014386 | No      |
|      |       |        |             |          |         | Tex2   | 24.6695   | 10.3991  | -1.24627         | 24.6705      | 10.4001       | -1.2461896       | 0.00014386 | No      |
|      |       |        |             |          |         | Tex26  | 0         | 3.60497  | inf              | 0.001        | 3.60597       | 11.8161717       | 0.00014386 | No      |
|      |       |        |             |          |         | Tex264 | 38.9902   | 96.1137  | 1.30163          | 38.9912      | 96.1147       | 1.30160854       | 0.00014386 | No      |
|      |       |        |             |          |         | Tex36  | 0         | 8.82022  | inf              | 0.001        | 8.82122       | 13.1067625       | 0.00014386 | No      |
|      |       |        |             |          |         | Tf     | 10.6683   | 20.7221  | 0.957835         | 10.6693      | 20.7231       | 0.95777431       | 0.00014386 | No      |
|      |       |        |             |          |         | Tfap2b | 0.0152659 | 13.5813  | 9.7971           | 0.0162659    | 13.5823       | 9.70566144       | 0.00014386 | No      |
|      |       |        |             |          |         | Tfdp2  | 2.12102   | 4.23227  | 0.996673         | 2.12202      | 4.23327       | 0.99633425       | 0.00014386 | No      |
|      |       |        |             |          |         | Tfg    | 17.9094   | 25.7544  | 0.524101         | 17.9104      | 25.7554       | 0.52407739       | 0.00014386 | No      |
|      |       |        |             |          |         | Tfpi   | 2.62068   | 6.48298  | 1.30672          | 2.62168      | 6.48398       | 1.30638804       | 0.00014386 | No      |
|      |       |        |             |          |         | Tfrc   | 17.8241   | 4.48069  | -1.99204         | 17.8251      | 4.48169       | -1.9917954       | 0.00014386 | No      |
|      |       |        |             |          |         | Tgds   | 29.0493   | 17.8851  | -0.699741        | 29.0503      | 17.8861       | -0.6997142       | 0.00014386 | No      |
|      |       |        |             |          |         | Tgfb1  | 128.084   | 16.3498  | -2.96975         | 128.085      | 16.3508       | -2.9696684       | 0.00014386 | No      |
|      |       |        |             |          |         | Tgfb2  | 0.118374  | 5.12543  | 5.43625          | 0.119374     | 5.12643       | 5.42439394       | 0.00014386 | No      |
|      |       |        |             |          |         | Tgfb3  | 1.25302   | 5.9469   | 2.24673          | 1.25402      | 5.9479        | 2.24582003       | 0.00014386 | No      |
|      |       |        |             |          |         | Tgfb4  | 7.95547   | 4.46654  | -0.832788        | 7.95647      | 4.46754       | -0.8326479       | 0.00014386 | No      |
|      |       |        |             |          |         | Tgfb5  | 30.23     | 15.6298  | -0.951684        | 30.231       | 15.6308       | -0.9516371       | 0.00014386 | No      |
|      |       |        |             |          |         | Tgfb6  | 0.324864  | 10.5115  | 5.01599          | 0.325864     | 10.5125       | 5.01169201       | 0.00014386 | No      |
|      |       |        |             |          |         | Tgif1  | 39.0245   | 19.4408  | -1.00529         | 39.0255      | 19.4418       | -1.0052553       | 0.00014386 | No      |
|      |       |        |             |          |         | Tgif2  | 4.1896    | 2.36022  | -0.827889        | 4.1906       | 2.36122       | -0.8276244       | 0.00014386 | No      |
|      |       |        |             |          |         | Tgs1   | 6.9271    | 2.82658  | -1.29319         | 6.9281       | 2.82758       | -1.2928919       | 0.00014386 | No      |
|      |       |        |             |          |         | Tha1   | 2.6054    | 6.69135  | 1.36079          | 2.6064       | 6.69235       | 1.36045439       | 0.00014386 | No      |
|      |       |        |             |          |         | Thap11 | 19.2856   | 13.2039  | -0.546563        | 19.2866      | 13.2049       | -0.5465255       | 0.00014386 | No      |
|      |       |        |             |          |         | Thap4  | 12.0394   | 193.541  | 4.00681          | 12.0404      | 193.542       | 4.00669145       | 0.00014386 | No      |
|      |       |        |             |          |         | Thap7  | 12.5325   | 20.0178  | 0.67561          | 12.5335      | 20.0188       | 0.67556615       | 0.00014386 | No      |
|      |       |        |             |          |         | Thbs1  | 0.290401  | 130.519  | 8.812            | 0.291401     | 130.52        | 8.80704935       | 0.00014386 | No      |
|      |       |        |             |          |         | Them4  | 1.94001   | 8.19647  | 2.07894          | 1.94101      | 8.19747       | 2.07837117       | 0.00014386 | No      |



| RRBS |       |        |             |          |         | RNAseq  |           |         |                  |              |               |                  |            |         |
|------|-------|--------|-------------|----------|---------|---------|-----------|---------|------------------|--------------|---------------|------------------|------------|---------|
| gene | Blood | Kidney | methyl.diff | pMWU.fdr | Match ? | gene    | blood     | kidney  | log2(fold_ratio) | blood+ 0.001 | kidney+ 0.001 | log2(fold_ratio) | q_value    | Match ? |
|      |       |        |             |          |         | Them6   | 10.8951   | 45.9472 | 2.07629          | 10.8961      | 45.9482       | 2.0761965        | 0.00014386 | No      |
|      |       |        |             |          |         | Them7   | 0         | 4.62462 | inf              | 0.001        | 4.62562       | 12.175431        | 0.00014386 | No      |
|      |       |        |             |          |         | Thns12  | 0.712271  | 87.5798 | 6.94203          | 0.713271     | 87.5808       | 6.9400205        | 0.00014386 | No      |
|      |       |        |             |          |         | Thoc1   | 34.4024   | 18.0988 | -0.926616        | 34.4034      | 18.0998       | -0.9265774       | 0.00014386 | No      |
|      |       |        |             |          |         | Thoc2   | 20.4142   | 3.86953 | -2.39934         | 20.4152      | 3.87053       | -2.3990407       | 0.00014386 | No      |
|      |       |        |             |          |         | Thoc3   | 26.6094   | 13.6753 | -0.96037         | 26.6104      | 13.6763       | -0.9603122       | 0.00014386 | No      |
|      |       |        |             |          |         | Thra    | 13.0895   | 48.4144 | 1.88703          | 13.0905      | 48.4154       | 1.88694581       | 0.00014386 | No      |
|      |       |        |             |          |         | Thrap3  | 66.8637   | 26.8751 | -1.31495         | 66.8647      | 26.8761       | -1.314921        | 0.00014386 | No      |
|      |       |        |             |          |         | Thrb    | 3.56775   | 7.94013 | 1.15415          | 3.56875      | 7.94113       | 1.15392547       | 0.00014386 | No      |
|      |       |        |             |          |         | Thsd4   | 0.0455288 | 4.93854 | 6.76116          | 0.0465288    | 4.93954       | 6.73010891       | 0.00014386 | No      |
|      |       |        |             |          |         | Thumpd2 | 13.3338   | 7.69936 | -0.792273        | 13.3348      | 7.70036       | -0.7921984       | 0.00014386 | No      |
|      |       |        |             |          |         | Thumpd3 | 13.3468   | 8.94269 | -0.577713        | 13.3478      | 8.94369       | -0.5776599       | 0.00014386 | No      |
|      |       |        |             |          |         | Tia1    | 27.8761   | 6.1237  | -2.18655         | 27.8771      | 6.1247        | -2.1863694       | 0.00014386 | No      |
|      |       |        |             |          |         | Tial1   | 80.628    | 25.2996 | -1.67216         | 80.629       | 25.3006       | -1.6721272       | 0.00014386 | No      |
|      |       |        |             |          |         | Tiam1   | 3.78197   | 1.5336  | -1.30221         | 3.78297      | 1.5346        | -1.3016567       | 0.00014386 | No      |
|      |       |        |             |          |         | Tiam2   | 0.179109  | 1.12051 | 2.64524          | 0.180109     | 1.12151       | 2.63850031       | 0.00014386 | No      |
|      |       |        |             |          |         | Tie1    | 2.21913   | 14.9884 | 2.75578          | 2.22013      | 14.9894       | 2.75522657       | 0.00014386 | No      |
|      |       |        |             |          |         | Tigd2   | 20.7387   | 5.1477  | -2.01033         | 20.7397      | 5.1487        | -2.0101149       | 0.00014386 | No      |
|      |       |        |             |          |         | Timd2   | 0.884611  | 15.7268 | 4.15204          | 0.885611     | 15.7278       | 4.15049993       | 0.00014386 | No      |
|      |       |        |             |          |         | Timm10  | 18.9912   | 52.3676 | 1.46334          | 18.9922      | 52.3686       | 1.463295         | 0.00014386 | No      |
|      |       |        |             |          |         | TIMM10B | 11.7067   | 23.5001 | 1.00534          | 11.7077      | 23.5011       | 1.0052706        | 0.00014386 | No      |
|      |       |        |             |          |         | Timm13  | 68.9704   | 205.019 | 1.57171          | 68.9714      | 205.02        | 1.5716945        | 0.00014386 | No      |
|      |       |        |             |          |         | Timm17a | 33.1585   | 108.49  | 1.71011          | 33.1595      | 108.491       | 1.71008121       | 0.00014386 | No      |
|      |       |        |             |          |         | Timm21  | 13.1192   | 32.8808 | 1.32556          | 13.1202      | 32.8818       | 1.32549956       | 0.00014386 | No      |
|      |       |        |             |          |         | Timm22  | 11.3887   | 32.374  | 1.50723          | 11.3897      | 32.375        | 1.50715045       | 0.00014386 | No      |
|      |       |        |             |          |         | Timm44  | 23.4649   | 36.4945 | 0.637173         | 23.4659      | 36.4955       | 0.63715279       | 0.00014386 | No      |
|      |       |        |             |          |         | Timm8b  | 34.2806   | 312.427 | 3.18805          | 34.2816      | 312.428       | 3.1880174        | 0.00014386 | No      |
|      |       |        |             |          |         | Timp2   | 0.49925   | 41.2966 | 6.37011          | 0.50025      | 41.2976       | 6.36726487       | 0.00014386 | No      |
|      |       |        |             |          |         | Timp3   | 0.077839  | 557.163 | 12.8053          | 0.078839     | 557.164       | 12.7869049       | 0.00014386 | No      |
|      |       |        |             |          |         | Timp4   | 0         | 1.7176  | inf              | 0.001        | 1.7186        | 10.7470181       | 0.00014386 | No      |
|      |       |        |             |          |         | Tiparp  | 17.53     | 9.36718 | -0.904141        | 17.531       | 9.36818       | -0.9040676       | 0.00014386 | No      |
|      |       |        |             |          |         | Tjp1    | 0.0729202 | 9.62702 | 7.04463          | 0.0739202    | 9.62802       | 7.02512667       | 0.00014386 | No      |
|      |       |        |             |          |         | Tjp2    | 0.0768754 | 20.8885 | 8.08597          | 0.0778754    | 20.8895       | 8.06739458       | 0.00014386 | No      |
|      |       |        |             |          |         | Tjp3    | 0.870009  | 14.6167 | 4.07044          | 0.871009     | 14.6177       | 4.06888489       | 0.00014386 | No      |
|      |       |        |             |          |         | Tk2     | 16.7465   | 9.58335 | -0.805255        | 16.7475      | 9.58435       | -0.8051933       | 0.00014386 | No      |
|      |       |        |             |          |         | Tkt     | 84.689    | 145.279 | 0.778578         | 84.69        | 145.28        | 0.77857257       | 0.00014386 | No      |
|      |       |        |             |          |         | Tlcd1   | 1.29787   | 30.9064 | 4.57368          | 1.29887      | 30.9074       | 4.57262335       | 0.00014386 | No      |
|      |       |        |             |          |         | Tle2    | 0.0556093 | 489.662 | 13.1042          | 0.0566093    | 489.663       | 13.0784625       | 0.00014386 | No      |
|      |       |        |             |          |         | Tle3    | 55.8403   | 13.5245 | -2.04573         | 55.8413      | 13.5255       | -2.0456506       | 0.00014386 | No      |
|      |       |        |             |          |         | Tle4    | 28.282    | 6.76068 | -2.06464         | 28.283       | 6.76168       | -2.0644815       | 0.00014386 | No      |
|      |       |        |             |          |         | Tlk2    | 21.1702   | 13.4989 | -0.649193        | 21.1712      | 13.4999       | -0.6491543       | 0.00014386 | No      |
|      |       |        |             |          |         | Tln1    | 67.3395   | 24.8436 | -1.43858         | 67.3405      | 24.8446       | -1.4385421       | 0.00014386 | No      |

| RRBS |       |        |             |          |         | RNAseq   |           |         |                  |              |               |                  |            |         |
|------|-------|--------|-------------|----------|---------|----------|-----------|---------|------------------|--------------|---------------|------------------|------------|---------|
| gene | Blood | Kidney | methyl.diff | pMWU.fdr | Match ? | gene     | blood     | kidney  | log2(fold_ratio) | blood+ 0.001 | kidney+ 0.001 | log2(fold_ratio) | q_value    | Match ? |
|      |       |        |             |          |         | Tln2     | 0.0136657 | 12.597  | 9.8483           | 0.0146657    | 12.598        | 9.74653307       | 0.00014386 | No      |
|      |       |        |             |          |         | Tlr12    | 0         | 2.48972 | inf              | 0.001        | 2.49072       | 11.2823471       | 0.00014386 | No      |
|      |       |        |             |          |         | Tlr3     | 0.679654  | 9.00917 | 3.72852          | 0.680654     | 9.01017       | 3.72656081       | 0.00014386 | No      |
|      |       |        |             |          |         | Tm2d1    | 14.5972   | 35.5195 | 1.28292          | 14.5982      | 35.5205       | 1.2828614        | 0.00014386 | No      |
|      |       |        |             |          |         | Tm2d2    | 21.4152   | 41.3659 | 0.949804         | 21.4162      | 41.3669       | 0.94977433       | 0.00014386 | No      |
|      |       |        |             |          |         | Tm7sf2   | 24.2701   | 38.7394 | 0.674622         | 24.2711      | 38.7404       | 0.67459936       | 0.00014386 | No      |
|      |       |        |             |          |         | Tm9sf2   | 14.4548   | 45.8567 | 1.66558          | 14.4558      | 45.8577       | 1.66551555       | 0.00014386 | No      |
|      |       |        |             |          |         | Tm9sf3   | 59.4413   | 41.7953 | -0.508123        | 59.4423      | 41.7963       | -0.5081147       | 0.00014386 | No      |
|      |       |        |             |          |         | Tmbim1   | 1.608     | 34.7384 | 4.43319          | 1.609        | 34.7394       | 4.43233661       | 0.00014386 | No      |
|      |       |        |             |          |         | Tmbim4   | 81.0148   | 55.0489 | -0.557471        | 81.0158      | 55.0499       | -0.5574634       | 0.00014386 | No      |
|      |       |        |             |          |         | Tmc4     | 0.117952  | 28.6299 | 7.92318          | 0.118952     | 28.6309       | 7.91104968       | 0.00014386 | No      |
|      |       |        |             |          |         | Tmc6     | 106.468   | 28.9289 | -1.87984         | 106.469      | 28.9299       | -1.8798002       | 0.00014386 | No      |
|      |       |        |             |          |         | Tmcc1    | 13.6315   | 4.2104  | -1.69491         | 13.6325      | 4.2114        | -1.6946783       | 0.00014386 | No      |
|      |       |        |             |          |         | Tmcc3    | 1.12448   | 3.66739 | 1.7055           | 1.12548      | 3.66839       | 1.70460661       | 0.00014386 | No      |
|      |       |        |             |          |         | Tmco4    | 12.9509   | 19.4764 | 0.58868          | 12.9519      | 19.4774       | 0.58863736       | 0.00014386 | No      |
|      |       |        |             |          |         | Tmed10   | 73.6078   | 45.2716 | -0.701252        | 73.6088      | 45.2726       | -0.7012401       | 0.00014386 | No      |
|      |       |        |             |          |         | Tmed2    | 112.467   | 79.6427 | -0.49789         | 112.468      | 79.6437       | -0.4978824       | 0.00014386 | No      |
|      |       |        |             |          |         | Tmed3    | 9.94979   | 22.7973 | 1.19613          | 9.95079      | 22.7983       | 1.19604328       | 0.00014386 | No      |
|      |       |        |             |          |         | Tmed5    | 13.4768   | 4.11197 | -1.71258         | 13.4778      | 4.11297       | -1.7123326       | 0.00014386 | No      |
|      |       |        |             |          |         | Tmed6    | 0.182558  | 48.021  | 8.03917          | 0.183558     | 48.022        | 8.03131569       | 0.00014386 | No      |
|      |       |        |             |          |         | Tmed7    | 12.3335   | 20.7187 | 0.748349         | 12.3345      | 20.7197       | 0.74830388       | 0.00014386 | No      |
|      |       |        |             |          |         | Tmed8    | 8.33354   | 1.81821 | -2.19641         | 8.33454      | 1.81921       | -2.1957905       | 0.00014386 | No      |
|      |       |        |             |          |         | Tmem106a | 2.02572   | 30.5588 | 3.91508          | 2.02672      | 30.5598       | 3.91441641       | 0.00014386 | No      |
|      |       |        |             |          |         | Tmem106b | 14.603    | 20.9312 | 0.519391         | 14.604       | 20.9322       | 0.51936037       | 0.00014386 | No      |
|      |       |        |             |          |         | Tmem106c | 5.34415   | 19.6468 | 1.87826          | 5.34515      | 19.6478       | 1.87806544       | 0.00014386 | No      |
|      |       |        |             |          |         | Tmem107  | 0.46792   | 14.0246 | 4.90556          | 0.46892      | 14.0256       | 4.90257687       | 0.00014386 | No      |
|      |       |        |             |          |         | Tmem109  | 11.7763   | 22.4213 | 0.928977         | 11.7773      | 22.4223       | 0.92892544       | 0.00014386 | No      |
|      |       |        |             |          |         | TMEM11   | 18.5771   | 34.8592 | 0.908014         | 18.5781      | 34.8602       | 0.90797788       | 0.00014386 | No      |
|      |       |        |             |          |         | Tmem116  | 0.0968297 | 5.97165 | 5.94654          | 0.0978297    | 5.97265       | 5.93195485       | 0.00014386 | No      |
|      |       |        |             |          |         | Tmem117  | 0.181596  | 9.04461 | 5.63825          | 0.182596     | 9.04561       | 5.63049073       | 0.00014386 | No      |
|      |       |        |             |          |         | Tmem120a | 13.2661   | 22.4702 | 0.760269         | 13.2671      | 22.4712       | 0.76022412       | 0.00014386 | No      |
|      |       |        |             |          |         | Tmem123  | 137.511   | 86.9001 | -0.662116        | 137.512      | 86.9011       | -0.6621112       | 0.00014386 | No      |
|      |       |        |             |          |         | Tmem126b | 11.8575   | 23.0196 | 0.957062         | 11.8585      | 23.0206       | 0.9570039        | 0.00014386 | No      |
|      |       |        |             |          |         | Tmem131  | 19.5943   | 11.8035 | -0.731218        | 19.5953      | 11.8045       | -0.7311707       | 0.00014386 | No      |
|      |       |        |             |          |         | Tmem132a | 0.803584  | 11.9542 | 3.89492          | 0.804584     | 11.9552       | 3.89325141       | 0.00014386 | No      |
|      |       |        |             |          |         | Tmem135  | 4.89988   | 15.7989 | 1.689            | 4.90088      | 15.7999       | 1.6888027        | 0.00014386 | No      |
|      |       |        |             |          |         | Tmem141  | 13.5955   | 33.919  | 1.31897          | 13.5965      | 33.92         | 1.31890085       | 0.00014386 | No      |
|      |       |        |             |          |         | TMEM144  | 2.20469   | 3.65085 | 0.72766          | 2.20569      | 3.65185       | 0.72739747       | 0.00014386 | No      |
|      |       |        |             |          |         | Tmem14a  | 10.8008   | 25.8516 | 1.25912          | 10.8018      | 25.8526       | 1.25903764       | 0.00014386 | No      |
|      |       |        |             |          |         | Tmem154  | 57.1926   | 2.66738 | -4.42233         | 57.1936      | 2.66838       | -4.4218177       | 0.00014386 | No      |
|      |       |        |             |          |         | Tmem156  | 54.5277   | 2.54868 | -4.41917         | 54.5287      | 2.54968       | -4.4186277       | 0.00014386 | No      |
|      |       |        |             |          |         | Tmem163  | 9.67039   | 0       | -inf             | 9.67139      | 0.001         | -13.239508       | 0.00014386 | No      |

| RRBS |       |        |             |          |         | RNAseq   |           |         |                  |              |               |                  |            |         |
|------|-------|--------|-------------|----------|---------|----------|-----------|---------|------------------|--------------|---------------|------------------|------------|---------|
| gene | Blood | Kidney | methyl.diff | pMWU.fdr | Match ? | gene     | blood     | kidney  | log2(fold_ratio) | blood+ 0.001 | kidney+ 0.001 | log2(fold_ratio) | q_value    | Match ? |
|      |       |        |             |          |         | Tmem164  | 11.9636   | 5.61174 | -1.09213         | 11.9646      | 5.61274       | -1.091995        | 0.00014386 | No      |
|      |       |        |             |          |         | TMEM165  | 18.4868   | 10.0362 | -0.881274        | 18.4878      | 10.0372       | -0.8812167       | 0.00014386 | No      |
|      |       |        |             |          |         | Tmem167a | 36.1517   | 22.6152 | -0.676769        | 36.1527      | 22.6162       | -0.6767468       | 0.00014386 | No      |
|      |       |        |             |          |         | Tmem169  | 0.0253455 | 4.62593 | 7.51187          | 0.0263455    | 4.62693       | 7.4563549        | 0.00014386 | No      |
|      |       |        |             |          |         | Tmem17   | 1.14437   | 12.4581 | 3.44446          | 1.14537      | 12.4591       | 3.44331423       | 0.00014386 | No      |
|      |       |        |             |          |         | Tmem170b | 5.12992   | 1.53431 | -1.74135         | 5.13092      | 1.53531       | -1.7406875       | 0.00014386 | No      |
|      |       |        |             |          |         | Tmem173  | 146.968   | 11.0021 | -3.73966         | 146.969      | 11.0031       | -3.7395299       | 0.00014386 | No      |
|      |       |        |             |          |         | Tmem176a | 5.52047   | 62.2967 | 3.49629          | 5.52147      | 62.2977       | 3.49605458       | 0.00014386 | No      |
|      |       |        |             |          |         | Tmem176b | 4.56756   | 108.119 | 4.56505          | 4.56856      | 108.12        | 4.5647501        | 0.00014386 | No      |
|      |       |        |             |          |         | Tmem177  | 2.74121   | 5.15096 | 0.910028         | 2.74221      | 5.15196       | 0.90978233       | 0.00014386 | No      |
|      |       |        |             |          |         | Tmem181  | 14.9029   | 4.64866 | -1.68071         | 14.9039      | 4.64966       | -1.6804928       | 0.00014386 | No      |
|      |       |        |             |          |         | Tmem183a | 33.5335   | 51.9951 | 0.63277          | 33.5345      | 51.9961       | 0.63275733       | 0.00014386 | No      |
|      |       |        |             |          |         | Tmem184b | 7.92615   | 16.671  | 1.07265          | 7.92715      | 16.672        | 1.072553         | 0.00014386 | No      |
|      |       |        |             |          |         | Tmem194  | 4.64235   | 1.31731 | -1.81727         | 4.64335      | 1.31831       | -1.8164764       | 0.00014386 | No      |
|      |       |        |             |          |         | Tmem194b | 21.1799   | 1.85929 | -3.50987         | 21.1809      | 1.86029       | -3.5091644       | 0.00014386 | No      |
|      |       |        |             |          |         | Tmem2    | 0.147771  | 5.37726 | 5.18543          | 0.148771     | 5.37826       | 5.17597427       | 0.00014386 | No      |
|      |       |        |             |          |         | Tmem203  | 12.5054   | 20.4094 | 0.70668          | 12.5064      | 20.4104       | 0.70663789       | 0.00014386 | No      |
|      |       |        |             |          |         | Tmem204  | 38.8409   | 4.01891 | -3.2727          | 38.8419      | 4.01991       | -3.2723787       | 0.00014386 | No      |
|      |       |        |             |          |         | Tmem205  | 3.12303   | 43.1547 | 3.7885           | 3.12403      | 43.1557       | 3.78807091       | 0.00014386 | No      |
|      |       |        |             |          |         | Tmem207  | 0.0234205 | 66.4183 | 11.4696          | 0.0244205    | 66.4193       | 11.4092941       | 0.00014386 | No      |
|      |       |        |             |          |         | Tmem209  | 25.9103   | 14.5792 | -0.829614        | 25.9113      | 14.5802       | -0.8295709       | 0.00014386 | No      |
|      |       |        |             |          |         | Tmem213  | 0.269665  | 279.659 | 10.0183          | 0.270665     | 279.66        | 10.0129499       | 0.00014386 | No      |
|      |       |        |             |          |         | Tmem216  | 5.74653   | 20.455  | 1.83169          | 5.74753      | 20.456        | 1.83151007       | 0.00014386 | No      |
|      |       |        |             |          |         | Tmem218  | 6.92768   | 16.5449 | 1.25594          | 6.92868      | 16.5459       | 1.25582134       | 0.00014386 | No      |
|      |       |        |             |          |         | Tmem220  | 1.71487   | 4.0919  | 1.25467          | 1.71587      | 4.0929        | 1.25418316       | 0.00014386 | No      |
|      |       |        |             |          |         | Tmem221  | 0         | 2.67837 | inf              | 0.001        | 2.67937       | 11.3876781       | 0.00014386 | No      |
|      |       |        |             |          |         | Tmem229b | 32.5246   | 1.14956 | -4.82238         | 32.5256      | 1.15056       | -4.8211675       | 0.00014386 | No      |
|      |       |        |             |          |         | Tmem237  | 1.79462   | 8.10185 | 2.17457          | 1.79562      | 8.10285       | 2.17394736       | 0.00014386 | No      |
|      |       |        |             |          |         | Tmem238  | 2.78694   | 43.4381 | 3.96221          | 2.78794      | 43.4391       | 3.96172279       | 0.00014386 | No      |
|      |       |        |             |          |         | Tmem240  | 1.13905   | 0       | -inf             | 1.14005      | 0.001         | -10.154881       | 0.00014386 | No      |
|      |       |        |             |          |         | Tmem243  | 71.1144   | 27.3316 | -1.37957         | 71.1154      | 27.3326       | -1.3795393       | 0.00014386 | No      |
|      |       |        |             |          |         | Tmem245  | 9.40202   | 4.05129 | -1.21459         | 9.40302      | 4.05229       | -1.2143868       | 0.00014386 | No      |
|      |       |        |             |          |         | Tmem246  | 0.106815  | 10.7907 | 6.65853          | 0.107815     | 10.7917       | 6.64522043       | 0.00014386 | No      |
|      |       |        |             |          |         | Tmem25   | 0.408361  | 6.86972 | 4.07234          | 0.409361     | 6.87072       | 4.06901572       | 0.00014386 | No      |
|      |       |        |             |          |         | Tmem252  | 0.0948362 | 23.3076 | 7.94115          | 0.0958362    | 23.3086       | 7.92607593       | 0.00014386 | No      |
|      |       |        |             |          |         | Tmem254  | 49.32     | 21.4457 | -1.20148         | 49.321       | 21.4467       | -1.2014464       | 0.00014386 | No      |
|      |       |        |             |          |         | Tmem255b | 0         | 3.85711 | inf              | 0.001        | 3.85811       | 11.9136786       | 0.00014386 | No      |
|      |       |        |             |          |         | Tmem256  | 30.8857   | 155.648 | 2.33327          | 30.8867      | 155.649       | 2.33323866       | 0.00014386 | No      |
|      |       |        |             |          |         | Tmem33   | 14.0022   | 19.4249 | 0.472256         | 14.0032      | 19.4259       | 0.47222489       | 0.00014386 | No      |
|      |       |        |             |          |         | Tmem38a  | 0.847249  | 9.75896 | 3.52587          | 0.848249     | 9.75996       | 3.52431551       | 0.00014386 | No      |
|      |       |        |             |          |         | Tmem38b  | 5.01439   | 15.1893 | 1.59891          | 5.01539      | 15.1903       | 1.59871657       | 0.00014386 | No      |
|      |       |        |             |          |         | Tmem40   | 0         | 2.73879 | inf              | 0.001        | 2.73979       | 11.4198496       | 0.00014386 | No      |

| RRBS |       |        |             |          |         | RNAseq    |            |          |                  |              |               |                  |            |         |
|------|-------|--------|-------------|----------|---------|-----------|------------|----------|------------------|--------------|---------------|------------------|------------|---------|
| gene | Blood | Kidney | methyl.diff | pMWU.fdr | Match ? | gene      | blood      | kidney   | log2(fold_ratio) | blood+ 0.001 | kidney+ 0.001 | log2(fold_ratio) | q_value    | Match ? |
|      |       |        |             |          |         | Tmem42    | 15.645     | 30.2306  | 0.950312         | 15.646       | 30.2316       | 0.95026347       | 0.00014386 | No      |
|      |       |        |             |          |         | Tmem43    | 22.5402    | 9.30873  | -1.27585         | 22.5412      | 9.30973       | -1.2757531       | 0.00014386 | No      |
|      |       |        |             |          |         | Tmem45b   | 0.0852767  | 5.17122  | 5.92221          | 0.0862767    | 5.17222       | 5.90566884       | 0.00014386 | No      |
|      |       |        |             |          |         | Tmem50a   | 253.389    | 85.0308  | -1.5753          | 253.39       | 85.0318       | -1.5752852       | 0.00014386 | No      |
|      |       |        |             |          |         | Tmem50b   | 1.74153    | 55.3527  | 4.99023          | 1.74253      | 55.3537       | 4.98942435       | 0.00014386 | No      |
|      |       |        |             |          |         | Tmem51    | 1.21278    | 16.9901  | 3.80831          | 1.21378      | 16.9911       | 3.8072004        | 0.00014386 | No      |
|      |       |        |             |          |         | Tmem52    | 0          | 4.73243  | inf              | 0.001        | 4.73343       | 12.2086703       | 0.00014386 | No      |
|      |       |        |             |          |         | Tmem53    | 2.86591    | 16.3265  | 2.51015          | 2.86691      | 16.3275       | 2.50973539       | 0.00014386 | No      |
|      |       |        |             |          |         | Tmem54    | 0          | 4.98333  | inf              | 0.001        | 4.98433       | 12.2831839       | 0.00014386 | No      |
|      |       |        |             |          |         | Tmem55a   | 0.400279   | 18.5044  | 5.53072          | 0.401279     | 18.5054       | 5.52719685       | 0.00014386 | No      |
|      |       |        |             |          |         | Tmem62    | 11.4748    | 8.06582  | -0.508575        | 11.4758      | 8.06682       | -0.5085228       | 0.00014386 | No      |
|      |       |        |             |          |         | Tmem64    | 1.93768    | 5.83315  | 1.58994          | 1.93868      | 5.83415       | 1.58944779       | 0.00014386 | No      |
|      |       |        |             |          |         | Tmem66    | 130.557    | 46.3862  | -1.49291         | 130.558      | 46.3872       | -1.4928922       | 0.00014386 | No      |
|      |       |        |             |          |         | Tmem67    | 0.143506   | 2.50092  | 4.12328          | 0.144506     | 2.50192       | 4.11383436       | 0.00014386 | No      |
|      |       |        |             |          |         | Tmem70    | 7.5904     | 28.0842  | 1.88751          | 7.5914       | 28.0852       | 1.8873722        | 0.00014386 | No      |
|      |       |        |             |          |         | Tmem71    | 63.2965    | 0.716164 | -6.46569         | 63.2975      | 0.717164      | -6.4637016       | 0.00014386 | No      |
|      |       |        |             |          |         | Tmem72    | 0.0295949  | 48.5688  | 10.6805          | 0.0305949    | 48.5698       | 10.6325526       | 0.00014386 | No      |
|      |       |        |             |          |         | Tmem86a   | 0.703597   | 55.7755  | 6.30874          | 0.704597     | 55.7765       | 6.30671527       | 0.00014386 | No      |
|      |       |        |             |          |         | Tmem86b   | 6.80577    | 1.22926  | -2.46897         | 6.80677      | 1.23026       | -2.4680071       | 0.00014386 | No      |
|      |       |        |             |          |         | Tmem87a   | 59.1527    | 21.7122  | -1.44594         | 59.1537      | 21.7132       | -1.4458961       | 0.00014386 | No      |
|      |       |        |             |          |         | Tmem87b   | 15.7486    | 10.8864  | -0.532699        | 15.7496      | 10.8874       | -0.5326557       | 0.00014386 | No      |
|      |       |        |             |          |         | TMEM9     | 20.1471    | 31.2508  | 0.633321         | 20.1481      | 31.2518       | 0.63329549       | 0.00014386 | No      |
|      |       |        |             |          |         | Tmem97    | 4.76368    | 9.28421  | 0.9627           | 4.76468      | 9.28521       | 0.96255521       | 0.00014386 | No      |
|      |       |        |             |          |         | Tmf1      | 17.4069    | 11.3323  | -0.619215        | 17.4079      | 11.3333       | -0.6191742       | 0.00014386 | No      |
|      |       |        |             |          |         | Tmlhe     | 8.82615    | 61.7918  | 2.80756          | 8.82715      | 61.7928       | 2.80741913       | 0.00014386 | No      |
|      |       |        |             |          |         | Tmod1     | 1.5754     | 14.6426  | 3.21638          | 1.5764       | 14.6436       | 3.21556471       | 0.00014386 | No      |
|      |       |        |             |          |         | Tmod3     | 50.7657    | 20.011   | -1.34306         | 50.7667      | 20.012        | -1.3430171       | 0.00014386 | No      |
|      |       |        |             |          |         | Tmpo      | 52.694     | 17.4712  | -1.59266         | 52.695       | 17.4722       | -1.5926048       | 0.00014386 | No      |
|      |       |        |             |          |         | Tmprss13  | 0          | 6.44513  | inf              | 0.001        | 6.44613       | 12.6542176       | 0.00014386 | No      |
|      |       |        |             |          |         | Tmprss9   | 0.049743   | 4.2241   | 6.40801          | 0.050743     | 4.2251        | 6.37963286       | 0.00014386 | No      |
|      |       |        |             |          |         | Tmsb10    | 8735.63    | 737.194  | -3.5668          | 8735.631     | 737.195       | -3.5667937       | 0.00014386 | No      |
|      |       |        |             |          |         | Tmsbl1    | 93.1501    | 4.02675  | -4.53187         | 93.1511      | 4.02775       | -4.5315268       | 0.00014386 | No      |
|      |       |        |             |          |         | Tmtc1     | 0.00836602 | 10.5918  | 10.3061          | 0.00936602   | 10.5928       | 10.1433602       | 0.00014386 | No      |
|      |       |        |             |          |         | Tmtc3     | 0.682794   | 2.28344  | 1.74169          | 0.683794     | 2.28444       | 1.74020688       | 0.00014386 | No      |
|      |       |        |             |          |         | Tmtc4     | 1.99669    | 9.23285  | 2.20917          | 1.99769      | 9.23385       | 2.20859957       | 0.00014386 | No      |
|      |       |        |             |          |         | Tmx1      | 27.5866    | 19.9878  | -0.464845        | 27.5876      | 19.9888       | -0.4648281       | 0.00014386 | No      |
|      |       |        |             |          |         | Tnfaip1   | 6.58513    | 23.3366  | 1.82531          | 6.58613      | 23.3376       | 1.82515331       | 0.00014386 | No      |
|      |       |        |             |          |         | Tnfaip3   | 48.4688    | 6.74458  | -2.84526         | 48.4698      | 6.74558       | -2.8450717       | 0.00014386 | No      |
|      |       |        |             |          |         | Tnfaip8l1 | 21.3245    | 1.41439  | -3.91426         | 21.3255      | 1.41539       | -3.913308        | 0.00014386 | No      |
|      |       |        |             |          |         | Tnfaip8l2 | 103.305    | 8.18447  | -3.65788         | 103.306      | 8.18547       | -3.657715        | 0.00014386 | No      |
|      |       |        |             |          |         | Tnfrsf13b | 3.49914    | 0        | -inf             | 3.50014      | 0.001         | -11.773197       | 0.00014386 | No      |
|      |       |        |             |          |         | Tnfrsf14  | 515.35     | 19.3834  | -4.73266         | 515.351      | 19.3844       | -4.7325874       | 0.00014386 | No      |

| RRBS |       |        |             |          |         | RNAseq   |           |          |                  |              |               |                  |            |         |
|------|-------|--------|-------------|----------|---------|----------|-----------|----------|------------------|--------------|---------------|------------------|------------|---------|
| gene | Blood | Kidney | methyl.diff | pMWU.fdr | Match ? | gene     | blood     | kidney   | log2(fold_ratio) | blood+ 0.001 | kidney+ 0.001 | log2(fold_ratio) | q_value    | Match ? |
|      |       |        |             |          |         | TNFRSF18 | 43.5      | 3.54401  | -3.61756         | 43.501       | 3.54501       | -3.617187        | 0.00014386 | No      |
|      |       |        |             |          |         | Tnfrsf1a | 10.382    | 21.125   | 1.02487          | 10.383       | 21.126        | 1.02479629       | 0.00014386 | No      |
|      |       |        |             |          |         | Tnfrsf1b | 22.5202   | 2.21151  | -3.34812         | 22.5212      | 2.21251       | -3.3475278       | 0.00014386 | No      |
|      |       |        |             |          |         | Tnfrsf21 | 2.84881   | 48.1085  | 4.07786          | 2.84981      | 48.1095       | 4.07738416       | 0.00014386 | No      |
|      |       |        |             |          |         | Tnfrsf26 | 124.813   | 4.72292  | -4.72395         | 124.814      | 4.72392       | -4.7236514       | 0.00014386 | No      |
|      |       |        |             |          |         | Tnfsf10  | 7.1108    | 13.0385  | 0.87469          | 7.1118       | 13.0395       | 0.87460189       | 0.00014386 | No      |
|      |       |        |             |          |         | Tnfsf11  | 1.32366   | 0        | -inf             | 1.32466      | 0.001         | -10.371406       | 0.00014386 | No      |
|      |       |        |             |          |         | Tnfsf13  | 0.884876  | 33.2907  | 5.2335           | 0.885876     | 33.2917       | 5.23191396       | 0.00014386 | No      |
|      |       |        |             |          |         | Tnik     | 8.47908   | 0.388797 | -4.44682         | 8.48008      | 0.389797      | -4.443283        | 0.00014386 | No      |
|      |       |        |             |          |         | Tnip1    | 75.9928   | 32.5059  | -1.22516         | 75.9938      | 32.5069       | -1.2251357       | 0.00014386 | No      |
|      |       |        |             |          |         | Tnks1bp1 | 3.29039   | 12.0792  | 1.87619          | 3.29139      | 12.0802       | 1.87587545       | 0.00014386 | No      |
|      |       |        |             |          |         | Tnks2    | 15.0316   | 6.96979  | -1.10881         | 15.0326      | 6.97079       | -1.1087005       | 0.00014386 | No      |
|      |       |        |             |          |         | Tnni2    | 0         | 11.2854  | inf              | 0.001        | 11.2864       | 13.4622978       | 0.00014386 | No      |
|      |       |        |             |          |         | Tnni3k   | 0.0931645 | 2.72852  | 4.87219          | 0.0941645    | 2.72952       | 4.85732019       | 0.00014386 | No      |
|      |       |        |             |          |         | Tnnt3    | 33.9234   | 17.4306  | -0.96066         | 33.9244      | 17.4316       | -0.9606183       | 0.00014386 | No      |
|      |       |        |             |          |         | Tnpo1    | 20.8643   | 9.94965  | -1.06832         | 20.8653      | 9.95065       | -1.068243        | 0.00014386 | No      |
|      |       |        |             |          |         | Tnrc6a   | 23.9825   | 9.47847  | -1.33926         | 23.9835      | 9.47947       | -1.3391639       | 0.00014386 | No      |
|      |       |        |             |          |         | Tnrc6b   | 15.2911   | 3.10982  | -2.29779         | 15.2921      | 3.11082       | -2.2974197       | 0.00014386 | No      |
|      |       |        |             |          |         | Tnrc6c   | 26.467    | 10.4345  | -1.34284         | 26.468       | 10.4355       | -1.3427495       | 0.00014386 | No      |
|      |       |        |             |          |         | Tns1     | 0.0901463 | 106.049  | 10.2002          | 0.0911463    | 106.05        | 10.1842729       | 0.00014386 | No      |
|      |       |        |             |          |         | Tns3     | 0.101883  | 48.9669  | 8.90875          | 0.102883     | 48.9679       | 8.8946879        | 0.00014386 | No      |
|      |       |        |             |          |         | Tns4     | 0         | 3.05919  | inf              | 0.001        | 3.06019       | 11.5794055       | 0.00014386 | No      |
|      |       |        |             |          |         | Tob1     | 14.9287   | 55.1183  | 1.88444          | 14.9297      | 55.1193       | 1.88437239       | 0.00014386 | No      |
|      |       |        |             |          |         | Toe1     | 22.4782   | 7.80911  | -1.5253          | 22.4792      | 7.81011       | -1.5251759       | 0.00014386 | No      |
|      |       |        |             |          |         | Tollip   | 9.91343   | 18.715   | 0.916738         | 9.91443      | 18.716        | 0.9166704        | 0.00014386 | No      |
|      |       |        |             |          |         | Tom1     | 12.3497   | 34.7264  | 1.49156          | 12.3507      | 34.7274       | 1.49148159       | 0.00014386 | No      |
|      |       |        |             |          |         | Tom1l1   | 2.15942   | 15.2989  | 2.82471          | 2.16042      | 15.2999       | 2.82413851       | 0.00014386 | No      |
|      |       |        |             |          |         | Tom1l2   | 13.9124   | 33.717   | 1.2771           | 13.9134      | 33.718        | 1.27704395       | 0.00014386 | No      |
|      |       |        |             |          |         | Tomm34   | 47.688    | 20.6703  | -1.20606         | 47.689       | 20.6713       | -1.2060274       | 0.00014386 | No      |
|      |       |        |             |          |         | Tomm40   | 26.1763   | 42.4572  | 0.697749         | 26.1773      | 42.4582       | 0.69772691       | 0.00014386 | No      |
|      |       |        |             |          |         | Tomm40l  | 6.31108   | 13.8191  | 1.1307           | 6.31208      | 13.8201       | 1.13058066       | 0.00014386 | No      |
|      |       |        |             |          |         | Tomm6    | 173.271   | 436.539  | 1.33308          | 173.272      | 436.54        | 1.33307531       | 0.00014386 | No      |
|      |       |        |             |          |         | Tomm70a  | 26.7585   | 11.8897  | -1.17029         | 26.7595      | 11.8907       | -1.1702175       | 0.00014386 | No      |
|      |       |        |             |          |         | Top2b    | 16.3275   | 2.76037  | -2.56437         | 16.3285      | 2.76137       | -2.5639362       | 0.00014386 | No      |
|      |       |        |             |          |         | Top3a    | 7.85971   | 2.10636  | -1.89972         | 7.86071      | 2.10736       | -1.8992228       | 0.00014386 | No      |
|      |       |        |             |          |         | Topbp1   | 18.4825   | 3.64163  | -2.3435          | 18.4835      | 3.64263       | -2.3431856       | 0.00014386 | No      |
|      |       |        |             |          |         | Topors   | 16.2611   | 8.92589  | -0.865354        | 16.2621      | 8.92689       | -0.865284        | 0.00014386 | No      |
|      |       |        |             |          |         | Tor3a    | 1.9763    | 37.7942  | 4.25729          | 1.9773       | 37.7952       | 4.25659934       | 0.00014386 | No      |
|      |       |        |             |          |         | Tor4a    | 15.7419   | 2.57588  | -2.61148         | 15.7429      | 2.57688       | -2.6110041       | 0.00014386 | No      |
|      |       |        |             |          |         | Tox      | 20.073    | 2.00281  | -3.32516         | 20.074       | 2.00381       | -3.3245105       | 0.00014386 | No      |
|      |       |        |             |          |         | Tox4     | 37.1562   | 13.3406  | -1.47778         | 37.1572      | 13.3416       | -1.4777101       | 0.00014386 | No      |
|      |       |        |             |          |         | Tp53     | 221.814   | 44.9302  | -2.30359         | 221.815      | 44.9312       | -2.3035674       | 0.00014386 | No      |

| RRBS |       |        |             |          |         | RNAseq   |           |          |                  |              |               |                  |            |         |
|------|-------|--------|-------------|----------|---------|----------|-----------|----------|------------------|--------------|---------------|------------------|------------|---------|
| gene | Blood | Kidney | methyl.diff | pMWU.fdr | Match ? | gene     | blood     | kidney   | log2(fold_ratio) | blood+ 0.001 | kidney+ 0.001 | log2(fold_ratio) | q_value    | Match ? |
|      |       |        |             |          |         | Tp53bp2  | 6.42065   | 15.2407  | 1.24714          | 6.42165      | 15.2417       | 1.24700788       | 0.00014386 | No      |
|      |       |        |             |          |         | Tp53i13  | 8.695     | 17.3135  | 0.993643         | 8.696        | 17.3145       | 0.99355688       | 0.00014386 | No      |
|      |       |        |             |          |         | Tp53inp1 | 27.7026   | 7.94181  | -1.80248         | 27.7036      | 7.94281       | -1.8023521       | 0.00014386 | No      |
|      |       |        |             |          |         | TP53INP2 | 0.634388  | 50.8003  | 6.32333          | 0.635388     | 50.8013       | 6.32108376       | 0.00014386 | No      |
|      |       |        |             |          |         | Tp63     | 0         | 0.834195 | inf              | 0.001        | 0.835195      | 9.70596926       | 0.00014386 | No      |
|      |       |        |             |          |         | Tpcn1    | 19.102    | 98.7348  | 2.36983          | 19.103       | 98.7358       | 2.36977406       | 0.00014386 | No      |
|      |       |        |             |          |         | Tpgs1    | 16.2117   | 34.6246  | 1.09476          | 16.2127      | 34.6256       | 1.0947147        | 0.00014386 | No      |
|      |       |        |             |          |         | Tpgs2    | 20.5988   | 11.414   | -0.851749        | 20.5998      | 11.415        | -0.8516995       | 0.00014386 | No      |
|      |       |        |             |          |         | Tpk1     | 1.30269   | 6.97703  | 2.42112          | 1.30369      | 6.97803       | 2.42021894       | 0.00014386 | No      |
|      |       |        |             |          |         | TPM1     | 11.1692   | 247.82   | 4.47169          | 11.1702      | 247.821       | 4.47157152       | 0.00014386 | No      |
|      |       |        |             |          |         | Tpm3     | 415.888   | 103.03   | -2.01313         | 415.889      | 103.031       | -2.01312         | 0.00014386 | No      |
|      |       |        |             |          |         | Tpmt     | 107.25    | 39.9827  | -1.42354         | 107.251      | 39.9837       | -1.4235072       | 0.00014386 | No      |
|      |       |        |             |          |         | Tpp1     | 20.7465   | 30.0555  | 0.534762         | 20.7475      | 30.0565       | 0.53473951       | 0.00014386 | No      |
|      |       |        |             |          |         | Tpp2     | 32.5044   | 14.0081  | -1.21437         | 32.5054      | 14.0091       | -1.2143151       | 0.00014386 | No      |
|      |       |        |             |          |         | Tpr      | 52.6422   | 16.7627  | -1.65096         | 52.6432      | 16.7637       | -1.6509066       | 0.00014386 | No      |
|      |       |        |             |          |         | Tpra1    | 23.6999   | 55.7397  | 1.23383          | 23.7009      | 55.7407       | 1.23378928       | 0.00014386 | No      |
|      |       |        |             |          |         | TPRG1L   | 123.684   | 83.1111  | -0.573547        | 123.685      | 83.1121       | -0.5735401       | 0.00014386 | No      |
|      |       |        |             |          |         | Tprn     | 4.82504   | 13.7805  | 1.51401          | 4.82604      | 13.7815       | 1.51382114       | 0.00014386 | No      |
|      |       |        |             |          |         | Tpst2    | 79.2765   | 31.6443  | -1.32495         | 79.2775      | 31.6453       | -1.3249202       | 0.00014386 | No      |
|      |       |        |             |          |         | Tpx2     | 2.02433   | 10.199   | 2.33291          | 2.02533      | 10.2          | 2.33234025       | 0.00014386 | No      |
|      |       |        |             |          |         | Tra2a    | 102.484   | 38.1301  | -1.4264          | 102.485      | 38.1311       | -1.4263727       | 0.00014386 | No      |
|      |       |        |             |          |         | Tra2b    | 157.006   | 54.0383  | -1.53877         | 157.007      | 54.0393       | -1.538748        | 0.00014386 | No      |
|      |       |        |             |          |         | Trabd2b  | 0.0183251 | 26.6251  | 10.5048          | 0.0193251    | 26.6261       | 10.4281495       | 0.00014386 | No      |
|      |       |        |             |          |         | Trac     | 1160.02   | 65.3632  | -4.14953         | 1160.021     | 65.3642       | -4.1495064       | 0.00014386 | No      |
|      |       |        |             |          |         | Traf1    | 7.49262   | 2.19673  | -1.77011         | 7.49362      | 2.19773       | -1.7696487       | 0.00014386 | No      |
|      |       |        |             |          |         | Traf2    | 35.6951   | 21.035   | -0.762933        | 35.6961      | 21.036        | -0.7629061       | 0.00014386 | No      |
|      |       |        |             |          |         | Traf3    | 13.7142   | 5.62464  | -1.28584         | 13.7152      | 5.62564       | -1.2856865       | 0.00014386 | No      |
|      |       |        |             |          |         | Traf3ip1 | 3.93857   | 6.01044  | 0.6098           | 3.93957      | 6.01144       | 0.60967245       | 0.00014386 | No      |
|      |       |        |             |          |         | Traf3ip3 | 220.814   | 11.3358  | -4.28387         | 220.815      | 11.3368       | -4.2837528       | 0.00014386 | No      |
|      |       |        |             |          |         | Traf4    | 15.5699   | 42.7071  | 1.45572          | 15.5709      | 42.7081       | 1.45565738       | 0.00014386 | No      |
|      |       |        |             |          |         | Traf5    | 8.58074   | 12.7599  | 0.572445         | 8.58174      | 12.7609       | 0.57238799       | 0.00014386 | No      |
|      |       |        |             |          |         | Traf6    | 8.49806   | 2.5731   | -1.72363         | 8.49906      | 2.5741        | -1.7232352       | 0.00014386 | No      |
|      |       |        |             |          |         | Trafd1   | 59.7733   | 36.1851  | -0.724105        | 59.7743      | 36.1861       | -0.7240897       | 0.00014386 | No      |
|      |       |        |             |          |         | Trak1    | 7.03462   | 16.5219  | 1.23184          | 7.03562      | 16.5229       | 1.23171745       | 0.00014386 | No      |
|      |       |        |             |          |         | Tram1    | 94.5653   | 43.8869  | -1.10752         | 94.5663      | 43.8879       | -1.1075029       | 0.00014386 | No      |
|      |       |        |             |          |         | Trap1    | 26.9426   | 37.9674  | 0.494873         | 26.9436      | 37.9684       | 0.49485658       | 0.00014386 | No      |
|      |       |        |             |          |         | Trappc1  | 36.303    | 100.431  | 1.46804          | 36.304       | 100.432       | 1.4680186        | 0.00014386 | No      |
|      |       |        |             |          |         | Trappc10 | 13.5098   | 7.72785  | -0.805866        | 13.5108      | 7.72885       | -0.8057874       | 0.00014386 | No      |
|      |       |        |             |          |         | TRAPPC2  | 9.88205   | 41.8942  | 2.08387          | 9.88305      | 41.8952       | 2.08375672       | 0.00014386 | No      |
|      |       |        |             |          |         | Trappc2l | 33.4873   | 98.748   | 1.56014          | 33.4883      | 98.749        | 1.560109         | 0.00014386 | No      |
|      |       |        |             |          |         | Trappc3  | 28.532    | 45.8432  | 0.684125         | 28.533       | 45.8442       | 0.68410778       | 0.00014386 | No      |
|      |       |        |             |          |         | Trappc5  | 32.0661   | 45.0595  | 0.490781         | 32.0671      | 45.0605       | 0.49076943       | 0.00014386 | No      |

| RRBS |       |        |             |          |         | RNAseq   |          |          |                  |              |               |                  |            |         |
|------|-------|--------|-------------|----------|---------|----------|----------|----------|------------------|--------------|---------------|------------------|------------|---------|
| gene | Blood | Kidney | methyl.diff | pMWU.fdr | Match ? | gene     | blood    | kidney   | log2(fold_ratio) | blood+ 0.001 | kidney+ 0.001 | log2(fold_ratio) | q_value    | Match ? |
|      |       |        |             |          |         | Trappc6b | 27.207   | 43.4308  | 0.674741         | 27.208       | 43.4318       | 0.67472083       | 0.00014386 | No      |
|      |       |        |             |          |         | Trappc8  | 12.6754  | 6.72788  | -0.913807        | 12.6764      | 6.72888       | -0.9137068       | 0.00014386 | No      |
|      |       |        |             |          |         | Trappc9  | 17.218   | 10.3872  | -0.729117        | 17.219       | 10.3882       | -0.7290557       | 0.00014386 | No      |
|      |       |        |             |          |         | Trat1    | 65.4639  | 0.719366 | -6.50783         | 65.4649      | 0.720366      | -6.5058477       | 0.00014386 | No      |
|      |       |        |             |          |         | Trav4-2  | 5.49519  | 0        | -inf             | 5.49619      | 0.001         | -12.424216       | 0.00014386 | No      |
|      |       |        |             |          |         | Trav7-2  | 5.57922  | 0        | -inf             | 5.58022      | 0.001         | -12.446106       | 0.00014386 | No      |
|      |       |        |             |          |         | Trdmt1   | 6.14497  | 3.35598  | -0.87267         | 6.14597      | 3.35698       | -0.8724768       | 0.00014386 | No      |
|      |       |        |             |          |         | Trem12   | 58.8872  | 0.562259 | -6.71058         | 58.8882      | 0.563259      | -6.7080363       | 0.00014386 | No      |
|      |       |        |             |          |         | Trerf1   | 13.1816  | 1.68102  | -2.97112         | 13.1826      | 1.68202       | -2.9703682       | 0.00014386 | No      |
|      |       |        |             |          |         | Triap1   | 23.8735  | 48.5104  | 1.02289          | 23.8745      | 48.5114       | 1.0228533        | 0.00014386 | No      |
|      |       |        |             |          |         | Trib1    | 0.529699 | 4.64959  | 3.13386          | 0.530699     | 4.65059       | 3.13144802       | 0.00014386 | No      |
|      |       |        |             |          |         | Trib2    | 92.3684  | 10.8608  | -3.08826         | 92.3694      | 10.8618       | -3.0881518       | 0.00014386 | No      |
|      |       |        |             |          |         | Trim14   | 33.1171  | 1.91899  | -4.10916         | 33.1181      | 1.91999       | -4.1084492       | 0.00014386 | No      |
|      |       |        |             |          |         | Trim21   | 31.2362  | 7.81061  | -1.99971         | 31.2372      | 7.81161       | -1.9995733       | 0.00014386 | No      |
|      |       |        |             |          |         | Trim25   | 14.6932  | 3.36696  | -2.12563         | 14.6942      | 3.36796       | -2.1252999       | 0.00014386 | No      |
|      |       |        |             |          |         | TRIM27   | 52.6306  | 29.7286  | -0.824049        | 52.6316      | 29.7296       | -0.8240292       | 0.00014386 | No      |
|      |       |        |             |          |         | Trim28   | 109.595  | 63.6547  | -0.783839        | 109.596      | 63.6557       | -0.7838335       | 0.00014386 | No      |
|      |       |        |             |          |         | Trim29   | 0        | 15.9864  | inf              | 0.001        | 15.9874       | 13.9646477       | 0.00014386 | No      |
|      |       |        |             |          |         | Trim3    | 6.04197  | 16.4746  | 1.44715          | 6.04297      | 16.4756       | 1.44700132       | 0.00014386 | No      |
|      |       |        |             |          |         | Trim32   | 4.7371   | 10.9341  | 1.20676          | 4.7381       | 10.9351       | 1.20658586       | 0.00014386 | No      |
|      |       |        |             |          |         | Trim33   | 21.0619  | 5.02788  | -2.06661         | 21.0629      | 5.02888       | -2.0663951       | 0.00014386 | No      |
|      |       |        |             |          |         | Trim34   | 40.1744  | 7.67709  | -2.38764         | 40.1754      | 7.67809       | -2.387493        | 0.00014386 | No      |
|      |       |        |             |          |         | Trim44   | 18.0539  | 34.2269  | 0.922819         | 18.0549      | 34.2279       | 0.92278235       | 0.00014386 | No      |
|      |       |        |             |          |         | Trim45   | 3.08479  | 7.95026  | 1.36583          | 3.08579      | 7.95126       | 1.36554361       | 0.00014386 | No      |
|      |       |        |             |          |         | Trim47   | 0        | 30.793   | inf              | 0.001        | 30.794        | 14.9103617       | 0.00014386 | No      |
|      |       |        |             |          |         | Trim5    | 149.143  | 16.7238  | -3.15672         | 149.144      | 16.7248       | -3.1566451       | 0.00014386 | No      |
|      |       |        |             |          |         | Trim59   | 21.3947  | 3.51418  | -2.606           | 21.3957      | 3.51518       | -2.6056504       | 0.00014386 | No      |
|      |       |        |             |          |         | Trim62   | 3.65545  | 2.09395  | -0.803819        | 3.65645      | 2.09495       | -0.8035278       | 0.00014386 | No      |
|      |       |        |             |          |         | Trio     | 5.99515  | 3.5172   | -0.769369        | 5.99615      | 3.5182        | -0.769199        | 0.00014386 | No      |
|      |       |        |             |          |         | Trip10   | 11.2436  | 69.7471  | 2.63302          | 11.2446      | 69.7481       | 2.63292158       | 0.00014386 | No      |
|      |       |        |             |          |         | Trip12   | 36.8668  | 21.4456  | -0.781637        | 36.8678      | 21.4466       | -0.7816124       | 0.00014386 | No      |
|      |       |        |             |          |         | Trip13   | 1.48003  | 0.274342 | -2.43158         | 1.48103      | 0.275342      | -2.4273043       | 0.00014386 | No      |
|      |       |        |             |          |         | Triqk    | 0        | 6.09452  | inf              | 0.001        | 6.09552       | 12.5735336       | 0.00014386 | No      |
|      |       |        |             |          |         | Trmt11   | 9.46225  | 5.9944   | -0.658567        | 9.46325      | 5.9954        | -0.6584797       | 0.00014386 | No      |
|      |       |        |             |          |         | Trmt12   | 1.47957  | 5.15786  | 1.80159          | 1.48057      | 5.15886       | 1.80089959       | 0.00014386 | No      |
|      |       |        |             |          |         | Trmt13   | 11.6535  | 2.53668  | -2.19974         | 11.6545      | 2.53768       | -2.199305        | 0.00014386 | No      |
|      |       |        |             |          |         | Trmt1l   | 25.765   | 16.3763  | -0.653799        | 25.766       | 16.3773       | -0.6537711       | 0.00014386 | No      |
|      |       |        |             |          |         | Trmt6    | 16.0167  | 5.59981  | -1.51613         | 16.0177      | 5.60081       | -1.5159596       | 0.00014386 | No      |
|      |       |        |             |          |         | Trove2   | 3.13839  | 8.08863  | 1.36587          | 3.13939      | 8.08963       | 1.36558946       | 0.00014386 | No      |
|      |       |        |             |          |         | Trpc1    | 0.200656 | 4.07664  | 4.34459          | 0.201656     | 4.07764       | 4.33776617       | 0.00014386 | No      |
|      |       |        |             |          |         | Trpc3    | 0        | 1.1541   | inf              | 0.001        | 1.1551        | 10.173802        | 0.00014386 | No      |
|      |       |        |             |          |         | Trpc4ap  | 73.5777  | 42.5841  | -0.788953        | 73.5787      | 42.5851       | -0.7889394       | 0.00014386 | No      |

| RRBS |       |        |             |          |         | RNAseq  |           |          |                  |              |               |                  |            |         |
|------|-------|--------|-------------|----------|---------|---------|-----------|----------|------------------|--------------|---------------|------------------|------------|---------|
| gene | Blood | Kidney | methyl.diff | pMWU.fdr | Match ? | gene    | blood     | kidney   | log2(fold_ratio) | blood+ 0.001 | kidney+ 0.001 | log2(fold_ratio) | q_value    | Match ? |
|      |       |        |             |          |         | Trpm4   | 0.0716711 | 2.27473  | 4.98816          | 0.0726711    | 2.27573       | 4.96880385       | 0.00014386 | No      |
|      |       |        |             |          |         | TRPM6   | 24.9425   | 4.9102   | -2.34475         | 24.9435      | 4.9112        | -2.3445164       | 0.00014386 | No      |
|      |       |        |             |          |         | Trpm7   | 40.1366   | 11.6727  | -1.78178         | 40.1376      | 11.6737       | -1.7816925       | 0.00014386 | No      |
|      |       |        |             |          |         | Trpv1   | 0.907535  | 16.009   | 4.14078          | 0.908535     | 16.01         | 4.1392874        | 0.00014386 | No      |
|      |       |        |             |          |         | Trpv2   | 14.8903   | 1.63047  | -3.19101         | 14.8913      | 1.63147       | -3.1902253       | 0.00014386 | No      |
|      |       |        |             |          |         | Trpv3   | 3.46789   | 0.176822 | -4.29369         | 3.46889      | 0.177822      | -4.2859684       | 0.00014386 | No      |
|      |       |        |             |          |         | Trpv4   | 0         | 34.2186  | inf              | 0.001        | 34.2196       | 15.0625353       | 0.00014386 | No      |
|      |       |        |             |          |         | Trpv6   | 1.25944   | 0.26306  | -2.25931         | 1.26044      | 0.26406       | -2.2549898       | 0.00014386 | No      |
|      |       |        |             |          |         | Trrap   | 53.216    | 20.3027  | -1.39019         | 53.217       | 20.3037       | -1.3901445       | 0.00014386 | No      |
|      |       |        |             |          |         | Trub2   | 25.7522   | 15.3285  | -0.748476        | 25.7532      | 15.3295       | -0.7484411       | 0.00014386 | No      |
|      |       |        |             |          |         | Tsc1    | 10.0735   | 5.83894  | -0.786791        | 10.0745      | 5.83994       | -0.7866828       | 0.00014386 | No      |
|      |       |        |             |          |         | Tsc22d1 | 31.5526   | 397.29   | 3.65436          | 31.5536      | 397.291       | 3.65431959       | 0.00014386 | No      |
|      |       |        |             |          |         | Tsc22d2 | 5.51326   | 2.74458  | -1.00632         | 5.51426      | 2.74558       | -1.0060563       | 0.00014386 | No      |
|      |       |        |             |          |         | Tsc22d3 | 415.277   | 106.762  | -1.95967         | 415.278      | 106.763       | -1.9596657       | 0.00014386 | No      |
|      |       |        |             |          |         | TSC22D4 | 68.3623   | 38.8641  | -0.814762        | 68.3633      | 38.8651       | -0.8147468       | 0.00014386 | No      |
|      |       |        |             |          |         | Tsen15  | 6.18044   | 36.2082  | 2.55053          | 6.18144      | 36.2092       | 2.55034144       | 0.00014386 | No      |
|      |       |        |             |          |         | Tsen54  | 11.8138   | 19.4534  | 0.719551         | 11.8148      | 19.4544       | 0.71950128       | 0.00014386 | No      |
|      |       |        |             |          |         | Tsfm    | 18.5842   | 33.905   | 0.867422         | 18.5852      | 33.906        | 0.86738638       | 0.00014386 | No      |
|      |       |        |             |          |         | Tsg101  | 36.7308   | 87.2655  | 1.24842          | 36.7318      | 87.2665       | 1.24839834       | 0.00014386 | No      |
|      |       |        |             |          |         | Tsku    | 0.083063  | 5.65263  | 6.08857          | 0.084063     | 5.65363       | 6.07156272       | 0.00014386 | No      |
|      |       |        |             |          |         | Tsn     | 33.2009   | 16.795   | -0.983195        | 33.2019      | 16.796        | -0.9831481       | 0.00014386 | No      |
|      |       |        |             |          |         | Tsnax   | 50.4248   | 37.5288  | -0.426136        | 50.4258      | 37.5298       | -0.4261255       | 0.00014386 | No      |
|      |       |        |             |          |         | Tspan12 | 0.306523  | 36.5037  | 6.89591          | 0.307523     | 36.5047       | 6.8912441        | 0.00014386 | No      |
|      |       |        |             |          |         | Tspan13 | 100.476   | 51.529   | -0.96339         | 100.477      | 51.53         | -0.9633808       | 0.00014386 | No      |
|      |       |        |             |          |         | Tspan14 | 36.6521   | 11.5883  | -1.66123         | 36.6531      | 11.5893       | -1.6611418       | 0.00014386 | No      |
|      |       |        |             |          |         | Tspan15 | 0.0893314 | 3.51614  | 5.29868          | 0.0903314    | 3.51714       | 5.28303138       | 0.00014386 | No      |
|      |       |        |             |          |         | Tspan18 | 0.0240301 | 8.76402  | 8.5106           | 0.0250301    | 8.76502       | 8.45194952       | 0.00014386 | No      |
|      |       |        |             |          |         | Tspan3  | 14.0013   | 93.0485  | 2.73243          | 14.0023      | 93.0495       | 2.73233458       | 0.00014386 | No      |
|      |       |        |             |          |         | Tspan31 | 2.37435   | 40.2054  | 4.08179          | 2.37535      | 40.2064       | 4.08121316       | 0.00014386 | No      |
|      |       |        |             |          |         | Tspan32 | 145.336   | 1.25628  | -6.85408         | 145.337      | 1.25728       | -6.8529522       | 0.00014386 | No      |
|      |       |        |             |          |         | Tspan5  | 1.51574   | 49.363   | 5.02534          | 1.51674      | 49.364        | 5.0244136        | 0.00014386 | No      |
|      |       |        |             |          |         | Tspan6  | 0.394401  | 19.3469  | 5.6163           | 0.395401     | 19.3479       | 5.61271666       | 0.00014386 | No      |
|      |       |        |             |          |         | Tspo    | 101.284   | 164.578  | 0.700359         | 101.285      | 164.579       | 0.70035973       | 0.00014386 | No      |
|      |       |        |             |          |         | Tspyl2  | 25.6505   | 7.97611  | -1.68523         | 25.6515      | 7.97711       | -1.6851051       | 0.00014386 | No      |
|      |       |        |             |          |         | Tspyl4  | 1.38171   | 2.92533  | 1.08215          | 1.38271      | 2.92633       | 1.08159386       | 0.00014386 | No      |
|      |       |        |             |          |         | Tsr2    | 4.56447   | 3.04387  | -0.58454         | 4.56547      | 3.04487       | -0.5843828       | 0.00014386 | No      |
|      |       |        |             |          |         | Tssc1   | 40.6116   | 21.414   | -0.92334         | 40.6126      | 21.415        | -0.9233057       | 0.00014386 | No      |
|      |       |        |             |          |         | Tssc4   | 35.6585   | 25.1679  | -0.502664        | 35.6595      | 25.1689       | -0.5026443       | 0.00014386 | No      |
|      |       |        |             |          |         | Ttbk2   | 2.30317   | 17.9439  | 2.9618           | 2.30417      | 17.9449       | 2.96125482       | 0.00014386 | No      |
|      |       |        |             |          |         | Ttc13   | 17.0544   | 8.24566  | -1.04844         | 17.0554      | 8.24666       | -1.0483468       | 0.00014386 | No      |
|      |       |        |             |          |         | Ttc14   | 16.5584   | 3.8148   | -2.11789         | 16.5594      | 3.8158        | -2.1175929       | 0.00014386 | No      |
|      |       |        |             |          |         | Ttc17   | 17.0957   | 8.76661  | -0.963542        | 17.0967      | 8.76761       | -0.9634624       | 0.00014386 | No      |



| RRBS |       |        |             |          |         | RNAseq  |           |         |                  |              |               |                  |            |         |
|------|-------|--------|-------------|----------|---------|---------|-----------|---------|------------------|--------------|---------------|------------------|------------|---------|
| gene | Blood | Kidney | methyl.diff | pMWU.fdr | Match ? | gene    | blood     | kidney  | log2(fold_ratio) | blood+ 0.001 | kidney+ 0.001 | log2(fold_ratio) | q_value    | Match ? |
|      |       |        |             |          |         | Ttc18   | 0.935034  | 3.51575 | 1.91074          | 0.936034     | 3.51675       | 1.90960994       | 0.00014386 | No      |
|      |       |        |             |          |         | Ttc28   | 12.1968   | 1.13112 | -3.43068         | 12.1978      | 1.13212       | -3.4295222       | 0.00014386 | No      |
|      |       |        |             |          |         | Ttc37   | 29.544    | 13.2523 | -1.15662         | 29.545       | 13.2533       | -1.1565624       | 0.00014386 | No      |
|      |       |        |             |          |         | Ttc38   | 8.46472   | 4.7865  | -0.822492        | 8.46572      | 4.7875        | -0.8223603       | 0.00014386 | No      |
|      |       |        |             |          |         | Ttc7b   | 7.10826   | 20.8768 | 1.55433          | 7.10926      | 20.8778       | 1.55419839       | 0.00014386 | No      |
|      |       |        |             |          |         | Ttc9    | 0.403647  | 4.14963 | 3.36182          | 0.404647     | 4.15063       | 3.35859453       | 0.00014386 | No      |
|      |       |        |             |          |         | Ttf1    | 15.0569   | 3.88717 | -1.95363         | 15.0579      | 3.88817       | -1.9533574       | 0.00014386 | No      |
|      |       |        |             |          |         | Ttll10  | 0.0211625 | 14.6349 | 9.43369          | 0.0221625    | 14.6359       | 9.36717512       | 0.00014386 | No      |
|      |       |        |             |          |         | Ttll12  | 10.5373   | 6.80502 | -0.630836        | 10.5383      | 6.80602       | -0.6307589       | 0.00014386 | No      |
|      |       |        |             |          |         | Ttll3   | 1.32821   | 8.74577 | 2.7191           | 1.32921      | 8.74677       | 2.71818131       | 0.00014386 | No      |
|      |       |        |             |          |         | Ttll4   | 4.92184   | 1.70328 | -1.53088         | 4.92284      | 1.70428       | -1.5303285       | 0.00014386 | No      |
|      |       |        |             |          |         | Ttll7   | 0.563682  | 2.62653 | 2.2202           | 0.564682     | 2.62753       | 2.21819669       | 0.00014386 | No      |
|      |       |        |             |          |         | Ttpal   | 10.2043   | 2.21364 | -2.20469         | 10.2053      | 2.21464       | -2.2041745       | 0.00014386 | No      |
|      |       |        |             |          |         | Ttyh3   | 95.101    | 11.9724 | -2.98975         | 95.102       | 11.9734       | -2.9896428       | 0.00014386 | No      |
|      |       |        |             |          |         | Tuba1a  | 250.423   | 167.328 | -0.581684        | 250.424      | 167.329       | -0.5816853       | 0.00014386 | No      |
|      |       |        |             |          |         | Tubb2a  | 4.33469   | 62.5682 | 3.85143          | 4.33569      | 62.5692       | 3.85111914       | 0.00014386 | No      |
|      |       |        |             |          |         | Tubb4b  | 47.039    | 111.245 | 1.24182          | 47.04        | 111.246       | 1.2417935        | 0.00014386 | No      |
|      |       |        |             |          |         | Tubb5   | 397.693   | 67.0777 | -2.56775         | 397.694      | 67.0787       | -2.5677322       | 0.00014386 | No      |
|      |       |        |             |          |         | Tubb6   | 0.140894  | 3.27462 | 4.53864          | 0.141894     | 3.27562       | 4.52888251       | 0.00014386 | No      |
|      |       |        |             |          |         | Tubd1   | 7.46035   | 2.28045 | -1.70992         | 7.46135      | 2.28145       | -1.7094856       | 0.00014386 | No      |
|      |       |        |             |          |         | Tube1   | 14.9002   | 1.79965 | -3.04955         | 14.9012      | 1.80065       | -3.0488388       | 0.00014386 | No      |
|      |       |        |             |          |         | Tubgcp2 | 18.547    | 11.0666 | -0.744966        | 18.548       | 11.0676       | -0.7449212       | 0.00014386 | No      |
|      |       |        |             |          |         | Tubgcp3 | 16.2161   | 6.65694 | -1.2845          | 16.2171      | 6.65794       | -1.2843681       | 0.00014386 | No      |
|      |       |        |             |          |         | Tubgcp5 | 7.04767   | 3.50449 | -1.00794         | 7.04867      | 3.50549       | -1.0077349       | 0.00014386 | No      |
|      |       |        |             |          |         | Tufm    | 37.7332   | 97.9747 | 1.37658          | 37.7342      | 97.9757       | 1.37655129       | 0.00014386 | No      |
|      |       |        |             |          |         | Tulp3   | 0.595115  | 10.7271 | 4.17195          | 0.596115     | 10.7281       | 4.1696601        | 0.00014386 | No      |
|      |       |        |             |          |         | Tulp4   | 3.15046   | 4.56714 | 0.535728         | 3.15146      | 4.56814       | 0.53558651       | 0.00014386 | No      |
|      |       |        |             |          |         | Tusc2   | 11.9407   | 36.0025 | 1.59221          | 11.9417      | 36.0035       | 1.59212893       | 0.00014386 | No      |
|      |       |        |             |          |         | Tusc3   | 0.755141  | 37.2023 | 5.6225           | 0.756141     | 37.2033       | 5.6206315        | 0.00014386 | No      |
|      |       |        |             |          |         | TVP23A  | 9.01317   | 3.28845 | -1.45463         | 9.01417      | 3.28945       | -1.4543483       | 0.00014386 | No      |
|      |       |        |             |          |         | Twf1    | 25.4323   | 59.3057 | 1.22151          | 25.4333      | 59.3067       | 1.22147643       | 0.00014386 | No      |
|      |       |        |             |          |         | Twf2    | 64.5784   | 5.79687 | -3.47771         | 64.5794      | 5.79787       | -3.4774791       | 0.00014386 | No      |
|      |       |        |             |          |         | Twist1  | 0         | 7.53557 | inf              | 0.001        | 7.53657       | 12.8796924       | 0.00014386 | No      |
|      |       |        |             |          |         | Twistnb | 8.82029   | 2.92313 | -1.59331         | 8.82129      | 2.92413       | -1.5929822       | 0.00014386 | No      |
|      |       |        |             |          |         | Twsg1   | 3.91385   | 22.0723 | 2.49558          | 3.91485      | 22.0733       | 2.4952734        | 0.00014386 | No      |
|      |       |        |             |          |         | Txk     | 90.3572   | 2.94502 | -4.93929         | 90.3582      | 2.94602       | -4.9388164       | 0.00014386 | No      |
|      |       |        |             |          |         | Txlng   | 17.4227   | 2.58324 | -2.75371         | 17.4237      | 2.58424       | -2.7532391       | 0.00014386 | No      |
|      |       |        |             |          |         | Txn1    | 243.165   | 743.016 | 1.61146          | 243.166      | 743.017       | 1.6114537        | 0.00014386 | No      |
|      |       |        |             |          |         | Txn2    | 38.7853   | 148.511 | 1.93699          | 38.7863      | 148.512       | 1.93696045       | 0.00014386 | No      |
|      |       |        |             |          |         | Txndc16 | 19.8816   | 3.71412 | -2.42034         | 19.8826      | 3.71512       | -2.4200257       | 0.00014386 | No      |
|      |       |        |             |          |         | Txndc17 | 20.3209   | 75.5619 | 1.89469          | 20.3219      | 75.5629       | 1.89464278       | 0.00014386 | No      |
|      |       |        |             |          |         | Txndc5  | 21.4305   | 29.2959 | 0.451036         | 21.4315      | 29.2969       | 0.45101519       | 0.00014386 | No      |

| RRBS |       |        |             |          |         | RNAseq  |          |         |                  |              |               |                  |            |         |
|------|-------|--------|-------------|----------|---------|---------|----------|---------|------------------|--------------|---------------|------------------|------------|---------|
| gene | Blood | Kidney | methyl.diff | pMWU.fdr | Match ? | gene    | blood    | kidney  | log2(fold_ratio) | blood+ 0.001 | kidney+ 0.001 | log2(fold_ratio) | q_value    | Match ? |
|      |       |        |             |          |         | Txnip   | 1583.33  | 158.488 | -3.32051         | 1583.331     | 158.489       | -3.3205083       | 0.00014386 | No      |
|      |       |        |             |          |         | Txn1    | 39.3535  | 80.1362 | 1.02596          | 39.3545      | 80.1372       | 1.02594349       | 0.00014386 | No      |
|      |       |        |             |          |         | Txnrd1  | 13.5097  | 43.9331 | 1.70131          | 13.5107      | 43.9341       | 1.70123872       | 0.00014386 | No      |
|      |       |        |             |          |         | Tyk2    | 22.7779  | 11.5093 | -0.984833        | 22.7789      | 11.5103       | -0.9847726       | 0.00014386 | No      |
|      |       |        |             |          |         | Tyms    | 1.07077  | 6.8877  | 2.68537          | 1.07177      | 6.8887        | 2.68423641       | 0.00014386 | No      |
|      |       |        |             |          |         | Tyro3   | 0.122826 | 3.68304 | 4.90621          | 0.123826     | 3.68404       | 4.89490255       | 0.00014386 | No      |
|      |       |        |             |          |         | Tyw3    | 4.95958  | 14.4191 | 1.53969          | 4.96058      | 14.4201       | 1.53950045       | 0.00014386 | No      |
|      |       |        |             |          |         | U2af2   | 161.437  | 60.7211 | -1.4107          | 161.438      | 60.7221       | -1.4106866       | 0.00014386 | No      |
|      |       |        |             |          |         | Uap1    | 4.38604  | 9.76351 | 1.15448          | 4.38704      | 9.76451       | 1.15429979       | 0.00014386 | No      |
|      |       |        |             |          |         | Uap1l1  | 6.76935  | 63.0717 | 3.2199           | 6.77035      | 63.0727       | 3.21971337       | 0.00014386 | No      |
|      |       |        |             |          |         | Uba1    | 83.3005  | 57.5083 | -0.534556        | 83.3015      | 57.5093       | -0.5345472       | 0.00014386 | No      |
|      |       |        |             |          |         | Uba2    | 51.704   | 20.8503 | -1.31021         | 51.705       | 20.8513       | -1.3101665       | 0.00014386 | No      |
|      |       |        |             |          |         | Uba52   | 3796.8   | 1538.29 | -1.30346         | 3796.801     | 1538.291      | -1.3034559       | 0.00014386 | No      |
|      |       |        |             |          |         | Uba6    | 6.9423   | 3.21164 | -1.1121          | 6.9433       | 3.21264       | -1.1118622       | 0.00014386 | No      |
|      |       |        |             |          |         | Uba7    | 13.4044  | 7.42046 | -0.853124        | 13.4054      | 7.42146       | -0.8530393       | 0.00014386 | No      |
|      |       |        |             |          |         | Ubac1   | 21.4113  | 43.5493 | 1.02427          | 21.4123      | 43.5503       | 1.02424289       | 0.00014386 | No      |
|      |       |        |             |          |         | Ubac2   | 51.5522  | 34.7275 | -0.569954        | 51.5532      | 34.7285       | -0.5699419       | 0.00014386 | No      |
|      |       |        |             |          |         | Ubald2  | 409.575  | 121.732 | -1.75043         | 409.576      | 121.733       | -1.7504109       | 0.00014386 | No      |
|      |       |        |             |          |         | Ubp1    | 12.4432  | 19.9606 | 0.681803         | 12.4442      | 19.9616       | 0.68175388       | 0.00014386 | No      |
|      |       |        |             |          |         | Ubp2l   | 41.4372  | 21.6298 | -0.937908        | 41.4382      | 21.6308       | -0.9378743       | 0.00014386 | No      |
|      |       |        |             |          |         | Ubash3b | 14.2908  | 6.78535 | -1.07459         | 14.2918      | 6.78635       | -1.0744799       | 0.00014386 | No      |
|      |       |        |             |          |         | Ubc     | 89.3328  | 250.571 | 1.48796          | 89.3338      | 250.572       | 1.48794717       | 0.00014386 | No      |
|      |       |        |             |          |         | Ubd     | 11.5777  | 33.8257 | 1.54677          | 11.5787      | 33.8267       | 1.54668916       | 0.00014386 | No      |
|      |       |        |             |          |         | Ube2b   | 78.9246  | 48.3127 | -0.708073        | 78.9256      | 48.3137       | -0.708061        | 0.00014386 | No      |
|      |       |        |             |          |         | Ube2d3  | 250.782  | 128.181 | -0.968248        | 250.783      | 128.182       | -0.9682459       | 0.00014386 | No      |
|      |       |        |             |          |         | Ube2e2  | 2.79806  | 30.4181 | 3.44243          | 2.79906      | 30.4191       | 3.44196315       | 0.00014386 | No      |
|      |       |        |             |          |         | Ube2e3  | 40.4764  | 63.6827 | 0.653822         | 40.4774      | 63.6837       | 0.65380753       | 0.00014386 | No      |
|      |       |        |             |          |         | Ube2f   | 16.5477  | 37.5296 | 1.18139          | 16.5487      | 37.5306       | 1.18134947       | 0.00014386 | No      |
|      |       |        |             |          |         | Ube2g1  | 55.3281  | 23.4013 | -1.24142         | 55.3291      | 23.4023       | -1.2413881       | 0.00014386 | No      |
|      |       |        |             |          |         | Ube2h   | 59.2952  | 21.371  | -1.47226         | 59.2962      | 21.372        | -1.4722177       | 0.00014386 | No      |
|      |       |        |             |          |         | Ube2i   | 169.808  | 90.0606 | -0.914934        | 169.809      | 90.0616       | -0.9149289       | 0.00014386 | No      |
|      |       |        |             |          |         | Ube2j1  | 27.9107  | 16.2429 | -0.781009        | 27.9117      | 16.2439       | -0.7809719       | 0.00014386 | No      |
|      |       |        |             |          |         | Ube2j2  | 102.087  | 49.5057 | -1.04413         | 102.088      | 49.5067       | -1.0441176       | 0.00014386 | No      |
|      |       |        |             |          |         | Ube2l6  | 1.51166  | 6.84502 | 2.17892          | 1.51266      | 6.84602       | 2.17817776       | 0.00014386 | No      |
|      |       |        |             |          |         | Ube2o   | 29.6634  | 8.01179 | -1.88849         | 29.6644      | 8.01279       | -1.888356        | 0.00014386 | No      |
|      |       |        |             |          |         | Ube2q1  | 101.977  | 62.5908 | -0.704223        | 101.978      | 62.5918       | -0.7042124       | 0.00014386 | No      |
|      |       |        |             |          |         | Ube2r2  | 176.009  | 110.493 | -0.67169         | 176.01       | 110.494       | -0.6716894       | 0.00014386 | No      |
|      |       |        |             |          |         | Ube2v1  | 131.46   | 98.1138 | -0.422091        | 131.461      | 98.1148       | -0.4220922       | 0.00014386 | No      |
|      |       |        |             |          |         | Ube3b   | 26.1391  | 36.2766 | 0.472826         | 26.1401      | 36.2776       | 0.47281436       | 0.00014386 | No      |
|      |       |        |             |          |         | Ube3c   | 15.3495  | 10.227  | -0.585812        | 15.3505      | 10.228        | -0.5857616       | 0.00014386 | No      |
|      |       |        |             |          |         | Ube4a   | 19.7282  | 7.82639 | -1.33384         | 19.7292      | 7.82739       | -1.3337292       | 0.00014386 | No      |
|      |       |        |             |          |         | Ubl3    | 43.9235  | 60.9028 | 0.471516         | 43.9245      | 60.9038       | 0.47150638       | 0.00014386 | No      |

| RRBS |       |        |             |          |         | RNAseq    |          |          |                  |              |               |                  |            |         |
|------|-------|--------|-------------|----------|---------|-----------|----------|----------|------------------|--------------|---------------|------------------|------------|---------|
| gene | Blood | Kidney | methyl.diff | pMWU.fdr | Match ? | gene      | blood    | kidney   | log2(fold_ratio) | blood+ 0.001 | kidney+ 0.001 | log2(fold_ratio) | q_value    | Match ? |
|      |       |        |             |          |         | Ubl4a     | 7.64631  | 19.4313  | 1.34555          | 7.64731      | 19.4323       | 1.3454324        | 0.00014386 | No      |
|      |       |        |             |          |         | Ubn1      | 19.2355  | 7.94889  | -1.27495         | 19.2365      | 7.94989       | -1.2748395       | 0.00014386 | No      |
|      |       |        |             |          |         | Ubn2      | 8.36656  | 3.07253  | -1.44521         | 8.36756      | 3.07353       | -1.4449104       | 0.00014386 | No      |
|      |       |        |             |          |         | Ubp1      | 71.4232  | 20.4617  | -1.80347         | 71.4242      | 20.4627       | -1.8034165       | 0.00014386 | No      |
|      |       |        |             |          |         | Ubqln1    | 50.711   | 34.0144  | -0.576154        | 50.712       | 34.0154       | -0.5761391       | 0.00014386 | No      |
|      |       |        |             |          |         | Ubr1      | 16.4337  | 8.5644   | -0.940237        | 16.4347      | 8.5654        | -0.9401526       | 0.00014386 | No      |
|      |       |        |             |          |         | Ubr2      | 29.4899  | 11.2296  | -1.39291         | 29.4909      | 11.2306       | -1.3928348       | 0.00014386 | No      |
|      |       |        |             |          |         | Ubr3      | 14.8967  | 9.35654  | -0.670944        | 14.8977      | 9.35754       | -0.6708884       | 0.00014386 | No      |
|      |       |        |             |          |         | Ubr4      | 65.403   | 23.3437  | -1.48633         | 65.404       | 23.3447       | -1.4862838       | 0.00014386 | No      |
|      |       |        |             |          |         | Ubr5      | 49.0552  | 32.9481  | -0.574208        | 49.0562      | 32.9491       | -0.5741964       | 0.00014386 | No      |
|      |       |        |             |          |         | Ubr7      | 17.5704  | 9.4937   | -0.888105        | 17.5714      | 9.4947        | -0.8880348       | 0.00014386 | No      |
|      |       |        |             |          |         | Ubxn11    | 0.227723 | 2.54297  | 3.48116          | 0.228723     | 2.54397       | 3.4754083        | 0.00014386 | No      |
|      |       |        |             |          |         | Ubxn2b    | 4.78015  | 2.51617  | -0.925828        | 4.78115      | 2.51717       | -0.925555        | 0.00014386 | No      |
|      |       |        |             |          |         | Ubxn8     | 3.986    | 7.98868  | 1.00302          | 3.987        | 7.98968       | 1.00283412       | 0.00014386 | No      |
|      |       |        |             |          |         | Uchl1     | 7.35034  | 57.486   | 2.96733          | 7.35134      | 57.487        | 2.96715659       | 0.00014386 | No      |
|      |       |        |             |          |         | Uchl5     | 21.9081  | 13.6115  | -0.686645        | 21.9091      | 13.6125       | -0.6865982       | 0.00014386 | No      |
|      |       |        |             |          |         | Uck2      | 9.3343   | 3.37993  | -1.46555         | 9.3353       | 3.38093       | -1.4652762       | 0.00014386 | No      |
|      |       |        |             |          |         | UCMA      | 0        | 2.00826  | inf              | 0.001        | 2.00926       | 10.9724485       | 0.00014386 | No      |
|      |       |        |             |          |         | Ucp2      | 607.231  | 63.6815  | -3.2533          | 607.232      | 63.6825       | -3.2532789       | 0.00014386 | No      |
|      |       |        |             |          |         | Ufl1      | 12.5046  | 6.6703   | -0.906634        | 12.5056      | 6.6713        | -0.9065345       | 0.00014386 | No      |
|      |       |        |             |          |         | Ufsp2     | 22.3048  | 46.0013  | 1.04432          | 22.3058      | 46.0023       | 1.0442871        | 0.00014386 | No      |
|      |       |        |             |          |         | Ugcg      | 41.3197  | 12.9829  | -1.67021         | 41.3207      | 12.9839       | -1.6701409       | 0.00014386 | No      |
|      |       |        |             |          |         | Ugdh      | 14.9736  | 43.6032  | 1.54201          | 14.9746      | 43.6042       | 1.54194964       | 0.00014386 | No      |
|      |       |        |             |          |         | Uggt1     | 29.3315  | 7.19801  | -2.02678         | 29.3325      | 7.19901       | -2.0266296       | 0.00014386 | No      |
|      |       |        |             |          |         | Ugp2      | 27.7756  | 50.2887  | 0.856419         | 27.7766      | 50.2897       | 0.85639293       | 0.00014386 | No      |
|      |       |        |             |          |         | Ugt1a2    | 1.39319  | 65.6916  | 5.55925          | 1.39419      | 65.6926       | 5.55823178       | 0.00014386 | No      |
|      |       |        |             |          |         | Ugt2b35   | 0        | 24.2474  | inf              | 0.001        | 24.2484       | 14.5656019       | 0.00014386 | No      |
|      |       |        |             |          |         | Uhrf1     | 2.14437  | 0.622534 | -1.78433         | 2.14537      | 0.623534      | -1.7826863       | 0.00014386 | No      |
|      |       |        |             |          |         | Uhrf1bp1  | 0.16105  | 9.72658  | 5.91635          | 0.16205      | 9.72758       | 5.90757001       | 0.00014386 | No      |
|      |       |        |             |          |         | Uhrf1bp1l | 23.138   | 9.97729  | -1.21354         | 23.139       | 9.97829       | -1.213462        | 0.00014386 | No      |
|      |       |        |             |          |         | Uhrf2     | 115.097  | 22.9282  | -2.32765         | 115.098      | 22.9292       | -2.3276048       | 0.00014386 | No      |
|      |       |        |             |          |         | Ulk1      | 14.2403  | 29.7664  | 1.06371          | 14.2413      | 29.7674       | 1.06365237       | 0.00014386 | No      |
|      |       |        |             |          |         | Ulk2      | 12.5283  | 6.29505  | -0.992902        | 12.5293      | 6.29605       | -0.9927869       | 0.00014386 | No      |
|      |       |        |             |          |         | Umod      | 2.14602  | 1380.22  | 9.32902          | 2.14702      | 1380.221      | 9.32834794       | 0.00014386 | No      |
|      |       |        |             |          |         | Unc119    | 37.5168  | 17.3778  | -1.1103          | 37.5178      | 17.3788       | -1.1102468       | 0.00014386 | No      |
|      |       |        |             |          |         | Unc13b    | 1.11181  | 4.0883   | 1.87859          | 1.11281      | 4.0893        | 1.87764662       | 0.00014386 | No      |
|      |       |        |             |          |         | Unc5b     | 4.27475  | 1.48711  | -1.52333         | 4.27575      | 1.48811       | -1.5226963       | 0.00014386 | No      |
|      |       |        |             |          |         | Unc5cl    | 1.96799  | 8.10126  | 2.04142          | 1.96899      | 8.10226       | 2.0408686        | 0.00014386 | No      |
|      |       |        |             |          |         | Ung       | 10.8022  | 24.6122  | 1.18805          | 10.8032      | 24.6132       | 1.18797352       | 0.00014386 | No      |
|      |       |        |             |          |         | Unk       | 18.1534  | 11.4855  | -0.660421        | 18.1544      | 11.4865       | -0.66038         | 0.00014386 | No      |
|      |       |        |             |          |         | Unkl      | 26.4271  | 6.94297  | -1.9284          | 26.4281      | 6.94397       | -1.9282401       | 0.00014386 | No      |
|      |       |        |             |          |         | Upf1      | 36.0287  | 21.6553  | -0.734424        | 36.0297      | 21.6563       | -0.7343999       | 0.00014386 | No      |

| RRBS |       |        |             |          |         | RNAseq  |         |          |                  |              |               |                  |            |         |
|------|-------|--------|-------------|----------|---------|---------|---------|----------|------------------|--------------|---------------|------------------|------------|---------|
| gene | Blood | Kidney | methyl.diff | pMWU.fdr | Match ? | gene    | blood   | kidney   | log2(fold_ratio) | blood+ 0.001 | kidney+ 0.001 | log2(fold_ratio) | q_value    | Match ? |
|      |       |        |             |          |         | Upf2    | 46.2502 | 24.0081  | -0.945939        | 46.2512      | 24.0091       | -0.9459095       | 0.00014386 | No      |
|      |       |        |             |          |         | Upf3b   | 45.096  | 9.95801  | -2.17907         | 45.097       | 9.95901       | -2.1789572       | 0.00014386 | No      |
|      |       |        |             |          |         | Upk1b   | 0       | 7.64883  | inf              | 0.001        | 7.64983       | 12.901212        | 0.00014386 | No      |
|      |       |        |             |          |         | Upk3bl  | 0       | 13.0883  | inf              | 0.001        | 13.0893       | 13.6761003       | 0.00014386 | No      |
|      |       |        |             |          |         | Upp1    | 1.2899  | 17.0213  | 3.72201          | 1.2909       | 17.0223       | 3.72097683       | 0.00014386 | No      |
|      |       |        |             |          |         | Upp2    | 0       | 0.899435 | inf              | 0.001        | 0.900435      | 9.81447833       | 0.00014386 | No      |
|      |       |        |             |          |         | Uqcc    | 17.8967 | 28.7904  | 0.685895         | 17.8977      | 28.7914       | 0.68586374       | 0.00014386 | No      |
|      |       |        |             |          |         | UQCRB   | 62.5322 | 271.336  | 2.11741          | 62.5332      | 271.337       | 2.11739154       | 0.00014386 | No      |
|      |       |        |             |          |         | Uqcrc1  | 90.7201 | 284.252  | 1.64767          | 90.7211      | 284.253       | 1.64766554       | 0.00014386 | No      |
|      |       |        |             |          |         | Uqcrc2  | 69.2852 | 143.126  | 1.04667          | 69.2862      | 143.127       | 1.04665591       | 0.00014386 | No      |
|      |       |        |             |          |         | Uqcrfs1 | 95.2085 | 297.298  | 1.64275          | 95.2095      | 297.299       | 1.64273717       | 0.00014386 | No      |
|      |       |        |             |          |         | Uqcrh   | 594.733 | 897.599  | 0.593828         | 594.734      | 897.6         | 0.59382812       | 0.00014386 | No      |
|      |       |        |             |          |         | Uqcrq   | 291.66  | 1543.95  | 2.40427          | 291.661      | 1543.951      | 2.40426258       | 0.00014386 | No      |
|      |       |        |             |          |         | Urad    | 0       | 15.815   | inf              | 0.001        | 15.816        | 13.9490972       | 0.00014386 | No      |
|      |       |        |             |          |         | Urb1    | 6.23014 | 0.849732 | -2.87418         | 6.23114      | 0.850732      | -2.8727195       | 0.00014386 | No      |
|      |       |        |             |          |         | Urb2    | 4.57092 | 1.06412  | -2.10283         | 4.57192      | 1.06512       | -2.1017842       | 0.00014386 | No      |
|      |       |        |             |          |         | Urgcp   | 7.76356 | 21.9691  | 1.50069          | 7.76456      | 21.9701       | 1.50056536       | 0.00014386 | No      |
|      |       |        |             |          |         | Uri1    | 46.4783 | 14.6564  | -1.66503         | 46.4793      | 14.6574       | -1.6649591       | 0.00014386 | No      |
|      |       |        |             |          |         | Urod    | 34.0047 | 84.6356  | 1.31553          | 34.0057      | 84.6366       | 1.31550508       | 0.00014386 | No      |
|      |       |        |             |          |         | Uros    | 1.86687 | 3.84745  | 1.04328          | 1.86787      | 3.84845       | 1.04288345       | 0.00014386 | No      |
|      |       |        |             |          |         | Use1    | 142.7   | 249.577  | 0.806493         | 142.701      | 249.578       | 0.80649532       | 0.00014386 | No      |
|      |       |        |             |          |         | Usmg5   | 497.858 | 1948.34  | 1.96844          | 497.859      | 1948.341      | 1.96843709       | 0.00014386 | No      |
|      |       |        |             |          |         | Uso1    | 25.8549 | 34.5681  | 0.419004         | 25.8559      | 34.5691       | 0.41898952       | 0.00014386 | No      |
|      |       |        |             |          |         | Usp1    | 20.9283 | 7.77832  | -1.42792         | 20.9293      | 7.77932       | -1.4278081       | 0.00014386 | No      |
|      |       |        |             |          |         | Usp14   | 32.0339 | 16.6803  | -0.941453        | 32.0349      | 16.6813       | -0.9414128       | 0.00014386 | No      |
|      |       |        |             |          |         | Usp15   | 22.8676 | 13.4262  | -0.768257        | 22.8686      | 13.4272       | -0.7682096       | 0.00014386 | No      |
|      |       |        |             |          |         | Usp16   | 37.1134 | 15.3547  | -1.27326         | 37.1144      | 15.3557       | -1.2732048       | 0.00014386 | No      |
|      |       |        |             |          |         | Usp18   | 12.2183 | 4.87912  | -1.32435         | 12.2193      | 4.88012       | -1.3241731       | 0.00014386 | No      |
|      |       |        |             |          |         | Usp20   | 7.58137 | 18.5052  | 1.2874           | 7.58237      | 18.5062       | 1.28728792       | 0.00014386 | No      |
|      |       |        |             |          |         | Usp22   | 27.4607 | 18.9319  | -0.536551        | 27.4617      | 18.9329       | -0.5365255       | 0.00014386 | No      |
|      |       |        |             |          |         | Usp24   | 38.1401 | 16.865   | -1.17727         | 38.1411      | 16.866        | -1.1772286       | 0.00014386 | No      |
|      |       |        |             |          |         | Usp25   | 33.9727 | 15.9667  | -1.08931         | 33.9737      | 15.9677       | -1.0892618       | 0.00014386 | No      |
|      |       |        |             |          |         | Usp28   | 82.3324 | 5.25278  | -3.97031         | 82.3334      | 5.25378       | -3.9700501       | 0.00014386 | No      |
|      |       |        |             |          |         | Usp31   | 2.15466 | 0.914266 | -1.23678         | 2.15566      | 0.915266      | -1.2358667       | 0.00014386 | No      |
|      |       |        |             |          |         | Usp33   | 23.7495 | 15.1064  | -0.652732        | 23.7505      | 15.1074       | -0.6527025       | 0.00014386 | No      |
|      |       |        |             |          |         | USP34   | 16.5222 | 3.47109  | -2.25094         | 16.5232      | 3.47209       | -2.2506169       | 0.00014386 | No      |
|      |       |        |             |          |         | Usp37   | 6.86365 | 2.73099  | -1.32955         | 6.86465      | 2.73199       | -1.329234        | 0.00014386 | No      |
|      |       |        |             |          |         | Usp38   | 21.799  | 4.88471  | -2.15792         | 21.8         | 4.88571       | -2.157688        | 0.00014386 | No      |
|      |       |        |             |          |         | USP39   | 24.0939 | 10.6244  | -1.18128         | 24.0949      | 10.6254       | -1.1812107       | 0.00014386 | No      |
|      |       |        |             |          |         | Usp40   | 43.3192 | 8.18177  | -2.40452         | 43.3202      | 8.18277       | -2.4043787       | 0.00014386 | No      |
|      |       |        |             |          |         | Usp42   | 7.23032 | 3.56956  | -1.01831         | 7.23132      | 3.57056       | -1.0181087       | 0.00014386 | No      |
|      |       |        |             |          |         | Usp43   | 0       | 4.73201  | inf              | 0.001        | 4.73301       | 12.2085423       | 0.00014386 | No      |

| RRBS |       |        |             |          |         | RNAseq |           |          |                  |              |               |                  |            |         |
|------|-------|--------|-------------|----------|---------|--------|-----------|----------|------------------|--------------|---------------|------------------|------------|---------|
| gene | Blood | Kidney | methyl.diff | pMWU.fdr | Match ? | gene   | blood     | kidney   | log2(fold_ratio) | blood+ 0.001 | kidney+ 0.001 | log2(fold_ratio) | q_value    | Match ? |
|      |       |        |             |          |         | Usp45  | 10.5868   | 2.91931  | -1.85857         | 10.5878      | 2.92031       | -1.8582094       | 0.00014386 | No      |
|      |       |        |             |          |         | Usp48  | 68.8423   | 14.8494  | -2.21289         | 68.8433      | 14.8504       | -2.2128145       | 0.00014386 | No      |
|      |       |        |             |          |         | Usp5   | 31.2148   | 22.4992  | -0.472355        | 31.2158      | 22.5002       | -0.4723386       | 0.00014386 | No      |
|      |       |        |             |          |         | Usp53  | 4.58486   | 13.0462  | 1.50868          | 4.58586      | 13.0472       | 1.50847601       | 0.00014386 | No      |
|      |       |        |             |          |         | Usp6nl | 9.32576   | 4.82219  | -0.951533        | 9.32676      | 4.82319       | -0.9513884       | 0.00014386 | No      |
|      |       |        |             |          |         | Usp7   | 75.7811   | 29.271   | -1.37237         | 75.7821      | 29.272        | -1.3723358       | 0.00014386 | No      |
|      |       |        |             |          |         | Usp8   | 14.6894   | 22.5393  | 0.617663         | 14.6904      | 22.5403       | 0.61763304       | 0.00014386 | No      |
|      |       |        |             |          |         | Usp9x  | 18.771    | 8.0687   | -1.2181          | 18.772       | 8.0697        | -1.2179954       | 0.00014386 | No      |
|      |       |        |             |          |         | Utp14a | 16.7305   | 5.45429  | -1.61702         | 16.7315      | 5.45529       | -1.616839        | 0.00014386 | No      |
|      |       |        |             |          |         | Utp18  | 18.7242   | 8.36773  | -1.162           | 18.7252      | 8.36873       | -1.1619005       | 0.00014386 | No      |
|      |       |        |             |          |         | Utp20  | 5.73067   | 1.86944  | -1.6161          | 5.73167      | 1.87044       | -1.6155779       | 0.00014386 | No      |
|      |       |        |             |          |         | Utp3   | 42.636    | 20.3701  | -1.06562         | 42.637       | 20.3711       | -1.065582        | 0.00014386 | No      |
|      |       |        |             |          |         | Utp6   | 14.704    | 9.31528  | -0.658538        | 14.705       | 9.31628       | -0.6584809       | 0.00014386 | No      |
|      |       |        |             |          |         | Utrn   | 53.2445   | 26.4864  | -1.00738         | 53.2455      | 26.4874       | -1.0073534       | 0.00014386 | No      |
|      |       |        |             |          |         | Uvssa  | 2.48305   | 1.10496  | -1.16812         | 2.48405      | 1.10596       | -1.167395        | 0.00014386 | No      |
|      |       |        |             |          |         | Vamp1  | 65.5159   | 7.28719  | -3.16841         | 65.5169      | 7.28819       | -3.1682346       | 0.00014386 | No      |
|      |       |        |             |          |         | Vamp4  | 20.0669   | 7.0285   | -1.51353         | 20.0679      | 7.0295        | -1.5133957       | 0.00014386 | No      |
|      |       |        |             |          |         | Vamp8  | 86.5262   | 285.027  | 1.71989          | 86.5272      | 285.028       | 1.71987803       | 0.00014386 | No      |
|      |       |        |             |          |         | Vangl1 | 0.357354  | 4.28689  | 3.58451          | 0.358354     | 4.28789       | 3.58081053       | 0.00014386 | No      |
|      |       |        |             |          |         | Vapa   | 95.8582   | 123.584  | 0.366518         | 95.8592      | 123.585       | 0.36651484       | 0.00014386 | No      |
|      |       |        |             |          |         | Vapb   | 23.7167   | 38.7008  | 0.706461         | 23.7177      | 38.7018       | 0.70643655       | 0.00014386 | No      |
|      |       |        |             |          |         | Vash2  | 0.0888508 | 10.2344  | 6.84783          | 0.0898508    | 10.2354       | 6.83182042       | 0.00014386 | No      |
|      |       |        |             |          |         | Vasp   | 97.5925   | 27.7163  | -1.81604         | 97.5935      | 27.7173       | -1.8159983       | 0.00014386 | No      |
|      |       |        |             |          |         | Vav1   | 40.4326   | 1.02214  | -5.30585         | 40.4336      | 1.02314       | -5.3044792       | 0.00014386 | No      |
|      |       |        |             |          |         | Vcan   | 0.102026  | 1.38663  | 3.76457          | 0.103026     | 1.38763       | 3.75154256       | 0.00014386 | No      |
|      |       |        |             |          |         | Vcl    | 1.6464    | 8.74645  | 2.40939          | 1.6474       | 8.74745       | 2.40867162       | 0.00014386 | No      |
|      |       |        |             |          |         | Vcpip1 | 15.7239   | 3.76309  | -2.06297         | 15.7249      | 3.76409       | -2.0626778       | 0.00014386 | No      |
|      |       |        |             |          |         | Vcpkmt | 41.8401   | 25.7931  | -0.6979          | 41.8411      | 25.7941       | -0.6978797       | 0.00014386 | No      |
|      |       |        |             |          |         | Vdac1  | 26.0386   | 276.45   | 3.40829          | 26.0396      | 276.451       | 3.4082446        | 0.00014386 | No      |
|      |       |        |             |          |         | Vdac2  | 92.3987   | 181.841  | 0.976735         | 92.3997      | 181.842       | 0.97672538       | 0.00014386 | No      |
|      |       |        |             |          |         | Vdac3  | 88.5449   | 155.98   | 0.816879         | 88.5459      | 155.981       | 0.81687289       | 0.00014386 | No      |
|      |       |        |             |          |         | Vdr    | 0.326635  | 31.5675  | 6.59462          | 0.327635     | 31.5685       | 6.59025242       | 0.00014386 | No      |
|      |       |        |             |          |         | Vegfa  | 0.206314  | 59.6259  | 8.17496          | 0.207314     | 59.6269       | 8.16800198       | 0.00014386 | No      |
|      |       |        |             |          |         | Vegfb  | 2.72948   | 51.8233  | 4.24691          | 2.73048      | 51.8243       | 4.24640223       | 0.00014386 | No      |
|      |       |        |             |          |         | Vegfc  | 0.259099  | 2.42871  | 3.22862          | 0.260099     | 2.42971       | 3.22365137       | 0.00014386 | No      |
|      |       |        |             |          |         | VeZF1  | 27.9575   | 18.278   | -0.613125        | 27.9585      | 18.279        | -0.6130998       | 0.00014386 | No      |
|      |       |        |             |          |         | Vhl    | 19.0155   | 26.5754  | 0.482911         | 19.0165      | 26.5764       | 0.48289395       | 0.00014386 | No      |
|      |       |        |             |          |         | Vil1   | 0.0734787 | 16.1389  | 7.779            | 0.0744787    | 16.1399       | 7.75958803       | 0.00014386 | No      |
|      |       |        |             |          |         | Vim    | 453.1     | 302.403  | -0.583355        | 453.101      | 302.404       | -0.5833555       | 0.00014386 | No      |
|      |       |        |             |          |         | Vipr2  | 4.83288   | 0.304221 | -3.98969         | 4.83388      | 0.305221      | -3.9852555       | 0.00014386 | No      |
|      |       |        |             |          |         | Vkorc1 | 7.51093   | 64.6799  | 3.10626          | 7.51193      | 64.6809       | 3.10608423       | 0.00014386 | No      |
|      |       |        |             |          |         | Vma21  | 4.89574   | 12.2312  | 1.32096          | 4.89674      | 12.2322       | 1.3207904        | 0.00014386 | No      |

| RRBS |       |        |             |          |         | RNAseq  |           |          |                  |              |               |                  |            |         |
|------|-------|--------|-------------|----------|---------|---------|-----------|----------|------------------|--------------|---------------|------------------|------------|---------|
| gene | Blood | Kidney | methyl.diff | pMWU.fdr | Match ? | gene    | blood     | kidney   | log2(fold_ratio) | blood+ 0.001 | kidney+ 0.001 | log2(fold_ratio) | q_value    | Match ? |
|      |       |        |             |          |         | Vmac    | 16.1902   | 32.4441  | 1.00284          | 16.1912      | 32.4451       | 1.0027907        | 0.00014386 | No      |
|      |       |        |             |          |         | Vnn1    | 0.60969   | 20.2814  | 5.05594          | 0.61069      | 20.2824       | 5.05364434       | 0.00014386 | No      |
|      |       |        |             |          |         | Vopp1   | 67.9822   | 29.4016  | -1.20926         | 67.9832      | 29.4026       | -1.2092345       | 0.00014386 | No      |
|      |       |        |             |          |         | Vprbp   | 21.7586   | 11.3215  | -0.942516        | 21.7596      | 11.3225       | -0.9424595       | 0.00014386 | No      |
|      |       |        |             |          |         | Vps13a  | 26.116    | 7.22427  | -1.85401         | 26.117       | 7.22527       | -1.8538658       | 0.00014386 | No      |
|      |       |        |             |          |         | Vps13b  | 22.2803   | 7.94635  | -1.48741         | 22.2813      | 7.94735       | -1.4872876       | 0.00014386 | No      |
|      |       |        |             |          |         | Vps13c  | 14.3289   | 7.72089  | -0.892087        | 14.3299      | 7.72189       | -0.8920026       | 0.00014386 | No      |
|      |       |        |             |          |         | Vps18   | 2.24812   | 4.90311  | 1.12498          | 2.24912      | 4.90411       | 1.1246307        | 0.00014386 | No      |
|      |       |        |             |          |         | Vps25   | 59.1972   | 126.289  | 1.09313          | 59.1982      | 126.29        | 1.09311519       | 0.00014386 | No      |
|      |       |        |             |          |         | Vps29   | 25.4776   | 96.0423  | 1.91444          | 25.4786      | 96.0433       | 1.91439897       | 0.00014386 | No      |
|      |       |        |             |          |         | Vps33b  | 13.0971   | 8.24338  | -0.667939        | 13.0981      | 8.24438       | -0.6678746       | 0.00014386 | No      |
|      |       |        |             |          |         | Vps36   | 55.5427   | 21.7141  | -1.35497         | 55.5437      | 21.7151       | -1.3549247       | 0.00014386 | No      |
|      |       |        |             |          |         | Vps37b  | 92.6374   | 8.25274  | -3.48865         | 92.6384      | 8.25374       | -3.4884904       | 0.00014386 | No      |
|      |       |        |             |          |         | Vps39   | 13.7165   | 9.69147  | -0.501122        | 13.7175      | 9.69247       | -0.5010813       | 0.00014386 | No      |
|      |       |        |             |          |         | Vps45   | 9.50547   | 30.2234  | 1.66883          | 9.50647      | 30.2244       | 1.66873206       | 0.00014386 | No      |
|      |       |        |             |          |         | Vps72   | 52.9331   | 29.4379  | -0.846494        | 52.9341      | 29.4389       | -0.8464736       | 0.00014386 | No      |
|      |       |        |             |          |         | Vps9d1  | 11.0748   | 38.6063  | 1.80156          | 11.0758      | 38.6073       | 1.80146276       | 0.00014386 | No      |
|      |       |        |             |          |         | Vrk1    | 33.2781   | 11.6431  | -1.51509         | 33.2791      | 11.6441       | -1.5150173       | 0.00014386 | No      |
|      |       |        |             |          |         | Vrk2    | 9.71019   | 3.33363  | -1.54241         | 9.71119      | 3.33463       | -1.5421214       | 0.00014386 | No      |
|      |       |        |             |          |         | Vsig10  | 0.0897714 | 10.3987  | 6.85593          | 0.0907714    | 10.3997       | 6.84008839       | 0.00014386 | No      |
|      |       |        |             |          |         | Vsig10l | 1.22975   | 9.24929  | 2.91097          | 1.23075      | 9.25029       | 2.90996086       | 0.00014386 | No      |
|      |       |        |             |          |         | Vta1    | 34.6031   | 52.0821  | 0.589884         | 34.6041      | 52.0831       | 0.58987234       | 0.00014386 | No      |
|      |       |        |             |          |         | Vtcn1   | 0         | 1.24476  | inf              | 0.001        | 1.24576       | 10.2828104       | 0.00014386 | No      |
|      |       |        |             |          |         | Vti1b   | 50.6474   | 75.6974  | 0.579756         | 50.6484      | 75.6984       | 0.57974611       | 0.00014386 | No      |
|      |       |        |             |          |         | Vwa5b2  | 3.05805   | 0.305066 | -3.32542         | 3.05905      | 0.306066      | -3.321169        | 0.00014386 | No      |
|      |       |        |             |          |         | Vwa7    | 0.0524972 | 4.78741  | 6.51086          | 0.0534972    | 4.78841       | 6.48393949       | 0.00014386 | No      |
|      |       |        |             |          |         | Vwa8    | 7.62427   | 32.5055  | 2.09201          | 7.62527      | 32.5065       | 2.0918679        | 0.00014386 | No      |
|      |       |        |             |          |         | Vwf     | 19.4316   | 5.15517  | -1.91431         | 19.4326      | 5.15617       | -1.9141072       | 0.00014386 | No      |
|      |       |        |             |          |         | Wac     | 109.228   | 38.5039  | -1.50426         | 109.229      | 38.5049       | -1.504242        | 0.00014386 | No      |
|      |       |        |             |          |         | Wapal   | 35.727    | 10.6602  | -1.74478         | 35.728       | 10.6612       | -1.7446853       | 0.00014386 | No      |
|      |       |        |             |          |         | Was     | 127.215   | 6.85302  | -4.21438         | 127.216      | 6.85402       | -4.2141859       | 0.00014386 | No      |
|      |       |        |             |          |         | Wasf2   | 38.5088   | 10.1985  | -1.91684         | 38.5098      | 10.1995       | -1.9167272       | 0.00014386 | No      |
|      |       |        |             |          |         | Wash    | 57.2156   | 89.1951  | 0.640556         | 57.2166      | 89.1961       | 0.64054686       | 0.00014386 | No      |
|      |       |        |             |          |         | Wbp1    | 63.3859   | 97.8063  | 0.625767         | 63.3869      | 97.8073       | 0.62575743       | 0.00014386 | No      |
|      |       |        |             |          |         | Wbp11   | 14.5049   | 10.0741  | -0.525895        | 14.5059      | 10.0751       | -0.5258457       | 0.00014386 | No      |
|      |       |        |             |          |         | Wbp1l   | 73.0915   | 23.9879  | -1.6074          | 73.0925      | 23.9889       | -1.6073564       | 0.00014386 | No      |
|      |       |        |             |          |         | Wbp4    | 35.3849   | 18.9048  | -0.90438         | 35.3859      | 18.9058       | -0.9043457       | 0.00014386 | No      |
|      |       |        |             |          |         | Wbp5    | 10.2067   | 210.695  | 4.36757          | 10.2077      | 210.696       | 4.36743319       | 0.00014386 | No      |
|      |       |        |             |          |         | Wbscr27 | 11.3391   | 22.5014  | 0.98871          | 11.3401      | 22.5024       | 0.98864552       | 0.00014386 | No      |
|      |       |        |             |          |         | Wdfy1   | 1.64445   | 10.1268  | 2.6225           | 1.64545      | 10.1278       | 2.62176673       | 0.00014386 | No      |
|      |       |        |             |          |         | Wdfy3   | 0.0508084 | 9.87157  | 7.60207          | 0.0518084    | 9.87257       | 7.57409585       | 0.00014386 | No      |
|      |       |        |             |          |         | Wdhd1   | 5.00202   | 0.730825 | -2.77491         | 5.00302      | 0.731825      | -2.7732286       | 0.00014386 | No      |

| RRBS |       |        |             |          |         | RNAseq |           |          |                  |              |               |                  |            |         |
|------|-------|--------|-------------|----------|---------|--------|-----------|----------|------------------|--------------|---------------|------------------|------------|---------|
| gene | Blood | Kidney | methyl.diff | pMWU.fdr | Match ? | gene   | blood     | kidney   | log2(fold_ratio) | blood+ 0.001 | kidney+ 0.001 | log2(fold_ratio) | q_value    | Match ? |
|      |       |        |             |          |         | Wdpcp  | 0.434935  | 4.20036  | 3.27164          | 0.435935     | 4.20136       | 3.26867147       | 0.00014386 | No      |
|      |       |        |             |          |         | Wdr1   | 176.98    | 120.963  | -0.549017        | 176.981      | 120.964       | -0.5490167       | 0.00014386 | No      |
|      |       |        |             |          |         | Wdr11  | 7.21498   | 21.1383  | 1.5508           | 7.21598      | 21.1393       | 1.55066036       | 0.00014386 | No      |
|      |       |        |             |          |         | Wdr12  | 22.2322   | 11.2423  | -0.983706        | 22.2332      | 11.2433       | -0.9836501       | 0.00014386 | No      |
|      |       |        |             |          |         | Wdr13  | 9.69492   | 16.2529  | 0.745393         | 9.69592      | 16.2539       | 0.74533622       | 0.00014386 | No      |
|      |       |        |             |          |         | Wdr19  | 0.328624  | 1.74272  | 2.40683          | 0.329624     | 1.74372       | 2.4032752        | 0.00014386 | No      |
|      |       |        |             |          |         | Wdr20  | 16.8882   | 9.63124  | -0.810225        | 16.8892      | 9.63224       | -0.8101577       | 0.00014386 | No      |
|      |       |        |             |          |         | Wdr25  | 22.2281   | 5.61271  | -1.98562         | 22.2291      | 5.61371       | -1.9854231       | 0.00014386 | No      |
|      |       |        |             |          |         | Wdr26  | 69.8253   | 15.6365  | -2.15883         | 69.8263      | 15.6375       | -2.1587606       | 0.00014386 | No      |
|      |       |        |             |          |         | Wdr27  | 0.0597468 | 5.53257  | 6.53294          | 0.0607468    | 5.53357       | 6.50925832       | 0.00014386 | No      |
|      |       |        |             |          |         | Wdr3   | 18.2184   | 6.09831  | -1.57891         | 18.2194      | 6.09931       | -1.5787575       | 0.00014386 | No      |
|      |       |        |             |          |         | Wdr31  | 0.0598601 | 9.61776  | 7.32796          | 0.0608601    | 9.61876       | 7.30421041       | 0.00014386 | No      |
|      |       |        |             |          |         | Wdr35  | 0.475087  | 12.0263  | 4.66186          | 0.476087     | 12.0273       | 4.65894376       | 0.00014386 | No      |
|      |       |        |             |          |         | Wdr36  | 27.2246   | 14.8824  | -0.87131         | 27.2256      | 14.8834       | -0.8712597       | 0.00014386 | No      |
|      |       |        |             |          |         | Wdr37  | 11.6485   | 6.15693  | -0.919861        | 11.6495      | 6.15793       | -0.9197507       | 0.00014386 | No      |
|      |       |        |             |          |         | Wdr41  | 15.2559   | 8.6879   | -0.812288        | 15.2569      | 8.6889        | -0.8122164       | 0.00014386 | No      |
|      |       |        |             |          |         | Wdr43  | 31.2869   | 9.20304  | -1.76537         | 31.2879      | 9.20404       | -1.7652657       | 0.00014386 | No      |
|      |       |        |             |          |         | Wdr44  | 6.42659   | 1.74427  | -1.88143         | 6.42759      | 1.74527       | -1.8808277       | 0.00014386 | No      |
|      |       |        |             |          |         | Wdr45  | 51.3212   | 31.446   | -0.706677        | 51.3222      | 31.447        | -0.7066606       | 0.00014386 | No      |
|      |       |        |             |          |         | Wdr46  | 33.2835   | 21.4386  | -0.634596        | 33.2845      | 21.4396       | -0.6345725       | 0.00014386 | No      |
|      |       |        |             |          |         | Wdr5   | 28.7043   | 13.7585  | -1.06094         | 28.7053      | 13.7595       | -1.0608891       | 0.00014386 | No      |
|      |       |        |             |          |         | Wdr54  | 0.0355911 | 23.2655  | 9.35246          | 0.0365911    | 23.2665       | 9.3125457        | 0.00014386 | No      |
|      |       |        |             |          |         | WDR55  | 125.633   | 63.9985  | -0.973103        | 125.634      | 63.9995       | -0.9730944       | 0.00014386 | No      |
|      |       |        |             |          |         | Wdr6   | 12.3199   | 21.9982  | 0.836396         | 12.3209      | 21.9992       | 0.83634342       | 0.00014386 | No      |
|      |       |        |             |          |         | Wdr60  | 0.284747  | 4.40546  | 3.95154          | 0.285747     | 4.40646       | 3.94680985       | 0.00014386 | No      |
|      |       |        |             |          |         | Wdr61  | 26.5524   | 43.518   | 0.712773         | 26.5534      | 43.519        | 0.7127488        | 0.00014386 | No      |
|      |       |        |             |          |         | Wdr7   | 4.91304   | 2.6743   | -0.877455        | 4.91404      | 2.6753        | -0.8772089       | 0.00014386 | No      |
|      |       |        |             |          |         | Wdr70  | 21.6194   | 12.0584  | -0.842283        | 21.6204      | 12.0594       | -0.8422351       | 0.00014386 | No      |
|      |       |        |             |          |         | Wdr72  | 0         | 13.0982  | inf              | 0.001        | 13.0992       | 13.6771911       | 0.00014386 | No      |
|      |       |        |             |          |         | Wdr73  | 6.5083    | 18.491   | 1.50647          | 6.5093       | 18.492        | 1.50632696       | 0.00014386 | No      |
|      |       |        |             |          |         | Wdr75  | 28.2073   | 11.4314  | -1.30306         | 28.2083      | 11.4324       | -1.3029914       | 0.00014386 | No      |
|      |       |        |             |          |         | Wdr76  | 4.46754   | 0.773581 | -2.52985         | 4.46854      | 0.774581      | -2.5283155       | 0.00014386 | No      |
|      |       |        |             |          |         | Wdr91  | 14.6416   | 52.8278  | 1.85123          | 14.6426      | 52.8288       | 1.85115289       | 0.00014386 | No      |
|      |       |        |             |          |         | Wdr92  | 8.3587    | 4.90036  | -0.770389        | 8.3597       | 4.90136       | -0.7702691       | 0.00014386 | No      |
|      |       |        |             |          |         | Wdsub1 | 2.14429   | 10.0702  | 2.23152          | 2.14529      | 10.0712       | 2.230991         | 0.00014386 | No      |
|      |       |        |             |          |         | Wdte1  | 29.6669   | 22.0136  | -0.430461        | 29.6679      | 22.0146       | -0.4304422       | 0.00014386 | No      |
|      |       |        |             |          |         | Wdyhv1 | 4.62648   | 1.60364  | -1.52856         | 4.62748      | 1.60464       | -1.5279771       | 0.00014386 | No      |
|      |       |        |             |          |         | Wfdc1  | 0         | 5.31652  | inf              | 0.001        | 5.31752       | 12.3765378       | 0.00014386 | No      |
|      |       |        |             |          |         | Wfdc10 | 0         | 2.9576   | inf              | 0.001        | 2.9586        | 11.5306989       | 0.00014386 | No      |
|      |       |        |             |          |         | Wfdc3  | 0         | 2.45651  | inf              | 0.001        | 2.45751       | 11.2629816       | 0.00014386 | No      |
|      |       |        |             |          |         | Wfs1   | 0.743787  | 5.6376   | 2.92212          | 0.744787     | 5.6386        | 2.92043721       | 0.00014386 | No      |
|      |       |        |             |          |         | Whsc1  | 4.02071   | 11.7964  | 1.55283          | 4.02171      | 11.7974       | 1.55258798       | 0.00014386 | No      |

| RRBS |       |        |             |          |         | RNAseq   |           |          |                  |              |               |                  |            |         |
|------|-------|--------|-------------|----------|---------|----------|-----------|----------|------------------|--------------|---------------|------------------|------------|---------|
| gene | Blood | Kidney | methyl.diff | pMWU.fdr | Match ? | gene     | blood     | kidney   | log2(fold_ratio) | blood+ 0.001 | kidney+ 0.001 | log2(fold_ratio) | q_value    | Match ? |
|      |       |        |             |          |         | Wibg     | 109.25    | 23.2647  | -2.23142         | 109.251      | 23.2657       | -2.23137         | 0.00014386 | No      |
|      |       |        |             |          |         | Wipf1    | 81.1011   | 2.94913  | -4.78136         | 81.1021      | 2.95013       | -4.7808888       | 0.00014386 | No      |
|      |       |        |             |          |         | Wipf2    | 8.09931   | 5.87609  | -0.462942        | 8.10031      | 5.87709       | -0.4628751       | 0.00014386 | No      |
|      |       |        |             |          |         | Wipf3    | 7.1299    | 0.930065 | -2.93848         | 7.1309       | 0.931065      | -2.9371304       | 0.00014386 | No      |
|      |       |        |             |          |         | Wipi1    | 0.195676  | 10.86    | 5.79441          | 0.196676     | 10.861        | 5.78719221       | 0.00014386 | No      |
|      |       |        |             |          |         | Wisp3    | 7.78081   | 1.95141  | -1.99541         | 7.78181      | 1.95241       | -1.9948497       | 0.00014386 | No      |
|      |       |        |             |          |         | Wiz      | 10.7628   | 16.2461  | 0.59404          | 10.7638      | 16.2471       | 0.59399474       | 0.00014386 | No      |
|      |       |        |             |          |         | Wls      | 4.93242   | 140.907  | 4.8363           | 4.93342      | 140.908       | 4.8360216        | 0.00014386 | No      |
|      |       |        |             |          |         | Wnt11    | 0         | 0.984857 | inf              | 0.001        | 0.985857      | 9.94523459       | 0.00014386 | No      |
|      |       |        |             |          |         | Wnt5a    | 0         | 2.65339  | inf              | 0.001        | 2.65439       | 11.3741646       | 0.00014386 | No      |
|      |       |        |             |          |         | Wrap73   | 15.7163   | 6.27718  | -1.32408         | 15.7173      | 6.27818       | -1.3239351       | 0.00014386 | No      |
|      |       |        |             |          |         | Wrb      | 4.43049   | 11.8544  | 1.41989          | 4.43149      | 11.8554       | 1.41968058       | 0.00014386 | No      |
|      |       |        |             |          |         | Wrn      | 10.5241   | 3.0213   | -1.80045         | 10.5251      | 3.0223        | -1.8001152       | 0.00014386 | No      |
|      |       |        |             |          |         | Wsb2     | 8.84378   | 51.6115  | 2.54496          | 8.84478      | 51.6125       | 2.54482235       | 0.00014386 | No      |
|      |       |        |             |          |         | Wscd1    | 0.144319  | 4.1417   | 4.84289          | 0.145319     | 4.1427        | 4.8332761        | 0.00014386 | No      |
|      |       |        |             |          |         | Wtap     | 63.4229   | 22.1811  | -1.51567         | 63.4239      | 22.1821       | -1.5156306       | 0.00014386 | No      |
|      |       |        |             |          |         | Wwc1     | 0.0876718 | 122.597  | 10.4495          | 0.0886718    | 122.598       | 10.4331725       | 0.00014386 | No      |
|      |       |        |             |          |         | Wwc3     | 1.11397   | 5.1986   | 2.22242          | 1.11497      | 5.1996        | 2.22139575       | 0.00014386 | No      |
|      |       |        |             |          |         | Wwox     | 3.93756   | 13.8489  | 1.8144           | 3.93856      | 13.8499       | 1.8141354        | 0.00014386 | No      |
|      |       |        |             |          |         | Wwp1     | 1.24752   | 35.2905  | 4.82215          | 1.24852      | 35.2915       | 4.82102991       | 0.00014386 | No      |
|      |       |        |             |          |         | XAF1     | 21.0815   | 5.77014  | -1.8693          | 21.0825      | 5.77114       | -1.8691177       | 0.00014386 | No      |
|      |       |        |             |          |         | XBP1     | 23.9842   | 51.3594  | 1.09854          | 23.9852      | 51.3604       | 1.09851197       | 0.00014386 | No      |
|      |       |        |             |          |         | Xcl1     | 2.81249   | 15.3853  | 2.45163          | 2.81349      | 15.3863       | 2.4512136        | 0.00014386 | No      |
|      |       |        |             |          |         | Xdh      | 0.97367   | 10.3905  | 3.41569          | 0.97467      | 10.3915       | 3.41434627       | 0.00014386 | No      |
|      |       |        |             |          |         | Xiap     | 18.6303   | 8.11619  | -1.19878         | 18.6313      | 8.11719       | -1.1986761       | 0.00014386 | No      |
|      |       |        |             |          |         | Xkr5     | 0.274637  | 1.47994  | 2.42994          | 0.275637     | 1.48094       | 2.42567173       | 0.00014386 | No      |
|      |       |        |             |          |         | Xkrx     | 22.6158   | 1.49189  | -3.92212         | 22.6168      | 1.49289       | -3.921215        | 0.00014386 | No      |
|      |       |        |             |          |         | Xpnpep1  | 17.6435   | 110.809  | 2.65087          | 17.6445      | 110.81        | 2.65079763       | 0.00014386 | No      |
|      |       |        |             |          |         | Xpnpep2  | 0.252288  | 12.2921  | 5.60652          | 0.253288     | 12.2931       | 5.60092623       | 0.00014386 | No      |
|      |       |        |             |          |         | Xpo1     | 38.2308   | 15.8961  | -1.26606         | 38.2318      | 15.8971       | -1.2660095       | 0.00014386 | No      |
|      |       |        |             |          |         | Xpo4     | 8.52231   | 2.38707  | -1.836           | 8.52331      | 2.38807       | -1.8355687       | 0.00014386 | No      |
|      |       |        |             |          |         | Xpo6     | 107       | 43.0596  | -1.31321         | 107.001      | 43.0606       | -1.313184        | 0.00014386 | No      |
|      |       |        |             |          |         | Xpot     | 6.65467   | 11.0665  | 0.733755         | 6.65567      | 11.0675       | 0.73367356       | 0.00014386 | No      |
|      |       |        |             |          |         | Xpr1     | 8.3967    | 4.69366  | -0.83911         | 8.3977       | 4.69466       | -0.8389736       | 0.00014386 | No      |
|      |       |        |             |          |         | Xrcc1    | 29.5655   | 48.8046  | 0.723101         | 29.5665      | 48.8056       | 0.72308322       | 0.00014386 | No      |
|      |       |        |             |          |         | Xrcc4    | 2.01859   | 7.06612  | 1.80757          | 2.01959      | 7.06712       | 1.80705997       | 0.00014386 | No      |
|      |       |        |             |          |         | Xrcc6bp1 | 9.53468   | 47.5358  | 2.31776          | 9.53568      | 47.5368       | 2.31763706       | 0.00014386 | No      |
|      |       |        |             |          |         | Xrn1     | 10.6964   | 5.76749  | -0.891112        | 10.6974      | 5.76849       | -0.8909946       | 0.00014386 | No      |
|      |       |        |             |          |         | Xrn2     | 48.8965   | 12.4622  | -1.97217         | 48.8975      | 12.4632       | -1.9720862       | 0.00014386 | No      |
|      |       |        |             |          |         | Xxylt1   | 5.78589   | 12.7661  | 1.1417           | 5.78689      | 12.7671       | 1.14157073       | 0.00014386 | No      |
|      |       |        |             |          |         | Xylb     | 5.60951   | 75.5853  | 3.75216          | 5.61051      | 75.5863       | 3.75192095       | 0.00014386 | No      |
|      |       |        |             |          |         | Xylt2    | 29.38     | 8.77384  | -1.74355         | 29.381       | 8.77484       | -1.7434388       | 0.00014386 | No      |



| RRBS |       |        |             |          |         | RNAseq |          |          |                  |              |               |                  |            |         |
|------|-------|--------|-------------|----------|---------|--------|----------|----------|------------------|--------------|---------------|------------------|------------|---------|
| gene | Blood | Kidney | methyl.diff | pMWU.fdr | Match ? | gene   | blood    | kidney   | log2(fold_ratio) | blood+ 0.001 | kidney+ 0.001 | log2(fold_ratio) | q_value    | Match ? |
|      |       |        |             |          |         | Yae1d1 | 4.17085  | 9.25247  | 1.1495           | 4.17185      | 9.25347       | 1.14930718       | 0.00014386 | No      |
|      |       |        |             |          |         | Ybey   | 1.35278  | 13.974   | 3.36875          | 1.35378      | 13.975        | 3.36778307       | 0.00014386 | No      |
|      |       |        |             |          |         | YBX1   | 167.456  | 310.286  | 0.889818         | 167.457      | 310.287       | 0.88981257       | 0.00014386 | No      |
|      |       |        |             |          |         | Yeats4 | 49.0548  | 26.4116  | -0.893224        | 49.0558      | 26.4126       | -0.8931974       | 0.00014386 | No      |
|      |       |        |             |          |         | Yes1   | 0        | 7.34545  | inf              | 0.001        | 7.34645       | 12.8428316       | 0.00014386 | No      |
|      |       |        |             |          |         | Yif1a  | 12.62    | 32.2303  | 1.3527           | 12.621       | 32.2313       | 1.35263615       | 0.00014386 | No      |
|      |       |        |             |          |         | Yif1b  | 26.5031  | 47.7066  | 0.848029         | 26.5041      | 47.7076       | 0.84800356       | 0.00014386 | No      |
|      |       |        |             |          |         | Yipf4  | 20.5855  | 38.3772  | 0.898625         | 20.5865      | 38.3782       | 0.89858848       | 0.00014386 | No      |
|      |       |        |             |          |         | YME1L1 | 13.5505  | 6.54161  | -1.05063         | 13.5515      | 6.54261       | -1.0505144       | 0.00014386 | No      |
|      |       |        |             |          |         | Ypel1  | 0.3376   | 6.92314  | 4.35804          | 0.3386       | 6.92414       | 4.35398102       | 0.00014386 | No      |
|      |       |        |             |          |         | Ypel3  | 346.708  | 107.902  | -1.684           | 346.709      | 107.903       | -1.6839903       | 0.00014386 | No      |
|      |       |        |             |          |         | Yrdc   | 37.1182  | 18.0331  | -1.04148         | 37.1192      | 18.0341       | -1.0414382       | 0.00014386 | No      |
|      |       |        |             |          |         | Ythdc1 | 80.0878  | 31.1595  | -1.36191         | 80.0888      | 31.1605       | -1.3618821       | 0.00014386 | No      |
|      |       |        |             |          |         | Ythdc2 | 9.25619  | 2.80885  | -1.72044         | 9.25719      | 2.80985       | -1.7200812       | 0.00014386 | No      |
|      |       |        |             |          |         | Ythdf1 | 31.9602  | 15.5101  | -1.04307         | 31.9612      | 15.5111       | -1.0430206       | 0.00014386 | No      |
|      |       |        |             |          |         | Ythdf2 | 18.9096  | 9.58726  | -0.979925        | 18.9106      | 9.58826       | -0.9798542       | 0.00014386 | No      |
|      |       |        |             |          |         | Ythdf3 | 23.3576  | 14.9711  | -0.641716        | 23.3586      | 14.9721       | -0.6416772       | 0.00014386 | No      |
|      |       |        |             |          |         | Ywhab  | 123.648  | 77.4674  | -0.67458         | 123.649      | 77.4684       | -0.6745707       | 0.00014386 | No      |
|      |       |        |             |          |         | Ywhae  | 136.992  | 301.332  | 1.13726          | 136.993      | 301.333       | 1.1372565        | 0.00014386 | No      |
|      |       |        |             |          |         | Ywhag  | 15.3689  | 36.5218  | 1.24875          | 15.3699      | 36.5228       | 1.24868959       | 0.00014386 | No      |
|      |       |        |             |          |         | Ywhah  | 171.812  | 110.958  | -0.630811        | 171.813      | 110.959       | -0.6308125       | 0.00014386 | No      |
|      |       |        |             |          |         | YWHAZ  | 342.888  | 214.937  | -0.673826        | 342.889      | 214.938       | -0.6738211       | 0.00014386 | No      |
|      |       |        |             |          |         | Yy1    | 53.7584  | 25.2621  | -1.08951         | 53.7594      | 25.2631       | -1.0894854       | 0.00014386 | No      |
|      |       |        |             |          |         | Zadh2  | 9.60895  | 15.1368  | 0.655606         | 9.60995      | 15.1378       | 0.65555472       | 0.00014386 | No      |
|      |       |        |             |          |         | Zak    | 1.21907  | 9.39357  | 2.9459           | 1.22007      | 9.39457       | 2.94486321       | 0.00014386 | No      |
|      |       |        |             |          |         | Zap70  | 148.164  | 12.5757  | -3.55849         | 148.165      | 12.5767       | -3.5583794       | 0.00014386 | No      |
|      |       |        |             |          |         | Zbed3  | 5.49953  | 18.4354  | 1.7451           | 5.50053      | 18.4364       | 1.74491443       | 0.00014386 | No      |
|      |       |        |             |          |         | Zbed4  | 6.30783  | 2.68549  | -1.23196         | 6.30883      | 2.68649       | -1.23165         | 0.00014386 | No      |
|      |       |        |             |          |         | Zbp1   | 66.4799  | 14.0501  | -2.24234         | 66.4809      | 14.0511       | -2.2422568       | 0.00014386 | No      |
|      |       |        |             |          |         | Zbtb1  | 26.8586  | 7.74456  | -1.79413         | 26.8596      | 7.74556       | -1.7939964       | 0.00014386 | No      |
|      |       |        |             |          |         | Zbtb11 | 12.9675  | 4.71411  | -1.45985         | 12.9685      | 4.71511       | -1.4596483       | 0.00014386 | No      |
|      |       |        |             |          |         | Zbtb25 | 8.05098  | 0.93989  | -3.0986          | 8.05198      | 0.94089       | -3.0972456       | 0.00014386 | No      |
|      |       |        |             |          |         | Zbtb32 | 7.37632  | 1.73586  | -2.08725         | 7.37732      | 1.73686       | -2.0866153       | 0.00014386 | No      |
|      |       |        |             |          |         | Zbtb34 | 7.23461  | 1.16868  | -2.63004         | 7.23561      | 1.16968       | -2.6290008       | 0.00014386 | No      |
|      |       |        |             |          |         | Zbtb37 | 2.26584  | 0.996226 | -1.1855          | 2.26684      | 0.997226      | -1.1846902       | 0.00014386 | No      |
|      |       |        |             |          |         | Zbtb38 | 2.45178  | 5.19449  | 1.08315          | 2.45278      | 5.19549       | 1.08284198       | 0.00014386 | No      |
|      |       |        |             |          |         | Zbtb4  | 11.5498  | 17.8373  | 0.627022         | 11.5508      | 17.8383       | 0.62698536       | 0.00014386 | No      |
|      |       |        |             |          |         | Zbtb40 | 25.4423  | 9.10169  | -1.48302         | 25.4433      | 9.10269       | -1.4829209       | 0.00014386 | No      |
|      |       |        |             |          |         | Zbtb42 | 1.71341  | 5.0994   | 1.57346          | 1.71441      | 5.1004        | 1.57289822       | 0.00014386 | No      |
|      |       |        |             |          |         | Zbtb43 | 6.26224  | 3.84096  | -0.705211        | 6.26324      | 3.84196       | -0.7050667       | 0.00014386 | No      |
|      |       |        |             |          |         | Zbtb44 | 21.4156  | 6.16768  | -1.79586         | 21.4166      | 6.16868       | -1.7956957       | 0.00014386 | No      |
|      |       |        |             |          |         | Zbtb47 | 0.062801 | 5.7981   | 6.52865          | 0.063801     | 5.7991        | 6.50610617       | 0.00014386 | No      |

| RRBS |       |        |             |          |         | RNAseq  |          |         |                  |              |               |                  |            |         |
|------|-------|--------|-------------|----------|---------|---------|----------|---------|------------------|--------------|---------------|------------------|------------|---------|
| gene | Blood | Kidney | methyl.diff | pMWU.fdr | Match ? | gene    | blood    | kidney  | log2(fold_ratio) | blood+ 0.001 | kidney+ 0.001 | log2(fold_ratio) | q_value    | Match ? |
|      |       |        |             |          |         | Zbtb6   | 7.07237  | 2.82268 | -1.32513         | 7.07337      | 2.82368       | -1.3248211       | 0.00014386 | No      |
|      |       |        |             |          |         | Zbtb8a  | 0.38208  | 4.28188 | 3.4863           | 0.38308      | 4.28288       | 3.48286364       | 0.00014386 | No      |
|      |       |        |             |          |         | Zbtb8os | 51.3466  | 83.8689 | 0.707867         | 51.3476      | 83.8699       | 0.70785629       | 0.00014386 | No      |
|      |       |        |             |          |         | Zc3h11a | 56.9937  | 18.8996 | -1.59245         | 56.9947      | 18.9006       | -1.5923957       | 0.00014386 | No      |
|      |       |        |             |          |         | Zc3h12d | 42.1167  | 1.34355 | -4.97027         | 42.1177      | 1.34455       | -4.9692313       | 0.00014386 | No      |
|      |       |        |             |          |         | Zc3h13  | 18.6131  | 10.3113 | -0.852097        | 18.6141      | 10.3123       | -0.8520297       | 0.00014386 | No      |
|      |       |        |             |          |         | Zc3h14  | 21.6617  | 31.0988 | 0.521707         | 21.6627      | 31.0998       | 0.52169223       | 0.00014386 | No      |
|      |       |        |             |          |         | Zc3h15  | 83.7813  | 35.918  | -1.22192         | 83.7823      | 35.919        | -1.2218983       | 0.00014386 | No      |
|      |       |        |             |          |         | Zc3h18  | 24.5156  | 14.5783 | -0.749879        | 24.5166      | 14.5793       | -0.7498375       | 0.00014386 | No      |
|      |       |        |             |          |         | Zc3h3   | 16.9936  | 10.6009 | -0.680812        | 16.9946      | 10.6019       | -0.6807536       | 0.00014386 | No      |
|      |       |        |             |          |         | Zc3h4   | 24.2351  | 10.3481 | -1.22774         | 24.2361      | 10.3491       | -1.2276523       | 0.00014386 | No      |
|      |       |        |             |          |         | Zc3h7a  | 92.3025  | 15.5393 | -2.57045         | 92.3035      | 15.5403       | -2.570371        | 0.00014386 | No      |
|      |       |        |             |          |         | Zc3hav1 | 77.2695  | 8.29573 | -3.21946         | 77.2705      | 8.29673       | -3.219303        | 0.00014386 | No      |
|      |       |        |             |          |         | Zc3hc1  | 20.4464  | 10.9696 | -0.898331        | 20.4474      | 10.9706       | -0.898275        | 0.00014386 | No      |
|      |       |        |             |          |         | Zc4h2   | 6.52818  | 2.37432 | -1.45917         | 6.52918      | 2.37532       | -1.4587799       | 0.00014386 | No      |
|      |       |        |             |          |         | Zcchc11 | 11.8373  | 3.91835 | -1.59502         | 11.8383      | 3.91935       | -1.5947756       | 0.00014386 | No      |
|      |       |        |             |          |         | Zcchc2  | 26.311   | 3.01488 | -3.12549         | 26.312       | 3.01588       | -3.12507         | 0.00014386 | No      |
|      |       |        |             |          |         | Zcchc3  | 0.549107 | 3.22084 | 2.55228          | 0.550107     | 3.22184       | 2.55010068       | 0.00014386 | No      |
|      |       |        |             |          |         | Zcchc6  | 29.6177  | 10.6792 | -1.47166         | 29.6187      | 10.6802       | -1.4715697       | 0.00014386 | No      |
|      |       |        |             |          |         | Zcchc7  | 55.9545  | 16.1399 | -1.79363         | 55.9555      | 16.1409       | -1.7935589       | 0.00014386 | No      |
|      |       |        |             |          |         | Zcchc8  | 30.908   | 12.236  | -1.33685         | 30.909       | 12.237        | -1.3367771       | 0.00014386 | No      |
|      |       |        |             |          |         | Zcchc9  | 30.2132  | 19.0844 | -0.662788        | 30.2142      | 19.0854       | -0.6627573       | 0.00014386 | No      |
|      |       |        |             |          |         | Zdhhc1  | 0.507661 | 27.0805 | 5.73724          | 0.508661     | 27.0815       | 5.73445936       | 0.00014386 | No      |
|      |       |        |             |          |         | Zdhhc14 | 11.5899  | 5.47078 | -1.08305         | 11.5909      | 5.47178       | -1.0829105       | 0.00014386 | No      |
|      |       |        |             |          |         | Zdhhc17 | 15.616   | 5.42387 | -1.52563         | 15.617       | 5.42487       | -1.5254569       | 0.00014386 | No      |
|      |       |        |             |          |         | Zdhhc20 | 10.3909  | 5.25131 | -0.984576        | 10.3919      | 5.25231       | -0.9844355       | 0.00014386 | No      |
|      |       |        |             |          |         | Zdhhc23 | 1.09372  | 8.57192 | 2.97038          | 1.09472      | 8.57292       | 2.96922477       | 0.00014386 | No      |
|      |       |        |             |          |         | Zdhhc4  | 18.993   | 31.237  | 0.717787         | 18.994       | 31.238        | 0.71775833       | 0.00014386 | No      |
|      |       |        |             |          |         | Zdhhc9  | 4.82844  | 10.0542 | 1.05816          | 4.82944      | 10.0552       | 1.05801396       | 0.00014386 | No      |
|      |       |        |             |          |         | Zeb1    | 7.45453  | 1.69913 | -2.13332         | 7.45553      | 1.70013       | -2.1326658       | 0.00014386 | No      |
|      |       |        |             |          |         | Zfand1  | 6.4193   | 9.80098 | 0.610511         | 6.4203       | 9.80198       | 0.61043249       | 0.00014386 | No      |
|      |       |        |             |          |         | Zfand3  | 63.3633  | 45.6937 | -0.471651        | 63.3643      | 45.6947       | -0.4716434       | 0.00014386 | No      |
|      |       |        |             |          |         | Zfand4  | 3.16227  | 7.12885 | 1.17271          | 3.16327      | 7.12985       | 1.17245502       | 0.00014386 | No      |
|      |       |        |             |          |         | Zfand5  | 22.5231  | 31.6824 | 0.49228          | 22.5241      | 31.6834       | 0.4922577        | 0.00014386 | No      |
|      |       |        |             |          |         | Zfand6  | 115.771  | 54.9025 | -1.07633         | 115.772      | 54.9035       | -1.0763163       | 0.00014386 | No      |
|      |       |        |             |          |         | Zfat    | 43.5898  | 2.55251 | -4.094           | 43.5908      | 2.55351       | -4.0934701       | 0.00014386 | No      |
|      |       |        |             |          |         | Zfc3h1  | 56.4119  | 8.64627 | -2.70585         | 56.4129      | 8.64727       | -2.7057085       | 0.00014386 | No      |
|      |       |        |             |          |         | Zfp1    | 8.66496  | 4.52617 | -0.936904        | 8.66596      | 4.52717       | -0.9367501       | 0.00014386 | No      |
|      |       |        |             |          |         | Zfp101  | 8.45797  | 1.27547 | -2.72928         | 8.45897      | 1.27647       | -2.7283224       | 0.00014386 | No      |
|      |       |        |             |          |         | Zfp110  | 26.8343  | 9.25412 | -1.53591         | 26.8353      | 9.25512       | -1.5358084       | 0.00014386 | No      |
|      |       |        |             |          |         | Zfp112  | 0.668412 | 1.71236 | 1.35717          | 0.669412     | 1.71336       | 1.35586199       | 0.00014386 | No      |
|      |       |        |             |          |         | Zfp120  | 7.82396  | 1.69982 | -2.20251         | 7.82496      | 1.70082       | -2.2018529       | 0.00014386 | No      |

| RRBS |       |        |             |          |         | RNAseq  |           |          |                  |              |               |                  |            |         |
|------|-------|--------|-------------|----------|---------|---------|-----------|----------|------------------|--------------|---------------|------------------|------------|---------|
| gene | Blood | Kidney | methyl.diff | pMWU.fdr | Match ? | gene    | blood     | kidney   | log2(fold_ratio) | blood+ 0.001 | kidney+ 0.001 | log2(fold_ratio) | q_value    | Match ? |
|      |       |        |             |          |         | Zfp128  | 4.65417   | 1.86501  | -1.31934         | 4.65517      | 1.86601       | -1.3188771       | 0.00014386 | No      |
|      |       |        |             |          |         | Zfp13   | 0         | 1.27103  | inf              | 0.001        | 1.27203       | 10.312917        | 0.00014386 | No      |
|      |       |        |             |          |         | Zfp131  | 26.4608   | 5.99548  | -2.14191         | 26.4618      | 5.99648       | -2.1417234       | 0.00014386 | No      |
|      |       |        |             |          |         | Zfp133  | 5.963     | 8.58485  | 0.525754         | 5.964        | 8.58585       | 0.52568071       | 0.00014386 | No      |
|      |       |        |             |          |         | Zfp142  | 18.7341   | 6.998    | -1.42065         | 18.7351      | 6.999         | -1.420523        | 0.00014386 | No      |
|      |       |        |             |          |         | Zfp143  | 10.0348   | 6.13411  | -0.71009         | 10.0358      | 6.13511       | -0.7099945       | 0.00014386 | No      |
|      |       |        |             |          |         | Zfp146  | 22.6717   | 7.97504  | -1.50733         | 22.6727      | 7.97604       | -1.5072117       | 0.00014386 | No      |
|      |       |        |             |          |         | Zfp157  | 7.14106   | 3.22269  | -1.14787         | 7.14206      | 3.22369       | -1.1476272       | 0.00014386 | No      |
|      |       |        |             |          |         | Zfp161  | 10.6926   | 6.33761  | -0.754596        | 10.6936      | 6.33861       | -0.7545092       | 0.00014386 | No      |
|      |       |        |             |          |         | Zfp167  | 0.324689  | 1.2973   | 1.99839          | 0.325689     | 1.2983        | 1.99505689       | 0.00014386 | No      |
|      |       |        |             |          |         | Zfp169  | 3.27267   | 0.707021 | -2.21064         | 3.27367      | 0.708021      | -2.2090448       | 0.00014386 | No      |
|      |       |        |             |          |         | Zfp18   | 16.7615   | 10.5562  | -0.667061        | 16.7625      | 10.5572       | -0.6670101       | 0.00014386 | No      |
|      |       |        |             |          |         | Zfp182  | 9.79399   | 2.74202  | -1.83666         | 9.79499      | 2.74302       | -1.8362789       | 0.00014386 | No      |
|      |       |        |             |          |         | Zfp185  | 0.0463089 | 12.3595  | 8.06012          | 0.0473089    | 12.3605       | 8.02940977       | 0.00014386 | No      |
|      |       |        |             |          |         | Zfp187  | 47.1449   | 10.1862  | -2.21049         | 47.1459      | 10.1872       | -2.2103747       | 0.00014386 | No      |
|      |       |        |             |          |         | Zfp192  | 2.08447   | 1.19703  | -0.800219        | 2.08547      | 1.19803       | -0.7997085       | 0.00014386 | No      |
|      |       |        |             |          |         | ZFP212  | 12.7819   | 5.54627  | -1.20451         | 12.7829      | 5.54727       | -1.2043653       | 0.00014386 | No      |
|      |       |        |             |          |         | Zfp213  | 8.11187   | 13.3289  | 0.716453         | 8.11287      | 13.3299       | 0.71638168       | 0.00014386 | No      |
|      |       |        |             |          |         | Zfp217  | 19.0842   | 5.64101  | -1.75835         | 19.0852      | 5.64201       | -1.7581732       | 0.00014386 | No      |
|      |       |        |             |          |         | Zfp236  | 11.7932   | 3.22505  | -1.87057         | 11.7942      | 3.22605       | -1.8702369       | 0.00014386 | No      |
|      |       |        |             |          |         | Zfp238  | 29.6532   | 8.93965  | -1.7299          | 29.6542      | 8.94065       | -1.7297848       | 0.00014386 | No      |
|      |       |        |             |          |         | Zfp251  | 6.19894   | 3.62858  | -0.772615        | 6.19994      | 3.62958       | -0.7724516       | 0.00014386 | No      |
|      |       |        |             |          |         | Zfp259  | 62.8027   | 26.2305  | -1.25958         | 62.8037      | 26.2315       | -1.2595492       | 0.00014386 | No      |
|      |       |        |             |          |         | Zfp26   | 6.84299   | 1.91829  | -1.83481         | 6.84399      | 1.91929       | -1.8342649       | 0.00014386 | No      |
|      |       |        |             |          |         | Zfp263  | 7.55688   | 2.64999  | -1.5118          | 7.55788      | 2.65099       | -1.5114504       | 0.00014386 | No      |
|      |       |        |             |          |         | Zfp275  | 6.3332    | 0.987986 | -2.68037         | 6.3342       | 0.988986      | -2.6791404       | 0.00014386 | No      |
|      |       |        |             |          |         | Zfp280c | 3.64169   | 0.885103 | -2.04069         | 3.64269      | 0.886103      | -2.0394579       | 0.00014386 | No      |
|      |       |        |             |          |         | Zfp280d | 20.6601   | 10.0893  | -1.03402         | 20.6611      | 10.0903       | -1.033948        | 0.00014386 | No      |
|      |       |        |             |          |         | Zfp281  | 7.00638   | 2.39599  | -1.54805         | 7.00738      | 2.39699       | -1.5476512       | 0.00014386 | No      |
|      |       |        |             |          |         | Zfp292  | 10.641    | 2.2361   | -2.25057         | 10.642       | 2.2371        | -2.2500677       | 0.00014386 | No      |
|      |       |        |             |          |         | Zfp3    | 12.584    | 3.15796  | -1.99453         | 12.585       | 3.15896       | -1.9941836       | 0.00014386 | No      |
|      |       |        |             |          |         | Zfp316  | 0.969384  | 2.60088  | 1.42386          | 0.970384     | 2.60188       | 1.42292676       | 0.00014386 | No      |
|      |       |        |             |          |         | Zfp317  | 8.62297   | 4.43364  | -0.959694        | 8.62397      | 4.43464       | -0.9595352       | 0.00014386 | No      |
|      |       |        |             |          |         | Zfp319  | 3.26154   | 1.28563  | -1.34308         | 3.26254      | 1.28663       | -1.3423984       | 0.00014386 | No      |
|      |       |        |             |          |         | Zfp329  | 1.69162   | 1.08783  | -0.63695         | 1.69262      | 1.08883       | -0.6364794       | 0.00014386 | No      |
|      |       |        |             |          |         | Zfp346  | 6.03187   | 10.1534  | 0.751281         | 6.03287      | 10.1544       | 0.7511886        | 0.00014386 | No      |
|      |       |        |             |          |         | Zfp347  | 10.57     | 3.5823   | -1.56101         | 10.571       | 3.5833        | -1.5607511       | 0.00014386 | No      |
|      |       |        |             |          |         | Zfp354a | 0.721959  | 15.4723  | 4.42163          | 0.722959     | 15.4733       | 4.41972327       | 0.00014386 | No      |
|      |       |        |             |          |         | Zfp354c | 3.28991   | 1.03525  | -1.66808         | 3.29091      | 1.03625       | -1.6671145       | 0.00014386 | No      |
|      |       |        |             |          |         | Zfp3612 | 392.255   | 35.6842  | -3.45843         | 392.256      | 35.6852       | -3.4583978       | 0.00014386 | No      |
|      |       |        |             |          |         | Zfp382  | 2.417     | 0.662927 | -1.8663          | 2.418        | 0.663927      | -1.8647177       | 0.00014386 | No      |
|      |       |        |             |          |         | Zfp383  | 5.39583   | 2.93238  | -0.879773        | 5.39683      | 2.93338       | -0.8795483       | 0.00014386 | No      |

| RRBS |       |        |             |          |         | RNAseq  |           |          |                  |              |               |                  |            |         |
|------|-------|--------|-------------|----------|---------|---------|-----------|----------|------------------|--------------|---------------|------------------|------------|---------|
| gene | Blood | Kidney | methyl.diff | pMWU.fdr | Match ? | gene    | blood     | kidney   | log2(fold_ratio) | blood+ 0.001 | kidney+ 0.001 | log2(fold_ratio) | q_value    | Match ? |
|      |       |        |             |          |         | Zfp384  | 32.394    | 14.7608  | -1.13396         | 32.395       | 14.7618       | -1.1339025       | 0.00014386 | No      |
|      |       |        |             |          |         | Zfp385c | 14.2786   | 0.374007 | -5.25465         | 14.2796      | 0.375007      | -5.2508942       | 0.00014386 | No      |
|      |       |        |             |          |         | Zfp386  | 55.6606   | 12.7521  | -2.12592         | 55.6616      | 12.7531       | -2.1258344       | 0.00014386 | No      |
|      |       |        |             |          |         | Zfp39   | 0.863504  | 1.75862  | 1.02617          | 0.864504     | 1.75962       | 1.02531936       | 0.00014386 | No      |
|      |       |        |             |          |         | Zfp394  | 15.0533   | 4.81163  | -1.64549         | 15.0543      | 4.81263       | -1.6452782       | 0.00014386 | No      |
|      |       |        |             |          |         | Zfp398  | 3.19558   | 1.33281  | -1.26161         | 3.19658      | 1.33381       | -1.260976        | 0.00014386 | No      |
|      |       |        |             |          |         | Zfp40   | 2.41336   | 0.821317 | -1.55503         | 2.41436      | 0.822317      | -1.5538742       | 0.00014386 | No      |
|      |       |        |             |          |         | Zfp407  | 9.94789   | 3.00869  | -1.72526         | 9.94889      | 3.00969       | -1.7249207       | 0.00014386 | No      |
|      |       |        |             |          |         | Zfp41   | 2.34321   | 0.996496 | -1.23355         | 2.34421      | 0.997496      | -1.2327189       | 0.00014386 | No      |
|      |       |        |             |          |         | Zfp418  | 0.256302  | 1.06283  | 2.052            | 0.257302     | 1.06383       | 2.04773305       | 0.00014386 | No      |
|      |       |        |             |          |         | Zfp422  | 16.439    | 11.7522  | -0.484198        | 16.44        | 11.7532       | -0.4841567       | 0.00014386 | No      |
|      |       |        |             |          |         | Zfp426  | 7.28717   | 4.96029  | -0.554934        | 7.28817      | 4.96129       | -0.5548413       | 0.00014386 | No      |
|      |       |        |             |          |         | Zfp444  | 11.7475   | 22.3194  | 0.925949         | 11.7485      | 22.3204       | 0.92588631       | 0.00014386 | No      |
|      |       |        |             |          |         | Zfp445  | 9.03203   | 6.84567  | -0.399858        | 9.03303      | 6.84667       | -0.3998075       | 0.00014386 | No      |
|      |       |        |             |          |         | Zfp449  | 0         | 1.86466  | inf              | 0.001        | 1.86566       | 10.8654704       | 0.00014386 | No      |
|      |       |        |             |          |         | Zfp451  | 13.3473   | 7.29984  | -0.870614        | 13.3483      | 7.30084       | -0.8705216       | 0.00014386 | No      |
|      |       |        |             |          |         | Zfp455  | 38.9868   | 9.81158  | -1.99043         | 38.9878      | 9.81258       | -1.9903183       | 0.00014386 | No      |
|      |       |        |             |          |         | Zfp462  | 0.0568767 | 8.93698  | 7.29581          | 0.0578767    | 8.93798       | 7.27082234       | 0.00014386 | No      |
|      |       |        |             |          |         | Zfp467  | 6.02799   | 14.9689  | 1.31222          | 6.02899      | 14.9699       | 1.31207634       | 0.00014386 | No      |
|      |       |        |             |          |         | Zfp472  | 19.535    | 2.91819  | -2.74292         | 19.536       | 2.91919       | -2.7424951       | 0.00014386 | No      |
|      |       |        |             |          |         | Zfp496  | 12.6463   | 7.87638  | -0.683108        | 12.6473      | 7.87738       | -0.6830416       | 0.00014386 | No      |
|      |       |        |             |          |         | Zfp507  | 8.76546   | 2.37351  | -1.88481         | 8.76646      | 2.37451       | -1.8843646       | 0.00014386 | No      |
|      |       |        |             |          |         | Zfp511  | 23.4423   | 15.1668  | -0.628191        | 23.4433      | 15.1678       | -0.6281638       | 0.00014386 | No      |
|      |       |        |             |          |         | Zfp512b | 11.0134   | 7.34835  | -0.583767        | 11.0144      | 7.34935       | -0.5837023       | 0.00014386 | No      |
|      |       |        |             |          |         | Zfp518a | 5.21007   | 1.79292  | -1.53899         | 5.21107      | 1.79392       | -1.5384641       | 0.00014386 | No      |
|      |       |        |             |          |         | Zfp52   | 24.7641   | 8.82997  | -1.48777         | 24.7651      | 8.83097       | -1.4876646       | 0.00014386 | No      |
|      |       |        |             |          |         | Zfp523  | 5.32444   | 21.4323  | 2.00908          | 5.32544      | 21.4333       | 2.00888136       | 0.00014386 | No      |
|      |       |        |             |          |         | Zfp526  | 4.4385    | 1.22554  | -1.85666         | 4.4395       | 1.22654       | -1.8558029       | 0.00014386 | No      |
|      |       |        |             |          |         | Zfp54   | 54.8923   | 12.427   | -2.14312         | 54.8933      | 12.428        | -2.1430359       | 0.00014386 | No      |
|      |       |        |             |          |         | Zfp574  | 3.67221   | 12.7661  | 1.79759          | 3.67321      | 12.7671       | 1.79731758       | 0.00014386 | No      |
|      |       |        |             |          |         | Zfp592  | 12.0558   | 5.4067   | -1.1569          | 12.0568      | 5.4077        | -1.15676         | 0.00014386 | No      |
|      |       |        |             |          |         | Zfp597  | 4.96432   | 1.37633  | -1.85076         | 4.96532      | 1.37733       | -1.8500124       | 0.00014386 | No      |
|      |       |        |             |          |         | Zfp598  | 24.9463   | 16.309   | -0.613159        | 24.9473      | 16.31         | -0.6131269       | 0.00014386 | No      |
|      |       |        |             |          |         | Zfp608  | 1.60429   | 3.21986  | 1.00506          | 1.60529      | 3.22086       | 1.00461201       | 0.00014386 | No      |
|      |       |        |             |          |         | Zfp612  | 1.30179   | 4.13131  | 1.6661           | 1.30279      | 4.13231       | 1.66534394       | 0.00014386 | No      |
|      |       |        |             |          |         | Zfp618  | 0         | 0.992709 | inf              | 0.001        | 0.993709      | 9.95667962       | 0.00014386 | No      |
|      |       |        |             |          |         | Zfp626  | 2.95969   | 0.53067  | -2.47956         | 2.96069      | 0.53167       | -2.4773305       | 0.00014386 | No      |
|      |       |        |             |          |         | Zfp628  | 7.89973   | 2.45127  | -1.68827         | 7.90073      | 2.45227       | -1.6878681       | 0.00014386 | No      |
|      |       |        |             |          |         | Zfp629  | 1.55616   | 5.51777  | 1.8261           | 1.55716      | 5.51877       | 1.82542957       | 0.00014386 | No      |
|      |       |        |             |          |         | Zfp639  | 10.1208   | 6.13835  | -0.721395        | 10.1218      | 6.13935       | -0.721308        | 0.00014386 | No      |
|      |       |        |             |          |         | Zfp646  | 16.0649   | 3.90892  | -2.03907         | 16.0659      | 3.90992       | -2.0387908       | 0.00014386 | No      |
|      |       |        |             |          |         | Zfp654  | 8.10074   | 2.5821   | -1.64951         | 8.10174      | 2.5831        | -1.6491283       | 0.00014386 | No      |

| RRBS |       |        |             |          |         | RNAseq  |          |          |                  |              |               |                  |            |         |
|------|-------|--------|-------------|----------|---------|---------|----------|----------|------------------|--------------|---------------|------------------|------------|---------|
| gene | Blood | Kidney | methyl.diff | pMWU.fdr | Match ? | gene    | blood    | kidney   | log2(fold_ratio) | blood+ 0.001 | kidney+ 0.001 | log2(fold_ratio) | q_value    | Match ? |
|      |       |        |             |          |         | Zfp658  | 2.0101   | 0.953169 | -1.07646         | 2.0111       | 0.954169      | -1.0756681       | 0.00014386 | No      |
|      |       |        |             |          |         | Zfp664  | 6.26129  | 13.6424  | 1.12356          | 6.26229      | 13.6434       | 1.12344099       | 0.00014386 | No      |
|      |       |        |             |          |         | Zfp672  | 3.19133  | 8.34725  | 1.38714          | 3.19233      | 8.34825       | 1.38686401       | 0.00014386 | No      |
|      |       |        |             |          |         | Zfp68   | 12.8886  | 7.74576  | -0.734617        | 12.8896      | 7.74676       | -0.7345425       | 0.00014386 | No      |
|      |       |        |             |          |         | Zfp691  | 2.99109  | 13.2108  | 2.14297          | 2.99209      | 13.2118       | 2.14260156       | 0.00014386 | No      |
|      |       |        |             |          |         | Zfp709  | 6.98006  | 2.68667  | -1.37742         | 6.98106      | 2.68767       | -1.3770901       | 0.00014386 | No      |
|      |       |        |             |          |         | Zfp715  | 18.173   | 3.60395  | -2.33414         | 18.174       | 3.60495       | -2.3338248       | 0.00014386 | No      |
|      |       |        |             |          |         | Zfp740  | 32.4369  | 13.2304  | -1.29377         | 32.4379      | 13.2314       | -1.2937147       | 0.00014386 | No      |
|      |       |        |             |          |         | Zfp746  | 14.8684  | 6.98731  | -1.08944         | 14.8694      | 6.98831       | -1.0893309       | 0.00014386 | No      |
|      |       |        |             |          |         | Zfp768  | 0.255636 | 13.8726  | 5.762            | 0.256636     | 13.8736       | 5.75647482       | 0.00014386 | No      |
|      |       |        |             |          |         | Zfp771  | 29.0462  | 45.0452  | 0.633026         | 29.0472      | 45.0462       | 0.63300631       | 0.00014386 | No      |
|      |       |        |             |          |         | Zfp775  | 6.75269  | 12.4217  | 0.879324         | 6.75369      | 12.4227       | 0.8792309        | 0.00014386 | No      |
|      |       |        |             |          |         | Zfp777  | 19.952   | 10.18    | -0.970796        | 19.953       | 10.181        | -0.9707264       | 0.00014386 | No      |
|      |       |        |             |          |         | Zfp787  | 10.5136  | 21.7204  | 1.04679          | 10.5146      | 21.7214       | 1.04672312       | 0.00014386 | No      |
|      |       |        |             |          |         | Zfp788  | 12.6     | 5.35116  | -1.2355          | 12.601       | 5.35216       | -1.2353451       | 0.00014386 | No      |
|      |       |        |             |          |         | Zfp799  | 3.18045  | 1.68453  | -0.916881        | 3.18145      | 1.68553       | -0.9164821       | 0.00014386 | No      |
|      |       |        |             |          |         | Zfp800  | 15.7818  | 2.52167  | -2.64581         | 15.7828      | 2.52267       | -2.6453298       | 0.00014386 | No      |
|      |       |        |             |          |         | Zfp821  | 11.1296  | 19.7917  | 0.830491         | 11.1306      | 19.7927       | 0.83043707       | 0.00014386 | No      |
|      |       |        |             |          |         | Zfp830  | 18.7836  | 10.2482  | -0.874094        | 18.7846      | 10.2492       | -0.8740391       | 0.00014386 | No      |
|      |       |        |             |          |         | Zfp84   | 7.59746  | 2.75629  | -1.46279         | 7.59846      | 2.75729       | -1.462456        | 0.00014386 | No      |
|      |       |        |             |          |         | Zfp85   | 3.32363  | 1.17332  | -1.50216         | 3.32463      | 1.17432       | -1.5013682       | 0.00014386 | No      |
|      |       |        |             |          |         | Zfp850  | 3.84695  | 1.45258  | -1.4051          | 3.84795      | 1.45358       | -1.4044796       | 0.00014386 | No      |
|      |       |        |             |          |         | Zfp853  | 0.262862 | 3.34371  | 3.66907          | 0.263862     | 3.34471       | 3.66402563       | 0.00014386 | No      |
|      |       |        |             |          |         | Zfp862  | 4.08513  | 0.457143 | -3.15966         | 4.08613      | 0.458143      | -3.1568652       | 0.00014386 | No      |
|      |       |        |             |          |         | Zfp866  | 5.52307  | 2.49376  | -1.14715         | 5.52407      | 2.49476       | -1.1468306       | 0.00014386 | No      |
|      |       |        |             |          |         | Zfp868  | 93.1488  | 20.976   | -2.15079         | 93.1498      | 20.977        | -2.1507443       | 0.00014386 | No      |
|      |       |        |             |          |         | ZFP87   | 13.4778  | 6.12845  | -1.13699         | 13.4788      | 6.12945       | -1.1368625       | 0.00014386 | No      |
|      |       |        |             |          |         | Zfp870  | 0.240481 | 2.1876   | 3.18535          | 0.241481     | 2.1886        | 3.18002672       | 0.00014386 | No      |
|      |       |        |             |          |         | Zfp871  | 12.2384  | 4.51746  | -1.43783         | 12.2394      | 4.51846       | -1.4376298       | 0.00014386 | No      |
|      |       |        |             |          |         | Zfp882  | 2.56727  | 1.31898  | -0.960809        | 2.56827      | 1.31998       | -0.9602808       | 0.00014386 | No      |
|      |       |        |             |          |         | Zfp94   | 7.08642  | 2.56991  | -1.46334         | 7.08742      | 2.57091       | -1.4629814       | 0.00014386 | No      |
|      |       |        |             |          |         | Zfp943  | 9.09784  | 2.70966  | -1.74741         | 9.09884      | 2.71066       | -1.7470385       | 0.00014386 | No      |
|      |       |        |             |          |         | Zfp955a | 2.8254   | 5.54837  | 0.973608         | 2.8264       | 5.54937       | 0.97335834       | 0.00014386 | No      |
|      |       |        |             |          |         | Zfp956  | 8.59119  | 2.69069  | -1.67488         | 8.59219      | 2.69169       | -1.6745136       | 0.00014386 | No      |
|      |       |        |             |          |         | Zfp958  | 48.5241  | 17.1115  | -1.50374         | 48.5251      | 17.1125       | -1.5036806       | 0.00014386 | No      |
|      |       |        |             |          |         | Zfpl1   | 18.3536  | 26.0354  | 0.504414         | 18.3546      | 26.0364       | 0.50438831       | 0.00014386 | No      |
|      |       |        |             |          |         | Zfpm1   | 26.1499  | 5.58051  | -2.22833         | 26.1509      | 5.58151       | -2.2281332       | 0.00014386 | No      |
|      |       |        |             |          |         | Zfx     | 13.4239  | 4.51729  | -1.57128         | 13.4249      | 4.51829       | -1.5710626       | 0.00014386 | No      |
|      |       |        |             |          |         | Zfyve16 | 1.07517  | 5.16781  | 2.26498          | 1.07617      | 5.16881       | 2.26392618       | 0.00014386 | No      |
|      |       |        |             |          |         | Zfyve21 | 3.82699  | 67.8     | 4.147            | 3.82799      | 67.801        | 4.14664759       | 0.00014386 | No      |
|      |       |        |             |          |         | Zfyve26 | 5.4915   | 3.3657   | -0.706291        | 5.4925       | 3.3667        | -0.7061278       | 0.00014386 | No      |
|      |       |        |             |          |         | Zfyve9  | 0.100311 | 4.57653  | 5.51171          | 0.101311     | 4.57753       | 5.49770661       | 0.00014386 | No      |

| RRBS |       |        |             |          |         | RNAseq  |           |         |                  |              |               |                  |            |         |
|------|-------|--------|-------------|----------|---------|---------|-----------|---------|------------------|--------------|---------------|------------------|------------|---------|
| gene | Blood | Kidney | methyl.diff | pMWU.fdr | Match ? | gene    | blood     | kidney  | log2(fold_ratio) | blood+ 0.001 | kidney+ 0.001 | log2(fold_ratio) | q_value    | Match ? |
|      |       |        |             |          |         | Zkscan1 | 4.86516   | 11.5743 | 1.25037          | 4.86616      | 11.5753       | 1.25019392       | 0.00014386 | No      |
|      |       |        |             |          |         | Zmat3   | 3.58903   | 2.0085  | -0.837473        | 3.59003      | 2.0095        | -0.8371593       | 0.00014386 | No      |
|      |       |        |             |          |         | Zmiz1   | 38.7299   | 21.7028 | -0.835567        | 38.7309      | 21.7038       | -0.8355374       | 0.00014386 | No      |
|      |       |        |             |          |         | Zmym1   | 17.6974   | 6.89988 | -1.35889         | 17.6984      | 6.90088       | -1.3587667       | 0.00014386 | No      |
|      |       |        |             |          |         | Zmym2   | 26.3731   | 9.89101 | -1.41488         | 26.3741      | 9.89201       | -1.4147863       | 0.00014386 | No      |
|      |       |        |             |          |         | Zmym3   | 9.05862   | 6.00366 | -0.593449        | 9.05962      | 6.00466       | -0.593368        | 0.00014386 | No      |
|      |       |        |             |          |         | Zmym4   | 5.91619   | 3.77223 | -0.649251        | 5.91719      | 3.77323       | -0.6491122       | 0.00014386 | No      |
|      |       |        |             |          |         | Zmym6   | 15.5955   | 9.29001 | -0.747378        | 15.5965      | 9.29101       | -0.747315        | 0.00014386 | No      |
|      |       |        |             |          |         | Zmynd11 | 41.7015   | 26.8287 | -0.63632         | 41.7025      | 26.8297       | -0.636303        | 0.00014386 | No      |
|      |       |        |             |          |         | Zmynd15 | 0.0676079 | 9.72047 | 7.16769          | 0.0686079    | 9.72147       | 7.14665596       | 0.00014386 | No      |
|      |       |        |             |          |         | Zmynd8  | 53.4007   | 21.126  | -1.33784         | 53.4017      | 21.127        | -1.3377977       | 0.00014386 | No      |
|      |       |        |             |          |         | Znhit1  | 36.1238   | 73.6353 | 1.02745          | 36.1248      | 73.6363       | 1.02742754       | 0.00014386 | No      |
|      |       |        |             |          |         | Znrd1   | 104.791   | 45.5981 | -1.20047         | 104.792      | 45.5991       | -1.2004513       | 0.00014386 | No      |
|      |       |        |             |          |         | Znrf1   | 102.253   | 40.0267 | -1.35311         | 102.254      | 40.0277       | -1.3530867       | 0.00014386 | No      |
|      |       |        |             |          |         | Znrf2   | 41.1123   | 11.1255 | -1.88569         | 41.1133      | 11.1265       | -1.8856053       | 0.00014386 | No      |
|      |       |        |             |          |         | Znrf3   | 4.48662   | 2.10373 | -1.09268         | 4.48762      | 2.10473       | -1.0923153       | 0.00014386 | No      |
|      |       |        |             |          |         | Zpbp2   | 25.9627   | 9.95567 | -1.38285         | 25.9637      | 9.95667       | -1.3827608       | 0.00014386 | No      |
|      |       |        |             |          |         | Zranb3  | 2.4556    | 1.30218 | -0.915141        | 2.4566       | 1.30318       | -0.9146266       | 0.00014386 | No      |
|      |       |        |             |          |         | Zrsr2   | 25.788    | 13.059  | -0.981656        | 25.789       | 13.06         | -0.9816009       | 0.00014386 | No      |
|      |       |        |             |          |         | ZSCAN12 | 5.23744   | 9.48169 | 0.856282         | 5.23844      | 9.48269       | 0.85615913       | 0.00014386 | No      |
|      |       |        |             |          |         | Zscan20 | 1.14481   | 2.84391 | 1.31277          | 1.14581      | 2.84491       | 1.31201518       | 0.00014386 | No      |
|      |       |        |             |          |         | Zswim5  | 3.88222   | 2.28839 | -0.762548        | 3.88322      | 2.28939       | -0.7622902       | 0.00014386 | No      |
|      |       |        |             |          |         | Zswim6  | 14.3012   | 2.24072 | -2.6741          | 14.3022      | 2.24172       | -2.6735591       | 0.00014386 | No      |
|      |       |        |             |          |         | Zufsp   | 41.8868   | 14.228  | -1.55776         | 41.8878      | 14.229        | -1.5576958       | 0.00014386 | No      |
|      |       |        |             |          |         | Zw10    | 13.1282   | 5.83573 | -1.16969         | 13.1292      | 5.83673       | -1.1695468       | 0.00014386 | No      |
|      |       |        |             |          |         | Zxdc    | 10.6638   | 5.59739 | -0.92989         | 10.6648      | 5.59839       | -0.929773        | 0.00014386 | No      |
|      |       |        |             |          |         | Zyg11b  | 4.16651   | 2.76462 | -0.591761        | 4.16751      | 2.76562       | -0.5915827       | 0.00014386 | No      |
|      |       |        |             |          |         | Zyx     | 89.7818   | 62.6023 | -0.520209        | 89.7828      | 62.6033       | -0.5202004       | 0.00014386 | No      |
|      |       |        |             |          |         | Zzef1   | 13.496    | 3.78134 | -1.83556         | 13.497       | 3.78234       | -1.8352878       | 0.00014386 | No      |
|      |       |        |             |          |         | Zzz3    | 18.69     | 9.26819 | -1.01191         | 18.691       | 9.26919       | -1.0118286       | 0.00014386 | No      |

**Figure 4B**

| Canonical Pathways/ Activation score                            |        |        |        |        |
|-----------------------------------------------------------------|--------|--------|--------|--------|
|                                                                 | MCWLS  | MCWHS  | CRLLS  | CRLHS  |
| Glycolysis I                                                    | 2.236  | 2.236  | 1.633  | 2.449  |
| EIF2 Signaling                                                  | -1.897 | -2.111 | -1.414 | -2.111 |
| Osteoarthritis Pathway                                          | 1      | 2.309  | 2.111  | 2.111  |
| Endothelin-1 Signaling                                          | 1.667  | 1.414  | 2.111  | 1.414  |
| CXCR4 Signaling                                                 | 1.414  | 1.414  | 2.121  | 1.633  |
| Glioblastoma Multiforme Signaling                               | 0.816  | 1.897  | 1.89   | 1.667  |
| D-myo-inositol-5-phosphate Metabolism                           | 1.134  | 1.342  | 2.887  | 0.905  |
| Integrin Signaling                                              | 1.732  | 1.387  | 1.265  | 1.732  |
| AMPK Signaling                                                  | 1.508  | 1.155  | 1.897  | 1.508  |
| 3-phosphoinositide Degradation                                  | 1.134  | 1      | 2.53   | 1.265  |
| Superpathway of Inositol Phosphate Compounds                    | 0.832  | 1      | 2.357  | 1.414  |
| Fcy Receptor-mediated Phagocytosis in Macrophages and Monocytes | 1.89   | 2.236  | 1.342  | N/A    |
| Sphingosine-1-phosphate Signaling                               | 0.816  | 1.265  | 2.121  | 1      |
| Dendritic Cell Maturation                                       | 0.632  | 1.265  | 2.111  | 1.155  |
| D-myo-inositol (1,4,5,6)-Tetrakisphosphate Biosynthesis         | 0.816  | 1      | 2.333  | 1      |
| D-myo-inositol (3,4,5,6)-tetrakisphosphate Biosynthesis         | 0.816  | 1      | 2.333  | 1      |
| GP6 Signaling Pathway                                           | 1.387  | 0.905  | 1.897  | 0.905  |
| Gaq Signaling                                                   | 1.265  | 1      | 2.111  | 0.707  |
| Mouse Embryonic Stem Cell Pluripotency                          | 1.414  | 0.816  | 1.342  | 1.342  |
| Signaling by Rho Family GTPases                                 | 1.387  | 1.807  | 0.535  | 1.155  |
| cAMP-mediated signaling                                         | -1.265 | -1.667 | -0.632 | -1.155 |
| 3-phosphoinositide Biosynthesis                                 | 0.632  | 0.707  | 1.941  | 1.387  |
| Synaptogenesis Signaling Pathway                                | 1.5    | 0.943  | 1.941  | 0.258  |
| Death Receptor Signaling                                        | 1.134  | 1.342  | 1      | 1.134  |
| Glioma Invasiveness Signaling                                   | 0.447  | 1.414  | 1      | 1.633  |
| RhoGDI Signaling                                                | -1.633 | -1.89  | -0.378 | -0.447 |
| NF-κB Signaling                                                 | 1.155  | 0.905  | 1      | 1.069  |
| Sperm Motility                                                  | 0.816  | 1.342  | 0.816  | -0.816 |
| Acute Phase Response Signaling                                  | -1.134 | -0.632 | -0.816 | -1.134 |
| ILK Signaling                                                   | 0.577  | 1      | 0.905  | 1.069  |
| IL-23 Signaling Pathway                                         | -0.707 | -1.633 | -0.816 | -0.378 |
| Cardiac Hypertrophy Signaling                                   | 0.707  | 0.905  | 1.508  | 0.333  |
| Sumoylation Pathway                                             | N/A    | -1.342 | -1.633 | 0.447  |
| IL-9 Signaling                                                  | -0.816 | -1.633 | -0.447 | -0.447 |
| Sirtuin Signaling Pathway                                       | 1.291  | 0.535  | 0.632  | 0.832  |
| Actin Cytoskeleton Signaling                                    | 0.905  | 1.155  | 0.302  | 0.832  |
| Apelin Cardiomyocyte Signaling Pathway                          | 0.378  | 0.378  | 1.414  | 1      |
| Tec Kinase Signaling                                            | 0.707  | 1.265  | 0.816  | 0.378  |
| CDK5 Signaling                                                  | 1.414  | 0.707  | 0.707  | 0.333  |
| Amyotrophic Lateral Sclerosis Signaling                         | 0.816  | 0      | 1.342  | 1      |
| PEDF Signaling                                                  | 0.707  | 0.378  | 1.134  | 0.816  |
| Adrenomedullin signaling pathway                                | 0.302  | 0.535  | 1.604  | 0.577  |
| PDGF Signaling                                                  | 0.447  | 0.816  | 1.342  | 0.378  |

|                                                                       | MCWLS  | MCWHS  | CRLLS  | CRLHS  |
|-----------------------------------------------------------------------|--------|--------|--------|--------|
| CREB Signaling in Neurons                                             | 0      | -0.816 | 1.414  | -0.707 |
| Glioma Signaling                                                      | 0.447  | 0.707  | 1      | 0.707  |
| Cardiac $\beta$ -adrenergic Signaling                                 | -0.707 | -0.378 | -0.707 | -1     |
| CD28 Signaling in T Helper Cells                                      | -0.378 | -1.134 | -0.447 | -0.816 |
| Th1 Pathway                                                           | -0.905 | -1.155 | -0.302 | -0.302 |
| Protein Kinase A Signaling                                            | -0.535 | 1.069  | 0.277  | -0.775 |
| Paxillin Signaling                                                    | 0.378  | 0.816  | 0.447  | 1      |
| Small Cell Lung Cancer Signaling                                      | -0.816 | -1     | 0      | -0.816 |
| Wnt/ $\beta$ -catenin Signaling                                       | -0.333 | -0.632 | -0.632 | -0.905 |
| iCOS-iCOSL Signaling in T Helper Cells                                | -0.378 | -1.414 | 0      | -0.707 |
| Cardiac Hypertrophy Signaling (Enhanced)                              | 0.243  | 0.853  | 0.655  | -0.688 |
| NF- $\kappa$ B Activation by Viruses                                  | -1.134 | -0.378 | -0.447 | -0.378 |
| Apelin Pancreas Signaling Pathway                                     | 0.447  | 0      | 1      | 0.816  |
| PKC $\theta$ Signaling in T Lymphocytes                               | -0.333 | -0.632 | 0.378  | -0.905 |
| Stearate Biosynthesis I (Animals)                                     | N/A    | 2.236  | N/A    | N/A    |
| PI3K Signaling in B Lymphocytes                                       | -0.378 | 0      | 0.816  | -1     |
| SPINK1 General Cancer Pathway                                         | -0.816 | -1.342 | N/A    | N/A    |
| Lymphotoxin $\beta$ Receptor Signaling                                | 0.378  | -0.447 | 0.447  | 0.816  |
| Growth Hormone Signaling                                              | 0.378  | -0.447 | 0.816  | -0.447 |
| p70S6K Signaling                                                      | -0.378 | 0.333  | 1      | 0.333  |
| mTOR Signaling                                                        | 0.378  | 0      | 0.816  | 0.816  |
| Mitochondrial L-carnitine Shuttle Pathway                             | N/A    | 2      | N/A    | N/A    |
| Fatty Acid $\beta$ -oxidation I                                       | N/A    | 2      | N/A    | N/A    |
| Thrombin Signaling                                                    | 0      | 0.535  | 1.069  | 0.258  |
| Role of NFAT in Regulation of the Immune Response                     | 0.632  | 0.302  | 0.577  | 0.333  |
| Apoptosis Signaling                                                   | -0.447 | 1      | N/A    | 0.378  |
| PTEN Signaling                                                        | 0      | 0.378  | 1.342  | 0      |
| Insulin Receptor Signaling                                            | -0.707 | 0      | -0.378 | 0.632  |
| Leptin Signaling in Obesity                                           | 0      | -0.447 | 0.447  | 0.816  |
| B Cell Receptor Signaling                                             | -0.535 | 0      | 0.333  | -0.832 |
| Phospholipase C Signaling                                             | 0.707  | 0.577  | 0.302  | 0      |
| Production of Nitric Oxide and Reactive Oxygen Species in Macrophages | 0      | 1.155  | 0      | -0.333 |
| Leukocyte Extravasation Signaling                                     | 0      | 0.832  | 0      | 0.632  |
| Non-Small Cell Lung Cancer Signaling                                  | 0      | 0      | 1      | 0.447  |
| Role of PI3K/AKT Signaling in the Pathogenesis of Influenza           | 0      | -1     | 0      | 0.447  |
| Estrogen-Dependent Breast Cancer Signaling                            | -0.447 | -1     | 0      | 0      |
| G $\alpha$ 12/13 Signaling                                            | -0.707 | 0      | 0      | 0.707  |
| IGF-1 Signaling                                                       | -0.447 | -0.447 | 0      | -0.447 |
| HMGB1 Signaling                                                       | -0.378 | 0      | 0.447  | 0.447  |
| Acute Myeloid Leukemia Signaling                                      | 0      | -0.816 | 0      | 0.447  |
| BMP signaling pathway                                                 | N/A    | 0.816  | N/A    | 0.447  |
| CD40 Signaling                                                        | 0      | -0.816 | 0      | 0.447  |
| Th2 Pathway                                                           | -0.302 | 0      | -0.333 | 0.577  |
| JAK/Stat Signaling                                                    | -0.378 | -0.816 | 0      | 0      |
| PPAR $\alpha$ /RXR $\alpha$ Activation                                | 0      | -0.333 | 0      | -0.816 |
| Rac Signaling                                                         | 0      | 0.378  | -0.378 | 0.378  |



|                                                   | MCWLS | MCWHS  | CRLLS  | CRLHS  |
|---------------------------------------------------|-------|--------|--------|--------|
| GDNF Family Ligand-Receptor Interactions          | 0     | 0      | 0.707  | -0.378 |
| D-myo-inositol (1,4,5)-Trisphosphate Biosynthesis | N/A   | N/A    | 1      | N/A    |
| BAG2 Signaling Pathway                            | N/A   | N/A    | 1      | N/A    |
| TWEAK Signaling                                   | 1     | N/A    | N/A    | N/A    |
| Gluconeogenesis I                                 | N/A   | N/A    | 1      | N/A    |
| Basal Cell Carcinoma Signaling                    | N/A   | 1      | N/A    | N/A    |
| IL-17A Signaling in Airway Cells                  | 0     | -0.447 | 0      | 0.447  |
| HIPPO signaling                                   | 0     | N/A    | -0.447 | -0.447 |
| Macropinocytosis Signaling                        | 0     | 0.447  | 0.447  | 0      |
| Apelin Endothelial Signaling Pathway              | 0     | -0.447 | 0      | 0.378  |
| Type II Diabetes Mellitus Signaling               | 0     | -0.816 | 0      | 0      |
| Ceramide Signaling                                | 0     | 0      | 0      | -0.816 |
| tRNA Splicing                                     | 0     | N/A    | 0.447  | 0      |
| Relaxin Signaling                                 | 0     | -0.378 | 0      | 0      |
| Fc Epsilon RI Signaling                           | 0     | 0.333  | 0      | 0      |
| GDP-glucose Biosynthesis                          | N/A   | N/A    | N/A    | N/A    |
| Glucose and Glucose-1-phosphate Degradation       | N/A   | N/A    | N/A    | N/A    |
| IL-17 Signaling                                   | N/A   | N/A    | N/A    | N/A    |
| Role of p14/p19ARF in Tumor Suppression           | 0     | N/A    | 0      | N/A    |
| Germ Cell-Sertoli Cell Junction Signaling         | N/A   | N/A    | N/A    | N/A    |
| Guanosine Nucleotides Degradation III             | N/A   | N/A    | N/A    | N/A    |
| TGF- $\beta$ Signaling                            | N/A   | 0      | N/A    | N/A    |
| FXR/RXR Activation                                | N/A   | N/A    | N/A    | N/A    |
| Apelin Cardiac Fibroblast Signaling Pathway       | N/A   | N/A    | N/A    | N/A    |
| Molecular Mechanisms of Cancer                    | N/A   | N/A    | N/A    | N/A    |
| HER-2 Signaling in Breast Cancer                  | N/A   | N/A    | N/A    | N/A    |
| Valine Degradation I                              | N/A   | N/A    | N/A    | N/A    |
| Isoleucine Degradation I                          | N/A   | N/A    | N/A    | N/A    |
| Methionine Salvage II (Mammalian)                 | N/A   | N/A    | N/A    | N/A    |
| Human Embryonic Stem Cell Pluripotency            | N/A   | N/A    | N/A    | N/A    |
| Glycine Betaine Degradation                       | N/A   | N/A    | N/A    | N/A    |
| Actin Nucleation by ARP-WASP Complex              | N/A   | N/A    | N/A    | N/A    |
| Gap Junction Signaling                            | N/A   | N/A    | N/A    | N/A    |
| Semaphorin Signaling in Neurons                   | N/A   | N/A    | N/A    | N/A    |
| Ubiquinol-10 Biosynthesis (Eukaryotic)            | N/A   | N/A    | N/A    | N/A    |
| Epithelial Adherens Junction Signaling            | N/A   | N/A    | N/A    | N/A    |
| $\gamma$ -linolenate Biosynthesis II (Animals)    | N/A   | N/A    | N/A    | N/A    |
| NAD Salvage Pathway II                            | N/A   | N/A    | N/A    | N/A    |
| Tight Junction Signaling                          | N/A   | N/A    | N/A    | N/A    |
| Fatty Acid Activation                             | N/A   | N/A    | N/A    | N/A    |
| Sucrose Degradation V (Mammalian)                 | N/A   | N/A    | N/A    | N/A    |
| T Cell Receptor Signaling                         | N/A   | N/A    | N/A    | N/A    |
| Axonal Guidance Signaling                         | N/A   | N/A    | N/A    | N/A    |
| D-myo-inositol (1,3,4)-trisphosphate Biosynthesis | N/A   | N/A    | N/A    | 0      |
| Thiosulfate Disproportionation III (Rhodanese)    | N/A   | N/A    | N/A    | N/A    |
| Sertoli Cell-Sertoli Cell Junction Signaling      | N/A   | N/A    | N/A    | N/A    |
| Cardiomyocyte Differentiation via BMP Receptors   | N/A   | N/A    | N/A    | N/A    |
| Th1 and Th2 Activation Pathway                    | N/A   | N/A    | N/A    | N/A    |

|                                                                                | MCWLS | MCWHS | CRLLS | CRLHS |
|--------------------------------------------------------------------------------|-------|-------|-------|-------|
| IL-15 Signaling                                                                | N/A   | N/A   | N/A   | N/A   |
| RAR Activation                                                                 | N/A   | N/A   | N/A   | N/A   |
| Salvage Pathways of Pyrimidine Deoxyribonucleotides                            | N/A   | N/A   | N/A   | N/A   |
| Regulation of the Epithelial-Mesenchymal Transition Pathway                    | N/A   | N/A   | N/A   | N/A   |
| Apelin Muscle Signaling Pathway                                                | N/A   | N/A   | N/A   | N/A   |
| Ephrin A Signaling                                                             | N/A   | N/A   | N/A   | N/A   |
| CTLA4 Signaling in Cytotoxic T Lymphocytes                                     | N/A   | N/A   | N/A   | N/A   |
| D-myo-inositol (1,4,5)-trisphosphate Degradation                               | N/A   | N/A   | N/A   | N/A   |
| FAT10 Cancer Signaling Pathway                                                 | 0     | N/A   | N/A   | N/A   |
| Reelin Signaling in Neurons                                                    | N/A   | N/A   | N/A   | N/A   |
| Virus Entry via Endocytic Pathways                                             | N/A   | N/A   | N/A   | N/A   |
| Oxidized GTP and dGTP Detoxification                                           | N/A   | N/A   | N/A   | N/A   |
| UDP-N-acetyl-D-glucosamine Biosynthesis II                                     | N/A   | N/A   | N/A   | N/A   |
| Phagosome Formation                                                            | N/A   | N/A   | N/A   | N/A   |
| Maturity Onset Diabetes of Young (MODY) Signaling                              | N/A   | N/A   | N/A   | N/A   |
| Leucine Degradation I                                                          | N/A   | N/A   | N/A   | N/A   |
| Role of IL-17A in Arthritis                                                    | N/A   | N/A   | N/A   | N/A   |
| G-Protein Coupled Receptor Signaling                                           | N/A   | N/A   | N/A   | N/A   |
| Role of JAK1 and JAK3 in $\gamma$ c Cytokine Signaling                         | N/A   | N/A   | N/A   | N/A   |
| Cellular Effects of Sildenafil (Viagra)                                        | N/A   | N/A   | N/A   | N/A   |
| VDR/RXR Activation                                                             | N/A   | N/A   | N/A   | N/A   |
| Breast Cancer Regulation by Stathmin1                                          | N/A   | N/A   | N/A   | N/A   |
| Erythropoietin Signaling                                                       | N/A   | N/A   | N/A   | N/A   |
| Role of Macrophages, Fibroblasts and Endothelial Cells in Rheumatoid Arthritis | N/A   | N/A   | N/A   | N/A   |
| Clathrin-mediated Endocytosis Signaling                                        | N/A   | N/A   | N/A   | N/A   |
| Natural Killer Cell Signaling                                                  | N/A   | N/A   | N/A   | N/A   |
| Superpathway of D-myo-inositol (1,4,5)-trisphosphate Metabolism                | N/A   | N/A   | N/A   | 0     |
| 1D-myo-inositol Hexakisphosphate Biosynthesis II (Mammalian)                   | N/A   | N/A   | N/A   | 0     |
| IL-15 Production                                                               | N/A   | N/A   | N/A   | N/A   |
| Angiopoietin Signaling                                                         | N/A   | N/A   | N/A   | 0     |
| IL-4 Signaling                                                                 | N/A   | N/A   | N/A   | N/A   |
| FAK Signaling                                                                  | N/A   | N/A   | N/A   | N/A   |
| Role of Osteoblasts, Osteoclasts and Chondrocytes in Rheumatoid Arthritis      | N/A   | N/A   | N/A   | N/A   |
| Hepatic Cholestasis                                                            | N/A   | N/A   | N/A   | N/A   |
| HIF1 $\alpha$ Signaling                                                        | N/A   | N/A   | N/A   | N/A   |
| UDP-N-acetyl-D-galactosamine Biosynthesis II                                   | N/A   | N/A   | N/A   | N/A   |
| Role of Tissue Factor in Cancer                                                | N/A   | N/A   | N/A   | N/A   |

**Figure 4C**

**Upstream Regulators / Activation score**

|            | MCWLS | MCWHS | CRLLS | CRLHS |
|------------|-------|-------|-------|-------|
| decitabine | 3.406 | 4.08  | 3.49  | 2.102 |

|                    | MCWLS  | MCWHS  | CRLLS  | CRLHS  |
|--------------------|--------|--------|--------|--------|
| L-triiodothyronine | 3.274  | 3.813  | 3.845  | 2.127  |
| D-glucose          | 2.954  | 4.056  | 2.817  | 2.549  |
| GLI1               | 3.07   | 2.921  | 2.934  | 3.067  |
| SP600125           | -3.553 | -2.701 | -3.635 | -1.964 |
| tretinoin          | 3.199  | 3.296  | 2.779  | 2.17   |
| HIF1A              | 2.909  | 3.342  | 2.666  | 2.402  |
| trogglitazone      | 3.507  | 2.417  | 2.454  | 2.737  |
| CEBPB              | 2.612  | 2.231  | 3.399  | 2.605  |
| PD98059            | -2.938 | -3.552 | -2.047 | -2.305 |
| RXRA               | 2.783  | 2.919  | 2.913  | 2.189  |
| IGF1               | 2.993  | 3.412  | 2.45   | 1.919  |
| Ins1               | 2.799  | 2.947  | 2.173  | 2.61   |
| LHX1               | 2.538  | 2.905  | 2.36   | 2.714  |
| SMARCA4            | 2.89   | 2.32   | 3.319  | 1.969  |
| dexamethasone      | 2.91   | 2.794  | 3.162  | 1.402  |
| PPARG              | 1.452  | 3.673  | 2.525  | 2.4    |
| Growth hormone     | 2.552  | 2.305  | 2.108  | 3.069  |
| KLF4               | 1.945  | 3.524  | 2.001  | 2.516  |
| KAT6A              | 2.646  | 2.646  | 2.646  | 2      |
| LIF                | 2.262  | 1.814  | 3.381  | 2.409  |
| Vegf               | 1.872  | 2.696  | 2.585  | 2.691  |
| SREBF1             | 3.386  | 2.421  | 1.809  | 2.157  |
| MYCN               | -2.242 | -2.636 | -1.934 | -2.796 |
| IKBKB              | 3.099  | 2.481  | 2.062  | 1.91   |
| F2                 | 1.506  | 4.146  | 1.644  | 2.223  |
| INHBA              | 2.892  | 2.583  | 2.358  | 1.576  |
| GDF2               | 2.688  | 2.72   | 1.912  | 1.976  |
| NR3C2              | 2.525  | 2.716  | 2.121  | 1.913  |
| DDIT3              | -1.89  | -2.393 | -2.121 | -2.828 |
| APOE               | -2.211 | -2.957 | -1.518 | -2.418 |
| NKX2-3             | 1.912  | 1.956  | 2.482  | 2.697  |
| SOX4               | 2.579  | 1.601  | 2.729  | 2.062  |
| Alpha catenin      | -2.201 | -2.728 | -1.757 | -2.238 |
| MMP9               | 2.828  | 2      | 2      | 2      |
| HNF4A              | 2.971  | 2.437  | 1.9    | 1.367  |
| TGFB1              | 2.314  | 3.374  | 2.102  | 0.818  |
| VEGFA              | 2.289  | 2.988  | 2.347  | 0.9    |
| TCF7L2             | 1.34   | 2.959  | 2.297  | 1.919  |
| EGF                | 2.063  | 2.506  | 1.704  | 2.073  |
| ERK1/2             | 1.715  | 2.273  | 2.152  | 2.104  |
| CREM               | 2.359  | 2.2    | 2.611  | 1.054  |
| Tgf beta           | 2.398  | 2.796  | 1.768  | 1.241  |
| TP53               | 2.212  | 1.806  | 1.596  | 2.571  |
| CD40               | -1.898 | -1.929 | -2.099 | -2.258 |
| IL13               | 1.106  | 2.307  | 2.494  | 2.231  |
| CSF1               | 2.129  | 2.881  | 1.613  | 1.483  |
| PRKAA2             | -1.942 | -3.088 | -0.992 | -2.007 |
| Akt                | 1.774  | 2.484  | 0.975  | 2.661  |

|                                                              | MCWLS  | MCWHS  | CRLLS  | CRLHS  |
|--------------------------------------------------------------|--------|--------|--------|--------|
| mono-(2-ethylhexyl)phthalate                                 | 2.191  | 2.55   | 2.891  | N/A    |
| Ige                                                          | 1.914  | 2.506  | 1.923  | 1.272  |
| TET2                                                         | 1.508  | 2.496  | 2.333  | 1.265  |
| TSH                                                          | 2.156  | 2.079  | 2.348  | 1      |
| trichloroethylene                                            | -2.121 | -1.633 | -1.89  | -1.89  |
| benzene                                                      | -2.121 | -1.633 | -1.89  | -1.89  |
| SMAD4                                                        | 1.594  | 2.361  | 1.644  | 1.886  |
| IGF1R                                                        | 1.655  | 2.352  | 1.916  | 1.547  |
| HTT                                                          | 0.913  | 2.335  | 2.704  | 1.49   |
| CHUK                                                         | 2.046  | 2.504  | 1.964  | 0.919  |
| HGF                                                          | 1.31   | 2.829  | 2.056  | 1.192  |
| 17-alpha-ethinylestradiol                                    | 2.36   | 2.358  | 2.63   | N/A    |
| FOXA2                                                        | 1.461  | 1.913  | 1.941  | 1.969  |
| INSR                                                         | N/A    | 2.563  | 2.345  | 2.36   |
| SPIB                                                         | 2.158  | 2.138  | 1.757  | 1.154  |
| losartan potassium                                           | -1.07  | -3.116 | -1.642 | -1.342 |
| ARNT                                                         | N/A    | 2.779  | 1.96   | 2.401  |
| MAPK9                                                        | 1.554  | 1.599  | 1.937  | 1.964  |
| IL3                                                          | 1.72   | 1.311  | 1.63   | 2.359  |
| LY294002                                                     | -2.294 | -3.141 | N/A    | -1.584 |
| STAT4                                                        | 2.178  | 2.197  | 1.427  | 1.202  |
| 25-hydroxycholesterol                                        | 2.236  | 0.509  | 2      | 2.236  |
| HOXA10                                                       | -1.726 | -2.18  | -1.154 | -1.913 |
| rosiglitazone                                                | 1.45   | 1.415  | 2.455  | 1.62   |
| NFKBIA                                                       | 2.196  | 3.032  | 1.594  | N/A    |
| atorvastatin                                                 | 1.177  | 1.612  | 1.899  | 2.069  |
| IL1B                                                         | 1.988  | 2.005  | 2.152  | 0.56   |
| methylmercury                                                | -1.667 | -1.134 | -1.89  | -1.89  |
| IgG                                                          | -2.335 | -2.309 | -1.913 | N/A    |
| SATB1                                                        | -1.569 | -1.411 | -2.373 | -1.181 |
| bucladesine                                                  | 1.631  | 1.629  | 1.772  | 1.43   |
| SU6656                                                       | -2.219 | -2.219 | -1.982 | N/A    |
| NCSTN                                                        | -2.219 | N/A    | -1.982 | -2.219 |
| Salmonella enterica serotype abortus equi lipopolysaccharide | 2.891  | 3.45   | N/A    | N/A    |
| GATA6                                                        | 1.169  | 1.591  | 2.07   | 1.5    |
| RELA                                                         | 2.288  | 2.13   | 1.898  | N/A    |
| STAT3                                                        | 1.718  | 1.5    | 1.527  | 1.506  |
| Pka                                                          | 1.942  | 1.972  | 2.326  | N/A    |
| CTNNB1                                                       | 1.15   | 2.778  | 1.012  | 1.283  |
| HNF1B                                                        | 1.8    | 1.628  | 2.785  | N/A    |
| miR-145-5p (and other miRNAs w/seed UCCAGUU)                 | N/A    | -2.233 | -1.543 | -2.434 |
| POMC                                                         | 2.183  | 2.395  | N/A    | 1.628  |
| TNFSF11                                                      | 1.823  | 2.361  | 1.12   | 0.896  |
| AGT                                                          | 0.868  | 2.949  | 1.209  | 1.082  |
| MKNK1                                                        | 2.646  | 0.905  | 2.53   | N/A    |
| EPAS1                                                        | 0.436  | 2.636  | 2.194  | 0.768  |
| PDGF BB                                                      | 1.421  | 2.814  | 1.622  | 0.161  |

|                                               | MCWLS  | MCWHS  | CRLLS  | CRLHS  |
|-----------------------------------------------|--------|--------|--------|--------|
| miR-199a-5p (and other miRNAs w/seed CCAGUGU) | -2.343 | -1.915 | N/A    | -1.671 |
| SB203580                                      | -2.568 | -3.356 | N/A    | N/A    |
| SMAD3                                         | 1.85   | 2.05   | 1.797  | 0.21   |
| EDN1                                          | 1.42   | 2.824  | 1.635  | N/A    |
| HNF4α dimer                                   | N/A    | 1.96   | 1.951  | 1.951  |
| HOXB3                                         | 1.951  | 1.951  | 1.951  | N/A    |
| FGF2                                          | 2.331  | 1.528  | 1.61   | 0.382  |
| BCL6                                          | 1.939  | 1.261  | 1.32   | 1.32   |
| nitrofen                                      | -2     | -2.449 | N/A    | -1.387 |
| SS18                                          | 0.707  | 2.646  | 1.633  | 0.816  |
| SGK1                                          | 1.942  | N/A    | 2.121  | 1.709  |
| NR1I3                                         | 2.772  | 2.942  | N/A    | N/A    |
| TO-901317                                     | 2.42   | 2.714  | N/A    | 0.446  |
| TRAF2                                         | -1.195 | -1.195 | -1.706 | -1.463 |
| NOTCH1                                        | -1.838 | -1.019 | -1.216 | -1.455 |
| RAF1                                          | 1.48   | 2.262  | 1.431  | 0.341  |
| IKBKG                                         | 2.191  | 3.293  | N/A    | N/A    |
| CG                                            | 2.127  | 3.322  | N/A    | N/A    |
| EP300                                         | 1.387  | 2.798  | N/A    | 1.254  |
| cyclic AMP                                    | N/A    | 2.001  | 1.604  | 1.821  |
| deferoxamine                                  | 0.978  | 3.007  | 1.384  | N/A    |
| DICER1                                        | -1.437 | -1.584 | -1.584 | -0.73  |
| IL33                                          | 1.518  | 2.205  | 1.183  | 0.423  |
| STK11                                         | 2.121  | 0.77   | 1.414  | 1      |
| ITGB1                                         | 1.195  | 1.219  | 1.4    | 1.446  |
| NFκB (complex)                                | 1.133  | 2.146  | 0.959  | 1.015  |
| TRIM37                                        | -1     | -2     | -2.236 | N/A    |
| IL10RA                                        | 2.309  | 1.414  | N/A    | 1.5    |
| P38 MAPK                                      | N/A    | 2.741  | 2.476  | N/A    |
| U0126                                         | -1.867 | -2.242 | -0.912 | -0.167 |
| ADCYAP1                                       | 1.168  | 1.818  | 0.718  | 1.445  |
| RUNX1                                         | -1.811 | -1.155 | -1.165 | -0.986 |
| HSPA9                                         | 1      | 2      | 1      | 1.067  |
| CD28                                          | -1.57  | N/A    | -1.321 | -2.174 |
| BMP2                                          | 1.816  | 1.597  | 1.611  | N/A    |
| GW3965                                        | 1.99   | 1.766  | N/A    | 1.23   |
| metribolone                                   | 1.761  | 1.325  | 0.361  | 1.518  |
| FGF8                                          | 2.183  | 1.3    | 1.23   | 0.236  |
| TGFBR1                                        | 1.912  | 1.117  | 1.913  | N/A    |
| FAS                                           | -0.958 | -1.455 | -1.709 | -0.818 |
| PTH                                           | 1.167  | 0.71   | 1.682  | 1.369  |
| NTRK2                                         | 1.234  | N/A    | 2.449  | 1.234  |
| BMP4                                          | 1.084  | 0.903  | 0.997  | 1.91   |
| oleic acid                                    | 2.049  | 1.362  | 1.48   | N/A    |
| PGR                                           | 0.216  | 2.299  | 1.946  | -0.412 |
| isobutylmethylxanthine                        | 1.345  | 1.576  | 1.902  | N/A    |
| IFNG                                          | 2.006  | 1.638  | 0.739  | 0.422  |
| methylprednisolone                            | 0.715  | 1.602  | 1.659  | 0.797  |

|                                               | MCWLS  | MCWHS  | CRLLS  | CRLHS  |
|-----------------------------------------------|--------|--------|--------|--------|
| testosterone                                  | 1.379  | 1.619  | 1.295  | 0.435  |
| Pdgf (complex)                                | 1.366  | 1.808  | 1.147  | -0.402 |
| MRTFA                                         | 2.183  | 0.6    | 1.4    | 0.522  |
| SRF                                           | 1.427  | N/A    | 1.813  | 1.444  |
| PPARD                                         | 0.921  | 1.324  | N/A    | 2.433  |
| PRKCE                                         | 2.219  | 2.433  | N/A    | N/A    |
| GW501516                                      | 1.446  | 1.977  | 1.154  | N/A    |
| EPO                                           | 2.776  | N/A    | N/A    | 1.781  |
| 1,4-bis[2-(3,5-dichloropyridyloxy)]benzene    | 2.158  | 2.353  | N/A    | N/A    |
| okadaic acid                                  | 1.279  | 1.243  | N/A    | 1.97   |
| COMMD3-BMI1                                   | -1.673 | -1.408 | -1.408 | N/A    |
| EZH2                                          | 1.045  | 1.377  | 1.432  | 0.59   |
| haloperidol                                   | 2.219  | N/A    | 2.219  | N/A    |
| STAT5A                                        | 1.526  | 1.321  | 1.588  | N/A    |
| PPARGC1B                                      | N/A    | 2.213  | 2.213  | N/A    |
| miR-133a-3p (and other miRNAs w/seed UUGGUCC) | N/A    | -2.219 | -2.19  | N/A    |
| POU4F1                                        | -1.644 | -1.369 | -1.331 | 0.051  |
| RUNX3                                         | -1.576 | N/A    | -1.026 | -1.792 |
| CST5                                          | -0.489 | -1.571 | -1     | -1.327 |
| FOXO3                                         | 1.935  | N/A    | 1.642  | 0.798  |
| cyclosporin A                                 | 1.997  | 0.436  | -1.045 | -0.895 |
| ZBTB16                                        | 0.485  | 1.026  | 0.64   | 2.138  |
| dihydrotestosterone                           | 1.288  | 1.634  | 0.701  | 0.664  |
| cocaine                                       | 1.965  | N/A    | 1.241  | 1.046  |
| NOD2                                          | 1.212  | 1.287  | 0.87   | 0.883  |
| isotretinoin                                  | 0      | -1.698 | -1.746 | -0.799 |
| sphingosine-1-phosphate                       | N/A    | 2.473  | 1.762  | N/A    |
| PAX7                                          | 1.89   | N/A    | 1      | 1.342  |
| F7                                            | 1.471  | 1.27   | 1.481  | N/A    |
| spironolactone                                | -2     | -2.219 | N/A    | N/A    |
| VitaminD3-VDR-RXR                             | 1.997  | N/A    | 2.219  | N/A    |
| CEBPA                                         | 1.451  | 0.184  | 1.947  | 0.625  |
| FGF10                                         | 2.219  | 1.982  | N/A    | N/A    |
| HOXA3                                         | 1.195  | 1.195  | 0.896  | 0.896  |
| KLF3                                          | 1.941  | 1.5    | N/A    | 0.728  |
| HBEGF                                         | 1.964  | N/A    | 2.2    | N/A    |
| SERPINF1                                      | 2      | 0      | 0.128  | 1.982  |
| NEUROG3                                       | 1.633  | N/A    | N/A    | 2.433  |
| methotrexate                                  | N/A    | 2.03   | N/A    | 2.03   |
| KLF2                                          | -0.555 | -0.956 | -1.134 | -1.408 |
| JUN                                           | -0.256 | 1.017  | -0.916 | -1.838 |
| NORAD                                         | 2      | 2      | N/A    | N/A    |
| dalfampridine                                 | 2      | 2      | N/A    | N/A    |
| GATA2                                         | 2.043  | 1.155  | N/A    | 0.781  |
| LYN                                           | N/A    | -1.982 | -1.982 | N/A    |
| PRKACA                                        | N/A    | N/A    | 1.974  | 1.987  |
| K+                                            | 1.982  | 1.96   | N/A    | N/A    |
| RBPJ                                          | N/A    | -1.543 | -0.794 | -1.588 |

|                                 | MCWLS  | MCWHS  | CRLLS  | CRLHS  |
|---------------------------------|--------|--------|--------|--------|
| mifepristone                    | -0.731 | -1.276 | -1.545 | -0.358 |
| 2-amino-5-phosphonovaleric acid | -1.454 | -1.8   | -0.651 | N/A    |
| Immunoglobulin                  | -0.988 | N/A    | -1.294 | -1.618 |
| HNF1A                           | N/A    | 3.887  | N/A    | N/A    |
| bicuculline                     | 1.941  | 1.941  | N/A    | N/A    |
| CSHL1                           | N/A    | 1.941  | 1.937  | N/A    |
| CD44                            | 1.709  | N/A    | 2.156  | N/A    |
| MAP3K8                          | 1.492  | 0.333  | 0.707  | 1.32   |
| SYVN1                           | 2.111  | 1.732  | N/A    | N/A    |
| actinomycin D                   | -0.914 | -2.922 | N/A    | N/A    |
| FOXA1                           | -1.722 | -0.64  | 0.218  | -1.24  |
| IGF2                            | 1.292  | 1.025  | 0.768  | 0.711  |
| prostaglandin E2                | 1.119  | 0.758  | 0.884  | 1.023  |
| sirolimus                       | 0.374  | 0.415  | 1.615  | 1.367  |
| ESR2                            | 1.339  | 0.771  | -1.044 | 0.603  |
| SHC1                            | 1.412  | 0.372  | 0.664  | 1.304  |
| IL7                             | -1.555 | -2.158 | N/A    | N/A    |
| PDX1                            | 1.207  | 1.109  | 1.093  | 0.302  |
| ciglitazone                     | 0.757  | 0.343  | 1.715  | 0.882  |
| Esrra                           | 1.757  | 0.761  | 0.822  | 0.351  |
| Ro31-8220                       | -1.172 | -1.387 | -1.109 | N/A    |
| caffeine                        | N/A    | -1.829 | -1.829 | N/A    |
| desmopressin                    | 1.276  | -0.342 | 1.601  | 0.437  |
| KRAS                            | 1.17   | 0.487  | -1.175 | 0.822  |
| paclitaxel                      | 2.063  | 0.199  | 0.468  | 0.894  |
| PTEN                            | -0.431 | -2.534 | -0.356 | -0.294 |
| cycloheximide                   | 0.9    | 0.789  | 1.082  | 0.819  |
| ERBB2                           | 0.78   | 1.879  | 0.339  | 0.586  |
| mycophenolic acid               | N/A    | N/A    | 2.449  | 1.134  |
| TCF7                            | -1.192 | N/A    | -1.192 | -1.192 |
| ADIPOQ                          | 0.99   | 0.714  | 1.849  | N/A    |
| glucagon                        | 1      | -0.728 | 1.369  | 0.437  |
| TNF                             | 1.382  | 1.026  | 0.478  | -0.643 |
| PD173074                        | N/A    | N/A    | 1.633  | 1.89   |
| PCGEM1                          | N/A    | 1.387  | 1.067  | 1.067  |
| GPS2                            | -1.342 | N/A    | -1.342 | -0.816 |
| kainic acid                     | 1.793  | N/A    | 1.695  | N/A    |
| ID2                             | -0.475 | 0.088  | -1.386 | -1.539 |
| IL6                             | 1.211  | 2.073  | 0.202  | N/A    |
| imatinib                        | N/A    | -1.809 | -0.733 | -0.94  |
| ARNT2                           | N/A    | 3.464  | N/A    | N/A    |
| pirinixic acid                  | 2.1    | 1.35   | N/A    | N/A    |
| NR4A1                           | 0.799  | 1.325  | 0.862  | 0.388  |
| garcinol                        | 1.134  | N/A    | 2.236  | N/A    |
| lovastatin                      | N/A    | -0.99  | -1.348 | -1.026 |
| aldosterone                     | 1.315  | 2.044  | N/A    | N/A    |
| Pkc(s)                          | N/A    | 2.3    | N/A    | 1.056  |
| IKZF1                           | 0.963  | 0.045  | 0.885  | 1.444  |

|                       | MCWLS  | MCWHS  | CRLLS  | CRLHS  |
|-----------------------|--------|--------|--------|--------|
| alitretinoin          | N/A    | 1.285  | 0.896  | 1.137  |
| CSF2                  | 0.949  | 1.061  | 0.681  | -0.627 |
| SIM1                  | N/A    | 3.317  | N/A    | N/A    |
| CREBBP                | 1.516  | -0.314 | 1.158  | -0.314 |
| KMT2A                 | 1.067  | 1.067  | 1.154  | N/A    |
| fenamic acid          | 1.698  | 1.188  | 0      | -0.378 |
| SMARCB1               | 1.89   | N/A    | N/A    | 1.342  |
| lomustine             | 1.633  | 1.134  | 0.447  | 0      |
| S100A9                | 0.791  | -0.158 | 1.462  | 0.791  |
| LDL                   | 1.772  | N/A    | 1.42   | N/A    |
| Tnf (family)          | 1.244  | N/A    | N/A    | 1.941  |
| IL21                  | -0.611 | N/A    | N/A    | -2.557 |
| MYC                   | 0.397  | 0.936  | 1.67   | 0.143  |
| FN1                   | 1.193  | 1.877  | N/A    | -0.066 |
| MTOR                  | 0.148  | 1.787  | 0.16   | 1.031  |
| vancomycin            | 1.294  | 0.392  | -0.57  | -0.863 |
| PIK3CA                | 1.981  | N/A    | N/A    | 1.131  |
| cisplatin             | 0.869  | 0.615  | 0.755  | -0.867 |
| Mek                   | 0.539  | 1.004  | 1.281  | 0.281  |
| SOX2                  | 0.287  | 0.607  | -0.505 | 1.703  |
| WISP2                 | -1.673 | 0      | -0.946 | -0.447 |
| FOS                   | -0.303 | -0.473 | -0.614 | -1.66  |
| RARA                  | 1.077  | 1.587  | 0.38   | N/A    |
| EGFR                  | 0.84   | 0.767  | N/A    | 1.431  |
| bisindolylmaleimide I | -1.254 | -1.782 | N/A    | N/A    |
| NR3C1                 | -0.81  | -0.276 | -0.534 | -1.416 |
| phenylbutazone        | 1.501  | 1.141  | 0.391  | 0      |
| MAPK14                | N/A    | 1.949  | N/A    | 1.074  |
| ionomycin             | 1.21   | 0.798  | 0.414  | 0.6    |
| 4-hydroxytamoxifen    | 0.983  | N/A    | 2.034  | N/A    |
| triamterene           | 1.633  | 1      | 0      | -0.378 |
| allopurinol           | 1.633  | 1      | 0      | -0.378 |
| ethionine             | N/A    | 0      | -1     | -2     |
| histone deacetylase   | -1     | -1     | -1     | N/A    |
| WNT3A                 | 0.608  | 1.305  | 0.587  | -0.5   |
| p70 S6k               | 1      | N/A    | 1      | 1      |
| MAPK1                 | 0.66   | 1.017  | 1.271  | -0.045 |
| CALCA                 | 0.381  | -0.647 | 1.258  | 0.699  |
| PSEN1                 | -0.492 | -0.335 | -1.387 | -0.768 |
| thioacetamide         | 1.664  | 0.788  | 0      | -0.478 |
| A23187                | 1.154  | 0.954  | 0.822  | N/A    |
| HMGA1                 | 1.137  | 0.981  | -0.225 | -0.58  |
| PRKAA1                | N/A    | -1.431 | N/A    | -1.492 |
| USF1                  | 1.387  | 0.083  | -0.064 | 1.387  |
| OSM                   | 1.165  | 0.412  | 0.489  | 0.852  |
| ATF4                  | N/A    | 0.78   | N/A    | 2.114  |
| CXCL12                | 1.263  | 0.689  | 0.94   | N/A    |
| H-7                   | -1.172 | -1.709 | N/A    | N/A    |



|                                                                        | MCWLS  | MCWHS  | CRLLS  | CRLHS  |
|------------------------------------------------------------------------|--------|--------|--------|--------|
| POU5F1                                                                 | 0.028  | N/A    | 2.659  | 0.188  |
| leukotriene D4                                                         | 1.118  | 0.728  | 1.026  | N/A    |
| SP1                                                                    | 0.548  | 1.12   | 0.786  | 0.41   |
| forskolin                                                              | 0.44   | 1.021  | 1.359  | -0.029 |
| curcumin                                                               | -0.529 | -1.804 | N/A    | -0.513 |
| TGFB2                                                                  | -0.994 | 1.534  | -0.305 | N/A    |
| NOTCH3                                                                 | 0.83   | 2      | N/A    | N/A    |
| cerivastatin                                                           | 0.9    | 0.092  | 0.861  | 0.975  |
| EGLN                                                                   | N/A    | N/A    | -1.278 | -1.543 |
| FFAR3                                                                  | -0.816 | -2     | N/A    | N/A    |
| sunitinib                                                              | -0.537 | -1.153 | -0.492 | -0.626 |
| plicamycin                                                             | -0.863 | -0.783 | -1.154 | N/A    |
| ERN1                                                                   | N/A    | -1.4   | -1.4   | N/A    |
| Hdac                                                                   | -0.292 | -0.403 | -0.727 | 1.374  |
| 2-(4-amino-1-isopropyl-1H-pyrazolo[3,4-d]pyrimidin-3-yl)-1H-indol-5-ol | -0.624 | -1.528 | -0.624 | N/A    |
| CREB1                                                                  | 1.258  | N/A    | 1.511  | N/A    |
| APC                                                                    | -0.805 | -1.951 | N/A    | N/A    |
| phorbol esters                                                         | 0.785  | 1.185  | 0.785  | N/A    |
| NFATC2                                                                 | 0.971  | N/A    | 1.066  | 0.711  |
| NR5A2                                                                  | N/A    | 2.739  | N/A    | N/A    |
| gemfibrozil                                                            | 0.946  | N/A    | 1.787  | N/A    |
| 2-bromoethylamine                                                      | 1.342  | 1.387  | N/A    | N/A    |
| S100A8                                                                 | 0.385  | 0      | 1.698  | 0.632  |
| RUNX2                                                                  | 1.067  | 0.686  | 0.801  | 0.16   |
| ID3                                                                    | 0.302  | 0.605  | -0.747 | -1.025 |
| NFYA                                                                   | 1      | 1.671  | N/A    | N/A    |
| beta-estradiol                                                         | -0.124 | 1.647  | 0.552  | -0.344 |
| ASCL1                                                                  | N/A    | 2.607  | N/A    | 0.059  |
| ramipril                                                               | -0.655 | N/A    | -2     | N/A    |
| COL18A1                                                                | N/A    | -2.646 | N/A    | N/A    |
| Insulin                                                                | 0.788  | 1.161  | 0.684  | N/A    |
| POR                                                                    | -0.816 | -0.816 | N/A    | -1     |
| streptozocin                                                           | -0.525 | 0.878  | 1.225  | N/A    |
| CNTF                                                                   | 0.356  | 0.057  | 0.529  | 1.671  |
| lactacystin                                                            | 0.831  | 0.954  | 0.492  | -0.32  |
| BMP7                                                                   | N/A    | -0.426 | 1.579  | 0.588  |
| REST                                                                   | N/A    | N/A    | -2.592 | N/A    |
| carrageenan                                                            | N/A    | 2.581  | N/A    | N/A    |
| AR                                                                     | 0.688  | 1.611  | 0.163  | 0.094  |
| STAT5B                                                                 | 0.447  | 1      | 0.816  | 0.277  |
| carbon tetrachloride                                                   | N/A    | 2.539  | N/A    | N/A    |
| phorbol myristate acetate                                              | 0.648  | 1.039  | 0.551  | 0.29   |
| DIO3                                                                   | -0.391 | -1.067 | 1.067  | N/A    |
| trans-hydroxytamoxifen                                                 | -0.632 | N/A    | -1.89  | N/A    |
| SP3                                                                    | -0.74  | -0.64  | -0.025 | -1.109 |
| EOMES                                                                  | -0.478 | N/A    | -0.146 | 1.89   |
| estrogen                                                               | N/A    | 1.381  | 1.08   | -0.046 |

|                                                                      | MCWLS  | MCWHS  | CRLLS  | CRLHS  |
|----------------------------------------------------------------------|--------|--------|--------|--------|
| EBF1                                                                 | 1.254  | N/A    | N/A    | 1.243  |
| TREM1                                                                | 2.496  | N/A    | N/A    | N/A    |
| infliximab                                                           | -0.447 | N/A    | -1.342 | 0.707  |
| CD38                                                                 | 0.799  | 0.913  | 0.691  | -0.084 |
| TCR                                                                  | -0.106 | 1.108  | 0.78   | -0.49  |
| RICTOR                                                               | -0.867 | N/A    | -0.152 | 1.452  |
| TAL1                                                                 | 1.066  | 0.426  | 0.788  | 0.181  |
| miR-124-3p (and other miRNAs w/seed AAGGCAC)                         | -2.454 | N/A    | N/A    | N/A    |
| SOX3                                                                 | N/A    | N/A    | -1.633 | -0.816 |
| ESR1                                                                 | 0.495  | 0.98   | 0.439  | 0.504  |
| IL2                                                                  | -0.288 | -0.575 | -0.032 | -1.495 |
| PTCH1                                                                | N/A    | -1     | N/A    | -1.387 |
| NFAT5                                                                | 1      | N/A    | N/A    | 1.362  |
| fenofibrate                                                          | 0.794  | N/A    | 1.556  | N/A    |
| SOX7                                                                 | -1     | N/A    | N/A    | -1.342 |
| doxycycline                                                          | N/A    | N/A    | 1.342  | 1      |
| 5-O-mycolyl-beta-araf-(1->2)-5-O-mycolyl-alpha-araf-(1->1')-glycerol | 0.816  | 1.134  | 0.378  | N/A    |
| filgrastim                                                           | -1.5   | -0.656 | N/A    | -0.17  |
| FGF1                                                                 | 1.23   | 0.915  | N/A    | 0.176  |
| camptothecin                                                         | 0.688  | 0.124  | 1      | 0.5    |
| LG100268                                                             | 1.732  | 0.577  | N/A    | N/A    |
| MAPK3                                                                | 1.331  | 0.97   | N/A    | N/A    |
| AKT1                                                                 | -1.112 | N/A    | -0.861 | -0.327 |
| cigarette smoke                                                      | 0.015  | N/A    | -0.393 | -1.887 |
| KLF5                                                                 | 0.44   | 1.045  | 0.44   | -0.364 |
| TP63                                                                 | 0.297  | 0.664  | -0.149 | 1.161  |
| galactosylceramide-alpha                                             | N/A    | 1.131  | 1.131  | N/A    |
| ARID4A                                                               | 1.131  | 1.131  | N/A    | N/A    |
| tetrachlorodibenzodioxin                                             | 0.113  | 0.759  | -0.375 | 0.992  |
| FADD                                                                 | -2.236 | N/A    | N/A    | N/A    |
| NOX4                                                                 | N/A    | 1.965  | N/A    | 0.254  |
| inosine                                                              | N/A    | 2.219  | N/A    | N/A    |
| miR-200b-3p (and other miRNAs w/seed AAUACUG)                        | N/A    | N/A    | N/A    | -2.219 |
| diphenyleneiodonium                                                  | N/A    | -2.213 | N/A    | N/A    |
| lipopolysaccharide                                                   | 0.32   | 1.256  | 0.194  | -0.43  |
| NR0B2                                                                | N/A    | -2.197 | N/A    | N/A    |
| TGFA                                                                 | N/A    | N/A    | 2.19   | N/A    |
| NCOA2                                                                | 0.277  | N/A    | 1.912  | N/A    |
| 15-deoxy-delta-12,14 -PGJ 2                                          | N/A    | -1.778 | -0.406 | N/A    |
| FOXO1                                                                | -0.077 | 1.069  | -0.037 | -0.995 |
| ID1                                                                  | 0.894  | 0.623  | 0.659  | N/A    |
| JAK2                                                                 | N/A    | 1.067  | 1.109  | N/A    |
| sodium chloride                                                      | N/A    | 2.175  | N/A    | N/A    |
| Nfat (family)                                                        | 0.333  | 1.508  | 0      | 0.333  |
| indomethacin                                                         | 0.64   | 1.398  | N/A    | -0.13  |
| gentamicin C                                                         | 1.342  | 0.378  | -0.447 | N/A    |
| AICAR                                                                | N/A    | -1.7   | N/A    | -0.457 |

|                                                                    | MCWLS  | MCWHS  | CRLLS  | CRLHS  |
|--------------------------------------------------------------------|--------|--------|--------|--------|
| calcitriol                                                         | 1.193  | 0.209  | 0.752  | 0.003  |
| raloxifene                                                         | 0.229  | 0.698  | N/A    | 1.217  |
| CDKN1B                                                             | N/A    | -2.138 | N/A    | N/A    |
| TRIM24                                                             | -1     | 0      | 0      | 1.134  |
| mir-193                                                            | N/A    | N/A    | -1.067 | -1.067 |
| ITGA5                                                              | 1.067  | N/A    | 1.067  | N/A    |
| MAPK8                                                              | N/A    | 0.756  | 0.711  | -0.664 |
| ERG                                                                | N/A    | N/A    | N/A    | 2.121  |
| DKK1                                                               | -0.241 | -0.691 | 0.156  | 1.02   |
| BRD4                                                               | -0.143 | 0.868  | 1.095  | N/A    |
| palmitic acid                                                      | 1.207  | 0.202  | 0.676  | N/A    |
| SHH                                                                | N/A    | N/A    | N/A    | 2.079  |
| progesterone                                                       | 0.397  | 0.712  | 0.969  | N/A    |
| N-[N-(3,5-difluorophenacetyl-L-Ala)]-S-phenylglycine t-butyl ester | 1.387  | N/A    | 0.686  | N/A    |
| caffeic acid phenethyl ester                                       | N/A    | N/A    | N/A    | 2.071  |
| TFAP2C                                                             | 0.6    | 0.799  | -0.404 | -0.266 |
| Lh                                                                 | -0.57  | -0.218 | -0.447 | -0.816 |
| ECSIT                                                              | -0.555 | 1.342  | 0      | -0.152 |
| IL15                                                               | 0.905  | 0.641  | 0.034  | 0.421  |
| methapyrilene                                                      | -2     | N/A    | N/A    | N/A    |
| COMMD1                                                             | N/A    | -2     | N/A    | N/A    |
| NF1                                                                | N/A    | N/A    | N/A    | 2      |
| ITGB2                                                              | -2     | N/A    | N/A    | N/A    |
| ARID4B                                                             | 1      | 1      | N/A    | N/A    |
| KCNK9                                                              | N/A    | -2     | N/A    | N/A    |
| PDGF-DD                                                            | N/A    | 2      | N/A    | N/A    |
| XDH                                                                | N/A    | -1     | -1     | N/A    |
| BRCA1                                                              | 1.141  | N/A    | N/A    | 0.853  |
| mir-155                                                            | N/A    | -0.12  | -1.478 | -0.391 |
| FGF9                                                               | N/A    | 1.982  | N/A    | N/A    |
| Raf                                                                | N/A    | N/A    | N/A    | 1.98   |
| JUND                                                               | N/A    | 1.98   | N/A    | N/A    |
| FSHR                                                               | N/A    | 1.98   | N/A    | N/A    |
| CIP2A                                                              | -0.333 | N/A    | -0.164 | -1.48  |
| simvastatin                                                        | -0.371 | -0.385 | 0.7    | 0.519  |
| norepinephrine                                                     | -0.419 | 0.854  | 0.393  | -0.307 |
| CD40LG                                                             | -0.259 | -0.043 | -0.826 | -0.844 |
| 22(R)-hydroxycholesterol                                           | 1.969  | N/A    | N/A    | N/A    |
| Stat3-Stat3                                                        | N/A    | N/A    | 1.964  | N/A    |
| IL11                                                               | N/A    | N/A    | 1.954  | N/A    |
| NFE2L2                                                             | N/A    | 1.946  | N/A    | N/A    |
| JUNB                                                               | N/A    | 1.944  | N/A    | N/A    |
| bisphenol A                                                        | N/A    | 1.943  | N/A    | N/A    |
| TWIST1                                                             | 0.333  | 1.604  | N/A    | N/A    |
| eplerenone                                                         | N/A    | -1.937 | 0      | N/A    |
| IL5                                                                | 0.747  | 1.184  | N/A    | N/A    |
| NFKB1                                                              | -0.308 | 0.475  | 1.145  | N/A    |

|                                             | MCWLS  | MCWHS  | CRLLS  | CRLHS  |
|---------------------------------------------|--------|--------|--------|--------|
| CXCR4                                       | 1.91   | N/A    | N/A    | N/A    |
| VHL                                         | N/A    | -0.802 | 0      | -1.107 |
| NR1H2                                       | 1.352  | N/A    | N/A    | 0.555  |
| MYOD1                                       | 0.808  | 1.095  | N/A    | N/A    |
| ST1926                                      | 1.897  | N/A    | N/A    | N/A    |
| phytohemagglutinin                          | N/A    | 0.976  | 0.918  | N/A    |
| RARG                                        | 0.186  | 0.469  | 0.469  | 0.766  |
| RAS                                         | N/A    | 1.854  | 0.034  | N/A    |
| GATA3                                       | -0.149 | -0.756 | -0.029 | -0.927 |
| NOG                                         | N/A    | N/A    | -1     | -0.853 |
| 8-bromoguanosine 3',5'-cyclic monophosphate | -0.339 | -1.506 | N/A    | N/A    |
| MSC                                         | 0.447  | 0.447  | 0.128  | -0.816 |
| 3,4,5,3',4'-pentachlorobiphenyl             | -0.587 | N/A    | -1.248 | N/A    |
| PAX1                                        | -1     | N/A    | N/A    | -0.816 |
| doxorubicin                                 | 0.422  | 0.466  | 0.792  | 0.124  |
| 3-deazaneplanocin                           | 0.365  | 0.277  | 0.973  | -0.186 |
| carboplatin                                 | 0.447  | 1.342  | N/A    | N/A    |
| adenosine triphosphate                      | 1.39   | N/A    | N/A    | 0.388  |
| nitrofurantoin                              | -1.257 | -0.508 | N/A    | N/A    |
| wortmannin                                  | -1.743 | N/A    | N/A    | N/A    |
| FSH                                         | 0.022  | 0.923  | -0.374 | -0.408 |
| lysophosphatidic acid                       | N/A    | N/A    | 1.725  | N/A    |
| CBFB                                        | -0.816 | N/A    | 0.447  | -0.447 |
| SPARC                                       | 0.871  | 0.244  | 0.587  | N/A    |
| OTX2                                        | 0.849  | N/A    | 0.849  | N/A    |
| OGA                                         | 0.447  | N/A    | 0.2    | -1.043 |
| 8-bromo-cAMP                                | N/A    | N/A    | 1.69   | N/A    |
| TGFB3                                       | N/A    | 1.677  | N/A    | N/A    |
| trichostatin A                              | 0.706  | N/A    | 0.549  | -0.418 |
| KITLG                                       | 1.671  | N/A    | N/A    | N/A    |
| SNAI1                                       | N/A    | -1.664 | N/A    | N/A    |
| CTLA4                                       | N/A    | N/A    | N/A    | 1.664  |
| PRKCA                                       | 0.269  | 1.387  | N/A    | N/A    |
| RHO                                         | -1.633 | N/A    | N/A    | N/A    |
| SPDEF                                       | N/A    | N/A    | -1.633 | N/A    |
| Hbb-b1                                      | N/A    | N/A    | 1.633  | N/A    |
| POU2F2                                      | -0.816 | -0.816 | N/A    | N/A    |
| hexachlorobenzene                           | N/A    | 0.816  | 0      | -0.816 |
| PPARA                                       | N/A    | 1.3    | 0.329  | N/A    |
| KDM1A                                       | N/A    | N/A    | 0.555  | 1.067  |
| ING1                                        | -0.555 | N/A    | -1.067 | N/A    |
| TRH                                         | 0.676  | 0.471  | N/A    | 0.471  |
| CD3                                         | -0.214 | N/A    | -0.188 | -1.206 |
| Y 27632                                     | N/A    | N/A    | -0.199 | -1.387 |
| napabucasin                                 | -0.816 | -0.378 | 0      | -0.378 |
| diethylstilbestrol                          | N/A    | 1.56   | N/A    | N/A    |
| FOXP1                                       | N/A    | N/A    | 0.776  | 0.776  |
| NCOA1                                       | N/A    | N/A    | 1.544  | N/A    |

|                                               | MCWLS  | MCWHS  | CRLLS  | CRLHS  |
|-----------------------------------------------|--------|--------|--------|--------|
| PTPN11                                        | N/A    | N/A    | 1.532  | N/A    |
| butyric acid                                  | 0.984  | 0.006  | 0.416  | -0.125 |
| TFAP2A                                        | N/A    | 1.526  | N/A    | N/A    |
| hydrogen peroxide                             | N/A    | 1.515  | N/A    | N/A    |
| salmonella minnesota R595 lipopolysaccharides | -0.146 | 0.555  | N/A    | -0.805 |
| STAT1                                         | 1.491  | N/A    | N/A    | N/A    |
| gentamicin                                    | -1.127 | N/A    | -0.081 | -0.277 |
| GDNF                                          | N/A    | N/A    | 1.473  | N/A    |
| triamcinolone acetonide                       | -0.399 | 0.898  | 0.171  | N/A    |
| IRS1                                          | 0.943  | 0.028  | 0.49   | N/A    |
| miR-1-3p (and other miRNAs w/seed GGAAUGU)    | N/A    | N/A    | -0.899 | -0.559 |
| SREBF2                                        | N/A    | 1.455  | N/A    | N/A    |
| corticosterone                                | N/A    | 1.45   | N/A    | N/A    |
| TXNIP                                         | 1.446  | N/A    | N/A    | N/A    |
| FOXC2                                         | N/A    | 1.432  | N/A    | N/A    |
| KLF6                                          | -0.045 | N/A    | N/A    | -1.377 |
| EGR1                                          | 0.022  | 1.394  | N/A    | N/A    |
| 5-azacytidine                                 | N/A    | N/A    | -0.563 | -0.853 |
| BMP6                                          | N/A    | 0.6    | 0.816  | N/A    |
| nocodazole                                    | 1.414  | N/A    | N/A    | N/A    |
| HRAS                                          | -0.236 | 0.831  | 0.271  | 0.071  |
| lithium chloride                              | N/A    | N/A    | 0.702  | 0.702  |
| IL4                                           | -0.401 | 0.733  | -0.141 | -0.125 |
| silibinin                                     | N/A    | -1.4   | N/A    | N/A    |
| advanced glycation end-products               | N/A    | 1.4    | N/A    | N/A    |
| PCGF2                                         | 0.44   | N/A    | 0.882  | 0.068  |
| miR-17-5p (and other miRNAs w/seed AAAGUGC)   | N/A    | N/A    | N/A    | 1.39   |
| SB 216763                                     | N/A    | N/A    | 1.387  | N/A    |
| bortezomib                                    | N/A    | N/A    | 1.373  | N/A    |
| miR-141-3p (and other miRNAs w/seed AACACUG)  | N/A    | N/A    | N/A    | -1.369 |
| VDR                                           | 0.348  | 0.509  | 0.509  | N/A    |
| 7-ketocholesterol                             | N/A    | 1.103  | 0.254  | N/A    |
| bee venom                                     | 0.225  | 0.225  | -0.246 | 0.648  |
| bromodeoxyuridine                             | N/A    | N/A    | 1.342  | N/A    |
| 2,3,4,7,8-pentachlorodibenzofuran             | N/A    | N/A    | -1.342 | N/A    |
| tributyrin                                    | N/A    | N/A    | 1.342  | N/A    |
| linoleic acid                                 | 1.342  | N/A    | N/A    | N/A    |
| NRG1                                          | N/A    | N/A    | 1.336  | N/A    |
| 5-N-ethylcarboxamido adenosine                | -0.432 | 0.115  | 0.362  | 0.418  |
| agmatine                                      | N/A    | N/A    | N/A    | 1.325  |
| FGFR2                                         | 0.298  | -0.345 | 0.154  | 0.507  |
| SPHK1                                         | N/A    | 0.332  | 0.958  | N/A    |
| NOSTRIN                                       | N/A    | -1.287 | N/A    | N/A    |
| BACH2                                         | N/A    | N/A    | 0.634  | 0.634  |
| ETS1                                          | 0.862  | 0.219  | 0.187  | N/A    |
| AHR                                           | -0.279 | -0.54  | -0.447 | N/A    |
| mibolerone                                    | -1.265 | 0      | N/A    | N/A    |
| HIC1                                          | N/A    | -0.447 | 0.816  | N/A    |

|                      | MCWLS  | MCWHS  | CRLLS  | CRLHS  |
|----------------------|--------|--------|--------|--------|
| EPHB4                | N/A    | N/A    | 0.447  | 0.816  |
| GRB2                 | -0.447 | N/A    | N/A    | -0.816 |
| BCR (complex)        | -1.256 | N/A    | N/A    | N/A    |
| NR1H3                | 1.255  | N/A    | N/A    | 0      |
| TP73                 | -0.142 | -0.618 | 0.146  | -0.326 |
| ISL1                 | -1.178 | N/A    | N/A    | 0.051  |
| ANGPT2               | 1.117  | N/A    | -0.102 | N/A    |
| HLX                  | N/A    | N/A    | -1.067 | 0.152  |
| LIPE                 | N/A    | N/A    | -0.152 | -1.067 |
| sodium arsenite      | 1.067  | N/A    | 0.152  | N/A    |
| RARB                 | 0.788  | N/A    | 0.426  | N/A    |
| AZGP1                | -0.651 | -0.555 | N/A    | N/A    |
| CFTR                 | -0.391 | N/A    | N/A    | 0.808  |
| CDH1                 | 0.64   | -0.555 | N/A    | N/A    |
| BDNF                 | 0.298  | -0.19  | -0.666 | -0.025 |
| Laminin (complex)    | N/A    | N/A    | N/A    | -1.172 |
| RBL1                 | N/A    | N/A    | N/A    | 1.165  |
| N-methyl-D-aspartate | 1.154  | N/A    | N/A    | N/A    |
| ARNTL                | N/A    | N/A    | 1.154  | N/A    |
| L-dopa               | 0      | 0.663  | 0      | -0.48  |
| captopril            | 0.896  | -0.239 | N/A    | N/A    |
| F3                   | N/A    | 1.134  | N/A    | N/A    |
| DNMT3A               | N/A    | N/A    | -1.134 | N/A    |
| NFATC1               | N/A    | N/A    | 1.134  | N/A    |
| SLC13A1              | N/A    | 1.134  | N/A    | N/A    |
| PTH1R                | N/A    | 1.131  | N/A    | N/A    |
| TGFBR2               | 0.633  | 0.496  | N/A    | N/A    |
| AMPK                 | N/A    | N/A    | -0.411 | -0.707 |
| epoxomicin           | -1.091 | N/A    | N/A    | N/A    |
| fulvestrant          | N/A    | N/A    | N/A    | 1.083  |
| PCDH11Y              | 0      | N/A    | -1.067 | 0      |
| phenacetin           | N/A    | 1.067  | N/A    | N/A    |
| 3-aminobenzamide     | N/A    | N/A    | N/A    | 1.067  |
| KDR                  | N/A    | N/A    | 1.067  | N/A    |
| SPRY2                | N/A    | N/A    | N/A    | -1.067 |
| SFRP1                | N/A    | -1.067 | N/A    | N/A    |
| SPI1                 | N/A    | N/A    | N/A    | -1.065 |
| KL                   | N/A    | -0.506 | 0.554  | N/A    |
| tamoxifen            | -0.03  | N/A    | 0.474  | 0.554  |
| CDK4/6               | 0.378  | N/A    | 0.333  | -0.333 |
| F2R                  | N/A    | 1.044  | N/A    | N/A    |
| MYB                  | -0.326 | N/A    | -0.649 | -0.038 |
| PPP3R1               | 1      | N/A    | N/A    | N/A    |
| HBA1/HBA2            | 0      | N/A    | 1      | N/A    |
| NANOG                | N/A    | N/A    | 1      | N/A    |
| SAHM1                | N/A    | -1     | N/A    | N/A    |
| SENP1                | N/A    | -1     | N/A    | N/A    |
| UHRF2                | 1      | N/A    | N/A    | 0      |

|                                              | MCWLS  | MCWHS  | CRLLS  | CRLHS  |
|----------------------------------------------|--------|--------|--------|--------|
| CHADL                                        | -1     | 0      | N/A    | N/A    |
| 2,4-dinitrophenol-ovalbumin conjugate        | N/A    | 1      | N/A    | N/A    |
| TRADD                                        | 1      | N/A    | N/A    | N/A    |
| 2-methoxyestradiol                           | N/A    | N/A    | N/A    | 1      |
| ELF3                                         | N/A    | 1      | N/A    | N/A    |
| GNRH1                                        | N/A    | 0.986  | N/A    | N/A    |
| TCF3                                         | -0.227 | 0.096  | -0.254 | 0.408  |
| MMP14                                        | 0.301  | N/A    | N/A    | 0.68   |
| epigallocatechin-gallate                     | N/A    | 0.162  | 0.811  | N/A    |
| TBX21                                        | -0.14  | N/A    | -0.14  | -0.689 |
| mir-30                                       | 0.965  | N/A    | N/A    | N/A    |
| HES1                                         | N/A    | -0.57  | -0.391 | N/A    |
| AG490                                        | N/A    | N/A    | N/A    | -0.956 |
| androgen                                     | 0.194  | 0      | 0.659  | -0.102 |
| VCAN                                         | N/A    | -0.954 | N/A    | N/A    |
| NFKBIB                                       | -0.943 | N/A    | N/A    | N/A    |
| PRNP                                         | N/A    | 0.106  | N/A    | -0.83  |
| PPARGC1A                                     | -0.885 | -0.048 | N/A    | N/A    |
| cholic acid                                  | N/A    | 0.933  | N/A    | N/A    |
| STAT6                                        | -0.103 | 0.687  | 0.131  | N/A    |
| tacrolimus                                   | 0.008  | 0.475  | -0.084 | -0.345 |
| WT1                                          | N/A    | 0.499  | -0.402 | N/A    |
| NGF                                          | N/A    | N/A    | N/A    | 0.899  |
| FOXP3                                        | -0.447 | N/A    | N/A    | -0.447 |
| miR-27a-3p (and other miRNAs w/seed UCACAGU) | N/A    | 0.875  | N/A    | N/A    |
| ZBTB7B                                       | 0.218  | 0.218  | 0.218  | 0.218  |
| miR-143-3p (and other miRNAs w/seed GAGAUGA) | N/A    | N/A    | N/A    | -0.865 |
| docosahexaenoic acid                         | N/A    | -0.296 | 0.545  | N/A    |
| quinolinic acid                              | 0.191  | N/A    | 0.646  | N/A    |
| PRL                                          | 0.403  | N/A    | N/A    | -0.43  |
| 26s Proteasome                               | N/A    | N/A    | -0.198 | 0.63   |
| diethylnitrosamine                           | N/A    | -0.816 | N/A    | N/A    |
| dibutyl phthalate                            | N/A    | -0.807 | N/A    | N/A    |
| NFIX                                         | N/A    | 0.805  | N/A    | N/A    |
| chenodeoxycholic acid                        | N/A    | N/A    | 0.802  | N/A    |
| SKIL                                         | N/A    | N/A    | 0.762  | N/A    |
| MST1                                         | N/A    | N/A    | -0.762 | N/A    |
| RUVBL1                                       | 0.762  | N/A    | N/A    | N/A    |
| TNFSF13                                      | N/A    | N/A    | N/A    | -0.762 |
| TRIM28                                       | N/A    | -0.762 | N/A    | N/A    |
| PIIF                                         | N/A    | -0.378 | -0.378 | N/A    |
| sulindac sulfide                             | 0.696  | N/A    | -0.053 | N/A    |
| DGCR8                                        | -0.728 | N/A    | N/A    | N/A    |
| vitamin D                                    | 0.44   | N/A    | N/A    | -0.277 |
| clozapine                                    | 0.152  | N/A    | 0.555  | N/A    |
| FLT1                                         | N/A    | -0.707 | N/A    | N/A    |
| WNT1                                         | 0.094  | 0.194  | -0.149 | -0.24  |
| 5-fluorouracil                               | N/A    | N/A    | N/A    | 0.664  |

|                                              | MCWLS  | MCWHS  | CRLLS  | CRLHS  |
|----------------------------------------------|--------|--------|--------|--------|
| glutamine                                    | N/A    | N/A    | N/A    | 0.657  |
| estrogen receptor                            | N/A    | 0.653  | N/A    | N/A    |
| NR4A2                                        | N/A    | N/A    | -0.643 | N/A    |
| cholecalciferol                              | N/A    | N/A    | 0.631  | N/A    |
| APP                                          | 0.148  | 0.037  | 0.036  | -0.408 |
| EGR2                                         | 0.426  | N/A    | N/A    | -0.183 |
| GCK                                          | -0.152 | N/A    | 0      | 0.447  |
| CHEK1                                        | N/A    | N/A    | N/A    | 0.594  |
| eicosapentenoic acid                         | N/A    | 0.592  | N/A    | N/A    |
| ADRB                                         | N/A    | N/A    | N/A    | -0.579 |
| rotenone                                     | N/A    | N/A    | -0.577 | N/A    |
| mir-24                                       | N/A    | -0.57  | N/A    | N/A    |
| FBXO32                                       | -0.57  | N/A    | N/A    | N/A    |
| platelet activating factor                   | N/A    | 0.555  | N/A    | N/A    |
| TAF4                                         | N/A    | -0.555 | N/A    | N/A    |
| WNT5A                                        | -0.552 | 0      | N/A    | N/A    |
| MET                                          | -0.224 | -0.325 | N/A    | N/A    |
| GABBR1                                       | N/A    | N/A    | -0.272 | -0.272 |
| IFNB1                                        | -0.543 | N/A    | N/A    | N/A    |
| selumetinib                                  | N/A    | N/A    | N/A    | -0.529 |
| SLC16A2                                      | -0.243 | 0.277  | N/A    | N/A    |
| mir-8                                        | N/A    | N/A    | N/A    | -0.506 |
| stearic acid                                 | N/A    | N/A    | N/A    | 0.492  |
| miR-34a-5p (and other miRNAs w/seed GGCAGUG) | N/A    | N/A    | N/A    | 0.491  |
| CLEC4G                                       | N/A    | N/A    | N/A    | -0.485 |
| Ro41-5253                                    | N/A    | N/A    | N/A    | 0.485  |
| pioglitazone                                 | 0.404  | -0.076 | N/A    | N/A    |
| HDAC1                                        | N/A    | 0.475  | N/A    | N/A    |
| cholesterol                                  | N/A    | 0.47   | N/A    | N/A    |
| KLF15                                        | N/A    | 0.393  | 0.06   | N/A    |
| 12-(3-adamantan-1-yl-ureido) dodecanoic acid | 0.447  | N/A    | N/A    | N/A    |
| CRNDE                                        | 0.447  | N/A    | N/A    | 0      |
| CD5                                          | N/A    | -0.447 | N/A    | N/A    |
| PSEN2                                        | N/A    | -0.051 | N/A    | -0.373 |
| JAG2                                         | N/A    | N/A    | -0.218 | 0.2    |
| INS                                          | -0.087 | N/A    | -0.322 | N/A    |
| dimethyl sulfoxide                           | 0.396  | N/A    | N/A    | N/A    |
| E. coli serotype 0127B8 lipopolysaccharide   | N/A    | N/A    | -0.302 | -0.093 |
| FGFR1                                        | N/A    | 0.378  | N/A    | 0      |
| PI3K (complex)                               | N/A    | N/A    | 0.081  | 0.296  |
| FSHB                                         | N/A    | 0.371  | N/A    | N/A    |
| TICAM1                                       | -0.306 | N/A    | N/A    | N/A    |
| LRP6                                         | N/A    | N/A    | 0.152  | 0.152  |
| GLI3                                         | N/A    | -0.152 | -0.152 | N/A    |
| CNR1                                         | N/A    | N/A    | N/A    | -0.302 |
| ACOX1                                        | N/A    | 0.302  | N/A    | N/A    |
| DLL4                                         | 0      | 0      | 0.293  | N/A    |
| TLR2                                         | N/A    | N/A    | -0.293 | N/A    |



|                                               | MCWLS  | MCWHS  | CRLLS  | CRLHS  |
|-----------------------------------------------|--------|--------|--------|--------|
| NR2F2                                         | 0.283  | N/A    | N/A    | N/A    |
| prednisolone                                  | -0.277 | N/A    | N/A    | N/A    |
| IFRD1                                         | N/A    | -0.277 | N/A    | N/A    |
| (+)-MK-801                                    | -0.268 | N/A    | N/A    | N/A    |
| INHA                                          | N/A    | -0.026 | -0.239 | N/A    |
| SNCA                                          | 0.208  | N/A    | -0.054 | N/A    |
| hydrocortisone                                | -0.248 | N/A    | N/A    | N/A    |
| PTPN1                                         | 0.243  | N/A    | N/A    | N/A    |
| CCL2                                          | 0.115  | N/A    | 0.115  | N/A    |
| IRF8                                          | N/A    | N/A    | 0.229  | N/A    |
| FOXO4                                         | N/A    | N/A    | N/A    | 0.218  |
| gefitinib                                     | -0.106 | N/A    | 0.106  | N/A    |
| miR-483-3p (miRNAs w/seed CACUCCU)            | N/A    | N/A    | N/A    | -0.203 |
| miR-203a-3p (and other miRNAs w/seed UGAAAUG) | N/A    | N/A    | N/A    | -0.2   |
| HOXD10                                        | 0.186  | N/A    | N/A    | N/A    |
| STUB1                                         | N/A    | N/A    | N/A    | -0.152 |
| ALDH1A2                                       | N/A    | -0.152 | N/A    | N/A    |
| SQSTM1                                        | -0.152 | N/A    | N/A    | N/A    |
| CDX2                                          | N/A    | N/A    | 0.152  | N/A    |
| DMP1                                          | N/A    | N/A    | N/A    | -0.132 |
| glucocorticoid                                | 0.132  | N/A    | N/A    | N/A    |
| CLOCK                                         | N/A    | -0.128 | N/A    | N/A    |
| GAST                                          | 0.128  | N/A    | N/A    | N/A    |
| PDCD1                                         | N/A    | N/A    | N/A    | 0.128  |
| arotinoid acid                                | N/A    | N/A    | 0.119  | 0      |
| GW 4064                                       | N/A    | -0.109 | N/A    | N/A    |
| testosterone propionate                       | 0.087  | N/A    | N/A    | N/A    |
| GNA12                                         | N/A    | 0.075  | N/A    | N/A    |
| YAP1                                          | N/A    | N/A    | N/A    | -0.064 |
| BCOR                                          | N/A    | N/A    | N/A    | N/A    |
| TDG                                           | N/A    | N/A    | N/A    | N/A    |
| ZFPM1                                         | N/A    | N/A    | N/A    | N/A    |
| FOXF1                                         | N/A    | N/A    | N/A    | N/A    |
| CHMP3                                         | N/A    | N/A    | N/A    | N/A    |
| HAND1                                         | N/A    | N/A    | N/A    | N/A    |
| PCBP2                                         | N/A    | N/A    | N/A    | N/A    |
| TCF                                           | N/A    | N/A    | N/A    | N/A    |
| DNAJC24                                       | N/A    | N/A    | N/A    | N/A    |
| FGF19                                         | N/A    | N/A    | N/A    | N/A    |
| GDF1                                          | N/A    | N/A    | N/A    | N/A    |
| STX2                                          | N/A    | N/A    | N/A    | N/A    |
| H2AFX                                         | N/A    | N/A    | N/A    | N/A    |
| DFFA                                          | N/A    | N/A    | N/A    | N/A    |
| GRHL2                                         | N/A    | N/A    | N/A    | N/A    |
| PRKAB2                                        | N/A    | N/A    | N/A    | N/A    |
| pirfenidone                                   | N/A    | N/A    | N/A    | N/A    |
| SEMA7A                                        | N/A    | N/A    | N/A    | N/A    |
| SERPIND1                                      | N/A    | N/A    | N/A    | N/A    |

|                                 | MCWLS | MCWHS | CRLLS | CRLHS |
|---------------------------------|-------|-------|-------|-------|
| tyrosine kinase inhibitor       | N/A   | N/A   | N/A   | N/A   |
| KCNIP4-IT1                      | N/A   | N/A   | N/A   | N/A   |
| XRCC2                           | N/A   | N/A   | N/A   | N/A   |
| PAX2                            | N/A   | N/A   | N/A   | N/A   |
| carbenoxolone                   | N/A   | N/A   | N/A   | N/A   |
| NFIC                            | N/A   | N/A   | N/A   | N/A   |
| M-PTH(1-28)                     | N/A   | N/A   | N/A   | N/A   |
| Ggt                             | N/A   | N/A   | N/A   | N/A   |
| HOXB6                           | N/A   | N/A   | N/A   | N/A   |
| DDB2                            | N/A   | N/A   | N/A   | N/A   |
| 2-nitrophenyl EGTA              | N/A   | N/A   | N/A   | N/A   |
| MAP2K5                          | N/A   | N/A   | N/A   | N/A   |
| Sry                             | N/A   | N/A   | N/A   | N/A   |
| RCE1                            | N/A   | N/A   | N/A   | N/A   |
| RBP7                            | N/A   | N/A   | N/A   | N/A   |
| EFEMP2                          | N/A   | N/A   | N/A   | N/A   |
| SPZ1                            | N/A   | N/A   | N/A   | N/A   |
| DNAJC14                         | N/A   | N/A   | N/A   | N/A   |
| Pld                             | N/A   | N/A   | N/A   | N/A   |
| RBP4                            | N/A   | N/A   | N/A   | N/A   |
| SETD2                           | N/A   | N/A   | N/A   | N/A   |
| sucrose                         | N/A   | N/A   | N/A   | N/A   |
| thyroid hormone receptor        | N/A   | N/A   | N/A   | N/A   |
| NR2C2                           | N/A   | N/A   | N/A   | N/A   |
| AIP                             | N/A   | N/A   | N/A   | N/A   |
| aurothioglucose                 | N/A   | N/A   | N/A   | N/A   |
| MECP2                           | N/A   | N/A   | N/A   | N/A   |
| PRDM5                           | N/A   | N/A   | N/A   | N/A   |
| EED                             | N/A   | N/A   | N/A   | N/A   |
| XRCC5                           | N/A   | N/A   | N/A   | N/A   |
| HEYL                            | N/A   | N/A   | N/A   | N/A   |
| HOXB5                           | N/A   | N/A   | N/A   | N/A   |
| SPTBN4                          | N/A   | N/A   | N/A   | N/A   |
| SOX17                           | N/A   | N/A   | N/A   | N/A   |
| FZD4                            | N/A   | N/A   | N/A   | N/A   |
| CLDN7                           | N/A   | 0     | 0     | N/A   |
| hydrocortisone phosphate        | N/A   | N/A   | N/A   | N/A   |
| MBD1                            | N/A   | N/A   | N/A   | N/A   |
| acetylcholine                   | N/A   | N/A   | N/A   | N/A   |
| HOXD1                           | N/A   | N/A   | N/A   | N/A   |
| HHEX                            | N/A   | N/A   | N/A   | N/A   |
| Ap2 alpha                       | N/A   | N/A   | N/A   | N/A   |
| ERP29                           | N/A   | N/A   | N/A   | N/A   |
| ASB4                            | N/A   | N/A   | N/A   | N/A   |
| ATRX                            | N/A   | N/A   | N/A   | N/A   |
| ITCH                            | N/A   | N/A   | N/A   | N/A   |
| miR-690 (miRNAs w/seed AAGGCUA) | N/A   | N/A   | N/A   | N/A   |
| CSRP3                           | N/A   | N/A   | N/A   | N/A   |

|                                             | MCWLS | MCWHS | CRLLS | CRLHS |
|---------------------------------------------|-------|-------|-------|-------|
| Hnf3                                        | N/A   | N/A   | N/A   | N/A   |
| juglone                                     | N/A   | N/A   | N/A   | N/A   |
| NONO                                        | 0     | N/A   | 0     | 0     |
| IDH2                                        | N/A   | N/A   | N/A   | N/A   |
| TMCG                                        | N/A   | N/A   | N/A   | N/A   |
| HDAC9                                       | N/A   | N/A   | N/A   | N/A   |
| CDK8                                        | N/A   | N/A   | N/A   | N/A   |
| BTRC                                        | N/A   | N/A   | N/A   | N/A   |
| GPC1                                        | N/A   | N/A   | N/A   | N/A   |
| acetone                                     | N/A   | N/A   | N/A   | N/A   |
| mir-602                                     | N/A   | N/A   | N/A   | N/A   |
| MCM10                                       | N/A   | N/A   | N/A   | N/A   |
| GBX2                                        | N/A   | N/A   | N/A   | N/A   |
| PCK1                                        | N/A   | N/A   | N/A   | N/A   |
| FOXI2                                       | N/A   | N/A   | N/A   | N/A   |
| CCK                                         | N/A   | N/A   | N/A   | N/A   |
| loganin                                     | N/A   | N/A   | N/A   | N/A   |
| FERMT3                                      | N/A   | N/A   | N/A   | N/A   |
| G protein alphas                            | N/A   | N/A   | N/A   | N/A   |
| DLL1                                        | N/A   | N/A   | N/A   | N/A   |
| KREMEN1                                     | N/A   | N/A   | N/A   | N/A   |
| topiramate                                  | N/A   | N/A   | N/A   | N/A   |
| HIST1H3E                                    | N/A   | N/A   | N/A   | N/A   |
| LINC00963                                   | N/A   | N/A   | N/A   | N/A   |
| MEF2D                                       | N/A   | N/A   | N/A   | N/A   |
| FGF23                                       | N/A   | N/A   | N/A   | N/A   |
| COLQ                                        | N/A   | N/A   | N/A   | N/A   |
| pivaloyloxymethyl butyrate                  | N/A   | N/A   | N/A   | N/A   |
| IGFBP4                                      | N/A   | N/A   | N/A   | N/A   |
| mir-25                                      | N/A   | 0     | N/A   | N/A   |
| androstenediol                              | N/A   | N/A   | N/A   | N/A   |
| PROK1                                       | N/A   | N/A   | N/A   | N/A   |
| miR-139-5p (miRNAs w/seed CUACAGU)          | N/A   | N/A   | N/A   | N/A   |
| SLC12A2                                     | N/A   | N/A   | N/A   | N/A   |
| TNFRSF13B                                   | N/A   | N/A   | N/A   | N/A   |
| MED17                                       | N/A   | N/A   | N/A   | N/A   |
| triamcinolone                               | N/A   | N/A   | N/A   | N/A   |
| SPAST                                       | N/A   | N/A   | N/A   | N/A   |
| ADM2                                        | N/A   | N/A   | N/A   | N/A   |
| rituximab                                   | N/A   | N/A   | N/A   | N/A   |
| 1-(carboxymethylthio)tetradecane            | N/A   | N/A   | N/A   | N/A   |
| LASP1                                       | N/A   | N/A   | N/A   | N/A   |
| TCF4                                        | N/A   | N/A   | N/A   | N/A   |
| LPAR1                                       | N/A   | N/A   | N/A   | N/A   |
| KIF11                                       | N/A   | N/A   | N/A   | N/A   |
| urea                                        | N/A   | N/A   | N/A   | N/A   |
| dexamethasone phosphate                     | N/A   | N/A   | N/A   | N/A   |
| miR-31-5p (and other miRNAs w/seed GGCAAGA) | N/A   | N/A   | N/A   | N/A   |

|                              | MCWLS | MCWHS | CRLLS | CRLHS |
|------------------------------|-------|-------|-------|-------|
| FZD2                         | N/A   | N/A   | N/A   | N/A   |
| phenytoin                    | N/A   | N/A   | N/A   | N/A   |
| LGALS12                      | N/A   | N/A   | N/A   | N/A   |
| NTRK1                        | N/A   | N/A   | N/A   | N/A   |
| STRA6                        | N/A   | N/A   | N/A   | N/A   |
| CYP1A1                       | N/A   | N/A   | N/A   | N/A   |
| DNA-PK                       | N/A   | N/A   | N/A   | N/A   |
| dactolisib                   | N/A   | N/A   | N/A   | N/A   |
| Trp1-M-PTH(1-28)             | N/A   | N/A   | N/A   | N/A   |
| pregna-4,17-diene-3,16-dione | N/A   | N/A   | N/A   | N/A   |
| ADCY3                        | N/A   | N/A   | N/A   | N/A   |
| IL31                         | N/A   | N/A   | N/A   | N/A   |
| DOT1L                        | N/A   | N/A   | N/A   | N/A   |
| STAR                         | N/A   | N/A   | N/A   | N/A   |
| WNT2                         | N/A   | N/A   | N/A   | N/A   |
| NXF3                         | N/A   | N/A   | N/A   | N/A   |
| RANBP2                       | N/A   | N/A   | N/A   | N/A   |
| IPCEF1                       | N/A   | N/A   | N/A   | N/A   |
| DL-threo-dihydrosphingosine  | N/A   | N/A   | N/A   | N/A   |
| FLCN                         | N/A   | N/A   | N/A   | N/A   |
| dextrorphan                  | N/A   | N/A   | N/A   | N/A   |
| ABCA12                       | N/A   | N/A   | N/A   | N/A   |
| C8                           | N/A   | N/A   | N/A   | N/A   |
| flavokawain C                | N/A   | N/A   | N/A   | N/A   |
| KREMEN2                      | N/A   | N/A   | N/A   | N/A   |
| Ras homolog                  | N/A   | N/A   | N/A   | N/A   |
| GSC                          | N/A   | N/A   | N/A   | N/A   |
| DPH2                         | N/A   | N/A   | N/A   | N/A   |
| BMP10                        | N/A   | N/A   | N/A   | N/A   |
| ETV5                         | N/A   | N/A   | N/A   | N/A   |
| HOTAIRM1                     | N/A   | N/A   | N/A   | N/A   |
| LRP2                         | N/A   | N/A   | N/A   | N/A   |
| hesperetin                   | N/A   | N/A   | N/A   | N/A   |
| gestodene                    | N/A   | N/A   | N/A   | N/A   |
| teasaponin                   | N/A   | N/A   | N/A   | N/A   |
| Rap                          | N/A   | N/A   | N/A   | N/A   |
| ASB9                         | N/A   | N/A   | N/A   | N/A   |
| LNX2                         | N/A   | N/A   | N/A   | N/A   |
| PNPLA8                       | N/A   | N/A   | N/A   | N/A   |
| CLCN5                        | N/A   | N/A   | N/A   | N/A   |
| GAL3ST1                      | N/A   | N/A   | N/A   | N/A   |
| LAMC1                        | N/A   | N/A   | N/A   | N/A   |
| HSP90AB1                     | N/A   | N/A   | N/A   | N/A   |
| IL6ST                        | N/A   | N/A   | N/A   | N/A   |
| GW7647                       | N/A   | N/A   | N/A   | N/A   |
| volinanserin                 | N/A   | N/A   | N/A   | N/A   |
| SMAD1/5                      | N/A   | N/A   | N/A   | N/A   |
| DMTN                         | N/A   | N/A   | N/A   | N/A   |

|                                    | MCWLS | MCWHS | CRLLS | CRLHS |
|------------------------------------|-------|-------|-------|-------|
| mir-326                            | N/A   | N/A   | N/A   | N/A   |
| SIX1                               | N/A   | N/A   | N/A   | N/A   |
| PROKR1                             | N/A   | N/A   | N/A   | N/A   |
| ESRRB                              | N/A   | N/A   | N/A   | N/A   |
| miR-602 (miRNAs w/seed ACACGGG)    | N/A   | N/A   | N/A   | N/A   |
| FOXN4                              | N/A   | N/A   | N/A   | N/A   |
| AEBP1                              | N/A   | N/A   | N/A   | N/A   |
| miR-138-5p (miRNAs w/seed GCUGGUG) | N/A   | N/A   | N/A   | N/A   |
| EBF2                               | N/A   | N/A   | N/A   | N/A   |
| PAX9                               | N/A   | N/A   | N/A   | N/A   |
| GNG2                               | N/A   | N/A   | N/A   | N/A   |
| diclofenac/hyaluronic acid         | N/A   | N/A   | N/A   | N/A   |
| SHP                                | N/A   | N/A   | N/A   | N/A   |
| cercosporin                        | N/A   | N/A   | N/A   | N/A   |
| AXIN2                              | N/A   | N/A   | N/A   | N/A   |
| NRAS                               | N/A   | N/A   | N/A   | N/A   |
| miR-211-3p (miRNAs w/seed CAGGGAC) | N/A   | N/A   | N/A   | N/A   |
| PPP1R13B                           | N/A   | N/A   | N/A   | N/A   |
| CGB3 (includes others)             | N/A   | N/A   | N/A   | N/A   |
| Rsk                                | N/A   | N/A   | N/A   | N/A   |
| fingolimod phosphate               | N/A   | N/A   | N/A   | N/A   |
| ZFP57                              | N/A   | N/A   | N/A   | N/A   |
| DNMT3L                             | N/A   | N/A   | N/A   | N/A   |
| JUP                                | N/A   | N/A   | N/A   | N/A   |
| arachidonyl-2-chloroethylamide     | N/A   | N/A   | N/A   | N/A   |
| droxinostat                        | N/A   | N/A   | N/A   | N/A   |
| CA1                                | N/A   | N/A   | N/A   | N/A   |
| TAF4B                              | N/A   | N/A   | N/A   | N/A   |
| SDR9C7                             | N/A   | N/A   | N/A   | N/A   |
| CNR2                               | N/A   | N/A   | N/A   | N/A   |
| podophyllotoxin                    | N/A   | N/A   | N/A   | N/A   |
| LGR4                               | N/A   | N/A   | N/A   | N/A   |
| ATF1                               | N/A   | N/A   | N/A   | N/A   |
| ALKBH5                             | N/A   | N/A   | N/A   | N/A   |
| FEM1A                              | N/A   | N/A   | N/A   | N/A   |
| ATN1                               | N/A   | N/A   | N/A   | N/A   |
| MBD3                               | N/A   | N/A   | N/A   | N/A   |
| GDC-0623                           | N/A   | N/A   | N/A   | N/A   |
| thiocoraline                       | N/A   | N/A   | N/A   | N/A   |
| EIF2AK2                            |       | 0     | N/A   | N/A   |
| MECOM                              | N/A   | N/A   |       | 0     |
| APLN                               | N/A   | N/A   |       | 0     |
| desoxycorticosterone               | N/A   | N/A   | N/A   | N/A   |
| ALDH1A1                            | N/A   | N/A   | N/A   | N/A   |
| cytarabine/idarubicin              | N/A   | N/A   | N/A   | N/A   |
| HOXA5                              | N/A   | N/A   | N/A   | N/A   |
| FENDRR                             | N/A   | N/A   | N/A   | N/A   |
| BMI1                               | N/A   | N/A   | N/A   | N/A   |

|                                               | MCWLS | MCWHS | CRLLS | CRLHS |
|-----------------------------------------------|-------|-------|-------|-------|
| Pdpk                                          | N/A   | N/A   | N/A   | N/A   |
| ACO1                                          | N/A   | N/A   | N/A   | N/A   |
| Sos                                           | N/A   | N/A   | N/A   | N/A   |
| PLRG1                                         | N/A   | N/A   | N/A   | N/A   |
| IREB2                                         | N/A   | N/A   | N/A   | N/A   |
| mir-486                                       | N/A   | N/A   | N/A   | N/A   |
| mir-23                                        | N/A   | N/A   | N/A   | N/A   |
| PCYT1A                                        | N/A   | N/A   | N/A   | N/A   |
| TEAD                                          | N/A   | N/A   | N/A   | N/A   |
| agar                                          | N/A   | N/A   | N/A   | N/A   |
| UHMK1                                         | N/A   | N/A   | N/A   | N/A   |
| interferon beta-1a                            | N/A   | N/A   | N/A   | N/A   |
| GNAQ                                          | N/A   | N/A   | N/A   | N/A   |
| 6,7-dinitroquinoxaline-2,3-dione              | N/A   | N/A   | N/A   | N/A   |
| Irs3                                          | N/A   | N/A   | N/A   | N/A   |
| NR4A3                                         | N/A   | N/A   | N/A   | N/A   |
| GFI1B                                         | N/A   | N/A   | N/A   | N/A   |
| ZNF536                                        | N/A   | N/A   | N/A   | N/A   |
| TET3                                          | N/A   | N/A   | N/A   | N/A   |
| MED28                                         | N/A   | N/A   | N/A   | N/A   |
| Pde                                           | N/A   | N/A   | N/A   | N/A   |
| PRKCI                                         | N/A   | N/A   | N/A   | N/A   |
| FZR1                                          | N/A   | N/A   | N/A   | N/A   |
| Ren2                                          | N/A   | N/A   | N/A   | N/A   |
| LCK                                           | N/A   | N/A   | N/A   | N/A   |
| amino acids                                   | N/A   | N/A   | N/A   | N/A   |
| isobutyric acid                               | N/A   | N/A   | N/A   | N/A   |
| CKAP4                                         | N/A   | N/A   | N/A   | N/A   |
| Pantr2                                        | N/A   | N/A   | N/A   | N/A   |
| retinol acetate                               | N/A   | N/A   | N/A   | N/A   |
| Patched                                       | N/A   | N/A   | N/A   | N/A   |
| decanoic acid                                 | N/A   | N/A   | N/A   | N/A   |
| CLCF1                                         | N/A   | N/A   | N/A   | N/A   |
| MIR17HG                                       | N/A   | N/A   | N/A   | N/A   |
| SLC2A2                                        | N/A   | N/A   | N/A   | N/A   |
| HOXD3                                         | N/A   | N/A   | N/A   | N/A   |
| MSX2                                          | N/A   | N/A   | N/A   | N/A   |
| Ctnna                                         | N/A   | N/A   | N/A   | N/A   |
| miR-199a-3p (and other miRNAs w/seed CAGUAGU) | N/A   | N/A   | N/A   | N/A   |
| myristic acid                                 | N/A   | N/A   | N/A   | N/A   |
| HOXD9                                         | N/A   | N/A   | N/A   | N/A   |
| PUS1                                          | N/A   | N/A   | N/A   | N/A   |
| acetic acid                                   | N/A   | N/A   | N/A   | N/A   |
| ARRB1                                         | N/A   | N/A   | N/A   | N/A   |
| quinpirole                                    | N/A   | N/A   | N/A   | N/A   |
| RNF19A                                        | N/A   | N/A   | N/A   | N/A   |
| CP-55940                                      | N/A   | N/A   | N/A   | N/A   |
| CUL4B                                         | N/A   | N/A   | N/A   | N/A   |

|                             | MCWLS | MCWHS | CRLLS | CRLHS |
|-----------------------------|-------|-------|-------|-------|
| TBX19                       | N/A   | N/A   | N/A   | N/A   |
| YY1                         | N/A   | N/A   | N/A   | N/A   |
| DTX1                        | N/A   | N/A   | N/A   | N/A   |
| clonidine                   | N/A   | N/A   | N/A   | N/A   |
| NKX2-1                      | N/A   | N/A   | N/A   | N/A   |
| PPAR $\alpha$ -RXR $\alpha$ | N/A   | N/A   | N/A   | N/A   |
| HDAC5                       | N/A   | N/A   | N/A   | N/A   |
| kurarinone                  | N/A   | N/A   | N/A   | N/A   |
| NOTCH4                      | 0     | 0     | 0     | N/A   |
| TCF21                       | N/A   | N/A   | N/A   | N/A   |
| CYTH2                       | N/A   | N/A   | N/A   | N/A   |
| L-histidine                 | N/A   | N/A   | N/A   | N/A   |
| WWTR1                       | N/A   | N/A   | N/A   | N/A   |
| AP20187                     | N/A   | N/A   | N/A   | N/A   |
| KRT8                        | N/A   | N/A   | N/A   | N/A   |
| ceramide                    | N/A   | N/A   | N/A   | N/A   |
| LIN28B                      | 0     | N/A   | N/A   | N/A   |
| Irp                         | N/A   | N/A   | N/A   | N/A   |
| Irs4                        | N/A   | N/A   | N/A   | N/A   |
| CTSV                        | N/A   | N/A   | N/A   | N/A   |
| PRKCG                       | N/A   | N/A   | N/A   | N/A   |
| RAB9A                       | N/A   | N/A   | N/A   | N/A   |
| GREM1                       | N/A   | N/A   | N/A   | N/A   |
| POU4F2                      | N/A   | N/A   | N/A   | N/A   |
| Hdac1/2                     | N/A   | N/A   | N/A   | N/A   |
| CST3                        | N/A   | N/A   | N/A   | N/A   |
| N-cor                       | N/A   | N/A   | N/A   | N/A   |
| SOD1                        | N/A   | N/A   | N/A   | N/A   |
| Igm                         | N/A   | N/A   | N/A   | N/A   |
| FKRP                        | N/A   | N/A   | N/A   | N/A   |
| maslinic acid               | N/A   | N/A   | N/A   | N/A   |
| tyrphostin                  | N/A   | N/A   | N/A   | N/A   |
| WSX1-gp130                  | N/A   | N/A   | N/A   | N/A   |
| raclopride                  | N/A   | N/A   | N/A   | N/A   |
| CCDC8                       | N/A   | N/A   | N/A   | N/A   |
| AVPR1B                      | N/A   | N/A   | N/A   | N/A   |
| TIMP3                       | N/A   | N/A   | N/A   | N/A   |
| ACSL5                       | N/A   | N/A   | N/A   | N/A   |
| FZD8                        | N/A   | N/A   | N/A   | N/A   |
| Mg <sup>2+</sup>            | N/A   | N/A   | N/A   | N/A   |
| Mt1                         | N/A   | N/A   | N/A   | N/A   |
| PSMB9                       | N/A   | N/A   | N/A   | N/A   |
| quisqualic acid             | N/A   | N/A   | N/A   | N/A   |
| CTF1                        | N/A   | N/A   | N/A   | N/A   |
| amurensin G                 | N/A   | N/A   | N/A   | N/A   |
| trandolapril                | N/A   | N/A   | N/A   | N/A   |
| WWC1                        | N/A   | N/A   | N/A   | N/A   |
| ALYREF                      | N/A   | N/A   | N/A   | N/A   |

|                                             | MCWLS | MCWHS | CRLLS | CRLHS |
|---------------------------------------------|-------|-------|-------|-------|
| HNRNPK                                      | N/A   | N/A   | N/A   | N/A   |
| SIX5                                        | N/A   | N/A   | N/A   | N/A   |
| Mir690                                      | N/A   | N/A   | N/A   | N/A   |
| Synuclein                                   | N/A   | N/A   | N/A   | N/A   |
| RSPO3                                       | N/A   | N/A   | N/A   | N/A   |
| Atrial Natriuretic Peptide                  | N/A   | N/A   | N/A   | N/A   |
| NOD1                                        | N/A   | N/A   | N/A   | N/A   |
| MC2R                                        | N/A   | N/A   | N/A   | N/A   |
| SMAD5                                       | N/A   | N/A   | N/A   | N/A   |
| MSGN1                                       | N/A   | N/A   | N/A   | N/A   |
| DHODH                                       | N/A   | N/A   | N/A   | N/A   |
| cytidyl-3'-5'-guanosine                     | N/A   | N/A   | N/A   | N/A   |
| HESX1                                       | N/A   | N/A   | N/A   | N/A   |
| ATP6AP2                                     | N/A   | N/A   | N/A   | N/A   |
| POLD4                                       | N/A   | N/A   | N/A   | N/A   |
| NSC194598                                   | N/A   | N/A   | N/A   | N/A   |
| DNMT1                                       | N/A   | N/A   | N/A   | N/A   |
| NCOR2                                       | N/A   | N/A   | N/A   | N/A   |
| PLCB1                                       | N/A   | N/A   | N/A   | N/A   |
| CML advanced glycation end products         | N/A   | N/A   | N/A   | N/A   |
| Ctf2                                        | N/A   | N/A   | N/A   | N/A   |
| SR 144528                                   | N/A   | N/A   | N/A   | N/A   |
| J11-CI                                      | N/A   | N/A   | N/A   | N/A   |
| phytosphingosine                            | N/A   | N/A   | N/A   | N/A   |
| L-type Calcium Channel                      | N/A   | N/A   | N/A   | N/A   |
| FGFR3                                       | N/A   | N/A   | N/A   | N/A   |
| TFAP4                                       | N/A   | 0     | N/A   | N/A   |
| miR-802-5p (miRNAs w/seed CAGUAAC)          | N/A   | N/A   | N/A   | N/A   |
| ADRA1B                                      | N/A   | N/A   | N/A   | N/A   |
| nilotinib                                   | N/A   | N/A   | N/A   | N/A   |
| SNED1                                       | N/A   | N/A   | N/A   | N/A   |
| CDKN3                                       | N/A   | N/A   | N/A   | N/A   |
| PER1                                        | N/A   | N/A   | N/A   | N/A   |
| B4GALT5                                     | N/A   | N/A   | N/A   | N/A   |
| TRPS1                                       | N/A   | N/A   | N/A   | N/A   |
| cannabidiol                                 | N/A   | N/A   | N/A   | N/A   |
| Cdkn1c                                      | N/A   | N/A   | N/A   | N/A   |
| IQCB1                                       | N/A   | N/A   | N/A   | N/A   |
| mir-132                                     | N/A   | N/A   | N/A   | N/A   |
| largazole                                   | N/A   | N/A   | N/A   | N/A   |
| miR-23a-5p (and other miRNAs w/seed GGGUUC) | N/A   | N/A   | N/A   | N/A   |
| GAS6                                        | N/A   | N/A   | N/A   | N/A   |
| NAP1L2                                      | N/A   | N/A   | N/A   | N/A   |
| TFRC                                        | N/A   | N/A   | N/A   | N/A   |
| LILRB1                                      | N/A   | N/A   | N/A   | N/A   |
| GnRH analog                                 | N/A   | N/A   | 0     | N/A   |
| GNA15                                       | N/A   | N/A   | N/A   | N/A   |
| POLK                                        | N/A   | N/A   | N/A   | N/A   |



|                                                  | MCWLS | MCWHS | CRLLS | CRLHS |
|--------------------------------------------------|-------|-------|-------|-------|
| KRIT1                                            | N/A   | N/A   | N/A   | N/A   |
| NRG2                                             | N/A   | N/A   | N/A   | N/A   |
| ETV6                                             | N/A   | N/A   | N/A   | N/A   |
| poloxamer                                        | N/A   | N/A   | N/A   | N/A   |
| DCLK1                                            | N/A   | N/A   | N/A   | N/A   |
| TCF12                                            | N/A   | N/A   | N/A   | N/A   |
| ASXL1                                            | N/A   | N/A   | N/A   | N/A   |
| FOXF2                                            | N/A   | N/A   | N/A   | N/A   |
| PCM1                                             | N/A   | N/A   | N/A   | N/A   |
| formaldehyde                                     | N/A   | N/A   | N/A   | N/A   |
| fluvoxamine                                      | N/A   | N/A   | N/A   | N/A   |
| mir-9                                            | N/A   | N/A   | N/A   | N/A   |
| CHRNA3                                           | N/A   | N/A   | N/A   | N/A   |
| TIGIT                                            | N/A   | N/A   | N/A   | N/A   |
| COL9A1                                           | N/A   | N/A   | N/A   | N/A   |
| hydralazine                                      | N/A   | N/A   | N/A   | N/A   |
| TGFB111                                          | N/A   | N/A   | N/A   | N/A   |
| CCDC80                                           | N/A   | N/A   | N/A   | N/A   |
| RASSF1-AS1                                       | N/A   | N/A   | N/A   | N/A   |
| DLX5                                             | N/A   | N/A   | N/A   | N/A   |
| calmidazolium                                    | N/A   | N/A   | N/A   | N/A   |
| pevonedistat                                     | N/A   | N/A   | N/A   | N/A   |
| SERPINA6                                         | N/A   | N/A   | N/A   | N/A   |
| SALL4                                            | N/A   | N/A   | N/A   | N/A   |
| CPT1C                                            | N/A   | N/A   | N/A   | N/A   |
| 2,4-dichlorobenzamil                             | N/A   | N/A   | N/A   | N/A   |
| APR-246                                          | N/A   | N/A   | N/A   | N/A   |
| pCPT-cAMP                                        | N/A   | N/A   | N/A   | N/A   |
| Wnt                                              | N/A   | N/A   | N/A   | N/A   |
| DVL2                                             | N/A   | N/A   | N/A   | N/A   |
| oxytetracycline                                  | N/A   | N/A   | N/A   | N/A   |
| SBDS                                             | N/A   | N/A   | N/A   | N/A   |
| tranlycypromine                                  | N/A   | N/A   | N/A   | N/A   |
| 2,3-dioxo-6-nitro-7-sulfamoylbenzo(f)quinoxaline | N/A   | N/A   | N/A   | N/A   |
| Fus                                              | N/A   | N/A   | N/A   | N/A   |
| grape seed extract                               | N/A   | N/A   | N/A   | N/A   |
| TXN                                              | N/A   | N/A   | N/A   | N/A   |
| mannitol                                         | N/A   | N/A   | N/A   | N/A   |
| ruboxistaurin                                    | N/A   | N/A   | N/A   | N/A   |
| CHRM2                                            | N/A   | N/A   | N/A   | N/A   |
| ATG16L1                                          | N/A   | N/A   | N/A   | N/A   |
| methylselenic acid                               | N/A   | N/A   | N/A   | N/A   |
| tryptase                                         | N/A   | N/A   | N/A   | N/A   |
| chromomycin A3                                   | N/A   | N/A   | N/A   | N/A   |
| POU2F1                                           | N/A   | N/A   | N/A   | N/A   |
| GYS2                                             | N/A   | N/A   | N/A   | N/A   |
| Hmgb2 (includes others)                          | N/A   | N/A   | N/A   | N/A   |
| ZC3H8                                            | N/A   | N/A   | N/A   | N/A   |

|                                      | MCWLS | MCWHS | CRLLS | CRLHS |
|--------------------------------------|-------|-------|-------|-------|
| NR2E3                                | N/A   | N/A   | N/A   | N/A   |
| INHBE                                | N/A   | N/A   | N/A   | N/A   |
| SFRP4                                | N/A   | N/A   | N/A   | N/A   |
| FAM3B                                | N/A   | N/A   | N/A   | N/A   |
| NPBWR1                               | N/A   | N/A   | N/A   | N/A   |
| glutamyl-Se-methylselenocysteine     | N/A   | N/A   | N/A   | N/A   |
| RIC8B                                | N/A   | N/A   | N/A   | N/A   |
| picropodophyllin                     | N/A   | N/A   | N/A   | N/A   |
| mahanine                             | N/A   | N/A   | N/A   | N/A   |
| TRIM16                               | N/A   | N/A   | N/A   | N/A   |
| ERRFI1                               | N/A   | N/A   | N/A   | N/A   |
| HOXB9                                | N/A   | N/A   | N/A   | N/A   |
| NRTN                                 | N/A   | N/A   | N/A   | N/A   |
| PP2A                                 | N/A   | N/A   | N/A   | N/A   |
| BIRC5                                | N/A   | N/A   | N/A   | N/A   |
| MDM4                                 | N/A   | N/A   | N/A   | N/A   |
| (des-Arg10,Leu9)-kallidin            | N/A   | N/A   | N/A   | N/A   |
| WNT7B                                | N/A   | N/A   | N/A   | N/A   |
| (R)-PFI-2                            | N/A   | N/A   | N/A   | N/A   |
| DMRT1                                | N/A   | N/A   | N/A   | N/A   |
| MYOC                                 | N/A   | N/A   | N/A   | N/A   |
| CCAR2                                | N/A   | N/A   | N/A   | N/A   |
| 3-beta,17-beta-androstanediol        | N/A   | N/A   | N/A   | N/A   |
| asbestos                             | N/A   | N/A   | N/A   | N/A   |
| miR-657 (miRNAs w/seed GCAGGUU)      | N/A   | N/A   | N/A   | N/A   |
| HSPA6                                | N/A   | N/A   | N/A   | N/A   |
| FOXD1                                | N/A   | N/A   | N/A   | N/A   |
| 6-cyano-7-nitroquinoxaline-2,3-dione | N/A   | N/A   | N/A   | N/A   |
| GSE1                                 | N/A   | N/A   | N/A   | N/A   |
| ZBTB7A                               | N/A   | N/A   | N/A   | N/A   |
| pepstatin                            | N/A   | N/A   | N/A   | N/A   |
| CRY1                                 | N/A   | N/A   | N/A   | N/A   |
| CIC                                  | N/A   | N/A   | N/A   | N/A   |
| Defb2                                | N/A   | N/A   | N/A   | N/A   |
| mapatumumab                          | N/A   | N/A   | N/A   | N/A   |
| MYT1                                 | N/A   | N/A   | N/A   | N/A   |
| HSPD1                                | N/A   | N/A   | N/A   | N/A   |
| Foxe3                                | N/A   | N/A   | N/A   | N/A   |
| CYP11A1                              | N/A   | N/A   | N/A   | N/A   |
| SCD5                                 | N/A   | N/A   | N/A   | N/A   |
| GPIIB-IIIA                           | N/A   | N/A   | N/A   | N/A   |
| SMO                                  | N/A   | N/A   | N/A   | N/A   |
| ZMPSTE24                             | N/A   | N/A   | N/A   | N/A   |
| HOXA13                               | N/A   | N/A   | N/A   | N/A   |
| FM19G11                              | N/A   | N/A   | N/A   | N/A   |
| mir-3960                             | N/A   | N/A   | N/A   | N/A   |
| DMAP1                                | N/A   | N/A   | N/A   | N/A   |
| IL9R                                 | N/A   | N/A   | N/A   | N/A   |

|                                              | MCWLS | MCWHS | CRLLS | CRLHS |
|----------------------------------------------|-------|-------|-------|-------|
| HMGA2                                        | N/A   | N/A   | N/A   | N/A   |
| MAP2K2                                       | N/A   | N/A   | N/A   | N/A   |
| miR-486-5p (and other miRNAs w/seed CCUGUAC) | N/A   | N/A   | N/A   | N/A   |
| NELFB                                        | N/A   | N/A   | N/A   | N/A   |
| R5020                                        | N/A   | N/A   | N/A   | N/A   |
| SDC1                                         | N/A   | N/A   | N/A   | N/A   |
| N(6)-carboxymethyl-L-lysine                  | N/A   | N/A   | N/A   | N/A   |
| THRSP                                        | N/A   | N/A   | N/A   | N/A   |
| ELF5                                         | N/A   | N/A   | N/A   | N/A   |
| LYL1                                         | N/A   | N/A   | N/A   | N/A   |
| Mcpt4                                        | N/A   | N/A   | N/A   | N/A   |
| SKP2                                         | N/A   | N/A   | N/A   | N/A   |
| FOLR1                                        | N/A   | N/A   | N/A   | N/A   |
| cyclothiazide                                | N/A   | N/A   | N/A   | N/A   |
| MAPT                                         | N/A   | N/A   | N/A   | N/A   |
| GNA14                                        | N/A   | N/A   | N/A   | N/A   |
| LGK-974                                      | N/A   | N/A   | N/A   | N/A   |
| ZIC2                                         | N/A   | N/A   | N/A   | N/A   |
| benfluorex                                   | N/A   | N/A   | N/A   | N/A   |
| isovaleric acid                              | N/A   | N/A   | N/A   | N/A   |
| IAPP                                         | N/A   | N/A   | N/A   | N/A   |
| leuprolide                                   | N/A   | N/A   | N/A   | N/A   |
| SULF2                                        | N/A   | N/A   | N/A   | N/A   |
| RNA polymerase II                            | N/A   | N/A   | N/A   | N/A   |
| LY379196                                     | N/A   | N/A   | N/A   | N/A   |
| COP1                                         | N/A   | N/A   | N/A   | N/A   |
| RLIM                                         | N/A   | N/A   | N/A   | N/A   |
| PARM1                                        | N/A   | N/A   | N/A   | N/A   |
| ozone                                        | N/A   | N/A   | N/A   | N/A   |
| MN1                                          | N/A   | N/A   | N/A   | N/A   |
| ARSB                                         | N/A   | N/A   | N/A   | N/A   |
| FOXC1                                        | N/A   | N/A   | N/A   | N/A   |
| ergosterol                                   | N/A   | N/A   | N/A   | N/A   |
| halofuginone                                 | N/A   | N/A   | N/A   | N/A   |
| POLG                                         | N/A   | N/A   | N/A   | N/A   |
| JARID2                                       | N/A   | N/A   | N/A   | N/A   |
| C7                                           | N/A   | N/A   | N/A   | N/A   |
| 2-[[4-[(e)-styryl]phenoxy]methyl]oxirane     | N/A   | N/A   | N/A   | N/A   |
| Lamin b                                      | N/A   | N/A   | N/A   | N/A   |
| YBX3                                         | N/A   | N/A   | N/A   | N/A   |
| 3,5-diiodothyronine                          | N/A   | N/A   | N/A   | N/A   |
| Histone h4                                   | N/A   | N/A   | N/A   | N/A   |
| MAC                                          | N/A   | N/A   | N/A   | N/A   |
| HEY1                                         | N/A   | N/A   | N/A   | N/A   |
| PCYT2                                        | N/A   | N/A   | N/A   | N/A   |
| aloperine                                    | N/A   | N/A   | N/A   | N/A   |
| Uchl1os                                      | N/A   | N/A   | N/A   | N/A   |
| PD173955                                     | N/A   | N/A   | N/A   | N/A   |

|                                              | MCWLS | MCWHS | CRLLS | CRLHS |
|----------------------------------------------|-------|-------|-------|-------|
| ITGAL                                        | N/A   | N/A   | N/A   | N/A   |
| IGFBP1                                       | N/A   | N/A   | N/A   | N/A   |
| miR-615-5p (and other miRNAs w/seed GGGGUCC) | N/A   | N/A   | N/A   | N/A   |
| BAHD1                                        | N/A   | N/A   | N/A   | N/A   |
| MRTFB                                        | N/A   | N/A   | N/A   | N/A   |
| ACE                                          | N/A   | N/A   | N/A   | N/A   |
| WNT8B                                        | N/A   | N/A   | N/A   | N/A   |
| HOXA9                                        | N/A   | N/A   | N/A   | N/A   |
| N(6)-methyl-2'-deoxyadenosine                | N/A   | N/A   | N/A   | N/A   |
| PAM                                          | N/A   | N/A   | N/A   | N/A   |
| HTR2A                                        | N/A   | N/A   | N/A   | N/A   |
| thioinosine                                  | N/A   | N/A   | N/A   | N/A   |
| CLCN7                                        | N/A   | N/A   | N/A   | N/A   |
| epicatechin                                  | 0     | 0     | N/A   | N/A   |
| RIF1                                         | N/A   | N/A   | N/A   | N/A   |
| FANCC                                        | N/A   | N/A   | N/A   | N/A   |
| IKZF2                                        | N/A   | N/A   | N/A   | N/A   |
| buspirone                                    | N/A   | N/A   | N/A   | N/A   |
| LINC01139                                    | N/A   | N/A   | N/A   | N/A   |
| nickel                                       | N/A   | N/A   | N/A   | N/A   |
| diazoxide                                    | 0     | N/A   | N/A   | N/A   |
| histidinol                                   | N/A   | N/A   | N/A   | N/A   |
| HISTONE                                      | N/A   | N/A   | N/A   | N/A   |
| LRP5                                         | N/A   | N/A   | N/A   | N/A   |
| Ap2                                          | N/A   | N/A   | N/A   | N/A   |
| TEAD4                                        | N/A   | N/A   | N/A   | N/A   |
| GPR37L1                                      | N/A   | N/A   | N/A   | N/A   |
| RARRES1                                      | N/A   | N/A   | N/A   | N/A   |
| Retnla                                       | N/A   | N/A   | N/A   | N/A   |
| glutathione peroxidase                       | N/A   | N/A   | N/A   | N/A   |
| FCGR3A/FCGR3B                                | N/A   | N/A   | N/A   | N/A   |
| PIWIL2                                       | N/A   | N/A   | N/A   | N/A   |
| PHF1                                         | N/A   | N/A   | N/A   | N/A   |
| miR-512-3p (miRNAs w/seed AGUGCUG)           | N/A   | N/A   | N/A   | N/A   |
| NKX3-1                                       | N/A   | N/A   | N/A   | N/A   |
| mitoguazone                                  | N/A   | N/A   | N/A   | N/A   |
| phenylpropanoic acid                         | N/A   | N/A   | N/A   | N/A   |
| NREP                                         | N/A   | N/A   | N/A   | N/A   |
| RG108                                        | N/A   | N/A   | N/A   | N/A   |
| atipamezole                                  | N/A   | N/A   | N/A   | N/A   |
| 24(S),25-epoxycholesterol                    | N/A   | N/A   | N/A   | N/A   |
| ADRA1A                                       | N/A   | N/A   | N/A   | N/A   |
| GLI2                                         | N/A   | N/A   | N/A   | N/A   |
| lycopene                                     | N/A   | N/A   | N/A   | N/A   |
| CXCL16                                       | N/A   | N/A   | N/A   | N/A   |
| cosyntropin                                  | N/A   | N/A   | N/A   | N/A   |
| DRD1                                         | N/A   | N/A   | N/A   | N/A   |
| esculetin                                    | N/A   | N/A   | N/A   | N/A   |

|                                                    | MCWLS | MCWHS | CRLLS | CRLHS |
|----------------------------------------------------|-------|-------|-------|-------|
| ZBTB32                                             | N/A   | N/A   | N/A   | N/A   |
| trestolone                                         | N/A   | N/A   | N/A   | N/A   |
| EIF4G2                                             | N/A   | N/A   | N/A   | N/A   |
| HOXC9                                              | N/A   | N/A   | N/A   | N/A   |
| CHRM4                                              | N/A   | N/A   | N/A   | N/A   |
| Nisch                                              | N/A   | N/A   | N/A   | N/A   |
| LCAT                                               | N/A   | N/A   | N/A   | N/A   |
| ZNF423                                             | N/A   | N/A   | N/A   | N/A   |
| leupeptin                                          | N/A   | N/A   | N/A   | N/A   |
| WLS                                                | N/A   | N/A   | N/A   | N/A   |
| JAK inhibitor I                                    | N/A   | N/A   | N/A   | N/A   |
| Histone h3                                         | N/A   | N/A   | N/A   | N/A   |
| MGP                                                | N/A   | N/A   | N/A   | N/A   |
| TRPM3                                              | N/A   | N/A   | N/A   | N/A   |
| Bcl9-Cbp/p300-Ctnnb1-Lef/Tcf                       | N/A   | N/A   | N/A   | N/A   |
| hispidulin                                         | N/A   | N/A   | N/A   | N/A   |
| 7,8-dihydro-7,8-dihydroxybenzo(a)pyrene 9,10-oxide | N/A   | N/A   | N/A   | N/A   |
| CYP11B1                                            | N/A   | N/A   | N/A   | N/A   |
| RP 73401                                           | N/A   | N/A   | N/A   | N/A   |
| NR2F1                                              | N/A   | N/A   | N/A   | N/A   |
| indican                                            | N/A   | N/A   | N/A   | N/A   |
| HNF1 $\alpha$ dimer                                | N/A   | N/A   | N/A   | N/A   |
| MED13                                              | N/A   | N/A   | N/A   | N/A   |
| TNRC6A                                             | N/A   | N/A   | N/A   | N/A   |
| SERPINA3                                           | N/A   | N/A   | N/A   | N/A   |
| IFI6                                               | N/A   | N/A   | N/A   | N/A   |
| PI3                                                | N/A   | N/A   | N/A   | N/A   |
| PTGS1                                              | N/A   | N/A   | N/A   | N/A   |
| THBS1                                              | N/A   | N/A   | N/A   | N/A   |
| MSR1                                               | N/A   | N/A   | N/A   | N/A   |
| spiperone                                          | N/A   | N/A   | N/A   | N/A   |
| SNRPD1                                             | N/A   | N/A   | N/A   | N/A   |
| TAS1R2                                             | N/A   | N/A   | N/A   | N/A   |
| bisindolylmaleimide III                            | N/A   | N/A   | N/A   | N/A   |
| BCO2                                               | N/A   | N/A   | N/A   | N/A   |
| probucol                                           | N/A   | N/A   | N/A   | N/A   |
| SIRT5                                              | N/A   | N/A   | N/A   | N/A   |
| SAV1                                               | N/A   | N/A   | N/A   | N/A   |
| NPY5R                                              | N/A   | N/A   | N/A   | N/A   |
| pubchem compound 6603792                           | N/A   | N/A   | N/A   | N/A   |
| NCL                                                | N/A   | N/A   | N/A   | N/A   |
| EDN3                                               | N/A   | N/A   | N/A   | N/A   |
| SPRY1                                              | N/A   | N/A   | N/A   | N/A   |
| ceruletide                                         | N/A   | N/A   | N/A   | N/A   |
| mir-580                                            | N/A   | N/A   | N/A   | N/A   |
| EDAR                                               | N/A   | N/A   | N/A   | N/A   |
| ADRA1D                                             | N/A   | N/A   | N/A   | N/A   |
| CTNNA1                                             | N/A   | N/A   | N/A   | N/A   |

|                                              | MCWLS | MCWHS | CRLLS | CRLHS |
|----------------------------------------------|-------|-------|-------|-------|
| DLX6                                         | N/A   | N/A   | N/A   | N/A   |
| GTPase                                       | N/A   | N/A   | N/A   | N/A   |
| PAX3                                         | N/A   | N/A   | N/A   | N/A   |
| SIAH2                                        | N/A   | N/A   | N/A   | N/A   |
| RDH5                                         | N/A   | N/A   | N/A   | N/A   |
| SRSF6                                        | N/A   | N/A   | N/A   | N/A   |
| tolbutamide                                  | N/A   | N/A   | N/A   | N/A   |
| HOXC8                                        | N/A   | N/A   | N/A   | N/A   |
| RPS3                                         | N/A   | N/A   | N/A   | N/A   |
| cantharidin                                  | N/A   | N/A   | N/A   | N/A   |
| bisindolylmaleimide                          | N/A   | N/A   | N/A   | N/A   |
| KT5720                                       | N/A   | N/A   | N/A   | N/A   |
| thiazide diuretic                            | N/A   | N/A   | N/A   | N/A   |
| GABBR2                                       | N/A   | N/A   | N/A   | N/A   |
| TAZ                                          | N/A   | N/A   | N/A   | N/A   |
| CYBA                                         | N/A   | N/A   | N/A   | N/A   |
| SMARCD3                                      | N/A   | N/A   | N/A   | N/A   |
| C9                                           | N/A   | N/A   | N/A   | N/A   |
| furosemide                                   | N/A   | N/A   | N/A   | N/A   |
| PD184352                                     | N/A   | N/A   | N/A   | N/A   |
| saikosaponin A                               | N/A   | N/A   | N/A   | N/A   |
| citrinin                                     | N/A   | N/A   | N/A   | N/A   |
| EPHB1                                        | N/A   | N/A   | N/A   | N/A   |
| ADRA1                                        | N/A   | N/A   | N/A   | N/A   |
| ANXA1                                        | N/A   | N/A   | N/A   | N/A   |
| miR-324-5p (miRNAs w/seed GCAUCCC)           | N/A   | N/A   | N/A   | N/A   |
| HOXC6                                        | N/A   | N/A   | N/A   | N/A   |
| PRMT7                                        | N/A   | N/A   | N/A   | N/A   |
| KLHL17                                       | N/A   | N/A   | N/A   | N/A   |
| vitamin A                                    | N/A   | N/A   | N/A   | N/A   |
| TARID                                        | N/A   | N/A   | N/A   | N/A   |
| IGF2-AS                                      | N/A   | N/A   | N/A   | N/A   |
| MEF2C                                        | N/A   | N/A   | N/A   | N/A   |
| miR-532-5p (and other miRNAs w/seed AUGCCUU) | N/A   | N/A   | N/A   | N/A   |
| 2-amino-3-phosphonopropionic acid            | N/A   | N/A   | N/A   | N/A   |
| IDH1                                         | N/A   | N/A   | N/A   | N/A   |
| AFP                                          | N/A   | N/A   | N/A   | N/A   |
| HNRNPA2B1                                    | N/A   | N/A   | N/A   | N/A   |
| NCKAP1L                                      | N/A   | N/A   | N/A   | N/A   |
| HIST1H1C                                     | N/A   | N/A   | N/A   | N/A   |
| IFT20                                        | N/A   | N/A   | N/A   | N/A   |
| EMD                                          | N/A   | N/A   | N/A   | N/A   |
| PC-SPES                                      | N/A   | N/A   | N/A   | N/A   |
| TFCP2L1                                      | N/A   | N/A   | N/A   | N/A   |
| beta-tocopherol                              | N/A   | N/A   | N/A   | N/A   |
| STK25                                        | N/A   | N/A   | N/A   | N/A   |
| NEUROG2                                      | N/A   | N/A   | N/A   | N/A   |
| ARRB2                                        | N/A   | N/A   | N/A   | N/A   |

|                                                                 | MCWLS | MCWHS | CRLLS | CRLHS |
|-----------------------------------------------------------------|-------|-------|-------|-------|
| TP53BP2                                                         | N/A   | N/A   | N/A   | N/A   |
| Rxr                                                             | N/A   | N/A   | N/A   | N/A   |
| EIF4EBP1                                                        | N/A   | N/A   | N/A   | N/A   |
| tert-butyl hydroperoxide                                        | N/A   | N/A   | N/A   | N/A   |
| farglitazar                                                     | N/A   | N/A   | N/A   | N/A   |
| SLCO1B3                                                         | N/A   | N/A   | N/A   | N/A   |
| USF2                                                            | N/A   | N/A   | N/A   | N/A   |
| MEF2                                                            | N/A   | N/A   | N/A   | N/A   |
| cinacalcet                                                      | N/A   | N/A   | N/A   | N/A   |
| XRCC6                                                           | N/A   | N/A   | N/A   | N/A   |
| LTBP4                                                           | N/A   | N/A   | N/A   | N/A   |
| SEC16B                                                          | N/A   | N/A   | N/A   | N/A   |
| BNIP3L                                                          |       | 0     | N/A   | N/A   |
| cortodoxone                                                     | N/A   | N/A   | N/A   | N/A   |
| 2-acetylaminofluorene                                           | N/A   | N/A   | N/A   | N/A   |
| FRMD6                                                           | N/A   | N/A   | N/A   | N/A   |
| dextran                                                         | N/A   | N/A   | N/A   | N/A   |
| TGFBR                                                           | N/A   | N/A   | N/A   | N/A   |
| PMP22                                                           | N/A   | N/A   | N/A   | N/A   |
| S100P                                                           | N/A   | N/A   | N/A   | N/A   |
| nilvadipine                                                     | N/A   |       | 0     | N/A   |
| SRD5A1                                                          | N/A   | N/A   | N/A   | N/A   |
| RUVBL2                                                          | N/A   | N/A   | N/A   | N/A   |
| ETV1                                                            | N/A   | N/A   | N/A   | N/A   |
| CBLC                                                            | N/A   | N/A   | N/A   | N/A   |
| LRP4                                                            | N/A   | N/A   | N/A   | N/A   |
| CALR                                                            | N/A   | N/A   | N/A   | N/A   |
| O6-benzylguanine                                                | N/A   | N/A   | N/A   | N/A   |
| WNT7A                                                           | N/A   | N/A   | N/A   | N/A   |
| HOXD12                                                          | N/A   | N/A   | N/A   | N/A   |
| HADHB                                                           | N/A   | N/A   | N/A   | N/A   |
| NR6A1                                                           | N/A   | N/A   | N/A   | N/A   |
| 4-((4-(3,4-dichlorophenyl)-1,2,5-thiadiazol-3-yl)oxy)butan-1-ol | N/A   | N/A   | N/A   | N/A   |
| xylitol                                                         | N/A   | N/A   | N/A   | N/A   |
| HMX2                                                            | N/A   | N/A   | N/A   | N/A   |
| PRKDC                                                           | N/A   | N/A   | N/A   | N/A   |
| RGS19                                                           | N/A   | N/A   | N/A   | N/A   |
| Cxcl3                                                           | N/A   | N/A   | N/A   | N/A   |
| STMN1                                                           | N/A   | N/A   | N/A   | N/A   |
| GNB1                                                            | N/A   | N/A   | N/A   | N/A   |
| DAB2IP                                                          | N/A   | N/A   | N/A   | N/A   |
| RRP1B                                                           | N/A   | N/A   | N/A   | N/A   |
| SIK1/SIK1B                                                      | N/A   | N/A   | N/A   | N/A   |
| pituitary adenylate cyclase-activating polypeptide              | N/A   | N/A   | N/A   | N/A   |
| EPST11                                                          | N/A   | N/A   | N/A   | N/A   |
| meldonium                                                       | N/A   | N/A   | N/A   | N/A   |
| edratide                                                        | N/A   | N/A   | N/A   | N/A   |

|                                              | MCWLS | MCWHS | CRLLS | CRLHS |
|----------------------------------------------|-------|-------|-------|-------|
| sotrastaurin                                 | N/A   | N/A   | N/A   | N/A   |
| rofecoxib                                    | N/A   | N/A   | N/A   | N/A   |
| conjugated linoleic acid                     | N/A   | N/A   | N/A   | N/A   |
| COL4A3                                       | N/A   | N/A   | N/A   | N/A   |
| PSMB8                                        | N/A   | N/A   | N/A   | N/A   |
| COL3A1                                       | N/A   | N/A   | N/A   | N/A   |
| EEF1A2                                       | N/A   | N/A   | N/A   | N/A   |
| miR-204-5p (and other miRNAs w/seed UCCCUUU) | N/A   | N/A   | N/A   | N/A   |
| TBX1                                         | N/A   | N/A   | N/A   | N/A   |
| CBX7                                         | N/A   | N/A   | 0     | 0     |
| USP48                                        | N/A   | N/A   | N/A   | N/A   |
| miR-331-5p (and other miRNAs w/seed UAGGUAU) | N/A   | N/A   | N/A   | N/A   |
| ketorolac                                    | N/A   | N/A   | N/A   | N/A   |
| BQ-788                                       | N/A   | N/A   | N/A   | N/A   |
| SUPT16H                                      | N/A   | N/A   | N/A   | N/A   |
| PRKAG3                                       | N/A   | N/A   | N/A   | N/A   |
| PPP3CB                                       | N/A   | N/A   | N/A   | N/A   |
| isonicotinamide                              | N/A   | N/A   | N/A   | N/A   |
| imipramine                                   | N/A   | N/A   | N/A   | N/A   |
| ARHGAP24                                     | N/A   | N/A   | N/A   | N/A   |
| CDK19                                        | N/A   | N/A   | N/A   | N/A   |
| EP400                                        | N/A   | N/A   | N/A   | N/A   |
| Pzp                                          | N/A   | N/A   | N/A   | N/A   |
| omeprazole                                   | N/A   | N/A   | N/A   | N/A   |
| XRCC1                                        | N/A   | N/A   | N/A   | N/A   |
| PLCB4                                        | N/A   | N/A   | N/A   | N/A   |
| DYSF                                         | N/A   | N/A   | N/A   | N/A   |
| BTG2                                         | N/A   | N/A   | N/A   | N/A   |
| STAT1/3/5 dimer                              | N/A   | N/A   | N/A   | N/A   |
| H2BFM                                        | N/A   | N/A   | N/A   | N/A   |
| mir-148                                      | N/A   | N/A   | N/A   | N/A   |
| HMGB2                                        | N/A   | N/A   | N/A   | N/A   |
| GNB2                                         | N/A   | N/A   | N/A   | N/A   |
| DNAJA4                                       | N/A   | N/A   | N/A   | N/A   |
| CCAR1                                        | N/A   | N/A   | N/A   | N/A   |
| MMS19                                        | N/A   | N/A   | N/A   | N/A   |
| cyanocobalamin                               | N/A   | N/A   | N/A   | N/A   |
| GALNT3                                       | N/A   | N/A   | N/A   | N/A   |
| PTGER1                                       | N/A   | N/A   | N/A   | N/A   |
| TLL1                                         | N/A   | N/A   | N/A   | N/A   |



**A**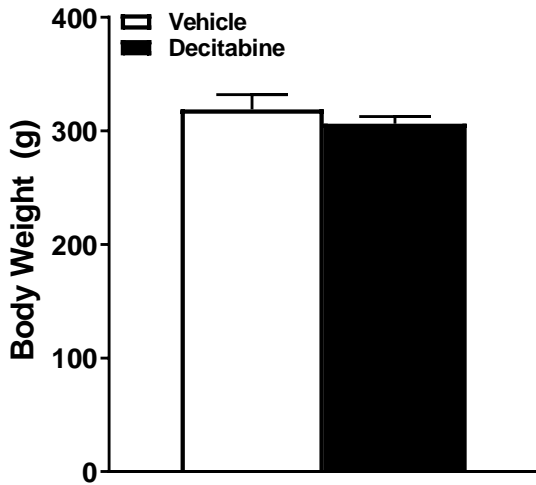**B**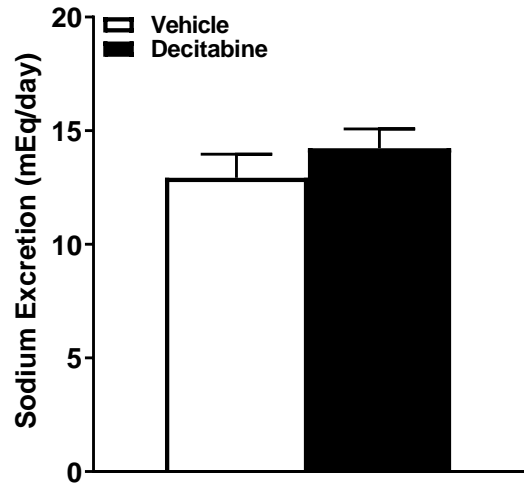**C**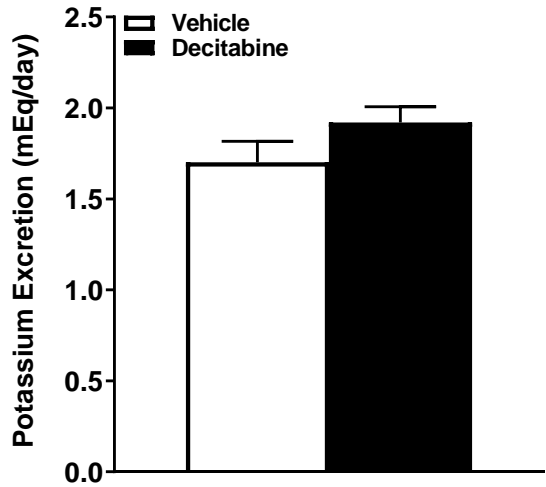

**Figure S7. Decitabine treatment had no effect on body or electrolyte excretion.** (A) Body weight of vehicle and decitabine-treated Dahl SS rats. (B) Sodium and (C) Potassium excretion rates were not altered with decitabine treatment following 14 days of high salt diet.
